# Supplementary material
Source: PubMed Central journal article supplement (PMC7610708)
Supplement: EMS119935-supplement-Major_Resources_Table.pdf [file EMS119935-supplement-Major_Resources_Table.pdf]

## Major Resources Table

In order to allow validation and replication of experiments, all essential research materials listed in the Methods should be included in the Major Resources Table below. Authors are encouraged to use public repositories for protocols, data, code, and other materials and provide persistent identifiers and/or links to repositories when available. Authors may add or delete rows as needed.

### Animals (in vivo studies)

| Species | Vendor or Source                                           | Background Strain    | Sex  | Persistent ID / URL |
|---------|------------------------------------------------------------|----------------------|------|---------------------|
| Mouse   | TACONIC Bioscience, Inc.                                   | C57BL/6Ntac          | Male |                     |
| Mouse   | Bred from genetically modified mouse lines described below | CARMN <sup>-/-</sup> | Male |                     |

### Genetically Modified Animals

|                 | Species | Vendor or Source         | Background Strain    | Other Information | Persistent ID / URL |
|-----------------|---------|--------------------------|----------------------|-------------------|---------------------|
| Parent - Male   | Mouse   | TACONIC Bioscience, Inc. | CARMN <sup>+/-</sup> |                   |                     |
| Parent - Female | Mouse   | TACONIC Bioscience, Inc. | CARMN <sup>+/-</sup> |                   |                     |

### Antibodies

| Target antigen                               | Vendor or Source | Catalog #  | Working concentration | Lot # (preferred but not required) | Persistent ID / URL                                                                                                                                                                                                                                                                                                                                                         |
|----------------------------------------------|------------------|------------|-----------------------|------------------------------------|-----------------------------------------------------------------------------------------------------------------------------------------------------------------------------------------------------------------------------------------------------------------------------------------------------------------------------------------------------------------------------|
| PerCP anti-mouse CD45 Antibody, clone 30-F11 | Biolegend        | 103129     | 1:100 (FACs)          |                                    | <a href="https://www.biolegend.com/en-us/products/percp-anti-mouse-cd45-antibody-4265">https://www.biolegend.com/en-us/products/percp-anti-mouse-cd45-antibody-4265</a>                                                                                                                                                                                                     |
| V500 Rat anti-Mouse CD45R/B220 Clone RA3-6B2 | BD Horizon       | 561227     | 1:50 (FACs)           |                                    | <a href="https://wwwbdbiosciences.com/eu/applications/research/stem-cell-research/hematopoietic-stem-cell-markers/mouse/negative-markers/v500-rat-anti-mouse-cd45rb220-ra3-6b2/p/561227">https://wwwbdbiosciences.com/eu/applications/research/stem-cell-research/hematopoietic-stem-cell-markers/mouse/negative-markers/v500-rat-anti-mouse-cd45rb220-ra3-6b2/p/561227</a> |
| CD3 Monoclonal Antibody (17A2), eFluor 450   | eBioscience      | 48-0032-80 | 1:100 (FACs)          |                                    | <a href="https://www.thermofisher.com/antibody/product/CD3-Antibody-clone-17A2-Monoclonal/48-0032-80">https://www.thermofisher.com/antibody/product/CD3-Antibody-clone-17A2-Monoclonal/48-0032-80</a>                                                                                                                                                                       |
| APC-H7 Rat anti-Mouse CD4 Clone GK1.5        | BD Bioscience    | 560246     | 1:100 (FACs)          |                                    | <a href="https://wwwbdbiosciences.com/us/applications/research/t-cell-immunology/th-1-cells/surface-markers/mouse/apc-h7-rat-anti-mouse-cd4-gk15/p/560246">https://wwwbdbiosciences.com/us/applications/research/t-cell-immunology/th-1-cells/surface-markers/mouse/apc-h7-rat-anti-mouse-cd4-gk15/p/560246</a>                                                             |
| APC anti-mouse CD8a Antibody, Clone 53-6.7   | eBioScience      | 100711     | 1:50 (FACs)           |                                    | <a href="https://www.biolegend.com/en-us/products/apc-anti-mouse-cd8a-antibody-150">https://www.biolegend.com/en-us/products/apc-anti-mouse-cd8a-antibody-150</a>                                                                                                                                                                                                           |
| PE Mouse Anti-Mouse NK-1.1, Clone PK136      | BD Pharmingen    | 561046     | 1:100 (FACs)          |                                    | <a href="https://wwwbdbiosciences.com/in/reagents/research/antibodies-buffers/immunology-reagents/anti-mouse-antibodies/cell-surface-antigens/pe-mouse-anti-mouse-nk-11-pk136/p/561046">https://wwwbdbiosciences.com/in/reagents/research/antibodies-buffers/immunology-reagents/anti-mouse-antibodies/cell-surface-antigens/pe-mouse-anti-mouse-nk-11-pk136/p/561046</a>   |
| Ly-6C APC                                    | Miltenyi         | 130-102-   | 1:10 (FACs)           |                                    | <a href="https://www.miltenyibiotec.com/US-">https://www.miltenyibiotec.com/US-</a>                                                                                                                                                                                                                                                                                         |

DOI [to be added]

|                                                               |               |            |              |  |                                                                                                                                                                                                                                                                                                                                                                                     |
|---------------------------------------------------------------|---------------|------------|--------------|--|-------------------------------------------------------------------------------------------------------------------------------------------------------------------------------------------------------------------------------------------------------------------------------------------------------------------------------------------------------------------------------------|
| Antibody, anti-mouse, Clone 1G7.G10                           | Biotec        | 899        |              |  | <a href="https://www.bdbiosciences.com/en/products/ly-6c-antibody-anti-mouse-1g7-g10.html#gref">en/products/ly-6c-antibody-anti-mouse-1g7-g10.html#gref</a>                                                                                                                                                                                                                         |
| PE-Cy™7 Rat Anti-CD11b Clone, M1/70                           | BD Pharmingen | 561098     | 1:300 (FACs) |  | <a href="https://www.bdbiosciences.com/us/applications/research/stem-cell-research/mesenchymal-stem-cell-markers-bone-marrow/mouse/negative-markers/pe-cy7-rat-anti-cd11b-m170/p/561098">https://www.bdbiosciences.com/us/applications/research/stem-cell-research/mesenchymal-stem-cell-markers-bone-marrow/mouse/negative-markers/pe-cy7-rat-anti-cd11b-m170/p/561098</a>         |
| PE Rat Anti-Mouse Siglec-F Clone. E50-2440                    | BD Pharmingen | 562068     | 1:100 (FACs) |  | <a href="https://www.bdbiosciences.com/eu/applications/research/b-cell-research/surface-markers/mouse/pe-rat-anti-mouse-siglec-f-e50-2440/p/562068">https://www.bdbiosciences.com/eu/applications/research/b-cell-research/surface-markers/mouse/pe-rat-anti-mouse-siglec-f-e50-2440/p/562068</a>                                                                                   |
| CD16/CD32 Monoclonal Antibody (93)                            | eBioScience   | 14-0161-82 | 1:100 (FACs) |  | <a href="https://www.thermofisher.com/antibody/product/CD16-CD32-Antibody-clone-93-Monoclonal/14-0161-82">https://www.thermofisher.com/antibody/product/CD16-CD32-Antibody-clone-93-Monoclonal/14-0161-82</a>                                                                                                                                                                       |
| APC-H7 Rat Anti-Mouse Ly-6G, Clone 1A8                        | BD BioScience | 565369     | 1:100 (FACs) |  | <a href="https://www.bdbiosciences.com/us/reagents/research/antibodies-buffers/immunology-reagents/anti-mouse-antibodies/cell-surface-antigens/apc-h7-rat-anti-mouse-ly-6g-1a8/p/565369">https://www.bdbiosciences.com/us/reagents/research/antibodies-buffers/immunology-reagents/anti-mouse-antibodies/cell-surface-antigens/apc-h7-rat-anti-mouse-ly-6g-1a8/p/565369</a>         |
| F4/80 Monoclonal Antibody (BM8), FITC,                        | eBioScience   | 11-4801-81 | 1:50 (FACs)  |  | <a href="https://www.thermofisher.com/antibody/product/F4-80-Antibody-clone-BM8-Monoclonal/11-4801-81">https://www.thermofisher.com/antibody/product/F4-80-Antibody-clone-BM8-Monoclonal/11-4801-81</a>                                                                                                                                                                             |
| CD45R (B220) Monoclonal Antibody (RA3-6B2), PerCP-Cyanine5.5, | eBioscience   | 45-0452-80 | 1:100 (FACs) |  | <a href="https://www.thermofisher.com/antibody/product/CD45R-B220-Antibody-clone-RA3-6B2-Monoclonal/45-0452-82">https://www.thermofisher.com/antibody/product/CD45R-B220-Antibody-clone-RA3-6B2-Monoclonal/45-0452-82</a>                                                                                                                                                           |
| CD3e Monoclonal Antibody (145-2C11), PerCP-Cyanine5.5         | eBioscience   | 45-0031-80 | 1:50 (FACs)  |  | <a href="https://www.thermofisher.com/antibody/product/CD3e-Antibody-clone-145-2C11-Monoclonal/45-0031-82">https://www.thermofisher.com/antibody/product/CD3e-Antibody-clone-145-2C11-Monoclonal/45-0031-82</a>                                                                                                                                                                     |
| PerCP-Cy™5.5 Rat Anti-CD11b Clone M1/70                       | BD Pharmingen | 561114     | 1:500 (FACs) |  | <a href="https://www.bdbiosciences.com/eu/applications/research/stem-cell-research/mesenchymal-stem-cell-markers-bone-marrow/mouse/negative-markers/percp-cy55-rat-anti-cd11b-m170/p/561114">https://www.bdbiosciences.com/eu/applications/research/stem-cell-research/mesenchymal-stem-cell-markers-bone-marrow/mouse/negative-markers/percp-cy55-rat-anti-cd11b-m170/p/561114</a> |
| PerCP-Cy™5.5 Rat Anti-Mouse Ly-6G Clone 1A8                   | BD Pharmingen | 560602     | 1:100 (FACs) |  | <a href="https://www.bdbiosciences.com/us/reagents/research/antibodies-buffers/immunology-reagents/anti-mouse-antibodies/cell-surface-antigens/percp-cy55-rat-anti-mouse-ly-6g-1a8/p/560602">https://www.bdbiosciences.com/us/reagents/research/antibodies-buffers/immunology-reagents/anti-mouse-antibodies/cell-surface-antigens/percp-cy55-rat-anti-mouse-ly-6g-1a8/p/560602</a> |
| NK1.1 Monoclonal Antibody (PK136), PerCP-Cyanine5.5           | eBioscience   | 45-5941-80 | 1:200 (FACs) |  | <a href="https://www.thermofisher.com/order/genome-database/generatePdf?productName=NK1.1&amp;assayType=ANTIBODY&amp;productId=45-5941-80&amp;detailed=true">https://www.thermofisher.com/order/genome-database/generatePdf?productName=NK1.1&amp;assayType=ANTIBODY&amp;productId=45-5941-80&amp;detailed=true</a>                                                                 |
| TER-119 Monoclonal Antibody (TER-119), PerCP-Cyanine5.5       | eBioscience   | 45-5921-80 | 1:400 (FACs) |  | <a href="https://www.thermofisher.com/antibody/product/TER-119-Antibody-clone-TER-119-Monoclonal/45-5921-82">https://www.thermofisher.com/antibody/product/TER-119-Antibody-clone-TER-119-Monoclonal/45-5921-82</a>                                                                                                                                                                 |

|                                                                                  |               |             |                  |  |                                                                                                                                                                                                                                                                                                 |
|----------------------------------------------------------------------------------|---------------|-------------|------------------|--|-------------------------------------------------------------------------------------------------------------------------------------------------------------------------------------------------------------------------------------------------------------------------------------------------|
| CD117 (c-Kit) Monoclonal Antibody (2B8), APC-eFluor 780                          | eBioscience   | 47-1171-80  | 1:200 (FACs)     |  | <a href="https://www.thermofisher.com/antibody/product/CD117-c-Kit-Antibody-clone-2B8-Monoclonal/47-1171-82">https://www.thermofisher.com/antibody/product/CD117-c-Kit-Antibody-clone-2B8-Monoclonal/47-1171-82</a>                                                                             |
| Ly-6A/E (Sca-1) Monoclonal Antibody (D7), APC                                    | eBioscience   | 17-5981-81  | 1:500 (FACs)     |  | <a href="https://www.thermofisher.com/antibody/product/Ly-6A-E-Sca-1-Antibody-clone-D7-Monoclonal/17-5981-82">https://www.thermofisher.com/antibody/product/Ly-6A-E-Sca-1-Antibody-clone-D7-Monoclonal/17-5981-82</a>                                                                           |
| CD16/CD32 Monoclonal Antibody (93), PE-Cyanine7                                  | eBioscience   | 25-0161-81  | 1:1000 (FACs)    |  | <a href="https://www.thermofisher.com/antibody/product/CD16-CD32-Antibody-clone-93-Monoclonal/25-0161-82">https://www.thermofisher.com/antibody/product/CD16-CD32-Antibody-clone-93-Monoclonal/25-0161-82</a>                                                                                   |
| CD34 Monoclonal Antibody (RAM34), eFluor 450                                     | eBioscience   | 48-0341-80  | 1:50 (FACs)      |  | <a href="https://www.thermofisher.com/antibody/product/CD34-Antibody-clone-RAM34-Monoclonal/48-0341-82">https://www.thermofisher.com/antibody/product/CD34-Antibody-clone-RAM34-Monoclonal/48-0341-82</a>                                                                                       |
| Monoclonal Anti-Actin, $\alpha$ -Smooth Muscle - FITC antibody produced in mouse | Sigma Aldrich | F3777       | 1:300 (IHC)      |  | <a href="https://www.sigmaaldrich.com/catalog/product/sigma/f3777?lang=en&amp;region=GB">https://www.sigmaaldrich.com/catalog/product/sigma/f3777?lang=en&amp;region=GB</a>                                                                                                                     |
| Anti-Mouse/Human Mac-2 (Galectin-3), Purified (Clone M3/38)                      | Cedarlane     | CL8942AP    | 1:4000 (IHC)     |  | <a href="https://www.cedarlanelabs.com/products/detail?code=CL8942AP">https://www.cedarlanelabs.com/products/detail?code=CL8942AP</a>                                                                                                                                                           |
| Anti-smooth muscle Myosin heavy chain 11 antibody                                | Abcam         | Ab53219     | 1:100 (IHC)      |  | <a href="https://www.abcam.com/smooth-muscle-myosin-heavy-chain-11-antibody-ab53219.html">https://www.abcam.com/smooth-muscle-myosin-heavy-chain-11-antibody-ab53219.html</a>                                                                                                                   |
| Anti-Digoxigenin-AP, Fab fragments                                               | Roche         | 11093274910 | 1:500 (in situ)  |  | <a href="https://www.sigmaaldrich.com/catalog/product/roche/11093274910?lang=en&amp;region=GB">https://www.sigmaaldrich.com/catalog/product/roche/11093274910?lang=en&amp;region=GB</a>                                                                                                         |
| Monoclonal mouse anti-human Actin (Smooth Muscle) (Concentrate) Clone 1A4        | Agilent Dako  | M085129     | 1:2500 (in situ) |  | <a href="https://www.agilent.com/en/product/immunohistochemistry/antibodies-controls/primary-antibodies/actin-(smooth-muscle)-(concentrate)-76542">https://www.agilent.com/en/product/immunohistochemistry/antibodies-controls/primary-antibodies/actin-(smooth-muscle)-(concentrate)-76542</a> |
| Monoclonal mouse anti-human CD68 (Concentrate) Clone KP1                         | Agilent Dako  | M081401     | 1:250 (in situ)  |  | <a href="https://www.agilent.com/en/product/immunohistochemistry/antibodies-controls/primary-antibodies/cd68-(concentrate)-76535">https://www.agilent.com/en/product/immunohistochemistry/antibodies-controls/primary-antibodies/cd68-(concentrate)-76535</a>                                   |

|                                                                                             |              |         |                 |  |                                                                                                                                                                                                                                                                                                               |
|---------------------------------------------------------------------------------------------|--------------|---------|-----------------|--|---------------------------------------------------------------------------------------------------------------------------------------------------------------------------------------------------------------------------------------------------------------------------------------------------------------|
| Monoclonal mouse anti-human CD45, Leucocyte Common Antigen (Dako Omnis) Clone 2B11 + PD7/26 | Agilent Dako | GA75161 | 1:400 (in situ) |  | <a href="https://www.agilent.com/en/product/immunohistochemistry/antibodies-controls/primary-antibodies/cd45-leucocyte-common-antigen-(dako-omnis)-76270">https://www.agilent.com/en/product/immunohistochemistry/antibodies-controls/primary-antibodies/cd45-leucocyte-common-antigen-(dako-omnis)-76270</a> |
|                                                                                             |              |         |                 |  |                                                                                                                                                                                                                                                                                                               |

### Cultured Cells

| Name                                        | Vendor or Source | Sex (F, M, or unknown) | Persistent ID / URL |
|---------------------------------------------|------------------|------------------------|---------------------|
| Coronary Artery Smooth Muscle Cells (human) | Lonza            | Male                   | CC-2583             |

### Data & Code Availability

| Description                                                                                                                  | Source / Repository | Persistent ID / URL                                                                                                                                 |
|------------------------------------------------------------------------------------------------------------------------------|---------------------|-----------------------------------------------------------------------------------------------------------------------------------------------------|
| The loss of CARMN regulates vascular smooth muscle cell phenotype and accelerates the development of atherosclerosis in mice | GEO database        | GSE158972 / <a href="https://www.ncbi.nlm.nih.gov/geo/query/acc.cgi?acc=GSE158972">https://www.ncbi.nlm.nih.gov/geo/query/acc.cgi?acc=GSE158972</a> |

### Other

| Description                                                             | Source / Repository | Persistent ID / URL                                                                                                                                                                                                                                                                                                                     |
|-------------------------------------------------------------------------|---------------------|-----------------------------------------------------------------------------------------------------------------------------------------------------------------------------------------------------------------------------------------------------------------------------------------------------------------------------------------|
| Smooth Muscle Cells Growth Medium 2 and Supplement                      | Promo Cell          | <a href="https://www.promocell.com/product/smooth-muscle-cell-growth-medium-2/">https://www.promocell.com/product/smooth-muscle-cell-growth-medium-2/</a>                                                                                                                                                                               |
| Penicillin-Streptomycin (P/S)                                           | Gibco               | <a href="https://www.fishersci.co.uk/shop/products/gibco-penicillin-streptomycin-10-000-u-ml-3/11548876">https://www.fishersci.co.uk/shop/products/gibco-penicillin-streptomycin-10-000-u-ml-3/11548876</a>                                                                                                                             |
| PDGF-BB                                                                 | R&D Systems         | <a href="https://www.rndsystems.com/products/recombinant-human-pdgf-bb-protein-cf_220-bb">https://www.rndsystems.com/products/recombinant-human-pdgf-bb-protein-cf_220-bb</a>                                                                                                                                                           |
| Lipofectamine RNAiMAX Transfection Reagent                              | Life Technologies   | <a href="https://www.thermofisher.com/uk/en/home/brands/product-brand/lipofectamine/lipofectamine-rnaimx.html">https://www.thermofisher.com/uk/en/home/brands/product-brand/lipofectamine/lipofectamine-rnaimx.html</a>                                                                                                                 |
| Opti-MEM Reduced Serum Media                                            | Gibco               | <a href="https://www.thermofisher.com/uk/en/home/life-science/cell-culture/mammalian-cell-culture/classical-media/opti-mem.html">https://www.thermofisher.com/uk/en/home/life-science/cell-culture/mammalian-cell-culture/classical-media/opti-mem.html</a>                                                                             |
| Liberase TM                                                             | Sigma Aldrich       | <a href="https://www.sigmaaldrich.com/catalog/product/roche/libtmro?lang=en&amp;region=GB&amp;gclid=EAlaIQObChMI64Lz1sO-7QIVDxoGAB24Zg27EAAAYASAAEgK_RPD_BwE">https://www.sigmaaldrich.com/catalog/product/roche/libtmro?lang=en&amp;region=GB&amp;gclid=EAlaIQObChMI64Lz1sO-7QIVDxoGAB24Zg27EAAAYASAAEgK_RPD_BwE</a>                   |
| ACK Lysing Buffer (not in your methods but presume you have used this?) | ThermoFisher        | <a href="https://www.thermofisher.com/order/catalog/product/A1049201#/A1049201">https://www.thermofisher.com/order/catalog/product/A1049201#/A1049201</a>                                                                                                                                                                               |
| QIAzol Lysis Reagent                                                    | Qiagen              | <a href="https://www.qiagen.com/gb/products/discovery-and-translational-research/lab-essentials/buffers-reagents/qiazol-lysis-reagent/?clear=true#orderinginformation">https://www.qiagen.com/gb/products/discovery-and-translational-research/lab-essentials/buffers-reagents/qiazol-lysis-reagent/?clear=true#orderinginformation</a> |
| Water soluble cholesterol-methyl- $\beta$ -cyclodextrin (CMBCD)         | Sigma Aldrich       | <a href="https://www.sigmaaldrich.com/catalog/product/sigma/c4951?lang=en&amp;region=GB">https://www.sigmaaldrich.com/catalog/product/sigma/c4951?lang=en&amp;region=GB</a>                                                                                                                                                             |

DOI [to be added]

|                                                                                |                     |                                                                                                                                                                                                                                                                                                                                                                                                                                                                                       |
|--------------------------------------------------------------------------------|---------------------|---------------------------------------------------------------------------------------------------------------------------------------------------------------------------------------------------------------------------------------------------------------------------------------------------------------------------------------------------------------------------------------------------------------------------------------------------------------------------------------|
| Oil Red O (ORO) Stain Kit                                                      | Abcam               | <a href="https://www.abcam.com/oil-red-o-stain-kit-lipid-stain-ab150678.html">https://www.abcam.com/oil-red-o-stain-kit-lipid-stain-ab150678.html</a>                                                                                                                                                                                                                                                                                                                                 |
| CellTiter 96 <sup>®</sup> AQueous One Solution Cell Proliferation Assay (MTS)  | Promega             | <a href="https://www.promega.co.uk/products/cell-health-assays/cell-viability-and-cytotoxicity-assays/celltiter-96-aqueous-one-solution-cell-proliferation-assay- mts /?catNum=G3582">https://www.promega.co.uk/products/cell-health-assays/cell-viability-and-cytotoxicity-assays/celltiter-96-aqueous-one-solution-cell-proliferation-assay- mts /?catNum=G3582</a>                                                                                                                 |
| Low Density Lipoprotein from Human Plasma, oxidized, Dil conjugate (Dil-OxLDL) | Invitrogen          | <a href="https://www.thermofisher.com/order/catalog/product/L34358?uk&amp;en#/L34358?uk&amp;en">https://www.thermofisher.com/order/catalog/product/L34358?uk&amp;en#/L34358?uk&amp;en</a>                                                                                                                                                                                                                                                                                             |
| miRNEasy Mini Kit                                                              | Qiagen              | <a href="https://www.qiagen.com/gb/products/discovery-and-translational-research/dna-rna-purification/rna-purification/mirna/mirneasy-mini-kit/?clear=true#orderinginformation">https://www.qiagen.com/gb/products/discovery-and-translational-research/dna-rna-purification/rna-purification/mirna/mirneasy-mini-kit/?clear=true#orderinginformation</a>                                                                                                                             |
| MultiScribe <sup>™</sup> Reverse Transcriptase kit                             | Life Technologies   | <a href="https://www.thermofisher.com/order/catalog/product/4311235?SID=srch-srp-4311235#/4311235?SID=srch-srp-4311235">https://www.thermofisher.com/order/catalog/product/4311235?SID=srch-srp-4311235#/4311235?SID=srch-srp-4311235</a>                                                                                                                                                                                                                                             |
| MTT Assay Kit                                                                  | Abcam               | <a href="https://www.abcam.com/mtt-assay-kit-cell-proliferation-ab211091.html">https://www.abcam.com/mtt-assay-kit-cell-proliferation-ab211091.html</a>                                                                                                                                                                                                                                                                                                                               |
| Power SYBR Green PCR Master Mix                                                | Life technologies   | <a href="https://www.thermofisher.com/uk/en/home/life-science/pcr/real-time-pcr/real-time-pcr-reagents/sybr-green-real-time-master-mixes/power-sybr-green-master-mix.html">https://www.thermofisher.com/uk/en/home/life-science/pcr/real-time-pcr/real-time-pcr-reagents/sybr-green-real-time-master-mixes/power-sybr-green-master-mix.html</a>                                                                                                                                       |
| TaqMan <sup>™</sup> Universal PCR Master Mix                                   | Thermo Fisher       | <a href="https://www.thermofisher.com/order/catalog/product/4305719#/4305719">https://www.thermofisher.com/order/catalog/product/4305719#/4305719</a>                                                                                                                                                                                                                                                                                                                                 |
| Click-iT <sup>®</sup> EdU Flow Cytometry Cell Proliferation Assay              | Invitrogen          | <a href="https://www.thermofisher.com/order/catalog/product/C10420?uk&amp;en#/C10420?uk&amp;en">https://www.thermofisher.com/order/catalog/product/C10420?uk&amp;en#/C10420?uk&amp;en</a>                                                                                                                                                                                                                                                                                             |
| PARIS <sup>™</sup> Kit                                                         | ThermoFisher        | <a href="https://www.thermofisher.com/order/catalog/product/AM1921?uk&amp;en#/AM1921?uk&amp;en">https://www.thermofisher.com/order/catalog/product/AM1921?uk&amp;en#/AM1921?uk&amp;en</a>                                                                                                                                                                                                                                                                                             |
| ProLong <sup>®</sup> Gold Antifade Mountant                                    | ThermoFisher        | <a href="https://www.thermofisher.com/order/catalog/product/P10144#/P10144">https://www.thermofisher.com/order/catalog/product/P10144#/P10144</a>                                                                                                                                                                                                                                                                                                                                     |
| Bioanalyzer Agilent RNA 6000 Nano kit                                          | Agilent             | <a href="https://www.agilent.com/en/product/automated-electrophoresis/bioanalyzer-systems/bioanalyzer-rna-kits-reagents/bioanalyzer-rna-analysis-228256">https://www.agilent.com/en/product/automated-electrophoresis/bioanalyzer-systems/bioanalyzer-rna-kits-reagents/bioanalyzer-rna-analysis-228256</a>                                                                                                                                                                           |
| ViewRNA <sup>™</sup> Cell FISH                                                 | ThermoFisher        | <a href="https://www.thermofisher.com/uk/en/home/life-science/cell-analysis/cellular-imaging/in-situ-hybridization-ish/rna-fish/viewrna-cell-assays.html#:~:text=ViewRNA%20ISH%20Cell%20and%20Cell,with%20protein%20in%20individual%20cells.">https://www.thermofisher.com/uk/en/home/life-science/cell-analysis/cellular-imaging/in-situ-hybridization-ish/rna-fish/viewrna-cell-assays.html#:~:text=ViewRNA%20ISH%20Cell%20and%20Cell,with%20protein%20in%20individual%20cells.</a> |
| miRCURY LNA miRNA ISH Buffer Set (FFPE)                                        | Qiagen, 339450      | <a href="https://www.qiagen.com/gb/products/discovery-and-translational-research/detection/ish-and-northern-blotting/mirna-detection/mircury-lna-mirna-ish-optimization-kits/#orderinginformation">https://www.qiagen.com/gb/products/discovery-and-translational-research/detection/ish-and-northern-blotting/mirna-detection/mircury-lna-mirna-ish-optimization-kits/#orderinginformation</a>                                                                                       |
| Proteinase K                                                                   | New England Biolabs | <a href="https://international.neb.com/products/p8107-proteinase-k-molecular-biology-grade?cnum=P8107S#Product%20Information">https://international.neb.com/products/p8107-proteinase-k-molecular-biology-grade?cnum=P8107S#Product%20Information</a>                                                                                                                                                                                                                                 |
| Roche Digoxigenin buffer                                                       | Roche, 11585762001  | <a href="https://www.sigmaaldrich.com/catalog/product/ROCHE/11585762001?lang=en&amp;region=GB">https://www.sigmaaldrich.com/catalog/product/ROCHE/11585762001?lang=en&amp;region=GB</a>                                                                                                                                                                                                                                                                                               |
| anti-Digoxigenin-AP                                                            | Roche, 1109327491   | <a href="https://www.sigmaaldrich.com/catalog/product/roche/11093274910?lang=en&amp;region=GB">https://www.sigmaaldrich.com/catalog/product/roche/11093274910?lang=en&amp;region=GB</a>                                                                                                                                                                                                                                                                                               |
| NBT/BCIP AP tablets                                                            | Roche, 11697471001  | <a href="https://www.sigmaaldrich.com/catalog/product/roche/11697471001?lang=en&amp;region=GB">https://www.sigmaaldrich.com/catalog/product/roche/11697471001?lang=en&amp;region=GB</a>                                                                                                                                                                                                                                                                                               |
| UltraPure 0.5M EDTA                                                            | Invitrogen          | <a href="https://www.thermofisher.com/order/catalog/product/15575020?SID=srch-hj-15575020#/15575020?SID=srch-hj-15575020">https://www.thermofisher.com/order/catalog/product/15575020?SID=srch-hj-15575020#/15575020?SID=srch-hj-15575020</a>                                                                                                                                                                                                                                         |
| TURBO DNase                                                                    | Invitrogen          | <a href="https://www.thermofisher.com/order/catalog/product/AM2239?SID=srch-hj-AM2239#/AM2239?SID=srch-hj-AM2239">https://www.thermofisher.com/order/catalog/product/AM2239?SID=srch-hj-AM2239#/AM2239?SID=srch-hj-AM2239</a>                                                                                                                                                                                                                                                         |
| RNAse inhibitor                                                                | New England Biolabs | <a href="https://international.neb.com/products/m0314-rnase-inhibitor-murine?cnum=M0314L#Product%20Information">https://international.neb.com/products/m0314-rnase-inhibitor-murine?cnum=M0314L#Product%20Information</a>                                                                                                                                                                                                                                                             |
| RQ1 RNase-free DNase                                                           | Promega             | <a href="https://www.promega.co.uk/products/cloning-and-dna-markers/molecular-biology-enzymes-and-reagents/rq1-rnase-free-dnase/?catNum=M6101">https://www.promega.co.uk/products/cloning-and-dna-markers/molecular-biology-enzymes-and-reagents/rq1-rnase-free-dnase/?catNum=M6101</a>                                                                                                                                                                                               |
| Antisense LNA GapmeR (sequences in Online Data Supplement)                     | Qiagen              | <a href="https://www.qiagen.com/us/products/discovery-and-translational-research/functional-and-cell-analysis/rna-silencing/antisense-lna-gapmers/antisense-lna-gapmers/#orderinginformation">https://www.qiagen.com/us/products/discovery-and-translational-research/functional-and-cell-analysis/rna-silencing/antisense-lna-gapmers/antisense-lna-gapmers/#orderinginformation</a>                                                                                                 |
| miRCURY LNA miRNA Inhibitors (ID in Online Data Supplement)                    | Qiagen              | <a href="https://www.qiagen.com/us/products/discovery-and-translational-research/functional-and-cell-analysis/mirna-functional-analysis/mircury-lna-mirna-inhibitors/mircury-lna-mirna-inhibitors/?clear=true#orderinginformation">https://www.qiagen.com/us/products/discovery-and-translational-research/functional-and-cell-analysis/mirna-functional-analysis/mircury-lna-mirna-inhibitors/mircury-lna-mirna-inhibitors/?clear=true#orderinginformation</a>                       |
| miRNA mimics                                                                   | MiRagen             | <a href="https://www.eurofinsgenomics.eu/en/ecom/oligonucleotides/custom-dna-oligos/custom-dna-oligos/">https://www.eurofinsgenomics.eu/en/ecom/oligonucleotides/custom-dna-oligos/custom-dna-oligos/</a>                                                                                                                                                                                                                                                                             |
| TaqMan Gene Expression Assays (ID in Online Data Supplement)                   | Thermo Fisher       | <a href="https://www.thermofisher.com/uk/en/home/life-science/pcr/real-time-pcr/real-time-pcr-assays/taqman-gene-expression/single-tube-taqman-gene-expression-analysis.html">https://www.thermofisher.com/uk/en/home/life-science/pcr/real-time-pcr/real-time-pcr-assays/taqman-gene-expression/single-tube-taqman-gene-expression-analysis.html</a>                                                                                                                                 |
| Applied Biosystems <sup>™</sup> TaqMan <sup>™</sup>                            | Fisher Scientific   | <a href="https://www.fishersci.co.uk/shop/products/taqman-microrna-reverse-transcription-kit-3/10146854">https://www.fishersci.co.uk/shop/products/taqman-microrna-reverse-transcription-kit-3/10146854</a>                                                                                                                                                                                                                                                                           |

|                                    |                    |                                                                                                                                                                                                                                                                   |
|------------------------------------|--------------------|-------------------------------------------------------------------------------------------------------------------------------------------------------------------------------------------------------------------------------------------------------------------|
| MicroRNA Reverse Transcription Kit |                    |                                                                                                                                                                                                                                                                   |
| Cholestrol FS Assay                | Diagnostic Systems | <a href="https://www.diasys-diagnostics.com/products/kit-lines/kits-for-respons/product-details/185-cholesterol-fs-10/product.show">https://www.diasys-diagnostics.com/products/kit-lines/kits-for-respons/product-details/185-cholesterol-fs-10/product.show</a> |
|                                    |                    |                                                                                                                                                                                                                                                                   |
