# Supplementary material
Source: PubMed Central journal article supplement (PMC7610708)
Supplement: EMS119935-supplement-Online_Table_IV.pdf [file EMS119935-supplement-Online_Table_IV.pdf]

| ENSEMBL name      | type        | chr   | start    | end      | str | GapCTR_B: | GapCTR_B: |
|-------------------|-------------|-------|----------|----------|-----|-----------|-----------|
| ENSG0000(TSPAN6   | protein_co  | chrX  | 1.01E+08 | 1.01E+08 | -   | 13.2      | 13.57     |
| ENSG0000(TNMD     | protein_co  | chrX  | 1.01E+08 | 1.01E+08 | +   | 0         | 0         |
| ENSG0000(DPM1     | protein_co  | chr20 | 50934867 | 50958555 | -   | 18.71     | 18.74     |
| ENSG0000(SCYL3    | protein_co  | chr1  | 1.7E+08  | 1.7E+08  | -   | 3.55      | 3.6       |
| ENSG0000(C1orf112 | protein_co  | chr1  | 1.7E+08  | 1.7E+08  | +   | 0.66      | 0.96      |
| ENSG0000(FGR      | protein_co  | chr1  | 27612064 | 27635277 | -   | 0         | 0         |
| ENSG0000(CFH      | protein_co  | chr1  | 1.97E+08 | 1.97E+08 | +   | 155.1     | 134.15    |
| ENSG0000(FUCA2    | protein_co  | chr6  | 1.43E+08 | 1.44E+08 | -   | 54.13     | 55.06     |
| ENSG0000(GCLC     | protein_co  | chr6  | 53497341 | 53616970 | -   | 7.19      | 13.33     |
| ENSG0000(NFYA     | protein_co  | chr6  | 41072945 | 41099976 | +   | 6.61      | 5.75      |
| ENSG0000(STPG1    | protein_co  | chr1  | 24356999 | 24416934 | -   | 4.09      | 3.96      |
| ENSG0000(NIPAL3   | protein_co  | chr1  | 24415794 | 24472976 | +   | 16.86     | 17.69     |
| ENSG0000(LAS1L    | protein_co  | chrX  | 65512582 | 65534775 | -   | 9.52      | 9.32      |
| ENSG0000(ENPP4    | protein_co  | chr6  | 46129993 | 46146699 | +   | 0.05      | 0         |
| ENSG0000(SEMA3F   | protein_co  | chr3  | 50155045 | 50189075 | +   | 6.18      | 7.93      |
| ENSG0000(CFTR     | protein_co  | chr7  | 1.17E+08 | 1.18E+08 | +   | 0         | 0         |
| ENSG0000(ANKIB1   | protein_co  | chr7  | 92246234 | 92401384 | +   | 19.32     | 23.21     |
| ENSG0000(CYP51A1  | protein_co  | chr7  | 92112151 | 92142952 | -   | 22.96     | 24.25     |
| ENSG0000(KRIT1    | protein_co  | chr7  | 92198969 | 92246166 | -   | 11.86     | 14.83     |
| ENSG0000(RAD52    | protein_co  | chr12 | 912077   | 990053   | -   | 4.4       | 5.82      |
| ENSG0000(MYH16    | transcribec | chr7  | 99238794 | 99311130 | +   | 0.04      | 0         |
| ENSG0000(BAD      | protein_co  | chr11 | 64269830 | 64284704 | -   | 65.13     | 58.18     |
| ENSG0000(LAP3     | protein_co  | chr4  | 17577192 | 17607972 | +   | 32.54     | 31.11     |
| ENSG0000(CD99     | protein_co  | chrX  | 2691179  | 2741309  | +   | 267.08    | 271.47    |
| ENSG0000(CD99     | protein_co  | chrY  | 2691179  | 2741309  | +   | 267.08    | 271.47    |
| ENSG0000(HS3ST1   | protein_co  | chr4  | 11393150 | 11429765 | -   | 0.03      | 0         |
| ENSG0000(AOC1     | protein_co  | chr7  | 1.51E+08 | 1.51E+08 | +   | 0         | 0         |
| ENSG0000(WNT16    | protein_co  | chr7  | 1.21E+08 | 1.21E+08 | +   | 0         | 0         |
| ENSG0000(HECW1    | protein_co  | chr7  | 43112599 | 43566001 | +   | 0         | 0.03      |
| ENSG0000(MAD1L1   | protein_co  | chr7  | 1815793  | 2233243  | -   | 9.24      | 9.19      |
| ENSG0000(LASP1    | protein_co  | chr17 | 38869859 | 38921770 | +   | 80.15     | 78.64     |
| ENSG0000(SNX11    | protein_co  | chr17 | 48103357 | 48123074 | +   | 8.6       | 8.25      |
| ENSG0000(TMEM176A | protein_co  | chr7  | 1.51E+08 | 1.51E+08 | +   | 0         | 0         |
| ENSG0000(M6PR     | protein_co  | chr12 | 8940363  | 8949955  | -   | 76.05     | 84.71     |
| ENSG0000(KLHL13   | protein_co  | chrX  | 1.18E+08 | 1.18E+08 | -   | 0.35      | 0.31      |
| ENSG0000(CYP26B1  | protein_co  | chr2  | 72129238 | 72148038 | -   | 0.49      | 0.44      |
| ENSG0000(ICA1     | protein_co  | chr7  | 8113184  | 8262687  | -   | 0.08      | 0         |
| ENSG0000(DBNDD1   | protein_co  | chr16 | 90004865 | 90020128 | -   | 5.39      | 6.29      |
| ENSG0000(ALS2     | protein_co  | chr2  | 2.02E+08 | 2.02E+08 | -   | 10.79     | 8.78      |
| ENSG0000(CASP10   | protein_co  | chr2  | 2.01E+08 | 2.01E+08 | +   | 3.26      | 2.62      |
| ENSG0000(CFLAR    | protein_co  | chr2  | 2.01E+08 | 2.01E+08 | +   | 19.84     | 18.51     |
| ENSG0000(TFPI     | protein_co  | chr2  | 1.87E+08 | 1.88E+08 | -   | 47.79     | 37.77     |
| ENSG0000(NDUFAF7  | protein_co  | chr2  | 37231631 | 37253403 | +   | 10.09     | 10.56     |
| ENSG0000(RBM5     | protein_co  | chr3  | 50088908 | 50119021 | +   | 68.22     | 66.61     |

|                    |                  |          |          |   |       |       |
|--------------------|------------------|----------|----------|---|-------|-------|
| ENSG0000(MTMR7     | protein_co chr8  | 17298030 | 17413528 | - | 0.38  | 0.34  |
| ENSG0000(SLC7A2    | protein_co chr8  | 17497088 | 17570573 | + | 22.73 | 16.55 |
| ENSG0000(ARF5      | protein_co chr7  | 1.28E+08 | 1.28E+08 | + | 87.51 | 90.79 |
| ENSG0000(SARM1     | protein_co chr17 | 28364356 | 28404049 | + | 7.03  | 6.99  |
| ENSG0000(POLDIP2   | protein_co chr17 | 28347177 | 28357522 | - | 34.35 | 32.3  |
| ENSG0000(PLXND1    | protein_co chr3  | 1.3E+08  | 1.3E+08  | - | 41.41 | 52.47 |
| ENSG0000(AK2       | protein_co chr1  | 33007940 | 33080996 | - | 57.85 | 54.07 |
| ENSG0000(CD38      | protein_co chr4  | 15778275 | 15853230 | + | 0.97  | 0.16  |
| ENSG0000(FKBP4     | protein_co chr12 | 2794953  | 2805423  | + | 12.92 | 12.67 |
| ENSG0000(KDM1A     | protein_co chr1  | 23019448 | 23083689 | + | 21.53 | 23.17 |
| ENSG0000(RBM6      | protein_co chr3  | 49940007 | 50100045 | + | 19.14 | 22.03 |
| ENSG0000(CAMKK1    | protein_co chr17 | 3860315  | 3894891  | - | 5.04  | 4.94  |
| ENSG0000(RECQL     | protein_co chr12 | 21468911 | 21501669 | - | 12.16 | 11.92 |
| ENSG0000(VPS50     | protein_co chr7  | 93232340 | 93361121 | + | 9.84  | 8.94  |
| ENSG0000(HSPB6     | protein_co chr19 | 35754569 | 35758079 | - | 39.58 | 55.35 |
| ENSG0000(ARHGAP33  | protein_co chr19 | 35774532 | 35788822 | + | 2.24  | 2.66  |
| ENSG0000(NDUFAB1   | protein_co chr16 | 23581002 | 23596356 | - | 24.99 | 22.74 |
| ENSG0000(PDK4      | protein_co chr7  | 95583499 | 95596491 | - | 0.83  | 1.4   |
| ENSG0000(SLC22A16  | protein_co chr6  | 1.1E+08  | 1.1E+08  | - | 0.06  | 0     |
| ENSG0000(ZMYND10   | protein_co chr3  | 50341110 | 50346852 | - | 1.2   | 1.72  |
| ENSG0000(ABCB5     | protein_co chr7  | 20615207 | 20777038 | + | 0.06  | 0     |
| ENSG0000(ARX       | protein_co chrX  | 25003694 | 25016420 | - | 0     | 0     |
| ENSG0000(SLC25A13  | protein_co chr7  | 96120220 | 96322147 | - | 6.8   | 5.78  |
| ENSG0000(ST7       | protein_co chr7  | 1.17E+08 | 1.17E+08 | + | 10.03 | 13.21 |
| ENSG0000(CDC27     | protein_co chr17 | 47117703 | 47189422 | - | 26.94 | 34.77 |
| ENSG0000(SLC4A1    | protein_co chr17 | 44248385 | 44268141 | - | 0.12  | 0.04  |
| ENSG0000(CALCR     | protein_co chr7  | 93424487 | 93574730 | - | 0     | 0     |
| ENSG0000(HCCS      | protein_co chrX  | 11111301 | 11123078 | + | 11.17 | 13.78 |
| ENSG0000(DVL2      | protein_co chr17 | 7225341  | 7234545  | - | 26.91 | 30.58 |
| ENSG0000(PRSS22    | protein_co chr16 | 2852727  | 2858170  | - | 0     | 0.06  |
| ENSG0000(UPF1      | protein_co chr19 | 18831938 | 18868236 | + | 18.26 | 19.59 |
| ENSG0000(SKAP2     | protein_co chr7  | 26667062 | 26995239 | - | 3.18  | 3.82  |
| ENSG0000(SLC25A5   | protein_co chrX  | 1.19E+08 | 1.19E+08 | + | 88.91 | 92.04 |
| ENSG0000(MCUB      | protein_co chr4  | 1.1E+08  | 1.1E+08  | + | 8.43  | 7.91  |
| ENSG0000(HOXA11    | protein_co chr7  | 27181510 | 27185223 | - | 0     | 0     |
| ENSG0000(POLR2J    | protein_co chr7  | 1.02E+08 | 1.02E+08 | - | 31.8  | 30.46 |
| ENSG0000(DHX33     | protein_co chr17 | 5440912  | 5469060  | - | 4.94  | 4.81  |
| ENSG0000(MEOX1     | protein_co chr17 | 43640388 | 43661954 | - | 0.54  | 0.44  |
| ENSG0000(THSD7A    | protein_co chr7  | 11370357 | 11832198 | - | 0.6   | 0.04  |
| ENSG0000(LIG3      | protein_co chr17 | 34980494 | 35009743 | + | 4.71  | 4.95  |
| ENSG0000(RPAP3     | protein_co chr12 | 47661249 | 47706061 | - | 7.61  | 9.06  |
| ENSG0000(ACSM3     | protein_co chr16 | 20610243 | 20797581 | + | 0.34  | 0.75  |
| ENSG0000(AC004381. | protein_co chr16 | 20806429 | 20849668 | + | 1.2   | 1.82  |
| ENSG0000(CIAPIN1   | protein_co chr16 | 57428169 | 57447528 | - | 15.35 | 15.21 |
| ENSG0000(SPPL2B    | protein_co chr19 | 2328615  | 2354806  | + | 18.37 | 18.08 |

|                    |                  |          |            |        |        |
|--------------------|------------------|----------|------------|--------|--------|
| ENSG0000(FAM214B   | protein_co chr9  | 35104112 | 35116341 - | 17.99  | 16.97  |
| ENSG0000(COPZ2     | protein_co chr17 | 48026167 | 48038030 - | 58.71  | 62.87  |
| ENSG0000(PRKAR2B   | protein_co chr7  | 1.07E+08 | 1.07E+08 + | 0.11   | 0.14   |
| ENSG0000(MSL3      | protein_co chrX  | 11758159 | 11775753 + | 11.64  | 14.77  |
| ENSG0000(CREBBP    | protein_co chr16 | 3725054  | 3880726 -  | 14.96  | 15.38  |
| ENSG0000(TSPOAP1   | protein_co chr17 | 58301228 | 58328760 - | 0.28   | 0.22   |
| ENSG0000(MPO       | protein_co chr17 | 58269856 | 58280935 - | 0.16   | 0      |
| ENSG0000(PON1      | protein_co chr7  | 95297676 | 95324707 - | 0      | 0      |
| ENSG0000(GCFC2     | protein_co chr2  | 75652000 | 75710989 - | 4.66   | 3.9    |
| ENSG0000(WDR54     | protein_co chr2  | 74421678 | 74425755 + | 20.87  | 18.83  |
| ENSG0000(CROT      | protein_co chr7  | 87345681 | 87399795 + | 10.93  | 12     |
| ENSG0000(ABCB4     | protein_co chr7  | 87401697 | 87480435 - | 0      | 0      |
| ENSG0000(KMT2E     | protein_co chr7  | 1.05E+08 | 1.05E+08 + | 17.46  | 20.11  |
| ENSG0000(RHBDD2    | protein_co chr7  | 75842602 | 75888926 + | 35.76  | 37.67  |
| ENSG0000(SOX8      | protein_co chr16 | 981808   | 986979 +   | 0.02   | 0.1    |
| ENSG0000(IBTK      | protein_co chr6  | 82169983 | 82247754 - | 11.42  | 11.46  |
| ENSG0000(ZNF195    | protein_co chr11 | 3339261  | 3379222 -  | 4.31   | 4.87   |
| ENSG0000(MYCBP2    | protein_co chr13 | 77044655 | 77327050 - | 13.84  | 12.52  |
| ENSG0000(FBXL3     | protein_co chr13 | 76992598 | 77027195 - | 13.6   | 15.32  |
| ENSG0000(ITGAL     | protein_co chr16 | 30472658 | 30523185 + | 0      | 0      |
| ENSG0000(PDK2      | protein_co chr17 | 50094737 | 50112152 + | 32.75  | 31.58  |
| ENSG0000(ITGA3     | protein_co chr17 | 50055968 | 50090481 + | 18.65  | 16.92  |
| ENSG0000(ZFX       | protein_co chrX  | 24149173 | 24216255 + | 6.76   | 7.19   |
| ENSG0000(LAMP2     | protein_co chrX  | 1.2E+08  | 1.2E+08 -  | 162.87 | 157.22 |
| ENSG0000(ITGA2B    | protein_co chr17 | 44372180 | 44389505 - | 0.25   | 0.25   |
| ENSG0000(ASB4      | protein_co chr7  | 95478444 | 95540232 + | 0      | 0      |
| ENSG0000(GDE1      | protein_co chr16 | 19501689 | 19522145 - | 32.05  | 36.95  |
| ENSG0000(C19orf60  | protein_co chr19 | 18588685 | 18592336 + | 28.11  | 31.85  |
| ENSG0000(CRLF1     | protein_co chr19 | 18572220 | 18607741 - | 141.13 | 127.05 |
| ENSG0000(OSBPL7    | protein_co chr17 | 47807372 | 47821834 - | 4.07   | 3.31   |
| ENSG0000(TMEM98    | protein_co chr17 | 32927910 | 32945106 + | 41.17  | 39.6   |
| ENSG0000(YBX2      | protein_co chr17 | 7288252  | 7294615 -  | 0      | 0.26   |
| ENSG0000(KRT33A    | protein_co chr17 | 41346092 | 41350812 - | 0      | 0      |
| ENSG0000(MAP3K14   | protein_co chr17 | 45263121 | 45317040 - | 4      | 5.07   |
| ENSG0000(ABCC8     | protein_co chr11 | 17392885 | 17476845 - | 0      | 0      |
| ENSG0000(CACNG3    | protein_co chr16 | 24255553 | 24362801 + | 0      | 0      |
| ENSG0000(TMEM132A  | protein_co chr11 | 60924463 | 60937159 + | 80.01  | 76.73  |
| ENSG0000(AP2B1     | protein_co chr17 | 35578046 | 35726409 + | 49.83  | 50.67  |
| ENSG0000(TAC1      | protein_co chr7  | 97731908 | 97740472 + | 0      | 0      |
| ENSG0000(ZNF263    | protein_co chr16 | 3263800  | 3301401 +  | 13.49  | 15.66  |
| ENSG0000(CX3CL1    | protein_co chr16 | 57372458 | 57385048 + | 0.11   | 0.15   |
| ENSG0000(SPATA20   | protein_co chr17 | 50543058 | 50555852 + | 37.33  | 41.28  |
| ENSG0000(CACNA1G   | protein_co chr17 | 50561068 | 50627474 + | 0.09   | 0.06   |
| ENSG0000(TNFRSF12A | protein_co chr16 | 3018445  | 3022383 +  | 59.67  | 58.18  |
| ENSG0000(DLX6      | protein_co chr7  | 97005548 | 97011039 + | 0      | 0      |

|                 |          |                  |          |          |   |       |       |
|-----------------|----------|------------------|----------|----------|---|-------|-------|
| ENSG00000100000 | MAP3K9   | protein_co chr14 | 70722526 | 70809534 | - | 0.03  | 0.05  |
| ENSG00000100000 | RALA     | protein_co chr7  | 39623483 | 39708124 | + | 46.62 | 50.33 |
| ENSG00000100000 | BAIAP2L1 | protein_co chr7  | 98291651 | 98401068 | - | 0.98  | 0.52  |
| ENSG00000100000 | KDM7A    | protein_co chr7  | 1.4E+08  | 1.4E+08  | - | 3.59  | 4.55  |
| ENSG00000100000 | ETV1     | protein_co chr7  | 13891228 | 13991425 | - | 3.44  | 3.32  |
| ENSG00000100000 | AGK      | protein_co chr7  | 1.42E+08 | 1.42E+08 | + | 6.73  | 6.18  |
| ENSG00000100000 | ALDH3B1  | protein_co chr11 | 68008578 | 68029282 | + | 16.03 | 16.82 |
| ENSG00000100000 | TTC22    | protein_co chr1  | 54779712 | 54801267 | - | 0     | 0     |
| ENSG00000100000 | PHTF2    | protein_co chr7  | 77798792 | 77957503 | + | 9.75  | 8.9   |
| ENSG00000100000 | CCL26    | protein_co chr7  | 75769533 | 75789896 | - | 5.72  | 6.9   |
| ENSG00000100000 | FARP2    | protein_co chr2  | 2.41E+08 | 2.41E+08 | + | 10.15 | 13.06 |
| ENSG00000100000 | USH1C    | protein_co chr11 | 17493895 | 17544416 | - | 0     | 0     |
| ENSG00000100000 | GGCT     | protein_co chr7  | 30496621 | 30504844 | - | 13.42 | 12.84 |
| ENSG00000100000 | DBF4     | protein_co chr7  | 87876216 | 87909541 | + | 2.16  | 2.13  |
| ENSG00000100000 | TBXA2R   | protein_co chr19 | 3594506  | 3606840  | - | 3.41  | 3.46  |
| ENSG00000100000 | IFRD1    | protein_co chr7  | 1.12E+08 | 1.12E+08 | + | 26.55 | 24.97 |
| ENSG00000100000 | LGALS14  | protein_co chr19 | 39704306 | 39709444 | + | 0     | 0     |
| ENSG00000100000 | COX10    | protein_co chr17 | 14069496 | 14208677 | + | 4.17  | 3.08  |
| ENSG00000100000 | GTF2IRD1 | protein_co chr7  | 74453790 | 74602604 | + | 5.82  | 4.62  |
| ENSG00000100000 | PAF1     | protein_co chr19 | 39385852 | 39391195 | - | 26.22 | 23.05 |
| ENSG00000100000 | VPS41    | protein_co chr7  | 38722963 | 38932394 | - | 38.42 | 41.64 |
| ENSG00000100000 | ARHGAP44 | protein_co chr17 | 12789539 | 12991643 | + | 0.39  | 0.12  |
| ENSG00000100000 | ELAC2    | protein_co chr17 | 12992391 | 13018187 | - | 13.23 | 12.81 |
| ENSG00000100000 | SCIN     | protein_co chr7  | 12570577 | 12660179 | + | 0.04  | 0.28  |
| ENSG00000100000 | ARSD     | protein_co chrX  | 2903970  | 2929351  | - | 7.82  | 8.62  |
| ENSG00000100000 | PNPLA4   | protein_co chrX  | 7898247  | 7927739  | - | 8.07  | 5.71  |
| ENSG00000100000 | MYH13    | protein_co chr17 | 10300865 | 10373130 | - | 0     | 0     |
| ENSG00000100000 | ADIPOR2  | protein_co chr12 | 1688574  | 1788678  | + | 19.93 | 21.47 |
| ENSG00000100000 | CDKL3    | protein_co chr5  | 1.34E+08 | 1.34E+08 | - | 1.59  | 2.16  |
| ENSG00000100000 | UPP2     | protein_co chr2  | 1.58E+08 | 1.58E+08 | + | 0     | 0     |
| ENSG00000100000 | PRSS21   | protein_co chr16 | 2817180  | 2826304  | + | 0     | 0     |
| ENSG00000100000 | MARK4    | protein_co chr19 | 45079288 | 45305283 | + | 19.06 | 19.16 |
| ENSG00000100000 | PROM1    | protein_co chr4  | 15963076 | 16084378 | - | 0     | 0     |
| ENSG00000100000 | CCDC124  | protein_co chr19 | 17933016 | 17943991 | + | 33.84 | 32.43 |
| ENSG00000100000 | CEACAM21 | protein_co chr19 | 41549518 | 41586844 | + | 0     | 0     |
| ENSG00000100000 | PAFAH1B1 | protein_co chr17 | 2593210  | 2685615  | + | 44.43 | 47.07 |
| ENSG00000100000 | NOS2     | protein_co chr17 | 27756766 | 27800499 | - | 0     | 0     |
| ENSG00000100000 | DNAH9    | protein_co chr17 | 11598431 | 11969748 | + | 0.03  | 0.06  |
| ENSG00000100000 | KIAA0100 | protein_co chr17 | 28614440 | 28645454 | - | 35.02 | 33.83 |
| ENSG00000100000 | SLC13A2  | protein_co chr17 | 28473293 | 28497781 | + | 0     | 0     |
| ENSG00000100000 | GAS7     | protein_co chr17 | 9910609  | 10198551 | - | 0.56  | 0.96  |
| ENSG00000100000 | TRAPPC6A | protein_co chr19 | 45162928 | 45178237 | - | 14.63 | 13.89 |
| ENSG00000100000 | MATK     | protein_co chr19 | 3777970  | 3802129  | - | 0     | 0     |
| ENSG00000100000 | CEACAM7  | protein_co chr19 | 41673307 | 41706976 | - | 0     | 0     |
| ENSG00000100000 | CD79B    | protein_co chr17 | 63928740 | 63932354 | - | 0     | 0.23  |

|                   |                  |          |          |   |       |        |
|-------------------|------------------|----------|----------|---|-------|--------|
| ENSG0000(SCN4A    | protein_co chr17 | 63938554 | 63972918 | - | 0     | 0      |
| ENSG0000(ST7L     | protein_co chr1  | 1.13E+08 | 1.13E+08 | - | 5.88  | 6.9    |
| ENSG0000(TKTL1    | protein_co chrX  | 1.54E+08 | 1.54E+08 | + | 0     | 0      |
| ENSG0000(PAX6     | protein_co chr11 | 31784779 | 31818062 | - | 0.08  | 0      |
| ENSG0000(RPUSD1   | protein_co chr16 | 784974   | 788397   | - | 9.9   | 11.3   |
| ENSG0000(RHBDF1   | protein_co chr16 | 58059    | 76355    | - | 22.34 | 24.59  |
| ENSG0000(LUC7L    | protein_co chr16 | 188969   | 229463   | - | 16.23 | 18.5   |
| ENSG0000(CACNA2D2 | protein_co chr3  | 50362799 | 50504244 | - | 0.07  | 0.02   |
| ENSG0000(BAIAP3   | protein_co chr16 | 1333601  | 1349441  | + | 0.34  | 0.15   |
| ENSG0000(TSR3     | protein_co chr16 | 1349240  | 1351911  | - | 26.36 | 25.41  |
| ENSG0000(PIGQ     | protein_co chr16 | 566995   | 584136   | + | 16.41 | 16.87  |
| ENSG0000(CRAMP1   | protein_co chr16 | 1612325  | 1677908  | + | 6.93  | 4.86   |
| ENSG0000(TEAD3    | protein_co chr6  | 35473597 | 35497076 | - | 21.38 | 26.92  |
| ENSG0000(SELE     | protein_co chr1  | 1.7E+08  | 1.7E+08  | - | 0     | 0      |
| ENSG0000(DNAJC11  | protein_co chr1  | 6634168  | 6701924  | - | 15.42 | 16.37  |
| ENSG0000(FMO3     | protein_co chr1  | 1.71E+08 | 1.71E+08 | + | 0.53  | 0.7    |
| ENSG0000(MYLIP    | protein_co chr6  | 16129125 | 16148248 | + | 3.23  | 4      |
| ENSG0000(NOX1     | protein_co chrX  | 1.01E+08 | 1.01E+08 | - | 0.1   | 0      |
| ENSG0000(E2F2     | protein_co chr1  | 23506430 | 23531220 | - | 0.01  | 0      |
| ENSG0000(PSMB1    | protein_co chr6  | 1.71E+08 | 1.71E+08 | - | 98    | 93.13  |
| ENSG0000(SYN1     | protein_co chrX  | 47571898 | 47619943 | - | 0.29  | 0.42   |
| ENSG0000(JARID2   | protein_co chr6  | 15246296 | 15522040 | + | 3.72  | 4.27   |
| ENSG0000(CDKL5    | protein_co chrX  | 18425583 | 18653629 | + | 2.46  | 2.21   |
| ENSG0000(CAMK1G   | protein_co chr1  | 2.1E+08  | 2.1E+08  | + | 0.08  | 0.38   |
| ENSG0000(CDK11A   | protein_co chr1  | 1702730  | 1724324  | - | 14.34 | 14.02  |
| ENSG0000(NADK     | protein_co chr1  | 1751232  | 1780457  | - | 21.91 | 24.96  |
| ENSG0000(TFAP2B   | protein_co chr6  | 50818723 | 50847613 | + | 0     | 0      |
| ENSG0000(TFAP2D   | protein_co chr6  | 50713828 | 50772988 | + | 0.2   | 0.2    |
| ENSG0000(DLEC1    | protein_co chr3  | 38039205 | 38124025 | + | 0.17  | 0.81   |
| ENSG0000(CYTH3    | protein_co chr7  | 6161776  | 6272644  | - | 14.78 | 13.9   |
| ENSG0000(ADAM22   | protein_co chr7  | 87934143 | 88202889 | + | 0.38  | 0.03   |
| ENSG0000(SYPL1    | protein_co chr7  | 1.06E+08 | 1.06E+08 | - | 40.84 | 39.69  |
| ENSG0000(CYB561   | protein_co chr17 | 63432304 | 63446378 | - | 22.99 | 20.86  |
| ENSG0000(SPAG9    | protein_co chr17 | 50962174 | 51120865 | - | 25.38 | 27.24  |
| ENSG0000(CELSR3   | protein_co chr3  | 48636469 | 48662915 | - | 0.27  | 0.79   |
| ENSG0000(AASS     | protein_co chr7  | 1.22E+08 | 1.22E+08 | - | 6.23  | 6.66   |
| ENSG0000(PLEKHG6  | protein_co chr12 | 6310436  | 6328506  | + | 0     | 0      |
| ENSG0000(SS18L2   | protein_co chr3  | 42581840 | 42595114 | + | 10.05 | 7.97   |
| ENSG0000(MPND     | protein_co chr19 | 4343527  | 4360086  | + | 5.83  | 7.03   |
| ENSG0000(MGST1    | protein_co chr12 | 16347142 | 16609259 | + | 292   | 270.48 |
| ENSG0000(CRY1     | protein_co chr12 | 1.07E+08 | 1.07E+08 | - | 4.38  | 8.26   |
| ENSG0000(PGLYRP1  | protein_co chr19 | 46019153 | 46023065 | - | 0     | 0      |
| ENSG0000(NFIX     | protein_co chr19 | 12995608 | 13098796 | + | 94.42 | 101.99 |
| ENSG0000(ST3GAL1  | protein_co chr8  | 1.33E+08 | 1.34E+08 | - | 65.42 | 65.17  |
| ENSG0000(MMP25    | protein_co chr16 | 3046681  | 3060726  | + | 0.09  | 0.05   |

|                |                  |          |          |   |        |        |
|----------------|------------------|----------|----------|---|--------|--------|
| ENSG0000011132 | protein_co chr16 | 3065297  | 3082192  | + | 40.38  | 35.27  |
| ENSG0000011132 | protein_co chr16 | 2088710  | 2135898  | - | 70.92  | 67.65  |
| ENSG0000011132 | protein_co chr22 | 50600685 | 50613981 | + | 0.37   | 0.49   |
| ENSG0000011132 | protein_co chr17 | 40019097 | 40061215 | - | 16.24  | 16.96  |
| ENSG0000011132 | protein_co chr8  | 22987417 | 23020199 | + | 7.13   | 4.45   |
| ENSG0000011132 | protein_co chr2  | 36968383 | 37084342 | - | 6.14   | 5.29   |
| ENSG0000011132 | protein_co chr3  | 1.7E+08  | 1.7E+08  | + | 48.95  | 51.92  |
| ENSG0000011132 | protein_co chr8  | 56067295 | 56074581 | - | 858    | 845.94 |
| ENSG0000011132 | protein_co chr1  | 1.15E+08 | 1.15E+08 | - | 155.05 | 151.67 |
| ENSG0000011132 | protein_co chr7  | 1.57E+08 | 1.57E+08 | + | 15.56  | 15.81  |
| ENSG0000011132 | protein_co chr6  | 1.11E+08 | 1.11E+08 | - | 24.23  | 23.21  |
| ENSG0000011132 | protein_co chrX  | 1.24E+08 | 1.25E+08 | - | 0      | 0      |
| ENSG0000011132 | protein_co chr1  | 18631006 | 18748866 | + | 0      | 0      |
| ENSG0000011132 | protein_co chr1  | 11026523 | 11047233 | - | 0      | 0      |
| ENSG0000011132 | protein_co chr6  | 1.5E+08  | 1.5E+08  | + | 0.09   | 0.02   |
| ENSG0000011132 | protein_co chr1  | 27725979 | 27763122 | + | 5.14   | 4.28   |
| ENSG0000011132 | protein_co chr1  | 2.1E+08  | 2.1E+08  | + | 0.15   | 0      |
| ENSG0000011132 | protein_co chr14 | 77274956 | 77320884 | - | 9.93   | 8.46   |
| ENSG0000011132 | protein_co chr6  | 1.42E+08 | 1.42E+08 | + | 21.18  | 21.47  |
| ENSG0000011132 | protein_co chr7  | 73593194 | 73624543 | - | 0.54   | 0.26   |
| ENSG0000011132 | protein_co chr7  | 73440398 | 73522278 | - | 22.02  | 21.6   |
| ENSG0000011132 | protein_co chr6  | 13621498 | 13711564 | - | 23.68  | 22.85  |
| ENSG0000011132 | protein_co chr6  | 36354091 | 36387800 | - | 1.38   | 1.73   |
| ENSG0000011132 | protein_co chr1  | 2.31E+08 | 2.31E+08 | + | 3.11   | 3.04   |
| ENSG0000011132 | protein_co chr1  | 1.72E+08 | 1.72E+08 | + | 11     | 8.19   |
| ENSG0000011132 | protein_co chr12 | 4562204  | 4615302  | + | 11.36  | 17.01  |
| ENSG0000011132 | protein_co chr17 | 32350117 | 32381886 | + | 49.39  | 47.52  |
| ENSG0000011132 | protein_co chr3  | 48599002 | 48610976 | - | 67.96  | 79.69  |
| ENSG0000011132 | protein_co chr7  | 38178222 | 38230671 | + | 18.14  | 19.57  |
| ENSG0000011132 | protein_co chr12 | 6199715  | 6238271  | + | 206.98 | 191.88 |
| ENSG0000011132 | protein_co chr3  | 42692663 | 42702827 | - | 0      | 0      |
| ENSG0000011132 | protein_co chr12 | 6493356  | 6531955  | + | 14.6   | 14.02  |
| ENSG0000011132 | protein_co chr12 | 6538375  | 6556083  | - | 17.97  | 22.66  |
| ENSG0000011132 | protein_co chr19 | 45668244 | 45683724 | + | 0.5    | 0.45   |
| ENSG0000011132 | protein_co chr3  | 52410657 | 52423641 | + | 3.09   | 3.5    |
| ENSG0000011132 | protein_co chr3  | 52433053 | 52445085 | - | 0.08   | 0.1    |
| ENSG0000011132 | protein_co chr3  | 52455118 | 52493071 | + | 37.45  | 40.62  |
| ENSG0000011132 | protein_co chr3  | 52495338 | 52524495 | + | 0.01   | 0.22   |
| ENSG0000011132 | protein_co chr19 | 49806869 | 49817376 | - | 9.33   | 8.99   |
| ENSG0000011132 | protein_co chr12 | 220621   | 262873   | - | 0.39   | 0.03   |
| ENSG0000011132 | protein_co chrX  | 1.49E+08 | 1.5E+08  | - | 26.17  | 25.45  |
| ENSG0000011132 | protein_co chr9  | 33750466 | 33799231 | + | 19.97  | 18.78  |
| ENSG0000011132 | protein_co chr16 | 3222325  | 3236221  | - | 3.43   | 2      |
| ENSG0000011132 | protein_co chr12 | 6786858  | 6820808  | + | 0.31   | 0.82   |
| ENSG0000011132 | protein_co chr12 | 6873569  | 6914243  | + | 5.92   | 6.98   |

|                  |                  |          |          |   |         |         |
|------------------|------------------|----------|----------|---|---------|---------|
| ENSG0000(BTK     | protein_co chrX  | 1.01E+08 | 1.01E+08 | - | 0       | 0.05    |
| ENSG0000(HFE     | protein_co chr6  | 26087281 | 26098343 | + | 14.34   | 14.24   |
| ENSG0000(SCMH1   | protein_co chr1  | 41027200 | 41242154 | - | 17.97   | 18.47   |
| ENSG0000(FYN     | protein_co chr6  | 1.12E+08 | 1.12E+08 | - | 56.8    | 57.76   |
| ENSG0000(HIVEP2  | protein_co chr6  | 1.43E+08 | 1.43E+08 | - | 7.16    | 8.58    |
| ENSG0000(FMO1    | protein_co chr1  | 1.71E+08 | 1.71E+08 | + | 0.37    | 0.7     |
| ENSG0000(ELOA    | protein_co chr1  | 23743155 | 23762059 | + | 13.77   | 14.6    |
| ENSG0000(LYPLA2  | protein_co chr1  | 23790970 | 23795539 | + | 19.27   | 20.36   |
| ENSG0000(CLCN6   | protein_co chr1  | 11806096 | 11843144 | + | 9.26    | 8.1     |
| ENSG0000(MRC2    | protein_co chr17 | 62627401 | 62693597 | + | 278.1   | 252.12  |
| ENSG0000(NME1-NM | protein_co chr17 | 51153590 | 51171744 | + | 12.8    | 12.19   |
| ENSG0000(SLC6A7  | protein_co chr5  | 1.5E+08  | 1.5E+08  | + | 0       | 0       |
| ENSG0000(TSPAN9  | protein_co chr12 | 3077355  | 3286564  | + | 15.8    | 16.31   |
| ENSG0000(BTBD7   | protein_co chr14 | 93237550 | 93333092 | - | 11.47   | 9.64    |
| ENSG0000(APBA3   | protein_co chr19 | 3750819  | 3761699  | - | 12.59   | 11.64   |
| ENSG0000(MKS1    | protein_co chr17 | 58205437 | 58219605 | - | 8.35    | 7.62    |
| ENSG0000(ABHD5   | protein_co chr3  | 43690113 | 43734371 | + | 21.54   | 22.58   |
| ENSG0000(ANOS1   | protein_co chrX  | 8528874  | 8732186  | - | 0.08    | 0.26    |
| ENSG0000(AKAP8L  | protein_co chr19 | 15380048 | 15419141 | - | 26.18   | 24.63   |
| ENSG0000(MBTD1   | protein_co chr17 | 51177425 | 51260163 | - | 3.48    | 3.97    |
| ENSG0000(UTP18   | protein_co chr17 | 51260528 | 51297936 | + | 11.56   | 13.64   |
| ENSG0000(RNF216  | protein_co chr7  | 5620047  | 5781739  | - | 13.36   | 14.02   |
| ENSG0000(TTC19   | protein_co chr17 | 15999380 | 16045015 | + | 12.3    | 12.9    |
| ENSG0000(PTBP1   | protein_co chr19 | 797075   | 812327   | + | 68.53   | 75.26   |
| ENSG0000(DPF1    | protein_co chr19 | 38211006 | 38229714 | - | 0       | 0.29    |
| ENSG0000(SYT7    | protein_co chr11 | 61515313 | 61581148 | - | 1.7     | 3.57    |
| ENSG0000(LARS2   | protein_co chr3  | 45388506 | 45549421 | + | 3.84    | 4.4     |
| ENSG0000(PIK3C2A | protein_co chr11 | 17077730 | 17207983 | - | 11.64   | 14.84   |
| ENSG0000(PLAUR   | protein_co chr19 | 43646095 | 43670547 | - | 39.73   | 34.45   |
| ENSG0000(ANLN    | protein_co chr7  | 36389806 | 36453791 | + | 1.26    | 1.63    |
| ENSG0000(WIZ     | protein_co chr19 | 15419980 | 15449951 | - | 21.46   | 20.8    |
| ENSG0000(RABGAP1 | protein_co chr9  | 1.23E+08 | 1.23E+08 | + | 17.53   | 16.29   |
| ENSG0000(DCN     | protein_co chr12 | 91140484 | 91183123 | - | 3536.27 | 3444.27 |
| ENSG0000(QPCTL   | protein_co chr19 | 45692483 | 45703989 | + | 6.38    | 6.14    |
| ENSG0000(PPP5C   | protein_co chr19 | 46346994 | 46392981 | + | 21.47   | 21.53   |
| ENSG0000(CEP68   | protein_co chr2  | 65056366 | 65087004 | + | 4.02    | 4.04    |
| ENSG0000(MAP4K3  | protein_co chr2  | 39249266 | 39437312 | - | 9.64    | 9.71    |
| ENSG0000(ZBTB32  | protein_co chr19 | 35704527 | 35717038 | + | 0       | 0.11    |
| ENSG0000(TYROBP  | protein_co chr19 | 35904401 | 35908295 | - | 0       | 0       |
| ENSG0000(TMEM159 | protein_co chr16 | 21158377 | 21180616 | + | 30.31   | 29.58   |
| ENSG0000(GABRA3  | protein_co chrX  | 1.52E+08 | 1.52E+08 | - | 0       | 0       |
| ENSG0000(BRCA1   | protein_co chr17 | 43044295 | 43170245 | - | 2.24    | 2.35    |
| ENSG0000(ERCC1   | protein_co chr19 | 45407333 | 45478828 | - | 40.47   | 41.72   |
| ENSG0000(CD22    | protein_co chr19 | 35319261 | 35347355 | + | 0       | 0       |
| ENSG0000(SEMA3B  | protein_co chr3  | 50267558 | 50277546 | + | 15.01   | 16.67   |

|                 |          |                  |          |          |   |        |       |
|-----------------|----------|------------------|----------|----------|---|--------|-------|
| ENSG00000108000 | MBTPS2   | protein_co chrX  | 21839636 | 21885424 | + | 8.27   | 8.32  |
| ENSG00000108000 | PRICKLE3 | protein_co chrX  | 49175264 | 49186528 | - | 4.18   | 4.48  |
| ENSG00000108000 | LTF      | protein_co chr3  | 46435645 | 46485234 | - | 2.7    | 2.93  |
| ENSG00000108000 | EXTL3    | protein_co chr8  | 28600469 | 28755599 | + | 9.84   | 8.71  |
| ENSG00000108000 | NR1H4    | protein_co chr12 | 1E+08    | 1.01E+08 | + | 0      | 0     |
| ENSG00000108000 | ELOVL5   | protein_co chr6  | 53267398 | 53349179 | - | 39.83  | 40.2  |
| ENSG00000108000 | ALOX5    | protein_co chr10 | 45374176 | 45446119 | + | 0.03   | 0     |
| ENSG00000108000 | KDM5D    | protein_co chrY  | 19703865 | 19744939 | - | 11.79  | 12.27 |
| ENSG00000108000 | CALCOCO1 | protein_co chr12 | 53708517 | 53727745 | - | 92.28  | 93.57 |
| ENSG00000108000 | UBR7     | protein_co chr14 | 93207056 | 93229215 | + | 6.31   | 5.21  |
| ENSG00000108000 | MAP4K5   | protein_co chr14 | 50418501 | 50561126 | - | 9.15   | 12.26 |
| ENSG00000108000 | EHD3     | protein_co chr2  | 31234337 | 31269447 | + | 6.17   | 5.98  |
| ENSG00000108000 | PSMC4    | protein_co chr19 | 39971005 | 39981441 | + | 30.42  | 30.56 |
| ENSG00000108000 | MAN2B2   | protein_co chr4  | 6575175  | 6623362  | + | 25.42  | 26.71 |
| ENSG00000108000 | SLC7A14  | protein_co chr3  | 1.7E+08  | 1.71E+08 | - | 0.1    | 0.11  |
| ENSG00000108000 | CLDN11   | protein_co chr3  | 1.7E+08  | 1.71E+08 | + | 66.99  | 60.85 |
| ENSG00000108000 | SLC25A39 | protein_co chr17 | 44319625 | 44324870 | - | 35.14  | 39.21 |
| ENSG00000108000 | MVP      | protein_co chr16 | 29820394 | 29848039 | + | 132.68 | 126.8 |
| ENSG00000108000 | NUB1     | protein_co chr7  | 1.51E+08 | 1.51E+08 | + | 26.35  | 27.94 |
| ENSG00000108000 | PGM3     | protein_co chr6  | 83161150 | 83193936 | - | 31.21  | 36.19 |
| ENSG00000108000 | RWDD2A   | protein_co chr6  | 83193379 | 83198932 | + | 4.41   | 4.41  |
| ENSG00000108000 | CLK1     | protein_co chr2  | 2.01E+08 | 2.01E+08 | - | 29.87  | 29.53 |
| ENSG00000108000 | POLR3B   | protein_co chr12 | 1.06E+08 | 1.07E+08 | + | 3.47   | 2.64  |
| ENSG00000108000 | ANGEL1   | protein_co chr14 | 76786178 | 76826246 | - | 4.94   | 4.5   |
| ENSG00000108000 | RNF14    | protein_co chr5  | 1.42E+08 | 1.42E+08 | + | 27.09  | 26.91 |
| ENSG00000108000 | DNASE1L1 | protein_co chrX  | 1.54E+08 | 1.54E+08 | - | 17.9   | 17.28 |
| ENSG00000108000 | DDX11    | protein_co chr12 | 31073845 | 31104791 | + | 4.58   | 7.15  |
| ENSG00000108000 | HEBP1    | protein_co chr12 | 12974864 | 13000273 | - | 57.84  | 62.7  |
| ENSG00000108000 | GPRC5A   | protein_co chr12 | 12890782 | 12917937 | + | 49.33  | 40.6  |
| ENSG00000108000 | MAMLD1   | protein_co chrX  | 1.5E+08  | 1.51E+08 | + | 1.76   | 1.93  |
| ENSG00000108000 | CD6      | protein_co chr11 | 60971680 | 61020377 | + | 0      | 0     |
| ENSG00000108000 | TACC3    | protein_co chr4  | 1721490  | 1745176  | + | 1.87   | 1.13  |
| ENSG00000108000 | UFL1     | protein_co chr6  | 96521595 | 96555276 | + | 7.34   | 7.38  |
| ENSG00000108000 | POLA2    | protein_co chr11 | 65261762 | 65305589 | + | 3.3    | 3.55  |
| ENSG00000108000 | ZC3H3    | protein_co chr8  | 1.43E+08 | 1.44E+08 | - | 5.67   | 6.51  |
| ENSG00000108000 | CAPN1    | protein_co chr11 | 65180566 | 65212006 | + | 49.99  | 53.4  |
| ENSG00000108000 | ACPP     | protein_co chr3  | 1.32E+08 | 1.32E+08 | + | 0.13   | 0.27  |
| ENSG00000108000 | MDH1     | protein_co chr2  | 63588609 | 63607197 | + | 59.7   | 59.03 |
| ENSG00000108000 | SLC30A9  | protein_co chr4  | 41990472 | 42090457 | + | 19.91  | 19.26 |
| ENSG00000108000 | MTMR11   | protein_co chr1  | 1.5E+08  | 1.5E+08  | - | 13.03  | 13.04 |
| ENSG00000108000 | COX15    | protein_co chr10 | 99711844 | 99732100 | - | 10.64  | 11.28 |
| ENSG00000108000 | CCDC88C  | protein_co chr14 | 91271323 | 91417844 | - | 0.35   | 0.98  |
| ENSG00000108000 | YAF2     | protein_co chr12 | 42157104 | 42238349 | - | 10.16  | 9.75  |
| ENSG00000108000 | ZMYND11  | protein_co chr10 | 134465   | 254637   | + | 26.29  | 27.38 |
| ENSG00000108000 | WAS      | protein_co chrX  | 48676596 | 48691427 | + | 0.09   | 0     |



|                  |                  |          |          |   |       |       |
|------------------|------------------|----------|----------|---|-------|-------|
| ENSG0000(DPEP1   | protein_co chr16 | 89613308 | 89638456 | + | 0     | 0     |
| ENSG0000(BID     | protein_co chr22 | 17734138 | 17774770 | - | 19.58 | 12.69 |
| ENSG0000(MATR3   | protein_co chr5  | 1.39E+08 | 1.39E+08 | + | 80.45 | 73.99 |
| ENSG0000(NPC1L1  | protein_co chr7  | 44512535 | 44541315 | - | 0.04  | 0.01  |
| ENSG0000(XYLT2   | protein_co chr17 | 50346092 | 50363138 | + | 16.26 | 15.56 |
| ENSG0000(RGPD5   | protein_co chr2  | 1.1E+08  | 1.1E+08  | + | 1.6   | 2.29  |
| ENSG0000(STMN4   | protein_co chr8  | 27235323 | 27258420 | - | 0     | 0     |
| ENSG0000(NUDCD3  | protein_co chr7  | 44379121 | 44490880 | - | 36.16 | 32.13 |
| ENSG0000(ISL1    | protein_co chr5  | 51383391 | 51394738 | + | 0     | 0     |
| ENSG0000(CHDH    | protein_co chr3  | 53812335 | 53846390 | - | 0.37  | 0.27  |
| ENSG0000(IL20RA  | protein_co chr6  | 1.37E+08 | 1.37E+08 | - | 0.02  | 0.1   |
| ENSG0000(CLCA1   | protein_co chr1  | 86468368 | 86500289 | + | 0     | 0     |
| ENSG0000(CLCA4   | protein_co chr1  | 86547078 | 86580754 | + | 0     | 0     |
| ENSG0000(GLT8D1  | protein_co chr3  | 52694488 | 52706032 | - | 42.18 | 44.33 |
| ENSG0000(ATP2C1  | protein_co chr3  | 1.31E+08 | 1.31E+08 | + | 44.8  | 40.75 |
| ENSG0000(IGF1    | protein_co chr12 | 1.02E+08 | 1.02E+08 | - | 5.25  | 6.65  |
| ENSG0000(SLC38A5 | protein_co chrX  | 48458537 | 48470256 | - | 2.9   | 2.76  |
| ENSG0000(RALBP1  | protein_co chr18 | 9475009  | 9538116  | + | 20.95 | 23.05 |
| ENSG0000(RUFY3   | protein_co chr4  | 70704204 | 70807315 | + | 19.4  | 24.86 |
| ENSG0000(CNTN1   | protein_co chr12 | 40692442 | 41072418 | + | 0.18  | 0     |
| ENSG0000(SLC11A1 | protein_co chr2  | 2.18E+08 | 2.18E+08 | + | 0.09  | 0.04  |
| ENSG0000(WWTR1   | protein_co chr3  | 1.5E+08  | 1.5E+08  | - | 39.4  | 41.42 |
| ENSG0000(AGPS    | protein_co chr2  | 1.77E+08 | 1.78E+08 | + | 17.3  | 22.59 |
| ENSG0000(ZNF806  | unprocessε chr2  | 1.32E+08 | 1.32E+08 | + | 0     | 0     |
| ENSG0000(CXorf56 | protein_co chrX  | 1.2E+08  | 1.2E+08  | - | 8.6   | 8.21  |
| ENSG0000(ATP1A2  | protein_co chr1  | 1.6E+08  | 1.6E+08  | + | 0.02  | 0     |
| ENSG0000(TTC27   | protein_co chr2  | 32628032 | 32821051 | + | 4.56  | 5.5   |
| ENSG0000(ZNF582  | protein_co chr19 | 56375846 | 56393545 | - | 0.61  | 1.43  |
| ENSG0000(VSIG2   | protein_co chr11 | 1.25E+08 | 1.25E+08 | - | 0.36  | 0.06  |
| ENSG0000(PHLDB1  | protein_co chr11 | 1.19E+08 | 1.19E+08 | + | 33.31 | 37.63 |
| ENSG0000(MARCO   | protein_co chr2  | 1.19E+08 | 1.19E+08 | + | 0     | 0     |
| ENSG0000(CYP24A1 | protein_co chr20 | 54153449 | 54173973 | - | 0.08  | 0.04  |
| ENSG0000(PRDM11  | protein_co chr11 | 45095806 | 45235110 | + | 1.85  | 2.18  |
| ENSG0000(SYT13   | protein_co chr11 | 45240301 | 45286319 | - | 0     | 0     |
| ENSG0000(SNAI2   | protein_co chr8  | 48917768 | 48921740 | - | 31.7  | 35.61 |
| ENSG0000(CD74    | protein_co chr5  | 1.5E+08  | 1.5E+08  | - | 1.79  | 2.19  |
| ENSG0000(HGF     | protein_co chr7  | 81699006 | 81770438 | - | 28.84 | 36.53 |
| ENSG0000(ZRANB1  | protein_co chr10 | 1.25E+08 | 1.25E+08 | + | 8.85  | 8.74  |
| ENSG0000(NCDN    | protein_co chr1  | 35557473 | 35567274 | + | 14.36 | 14.36 |
| ENSG0000(ADGRA2  | protein_co chr8  | 37784191 | 37844896 | + | 50.13 | 54.75 |
| ENSG0000(CCT8L1P | processed_ chr7  | 1.52E+08 | 1.52E+08 | + | 0.03  | 0     |
| ENSG0000(ZFP64   | protein_co chr20 | 52051663 | 52204308 | - | 6.08  | 5.92  |
| ENSG0000(MNAT1   | protein_co chr14 | 60734742 | 60969953 | + | 12.6  | 11.11 |
| ENSG0000(SAMD4A  | protein_co chr14 | 54567097 | 54793315 | + | 5.32  | 4.99  |
| ENSG0000(RUNX3   | protein_co chr1  | 24899511 | 24965121 | - | 0.01  | 0     |

|                   |                  |          |          |   |        |        |
|-------------------|------------------|----------|----------|---|--------|--------|
| ENSG0000(MRE11    | protein_co chr11 | 94415578 | 94493908 | - | 5.6    | 7.3    |
| ENSG0000(PLEKHB1  | protein_co chr11 | 73646178 | 73662819 | + | 0.3    | 1.3    |
| ENSG0000(SERPINB1 | protein_co chr6  | 2832332  | 2842006  | - | 11.67  | 9.23   |
| ENSG0000(CYP3A43  | protein_co chr7  | 99828013 | 99866102 | + | 0.03   | 0      |
| ENSG0000(SLC7A9   | protein_co chr19 | 32830509 | 32869766 | - | 0.07   | 0.51   |
| ENSG0000(SPAST    | protein_co chr2  | 32063611 | 32157637 | + | 5.13   | 6.41   |
| ENSG0000(NRXN3    | protein_co chr14 | 78170373 | 79868290 | + | 0.51   | 0.66   |
| ENSG0000(OSBPL5   | protein_co chr11 | 3087116  | 3166739  | - | 14.46  | 12.25  |
| ENSG0000(AQR      | protein_co chr15 | 34851782 | 34969839 | - | 7.88   | 7.1    |
| ENSG0000(CPS1     | protein_co chr2  | 2.1E+08  | 2.11E+08 | + | 5.4    | 3.49   |
| ENSG0000(C8B      | protein_co chr1  | 56929210 | 56966140 | - | 0      | 0      |
| ENSG0000(FHL1     | protein_co chrX  | 1.36E+08 | 1.36E+08 | + | 21.53  | 27.06  |
| ENSG0000(RTFDC1   | protein_co chr20 | 56468585 | 56519449 | + | 49.24  | 46.02  |
| ENSG0000(GABRA1   | protein_co chr5  | 1.62E+08 | 1.62E+08 | + | 0      | 0      |
| ENSG0000(NLRP2    | protein_co chr19 | 54953130 | 55001142 | + | 0.02   | 0      |
| ENSG0000(SLC45A4  | protein_co chr8  | 1.41E+08 | 1.41E+08 | - | 3.64   | 3.76   |
| ENSG0000(RNF10    | protein_co chr12 | 1.21E+08 | 1.21E+08 | + | 53.09  | 48.68  |
| ENSG0000(ZNF839   | protein_co chr14 | 1.02E+08 | 1.02E+08 | + | 2.22   | 2.34   |
| ENSG0000(ZDHHC6   | protein_co chr10 | 1.12E+08 | 1.12E+08 | - | 14.47  | 17.99  |
| ENSG0000(GRAMD1B  | protein_co chr11 | 1.23E+08 | 1.24E+08 | + | 0.67   | 0.99   |
| ENSG0000(RNH1     | protein_co chr11 | 494512   | 507300   | - | 203.98 | 192.12 |
| ENSG0000(NDUFS1   | protein_co chr2  | 2.06E+08 | 2.06E+08 | - | 19.01  | 18.52  |
| ENSG0000(RB1CC1   | protein_co chr8  | 52622456 | 52745843 | - | 17.75  | 18.99  |
| ENSG0000(ERP44    | protein_co chr9  | 99979179 | 1E+08    | - | 14.32  | 14.4   |
| ENSG0000(ALAS1    | protein_co chr3  | 52198086 | 52214327 | + | 20.66  | 24.17  |
| ENSG0000(BIRC3    | protein_co chr11 | 1.02E+08 | 1.02E+08 | + | 0.57   | 0.47   |
| ENSG0000(AKAP11   | protein_co chr13 | 42272153 | 42323267 | + | 7.74   | 7.48   |
| ENSG0000(GLRX2    | protein_co chr1  | 1.93E+08 | 1.93E+08 | - | 5.86   | 7.38   |
| ENSG0000(SNAPC1   | protein_co chr14 | 61762357 | 61796428 | + | 5.53   | 4.3    |
| ENSG0000(DERA     | protein_co chr12 | 15911172 | 16037282 | + | 17.37  | 21.22  |
| ENSG0000(STRAP    | protein_co chr12 | 15882391 | 15903478 | + | 36.38  | 38.87  |
| ENSG0000(ABCC2    | protein_co chr10 | 99782732 | 99852192 | + | 0.16   | 0.16   |
| ENSG0000(DEF6     | protein_co chr6  | 35297852 | 35321771 | + | 0.64   | 0.89   |
| ENSG0000(PLEKHO1  | protein_co chr1  | 1.5E+08  | 1.5E+08  | + | 29.56  | 26.37  |
| ENSG0000(GCLM     | protein_co chr1  | 93885205 | 93909456 | - | 27.6   | 27.93  |
| ENSG0000(UBR2     | protein_co chr6  | 42564062 | 42693504 | + | 7.68   | 7.82   |
| ENSG0000(EHD2     | protein_co chr19 | 47713343 | 47743134 | + | 137.58 | 134.79 |
| ENSG0000(DEPDC1   | protein_co chr1  | 68474152 | 68497221 | - | 0      | 0.13   |
| ENSG0000(CCDC28A  | protein_co chr6  | 1.39E+08 | 1.39E+08 | + | 10.01  | 8.24   |
| ENSG0000(RRAGD    | protein_co chr6  | 89364636 | 89412270 | - | 0.65   | 0.08   |
| ENSG0000(HSF2     | protein_co chr6  | 1.22E+08 | 1.22E+08 | + | 7.88   | 6.44   |
| ENSG0000(PHF20    | protein_co chr20 | 35771974 | 35950381 | + | 15.37  | 11.45  |
| ENSG0000(HSD17B6  | protein_co chr12 | 56752161 | 56787790 | + | 3.06   | 4.64   |
| ENSG0000(NR1H3    | protein_co chr11 | 47248300 | 47269032 | + | 8.87   | 11.56  |
| ENSG0000(TYMP     | protein_co chr22 | 50525752 | 50530056 | - | 5.02   | 4.12   |

|                     |                  |          |          |   |         |         |
|---------------------|------------------|----------|----------|---|---------|---------|
| ENSG0000( NCAPH2    | protein_co chr22 | 50508216 | 50523472 | + | 9.86    | 9.3     |
| ENSG0000( TOMM34    | protein_co chr20 | 44942130 | 44960486 | - | 16.6    | 18.38   |
| ENSG0000( SEC63     | protein_co chr6  | 1.08E+08 | 1.08E+08 | - | 42.35   | 36.46   |
| ENSG0000( KPNA6     | protein_co chr1  | 32108038 | 32176568 | + | 10.99   | 11.91   |
| ENSG0000( VIM       | protein_co chr10 | 17228259 | 17237593 | + | 2126.62 | 2014.09 |
| ENSG0000( RTEL1-TNF | protein_co chr20 | 63659300 | 63698684 | + | 2.01    | 2.12    |
| ENSG0000( FAS       | protein_co chr10 | 88990582 | 89015785 | + | 26.03   | 26.53   |
| ENSG0000( RNASET2   | protein_co chr6  | 1.67E+08 | 1.67E+08 | - | 21.16   | 23.52   |
| ENSG0000( CD44      | protein_co chr11 | 35138870 | 35232402 | + | 317.23  | 297.36  |
| ENSG0000( KCNG1     | protein_co chr20 | 51003656 | 51023129 | - | 2.27    | 2.77    |
| ENSG0000( AGPAT4    | protein_co chr6  | 1.61E+08 | 1.61E+08 | - | 3.01    | 2.56    |
| ENSG0000( SLAMF7    | protein_co chr1  | 1.61E+08 | 1.61E+08 | + | 0       | 0.04    |
| ENSG0000( BTN3A1    | protein_co chr6  | 26402237 | 26415216 | + | 7.16    | 8.78    |
| ENSG0000( MIPEP     | protein_co chr13 | 23730189 | 23889419 | - | 5.08    | 6.24    |
| ENSG0000( PRKCH     | protein_co chr14 | 61187559 | 61550976 | + | 1.42    | 1.94    |
| ENSG0000( INSRR     | protein_co chr1  | 1.57E+08 | 1.57E+08 | - | 0       | 0.01    |
| ENSG0000( IFNGR1    | protein_co chr6  | 1.37E+08 | 1.37E+08 | - | 22.44   | 20.93   |
| ENSG0000( B4GALT7   | protein_co chr5  | 1.78E+08 | 1.78E+08 | + | 14.3    | 14.82   |
| ENSG0000( SH2D2A    | protein_co chr1  | 1.57E+08 | 1.57E+08 | - | 0       | 0       |
| ENSG0000( VRK2      | protein_co chr2  | 57907651 | 58159920 | + | 8.36    | 8.4     |
| ENSG0000( TNFRSF1B  | protein_co chr1  | 12167003 | 12209228 | + | 6.91    | 6.02    |
| ENSG0000( VEZT      | protein_co chr12 | 95217746 | 95302790 | + | 25.9    | 22.68   |
| ENSG0000( POU2F2    | protein_co chr19 | 42086110 | 42196585 | - | 3.08    | 3.17    |
| ENSG0000( BRD9      | protein_co chr5  | 850291   | 892824   | - | 13.18   | 13.88   |
| ENSG0000( SNX1      | protein_co chr15 | 64094123 | 64146090 | + | 51.1    | 51.86   |
| ENSG0000( TBPL1     | protein_co chr6  | 1.34E+08 | 1.34E+08 | + | 20.19   | 21.93   |
| ENSG0000( ARNTL2    | protein_co chr12 | 27332854 | 27425289 | + | 4.03    | 4.52    |
| ENSG0000( BCLAF1    | protein_co chr6  | 1.36E+08 | 1.36E+08 | - | 45.62   | 44.79   |
| ENSG0000( SLC39A9   | protein_co chr14 | 69398015 | 69462388 | + | 22.04   | 21.52   |
| ENSG0000( ANK1      | protein_co chr8  | 41653220 | 41896762 | - | 2.25    | 2.36    |
| ENSG0000( IBSP      | protein_co chr4  | 87799581 | 87812435 | + | 0       | 0       |
| ENSG0000( TFB1M     | protein_co chr6  | 1.55E+08 | 1.55E+08 | - | 4.57    | 4.82    |
| ENSG0000( RABEP1    | protein_co chr17 | 5282265  | 5385812  | + | 22.89   | 18.4    |
| ENSG0000( HMGB3     | protein_co chrX  | 1.51E+08 | 1.51E+08 | + | 5.39    | 8.6     |
| ENSG0000( NUP160    | protein_co chr11 | 47778087 | 47848555 | - | 8.26    | 9.18    |
| ENSG0000( BAK1      | protein_co chr6  | 33572547 | 33580293 | - | 7.78    | 7.73    |
| ENSG0000( MUSK      | protein_co chr9  | 1.11E+08 | 1.11E+08 | + | 0.1     | 0.23    |
| ENSG0000( IKZF2     | protein_co chr2  | 2.13E+08 | 2.13E+08 | - | 0.56    | 0.57    |
| ENSG0000( GRN       | protein_co chr17 | 44345086 | 44353102 | + | 650.77  | 673.08  |
| ENSG0000( FAM13B    | protein_co chr5  | 1.38E+08 | 1.38E+08 | - | 11.4    | 10.13   |
| ENSG0000( ARHGAP31  | protein_co chr3  | 1.19E+08 | 1.19E+08 | + | 4.36    | 4.84    |
| ENSG0000( CENPQ     | protein_co chr6  | 49463378 | 49493107 | + | 2.05    | 2.08    |
| ENSG0000( SARS      | protein_co chr1  | 1.09E+08 | 1.09E+08 | + | 109.97  | 113.44  |
| ENSG0000( RANBP3    | protein_co chr19 | 5916139  | 5978142  | - | 28.96   | 27.19   |
| ENSG0000( ARID4A    | protein_co chr14 | 58298385 | 58373887 | + | 5.57    | 5.77    |

|                   |                  |          |            |         |        |
|-------------------|------------------|----------|------------|---------|--------|
| ENSG0000(TSSC1    | protein_co chr2  | 3188925  | 3377882 -  | 6.59    | 6.63   |
| ENSG0000(PNPLA6   | protein_co chr19 | 7534004  | 7561764 +  | 15.7    | 22.05  |
| ENSG0000(IFT88    | protein_co chr13 | 20567069 | 20691437 + | 7.48    | 6.35   |
| ENSG0000(ALG1     | protein_co chr16 | 5033960  | 5087379 +  | 16.39   | 14.88  |
| ENSG0000(ZCCHC8   | protein_co chr12 | 1.22E+08 | 1.23E+08 - | 6.33    | 5.97   |
| ENSG0000(ABCF2    | protein_co chr7  | 1.51E+08 | 1.51E+08 - | 19.75   | 20.3   |
| ENSG0000(CHPF2    | protein_co chr7  | 1.51E+08 | 1.51E+08 + | 28.87   | 29.59  |
| ENSG0000(LRRC7    | protein_co chr1  | 69568398 | 70151945 + | 0       | 0      |
| ENSG0000(FUT8     | protein_co chr14 | 65410592 | 65744121 + | 142.73  | 136.18 |
| ENSG0000(UBA6     | protein_co chr4  | 67612652 | 67701179 - | 17.48   | 14.53  |
| ENSG0000(GAB2     | protein_co chr11 | 78215297 | 78418348 - | 11.4    | 11.5   |
| ENSG0000(ATP6VOA1 | protein_co chr17 | 42458844 | 42522611 + | 13.88   | 14.55  |
| ENSG0000(PIAS1    | protein_co chr15 | 68054179 | 68198603 + | 9.82    | 12.43  |
| ENSG0000(SLC4A7   | protein_co chr3  | 27372721 | 27484420 - | 17.73   | 20.56  |
| ENSG0000(APBA2    | protein_co chr15 | 28884483 | 29118315 + | 6.24    | 5.27   |
| ENSG0000(MAP2K3   | protein_co chr17 | 21284672 | 21315240 + | 22.07   | 17.37  |
| ENSG0000(EFCAB1   | protein_co chr8  | 48710789 | 48735311 - | 0       | 0.25   |
| ENSG0000(TMSB10   | protein_co chr2  | 84905625 | 84906675 + | 3025.48 | 2732.5 |
| ENSG0000(ASTE1    | protein_co chr3  | 1.31E+08 | 1.31E+08 - | 3.3     | 3.69   |
| ENSG0000(RNF19A   | protein_co chr8  | 1E+08    | 1E+08 -    | 14.39   | 14.07  |
| ENSG0000(PEX3     | protein_co chr6  | 1.43E+08 | 1.43E+08 + | 7.3     | 7.54   |
| ENSG0000(GABARAPL | protein_co chr16 | 75566351 | 75577881 + | 63.16   | 64.84  |
| ENSG0000(MYOC     | protein_co chr1  | 1.72E+08 | 1.72E+08 - | 0.74    | 0.96   |
| ENSG0000(SH3YL1   | protein_co chr2  | 217730   | 266398 -   | 16.9    | 16.22  |
| ENSG0000(FAM136A  | protein_co chr2  | 70295975 | 70302090 - | 12.13   | 13.15  |
| ENSG0000(VCL      | protein_co chr10 | 73995193 | 74121363 + | 82.71   | 90.83  |
| ENSG0000(DEPDC1B  | protein_co chr5  | 60596912 | 60700190 - | 0.29    | 0.24   |
| ENSG0000(DAPK2    | protein_co chr15 | 63907036 | 64072033 - | 0.52    | 0.29   |
| ENSG0000(NSMAF    | protein_co chr8  | 58583504 | 58659844 - | 18.26   | 17.93  |
| ENSG0000(ADSS     | protein_co chr1  | 2.44E+08 | 2.44E+08 - | 15.53   | 15.31  |
| ENSG0000(STAP1    | protein_co chr4  | 67558728 | 67607337 + | 0       | 0      |
| ENSG0000(TIMP2    | protein_co chr17 | 78852977 | 78925387 - | 446.32  | 493.79 |
| ENSG0000(RFC1     | protein_co chr4  | 39287456 | 39366375 - | 16.01   | 13.39  |
| ENSG0000(TBC1D23  | protein_co chr3  | 1E+08    | 1E+08 +    | 19.49   | 15.32  |
| ENSG0000(CUL3     | protein_co chr2  | 2.24E+08 | 2.25E+08 - | 21.34   | 22.42  |
| ENSG0000(MYOM2    | protein_co chr8  | 2045040  | 2165552 +  | 1.43    | 0.28   |
| ENSG0000(OTC      | protein_co chrX  | 38352545 | 38421450 + | 0.04    | 0      |
| ENSG0000(CYP46A1  | protein_co chr14 | 99684304 | 99727301 + | 0.48    | 0.58   |
| ENSG0000(ZZZ3     | protein_co chr1  | 77562416 | 77683419 - | 11.92   | 13.79  |
| ENSG0000(SLC18A1  | protein_co chr8  | 20144855 | 20183206 - | 0       | 0      |
| ENSG0000(USP2     | protein_co chr11 | 1.19E+08 | 1.19E+08 - | 0.19    | 0.52   |
| ENSG0000(CASR     | protein_co chr3  | 1.22E+08 | 1.22E+08 + | 0.4     | 0.26   |
| ENSG0000(TUBG2    | protein_co chr17 | 42659305 | 42667006 + | 13.31   | 14.71  |
| ENSG0000(RPL26L1  | protein_co chr5  | 1.73E+08 | 1.73E+08 + | 17.68   | 16.05  |
| ENSG0000(FLT4     | protein_co chr5  | 1.81E+08 | 1.81E+08 - | 0.03    | 0.01   |

|                   |                  |          |            |        |        |
|-------------------|------------------|----------|------------|--------|--------|
| ENSG0000( NSUN2   | protein_co chr5  | 6599239  | 6633291 -  | 12.2   | 13.08  |
| ENSG0000( FBXO42  | protein_co chr1  | 16246839 | 16352454 - | 10.3   | 9.32   |
| ENSG0000( MFAP3   | protein_co chr5  | 1.54E+08 | 1.54E+08 + | 15.88  | 14.81  |
| ENSG0000( MRI1    | protein_co chr19 | 13764532 | 13774282 + | 17.14  | 13.99  |
| ENSG0000( METTL1  | protein_co chr12 | 57768471 | 57772793 - | 6.49   | 5.21   |
| ENSG0000( HOXC8   | protein_co chr12 | 54009106 | 54012362 + | 0.03   | 0      |
| ENSG0000( AGA     | protein_co chr4  | 1.77E+08 | 1.77E+08 - | 21.55  | 19.24  |
| ENSG0000( PI4K2B  | protein_co chr4  | 25233975 | 25279092 + | 3.4    | 2.02   |
| ENSG0000( BOD1L1  | protein_co chr4  | 13568738 | 13627723 - | 11.87  | 12.13  |
| ENSG0000( MAT2B   | protein_co chr5  | 1.64E+08 | 1.64E+08 + | 22.03  | 27.67  |
| ENSG0000( TLL1    | protein_co chr4  | 1.66E+08 | 1.66E+08 + | 1.23   | 1.09   |
| ENSG0000( EDC4    | protein_co chr16 | 67873023 | 67884503 + | 14.91  | 14.07  |
| ENSG0000( TRIO    | protein_co chr5  | 14143702 | 14532128 + | 31.68  | 34.59  |
| ENSG0000( VCAN    | protein_co chr5  | 83471465 | 83582303 + | 150.08 | 128.97 |
| ENSG0000( CLEC16A | protein_co chr16 | 10944488 | 11182189 + | 5.12   | 6.85   |
| ENSG0000( MSR1    | protein_co chr8  | 16107878 | 16567490 - | 0.8    | 0.83   |
| ENSG0000( CDH1    | protein_co chr16 | 68737225 | 68835548 + | 0.08   | 0.45   |
| ENSG0000( SKIV2L2 | protein_co chr5  | 55307760 | 55425581 + | 21.34  | 23.04  |
| ENSG0000( DNAH5   | protein_co chr5  | 13690331 | 13944543 - | 0.26   | 0.03   |
| ENSG0000( ZFYVE16 | protein_co chr5  | 80408013 | 80479350 + | 6.89   | 6.92   |
| ENSG0000( FAM65A  | protein_co chr16 | 67518418 | 67546788 + | 24.51  | 25.57  |
| ENSG0000( C6      | protein_co chr5  | 41142234 | 41261438 - | 0.21   | 0.07   |
| ENSG0000( RAI14   | protein_co chr5  | 34656237 | 34832627 + | 25.86  | 25.03  |
| ENSG0000( SOX30   | protein_co chr5  | 1.58E+08 | 1.58E+08 - | 0.03   | 0.04   |
| ENSG0000( PNKP    | protein_co chr19 | 49859882 | 49878351 - | 15.86  | 15.17  |
| ENSG0000( BEST2   | protein_co chr19 | 12751702 | 12758458 + | 0      | 0      |
| ENSG0000( PHLPP2  | protein_co chr16 | 71637835 | 71724701 - | 3.84   | 2.8    |
| ENSG0000( SPDL1   | protein_co chr5  | 1.7E+08  | 1.7E+08 +  | 10.45  | 14.38  |
| ENSG0000( STAU2   | protein_co chr8  | 73420369 | 73747708 - | 18.15  | 19.09  |
| ENSG0000( PQLC2   | protein_co chr1  | 19312326 | 19329300 + | 12.64  | 12.51  |
| ENSG0000( CTNS    | protein_co chr17 | 3636468  | 3661542 +  | 16.2   | 15.66  |
| ENSG0000( RTN4R   | protein_co chr22 | 20241415 | 20283246 - | 0.25   | 0.32   |
| ENSG0000( PHF23   | protein_co chr17 | 7235028  | 7239722 -  | 39.15  | 31.79  |
| ENSG0000( CDH10   | protein_co chr5  | 24487100 | 24644978 - | 0.48   | 0.71   |
| ENSG0000( INPP4A  | protein_co chr2  | 98444854 | 98594390 + | 7.07   | 6.97   |
| ENSG0000( RAB27B  | protein_co chr18 | 54717860 | 54895516 + | 2.59   | 3.17   |
| ENSG0000( PSMA4   | protein_co chr15 | 78540405 | 78552419 + | 64.11  | 67.58  |
| ENSG0000( MYO16   | protein_co chr13 | 1.09E+08 | 1.09E+08 + | 0      | 0      |
| ENSG0000( LSG1    | protein_co chr3  | 1.95E+08 | 1.95E+08 - | 11.88  | 11.8   |
| ENSG0000( PARP3   | protein_co chr3  | 51942345 | 51948867 + | 15.32  | 16.81  |
| ENSG0000( TNC     | protein_co chr9  | 1.15E+08 | 1.15E+08 - | 6.41   | 9.71   |
| ENSG0000( THAP3   | protein_co chr1  | 6624866  | 6635586 +  | 10.18  | 9.67   |
| ENSG0000( FAM65C  | protein_co chr20 | 50586108 | 50691528 - | 5.2    | 5.6    |
| ENSG0000( TDP1    | protein_co chr14 | 89954939 | 90044768 + | 4.16   | 4.46   |
| ENSG0000( AIFM2   | protein_co chr10 | 70098223 | 70132934 - | 11.64  | 10.77  |

|                   |                  |          |          |   |        |        |
|-------------------|------------------|----------|----------|---|--------|--------|
| ENSG0000(C2orf83  | protein_co chr2  | 2.28E+08 | 2.28E+08 | - | 0      | 0.03   |
| ENSG0000(SPATA7   | protein_co chr14 | 88384924 | 88470350 | + | 4.33   | 4.9    |
| ENSG0000(MED17    | protein_co chr11 | 93784227 | 93814963 | + | 7.19   | 6.4    |
| ENSG0000(RETSAT   | protein_co chr2  | 85342088 | 85354620 | - | 29.12  | 29.9   |
| ENSG0000(CAPG     | protein_co chr2  | 85394748 | 85418432 | - | 27.59  | 25.97  |
| ENSG0000(AP2S1    | protein_co chr19 | 46838136 | 46850992 | - | 102.23 | 104.14 |
| ENSG0000(USH2A    | protein_co chr1  | 2.16E+08 | 2.16E+08 | - | 0      | 0      |
| ENSG0000(ZBPB     | protein_co chr7  | 49850421 | 50121329 | - | 0      | 0      |
| ENSG0000(TG       | protein_co chr8  | 1.33E+08 | 1.33E+08 | + | 0.33   | 0.34   |
| ENSG0000(ADAM28   | protein_co chr8  | 24294040 | 24359018 | + | 1.38   | 1.69   |
| ENSG0000(BARX2    | protein_co chr11 | 1.29E+08 | 1.29E+08 | + | 0.07   | 0      |
| ENSG0000(DCUN1D1  | protein_co chr3  | 1.83E+08 | 1.83E+08 | - | 11.67  | 9.35   |
| ENSG0000(JADE2    | protein_co chr5  | 1.35E+08 | 1.35E+08 | + | 12.72  | 14.27  |
| ENSG0000(ZIC2     | protein_co chr13 | 99981772 | 99986773 | + | 0      | 0.08   |
| ENSG0000(LCP2     | protein_co chr5  | 1.7E+08  | 1.7E+08  | - | 0      | 0      |
| ENSG0000(TRIT1    | protein_co chr1  | 39841022 | 39883511 | - | 7.34   | 7.35   |
| ENSG0000(ADRB1    | protein_co chr10 | 1.14E+08 | 1.14E+08 | + | 0      | 0      |
| ENSG0000(GUCA2B   | protein_co chr1  | 42153421 | 42155824 | + | 0      | 0      |
| ENSG0000(CUL7     | protein_co chr6  | 43037617 | 43053945 | - | 15.09  | 14.62  |
| ENSG0000(CTNNA1   | protein_co chr5  | 1.39E+08 | 1.39E+08 | + | 108.47 | 105.23 |
| ENSG0000(PHKA2    | protein_co chrX  | 18892300 | 18984598 | - | 7.6    | 8.33   |
| ENSG0000(CNTLN    | protein_co chr9  | 17134982 | 17503923 | + | 2.92   | 2.86   |
| ENSG0000(EPHA3    | protein_co chr3  | 89107524 | 89482134 | + | 0      | 0      |
| ENSG0000(HSPA5    | protein_co chr9  | 1.25E+08 | 1.25E+08 | - | 180.58 | 163.23 |
| ENSG0000(DSG2     | protein_co chr18 | 31498043 | 31549008 | + | 29.35  | 30.07  |
| ENSG0000(GEMIN8   | protein_co chrX  | 14008279 | 14029893 | - | 9.49   | 10.38  |
| ENSG0000(OFD1     | protein_co chrX  | 13734745 | 13769353 | + | 3.56   | 4.92   |
| ENSG0000(GPM6B    | protein_co chrX  | 13771031 | 13938638 | - | 0      | 0.07   |
| ENSG0000(MAGEC2   | protein_co chrX  | 1.42E+08 | 1.42E+08 | - | 0.06   | 0      |
| ENSG0000(PREX2    | protein_co chr8  | 67952118 | 68237030 | + | 0      | 0.01   |
| ENSG0000(WDR37    | protein_co chr10 | 1049538  | 1132297  | + | 5.26   | 5.5    |
| ENSG0000(YTHDC2   | protein_co chr5  | 1.14E+08 | 1.14E+08 | + | 5.28   | 5.93   |
| ENSG0000(CTPS2    | protein_co chrX  | 16588003 | 16712936 | - | 3.26   | 3.35   |
| ENSG0000(ATP6V1H  | protein_co chr8  | 53715557 | 53843558 | - | 26.29  | 26.39  |
| ENSG0000(POLR2B   | protein_co chr4  | 56977722 | 57031168 | + | 36.73  | 37.08  |
| ENSG0000(FAM214A  | protein_co chr15 | 52581317 | 52709817 | - | 12.88  | 10.94  |
| ENSG0000(ARAP2    | protein_co chr4  | 35948221 | 36244509 | - | 0      | 0      |
| ENSG0000(TPR      | protein_co chr1  | 1.86E+08 | 1.86E+08 | - | 21.64  | 24.55  |
| ENSG0000(CP       | protein_co chr3  | 1.49E+08 | 1.49E+08 | - | 6.05   | 6.22   |
| ENSG0000(KIAA0556 | protein_co chr16 | 27550133 | 27780369 | + | 8.36   | 10.4   |
| ENSG0000(DTNBP1   | protein_co chr6  | 15522801 | 15663058 | - | 11.63  | 11.81  |
| ENSG0000(XK       | protein_co chrX  | 37685759 | 37732130 | + | 0.01   | 0      |
| ENSG0000(ANO2     | protein_co chr12 | 5531869  | 5946232  | - | 0      | 0      |
| ENSG0000(C12orf4  | protein_co chr12 | 4487728  | 4538508  | - | 6.82   | 7.38   |
| ENSG0000(SCML1    | protein_co chrX  | 17737449 | 17754988 | + | 4.6    | 4.88   |

|                   |                  |          |          |   |        |        |
|-------------------|------------------|----------|----------|---|--------|--------|
| ENSG0000(WWC3     | protein_co chrX  | 10015562 | 10144478 | + | 4      | 4.11   |
| ENSG0000(ARHGAP6  | protein_co chrX  | 11137543 | 11665701 | - | 4.17   | 4.64   |
| ENSG0000(FAM184B  | protein_co chr4  | 17629306 | 17781512 | - | 0      | 0.03   |
| ENSG0000(MAP4     | protein_co chr3  | 47850690 | 48089272 | - | 89.86  | 89.22  |
| ENSG0000(GOPC     | protein_co chr6  | 1.18E+08 | 1.18E+08 | - | 11.26  | 11.52  |
| ENSG0000(ROS1     | protein_co chr6  | 1.17E+08 | 1.17E+08 | - | 0.05   | 0.02   |
| ENSG0000(USP28    | protein_co chr11 | 1.14E+08 | 1.14E+08 | - | 10.39  | 11.26  |
| ENSG0000(HDAC9    | protein_co chr7  | 18086949 | 19002416 | + | 4.6    | 2.93   |
| ENSG0000(TSPAN17  | protein_co chr5  | 1.77E+08 | 1.77E+08 | + | 21.38  | 22.69  |
| ENSG0000(NOP16    | protein_co chr5  | 1.76E+08 | 1.76E+08 | - | 8.06   | 9.18   |
| ENSG0000(CC2D2A   | protein_co chr4  | 15469865 | 15601557 | + | 9.05   | 12     |
| ENSG0000(RRM2B    | protein_co chr8  | 1.02E+08 | 1.02E+08 | - | 17.38  | 18.24  |
| ENSG0000(ZNF800   | protein_co chr7  | 1.27E+08 | 1.27E+08 | - | 8.58   | 8.02   |
| ENSG0000(TNFRSF17 | protein_co chr16 | 11965107 | 11968068 | + | 0.18   | 0      |
| ENSG0000(SNX29    | protein_co chr16 | 11976737 | 12574289 | + | 5.99   | 7.17   |
| ENSG0000(LMO3     | protein_co chr12 | 16548373 | 16610594 | - | 1.28   | 0.69   |
| ENSG0000(MRPS10   | protein_co chr6  | 42206801 | 42217865 | - | 14.14  | 12.55  |
| ENSG0000(GUCA1A   | protein_co chr6  | 42155406 | 42180056 | + | 0      | 0      |
| ENSG0000(RSF1     | protein_co chr11 | 77659996 | 77821017 | - | 14.59  | 15.9   |
| ENSG0000(VPS13D   | protein_co chr1  | 12230067 | 12512047 | + | 7.12   | 7.05   |
| ENSG0000(CELF2    | protein_co chr10 | 10798397 | 11336675 | + | 20.9   | 20.62  |
| ENSG0000(FAM120A  | protein_co chr9  | 93451722 | 93566107 | + | 38.16  | 40.59  |
| ENSG0000(R3HDM1   | protein_co chr2  | 1.36E+08 | 1.36E+08 | + | 10.71  | 9.95   |
| ENSG0000(COL9A2   | protein_co chr1  | 40300487 | 40317816 | - | 0.15   | 0.4    |
| ENSG0000(KITLG    | protein_co chr12 | 88492793 | 88580851 | - | 30.88  | 32.97  |
| ENSG0000(ERCC8    | protein_co chr5  | 60873831 | 60945073 | - | 4.86   | 2.86   |
| ENSG0000(ADAMTS6  | protein_co chr5  | 65148736 | 65481920 | - | 5.72   | 5.62   |
| ENSG0000(H6PD     | protein_co chr1  | 9234775  | 9271337  | + | 18.25  | 19.69  |
| ENSG0000(VAMP3    | protein_co chr1  | 7771269  | 7781432  | + | 61.37  | 59.86  |
| ENSG0000(PER3     | protein_co chr1  | 7784320  | 7845177  | + | 13.67  | 11.59  |
| ENSG0000(UTS2     | protein_co chr1  | 7843083  | 7853512  | - | 0      | 0      |
| ENSG0000(TNFRSF9  | protein_co chr1  | 7915894  | 7943165  | - | 0.73   | 0.29   |
| ENSG0000(EPN3     | protein_co chr17 | 50532543 | 50543750 | + | 0      | 0.04   |
| ENSG0000(LTBP1    | protein_co chr2  | 32946972 | 33399509 | + | 60.97  | 62.07  |
| ENSG0000(RCN1     | protein_co chr11 | 31812391 | 32105755 | + | 125.62 | 120.66 |
| ENSG0000(ELN      | protein_co chr7  | 74027789 | 74069907 | + | 29.32  | 28.35  |
| ENSG0000(RFC2     | protein_co chr7  | 74231499 | 74254458 | - | 5.79   | 4.73   |
| ENSG0000(ARID1B   | protein_co chr6  | 1.57E+08 | 1.57E+08 | + | 14.03  | 14.99  |
| ENSG0000(CLPTM1L  | protein_co chr5  | 1317744  | 1345099  | - | 53.63  | 41.63  |
| ENSG0000(NEDD4L   | protein_co chr18 | 58044367 | 58401540 | + | 3.02   | 1.81   |
| ENSG0000(FOXP3    | protein_co chrX  | 49250436 | 49264826 | - | 0.07   | 0      |
| ENSG0000(PPP1R3F  | protein_co chrX  | 49269843 | 49301461 | + | 3.83   | 2.03   |
| ENSG0000(HEXB     | protein_co chr5  | 74640023 | 74722647 | + | 173.14 | 181.87 |
| ENSG0000(PTCD2    | protein_co chr5  | 72320367 | 72368395 | + | 2.73   | 4.76   |
| ENSG0000(KIAA2022 | protein_co chrX  | 74732849 | 74925485 | - | 0      | 0      |

|                   |                  |          |          |   |        |        |
|-------------------|------------------|----------|----------|---|--------|--------|
| ENSG0000(JKAMP    | protein_co chr14 | 59484443 | 59505410 | + | 35.98  | 45.93  |
| ENSG0000(DKK3     | protein_co chr11 | 11963106 | 12009769 | - | 206.89 | 186.88 |
| ENSG0000(ARHGFE5  | protein_co chr7  | 1.44E+08 | 1.44E+08 | + | 1.33   | 1.72   |
| ENSG0000(NFE2L3   | protein_co chr7  | 26152240 | 26187125 | + | 0.12   | 0.22   |
| ENSG0000(MCUR1    | protein_co chr6  | 13786557 | 13814568 | - | 5.13   | 6.87   |
| ENSG0000(LIMA1    | protein_co chr12 | 50175788 | 50283546 | - | 110.56 | 109.69 |
| ENSG0000(LETMD1   | protein_co chr12 | 51047962 | 51060424 | + | 26.76  | 24.22  |
| ENSG0000(SLC4A8   | protein_co chr12 | 51391317 | 51515763 | + | 0.77   | 0.58   |
| ENSG0000(LAMC3    | protein_co chr9  | 1.31E+08 | 1.31E+08 | + | 0      | 0      |
| ENSG0000(PTGER3   | protein_co chr1  | 70852353 | 71047808 | - | 0      | 0      |
| ENSG0000(TNIP3    | protein_co chr4  | 1.21E+08 | 1.21E+08 | - | 0.07   | 0      |
| ENSG0000(MAPK9    | protein_co chr5  | 1.8E+08  | 1.8E+08  | - | 12.72  | 17.29  |
| ENSG0000(COL23A1  | protein_co chr5  | 1.78E+08 | 1.79E+08 | - | 0      | 0      |
| ENSG0000(BCAR1    | protein_co chr16 | 75228187 | 75268053 | - | 21.53  | 21.77  |
| ENSG0000(FAM160A2 | protein_co chr11 | 6211335  | 6234711  | - | 14.64  | 14.93  |
| ENSG0000(HERPUD1  | protein_co chr16 | 56932048 | 56944863 | + | 108.27 | 110.59 |
| ENSG0000(HOMER3   | protein_co chr19 | 18929201 | 18941261 | - | 46.11  | 47.93  |
| ENSG0000(RAD51    | protein_co chr15 | 40694774 | 40732339 | + | 1.26   | 0.57   |
| ENSG0000(POLQ     | protein_co chr3  | 1.21E+08 | 1.22E+08 | - | 0.06   | 0.06   |
| ENSG0000(PIK3CB   | protein_co chr3  | 1.39E+08 | 1.39E+08 | - | 8.77   | 6.76   |
| ENSG0000(CYBA     | protein_co chr16 | 88643283 | 88651152 | - | 114.2  | 117.1  |
| ENSG0000(THOC3    | protein_co chr5  | 1.76E+08 | 1.76E+08 | - | 10.72  | 12.31  |
| ENSG0000(HEBP2    | protein_co chr6  | 1.38E+08 | 1.38E+08 | + | 25.2   | 23.26  |
| ENSG0000(MPHOSPH1 | protein_co chr12 | 1.23E+08 | 1.23E+08 | - | 6.4    | 7.22   |
| ENSG0000(PLEKHA5  | protein_co chr12 | 19129752 | 19376400 | + | 18.54  | 18.68  |
| ENSG0000(PRSS8    | protein_co chr16 | 31131433 | 31135762 | - | 0      | 0.15   |
| ENSG0000(SIKE1    | protein_co chr1  | 1.15E+08 | 1.15E+08 | - | 15.56  | 9.71   |
| ENSG0000(RRP12    | protein_co chr10 | 97356358 | 97426076 | - | 6.2    | 7.3    |
| ENSG0000(FNIP2    | protein_co chr4  | 1.59E+08 | 1.59E+08 | + | 4.95   | 7.28   |
| ENSG0000(MSMO1    | protein_co chr4  | 1.65E+08 | 1.65E+08 | + | 30.35  | 30.74  |
| ENSG0000(TTC17    | protein_co chr11 | 43358932 | 43494933 | + | 25.98  | 26.85  |
| ENSG0000(ALX4     | protein_co chr11 | 44260444 | 44310166 | - | 0      | 0      |
| ENSG0000(FSTL4    | protein_co chr5  | 1.33E+08 | 1.34E+08 | - | 0      | 0      |
| ENSG0000(FOXN3    | protein_co chr14 | 89124871 | 89619149 | - | 13.47  | 14.89  |
| ENSG0000(METTL24  | protein_co chr6  | 1.1E+08  | 1.1E+08  | - | 0      | 0      |
| ENSG0000(AKR7A2   | protein_co chr1  | 19303965 | 19312146 | - | 36.53  | 37.74  |
| ENSG0000(MRTO4    | protein_co chr1  | 19251539 | 19260128 | + | 9.75   | 9.06   |
| ENSG0000(NNAT     | protein_co chr20 | 37521215 | 37523693 | + | 0      | 0.05   |
| ENSG0000(USE1     | protein_co chr19 | 17215346 | 17219829 | + | 21.27  | 17.95  |
| ENSG0000(MCF2L2   | protein_co chr3  | 1.83E+08 | 1.83E+08 | - | 0.1    | 0.09   |
| ENSG0000(NRIP2    | protein_co chr12 | 2825348  | 2835544  | - | 0      | 0      |
| ENSG0000(LAMA3    | protein_co chr18 | 23689443 | 23955066 | + | 2.06   | 2.5    |
| ENSG0000(AP5M1    | protein_co chr14 | 57268909 | 57298742 | + | 11.16  | 10.65  |
| ENSG0000(ANAPC4   | protein_co chr4  | 25377213 | 25418498 | + | 10.06  | 8.16   |
| ENSG0000(KCNQ1    | protein_co chr11 | 2444684  | 2849109  | + | 0      | 0      |



|                    |                  |          |            |       |       |
|--------------------|------------------|----------|------------|-------|-------|
| ENSG0000( TRAPPC3  | protein_co chr1  | 36136570 | 36156053 - | 39.28 | 38.81 |
| ENSG0000( THRAP3   | protein_co chr1  | 36224416 | 36305357 + | 33.78 | 30.95 |
| ENSG0000( PHPT1    | protein_co chr9  | 1.37E+08 | 1.37E+08 + | 96.61 | 91.77 |
| ENSG0000( ENTPD2   | protein_co chr9  | 1.37E+08 | 1.37E+08 - | 0     | 0.08  |
| ENSG0000( LY75     | protein_co chr2  | 1.6E+08  | 1.6E+08 -  | 0.65  | 0.33  |
| ENSG0000( ARID4B   | protein_co chr1  | 2.35E+08 | 2.35E+08 - | 8.44  | 10.81 |
| ENSG0000( OPN3     | protein_co chr1  | 2.42E+08 | 2.42E+08 - | 4.41  | 4.22  |
| ENSG0000( SDCCAG8  | protein_co chr1  | 2.43E+08 | 2.44E+08 + | 15.08 | 14.28 |
| ENSG0000( PTPRN    | protein_co chr2  | 2.19E+08 | 2.19E+08 - | 1.39  | 3.14  |
| ENSG0000( HHAT     | protein_co chr1  | 2.1E+08  | 2.11E+08 + | 3.81  | 3.64  |
| ENSG0000( KIF1B    | protein_co chr1  | 10210805 | 10381603 + | 10.3  | 9.8   |
| ENSG0000( FOXC1    | protein_co chr6  | 1609972  | 1613897 +  | 1.1   | 1.24  |
| ENSG0000( TBC1D22A | protein_co chr22 | 46762617 | 47175699 + | 10.84 | 11.04 |
| ENSG0000( SYNE2    | protein_co chr14 | 63852983 | 64226433 + | 4.17  | 3.48  |
| ENSG0000( PLEKHH1  | protein_co chr14 | 67533301 | 67589612 + | 0.36  | 0.96  |
| ENSG0000( ATP9A    | protein_co chr20 | 51596514 | 51768634 - | 8.35  | 7.73  |
| ENSG0000( SPO11    | protein_co chr20 | 57329759 | 57343994 + | 0     | 0     |
| ENSG0000( CBLN4    | protein_co chr20 | 55997440 | 56005472 - | 0     | 0     |
| ENSG0000( CHRDL2   | protein_co chr11 | 74696429 | 74731385 - | 5.4   | 6.87  |
| ENSG0000( FAM168A  | protein_co chr11 | 73400487 | 73598189 - | 20.22 | 21.23 |
| ENSG0000( RELT     | protein_co chr11 | 73376264 | 73397474 + | 1.18  | 1.15  |
| ENSG0000( GALC     | protein_co chr14 | 87837820 | 87993665 - | 14.47 | 12.5  |
| ENSG0000( NOP58    | protein_co chr2  | 2.02E+08 | 2.02E+08 + | 13.74 | 12.35 |
| ENSG0000( SZRD1    | protein_co chr1  | 16352575 | 16398145 + | 48.35 | 48.73 |
| ENSG0000( KCNH2    | protein_co chr7  | 1.51E+08 | 1.51E+08 - | 0     | 0.02  |
| ENSG0000( CUL1     | protein_co chr7  | 1.49E+08 | 1.49E+08 + | 18.29 | 17.27 |
| ENSG0000( FAM114A2 | protein_co chr5  | 1.54E+08 | 1.54E+08 - | 11.82 | 10.29 |
| ENSG0000( CYFIP2   | protein_co chr5  | 1.57E+08 | 1.57E+08 + | 4.29  | 5.2   |
| ENSG0000( TAB2     | protein_co chr6  | 1.49E+08 | 1.49E+08 + | 17.25 | 17.49 |
| ENSG0000( GINM1    | protein_co chr6  | 1.5E+08  | 1.5E+08 +  | 44.52 | 42.2  |
| ENSG0000( EIF2AK2  | protein_co chr2  | 37099210 | 37157065 - | 9.73  | 11.49 |
| ENSG0000( USP36    | protein_co chr17 | 78787381 | 78841441 - | 11.8  | 12.65 |
| ENSG0000( KMT2C    | protein_co chr7  | 1.52E+08 | 1.52E+08 - | 8.86  | 9.73  |
| ENSG0000( MCOLN3   | protein_co chr1  | 85018082 | 85048499 - | 2.19  | 2.5   |
| ENSG0000( CCDC85A  | protein_co chr2  | 56184123 | 56386173 + | 0.03  | 0.07  |
| ENSG0000( PUM2     | protein_co chr2  | 20248691 | 20352234 - | 17.68 | 18.59 |
| ENSG0000( MRPL43   | protein_co chr10 | 1.01E+08 | 1.01E+08 - | 36.27 | 34.82 |
| ENSG0000( ITIH4    | protein_co chr3  | 52812975 | 52831479 - | 1.34  | 0.91  |
| ENSG0000( ITIH1    | protein_co chr3  | 52777592 | 52792068 + | 0     | 0     |
| ENSG0000( HPF1     | protein_co chr4  | 1.7E+08  | 1.7E+08 -  | 9.62  | 9.16  |
| ENSG0000( ZFR      | protein_co chr5  | 32354350 | 32444761 - | 25.23 | 27.85 |
| ENSG0000( ZNF280C  | protein_co chrX  | 1.3E+08  | 1.3E+08 -  | 1.16  | 0.86  |
| ENSG0000( NPFFR2   | protein_co chr4  | 72031804 | 72148067 + | 0     | 0     |
| ENSG0000( PHF21B   | protein_co chr22 | 44881162 | 45009999 - | 0     | 0     |
| ENSG0000( TRAF1    | protein_co chr9  | 1.21E+08 | 1.21E+08 - | 0.82  | 0.93  |

|                   |                  |          |          |   |        |        |
|-------------------|------------------|----------|----------|---|--------|--------|
| ENSG0000(RC3H2    | protein_co chr9  | 1.23E+08 | 1.23E+08 | - | 11.14  | 11.51  |
| ENSG0000(IL17RB   | protein_co chr3  | 53846580 | 53865800 | + | 0.06   | 0      |
| ENSG0000(TRAF3IP2 | protein_co chr6  | 1.12E+08 | 1.12E+08 | - | 17.12  | 14.69  |
| ENSG0000(GYG2     | protein_co chrX  | 2828788  | 2882820  | + | 4.61   | 3.49   |
| ENSG0000(DCBLD2   | protein_co chr3  | 98795941 | 98901689 | - | 35.2   | 34.48  |
| ENSG0000(SERPINB3 | protein_co chr18 | 63655197 | 63661963 | - | 0      | 0      |
| ENSG0000(SOAT1    | protein_co chr1  | 1.79E+08 | 1.79E+08 | + | 20.17  | 19.33  |
| ENSG0000(PKP2     | protein_co chr12 | 32790745 | 32896840 | - | 2.25   | 2.42   |
| ENSG0000(MSH4     | protein_co chr1  | 75796882 | 75913238 | + | 0.03   | 0      |
| ENSG0000(F7       | protein_co chr13 | 1.13E+08 | 1.13E+08 | + | 0.02   | 0      |
| ENSG0000(GDI2     | protein_co chr10 | 5765223  | 5842132  | - | 78     | 75.53  |
| ENSG0000(PRDM1    | protein_co chr6  | 1.06E+08 | 1.06E+08 | + | 0.29   | 0.7    |
| ENSG0000(ATG5     | protein_co chr6  | 1.06E+08 | 1.06E+08 | - | 10.23  | 10.31  |
| ENSG0000(TMCC3    | protein_co chr12 | 94567124 | 94650562 | - | 0.95   | 0.88   |
| ENSG0000(PITHD1   | protein_co chr1  | 23778405 | 23788232 | + | 14.91  | 16.23  |
| ENSG0000(MTA3     | protein_co chr2  | 42494569 | 42756947 | + | 14.54  | 15.2   |
| ENSG0000(USP13    | protein_co chr3  | 1.8E+08  | 1.8E+08  | + | 2.66   | 3.7    |
| ENSG0000(ATP11B   | protein_co chr3  | 1.83E+08 | 1.83E+08 | + | 18.61  | 19.79  |
| ENSG0000(LAMC2    | protein_co chr1  | 1.83E+08 | 1.83E+08 | + | 1.82   | 1.63   |
| ENSG0000(CDK14    | protein_co chr7  | 90466424 | 91210590 | + | 11.14  | 12.89  |
| ENSG0000(SEC61A1  | protein_co chr3  | 1.28E+08 | 1.28E+08 | + | 138.43 | 138.91 |
| ENSG0000(PPP1R12A | protein_co chr12 | 79773563 | 79935460 | - | 19.11  | 19.06  |
| ENSG0000(RASGRF1  | protein_co chr15 | 78959947 | 79090773 | - | 0.02   | 0      |
| ENSG0000(CAMK2B   | protein_co chr7  | 44217150 | 44334577 | - | 0.14   | 0.48   |
| ENSG0000(CROCC    | protein_co chr1  | 16740273 | 16972979 | + | 9.89   | 11.41  |
| ENSG0000(POLR3E   | protein_co chr16 | 22297375 | 22335103 | + | 9.55   | 9.7    |
| ENSG0000(ATP2B4   | protein_co chr1  | 2.04E+08 | 2.04E+08 | + | 75.26  | 73.65  |
| ENSG0000(ZC3H11A  | protein_co chr1  | 2.04E+08 | 2.04E+08 | + | 28.18  | 32.21  |
| ENSG0000(RIOK2    | protein_co chr5  | 97160867 | 97183260 | - | 12.91  | 8.32   |
| ENSG0000(YIPF1    | protein_co chr1  | 53851719 | 53889834 | - | 10.94  | 13.45  |
| ENSG0000(NDC1     | protein_co chr1  | 53765460 | 53838860 | - | 1.78   | 2.56   |
| ENSG0000(DGKG     | protein_co chr3  | 1.86E+08 | 1.86E+08 | - | 0.57   | 0.03   |
| ENSG0000(FLYWCH1  | protein_co chr16 | 2911937  | 2951208  | + | 29.59  | 24.57  |
| ENSG0000(UNKL     | protein_co chr16 | 1363205  | 1414751  | - | 7.94   | 8.82   |
| ENSG0000(TBXAS1   | protein_co chr7  | 1.4E+08  | 1.4E+08  | + | 0.83   | 1.05   |
| ENSG0000(PARP12   | protein_co chr7  | 1.4E+08  | 1.4E+08  | - | 5.27   | 6.02   |
| ENSG0000(ALDH18A1 | protein_co chr10 | 95605929 | 95656706 | - | 23.48  | 22.4   |
| ENSG0000(TARBP1   | protein_co chr1  | 2.34E+08 | 2.34E+08 | - | 5.34   | 6.51   |
| ENSG0000(GATB     | protein_co chr4  | 1.52E+08 | 1.52E+08 | - | 10.21  | 9.73   |
| ENSG0000(MXD1     | protein_co chr2  | 69897688 | 69942945 | + | 3.95   | 3.12   |
| ENSG0000(CDK17    | protein_co chr12 | 96278261 | 96400560 | - | 9.47   | 12.15  |
| ENSG0000(DNAJC25  | protein_co chr9  | 1.12E+08 | 1.12E+08 | + | 6.36   | 4.26   |
| ENSG0000(SLC2A3   | protein_co chr12 | 7919230  | 7936275  | - | 40.25  | 40.64  |
| ENSG0000(PSD      | protein_co chr10 | 1.02E+08 | 1.02E+08 | - | 0.42   | 1.19   |
| ENSG0000(CTDP1    | protein_co chr18 | 79679801 | 79756623 | + | 6.89   | 7.12   |

|                  |                  |          |            |        |        |
|------------------|------------------|----------|------------|--------|--------|
| ENSG0000(YBX3    | protein_co chr12 | 10699089 | 10723312 - | 158.17 | 164.99 |
| ENSG0000(STYK1   | protein_co chr12 | 10618939 | 10674318 - | 0.07   | 0.08   |
| ENSG0000(WNK1    | protein_co chr12 | 752593   | 911452 +   | 39.1   | 38.33  |
| ENSG0000(RPS17P5 | processed_chr6   | 50857255 | 50857662 - | 0      | 0      |
| ENSG0000(CCAR1   | protein_co chr10 | 68721012 | 68792377 + | 30.69  | 29.81  |
| ENSG0000(OGFR    | protein_co chr20 | 62804835 | 62814000 + | 16.29  | 19.11  |
| ENSG0000(GNA15   | protein_co chr19 | 3136193  | 3163769 +  | 0.03   | 0      |
| ENSG0000(CREB3L3 | protein_co chr19 | 4153601  | 4173054 +  | 0      | 0.05   |
| ENSG0000(PIGV    | protein_co chr1  | 26787472 | 26798398 + | 7.72   | 6.76   |
| ENSG0000(PTPRU   | protein_co chr1  | 29236516 | 29326813 + | 3.54   | 3.61   |
| ENSG0000(SNRNP40 | protein_co chr1  | 31259568 | 31296782 - | 12.14  | 15.3   |
| ENSG0000(RIMBP2  | protein_co chr12 | 1.3E+08  | 1.31E+08 - | 0      | 0      |
| ENSG0000(COL11A1 | protein_co chr1  | 1.03E+08 | 1.03E+08 - | 0.92   | 0.5    |
| ENSG0000(QSER1   | protein_co chr11 | 32893178 | 32993316 + | 6.24   | 6.48   |
| ENSG0000(MPC1    | protein_co chr6  | 1.66E+08 | 1.66E+08 - | 11.31  | 11.09  |
| ENSG0000(ACAA1   | protein_co chr3  | 38103129 | 38137242 - | 25.78  | 25.9   |
| ENSG0000(BCAT1   | protein_co chr12 | 24810022 | 24949459 - | 36.77  | 27.36  |
| ENSG0000(HDAC7   | protein_co chr12 | 47782722 | 47833132 - | 37.72  | 40.74  |
| ENSG0000(LZTS1   | protein_co chr8  | 20246165 | 20303963 - | 0.24   | 0.52   |
| ENSG0000(PRDM6   | protein_co chr5  | 1.23E+08 | 1.23E+08 + | 0.28   | 0.39   |
| ENSG0000(WNT8A   | protein_co chr5  | 1.38E+08 | 1.38E+08 + | 0      | 0      |
| ENSG0000(SPAG4   | protein_co chr20 | 35615892 | 35621049 + | 15.57  | 12.11  |
| ENSG0000(NCKAP1  | protein_co chr2  | 1.83E+08 | 1.83E+08 - | 59.3   | 52.49  |
| ENSG0000(MRPS35  | protein_co chr12 | 27710773 | 27756295 + | 13.69  | 14.43  |
| ENSG0000(GUCY1B3 | protein_co chr4  | 1.56E+08 | 1.56E+08 + | 0.03   | 0      |
| ENSG0000(SFSWAP  | protein_co chr12 | 1.32E+08 | 1.32E+08 + | 14.24  | 12.8   |
| ENSG0000(TNK2    | protein_co chr3  | 1.96E+08 | 1.96E+08 - | 7.85   | 8.78   |
| ENSG0000(MON2    | protein_co chr12 | 62466817 | 62600479 + | 10.69  | 12.18  |
| ENSG0000(CDH3    | protein_co chr16 | 68636189 | 68722616 + | 1.09   | 0.13   |
| ENSG0000(ARSF    | protein_co chrX  | 3041471  | 3112726 +  | 0      | 0      |
| ENSG0000(GPBP1   | protein_co chr5  | 57173948 | 57264679 + | 19.5   | 20.96  |
| ENSG0000(DGAT2   | protein_co chr11 | 75759512 | 75801535 + | 2.31   | 2.02   |
| ENSG0000(ZNF112  | protein_co chr19 | 44326555 | 44367217 - | 2.54   | 2.91   |
| ENSG0000(CS      | protein_co chr12 | 56271699 | 56300392 - | 41.82  | 42.82  |
| ENSG0000(LTK     | protein_co chr15 | 41503638 | 41513887 - | 0.12   | 0.27   |
| ENSG0000(MRPS24  | protein_co chr7  | 43866558 | 43869893 - | 54.36  | 51.73  |
| ENSG0000(ELMO2   | protein_co chr20 | 46366049 | 46432985 - | 12.84  | 13.15  |
| ENSG0000(WAPL    | protein_co chr10 | 86435256 | 86521815 - | 12.42  | 12.97  |
| ENSG0000(VMP1    | protein_co chr17 | 59707192 | 59842255 + | 86.84  | 92.27  |
| ENSG0000(APPBP2  | protein_co chr17 | 60443149 | 60526219 - | 13.76  | 15.53  |
| ENSG0000(POLD1   | protein_co chr19 | 50384204 | 50418018 + | 4.07   | 3.95   |
| ENSG0000(SEZ6    | protein_co chr17 | 28954901 | 29006440 - | 0      | 0      |
| ENSG0000(EIF4B   | protein_co chr12 | 53006158 | 53042209 + | 228.57 | 228.24 |
| ENSG0000(SLC6A16 | protein_co chr19 | 49289638 | 49325225 - | 0.28   | 0.12   |
| ENSG0000(GLTSCR1 | protein_co chr19 | 47608196 | 47703277 + | 3.56   | 4.88   |

|                   |                  |          |          |   |        |        |
|-------------------|------------------|----------|----------|---|--------|--------|
| ENSG0000(SPHK2    | protein_co chr19 | 48619291 | 48630717 | + | 5.07   | 4.92   |
| ENSG0000(RPL18    | protein_co chr19 | 48615328 | 48619536 | - | 860.59 | 881.87 |
| ENSG0000(CA11     | protein_co chr19 | 48637942 | 48646312 | - | 11.16  | 8.26   |
| ENSG0000(ISOC2    | protein_co chr19 | 55452985 | 55462343 | - | 27.11  | 30.18  |
| ENSG0000(U2AF2    | protein_co chr19 | 55654146 | 55674715 | + | 49.85  | 59.52  |
| ENSG0000(EPN1     | protein_co chr19 | 55675226 | 55709858 | + | 58.72  | 61.01  |
| ENSG0000(MED29    | protein_co chr19 | 39391303 | 39400637 | + | 16.2   | 16.67  |
| ENSG0000(AHRR     | protein_co chr5  | 304176   | 438291   | + | 5.24   | 4.35   |
| ENSG0000(GSC2     | protein_co chr22 | 19148576 | 19150283 | - | 0      | 0      |
| ENSG0000(ZNF275   | protein_co chrX  | 1.53E+08 | 1.53E+08 | + | 3.87   | 3.95   |
| ENSG0000(MTMR1    | protein_co chrX  | 1.51E+08 | 1.51E+08 | + | 7.74   | 8.44   |
| ENSG0000(GPC1     | protein_co chr2  | 2.4E+08  | 2.4E+08  | + | 52.56  | 51.09  |
| ENSG0000(ADCK1    | protein_co chr14 | 77800083 | 77935012 | + | 2.57   | 4.32   |
| ENSG0000(HAGH     | protein_co chr16 | 1795620  | 1827194  | - | 31.06  | 26.79  |
| ENSG0000(RNF4     | protein_co chr4  | 2462220  | 2625320  | + | 21.9   | 20.53  |
| ENSG0000(CASP8    | protein_co chr2  | 2.01E+08 | 2.01E+08 | + | 7.82   | 6.49   |
| ENSG0000(LIMCH1   | protein_co chr4  | 41359607 | 41700044 | + | 1.19   | 1.15   |
| ENSG0000(INTS13   | protein_co chr12 | 26905181 | 26938326 | - | 9.31   | 8.28   |
| ENSG0000(TM7SF3   | protein_co chr12 | 26973195 | 27014434 | - | 32.2   | 37.19  |
| ENSG0000(DLX3     | protein_co chr17 | 49990005 | 49995224 | - | 0      | 0.07   |
| ENSG0000(SPA17    | protein_co chr11 | 1.25E+08 | 1.25E+08 | + | 3.68   | 5.35   |
| ENSG0000(TSPAN32  | protein_co chr11 | 2301997  | 2318200  | + | 0.33   | 0.08   |
| ENSG0000(WISP2    | protein_co chr20 | 44714844 | 44728509 | + | 45.76  | 54     |
| ENSG0000(DMRT3    | protein_co chr9  | 976964   | 991731   | + | 0      | 0      |
| ENSG0000(ST3GAL6  | protein_co chr3  | 98732236 | 98821201 | + | 4.88   | 6.14   |
| ENSG0000(ATP2C2   | protein_co chr16 | 84368527 | 84464187 | + | 0      | 0      |
| ENSG0000(NGFR     | protein_co chr17 | 49495293 | 49515017 | + | 0.08   | 0      |
| ENSG0000(CDON     | protein_co chr11 | 1.26E+08 | 1.26E+08 | - | 4.31   | 4.15   |
| ENSG0000(TAF2     | protein_co chr8  | 1.2E+08  | 1.2E+08  | - | 11.95  | 9.85   |
| ENSG0000(HIPK2    | protein_co chr7  | 1.4E+08  | 1.4E+08  | - | 5.21   | 6.17   |
| ENSG0000(TNPO3    | protein_co chr7  | 1.29E+08 | 1.29E+08 | - | 17.88  | 16.74  |
| ENSG0000(BORCS8-M | protein_co chr19 | 19145567 | 19192158 | - | 2.39   | 4.48   |
| ENSG0000(RFXANK   | protein_co chr19 | 19192229 | 19201869 | + | 24.33  | 23.6   |
| ENSG0000(TMEM161A | protein_co chr19 | 19119169 | 19138513 | - | 11.66  | 9.17   |
| ENSG0000(LPAR2    | protein_co chr19 | 19623668 | 19628930 | - | 1.1    | 1.58   |
| ENSG0000(CTSA     | protein_co chr20 | 45890144 | 45898820 | + | 501.59 | 497.4  |
| ENSG0000(SUGP2    | protein_co chr19 | 18990888 | 19034023 | - | 18.29  | 16.02  |
| ENSG0000(SLC12A2  | protein_co chr5  | 1.28E+08 | 1.28E+08 | + | 10.67  | 11.94  |
| ENSG0000(SNX24    | protein_co chr5  | 1.23E+08 | 1.23E+08 | + | 11.02  | 13.41  |
| ENSG0000(EYA2     | protein_co chr20 | 46894624 | 47188844 | + | 0.99   | 1.01   |
| ENSG0000(CNN2     | protein_co chr19 | 1026581  | 1039068  | + | 142.2  | 161.9  |
| ENSG0000(ABCA7    | protein_co chr19 | 1040101  | 1065572  | + | 4.53   | 8.09   |
| ENSG0000(SNCAIP   | protein_co chr5  | 1.22E+08 | 1.22E+08 | + | 0.07   | 0.03   |
| ENSG0000(DDX20    | protein_co chr1  | 1.12E+08 | 1.12E+08 | + | 4.73   | 3.34   |
| ENSG0000(BTBD1    | protein_co chr15 | 83016422 | 83067354 | - | 21.82  | 20.72  |

|                   |                  |          |          |   |        |       |
|-------------------|------------------|----------|----------|---|--------|-------|
| ENSG0000(FAR2     | protein_co chr12 | 29149103 | 29340980 | + | 5.91   | 3.13  |
| ENSG0000(BCAS1    | protein_co chr20 | 53936777 | 54070594 | - | 0.35   | 0.08  |
| ENSG0000(POU1F1   | protein_co chr3  | 87259404 | 87276587 | - | 0      | 0     |
| ENSG0000(CHI3L2   | protein_co chr1  | 1.11E+08 | 1.11E+08 | + | 88.68  | 80.28 |
| ENSG0000(SBNO2    | protein_co chr19 | 1107636  | 1174283  | - | 28.8   | 22.43 |
| ENSG0000(PMS1     | protein_co chr2  | 1.9E+08  | 1.9E+08  | + | 4.65   | 3     |
| ENSG0000(HMG20B   | protein_co chr19 | 3572777  | 3579088  | + | 34.56  | 39.24 |
| ENSG0000(CALCRL   | protein_co chr2  | 1.87E+08 | 1.87E+08 | - | 8.4    | 9.12  |
| ENSG0000(TAF11    | protein_co chr6  | 34877778 | 34888089 | - | 8.25   | 8.77  |
| ENSG0000(ANKS1A   | protein_co chr6  | 34889265 | 35091413 | + | 3.93   | 4.26  |
| ENSG0000(AP3D1    | protein_co chr19 | 2100988  | 2164465  | - | 30.07  | 32.43 |
| ENSG0000(ZNF76    | protein_co chr6  | 35258909 | 35295985 | + | 12.26  | 13.2  |
| ENSG0000(SLC9A3R2 | protein_co chr16 | 2025356  | 2039026  | + | 15.45  | 18.41 |
| ENSG0000(NTHL1    | protein_co chr16 | 2039815  | 2047866  | - | 5.27   | 8.11  |
| ENSG0000(UHRF1BP1 | protein_co chr6  | 34792015 | 34883138 | + | 3.87   | 3.97  |
| ENSG0000(GNAI3    | protein_co chr1  | 1.1E+08  | 1.1E+08  | + | 2.81   | 2.95  |
| ENSG0000(IPO5     | protein_co chr13 | 97953658 | 98024297 | + | 39.05  | 40.63 |
| ENSG0000(OAT      | protein_co chr10 | 1.24E+08 | 1.24E+08 | - | 57.31  | 54.03 |
| ENSG0000(WDR3     | protein_co chr1  | 1.18E+08 | 1.18E+08 | + | 7.93   | 9.36  |
| ENSG0000(PKN2     | protein_co chr1  | 88684222 | 88836255 | + | 13.2   | 11.96 |
| ENSG0000(WDR18    | protein_co chr19 | 984271   | 998438   | + | 19.73  | 23.07 |
| ENSG0000(TRAM2    | protein_co chr6  | 52497402 | 52576915 | - | 104.52 | 104.5 |
| ENSG0000(NTN1     | protein_co chr17 | 9021542  | 9244000  | + | 0.08   | 0.06  |
| ENSG0000(GLP2R    | protein_co chr17 | 9822206  | 9892102  | + | 0      | 0     |
| ENSG0000(MCM10    | protein_co chr10 | 13161554 | 13211104 | + | 0.02   | 0.18  |
| ENSG0000(DGKA     | protein_co chr12 | 55927319 | 55954027 | + | 27.14  | 25.13 |
| ENSG0000(ERBB3    | protein_co chr12 | 56079857 | 56103505 | + | 1.08   | 0.8   |
| ENSG0000(ROPN1    | protein_co chr3  | 1.24E+08 | 1.24E+08 | - | 0      | 0     |
| ENSG0000(ANKRD44  | protein_co chr2  | 1.97E+08 | 1.97E+08 | - | 3.64   | 4.29  |
| ENSG0000(KARS     | protein_co chr16 | 75627474 | 75648643 | - | 41.28  | 44.46 |
| ENSG0000(ADAT1    | protein_co chr16 | 75596981 | 75623300 | - | 14.37  | 13.59 |
| ENSG0000(PDIA5    | protein_co chr3  | 1.23E+08 | 1.23E+08 | + | 50.95  | 46.71 |
| ENSG0000(TBC1D22B | protein_co chr6  | 37257772 | 37332970 | + | 7.14   | 7.57  |
| ENSG0000(NDUFB4   | protein_co chr3  | 1.21E+08 | 1.21E+08 | + | 81.16  | 83.82 |
| ENSG0000(SPEN     | protein_co chr1  | 15847864 | 15940460 | + | 8.78   | 8.86  |
| ENSG0000(MYLK     | protein_co chr3  | 1.24E+08 | 1.24E+08 | - | 6.58   | 7.24  |
| ENSG0000(ZC3H15   | protein_co chr2  | 1.86E+08 | 1.87E+08 | + | 18.17  | 17.53 |
| ENSG0000(MAP2K4   | protein_co chr17 | 12020824 | 12143830 | + | 7.47   | 9.06  |
| ENSG0000(TMEM206  | protein_co chr1  | 2.12E+08 | 2.12E+08 | - | 4.05   | 3.46  |
| ENSG0000(SNAP91   | protein_co chr6  | 83552880 | 83709691 | - | 0      | 0     |
| ENSG0000(SLK      | protein_co chr10 | 1.04E+08 | 1.04E+08 | + | 7.54   | 8.02  |
| ENSG0000(CYB5R4   | protein_co chr6  | 83859643 | 83967424 | + | 10.38  | 12.06 |
| ENSG0000(COL17A1  | protein_co chr10 | 1.04E+08 | 1.04E+08 | - | 0.86   | 0.22  |
| ENSG0000(GSTO2    | protein_co chr10 | 1.04E+08 | 1.04E+08 | + | 0.94   | 0.31  |
| ENSG0000(SEC61A2  | protein_co chr10 | 12129637 | 12169961 | + | 3.54   | 3.53  |

|                  |                  |          |            |        |       |
|------------------|------------------|----------|------------|--------|-------|
| ENSG0000(PRKCQ   | protein_co chr10 | 6427143  | 6580301 -  | 0      | 0     |
| ENSG0000(TLE2    | protein_co chr19 | 2997638  | 3047635 -  | 3.16   | 3.26  |
| ENSG0000(ASB1    | protein_co chr2  | 2.38E+08 | 2.38E+08 + | 12.44  | 13.07 |
| ENSG0000(FAM107B | protein_co chr10 | 14518557 | 14774897 - | 3.28   | 1.94  |
| ENSG0000(ME1     | protein_co chr6  | 83210389 | 83431071 - | 5.08   | 5.85  |
| ENSG0000(TBC1D1  | protein_co chr4  | 37891087 | 38139175 + | 8.88   | 9.27  |
| ENSG0000(CDK13   | protein_co chr7  | 39950037 | 40097134 + | 10.62  | 10.43 |
| ENSG0000(MTHFD2  | protein_co chr2  | 74198562 | 74217565 + | 66.05  | 61.46 |
| ENSG0000(SLC9A7  | protein_co chrX  | 46599252 | 46759172 - | 6.66   | 6.66  |
| ENSG0000(FOXJ2   | protein_co chr12 | 8032703  | 8055503 +  | 8.78   | 9.02  |
| ENSG0000(YBX1    | protein_co chr1  | 42682427 | 42702349 + | 301.16 | 300.4 |
| ENSG0000(PDE4A   | protein_co chr19 | 10416773 | 10469631 + | 9.99   | 9.31  |
| ENSG0000(PPP2R5A | protein_co chr1  | 2.12E+08 | 2.12E+08 + | 6.59   | 7.66  |
| ENSG0000(CTNNA2  | protein_co chr2  | 79185231 | 80648861 + | 0.02   | 0     |
| ENSG0000(ELAVL1  | protein_co chr19 | 7958579  | 8005659 -  | 18.91  | 24.08 |
| ENSG0000(TIE1    | protein_co chr1  | 43300993 | 43323108 + | 1.39   | 0.9   |
| ENSG0000(DIP2B   | protein_co chr12 | 50504985 | 50748667 + | 9.72   | 10.63 |
| ENSG0000(SMARCD1 | protein_co chr12 | 50084972 | 50100712 + | 24.48  | 20.44 |
| ENSG0000(KDM4A   | protein_co chr1  | 43650158 | 43705515 + | 12.73  | 12.66 |
| ENSG0000(NFYC    | protein_co chr1  | 40691648 | 40771603 + | 14.95  | 13.81 |
| ENSG0000(ZMYND12 | protein_co chr1  | 42430329 | 42456267 - | 0.42   | 0.31  |
| ENSG0000(SLC9A3  | protein_co chr5  | 473310   | 524332 -   | 0      | 0     |
| ENSG0000(NGEF    | protein_co chr2  | 2.33E+08 | 2.33E+08 - | 2.26   | 1.99  |
| ENSG0000(ASPM    | protein_co chr1  | 1.97E+08 | 1.97E+08 - | 0.25   | 0.21  |
| ENSG0000(CD84    | protein_co chr1  | 1.61E+08 | 1.61E+08 - | 0.01   | 0.01  |
| ENSG0000(ELOVL1  | protein_co chr1  | 43363397 | 43368074 - | 53.32  | 55.68 |
| ENSG0000(SPI1    | protein_co chr11 | 47354860 | 47378576 - | 0      | 0     |
| ENSG0000(ZNRD1   | protein_co chr6  | 30058899 | 30064909 + | 10.43  | 9.96  |
| ENSG0000(MPPED2  | protein_co chr11 | 30384493 | 30586872 - | 0.02   | 0.02  |
| ENSG0000(CLDN18  | protein_co chr3  | 1.38E+08 | 1.38E+08 + | 0      | 0     |
| ENSG0000(ZBTB11  | protein_co chr3  | 1.02E+08 | 1.02E+08 - | 3.55   | 3.21  |
| ENSG0000(ATXN3   | protein_co chr14 | 92038652 | 92106621 - | 8.88   | 13.46 |
| ENSG0000(GOLGA5  | protein_co chr14 | 92794231 | 92839963 + | 20.05  | 20.05 |
| ENSG0000(FGFR2   | protein_co chr10 | 1.21E+08 | 1.22E+08 - | 0.52   | 0.12  |
| ENSG0000(LRRC40  | protein_co chr1  | 70144805 | 70205620 - | 3.09   | 3.27  |
| ENSG0000(ISOC1   | protein_co chr5  | 1.29E+08 | 1.29E+08 + | 5.67   | 5.61  |
| ENSG0000(EML1    | protein_co chr14 | 99737693 | 99942060 + | 18.47  | 19.59 |
| ENSG0000(TRMT11  | protein_co chr6  | 1.26E+08 | 1.26E+08 + | 6.91   | 7.76  |
| ENSG0000(THUMPD1 | protein_co chr16 | 20702816 | 20742084 - | 9.24   | 11.46 |
| ENSG0000(MSANTD3 | protein_co chr9  | 1E+08    | 1E+08 +    | 23.61  | 22.25 |
| ENSG0000(KIF26A  | protein_co chr14 | 1.04E+08 | 1.04E+08 + | 0      | 0     |
| ENSG0000(ATG2B   | protein_co chr14 | 96279202 | 96363870 - | 9.42   | 11.31 |
| ENSG0000(ARFGEF1 | protein_co chr8  | 67173511 | 67343677 - | 9.59   | 8.97  |
| ENSG0000(ACSM2B  | protein_co chr16 | 20536226 | 20576427 - | 0      | 0     |
| ENSG0000(ZFAT    | protein_co chr8  | 1.34E+08 | 1.35E+08 - | 2.22   | 1.67  |

|                   |                  |          |            |        |        |
|-------------------|------------------|----------|------------|--------|--------|
| ENSG0000(MTFR1    | protein_co chr8  | 65644734 | 65771261 + | 7.11   | 5.71   |
| ENSG0000(STAG3    | protein_co chr7  | 1E+08    | 1E+08 +    | 0.78   | 0.9    |
| ENSG0000(FECH     | protein_co chr18 | 57548283 | 57586772 - | 15.75  | 16.32  |
| ENSG0000(MYO9A    | protein_co chr15 | 71822289 | 72118577 - | 8.06   | 7.09   |
| ENSG0000(DDX3Y    | protein_co chrY  | 12904108 | 12920478 + | 22.28  | 23.51  |
| ENSG0000(PFKP     | protein_co chr10 | 3066333  | 3137712 +  | 81.56  | 70.37  |
| ENSG0000(IDI1     | protein_co chr10 | 1039908  | 1049170 -  | 15.8   | 14.98  |
| ENSG0000(SP100    | protein_co chr2  | 2.3E+08  | 2.31E+08 + | 44.48  | 41.24  |
| ENSG0000(KLF6     | protein_co chr10 | 3775996  | 3785281 -  | 12.3   | 12.96  |
| ENSG0000(PLPP1    | protein_co chr5  | 55424854 | 55535050 - | 44.7   | 56.78  |
| ENSG0000(NEO1     | protein_co chr15 | 73051710 | 73305206 + | 8.58   | 9.01   |
| ENSG0000(TRAM1    | protein_co chr8  | 70573442 | 70608387 - | 123.91 | 119.79 |
| ENSG0000(PHKA1    | protein_co chrX  | 72578814 | 72714319 - | 2.33   | 2.31   |
| ENSG0000(TNFRSF1A | protein_co chr12 | 6328757  | 6342114 -  | 141.96 | 144.4  |
| ENSG0000(CACNB1   | protein_co chr17 | 39173456 | 39197703 - | 4.3    | 2.66   |
| ENSG0000(EV15     | protein_co chr1  | 92508696 | 92792404 - | 12.96  | 13.11  |
| ENSG0000(STOML1   | protein_co chr15 | 73978923 | 73994622 - | 5.72   | 7.82   |
| ENSG0000(PKM      | protein_co chr15 | 72199029 | 72231822 - | 990.01 | 838.28 |
| ENSG0000(DHX29    | protein_co chr5  | 55256245 | 55307722 - | 9.2    | 8.48   |
| ENSG0000(DNTTIP2  | protein_co chr1  | 93866283 | 93879918 - | 12.26  | 11.12  |
| ENSG0000(METTL22  | protein_co chr16 | 8621683  | 8649654 +  | 13.22  | 16     |
| ENSG0000(TP53BP1  | protein_co chr15 | 43403061 | 43510728 - | 23.81  | 24.33  |
| ENSG0000(TRO      | protein_co chrX  | 54920462 | 54931431 + | 8.17   | 10.8   |
| ENSG0000(RRP15    | protein_co chr1  | 2.18E+08 | 2.18E+08 + | 3.62   | 3.37   |
| ENSG0000(RHOA     | protein_co chr3  | 49359145 | 49412998 - | 226.22 | 229.87 |
| ENSG0000(DHX8     | protein_co chr17 | 43483865 | 43544463 + | 12.71  | 13.62  |
| ENSG0000(PMS2P4   | transcribec chr7 | 67295608 | 67302907 - | 2.83   | 2.05   |
| ENSG0000(PRKCZ    | protein_co chr1  | 2050470  | 2185395 +  | 1.26   | 0.86   |
| ENSG0000(ZFY      | protein_co chrY  | 2935281  | 2982506 +  | 5.58   | 6.19   |
| ENSG0000(IARS2    | protein_co chr1  | 2.2E+08  | 2.2E+08 +  | 33.54  | 34.19  |
| ENSG0000(SYT1     | protein_co chr12 | 78863993 | 79452008 + | 4.57   | 3.68   |
| ENSG0000(NAV3     | protein_co chr12 | 77324641 | 78213008 + | 9.59   | 7.66   |
| ENSG0000(IDH3G    | protein_co chrX  | 1.54E+08 | 1.54E+08 - | 24.86  | 24.88  |
| ENSG0000(ROGDI    | protein_co chr16 | 4796968  | 4802950 -  | 16.82  | 14.82  |
| ENSG0000(PDZD4    | protein_co chrX  | 1.54E+08 | 1.54E+08 - | 0.19   | 0.29   |
| ENSG0000(ATP2B3   | protein_co chrX  | 1.54E+08 | 1.54E+08 + | 0.01   | 0      |
| ENSG0000(ROCK1    | protein_co chr18 | 20946906 | 21111851 - | 12.61  | 12.5   |
| ENSG0000(CBFB     | protein_co chr16 | 67029116 | 67101058 + | 17.63  | 18.86  |
| ENSG0000(PDK3     | protein_co chrX  | 24465221 | 24539837 + | 3.3    | 3.65   |
| ENSG0000(HYAL2    | protein_co chr3  | 50317790 | 50322906 - | 18.91  | 19.36  |
| ENSG0000(HDAC4    | protein_co chr2  | 2.39E+08 | 2.39E+08 - | 5.43   | 5.04   |
| ENSG0000(RASSF1   | protein_co chr3  | 50329782 | 50340980 - | 22.94  | 23.45  |
| ENSG0000(FGFR3    | protein_co chr4  | 1793307  | 1808872 +  | 0.15   | 0.28   |
| ENSG0000(IFI35    | protein_co chr17 | 43006725 | 43014456 + | 18.98  | 17.51  |
| ENSG0000(HEATR6   | protein_co chr17 | 60043194 | 60078931 - | 5.25   | 7.71   |

|                 |           |                  |          |          |   |        |        |
|-----------------|-----------|------------------|----------|----------|---|--------|--------|
| ENSG00000100000 | COASY     | protein_co chr17 | 42561467 | 42566277 | + | 18.14  | 17.21  |
| ENSG00000100000 | PLEKHH3   | protein_co chr17 | 42667914 | 42676994 | - | 10.11  | 11.51  |
| ENSG00000100000 | MEF2A     | protein_co chr15 | 99565417 | 99716466 | + | 19.17  | 19.62  |
| ENSG00000100000 | OTUD5     | protein_co chrX  | 48922028 | 48958386 | - | 25.46  | 26.5   |
| ENSG00000100000 | TFE3      | protein_co chrX  | 49028726 | 49043486 | - | 27.68  | 27.61  |
| ENSG00000100000 | TBC1D25   | protein_co chrX  | 48539457 | 48562609 | + | 7.78   | 8.1    |
| ENSG00000100000 | ACSL4     | protein_co chrX  | 1.1E+08  | 1.1E+08  | - | 24.71  | 31.28  |
| ENSG00000100000 | INPP5A    | protein_co chr10 | 1.33E+08 | 1.33E+08 | + | 7.01   | 6.08   |
| ENSG00000100000 | GPKOW     | protein_co chrX  | 49113389 | 49123801 | - | 8.36   | 8.13   |
| ENSG00000100000 | GRIPAP1   | protein_co chrX  | 48973720 | 49002264 | - | 11.03  | 13.15  |
| ENSG00000100000 | FTSJ1     | protein_co chrX  | 48476021 | 48486364 | + | 17.82  | 15.52  |
| ENSG00000100000 | PRR11     | protein_co chr17 | 59155499 | 59204705 | + | 1.26   | 0.83   |
| ENSG00000100000 | REEP1     | protein_co chr2  | 86213993 | 86338083 | - | 0      | 0.03   |
| ENSG00000100000 | ATP11A    | protein_co chr13 | 1.13E+08 | 1.13E+08 | + | 12.43  | 15.06  |
| ENSG00000100000 | POLR1A    | protein_co chr2  | 86020216 | 86106155 | - | 5.97   | 6.05   |
| ENSG00000100000 | LAPTM4A   | protein_co chr2  | 20032650 | 20052028 | - | 244.35 | 257.78 |
| ENSG00000100000 | TTC7A     | protein_co chr2  | 46916157 | 47076137 | + | 17.87  | 18.15  |
| ENSG00000100000 | IP6K2     | protein_co chr3  | 48688003 | 48740353 | - | 48.09  | 44.83  |
| ENSG00000100000 | STON1-GTF | protein_co chr2  | 48529925 | 48776517 | + | 0.67   | 0.76   |
| ENSG00000100000 | SRBD1     | protein_co chr2  | 45388680 | 45612165 | - | 2.75   | 3.1    |
| ENSG00000100000 | KIF2A     | protein_co chr5  | 62306162 | 62537249 | + | 9.25   | 8.79   |
| ENSG00000100000 | RASGRP2   | protein_co chr11 | 64726911 | 64745456 | - | 0.26   | 0.73   |
| ENSG00000100000 | PSME4     | protein_co chr2  | 53864067 | 53970840 | - | 9.81   | 10.26  |
| ENSG00000100000 | IFT80     | protein_co chr3  | 1.6E+08  | 1.6E+08  | - | 19.14  | 19.81  |
| ENSG00000100000 | SIRT2     | protein_co chr19 | 38878555 | 38899862 | - | 41.84  | 42.53  |
| ENSG00000100000 | ERLEC1    | protein_co chr2  | 53787044 | 53818819 | + | 28.32  | 28.63  |
| ENSG00000100000 | PPP2R5B   | protein_co chr11 | 64917553 | 64934473 | + | 8.54   | 11.28  |
| ENSG00000100000 | PYGM      | protein_co chr11 | 64746389 | 64760297 | - | 1.35   | 1.32   |
| ENSG00000100000 | PAGE1     | protein_co chrX  | 49687450 | 49695993 | - | 0      | 0      |
| ENSG00000100000 | PITX1     | protein_co chr5  | 1.35E+08 | 1.35E+08 | - | 0.04   | 0      |
| ENSG00000100000 | TRPC7     | protein_co chr5  | 1.36E+08 | 1.36E+08 | - | 0      | 0      |
| ENSG00000100000 | MAST4     | protein_co chr5  | 66596361 | 67169595 | + | 8.13   | 10.09  |
| ENSG00000100000 | ADGRF5    | protein_co chr6  | 46852512 | 46954943 | - | 0.03   | 0.02   |
| ENSG00000100000 | SDK2      | protein_co chr17 | 73334384 | 73644089 | - | 0.01   | 0      |
| ENSG00000100000 | ADAM7     | protein_co chr8  | 24440930 | 24526970 | + | 0      | 0      |
| ENSG00000100000 | NUP133    | protein_co chr1  | 2.29E+08 | 2.3E+08  | - | 12.46  | 11.14  |
| ENSG00000100000 | NUCKS1    | protein_co chr1  | 2.06E+08 | 2.06E+08 | - | 33.45  | 52.26  |
| ENSG00000100000 | VPS35     | protein_co chr16 | 46656132 | 46689518 | - | 40.65  | 42.09  |
| ENSG00000100000 | DNAJA2    | protein_co chr16 | 46955362 | 46973788 | - | 20.39  | 22.14  |
| ENSG00000100000 | BCL3      | protein_co chr19 | 44747705 | 44760044 | + | 36.28  | 37.91  |
| ENSG00000100000 | KCNAB2    | protein_co chr1  | 5991466  | 6101193  | + | 4.54   | 4.69   |
| ENSG00000100000 | ABCC9     | protein_co chr12 | 21797401 | 21942529 | - | 4.57   | 4.86   |
| ENSG00000100000 | GAL       | protein_co chr11 | 68683779 | 68691175 | + | 0      | 0.09   |
| ENSG00000100000 | CLEC2D    | protein_co chr12 | 9664969  | 9699555  | + | 1.69   | 1.73   |
| ENSG00000100000 | FUNDC1    | protein_co chrX  | 44523639 | 44543001 | - | 6.31   | 6.31   |



|                 |           |                  |          |          |   |        |        |
|-----------------|-----------|------------------|----------|----------|---|--------|--------|
| ENSG00000100000 | MAOB      | protein_co chrX  | 43766611 | 43882447 | - | 0      | 0      |
| ENSG00000100000 | RORA      | protein_co chr15 | 60488284 | 61229319 | - | 2.39   | 2.87   |
| ENSG00000100000 | DRD4      | protein_co chr11 | 637293   | 640706   | + | 0      | 0.05   |
| ENSG00000100000 | TGFBR3    | protein_co chr1  | 91680343 | 91906335 | - | 14.2   | 12.99  |
| ENSG00000100000 | KIAA1107  | protein_co chr1  | 92166985 | 92184723 | + | 0.63   | 0.7    |
| ENSG00000100000 | PLA2G10   | protein_co chr16 | 14672545 | 14694669 | - | 0      | 0.13   |
| ENSG00000100000 | HES2      | protein_co chr1  | 6412418  | 6424670  | - | 0.23   | 0.32   |
| ENSG00000100000 | ATP1B3    | protein_co chr3  | 1.42E+08 | 1.42E+08 | + | 74.31  | 72.79  |
| ENSG00000100000 | NEDD4     | protein_co chr15 | 55826922 | 55993746 | - | 30.68  | 30.57  |
| ENSG00000100000 | PIGB      | protein_co chr15 | 55318960 | 55355648 | + | 7.14   | 8.31   |
| ENSG00000100000 | MAPK6     | protein_co chr15 | 51952106 | 52067372 | + | 15.15  | 15.4   |
| ENSG00000100000 | GNB5      | protein_co chr15 | 52115105 | 52191369 | - | 12.72  | 11.04  |
| ENSG00000100000 | RAB27A    | protein_co chr15 | 55202966 | 55319113 | - | 14.28  | 11.8   |
| ENSG00000100000 | HDHD5     | protein_co chr22 | 17137511 | 17165287 | - | 21.31  | 19.8   |
| ENSG00000100000 | UFD1L     | protein_co chr22 | 19449910 | 19479215 | - | 31.02  | 27.76  |
| ENSG00000100000 | LRP6      | protein_co chr12 | 12116025 | 12267012 | - | 11.46  | 11     |
| ENSG00000100000 | GUCY2C    | protein_co chr12 | 14612632 | 14696585 | - | 0      | 0      |
| ENSG00000100000 | SCT       | protein_co chr11 | 626431   | 627143   | - | 0      | 0      |
| ENSG00000100000 | PHRF1     | protein_co chr11 | 576486   | 612222   | + | 9.76   | 9.52   |
| ENSG00000100000 | IKBKAP    | protein_co chr9  | 1.09E+08 | 1.09E+08 | - | 7.49   | 9.46   |
| ENSG00000100000 | NUCB2     | protein_co chr11 | 17208153 | 17349974 | + | 107.96 | 104.85 |
| ENSG00000100000 | PFN2      | protein_co chr3  | 1.5E+08  | 1.5E+08  | - | 85.53  | 91.13  |
| ENSG00000100000 | PTPN3     | protein_co chr9  | 1.09E+08 | 1.09E+08 | - | 0.49   | 0.48   |
| ENSG00000100000 | SPTB      | protein_co chr14 | 64746283 | 64879883 | - | 0.41   | 0.23   |
| ENSG00000100000 | DAPP1     | protein_co chr4  | 99816833 | 99870154 | + | 0      | 0      |
| ENSG00000100000 | FGF10     | protein_co chr5  | 44303544 | 44389706 | - | 0      | 0      |
| ENSG00000100000 | SLC44A1   | protein_co chr9  | 1.05E+08 | 1.05E+08 | + | 26.71  | 24.65  |
| ENSG00000100000 | TMEM260   | protein_co chr14 | 56488354 | 56650606 | + | 4.93   | 4.72   |
| ENSG00000100000 | SMG6      | protein_co chr17 | 2059839  | 2303771  | - | 49.03  | 41.58  |
| ENSG00000100000 | EXOC5     | protein_co chr14 | 57200507 | 57269008 | - | 18.09  | 19.6   |
| ENSG00000100000 | CLTCL1    | protein_co chr22 | 19179473 | 19291716 | - | 2.64   | 2.32   |
| ENSG00000100000 | FGF22     | protein_co chr19 | 639879   | 644371   | + | 0.15   | 0.2    |
| ENSG00000100000 | FSTL3     | protein_co chr19 | 676365   | 683399   | + | 29.34  | 28.11  |
| ENSG00000100000 | DGCR2     | protein_co chr22 | 19036282 | 19122454 | - | 20.47  | 23.98  |
| ENSG00000100000 | RNF126    | protein_co chr19 | 647526   | 663277   | - | 11.57  | 11.02  |
| ENSG00000100000 | MNT       | protein_co chr17 | 2384060  | 2401118  | - | 12.53  | 16.98  |
| ENSG00000100000 | ZXDC      | protein_co chr3  | 1.26E+08 | 1.26E+08 | - | 6.95   | 5.74   |
| ENSG00000100000 | JMJD6     | protein_co chr17 | 76712832 | 76726799 | - | 7.35   | 7.94   |
| ENSG00000100000 | POLB      | protein_co chr8  | 42338454 | 42371808 | + | 7.33   | 8.6    |
| ENSG00000100000 | ST6GALNA5 | protein_co chr17 | 76624761 | 76643838 | - | 0.12   | 0.14   |
| ENSG00000100000 | WIP1      | protein_co chr17 | 68420948 | 68457513 | - | 95.9   | 92.86  |
| ENSG00000100000 | FRMPD1    | protein_co chr9  | 37651000 | 37746904 | + | 4.84   | 2.51   |
| ENSG00000100000 | GBA2      | protein_co chr9  | 35736866 | 35749228 | - | 12.12  | 11.56  |
| ENSG00000100000 | NDST1     | protein_co chr5  | 1.5E+08  | 1.51E+08 | + | 49.01  | 45.76  |
| ENSG00000100000 | ASNS      | protein_co chr7  | 97852118 | 97872542 | - | 34     | 37.18  |

|                 |           |                  |          |          |   |         |         |
|-----------------|-----------|------------------|----------|----------|---|---------|---------|
| ENSG00000100000 | AP3M2     | protein_co chr8  | 42152946 | 42171673 | + | 9.76    | 8.38    |
| ENSG00000100000 | CNGB1     | protein_co chr16 | 57882340 | 57971116 | - | 0       | 0       |
| ENSG00000100000 | ST6GALNA4 | protein_co chr17 | 76565379 | 76586956 | - | 1.04    | 1.75    |
| ENSG00000100000 | CHAT      | protein_co chr10 | 49609095 | 49665104 | + | 0       | 0       |
| ENSG00000100000 | PABPC1    | protein_co chr8  | 1.01E+08 | 1.01E+08 | - | 653.61  | 739.83  |
| ENSG00000100000 | TESK2     | protein_co chr1  | 45343883 | 45491166 | - | 2.44    | 2.13    |
| ENSG00000100000 | CFAP20    | protein_co chr16 | 58113588 | 58129450 | - | 12.91   | 13.32   |
| ENSG00000100000 | CSNK2A2   | protein_co chr16 | 58157907 | 58197920 | - | 22.77   | 23.07   |
| ENSG00000100000 | PTPN21    | protein_co chr14 | 88465778 | 88554733 | - | 6.64    | 7.24    |
| ENSG00000100000 | EIF2B3    | protein_co chr1  | 44850522 | 44986722 | - | 7.87    | 8.26    |
| ENSG00000100000 | CAMK2A    | protein_co chr5  | 1.5E+08  | 1.5E+08  | - | 0.19    | 0.27    |
| ENSG00000100000 | TCOF1     | protein_co chr5  | 1.5E+08  | 1.5E+08  | + | 7.43    | 8.09    |
| ENSG00000100000 | CDC42     | protein_co chr1  | 22052627 | 22092946 | + | 80.71   | 78.9    |
| ENSG00000100000 | OSBPL3    | protein_co chr7  | 24796539 | 24981634 | - | 11.17   | 12.65   |
| ENSG00000100000 | EPHA8     | protein_co chr1  | 22563564 | 22603594 | + | 0       | 0       |
| ENSG00000100000 | SLC12A3   | protein_co chr16 | 56865207 | 56915850 | + | 0       | 0       |
| ENSG00000100000 | RAD18     | protein_co chr3  | 8775402  | 8963773  | - | 3.42    | 4.94    |
| ENSG00000100000 | ATP2B1    | protein_co chr12 | 89588049 | 89709300 | - | 15.46   | 15.77   |
| ENSG00000100000 | TRPM5     | protein_co chr11 | 2404515  | 2423045  | - | 0       | 0       |
| ENSG00000100000 | NCK2      | protein_co chr2  | 1.06E+08 | 1.06E+08 | + | 12.08   | 11.06   |
| ENSG00000100000 | MAP4K4    | protein_co chr2  | 1.02E+08 | 1.02E+08 | + | 135.37  | 139.09  |
| ENSG00000100000 | MGAT4A    | protein_co chr2  | 98619106 | 98731126 | - | 0.19    | 0.1     |
| ENSG00000100000 | RPL31     | protein_co chr2  | 1.01E+08 | 1.01E+08 | + | 1198.52 | 1173.53 |
| ENSG00000100000 | WDR1      | protein_co chr4  | 10074339 | 10116949 | - | 187.44  | 187.68  |
| ENSG00000100000 | SNX13     | protein_co chr7  | 17790761 | 17940501 | - | 16.93   | 15.92   |
| ENSG00000100000 | MS4A12    | protein_co chr11 | 60492778 | 60507430 | + | 0       | 0.07    |
| ENSG00000100000 | ARHGAP10  | protein_co chr4  | 1.48E+08 | 1.48E+08 | + | 9.11    | 9.36    |
| ENSG00000100000 | RPS6KA2   | protein_co chr6  | 1.66E+08 | 1.67E+08 | - | 43.87   | 43.68   |
| ENSG00000100000 | ING3      | protein_co chr7  | 1.21E+08 | 1.21E+08 | + | 5.76    | 4.89    |
| ENSG00000100000 | VASH1     | protein_co chr14 | 76762189 | 76783015 | + | 7.07    | 9.91    |
| ENSG00000100000 | LMCD1     | protein_co chr3  | 8501707  | 8574673  | + | 21.69   | 22.45   |
| ENSG00000100000 | WBSCR22   | protein_co chr7  | 73683025 | 73705161 | + | 26.86   | 30.71   |
| ENSG00000100000 | SEL1L     | protein_co chr14 | 81471549 | 81533861 | - | 55.13   | 57.31   |
| ENSG00000100000 | TRIP13    | protein_co chr5  | 892643   | 919357   | + | 0.79    | 1.05    |
| ENSG00000100000 | ATP6AP1   | protein_co chrX  | 1.54E+08 | 1.54E+08 | + | 70.1    | 71.15   |
| ENSG00000100000 | TCF3      | protein_co chr19 | 1609290  | 1652605  | - | 37.81   | 40.24   |
| ENSG00000100000 | TRIB2     | protein_co chr2  | 12716889 | 12742734 | + | 10.76   | 11.49   |
| ENSG00000100000 | DAZAP1    | protein_co chr19 | 1407569  | 1435687  | + | 23.23   | 20.75   |
| ENSG00000100000 | MBD3      | protein_co chr19 | 1573596  | 1592801  | - | 27.9    | 28.27   |
| ENSG00000100000 | PRLH      | protein_co chr2  | 2.38E+08 | 2.38E+08 | + | 0       | 0       |
| ENSG00000100000 | HLTF      | protein_co chr3  | 1.49E+08 | 1.49E+08 | - | 10.67   | 11.11   |
| ENSG00000100000 | FAM50A    | protein_co chrX  | 1.54E+08 | 1.54E+08 | + | 50      | 48.19   |
| ENSG00000100000 | FAM3A     | protein_co chrX  | 1.55E+08 | 1.55E+08 | - | 29.97   | 28.66   |
| ENSG00000100000 | CPSF1     | protein_co chr8  | 1.44E+08 | 1.44E+08 | - | 16.05   | 17.6    |
| ENSG00000100000 | MYO3B     | protein_co chr2  | 1.7E+08  | 1.71E+08 | + | 0       | 0.06    |

|                   |                  |          |            |        |        |
|-------------------|------------------|----------|------------|--------|--------|
| ENSG0000(CYBRD1   | protein_co chr2  | 1.72E+08 | 1.72E+08 + | 170.04 | 194.87 |
| ENSG0000(CDH19    | protein_co chr18 | 66501083 | 66604138 - | 0.03   | 0.46   |
| ENSG0000(PDCD2    | protein_co chr6  | 1.71E+08 | 1.71E+08 - | 22.02  | 23.49  |
| ENSG0000(SLC6A15  | protein_co chr12 | 84859488 | 84913615 - | 2.04   | 2.17   |
| ENSG0000(RDH11    | protein_co chr14 | 67676801 | 67695814 - | 32.72  | 29.92  |
| ENSG0000(PRKACA   | protein_co chr19 | 14091688 | 14118084 - | 40.49  | 39.62  |
| ENSG0000(ADGRL1   | protein_co chr19 | 14147743 | 14206187 - | 5.32   | 7.06   |
| ENSG0000(SPP2     | protein_co chr2  | 2.34E+08 | 2.34E+08 + | 0.86   | 0.86   |
| ENSG0000(ACTN1    | protein_co chr14 | 68874143 | 68979440 - | 108    | 116.59 |
| ENSG0000(ZFYVE26  | protein_co chr14 | 67727374 | 67816590 - | 7.58   | 7.81   |
| ENSG0000(RPS6KA6  | protein_co chrX  | 84058346 | 84187907 - | 0.89   | 1.18   |
| ENSG0000(EPN2     | protein_co chr17 | 19215615 | 19336715 + | 17.47  | 13.13  |
| ENSG0000(PTPN18   | protein_co chr2  | 1.3E+08  | 1.3E+08 +  | 14.33  | 13.38  |
| ENSG0000(LIMS2    | protein_co chr2  | 1.28E+08 | 1.28E+08 - | 12.63  | 14.74  |
| ENSG0000(ASIC4    | protein_co chr2  | 2.2E+08  | 2.2E+08 +  | 0      | 0      |
| ENSG0000(SPEG     | protein_co chr2  | 2.19E+08 | 2.19E+08 + | 20.48  | 23.72  |
| ENSG0000(LNX1     | protein_co chr4  | 53459301 | 53701405 - | 0.84   | 1.24   |
| ENSG0000(ALDH3A2  | protein_co chr17 | 19648136 | 19677598 + | 18.98  | 22.5   |
| ENSG0000(TFRC     | protein_co chr3  | 1.96E+08 | 1.96E+08 - | 77.44  | 75.87  |
| ENSG0000(SREBF1   | protein_co chr17 | 17810399 | 17837002 - | 37.25  | 42.33  |
| ENSG0000(TRPC5    | protein_co chrX  | 1.12E+08 | 1.12E+08 - | 0      | 0      |
| ENSG0000(AFF4     | protein_co chr5  | 1.33E+08 | 1.33E+08 - | 25.72  | 25.47  |
| ENSG0000(UBE2D1   | protein_co chr10 | 58334975 | 58370753 + | 8.5    | 5.62   |
| ENSG0000(MPP5     | protein_co chr14 | 67241109 | 67335819 + | 5.9    | 6.42   |
| ENSG0000(RHOBTB1  | protein_co chr10 | 60869438 | 61001440 - | 7.3    | 8.06   |
| ENSG0000(SMC1A    | protein_co chrX  | 53374149 | 53422728 - | 11.06  | 11.7   |
| ENSG0000(HSD17B10 | protein_co chrX  | 53431258 | 53434373 - | 37.2   | 37.31  |
| ENSG0000(MARK2    | protein_co chr11 | 63838928 | 63911019 + | 7.29   | 7.91   |
| ENSG0000(HMMR     | protein_co chr5  | 1.63E+08 | 1.63E+08 + | 0.02   | 0.37   |
| ENSG0000(CHFR     | protein_co chr12 | 1.33E+08 | 1.33E+08 - | 12.81  | 14.54  |
| ENSG0000(TRHDE    | protein_co chr12 | 72087266 | 72670757 + | 0.63   | 0.47   |
| ENSG0000(P4HA2    | protein_co chr5  | 1.32E+08 | 1.32E+08 - | 222.88 | 215.44 |
| ENSG0000(FCGR2B   | protein_co chr1  | 1.62E+08 | 1.62E+08 + | 0      | 0      |
| ENSG0000(NFATC3   | protein_co chr16 | 68084751 | 68229259 + | 6.59   | 8.01   |
| ENSG0000(TRNT1    | protein_co chr3  | 3126916  | 3150879 +  | 4.68   | 6.6    |
| ENSG0000(ACADVL   | protein_co chr17 | 7217125  | 7225273 +  | 183.37 | 177.7  |
| ENSG0000(STK10    | protein_co chr5  | 1.72E+08 | 1.72E+08 - | 6.47   | 6.5    |
| ENSG0000(FBXW11   | protein_co chr5  | 1.72E+08 | 1.72E+08 - | 19.93  | 20.1   |
| ENSG0000(ACAP1    | protein_co chr17 | 7336529  | 7351478 +  | 1.3    | 3.85   |
| ENSG0000(CRMP1    | protein_co chr4  | 5748084  | 5893058 -  | 0.08   | 0.07   |
| ENSG0000(EVC      | protein_co chr4  | 5711197  | 5814305 +  | 24.64  | 24.86  |
| ENSG0000(DERL2    | protein_co chr17 | 5471251  | 5486811 -  | 34.3   | 28.87  |
| ENSG0000(SIDT1    | protein_co chr3  | 1.14E+08 | 1.14E+08 + | 0      | 0      |
| ENSG0000(NDE1     | protein_co chr16 | 15643267 | 15726353 + | 7.07   | 8.44   |
| ENSG0000(MRVI1    | protein_co chr11 | 10573091 | 10693988 - | 1.79   | 2.25   |

|                  |                  |          |          |   |       |       |
|------------------|------------------|----------|----------|---|-------|-------|
| ENSG0000(TMEM38A | protein_co chr19 | 16661127 | 16690029 | + | 2.22  | 2.57  |
| ENSG0000(AP1M1   | protein_co chr19 | 16197578 | 16245907 | + | 32.9  | 28.77 |
| ENSG0000(PVR     | protein_co chr19 | 44643798 | 44663583 | + | 19.83 | 18.44 |
| ENSG0000(XRCC1   | protein_co chr19 | 43543040 | 43580473 | - | 13.09 | 13.28 |
| ENSG0000(SCARB1  | protein_co chr12 | 1.25E+08 | 1.25E+08 | - | 11.46 | 12.39 |
| ENSG0000(CYP2W1  | protein_co chr7  | 983199   | 989640   | + | 0     | 0.08  |
| ENSG0000(MCM2    | protein_co chr3  | 1.28E+08 | 1.28E+08 | + | 4.64  | 4.64  |
| ENSG0000(MOV10L1 | protein_co chr22 | 50089879 | 50161690 | + | 1.98  | 2.9   |
| ENSG0000(PANX2   | protein_co chr22 | 50170731 | 50180294 | + | 2.35  | 2.33  |
| ENSG0000(SELENOO | protein_co chr22 | 50200979 | 50217616 | + | 9.01  | 10.49 |
| ENSG0000(TP63    | protein_co chr3  | 1.9E+08  | 1.9E+08  | + | 0.1   | 0     |
| ENSG0000(ALPK1   | protein_co chr4  | 1.12E+08 | 1.12E+08 | + | 7.82  | 8.72  |
| ENSG0000(LLGL2   | protein_co chr17 | 75525080 | 75575208 | + | 0.22  | 0.51  |
| ENSG0000(PDE8A   | protein_co chr15 | 84980440 | 85139145 | + | 11.33 | 9.93  |
| ENSG0000(CLCN4   | protein_co chrX  | 10156945 | 10237660 | + | 2.31  | 0.72  |
| ENSG0000(NLE1    | protein_co chr17 | 35128753 | 35142315 | - | 5.9   | 7.11  |
| ENSG0000(SDHA    | protein_co chr5  | 218241   | 256700   | + | 42.5  | 42.65 |
| ENSG0000(SMARCE1 | protein_co chr17 | 40624962 | 40648508 | - | 66.04 | 76.19 |
| ENSG0000(FNDC8   | protein_co chr17 | 35121579 | 35130732 | + | 0.08  | 0     |
| ENSG0000(GSDMB   | protein_co chr17 | 39904595 | 39919854 | - | 3.14  | 3.57  |
| ENSG0000(KDM5A   | protein_co chr12 | 280129   | 389454   | - | 11.35 | 13.59 |
| ENSG0000(ADAM11  | protein_co chr17 | 44759031 | 44781846 | + | 0.32  | 0.33  |
| ENSG0000(PPP2R3A | protein_co chr3  | 1.36E+08 | 1.36E+08 | + | 4.87  | 5.91  |
| ENSG0000(FERMT2  | protein_co chr14 | 52857268 | 52952435 | - | 48.67 | 50.89 |
| ENSG0000(ABCB11  | protein_co chr2  | 1.69E+08 | 1.69E+08 | - | 0     | 0     |
| ENSG0000(DHRS9   | protein_co chr2  | 1.69E+08 | 1.69E+08 | + | 0.08  | 0.13  |
| ENSG0000(CD5L    | protein_co chr1  | 1.58E+08 | 1.58E+08 | - | 0     | 0     |
| ENSG0000(PTGS2   | protein_co chr1  | 1.87E+08 | 1.87E+08 | - | 7.34  | 6.61  |
| ENSG0000(IGF2BP2 | protein_co chr3  | 1.86E+08 | 1.86E+08 | - | 24.28 | 23.33 |
| ENSG0000(MAP3K13 | protein_co chr3  | 1.85E+08 | 1.85E+08 | + | 6.89  | 5.97  |
| ENSG0000(ST6GAL1 | protein_co chr3  | 1.87E+08 | 1.87E+08 | + | 3.86  | 3.87  |
| ENSG0000(TBX21   | protein_co chr17 | 47733244 | 47746119 | + | 0     | 0     |
| ENSG0000(VDAC1P1 | processed_chrX   | 80929500 | 80930347 | + | 0     | 0     |
| ENSG0000(FRY     | protein_co chr13 | 32031300 | 32299122 | + | 2.24  | 3.64  |
| ENSG0000(PICALM  | protein_co chr11 | 85957684 | 86069882 | - | 74.95 | 73.92 |
| ENSG0000(NSF     | protein_co chr17 | 46590669 | 46757464 | + | 15.84 | 15.7  |
| ENSG0000(GLI2    | protein_co chr2  | 1.21E+08 | 1.21E+08 | + | 4.73  | 6.71  |
| ENSG0000(CLASP1  | protein_co chr2  | 1.21E+08 | 1.22E+08 | - | 12.08 | 14.77 |
| ENSG0000(MRPS34  | protein_co chr16 | 1771890  | 1773155  | - | 33.12 | 32.15 |
| ENSG0000(NOTCH3  | protein_co chr19 | 15159038 | 15200981 | - | 18.78 | 16.89 |
| ENSG0000(CLNS1A  | protein_co chr11 | 77514936 | 77637805 | - | 57.77 | 53.5  |
| ENSG0000(PPP2R2C | protein_co chr4  | 6320578  | 6563600  | - | 0     | 0.07  |
| ENSG0000(TEAD2   | protein_co chr19 | 49340595 | 49362457 | - | 19.87 | 18.76 |
| ENSG0000(EED     | protein_co chr11 | 86244544 | 86278813 | + | 6.47  | 5.84  |
| ENSG0000(CDHR2   | protein_co chr5  | 1.77E+08 | 1.77E+08 | + | 0.05  | 0.03  |

|                   |                  |          |            |         |        |
|-------------------|------------------|----------|------------|---------|--------|
| ENSG0000(SNCB     | protein_co chr5  | 1.77E+08 | 1.77E+08 - | 0.38    | 1      |
| ENSG0000(TSG101   | protein_co chr11 | 18468336 | 18527232 - | 49.27   | 42.77  |
| ENSG0000(NCBP3    | protein_co chr17 | 3802165  | 3846251 -  | 13.73   | 11.16  |
| ENSG0000(ATP2A3   | protein_co chr17 | 3923870  | 3964464 -  | 0.47    | 0.31   |
| ENSG0000(CA12     | protein_co chr15 | 63321378 | 63382161 - | 138.09  | 101.01 |
| ENSG0000(MGLL     | protein_co chr3  | 1.28E+08 | 1.28E+08 - | 7.57    | 8.18   |
| ENSG0000(NTN4     | protein_co chr12 | 95657807 | 95791152 - | 22.76   | 22.23  |
| ENSG0000(BCS1L    | protein_co chr2  | 2.19E+08 | 2.19E+08 + | 10.92   | 12.9   |
| ENSG0000(NUAK1    | protein_co chr12 | 1.06E+08 | 1.06E+08 - | 6.58    | 6.73   |
| ENSG0000(DPP8     | protein_co chr15 | 65442463 | 65517704 - | 10.21   | 9.41   |
| ENSG0000(SLC24A1  | protein_co chr15 | 65611366 | 65660995 + | 3.36    | 3.82   |
| ENSG0000(ZNF532   | protein_co chr18 | 58862600 | 58986480 + | 26.42   | 28.52  |
| ENSG0000(SCARF1   | protein_co chr17 | 1633858  | 1645747 -  | 0.48    | 0.37   |
| ENSG0000(LMAN1    | protein_co chr18 | 59327823 | 59359962 - | 33.96   | 33.08  |
| ENSG0000(HACD3    | protein_co chr15 | 65530418 | 65578352 + | 24.59   | 25.05  |
| ENSG0000(IPCEF1   | protein_co chr6  | 1.54E+08 | 1.54E+08 - | 0       | 0.01   |
| ENSG0000(ZZEF1    | protein_co chr17 | 4004445  | 4143020 -  | 11.21   | 10.11  |
| ENSG0000(NOX3     | protein_co chr6  | 1.55E+08 | 1.55E+08 - | 0       | 0      |
| ENSG0000(ENO1     | protein_co chr1  | 8861002  | 8879249 -  | 1004.26 | 860.33 |
| ENSG0000(SLC12A1  | protein_co chr15 | 48191664 | 48304078 + | 0       | 0      |
| ENSG0000(MYDGF    | protein_co chr19 | 4641374  | 4670370 -  | 125.27  | 115.68 |
| ENSG0000(ANO8     | protein_co chr19 | 17323223 | 17334829 - | 2.65    | 2.95   |
| ENSG0000(TUBE1    | protein_co chr6  | 1.12E+08 | 1.12E+08 - | 10.72   | 7.51   |
| ENSG0000(ARHGEF10 | protein_co chr1  | 17539835 | 17697874 + | 7.4     | 7.73   |
| ENSG0000(TXK      | protein_co chr4  | 48066393 | 48134256 - | 0       | 0.03   |
| ENSG0000(WSCD2    | protein_co chr12 | 1.08E+08 | 1.08E+08 + | 0       | 0      |
| ENSG0000(KCNQ2    | protein_co chr20 | 63400210 | 63472677 - | 0       | 0      |
| ENSG0000(TACR2    | protein_co chr10 | 69403903 | 69416867 - | 0.07    | 0.04   |
| ENSG0000(ACTR6    | protein_co chr12 | 1E+08    | 1E+08 +    | 5.8     | 6.49   |
| ENSG0000(TIPIN    | protein_co chr15 | 66336206 | 66386746 - | 3.08    | 3.05   |
| ENSG0000(SRI      | protein_co chr7  | 88205118 | 88226993 - | 66.7    | 69.34  |
| ENSG0000(EIF4G3   | protein_co chr1  | 20806292 | 21176888 - | 29.07   | 32.21  |
| ENSG0000(NUP37    | protein_co chr12 | 1.02E+08 | 1.02E+08 - | 19.85   | 14.74  |
| ENSG0000(SEMA3A   | protein_co chr7  | 83955777 | 84492724 - | 1.96    | 2.24   |
| ENSG0000(GTSE1    | protein_co chr22 | 46296741 | 46330810 + | 0.12    | 0.06   |
| ENSG0000(SEMA3C   | protein_co chr7  | 80742538 | 80922359 - | 139.1   | 156.26 |
| ENSG0000(TTC38    | protein_co chr22 | 46267961 | 46294008 + | 8.51    | 10.55  |
| ENSG0000(ACAT1    | protein_co chr11 | 1.08E+08 | 1.08E+08 + | 25.58   | 27.08  |
| ENSG0000(GRAMD4   | protein_co chr22 | 46576012 | 46679790 + | 7.15    | 6.86   |
| ENSG0000(CELSR1   | protein_co chr22 | 46360834 | 46537170 - | 0.47    | 0.76   |
| ENSG0000(WNT8B    | protein_co chr10 | 1E+08    | 1E+08 +    | 0       | 0      |
| ENSG0000(ZNF638   | protein_co chr2  | 71276561 | 71435069 + | 22.22   | 19.28  |
| ENSG0000(SLC25A40 | protein_co chr7  | 87833568 | 87876357 - | 6.07    | 6.88   |
| ENSG0000(TIMM21   | protein_co chr18 | 74148511 | 74160530 + | 16.17   | 16.96  |
| ENSG0000(ADD2     | protein_co chr2  | 70607618 | 70768225 - | 0.51    | 0.2    |

|                   |                  |          |          |   |         |         |
|-------------------|------------------|----------|----------|---|---------|---------|
| ENSG0000(FGF4     | protein_co chr11 | 69771016 | 69775403 | - | 0       | 0       |
| ENSG0000(RASAL2   | protein_co chr1  | 1.78E+08 | 1.78E+08 | + | 9.54    | 14.46   |
| ENSG0000(VPS9D1   | protein_co chr16 | 89707134 | 89720986 | - | 10.79   | 10.15   |
| ENSG0000(ZNF37A   | protein_co chr10 | 38094334 | 38150293 | + | 5.69    | 5.78    |
| ENSG0000(MARK3    | protein_co chr14 | 1.03E+08 | 1.04E+08 | + | 33.07   | 34.48   |
| ENSG0000(SLC25A3  | protein_co chr12 | 98593591 | 98606379 | + | 314.95  | 320.38  |
| ENSG0000(FNDC3B   | protein_co chr3  | 1.72E+08 | 1.72E+08 | + | 53.82   | 50.44   |
| ENSG0000(FOSL2    | protein_co chr2  | 28392448 | 28417312 | + | 22.87   | 20.98   |
| ENSG0000(CACNG5   | protein_co chr17 | 66835117 | 66885486 | + | 0       | 0       |
| ENSG0000(CACNG4   | protein_co chr17 | 66964910 | 67033398 | + | 0       | 0       |
| ENSG0000(FRYL     | protein_co chr4  | 48497361 | 48780322 | - | 12.83   | 13.7    |
| ENSG0000(TMEM131  | protein_co chr2  | 97756333 | 97995891 | - | 12.7    | 13.33   |
| ENSG0000(FSCN1    | protein_co chr7  | 5592823  | 5606655  | + | 47.62   | 50.33   |
| ENSG0000(ACTB     | protein_co chr7  | 5527151  | 5563784  | - | 1770.69 | 1818.41 |
| ENSG0000(MOCOS    | protein_co chr18 | 36187519 | 36272157 | + | 2.4     | 1.41    |
| ENSG0000(PLD1     | protein_co chr3  | 1.72E+08 | 1.72E+08 | - | 10.53   | 9.72    |
| ENSG0000(ATP12A   | protein_co chr13 | 24680411 | 24712493 | + | 0       | 0       |
| ENSG0000(WDR62    | protein_co chr19 | 36054881 | 36105106 | + | 0.54    | 1.15    |
| ENSG0000(DLG1     | protein_co chr3  | 1.97E+08 | 1.97E+08 | - | 23.27   | 23.87   |
| ENSG0000(RAB7A    | protein_co chr3  | 1.29E+08 | 1.29E+08 | + | 157.24  | 155.1   |
| ENSG0000(BCAP29   | protein_co chr7  | 1.08E+08 | 1.08E+08 | + | 22.05   | 24.25   |
| ENSG0000(SEC31B   | protein_co chr10 | 1E+08    | 1.01E+08 | - | 4.58    | 5.75    |
| ENSG0000(SART3    | protein_co chr12 | 1.09E+08 | 1.09E+08 | - | 13.77   | 13.85   |
| ENSG0000(ARHGAP15 | protein_co chr2  | 1.43E+08 | 1.44E+08 | + | 0       | 0       |
| ENSG0000(TUBA3D   | protein_co chr2  | 1.31E+08 | 1.31E+08 | + | 0       | 0       |
| ENSG0000(PAX2     | protein_co chr10 | 1.01E+08 | 1.01E+08 | + | 0       | 0       |
| ENSG0000(EXOSC7   | protein_co chr3  | 44975241 | 45036066 | + | 17.41   | 15.15   |
| ENSG0000(KIFAP3   | protein_co chr1  | 1.7E+08  | 1.7E+08  | - | 11.83   | 11.46   |
| ENSG0000(MKRN2    | protein_co chr3  | 12557014 | 12583713 | + | 14.4    | 15.61   |
| ENSG0000(MCM6     | protein_co chr2  | 1.36E+08 | 1.36E+08 | - | 6.25    | 7.02    |
| ENSG0000(REXO2    | protein_co chr11 | 1.14E+08 | 1.14E+08 | + | 112.63  | 107.95  |
| ENSG0000(RBM7     | protein_co chr11 | 1.14E+08 | 1.14E+08 | + | 22.83   | 24.49   |
| ENSG0000(RBMS2    | protein_co chr12 | 56521929 | 56596196 | + | 17.57   | 12.09   |
| ENSG0000(BAZ2A    | protein_co chr12 | 56595596 | 56636816 | - | 18.87   | 19      |
| ENSG0000(PTPN23   | protein_co chr3  | 47381011 | 47413441 | + | 15.22   | 13.84   |
| ENSG0000(MLH1     | protein_co chr3  | 36993332 | 37050918 | + | 12.42   | 11.75   |
| ENSG0000(UNG      | protein_co chr12 | 1.09E+08 | 1.09E+08 | + | 8.35    | 8.28    |
| ENSG0000(FMO4     | protein_co chr1  | 1.71E+08 | 1.71E+08 | + | 1.4     | 1.89    |
| ENSG0000(KLHL20   | protein_co chr1  | 1.74E+08 | 1.74E+08 | + | 8.94    | 7.93    |
| ENSG0000(RGS11    | protein_co chr16 | 268301   | 275980   | - | 3.04    | 2.44    |
| ENSG0000(SLC46A1  | protein_co chr17 | 28394756 | 28407197 | - | 3.15    | 1.93    |
| ENSG0000(PLXNA2   | protein_co chr1  | 2.08E+08 | 2.08E+08 | - | 5.39    | 6.99    |
| ENSG0000(SPAG5    | protein_co chr17 | 28577565 | 28599279 | - | 1.45    | 1.35    |
| ENSG0000(ANKRD13A | protein_co chr12 | 1.1E+08  | 1.1E+08  | + | 55.58   | 52.66   |
| ENSG0000(TPD52    | protein_co chr8  | 80034745 | 80231232 | - | 0.59    | 0.36    |

|                    |                  |          |            |        |        |
|--------------------|------------------|----------|------------|--------|--------|
| ENSG0000( ACACB    | protein_co chr12 | 1.09E+08 | 1.09E+08 + | 3.4    | 2.54   |
| ENSG0000( TRAF4    | protein_co chr17 | 28743984 | 28750958 + | 17.62  | 17.62  |
| ENSG0000( PAG1     | protein_co chr8  | 80967810 | 81112068 - | 0.32   | 0.71   |
| ENSG0000( GPATCH1  | protein_co chr19 | 33080880 | 33130542 + | 2.22   | 2.13   |
| ENSG0000( ICAM3    | protein_co chr19 | 10333776 | 10339823 - | 4.33   | 4.44   |
| ENSG0000( NT5C2    | protein_co chr10 | 1.03E+08 | 1.03E+08 - | 36.83  | 43.07  |
| ENSG0000( MCAM     | protein_co chr11 | 1.19E+08 | 1.19E+08 - | 0.64   | 0.65   |
| ENSG0000( GPC4     | protein_co chrX  | 1.33E+08 | 1.33E+08 - | 0      | 0      |
| ENSG0000( MBNL3    | protein_co chrX  | 1.32E+08 | 1.32E+08 - | 1.06   | 1.75   |
| ENSG0000( CAMSAP3  | protein_co chr19 | 7595902  | 7618304 +  | 0.01   | 0.03   |
| ENSG0000( RAP1GAP  | protein_co chr1  | 21596215 | 21669363 - | 0.51   | 0.96   |
| ENSG0000( XAB2     | protein_co chr19 | 7619525  | 7629565 -  | 13.71  | 13.34  |
| ENSG0000( ARHGEF1  | protein_co chr19 | 41883161 | 41930150 + | 19.56  | 23.51  |
| ENSG0000( STXBP2   | protein_co chr19 | 7636881  | 7647873 +  | 12.6   | 15.25  |
| ENSG0000( MAP2K7   | protein_co chr19 | 7903843  | 7914478 +  | 10.52  | 10.89  |
| ENSG0000( NMRK2    | protein_co chr19 | 3933103  | 3942416 +  | 0      | 0      |
| ENSG0000( DGKD     | protein_co chr2  | 2.33E+08 | 2.33E+08 + | 6.97   | 6.7    |
| ENSG0000( CTTNBP2  | protein_co chr7  | 1.18E+08 | 1.18E+08 - | 0.05   | 0.01   |
| ENSG0000( ACTL6B   | protein_co chr7  | 1.01E+08 | 1.01E+08 - | 0      | 0      |
| ENSG0000( RARB     | protein_co chr3  | 25174332 | 25597932 + | 3.99   | 4.44   |
| ENSG0000( TOP2B    | protein_co chr3  | 25597905 | 25664907 - | 23.53  | 26.4   |
| ENSG0000( TM9SF3   | protein_co chr10 | 96518109 | 96587452 - | 34.53  | 39.25  |
| ENSG0000( NFKB2    | protein_co chr10 | 1.02E+08 | 1.02E+08 + | 15.36  | 13.96  |
| ENSG0000( UBE2T    | protein_co chr1  | 2.02E+08 | 2.02E+08 - | 2.05   | 2.76   |
| ENSG0000( PPP1R12B | protein_co chr1  | 2.02E+08 | 2.03E+08 + | 7.82   | 12.4   |
| ENSG0000( DNAJC10  | protein_co chr2  | 1.83E+08 | 1.83E+08 + | 66.27  | 68.19  |
| ENSG0000( GTF3C1   | protein_co chr16 | 27459555 | 27549913 - | 19.26  | 22.16  |
| ENSG0000( IL4R     | protein_co chr16 | 27313668 | 27364778 + | 43.77  | 37.83  |
| ENSG0000( USP33    | protein_co chr1  | 77695987 | 77759852 - | 25.26  | 29.16  |
| ENSG0000( PAK3     | protein_co chrX  | 1.11E+08 | 1.11E+08 + | 0.22   | 0.14   |
| ENSG0000( CAPN6    | protein_co chrX  | 1.11E+08 | 1.11E+08 - | 0      | 0      |
| ENSG0000( DCX      | protein_co chrX  | 1.11E+08 | 1.11E+08 - | 0      | 0      |
| ENSG0000( SNRPA    | protein_co chr19 | 40750637 | 40765389 + | 14.49  | 18.58  |
| ENSG0000( SPAG6    | protein_co chr10 | 22345445 | 22454224 + | 0      | 0.08   |
| ENSG0000( EXOSC5   | protein_co chr19 | 41386374 | 41397479 - | 8.28   | 7.73   |
| ENSG0000( DYNC112  | protein_co chr2  | 1.72E+08 | 1.72E+08 + | 58.33  | 60.4   |
| ENSG0000( APBB1IP  | protein_co chr10 | 26438203 | 26567803 + | 0.67   | 0.69   |
| ENSG0000( LRCH4    | protein_co chr7  | 1.01E+08 | 1.01E+08 - | 11.33  | 12.46  |
| ENSG0000( FAM76B   | protein_co chr11 | 95768942 | 95790409 - | 9.9    | 7.32   |
| ENSG0000( SIRT6    | protein_co chr19 | 4174109  | 4182604 -  | 7.67   | 9.26   |
| ENSG0000( TYR      | protein_co chr11 | 89177452 | 89295759 + | 0      | 0      |
| ENSG0000( POLD3    | protein_co chr11 | 74493851 | 74669117 + | 8.04   | 8.52   |
| ENSG0000( ACTN2    | protein_co chr1  | 2.37E+08 | 2.37E+08 + | 0      | 0      |
| ENSG0000( CAPZB    | protein_co chr1  | 19338776 | 19485539 - | 222.09 | 202.04 |
| ENSG0000( GPR137B  | protein_co chr1  | 2.36E+08 | 2.36E+08 + | 12.29  | 10.74  |

|                    |                  |          |          |   |        |        |
|--------------------|------------------|----------|----------|---|--------|--------|
| ENSG0000( NAALAD2  | protein_co chr11 | 90131515 | 90192894 | + | 0.15   | 0.37   |
| ENSG0000( JADE1    | protein_co chr4  | 1.29E+08 | 1.29E+08 | + | 6.59   | 6.49   |
| ENSG0000( SLC25A43 | protein_co chrX  | 1.19E+08 | 1.19E+08 | + | 12.84  | 12.06  |
| ENSG0000( UBE2A    | protein_co chrX  | 1.2E+08  | 1.2E+08  | + | 32.9   | 33.35  |
| ENSG0000( FGFR1    | protein_co chr8  | 38411138 | 38468834 | - | 86.79  | 95.03  |
| ENSG0000( FKBP6    | protein_co chr7  | 73328164 | 73358637 | + | 0      | 0      |
| ENSG0000( SMC1B    | protein_co chr22 | 45344063 | 45413619 | - | 0      | 0      |
| ENSG0000( FBLN1    | protein_co chr22 | 45502238 | 45601135 | + | 599.4  | 714.57 |
| ENSG0000( ITGA8    | protein_co chr10 | 15513949 | 15720125 | - | 0      | 0.04   |
| ENSG0000( CST7     | protein_co chr20 | 24949230 | 24959928 | + | 0      | 0      |
| ENSG0000( MAP2     | protein_co chr2  | 2.09E+08 | 2.1E+08  | + | 1.61   | 2.2    |
| ENSG0000( PIAS2    | protein_co chr18 | 46803224 | 46920160 | - | 6.74   | 6.39   |
| ENSG0000( AMPH     | protein_co chr7  | 38383704 | 38631567 | - | 0.5    | 0.56   |
| ENSG0000( ARAF     | protein_co chrX  | 47561100 | 47571920 | + | 24.96  | 23.49  |
| ENSG0000( MCCC1    | protein_co chr3  | 1.83E+08 | 1.83E+08 | - | 8.13   | 7.47   |
| ENSG0000( LAMP3    | protein_co chr3  | 1.83E+08 | 1.83E+08 | - | 0.75   | 0.35   |
| ENSG0000( FAP      | protein_co chr2  | 1.62E+08 | 1.62E+08 | - | 236.71 | 217.21 |
| ENSG0000( NEBL     | protein_co chr10 | 20779973 | 21174187 | - | 0.18   | 0.57   |
| ENSG0000( ACER3    | protein_co chr11 | 76860867 | 77026797 | + | 4.17   | 5.6    |
| ENSG0000( UBE2K    | protein_co chr4  | 39698044 | 39782792 | + | 33.14  | 30.37  |
| ENSG0000( PIK3C3   | protein_co chr18 | 41955206 | 42087830 | + | 20.13  | 19.64  |
| ENSG0000( N4BP2    | protein_co chr4  | 40056826 | 40158252 | + | 1.06   | 1.15   |
| ENSG0000( TIGAR    | protein_co chr12 | 4307763  | 4354593  | + | 8.73   | 9.74   |
| ENSG0000( TULP3    | protein_co chr12 | 2877223  | 2941140  | + | 14.79  | 15.08  |
| ENSG0000( SYNJ2    | protein_co chr6  | 1.58E+08 | 1.58E+08 | + | 12.23  | 10.26  |
| ENSG0000( ADCY2    | protein_co chr5  | 7396208  | 7830081  | + | 0      | 0.04   |
| ENSG0000( PPP2R5C  | protein_co chr14 | 1.02E+08 | 1.02E+08 | + | 34.28  | 33.36  |
| ENSG0000( PMS2P1   | unprocessε chr7  | 1E+08    | 1E+08    | - | 3.5    | 3.37   |
| ENSG0000( RBFOX1   | protein_co chr16 | 6019094  | 7713338  | + | 0      | 0      |
| ENSG0000( GNB1     | protein_co chr1  | 1785285  | 1891117  | - | 145.59 | 136.61 |
| ENSG0000( HOXA9    | protein_co chr7  | 27162435 | 27175180 | - | 0      | 0      |
| ENSG0000( EDN1     | protein_co chr6  | 12290363 | 12297194 | + | 6.57   | 5.36   |
| ENSG0000( MLLT10   | protein_co chr10 | 21524675 | 21743630 | + | 10.79  | 9.96   |
| ENSG0000( ZCWPW1   | protein_co chr7  | 1E+08    | 1E+08    | - | 2.29   | 2.9    |
| ENSG0000( ADCYAP1R | protein_co chr7  | 31052461 | 31111479 | + | 0      | 0      |
| ENSG0000( FGF20    | protein_co chr8  | 16992169 | 17002181 | - | 0.07   | 0      |
| ENSG0000( P2RY10   | protein_co chrX  | 78945332 | 78961954 | + | 0      | 0      |
| ENSG0000( ITM2A    | protein_co chrX  | 79360384 | 79367667 | - | 0.56   | 0.78   |
| ENSG0000( NRDC     | protein_co chr1  | 51789191 | 51878937 | - | 43.15  | 41.39  |
| ENSG0000( VDAC3    | protein_co chr8  | 42391624 | 42405897 | + | 43.31  | 44.71  |
| ENSG0000( PCM1     | protein_co chr8  | 17922840 | 18029944 | + | 21.92  | 27.19  |
| ENSG0000( TNRC6C   | protein_co chr17 | 77959240 | 78108835 | + | 3.77   | 3.84   |
| ENSG0000( CBFA2T2  | protein_co chr20 | 33490075 | 33650036 | + | 5.36   | 6.87   |
| ENSG0000( BRINP1   | protein_co chr9  | 1.19E+08 | 1.19E+08 | - | 0.03   | 0.11   |
| ENSG0000( ITCH     | protein_co chr20 | 34363235 | 34511393 | + | 12.79  | 13.65  |



|                   |                  |          |          |   |        |        |
|-------------------|------------------|----------|----------|---|--------|--------|
| ENSG0000(PKD2L2   | protein_co chr5  | 1.38E+08 | 1.38E+08 | + | 0.82   | 0.98   |
| ENSG0000(TP53INP2 | protein_co chr20 | 34704290 | 34713439 | + | 10.29  | 10.77  |
| ENSG0000(SDF4     | protein_co chr1  | 1216908  | 1232031  | - | 195.27 | 183.76 |
| ENSG0000(MYH7B    | protein_co chr20 | 34975403 | 35002437 | + | 0.83   | 1.05   |
| ENSG0000(BPIFB2   | protein_co chr20 | 33007600 | 33023709 | + | 0      | 0      |
| ENSG0000(TP73     | protein_co chr1  | 3652520  | 3736201  | + | 0      | 0      |
| ENSG0000(TOLLIP   | protein_co chr11 | 1274371  | 1309654  | - | 29.42  | 25.03  |
| ENSG0000(UBE2D4   | protein_co chr7  | 43926438 | 43956136 | + | 8.3    | 9.17   |
| ENSG0000(CLUL1    | protein_co chr18 | 596988   | 650334   | + | 0      | 0      |
| ENSG0000(RUNX1T1  | protein_co chr8  | 91954967 | 92103286 | - | 1.85   | 3.25   |
| ENSG0000(CDH17    | protein_co chr8  | 94127171 | 94217303 | - | 0      | 0      |
| ENSG0000(THOC1    | protein_co chr18 | 214520   | 268050   | - | 11.42  | 8.9    |
| ENSG0000(FKBP7    | protein_co chr2  | 1.78E+08 | 1.78E+08 | - | 30.81  | 36.95  |
| ENSG0000(OSBPL6   | protein_co chr2  | 1.78E+08 | 1.78E+08 | + | 4.61   | 4.8    |
| ENSG0000(SLC1A3   | protein_co chr5  | 36606355 | 36688334 | + | 1.17   | 0.03   |
| ENSG0000(XRCC5    | protein_co chr2  | 2.16E+08 | 2.16E+08 | + | 79.24  | 65.7   |
| ENSG0000(LXN      | protein_co chr3  | 1.59E+08 | 1.59E+08 | - | 78.89  | 70.89  |
| ENSG0000(SP140    | protein_co chr2  | 2.3E+08  | 2.3E+08  | + | 1.04   | 0.29   |
| ENSG0000(MKNK1    | protein_co chr1  | 46557408 | 46616843 | - | 16.85  | 19.42  |
| ENSG0000(TNS1     | protein_co chr2  | 2.18E+08 | 2.18E+08 | - | 45.85  | 44.26  |
| ENSG0000(REXO1    | protein_co chr19 | 1815246  | 1848463  | - | 6.67   | 5.16   |
| ENSG0000(SAR1A    | protein_co chr10 | 70147289 | 70170523 | - | 67.15  | 74.37  |
| ENSG0000(CDC14A   | protein_co chr1  | 1E+08    | 1.01E+08 | + | 0.8    | 0.6    |
| ENSG0000(RAPGEF3  | protein_co chr12 | 47734367 | 47771040 | - | 0.88   | 1.19   |
| ENSG0000(CEACAM1  | protein_co chr19 | 42507304 | 42561234 | - | 0.88   | 0.23   |
| ENSG0000(SEN1     | protein_co chr12 | 48042898 | 48106308 | - | 5.15   | 4.46   |
| ENSG0000(DUSP13   | protein_co chr10 | 75094432 | 75109221 | - | 0      | 0      |
| ENSG0000(CIC      | protein_co chr19 | 42268537 | 42295797 | + | 26.36  | 28.39  |
| ENSG0000(LIPE     | protein_co chr19 | 42401507 | 42427426 | - | 1.49   | 1.04   |
| ENSG0000(FDFT1    | protein_co chr8  | 11795573 | 11839309 | + | 57.85  | 67.18  |
| ENSG0000(PAFAH1B3 | protein_co chr19 | 42297033 | 42303546 | - | 14.21  | 15.04  |
| ENSG0000(OPHN1    | protein_co chrX  | 68042344 | 68433913 | - | 2.21   | 2.18   |
| ENSG0000(AFM      | protein_co chr4  | 73481683 | 73504001 | + | 0      | 0      |
| ENSG0000(KIF22    | protein_co chr16 | 29790719 | 29805385 | + | 8.29   | 10.07  |
| ENSG0000(SCGN     | protein_co chr6  | 25652201 | 25701783 | + | 0      | 0      |
| ENSG0000(CARMIL1  | protein_co chr6  | 25279078 | 25620530 | + | 8.88   | 9.38   |
| ENSG0000(PGM1     | protein_co chr1  | 63593276 | 63660245 | + | 31.69  | 30.24  |
| ENSG0000(DDX1     | protein_co chr2  | 15591178 | 15631111 | + | 30.28  | 30.05  |
| ENSG0000(DNM2     | protein_co chr19 | 10718079 | 10833488 | + | 41.72  | 44.67  |
| ENSG0000(EPB41L2  | protein_co chr6  | 1.31E+08 | 1.31E+08 | - | 121.31 | 104.39 |
| ENSG0000(RIMS1    | protein_co chr6  | 71886703 | 72403143 | + | 0      | 0      |
| ENSG0000(MOXD1    | protein_co chr6  | 1.32E+08 | 1.32E+08 | - | 22.63  | 19.39  |
| ENSG0000(STX7     | protein_co chr6  | 1.32E+08 | 1.33E+08 | - | 24.29  | 28.92  |
| ENSG0000(RABL2B   | protein_co chr22 | 50767501 | 50783663 | - | 16.22  | 13     |
| ENSG0000(KEAP1    | protein_co chr19 | 10486120 | 10503741 | - | 24.13  | 29.03  |

|                    |                  |          |          |   |        |        |
|--------------------|------------------|----------|----------|---|--------|--------|
| ENSG0000( DDX43    | protein_co chr6  | 73394748 | 73417569 | + | 0.07   | 0.23   |
| ENSG0000( PTPRH    | protein_co chr19 | 55181248 | 55209506 | - | 2.13   | 1.63   |
| ENSG0000( DCT      | protein_co chr13 | 94436808 | 94479682 | - | 0.01   | 0.04   |
| ENSG0000( SLC35C2  | protein_co chr20 | 46345980 | 46364458 | - | 20.58  | 19.52  |
| ENSG0000( CRYBG3   | protein_co chr3  | 97822040 | 97944963 | + | 5.51   | 4.91   |
| ENSG0000( EPHA6    | protein_co chr3  | 96814581 | 97752460 | + | 0      | 0      |
| ENSG0000( SCTR     | protein_co chr2  | 1.19E+08 | 1.2E+08  | - | 0      | 0      |
| ENSG0000( RFX3     | protein_co chr9  | 3218297  | 3526004  | - | 1.48   | 1.43   |
| ENSG0000( RIF1     | protein_co chr2  | 1.51E+08 | 1.52E+08 | + | 4.65   | 4.77   |
| ENSG0000( RAB21    | protein_co chr12 | 71754874 | 71800285 | + | 20.03  | 19.83  |
| ENSG0000( SLC4A4   | protein_co chr4  | 71186757 | 71572087 | + | 3.01   | 3.73   |
| ENSG0000( SMARCA2  | protein_co chr9  | 1980290  | 2193624  | + | 38.67  | 39.66  |
| ENSG0000( RDH8     | protein_co chr19 | 10013249 | 10022279 | + | 0      | 0      |
| ENSG0000( SESN1    | protein_co chr6  | 1.09E+08 | 1.09E+08 | - | 14.62  | 15.63  |
| ENSG0000( MID2     | protein_co chrX  | 1.08E+08 | 1.08E+08 | + | 5.02   | 5.56   |
| ENSG0000( PIH1D3   | protein_co chrX  | 1.07E+08 | 1.07E+08 | + | 0      | 0      |
| ENSG0000( COL5A3   | protein_co chr19 | 9959561  | 10010471 | - | 2.93   | 3.9    |
| ENSG0000( SRCAP    | protein_co chr16 | 30698209 | 30741409 | + | 21.33  | 18.33  |
| ENSG0000( PUM3     | protein_co chr9  | 2720469  | 2844241  | - | 14.15  | 13.41  |
| ENSG0000( CPB2     | protein_co chr13 | 46053186 | 46105076 | - | 0      | 0      |
| ENSG0000( CHRNA3   | protein_co chr15 | 78593052 | 78621295 | - | 0.02   | 0      |
| ENSG0000( KCNN2    | protein_co chr5  | 1.14E+08 | 1.14E+08 | + | 0.06   | 0      |
| ENSG0000( CNOT4    | protein_co chr7  | 1.35E+08 | 1.36E+08 | - | 8.2    | 8.54   |
| ENSG0000( PSEN1    | protein_co chr14 | 73136418 | 73223691 | + | 22.53  | 22.08  |
| ENSG0000( CPOX     | protein_co chr3  | 98521132 | 98593723 | - | 12.81  | 12.79  |
| ENSG0000( CLDND1   | protein_co chr3  | 98497912 | 98523066 | - | 34.76  | 35.2   |
| ENSG0000( MOK      | protein_co chr14 | 1.02E+08 | 1.02E+08 | - | 6.98   | 10.08  |
| ENSG0000( HSP90AA1 | protein_co chr14 | 1.02E+08 | 1.02E+08 | - | 129.37 | 128.51 |
| ENSG0000( RBL1     | protein_co chr20 | 36996349 | 37095995 | - | 0.96   | 1.67   |
| ENSG0000( DLGAP4   | protein_co chr20 | 36306336 | 36528637 | + | 33.88  | 29.97  |
| ENSG0000( IGSF9B   | protein_co chr11 | 1.34E+08 | 1.34E+08 | - | 1.46   | 2.65   |
| ENSG0000( CFHR2    | protein_co chr1  | 1.97E+08 | 1.97E+08 | + | 0      | 0      |
| ENSG0000( CROCCP3  | transcribec chr1 | 16467436 | 16499257 | - | 7.3    | 12.66  |
| ENSG0000( NDC80    | protein_co chr18 | 2571511  | 2616635  | + | 0.56   | 0.87   |
| ENSG0000( AP4E1    | protein_co chr15 | 50908672 | 51005900 | + | 3.94   | 3.87   |
| ENSG0000( RSNB1    | protein_co chr1  | 1.14E+08 | 1.14E+08 | - | 3.11   | 3.5    |
| ENSG0000( MAGI3    | protein_co chr1  | 1.13E+08 | 1.14E+08 | + | 2.06   | 2.76   |
| ENSG0000( CXCL2    | protein_co chr4  | 74097035 | 74099293 | - | 10.63  | 10.18  |
| ENSG0000( AFP      | protein_co chr4  | 73431138 | 73456174 | + | 0.09   | 0.5    |
| ENSG0000( COL4A4   | protein_co chr2  | 2.27E+08 | 2.27E+08 | - | 25.56  | 24.92  |
| ENSG0000( TCF7     | protein_co chr5  | 1.34E+08 | 1.34E+08 | + | 0.79   | 1.36   |
| ENSG0000( OSTM1    | protein_co chr6  | 1.08E+08 | 1.08E+08 | - | 33.67  | 34.61  |
| ENSG0000( CDH7     | protein_co chr18 | 65750252 | 65890341 | + | 0      | 0      |
| ENSG0000( IMPG2    | protein_co chr3  | 1.01E+08 | 1.01E+08 | - | 0.02   | 0.02   |
| ENSG0000( PCNP     | protein_co chr3  | 1.02E+08 | 1.02E+08 | + | 64.54  | 50.08  |

|                    |                  |          |            |        |        |
|--------------------|------------------|----------|------------|--------|--------|
| ENSG0000( EXD2     | protein_co chr14 | 69191511 | 69244020 + | 7.57   | 7.58   |
| ENSG0000( ARG2     | protein_co chr14 | 67619798 | 67651720 + | 3.03   | 3.61   |
| ENSG0000( MEF2C    | protein_co chr5  | 88717117 | 88904257 - | 1.69   | 2.27   |
| ENSG0000( PTPRC    | protein_co chr1  | 1.99E+08 | 1.99E+08 + | 0      | 0      |
| ENSG0000( CACNA1S  | protein_co chr1  | 2.01E+08 | 2.01E+08 - | 0      | 0      |
| ENSG0000( PKP1     | protein_co chr1  | 2.01E+08 | 2.01E+08 + | 0.07   | 0.03   |
| ENSG0000( UBA5     | protein_co chr3  | 1.33E+08 | 1.33E+08 + | 13.25  | 14.43  |
| ENSG0000( STK17B   | protein_co chr2  | 1.96E+08 | 1.96E+08 - | 6.12   | 6.45   |
| ENSG0000( CDC14B   | protein_co chr9  | 96490241 | 96619830 - | 8.55   | 9.32   |
| ENSG0000( ZNF510   | protein_co chr9  | 96755865 | 96778129 - | 2.78   | 3.34   |
| ENSG0000( LRP2     | protein_co chr2  | 1.69E+08 | 1.69E+08 - | 0      | 0      |
| ENSG0000( ZNF506   | protein_co chr19 | 19785839 | 19821751 - | 1.93   | 3.33   |
| ENSG0000( JMJD4    | protein_co chr1  | 2.28E+08 | 2.28E+08 - | 7.23   | 6.15   |
| ENSG0000( DUSP12   | protein_co chr1  | 1.62E+08 | 1.62E+08 + | 10.95  | 9.18   |
| ENSG0000( AACS     | protein_co chr12 | 1.25E+08 | 1.25E+08 + | 9.6    | 9.97   |
| ENSG0000( KIAA0141 | protein_co chr5  | 1.42E+08 | 1.42E+08 + | 41.2   | 32.93  |
| ENSG0000( SLC13A1  | protein_co chr7  | 1.23E+08 | 1.23E+08 - | 0.05   | 0      |
| ENSG0000( CADPS2   | protein_co chr7  | 1.22E+08 | 1.23E+08 - | 0.89   | 0.66   |
| ENSG0000( PCDHB4   | protein_co chr5  | 1.41E+08 | 1.41E+08 + | 0.07   | 0.28   |
| ENSG0000( PCDHA6   | protein_co chr5  | 1.41E+08 | 1.41E+08 + | 0.39   | 0.18   |
| ENSG0000( PCDHGA2  | protein_co chr5  | 1.41E+08 | 1.42E+08 + | 2.3    | 2.35   |
| ENSG0000( HSPB11   | protein_co chr1  | 53916574 | 53945929 - | 16.2   | 16.05  |
| ENSG0000( PHLPP1   | protein_co chr18 | 62715450 | 62980433 + | 3.01   | 3.76   |
| ENSG0000( ATP8B1   | protein_co chr18 | 57646426 | 57803101 - | 4.85   | 4.37   |
| ENSG0000( IL12RB2  | protein_co chr1  | 67307364 | 67396900 + | 0      | 0      |
| ENSG0000( SMARCD3  | protein_co chr7  | 1.51E+08 | 1.51E+08 - | 15.35  | 16.28  |
| ENSG0000( WDR70    | protein_co chr5  | 37379212 | 37753435 + | 10.67  | 14.13  |
| ENSG0000( FYB      | protein_co chr5  | 39105236 | 39274528 - | 0.22   | 0.22   |
| ENSG0000( MPP4     | protein_co chr2  | 2.02E+08 | 2.02E+08 - | 0.56   | 0.22   |
| ENSG0000( STRADB   | protein_co chr2  | 2.01E+08 | 2.01E+08 + | 24.87  | 23.27  |
| ENSG0000( BZW1     | protein_co chr2  | 2.01E+08 | 2.01E+08 + | 133.05 | 114.83 |
| ENSG0000( PGR      | protein_co chr11 | 1.01E+08 | 1.01E+08 - | 0      | 0      |
| ENSG0000( C1QTNF3  | protein_co chr5  | 34019448 | 34043832 - | 1.07   | 1.08   |
| ENSG0000( ME2      | protein_co chr18 | 50878734 | 50954257 + | 10.1   | 9.91   |
| ENSG0000( C5orf22  | protein_co chr5  | 31532266 | 31555058 + | 4.79   | 4.91   |
| ENSG0000( CCNT2    | protein_co chr2  | 1.35E+08 | 1.35E+08 + | 6.92   | 7.31   |
| ENSG0000( FAM135A  | protein_co chr6  | 70412941 | 70561174 + | 2.3    | 2.66   |
| ENSG0000( COL19A1  | protein_co chr6  | 69866571 | 70209976 + | 0      | 0      |
| ENSG0000( EPB41L3  | protein_co chr18 | 5392381  | 5630700 -  | 4.2    | 4.39   |
| ENSG0000( COBLL1   | protein_co chr2  | 1.65E+08 | 1.65E+08 - | 2.18   | 1.88   |
| ENSG0000( DLG3     | protein_co chrX  | 70444861 | 70505490 + | 3.93   | 4.81   |
| ENSG0000( KCNK2    | protein_co chr1  | 2.15E+08 | 2.15E+08 + | 1.33   | 0.75   |
| ENSG0000( SERTAD4  | protein_co chr1  | 2.1E+08  | 2.1E+08 +  | 3.29   | 4.43   |
| ENSG0000( TRAF5    | protein_co chr1  | 2.11E+08 | 2.11E+08 + | 8.63   | 6.81   |
| ENSG0000( MRPL22   | protein_co chr5  | 1.55E+08 | 1.55E+08 + | 13.63  | 15.93  |

|                    |                  |          |          |   |        |        |
|--------------------|------------------|----------|----------|---|--------|--------|
| ENSG0000(GEMIN5    | protein_co chr5  | 1.55E+08 | 1.55E+08 | - | 3.33   | 3.66   |
| ENSG0000(OPRK1     | protein_co chr8  | 53225716 | 53251697 | - | 0      | 0.01   |
| ENSG0000(NFE2L1    | protein_co chr17 | 48048329 | 48061487 | + | 214.81 | 206.86 |
| ENSG0000(SEMA5B    | protein_co chr3  | 1.23E+08 | 1.23E+08 | - | 0.09   | 0.5    |
| ENSG0000(GSK3B     | protein_co chr3  | 1.2E+08  | 1.2E+08  | - | 19.53  | 20.7   |
| ENSG0000(ITGB5     | protein_co chr3  | 1.25E+08 | 1.25E+08 | - | 264.45 | 266.78 |
| ENSG0000(ERC1      | protein_co chr12 | 990509   | 1495933  | + | 8.66   | 9.07   |
| ENSG0000(XPO1      | protein_co chr2  | 61477849 | 61538626 | - | 40.17  | 36.5   |
| ENSG0000(LINC01587 | processed_chr4   | 5524569  | 5527801  | + | 0      | 0      |
| ENSG0000(RNF13     | protein_co chr3  | 1.5E+08  | 1.5E+08  | + | 27.23  | 29.71  |
| ENSG0000(TRPM3     | protein_co chr9  | 70529063 | 71446904 | - | 1.48   | 2.83   |
| ENSG0000(PALB2     | protein_co chr16 | 23603160 | 23641310 | - | 2.72   | 2.74   |
| ENSG0000(DOPEY1    | protein_co chr6  | 83067666 | 83171350 | + | 6.73   | 8.63   |
| ENSG0000(LYRM2     | protein_co chr6  | 89568144 | 89638753 | - | 19.27  | 15.27  |
| ENSG0000(BCKDHB    | protein_co chr6  | 80106647 | 80346270 | + | 8.64   | 10.08  |
| ENSG0000(KAT6A     | protein_co chr8  | 41929479 | 42051990 | - | 5.94   | 6.71   |
| ENSG0000(ZCCHC6    | protein_co chr9  | 86287733 | 86354454 | - | 8.41   | 7.04   |
| ENSG0000(ULK2      | protein_co chr17 | 19770829 | 19867936 | - | 10.78  | 16.23  |
| ENSG0000(GRHL2     | protein_co chr8  | 1.01E+08 | 1.02E+08 | + | 0      | 0      |
| ENSG0000(TNPO1     | protein_co chr5  | 72816312 | 72916733 | + | 48.99  | 48.79  |
| ENSG0000(PLOD1     | protein_co chr1  | 11934205 | 11975538 | + | 379    | 345.82 |
| ENSG0000(P2RX5     | protein_co chr17 | 3672199  | 3696404  | - | 2.01   | 2.21   |
| ENSG0000(ITGAE     | protein_co chr17 | 3714628  | 3801243  | - | 15.39  | 15.52  |
| ENSG0000(DIS3      | protein_co chr13 | 72752169 | 72782096 | - | 8.59   | 8.06   |
| ENSG0000(PIBF1     | protein_co chr13 | 72782059 | 73016461 | + | 5.8    | 5.71   |
| ENSG0000(TDRD3     | protein_co chr13 | 60396457 | 60573878 | + | 4.47   | 5.19   |
| ENSG0000(AC000111. | antisense chr7   | 1.18E+08 | 1.18E+08 | - | 0      | 0      |
| ENSG0000(NUFIP1    | protein_co chr13 | 44939249 | 44989483 | - | 1.34   | 1.15   |
| ENSG0000(PDS5B     | protein_co chr13 | 32586427 | 32778019 | + | 8.19   | 8.62   |
| ENSG0000(OXCT1     | protein_co chr5  | 41730065 | 41870519 | - | 13.69  | 15.62  |
| ENSG0000(RRAGB     | protein_co chrX  | 55717739 | 55758774 | + | 15.15  | 17.86  |
| ENSG0000(EPYC      | protein_co chr12 | 90963679 | 91005026 | - | 0.04   | 0.11   |
| ENSG0000(CYLD      | protein_co chr16 | 50742050 | 50801935 | + | 14.15  | 12.63  |
| ENSG0000(SLC27A5   | protein_co chr19 | 58479512 | 58512413 | - | 2.75   | 2.72   |
| ENSG0000(ZNF324    | protein_co chr19 | 58467045 | 58475436 | + | 4.16   | 4.04   |
| ENSG0000(ZNF671    | protein_co chr19 | 57719751 | 57727624 | - | 1.81   | 1.18   |
| ENSG0000(ZNF416    | protein_co chr19 | 57571566 | 57578927 | - | 2.33   | 2.33   |
| ENSG0000(ZNF586    | protein_co chr19 | 57769655 | 57819939 | + | 2.58   | 2.2    |
| ENSG0000(ZNF446    | protein_co chr19 | 58474017 | 58481230 | + | 6.07   | 5.66   |
| ENSG0000(ZNF264    | protein_co chr19 | 57191500 | 57222846 | + | 4.15   | 3.63   |
| ENSG0000(RPS5      | protein_co chr19 | 58386400 | 58394806 | + | 586.22 | 605.54 |
| ENSG0000(FAT1      | protein_co chr4  | 1.87E+08 | 1.87E+08 | - | 27.25  | 31.98  |
| ENSG0000(YTHDC1    | protein_co chr4  | 68310387 | 68350089 | - | 19.57  | 20.53  |
| ENSG0000(CHMP2B    | protein_co chr3  | 87227271 | 87255548 | + | 18.25  | 18.31  |
| ENSG0000(SMAP2     | protein_co chr1  | 40344850 | 40423326 | + | 7.36   | 8.47   |

|                   |                  |          |          |   |        |        |
|-------------------|------------------|----------|----------|---|--------|--------|
| ENSG0000(PPIE     | protein_co chr1  | 39692182 | 39763914 | + | 20.57  | 21.11  |
| ENSG0000(ZMPSTE24 | protein_co chr1  | 40258107 | 40294184 | + | 15.08  | 14.56  |
| ENSG0000(STARD7   | protein_co chr2  | 96184859 | 96208825 | - | 21.21  | 22.34  |
| ENSG0000(NOAA1    | protein_co chr4  | 56963370 | 56978823 | - | 8.6    | 8.41   |
| ENSG0000(REST     | protein_co chr4  | 56907876 | 56966678 | + | 6.91   | 5.91   |
| ENSG0000(HAL      | protein_co chr12 | 95972662 | 95996365 | - | 0.03   | 0.1    |
| ENSG0000(SSH1     | protein_co chr12 | 1.09E+08 | 1.09E+08 | - | 12.62  | 15.34  |
| ENSG0000(GSTP1    | protein_co chr11 | 67583595 | 67586660 | + | 228.77 | 237.53 |
| ENSG0000(APLP2    | protein_co chr11 | 1.3E+08  | 1.3E+08  | + | 324.93 | 320.1  |
| ENSG0000(FAM234B  | protein_co chr12 | 13044284 | 13142521 | + | 2.58   | 2.6    |
| ENSG0000(SLCO1A2  | protein_co chr12 | 21264600 | 21419594 | - | 0      | 0      |
| ENSG0000(WBP11    | protein_co chr12 | 14784579 | 14803540 | - | 15.31  | 14.64  |
| ENSG0000(EIF3I    | protein_co chr1  | 32221928 | 32231604 | + | 88.39  | 92.26  |
| ENSG0000(NKAIN1   | protein_co chr1  | 31179745 | 31239554 | - | 0      | 0      |
| ENSG0000(COL16A1  | protein_co chr1  | 31652247 | 31704319 | - | 135.96 | 127.06 |
| ENSG0000(TXLNA    | protein_co chr1  | 32179686 | 32198285 | + | 23.81  | 23.72  |
| ENSG0000(APOB     | protein_co chr2  | 21001429 | 21044073 | - | 0.01   | 0      |
| ENSG0000(NCOA1    | protein_co chr2  | 24491914 | 24770702 | + | 7.37   | 7.36   |
| ENSG0000(AGBL5    | protein_co chr2  | 27042364 | 27070622 | + | 12.17  | 13.04  |
| ENSG0000(EFR3B    | protein_co chr2  | 25042130 | 25159137 | + | 0.25   | 0.25   |
| ENSG0000(KIF3C    | protein_co chr2  | 25926596 | 25982749 | - | 8.89   | 9.98   |
| ENSG0000(RAB10    | protein_co chr2  | 26034107 | 26137454 | + | 78.41  | 69.61  |
| ENSG0000(GCKR     | protein_co chr2  | 27496842 | 27523684 | + | 0.08   | 0.7    |
| ENSG0000(HADHA    | protein_co chr2  | 26190635 | 26244726 | - | 52.13  | 58.96  |
| ENSG0000(MAPRE3   | protein_co chr2  | 26970612 | 27027196 | + | 16.24  | 16.57  |
| ENSG0000(CAD      | protein_co chr2  | 27217390 | 27243943 | + | 7.61   | 7.86   |
| ENSG0000(CD59     | protein_co chr11 | 33698261 | 33736445 | - | 554.94 | 501.2  |
| ENSG0000(CD82     | protein_co chr11 | 44564427 | 44620363 | + | 21.5   | 19.75  |
| ENSG0000(BCORL1   | protein_co chrX  | 1.3E+08  | 1.3E+08  | + | 6.26   | 4.62   |
| ENSG0000(ATRX     | protein_co chrX  | 77504878 | 77786269 | - | 19.24  | 19.08  |
| ENSG0000(AK6      | protein_co chr5  | 69350984 | 69370013 | - | 22.66  | 19.52  |
| ENSG0000(FCN1     | protein_co chr9  | 1.35E+08 | 1.35E+08 | - | 0.02   | 0      |
| ENSG0000(MYNN     | protein_co chr3  | 1.7E+08  | 1.7E+08  | + | 5.75   | 5.22   |
| ENSG0000(MECOM    | protein_co chr3  | 1.69E+08 | 1.7E+08  | - | 10.24  | 9.1    |
| ENSG0000(SCAMP1   | protein_co chr5  | 78360583 | 78479071 | + | 19.94  | 20.68  |
| ENSG0000(PREP     | protein_co chr6  | 1.05E+08 | 1.05E+08 | - | 10.92  | 9.44   |
| ENSG0000(HACE1    | protein_co chr6  | 1.05E+08 | 1.05E+08 | - | 4.14   | 4.26   |
| ENSG0000(SEH1L    | protein_co chr18 | 12947133 | 12987536 | + | 13.68  | 11.33  |
| ENSG0000(WDR47    | protein_co chr1  | 1.09E+08 | 1.09E+08 | - | 5.19   | 5.44   |
| ENSG0000(WDFY1    | protein_co chr2  | 2.24E+08 | 2.24E+08 | - | 18.78  | 22.59  |
| ENSG0000(OVGP1    | protein_co chr1  | 1.11E+08 | 1.11E+08 | - | 0.27   | 0.63   |
| ENSG0000(SLC25A24 | protein_co chr1  | 1.08E+08 | 1.08E+08 | - | 9.13   | 8.28   |
| ENSG0000(MAP3K4   | protein_co chr6  | 1.61E+08 | 1.61E+08 | + | 7.7    | 6.21   |
| ENSG0000(PILRA    | protein_co chr7  | 1E+08    | 1E+08    | + | 1.33   | 1.55   |
| ENSG0000(IGSF9    | protein_co chr1  | 1.6E+08  | 1.6E+08  | - | 0.16   | 0.21   |

|                   |                  |          |          |   |        |        |
|-------------------|------------------|----------|----------|---|--------|--------|
| ENSG0000( ABCB1   | protein_co chr7  | 87503633 | 87713323 | - | 0.05   | 0.15   |
| ENSG0000( ZNF213  | protein_co chr16 | 3129777  | 3142805  | + | 5.83   | 5.16   |
| ENSG0000( AKR1B1  | protein_co chr7  | 1.34E+08 | 1.34E+08 | - | 114.77 | 105.51 |
| ENSG0000( CPNE3   | protein_co chr8  | 86514427 | 86561498 | + | 22.38  | 26.39  |
| ENSG0000( RRN3    | protein_co chr16 | 15060022 | 15094317 | - | 8.35   | 8.92   |
| ENSG0000( CTTN    | protein_co chr11 | 70398404 | 70436584 | + | 149.79 | 149.14 |
| ENSG0000( WNT11   | protein_co chr11 | 76186325 | 76210736 | - | 0.06   | 0.03   |
| ENSG0000( MTF2    | protein_co chr2  | 55236595 | 55269347 | - | 10.22  | 9.84   |
| ENSG0000( DDHD2   | protein_co chr8  | 38225218 | 38275558 | + | 29.17  | 27.61  |
| ENSG0000( TTC39A  | protein_co chr1  | 51287258 | 51345116 | - | 0.37   | 0.25   |
| ENSG0000( EPS15   | protein_co chr1  | 51354263 | 51519328 | - | 23.05  | 19.85  |
| ENSG0000( ORC1    | protein_co chr1  | 52372829 | 52404459 | - | 0.21   | 0.12   |
| ENSG0000( MGST2   | protein_co chr4  | 1.4E+08  | 1.4E+08  | + | 28.41  | 25.6   |
| ENSG0000( CHERP   | protein_co chr19 | 16517889 | 16542530 | - | 9.15   | 8.82   |
| ENSG0000( ATG16L1 | protein_co chr2  | 2.33E+08 | 2.33E+08 | + | 6.68   | 9.25   |
| ENSG0000( USP40   | protein_co chr2  | 2.33E+08 | 2.34E+08 | - | 10.45  | 11.92  |
| ENSG0000( POMGNT1 | protein_co chr1  | 46188682 | 46220305 | - | 15.88  | 16.83  |
| ENSG0000( RAD54L  | protein_co chr1  | 46247688 | 46278473 | + | 0.46   | 0.33   |
| ENSG0000( MAST2   | protein_co chr1  | 45786987 | 46036124 | + | 11.33  | 13.14  |
| ENSG0000( DNAJA1  | protein_co chr9  | 33025211 | 33039907 | + | 41.61  | 43.2   |
| ENSG0000( B4GALT1 | protein_co chr9  | 33104082 | 33167356 | - | 139.79 | 127.87 |
| ENSG0000( CHMP5   | protein_co chr9  | 33264879 | 33282069 | + | 35.88  | 32.59  |
| ENSG0000( NFX1    | protein_co chr9  | 33290511 | 33371157 | + | 12.36  | 12.78  |
| ENSG0000( AQP6    | protein_co chr12 | 49967194 | 49977139 | + | 0.23   | 0.26   |
| ENSG0000( DIMT1   | protein_co chr5  | 62387254 | 62403939 | - | 9.97   | 9.87   |
| ENSG0000( IPO11   | protein_co chr5  | 62403972 | 62628582 | + | 6.24   | 4.51   |
| ENSG0000( FOLH1   | protein_co chr11 | 49146635 | 49208670 | - | 0      | 0      |
| ENSG0000( EIF2AK1 | protein_co chr7  | 6022244  | 6059230  | - | 36.26  | 25.4   |
| ENSG0000( NME8    | protein_co chr7  | 37848597 | 37900401 | + | 0      | 0      |
| ENSG0000( EPDR1   | protein_co chr7  | 37683843 | 37951941 | + | 36.52  | 31.86  |
| ENSG0000( SNX10   | protein_co chr7  | 26291895 | 26374329 | + | 0.09   | 0.1    |
| ENSG0000( SEPHS1  | protein_co chr10 | 13317424 | 13348298 | - | 14.78  | 16.01  |
| ENSG0000( MRPL28  | protein_co chr16 | 367384   | 370527   | - | 30.16  | 28.69  |
| ENSG0000( HBQ1    | protein_co chr16 | 180453   | 181181   | + | 0.14   | 0      |
| ENSG0000( ITPKC   | protein_co chr19 | 40717103 | 40740860 | + | 9.88   | 9.81   |
| ENSG0000( CEACAM6 | protein_co chr19 | 41750977 | 41772208 | + | 0      | 0      |
| ENSG0000( FAT2    | protein_co chr5  | 1.52E+08 | 1.52E+08 | - | 0.05   | 0.02   |
| ENSG0000( RBM22   | protein_co chr5  | 1.51E+08 | 1.51E+08 | - | 17.53  | 16.11  |
| ENSG0000( TMED2   | protein_co chr12 | 1.24E+08 | 1.24E+08 | + | 84.21  | 83.77  |
| ENSG0000( ERO1B   | protein_co chr1  | 2.36E+08 | 2.36E+08 | - | 1.59   | 1.04   |
| ENSG0000( ZFAND6  | protein_co chr15 | 80059568 | 80138393 | + | 32.42  | 36.18  |
| ENSG0000( HSD17B2 | protein_co chr16 | 82035004 | 82098534 | + | 0      | 0.01   |
| ENSG0000( TXLNG   | protein_co chrX  | 16786427 | 16844519 | + | 4.37   | 4.01   |
| ENSG0000( PPEF1   | protein_co chrX  | 18675909 | 18827921 | + | 0      | 0      |
| ENSG0000( LAT2    | protein_co chr7  | 74199652 | 74229834 | + | 0.48   | 0.3    |

|                    |                  |          |          |   |         |         |
|--------------------|------------------|----------|----------|---|---------|---------|
| ENSG0000(HUWE1     | protein_co chrX  | 53532096 | 53686729 | - | 33.39   | 35.28   |
| ENSG0000(ZW10      | protein_co chr11 | 1.14E+08 | 1.14E+08 | - | 5.22    | 4.58    |
| ENSG0000(ALG9      | protein_co chr11 | 1.12E+08 | 1.12E+08 | - | 11.72   | 10.55   |
| ENSG0000(MYBPC2    | protein_co chr19 | 50432903 | 50466321 | + | 0       | 0       |
| ENSG0000(NOX4      | protein_co chr11 | 89324356 | 89498187 | - | 2.62    | 4.93    |
| ENSG0000(ACOX3     | protein_co chr4  | 8366282  | 8440723  | - | 7.52    | 6.88    |
| ENSG0000(MTMR2     | protein_co chr11 | 95832882 | 95925315 | - | 15.57   | 14.47   |
| ENSG0000(PPP1R15A  | protein_co chr19 | 48872392 | 48876057 | + | 43.67   | 41.26   |
| ENSG0000(HSD17B14  | protein_co chr19 | 48813017 | 48836678 | - | 14.71   | 15.36   |
| ENSG0000(TRIP6     | protein_co chr7  | 1.01E+08 | 1.01E+08 | + | 55.55   | 51.31   |
| ENSG0000(ACHE      | protein_co chr7  | 1.01E+08 | 1.01E+08 | - | 0.2     | 0.06    |
| ENSG0000(FTL       | protein_co chr19 | 48965301 | 48966878 | + | 4882.07 | 5108.77 |
| ENSG0000(SRRT      | protein_co chr7  | 1.01E+08 | 1.01E+08 | + | 22      | 24.03   |
| ENSG0000(BAX       | protein_co chr19 | 48954815 | 48961798 | + | 115.63  | 124.29  |
| ENSG0000(NLK       | protein_co chr17 | 28041737 | 28196381 | + | 3.47    | 2.92    |
| ENSG0000(PIGS      | protein_co chr17 | 28553383 | 28571872 | - | 50.89   | 44.7    |
| ENSG0000(ADAMTS2   | protein_co chr5  | 1.79E+08 | 1.79E+08 | - | 38.26   | 40.06   |
| ENSG0000(TMPRSS11  | protein_co chr4  | 68447449 | 68497604 | + | 0       | 0       |
| ENSG0000(ATXN7L3   | protein_co chr17 | 44191805 | 44200113 | - | 21.29   | 22.16   |
| ENSG0000(PGS1      | protein_co chr17 | 78378640 | 78425114 | + | 12.45   | 12.92   |
| ENSG0000(PSMC5     | protein_co chr17 | 63827152 | 63832026 | + | 51.2    | 45.49   |
| ENSG0000(UIMC1     | protein_co chr5  | 1.77E+08 | 1.77E+08 | - | 13.85   | 14.77   |
| ENSG0000(CETP      | protein_co chr16 | 56961850 | 56983845 | + | 0.66    | 0.39    |
| ENSG0000(MMP2      | protein_co chr16 | 55389700 | 55506691 | + | 4097.55 | 4032.16 |
| ENSG0000(MT3       | protein_co chr16 | 56589074 | 56591088 | + | 0.87    | 0.32    |
| ENSG0000(LPCAT2    | protein_co chr16 | 55508998 | 55586670 | + | 11.93   | 13.95   |
| ENSG0000(GNAO1     | protein_co chr16 | 56191347 | 56357457 | + | 0       | 0.15    |
| ENSG0000(OGFOD1    | protein_co chr16 | 56451490 | 56479100 | + | 13.16   | 10.55   |
| ENSG0000(SH3BP2    | protein_co chr4  | 2793023  | 2841098  | + | 14.13   | 16.37   |
| ENSG0000(NOP14     | protein_co chr4  | 2937933  | 2963385  | - | 10.81   | 9.99    |
| ENSG0000(ADD1      | protein_co chr4  | 2843857  | 2930076  | + | 65      | 66.5    |
| ENSG0000(L2HGDH    | protein_co chr14 | 50237563 | 50312548 | - | 1.36    | 1.65    |
| ENSG0000(TXNDC16   | protein_co chr14 | 52430590 | 52552522 | - | 5.94    | 5.27    |
| ENSG0000(C14orf166 | protein_co chr14 | 51989475 | 52010691 | + | 56.92   | 60.3    |
| ENSG0000(NID2      | protein_co chr14 | 52004803 | 52069228 | - | 98.3    | 114.44  |
| ENSG0000(GMCL1     | protein_co chr2  | 69829642 | 69881396 | + | 4.59    | 4.84    |
| ENSG0000(SF3B2     | protein_co chr11 | 66050729 | 66069308 | + | 59.48   | 55.73   |
| ENSG0000(KLHL42    | protein_co chr12 | 27780020 | 27803040 | + | 5.28    | 7.05    |
| ENSG0000(GNAS      | protein_co chr20 | 58839718 | 58911192 | + | 460.01  | 462.19  |
| ENSG0000(DNM1L     | protein_co chr12 | 32679200 | 32745650 | + | 15.19   | 14.71   |
| ENSG0000(PTHLH     | protein_co chr12 | 27958084 | 27972705 | - | 1.94    | 1.42    |
| ENSG0000(PHACTR3   | protein_co chr20 | 59577509 | 59847711 | + | 0       | 0       |
| ENSG0000(ERGIC2    | protein_co chr12 | 29337352 | 29381189 | - | 26.68   | 22.98   |
| ENSG0000(TFAP2C    | protein_co chr20 | 56629302 | 56639283 | + | 0       | 0       |
| ENSG0000(AURKA     | protein_co chr20 | 56369389 | 56392337 | - | 0.58    | 0.38    |

|                    |                   |          |          |   |        |        |
|--------------------|-------------------|----------|----------|---|--------|--------|
| ENSG0000(CASS4     | protein_co chr20  | 56412112 | 56460387 | + | 0.59   | 0.5    |
| ENSG0000(PIR       | protein_co chrX   | 15384799 | 15493564 | - | 8.77   | 10.84  |
| ENSG0000(AAMDC     | protein_co chr11  | 77821109 | 77918432 | + | 49.45  | 42.03  |
| ENSG0000(RFX2      | protein_co chr19  | 5993164  | 6199572  | - | 5.05   | 7.2    |
| ENSG0000(METTL2A   | protein_co chr17  | 62423867 | 62450822 | + | 5.54   | 5.52   |
| ENSG0000(SULT2B1   | protein_co chr19  | 48552075 | 48599425 | + | 0.05   | 0.2    |
| ENSG0000(ALG6      | protein_co chr1   | 63367590 | 63438562 | + | 3.25   | 3.64   |
| ENSG0000(CNOT3     | protein_co chr19  | 54137728 | 54155681 | + | 14.61  | 11.75  |
| ENSG0000(GP6       | protein_co chr19  | 55013705 | 55038264 | - | 0.15   | 0.03   |
| ENSG0000(PTPN4     | protein_co chr2   | 1.2E+08  | 1.2E+08  | + | 8.16   | 4.43   |
| ENSG0000(DDX18     | protein_co chr2   | 1.18E+08 | 1.18E+08 | + | 18.78  | 18.41  |
| ENSG0000(KHSRP     | protein_co chr19  | 6413348  | 6424794  | - | 77.85  | 82.6   |
| ENSG0000(GNA11     | protein_co chr19  | 3094410  | 3124004  | + | 22.13  | 23.09  |
| ENSG0000(ASAP3     | protein_co chr1   | 23428563 | 23484568 | - | 33.41  | 33.98  |
| ENSG0000(EDEM2     | protein_co chr20  | 35115357 | 35147364 | - | 20.11  | 21.64  |
| ENSG0000(DNMT3B    | protein_co chr20  | 32762385 | 32809356 | + | 0.45   | 0.57   |
| ENSG0000(REM1      | protein_co chr20  | 31475293 | 31484905 | + | 0.17   | 0.19   |
| ENSG0000(TPX2      | protein_co chr20  | 31739271 | 31801805 | + | 2.09   | 2.55   |
| ENSG0000(FER1L4    | transcribec chr20 | 35558737 | 35607562 | - | 16.32  | 12.89  |
| ENSG0000(PDRG1     | protein_co chr20  | 31944342 | 31952092 | - | 6.28   | 4.88   |
| ENSG0000(EPB41L1   | protein_co chr20  | 36091504 | 36232799 | + | 29.68  | 31.59  |
| ENSG0000(SLC15A1   | protein_co chr13  | 98683801 | 98752654 | - | 0.18   | 0.08   |
| ENSG0000(DOCK9     | protein_co chr13  | 98793429 | 99086625 | - | 11.85  | 21.62  |
| ENSG0000(ANKRD10   | protein_co chr13  | 1.11E+08 | 1.11E+08 | - | 55.49  | 61.54  |
| ENSG0000(TGDS      | protein_co chr13  | 94574051 | 94596257 | - | 3      | 3.11   |
| ENSG0000(DOCK3     | protein_co chr3   | 50675241 | 51384198 | + | 0.72   | 0.79   |
| ENSG0000(C3orf18   | protein_co chr3   | 50558025 | 50571027 | - | 10.9   | 10.98  |
| ENSG0000(COQ9      | protein_co chr16  | 57447425 | 57461275 | + | 17.17  | 17.62  |
| ENSG0000(TMEM40    | protein_co chr3   | 12733525 | 12769457 | - | 0.13   | 0      |
| ENSG0000(KIF9      | protein_co chr3   | 47228026 | 47283451 | - | 3.52   | 2.03   |
| ENSG0000(ARHGAP28  | protein_co chr18  | 6729718  | 6915716  | + | 0.81   | 0.19   |
| ENSG0000(CRLS1     | protein_co chr20  | 6006090  | 6040053  | + | 16.73  | 16.19  |
| ENSG0000(DEFB127   | protein_co chr20  | 157470   | 159163   | + | 0      | 0      |
| ENSG0000(PPP1R13B  | protein_co chr14  | 1.04E+08 | 1.04E+08 | - | 4.18   | 4.31   |
| ENSG0000(ATRN      | protein_co chr20  | 3471040  | 3651122  | + | 34.08  | 34.95  |
| ENSG0000(SMOX      | protein_co chr20  | 4120980  | 4187747  | + | 11.47  | 12.22  |
| ENSG0000(SIGLEC1   | protein_co chr20  | 3686970  | 3707128  | - | 0      | 0      |
| ENSG0000(FKBP1A    | protein_co chr20  | 1368978  | 1393172  | - | 214.76 | 216.37 |
| ENSG0000(NSFL1C    | protein_co chr20  | 1442162  | 1473842  | - | 33.14  | 29.15  |
| ENSG0000(SLC4A11   | protein_co chr20  | 3227417  | 3239190  | - | 1.52   | 1.49   |
| ENSG0000(C20orf194 | protein_co chr20  | 3249305  | 3407625  | - | 5.7    | 5.18   |
| ENSG0000(ZNF343    | protein_co chr20  | 2481817  | 2524702  | - | 4.21   | 7.04   |
| ENSG0000(EBF4      | protein_co chr20  | 2692878  | 2760108  | + | 0.36   | 0.5    |
| ENSG0000(CPXM1     | protein_co chr20  | 2794069  | 2800637  | - | 1.45   | 1.82   |
| ENSG0000(MAVS      | protein_co chr20  | 3846799  | 3876123  | + | 13.09  | 13.36  |



|                   |                  |          |            |         |         |
|-------------------|------------------|----------|------------|---------|---------|
| ENSG0000(LZTS3    | protein_co chr20 | 3162617  | 3173592 -  | 2.48    | 2.35    |
| ENSG0000(F11      | protein_co chr4  | 1.86E+08 | 1.86E+08 + | 0.22    | 0       |
| ENSG0000(XRN2     | protein_co chr20 | 21303304 | 21389827 + | 35.74   | 34.99   |
| ENSG0000(KIZ      | protein_co chr20 | 21125983 | 21246622 + | 8.11    | 10.14   |
| ENSG0000(DYNLL1   | protein_co chr12 | 1.2E+08  | 1.2E+08 +  | 195.69  | 193.2   |
| ENSG0000(TESC     | protein_co chr12 | 1.17E+08 | 1.17E+08 - | 0       | 0       |
| ENSG0000(SNX5     | protein_co chr20 | 17941597 | 17968980 - | 33.44   | 30.78   |
| ENSG0000(RPL6     | protein_co chr12 | 1.12E+08 | 1.12E+08 - | 735.35  | 735.03  |
| ENSG0000(SIRPG    | protein_co chr20 | 1629152  | 1657779 -  | 0.07    | 0       |
| ENSG0000(MAPKAPK5 | protein_co chr12 | 1.12E+08 | 1.12E+08 + | 11.31   | 14.25   |
| ENSG0000(P2RX7    | protein_co chr12 | 1.21E+08 | 1.21E+08 + | 0.27    | 0.41    |
| ENSG0000(ESF1     | protein_co chr20 | 13714322 | 13784886 - | 5.4     | 6.07    |
| ENSG0000(RBBP9    | protein_co chr20 | 18486540 | 18497243 - | 5.69    | 6.66    |
| ENSG0000(ANAPC5   | protein_co chr12 | 1.21E+08 | 1.21E+08 - | 37.24   | 39.06   |
| ENSG0000(SLC23A2  | protein_co chr20 | 4852356  | 5010293 -  | 5.44    | 5.22    |
| ENSG0000(SLC8B1   | protein_co chr12 | 1.13E+08 | 1.13E+08 - | 14.37   | 13.09   |
| ENSG0000(TMEM230  | protein_co chr20 | 5068232  | 5113103 -  | 52.14   | 50.79   |
| ENSG0000(DZANK1   | protein_co chr20 | 18383367 | 18467281 - | 0.87    | 0.72    |
| ENSG0000(KDM2B    | protein_co chr12 | 1.21E+08 | 1.22E+08 - | 7.23    | 8.36    |
| ENSG0000(CFAP61   | protein_co chr20 | 20052514 | 20360702 + | 0       | 0.03    |
| ENSG0000(LHX5     | protein_co chr12 | 1.13E+08 | 1.13E+08 - | 0       | 0       |
| ENSG0000(TASP1    | protein_co chr20 | 13389392 | 13638940 - | 2.31    | 1.84    |
| ENSG0000(OAS1     | protein_co chr12 | 1.13E+08 | 1.13E+08 + | 7.26    | 3.3     |
| ENSG0000(GCN1     | protein_co chr12 | 1.2E+08  | 1.2E+08 -  | 16.9    | 15.66   |
| ENSG0000(RPLP0    | protein_co chr12 | 1.2E+08  | 1.2E+08 -  | 1742.97 | 1758.23 |
| ENSG0000(PXN      | protein_co chr12 | 1.2E+08  | 1.2E+08 -  | 64.25   | 70.59   |
| ENSG0000(SIRT4    | protein_co chr12 | 1.2E+08  | 1.2E+08 +  | 1.25    | 0.99    |
| ENSG0000(RPH3A    | protein_co chr12 | 1.13E+08 | 1.13E+08 + | 0       | 0       |
| ENSG0000(KIF16B   | protein_co chr20 | 16272104 | 16573434 - | 2.72    | 3.48    |
| ENSG0000(TRMT6    | protein_co chr20 | 5937235  | 5950558 -  | 2.88    | 2.89    |
| ENSG0000(CHGB     | protein_co chr20 | 5911430  | 5925361 +  | 0.34    | 0.75    |
| ENSG0000(PEBP1    | protein_co chr12 | 1.18E+08 | 1.18E+08 + | 97.97   | 101.45  |
| ENSG0000(TBX5     | protein_co chr12 | 1.14E+08 | 1.14E+08 - | 3.14    | 2.2     |
| ENSG0000(BRAP     | protein_co chr12 | 1.12E+08 | 1.12E+08 - | 7.4     | 7.06    |
| ENSG0000(ERP29    | protein_co chr12 | 1.12E+08 | 1.12E+08 + | 89.56   | 88.97   |
| ENSG0000(NOS1     | protein_co chr12 | 1.17E+08 | 1.17E+08 - | 0       | 0       |
| ENSG0000(FUS      | protein_co chr16 | 31180110 | 31194871 + | 48.05   | 47.57   |
| ENSG0000(IGBP1    | protein_co chrX  | 70133449 | 70166324 + | 34.78   | 36.58   |
| ENSG0000(FXD5     | protein_co chr19 | 35154730 | 35169883 + | 102.83  | 99.07   |
| ENSG0000(ZNF302   | protein_co chr19 | 34677639 | 34686397 + | 11.33   | 14      |
| ENSG0000(GRAMD1A  | protein_co chr19 | 34994784 | 35026471 + | 38.93   | 32.76   |
| ENSG0000(FXD3     | protein_co chr19 | 35115879 | 35124324 + | 0       | 0.14    |
| ENSG0000(HEPH     | protein_co chrX  | 66162549 | 66268867 + | 39.58   | 47.96   |
| ENSG0000(CDIP1    | protein_co chr16 | 4510675  | 4538828 -  | 13.33   | 14.04   |
| ENSG0000(CMTM1    | protein_co chr16 | 66566393 | 66579137 + | 1.59    | 2.23    |

|                    |                  |          |          |   |        |        |
|--------------------|------------------|----------|----------|---|--------|--------|
| ENSG0000(KCNH4     | protein_co chr17 | 42156891 | 42181278 | - | 0      | 0      |
| ENSG0000(GANAB     | protein_co chr11 | 62624826 | 62646726 | - | 245.22 | 230.83 |
| ENSG0000(GMIP      | protein_co chr19 | 19629476 | 19643667 | - | 4.43   | 2.85   |
| ENSG0000(RBM41     | protein_co chrX  | 1.07E+08 | 1.07E+08 | - | 5.55   | 5.59   |
| ENSG0000(BIRC5     | protein_co chr17 | 78214186 | 78225636 | + | 0.97   | 0.71   |
| ENSG0000(LAG3      | protein_co chr12 | 6772512  | 6778455  | + | 0.02   | 0.2    |
| ENSG0000(MLF2      | protein_co chr12 | 6747996  | 6767475  | - | 89.16  | 97.33  |
| ENSG0000(OTUB2     | protein_co chr14 | 94026329 | 94048930 | + | 0.75   | 0.79   |
| ENSG0000(DDX24     | protein_co chr14 | 94048291 | 94081245 | - | 74.4   | 67.63  |
| ENSG0000(ZBTB25    | protein_co chr14 | 64449106 | 64505213 | - | 5.33   | 3.82   |
| ENSG0000(NECAP1    | protein_co chr12 | 8076939  | 8097859  | + | 13.69  | 13.49  |
| ENSG0000(ARHGAP4   | protein_co chrX  | 1.54E+08 | 1.54E+08 | - | 0.59   | 0.8    |
| ENSG0000(ANKRD24   | protein_co chr19 | 4183354  | 4224814  | + | 0.47   | 0.32   |
| ENSG0000(DHX32     | protein_co chr10 | 1.26E+08 | 1.26E+08 | - | 13.34  | 11.88  |
| ENSG0000(RCOR1     | protein_co chr14 | 1.03E+08 | 1.03E+08 | + | 6.35   | 8.34   |
| ENSG0000(GPATCH2L  | protein_co chr14 | 76151916 | 76254342 | + | 6.9    | 7.82   |
| ENSG0000(LTBP4     | protein_co chr19 | 40592883 | 40629818 | + | 89.67  | 112.88 |
| ENSG0000(BLVRB     | protein_co chr19 | 40447789 | 40465840 | - | 74.97  | 81.19  |
| ENSG0000(SLC9A1    | protein_co chr1  | 27098815 | 27166981 | - | 15.8   | 14.3   |
| ENSG0000(SPTLC1    | protein_co chr9  | 92031999 | 92115384 | - | 25.81  | 28.47  |
| ENSG0000(PAPOLA    | protein_co chr14 | 96501433 | 96567111 | + | 38.29  | 38.19  |
| ENSG0000(CCNK      | protein_co chr14 | 99481169 | 99535044 | + | 15.13  | 14.64  |
| ENSG0000(PCBP4     | protein_co chr3  | 51957454 | 51974016 | - | 21.16  | 24.82  |
| ENSG0000(RGS1      | protein_co chr1  | 1.93E+08 | 1.93E+08 | + | 0      | 0      |
| ENSG0000(YPEL3     | protein_co chr16 | 30092314 | 30096915 | - | 80.46  | 80.56  |
| ENSG0000(MRPS33    | protein_co chr7  | 1.41E+08 | 1.41E+08 | - | 26.46  | 26.57  |
| ENSG0000(NDUFB2    | protein_co chr7  | 1.41E+08 | 1.41E+08 | + | 80.4   | 88.86  |
| ENSG0000(NUDC      | protein_co chr1  | 26900238 | 26946862 | + | 32.41  | 32.58  |
| ENSG0000(MAEA      | protein_co chr4  | 1289851  | 1340147  | + | 30.07  | 29.07  |
| ENSG0000(ICAM1     | protein_co chr19 | 10270835 | 10286615 | + | 39.03  | 38.33  |
| ENSG0000(STRN4     | protein_co chr19 | 46719507 | 46746994 | - | 27.79  | 31.1   |
| ENSG0000(IRAK3     | protein_co chr12 | 66188879 | 66254622 | + | 6.56   | 6.88   |
| ENSG0000(LYZ       | protein_co chr12 | 69348341 | 69354234 | + | 0.43   | 0.45   |
| ENSG0000(SI        | protein_co chr3  | 1.65E+08 | 1.65E+08 | - | 0      | 0      |
| ENSG0000(MUL1      | protein_co chr1  | 20499448 | 20508161 | - | 13.46  | 14.83  |
| ENSG0000(TFAP4     | protein_co chr16 | 4257186  | 4273075  | - | 2.7    | 4.38   |
| ENSG0000(PDCD7     | protein_co chr15 | 65117379 | 65133836 | - | 8.08   | 8.16   |
| ENSG0000(SPG21     | protein_co chr15 | 64963021 | 64990310 | - | 53.18  | 51.34  |
| ENSG0000(FETUB     | protein_co chr3  | 1.87E+08 | 1.87E+08 | + | 0      | 0      |
| ENSG0000(DNAJB11   | protein_co chr3  | 1.87E+08 | 1.87E+08 | + | 29.85  | 31.58  |
| ENSG0000(P3H2      | protein_co chr3  | 1.9E+08  | 1.9E+08  | - | 8.08   | 6.94   |
| ENSG0000(THPO      | protein_co chr3  | 1.84E+08 | 1.84E+08 | - | 0.11   | 0.29   |
| ENSG0000(CHR1D     | protein_co chr3  | 1.84E+08 | 1.84E+08 | + | 0.54   | 0.74   |
| ENSG0000(FLT3LG    | protein_co chr19 | 49474207 | 49486231 | + | 9      | 10.53  |
| ENSG0000(RAB11FIP3 | protein_co chr16 | 425619   | 523011   | + | 21.3   | 20.6   |

|                  |                  |          |          |   |        |        |
|------------------|------------------|----------|----------|---|--------|--------|
| ENSG0000(GNPTG   | protein_co chr16 | 1351923  | 1364113  | + | 74.25  | 68.56  |
| ENSG0000(ZNF268  | protein_co chr12 | 1.33E+08 | 1.33E+08 | + | 6.67   | 4.13   |
| ENSG0000(GOLGA3  | protein_co chr12 | 1.33E+08 | 1.33E+08 | - | 12.87  | 11     |
| ENSG0000(PABPC4  | protein_co chr1  | 39560816 | 39576790 | - | 68.17  | 66.98  |
| ENSG0000(CD209   | protein_co chr19 | 7739994  | 7747564  | - | 0.01   | 0      |
| ENSG0000(CERS4   | protein_co chr19 | 8206736  | 8262421  | + | 1.72   | 2.51   |
| ENSG0000(MCOLN1  | protein_co chr19 | 7522626  | 7534009  | + | 22.41  | 26.93  |
| ENSG0000(USP48   | protein_co chr1  | 21678298 | 21783606 | - | 20.06  | 19.73  |
| ENSG0000(EFNB1   | protein_co chrX  | 68828997 | 68842147 | + | 18.99  | 23.11  |
| ENSG0000(PDPR    | protein_co chr16 | 70113626 | 70162537 | + | 10.3   | 10.32  |
| ENSG0000(AARS    | protein_co chr16 | 70252295 | 70289543 | - | 66.82  | 66.51  |
| ENSG0000(GLG1    | protein_co chr16 | 74447427 | 74607144 | - | 96.41  | 94.25  |
| ENSG0000(KIF4A   | protein_co chrX  | 70290090 | 70420832 | + | 0.26   | 0.16   |
| ENSG0000(TNRC6A  | protein_co chr16 | 24610209 | 24827632 | + | 18.99  | 19.66  |
| ENSG0000(PLEKHG2 | protein_co chr19 | 39412585 | 39428415 | + | 15.89  | 14.18  |
| ENSG0000(DLL3    | protein_co chr19 | 39498895 | 39508481 | + | 0.3    | 0.34   |
| ENSG0000(NAT14   | protein_co chr19 | 55485004 | 55487568 | + | 14.2   | 12.23  |
| ENSG0000(PITPNM2 | protein_co chr12 | 1.23E+08 | 1.23E+08 | - | 5.22   | 4.3    |
| ENSG0000(EXOC1   | protein_co chr4  | 55853616 | 55905034 | + | 20.34  | 17.91  |
| ENSG0000(RBM27   | protein_co chr5  | 1.46E+08 | 1.46E+08 | + | 3.29   | 3.29   |
| ENSG0000(POU4F3  | protein_co chr5  | 1.46E+08 | 1.46E+08 | + | 0      | 0      |
| ENSG0000(OSBPL8  | protein_co chr12 | 76351797 | 76559809 | - | 115.46 | 97.69  |
| ENSG0000(DTX2    | protein_co chr7  | 76461676 | 76505995 | + | 6.81   | 4.34   |
| ENSG0000(NLRC4   | protein_co chr2  | 32224453 | 32265854 | - | 0      | 0      |
| ENSG0000(PUS7    | protein_co chr7  | 1.05E+08 | 1.06E+08 | - | 3.33   | 3.48   |
| ENSG0000(LAMB4   | protein_co chr7  | 1.08E+08 | 1.08E+08 | - | 0.22   | 0.13   |
| ENSG0000(NRCAM   | protein_co chr7  | 1.08E+08 | 1.08E+08 | - | 15.9   | 16.72  |
| ENSG0000(LAMB1   | protein_co chr7  | 1.08E+08 | 1.08E+08 | - | 312.88 | 307.82 |
| ENSG0000(SLC26A4 | protein_co chr7  | 1.08E+08 | 1.08E+08 | + | 0.09   | 0.14   |
| ENSG0000(SLC26A3 | protein_co chr7  | 1.08E+08 | 1.08E+08 | - | 0      | 0      |
| ENSG0000(DLD     | protein_co chr7  | 1.08E+08 | 1.08E+08 | + | 19.93  | 28.36  |
| ENSG0000(WDR7    | protein_co chr18 | 56651343 | 57036606 | + | 5.79   | 3.51   |
| ENSG0000(TXNL1   | protein_co chr18 | 56597208 | 56651600 | - | 34.83  | 39.22  |
| ENSG0000(IL5RA   | protein_co chr3  | 3066326  | 3126613  | - | 0      | 0      |
| ENSG0000(ABCC6   | protein_co chr16 | 16148928 | 16223522 | - | 0.11   | 0.59   |
| ENSG0000(CMTM6   | protein_co chr3  | 32481312 | 32503408 | - | 19.29  | 19.66  |
| ENSG0000(ITGA6   | protein_co chr2  | 1.72E+08 | 1.73E+08 | + | 4.17   | 3.64   |
| ENSG0000(RAPGEF4 | protein_co chr2  | 1.73E+08 | 1.73E+08 | + | 2.08   | 1.57   |
| ENSG0000(MAP3K20 | protein_co chr2  | 1.73E+08 | 1.73E+08 | + | 14.15  | 14.33  |
| ENSG0000(SMPX    | protein_co chrX  | 21705972 | 21758163 | - | 0      | 0      |
| ENSG0000(FH      | protein_co chr1  | 2.41E+08 | 2.42E+08 | - | 20.85  | 23.39  |
| ENSG0000(SEL1L3  | protein_co chr4  | 25747427 | 25863760 | - | 67.25  | 63.77  |
| ENSG0000(TF      | protein_co chr3  | 1.34E+08 | 1.34E+08 | + | 0.15   | 0.21   |
| ENSG0000(CDV3    | protein_co chr3  | 1.34E+08 | 1.34E+08 | + | 58.69  | 64.81  |
| ENSG0000(MYO15A  | protein_co chr17 | 18108706 | 18179802 | + | 1.29   | 1.09   |

|                    |                  |          |          |   |         |         |
|--------------------|------------------|----------|----------|---|---------|---------|
| ENSG0000( ALKBH5   | protein_co chr17 | 18183078 | 18209954 | + | 33.27   | 34.42   |
| ENSG0000( APOH     | protein_co chr17 | 66212033 | 66256525 | - | 0       | 0       |
| ENSG0000( NLRP1    | protein_co chr17 | 5499427  | 5619424  | - | 21.55   | 21.89   |
| ENSG0000( PITPNM3  | protein_co chr17 | 6451264  | 6556494  | - | 0.28    | 0.38    |
| ENSG0000( SPAG7    | protein_co chr17 | 4959226  | 4967872  | - | 40.53   | 40.81   |
| ENSG0000( ORC6     | protein_co chr16 | 46689643 | 46698394 | + | 3.51    | 3.71    |
| ENSG0000( ZFHX4    | protein_co chr8  | 76681219 | 76867285 | + | 5.49    | 5.68    |
| ENSG0000( SLC17A6  | protein_co chr11 | 22338097 | 22379503 | + | 0       | 0       |
| ENSG0000( CPA1     | protein_co chr7  | 1.3E+08  | 1.3E+08  | + | 0.44    | 0.26    |
| ENSG0000( ZC3HC1   | protein_co chr7  | 1.3E+08  | 1.3E+08  | - | 9.36    | 7.92    |
| ENSG0000( ESR1     | protein_co chr6  | 1.52E+08 | 1.52E+08 | + | 0.97    | 0.69    |
| ENSG0000( RGS17    | protein_co chr6  | 1.53E+08 | 1.53E+08 | - | 2.31    | 2.48    |
| ENSG0000( ANGPT2   | protein_co chr8  | 6499651  | 6563409  | - | 0.96    | 0.96    |
| ENSG0000( TMEM101  | protein_co chr17 | 44011188 | 44023946 | - | 13.09   | 12.08   |
| ENSG0000( CD200    | protein_co chr3  | 1.12E+08 | 1.12E+08 | + | 49.41   | 40.28   |
| ENSG0000( CCDC80   | protein_co chr3  | 1.13E+08 | 1.13E+08 | - | 2153.67 | 2110.55 |
| ENSG0000( CMA1     | protein_co chr14 | 24505353 | 24508265 | - | 0       | 0       |
| ENSG0000( PSME1    | protein_co chr14 | 24136158 | 24138967 | + | 78.96   | 78.89   |
| ENSG0000( PPP2R3C  | protein_co chr14 | 35085467 | 35122517 | - | 8.63    | 9.73    |
| ENSG0000( HAUS4    | protein_co chr14 | 22946228 | 22957161 | - | 9.81    | 12.41   |
| ENSG0000( JPH4     | protein_co chr14 | 23568035 | 23578800 | - | 0.02    | 0       |
| ENSG0000( MYH7     | protein_co chr14 | 23412738 | 23435718 | - | 0       | 0       |
| ENSG0000( CEBPE    | protein_co chr14 | 23117304 | 23119616 | - | 0       | 0       |
| ENSG0000( SLC7A8   | protein_co chr14 | 23125295 | 23183674 | - | 2.34    | 3.07    |
| ENSG0000( OSGEP    | protein_co chr14 | 20446411 | 20455105 | - | 14.62   | 11.94   |
| ENSG0000( SLC22A17 | protein_co chr14 | 23346306 | 23352912 | - | 3.74    | 4.78    |
| ENSG0000( RNF31    | protein_co chr14 | 24146683 | 24160661 | + | 14.06   | 12.73   |
| ENSG0000( SCFD1    | protein_co chr14 | 30622112 | 30735812 | + | 23.66   | 22.83   |
| ENSG0000( G2E3     | protein_co chr14 | 30559123 | 30620063 | + | 4.37    | 4.12    |
| ENSG0000( HECTD1   | protein_co chr14 | 31100112 | 31207804 | - | 39.66   | 43.77   |
| ENSG0000( HNRNPC   | protein_co chr14 | 21209136 | 21269494 | - | 122.29  | 117.95  |
| ENSG0000( RPGRIP1  | protein_co chr14 | 21287939 | 21351301 | + | 0       | 0       |
| ENSG0000( SUPT16H  | protein_co chr14 | 21351472 | 21384266 | - | 22.23   | 21.69   |
| ENSG0000( TOX4     | protein_co chr14 | 21476597 | 21499175 | + | 32.47   | 35.71   |
| ENSG0000( GEMIN2   | protein_co chr14 | 39114223 | 39136973 | + | 3.33    | 3.69    |
| ENSG0000( TGM1     | protein_co chr14 | 24249114 | 24264432 | - | 0.46    | 0.44    |
| ENSG0000( TINF2    | protein_co chr14 | 24239643 | 24242674 | - | 23.79   | 27.11   |
| ENSG0000( DAZL     | protein_co chr3  | 16586792 | 16670306 | - | 0       | 0       |
| ENSG0000( TBL1Y    | protein_co chrY  | 6910686  | 7091683  | + | 0       | 0       |
| ENSG0000( SEMA6A   | protein_co chr5  | 1.16E+08 | 1.17E+08 | - | 0.88    | 1.14    |
| ENSG0000( TRPM7    | protein_co chr15 | 50552473 | 50686815 | - | 16.91   | 17.28   |
| ENSG0000( TYRO3    | protein_co chr15 | 41557675 | 41583586 | + | 4.29    | 6.01    |
| ENSG0000( WDR76    | protein_co chr15 | 43826963 | 43868419 | + | 1.16    | 1.65    |
| ENSG0000( CAPN3    | protein_co chr15 | 42359500 | 42412318 | + | 1.57    | 3.08    |
| ENSG0000( SNAP23   | protein_co chr15 | 42491233 | 42545356 | + | 49      | 53.43   |

|                    |                  |          |            |         |         |
|--------------------|------------------|----------|------------|---------|---------|
| ENSG0000(TBX15     | protein_co chr1  | 1.19E+08 | 1.19E+08 - | 1.47    | 1.52    |
| ENSG0000(PHGDH     | protein_co chr1  | 1.2E+08  | 1.2E+08 +  | 111.41  | 120.87  |
| ENSG0000(COL9A3    | protein_co chr20 | 62816244 | 62841159 + | 0.79    | 0.98    |
| ENSG0000(EZR       | protein_co chr6  | 1.59E+08 | 1.59E+08 - | 20.33   | 20.59   |
| ENSG0000(MYL6      | protein_co chr12 | 56158161 | 56163496 + | 1391.46 | 1444.47 |
| ENSG0000(AGO1      | protein_co chr1  | 35869808 | 35930528 + | 5.75    | 6.41    |
| ENSG0000(TEKT2     | protein_co chr1  | 36084075 | 36088275 + | 0.11    | 0.21    |
| ENSG0000(CLSPN     | protein_co chr1  | 35720218 | 35769967 - | 0.06    | 0.07    |
| ENSG0000(RFFL      | protein_co chr17 | 35005990 | 35089319 - | 5.84    | 6.32    |
| ENSG0000(UNC13D    | protein_co chr17 | 75827225 | 75844717 - | 1       | 0.65    |
| ENSG0000(MFSD11    | protein_co chr17 | 76735865 | 76781449 + | 15.25   | 14.48   |
| ENSG0000(DPYSL2    | protein_co chr8  | 26514022 | 26658178 + | 66.09   | 66.05   |
| ENSG0000(TGFB2     | protein_co chr1  | 2.18E+08 | 2.18E+08 + | 27.56   | 20.75   |
| ENSG0000(GPATCH2   | protein_co chr1  | 2.17E+08 | 2.18E+08 - | 2.75    | 1.8     |
| ENSG0000(NUP50     | protein_co chr22 | 45163841 | 45188015 + | 9.17    | 9.96    |
| ENSG0000(CDC45     | protein_co chr22 | 19479459 | 19520612 + | 0.29    | 0.74    |
| ENSG0000(COMT      | protein_co chr22 | 19941607 | 19969975 + | 120.3   | 136.68  |
| ENSG0000(CECR1     | protein_co chr22 | 17178790 | 17221989 - | 0.79    | 0.72    |
| ENSG0000(XXbac-B46 | processed_chr22  | 17787652 | 17811497 - | 1.49    | 1.5     |
| ENSG0000(VNN3      | protein_co chr6  | 1.33E+08 | 1.33E+08 - | 0       | 0.04    |
| ENSG0000(ECHDC1    | protein_co chr6  | 1.27E+08 | 1.27E+08 - | 29.79   | 43.06   |
| ENSG0000(LRRFIP2   | protein_co chr3  | 37052656 | 37183689 - | 20.81   | 21.14   |
| ENSG0000(SEC22C    | protein_co chr3  | 42547969 | 42601080 - | 27.36   | 25.95   |
| ENSG0000(XYLB      | protein_co chr3  | 38346760 | 38421348 + | 2.05    | 2.05    |
| ENSG0000(HDAC6     | protein_co chrX  | 48801377 | 48824982 + | 17.62   | 21.4    |
| ENSG0000(OR11I     | protein_co chr19 | 15086980 | 15088221 + | 0       | 0       |
| ENSG0000(GABRP     | protein_co chr5  | 1.71E+08 | 1.71E+08 + | 0.75    | 0.85    |
| ENSG0000(KRT31     | protein_co chr17 | 41393724 | 41397592 - | 0       | 0       |
| ENSG0000(CDC6      | protein_co chr17 | 40287633 | 40304657 + | 0.7     | 0.51    |
| ENSG0000(UPRT      | protein_co chrX  | 75274085 | 75304600 + | 4.47    | 6.09    |
| ENSG0000(CDC23     | protein_co chr5  | 1.38E+08 | 1.38E+08 - | 10.31   | 10.39   |
| ENSG0000(AAAS      | protein_co chr12 | 53307456 | 53324864 - | 24.19   | 25.76   |
| ENSG0000(CBX5      | protein_co chr12 | 54230940 | 54280133 - | 11.03   | 11.05   |
| ENSG0000(FMO2      | protein_co chr1  | 1.71E+08 | 1.71E+08 + | 6.94    | 4.05    |
| ENSG0000(SUCO      | protein_co chr1  | 1.73E+08 | 1.73E+08 + | 6.81    | 6.08    |
| ENSG0000(MSH2      | protein_co chr2  | 47402969 | 47562311 + | 4.56    | 4.79    |
| ENSG0000(MAP3K1    | protein_co chr5  | 56815574 | 56896152 + | 0.97    | 1.3     |
| ENSG0000(DHPS      | protein_co chr19 | 12675717 | 12681902 - | 27.42   | 27.83   |
| ENSG0000(HOOK2     | protein_co chr19 | 12763003 | 12872740 - | 14.2    | 14.16   |
| ENSG0000(NXPE1     | protein_co chr11 | 1.15E+08 | 1.15E+08 - | 0       | 0       |
| ENSG0000(ARCN1     | protein_co chr11 | 1.19E+08 | 1.19E+08 + | 59.03   | 55.31   |
| ENSG0000(EPB41L4B  | protein_co chr9  | 1.09E+08 | 1.09E+08 - | 0.05    | 0.15    |
| ENSG0000(TMEM38B   | protein_co chr9  | 1.06E+08 | 1.06E+08 + | 3.47    | 2.87    |
| ENSG0000(PSMD5     | protein_co chr9  | 1.21E+08 | 1.21E+08 - | 13.89   | 13.65   |
| ENSG0000(PTGS1     | protein_co chr9  | 1.22E+08 | 1.22E+08 + | 199.98  | 169.19  |

|                   |                  |          |          |   |        |        |
|-------------------|------------------|----------|----------|---|--------|--------|
| ENSG0000(NUP188   | protein_co chr9  | 1.29E+08 | 1.29E+08 | + | 13.48  | 12.67  |
| ENSG0000(CRAT     | protein_co chr9  | 1.29E+08 | 1.29E+08 | - | 31.27  | 30.17  |
| ENSG0000(SH2D3C   | protein_co chr9  | 1.28E+08 | 1.28E+08 | - | 0.16   | 0.41   |
| ENSG0000(NANS     | protein_co chr9  | 98056739 | 98083075 | + | 18.62  | 19.84  |
| ENSG0000(TBC1D2   | protein_co chr9  | 98198999 | 98255721 | - | 9.66   | 8.57   |
| ENSG0000(WHRN     | protein_co chr9  | 1.14E+08 | 1.15E+08 | - | 4.35   | 4.63   |
| ENSG0000(PDE6C    | protein_co chr10 | 93612588 | 93666010 | + | 0      | 0      |
| ENSG0000(CWF19L1  | protein_co chr10 | 1E+08    | 1E+08    | - | 6.17   | 4.66   |
| ENSG0000(SEMA4G   | protein_co chr10 | 1.01E+08 | 1.01E+08 | + | 2.25   | 2.44   |
| ENSG0000(BTAF1    | protein_co chr10 | 91923769 | 92030325 | + | 13.5   | 13.98  |
| ENSG0000(IKZF5    | protein_co chr10 | 1.23E+08 | 1.23E+08 | - | 3.33   | 3.52   |
| ENSG0000(BLNK     | protein_co chr10 | 96191702 | 96271587 | - | 0      | 0.07   |
| ENSG0000(TLL2     | protein_co chr10 | 96364606 | 96513918 | - | 0.16   | 0.07   |
| ENSG0000(CYP26A1  | protein_co chr10 | 93073475 | 93077890 | + | 0.05   | 0.09   |
| ENSG0000(TDRD1    | protein_co chr10 | 1.14E+08 | 1.14E+08 | + | 0      | 0      |
| ENSG0000(SORBS1   | protein_co chr10 | 95311771 | 95561414 | - | 0.06   | 0.09   |
| ENSG0000(CRTAC1   | protein_co chr10 | 97865000 | 98030828 | - | 0      | 0      |
| ENSG0000(BAMBI    | protein_co chr10 | 28677342 | 28682939 | + | 19.43  | 17.21  |
| ENSG0000(IL11     | protein_co chr19 | 55364389 | 55370463 | - | 3.72   | 2.06   |
| ENSG0000(MYO3A    | protein_co chr10 | 25934267 | 26212527 | + | 0      | 0      |
| ENSG0000(WAC      | protein_co chr10 | 28532493 | 28623112 | + | 39     | 42.88  |
| ENSG0000(CREM     | protein_co chr10 | 35126791 | 35212958 | + | 10.78  | 11.66  |
| ENSG0000(NUBP2    | protein_co chr16 | 1782901  | 1789191  | + | 19.85  | 20.04  |
| ENSG0000(TPSD1    | protein_co chr16 | 1256059  | 1258998  | + | 0      | 0      |
| ENSG0000(SMIM24   | protein_co chr19 | 3473986  | 3480542  | - | 0      | 0.11   |
| ENSG0000(HIVEP1   | protein_co chr6  | 12008762 | 12164999 | + | 6.5    | 6.08   |
| ENSG0000(TREM2    | protein_co chr6  | 41158506 | 41163186 | - | 0.46   | 0.64   |
| ENSG0000(KCNK16   | protein_co chr6  | 39314698 | 39322968 | - | 0      | 0      |
| ENSG0000(CRISP3   | protein_co chr6  | 49727384 | 49744437 | - | 0      | 0      |
| ENSG0000(FKBP5    | protein_co chr6  | 35573585 | 35728583 | - | 2.3    | 2.55   |
| ENSG0000(SRPK1    | protein_co chr6  | 35832966 | 35921342 | - | 8.12   | 11.1   |
| ENSG0000(BRPF3    | protein_co chr6  | 36196744 | 36232790 | + | 9.82   | 10.48  |
| ENSG0000(MRPS18A  | protein_co chr6  | 43671303 | 43687791 | - | 22.22  | 18.05  |
| ENSG0000(PGC      | protein_co chr6  | 41736711 | 41754109 | - | 0      | 0      |
| ENSG0000(TMEM14A  | protein_co chr6  | 52671109 | 52686588 | + | 14.15  | 16.38  |
| ENSG0000(EFHC1    | protein_co chr6  | 52362123 | 52529886 | + | 28.22  | 27.77  |
| ENSG0000(NCR2     | protein_co chr6  | 41335655 | 41350887 | + | 0      | 0      |
| ENSG0000(HSP90AB1 | protein_co chr6  | 44246166 | 44253888 | + | 243.58 | 241.74 |
| ENSG0000(MLN      | protein_co chr6  | 33794673 | 33804011 | - | 0      | 0      |
| ENSG0000(CDC5L    | protein_co chr6  | 44387525 | 44450426 | + | 5.2    | 5.08   |
| ENSG0000(ITPR3    | protein_co chr6  | 33620365 | 33696574 | + | 21.61  | 20.98  |
| ENSG0000(ZNF184   | protein_co chr6  | 27450743 | 27473118 | - | 2.12   | 2.04   |
| ENSG0000(DSP      | protein_co chr6  | 7541575  | 7586717  | + | 7.32   | 7.63   |
| ENSG0000(SIRT1    | protein_co chr10 | 67884669 | 67918390 | + | 6.08   | 5.75   |
| ENSG0000(HNRNPH3  | protein_co chr10 | 68331174 | 68343191 | + | 47.49  | 47.56  |

|                    |                   |          |            |        |        |
|--------------------|-------------------|----------|------------|--------|--------|
| ENSG0000( IFT74    | protein_co chr9   | 26947039 | 27062930 + | 6.02   | 5.89   |
| ENSG0000( JAK2     | protein_co chr9   | 4984390  | 5128183 +  | 3.49   | 3.02   |
| ENSG0000( IL12RB1  | protein_co chr19  | 18058995 | 18098944 - | 0.24   | 0.07   |
| ENSG0000( ABL1     | protein_co chr9   | 1.31E+08 | 1.31E+08 + | 42.14  | 42.47  |
| ENSG0000( ACOT7    | protein_co chr1   | 6264269  | 6394391 -  | 13.77  | 13.03  |
| ENSG0000( SH3GLB1  | protein_co chr1   | 86704570 | 86748184 + | 79.04  | 70.07  |
| ENSG0000( CDC7     | protein_co chr1   | 91500893 | 91525764 + | 2.07   | 2.66   |
| ENSG0000( SYDE2    | protein_co chr1   | 85156873 | 85201046 - | 0.16   | 0.25   |
| ENSG0000( PCSK5    | protein_co chr9   | 75890644 | 76362339 + | 5.41   | 4.45   |
| ENSG0000( SCD      | protein_co chr10  | 1E+08    | 1E+08 +    | 137.82 | 127.9  |
| ENSG0000( TMED1    | protein_co chr19  | 10832438 | 10836318 - | 20.55  | 16.96  |
| ENSG0000( ABLIM1   | protein_co chr10  | 1.14E+08 | 1.15E+08 - | 2.59   | 2.06   |
| ENSG0000( ERMP1    | protein_co chr9   | 5765076  | 5833117 -  | 6.6    | 5.9    |
| ENSG0000( RAB18    | protein_co chr10  | 27504174 | 27542237 + | 46.38  | 40.61  |
| ENSG0000( NRP1     | protein_co chr10  | 33177492 | 33336262 - | 111.32 | 105.57 |
| ENSG0000( HSD17B7P | transcribec chr10 | 38356380 | 38378505 + | 0.95   | 0.98   |
| ENSG0000( PRTFDC1  | protein_co chr10  | 24848607 | 24952604 - | 8.45   | 9.02   |
| ENSG0000( PALMD    | protein_co chr1   | 99645943 | 99694541 + | 1.13   | 1.06   |
| ENSG0000( TSPAN15  | protein_co chr10  | 69451473 | 69507669 + | 0.24   | 0.04   |
| ENSG0000( H2AFY2   | protein_co chr10  | 70052796 | 70112280 + | 5.91   | 6.54   |
| ENSG0000( WASHC2A  | protein_co chr10  | 50067888 | 50133506 + | 25.72  | 27.69  |
| ENSG0000( MAST3    | protein_co chr19  | 18097793 | 18151692 + | 3.18   | 2.56   |
| ENSG0000( MZF1     | protein_co chr19  | 58561931 | 58573575 - | 8.64   | 8.42   |
| ENSG0000( OCEL1    | protein_co chr19  | 17226204 | 17229219 + | 15.45  | 12.84  |
| ENSG0000( MYO9B    | protein_co chr19  | 17075781 | 17214537 + | 17.64  | 21.03  |
| ENSG0000( KCNK6    | protein_co chr19  | 38319844 | 38332076 + | 10.04  | 9.45   |
| ENSG0000( CATSPERG | protein_co chr19  | 38335775 | 38370943 + | 0.26   | 0.22   |
| ENSG0000( PSMD8    | protein_co chr19  | 38374536 | 38383824 + | 104.9  | 108.06 |
| ENSG0000( FBXL19   | protein_co chr16  | 30923055 | 30948783 + | 6.31   | 8.24   |
| ENSG0000( STX1B    | protein_co chr16  | 30989256 | 31010661 - | 0.68   | 0.98   |
| ENSG0000( HSD3B7   | protein_co chr16  | 30985207 | 30989152 + | 17     | 15.3   |
| ENSG0000( SETD1A   | protein_co chr16  | 30957294 | 30984664 + | 5.13   | 5.22   |
| ENSG0000( BCL7C    | protein_co chr16  | 30833626 | 30894960 - | 16     | 13.46  |
| ENSG0000( MAGEB2   | protein_co chrX   | 30215560 | 30220089 + | 0      | 0      |
| ENSG0000( EFNA2    | protein_co chr19  | 1286154  | 1300237 +  | 0      | 0.07   |
| ENSG0000( CIRBP    | protein_co chr19  | 1259384  | 1274880 +  | 168.07 | 164.91 |
| ENSG0000( ATP5D    | protein_co chr19  | 1241746  | 1244826 +  | 65.87  | 57.21  |
| ENSG0000( CBARP    | protein_co chr19  | 1228287  | 1238027 -  | 0.84   | 1.02   |
| ENSG0000( PCDH11Y  | protein_co chrY   | 5000226  | 5742224 +  | 0.21   | 0.08   |
| ENSG0000( AMELY    | protein_co chrY   | 6865918  | 6874027 -  | 0      | 0      |
| ENSG0000( PRKY     | transcribec chrY  | 7273972  | 7381548 +  | 9.9    | 9.83   |
| ENSG0000( IGFALS   | protein_co chr16  | 1790413  | 1794971 -  | 0      | 0      |
| ENSG0000( HNRNPM   | protein_co chr19  | 8444767  | 8489114 +  | 41.35  | 42.84  |
| ENSG0000( 2-Mar    | protein_co chr19  | 8413270  | 8439017 +  | 20.58  | 26.04  |
| ENSG0000( NDUFB7   | protein_co chr19  | 14566078 | 14572062 - | 97.68  | 90.35  |

|                   |                  |          |          |   |        |        |
|-------------------|------------------|----------|----------|---|--------|--------|
| ENSG0000(TECR     | protein_co chr19 | 14517085 | 14565980 | + | 55.91  | 56.97  |
| ENSG0000(TIMM13   | protein_co chr19 | 2425624  | 2427894  | - | 47.02  | 41.71  |
| ENSG0000(CDC34    | protein_co chr19 | 531712   | 542092   | + | 22.23  | 26.28  |
| ENSG0000(MTAP     | protein_co chr9  | 21802543 | 21937651 | + | 10.85  | 11.12  |
| ENSG0000(MISP     | protein_co chr19 | 751126   | 764318   | + | 0.04   | 0.02   |
| ENSG0000(CEP170B  | protein_co chr14 | 1.05E+08 | 1.05E+08 | + | 9.9    | 10.54  |
| ENSG0000(POLR2E   | protein_co chr19 | 1086579  | 1095380  | - | 117.58 | 125.28 |
| ENSG0000(POLRMT   | protein_co chr19 | 617224   | 633604   | - | 8.74   | 8.38   |
| ENSG0000(HCN2     | protein_co chr19 | 589893   | 617159   | + | 0.51   | 0.36   |
| ENSG0000(CDHR5    | protein_co chr11 | 616565   | 626078   | - | 0      | 0      |
| ENSG0000(IZUMO4   | protein_co chr19 | 2096429  | 2099593  | + | 1.56   | 2.22   |
| ENSG0000(RASSF7   | protein_co chr11 | 560404   | 564021   | + | 7.79   | 4.8    |
| ENSG0000(GADD45B  | protein_co chr19 | 2476122  | 2478259  | + | 16.28  | 15.49  |
| ENSG0000(PALM     | protein_co chr19 | 708939   | 748329   | + | 12.59  | 15.28  |
| ENSG0000(MADCAM1  | protein_co chr19 | 489176   | 505342   | + | 0.49   | 0.43   |
| ENSG0000(IGF2-AS  | antisense chr11  | 2140501  | 2148666  | + | 0.57   | 0.89   |
| ENSG0000(MKNK2    | protein_co chr19 | 2037465  | 2051244  | - | 42.77  | 45.12  |
| ENSG0000(ARVCF    | protein_co chr22 | 19969896 | 20016808 | - | 4.2    | 3.68   |
| ENSG0000(TRMT2A   | protein_co chr22 | 20111866 | 20117392 | - | 19.71  | 19.31  |
| ENSG0000(RANBP1   | protein_co chr22 | 20115938 | 20127357 | + | 27.97  | 35.85  |
| ENSG0000(ZDHC8    | protein_co chr22 | 20129456 | 20148007 | + | 22.67  | 23.14  |
| ENSG0000(KLHL22   | protein_co chr22 | 20441519 | 20495883 | - | 14.81  | 16.28  |
| ENSG0000(MED15    | protein_co chr22 | 20495913 | 20587632 | + | 28.66  | 27.14  |
| ENSG0000(SERPIND1 | protein_co chr22 | 20773879 | 20787720 | + | 0.28   | 0.22   |
| ENSG0000(SNAP29   | protein_co chr22 | 20858983 | 20891218 | + | 19     | 17.18  |
| ENSG0000(CRKL     | protein_co chr22 | 20917426 | 20953749 | + | 14.37  | 13.76  |
| ENSG0000(LZTR1    | protein_co chr22 | 20979462 | 20999038 | + | 14     | 16.46  |
| ENSG0000(MMP11    | protein_co chr22 | 23768226 | 23784316 | + | 5.5    | 5.53   |
| ENSG0000(CECR2    | protein_co chr22 | 17359949 | 17558149 | + | 0      | 0.03   |
| ENSG0000(SMARCB1  | protein_co chr22 | 23786963 | 23834516 | + | 20.23  | 22.79  |
| ENSG0000(P2RX6    | protein_co chr22 | 21009808 | 21028830 | + | 3.53   | 5.48   |
| ENSG0000(DERL3    | protein_co chr22 | 23834503 | 23839128 | - | 0.17   | 0.25   |
| ENSG0000(SLC7A4   | protein_co chr22 | 21028718 | 21032840 | - | 1.65   | 2.59   |
| ENSG0000(BCL2L13  | protein_co chr22 | 17628855 | 17730855 | + | 28.13  | 29.3   |
| ENSG0000(DDTL     | protein_co chr22 | 23966901 | 23972532 | + | 0.43   | 0.33   |
| ENSG0000(DDT      | protein_co chr22 | 23971365 | 23980469 | - | 63.58  | 57.01  |
| ENSG0000(GSTT2    | polymorph chr22  | 23980058 | 23983915 | + | 1.04   | 0.86   |
| ENSG0000(OSM      | protein_co chr22 | 30262829 | 30266840 | - | 0      | 0      |
| ENSG0000(CABIN1   | protein_co chr22 | 24011192 | 24178628 | + | 10.26  | 12.57  |
| ENSG0000(TBC1D10A | protein_co chr22 | 30291990 | 30327046 | - | 8.73   | 10.14  |
| ENSG0000(SUSD2    | protein_co chr22 | 24181259 | 24189110 | + | 2.29   | 1.86   |
| ENSG0000(SF3A1    | protein_co chr22 | 30331988 | 30356947 | - | 33.41  | 30.21  |
| ENSG0000(GGT5     | protein_co chr22 | 24219654 | 24245142 | - | 20.29  | 16.9   |
| ENSG0000(RNF215   | protein_co chr22 | 30368811 | 30421771 | - | 11.89  | 13.12  |
| ENSG0000(SEC14L2  | protein_co chr22 | 30396857 | 30425317 | + | 22.36  | 16.89  |



|                     |                   |          |            |         |         |
|---------------------|-------------------|----------|------------|---------|---------|
| ENSG0000( SEC14L3   | protein_co chr22  | 30447959 | 30472049 - | 0       | 0       |
| ENSG0000( SPECC1L   | protein_co chr22  | 24270817 | 24417740 + | 11.95   | 10.68   |
| ENSG0000( PPIL2     | protein_co chr22  | 21666009 | 21700015 + | 15.01   | 15.43   |
| ENSG0000( UPB1      | protein_co chr22  | 24494107 | 24528390 + | 0.06    | 0       |
| ENSG0000( YPEL1     | protein_co chr22  | 21697544 | 21735834 - | 1.58    | 1.26    |
| ENSG0000( SNRPD3    | protein_co chr22  | 24555503 | 24609980 + | 50.56   | 41.31   |
| ENSG0000( PES1      | protein_co chr22  | 30576625 | 30607083 - | 31.58   | 28.51   |
| ENSG0000( MAPK1     | protein_co chr22  | 21754500 | 21867680 - | 46.81   | 42.46   |
| ENSG0000( GGT1      | protein_co chr22  | 24583750 | 24629005 + | 3.57    | 3.35    |
| ENSG0000( PRODH     | protein_co chr22  | 18912777 | 18936553 - | 0.23    | 0.04    |
| ENSG0000( PPM1F     | protein_co chr22  | 21919420 | 21952837 - | 15.17   | 15.25   |
| ENSG0000( SLC35E4   | protein_co chr22  | 30635652 | 30669016 + | 2.73    | 2.19    |
| ENSG0000( TOP3B     | protein_co chr22  | 21957025 | 21982816 - | 8.88    | 7.08    |
| ENSG0000( CRYBB3    | protein_co chr22  | 25199850 | 25207363 + | 0       | 0       |
| ENSG0000( CYTH4     | protein_co chr22  | 37282027 | 37315345 + | 0.12    | 0.05    |
| ENSG0000( DGCR14    | protein_co chr22  | 19130279 | 19144684 - | 7.07    | 8.08    |
| ENSG0000( CRYBB2P1  | transcribec chr22 | 25448105 | 25520854 + | 31.56   | 24.28   |
| ENSG0000( MFNG      | protein_co chr22  | 37469063 | 37486401 - | 0       | 0.03    |
| ENSG0000( CARD10    | protein_co chr22  | 37490362 | 37519542 - | 3.71    | 2.37    |
| ENSG0000( LRP5L     | protein_co chr22  | 25351418 | 25405377 - | 1.22    | 1.36    |
| ENSG0000( SLC25A1   | protein_co chr22  | 19175575 | 19178830 - | 38.42   | 36.57   |
| ENSG0000( GRK3      | protein_co chr22  | 25564849 | 25729294 + | 0.08    | 0.24    |
| ENSG0000( PLA2G3    | protein_co chr22  | 31134809 | 31140607 - | 0       | 0       |
| ENSG0000( LGALS2    | protein_co chr22  | 37570246 | 37582616 - | 0       | 0       |
| ENSG0000( GGA1      | protein_co chr22  | 37608475 | 37633564 + | 15.62   | 14.78   |
| ENSG0000( HIRA      | protein_co chr22  | 19330698 | 19447450 - | 10.61   | 9.4     |
| ENSG0000( SH3BP1    | protein_co chr22  | 37634654 | 37666932 + | 4.55    | 6.03    |
| ENSG0000( SEZ6L     | protein_co chr22  | 26169474 | 26383597 + | 0       | 0       |
| ENSG0000( LGALS1    | protein_co chr22  | 37675608 | 37679806 + | 2128.06 | 1996.26 |
| ENSG0000( HPS4      | protein_co chr22  | 26443423 | 26483837 - | 14.8    | 17.32   |
| ENSG0000( PIK3IP1   | protein_co chr22  | 31281593 | 31292534 - | 29.85   | 34.22   |
| ENSG0000( RP1-37E16 | protein_co chr22  | 37686414 | 37726503 + | 0       | 0       |
| ENSG0000( SRRD      | protein_co chr22  | 26483877 | 26494658 + | 10.51   | 6.38    |
| ENSG0000( PATZ1     | protein_co chr22  | 31325804 | 31346232 - | 4.75    | 5.79    |
| ENSG0000( TRIOBP    | protein_co chr22  | 37697004 | 37776556 + | 58.89   | 59.84   |
| ENSG0000( TFIP11    | protein_co chr22  | 26491225 | 26512505 - | 12.24   | 13.82   |
| ENSG0000( GCAT      | protein_co chr22  | 37807905 | 37817176 + | 11.84   | 12.31   |
| ENSG0000( GGTL2     | protein_co chr22  | 22644475 | 22647903 + | 0       | 0       |
| ENSG0000( CRYBB1    | protein_co chr22  | 26599278 | 26618088 - | 0       | 0       |
| ENSG0000( ANKRD54   | protein_co chr22  | 37830855 | 37849327 - | 9.32    | 9.82    |
| ENSG0000( EIF3L     | protein_co chr22  | 37848868 | 37889407 + | 206.17  | 199.25  |
| ENSG0000( SNU13     | protein_co chr22  | 41673930 | 41690504 - | 70.8    | 58.99   |
| ENSG0000( MICALL1   | protein_co chr22  | 37905657 | 37942822 + | 13.74   | 19.45   |
| ENSG0000( POLR2F    | protein_co chr22  | 37952607 | 38041915 + | 39.58   | 43.7    |
| ENSG0000( SOX10     | protein_co chr22  | 37970686 | 37987422 - | 0       | 0       |

|                 |          |                   |          |          |   |        |        |
|-----------------|----------|-------------------|----------|----------|---|--------|--------|
| ENSG00000100000 | CCDC134  | protein_co chr22  | 41800679 | 41826299 | + | 2.03   | 1.78   |
| ENSG00000100000 | DEPDC5   | protein_co chr22  | 31753951 | 31907034 | + | 8.58   | 7.31   |
| ENSG00000100000 | PICK1    | protein_co chr22  | 38056311 | 38075701 | + | 7.88   | 6.63   |
| ENSG00000100000 | TTC28    | protein_co chr22  | 27978014 | 28679865 | - | 14.85  | 13.95  |
| ENSG00000100000 | SLC16A8  | protein_co chr22  | 38078134 | 38084093 | - | 0.03   | 0.11   |
| ENSG00000100000 | CENPM    | protein_co chr22  | 41938721 | 41947164 | - | 0.7    | 1.49   |
| ENSG00000100000 | 3-Sep    | protein_co chr22  | 41976272 | 41998221 | + | 0.33   | 0.26   |
| ENSG00000100000 | SLC5A1   | protein_co chr22  | 32043032 | 32113029 | + | 0      | 0.01   |
| ENSG00000100000 | TPTEP1   | transcribed chr22 | 16601887 | 16698742 | + | 0.94   | 1.51   |
| ENSG00000100000 | SLC5A4   | protein_co chr22  | 32218476 | 32255341 | - | 0      | 0.03   |
| ENSG00000100000 | KDELRL3  | protein_co chr22  | 38468062 | 38483447 | + | 41.39  | 39.09  |
| ENSG00000100000 | CYP2D6   | protein_co chr22  | 42126499 | 42130906 | - | 0.13   | 0.27   |
| ENSG00000100000 | DDX17    | protein_co chr22  | 38483440 | 38507660 | - | 112.92 | 104.93 |
| ENSG00000100000 | DMC1     | protein_co chr22  | 38518949 | 38570286 | - | 0.18   | 0.16   |
| ENSG00000100000 | TCF20    | protein_co chr22  | 42160013 | 42343616 | - | 5.27   | 6.01   |
| ENSG00000100000 | HSCB     | protein_co chr22  | 28742031 | 28757515 | + | 8.37   | 8.82   |
| ENSG00000100000 | CBY1     | protein_co chr22  | 38656636 | 38673854 | + | 23.55  | 24.47  |
| ENSG00000100000 | TOMM22   | protein_co chr22  | 38681948 | 38685421 | + | 23.79  | 25.35  |
| ENSG00000100000 | RSPH14   | protein_co chr22  | 23059415 | 23145021 | - | 0      | 0.05   |
| ENSG00000100000 | XBP1     | protein_co chr22  | 28794555 | 28800597 | - | 46.12  | 40.58  |
| ENSG00000100000 | RTCB     | protein_co chr22  | 32387582 | 32412255 | - | 31.29  | 34.19  |
| ENSG00000100000 | JOSD1    | protein_co chr22  | 38685543 | 38701556 | - | 26.76  | 25.68  |
| ENSG00000100000 | FBXO7    | protein_co chr22  | 32474676 | 32498829 | + | 39.73  | 40.84  |
| ENSG00000100000 | GTPBP1   | protein_co chr22  | 38705723 | 38738299 | + | 10.85  | 13.36  |
| ENSG00000100000 | POLDIP3  | protein_co chr22  | 42583721 | 42614962 | - | 25.48  | 26.94  |
| ENSG00000100000 | RAB36    | protein_co chr22  | 23145326 | 23164350 | + | 3.21   | 2.93   |
| ENSG00000100000 | TIMP3    | protein_co chr22  | 32801701 | 32863043 | + | 70.85  | 72.46  |
| ENSG00000100000 | PPP6R2   | protein_co chr22  | 50343304 | 50445090 | + | 20.98  | 21.42  |
| ENSG00000100000 | SBF1     | protein_co chr22  | 50445000 | 50475024 | - | 17.77  | 18.99  |
| ENSG00000100000 | SUN2     | protein_co chr22  | 38734725 | 38794143 | - | 47.12  | 46.73  |
| ENSG00000100000 | CYB5R3   | protein_co chr22  | 42617840 | 42649568 | - | 214.69 | 224.5  |
| ENSG00000100000 | DNAL4    | protein_co chr22  | 38778508 | 38794198 | - | 9.63   | 9.91   |
| ENSG00000100000 | C22orf31 | protein_co chr22  | 29058672 | 29061844 | - | 0      | 0      |
| ENSG00000100000 | MIOX     | protein_co chr22  | 50486784 | 50490648 | + | 0.36   | 0.41   |
| ENSG00000100000 | LMF2     | protein_co chr22  | 50502949 | 50507691 | - | 38.01  | 36.32  |
| ENSG00000100000 | RHBDD3   | protein_co chr22  | 29259852 | 29268209 | - | 19.85  | 20.65  |
| ENSG00000100000 | PACSIN2  | protein_co chr22  | 42835412 | 43015145 | - | 18.25  | 14.04  |
| ENSG00000100000 | TTL1     | protein_co chr22  | 43039644 | 43089428 | - | 6.49   | 5.73   |
| ENSG00000100000 | RASL10A  | protein_co chr22  | 29312933 | 29319679 | - | 0      | 0      |
| ENSG00000100000 | AP1B1    | protein_co chr22  | 29327680 | 29423179 | - | 14.22  | 17.29  |
| ENSG00000100000 | HMGXB4   | protein_co chr22  | 35257452 | 35295807 | + | 8.08   | 9.31   |
| ENSG00000100000 | TOM1     | protein_co chr22  | 35299275 | 35347994 | + | 18.57  | 18.97  |
| ENSG00000100000 | NEFH     | protein_co chr22  | 29480230 | 29491390 | + | 0.13   | 0.05   |
| ENSG00000100000 | CHKB     | protein_co chr22  | 50578949 | 50601455 | - | 23.73  | 27.21  |
| ENSG00000100000 | BIK      | protein_co chr22  | 43110748 | 43129712 | + | 0      | 0.14   |

|                   |                  |          |          |   |         |         |
|-------------------|------------------|----------|----------|---|---------|---------|
| ENSG0000(HMOX1    | protein_co chr22 | 35380361 | 35394214 | + | 56.85   | 59.71   |
| ENSG0000(MCAT     | protein_co chr22 | 43132206 | 43143394 | - | 5.95    | 7.06    |
| ENSG0000(THOC5    | protein_co chr22 | 29505879 | 29555216 | - | 25.03   | 25.17   |
| ENSG0000(MCM5     | protein_co chr22 | 35400063 | 35425430 | + | 3.05    | 4.38    |
| ENSG0000(APOBEC3H | protein_co chr22 | 39097224 | 39104067 | + | 0.17    | 0       |
| ENSG0000(ARSA     | protein_co chr22 | 50622754 | 50628173 | - | 48.06   | 50.32   |
| ENSG0000(TSPO     | protein_co chr22 | 43151514 | 43163242 | + | 158.86  | 155.23  |
| ENSG0000(RASD2    | protein_co chr22 | 35540868 | 35554001 | + | 0.05    | 0.03    |
| ENSG0000(TTLL12   | protein_co chr22 | 43166622 | 43187133 | - | 10.37   | 9.87    |
| ENSG0000(CBX7     | protein_co chr22 | 39120167 | 39152674 | - | 8.06    | 8.49    |
| ENSG0000(PDGFB    | protein_co chr22 | 39223359 | 39244751 | - | 0       | 0       |
| ENSG0000(ACR      | protein_co chr22 | 50738196 | 50745334 | + | 0.04    | 0       |
| ENSG0000(CABP7    | protein_co chr22 | 29720084 | 29731839 | + | 0       | 0       |
| ENSG0000(RPL3     | protein_co chr22 | 39312882 | 39320389 | - | 1256.04 | 1275.29 |
| ENSG0000(ZMAT5    | protein_co chr22 | 29730956 | 29767011 | - | 14.48   | 20.23   |
| ENSG0000(RBFOX2   | protein_co chr22 | 35738736 | 36028425 | - | 70.67   | 81.58   |
| ENSG0000(SYNGR1   | protein_co chr22 | 39349925 | 39385588 | + | 14.51   | 12.48   |
| ENSG0000(TAB1     | protein_co chr22 | 39399741 | 39437060 | + | 9.62    | 9.82    |
| ENSG0000(ASCC2    | protein_co chr22 | 29788608 | 29838304 | - | 17.26   | 15.44   |
| ENSG0000(MTMR3    | protein_co chr22 | 29883155 | 30030866 | + | 14.48   | 11.59   |
| ENSG0000(MIEF1    | protein_co chr22 | 39499432 | 39518132 | + | 10.18   | 10.36   |
| ENSG0000(APOL4    | protein_co chr22 | 36189124 | 36204840 | - | 2.78    | 2.84    |
| ENSG0000(PNPLA5   | protein_co chr22 | 43879678 | 43892013 | - | 0       | 0       |
| ENSG0000(APOL1    | protein_co chr22 | 36253010 | 36267530 | + | 24.55   | 20.29   |
| ENSG0000(PNPLA3   | protein_co chr22 | 43923739 | 43964488 | + | 0.26    | 0.22    |
| ENSG0000(MYH9     | protein_co chr22 | 36281281 | 36388018 | - | 198.82  | 220.57  |
| ENSG0000(CACNA1I  | protein_co chr22 | 39570753 | 39689737 | + | 0       | 0       |
| ENSG0000(SAMM50   | protein_co chr22 | 43955421 | 44010531 | + | 19.1    | 19.3    |
| ENSG0000(TXN2     | protein_co chr22 | 36467036 | 36482030 | - | 48.14   | 43.25   |
| ENSG0000(FOXRED2  | protein_co chr22 | 36487190 | 36507101 | - | 10.58   | 9.48    |
| ENSG0000(GRAP2    | protein_co chr22 | 39901082 | 39973721 | + | 0       | 0       |
| ENSG0000(EIF3D    | protein_co chr22 | 36510850 | 36529436 | - | 84.57   | 86.53   |
| ENSG0000(TNRC6B   | protein_co chr22 | 40044817 | 40335808 | + | 4.5     | 4.55    |
| ENSG0000(SGSM3    | protein_co chr22 | 40370591 | 40410289 | + | 25      | 21.88   |
| ENSG0000(IFT27    | protein_co chr22 | 36758202 | 36776256 | - | 20.36   | 15.36   |
| ENSG0000(PVALB    | protein_co chr22 | 36800684 | 36819479 | - | 0.25    | 0       |
| ENSG0000(KIAA0930 | protein_co chr22 | 45190338 | 45240769 | - | 16.11   | 17.5    |
| ENSG0000(NCF4     | protein_co chr22 | 36860988 | 36878015 | + | 0.38    | 0.3     |
| ENSG0000(CSF2RB   | protein_co chr22 | 36913628 | 36940449 | + | 4.69    | 3.17    |
| ENSG0000(SLC25A17 | protein_co chr22 | 40769630 | 40819399 | - | 8.51    | 9.69    |
| ENSG0000(UPK3A    | protein_co chr22 | 45284982 | 45295874 | + | 0       | 0       |
| ENSG0000(FAM118A  | protein_co chr22 | 45308968 | 45341955 | + | 14.54   | 13.93   |
| ENSG0000(KCTD17   | protein_co chr22 | 37051736 | 37063390 | + | 24.09   | 19.71   |
| ENSG0000(ST13     | protein_co chr22 | 40824535 | 40857022 | - | 170     | 186.48  |
| ENSG0000(IL2RB    | protein_co chr22 | 37125838 | 37175054 | - | 0.53    | 0.98    |

|                    |                  |          |          |   |       |       |
|--------------------|------------------|----------|----------|---|-------|-------|
| ENSG0000(RBX1      | protein_co chr22 | 40951347 | 40973309 | + | 27.73 | 26.35 |
| ENSG0000(EP300     | protein_co chr22 | 41091786 | 41180079 | + | 16.25 | 14.95 |
| ENSG0000(L3MBTL2   | protein_co chr22 | 41205205 | 41231271 | + | 5.61  | 5.57  |
| ENSG0000(CHADL     | protein_co chr22 | 41229510 | 41240934 | - | 0.43  | 0.86  |
| ENSG0000(RANGAP1   | protein_co chr22 | 41245611 | 41286251 | - | 15.62 | 15.51 |
| ENSG0000(ZC3H7B    | protein_co chr22 | 41301522 | 41360147 | + | 28.23 | 28.48 |
| ENSG0000(PHF5A     | protein_co chr22 | 41459717 | 41468725 | - | 16.78 | 14.4  |
| ENSG0000(ACO2      | protein_co chr22 | 41469125 | 41528989 | + | 26.26 | 25.55 |
| ENSG0000(POLR3H    | protein_co chr22 | 41525804 | 41544606 | - | 17.65 | 20.14 |
| ENSG0000(TRMU      | protein_co chr22 | 46330875 | 46357340 | + | 10.56 | 11.52 |
| ENSG0000(PMM1      | protein_co chr22 | 41576894 | 41589890 | - | 29.96 | 31.1  |
| ENSG0000(DES11     | protein_co chr22 | 41598028 | 41621096 | - | 13.04 | 11.18 |
| ENSG0000(CERK      | protein_co chr22 | 46684411 | 46738261 | - | 11.5  | 10.06 |
| ENSG0000(BRD1      | protein_co chr22 | 49773283 | 49827512 | - | 8.85  | 9.04  |
| ENSG0000(ZBED4     | protein_co chr22 | 49853842 | 49890078 | + | 2.67  | 2.73  |
| ENSG0000(MLC1      | protein_co chr22 | 50059391 | 50085902 | - | 0.03  | 0.12  |
| ENSG0000(HDAC10    | protein_co chr22 | 50245183 | 50251405 | - | 15.1  | 15.77 |
| ENSG0000(KCNK10    | protein_co chr14 | 88180103 | 88326907 | - | 0     | 0     |
| ENSG0000(ABHD4     | protein_co chr14 | 22598237 | 22613215 | + | 34.69 | 40.98 |
| ENSG0000(KHNYN     | protein_co chr14 | 24429286 | 24441834 | + | 28.16 | 28.07 |
| ENSG0000(FKBP3     | protein_co chr14 | 45115600 | 45135319 | - | 23.15 | 21.65 |
| ENSG0000(SDR39U1   | protein_co chr14 | 24439766 | 24442905 | - | 20.25 | 19.99 |
| ENSG0000(CTSG      | protein_co chr14 | 24573522 | 24576260 | - | 0     | 0     |
| ENSG0000(GZMH      | protein_co chr14 | 24606480 | 24609699 | - | 0     | 0     |
| ENSG0000(GZMB      | protein_co chr14 | 24630954 | 24634267 | - | 0     | 0     |
| ENSG0000(RBM23     | protein_co chr14 | 22893206 | 22919184 | - | 24.31 | 27.4  |
| ENSG0000(PRMT5     | protein_co chr14 | 22920511 | 22929585 | - | 28.14 | 22.71 |
| ENSG0000(COCH      | protein_co chr14 | 30874514 | 30895065 | + | 0.05  | 0.28  |
| ENSG0000(AP4S1     | protein_co chr14 | 31025106 | 31096450 | + | 1.79  | 1.99  |
| ENSG0000(POLE2     | protein_co chr14 | 49643555 | 49688422 | - | 1.05  | 1.17  |
| ENSG0000(VCPKMT    | protein_co chr14 | 50108632 | 50116600 | - | 2.6   | 3.2   |
| ENSG0000(SOS2      | protein_co chr14 | 50117120 | 50231558 | - | 7.18  | 6.52  |
| ENSG0000(CDKL1     | protein_co chr14 | 50329404 | 50416461 | - | 0.25  | 0.1   |
| ENSG0000(NIN       | protein_co chr14 | 50719763 | 50831121 | - | 10.65 | 11    |
| ENSG0000(PYGL      | protein_co chr14 | 50857891 | 50944736 | - | 29.74 | 33.31 |
| ENSG0000(TRIM9     | protein_co chr14 | 50975262 | 51096061 | - | 0.13  | 0.08  |
| ENSG0000(PSMC6     | protein_co chr14 | 52707172 | 52728587 | + | 33.65 | 33.6  |
| ENSG0000(GNPNAT1   | protein_co chr14 | 52775194 | 52791668 | - | 8.43  | 8.24  |
| ENSG0000(DDHD1     | protein_co chr14 | 53036745 | 53153282 | - | 2.88  | 2.82  |
| ENSG0000(CDKN3     | protein_co chr14 | 54396849 | 54420218 | + | 1.43  | 1.66  |
| ENSG0000(CNIH1     | protein_co chr14 | 54423560 | 54441431 | - | 89.63 | 90.71 |
| ENSG0000(CGRRF1    | protein_co chr14 | 54509812 | 54539309 | + | 9.21  | 11.18 |
| ENSG0000(ATP6V1D   | protein_co chr14 | 67294371 | 67360265 | - | 39.14 | 39.66 |
| ENSG0000(C14orf105 | protein_co chr14 | 57469301 | 57493867 | - | 0     | 0.02  |
| ENSG0000(PLEK2     | protein_co chr14 | 67386983 | 67412200 | - | 6.46  | 6.29  |

|                   |                  |          |          |   |        |        |
|-------------------|------------------|----------|----------|---|--------|--------|
| ENSG0000(PIGH     | protein_co chr14 | 67581955 | 67600287 | - | 8.62   | 9.95   |
| ENSG0000(LRRC74A  | protein_co chr14 | 76826372 | 76870302 | + | 0      | 0      |
| ENSG0000(PSMA3    | protein_co chr14 | 58244831 | 58272012 | + | 42.33  | 40.67  |
| ENSG0000(VTI1B    | protein_co chr14 | 67647075 | 67674831 | - | 58.71  | 58.84  |
| ENSG0000(TIMM9    | protein_co chr14 | 58408494 | 58427614 | - | 20.86  | 21.66  |
| ENSG0000(GSTZ1    | protein_co chr14 | 77320884 | 77331597 | + | 18.45  | 16.38  |
| ENSG0000(KIAA0586 | protein_co chr14 | 58427385 | 58551289 | + | 3      | 2.28   |
| ENSG0000(TMED8    | protein_co chr14 | 77335021 | 77377109 | - | 2.95   | 2.88   |
| ENSG0000(SAMD15   | protein_co chr14 | 77376689 | 77391497 | + | 0.83   | 0.82   |
| ENSG0000(AHSA1    | protein_co chr14 | 77457870 | 77469474 | + | 57.08  | 56.84  |
| ENSG0000(DAAM1    | protein_co chr14 | 59188646 | 59371405 | + | 34.74  | 33.76  |
| ENSG0000(ISM2     | protein_co chr14 | 77474394 | 77498850 | - | 0.78   | 0.41   |
| ENSG0000(SPTLC2   | protein_co chr14 | 77505997 | 77616773 | - | 5.72   | 5.77   |
| ENSG0000(RIN3     | protein_co chr14 | 92513774 | 92688994 | + | 6.37   | 6.37   |
| ENSG0000(LGMN     | protein_co chr14 | 92703807 | 92748702 | - | 45.17  | 50.1   |
| ENSG0000(ALKBH1   | protein_co chr14 | 77672404 | 77708020 | - | 4.19   | 4.52   |
| ENSG0000(SNW1     | protein_co chr14 | 77717599 | 77761207 | - | 22.43  | 22.05  |
| ENSG0000(CHGA     | protein_co chr14 | 92923080 | 92935293 | + | 0.04   | 0      |
| ENSG0000(ITPK1    | protein_co chr14 | 92936914 | 93116320 | - | 14.25  | 12.78  |
| ENSG0000(DHRS7    | protein_co chr14 | 60144120 | 60169856 | - | 24.44  | 24.72  |
| ENSG0000(PPM1A    | protein_co chr14 | 60245752 | 60299087 | + | 22.86  | 21.4   |
| ENSG0000(SIX4     | protein_co chr14 | 60709528 | 60724348 | - | 2.61   | 2.98   |
| ENSG0000(GALNT16  | protein_co chr14 | 69259277 | 69357033 | + | 2.3    | 2.42   |
| ENSG0000(ASB2     | protein_co chr14 | 93934153 | 93976791 | - | 0      | 0      |
| ENSG0000(CEP128   | protein_co chr14 | 80476983 | 80959517 | - | 0.45   | 1.01   |
| ENSG0000(ERH      | protein_co chr14 | 69380123 | 69398627 | - | 56.93  | 56.61  |
| ENSG0000(HIF1A    | protein_co chr14 | 61695513 | 61748259 | + | 191.72 | 195.38 |
| ENSG0000(SUSD6    | protein_co chr14 | 69611596 | 69715142 | + | 10.74  | 11.71  |
| ENSG0000(SRSF5    | protein_co chr14 | 69726900 | 69772005 | + | 186.87 | 186.22 |
| ENSG0000(SLC10A1  | protein_co chr14 | 69775417 | 69797289 | - | 0      | 0.03   |
| ENSG0000(EIF5     | protein_co chr14 | 1.03E+08 | 1.03E+08 | + | 170.89 | 146.45 |
| ENSG0000(SERPINA4 | protein_co chr14 | 94561091 | 94569913 | + | 0      | 0      |
| ENSG0000(SLC8A3   | protein_co chr14 | 70044217 | 70189070 | - | 0.04   | 0      |
| ENSG0000(DICER1   | protein_co chr14 | 95086228 | 95158010 | - | 8.8    | 11.21  |
| ENSG0000(ZFYVE21  | protein_co chr14 | 1.04E+08 | 1.04E+08 | + | 27.36  | 27.93  |
| ENSG0000(MTHFD1   | protein_co chr14 | 64388031 | 64463457 | + | 14.01  | 13.66  |
| ENSG0000(TCL1A    | protein_co chr14 | 95709967 | 95714196 | - | 0      | 0      |
| ENSG0000(ZC3H14   | protein_co chr14 | 88562909 | 88627596 | + | 21.35  | 17.77  |
| ENSG0000(TELO2    | protein_co chr16 | 1493344  | 1510457  | + | 6.93   | 6.93   |
| ENSG0000(PCNX1    | protein_co chr14 | 70907405 | 71115382 | + | 16.31  | 16.8   |
| ENSG0000(BDKRB1   | protein_co chr14 | 96255824 | 96268967 | + | 27.49  | 27.49  |
| ENSG0000(GSKIP    | protein_co chr14 | 96363452 | 96387288 | + | 6.12   | 6.01   |
| ENSG0000(VRK1     | protein_co chr14 | 96797304 | 96931722 | + | 1.9    | 1.53   |
| ENSG0000(PSMC1    | protein_co chr14 | 90256495 | 90275429 | + | 68.15  | 70.65  |
| ENSG0000(PAPLN    | protein_co chr14 | 73237497 | 73274640 | + | 2.52   | 3.43   |

|                    |                  |          |          |   |        |       |
|--------------------|------------------|----------|----------|---|--------|-------|
| ENSG0000(RPS6KA5)  | protein_co chr14 | 90847862 | 91060636 | - | 1.71   | 2.39  |
| ENSG0000(PPP4R3A)  | protein_co chr14 | 91457611 | 91510554 | - | 18.69  | 23.24 |
| ENSG0000(C14orf93) | protein_co chr14 | 22985908 | 23010166 | - | 3.11   | 4.69  |
| ENSG0000(PSMB5)    | protein_co chr14 | 23016543 | 23035230 | - | 81.76  | 76.27 |
| ENSG0000(YY1)      | protein_co chr14 | 1E+08    | 1E+08    | + | 20.81  | 17.47 |
| ENSG0000(ACIN1)    | protein_co chr14 | 23058564 | 23095614 | - | 99.47  | 94.46 |
| ENSG0000(CCNB1IP1) | protein_co chr14 | 20311368 | 20333312 | - | 15.59  | 16.53 |
| ENSG0000(TRIP11)   | protein_co chr14 | 91965991 | 92040896 | - | 9.76   | 12.43 |
| ENSG0000(APEX1)    | protein_co chr14 | 20455191 | 20457772 | + | 84.62  | 85.29 |
| ENSG0000(PABPN1)   | protein_co chr14 | 23321289 | 23326185 | + | 57.95  | 55.09 |
| ENSG0000(EFS)      | protein_co chr14 | 23356402 | 23365752 | - | 0.02   | 0.04  |
| ENSG0000(ARHGAP5)  | protein_co chr14 | 32076114 | 32159728 | + | 15.59  | 15.3  |
| ENSG0000(CINP)     | protein_co chr14 | 1.02E+08 | 1.02E+08 | - | 16.75  | 19.08 |
| ENSG0000(DHRS2)    | protein_co chr14 | 23630115 | 23645639 | + | 0      | 0     |
| ENSG0000(SRP54)    | protein_co chr14 | 34981957 | 35029567 | + | 23.78  | 21.28 |
| ENSG0000(CPNE6)    | protein_co chr14 | 24070837 | 24078100 | + | 0      | 0     |
| ENSG0000(CHD8)     | protein_co chr14 | 21385194 | 21456126 | - | 15.35  | 15.4  |
| ENSG0000(PCK2)     | protein_co chr14 | 24094053 | 24110598 | + | 28.02  | 29.51 |
| ENSG0000(KIAA0391) | protein_co chr14 | 35121846 | 35277614 | + | 8.77   | 9.06  |
| ENSG0000(DCAF11)   | protein_co chr14 | 24114195 | 24125242 | + | 23.63  | 29.16 |
| ENSG0000(PSMA6)    | protein_co chr14 | 35278633 | 35317493 | + | 61.36  | 65.42 |
| ENSG0000(NFKBIA)   | protein_co chr14 | 35401511 | 35404749 | - | 42.46  | 36.92 |
| ENSG0000(EMC9)     | protein_co chr14 | 24138959 | 24141588 | - | 6.74   | 6.83  |
| ENSG0000(PSME2)    | protein_co chr14 | 24143362 | 24147570 | - | 45.06  | 39.95 |
| ENSG0000(BRMS1L)   | protein_co chr14 | 35826318 | 35932325 | + | 2.79   | 3.04  |
| ENSG0000(REC8)     | protein_co chr14 | 24171853 | 24180257 | + | 2.2    | 1.1   |
| ENSG0000(TM9SF1)   | protein_co chr14 | 24189143 | 24195687 | - | 41.91  | 32.54 |
| ENSG0000(SEC23A)   | protein_co chr14 | 39031919 | 39109646 | - | 52.99  | 57.29 |
| ENSG0000(GMPR2)    | protein_co chr14 | 24232422 | 24239242 | + | 41.4   | 33.86 |
| ENSG0000(PNN)      | protein_co chr14 | 39175183 | 39183218 | + | 19.1   | 19.95 |
| ENSG0000(RABGGTA)  | protein_co chr14 | 24265538 | 24271739 | - | 10.55  | 11.17 |
| ENSG0000(NFATC4)   | protein_co chr14 | 24365673 | 24379604 | + | 72.42  | 76.91 |
| ENSG0000(PLTP)     | protein_co chr20 | 45898621 | 45912155 | - | 191.54 | 215.6 |
| ENSG0000(PCIF1)    | protein_co chr20 | 45934628 | 45948023 | + | 9.59   | 10.87 |
| ENSG0000(GSS)      | protein_co chr20 | 34928430 | 34955817 | - | 16.19  | 18.24 |
| ENSG0000(MMP9)     | protein_co chr20 | 46008908 | 46016561 | + | 0.09   | 0.03  |
| ENSG0000(VSX1)     | protein_co chr20 | 25070885 | 25082365 | - | 0      | 0     |
| ENSG0000(TRPC4AP)  | protein_co chr20 | 35002404 | 35092871 | - | 36.3   | 35.91 |
| ENSG0000(PYGB)     | protein_co chr20 | 25248069 | 25298014 | + | 33.81  | 38.13 |
| ENSG0000(ABHD12)   | protein_co chr20 | 25294743 | 25390983 | - | 21.26  | 25.14 |
| ENSG0000(PROCR)    | protein_co chr20 | 35172073 | 35216240 | + | 50.3   | 45    |
| ENSG0000(GINS1)    | protein_co chr20 | 25407727 | 25452628 | + | 0.33   | 0.16  |
| ENSG0000(NINL)     | protein_co chr20 | 25452705 | 25585517 | - | 2.73   | 3.72  |
| ENSG0000(CD40)     | protein_co chr20 | 46118272 | 46129863 | + | 3.53   | 3.04  |
| ENSG0000(UQCC1)    | protein_co chr20 | 35302566 | 35412141 | - | 15.16  | 15.28 |

|                   |                  |          |          |   |       |        |
|-------------------|------------------|----------|----------|---|-------|--------|
| ENSG0000(ZMYND8   | protein_co chr20 | 47209214 | 47356889 | - | 6.55  | 8.53   |
| ENSG0000(SGK2     | protein_co chr20 | 43558968 | 43588237 | + | 0.3   | 0.37   |
| ENSG0000(IFT52    | protein_co chr20 | 43590931 | 43647296 | + | 21.77 | 21.84  |
| ENSG0000(MYBL2    | protein_co chr20 | 43667019 | 43716496 | + | 0.06  | 0.07   |
| ENSG0000(R3HDML   | protein_co chr20 | 44336986 | 44351235 | + | 0     | 0      |
| ENSG0000(HNF4A    | protein_co chr20 | 44355700 | 44434596 | + | 0     | 0      |
| ENSG0000(NDRG3    | protein_co chr20 | 36651766 | 36746078 | - | 13.48 | 13.74  |
| ENSG0000(SLA2     | protein_co chr20 | 36612318 | 36646216 | - | 0.03  | 0      |
| ENSG0000(C2orf24  | protein_co chr20 | 36605734 | 36612557 | + | 34.93 | 35.82  |
| ENSG0000(NFATC2   | protein_co chr20 | 51386957 | 51562831 | - | 0.05  | 0.02   |
| ENSG0000(RIMS4    | protein_co chr20 | 44751808 | 44810338 | - | 0.02  | 0.03   |
| ENSG0000(PABPC1L  | protein_co chr20 | 44910062 | 44959035 | + | 12.52 | 13.63  |
| ENSG0000(STK4     | protein_co chr20 | 44966474 | 45079959 | + | 9.91  | 9.4    |
| ENSG0000(SALL4    | protein_co chr20 | 51782331 | 51802520 | - | 0.06  | 0.02   |
| ENSG0000(ADNP     | protein_co chr20 | 50888919 | 50931240 | - | 13.46 | 13.92  |
| ENSG0000(PFDN4    | protein_co chr20 | 54207847 | 54228052 | + | 30.04 | 33.48  |
| ENSG0000(DOK5     | protein_co chr20 | 54475597 | 54651171 | + | 10.38 | 9.78   |
| ENSG0000(CSTF1    | protein_co chr20 | 56392371 | 56406369 | + | 11.55 | 11.82  |
| ENSG0000(BMP7     | protein_co chr20 | 57168748 | 57266629 | - | 0.21  | 0.32   |
| ENSG0000(RAE1     | protein_co chr20 | 57351010 | 57379211 | + | 15.95 | 18.77  |
| ENSG0000(TPD52L2  | protein_co chr20 | 63865228 | 63891545 | + | 66.37 | 66.13  |
| ENSG0000(DNAJC5   | protein_co chr20 | 63895182 | 63936031 | + | 16.37 | 16.99  |
| ENSG0000(NELFCD   | protein_co chr20 | 58981208 | 58995133 | + | 21.35 | 20.48  |
| ENSG0000(CTSZ     | protein_co chr20 | 58995185 | 59007247 | - | 92.66 | 92.38  |
| ENSG0000(PRPF6    | protein_co chr20 | 63981135 | 64033100 | + | 24.15 | 23.3   |
| ENSG0000(TUBB1    | protein_co chr20 | 59019254 | 59026654 | + | 0     | 0      |
| ENSG0000(PRELID3B | protein_co chr20 | 59033145 | 59042909 | - | 18.5  | 16.46  |
| ENSG0000(HRH3     | protein_co chr20 | 62214970 | 62220267 | - | 0     | 0      |
| ENSG0000(MTG2     | protein_co chr20 | 62183029 | 62203568 | + | 13    | 11.43  |
| ENSG0000(PSMA7    | protein_co chr20 | 62136735 | 62143440 | - | 92.32 | 100.24 |
| ENSG0000(SLCO4A1  | protein_co chr20 | 62642445 | 62685785 | + | 0.06  | 0      |
| ENSG0000(NTSR1    | protein_co chr20 | 62708837 | 62762771 | + | 0     | 0      |
| ENSG0000(MRGBP    | protein_co chr20 | 62796453 | 62801738 | + | 6.96  | 6.16   |
| ENSG0000(TCFL5    | protein_co chr20 | 62841115 | 62861763 | - | 4.47  | 5.8    |
| ENSG0000(DIDO1    | protein_co chr20 | 62877738 | 62937952 | - | 14.43 | 14.32  |
| ENSG0000(GID8     | protein_co chr20 | 62938119 | 62948475 | + | 11.27 | 11.3   |
| ENSG0000(SLC17A9  | protein_co chr20 | 62952647 | 62969585 | + | 0.15  | 0.15   |
| ENSG0000(BIRC7    | protein_co chr20 | 63235883 | 63240507 | + | 0     | 0.05   |
| ENSG0000(NKAIN4   | protein_co chr20 | 63240784 | 63272694 | - | 0     | 0.53   |
| ENSG0000(ARFGAP1  | protein_co chr20 | 63272785 | 63289793 | + | 34.02 | 34.75  |
| ENSG0000(AVP      | protein_co chr20 | 3082556  | 3084724  | - | 0     | 0      |
| ENSG0000(COL20A1  | protein_co chr20 | 63293186 | 63334851 | + | 0     | 0.01   |
| ENSG0000(CHRNA4   | protein_co chr20 | 63343223 | 63378401 | - | 0     | 0      |
| ENSG0000(EEF1A2   | protein_co chr20 | 63488013 | 63499315 | - | 0     | 0.04   |
| ENSG0000(PTK6     | protein_co chr20 | 63528001 | 63537370 | - | 0.02  | 0.08   |

|                   |                  |          |          |   |        |        |
|-------------------|------------------|----------|----------|---|--------|--------|
| ENSG0000(GMEB2    | protein_co chr20 | 63587602 | 63627041 | - | 4.32   | 4.51   |
| ENSG0000(C20orf27 | protein_co chr20 | 3753508  | 3768387  | - | 18.14  | 16.94  |
| ENSG0000(SPEF1    | protein_co chr20 | 3777504  | 3781448  | - | 0.07   | 0.04   |
| ENSG0000(CDC25B   | protein_co chr20 | 3786772  | 3806121  | + | 39.85  | 43.3   |
| ENSG0000(ISM1     | protein_co chr20 | 13221771 | 13300651 | + | 0.06   | 0.02   |
| ENSG0000(RNF24    | protein_co chr20 | 3927309  | 4015582  | - | 17.8   | 16.96  |
| ENSG0000(ARFRP1   | protein_co chr20 | 63698642 | 63708025 | - | 17.47  | 17.52  |
| ENSG0000(NDUFAF5  | protein_co chr20 | 13784950 | 13821582 | + | 4.81   | 8.74   |
| ENSG0000(SEL1L2   | protein_co chr20 | 13849247 | 13996443 | - | 0      | 0      |
| ENSG0000(TRIB3    | protein_co chr20 | 362835   | 397559   | + | 36.37  | 33.76  |
| ENSG0000(RASSF2   | protein_co chr20 | 4780023  | 4823645  | - | 0.62   | 1.15   |
| ENSG0000(CSNK2A1  | protein_co chr20 | 473591   | 543821   | - | 44.59  | 40.82  |
| ENSG0000(SLC52A3  | protein_co chr20 | 760080   | 776015   | - | 0      | 0      |
| ENSG0000(RPS10P5  | processed_chr20  | 839447   | 839977   | - | 0      | 0      |
| ENSG0000(ANGPT4   | protein_co chr20 | 869899   | 916317   | - | 0      | 0.02   |
| ENSG0000(RSPO4    | protein_co chr20 | 958452   | 1002264  | - | 0.02   | 0.07   |
| ENSG0000(CDS2     | protein_co chr20 | 5126786  | 5197887  | + | 13.51  | 14.07  |
| ENSG0000(PROKR2   | protein_co chr20 | 5302040  | 5314369  | - | 0      | 0      |
| ENSG0000(HM13     | protein_co chr20 | 31514428 | 31577923 | + | 102.19 | 99.59  |
| ENSG0000(SNPH     | protein_co chr20 | 1266316  | 1309328  | + | 3.36   | 3.44   |
| ENSG0000(MYLK2    | protein_co chr20 | 31819308 | 31834689 | + | 0.02   | 0      |
| ENSG0000(SIRPB1   | protein_co chr20 | 1563521  | 1620061  | - | 5.82   | 4.19   |
| ENSG0000(SEC23B   | protein_co chr20 | 18507493 | 18561415 | + | 9.21   | 8.21   |
| ENSG0000(FERMT1   | protein_co chr20 | 6074845  | 6123544  | - | 3.02   | 2.94   |
| ENSG0000(HAO1     | protein_co chr20 | 7882981  | 7940474  | - | 0.06   | 0      |
| ENSG0000(PDYN     | protein_co chr20 | 1978757  | 1994285  | - | 0      | 0      |
| ENSG0000(CCM2L    | protein_co chr20 | 32010450 | 32032180 | + | 0      | 0      |
| ENSG0000(PLCB4    | protein_co chr20 | 9068763  | 9481242  | + | 0.35   | 0.38   |
| ENSG0000(MYL9     | protein_co chr20 | 36541484 | 36551447 | + | 211.33 | 239.22 |
| ENSG0000(HCK      | protein_co chr20 | 32052188 | 32101856 | + | 0      | 0      |
| ENSG0000(TM9SF4   | protein_co chr20 | 32109506 | 32167258 | + | 29.51  | 27.37  |
| ENSG0000(TLDC2    | protein_co chr20 | 36876121 | 36894235 | + | 0      | 0      |
| ENSG0000(CRNKL1   | protein_co chr20 | 20034368 | 20056046 | - | 7.59   | 8.28   |
| ENSG0000(POFUT1   | protein_co chr20 | 32207880 | 32238667 | + | 17.44  | 19.43  |
| ENSG0000(SAMHD1   | protein_co chr20 | 36890229 | 36951843 | - | 10.98  | 10.4   |
| ENSG0000(PAK5     | protein_co chr20 | 9537389  | 9839041  | - | 0      | 0      |
| ENSG0000(KIF3B    | protein_co chr20 | 32277664 | 32335011 | + | 10.38  | 10.52  |
| ENSG0000(MROH8    | protein_co chr20 | 37101226 | 37179588 | - | 2.13   | 1.36   |
| ENSG0000(NOP56    | protein_co chr20 | 2652145  | 2658393  | + | 38.24  | 32.82  |
| ENSG0000(MANBAL   | protein_co chr20 | 37289638 | 37317260 | + | 33.27  | 33.16  |
| ENSG0000(IDH3B    | protein_co chr20 | 2658395  | 2664219  | - | 22.8   | 26.99  |
| ENSG0000(MAPRE1   | protein_co chr20 | 32819893 | 32850405 | + | 20.82  | 22.24  |
| ENSG0000(JAG1     | protein_co chr20 | 10637684 | 10674107 | - | 9.05   | 10.97  |
| ENSG0000(CDK5RAP1 | protein_co chr20 | 33358839 | 33401561 | - | 7.09   | 8.21   |
| ENSG0000(SNTA1    | protein_co chr20 | 33407955 | 33443892 | - | 14.8   | 14.89  |



|                   |                  |          |          |   |        |        |
|-------------------|------------------|----------|----------|---|--------|--------|
| ENSG0000(OXT      | protein_co chr20 | 3071620  | 3072517  | + | 0      | 0      |
| ENSG0000(TTI1     | protein_co chr20 | 37983007 | 38033468 | - | 6.4    | 5.26   |
| ENSG0000(E2F1     | protein_co chr20 | 33675683 | 33686404 | - | 0.5    | 0.36   |
| ENSG0000(RPRD1B   | protein_co chr20 | 38033546 | 38127780 | + | 5.87   | 7.17   |
| ENSG0000(PXMP4    | protein_co chr20 | 33702754 | 33720319 | - | 4.75   | 5.05   |
| ENSG0000(CHMP4B   | protein_co chr20 | 33811304 | 33854366 | + | 71.22  | 72.24  |
| ENSG0000(BPI      | protein_co chr20 | 38260149 | 38337505 | + | 1.01   | 2.75   |
| ENSG0000(CST9L    | protein_co chr20 | 23564732 | 23568749 | - | 0      | 0      |
| ENSG0000(SLC32A1  | protein_co chr20 | 38724462 | 38729372 | + | 0      | 0      |
| ENSG0000(CST3     | protein_co chr20 | 23626706 | 23638473 | - | 443.72 | 447.09 |
| ENSG0000(ASIP     | protein_co chr20 | 34194569 | 34269344 | + | 0.48   | 0.92   |
| ENSG0000(CST4     | protein_co chr20 | 23685640 | 23689040 | - | 0      | 0      |
| ENSG0000(ACR5     | protein_co chr20 | 38748442 | 38772520 | + | 2.45   | 2.32   |
| ENSG0000(WFDC2    | protein_co chr20 | 45469706 | 45481532 | + | 0      | 0.32   |
| ENSG0000(AHCY     | protein_co chr20 | 34280268 | 34311802 | - | 35.36  | 39.15  |
| ENSG0000(PPP1R16B | protein_co chr20 | 38805705 | 38923024 | + | 0.01   | 0      |
| ENSG0000(SPINT3   | protein_co chr20 | 45512461 | 45515624 | - | 0      | 0      |
| ENSG0000(FAM83D   | protein_co chr20 | 38926312 | 38953106 | + | 0.14   | 0.08   |
| ENSG0000(EPPIN    | protein_co chr20 | 45540626 | 45547752 | - | 0.32   | 0.43   |
| ENSG0000(DHX35    | protein_co chr20 | 38962299 | 39039723 | + | 3.41   | 3.41   |
| ENSG0000(DNTTIP1  | protein_co chr20 | 45791937 | 45811427 | + | 18.39  | 18.8   |
| ENSG0000(MAP1LC3A | protein_co chr20 | 34546854 | 34560345 | + | 26.68  | 29.14  |
| ENSG0000(SYNDIG1  | protein_co chr20 | 24469199 | 24666616 | + | 0      | 0      |
| ENSG0000(PIGU     | protein_co chr20 | 34560542 | 34698790 | - | 8.41   | 10     |
| ENSG0000(TNNC2    | protein_co chr20 | 45823214 | 45833745 | - | 1.24   | 1      |
| ENSG0000(ACOT8    | protein_co chr20 | 45841721 | 45857406 | - | 12.51  | 13.94  |
| ENSG0000(APMAP    | protein_co chr20 | 24962925 | 24992979 | - | 75.34  | 76.35  |
| ENSG0000(CELF4    | protein_co chr18 | 37243047 | 37566037 | - | 0      | 0      |
| ENSG0000(ZNF516   | protein_co chr18 | 76358190 | 76495190 | - | 6.41   | 4.95   |
| ENSG0000(CDH20    | protein_co chr18 | 61333582 | 61555773 | + | 0      | 0.15   |
| ENSG0000(ADNP2    | protein_co chr18 | 80109031 | 80147523 | + | 5.71   | 5.76   |
| ENSG0000(RBFA     | protein_co chr18 | 80034358 | 80046397 | + | 11.03  | 12.48  |
| ENSG0000(USP14    | protein_co chr18 | 158383   | 214629   | + | 18.23  | 17.94  |
| ENSG0000(VAPA     | protein_co chr18 | 9914002  | 9960021  | + | 145.58 | 134.91 |
| ENSG0000(METTL4   | protein_co chr18 | 2537525  | 2571509  | - | 4.26   | 2.67   |
| ENSG0000(LPIN2    | protein_co chr18 | 2916994  | 3013315  | - | 10.51  | 10.41  |
| ENSG0000(SMCHD1   | protein_co chr18 | 2655738  | 2805017  | + | 8.22   | 7.88   |
| ENSG0000(MYOM1    | protein_co chr18 | 3066807  | 3220108  | - | 0.52   | 0.42   |
| ENSG0000(MYL12A   | protein_co chr18 | 3247481  | 3256236  | + | 237.54 | 216.6  |
| ENSG0000(CEP76    | protein_co chr18 | 12661833 | 12702777 | - | 2.67   | 2.56   |
| ENSG0000(ST8SIA5  | protein_co chr18 | 46667821 | 46759257 | - | 0.11   | 0      |
| ENSG0000(CEP192   | protein_co chr18 | 12991362 | 13125052 | + | 3.71   | 4.45   |
| ENSG0000(RNMT     | protein_co chr18 | 13726660 | 13764558 | + | 11.59  | 10.66  |
| ENSG0000(SMAD7    | protein_co chr18 | 48919853 | 48950711 | - | 5.87   | 7.05   |
| ENSG0000(LIPG     | protein_co chr18 | 49560699 | 49599182 | + | 4.9    | 4.87   |

|                  |                  |          |          |   |       |        |
|------------------|------------------|----------|----------|---|-------|--------|
| ENSG0000(LAMA1   | protein_co chr18 | 6941744  | 7117814  | - | 5.6   | 4.58   |
| ENSG0000(RNF125  | protein_co chr18 | 32018372 | 32073213 | + | 0.1   | 0.13   |
| ENSG0000(ANKRD12 | protein_co chr18 | 9136228  | 9285985  | + | 10.18 | 9.04   |
| ENSG0000(NOL4    | protein_co chr18 | 33851100 | 34224952 | - | 0     | 0      |
| ENSG0000(POLI    | protein_co chr18 | 54269404 | 54321266 | + | 10.83 | 9.45   |
| ENSG0000(MIB1    | protein_co chr18 | 21704957 | 21870957 | + | 7.66  | 7.5    |
| ENSG0000(RBBP8   | protein_co chr18 | 22798261 | 23026488 | + | 6.4   | 7.43   |
| ENSG0000(RIOK3   | protein_co chr18 | 23452823 | 23486603 | + | 23.35 | 24.81  |
| ENSG0000(CSTF2   | protein_co chrX  | 1.01E+08 | 1.01E+08 | + | 4.22  | 5.6    |
| ENSG0000(H2BFM   | protein_co chrX  | 1.04E+08 | 1.04E+08 | + | 0.42  | 0.29   |
| ENSG0000(MXRA5   | protein_co chrX  | 3308565  | 3346641  | - | 0.85  | 0.83   |
| ENSG0000(VSIG1   | protein_co chrX  | 1.08E+08 | 1.08E+08 | + | 0.74  | 0.28   |
| ENSG0000(PSMD10  | protein_co chrX  | 1.08E+08 | 1.08E+08 | - | 24.31 | 24.27  |
| ENSG0000(ATG4A   | protein_co chrX  | 1.08E+08 | 1.08E+08 | + | 4.97  | 5.46   |
| ENSG0000(STS     | protein_co chrX  | 7219456  | 7354810  | + | 7.26  | 6.28   |
| ENSG0000(TBL1X   | protein_co chrX  | 9463295  | 9719743  | + | 6.53  | 5.59   |
| ENSG0000(GPR143  | protein_co chrX  | 9725346  | 9786297  | - | 0     | 0      |
| ENSG0000(PGRMC1  | protein_co chrX  | 1.19E+08 | 1.19E+08 | + | 51.93 | 45.8   |
| ENSG0000(POLA1   | protein_co chrX  | 24693919 | 24996986 | + | 1.62  | 1.7    |
| ENSG0000(MID1    | protein_co chrX  | 10445310 | 10833654 | - | 11.26 | 9.03   |
| ENSG0000(NKAP    | protein_co chrX  | 1.2E+08  | 1.2E+08  | - | 4.4   | 4.78   |
| ENSG0000(RHOXF1  | protein_co chrX  | 1.2E+08  | 1.2E+08  | - | 0     | 0      |
| ENSG0000(NXT2    | protein_co chrX  | 1.1E+08  | 1.1E+08  | + | 1.92  | 2.73   |
| ENSG0000(GUCY2F  | protein_co chrX  | 1.09E+08 | 1.09E+08 | - | 0.03  | 0.02   |
| ENSG0000(ATP1B4  | protein_co chrX  | 1.2E+08  | 1.2E+08  | + | 0.01  | 0.06   |
| ENSG0000(MCTS2P  | processed_ chr20 | 31547504 | 31548049 | + | 1.07  | 2.31   |
| ENSG0000(ALG13   | protein_co chrX  | 1.12E+08 | 1.12E+08 | + | 13.17 | 12.48  |
| ENSG0000(PRPS2   | protein_co chrX  | 12791355 | 12824222 | + | 21.97 | 26.77  |
| ENSG0000(TLR8    | protein_co chrX  | 12906620 | 12923169 | + | 0     | 0      |
| ENSG0000(MOSPD1  | protein_co chrX  | 1.35E+08 | 1.35E+08 | - | 14.2  | 12.93  |
| ENSG0000(AMMECR1 | protein_co chrX  | 1.1E+08  | 1.1E+08  | - | 3.2   | 3.21   |
| ENSG0000(CHRDL1  | protein_co chrX  | 1.11E+08 | 1.11E+08 | - | 0     | 0      |
| ENSG0000(WDR13   | protein_co chrX  | 48590042 | 48608867 | + | 41.76 | 44.28  |
| ENSG0000(SUV39H1 | protein_co chrX  | 48695554 | 48709012 | + | 1.27  | 1.56   |
| ENSG0000(PAGE4   | protein_co chrX  | 49829260 | 49833973 | + | 0     | 0      |
| ENSG0000(SRPX    | protein_co chrX  | 38149336 | 38220924 | - | 278.9 | 255.85 |
| ENSG0000(GLRA2   | protein_co chrX  | 14529298 | 14731812 | + | 0     | 0      |
| ENSG0000(XIAP    | protein_co chrX  | 1.24E+08 | 1.24E+08 | + | 7.83  | 5.6    |
| ENSG0000(STAG2   | protein_co chrX  | 1.24E+08 | 1.24E+08 | + | 23.87 | 23.22  |
| ENSG0000(ATP11C  | protein_co chrX  | 1.4E+08  | 1.4E+08  | - | 13.12 | 14.29  |
| ENSG0000(MCF2    | protein_co chrX  | 1.4E+08  | 1.4E+08  | - | 0.03  | 0.06   |
| ENSG0000(F9      | protein_co chrX  | 1.4E+08  | 1.4E+08  | + | 0     | 0      |
| ENSG0000(ABCD1   | protein_co chrX  | 1.54E+08 | 1.54E+08 | + | 6.08  | 5.17   |
| ENSG0000(CCDC22  | protein_co chrX  | 49235467 | 49250526 | + | 5.67  | 4.26   |
| ENSG0000(CACNA1F | protein_co chrX  | 49205063 | 49233371 | - | 0     | 0      |

|                   |                  |          |          |   |        |        |
|-------------------|------------------|----------|----------|---|--------|--------|
| ENSG0000(SYP      | protein_co chrX  | 49187804 | 49200259 | - | 0.53   | 0.31   |
| ENSG0000(PLP2     | protein_co chrX  | 49171926 | 49175239 | + | 89.3   | 85.31  |
| ENSG0000(BMX      | protein_co chrX  | 15464246 | 15556529 | + | 0.07   | 0      |
| ENSG0000(LUZP4    | protein_co chrX  | 1.15E+08 | 1.15E+08 | + | 0      | 0      |
| ENSG0000(PLS3     | protein_co chrX  | 1.16E+08 | 1.16E+08 | + | 195.5  | 207.18 |
| ENSG0000(NAA10    | protein_co chrX  | 1.54E+08 | 1.54E+08 | - | 38.03  | 35.43  |
| ENSG0000(RENBP    | protein_co chrX  | 1.54E+08 | 1.54E+08 | - | 0.98   | 1.11   |
| ENSG0000(ELF4     | protein_co chrX  | 1.3E+08  | 1.3E+08  | - | 7.75   | 7.96   |
| ENSG0000(SMARCA1  | protein_co chrX  | 1.29E+08 | 1.3E+08  | - | 26.44  | 26.03  |
| ENSG0000(MTMR8    | protein_co chrX  | 64268081 | 64395431 | - | 0      | 0      |
| ENSG0000(ASB9     | protein_co chrX  | 15235288 | 15270467 | - | 0.11   | 0.18   |
| ENSG0000(ZC3H12B  | protein_co chrX  | 65366638 | 65507887 | + | 0.05   | 0.04   |
| ENSG0000(RBBP7    | protein_co chrX  | 16839283 | 16870414 | - | 44.14  | 47.29  |
| ENSG0000(PPP1R2P9 | protein_co chrX  | 42777368 | 42778247 | - | 0      | 0      |
| ENSG0000(KCND1    | protein_co chrX  | 48961378 | 48971569 | - | 1.55   | 1.53   |
| ENSG0000(OPN1LW   | protein_co chrX  | 1.54E+08 | 1.54E+08 | + | 0      | 0      |
| ENSG0000(SLC25A14 | protein_co chrX  | 1.3E+08  | 1.3E+08  | + | 6.85   | 6.82   |
| ENSG0000(FMR1     | protein_co chrX  | 1.48E+08 | 1.48E+08 | + | 12.17  | 15.98  |
| ENSG0000(PIM2     | protein_co chrX  | 48913182 | 48919024 | - | 1.87   | 2.18   |
| ENSG0000(SCML2    | protein_co chrX  | 18239314 | 18354727 | - | 0.14   | 0.19   |
| ENSG0000(SLC35A2  | protein_co chrX  | 48903180 | 48911958 | - | 13.73  | 11.3   |
| ENSG0000(PQBP1    | protein_co chrX  | 48897912 | 48903143 | + | 29.8   | 29.79  |
| ENSG0000(RS1      | protein_co chrX  | 18639910 | 18672109 | - | 0      | 0      |
| ENSG0000(PCSK1N   | protein_co chrX  | 48831094 | 48835633 | - | 0.52   | 0.63   |
| ENSG0000(EMD      | protein_co chrX  | 1.54E+08 | 1.54E+08 | + | 35.15  | 41.97  |
| ENSG0000(TAZ      | protein_co chrX  | 1.54E+08 | 1.54E+08 | + | 13.82  | 16.94  |
| ENSG0000(RAB40A   | protein_co chrX  | 1.03E+08 | 1.03E+08 | + | 0      | 0.08   |
| ENSG0000(PGK1     | protein_co chrX  | 78065188 | 78129296 | + | 658.03 | 554.06 |
| ENSG0000(GATA1    | protein_co chrX  | 48786554 | 48794311 | + | 0      | 0      |
| ENSG0000(MAGT1    | protein_co chrX  | 77826364 | 77895593 | - | 25.23  | 25.4   |
| ENSG0000(SMS      | protein_co chrX  | 21940573 | 21994835 | + | 33.69  | 31.67  |
| ENSG0000(PHEX     | protein_co chrX  | 22032441 | 22251310 | + | 0.17   | 0.36   |
| ENSG0000(UBL4A    | protein_co chrX  | 1.54E+08 | 1.54E+08 | - | 19.54  | 14.27  |
| ENSG0000(CD99L2   | protein_co chrX  | 1.51E+08 | 1.51E+08 | - | 42.93  | 43.8   |
| ENSG0000(EEA1     | protein_co chr12 | 92770637 | 92929331 | - | 21.37  | 19.98  |
| ENSG0000(GPR50    | protein_co chrX  | 1.51E+08 | 1.51E+08 | + | 0      | 0      |
| ENSG0000(RP2      | protein_co chrX  | 46836940 | 46882358 | + | 3.31   | 2.62   |
| ENSG0000(JADE3    | protein_co chrX  | 46912276 | 47061242 | + | 3.47   | 3.59   |
| ENSG0000(CDK16    | protein_co chrX  | 47217860 | 47229997 | + | 42.86  | 47.48  |
| ENSG0000(USP11    | protein_co chrX  | 47232690 | 47248328 | + | 14.96  | 17.81  |
| ENSG0000(PCYT1B   | protein_co chrX  | 24558087 | 24672677 | - | 0.04   | 0.2    |
| ENSG0000(BRS3     | protein_co chrX  | 1.36E+08 | 1.36E+08 | + | 0      | 0      |
| ENSG0000(HTATSF1  | protein_co chrX  | 1.36E+08 | 1.37E+08 | + | 11.65  | 11.71  |
| ENSG0000(VGLL1    | protein_co chrX  | 1.37E+08 | 1.37E+08 | + | 0      | 0      |
| ENSG0000(CD40LG   | protein_co chrX  | 1.37E+08 | 1.37E+08 | + | 0      | 0      |

|                   |                  |          |          |   |         |         |
|-------------------|------------------|----------|----------|---|---------|---------|
| ENSG0000(TIMP1    | protein_co chrX  | 47582313 | 47586789 | + | 3915.21 | 3826.82 |
| ENSG0000(KLHL4    | protein_co chrX  | 87517749 | 87670050 | + | 6.06    | 5.43    |
| ENSG0000(GABRE    | protein_co chrX  | 1.52E+08 | 1.52E+08 | - | 21.48   | 23.46   |
| ENSG0000(PCDH11X  | protein_co chrX  | 91779261 | 92623230 | + | 0.02    | 0.05    |
| ENSG0000(FGD1     | protein_co chrX  | 54445454 | 54496166 | - | 4.99    | 6.39    |
| ENSG0000(PIN4     | protein_co chrX  | 72181353 | 72302926 | + | 13.05   | 11.58   |
| ENSG0000(PORCN    | protein_co chrX  | 48508962 | 48520814 | + | 11.49   | 11.18   |
| ENSG0000(ITIH6    | protein_co chrX  | 54748899 | 54798240 | - | 0       | 0       |
| ENSG0000(MAGED2   | protein_co chrX  | 54807599 | 54816012 | + | 99.87   | 105.71  |
| ENSG0000(RBM3     | protein_co chrX  | 48574449 | 48579066 | + | 156.4   | 158.45  |
| ENSG0000(KLF8     | protein_co chrX  | 56232421 | 56287889 | + | 0.96    | 0.74    |
| ENSG0000(SRPX2    | protein_co chrX  | 1.01E+08 | 1.01E+08 | + | 23.64   | 22.92   |
| ENSG0000(SYTL4    | protein_co chrX  | 1.01E+08 | 1.01E+08 | - | 2.73    | 1.91    |
| ENSG0000(ZDHHC15  | protein_co chrX  | 75368427 | 75523502 | - | 0       | 0.23    |
| ENSG0000(CENPI    | protein_co chrX  | 1.01E+08 | 1.01E+08 | + | 0.39    | 0.39    |
| ENSG0000(DRP2     | protein_co chrX  | 1.01E+08 | 1.01E+08 | + | 1.81    | 1.68    |
| ENSG0000(TAF7L    | protein_co chrX  | 1.01E+08 | 1.01E+08 | - | 0.05    | 0.16    |
| ENSG0000(PBDC1    | protein_co chrX  | 76172936 | 76178204 | + | 18.49   | 18.25   |
| ENSG0000(GLA      | protein_co chrX  | 1.01E+08 | 1.01E+08 | - | 14.2    | 11.92   |
| ENSG0000(ARMCX3   | protein_co chrX  | 1.02E+08 | 1.02E+08 | + | 35.84   | 32.65   |
| ENSG0000(BEX4     | protein_co chrX  | 1.03E+08 | 1.03E+08 | + | 1.4     | 1.35    |
| ENSG0000(RUBCNL   | protein_co chr13 | 46342000 | 46438190 | - | 0       | 0       |
| ENSG0000(NALCN    | protein_co chr13 | 1.01E+08 | 1.01E+08 | - | 0.16    | 0.12    |
| ENSG0000(FGF14    | protein_co chr13 | 1.02E+08 | 1.02E+08 | - | 0.02    | 0       |
| ENSG0000(HTR2A    | protein_co chr13 | 46831550 | 46897076 | - | 3.12    | 1.44    |
| ENSG0000(NDFIP2   | protein_co chr13 | 79481124 | 79556075 | + | 16.73   | 15.21   |
| ENSG0000(TNFSF13B | protein_co chr13 | 1.08E+08 | 1.08E+08 | + | 2.36    | 3.4     |
| ENSG0000(FNDC3A   | protein_co chr13 | 48975912 | 49209779 | + | 11.73   | 12.59   |
| ENSG0000(MLNR     | protein_co chr13 | 49220338 | 49222377 | + | 0       | 0       |
| ENSG0000(CDADC1   | protein_co chr13 | 49247925 | 49293485 | + | 5.19    | 4.21    |
| ENSG0000(CAB39L   | protein_co chr13 | 49308650 | 49444126 | - | 2.98    | 2.46    |
| ENSG0000(KLF5     | protein_co chr13 | 73054976 | 73077542 | + | 7.14    | 4.84    |
| ENSG0000(STK24    | protein_co chr13 | 98445185 | 98577940 | - | 26.43   | 21.7    |
| ENSG0000(ACP5     | protein_co chr19 | 11574660 | 11579008 | - | 0.57    | 0.6     |
| ENSG0000(DNAJC3   | protein_co chr13 | 95677139 | 95794989 | + | 12.52   | 12.31   |
| ENSG0000(UGGT2    | protein_co chr13 | 95801580 | 96053482 | - | 20.7    | 17.5    |
| ENSG0000(ARHGEF7  | protein_co chr13 | 1.11E+08 | 1.11E+08 | + | 15.84   | 13.74   |
| ENSG0000(FGF9     | protein_co chr13 | 21671383 | 21704498 | + | 0       | 0       |
| ENSG0000(SGCG     | protein_co chr13 | 23180952 | 23325165 | + | 0.25    | 0.15    |
| ENSG0000(PARP4    | protein_co chr13 | 24420926 | 24512810 | - | 42.21   | 43.29   |
| ENSG0000(SUPT20H  | protein_co chr13 | 37009312 | 37059713 | - | 16.11   | 15.77   |
| ENSG0000(MRPS31   | protein_co chr13 | 40729135 | 40771173 | - | 5.65    | 5.2     |
| ENSG0000(SLC25A15 | protein_co chr13 | 40789412 | 40810111 | + | 2.13    | 3.08    |
| ENSG0000(KPNA3    | protein_co chr13 | 49699307 | 49792921 | - | 9.56    | 9.96    |
| ENSG0000(FLT1     | protein_co chr13 | 28300344 | 28495145 | - | 0.87    | 0.71    |

|                   |                  |          |          |   |        |       |
|-------------------|------------------|----------|----------|---|--------|-------|
| ENSG0000(RGCC     | protein_co chr13 | 41457559 | 41470882 | + | 0      | 0.07  |
| ENSG0000(VWA8     | protein_co chr13 | 41566837 | 41961120 | - | 3.88   | 4.88  |
| ENSG0000(DGKH     | protein_co chr13 | 42040036 | 42256578 | + | 2.09   | 2.01  |
| ENSG0000(KATNAL1  | protein_co chr13 | 30202630 | 30307484 | - | 4.75   | 5.34  |
| ENSG0000(INTS6    | protein_co chr13 | 51354077 | 51454264 | - | 10.02  | 7.94  |
| ENSG0000(ACOD1    | protein_co chr13 | 76948497 | 76958642 | + | 0      | 0     |
| ENSG0000(DHRS12   | protein_co chr13 | 51767993 | 51804157 | - | 5.39   | 5.8   |
| ENSG0000(MEDAG    | protein_co chr13 | 30906191 | 30925572 | + | 99.2   | 93.71 |
| ENSG0000(TSC22D1  | protein_co chr13 | 44432143 | 44577147 | - | 41.3   | 46.98 |
| ENSG0000(CLN5     | protein_co chr13 | 76990660 | 77019143 | + | 19.12  | 19.85 |
| ENSG0000(OLFM4    | protein_co chr13 | 53028759 | 53052057 | + | 0      | 0     |
| ENSG0000(MSLN     | protein_co chr16 | 760762   | 768865   | + | 0.28   | 0.37  |
| ENSG0000(MGRN1    | protein_co chr16 | 4616493  | 4690974  | + | 20.47  | 21.96 |
| ENSG0000(ZNF629   | protein_co chr16 | 30778449 | 30787202 | - | 6.38   | 5.38  |
| ENSG0000(TRADD    | protein_co chr16 | 67154180 | 67160298 | - | 14.83  | 13.53 |
| ENSG0000(HSF4     | protein_co chr16 | 67164681 | 67169945 | + | 19.67  | 23.44 |
| ENSG0000(CORO1A   | protein_co chr16 | 30182827 | 30189076 | + | 0.67   | 0.29  |
| ENSG0000(MAPK3    | protein_co chr16 | 30114105 | 30123506 | - | 105.76 | 93.13 |
| ENSG0000(GDPD3    | protein_co chr16 | 30104810 | 30113856 | - | 1.83   | 1.98  |
| ENSG0000(ELMO3    | protein_co chr16 | 67199111 | 67204029 | + | 0.48   | 0.29  |
| ENSG0000(MT4      | protein_co chr16 | 56565049 | 56568957 | + | 0      | 0     |
| ENSG0000(PHKB     | protein_co chr16 | 47461123 | 47701523 | + | 16.09  | 15.04 |
| ENSG0000(LYRM1    | protein_co chr16 | 20899868 | 20925006 | + | 13.13  | 11.5  |
| ENSG0000(NUTF2    | protein_co chr16 | 67846732 | 67872567 | + | 51.03  | 57.35 |
| ENSG0000(NUP93    | protein_co chr16 | 56730105 | 56850286 | + | 11.21  | 11.12 |
| ENSG0000(CENPT    | protein_co chr16 | 67828157 | 67847811 | - | 17.02  | 15.89 |
| ENSG0000(TSNAXIP1 | protein_co chr16 | 67806765 | 67832148 | + | 1.1    | 0.93  |
| ENSG0000(NFAT5    | protein_co chr16 | 69565094 | 69704666 | + | 8.94   | 10.04 |
| ENSG0000(LONP2    | protein_co chr16 | 48244296 | 48363122 | + | 19.38  | 21.31 |
| ENSG0000(N4BP1    | protein_co chr16 | 48538726 | 48620148 | - | 12.01  | 8.1   |
| ENSG0000(CBLN1    | protein_co chr16 | 49277917 | 49281831 | - | 0      | 0     |
| ENSG0000(ARL2BP   | protein_co chr16 | 57245098 | 57253635 | + | 26.28  | 28.4  |
| ENSG0000(PLLP     | protein_co chr16 | 57248547 | 57284687 | - | 0.17   | 0.14  |
| ENSG0000(ZNF423   | protein_co chr16 | 49487524 | 49857919 | - | 0.71   | 1.02  |
| ENSG0000(CCL22    | protein_co chr16 | 57358772 | 57366190 | + | 0.02   | 0.02  |
| ENSG0000(DHODH    | protein_co chr16 | 72008588 | 72027664 | + | 1.12   | 1.78  |
| ENSG0000(CCL17    | protein_co chr16 | 57404767 | 57416062 | + | 0      | 0     |
| ENSG0000(CTCF     | protein_co chr16 | 67562407 | 67639183 | + | 7.83   | 8.59  |
| ENSG0000(ACD      | protein_co chr16 | 67657512 | 67660815 | - | 10.77  | 9.66  |
| ENSG0000(POLR2C   | protein_co chr16 | 57462387 | 57472010 | + | 26.41  | 23.61 |
| ENSG0000(PARD6A   | protein_co chr16 | 67660946 | 67662778 | + | 0.98   | 0.56  |
| ENSG0000(ZNF821   | protein_co chr16 | 71859680 | 71895336 | - | 3.98   | 4.07  |
| ENSG0000(MMP15    | protein_co chr16 | 58025566 | 58046901 | + | 3      | 2.72  |
| ENSG0000(USB1     | protein_co chr16 | 57999546 | 58021618 | + | 14.63  | 13.21 |
| ENSG0000(CYB5B    | protein_co chr16 | 69424525 | 69466266 | + | 40.74  | 38.41 |

|                 |           |                  |          |          |   |        |        |
|-----------------|-----------|------------------|----------|----------|---|--------|--------|
| ENSG00000100000 | CCDC113   | protein_co chr16 | 58231157 | 58283836 | + | 0.5    | 0.97   |
| ENSG00000100000 | PRSS54    | protein_co chr16 | 58279997 | 58295047 | - | 0      | 0      |
| ENSG00000100000 | NME3      | protein_co chr16 | 1770286  | 1771730  | - | 19.19  | 20.22  |
| ENSG00000100000 | NDRG4     | protein_co chr16 | 58462846 | 58513628 | + | 12.12  | 12.73  |
| ENSG00000100000 | PSMD7     | protein_co chr16 | 74296775 | 74306288 | + | 37.27  | 41.95  |
| ENSG00000100000 | SETD6     | protein_co chr16 | 58515479 | 58521181 | + | 5.89   | 7      |
| ENSG00000100000 | SLC38A7   | protein_co chr16 | 58665109 | 58685104 | - | 18.86  | 19.7   |
| ENSG00000100000 | VAC14     | protein_co chr16 | 70687439 | 70801161 | - | 24.38  | 25.99  |
| ENSG00000100000 | HAS3      | protein_co chr16 | 69105564 | 69118719 | + | 1.12   | 0.82   |
| ENSG00000100000 | TANGO6    | protein_co chr16 | 68843604 | 69085180 | + | 3.85   | 2.88   |
| ENSG00000100000 | COG4      | protein_co chr16 | 70480568 | 70523565 | - | 22.78  | 20.58  |
| ENSG00000100000 | SMPD3     | protein_co chr16 | 68358325 | 68448688 | - | 0.04   | 0.03   |
| ENSG00000100000 | SLC7A6OS  | protein_co chr16 | 68284503 | 68310946 | - | 5.61   | 5.72   |
| ENSG00000100000 | SLC7A6    | protein_co chr16 | 68264516 | 68301823 | + | 11.13  | 9.27   |
| ENSG00000100000 | PLA2G15   | protein_co chr16 | 68245304 | 68261062 | + | 15.64  | 13.97  |
| ENSG00000100000 | ESRP2     | protein_co chr16 | 68229111 | 68238102 | - | 0.03   | 0      |
| ENSG00000100000 | FA2H      | protein_co chr16 | 74712955 | 74774831 | - | 0      | 0      |
| ENSG00000100000 | WDR59     | protein_co chr16 | 74871367 | 75000173 | - | 18.15  | 21.64  |
| ENSG00000100000 | MON1B     | protein_co chr16 | 77190835 | 77202405 | + | 13.72  | 16.97  |
| ENSG00000100000 | CMC2      | protein_co chr16 | 80966448 | 81020270 | - | 14.31  | 18.44  |
| ENSG00000100000 | AXIN1     | protein_co chr16 | 287440   | 352673   | - | 8.75   | 9.25   |
| ENSG00000100000 | HCFC1R1   | protein_co chr16 | 3022620  | 3024286  | - | 112.75 | 114.91 |
| ENSG00000100000 | NPRL3     | protein_co chr16 | 84271    | 138860   | - | 15.77  | 14.7   |
| ENSG00000100000 | MLYCD     | protein_co chr16 | 83899126 | 83927026 | + | 1.61   | 1.67   |
| ENSG00000100000 | MPG       | protein_co chr16 | 77007    | 85853    | + | 41.99  | 45.46  |
| ENSG00000100000 | NECAB2    | protein_co chr16 | 83968632 | 84002776 | + | 0.8    | 0.62   |
| ENSG00000100000 | HSDL1     | protein_co chr16 | 84122146 | 84145192 | - | 8.22   | 8.22   |
| ENSG00000100000 | TAF1C     | protein_co chr16 | 84177847 | 84187070 | - | 8.2    | 9.89   |
| ENSG00000100000 | NAGPA     | protein_co chr16 | 5024844  | 5034141  | - | 14.72  | 15.42  |
| ENSG00000100000 | WFDC1     | protein_co chr16 | 84294646 | 84329851 | + | 0.06   | 0.07   |
| ENSG00000100000 | SEC14L5   | protein_co chr16 | 4958317  | 5019158  | + | 0.42   | 0.62   |
| ENSG00000100000 | COTL1     | protein_co chr16 | 84565594 | 84618077 | - | 43.87  | 41.82  |
| ENSG00000100000 | USP10     | protein_co chr16 | 84699978 | 84779922 | + | 15.89  | 15.46  |
| ENSG00000100000 | CRISPLD2  | protein_co chr16 | 84819984 | 84920768 | + | 1.35   | 1.45   |
| ENSG00000100000 | TSC2      | protein_co chr16 | 2047465  | 2088720  | + | 22.24  | 21.24  |
| ENSG00000100000 | ZNF500    | protein_co chr16 | 4748239  | 4767624  | - | 5.06   | 7.73   |
| ENSG00000100000 | RP11-723C | processed_chr7   | 1.4E+08  | 1.4E+08  | - | 0      | 0      |
| ENSG00000100000 | NME4      | protein_co chr16 | 396725   | 410367   | + | 76.7   | 81.35  |
| ENSG00000100000 | ABCC1     | protein_co chr16 | 15949577 | 16143074 | + | 21.68  | 22.18  |
| ENSG00000100000 | NOMO3     | protein_co chr16 | 16232495 | 16294814 | + | 35.8   | 33.3   |
| ENSG00000100000 | LMF1      | protein_co chr16 | 853634   | 981318   | - | 8.99   | 8.32   |
| ENSG00000100000 | FOXF1     | protein_co chr16 | 86510527 | 86515418 | + | 0.58   | 0.69   |
| ENSG00000100000 | NARFL     | protein_co chr16 | 729753   | 741329   | - | 10.34  | 10.57  |
| ENSG00000100000 | MTHFSD    | protein_co chr16 | 86530176 | 86555235 | - | 8.17   | 7.8    |
| ENSG00000100000 | CLCN7     | protein_co chr16 | 1444934  | 1475580  | - | 46.96  | 52.18  |

|                    |                   |          |            |        |        |
|--------------------|-------------------|----------|------------|--------|--------|
| ENSG0000(HAGHL     | protein_co chr16  | 726936   | 735525 +   | 7.46   | 5.24   |
| ENSG0000(FAM173A   | protein_co chr16  | 720581   | 722601 +   | 10.51  | 8.98   |
| ENSG0000(SLC7A5    | protein_co chr16  | 87830023 | 87869488 - | 29.72  | 29.66  |
| ENSG0000(METRNL    | protein_co chr16  | 715115   | 719655 +   | 23.42  | 22.39  |
| ENSG0000(FBXO31    | protein_co chr16  | 87326987 | 87392142 - | 19.22  | 17.88  |
| ENSG0000(STUB1     | protein_co chr16  | 680224   | 682870 +   | 50.6   | 49.2   |
| ENSG0000(RHBDL1    | protein_co chr16  | 675666   | 678268 +   | 1.74   | 1.06   |
| ENSG0000(NUBP1     | protein_co chr16  | 10743786 | 10769351 + | 8.11   | 8.26   |
| ENSG0000(UBE2I     | protein_co chr16  | 1308880  | 1327018 +  | 57.92  | 48.72  |
| ENSG0000(ZP2       | protein_co chr16  | 21197450 | 21214510 - | 0      | 0      |
| ENSG0000(MEFV      | protein_co chr16  | 3242028  | 3256627 -  | 0.16   | 0.07   |
| ENSG0000(CRYM      | protein_co chr16  | 21238874 | 21303083 - | 1.59   | 0.43   |
| ENSG0000(EEF2K     | protein_co chr16  | 22206282 | 22288732 + | 9.52   | 9.38   |
| ENSG0000(CAPN15    | protein_co chr16  | 527717   | 554636 +   | 8.42   | 11.12  |
| ENSG0000(PIEZO1    | protein_co chr16  | 88715343 | 88785211 - | 55.37  | 41.02  |
| ENSG0000(GSPT1     | protein_co chr16  | 11868128 | 11916082 - | 25.64  | 28.89  |
| ENSG0000(ZNF174    | protein_co chr16  | 3401235  | 3409370 +  | 5.21   | 4.35   |
| ENSG0000(CLUAP1    | protein_co chr16  | 3500924  | 3539048 +  | 19.23  | 12.23  |
| ENSG0000(UBFD1     | protein_co chr16  | 23557362 | 23574389 + | 22.63  | 21.92  |
| ENSG0000(PRSS33    | protein_co chr16  | 2783953  | 2787948 -  | 0.07   | 0      |
| ENSG0000(EARS2     | protein_co chr16  | 23522014 | 23557731 - | 5.85   | 6.3    |
| ENSG0000(ELOB      | protein_co chr16  | 2771414  | 2777297 -  | 158.59 | 162.68 |
| ENSG0000(GGA2      | protein_co chr16  | 23463542 | 23521995 - | 25.92  | 22.94  |
| ENSG0000(AQP8      | protein_co chr16  | 25215731 | 25228940 + | 0      | 0      |
| ENSG0000(CPPED1    | protein_co chr16  | 12659799 | 12804017 - | 0.53   | 0.46   |
| ENSG0000(USP31     | protein_co chr16  | 23061406 | 23149270 - | 1.35   | 1.33   |
| ENSG0000(HMOX2     | protein_co chr16  | 4474690  | 4510347 +  | 22.93  | 19.14  |
| ENSG0000(DNAJA3    | protein_co chr16  | 4425805  | 4456775 +  | 15.33  | 13.33  |
| ENSG0000(CORO7-PAI | protein_co chr16  | 4340251  | 4420494 -  | 0      | 0      |
| ENSG0000(BFAR      | protein_co chr16  | 14632815 | 14669236 + | 39.77  | 37.88  |
| ENSG0000(SALL1     | protein_co chr16  | 51135975 | 51151367 - | 1.42   | 0.87   |
| ENSG0000(TOX3      | protein_co chr16  | 52438005 | 52547802 - | 0      | 0      |
| ENSG0000(RRN3P2    | transcribec chr16 | 29074976 | 29116718 + | 0.71   | 0.72   |
| ENSG0000(RBL2      | protein_co chr16  | 53433977 | 53491649 + | 14.39  | 16.35  |
| ENSG0000(QPRT      | protein_co chr16  | 29679008 | 29698699 + | 4.64   | 5.13   |
| ENSG0000(XYLT1     | protein_co chr16  | 17101769 | 17470881 - | 3.34   | 2.61   |
| ENSG0000(PYCARD    | protein_co chr16  | 31201485 | 31203450 - | 17.33  | 21.28  |
| ENSG0000(RPGRIP1L  | protein_co chr16  | 53597683 | 53703938 - | 2.41   | 3.97   |
| ENSG0000(MAZ       | protein_co chr16  | 29806106 | 29811164 + | 77.26  | 80.63  |
| ENSG0000(STX4      | protein_co chr16  | 31032889 | 31042975 + | 34.71  | 33.89  |
| ENSG0000(CDIPT     | protein_co chr16  | 29858357 | 29863736 - | 81.38  | 85.2   |
| ENSG0000(BCKDK     | protein_co chr16  | 31106107 | 31112791 + | 31.56  | 29.22  |
| ENSG0000(KAT8      | protein_co chr16  | 31115754 | 31131393 + | 16.92  | 16.6   |
| ENSG0000(NOMO1     | protein_co chr16  | 14833681 | 14896160 + | 60.39  | 62.41  |
| ENSG0000(IL21R     | protein_co chr16  | 27402162 | 27452042 + | 0.79   | 0.81   |

|                   |                  |          |          |   |        |        |
|-------------------|------------------|----------|----------|---|--------|--------|
| ENSG0000(SYT17    | protein_co chr16 | 19167971 | 19268334 | + | 0.44   | 0.01   |
| ENSG0000(TMC5     | protein_co chr16 | 19410496 | 19499113 | + | 0.03   | 0      |
| ENSG0000(CCP110   | protein_co chr16 | 19523811 | 19553408 | + | 2.84   | 3.2    |
| ENSG0000(C16orf62 | protein_co chr16 | 19555240 | 19706793 | + | 22     | 23.11  |
| ENSG0000(SLC6A2   | protein_co chr16 | 55655604 | 55706192 | + | 0      | 0      |
| ENSG0000(RNF40    | protein_co chr16 | 30761745 | 30776307 | + | 28.27  | 29.63  |
| ENSG0000(KNOP1    | protein_co chr16 | 19701934 | 19718235 | - | 9.46   | 7.92   |
| ENSG0000(AQP9     | protein_co chr15 | 58138169 | 58185911 | + | 0      | 0      |
| ENSG0000(AAGAB    | protein_co chr15 | 67201033 | 67255195 | - | 15.14  | 15.14  |
| ENSG0000(IQCH     | protein_co chr15 | 67254800 | 67502260 | + | 0.46   | 0.33   |
| ENSG0000(LACTB    | protein_co chr15 | 63121800 | 63142061 | + | 15.15  | 15.16  |
| ENSG0000(CORO2B   | protein_co chr15 | 68578969 | 68727806 | + | 14.91  | 15.65  |
| ENSG0000(CSK      | protein_co chr15 | 74782057 | 74803198 | + | 14.5   | 15.35  |
| ENSG0000(HERC1    | protein_co chr15 | 63608618 | 63833942 | - | 12.1   | 10.16  |
| ENSG0000(TRIP4    | protein_co chr15 | 64387748 | 64455303 | + | 8.35   | 8.21   |
| ENSG0000(MTFMT    | protein_co chr15 | 65001512 | 65029639 | - | 5.14   | 4.01   |
| ENSG0000(RASL12   | protein_co chr15 | 65053337 | 65076690 | - | 0.23   | 0.36   |
| ENSG0000(AP3B2    | protein_co chr15 | 82659281 | 82709914 | - | 0.4    | 0.45   |
| ENSG0000(ACSBG1   | protein_co chr15 | 78167468 | 78245688 | - | 0      | 0.01   |
| ENSG0000(IGDCC4   | protein_co chr15 | 65381464 | 65423072 | - | 0.26   | 0.5    |
| ENSG0000(RAB11A   | protein_co chr15 | 65726054 | 65891991 | + | 108.14 | 101.92 |
| ENSG0000(CTSH     | protein_co chr15 | 78921058 | 78949574 | - | 105.04 | 109.06 |
| ENSG0000(GOLGA8UF | unprocessε chr15 | 30791573 | 30801859 | + | 0      | 0      |
| ENSG0000(TTC23    | protein_co chr15 | 99136323 | 99251223 | - | 8.53   | 10.12  |
| ENSG0000(CD276    | protein_co chr15 | 73683966 | 73714518 | + | 55.42  | 63.52  |
| ENSG0000(FAH      | protein_co chr15 | 80152490 | 80186946 | + | 10.97  | 9.99   |
| ENSG0000(CEMIP    | protein_co chr15 | 80779343 | 80951776 | + | 643.83 | 564.08 |
| ENSG0000(RPAP1    | protein_co chr15 | 41517176 | 41544269 | - | 5      | 6.07   |
| ENSG0000(HOMER2   | protein_co chr15 | 82836946 | 82986153 | - | 0.81   | 0.78   |
| ENSG0000(EHD4     | protein_co chr15 | 41895939 | 41972578 | - | 2.19   | 2.51   |
| ENSG0000(TMEM87A  | protein_co chr15 | 42210452 | 42273663 | - | 10.75  | 12.22  |
| ENSG0000(ZNF106   | protein_co chr15 | 42412823 | 42491123 | - | 21.37  | 23.48  |
| ENSG0000(CEP152   | protein_co chr15 | 48712928 | 48811146 | - | 2.47   | 1.48   |
| ENSG0000(ATP8B4   | protein_co chr15 | 49858238 | 50182817 | - | 2.95   | 3.99   |
| ENSG0000(OCA2     | protein_co chr15 | 27754875 | 28099358 | - | 0      | 0      |
| ENSG0000(DTWD1    | protein_co chr15 | 49620980 | 49656232 | + | 29.26  | 29.83  |
| ENSG0000(TGM5     | protein_co chr15 | 43232595 | 43266857 | - | 0      | 0      |
| ENSG0000(FAM189A1 | protein_co chr15 | 29120254 | 29570723 | - | 0.46   | 0.31   |
| ENSG0000(GABPB1   | protein_co chr15 | 50275392 | 50355408 | - | 7.53   | 7.74   |
| ENSG0000(TJP1     | protein_co chr15 | 29699367 | 29968865 | - | 23.49  | 20.76  |
| ENSG0000(BMF      | protein_co chr15 | 40087890 | 40108892 | - | 3.66   | 3.39   |
| ENSG0000(DMXL2    | protein_co chr15 | 51447711 | 51622833 | - | 5.17   | 4.3    |
| ENSG0000(SCG3     | protein_co chr15 | 51681353 | 51721031 | + | 0      | 0      |
| ENSG0000(DNAJC17  | protein_co chr15 | 40765155 | 40807478 | - | 13.66  | 13.48  |
| ENSG0000(EIF3J    | protein_co chr15 | 44537057 | 44563029 | + | 23.23  | 24.59  |



|                  |                  |          |          |   |        |        |
|------------------|------------------|----------|----------|---|--------|--------|
| ENSG0000(SPG11   | protein_co chr15 | 44562696 | 44663678 | - | 15.36  | 14.74  |
| ENSG0000(RHOV    | protein_co chr15 | 40872214 | 40874289 | - | 0.1    | 0.15   |
| ENSG0000(VPS18   | protein_co chr15 | 40894430 | 40903975 | + | 11.59  | 12.01  |
| ENSG0000(OIP5    | protein_co chr15 | 41309268 | 41332621 | - | 0.14   | 0.26   |
| ENSG0000(SLC30A4 | protein_co chr15 | 45479611 | 45522807 | - | 3.14   | 2.38   |
| ENSG0000(BLOC1S6 | protein_co chr15 | 45587123 | 45615999 | + | 31.53  | 27.74  |
| ENSG0000(MYEF2   | protein_co chr15 | 48134631 | 48178517 | - | 3.34   | 2.06   |
| ENSG0000(SGK3    | protein_co chr8  | 66712418 | 66862022 | + | 1.54   | 3.86   |
| ENSG0000(PDGFRL  | protein_co chr8  | 17576433 | 17644071 | + | 15.19  | 13.05  |
| ENSG0000(CSPP1   | protein_co chr8  | 67062426 | 67196263 | + | 2.48   | 3.16   |
| ENSG0000(ZDHHC2  | protein_co chr8  | 17156029 | 17224799 | + | 19.55  | 19.45  |
| ENSG0000(BRF2    | protein_co chr8  | 37843268 | 37849904 | - | 4.38   | 3.57   |
| ENSG0000(TRIM35  | protein_co chr8  | 27284887 | 27311319 | - | 12.49  | 11.16  |
| ENSG0000(ZFAND1  | protein_co chr8  | 81701334 | 81732903 | - | 13.28  | 12.55  |
| ENSG0000(RP1     | protein_co chr8  | 54554361 | 54871720 | + | 0.01   | 0      |
| ENSG0000(CA2     | protein_co chr8  | 85463852 | 85481493 | + | 0      | 0      |
| ENSG0000(FZD3    | protein_co chr8  | 28494205 | 28574268 | + | 0.12   | 0.04   |
| ENSG0000(INTS9   | protein_co chr8  | 28767661 | 28890242 | - | 5.98   | 7.96   |
| ENSG0000(RIPK2   | protein_co chr8  | 89757747 | 89791063 | + | 9.6    | 8.64   |
| ENSG0000(EYA1    | protein_co chr8  | 71197433 | 71362232 | - | 0      | 0.08   |
| ENSG0000(NBN     | protein_co chr8  | 89933336 | 90003228 | - | 7.51   | 8.85   |
| ENSG0000(TRPA1   | protein_co chr8  | 72019917 | 72075617 | - | 1.82   | 1.23   |
| ENSG0000(CPQ     | protein_co chr8  | 96645227 | 97149654 | + | 34.2   | 34.34  |
| ENSG0000(DECR1   | protein_co chr8  | 90001405 | 90052092 | + | 48.55  | 52.33  |
| ENSG0000(CALB1   | protein_co chr8  | 90058608 | 90095475 | - | 0      | 0.18   |
| ENSG0000(IMPAD1  | protein_co chr8  | 56957933 | 56993844 | - | 19.77  | 19.72  |
| ENSG0000(SFRP1   | protein_co chr8  | 41261958 | 41309497 | - | 59.52  | 62.74  |
| ENSG0000(LAPTM4B | protein_co chr8  | 97775057 | 97853013 | + | 31.82  | 35.95  |
| ENSG0000(UBE2W   | protein_co chr8  | 73780097 | 73878910 | - | 6.46   | 7.05   |
| ENSG0000(POP1    | protein_co chr8  | 98117297 | 98159834 | + | 1.86   | 1.43   |
| ENSG0000(NIPAL2  | protein_co chr8  | 98189833 | 98294393 | - | 10.05  | 15.14  |
| ENSG0000(IKBKB   | protein_co chr8  | 42271302 | 42332653 | + | 14.96  | 13.14  |
| ENSG0000(PLAT    | protein_co chr8  | 42175233 | 42207724 | - | 39.05  | 26.54  |
| ENSG0000(JPH1    | protein_co chr8  | 74234700 | 74321328 | - | 0.07   | 0.04   |
| ENSG0000(DKK4    | protein_co chr8  | 42374068 | 42377232 | - | 0      | 0      |
| ENSG0000(STK3    | protein_co chr8  | 98401403 | 98942827 | - | 6.09   | 6.87   |
| ENSG0000(GDAP1   | protein_co chr8  | 74321130 | 74488872 | + | 2.13   | 1.52   |
| ENSG0000(RAB2A   | protein_co chr8  | 60516857 | 60623627 | + | 72.61  | 71.59  |
| ENSG0000(EIF3E   | protein_co chr8  | 1.08E+08 | 1.08E+08 | - | 138.64 | 141.31 |
| ENSG0000(EMC2    | protein_co chr8  | 1.08E+08 | 1.08E+08 | + | 26.77  | 22.87  |
| ENSG0000(ESRP1   | protein_co chr8  | 94641074 | 94707466 | + | 0      | 0      |
| ENSG0000(WISP1   | protein_co chr8  | 1.33E+08 | 1.33E+08 | + | 0.55   | 0.89   |
| ENSG0000(NDRG1   | protein_co chr8  | 1.33E+08 | 1.33E+08 | - | 222.84 | 189.52 |
| ENSG0000(ZC2HC1A | protein_co chr8  | 78666047 | 78719765 | + | 8.07   | 7.7    |
| ENSG0000(IL7     | protein_co chr8  | 78675743 | 78805523 | - | 2.18   | 1.15   |

|                     |                  |          |          |   |        |        |
|---------------------|------------------|----------|----------|---|--------|--------|
| ENSG0000( STMN2     | protein_co chr8  | 79610814 | 79666175 | + | 0      | 0      |
| ENSG0000( ARMC1     | protein_co chr8  | 65602456 | 65634217 | - | 8.86   | 9.03   |
| ENSG0000( TRPS1     | protein_co chr8  | 1.15E+08 | 1.16E+08 | - | 7.06   | 9.7    |
| ENSG0000( SPAG1     | protein_co chr8  | 1E+08    | 1E+08    | + | 0.54   | 0.58   |
| ENSG0000( CHRAC1    | protein_co chr8  | 1.41E+08 | 1.41E+08 | + | 8.75   | 10.58  |
| ENSG0000( NCALD     | protein_co chr8  | 1.02E+08 | 1.02E+08 | - | 0.07   | 0      |
| ENSG0000( SNX16     | protein_co chr8  | 81799581 | 81842866 | - | 5.77   | 5.72   |
| ENSG0000( GML       | protein_co chr8  | 1.43E+08 | 1.43E+08 | + | 0      | 0      |
| ENSG0000( UBR5      | protein_co chr8  | 1.02E+08 | 1.02E+08 | - | 21.46  | 19.01  |
| ENSG0000( GSDMD     | protein_co chr8  | 1.44E+08 | 1.44E+08 | + | 17.6   | 20.62  |
| ENSG0000( TSTA3     | protein_co chr8  | 1.44E+08 | 1.44E+08 | - | 26.7   | 29.87  |
| ENSG0000( PYCRL     | protein_co chr8  | 1.44E+08 | 1.44E+08 | - | 3.49   | 2.98   |
| ENSG0000( EEF1D     | protein_co chr8  | 1.44E+08 | 1.44E+08 | - | 270.02 | 265.53 |
| ENSG0000( ANXA13    | protein_co chr8  | 1.24E+08 | 1.24E+08 | - | 0      | 0      |
| ENSG0000( SQLE      | protein_co chr8  | 1.25E+08 | 1.25E+08 | + | 22.54  | 22.78  |
| ENSG0000( SH2D4A    | protein_co chr8  | 19313617 | 19396218 | + | 18.95  | 17.09  |
| ENSG0000( INTS10    | protein_co chr8  | 19817140 | 19852083 | + | 13.35  | 16.26  |
| ENSG0000( ERI1      | protein_co chr8  | 9002147  | 9116746  | + | 4.15   | 4.32   |
| ENSG0000( SLC39A14  | protein_co chr8  | 22367249 | 22434129 | + | 61.51  | 54.09  |
| ENSG0000( MTMR9     | protein_co chr8  | 11284416 | 11328146 | + | 2.61   | 2.62   |
| ENSG0000( LEPROTL1  | protein_co chr8  | 30095398 | 30177208 | + | 30.08  | 30.15  |
| ENSG0000( DCTN6     | protein_co chr8  | 30156297 | 30183640 | + | 22.32  | 20.11  |
| ENSG0000( R3HCC1    | protein_co chr8  | 23270120 | 23296279 | + | 11.15  | 13.96  |
| ENSG0000( GSR       | protein_co chr8  | 30678061 | 30727926 | - | 24.58  | 29.73  |
| ENSG0000( TNFRSF10A | protein_co chr8  | 23190452 | 23225126 | - | 2.42   | 2.55   |
| ENSG0000( UBXN8     | protein_co chr8  | 30732247 | 30767006 | + | 6.26   | 5.15   |
| ENSG0000( PPP2CB    | protein_co chr8  | 30774457 | 30814314 | - | 37.74  | 48.68  |
| ENSG0000( ERICH1    | protein_co chr8  | 614746   | 738106   | - | 8.64   | 10.24  |
| ENSG0000( NEFM      | protein_co chr8  | 24913012 | 24919098 | + | 0.13   | 0      |
| ENSG0000( TUSC3     | protein_co chr8  | 15417215 | 15766649 | + | 76.68  | 74.32  |
| ENSG0000( ARHGEF10  | protein_co chr8  | 1823976  | 1958641  | + | 18.62  | 18.61  |
| ENSG0000( KLHDC4    | protein_co chr16 | 87696485 | 87765992 | - | 6.57   | 6.41   |
| ENSG0000( MCM4      | protein_co chr8  | 47960185 | 47978160 | + | 11.62  | 8.77   |
| ENSG0000( ADAM2     | protein_co chr8  | 39743735 | 39838289 | - | 0      | 0      |
| ENSG0000( KCTD9     | protein_co chr8  | 25427847 | 25458476 | - | 13.95  | 11.61  |
| ENSG0000( FGL1      | protein_co chr8  | 17864380 | 17910365 | - | 0      | 0      |
| ENSG0000( ASAH1     | protein_co chr8  | 18055992 | 18084998 | - | 106.97 | 113.87 |
| ENSG0000( BNIP3L    | protein_co chr8  | 26382898 | 26505636 | + | 191.76 | 183.52 |
| ENSG0000( MAN2B1    | protein_co chr19 | 12646511 | 12666742 | - | 55.6   | 59.01  |
| ENSG0000( KCNN4     | protein_co chr19 | 43766533 | 43781257 | - | 2.34   | 2.94   |
| ENSG0000( TULP2     | protein_co chr19 | 48880965 | 48898733 | - | 0.03   | 0.07   |
| ENSG0000( NUCB1     | protein_co chr19 | 48900050 | 48923372 | + | 311.79 | 310.15 |
| ENSG0000( DHDH      | protein_co chr19 | 48933682 | 48944969 | + | 0.28   | 0.09   |
| ENSG0000( GYS1      | protein_co chr19 | 48968125 | 48993310 | - | 44.73  | 30.92  |
| ENSG0000( MAP4K1    | protein_co chr19 | 38587641 | 38618882 | - | 0.26   | 0.63   |

|                   |                  |          |          |   |        |        |
|-------------------|------------------|----------|----------|---|--------|--------|
| ENSG0000(CGB2     | protein_co chr19 | 49031912 | 49033238 | + | 0      | 0      |
| ENSG0000(ECH1     | protein_co chr19 | 38815422 | 38832005 | - | 51.15  | 54.12  |
| ENSG0000(HNRNPL   | protein_co chr19 | 38836388 | 38852347 | - | 88.84  | 95.84  |
| ENSG0000(NFKBIB   | protein_co chr19 | 38899700 | 38908893 | + | 12.68  | 12.02  |
| ENSG0000(LHB      | protein_co chr19 | 49015980 | 49017081 | - | 0      | 0      |
| ENSG0000(CGB3     | protein_co chr19 | 49022869 | 49024333 | - | 0      | 0      |
| ENSG0000(TUBB4A   | protein_co chr19 | 6494319  | 6502848  | - | 0      | 0      |
| ENSG0000(SARS2    | protein_co chr19 | 38915266 | 38930896 | - | 6.06   | 5.33   |
| ENSG0000(KCNA7    | protein_co chr19 | 49067418 | 49072941 | - | 0.09   | 0.06   |
| ENSG0000(SNRNP70  | protein_co chr19 | 49085419 | 49108605 | + | 86.3   | 93.11  |
| ENSG0000(CLPTM1   | protein_co chr19 | 44954585 | 44993341 | + | 48.41  | 47.62  |
| ENSG0000(RELB     | protein_co chr19 | 45001430 | 45038198 | + | 6.79   | 6.51   |
| ENSG0000(CLASRP   | protein_co chr19 | 45039040 | 45070956 | + | 15.82  | 12.31  |
| ENSG0000(LIN7B    | protein_co chr19 | 49114324 | 49118460 | + | 3.19   | 2.45   |
| ENSG0000(PPP1R37  | protein_co chr19 | 45091396 | 45148077 | + | 15.2   | 14.09  |
| ENSG0000(FCGRT    | protein_co chr19 | 49506816 | 49526333 | + | 130.89 | 134.31 |
| ENSG0000(PIH1D1   | protein_co chr19 | 49446298 | 49453497 | - | 31.61  | 30.92  |
| ENSG0000(CKM      | protein_co chr19 | 45306414 | 45322977 | - | 0      | 0      |
| ENSG0000(ARHGEF18 | protein_co chr19 | 7395113  | 7472477  | + | 9.34   | 9.75   |
| ENSG0000(PPP1R13L | protein_co chr19 | 45379634 | 45406349 | - | 9.45   | 9.37   |
| ENSG0000(PEX11G   | protein_co chr19 | 7476875  | 7497449  | - | 3.68   | 2.31   |
| ENSG0000(ERCC2    | protein_co chr19 | 45349837 | 45370918 | - | 13     | 16.01  |
| ENSG0000(DOT1L    | protein_co chr19 | 2164149  | 2232578  | + | 5.86   | 5.01   |
| ENSG0000(PLEKHJ1  | protein_co chr19 | 2230084  | 2237704  | - | 16.81  | 19.31  |
| ENSG0000(SLC17A7  | protein_co chr19 | 49429401 | 49442360 | - | 0.22   | 0.3    |
| ENSG0000(RNASEH2A | protein_co chr19 | 12802063 | 12813638 | + | 6.17   | 4.62   |
| ENSG0000(KLC3     | protein_co chr19 | 45333434 | 45351520 | + | 0.12   | 0.17   |
| ENSG0000(CD37     | protein_co chr19 | 49335171 | 49343335 | + | 0.03   | 0      |
| ENSG0000(SF3A2    | protein_co chr19 | 2236504  | 2248679  | + | 18.58  | 19.27  |
| ENSG0000(AMH      | protein_co chr19 | 2249309  | 2252073  | + | 0.03   | 0.46   |
| ENSG0000(DKKL1    | protein_co chr19 | 49361783 | 49375116 | + | 0.38   | 0      |
| ENSG0000(LYL1     | protein_co chr19 | 13099033 | 13103161 | - | 0.08   | 0.3    |
| ENSG0000(OAZ1     | protein_co chr19 | 2269509  | 2273490  | + | 671.04 | 649.1  |
| ENSG0000(TRMT1    | protein_co chr19 | 13104902 | 13117567 | - | 9.36   | 8.91   |
| ENSG0000(STX10    | protein_co chr19 | 13144058 | 13150383 | - | 34.98  | 35.19  |
| ENSG0000(RETN     | protein_co chr19 | 7669044  | 7670454  | + | 0      | 0      |
| ENSG0000(FCER2    | protein_co chr19 | 7688758  | 7702146  | - | 0      | 0      |
| ENSG0000(DMPK     | protein_co chr19 | 45769717 | 45782552 | - | 21.4   | 23.94  |
| ENSG0000(CLEC4M   | protein_co chr19 | 7763149  | 7769605  | + | 0      | 0      |
| ENSG0000(RSPH6A   | protein_co chr19 | 45795710 | 45815319 | - | 0      | 0      |
| ENSG0000(TBC1D17  | protein_co chr19 | 49877425 | 49888749 | + | 36.37  | 32.2   |
| ENSG0000(IL4I1    | protein_co chr19 | 49889654 | 49929539 | - | 0.24   | 0.32   |
| ENSG0000(TLE6     | protein_co chr19 | 2977446  | 2995184  | + | 0.53   | 0.37   |
| ENSG0000(CCDC130  | protein_co chr19 | 13731760 | 13763296 | + | 13.6   | 14.31  |
| ENSG0000(PTOV1    | protein_co chr19 | 49850735 | 49860744 | + | 55.48  | 50.53  |

|                   |                  |          |            |         |         |
|-------------------|------------------|----------|------------|---------|---------|
| ENSG0000(AES      | protein_co chr19 | 3052910  | 3063107 -  | 176.49  | 195.38  |
| ENSG0000(NOVA2    | protein_co chr19 | 45933734 | 45973546 - | 2.72    | 2.61    |
| ENSG0000(SGTA     | protein_co chr19 | 2754714  | 2783371 -  | 17.34   | 18.03   |
| ENSG0000(KIR3DX1  | protein_co chr19 | 54532692 | 54545771 + | 0.04    | 0.11    |
| ENSG0000(LILRB1   | protein_co chr19 | 54617158 | 54637528 + | 0       | 0       |
| ENSG0000(MED25    | protein_co chr19 | 49818279 | 49838816 + | 24.52   | 25.03   |
| ENSG0000(LILRA1   | protein_co chr19 | 54593582 | 54602090 + | 0       | 0       |
| ENSG0000(SNAPC2   | protein_co chr19 | 7920316  | 7923250 +  | 19.61   | 21.27   |
| ENSG0000(C19orf53 | protein_co chr19 | 13774168 | 13778462 + | 67.04   | 62.5    |
| ENSG0000(TIMM44   | protein_co chr19 | 7926718  | 7943920 -  | 18.62   | 19.18   |
| ENSG0000(CCDC61   | protein_co chr19 | 45995461 | 46021318 + | 3.21    | 2.01    |
| ENSG0000(IL27RA   | protein_co chr19 | 14031748 | 14053216 + | 0.7     | 0.93    |
| ENSG0000(ASF1B    | protein_co chr19 | 14119509 | 14136956 - | 0.35    | 0       |
| ENSG0000(TNNT1    | protein_co chr19 | 55132794 | 55149354 - | 1.69    | 1.51    |
| ENSG0000(VRK3     | protein_co chr19 | 49976467 | 50025946 - | 13.75   | 13.77   |
| ENSG0000(FAM32A   | protein_co chr19 | 16185380 | 16192046 + | 48.24   | 50.45   |
| ENSG0000(PPP6R1   | protein_co chr19 | 55229780 | 55258995 - | 21.85   | 21.49   |
| ENSG0000(C19orf44 | protein_co chr19 | 16496311 | 16521352 + | 3.82    | 3.76    |
| ENSG0000(MED26    | protein_co chr19 | 16574907 | 16629062 - | 2.97    | 3.33    |
| ENSG0000(OLFM2    | protein_co chr19 | 9853718  | 9936552 -  | 0.03    | 0.09    |
| ENSG0000(RASAL3   | protein_co chr19 | 15451624 | 15464571 - | 0.03    | 0.07    |
| ENSG0000(AKAP8    | protein_co chr19 | 15353385 | 15379798 - | 7.8     | 7.02    |
| ENSG0000(EPHX3    | protein_co chr19 | 15226919 | 15233435 - | 0       | 0.29    |
| ENSG0000(ILVBL    | protein_co chr19 | 15114984 | 15125785 - | 24.41   | 24.26   |
| ENSG0000(ZNF419   | protein_co chr19 | 57487711 | 57496097 + | 5.84    | 6.73    |
| ENSG0000(SYDE1    | protein_co chr19 | 15107403 | 15114988 + | 17.4    | 17.01   |
| ENSG0000(CASP14   | protein_co chr19 | 15049384 | 15058293 + | 0       | 0       |
| ENSG0000(SLC1A6   | protein_co chr19 | 14950034 | 15022990 - | 0       | 0.02    |
| ENSG0000(AURKC    | protein_co chr19 | 57230802 | 57235548 + | 0.21    | 0.42    |
| ENSG0000(POP4     | protein_co chr19 | 29604017 | 29617237 + | 27.2    | 26.43   |
| ENSG0000(CCNE1    | protein_co chr19 | 29811898 | 29824308 + | 2.91    | 2.67    |
| ENSG0000(URI1     | protein_co chr19 | 29923644 | 30016608 + | 16.75   | 17.39   |
| ENSG0000(PDCD5    | protein_co chr19 | 32581068 | 32587452 + | 87.62   | 100.19  |
| ENSG0000(ANKRD27  | protein_co chr19 | 32597007 | 32676597 - | 8.08    | 8.43    |
| ENSG0000(RPS16    | protein_co chr19 | 39433207 | 39435948 - | 1086.25 | 1089.34 |
| ENSG0000(TIMM50   | protein_co chr19 | 39480412 | 39493785 + | 19.29   | 22.22   |
| ENSG0000(LGALS13  | protein_co chr19 | 39602501 | 39607476 + | 0       | 0       |
| ENSG0000(FBL      | protein_co chr19 | 39834458 | 39846414 - | 59.77   | 55.79   |
| ENSG0000(DYRK1B   | protein_co chr19 | 39825350 | 39834201 - | 12      | 12.39   |
| ENSG0000(CLC      | protein_co chr19 | 39731250 | 39738028 - | 0       | 0       |
| ENSG0000(CNTD2    | protein_co chr19 | 40222208 | 40226690 - | 0.19    | 0.17    |
| ENSG0000(GPI      | protein_co chr19 | 34359480 | 34402156 + | 227.76  | 192.36  |
| ENSG0000(AKT2     | protein_co chr19 | 40230317 | 40285536 - | 65.23   | 62.94   |
| ENSG0000(PLD3     | protein_co chr19 | 40348456 | 40380439 + | 247.4   | 250.76  |
| ENSG0000(PRX      | protein_co chr19 | 40393768 | 40413366 - | 2.61    | 2.56    |

|                   |                  |          |          |   |         |         |
|-------------------|------------------|----------|----------|---|---------|---------|
| ENSG0000(PIAS4    | protein_co chr19 | 4007646  | 4039386  | + | 7.4     | 7.52    |
| ENSG0000(NUMBL    | protein_co chr19 | 40665905 | 40690972 | - | 32.33   | 30.48   |
| ENSG0000(EBI3     | protein_co chr19 | 4229498  | 4237531  | + | 0.1     | 0.27    |
| ENSG0000(CCDC94   | protein_co chr19 | 4247079  | 4269090  | + | 7.19    | 6.81    |
| ENSG0000(SHD      | protein_co chr19 | 4278601  | 4290724  | + | 0       | 0       |
| ENSG0000(TBCB     | protein_co chr19 | 36114289 | 36125947 | + | 81.48   | 70.68   |
| ENSG0000(FSD1     | protein_co chr19 | 4304600  | 4323843  | + | 1.33    | 1.47    |
| ENSG0000(POLR2I   | protein_co chr19 | 36113710 | 36115346 | - | 32.31   | 33.51   |
| ENSG0000(OVOL3    | protein_co chr19 | 36111151 | 36113711 | + | 0       | 0       |
| ENSG0000(CLIP3    | protein_co chr19 | 36014660 | 36033343 | - | 29.3    | 32.1    |
| ENSG0000(ZFR2     | protein_co chr19 | 3804024  | 3869032  | - | 0       | 0       |
| ENSG0000(SLC1A5   | protein_co chr19 | 46774883 | 46788594 | - | 118.89  | 123.96  |
| ENSG0000(PRKD2    | protein_co chr19 | 46674275 | 46717127 | - | 12.02   | 10.06   |
| ENSG0000(TJP3     | protein_co chr19 | 3708109  | 3750813  | + | 0       | 0       |
| ENSG0000(APLP1    | protein_co chr19 | 35867899 | 35879791 | + | 17.29   | 18.04   |
| ENSG0000(CACTIN   | protein_co chr19 | 3610641  | 3626815  | - | 6.72    | 6.79    |
| ENSG0000(CCDC9    | protein_co chr19 | 47255980 | 47271953 | + | 10.27   | 9.42    |
| ENSG0000(HNRNPUL1 | protein_co chr19 | 41262496 | 41307598 | + | 74.97   | 77.57   |
| ENSG0000(FZR1     | protein_co chr19 | 3506273  | 3538330  | + | 19.05   | 17.44   |
| ENSG0000(BBC3     | protein_co chr19 | 47220822 | 47232766 | - | 21.73   | 24.82   |
| ENSG0000(TGFB1    | protein_co chr19 | 41301587 | 41353911 | - | 55.63   | 58.84   |
| ENSG0000(DENND3   | protein_co chr8  | 1.41E+08 | 1.41E+08 | + | 3.09    | 4.04    |
| ENSG0000(ATP5SL   | protein_co chr19 | 41431318 | 41440717 | - | 21.15   | 17.31   |
| ENSG0000(CEACAM4  | protein_co chr19 | 41618971 | 41627074 | - | 0       | 0       |
| ENSG0000(PLIN3    | protein_co chr19 | 4838341  | 4867768  | - | 67.18   | 58.57   |
| ENSG0000(MYH14    | protein_co chr19 | 50188186 | 50310545 | + | 0       | 0       |
| ENSG0000(MRPL4    | protein_co chr19 | 10251901 | 10260045 | + | 22.07   | 19.29   |
| ENSG0000(SIGLEC8  | protein_co chr19 | 51450847 | 51458456 | - | 0       | 0       |
| ENSG0000(CD79A    | protein_co chr19 | 41877120 | 41881372 | + | 0.19    | 0.27    |
| ENSG0000(LIM2     | protein_co chr19 | 51379909 | 51387960 | - | 0       | 0       |
| ENSG0000(ICAM4    | protein_co chr19 | 10286967 | 10288522 | + | 1.33    | 0.65    |
| ENSG0000(RPS19    | protein_co chr19 | 41859918 | 41872926 | + | 2096.81 | 2076.92 |
| ENSG0000(GLTSCR2  | protein_co chr19 | 47745522 | 47757058 | + | 98.64   | 111.75  |
| ENSG0000(NKG7     | protein_co chr19 | 51371606 | 51372715 | - | 0       | 0       |
| ENSG0000(ICAM5    | protein_co chr19 | 10289981 | 10296778 | + | 2.73    | 1.92    |
| ENSG0000(ETFB     | protein_co chr19 | 51345169 | 51366418 | - | 56.33   | 62.06   |
| ENSG0000(CD33     | protein_co chr19 | 51225064 | 51243860 | + | 0.15    | 0       |
| ENSG0000(CEACAM5  | protein_co chr19 | 41708585 | 41729798 | + | 0       | 0       |
| ENSG0000(CRX      | protein_co chr19 | 47819779 | 47843330 | + | 0.38    | 0.54    |
| ENSG0000(BABAM1   | protein_co chr19 | 17267350 | 17281249 | + | 33.07   | 35.11   |
| ENSG0000(TYK2     | protein_co chr19 | 10350529 | 10380676 | - | 30.04   | 27.86   |
| ENSG0000(SULT2A1  | protein_co chr19 | 47870466 | 47886397 | - | 0       | 0       |
| ENSG0000(CDC37    | protein_co chr19 | 10391134 | 10420121 | - | 81.49   | 80.31   |
| ENSG0000(NAPA     | protein_co chr19 | 47487637 | 47515240 | - | 78.93   | 78.36   |
| ENSG0000(RABAC1   | protein_co chr19 | 41956681 | 41959390 | - | 149.51  | 146.69  |

|                  |                  |          |          |   |        |        |
|------------------|------------------|----------|----------|---|--------|--------|
| ENSG0000(ATP1A3  | protein_co chr19 | 41966582 | 41997497 | - | 0.34   | 0.38   |
| ENSG0000(MEIS3   | protein_co chr19 | 47403124 | 47419523 | - | 24.54  | 24.32  |
| ENSG0000(PTPRS   | protein_co chr19 | 5158495  | 5340803  | - | 24.63  | 25.9   |
| ENSG0000(CNFN    | protein_co chr19 | 42387019 | 42390287 | - | 0.15   | 0.31   |
| ENSG0000(ZNRF4   | protein_co chr19 | 5455431  | 5456856  | + | 0      | 0      |
| ENSG0000(MEGF8   | protein_co chr19 | 42325609 | 42378769 | + | 18.91  | 20.38  |
| ENSG0000(KDELRL1 | protein_co chr19 | 48382570 | 48391553 | - | 128.72 | 132.48 |
| ENSG0000(CYTH2   | protein_co chr19 | 48469032 | 48482314 | + | 31.83  | 32.29  |
| ENSG0000(GRWD1   | protein_co chr19 | 48445773 | 48457022 | + | 11.02  | 8.49   |
| ENSG0000(GRIN2D  | protein_co chr19 | 48394875 | 48444931 | + | 0.89   | 0.95   |
| ENSG0000(SYNGR4  | protein_co chr19 | 48364395 | 48376376 | + | 0      | 0      |
| ENSG0000(CLEC11A | protein_co chr19 | 50723329 | 50725718 | + | 76.45  | 81.87  |
| ENSG0000(CCDC114 | protein_co chr19 | 48296457 | 48321894 | - | 0.1    | 0.14   |
| ENSG0000(CARD8   | protein_co chr19 | 48180770 | 48255946 | - | 7.68   | 7.3    |
| ENSG0000(LIG1    | protein_co chr19 | 48115445 | 48170603 | - | 6.23   | 4.32   |
| ENSG0000(SIGLEC6 | protein_co chr19 | 51519525 | 51531856 | - | 0      | 0      |
| ENSG0000(ZNF175  | protein_co chr19 | 51571298 | 51592508 | + | 7.06   | 5.47   |
| ENSG0000(PLA2G4C | protein_co chr19 | 48047843 | 48110817 | - | 3.89   | 3.85   |
| ENSG0000(SIGLEC5 | protein_co chr19 | 51611927 | 51645545 | - | 0      | 0      |
| ENSG0000(CABP5   | protein_co chr19 | 48029953 | 48044053 | - | 0      | 0      |
| ENSG0000(HAS1    | protein_co chr19 | 51713112 | 51723994 | - | 0.03   | 0.03   |
| ENSG0000(RAB3D   | protein_co chr19 | 11322046 | 11346270 | - | 4.04   | 4.19   |
| ENSG0000(DBP     | protein_co chr19 | 48630030 | 48637438 | - | 21.8   | 20.89  |
| ENSG0000(TMEM205 | protein_co chr19 | 11342776 | 11346518 | - | 39.89  | 34.78  |
| ENSG0000(CAPS    | protein_co chr19 | 5911707  | 5915877  | + | 6.54   | 4.54   |
| ENSG0000(PLPPR2  | protein_co chr19 | 11355386 | 11365698 | + | 20.59  | 21.9   |
| ENSG0000(FAM83E  | protein_co chr19 | 48600810 | 48614854 | - | 0.12   | 0      |
| ENSG0000(RASIP1  | protein_co chr19 | 48720587 | 48740721 | - | 5.19   | 5.87   |
| ENSG0000(THEG    | protein_co chr19 | 361747   | 376670   | - | 0      | 0      |
| ENSG0000(FGF21   | protein_co chr19 | 48755559 | 48758330 | + | 0      | 0      |
| ENSG0000(BCAT2   | protein_co chr19 | 48795062 | 48811029 | - | 20.29  | 23.62  |
| ENSG0000(MIER2   | protein_co chr19 | 301444   | 344815   | - | 8.28   | 9.34   |
| ENSG0000(PLEKHA4 | protein_co chr19 | 48837097 | 48868632 | - | 31.76  | 31.09  |
| ENSG0000(PPP2R1A | protein_co chr19 | 52190039 | 52229533 | + | 98.25  | 103.73 |
| ENSG0000(TNPO2   | protein_co chr19 | 12699194 | 12724011 | - | 25.79  | 24.6   |
| ENSG0000(WDR83OS | protein_co chr19 | 12668071 | 12671356 | - | 98.13  | 94.93  |
| ENSG0000(CACNG7  | protein_co chr19 | 53909335 | 53943941 | + | 12.31  | 14.12  |
| ENSG0000(GCDH    | protein_co chr19 | 12891026 | 12914207 | + | 6.99   | 5.86   |
| ENSG0000(LILRB5  | protein_co chr19 | 54249431 | 54257301 | - | 0.1    | 0.1    |
| ENSG0000(KLF1    | protein_co chr19 | 12884423 | 12887181 | - | 0.04   | 0      |
| ENSG0000(DNASE2  | protein_co chr19 | 12875211 | 12881468 | - | 78.32  | 76.5   |
| ENSG0000(MAST1   | protein_co chr19 | 12833951 | 12874951 | + | 0.27   | 0.24   |
| ENSG0000(LENG1   | protein_co chr19 | 54155161 | 54159882 | - | 3      | 3.71   |
| ENSG0000(PRPF31  | protein_co chr19 | 54115410 | 54131719 | + | 22.31  | 23.08  |
| ENSG0000(TFPT    | protein_co chr19 | 54107013 | 54115675 | - | 9.22   | 7.76   |

|                  |                  |          |            |         |         |
|------------------|------------------|----------|------------|---------|---------|
| ENSG0000(JAK3    | protein_co chr19 | 17824780 | 17848071 - | 0.86    | 0.67    |
| ENSG0000(RPL18A  | protein_co chr19 | 17859876 | 17864153 + | 1022.67 | 1039.57 |
| ENSG0000(SLC5A5  | protein_co chr19 | 17871973 | 17895174 + | 0.06    | 0.05    |
| ENSG0000(KCNN1   | protein_co chr19 | 17951293 | 18000080 + | 0       | 0.16    |
| ENSG0000(ARRDC2  | protein_co chr19 | 18001132 | 18014102 + | 4.82    | 5.91    |
| ENSG0000(PIK3R2  | protein_co chr19 | 18153118 | 18170540 + | 16.92   | 19.35   |
| ENSG0000(RAB3A   | protein_co chr19 | 18196784 | 18204074 - | 1.94    | 1.45    |
| ENSG0000(PDE4C   | protein_co chr19 | 18207961 | 18255419 - | 0.61    | 0.4     |
| ENSG0000(ISYNA1  | protein_co chr19 | 18434388 | 18438301 - | 14.31   | 16.83   |
| ENSG0000(ELL     | protein_co chr19 | 18442663 | 18522127 - | 5.64    | 7.9     |
| ENSG0000(CRTC1   | protein_co chr19 | 18683677 | 18782333 + | 7.35    | 7.01    |
| ENSG0000(COMP    | protein_co chr19 | 18782773 | 18791314 - | 0.38    | 0.32    |
| ENSG0000(UPK1A   | protein_co chr19 | 35666516 | 35678483 + | 0       | 0       |
| ENSG0000(COPE    | protein_co chr19 | 18899514 | 18919397 - | 75.97   | 74.9    |
| ENSG0000(DDX49   | protein_co chr19 | 18919675 | 18928633 + | 18.72   | 23.35   |
| ENSG0000(ETV2    | protein_co chr19 | 35641745 | 35644871 + | 1.31    | 1.32    |
| ENSG0000(ATP4A   | protein_co chr19 | 35550043 | 35563658 - | 0       | 0.02    |
| ENSG0000(ARMC6   | protein_co chr19 | 19033575 | 19060311 + | 9.98    | 10.68   |
| ENSG0000(TMEM147 | protein_co chr19 | 35545595 | 35547526 + | 91.66   | 81.36   |
| ENSG0000(GAPDHS  | protein_co chr19 | 35533412 | 35545316 + | 0.04    | 0       |
| ENSG0000(ELOCP28 | processed_chr19  | 2538112  | 2538754 +  | 0       | 0       |
| ENSG0000(MAG     | protein_co chr19 | 35292125 | 35313804 + | 0       | 0       |
| ENSG0000(TMEM59L | protein_co chr19 | 18607430 | 18621039 + | 14.74   | 12.97   |
| ENSG0000(HAMP    | protein_co chr19 | 35280716 | 35285143 + | 0       | 0.02    |
| ENSG0000(USF2    | protein_co chr19 | 35268978 | 35279821 + | 45.47   | 41.25   |
| ENSG0000(LSR     | protein_co chr19 | 35248330 | 35267964 + | 0.43    | 0.47    |
| ENSG0000(KXD1    | protein_co chr19 | 18557762 | 18569387 + | 48.61   | 51.13   |
| ENSG0000(FKBP8   | protein_co chr19 | 18531751 | 18544077 - | 149.72  | 156.51  |
| ENSG0000(SUGP1   | protein_co chr19 | 19276018 | 19320844 - | 18.88   | 22      |
| ENSG0000(HPN     | protein_co chr19 | 35040506 | 35066571 + | 0.69    | 0.53    |
| ENSG0000(ZNF14   | protein_co chr19 | 19710471 | 19733097 - | 1.54    | 1.52    |
| ENSG0000(SCN1B   | protein_co chr19 | 35030466 | 35040449 + | 7.36    | 7.28    |
| ENSG0000(PBX4    | protein_co chr19 | 19561707 | 19618916 - | 0       | 0       |
| ENSG0000(ERF     | protein_co chr19 | 42247572 | 42255157 - | 26.74   | 28.72   |
| ENSG0000(GSK3A   | protein_co chr19 | 42230186 | 42242625 - | 22.63   | 22.33   |
| ENSG0000(ATP13A1 | protein_co chr19 | 19645198 | 19663693 - | 14.24   | 16.6    |
| ENSG0000(ZNF574  | protein_co chr19 | 42068477 | 42081549 + | 4.86    | 5.08    |
| ENSG0000(GRIK5   | protein_co chr19 | 41998321 | 42069498 - | 0.44    | 0       |
| ENSG0000(SIPA1L3 | protein_co chr19 | 37907228 | 38208372 + | 3.09    | 2.66    |
| ENSG0000(ZNF85   | protein_co chr19 | 20923222 | 20950697 + | 2.52    | 2.37    |
| ENSG0000(ETHE1   | protein_co chr19 | 43506719 | 43527244 - | 70.19   | 70.31   |
| ENSG0000(CADM4   | protein_co chr19 | 43622368 | 43639839 - | 2.06    | 2.6     |
| ENSG0000(SMG9    | protein_co chr19 | 43727992 | 43754990 - | 26.61   | 26.22   |
| ENSG0000(AVL9    | protein_co chr7  | 32495426 | 32588721 + | 11.43   | 9.99    |
| ENSG0000(RUNDC3B | protein_co chr7  | 87627548 | 87832296 + | 0       | 0.28    |

|                   |                 |          |          |   |        |        |
|-------------------|-----------------|----------|----------|---|--------|--------|
| ENSG0000(CFAP69   | protein_co chr7 | 90245174 | 90311063 | + | 4.31   | 4.63   |
| ENSG0000(GTPBP10  | protein_co chr7 | 90335223 | 90391455 | + | 7.06   | 8.27   |
| ENSG0000(RASA4    | protein_co chr7 | 1.03E+08 | 1.03E+08 | - | 10.96  | 9.11   |
| ENSG0000(CDK6     | protein_co chr7 | 92604921 | 92836594 | - | 4.53   | 3.94   |
| ENSG0000(PMPCB    | protein_co chr7 | 1.03E+08 | 1.03E+08 | + | 27.86  | 27.41  |
| ENSG0000(DNAJC2   | protein_co chr7 | 1.03E+08 | 1.03E+08 | - | 8.84   | 9.2    |
| ENSG0000(TFPI2    | protein_co chr7 | 93885397 | 93890991 | - | 321.78 | 285.85 |
| ENSG0000(BET1     | protein_co chr7 | 93962762 | 94004382 | - | 15.22  | 12.53  |
| ENSG0000(NAMPT    | protein_co chr7 | 1.06E+08 | 1.06E+08 | - | 280.94 | 209.84 |
| ENSG0000(TWISTNB  | protein_co chr7 | 19695462 | 19709087 | - | 5.2    | 4.1    |
| ENSG0000(PIK3CG   | protein_co chr7 | 1.07E+08 | 1.07E+08 | + | 0      | 0      |
| ENSG0000(PON3     | protein_co chr7 | 95359944 | 95396368 | - | 0      | 0.25   |
| ENSG0000(PON2     | protein_co chr7 | 95404863 | 95435329 | - | 47.1   | 50.31  |
| ENSG0000(ITGB8    | protein_co chr7 | 20330702 | 20415754 | + | 2.67   | 2.33   |
| ENSG0000(HBP1     | protein_co chr7 | 1.07E+08 | 1.07E+08 | + | 56.51  | 57.87  |
| ENSG0000(DUS4L    | protein_co chr7 | 1.08E+08 | 1.08E+08 | + | 2.15   | 2.14   |
| ENSG0000(SP4      | protein_co chr7 | 21428034 | 21514822 | + | 0.97   | 2.04   |
| ENSG0000(WDR91    | protein_co chr7 | 1.35E+08 | 1.35E+08 | - | 5.8    | 3.8    |
| ENSG0000(DNAH11   | protein_co chr7 | 21543215 | 21901839 | + | 0.2    | 0.56   |
| ENSG0000(CBLL1    | protein_co chr7 | 1.08E+08 | 1.08E+08 | + | 8.64   | 9.6    |
| ENSG0000(DLX5     | protein_co chr7 | 97020392 | 97025097 | - | 0.06   | 0      |
| ENSG0000(MTPN     | protein_co chr7 | 1.36E+08 | 1.36E+08 | - | 66.54  | 62.07  |
| ENSG0000(STEAP1B  | protein_co chr7 | 22419444 | 22632925 | - | 0.22   | 0.17   |
| ENSG0000(PTN      | protein_co chr7 | 1.37E+08 | 1.37E+08 | - | 4.23   | 4.07   |
| ENSG0000(MPP6     | protein_co chr7 | 24573268 | 24694193 | + | 3.1    | 4.15   |
| ENSG0000(DFNA5    | protein_co chr7 | 24698353 | 24758113 | - | 23.1   | 25.38  |
| ENSG0000(ATP6V0A4 | protein_co chr7 | 1.39E+08 | 1.39E+08 | - | 0.95   | 0      |
| ENSG0000(ZC3HAV1  | protein_co chr7 | 1.39E+08 | 1.39E+08 | - | 8.03   | 9.57   |
| ENSG0000(TTC26    | protein_co chr7 | 1.39E+08 | 1.39E+08 | + | 2.36   | 2.23   |
| ENSG0000(OGDH     | protein_co chr7 | 44606572 | 44709066 | + | 20.7   | 17.65  |
| ENSG0000(NPVF     | protein_co chr7 | 25224570 | 25228486 | - | 0      | 0      |
| ENSG0000(ADAP1    | protein_co chr7 | 897901   | 955407   | - | 2.27   | 2.48   |
| ENSG0000(TFEC     | protein_co chr7 | 1.16E+08 | 1.16E+08 | - | 0.01   | 0.02   |
| ENSG0000(H2AFV    | protein_co chr7 | 44826791 | 44848083 | - | 42.93  | 47.84  |
| ENSG0000(CAV2     | protein_co chr7 | 1.16E+08 | 1.17E+08 | + | 23.89  | 27.24  |
| ENSG0000(CAV1     | protein_co chr7 | 1.17E+08 | 1.17E+08 | + | 193.44 | 186.07 |
| ENSG0000(MET      | protein_co chr7 | 1.17E+08 | 1.17E+08 | + | 6.3    | 4.61   |
| ENSG0000(RNF32    | protein_co chr7 | 1.57E+08 | 1.57E+08 | + | 0.45   | 0.35   |
| ENSG0000(LMBR1    | protein_co chr7 | 1.57E+08 | 1.57E+08 | - | 18.74  | 15.45  |
| ENSG0000(NHP2P1   | processed_chr10 | 92216332 | 92216793 | + | 0      | 0      |
| ENSG0000(WNT2     | protein_co chr7 | 1.17E+08 | 1.17E+08 | - | 2.62   | 1.71   |
| ENSG0000(HOXA1    | protein_co chr7 | 27092993 | 27095996 | - | 0      | 0      |
| ENSG0000(DNAJB6   | protein_co chr7 | 1.57E+08 | 1.57E+08 | + | 41     | 53.73  |
| ENSG0000(HOXA2    | protein_co chr7 | 27100354 | 27102811 | - | 0      | 0      |
| ENSG0000(HOXA3    | protein_co chr7 | 27106184 | 27152581 | - | 0      | 0      |



|                  |                  |          |          |   |        |        |
|------------------|------------------|----------|----------|---|--------|--------|
| ENSG0000(LFNG    | protein_co chr7  | 2512529  | 2529177  | + | 0.41   | 0.55   |
| ENSG0000(HOXA5   | protein_co chr7  | 27141052 | 27143668 | - | 0      | 0      |
| ENSG0000(HOXA6   | protein_co chr7  | 27145396 | 27150603 | - | 0      | 0      |
| ENSG0000(BRAT1   | protein_co chr7  | 2537877  | 2555727  | - | 9.94   | 10.2   |
| ENSG0000(IQCE    | protein_co chr7  | 2558972  | 2614734  | + | 4.93   | 5.76   |
| ENSG0000(ANKRD7  | protein_co chr7  | 1.18E+08 | 1.18E+08 | + | 0.05   | 0.1    |
| ENSG0000(VIPR2   | protein_co chr7  | 1.59E+08 | 1.59E+08 | - | 0      | 0      |
| ENSG0000(TSPAN12 | protein_co chr7  | 1.21E+08 | 1.21E+08 | - | 0.05   | 0.19   |
| ENSG0000(SSBP1   | protein_co chr7  | 1.42E+08 | 1.42E+08 | + | 57.05  | 62.23  |
| ENSG0000(HOXA13  | protein_co chr7  | 27193503 | 27200106 | - | 0      | 0      |
| ENSG0000(CPED1   | protein_co chr7  | 1.21E+08 | 1.21E+08 | + | 6.1    | 6.03   |
| ENSG0000(EVX1    | protein_co chr7  | 27242700 | 27250493 | + | 0      | 0      |
| ENSG0000(HIBADH  | protein_co chr7  | 27525442 | 27662995 | - | 32.41  | 34.58  |
| ENSG0000(TAX1BP1 | protein_co chr7  | 27739331 | 27844564 | + | 54.91  | 56.85  |
| ENSG0000(CPVL    | protein_co chr7  | 28995231 | 29195451 | - | 0      | 0.08   |
| ENSG0000(CHN2    | protein_co chr7  | 29122274 | 29514328 | + | 0.14   | 0.52   |
| ENSG0000(GRB10   | protein_co chr7  | 50590063 | 50793462 | - | 22.22  | 21.32  |
| ENSG0000(ABHD11  | protein_co chr7  | 73736094 | 73738867 | - | 6.47   | 4.75   |
| ENSG0000(COBL    | protein_co chr7  | 51016212 | 51316818 | - | 0      | 0      |
| ENSG0000(FKBP14  | protein_co chr7  | 30010587 | 30026684 | - | 7.19   | 7.56   |
| ENSG0000(PLEKHA8 | protein_co chr7  | 30027404 | 30130483 | + | 3.97   | 3.14   |
| ENSG0000(STX1A   | protein_co chr7  | 73699206 | 73719672 | - | 3.66   | 6.39   |
| ENSG0000(NOD1    | protein_co chr7  | 30424527 | 30478784 | - | 2.36   | 3.03   |
| ENSG0000(GARS    | protein_co chr7  | 30594681 | 30634033 | + | 120.47 | 119.84 |
| ENSG0000(CRHR2   | protein_co chr7  | 30651943 | 30700129 | - | 0      | 0      |
| ENSG0000(EPHB6   | protein_co chr7  | 1.43E+08 | 1.43E+08 | + | 16.15  | 19.89  |
| ENSG0000(MINDY4  | protein_co chr7  | 30771417 | 30892387 | + | 2.49   | 2.41   |
| ENSG0000(GHRHR   | protein_co chr7  | 30938669 | 30993254 | + | 0      | 0      |
| ENSG0000(NSUN5P2 | transcribec chr7 | 72947581 | 72954790 | - | 3.94   | 4.02   |
| ENSG0000(CASP2   | protein_co chr7  | 1.43E+08 | 1.43E+08 | + | 5.03   | 5.12   |
| ENSG0000(CHCHD2  | protein_co chr7  | 56101569 | 56106576 | - | 183.23 | 182.06 |
| ENSG0000(CCL24   | protein_co chr7  | 75811665 | 75823356 | - | 0      | 0      |
| ENSG0000(HSPB1   | protein_co chr7  | 76302544 | 76304295 | + | 318.34 | 326.85 |
| ENSG0000(NPTX2   | protein_co chr7  | 98617297 | 98629868 | + | 2.8    | 3.2    |
| ENSG0000(PDAP1   | protein_co chr7  | 99392048 | 99408829 | - | 62.53  | 67.4   |
| ENSG0000(BUD31   | protein_co chr7  | 99408641 | 99419616 | + | 50.31  | 50.11  |
| ENSG0000(PTCD1   | protein_co chr7  | 99416739 | 99466163 | - | 1.4    | 2.22   |
| ENSG0000(CYP3A5  | protein_co chr7  | 99648194 | 99679998 | - | 0.57   | 0.94   |
| ENSG0000(ZKSCAN1 | protein_co chr7  | 1E+08    | 1E+08    | + | 13.03  | 13.21  |
| ENSG0000(EIF3B   | protein_co chr7  | 2354086  | 2380745  | + | 56.6   | 57.01  |
| ENSG0000(SNX8    | protein_co chr7  | 2251770  | 2354318  | - | 17.86  | 21.22  |
| ENSG0000(NUDT1   | protein_co chr7  | 2242222  | 2251146  | + | 8.64   | 7.99   |
| ENSG0000(PTPRZ1  | protein_co chr7  | 1.22E+08 | 1.22E+08 | + | 0.01   | 0.03   |
| ENSG0000(TAF6    | protein_co chr7  | 1E+08    | 1E+08    | - | 24.9   | 20.96  |
| ENSG0000(WASL    | protein_co chr7  | 1.24E+08 | 1.24E+08 | - | 10.29  | 11.23  |

|                    |                 |          |            |        |        |
|--------------------|-----------------|----------|------------|--------|--------|
| ENSG0000(HYAL4     | protein_co chr7 | 1.24E+08 | 1.24E+08 + | 0      | 0      |
| ENSG0000(SPAM1     | protein_co chr7 | 1.24E+08 | 1.24E+08 + | 0      | 0      |
| ENSG0000(AIMP2     | protein_co chr7 | 6009245  | 6023834 +  | 14.62  | 13.98  |
| ENSG0000(TFR2      | protein_co chr7 | 1.01E+08 | 1.01E+08 - | 0.56   | 1.04   |
| ENSG0000(FSCN3     | protein_co chr7 | 1.28E+08 | 1.28E+08 + | 0.7    | 0.76   |
| ENSG0000(MOSPD3    | protein_co chr7 | 1.01E+08 | 1.01E+08 + | 15.8   | 16.58  |
| ENSG0000(PAX4      | protein_co chr7 | 1.28E+08 | 1.28E+08 - | 0      | 0      |
| ENSG0000(PCOLCE    | protein_co chr7 | 1.01E+08 | 1.01E+08 + | 334.16 | 357.73 |
| ENSG0000(FBXO24    | protein_co chr7 | 1.01E+08 | 1.01E+08 + | 0.1    | 0.13   |
| ENSG0000(PPP1R17   | protein_co chr7 | 31686715 | 31708455 + | 0      | 0      |
| ENSG0000(RBM28     | protein_co chr7 | 1.28E+08 | 1.28E+08 - | 7.17   | 8.93   |
| ENSG0000(USP42     | protein_co chr7 | 6104884  | 6161564 +  | 2.56   | 2.57   |
| ENSG0000(IMPDH1    | protein_co chr7 | 1.28E+08 | 1.28E+08 - | 25.01  | 27.95  |
| ENSG0000(AGFG2     | protein_co chr7 | 1.01E+08 | 1.01E+08 + | 9.03   | 12.16  |
| ENSG0000(LSM5      | protein_co chr7 | 32485332 | 32495283 - | 9.13   | 8.86   |
| ENSG0000(SERPINE1  | protein_co chr7 | 1.01E+08 | 1.01E+08 + | 185.58 | 116.79 |
| ENSG0000(AP1S1     | protein_co chr7 | 1.01E+08 | 1.01E+08 + | 41.65  | 39.62  |
| ENSG0000(MOGAT3    | protein_co chr7 | 1.01E+08 | 1.01E+08 - | 0      | 0.04   |
| ENSG0000(C1GALT1   | protein_co chr7 | 7156934  | 7248651 +  | 21.33  | 20.5   |
| ENSG0000(PLOD3     | protein_co chr7 | 1.01E+08 | 1.01E+08 - | 59.43  | 56.35  |
| ENSG0000(RPA3      | protein_co chr7 | 7636518  | 7718607 -  | 7.73   | 5.89   |
| ENSG0000(ZNHIT1    | protein_co chr7 | 1.01E+08 | 1.01E+08 + | 45.09  | 44.75  |
| ENSG0000(CLDN15    | protein_co chr7 | 1.01E+08 | 1.01E+08 - | 3.19   | 3.53   |
| ENSG0000(NOBOX     | protein_co chr7 | 1.44E+08 | 1.44E+08 - | 0      | 0      |
| ENSG0000(GLCCI1    | protein_co chr7 | 7968794  | 8094272 +  | 1.22   | 0.99   |
| ENSG0000(MYL10     | protein_co chr7 | 1.02E+08 | 1.02E+08 - | 0      | 0      |
| ENSG0000(PHF14     | protein_co chr7 | 10973872 | 11169630 + | 9.29   | 8.5    |
| ENSG0000(NRF1      | protein_co chr7 | 1.3E+08  | 1.3E+08 +  | 3.26   | 4.6    |
| ENSG0000(TMEM106i  | protein_co chr7 | 12211241 | 12243367 + | 19.59  | 17.87  |
| ENSG0000(EZH2      | protein_co chr7 | 1.49E+08 | 1.49E+08 - | 2.56   | 1.71   |
| ENSG0000(CEP41     | protein_co chr7 | 1.3E+08  | 1.3E+08 -  | 6.85   | 7.77   |
| ENSG0000(ZNF862    | protein_co chr7 | 1.5E+08  | 1.5E+08 +  | 13.25  | 11.92  |
| ENSG0000(SFRP4     | protein_co chr7 | 37905932 | 38025695 - | 229.19 | 239.99 |
| ENSG0000(MEST      | protein_co chr7 | 1.3E+08  | 1.31E+08 + | 33.63  | 32.97  |
| ENSG0000(MEOX2     | protein_co chr7 | 15611212 | 15686812 - | 0      | 0.02   |
| ENSG0000(ANKMY2    | protein_co chr7 | 16599776 | 16645817 - | 8.97   | 8.43   |
| ENSG0000(ACTR3C    | protein_co chr7 | 1.5E+08  | 1.5E+08 -  | 1.16   | 0.11   |
| ENSG0000(POU6F2    | protein_co chr7 | 38977998 | 39493095 + | 0.04   | 0      |
| ENSG0000(TSPAN13   | protein_co chr7 | 16753535 | 16784536 + | 2.74   | 3.27   |
| ENSG0000(RARRES2   | protein_co chr7 | 1.5E+08  | 1.5E+08 -  | 529.62 | 543.1  |
| ENSG0000(AC004837. | processed_chr7  | 39609717 | 39610280 + | 0.2    | 0      |
| ENSG0000(AGR2      | protein_co chr7 | 16791811 | 16833433 - | 0      | 0      |
| ENSG0000(AHR       | protein_co chr7 | 17298622 | 17346152 + | 51.44  | 45.88  |
| ENSG0000(CHCHD3    | protein_co chr7 | 1.33E+08 | 1.33E+08 - | 24.4   | 28.14  |
| ENSG0000(GIMAP2    | protein_co chr7 | 1.51E+08 | 1.51E+08 + | 0.44   | 0.68   |

|                   |                  |          |          |   |        |        |
|-------------------|------------------|----------|----------|---|--------|--------|
| ENSG0000(TMEM176) | protein_co chr7  | 1.51E+08 | 1.51E+08 | - | 0      | 0.07   |
| ENSG0000( GLI3    | protein_co chr7  | 41960950 | 42237870 | - | 4.47   | 3.97   |
| ENSG0000( PSMA2   | protein_co chr7  | 42916857 | 42932223 | - | 58.52  | 58.72  |
| ENSG0000( MRPL32  | protein_co chr7  | 42932200 | 42948958 | + | 19.57  | 17.87  |
| ENSG0000( COA1    | protein_co chr7  | 43608456 | 43729717 | - | 17.23  | 18.89  |
| ENSG0000( BLVRA   | protein_co chr7  | 43758680 | 43807342 | + | 23.81  | 22.74  |
| ENSG0000( URGCP   | protein_co chr7  | 43875894 | 43926411 | - | 10.01  | 8.47   |
| ENSG0000( TMEM248 | protein_co chr7  | 66921225 | 66958551 | + | 41     | 43.5   |
| ENSG0000( STAG3L4 | transcribec chr7 | 67302621 | 67321526 | + | 4.12   | 2.66   |
| ENSG0000( RHEB    | protein_co chr7  | 1.51E+08 | 1.52E+08 | - | 57.28  | 60.16  |
| ENSG0000( PRKAG2  | protein_co chr7  | 1.52E+08 | 1.52E+08 | - | 5.72   | 6.77   |
| ENSG0000( AEBP1   | protein_co chr7  | 44104361 | 44114562 | + | 187.56 | 200.37 |
| ENSG0000( POLD2   | protein_co chr7  | 44114681 | 44124358 | - | 39.5   | 37.88  |
| ENSG0000( MYL7    | protein_co chr7  | 44138864 | 44141332 | - | 0      | 0      |
| ENSG0000( GCK     | protein_co chr7  | 44144271 | 44198170 | - | 0.1    | 0.1    |
| ENSG0000( BCL7B   | protein_co chr7  | 73536356 | 73558002 | - | 21.33  | 18.98  |
| ENSG0000( YKT6    | protein_co chr7  | 44200968 | 44214294 | + | 46.73  | 51.26  |
| ENSG0000( TBL2    | protein_co chr7  | 73568932 | 73578791 | - | 18.46  | 19.13  |
| ENSG0000( GALNTL5 | protein_co chr7  | 1.52E+08 | 1.52E+08 | + | 0      | 0.28   |
| ENSG0000( CLIP2   | protein_co chr7  | 74289475 | 74405943 | + | 14.63  | 13.83  |
| ENSG0000( EIF4H   | protein_co chr7  | 74174245 | 74197101 | + | 145.73 | 140.73 |
| ENSG0000( LIMK1   | protein_co chr7  | 74082933 | 74122525 | + | 16.19  | 17.58  |
| ENSG0000( SPATA6L | protein_co chr9  | 4553386  | 4666674  | - | 0.89   | 0.67   |
| ENSG0000( SLC1A1  | protein_co chr9  | 4490444  | 4587469  | + | 13.49  | 14.4   |
| ENSG0000( LHX2    | protein_co chr9  | 1.24E+08 | 1.24E+08 | + | 0      | 0.05   |
| ENSG0000( FKTN    | protein_co chr9  | 1.06E+08 | 1.06E+08 | + | 5.98   | 5.29   |
| ENSG0000( FSD1L   | protein_co chr9  | 1.05E+08 | 1.06E+08 | + | 1.61   | 1.57   |
| ENSG0000( CNTNAP3 | protein_co chr9  | 39072767 | 39288315 | - | 8.33   | 8.04   |
| ENSG0000( SPIN1   | protein_co chr9  | 88388419 | 88478694 | + | 23.26  | 23.89  |
| ENSG0000( NMRK1   | protein_co chr9  | 75060573 | 75088217 | - | 8.93   | 10.69  |
| ENSG0000( TMEM245 | protein_co chr9  | 1.09E+08 | 1.09E+08 | - | 14.35  | 16.23  |
| ENSG0000( PRUNE2  | protein_co chr9  | 76611376 | 76906087 | - | 5.72   | 5.87   |
| ENSG0000( MEGF9   | protein_co chr9  | 1.21E+08 | 1.21E+08 | - | 8.42   | 9.03   |
| ENSG0000( TRIM14  | protein_co chr9  | 98069275 | 98119212 | - | 1.1    | 0.91   |
| ENSG0000( CORO2A  | protein_co chr9  | 98120975 | 98192640 | - | 0.33   | 0.28   |
| ENSG0000( TGFB1   | protein_co chr9  | 99104038 | 99154192 | + | 13.5   | 13.62  |
| ENSG0000( SEC61B  | protein_co chr9  | 99222064 | 99230615 | + | 91.01  | 95.71  |
| ENSG0000( C5      | protein_co chr9  | 1.21E+08 | 1.21E+08 | - | 1.51   | 1.06   |
| ENSG0000( OGN     | protein_co chr9  | 92383967 | 92404696 | - | 2.52   | 5.16   |
| ENSG0000( ASPN    | protein_co chr9  | 92456205 | 92482506 | - | 5.04   | 10.33  |
| ENSG0000( ECM2    | protein_co chr9  | 92493554 | 92536655 | - | 11.58  | 15.65  |
| ENSG0000( TLE4    | protein_co chr9  | 79571773 | 79726882 | + | 14.27  | 16.04  |
| ENSG0000( LHX6    | protein_co chr9  | 1.22E+08 | 1.22E+08 | - | 0      | 0      |
| ENSG0000( PTGR1   | protein_co chr9  | 1.12E+08 | 1.12E+08 | - | 70.45  | 68.28  |
| ENSG0000( SUSD1   | protein_co chr9  | 1.12E+08 | 1.12E+08 | - | 7.74   | 6.76   |

|                   |                  |          |            |        |        |
|-------------------|------------------|----------|------------|--------|--------|
| ENSG0000( AMBP    | protein_co chr9  | 1.14E+08 | 1.14E+08 - | 0.12   | 0.18   |
| ENSG0000( AKNA    | protein_co chr9  | 1.14E+08 | 1.14E+08 - | 7.54   | 9.93   |
| ENSG0000( TNFSF8  | protein_co chr9  | 1.15E+08 | 1.15E+08 - | 0      | 0      |
| ENSG0000( DNMT1   | protein_co chr9  | 1.28E+08 | 1.28E+08 + | 6.98   | 10.25  |
| ENSG0000( ENG     | protein_co chr9  | 1.28E+08 | 1.28E+08 - | 80.14  | 71.89  |
| ENSG0000( AK1     | protein_co chr9  | 1.28E+08 | 1.28E+08 - | 52.64  | 47.88  |
| ENSG0000( CDC37L1 | protein_co chr9  | 4679559  | 4708398 +  | 8.17   | 9.2    |
| ENSG0000( RLN2    | protein_co chr9  | 5299868  | 5304969 -  | 0      | 0      |
| ENSG0000( RLN1    | protein_co chr9  | 5334969  | 5339873 -  | 0      | 0      |
| ENSG0000( PLGRKT  | protein_co chr9  | 5357973  | 5437878 -  | 7.71   | 7.97   |
| ENSG0000( TBC1D13 | protein_co chr9  | 1.29E+08 | 1.29E+08 + | 16.05  | 13.31  |
| ENSG0000( RIC1    | protein_co chr9  | 5629025  | 5776557 +  | 19.13  | 16.01  |
| ENSG0000( KDM4C   | protein_co chr9  | 6720863  | 7175648 +  | 10.57  | 8.7    |
| ENSG0000( DOCK8   | protein_co chr9  | 214854   | 465259 +   | 0.25   | 0.01   |
| ENSG0000( KANK1   | protein_co chr9  | 470291   | 746106 +   | 6.13   | 5.38   |
| ENSG0000( ELAVL2  | protein_co chr9  | 23690104 | 23826337 - | 0      | 0      |
| ENSG0000( NCS1    | protein_co chr9  | 1.3E+08  | 1.3E+08 +  | 19.78  | 17.67  |
| ENSG0000( TESK1   | protein_co chr9  | 35605305 | 35610041 + | 18.75  | 16.28  |
| ENSG0000( KCNT1   | protein_co chr9  | 1.36E+08 | 1.36E+08 + | 0      | 0      |
| ENSG0000( CA9     | protein_co chr9  | 35673856 | 35681159 + | 0.66   | 1.01   |
| ENSG0000( FUBP3   | protein_co chr9  | 1.31E+08 | 1.31E+08 + | 18.34  | 18.5   |
| ENSG0000( TYRP1   | protein_co chr9  | 12685439 | 12710290 + | 0.61   | 1.12   |
| ENSG0000( CREB3   | protein_co chr9  | 35732335 | 35737004 + | 27.22  | 26.61  |
| ENSG0000( RGP1    | protein_co chr9  | 35749287 | 35758575 + | 11.71  | 11.73  |
| ENSG0000( MPDZ    | protein_co chr9  | 13105704 | 13279590 - | 13.17  | 14.33  |
| ENSG0000( LHX3    | protein_co chr9  | 1.36E+08 | 1.36E+08 - | 0      | 0      |
| ENSG0000( DDX58   | protein_co chr9  | 32455705 | 32526324 - | 3.35   | 3.26   |
| ENSG0000( EDF1    | protein_co chr9  | 1.37E+08 | 1.37E+08 - | 233.86 | 225.12 |
| ENSG0000( PIP5K1B | protein_co chr9  | 68705414 | 69009176 + | 0      | 0.02   |
| ENSG0000( GLIS3   | protein_co chr9  | 3824127  | 4348392 -  | 15     | 14.67  |
| ENSG0000( BAG1    | protein_co chr9  | 33247820 | 33264720 - | 22.8   | 25.59  |
| ENSG0000( RAPGEF1 | protein_co chr9  | 1.32E+08 | 1.32E+08 - | 10.96  | 13.4   |
| ENSG0000( NPDC1   | protein_co chr9  | 1.37E+08 | 1.37E+08 - | 53.72  | 57.05  |
| ENSG0000( APBA1   | protein_co chr9  | 69427530 | 69672306 - | 0.89   | 1.57   |
| ENSG0000( SETX    | protein_co chr9  | 1.32E+08 | 1.32E+08 - | 9.17   | 10.61  |
| ENSG0000( SH3GL2  | protein_co chr9  | 17579082 | 17797129 + | 0      | 0.05   |
| ENSG0000( PTGDS   | protein_co chr9  | 1.37E+08 | 1.37E+08 + | 68.57  | 73.44  |
| ENSG0000( ABCA2   | protein_co chr9  | 1.37E+08 | 1.37E+08 - | 17.29  | 18.55  |
| ENSG0000( SHB     | protein_co chr9  | 37919134 | 38069211 - | 13.14  | 12.3   |
| ENSG0000( UBE2R2  | protein_co chr9  | 33817567 | 33920404 + | 15.47  | 16.66  |
| ENSG0000( ABHD17B | protein_co chr9  | 71862452 | 71910931 - | 3.72   | 3.42   |
| ENSG0000( EXOSC3  | protein_co chr9  | 37766978 | 37801437 - | 17.36  | 16.72  |
| ENSG0000( ZFAND5  | protein_co chr9  | 72351425 | 72365235 - | 109.54 | 102.62 |
| ENSG0000( DVL1    | protein_co chr1  | 1335276  | 1349350 -  | 21.42  | 19.24  |
| ENSG0000( PDLIM1  | protein_co chr10 | 95237572 | 95291024 - | 72.47  | 67.91  |

|                    |                  |          |          |   |        |        |
|--------------------|------------------|----------|----------|---|--------|--------|
| ENSG0000(CCNJ      | protein_co chr10 | 96043394 | 96060870 | + | 2.11   | 1.7    |
| ENSG0000(DNTT      | protein_co chr10 | 96304396 | 96338564 | + | 0      | 0      |
| ENSG0000(GATA3     | protein_co chr10 | 8053604  | 8075198  | + | 1.88   | 1.61   |
| ENSG0000(ATRNL1    | protein_co chr10 | 1.15E+08 | 1.16E+08 | + | 0.07   | 0.07   |
| ENSG0000(HPS1      | protein_co chr10 | 98416198 | 98446947 | - | 44.32  | 45.56  |
| ENSG0000(PHYH      | protein_co chr10 | 13277796 | 13302412 | - | 17.67  | 19.47  |
| ENSG0000(RASSF4    | protein_co chr10 | 44959407 | 44995891 | + | 38.05  | 39.53  |
| ENSG0000(DNMBP     | protein_co chr10 | 99875577 | 1E+08    | - | 7.35   | 7.76   |
| ENSG0000(RAB11FIP2 | protein_co chr10 | 1.18E+08 | 1.18E+08 | - | 9.83   | 5.8    |
| ENSG0000(CXCL12    | protein_co chr10 | 44370165 | 44386493 | - | 102.23 | 87.45  |
| ENSG0000(ERLIN1    | protein_co chr10 | 1E+08    | 1E+08    | - | 24.74  | 25.29  |
| ENSG0000(EIF3A     | protein_co chr10 | 1.19E+08 | 1.19E+08 | - | 66.33  | 68.4   |
| ENSG0000(PKD2L1    | protein_co chr10 | 1E+08    | 1E+08    | - | 0      | 0      |
| ENSG0000(CUBN      | protein_co chr10 | 16823964 | 17129831 | - | 0.19   | 0.19   |
| ENSG0000(TRDMT1    | protein_co chr10 | 17142254 | 17202054 | - | 1.72   | 1.75   |
| ENSG0000(DDX50     | protein_co chr10 | 68901278 | 68946847 | + | 17.26  | 15.83  |
| ENSG0000(MAPK8     | protein_co chr10 | 48306639 | 48439360 | + | 17.76  | 18.51  |
| ENSG0000(SEC23IP   | protein_co chr10 | 1.2E+08  | 1.2E+08  | + | 18.15  | 16.3   |
| ENSG0000(ATE1      | protein_co chr10 | 1.22E+08 | 1.22E+08 | - | 4.84   | 5.59   |
| ENSG0000(NSMCE4A   | protein_co chr10 | 1.22E+08 | 1.22E+08 | - | 8.58   | 7.58   |
| ENSG0000(PLEKHA1   | protein_co chr10 | 1.22E+08 | 1.22E+08 | + | 10.05  | 10.55  |
| ENSG0000(PALD1     | protein_co chr10 | 70478821 | 70568449 | + | 0      | 0.01   |
| ENSG0000(UNC5B     | protein_co chr10 | 71212570 | 71302864 | + | 14.87  | 16.12  |
| ENSG0000(CDH23     | protein_co chr10 | 71396934 | 71815947 | + | 0.11   | 0.17   |
| ENSG0000(VSIR      | protein_co chr10 | 71747559 | 71773498 | - | 54.27  | 56.52  |
| ENSG0000(SPOCK2    | protein_co chr10 | 72059035 | 72089032 | - | 0.32   | 0.09   |
| ENSG0000(MICU1     | protein_co chr10 | 72367327 | 72626191 | - | 41.84  | 42.74  |
| ENSG0000(PPP3CB    | protein_co chr10 | 73436428 | 73496024 | - | 20.1   | 20.33  |
| ENSG0000(CCSER2    | protein_co chr10 | 84328586 | 84518521 | + | 20.48  | 21.34  |
| ENSG0000(BMPR1A    | protein_co chr10 | 86756601 | 86932838 | + | 14.19  | 12.42  |
| ENSG0000(MINPP1    | protein_co chr10 | 87504875 | 87553460 | + | 10.16  | 10.64  |
| ENSG0000(ACTA2     | protein_co chr10 | 88935074 | 88991339 | - | 329.9  | 481.15 |
| ENSG0000(LIPA      | protein_co chr10 | 89213569 | 89414557 | - | 33.85  | 29.56  |
| ENSG0000(TLX1      | protein_co chr10 | 1.01E+08 | 1.01E+08 | + | 0      | 0      |
| ENSG0000(TWNK      | protein_co chr10 | 1.01E+08 | 1.01E+08 | + | 3.58   | 3.1    |
| ENSG0000(LZTS2     | protein_co chr10 | 1.01E+08 | 1.01E+08 | + | 51.13  | 50.66  |
| ENSG0000(SFXN3     | protein_co chr10 | 1.01E+08 | 1.01E+08 | + | 43.8   | 48.29  |
| ENSG0000(KAZALD1   | protein_co chr10 | 1.01E+08 | 1.01E+08 | + | 8.21   | 8.6    |
| ENSG0000(FBXW4     | protein_co chr10 | 1.02E+08 | 1.02E+08 | - | 12.79  | 14.48  |
| ENSG0000(FGF8      | protein_co chr10 | 1.02E+08 | 1.02E+08 | - | 0.07   | 0      |
| ENSG0000(NPM3      | protein_co chr10 | 1.02E+08 | 1.02E+08 | - | 15.44  | 13.19  |
| ENSG0000(TNKS2     | protein_co chr10 | 91798312 | 91865276 | + | 14.61  | 14.25  |
| ENSG0000(PITX3     | protein_co chr10 | 1.02E+08 | 1.02E+08 | - | 0.5    | 0.22   |
| ENSG0000(GBF1      | protein_co chr10 | 1.02E+08 | 1.02E+08 | + | 19.22  | 19.19  |
| ENSG0000(ARHGAP21  | protein_co chr10 | 24583609 | 24723668 | - | 61.13  | 68.85  |

|                   |                  |          |          |   |         |         |
|-------------------|------------------|----------|----------|---|---------|---------|
| ENSG0000(CPEB3    | protein_co chr10 | 92046692 | 92291087 | - | 0.47    | 0.71    |
| ENSG0000(FBXL15   | protein_co chr10 | 1.02E+08 | 1.02E+08 | + | 5.53    | 6.7     |
| ENSG0000(CUEDC2   | protein_co chr10 | 1.02E+08 | 1.02E+08 | - | 36.19   | 39.12   |
| ENSG0000(SUFU     | protein_co chr10 | 1.03E+08 | 1.03E+08 | + | 7.3     | 8.65    |
| ENSG0000(ANKRD26  | protein_co chr10 | 26991914 | 27100498 | - | 2.06    | 2       |
| ENSG0000(ACBD5    | protein_co chr10 | 27195214 | 27242130 | - | 10.48   | 9.02    |
| ENSG0000(LHPP     | protein_co chr10 | 1.24E+08 | 1.25E+08 | + | 8.19    | 7.82    |
| ENSG0000(LARP4B   | protein_co chr10 | 806914   | 931705   | - | 12.74   | 11.35   |
| ENSG0000(GTPBP4   | protein_co chr10 | 988019   | 1019936  | + | 8.71    | 12.98   |
| ENSG0000(EDRF1    | protein_co chr10 | 1.26E+08 | 1.26E+08 | + | 4.68    | 6.23    |
| ENSG0000(BCCIP    | protein_co chr10 | 1.26E+08 | 1.26E+08 | + | 13.88   | 14.95   |
| ENSG0000(MTPAP    | protein_co chr10 | 30309801 | 30374448 | - | 3.64    | 3.86    |
| ENSG0000(NEURL1   | protein_co chr10 | 1.03E+08 | 1.04E+08 | + | 0       | 0       |
| ENSG0000(SH3PXD2A | protein_co chr10 | 1.04E+08 | 1.04E+08 | - | 20.41   | 22.95   |
| ENSG0000(PITRM1   | protein_co chr10 | 3137728  | 3172841  | - | 19.65   | 20.25   |
| ENSG0000(STN1     | protein_co chr10 | 1.04E+08 | 1.04E+08 | - | 9.5     | 11.03   |
| ENSG0000(MAP3K8   | protein_co chr10 | 30433937 | 30461833 | + | 17.32   | 16.26   |
| ENSG0000(DKK1     | protein_co chr10 | 52314296 | 52318042 | + | 131.56  | 112.04  |
| ENSG0000(EBF3     | protein_co chr10 | 1.3E+08  | 1.3E+08  | - | 12.48   | 12.23   |
| ENSG0000(GLRX3    | protein_co chr10 | 1.3E+08  | 1.3E+08  | + | 31.85   | 33.05   |
| ENSG0000(SORCS1   | protein_co chr10 | 1.07E+08 | 1.07E+08 | - | 0       | 0       |
| ENSG0000(FAM208B  | protein_co chr10 | 5684838  | 5763740  | + | 14.71   | 13.6    |
| ENSG0000(XPNPEP1  | protein_co chr10 | 1.1E+08  | 1.1E+08  | - | 30.32   | 33.66   |
| ENSG0000(SMC3     | protein_co chr10 | 1.11E+08 | 1.11E+08 | + | 13.26   | 12.39   |
| ENSG0000(SHOC2    | protein_co chr10 | 1.11E+08 | 1.11E+08 | + | 16.7    | 19.65   |
| ENSG0000(TFAM     | protein_co chr10 | 58385022 | 58399221 | + | 6.13    | 6.15    |
| ENSG0000(CCDC6    | protein_co chr10 | 59788763 | 59906656 | - | 9.69    | 10.24   |
| ENSG0000(CUL2     | protein_co chr10 | 35008551 | 35090642 | - | 12.17   | 16.41   |
| ENSG0000(CCN1     | protein_co chr10 | 35247025 | 35572669 | + | 48.01   | 49.47   |
| ENSG0000(UBE2S    | protein_co chr19 | 55399745 | 55407777 | - | 12.24   | 14.06   |
| ENSG0000(RPL28    | protein_co chr19 | 55385345 | 55403250 | + | 944.31  | 939.87  |
| ENSG0000(ZMIZ1    | protein_co chr10 | 79069035 | 79316528 | + | 28.69   | 29.63   |
| ENSG0000(DNAJC12  | protein_co chr10 | 67796665 | 67838166 | - | 1.91    | 0.94    |
| ENSG0000(PPIF     | protein_co chr10 | 79347469 | 79355337 | + | 20.48   | 20.25   |
| ENSG0000(PBLD     | protein_co chr10 | 68282660 | 68333049 | - | 5.11    | 4.41    |
| ENSG0000(TSPAN14  | protein_co chr10 | 80454166 | 80533123 | + | 30.15   | 28.87   |
| ENSG0000(LGI1     | protein_co chr10 | 93757809 | 93806272 | + | 0.11    | 0.19    |
| ENSG0000(TBC1D12  | protein_co chr10 | 94402504 | 94535930 | + | 2.99    | 2.61    |
| ENSG0000(CYP2C18  | protein_co chr10 | 94683621 | 94736190 | + | 0       | 0.09    |
| ENSG0000(KRT23    | protein_co chr17 | 40922696 | 40937634 | - | 0       | 0       |
| ENSG0000(CRYBA1   | protein_co chr17 | 29246863 | 29254494 | + | 0.08    | 0.09    |
| ENSG0000(NUFIP2   | protein_co chr17 | 29255836 | 29294118 | - | 18.91   | 16.22   |
| ENSG0000(GIT1     | protein_co chr17 | 29573469 | 29594054 | - | 14.16   | 15.87   |
| ENSG0000(RPL19    | protein_co chr17 | 39200283 | 39204727 | + | 1296.84 | 1297.95 |
| ENSG0000(FBXL20   | protein_co chr17 | 39252644 | 39402523 | - | 5.9     | 5.25    |

|                   |                  |          |          |   |        |        |
|-------------------|------------------|----------|----------|---|--------|--------|
| ENSG0000(RUNDC3A  | protein_co chr17 | 44308413 | 44318671 | + | 0.18   | 0.12   |
| ENSG0000(UBTF     | protein_co chr17 | 44205033 | 44221626 | - | 25.21  | 23.99  |
| ENSG0000(CSF3     | protein_co chr17 | 40015361 | 40017813 | + | 0.95   | 0.9    |
| ENSG0000(PSMD3    | protein_co chr17 | 39980797 | 39997960 | + | 37.13  | 39.33  |
| ENSG0000(CASC3    | protein_co chr17 | 40140318 | 40172183 | + | 20.84  | 23.67  |
| ENSG0000(RAPGEFL1 | protein_co chr17 | 40177010 | 40195656 | + | 2.57   | 2.16   |
| ENSG0000(RGS9     | protein_co chr17 | 65100812 | 65227703 | + | 1.33   | 2.46   |
| ENSG0000(RNF43    | protein_co chr17 | 58352500 | 58417595 | - | 0.58   | 0.12   |
| ENSG0000(WNT3     | protein_co chr17 | 46762506 | 46833154 | - | 0.83   | 1.01   |
| ENSG0000(ASPA     | protein_co chr17 | 3472374  | 3503419  | + | 1.1    | 1.75   |
| ENSG0000(RAD51C   | protein_co chr17 | 58692573 | 58735611 | + | 14.12  | 12.33  |
| ENSG0000(4-Sep    | protein_co chr17 | 58520250 | 58540818 | - | 3.09   | 3.14   |
| ENSG0000(MTMR4    | protein_co chr17 | 58489529 | 58517905 | - | 13.59  | 9.27   |
| ENSG0000(TRIM37   | protein_co chr17 | 58982638 | 59106921 | - | 12.59  | 13.55  |
| ENSG0000(P2RX1    | protein_co chr17 | 3896592  | 3916500  | - | 0      | 0.08   |
| ENSG0000(DHX40    | protein_co chr17 | 59565525 | 59608345 | + | 25.92  | 24.01  |
| ENSG0000(KRT37    | protein_co chr17 | 41420753 | 41424523 | - | 0      | 0      |
| ENSG0000(TUBD1    | protein_co chr17 | 59859482 | 59892945 | - | 1.77   | 2.57   |
| ENSG0000(KPNB1    | protein_co chr17 | 47649476 | 47685505 | + | 98.34  | 95.87  |
| ENSG0000(GOSR2    | protein_co chr17 | 46923075 | 46975524 | + | 19.47  | 20.3   |
| ENSG0000(PNPO     | protein_co chr17 | 47941506 | 47948288 | + | 7.73   | 8.52   |
| ENSG0000(TVP23BP2 | processed_chr2   | 74628328 | 74628942 | - | 0      | 0      |
| ENSG0000(RPS6KB1  | protein_co chr17 | 59893046 | 59950564 | + | 13.34  | 15.31  |
| ENSG0000(TRIM16L  | protein_co chr17 | 18697998 | 18736118 | + | 7.2    | 8.38   |
| ENSG0000(ZNF29P   | unprocessε chr17 | 15675476 | 15675643 | + | 0      | 0      |
| ENSG0000(CDK5RAP3 | protein_co chr17 | 47967810 | 47981774 | + | 39.06  | 42.55  |
| ENSG0000(CBX1     | protein_co chr17 | 48070052 | 48101521 | - | 36.17  | 33.84  |
| ENSG0000(RECQL5   | protein_co chr17 | 75626845 | 75667189 | - | 8.27   | 6.38   |
| ENSG0000(PIGL     | protein_co chr17 | 16217191 | 16351797 | + | 24.26  | 20.44  |
| ENSG0000(GALK1    | protein_co chr17 | 75751594 | 75765711 | - | 13.04  | 11.91  |
| ENSG0000(INTS2    | protein_co chr17 | 61865367 | 61928016 | - | 1.8    | 1.86   |
| ENSG0000(CAMTA2   | protein_co chr17 | 4967992  | 4987652  | - | 33.14  | 34.04  |
| ENSG0000(MED13    | protein_co chr17 | 61942605 | 62065282 | - | 8.01   | 9.6    |
| ENSG0000(HOXB6    | protein_co chr17 | 48595751 | 48604992 | - | 0.35   | 0.23   |
| ENSG0000(ENO3     | protein_co chr17 | 4948092  | 4957131  | + | 3.22   | 2.45   |
| ENSG0000(AC003958 | unprocessε chr17 | 41334632 | 41335733 | + | 0      | 0      |
| ENSG0000(PFN1     | protein_co chr17 | 4945652  | 4949061  | - | 527.23 | 509.36 |
| ENSG0000(RNF167   | protein_co chr17 | 4940008  | 4945222  | + | 40.63  | 44.32  |
| ENSG0000(SLC25A11 | protein_co chr17 | 4937130  | 4940251  | - | 26.96  | 24.33  |
| ENSG0000(RASD1    | protein_co chr17 | 17494437 | 17496395 | - | 16.32  | 15.25  |
| ENSG0000(CHRNE    | protein_co chr17 | 4897774  | 4903074  | - | 0.18   | 0.13   |
| ENSG0000(RAI1     | protein_co chr17 | 17681473 | 17811453 | + | 7.62   | 8.21   |
| ENSG0000(NUP88    | protein_co chr17 | 5360963  | 5420160  | - | 11.62  | 10.88  |
| ENSG0000(C1QBP    | protein_co chr17 | 5432777  | 5448830  | - | 38.11  | 39.23  |
| ENSG0000(SLC6A4   | protein_co chr17 | 30194319 | 30236002 | - | 0.67   | 1.23   |

|                    |                  |          |            |         |        |
|--------------------|------------------|----------|------------|---------|--------|
| ENSG0000(BLMH      | protein_co chr17 | 30248195 | 30292056 - | 15.52   | 17.06  |
| ENSG0000(CPD       | protein_co chr17 | 30378905 | 30469989 + | 130.98  | 138.21 |
| ENSG0000(GOSR1     | protein_co chr17 | 30477362 | 30527592 + | 11.95   | 16.83  |
| ENSG0000(CCDC47    | protein_co chr17 | 63745250 | 63776351 - | 32.13   | 31.15  |
| ENSG0000(MED31     | protein_co chr17 | 6643315  | 6651634 -  | 6.98    | 6.14   |
| ENSG0000(DRG2      | protein_co chr17 | 18087886 | 18107971 + | 10.89   | 15.17  |
| ENSG0000(FTSJ3     | protein_co chr17 | 63819433 | 63830012 - | 17.11   | 17.39  |
| ENSG0000(AKAP10    | protein_co chr17 | 19904302 | 19978343 - | 9.84    | 11.83  |
| ENSG0000(ALDH3A1   | protein_co chr17 | 19737984 | 19748943 - | 0.51    | 0.93   |
| ENSG0000(SMARCD2   | protein_co chr17 | 63832081 | 63843065 - | 26.65   | 28.43  |
| ENSG0000(ICAM2     | protein_co chr17 | 64002594 | 64020634 - | 1.95    | 1.96   |
| ENSG0000(SYNGR2    | protein_co chr17 | 78168558 | 78173527 + | 6.45    | 5.62   |
| ENSG0000(B9D1      | protein_co chr17 | 19337554 | 19378182 - | 14.48   | 15.01  |
| ENSG0000(UTP6      | protein_co chr17 | 31860899 | 31901765 - | 17.47   | 16.11  |
| ENSG0000(DDX5      | protein_co chr17 | 64499616 | 64508199 - | 236.03  | 263.75 |
| ENSG0000(C17orf75  | protein_co chr17 | 32324565 | 32350023 - | 7.44    | 6.48   |
| ENSG0000(CYTH1     | protein_co chr17 | 78674048 | 78782297 - | 6.53    | 5.33   |
| ENSG0000(PSMD11    | protein_co chr17 | 32444261 | 32483318 + | 18.8    | 24.1   |
| ENSG0000(LGALS3BP  | protein_co chr17 | 78971238 | 78980109 - | 373.23  | 357.86 |
| ENSG0000(ASIC2     | protein_co chr17 | 33013087 | 34174964 - | 0       | 0.16   |
| ENSG0000(CCL7      | protein_co chr17 | 34270221 | 34272242 + | 6.85    | 6.58   |
| ENSG0000(CCL2      | protein_co chr17 | 34255218 | 34257203 + | 266.8   | 237.93 |
| ENSG0000(CCL8      | protein_co chr17 | 34319036 | 34321402 + | 0.19    | 0.56   |
| ENSG0000(CCL1      | protein_co chr17 | 34360328 | 34363231 - | 0       | 0      |
| ENSG0000(PEX12     | protein_co chr17 | 35574795 | 35578863 - | 3.97    | 3.97   |
| ENSG0000(KRT32     | protein_co chr17 | 41459811 | 41467429 - | 0       | 0      |
| ENSG0000(DHX58     | protein_co chr17 | 42101404 | 42112733 - | 7.29    | 7.27   |
| ENSG0000(KAT2A     | protein_co chr17 | 42113108 | 42121358 - | 11.01   | 13.84  |
| ENSG0000(RAB5C     | protein_co chr17 | 42124976 | 42155044 - | 97.37   | 93.95  |
| ENSG0000(NAGLU     | protein_co chr17 | 42536172 | 42544449 + | 56.49   | 58.34  |
| ENSG0000(HSD17B1P: | unprocessε chr17 | 42546764 | 42548706 + | 0       | 0      |
| ENSG0000(HSD17B1   | protein_co chr17 | 42549214 | 42555213 + | 0.74    | 0.76   |
| ENSG0000(MLX       | protein_co chr17 | 42567068 | 42573239 + | 16.47   | 16.58  |
| ENSG0000(CNTNAP1   | protein_co chr17 | 42682613 | 42699814 + | 51.56   | 48.15  |
| ENSG0000(ABI3      | protein_co chr17 | 49210227 | 49223225 + | 0       | 0.11   |
| ENSG0000(EZH1      | protein_co chr17 | 42700275 | 42745049 - | 14.86   | 16.61  |
| ENSG0000(DLX4      | protein_co chr17 | 49968970 | 49974959 + | 0.45    | 0.55   |
| ENSG0000(PPP1R9B   | protein_co chr17 | 50133735 | 50150630 - | 20.04   | 19.73  |
| ENSG0000(COL1A1    | protein_co chr17 | 50183289 | 50201632 - | 2909.75 | 3039.8 |
| ENSG0000(SGCA      | protein_co chr17 | 50164214 | 50175931 + | 0.29    | 0.51   |
| ENSG0000(PTGES3L-A | protein_co chr17 | 42950526 | 42980528 - | 0.51    | 0.64   |
| ENSG0000(MRPL27    | protein_co chr17 | 50367857 | 50373214 - | 26.44   | 33.5   |
| ENSG0000(VAT1      | protein_co chr17 | 43014605 | 43025123 - | 373.03  | 370.96 |
| ENSG0000(LRRC59    | protein_co chr17 | 50375059 | 50397553 - | 26.35   | 27.18  |
| ENSG0000(RND2      | protein_co chr17 | 43025241 | 43032036 + | 1.03    | 1.56   |



|                    |                  |          |          |   |        |        |
|--------------------|------------------|----------|----------|---|--------|--------|
| ENSG0000(ALOX12    | protein_co chr17 | 6996065  | 7010736  | + | 0      | 0      |
| ENSG0000(HDAC5     | protein_co chr17 | 44076746 | 44123702 | - | 23.63  | 23.72  |
| ENSG0000(ABCC3     | protein_co chr17 | 50634777 | 50692252 | + | 5.85   | 4.56   |
| ENSG0000(LUC7L3    | protein_co chr17 | 50719544 | 50756213 | + | 52.27  | 51.96  |
| ENSG0000(PPY       | protein_co chr17 | 43940804 | 43942468 | - | 0.17   | 0      |
| ENSG0000(MPP2      | protein_co chr17 | 43875357 | 43909711 | - | 2.87   | 2.89   |
| ENSG0000(SMURF2    | protein_co chr17 | 64542295 | 64662068 | - | 17.82  | 15.68  |
| ENSG0000(DUSP3     | protein_co chr17 | 43766121 | 43778988 | - | 25.47  | 23.61  |
| ENSG0000(CACNG1    | protein_co chr17 | 67044590 | 67056797 | + | 0      | 0      |
| ENSG0000(EFTUD2    | protein_co chr17 | 44849943 | 44899662 | - | 25.72  | 23.26  |
| ENSG0000(HLF       | protein_co chr17 | 55265012 | 55325065 | + | 0      | 0      |
| ENSG0000(SLC16A6   | protein_co chr17 | 68267026 | 68291267 | - | 0.05   | 0      |
| ENSG0000(PRKAR1A   | protein_co chr17 | 68511780 | 68551319 | + | 148.69 | 145.63 |
| ENSG0000(EFNB3     | protein_co chr17 | 7705202  | 7711378  | + | 16.71  | 17.1   |
| ENSG0000(FAM20A    | protein_co chr17 | 68535113 | 68601389 | - | 40.25  | 36.51  |
| ENSG0000(YWHAE     | protein_co chr17 | 1344272  | 1400378  | - | 210.19 | 198.66 |
| ENSG0000(AC016292. | processed_chr17  | 1858039  | 1858446  | - | 0      | 0      |
| ENSG0000(MMD       | protein_co chr17 | 55392613 | 55421992 | - | 2.41   | 3.09   |
| ENSG0000(RANGRF    | protein_co chr17 | 8288497  | 8290092  | + | 16.31  | 16.72  |
| ENSG0000(DPH1      | protein_co chr17 | 2030110  | 2043430  | + | 21.64  | 22.87  |
| ENSG0000(MAP2K6    | protein_co chr17 | 69414698 | 69543331 | + | 0.58   | 1.7    |
| ENSG0000(DHRS7B    | protein_co chr17 | 21123364 | 21193265 | + | 7.94   | 9.95   |
| ENSG0000(WSB1      | protein_co chr17 | 27294076 | 27315926 | + | 178.81 | 171.67 |
| ENSG0000(RCVRN     | protein_co chr17 | 9896320  | 9905621  | - | 0      | 0      |
| ENSG0000(MYH1      | protein_co chr17 | 10492307 | 10518543 | - | 0      | 0      |
| ENSG0000(SLC9A3R1  | protein_co chr17 | 74748652 | 74769353 | + | 5.61   | 7.23   |
| ENSG0000(MYH3      | protein_co chr17 | 10628526 | 10657309 | - | 0.27   | 0.53   |
| ENSG0000(NAT9      | protein_co chr17 | 74770547 | 74776367 | - | 19.19  | 19.53  |
| ENSG0000(TMEM104   | protein_co chr17 | 74776483 | 74839779 | + | 4.78   | 5.33   |
| ENSG0000(VTN       | protein_co chr17 | 28367276 | 28373091 | - | 39.84  | 35.06  |
| ENSG0000(TNFAIP1   | protein_co chr17 | 28335602 | 28347009 | + | 18.09  | 16.58  |
| ENSG0000(IFT20     | protein_co chr17 | 28328325 | 28335489 | - | 27.89  | 31.92  |
| ENSG0000(TMEM97    | protein_co chr17 | 28319095 | 28328685 | + | 7.78   | 7.75   |
| ENSG0000(CDR2L     | protein_co chr17 | 74987632 | 75005800 | + | 6.5    | 6.27   |
| ENSG0000(PMP22     | protein_co chr17 | 15229777 | 15265326 | - | 46.91  | 48.03  |
| ENSG0000(FOXN1     | protein_co chr17 | 28506243 | 28538896 | + | 0      | 0      |
| ENSG0000(UNC119    | protein_co chr17 | 28546707 | 28552668 | - | 20.18  | 18.4   |
| ENSG0000(ALDOC     | protein_co chr17 | 28573115 | 28577264 | - | 46.59  | 40.43  |
| ENSG0000(SUPT6H    | protein_co chr17 | 28662091 | 28702684 | + | 29.63  | 27.63  |
| ENSG0000(RAB34     | protein_co chr17 | 28714281 | 28718429 | - | 98.76  | 96.08  |
| ENSG0000(PHF12     | protein_co chr17 | 28905250 | 28951771 | - | 13.95  | 12.94  |
| ENSG0000(PHOX2B    | protein_co chr4  | 41744082 | 41748970 | - | 0      | 0      |
| ENSG0000(TMEM33    | protein_co chr4  | 41935120 | 41960572 | + | 11.7   | 12.37  |
| ENSG0000(GABRA4    | protein_co chr4  | 46918900 | 46994407 | - | 0      | 0      |
| ENSG0000(GNRHR     | protein_co chr4  | 67739328 | 67754360 | - | 0      | 0      |

|                   |                 |          |          |   |        |        |
|-------------------|-----------------|----------|----------|---|--------|--------|
| ENSG0000(SLAIN2   | protein_co chr4 | 48341322 | 48426212 | + | 30.64  | 34.18  |
| ENSG0000(OCIAD1   | protein_co chr4 | 48805212 | 48861817 | + | 62.35  | 62.31  |
| ENSG0000(UGT2B10  | protein_co chr4 | 68815993 | 68831196 | + | 0      | 0      |
| ENSG0000(CWH43    | protein_co chr4 | 48986247 | 49062081 | + | 0      | 0      |
| ENSG0000(DCUN1D4  | protein_co chr4 | 51843000 | 51916837 | + | 19.94  | 23.13  |
| ENSG0000(USP46    | protein_co chr4 | 52590972 | 52659335 | - | 4.51   | 6.54   |
| ENSG0000(SULT1E1  | protein_co chr4 | 69810780 | 69860152 | - | 1.28   | 1.81   |
| ENSG0000(ODAM     | protein_co chr4 | 70196496 | 70204576 | + | 0.1    | 0      |
| ENSG0000(SMR3A    | protein_co chr4 | 70360761 | 70367158 | + | 0      | 0      |
| ENSG0000(CHIC2    | protein_co chr4 | 54009789 | 54064690 | - | 21.14  | 21.25  |
| ENSG0000(NMU      | protein_co chr4 | 55595229 | 55636698 | - | 1.75   | 0.28   |
| ENSG0000(KIAA1211 | protein_co chr4 | 56049073 | 56328625 | + | 6.4    | 7.61   |
| ENSG0000(LAMTOR3  | protein_co chr4 | 99878336 | 99894490 | - | 25.33  | 22.93  |
| ENSG0000(PF4V1    | protein_co chr4 | 73853189 | 73854155 | + | 1.4    | 1.09   |
| ENSG0000(NFKB1    | protein_co chr4 | 1.03E+08 | 1.03E+08 | + | 12.93  | 15.79  |
| ENSG0000(AREG     | protein_co chr4 | 74445134 | 74455009 | + | 0.33   | 1.12   |
| ENSG0000(MANBA    | protein_co chr4 | 1.03E+08 | 1.03E+08 | - | 26.65  | 24.98  |
| ENSG0000(UBE2D3   | protein_co chr4 | 1.03E+08 | 1.03E+08 | - | 127.65 | 113.17 |
| ENSG0000(MAPK10   | protein_co chr4 | 86010395 | 86594131 | - | 5.9    | 5.25   |
| ENSG0000(ELF2     | protein_co chr4 | 1.39E+08 | 1.39E+08 | - | 14.67  | 15.79  |
| ENSG0000(NDUFC1   | protein_co chr4 | 1.39E+08 | 1.39E+08 | - | 39.39  | 44.1   |
| ENSG0000(UCP1     | protein_co chr4 | 1.41E+08 | 1.41E+08 | - | 0      | 0      |
| ENSG0000(TBC1D9   | protein_co chr4 | 1.41E+08 | 1.41E+08 | - | 15.69  | 15.23  |
| ENSG0000(ZNF330   | protein_co chr4 | 1.41E+08 | 1.41E+08 | + | 18.34  | 21.29  |
| ENSG0000(INPP4B   | protein_co chr4 | 1.42E+08 | 1.43E+08 | - | 0.57   | 0.93   |
| ENSG0000(GAB1     | protein_co chr4 | 1.43E+08 | 1.43E+08 | + | 7.06   | 5.78   |
| ENSG0000(KLHL2    | protein_co chr4 | 1.65E+08 | 1.65E+08 | + | 11.78  | 11.15  |
| ENSG0000(IL2      | protein_co chr4 | 1.22E+08 | 1.22E+08 | - | 0      | 0      |
| ENSG0000(CPE      | protein_co chr4 | 1.65E+08 | 1.65E+08 | + | 26.22  | 28.68  |
| ENSG0000(RPL34    | protein_co chr4 | 1.09E+08 | 1.09E+08 | + | 843.45 | 852.48 |
| ENSG0000(WFS1     | protein_co chr4 | 6269849  | 6303265  | + | 8.68   | 11.49  |
| ENSG0000(ANXA10   | protein_co chr4 | 1.68E+08 | 1.68E+08 | + | 11.45  | 9.25   |
| ENSG0000(GRPEL1   | protein_co chr4 | 7058906  | 7068197  | - | 15.29  | 12.04  |
| ENSG0000(GAR1     | protein_co chr4 | 1.1E+08  | 1.1E+08  | + | 6.92   | 7.2    |
| ENSG0000(FRG1     | protein_co chr4 | 1.9E+08  | 1.9E+08  | + | 19.96  | 23.42  |
| ENSG0000(CLCN3    | protein_co chr4 | 1.7E+08  | 1.7E+08  | + | 26.47  | 24.7   |
| ENSG0000(AADAT    | protein_co chr4 | 1.7E+08  | 1.7E+08  | - | 2.58   | 3.2    |
| ENSG0000(GALNT7   | protein_co chr4 | 1.73E+08 | 1.73E+08 | + | 18.49  | 19.49  |
| ENSG0000(DHX15    | protein_co chr4 | 24517441 | 24584550 | - | 35.08  | 33.88  |
| ENSG0000(SOD3     | protein_co chr4 | 24789912 | 24800842 | + | 47.3   | 49.73  |
| ENSG0000(SEPSECS  | protein_co chr4 | 25120014 | 25160442 | - | 2.61   | 3.15   |
| ENSG0000(CPZ      | protein_co chr4 | 8592660  | 8619759  | + | 6.03   | 6.93   |
| ENSG0000(TRIM2    | protein_co chr4 | 1.53E+08 | 1.53E+08 | + | 16.49  | 13.72  |
| ENSG0000(SLC2A9   | protein_co chr4 | 9771153  | 10054936 | - | 3.39   | 4.23   |
| ENSG0000(FBXW7    | protein_co chr4 | 1.52E+08 | 1.53E+08 | - | 8.05   | 9.07   |

|                    |                  |          |            |        |        |
|--------------------|------------------|----------|------------|--------|--------|
| ENSG0000( NEIL3    | protein_co chr4  | 1.77E+08 | 1.77E+08 + | 0.24   | 0.35   |
| ENSG0000( TBC1D19  | protein_co chr4  | 26576437 | 26755351 + | 4.54   | 5.32   |
| ENSG0000( CLNK     | protein_co chr4  | 10486395 | 10684865 - | 0      | 0.08   |
| ENSG0000( NSD2     | protein_co chr4  | 1871424  | 1982207 +  | 6.38   | 9.67   |
| ENSG0000( SH3D19   | protein_co chr4  | 1.51E+08 | 1.51E+08 - | 60.25  | 64.56  |
| ENSG0000( STIM2    | protein_co chr4  | 26857678 | 27025381 + | 9.32   | 10.83  |
| ENSG0000( NKX3-2   | protein_co chr4  | 13540830 | 13545050 - | 0.08   | 0.06   |
| ENSG0000( MFSD10   | protein_co chr4  | 2930561  | 2934859 -  | 38.7   | 39.04  |
| ENSG0000( GLRB     | protein_co chr4  | 1.57E+08 | 1.57E+08 + | 2.75   | 2.3    |
| ENSG0000( BST1     | protein_co chr4  | 15702950 | 15738313 + | 28.15  | 28.96  |
| ENSG0000( RAPGEF2  | protein_co chr4  | 1.59E+08 | 1.59E+08 + | 19.08  | 14.09  |
| ENSG0000( HGFAC    | protein_co chr4  | 3441887  | 3449495 +  | 0.12   | 0.18   |
| ENSG0000( SNX25    | protein_co chr4  | 1.85E+08 | 1.85E+08 + | 7.28   | 5.46   |
| ENSG0000( LRP2BP   | protein_co chr4  | 1.85E+08 | 1.85E+08 - | 0.1    | 0.2    |
| ENSG0000( UFSP2    | protein_co chr4  | 1.85E+08 | 1.85E+08 - | 14.9   | 15.37  |
| ENSG0000( KLF3     | protein_co chr4  | 38664196 | 38701042 + | 10.91  | 12.38  |
| ENSG0000( KLHL5    | protein_co chr4  | 39045039 | 39126857 + | 72.12  | 75.18  |
| ENSG0000( FAM149A  | protein_co chr4  | 1.86E+08 | 1.86E+08 + | 3.95   | 3.14   |
| ENSG0000( NCAPG    | protein_co chr4  | 17810902 | 17844862 + | 0.25   | 0.26   |
| ENSG0000( UGDH     | protein_co chr4  | 39498755 | 39528311 - | 32.29  | 33.55  |
| ENSG0000( PPARGC1A | protein_co chr4  | 23755041 | 23904089 - | 0.51   | 0.03   |
| ENSG0000( DDX25    | protein_co chr11 | 1.26E+08 | 1.26E+08 + | 0.02   | 0      |
| ENSG0000( CRYAB    | protein_co chr11 | 1.12E+08 | 1.12E+08 - | 29.27  | 43.29  |
| ENSG0000( DBX1     | protein_co chr11 | 20156155 | 20160613 - | 0      | 0      |
| ENSG0000( HTATIP2  | protein_co chr11 | 20363685 | 20383783 + | 25.56  | 23.78  |
| ENSG0000( CTSC     | protein_co chr11 | 88293592 | 88337787 - | 51.41  | 42.79  |
| ENSG0000( CCDC34   | protein_co chr11 | 27330827 | 27363868 - | 3.46   | 2.88   |
| ENSG0000( ZBTB16   | protein_co chr11 | 1.14E+08 | 1.14E+08 + | 0      | 0.01   |
| ENSG0000( ELP4     | protein_co chr11 | 31509700 | 31790328 + | 6.27   | 6.19   |
| ENSG0000( ZPR1     | protein_co chr11 | 1.17E+08 | 1.17E+08 - | 19.73  | 18.77  |
| ENSG0000( MTCH2    | protein_co chr11 | 47617315 | 47642623 - | 62.12  | 64.16  |
| ENSG0000( FNBP4    | protein_co chr11 | 47716517 | 47767443 - | 28.41  | 33.79  |
| ENSG0000( TECTA    | protein_co chr11 | 1.21E+08 | 1.21E+08 + | 0.22   | 0.3    |
| ENSG0000( SC5D     | protein_co chr11 | 1.21E+08 | 1.21E+08 + | 18.61  | 24.94  |
| ENSG0000( CRTAM    | protein_co chr11 | 1.23E+08 | 1.23E+08 + | 0.06   | 0.13   |
| ENSG0000( C11orf63 | protein_co chr11 | 1.23E+08 | 1.23E+08 + | 0.93   | 1.15   |
| ENSG0000( B3GAT1   | protein_co chr11 | 1.34E+08 | 1.34E+08 - | 0      | 0      |
| ENSG0000( HSPA8    | protein_co chr11 | 1.23E+08 | 1.23E+08 - | 577.16 | 597.14 |
| ENSG0000( P2RX3    | protein_co chr11 | 57338374 | 57370600 + | 0      | 0.14   |
| ENSG0000( VWA5A    | protein_co chr11 | 1.24E+08 | 1.24E+08 + | 10.64  | 10.81  |
| ENSG0000( DNAJC4   | protein_co chr11 | 64230278 | 64234286 + | 21.66  | 20.64  |
| ENSG0000( SIAE     | protein_co chr11 | 1.25E+08 | 1.25E+08 - | 19.08  | 18.78  |
| ENSG0000( SNX15    | protein_co chr11 | 65027408 | 65040572 + | 8.69   | 7.74   |
| ENSG0000( LPXN     | protein_co chr11 | 58526871 | 58578220 - | 7.82   | 6.6    |
| ENSG0000( DTX4     | protein_co chr11 | 59171430 | 59208587 + | 0.82   | 1.43   |

|                    |                  |          |          |   |        |        |
|--------------------|------------------|----------|----------|---|--------|--------|
| ENSG0000(ATG2A     | protein_co chr11 | 64894546 | 64917248 | - | 5.83   | 6.96   |
| ENSG0000(EHD1      | protein_co chr11 | 64851642 | 64888296 | - | 21.03  | 20.06  |
| ENSG0000(OSBP      | protein_co chr11 | 59574398 | 59616144 | - | 15.73  | 15.45  |
| ENSG0000(UNC93B1   | protein_co chr11 | 67991104 | 68004982 | - | 12.63  | 12.42  |
| ENSG0000(PUS3      | protein_co chr11 | 1.26E+08 | 1.26E+08 | - | 5.66   | 4.85   |
| ENSG0000(DCPS      | protein_co chr11 | 1.26E+08 | 1.26E+08 | + | 7.36   | 6.66   |
| ENSG0000(KMT5B     | protein_co chr11 | 68154863 | 68213828 | - | 10.24  | 10.56  |
| ENSG0000(FOXRED1   | protein_co chr11 | 1.26E+08 | 1.26E+08 | + | 8.15   | 8.66   |
| ENSG0000(PPP6R3    | protein_co chr11 | 68460731 | 68615334 | + | 18.97  | 20.4   |
| ENSG0000(NRXN2     | protein_co chr11 | 64606174 | 64723188 | - | 0.24   | 0.86   |
| ENSG0000(MS4A6A    | protein_co chr11 | 60172014 | 60184666 | - | 0      | 0.05   |
| ENSG0000(MS4A4A    | protein_co chr11 | 60280541 | 60308972 | + | 0      | 0      |
| ENSG0000(ST3GAL4   | protein_co chr11 | 1.26E+08 | 1.26E+08 | + | 22.89  | 23.07  |
| ENSG0000(CPT1A     | protein_co chr11 | 68754620 | 68844410 | - | 17.9   | 18.29  |
| ENSG0000(CCND1     | protein_co chr11 | 69641087 | 69654474 | + | 20.07  | 16.49  |
| ENSG0000(CCDC86    | protein_co chr11 | 60842071 | 60851081 | + | 9.14   | 9.37   |
| ENSG0000(PRPF19    | protein_co chr11 | 60890730 | 60906588 | - | 28.96  | 31.09  |
| ENSG0000(TMEM109   | protein_co chr11 | 60913874 | 60923443 | + | 40.61  | 42.74  |
| ENSG0000(CCKBR     | protein_co chr11 | 6259736  | 6272127  | + | 0      | 0      |
| ENSG0000(HPX       | protein_co chr11 | 6431049  | 6442617  | - | 1.46   | 1.17   |
| ENSG0000(TRIM3     | protein_co chr11 | 6448613  | 6474459  | - | 12.67  | 11.86  |
| ENSG0000(CHORDC1   | protein_co chr11 | 90201160 | 90223364 | - | 9.01   | 10.53  |
| ENSG0000(FOLR1     | protein_co chr11 | 72189558 | 72196323 | + | 0      | 0      |
| ENSG0000(ANAPC15   | protein_co chr11 | 72106378 | 72112780 | - | 16.36  | 16.52  |
| ENSG0000(FOLR3     | protein_co chr11 | 72114869 | 72139892 | + | 0.73   | 0.52   |
| ENSG0000(PANX1     | protein_co chr11 | 94128928 | 94181972 | + | 14.07  | 10.9   |
| ENSG0000(ARHGEF17  | protein_co chr11 | 73308289 | 73369091 | + | 20.52  | 18.95  |
| ENSG0000(APOA5     | protein_co chr11 | 1.17E+08 | 1.17E+08 | - | 0.14   | 0.15   |
| ENSG0000(APOA4     | protein_co chr11 | 1.17E+08 | 1.17E+08 | - | 0      | 0      |
| ENSG0000(APOC3     | protein_co chr11 | 1.17E+08 | 1.17E+08 | + | 0      | 0      |
| ENSG0000(CEP164    | protein_co chr11 | 1.17E+08 | 1.17E+08 | + | 11.31  | 12.18  |
| ENSG0000(RNF141    | protein_co chr11 | 10511678 | 10541230 | - | 12.03  | 15.74  |
| ENSG0000(CEP126    | protein_co chr11 | 1.02E+08 | 1.02E+08 | + | 1.73   | 2.42   |
| ENSG0000(EIF4G2    | protein_co chr11 | 10797050 | 10809110 | - | 225.97 | 237.69 |
| ENSG0000(IL10RA    | protein_co chr11 | 1.18E+08 | 1.18E+08 | + | 0      | 0      |
| ENSG0000(GALNT18   | protein_co chr11 | 11270876 | 11622005 | - | 0.17   | 0.19   |
| ENSG0000(BIRC2     | protein_co chr11 | 1.02E+08 | 1.02E+08 | + | 20.41  | 22.53  |
| ENSG0000(UBE4A     | protein_co chr11 | 1.18E+08 | 1.18E+08 | + | 10.04  | 9.97   |
| ENSG0000(DDX6      | protein_co chr11 | 1.19E+08 | 1.19E+08 | - | 28.48  | 27.33  |
| ENSG0000(UPK2      | protein_co chr11 | 1.19E+08 | 1.19E+08 | + | 0.14   | 0.49   |
| ENSG0000(CBL       | protein_co chr11 | 1.19E+08 | 1.19E+08 | + | 3.36   | 3.25   |
| ENSG0000(NECTIN1   | protein_co chr11 | 1.2E+08  | 1.2E+08  | - | 2.57   | 2.61   |
| ENSG0000(HIPK3     | protein_co chr11 | 33256672 | 33357023 | + | 20.66  | 20.32  |
| ENSG0000(KIAA1549L | protein_co chr11 | 33542072 | 33674102 | + | 0.99   | 1.09   |
| ENSG0000(FBXO3     | protein_co chr11 | 33740939 | 33774543 | - | 18.33  | 18.51  |

|                   |                  |          |          |   |        |        |
|-------------------|------------------|----------|----------|---|--------|--------|
| ENSG0000(PDHX     | protein_co chr11 | 34915829 | 35020591 | + | 10.78  | 9.75   |
| ENSG0000(SLC1A2   | protein_co chr11 | 35251206 | 35420063 | - | 0.86   | 0.56   |
| ENSG0000(COMMD9   | protein_co chr11 | 36269284 | 36289449 | - | 45.79  | 49.61  |
| ENSG0000(SLC15A3  | protein_co chr11 | 60937084 | 60952530 | - | 11.02  | 14.62  |
| ENSG0000(CD5      | protein_co chr11 | 61102395 | 61127852 | + | 0      | 0      |
| ENSG0000(ACCS     | protein_co chr11 | 44065925 | 44084222 | + | 9.34   | 10.69  |
| ENSG0000(SCGB2A2  | protein_co chr11 | 62270155 | 62273156 | + | 0      | 0      |
| ENSG0000(MDK      | protein_co chr11 | 46380756 | 46383837 | + | 159.24 | 153.51 |
| ENSG0000(AMBRA1   | protein_co chr11 | 46396414 | 46594125 | - | 8.37   | 8.64   |
| ENSG0000(MADD     | protein_co chr11 | 47269161 | 47330031 | + | 10.76  | 9.37   |
| ENSG0000(PTPMT1   | protein_co chr11 | 47565430 | 47573461 | + | 26.14  | 24.67  |
| ENSG0000(NAA40    | protein_co chr11 | 63938959 | 63957328 | + | 11.31  | 11.31  |
| ENSG0000(CARS     | protein_co chr11 | 3000922  | 3057613  | - | 47.38  | 52.12  |
| ENSG0000(SLC22A18 | protein_co chr11 | 2899721  | 2925246  | + | 11.64  | 9.94   |
| ENSG0000(CD81     | protein_co chr11 | 2376177  | 2397419  | + | 558.56 | 544.19 |
| ENSG0000(SLC35F2  | protein_co chr11 | 1.08E+08 | 1.08E+08 | - | 1.48   | 1.52   |
| ENSG0000(C11orf21 | protein_co chr11 | 2295645  | 2303049  | - | 0.04   | 0.29   |
| ENSG0000(ELMOD1   | protein_co chr11 | 1.08E+08 | 1.08E+08 | + | 0.37   | 0.66   |
| ENSG0000(CALCA    | protein_co chr11 | 14966668 | 14972354 | - | 0.22   | 0.08   |
| ENSG0000(SOX6     | protein_co chr11 | 15966449 | 16739591 | - | 0.03   | 0.01   |
| ENSG0000(C11orf58 | protein_co chr11 | 16613132 | 16756881 | + | 82.63  | 89.64  |
| ENSG0000(PITPNM1  | protein_co chr11 | 67491768 | 67506263 | - | 9.83   | 9.43   |
| ENSG0000(RPS13    | protein_co chr11 | 17074389 | 17077787 | - | 439.22 | 448.37 |
| ENSG0000(AIP      | protein_co chr11 | 67483041 | 67491103 | + | 31.67  | 34.38  |
| ENSG0000(NUP98    | protein_co chr11 | 3671083  | 3797792  | - | 18.53  | 18.36  |
| ENSG0000(NDUFS8   | protein_co chr11 | 68030617 | 68036644 | + | 37.61  | 43.87  |
| ENSG0000(TCIRG1   | protein_co chr11 | 68039016 | 68050895 | + | 25.7   | 28.32  |
| ENSG0000(CHKA     | protein_co chr11 | 68052859 | 68121444 | - | 5.44   | 6.61   |
| ENSG0000(EXPH5    | protein_co chr11 | 1.09E+08 | 1.09E+08 | - | 0.08   | 0.09   |
| ENSG0000(HPS5     | protein_co chr11 | 18278668 | 18322198 | - | 7.88   | 7.13   |
| ENSG0000(GTF2H1   | protein_co chr11 | 18322295 | 18367044 | + | 29.39  | 30.83  |
| ENSG0000(POU2AF1  | protein_co chr11 | 1.11E+08 | 1.11E+08 | - | 0.1    | 0.09   |
| ENSG0000(PTPN5    | protein_co chr11 | 18727928 | 18792721 | - | 0.08   | 0.1    |
| ENSG0000(VWF      | protein_co chr12 | 5948874  | 6124770  | - | 0.2    | 0.23   |
| ENSG0000(PSMD9    | protein_co chr12 | 1.22E+08 | 1.22E+08 | + | 43.03  | 43.44  |
| ENSG0000(P3H3     | protein_co chr12 | 6828410  | 6839851  | + | 57.06  | 52.05  |
| ENSG0000(PPFIBP1  | protein_co chr12 | 27523431 | 27695564 | + | 32.14  | 33.7   |
| ENSG0000(PRP40B   | protein_co chr12 | 49568218 | 49644666 | + | 7.38   | 7.34   |
| ENSG0000(CD69     | protein_co chr12 | 9752486  | 9760901  | - | 0      | 0      |
| ENSG0000(PRDM4    | protein_co chr12 | 1.08E+08 | 1.08E+08 | - | 10.07  | 11.21  |
| ENSG0000(CLEC2B   | protein_co chr12 | 9852984  | 9870136  | - | 6.76   | 6.12   |
| ENSG0000(COQ5     | protein_co chr12 | 1.21E+08 | 1.21E+08 | - | 13.67  | 13.1   |
| ENSG0000(SELPLG   | protein_co chr12 | 1.09E+08 | 1.09E+08 | - | 3.01   | 3      |
| ENSG0000(CORO1C   | protein_co chr12 | 1.09E+08 | 1.09E+08 | - | 81.74  | 75.16  |
| ENSG0000(ASIC1    | protein_co chr12 | 50057548 | 50083611 | + | 6.34   | 5.06   |

|                 |          |                  |          |          |   |        |        |
|-----------------|----------|------------------|----------|----------|---|--------|--------|
| ENSG00000100000 | DAO      | protein_co chr12 | 1.09E+08 | 1.09E+08 | + | 0      | 0.12   |
| ENSG00000100000 | CAPRIN2  | protein_co chr12 | 30709552 | 30754951 | - | 22.14  | 20.76  |
| ENSG00000100000 | TSPAN11  | protein_co chr12 | 30926428 | 30996599 | + | 0.13   | 0.26   |
| ENSG00000100000 | KCTD10   | protein_co chr12 | 1.09E+08 | 1.09E+08 | - | 31.94  | 30.25  |
| ENSG00000100000 | SLC11A2  | protein_co chr12 | 50979401 | 51028566 | - | 20.02  | 23.29  |
| ENSG00000100000 | MLEC     | protein_co chr12 | 1.21E+08 | 1.21E+08 | + | 27.4   | 26.86  |
| ENSG00000100000 | MVK      | protein_co chr12 | 1.1E+08  | 1.1E+08  | + | 8.45   | 7.88   |
| ENSG00000100000 | CSRNP2   | protein_co chr12 | 51061205 | 51083664 | - | 8.04   | 8.06   |
| ENSG00000100000 | CAMKK2   | protein_co chr12 | 1.21E+08 | 1.21E+08 | - | 11.32  | 12.05  |
| ENSG00000100000 | BIN2     | protein_co chr12 | 51281038 | 51324668 | - | 0      | 0      |
| ENSG00000100000 | IL23A    | protein_co chr12 | 56334174 | 56340410 | + | 0      | 0      |
| ENSG00000100000 | ATP5B    | protein_co chr12 | 56638175 | 56646068 | - | 187.17 | 184.75 |
| ENSG00000100000 | PTGES3   | protein_co chr12 | 56663341 | 56688408 | - | 57.97  | 54.3   |
| ENSG00000100000 | SYT10    | protein_co chr12 | 33374238 | 33439819 | - | 0      | 0      |
| ENSG00000100000 | BCL7A    | protein_co chr12 | 1.22E+08 | 1.22E+08 | + | 1.83   | 2.77   |
| ENSG00000100000 | RSRC2    | protein_co chr12 | 1.23E+08 | 1.23E+08 | - | 29.09  | 28.64  |
| ENSG00000100000 | CYP27B1  | protein_co chr12 | 57762334 | 57768986 | - | 0.19   | 0.12   |
| ENSG00000100000 | MYF6     | protein_co chr12 | 80707498 | 80709474 | + | 0      | 0      |
| ENSG00000100000 | MYF5     | protein_co chr12 | 80716912 | 80719673 | + | 0      | 0      |
| ENSG00000100000 | LIN7A    | protein_co chr12 | 80792520 | 80937925 | - | 0      | 0.01   |
| ENSG00000100000 | KRT18    | protein_co chr12 | 52948871 | 52952901 | + | 81.52  | 80.16  |
| ENSG00000100000 | ACSS3    | protein_co chr12 | 80936414 | 81261205 | + | 0.08   | 0.16   |
| ENSG00000100000 | TNS2     | protein_co chr12 | 53046969 | 53064372 | + | 44.66  | 47.19  |
| ENSG00000100000 | GLI1     | protein_co chr12 | 57460135 | 57472262 | + | 0.79   | 1.06   |
| ENSG00000100000 | PPM1H    | protein_co chr12 | 62643982 | 62935037 | - | 0.24   | 0.23   |
| ENSG00000100000 | METAP2   | protein_co chr12 | 95473520 | 95515839 | + | 47.54  | 40.53  |
| ENSG00000100000 | LTA4H    | protein_co chr12 | 96000828 | 96043520 | - | 32.96  | 35.19  |
| ENSG00000100000 | ELK3     | protein_co chr12 | 96194382 | 96269835 | + | 11.63  | 14.94  |
| ENSG00000100000 | SLC6A12  | protein_co chr12 | 190077   | 214570   | - | 0.09   | 0.14   |
| ENSG00000100000 | WNT5B    | protein_co chr12 | 1529891  | 1647243  | + | 0.41   | 0.68   |
| ENSG00000100000 | MAGOHB   | protein_co chr12 | 10604190 | 10613623 | - | 7.91   | 8.07   |
| ENSG00000100000 | TRPV4    | protein_co chr12 | 1.1E+08  | 1.1E+08  | - | 2.39   | 2.5    |
| ENSG00000100000 | ITFG2    | protein_co chr12 | 2812622  | 2859791  | + | 10.42  | 10.97  |
| ENSG00000100000 | FOXM1    | protein_co chr12 | 2857681  | 2877155  | - | 1.39   | 1.65   |
| ENSG00000100000 | PRR4     | protein_co chr12 | 10845849 | 11171613 | - | 3.06   | 3.81   |
| ENSG00000100000 | PRMT8    | protein_co chr12 | 3381349  | 3593973  | + | 0.01   | 0.04   |
| ENSG00000100000 | PARP11   | protein_co chr12 | 3791047  | 3873448  | - | 3.15   | 3.3    |
| ENSG00000100000 | ARPC3    | protein_co chr12 | 1.1E+08  | 1.1E+08  | - | 112.46 | 107.47 |
| ENSG00000100000 | GPN3     | protein_co chr12 | 1.1E+08  | 1.1E+08  | - | 8.81   | 7.72   |
| ENSG00000100000 | VPS29    | protein_co chr12 | 1.1E+08  | 1.11E+08 | - | 47.03  | 39.8   |
| ENSG00000100000 | FGF6     | protein_co chr12 | 4428155  | 4445614  | - | 0      | 0      |
| ENSG00000100000 | MYL2     | protein_co chr12 | 1.11E+08 | 1.11E+08 | - | 0      | 0      |
| ENSG00000100000 | RAD51AP1 | protein_co chr12 | 4538798  | 4560048  | + | 0.58   | 0.25   |
| ENSG00000100000 | CUX2     | protein_co chr12 | 1.11E+08 | 1.11E+08 | + | 0      | 0      |
| ENSG00000100000 | SH2B3    | protein_co chr12 | 1.11E+08 | 1.11E+08 | + | 7.35   | 7.52   |

|                    |                  |          |            |        |        |
|--------------------|------------------|----------|------------|--------|--------|
| ENSG0000( AKAP3    | protein_co chr12 | 4615508  | 4649047 -  | 0.38   | 0.26   |
| ENSG0000( MANSC1   | protein_co chr12 | 12326056 | 12350541 - | 10.55  | 9.89   |
| ENSG0000( KCNA1    | protein_co chr12 | 4909893  | 4918256 +  | 0.04   | 0      |
| ENSG0000( DUSP16   | protein_co chr12 | 12474210 | 12562383 - | 2.78   | 2.9    |
| ENSG0000( CREBL2   | protein_co chr12 | 12611827 | 12645108 + | 14.69  | 15.19  |
| ENSG0000( ACAD10   | protein_co chr12 | 1.12E+08 | 1.12E+08 + | 7.97   | 7.44   |
| ENSG0000( ALDH2    | protein_co chr12 | 1.12E+08 | 1.12E+08 + | 37.79  | 37.64  |
| ENSG0000( CDKN1B   | protein_co chr12 | 12715058 | 12722371 + | 14.73  | 14.41  |
| ENSG0000( GPRC5D   | protein_co chr12 | 12940775 | 12952147 - | 0      | 0      |
| ENSG0000( NAA25    | protein_co chr12 | 1.12E+08 | 1.12E+08 - | 4.29   | 3.6    |
| ENSG0000( GSG1     | protein_co chr12 | 13083560 | 13103683 - | 0.59   | 0.82   |
| ENSG0000( SCNN1A   | protein_co chr12 | 6346843  | 6377730 -  | 0.87   | 0.25   |
| ENSG0000( LTBR     | protein_co chr12 | 6375045  | 6391571 +  | 80.32  | 83.57  |
| ENSG0000( OGFOD2   | protein_co chr12 | 1.23E+08 | 1.23E+08 + | 8.67   | 10.43  |
| ENSG0000( CDK2AP1  | protein_co chr12 | 1.23E+08 | 1.23E+08 - | 108.77 | 109.88 |
| ENSG0000( OAS3     | protein_co chr12 | 1.13E+08 | 1.13E+08 + | 3.59   | 2.82   |
| ENSG0000( OAS2     | protein_co chr12 | 1.13E+08 | 1.13E+08 + | 5.79   | 6.49   |
| ENSG0000( ART4     | protein_co chr12 | 14825569 | 14843495 - | 0.35   | 0.46   |
| ENSG0000( MGP      | protein_co chr12 | 14881181 | 14885926 - | 656.23 | 822.97 |
| ENSG0000( RASAL1   | protein_co chr12 | 1.13E+08 | 1.13E+08 - | 0.03   | 0      |
| ENSG0000( ARHGDI1  | protein_co chr12 | 14942017 | 14961728 - | 21.65  | 18.97  |
| ENSG0000( GTF2H3   | protein_co chr12 | 1.24E+08 | 1.24E+08 + | 10.03  | 8.83   |
| ENSG0000( EIF2B1   | protein_co chr12 | 1.24E+08 | 1.24E+08 - | 16.22  | 15.27  |
| ENSG0000( DDX55    | protein_co chr12 | 1.24E+08 | 1.24E+08 + | 6.63   | 6.14   |
| ENSG0000( SLC38A1  | protein_co chr12 | 46183063 | 46270017 - | 23.66  | 21.86  |
| ENSG0000( RERGL    | protein_co chr12 | 18080869 | 18320107 - | 0      | 0      |
| ENSG0000( ENDOU    | protein_co chr12 | 47709734 | 47725567 - | 0      | 0.03   |
| ENSG0000( C12orf49 | protein_co chr12 | 1.17E+08 | 1.17E+08 - | 9.78   | 9.06   |
| ENSG0000( VDR      | protein_co chr12 | 47841537 | 47943048 - | 8.1    | 8.08   |
| ENSG0000( FZD10    | protein_co chr12 | 1.3E+08  | 1.3E+08 +  | 0      | 0.02   |
| ENSG0000( RFC5     | protein_co chr12 | 1.18E+08 | 1.18E+08 + | 3.06   | 4.19   |
| ENSG0000( STX2     | protein_co chr12 | 1.31E+08 | 1.31E+08 - | 14.8   | 13.35  |
| ENSG0000( ADGRD1   | protein_co chr12 | 1.31E+08 | 1.31E+08 + | 2.97   | 3.5    |
| ENSG0000( COPZ1    | protein_co chr12 | 54301202 | 54351849 + | 62.77  | 63.62  |
| ENSG0000( TBC1D30  | protein_co chr12 | 64781193 | 64881032 + | 1.17   | 0.67   |
| ENSG0000( CAND1    | protein_co chr12 | 67269281 | 67319951 + | 50.49  | 48.23  |
| ENSG0000( IL26     | protein_co chr12 | 68201351 | 68225821 - | 0      | 0      |
| ENSG0000( IFNG     | protein_co chr12 | 68154768 | 68159747 - | 0      | 0      |
| ENSG0000( RAB5B    | protein_co chr12 | 55973913 | 55996683 + | 57.76  | 58.27  |
| ENSG0000( MDM1     | protein_co chr12 | 68272443 | 68332381 - | 5.49   | 5.99   |
| ENSG0000( NUP107   | protein_co chr12 | 68686734 | 68745809 + | 9.74   | 9.21   |
| ENSG0000( CNOT2    | protein_co chr12 | 70242994 | 70354993 + | 29.95  | 30.26  |
| ENSG0000( TIMELESS | protein_co chr12 | 56416373 | 56449403 - | 2.14   | 3.14   |
| ENSG0000( CPSF6    | protein_co chr12 | 69239537 | 69274358 + | 20.03  | 24.51  |
| ENSG0000( KRR1     | protein_co chr12 | 75490861 | 75511636 - | 16.62  | 15.95  |

|                     |                  |          |            |         |         |
|---------------------|------------------|----------|------------|---------|---------|
| ENSG0000(MRPL51     | protein_co chr12 | 6491886  | 6493841 -  | 70.62   | 69.62   |
| ENSG0000(GAPDH      | protein_co chr12 | 6533927  | 6538374 +  | 4454.46 | 4023.25 |
| ENSG0000(NOP2       | protein_co chr12 | 6556863  | 6568691 -  | 7.18    | 9.43    |
| ENSG0000(CHD4       | protein_co chr12 | 6570083  | 6607476 -  | 55.92   | 63.29   |
| ENSG0000(ACRBP      | protein_co chr12 | 6638075  | 6647460 -  | 0.15    | 0.17    |
| ENSG0000(UHRF1BP1   | protein_co chr12 | 1E+08    | 1E+08 -    | 9.66    | 7.06    |
| ENSG0000(COPS7A     | protein_co chr12 | 6723741  | 6731875 +  | 54.63   | 53.86   |
| ENSG0000(ING4       | protein_co chr12 | 6650280  | 6663148 -  | 25.82   | 25.55   |
| ENSG0000(GNB3       | protein_co chr12 | 6839954  | 6847393 +  | 1.2     | 1.45    |
| ENSG0000(CDCA3      | protein_co chr12 | 6844793  | 6852066 -  | 0.89    | 0.85    |
| ENSG0000(CHPT1      | protein_co chr12 | 1.02E+08 | 1.02E+08 + | 12.03   | 12.45   |
| ENSG0000(USP5       | protein_co chr12 | 6852128  | 6866632 +  | 22.19   | 23.35   |
| ENSG0000(TPI1       | protein_co chr12 | 6867119  | 6870948 +  | 922.45  | 787.01  |
| ENSG0000(GNPTAB     | protein_co chr12 | 1.02E+08 | 1.02E+08 - | 67.58   | 58.67   |
| ENSG0000(SPSB2      | protein_co chr12 | 6870935  | 6889358 -  | 5.85    | 4.33    |
| ENSG0000(ENO2       | protein_co chr12 | 6913745  | 6923698 +  | 77.33   | 58.38   |
| ENSG0000(ATN1       | protein_co chr12 | 6924463  | 6942321 +  | 43.95   | 46.41   |
| ENSG0000(C12orf57   | protein_co chr12 | 6942978  | 6946003 +  | 109.11  | 93.51   |
| ENSG0000(PTPN6      | protein_co chr12 | 6946468  | 6961316 +  | 0       | 0.03    |
| ENSG0000(LPCAT3     | protein_co chr12 | 6976186  | 7018510 -  | 14.26   | 15.61   |
| ENSG0000(NT5DC3     | protein_co chr12 | 1.04E+08 | 1.04E+08 - | 0.57    | 0.49    |
| ENSG0000(SLCO1B3    | protein_co chr12 | 20810702 | 20916911 + | 0       | 0       |
| ENSG0000(APOBEC1    | protein_co chr12 | 7649400  | 7665903 -  | 0       | 0       |
| ENSG0000(NANOG      | protein_co chr12 | 7787794  | 7799141 +  | 0.13    | 0.02    |
| ENSG0000(SUDS3      | protein_co chr12 | 1.18E+08 | 1.18E+08 + | 7.52    | 9.11    |
| ENSG0000(GOLT1B     | protein_co chr12 | 21501781 | 21518408 + | 25.73   | 19.29   |
| ENSG0000(GYS2       | protein_co chr12 | 21536189 | 21604847 - | 0       | 0.04    |
| ENSG0000(LDHB       | protein_co chr12 | 21635342 | 21757857 - | 162.2   | 176.63  |
| ENSG0000(PRKAB1     | protein_co chr12 | 1.2E+08  | 1.2E+08 +  | 9.23    | 11.7    |
| ENSG0000(CMAS       | protein_co chr12 | 22046174 | 22065674 + | 12.99   | 12.47   |
| ENSG0000(HCFC2      | protein_co chr12 | 1.04E+08 | 1.04E+08 + | 9.27    | 8.55    |
| ENSG0000(ST8SIA1    | protein_co chr12 | 22063773 | 22437041 - | 0.29    | 0.01    |
| ENSG0000(CLEC4A     | protein_co chr12 | 8082269  | 8138607 +  | 0.4     | 0.57    |
| ENSG0000(C2CD5      | protein_co chr12 | 22448583 | 22544546 - | 10.49   | 12.69   |
| ENSG0000(AICDA      | protein_co chr12 | 8602166  | 8612871 -  | 0.81    | 0.18    |
| ENSG0000(RAB35      | protein_co chr12 | 1.2E+08  | 1.2E+08 -  | 15.56   | 17.33   |
| ENSG0000(PHC1       | protein_co chr12 | 8913896  | 8941467 +  | 13.36   | 15.55   |
| ENSG0000(COX6A1     | protein_co chr12 | 1.2E+08  | 1.2E+08 +  | 283.45  | 299.06  |
| ENSG0000(ALO21546.1 | protein_co chr12 | 1.2E+08  | 1.2E+08 +  | 0.51    | 0.82    |
| ENSG0000(RFX4       | protein_co chr12 | 1.07E+08 | 1.07E+08 + | 0       | 0       |
| ENSG0000(RIC8B      | protein_co chr12 | 1.07E+08 | 1.07E+08 + | 4       | 5.07    |
| ENSG0000(SRSF9      | protein_co chr12 | 1.2E+08  | 1.2E+08 -  | 58.98   | 58.43   |
| ENSG0000(RP11-22B2  | unprocessε chr12 | 9277235  | 9313241 +  | 0.46    | 0.38    |
| ENSG0000(FGFR1OP2   | protein_co chr12 | 26938383 | 26966650 + | 15.07   | 17.01   |
| ENSG0000(KLRB1      | protein_co chr12 | 9594551  | 9607886 -  | 0       | 0       |



|                  |                 |          |          |   |        |        |
|------------------|-----------------|----------|----------|---|--------|--------|
| ENSG0000(COL12A1 | protein_co chr6 | 75084326 | 75206051 | - | 104.59 | 96.11  |
| ENSG0000(BTN3A3  | protein_co chr6 | 26440472 | 26453415 | + | 13.49  | 13.01  |
| ENSG0000(TDP2    | protein_co chr6 | 24649977 | 24667033 | - | 12.37  | 14.57  |
| ENSG0000(FRK     | protein_co chr6 | 1.16E+08 | 1.16E+08 | - | 0.72   | 0.62   |
| ENSG0000(DSE     | protein_co chr6 | 1.16E+08 | 1.16E+08 | + | 29.02  | 33.81  |
| ENSG0000(RWDD1   | protein_co chr6 | 1.17E+08 | 1.17E+08 | + | 23.44  | 24.04  |
| ENSG0000(RSPH4A  | protein_co chr6 | 1.17E+08 | 1.17E+08 | + | 0.04   | 0.09   |
| ENSG0000(MAK     | protein_co chr6 | 10762723 | 10838555 | - | 0.01   | 0.02   |
| ENSG0000(TMEM14C | protein_co chr6 | 10722915 | 10731129 | + | 83.07  | 87.67  |
| ENSG0000(PAK1IP1 | protein_co chr6 | 10694695 | 10709782 | + | 6.63   | 7.08   |
| ENSG0000(GCNT2   | protein_co chr6 | 10492223 | 10629368 | + | 0.07   | 0.02   |
| ENSG0000(SMIM8   | protein_co chr6 | 87322583 | 87399749 | + | 2.22   | 2.18   |
| ENSG0000(NEDD9   | protein_co chr6 | 11183298 | 11382348 | - | 1.36   | 1      |
| ENSG0000(CEP85L  | protein_co chr6 | 1.18E+08 | 1.19E+08 | - | 2.11   | 1.65   |
| ENSG0000(ADTRP   | protein_co chr6 | 11712054 | 11807046 | - | 2.65   | 2.12   |
| ENSG0000(ASF1A   | protein_co chr6 | 1.19E+08 | 1.19E+08 | + | 6.96   | 4.3    |
| ENSG0000(MCM9    | protein_co chr6 | 1.19E+08 | 1.19E+08 | - | 2.63   | 3.36   |
| ENSG0000(FAM184A | protein_co chr6 | 1.19E+08 | 1.19E+08 | - | 0.12   | 0.17   |
| ENSG0000(RNGTT   | protein_co chr6 | 88610272 | 88963721 | - | 2.19   | 1.71   |
| ENSG0000(MAN1A1  | protein_co chr6 | 1.19E+08 | 1.19E+08 | - | 27.43  | 25.42  |
| ENSG0000(GABRR2  | protein_co chr6 | 89257208 | 89315299 | - | 0.17   | 0.07   |
| ENSG0000(SERINC1 | protein_co chr6 | 1.22E+08 | 1.22E+08 | - | 85.94  | 83.86  |
| ENSG0000(HDDC2   | protein_co chr6 | 1.25E+08 | 1.25E+08 | - | 31.02  | 30.05  |
| ENSG0000(TPD52L1 | protein_co chr6 | 1.25E+08 | 1.25E+08 | + | 6.55   | 7.33   |
| ENSG0000(HINT3   | protein_co chr6 | 1.26E+08 | 1.26E+08 | + | 5.87   | 5.54   |
| ENSG0000(NCOA7   | protein_co chr6 | 1.26E+08 | 1.26E+08 | + | 28.97  | 30.26  |
| ENSG0000(FAM65B  | protein_co chr6 | 24804282 | 25042018 | - | 0.08   | 0.02   |
| ENSG0000(SASH1   | protein_co chr6 | 1.48E+08 | 1.49E+08 | + | 12.41  | 13.88  |
| ENSG0000(UST     | protein_co chr6 | 1.49E+08 | 1.49E+08 | + | 7.47   | 10.53  |
| ENSG0000(ULBP1   | protein_co chr6 | 1.5E+08  | 1.5E+08  | + | 1      | 1.02   |
| ENSG0000(FBXO5   | protein_co chr6 | 1.53E+08 | 1.53E+08 | - | 2.48   | 2.3    |
| ENSG0000(MTRF1L  | protein_co chr6 | 1.53E+08 | 1.53E+08 | - | 6.54   | 6.83   |
| ENSG0000(PPARD   | protein_co chr6 | 35342558 | 35428191 | + | 13.4   | 14.78  |
| ENSG0000(OPRM1   | protein_co chr6 | 1.54E+08 | 1.54E+08 | + | 0      | 0      |
| ENSG0000(FANCE   | protein_co chr6 | 35452361 | 35467103 | + | 2.91   | 2.71   |
| ENSG0000(TULP1   | protein_co chr6 | 35497874 | 35512938 | - | 0      | 0      |
| ENSG0000(SLC26A8 | protein_co chr6 | 35943514 | 36024868 | - | 0.05   | 0.1    |
| ENSG0000(MAPK14  | protein_co chr6 | 36027677 | 36111236 | + | 16.13  | 15.9   |
| ENSG0000(RHAG    | protein_co chr6 | 49605158 | 49636839 | - | 0      | 0      |
| ENSG0000(KCTD20  | protein_co chr6 | 36442767 | 36491143 | + | 16     | 16.49  |
| ENSG0000(STK38   | protein_co chr6 | 36493892 | 36547470 | - | 22.85  | 23.41  |
| ENSG0000(SRSF3   | protein_co chr6 | 36594353 | 36605600 | + | 68.18  | 61.56  |
| ENSG0000(SOD2    | protein_co chr6 | 1.6E+08  | 1.6E+08  | - | 922.74 | 741.18 |
| ENSG0000(MRPL18  | protein_co chr6 | 1.6E+08  | 1.6E+08  | + | 30.31  | 30.95  |
| ENSG0000(IL17A   | protein_co chr6 | 52186387 | 52190638 | + | 0      | 0      |

|                   |                 |          |            |         |         |
|-------------------|-----------------|----------|------------|---------|---------|
| ENSG0000( IL17F   | protein_co chr6 | 52236681 | 52244537 - | 0       | 0       |
| ENSG0000( MCM3    | protein_co chr6 | 52264009 | 52284881 - | 6.63    | 9.02    |
| ENSG0000( RNF8    | protein_co chr6 | 37353972 | 37394738 + | 10.62   | 11.05   |
| ENSG0000( PHACTR1 | protein_co chr6 | 12716805 | 13290484 + | 0.82    | 0.11    |
| ENSG0000( MDGA1   | protein_co chr6 | 37630679 | 37699306 - | 5.65    | 8.34    |
| ENSG0000( ICK     | protein_co chr6 | 53001279 | 53061802 - | 3.15    | 3.12    |
| ENSG0000( FBXO9   | protein_co chr6 | 53051991 | 53100873 + | 40.37   | 44.95   |
| ENSG0000( CD83    | protein_co chr6 | 14117256 | 14136918 + | 0.29    | 0.24    |
| ENSG0000( MDN1    | protein_co chr6 | 89642499 | 89819723 - | 3.36    | 3.98    |
| ENSG0000( GLP1R   | protein_co chr6 | 39048798 | 39087743 + | 0.03    | 0       |
| ENSG0000( SAYSD1  | protein_co chr6 | 39104064 | 39115189 - | 7.13    | 6.01    |
| ENSG0000( BMP5    | protein_co chr6 | 55753645 | 55875564 - | 0       | 0       |
| ENSG0000( BACH2   | protein_co chr6 | 89926529 | 90296908 - | 0.43    | 0.04    |
| ENSG0000( RBM24   | protein_co chr6 | 17281346 | 17293875 + | 1.18    | 1.03    |
| ENSG0000( CAP2    | protein_co chr6 | 17393216 | 17557792 + | 12.07   | 11.68   |
| ENSG0000( TREML2  | protein_co chr6 | 41190277 | 41201194 - | 0       | 0       |
| ENSG0000( ZNF451  | protein_co chr6 | 57086844 | 57170307 + | 8.96    | 9.54    |
| ENSG0000( BAG2    | protein_co chr6 | 57172326 | 57189833 + | 2.09    | 3.03    |
| ENSG0000( RAB23   | protein_co chr6 | 57186992 | 57222314 - | 6.08    | 8.07    |
| ENSG0000( TSPO2   | protein_co chr6 | 41042554 | 41044337 + | 0       | 0       |
| ENSG0000( FHL5    | protein_co chr6 | 96562548 | 96616636 + | 0       | 0       |
| ENSG0000( GPR63   | protein_co chr6 | 96794126 | 96837463 - | 0       | 0.03    |
| ENSG0000( KHDRBS2 | protein_co chr6 | 61679960 | 62286227 - | 0       | 0       |
| ENSG0000( FBXL4   | protein_co chr6 | 98868538 | 98948006 - | 5.55    | 4.85    |
| ENSG0000( CCNC    | protein_co chr6 | 99542380 | 99568973 - | 18.82   | 17.57   |
| ENSG0000( PRDM13  | protein_co chr6 | 99606730 | 99615578 + | 0       | 0       |
| ENSG0000( E2F3    | protein_co chr6 | 20401906 | 20493715 + | 3.63    | 4.97    |
| ENSG0000( PTP4A1  | protein_co chr6 | 63521748 | 63583587 + | 72.56   | 97.27   |
| ENSG0000( SIM1    | protein_co chr6 | 1E+08    | 1E+08 -    | 0       | 0       |
| ENSG0000( ASCC3   | protein_co chr6 | 1.01E+08 | 1.01E+08 - | 11.06   | 11.16   |
| ENSG0000( HDGFL1  | protein_co chr6 | 22569493 | 22571666 + | 0       | 0       |
| ENSG0000( BVES    | protein_co chr6 | 1.05E+08 | 1.05E+08 - | 1.6     | 1.47    |
| ENSG0000( COL9A1  | protein_co chr6 | 70215061 | 70303083 - | 0       | 0       |
| ENSG0000( MED23   | protein_co chr6 | 1.32E+08 | 1.32E+08 - | 8.45    | 7.81    |
| ENSG0000( WASF1   | protein_co chr6 | 1.1E+08  | 1.1E+08 -  | 10.36   | 8.95    |
| ENSG0000( GPLD1   | protein_co chr6 | 24424565 | 24495205 - | 0.11    | 0.06    |
| ENSG0000( ALDH5A1 | protein_co chr6 | 24494852 | 24537207 + | 0.22    | 0.5     |
| ENSG0000( AIM1    | protein_co chr6 | 1.06E+08 | 1.07E+08 + | 0.39    | 0.39    |
| ENSG0000( VNN1    | protein_co chr6 | 1.33E+08 | 1.33E+08 - | 0.02    | 0.13    |
| ENSG0000( VNN2    | protein_co chr6 | 1.33E+08 | 1.33E+08 - | 0.12    | 0       |
| ENSG0000( ACOT13  | protein_co chr6 | 24667035 | 24705065 + | 10.8    | 13.4    |
| ENSG0000( SMAP1   | protein_co chr6 | 70667776 | 70862015 + | 12.13   | 12.38   |
| ENSG0000( RPS12   | protein_co chr6 | 1.33E+08 | 1.33E+08 + | 1144.08 | 1150.94 |
| ENSG0000( C6orf62 | protein_co chr6 | 24704861 | 24720836 - | 47.53   | 42.84   |
| ENSG0000( B3GAT2  | protein_co chr6 | 70856679 | 70957038 - | 0       | 0       |

|                    |                 |          |          |   |        |        |
|--------------------|-----------------|----------|----------|---|--------|--------|
| ENSG0000(GMNN)     | protein_co chr6 | 24774931 | 24786099 | + | 4.18   | 4.51   |
| ENSG0000(EYA4)     | protein_co chr6 | 1.33E+08 | 1.34E+08 | + | 0      | 0      |
| ENSG0000(SOBP)     | protein_co chr6 | 1.07E+08 | 1.08E+08 | + | 1.52   | 1.81   |
| ENSG0000(NR2E1)    | protein_co chr6 | 1.08E+08 | 1.08E+08 | + | 0      | 0      |
| ENSG0000(SNX3)     | protein_co chr6 | 1.08E+08 | 1.08E+08 | - | 114.13 | 110.83 |
| ENSG0000(SLC17A2)  | protein_co chr6 | 25912754 | 25930726 | - | 0      | 0      |
| ENSG0000(HBS1L)    | protein_co chr6 | 1.35E+08 | 1.35E+08 | - | 29.79  | 25.54  |
| ENSG0000(TRIM38)   | protein_co chr6 | 25962802 | 25991226 | + | 5.9    | 6.18   |
| ENSG0000(PEX7)     | protein_co chr6 | 1.37E+08 | 1.37E+08 | + | 3.09   | 2.81   |
| ENSG0000(ZBTB24)   | protein_co chr6 | 1.09E+08 | 1.09E+08 | - | 2.05   | 2.05   |
| ENSG0000(FIG4)     | protein_co chr6 | 1.1E+08  | 1.1E+08  | + | 9.72   | 9.14   |
| ENSG0000(PERP)     | protein_co chr6 | 1.38E+08 | 1.38E+08 | - | 14.49  | 13.75  |
| ENSG0000(ARFGF3)   | protein_co chr6 | 1.38E+08 | 1.38E+08 | + | 0.18   | 0.08   |
| ENSG0000(SLC16A10) | protein_co chr6 | 1.11E+08 | 1.11E+08 | + | 0      | 0.01   |
| ENSG0000(HECA)     | protein_co chr6 | 1.39E+08 | 1.39E+08 | + | 4.3    | 5.07   |
| ENSG0000(ADGRG6)   | protein_co chr6 | 1.42E+08 | 1.42E+08 | + | 3.28   | 3.76   |
| ENSG0000(PHACTR2)  | protein_co chr6 | 1.44E+08 | 1.44E+08 | + | 16.45  | 13.91  |
| ENSG0000(EPM2A)    | protein_co chr6 | 1.45E+08 | 1.46E+08 | - | 3.16   | 2.24   |
| ENSG0000(OR12D3)   | protein_co chr6 | 29373423 | 29375291 | - | 0      | 0      |
| ENSG0000(SLC39A7)  | protein_co chr6 | 33200445 | 33204439 | + | 85.83  | 81.56  |
| ENSG0000(CCR6)     | protein_co chr6 | 1.67E+08 | 1.67E+08 | + | 0      | 0      |
| ENSG0000(UNC93A)   | protein_co chr6 | 1.67E+08 | 1.67E+08 | + | 0      | 0      |
| ENSG0000(SLC22A2)  | protein_co chr6 | 1.6E+08  | 1.6E+08  | - | 0.09   | 0      |
| ENSG0000(PHF1)     | protein_co chr6 | 33410399 | 33416453 | + | 26.77  | 28.56  |
| ENSG0000(CUTA)     | protein_co chr6 | 33416442 | 33418317 | - | 123.11 | 122.96 |
| ENSG0000(PACRG)    | protein_co chr6 | 1.63E+08 | 1.63E+08 | + | 0.36   | 0.56   |
| ENSG0000(QKI)      | protein_co chr6 | 1.63E+08 | 1.64E+08 | + | 53.18  | 65.6   |
| ENSG0000(C6orf118) | protein_co chr6 | 1.65E+08 | 1.65E+08 | - | 0.08   | 0.03   |
| ENSG0000(PDE10A)   | protein_co chr6 | 1.65E+08 | 1.66E+08 | - | 3.99   | 4.42   |
| ENSG0000(MDFI)     | protein_co chr6 | 41636882 | 41654246 | + | 0.76   | 0.59   |
| ENSG0000(TFEB)     | protein_co chr6 | 41683978 | 41736259 | - | 2.03   | 2.34   |
| ENSG0000(SMOC2)    | protein_co chr6 | 1.68E+08 | 1.69E+08 | + | 0      | 0      |
| ENSG0000(CCND3)    | protein_co chr6 | 41934933 | 42050357 | - | 12.76  | 13.43  |
| ENSG0000(BYSL)     | protein_co chr6 | 41921188 | 41933046 | + | 6.69   | 6.34   |
| ENSG0000(FAM120B)  | protein_co chr6 | 1.7E+08  | 1.7E+08  | + | 11.29  | 10.59  |
| ENSG0000(TBP)      | protein_co chr6 | 1.71E+08 | 1.71E+08 | + | 6.99   | 6.89   |
| ENSG0000(GUCA1B)   | protein_co chr6 | 42184401 | 42194916 | - | 0.16   | 0.3    |
| ENSG0000(PRPH2)    | protein_co chr6 | 42696600 | 42722574 | - | 0.04   | 0.12   |
| ENSG0000(GLTSCR1L) | protein_co chr6 | 42746958 | 42868560 | + | 4.48   | 4.16   |
| ENSG0000(PPP2R5D)  | protein_co chr6 | 42984499 | 43012342 | + | 23.07  | 22.73  |
| ENSG0000(MRPL2)    | protein_co chr6 | 43054029 | 43059806 | - | 17.91  | 17.92  |
| ENSG0000(PTK7)     | protein_co chr6 | 43076268 | 43161719 | + | 72.96  | 79.22  |
| ENSG0000(SRF)      | protein_co chr6 | 43171299 | 43181507 | + | 14.55  | 14.11  |
| ENSG0000(CUL9)     | protein_co chr6 | 43182175 | 43224587 | + | 9.91   | 9.07   |
| ENSG0000(DNPH1)    | protein_co chr6 | 43225629 | 43229484 | - | 32.62  | 34.05  |

|                  |                  |          |            |        |        |
|------------------|------------------|----------|------------|--------|--------|
| ENSG0000(DUSP22  | protein_co chr6  | 291630   | 351355 +   | 11.76  | 15.15  |
| ENSG0000(EXOC2   | protein_co chr6  | 485133   | 693111 -   | 7.87   | 8.7    |
| ENSG0000(COX7A2  | protein_co chr6  | 75237675 | 75250323 - | 105.77 | 86.26  |
| ENSG0000(TMEM30A | protein_co chr6  | 75252924 | 75284968 - | 57.43  | 53.88  |
| ENSG0000(GMDS    | protein_co chr6  | 1623806  | 2245692 -  | 6.59   | 6.56   |
| ENSG0000(SENPA6  | protein_co chr6  | 75601509 | 75718278 + | 19.08  | 20.28  |
| ENSG0000(IMPG1   | protein_co chr6  | 75921115 | 76072678 - | 0.02   | 0      |
| ENSG0000(VEGFA   | protein_co chr6  | 43770184 | 43786487 + | 197.93 | 174.35 |
| ENSG0000(PRPF4B  | protein_co chr6  | 4021267  | 4064983 +  | 14.96  | 14.01  |
| ENSG0000(TTK     | protein_co chr6  | 80003887 | 80042527 + | 0.12   | 0.18   |
| ENSG0000(SLC29A1 | protein_co chr6  | 44219505 | 44234151 + | 9.21   | 8.79   |
| ENSG0000(WISP3   | protein_co chr6  | 1.12E+08 | 1.12E+08 + | 0      | 0      |
| ENSG0000(BTN2A1  | protein_co chr6  | 26457904 | 26476621 + | 12.8   | 12.11  |
| ENSG0000(LAMA4   | protein_co chr6  | 1.12E+08 | 1.12E+08 - | 297.79 | 314.3  |
| ENSG0000(FAM46A  | protein_co chr6  | 81491439 | 81752774 - | 16.63  | 16.47  |
| ENSG0000(CLIC5   | protein_co chr6  | 45898451 | 46080395 - | 0      | 0      |
| ENSG0000(FBRSL1  | protein_co chr12 | 1.32E+08 | 1.33E+08 + | 10.17  | 12.89  |
| ENSG0000(ENPP5   | protein_co chr6  | 46159187 | 46170971 - | 0      | 0      |
| ENSG0000(LY86    | protein_co chr6  | 6588108  | 6654983 +  | 0      | 0      |
| ENSG0000(PRSS16  | protein_co chr6  | 27247701 | 27256624 + | 0.03   | 0.14   |
| ENSG0000(MEP1A   | protein_co chr6  | 46793390 | 46839782 + | 0      | 0      |
| ENSG0000(TBX18   | protein_co chr6  | 84687351 | 84764519 - | 34.27  | 40.15  |
| ENSG0000(ERBIN   | protein_co chr5  | 65926475 | 66082549 + | 14.26  | 14.15  |
| ENSG0000(PCDHB2  | protein_co chr5  | 1.41E+08 | 1.41E+08 + | 1.01   | 1.52   |
| ENSG0000(HARS2   | protein_co chr5  | 1.41E+08 | 1.41E+08 + | 11.7   | 11.4   |
| ENSG0000(NUDT12  | protein_co chr5  | 1.04E+08 | 1.04E+08 - | 4.45   | 4.61   |
| ENSG0000(CEP72   | protein_co chr5  | 612272   | 667168 +   | 0.66   | 0.82   |
| ENSG0000(MAN2A1  | protein_co chr5  | 1.1E+08  | 1.1E+08 +  | 19.07  | 19.16  |
| ENSG0000(SEMA5A  | protein_co chr5  | 9035026  | 9546075 -  | 1.45   | 1.76   |
| ENSG0000(C7      | protein_co chr5  | 40909252 | 40982939 + | 1.4    | 2.07   |
| ENSG0000(PAPD7   | protein_co chr5  | 6713007  | 6757048 +  | 6.42   | 8.54   |
| ENSG0000(GHR     | protein_co chr5  | 42423777 | 42721878 + | 0.28   | 0.37   |
| ENSG0000(HMGCS1  | protein_co chr5  | 43289395 | 43313512 - | 17.77  | 22.6   |
| ENSG0000(DAP     | protein_co chr5  | 10679230 | 10761272 - | 43.01  | 45.15  |
| ENSG0000(NME5    | protein_co chr5  | 1.38E+08 | 1.38E+08 - | 0.25   | 0.76   |
| ENSG0000(BRD8    | protein_co chr5  | 1.38E+08 | 1.38E+08 - | 20.21  | 27.42  |
| ENSG0000(KIF20A  | protein_co chr5  | 1.38E+08 | 1.38E+08 + | 0.02   | 0.06   |
| ENSG0000(NNT     | protein_co chr5  | 43602692 | 43707405 + | 22.64  | 22.53  |
| ENSG0000(MRPS30  | protein_co chr5  | 44808925 | 44820428 + | 9.21   | 8.52   |
| ENSG0000(HSPA9   | protein_co chr5  | 1.39E+08 | 1.39E+08 - | 72.09  | 74.72  |
| ENSG0000(MRPS27  | protein_co chr5  | 72219409 | 72320646 - | 20.18  | 21.68  |
| ENSG0000(PFDN1   | protein_co chr5  | 1.4E+08  | 1.4E+08 -  | 32.53  | 31.87  |
| ENSG0000(HBEGF   | protein_co chr5  | 1.4E+08  | 1.4E+08 -  | 0.62   | 0.99   |
| ENSG0000(SLC4A9  | protein_co chr5  | 1.4E+08  | 1.4E+08 +  | 0      | 0      |
| ENSG0000(LOX     | protein_co chr5  | 1.22E+08 | 1.22E+08 - | 131.29 | 104.38 |

|                   |                 |          |          |   |         |         |
|-------------------|-----------------|----------|----------|---|---------|---------|
| ENSG0000(GZMK     | protein_co chr5 | 55024253 | 55034570 | + | 0       | 0       |
| ENSG0000(CDH9     | protein_co chr5 | 26880600 | 27121150 | - | 0       | 0       |
| ENSG0000(APBB3    | protein_co chr5 | 1.41E+08 | 1.41E+08 | - | 8.91    | 13.35   |
| ENSG0000(TMCO6    | protein_co chr5 | 1.41E+08 | 1.41E+08 | + | 3.11    | 2.37    |
| ENSG0000(SPARC    | protein_co chr5 | 1.52E+08 | 1.52E+08 | - | 3936.24 | 4164.81 |
| ENSG0000(IK       | protein_co chr5 | 1.41E+08 | 1.41E+08 | + | 36.33   | 37.89   |
| ENSG0000(HMGCR    | protein_co chr5 | 75336329 | 75362104 | + | 12.69   | 15.95   |
| ENSG0000(COL4A3BP | protein_co chr5 | 75368486 | 75512138 | - | 20.72   | 24.58   |
| ENSG0000(FAF2     | protein_co chr5 | 1.76E+08 | 1.77E+08 | + | 15.89   | 14.61   |
| ENSG0000(HAND1    | protein_co chr5 | 1.54E+08 | 1.54E+08 | - | 0       | 0       |
| ENSG0000(PCDHB3   | protein_co chr5 | 1.41E+08 | 1.41E+08 | + | 0.12    | 0.19    |
| ENSG0000(PCDHB5   | protein_co chr5 | 1.41E+08 | 1.41E+08 | + | 0.41    | 0.6     |
| ENSG0000(PCDHB6   | protein_co chr5 | 1.41E+08 | 1.41E+08 | + | 0.8     | 0.6     |
| ENSG0000(PCDHB7   | protein_co chr5 | 1.41E+08 | 1.41E+08 | + | 1.01    | 1.07    |
| ENSG0000(PDE8B    | protein_co chr5 | 77210449 | 77429807 | + | 0.13    | 0       |
| ENSG0000(CLK4     | protein_co chr5 | 1.79E+08 | 1.79E+08 | - | 9.14    | 8.74    |
| ENSG0000(PCDHB15  | protein_co chr5 | 1.41E+08 | 1.41E+08 | + | 0.47    | 0.41    |
| ENSG0000(HAVCR1   | protein_co chr5 | 1.57E+08 | 1.57E+08 | - | 0       | 0       |
| ENSG0000(GRM6     | protein_co chr5 | 1.79E+08 | 1.79E+08 | - | 0.03    | 0.03    |
| ENSG0000(ITK      | protein_co chr5 | 1.57E+08 | 1.57E+08 | + | 0.01    | 0.05    |
| ENSG0000(RNF130   | protein_co chr5 | 1.8E+08  | 1.8E+08  | - | 28.88   | 29.31   |
| ENSG0000(THG1L    | protein_co chr5 | 1.58E+08 | 1.58E+08 | + | 7.11    | 7.63    |
| ENSG0000(ARSB     | protein_co chr5 | 78777209 | 78986087 | - | 20.43   | 19.5    |
| ENSG0000(CLINT1   | protein_co chr5 | 1.58E+08 | 1.58E+08 | - | 31.73   | 31.83   |
| ENSG0000(THBS4    | protein_co chr5 | 79991311 | 80083287 | + | 0.25    | 0.22    |
| ENSG0000(CNOT6    | protein_co chr5 | 1.8E+08  | 1.81E+08 | + | 4.4     | 5.89    |
| ENSG0000(IL12B    | protein_co chr5 | 1.59E+08 | 1.59E+08 | - | 0       | 0.04    |
| ENSG0000(BTNL8    | protein_co chr5 | 1.81E+08 | 1.81E+08 | + | 0.09    | 0       |
| ENSG0000(TTC1     | protein_co chr5 | 1.6E+08  | 1.6E+08  | + | 22.29   | 21.64   |
| ENSG0000(MSH3     | protein_co chr5 | 80654648 | 80876460 | + | 3.82    | 3.05    |
| ENSG0000(RASGRF2  | protein_co chr5 | 80960672 | 81230156 | + | 0.8     | 0.8     |
| ENSG0000(GABRG2   | protein_co chr5 | 1.62E+08 | 1.62E+08 | + | 3.27    | 3.33    |
| ENSG0000(CCNG1    | protein_co chr5 | 1.63E+08 | 1.63E+08 | + | 142.99  | 136.7   |
| ENSG0000(POLR3G   | protein_co chr5 | 90471748 | 90514553 | + | 0.53    | 0.86    |
| ENSG0000(DROSHA   | protein_co chr5 | 31400497 | 31532196 | - | 14.63   | 10.75   |
| ENSG0000(CDH6     | protein_co chr5 | 31193750 | 31329146 | + | 12.79   | 9.67    |
| ENSG0000(LMNB1    | protein_co chr5 | 1.27E+08 | 1.27E+08 | + | 2.19    | 1.74    |
| ENSG0000(ARRDC3   | protein_co chr5 | 91368724 | 91383359 | - | 28.82   | 25.57   |
| ENSG0000(GOLPH3   | protein_co chr5 | 32124704 | 32174350 | - | 26.78   | 26.29   |
| ENSG0000(SUB1     | protein_co chr5 | 32531633 | 32604079 | + | 78.34   | 81.38   |
| ENSG0000(NPR3     | protein_co chr5 | 32689070 | 32791724 | + | 11.24   | 12.08   |
| ENSG0000(FAM172A  | protein_co chr5 | 93618069 | 94111699 | - | 9.98    | 8.49    |
| ENSG0000(SLC27A6  | protein_co chr5 | 1.29E+08 | 1.29E+08 | + | 0.02    | 0.09    |
| ENSG0000(TARS     | protein_co chr5 | 33440696 | 33469539 | + | 52.77   | 52.07   |
| ENSG0000(IRX4     | protein_co chr5 | 1877413  | 1887236  | - | 0       | 0       |

|                   |                 |          |          |   |        |        |
|-------------------|-----------------|----------|----------|---|--------|--------|
| ENSG0000(LNPEP    | protein_co chr5 | 96935394 | 97037515 | + | 5.73   | 6.19   |
| ENSG0000(PDE4D    | protein_co chr5 | 58969038 | 60522120 | - | 0.7    | 0.85   |
| ENSG0000(RAD1     | protein_co chr5 | 34905264 | 34918989 | - | 10.52  | 9.99   |
| ENSG0000(BRIX1    | protein_co chr5 | 34915376 | 34925996 | + | 10.7   | 7.74   |
| ENSG0000(AGXT2    | protein_co chr5 | 34998101 | 35048135 | - | 0      | 0      |
| ENSG0000(PRLR     | protein_co chr5 | 35048756 | 35230589 | - | 0      | 0      |
| ENSG0000(SLC12A7  | protein_co chr5 | 1050376  | 1112035  | - | 10.42  | 9.45   |
| ENSG0000(IL4      | protein_co chr5 | 1.33E+08 | 1.33E+08 | + | 0      | 0      |
| ENSG0000(RAD50    | protein_co chr5 | 1.33E+08 | 1.33E+08 | + | 12.56  | 12.64  |
| ENSG0000(IL5      | protein_co chr5 | 1.33E+08 | 1.33E+08 | - | 0      | 0      |
| ENSG0000(ST8SIA4  | protein_co chr5 | 1.01E+08 | 1.01E+08 | - | 0.78   | 0.58   |
| ENSG0000(GNPDA1   | protein_co chr5 | 1.42E+08 | 1.42E+08 | - | 45.39  | 51.64  |
| ENSG0000(PCDH12   | protein_co chr5 | 1.42E+08 | 1.42E+08 | - | 0.06   | 0.02   |
| ENSG0000(SKP1     | protein_co chr5 | 1.34E+08 | 1.34E+08 | - | 311.69 | 317.12 |
| ENSG0000(NUP155   | protein_co chr5 | 37288137 | 37371181 | - | 3.83   | 3.35   |
| ENSG0000(PPP2CA   | protein_co chr5 | 1.34E+08 | 1.34E+08 | - | 53.57  | 62.26  |
| ENSG0000(FGF1     | protein_co chr5 | 1.43E+08 | 1.43E+08 | - | 0.91   | 1.08   |
| ENSG0000(NR3C1    | protein_co chr5 | 1.43E+08 | 1.43E+08 | - | 26.75  | 28.83  |
| ENSG0000(C5orf15  | protein_co chr5 | 1.34E+08 | 1.34E+08 | - | 38.55  | 41.85  |
| ENSG0000(PPWD1    | protein_co chr5 | 65563236 | 65587549 | + | 13.47  | 12.19  |
| ENSG0000(LIFR     | protein_co chr5 | 38474963 | 38608354 | - | 4.68   | 4.14   |
| ENSG0000(TRIM23   | protein_co chr5 | 65589680 | 65625975 | - | 6.24   | 5.47   |
| ENSG0000(TRAPPC13 | protein_co chr5 | 65624716 | 65666233 | + | 6.17   | 9.2    |
| ENSG0000(C9       | protein_co chr5 | 39284262 | 39424868 | - | 0.06   | 0.02   |
| ENSG0000(SEC24A   | protein_co chr5 | 1.35E+08 | 1.35E+08 | + | 7.41   | 6.99   |
| ENSG0000(TXNDC15  | protein_co chr5 | 1.35E+08 | 1.35E+08 | + | 51.92  | 32.75  |
| ENSG0000(TTC33    | protein_co chr5 | 40512333 | 40755975 | - | 4.23   | 6.02   |
| ENSG0000(RARS     | protein_co chr5 | 1.68E+08 | 1.69E+08 | + | 24.06  | 25.39  |
| ENSG0000(WWC1     | protein_co chr5 | 1.68E+08 | 1.68E+08 | + | 0.64   | 0.96   |
| ENSG0000(H2AFY    | protein_co chr5 | 1.35E+08 | 1.35E+08 | - | 45.38  | 51.95  |
| ENSG0000(TCERG1   | protein_co chr5 | 1.46E+08 | 1.47E+08 | + | 10.12  | 11.65  |
| ENSG0000(DPYSL3   | protein_co chr5 | 1.47E+08 | 1.48E+08 | - | 183.13 | 164.61 |
| ENSG0000(SMAD5    | protein_co chr5 | 1.36E+08 | 1.36E+08 | + | 26.32  | 28.07  |
| ENSG0000(CSNK1A1  | protein_co chr5 | 1.49E+08 | 1.5E+08  | - | 101.32 | 102.49 |
| ENSG0000(HMGXB3   | protein_co chr5 | 1.5E+08  | 1.5E+08  | + | 13     | 13.79  |
| ENSG0000(ERGIC1   | protein_co chr5 | 1.73E+08 | 1.73E+08 | + | 61.61  | 60.44  |
| ENSG0000(PDGFRB   | protein_co chr5 | 1.5E+08  | 1.5E+08  | - | 47.02  | 57.57  |
| ENSG0000(CDX1     | protein_co chr5 | 1.5E+08  | 1.5E+08  | + | 0      | 0.52   |
| ENSG0000(ATP6V0E1 | protein_co chr5 | 1.73E+08 | 1.73E+08 | + | 242.19 | 253.89 |
| ENSG0000(BNIP1    | protein_co chr5 | 1.73E+08 | 1.73E+08 | + | 5.6    | 3.99   |
| ENSG0000(STC2     | protein_co chr5 | 1.73E+08 | 1.73E+08 | - | 70.72  | 67.69  |
| ENSG0000(CPEB4    | protein_co chr5 | 1.74E+08 | 1.74E+08 | + | 10.11  | 9.66   |
| ENSG0000(HRH2     | protein_co chr5 | 1.76E+08 | 1.76E+08 | + | 0      | 0      |
| ENSG0000(DBN1     | protein_co chr5 | 1.77E+08 | 1.77E+08 | - | 90.08  | 92.92  |
| ENSG0000(ZNF346   | protein_co chr5 | 1.77E+08 | 1.77E+08 | + | 8.31   | 8.55   |

|                    |                  |          |            |        |       |
|--------------------|------------------|----------|------------|--------|-------|
| ENSG0000( UNC5A    | protein_co chr5  | 1.77E+08 | 1.77E+08 + | 0      | 0.02  |
| ENSG0000( EHHADH   | protein_co chr3  | 1.85E+08 | 1.85E+08 - | 1.97   | 1.89  |
| ENSG0000( CNTN3    | protein_co chr3  | 74262568 | 74521140 - | 5.53   | 3.34  |
| ENSG0000( SMC4     | protein_co chr3  | 1.6E+08  | 1.6E+08 +  | 7.46   | 9.35  |
| ENSG0000( SELENOK  | protein_co chr3  | 53884410 | 53891988 - | 19.41  | 17    |
| ENSG0000( ACTR8    | protein_co chr3  | 53867066 | 53882202 - | 11.43  | 10.92 |
| ENSG0000( TBCCD1   | protein_co chr3  | 1.87E+08 | 1.87E+08 - | 3.97   | 4.29  |
| ENSG0000( TIMMDC1  | protein_co chr3  | 1.19E+08 | 1.2E+08 +  | 40.14  | 40.02 |
| ENSG0000( CRBN     | protein_co chr3  | 3144628  | 3179727 -  | 14.43  | 12.65 |
| ENSG0000( KNG1     | protein_co chr3  | 1.87E+08 | 1.87E+08 + | 0      | 0     |
| ENSG0000( HRG      | protein_co chr3  | 1.87E+08 | 1.87E+08 + | 0      | 0.13  |
| ENSG0000( BCL6     | protein_co chr3  | 1.88E+08 | 1.88E+08 - | 43.12  | 39.95 |
| ENSG0000( HGD      | protein_co chr3  | 1.21E+08 | 1.21E+08 - | 1.98   | 0.76  |
| ENSG0000( CLDN16   | protein_co chr3  | 1.9E+08  | 1.9E+08 +  | 0.03   | 0     |
| ENSG0000( ARL6     | protein_co chr3  | 97764521 | 97801242 + | 2.78   | 3.28  |
| ENSG0000( NPHP3    | protein_co chr3  | 1.33E+08 | 1.33E+08 - | 8.59   | 7.1   |
| ENSG0000( CD86     | protein_co chr3  | 1.22E+08 | 1.22E+08 + | 0      | 0     |
| ENSG0000( AMOTL2   | protein_co chr3  | 1.34E+08 | 1.34E+08 - | 64.61  | 63.44 |
| ENSG0000( NIT2     | protein_co chr3  | 1E+08    | 1E+08 +    | 32.73  | 34.02 |
| ENSG0000( FAM162A  | protein_co chr3  | 1.22E+08 | 1.22E+08 + | 104.66 | 82.63 |
| ENSG0000( OGG1     | protein_co chr3  | 9749944  | 9788219 +  | 10.25  | 9.31  |
| ENSG0000( KPNA1    | protein_co chr3  | 1.22E+08 | 1.23E+08 - | 20.66  | 20.97 |
| ENSG0000( PCCB     | protein_co chr3  | 1.36E+08 | 1.36E+08 + | 17.39  | 18.77 |
| ENSG0000( UBE3A    | protein_co chr15 | 25333728 | 25439056 - | 20.57  | 21.67 |
| ENSG0000( ARMC8    | protein_co chr3  | 1.38E+08 | 1.38E+08 + | 9.06   | 9     |
| ENSG0000( CEP70    | protein_co chr3  | 1.38E+08 | 1.39E+08 - | 5.41   | 7.06  |
| ENSG0000( RBP2     | protein_co chr3  | 1.39E+08 | 1.39E+08 - | 0      | 0     |
| ENSG0000( RBP1     | protein_co chr3  | 1.4E+08  | 1.4E+08 -  | 37.2   | 46.35 |
| ENSG0000( SLC25A36 | protein_co chr3  | 1.41E+08 | 1.41E+08 + | 27.21  | 26.24 |
| ENSG0000( GRK7     | protein_co chr3  | 1.42E+08 | 1.42E+08 + | 0      | 0     |
| ENSG0000( RNF7     | protein_co chr3  | 1.42E+08 | 1.42E+08 + | 45.69  | 43.71 |
| ENSG0000( TFDP2    | protein_co chr3  | 1.42E+08 | 1.42E+08 - | 10.49  | 15.77 |
| ENSG0000( XRN1     | protein_co chr3  | 1.42E+08 | 1.42E+08 - | 8.07   | 5.53  |
| ENSG0000( KAT2B    | protein_co chr3  | 20040023 | 20154404 + | 5.02   | 8.68  |
| ENSG0000( BCHE     | protein_co chr3  | 1.66E+08 | 1.66E+08 - | 0      | 0     |
| ENSG0000( SERPINI2 | protein_co chr3  | 1.67E+08 | 1.67E+08 - | 0      | 0     |
| ENSG0000( PDCD10   | protein_co chr3  | 1.68E+08 | 1.68E+08 - | 20.77  | 18.1  |
| ENSG0000( LRRC31   | protein_co chr3  | 1.7E+08  | 1.7E+08 -  | 0      | 0     |
| ENSG0000( WNT5A    | protein_co chr3  | 55465715 | 55490539 - | 0.76   | 0.95  |
| ENSG0000( PFKFB4   | protein_co chr3  | 48517684 | 48562015 - | 8.95   | 6.82  |
| ENSG0000( COL7A1   | protein_co chr3  | 48564073 | 48595267 - | 6.04   | 8.07  |
| ENSG0000( FGF12    | protein_co chr3  | 1.92E+08 | 1.93E+08 - | 0.18   | 0     |
| ENSG0000( PRKAR2A  | protein_co chr3  | 48744597 | 48847846 - | 9.59   | 12.52 |
| ENSG0000( HES1     | protein_co chr3  | 1.94E+08 | 1.94E+08 + | 0.11   | 0.2   |
| ENSG0000( USP4     | protein_co chr3  | 49277831 | 49340712 - | 18.03  | 19.4  |

|                    |                 |          |            |        |        |
|--------------------|-----------------|----------|------------|--------|--------|
| ENSG0000( ACAP2    | protein_co chr3 | 1.95E+08 | 1.95E+08 - | 18.91  | 18.68  |
| ENSG0000( ECT2     | protein_co chr3 | 1.73E+08 | 1.73E+08 + | 5.54   | 6.33   |
| ENSG0000( GNAT1    | protein_co chr3 | 50191612 | 50196516 + | 0      | 0      |
| ENSG0000( GNAI2    | protein_co chr3 | 50226292 | 50259355 + | 179.14 | 178.45 |
| ENSG0000( TFG      | protein_co chr3 | 1.01E+08 | 1.01E+08 + | 43.91  | 45.65  |
| ENSG0000( USP9Y    | protein_co chrY | 12701231 | 12860839 + | 5.87   | 5.34   |
| ENSG0000( HYAL1    | protein_co chr3 | 50299889 | 50312381 - | 2.07   | 2.33   |
| ENSG0000( TUSC2    | protein_co chr3 | 50320027 | 50328251 - | 16.08  | 13.16  |
| ENSG0000( NPRL2    | protein_co chr3 | 50347330 | 50351091 - | 8.91   | 8.2    |
| ENSG0000( RPL24    | protein_co chr3 | 1.02E+08 | 1.02E+08 - | 485.41 | 541.78 |
| ENSG0000( CYB561D2 | protein_co chr3 | 50350695 | 50358460 + | 10.02  | 8.08   |
| ENSG0000( C3orf14  | protein_co chr3 | 62318973 | 62336213 + | 5.7    | 6.61   |
| ENSG0000( FXR1     | protein_co chr3 | 1.81E+08 | 1.81E+08 + | 62.42  | 61.59  |
| ENSG0000( CBLB     | protein_co chr3 | 1.06E+08 | 1.06E+08 - | 17.49  | 15.8   |
| ENSG0000( BBX      | protein_co chr3 | 1.08E+08 | 1.08E+08 + | 15.94  | 15.18  |
| ENSG0000( IFT57    | protein_co chr3 | 1.08E+08 | 1.08E+08 - | 26.95  | 27.91  |
| ENSG0000( GNB4     | protein_co chr3 | 1.79E+08 | 1.79E+08 - | 6.86   | 7.58   |
| ENSG0000( HHLA2    | protein_co chr3 | 1.08E+08 | 1.08E+08 + | 0      | 0      |
| ENSG0000( IQCG     | protein_co chr3 | 1.98E+08 | 1.98E+08 - | 5.34   | 3.27   |
| ENSG0000( GBE1     | protein_co chr3 | 81489699 | 81762161 - | 100.72 | 89.66  |
| ENSG0000( MORC1    | protein_co chr3 | 1.09E+08 | 1.09E+08 - | 0      | 0      |
| ENSG0000( UMPS     | protein_co chr3 | 1.25E+08 | 1.25E+08 + | 8.39   | 9.13   |
| ENSG0000( NCBP2    | protein_co chr3 | 1.97E+08 | 1.97E+08 - | 29.18  | 30.8   |
| ENSG0000( SNX4     | protein_co chr3 | 1.25E+08 | 1.26E+08 - | 13.87  | 12.78  |
| ENSG0000( C3orf52  | protein_co chr3 | 1.12E+08 | 1.12E+08 + | 2.03   | 2.45   |
| ENSG0000( FRMD4B   | protein_co chr3 | 69169990 | 69542583 - | 0.52   | 0.48   |
| ENSG0000( SLC41A3  | protein_co chr3 | 1.26E+08 | 1.26E+08 - | 21.38  | 20.44  |
| ENSG0000( ROPN1B   | protein_co chr3 | 1.26E+08 | 1.26E+08 + | 0      | 0      |
| ENSG0000( PLXNA1   | protein_co chr3 | 1.27E+08 | 1.27E+08 + | 22.21  | 24.71  |
| ENSG0000( ATP6V1A  | protein_co chr3 | 1.14E+08 | 1.14E+08 + | 35.38  | 35.39  |
| ENSG0000( ABTB1    | protein_co chr3 | 1.28E+08 | 1.28E+08 + | 17.83  | 22.15  |
| ENSG0000( PODXL2   | protein_co chr3 | 1.28E+08 | 1.28E+08 + | 2.3    | 2.28   |
| ENSG0000( UPK1B    | protein_co chr3 | 1.19E+08 | 1.19E+08 + | 0.26   | 0.12   |
| ENSG0000( CSPG5    | protein_co chr3 | 47562239 | 47580792 - | 0.05   | 0.03   |
| ENSG0000( KLHL18   | protein_co chr3 | 47282917 | 47346816 + | 5.33   | 5.35   |
| ENSG0000( SCAP     | protein_co chr3 | 47413694 | 47477126 - | 18.53  | 20.05  |
| ENSG0000( EFCC1    | protein_co chr3 | 1.29E+08 | 1.29E+08 + | 0      | 0      |
| ENSG0000( KIAA1257 | protein_co chr3 | 1.29E+08 | 1.29E+08 - | 0.1    | 0.07   |
| ENSG0000( NEK11    | protein_co chr3 | 1.31E+08 | 1.31E+08 + | 3.78   | 3.93   |
| ENSG0000( MRPL3    | protein_co chr3 | 1.31E+08 | 1.32E+08 - | 25.25  | 25.18  |
| ENSG0000( PLSCR4   | protein_co chr3 | 1.46E+08 | 1.46E+08 - | 63.4   | 63.56  |
| ENSG0000( HEMK1    | protein_co chr3 | 50569152 | 50596168 + | 5.68   | 5.98   |
| ENSG0000( CISH     | protein_co chr3 | 50606490 | 50611831 - | 2.5    | 1.99   |
| ENSG0000( MAPKAPK3 | protein_co chr3 | 50611520 | 50649297 + | 13.82  | 17.65  |
| ENSG0000( ACVR2B   | protein_co chr3 | 38453851 | 38493142 + | 0.38   | 0.64   |



|                   |                 |          |          |   |        |        |
|-------------------|-----------------|----------|----------|---|--------|--------|
| ENSG0000(WDR48    | protein_co chr3 | 39051998 | 39096671 | + | 12.5   | 14.18  |
| ENSG0000(COMMD2   | protein_co chr3 | 1.5E+08  | 1.5E+08  | - | 10.91  | 11.73  |
| ENSG0000(GORASP1  | protein_co chr3 | 39096659 | 39108363 | - | 23     | 22.1   |
| ENSG0000(PEX5L    | protein_co chr3 | 1.8E+08  | 1.8E+08  | - | 0.71   | 0.95   |
| ENSG0000(RRP9     | protein_co chr3 | 51933430 | 51941941 | - | 8.42   | 8.51   |
| ENSG0000(ABCC5    | protein_co chr3 | 1.84E+08 | 1.84E+08 | - | 14.4   | 13.56  |
| ENSG0000(AADAC    | protein_co chr3 | 1.52E+08 | 1.52E+08 | + | 12.79  | 7.81   |
| ENSG0000(ABHD14B  | protein_co chr3 | 51968510 | 51983409 | - | 27.25  | 30.07  |
| ENSG0000(EIF1B    | protein_co chr3 | 40309684 | 40312424 | + | 25.08  | 24.08  |
| ENSG0000(ABHD14A- | protein_co chr3 | 51974706 | 51989183 | + | 1.19   | 1.99   |
| ENSG0000(ARHGEF26 | protein_co chr3 | 1.54E+08 | 1.54E+08 | + | 1.14   | 1.33   |
| ENSG0000(KLHL24   | protein_co chr3 | 1.84E+08 | 1.84E+08 | + | 15.29  | 16.51  |
| ENSG0000(PLCH1    | protein_co chr3 | 1.55E+08 | 1.56E+08 | - | 0      | 0      |
| ENSG0000(VIPR1    | protein_co chr3 | 42489299 | 42537573 | + | 1.86   | 2.03   |
| ENSG0000(DNAH1    | protein_co chr3 | 52316319 | 52400491 | + | 1.12   | 1.75   |
| ENSG0000(SSR3     | protein_co chr3 | 1.57E+08 | 1.57E+08 | - | 71.37  | 70.4   |
| ENSG0000(ZBTB47   | protein_co chr3 | 42653684 | 42665854 | + | 13.15  | 14.32  |
| ENSG0000(TNNC1    | protein_co chr3 | 52451102 | 52454070 | - | 1.09   | 0.61   |
| ENSG0000(NKTR     | protein_co chr3 | 42600614 | 42648741 | + | 15.45  | 15.16  |
| ENSG0000(CLCN2    | protein_co chr3 | 1.84E+08 | 1.84E+08 | - | 2.13   | 3.33   |
| ENSG0000(FOXP1    | protein_co chr3 | 70954693 | 71583989 | - | 27.58  | 20.65  |
| ENSG0000(EIF4G1   | protein_co chr3 | 1.84E+08 | 1.84E+08 | + | 82.96  | 79.36  |
| ENSG0000(SPCS1    | protein_co chr3 | 52704955 | 52711146 | + | 72.81  | 72.46  |
| ENSG0000(NEK4     | protein_co chr3 | 52708449 | 52770949 | - | 4.74   | 4.61   |
| ENSG0000(SLC4A3   | protein_co chr2 | 2.2E+08  | 2.2E+08  | + | 6.44   | 7.78   |
| ENSG0000(INO80D   | protein_co chr2 | 2.06E+08 | 2.06E+08 | - | 1.76   | 1.11   |
| ENSG0000(EEF1B2   | protein_co chr2 | 2.06E+08 | 2.06E+08 | + | 251.24 | 241.22 |
| ENSG0000(ADAM23   | protein_co chr2 | 2.06E+08 | 2.07E+08 | + | 7.73   | 7.03   |
| ENSG0000(DGUOK    | protein_co chr2 | 73926826 | 73958961 | + | 34.97  | 30.63  |
| ENSG0000(MOB1A    | protein_co chr2 | 74152528 | 74178898 | - | 29.69  | 26.54  |
| ENSG0000(KANSL3   | protein_co chr2 | 96593170 | 96642787 | - | 18.22  | 19.53  |
| ENSG0000(LMAN2L   | protein_co chr2 | 96705929 | 96740064 | - | 10.65  | 11.31  |
| ENSG0000(RTKN     | protein_co chr2 | 74425836 | 74442422 | - | 7.39   | 9.87   |
| ENSG0000(TTL      | protein_co chr2 | 1.12E+08 | 1.13E+08 | + | 16.94  | 14.8   |
| ENSG0000(IL1A     | protein_co chr2 | 1.13E+08 | 1.13E+08 | - | 1.04   | 0.83   |
| ENSG0000(CCL20    | protein_co chr2 | 2.28E+08 | 2.28E+08 | + | 0.38   | 0.11   |
| ENSG0000(PIKFYVE  | protein_co chr2 | 2.08E+08 | 2.08E+08 | + | 6.74   | 6.83   |
| ENSG0000(KCNIP3   | protein_co chr2 | 95297304 | 95386083 | + | 1.32   | 0.94   |
| ENSG0000(FAHD2A   | protein_co chr2 | 95402721 | 95416616 | + | 12.42  | 11.76  |
| ENSG0000(NCL      | protein_co chr2 | 2.31E+08 | 2.31E+08 | - | 197.26 | 183.68 |
| ENSG0000(ACTR1B   | protein_co chr2 | 97655963 | 97664107 | - | 27.21  | 26.87  |
| ENSG0000(SLC35F5  | protein_co chr2 | 1.14E+08 | 1.14E+08 | - | 19.56  | 19.32  |
| ENSG0000(ZAP70    | protein_co chr2 | 97713560 | 97739862 | + | 0      | 0.07   |
| ENSG0000(ACTR3    | protein_co chr2 | 1.14E+08 | 1.14E+08 | + | 86.16  | 79.25  |
| ENSG0000(STEAP3   | protein_co chr2 | 1.19E+08 | 1.19E+08 | + | 8.99   | 8.39   |

|                   |                  |          |            |        |        |
|-------------------|------------------|----------|------------|--------|--------|
| ENSG0000( EPB41L5 | protein_co chr2  | 1.2E+08  | 1.2E+08 +  | 3.48   | 3.52   |
| ENSG0000( TFCP2L1 | protein_co chr2  | 1.21E+08 | 1.21E+08 - | 0      | 0      |
| ENSG0000( SF3B6   | protein_co chr2  | 24067584 | 24076443 - | 50.99  | 52.31  |
| ENSG0000( TP53I3  | protein_co chr2  | 24077433 | 24085861 - | 32.9   | 32.16  |
| ENSG0000( DNAJC27 | protein_co chr2  | 24943636 | 24972094 - | 1.29   | 1.26   |
| ENSG0000( POMC    | protein_co chr2  | 25160853 | 25168903 - | 0.14   | 0.3    |
| ENSG0000( STAM2   | protein_co chr2  | 1.52E+08 | 1.52E+08 - | 10.54  | 9.08   |
| ENSG0000( OTOF    | protein_co chr2  | 26457203 | 26558698 - | 0      | 0      |
| ENSG0000( GPD2    | protein_co chr2  | 1.56E+08 | 1.57E+08 + | 6.13   | 5.78   |
| ENSG0000( CENPA   | protein_co chr2  | 26764289 | 26801067 + | 0.43   | 0.1    |
| ENSG0000( CYTIP   | protein_co chr2  | 1.57E+08 | 1.57E+08 - | 0      | 0      |
| ENSG0000( ACVR1   | protein_co chr2  | 1.58E+08 | 1.58E+08 - | 35.36  | 36.63  |
| ENSG0000( TANC1   | protein_co chr2  | 1.59E+08 | 1.59E+08 + | 7.02   | 6.78   |
| ENSG0000( SLC30A3 | protein_co chr2  | 27253684 | 27275817 - | 0.29   | 0      |
| ENSG0000( MPV17   | protein_co chr2  | 27309492 | 27325680 - | 81.65  | 80.18  |
| ENSG0000( GTF3C2  | protein_co chr2  | 27325849 | 27357034 - | 14.97  | 20.64  |
| ENSG0000( EIF2B4  | protein_co chr2  | 27364352 | 27370486 - | 15.27  | 18.07  |
| ENSG0000( NRBP1   | protein_co chr2  | 27427790 | 27442259 + | 58.14  | 59.84  |
| ENSG0000( ITGB6   | protein_co chr2  | 1.6E+08  | 1.6E+08 -  | 0.31   | 0.03   |
| ENSG0000( FNDC4   | protein_co chr2  | 27491883 | 27495245 - | 10.89  | 10.55  |
| ENSG0000( ITGA4   | protein_co chr2  | 1.81E+08 | 1.82E+08 + | 1.99   | 1.73   |
| ENSG0000( PSMD14  | protein_co chr2  | 1.61E+08 | 1.61E+08 + | 17.37  | 17.43  |
| ENSG0000( SNX17   | protein_co chr2  | 27370496 | 27377533 + | 53.49  | 54.09  |
| ENSG0000( ASB3    | protein_co chr2  | 53532672 | 53787610 - | 6.13   | 5.97   |
| ENSG0000( PPM1G   | protein_co chr2  | 27381194 | 27409687 - | 27.95  | 29.18  |
| ENSG0000( PDE1A   | protein_co chr2  | 1.82E+08 | 1.83E+08 - | 1.4    | 2.21   |
| ENSG0000( REEP6   | protein_co chr19 | 1490747  | 1497927 +  | 3.8    | 3.55   |
| ENSG0000( PCSK4   | protein_co chr19 | 1481428  | 1490752 -  | 2.16   | 1.8    |
| ENSG0000( GCG     | protein_co chr2  | 1.62E+08 | 1.62E+08 - | 0      | 0      |
| ENSG0000( APC2    | protein_co chr19 | 1446302  | 1473244 +  | 0.06   | 0.05   |
| ENSG0000( IFIH1   | protein_co chr2  | 1.62E+08 | 1.62E+08 - | 2.86   | 2.61   |
| ENSG0000( RPS15   | protein_co chr19 | 1438358  | 1440494 +  | 615.94 | 607.77 |
| ENSG0000( GCA     | protein_co chr2  | 1.62E+08 | 1.62E+08 + | 0.81   | 0.43   |
| ENSG0000( INO80B  | protein_co chr2  | 74455023 | 74457960 + | 10.91  | 9.37   |
| ENSG0000( MOGS    | protein_co chr2  | 74461057 | 74465410 - | 21.09  | 21.52  |
| ENSG0000( TTC31   | protein_co chr2  | 74483073 | 74494886 + | 11.38  | 12.48  |
| ENSG0000( NDUFS7  | protein_co chr19 | 1383527  | 1395589 +  | 39.46  | 36.78  |
| ENSG0000( PCGF1   | protein_co chr2  | 74505043 | 74508580 - | 6.96   | 9.77   |
| ENSG0000( GRB14   | protein_co chr2  | 1.64E+08 | 1.65E+08 - | 0.93   | 1.12   |
| ENSG0000( CLIP4   | protein_co chr2  | 29097705 | 29189643 + | 30.25  | 29.28  |
| ENSG0000( TLX2    | protein_co chr2  | 74513463 | 74517147 + | 0      | 0      |
| ENSG0000( SPTBN1  | protein_co chr2  | 54456285 | 54671445 + | 85.5   | 84.87  |
| ENSG0000( AUP1    | protein_co chr2  | 74526645 | 74529939 - | 45.06  | 45.9   |
| ENSG0000( RTN4    | protein_co chr2  | 54972187 | 55112621 - | 259.65 | 264.93 |
| ENSG0000( HTRA2   | protein_co chr2  | 74529377 | 74533348 + | 13.07  | 13.14  |

|                   |                 |          |            |         |         |
|-------------------|-----------------|----------|------------|---------|---------|
| ENSG0000( LOXL3   | protein_co chr2 | 74532414 | 74555690 - | 45.82   | 33.03   |
| ENSG0000( DOK1    | protein_co chr2 | 74549026 | 74557554 + | 12.65   | 11.47   |
| ENSG0000( GALNT3  | protein_co chr2 | 1.66E+08 | 1.66E+08 - | 0.51    | 0.14    |
| ENSG0000( POLE4   | protein_co chr2 | 74958492 | 74970128 + | 56.91   | 60.46   |
| ENSG0000( TACR1   | protein_co chr2 | 75046463 | 75199700 - | 0.02    | 0.01    |
| ENSG0000( CCDC88A | protein_co chr2 | 55287842 | 55419921 - | 5.87    | 7.13    |
| ENSG0000( ACADL   | protein_co chr2 | 2.1E+08  | 2.1E+08 -  | 0       | 0       |
| ENSG0000( EVA1A   | protein_co chr2 | 75469302 | 75569722 - | 6.74    | 10.01   |
| ENSG0000( MRPL19  | protein_co chr2 | 75646783 | 75690851 + | 11.19   | 11.61   |
| ENSG0000( LANCL1  | protein_co chr2 | 2.1E+08  | 2.1E+08 -  | 19.94   | 22.18   |
| ENSG0000( WDR75   | protein_co chr2 | 1.89E+08 | 1.89E+08 + | 10.92   | 12.15   |
| ENSG0000( EFEMP1  | protein_co chr2 | 55865967 | 55924139 - | 1882.66 | 1683.53 |
| ENSG0000( REG1A   | protein_co chr2 | 79120362 | 79123419 + | 0       | 0       |
| ENSG0000( FANCL   | protein_co chr2 | 58159243 | 58241372 - | 5.1     | 4.7     |
| ENSG0000( FN1     | protein_co chr2 | 2.15E+08 | 2.15E+08 - | 5090.44 | 5042.16 |
| ENSG0000( STAT1   | protein_co chr2 | 1.91E+08 | 1.91E+08 - | 81.25   | 80.02   |
| ENSG0000( GLS     | protein_co chr2 | 1.91E+08 | 1.91E+08 + | 116.54  | 112.03  |
| ENSG0000( PAPOLG  | protein_co chr2 | 60756230 | 60802085 + | 3.7     | 3.68    |
| ENSG0000( DNAH6   | protein_co chr2 | 84516455 | 84819589 + | 0.13    | 0.22    |
| ENSG0000( PECR    | protein_co chr2 | 2.16E+08 | 2.16E+08 - | 9.31    | 11.28   |
| ENSG0000( UNC50   | protein_co chr2 | 98608579 | 98618515 + | 21.47   | 22.66   |
| ENSG0000( IGFBP2  | protein_co chr2 | 2.17E+08 | 2.17E+08 + | 0.2     | 0.42    |
| ENSG0000( ELMOD3  | protein_co chr2 | 85354394 | 85391752 + | 8.48    | 9.07    |
| ENSG0000( IGFBP5  | protein_co chr2 | 2.17E+08 | 2.17E+08 - | 2.27    | 2.47    |
| ENSG0000( USP34   | protein_co chr2 | 61187463 | 61470769 - | 19.37   | 19.44   |
| ENSG0000( EFHD1   | protein_co chr2 | 2.33E+08 | 2.33E+08 + | 0.23    | 0.13    |
| ENSG0000( KCNJ13  | protein_co chr2 | 2.33E+08 | 2.33E+08 - | 0       | 0       |
| ENSG0000( CCT4    | protein_co chr2 | 61868089 | 61888804 - | 41.25   | 42.01   |
| ENSG0000( GGCX    | protein_co chr2 | 85544723 | 85561547 - | 27.13   | 27.62   |
| ENSG0000( NEU2    | protein_co chr2 | 2.33E+08 | 2.33E+08 + | 0       | 0       |
| ENSG0000( EHBP1   | protein_co chr2 | 62673851 | 63046487 + | 16.99   | 21.19   |
| ENSG0000( OTX1    | protein_co chr2 | 63050057 | 63057836 + | 0.04    | 0.04    |
| ENSG0000( TXNDC9  | protein_co chr2 | 99318982 | 99340702 - | 15.88   | 14.07   |
| ENSG0000( COQ10B  | protein_co chr2 | 1.97E+08 | 1.97E+08 + | 11.46   | 12.77   |
| ENSG0000( GNLY    | protein_co chr2 | 85685175 | 85698854 + | 0       | 0       |
| ENSG0000( SF3B1   | protein_co chr2 | 1.97E+08 | 1.97E+08 - | 104.57  | 100.55  |
| ENSG0000( ST3GAL5 | protein_co chr2 | 85837120 | 85905199 - | 23.55   | 21.38   |
| ENSG0000( CHST10  | protein_co chr2 | 1E+08    | 1E+08 -    | 4.78    | 4.62    |
| ENSG0000( PDCL3   | protein_co chr2 | 1.01E+08 | 1.01E+08 + | 6.35    | 5.55    |
| ENSG0000( MOB4    | protein_co chr2 | 1.98E+08 | 1.98E+08 + | 6.48    | 5.61    |
| ENSG0000( HSPE1   | protein_co chr2 | 1.97E+08 | 1.98E+08 + | 53.05   | 48.89   |
| ENSG0000( KDM3A   | protein_co chr2 | 86440647 | 86492716 + | 17.9    | 21.38   |
| ENSG0000( PLCD4   | protein_co chr2 | 2.19E+08 | 2.19E+08 + | 2.7     | 2.12    |
| ENSG0000( CHMP3   | protein_co chr2 | 86503431 | 86563479 - | 79.63   | 77.42   |
| ENSG0000( ZNF142  | protein_co chr2 | 2.19E+08 | 2.19E+08 - | 6.44    | 6.74    |

|                 |          |                 |          |          |   |        |        |
|-----------------|----------|-----------------|----------|----------|---|--------|--------|
| ENSG00000111122 | IL1R2    | protein_co chr2 | 1.02E+08 | 1.02E+08 | + | 0.72   | 1.93   |
| ENSG00000111123 | PRKAG3   | protein_co chr2 | 2.19E+08 | 2.19E+08 | - | 0.07   | 0.38   |
| ENSG00000111124 | SMYD1    | protein_co chr2 | 88067780 | 88113387 | + | 0      | 0      |
| ENSG00000111125 | IL1R1    | protein_co chr2 | 1.02E+08 | 1.02E+08 | + | 176.28 | 173.09 |
| ENSG00000111126 | WNT6     | protein_co chr2 | 2.19E+08 | 2.19E+08 | + | 0      | 0      |
| ENSG00000111127 | IL1RL2   | protein_co chr2 | 1.02E+08 | 1.02E+08 | + | 0.51   | 0.42   |
| ENSG00000111128 | IL1RL1   | protein_co chr2 | 1.02E+08 | 1.02E+08 | + | 0.32   | 0.14   |
| ENSG00000111129 | IL18R1   | protein_co chr2 | 1.02E+08 | 1.02E+08 | + | 3.75   | 2.88   |
| ENSG00000111130 | IL18RAP  | protein_co chr2 | 1.02E+08 | 1.02E+08 | + | 0      | 0      |
| ENSG00000111131 | SLC9A2   | protein_co chr2 | 1.03E+08 | 1.03E+08 | + | 0      | 0      |
| ENSG00000111132 | FHL2     | protein_co chr2 | 1.05E+08 | 1.05E+08 | - | 56.38  | 59.73  |
| ENSG00000111133 | MLPH     | protein_co chr2 | 2.37E+08 | 2.38E+08 | + | 1.48   | 1.56   |
| ENSG00000111134 | CNPPD1   | protein_co chr2 | 2.19E+08 | 2.19E+08 | - | 27.48  | 31.01  |
| ENSG00000111135 | UXS1     | protein_co chr2 | 1.06E+08 | 1.06E+08 | - | 14.4   | 11.64  |
| ENSG00000111136 | ABCB6    | protein_co chr2 | 2.19E+08 | 2.19E+08 | - | 16.71  | 15.12  |
| ENSG00000111137 | STK16    | protein_co chr2 | 2.19E+08 | 2.19E+08 | + | 18.86  | 19.48  |
| ENSG00000111138 | SLC5A7   | protein_co chr2 | 1.08E+08 | 1.08E+08 | + | 0      | 0      |
| ENSG00000111139 | HDLBP    | protein_co chr2 | 2.41E+08 | 2.41E+08 | - | 264.1  | 267.78 |
| ENSG00000111140 | PPP1R7   | protein_co chr2 | 2.41E+08 | 2.41E+08 | + | 41.88  | 43.09  |
| ENSG00000111141 | PASK     | protein_co chr2 | 2.41E+08 | 2.41E+08 | - | 5.31   | 4.65   |
| ENSG00000111142 | STK25    | protein_co chr2 | 2.41E+08 | 2.42E+08 | - | 58.17  | 65.36  |
| ENSG00000111143 | TPO      | protein_co chr2 | 1374223  | 1543711  | + | 0      | 0      |
| ENSG00000111144 | PROC     | protein_co chr2 | 1.27E+08 | 1.27E+08 | + | 0.08   | 0.46   |
| ENSG00000111145 | ID2      | protein_co chr2 | 8678845  | 8684453  | + | 91.23  | 86.27  |
| ENSG00000111146 | TAF1B    | protein_co chr2 | 9843354  | 9934416  | + | 5.82   | 4.99   |
| ENSG00000111147 | HPCAL1   | protein_co chr2 | 10302889 | 10427617 | + | 7.8    | 8.05   |
| ENSG00000111148 | ODC1     | protein_co chr2 | 10439968 | 10448504 | - | 14.18  | 16.13  |
| ENSG00000111149 | BIRC6    | protein_co chr2 | 32357028 | 32618899 | + | 13.4   | 12.26  |
| ENSG00000111150 | NOL10    | protein_co chr2 | 10570766 | 10689987 | - | 7.7    | 7.57   |
| ENSG00000111151 | PLEKHB2  | protein_co chr2 | 1.31E+08 | 1.31E+08 | + | 19.32  | 19.66  |
| ENSG00000111152 | GORASP2  | protein_co chr2 | 1.71E+08 | 1.71E+08 | + | 45.35  | 42.42  |
| ENSG00000111153 | STRN     | protein_co chr2 | 36843640 | 36966472 | - | 6.97   | 7.91   |
| ENSG00000111154 | CEBPZ    | protein_co chr2 | 37201612 | 37231713 | - | 7.65   | 8.67   |
| ENSG00000111155 | PRKD3    | protein_co chr2 | 37250502 | 37324808 | - | 15.39  | 14.19  |
| ENSG00000111156 | DCAF17   | protein_co chr2 | 1.71E+08 | 1.71E+08 | + | 4.31   | 6.23   |
| ENSG00000111157 | QPCT     | protein_co chr2 | 37344574 | 37373322 | + | 5.08   | 4.36   |
| ENSG00000111158 | RAB3GAP1 | protein_co chr2 | 1.35E+08 | 1.35E+08 | + | 24.72  | 25.73  |
| ENSG00000111159 | SLC25A12 | protein_co chr2 | 1.72E+08 | 1.72E+08 | - | 12.54  | 12.54  |
| ENSG00000111160 | RMDN2    | protein_co chr2 | 37923187 | 38067142 | + | 5.13   | 5.36   |
| ENSG00000111161 | DLX2     | protein_co chr2 | 1.72E+08 | 1.72E+08 | - | 0.42   | 0.64   |
| ENSG00000111162 | LCT      | protein_co chr2 | 1.36E+08 | 1.36E+08 | - | 0.02   | 0      |
| ENSG00000111163 | DARS     | protein_co chr2 | 1.36E+08 | 1.36E+08 | - | 43.14  | 37.02  |
| ENSG00000111164 | SRSF7    | protein_co chr2 | 38743599 | 38751494 | - | 29.31  | 26.29  |
| ENSG00000111165 | SDC1     | protein_co chr2 | 20200797 | 20225433 | - | 3.67   | 6.24   |
| ENSG00000111166 | PLCL1    | protein_co chr2 | 1.98E+08 | 1.99E+08 | + | 14.77  | 15.9   |

|                    |                  |          |          |   |        |        |
|--------------------|------------------|----------|----------|---|--------|--------|
| ENSG0000(SLC1A4    | protein_co chr2  | 64988477 | 65023865 | + | 5.56   | 5.27   |
| ENSG0000(SOS1      | protein_co chr2  | 38981396 | 39124345 | - | 10.68  | 13.91  |
| ENSG0000(KYNU      | protein_co chr2  | 1.43E+08 | 1.43E+08 | + | 0.65   | 0.64   |
| ENSG0000(RP11-153K | lincRNA chr12    | 23181334 | 23251499 | - | 0      | 0      |
| ENSG0000(WIPF1     | protein_co chr2  | 1.75E+08 | 1.75E+08 | - | 17.62  | 14.37  |
| ENSG0000(ORC2      | protein_co chr2  | 2.01E+08 | 2.01E+08 | - | 6.72   | 4.17   |
| ENSG0000(COX7A2L   | protein_co chr2  | 42333546 | 42425088 | - | 66.08  | 63.92  |
| ENSG0000(PNO1      | protein_co chr2  | 68157844 | 68176238 | + | 3.01   | 4.07   |
| ENSG0000(ORC4      | protein_co chr2  | 1.48E+08 | 1.48E+08 | - | 7.3    | 6.74   |
| ENSG0000(PLEK      | protein_co chr2  | 68365173 | 68397453 | + | 0      | 0      |
| ENSG0000(RND3      | protein_co chr2  | 1.5E+08  | 1.51E+08 | - | 63.79  | 56.91  |
| ENSG0000(ATF2      | protein_co chr2  | 1.75E+08 | 1.75E+08 | - | 19.9   | 18.55  |
| ENSG0000(THADA     | protein_co chr2  | 43230836 | 43596046 | - | 5.83   | 7.96   |
| ENSG0000(AAK1      | protein_co chr2  | 69457997 | 69674349 | - | 13.75  | 11.3   |
| ENSG0000(TRAK2     | protein_co chr2  | 2.01E+08 | 2.01E+08 | - | 18.69  | 19.87  |
| ENSG0000(C2orf42   | protein_co chr2  | 70149880 | 70248615 | - | 5.67   | 5.73   |
| ENSG0000(TIA1      | protein_co chr2  | 70209444 | 70248660 | - | 47.63  | 42.14  |
| ENSG0000(PCYOX1    | protein_co chr2  | 70257386 | 70281191 | + | 79.63  | 70.31  |
| ENSG0000(KISS1R    | protein_co chr19 | 917287   | 921015   | + | 0      | 0      |
| ENSG0000(EPAS1     | protein_co chr2  | 46293667 | 46386703 | + | 156.83 | 150.04 |
| ENSG0000(ARID3A    | protein_co chr19 | 925781   | 975934   | + | 6.38   | 4.8    |
| ENSG0000(SUMO1     | protein_co chr2  | 2.02E+08 | 2.02E+08 | - | 49.28  | 51.9   |
| ENSG0000(CD207     | protein_co chr2  | 70830214 | 70835822 | - | 0      | 0.03   |
| ENSG0000(GRIN3B    | protein_co chr19 | 1000419  | 1009732  | + | 0.58   | 1.26   |
| ENSG0000(VAX2      | protein_co chr2  | 70900590 | 70933446 | + | 2.02   | 1.54   |
| ENSG0000(ATP6V1B1  | protein_co chr2  | 70935882 | 70965406 | + | 1.05   | 1.32   |
| ENSG0000(NFE2L2    | protein_co chr2  | 1.77E+08 | 1.77E+08 | - | 92.71  | 86.43  |
| ENSG0000(MSH6      | protein_co chr2  | 47695530 | 47810101 | + | 17.44  | 16.49  |
| ENSG0000(PLEKHA3   | protein_co chr2  | 1.78E+08 | 1.79E+08 | + | 12.6   | 12.47  |
| ENSG0000(SPR       | protein_co chr2  | 72887360 | 72892158 | + | 15.43  | 17.08  |
| ENSG0000(EPHA4     | protein_co chr2  | 2.21E+08 | 2.22E+08 | - | 1.29   | 2.13   |
| ENSG0000(PARD3B    | protein_co chr2  | 2.05E+08 | 2.06E+08 | + | 2      | 1.87   |
| ENSG0000(FARSB     | protein_co chr2  | 2.23E+08 | 2.23E+08 | - | 4.2    | 5.4    |
| ENSG0000(ALMS1     | protein_co chr2  | 73385758 | 73610793 | + | 6.36   | 2.75   |
| ENSG0000(BCL9      | protein_co chr1  | 1.48E+08 | 1.48E+08 | + | 5.86   | 6.99   |
| ENSG0000(PRRX1     | protein_co chr1  | 1.71E+08 | 1.71E+08 | + | 92.88  | 97.67  |
| ENSG0000(DHCR24    | protein_co chr1  | 54849633 | 54887218 | - | 52.59  | 51.27  |
| ENSG0000(DNAJC16   | protein_co chr1  | 15526813 | 15592379 | + | 7.44   | 5.9    |
| ENSG0000(MARK1     | protein_co chr1  | 2.21E+08 | 2.21E+08 | + | 0      | 0      |
| ENSG0000(TNR       | protein_co chr1  | 1.75E+08 | 1.76E+08 | - | 0      | 0      |
| ENSG0000(MORN1     | protein_co chr1  | 2321253  | 2391707  | - | 2.26   | 3.49   |
| ENSG0000(GPX7      | protein_co chr1  | 52602372 | 52609051 | + | 6.51   | 7.48   |
| ENSG0000(CACYBP    | protein_co chr1  | 1.75E+08 | 1.75E+08 | + | 34.26  | 40.51  |
| ENSG0000(SCP2      | protein_co chr1  | 52927229 | 53051703 | + | 116.7  | 113.32 |
| ENSG0000(TPSG1     | protein_co chr16 | 1221651  | 1225257  | - | 0      | 0      |

|                   |                 |          |          |   |        |        |
|-------------------|-----------------|----------|----------|---|--------|--------|
| ENSG0000(PAPPA2   | protein_co chr1 | 1.76E+08 | 1.77E+08 | + | 0.89   | 0.85   |
| ENSG0000(RALGPS2  | protein_co chr1 | 1.79E+08 | 1.79E+08 | + | 17.68  | 15.68  |
| ENSG0000(ANGPTL1  | protein_co chr1 | 1.79E+08 | 1.79E+08 | - | 5.88   | 5.35   |
| ENSG0000(CEP104   | protein_co chr1 | 3812081  | 3857214  | - | 12.27  | 7.63   |
| ENSG0000(FAM20B   | protein_co chr1 | 1.79E+08 | 1.79E+08 | + | 11.66  | 10.13  |
| ENSG0000(TCEANC2  | protein_co chr1 | 54053587 | 54112519 | + | 1.74   | 1.97   |
| ENSG0000(TMEM59   | protein_co chr1 | 54026681 | 54053504 | - | 310.49 | 306.22 |
| ENSG0000(LRRC42   | protein_co chr1 | 53946077 | 53968168 | + | 20.91  | 20.43  |
| ENSG0000(WRAP73   | protein_co chr1 | 3630767  | 3652761  | - | 6.8    | 7.41   |
| ENSG0000(NPHS2    | protein_co chr1 | 1.8E+08  | 1.8E+08  | - | 0      | 0      |
| ENSG0000(MRPL37   | protein_co chr1 | 54184041 | 54225464 | + | 37.14  | 33.71  |
| ENSG0000(ICMT     | protein_co chr1 | 6221193  | 6235972  | - | 21.3   | 20.48  |
| ENSG0000(RPL22    | protein_co chr1 | 6181269  | 6209389  | - | 277.63 | 275.3  |
| ENSG0000(CHD5     | protein_co chr1 | 6101793  | 6180123  | - | 0.13   | 0.13   |
| ENSG0000(QSOX1    | protein_co chr1 | 1.8E+08  | 1.8E+08  | + | 498.89 | 500.43 |
| ENSG0000(STXBP3   | protein_co chr1 | 1.09E+08 | 1.09E+08 | + | 13.51  | 13.83  |
| ENSG0000(PHF13    | protein_co chr1 | 6613685  | 6624033  | + | 10.08  | 9.95   |
| ENSG0000(ERF11    | protein_co chr1 | 8004404  | 8026308  | - | 32.49  | 36.04  |
| ENSG0000(PARK7    | protein_co chr1 | 7954291  | 7985505  | + | 133.66 | 137.65 |
| ENSG0000(KIAA1324 | protein_co chr1 | 1.09E+08 | 1.09E+08 | + | 0.9    | 0.54   |
| ENSG0000(OPRD1    | protein_co chr1 | 28812142 | 28871267 | + | 0.01   | 0.01   |
| ENSG0000(AMPD2    | protein_co chr1 | 1.1E+08  | 1.1E+08  | + | 28.69  | 28.03  |
| ENSG0000(SRSF4    | protein_co chr1 | 29147743 | 29181987 | - | 25.65  | 24.91  |
| ENSG0000(MECR     | protein_co chr1 | 29192873 | 29230942 | - | 14.47  | 15.69  |
| ENSG0000(KCNC4    | protein_co chr1 | 1.1E+08  | 1.1E+08  | + | 4.43   | 4.02   |
| ENSG0000(EDEM3    | protein_co chr1 | 1.85E+08 | 1.85E+08 | - | 7.93   | 11.89  |
| ENSG0000(WDR77    | protein_co chr1 | 1.11E+08 | 1.11E+08 | - | 9.59   | 10.48  |
| ENSG0000(ATP5F1   | protein_co chr1 | 1.11E+08 | 1.11E+08 | + | 106.58 | 109.57 |
| ENSG0000(RAP1A    | protein_co chr1 | 1.12E+08 | 1.12E+08 | + | 30.06  | 29.01  |
| ENSG0000(HDAC1    | protein_co chr1 | 32292086 | 32333635 | + | 30.53  | 29.1   |
| ENSG0000(CAPZA1   | protein_co chr1 | 1.13E+08 | 1.13E+08 | + | 51.97  | 38.81  |
| ENSG0000(S100PBP  | protein_co chr1 | 32816767 | 32858879 | + | 14.74  | 14.24  |
| ENSG0000(RNF19B   | protein_co chr1 | 32936445 | 32964685 | - | 8.07   | 8.39   |
| ENSG0000(SCAMP3   | protein_co chr1 | 1.55E+08 | 1.55E+08 | - | 48.07  | 48.2   |
| ENSG0000(TRIM62   | protein_co chr1 | 33145402 | 33182059 | - | 3.44   | 3.13   |
| ENSG0000(ASH1L    | protein_co chr1 | 1.55E+08 | 1.56E+08 | - | 9.97   | 10.48  |
| ENSG0000(DLGAP3   | protein_co chr1 | 34865436 | 34929585 | - | 0.06   | 0.02   |
| ENSG0000(SFPQ     | protein_co chr1 | 35176378 | 35193148 | - | 75.06  | 71.57  |
| ENSG0000(RHOU     | protein_co chr1 | 2.29E+08 | 2.29E+08 | + | 1.3    | 1.5    |
| ENSG0000(GON4L    | protein_co chr1 | 1.56E+08 | 1.56E+08 | - | 11.18  | 10.24  |
| ENSG0000(ARHGEF2  | protein_co chr1 | 1.56E+08 | 1.56E+08 | - | 54.21  | 53.66  |
| ENSG0000(LAMTOR2  | protein_co chr1 | 1.56E+08 | 1.56E+08 | + | 37.27  | 38.05  |
| ENSG0000(MEF2D    | protein_co chr1 | 1.56E+08 | 1.57E+08 | - | 14.3   | 12.91  |
| ENSG0000(DOCK7    | protein_co chr1 | 62454298 | 62688368 | - | 24.56  | 23.42  |
| ENSG0000(SRM      | protein_co chr1 | 11054584 | 11060024 | - | 38.44  | 36.28  |

|                   |            |      |          |          |   |        |        |
|-------------------|------------|------|----------|----------|---|--------|--------|
| ENSG0000(DLEU2L   | sense_intr | chr1 | 63547082 | 63550636 | + | 1.47   | 1.42   |
| ENSG0000(FBXO2    | protein_co | chr1 | 11648367 | 11655785 | - | 0.99   | 1.05   |
| ENSG0000(FBXO6    | protein_co | chr1 | 11664124 | 11674354 | + | 2.01   | 2.42   |
| ENSG0000(C1orf21  | protein_co | chr1 | 1.84E+08 | 1.85E+08 | + | 8.72   | 9.77   |
| ENSG0000(SWT1     | protein_co | chr1 | 1.85E+08 | 1.85E+08 | + | 1.77   | 1.95   |
| ENSG0000(MAD2L2   | protein_co | chr1 | 11674480 | 11691650 | - | 15.85  | 15.11  |
| ENSG0000(DNAJC6   | protein_co | chr1 | 65248219 | 65415869 | + | 0.28   | 0.42   |
| ENSG0000(LEPR     | protein_co | chr1 | 65420652 | 65641559 | + | 9.91   | 8.33   |
| ENSG0000(IVNS1ABP | protein_co | chr1 | 1.85E+08 | 1.85E+08 | - | 9.89   | 9.21   |
| ENSG0000(KIAA2013 | protein_co | chr1 | 11919591 | 11926428 | - | 35.23  | 37.18  |
| ENSG0000(MFN2     | protein_co | chr1 | 11980181 | 12013514 | + | 23.11  | 24.86  |
| ENSG0000(PRG4     | protein_co | chr1 | 1.86E+08 | 1.86E+08 | + | 63.06  | 65.58  |
| ENSG0000(MIIP     | protein_co | chr1 | 12019466 | 12032045 | + | 10.17  | 11.79  |
| ENSG0000(SMG7     | protein_co | chr1 | 1.83E+08 | 1.84E+08 | + | 11.25  | 13.8   |
| ENSG0000(NCF2     | protein_co | chr1 | 1.84E+08 | 1.84E+08 | - | 0.25   | 0.93   |
| ENSG0000(PDC      | protein_co | chr1 | 1.86E+08 | 1.86E+08 | - | 0.05   | 0      |
| ENSG0000(SLC35D1  | protein_co | chr1 | 66999332 | 67054099 | - | 2.41   | 2.56   |
| ENSG0000(PLA2G4A  | protein_co | chr1 | 1.87E+08 | 1.87E+08 | + | 5.12   | 5.59   |
| ENSG0000(GADD45A  | protein_co | chr1 | 67685061 | 67688338 | + | 31.25  | 37.77  |
| ENSG0000(PRAMEF1  | protein_co | chr1 | 12791397 | 12796628 | + | 0      | 0      |
| ENSG0000(PRAMEF12 | protein_co | chr1 | 12774841 | 12777906 | + | 0      | 0      |
| ENSG0000(WLS      | protein_co | chr1 | 68098473 | 68233120 | - | 82.95  | 85.32  |
| ENSG0000(PRDM2    | protein_co | chr1 | 13700198 | 13825079 | + | 6.48   | 8.19   |
| ENSG0000(RGS2     | protein_co | chr1 | 1.93E+08 | 1.93E+08 | + | 4.29   | 5      |
| ENSG0000(RPE65    | protein_co | chr1 | 68428822 | 68449959 | - | 0      | 0.02   |
| ENSG0000(TROVE2   | protein_co | chr1 | 1.93E+08 | 1.93E+08 | + | 9.89   | 8.47   |
| ENSG0000(AMPD1    | protein_co | chr1 | 1.15E+08 | 1.15E+08 | - | 0      | 0      |
| ENSG0000(UCHL5    | protein_co | chr1 | 1.93E+08 | 1.93E+08 | - | 9.35   | 10.95  |
| ENSG0000(BCAS2    | protein_co | chr1 | 1.15E+08 | 1.15E+08 | - | 14.92  | 12.57  |
| ENSG0000(SRSF11   | protein_co | chr1 | 70205682 | 70253052 | + | 92.82  | 84.1   |
| ENSG0000(CTH      | protein_co | chr1 | 70411218 | 70439851 | + | 3.23   | 3.4    |
| ENSG0000(AGMAT    | protein_co | chr1 | 15572353 | 15585110 | - | 0.04   | 0.02   |
| ENSG0000(OLFML3   | protein_co | chr1 | 1.14E+08 | 1.14E+08 | + | 144.28 | 156.09 |
| ENSG0000(TNNI3K   | protein_co | chr1 | 74235401 | 74544428 | + | 0.05   | 1.19   |
| ENSG0000(CFHR3    | protein_co | chr1 | 1.97E+08 | 1.97E+08 | + | 0.14   | 0.11   |
| ENSG0000(PLEKHM2  | protein_co | chr1 | 15684332 | 15734769 | + | 36.54  | 37.78  |
| ENSG0000(CRYZ     | protein_co | chr1 | 74705482 | 74733408 | - | 16.86  | 17.36  |
| ENSG0000(PHTF1    | protein_co | chr1 | 1.14E+08 | 1.14E+08 | - | 12.91  | 15.66  |
| ENSG0000(ZBTB17   | protein_co | chr1 | 15941869 | 15976132 | - | 9.09   | 13.78  |
| ENSG0000(CD58     | protein_co | chr1 | 1.17E+08 | 1.17E+08 | - | 13.53  | 12.78  |
| ENSG0000(TFAP2E   | protein_co | chr1 | 35573370 | 35595328 | + | 0.28   | 0.31   |
| ENSG0000(CD2      | protein_co | chr1 | 1.17E+08 | 1.17E+08 | + | 0      | 0      |
| ENSG0000(TTF2     | protein_co | chr1 | 1.17E+08 | 1.17E+08 | + | 3.03   | 5      |
| ENSG0000(NR5A2    | protein_co | chr1 | 2E+08    | 2E+08    | + | 0      | 0      |
| ENSG0000(KIF21B   | protein_co | chr1 | 2.01E+08 | 2.01E+08 | - | 0      | 0.02   |

|                    |                 |          |            |        |        |
|--------------------|-----------------|----------|------------|--------|--------|
| ENSG0000(TMEM9     | protein_co chr1 | 2.01E+08 | 2.01E+08 - | 35     | 35.8   |
| ENSG0000(ADPRHL2   | protein_co chr1 | 36088875 | 36093932 + | 17.13  | 19.18  |
| ENSG0000(MAP7D1    | protein_co chr1 | 36155579 | 36180849 + | 51.83  | 48.32  |
| ENSG0000(WARS2     | protein_co chr1 | 1.19E+08 | 1.19E+08 - | 6.05   | 7.16   |
| ENSG0000(HAO2      | protein_co chr1 | 1.19E+08 | 1.19E+08 + | 0      | 0      |
| ENSG0000(RP11-268J | antisense chr1  | 36323734 | 36329221 + | 4.05   | 3.54   |
| ENSG0000(OSCP1     | protein_co chr1 | 36415827 | 36450451 - | 6.38   | 6.29   |
| ENSG0000(MRPS15    | protein_co chr1 | 36455718 | 36464437 - | 30.78  | 32.01  |
| ENSG0000(EXOC8     | protein_co chr1 | 2.31E+08 | 2.31E+08 - | 3.09   | 2.96   |
| ENSG0000(GNPAT     | protein_co chr1 | 2.31E+08 | 2.31E+08 + | 13.32  | 13.72  |
| ENSG0000(TSNAX     | protein_co chr1 | 2.32E+08 | 2.32E+08 + | 16.32  | 12.82  |
| ENSG0000(C1orf109  | protein_co chr1 | 37681570 | 37692249 - | 11.47  | 10.11  |
| ENSG0000(RRAGC     | protein_co chr1 | 38838198 | 38859823 - | 27.96  | 28.01  |
| ENSG0000(TBCE      | protein_co chr1 | 2.35E+08 | 2.35E+08 + | 7.63   | 6.57   |
| ENSG0000(NID1      | protein_co chr1 | 2.36E+08 | 2.36E+08 - | 118.78 | 123.35 |
| ENSG0000(LGALS8    | protein_co chr1 | 2.37E+08 | 2.37E+08 + | 25.74  | 26.34  |
| ENSG0000(NT5C1A    | protein_co chr1 | 39659121 | 39672038 - | 0      | 0      |
| ENSG0000(HPCAL4    | protein_co chr1 | 39678648 | 39691689 - | 0      | 0      |
| ENSG0000(MTR       | protein_co chr1 | 2.37E+08 | 2.37E+08 + | 10.15  | 9.05   |
| ENSG0000(BMP8B     | protein_co chr1 | 39757182 | 39788861 - | 0      | 0.02   |
| ENSG0000(MYCL      | protein_co chr1 | 39895426 | 39902256 - | 0.37   | 0.22   |
| ENSG0000(SIPA1L2   | protein_co chr1 | 2.32E+08 | 2.33E+08 - | 8.4    | 7.43   |
| ENSG0000(ZP4       | protein_co chr1 | 2.38E+08 | 2.38E+08 - | 0      | 0      |
| ENSG0000(RLF       | protein_co chr1 | 40161373 | 40240921 + | 4.69   | 4.28   |
| ENSG0000(KMO       | protein_co chr1 | 2.42E+08 | 2.42E+08 + | 0      | 0      |
| ENSG0000(ZNF684    | protein_co chr1 | 40531561 | 40548169 + | 1.01   | 1.44   |
| ENSG0000(KCNQ4     | protein_co chr1 | 40784012 | 40840452 + | 0.03   | 0.04   |
| ENSG0000(RIMS3     | protein_co chr1 | 40620679 | 40665657 - | 0.67   | 0.61   |
| ENSG0000(AKT3      | protein_co chr1 | 2.43E+08 | 2.44E+08 - | 16.91  | 17.46  |
| ENSG0000(ETV3      | protein_co chr1 | 1.57E+08 | 1.57E+08 - | 4.14   | 4.42   |
| ENSG0000(ACADM     | protein_co chr1 | 75724347 | 75787575 + | 17.05  | 15.87  |
| ENSG0000(ST6GALNA  | protein_co chr1 | 76867441 | 77065711 + | 0      | 0      |
| ENSG0000(SLAMF1    | protein_co chr1 | 1.61E+08 | 1.61E+08 - | 0      | 0      |
| ENSG0000(CD48      | protein_co chr1 | 1.61E+08 | 1.61E+08 - | 0      | 0      |
| ENSG0000(ADGRL2    | protein_co chr1 | 81306160 | 81992436 + | 14.84  | 15.45  |
| ENSG0000(PADI2     | protein_co chr1 | 17066761 | 17119435 - | 0.04   | 0.08   |
| ENSG0000(SDHB      | protein_co chr1 | 17018722 | 17054170 - | 41.58  | 38.38  |
| ENSG0000(MFAP2     | protein_co chr1 | 16974502 | 16980835 - | 100.14 | 115.15 |
| ENSG0000(RPF1      | protein_co chr1 | 84479259 | 84497790 + | 12.88  | 12.31  |
| ENSG0000(KDM5B     | protein_co chr1 | 2.03E+08 | 2.03E+08 - | 23.38  | 22.02  |
| ENSG0000(UAP1      | protein_co chr1 | 1.63E+08 | 1.63E+08 + | 29.01  | 25.92  |
| ENSG0000(ACTL8     | protein_co chr1 | 17755313 | 17827063 + | 0      | 0      |
| ENSG0000(CTBS      | protein_co chr1 | 84549606 | 84574480 - | 12.54  | 10.39  |
| ENSG0000(RGS4      | protein_co chr1 | 1.63E+08 | 1.63E+08 + | 21.27  | 24.67  |
| ENSG0000(KLHL12    | protein_co chr1 | 2.03E+08 | 2.03E+08 - | 8.5    | 9.45   |



|                   |                  |          |          |   |        |        |
|-------------------|------------------|----------|----------|---|--------|--------|
| ENSG0000(IGSF21   | protein_co chr1  | 18107746 | 18378483 | + | 0      | 0      |
| ENSG0000(SSX2IP   | protein_co chr1  | 84643707 | 84690803 | - | 8.5    | 8.9    |
| ENSG0000(ZNHIT6   | protein_co chr1  | 85649423 | 85708433 | - | 4.81   | 5.15   |
| ENSG0000(PLA2G2D  | protein_co chr1  | 20111939 | 20119566 | - | 0.02   | 0      |
| ENSG0000(RBBP5    | protein_co chr1  | 2.05E+08 | 2.05E+08 | - | 4.43   | 4.28   |
| ENSG0000(GBP3     | protein_co chr1  | 89006666 | 89022894 | - | 9.44   | 12.52  |
| ENSG0000(GBP1     | protein_co chr1  | 89052319 | 89065360 | - | 8.84   | 11.88  |
| ENSG0000(PINK1-AS | antisense chr1   | 20642657 | 20652193 | - | 4.71   | 4.88   |
| ENSG0000(KIF17    | protein_co chr1  | 20664014 | 20718017 | - | 0.56   | 0.63   |
| ENSG0000(GPR89A   | protein_co chr1  | 1.46E+08 | 1.46E+08 | + | 6      | 6.58   |
| ENSG0000(CDK18    | protein_co chr1  | 2.06E+08 | 2.06E+08 | + | 0.54   | 1.03   |
| ENSG0000(RAB29    | protein_co chr1  | 2.06E+08 | 2.06E+08 | - | 19.81  | 21.41  |
| ENSG0000(CD160    | protein_co chr1  | 1.46E+08 | 1.46E+08 | + | 0      | 0      |
| ENSG0000(ECE1     | protein_co chr1  | 21217247 | 21345504 | - | 64.61  | 60.39  |
| ENSG0000(HMGCL    | protein_co chr1  | 23801885 | 23838620 | - | 26.06  | 24.22  |
| ENSG0000(GALE     | protein_co chr1  | 23795599 | 23800804 | - | 3.05   | 4.32   |
| ENSG0000(ID3      | protein_co chr1  | 23557918 | 23559794 | - | 13.81  | 14.61  |
| ENSG0000(CR2      | protein_co chr1  | 2.07E+08 | 2.07E+08 | + | 0      | 0      |
| ENSG0000(CD46     | protein_co chr1  | 2.08E+08 | 2.08E+08 | + | 93.21  | 84.13  |
| ENSG0000(PRPF3    | protein_co chr1  | 1.5E+08  | 1.5E+08  | + | 13.2   | 12.82  |
| ENSG0000(APH1A    | protein_co chr1  | 1.5E+08  | 1.5E+08  | - | 64.13  | 65.96  |
| ENSG0000(P3H1     | protein_co chr1  | 42746335 | 42767084 | - | 63.85  | 59.19  |
| ENSG0000(SLC2A1   | protein_co chr1  | 42925375 | 42959173 | - | 38.96  | 35.73  |
| ENSG0000(EBNA1BP2 | protein_co chr1  | 43164175 | 43270936 | - | 23.91  | 28.45  |
| ENSG0000(CDC20    | protein_co chr1  | 43358955 | 43363203 | + | 0.25   | 0.11   |
| ENSG0000(MPL      | protein_co chr1  | 43337849 | 43352772 | + | 0      | 0.03   |
| ENSG0000(ARTN     | protein_co chr1  | 43933320 | 43937241 | + | 0.04   | 0      |
| ENSG0000(IPO13    | protein_co chr1  | 43946939 | 43968022 | + | 11.06  | 11.1   |
| ENSG0000(ATP6V0B  | protein_co chr1  | 43974487 | 43978295 | + | 46.3   | 45.03  |
| ENSG0000(B4GALT2  | protein_co chr1  | 43978943 | 43991170 | + | 28.5   | 28.95  |
| ENSG0000(ERI3     | protein_co chr1  | 44221070 | 44355260 | - | 22.22  | 23.04  |
| ENSG0000(PTCH2    | protein_co chr1  | 44819844 | 44843063 | - | 0.59   | 1.07   |
| ENSG0000(AKR1A1   | protein_co chr1  | 45550543 | 45570049 | + | 73.72  | 72.84  |
| ENSG0000(PRDX1    | protein_co chr1  | 45511036 | 45523047 | - | 205.86 | 216.54 |
| ENSG0000(PIK3R3   | protein_co chr1  | 46040140 | 46133036 | - | 0.93   | 1.48   |
| ENSG0000(TSPAN1   | protein_co chr1  | 46175073 | 46185958 | + | 0.24   | 0.39   |
| ENSG0000(BLZF1    | protein_co chr1  | 1.69E+08 | 1.69E+08 | + | 7.8    | 8.02   |
| ENSG0000(CCDC181  | protein_co chr1  | 1.69E+08 | 1.69E+08 | - | 0      | 0      |
| ENSG0000(SLC19A2  | protein_co chr1  | 1.69E+08 | 1.69E+08 | - | 2.19   | 1.38   |
| ENSG0000(FAAH     | protein_co chr1  | 46394265 | 46413848 | + | 0.3    | 0.18   |
| ENSG0000(NSUN4    | protein_co chr1  | 46340177 | 46365152 | + | 6.48   | 5.87   |
| ENSG0000(TMED5    | protein_co chr1  | 93149742 | 93180728 | - | 28.09  | 25.36  |
| ENSG0000(MROH9    | protein_co chr1  | 1.71E+08 | 1.71E+08 | + | 0.1    | 0.21   |
| ENSG0000(DR1      | protein_co chr1  | 93345888 | 93369498 | + | 14     | 14     |
| ENSG0000(FMO6P    | transcribec chr1 | 1.71E+08 | 1.71E+08 | + | 0.13   | 0      |

|                   |                  |          |            |        |        |
|-------------------|------------------|----------|------------|--------|--------|
| ENSG0000(CNN3     | protein_co chr1  | 94896949 | 94927278 - | 104.12 | 99.13  |
| ENSG0000(PRRC2C   | protein_co chr1  | 1.71E+08 | 1.72E+08 + | 25.95  | 26.33  |
| ENSG0000(F3       | protein_co chr1  | 94529225 | 94541800 - | 4.15   | 4.08   |
| ENSG0000(ABCD3    | protein_co chr1  | 94418455 | 94518666 + | 10.96  | 10.58  |
| ENSG0000(VAMP4    | protein_co chr1  | 1.72E+08 | 1.72E+08 - | 5.38   | 6      |
| ENSG0000(DPH5     | protein_co chr1  | 1.01E+08 | 1.01E+08 - | 16.8   | 13.7   |
| ENSG0000(FASLG    | protein_co chr1  | 1.73E+08 | 1.73E+08 + | 0      | 0      |
| ENSG0000(PTBP2    | protein_co chr1  | 96721665 | 96823738 + | 3.63   | 4.85   |
| ENSG0000(TNFSF4   | protein_co chr1  | 1.73E+08 | 1.73E+08 - | 0.39   | 0.21   |
| ENSG0000(PRDX6    | protein_co chr1  | 1.73E+08 | 1.73E+08 + | 101.83 | 104.33 |
| ENSG0000(DARS2    | protein_co chr1  | 1.74E+08 | 1.74E+08 + | 4.18   | 3.83   |
| ENSG0000(HSD11B1  | protein_co chr1  | 2.1E+08  | 2.1E+08 +  | 92.6   | 79.64  |
| ENSG0000(IRF6     | protein_co chr1  | 2.1E+08  | 2.1E+08 -  | 0.33   | 0.26   |
| ENSG0000(DIEXF    | protein_co chr1  | 2.1E+08  | 2.1E+08 +  | 3.61   | 3.4    |
| ENSG0000(PLPPR5   | protein_co chr1  | 98890245 | 99005032 - | 0      | 0.02   |
| ENSG0000(PLPPR4   | protein_co chr1  | 99263953 | 99309590 + | 0      | 0      |
| ENSG0000(SERPINC1 | protein_co chr1  | 1.74E+08 | 1.74E+08 - | 0.25   | 0      |
| ENSG0000(RCAN3    | protein_co chr1  | 24502351 | 24541040 + | 1.95   | 2.07   |
| ENSG0000(SYF2     | protein_co chr1  | 25222679 | 25232502 - | 35.45  | 33.43  |
| ENSG0000(RSRP1    | protein_co chr1  | 25242237 | 25338213 - | 40.99  | 41.73  |
| ENSG0000(SLC35A3  | protein_co chr1  | 99969351 | 1E+08 +    | 3.48   | 3.69   |
| ENSG0000(RCOR3    | protein_co chr1  | 2.11E+08 | 2.11E+08 + | 13.04  | 14.94  |
| ENSG0000(STMN1    | protein_co chr1  | 25884181 | 25906991 - | 21.82  | 22.53  |
| ENSG0000(MTFR1L   | protein_co chr1  | 25818640 | 25832942 + | 31.89  | 33     |
| ENSG0000(MAN1C1   | protein_co chr1  | 25617468 | 25786207 + | 8.62   | 9.43   |
| ENSG0000(NEK2     | protein_co chr1  | 2.12E+08 | 2.12E+08 - | 0.11   | 0.1    |
| ENSG0000(RPS6KA1  | protein_co chr1  | 26529761 | 26575030 + | 1.36   | 1.27   |
| ENSG0000(DHDDS    | protein_co chr1  | 26432282 | 26471294 + | 17.69  | 16.17  |
| ENSG0000(NENF     | protein_co chr1  | 2.12E+08 | 2.12E+08 + | 55.14  | 55.89  |
| ENSG0000(NSL1     | protein_co chr1  | 2.13E+08 | 2.13E+08 - | 12.67  | 12.7   |
| ENSG0000(PROX1    | protein_co chr1  | 2.14E+08 | 2.14E+08 + | 0.16   | 0.14   |
| ENSG0000(ARID1A   | protein_co chr1  | 26693236 | 26782104 + | 13.11  | 11.23  |
| ENSG0000(CENPF    | protein_co chr1  | 2.15E+08 | 2.15E+08 + | 0.35   | 0.62   |
| ENSG0000(RPA2     | protein_co chr1  | 27891524 | 27914746 - | 8.56   | 11.43  |
| ENSG0000(PPP1R8   | protein_co chr1  | 27830778 | 27851676 + | 19.34  | 18.81  |
| ENSG0000(STX12    | protein_co chr1  | 27773183 | 27824452 + | 19.9   | 17.17  |
| ENSG0000(2-Mar    | protein_co chr1  | 2.21E+08 | 2.21E+08 + | 5.71   | 5.19   |
| ENSG0000(SLC5A9   | protein_co chr1  | 48222685 | 48248644 + | 0      | 0      |
| ENSG0000(OSBPL9   | protein_co chr1  | 51577179 | 51798427 + | 41.63  | 38.41  |
| ENSG0000(TXNDC12  | protein_co chr1  | 52020131 | 52056171 - | 34.76  | 31.1   |
| ENSG0000(ESYT2    | protein_co chr7  | 1.59E+08 | 1.59E+08 - | 45.68  | 44.94  |
| ENSG0000(CD3EAP   | protein_co chr19 | 45406209 | 45410766 + | 3.25   | 2.74   |
| ENSG0000(MESDC2   | protein_co chr15 | 80946289 | 80989878 - | 14.53  | 16.65  |
| ENSG0000(RCN2     | protein_co chr15 | 76931619 | 76954392 + | 22.82  | 22.99  |
| ENSG0000(CHRNB4   | protein_co chr15 | 78624119 | 78727754 - | 0      | 0      |

|                   |                  |          |            |        |        |
|-------------------|------------------|----------|------------|--------|--------|
| ENSG0000(MUC5B    | protein_co chr11 | 1223066  | 1262172 +  | 0      | 0      |
| ENSG0000(CTSD     | protein_co chr11 | 1752752  | 1764573 -  | 528.08 | 506.52 |
| ENSG0000(COLEC11  | protein_co chr2  | 3594832  | 3644644 +  | 0.24   | 0.23   |
| ENSG0000(STAG1    | protein_co chr3  | 1.36E+08 | 1.37E+08 - | 12.06  | 10.71  |
| ENSG0000(A4GNT    | protein_co chr3  | 1.38E+08 | 1.38E+08 - | 0      | 0      |
| ENSG0000(STK11    | protein_co chr19 | 1177558  | 1228435 +  | 23.26  | 21.47  |
| ENSG0000(KMT2A    | protein_co chr11 | 1.18E+08 | 1.19E+08 + | 9.92   | 11.64  |
| ENSG0000(TREH     | protein_co chr11 | 1.19E+08 | 1.19E+08 - | 0.08   | 0      |
| ENSG0000(IFT46    | protein_co chr11 | 1.19E+08 | 1.19E+08 - | 10.07  | 11.16  |
| ENSG0000(MMP8     | protein_co chr11 | 1.03E+08 | 1.03E+08 - | 0.11   | 0.02   |
| ENSG0000(APOA1    | protein_co chr11 | 1.17E+08 | 1.17E+08 - | 33.76  | 36.36  |
| ENSG0000(ZNF541   | protein_co chr19 | 47520685 | 47555856 - | 0.04   | 0.05   |
| ENSG0000(SLC8A2   | protein_co chr19 | 47428017 | 47472168 - | 0      | 0      |
| ENSG0000(KPTN     | protein_co chr19 | 47475144 | 47484268 - | 3.68   | 4.51   |
| ENSG0000(RPS25    | protein_co chr11 | 1.19E+08 | 1.19E+08 - | 425.5  | 421.84 |
| ENSG0000(KIF14    | protein_co chr1  | 2.01E+08 | 2.01E+08 - | 0.03   | 0.06   |
| ENSG0000(TNNT2    | protein_co chr1  | 2.01E+08 | 2.01E+08 - | 0.14   | 0.14   |
| ENSG0000(DDX59    | protein_co chr1  | 2.01E+08 | 2.01E+08 - | 5.97   | 5.57   |
| ENSG0000(CAMSAP2  | protein_co chr1  | 2.01E+08 | 2.01E+08 + | 15.02  | 14.33  |
| ENSG0000(ATF6     | protein_co chr1  | 1.62E+08 | 1.62E+08 + | 7.8    | 8.39   |
| ENSG0000(CRYGD    | protein_co chr2  | 2.08E+08 | 2.08E+08 - | 0      | 0      |
| ENSG0000(MREG     | protein_co chr2  | 2.16E+08 | 2.16E+08 - | 1.14   | 1.22   |
| ENSG0000(TNP1     | protein_co chr2  | 2.17E+08 | 2.17E+08 - | 0      | 0      |
| ENSG0000(FASTKD2  | protein_co chr2  | 2.07E+08 | 2.07E+08 + | 7.11   | 7.84   |
| ENSG0000(NRP2     | protein_co chr2  | 2.06E+08 | 2.06E+08 + | 16.87  | 14.55  |
| ENSG0000(CREB1    | protein_co chr2  | 2.08E+08 | 2.08E+08 + | 18.74  | 28.3   |
| ENSG0000(KLF7     | protein_co chr2  | 2.07E+08 | 2.07E+08 - | 13.32  | 12.87  |
| ENSG0000(TTR      | protein_co chr18 | 31591726 | 31599021 + | 0      | 0      |
| ENSG0000(B4GALT6  | protein_co chr18 | 31622247 | 31685836 - | 3.01   | 3.36   |
| ENSG0000(C1orf54  | protein_co chr1  | 1.5E+08  | 1.5E+08 +  | 30.94  | 28.84  |
| ENSG0000(CA14     | protein_co chr1  | 1.5E+08  | 1.5E+08 +  | 0.58   | 0.27   |
| ENSG0000(CASC1    | protein_co chr12 | 25108420 | 25195162 - | 0.25   | 0.33   |
| ENSG0000(LRMP     | protein_co chr12 | 25004342 | 25108334 + | 0.3    | 0.12   |
| ENSG0000(ATP10B   | protein_co chr5  | 1.61E+08 | 1.61E+08 - | 0.01   | 0.01   |
| ENSG0000(SPCS2    | protein_co chr11 | 74949247 | 74979031 + | 87.91  | 80.09  |
| ENSG0000(USP35    | protein_co chr11 | 78188812 | 78214711 + | 9.24   | 11.11  |
| ENSG0000(ELOVL4   | protein_co chr6  | 79914812 | 79947580 - | 2.53   | 2.47   |
| ENSG0000(FILIP1   | protein_co chr6  | 75291859 | 75493738 - | 0.14   | 0.11   |
| ENSG0000(CASP8AP2 | protein_co chr6  | 89829894 | 89874436 + | 2.43   | 2.9    |
| ENSG0000(HMGN3    | protein_co chr6  | 79201245 | 79234738 - | 27.3   | 27.02  |
| ENSG0000(UBE3D    | protein_co chr6  | 82892398 | 83065841 - | 1.51   | 2.05   |
| ENSG0000(CNR1     | protein_co chr6  | 88139864 | 88166359 - | 0      | 0      |
| ENSG0000(SPACA1   | protein_co chr6  | 88047789 | 88066832 + | 0      | 0      |
| ENSG0000(ANKRD13C | protein_co chr1  | 70260588 | 70354734 - | 6.86   | 6.22   |
| ENSG0000(SGIP1    | protein_co chr1  | 66533383 | 66748299 + | 1.35   | 0.61   |

|                    |                  |          |          |   |        |        |
|--------------------|------------------|----------|----------|---|--------|--------|
| ENSG0000( PHF3     | protein_co chr6  | 63635820 | 63779336 | + | 15.22  | 15.32  |
| ENSG0000( ZC2HC1B  | protein_co chr6  | 1.44E+08 | 1.44E+08 | + | 0      | 0      |
| ENSG0000( ADGB     | protein_co chr6  | 1.47E+08 | 1.47E+08 | + | 0      | 0      |
| ENSG0000( PLAGL1   | protein_co chr6  | 1.44E+08 | 1.44E+08 | - | 35.45  | 35.82  |
| ENSG0000( FBXO30   | protein_co chr6  | 1.46E+08 | 1.46E+08 | - | 2.78   | 2.6    |
| ENSG0000( TNFAIP3  | protein_co chr6  | 1.38E+08 | 1.38E+08 | + | 20.28  | 17.76  |
| ENSG0000( AKAP7    | protein_co chr6  | 1.31E+08 | 1.31E+08 | + | 5.31   | 2.99   |
| ENSG0000( RAB32    | protein_co chr6  | 1.47E+08 | 1.47E+08 | + | 51.07  | 49.95  |
| ENSG0000( MYB      | protein_co chr6  | 1.35E+08 | 1.35E+08 | + | 0.03   | 0      |
| ENSG0000( ALDH8A1  | protein_co chr6  | 1.35E+08 | 1.35E+08 | - | 0.25   | 0.25   |
| ENSG0000( SGK1     | protein_co chr6  | 1.34E+08 | 1.34E+08 | - | 266.06 | 266.62 |
| ENSG0000( RNF146   | protein_co chr6  | 1.27E+08 | 1.27E+08 | + | 20.01  | 20.06  |
| ENSG0000( ARG1     | protein_co chr6  | 1.32E+08 | 1.32E+08 | + | 0      | 0      |
| ENSG0000( CTGF     | protein_co chr6  | 1.32E+08 | 1.32E+08 | - | 43.01  | 44.45  |
| ENSG0000( TCF21    | protein_co chr6  | 1.34E+08 | 1.34E+08 | + | 13.8   | 12.24  |
| ENSG0000( PMFBP1   | protein_co chr16 | 72112157 | 72176878 | - | 0.03   | 0.08   |
| ENSG0000( FBXL5    | protein_co chr4  | 15604539 | 15681679 | - | 21.47  | 23.89  |
| ENSG0000( MED28    | protein_co chr4  | 17614631 | 17634105 | + | 18.61  | 17.78  |
| ENSG0000( SLC16A7  | protein_co chr12 | 59596067 | 59789855 | + | 3.39   | 3.35   |
| ENSG0000( TMEM5    | protein_co chr12 | 63779803 | 63809558 | + | 6.57   | 7.18   |
| ENSG0000( ZNF430   | protein_co chr19 | 21020620 | 21060050 | + | 1.68   | 1.05   |
| ENSG0000( VAMP8    | protein_co chr2  | 85561562 | 85582031 | + | 2.74   | 3.55   |
| ENSG0000( DCLRE1B  | protein_co chr1  | 1.14E+08 | 1.14E+08 | + | 1.9    | 2.2    |
| ENSG0000( MYL12B   | protein_co chr18 | 3261909  | 3278284  | + | 253.41 | 243.81 |
| ENSG0000( FOXO3    | protein_co chr6  | 1.09E+08 | 1.09E+08 | + | 15.97  | 16.41  |
| ENSG0000( ARMC2    | protein_co chr6  | 1.09E+08 | 1.09E+08 | + | 2.07   | 1.13   |
| ENSG0000( GHRH     | protein_co chr20 | 37251082 | 37261835 | - | 0      | 0      |
| ENSG0000( RPN2     | protein_co chr20 | 37178410 | 37241623 | + | 235.47 | 230.9  |
| ENSG0000( TGIF2    | protein_co chr20 | 36573488 | 36593950 | + | 4.12   | 4.64   |
| ENSG0000( CASQ2    | protein_co chr1  | 1.16E+08 | 1.16E+08 | - | 0      | 0      |
| ENSG0000( OLFM3    | protein_co chr1  | 1.02E+08 | 1.02E+08 | - | 0      | 0      |
| ENSG0000( PKD2     | protein_co chr4  | 88007668 | 88077777 | + | 28.1   | 25.24  |
| ENSG0000( ABCG2    | protein_co chr4  | 88090264 | 88231322 | - | 0.1    | 0.09   |
| ENSG0000( SPP1     | protein_co chr4  | 87975650 | 87983426 | + | 0.39   | 0.25   |
| ENSG0000( STBD1    | protein_co chr4  | 76306026 | 76311599 | + | 1.62   | 1.21   |
| ENSG0000( CCNI     | protein_co chr4  | 77047158 | 77076005 | - | 109.36 | 122.51 |
| ENSG0000( RARRES1  | protein_co chr3  | 1.59E+08 | 1.59E+08 | - | 92.85  | 74.59  |
| ENSG0000( MFSD1    | protein_co chr3  | 1.59E+08 | 1.59E+08 | + | 66.52  | 57.74  |
| ENSG0000( RAB3GAP2 | protein_co chr1  | 2.2E+08  | 2.2E+08  | - | 8.51   | 10.48  |
| ENSG0000( EEF2KMT  | protein_co chr16 | 5084304  | 5097808  | - | 4.31   | 5.88   |
| ENSG0000( PPL      | protein_co chr16 | 4882507  | 4960741  | - | 11.28  | 10.73  |
| ENSG0000( UBN1     | protein_co chr16 | 4846665  | 4882360  | + | 24.92  | 23.52  |
| ENSG0000( BTF3P11  | processed_chr13  | 76928066 | 76928836 | + | 0      | 0      |
| ENSG0000( KLF12    | protein_co chr13 | 73686089 | 73995056 | - | 5.11   | 5.23   |
| ENSG0000( UCHL3    | protein_co chr13 | 75549480 | 75606020 | + | 14.5   | 16.2   |

|                    |                  |          |            |       |       |
|--------------------|------------------|----------|------------|-------|-------|
| ENSG0000( PCDH17   | protein_co chr13 | 57631810 | 57729311 + | 0     | 0.01  |
| ENSG0000( HS1BP3   | protein_co chr2  | 20560448 | 20651089 - | 19.75 | 21.32 |
| ENSG0000( LDAH     | protein_co chr2  | 20684014 | 20823130 - | 8.16  | 7.83  |
| ENSG0000( WDR35    | protein_co chr2  | 19910260 | 19990131 - | 3.26  | 3.55  |
| ENSG0000( CCND2    | protein_co chr12 | 4273772  | 4305350 +  | 0.63  | 0.66  |
| ENSG0000( FGF23    | protein_co chr12 | 4368227  | 4379728 -  | 0     | 0     |
| ENSG0000( OTUD4P1  | processed_chr12  | 3839459  | 3842525 +  | 0     | 0     |
| ENSG0000( ELL2     | protein_co chr5  | 95885098 | 95962071 - | 11.33 | 8.96  |
| ENSG0000( GLRXP3   | processed_chr5   | 1.62E+08 | 1.62E+08 - | 0     | 0     |
| ENSG0000( DNAH7    | protein_co chr2  | 1.96E+08 | 1.96E+08 - | 0.4   | 0.95  |
| ENSG0000( CYP20A1  | protein_co chr2  | 2.03E+08 | 2.03E+08 + | 5.44  | 7.76  |
| ENSG0000( NDUFB3   | protein_co chr2  | 2.01E+08 | 2.01E+08 + | 34.98 | 31.15 |
| ENSG0000( GTF3C3   | protein_co chr2  | 1.97E+08 | 1.97E+08 - | 10.39 | 15.92 |
| ENSG0000( SATB2    | protein_co chr2  | 1.99E+08 | 1.99E+08 - | 2.24  | 1.57  |
| ENSG0000( UBE2B    | protein_co chr5  | 1.34E+08 | 1.34E+08 + | 49.14 | 47.25 |
| ENSG0000( TRPM6    | protein_co chr9  | 74722495 | 74888094 - | 0.18  | 0.09  |
| ENSG0000( GDA      | protein_co chr9  | 72114595 | 72257193 + | 0     | 0     |
| ENSG0000( KLF9     | protein_co chr9  | 70384597 | 70414624 - | 11.45 | 10.35 |
| ENSG0000( TJP2     | protein_co chr9  | 69121264 | 69255208 + | 24.64 | 23.88 |
| ENSG0000( C2orf40  | protein_co chr2  | 1.06E+08 | 1.06E+08 + | 0     | 0     |
| ENSG0000( ITGB1BP1 | protein_co chr2  | 9403475  | 9423547 -  | 59.16 | 59.64 |
| ENSG0000( CPSF3    | protein_co chr2  | 9423568  | 9473101 +  | 9.62  | 11.9  |
| ENSG0000( PIGZ     | protein_co chr3  | 1.97E+08 | 1.97E+08 - | 6.47  | 6.7   |
| ENSG0000( SENP5    | protein_co chr3  | 1.97E+08 | 1.97E+08 + | 5.24  | 6.11  |
| ENSG0000( CCDC92   | protein_co chr12 | 1.24E+08 | 1.24E+08 - | 26.81 | 26.74 |
| ENSG0000( C1orf198 | protein_co chr1  | 2.31E+08 | 2.31E+08 - | 37.44 | 37.98 |
| ENSG0000( TRIM67   | protein_co chr1  | 2.31E+08 | 2.31E+08 + | 0     | 0     |
| ENSG0000( HEATR1   | protein_co chr1  | 2.37E+08 | 2.37E+08 - | 6.15  | 6.34  |
| ENSG0000( PTBP3    | protein_co chr9  | 1.12E+08 | 1.12E+08 - | 7.76  | 7.66  |
| ENSG0000( RAD23B   | protein_co chr9  | 1.07E+08 | 1.07E+08 + | 68.74 | 67.75 |
| ENSG0000( FKBP15   | protein_co chr9  | 1.13E+08 | 1.13E+08 - | 14.74 | 14.77 |
| ENSG0000( CTNNAL1  | protein_co chr9  | 1.09E+08 | 1.09E+08 - | 22.02 | 22.71 |
| ENSG0000( FAM206A  | protein_co chr9  | 1.09E+08 | 1.09E+08 + | 7.04  | 9.08  |
| ENSG0000( WDR34    | protein_co chr9  | 1.29E+08 | 1.29E+08 - | 14.59 | 15.58 |
| ENSG0000( SET      | protein_co chr9  | 1.29E+08 | 1.29E+08 + | 79.86 | 73.57 |
| ENSG0000( PTPA     | protein_co chr9  | 1.29E+08 | 1.29E+08 + | 74.63 | 68.18 |
| ENSG0000( GLE1     | protein_co chr9  | 1.29E+08 | 1.29E+08 + | 10.1  | 9.37  |
| ENSG0000( RAB14    | protein_co chr9  | 1.21E+08 | 1.21E+08 - | 20.76 | 20.42 |
| ENSG0000( CNTRL    | protein_co chr9  | 1.21E+08 | 1.21E+08 + | 2.02  | 3.02  |
| ENSG0000( TRIM32   | protein_co chr9  | 1.17E+08 | 1.17E+08 + | 8.95  | 9.95  |
| ENSG0000( FBXW2    | protein_co chr9  | 1.21E+08 | 1.21E+08 - | 23.7  | 23.78 |
| ENSG0000( PHF19    | protein_co chr9  | 1.21E+08 | 1.21E+08 - | 11.43 | 11.02 |
| ENSG0000( NEK6     | protein_co chr9  | 1.24E+08 | 1.24E+08 + | 38.91 | 32.97 |
| ENSG0000( BSPRY    | protein_co chr9  | 1.13E+08 | 1.13E+08 + | 0     | 0     |
| ENSG0000( PPP6C    | protein_co chr9  | 1.25E+08 | 1.25E+08 - | 16.78 | 15.83 |

|                    |                  |          |            |        |        |
|--------------------|------------------|----------|------------|--------|--------|
| ENSG0000( NDUFA8   | protein_co chr9  | 1.22E+08 | 1.22E+08 - | 29.92  | 30.29  |
| ENSG0000( HDHD3    | protein_co chr9  | 1.13E+08 | 1.13E+08 - | 7.9    | 8.14   |
| ENSG0000( LCN1P1   | unprocessε chr9  | 1.33E+08 | 1.33E+08 - | 0      | 0      |
| ENSG0000( RBM18    | protein_co chr9  | 1.22E+08 | 1.22E+08 - | 10.04  | 7.54   |
| ENSG0000( SLC46A2  | protein_co chr9  | 1.13E+08 | 1.13E+08 - | 0      | 0      |
| ENSG0000( HSDL2    | protein_co chr9  | 1.12E+08 | 1.12E+08 + | 10.4   | 10.33  |
| ENSG0000( MAPKAP1  | protein_co chr9  | 1.25E+08 | 1.26E+08 - | 32.29  | 41.35  |
| ENSG0000( NR4A3    | protein_co chr9  | 99821855 | 99866891 + | 0.1    | 0.29   |
| ENSG0000( INVS     | protein_co chr9  | 1E+08    | 1E+08 +    | 5.86   | 5.07   |
| ENSG0000( GALNT12  | protein_co chr9  | 98807699 | 98850081 + | 7.49   | 6.72   |
| ENSG0000( DENND1A  | protein_co chr9  | 1.23E+08 | 1.24E+08 - | 8.09   | 7.26   |
| ENSG0000( ALG2     | protein_co chr9  | 99216426 | 99221956 - | 15.58  | 17.78  |
| ENSG0000( CSF3R    | protein_co chr1  | 36466043 | 36483278 - | 0.05   | 0.04   |
| ENSG0000( KDSR     | protein_co chr18 | 63327726 | 63367510 - | 48.26  | 41.3   |
| ENSG0000( VPS4B    | protein_co chr18 | 63389190 | 63422483 - | 15.83  | 16.73  |
| ENSG0000( ONECUT2  | protein_co chr18 | 57435685 | 57491297 + | 0      | 0.01   |
| ENSG0000( C19orf25 | protein_co chr19 | 1461143  | 1479556 -  | 18.45  | 19.37  |
| ENSG0000( ZBTB45   | protein_co chr19 | 58513530 | 58538911 - | 5.52   | 5.74   |
| ENSG0000( YLPM1    | protein_co chr14 | 74763366 | 74859435 + | 15.91  | 15.65  |
| ENSG0000( DCAF4    | protein_co chr14 | 72926332 | 72959703 + | 5.53   | 6.44   |
| ENSG0000( PROX2    | protein_co chr14 | 74852871 | 74871940 - | 0      | 0      |
| ENSG0000( VSX2     | protein_co chr14 | 74239472 | 74262738 + | 0      | 0      |
| ENSG0000( FCF1     | protein_co chr14 | 74713144 | 74738620 + | 18.29  | 18.89  |
| ENSG0000( PGF      | protein_co chr14 | 74941834 | 74955784 - | 0.87   | 1.09   |
| ENSG0000( IFI27L2  | protein_co chr14 | 94127779 | 94130253 - | 109.74 | 113.03 |
| ENSG0000( BBOF1    | protein_co chr14 | 74019353 | 74082863 + | 5.73   | 6.12   |
| ENSG0000( NEK9     | protein_co chr14 | 75079353 | 75127344 - | 32.21  | 32.59  |
| ENSG0000( ACYP1    | protein_co chr14 | 75053221 | 75069483 - | 4.59   | 4      |
| ENSG0000( IFT43    | protein_co chr14 | 75902136 | 76084585 + | 18.07  | 19.51  |
| ENSG0000( NPC2     | protein_co chr14 | 74476192 | 74494177 - | 407.62 | 417.89 |
| ENSG0000( DPPA5P4  | processed_ chr14 | 75292131 | 75292495 - | 0      | 0      |
| ENSG0000( DNAL1    | protein_co chr14 | 73644875 | 73703732 + | 4.69   | 4.1    |
| ENSG0000( IRF2BPL  | protein_co chr14 | 77024543 | 77028699 - | 14.27  | 15.28  |
| ENSG0000( ACOT2    | protein_co chr14 | 73567620 | 73575658 + | 15.49  | 16.74  |
| ENSG0000( LTBP2    | protein_co chr14 | 74498170 | 74612378 - | 104.52 | 99.95  |
| ENSG0000( AREL1    | protein_co chr14 | 74653437 | 74713115 - | 11.57  | 11.76  |
| ENSG0000( MLH3     | protein_co chr14 | 75013764 | 75051532 - | 6.92   | 6.21   |
| ENSG0000( TTL5     | protein_co chr14 | 75633625 | 75955078 + | 6.22   | 8.57   |
| ENSG0000( FLVCR2   | protein_co chr14 | 75578617 | 75663214 + | 0.42   | 0.56   |
| ENSG0000( ABCD4    | protein_co chr14 | 74285423 | 74303056 - | 24.25  | 20.16  |
| ENSG0000( DLST     | protein_co chr14 | 74881891 | 74903745 + | 47.01  | 50.01  |
| ENSG0000( PPP4R4   | protein_co chr14 | 94146128 | 94279735 + | 2.93   | 1.87   |
| ENSG0000( TGFB3    | protein_co chr14 | 75958099 | 75982991 - | 9.75   | 8.77   |
| ENSG0000( ZC2HC1C  | protein_co chr14 | 75064170 | 75079987 + | 1.47   | 1.04   |
| ENSG0000( SLIRP    | protein_co chr14 | 77708071 | 77761104 + | 56.65  | 65.14  |

|                   |                  |          |          |   |       |       |
|-------------------|------------------|----------|----------|---|-------|-------|
| ENSG0000(RBM25    | protein_co chr14 | 73058436 | 73123898 | + | 22.66 | 25.87 |
| ENSG0000(ALDH6A1  | protein_co chr14 | 74056850 | 74084493 | - | 6.42  | 5.76  |
| ENSG0000(GPR68    | protein_co chr14 | 91232532 | 91253925 | - | 1.6   | 1.5   |
| ENSG0000(ESRRB    | protein_co chr14 | 76310614 | 76501841 | + | 0     | 0     |
| ENSG0000(EIF2B2   | protein_co chr14 | 75002911 | 75012366 | + | 11.68 | 13.69 |
| ENSG0000(NRDE2    | protein_co chr14 | 90267856 | 90332137 | - | 4.73  | 4.77  |
| ENSG0000(COQ6     | protein_co chr14 | 73949926 | 73963670 | + | 10.49 | 11.74 |
| ENSG0000(ZNF410   | protein_co chr14 | 73886617 | 73932511 | + | 20.56 | 20.23 |
| ENSG0000(RHOQ     | protein_co chr2  | 46541806 | 46583121 | + | 74.3  | 65.14 |
| ENSG0000(GPR75    | protein_co chr2  | 53852913 | 53859989 | - | 0.13  | 0.14  |
| ENSG0000(SUPT7L   | protein_co chr2  | 27650812 | 27663840 | - | 13.92 | 13.24 |
| ENSG0000(KLHL29   | protein_co chr2  | 23385217 | 23708611 | + | 1.48  | 1.54  |
| ENSG0000(DNMT3A   | protein_co chr2  | 25227855 | 25342590 | - | 3.95  | 5.67  |
| ENSG0000(TMEM214  | protein_co chr2  | 27032910 | 27041695 | + | 36.24 | 33.46 |
| ENSG0000(ATAD2B   | protein_co chr2  | 23748664 | 23927114 | - | 2.13  | 2.78  |
| ENSG0000(FKBP1B   | protein_co chr2  | 24049701 | 24063681 | + | 8.22  | 8.59  |
| ENSG0000(ATL2     | protein_co chr2  | 38294880 | 38377285 | - | 9.08  | 14.33 |
| ENSG0000(YPEL5    | protein_co chr2  | 30146941 | 30160533 | + | 55.16 | 56.37 |
| ENSG0000(FAM98A   | protein_co chr2  | 33583658 | 33599382 | - | 17.6  | 16.94 |
| ENSG0000(YIPF4    | protein_co chr2  | 32277910 | 32316594 | + | 19.99 | 20.16 |
| ENSG0000(AFTPH    | protein_co chr2  | 64524305 | 64593005 | + | 7.16  | 7.62  |
| ENSG0000(LGALS1   | protein_co chr2  | 64453969 | 64461381 | + | 2.75  | 1.85  |
| ENSG0000(CNRIP1   | protein_co chr2  | 68284171 | 68320051 | - | 13.87 | 16.03 |
| ENSG0000(BCL11A   | protein_co chr2  | 60451167 | 60553567 | - | 0     | 0     |
| ENSG0000(CRIPT    | protein_co chr2  | 46616416 | 46625742 | + | 6.75  | 7.24  |
| ENSG0000(EPCAM    | protein_co chr2  | 47345158 | 47387601 | + | 0     | 0     |
| ENSG0000(SLC17A5  | protein_co chr6  | 73593379 | 73654155 | - | 10.46 | 11.63 |
| ENSG0000(OGFRL1   | protein_co chr6  | 71288803 | 71308950 | + | 5.34  | 5.25  |
| ENSG0000(SLF2     | protein_co chr10 | 1.01E+08 | 1.01E+08 | + | 7.68  | 7.59  |
| ENSG0000(IDE      | protein_co chr10 | 92451684 | 92574076 | - | 9.56  | 11.07 |
| ENSG0000(TECTB    | protein_co chr10 | 1.12E+08 | 1.12E+08 | + | 0     | 0     |
| ENSG0000(ELOVL3   | protein_co chr10 | 1.02E+08 | 1.02E+08 | + | 1.44  | 1.02  |
| ENSG0000(IFIT3    | protein_co chr10 | 89327894 | 89340971 | + | 11.98 | 11.85 |
| ENSG0000(NKX2-3   | protein_co chr10 | 99532933 | 99536524 | + | 0     | 0     |
| ENSG0000(IFIT2    | protein_co chr10 | 89283694 | 89309276 | + | 3.22  | 3.63  |
| ENSG0000(GPAM     | protein_co chr10 | 1.12E+08 | 1.12E+08 | - | 2.52  | 2.31  |
| ENSG0000(CUTC     | protein_co chr10 | 99702558 | 99756134 | + | 9.49  | 7.9   |
| ENSG0000(PPP1R3C  | protein_co chr10 | 91628442 | 91633054 | - | 25.35 | 25.48 |
| ENSG0000(PYROXD2  | protein_co chr10 | 98383565 | 98415184 | - | 6.36  | 8.03  |
| ENSG0000(CNNM1    | protein_co chr10 | 99329099 | 99394330 | + | 0     | 0     |
| ENSG0000(MX1      | protein_co chr10 | 1.1E+08  | 1.1E+08  | + | 44.22 | 40.8  |
| ENSG0000(SMNDC1   | protein_co chr10 | 1.1E+08  | 1.1E+08  | - | 12.74 | 13.45 |
| ENSG0000(C10orf88 | protein_co chr10 | 1.23E+08 | 1.23E+08 | - | 3.63  | 3.05  |
| ENSG0000(HELLS    | protein_co chr10 | 94501434 | 94613905 | + | 0.54  | 0.48  |
| ENSG0000(PRLHR    | protein_co chr10 | 1.19E+08 | 1.19E+08 | - | 0.01  | 0.01  |

|                   |                  |          |            |       |       |
|-------------------|------------------|----------|------------|-------|-------|
| ENSG0000(TCTN3    | protein_co chr10 | 95663396 | 95694143 - | 17.24 | 16.87 |
| ENSG0000(FAM45A   | protein_co chr10 | 1.19E+08 | 1.19E+08 + | 39.59 | 41.41 |
| ENSG0000(AVPI1    | protein_co chr10 | 97677424 | 97687323 - | 45.07 | 42.94 |
| ENSG0000(WDR11    | protein_co chr10 | 1.21E+08 | 1.21E+08 + | 19.68 | 20.34 |
| ENSG0000(C10orf76 | protein_co chr10 | 1.02E+08 | 1.02E+08 - | 7.2   | 7.82  |
| ENSG0000(KCNIP2   | protein_co chr10 | 1.02E+08 | 1.02E+08 - | 0.79  | 0.38  |
| ENSG0000(CFAP58   | protein_co chr10 | 1.04E+08 | 1.04E+08 + | 0.36  | 0.47  |
| ENSG0000(GOT1     | protein_co chr10 | 99396870 | 99430624 - | 16.32 | 17.16 |
| ENSG0000(CPN1     | protein_co chr10 | 1E+08    | 1E+08 -    | 0     | 0     |
| ENSG0000(C10orf95 | protein_co chr10 | 1.02E+08 | 1.02E+08 - | 0     | 0.04  |
| ENSG0000(SFRP5    | protein_co chr10 | 97766751 | 97771952 - | 0     | 0     |
| ENSG0000(GNA13    | protein_co chr17 | 65010715 | 65056839 - | 8.54  | 8.88  |
| ENSG0000(HOXB8    | protein_co chr17 | 48611377 | 48614939 - | 0     | 0     |
| ENSG0000(KANSL1   | protein_co chr17 | 46029916 | 46225389 - | 13.26 | 13.25 |
| ENSG0000(HOXB5    | protein_co chr17 | 48591257 | 48593961 - | 0.05  | 0.06  |
| ENSG0000(CRHR1    | protein_co chr17 | 45784280 | 45835828 + | 0     | 0     |
| ENSG0000(HOXB3    | protein_co chr17 | 48548870 | 48604912 - | 0.75  | 1.16  |
| ENSG0000(HOXB1    | protein_co chr17 | 48528526 | 48530997 - | 0     | 0     |
| ENSG0000(DUSP1    | protein_co chr5  | 1.73E+08 | 1.73E+08 - | 5.76  | 5.55  |
| ENSG0000(PANK3    | protein_co chr5  | 1.69E+08 | 1.69E+08 - | 12.5  | 10.52 |
| ENSG0000(MSX2     | protein_co chr5  | 1.75E+08 | 1.75E+08 + | 0.9   | 1.34  |
| ENSG0000(TEK      | protein_co chr9  | 27109141 | 27230175 + | 16.18 | 17.49 |
| ENSG0000(RCL1     | protein_co chr9  | 4792869  | 4885917 +  | 3.36  | 2.92  |
| ENSG0000(CAAP1    | protein_co chr9  | 26840685 | 26892804 - | 5.57  | 7.58  |
| ENSG0000(EQTN     | protein_co chr9  | 27284659 | 27297139 - | 0     | 0     |
| ENSG0000(MOB3B    | protein_co chr9  | 27325209 | 27529781 - | 0.09  | 0.02  |
| ENSG0000(INSL6    | protein_co chr9  | 5131979  | 5185668 -  | 0     | 0.19  |
| ENSG0000(INSL4    | protein_co chr9  | 5231419  | 5235304 +  | 0     | 0     |
| ENSG0000(MLANA    | protein_co chr9  | 5890802  | 5910606 +  | 0.18  | 0.13  |
| ENSG0000(CD274    | protein_co chr9  | 5450503  | 5470566 +  | 1.5   | 2.37  |
| ENSG0000(IFNA6    | protein_co chr9  | 21349835 | 21351378 - | 0     | 0     |
| ENSG0000(IFNA8    | protein_co chr9  | 21409147 | 21410185 + | 0     | 0     |
| ENSG0000(GRIA2    | protein_co chr4  | 1.57E+08 | 1.57E+08 + | 0     | 0     |
| ENSG0000(NUP43    | protein_co chr6  | 1.5E+08  | 1.5E+08 -  | 5.74  | 5.71  |
| ENSG0000(MTHFD1L  | protein_co chr6  | 1.51E+08 | 1.51E+08 + | 29.17 | 27.77 |
| ENSG0000(LRP11    | protein_co chr6  | 1.5E+08  | 1.5E+08 -  | 17.41 | 16.35 |
| ENSG0000(CCDC170  | protein_co chr6  | 1.51E+08 | 1.52E+08 + | 0.88  | 1.35  |
| ENSG0000(PCMT1    | protein_co chr6  | 1.5E+08  | 1.5E+08 +  | 27.31 | 28.55 |
| ENSG0000(PLEKHG1  | protein_co chr6  | 1.51E+08 | 1.51E+08 + | 1.53  | 1.76  |
| ENSG0000(MYCT1    | protein_co chr6  | 1.53E+08 | 1.53E+08 + | 7.36  | 7.14  |
| ENSG0000(CXorf21  | protein_co chrX  | 30558824 | 30577844 - | 0     | 0     |
| ENSG0000(MAGEB4   | protein_co chrX  | 30242052 | 30244193 + | 0     | 0     |
| ENSG0000(CYSTM1   | protein_co chr5  | 1.4E+08  | 1.4E+08 +  | 38.36 | 35.61 |
| ENSG0000(WDR55    | protein_co chr5  | 1.41E+08 | 1.41E+08 + | 7.66  | 7.72  |
| ENSG0000(ARAP3    | protein_co chr5  | 1.42E+08 | 1.42E+08 - | 7.26  | 7.52  |



|                     |                   |          |            |       |       |
|---------------------|-------------------|----------|------------|-------|-------|
| ENSG0000( PCDHB8    | protein_co chr5   | 1.41E+08 | 1.41E+08 + | 0.37  | 0.5   |
| ENSG0000( PCDHB10   | protein_co chr5   | 1.41E+08 | 1.41E+08 + | 0.85  | 1.05  |
| ENSG0000( PCDHB14   | protein_co chr5   | 1.41E+08 | 1.41E+08 + | 1.69  | 1.77  |
| ENSG0000( PCDHB12   | protein_co chr5   | 1.41E+08 | 1.41E+08 + | 0.36  | 0.31  |
| ENSG0000( SLC25A2   | protein_co chr5   | 1.41E+08 | 1.41E+08 - | 0     | 0     |
| ENSG0000( TNN       | protein_co chr1   | 1.75E+08 | 1.75E+08 + | 0.01  | 0     |
| ENSG0000( MRPS14    | protein_co chr1   | 1.75E+08 | 1.75E+08 - | 10.86 | 10.59 |
| ENSG0000( CENPL     | protein_co chr1   | 1.74E+08 | 1.74E+08 - | 2.19  | 2.25  |
| ENSG0000( TNFSF18   | protein_co chr1   | 1.73E+08 | 1.73E+08 - | 0     | 0     |
| ENSG0000( SEC16B    | protein_co chr1   | 1.78E+08 | 1.78E+08 - | 1.68  | 1.82  |
| ENSG0000( GORAB     | protein_co chr1   | 1.71E+08 | 1.71E+08 + | 9.4   | 8.26  |
| ENSG0000( GPR31     | protein_co chr6   | 1.67E+08 | 1.67E+08 - | 0     | 0     |
| ENSG0000( ACAT2     | protein_co chr6   | 1.6E+08  | 1.6E+08 +  | 14.7  | 13.82 |
| ENSG0000( TCP1      | protein_co chr6   | 1.6E+08  | 1.6E+08 -  | 81.24 | 85.02 |
| ENSG0000( TTL2      | protein_co chr6   | 1.67E+08 | 1.67E+08 + | 0     | 0     |
| ENSG0000( SNX19     | protein_co chr11  | 1.31E+08 | 1.31E+08 - | 27.88 | 25.2  |
| ENSG0000( KCNJ5     | protein_co chr11  | 1.29E+08 | 1.29E+08 + | 0.04  | 0.06  |
| ENSG0000( MSANTD2   | protein_co chr11  | 1.25E+08 | 1.25E+08 - | 3.36  | 3.48  |
| ENSG0000( TP53AIP1  | protein_co chr11  | 1.29E+08 | 1.29E+08 - | 0.02  | 0     |
| ENSG0000( TEX11     | protein_co chrX   | 70528940 | 70908731 - | 0.02  | 0     |
| ENSG0000( ARR3      | protein_co chrX   | 70268305 | 70281840 + | 0     | 0     |
| ENSG0000( PDZD11    | protein_co chrX   | 70286595 | 70290514 - | 20.79 | 24.53 |
| ENSG0000( SLC10A7   | protein_co chr4   | 1.46E+08 | 1.47E+08 - | 2.33  | 4.71  |
| ENSG0000( NUDCD1    | protein_co chr8   | 1.09E+08 | 1.09E+08 - | 4.1   | 4.28  |
| ENSG0000( ENY2      | protein_co chr8   | 1.09E+08 | 1.09E+08 + | 48.09 | 37.4  |
| ENSG0000( MASTL     | protein_co chr10  | 27154824 | 27186924 + | 2.87  | 2.65  |
| ENSG0000( KIAA1217  | protein_co chr10  | 23694746 | 24547848 + | 0.86  | 0.84  |
| ENSG0000( SEPT7P9   | transcribec chr10 | 38383069 | 38402916 - | 0.09  | 0     |
| ENSG0000( LYZL1     | protein_co chr10  | 29289061 | 29318328 + | 0     | 0     |
| ENSG0000( PLXDC2    | protein_co chr10  | 19816239 | 20289856 + | 2.39  | 4.07  |
| ENSG0000( EPC1      | protein_co chr10  | 32267751 | 32378798 - | 10.83 | 9.78  |
| ENSG0000( IQSEC3    | protein_co chr12  | 66765    | 178460 +   | 0.14  | 0.04  |
| ENSG0000( CCDC77    | protein_co chr12  | 389273   | 442645 +   | 2.93  | 2.77  |
| ENSG0000( TAF12     | protein_co chr1   | 28589323 | 28643085 - | 14.55 | 16.57 |
| ENSG0000( ENOX1     | protein_co chr13  | 43213518 | 43786908 - | 14.41 | 11.58 |
| ENSG0000( TNFSF11   | protein_co chr13  | 42562736 | 42608013 + | 0     | 0.06  |
| ENSG0000( MTRF1     | protein_co chr13  | 41216369 | 41263577 - | 6.59  | 4.06  |
| ENSG0000( SPG20-AS1 | antisense chr13   | 36346431 | 36369601 + | 3.72  | 2.7   |
| ENSG0000( SOHLH2    | protein_co chr13  | 36168208 | 36214615 - | 0.06  | 0     |
| ENSG0000( DNAJC15   | protein_co chr13  | 43023203 | 43114224 + | 9.32  | 11.18 |
| ENSG0000( PROSER1   | protein_co chr13  | 39009866 | 39038076 - | 6.06  | 8.83  |
| ENSG0000( UFM1      | protein_co chr13  | 38349849 | 38363619 + | 21.01 | 21.08 |
| ENSG0000( WBP4      | protein_co chr13  | 41061274 | 41084006 + | 5.41  | 5.29  |
| ENSG0000( ELF1      | protein_co chr13  | 40932028 | 41061440 - | 24.2  | 21.88 |
| ENSG0000( SMAD9     | protein_co chr13  | 36844831 | 36920765 - | 3.08  | 2.81  |

|                    |                  |          |          |   |         |         |
|--------------------|------------------|----------|----------|---|---------|---------|
| ENSG0000(HSPH1     | protein_co chr13 | 31134974 | 31162388 | - | 14.07   | 14.61   |
| ENSG0000(KBTBD7    | protein_co chr13 | 41189833 | 41194566 | - | 1.51    | 1.74    |
| ENSG0000(ALG5      | protein_co chr13 | 36949775 | 37000261 | - | 22.34   | 21.14   |
| ENSG0000(EXOSC8    | protein_co chr13 | 36998816 | 37009613 | + | 9.61    | 10.96   |
| ENSG0000(ETF1      | protein_co chr5  | 1.39E+08 | 1.39E+08 | - | 33.55   | 31.11   |
| ENSG0000(TGFBI     | protein_co chr5  | 1.36E+08 | 1.36E+08 | + | 1914.63 | 1782.12 |
| ENSG0000(FAM53C    | protein_co chr5  | 1.38E+08 | 1.38E+08 | + | 17.89   | 16.27   |
| ENSG0000(SIL1      | protein_co chr5  | 1.39E+08 | 1.39E+08 | - | 57.73   | 51.92   |
| ENSG0000(PAIP2     | protein_co chr5  | 1.39E+08 | 1.39E+08 | + | 35.98   | 32.84   |
| ENSG0000(MYOT      | protein_co chr5  | 1.38E+08 | 1.38E+08 | + | 0       | 0       |
| ENSG0000(KDM3B     | protein_co chr5  | 1.38E+08 | 1.38E+08 | + | 15.46   | 14.24   |
| ENSG0000(EGR1      | protein_co chr5  | 1.38E+08 | 1.38E+08 | + | 7.32    | 9.91    |
| ENSG0000(SERP1     | protein_co chr3  | 1.51E+08 | 1.51E+08 | - | 43.58   | 50.37   |
| ENSG0000(PLS1      | protein_co chr3  | 1.43E+08 | 1.43E+08 | + | 0.41    | 0.43    |
| ENSG0000(ZFP30     | protein_co chr19 | 37613749 | 37692337 | - | 2.82    | 3.73    |
| ENSG0000(NR2C1     | protein_co chr12 | 95020229 | 95073703 | - | 12.33   | 12.02   |
| ENSG0000(UTP20     | protein_co chr12 | 1.01E+08 | 1.01E+08 | + | 2.29    | 2.75    |
| ENSG0000(TMPO      | protein_co chr12 | 98515512 | 98550379 | + | 7.12    | 8.65    |
| ENSG0000(ARL1      | protein_co chr12 | 1.01E+08 | 1.01E+08 | - | 39.58   | 38.67   |
| ENSG0000(GLT8D2    | protein_co chr12 | 1.04E+08 | 1.04E+08 | - | 43.37   | 43.54   |
| ENSG0000(MTERF2    | protein_co chr12 | 1.07E+08 | 1.07E+08 | - | 3.83    | 4.4     |
| ENSG0000(SOCS2     | protein_co chr12 | 93569814 | 93583487 | + | 3.03    | 3.42    |
| ENSG0000(NFYB      | protein_co chr12 | 1.04E+08 | 1.04E+08 | - | 39.74   | 42.56   |
| ENSG0000(WASHC3    | protein_co chr12 | 1.02E+08 | 1.02E+08 | - | 51.71   | 50.43   |
| ENSG0000(APAF1     | protein_co chr12 | 98645141 | 98735433 | + | 3.18    | 3.23    |
| ENSG0000(DUSP4     | protein_co chr8  | 29333064 | 29350668 | - | 4.18    | 3.61    |
| ENSG0000(CLU       | protein_co chr8  | 27596917 | 27615031 | - | 429.49  | 469.97  |
| ENSG0000(TNFRSF10E | protein_co chr8  | 23020133 | 23069179 | - | 77.41   | 78.17   |
| ENSG0000(SORBS3    | protein_co chr8  | 22544986 | 22575788 | + | 86.28   | 73.84   |
| ENSG0000(PTK2B     | protein_co chr8  | 27311482 | 27459391 | + | 22.84   | 25.73   |
| ENSG0000(CHRNA2    | protein_co chr8  | 27459761 | 27479883 | - | 0       | 0       |
| ENSG0000(ADRA1A    | protein_co chr8  | 26748150 | 26867273 | - | 0.05    | 0.09    |
| ENSG0000(PPP3CC    | protein_co chr8  | 22440819 | 22541142 | + | 12.76   | 12.03   |
| ENSG0000(PDLIM2    | protein_co chr8  | 22578279 | 22598025 | + | 131.72  | 136.37  |
| ENSG0000(EPHX2     | protein_co chr8  | 27490779 | 27545564 | + | 1.68    | 1.14    |
| ENSG0000(RNF170    | protein_co chr8  | 42849637 | 42897290 | - | 12.41   | 10.5    |
| ENSG0000(NPPB      | protein_co chr1  | 11857464 | 11858931 | - | 3.06    | 3.58    |
| ENSG0000(UBIAD1    | protein_co chr1  | 11273206 | 11296049 | + | 4.13    | 4.57    |
| ENSG0000(TARDBP    | protein_co chr1  | 11012344 | 11026420 | + | 60.18   | 61.23   |
| ENSG0000(TNFRSF8   | protein_co chr1  | 12063377 | 12144207 | + | 3.09    | 2.63    |
| ENSG0000(PRAMEF2   | protein_co chr1  | 12857086 | 12861909 | + | 0       | 0       |
| ENSG0000(ZNF706    | protein_co chr8  | 1.01E+08 | 1.01E+08 | - | 41.34   | 38.81   |
| ENSG0000(LYPLA1    | protein_co chr8  | 54046367 | 54102017 | - | 26.65   | 27.99   |
| ENSG0000(CRISPLD1  | protein_co chr8  | 74984515 | 75034558 | + | 0.35    | 0.46    |
| ENSG0000(COP55     | protein_co chr8  | 67043079 | 67083783 | - | 23.91   | 25.93   |

|                    |                  |          |          |   |       |       |
|--------------------|------------------|----------|----------|---|-------|-------|
| ENSG0000(RDH10     | protein_co chr8  | 73294612 | 73325281 | + | 23.61 | 32.54 |
| ENSG0000(EPX       | protein_co chr17 | 58192737 | 58205174 | + | 0     | 0     |
| ENSG0000(AKAP1     | protein_co chr17 | 57085092 | 57121349 | + | 8.96  | 9.04  |
| ENSG0000(COIL      | protein_co chr17 | 56938187 | 56961054 | - | 4.12  | 4.98  |
| ENSG0000(TRIM25    | protein_co chr17 | 56887909 | 56914038 | - | 37.58 | 31.44 |
| ENSG0000(SCPEP1    | protein_co chr17 | 56978105 | 57006768 | + | 90.36 | 90.48 |
| ENSG0000(SPOP      | protein_co chr17 | 49598884 | 49678234 | - | 17.02 | 18.6  |
| ENSG0000(TBX2      | protein_co chr17 | 61399896 | 61409466 | + | 1.43  | 2.48  |
| ENSG0000(SLC35B1   | protein_co chr17 | 49700943 | 49709014 | - | 24.91 | 25.07 |
| ENSG0000(TBX4      | protein_co chr17 | 61452404 | 61485110 | + | 0     | 0     |
| ENSG0000(NACA3P    | processed_chr4   | 1.65E+08 | 1.65E+08 | + | 0     | 0     |
| ENSG0000(TEX14     | protein_co chr17 | 58556678 | 58692055 | - | 0     | 0.11  |
| ENSG0000(FAM117A   | protein_co chr17 | 49710332 | 49789180 | - | 6.22  | 6.21  |
| ENSG0000(NCAPH     | protein_co chr2  | 96335787 | 96373845 | + | 0.3   | 0.04  |
| ENSG0000(LRAT      | protein_co chr4  | 1.55E+08 | 1.55E+08 | + | 0.02  | 0.01  |
| ENSG0000(KIAA0922  | protein_co chr4  | 1.53E+08 | 1.54E+08 | + | 4.22  | 3.61  |
| ENSG0000(MND1      | protein_co chr4  | 1.53E+08 | 1.53E+08 | + | 0.11  | 0.16  |
| ENSG0000(TRIM6     | protein_co chr11 | 5596109  | 5612958  | + | 1.37  | 2.38  |
| ENSG0000(ABCC11    | protein_co chr16 | 48166910 | 48247568 | - | 0.25  | 0.11  |
| ENSG0000(PAPD5     | protein_co chr16 | 50152918 | 50235310 | + | 3.79  | 4.04  |
| ENSG0000(ADCY7     | protein_co chr16 | 50246137 | 50318135 | + | 13.89 | 11.02 |
| ENSG0000(CEP89     | protein_co chr19 | 32875925 | 32971991 | - | 8.2   | 7.92  |
| ENSG0000(TSHZ3     | protein_co chr19 | 31274945 | 31349547 | - | 8.59  | 8.99  |
| ENSG0000(ECHDC2    | protein_co chr1  | 52895910 | 52927212 | - | 35.17 | 37.27 |
| ENSG0000(TAS2R8    | protein_co chr12 | 10806051 | 10807293 | - | 0     | 0     |
| ENSG0000(PLBD1     | protein_co chr12 | 14503661 | 14568349 | - | 0.69  | 0.72  |
| ENSG0000(TAS2R10   | protein_co chr12 | 10825317 | 10826358 | - | 0     | 0.06  |
| ENSG0000(PRB2      | protein_co chr12 | 11391540 | 11501041 | - | 0     | 0     |
| ENSG0000(PYROXD1   | protein_co chr12 | 21437615 | 21471252 | + | 5.8   | 4.41  |
| ENSG0000(IAPP      | protein_co chr12 | 21354959 | 21379978 | + | 0.11  | 0.09  |
| ENSG0000(KCNJ8     | protein_co chr12 | 21764955 | 21775581 | - | 4.28  | 5.5   |
| ENSG0000(TAS2R7    | protein_co chr12 | 10801532 | 10802627 | - | 0     | 0     |
| ENSG0000(BCL2L14   | protein_co chr12 | 12049844 | 12211084 | + | 0.04  | 0.05  |
| ENSG0000(TAS2R9    | protein_co chr12 | 10809094 | 10810168 | - | 0     | 0     |
| ENSG0000(RP11-408E | unprocessε chr13 | 19185225 | 19187349 | + | 0     | 0     |
| ENSG0000(PSPC1     | protein_co chr13 | 19674752 | 19783019 | - | 11.81 | 12.15 |
| ENSG0000(ZNF549    | protein_co chr19 | 57527325 | 57557542 | + | 2.07  | 2.17  |
| ENSG0000(A1BG      | protein_co chr19 | 58345178 | 58353499 | - | 18.41 | 16.57 |
| ENSG0000(ZSCAN18   | protein_co chr19 | 58083838 | 58118427 | - | 3.64  | 2.9   |
| ENSG0000(ZNF211    | protein_co chr19 | 57630395 | 57642779 | + | 5.45  | 6.55  |
| ENSG0000(PDZRN3    | protein_co chr3  | 73382433 | 73624940 | - | 10.63 | 11.48 |
| ENSG0000(RGSL1     | protein_co chr1  | 1.82E+08 | 1.83E+08 | + | 0     | 0     |
| ENSG0000(LHX4      | protein_co chr1  | 1.8E+08  | 1.8E+08  | + | 0     | 0     |
| ENSG0000(RNF2      | protein_co chr1  | 1.85E+08 | 1.85E+08 | + | 9.73  | 10.16 |
| ENSG0000(TRMT1L    | protein_co chr1  | 1.85E+08 | 1.85E+08 | - | 5.53  | 6.61  |

|                    |                  |          |            |       |       |
|--------------------|------------------|----------|------------|-------|-------|
| ENSG0000( SEC22A   | protein_co chr3  | 1.23E+08 | 1.23E+08 + | 12.46 | 18.67 |
| ENSG0000( CSTA     | protein_co chr3  | 1.22E+08 | 1.22E+08 + | 2.51  | 2.48  |
| ENSG0000( DPPA4    | protein_co chr3  | 1.09E+08 | 1.09E+08 - | 0.24  | 0.1   |
| ENSG0000( POPDC2   | protein_co chr3  | 1.2E+08  | 1.2E+08 -  | 0.48  | 0.73  |
| ENSG0000( B4GALT4  | protein_co chr3  | 1.19E+08 | 1.19E+08 - | 17    | 15.79 |
| ENSG0000( NAA50    | protein_co chr3  | 1.14E+08 | 1.14E+08 - | 44.59 | 46.92 |
| ENSG0000( CD80     | protein_co chr3  | 1.2E+08  | 1.2E+08 -  | 0     | 0.02  |
| ENSG0000( KIF18A   | protein_co chr11 | 28020620 | 28108308 - | 0.32  | 0.17  |
| ENSG0000( GJA8     | protein_co chr1  | 1.48E+08 | 1.48E+08 + | 0     | 0     |
| ENSG0000( DESI2    | protein_co chr1  | 2.45E+08 | 2.45E+08 + | 9.7   | 10.86 |
| ENSG0000( MAPK8IP1 | protein_co chr11 | 45885651 | 45906465 + | 3.84  | 4.27  |
| ENSG0000( CRY2     | protein_co chr11 | 45847118 | 45883248 + | 11.02 | 10.89 |
| ENSG0000( PEX16    | protein_co chr11 | 45909669 | 45918812 - | 9.89  | 10.27 |
| ENSG0000( DEPDC7   | protein_co chr11 | 33015864 | 33033582 + | 2.61  | 3.32  |
| ENSG0000( CAT      | protein_co chr11 | 34438925 | 34472062 + | 27.68 | 30.55 |
| ENSG0000( PILRB    | protein_co chr7  | 1E+08    | 1E+08 +    | 6.6   | 6.31  |
| ENSG0000( ZMYM2    | protein_co chr13 | 19958670 | 20091829 + | 18.69 | 15.85 |
| ENSG0000( GJB6     | protein_co chr13 | 20221971 | 20232395 - | 0     | 0     |
| ENSG0000( GJA3     | protein_co chr13 | 20138255 | 20161049 - | 1.34  | 1.06  |
| ENSG0000( TBC1D15  | protein_co chr12 | 71839707 | 71927248 + | 20.81 | 24.46 |
| ENSG0000( ADGRB2   | protein_co chr1  | 31727117 | 31764893 - | 8.41  | 9.27  |
| ENSG0000( HCRTR1   | protein_co chr1  | 31617686 | 31632518 + | 0     | 0     |
| ENSG0000( ZCCHC17  | protein_co chr1  | 31296982 | 31364953 + | 23.1  | 20.21 |
| ENSG0000( FABP3    | protein_co chr1  | 31365625 | 31376850 - | 5.16  | 4.78  |
| ENSG0000( KHDRBS1  | protein_co chr1  | 32013829 | 32060850 + | 36.4  | 37.06 |
| ENSG0000( TMEM39B  | protein_co chr1  | 32072031 | 32102866 + | 8.18  | 10.26 |
| ENSG0000( CCRL2    | protein_co chr3  | 46407163 | 46412997 + | 0     | 0     |
| ENSG0000( CCR2     | protein_co chr3  | 46353734 | 46360928 + | 0     | 0     |
| ENSG0000( POLR3GL  | protein_co chr1  | 1.46E+08 | 1.46E+08 + | 16.29 | 17.95 |
| ENSG0000( GHSR     | protein_co chr3  | 1.72E+08 | 1.72E+08 - | 0     | 0     |
| ENSG0000( TNFSF10  | protein_co chr3  | 1.73E+08 | 1.73E+08 - | 6.06  | 5.95  |
| ENSG0000( ZNF639   | protein_co chr3  | 1.79E+08 | 1.79E+08 + | 11.53 | 11.29 |
| ENSG0000( SLITRK3  | protein_co chr3  | 1.65E+08 | 1.65E+08 - | 0     | 0     |
| ENSG0000( PIK3CA   | protein_co chr3  | 1.79E+08 | 1.79E+08 + | 6.23  | 7.71  |
| ENSG0000( PDS5A    | protein_co chr4  | 39822863 | 39977956 - | 13.68 | 10.97 |
| ENSG0000( TMEM156  | protein_co chr4  | 38966744 | 39032922 - | 0.2   | 0.22  |
| ENSG0000( LIAS     | protein_co chr4  | 39458587 | 39485109 + | 8.14  | 5.26  |
| ENSG0000( CPXM2    | protein_co chr10 | 1.24E+08 | 1.24E+08 - | 35.41 | 33.23 |
| ENSG0000( TMEM54   | protein_co chr1  | 32894594 | 32901438 - | 23.01 | 26.16 |
| ENSG0000( ZSCAN20  | protein_co chr1  | 33472645 | 33496507 + | 1.58  | 2.2   |
| ENSG0000( CSMD2    | protein_co chr1  | 33513999 | 34165842 - | 1.51  | 1.08  |
| ENSG0000( HPCA     | protein_co chr1  | 32885994 | 32898441 + | 0     | 0.15  |
| ENSG0000( LRIF1    | protein_co chr1  | 1.11E+08 | 1.11E+08 - | 4.4   | 5.57  |
| ENSG0000( TMIGD3   | protein_co chr1  | 1.11E+08 | 1.12E+08 - | 0.06  | 0.17  |
| ENSG0000( CLCC1    | protein_co chr1  | 1.09E+08 | 1.09E+08 - | 15.16 | 17.46 |

|                    |                  |          |            |        |        |
|--------------------|------------------|----------|------------|--------|--------|
| ENSG0000(GPSM2     | protein_co chr1  | 1.09E+08 | 1.09E+08 + | 2.48   | 3.45   |
| ENSG0000(GTDC1     | protein_co chr2  | 1.44E+08 | 1.44E+08 - | 5.23   | 5.42   |
| ENSG0000(CXCR4     | protein_co chr2  | 1.36E+08 | 1.36E+08 - | 0.04   | 0.09   |
| ENSG0000(ZRANB3    | protein_co chr2  | 1.35E+08 | 1.36E+08 - | 2.15   | 1.35   |
| ENSG0000(ACVR2A    | protein_co chr2  | 1.48E+08 | 1.48E+08 + | 7.56   | 7.67   |
| ENSG0000(POLK      | protein_co chr5  | 75511756 | 75601144 + | 8.7    | 7.76   |
| ENSG0000(SV2C      | protein_co chr5  | 76083172 | 76353939 + | 0      | 0      |
| ENSG0000(FLT3      | protein_co chr13 | 28003274 | 28100592 - | 0      | 0      |
| ENSG0000(RPL21     | protein_co chr13 | 27251309 | 27256691 + | 376.82 | 422.07 |
| ENSG0000(MTIF3     | protein_co chr13 | 27435643 | 27450591 - | 27.86  | 30.96  |
| ENSG0000(GTF3A     | protein_co chr13 | 27424544 | 27435823 + | 35.16  | 36.56  |
| ENSG0000(RASL11A   | protein_co chr13 | 27270327 | 27273690 + | 4.15   | 0.93   |
| ENSG0000(UBL3      | protein_co chr13 | 29764371 | 29850684 - | 8.39   | 8.34   |
| ENSG0000(LINC00544 | lincRNA chr13    | 29935905 | 29950488 + | 0      | 0      |
| ENSG0000(FYTTD1    | protein_co chr3  | 1.98E+08 | 1.98E+08 + | 20.55  | 20     |
| ENSG0000(MTERF4    | protein_co chr2  | 2.41E+08 | 2.41E+08 - | 16.09  | 15.74  |
| ENSG0000(XPNPEP2   | protein_co chrX  | 1.3E+08  | 1.3E+08 +  | 11.17  | 10.17  |
| ENSG0000(SASH3     | protein_co chrX  | 1.3E+08  | 1.3E+08 +  | 0      | 0      |
| ENSG0000(OCRL      | protein_co chrX  | 1.3E+08  | 1.3E+08 +  | 10.9   | 11.41  |
| ENSG0000(PAEP      | protein_co chr9  | 1.36E+08 | 1.36E+08 + | 0.12   | 0      |
| ENSG0000(OBP2A     | protein_co chr9  | 1.36E+08 | 1.36E+08 + | 0      | 0      |
| ENSG0000(MRPS2     | protein_co chr9  | 1.35E+08 | 1.36E+08 + | 21.84  | 19.52  |
| ENSG0000(TBX22     | protein_co chrX  | 80014756 | 80031769 + | 0      | 0      |
| ENSG0000(FMOD      | protein_co chr1  | 2.03E+08 | 2.03E+08 - | 36.48  | 36.84  |
| ENSG0000(MYOG      | protein_co chr1  | 2.03E+08 | 2.03E+08 - | 0      | 0      |
| ENSG0000(LAX1      | protein_co chr1  | 2.04E+08 | 2.04E+08 + | 0.04   | 0      |
| ENSG0000(PLG       | protein_co chr6  | 1.61E+08 | 1.61E+08 + | 0.02   | 0.42   |
| ENSG0000(KIAA1191  | protein_co chr5  | 1.76E+08 | 1.76E+08 - | 48.28  | 45.8   |
| ENSG0000(COPA      | protein_co chr1  | 1.6E+08  | 1.6E+08 -  | 70.19  | 65.29  |
| ENSG0000(CD244     | protein_co chr1  | 1.61E+08 | 1.61E+08 - | 0.22   | 0.47   |
| ENSG0000(LY9       | protein_co chr1  | 1.61E+08 | 1.61E+08 + | 0.03   | 0.04   |
| ENSG0000(HS3ST2    | protein_co chr16 | 22814177 | 22916338 + | 0      | 0      |
| ENSG0000(RBBP6     | protein_co chr16 | 24537693 | 24572863 + | 15.29  | 16.38  |
| ENSG0000(ZC3H7A    | protein_co chr16 | 11750586 | 11797267 - | 14.48  | 14.36  |
| ENSG0000(PRM2      | protein_co chr16 | 11275639 | 11276480 - | 0      | 0      |
| ENSG0000(SERAC1    | protein_co chr6  | 1.58E+08 | 1.58E+08 - | 16.23  | 17.59  |
| ENSG0000(ANXA11    | protein_co chr10 | 80150889 | 80205572 - | 104.32 | 122.31 |
| ENSG0000(LDB3      | protein_co chr10 | 86668449 | 86736068 + | 0.06   | 0.03   |
| ENSG0000(OPN4      | protein_co chr10 | 86654557 | 86666848 + | 0      | 0      |
| ENSG0000(FAM35A    | protein_co chr10 | 87094161 | 87191468 + | 7.26   | 7.03   |
| ENSG0000(FAM213A   | protein_co chr10 | 80407829 | 80437115 + | 0.3    | 0.25   |
| ENSG0000(ZNF205    | protein_co chr16 | 3112560  | 3120517 +  | 5.56   | 6.47   |
| ENSG0000(NAA60     | protein_co chr16 | 3443611  | 3486963 +  | 27.08  | 24.69  |
| ENSG0000(RPL5      | protein_co chr1  | 92832025 | 92841924 + | 601.88 | 591.86 |
| ENSG0000(ODF2L     | protein_co chr1  | 86346824 | 86396342 - | 19.76  | 15     |

|                    |                  |          |          |   |        |        |
|--------------------|------------------|----------|----------|---|--------|--------|
| ENSG0000( PTGFR    | protein_co chr1  | 78303884 | 78539749 | + | 16.1   | 13.74  |
| ENSG0000( SPATA1   | protein_co chr1  | 84506300 | 84566194 | + | 0.51   | 0.6    |
| ENSG0000( TRMT13   | protein_co chr1  | 1E+08    | 1E+08    | + | 3.05   | 4.15   |
| ENSG0000( LRRC39   | protein_co chr1  | 1E+08    | 1E+08    | - | 0      | 0.23   |
| ENSG0000( RWDD3    | protein_co chr1  | 95234155 | 95247225 | + | 5.37   | 7.13   |
| ENSG0000( ZNF644   | protein_co chr1  | 90915298 | 91022272 | - | 8.98   | 8.66   |
| ENSG0000( CCDC18   | protein_co chr1  | 93179919 | 93278730 | + | 0.94   | 0.82   |
| ENSG0000( RPAP2    | protein_co chr1  | 92298965 | 92402056 | + | 4.77   | 5.5    |
| ENSG0000( PQLC1    | protein_co chr18 | 79902420 | 79951664 | - | 12.92  | 13.79  |
| ENSG0000( BBS9     | protein_co chr7  | 33129244 | 33606068 | + | 6.96   | 7.24   |
| ENSG0000( PMS2     | protein_co chr7  | 5973239  | 6009125  | - | 6.68   | 6.82   |
| ENSG0000( ZMIZ2    | protein_co chr7  | 44748581 | 44769881 | + | 21.61  | 23.35  |
| ENSG0000( OCM      | protein_co chr7  | 5879827  | 5886362  | + | 0.11   | 0.11   |
| ENSG0000( 7-Sep    | protein_co chr7  | 35800932 | 35907105 | + | 116.21 | 118.04 |
| ENSG0000( EEPD1    | protein_co chr7  | 36153149 | 36301543 | + | 0.63   | 1.78   |
| ENSG0000( KIAA0087 | lincRNA chr7     | 26533121 | 26538788 | - | 0.05   | 0      |
| ENSG0000( KLHL7    | protein_co chr7  | 23105758 | 23177914 | + | 14.28  | 11.88  |
| ENSG0000( HERPUD2  | protein_co chr7  | 35632659 | 35695571 | - | 13.49  | 14.68  |
| ENSG0000( CBX3     | protein_co chr7  | 26201162 | 26213356 | + | 66.9   | 60.82  |
| ENSG0000( HNRNPA2E | protein_co chr7  | 26189927 | 26201529 | - | 151.84 | 148.96 |
| ENSG0000( WIPF3    | protein_co chr7  | 29806486 | 29917066 | + | 0      | 0      |
| ENSG0000( NXPH1    | protein_co chr7  | 8433955  | 8752963  | + | 0      | 0      |
| ENSG0000( NPY      | protein_co chr7  | 24284163 | 24291865 | + | 0      | 0      |
| ENSG0000( FAM126A  | protein_co chr7  | 22889371 | 23014130 | - | 16.1   | 16.37  |
| ENSG0000( HOXA7    | protein_co chr7  | 27153716 | 27157936 | - | 0      | 0      |
| ENSG0000( INHBA    | protein_co chr7  | 41667168 | 41705834 | - | 24.33  | 28.75  |
| ENSG0000( FKBP9    | protein_co chr7  | 32957404 | 33006931 | + | 277.99 | 266.13 |
| ENSG0000( NT5C3A   | protein_co chr7  | 33014114 | 33062797 | - | 7.29   | 7.24   |
| ENSG0000( ARL4A    | protein_co chr7  | 12686856 | 12690934 | + | 2.5    | 4.04   |
| ENSG0000( CCZ1     | protein_co chr7  | 5898725  | 5926550  | + | 18.85  | 20.13  |
| ENSG0000( POLM     | protein_co chr7  | 44072247 | 44082540 | - | 9.44   | 8.7    |
| ENSG0000( RAMP3    | protein_co chr7  | 45157791 | 45186302 | + | 0      | 0      |
| ENSG0000( MRM2     | protein_co chr7  | 2234231  | 2242198  | - | 10.79  | 8.94   |
| ENSG0000( TWIST1   | protein_co chr7  | 19020991 | 19117672 | - | 22.2   | 23.22  |
| ENSG0000( SMU1     | protein_co chr9  | 33041764 | 33076659 | - | 5.85   | 6.84   |
| ENSG0000( GLIPR2   | protein_co chr9  | 36136536 | 36163913 | + | 18.48  | 23.33  |
| ENSG0000( SLC25A51 | protein_co chr9  | 37879400 | 37904353 | - | 7.37   | 7.57   |
| ENSG0000( CLTA     | protein_co chr9  | 36190856 | 36304781 | + | 147.81 | 151.37 |
| ENSG0000( RECK     | protein_co chr9  | 36036433 | 36124451 | + | 29.89  | 29.08  |
| ENSG0000( SPINK4   | protein_co chr9  | 33218365 | 33248567 | + | 0      | 0      |
| ENSG0000( TAF1L    | protein_co chr9  | 32629454 | 32635669 | - | 0.03   | 0      |
| ENSG0000( ACO1     | protein_co chr9  | 32384603 | 32454769 | + | 48.33  | 48.23  |
| ENSG0000( PHF24    | protein_co chr9  | 34957608 | 34982544 | + | 0.02   | 0.15   |
| ENSG0000( DNAI1    | protein_co chr9  | 34457414 | 34520989 | + | 0      | 0      |
| ENSG0000( DCAF10   | protein_co chr9  | 37800502 | 37867666 | + | 11.06  | 8.58   |

|                   |                  |          |          |   |        |        |
|-------------------|------------------|----------|----------|---|--------|--------|
| ENSG0000(CNTFR    | protein_co chr9  | 34551432 | 34590140 | - | 0.06   | 0.1    |
| ENSG0000(KIAA1549 | protein_co chr7  | 1.39E+08 | 1.39E+08 | - | 2.05   | 2.32   |
| ENSG0000(TRIM24   | protein_co chr7  | 1.38E+08 | 1.39E+08 | + | 4.54   | 5.69   |
| ENSG0000(C7orf49  | protein_co chr7  | 1.35E+08 | 1.35E+08 | - | 15.97  | 13.94  |
| ENSG0000(CALD1    | protein_co chr7  | 1.35E+08 | 1.35E+08 | + | 188.65 | 186.63 |
| ENSG0000(AKR1D1   | protein_co chr7  | 1.38E+08 | 1.38E+08 | + | 0      | 0      |
| ENSG0000(NUDT10   | protein_co chrX  | 51332231 | 51337525 | + | 0.31   | 0.18   |
| ENSG0000(SFTPA1   | protein_co chr10 | 79610939 | 79615455 | + | 0      | 0      |
| ENSG0000(NEUROG3  | protein_co chr10 | 69571698 | 69573238 | - | 0      | 0      |
| ENSG0000(PLAU     | protein_co chr10 | 73909177 | 73917497 | + | 6.16   | 5.7    |
| ENSG0000(SRGN     | protein_co chr10 | 69088106 | 69104811 | + | 199.97 | 179.31 |
| ENSG0000(CHST3    | protein_co chr10 | 71964365 | 72013564 | + | 6.12   | 6.56   |
| ENSG0000(BICC1    | protein_co chr10 | 58513140 | 58831437 | + | 42.19  | 45.35  |
| ENSG0000(ARL4AP1  | processed_chr10  | 60684505 | 60685209 | + | 0      | 0      |
| ENSG0000(CISD1    | protein_co chr10 | 58269058 | 58289586 | + | 32.85  | 27.68  |
| ENSG0000(EGR2     | protein_co chr10 | 62811996 | 62919900 | - | 6.32   | 6.93   |
| ENSG0000(ECD      | protein_co chr10 | 73130155 | 73169055 | - | 10.08  | 10.34  |
| ENSG0000(P4HA1    | protein_co chr10 | 73007217 | 73096974 | - | 136.99 | 124.47 |
| ENSG0000(SLC25A16 | protein_co chr10 | 68477999 | 68527474 | - | 5.16   | 7.01   |
| ENSG0000(ZWINT    | protein_co chr10 | 56357228 | 56361275 | - | 2.65   | 1.37   |
| ENSG0000(VPS26A   | protein_co chr10 | 69123512 | 69172861 | + | 30.84  | 30.48  |
| ENSG0000(RBM19    | protein_co chr12 | 1.14E+08 | 1.14E+08 | - | 6.19   | 6.82   |
| ENSG0000(CIT      | protein_co chr12 | 1.2E+08  | 1.2E+08  | - | 1.02   | 0.73   |
| ENSG0000(IFT81    | protein_co chr12 | 1.1E+08  | 1.1E+08  | + | 5.36   | 3.38   |
| ENSG0000(ACADS    | protein_co chr12 | 1.21E+08 | 1.21E+08 | + | 7.23   | 7.35   |
| ENSG0000(HVCN1    | protein_co chr12 | 1.11E+08 | 1.11E+08 | - | 1.85   | 2.32   |
| ENSG0000(NME2P1   | processed_chr12  | 1.2E+08  | 1.2E+08  | + | 0      | 0      |
| ENSG0000(DDX54    | protein_co chr12 | 1.13E+08 | 1.13E+08 | - | 26.36  | 24.39  |
| ENSG0000(MED13L   | protein_co chr12 | 1.16E+08 | 1.16E+08 | - | 10.17  | 13.28  |
| ENSG0000(CDKN2C   | protein_co chr1  | 50960745 | 50974633 | + | 6.64   | 6.85   |
| ENSG0000(RNF11    | protein_co chr1  | 51236271 | 51273455 | + | 58.95  | 63.22  |
| ENSG0000(RASSF8   | protein_co chr12 | 25959029 | 26079892 | + | 29.87  | 28.52  |
| ENSG0000(BHLHE41  | protein_co chr12 | 26120026 | 26125127 | - | 14.7   | 17.04  |
| ENSG0000(SSPN     | protein_co chr12 | 26121991 | 26299290 | + | 8.03   | 9.89   |
| ENSG0000(ITPR2    | protein_co chr12 | 26336515 | 26833198 | - | 6.65   | 6.26   |
| ENSG0000(CCDC91   | protein_co chr12 | 28133249 | 28581511 | + | 12.88  | 10.73  |
| ENSG0000(NECAB1   | protein_co chr8  | 90791550 | 90959408 | + | 0      | 0      |
| ENSG0000(WWP1     | protein_co chr8  | 86342738 | 86478420 | + | 12.59  | 12.53  |
| ENSG0000(ACOT9    | protein_co chrX  | 23702253 | 23766475 | - | 18.13  | 17.2   |
| ENSG0000(PRDX4    | protein_co chrX  | 23664262 | 23686399 | + | 162.4  | 162.97 |
| ENSG0000(DDX39A   | protein_co chr19 | 14408819 | 14419383 | - | 14.22  | 15.95  |
| ENSG0000(PKN1     | protein_co chr19 | 14433053 | 14471867 | + | 50.01  | 49.01  |
| ENSG0000(C19orf43 | protein_co chr19 | 12730640 | 12734775 | - | 104.72 | 109.3  |
| ENSG0000(ADGRE5   | protein_co chr19 | 14380501 | 14408725 | + | 18.48  | 17.1   |
| ENSG0000(WDR83    | protein_co chr19 | 12666800 | 12675832 | + | 4.92   | 4.9    |

|                   |                   |          |          |   |        |        |
|-------------------|-------------------|----------|----------|---|--------|--------|
| ENSG0000(GIPC1    | protein_co chr19  | 14477760 | 14496149 | - | 48.47  | 50.79  |
| ENSG0000(ACTRT1   | protein_co chrX   | 1.28E+08 | 1.28E+08 | - | 0      | 0      |
| ENSG0000(CCDC70   | protein_co chr13  | 51861981 | 51866232 | + | 0      | 0      |
| ENSG0000(SPRYD7   | protein_co chr13  | 49912706 | 49936490 | - | 2.48   | 1.77   |
| ENSG0000(EBPL     | protein_co chr13  | 49660723 | 49691475 | - | 19.63  | 20.7   |
| ENSG0000(ATP7B    | protein_co chr13  | 51930436 | 52012125 | - | 0.97   | 1.39   |
| ENSG0000(ZC3H13   | protein_co chr13  | 45954465 | 46052759 | - | 10.85  | 11.21  |
| ENSG0000(GUCY1B2  | transcribec chr13 | 50994511 | 51080862 | - | 0.03   | 0      |
| ENSG0000(NLN      | protein_co chr5   | 65722196 | 65871725 | + | 5.2    | 6.02   |
| ENSG0000(CENPK    | protein_co chr5   | 65517766 | 65563171 | - | 0.9    | 0.57   |
| ENSG0000(OPTN     | protein_co chr10  | 13099449 | 13138308 | + | 94.86  | 93.83  |
| ENSG0000(ITIH5    | protein_co chr10  | 7559270  | 7666998  | - | 0.19   | 0.17   |
| ENSG0000(ATF1     | protein_co chr12  | 50763710 | 50821122 | + | 22.44  | 21.03  |
| ENSG0000(TSFM     | protein_co chr12  | 57782589 | 57808071 | + | 20.73  | 18.33  |
| ENSG0000(NEUROD4  | protein_co chr12  | 55019945 | 55030014 | + | 0      | 0      |
| ENSG0000(ARHGAP9  | protein_co chr12  | 57472255 | 57488814 | - | 0.13   | 0.22   |
| ENSG0000(NCKAP1L  | protein_co chr12  | 54497711 | 54548238 | + | 0.3    | 0.02   |
| ENSG0000(MMP19    | protein_co chr12  | 55835433 | 55842966 | - | 16.39  | 16.39  |
| ENSG0000(PFDN5    | protein_co chr12  | 53295291 | 53299450 | + | 408.33 | 400.12 |
| ENSG0000(SPATS2   | protein_co chr12  | 49366584 | 49527424 | + | 20.8   | 20.44  |
| ENSG0000(ORMDL2   | protein_co chr12  | 55817919 | 55821879 | + | 16.77  | 17.76  |
| ENSG0000(NR4A1    | protein_co chr12  | 52022832 | 52059507 | + | 3.17   | 3.39   |
| ENSG0000(PDE1B    | protein_co chr12  | 54549350 | 54579239 | + | 0.08   | 0.03   |
| ENSG0000(HOXC13   | protein_co chr12  | 53938765 | 53946544 | + | 0      | 0      |
| ENSG0000(CDK2     | protein_co chr12  | 55966769 | 55972784 | + | 15.29  | 12.51  |
| ENSG0000(LRP1     | protein_co chr12  | 57128493 | 57213351 | + | 359.13 | 365.82 |
| ENSG0000(HOXC11   | protein_co chr12  | 53973126 | 53977643 | + | 0      | 0      |
| ENSG0000(ATG101   | protein_co chr12  | 52069246 | 52077494 | + | 21.09  | 20.89  |
| ENSG0000(NFE2     | protein_co chr12  | 54292111 | 54301121 | - | 4.77   | 4.14   |
| ENSG0000(HOXC12   | protein_co chr12  | 53954834 | 53958956 | + | 0      | 0      |
| ENSG0000(IKZF4    | protein_co chr12  | 56007659 | 56038435 | + | 3.75   | 4.05   |
| ENSG0000(SMUG1    | protein_co chr12  | 54121277 | 54189008 | - | 10.48  | 12.92  |
| ENSG0000(TUBA1B   | protein_co chr12  | 49127782 | 49131397 | - | 164.16 | 159.98 |
| ENSG0000(METTL21B | protein_co chr12  | 57771492 | 57782541 | + | 5.43   | 4.77   |
| ENSG0000(KBTBD4   | protein_co chr11  | 47572197 | 47579015 | - | 7.58   | 7.81   |
| ENSG0000(TYRL     | unprocessε chr11  | 49405091 | 49415789 | - | 0      | 0      |
| ENSG0000(SARDH    | protein_co chr9   | 1.34E+08 | 1.34E+08 | - | 0.89   | 1.22   |
| ENSG0000(DBH      | protein_co chr9   | 1.34E+08 | 1.34E+08 | + | 0      | 0      |
| ENSG0000(ATPAF1   | protein_co chr1   | 46632737 | 46673867 | - | 19.47  | 18.2   |
| ENSG0000(STIL     | protein_co chr1   | 47250139 | 47314147 | - | 0.73   | 0.81   |
| ENSG0000(HJURP    | protein_co chr2   | 2.34E+08 | 2.34E+08 | - | 0.65   | 0.46   |
| ENSG0000(IL13RA2  | protein_co chrX   | 1.15E+08 | 1.15E+08 | - | 0.38   | 0      |
| ENSG0000(COL10A1  | protein_co chr6   | 1.16E+08 | 1.16E+08 | - | 0.11   | 1.65   |
| ENSG0000(AMD1     | protein_co chr6   | 1.11E+08 | 1.11E+08 | + | 10.97  | 11.41  |
| ENSG0000(NDUFAF4  | protein_co chr6   | 96889313 | 96897881 | - | 6.06   | 4.91   |



|                    |                   |          |            |        |        |
|--------------------|-------------------|----------|------------|--------|--------|
| ENSG0000( USP45    | protein_co chr6   | 99432379 | 99521728 - | 6.31   | 6.34   |
| ENSG0000( PLP1     | protein_co chrX   | 1.04E+08 | 1.04E+08 + | 0.92   | 0.75   |
| ENSG0000( SERPINA7 | protein_co chrX   | 1.06E+08 | 1.06E+08 - | 0      | 0      |
| ENSG0000( MORF4L2  | protein_co chrX   | 1.04E+08 | 1.04E+08 - | 182.42 | 183.71 |
| ENSG0000( H2BFWT   | protein_co chrX   | 1.04E+08 | 1.04E+08 - | 0      | 0      |
| ENSG0000( RAB9B    | protein_co chrX   | 1.04E+08 | 1.04E+08 - | 0.56   | 0.58   |
| ENSG0000( NRK      | protein_co chrX   | 1.06E+08 | 1.06E+08 + | 0      | 0      |
| ENSG0000( FAM199X  | protein_co chrX   | 1.04E+08 | 1.04E+08 + | 3.39   | 3.29   |
| ENSG0000( ESX1     | protein_co chrX   | 1.04E+08 | 1.04E+08 - | 0      | 0      |
| ENSG0000( MAGEA9   | protein_co chrX   | 1.5E+08  | 1.5E+08 +  | 0      | 0      |
| ENSG0000( ATXN3L   | protein_co chrX   | 13318236 | 13320399 - | 0      | 0      |
| ENSG0000( RAB9A    | protein_co chrX   | 13689125 | 13710506 + | 16.89  | 16.31  |
| ENSG0000( METTL8   | protein_co chr2   | 1.71E+08 | 1.71E+08 - | 7.97   | 6.41   |
| ENSG0000( TTC21B   | protein_co chr2   | 1.66E+08 | 1.66E+08 - | 3.38   | 2.69   |
| ENSG0000( NMI      | protein_co chr2   | 1.51E+08 | 1.51E+08 - | 9.18   | 8.02   |
| ENSG0000( TNFAIP6  | protein_co chr2   | 1.51E+08 | 1.51E+08 + | 39.01  | 42.55  |
| ENSG0000( ACVR1C   | protein_co chr2   | 1.58E+08 | 1.58E+08 - | 0.01   | 0      |
| ENSG0000( BAZ2B    | protein_co chr2   | 1.59E+08 | 1.6E+08 -  | 16.84  | 13.96  |
| ENSG0000( SLC36A1  | protein_co chr5   | 1.51E+08 | 1.51E+08 + | 6.67   | 6.23   |
| ENSG0000( LPGAT1   | protein_co chr1   | 2.12E+08 | 2.12E+08 - | 6.11   | 6.61   |
| ENSG0000( BATF3    | protein_co chr1   | 2.13E+08 | 2.13E+08 - | 0.5    | 0.25   |
| ENSG0000( GOS2     | protein_co chr1   | 2.1E+08  | 2.1E+08 +  | 158.3  | 117.78 |
| ENSG0000( KCNJ2    | protein_co chr17  | 70168673 | 70180048 + | 0.03   | 0.01   |
| ENSG0000( RAP2C    | protein_co chrX   | 1.32E+08 | 1.32E+08 - | 6.93   | 8.65   |
| ENSG0000( EXOSC9   | protein_co chr4   | 1.22E+08 | 1.22E+08 + | 9.92   | 9.6    |
| ENSG0000( PLA2G12A | protein_co chr4   | 1.1E+08  | 1.1E+08 -  | 16.78  | 16.63  |
| ENSG0000( B9D2     | protein_co chr19  | 41354421 | 41364173 - | 3.9    | 4.76   |
| ENSG0000( COQ8B    | protein_co chr19  | 40691529 | 40718207 - | 13.91  | 11.69  |
| ENSG0000( PFKFB2   | protein_co chr1   | 2.07E+08 | 2.07E+08 + | 0.85   | 1.42   |
| ENSG0000( C4BPA    | protein_co chr1   | 2.07E+08 | 2.07E+08 + | 0      | 0      |
| ENSG0000( C4BPB    | protein_co chr1   | 2.07E+08 | 2.07E+08 + | 0      | 0      |
| ENSG0000( ZNF137P  | transcribec chr19 | 52588505 | 52597345 + | 1.26   | 0.96   |
| ENSG0000( RAB38    | protein_co chr11  | 88113242 | 88175467 - | 0.27   | 0.33   |
| ENSG0000( GPR83    | protein_co chr11  | 94377311 | 94401419 - | 0.02   | 0      |
| ENSG0000( AGO2     | protein_co chr8   | 1.41E+08 | 1.41E+08 - | 4.11   | 5.78   |
| ENSG0000( MXD4     | protein_co chr4   | 2247432  | 2262294 -  | 39.18  | 40.93  |
| ENSG0000( PMS2P5   | unprocessε chr7   | 74894116 | 74897835 + | 0.66   | 1.31   |
| ENSG0000( CKS2     | protein_co chr9   | 89311198 | 89316703 + | 8.57   | 10.79  |
| ENSG0000( DAW1     | protein_co chr2   | 2.28E+08 | 2.28E+08 + | 4.68   | 4.26   |
| ENSG0000( ACSL3    | protein_co chr2   | 2.23E+08 | 2.23E+08 + | 26.97  | 31.56  |
| ENSG0000( CHPF     | protein_co chr2   | 2.2E+08  | 2.2E+08 -  | 46.15  | 51.5   |
| ENSG0000( DNPEP    | protein_co chr2   | 2.19E+08 | 2.19E+08 - | 41.12  | 34.78  |
| ENSG0000( INHA     | protein_co chr2   | 2.2E+08  | 2.2E+08 +  | 1.06   | 1.26   |
| ENSG0000( MOGAT1   | protein_co chr2   | 2.23E+08 | 2.23E+08 + | 0      | 0      |
| ENSG0000( OBSL1    | protein_co chr2   | 2.2E+08  | 2.2E+08 -  | 32.27  | 33.23  |

|                   |                  |          |          |   |        |        |
|-------------------|------------------|----------|----------|---|--------|--------|
| ENSG0000(FAM124B  | protein_co chr2  | 2.24E+08 | 2.24E+08 | - | 0      | 0      |
| ENSG0000(SLC12A4  | protein_co chr16 | 67943474 | 67969601 | - | 31.65  | 31.34  |
| ENSG0000(ENKD1    | protein_co chr16 | 67662945 | 67667265 | - | 11.14  | 13.23  |
| ENSG0000(MC3R     | protein_co chr20 | 56248732 | 56249815 | + | 0      | 0      |
| ENSG0000(GCNT7    | protein_co chr20 | 56491492 | 56525925 | - | 0      | 0      |
| ENSG0000(CTCF     | protein_co chr20 | 57495966 | 57525652 | - | 0      | 0      |
| ENSG0000(HMGB1P1  | processed_chr20  | 57488392 | 57489027 | - | 0.22   | 0.24   |
| ENSG0000(FAM210B  | protein_co chr20 | 56358915 | 56368663 | + | 31.81  | 33.64  |
| ENSG0000(PI3      | protein_co chr20 | 45174876 | 45176544 | + | 0.86   | 1.21   |
| ENSG0000(FAM209A  | protein_co chr20 | 56517187 | 56526142 | + | 0.14   | 0      |
| ENSG0000(SNX21    | protein_co chr20 | 45833810 | 45843275 | + | 39.05  | 39.08  |
| ENSG0000(SLPI     | protein_co chr20 | 45252239 | 45254564 | - | 5.51   | 8.12   |
| ENSG0000(WFDC3    | protein_co chr20 | 45747944 | 45791932 | - | 12.96  | 12.96  |
| ENSG0000(TTPAL    | protein_co chr20 | 44475886 | 44494603 | + | 6.81   | 6.14   |
| ENSG0000(PREX1    | protein_co chr20 | 48624252 | 48827883 | - | 2.17   | 2.67   |
| ENSG0000(KCNS1    | protein_co chr20 | 45092310 | 45101112 | - | 0.57   | 0.65   |
| ENSG0000(SLC12A5  | protein_co chr20 | 46021690 | 46060152 | + | 1.98   | 0.75   |
| ENSG0000(ARHGAP40 | protein_co chr20 | 38601934 | 38651035 | + | 0.06   | 0      |
| ENSG0000(SDC4     | protein_co chr20 | 45325288 | 45348424 | - | 69.25  | 70.51  |
| ENSG0000(NCOA3    | protein_co chr20 | 47501902 | 47656877 | + | 14.51  | 14.82  |
| ENSG0000(PIGT     | protein_co chr20 | 45416067 | 45456934 | + | 205.3  | 207.54 |
| ENSG0000(SEMG2    | protein_co chr20 | 45221300 | 45224458 | + | 0      | 0      |
| ENSG0000(MATN4    | protein_co chr20 | 45293445 | 45308529 | - | 0.03   | 0.18   |
| ENSG0000(NCOA5    | protein_co chr20 | 46060985 | 46089952 | - | 8.88   | 10.93  |
| ENSG0000(VAPB     | protein_co chr20 | 58389122 | 58451101 | + | 19.66  | 20.85  |
| ENSG0000(PARD6B   | protein_co chr20 | 50731544 | 50756795 | + | 0.27   | 0.15   |
| ENSG0000(ATP5E    | protein_co chr20 | 59025467 | 59032382 | - | 52.05  | 44.85  |
| ENSG0000(CHD6     | protein_co chr20 | 41402101 | 41618494 | - | 8.6    | 8.56   |
| ENSG0000(PLCG1    | protein_co chr20 | 41136960 | 41196801 | + | 27.49  | 26.83  |
| ENSG0000(TOX2     | protein_co chr20 | 43914864 | 44069616 | + | 8.59   | 8.24   |
| ENSG0000(SRSF6    | protein_co chr20 | 43457928 | 43464247 | + | 49.52  | 50.06  |
| ENSG0000(GDAP1L1  | protein_co chr20 | 44247099 | 44280917 | + | 0      | 0      |
| ENSG0000(GTSF1L   | protein_co chr20 | 43726164 | 43726998 | - | 0      | 0      |
| ENSG0000(ARFGEF2  | protein_co chr20 | 48921890 | 49036693 | + | 10.38  | 9.34   |
| ENSG0000(ZNFX1    | protein_co chr20 | 49237946 | 49278426 | - | 15.19  | 15.16  |
| ENSG0000(ZNF831   | protein_co chr20 | 59123381 | 59259113 | + | 0      | 0      |
| ENSG0000(EDN3     | protein_co chr20 | 59300427 | 59325992 | + | 0      | 0      |
| ENSG0000(CSE1L    | protein_co chr20 | 49046246 | 49096960 | + | 11.27  | 12.02  |
| ENSG0000(TMEM189  | protein_co chr20 | 50081124 | 50153637 | - | 2.81   | 3.49   |
| ENSG0000(RAB22A   | protein_co chr20 | 58309696 | 58367507 | + | 6.28   | 5.83   |
| ENSG0000(PTGIS    | protein_co chr20 | 49503874 | 49568146 | - | 432.82 | 411.63 |
| ENSG0000(STAU1    | protein_co chr20 | 49113339 | 49188367 | - | 33.76  | 31.84  |
| ENSG0000(CDH26    | protein_co chr20 | 59958427 | 60034011 | + | 0.08   | 0.13   |
| ENSG0000(SNAI1    | protein_co chr20 | 49982999 | 49988886 | + | 2.85   | 2.66   |
| ENSG0000(MOCS3    | protein_co chr20 | 50958826 | 50963931 | + | 1.87   | 1.95   |

|                 |          |                   |          |          |   |       |       |
|-----------------|----------|-------------------|----------|----------|---|-------|-------|
| ENSG00000108110 | STX16    | protein_co chr20  | 58651253 | 58679526 | + | 27.1  | 24.94 |
| ENSG00000108111 | PPP4R1L  | transcribec chr20 | 58228940 | 58309439 | - | 4.01  | 4.05  |
| ENSG00000108112 | PMEPA1   | protein_co chr20  | 57648392 | 57711536 | - | 8.23  | 7.53  |
| ENSG00000108113 | RNF114   | protein_co chr20  | 49936336 | 49953892 | + | 24.51 | 24.31 |
| ENSG00000108114 | ANKRD60  | protein_co chr20  | 58218495 | 58228653 | - | 0     | 0     |
| ENSG00000108115 | DDX27    | protein_co chr20  | 49219295 | 49244077 | + | 15.1  | 13.92 |
| ENSG00000108116 | RBPJL    | protein_co chr20  | 45306851 | 45317824 | + | 0     | 0     |
| ENSG00000108117 | SEMG1    | protein_co chr20  | 45206997 | 45209772 | + | 0     | 0     |
| ENSG00000108118 | C20orf85 | protein_co chr20  | 58150904 | 58161150 | + | 0     | 0     |
| ENSG00000108119 | BCAS4    | protein_co chr20  | 50794894 | 50882676 | + | 6.91  | 5.29  |
| ENSG00000108120 | KCNK15   | protein_co chr20  | 44745780 | 44752313 | + | 5.87  | 6.64  |
| ENSG00000108121 | TP53TG5  | protein_co chr20  | 45372563 | 45407889 | - | 0     | 0     |
| ENSG00000108122 | PCK1     | protein_co chr20  | 57561080 | 57568112 | + | 0     | 0     |
| ENSG00000108123 | ZBP1     | protein_co chr20  | 57603846 | 57620576 | - | 0     | 0     |
| ENSG00000108124 | NEURL2   | protein_co chr20  | 45888625 | 45891287 | - | 2.99  | 2.83  |
| ENSG00000108125 | MAGEA10  | protein_co chrX   | 1.52E+08 | 1.52E+08 | - | 0     | 0     |
| ENSG00000108126 | MTRR     | protein_co chr5   | 7851186  | 7906025  | + | 18.57 | 17.34 |
| ENSG00000108127 | FASTKD3  | protein_co chr5   | 7859159  | 7869037  | - | 4.35  | 3.84  |
| ENSG00000108128 | PEPD     | protein_co chr19  | 33386950 | 33521794 | - | 52.35 | 56.69 |
| ENSG00000108129 | CHST8    | protein_co chr19  | 33621955 | 33773509 | + | 0     | 0     |
| ENSG00000108130 | IQSEC2   | protein_co chrX   | 53225828 | 53321328 | - | 9.49  | 9.41  |
| ENSG00000108131 | VAMP7    | protein_co chrX   | 1.56E+08 | 1.56E+08 | + | 7.34  | 8.54  |
| ENSG00000108132 | VAMP7    | protein_co chrY   | 57067813 | 57130289 | + | 7.34  | 8.54  |
| ENSG00000108133 | IL9R     | protein_co chrX   | 1.56E+08 | 1.56E+08 | + | 0.01  | 0     |
| ENSG00000108134 | IL9R     | protein_co chrY   | 57184101 | 57197337 | + | 0.01  | 0     |
| ENSG00000108135 | XG       | protein_co chrX   | 2752050  | 2815927  | + | 5.73  | 6.01  |
| ENSG00000108136 | STAMBIP  | protein_co chr2   | 73828916 | 73873659 | + | 17.08 | 14.11 |
| ENSG00000108137 | NAGK     | protein_co chr2   | 71064344 | 71079805 | + | 73.54 | 64.48 |
| ENSG00000108138 | MCEE     | protein_co chr2   | 71109684 | 71130239 | - | 8.38  | 6.53  |
| ENSG00000108139 | PAIP2B   | protein_co chr2   | 71182739 | 71227083 | - | 0.23  | 0.3   |
| ENSG00000108140 | SNRNP27  | protein_co chr2   | 69893560 | 69905575 | + | 18.17 | 18.62 |
| ENSG00000108141 | MPHOSPH8 | protein_co chr2   | 71130314 | 71150101 | + | 7.89  | 8.31  |
| ENSG00000108142 | IL17C    | protein_co chr16  | 88638591 | 88640473 | + | 0.06  | 0.06  |
| ENSG00000108143 | NDUFB4P1 | processed_chr4    | 43898962 | 43899351 | + | 0     | 0     |
| ENSG00000108144 | ATP8A1   | protein_co chr4   | 42408373 | 42657105 | - | 1.35  | 1.27  |
| ENSG00000108145 | USP22    | protein_co chr17  | 20999593 | 21043760 | - | 52.04 | 51.28 |
| ENSG00000108146 | POF1B    | protein_co chrX   | 85277396 | 85379743 | - | 0     | 0     |
| ENSG00000108147 | HIF3A    | protein_co chr19  | 46297046 | 46343433 | + | 2.9   | 2.04  |
| ENSG00000108148 | ZNF576   | protein_co chr19  | 43596392 | 43601157 | + | 6.14  | 5.56  |
| ENSG00000108149 | IRGC     | protein_co chr19  | 43716010 | 43720021 | + | 0     | 0     |
| ENSG00000108150 | ZNF45    | protein_co chr19  | 43912629 | 43935278 | - | 5.43  | 5.22  |
| ENSG00000108151 | LYPD3    | protein_co chr19  | 43460787 | 43465660 | - | 0.83  | 0.92  |
| ENSG00000108152 | PSG8     | protein_co chr19  | 42752686 | 42855691 | - | 0     | 0     |
| ENSG00000108153 | CEACAM8  | protein_co chr19  | 42580241 | 42595055 | - | 0.05  | 0.04  |
| ENSG00000108154 | NDP      | protein_co chrX   | 43948776 | 43973504 | - | 0     | 0     |

|                     |                  |          |          |   |        |        |
|---------------------|------------------|----------|----------|---|--------|--------|
| ENSG0000( USP9X     | protein_co chrX  | 41085635 | 41236579 | + | 20.38  | 21.34  |
| ENSG0000( CRISP2    | protein_co chr6  | 49692358 | 49713590 | - | 0      | 0      |
| ENSG0000( F13A1     | protein_co chr6  | 6144085  | 6321013  | - | 0      | 0      |
| ENSG0000( GRM4      | protein_co chr6  | 34018645 | 34155622 | - | 0      | 0.01   |
| ENSG0000( TRERF1    | protein_co chr6  | 42224931 | 42452051 | - | 4.67   | 4.58   |
| ENSG0000( PACSIN1   | protein_co chr6  | 34466061 | 34535231 | + | 0.11   | 0.04   |
| ENSG0000( BTN2A2    | protein_co chr6  | 26383096 | 26394874 | + | 7.57   | 6.99   |
| ENSG0000( SIRT5     | protein_co chr6  | 13574529 | 13615158 | + | 5.09   | 5.58   |
| ENSG0000( MRS2      | protein_co chr6  | 24402908 | 24426194 | + | 5.44   | 6.4    |
| ENSG0000( WRNIP1    | protein_co chr6  | 2765414  | 2786952  | + | 17.43  | 17.82  |
| ENSG0000( RRP36     | protein_co chr6  | 43021645 | 43034156 | + | 18.51  | 19.01  |
| ENSG0000( BTN2A3P   | transcribec chr6 | 26421391 | 26432383 | + | 3.75   | 3.37   |
| ENSG0000( BTN1A1    | protein_co chr6  | 26501221 | 26510422 | + | 0      | 0      |
| ENSG0000( SNRPC     | protein_co chr6  | 34757406 | 34773794 | + | 51.31  | 52.51  |
| ENSG0000( SLC17A3   | protein_co chr6  | 25833066 | 25882286 | - | 0      | 0      |
| ENSG0000( SLC17A1   | protein_co chr6  | 25782897 | 25832059 | - | 0      | 0      |
| ENSG0000( SERPINB6  | protein_co chr6  | 2948159  | 2972165  | - | 56.24  | 56.41  |
| ENSG0000( XPO5      | protein_co chr6  | 43522330 | 43576075 | - | 13.92  | 7.16   |
| ENSG0000( ABCC10    | protein_co chr6  | 43427366 | 43450430 | + | 17.05  | 15.74  |
| ENSG0000( HIST1H1D  | protein_co chr6  | 26234268 | 26234933 | - | 0      | 0      |
| ENSG0000( PEX6      | protein_co chr6  | 42963870 | 42979220 | - | 5.91   | 7.02   |
| ENSG0000( NQO2      | protein_co chr6  | 2987987  | 3028869  | + | 33.34  | 34.19  |
| ENSG0000( RP11-298J | protein_co chr6  | 41780349 | 41790141 | + | 4.41   | 5.02   |
| ENSG0000( OARD1     | protein_co chr6  | 41033627 | 41097787 | - | 12.84  | 10.19  |
| ENSG0000( UNC5CL    | protein_co chr6  | 41026911 | 41039217 | - | 0.05   | 0.08   |
| ENSG0000( AARS2     | protein_co chr6  | 44299654 | 44313326 | - | 3.78   | 3.85   |
| ENSG0000( HIST1H1A  | protein_co chr6  | 26017085 | 26017732 | - | 0      | 0      |
| ENSG0000( ZNF391    | protein_co chr6  | 27374615 | 27403904 | + | 0.9    | 0.95   |
| ENSG0000( RPS10     | protein_co chr6  | 34417454 | 34426125 | - | 744.52 | 740.02 |
| ENSG0000( MOCS1     | protein_co chr6  | 39899578 | 39934551 | - | 5.74   | 5.42   |
| ENSG0000( HIST1H2BJ | protein_co chr6  | 27125897 | 27132750 | - | 0.59   | 0.48   |
| ENSG0000( MED20     | protein_co chr6  | 41905354 | 41921139 | - | 9.45   | 9.87   |
| ENSG0000( OR2B6     | protein_co chr6  | 27957241 | 27958182 | + | 0      | 0      |
| ENSG0000( TBCC      | protein_co chr6  | 42744481 | 42746096 | - | 11.72  | 10.73  |
| ENSG0000( SPDEF     | protein_co chr6  | 34537802 | 34556333 | - | 0      | 0.03   |
| ENSG0000( TCP11     | protein_co chr6  | 35118071 | 35148610 | - | 0.2    | 0.25   |
| ENSG0000( MAD2L1BP  | protein_co chr6  | 43629540 | 43640952 | + | 10.73  | 13.05  |
| ENSG0000( APOBEC2   | protein_co chr6  | 41053304 | 41064511 | + | 0      | 0      |
| ENSG0000( KLHDC3    | protein_co chr6  | 43014103 | 43021298 | + | 32.33  | 32.63  |
| ENSG0000( GNMT      | protein_co chr6  | 42960758 | 42963880 | + | 0.22   | 0.37   |
| ENSG0000( DNAH8     | protein_co chr6  | 38715341 | 39030529 | + | 0      | 0      |
| ENSG0000( TREM1     | protein_co chr6  | 41267926 | 41286719 | - | 2.38   | 2.62   |
| ENSG0000( MEA1      | protein_co chr6  | 43012094 | 43013968 | - | 50.05  | 49.67  |
| ENSG0000( KLHL31    | protein_co chr6  | 53647901 | 53665708 | - | 0      | 0.01   |
| ENSG0000( COL21A1   | protein_co chr6  | 56056590 | 56394094 | - | 0.44   | 0.05   |

|                    |                  |          |            |        |        |
|--------------------|------------------|----------|------------|--------|--------|
| ENSG0000(CDKN1A    | protein_co chr6  | 36676460 | 36687339 + | 469.19 | 493.58 |
| ENSG0000(SOX4      | protein_co chr6  | 21592768 | 21598619 + | 15.1   | 17.57  |
| ENSG0000(GLO1      | protein_co chr6  | 38675925 | 38703141 - | 31.19  | 34.38  |
| ENSG0000(CPNE5     | protein_co chr6  | 36740775 | 36840002 - | 0.18   | 0.08   |
| ENSG0000(KCNK17    | protein_co chr6  | 39299001 | 39314553 - | 0      | 0      |
| ENSG0000(RREB1     | protein_co chr6  | 7107597  | 7251980 +  | 4.38   | 4.95   |
| ENSG0000(SSR1      | protein_co chr6  | 7268306  | 7347446 -  | 63.88  | 60.74  |
| ENSG0000(RIOK1     | protein_co chr6  | 7389496  | 7418037 +  | 5.16   | 4.96   |
| ENSG0000(NRN1      | protein_co chr6  | 5997999  | 6007605 -  | 0      | 0      |
| ENSG0000(SLC35B3   | protein_co chr6  | 8413068  | 8435483 -  | 9.78   | 9.76   |
| ENSG0000(RPP40     | protein_co chr6  | 4994732  | 5004063 -  | 1.54   | 2.85   |
| ENSG0000(ATXN1     | protein_co chr6  | 16299112 | 16761491 - | 10.66  | 11.48  |
| ENSG0000(NUP153    | protein_co chr6  | 17615035 | 17706834 - | 8.59   | 8.41   |
| ENSG0000(DEK       | protein_co chr6  | 18223868 | 18264823 - | 29.29  | 33.67  |
| ENSG0000(EEF1E1    | protein_co chr6  | 8073360  | 8102578 -  | 10.11  | 10.78  |
| ENSG0000(CRISP1    | protein_co chr6  | 49834257 | 49877096 - | 0      | 0      |
| ENSG0000(RUNX2     | protein_co chr6  | 45328157 | 45664349 + | 7.14   | 7.76   |
| ENSG0000(OPN5      | protein_co chr6  | 47781982 | 47832780 + | 0      | 0      |
| ENSG0000(GCM2      | protein_co chr6  | 10873223 | 10881941 - | 0      | 0      |
| ENSG0000(LRRFIP1   | protein_co chr2  | 2.38E+08 | 2.38E+08 + | 44.51  | 37.5   |
| ENSG0000(AC105760. | antisense chr2   | 2.37E+08 | 2.37E+08 - | 0      | 0      |
| ENSG0000(RAB17     | protein_co chr2  | 2.38E+08 | 2.38E+08 - | 0.1    | 0.08   |
| ENSG0000(CXCL6     | protein_co chr4  | 73836497 | 73849064 + | 104.11 | 66.9   |
| ENSG0000(EREG      | protein_co chr4  | 74365143 | 74388751 + | 0.07   | 0.11   |
| ENSG0000(TRIM51    | protein_co chr11 | 55883297 | 55891810 + | 0      | 0      |
| ENSG0000(DKFZP434k | lincRNA chr11    | 61746493 | 61757655 - | 0      | 0      |
| ENSG0000(MYRF      | protein_co chr11 | 61752642 | 61788518 + | 0.56   | 0.57   |
| ENSG0000(SCGB1D2   | protein_co chr11 | 62242210 | 62244808 + | 0      | 0      |
| ENSG0000(SCGB2A1   | protein_co chr11 | 62208668 | 62213939 + | 0      | 0      |
| ENSG0000(AHNAK     | protein_co chr11 | 62433542 | 62556235 - | 196.27 | 207.76 |
| ENSG0000(EMC3      | protein_co chr3  | 9962537  | 10011116 - | 67.5   | 61.91  |
| ENSG0000(SSUH2     | protein_co chr3  | 8619400  | 8745040 -  | 0.26   | 0      |
| ENSG0000(WNT1      | protein_co chr12 | 48978453 | 48981676 + | 0      | 0      |
| ENSG0000(SH3TC1    | protein_co chr4  | 8182072  | 8241803 +  | 0.44   | 0.54   |
| ENSG0000(CNOT1     | protein_co chr16 | 58519951 | 58629886 - | 42.73  | 40.44  |
| ENSG0000(LRRC29    | protein_co chr16 | 67207139 | 67227048 - | 2.51   | 2.38   |
| ENSG0000(BBS2      | protein_co chr16 | 56466836 | 56520283 - | 17.45  | 19.64  |
| ENSG0000(MT1G      | protein_co chr16 | 56666731 | 56668065 - | 0.69   | 0      |
| ENSG0000(MT2A      | protein_co chr16 | 56608199 | 56609497 + | 105.53 | 88.21  |
| ENSG0000(C16orf70  | protein_co chr16 | 67109958 | 67148539 + | 7.47   | 7.1    |
| ENSG0000(GOT2      | protein_co chr16 | 58707131 | 58734357 - | 17.63  | 16.12  |
| ENSG0000(DOK4      | protein_co chr16 | 57471922 | 57487327 - | 24.7   | 28.9   |
| ENSG0000(PIWIL1    | protein_co chr12 | 1.3E+08  | 1.3E+08 +  | 0      | 0.04   |
| ENSG0000(GPR18     | protein_co chr13 | 99254714 | 99261744 - | 0      | 0      |
| ENSG0000(CLYBL     | protein_co chr13 | 99606669 | 99897134 + | 0.32   | 0.63   |

|                    |                  |          |          |   |       |       |
|--------------------|------------------|----------|----------|---|-------|-------|
| ENSG0000(TMTC4     | protein_co chr13 | 1.01E+08 | 1.01E+08 | - | 14.44 | 11.53 |
| ENSG0000(RAP2A     | protein_co chr13 | 97434222 | 97469128 | + | 7.3   | 6.91  |
| ENSG0000(SLC10A2   | protein_co chr13 | 1.03E+08 | 1.03E+08 | - | 0     | 0     |
| ENSG0000(ABCC4     | protein_co chr13 | 95019829 | 95301446 | - | 7.85  | 7.43  |
| ENSG0000(EFNB2     | protein_co chr13 | 1.06E+08 | 1.07E+08 | - | 0.36  | 0.41  |
| ENSG0000(SOX21     | protein_co chr13 | 94709622 | 94712399 | - | 0     | 0     |
| ENSG0000(TM9SF2    | protein_co chr13 | 99501417 | 99564006 | + | 54.83 | 52.11 |
| ENSG0000(C17orf53  | protein_co chr17 | 44141906 | 44162476 | + | 0.38  | 0.33  |
| ENSG0000(KIF25     | protein_co chr6  | 1.68E+08 | 1.68E+08 | + | 0     | 0.25  |
| ENSG0000(IRF1      | protein_co chr5  | 1.32E+08 | 1.32E+08 | - | 9.75  | 9.63  |
| ENSG0000(UPF3B     | protein_co chrX  | 1.2E+08  | 1.2E+08  | - | 4.27  | 5.05  |
| ENSG0000(RNF113A   | protein_co chrX  | 1.2E+08  | 1.2E+08  | - | 8.03  | 6.76  |
| ENSG0000(6-Sep     | protein_co chrX  | 1.2E+08  | 1.2E+08  | - | 19.94 | 17.81 |
| ENSG0000(TMEM255   | protein_co chrX  | 1.2E+08  | 1.2E+08  | - | 0.06  | 0.1   |
| ENSG0000(NDUFA1    | protein_co chrX  | 1.2E+08  | 1.2E+08  | + | 68.62 | 68.34 |
| ENSG0000(AMELX     | protein_co chrX  | 11293413 | 11300761 | + | 0     | 0     |
| ENSG0000(ATP5S     | protein_co chr14 | 50312326 | 50335558 | + | 4.53  | 4.62  |
| ENSG0000(BMP4      | protein_co chr14 | 53949736 | 53958761 | - | 2.62  | 1.5   |
| ENSG0000(PTGER2    | protein_co chr14 | 52314305 | 52328606 | + | 0.51  | 0.91  |
| ENSG0000(RP11-297B | processed_chr9   | 37046835 | 37047237 | + | 0     | 0     |
| ENSG0000(FAM193A   | protein_co chr4  | 2536631  | 2732565  | + | 6.57  | 7.07  |
| ENSG0000(GRK4      | protein_co chr4  | 2963608  | 3040747  | + | 2.08  | 1.72  |
| ENSG0000(SOX9      | protein_co chr17 | 72121020 | 72126420 | + | 6.44  | 7.85  |
| ENSG0000(TEKT3     | protein_co chr17 | 15303811 | 15341641 | - | 0.24  | 0.17  |
| ENSG0000(MYH2      | protein_co chr17 | 10521148 | 10549957 | - | 0     | 0     |
| ENSG0000(HS3ST3B1  | protein_co chr17 | 14301083 | 14349404 | + | 0.24  | 0.27  |
| ENSG0000(SLC25A35  | protein_co chr17 | 8287763  | 8295343  | - | 2.45  | 2.91  |
| ENSG0000(MRPS7     | protein_co chr17 | 75261674 | 75266373 | + | 24.78 | 25    |
| ENSG0000(GGA3      | protein_co chr17 | 75236599 | 75262363 | - | 17.04 | 16.84 |
| ENSG0000(ARMC7     | protein_co chr17 | 75109952 | 75130265 | + | 5.63  | 5.48  |
| ENSG0000(NUP85     | protein_co chr17 | 75205659 | 75235758 | + | 12.36 | 11.9  |
| ENSG0000(SLC25A19  | protein_co chr17 | 75272981 | 75289510 | - | 4.07  | 3.14  |
| ENSG0000(MIF4GD    | protein_co chr17 | 75266228 | 75271227 | - | 6.43  | 7.82  |
| ENSG0000(NT5C      | protein_co chr17 | 75130225 | 75131795 | - | 23.58 | 25.62 |
| ENSG0000(MSTO1     | protein_co chr1  | 1.56E+08 | 1.56E+08 | + | 13.09 | 11.68 |
| ENSG0000(C1orf61   | protein_co chr1  | 1.56E+08 | 1.56E+08 | - | 0.17  | 0.09  |
| ENSG0000(TTF1      | protein_co chr9  | 1.32E+08 | 1.32E+08 | - | 3.84  | 3.71  |
| ENSG0000(GTF3C4    | protein_co chr9  | 1.33E+08 | 1.33E+08 | + | 5.26  | 5.61  |
| ENSG0000(DDX31     | protein_co chr9  | 1.33E+08 | 1.33E+08 | - | 3.8   | 3.93  |
| ENSG0000(BARHL1    | protein_co chr9  | 1.33E+08 | 1.33E+08 | + | 0     | 0     |
| ENSG0000(KIR2DL1   | protein_co chr19 | 54769811 | 54784322 | + | 0     | 0     |
| ENSG0000(PPP1R12C  | protein_co chr19 | 55090913 | 55117559 | - | 39.23 | 38.39 |
| ENSG0000(MBOAT7    | protein_co chr19 | 54173412 | 54189882 | - | 61.32 | 52.7  |
| ENSG0000(SRMS      | protein_co chr20 | 63540810 | 63547504 | - | 0.04  | 0     |
| ENSG0000(OPRL1     | protein_co chr20 | 64080173 | 64100643 | + | 0.76  | 1.19  |

|                    |             |       |          |          |   |         |         |
|--------------------|-------------|-------|----------|----------|---|---------|---------|
| ENSG0000(LINC00029 | lincRNA     | chr20 | 63034217 | 63037028 | - | 0       | 0       |
| ENSG0000(SLC2A4RG  | protein_co  | chr20 | 63739861 | 63743505 | + | 66.05   | 60.62   |
| ENSG0000(NPBWR2    | protein_co  | chr20 | 64105820 | 64107171 | - | 0       | 0       |
| ENSG0000(FNDC11    | protein_co  | chr20 | 63547891 | 63556708 | + | 0.35    | 0.45    |
| ENSG0000(BHLHE23   | protein_co  | chr20 | 63005927 | 63007035 | - | 0       | 0       |
| ENSG0000(PPDPF     | protein_co  | chr20 | 63520724 | 63522206 | + | 192.78  | 190.53  |
| ENSG0000(IL1B      | protein_co  | chr2  | 1.13E+08 | 1.13E+08 | - | 51.45   | 43.71   |
| ENSG0000(PLGLB2    | protein_co  | chr2  | 87748087 | 87758793 | + | 0.38    | 0.6     |
| ENSG0000(IL37      | protein_co  | chr2  | 1.13E+08 | 1.13E+08 | + | 0.08    | 0       |
| ENSG0000(CHCHD5    | protein_co  | chr2  | 1.13E+08 | 1.13E+08 | + | 16.97   | 15.6    |
| ENSG0000(PAX8      | protein_co  | chr2  | 1.13E+08 | 1.13E+08 | - | 0.66    | 0.76    |
| ENSG0000(INSIG2    | protein_co  | chr2  | 1.18E+08 | 1.18E+08 | + | 8.84    | 10.99   |
| ENSG0000(POLR1B    | protein_co  | chr2  | 1.13E+08 | 1.13E+08 | + | 6.23    | 6.16    |
| ENSG0000(HTR5BP    | transcribed | chr2  | 1.18E+08 | 1.18E+08 | + | 0       | 0       |
| ENSG0000(CCDC93    | protein_co  | chr2  | 1.18E+08 | 1.18E+08 | - | 14.93   | 15.98   |
| ENSG0000(PSD4      | protein_co  | chr2  | 1.13E+08 | 1.13E+08 | + | 0.78    | 1.43    |
| ENSG0000(SLC25A23  | protein_co  | chr19 | 6436079  | 6465203  | - | 21.83   | 21.34   |
| ENSG0000(PSPN      | protein_co  | chr19 | 6375148  | 6379058  | - | 0.57    | 0.59    |
| ENSG0000(GTF2F1    | protein_co  | chr19 | 6379569  | 6393981  | - | 27.88   | 31.67   |
| ENSG0000(ALKBH7    | protein_co  | chr19 | 6372433  | 6375251  | + | 29.08   | 31.05   |
| ENSG0000(CLPP      | protein_co  | chr19 | 6361452  | 6368908  | + | 29.78   | 29.43   |
| ENSG0000(TNFSF9    | protein_co  | chr19 | 6530999  | 6535928  | + | 3.88    | 4.42    |
| ENSG0000(GRIA3     | protein_co  | chrX  | 1.23E+08 | 1.23E+08 | + | 2.8     | 2.34    |
| ENSG0000(THOC2     | protein_co  | chrX  | 1.24E+08 | 1.24E+08 | - | 22.41   | 23.21   |
| ENSG0000(MED1      | protein_co  | chr17 | 39404285 | 39451286 | - | 12.55   | 13.38   |
| ENSG0000(RPL23     | protein_co  | chr17 | 38847865 | 38853843 | - | 1161.07 | 1177.56 |
| ENSG0000(RP11-51F1 | protein_co  | chr17 | 63702845 | 63752097 | - | 0       | 0       |
| ENSG0000(ATG4C     | protein_co  | chr1  | 62784135 | 62865513 | + | 4.23    | 3.87    |
| ENSG0000(CD70      | protein_co  | chr19 | 6583183  | 6604103  | - | 0.14    | 0.15    |
| ENSG0000(C3        | protein_co  | chr19 | 6677704  | 6730562  | - | 1008.65 | 941.6   |
| ENSG0000(SH2D3A    | protein_co  | chr19 | 6752160  | 6767588  | - | 0.11    | 0.18    |
| ENSG0000(TRIP10    | protein_co  | chr19 | 6737925  | 6751526  | + | 30.99   | 30.11   |
| ENSG0000(GPR108    | protein_co  | chr19 | 6729914  | 6737603  | - | 34.63   | 36.82   |
| ENSG0000(TNFSF14   | protein_co  | chr19 | 6661253  | 6670588  | - | 1.85    | 1.47    |
| ENSG0000(FOSB      | protein_co  | chr19 | 45467995 | 45475179 | + | 0.6     | 0.21    |
| ENSG0000(OPA3      | protein_co  | chr19 | 45527427 | 45602212 | - | 5.37    | 5.61    |
| ENSG0000(SNRPD2    | protein_co  | chr19 | 45687454 | 45692569 | - | 120.44  | 118.78  |
| ENSG0000(RTN2      | protein_co  | chr19 | 45485289 | 45497061 | - | 11.72   | 14.1    |
| ENSG0000(EML2      | protein_co  | chr19 | 45606994 | 45645629 | - | 11      | 11.9    |
| ENSG0000(VASP      | protein_co  | chr19 | 45506579 | 45526983 | + | 28.52   | 32.49   |
| ENSG0000(SYMPK     | protein_co  | chr19 | 45815410 | 45863290 | - | 13.36   | 15.96   |
| ENSG0000(GPCPD1    | protein_co  | chr20 | 5544404  | 5611026  | - | 8.27    | 5.28    |
| ENSG0000(SDCBP2    | protein_co  | chr20 | 1309909  | 1329239  | - | 1.18    | 1.01    |
| ENSG0000(PANK2     | protein_co  | chr20 | 3888839  | 3929882  | + | 15.77   | 14.85   |
| ENSG0000(TGM3      | protein_co  | chr20 | 2296001  | 2341078  | + | 0       | 0       |

|                    |                  |          |          |   |       |        |
|--------------------|------------------|----------|----------|---|-------|--------|
| ENSG0000(GNRH2     | protein_co chr20 | 3043622  | 3045747  | + | 0.09  | 0      |
| ENSG0000(DEFB126   | protein_co chr20 | 142369   | 145751   | + | 0     | 0      |
| ENSG0000(FOXA2     | protein_co chr20 | 22581005 | 22585455 | - | 0     | 0      |
| ENSG0000(FAM182A   | processed_chr20  | 26054655 | 26086917 | + | 0.08  | 0.18   |
| ENSG0000(CD93      | protein_co chr20 | 23079349 | 23086340 | - | 0     | 0.01   |
| ENSG0000(GZF1      | protein_co chr20 | 23362182 | 23373063 | + | 4.03  | 5.93   |
| ENSG0000(PAX1      | protein_co chr20 | 21705659 | 21718486 | + | 0     | 0      |
| ENSG0000(NAPB      | protein_co chr20 | 23374519 | 23421519 | - | 3.82  | 3.9    |
| ENSG0000(CST8      | protein_co chr20 | 23491101 | 23496018 | + | 0     | 0      |
| ENSG0000(NKX2-4    | protein_co chr20 | 21395367 | 21398028 | - | 0     | 0      |
| ENSG0000(CENPB     | protein_co chr20 | 3783851  | 3786690  | - | 28.85 | 31.07  |
| ENSG0000(PSMF1     | protein_co chr20 | 1113263  | 1189415  | + | 50.61 | 51.43  |
| ENSG0000(NKX2-2    | protein_co chr20 | 21511010 | 21514026 | - | 0     | 0      |
| ENSG0000(DTD1      | protein_co chr20 | 18567453 | 18763917 | + | 27.55 | 27.87  |
| ENSG0000(CSTL1     | protein_co chr20 | 23439685 | 23444930 | + | 0     | 0.18   |
| ENSG0000(RBCK1     | protein_co chr20 | 407498   | 430966   | + | 46.43 | 47.03  |
| ENSG0000(TMX4      | protein_co chr20 | 7977348  | 8019829  | - | 52.09 | 52.7   |
| ENSG0000(CST11     | protein_co chr20 | 23450403 | 23452857 | - | 0     | 0      |
| ENSG0000(STK35     | protein_co chr20 | 2101611  | 2177038  | + | 4.16  | 4.19   |
| ENSG0000(SNRPB     | protein_co chr20 | 2461634  | 2470853  | - | 57.32 | 55.85  |
| ENSG0000(NRSN2     | protein_co chr20 | 346782   | 359660   | + | 35.24 | 32.68  |
| ENSG0000(AP5S1     | protein_co chr20 | 3820524  | 3828837  | + | 7.21  | 6.23   |
| ENSG0000(RRBP1     | protein_co chr20 | 17613678 | 17682295 | - | 62.89 | 65.95  |
| ENSG0000(BMP2      | protein_co chr20 | 6767664  | 6780280  | + | 7.2   | 7.23   |
| ENSG0000(ZNF133    | protein_co chr20 | 18288283 | 18316996 | + | 6.9   | 6.36   |
| ENSG0000(FLRT3     | protein_co chr20 | 14322988 | 14337616 | - | 0.55  | 0.44   |
| ENSG0000(OVOL2     | protein_co chr20 | 17956979 | 18059188 | - | 0     | 0      |
| ENSG0000(PCSK2     | protein_co chr20 | 17226107 | 17484578 | + | 0.02  | 0      |
| ENSG0000(GFRA4     | protein_co chr20 | 3659292  | 3663399  | - | 0     | 0      |
| ENSG0000(MKKS      | protein_co chr20 | 10401009 | 10434222 | - | 11.55 | 30.65  |
| ENSG0000(BFSP1     | protein_co chr20 | 17493905 | 17569220 | - | 1.08  | 1.94   |
| ENSG0000(DSTN      | protein_co chr20 | 17569863 | 17609919 | + | 272.1 | 287.32 |
| ENSG0000(LAMP5     | protein_co chr20 | 9514358  | 9530524  | + | 0     | 0      |
| ENSG0000(SNRPB2    | protein_co chr20 | 16729961 | 16742563 | + | 23.18 | 21.39  |
| ENSG0000(MGME1     | protein_co chr20 | 17968913 | 17991122 | + | 4.65  | 4.6    |
| ENSG0000(LRRN4     | protein_co chr20 | 6040778  | 6054049  | - | 0.18  | 0.11   |
| ENSG0000(TBC1D20   | protein_co chr20 | 435480   | 462553   | - | 25.46 | 27.25  |
| ENSG0000(ITPA      | protein_co chr20 | 3208868  | 3223870  | + | 22.47 | 18.03  |
| ENSG0000(TCF15     | protein_co chr20 | 603797   | 610398   | - | 0     | 0.04   |
| ENSG0000(OTOR      | protein_co chr20 | 16748358 | 16770062 | + | 0     | 0      |
| ENSG0000(MCM8      | protein_co chr20 | 5950652  | 5998977  | + | 1.11  | 0.87   |
| ENSG0000(BANF2     | protein_co chr20 | 17693672 | 17735871 | + | 0     | 0      |
| ENSG0000(TMEM74B   | protein_co chr20 | 1180561  | 1185415  | - | 0.19  | 0.32   |
| ENSG0000(FAM110A   | protein_co chr20 | 833715   | 857463   | + | 1.66  | 1.37   |
| ENSG0000(C20orf187 | lincRNA chr20    | 11027760 | 11029366 | + | 0     | 0      |



|                    |                   |          |            |        |        |
|--------------------|-------------------|----------|------------|--------|--------|
| ENSG0000(SIRPD     | protein_co chr20  | 1534251  | 1558843 -  | 0      | 0      |
| ENSG0000(MRPS26    | protein_co chr20  | 3045945  | 3048254 +  | 14.93  | 16.2   |
| ENSG0000(DEFB129   | protein_co chr20  | 227258   | 229886 +   | 0      | 0      |
| ENSG0000(S1PR4     | protein_co chr19  | 3172346  | 3180332 +  | 0      | 0      |
| ENSG0000(NCLN      | protein_co chr19  | 3185563  | 3209575 +  | 15.73  | 14.03  |
| ENSG0000(CITED1    | protein_co chrX   | 72301638 | 72307187 - | 0.14   | 0.16   |
| ENSG0000(HNRNPR    | protein_co chr1   | 23303771 | 23344336 - | 45.08  | 37.37  |
| ENSG0000(ZNF436    | protein_co chr1   | 23359448 | 23369442 - | 10.6   | 11.29  |
| ENSG0000(MAX       | protein_co chr14  | 65006174 | 65102695 - | 36.31  | 39.42  |
| ENSG0000(CHURC1-FI | protein_co chr14  | 64914485 | 65061803 + | 4.07   | 2.95   |
| ENSG0000(ARMCX5    | protein_co chrX   | 1.03E+08 | 1.03E+08 + | 5.62   | 5.77   |
| ENSG0000(GDF5      | protein_co chr20  | 35433347 | 35454746 - | 4.34   | 2.88   |
| ENSG0000(MMP24     | protein_co chr20  | 35226654 | 35277000 + | 0.41   | 0.49   |
| ENSG0000(NECAB3    | protein_co chr20  | 33657087 | 33674463 - | 14.23  | 11.22  |
| ENSG0000(ID1       | protein_co chr20  | 31605283 | 31606515 + | 8      | 8.78   |
| ENSG0000(RALY      | protein_co chr20  | 33993646 | 34108308 + | 86.14  | 93.72  |
| ENSG0000(DYNLRB1   | protein_co chr20  | 34516409 | 34540958 + | 122.87 | 121.12 |
| ENSG0000(C20orf173 | protein_co chr20  | 35523186 | 35529652 - | 0      | 0      |
| ENSG0000(EIF2S2    | protein_co chr20  | 34088298 | 34112332 - | 56.47  | 54.38  |
| ENSG0000(ERGIC3    | protein_co chr20  | 35542021 | 35557634 + | 195.58 | 187.32 |
| ENSG0000(ROMO1     | protein_co chr20  | 35699272 | 35700984 + | 86.26  | 83.49  |
| ENSG0000(BPIFB9P   | transcribec chr20 | 33347720 | 33354444 + | 0      | 0      |
| ENSG0000(FAM83C    | protein_co chr20  | 35285731 | 35292401 - | 0      | 0      |
| ENSG0000(BPIFB1    | protein_co chr20  | 33273480 | 33309878 + | 0      | 0      |
| ENSG0000(CEP250    | protein_co chr20  | 35455164 | 35519280 + | 17.95  | 11.19  |
| ENSG0000(PLAGL2    | protein_co chr20  | 32192503 | 32207791 - | 2.93   | 2.93   |
| ENSG0000(MMP24-AS  | protein_co chr20  | 35201745 | 35278131 - | 47.16  | 46.59  |
| ENSG0000(GRPR      | protein_co chrX   | 16123556 | 16153021 + | 0      | 0.03   |
| ENSG0000(KDM5C     | protein_co chrX   | 53191321 | 53225422 - | 17.43  | 19.3   |
| ENSG0000(AMOT      | protein_co chrX   | 1.13E+08 | 1.13E+08 - | 8.46   | 9.79   |
| ENSG0000(TMEM115   | protein_co chr3   | 50354749 | 50359610 - | 26.78  | 30.29  |
| ENSG0000(PSMB2     | protein_co chr1   | 35599544 | 35641844 - | 30.05  | 32.13  |
| ENSG0000(AGO3      | protein_co chr1   | 35930718 | 36072500 + | 2.27   | 4.12   |
| ENSG0000(UROD      | protein_co chr1   | 45012147 | 45015575 + | 77.8   | 89.66  |
| ENSG0000(ST3GAL3   | protein_co chr1   | 43705824 | 43931165 + | 4.84   | 7.05   |
| ENSG0000(TMEM53    | protein_co chr1   | 44635238 | 44674555 - | 6.17   | 4.26   |
| ENSG0000(HECTD3    | protein_co chr1   | 45002540 | 45011329 - | 20.12  | 21.99  |
| ENSG0000(KLC1      | protein_co chr14  | 1.04E+08 | 1.04E+08 + | 62.93  | 67.48  |
| ENSG0000(XRCC3     | protein_co chr14  | 1.04E+08 | 1.04E+08 - | 1.56   | 2.23   |
| ENSG0000(TUBGCP3   | protein_co chr13  | 1.12E+08 | 1.13E+08 - | 5.8    | 7.11   |
| ENSG0000(MCF2L     | protein_co chr13  | 1.13E+08 | 1.13E+08 + | 0.86   | 0.44   |
| ENSG0000(F10       | protein_co chr13  | 1.13E+08 | 1.13E+08 + | 0.69   | 1.32   |
| ENSG0000(PCID2     | protein_co chr13  | 1.13E+08 | 1.13E+08 - | 26.78  | 26.33  |
| ENSG0000(PROZ      | protein_co chr13  | 1.13E+08 | 1.13E+08 + | 0      | 0      |
| ENSG0000(SLURP1    | protein_co chr8   | 1.43E+08 | 1.43E+08 - | 0      | 0      |

|                  |                  |          |          |   |        |        |
|------------------|------------------|----------|----------|---|--------|--------|
| ENSG0000(LRFN3   | protein_co chr19 | 35935358 | 35945767 | + | 6.53   | 8.89   |
| ENSG0000(IGFLR1  | protein_co chr19 | 35738801 | 35742453 | - | 1.18   | 3.4    |
| ENSG0000(CAPNS1  | protein_co chr19 | 36139575 | 36150353 | + | 540.73 | 521.58 |
| ENSG0000(PDCD2L  | protein_co chr19 | 34404384 | 34426168 | + | 2.03   | 3.63   |
| ENSG0000(GPR42   | protein_co chr19 | 35370929 | 35372962 | + | 0      | 0      |
| ENSG0000(RBM42   | protein_co chr19 | 35629030 | 35637686 | + | 25.74  | 25.29  |
| ENSG0000(KIRREL2 | protein_co chr19 | 35855861 | 35867109 | + | 0      | 0.03   |
| ENSG0000(UBA2    | protein_co chr19 | 34428352 | 34471251 | + | 42.55  | 40.66  |
| ENSG0000(FFAR2   | protein_co chr19 | 35443907 | 35451767 | + | 0      | 0      |
| ENSG0000(HCST    | protein_co chr19 | 35902480 | 35904377 | + | 0      | 0.2    |
| ENSG0000(FFAR1   | protein_co chr19 | 35351552 | 35353862 | + | 0      | 0      |
| ENSG0000(COX6B1  | protein_co chr19 | 35648223 | 35658861 | + | 163.48 | 162.29 |
| ENSG0000(KRT36   | protein_co chr17 | 41486136 | 41492546 | - | 0.03   | 0.04   |
| ENSG0000(THRA    | protein_co chr17 | 40058290 | 40093867 | + | 16.39  | 16.12  |
| ENSG0000(CCR7    | protein_co chr17 | 40553769 | 40565472 | - | 0      | 0.03   |
| ENSG0000(NR1D1   | protein_co chr17 | 40092787 | 40100725 | - | 13.31  | 10.24  |
| ENSG0000(FRMD8   | protein_co chr11 | 65386599 | 65413525 | + | 10.81  | 12.69  |
| ENSG0000(PRDX5   | protein_co chr11 | 64318088 | 64321811 | + | 280.12 | 277.75 |
| ENSG0000(BCL2L12 | protein_co chr19 | 49665142 | 49673916 | + | 9.22   | 8.9    |
| ENSG0000(IRF3    | protein_co chr19 | 49659569 | 49665875 | - | 23.24  | 29.93  |
| ENSG0000(PRMT1   | protein_co chr19 | 49675786 | 49689029 | + | 59.75  | 58.67  |
| ENSG0000(RRAS    | protein_co chr19 | 49635292 | 49640201 | - | 103.42 | 100.49 |
| ENSG0000(PRRG2   | protein_co chr19 | 49580646 | 49591015 | + | 1.6    | 1.16   |
| ENSG0000(SCAF1   | protein_co chr19 | 49642125 | 49658642 | + | 17.12  | 16.35  |
| ENSG0000(PRR12   | protein_co chr19 | 49591643 | 49626439 | + | 6.03   | 6.08   |
| ENSG0000(TSKS    | protein_co chr19 | 49739753 | 49763330 | - | 1.12   | 1.23   |
| ENSG0000(FLRT1   | protein_co chr11 | 64103188 | 64119173 | + | 0      | 0.07   |
| ENSG0000(ASL     | protein_co chr7  | 66075798 | 66093558 | + | 23.13  | 19.97  |
| ENSG0000(SBDS    | protein_co chr7  | 66987677 | 66995601 | - | 39.45  | 40.73  |
| ENSG0000(CSN1S1  | protein_co chr4  | 69931081 | 69946574 | + | 0      | 0      |
| ENSG0000(STATH   | protein_co chr4  | 69995930 | 70002570 | + | 1.4    | 0.77   |
| ENSG0000(HTN1    | protein_co chr4  | 70050402 | 70058845 | + | 0.09   | 0.05   |
| ENSG0000(STAT5A  | protein_co chr17 | 42287547 | 42311943 | + | 9.71   | 10.51  |
| ENSG0000(WNK4    | protein_co chr17 | 42780678 | 42796936 | + | 5.81   | 4.24   |
| ENSG0000(BECN1   | protein_co chr17 | 42810134 | 42833350 | - | 39.57  | 39.07  |
| ENSG0000(PRKCG   | protein_co chr19 | 53879190 | 53907652 | + | 0      | 0.27   |
| ENSG0000(TRAP1   | protein_co chr16 | 3651639  | 3717597  | - | 15.29  | 13.56  |
| ENSG0000(GLIS2   | protein_co chr16 | 4314761  | 4339597  | + | 13.4   | 14.76  |
| ENSG0000(NSRP1   | protein_co chr17 | 30115521 | 30186475 | + | 13.7   | 15.56  |
| ENSG0000(DNAJC8  | protein_co chr1  | 28199456 | 28233025 | - | 44.96  | 48.54  |
| ENSG0000(AHDC1   | protein_co chr1  | 27534035 | 27604431 | - | 7.21   | 7.11   |
| ENSG0000(IFI6    | protein_co chr1  | 27666061 | 27672218 | - | 450.83 | 328.81 |
| ENSG0000(DACH2   | protein_co chrX  | 86148458 | 86832604 | + | 0      | 0      |
| ENSG0000(ZNF384  | protein_co chr12 | 6666477  | 6689572  | - | 22.36  | 23.17  |
| ENSG0000(EMG1    | protein_co chr12 | 6970893  | 6979941  | + | 6.75   | 10.29  |

|                  |                  |          |          |   |        |        |
|------------------|------------------|----------|----------|---|--------|--------|
| ENSG0000(SSX1    | protein_co chrX  | 48255317 | 48267444 | + | 0      | 0      |
| ENSG0000(UXT     | protein_co chrX  | 47651798 | 47659161 | - | 69.15  | 72.91  |
| ENSG0000(CFP     | protein_co chrX  | 47623172 | 47630305 | - | 0.07   | 0.51   |
| ENSG0000(ELK1    | protein_co chrX  | 47635521 | 47650604 | - | 14.57  | 12.08  |
| ENSG0000(TIMM17B | protein_co chrX  | 48893447 | 48898143 | - | 18.95  | 18.24  |
| ENSG0000(PCNX4   | protein_co chr14 | 60091911 | 60169133 | + | 18.92  | 19.35  |
| ENSG0000(ATG14   | protein_co chr14 | 55366392 | 55411858 | - | 6.01   | 6.13   |
| ENSG0000(KTN1    | protein_co chr14 | 55559072 | 55701526 | + | 60.39  | 58.05  |
| ENSG0000(SIX1    | protein_co chr14 | 60643415 | 60658259 | - | 2.44   | 3.11   |
| ENSG0000(RHOJ    | protein_co chr14 | 63204114 | 63293219 | + | 17.3   | 17.81  |
| ENSG0000(DLGAP5  | protein_co chr14 | 55148112 | 55191678 | - | 0.02   | 0.04   |
| ENSG0000(L3HYPDH | protein_co chr14 | 59460363 | 59484430 | - | 27.2   | 25.8   |
| ENSG0000(HSPA2   | protein_co chr14 | 64535905 | 64546173 | + | 0.69   | 0.67   |
| ENSG0000(ZBTB1   | protein_co chr14 | 64503712 | 64533690 | + | 14.2   | 16.8   |
| ENSG0000(TRMT5   | protein_co chr14 | 60971451 | 60981358 | - | 6.11   | 2.61   |
| ENSG0000(SGPP1   | protein_co chr14 | 63684214 | 63728039 | - | 4.1    | 3.78   |
| ENSG0000(PLEKHG3 | protein_co chr14 | 64704102 | 64750247 | + | 7.85   | 10.92  |
| ENSG0000(PZP     | protein_co chr12 | 9148840  | 9208370  | - | 0      | 0      |
| ENSG0000(PRDM7   | protein_co chr16 | 90056566 | 90092072 | - | 0.02   | 0.02   |
| ENSG0000(RHOT1   | protein_co chr17 | 32142454 | 32253374 | + | 13.03  | 12.73  |
| ENSG0000(EV12A   | protein_co chr17 | 31317560 | 31321884 | - | 13.87  | 15.44  |
| ENSG0000(OMG     | protein_co chr17 | 31272013 | 31297539 | - | 3.52   | 4.7    |
| ENSG0000(WDR60   | protein_co chr7  | 1.59E+08 | 1.59E+08 | + | 6.01   | 5.54   |
| ENSG0000(AIF1L   | protein_co chr9  | 1.31E+08 | 1.31E+08 | + | 0.1    | 0.09   |
| ENSG0000(FAM78A  | protein_co chr9  | 1.31E+08 | 1.31E+08 | - | 0.46   | 0.76   |
| ENSG0000(NUP214  | protein_co chr9  | 1.31E+08 | 1.31E+08 | + | 9.47   | 8.2    |
| ENSG0000(CTAG2   | protein_co chrX  | 1.55E+08 | 1.55E+08 | - | 0      | 0      |
| ENSG0000(AVPR2   | protein_co chrX  | 1.54E+08 | 1.54E+08 | + | 0      | 0      |
| ENSG0000(SLC10A3 | protein_co chrX  | 1.54E+08 | 1.54E+08 | - | 24.71  | 26.66  |
| ENSG0000(MAP2K2  | protein_co chr19 | 4090321  | 4124129  | - | 87.34  | 86.72  |
| ENSG0000(HNRNPH2 | protein_co chrX  | 1.01E+08 | 1.01E+08 | + | 30.33  | 29.26  |
| ENSG0000(ARMCX1  | protein_co chrX  | 1.02E+08 | 1.02E+08 | + | 17.36  | 15.92  |
| ENSG0000(TMEM35A | protein_co chrX  | 1.01E+08 | 1.01E+08 | + | 3.3    | 3.77   |
| ENSG0000(NXF5    | protein_co chrX  | 1.02E+08 | 1.02E+08 | - | 0      | 0      |
| ENSG0000(TIMM8A  | protein_co chrX  | 1.01E+08 | 1.01E+08 | - | 2.4    | 2.82   |
| ENSG0000(ZC4H2   | protein_co chrX  | 64915802 | 65034713 | - | 3.46   | 1.74   |
| ENSG0000(CANX    | protein_co chr5  | 1.8E+08  | 1.8E+08  | + | 324.67 | 321.09 |
| ENSG0000(INTS11  | protein_co chr1  | 1311585  | 1324691  | - | 30.09  | 30.88  |
| ENSG0000(RGS13   | protein_co chr1  | 1.93E+08 | 1.93E+08 | + | 0.01   | 0      |
| ENSG0000(IPPK    | protein_co chr9  | 92613184 | 92670265 | - | 4.17   | 2.92   |
| ENSG0000(ZNF484  | protein_co chr9  | 92845031 | 92878038 | - | 1.37   | 1.03   |
| ENSG0000(OMD     | protein_co chr9  | 92414245 | 92424461 | - | 0.11   | 0.12   |
| ENSG0000(FGD3    | protein_co chr9  | 92947451 | 93036236 | + | 0      | 0      |
| ENSG0000(HIVEP3  | protein_co chr1  | 41506365 | 42035925 | - | 2.45   | 1.78   |
| ENSG0000(PPCS    | protein_co chr1  | 42456117 | 42473385 | + | 21.68  | 23.09  |

|                   |                  |          |            |        |        |
|-------------------|------------------|----------|------------|--------|--------|
| ENSG0000( EDN2    | protein_co chr1  | 41478775 | 41484673 - | 0      | 0.09   |
| ENSG0000( BCL11B  | protein_co chr14 | 99169287 | 99271524 - | 0      | 0      |
| ENSG0000( COX7C   | protein_co chr5  | 86617904 | 86620962 + | 226.17 | 246.72 |
| ENSG0000( TRAF2   | protein_co chr9  | 1.37E+08 | 1.37E+08 + | 5.79   | 6.02   |
| ENSG0000( ABHD8   | protein_co chr19 | 17292131 | 17310236 - | 8.79   | 10.14  |
| ENSG0000( MASP1   | protein_co chr3  | 1.87E+08 | 1.87E+08 - | 15.15  | 19.3   |
| ENSG0000( ATP13A4 | protein_co chr3  | 1.93E+08 | 1.94E+08 - | 0.03   | 0.12   |
| ENSG0000( HRASLS  | protein_co chr3  | 1.93E+08 | 1.93E+08 + | 0.23   | 0.12   |
| ENSG0000( HELB    | protein_co chr12 | 66302545 | 66347645 + | 0.66   | 0.4    |
| ENSG0000( RAP1B   | protein_co chr12 | 68610839 | 68671901 + | 89.22  | 102.16 |
| ENSG0000( IL22    | protein_co chr12 | 68248242 | 68253607 - | 0      | 0      |
| ENSG0000( TSPAN8  | protein_co chr12 | 71125085 | 71441898 - | 80.49  | 83.65  |
| ENSG0000( BEST3   | protein_co chr12 | 69643360 | 69699476 - | 0      | 0      |
| ENSG0000( RAB3IP  | protein_co chr12 | 69738681 | 69823204 + | 4.36   | 3.35   |
| ENSG0000( PTPRB   | protein_co chr12 | 70515866 | 70637440 - | 6.1    | 3.65   |
| ENSG0000( DYRK2   | protein_co chr12 | 67648338 | 67665406 + | 13.37  | 15.34  |
| ENSG0000( YEATS4  | protein_co chr12 | 69359703 | 69390796 + | 5.55   | 6.48   |
| ENSG0000( TAS2R3  | protein_co chr7  | 1.42E+08 | 1.42E+08 + | 0.11   | 0      |
| ENSG0000( TAS2R4  | protein_co chr7  | 1.42E+08 | 1.42E+08 + | 0.51   | 0.65   |
| ENSG0000( TAS2R5  | protein_co chr7  | 1.42E+08 | 1.42E+08 + | 0      | 0.28   |
| ENSG0000( CRYGN   | protein_co chr7  | 1.51E+08 | 1.51E+08 - | 0.1    | 0.1    |
| ENSG0000( LRRC61  | protein_co chr7  | 1.5E+08  | 1.5E+08 +  | 0.34   | 0.57   |
| ENSG0000( TRPV5   | protein_co chr7  | 1.43E+08 | 1.43E+08 - | 0      | 0      |
| ENSG0000( IDUA    | protein_co chr4  | 986997   | 1004506 +  | 15.24  | 16.33  |
| ENSG0000( FGFRL1  | protein_co chr4  | 1009936  | 1026897 +  | 28.11  | 28.11  |
| ENSG0000( TMEM175 | protein_co chr4  | 932387   | 958656 +   | 12.4   | 11.19  |
| ENSG0000( AUNIP   | protein_co chr1  | 25831913 | 25859458 - | 0.08   | 0.05   |
| ENSG0000( PIN1    | protein_co chr19 | 9835257  | 9849682 +  | 42.03  | 44.88  |
| ENSG0000( FBXL12  | protein_co chr19 | 9810267  | 9827816 -  | 12.69  | 10.63  |
| ENSG0000( EMC1    | protein_co chr1  | 19215664 | 19251552 - | 32.44  | 35.76  |
| ENSG0000( PLA2G5  | protein_co chr1  | 20028179 | 20091190 + | 4.73   | 3.41   |
| ENSG0000( UBR4    | protein_co chr1  | 19074506 | 19210276 - | 37.62  | 43.12  |
| ENSG0000( HP1BP3  | protein_co chr1  | 20742661 | 20787323 - | 91.32  | 99.19  |
| ENSG0000( ADGRE2  | protein_co chr19 | 14732393 | 14778541 - | 0.03   | 0.02   |
| ENSG0000( SIN3B   | protein_co chr19 | 16829400 | 16880353 + | 14.99  | 16.67  |
| ENSG0000( OR7A10  | protein_co chr19 | 14840948 | 14841877 - | 0      | 0      |
| ENSG0000( SLC35E1 | protein_co chr19 | 16549831 | 16572382 - | 14.31  | 12.45  |
| ENSG0000( EPS15L1 | protein_co chr19 | 16355239 | 16472085 - | 13.53  | 12.64  |
| ENSG0000( KLF2    | protein_co chr19 | 16324817 | 16327874 + | 5.84   | 4.97   |
| ENSG0000( OR7C2   | protein_co chr19 | 14941489 | 14942448 + | 0      | 0      |
| ENSG0000( OR7C1   | protein_co chr19 | 14799146 | 14800211 - | 0      | 0      |
| ENSG0000( F2RL3   | protein_co chr19 | 16888860 | 16892606 + | 0      | 0.03   |
| ENSG0000( UQCR11  | protein_co chr19 | 1597172  | 1605490 -  | 95.65  | 93.19  |
| ENSG0000( GFER    | protein_co chr16 | 1984207  | 1987749 +  | 13.28  | 17.57  |
| ENSG0000( SYNGR3  | protein_co chr16 | 1989660  | 1994275 +  | 1.24   | 1.71   |

|                   |                  |          |            |       |       |
|-------------------|------------------|----------|------------|-------|-------|
| ENSG0000(PKMYT1   | protein_co chr16 | 2968024  | 2980539 -  | 0.53  | 0.08  |
| ENSG0000(WFIKKN1  | protein_co chr16 | 629239   | 634116 +   | 0.03  | 0.06  |
| ENSG0000(WDR24    | protein_co chr16 | 684622   | 690444 -   | 3.74  | 4.36  |
| ENSG0000(FBXL16   | protein_co chr16 | 692498   | 705829 -   | 0.05  | 0.11  |
| ENSG0000(CHTF18   | protein_co chr16 | 788046   | 800737 +   | 1.77  | 1.31  |
| ENSG0000(GNG13    | protein_co chr16 | 798041   | 800733 -   | 0     | 0     |
| ENSG0000(TUBBP1   | transcribec chr8 | 30351873 | 30353518 + | 1.82  | 0.93  |
| ENSG0000(MACF1    | protein_co chr1  | 39081316 | 39487177 + | 58.09 | 53.59 |
| ENSG0000(SMARCA4  | protein_co chr19 | 10961001 | 11065395 + | 19.34 | 17.77 |
| ENSG0000(KDM4B    | protein_co chr19 | 4969113  | 5153595 +  | 16.69 | 15.65 |
| ENSG0000(TICAM1   | protein_co chr19 | 4815932  | 4831704 -  | 6.93  | 7     |
| ENSG0000(METTL25  | protein_co chr12 | 82358497 | 82479236 + | 4.69  | 5.13  |
| ENSG0000(IL17B    | protein_co chr5  | 1.49E+08 | 1.49E+08 - | 0     | 0     |
| ENSG0000(EMC6     | protein_co chr17 | 3668815  | 3669668 +  | 22.65 | 21.85 |
| ENSG0000(OR1E2    | protein_co chr17 | 3432870  | 3433841 -  | 0     | 0     |
| ENSG0000(METTL16  | protein_co chr17 | 2405562  | 2511891 -  | 3.88  | 4.44  |
| ENSG0000(TUBA4A   | protein_co chr2  | 2.19E+08 | 2.19E+08 - | 14.18 | 9.89  |
| ENSG0000(VIL1     | protein_co chr2  | 2.18E+08 | 2.18E+08 + | 0     | 0     |
| ENSG0000(AAMP     | protein_co chr2  | 2.18E+08 | 2.18E+08 - | 43.68 | 45.18 |
| ENSG0000(PNKD     | protein_co chr2  | 2.18E+08 | 2.18E+08 + | 24.75 | 26.77 |
| ENSG0000(TNFRSF19 | protein_co chr13 | 23570370 | 23676104 + | 2.17  | 1.99  |
| ENSG0000(RNF6     | protein_co chr13 | 26132115 | 26222493 - | 14.2  | 13.91 |
| ENSG0000(ECHS1    | protein_co chr10 | 1.33E+08 | 1.33E+08 - | 35.42 | 36.57 |
| ENSG0000(ZNF835   | protein_co chr19 | 56661981 | 56671783 - | 0.02  | 0     |
| ENSG0000(AKAP9    | protein_co chr7  | 91940867 | 92110673 + | 7.99  | 7.66  |
| ENSG0000(GNG11    | protein_co chr7  | 93921699 | 93928610 + | 36.12 | 35.35 |
| ENSG0000(SEM1     | protein_co chr7  | 96481626 | 96709891 - | 87.66 | 98.05 |
| ENSG0000(GNGT1    | protein_co chr7  | 93591573 | 93911265 + | 0     | 0     |
| ENSG0000(HIP1     | protein_co chr7  | 75533300 | 75738962 - | 3.98  | 4.54  |
| ENSG0000(PTPN12   | protein_co chr7  | 77537275 | 77640071 + | 30.69 | 30.14 |
| ENSG0000(POR      | protein_co chr7  | 75899200 | 75986855 + | 20.82 | 24.96 |
| ENSG0000(FGL2     | protein_co chr7  | 77193371 | 77199848 - | 26.27 | 22.27 |
| ENSG0000(STYXL1   | protein_co chr7  | 75996338 | 76048004 - | 21.39 | 19.45 |
| ENSG0000(STEAP4   | protein_co chr7  | 88270892 | 88306891 - | 0.12  | 0.33  |
| ENSG0000(GNAI1    | protein_co chr7  | 80133955 | 80219402 + | 10.97 | 12.67 |
| ENSG0000(PMS2P3   | transcribec chr7 | 75502930 | 75528148 - | 3.41  | 6     |
| ENSG0000(PEX1     | protein_co chr7  | 92487020 | 92528531 - | 4.44  | 5.71  |
| ENSG0000(MTERF1   | protein_co chr7  | 91692008 | 91880720 - | 4.41  | 3.65  |
| ENSG0000(SGCE     | protein_co chr7  | 94585230 | 94656209 - | 66.33 | 70.89 |
| ENSG0000(RBM48    | protein_co chr7  | 92528773 | 92538005 + | 5.02  | 3.87  |
| ENSG0000(CASD1    | protein_co chr7  | 94509219 | 94557019 + | 4.1   | 3.25  |
| ENSG0000(ZNF780B  | protein_co chr19 | 40028260 | 40056209 - | 3.79  | 3.22  |
| ENSG0000(LRFN1    | protein_co chr19 | 39306568 | 39315336 - | 0.1   | 0.04  |
| ENSG0000(ZFP36    | protein_co chr19 | 39406813 | 39409412 + | 17.06 | 16.47 |
| ENSG0000(SRD5A3   | protein_co chr4  | 55346109 | 55373096 + | 6.04  | 5.25  |

|                   |                   |          |          |   |        |        |
|-------------------|-------------------|----------|----------|---|--------|--------|
| ENSG0000(SPINK2   | protein_co chr4   | 56809860 | 56821742 | - | 0      | 0      |
| ENSG0000(RASL11B  | protein_co chr4   | 52862290 | 52866835 | + | 0      | 0.04   |
| ENSG0000(PAICS    | protein_co chr4   | 56435741 | 56464579 | + | 30.78  | 30.28  |
| ENSG0000(KDR      | protein_co chr4   | 55078477 | 55125589 | - | 1.18   | 1.17   |
| ENSG0000(PPAT     | protein_co chr4   | 56393362 | 56435615 | - | 2.26   | 2.97   |
| ENSG0000(TUBGCP6  | protein_co chr22  | 50217689 | 50244992 | - | 9.73   | 10.8   |
| ENSG0000(ADM2     | protein_co chr22  | 50481556 | 50486440 | + | 3.78   | 4.26   |
| ENSG0000(DGCR6L   | protein_co chr22  | 20314276 | 20320080 | - | 38.28  | 37.16  |
| ENSG0000(DGCR8    | protein_co chr22  | 20080232 | 20111877 | + | 9.15   | 8.13   |
| ENSG0000(ASPHD2   | protein_co chr22  | 26429273 | 26445015 | + | 1.62   | 1.54   |
| ENSG0000(VPREB3   | protein_co chr22  | 23752743 | 23754468 | - | 0      | 0      |
| ENSG0000(SDF2L1   | protein_co chr22  | 21642261 | 21644298 | + | 9.58   | 11.58  |
| ENSG0000(GAL3ST1  | protein_co chr22  | 30554635 | 30574587 | - | 0      | 0      |
| ENSG0000(YWHAH    | protein_co chr22  | 31944461 | 31957603 | + | 45.04  | 42.92  |
| ENSG0000(RFPL1    | protein_co chr22  | 29438583 | 29442455 | + | 0      | 0.04   |
| ENSG0000(RFPL2    | protein_co chr22  | 32190435 | 32203477 | - | 0      | 0      |
| ENSG0000(C22orf24 | processed_chr22   | 31933521 | 31945518 | - | 0.27   | 0      |
| ENSG0000(POM121L9 | transcribec chr22 | 24251828 | 24265525 | + | 1.1    | 0.79   |
| ENSG0000(GNAZ     | protein_co chr22  | 23070361 | 23125037 | + | 0.34   | 0.23   |
| ENSG0000(MGAT3    | protein_co chr22  | 39457344 | 39492194 | + | 0.99   | 0.89   |
| ENSG0000(ADORA2A  | protein_co chr22  | 24417879 | 24442360 | + | 0.48   | 0.28   |
| ENSG0000(ATF4     | protein_co chr22  | 39519695 | 39522685 | + | 322.96 | 320.49 |
| ENSG0000(A4GALT   | protein_co chr22  | 42692121 | 42721298 | - | 37.85  | 34.77  |
| ENSG0000(RFPL3    | protein_co chr22  | 32354885 | 32361161 | + | 0      | 0      |
| ENSG0000(CDC42EP1 | protein_co chr22  | 37560447 | 37569405 | + | 37.59  | 45.58  |
| ENSG0000(APOL3    | protein_co chr22  | 36140330 | 36166177 | - | 8.38   | 8.66   |
| ENSG0000(MCHR1    | protein_co chr22  | 40678750 | 40682814 | + | 1.03   | 0.81   |
| ENSG0000(TPST2    | protein_co chr22  | 26521983 | 26596717 | - | 6.85   | 7.66   |
| ENSG0000(BAIAP2L2 | protein_co chr22  | 38084889 | 38110670 | - | 0.64   | 0.59   |
| ENSG0000(MPST     | protein_co chr22  | 37019635 | 37029822 | + | 37.72  | 34.67  |
| ENSG0000(GALR3    | protein_co chr22  | 37823382 | 37825495 | + | 0      | 0      |
| ENSG0000(TST      | protein_co chr22  | 37010859 | 37020183 | - | 45.92  | 33.4   |
| ENSG0000(APOL5    | protein_co chr22  | 35717872 | 35729483 | + | 0      | 0      |
| ENSG0000(IGLL1    | protein_co chr22  | 23573125 | 23580308 | - | 0      | 0.11   |
| ENSG0000(APOL2    | protein_co chr22  | 36226203 | 36239954 | - | 20.72  | 18.37  |
| ENSG0000(RAC2     | protein_co chr22  | 37225261 | 37244448 | - | 36     | 33.34  |
| ENSG0000(LIF      | protein_co chr22  | 30240447 | 30246851 | - | 5.55   | 8.75   |
| ENSG0000(C22orf23 | protein_co chr22  | 37943050 | 37953669 | - | 0.33   | 0.46   |
| ENSG0000(APOBEC3A | protein_co chr22  | 38952741 | 38992778 | + | 0.2    | 0.09   |
| ENSG0000(APOBEC3F | protein_co chr22  | 39040604 | 39053910 | + | 4.86   | 3.61   |
| ENSG0000(RIBC2    | protein_co chr22  | 45413691 | 45432496 | + | 0.09   | 0.23   |
| ENSG0000(KRT17    | protein_co chr17  | 41619437 | 41624842 | - | 1.08   | 0.76   |
| ENSG0000(TBC1D27  | transcribec chr17 | 16922915 | 16934839 | - | 0      | 0      |
| ENSG0000(EMC4     | protein_co chr15  | 34224999 | 34230156 | + | 51.29  | 55.36  |
| ENSG0000(RNF112   | protein_co chr17  | 19411125 | 19417276 | + | 2.1    | 2.13   |

|                   |                  |          |          |   |        |        |
|-------------------|------------------|----------|----------|---|--------|--------|
| ENSG0000(SPECC1   | protein_co chr17 | 20009344 | 20319026 | + | 7.8    | 7.34   |
| ENSG0000(CPA4     | protein_co chr7  | 1.3E+08  | 1.3E+08  | + | 39.1   | 38.41  |
| ENSG0000(DOCK4    | protein_co chr7  | 1.12E+08 | 1.12E+08 | - | 2.37   | 2.46   |
| ENSG0000(POT1     | protein_co chr7  | 1.25E+08 | 1.25E+08 | - | 7.48   | 9.17   |
| ENSG0000(TAS2R16  | protein_co chr7  | 1.23E+08 | 1.23E+08 | - | 0      | 0      |
| ENSG0000(ATP6V1F  | protein_co chr7  | 1.29E+08 | 1.29E+08 | + | 116.63 | 103.9  |
| ENSG0000(LSM8     | protein_co chr7  | 1.18E+08 | 1.18E+08 | + | 12.45  | 14.75  |
| ENSG0000(CDHR3    | protein_co chr7  | 1.06E+08 | 1.06E+08 | + | 1.25   | 1.63   |
| ENSG0000(PRKRIP1  | protein_co chr7  | 1.02E+08 | 1.02E+08 | + | 14.77  | 16.23  |
| ENSG0000(VGF      | protein_co chr7  | 1.01E+08 | 1.01E+08 | - | 0.04   | 0      |
| ENSG0000(PODXL    | protein_co chr7  | 1.32E+08 | 1.32E+08 | - | 5.1    | 4.97   |
| ENSG0000(FOXP2    | protein_co chr7  | 1.14E+08 | 1.15E+08 | + | 0.01   | 0.05   |
| ENSG0000(STRIP2   | protein_co chr7  | 1.29E+08 | 1.29E+08 | + | 2.44   | 2.13   |
| ENSG0000(IFT22    | protein_co chr7  | 1.01E+08 | 1.01E+08 | - | 21.55  | 21.07  |
| ENSG0000(MKLN1    | protein_co chr7  | 1.31E+08 | 1.31E+08 | + | 11.06  | 10.45  |
| ENSG0000(DNAJB9   | protein_co chr7  | 1.09E+08 | 1.09E+08 | + | 12.58  | 10.91  |
| ENSG0000(FLNC     | protein_co chr7  | 1.29E+08 | 1.29E+08 | + | 38.2   | 37.79  |
| ENSG0000(LRRC4    | protein_co chr7  | 1.28E+08 | 1.28E+08 | - | 0.01   | 0.14   |
| ENSG0000(CALU     | protein_co chr7  | 1.29E+08 | 1.29E+08 | + | 326.06 | 312.3  |
| ENSG0000(CCDC136  | protein_co chr7  | 1.29E+08 | 1.29E+08 | + | 8.31   | 7.1    |
| ENSG0000(SMO      | protein_co chr7  | 1.29E+08 | 1.29E+08 | + | 9.44   | 9.14   |
| ENSG0000(IRF5     | protein_co chr7  | 1.29E+08 | 1.29E+08 | + | 0.26   | 0.36   |
| ENSG0000(LRRC17   | protein_co chr7  | 1.03E+08 | 1.03E+08 | + | 125.65 | 127.63 |
| ENSG0000(KLHDC10  | protein_co chr7  | 1.3E+08  | 1.3E+08  | + | 8.28   | 8      |
| ENSG0000(NDUFA5   | protein_co chr7  | 1.24E+08 | 1.24E+08 | - | 14.31  | 14.62  |
| ENSG0000(FEZF1    | protein_co chr7  | 1.22E+08 | 1.22E+08 | - | 0      | 0      |
| ENSG0000(OPN1SW   | protein_co chr7  | 1.29E+08 | 1.29E+08 | - | 0      | 0      |
| ENSG0000(MRPS12   | protein_co chr19 | 38930548 | 38933162 | + | 17.24  | 18.81  |
| ENSG0000(MYO1B    | protein_co chr2  | 1.91E+08 | 1.91E+08 | + | 26.3   | 25.21  |
| ENSG0000(HOXD1    | protein_co chr2  | 1.76E+08 | 1.76E+08 | + | 0      | 0      |
| ENSG0000(HOXD3    | protein_co chr2  | 1.76E+08 | 1.76E+08 | + | 0      | 0      |
| ENSG0000(MTX2     | protein_co chr2  | 1.76E+08 | 1.76E+08 | + | 20.73  | 18.87  |
| ENSG0000(PDE11A   | protein_co chr2  | 1.78E+08 | 1.78E+08 | - | 0.03   | 0.02   |
| ENSG0000(CHN1     | protein_co chr2  | 1.75E+08 | 1.75E+08 | - | 2.39   | 3.07   |
| ENSG0000(GAD1     | protein_co chr2  | 1.71E+08 | 1.71E+08 | + | 0.11   | 0      |
| ENSG0000(EIF2S2P4 | processed_chr2   | 1.71E+08 | 1.71E+08 | + | 0      | 0      |
| ENSG0000(OSGEPL1  | protein_co chr2  | 1.9E+08  | 1.9E+08  | - | 3.62   | 3.57   |
| ENSG0000(ORMDL1   | protein_co chr2  | 1.9E+08  | 1.9E+08  | - | 35.17  | 34.12  |
| ENSG0000(HAT1     | protein_co chr2  | 1.72E+08 | 1.72E+08 | + | 16.16  | 17.16  |
| ENSG0000(HOXD9    | protein_co chr2  | 1.76E+08 | 1.76E+08 | + | 0      | 0      |
| ENSG0000(HOXD10   | protein_co chr2  | 1.76E+08 | 1.76E+08 | + | 0      | 0      |
| ENSG0000(HOXD11   | protein_co chr2  | 1.76E+08 | 1.76E+08 | + | 0      | 0      |
| ENSG0000(HOXD13   | protein_co chr2  | 1.76E+08 | 1.76E+08 | + | 0      | 0      |
| ENSG0000(HERC2    | protein_co chr15 | 28111040 | 28322152 | - | 10.56  | 12.65  |
| ENSG0000(SNRPN    | protein_co chr15 | 24823637 | 24978723 | + | 48.79  | 52.4   |

|                    |                  |          |          |   |        |        |
|--------------------|------------------|----------|----------|---|--------|--------|
| ENSG0000( PSMG2    | protein_co chr18 | 12658043 | 12725740 | + | 44.71  | 42.89  |
| ENSG0000( TWSG1    | protein_co chr18 | 9334767  | 9402420  | + | 27.47  | 30.05  |
| ENSG0000( ARHGAP22 | protein_co chr10 | 48446034 | 48656265 | - | 10.45  | 10.66  |
| ENSG0000( WDFY4    | protein_co chr10 | 48684876 | 48982956 | + | 0      | 0.01   |
| ENSG0000( EIF2AK4  | protein_co chr15 | 39934146 | 40035591 | + | 16.3   | 18.12  |
| ENSG0000( MYO5C    | protein_co chr15 | 52192322 | 52295798 | - | 0.01   | 0.02   |
| ENSG0000( CGNL1    | protein_co chr15 | 57375967 | 57550727 | + | 16.22  | 16.1   |
| ENSG0000( TMOD2    | protein_co chr15 | 51751561 | 51816368 | + | 3.48   | 3.22   |
| ENSG0000( TTBK2    | protein_co chr15 | 42738734 | 42920809 | - | 5.61   | 6.53   |
| ENSG0000( ELL3     | protein_co chr15 | 43772600 | 43777543 | - | 2.06   | 1.74   |
| ENSG0000( C15orf57 | protein_co chr15 | 40528683 | 40565057 | - | 9.34   | 18.39  |
| ENSG0000( INO80    | protein_co chr15 | 40978880 | 41116354 | - | 8.05   | 7.75   |
| ENSG0000( ICE2     | protein_co chr15 | 60419609 | 60479160 | - | 10.39  | 11.43  |
| ENSG0000( DLL4     | protein_co chr15 | 40929340 | 40939072 | + | 0.03   | 0.11   |
| ENSG0000( ALDH1A2  | protein_co chr15 | 57953424 | 58497866 | - | 0.73   | 0      |
| ENSG0000( MINDY2   | protein_co chr15 | 58771192 | 58861900 | + | 4.69   | 4.33   |
| ENSG0000( IVD      | protein_co chr15 | 40405795 | 40435947 | + | 20.74  | 19.57  |
| ENSG0000( KNSTRN   | protein_co chr15 | 40382721 | 40394246 | + | 4.08   | 2.47   |
| ENSG0000( DUT      | protein_co chr15 | 48331011 | 48343373 | + | 40.97  | 39.44  |
| ENSG0000( CHAC1    | protein_co chr15 | 40952962 | 40956519 | + | 11.29  | 10.43  |
| ENSG0000( CLN6     | protein_co chr15 | 68206992 | 68257211 | - | 9.75   | 11.89  |
| ENSG0000( ARPP19   | protein_co chr15 | 52547045 | 52569883 | - | 25.11  | 24.73  |
| ENSG0000( VPS13C   | protein_co chr15 | 61852389 | 62060473 | - | 10.65  | 11.59  |
| ENSG0000( CALML4   | protein_co chr15 | 68190705 | 68206110 | - | 1.04   | 0.3    |
| ENSG0000( ISLR     | protein_co chr15 | 74173671 | 74176872 | + | 217.38 | 230.2  |
| ENSG0000( THAP10   | protein_co chr15 | 70881342 | 70892785 | - | 1.05   | 1.36   |
| ENSG0000( LOXL1    | protein_co chr15 | 73925989 | 73952137 | + | 112.33 | 116.73 |
| ENSG0000( ACKR4    | protein_co chr3  | 1.33E+08 | 1.33E+08 | + | 4.24   | 7.33   |
| ENSG0000( ANAPC13  | protein_co chr3  | 1.34E+08 | 1.34E+08 | - | 34.24  | 35.09  |
| ENSG0000( MBD4     | protein_co chr3  | 1.29E+08 | 1.29E+08 | - | 13.55  | 12.94  |
| ENSG0000( COPB1    | protein_co chr11 | 14443440 | 14500027 | - | 47.75  | 46.55  |
| ENSG0000( PSMA1    | protein_co chr11 | 14504874 | 14643635 | - | 43.44  | 40.84  |
| ENSG0000( SUMF2    | protein_co chr7  | 56064002 | 56080670 | + | 138.54 | 149.01 |
| ENSG0000( PALLD    | protein_co chr4  | 1.68E+08 | 1.69E+08 | + | 23.45  | 26.53  |
| ENSG0000( SPCS3    | protein_co chr4  | 1.76E+08 | 1.76E+08 | + | 15.32  | 15     |
| ENSG0000( BBOX1    | protein_co chr11 | 27040725 | 27127809 | + | 0      | 0.12   |
| ENSG0000( MYOD1    | protein_co chr11 | 17719568 | 17722131 | + | 0      | 0      |
| ENSG0000( SERGEF   | protein_co chr11 | 17788048 | 18013162 | - | 10.98  | 13.98  |
| ENSG0000( KCNC1    | protein_co chr11 | 17734774 | 17856804 | + | 0      | 0      |
| ENSG0000( TPH1     | protein_co chr11 | 18017564 | 18042426 | - | 0.05   | 0.04   |
| ENSG0000( CSRP3    | protein_co chr11 | 19182030 | 19210573 | - | 0      | 0      |
| ENSG0000( E2F8     | protein_co chr11 | 19224063 | 19241620 | - | 0.27   | 0.1    |
| ENSG0000( DCTD     | protein_co chr4  | 1.83E+08 | 1.83E+08 | - | 44.74  | 44.64  |
| ENSG0000( SOX15    | protein_co chr17 | 7588178  | 7590170  | - | 0.58   | 0.13   |
| ENSG0000( FAM64A   | protein_co chr17 | 6444415  | 6451469  | + | 0.08   | 0      |



|                    |                  |          |            |        |        |
|--------------------|------------------|----------|------------|--------|--------|
| ENSG0000(RPAIN)    | protein_co chr17 | 5419641  | 5432876 +  | 21.46  | 20.83  |
| ENSG0000(USP6)     | protein_co chr17 | 5116438  | 5175034 +  | 1.04   | 0.86   |
| ENSG0000(SHBG)     | protein_co chr17 | 7613946  | 7633383 +  | 0.88   | 1.19   |
| ENSG0000(PLD2)     | protein_co chr17 | 4807096  | 4823434 +  | 14.83  | 16.07  |
| ENSG0000(AIPL1)    | protein_co chr17 | 6393693  | 6435199 -  | 0.14   | 0.03   |
| ENSG0000(CD68)     | protein_co chr17 | 7579467  | 7582113 +  | 78.73  | 66.93  |
| ENSG0000(TXNDC17)  | protein_co chr17 | 6640758  | 6644541 +  | 71.02  | 65.61  |
| ENSG0000(ATP1B2)   | protein_co chr17 | 7646627  | 7657768 +  | 0.09   | 0.02   |
| ENSG0000(FXR2)     | protein_co chr17 | 7591230  | 7614871 -  | 17.06  | 16.15  |
| ENSG0000(KIF1C)    | protein_co chr17 | 4997948  | 5028401 +  | 71.71  | 66.33  |
| ENSG0000(MPDU1)    | protein_co chr17 | 7583529  | 7592789 +  | 37.52  | 35.51  |
| ENSG0000(PHF20L1)  | protein_co chr8  | 1.33E+08 | 1.33E+08 + | 14.84  | 16.02  |
| ENSG0000(LRRC6)    | protein_co chr8  | 1.33E+08 | 1.33E+08 - | 1.08   | 0.83   |
| ENSG0000(CCNT1)    | protein_co chr12 | 48688458 | 48716998 - | 5.57   | 5.27   |
| ENSG0000(PUS7L)    | protein_co chr12 | 43718993 | 43758817 - | 1.97   | 2.19   |
| ENSG0000(KRI1)     | protein_co chr19 | 10553078 | 10566037 - | 8.88   | 9.71   |
| ENSG0000(ILF3)     | protein_co chr19 | 10654261 | 10692417 + | 40.27  | 36.93  |
| ENSG0000(SLC44A2)  | protein_co chr19 | 10602457 | 10644559 + | 30.52  | 36.23  |
| ENSG0000(AP1M2)    | protein_co chr19 | 10572671 | 10587315 - | 0.29   | 0.16   |
| ENSG0000(CDKN2D)   | protein_co chr19 | 10566462 | 10569059 - | 6.2    | 4.69   |
| ENSG0000(MTUS1)    | protein_co chr8  | 17643795 | 17800917 - | 1.1    | 0.79   |
| ENSG0000(KLK14)    | protein_co chr19 | 51077495 | 51084245 - | 0      | 0.06   |
| ENSG0000(SIGLEC9)  | protein_co chr19 | 51124908 | 51136651 + | 0.47   | 0.41   |
| ENSG0000(KLK10)    | protein_co chr19 | 51012739 | 51020175 - | 0.21   | 0.08   |
| ENSG0000(KLK8)     | protein_co chr19 | 50996007 | 51002711 - | 0      | 0      |
| ENSG0000(NGDN)     | protein_co chr14 | 23469688 | 23509862 + | 14     | 11.63  |
| ENSG0000(RIPK3)    | protein_co chr14 | 24336021 | 24340045 - | 0.31   | 0.47   |
| ENSG0000(ADCY4)    | protein_co chr14 | 24318349 | 24335093 - | 2.33   | 2.06   |
| ENSG0000(RAB2B)    | protein_co chr14 | 21459020 | 21476973 - | 8.82   | 9.27   |
| ENSG0000(BCL2L2)   | protein_co chr14 | 23298790 | 23311759 + | 16.51  | 19.22  |
| ENSG0000(AJUBA)    | protein_co chr14 | 22971174 | 22982642 - | 15     | 11.63  |
| ENSG0000(DTD2)     | protein_co chr14 | 31446036 | 31457510 - | 7.33   | 6.18   |
| ENSG0000(PARP2)    | protein_co chr14 | 20343582 | 20357905 + | 8.8    | 10.55  |
| ENSG0000(HEATR5A)  | protein_co chr14 | 31291791 | 31420582 - | 16.72  | 11.72  |
| ENSG0000(FOXA1)    | protein_co chr14 | 37589984 | 37596059 - | 0.15   | 0.07   |
| ENSG0000(SNX6)     | protein_co chr14 | 34561094 | 34630183 - | 51.9   | 36.19  |
| ENSG0000(EAPP)     | protein_co chr14 | 34515929 | 34539711 - | 24.42  | 25.33  |
| ENSG0000(EGLN3)    | protein_co chr14 | 33924231 | 34462774 - | 0.56   | 0.27   |
| ENSG0000(MIS18BP1) | protein_co chr14 | 45203190 | 45253540 - | 3.98   | 2.93   |
| ENSG0000(NRL)      | protein_co chr14 | 24080107 | 24115014 - | 0.24   | 0.57   |
| ENSG0000(RNASE1)   | protein_co chr14 | 20801228 | 20803278 - | 1.55   | 1.01   |
| ENSG0000(NEDD8)    | protein_co chr14 | 24216852 | 24232454 - | 141.6  | 138.27 |
| ENSG0000(DAD1)     | protein_co chr14 | 22564905 | 22589269 - | 138.48 | 145.2  |
| ENSG0000(TEP1)     | protein_co chr14 | 20365667 | 20413429 - | 8.03   | 6.62   |
| ENSG0000(EPB41L4A) | protein_co chr5  | 1.12E+08 | 1.12E+08 - | 0.4    | 0.29   |

|                   |                  |          |            |       |        |
|-------------------|------------------|----------|------------|-------|--------|
| ENSG0000(CDO1     | protein_co chr5  | 1.16E+08 | 1.16E+08 - | 0.09  | 0.09   |
| ENSG0000(REEP5    | protein_co chr5  | 1.13E+08 | 1.13E+08 - | 51.56 | 46.36  |
| ENSG0000(ITFG1    | protein_co chr16 | 47154387 | 47464149 - | 39.34 | 41.18  |
| ENSG0000(QRICH2   | protein_co chr17 | 76274049 | 76307998 - | 1.59  | 1.1    |
| ENSG0000(FOXJ1    | protein_co chr17 | 76136333 | 76141299 - | 0     | 0      |
| ENSG0000(SEC14L1  | protein_co chr17 | 77086716 | 77217101 + | 14.65 | 18.2   |
| ENSG0000(RHBDF2   | protein_co chr17 | 76470891 | 76501790 - | 4.52  | 5.67   |
| ENSG0000(AANAT    | protein_co chr17 | 76453351 | 76470117 + | 0     | 0.2    |
| ENSG0000(ARHGFE6  | protein_co chrX  | 1.37E+08 | 1.37E+08 - | 5.26  | 5.37   |
| ENSG0000(MAP7D3   | protein_co chrX  | 1.36E+08 | 1.36E+08 - | 4.61  | 4.26   |
| ENSG0000(FGF13    | protein_co chrX  | 1.39E+08 | 1.39E+08 - | 0.12  | 0.12   |
| ENSG0000(ASH2L    | protein_co chr8  | 38105242 | 38144076 + | 12.39 | 13.61  |
| ENSG0000(TTI2     | protein_co chr8  | 33473386 | 33513601 - | 4.28  | 4.32   |
| ENSG0000(ART1     | protein_co chr11 | 3645128  | 3664416 +  | 0     | 0      |
| ENSG0000(CHRNA10  | protein_co chr11 | 3665587  | 3671384 -  | 0.22  | 0.25   |
| ENSG0000(CDKN1C   | protein_co chr11 | 2883213  | 2885881 -  | 21.28 | 26.86  |
| ENSG0000(SGO1     | protein_co chr3  | 20160593 | 20186292 - | 0     | 0.17   |
| ENSG0000(TTTY1B   | lincRNA chrY     | 6390431  | 6411564 +  | 0     | 0      |
| ENSG0000(RPS4Y1   | protein_co chrY  | 2841486  | 2932000 +  | 258.4 | 254.94 |
| ENSG0000(TTTY1    | lincRNA chrY     | 9753156  | 9774289 -  | 0     | 0      |
| ENSG0000(VCY1B    | protein_co chrY  | 14056217 | 14056958 + | 0     | 0      |
| ENSG0000(VCY      | protein_co chrY  | 13985772 | 13986513 - | 0     | 0      |
| ENSG0000(CDY2B    | protein_co chrY  | 17877410 | 17880220 - | 0     | 0      |
| ENSG0000(CDH15    | protein_co chr16 | 89171767 | 89195492 + | 0.04  | 0.09   |
| ENSG0000(KLF16    | protein_co chr19 | 1852399  | 1863568 -  | 9.99  | 10.55  |
| ENSG0000(TMEM8A   | protein_co chr16 | 370773   | 387113 -   | 27.6  | 27.75  |
| ENSG0000(DOHH     | protein_co chr19 | 3490821  | 3500940 -  | 5.46  | 5.27   |
| ENSG0000(MAU2     | protein_co chr19 | 19320681 | 19358755 + | 17.68 | 16.81  |
| ENSG0000(SHC2     | protein_co chr19 | 416583   | 460996 -   | 1.24  | 1.06   |
| ENSG0000(PLPPR3   | protein_co chr19 | 812488   | 821977 -   | 0.08  | 0.52   |
| ENSG0000(INS-IGF2 | protein_co chr11 | 2132538  | 2161209 -  | 0     | 0      |
| ENSG0000(ABHD17A  | protein_co chr19 | 1876810  | 1885547 -  | 31.39 | 31.27  |
| ENSG0000(LBP      | protein_co chr20 | 38346356 | 38377023 + | 0.03  | 0.09   |
| ENSG0000(SYT5     | protein_co chr19 | 55171199 | 55180441 - | 0.03  | 0.05   |
| ENSG0000(TNNI3    | protein_co chr19 | 55151767 | 55157773 - | 0     | 0      |
| ENSG0000(CBFA2T3  | protein_co chr16 | 88874858 | 88977204 - | 0     | 0      |
| ENSG0000(GAMT     | protein_co chr19 | 1397026  | 1401570 -  | 20.05 | 23.27  |
| ENSG0000(PUDP     | protein_co chrX  | 7048920  | 7148190 -  | 3.73  | 3.71   |
| ENSG0000(ERMARD   | protein_co chr6  | 1.7E+08  | 1.7E+08 +  | 8.91  | 8      |
| ENSG0000(PHF10    | protein_co chr6  | 1.7E+08  | 1.7E+08 -  | 13.52 | 13.87  |
| ENSG0000(PRRG3    | protein_co chrX  | 1.52E+08 | 1.52E+08 + | 0     | 0      |
| ENSG0000(GALNT8   | protein_co chr12 | 4720341  | 4851927 +  | 0     | 0.05   |
| ENSG0000(KCNA5    | protein_co chr12 | 5043989  | 5046788 +  | 0     | 0      |
| ENSG0000(CRACR2A  | protein_co chr12 | 3606633  | 3764819 -  | 2.58  | 3.83   |
| ENSG0000(NXNL2    | protein_co chr9  | 88535101 | 88584274 + | 0.51  | 0.29   |

|                    |                  |          |          |   |        |        |
|--------------------|------------------|----------|----------|---|--------|--------|
| ENSG0000( STARD8   | protein_co chrX  | 68647666 | 68725842 | + | 1.84   | 1.54   |
| ENSG0000( FAM155B  | protein_co chrX  | 69505241 | 69532508 | + | 0      | 0      |
| ENSG0000( GDPD2    | protein_co chrX  | 70423031 | 70433390 | + | 0      | 0      |
| ENSG0000( SAT1     | protein_co chrX  | 23783173 | 23786226 | + | 238.22 | 268.72 |
| ENSG0000( GNL3L    | protein_co chrX  | 54530211 | 54561071 | + | 3.79   | 4.06   |
| ENSG0000( SH3BP4   | protein_co chr2  | 2.35E+08 | 2.35E+08 | + | 18.67  | 21.26  |
| ENSG0000( MOSPD2   | protein_co chrX  | 14873441 | 14922327 | + | 10.79  | 10.22  |
| ENSG0000( DOCK6    | protein_co chr19 | 11199295 | 11262481 | - | 6.94   | 6.8    |
| ENSG0000( ECSIT    | protein_co chr19 | 11505916 | 11529174 | - | 13.85  | 12.32  |
| ENSG0000( LDLR     | protein_co chr19 | 11089362 | 11133816 | + | 55.4   | 55.03  |
| ENSG0000( ELOF1    | protein_co chr19 | 11551147 | 11559236 | - | 33.58  | 33.65  |
| ENSG0000( TSPAN16  | protein_co chr19 | 11296139 | 11326996 | + | 0      | 0      |
| ENSG0000( ANGPTL8  | protein_co chr19 | 11237450 | 11241943 | + | 0.15   | 0.33   |
| ENSG0000( PRKCSH   | protein_co chr19 | 11435288 | 11450968 | + | 228.89 | 210.61 |
| ENSG0000( CNN1     | protein_co chr19 | 11538717 | 11550323 | + | 5.85   | 7.92   |
| ENSG0000( CDC16    | protein_co chr13 | 1.14E+08 | 1.14E+08 | + | 33.55  | 33.55  |
| ENSG0000( ZSCAN10  | protein_co chr16 | 3088890  | 3099317  | - | 0      | 0      |
| ENSG0000( THEM6    | protein_co chr8  | 1.43E+08 | 1.43E+08 | + | 3.83   | 5.39   |
| ENSG0000( NECTIN2  | protein_co chr19 | 44846175 | 44889228 | + | 42.49  | 40.45  |
| ENSG0000( APOE     | protein_co chr19 | 44905754 | 44909393 | + | 49.86  | 64.96  |
| ENSG0000( TOMM40   | protein_co chr19 | 44890569 | 44903689 | + | 11.48  | 12.76  |
| ENSG0000( APOC1    | protein_co chr19 | 44914247 | 44919349 | + | 0.73   | 3.42   |
| ENSG0000( GADD45G  | protein_co chr9  | 89605013 | 89606555 | + | 0.63   | 0.56   |
| ENSG0000( LRCH2    | protein_co chrX  | 1.15E+08 | 1.15E+08 | - | 0.4    | 0.51   |
| ENSG0000( DPP6     | protein_co chr7  | 1.54E+08 | 1.55E+08 | + | 0      | 0      |
| ENSG0000( XPO7     | protein_co chr8  | 21919671 | 22006585 | + | 18.25  | 15.7   |
| ENSG0000( ACE2     | protein_co chrX  | 15561033 | 15602148 | - | 0.08   | 0.18   |
| ENSG0000( FAM98C   | protein_co chr19 | 38403135 | 38409088 | + | 8.61   | 10.42  |
| ENSG0000( SAFB2    | protein_co chr19 | 5586999  | 5624046  | - | 16.39  | 19.09  |
| ENSG0000( RPL36    | protein_co chr19 | 5674947  | 5691876  | + | 370.46 | 379.22 |
| ENSG0000( ATP8B3   | protein_co chr19 | 1782075  | 1812276  | - | 2.19   | 1.58   |
| ENSG0000( GDF1     | protein_co chr19 | 18868545 | 18896096 | - | 0.39   | 0.37   |
| ENSG0000( NCAN     | protein_co chr19 | 19211973 | 19252233 | + | 0      | 0      |
| ENSG0000( KIF1A    | protein_co chr2  | 2.41E+08 | 2.41E+08 | - | 0      | 0      |
| ENSG0000( GTPBP3   | protein_co chr19 | 17334920 | 17342735 | + | 7.15   | 5.73   |
| ENSG0000( PLVAP    | protein_co chr19 | 17351448 | 17377350 | - | 0.31   | 0.05   |
| ENSG0000( BST2     | protein_co chr19 | 17402939 | 17405648 | - | 12.28  | 7.34   |
| ENSG0000( SLC27A1  | protein_co chr19 | 17468769 | 17506168 | + | 18.11  | 18.11  |
| ENSG0000( NSUN5    | protein_co chr7  | 73302517 | 73308867 | - | 6.46   | 8.4    |
| ENSG0000( USHBP1   | protein_co chr19 | 17249176 | 17282786 | - | 0.02   | 0.03   |
| ENSG0000( COLGALT1 | protein_co chr19 | 17555594 | 17583162 | + | 28.05  | 29.66  |
| ENSG0000( DDA1     | protein_co chr19 | 17309518 | 17323301 | + | 23.63  | 22.68  |
| ENSG0000( MRPL34   | protein_co chr19 | 17292609 | 17306843 | + | 26.92  | 34.19  |
| ENSG0000( PGLS     | protein_co chr19 | 17511629 | 17521288 | + | 55.8   | 54.73  |
| ENSG0000( LSM7     | protein_co chr19 | 2321517  | 2328620  | - | 39.97  | 45.52  |

|                   |                  |          |          |   |        |        |
|-------------------|------------------|----------|----------|---|--------|--------|
| ENSG0000(TULP4    | protein_co chr6  | 1.58E+08 | 1.59E+08 | + | 7.13   | 7.07   |
| ENSG0000(SNX9     | protein_co chr6  | 1.58E+08 | 1.58E+08 | + | 55.12  | 57.88  |
| ENSG0000(RTN4IP1  | protein_co chr6  | 1.07E+08 | 1.07E+08 | - | 1.14   | 2.15   |
| ENSG0000(QRSL1    | protein_co chr6  | 1.07E+08 | 1.07E+08 | + | 3.72   | 3.45   |
| ENSG0000(C6orf203 | protein_co chr6  | 1.07E+08 | 1.07E+08 | + | 7.9    | 6.71   |
| ENSG0000(RSPH3    | protein_co chr6  | 1.59E+08 | 1.59E+08 | - | 6.37   | 4.79   |
| ENSG0000(MAS1     | protein_co chr6  | 1.6E+08  | 1.6E+08  | + | 0.06   | 0.08   |
| ENSG0000(ACSBG2   | protein_co chr19 | 6135247  | 6193094  | + | 0.03   | 0      |
| ENSG0000(MLLT1    | protein_co chr19 | 6210379  | 6279948  | - | 22.46  | 23.18  |
| ENSG0000(FUT5     | protein_co chr19 | 5865826  | 5870540  | - | 0      | 0      |
| ENSG0000(BMP15    | protein_co chrX  | 50910784 | 50916607 | + | 0      | 0      |
| ENSG0000(AFDN     | protein_co chr6  | 1.68E+08 | 1.68E+08 | + | 10.6   | 11.25  |
| ENSG0000(ACTN4    | protein_co chr19 | 38647649 | 38731583 | + | 224.4  | 218.69 |
| ENSG0000(STK33    | protein_co chr11 | 8391868  | 8594289  | - | 0.58   | 0.39   |
| ENSG0000(NDUFA10  | protein_co chr2  | 2.4E+08  | 2.4E+08  | - | 54.18  | 63.35  |
| ENSG0000(EPO      | protein_co chr7  | 1.01E+08 | 1.01E+08 | + | 0      | 0      |
| ENSG0000(ARPC1B   | protein_co chr7  | 99374249 | 99394801 | + | 145.6  | 142.3  |
| ENSG0000(CACNG6   | protein_co chr19 | 53992288 | 54012669 | + | 0.56   | 0.33   |
| ENSG0000(ZSWIM6   | protein_co chr5  | 61332273 | 61546170 | + | 4.03   | 4.15   |
| ENSG0000(FCHO1    | protein_co chr19 | 17747718 | 17788568 | + | 0.25   | 0.48   |
| ENSG0000(UNC13A   | protein_co chr19 | 17601328 | 17688365 | - | 0.23   | 0.13   |
| ENSG0000(MAP1S    | protein_co chr19 | 17719242 | 17734516 | + | 12.45  | 11.9   |
| ENSG0000(KLHDC7B  | protein_co chr22 | 50548033 | 50551023 | + | 0.45   | 0.38   |
| ENSG0000(SCO2     | protein_co chr22 | 50523568 | 50525606 | - | 11.75  | 13.26  |
| ENSG0000(PXDN     | protein_co chr2  | 1631887  | 1744852  | - | 160.24 | 156.69 |
| ENSG0000(SSBP4    | protein_co chr19 | 18418864 | 18434562 | + | 46.4   | 46.28  |
| ENSG0000(GDF15    | protein_co chr19 | 18374731 | 18389176 | + | 89.15  | 84.74  |
| ENSG0000(PGPEP1   | protein_co chr19 | 18340587 | 18369950 | + | 13.78  | 13.13  |
| ENSG0000(KIAA1683 | protein_co chr19 | 18257097 | 18274509 | - | 1.07   | 1.08   |
| ENSG0000(LSM4     | protein_co chr19 | 18306230 | 18323274 | - | 29.53  | 34.53  |
| ENSG0000(JUND     | protein_co chr19 | 18279760 | 18281622 | - | 42.79  | 41.86  |
| ENSG0000(HRC      | protein_co chr19 | 49151198 | 49155424 | - | 0.03   | 0.03   |
| ENSG0000(TRPM4    | protein_co chr19 | 49157741 | 49211836 | + | 13.26  | 12.6   |
| ENSG0000(OR11H1   | protein_co chr22 | 15528158 | 15529139 | + | 0      | 0      |
| ENSG0000(SULT4A1  | protein_co chr22 | 43824509 | 43862503 | - | 0.25   | 0.12   |
| ENSG0000(ZNF557   | protein_co chr19 | 7069444  | 7087968  | + | 1.65   | 1.59   |
| ENSG0000(CRB3     | protein_co chr19 | 6463777  | 6467221  | + | 0      | 0      |
| ENSG0000(OLFM1    | protein_co chr9  | 1.35E+08 | 1.35E+08 | + | 2.91   | 3.46   |
| ENSG0000(CAMSAP1  | protein_co chr9  | 1.36E+08 | 1.36E+08 | - | 10.24  | 5.83   |
| ENSG0000(UBAC1    | protein_co chr9  | 1.36E+08 | 1.36E+08 | - | 15.12  | 14.03  |
| ENSG0000(SAG      | protein_co chr2  | 2.33E+08 | 2.33E+08 | + | 0.15   | 0.09   |
| ENSG0000(ZBTB46   | protein_co chr20 | 63743666 | 63831244 | - | 1.5    | 1.17   |
| ENSG0000(HELZ2    | protein_co chr20 | 63558086 | 63574239 | - | 8.7    | 7.02   |
| ENSG0000(SAMD10   | protein_co chr20 | 63974113 | 63980008 | - | 1.35   | 2.3    |
| ENSG0000(LSP1     | protein_co chr11 | 1852970  | 1892267  | + | 1.67   | 0.57   |

|                   |                   |          |            |        |        |
|-------------------|-------------------|----------|------------|--------|--------|
| ENSG0000(TNNT3    | protein_co chr11  | 1919562  | 1938706 +  | 0.66   | 1.51   |
| ENSG0000(TNNI2    | protein_co chr11  | 1838989  | 1841680 +  | 0      | 0      |
| ENSG0000(H19      | processed_chr11   | 1995163  | 2001470 -  | 28.44  | 25.32  |
| ENSG0000(CYP2G1P  | transcribed chr19 | 40890826 | 40900508 + | 0.14   | 0.05   |
| ENSG0000(COL5A1   | protein_co chr9   | 1.35E+08 | 1.35E+08 + | 167.53 | 169.19 |
| ENSG0000(ATXN10   | protein_co chr22  | 45671798 | 45845307 + | 72.45  | 76     |
| ENSG0000(TUBGCP2  | protein_co chr10  | 1.33E+08 | 1.33E+08 - | 16.32  | 15.75  |
| ENSG0000(CALY     | protein_co chr10  | 1.33E+08 | 1.33E+08 - | 0.13   | 0      |
| ENSG0000(CYP2E1   | protein_co chr10  | 1.34E+08 | 1.34E+08 + | 0.61   | 1.02   |
| ENSG0000(PNPLA7   | protein_co chr9   | 1.37E+08 | 1.38E+08 - | 1.81   | 1.93   |
| ENSG0000(HBZ      | protein_co chr16  | 152687   | 154503 +   | 0.09   | 0      |
| ENSG0000(PAK4     | protein_co chr19  | 39125770 | 39182816 + | 9.82   | 11.95  |
| ENSG0000(MNX1     | protein_co chr7   | 1.57E+08 | 1.57E+08 - | 0      | 0      |
| ENSG0000(ZNF337   | protein_co chr20  | 25674215 | 25696841 - | 7.8    | 7.77   |
| ENSG0000(CEP85    | protein_co chr1   | 26234153 | 26279038 + | 3.43   | 3.24   |
| ENSG0000(TAF4     | protein_co chr20  | 61953469 | 62065810 - | 5.6    | 3.29   |
| ENSG0000(GATA5    | protein_co chr20  | 62463497 | 62475970 - | 0      | 0      |
| ENSG0000(RBBP8NL  | protein_co chr20  | 62410237 | 62427533 - | 0      | 0      |
| ENSG0000(LAMA5    | protein_co chr20  | 62307955 | 62367312 - | 25.2   | 26.87  |
| ENSG0000(OSBPL2   | protein_co chr20  | 62231922 | 62296213 + | 10.03  | 10.59  |
| ENSG0000(ADRM1    | protein_co chr20  | 62302093 | 62308862 + | 42.06  | 43.05  |
| ENSG0000(ASS1     | protein_co chr9   | 1.3E+08  | 1.31E+08 + | 69.43  | 75.52  |
| ENSG0000(PRDM12   | protein_co chr9   | 1.31E+08 | 1.31E+08 + | 0      | 0      |
| ENSG0000(EXOSC2   | protein_co chr9   | 1.31E+08 | 1.31E+08 + | 7.54   | 7.81   |
| ENSG0000(POMT1    | protein_co chr9   | 1.32E+08 | 1.32E+08 + | 12.83  | 14.79  |
| ENSG0000(UCK1     | protein_co chr9   | 1.32E+08 | 1.32E+08 - | 16.06  | 14.12  |
| ENSG0000(FIBCD1   | protein_co chr9   | 1.31E+08 | 1.31E+08 - | 0.84   | 0.3    |
| ENSG0000(PRRC2B   | protein_co chr9   | 1.31E+08 | 1.32E+08 + | 38.46  | 43.06  |
| ENSG0000(CHMP2A   | protein_co chr19  | 58551566 | 58555124 - | 71.51  | 75.72  |
| ENSG0000(UBE2M    | protein_co chr19  | 58555712 | 58558960 - | 32.84  | 29.34  |
| ENSG0000(TRIM28   | protein_co chr19  | 58544091 | 58550722 + | 96.81  | 103.09 |
| ENSG0000(METTL26  | protein_co chr16  | 634427   | 636366 -   | 68.24  | 58.22  |
| ENSG0000(YIPF2    | protein_co chr19  | 10922185 | 10928681 - | 24.16  | 23.9   |
| ENSG0000(ATG4D    | protein_co chr19  | 10543895 | 10553418 + | 8.89   | 7.57   |
| ENSG0000(EIF2S3   | protein_co chrX   | 24054716 | 24077971 + | 48.6   | 48.59  |
| ENSG0000(TMEM160  | protein_co chr19  | 47045907 | 47048630 - | 7.82   | 13.08  |
| ENSG0000(ZC3H4    | protein_co chr19  | 47064187 | 47113752 - | 7.22   | 7.86   |
| ENSG0000(NPAS1    | protein_co chr19  | 47019820 | 47045775 + | 0.59   | 1.43   |
| ENSG0000(GMFG     | protein_co chr19  | 39328353 | 39342372 - | 0.15   | 0.47   |
| ENSG0000(MAP3K10  | protein_co chr19  | 40191744 | 40215575 + | 4.59   | 4.27   |
| ENSG0000(ARHGEF16 | protein_co chr1   | 3454426  | 3481113 +  | 0.05   | 0      |
| ENSG0000(LRRC47   | protein_co chr1   | 3778558  | 3796504 -  | 14.68  | 14.69  |
| ENSG0000(SESN2    | protein_co chr1   | 28259527 | 28282491 + | 17.97  | 17.44  |
| ENSG0000(SMPDL3B  | protein_co chr1   | 27934993 | 27959157 + | 0.11   | 0.04   |
| ENSG0000(ATPIF1   | protein_co chr1   | 28236109 | 28246906 + | 111.13 | 104.85 |

|                   |                  |          |          |   |       |       |
|-------------------|------------------|----------|----------|---|-------|-------|
| ENSG0000(MED18    | protein_co chr1  | 28329002 | 28335967 | + | 5.01  | 7.8   |
| ENSG0000(THEMIS2  | protein_co chr1  | 27872543 | 27886685 | + | 2.82  | 2     |
| ENSG0000(CLIP1    | protein_co chr12 | 1.22E+08 | 1.22E+08 | - | 32.05 | 34.29 |
| ENSG0000(CCDC62   | protein_co chr12 | 1.23E+08 | 1.23E+08 | + | 0.2   | 0.05  |
| ENSG0000(HIP1R    | protein_co chr12 | 1.23E+08 | 1.23E+08 | + | 8.68  | 9.93  |
| ENSG0000(ZNF317   | protein_co chr19 | 9140380  | 9163424  | + | 6.23  | 6.15  |
| ENSG0000(PPAN     | protein_co chr19 | 10106289 | 10111634 | + | 15.82 | 14.33 |
| ENSG0000(EIF3G    | protein_co chr19 | 10115017 | 10119918 | - | 83.04 | 86.34 |
| ENSG0000(ANGPTL6  | protein_co chr19 | 10092338 | 10102796 | - | 0.32  | 0.43  |
| ENSG0000(C19orf66 | protein_co chr19 | 10086122 | 10093252 | + | 19.16 | 19.16 |
| ENSG0000(DNMT1    | protein_co chr19 | 10133345 | 10231286 | - | 10.23 | 11.01 |
| ENSG0000(ZNF426   | protein_co chr19 | 9523224  | 9538645  | - | 4.6   | 6.04  |
| ENSG0000(SLC6A8   | protein_co chrX  | 1.54E+08 | 1.54E+08 | + | 44.73 | 40.37 |
| ENSG0000(PNCK     | protein_co chrX  | 1.54E+08 | 1.54E+08 | - | 0.55  | 0.58  |
| ENSG0000(DKC1     | protein_co chrX  | 1.55E+08 | 1.55E+08 | + | 11.95 | 11.54 |
| ENSG0000(PLXNA3   | protein_co chrX  | 1.54E+08 | 1.54E+08 | + | 31.99 | 32.97 |
| ENSG0000(DUSP9    | protein_co chrX  | 1.54E+08 | 1.54E+08 | + | 0     | 0     |
| ENSG0000(MPP1     | protein_co chrX  | 1.55E+08 | 1.55E+08 | - | 15.98 | 15.27 |
| ENSG0000(ZNF331   | protein_co chr19 | 53520981 | 53580269 | + | 3.63  | 3.73  |
| ENSG0000(ZNF236   | protein_co chr18 | 76822607 | 76970727 | + | 2.55  | 2.73  |
| ENSG0000(SLC7A10  | protein_co chr19 | 33208664 | 33225850 | - | 0     | 0     |
| ENSG0000(LRP3     | protein_co chr19 | 33177603 | 33208867 | + | 13.9  | 12.12 |
| ENSG0000(C12orf65 | protein_co chr12 | 1.23E+08 | 1.23E+08 | + | 8.72  | 7.51  |
| ENSG0000(NOL11    | protein_co chr17 | 67717833 | 67744531 | + | 7.75  | 10.96 |
| ENSG0000(UBE4B    | protein_co chr1  | 10032832 | 10181239 | + | 20.19 | 21.64 |
| ENSG0000(CASZ1    | protein_co chr1  | 10636604 | 10796650 | - | 0.07  | 0.12  |
| ENSG0000(PKDREJ   | protein_co chr22 | 46255663 | 46263355 | - | 0     | 0     |
| ENSG0000(HSD17B3  | protein_co chr9  | 96235306 | 96302152 | - | 0.19  | 0     |
| ENSG0000(NUTM2F   | protein_co chr9  | 94318196 | 94328644 | - | 0     | 0     |
| ENSG0000(HABP4    | protein_co chr9  | 96450201 | 96491336 | + | 7.92  | 7.91  |
| ENSG0000(FBP2     | protein_co chr9  | 94558720 | 94593793 | - | 0     | 0     |
| ENSG0000(SLC35D2  | protein_co chr9  | 96320706 | 96383710 | - | 12.17 | 12.65 |
| ENSG0000(PRRG1    | protein_co chrX  | 37349275 | 37457295 | + | 10.22 | 14.58 |
| ENSG0000(UBA1     | protein_co chrX  | 47190861 | 47215128 | + | 79.9  | 79.62 |
| ENSG0000(RGN      | protein_co chrX  | 47078355 | 47093314 | + | 0.06  | 0.04  |
| ENSG0000(POLN     | protein_co chr4  | 2071918  | 2242121  | - | 1.92  | 1.06  |
| ENSG0000(TXLNGY   | transcribec chrY | 19567313 | 19606274 | + | 8.93  | 13.78 |
| ENSG0000(TTTY9B   | antisense chrY   | 18581206 | 18590521 | - | 0     | 0     |
| ENSG0000(PPIL4    | protein_co chr6  | 1.5E+08  | 1.5E+08  | - | 10.94 | 9.96  |
| ENSG0000(ULBP2    | protein_co chr6  | 1.5E+08  | 1.5E+08  | + | 4.14  | 3.63  |
| ENSG0000(AKAP12   | protein_co chr6  | 1.51E+08 | 1.51E+08 | + | 20.27 | 18.47 |
| ENSG0000(SYNE1    | protein_co chr6  | 1.52E+08 | 1.53E+08 | - | 31.82 | 31.1  |
| ENSG0000(ULBP3    | protein_co chr6  | 1.5E+08  | 1.5E+08  | - | 1.25  | 0.47  |
| ENSG0000(LATS1    | protein_co chr6  | 1.5E+08  | 1.5E+08  | - | 5.11  | 4.97  |
| ENSG0000(EPS8L1   | protein_co chr19 | 55072020 | 55087923 | + | 1.01  | 2.01  |

|                    |                  |          |            |        |        |
|--------------------|------------------|----------|------------|--------|--------|
| ENSG0000(LILRB2    | protein_co chr19 | 54273821 | 54281184 - | 0      | 0      |
| ENSG0000(AAR2      | protein_co chr20 | 36236459 | 36270918 + | 14.52  | 14.03  |
| ENSG0000(TTLL9     | protein_co chr20 | 31870702 | 31944963 + | 0.14   | 0.08   |
| ENSG0000(BPIFA2    | protein_co chr20 | 33161768 | 33181412 + | 0      | 0      |
| ENSG0000(RBM39     | protein_co chr20 | 35701347 | 35742312 - | 103.58 | 108.61 |
| ENSG0000(COX4I2    | protein_co chr20 | 31637888 | 31645006 + | 0      | 0      |
| ENSG0000(BPIFA3    | protein_co chr20 | 33217310 | 33227758 + | 0      | 0      |
| ENSG0000(ZNF341    | protein_co chr20 | 33731657 | 33792269 + | 1.49   | 1.53   |
| ENSG0000(GGT7      | protein_co chr20 | 34844720 | 34872860 - | 17.6   | 19.72  |
| ENSG0000(DEFB118   | protein_co chr20 | 31368618 | 31373923 + | 0      | 0      |
| ENSG0000(ACSS2     | protein_co chr20 | 34872146 | 34927962 + | 17.64  | 17.04  |
| ENSG0000(EDA2R     | protein_co chrX  | 66595637 | 66639298 - | 14.92  | 15.89  |
| ENSG0000(ARHGEF9   | protein_co chrX  | 63634967 | 63809274 - | 5.35   | 6.19   |
| ENSG0000(C1QL1     | protein_co chr17 | 44959693 | 44968071 - | 0.14   | 0      |
| ENSG0000(GFAP      | protein_co chr17 | 44903161 | 44916937 - | 0.21   | 0.1    |
| ENSG0000(PYY       | protein_co chr17 | 43952738 | 44004469 - | 0      | 0      |
| ENSG0000(HIGD1B    | protein_co chr17 | 44846353 | 44850480 + | 0      | 0      |
| ENSG0000(ATP6V1E1  | protein_co chr22 | 17592136 | 17628818 - | 90.77  | 91.57  |
| ENSG0000(ZNF227    | protein_co chr19 | 44207547 | 44237268 + | 5.27   | 4.97   |
| ENSG0000(ZNF428    | protein_co chr19 | 43607219 | 43619874 - | 24.9   | 27.15  |
| ENSG0000(TEX101    | protein_co chr19 | 43401496 | 43418597 + | 0      | 0      |
| ENSG0000(ZNF141    | protein_co chr4  | 337814   | 384864 +   | 2.59   | 2.74   |
| ENSG0000(CCL25     | protein_co chr19 | 8052767  | 8062650 +  | 0.26   | 0      |
| ENSG0000(COX4I1    | protein_co chr16 | 85798633 | 85807044 + | 305.88 | 318.77 |
| ENSG0000(EMC8      | protein_co chr16 | 85771758 | 85799608 - | 15.45  | 16.01  |
| ENSG0000(GSE1      | protein_co chr16 | 85169525 | 85676204 + | 11.32  | 11.05  |
| ENSG0000(RP11-178L | protein_co chr16 | 87302876 | 87334273 - | 0      | 0      |
| ENSG0000(GINS2     | protein_co chr16 | 85676198 | 85690073 - | 0.36   | 0.22   |
| ENSG0000(CHMP1A    | protein_co chr16 | 89644431 | 89657845 - | 34.93  | 36.1   |
| ENSG0000(SH3BGR1   | protein_co chrX  | 81201943 | 81298547 + | 52.79  | 55.89  |
| ENSG0000(COX7B     | protein_co chrX  | 77899438 | 77907373 + | 57.23  | 59.45  |
| ENSG0000(SLC34A1   | protein_co chr5  | 1.77E+08 | 1.77E+08 + | 0      | 0      |
| ENSG0000(F12       | protein_co chr5  | 1.77E+08 | 1.77E+08 - | 0.44   | 0.6    |
| ENSG0000(PRR7      | protein_co chr5  | 1.77E+08 | 1.77E+08 + | 4.2    | 4.96   |
| ENSG0000(NFATC1    | protein_co chr18 | 79395856 | 79529325 + | 6.78   | 7.54   |
| ENSG0000(IDO1      | protein_co chr8  | 39902275 | 39928444 + | 0      | 0      |
| ENSG0000(GJA9      | protein_co chr1  | 38874451 | 38881587 - | 0      | 0      |
| ENSG0000(CAP1      | protein_co chr1  | 40040233 | 40072649 + | 136.98 | 142.82 |
| ENSG0000(PPT1      | protein_co chr1  | 40072705 | 40097703 - | 51.98  | 50.2   |
| ENSG0000(RAB11FIP4 | protein_co chr17 | 31391624 | 31538217 + | 0.34   | 0.38   |
| ENSG0000(RLIM      | protein_co chrX  | 74585217 | 74614617 - | 6.51   | 6.44   |
| ENSG0000(CDX4      | protein_co chrX  | 73447254 | 73455245 + | 0      | 0      |
| ENSG0000(ABCB7     | protein_co chrX  | 75053172 | 75156732 - | 9.37   | 8.66   |
| ENSG0000(TRAF3     | protein_co chr14 | 1.03E+08 | 1.03E+08 + | 9.98   | 9.78   |
| ENSG0000(HAUS8     | protein_co chr19 | 17049729 | 17075625 - | 1.7    | 2.68   |

|                     |                   |          |            |        |        |
|---------------------|-------------------|----------|------------|--------|--------|
| ENSG0000( ADGRE3    | protein_co chr19  | 14619117 | 14690027 - | 0      | 0      |
| ENSG0000( MRPS25    | protein_co chr3   | 15042460 | 15065335 - | 15.5   | 13.15  |
| ENSG0000( SH3BP5    | protein_co chr3   | 15254853 | 15341368 - | 44.54  | 45.58  |
| ENSG0000( HAC11     | protein_co chr3   | 15560704 | 15601852 - | 5.05   | 5.54   |
| ENSG0000( TBC1D5    | protein_co chr3   | 17157162 | 18444817 - | 17.77  | 19.08  |
| ENSG0000( CAPN7     | protein_co chr3   | 15206152 | 15252918 + | 9.96   | 9.88   |
| ENSG0000( RFTN1     | protein_co chr3   | 16313574 | 16514026 - | 29.27  | 31.37  |
| ENSG0000( C3orf20   | protein_co chr3   | 14675099 | 14773034 + | 0      | 0.07   |
| ENSG0000( RBSN      | protein_co chr3   | 15070073 | 15099163 - | 6.93   | 6.33   |
| ENSG0000( GALNT15   | protein_co chr3   | 16174649 | 16231992 + | 1.18   | 1.43   |
| ENSG0000( SLC6A6    | protein_co chr3   | 14402576 | 14489349 + | 15     | 15.05  |
| ENSG0000( KCNC3     | protein_co chr19  | 50311937 | 50333515 - | 0.26   | 0.07   |
| ENSG0000( NAPSA     | protein_co chr19  | 50358477 | 50365830 - | 0.4    | 0.53   |
| ENSG0000( NAPSB     | transcribec chr19 | 50333796 | 50344767 - | 0      | 0      |
| ENSG0000( NR1H2     | protein_co chr19  | 50329653 | 50382982 + | 38.01  | 38.35  |
| ENSG0000( LRRC4B    | protein_co chr19  | 50516892 | 50568045 - | 1.48   | 0.91   |
| ENSG0000( PDLIM4    | protein_co chr5   | 1.32E+08 | 1.32E+08 + | 41.58  | 45.01  |
| ENSG0000( KIF3A     | protein_co chr5   | 1.33E+08 | 1.33E+08 - | 5.31   | 4.05   |
| ENSG0000( MGAT1     | protein_co chr5   | 1.81E+08 | 1.81E+08 - | 63.93  | 67.94  |
| ENSG0000( GFPT2     | protein_co chr5   | 1.8E+08  | 1.8E+08 -  | 52.67  | 50.33  |
| ENSG0000( TUBG1     | protein_co chr17  | 42609676 | 42615234 + | 16.71  | 15.44  |
| ENSG0000( PSME3     | protein_co chr17  | 42824385 | 42843758 + | 33.92  | 38.61  |
| ENSG0000( RPL27     | protein_co chr17  | 42998273 | 43002959 + | 853.95 | 879.87 |
| ENSG0000( PSMC3IP   | protein_co chr17  | 42572315 | 42577831 - | 1.95   | 1.56   |
| ENSG0000( AOC3      | protein_co chr17  | 42851184 | 42858130 + | 1.58   | 1.47   |
| ENSG0000( ACLY      | protein_co chr17  | 41866908 | 41930542 - | 45.5   | 43.27  |
| ENSG0000( VPS25     | protein_co chr17  | 42773436 | 42779599 + | 35.77  | 37.78  |
| ENSG0000( RAMP2     | protein_co chr17  | 42758447 | 42763041 + | 4.1    | 4.36   |
| ENSG0000( AOC2      | protein_co chr17  | 42844600 | 42850707 + | 0.21   | 0.14   |
| ENSG0000( G6PC      | protein_co chr17  | 42900797 | 42913369 + | 0      | 0.02   |
| ENSG0000( RP11-798G | lincRNA chr17     | 45533963 | 45534710 + | 0.85   | 0.49   |
| ENSG0000( NDUFA2    | protein_co chr5   | 1.41E+08 | 1.41E+08 - | 38.95  | 37.04  |
| ENSG0000( ANKHD1    | protein_co chr5   | 1.4E+08  | 1.41E+08 + | 18.12  | 18.57  |
| ENSG0000( DIAPH1    | protein_co chr5   | 1.42E+08 | 1.42E+08 - | 9.18   | 10.77  |
| ENSG0000( NDFIP1    | protein_co chr5   | 1.42E+08 | 1.42E+08 + | 26.21  | 25.28  |
| ENSG0000( UBE2D2    | protein_co chr5   | 1.4E+08  | 1.4E+08 +  | 53.3   | 46.06  |
| ENSG0000( TTTY6     | lincRNA chrY      | 22439593 | 22441458 - | 0      | 0      |
| ENSG0000( TTTY6B    | antisense chrY    | 22144966 | 22146831 + | 0      | 0      |
| ENSG0000( EXOC4     | protein_co chr7   | 1.33E+08 | 1.34E+08 + | 24.39  | 24.95  |
| ENSG0000( ACAP3     | protein_co chr1   | 1292376  | 1309609 -  | 29.74  | 32.5   |
| ENSG0000( C1orf159  | protein_co chr1   | 1081818  | 1116361 -  | 3.87   | 4.11   |
| ENSG0000( ANO1      | protein_co chr11  | 70078302 | 70189528 + | 0.12   | 0      |
| ENSG0000( PPFIA1    | protein_co chr11  | 70270700 | 70384403 + | 23.87  | 28.73  |
| ENSG0000( TMEM204   | protein_co chr16  | 1528688  | 1555580 +  | 6      | 6.91   |
| ENSG0000( KREMEN2   | protein_co chr16  | 2963944  | 2968383 +  | 0      | 0      |



|                    |                   |          |            |       |       |
|--------------------|-------------------|----------|------------|-------|-------|
| ENSG0000( THOC6    | protein_co chr16  | 3024027  | 3027755 +  | 15.08 | 13.18 |
| ENSG0000( TRAF7    | protein_co chr16  | 2155698  | 2178129 +  | 34.02 | 41.1  |
| ENSG0000( BARX1    | protein_co chr9   | 93951622 | 93955372 - | 0.09  | 0.05  |
| ENSG0000( NINJ1    | protein_co chr9   | 93121489 | 93134288 - | 32.43 | 37.04 |
| ENSG0000( CA6      | protein_co chr1   | 8945867  | 8975092 +  | 0     | 0.17  |
| ENSG0000( NPHP4    | protein_co chr1   | 5862811  | 5992473 -  | 3.72  | 3.66  |
| ENSG0000( MAP1B    | protein_co chr5   | 72107234 | 72209570 + | 22.27 | 22.22 |
| ENSG0000( RHOXF2   | protein_co chrX   | 1.2E+08  | 1.2E+08 +  | 0     | 0     |
| ENSG0000( IL13RA1  | protein_co chrX   | 1.19E+08 | 1.19E+08 + | 28.8  | 29.91 |
| ENSG0000( WDR44    | protein_co chrX   | 1.18E+08 | 1.18E+08 + | 6.63  | 6.38  |
| ENSG0000( CKMT2    | protein_co chr5   | 81233285 | 81266397 + | 0.23  | 0.2   |
| ENSG0000( ZCCHC9   | protein_co chr5   | 81301590 | 81313297 + | 7.57  | 8.23  |
| ENSG0000( KRT34    | protein_co chr17  | 41377650 | 41382403 - | 0     | 0     |
| ENSG0000( KRT33B   | protein_co chr17  | 41363494 | 41369800 - | 0     | 0     |
| ENSG0000( TNS4     | protein_co chr17  | 40475828 | 40501597 - | 0.15  | 0     |
| ENSG0000( TOP2A    | protein_co chr17  | 40388516 | 40417950 - | 0.59  | 0.73  |
| ENSG0000( STARD3   | protein_co chr17  | 39637065 | 39663484 + | 19.48 | 24.03 |
| ENSG0000( RARA     | protein_co chr17  | 40309192 | 40357643 + | 15.14 | 17.26 |
| ENSG0000( PPP1R1B  | protein_co chr17  | 39626740 | 39636626 + | 1.39  | 2.17  |
| ENSG0000( KHDRBS3  | protein_co chr8   | 1.35E+08 | 1.36E+08 + | 13.47 | 12.89 |
| ENSG0000( CHD1L    | protein_co chr1   | 1.47E+08 | 1.47E+08 + | 12.5  | 9.07  |
| ENSG0000( PEX11B   | protein_co chr1   | 1.46E+08 | 1.46E+08 - | 12.91 | 12.72 |
| ENSG0000( FMO5     | protein_co chr1   | 1.47E+08 | 1.47E+08 - | 0.78  | 0.64  |
| ENSG0000( PIAS3    | protein_co chr1   | 1.46E+08 | 1.46E+08 - | 19.33 | 19.45 |
| ENSG0000( PRKAB2   | protein_co chr1   | 1.47E+08 | 1.47E+08 - | 8.02  | 9.74  |
| ENSG0000( CLUHP3   | transcribec chr16 | 31700590 | 31711986 + | 3.4   | 3.73  |
| ENSG0000( FSHB     | protein_co chr11  | 30231016 | 30235261 + | 0     | 0     |
| ENSG0000( PDHA1    | protein_co chrX   | 19343893 | 19361705 + | 50.48 | 46.11 |
| ENSG0000( RAI2     | protein_co chrX   | 17800049 | 17861337 - | 0     | 0.19  |
| ENSG0000( MCCC2    | protein_co chr5   | 71587288 | 71658704 + | 10.64 | 11.83 |
| ENSG0000( ZNF304   | protein_co chr19  | 57351307 | 57359898 + | 3.05  | 4.03  |
| ENSG0000( ZSCAN5A  | protein_co chr19  | 56219670 | 56368383 - | 4.26  | 1.91  |
| ENSG0000( ZNF132   | protein_co chr19  | 58432814 | 58440222 - | 2.25  | 1.48  |
| ENSG0000( USP29    | protein_co chr19  | 57119138 | 57131926 + | 0     | 0     |
| ENSG0000( SELENOS  | protein_co chr15  | 1.01E+08 | 1.01E+08 - | 40.43 | 38.26 |
| ENSG0000( CHSY1    | protein_co chr15  | 1.01E+08 | 1.01E+08 - | 15.82 | 14.31 |
| ENSG0000( SNRPA1   | protein_co chr15  | 1.01E+08 | 1.01E+08 - | 11.52 | 13.31 |
| ENSG0000( KRT17P1  | transcribec chr17 | 16840743 | 16845883 - | 0     | 0     |
| ENSG0000( LLGL1    | protein_co chr17  | 18225587 | 18244875 + | 18.92 | 18.95 |
| ENSG0000( NROB2    | protein_co chr1   | 26911489 | 26913966 - | 0     | 0     |
| ENSG0000( LIN28A   | protein_co chr1   | 26410778 | 26429722 + | 0     | 0.03  |
| ENSG0000( THAP1    | protein_co chr8   | 42836674 | 42843325 - | 3.31  | 6.38  |
| ENSG0000( RHPN2    | protein_co chr19  | 32978593 | 33064888 - | 2.91  | 2.84  |
| ENSG0000( C19orf12 | protein_co chr19  | 29698886 | 29715789 - | 11.57 | 14.39 |
| ENSG0000( FAAP24   | protein_co chr19  | 32972209 | 32978222 + | 2.38  | 1.8   |

|                    |                  |          |            |        |        |
|--------------------|------------------|----------|------------|--------|--------|
| ENSG0000(LRRC9     | protein_co chr14 | 59919713 | 60063559 + | 0      | 0      |
| ENSG0000(ACR10     | protein_co chr14 | 58200080 | 58235636 + | 39.12  | 43.21  |
| ENSG0000(ABHD12B   | protein_co chr14 | 50872160 | 50904970 + | 0      | 0.04   |
| ENSG0000(GCH1      | protein_co chr14 | 54842008 | 54902852 - | 1.77   | 1.39   |
| ENSG0000(LGALS3    | protein_co chr14 | 55124110 | 55145413 + | 368.47 | 387.64 |
| ENSG0000(UBE2L2    | processed_chr12  | 20449655 | 20450083 - | 0      | 0      |
| ENSG0000(PODNL1    | protein_co chr19 | 13931187 | 13953392 - | 7.55   | 8.45   |
| ENSG0000(DNAJB1    | protein_co chr19 | 14514770 | 14529770 - | 44.44  | 46.71  |
| ENSG0000(ZSWIM4    | protein_co chr19 | 13795460 | 13832230 + | 3.99   | 3.45   |
| ENSG0000(FBXW9     | protein_co chr19 | 12688053 | 12696643 - | 4.87   | 4.37   |
| ENSG0000(RFX1      | protein_co chr19 | 13961538 | 14007039 - | 3.15   | 3.2    |
| ENSG0000(ZNF20     | protein_co chr19 | 12092843 | 12140407 - | 1.06   | 0.69   |
| ENSG0000(C19orf57  | protein_co chr19 | 13882348 | 13906452 - | 0.66   | 0.61   |
| ENSG0000(DCAF15    | protein_co chr19 | 13952492 | 13961449 + | 9.54   | 7.45   |
| ENSG0000(CC2D1A    | protein_co chr19 | 13906201 | 13930879 + | 11.53  | 12.17  |
| ENSG0000(RTBDN     | protein_co chr19 | 12825478 | 12835428 - | 0      | 0      |
| ENSG0000(MATN3     | protein_co chr2  | 19992111 | 20012694 - | 1      | 1.23   |
| ENSG0000(TRIM21    | protein_co chr11 | 4384897  | 4393696 -  | 8.25   | 7.74   |
| ENSG0000(SPATA6    | protein_co chr1  | 48295372 | 48472208 - | 4.23   | 3.59   |
| ENSG0000(LRRC41    | protein_co chr1  | 46261196 | 46303608 - | 35.3   | 33.77  |
| ENSG0000(CCT6B     | protein_co chr17 | 34927859 | 34981078 - | 0.66   | 1.54   |
| ENSG0000(DHX30     | protein_co chr3  | 47802909 | 47850195 + | 15.85  | 15.64  |
| ENSG0000(RAF1      | protein_co chr3  | 12583601 | 12664226 - | 30.31  | 27.72  |
| ENSG0000(SLC6A11   | protein_co chr3  | 10816200 | 10940733 + | 0.04   | 0.07   |
| ENSG0000(PPARG     | protein_co chr3  | 12287368 | 12434356 + | 0.56   | 0.58   |
| ENSG0000(NUP210    | protein_co chr3  | 13316235 | 13420309 - | 0      | 0      |
| ENSG0000(FCRLA     | protein_co chr1  | 1.62E+08 | 1.62E+08 + | 1.7    | 1.21   |
| ENSG0000(HSD17B7   | protein_co chr1  | 1.63E+08 | 1.63E+08 + | 5.04   | 4.58   |
| ENSG0000(ENOSF1    | protein_co chr18 | 670324   | 712676 -   | 19.12  | 17.09  |
| ENSG0000(LINC00470 | lincRNA chr18    | 1254383  | 1408344 -  | 0      | 0.17   |
| ENSG0000(EMILIN2   | protein_co chr18 | 2847030  | 2915993 +  | 8.22   | 6.58   |
| ENSG0000(SLX1A     | protein_co chr16 | 30193887 | 30197561 + | 13.02  | 11.18  |
| ENSG0000(ARFIP2    | protein_co chr11 | 6474683  | 6481479 -  | 27.94  | 26.56  |
| ENSG0000(TRIM5     | protein_co chr11 | 5663557  | 5938619 -  | 9.75   | 10.19  |
| ENSG0000(CNGA4     | protein_co chr11 | 6234765  | 6244429 +  | 0.06   | 0.1    |
| ENSG0000(TRIM22    | protein_co chr11 | 5689689  | 5737089 +  | 80.88  | 93.79  |
| ENSG0000(RRP8      | protein_co chr11 | 6595075  | 6603620 -  | 6.59   | 8.51   |
| ENSG0000(TIMM10B   | protein_co chr11 | 6481447  | 6484679 +  | 14.42  | 11.01  |
| ENSG0000(EFR3A     | protein_co chr8  | 1.32E+08 | 1.32E+08 + | 17.46  | 21.31  |
| ENSG0000(HHLA1     | protein_co chr8  | 1.32E+08 | 1.32E+08 - | 0.05   | 0.06   |
| ENSG0000(PTCD3     | protein_co chr2  | 86106182 | 86142157 + | 22.49  | 27.83  |
| ENSG0000(IMMT      | protein_co chr2  | 86143932 | 86195770 - | 20.38  | 21.16  |
| ENSG0000(MRPL35    | protein_co chr2  | 86199355 | 86213794 + | 11.3   | 14.18  |
| ENSG0000(IQCA1     | protein_co chr2  | 2.36E+08 | 2.37E+08 - | 0      | 0.05   |
| ENSG0000(ILKAP     | protein_co chr2  | 2.38E+08 | 2.38E+08 - | 12.5   | 11.22  |

|                    |                  |          |            |        |        |
|--------------------|------------------|----------|------------|--------|--------|
| ENSG0000( PER2     | protein_co chr2  | 2.38E+08 | 2.38E+08 - | 3.02   | 2.29   |
| ENSG0000( RAMP1    | protein_co chr2  | 2.38E+08 | 2.38E+08 + | 12.76  | 13.4   |
| ENSG0000( SCLY     | protein_co chr2  | 2.38E+08 | 2.38E+08 + | 4.34   | 3.53   |
| ENSG0000( PTPRE    | protein_co chr10 | 1.28E+08 | 1.28E+08 + | 0.07   | 0.27   |
| ENSG0000( RAN      | protein_co chr12 | 1.31E+08 | 1.31E+08 + | 211.5  | 217.08 |
| ENSG0000( PRKAA1   | protein_co chr5  | 40759379 | 40798374 - | 24     | 33.27  |
| ENSG0000( CARD6    | protein_co chr5  | 40841184 | 40860175 + | 7.81   | 8.24   |
| ENSG0000( RAP1GAP2 | protein_co chr17 | 2755705  | 3037739 +  | 0.06   | 0.16   |
| ENSG0000( CLUH     | protein_co chr17 | 2689386  | 2712663 -  | 9.57   | 14.9   |
| ENSG0000( INPP5K   | protein_co chr17 | 1494571  | 1516888 -  | 13.12  | 14.98  |
| ENSG0000( MYBBP1A  | protein_co chr17 | 4538897  | 4555631 -  | 10.83  | 11.1   |
| ENSG0000( RPA1     | protein_co chr17 | 1829702  | 1900082 +  | 27.65  | 31.11  |
| ENSG0000( SERPINF1 | protein_co chr17 | 1761959  | 1777574 +  | 311.28 | 311.59 |
| ENSG0000( UBE2G1   | protein_co chr17 | 4269259  | 4366628 -  | 21.74  | 21.74  |
| ENSG0000( EEFSEC   | protein_co chr3  | 1.28E+08 | 1.28E+08 + | 5.28   | 5.51   |
| ENSG0000( TBC1D14  | protein_co chr4  | 6909242  | 7033118 +  | 12.34  | 12.6   |
| ENSG0000( TMEM128  | protein_co chr4  | 4235542  | 4248212 -  | 8.5    | 8.19   |
| ENSG0000( COQ3     | protein_co chr6  | 99369400 | 99394204 - | 1.48   | 1.83   |
| ENSG0000( PNISR    | protein_co chr6  | 99398051 | 99425331 - | 40.93  | 44.44  |
| ENSG0000( POPDC3   | protein_co chr6  | 1.05E+08 | 1.05E+08 - | 8.43   | 9.05   |
| ENSG0000( SEC61G   | protein_co chr7  | 54752250 | 54759974 - | 134.66 | 109.73 |
| ENSG0000( LANCL2   | protein_co chr7  | 55365448 | 55433742 + | 10.06  | 10.64  |
| ENSG0000( FIGNL1   | protein_co chr7  | 50444128 | 50542535 - | 2.32   | 2.83   |
| ENSG0000( DDC      | protein_co chr7  | 50458436 | 50565457 - | 0      | 0      |
| ENSG0000( FTHL17   | protein_co chrX  | 31071241 | 31072053 - | 0      | 0      |
| ENSG0000( GRSF1    | protein_co chr4  | 70815782 | 70839945 - | 33.67  | 31.43  |
| ENSG0000( ENAM     | protein_co chr4  | 70628744 | 70686816 + | 0      | 0      |
| ENSG0000( JCHAIN   | protein_co chr4  | 70655541 | 70681817 - | 1.92   | 2.79   |
| ENSG0000( ANKRD17  | protein_co chr4  | 73073376 | 73258798 - | 15.38  | 15.06  |
| ENSG0000( UTP3     | protein_co chr4  | 70688479 | 70690551 + | 12.27  | 12.91  |
| ENSG0000( ITGB4    | protein_co chr17 | 75721328 | 75757818 + | 0.85   | 2.23   |
| ENSG0000( WBP2     | protein_co chr17 | 75845699 | 75856507 - | 59.77  | 60     |
| ENSG0000( H3F3B    | protein_co chr17 | 75776434 | 75785893 - | 255.77 | 251.04 |
| ENSG0000( UNK      | protein_co chr17 | 75784771 | 75825799 + | 8.56   | 8.84   |
| ENSG0000( TRIM47   | protein_co chr17 | 75874161 | 75878575 - | 9.8    | 10.84  |
| ENSG0000( ZRANB2   | protein_co chr1  | 71063291 | 71081297 - | 32.3   | 29.71  |
| ENSG0000( EIF5A    | protein_co chr17 | 7306999  | 7312463 +  | 203.12 | 211.1  |
| ENSG0000( KDM6B    | protein_co chr17 | 7839904  | 7854796 +  | 13.47  | 14.68  |
| ENSG0000( CLEC10A  | protein_co chr17 | 7074537  | 7080307 -  | 0.23   | 0.14   |
| ENSG0000( SLC52A1  | protein_co chr17 | 5032600  | 5052009 -  | 0.05   | 0.13   |
| ENSG0000( GUCY2D   | protein_co chr17 | 8002594  | 8020339 +  | 0.01   | 0      |
| ENSG0000( GPS2     | protein_co chr17 | 7311324  | 7315564 -  | 29.77  | 30.36  |
| ENSG0000( XAF1     | protein_co chr17 | 6755447  | 6775647 +  | 19.31  | 14.84  |
| ENSG0000( DLG4     | protein_co chr17 | 7189890  | 7219702 -  | 13.37  | 19.25  |
| ENSG0000( RIDA     | protein_co chr8  | 98102344 | 98117241 - | 6.79   | 7.15   |

|                   |                  |          |          |   |       |       |
|-------------------|------------------|----------|----------|---|-------|-------|
| ENSG0000(VPS13B   | protein_co chr8  | 99013266 | 99877580 | + | 7.23  | 7.39  |
| ENSG0000(RGS22    | protein_co chr8  | 99960936 | 1E+08    | - | 0     | 0.08  |
| ENSG0000(MATN2    | protein_co chr8  | 97868840 | 98036716 | + | 19.82 | 25.06 |
| ENSG0000(REEP2    | protein_co chr5  | 1.38E+08 | 1.38E+08 | + | 4.35  | 6.25  |
| ENSG0000(PCBD2    | protein_co chr5  | 1.35E+08 | 1.35E+08 | + | 1.38  | 1.65  |
| ENSG0000(SDF2     | protein_co chr17 | 28648356 | 28662189 | - | 41.11 | 32.27 |
| ENSG0000(FLOT2    | protein_co chr17 | 28879335 | 28897679 | - | 49.96 | 47    |
| ENSG0000(ERAL1    | protein_co chr17 | 28854938 | 28861067 | + | 16.32 | 14.76 |
| ENSG0000(PRMT7    | protein_co chr16 | 68310974 | 68358563 | + | 18.41 | 24.29 |
| ENSG0000(NIP7     | protein_co chr16 | 69339430 | 69343111 | + | 7.46  | 5.75  |
| ENSG0000(TERF2    | protein_co chr16 | 69355561 | 69408571 | - | 6.82  | 9.67  |
| ENSG0000(VPS4A    | protein_co chr16 | 69311356 | 69326939 | + | 13.84 | 12.65 |
| ENSG0000(MTSS1L   | protein_co chr16 | 70661204 | 70686066 | - | 14.45 | 15.08 |
| ENSG0000(HSPA12B  | protein_co chr20 | 3732667  | 3753111  | + | 0.26  | 0.28  |
| ENSG0000(ANKEF1   | protein_co chr20 | 9986126  | 10058303 | + | 0.02  | 0     |
| ENSG0000(SCP2D1   | protein_co chr20 | 18813726 | 18814392 | + | 0     | 0     |
| ENSG0000(PCED1A   | protein_co chr20 | 2835314  | 2841190  | - | 16.43 | 16.02 |
| ENSG0000(SNAP25   | protein_co chr20 | 10218830 | 10307418 | + | 0     | 0     |
| ENSG0000(BTBD3    | protein_co chr20 | 11890723 | 11926609 | + | 4.96  | 5.27  |
| ENSG0000(PCNA     | protein_co chr20 | 5114953  | 5126626  | - | 40.3  | 40.79 |
| ENSG0000(NXT1     | protein_co chr20 | 23350736 | 23354777 | + | 5.11  | 5.68  |
| ENSG0000(POLR3F   | protein_co chr20 | 18467127 | 18484643 | + | 2.88  | 2.8   |
| ENSG0000(RIN2     | protein_co chr20 | 19886521 | 20002457 | + | 8.4   | 10.24 |
| ENSG0000(PTPRA    | protein_co chr20 | 2864184  | 3039076  | + | 30.79 | 31.72 |
| ENSG0000(SSTR4    | protein_co chr20 | 23035386 | 23036812 | + | 0     | 0     |
| ENSG0000(DAP3     | protein_co chr1  | 1.56E+08 | 1.56E+08 | + | 38.04 | 39.18 |
| ENSG0000(RHBG     | protein_co chr1  | 1.56E+08 | 1.56E+08 | + | 0.06  | 0.25  |
| ENSG0000(KIAA0907 | protein_co chr1  | 1.56E+08 | 1.56E+08 | - | 17.11 | 13.08 |
| ENSG0000(ATP1A4   | protein_co chr1  | 1.6E+08  | 1.6E+08  | + | 0.02  | 0.06  |
| ENSG0000(NES      | protein_co chr1  | 1.57E+08 | 1.57E+08 | - | 6.28  | 7.14  |
| ENSG0000(BCAN     | protein_co chr1  | 1.57E+08 | 1.57E+08 | + | 0     | 0.03  |
| ENSG0000(CRP      | protein_co chr1  | 1.6E+08  | 1.6E+08  | - | 0     | 0     |
| ENSG0000(ARHGEF11 | protein_co chr1  | 1.57E+08 | 1.57E+08 | - | 10.38 | 11.26 |
| ENSG0000(RAB25    | protein_co chr1  | 1.56E+08 | 1.56E+08 | + | 0     | 0     |
| ENSG0000(HAPLN2   | protein_co chr1  | 1.57E+08 | 1.57E+08 | + | 0     | 0.08  |
| ENSG0000(APCS     | protein_co chr1  | 1.6E+08  | 1.6E+08  | + | 0     | 0     |
| ENSG0000(FCRL2    | protein_co chr1  | 1.58E+08 | 1.58E+08 | - | 0     | 0     |
| ENSG0000(DCAF8    | protein_co chr1  | 1.6E+08  | 1.6E+08  | - | 59.91 | 61.65 |
| ENSG0000(SYT11    | protein_co chr1  | 1.56E+08 | 1.56E+08 | + | 9.97  | 9.62  |
| ENSG0000(IGHMBP2  | protein_co chr11 | 68903842 | 68940602 | + | 3.69  | 2.89  |
| ENSG0000(ACY3     | protein_co chr11 | 67642555 | 67650659 | - | 0     | 0     |
| ENSG0000(ALDH3B2  | protein_co chr11 | 67662162 | 67681200 | - | 0.05  | 0     |
| ENSG0000(TESMIN   | protein_co chr11 | 68707440 | 68751564 | - | 0     | 0     |
| ENSG0000(MMACHC   | protein_co chr1  | 45500053 | 45513382 | + | 1.96  | 2.36  |
| ENSG0000(DPH2     | protein_co chr1  | 43970000 | 43973369 | + | 4.64  | 7.68  |

|                     |                  |          |          |   |       |       |
|---------------------|------------------|----------|----------|---|-------|-------|
| ENSG0000( TOE1      | protein_co chr1  | 45339670 | 45343975 | + | 2.33  | 2.58  |
| ENSG0000( NASP      | protein_co chr1  | 45583846 | 45618904 | + | 26.7  | 30.46 |
| ENSG0000( MUTYH     | protein_co chr1  | 45329163 | 45340470 | - | 4.4   | 4.88  |
| ENSG0000( CTNBL1    | protein_co chr20 | 37693955 | 37872129 | + | 10.86 | 10.89 |
| ENSG0000( LPIN3     | protein_co chr20 | 41340920 | 41360582 | + | 9.49  | 11.07 |
| ENSG0000( ZSWIM3    | protein_co chr20 | 45857617 | 45879122 | + | 2.04  | 2.09  |
| ENSG0000( RBM38     | protein_co chr20 | 57391407 | 57409333 | + | 4.78  | 4.55  |
| ENSG0000( VSTM2L    | protein_co chr20 | 37903104 | 37945350 | + | 0.34  | 0.47  |
| ENSG0000( OSER1     | protein_co chr20 | 44196496 | 44210791 | - | 19.23 | 21.12 |
| ENSG0000( SERINC3   | protein_co chr20 | 44496221 | 44522109 | - | 71.86 | 65.22 |
| ENSG0000( PPP1R3D   | protein_co chr20 | 59936668 | 59940297 | - | 2.1   | 2.28  |
| ENSG0000( LINC01260 | lincRNA chr20    | 44656451 | 44696096 | - | 0.41  | 0.45  |
| ENSG0000( DMGDH     | protein_co chr5  | 78997606 | 79236038 | - | 1.06  | 0.91  |
| ENSG0000( BHMT2     | protein_co chr5  | 79069717 | 79089466 | + | 0.26  | 0.54  |
| ENSG0000( AP3B1     | protein_co chr5  | 78000525 | 78294755 | - | 14.95 | 15.8  |
| ENSG0000( ZBED3     | protein_co chr5  | 77072072 | 77087323 | - | 4.86  | 5.15  |
| ENSG0000( PATJ      | protein_co chr1  | 61742477 | 62178675 | + | 2.76  | 2.88  |
| ENSG0000( KANK4     | protein_co chr1  | 62236979 | 62319414 | - | 0     | 0     |
| ENSG0000( ANGPTL3   | protein_co chr1  | 62597487 | 62606159 | + | 0     | 0     |
| ENSG0000( SYT4      | protein_co chr18 | 43267878 | 43277650 | - | 0.03  | 0     |
| ENSG0000( SLC14A2   | protein_co chr18 | 45212995 | 45683686 | + | 0.2   | 0.09  |
| ENSG0000( FBXO44    | protein_co chr1  | 11654375 | 11663327 | + | 11.81 | 12.94 |
| ENSG0000( RSG1      | protein_co chr1  | 16231700 | 16237162 | - | 4.15  | 3.07  |
| ENSG0000( CASP9     | protein_co chr1  | 15490832 | 15526534 | - | 4.95  | 4.91  |
| ENSG0000( NMUR2     | protein_co chr5  | 1.52E+08 | 1.52E+08 | - | 0     | 0     |
| ENSG0000( DCTN4     | protein_co chr5  | 1.51E+08 | 1.51E+08 | - | 18.62 | 17.84 |
| ENSG0000( PDE6A     | protein_co chr5  | 1.5E+08  | 1.5E+08  | - | 0.53  | 0.5   |
| ENSG0000( ATP8A2    | protein_co chr13 | 25372071 | 26025851 | + | 0     | 0     |
| ENSG0000( MTUS2     | protein_co chr13 | 28820348 | 29505947 | + | 0.23  | 0.1   |
| ENSG0000( ZMYM5     | protein_co chr13 | 19823482 | 19863636 | - | 5.02  | 3.9   |
| ENSG0000( USPL1     | protein_co chr13 | 30617693 | 30660770 | + | 3.61  | 4.63  |
| ENSG0000( XPO4      | protein_co chr13 | 20777329 | 20903048 | - | 2.57  | 2.88  |
| ENSG0000( TPTE2     | protein_co chr13 | 19422877 | 19536762 | - | 0     | 0     |
| ENSG0000( POMP      | protein_co chr13 | 28659104 | 28678925 | + | 38.58 | 35.26 |
| ENSG0000( CDK8      | protein_co chr13 | 26254104 | 26405238 | + | 4.16  | 5.51  |
| ENSG0000( ALOX5AP   | protein_co chr13 | 30713478 | 30764426 | + | 1.38  | 1.44  |
| ENSG0000( HMGB1P5   | transcribec chr3 | 22381819 | 22382929 | + | 0.13  | 0.76  |
| ENSG0000( WASF3     | protein_co chr13 | 26557703 | 26688948 | + | 7.11  | 6.64  |
| ENSG0000( RNFI7     | protein_co chr13 | 24764152 | 24879921 | + | 0.49  | 1.02  |
| ENSG0000( GPR12     | protein_co chr13 | 26755200 | 26760785 | - | 0     | 0.01  |
| ENSG0000( CHRM3     | protein_co chr1  | 2.39E+08 | 2.4E+08  | + | 0.01  | 0.02  |
| ENSG0000( MYH8      | protein_co chr17 | 10390322 | 10421950 | - | 0     | 0     |
| ENSG0000( MYH10     | protein_co chr17 | 8474205  | 8630761  | - | 40.13 | 48.3  |
| ENSG0000( PEMT      | protein_co chr17 | 17505563 | 17591708 | - | 11.66 | 10.93 |
| ENSG0000( SCO1      | protein_co chr17 | 10672474 | 10698375 | - | 11.44 | 9.03  |

|                   |                  |          |          |   |         |         |
|-------------------|------------------|----------|----------|---|---------|---------|
| ENSG0000(MPRIP    | protein_co chr17 | 17042545 | 17217679 | + | 47.11   | 51.26   |
| ENSG0000(CHI3L1   | protein_co chr1  | 2.03E+08 | 2.03E+08 | - | 261.54  | 264.28  |
| ENSG0000(MYBPH    | protein_co chr1  | 2.03E+08 | 2.03E+08 | - | 0.03    | 0.1     |
| ENSG0000(PIK3C2B  | protein_co chr1  | 2.04E+08 | 2.04E+08 | - | 2.62    | 2.31    |
| ENSG0000(DSTYK    | protein_co chr1  | 2.05E+08 | 2.05E+08 | - | 7.07    | 6.98    |
| ENSG0000(CHIT1    | protein_co chr1  | 2.03E+08 | 2.03E+08 | - | 0.45    | 0.47    |
| ENSG0000(SLC41A1  | protein_co chr1  | 2.06E+08 | 2.06E+08 | - | 13.88   | 12.93   |
| ENSG0000(LGR6     | protein_co chr1  | 2.02E+08 | 2.02E+08 | + | 0.02    | 0       |
| ENSG0000(TMCC2    | protein_co chr1  | 2.05E+08 | 2.05E+08 | + | 1.57    | 1.08    |
| ENSG0000(DCLK1    | protein_co chr13 | 35768652 | 36131306 | - | 0.26    | 0.11    |
| ENSG0000(CCNA1    | protein_co chr13 | 36431520 | 36442882 | + | 4.57    | 4.15    |
| ENSG0000(COG6     | protein_co chr13 | 39655627 | 39791665 | + | 9.77    | 11.58   |
| ENSG0000(SPG20    | protein_co chr13 | 36301638 | 36370180 | - | 61.81   | 63.57   |
| ENSG0000(RXFP2    | protein_co chr13 | 31739542 | 31803388 | + | 0       | 0       |
| ENSG0000(EPSTI1   | protein_co chr13 | 42886388 | 42992271 | - | 5.16    | 6.08    |
| ENSG0000(TRPC4    | protein_co chr13 | 37636636 | 37870425 | - | 0.18    | 0.04    |
| ENSG0000(POSTN    | protein_co chr13 | 37562583 | 37598844 | - | 68.93   | 58.77   |
| ENSG0000(RFXAP    | protein_co chr13 | 36819224 | 36829104 | + | 1.39    | 1.13    |
| ENSG0000(TPT1     | protein_co chr13 | 45333471 | 45341370 | - | 2678.63 | 2617.66 |
| ENSG0000(GPALPP1  | protein_co chr13 | 44989529 | 45037669 | + | 8.15    | 6.57    |
| ENSG0000(STOML3   | protein_co chr13 | 38965925 | 38991066 | - | 0       | 0       |
| ENSG0000(KL       | protein_co chr13 | 33016433 | 33066145 | + | 0.03    | 0.02    |
| ENSG0000(RFC3     | protein_co chr13 | 33818049 | 33966558 | + | 1.27    | 1.52    |
| ENSG0000(STARD13  | protein_co chr13 | 33103135 | 33350630 | - | 3.1     | 2.99    |
| ENSG0000(IRS4     | protein_co chrX  | 1.09E+08 | 1.09E+08 | - | 0       | 0       |
| ENSG0000(MORC4    | protein_co chrX  | 1.07E+08 | 1.07E+08 | - | 14.28   | 16.14   |
| ENSG0000(BEX2     | protein_co chrX  | 1.03E+08 | 1.03E+08 | - | 0.3     | 0.46    |
| ENSG0000(RNF128   | protein_co chrX  | 1.07E+08 | 1.07E+08 | + | 0.29    | 0.04    |
| ENSG0000(GNG5P2   | processed_chrX   | 1.1E+08  | 1.1E+08  | - | 0       | 0       |
| ENSG0000(TBC1D8B  | protein_co chrX  | 1.07E+08 | 1.07E+08 | + | 7.63    | 8.68    |
| ENSG0000(TCEAL4   | protein_co chrX  | 1.04E+08 | 1.04E+08 | + | 68.44   | 63.51   |
| ENSG0000(BEX1     | protein_co chrX  | 1.03E+08 | 1.03E+08 | - | 1.67    | 2.72    |
| ENSG0000(FAM104A  | protein_co chr17 | 73207353 | 73236753 | - | 12.37   | 14.97   |
| ENSG0000(SLC39A11 | protein_co chr17 | 72645949 | 73092712 | - | 8.05    | 8.13    |
| ENSG0000(EPHB2    | protein_co chr1  | 22710839 | 22921500 | + | 3.99    | 4.37    |
| ENSG0000(SRRM1    | protein_co chr1  | 24631716 | 24673267 | + | 23.53   | 28.09   |
| ENSG0000(BTBD2    | protein_co chr19 | 1985438  | 2034881  | - | 43.07   | 43.03   |
| ENSG0000(PRAM1    | protein_co chr19 | 8490056  | 8503112  | - | 0       | 0.25    |
| ENSG0000(KMT5C    | protein_co chr19 | 55339853 | 55348120 | + | 4.49    | 4.73    |
| ENSG0000(ZNF414   | protein_co chr19 | 8509678  | 8514164  | - | 8.58    | 8.62    |
| ENSG0000(PDE6B    | protein_co chr4  | 625584   | 670782   | + | 0.05    | 0.18    |
| ENSG0000(HSPBP1   | protein_co chr19 | 55262231 | 55280381 | - | 14.79   | 16.46   |
| ENSG0000(CSNK1G2  | protein_co chr19 | 1941149  | 1981338  | + | 26.71   | 21.11   |
| ENSG0000(SLF1     | protein_co chr5  | 94618347 | 94739436 | + | 1.04    | 0.68    |
| ENSG0000(CNDP2    | protein_co chr18 | 74495816 | 74523454 | + | 24.01   | 28      |

|                    |                   |          |            |        |        |
|--------------------|-------------------|----------|------------|--------|--------|
| ENSG0000( MACROD1  | protein_co chr11  | 63998558 | 64166106 - | 8.89   | 11.24  |
| ENSG0000( WDR74    | protein_co chr11  | 62832342 | 62841809 - | 12.82  | 13.76  |
| ENSG0000( LGALS12  | protein_co chr11  | 63506084 | 63516774 + | 0.11   | 0.04   |
| ENSG0000( RTN3     | protein_co chr11  | 63681446 | 63759891 + | 91.81  | 91.36  |
| ENSG0000( RARRES3  | protein_co chr11  | 63536809 | 63546462 + | 12.16  | 15.87  |
| ENSG0000( HRASLS2  | protein_co chr11  | 63552770 | 63563383 - | 0      | 0      |
| ENSG0000( MYH11    | protein_co chr16  | 15703172 | 15857033 - | 0.03   | 0.46   |
| ENSG0000( FOPNL    | protein_co chr16  | 15865720 | 15888625 - | 11.99  | 9.16   |
| ENSG0000( MED10    | protein_co chr5   | 6371881  | 6378594 -  | 20.05  | 21.8   |
| ENSG0000( PDZD2    | protein_co chr5   | 31639410 | 32110931 + | 0.04   | 0.34   |
| ENSG0000( MORC2    | protein_co chr22  | 30925130 | 30968298 - | 10.55  | 12.76  |
| ENSG0000( LARGE1   | protein_co chr22  | 33162226 | 33922841 - | 3.83   | 4.61   |
| ENSG0000( GSTT2B   | protein_co chr22  | 23957414 | 23961186 - | 2.28   | 3.78   |
| ENSG0000( MYO18B   | protein_co chr22  | 25742144 | 26031041 + | 0      | 0      |
| ENSG0000( SLC2A11  | protein_co chr22  | 23856703 | 23886309 + | 5.58   | 6.65   |
| ENSG0000( C1QTNF6  | protein_co chr22  | 37180167 | 37199385 - | 18.98  | 17.28  |
| ENSG0000( GGT2     | protein_co chr22  | 21207973 | 21227637 - | 0      | 0      |
| ENSG0000( FAM83F   | protein_co chr22  | 39994949 | 40043529 + | 0      | 0      |
| ENSG0000( SEC14L4  | protein_co chr22  | 30488913 | 30505711 - | 0.05   | 0.1    |
| ENSG0000( ZDHHC8P1 | transcribec chr22 | 23390606 | 23402726 - | 0      | 0      |
| ENSG0000( GIMAP6   | protein_co chr7   | 1.51E+08 | 1.51E+08 - | 0      | 0      |
| ENSG0000( GIMAP4   | protein_co chr7   | 1.51E+08 | 1.51E+08 + | 0      | 0      |
| ENSG0000( ADCK2    | protein_co chr7   | 1.41E+08 | 1.41E+08 + | 5.99   | 6.55   |
| ENSG0000( MKRN1    | protein_co chr7   | 1.4E+08  | 1.4E+08 -  | 47.53  | 38.51  |
| ENSG0000( AGAP3    | protein_co chr7   | 1.51E+08 | 1.51E+08 + | 24.9   | 27.57  |
| ENSG0000( KRBA1    | protein_co chr7   | 1.5E+08  | 1.5E+08 +  | 5.45   | 5.27   |
| ENSG0000( ZNF767P  | transcribec chr7  | 1.5E+08  | 1.5E+08 -  | 7.12   | 5.55   |
| ENSG0000( ACTR3B   | protein_co chr7   | 1.53E+08 | 1.53E+08 + | 2.9    | 4.82   |
| ENSG0000( NTS      | protein_co chr12  | 85874295 | 85882992 + | 0      | 0      |
| ENSG0000( BTG1     | protein_co chr12  | 92140278 | 92145897 - | 28.75  | 26.89  |
| ENSG0000( LRRIQ1   | protein_co chr12  | 85036314 | 85263224 + | 0.47   | 0.2    |
| ENSG0000( C12orf29 | protein_co chr12  | 88033846 | 88050160 + | 11.56  | 8.83   |
| ENSG0000( ATP13A3  | protein_co chr3   | 1.94E+08 | 1.94E+08 - | 331.22 | 305.65 |
| ENSG0000( SFTPD    | protein_co chr10  | 79937740 | 79982614 - | 0      | 0.23   |
| ENSG0000( DYDC2    | protein_co chr10  | 80344745 | 80368073 + | 0      | 0      |
| ENSG0000( TMEM254  | protein_co chr10  | 80078646 | 80092557 + | 13.76  | 11.54  |
| ENSG0000( TMTC1    | protein_co chr12  | 29500840 | 29784759 - | 10.66  | 9.78   |
| ENSG0000( KRAS     | protein_co chr12  | 25204789 | 25250936 - | 3.69   | 3.18   |
| ENSG0000( IPO8     | protein_co chr12  | 30628988 | 30695986 - | 12.38  | 13.46  |
| ENSG0000( LARS     | protein_co chr5   | 1.46E+08 | 1.46E+08 - | 40.48  | 36.12  |
| ENSG0000( SPINK5   | protein_co chr5   | 1.48E+08 | 1.48E+08 + | 0      | 0      |
| ENSG0000( IMPA1    | protein_co chr8   | 81657961 | 81686693 - | 10.68  | 9.9    |
| ENSG0000( LRRCC1   | protein_co chr8   | 85107147 | 85146076 + | 1.2    | 1.49   |
| ENSG0000( E2F5     | protein_co chr8   | 85177225 | 85217158 + | 3.37   | 2.19   |
| ENSG0000( CA1      | protein_co chr8   | 85327608 | 85379014 - | 0      | 0      |

|                    |                  |          |            |        |        |
|--------------------|------------------|----------|------------|--------|--------|
| ENSG0000(CCDC59    | protein_co chr12 | 82223681 | 82358805 - | 14.67  | 11.28  |
| ENSG0000(SWAP70    | protein_co chr11 | 9664077  | 9752991 +  | 23     | 20.11  |
| ENSG0000(ARNTL     | protein_co chr11 | 13276652 | 13387266 + | 4.62   | 3.75   |
| ENSG0000(LYVE1     | protein_co chr11 | 10556966 | 10611689 - | 0      | 0.11   |
| ENSG0000(AMPD3     | protein_co chr11 | 10308313 | 10507579 + | 4.87   | 3.91   |
| ENSG0000(MICALCL   | protein_co chr11 | 12276080 | 12359144 + | 0.35   | 0.02   |
| ENSG0000(SBF2      | protein_co chr11 | 9778667  | 10294207 - | 15.84  | 18.53  |
| ENSG0000(MICAL2    | protein_co chr11 | 12094008 | 12263789 + | 24.96  | 23.24  |
| ENSG0000(RRAS2     | protein_co chr11 | 14277926 | 14364506 - | 36.58  | 39     |
| ENSG0000(HSD17B4   | protein_co chr5  | 1.19E+08 | 1.2E+08 +  | 79.3   | 81.6   |
| ENSG0000(ZFC3H1    | protein_co chr12 | 71609472 | 71667725 - | 16.15  | 16.28  |
| ENSG0000(TEX15     | protein_co chr8  | 30831544 | 30890606 - | 0      | 0      |
| ENSG0000(SARAF     | protein_co chr8  | 30063012 | 30083208 - | 121.9  | 117.58 |
| ENSG0000(RNF122    | protein_co chr8  | 33547755 | 33567125 - | 6.69   | 7.53   |
| ENSG0000(DUSP26    | protein_co chr8  | 33591332 | 33600106 - | 0.18   | 0      |
| ENSG0000(DPF2      | protein_co chr11 | 65333754 | 65353249 + | 28.69  | 23.74  |
| ENSG0000(MEN1      | protein_co chr11 | 64803510 | 64811294 - | 12.92  | 14.77  |
| ENSG0000(C14orf1   | protein_co chr14 | 75649791 | 75661189 - | 12.32  | 12.34  |
| ENSG0000(GSC       | protein_co chr14 | 94768216 | 94770230 - | 0.19   | 0.41   |
| ENSG0000(C14orf159 | protein_co chr14 | 91060333 | 91225632 + | 21.68  | 25.81  |
| ENSG0000(UNC79     | protein_co chr14 | 93333219 | 93707876 + | 0.03   | 0.05   |
| ENSG0000(NUMB      | protein_co chr14 | 73275107 | 73463642 - | 38.01  | 39.53  |
| ENSG0000(CATSPERB  | protein_co chr14 | 91580696 | 91780707 - | 0      | 0      |
| ENSG0000(VRTN      | protein_co chr14 | 74303069 | 74360008 + | 0      | 0      |
| ENSG0000(COX16     | protein_co chr14 | 70325081 | 70359731 - | 15.41  | 16.85  |
| ENSG0000(TTC9      | protein_co chr14 | 70641787 | 70675360 + | 0.07   | 0.07   |
| ENSG0000(MED6      | protein_co chr14 | 70581257 | 70600690 - | 10.45  | 10.29  |
| ENSG0000(EIF2S1    | protein_co chr14 | 67359997 | 67386516 + | 29.44  | 32.45  |
| ENSG0000(ADAM20    | protein_co chr14 | 70522358 | 70535015 - | 0.02   | 0.04   |
| ENSG0000(LOXL2     | protein_co chr8  | 23297189 | 23425328 - | 288.86 | 248.66 |
| ENSG0000(ELP3      | protein_co chr8  | 28089673 | 28191156 + | 10.3   | 9.67   |
| ENSG0000(PEBP4     | protein_co chr8  | 22713251 | 23000000 - | 0.56   | 0.23   |
| ENSG0000(ADAMDEC   | protein_co chr8  | 24384285 | 24406013 + | 0      | 0      |
| ENSG0000(CTIF      | protein_co chr18 | 48539046 | 48863217 + | 36.22  | 40.26  |
| ENSG0000(MRO       | protein_co chr18 | 50795120 | 50825402 - | 0.41   | 0.27   |
| ENSG0000(MBD2      | protein_co chr18 | 54151601 | 54224788 - | 58.81  | 65.71  |
| ENSG0000(IER3IP1   | protein_co chr18 | 47152834 | 47176374 - | 8.09   | 7.51   |
| ENSG0000(MRPS36    | protein_co chr5  | 69217760 | 69230129 + | 9.03   | 15.66  |
| ENSG0000(CCNB1     | protein_co chr5  | 69167010 | 69178245 + | 2.8    | 2.39   |
| ENSG0000(CDK7      | protein_co chr5  | 69234795 | 69277430 + | 15.87  | 15.75  |
| ENSG0000(CD180     | protein_co chr5  | 67179613 | 67196799 - | 0.36   | 0.32   |
| ENSG0000(IRAK2     | protein_co chr3  | 10164865 | 10243743 + | 2.19   | 2.24   |
| ENSG0000(CAMK1     | protein_co chr3  | 9757342  | 9769992 -  | 13.4   | 10.63  |
| ENSG0000(THUMPD3   | protein_co chr3  | 9362842  | 9386791 +  | 18.18  | 19.87  |
| ENSG0000(VHL       | protein_co chr3  | 10141008 | 10152220 + | 11.75  | 13.26  |



|                    |                   |          |            |        |        |
|--------------------|-------------------|----------|------------|--------|--------|
| ENSG0000(BHLHE40   | protein_co chr3   | 4979116  | 4985323 +  | 29.2   | 31.24  |
| ENSG0000(ARL8B     | protein_co chr3   | 5122220  | 5180912 +  | 51.31  | 46.39  |
| ENSG0000(EDM1      | protein_co chr3   | 5187646  | 5219957 +  | 16.43  | 17.56  |
| ENSG0000(CNTN6     | protein_co chr3   | 1092576  | 1404217 +  | 0.13   | 0.03   |
| ENSG0000(CHL1      | protein_co chr3   | 196596   | 409417 +   | 0      | 0      |
| ENSG0000(MEIS2     | protein_co chr15  | 36889204 | 37101299 - | 23.41  | 28.36  |
| ENSG0000(DPH6      | protein_co chr15  | 35217345 | 35546193 - | 6.01   | 5.09   |
| ENSG0000(KATNBL1   | protein_co chr15  | 34140674 | 34210096 - | 12.68  | 12.67  |
| ENSG0000(EMC7      | protein_co chr15  | 34084017 | 34101948 - | 58.85  | 52.38  |
| ENSG0000(TRPM1     | protein_co chr15  | 31001061 | 31161273 - | 0      | 0      |
| ENSG0000(GNAT2     | protein_co chr1   | 1.1E+08  | 1.1E+08 -  | 0.33   | 0.28   |
| ENSG0000(GSTM1     | protein_co chr1   | 1.1E+08  | 1.1E+08 +  | 33.42  | 31.69  |
| ENSG0000(PRPF38B   | protein_co chr1   | 1.09E+08 | 1.09E+08 + | 13.41  | 15.1   |
| ENSG0000(REG4      | protein_co chr1   | 1.2E+08  | 1.2E+08 -  | 0      | 0      |
| ENSG0000(TSPAN2    | protein_co chr1   | 1.15E+08 | 1.15E+08 - | 0.17   | 0      |
| ENSG0000(TSHB      | protein_co chr1   | 1.15E+08 | 1.15E+08 + | 0      | 0      |
| ENSG0000(GSTM5     | protein_co chr1   | 1.1E+08  | 1.1E+08 +  | 1.26   | 1      |
| ENSG0000(GSTM3     | protein_co chr1   | 1.1E+08  | 1.1E+08 -  | 40.05  | 39.12  |
| ENSG0000(SYT6      | protein_co chr1   | 1.14E+08 | 1.14E+08 - | 0      | 0      |
| ENSG0000(VAV3      | protein_co chr1   | 1.08E+08 | 1.08E+08 - | 0      | 0      |
| ENSG0000(CHIA      | protein_co chr1   | 1.11E+08 | 1.11E+08 + | 0      | 0      |
| ENSG0000(PSRC1     | protein_co chr1   | 1.09E+08 | 1.09E+08 - | 2.03   | 1.28   |
| ENSG0000(HMGCS2    | protein_co chr1   | 1.2E+08  | 1.2E+08 -  | 0      | 0      |
| ENSG0000(PTPN22    | protein_co chr1   | 1.14E+08 | 1.14E+08 - | 0.63   | 0.66   |
| ENSG0000(SORT1     | protein_co chr1   | 1.09E+08 | 1.09E+08 - | 3.01   | 3.35   |
| ENSG0000(WNT2B     | protein_co chr1   | 1.12E+08 | 1.13E+08 + | 0.53   | 0.73   |
| ENSG0000(PTGFRN    | protein_co chr1   | 1.17E+08 | 1.17E+08 + | 54.02  | 57.2   |
| ENSG0000(LAMTOR5   | protein_co chr1   | 1.1E+08  | 1.1E+08 -  | 81.72  | 76.67  |
| ENSG0000(ADAM30    | protein_co chr1   | 1.2E+08  | 1.2E+08 -  | 0      | 0      |
| ENSG0000(NOTCH2    | protein_co chr1   | 1.2E+08  | 1.2E+08 -  | 30.28  | 31.03  |
| ENSG0000(TRIM45    | protein_co chr1   | 1.17E+08 | 1.17E+08 - | 2.17   | 1.75   |
| ENSG0000(CEPT1     | protein_co chr1   | 1.11E+08 | 1.11E+08 + | 15.15  | 15.64  |
| ENSG0000(CD101     | protein_co chr1   | 1.17E+08 | 1.17E+08 + | 0.55   | 1.42   |
| ENSG0000(VTCN1     | protein_co chr1   | 1.17E+08 | 1.17E+08 - | 0.06   | 0      |
| ENSG0000(NGF       | protein_co chr1   | 1.15E+08 | 1.15E+08 - | 2.25   | 3.94   |
| ENSG0000(AP4B1     | protein_co chr1   | 1.14E+08 | 1.14E+08 - | 5.68   | 3.98   |
| ENSG0000(NAPG      | protein_co chr18  | 10525905 | 10552761 + | 6.43   | 6.43   |
| ENSG0000(SPIRE1    | protein_co chr18  | 12446512 | 12658134 - | 9.04   | 11.58  |
| ENSG0000(PPHLN1    | protein_co chr12  | 42238447 | 42459715 + | 20.68  | 22.07  |
| ENSG0000(FKBP11    | protein_co chr12  | 48921518 | 48926474 - | 32.56  | 27.78  |
| ENSG0000(ARF3      | protein_co chr12  | 48935723 | 48957551 - | 54.97  | 54.81  |
| ENSG0000(TMEM106   | protein_co chr12  | 47963569 | 47968878 + | 19.83  | 23.61  |
| ENSG0000(SLC38A2   | protein_co chr12  | 46358189 | 46372867 - | 298.14 | 245.56 |
| ENSG0000(PLEKHA8P1 | transcribed chr12 | 45173064 | 45216041 - | 2.17   | 1.47   |
| ENSG0000(YWHAQ     | protein_co chr2   | 9583972  | 9631014 -  | 159.23 | 158.27 |

|                    |                  |          |            |         |        |
|--------------------|------------------|----------|------------|---------|--------|
| ENSG0000(KIDINS220 | protein_co chr2  | 8721081  | 8837630 -  | 26.03   | 25.09  |
| ENSG0000(GRHL1     | protein_co chr2  | 9951693  | 10002277 + | 0.1     | 0.16   |
| ENSG0000(ROCK2     | protein_co chr2  | 11179761 | 11348330 - | 11.46   | 10.96  |
| ENSG0000(RSAD2     | protein_co chr2  | 6865806  | 6898239 +  | 0.17    | 0.73   |
| ENSG0000(MYCN      | protein_co chr2  | 15940564 | 15947007 + | 0       | 0      |
| ENSG0000(LPIN1     | protein_co chr2  | 11677595 | 11827409 + | 33.29   | 37.51  |
| ENSG0000(CMPK2     | protein_co chr2  | 6840570  | 6866635 -  | 1.08    | 0.69   |
| ENSG0000(IAH1      | protein_co chr2  | 9473658  | 9496543 +  | 38.68   | 33.59  |
| ENSG0000(LDHA      | protein_co chr11 | 18394388 | 18408425 + | 1089.13 | 929.66 |
| ENSG0000(SAA2      | protein_co chr11 | 18239223 | 18248643 - | 4.38    | 3.39   |
| ENSG0000(ANO3      | protein_co chr11 | 26309599 | 26663288 + | 0.44    | 0.34   |
| ENSG0000(IL6ST     | protein_co chr5  | 55935095 | 55994993 - | 483.46  | 492.15 |
| ENSG0000(FST       | protein_co chr5  | 53480409 | 53487134 + | 165     | 145.82 |
| ENSG0000(CFHR4     | protein_co chr1  | 1.97E+08 | 1.97E+08 + | 0       | 0      |
| ENSG0000(NAV1      | protein_co chr1  | 2.02E+08 | 2.02E+08 + | 29.15   | 29.75  |
| ENSG0000(CDC73     | protein_co chr1  | 1.93E+08 | 1.93E+08 + | 5.09    | 4.68   |
| ENSG0000(TIMM17A   | protein_co chr1  | 2.02E+08 | 2.02E+08 + | 25.11   | 22.39  |
| ENSG0000(CRB1      | protein_co chr1  | 1.97E+08 | 1.97E+08 + | 0.01    | 0      |
| ENSG0000(CFHR5     | protein_co chr1  | 1.97E+08 | 1.97E+08 + | 0       | 0      |
| ENSG0000(ERN2      | protein_co chr16 | 23690326 | 23713500 - | 0.09    | 0.02   |
| ENSG0000(RPS15A    | protein_co chr16 | 18781295 | 18790383 - | 837.16  | 867.5  |
| ENSG0000(RAX       | protein_co chr18 | 59267035 | 59274086 - | 0       | 0      |
| ENSG0000(NARS      | protein_co chr18 | 57600656 | 57622213 - | 84.51   | 81.35  |
| ENSG0000(GRP       | protein_co chr18 | 59220168 | 59230774 + | 0       | 0      |
| ENSG0000(KIAA1468  | protein_co chr18 | 62187258 | 62307829 + | 12.49   | 13.72  |
| ENSG0000(FBXO18    | protein_co chr10 | 5890203  | 5937594 +  | 25.8    | 29.02  |
| ENSG0000(RBM17     | protein_co chr10 | 6088987  | 6117457 +  | 46.04   | 43.02  |
| ENSG0000(IL2RA     | protein_co chr10 | 6010689  | 6062325 -  | 0       | 0      |
| ENSG0000(ANKRD16   | protein_co chr10 | 5861617  | 5889906 -  | 3.49    | 3.47   |
| ENSG0000(ECHDC3    | protein_co chr10 | 11742366 | 11764070 + | 0       | 0      |
| ENSG0000(IL15RA    | protein_co chr10 | 5943639  | 5978187 -  | 12.9    | 11.98  |
| ENSG0000(CCNH      | protein_co chr5  | 87391494 | 87413019 - | 14.27   | 14.44  |
| ENSG0000(HRH4      | protein_co chr18 | 24460629 | 24479957 + | 0.01    | 0.03   |
| ENSG0000(TMEM241   | protein_co chr18 | 23197144 | 23437961 - | 3.24    | 2.3    |
| ENSG0000(KCTD1     | protein_co chr18 | 26454910 | 26657401 - | 7.3     | 6.61   |
| ENSG0000(CABLES1   | protein_co chr18 | 23134564 | 23260467 + | 13.67   | 12.76  |
| ENSG0000(DOCK2     | protein_co chr5  | 1.7E+08  | 1.7E+08 +  | 0.98    | 2.14   |
| ENSG0000(EMP1      | protein_co chr12 | 13196716 | 13219939 + | 131.51  | 145.79 |
| ENSG0000(SOX5      | protein_co chr12 | 23529500 | 23951032 - | 0       | 0.05   |
| ENSG0000(RERG      | protein_co chr12 | 15107783 | 15348675 - | 0.39    | 0.14   |
| ENSG0000(SLCO1B1   | protein_co chr12 | 21131202 | 21239246 + | 0       | 0      |
| ENSG0000(KLRD1     | protein_co chr12 | 10226058 | 10329600 + | 0.21    | 0.08   |
| ENSG0000(KLRC1     | protein_co chr12 | 10442264 | 10454685 - | 0       | 0      |
| ENSG0000(SPX       | protein_co chr12 | 21526307 | 21537377 + | 0       | 0.03   |
| ENSG0000(PRH2      | protein_co chr12 | 10929236 | 10932341 + | 0       | 0      |

|                  |                   |          |          |   |        |        |
|------------------|-------------------|----------|----------|---|--------|--------|
| ENSG0000(LRP4    | protein_co chr11  | 46856868 | 46918642 | - | 3.04   | 3.15   |
| ENSG0000(MYBPC3  | protein_co chr11  | 47331397 | 47352702 | - | 0      | 0      |
| ENSG0000(DDB2    | protein_co chr11  | 47214465 | 47239240 | + | 38.68  | 42.46  |
| ENSG0000(ACP2    | protein_co chr11  | 47239302 | 47248906 | - | 12.02  | 11.75  |
| ENSG0000(USP26   | protein_co chrX   | 1.33E+08 | 1.33E+08 | - | 0      | 0      |
| ENSG0000(FAM127A | protein_co chrX   | 1.35E+08 | 1.35E+08 | + | 143.57 | 151.76 |
| ENSG0000(RAB33A  | protein_co chrX   | 1.3E+08  | 1.3E+08  | + | 0.47   | 0.77   |
| ENSG0000(SOX3    | protein_co chrX   | 1.41E+08 | 1.41E+08 | - | 0      | 0      |
| ENSG0000(RBMX2   | protein_co chrX   | 1.3E+08  | 1.3E+08  | + | 10.74  | 9.93   |
| ENSG0000(STK26   | protein_co chrX   | 1.32E+08 | 1.32E+08 | + | 0.67   | 0.44   |
| ENSG0000(FOLH1B  | transcribec chr11 | 89639227 | 89698718 | + | 0      | 0      |
| ENSG0000(PIWIL4  | protein_co chr11  | 94543840 | 94621421 | + | 1.39   | 0.8    |
| ENSG0000(MTNR1B  | protein_co chr11  | 92969720 | 92985066 | + | 0      | 0      |
| ENSG0000(PUM1    | protein_co chr1   | 30931506 | 31065991 | - | 23.1   | 24.21  |
| ENSG0000(SPOCD1  | protein_co chr1   | 31790422 | 31816051 | - | 9.13   | 6.8    |
| ENSG0000(YARS    | protein_co chr1   | 32775237 | 32818153 | - | 81.64  | 77.96  |
| ENSG0000(PHC2    | protein_co chr1   | 33323623 | 33431052 | - | 34.38  | 32.44  |
| ENSG0000(CDCA8   | protein_co chr1   | 37692418 | 37709719 | + | 0.13   | 0.11   |
| ENSG0000(GNL2    | protein_co chr1   | 37566816 | 37595935 | - | 14.77  | 13.84  |
| ENSG0000(AGO4    | protein_co chr1   | 35808172 | 35857890 | + | 5.16   | 8.25   |
| ENSG0000(HOOK1   | protein_co chr1   | 59814786 | 59876378 | + | 0      | 0      |
| ENSG0000(CYP2J2  | protein_co chr1   | 59893308 | 59926790 | - | 0      | 0.1    |
| ENSG0000(BTF3L4  | protein_co chr1   | 52056125 | 52090716 | + | 27.6   | 27.9   |
| ENSG0000(ZCCHC11 | protein_co chr1   | 52408282 | 52553487 | - | 13.56  | 15     |
| ENSG0000(PRPF38A | protein_co chr1   | 52404564 | 52420839 | + | 8.83   | 10.13  |
| ENSG0000(DSC2    | protein_co chr18  | 31058840 | 31102415 | - | 0      | 0      |
| ENSG0000(DSG3    | protein_co chr18  | 31447795 | 31478702 | + | 0.18   | 0.08   |
| ENSG0000(RNF138  | protein_co chr18  | 32091855 | 32131561 | + | 6.45   | 7.61   |
| ENSG0000(ELP2    | protein_co chr18  | 36129444 | 36180556 | + | 32.72  | 41.23  |
| ENSG0000(DSG1    | protein_co chr18  | 31318089 | 31357029 | + | 0      | 0      |
| ENSG0000(DSC3    | protein_co chr18  | 30990008 | 31042815 | - | 0.03   | 0.06   |
| ENSG0000(DSC1    | protein_co chr18  | 31129236 | 31162856 | - | 0      | 0      |
| ENSG0000(DTNA    | protein_co chr18  | 34493290 | 34891844 | + | 9.78   | 8.46   |
| ENSG0000(FHOD3   | protein_co chr18  | 36297714 | 36780055 | + | 5.93   | 7.43   |
| ENSG0000(TPGS2   | protein_co chr18  | 36777647 | 36829216 | - | 73.36  | 63.79  |
| ENSG0000(DAGLA   | protein_co chr11  | 61680433 | 61747001 | + | 1.49   | 1.7    |
| ENSG0000(SLC43A3 | protein_co chr11  | 57406954 | 57427580 | - | 43.78  | 38.38  |
| ENSG0000(TIMM10  | protein_co chr11  | 57528463 | 57530803 | - | 14.41  | 17.61  |
| ENSG0000(GIF     | protein_co chr11  | 59829268 | 59845501 | - | 0      | 0      |
| ENSG0000(DHX34   | protein_co chr19  | 47349281 | 47382704 | + | 3.58   | 3.67   |
| ENSG0000(APLNR   | protein_co chr11  | 57233577 | 57237314 | - | 0      | 0.02   |
| ENSG0000(FADS2   | protein_co chr11  | 61792980 | 61867354 | + | 198.07 | 207.36 |
| ENSG0000(TMEM258 | protein_co chr11  | 61768501 | 61792802 | - | 124.29 | 128.9  |
| ENSG0000(TCN1    | protein_co chr11  | 59852800 | 59866575 | - | 0.52   | 0.39   |
| ENSG0000(C5AR2   | protein_co chr19  | 47332147 | 47347327 | + | 0.16   | 0.12   |

|                   |                  |          |          |   |        |        |
|-------------------|------------------|----------|----------|---|--------|--------|
| ENSG0000(TMEM165  | protein_co chr4  | 55395957 | 55453397 | + | 43.37  | 36.13  |
| ENSG0000(CLOCK    | protein_co chr4  | 55427903 | 55547138 | - | 3.97   | 4.91   |
| ENSG0000(PDGFR    | protein_co chr4  | 54229097 | 54298247 | + | 159.09 | 144.16 |
| ENSG0000(GGACT    | protein_co chr13 | 1.01E+08 | 1.01E+08 | - | 5.46   | 4.36   |
| ENSG0000(COL4A2   | protein_co chr13 | 1.1E+08  | 1.11E+08 | + | 90.48  | 95.02  |
| ENSG0000(CLDN10   | protein_co chr13 | 95433604 | 95579759 | + | 0      | 0      |
| ENSG0000(DZIP1    | protein_co chr13 | 95578202 | 95644703 | - | 10.02  | 9.93   |
| ENSG0000(UBAC2    | protein_co chr13 | 99200774 | 99386434 | + | 24.65  | 26.87  |
| ENSG0000(ARGLU1   | protein_co chr13 | 1.07E+08 | 1.07E+08 | - | 58.78  | 54.74  |
| ENSG0000(BIVM     | protein_co chr13 | 1.03E+08 | 1.03E+08 | + | 9.6    | 10.68  |
| ENSG0000(ERCC5    | protein_co chr13 | 1.03E+08 | 1.03E+08 | + | 9.45   | 13.72  |
| ENSG0000(TPP2     | protein_co chr13 | 1.03E+08 | 1.03E+08 | + | 11.44  | 12.13  |
| ENSG0000(KDEL1    | protein_co chr13 | 1.03E+08 | 1.03E+08 | - | 9.79   | 10.45  |
| ENSG0000(CARS2    | protein_co chr13 | 1.11E+08 | 1.11E+08 | - | 38.06  | 33.57  |
| ENSG0000(ARHGAP32 | protein_co chr11 | 1.29E+08 | 1.29E+08 | - | 5.89   | 5.95   |
| ENSG0000(STT3A    | protein_co chr11 | 1.26E+08 | 1.26E+08 | + | 94.42  | 92.67  |
| ENSG0000(ADAMTS8  | protein_co chr11 | 1.3E+08  | 1.3E+08  | - | 0      | 0      |
| ENSG0000(ACRV1    | protein_co chr11 | 1.26E+08 | 1.26E+08 | - | 0.06   | 0.15   |
| ENSG0000(ETS1     | protein_co chr11 | 1.28E+08 | 1.29E+08 | - | 16.43  | 15.63  |
| ENSG0000(SLC37A2  | protein_co chr11 | 1.25E+08 | 1.25E+08 | + | 1.04   | 0.95   |
| ENSG0000(KLB      | protein_co chr4  | 39406853 | 39451536 | + | 0.01   | 0.04   |
| ENSG0000(TMED7    | protein_co chr5  | 1.16E+08 | 1.16E+08 | - | 29.96  | 32.88  |
| ENSG0000(APC      | protein_co chr5  | 1.13E+08 | 1.13E+08 | + | 7.35   | 5.58   |
| ENSG0000(NREP     | protein_co chr5  | 1.12E+08 | 1.12E+08 | - | 51.64  | 45.51  |
| ENSG0000(WDR36    | protein_co chr5  | 1.11E+08 | 1.11E+08 | + | 7.79   | 6.87   |
| ENSG0000(OSTF1    | protein_co chr9  | 75088543 | 75147265 | + | 14.98  | 13.23  |
| ENSG0000(RFK      | protein_co chr9  | 76385517 | 76394517 | - | 8.84   | 15.56  |
| ENSG0000(UBQLN1   | protein_co chr9  | 83659963 | 83708203 | - | 28.97  | 26.46  |
| ENSG0000(NAA35    | protein_co chr9  | 85941146 | 86022298 | + | 8.05   | 6.31   |
| ENSG0000(C9orf40  | protein_co chr9  | 74946581 | 74952886 | - | 1.66   | 1.3    |
| ENSG0000(ANXA1    | protein_co chr9  | 73151757 | 73170393 | + | 420.91 | 400.69 |
| ENSG0000(CTSL     | protein_co chr9  | 87725519 | 87731393 | + | 212.49 | 218.03 |
| ENSG0000(TMEM2    | protein_co chr9  | 71683366 | 71816690 | - | 9.6    | 7.4    |
| ENSG0000(AGTPBP1  | protein_co chr9  | 85546539 | 85742029 | - | 4.24   | 4.43   |
| ENSG0000(GOLM1    | protein_co chr9  | 86026146 | 86100173 | - | 34.19  | 34.65  |
| ENSG0000(FAM189A2 | protein_co chr9  | 69324572 | 69392455 | + | 0.17   | 0      |
| ENSG0000(PSAT1    | protein_co chr9  | 78297143 | 78330093 | + | 43.05  | 45.58  |
| ENSG0000(ISCA1    | protein_co chr9  | 86264546 | 86283102 | - | 20.87  | 22.43  |
| ENSG0000(ADAM19   | protein_co chr5  | 1.57E+08 | 1.58E+08 | - | 15.09  | 13.33  |
| ENSG0000(HAVCR2   | protein_co chr5  | 1.57E+08 | 1.57E+08 | - | 0.12   | 0.03   |
| ENSG0000(CCNJL    | protein_co chr5  | 1.6E+08  | 1.6E+08  | - | 0.23   | 0.37   |
| ENSG0000(TAOK3    | protein_co chr12 | 1.18E+08 | 1.18E+08 | - | 12.55  | 9.43   |
| ENSG0000(USP30    | protein_co chr12 | 1.09E+08 | 1.09E+08 | + | 5.39   | 6.38   |
| ENSG0000(SDS      | protein_co chr12 | 1.13E+08 | 1.13E+08 | - | 0      | 0      |
| ENSG0000(MSI1     | protein_co chr12 | 1.2E+08  | 1.2E+08  | - | 0.11   | 0      |

|                  |                  |          |            |       |       |
|------------------|------------------|----------|------------|-------|-------|
| ENSG0000(HNF1A   | protein_co chr12 | 1.21E+08 | 1.21E+08 + | 0.07  | 0     |
| ENSG0000(FBXO21  | protein_co chr12 | 1.17E+08 | 1.17E+08 - | 16.15 | 18.81 |
| ENSG0000(TBX3    | protein_co chr12 | 1.15E+08 | 1.15E+08 - | 6.77  | 7.94  |
| ENSG0000(OASL    | protein_co chr12 | 1.21E+08 | 1.21E+08 - | 0     | 0     |
| ENSG0000(HRK     | protein_co chr12 | 1.17E+08 | 1.17E+08 - | 0.06  | 0.01  |
| ENSG0000(RNFT2   | protein_co chr12 | 1.17E+08 | 1.17E+08 + | 0.13  | 0.15  |
| ENSG0000(P2RX4   | protein_co chr12 | 1.21E+08 | 1.21E+08 + | 7.91  | 6.02  |
| ENSG0000(BICDL1  | protein_co chr12 | 1.2E+08  | 1.2E+08 +  | 0     | 0.23  |
| ENSG0000(DTX1    | protein_co chr12 | 1.13E+08 | 1.13E+08 + | 0.18  | 0.66  |
| ENSG0000(TRAFF1  | protein_co chr12 | 1.12E+08 | 1.12E+08 + | 17.77 | 17.35 |
| ENSG0000(DMTF1   | protein_co chr7  | 87152361 | 87196337 + | 25.47 | 27.02 |
| ENSG0000(OCM2    | protein_co chr7  | 97984684 | 97991169 - | 0     | 0     |
| ENSG0000(TMEM243 | protein_co chr7  | 87196160 | 87220587 - | 10.61 | 10.4  |
| ENSG0000(CCDC146 | protein_co chr7  | 77122434 | 77329533 + | 1.16  | 2.11  |
| ENSG0000(TMEM60  | protein_co chr7  | 77793728 | 77798580 - | 15.19 | 12.66 |
| ENSG0000(CD36    | protein_co chr7  | 80369575 | 80679277 + | 1.58  | 0.73  |
| ENSG0000(UGT2A3  | protein_co chr4  | 68928463 | 68951791 - | 0     | 0     |
| ENSG0000(CSN2    | protein_co chr4  | 69955256 | 69961007 - | 0     | 0     |
| ENSG0000(UGT2B28 | protein_co chr4  | 69280499 | 69295050 + | 0     | 0     |
| ENSG0000(PNPLA8  | protein_co chr7  | 1.08E+08 | 1.09E+08 - | 13.18 | 13.22 |
| ENSG0000(HILPDA  | protein_co chr7  | 1.28E+08 | 1.28E+08 + | 28    | 22.5  |
| ENSG0000(FAM71F1 | protein_co chr7  | 1.29E+08 | 1.29E+08 + | 0.07  | 0.23  |
| ENSG0000(RINT1   | protein_co chr7  | 1.06E+08 | 1.06E+08 + | 5.45  | 5.71  |
| ENSG0000(SRPK2   | protein_co chr7  | 1.05E+08 | 1.05E+08 - | 21.92 | 20.79 |
| ENSG0000(KCP     | protein_co chr7  | 1.29E+08 | 1.29E+08 - | 0.43  | 0.43  |
| ENSG0000(TES     | protein_co chr7  | 1.16E+08 | 1.16E+08 + | 14.18 | 17.24 |
| ENSG0000(MDFIC   | protein_co chr7  | 1.15E+08 | 1.15E+08 + | 46.26 | 46.17 |
| ENSG0000(MTO1    | protein_co chr6  | 73461578 | 73509236 + | 9.27  | 8.17  |
| ENSG0000(ADGRB3  | protein_co chr6  | 68635367 | 69389511 + | 0.01  | 0.01  |
| ENSG0000(ANKRD6  | protein_co chr6  | 89433170 | 89633834 + | 1.48  | 1.57  |
| ENSG0000(HTR1B   | protein_co chr6  | 77461753 | 77463773 - | 0     | 0.03  |
| ENSG0000(KHDC1   | protein_co chr6  | 73241314 | 73310365 - | 2.24  | 2.16  |
| ENSG0000(CEP162  | protein_co chr6  | 84124241 | 84227635 - | 4.35  | 3.53  |
| ENSG0000(SYNCRIP | protein_co chr6  | 85607785 | 85643792 - | 45.83 | 36.58 |
| ENSG0000(SNX14   | protein_co chr6  | 85505496 | 85594156 - | 27.76 | 32.67 |
| ENSG0000(NT5E    | protein_co chr6  | 85449584 | 85495791 + | 70.59 | 53.71 |
| ENSG0000(MRAP2   | protein_co chr6  | 84033756 | 84090881 + | 2.42  | 2.04  |
| ENSG0000(EPHA7   | protein_co chr6  | 93240020 | 93419547 - | 0     | 0     |
| ENSG0000(AKIRIN2 | protein_co chr6  | 87675072 | 87702209 - | 13.27 | 17.96 |
| ENSG0000(ORC3    | protein_co chr6  | 87590067 | 87667453 + | 8.61  | 9.1   |
| ENSG0000(LCA5    | protein_co chr6  | 79484991 | 79537458 - | 3     | 2.72  |
| ENSG0000(MAP3K7  | protein_co chr6  | 90513573 | 90587045 - | 10.73 | 11.01 |
| ENSG0000(CGA     | protein_co chr6  | 87085498 | 87095406 - | 0.22  | 0     |
| ENSG0000(GJA10   | protein_co chr6  | 89894469 | 89921760 + | 0     | 0     |
| ENSG0000(PRR5L   | protein_co chr11 | 36296288 | 36465204 + | 7.49  | 9.03  |

|                   |                   |          |          |   |        |         |
|-------------------|-------------------|----------|----------|---|--------|---------|
| ENSG0000(LMO2     | protein_co chr11  | 33858576 | 33892289 | - | 3.36   | 3.07    |
| ENSG0000(PHF21A   | protein_co chr11  | 45929323 | 46121178 | - | 22.43  | 21.78   |
| ENSG0000(NAT10    | protein_co chr11  | 34105602 | 34147670 | + | 10.68  | 7.45    |
| ENSG0000(EHF      | protein_co chr11  | 34621093 | 34661057 | + | 0.27   | 0.16    |
| ENSG0000(ELF5     | protein_co chr11  | 34478793 | 34513805 | - | 0      | 0       |
| ENSG0000(PRRG4    | protein_co chr11  | 32829943 | 32858123 | + | 0.04   | 0.02    |
| ENSG0000(CAPRIN1  | protein_co chr11  | 34051683 | 34101156 | + | 63.37  | 74.76   |
| ENSG0000(ATP5G2   | protein_co chr12  | 53632726 | 53677408 | - | 282.97 | 290.57  |
| ENSG0000(DNAJC14  | protein_co chr12  | 55820960 | 55830824 | - | 17.87  | 16.04   |
| ENSG0000(CD63     | protein_co chr12  | 55725323 | 55729707 | - | 1417.4 | 1387.19 |
| ENSG0000(PRPH     | protein_co chr12  | 49293252 | 49298686 | + | 0.56   | 1.07    |
| ENSG0000(AVIL     | protein_co chr12  | 57797376 | 57818704 | - | 2.73   | 1.79    |
| ENSG0000(AMHR2    | protein_co chr12  | 53423855 | 53431534 | + | 0.19   | 0.16    |
| ENSG0000(LACRT    | protein_co chr12  | 54630811 | 54634895 | - | 0      | 0       |
| ENSG0000(GDF11    | protein_co chr12  | 55743280 | 55757278 | + | 5.78   | 4.58    |
| ENSG0000(GLS2     | protein_co chr12  | 56470944 | 56488414 | - | 0.52   | 0.13    |
| ENSG0000(ITGA7    | protein_co chr12  | 55684568 | 55716043 | - | 21.45  | 25.05   |
| ENSG0000(TESPA1   | protein_co chr12  | 54948018 | 54984746 | - | 0.01   | 0.02    |
| ENSG0000(FAM186B  | protein_co chr12  | 49582885 | 49605639 | - | 0.09   | 0.12    |
| ENSG0000(RDH5     | protein_co chr12  | 55720367 | 55724705 | + | 6.68   | 7.63    |
| ENSG0000(AGAP2    | protein_co chr12  | 57723761 | 57742157 | - | 0.12   | 0.14    |
| ENSG0000(BLOC1S1  | protein_co chr12  | 55716037 | 55720087 | + | 51.7   | 58.25   |
| ENSG0000(KRT85    | protein_co chr12  | 52360006 | 52367481 | - | 0      | 0       |
| ENSG0000(CDK4     | protein_co chr12  | 57747727 | 57756013 | - | 175    | 174.23  |
| ENSG0000(PPP1R1A  | protein_co chr12  | 54575387 | 54588659 | - | 0      | 0       |
| ENSG0000(TROAP    | protein_co chr12  | 49323236 | 49331731 | + | 0      | 0.13    |
| ENSG0000(TSPAN31  | protein_co chr12  | 57738013 | 57750211 | + | 18.25  | 18.03   |
| ENSG0000(B4GALNT1 | protein_co chr12  | 57623410 | 57633355 | - | 1.73   | 2.8     |
| ENSG0000(TFCP2    | protein_co chr12  | 51093663 | 51173134 | - | 9.2    | 9.29    |
| ENSG0000(COQ10A   | protein_co chr12  | 56266858 | 56270966 | + | 7.72   | 6.37    |
| ENSG0000(FAIM2    | protein_co chr12  | 49866896 | 49904217 | - | 5.33   | 3.72    |
| ENSG0000(PAN2     | protein_co chr12  | 56316223 | 56334053 | - | 9.43   | 9.38    |
| ENSG0000(ESPL1    | protein_co chr12  | 53268299 | 53293643 | + | 0.35   | 0.28    |
| ENSG0000(KRT87P   | transcribec chr12 | 52250466 | 52258867 | - | 0      | 0.09    |
| ENSG0000(KRT7     | protein_co chr12  | 52232520 | 52252186 | + | 30.83  | 32.27   |
| ENSG0000(ZC3H10   | protein_co chr12  | 56118159 | 56127514 | + | 2.37   | 2.11    |
| ENSG0000(HNRNPA1  | protein_co chr12  | 54280193 | 54287088 | + | 407.39 | 408.07  |
| ENSG0000(SLC26A10 | protein_co chr12  | 57619527 | 57626151 | + | 1.61   | 1.24    |
| ENSG0000(ACVR1B   | protein_co chr12  | 51951667 | 51997078 | + | 12.77  | 12.31   |
| ENSG0000(OS9      | protein_co chr12  | 57693955 | 57721557 | + | 250.6  | 246.89  |
| ENSG0000(MIP      | protein_co chr12  | 56449502 | 56469166 | - | 0      | 0.02    |
| ENSG0000(KCNH3    | protein_co chr12  | 49539157 | 49558308 | + | 0.2    | 0.18    |
| ENSG0000(LTV1     | protein_co chr6   | 1.44E+08 | 1.44E+08 | + | 6.9    | 9.09    |
| ENSG0000(MAP7     | protein_co chr6   | 1.36E+08 | 1.37E+08 | - | 0.17   | 0.11    |
| ENSG0000(CD164    | protein_co chr6   | 1.09E+08 | 1.09E+08 | - | 126.52 | 121.16  |

|                    |                  |          |          |   |        |        |
|--------------------|------------------|----------|----------|---|--------|--------|
| ENSG0000(LACE1     | protein_co chr6  | 1.08E+08 | 1.09E+08 | + | 1.48   | 1.45   |
| ENSG0000(NHSL1     | protein_co chr6  | 1.38E+08 | 1.39E+08 | - | 8.88   | 8.45   |
| ENSG0000(AHI1      | protein_co chr6  | 1.35E+08 | 1.35E+08 | - | 5.07   | 5.31   |
| ENSG0000(HEY2      | protein_co chr6  | 1.26E+08 | 1.26E+08 | + | 2.48   | 3.19   |
| ENSG0000(PKIB      | protein_co chr6  | 1.22E+08 | 1.23E+08 | + | 1.68   | 0.83   |
| ENSG0000(TAAR5     | protein_co chr6  | 1.33E+08 | 1.33E+08 | - | 0      | 0      |
| ENSG0000(NMBR      | protein_co chr6  | 1.42E+08 | 1.42E+08 | - | 0      | 0.05   |
| ENSG0000(SMPD2     | protein_co chr6  | 1.09E+08 | 1.09E+08 | + | 3.98   | 4.48   |
| ENSG0000(MICAL1    | protein_co chr6  | 1.09E+08 | 1.09E+08 | - | 14.29  | 17.73  |
| ENSG0000(REPS1     | protein_co chr6  | 1.39E+08 | 1.39E+08 | - | 8.17   | 9.93   |
| ENSG0000(STX11     | protein_co chr6  | 1.44E+08 | 1.44E+08 | + | 0.78   | 0.77   |
| ENSG0000(TEC       | protein_co chr4  | 48135783 | 48269864 | - | 0.31   | 0.36   |
| ENSG0000(PRADC1    | protein_co chr2  | 73228006 | 73233238 | - | 11.81  | 12.59  |
| ENSG0000(SEMA4F    | protein_co chr2  | 74654228 | 74683853 | + | 8.67   | 7.78   |
| ENSG0000(CCT7      | protein_co chr2  | 73233420 | 73253021 | + | 72.67  | 67.11  |
| ENSG0000(EGR4      | protein_co chr2  | 73290929 | 73293705 | - | 0      | 0      |
| ENSG0000(RAB11FIP5 | protein_co chr2  | 73073382 | 73156721 | - | 19.44  | 18.4   |
| ENSG0000(SMYD5     | protein_co chr2  | 73214222 | 73227237 | + | 8.75   | 8.69   |
| ENSG0000(DYSF      | protein_co chr2  | 71453722 | 71686768 | + | 3.9    | 3.92   |
| ENSG0000(CCDC142   | protein_co chr2  | 74471986 | 74483408 | - | 4.3    | 5.35   |
| ENSG0000(EMX1      | protein_co chr2  | 72916260 | 72936071 | + | 0      | 0      |
| ENSG0000(KCNMB4    | protein_co chr12 | 70366276 | 70434292 | + | 5.17   | 4.05   |
| ENSG0000(USP15     | protein_co chr12 | 62260338 | 62417431 | + | 24.63  | 20.23  |
| ENSG0000(GNS       | protein_co chr12 | 64713445 | 64759447 | - | 136.77 | 139.51 |
| ENSG0000(CPM       | protein_co chr12 | 68842197 | 68971570 | - | 1.1    | 1.74   |
| ENSG0000(MDM2      | protein_co chr12 | 68808176 | 68850686 | + | 54.65  | 54.31  |
| ENSG0000(KLHL36    | protein_co chr16 | 84648525 | 84667686 | + | 17.92  | 18.92  |
| ENSG0000(BCO1      | protein_co chr16 | 81238448 | 81291142 | + | 0.19   | 0.17   |
| ENSG0000(MPHOSPH1  | protein_co chr16 | 82147798 | 82170226 | - | 8.08   | 7.73   |
| ENSG0000(CHST5     | protein_co chr16 | 75528535 | 75535247 | - | 0      | 0.04   |
| ENSG0000(KIAA0513  | protein_co chr16 | 85027751 | 85094230 | + | 4.09   | 3.78   |
| ENSG0000(DYNC1LI2  | protein_co chr16 | 66720893 | 66751798 | - | 42.46  | 37.26  |
| ENSG0000(FBXL8     | protein_co chr16 | 67159931 | 67164570 | + | 7.93   | 10.37  |
| ENSG0000(FHOD1     | protein_co chr16 | 67229387 | 67247658 | - | 7.05   | 8.67   |
| ENSG0000(CCDC102A  | protein_co chr16 | 57512178 | 57536599 | - | 8.14   | 7.64   |
| ENSG0000(SLC9A5    | protein_co chr16 | 67237683 | 67272190 | + | 0.85   | 0.69   |
| ENSG0000(AGT       | protein_co chr1  | 2.31E+08 | 2.31E+08 | - | 0.07   | 0.08   |
| ENSG0000(ZNF670-ZN | protein_co chr1  | 2.47E+08 | 2.47E+08 | - | 0.24   | 0.11   |
| ENSG0000(PCNX2     | protein_co chr1  | 2.33E+08 | 2.33E+08 | - | 12.19  | 20.16  |
| ENSG0000(KCNK1     | protein_co chr1  | 2.34E+08 | 2.34E+08 | + | 2.3    | 2.94   |
| ENSG0000(URB2      | protein_co chr1  | 2.3E+08  | 2.3E+08  | + | 1.49   | 1.59   |
| ENSG0000(EGLN1     | protein_co chr1  | 2.31E+08 | 2.31E+08 | - | 24.24  | 19.54  |
| ENSG0000(CAPN9     | protein_co chr1  | 2.31E+08 | 2.31E+08 | + | 0      | 0      |
| ENSG0000(COG2      | protein_co chr1  | 2.31E+08 | 2.31E+08 | + | 5.28   | 4.62   |
| ENSG0000(ABCB10    | protein_co chr1  | 2.3E+08  | 2.3E+08  | - | 3.21   | 3.22   |

|                   |                 |          |            |        |        |
|-------------------|-----------------|----------|------------|--------|--------|
| ENSG0000(NTPCR    | protein_co chr1 | 2.33E+08 | 2.33E+08 + | 31.01  | 32.17  |
| ENSG0000(TAF5L    | protein_co chr1 | 2.3E+08  | 2.3E+08 -  | 4.64   | 4.48   |
| ENSG0000(GLUL     | protein_co chr1 | 1.82E+08 | 1.82E+08 - | 71.62  | 68.41  |
| ENSG0000(STX6     | protein_co chr1 | 1.81E+08 | 1.81E+08 - | 6.31   | 7.06   |
| ENSG0000(RGS8     | protein_co chr1 | 1.83E+08 | 1.83E+08 - | 0      | 0      |
| ENSG0000(RNASEL   | protein_co chr1 | 1.83E+08 | 1.83E+08 - | 4.91   | 4.53   |
| ENSG0000(DHX9     | protein_co chr1 | 1.83E+08 | 1.83E+08 + | 34.24  | 30.08  |
| ENSG0000(KIAA1614 | protein_co chr1 | 1.81E+08 | 1.81E+08 + | 4.79   | 4.69   |
| ENSG0000(CEP350   | protein_co chr1 | 1.8E+08  | 1.8E+08 +  | 11.32  | 9.64   |
| ENSG0000(NPL      | protein_co chr1 | 1.83E+08 | 1.83E+08 + | 1.37   | 2.86   |
| ENSG0000(FAM129A  | protein_co chr1 | 1.85E+08 | 1.85E+08 - | 32.12  | 34.59  |
| ENSG0000(PIGC     | protein_co chr1 | 1.72E+08 | 1.72E+08 - | 8.72   | 9.29   |
| ENSG0000(LAMC1    | protein_co chr1 | 1.83E+08 | 1.83E+08 + | 425.98 | 439.68 |
| ENSG0000(RC3H1    | protein_co chr1 | 1.74E+08 | 1.74E+08 - | 4.43   | 2.81   |
| ENSG0000(GPR55    | protein_co chr2 | 2.31E+08 | 2.31E+08 - | 0      | 0      |
| ENSG0000(SP110    | protein_co chr2 | 2.3E+08  | 2.3E+08 -  | 9.42   | 11.94  |
| ENSG0000(MRPL44   | protein_co chr2 | 2.24E+08 | 2.24E+08 + | 12.14  | 11.36  |
| ENSG0000(CHRND    | protein_co chr2 | 2.33E+08 | 2.33E+08 + | 0      | 0      |
| ENSG0000(PAX3     | protein_co chr2 | 2.22E+08 | 2.22E+08 - | 0      | 0      |
| ENSG0000(DOCK10   | protein_co chr2 | 2.25E+08 | 2.25E+08 - | 3.88   | 5.41   |
| ENSG0000(TTLL4    | protein_co chr2 | 2.19E+08 | 2.19E+08 + | 11.54  | 8      |
| ENSG0000(USP37    | protein_co chr2 | 2.18E+08 | 2.19E+08 - | 2.01   | 1.64   |
| ENSG0000(HTR2B    | protein_co chr2 | 2.31E+08 | 2.31E+08 - | 0.25   | 0.19   |
| ENSG0000(ITM2C    | protein_co chr2 | 2.31E+08 | 2.31E+08 + | 104.7  | 100.8  |
| ENSG0000(SLC19A3  | protein_co chr2 | 2.28E+08 | 2.28E+08 - | 1.69   | 1.46   |
| ENSG0000(SERPINE2 | protein_co chr2 | 2.24E+08 | 2.24E+08 - | 864.71 | 873.74 |
| ENSG0000(DNAJB2   | protein_co chr2 | 2.19E+08 | 2.19E+08 + | 34.8   | 33.9   |
| ENSG0000(WNT10A   | protein_co chr2 | 2.19E+08 | 2.19E+08 + | 0      | 0      |
| ENSG0000(TMBIM1   | protein_co chr2 | 2.18E+08 | 2.18E+08 - | 88.34  | 91.42  |
| ENSG0000(CYP27A1  | protein_co chr2 | 2.19E+08 | 2.19E+08 + | 20.23  | 23.14  |
| ENSG0000(EIF4E2   | protein_co chr2 | 2.33E+08 | 2.33E+08 + | 43.89  | 34.63  |
| ENSG0000(ARMC9    | protein_co chr2 | 2.31E+08 | 2.31E+08 + | 9.09   | 9.95   |
| ENSG0000(CAB39    | protein_co chr2 | 2.31E+08 | 2.31E+08 + | 20.01  | 18.32  |
| ENSG0000(COX5B    | protein_co chr2 | 97646040 | 97648383 + | 98.02  | 99.82  |
| ENSG0000(REV1     | protein_co chr2 | 99400475 | 99490035 - | 7.48   | 7.42   |
| ENSG0000(TSGA10   | protein_co chr2 | 98997261 | 99154964 - | 1.46   | 3.19   |
| ENSG0000(MFSD9    | protein_co chr2 | 1.03E+08 | 1.03E+08 - | 2.64   | 3.94   |
| ENSG0000(TMEM127  | protein_co chr2 | 96248516 | 96265994 - | 30.12  | 30.78  |
| ENSG0000(EDAR     | protein_co chr2 | 1.09E+08 | 1.09E+08 - | 0      | 0      |
| ENSG0000(TGFBRAP1 | protein_co chr2 | 1.05E+08 | 1.05E+08 - | 7.69   | 7.46   |
| ENSG0000(GCC2     | protein_co chr2 | 1.08E+08 | 1.09E+08 + | 10.78  | 10.13  |
| ENSG0000(MRPS9    | protein_co chr2 | 1.05E+08 | 1.05E+08 + | 9.71   | 10.48  |
| ENSG0000(GPR45    | protein_co chr2 | 1.05E+08 | 1.05E+08 + | 0      | 0      |
| ENSG0000(C2orf49  | protein_co chr2 | 1.05E+08 | 1.05E+08 + | 6.63   | 6.82   |
| ENSG0000(ANKRD36  | protein_co chr2 | 97113496 | 97264521 + | 4.2    | 3.91   |



|                    |                  |          |            |         |         |
|--------------------|------------------|----------|------------|---------|---------|
| ENSG0000(EPC2      | protein_co chr2  | 1.49E+08 | 1.49E+08 + | 6.37    | 6.13    |
| ENSG0000(ARHGEF4   | protein_co chr2  | 1.31E+08 | 1.31E+08 + | 0.44    | 0.77    |
| ENSG0000(ISCU      | protein_co chr12 | 1.09E+08 | 1.09E+08 + | 85.15   | 90.3    |
| ENSG0000(ALDH1L2   | protein_co chr12 | 1.05E+08 | 1.05E+08 - | 26.39   | 26.58   |
| ENSG0000(STAB2     | protein_co chr12 | 1.04E+08 | 1.04E+08 + | 0       | 0       |
| ENSG0000(USP44     | protein_co chr12 | 95516560 | 95551490 - | 0.32    | 0.23    |
| ENSG0000(SCYL2     | protein_co chr12 | 1E+08    | 1E+08 +    | 10.9    | 9.93    |
| ENSG0000(CKAP4     | protein_co chr12 | 1.06E+08 | 1.06E+08 - | 93.84   | 85.39   |
| ENSG0000(PLXNC1    | protein_co chr12 | 94148723 | 94307675 + | 0.71    | 0.91    |
| ENSG0000(APPL2     | protein_co chr12 | 1.05E+08 | 1.05E+08 - | 21.19   | 24.6    |
| ENSG0000(PWP1      | protein_co chr12 | 1.08E+08 | 1.08E+08 + | 23.78   | 23.73   |
| ENSG0000(DRAM1     | protein_co chr12 | 1.02E+08 | 1.02E+08 + | 72.97   | 65.33   |
| ENSG0000(WASHC4    | protein_co chr12 | 1.05E+08 | 1.05E+08 + | 23.02   | 16.58   |
| ENSG0000(SLC41A2   | protein_co chr12 | 1.05E+08 | 1.05E+08 - | 14.78   | 14.57   |
| ENSG0000(VILL      | protein_co chr3  | 37988059 | 38007188 + | 2.84    | 3.43    |
| ENSG0000(FLNB      | protein_co chr3  | 58008400 | 58172251 + | 22.06   | 23.37   |
| ENSG0000(NEK3      | protein_co chr13 | 52132639 | 52159861 - | 2.83    | 2.18    |
| ENSG0000(PCDH8     | protein_co chr13 | 52842889 | 52848641 - | 0       | 0       |
| ENSG0000(VPS36     | protein_co chr13 | 52412602 | 52450628 - | 7.89    | 10.36   |
| ENSG0000(RNASEH2B  | protein_co chr13 | 50909678 | 50973745 + | 11.55   | 11.28   |
| ENSG0000(CKAP2     | protein_co chr13 | 52455429 | 52476628 + | 3.62    | 4.34    |
| ENSG0000(CNMD      | protein_co chr13 | 52703264 | 52739812 - | 0       | 0       |
| ENSG0000(TBC1D4    | protein_co chr13 | 75284665 | 75482114 - | 5.08    | 4.87    |
| ENSG0000(THSD1     | protein_co chr13 | 52377167 | 52406494 - | 4.58    | 5.11    |
| ENSG0000(BORA      | protein_co chr13 | 72727749 | 72756198 + | 0.91    | 0.91    |
| ENSG0000(LRCH1     | protein_co chr13 | 46553168 | 46753040 + | 4.21    | 4.72    |
| ENSG0000(SUCLA2    | protein_co chr13 | 47936491 | 48001354 - | 18.45   | 17.37   |
| ENSG0000(RCBTB1    | protein_co chr13 | 49531946 | 49585583 - | 7.38    | 8.76    |
| ENSG0000(MED4      | protein_co chr13 | 48053323 | 48095131 - | 27      | 28.33   |
| ENSG0000(PHF11     | protein_co chr13 | 49495610 | 49528987 + | 12.83   | 13.79   |
| ENSG0000(RPL13AP25 | processed_chr13  | 54440704 | 54441315 - | 0.43    | 0.3     |
| ENSG0000(COG3      | protein_co chr13 | 45464898 | 45536630 + | 8.13    | 11.09   |
| ENSG0000(LMO7      | protein_co chr13 | 75620434 | 75859870 + | 31.97   | 28.98   |
| ENSG0000(SCEL      | protein_co chr13 | 77535674 | 77645263 + | 0       | 0       |
| ENSG0000(ITM2B     | protein_co chr13 | 48233158 | 48270357 + | 1030.05 | 1050.01 |
| ENSG0000(SPRY2     | protein_co chr13 | 80335976 | 80340951 - | 5.04    | 5.57    |
| ENSG0000(NUDT15    | protein_co chr13 | 48037567 | 48047222 + | 4.61    | 4.07    |
| ENSG0000(EDNRB     | protein_co chr13 | 77895481 | 77919768 - | 0.15    | 0.6     |
| ENSG0000(RCBTB2    | protein_co chr13 | 48488959 | 48533256 - | 4.79    | 3.65    |
| ENSG0000(LCP1      | protein_co chr13 | 46125920 | 46211871 - | 0       | 0       |
| ENSG0000(SETDB2    | protein_co chr13 | 49444374 | 49495003 + | 2.32    | 3.63    |
| ENSG0000(SCRN1     | protein_co chr7  | 29920103 | 29990289 - | 32.1    | 33.56   |
| ENSG0000(C7orf25   | protein_co chr7  | 42908726 | 42912305 - | 1.66    | 1.7     |
| ENSG0000(TNS3      | protein_co chr7  | 47275154 | 47582558 - | 44.44   | 45.43   |
| ENSG0000(SPDYE1    | protein_co chr7  | 44000889 | 44010122 + | 0.02    | 0       |

|                    |                  |          |          |   |        |        |
|--------------------|------------------|----------|----------|---|--------|--------|
| ENSG0000(CHST12    | protein_co chr7  | 2403560  | 2448483  | + | 10.32  | 10.18  |
| ENSG0000(IGF2BP3   | protein_co chr7  | 23310209 | 23470467 | - | 4.69   | 3.29   |
| ENSG0000(GPNMB     | protein_co chr7  | 23235967 | 23275108 | + | 470.94 | 478.14 |
| ENSG0000(RAPGEF5   | protein_co chr7  | 22118238 | 22357144 | - | 0      | 0      |
| ENSG0000(RAC1      | protein_co chr7  | 6374523  | 6403977  | + | 128.14 | 118    |
| ENSG0000(KDELRL2   | protein_co chr7  | 6445953  | 6484242  | - | 86.63  | 87.54  |
| ENSG0000(NUPL2     | protein_co chr7  | 23181827 | 23201011 | + | 8.61   | 9.49   |
| ENSG0000(IL6       | protein_co chr7  | 22725884 | 22732002 | + | 18.77  | 12.58  |
| ENSG0000(ZDHHC4    | protein_co chr7  | 6577434  | 6589374  | + | 19.91  | 20     |
| ENSG0000(AOAH      | protein_co chr7  | 36512949 | 36724549 | - | 0.1    | 0      |
| ENSG0000(BZW2      | protein_co chr7  | 16646131 | 16706523 | + | 18.04  | 15.97  |
| ENSG0000(DGKB      | protein_co chr7  | 14145049 | 14974777 | - | 0.03   | 0.04   |
| ENSG0000(TBRG4     | protein_co chr7  | 45100100 | 45112047 | - | 19.12  | 16.48  |
| ENSG0000(DDX56     | protein_co chr7  | 44565417 | 44575051 | - | 20.53  | 20.21  |
| ENSG0000(HUS1      | protein_co chr7  | 47695730 | 47979581 | - | 8.03   | 5.96   |
| ENSG0000(NACAD     | protein_co chr7  | 45080438 | 45088914 | - | 1.63   | 1.62   |
| ENSG0000(C7orf69   | antisense chr7   | 47795291 | 47819847 | + | 0.21   | 0.91   |
| ENSG0000(DBNL      | protein_co chr7  | 44044640 | 44069456 | + | 47.51  | 46.44  |
| ENSG0000(CCM2      | protein_co chr7  | 44999475 | 45076469 | + | 23.59  | 22.07  |
| ENSG0000(MYO1G     | protein_co chr7  | 44962662 | 44979098 | - | 0      | 0      |
| ENSG0000(TTYH3     | protein_co chr7  | 2631951  | 2664802  | + | 51.08  | 49.22  |
| ENSG0000(MMD2      | protein_co chr7  | 4905989  | 4959213  | - | 0      | 0      |
| ENSG0000(CIDEB     | protein_co chr14 | 24305096 | 24311430 | - | 0.93   | 1.07   |
| ENSG0000(RP11-84C1 | lincRNA chr14    | 20919361 | 20920299 | + | 0      | 0      |
| ENSG0000(TTC5      | protein_co chr14 | 20256558 | 20305994 | - | 6.58   | 6.28   |
| ENSG0000(NKX2-8    | protein_co chr14 | 36580579 | 36582607 | - | 0      | 0      |
| ENSG0000(NKX2-1    | protein_co chr14 | 36516392 | 36521149 | - | 0      | 0      |
| ENSG0000(ZFH2      | protein_co chr14 | 23520855 | 23556192 | - | 0.22   | 0.28   |
| ENSG0000(MTHFS     | protein_co chr15 | 79833585 | 79897379 | - | 7.35   | 8.91   |
| ENSG0000(ADAMTS7   | protein_co chr15 | 78759203 | 78811431 | - | 20.62  | 23.08  |
| ENSG0000(ABHD17C   | protein_co chr15 | 80679684 | 80755621 | + | 20.24  | 21.15  |
| ENSG0000(IREB2     | protein_co chr15 | 78437431 | 78501456 | + | 15.62  | 9.63   |
| ENSG0000(ALPK3     | protein_co chr15 | 84816680 | 84873482 | + | 0.61   | 1.35   |
| ENSG0000(TM6SF1    | protein_co chr15 | 83107407 | 83144854 | + | 0.35   | 0.63   |
| ENSG0000(CIB2      | protein_co chr15 | 78104606 | 78131544 | - | 2.97   | 2.41   |
| ENSG0000(CALCOCO2  | protein_co chr17 | 48830988 | 48866522 | + | 54.55  | 51.19  |
| ENSG0000(RSAD1     | protein_co chr17 | 50478800 | 50485975 | + | 13.45  | 14.49  |
| ENSG0000(NMT1      | protein_co chr17 | 45051610 | 45109016 | + | 49.07  | 35.84  |
| ENSG0000(MYCBPAP   | protein_co chr17 | 50508384 | 50531501 | + | 0.32   | 0.14   |
| ENSG0000(SRSF1     | protein_co chr17 | 58003360 | 58007346 | - | 55.31  | 56.84  |
| ENSG0000(VEZF1     | protein_co chr17 | 57971547 | 57988259 | - | 16.8   | 17.28  |
| ENSG0000(CHAD      | protein_co chr17 | 50464496 | 50468966 | - | 0      | 0      |
| ENSG0000(TACO1     | protein_co chr17 | 63600872 | 63608365 | + | 8.46   | 7.79   |
| ENSG0000(TEX2      | protein_co chr17 | 64147227 | 64263301 | - | 12.64  | 15.06  |
| ENSG0000(DCAF7     | protein_co chr17 | 63550461 | 63594266 | + | 23.01  | 23.24  |

|                  |                  |          |          |   |       |       |
|------------------|------------------|----------|----------|---|-------|-------|
| ENSG0000(GH2     | protein_co chr17 | 63880215 | 63881935 | - | 0     | 0     |
| ENSG0000(CSH1    | protein_co chr17 | 63894909 | 63896661 | - | 0     | 0     |
| ENSG0000(LIMD2   | protein_co chr17 | 63695902 | 63701172 | - | 4.9   | 6.75  |
| ENSG0000(BRIP1   | protein_co chr17 | 61681266 | 61863521 | - | 0.12  | 0.16  |
| ENSG0000(KAT7    | protein_co chr17 | 49788555 | 49835030 | + | 12.17 | 11.44 |
| ENSG0000(RTP4    | protein_co chr3  | 1.87E+08 | 1.87E+08 | + | 2.43  | 2.47  |
| ENSG0000(ACTL6A  | protein_co chr3  | 1.8E+08  | 1.8E+08  | + | 17.27 | 16.54 |
| ENSG0000(NDUFB5  | protein_co chr3  | 1.8E+08  | 1.8E+08  | + | 36.55 | 39.25 |
| ENSG0000(MRPL47  | protein_co chr3  | 1.8E+08  | 1.8E+08  | - | 13.83 | 13.82 |
| ENSG0000(TRA2B   | protein_co chr3  | 1.86E+08 | 1.86E+08 | - | 41.93 | 42.31 |
| ENSG0000(SCN2A   | protein_co chr2  | 1.65E+08 | 1.65E+08 | + | 0.1   | 0.22  |
| ENSG0000(TBR1    | protein_co chr2  | 1.61E+08 | 1.61E+08 | + | 0     | 0     |
| ENSG0000(7-Mar   | protein_co chr2  | 1.6E+08  | 1.6E+08  | + | 27.32 | 24.6  |
| ENSG0000(ERMN    | protein_co chr2  | 1.57E+08 | 1.57E+08 | - | 0     | 0     |
| ENSG0000(GALNT5  | protein_co chr2  | 1.57E+08 | 1.57E+08 | + | 15.19 | 14.79 |
| ENSG0000(SCN7A   | protein_co chr2  | 1.66E+08 | 1.66E+08 | - | 0.88  | 1.09  |
| ENSG0000(TANK    | protein_co chr2  | 1.61E+08 | 1.61E+08 | + | 26.95 | 25.75 |
| ENSG0000(BLK     | protein_co chr8  | 11494001 | 11564604 | + | 0     | 0     |
| ENSG0000(GATA4   | protein_co chr8  | 11676959 | 11760002 | + | 29.97 | 26.66 |
| ENSG0000(SKIL    | protein_co chr3  | 1.7E+08  | 1.7E+08  | + | 7.92  | 8.05  |
| ENSG0000(EPRS    | protein_co chr1  | 2.2E+08  | 2.2E+08  | - | 31.66 | 28.45 |
| ENSG0000(HLX     | protein_co chr1  | 2.21E+08 | 2.21E+08 | + | 4.05  | 5.21  |
| ENSG0000(VPS45   | protein_co chr1  | 1.5E+08  | 1.5E+08  | + | 12.71 | 15.11 |
| ENSG0000(IL10    | protein_co chr1  | 2.07E+08 | 2.07E+08 | - | 0     | 0.24  |
| ENSG0000(KCTD3   | protein_co chr1  | 2.16E+08 | 2.16E+08 | + | 14.45 | 20.85 |
| ENSG0000(RPS6KC1 | protein_co chr1  | 2.13E+08 | 2.13E+08 | + | 9.07  | 8.66  |
| ENSG0000(CBWD2   | protein_co chr2  | 1.13E+08 | 1.13E+08 | + | 13.33 | 12.86 |
| ENSG0000(IL36G   | protein_co chr2  | 1.13E+08 | 1.13E+08 | + | 0     | 0.27  |
| ENSG0000(IL1RN   | protein_co chr2  | 1.13E+08 | 1.13E+08 | + | 0.75  | 0.75  |
| ENSG0000(IL36A   | protein_co chr2  | 1.13E+08 | 1.13E+08 | + | 0     | 0     |
| ENSG0000(IL36RN  | protein_co chr2  | 1.13E+08 | 1.13E+08 | + | 0.12  | 0.16  |
| ENSG0000(IL36B   | protein_co chr2  | 1.13E+08 | 1.13E+08 | - | 0.34  | 0.06  |
| ENSG0000(IL1F10  | protein_co chr2  | 1.13E+08 | 1.13E+08 | + | 0     | 0     |
| ENSG0000(CFC1    | protein_co chr2  | 1.31E+08 | 1.31E+08 | - | 0     | 0     |
| ENSG0000(SMPD4   | protein_co chr2  | 1.3E+08  | 1.3E+08  | - | 20.98 | 22.19 |
| ENSG0000(WDR33   | protein_co chr2  | 1.28E+08 | 1.28E+08 | - | 10.88 | 13.75 |
| ENSG0000(CCDC115 | protein_co chr2  | 1.3E+08  | 1.3E+08  | - | 25.19 | 23.41 |
| ENSG0000(SAP130  | protein_co chr2  | 1.28E+08 | 1.28E+08 | - | 9.02  | 8.82  |
| ENSG0000(BIN1    | protein_co chr2  | 1.27E+08 | 1.27E+08 | - | 19.93 | 27.32 |
| ENSG0000(IMP4    | protein_co chr2  | 1.3E+08  | 1.3E+08  | + | 21.9  | 23.2  |
| ENSG0000(HS6ST1  | protein_co chr2  | 1.28E+08 | 1.28E+08 | - | 7.95  | 7.7   |
| ENSG0000(UGGT1   | protein_co chr2  | 1.28E+08 | 1.28E+08 | + | 20.5  | 19.41 |
| ENSG0000(GYPC    | protein_co chr2  | 1.27E+08 | 1.27E+08 | + | 27.27 | 29.58 |
| ENSG0000(STAM    | protein_co chr10 | 17644125 | 17715914 | + | 12.02 | 15.18 |
| ENSG0000(GAD2    | protein_co chr10 | 26216307 | 26304558 | + | 0     | 0     |

|                     |                  |          |          |   |        |        |
|---------------------|------------------|----------|----------|---|--------|--------|
| ENSG0000( ABI1      | protein_co chr10 | 26746593 | 26861087 | - | 25.54  | 23.87  |
| ENSG0000( YME1L1    | protein_co chr10 | 27110112 | 27155266 | - | 41.78  | 38.83  |
| ENSG0000( DNAJC1    | protein_co chr10 | 21756537 | 22003769 | - | 18.1   | 18.42  |
| ENSG0000( NIPSNAP3A | protein_co chr9  | 1.05E+08 | 1.05E+08 | + | 8.43   | 7.79   |
| ENSG0000( LRRC8A    | protein_co chr9  | 1.29E+08 | 1.29E+08 | + | 20.46  | 21.61  |
| ENSG0000( CDK9      | protein_co chr9  | 1.28E+08 | 1.28E+08 | + | 26.49  | 20.03  |
| ENSG0000( TXN       | protein_co chr9  | 1.1E+08  | 1.1E+08  | - | 108.04 | 101.41 |
| ENSG0000( ODF2      | protein_co chr9  | 1.28E+08 | 1.29E+08 | + | 10.35  | 11.78  |
| ENSG0000( KIAA0368  | protein_co chr9  | 1.11E+08 | 1.11E+08 | - | 21.06  | 20.87  |
| ENSG0000( TOR1B     | protein_co chr9  | 1.3E+08  | 1.3E+08  | + | 7.05   | 9.9    |
| ENSG0000( C9orf78   | protein_co chr9  | 1.3E+08  | 1.3E+08  | - | 29.89  | 26.62  |
| ENSG0000( SMC2      | protein_co chr9  | 1.04E+08 | 1.04E+08 | + | 4.38   | 4.47   |
| ENSG0000( KLF4      | protein_co chr9  | 1.07E+08 | 1.07E+08 | - | 22.65  | 26.23  |
| ENSG0000( TOR1A     | protein_co chr9  | 1.3E+08  | 1.3E+08  | - | 15.97  | 20.51  |
| ENSG0000( RALGPS1   | protein_co chr9  | 1.27E+08 | 1.27E+08 | + | 0.41   | 0.95   |
| ENSG0000( FAM129B   | protein_co chr9  | 1.28E+08 | 1.28E+08 | - | 116.98 | 110.82 |
| ENSG0000( OR1J1     | protein_co chr9  | 1.22E+08 | 1.22E+08 | - | 0      | 0      |
| ENSG0000( OR13C9    | protein_co chr9  | 1.05E+08 | 1.05E+08 | - | 0      | 0      |
| ENSG0000( ST6GALNA1 | protein_co chr9  | 1.28E+08 | 1.28E+08 | - | 11.97  | 13.66  |
| ENSG0000( TMOD1     | protein_co chr9  | 97501180 | 97601748 | + | 0.13   | 0.14   |
| ENSG0000( DAB2IP    | protein_co chr9  | 1.22E+08 | 1.22E+08 | + | 7.52   | 7.98   |
| ENSG0000( STXBP1    | protein_co chr9  | 1.28E+08 | 1.28E+08 | + | 22.21  | 26.18  |
| ENSG0000( SLC2A8    | protein_co chr9  | 1.27E+08 | 1.27E+08 | + | 2.23   | 1.45   |
| ENSG0000( ANGPTL2   | protein_co chr9  | 1.27E+08 | 1.27E+08 | - | 88.24  | 85.85  |
| ENSG0000( CDK5RAP2  | protein_co chr9  | 1.2E+08  | 1.21E+08 | - | 31.93  | 31.35  |
| ENSG0000( ZFP37     | protein_co chr9  | 1.13E+08 | 1.13E+08 | - | 0.71   | 1.22   |
| ENSG0000( SLC31A2   | protein_co chr9  | 1.13E+08 | 1.13E+08 | + | 11.06  | 10.83  |
| ENSG0000( SLC31A1   | protein_co chr9  | 1.13E+08 | 1.13E+08 | + | 13.45  | 13.7   |
| ENSG0000( TLR4      | protein_co chr9  | 1.18E+08 | 1.18E+08 | + | 10.27  | 10.64  |
| ENSG0000( ZNF189    | protein_co chr9  | 1.01E+08 | 1.01E+08 | + | 6.03   | 6.2    |
| ENSG0000( ALDOB     | protein_co chr9  | 1.01E+08 | 1.01E+08 | - | 0      | 0      |
| ENSG0000( STX17     | protein_co chr9  | 99906633 | 99970341 | + | 6.93   | 6.07   |
| ENSG0000( PRPF4     | protein_co chr9  | 1.13E+08 | 1.13E+08 | + | 5.99   | 6.5    |
| ENSG0000( FPGS      | protein_co chr9  | 1.28E+08 | 1.28E+08 | + | 25.26  | 24.82  |
| ENSG0000( USP20     | protein_co chr9  | 1.3E+08  | 1.3E+08  | + | 8.38   | 7.5    |
| ENSG0000( BAAT      | protein_co chr9  | 1.01E+08 | 1.01E+08 | - | 0      | 0      |
| ENSG0000( KIF12     | protein_co chr9  | 1.14E+08 | 1.14E+08 | - | 0      | 0      |
| ENSG0000( ATP6V1G1  | protein_co chr9  | 1.15E+08 | 1.15E+08 | + | 55.28  | 54.51  |
| ENSG0000( TEX10     | protein_co chr9  | 1E+08    | 1E+08    | - | 9.59   | 8.21   |
| ENSG0000( GARNL3    | protein_co chr9  | 1.27E+08 | 1.27E+08 | + | 0.14   | 0.19   |
| ENSG0000( MRPL50    | protein_co chr9  | 1.01E+08 | 1.01E+08 | - | 2.6    | 3.34   |
| ENSG0000( DPM2      | protein_co chr9  | 1.28E+08 | 1.28E+08 | - | 12.8   | 12.67  |
| ENSG0000( WDR38     | protein_co chr9  | 1.25E+08 | 1.25E+08 | + | 0      | 0      |
| ENSG0000( TSTD2     | protein_co chr9  | 97600080 | 97633575 | - | 6.55   | 5.61   |
| ENSG0000( GABBR2    | protein_co chr9  | 98288082 | 98709197 | - | 0.03   | 0.09   |

|                    |                 |          |            |       |        |
|--------------------|-----------------|----------|------------|-------|--------|
| ENSG0000( HEMGN    | protein_co chr9 | 97926791 | 97944856 - | 0     | 0      |
| ENSG0000( PSMB7    | protein_co chr9 | 1.24E+08 | 1.24E+08 - | 81.02 | 88.25  |
| ENSG0000( NR5A1    | protein_co chr9 | 1.24E+08 | 1.25E+08 - | 0     | 0      |
| ENSG0000( TRMO     | protein_co chr9 | 97904489 | 97922570 - | 7.46  | 8.23   |
| ENSG0000( RABEPK   | protein_co chr9 | 1.25E+08 | 1.25E+08 + | 11.2  | 10.55  |
| ENSG0000( GOLGA1   | protein_co chr9 | 1.25E+08 | 1.25E+08 - | 6.37  | 6.93   |
| ENSG0000( XPA      | protein_co chr9 | 97674909 | 97697357 - | 6.28  | 5.07   |
| ENSG0000( NCBP1    | protein_co chr9 | 97633626 | 97673748 + | 5.84  | 6.15   |
| ENSG0000( ANP32B   | protein_co chr9 | 97983361 | 98015943 + | 66.65 | 68.83  |
| ENSG0000( OR1L4    | protein_co chr9 | 1.23E+08 | 1.23E+08 + | 0     | 0      |
| ENSG0000( PDCL     | protein_co chr9 | 1.23E+08 | 1.23E+08 - | 7.17  | 7.79   |
| ENSG0000( RPL35    | protein_co chr9 | 1.25E+08 | 1.25E+08 - | 570.1 | 568.8  |
| ENSG0000( CTSV     | protein_co chr9 | 97029679 | 97039643 - | 0.11  | 0.08   |
| ENSG0000( LMX1B    | protein_co chr9 | 1.27E+08 | 1.27E+08 + | 0     | 0      |
| ENSG0000( ARPC5L   | protein_co chr9 | 1.25E+08 | 1.25E+08 + | 12.97 | 12.35  |
| ENSG0000( ENPP2    | protein_co chr8 | 1.2E+08  | 1.2E+08 -  | 0.18  | 0.07   |
| ENSG0000( DSCC1    | protein_co chr8 | 1.2E+08  | 1.2E+08 -  | 1.91  | 1.89   |
| ENSG0000( DERL1    | protein_co chr8 | 1.23E+08 | 1.23E+08 - | 26.96 | 26.66  |
| ENSG0000( MYC      | protein_co chr8 | 1.28E+08 | 1.28E+08 + | 34.25 | 30.4   |
| ENSG0000( NOV      | protein_co chr8 | 1.19E+08 | 1.19E+08 + | 1.06  | 0.64   |
| ENSG0000( IL33     | protein_co chr9 | 6215786  | 6257983 +  | 83.38 | 86.25  |
| ENSG0000( TMEM261  | protein_co chr9 | 7796490  | 7888380 -  | 18.69 | 21.5   |
| ENSG0000( RANBP6   | protein_co chr9 | 6011043  | 6015625 -  | 4.12  | 4.04   |
| ENSG0000( POLR1E   | protein_co chr9 | 37485935 | 37503697 + | 9.66  | 9.81   |
| ENSG0000( PLAA     | protein_co chr9 | 26904083 | 26947463 - | 13.49 | 11.67  |
| ENSG0000( IL11RA   | protein_co chr9 | 34650702 | 34661892 + | 12.61 | 13.03  |
| ENSG0000( UBAP2    | protein_co chr9 | 33921693 | 34048949 - | 9.18  | 9.11   |
| ENSG0000( APTX     | protein_co chr9 | 32972606 | 33025168 - | 17.45 | 18.54  |
| ENSG0000( RNF38    | protein_co chr9 | 36336396 | 36487548 - | 6.28  | 8.24   |
| ENSG0000( TLN1     | protein_co chr9 | 35696948 | 35732395 - | 96.2  | 105.47 |
| ENSG0000( CCL21    | protein_co chr9 | 34709005 | 34710124 - | 0     | 0      |
| ENSG0000( SIT1     | protein_co chr9 | 35649295 | 35650950 - | 0.07  | 0.08   |
| ENSG0000( IFNA21   | protein_co chr9 | 21165637 | 21166660 - | 0     | 0      |
| ENSG0000( DMRT1    | protein_co chr9 | 841690   | 969090 +   | 0     | 0      |
| ENSG0000( DNAJB5   | protein_co chr9 | 34989641 | 34998900 + | 7.62  | 9.06   |
| ENSG0000( SPAG8    | protein_co chr9 | 35808045 | 35812272 - | 0.68  | 0.69   |
| ENSG0000( DCTN3    | protein_co chr9 | 34613545 | 34620523 - | 66.02 | 73.48  |
| ENSG0000( CD72     | protein_co chr9 | 35609533 | 35646810 - | 2.65  | 2.34   |
| ENSG0000( TMEM8B   | protein_co chr9 | 35814451 | 35854847 + | 11.34 | 9.92   |
| ENSG0000( GRHPR    | protein_co chr9 | 37422666 | 37436990 + | 50.84 | 58.79  |
| ENSG0000( ALDH1B1  | protein_co chr9 | 38392664 | 38398661 + | 5.84  | 6.38   |
| ENSG0000( HINT2    | protein_co chr9 | 35812960 | 35815354 - | 17.53 | 19.2   |
| ENSG0000( ARHGEF39 | protein_co chr9 | 35658875 | 35675866 - | 0.08  | 0.1    |
| ENSG0000( IGFBPL1  | protein_co chr9 | 38408994 | 38424447 - | 0     | 0      |
| ENSG0000( DENND4C  | protein_co chr9 | 19230435 | 19373545 + | 10.82 | 10.33  |

|                   |                 |          |          |   |        |        |
|-------------------|-----------------|----------|----------|---|--------|--------|
| ENSG0000(RPS6     | protein_co chr9 | 19375715 | 19380254 | - | 914.89 | 911.04 |
| ENSG0000(CNPY3    | protein_co chr6 | 42929192 | 42939287 | + | 21.61  | 22.61  |
| ENSG0000(FOXP4    | protein_co chr6 | 41546426 | 41602384 | + | 5.8    | 7.16   |
| ENSG0000(PPIL1    | protein_co chr6 | 36854827 | 36875024 | - | 6.48   | 8.07   |
| ENSG0000(KLC4     | protein_co chr6 | 43040777 | 43075099 | + | 12.79  | 13.82  |
| ENSG0000(KIF13A   | protein_co chr6 | 17759183 | 17987623 | - | 20.76  | 22.15  |
| ENSG0000(ZSCAN9   | protein_co chr6 | 28224886 | 28233482 | + | 5.55   | 6.56   |
| ENSG0000(PIM1     | protein_co chr6 | 37170203 | 37175426 | + | 34.32  | 36.72  |
| ENSG0000(GMPR     | protein_co chr6 | 16238580 | 16295549 | + | 10.29  | 11.55  |
| ENSG0000(CMTR1    | protein_co chr6 | 37433219 | 37482827 | + | 16.95  | 17.81  |
| ENSG0000(TFAP2A   | protein_co chr6 | 10393186 | 10419659 | - | 5.19   | 4.53   |
| ENSG0000(SLC22A7  | protein_co chr6 | 43295694 | 43305538 | + | 0      | 0      |
| ENSG0000(YIPF3    | protein_co chr6 | 43511827 | 43516990 | - | 78.1   | 83.69  |
| ENSG0000(TMEM14B  | protein_co chr6 | 10747759 | 10852753 | + | 48.15  | 51.65  |
| ENSG0000(TMEM63B  | protein_co chr6 | 44126914 | 44155519 | + | 12.78  | 14.86  |
| ENSG0000(FRS3     | protein_co chr6 | 41770176 | 41786542 | - | 1.91   | 1.92   |
| ENSG0000(TJAP1    | protein_co chr6 | 43477523 | 43506556 | + | 12.37  | 12.53  |
| ENSG0000(CAPN11   | protein_co chr6 | 44158811 | 44184402 | + | 0      | 0.13   |
| ENSG0000(TINAG    | protein_co chr6 | 54307859 | 54390152 | + | 0      | 0      |
| ENSG0000(HCRTR2   | protein_co chr6 | 55106460 | 55282620 | + | 0      | 0      |
| ENSG0000(KIAA0319 | protein_co chr6 | 24544104 | 24646155 | - | 0.06   | 0.01   |
| ENSG0000(IRF4     | protein_co chr6 | 391739   | 411447   | + | 0      | 0      |
| ENSG0000(SLC22A23 | protein_co chr6 | 3268962  | 3457022  | - | 11.58  | 10.43  |
| ENSG0000(TUBB2A   | protein_co chr6 | 3153669  | 3157526  | - | 9.64   | 9.03   |
| ENSG0000(LRRC1    | protein_co chr6 | 53794497 | 53924121 | + | 0.75   | 0.4    |
| ENSG0000(GCM1     | protein_co chr6 | 53126964 | 53148829 | - | 0      | 0      |
| ENSG0000(FOXF2    | protein_co chr6 | 1389834  | 1395597  | + | 4.58   | 4.12   |
| ENSG0000(BPHL     | protein_co chr6 | 3118374  | 3153578  | + | 7.51   | 6.24   |
| ENSG0000(RIPK1    | protein_co chr6 | 3063991  | 3115187  | + | 10.9   | 10.69  |
| ENSG0000(TUBB2B   | protein_co chr6 | 3224261  | 3231730  | - | 0.29   | 0.51   |
| ENSG0000(UQCC2    | protein_co chr6 | 33694293 | 33711727 | - | 28.36  | 27.44  |
| ENSG0000(HMGA1    | protein_co chr6 | 34236873 | 34246231 | + | 40.45  | 40.32  |
| ENSG0000(TCF19    | protein_co chr6 | 31158542 | 31167159 | + | 1.52   | 1.35   |
| ENSG0000(FLOT1    | protein_co chr6 | 30727709 | 30742733 | - | 61.52  | 58.1   |
| ENSG0000(IER3     | protein_co chr6 | 30743199 | 30744554 | - | 88.96  | 89.66  |
| ENSG0000(MDC1     | protein_co chr6 | 30699807 | 30717889 | - | 7.97   | 9.55   |
| ENSG0000(PGBD1    | protein_co chr6 | 28281572 | 28302549 | + | 1.87   | 1.86   |
| ENSG0000(ATAT1    | protein_co chr6 | 30626842 | 30646823 | + | 4.53   | 5.74   |
| ENSG0000(TPMT     | protein_co chr6 | 18128311 | 18155074 | - | 3.78   | 3.77   |
| ENSG0000(CLPS     | protein_co chr6 | 35794982 | 35797344 | - | 0      | 0      |
| ENSG0000(RNF144B  | protein_co chr6 | 18387350 | 18468874 | + | 0.66   | 0.37   |
| ENSG0000(NRM      | protein_co chr6 | 30688047 | 30691420 | - | 7.22   | 7.96   |
| ENSG0000(MTCH1    | protein_co chr6 | 36968141 | 36986298 | - | 93.57  | 105.17 |
| ENSG0000(VARS2    | protein_co chr6 | 30908242 | 30926459 | + | 7.65   | 6.76   |
| ENSG0000(TAF8     | protein_co chr6 | 42050513 | 42087461 | + | 5.19   | 5.16   |

|                   |                  |          |          |   |        |        |
|-------------------|------------------|----------|----------|---|--------|--------|
| ENSG0000(FAM8A1   | protein_co chr6  | 17600355 | 17611719 | + | 11.32  | 11.62  |
| ENSG0000(C6orf52  | protein_co chr6  | 10671418 | 10694797 | - | 0      | 0.28   |
| ENSG0000(FGFBP1   | protein_co chr4  | 15935569 | 15938740 | - | 0      | 0      |
| ENSG0000(FGFBP2   | protein_co chr4  | 15960243 | 15969309 | - | 0.15   | 0.06   |
| ENSG0000(CPEB2    | protein_co chr4  | 15002674 | 15070153 | + | 4.69   | 5.37   |
| ENSG0000(FHDC1    | protein_co chr4  | 1.53E+08 | 1.53E+08 | + | 0.07   | 0.04   |
| ENSG0000(TLR2     | protein_co chr4  | 1.54E+08 | 1.54E+08 | + | 0.22   | 0.01   |
| ENSG0000(MGARP    | protein_co chr4  | 1.39E+08 | 1.39E+08 | - | 12.77  | 11.75  |
| ENSG0000(TTC29    | protein_co chr4  | 1.47E+08 | 1.47E+08 | - | 0      | 0      |
| ENSG0000(MYO7A    | protein_co chr11 | 77128264 | 77215239 | + | 0.14   | 0.04   |
| ENSG0000(FCHSD2   | protein_co chr11 | 72836745 | 73142261 | - | 9.65   | 9.59   |
| ENSG0000(ARRB1    | protein_co chr11 | 75264182 | 75351705 | - | 5.79   | 6.08   |
| ENSG0000(SLCO2B1  | protein_co chr11 | 75100563 | 75206549 | + | 0      | 0.26   |
| ENSG0000(THAP12   | protein_co chr11 | 76349956 | 76380971 | - | 9.55   | 9.97   |
| ENSG0000(ANKRD42  | protein_co chr11 | 83193739 | 83260694 | + | 7.02   | 7.06   |
| ENSG0000(IL18BP   | protein_co chr11 | 71998541 | 72005715 | + | 2.58   | 3.05   |
| ENSG0000(NUMA1    | protein_co chr11 | 72002864 | 72080693 | - | 81.63  | 81.81  |
| ENSG0000(CCDC90B  | protein_co chr11 | 83259097 | 83286407 | - | 28.7   | 31.6   |
| ENSG0000(SYTL2    | protein_co chr11 | 85694224 | 85811159 | - | 25.02  | 21.31  |
| ENSG0000(RAB30    | protein_co chr11 | 82973133 | 83071923 | - | 17.29  | 21.43  |
| ENSG0000(CREBZF   | protein_co chr11 | 85659708 | 85682908 | - | 16.2   | 15.84  |
| ENSG0000(LRRC32   | protein_co chr11 | 76657524 | 76670747 | - | 35.44  | 30.63  |
| ENSG0000(PRCP     | protein_co chr11 | 82823502 | 82970584 | - | 77.28  | 76.06  |
| ENSG0000(NARS2    | protein_co chr11 | 78435961 | 78574874 | - | 4.34   | 3.97   |
| ENSG0000(RNF121   | protein_co chr11 | 71928701 | 71997597 | + | 17.37  | 17.25  |
| ENSG0000(MRPL15   | protein_co chr8  | 54135210 | 54147901 | + | 17.81  | 18.55  |
| ENSG0000(PI15     | protein_co chr8  | 74824537 | 74855029 | + | 0.2    | 1.03   |
| ENSG0000(TTPA     | protein_co chr8  | 63048553 | 63086053 | - | 0      | 0      |
| ENSG0000(GGH      | protein_co chr8  | 63015079 | 63039171 | - | 8.99   | 8.11   |
| ENSG0000(SLCO5A1  | protein_co chr8  | 69667047 | 69835064 | - | 0.06   | 0.01   |
| ENSG0000(SULF1    | protein_co chr8  | 69466624 | 69660915 | + | 128.01 | 137.79 |
| ENSG0000(TGS1     | protein_co chr8  | 55773142 | 55825448 | + | 4.32   | 3.47   |
| ENSG0000(SDCBP    | protein_co chr8  | 58552924 | 58582860 | + | 195.46 | 206.04 |
| ENSG0000(NEK1     | protein_co chr4  | 1.69E+08 | 1.7E+08  | - | 4.37   | 4.84   |
| ENSG0000(DDX60    | protein_co chr4  | 1.68E+08 | 1.68E+08 | - | 2.28   | 3.94   |
| ENSG0000(NXPE4    | protein_co chr11 | 1.15E+08 | 1.15E+08 | - | 0.15   | 0      |
| ENSG0000(SORL1    | protein_co chr11 | 1.21E+08 | 1.22E+08 | + | 0.23   | 0.25   |
| ENSG0000(TMPRSS4  | protein_co chr11 | 1.18E+08 | 1.18E+08 | + | 0.1    | 0.04   |
| ENSG0000(BUD13    | protein_co chr11 | 1.17E+08 | 1.17E+08 | - | 5.16   | 4.54   |
| ENSG0000(TRPC6    | protein_co chr11 | 1.01E+08 | 1.02E+08 | - | 0      | 0      |
| ENSG0000(MMP7     | protein_co chr11 | 1.03E+08 | 1.03E+08 | - | 0      | 0      |
| ENSG0000(MMP20    | protein_co chr11 | 1.03E+08 | 1.03E+08 | - | 0      | 0      |
| ENSG0000(MMP27    | protein_co chr11 | 1.03E+08 | 1.03E+08 | - | 0      | 0      |
| ENSG0000(C11orf70 | protein_co chr11 | 1.02E+08 | 1.02E+08 | + | 4.59   | 4.75   |
| ENSG0000(DCUN1D5  | protein_co chr11 | 1.03E+08 | 1.03E+08 | - | 15.37  | 14.93  |

|                    |                  |          |            |         |         |
|--------------------|------------------|----------|------------|---------|---------|
| ENSG0000(YAP1      | protein_co chr11 | 1.02E+08 | 1.02E+08 + | 78.59   | 79.45   |
| ENSG0000(TRIM29    | protein_co chr11 | 1.2E+08  | 1.2E+08 -  | 0.05    | 0       |
| ENSG0000(SLC37A4   | protein_co chr11 | 1.19E+08 | 1.19E+08 - | 7.05    | 10.44   |
| ENSG0000(BTG4      | protein_co chr11 | 1.11E+08 | 1.12E+08 - | 0       | 0       |
| ENSG0000(POU2F3    | protein_co chr11 | 1.2E+08  | 1.2E+08 +  | 0       | 0.06    |
| ENSG0000(RDX       | protein_co chr11 | 1.1E+08  | 1.1E+08 -  | 25.51   | 27.01   |
| ENSG0000(PPP2R1B   | protein_co chr11 | 1.12E+08 | 1.12E+08 - | 8.15    | 6.65    |
| ENSG0000(FDX1      | protein_co chr11 | 1.1E+08  | 1.1E+08 +  | 2.9     | 3.22    |
| ENSG0000(C11orf1   | protein_co chr11 | 1.12E+08 | 1.12E+08 + | 5.94    | 6.4     |
| ENSG0000(FXYD6     | protein_co chr11 | 1.18E+08 | 1.18E+08 - | 0       | 0       |
| ENSG0000(ARHGAP20  | protein_co chr11 | 1.11E+08 | 1.11E+08 - | 3.68    | 3.6     |
| ENSG0000(FXYD2     | protein_co chr11 | 1.18E+08 | 1.18E+08 - | 0.37    | 0.16    |
| ENSG0000(MMP13     | protein_co chr11 | 1.03E+08 | 1.03E+08 - | 0       | 0.06    |
| ENSG0000(TMPRSS13  | protein_co chr11 | 1.18E+08 | 1.18E+08 - | 0       | 0       |
| ENSG0000(CASP1     | protein_co chr11 | 1.05E+08 | 1.05E+08 - | 6.65    | 14.71   |
| ENSG0000(CASP5     | protein_co chr11 | 1.05E+08 | 1.05E+08 - | 0       | 0       |
| ENSG0000(ALKBH8    | protein_co chr11 | 1.08E+08 | 1.08E+08 - | 2.18    | 2.39    |
| ENSG0000(MAP2K5    | protein_co chr15 | 67542709 | 67807123 + | 13.09   | 13.06   |
| ENSG0000(UNC13C    | protein_co chr15 | 54012904 | 54633414 + | 0       | 0       |
| ENSG0000(SQRDL     | protein_co chr15 | 45631148 | 45691294 + | 22.63   | 22.3    |
| ENSG0000(CTDSPL2   | protein_co chr15 | 44427234 | 44529038 + | 9.42    | 9.97    |
| ENSG0000(SLTM      | protein_co chr15 | 58879045 | 58933653 - | 27.53   | 23.35   |
| ENSG0000(THBS1     | protein_co chr15 | 39581079 | 39599466 + | 343     | 287.97  |
| ENSG0000(MAPKBP1   | protein_co chr15 | 41774434 | 41827855 + | 5.3     | 4.96    |
| ENSG0000(NUSAP1    | protein_co chr15 | 41332694 | 41381050 + | 0.88    | 1.57    |
| ENSG0000(NDUFAF1   | protein_co chr15 | 41387349 | 41402519 - | 9.12    | 9.55    |
| ENSG0000(KIF23     | protein_co chr15 | 69414246 | 69448427 + | 0.64    | 0.76    |
| ENSG0000(RP11-809H | processed_chr15  | 68930504 | 69028889 + | 0       | 0       |
| ENSG0000(ITGA11    | protein_co chr15 | 68296533 | 68432162 - | 61.47   | 64.47   |
| ENSG0000(KNL1      | protein_co chr15 | 40594020 | 40664342 + | 0.12    | 0.4     |
| ENSG0000(HAUS2     | protein_co chr15 | 42548810 | 42569994 + | 9.49    | 7.96    |
| ENSG0000(RTF1      | protein_co chr15 | 41408408 | 41483563 + | 17.36   | 16.71   |
| ENSG0000(PARP6     | protein_co chr15 | 72241181 | 72272999 - | 23.43   | 21.8    |
| ENSG0000(RPLP1     | protein_co chr15 | 69452784 | 69456194 + | 1188.49 | 1243.52 |
| ENSG0000(PAQR5     | protein_co chr15 | 69298947 | 69407780 + | 0.16    | 0.18    |
| ENSG0000(LRRC49    | protein_co chr15 | 70853239 | 71053657 + | 6.88    | 7.11    |
| ENSG0000(TUBGCP4   | protein_co chr15 | 43369221 | 43409771 + | 4.99    | 5.77    |
| ENSG0000(RMDN3     | protein_co chr15 | 40735884 | 40755851 - | 18.22   | 15.72   |
| ENSG0000(ITPKA     | protein_co chr15 | 41493393 | 41503551 + | 0.29    | 0.3     |
| ENSG0000(UACA      | protein_co chr15 | 70654554 | 70763593 - | 28.81   | 28.28   |
| ENSG0000(SMAD6     | protein_co chr15 | 66702228 | 66782848 + | 3.69    | 3.87    |
| ENSG0000(PLCB2     | protein_co chr15 | 40278176 | 40307935 - | 0.14    | 0.44    |
| ENSG0000(TMEM62    | protein_co chr15 | 43123279 | 43185146 + | 4.08    | 4.64    |
| ENSG0000(PAK6      | protein_co chr15 | 40238759 | 40277487 + | 0.13    | 0.44    |
| ENSG0000(ADAM10    | protein_co chr15 | 58588807 | 58749978 - | 102.32  | 86.98   |



|                    |                  |          |          |   |       |       |
|--------------------|------------------|----------|----------|---|-------|-------|
| ENSG0000( DUOX1    | protein_co chr15 | 45129933 | 45165576 | + | 0.62  | 0.47  |
| ENSG0000( SLC28A2  | protein_co chr15 | 45252230 | 45277845 | + | 0.05  | 0.07  |
| ENSG0000( STRA6    | protein_co chr15 | 74179466 | 74212267 | - | 0.16  | 0.08  |
| ENSG0000( CYP19A1  | protein_co chr15 | 51208057 | 51338610 | - | 0.36  | 0.38  |
| ENSG0000( ZNF280D  | protein_co chr15 | 56630181 | 56918571 | - | 8.52  | 13.61 |
| ENSG0000( SEMA6D   | protein_co chr15 | 47184101 | 47774223 | + | 4.34  | 5.73  |
| ENSG0000( BCL2L10  | protein_co chr15 | 52109263 | 52112775 | - | 0     | 0     |
| ENSG0000( RSL24D1  | protein_co chr15 | 55180806 | 55197067 | - | 24.4  | 23.39 |
| ENSG0000( SPTBN5   | protein_co chr15 | 41848144 | 41894077 | - | 0.04  | 0.03  |
| ENSG0000( GCOM1    | protein_co chr15 | 57591908 | 57714745 | + | 0     | 0.06  |
| ENSG0000( GCHFR    | protein_co chr15 | 40764020 | 40767710 | + | 8.04  | 7.73  |
| ENSG0000( BCAR3    | protein_co chr1  | 93561786 | 93847150 | - | 14.96 | 12.99 |
| ENSG0000( TTLL7    | protein_co chr1  | 83865028 | 83999150 | - | 5.92  | 5.24  |
| ENSG0000( FNBP1L   | protein_co chr1  | 93448131 | 93554661 | + | 4.7   | 5.09  |
| ENSG0000( KYAT3    | protein_co chr1  | 88935773 | 88992953 | - | 13.25 | 13.49 |
| ENSG0000( GTF2B    | protein_co chr1  | 88852932 | 88891944 | - | 11.74 | 12.39 |
| ENSG0000( BRDT     | protein_co chr1  | 91949371 | 92014426 | + | 0     | 0     |
| ENSG0000( RABGGTB  | protein_co chr1  | 75786197 | 75795079 | + | 27.41 | 22.88 |
| ENSG0000( IFI44L   | protein_co chr1  | 78619922 | 78646145 | + | 6.28  | 5.53  |
| ENSG0000( GIPC2    | protein_co chr1  | 77979542 | 78138449 | + | 0.03  | 0     |
| ENSG0000( ARHGAP29 | protein_co chr1  | 94148988 | 94275068 | - | 25.01 | 27.08 |
| ENSG0000( IFI44    | protein_co chr1  | 78649796 | 78664078 | + | 8.65  | 9.48  |
| ENSG0000( SLC44A5  | protein_co chr1  | 75202131 | 75611116 | - | 0.19  | 0.13  |
| ENSG0000( RPL7P9   | processed_chr1   | 96678874 | 96679620 | - | 0     | 0     |
| ENSG0000( CLCA2    | protein_co chr1  | 86424086 | 86456558 | + | 16.24 | 14.03 |
| ENSG0000( DNASE2B  | protein_co chr1  | 84398532 | 84415018 | + | 0     | 0     |
| ENSG0000( DBT      | protein_co chr1  | 1E+08    | 1E+08    | - | 3.87  | 4.67  |
| ENSG0000( RTCA     | protein_co chr1  | 1E+08    | 1E+08    | + | 13.39 | 12.15 |
| ENSG0000( IFT172   | protein_co chr2  | 27444371 | 27489789 | - | 6.78  | 9.29  |
| ENSG0000( SELENOI  | protein_co chr2  | 26308547 | 26395891 | + | 1.73  | 2.62  |
| ENSG0000( CGREF1   | protein_co chr2  | 27098889 | 27119115 | - | 4.49  | 3.69  |
| ENSG0000( HADHB    | protein_co chr2  | 26243170 | 26290468 | + | 60.71 | 62.7  |
| ENSG0000( KHK      | protein_co chr2  | 27086747 | 27100772 | + | 0.83  | 0.78  |
| ENSG0000( ADCY3    | protein_co chr2  | 24819169 | 24919839 | - | 23.22 | 21.48 |
| ENSG0000( PPM1B    | protein_co chr2  | 44167969 | 44244384 | + | 10.26 | 11.6  |
| ENSG0000( PNPT1    | protein_co chr2  | 55634265 | 55693910 | - | 9.79  | 13.21 |
| ENSG0000( DYNC2L11 | protein_co chr2  | 43774039 | 43810010 | + | 9.86  | 8.51  |
| ENSG0000( LHCGR    | protein_co chr2  | 48686775 | 48755730 | - | 0     | 0     |
| ENSG0000( THUMPD2  | protein_co chr2  | 39736060 | 39779267 | - | 4.32  | 3.96  |
| ENSG0000( CYP1B1   | protein_co chr2  | 38066973 | 38109902 | - | 22.1  | 18.55 |
| ENSG0000( SULT6B1  | protein_co chr2  | 37167820 | 37196598 | - | 0     | 0     |
| ENSG0000( RAB1A    | protein_co chr2  | 65070701 | 65130106 | - | 74.78 | 72.35 |
| ENSG0000( ACTR2    | protein_co chr2  | 65227753 | 65271253 | + | 54.51 | 52.52 |
| ENSG0000( PREB     | protein_co chr2  | 27130756 | 27134675 | - | 18.47 | 19.04 |
| ENSG0000( SLC5A6   | protein_co chr2  | 27199587 | 27212958 | - | 5.58  | 4.99  |

|                    |                  |          |            |         |         |
|--------------------|------------------|----------|------------|---------|---------|
| ENSG0000( ABCG5    | protein_co chr2  | 43812472 | 43838865 - | 0.02    | 0       |
| ENSG0000( PREPL    | protein_co chr2  | 44316281 | 44361862 - | 17.06   | 19.25   |
| ENSG0000( SLC3A1   | protein_co chr2  | 44275458 | 44321494 + | 0.27    | 0.32    |
| ENSG0000( EMILIN1  | protein_co chr2  | 27078567 | 27086408 + | 102.21  | 110.95  |
| ENSG0000( FBXO11   | protein_co chr2  | 47789316 | 47905793 - | 18.84   | 16.13   |
| ENSG0000( SIX3     | protein_co chr2  | 44941898 | 44946077 + | 0       | 0       |
| ENSG0000( ATRAID   | protein_co chr2  | 27212027 | 27217178 + | 126.08  | 124.38  |
| ENSG0000( CENPO    | protein_co chr2  | 24793136 | 24822376 + | 2.82    | 2.73    |
| ENSG0000( LRPPRC   | protein_co chr2  | 43886508 | 43996005 - | 18.43   | 20.61   |
| ENSG0000( TRIM54   | protein_co chr2  | 27282392 | 27307439 + | 0.03    | 0.03    |
| ENSG0000( DTNB     | protein_co chr2  | 25377198 | 25673647 - | 2.98    | 3.1     |
| ENSG0000( ACTR1A   | protein_co chr10 | 1.02E+08 | 1.03E+08 - | 51.65   | 58.46   |
| ENSG0000( CYP2C9   | protein_co chr10 | 94938658 | 94989390 + | 0.12    | 0       |
| ENSG0000( MFSD13A  | protein_co chr10 | 1.02E+08 | 1.02E+08 + | 1.97    | 1.07    |
| ENSG0000( CYP2C8   | protein_co chr10 | 95036772 | 95069497 - | 0       | 0       |
| ENSG0000( MYOF     | protein_co chr10 | 93306429 | 93482317 - | 99.17   | 99.91   |
| ENSG0000( LOXL4    | protein_co chr10 | 98247690 | 98268250 - | 5.02    | 4.36    |
| ENSG0000( STAMBPL1 | protein_co chr10 | 88879734 | 88975153 + | 9.3     | 6.78    |
| ENSG0000( CH25H    | protein_co chr10 | 89205629 | 89207314 - | 0.17    | 0.04    |
| ENSG0000( LBX1     | protein_co chr10 | 1.01E+08 | 1.01E+08 - | 0       | 0       |
| ENSG0000( ATAD1    | protein_co chr10 | 87751512 | 87841343 - | 16.58   | 16.31   |
| ENSG0000( BTBD16   | protein_co chr10 | 1.22E+08 | 1.22E+08 + | 0.03    | 0.13    |
| ENSG0000( KIF11    | protein_co chr10 | 92593286 | 92655395 + | 0.7     | 0.97    |
| ENSG0000( CUZD1    | protein_co chr10 | 1.23E+08 | 1.23E+08 - | 0.38    | 0.23    |
| ENSG0000( TACC2    | protein_co chr10 | 1.22E+08 | 1.22E+08 + | 10.73   | 9.74    |
| ENSG0000( DUSP5    | protein_co chr10 | 1.1E+08  | 1.11E+08 + | 2.57    | 2.4     |
| ENSG0000( CALHM2   | protein_co chr10 | 1.03E+08 | 1.03E+08 - | 54      | 54.61   |
| ENSG0000( ARL3     | protein_co chr10 | 1.03E+08 | 1.03E+08 - | 5.54    | 5.59    |
| ENSG0000( CEP55    | protein_co chr10 | 93496632 | 93529092 + | 0.18    | 0.57    |
| ENSG0000( KIF20B   | protein_co chr10 | 89701610 | 89774939 + | 0.39    | 1.24    |
| ENSG0000( ENTPD1   | protein_co chr10 | 95711779 | 95869695 + | 0.25    | 0.38    |
| ENSG0000( EXOC6    | protein_co chr10 | 92834713 | 93059493 + | 2.37    | 3       |
| ENSG0000( PLCE1    | protein_co chr10 | 94030812 | 94332823 + | 0.53    | 0.77    |
| ENSG0000( RBP4     | protein_co chr10 | 93591687 | 93601744 - | 0.08    | 0.6     |
| ENSG0000( DBR1     | protein_co chr3  | 1.38E+08 | 1.38E+08 - | 4.02    | 4.77    |
| ENSG0000( DNAJC13  | protein_co chr3  | 1.32E+08 | 1.33E+08 + | 18.36   | 18.32   |
| ENSG0000( GPR87    | protein_co chr3  | 1.51E+08 | 1.51E+08 - | 0       | 0       |
| ENSG0000( ANXA7    | protein_co chr10 | 73375101 | 73414076 - | 57.96   | 61.36   |
| ENSG0000( FAM149B1 | protein_co chr10 | 73168166 | 73244504 + | 12.28   | 10.66   |
| ENSG0000( ASCC1    | protein_co chr10 | 72096032 | 72217134 - | 16.02   | 13.93   |
| ENSG0000( PLA2G12B | protein_co chr10 | 72935170 | 72954778 - | 0       | 0       |
| ENSG0000( ZNF365   | protein_co chr10 | 62374192 | 62672011 + | 0.47    | 0.74    |
| ENSG0000( OIT3     | protein_co chr10 | 72893581 | 72933033 + | 0       | 0.04    |
| ENSG0000( ADAMTS14 | protein_co chr10 | 70672803 | 70762441 + | 3.29    | 3       |
| ENSG0000( RPS24    | protein_co chr10 | 78033760 | 78056812 + | 1183.56 | 1147.49 |

|                    |                  |          |          |   |       |       |
|--------------------|------------------|----------|----------|---|-------|-------|
| ENSG0000(TET1      | protein_co chr10 | 68560656 | 68694482 | + | 0.36  | 0.39  |
| ENSG0000(DNA2      | protein_co chr10 | 68414064 | 68472121 | - | 0.49  | 0.67  |
| ENSG0000(MYPN      | protein_co chr10 | 68106117 | 68212017 | + | 0.01  | 0.01  |
| ENSG0000(AOX1      | protein_co chr2  | 2.01E+08 | 2.01E+08 | + | 9.56  | 10.21 |
| ENSG0000(ATIC      | protein_co chr2  | 2.15E+08 | 2.15E+08 | + | 19.66 | 25.33 |
| ENSG0000(SMARCAL1  | protein_co chr2  | 2.16E+08 | 2.16E+08 | + | 11.01 | 11.72 |
| ENSG0000(BARD1     | protein_co chr2  | 2.15E+08 | 2.15E+08 | - | 1.24  | 1.42  |
| ENSG0000(STAT4     | protein_co chr2  | 1.91E+08 | 1.91E+08 | - | 0.38  | 0.28  |
| ENSG0000(MSTN      | protein_co chr2  | 1.9E+08  | 1.9E+08  | - | 0.04  | 0.04  |
| ENSG0000(CARF      | protein_co chr2  | 2.03E+08 | 2.03E+08 | + | 5.35  | 3.67  |
| ENSG0000(ASNSD1    | protein_co chr2  | 1.9E+08  | 1.9E+08  | + | 19.34 | 20.92 |
| ENSG0000(METTL5    | protein_co chr2  | 1.7E+08  | 1.7E+08  | - | 17.8  | 19.18 |
| ENSG0000(SSB       | protein_co chr2  | 1.7E+08  | 1.7E+08  | + | 36.15 | 36.18 |
| ENSG0000(NAB1      | protein_co chr2  | 1.91E+08 | 1.91E+08 | + | 12.2  | 12.62 |
| ENSG0000(CDK15     | protein_co chr2  | 2.02E+08 | 2.02E+08 | + | 0.53  | 1.15  |
| ENSG0000(PPIG      | protein_co chr2  | 1.7E+08  | 1.7E+08  | + | 22.81 | 23.03 |
| ENSG0000(FASTKD1   | protein_co chr2  | 1.7E+08  | 1.7E+08  | - | 6.04  | 5.1   |
| ENSG0000(MDH1B     | protein_co chr2  | 2.07E+08 | 2.07E+08 | - | 0.73  | 0.88  |
| ENSG0000(HECW2     | protein_co chr2  | 1.96E+08 | 1.97E+08 | - | 7.63  | 6.54  |
| ENSG0000(IDH1      | protein_co chr2  | 2.08E+08 | 2.08E+08 | - | 89.47 | 88.39 |
| ENSG0000(OLA1      | protein_co chr2  | 1.74E+08 | 1.74E+08 | - | 38.76 | 36.91 |
| ENSG0000(CIR1      | protein_co chr2  | 1.74E+08 | 1.74E+08 | - | 17.6  | 19.21 |
| ENSG0000(SSFA2     | protein_co chr2  | 1.82E+08 | 1.82E+08 | + | 40.86 | 28.52 |
| ENSG0000(CHRNA1    | protein_co chr2  | 1.75E+08 | 1.75E+08 | - | 0     | 0     |
| ENSG0000(FAM117B   | protein_co chr2  | 2.03E+08 | 2.03E+08 | + | 1.73  | 1.77  |
| ENSG0000(WDR12     | protein_co chr2  | 2.03E+08 | 2.03E+08 | - | 18.55 | 16.54 |
| ENSG0000(ABI2      | protein_co chr2  | 2.03E+08 | 2.03E+08 | + | 24.2  | 31.98 |
| ENSG0000(ITGAV     | protein_co chr2  | 1.87E+08 | 1.87E+08 | + | 86.02 | 85.08 |
| ENSG0000(SLC40A1   | protein_co chr2  | 1.9E+08  | 1.9E+08  | - | 10.95 | 19.31 |
| ENSG0000(SLC35A5   | protein_co chr3  | 1.13E+08 | 1.13E+08 | + | 26.04 | 26.82 |
| ENSG0000(DIRC2     | protein_co chr3  | 1.23E+08 | 1.23E+08 | + | 9.7   | 11.12 |
| ENSG0000(SENPA7    | protein_co chr3  | 1.01E+08 | 1.02E+08 | - | 5.55  | 5.08  |
| ENSG0000(GUCA1C    | protein_co chr3  | 1.09E+08 | 1.09E+08 | - | 0     | 0     |
| ENSG0000(CCDC54    | protein_co chr3  | 1.07E+08 | 1.07E+08 | + | 0     | 0     |
| ENSG0000(COX17     | protein_co chr3  | 1.2E+08  | 1.2E+08  | - | 15.15 | 11.99 |
| ENSG0000(PARP9     | protein_co chr3  | 1.23E+08 | 1.23E+08 | - | 10.2  | 9.81  |
| ENSG0000(MNS1      | protein_co chr15 | 56421544 | 56465137 | - | 0.55  | 0.54  |
| ENSG0000(USP8      | protein_co chr15 | 50424380 | 50514419 | + | 18.36 | 18.33 |
| ENSG0000(SECISBP2L | protein_co chr15 | 48988476 | 49046563 | - | 15.33 | 15.35 |
| ENSG0000(TMOD3     | protein_co chr15 | 51829628 | 51947295 | + | 17.62 | 14.94 |
| ENSG0000(SPPL2A    | protein_co chr15 | 50702266 | 50765808 | - | 42.9  | 45.84 |
| ENSG0000(GLCE      | protein_co chr15 | 69160584 | 69272217 | + | 5.27  | 5.44  |
| ENSG0000(SHF       | protein_co chr15 | 45167214 | 45201175 | - | 2.91  | 3.48  |
| ENSG0000(APH1B     | protein_co chr15 | 63276018 | 63309126 | + | 8.1   | 5.51  |
| ENSG0000(INTS14    | protein_co chr15 | 65578753 | 65611289 | - | 12.38 | 11.92 |

|                 |          |                  |          |          |   |        |        |
|-----------------|----------|------------------|----------|----------|---|--------|--------|
| ENSG00000101000 | CILP     | protein_co chr15 | 65194758 | 65211488 | - | 0.07   | 0.21   |
| ENSG00000101000 | PARP16   | protein_co chr15 | 65234460 | 65300618 | - | 5.86   | 7.24   |
| ENSG00000101000 | PPCDC    | protein_co chr15 | 75023555 | 75117462 | + | 5.72   | 6.21   |
| ENSG00000101000 | HCN4     | protein_co chr15 | 73319859 | 73369264 | - | 0      | 0      |
| ENSG00000101000 | SEMA7A   | protein_co chr15 | 74409289 | 74434467 | - | 3.33   | 3.23   |
| ENSG00000101000 | UBL7     | protein_co chr15 | 74445977 | 74461182 | - | 26.28  | 26.35  |
| ENSG00000101000 | ARHGAP24 | protein_co chr4  | 85475114 | 86002670 | + | 21.34  | 21.21  |
| ENSG00000101000 | FAM13A   | protein_co chr4  | 88725955 | 89111398 | - | 6.64   | 5.87   |
| ENSG00000101000 | HERC3    | protein_co chr4  | 88521048 | 88708542 | + | 8.13   | 10.08  |
| ENSG00000101000 | HERC6    | protein_co chr4  | 88378739 | 88443111 | + | 2.82   | 2.72   |
| ENSG00000101000 | HERC5    | protein_co chr4  | 88457117 | 88506163 | + | 0.18   | 0.08   |
| ENSG00000101000 | PCDH10   | protein_co chr4  | 1.33E+08 | 1.33E+08 | + | 2.75   | 3.37   |
| ENSG00000101000 | NDST4    | protein_co chr4  | 1.15E+08 | 1.15E+08 | - | 0      | 0      |
| ENSG00000101000 | ZGRF1    | protein_co chr4  | 1.13E+08 | 1.13E+08 | - | 1.41   | 1.64   |
| ENSG00000101000 | AP1AR    | protein_co chr4  | 1.12E+08 | 1.12E+08 | + | 4.51   | 5.26   |
| ENSG00000101000 | COPS4    | protein_co chr4  | 83034447 | 83075818 | + | 14.79  | 14.75  |
| ENSG00000101000 | HNRNPD   | protein_co chr4  | 82352498 | 82374503 | - | 71.77  | 64.31  |
| ENSG00000101000 | PRKG2    | protein_co chr4  | 81087370 | 81215117 | - | 0.45   | 0.39   |
| ENSG00000101000 | RASGEF1B | protein_co chr4  | 81426393 | 82044244 | - | 0.04   | 0      |
| ENSG00000101000 | SEC31A   | protein_co chr4  | 82818661 | 82901166 | - | 120.28 | 119.8  |
| ENSG00000101000 | FGF5     | protein_co chr4  | 80266599 | 80336680 | + | 2.99   | 2.97   |
| ENSG00000101000 | GPAT3    | protein_co chr4  | 83535914 | 83605875 | + | 1.91   | 1.76   |
| ENSG00000101000 | IL21     | protein_co chr4  | 1.23E+08 | 1.23E+08 | - | 0      | 0      |
| ENSG00000101000 | FGF2     | protein_co chr4  | 1.23E+08 | 1.23E+08 | + | 27.02  | 28.52  |
| ENSG00000101000 | BBS7     | protein_co chr4  | 1.22E+08 | 1.22E+08 | - | 6.37   | 5.49   |
| ENSG00000101000 | KIAA1109 | protein_co chr4  | 1.22E+08 | 1.22E+08 | + | 19.7   | 18.43  |
| ENSG00000101000 | BMPR1B   | protein_co chr4  | 94757968 | 95158448 | + | 0.18   | 0.07   |
| ENSG00000101000 | RAP1GDS1 | protein_co chr4  | 98261384 | 98443861 | + | 16.38  | 17.32  |
| ENSG00000101000 | LARP1B   | protein_co chr4  | 1.28E+08 | 1.28E+08 | + | 4.15   | 4.28   |
| ENSG00000101000 | MMRN1    | protein_co chr4  | 89879532 | 89954629 | + | 0      | 0      |
| ENSG00000101000 | PDE5A    | protein_co chr4  | 1.19E+08 | 1.2E+08  | - | 5.24   | 4.65   |
| ENSG00000101000 | PRDM5    | protein_co chr4  | 1.21E+08 | 1.21E+08 | - | 2.81   | 2.46   |
| ENSG00000101000 | TRPC3    | protein_co chr4  | 1.22E+08 | 1.22E+08 | - | 0      | 0      |
| ENSG00000101000 | NAAA     | protein_co chr4  | 75913657 | 75941051 | - | 11.08  | 11.84  |
| ENSG00000101000 | NUP54    | protein_co chr4  | 76114659 | 76148515 | - | 15.71  | 16.95  |
| ENSG00000101000 | CXCL9    | protein_co chr4  | 76001275 | 76007488 | - | 0      | 0      |
| ENSG00000101000 | BMP2K    | protein_co chr4  | 78776342 | 78916372 | + | 14.93  | 15.94  |
| ENSG00000101000 | G3BP2    | protein_co chr4  | 75642782 | 75724525 | - | 38.61  | 38.5   |
| ENSG00000101000 | 11-Sep   | protein_co chr4  | 76949703 | 77040384 | + | 48.29  | 55.62  |
| ENSG00000101000 | FRAS1    | protein_co chr4  | 78057570 | 78544269 | + | 0.27   | 0.66   |
| ENSG00000101000 | SCARB2   | protein_co chr4  | 76158733 | 76234536 | - | 137.54 | 146.46 |
| ENSG00000101000 | CCNG2    | protein_co chr4  | 77157151 | 77433388 | + | 41.59  | 38.96  |
| ENSG00000101000 | CNOT6L   | protein_co chr4  | 77713387 | 77819615 | - | 7.48   | 7.69   |
| ENSG00000101000 | USO1     | protein_co chr4  | 75724593 | 75814286 | + | 22.4   | 24.82  |
| ENSG00000101000 | CDKL2    | protein_co chr4  | 75578005 | 75630716 | - | 0.2    | 0.1    |

|                    |                  |          |          |   |       |       |
|--------------------|------------------|----------|----------|---|-------|-------|
| ENSG0000(SHROOM3)  | protein_co chr4  | 76435100 | 76783253 | + | 1.43  | 1.41  |
| ENSG0000(ANXA3)    | protein_co chr4  | 78551519 | 78610451 | + | 26.42 | 35.31 |
| ENSG0000(PPA2)     | protein_co chr4  | 1.05E+08 | 1.05E+08 | - | 38.95 | 37.04 |
| ENSG0000(CENPE)    | protein_co chr4  | 1.03E+08 | 1.03E+08 | - | 0.25  | 0.4   |
| ENSG0000(GSTCD)    | protein_co chr4  | 1.06E+08 | 1.06E+08 | + | 2.55  | 2.9   |
| ENSG0000(INTS12)   | protein_co chr4  | 1.06E+08 | 1.06E+08 | - | 8.3   | 8.35  |
| ENSG0000(ENPEP)    | protein_co chr4  | 1.1E+08  | 1.11E+08 | + | 0.19  | 0.09  |
| ENSG0000(CASP6)    | protein_co chr4  | 1.1E+08  | 1.1E+08  | - | 12.79 | 9.51  |
| ENSG0000(LEF1)     | protein_co chr4  | 1.08E+08 | 1.08E+08 | - | 0     | 0     |
| ENSG0000(HADH)     | protein_co chr4  | 1.08E+08 | 1.08E+08 | + | 18.18 | 21.16 |
| ENSG0000(EGF)      | protein_co chr4  | 1.1E+08  | 1.1E+08  | + | 0     | 0.02  |
| ENSG0000(PAPSS1)   | protein_co chr4  | 1.08E+08 | 1.08E+08 | - | 25.77 | 26.82 |
| ENSG0000(SEC24B)   | protein_co chr4  | 1.09E+08 | 1.1E+08  | + | 12.82 | 11.7  |
| ENSG0000(C4orf17)  | protein_co chr4  | 99511004 | 99542303 | + | 0     | 0     |
| ENSG0000(PPP3CA)   | protein_co chr4  | 1.01E+08 | 1.01E+08 | - | 20.26 | 15.68 |
| ENSG0000(SLC39A8)  | protein_co chr4  | 1.02E+08 | 1.02E+08 | - | 49.52 | 41.12 |
| ENSG0000(MTTP)     | protein_co chr4  | 99563761 | 99623999 | + | 0     | 0     |
| ENSG0000(FBN2)     | protein_co chr5  | 1.28E+08 | 1.29E+08 | - | 6.12  | 6.51  |
| ENSG0000(MAPK8IP3) | protein_co chr16 | 1706183  | 1770317  | + | 27.79 | 28.18 |
| ENSG0000(RGS3)     | protein_co chr9  | 1.13E+08 | 1.14E+08 | + | 12.57 | 13.27 |
| ENSG0000(GUCD1)    | protein_co chr22 | 24540423 | 24555935 | - | 35.98 | 31.39 |
| ENSG0000(TTLL8)    | protein_co chr22 | 50015123 | 50056935 | - | 0     | 0     |
| ENSG0000(RNF185)   | protein_co chr22 | 31160183 | 31207019 | + | 24.13 | 25.78 |
| ENSG0000(KIAA1644) | protein_co chr22 | 44243667 | 44312851 | - | 7.02  | 8.61  |
| ENSG0000(PARVG)    | protein_co chr22 | 44172956 | 44219533 | + | 0     | 0     |
| ENSG0000(B4GALNT3) | protein_co chr12 | 460364   | 563509   | + | 1.15  | 0.72  |
| ENSG0000(PDE6H)    | protein_co chr12 | 14973022 | 14981865 | + | 0     | 0     |
| ENSG0000(ERP27)    | protein_co chr12 | 14914035 | 14939082 | - | 0.05  | 0     |
| ENSG0000(ETV6)     | protein_co chr12 | 11649854 | 11895402 | + | 3.44  | 3.51  |
| ENSG0000(GABARAPL) | protein_co chr12 | 10212458 | 10223130 | + | 60.59 | 60.94 |
| ENSG0000(KIF21A)   | protein_co chr12 | 39293228 | 39443390 | - | 2.23  | 2.4   |
| ENSG0000(CPNE8)    | protein_co chr12 | 38646822 | 38907430 | - | 6.01  | 5.81  |
| ENSG0000(YARS2)    | protein_co chr12 | 32727490 | 32755902 | - | 7.97  | 11.64 |
| ENSG0000(FGD4)     | protein_co chr12 | 32399529 | 32646050 | + | 1.45  | 1.55  |
| ENSG0000(ALG10)    | protein_co chr12 | 34022281 | 34029694 | + | 1.66  | 0.8   |
| ENSG0000(PIK3C2G)  | protein_co chr12 | 18247614 | 18648416 | + | 0.01  | 0     |
| ENSG0000(FAM60A)   | protein_co chr12 | 31280584 | 31327058 | - | 4.36  | 6.1   |
| ENSG0000(PLCZ1)    | protein_co chr12 | 18683169 | 18738057 | - | 0     | 0     |
| ENSG0000(AEBP2)    | protein_co chr12 | 19404045 | 19720801 | + | 12.21 | 9.17  |
| ENSG0000(SLCO1C1)  | protein_co chr12 | 20695355 | 20753386 | + | 0     | 0     |
| ENSG0000(ETFBKMT)  | protein_co chr12 | 31647160 | 31673114 | + | 0.8   | 1.48  |
| ENSG0000(ETNK1)    | protein_co chr12 | 22625075 | 22690665 | + | 8.13  | 8.77  |
| ENSG0000(ZCRB1)    | protein_co chr12 | 42312078 | 42326118 | - | 31.38 | 37.59 |
| ENSG0000(TMEM117)  | protein_co chr12 | 43835967 | 44389762 | + | 4.15  | 4.95  |
| ENSG0000(PRICKLE1) | protein_co chr12 | 42456757 | 42590355 | - | 1.89  | 2.3   |

|                   |                  |          |            |        |        |
|-------------------|------------------|----------|------------|--------|--------|
| ENSG0000(C1RL     | protein_co chr12 | 7089587  | 7109273 -  | 66.73  | 60.04  |
| ENSG0000(NDUFA9   | protein_co chr12 | 4649095  | 4694317 +  | 35.07  | 30.72  |
| ENSG0000(CLSTN3   | protein_co chr12 | 7129698  | 7158945 +  | 22.05  | 23.53  |
| ENSG0000(KLRG1    | protein_co chr12 | 8950044  | 9010760 +  | 0      | 0.34   |
| ENSG0000(VAMP1    | protein_co chr12 | 6462237  | 6470987 -  | 7.96   | 10.51  |
| ENSG0000(TAPBPL   | protein_co chr12 | 6451690  | 6466517 +  | 17.42  | 18.08  |
| ENSG0000(CD27     | protein_co chr12 | 6444867  | 6451718 +  | 0.17   | 0      |
| ENSG0000(RBP5     | protein_co chr12 | 7123684  | 7128942 -  | 0.14   | 0      |
| ENSG0000(PEX5     | protein_co chr12 | 7188685  | 7218574 +  | 17.16  | 14.93  |
| ENSG0000(PIANP    | protein_co chr12 | 6693792  | 6700800 -  | 3.24   | 2.27   |
| ENSG0000(SLC38A4  | protein_co chr12 | 46764761 | 46832408 - | 0.18   | 0.19   |
| ENSG0000(AMIGO2   | protein_co chr12 | 47075707 | 47079951 - | 4.74   | 4.9    |
| ENSG0000(SCAF11   | protein_co chr12 | 45919131 | 45992120 - | 22.92  | 26.69  |
| ENSG0000(COL2A1   | protein_co chr12 | 47972965 | 48004486 - | 0      | 0      |
| ENSG0000(PPFIA2   | protein_co chr12 | 81257975 | 81759553 - | 0      | 0      |
| ENSG0000(ANP32D   | protein_co chr12 | 48472665 | 48473624 + | 0      | 0.21   |
| ENSG0000(LLPH     | protein_co chr12 | 66116555 | 66130768 - | 12.45  | 11.51  |
| ENSG0000(RPL14P1  | processed_chr12  | 62965325 | 62965969 + | 1.39   | 0.98   |
| ENSG0000(LRIG3    | protein_co chr12 | 58872149 | 58920522 - | 10.69  | 9.11   |
| ENSG0000( 9-Mar   | protein_co chr12 | 57755098 | 57760407 + | 6.82   | 5.53   |
| ENSG0000(INHBE    | protein_co chr12 | 57452323 | 57459280 + | 4.11   | 4.56   |
| ENSG0000(GLIPR1   | protein_co chr12 | 75480680 | 75503853 + | 103.71 | 99.5   |
| ENSG0000(TPH2     | protein_co chr12 | 71938846 | 72186618 + | 0      | 0.09   |
| ENSG0000(PHLDA1   | protein_co chr12 | 76025447 | 76033932 - | 21.17  | 19.08  |
| ENSG0000(TMEM19   | protein_co chr12 | 71686087 | 71705046 + | 15.1   | 13.03  |
| ENSG0000(LGR5     | protein_co chr12 | 71439770 | 71586310 + | 0.61   | 0.96   |
| ENSG0000(PTPRQ    | protein_co chr12 | 80402178 | 80680234 + | 0.67   | 1.17   |
| ENSG0000(DUSP6    | protein_co chr12 | 89347232 | 89353271 - | 15.32  | 14.41  |
| ENSG0000(POC1B    | protein_co chr12 | 89419718 | 89526024 - | 3.26   | 2.98   |
| ENSG0000(TMTC3    | protein_co chr12 | 88142296 | 88199887 + | 3.77   | 4.77   |
| ENSG0000(LUM      | protein_co chr12 | 91102629 | 91111831 - | 287.09 | 327.08 |
| ENSG0000(KERA     | protein_co chr12 | 91050491 | 91057983 - | 0      | 0      |
| ENSG0000(SNRPF    | protein_co chr12 | 95858928 | 95903828 + | 13.64  | 10.98  |
| ENSG0000(AMDHD1   | protein_co chr12 | 95943293 | 95968716 + | 0.48   | 1      |
| ENSG0000(NEDD1    | protein_co chr12 | 96907223 | 96953777 + | 11.49  | 11.6   |
| ENSG0000(SYCP3    | protein_co chr12 | 1.02E+08 | 1.02E+08 - | 0.72   | 0.32   |
| ENSG0000(ASCL1    | protein_co chr12 | 1.03E+08 | 1.03E+08 + | 0      | 0.02   |
| ENSG0000(GAS2L3   | protein_co chr12 | 1.01E+08 | 1.01E+08 + | 0.72   | 0.81   |
| ENSG0000(TMEM132f | protein_co chr12 | 1.25E+08 | 1.26E+08 + | 1.27   | 2.46   |
| ENSG0000(SLC15A4  | protein_co chr12 | 1.29E+08 | 1.29E+08 - | 12.02  | 14.18  |
| ENSG0000(TDG      | protein_co chr12 | 1.04E+08 | 1.04E+08 + | 9.41   | 7.33   |
| ENSG0000(RITA1    | protein_co chr12 | 1.13E+08 | 1.13E+08 + | 8.59   | 8.03   |
| ENSG0000(SDSL     | protein_co chr12 | 1.13E+08 | 1.13E+08 + | 2.99   | 4.82   |
| ENSG0000(MMAB     | protein_co chr12 | 1.1E+08  | 1.1E+08 -  | 24.1   | 27.61  |
| ENSG0000(GLTP     | protein_co chr12 | 1.1E+08  | 1.1E+08 -  | 19.67  | 18.4   |

|                   |                  |          |            |        |       |
|-------------------|------------------|----------|------------|--------|-------|
| ENSG0000(GIT2     | protein_co chr12 | 1.1E+08  | 1.1E+08 -  | 20.66  | 20.84 |
| ENSG0000(TCHP     | protein_co chr12 | 1.1E+08  | 1.1E+08 +  | 5.04   | 6.27  |
| ENSG0000(FAM222A  | protein_co chr12 | 1.1E+08  | 1.1E+08 +  | 0.07   | 0.15  |
| ENSG0000(FOXN4    | protein_co chr12 | 1.09E+08 | 1.09E+08 - | 0      | 0     |
| ENSG0000(NUP58    | protein_co chr13 | 25301524 | 25349800 + | 5.86   | 6.44  |
| ENSG0000(MTMR6    | protein_co chr13 | 25246201 | 25288009 - | 4.71   | 4.65  |
| ENSG0000(SLC46A3  | protein_co chr13 | 28700064 | 28718970 - | 2.02   | 2.36  |
| ENSG0000(SLC7A1   | protein_co chr13 | 29509410 | 29595688 - | 9.55   | 9.79  |
| ENSG0000(PDX1     | protein_co chr13 | 27920020 | 27926231 + | 0      | 0     |
| ENSG0000(LNX2     | protein_co chr13 | 27545911 | 27620404 - | 2.31   | 2.03  |
| ENSG0000(SUOX     | protein_co chr12 | 55997180 | 56006641 + | 8.21   | 8.39  |
| ENSG0000(CCDC65   | protein_co chr12 | 48904110 | 48931840 + | 0.16   | 0.14  |
| ENSG0000(SLC39A5  | protein_co chr12 | 56230049 | 56237846 + | 0      | 0.08  |
| ENSG0000(TARBP2   | protein_co chr12 | 53500921 | 53506431 + | 18.21  | 18.09 |
| ENSG0000(RDH16    | protein_co chr12 | 56951431 | 56959374 - | 0.24   | 0.17  |
| ENSG0000(DHH      | protein_co chr12 | 49089421 | 49094819 - | 0      | 0     |
| ENSG0000(ACVRL1   | protein_co chr12 | 51906908 | 51923361 + | 7.04   | 6.62  |
| ENSG0000(GPR84    | protein_co chr12 | 54362445 | 54364487 - | 0      | 0.04  |
| ENSG0000(NPFF     | protein_co chr12 | 53506690 | 53507638 - | 0      | 0     |
| ENSG0000(NABP2    | protein_co chr12 | 56222015 | 56229854 + | 14.55  | 14.11 |
| ENSG0000(N4BP2L1  | protein_co chr13 | 32400723 | 32428311 - | 5.26   | 4.63  |
| ENSG0000(CELA1    | protein_co chr12 | 51328443 | 51346679 - | 0      | 0     |
| ENSG0000(SMARCC2  | protein_co chr12 | 56162983 | 56189567 - | 35.74  | 38.42 |
| ENSG0000(BRCA2    | protein_co chr13 | 32315474 | 32400266 + | 0.42   | 0.44  |
| ENSG0000(KANSL2   | protein_co chr12 | 48653401 | 48682238 - | 9.76   | 8.71  |
| ENSG0000(CERS5    | protein_co chr12 | 50129306 | 50167533 - | 26.43  | 23.07 |
| ENSG0000(MAP3K12  | protein_co chr12 | 53479669 | 53500063 - | 46.07  | 52.68 |
| ENSG0000(ITGB7    | protein_co chr12 | 53191318 | 53207307 - | 0.44   | 0.68  |
| ENSG0000(GALNT6   | protein_co chr12 | 51351247 | 51392867 - | 0.32   | 0.63  |
| ENSG0000(CSAD     | protein_co chr12 | 53157663 | 53180909 - | 16.93  | 16.16 |
| ENSG0000(LMBR1L   | protein_co chr12 | 49096551 | 49110900 - | 32.63  | 34.59 |
| ENSG0000(C12orf10 | protein_co chr12 | 53299686 | 53307177 + | 21.43  | 25.16 |
| ENSG0000(ESYT1    | protein_co chr12 | 56118250 | 56144671 + | 55.02  | 53.1  |
| ENSG0000(TMBIM6   | protein_co chr12 | 49707725 | 49764934 + | 229.62 | 234.8 |
| ENSG0000(ANKRD52  | protein_co chr12 | 56237807 | 56258391 - | 16.42  | 15.3  |
| ENSG0000(KRT71    | protein_co chr12 | 52543909 | 52553147 - | 0      | 0     |
| ENSG0000(ZNF740   | protein_co chr12 | 53180700 | 53195141 + | 10.47  | 8.23  |
| ENSG0000(SMIM2    | protein_co chr13 | 44143543 | 44161257 - | 0      | 0     |
| ENSG0000(WDFY2    | protein_co chr13 | 51584455 | 51767707 + | 3.12   | 3.14  |
| ENSG0000(HNRNPA1L | protein_co chr13 | 52640786 | 52643796 + | 2.09   | 2.32  |
| ENSG0000(LPAR6    | protein_co chr13 | 48389567 | 48444704 - | 2.33   | 2.66  |
| ENSG0000(ESD      | protein_co chr13 | 46771256 | 46797232 - | 80.21  | 78.73 |
| ENSG0000(RB1      | protein_co chr13 | 48303751 | 48481986 + | 9.41   | 9.98  |
| ENSG0000(SBNO1    | protein_co chr12 | 1.23E+08 | 1.23E+08 - | 7.06   | 6.81  |
| ENSG0000(MORN3    | protein_co chr12 | 1.22E+08 | 1.22E+08 - | 0.19   | 0.62  |

|                    |                  |          |            |       |       |
|--------------------|------------------|----------|------------|-------|-------|
| ENSG0000( SETD1B   | protein_co chr12 | 1.22E+08 | 1.22E+08 + | 5.45  | 5.77  |
| ENSG0000( VPS33A   | protein_co chr12 | 1.22E+08 | 1.22E+08 - | 9     | 8.34  |
| ENSG0000( VPS37B   | protein_co chr12 | 1.23E+08 | 1.23E+08 - | 9.23  | 9.46  |
| ENSG0000( RHOF     | protein_co chr12 | 1.22E+08 | 1.22E+08 - | 2.28  | 2.56  |
| ENSG0000( DENR     | protein_co chr12 | 1.23E+08 | 1.23E+08 + | 21.24 | 22.93 |
| ENSG0000( DIAPH3   | protein_co chr13 | 59665583 | 60163987 - | 1.26  | 1.6   |
| ENSG0000( SLAIN1   | protein_co chr13 | 77697854 | 77764242 + | 0     | 0     |
| ENSG0000( RBM26    | protein_co chr13 | 79311824 | 79406477 - | 7.6   | 9.42  |
| ENSG0000( SRRM4    | protein_co chr12 | 1.19E+08 | 1.19E+08 + | 0     | 0     |
| ENSG0000( METTL21C | protein_co chr13 | 1.03E+08 | 1.03E+08 - | 0.11  | 0     |
| ENSG0000( MBNL2    | protein_co chr13 | 97221434 | 97394120 + | 35.16 | 31.76 |
| ENSG0000( RNFI13B  | protein_co chr13 | 98175785 | 98177265 - | 0     | 0     |
| ENSG0000( ZIC5     | protein_co chr13 | 99962964 | 99971909 - | 0     | 0     |
| ENSG0000( ABHD13   | protein_co chr13 | 1.08E+08 | 1.08E+08 + | 2.36  | 2.65  |
| ENSG0000( RAB20    | protein_co chr13 | 1.11E+08 | 1.11E+08 - | 4.23  | 3.69  |
| ENSG0000( GRTP1    | protein_co chr13 | 1.13E+08 | 1.13E+08 - | 1.72  | 1.14  |
| ENSG0000( CUL4A    | protein_co chr13 | 1.13E+08 | 1.13E+08 + | 26.45 | 27.21 |
| ENSG0000( TTC6     | protein_co chr14 | 37595847 | 38041442 + | 0.06  | 0.01  |
| ENSG0000( SSTR1    | protein_co chr14 | 38207999 | 38213067 + | 0.52  | 0.42  |
| ENSG0000( CDH24    | protein_co chr14 | 23047062 | 23057538 - | 2.27  | 3.1   |
| ENSG0000( REM2     | protein_co chr14 | 22883165 | 22887686 + | 0.15  | 0.13  |
| ENSG0000( CBLN3    | protein_co chr14 | 24426532 | 24430954 - | 10.71 | 11.33 |
| ENSG0000( TSSK4    | protein_co chr14 | 24205697 | 24208362 + | 0     | 0     |
| ENSG0000( NOVA1    | protein_co chr14 | 26443093 | 26597754 - | 2.63  | 3.05  |
| ENSG0000( FITM1    | protein_co chr14 | 24131275 | 24132849 + | 0     | 0     |
| ENSG0000( MDGA2    | protein_co chr14 | 46839629 | 47674954 - | 0     | 0     |
| ENSG0000( TMX1     | protein_co chr14 | 51240162 | 51257546 + | 10.23 | 11.49 |
| ENSG0000( FRMD6    | protein_co chr14 | 51489100 | 51730727 + | 37.07 | 38.27 |
| ENSG0000( PELI2    | protein_co chr14 | 56117814 | 56301526 + | 5.17  | 5.81  |
| ENSG0000( RTN1     | protein_co chr14 | 59595976 | 59870966 - | 0.02  | 0.05  |
| ENSG0000( C14orf37 | protein_co chr14 | 57999735 | 58298139 - | 2.69  | 1.83  |
| ENSG0000( SYT16    | protein_co chr14 | 61811974 | 62112550 + | 0     | 0     |
| ENSG0000( SLC38A6  | protein_co chr14 | 60981114 | 61083733 + | 19.86 | 18.68 |
| ENSG0000( NAA30    | protein_co chr14 | 57390544 | 57415917 + | 5.48  | 6.07  |
| ENSG0000( ADAM21   | protein_co chr14 | 70452157 | 70459899 + | 0.14  | 0.14  |
| ENSG0000( RDH12    | protein_co chr14 | 67701886 | 67734452 + | 0     | 0     |
| ENSG0000( DCAF5    | protein_co chr14 | 69050881 | 69153150 - | 26.67 | 24.93 |
| ENSG0000( RAB15    | protein_co chr14 | 64945814 | 64972776 - | 3.57  | 2.99  |
| ENSG0000( WDR89    | protein_co chr14 | 63597039 | 63641861 - | 1.46  | 1.53  |
| ENSG0000( ESR2     | protein_co chr14 | 64084232 | 64338112 - | 0     | 0     |
| ENSG0000( KCNH5    | protein_co chr14 | 62699454 | 63102037 - | 0.02  | 0     |
| ENSG0000( STON2    | protein_co chr14 | 81260656 | 81436465 - | 0.89  | 0.68  |
| ENSG0000( EFCAB11  | protein_co chr14 | 89794669 | 89954777 - | 4.86  | 5.06  |
| ENSG0000( GPR65    | protein_co chr14 | 88005124 | 88014811 + | 0.04  | 0.06  |
| ENSG0000( PTGR2    | protein_co chr14 | 73851844 | 73886827 + | 3.22  | 4.05  |



|                    |                  |          |            |        |        |
|--------------------|------------------|----------|------------|--------|--------|
| ENSG0000(JDP2      | protein_co chr14 | 75427716 | 75474111 + | 34.25  | 33.07  |
| ENSG0000(AK7       | protein_co chr14 | 96392111 | 96489427 + | 0.46   | 0.43   |
| ENSG0000(FAM181A   | protein_co chr14 | 93918894 | 93929608 + | 0      | 0      |
| ENSG0000(SLC24A4   | protein_co chr14 | 92322581 | 92501483 + | 0.02   | 0.03   |
| ENSG0000(FBLN5     | protein_co chr14 | 91869412 | 91947987 - | 89.77  | 102.42 |
| ENSG0000(SERPINA10 | protein_co chr14 | 94280455 | 94293271 - | 0.03   | 0.01   |
| ENSG0000(C14orf79  | protein_co chr14 | 1.05E+08 | 1.05E+08 + | 4.78   | 6.48   |
| ENSG0000(WARS      | protein_co chr14 | 1E+08    | 1E+08 -    | 167.64 | 192.12 |
| ENSG0000(SLC25A47  | protein_co chr14 | 1E+08    | 1E+08 +    | 0      | 0      |
| ENSG0000(WDR20     | protein_co chr14 | 1.02E+08 | 1.02E+08 + | 6.36   | 7.09   |
| ENSG0000(NIPA2     | protein_co chr15 | 22838641 | 22868384 + | 16.6   | 15.07  |
| ENSG0000(SLC12A6   | protein_co chr15 | 34229996 | 34338060 - | 12.96  | 14.31  |
| ENSG0000(DUOXA1    | protein_co chr15 | 45117367 | 45129938 - | 0.04   | 0      |
| ENSG0000(MFAP1     | protein_co chr15 | 43804492 | 43824802 - | 12.26  | 11.59  |
| ENSG0000(TCF12     | protein_co chr15 | 56918623 | 57299281 + | 43.59  | 43.37  |
| ENSG0000(SORD      | protein_co chr15 | 45023104 | 45077185 + | 6.64   | 6.34   |
| ENSG0000(SERF2     | protein_co chr15 | 43777087 | 43802589 + | 685.59 | 665.14 |
| ENSG0000(ZSCAN29   | protein_co chr15 | 43358172 | 43371025 - | 9.09   | 8.59   |
| ENSG0000(DUOXA2    | protein_co chr15 | 45114321 | 45118421 + | 0      | 0      |
| ENSG0000(DUOX2     | protein_co chr15 | 45092650 | 45114344 - | 0.13   | 0.26   |
| ENSG0000(LYSMD2    | protein_co chr15 | 51723011 | 51751585 - | 2.14   | 2.65   |
| ENSG0000(SLC27A2   | protein_co chr15 | 50182196 | 50236395 + | 0      | 0      |
| ENSG0000(FGF7      | protein_co chr15 | 49423096 | 49488775 + | 235.23 | 215.17 |
| ENSG0000(HDC       | protein_co chr15 | 50241947 | 50266026 - | 0      | 0      |
| ENSG0000(GCNT3     | protein_co chr15 | 59594875 | 59640239 + | 1.46   | 0.9    |
| ENSG0000(BNIP2     | protein_co chr15 | 59659146 | 59689534 - | 29.08  | 25.66  |
| ENSG0000(GTF2A2    | protein_co chr15 | 59638062 | 59657541 - | 34.69  | 32.12  |
| ENSG0000(SRP14     | protein_co chr15 | 40035739 | 40039188 - | 199.07 | 211.53 |
| ENSG0000(BAHD1     | protein_co chr15 | 40439721 | 40468242 + | 6.9    | 6.93   |
| ENSG0000(DISP2     | protein_co chr15 | 40358235 | 40378639 + | 0.28   | 0.31   |
| ENSG0000(CDAN1     | protein_co chr15 | 42723559 | 42737126 - | 3.83   | 3.53   |
| ENSG0000(TLE3      | protein_co chr15 | 70047790 | 70098176 - | 6.74   | 8.14   |
| ENSG0000(ANP32A    | protein_co chr15 | 68778535 | 68820897 - | 30.21  | 31.58  |
| ENSG0000(COMMD4    | protein_co chr15 | 75335891 | 75343224 + | 42.95  | 43.27  |
| ENSG0000(UBE2Q2    | protein_co chr15 | 75843285 | 75901078 + | 14.15  | 13.41  |
| ENSG0000(PSTPIP1   | protein_co chr15 | 76993359 | 77037332 + | 0.21   | 0.14   |
| ENSG0000(ETFA      | protein_co chr15 | 76215355 | 76311472 - | 48.81  | 60.23  |
| ENSG0000(BCL2A1    | protein_co chr15 | 79960889 | 79971446 - | 0      | 0      |
| ENSG0000(HMG20A    | protein_co chr15 | 77420412 | 77485607 + | 16.18  | 15.77  |
| ENSG0000(SCAPER    | protein_co chr15 | 76347904 | 76905444 - | 5.05   | 5.79   |
| ENSG0000(TSPAN3    | protein_co chr15 | 77041404 | 77083984 - | 191.98 | 191.4  |
| ENSG0000(WDR61     | protein_co chr15 | 78277835 | 78299794 - | 32.15  | 30.96  |
| ENSG0000(NCOA2     | protein_co chr8  | 70109762 | 70403805 - | 7.4    | 8.18   |
| ENSG0000(NEIL1     | protein_co chr15 | 75346955 | 75357114 + | 7.88   | 6.93   |
| ENSG0000(MAN2C1    | protein_co chr15 | 75355207 | 75368630 - | 52.43  | 56.65  |

|                   |                  |          |          |   |        |        |
|-------------------|------------------|----------|----------|---|--------|--------|
| ENSG0000(DNAJA4   | protein_co chr15 | 78264086 | 78282196 | + | 0.54   | 0.61   |
| ENSG0000(MESDC1   | protein_co chr15 | 81000944 | 81005788 | + | 2.54   | 3      |
| ENSG0000(TPM1     | protein_co chr15 | 63042632 | 63071915 | + | 285.78 | 313.03 |
| ENSG0000(IGF1R    | protein_co chr15 | 98648971 | 98964530 | + | 6.89   | 7.62   |
| ENSG0000(ARRDC4   | protein_co chr15 | 97960698 | 97973838 | + | 7.85   | 6.82   |
| ENSG0000(PIF1     | protein_co chr15 | 64815632 | 64825668 | - | 3.5    | 2.69   |
| ENSG0000(USP3     | protein_co chr15 | 63504511 | 63594640 | + | 10.82  | 9.24   |
| ENSG0000(CYP11A1  | protein_co chr15 | 74337759 | 74367740 | - | 1.46   | 1.45   |
| ENSG0000(BBS4     | protein_co chr15 | 72686179 | 72738476 | + | 11.42  | 12.82  |
| ENSG0000(PML      | protein_co chr15 | 73994673 | 74047812 | + | 38.87  | 37.13  |
| ENSG0000(CYP1A1   | protein_co chr15 | 74719542 | 74725610 | - | 0.14   | 0.52   |
| ENSG0000(ADAMTS17 | protein_co chr15 | 99971589 | 1E+08    | - | 0.03   | 0      |
| ENSG0000(LINS1    | protein_co chr15 | 1.01E+08 | 1.01E+08 | - | 4.05   | 3.86   |
| ENSG0000(ULK3     | protein_co chr15 | 74836116 | 74843346 | - | 9.95   | 13.05  |
| ENSG0000(GOLGA6D  | protein_co chr15 | 75282835 | 75295807 | + | 0      | 0      |
| ENSG0000(PCSK6    | protein_co chr15 | 1.01E+08 | 1.02E+08 | - | 2.93   | 3.44   |
| ENSG0000(CCDC33   | protein_co chr15 | 74202705 | 74336472 | + | 0      | 0      |
| ENSG0000(CELF6    | protein_co chr15 | 72284727 | 72320129 | - | 1.69   | 1.1    |
| ENSG0000(SCAMP2   | protein_co chr15 | 74843730 | 74873365 | - | 30.5   | 34     |
| ENSG0000(CYP1A2   | protein_co chr15 | 74748844 | 74756202 | + | 0      | 0      |
| ENSG0000(LMAN1L   | protein_co chr15 | 74812716 | 74825758 | + | 0      | 0.04   |
| ENSG0000(HAPLN3   | protein_co chr15 | 88877288 | 88895626 | - | 2.57   | 2.21   |
| ENSG0000(RHCG     | protein_co chr15 | 89471398 | 89496613 | - | 0      | 0.09   |
| ENSG0000(POLG     | protein_co chr15 | 89305198 | 89334861 | - | 49.4   | 13.79  |
| ENSG0000(RLBP1    | protein_co chr15 | 89209869 | 89221751 | - | 0      | 0      |
| ENSG0000(FANCI    | protein_co chr15 | 89243949 | 89317261 | + | 2.33   | 2.18   |
| ENSG0000(ABHD2    | protein_co chr15 | 89087459 | 89202360 | + | 18.08  | 13.24  |
| ENSG0000(WDR93    | protein_co chr15 | 89690797 | 89743638 | + | 0.03   | 0.12   |
| ENSG0000(TICRR    | protein_co chr15 | 89575482 | 89631056 | + | 0.32   | 0.33   |
| ENSG0000(NTRK3    | protein_co chr15 | 87859751 | 88256768 | - | 2.07   | 1.86   |
| ENSG0000(DET1     | protein_co chr15 | 88494440 | 88546675 | - | 3.45   | 3.98   |
| ENSG0000(MFGE8    | protein_co chr15 | 88898683 | 88913411 | - | 94.35  | 99.67  |
| ENSG0000(ZNF710   | protein_co chr15 | 90001392 | 90082206 | + | 4.34   | 3.25   |
| ENSG0000(UNC45A   | protein_co chr15 | 90930180 | 90954093 | + | 31.6   | 27.68  |
| ENSG0000(ST8SIA2  | protein_co chr15 | 92393828 | 92468728 | + | 0      | 0      |
| ENSG0000(MCTP2    | protein_co chr15 | 94231538 | 94483952 | + | 0.05   | 0.03   |
| ENSG0000(FURIN    | protein_co chr15 | 90868592 | 90883458 | + | 35     | 33.67  |
| ENSG0000(IQGAP1   | protein_co chr15 | 90388218 | 90502243 | + | 76.03  | 71.67  |
| ENSG0000(CRTC3    | protein_co chr15 | 90529925 | 90645345 | + | 12.02  | 12.91  |
| ENSG0000(EFL1     | protein_co chr15 | 82130230 | 82262763 | - | 5.59   | 5.09   |
| ENSG0000(SH3GL3   | protein_co chr15 | 83447228 | 83618743 | + | 0.17   | 0.09   |
| ENSG0000(SEC11A   | protein_co chr15 | 84669538 | 84716716 | - | 112.01 | 102.17 |
| ENSG0000(12-Sep   | protein_co chr16 | 4777669  | 4788521  | - | 0      | 0      |
| ENSG0000(GLYR1    | protein_co chr16 | 4803203  | 4847342  | - | 24.66  | 27.01  |
| ENSG0000(PMM2     | protein_co chr16 | 8788823  | 8849331  | + | 17.74  | 15.55  |

|                   |                  |          |          |   |        |         |
|-------------------|------------------|----------|----------|---|--------|---------|
| ENSG0000(SLC5A2   | protein_co chr16 | 31483002 | 31490860 | + | 0.02   | 0       |
| ENSG0000(ITGAX    | protein_co chr16 | 31355134 | 31382997 | + | 0.17   | 0.06    |
| ENSG0000(TGFB111  | protein_co chr16 | 31471585 | 31477960 | + | 48.92  | 52.13   |
| ENSG0000(C16orf58 | protein_co chr16 | 31489471 | 31509309 | - | 25.13  | 27.16   |
| ENSG0000(ARMC5    | protein_co chr16 | 31458080 | 31467166 | + | 4.02   | 4.21    |
| ENSG0000(PARN     | protein_co chr16 | 14435701 | 14632728 | - | 15.12  | 17.41   |
| ENSG0000(FTO      | protein_co chr16 | 53701692 | 54158512 | + | 35.44  | 36.18   |
| ENSG0000(UQCRC2   | protein_co chr16 | 21952660 | 21983660 | + | 50.28  | 56.03   |
| ENSG0000(CDR2     | protein_co chr16 | 22345936 | 22437165 | - | 6.82   | 7.81    |
| ENSG0000(IGSF6    | protein_co chr16 | 21639537 | 21652660 | - | 0      | 0       |
| ENSG0000(ARHGAP17 | protein_co chr16 | 24919385 | 25015666 | - | 29.33  | 30.93   |
| ENSG0000(MYLK3    | protein_co chr16 | 46703369 | 46790407 | - | 0.22   | 0.2     |
| ENSG0000(ABCC12   | protein_co chr16 | 48082973 | 48156018 | - | 0      | 0       |
| ENSG0000(NKD1     | protein_co chr16 | 50548330 | 50649249 | + | 0.02   | 0.04    |
| ENSG0000(DHX38    | protein_co chr16 | 72093562 | 72112912 | + | 13.03  | 16.27   |
| ENSG0000(TXNL4B   | protein_co chr16 | 72044289 | 72094431 | - | 5.52   | 5.16    |
| ENSG0000(MARVELD3 | protein_co chr16 | 71626161 | 71642114 | + | 0      | 0.02    |
| ENSG0000(CHST4    | protein_co chr16 | 71525233 | 71538746 | + | 0      | 0       |
| ENSG0000(ZFHX3    | protein_co chr16 | 72782885 | 73059698 | - | 3.38   | 3.22    |
| ENSG0000(CLEC18B  | protein_co chr16 | 74408270 | 74421953 | - | 0.17   | 0.94    |
| ENSG0000(CPNE2    | protein_co chr16 | 57092537 | 57148367 | + | 12.67  | 12.24   |
| ENSG0000(NLRC5    | protein_co chr16 | 56989485 | 57083531 | + | 8.53   | 8.54    |
| ENSG0000(KATNB1   | protein_co chr16 | 57735730 | 57757250 | + | 5.87   | 6.79    |
| ENSG0000(KIFC3    | protein_co chr16 | 57758217 | 57863053 | - | 12.34  | 12.45   |
| ENSG0000(ADAMTS18 | protein_co chr16 | 77247813 | 77435114 | - | 0.24   | 0.37    |
| ENSG0000(NUDT7    | protein_co chr16 | 77722492 | 77742260 | + | 1.61   | 2.22    |
| ENSG0000(GCSH     | protein_co chr16 | 81081938 | 81096425 | - | 8.17   | 9.71    |
| ENSG0000(CMTM3    | protein_co chr16 | 66603874 | 66613892 | + | 21.33  | 20.8    |
| ENSG0000(CMTM2    | protein_co chr16 | 66579448 | 66588275 | + | 0.35   | 0       |
| ENSG0000(CDH11    | protein_co chr16 | 64943753 | 65126112 | - | 240.54 | 223.3   |
| ENSG0000(NOL3     | protein_co chr16 | 67170154 | 67175735 | + | 17.5   | 18.44   |
| ENSG0000(MAP1LC3B | protein_co chr16 | 87383995 | 87404779 | + | 70.13  | 68.51   |
| ENSG0000(MBTPS1   | protein_co chr16 | 84053761 | 84116906 | - | 47.46  | 51.37   |
| ENSG0000(CDH13    | protein_co chr16 | 82626803 | 83800640 | + | 62.63  | 51.09   |
| ENSG0000(ZCCHC14  | protein_co chr16 | 87406246 | 87492045 | - | 10.78  | 11.97   |
| ENSG0000(TLDC1    | protein_co chr16 | 84476421 | 84554033 | - | 8.51   | 9.85    |
| ENSG0000(ADAD2    | protein_co chr16 | 84191138 | 84197168 | + | 0      | 0       |
| ENSG0000(OSGIN1   | protein_co chr16 | 83948282 | 83966332 | + | 5.23   | 4.35    |
| ENSG0000(IRF8     | protein_co chr16 | 85898803 | 85922609 | + | 0      | 0       |
| ENSG0000(RHOT2    | protein_co chr16 | 668086   | 674174   | + | 30.42  | 34.92   |
| ENSG0000(RPL3L    | protein_co chr16 | 1943974  | 1957606  | - | 0      | 0       |
| ENSG0000(ZSCAN32  | protein_co chr16 | 3382081  | 3401065  | - | 6.43   | 7.7     |
| ENSG0000(RPS2     | protein_co chr16 | 1962052  | 1964860  | - | 1269.9 | 1291.63 |
| ENSG0000(NDUFB10  | protein_co chr16 | 1959508  | 1961975  | + | 81.94  | 80.04   |
| ENSG0000(PDPK1    | protein_co chr16 | 2537964  | 2603188  | + | 14.12  | 13.62   |

|                    |                  |          |          |   |       |       |
|--------------------|------------------|----------|----------|---|-------|-------|
| ENSG0000(TIGD7     | protein_co chr16 | 3298832  | 3305729  | - | 2.3   | 2.06  |
| ENSG0000( DEF8     | protein_co chr16 | 89947925 | 89968060 | + | 38.25 | 33.57 |
| ENSG0000( TCF25    | protein_co chr16 | 89873570 | 89913627 | + | 66.29 | 64.94 |
| ENSG0000( GALNS    | protein_co chr16 | 88813734 | 88856970 | - | 26.59 | 26.85 |
| ENSG0000( GAS8     | protein_co chr16 | 90019629 | 90044975 | + | 6.95  | 6.27  |
| ENSG0000( MED9     | protein_co chr17 | 17476986 | 17493226 | + | 6.07  | 6.1   |
| ENSG0000( NCOR1    | protein_co chr17 | 16029157 | 16218185 | - | 23.51 | 31.43 |
| ENSG0000( CDRT15P1 | unprocessε chr17 | 14024514 | 14025488 | + | 0     | 0     |
| ENSG0000( COPS3    | protein_co chr17 | 17246820 | 17281293 | - | 21.67 | 24.25 |
| ENSG0000( GID4     | protein_co chr17 | 18039292 | 18068404 | + | 4.83  | 5.6   |
| ENSG0000( ZNF287   | protein_co chr17 | 16551387 | 16569206 | - | 3.18  | 5.91  |
| ENSG0000( MYOCD    | protein_co chr17 | 12665890 | 12768949 | + | 0     | 0     |
| ENSG0000( KSR1     | protein_co chr17 | 27456714 | 27626438 | + | 16.73 | 16.96 |
| ENSG0000( UTP4     | protein_co chr16 | 69131291 | 69231130 | + | 14.93 | 15.36 |
| ENSG0000( RANBP10  | protein_co chr16 | 67723066 | 67806652 | - | 7.41  | 6.93  |
| ENSG0000( CTRL     | protein_co chr16 | 67927640 | 67932414 | - | 0     | 0.13  |
| ENSG0000( DPEP3    | protein_co chr16 | 67975663 | 67980829 | - | 0     | 0     |
| ENSG0000( GFOD2    | protein_co chr16 | 67674531 | 67719421 | - | 6.72  | 6.04  |
| ENSG0000( NOB1     | protein_co chr16 | 69741867 | 69754940 | - | 26.68 | 30.01 |
| ENSG0000( PRPSAP2  | protein_co chr17 | 18840085 | 18931287 | + | 7.44  | 7.71  |
| ENSG0000( UNC45B   | protein_co chr17 | 35147817 | 35189345 | + | 0     | 0     |
| ENSG0000( PCTP     | protein_co chr17 | 55750979 | 55842830 | + | 5.65  | 5.22  |
| ENSG0000( OR4D1    | protein_co chr17 | 58155133 | 58156156 | + | 0     | 0     |
| ENSG0000( TOM1L1   | protein_co chr17 | 54899387 | 54961956 | + | 8.03  | 10.1  |
| ENSG0000( KIF2B    | protein_co chr17 | 53822901 | 53825213 | + | 0     | 0     |
| ENSG0000( C17orf80 | protein_co chr17 | 73232233 | 73248947 | + | 6.13  | 6.56  |
| ENSG0000( TOB1     | protein_co chr17 | 50862223 | 50867978 | - | 14.25 | 17.01 |
| ENSG0000( VPS53    | protein_co chr17 | 508668   | 721717   | - | 8.4   | 10.67 |
| ENSG0000( SPATA22  | protein_co chr17 | 3440019  | 3513852  | - | 0     | 0     |
| ENSG0000( SGSM2    | protein_co chr17 | 2337498  | 2381058  | + | 18.6  | 21.53 |
| ENSG0000( NPEPPS   | protein_co chr17 | 47522942 | 47623276 | + | 72.39 | 69.32 |
| ENSG0000( SKAP1    | protein_co chr17 | 48133440 | 48430275 | - | 0     | 0     |
| ENSG0000( LRRC46   | protein_co chr17 | 47831627 | 47837713 | + | 0.26  | 0.08  |
| ENSG0000( SCRN2    | protein_co chr17 | 47837692 | 47841333 | - | 18.83 | 19.45 |
| ENSG0000( SSH2     | protein_co chr17 | 29625938 | 29930276 | - | 8.72  | 10.32 |
| ENSG0000( RHBDL3   | protein_co chr17 | 32266176 | 32324661 | + | 0.02  | 0.05  |
| ENSG0000( SPACA3   | protein_co chr17 | 32970376 | 32997877 | + | 0     | 0     |
| ENSG0000( ARSG     | protein_co chr17 | 68259182 | 68422731 | + | 0.87  | 0.39  |
| ENSG0000( ABCA8    | protein_co chr17 | 68867292 | 68955392 | - | 54.69 | 52.55 |
| ENSG0000( G6PC3    | protein_co chr17 | 44070735 | 44076344 | + | 41.09 | 44.44 |
| ENSG0000( CLTC     | protein_co chr17 | 59619689 | 59696956 | + | 89.64 | 93.12 |
| ENSG0000( C17orf64 | protein_co chr17 | 60392429 | 60431421 | + | 0     | 0     |
| ENSG0000( BCAS3    | protein_co chr17 | 60677453 | 61392838 | + | 8.91  | 9.14  |
| ENSG0000( PTRH2    | protein_co chr17 | 59674636 | 59707626 | - | 13.65 | 13.96 |
| ENSG0000( SS18     | protein_co chr18 | 26016253 | 26091217 | - | 28.91 | 28.32 |

|                   |                  |          |          |   |        |        |
|-------------------|------------------|----------|----------|---|--------|--------|
| ENSG0000(TAF4B    | protein_co chr18 | 26225936 | 26391685 | + | 0.72   | 0.51   |
| ENSG0000(AFG3L2   | protein_co chr18 | 12328944 | 12377314 | - | 17.41  | 21.01  |
| ENSG0000(PRELID3A | protein_co chr18 | 12407896 | 12432238 | + | 3.87   | 4.99   |
| ENSG0000(IMPA2    | protein_co chr18 | 11981025 | 12030883 | + | 14.56  | 17.55  |
| ENSG0000(GNAL     | protein_co chr18 | 11688956 | 11885685 | + | 0.32   | 0.45   |
| ENSG0000(SLC39A6  | protein_co chr18 | 36108532 | 36129385 | - | 39.11  | 40.14  |
| ENSG0000(RPRD1A   | protein_co chr18 | 35984387 | 36067576 | - | 8.37   | 8.77   |
| ENSG0000(C18orf21 | protein_co chr18 | 35972083 | 35979286 | + | 12.74  | 9.78   |
| ENSG0000(GALNT1   | protein_co chr18 | 35581117 | 35711834 | + | 26.9   | 27.44  |
| ENSG0000(ASXL3    | protein_co chr18 | 33578577 | 33751192 | + | 0      | 0      |
| ENSG0000(ADCYAP1  | protein_co chr18 | 904943   | 912172   | + | 0      | 0      |
| ENSG0000(MEP1B    | protein_co chr18 | 32185069 | 32220404 | + | 0      | 0      |
| ENSG0000(SLC25A52 | protein_co chr18 | 31759562 | 31760880 | - | 0      | 0      |
| ENSG0000(GAREM1   | protein_co chr18 | 32124877 | 32470484 | - | 2.65   | 2.29   |
| ENSG0000(ESCO1    | protein_co chr18 | 21529281 | 21600884 | - | 4.6    | 3.95   |
| ENSG0000(OSBPL1A  | protein_co chr18 | 24162044 | 24397880 | - | 22.22  | 23.53  |
| ENSG0000(GATA6    | protein_co chr18 | 22169443 | 22202528 | + | 27.56  | 24.84  |
| ENSG0000(GREB1L   | protein_co chr18 | 21242242 | 21525417 | + | 0.45   | 0.57   |
| ENSG0000(C18orf8  | protein_co chr18 | 23503470 | 23531807 | + | 9.25   | 9.43   |
| ENSG0000(PELP1    | protein_co chr17 | 4669774  | 4704337  | - | 11.68  | 10.72  |
| ENSG0000(NPC1     | protein_co chr18 | 23506184 | 23586898 | - | 32.58  | 27.73  |
| ENSG0000(SLC14A1  | protein_co chr18 | 45724127 | 45752520 | + | 114.28 | 104.95 |
| ENSG0000(ARRB2    | protein_co chr17 | 4710489  | 4721499  | + | 7.25   | 8.49   |
| ENSG0000(SLC13A5  | protein_co chr17 | 6684713  | 6713567  | - | 0.08   | 0.12   |
| ENSG0000(ZMYND15  | protein_co chr17 | 4740015  | 4746119  | + | 0.43   | 0.43   |
| ENSG0000(WRAP53   | protein_co chr17 | 7686071  | 7703502  | + | 3.64   | 3.35   |
| ENSG0000(MINK1    | protein_co chr17 | 4833388  | 4898061  | + | 22.86  | 23.94  |
| ENSG0000(SAT2     | protein_co chr17 | 7626234  | 7627876  | - | 76.96  | 71.77  |
| ENSG0000(ASGR1    | protein_co chr17 | 7173431  | 7179564  | - | 0.27   | 0.31   |
| ENSG0000(PIK3R5   | protein_co chr17 | 8878911  | 8965712  | - | 0      | 0      |
| ENSG0000(TP53     | protein_co chr17 | 7661779  | 7687550  | - | 27.04  | 26.36  |
| ENSG0000(CCDC40   | protein_co chr17 | 80036632 | 80100613 | + | 1.91   | 1.87   |
| ENSG0000(ARHGDI1A | protein_co chr17 | 81867721 | 81871406 | - | 133.03 | 118.41 |
| ENSG0000(TMC6     | protein_co chr17 | 78110458 | 78132407 | - | 0.47   | 0.47   |
| ENSG0000(SLC16A3  | protein_co chr17 | 82228397 | 82261129 | + | 143.26 | 115.5  |
| ENSG0000(CARD14   | protein_co chr17 | 80169992 | 80209331 | + | 0.06   | 0.17   |
| ENSG0000(TTYH2    | protein_co chr17 | 74213514 | 74262020 | + | 2.66   | 2.98   |
| ENSG0000(RAB40B   | protein_co chr17 | 82654973 | 82698728 | - | 7.07   | 6.39   |
| ENSG0000(EIF4A3   | protein_co chr17 | 80135214 | 80147183 | - | 25.5   | 25.39  |
| ENSG0000(CSNK1D   | protein_co chr17 | 82239023 | 82273731 | - | 50.17  | 52.08  |
| ENSG0000(ANAPC11  | protein_co chr17 | 81890790 | 81900991 | + | 57.6   | 66.88  |
| ENSG0000(TBCD     | protein_co chr17 | 82752064 | 82945922 | + | 20.76  | 20.53  |
| ENSG0000(FN3KRP   | protein_co chr17 | 82716683 | 82730328 | + | 13.53  | 13.96  |
| ENSG0000(NARF     | protein_co chr17 | 82458180 | 82490537 | + | 26.03  | 25.45  |
| ENSG0000(RPTOR    | protein_co chr17 | 80544819 | 80966371 | + | 4.74   | 5.23   |

|                     |                  |          |          |   |        |        |
|---------------------|------------------|----------|----------|---|--------|--------|
| ENSG0000( FOXK2     | protein_co chr17 | 82519713 | 82644662 | + | 10.9   | 12.07  |
| ENSG0000( TRIM65    | protein_co chr17 | 75880335 | 75897003 | - | 9.28   | 9.46   |
| ENSG0000( CBX8      | protein_co chr17 | 79792132 | 79801683 | - | 2.65   | 2.8    |
| ENSG0000( SECTM1    | protein_co chr17 | 82321024 | 82334074 | - | 23.06  | 25.97  |
| ENSG0000( RNF157    | protein_co chr17 | 76142453 | 76240373 | - | 0.06   | 0      |
| ENSG0000( CEP131    | protein_co chr17 | 81189593 | 81222999 | - | 3.04   | 2.97   |
| ENSG0000( ZNF750    | protein_co chr17 | 82829435 | 82840578 | - | 0      | 0      |
| ENSG0000( WDR45B    | protein_co chr17 | 82614562 | 82648553 | - | 39.72  | 37.57  |
| ENSG0000( CBX4      | protein_co chr17 | 79833156 | 79839429 | - | 7.38   | 8.46   |
| ENSG0000( RNF165    | protein_co chr18 | 46326809 | 46463140 | + | 0.07   | 0.15   |
| ENSG0000( DYM       | protein_co chr18 | 49041474 | 49461347 | - | 34.35  | 33.99  |
| ENSG0000( MAPK4     | protein_co chr18 | 50560078 | 50731824 | + | 0.04   | 0.03   |
| ENSG0000( ELAC1     | protein_co chr18 | 50967991 | 50988121 | + | 4.97   | 5.66   |
| ENSG0000( MBD1      | protein_co chr18 | 50266882 | 50281774 | - | 28.25  | 29.75  |
| ENSG0000( SMAD4     | protein_co chr18 | 51028394 | 51085045 | + | 31.26  | 41.11  |
| ENSG0000( TNFRSF11A | protein_co chr18 | 62325287 | 62391292 | + | 1.55   | 0.99   |
| ENSG0000( ZCCHC2    | protein_co chr18 | 62523007 | 62587709 | + | 5.04   | 5.12   |
| ENSG0000( FBXO15    | protein_co chr18 | 74073353 | 74147865 | - | 0.17   | 0.17   |
| ENSG0000( CBLN2     | protein_co chr18 | 72536680 | 72638521 | - | 0      | 0      |
| ENSG0000( PMAIP1    | protein_co chr18 | 59899948 | 59904306 | + | 1.72   | 1.83   |
| ENSG0000( P3H4      | protein_co chr17 | 41801947 | 41812604 | - | 18.74  | 17.61  |
| ENSG0000( NT5C3B    | protein_co chr17 | 41825181 | 41836263 | - | 28.05  | 27.56  |
| ENSG0000( FAM134C   | protein_co chr17 | 42579513 | 42610623 | - | 14.48  | 12.48  |
| ENSG0000( ERBB2     | protein_co chr17 | 39687914 | 39730426 | + | 22.53  | 22.4   |
| ENSG0000( GRB7      | protein_co chr17 | 39737927 | 39747291 | + | 0.03   | 0.13   |
| ENSG0000( MIEN1     | protein_co chr17 | 39728496 | 39730787 | - | 28.14  | 32.57  |
| ENSG0000( PNMT      | protein_co chr17 | 39667981 | 39670475 | + | 0      | 0      |
| ENSG0000( ARL5C     | protein_co chr17 | 39156894 | 39167484 | - | 0      | 0      |
| ENSG0000( STAC2     | protein_co chr17 | 39210536 | 39225872 | - | 0.1    | 0.11   |
| ENSG0000( IGFBP4    | protein_co chr17 | 40443461 | 40457731 | + | 821.39 | 803.13 |
| ENSG0000( FKBP10    | protein_co chr17 | 41812680 | 41823217 | + | 252.59 | 233.68 |
| ENSG0000( TXNL4A    | protein_co chr18 | 79970811 | 80033949 | - | 37.54  | 38.36  |
| ENSG0000( CACNA1A   | protein_co chr19 | 13206442 | 13633025 | - | 1.26   | 0.72   |
| ENSG0000( MISP3     | protein_co chr19 | 14072536 | 14075062 | + | 0.79   | 1      |
| ENSG0000( SAMD1     | protein_co chr19 | 14087840 | 14091036 | - | 11.97  | 11.44  |
| ENSG0000( BRD4      | protein_co chr19 | 15235519 | 15332545 | - | 16.54  | 19.92  |
| ENSG0000( SLC39A3   | protein_co chr19 | 2732204  | 2740152  | - | 11.66  | 11.1   |
| ENSG0000( NFIC      | protein_co chr19 | 3359563  | 3469217  | + | 34.41  | 37.49  |
| ENSG0000( TPGS1     | protein_co chr19 | 507497   | 519654   | + | 8.36   | 11.24  |
| ENSG0000( PLPP2     | protein_co chr19 | 281040   | 291504   | - | 0.07   | 0.16   |
| ENSG0000( ZIM3      | protein_co chr19 | 57134096 | 57145202 | - | 0.02   | 0      |
| ENSG0000( PRDM15    | protein_co chr21 | 41798225 | 41879482 | - | 1.51   | 1.7    |
| ENSG0000( PFKL      | protein_co chr21 | 44300051 | 44327376 | + | 86.27  | 77.74  |
| ENSG0000( FEM1A     | protein_co chr19 | 4791681  | 4801273  | + | 2.2    | 2.19   |
| ENSG0000( VAV1      | protein_co chr19 | 6772714  | 6857366  | + | 0.08   | 0.19   |

|                    |                  |          |          |   |         |        |
|--------------------|------------------|----------|----------|---|---------|--------|
| ENSG0000(MVB12A    | protein_co chr19 | 17405722 | 17433724 | + | 29.43   | 27.71  |
| ENSG0000(CIB3      | protein_co chr19 | 16161368 | 16173525 | - | 0       | 0      |
| ENSG0000(CTD-3222D | protein_co chr19 | 16479067 | 16628204 | - | 0       | 0      |
| ENSG0000(SH3GL1    | protein_co chr19 | 4360370  | 4400547  | - | 42.19   | 42.56  |
| ENSG0000(DUS3L     | protein_co chr19 | 5784832  | 5791238  | - | 8.31    | 6.66   |
| ENSG0000(DPP9      | protein_co chr19 | 4675224  | 4724673  | - | 11.55   | 12.21  |
| ENSG0000(DMRTC2    | protein_co chr19 | 41844743 | 41852333 | + | 0       | 0      |
| ENSG0000(CCDC97    | protein_co chr19 | 41310189 | 41324883 | + | 9.85    | 11.66  |
| ENSG0000(TMEM91    | protein_co chr19 | 41350911 | 41384083 | + | 7.87    | 9.08   |
| ENSG0000(ZFP14     | protein_co chr19 | 36334453 | 36379199 | - | 0.54    | 0.75   |
| ENSG0000(SIRT3     | protein_co chr11 | 215458   | 236931   | - | 11.17   | 9.81   |
| ENSG0000(IFITM3    | protein_co chr11 | 319669   | 327537   | - | 993.08  | 962.95 |
| ENSG0000(PGGHG     | protein_co chr11 | 289135   | 296107   | + | 5.03    | 6.46   |
| ENSG0000(HUNK      | protein_co chr21 | 31873315 | 32044633 | + | 0.01    | 0.03   |
| ENSG0000(COL6A1    | protein_co chr21 | 45981737 | 46005050 | + | 822.04  | 881.53 |
| ENSG0000(OR1E3     | unprocessε chr17 | 3116423  | 3117366  | + | 0       | 0      |
| ENSG0000(IFNAR1    | protein_co chr21 | 33324477 | 33359862 | + | 12.8    | 11.43  |
| ENSG0000(SOD1      | protein_co chr21 | 31659622 | 31668931 | + | 115.16  | 116.55 |
| ENSG0000(COL6A2    | protein_co chr21 | 46098097 | 46132849 | + | 1108.85 | 1164.3 |
| ENSG0000(SIK1      | protein_co chr21 | 43414515 | 43427128 | - | 0       | 0      |
| ENSG0000(DNMT3L    | protein_co chr21 | 44246339 | 44262216 | - | 0       | 0      |
| ENSG0000(TRPM2     | protein_co chr21 | 44350163 | 44443081 | + | 0.01    | 0      |
| ENSG0000(SCYL1     | protein_co chr11 | 65525077 | 65538704 | + | 34.76   | 34.31  |
| ENSG0000(TMEM50B   | protein_co chr21 | 33432485 | 33480011 | - | 11.15   | 10.23  |
| ENSG0000(APP       | protein_co chr21 | 25880550 | 26171128 | - | 625.1   | 610.85 |
| ENSG0000(DOPEY2    | protein_co chr21 | 36156782 | 36294274 | + | 5.03    | 4.87   |
| ENSG0000(URB1      | protein_co chr21 | 32311018 | 32393026 | - | 3.46    | 3.52   |
| ENSG0000(AKT1      | protein_co chr14 | 1.05E+08 | 1.05E+08 | - | 52.59   | 50.94  |
| ENSG0000(IL19      | protein_co chr1  | 2.07E+08 | 2.07E+08 | + | 0.24    | 0.33   |
| ENSG0000(EMP3      | protein_co chr19 | 48321509 | 48330553 | + | 274.47  | 284.67 |
| ENSG0000(SAE1      | protein_co chr19 | 47113274 | 47210636 | + | 33.05   | 34.18  |
| ENSG0000(NTN5      | protein_co chr19 | 48661407 | 48673081 | - | 0.2     | 0.32   |
| ENSG0000(LMTK3     | protein_co chr19 | 48485271 | 48513189 | - | 0.01    | 0.04   |
| ENSG0000(GEMIN7    | protein_co chr19 | 45079195 | 45091524 | + | 14.43   | 10.23  |
| ENSG0000(CBLC      | protein_co chr19 | 44777869 | 44800634 | + | 0       | 0      |
| ENSG0000(WTIP      | protein_co chr19 | 34481638 | 34512304 | + | 13.55   | 14.18  |
| ENSG0000(ADAMTS1C  | protein_co chr19 | 8580242  | 8610735  | - | 12.69   | 14.81  |
| ENSG0000(SLC6A3    | protein_co chr5  | 1392790  | 1445430  | - | 0       | 0      |
| ENSG0000(RNPEPL1   | protein_co chr2  | 2.41E+08 | 2.41E+08 | + | 21.8    | 24.53  |
| ENSG0000(CAPN10    | protein_co chr2  | 2.41E+08 | 2.41E+08 | + | 8.39    | 6.99   |
| ENSG0000(MYO1F     | protein_co chr19 | 8520790  | 8577577  | - | 0.25    | 0.05   |
| ENSG0000(ERVK3-1   | protein_co chr19 | 58305319 | 58315663 | + | 12.99   | 16.25  |
| ENSG0000(NLRP12    | protein_co chr19 | 53793603 | 53824394 | - | 0.02    | 0.05   |
| ENSG0000(CACNG8    | protein_co chr19 | 53963040 | 53990215 | + | 2.62    | 2.85   |
| ENSG0000(ZNF787    | protein_co chr19 | 56087366 | 56121280 | - | 7.78    | 8.18   |

|                    |                  |          |          |   |         |         |
|--------------------|------------------|----------|----------|---|---------|---------|
| ENSG0000(TIMM29    | protein_co chr19 | 10928733 | 10933535 | + | 8.66    | 7.14    |
| ENSG0000(FBN3      | protein_co chr19 | 8065402  | 8149846  | - | 0       | 0       |
| ENSG0000(CARM1     | protein_co chr19 | 10871513 | 10923070 | + | 23.35   | 24.88   |
| ENSG0000(EVI5L     | protein_co chr19 | 7830233  | 7864976  | + | 9.64    | 11.28   |
| ENSG0000(TM4SF5    | protein_co chr17 | 4771884  | 4783213  | + | 0       | 0       |
| ENSG0000(SLC47A1   | protein_co chr17 | 19495385 | 19579034 | + | 0.14    | 0.78    |
| ENSG0000(PSMB6     | protein_co chr17 | 4796144  | 4798503  | + | 69.97   | 74.95   |
| ENSG0000(GPR32     | protein_co chr19 | 50770464 | 50771732 | + | 0       | 0       |
| ENSG0000(SIGLEC10  | protein_co chr19 | 51410021 | 51417803 | - | 0.07    | 0.14    |
| ENSG0000(ACPT      | protein_co chr19 | 50790415 | 50795224 | + | 0       | 0       |
| ENSG0000(KLK3      | protein_co chr19 | 50854915 | 50860764 | + | 0       | 0       |
| ENSG0000(ZNF473    | protein_co chr19 | 50025714 | 50053414 | + | 3.15    | 1.38    |
| ENSG0000(FAM71E1   | protein_co chr19 | 50466785 | 50476753 | - | 0.18    | 0.39    |
| ENSG0000(RPS11     | protein_co chr19 | 49496365 | 49499689 | + | 1413.69 | 1428.57 |
| ENSG0000(PTH2      | protein_co chr19 | 49422414 | 49423441 | - | 0       | 0       |
| ENSG0000(CTD-2545M | protein_co chr19 | 50415799 | 50428409 | + | 0       | 0       |
| ENSG0000(RPL13A    | protein_co chr19 | 49487554 | 49492308 | + | 1552.68 | 1582.08 |
| ENSG0000(CTU1      | protein_co chr19 | 51097606 | 51108370 | - | 1.52    | 3.04    |
| ENSG0000(NOSIP     | protein_co chr19 | 49555711 | 49590262 | - | 28      | 29.55   |
| ENSG0000(IGLON5    | protein_co chr19 | 51311848 | 51330354 | + | 0.02    | 0.05    |
| ENSG0000(RCN3      | protein_co chr19 | 49527618 | 49546962 | + | 102.97  | 92.99   |
| ENSG0000(ZNF614    | protein_co chr19 | 52012765 | 52030240 | - | 2.92    | 2.63    |
| ENSG0000(SLC2A5    | protein_co chr1  | 9035107  | 9088478  | - | 5.03    | 4.06    |
| ENSG0000(RERE      | protein_co chr1  | 8352397  | 8817643  | - | 35.45   | 40.79   |
| ENSG0000(MMEL1     | protein_co chr1  | 2590639  | 2632990  | - | 0.13    | 0       |
| ENSG0000(CFAP74    | protein_co chr1  | 1921951  | 2003837  | - | 0.12    | 0.03    |
| ENSG0000(PRDM16    | protein_co chr1  | 3069168  | 3438621  | + | 0       | 0.02    |
| ENSG0000(CELA2A    | protein_co chr1  | 15456728 | 15472091 | + | 0       | 0.07    |
| ENSG0000(PADI3     | protein_co chr1  | 17249098 | 17284233 | + | 0       | 0       |
| ENSG0000(FHAD1     | protein_co chr1  | 15247272 | 15400283 | + | 0.08    | 0.18    |
| ENSG0000(PADI1     | protein_co chr1  | 17205126 | 17246005 | + | 0.02    | 0       |
| ENSG0000(EPHA2     | protein_co chr1  | 16124337 | 16156087 | - | 7.47    | 9.53    |
| ENSG0000(ARHGEF19  | protein_co chr1  | 16197854 | 16212609 | - | 5.42    | 5.72    |
| ENSG0000(EFHD2     | protein_co chr1  | 15409895 | 15430343 | + | 6.22    | 7.64    |
| ENSG0000(PEX14     | protein_co chr1  | 10472288 | 10630758 | + | 8.66    | 7.73    |
| ENSG0000(PGD       | protein_co chr1  | 10398592 | 10420144 | + | 71.78   | 79.99   |
| ENSG0000(MYOM3     | protein_co chr1  | 24056035 | 24112175 | - | 0.02    | 0.02    |
| ENSG0000(SH3BGR13  | protein_co chr1  | 26279176 | 26281522 | + | 264.15  | 240.72  |
| ENSG0000(CNKSR1    | protein_co chr1  | 26177403 | 26189886 | + | 0.23    | 0.07    |
| ENSG0000(RPL11     | protein_co chr1  | 23691779 | 23696425 | + | 1137.36 | 1113.05 |
| ENSG0000(IL22RA1   | protein_co chr1  | 24119771 | 24143121 | - | 0.02    | 0       |
| ENSG0000(ZNF593    | protein_co chr1  | 26169871 | 26170873 | + | 9.71    | 11.9    |
| ENSG0000(C1orf216  | protein_co chr1  | 35713875 | 35719472 | - | 9.45    | 9.32    |
| ENSG0000(KIAA0319L | protein_co chr1  | 35433490 | 35557950 | - | 21.44   | 22.29   |
| ENSG0000(EVA1B     | protein_co chr1  | 36322031 | 36324154 | - | 47.01   | 54.47   |



|                   |                 |          |          |   |        |        |
|-------------------|-----------------|----------|----------|---|--------|--------|
| ENSG0000(C1orf94  | protein_co chr1 | 34166883 | 34219131 | + | 0      | 0      |
| ENSG0000(DMRTA2   | protein_co chr1 | 50417550 | 50423500 | - | 0      | 0      |
| ENSG0000(PLK4     | protein_co chr4 | 1.28E+08 | 1.28E+08 | + | 0.89   | 0.81   |
| ENSG0000(MAP3K6   | protein_co chr1 | 27355184 | 27366892 | - | 10.64  | 10.66  |
| ENSG0000(FCN3     | protein_co chr1 | 27369112 | 27374824 | - | 0.06   | 0      |
| ENSG0000(GPN2     | protein_co chr1 | 26876133 | 26890297 | - | 15.49  | 13.34  |
| ENSG0000(SYTL1    | protein_co chr1 | 27342020 | 27353937 | + | 0.85   | 0.55   |
| ENSG0000(WDTC1    | protein_co chr1 | 27234516 | 27308633 | + | 19.77  | 19.59  |
| ENSG0000(CELA3A   | protein_co chr1 | 22001656 | 22012539 | + | 0      | 0      |
| ENSG0000(NBPF3    | protein_co chr1 | 21440128 | 21485005 | + | 9.07   | 7.86   |
| ENSG0000(HSPG2    | protein_co chr1 | 21822245 | 21937297 | - | 230.81 | 228.91 |
| ENSG0000(ITGB3BP  | protein_co chr1 | 63440770 | 63593721 | - | 12.19  | 10.46  |
| ENSG0000(SERBP1   | protein_co chr1 | 67407810 | 67430415 | - | 73.5   | 72.32  |
| ENSG0000(BCL10    | protein_co chr1 | 85266248 | 85277090 | - | 6.46   | 5.43   |
| ENSG0000(CYR61    | protein_co chr1 | 85580761 | 85583962 | + | 176.65 | 143.93 |
| ENSG0000(PRKACB   | protein_co chr1 | 84078062 | 84238498 | + | 11.81  | 12.85  |
| ENSG0000(PIGK     | protein_co chr1 | 77088990 | 77219430 | - | 21.87  | 23.54  |
| ENSG0000(TINAGL1  | protein_co chr1 | 31576485 | 31587686 | + | 3.34   | 3.94   |
| ENSG0000(AZIN2    | protein_co chr1 | 33081104 | 33120530 | + | 5.25   | 4.94   |
| ENSG0000(RPS8     | protein_co chr1 | 44775251 | 44778779 | + | 818.99 | 849.75 |
| ENSG0000(KIF2C    | protein_co chr1 | 44739818 | 44767767 | + | 0.06   | 0.23   |
| ENSG0000(PTPRF    | protein_co chr1 | 43525187 | 43623666 | + | 32.66  | 27.85  |
| ENSG0000(BEST4    | protein_co chr1 | 44783585 | 44787705 | - | 0.38   | 0.18   |
| ENSG0000(MOB3C    | protein_co chr1 | 46607715 | 46616891 | - | 6.53   | 4.63   |
| ENSG0000(CYP4B1   | protein_co chr1 | 46757838 | 46819413 | + | 0      | 0      |
| ENSG0000(TMEM61   | protein_co chr1 | 54980792 | 54992293 | + | 0.05   | 0      |
| ENSG0000(DMRTB1   | protein_co chr1 | 53459399 | 53467488 | + | 0      | 0      |
| ENSG0000(LMO4     | protein_co chr1 | 87328468 | 87348923 | + | 33.91  | 35.81  |
| ENSG0000(SYPL2    | protein_co chr1 | 1.09E+08 | 1.09E+08 | + | 0.24   | 0.2    |
| ENSG0000(BARHL2   | protein_co chr1 | 90711539 | 90717237 | - | 0      | 0      |
| ENSG0000(MTF2     | protein_co chr1 | 93079235 | 93139081 | + | 3.46   | 5.85   |
| ENSG0000(SLC44A3  | protein_co chr1 | 94820342 | 94895246 | + | 1.21   | 0.43   |
| ENSG0000(IGSF3    | protein_co chr1 | 1.17E+08 | 1.17E+08 | - | 0.4    | 0.6    |
| ENSG0000(ZNF697   | protein_co chr1 | 1.2E+08  | 1.2E+08  | - | 2.23   | 2.56   |
| ENSG0000(CTTNBP2N | protein_co chr1 | 1.12E+08 | 1.12E+08 | + | 9.57   | 9.15   |
| ENSG0000(STRIP1   | protein_co chr1 | 1.1E+08  | 1.1E+08  | + | 13.59  | 14.31  |
| ENSG0000(KCNA10   | protein_co chr1 | 1.11E+08 | 1.11E+08 | - | 0      | 0      |
| ENSG0000(PSMA5    | protein_co chr1 | 1.09E+08 | 1.09E+08 | - | 22.93  | 25.3   |
| ENSG0000(FNDC7    | protein_co chr1 | 1.09E+08 | 1.09E+08 | + | 0.02   | 0.04   |
| ENSG0000(C1orf162 | protein_co chr1 | 1.11E+08 | 1.11E+08 | + | 0.07   | 0.45   |
| ENSG0000(CD53     | protein_co chr1 | 1.11E+08 | 1.11E+08 | + | 0      | 0      |
| ENSG0000(PROK1    | protein_co chr1 | 1.1E+08  | 1.1E+08  | + | 0      | 0      |
| ENSG0000(CELSR2   | protein_co chr1 | 1.09E+08 | 1.09E+08 | + | 1.09   | 1.07   |
| ENSG0000(ITGA10   | protein_co chr1 | 1.46E+08 | 1.46E+08 | - | 1.17   | 0.91   |
| ENSG0000(GPR161   | protein_co chr1 | 1.68E+08 | 1.68E+08 | - | 8.15   | 8      |

|                   |                 |          |            |        |        |
|-------------------|-----------------|----------|------------|--------|--------|
| ENSG0000( ALDH9A1 | protein_co chr1 | 1.66E+08 | 1.66E+08 - | 37.74  | 39     |
| ENSG0000( ATP1B1  | protein_co chr1 | 1.69E+08 | 1.69E+08 + | 4.01   | 4.24   |
| ENSG0000( TIPRL   | protein_co chr1 | 1.68E+08 | 1.68E+08 + | 17.25  | 16.75  |
| ENSG0000( NME7    | protein_co chr1 | 1.69E+08 | 1.69E+08 - | 7.95   | 10.76  |
| ENSG0000( POGK    | protein_co chr1 | 1.67E+08 | 1.67E+08 + | 7.03   | 6.63   |
| ENSG0000( MPC2    | protein_co chr1 | 1.68E+08 | 1.68E+08 - | 27.91  | 30.28  |
| ENSG0000( CREG1   | protein_co chr1 | 1.68E+08 | 1.68E+08 - | 121.9  | 123.74 |
| ENSG0000( DCAF6   | protein_co chr1 | 1.68E+08 | 1.68E+08 + | 34.75  | 35.57  |
| ENSG0000( GPA33   | protein_co chr1 | 1.67E+08 | 1.67E+08 - | 0      | 0      |
| ENSG0000( RXRG    | protein_co chr1 | 1.65E+08 | 1.65E+08 - | 0.03   | 0      |
| ENSG0000( TBX19   | protein_co chr1 | 1.68E+08 | 1.68E+08 + | 1.69   | 1.67   |
| ENSG0000( UCK2    | protein_co chr1 | 1.66E+08 | 1.66E+08 + | 16.63  | 13.64  |
| ENSG0000( TMCO1   | protein_co chr1 | 1.66E+08 | 1.66E+08 - | 53.73  | 55.86  |
| ENSG0000( XCL1    | protein_co chr1 | 1.69E+08 | 1.69E+08 + | 0      | 0      |
| ENSG0000( XCL2    | protein_co chr1 | 1.69E+08 | 1.69E+08 - | 0      | 0      |
| ENSG0000( POU2F1  | protein_co chr1 | 1.67E+08 | 1.67E+08 + | 1.6    | 1.32   |
| ENSG0000( MAEL    | protein_co chr1 | 1.67E+08 | 1.67E+08 + | 0      | 0      |
| ENSG0000( ILDR2   | protein_co chr1 | 1.67E+08 | 1.67E+08 - | 0      | 0      |
| ENSG0000( DPT     | protein_co chr1 | 1.69E+08 | 1.69E+08 - | 0.54   | 0.24   |
| ENSG0000( MGST3   | protein_co chr1 | 1.66E+08 | 1.66E+08 + | 122.4  | 124.78 |
| ENSG0000( ADCY10  | protein_co chr1 | 1.68E+08 | 1.68E+08 - | 0      | 0      |
| ENSG0000( RFWD2   | protein_co chr1 | 1.76E+08 | 1.76E+08 - | 11.3   | 11.55  |
| ENSG0000( NECTIN4 | protein_co chr1 | 1.61E+08 | 1.61E+08 - | 0.22   | 0.32   |
| ENSG0000( UFC1    | protein_co chr1 | 1.61E+08 | 1.61E+08 + | 63.24  | 59.94  |
| ENSG0000( PPOX    | protein_co chr1 | 1.61E+08 | 1.61E+08 + | 10.53  | 11.58  |
| ENSG0000( FCGR2A  | protein_co chr1 | 1.62E+08 | 1.62E+08 + | 0.16   | 0.14   |
| ENSG0000( NUF2    | protein_co chr1 | 1.63E+08 | 1.63E+08 + | 0.12   | 0.07   |
| ENSG0000( RGS5    | protein_co chr1 | 1.63E+08 | 1.63E+08 - | 11.98  | 14.49  |
| ENSG0000( SDHC    | protein_co chr1 | 1.61E+08 | 1.61E+08 + | 107.35 | 121.13 |
| ENSG0000( PFDN2   | protein_co chr1 | 1.61E+08 | 1.61E+08 - | 38.93  | 37.66  |
| ENSG0000( NR1I3   | protein_co chr1 | 1.61E+08 | 1.61E+08 - | 0.17   | 0.24   |
| ENSG0000( USP21   | protein_co chr1 | 1.61E+08 | 1.61E+08 + | 7.7    | 9.23   |
| ENSG0000( F13B    | protein_co chr1 | 1.97E+08 | 1.97E+08 - | 0      | 0      |
| ENSG0000( PRCC    | protein_co chr1 | 1.57E+08 | 1.57E+08 + | 22.55  | 22.43  |
| ENSG0000( FCRL5   | protein_co chr1 | 1.58E+08 | 1.58E+08 - | 0      | 0      |
| ENSG0000( RRNAD1  | protein_co chr1 | 1.57E+08 | 1.57E+08 + | 9.93   | 11.18  |
| ENSG0000( MRPL24  | protein_co chr1 | 1.57E+08 | 1.57E+08 - | 22.9   | 26.55  |
| ENSG0000( PIGM    | protein_co chr1 | 1.6E+08  | 1.6E+08 -  | 2.85   | 2.44   |
| ENSG0000( CASQ1   | protein_co chr1 | 1.6E+08  | 1.6E+08 +  | 0      | 0      |
| ENSG0000( ISG20L2 | protein_co chr1 | 1.57E+08 | 1.57E+08 - | 11.28  | 14.24  |
| ENSG0000( CRABP2  | protein_co chr1 | 1.57E+08 | 1.57E+08 - | 148.17 | 140.1  |
| ENSG0000( HDGF    | protein_co chr1 | 1.57E+08 | 1.57E+08 - | 135.35 | 136.63 |
| ENSG0000( ABL2    | protein_co chr1 | 1.79E+08 | 1.79E+08 - | 15.05  | 13.18  |
| ENSG0000( XPR1    | protein_co chr1 | 1.81E+08 | 1.81E+08 + | 10.09  | 8.65   |
| ENSG0000( RGS16   | protein_co chr1 | 1.83E+08 | 1.83E+08 - | 0.34   | 0.15   |

|                    |                  |          |            |        |        |
|--------------------|------------------|----------|------------|--------|--------|
| ENSG0000(TOR1AIP1  | protein_co chr1  | 1.8E+08  | 1.8E+08 +  | 29.45  | 27.58  |
| ENSG0000(FAM163A   | protein_co chr1  | 1.8E+08  | 1.8E+08 +  | 0.04   | 0.04   |
| ENSG0000(HMCN1     | protein_co chr1  | 1.86E+08 | 1.86E+08 + | 80.23  | 91.15  |
| ENSG0000(RGL1      | protein_co chr1  | 1.84E+08 | 1.84E+08 + | 10.62  | 13.28  |
| ENSG0000(LYPLAL1   | protein_co chr1  | 2.19E+08 | 2.19E+08 + | 10.07  | 15.09  |
| ENSG0000(LHX9      | protein_co chr1  | 1.98E+08 | 1.98E+08 + | 2.27   | 1.72   |
| ENSG0000(PRUNE1    | protein_co chr1  | 1.51E+08 | 1.51E+08 + | 8.19   | 9.86   |
| ENSG0000(RORC      | protein_co chr1  | 1.52E+08 | 1.52E+08 - | 0      | 0.02   |
| ENSG0000(TUFT1     | protein_co chr1  | 1.52E+08 | 1.52E+08 + | 3.62   | 4      |
| ENSG0000(SF3B4     | protein_co chr1  | 1.5E+08  | 1.5E+08 -  | 22.03  | 22.75  |
| ENSG0000(ECM1      | protein_co chr1  | 1.51E+08 | 1.51E+08 + | 181.97 | 179.91 |
| ENSG0000(ZNF687    | protein_co chr1  | 1.51E+08 | 1.51E+08 + | 8.09   | 7.27   |
| ENSG0000(TARS2     | protein_co chr1  | 1.5E+08  | 1.51E+08 + | 7.05   | 8.1    |
| ENSG0000(CGN       | protein_co chr1  | 1.52E+08 | 1.52E+08 + | 0.54   | 0.54   |
| ENSG0000(SNX27     | protein_co chr1  | 1.52E+08 | 1.52E+08 + | 6.09   | 5.53   |
| ENSG0000(SETDB1    | protein_co chr1  | 1.51E+08 | 1.51E+08 + | 9.91   | 11.02  |
| ENSG0000(ADAMTSL4  | protein_co chr1  | 1.51E+08 | 1.51E+08 + | 26.29  | 24.62  |
| ENSG0000(MCL1      | protein_co chr1  | 1.51E+08 | 1.51E+08 - | 64.69  | 63.7   |
| ENSG0000(CTSK      | protein_co chr1  | 1.51E+08 | 1.51E+08 - | 198.22 | 216.37 |
| ENSG0000(RFX5      | protein_co chr1  | 1.51E+08 | 1.51E+08 - | 10.82  | 11.55  |
| ENSG0000(PI4KB     | protein_co chr1  | 1.51E+08 | 1.51E+08 - | 21.37  | 21.39  |
| ENSG0000(PIP5K1A   | protein_co chr1  | 1.51E+08 | 1.51E+08 + | 24.94  | 21.78  |
| ENSG0000(ANP32E    | protein_co chr1  | 1.5E+08  | 1.5E+08 -  | 6.99   | 8.71   |
| ENSG0000(MINDY1    | protein_co chr1  | 1.51E+08 | 1.51E+08 - | 7.86   | 8.89   |
| ENSG0000(ANXA9     | protein_co chr1  | 1.51E+08 | 1.51E+08 + | 0.18   | 0.48   |
| ENSG0000(SELENBP1  | protein_co chr1  | 1.51E+08 | 1.51E+08 - | 43.62  | 55.82  |
| ENSG0000(CERS2     | protein_co chr1  | 1.51E+08 | 1.51E+08 - | 82.69  | 79.9   |
| ENSG0000(ENSA      | protein_co chr1  | 1.51E+08 | 1.51E+08 - | 46.98  | 49.28  |
| ENSG0000(AC027612. | transcribec chr2 | 91617160 | 91659972 - | 7.48   | 8.97   |
| ENSG0000(SEMA6C    | protein_co chr1  | 1.51E+08 | 1.51E+08 - | 3.57   | 3.19   |
| ENSG0000(MRPL9     | protein_co chr1  | 1.52E+08 | 1.52E+08 - | 19.27  | 21.79  |
| ENSG0000(ARNT      | protein_co chr1  | 1.51E+08 | 1.51E+08 - | 31.05  | 32.13  |
| ENSG0000(POGZ      | protein_co chr1  | 1.51E+08 | 1.51E+08 - | 20.63  | 18.88  |
| ENSG0000(C1orf56   | protein_co chr1  | 1.51E+08 | 1.51E+08 + | 2.76   | 3.11   |
| ENSG0000(OAZ3      | protein_co chr1  | 1.52E+08 | 1.52E+08 + | 0.39   | 1.58   |
| ENSG0000(HORMAD1   | protein_co chr1  | 1.51E+08 | 1.51E+08 - | 0.09   | 0      |
| ENSG0000(GOLPH3L   | protein_co chr1  | 1.51E+08 | 1.51E+08 - | 9.9    | 12.44  |
| ENSG0000(GABPB2    | protein_co chr1  | 1.51E+08 | 1.51E+08 + | 3.9    | 3.85   |
| ENSG0000(SYT14     | protein_co chr1  | 2.1E+08  | 2.1E+08 +  | 1.26   | 1.8    |
| ENSG0000(KCNH1     | protein_co chr1  | 2.11E+08 | 2.11E+08 - | 0      | 0      |
| ENSG0000(DTL       | protein_co chr1  | 2.12E+08 | 2.12E+08 + | 0.25   | 0.33   |
| ENSG0000(DYRK3     | protein_co chr1  | 2.07E+08 | 2.07E+08 + | 6.25   | 6.55   |
| ENSG0000(EIF2D     | protein_co chr1  | 2.07E+08 | 2.07E+08 - | 26.27  | 27.29  |
| ENSG0000(INTS7     | protein_co chr1  | 2.12E+08 | 2.12E+08 - | 5.34   | 4.76   |
| ENSG0000(VASH2     | protein_co chr1  | 2.13E+08 | 2.13E+08 + | 0.89   | 1.84   |

|                   |                 |          |            |        |        |
|-------------------|-----------------|----------|------------|--------|--------|
| ENSG0000(TAF1A    | protein_co chr1 | 2.23E+08 | 2.23E+08 - | 2.5    | 2.09   |
| ENSG0000(SMYD2    | protein_co chr1 | 2.14E+08 | 2.14E+08 + | 13.43  | 13.66  |
| ENSG0000(SUSD4    | protein_co chr1 | 2.23E+08 | 2.23E+08 - | 0.06   | 0.55   |
| ENSG0000(DUSP10   | protein_co chr1 | 2.22E+08 | 2.22E+08 - | 6.42   | 6.94   |
| ENSG0000(HHIPL2   | protein_co chr1 | 2.23E+08 | 2.23E+08 - | 1.42   | 1.13   |
| ENSG0000(TP53BP2  | protein_co chr1 | 2.24E+08 | 2.24E+08 - | 9      | 10.91  |
| ENSG0000(ATP8B2   | protein_co chr1 | 1.54E+08 | 1.54E+08 + | 38.44  | 39.34  |
| ENSG0000(FLG2     | protein_co chr1 | 1.52E+08 | 1.52E+08 - | 0.01   | 0      |
| ENSG0000(CRNN     | protein_co chr1 | 1.52E+08 | 1.52E+08 - | 0      | 0      |
| ENSG0000(ADAM15   | protein_co chr1 | 1.55E+08 | 1.55E+08 + | 51.92  | 49.69  |
| ENSG0000(JTB      | protein_co chr1 | 1.54E+08 | 1.54E+08 - | 64.33  | 65.58  |
| ENSG0000(RAB13    | protein_co chr1 | 1.54E+08 | 1.54E+08 - | 228.46 | 222.7  |
| ENSG0000(S100A8   | protein_co chr1 | 1.53E+08 | 1.53E+08 - | 0      | 0.33   |
| ENSG0000(TPM3     | protein_co chr1 | 1.54E+08 | 1.54E+08 - | 108.53 | 116.2  |
| ENSG0000(NUP210L  | protein_co chr1 | 1.54E+08 | 1.54E+08 - | 0      | 0      |
| ENSG0000(SNAPIN   | protein_co chr1 | 1.54E+08 | 1.54E+08 + | 31.23  | 31.58  |
| ENSG0000(SLC27A3  | protein_co chr1 | 1.54E+08 | 1.54E+08 + | 28     | 25.55  |
| ENSG0000(S100A7   | protein_co chr1 | 1.53E+08 | 1.53E+08 - | 0      | 0      |
| ENSG0000(UBAP2L   | protein_co chr1 | 1.54E+08 | 1.54E+08 + | 62.75  | 64.98  |
| ENSG0000(SLC39A1  | protein_co chr1 | 1.54E+08 | 1.54E+08 - | 53.8   | 51.84  |
| ENSG0000(HAX1     | protein_co chr1 | 1.54E+08 | 1.54E+08 + | 42.68  | 42.15  |
| ENSG0000(CREB3L4  | protein_co chr1 | 1.54E+08 | 1.54E+08 + | 6.2    | 6.58   |
| ENSG0000(EFNA3    | protein_co chr1 | 1.55E+08 | 1.55E+08 + | 3.86   | 3.25   |
| ENSG0000(AQP10    | protein_co chr1 | 1.54E+08 | 1.54E+08 + | 0.09   | 0.28   |
| ENSG0000(KCNN3    | protein_co chr1 | 1.55E+08 | 1.55E+08 - | 0.13   | 0.04   |
| ENSG0000(C1orf43  | protein_co chr1 | 1.54E+08 | 1.54E+08 - | 87.77  | 90.49  |
| ENSG0000(GATAD2B  | protein_co chr1 | 1.54E+08 | 1.54E+08 - | 5.81   | 7.75   |
| ENSG0000(ILF2     | protein_co chr1 | 1.54E+08 | 1.54E+08 - | 42.04  | 47.68  |
| ENSG0000(RIT1     | protein_co chr1 | 1.56E+08 | 1.56E+08 - | 12.48  | 10.86  |
| ENSG0000(INTS3    | protein_co chr1 | 1.54E+08 | 1.54E+08 + | 17.7   | 16.13  |
| ENSG0000(PKLR     | protein_co chr1 | 1.55E+08 | 1.55E+08 - | 0.08   | 0      |
| ENSG0000(HCN3     | protein_co chr1 | 1.55E+08 | 1.55E+08 + | 1.97   | 1.49   |
| ENSG0000(FLG      | protein_co chr1 | 1.52E+08 | 1.52E+08 - | 0      | 0      |
| ENSG0000(ACTA1    | protein_co chr1 | 2.29E+08 | 2.29E+08 - | 0      | 0.06   |
| ENSG0000(C1orf131 | protein_co chr1 | 2.31E+08 | 2.31E+08 - | 5.17   | 5.62   |
| ENSG0000(GALNT2   | protein_co chr1 | 2.3E+08  | 2.3E+08 +  | 125.22 | 114.57 |
| ENSG0000(TTC13    | protein_co chr1 | 2.31E+08 | 2.31E+08 - | 5.36   | 3.93   |
| ENSG0000(SCCPDH   | protein_co chr1 | 2.47E+08 | 2.47E+08 + | 14.11  | 14.93  |
| ENSG0000(LYST     | protein_co chr1 | 2.36E+08 | 2.36E+08 - | 5.59   | 5.35   |
| ENSG0000(MAP3K21  | protein_co chr1 | 2.33E+08 | 2.33E+08 + | 0.12   | 0.03   |
| ENSG0000(CEP170   | protein_co chr1 | 2.43E+08 | 2.43E+08 - | 35.41  | 35     |
| ENSG0000(ACP1     | protein_co chr2 | 264140   | 278283 +   | 37.79  | 41.47  |
| ENSG0000(SNAP47   | protein_co chr1 | 2.28E+08 | 2.28E+08 + | 15.44  | 16.31  |
| ENSG0000(SRP9     | protein_co chr1 | 2.26E+08 | 2.26E+08 + | 70.93  | 73.96  |
| ENSG0000(NVL      | protein_co chr1 | 2.24E+08 | 2.24E+08 - | 4.31   | 5.1    |

|                   |                 |          |            |        |        |
|-------------------|-----------------|----------|------------|--------|--------|
| ENSG0000(SDE2     | protein_co chr1 | 2.26E+08 | 2.26E+08 - | 3.16   | 2.61   |
| ENSG0000(DEGS1    | protein_co chr1 | 2.24E+08 | 2.24E+08 + | 31.66  | 34.35  |
| ENSG0000(FBXO28   | protein_co chr1 | 2.24E+08 | 2.24E+08 + | 8.11   | 7.37   |
| ENSG0000(ARF1     | protein_co chr1 | 2.28E+08 | 2.28E+08 + | 163.28 | 159.54 |
| ENSG0000(LEFTY2   | protein_co chr1 | 2.26E+08 | 2.26E+08 - | 0.08   | 0.31   |
| ENSG0000(CNIH4    | protein_co chr1 | 2.24E+08 | 2.24E+08 + | 27.78  | 31.41  |
| ENSG0000(ITPKB    | protein_co chr1 | 2.27E+08 | 2.27E+08 - | 7.82   | 6.88   |
| ENSG0000(GUK1     | protein_co chr1 | 2.28E+08 | 2.28E+08 + | 150.81 | 147.66 |
| ENSG0000(CDC42BPA | protein_co chr1 | 2.27E+08 | 2.27E+08 - | 13     | 12.93  |
| ENSG0000(CNIH3    | protein_co chr1 | 2.24E+08 | 2.25E+08 + | 8.45   | 10.11  |
| ENSG0000(C1orf35  | protein_co chr1 | 2.28E+08 | 2.28E+08 - | 7.9    | 7.31   |
| ENSG0000(MBOAT2   | protein_co chr2 | 8852690  | 9003813 -  | 32.12  | 33.31  |
| ENSG0000(PARP1    | protein_co chr1 | 2.26E+08 | 2.26E+08 - | 20.36  | 24.66  |
| ENSG0000(PSEN2    | protein_co chr1 | 2.27E+08 | 2.27E+08 + | 8.65   | 7.54   |
| ENSG0000(PYCR2    | protein_co chr1 | 2.26E+08 | 2.26E+08 - | 21.71  | 21.65  |
| ENSG0000(LBR      | protein_co chr1 | 2.25E+08 | 2.25E+08 - | 7.81   | 6.06   |
| ENSG0000(WNT9A    | protein_co chr1 | 2.28E+08 | 2.28E+08 - | 0.69   | 1.01   |
| ENSG0000(EPHX1    | protein_co chr1 | 2.26E+08 | 2.26E+08 + | 64.97  | 67.12  |
| ENSG0000(REN      | protein_co chr1 | 2.04E+08 | 2.04E+08 - | 0.08   | 0      |
| ENSG0000(SOX13    | protein_co chr1 | 2.04E+08 | 2.04E+08 + | 7.87   | 8.25   |
| ENSG0000(ETNK2    | protein_co chr1 | 2.04E+08 | 2.04E+08 - | 3.04   | 4.34   |
| ENSG0000(PPFIA4   | protein_co chr1 | 2.03E+08 | 2.03E+08 + | 12.3   | 11.69  |
| ENSG0000(PLEKHA6  | protein_co chr1 | 2.04E+08 | 2.04E+08 - | 1.26   | 1.83   |
| ENSG0000(PTPN7    | protein_co chr1 | 2.02E+08 | 2.02E+08 - | 0      | 0      |
| ENSG0000(SYT2     | protein_co chr1 | 2.03E+08 | 2.03E+08 - | 0.01   | 0      |
| ENSG0000(ARL8A    | protein_co chr1 | 2.02E+08 | 2.02E+08 - | 25.71  | 20.3   |
| ENSG0000(OSR1     | protein_co chr2 | 19351485 | 19358653 - | 7.06   | 5.35   |
| ENSG0000(GDF7     | protein_co chr2 | 20666664 | 20679245 + | 0      | 0      |
| ENSG0000(PDIA6    | protein_co chr2 | 10783391 | 10837977 - | 202.68 | 187.85 |
| ENSG0000(RHOB     | protein_co chr2 | 20447074 | 20449445 + | 8.23   | 8.03   |
| ENSG0000(ATP6V1C2 | protein_co chr2 | 10721649 | 10785110 + | 0.02   | 0.04   |
| ENSG0000(HNRNPLL  | protein_co chr2 | 38561978 | 38603586 - | 12.82  | 14.45  |
| ENSG0000(GALM     | protein_co chr2 | 38665910 | 38741237 + | 10.79  | 11.39  |
| ENSG0000(CAMKMT   | protein_co chr2 | 44361950 | 44772592 + | 1.38   | 2.45   |
| ENSG0000(ABCG8    | protein_co chr2 | 43838964 | 43878466 + | 0      | 0      |
| ENSG0000(EML4     | protein_co chr2 | 42169350 | 42332548 + | 10.65  | 12.42  |
| ENSG0000(CALM2    | protein_co chr2 | 47160082 | 47176601 - | 160.39 | 167.79 |
| ENSG0000(CHAC2    | protein_co chr2 | 53767792 | 53775196 + | 0.4    | 0.34   |
| ENSG0000(RPS27A   | protein_co chr2 | 55231903 | 55235853 + | 734.56 | 725.62 |
| ENSG0000(WDPCP    | protein_co chr2 | 63121383 | 63827843 - | 4.27   | 2.9    |
| ENSG0000(VPS54    | protein_co chr2 | 63892146 | 64019072 - | 6.78   | 7.34   |
| ENSG0000(REG3G    | protein_co chr2 | 79025686 | 79028505 + | 0      | 0      |
| ENSG0000(ASXL2    | protein_co chr2 | 25733753 | 25878516 - | 7.47   | 7.01   |
| ENSG0000(ETAA1    | protein_co chr2 | 67397319 | 67410545 + | 5.54   | 6.22   |
| ENSG0000(SNRPG    | protein_co chr2 | 70281362 | 70293771 - | 42.43  | 36.34  |

|                     |                 |          |            |       |       |
|---------------------|-----------------|----------|------------|-------|-------|
| ENSG0000( ABHD1     | protein_co chr2 | 27123789 | 27130812 + | 0.04  | 0.06  |
| ENSG0000( MEIS1     | protein_co chr2 | 66433452 | 66573869 + | 22.23 | 17.51 |
| ENSG0000( TRIM43B   | protein_co chr2 | 95476967 | 95484731 - | 0     | 0     |
| ENSG0000( TRIM43    | protein_co chr2 | 95592018 | 95599778 + | 0     | 0     |
| ENSG0000( CIAO1     | protein_co chr2 | 96266132 | 96273349 + | 28.92 | 28.33 |
| ENSG0000( ZNF514    | protein_co chr2 | 95147330 | 95165413 - | 4.47  | 6.23  |
| ENSG0000( SNRNP200  | protein_co chr2 | 96274336 | 96305515 - | 38.58 | 35.41 |
| ENSG0000( MRPS5     | protein_co chr2 | 95087207 | 95149434 - | 18.08 | 18.26 |
| ENSG0000( ANKRD53   | protein_co chr2 | 70978380 | 70985499 + | 0.71  | 1.38  |
| ENSG0000( TPRKB     | protein_co chr2 | 73729104 | 73737400 - | 11.31 | 8.61  |
| ENSG0000( NAT8      | protein_co chr2 | 73640832 | 73642393 - | 0     | 0     |
| ENSG0000( EXOC6B    | protein_co chr2 | 72175984 | 72826041 - | 13.97 | 16.58 |
| ENSG0000( SFXN5     | protein_co chr2 | 72942036 | 73075619 - | 5.24  | 5.14  |
| ENSG0000( TEX261    | protein_co chr2 | 70985938 | 70994945 - | 37.53 | 42.19 |
| ENSG0000( DQX1      | protein_co chr2 | 74518131 | 74526336 - | 0     | 0     |
| ENSG0000( DUSP11    | protein_co chr2 | 73762184 | 73780157 - | 10    | 8.59  |
| ENSG0000( ST6GAL2   | protein_co chr2 | 1.07E+08 | 1.07E+08 - | 0.01  | 0     |
| ENSG0000( NPHP1     | protein_co chr2 | 1.1E+08  | 1.1E+08 -  | 3.42  | 3.09  |
| ENSG0000( MALL      | protein_co chr2 | 1.1E+08  | 1.1E+08 -  | 1.63  | 1.34  |
| ENSG0000( THNSL2    | protein_co chr2 | 88170295 | 88186636 + | 1.02  | 0.94  |
| ENSG0000( RALB      | protein_co chr2 | 1.2E+08  | 1.2E+08 +  | 22.29 | 19.02 |
| ENSG0000( C1QL2     | protein_co chr2 | 1.19E+08 | 1.19E+08 - | 0     | 0     |
| ENSG0000( TMEM177   | protein_co chr2 | 1.2E+08  | 1.2E+08 +  | 3.47  | 3.67  |
| ENSG0000( NT5DC4    | protein_co chr2 | 1.13E+08 | 1.13E+08 + | 0     | 0     |
| ENSG0000( RABL2A    | protein_co chr2 | 1.14E+08 | 1.14E+08 + | 10.82 | 10.98 |
| ENSG0000( SLC20A1   | protein_co chr2 | 1.13E+08 | 1.13E+08 + | 40.98 | 42.82 |
| ENSG0000( FBLN7     | protein_co chr2 | 1.12E+08 | 1.12E+08 + | 15.9  | 16.51 |
| ENSG0000( RP11-395L | processed_chr2  | 1.14E+08 | 1.14E+08 + | 0     | 0     |
| ENSG0000( ZC3H8     | protein_co chr2 | 1.12E+08 | 1.12E+08 - | 8.19  | 6.98  |
| ENSG0000( LIPT1     | protein_co chr2 | 99154955 | 99163157 + | 3.24  | 3.7   |
| ENSG0000( TRIM43CP  | unprocessε chr2 | 97025981 | 97031636 - | 0     | 0     |
| ENSG0000( CNGA3     | protein_co chr2 | 98346155 | 98398601 + | 0.06  | 0     |
| ENSG0000( FAHD2B    | protein_co chr2 | 97083583 | 97094882 - | 4.27  | 4.13  |
| ENSG0000( LYG1      | protein_co chr2 | 99284238 | 99304742 - | 0.31  | 0.79  |
| ENSG0000( AFF3      | protein_co chr2 | 99545419 | 1E+08 -    | 0     | 0.01  |
| ENSG0000( UBXN4     | protein_co chr2 | 1.36E+08 | 1.36E+08 + | 32.68 | 32.94 |
| ENSG0000( NXPH2     | protein_co chr2 | 1.39E+08 | 1.39E+08 - | 0.06  | 0     |
| ENSG0000( SPOPL     | protein_co chr2 | 1.39E+08 | 1.39E+08 + | 7.88  | 9.86  |
| ENSG0000( THSD7B    | protein_co chr2 | 1.37E+08 | 1.38E+08 + | 0     | 0     |
| ENSG0000( GPR17     | protein_co chr2 | 1.28E+08 | 1.28E+08 + | 0     | 0     |
| ENSG0000( POLR2D    | protein_co chr2 | 1.28E+08 | 1.28E+08 - | 7.72  | 7.2   |
| ENSG0000( AMMECR1   | protein_co chr2 | 1.28E+08 | 1.28E+08 - | 6.72  | 6.52  |
| ENSG0000( GALNT13   | protein_co chr2 | 1.54E+08 | 1.54E+08 + | 0     | 0     |
| ENSG0000( PKP4      | protein_co chr2 | 1.58E+08 | 1.59E+08 + | 9.21  | 8.1   |
| ENSG0000( SCN1A     | protein_co chr2 | 1.66E+08 | 1.66E+08 - | 0.13  | 0.31  |

|                    |                 |          |            |       |       |
|--------------------|-----------------|----------|------------|-------|-------|
| ENSG0000(SLC4A10)  | protein_co chr2 | 1.61E+08 | 1.62E+08 + | 0     | 0     |
| ENSG0000(SCRN3)    | protein_co chr2 | 1.74E+08 | 1.74E+08 + | 13.65 | 15.99 |
| ENSG0000(LNPK)     | protein_co chr2 | 1.76E+08 | 1.76E+08 - | 14.2  | 16.62 |
| ENSG0000(ZNF385B)  | protein_co chr2 | 1.79E+08 | 1.8E+08 -  | 0.06  | 0.16  |
| ENSG0000(TMEFF2)   | protein_co chr2 | 1.92E+08 | 1.92E+08 - | 0.31  | 0.44  |
| ENSG0000(CDCA7)    | protein_co chr2 | 1.73E+08 | 1.73E+08 + | 0.04  | 0.06  |
| ENSG0000(DLX1)     | protein_co chr2 | 1.72E+08 | 1.72E+08 + | 1.7   | 1.16  |
| ENSG0000(UBR3)     | protein_co chr2 | 1.7E+08  | 1.7E+08 +  | 7.13  | 7.28  |
| ENSG0000(PHOSPHO2) | protein_co chr2 | 1.7E+08  | 1.7E+08 +  | 2.08  | 2.35  |
| ENSG0000(GULP1)    | protein_co chr2 | 1.88E+08 | 1.89E+08 + | 10.11 | 11.42 |
| ENSG0000(FAM171B)  | protein_co chr2 | 1.87E+08 | 1.87E+08 + | 3.33  | 3.57  |
| ENSG0000(HSPD1)    | protein_co chr2 | 1.97E+08 | 1.98E+08 - | 56.56 | 54.99 |
| ENSG0000(CCDC150)  | protein_co chr2 | 1.97E+08 | 1.97E+08 + | 0.59  | 0.38  |
| ENSG0000(METTL21A) | protein_co chr2 | 2.08E+08 | 2.08E+08 - | 5.24  | 6.34  |
| ENSG0000(UNC80)    | protein_co chr2 | 2.1E+08  | 2.1E+08 +  | 0.56  | 0.4   |
| ENSG0000(PTH2R)    | protein_co chr2 | 2.08E+08 | 2.09E+08 + | 0     | 0     |
| ENSG0000(CPO)      | protein_co chr2 | 2.07E+08 | 2.07E+08 + | 0     | 0.05  |
| ENSG0000(NBEAL1)   | protein_co chr2 | 2.03E+08 | 2.03E+08 + | 4.66  | 4.96  |
| ENSG0000(KANSL1L)  | protein_co chr2 | 2.1E+08  | 2.1E+08 -  | 5.27  | 5.51  |
| ENSG0000(SPAG16)   | protein_co chr2 | 2.13E+08 | 2.14E+08 + | 9.99  | 13.31 |
| ENSG0000(ABCA12)   | protein_co chr2 | 2.15E+08 | 2.15E+08 - | 0.13  | 0.16  |
| ENSG0000(SUMF1)    | protein_co chr3 | 3700814  | 4467281 -  | 41.24 | 42.99 |
| ENSG0000(NYAP2)    | protein_co chr2 | 2.25E+08 | 2.26E+08 + | 0     | 0     |
| ENSG0000(RHBDD1)   | protein_co chr2 | 2.27E+08 | 2.27E+08 + | 6.41  | 8.72  |
| ENSG0000(ACKR3)    | protein_co chr2 | 2.37E+08 | 2.37E+08 + | 0.45  | 0.71  |
| ENSG0000(TRPM8)    | protein_co chr2 | 2.34E+08 | 2.34E+08 + | 0     | 0     |
| ENSG0000(HES6)     | protein_co chr2 | 2.38E+08 | 2.38E+08 - | 0.68  | 1.61  |
| ENSG0000(ESPNL)    | protein_co chr2 | 2.38E+08 | 2.38E+08 + | 0.43  | 0.29  |
| ENSG0000(ANKMY1)   | protein_co chr2 | 2.4E+08  | 2.41E+08 - | 3.22  | 3.44  |
| ENSG0000(COPS7B)   | protein_co chr2 | 2.32E+08 | 2.32E+08 + | 13.65 | 15.47 |
| ENSG0000(DIS3L2)   | protein_co chr2 | 2.32E+08 | 2.32E+08 + | 4.34  | 5.61  |
| ENSG0000(CPNE9)    | protein_co chr3 | 9703807  | 9729908 +  | 0     | 0.03  |
| ENSG0000(FANCD2)   | protein_co chr3 | 10026414 | 10101930 + | 1.57  | 0.71  |
| ENSG0000(TAMM41)   | protein_co chr3 | 11790442 | 11846919 - | 5.18  | 4.58  |
| ENSG0000(VGLL4)    | protein_co chr3 | 11556070 | 11771350 - | 19.32 | 18.31 |
| ENSG0000(RAB5A)    | protein_co chr3 | 19947079 | 19985175 + | 20.45 | 21.58 |
| ENSG0000(FAM134A)  | protein_co chr2 | 2.19E+08 | 2.19E+08 + | 55.15 | 46.81 |
| ENSG0000(CTDSP1)   | protein_co chr2 | 2.18E+08 | 2.18E+08 + | 60.05 | 56.41 |
| ENSG0000(CNOT9)    | protein_co chr2 | 2.19E+08 | 2.19E+08 + | 9.72  | 11.09 |
| ENSG0000(4-Mar)    | protein_co chr2 | 2.16E+08 | 2.16E+08 - | 2.7   | 2.63  |
| ENSG0000(STK11IP)  | protein_co chr2 | 2.2E+08  | 2.2E+08 +  | 8.02  | 6.98  |
| ENSG0000(GMPPA)    | protein_co chr2 | 2.19E+08 | 2.2E+08 +  | 21.38 | 19.17 |
| ENSG0000(GRIP2)    | protein_co chr3 | 14489111 | 14556075 - | 0.65  | 0.17  |
| ENSG0000(EAF1)     | protein_co chr3 | 15427355 | 15450635 + | 8.11  | 7.05  |
| ENSG0000(CNTN4)    | protein_co chr3 | 2098813  | 3057956 +  | 0.03  | 0.01  |

|                     |                  |          |          |   |        |        |
|---------------------|------------------|----------|----------|---|--------|--------|
| ENSG0000(DYNC1L1)   | protein_co chr3  | 32525971 | 32570874 | - | 12.13  | 13.23  |
| ENSG0000(RBMS3)     | protein_co chr3  | 28574791 | 30010391 | + | 7.85   | 8.02   |
| ENSG0000(GADL1)     | protein_co chr3  | 30726200 | 30894765 | - | 0.09   | 0.18   |
| ENSG0000(OSBPL10)   | protein_co chr3  | 31657890 | 32077580 | - | 6.6    | 6.65   |
| ENSG0000(POMGNT2)   | protein_co chr3  | 43079232 | 43106076 | - | 2.62   | 3.36   |
| ENSG0000(ACKR2)     | protein_co chr3  | 42804752 | 42887974 | + | 0.25   | 0.06   |
| ENSG0000(FAM198A)   | protein_co chr3  | 42979267 | 43060211 | + | 0.03   | 0.09   |
| ENSG0000(CSRNP1)    | protein_co chr3  | 39141855 | 39154562 | - | 1.9    | 2.08   |
| ENSG0000(SLC25A38)  | protein_co chr3  | 39383348 | 39397351 | + | 13.16  | 12.12  |
| ENSG0000(ITGA9)     | protein_co chr3  | 37452115 | 37823514 | + | 0      | 0.03   |
| ENSG0000(SLC22A14)  | protein_co chr3  | 38282294 | 38318575 | + | 0.14   | 0.2    |
| ENSG0000(GOLGA4)    | protein_co chr3  | 37243177 | 37366751 | + | 16.34  | 15.42  |
| ENSG0000(CTDSPL)    | protein_co chr3  | 37861960 | 37984469 | + | 12.35  | 11.32  |
| ENSG0000(STAC)      | protein_co chr3  | 36380344 | 36548007 | + | 5.32   | 5.75   |
| ENSG0000(IQSEC1)    | protein_co chr3  | 12897220 | 13073117 | - | 7.93   | 8.32   |
| ENSG0000(CAND2)     | protein_co chr3  | 12796472 | 12871916 | + | 0.17   | 0.32   |
| ENSG0000(RPL32)     | protein_co chr3  | 12834485 | 12841588 | - | 879.14 | 911.44 |
| ENSG0000(PTPRG)     | protein_co chr3  | 61561569 | 62297613 | + | 9.2    | 8.6    |
| ENSG0000(IL17RD)    | protein_co chr3  | 57089982 | 57170306 | - | 3.01   | 4.63   |
| ENSG0000(SHQ1)      | protein_co chr3  | 72749277 | 72861914 | - | 6.85   | 9.44   |
| ENSG0000(SLC25A26)  | protein_co chr3  | 66133610 | 66388116 | + | 8.56   | 9.7    |
| ENSG0000(UBA3)      | protein_co chr3  | 69054730 | 69080408 | - | 24.27  | 24.88  |
| ENSG0000(ARL6IP5)   | protein_co chr3  | 69084944 | 69106066 | + | 67.55  | 72.04  |
| ENSG0000(TMF1)      | protein_co chr3  | 69019827 | 69052303 | - | 11.6   | 13.98  |
| ENSG0000(LRIG1)     | protein_co chr3  | 66378797 | 66501263 | - | 5.53   | 5.29   |
| ENSG0000(LRTM1)     | protein_co chr3  | 54918237 | 54967088 | - | 0      | 0      |
| ENSG0000(RP11-977G) | protein_co chr12 | 56285916 | 56316059 | - | 3.42   | 0      |
| ENSG0000(LIMD1)     | protein_co chr3  | 45555394 | 45686338 | + | 8.82   | 7.44   |
| ENSG0000(ZNF660)    | protein_co chr3  | 44578223 | 44599694 | + | 0.15   | 0.16   |
| ENSG0000(NFKBIZ)    | protein_co chr3  | 1.02E+08 | 1.02E+08 | + | 53.94  | 41.91  |
| ENSG0000(COL8A1)    | protein_co chr3  | 99638475 | 99799226 | + | 49.41  | 49.16  |
| ENSG0000(NXPE3)     | protein_co chr3  | 1.02E+08 | 1.02E+08 | + | 7.82   | 8.3    |
| ENSG0000(ADGRG7)    | protein_co chr3  | 1.01E+08 | 1.01E+08 | + | 0.02   | 0      |
| ENSG0000(MYH15)     | protein_co chr3  | 1.08E+08 | 1.09E+08 | - | 0.74   | 0.79   |
| ENSG0000(PHLDB2)    | protein_co chr3  | 1.12E+08 | 1.12E+08 | + | 21.12  | 20.02  |
| ENSG0000(ABHD10)    | protein_co chr3  | 1.12E+08 | 1.12E+08 | + | 10.43  | 10.08  |
| ENSG0000(TAGLN3)    | protein_co chr3  | 1.12E+08 | 1.12E+08 | + | 0      | 0.14   |
| ENSG0000(PLA1A)     | protein_co chr3  | 1.2E+08  | 1.2E+08  | + | 0.82   | 0.59   |
| ENSG0000(RABL3)     | protein_co chr3  | 1.21E+08 | 1.21E+08 | - | 8.8    | 7.5    |
| ENSG0000(ADPRH)     | protein_co chr3  | 1.2E+08  | 1.2E+08  | + | 1.28   | 1.33   |
| ENSG0000(IGSF11)    | protein_co chr3  | 1.19E+08 | 1.19E+08 | - | 0.02   | 0      |
| ENSG0000(ATG3)      | protein_co chr3  | 1.13E+08 | 1.13E+08 | - | 35.21  | 32.98  |
| ENSG0000(NR1I2)     | protein_co chr3  | 1.2E+08  | 1.2E+08  | + | 0.02   | 0      |
| ENSG0000(BOC)       | protein_co chr3  | 1.13E+08 | 1.13E+08 | + | 1.22   | 1.34   |
| ENSG0000(SRPRB)     | protein_co chr3  | 1.34E+08 | 1.34E+08 | + | 17.83  | 15.37  |



|                    |                 |          |            |       |       |
|--------------------|-----------------|----------|------------|-------|-------|
| ENSG0000(TMEM108   | protein_co chr3 | 1.33E+08 | 1.33E+08 + | 0.01  | 0     |
| ENSG0000(AGTR1     | protein_co chr3 | 1.49E+08 | 1.49E+08 + | 0.16  | 0.5   |
| ENSG0000(MED12L    | protein_co chr3 | 1.51E+08 | 1.51E+08 + | 0.24  | 0.04  |
| ENSG0000(EIF2A     | protein_co chr3 | 1.51E+08 | 1.51E+08 + | 34.14 | 33.13 |
| ENSG0000(ALDH1L1   | protein_co chr3 | 1.26E+08 | 1.26E+08 - | 0     | 0.02  |
| ENSG0000(OSBPL11   | protein_co chr3 | 1.26E+08 | 1.26E+08 - | 2.81  | 2.8   |
| ENSG0000(TRPC1     | protein_co chr3 | 1.43E+08 | 1.43E+08 + | 5.5   | 4.57  |
| ENSG0000(NCEH1     | protein_co chr3 | 1.73E+08 | 1.73E+08 - | 3.22  | 2.81  |
| ENSG0000(SPATA16   | protein_co chr3 | 1.73E+08 | 1.73E+08 - | 0     | 0     |
| ENSG0000(FAM86B2   | protein_co chr8 | 12425614 | 12436343 - | 0.32  | 0.84  |
| ENSG0000(LPP       | protein_co chr3 | 1.88E+08 | 1.89E+08 + | 12.25 | 8.71  |
| ENSG0000(TMEM44    | protein_co chr3 | 1.95E+08 | 1.95E+08 - | 20.48 | 22.84 |
| ENSG0000(RUBCN     | protein_co chr3 | 1.98E+08 | 1.98E+08 - | 5.7   | 4.94  |
| ENSG0000(AMT       | protein_co chr3 | 49416775 | 49422753 - | 1.94  | 2.5   |
| ENSG0000(TCTA      | protein_co chr3 | 49412206 | 49416475 + | 14.68 | 14.17 |
| ENSG0000(NICN1     | protein_co chr3 | 49422946 | 49429326 - | 6.03  | 7.35  |
| ENSG0000(UCN2      | protein_co chr3 | 48561727 | 48563773 - | 0.57  | 0.7   |
| ENSG0000(DCAF1     | protein_co chr3 | 51395867 | 51500002 - | 5.37  | 5.35  |
| ENSG0000(MANF      | protein_co chr3 | 51385047 | 51389397 + | 50.89 | 50.38 |
| ENSG0000(AC062028. | lincRNA chr2    | 11105317 | 11132821 - | 0     | 0     |
| ENSG0000(CCDC39    | protein_co chr3 | 1.81E+08 | 1.81E+08 - | 1.02  | 0.68  |
| ENSG0000(STXBP5L   | protein_co chr3 | 1.21E+08 | 1.21E+08 + | 0.04  | 0     |
| ENSG0000(EAF2      | protein_co chr3 | 1.22E+08 | 1.22E+08 + | 0.53  | 0.42  |
| ENSG0000(ILDR1     | protein_co chr3 | 1.22E+08 | 1.22E+08 - | 0     | 0     |
| ENSG0000(TM4SF19   | protein_co chr3 | 1.96E+08 | 1.96E+08 - | 0.07  | 0.08  |
| ENSG0000(MUC4      | protein_co chr3 | 1.96E+08 | 1.96E+08 - | 0     | 0     |
| ENSG0000(SLIT2     | protein_co chr4 | 20253260 | 20620561 + | 26.5  | 24.15 |
| ENSG0000(EIF2B5    | protein_co chr3 | 1.84E+08 | 1.84E+08 + | 12.79 | 12.77 |
| ENSG0000(AHSG      | protein_co chr3 | 1.87E+08 | 1.87E+08 + | 0     | 0.04  |
| ENSG0000(ECE2      | protein_co chr3 | 1.84E+08 | 1.84E+08 + | 0.86  | 1.32  |
| ENSG0000(VWA5B2    | protein_co chr3 | 1.84E+08 | 1.84E+08 + | 0.08  | 0     |
| ENSG0000(DGKQ      | protein_co chr4 | 958887   | 986895 -   | 5.38  | 5.43  |
| ENSG0000(FIP1L1    | protein_co chr4 | 53377643 | 53460861 + | 24.38 | 21.46 |
| ENSG0000(SLC26A1   | protein_co chr4 | 979073   | 993440 -   | 0.2   | 0.34  |
| ENSG0000(LYAR      | protein_co chr4 | 4267701  | 4290169 -  | 2.11  | 2.88  |
| ENSG0000(CENPC     | protein_co chr4 | 67468748 | 67545606 - | 4.99  | 4.5   |
| ENSG0000(EPHA5     | protein_co chr4 | 65319563 | 65670495 - | 8.15  | 11.23 |
| ENSG0000(CORIN     | protein_co chr4 | 47593998 | 47838106 - | 0.05  | 0.08  |
| ENSG0000(ATP10D    | protein_co chr4 | 47485288 | 47593486 + | 12.34 | 12.77 |
| ENSG0000(OCIAD2    | protein_co chr4 | 48885019 | 48906937 - | 13    | 7.74  |
| ENSG0000(SLC10A4   | protein_co chr4 | 48483343 | 48489196 + | 0     | 0.03  |
| ENSG0000(SLC10A6   | protein_co chr4 | 86823468 | 86849263 - | 0     | 0     |
| ENSG0000(SCD5      | protein_co chr4 | 82629539 | 82798857 - | 17.43 | 18.34 |
| ENSG0000(PLAC8     | protein_co chr4 | 83090048 | 83137075 - | 0.35  | 0.31  |
| ENSG0000(ENOPH1    | protein_co chr4 | 82430562 | 82461091 + | 13.98 | 14.43 |

|                   |                 |          |          |   |         |        |
|-------------------|-----------------|----------|----------|---|---------|--------|
| ENSG0000(CABS1    | protein_co chr4 | 70334966 | 70337116 | + | 0       | 0      |
| ENSG0000(GC       | protein_co chr4 | 71741693 | 71804041 | - | 0       | 0      |
| ENSG0000(TRMT10A  | protein_co chr4 | 99546709 | 99564032 | - | 1.65    | 1.7    |
| ENSG0000(KLHL8    | protein_co chr4 | 87160103 | 87240314 | - | 3       | 4.03   |
| ENSG0000(SNCA     | protein_co chr4 | 89724099 | 89838315 | - | 0       | 0      |
| ENSG0000(PYURF    | protein_co chr4 | 88520985 | 88523813 | - | 23.95   | 26.08  |
| ENSG0000(TBCK     | protein_co chr4 | 1.06E+08 | 1.06E+08 | - | 9.42    | 9.95   |
| ENSG0000(CAMK2D   | protein_co chr4 | 1.13E+08 | 1.14E+08 | - | 40.83   | 38.8   |
| ENSG0000(CISD2    | protein_co chr4 | 1.03E+08 | 1.03E+08 | + | 7.52    | 9.09   |
| ENSG0000(DDIT4L   | protein_co chr4 | 1E+08    | 1E+08    | - | 12.51   | 10.07  |
| ENSG0000(ANK2     | protein_co chr4 | 1.13E+08 | 1.13E+08 | + | 4.35    | 3.9    |
| ENSG0000(TIFA     | protein_co chr4 | 1.12E+08 | 1.12E+08 | - | 3.6     | 3.58   |
| ENSG0000(SPATA5   | protein_co chr4 | 1.23E+08 | 1.23E+08 | + | 0.68    | 0.68   |
| ENSG0000(FABP2    | protein_co chr4 | 1.19E+08 | 1.19E+08 | - | 0       | 0      |
| ENSG0000(CCNA2    | protein_co chr4 | 1.22E+08 | 1.22E+08 | - | 0.62    | 0.88   |
| ENSG0000(METTL14  | protein_co chr4 | 1.19E+08 | 1.19E+08 | + | 16.76   | 11.32  |
| ENSG0000(USP53    | protein_co chr4 | 1.19E+08 | 1.19E+08 | + | 16.7    | 13.29  |
| ENSG0000(SETD7    | protein_co chr4 | 1.39E+08 | 1.4E+08  | - | 17.27   | 16.27  |
| ENSG0000(NAF1     | protein_co chr4 | 1.63E+08 | 1.63E+08 | - | 4.25    | 3.31   |
| ENSG0000(1-Mar    | protein_co chr4 | 1.64E+08 | 1.64E+08 | - | 0       | 0      |
| ENSG0000(SFRP2    | protein_co chr4 | 1.54E+08 | 1.54E+08 | - | 0.03    | 0      |
| ENSG0000(RPS3A    | protein_co chr4 | 1.51E+08 | 1.51E+08 | + | 810.73  | 805.31 |
| ENSG0000(RNF175   | protein_co chr4 | 1.54E+08 | 1.54E+08 | - | 0       | 0      |
| ENSG0000(PDGFC    | protein_co chr4 | 1.57E+08 | 1.57E+08 | - | 13.59   | 14.6   |
| ENSG0000(CBR4     | protein_co chr4 | 1.69E+08 | 1.69E+08 | - | 4.24    | 4.29   |
| ENSG0000(GLRA3    | protein_co chr4 | 1.75E+08 | 1.75E+08 | - | 0       | 0      |
| ENSG0000(CYP4V2   | protein_co chr4 | 1.86E+08 | 1.86E+08 | + | 10.42   | 11.68  |
| ENSG0000(ROPN1L   | protein_co chr5 | 10441524 | 10472029 | + | 0.11    | 0.12   |
| ENSG0000(NDUFS6   | protein_co chr5 | 1801400  | 1816605  | + | 20.62   | 23.28  |
| ENSG0000(6-Mar    | protein_co chr5 | 10353703 | 10440388 | + | 40.41   | 42.13  |
| ENSG0000(NKD2     | protein_co chr5 | 1008829  | 1038943  | + | 1.97    | 1.98   |
| ENSG0000(CDH18    | protein_co chr5 | 19472951 | 20575873 | - | 0.53    | 0.4    |
| ENSG0000(ADAMTS16 | protein_co chr5 | 5140330  | 5320304  | + | 0.21    | 0.4    |
| ENSG0000(SRD5A1   | protein_co chr5 | 6633343  | 6674386  | + | 4.46    | 4.18   |
| ENSG0000(MYO10    | protein_co chr5 | 16661914 | 16936276 | - | 22.94   | 22.72  |
| ENSG0000(FAM105A  | protein_co chr5 | 14581775 | 14615007 | + | 0.01    | 0      |
| ENSG0000(RPL37    | protein_co chr5 | 40825262 | 40835335 | - | 1247.69 | 1233.9 |
| ENSG0000(SKP2     | protein_co chr5 | 36151989 | 36184319 | + | 5.96    | 7.03   |
| ENSG0000(OSMR     | protein_co chr5 | 38845858 | 38945596 | + | 72.13   | 62.92  |
| ENSG0000(UGT3A1   | protein_co chr5 | 35951010 | 36001028 | - | 0       | 0      |
| ENSG0000(PLK2     | protein_co chr5 | 58453982 | 58460260 | - | 239.64  | 260.5  |
| ENSG0000(FAM159B  | protein_co chr5 | 64690308 | 64718090 | + | 0       | 0      |
| ENSG0000(GZMA     | protein_co chr5 | 55102648 | 55110252 | + | 0       | 0      |
| ENSG0000(PIK3R1   | protein_co chr5 | 68215720 | 68301821 | + | 10.97   | 12.78  |
| ENSG0000(HAPLN1   | protein_co chr5 | 83637805 | 83721613 | - | 0.12    | 0.15   |

|                    |                 |          |            |        |        |
|--------------------|-----------------|----------|------------|--------|--------|
| ENSG0000(LHFPL2    | protein_co chr5 | 78485215 | 78770021 - | 25.85  | 28.55  |
| ENSG0000(SSBP2     | protein_co chr5 | 81413021 | 81751797 - | 26.67  | 23.75  |
| ENSG0000(BHMT      | protein_co chr5 | 79111779 | 79132290 + | 0      | 0      |
| ENSG0000(ANKRD31   | protein_co chr5 | 75068275 | 75236878 - | 0.03   | 0      |
| ENSG0000(IQGAP2    | protein_co chr5 | 76403249 | 76708132 + | 0      | 0.3    |
| ENSG0000(CRHBP     | protein_co chr5 | 76952713 | 76981158 + | 0.67   | 0.18   |
| ENSG0000(RASA1     | protein_co chr5 | 87267888 | 87391931 + | 12.62  | 13.23  |
| ENSG0000(LIX1      | protein_co chr5 | 97091867 | 97142872 - | 0      | 0      |
| ENSG0000(GIN1      | protein_co chr5 | 1.03E+08 | 1.03E+08 - | 1.65   | 2.38   |
| ENSG0000(PIIP5K2   | protein_co chr5 | 1.03E+08 | 1.03E+08 + | 15.81  | 16.8   |
| ENSG0000(PAM       | protein_co chr5 | 1.03E+08 | 1.03E+08 + | 319.71 | 297.52 |
| ENSG0000(BDP1      | protein_co chr5 | 71455615 | 71567820 + | 3.76   | 4.23   |
| ENSG0000(GTF2H2    | protein_co chr5 | 71032670 | 71067689 - | 3.26   | 4.12   |
| ENSG0000(SLC30A5   | protein_co chr5 | 69093646 | 69131069 + | 20.33  | 21.4   |
| ENSG0000(BTF3      | protein_co chr5 | 73498408 | 73505635 + | 297.86 | 299.53 |
| ENSG0000(FBXL17    | protein_co chr5 | 1.08E+08 | 1.08E+08 - | 8.88   | 10.3   |
| ENSG0000(SPATA9    | protein_co chr5 | 95652181 | 95698711 - | 0.11   | 0.3    |
| ENSG0000(TSLP      | protein_co chr5 | 1.11E+08 | 1.11E+08 + | 4.19   | 2.73   |
| ENSG0000(TNFAIP8   | protein_co chr5 | 1.19E+08 | 1.19E+08 + | 11.09  | 11.15  |
| ENSG0000(FEM1C     | protein_co chr5 | 1.16E+08 | 1.16E+08 - | 6.09   | 5.79   |
| ENSG0000(COMMD10   | protein_co chr5 | 1.16E+08 | 1.16E+08 + | 8.45   | 7.58   |
| ENSG0000(ATG12     | protein_co chr5 | 1.16E+08 | 1.16E+08 - | 32.62  | 25.39  |
| ENSG0000(MEGF10    | protein_co chr5 | 1.27E+08 | 1.27E+08 + | 0.13   | 0.62   |
| ENSG0000(ADAMTS15  | protein_co chr5 | 1.29E+08 | 1.3E+08 +  | 0      | 0      |
| ENSG0000(YIPF5     | protein_co chr5 | 1.44E+08 | 1.44E+08 - | 40.11  | 44.28  |
| ENSG0000(ARHGAP26  | protein_co chr5 | 1.43E+08 | 1.43E+08 + | 2.71   | 3.68   |
| ENSG0000(CXCL14    | protein_co chr5 | 1.36E+08 | 1.36E+08 - | 0.19   | 0      |
| ENSG0000(LECT2     | protein_co chr5 | 1.36E+08 | 1.36E+08 - | 0      | 0      |
| ENSG0000(SLC25A48  | protein_co chr5 | 1.36E+08 | 1.36E+08 + | 0      | 0      |
| ENSG0000(DDX46     | protein_co chr5 | 1.35E+08 | 1.35E+08 + | 17.03  | 14.25  |
| ENSG0000(CDKN2AIP1 | processed_chr2  | 26827169 | 26827520 - | 0      | 0      |
| ENSG0000(IL9       | protein_co chr5 | 1.36E+08 | 1.36E+08 - | 0      | 0      |
| ENSG0000(TIMD4     | protein_co chr5 | 1.57E+08 | 1.57E+08 - | 0      | 0      |
| ENSG0000(RNF145    | protein_co chr5 | 1.59E+08 | 1.59E+08 - | 21.9   | 21.8   |
| ENSG0000(C1QTNF2   | protein_co chr5 | 1.6E+08  | 1.6E+08 -  | 0.14   | 0.38   |
| ENSG0000(GABRA6    | protein_co chr5 | 1.62E+08 | 1.62E+08 + | 0      | 0      |
| ENSG0000(GABRB2    | protein_co chr5 | 1.61E+08 | 1.62E+08 - | 0      | 0      |
| ENSG0000(FBXO38    | protein_co chr5 | 1.48E+08 | 1.48E+08 + | 14.09  | 15.33  |
| ENSG0000(SPINK7    | protein_co chr5 | 1.48E+08 | 1.48E+08 + | 0      | 0      |
| ENSG0000(PCYOX1L   | protein_co chr5 | 1.49E+08 | 1.49E+08 + | 5.79   | 6.42   |
| ENSG0000(GLRA1     | protein_co chr5 | 1.52E+08 | 1.52E+08 - | 0.03   | 0      |
| ENSG0000(TNIP1     | protein_co chr5 | 1.51E+08 | 1.51E+08 - | 56.11  | 50.99  |
| ENSG0000(G3BP1     | protein_co chr5 | 1.52E+08 | 1.52E+08 + | 34.8   | 32.95  |
| ENSG0000(ZNF300    | protein_co chr5 | 1.51E+08 | 1.51E+08 - | 3.02   | 3.3    |
| ENSG0000(N4BP3     | protein_co chr5 | 1.78E+08 | 1.78E+08 + | 0.26   | 0.39   |

|                    |                  |          |            |        |       |
|--------------------|------------------|----------|------------|--------|-------|
| ENSG0000(NHP2      | protein_co chr5  | 1.78E+08 | 1.78E+08 - | 38.2   | 39.84 |
| ENSG0000(RMND5B    | protein_co chr5  | 1.78E+08 | 1.78E+08 + | 9.84   | 12.03 |
| ENSG0000(BOD1      | protein_co chr5  | 1.74E+08 | 1.74E+08 - | 37.43  | 38.47 |
| ENSG0000(CPLX2     | protein_co chr5  | 1.76E+08 | 1.76E+08 + | 0      | 0     |
| ENSG0000(TENM2     | protein_co chr5  | 1.67E+08 | 1.68E+08 + | 1.36   | 1.35  |
| ENSG0000(KCNMB1    | protein_co chr5  | 1.7E+08  | 1.7E+08 -  | 0.05   | 0.11  |
| ENSG0000(FAM50B    | protein_co chr6  | 3849386  | 3851317 +  | 2.89   | 3.33  |
| ENSG0000(MYLK4     | protein_co chr6  | 2663629  | 2750966 -  | 0.36   | 0.33  |
| ENSG0000(FAM217A   | protein_co chr6  | 4049434  | 4087344 -  | 0      | 0     |
| ENSG0000(TBC1D7    | protein_co chr6  | 13266542 | 13328583 - | 12.92  | 11.93 |
| ENSG0000(FARS2     | protein_co chr6  | 5261044  | 5771580 +  | 4.86   | 5.24  |
| ENSG0000(GFOD1     | protein_co chr6  | 13357830 | 13487662 - | 3.3    | 3.04  |
| ENSG0000(CDKAL1    | protein_co chr6  | 20534457 | 21232404 + | 3      | 3.32  |
| ENSG0000(PCDHB18P  | transcribec chr5 | 1.41E+08 | 1.41E+08 + | 0.21   | 0.18  |
| ENSG0000(PSD2      | protein_co chr5  | 1.4E+08  | 1.4E+08 +  | 0.01   | 0.01  |
| ENSG0000(LRRTM2    | protein_co chr5  | 1.39E+08 | 1.39E+08 - | 0.03   | 0.16  |
| ENSG0000(ZMAT2     | protein_co chr5  | 1.41E+08 | 1.41E+08 + | 38.07  | 37.44 |
| ENSG0000(GFRA3     | protein_co chr5  | 1.38E+08 | 1.38E+08 - | 1.45   | 1.62  |
| ENSG0000(KLHL3     | protein_co chr5  | 1.38E+08 | 1.38E+08 - | 0.27   | 0.37  |
| ENSG0000(DCDC2     | protein_co chr6  | 24171756 | 24358052 - | 0.01   | 0.01  |
| ENSG0000(SLC17A4   | protein_co chr6  | 25754699 | 25781191 + | 0      | 0     |
| ENSG0000(HIST1H2BA | protein_co chr6  | 25726777 | 25727292 + | 0      | 0     |
| ENSG0000(KAAG1     | protein_co chr6  | 24356903 | 24358284 + | 0      | 0     |
| ENSG0000(TRIM7     | protein_co chr5  | 1.81E+08 | 1.81E+08 - | 0.91   | 0.9   |
| ENSG0000(TRIM41    | protein_co chr5  | 1.81E+08 | 1.81E+08 + | 13.57  | 10.15 |
| ENSG0000(HIGD2A    | protein_co chr5  | 1.76E+08 | 1.76E+08 + | 78.39  | 76.6  |
| ENSG0000(FAM193B   | protein_co chr5  | 1.78E+08 | 1.78E+08 - | 31.62  | 46.2  |
| ENSG0000(PLA2G7    | protein_co chr6  | 46704201 | 46735693 - | 0.39   | 0.13  |
| ENSG0000(TNFRSF21  | protein_co chr6  | 47231532 | 47309905 - | 107.54 | 117.3 |
| ENSG0000(RNF44     | protein_co chr5  | 1.77E+08 | 1.77E+08 - | 10.24  | 11.14 |
| ENSG0000(MUT       | protein_co chr6  | 49430360 | 49463191 - | 10.07  | 9.42  |
| ENSG0000(RASGEF1C  | protein_co chr5  | 1.8E+08  | 1.8E+08 -  | 0      | 0     |
| ENSG0000(DOK3      | protein_co chr5  | 1.78E+08 | 1.78E+08 - | 1.95   | 2.8   |
| ENSG0000(ABT1      | protein_co chr6  | 26596952 | 26600744 + | 4.78   | 4.59  |
| ENSG0000(PPP1R18   | protein_co chr6  | 30676389 | 30687895 - | 51.51  | 54.16 |
| ENSG0000(DAAM2     | protein_co chr6  | 39792298 | 39904877 + | 1.73   | 2.25  |
| ENSG0000(PRIM2     | protein_co chr6  | 57314805 | 57646849 + | 2.41   | 2.63  |
| ENSG0000(MLIP      | protein_co chr6  | 53929982 | 54266280 + | 0.02   | 0     |
| ENSG0000(HMGCLL1   | protein_co chr6  | 55434369 | 55579214 - | 0      | 0     |
| ENSG0000(LGSN      | protein_co chr6  | 63275951 | 63319977 - | 0      | 0     |
| ENSG0000(FGD2      | protein_co chr6  | 37005646 | 37029070 + | 0.03   | 0.02  |
| ENSG0000(SCUBE3    | protein_co chr6  | 35214419 | 35253079 + | 0.15   | 0.27  |
| ENSG0000(ANO7      | protein_co chr2  | 2.41E+08 | 2.41E+08 + | 1.59   | 1.24  |
| ENSG0000(CRIP3     | protein_co chr6  | 43299710 | 43308797 - | 0.08   | 0     |
| ENSG0000(TTBK1     | protein_co chr6  | 43243680 | 43288259 + | 0      | 0     |

|                    |                 |          |          |   |       |       |
|--------------------|-----------------|----------|----------|---|-------|-------|
| ENSG0000(TCTE1     | protein_co chr6 | 44278743 | 44297688 | - | 0.02  | 0     |
| ENSG0000(RPL7L1    | protein_co chr6 | 42879618 | 42889925 | + | 30.62 | 29.62 |
| ENSG0000(NFKBIE    | protein_co chr6 | 44258166 | 44265788 | - | 2.55  | 3.52  |
| ENSG0000(CYP39A1   | protein_co chr6 | 46549580 | 46652830 | - | 0     | 0.03  |
| ENSG0000(TPBG      | protein_co chr6 | 82363206 | 82370828 | + | 33.98 | 34.53 |
| ENSG0000(IRAK1BP1  | protein_co chr6 | 78867472 | 78946440 | + | 0.96  | 1.07  |
| ENSG0000(PHIP      | protein_co chr6 | 78935867 | 79078236 | - | 4.79  | 4.55  |
| ENSG0000(PRSS35    | protein_co chr6 | 83512538 | 83525704 | + | 0.4   | 0.25  |
| ENSG0000(MMS22L    | protein_co chr6 | 97142161 | 97283217 | - | 1.46  | 2.06  |
| ENSG0000(FAXC      | protein_co chr6 | 99271169 | 99350062 | - | 0.38  | 0.29  |
| ENSG0000(GABRR1    | protein_co chr6 | 89177501 | 89231278 | - | 0     | 0     |
| ENSG0000(PNRC1     | protein_co chr6 | 89080751 | 89085160 | + | 52.59 | 56.42 |
| ENSG0000(PM20D2    | protein_co chr6 | 89146050 | 89165565 | + | 0.45  | 0.46  |
| ENSG0000(RARS2     | protein_co chr6 | 87514378 | 87590003 | - | 19.13 | 18.07 |
| ENSG0000(SCML4     | protein_co chr6 | 1.08E+08 | 1.08E+08 | - | 0     | 0     |
| ENSG0000(TBC1D32   | protein_co chr6 | 1.21E+08 | 1.21E+08 | - | 1.82  | 2.15  |
| ENSG0000(CLVS2     | protein_co chr6 | 1.23E+08 | 1.23E+08 | + | 0     | 0     |
| ENSG0000(GPR6      | protein_co chr6 | 1.1E+08  | 1.1E+08  | + | 0     | 0     |
| ENSG0000(RNF217    | protein_co chr6 | 1.25E+08 | 1.25E+08 | + | 5.96  | 6.81  |
| ENSG0000(RSPO3     | protein_co chr6 | 1.27E+08 | 1.27E+08 | + | 0.14  | 0.05  |
| ENSG0000(ARHGAP18  | protein_co chr6 | 1.3E+08  | 1.3E+08  | - | 7.95  | 7.56  |
| ENSG0000(TAAR2     | protein_co chr6 | 1.33E+08 | 1.33E+08 | - | 0     | 0     |
| ENSG0000(TAAR6     | protein_co chr6 | 1.33E+08 | 1.33E+08 | + | 0     | 0     |
| ENSG0000(TAAR8     | protein_co chr6 | 1.33E+08 | 1.33E+08 | + | 0     | 0     |
| ENSG0000(ABRACL    | protein_co chr6 | 1.39E+08 | 1.39E+08 | + | 19.97 | 20.54 |
| ENSG0000(TAAR1     | protein_co chr6 | 1.33E+08 | 1.33E+08 | - | 0     | 0     |
| ENSG0000(SLC18B1   | protein_co chr6 | 1.33E+08 | 1.33E+08 | - | 2.53  | 1.86  |
| ENSG0000(MTFR2     | protein_co chr6 | 1.36E+08 | 1.36E+08 | - | 0.3   | 0.33  |
| ENSG0000(SLC2A12   | protein_co chr6 | 1.34E+08 | 1.34E+08 | - | 2.5   | 3.08  |
| ENSG0000(SHPRH     | protein_co chr6 | 1.46E+08 | 1.46E+08 | - | 3.6   | 4.18  |
| ENSG0000(AIG1      | protein_co chr6 | 1.43E+08 | 1.43E+08 | + | 14.48 | 12.87 |
| ENSG0000(DYNLT1    | protein_co chr6 | 1.59E+08 | 1.59E+08 | - | 75.86 | 80.59 |
| ENSG0000(TIAM2     | protein_co chr6 | 1.55E+08 | 1.55E+08 | + | 1.36  | 1.8   |
| ENSG0000(TMEM181   | protein_co chr6 | 1.59E+08 | 1.59E+08 | + | 11.47 | 11.07 |
| ENSG0000(PNLDC1    | protein_co chr6 | 1.6E+08  | 1.6E+08  | + | 0     | 0     |
| ENSG0000(WTAP      | protein_co chr6 | 1.6E+08  | 1.6E+08  | + | 67.25 | 57.13 |
| ENSG0000(ZMYM4     | protein_co chr1 | 35268967 | 35422058 | + | 15.46 | 14.87 |
| ENSG0000(VIP       | protein_co chr6 | 1.53E+08 | 1.53E+08 | + | 0.32  | 0.28  |
| ENSG0000(ARMT1     | protein_co chr6 | 1.51E+08 | 1.51E+08 | + | 8.27  | 9.01  |
| ENSG0000(SLC22A3   | protein_co chr6 | 1.6E+08  | 1.6E+08  | + | 1.25  | 1.15  |
| ENSG0000(LINC01558 | lincRNA chr6    | 1.68E+08 | 1.68E+08 | - | 0     | 0     |
| ENSG0000(VWDE      | protein_co chr7 | 12330885 | 12403941 | - | 0     | 0     |
| ENSG0000(GNA12     | protein_co chr7 | 2728112  | 2844324  | - | 27.75 | 27.84 |
| ENSG0000(C7orf50   | protein_co chr7 | 996986   | 1138260  | - | 28.26 | 36.16 |
| ENSG0000(SDK1      | protein_co chr7 | 3301448  | 4269000  | + | 0.73  | 1.39  |

|                    |                  |          |            |       |       |
|--------------------|------------------|----------|------------|-------|-------|
| ENSG0000(WASH2P    | transcribed chr2 | 1.14E+08 | 1.14E+08 + | 9     | 7.69  |
| ENSG0000(CCZ1B     | protein_co chr7  | 6794134  | 6826770 -  | 4.53  | 6.14  |
| ENSG0000(C7orf26   | protein_co chr7  | 6590017  | 6608726 +  | 8.53  | 8.63  |
| ENSG0000(RBAK      | protein_co chr7  | 5045821  | 5069488 +  | 2.48  | 2.7   |
| ENSG0000(CREB5     | protein_co chr7  | 28299321 | 28825894 + | 0.36  | 0.18  |
| ENSG0000(FERD3L    | protein_co chr7  | 19144782 | 19145421 - | 0     | 0     |
| ENSG0000(EGFR      | protein_co chr7  | 55019021 | 55211628 + | 29.54 | 27.84 |
| ENSG0000(LINC00525 | antisense chr7   | 47761476 | 47766772 + | 0     | 0     |
| ENSG0000(CDCA5     | protein_co chr11 | 65066300 | 65084164 - | 1.06  | 0.58  |
| ENSG0000(IGFBP3    | protein_co chr7  | 45912245 | 45921874 - | 69.96 | 87.76 |
| ENSG0000(PURB      | protein_co chr7  | 44876293 | 44885361 - | 4.78  | 4.87  |
| ENSG0000(AC004453. | processed_chr7   | 44467897 | 44468304 + | 0.17  | 0     |
| ENSG0000(IGFBP1    | protein_co chr7  | 45888357 | 45893668 + | 0     | 0.08  |
| ENSG0000(SSC4D     | protein_co chr7  | 76389334 | 76409695 - | 0.34  | 0.32  |
| ENSG0000(MDH2      | protein_co chr7  | 76048051 | 76067508 + | 77.05 | 76.6  |
| ENSG0000(POMZP3    | protein_co chr7  | 76609986 | 76627261 - | 3.86  | 4.04  |
| ENSG0000(AC006014. | transcribed chr7 | 75391955 | 75395434 - | 0     | 0     |
| ENSG0000(GBAS      | protein_co chr7  | 55951793 | 56000181 + | 17.61 | 26.07 |
| ENSG0000(CCT6A     | protein_co chr7  | 56051630 | 56063989 + | 43.7  | 59.04 |
| ENSG0000(PSPH      | protein_co chr7  | 56011051 | 56051604 - | 13.7  | 17.33 |
| ENSG0000(TRIM50    | protein_co chr7  | 73312539 | 73328082 - | 0     | 0     |
| ENSG0000(ZNF92     | protein_co chr7  | 65373799 | 65401135 + | 1.13  | 1.33  |
| ENSG0000(ATXN7L1   | protein_co chr7  | 1.06E+08 | 1.06E+08 - | 3.08  | 2.55  |
| ENSG0000(TMEM168   | protein_co chr7  | 1.13E+08 | 1.13E+08 - | 6.25  | 7.39  |
| ENSG0000(ASB15     | protein_co chr7  | 1.24E+08 | 1.24E+08 + | 0     | 0     |
| ENSG0000(C7orf43   | protein_co chr7  | 1E+08    | 1E+08 -    | 5.3   | 6.33  |
| ENSG0000(SLC12A9   | protein_co chr7  | 1.01E+08 | 1.01E+08 + | 10.06 | 10.68 |
| ENSG0000(GIGYF1    | protein_co chr7  | 1.01E+08 | 1.01E+08 - | 11.43 | 13.62 |
| ENSG0000(TRIM4     | protein_co chr7  | 99876958 | 99919600 - | 13.01 | 12.94 |
| ENSG0000(MEPCF     | protein_co chr7  | 1E+08    | 1E+08 +    | 21.03 | 20.72 |
| ENSG0000(ZAN       | protein_co chr7  | 1.01E+08 | 1.01E+08 + | 0     | 0     |
| ENSG0000(TMEM209   | protein_co chr7  | 1.3E+08  | 1.3E+08 -  | 3.77  | 5.1   |
| ENSG0000(AGBL3     | protein_co chr7  | 1.35E+08 | 1.35E+08 + | 0.54  | 0.53  |
| ENSG0000(STRA8     | protein_co chr7  | 1.35E+08 | 1.35E+08 + | 0     | 0     |
| ENSG0000(ZC3HAV1L  | protein_co chr7  | 1.39E+08 | 1.39E+08 - | 2.96  | 3.47  |
| ENSG0000(TMEM140   | protein_co chr7  | 1.35E+08 | 1.35E+08 + | 6.7   | 5.99  |
| ENSG0000(TLK2      | protein_co chr17 | 62458658 | 62615481 + | 17.23 | 10.78 |
| ENSG0000(EPHA1     | protein_co chr7  | 1.43E+08 | 1.43E+08 - | 0     | 0.09  |
| ENSG0000(NOM1      | protein_co chr7  | 1.57E+08 | 1.57E+08 + | 4.1   | 6.39  |
| ENSG0000(CNPY1     | protein_co chr7  | 1.55E+08 | 1.56E+08 - | 0     | 0     |
| ENSG0000(NCAPG2    | protein_co chr7  | 1.59E+08 | 1.59E+08 - | 3.87  | 3.89  |
| ENSG0000(ASB10     | protein_co chr7  | 1.51E+08 | 1.51E+08 - | 0     | 0     |
| ENSG0000(NLGN4X    | protein_co chrX  | 5840637  | 6228863 -  | 0     | 0     |
| ENSG0000(SHROOM2   | protein_co chrX  | 9786456  | 9949443 +  | 0     | 0     |
| ENSG0000(RAB19     | protein_co chr7  | 1.4E+08  | 1.4E+08 +  | 0     | 0     |

|                   |                 |          |          |   |        |        |
|-------------------|-----------------|----------|----------|---|--------|--------|
| ENSG0000(LUC7L2   | protein_co chr7 | 1.39E+08 | 1.39E+08 | + | 17.44  | 15.77  |
| ENSG0000(DENND2A  | protein_co chr7 | 1.41E+08 | 1.41E+08 | - | 2.83   | 2.72   |
| ENSG0000(TMEM27   | protein_co chrX | 15627318 | 15665031 | - | 0      | 0.04   |
| ENSG0000(SH3KBP1  | protein_co chrX | 19533975 | 19887601 | - | 17.75  | 20.42  |
| ENSG0000(TMEM47   | protein_co chrX | 34627064 | 34657288 | - | 22.31  | 22.9   |
| ENSG0000(LANCL3   | protein_co chrX | 37571569 | 37684463 | + | 0.02   | 0.02   |
| ENSG0000(SYTL5    | protein_co chrX | 38006582 | 38128819 | + | 0.11   | 0.06   |
| ENSG0000(CASK     | protein_co chrX | 41514934 | 41923463 | - | 9.39   | 10.4   |
| ENSG0000(KDM6A    | protein_co chrX | 44873177 | 45112602 | + | 4.01   | 4.02   |
| ENSG0000(SPIN2A   | protein_co chrX | 57134530 | 57137625 | - | 0.3    | 0.32   |
| ENSG0000(MSN      | protein_co chrX | 65588377 | 65741931 | + | 114.35 | 117.88 |
| ENSG0000(AKAP4    | protein_co chrX | 50190768 | 50201013 | - | 0      | 0      |
| ENSG0000(CCNB3    | protein_co chrX | 50202713 | 50351910 | + | 0.09   | 0.39   |
| ENSG0000(HDAC8    | protein_co chrX | 72329516 | 72573103 | - | 9.61   | 9.73   |
| ENSG0000(SLC16A2  | protein_co chrX | 74421461 | 74533917 | + | 52     | 48.8   |
| ENSG0000(CXorf36  | protein_co chrX | 45148374 | 45200901 | - | 0.02   | 0.03   |
| ENSG0000(ZNF157   | protein_co chrX | 47370583 | 47414305 | + | 0.14   | 0.05   |
| ENSG0000(ZNF182   | protein_co chrX | 47974851 | 48003978 | - | 1.53   | 1.79   |
| ENSG0000(CHST7    | protein_co chrX | 46573784 | 46598408 | + | 0.53   | 0.77   |
| ENSG0000(KRBOX4   | protein_co chrX | 46446857 | 46497422 | + | 6.12   | 4.83   |
| ENSG0000(NDUFB11  | protein_co chrX | 47142216 | 47145504 | - | 34.36  | 35     |
| ENSG0000(ZNF41    | protein_co chrX | 47445879 | 47482946 | - | 2.27   | 3.1    |
| ENSG0000(RAB41    | protein_co chrX | 70282093 | 70285002 | + | 0      | 0      |
| ENSG0000(ZMYM3    | protein_co chrX | 71239624 | 71255146 | - | 13.51  | 13.64  |
| ENSG0000(TAF1     | protein_co chrX | 71366239 | 71532374 | + | 8.45   | 7.49   |
| ENSG0000(GPR174   | protein_co chrX | 79170972 | 79172229 | + | 0      | 0      |
| ENSG0000(NONO     | protein_co chrX | 71283192 | 71301168 | + | 139.85 | 126.5  |
| ENSG0000(CCDC120  | protein_co chrX | 49053572 | 49069857 | + | 1.63   | 1.56   |
| ENSG0000(LPAR4    | protein_co chrX | 78747709 | 78757094 | + | 0      | 0.14   |
| ENSG0000(EBP      | protein_co chrX | 48521158 | 48528716 | + | 24.22  | 23.59  |
| ENSG0000(AWAT2    | protein_co chrX | 70040542 | 70049938 | - | 0      | 0      |
| ENSG0000(OGT      | protein_co chrX | 71533083 | 71575897 | + | 84.93  | 95.46  |
| ENSG0000(SNX12    | protein_co chrX | 71056332 | 71073426 | - | 33.1   | 32.43  |
| ENSG0000(ITGB1BP2 | protein_co chrX | 71301734 | 71305371 | + | 0      | 0.05   |
| ENSG0000(IL2RG    | protein_co chrX | 71107404 | 71112108 | - | 0      | 0      |
| ENSG0000(GCNA     | protein_co chrX | 71578411 | 71613583 | + | 0.77   | 0.36   |
| ENSG0000(ZNF711   | protein_co chrX | 85244032 | 85273362 | + | 0.02   | 0.02   |
| ENSG0000(CPXCR1   | protein_co chrX | 88747225 | 88754785 | + | 0      | 0      |
| ENSG0000(DIAPH2   | protein_co chrX | 96684663 | 97604997 | + | 5.11   | 4.08   |
| ENSG0000(NXF3     | protein_co chrX | 1.03E+08 | 1.03E+08 | - | 0.23   | 0.17   |
| ENSG0000(RIPPLY1  | protein_co chrX | 1.07E+08 | 1.07E+08 | - | 0      | 0      |
| ENSG0000(PRPS1    | protein_co chrX | 1.08E+08 | 1.08E+08 | + | 11.56  | 15.54  |
| ENSG0000(CXorf57  | protein_co chrX | 1.07E+08 | 1.07E+08 | + | 0.87   | 1.24   |
| ENSG0000(FRMPD3   | protein_co chrX | 1.08E+08 | 1.08E+08 | + | 0.08   | 0.03   |
| ENSG0000(HTR2C    | protein_co chrX | 1.15E+08 | 1.15E+08 | + | 0      | 0      |

|                    |                 |          |            |         |        |
|--------------------|-----------------|----------|------------|---------|--------|
| ENSG0000( DOCK11   | protein_co chrX | 1.18E+08 | 1.19E+08 + | 21.13   | 19.24  |
| ENSG0000( IGSF1    | protein_co chrX | 1.31E+08 | 1.32E+08 - | 0       | 0      |
| ENSG0000( ARHGAP36 | protein_co chrX | 1.31E+08 | 1.31E+08 + | 0       | 0      |
| ENSG0000( GPC3     | protein_co chrX | 1.34E+08 | 1.34E+08 - | 0.54    | 0.48   |
| ENSG0000( GPR119   | protein_co chrX | 1.3E+08  | 1.3E+08 -  | 0       | 0      |
| ENSG0000( RBMX     | protein_co chrX | 1.37E+08 | 1.37E+08 - | 69.22   | 72.67  |
| ENSG0000( MCPH1    | protein_co chr8 | 6406592  | 6648504 +  | 6.92    | 4.87   |
| ENSG0000( MFHAS1   | protein_co chr8 | 8783354  | 8893645 -  | 3.61    | 5.59   |
| ENSG0000( FBXO25   | protein_co chr8 | 406428   | 477967 +   | 17.46   | 15.8   |
| ENSG0000( FATE1    | protein_co chrX | 1.52E+08 | 1.52E+08 + | 0       | 0      |
| ENSG0000( MAGEA4   | protein_co chrX | 1.52E+08 | 1.52E+08 + | 0       | 0      |
| ENSG0000( NSDHL    | protein_co chrX | 1.53E+08 | 1.53E+08 + | 11.72   | 10.81  |
| ENSG0000( ZNF185   | protein_co chrX | 1.53E+08 | 1.53E+08 + | 2.3     | 2.53   |
| ENSG0000( CETN2    | protein_co chrX | 1.53E+08 | 1.53E+08 - | 21.26   | 20.03  |
| ENSG0000( RPL10    | protein_co chrX | 1.54E+08 | 1.54E+08 + | 2320.39 | 2256.4 |
| ENSG0000( CSGALNAC | protein_co chr8 | 19404161 | 19758029 - | 3.41    | 2.28   |
| ENSG0000( ATP6V1B2 | protein_co chr8 | 20197367 | 20226819 + | 50.55   | 43.78  |
| ENSG0000( CCDC25   | protein_co chr8 | 27733311 | 27772653 - | 14.81   | 13.49  |
| ENSG0000( HMBOX1   | protein_co chr8 | 28890394 | 29064764 + | 9.81    | 9.29   |
| ENSG0000( CHRNB3   | protein_co chr8 | 42697376 | 42737407 + | 0       | 0      |
| ENSG0000( CHRNA6   | protein_co chr8 | 42752620 | 42796392 - | 0       | 0      |
| ENSG0000( GNRH1    | protein_co chr8 | 25419260 | 25424654 - | 1.77    | 1.03   |
| ENSG0000( BIN3     | protein_co chr8 | 22620418 | 22669148 - | 20.64   | 19.13  |
| ENSG0000( DOK2     | protein_co chr8 | 21908873 | 21913860 - | 0.03    | 0      |
| ENSG0000( SLC25A37 | protein_co chr8 | 23528805 | 23575463 + | 14.87   | 15.13  |
| ENSG0000( CHMP7    | protein_co chr8 | 23243637 | 23262000 + | 16.12   | 15.13  |
| ENSG0000( DOCK5    | protein_co chr8 | 25184723 | 25418082 + | 6.16    | 6.41   |
| ENSG0000( STAR     | protein_co chr8 | 38143649 | 38151265 - | 0.21    | 0.65   |
| ENSG0000( PROSC    | protein_co chr8 | 37762593 | 37779767 + | 12.74   | 20.41  |
| ENSG0000( ERLIN2   | protein_co chr8 | 37736599 | 37759101 + | 22.78   | 20.02  |
| ENSG0000( SNTG1    | protein_co chr8 | 49909789 | 50794118 + | 0       | 0      |
| ENSG0000( PXDNL    | protein_co chr8 | 51319578 | 51809445 - | 0.06    | 0      |
| ENSG0000( ST18     | protein_co chr8 | 52110839 | 52460959 - | 0.09    | 0      |
| ENSG0000( RGS20    | protein_co chr8 | 53851808 | 53959303 + | 3.38    | 2.36   |
| ENSG0000( TACC1    | protein_co chr8 | 38728186 | 38853028 + | 14.14   | 18.96  |
| ENSG0000( GOLGA7   | protein_co chr8 | 41490396 | 41510980 + | 39.75   | 39.27  |
| ENSG0000( PLPP5    | protein_co chr8 | 38263130 | 38269243 - | 10.94   | 14.35  |
| ENSG0000( GINS4    | protein_co chr8 | 41529206 | 41545046 + | 1.8     | 0.83   |
| ENSG0000( NSD3     | protein_co chr8 | 38269697 | 38382272 - | 18.8    | 18.15  |
| ENSG0000( DNAJC5B  | protein_co chr8 | 66021560 | 66100526 + | 0       | 0      |
| ENSG0000( CRH      | protein_co chr8 | 66176382 | 66178725 - | 0       | 0      |
| ENSG0000( TRIM55   | protein_co chr8 | 66126896 | 66175487 + | 0.03    | 0.14   |
| ENSG0000( ADHFE1   | protein_co chr8 | 66430185 | 66471601 + | 2.64    | 2.41   |
| ENSG0000( MRPS28   | protein_co chr8 | 79918717 | 80030289 - | 19.3    | 18.8   |
| ENSG0000( PMP2     | protein_co chr8 | 81440326 | 81447523 - | 0       | 0      |



|                   |                 |          |            |         |         |
|-------------------|-----------------|----------|------------|---------|---------|
| ENSG0000(LACTB2   | protein_co chr8 | 70635318 | 70669174 - | 9.69    | 9.03    |
| ENSG0000(PRDM14   | protein_co chr8 | 70051651 | 70071693 - | 0       | 0       |
| ENSG0000(TERF1    | protein_co chr8 | 73008864 | 73048122 + | 11.68   | 11.59   |
| ENSG0000(RPL7     | protein_co chr8 | 73290267 | 73295789 - | 1082.69 | 1090.96 |
| ENSG0000(SLC26A7  | protein_co chr8 | 91209494 | 91398152 + | 0.09    | 0.4     |
| ENSG0000(PSKH2    | protein_co chr8 | 86048373 | 86088621 - | 0       | 0       |
| ENSG0000(ATP6VOD2 | protein_co chr8 | 85987323 | 86154228 + | 0.07    | 0       |
| ENSG0000(SYBU     | protein_co chr8 | 1.1E+08  | 1.1E+08 -  | 0.71    | 0.42    |
| ENSG0000(DPYS     | protein_co chr8 | 1.04E+08 | 1.04E+08 - | 0.05    | 0       |
| ENSG0000(MTDH     | protein_co chr8 | 97644179 | 97728770 + | 42.79   | 50.51   |
| ENSG0000(LRP12    | protein_co chr8 | 1.04E+08 | 1.05E+08 - | 15.88   | 13.05   |
| ENSG0000(EBAG9    | protein_co chr8 | 1.1E+08  | 1.1E+08 +  | 5.21    | 6.31    |
| ENSG0000(RSPO2    | protein_co chr8 | 1.08E+08 | 1.08E+08 - | 0.15    | 0       |
| ENSG0000(POLR2K   | protein_co chr8 | 1E+08    | 1E+08 +    | 20.64   | 20.56   |
| ENSG0000(MAL2     | protein_co chr8 | 1.19E+08 | 1.19E+08 + | 0       | 0       |
| ENSG0000(EIF3H    | protein_co chr8 | 1.17E+08 | 1.17E+08 - | 146.39  | 160.13  |
| ENSG0000(UTP23    | protein_co chr8 | 1.17E+08 | 1.17E+08 + | 7.24    | 8.39    |
| ENSG0000(NDUFB9   | protein_co chr8 | 1.25E+08 | 1.25E+08 + | 83.23   | 74.59   |
| ENSG0000(TATDN1   | protein_co chr8 | 1.24E+08 | 1.25E+08 - | 14.06   | 15.03   |
| ENSG0000(FAM83A   | protein_co chr8 | 1.23E+08 | 1.23E+08 + | 0       | 0       |
| ENSG0000(GSDMC    | protein_co chr8 | 1.3E+08  | 1.3E+08 -  | 0.04    | 0.02    |
| ENSG0000(FAM135B  | protein_co chr8 | 1.38E+08 | 1.38E+08 - | 0       | 0       |
| ENSG0000(TTTY7    | lincRNA chrY    | 6449468  | 6457906 +  | 0       | 0       |
| ENSG0000(TTTY7B   | lincRNA chrY    | 9706824  | 9715262 -  | 0       | 0       |
| ENSG0000(ZNF7     | protein_co chr8 | 1.45E+08 | 1.45E+08 + | 10.65   | 11.31   |
| ENSG0000(ARHGAP39 | protein_co chr8 | 1.45E+08 | 1.45E+08 - | 1.22    | 1.95    |
| ENSG0000(SLC39A4  | protein_co chr8 | 1.44E+08 | 1.44E+08 - | 5.84    | 7       |
| ENSG0000(NAPRT    | protein_co chr8 | 1.44E+08 | 1.44E+08 - | 19.03   | 23.85   |
| ENSG0000(VLDLR    | protein_co chr9 | 2621834  | 2660053 +  | 43.52   | 43.23   |
| ENSG0000(AK3      | protein_co chr9 | 4709559  | 4742043 -  | 41.23   | 47.04   |
| ENSG0000(UHRF2    | protein_co chr9 | 6413151  | 6507054 +  | 20.24   | 25.14   |
| ENSG0000(NFIB     | protein_co chr9 | 14081843 | 14398983 - | 22.71   | 25.62   |
| ENSG0000(CER1     | protein_co chr9 | 14719724 | 14722717 - | 0       | 0       |
| ENSG0000(PLIN2    | protein_co chr9 | 19108375 | 19149290 - | 198.4   | 202.06  |
| ENSG0000(IFNA5    | protein_co chr9 | 21304326 | 21305312 - | 0       | 0       |
| ENSG0000(HAUS6    | protein_co chr9 | 19053143 | 19103119 - | 4.68    | 3.07    |
| ENSG0000(CDKN2B   | protein_co chr9 | 22002903 | 22009363 - | 19.07   | 21.8    |
| ENSG0000(IFNA16   | protein_co chr9 | 21216373 | 21217311 - | 0       | 0       |
| ENSG0000(CDKN2A   | protein_co chr9 | 21967753 | 21995301 - | 67.82   | 75.44   |
| ENSG0000(C9orf72  | protein_co chr9 | 27546545 | 27573866 - | 2.53    | 1.88    |
| ENSG0000(IFNK     | protein_co chr9 | 27524314 | 27526498 + | 0       | 0       |
| ENSG0000(ZCCHC7   | protein_co chr9 | 37120539 | 37358149 + | 9.74    | 9.05    |
| ENSG0000(FBXO10   | protein_co chr9 | 37510892 | 37576349 - | 3.38    | 4       |
| ENSG0000(SIGMAR1  | protein_co chr9 | 34634722 | 34637809 - | 44.61   | 47.53   |
| ENSG0000(CBWD5    | protein_co chr9 | 65668805 | 65734041 + | 13.03   | 12.4    |

|                    |                 |          |            |         |         |
|--------------------|-----------------|----------|------------|---------|---------|
| ENSG0000( CEP78    | protein_co chr9 | 78236062 | 78279690 + | 3.96    | 3.89    |
| ENSG0000( NTRK2    | protein_co chr9 | 84668551 | 85027070 + | 0.01    | 0       |
| ENSG0000( IDNK     | protein_co chr9 | 83623049 | 83644130 + | 3.01    | 3.01    |
| ENSG0000( SHC3     | protein_co chr9 | 89005771 | 89178767 - | 5.89    | 4.31    |
| ENSG0000( AUH      | protein_co chr9 | 91213815 | 91361913 - | 6.59    | 6.16    |
| ENSG0000( MFSD14B  | protein_co chr9 | 94374551 | 94461042 + | 13.71   | 13.9    |
| ENSG0000( C9orf3   | protein_co chr9 | 94726701 | 95087218 + | 32.99   | 37.12   |
| ENSG0000( PLPPR1   | protein_co chr9 | 1.01E+08 | 1.01E+08 + | 0       | 0       |
| ENSG0000( OR13C4   | protein_co chr9 | 1.05E+08 | 1.05E+08 - | 0       | 0       |
| ENSG0000( ZNF462   | protein_co chr9 | 1.07E+08 | 1.07E+08 + | 1.85    | 2.38    |
| ENSG0000( INIP     | protein_co chr9 | 1.13E+08 | 1.13E+08 - | 4.55    | 6.98    |
| ENSG0000( UGCG     | protein_co chr9 | 1.12E+08 | 1.12E+08 + | 21.15   | 20.27   |
| ENSG0000( ACTL7B   | protein_co chr9 | 1.09E+08 | 1.09E+08 - | 0       | 0       |
| ENSG0000( SNX30    | protein_co chr9 | 1.13E+08 | 1.13E+08 + | 8.21    | 7.53    |
| ENSG0000( STOM     | protein_co chr9 | 1.21E+08 | 1.21E+08 - | 118.62  | 116.52  |
| ENSG0000( GSN      | protein_co chr9 | 1.21E+08 | 1.21E+08 + | 230.54  | 251.98  |
| ENSG0000( MRRF     | protein_co chr9 | 1.22E+08 | 1.22E+08 + | 16.73   | 15.7    |
| ENSG0000( NR6A1    | protein_co chr9 | 1.25E+08 | 1.25E+08 - | 0.13    | 0.22    |
| ENSG0000( CRB2     | protein_co chr9 | 1.23E+08 | 1.23E+08 + | 0       | 0       |
| ENSG0000( OR5C1    | protein_co chr9 | 1.23E+08 | 1.23E+08 + | 0       | 0       |
| ENSG0000( ALAD     | protein_co chr9 | 1.13E+08 | 1.13E+08 - | 55.63   | 56.17   |
| ENSG0000( ASTN2    | protein_co chr9 | 1.16E+08 | 1.17E+08 - | 3.63    | 3.84    |
| ENSG0000( WDR31    | protein_co chr9 | 1.13E+08 | 1.13E+08 - | 2.25    | 2.07    |
| ENSG0000( POLE3    | protein_co chr9 | 1.13E+08 | 1.13E+08 - | 12.45   | 12.08   |
| ENSG0000( SURF4    | protein_co chr9 | 1.33E+08 | 1.33E+08 - | 91.4    | 84.83   |
| ENSG0000( GBGT1    | protein_co chr9 | 1.33E+08 | 1.33E+08 - | 3.2     | 3.55    |
| ENSG0000( SURF1    | protein_co chr9 | 1.33E+08 | 1.33E+08 - | 23.09   | 22.61   |
| ENSG0000( SURF2    | protein_co chr9 | 1.33E+08 | 1.33E+08 + | 7.93    | 7.79    |
| ENSG0000( SURF6    | protein_co chr9 | 1.33E+08 | 1.33E+08 - | 7.79    | 7.43    |
| ENSG0000( MED22    | protein_co chr9 | 1.33E+08 | 1.33E+08 - | 11.85   | 12.57   |
| ENSG0000( REXO4    | protein_co chr9 | 1.33E+08 | 1.33E+08 - | 12.29   | 12.48   |
| ENSG0000( RPL7A    | protein_co chr9 | 1.33E+08 | 1.33E+08 + | 1383.99 | 1401.39 |
| ENSG0000( GTF3C5   | protein_co chr9 | 1.33E+08 | 1.33E+08 + | 15.63   | 16.57   |
| ENSG0000( ASB6     | protein_co chr9 | 1.3E+08  | 1.3E+08 -  | 7.67    | 8.24    |
| ENSG0000( PTGES2   | protein_co chr9 | 1.28E+08 | 1.28E+08 - | 27.75   | 24.87   |
| ENSG0000( NTMT1    | protein_co chr9 | 1.3E+08  | 1.3E+08 +  | 20      | 18.76   |
| ENSG0000( CIZ1     | protein_co chr9 | 1.28E+08 | 1.28E+08 - | 37.64   | 42.39   |
| ENSG0000( SLC25A25 | protein_co chr9 | 1.28E+08 | 1.28E+08 + | 3.41    | 4.04    |
| ENSG0000( SH3GLB2  | protein_co chr9 | 1.29E+08 | 1.29E+08 - | 37.38   | 38.15   |
| ENSG0000( MIGA2    | protein_co chr9 | 1.29E+08 | 1.29E+08 + | 6.54    | 9.31    |
| ENSG0000( PTGES    | protein_co chr9 | 1.3E+08  | 1.3E+08 -  | 24.54   | 24.35   |
| ENSG0000( LCN2     | protein_co chr9 | 1.28E+08 | 1.28E+08 + | 0.39    | 0.21    |
| ENSG0000( LRSAM1   | protein_co chr9 | 1.27E+08 | 1.28E+08 + | 5.74    | 5.29    |
| ENSG0000( HMCN2    | protein_co chr9 | 1.3E+08  | 1.3E+08 +  | 0.13    | 0.13    |
| ENSG0000( GPR107   | protein_co chr9 | 1.3E+08  | 1.3E+08 +  | 18.24   | 18.79   |

|                   |                  |          |          |   |        |        |
|-------------------|------------------|----------|----------|---|--------|--------|
| ENSG0000(C9orf142 | protein_co chr9  | 1.37E+08 | 1.37E+08 | + | 14.08  | 14.74  |
| ENSG0000(IDI2     | protein_co chr10 | 1018907  | 1025859  | - | 0      | 0.05   |
| ENSG0000(INPP5E   | protein_co chr9  | 1.36E+08 | 1.36E+08 | - | 6.4    | 6.6    |
| ENSG0000(LCN9     | protein_co chr9  | 1.36E+08 | 1.36E+08 | + | 0      | 0      |
| ENSG0000(SEC16A   | protein_co chr9  | 1.36E+08 | 1.36E+08 | - | 14     | 14.51  |
| ENSG0000(DPH7     | protein_co chr9  | 1.38E+08 | 1.38E+08 | - | 11.18  | 12.89  |
| ENSG0000(NOTCH1   | protein_co chr9  | 1.36E+08 | 1.37E+08 | - | 2.72   | 3.07   |
| ENSG0000(CACNA1B  | protein_co chr9  | 1.38E+08 | 1.38E+08 | + | 0      | 0      |
| ENSG0000(NACC2    | protein_co chr9  | 1.36E+08 | 1.36E+08 | - | 9.23   | 10.21  |
| ENSG0000(PROSER2  | protein_co chr10 | 11823339 | 11872277 | + | 1.8    | 2.99   |
| ENSG0000(USP6NL   | protein_co chr10 | 11453946 | 11611754 | - | 4.95   | 5.02   |
| ENSG0000(COMMD3   | protein_co chr10 | 22315974 | 22320308 | + | 26.55  | 29.3   |
| ENSG0000(MSRB2    | protein_co chr10 | 23095506 | 23122013 | + | 12.98  | 15.15  |
| ENSG0000(PDSS1    | protein_co chr10 | 26697659 | 26746798 | + | 1.35   | 1.19   |
| ENSG0000(FAM171A1 | protein_co chr10 | 15211643 | 15371062 | - | 13.63  | 11.68  |
| ENSG0000(MINDY3   | protein_co chr10 | 15778170 | 15860520 | - | 12.42  | 10.68  |
| ENSG0000(SLC39A12 | protein_co chr10 | 17951839 | 18043292 | + | 0      | 0      |
| ENSG0000(TMEM236  | protein_co chr10 | 17752252 | 17800868 | + | 0.04   | 0.05   |
| ENSG0000(RSU1     | protein_co chr10 | 16590611 | 16817528 | - | 48.21  | 48.86  |
| ENSG0000(ST8SIA6  | protein_co chr10 | 17318383 | 17454330 | - | 0      | 0      |
| ENSG0000(PARD3    | protein_co chr10 | 34109560 | 34815325 | - | 21     | 22.16  |
| ENSG0000(ANKRD30A | protein_co chr10 | 37125788 | 37384111 | + | 0      | 0      |
| ENSG0000(ZEB1     | protein_co chr10 | 31318495 | 31529814 | + | 28.32  | 26.93  |
| ENSG0000(FAM13C   | protein_co chr10 | 59246129 | 59363181 | - | 3      | 4.17   |
| ENSG0000(NRBF2    | protein_co chr10 | 63133247 | 63155031 | + | 20.39  | 20.75  |
| ENSG0000(A1CF     | protein_co chr10 | 50799409 | 50885675 | - | 0      | 0      |
| ENSG0000(CDHR1    | protein_co chr10 | 84194635 | 84219621 | + | 0.01   | 0      |
| ENSG0000(LRIT1    | protein_co chr10 | 84231593 | 84241461 | - | 0      | 0      |
| ENSG0000(RGR      | protein_co chr10 | 84245053 | 84259960 | + | 0      | 0      |
| ENSG0000(POLR3A   | protein_co chr10 | 77969251 | 78029545 | - | 4.26   | 4.22   |
| ENSG0000(HERC4    | protein_co chr10 | 67921899 | 68075348 | - | 13.94  | 15.32  |
| ENSG0000(C10orf11 | protein_co chr10 | 75431453 | 76560167 | + | 1.09   | 1.87   |
| ENSG0000(CAMK2G   | protein_co chr10 | 73812501 | 73874591 | - | 10.34  | 9.81   |
| ENSG0000(ADIRF    | protein_co chr10 | 86968192 | 86983934 | + | 6.47   | 4.54   |
| ENSG0000(GLUD1    | protein_co chr10 | 87050486 | 87094866 | - | 38.25  | 38.53  |
| ENSG0000(ANKRD1   | protein_co chr10 | 90912096 | 90921276 | - | 0.14   | 0.25   |
| ENSG0000(HTR7     | protein_co chr10 | 90740823 | 90857698 | - | 1.11   | 0.76   |
| ENSG0000(RPP30    | protein_co chr10 | 90871716 | 90908553 | + | 17.82  | 15.59  |
| ENSG0000(FRA10AC1 | protein_co chr10 | 93667883 | 93702572 | - | 3.41   | 3.68   |
| ENSG0000(ADD3     | protein_co chr10 | 1.1E+08  | 1.1E+08  | + | 139.66 | 151.87 |
| ENSG0000(HABP2    | protein_co chr10 | 1.14E+08 | 1.14E+08 | + | 0      | 0      |
| ENSG0000(VAX1     | protein_co chr10 | 1.17E+08 | 1.17E+08 | - | 0      | 0      |
| ENSG0000(DNAJB12  | protein_co chr10 | 72332830 | 72355230 | - | 15.96  | 15.48  |
| ENSG0000(EIF4EBP2 | protein_co chr10 | 70404379 | 70428618 | + | 20.09  | 19.06  |
| ENSG0000(NPFFR1   | protein_co chr10 | 70247329 | 70283676 | - | 0.01   | 0.05   |

|                    |                  |          |            |        |        |
|--------------------|------------------|----------|------------|--------|--------|
| ENSG0000( PLEKHS1  | protein_co chr10 | 1.14E+08 | 1.14E+08 + | 0      | 0      |
| ENSG0000( TCF7L2   | protein_co chr10 | 1.13E+08 | 1.13E+08 + | 28.39  | 25.9   |
| ENSG0000( MKI67    | protein_co chr10 | 1.28E+08 | 1.28E+08 - | 0.17   | 0.1    |
| ENSG0000( CYP17A1  | protein_co chr10 | 1.03E+08 | 1.03E+08 - | 0      | 0      |
| ENSG0000( INA      | protein_co chr10 | 1.03E+08 | 1.03E+08 + | 0.03   | 0.11   |
| ENSG0000( FUOM     | protein_co chr10 | 1.33E+08 | 1.33E+08 - | 7.3    | 5.54   |
| ENSG0000( LRRC27   | protein_co chr10 | 1.32E+08 | 1.32E+08 + | 6.59   | 6.66   |
| ENSG0000( MTG1     | protein_co chr10 | 1.33E+08 | 1.33E+08 + | 18.11  | 16.74  |
| ENSG0000( NKX6-2   | protein_co chr10 | 1.33E+08 | 1.33E+08 - | 0      | 0      |
| ENSG0000( PAOX     | protein_co chr10 | 1.33E+08 | 1.33E+08 + | 2.61   | 2.23   |
| ENSG0000( GSTO1    | protein_co chr10 | 1.04E+08 | 1.04E+08 + | 73.06  | 76.03  |
| ENSG0000( TAF5     | protein_co chr10 | 1.03E+08 | 1.03E+08 + | 1.14   | 1.03   |
| ENSG0000( PPRC1    | protein_co chr10 | 1.02E+08 | 1.02E+08 + | 9.23   | 9.28   |
| ENSG0000( ITPRIP   | protein_co chr10 | 1.04E+08 | 1.04E+08 - | 13.42  | 13.78  |
| ENSG0000( CNNM2    | protein_co chr10 | 1.03E+08 | 1.03E+08 + | 3.61   | 3.97   |
| ENSG0000( PDCD11   | protein_co chr10 | 1.03E+08 | 1.03E+08 + | 6.48   | 5.75   |
| ENSG0000( ADAM12   | protein_co chr10 | 1.26E+08 | 1.26E+08 - | 46.01  | 46.27  |
| ENSG0000( RGS10    | protein_co chr10 | 1.19E+08 | 1.2E+08 -  | 26.5   | 31.62  |
| ENSG0000( BTBD10   | protein_co chr11 | 13388001 | 13463297 - | 14.55  | 14.63  |
| ENSG0000( ADM      | protein_co chr11 | 10304680 | 10307397 + | 56.24  | 54.86  |
| ENSG0000( GAS2     | protein_co chr11 | 22625642 | 22813055 + | 0.13   | 0.03   |
| ENSG0000( SLC5A12  | protein_co chr11 | 26667019 | 26723427 - | 0.47   | 0.33   |
| ENSG0000( LIN7C    | protein_co chr11 | 27494576 | 27506773 - | 1.9    | 2.16   |
| ENSG0000( LRRC4C   | protein_co chr11 | 40114203 | 41459773 - | 0.05   | 0.03   |
| ENSG0000( IMMP1L   | protein_co chr11 | 31432401 | 31509645 - | 4.42   | 4.24   |
| ENSG0000( SAA4     | protein_co chr11 | 18231349 | 18236893 - | 0      | 0      |
| ENSG0000( PGAP2    | protein_co chr11 | 3797724  | 3826371 +  | 15.07  | 17.17  |
| ENSG0000( TUT1     | protein_co chr11 | 62575045 | 62592177 - | 4.84   | 3.76   |
| ENSG0000( SCGB1A1  | protein_co chr11 | 62405103 | 62423195 + | 0      | 0      |
| ENSG0000( SYT8     | protein_co chr11 | 1828307  | 1837521 +  | 0      | 0      |
| ENSG0000( ZNF214   | protein_co chr11 | 6999318  | 7020368 -  | 1.64   | 1.14   |
| ENSG0000( ZNF215   | protein_co chr11 | 6926404  | 7001004 +  | 1.51   | 0.74   |
| ENSG0000( HSD17B12 | protein_co chr11 | 43680558 | 43856617 + | 19.39  | 18.04  |
| ENSG0000( APIP     | protein_co chr11 | 34853094 | 34916499 - | 6.54   | 6.27   |
| ENSG0000( PAMR1    | protein_co chr11 | 35431823 | 35530300 - | 155.47 | 138.85 |
| ENSG0000( DGKZ     | protein_co chr11 | 46332905 | 46380554 + | 13.76  | 15.03  |
| ENSG0000( EIF3M    | protein_co chr11 | 32583798 | 32606262 + | 109.8  | 127.66 |
| ENSG0000( TNKS1BP1 | protein_co chr11 | 57299638 | 57324952 - | 85.41  | 85.41  |
| ENSG0000( GLYAT    | protein_co chr11 | 58640426 | 58731974 - | 0      | 0.06   |
| ENSG0000( SERPING1 | protein_co chr11 | 57597387 | 57614853 + | 210.83 | 212.46 |
| ENSG0000( OR5F1    | protein_co chr11 | 55993681 | 55994625 - | 0      | 0      |
| ENSG0000( SSRP1    | protein_co chr11 | 57325985 | 57335877 - | 32.11  | 31.78  |
| ENSG0000( SLC43A1  | protein_co chr11 | 57484534 | 57515786 - | 9.91   | 9.48   |
| ENSG0000( PTPRJ    | protein_co chr11 | 47980558 | 48170841 + | 8.93   | 8.4    |
| ENSG0000( C11orf49 | protein_co chr11 | 46936689 | 47164385 + | 16.72  | 14.77  |

|                    |                  |          |          |   |        |        |
|--------------------|------------------|----------|----------|---|--------|--------|
| ENSG0000( ARFGAP2  | protein_co chr11 | 47164299 | 47177125 | - | 22.85  | 25.83  |
| ENSG0000( CELF1    | protein_co chr11 | 47465944 | 47565569 | - | 23.95  | 26.01  |
| ENSG0000( HIKESHI  | protein_co chr11 | 86302211 | 86345931 | + | 26.66  | 21.71  |
| ENSG0000( CCDC81   | protein_co chr11 | 86374736 | 86423109 | + | 0.26   | 0.26   |
| ENSG0000( SESN3    | protein_co chr11 | 95165513 | 95232541 | - | 3.04   | 2.35   |
| ENSG0000( ENDOD1   | protein_co chr11 | 95089810 | 95132645 | + | 8.29   | 9.19   |
| ENSG0000( CCDC82   | protein_co chr11 | 96352769 | 96389923 | - | 14.51  | 11.2   |
| ENSG0000( KLHL35   | protein_co chr11 | 75422394 | 75430629 | - | 2.11   | 1.95   |
| ENSG0000( TENM4    | protein_co chr11 | 78652831 | 79440948 | - | 2.64   | 1.39   |
| ENSG0000( SERPINH1 | protein_co chr11 | 75562056 | 75572783 | + | 404.37 | 402.23 |
| ENSG0000( CAPN5    | protein_co chr11 | 77066932 | 77126155 | + | 12.04  | 13.37  |
| ENSG0000( INTS4    | protein_co chr11 | 77878720 | 77994678 | - | 9.1    | 10.11  |
| ENSG0000( PAK1     | protein_co chr11 | 77321707 | 77474635 | - | 7.76   | 9.43   |
| ENSG0000( RPS3     | protein_co chr11 | 75399486 | 75422280 | + | 923.05 | 941.8  |
| ENSG0000( ZC3H12C  | protein_co chr11 | 1.1E+08  | 1.1E+08  | + | 5.35   | 5.63   |
| ENSG0000( TTC12    | protein_co chr11 | 1.13E+08 | 1.13E+08 | + | 2.77   | 5.88   |
| ENSG0000( NCAM1    | protein_co chr11 | 1.13E+08 | 1.13E+08 | + | 0.75   | 0.8    |
| ENSG0000( DRD2     | protein_co chr11 | 1.13E+08 | 1.13E+08 | - | 0.14   | 0.15   |
| ENSG0000( C11orf52 | protein_co chr11 | 1.12E+08 | 1.12E+08 | + | 0.02   | 0.28   |
| ENSG0000( HTR3B    | protein_co chr11 | 1.14E+08 | 1.14E+08 | + | 0      | 0      |
| ENSG0000( NPAT     | protein_co chr11 | 1.08E+08 | 1.08E+08 | - | 4.47   | 4.22   |
| ENSG0000( ATM      | protein_co chr11 | 1.08E+08 | 1.08E+08 | + | 9.1    | 10.82  |
| ENSG0000( AASDHPPT | protein_co chr11 | 1.06E+08 | 1.06E+08 | + | 13.58  | 13.69  |
| ENSG0000( GLB1L2   | protein_co chr11 | 1.34E+08 | 1.34E+08 | + | 0.36   | 0.4    |
| ENSG0000( SLX4IP   | protein_co chr20 | 10435303 | 10636829 | + | 1.07   | 0.76   |
| ENSG0000( LAMTOR1  | protein_co chr11 | 72085895 | 72103387 | - | 73.57  | 85.55  |
| ENSG0000( P4HA3    | protein_co chr11 | 74235801 | 74311657 | - | 7.42   | 8.49   |
| ENSG0000( GRIK4    | protein_co chr11 | 1.21E+08 | 1.21E+08 | + | 0.02   | 0      |
| ENSG0000( ST14     | protein_co chr11 | 1.3E+08  | 1.3E+08  | + | 0      | 0      |
| ENSG0000( HYOU1    | protein_co chr11 | 1.19E+08 | 1.19E+08 | - | 36.5   | 35.34  |
| ENSG0000( GGTLC1   | protein_co chr20 | 23985050 | 23988779 | - | 0      | 0      |
| ENSG0000( C20orf78 | sense_ove  chr20 | 18809728 | 18830153 | - | 0      | 0      |
| ENSG0000( ADAM33   | protein_co chr20 | 3667965  | 3682246  | - | 13.75  | 18.84  |
| ENSG0000( SLC22A8  | protein_co chr11 | 62989154 | 63015839 | - | 0      | 0      |
| ENSG0000( KAT14    | protein_co chr20 | 18138118 | 18188387 | + | 4.72   | 6.28   |
| ENSG0000( TKFC     | protein_co chr11 | 61333210 | 61353295 | + | 19.06  | 14.39  |
| ENSG0000( MTA2     | protein_co chr11 | 62593214 | 62601840 | - | 24.8   | 26.95  |
| ENSG0000( TMEM138  | protein_co chr11 | 61362001 | 61369509 | + | 37.48  | 41.16  |
| ENSG0000( FADS1    | protein_co chr11 | 61799625 | 61829318 | - | 45.7   | 37.49  |
| ENSG0000( TMC2     | protein_co chr20 | 2536607  | 2641784  | + | 0.05   | 0.04   |
| ENSG0000( ROM1     | protein_co chr11 | 62611722 | 62615120 | + | 2.93   | 4.53   |
| ENSG0000( EML3     | protein_co chr11 | 62602218 | 62612765 | - | 16.6   | 19.37  |
| ENSG0000( INCENP   | protein_co chr11 | 62123973 | 62153163 | + | 3.82   | 3.47   |
| ENSG0000( ZP1      | protein_co chr11 | 60867562 | 60875693 | + | 1.07   | 0.75   |
| ENSG0000( OOSP2    | protein_co chr11 | 60040275 | 60048044 | + | 0      | 0      |

|                |                    |       |          |          |   |         |         |
|----------------|--------------------|-------|----------|----------|---|---------|---------|
| ENSG0000010543 | protein_coding     | chr11 | 60056587 | 60071128 | + | 0       | 0       |
| ENSG0000010542 | protein_coding     | chr1  | 2425980  | 2505530  | + | 0.02    | 0       |
| ENSG0000010541 | unprocessed_coding | chr20 | 30377372 | 30399257 | + | 7.88    | 8.86    |
| ENSG0000010540 | protein_coding     | chr11 | 61402641 | 61430031 | - | 24.43   | 22.7    |
| ENSG0000010539 | protein_coding     | chr11 | 60088261 | 60098466 | + | 0.08    | 0       |
| ENSG0000010538 | protein_coding     | chr11 | 62615296 | 62622175 | - | 19.67   | 20.17   |
| ENSG0000010537 | protein_coding     | chr11 | 1.26E+08 | 1.26E+08 | + | 53.86   | 58.45   |
| ENSG0000010536 | protein_coding     | chr11 | 1.25E+08 | 1.25E+08 | + | 0.5     | 0.24    |
| ENSG0000010535 | protein_coding     | chr11 | 1.26E+08 | 1.26E+08 | + | 7.27    | 9.09    |
| ENSG0000010534 | protein_coding     | chr11 | 1.25E+08 | 1.25E+08 | - | 48      | 46.12   |
| ENSG0000010533 | protein_coding     | chr11 | 1.25E+08 | 1.25E+08 | - | 0.15    | 0.03    |
| ENSG0000010532 | protein_coding     | chr11 | 1.26E+08 | 1.27E+08 | - | 1.48    | 1.03    |
| ENSG0000010531 | protein_coding     | chr11 | 1.18E+08 | 1.18E+08 | - | 0.22    | 0.07    |
| ENSG0000010530 | protein_coding     | chr11 | 1.18E+08 | 1.18E+08 | - | 0       | 0.03    |
| ENSG0000010529 | protein_coding     | chr11 | 1.17E+08 | 1.17E+08 | + | 23.65   | 21.51   |
| ENSG0000010528 | protein_coding     | chr11 | 1.19E+08 | 1.19E+08 | + | 5.05    | 4.74    |
| ENSG0000010527 | protein_coding     | chr11 | 1.17E+08 | 1.17E+08 | + | 1007.24 | 1141.64 |
| ENSG0000010526 | protein_coding     | chr20 | 44111695 | 44187578 | - | 0.07    | 0.09    |
| ENSG0000010525 | protein_coding     | chr20 | 31847637 | 31870747 | - | 0       | 0       |
| ENSG0000010524 | protein_coding     | chr20 | 32702691 | 32743997 | - | 19.6    | 21      |
| ENSG0000010523 | protein_coding     | chr20 | 33662284 | 33665619 | + | 0.12    | 0.05    |
| ENSG0000010522 | protein_coding     | chr20 | 38210488 | 38260772 | - | 4.14    | 4.58    |
| ENSG0000010521 | protein_coding     | chr20 | 45886489 | 45887635 | - | 1.88    | 1.04    |
| ENSG0000010520 | protein_coding     | chr20 | 46540946 | 46550574 | - | 0       | 0       |
| ENSG0000010519 | protein_coding     | chr20 | 36751791 | 36773818 | - | 3.75    | 2.75    |
| ENSG0000010518 | protein_coding     | chr20 | 36777442 | 36863686 | - | 4.92    | 5.1     |
| ENSG0000010517 | protein_coding     | chr20 | 35954564 | 36030700 | + | 1.36    | 1.25    |
| ENSG0000010516 | protein_coding     | chr20 | 45722351 | 45725830 | + | 0       | 0       |
| ENSG0000010515 | protein_coding     | chr20 | 46173733 | 46308498 | - | 0       | 0       |
| ENSG0000010514 | lincRNA            | chr20 | 64290385 | 64313132 | + | 0       | 0.2     |
| ENSG0000010513 | protein_coding     | chr20 | 62122461 | 62135378 | + | 22.6    | 21.51   |
| ENSG0000010512 | protein_coding     | chr20 | 63195429 | 63216234 | - | 12.62   | 11.33   |
| ENSG0000010511 | protein_coding     | chr20 | 62388632 | 62407285 | - | 2.86    | 2.97    |
| ENSG0000010510 | protein_coding     | chr11 | 69653076 | 69675416 | - | 8.85    | 11.2    |
| ENSG0000010509 | protein_coding     | chr11 | 64934471 | 64935888 | - | 0       | 0       |
| ENSG0000010508 | protein_coding     | chr11 | 63369789 | 63410294 | + | 0       | 0       |
| ENSG0000010507 | protein_coding     | chr11 | 64223799 | 64226254 | - | 24.17   | 20      |
| ENSG0000010506 | protein_coding     | chr11 | 64225941 | 64230686 | + | 23.12   | 21.7    |
| ENSG0000010505 | protein_coding     | chr11 | 64206678 | 64223886 | + | 3.29    | 4.95    |
| ENSG0000010504 | protein_coding     | chr11 | 64251523 | 64269150 | + | 13.52   | 11.5    |
| ENSG0000010503 | protein_coding     | chr11 | 65122183 | 65127371 | + | 23.55   | 25.48   |
| ENSG0000010502 | protein_coding     | chr11 | 65314818 | 65322429 | + | 18.33   | 20.4    |
| ENSG0000010501 | protein_coding     | chr11 | 65120628 | 65122473 | - | 375.5   | 370.13  |
| ENSG0000010500 | protein_coding     | chr11 | 65111845 | 65116384 | + | 4.56    | 6.5     |
| ENSG0000010499 | protein_coding     | chr11 | 65089324 | 65111860 | + | 40.99   | 42.02   |

|                   |                  |          |            |         |         |
|-------------------|------------------|----------|------------|---------|---------|
| ENSG0000(TBX6     | protein_co chr16 | 30085793 | 30091887 - | 0.19    | 0.45    |
| ENSG0000(PPP4C    | protein_co chr16 | 30075978 | 30085377 + | 47.16   | 54.37   |
| ENSG0000(ALDOA    | protein_co chr16 | 30053090 | 30070457 + | 1319.45 | 1171.81 |
| ENSG0000(FAM57B   | protein_co chr16 | 30024427 | 30052978 - | 0.09    | 0.14    |
| ENSG0000(DOC2A    | protein_co chr16 | 30005509 | 30023270 - | 0.07    | 0.05    |
| ENSG0000(HIRIP3   | protein_co chr16 | 29992321 | 29996436 - | 3.84    | 3.43    |
| ENSG0000(TAOK2    | protein_co chr16 | 29973641 | 29992261 + | 14.46   | 15.84   |
| ENSG0000(TMEM219  | protein_co chr16 | 29940885 | 29973052 + | 80      | 71.09   |
| ENSG0000(HMGA2    | protein_co chr12 | 65824131 | 65966295 + | 3.16    | 2.99    |
| ENSG0000(MMP3     | protein_co chr11 | 1.03E+08 | 1.03E+08 - | 2.33    | 0.75    |
| ENSG0000(CNKSR2   | protein_co chrX  | 21374418 | 21654695 + | 1.47    | 1.77    |
| ENSG0000(CNTN5    | protein_co chr11 | 99020953 | 1E+08 +    | 0.03    | 0       |
| ENSG0000(KLRF1    | protein_co chr12 | 9827481  | 9845007 +  | 0       | 0       |
| ENSG0000(CLEC1A   | protein_co chr12 | 10069554 | 10111627 - | 0       | 0       |
| ENSG0000(MKX      | protein_co chr10 | 27672875 | 27746060 - | 0       | 0       |
| ENSG0000(MPP7     | protein_co chr10 | 28050993 | 28334486 - | 0.11    | 0.2     |
| ENSG0000(ITGB1    | protein_co chr10 | 32900319 | 33005792 - | 1219.36 | 1144.79 |
| ENSG0000(FRMPD2B  | unprocessε chr10 | 46870858 | 46894562 + | 0       | 0       |
| ENSG0000(FXYD4    | protein_co chr10 | 43371642 | 43376335 + | 0       | 0       |
| ENSG0000(TRIM48   | protein_co chr11 | 55262182 | 55271119 + | 0       | 0       |
| ENSG0000(OR8K1    | protein_co chr11 | 56346039 | 56346998 + | 0       | 0       |
| ENSG0000(OR5M9    | protein_co chr11 | 56462469 | 56463401 - | 0       | 0       |
| ENSG0000(PCDH15   | protein_co chr10 | 53802771 | 55627942 - | 0       | 0       |
| ENSG0000(PPIAP26  | processed_ chr13 | 52820497 | 52821018 + | 0       | 0       |
| ENSG0000(CTF1     | protein_co chr16 | 30896607 | 30903560 + | 4.69    | 5.52    |
| ENSG0000(CWC15    | protein_co chr11 | 94962622 | 94973612 - | 21.65   | 23.75   |
| ENSG0000(FCGR1A   | protein_co chr1  | 1.5E+08  | 1.5E+08 +  | 0       | 0       |
| ENSG0000(ARID5B   | protein_co chr10 | 61901300 | 62096944 + | 29.27   | 27.87   |
| ENSG0000(KLHL1    | protein_co chr13 | 69700594 | 70108493 - | 0       | 0       |
| ENSG0000(CDH8     | protein_co chr16 | 61647242 | 62037035 - | 1.08    | 0.76    |
| ENSG0000(DCUN1D2  | protein_co chr13 | 1.13E+08 | 1.13E+08 - | 7.56    | 8.09    |
| ENSG0000(TMCO3    | protein_co chr13 | 1.13E+08 | 1.14E+08 + | 54.82   | 58      |
| ENSG0000(TMEM218  | protein_co chr11 | 1.25E+08 | 1.25E+08 - | 13.82   | 13.04   |
| ENSG0000(TIRAP    | protein_co chr11 | 1.26E+08 | 1.26E+08 + | 4.52    | 4.44    |
| ENSG0000(EEF1AKMT | protein_co chr13 | 20728731 | 20773958 - | 3.57    | 5.42    |
| ENSG0000(LATS2    | protein_co chr13 | 20973032 | 21061547 - | 9.12    | 9.64    |
| ENSG0000(SAP18    | protein_co chr13 | 21140514 | 21149084 + | 91.63   | 89.53   |
| ENSG0000(ADGRL3   | protein_co chr4  | 61201258 | 62078335 + | 0       | 0       |
| ENSG0000(KIAA1328 | protein_co chr18 | 36829106 | 37232172 + | 7.63    | 7.35    |
| ENSG0000(FAM124A  | protein_co chr13 | 51222334 | 51284241 + | 0.87    | 1.15    |
| ENSG0000(MIA2     | protein_co chr14 | 39230231 | 39253639 + | 0       | 0       |
| ENSG0000(CTAGE5   | protein_co chr14 | 39265284 | 39388513 + | 9.76    | 10.11   |
| ENSG0000(HNMT     | protein_co chr2  | 1.38E+08 | 1.38E+08 + | 49.36   | 56.43   |
| ENSG0000(LYPD1    | protein_co chr2  | 1.33E+08 | 1.33E+08 - | 18.91   | 17.08   |
| ENSG0000(LYPD6B   | protein_co chr2  | 1.49E+08 | 1.49E+08 + | 0       | 0       |

|                    |                  |          |            |        |        |
|--------------------|------------------|----------|------------|--------|--------|
| ENSG0000(PDCD4     | protein_co chr10 | 1.11E+08 | 1.11E+08 + | 69.55  | 71.83  |
| ENSG0000(ADRA2A    | protein_co chr10 | 1.11E+08 | 1.11E+08 + | 0      | 0      |
| ENSG0000(GPM6A     | protein_co chr4  | 1.76E+08 | 1.76E+08 - | 0      | 0      |
| ENSG0000(WDR17     | protein_co chr4  | 1.76E+08 | 1.76E+08 + | 0.23   | 0.01   |
| ENSG0000(SPATA4    | protein_co chr4  | 1.76E+08 | 1.76E+08 - | 0.2    | 0.41   |
| ENSG0000(VEGFC     | protein_co chr4  | 1.77E+08 | 1.77E+08 - | 11.04  | 8.03   |
| ENSG0000(CCDC102B  | protein_co chr18 | 68715209 | 69055189 + | 3.15   | 4.22   |
| ENSG0000(CD226     | protein_co chr18 | 69831158 | 69961803 - | 0.05   | 0.06   |
| ENSG0000(CNDP1     | protein_co chr18 | 74534440 | 74587212 + | 0      | 0      |
| ENSG0000(FSIP1     | protein_co chr15 | 39600031 | 39782830 - | 0.21   | 0.13   |
| ENSG0000(DLG2      | protein_co chr11 | 83455012 | 85627922 - | 0.36   | 0.29   |
| ENSG0000(CCDC83    | protein_co chr11 | 85855101 | 85920021 + | 0      | 0      |
| ENSG0000(RGS18     | protein_co chr1  | 1.92E+08 | 1.92E+08 + | 0      | 0      |
| ENSG0000(PRSS23    | protein_co chr11 | 86791059 | 86952910 + | 375.96 | 380.38 |
| ENSG0000(MTMR12    | protein_co chr5  | 32226994 | 32313009 - | 6.2    | 6.47   |
| ENSG0000(PPP1R1C   | protein_co chr2  | 1.82E+08 | 1.82E+08 + | 0.6    | 0.82   |
| ENSG0000(RP11-134C | processed_chr1   | 1.88E+08 | 1.88E+08 - | 0      | 0      |
| ENSG0000(C11orf53  | protein_co chr11 | 1.11E+08 | 1.11E+08 + | 0      | 0      |
| ENSG0000(CCT5      | protein_co chr5  | 10249921 | 10266412 + | 57.72  | 60.03  |
| ENSG0000(FAM173B   | protein_co chr5  | 10226330 | 10249897 - | 4.06   | 6.84   |
| ENSG0000(DOCK1     | protein_co chr10 | 1.27E+08 | 1.27E+08 + | 24.78  | 24.49  |
| ENSG0000(DIXDC1    | protein_co chr11 | 1.12E+08 | 1.12E+08 + | 7.51   | 7.1    |
| ENSG0000(DLAT      | protein_co chr11 | 1.12E+08 | 1.12E+08 + | 8.79   | 6.52   |
| ENSG0000(PIH1D2    | protein_co chr11 | 1.12E+08 | 1.12E+08 - | 1.58   | 1.4    |
| ENSG0000(C11orf57  | protein_co chr11 | 1.12E+08 | 1.12E+08 + | 12.86  | 12.18  |
| ENSG0000(TIMM8B    | protein_co chr11 | 1.12E+08 | 1.12E+08 - | 28.78  | 25.66  |
| ENSG0000(IL18      | protein_co chr11 | 1.12E+08 | 1.12E+08 - | 0.03   | 0.06   |
| ENSG0000(TEX12     | protein_co chr11 | 1.12E+08 | 1.12E+08 + | 0      | 0      |
| ENSG0000(PTS       | protein_co chr11 | 1.12E+08 | 1.12E+08 + | 15.65  | 13.95  |
| ENSG0000(PIP4K2A   | protein_co chr10 | 22534849 | 22714555 - | 9.44   | 10.88  |
| ENSG0000(C2orf50   | protein_co chr2  | 11133053 | 11146790 + | 0      | 0.04   |
| ENSG0000(FREM2     | protein_co chr13 | 38687129 | 38887131 + | 0      | 0      |
| ENSG0000(FOXO1     | protein_co chr13 | 40469953 | 40666597 - | 3.43   | 4.49   |
| ENSG0000(CRIM1     | protein_co chr2  | 36355926 | 36551135 + | 99.04  | 98.38  |
| ENSG0000(SEC24D    | protein_co chr4  | 1.19E+08 | 1.19E+08 - | 26.74  | 26.69  |
| ENSG0000(ABCB9     | protein_co chr12 | 1.23E+08 | 1.23E+08 - | 3.24   | 2.99   |
| ENSG0000(RILPL2    | protein_co chr12 | 1.23E+08 | 1.23E+08 - | 3.39   | 3.14   |
| ENSG0000(DHX37     | protein_co chr12 | 1.25E+08 | 1.25E+08 - | 3.8    | 4.48   |
| ENSG0000(UBC       | protein_co chr12 | 1.25E+08 | 1.25E+08 - | 567.55 | 577.45 |
| ENSG0000(ITPR1     | protein_co chr3  | 4493348  | 4847840 +  | 3.01   | 2.93   |
| ENSG0000(TKTL2     | protein_co chr4  | 1.63E+08 | 1.63E+08 - | 0      | 0      |
| ENSG0000(PRSS53    | protein_co chr16 | 31083425 | 31089628 - | 1.35   | 1.54   |
| ENSG0000(SLC7A11   | protein_co chr4  | 1.38E+08 | 1.38E+08 - | 6.76   | 5.89   |
| ENSG0000(NOCT      | protein_co chr4  | 1.39E+08 | 1.39E+08 + | 6.3    | 5.71   |
| ENSG0000(ENKUR     | protein_co chr10 | 24981979 | 25062279 - | 0.04   | 0.14   |



|                    |                  |          |          |   |       |       |
|--------------------|------------------|----------|----------|---|-------|-------|
| ENSG0000(GPR158    | protein_co chr10 | 25175062 | 25602226 | + | 0.69  | 0.65  |
| ENSG0000(LYZL2     | protein_co chr10 | 30611779 | 30629762 | - | 0     | 0     |
| ENSG0000(CACNA2D4  | protein_co chr12 | 1791957  | 1918836  | - | 0.14  | 0.4   |
| ENSG0000(DCP1B     | protein_co chr12 | 1946054  | 2004535  | - | 10.28 | 11.45 |
| ENSG0000(CACNA1C   | protein_co chr12 | 1970786  | 2697950  | + | 3.34  | 2.92  |
| ENSG0000(KCNA6     | protein_co chr12 | 4809176  | 4813412  | + | 0     | 0     |
| ENSG0000(THRB      | protein_co chr3  | 24117160 | 24495282 | - | 0     | 0.33  |
| ENSG0000(NGLY1     | protein_co chr3  | 25718944 | 25790039 | - | 8.04  | 8.35  |
| ENSG0000(OXSM      | protein_co chr3  | 25782917 | 25794534 | + | 6.53  | 4.24  |
| ENSG0000(UEVLD     | protein_co chr11 | 18529609 | 18588747 | - | 7.34  | 8.61  |
| ENSG0000(TMEM86A   | protein_co chr11 | 18693122 | 18704785 | + | 1.87  | 2.24  |
| ENSG0000(C12orf45  | protein_co chr12 | 1.05E+08 | 1.05E+08 | + | 5.01  | 6.59  |
| ENSG0000(TMEM263   | protein_co chr12 | 1.07E+08 | 1.07E+08 | + | 28.52 | 26.71 |
| ENSG0000(BTBD11    | protein_co chr12 | 1.07E+08 | 1.08E+08 | + | 0.51  | 0.45  |
| ENSG0000(UBE3B     | protein_co chr12 | 1.09E+08 | 1.1E+08  | + | 14.13 | 16.7  |
| ENSG0000(ANK3      | protein_co chr10 | 60026298 | 60733490 | - | 9.25  | 12.26 |
| ENSG0000(IPMK      | protein_co chr10 | 58191517 | 58267934 | - | 1.79  | 2.01  |
| ENSG0000(RAD9B     | protein_co chr12 | 1.11E+08 | 1.11E+08 | + | 0.06  | 0.14  |
| ENSG0000(PLBD2     | protein_co chr12 | 1.13E+08 | 1.13E+08 | + | 74.7  | 74.77 |
| ENSG0000(DLG5      | protein_co chr10 | 77790791 | 77926526 | - | 16.96 | 19.24 |
| ENSG0000(MAT1A     | protein_co chr10 | 80271820 | 80289684 | - | 0     | 0     |
| ENSG0000(SLC2A13   | protein_co chr12 | 39755021 | 40106089 | - | 3.48  | 2.91  |
| ENSG0000(GXYLT1    | protein_co chr12 | 42081845 | 42144879 | - | 3.13  | 2.7   |
| ENSG0000(TWF1      | protein_co chr12 | 43793723 | 43806375 | - | 42.6  | 40.12 |
| ENSG0000(DIP2C     | protein_co chr10 | 274190   | 689668   | - | 5.81  | 5.61  |
| ENSG0000(EIF4E     | protein_co chr4  | 98871684 | 98930637 | - | 23.61 | 26.98 |
| ENSG0000(MAGI1     | protein_co chr3  | 65353525 | 66038834 | - | 5.77  | 7.14  |
| ENSG0000(TEX30     | protein_co chr13 | 1.03E+08 | 1.03E+08 | - | 4.22  | 4.48  |
| ENSG0000(CSNK1G3   | protein_co chr5  | 1.24E+08 | 1.24E+08 | + | 13.94 | 14.94 |
| ENSG0000(RP11-96C2 | processed_chr10  | 86992406 | 87010203 | + | 0.16  | 0.21  |
| ENSG0000(SRFBP1    | protein_co chr5  | 1.22E+08 | 1.22E+08 | + | 1.86  | 2.24  |
| ENSG0000(AKAP6     | protein_co chr14 | 32329273 | 32837681 | + | 1.67  | 1.73  |
| ENSG0000(NPAS3     | protein_co chr14 | 32934933 | 33804176 | + | 0     | 0.01  |
| ENSG0000(FAM177A1  | protein_co chr14 | 35044907 | 35113130 | + | 32.84 | 33.62 |
| ENSG0000(MBIP      | protein_co chr14 | 36298558 | 36320676 | - | 9.63  | 8.41  |
| ENSG0000(MIPOL1    | protein_co chr14 | 37197913 | 37552361 | + | 2.7   | 2.74  |
| ENSG0000(EXT2      | protein_co chr11 | 44095549 | 44245429 | + | 92.5  | 88.63 |
| ENSG0000(TMEM18    | protein_co chr2  | 667335   | 677439   | - | 13.09 | 11.65 |
| ENSG0000(ALLC      | protein_co chr2  | 3658195  | 3702671  | + | 0     | 0     |
| ENSG0000(KCTD14    | protein_co chr11 | 78015715 | 78046191 | - | 0.7   | 0.33  |
| ENSG0000(THRSP     | protein_co chr11 | 78063861 | 78068351 | + | 0     | 0.06  |
| ENSG0000(NDUFC2    | protein_co chr11 | 78068304 | 78080219 | - | 81.09 | 84.67 |
| ENSG0000(ME3       | protein_co chr11 | 86441108 | 86672636 | - | 9.67  | 10.44 |
| ENSG0000(MSGN1     | protein_co chr2  | 17816496 | 17817101 | + | 0     | 0     |
| ENSG0000(ADAMTS12  | protein_co chr5  | 33523535 | 33892192 | - | 20.28 | 23.06 |

|                   |                  |          |          |   |        |        |
|-------------------|------------------|----------|----------|---|--------|--------|
| ENSG0000(NUBPL    | protein_co chr14 | 31489956 | 31861224 | + | 4.46   | 3.5    |
| ENSG0000(NEK7     | protein_co chr1  | 1.98E+08 | 1.98E+08 | + | 56.78  | 50.34  |
| ENSG0000(ATP6V1G3 | protein_co chr1  | 1.99E+08 | 1.99E+08 | - | 0      | 0      |
| ENSG0000(FER      | protein_co chr5  | 1.09E+08 | 1.09E+08 | + | 7.08   | 7.36   |
| ENSG0000(VIPAS39  | protein_co chr14 | 77426675 | 77457952 | - | 11.75  | 11.65  |
| ENSG0000(ANKRD50  | protein_co chr4  | 1.25E+08 | 1.25E+08 | - | 18.92  | 19.13  |
| ENSG0000(UPF2     | protein_co chr10 | 11920022 | 12043170 | - | 7.97   | 8.06   |
| ENSG0000(CDC123   | protein_co chr10 | 12195965 | 12250589 | + | 37.46  | 35.15  |
| ENSG0000(SCLT1    | protein_co chr4  | 1.29E+08 | 1.29E+08 | - | 1.98   | 1.73   |
| ENSG0000(CCDC3    | protein_co chr10 | 12896625 | 13099652 | - | 0.05   | 0.04   |
| ENSG0000(C4orf33  | protein_co chr4  | 1.29E+08 | 1.29E+08 | + | 4.68   | 4.21   |
| ENSG0000(FRMD4A   | protein_co chr10 | 13643706 | 14462142 | - | 19.43  | 25.51  |
| ENSG0000(SLC25A31 | protein_co chr4  | 1.28E+08 | 1.28E+08 | + | 0      | 0      |
| ENSG0000(PTPRO    | protein_co chr12 | 15322397 | 15597399 | + | 0      | 0.02   |
| ENSG0000(EPS8     | protein_co chr12 | 15620158 | 15882329 | - | 40.73  | 41.85  |
| ENSG0000(ACAD8    | protein_co chr11 | 1.34E+08 | 1.34E+08 | + | 11.81  | 10.95  |
| ENSG0000(THYN1    | protein_co chr11 | 1.34E+08 | 1.34E+08 | - | 28.19  | 25.01  |
| ENSG0000(VPS26B   | protein_co chr11 | 1.34E+08 | 1.34E+08 | + | 19.91  | 23.77  |
| ENSG0000(NCAPD3   | protein_co chr11 | 1.34E+08 | 1.34E+08 | - | 3.81   | 2.56   |
| ENSG0000(VTI1A    | protein_co chr10 | 1.12E+08 | 1.13E+08 | + | 7.39   | 6.79   |
| ENSG0000(QDPR     | protein_co chr4  | 17460261 | 17512234 | - | 15.44  | 12.13  |
| ENSG0000(FAM160B1 | protein_co chr10 | 1.15E+08 | 1.15E+08 | + | 9.79   | 9.84   |
| ENSG0000(ANO4     | protein_co chr12 | 1.01E+08 | 1.01E+08 | + | 0      | 0      |
| ENSG0000(TEX9     | protein_co chr15 | 56244009 | 56445997 | + | 1.96   | 2.39   |
| ENSG0000(QTRT2    | protein_co chr3  | 1.14E+08 | 1.14E+08 | + | 3.93   | 2.8    |
| ENSG0000(DRD3     | protein_co chr3  | 1.14E+08 | 1.14E+08 | - | 0      | 0      |
| ENSG0000(MMAA     | protein_co chr4  | 1.46E+08 | 1.46E+08 | + | 3.06   | 3.44   |
| ENSG0000(ZNF827   | protein_co chr4  | 1.46E+08 | 1.46E+08 | - | 7.29   | 5.62   |
| ENSG0000(POU4F2   | protein_co chr4  | 1.47E+08 | 1.47E+08 | + | 0      | 0      |
| ENSG0000(EDNRA    | protein_co chr4  | 1.47E+08 | 1.48E+08 | + | 2.84   | 4.22   |
| ENSG0000(NR3C2    | protein_co chr4  | 1.48E+08 | 1.48E+08 | - | 1.22   | 0.97   |
| ENSG0000(AKR1C6P  | unprocessε chr10 | 4871901  | 4891975  | - | 0      | 0      |
| ENSG0000(AKR1C2   | protein_co chr10 | 4987400  | 5018031  | - | 120.32 | 166.54 |
| ENSG0000(DPYSL4   | protein_co chr10 | 1.32E+08 | 1.32E+08 | + | 1.38   | 1.08   |
| ENSG0000(VENTX    | protein_co chr10 | 1.33E+08 | 1.33E+08 | + | 0      | 0.02   |
| ENSG0000(ADAM8    | protein_co chr10 | 1.33E+08 | 1.33E+08 | - | 0.63   | 0.52   |
| ENSG0000(ITIH2    | protein_co chr10 | 7703269  | 7749520  | + | 0      | 0.02   |
| ENSG0000(KIN      | protein_co chr10 | 7750962  | 7787981  | - | 3.72   | 5.2    |
| ENSG0000(PIGF     | protein_co chr2  | 46580937 | 46617119 | - | 9.48   | 11.83  |
| ENSG0000(ANKAR    | protein_co chr2  | 1.9E+08  | 1.9E+08  | + | 2.9    | 2.01   |
| ENSG0000(INPP1    | protein_co chr2  | 1.9E+08  | 1.9E+08  | + | 10.69  | 10.71  |
| ENSG0000(MFSD6    | protein_co chr2  | 1.9E+08  | 1.91E+08 | + | 1.43   | 1.31   |
| ENSG0000(RNF144A  | protein_co chr2  | 6917392  | 7068286  | + | 0.96   | 0.72   |
| ENSG0000(ASAP2    | protein_co chr2  | 9206765  | 9405683  | + | 15.75  | 14.31  |
| ENSG0000(ADAM17   | protein_co chr2  | 9488486  | 9555792  | - | 14.34  | 14.92  |

|                 |          |                  |          |          |   |        |        |
|-----------------|----------|------------------|----------|----------|---|--------|--------|
| ENSG00000101111 | FLI1     | protein_co chr11 | 1.29E+08 | 1.29E+08 | + | 14.44  | 12.04  |
| ENSG00000101111 | KCNJ1    | protein_co chr11 | 1.29E+08 | 1.29E+08 | - | 0.07   | 0      |
| ENSG00000101111 | TMEM45B  | protein_co chr11 | 1.3E+08  | 1.3E+08  | + | 0.03   | 0      |
| ENSG00000101111 | WWC2     | protein_co chr4  | 1.83E+08 | 1.83E+08 | + | 12.43  | 14.25  |
| ENSG00000101111 | CENPU    | protein_co chr4  | 1.85E+08 | 1.85E+08 | - | 2.66   | 2.22   |
| ENSG00000101111 | ACSL1    | protein_co chr4  | 1.85E+08 | 1.85E+08 | - | 22.2   | 24.14  |
| ENSG00000101111 | SLC25A4  | protein_co chr4  | 1.85E+08 | 1.85E+08 | + | 6.32   | 5.62   |
| ENSG00000101111 | AMN1     | protein_co chr12 | 31671137 | 31729174 | - | 5.65   | 4.61   |
| ENSG00000101111 | BICD1    | protein_co chr12 | 32106835 | 32383633 | + | 7.29   | 5.63   |
| ENSG00000101111 | SAV1     | protein_co chr14 | 50632058 | 50668331 | - | 12.96  | 13.21  |
| ENSG00000101111 | CCDC122  | protein_co chr13 | 43823909 | 43879727 | - | 3.12   | 4.61   |
| ENSG00000101111 | SERP2    | protein_co chr13 | 44373665 | 44397714 | + | 2.78   | 1.93   |
| ENSG00000101111 | NBAS     | protein_co chr2  | 15166909 | 15561330 | - | 11.26  | 12.82  |
| ENSG00000101111 | ZNF385D  | protein_co chr3  | 21412222 | 22373321 | - | 0.04   | 0.42   |
| ENSG00000101111 | TDO2     | protein_co chr4  | 1.56E+08 | 1.56E+08 | + | 0.1    | 0.55   |
| ENSG00000101111 | GUF1     | protein_co chr4  | 44678427 | 44700926 | + | 6.13   | 3.92   |
| ENSG00000101111 | SLC35F4  | protein_co chr14 | 57563922 | 57982194 | - | 0.04   | 0      |
| ENSG00000101111 | GABRA2   | protein_co chr4  | 46248427 | 46475230 | - | 0      | 0      |
| ENSG00000101111 | SACS     | protein_co chr13 | 23328826 | 23411513 | - | 3.25   | 3.62   |
| ENSG00000101111 | CCDC175  | protein_co chr14 | 59504539 | 59576831 | - | 0      | 0      |
| ENSG00000101111 | PABPC3   | protein_co chr13 | 25095868 | 25099254 | + | 0      | 0.02   |
| ENSG00000101111 | CENPJ    | protein_co chr13 | 24882284 | 24922889 | - | 1.21   | 1.65   |
| ENSG00000101111 | FBXO4    | protein_co chr5  | 41925254 | 41941743 | + | 5      | 5.99   |
| ENSG00000101111 | TMEM267  | protein_co chr5  | 43444252 | 43483893 | - | 10.01  | 8.62   |
| ENSG00000101111 | CCL28    | protein_co chr5  | 43376645 | 43412391 | - | 1.45   | 1.11   |
| ENSG00000101111 | PARP8    | protein_co chr5  | 50665899 | 50846522 | + | 6.6    | 5.17   |
| ENSG00000101111 | GFRA1    | protein_co chr10 | 1.16E+08 | 1.16E+08 | - | 0.06   | 0.03   |
| ENSG00000101111 | CACUL1   | protein_co chr10 | 1.19E+08 | 1.19E+08 | - | 7.01   | 8.31   |
| ENSG00000101111 | DST      | protein_co chr6  | 56457987 | 56954628 | - | 45.74  | 53.71  |
| ENSG00000101111 | BEND6    | protein_co chr6  | 56955126 | 57027342 | + | 4.69   | 4.85   |
| ENSG00000101111 | TIAL1    | protein_co chr10 | 1.2E+08  | 1.2E+08  | - | 31.65  | 30.33  |
| ENSG00000101111 | BAG3     | protein_co chr10 | 1.2E+08  | 1.2E+08  | + | 21.8   | 22.91  |
| ENSG00000101111 | GLT1D1   | protein_co chr12 | 1.29E+08 | 1.29E+08 | + | 0.02   | 0      |
| ENSG00000101111 | TMEM132L | protein_co chr12 | 1.29E+08 | 1.3E+08  | - | 0      | 0      |
| ENSG00000101111 | RBM46    | protein_co chr4  | 1.55E+08 | 1.55E+08 | + | 0      | 0      |
| ENSG00000101111 | ZNF37CP  | unprocessε chr10 | 37883594 | 37884109 | + | 0      | 1.92   |
| ENSG00000101111 | SCHIP1   | protein_co chr3  | 1.6E+08  | 1.6E+08  | + | 0.72   | 2.26   |
| ENSG00000101111 | MCHR2    | protein_co chr6  | 99919910 | 99994247 | - | 0      | 0      |
| ENSG00000101111 | KCNE4    | protein_co chr2  | 2.23E+08 | 2.23E+08 | + | 2.15   | 2      |
| ENSG00000101111 | AP1S3    | protein_co chr2  | 2.24E+08 | 2.24E+08 | - | 0.74   | 0.97   |
| ENSG00000101111 | RABGAP1L | protein_co chr1  | 1.74E+08 | 1.75E+08 | + | 6.69   | 7.29   |
| ENSG00000101111 | CCDC74B  | protein_co chr2  | 1.3E+08  | 1.3E+08  | - | 5.59   | 8.01   |
| ENSG00000101111 | TMEM56   | protein_co chr1  | 95117338 | 95197607 | + | 0.04   | 0.03   |
| ENSG00000101111 | MZT2B    | protein_co chr2  | 1.3E+08  | 1.3E+08  | + | 121.88 | 101.93 |
| ENSG00000101111 | TUBA3E   | protein_co chr2  | 1.3E+08  | 1.3E+08  | - | 0      | 0      |

|                 |          |                  |          |          |   |        |        |
|-----------------|----------|------------------|----------|----------|---|--------|--------|
| ENSG00000101010 | ASTN1    | protein_co chr1  | 1.77E+08 | 1.77E+08 | - | 0.04   | 0.06   |
| ENSG00000101011 | CFC1B    | protein_co chr2  | 1.31E+08 | 1.31E+08 | + | 0      | 0      |
| ENSG00000101012 | FAM168B  | protein_co chr2  | 1.31E+08 | 1.31E+08 | - | 42.93  | 41.06  |
| ENSG00000101013 | PTPN14   | protein_co chr1  | 2.14E+08 | 2.15E+08 | - | 14.35  | 12.18  |
| ENSG00000101014 | AC093838 | transcribed chr2 | 1.31E+08 | 1.32E+08 | + | 5.65   | 5.47   |
| ENSG00000101015 | MGAT5    | protein_co chr2  | 1.34E+08 | 1.34E+08 | + | 3.55   | 3.27   |
| ENSG00000101016 | TMEM163  | protein_co chr2  | 1.34E+08 | 1.35E+08 | - | 0      | 0      |
| ENSG00000101017 | GPATCH11 | protein_co chr2  | 37084451 | 37099244 | + | 2.92   | 3.02   |
| ENSG00000101018 | HSPB8    | protein_co chr12 | 1.19E+08 | 1.19E+08 | + | 14.54  | 15.26  |
| ENSG00000101019 | GEMIN6   | protein_co chr2  | 38751534 | 38785000 | + | 3.94   | 3.89   |
| ENSG00000101020 | TMEM178A | protein_co chr2  | 39664982 | 39717963 | + | 1.19   | 1.48   |
| ENSG00000101021 | POU4F1   | protein_co chr13 | 78598362 | 78603560 | - | 0      | 0      |
| ENSG00000101022 | RNF219   | protein_co chr13 | 78614291 | 78659179 | - | 3.91   | 3.06   |
| ENSG00000101023 | CYSLTR2  | protein_co chr13 | 48653711 | 48711226 | + | 0      | 0.1    |
| ENSG00000101024 | GRID2    | protein_co chr4  | 92303622 | 93810157 | + | 0      | 0.01   |
| ENSG00000101025 | ARL11    | protein_co chr13 | 49628299 | 49633872 | + | 0      | 0      |
| ENSG00000101026 | RIT2     | protein_co chr18 | 42743227 | 43115691 | - | 0      | 0      |
| ENSG00000101027 | SETBP1   | protein_co chr18 | 44680173 | 45068510 | + | 0.88   | 0.79   |
| ENSG00000101028 | ARL14EP  | protein_co chr11 | 30323051 | 30338227 | + | 8.76   | 8.33   |
| ENSG00000101029 | EPG5     | protein_co chr18 | 45847609 | 45967274 | - | 13.8   | 12.74  |
| ENSG00000101030 | PSTPIP2  | protein_co chr18 | 45983536 | 46072272 | - | 4.97   | 3.57   |
| ENSG00000101031 | ATP5A1   | protein_co chr18 | 46080248 | 46104334 | - | 124.52 | 124.39 |
| ENSG00000101032 | HAUS1    | protein_co chr18 | 46104332 | 46128333 | + | 17.83  | 13.45  |
| ENSG00000101033 | C18orf25 | protein_co chr18 | 46173553 | 46266991 | + | 4.59   | 4.92   |
| ENSG00000101034 | SPC25    | protein_co chr2  | 1.69E+08 | 1.69E+08 | - | 0.33   | 0.58   |
| ENSG00000101035 | G6PC2    | protein_co chr2  | 1.69E+08 | 1.69E+08 | + | 0      | 0      |
| ENSG00000101036 | PDK1     | protein_co chr2  | 1.73E+08 | 1.73E+08 | + | 17.41  | 21.51  |
| ENSG00000101037 | PTH      | protein_co chr11 | 13492055 | 13496181 | - | 0      | 0      |
| ENSG00000101038 | PDE3B    | protein_co chr11 | 14643723 | 14872044 | + | 0.12   | 0.1    |
| ENSG00000101039 | TCF7L1   | protein_co chr2  | 85133410 | 85310388 | + | 8.68   | 11.14  |
| ENSG00000101040 | TGOLN2   | protein_co chr2  | 85318020 | 85328425 | - | 66.95  | 64.98  |
| ENSG00000101041 | SH2D6    | protein_co chr2  | 85418721 | 85437029 | + | 0.09   | 0.8    |
| ENSG00000101042 | KCNK13   | protein_co chr14 | 90061765 | 90185857 | + | 0.04   | 0      |
| ENSG00000101043 | UHMK1    | protein_co chr1  | 1.62E+08 | 1.63E+08 | + | 8.35   | 8.85   |
| ENSG00000101044 | ATG10    | protein_co chr5  | 81972025 | 82276857 | + | 3.68   | 3.34   |
| ENSG00000101045 | POC5     | protein_co chr5  | 75674124 | 75717481 | - | 2.24   | 3.07   |
| ENSG00000101046 | SPOCK1   | protein_co chr5  | 1.37E+08 | 1.38E+08 | - | 273.86 | 235.86 |
| ENSG00000101047 | FAM151B  | protein_co chr5  | 80487969 | 80542563 | + | 1.42   | 0.73   |
| ENSG00000101048 | TADA1    | protein_co chr1  | 1.67E+08 | 1.67E+08 | - | 2.67   | 2.28   |
| ENSG00000101049 | GUCY1A2  | protein_co chr11 | 1.07E+08 | 1.07E+08 | - | 0.32   | 0.14   |
| ENSG00000101050 | CWF19L2  | protein_co chr11 | 1.07E+08 | 1.07E+08 | - | 3.49   | 3.24   |
| ENSG00000101051 | JMY      | protein_co chr5  | 79236189 | 79327215 | + | 4.8    | 4.45   |
| ENSG00000101052 | HOMER1   | protein_co chr5  | 79372636 | 79514217 | - | 1.24   | 1.6    |
| ENSG00000101053 | XRCC4    | protein_co chr5  | 83077498 | 83353787 | + | 2.49   | 2.52   |
| ENSG00000101054 | BOLL     | protein_co chr2  | 1.98E+08 | 1.98E+08 | - | 0      | 0      |

|                   |                  |          |          |   |        |        |
|-------------------|------------------|----------|----------|---|--------|--------|
| ENSG0000(ZNF547   | protein_co chr19 | 57363477 | 57379565 | + | 2.03   | 2.41   |
| ENSG0000(ZNF773   | protein_co chr19 | 57499915 | 57518404 | + | 7.46   | 7.14   |
| ENSG0000(ZNF776   | protein_co chr19 | 57746796 | 57758159 | + | 4.26   | 3.6    |
| ENSG0000(ZNF256   | protein_co chr19 | 57940833 | 57947675 | - | 2.15   | 2.83   |
| ENSG0000(SUV39H2  | protein_co chr10 | 14878820 | 14904315 | + | 2.39   | 2.66   |
| ENSG0000(DCLRE1C  | protein_co chr10 | 14897359 | 14954432 | - | 3.2    | 3.32   |
| ENSG0000(OLAH     | protein_co chr10 | 15032227 | 15073852 | + | 0      | 0.04   |
| ENSG0000(RPP38    | protein_co chr10 | 15097180 | 15139818 | + | 6.91   | 7.18   |
| ENSG0000(NMT2     | protein_co chr10 | 15102584 | 15168693 | - | 13.97  | 10.54  |
| ENSG0000(ZSCAN1   | protein_co chr19 | 58034032 | 58054631 | + | 0      | 0      |
| ENSG0000(ZNF837   | protein_co chr19 | 58367618 | 58381060 | - | 1.25   | 1.6    |
| ENSG0000(USP12    | protein_co chr13 | 27066142 | 27171896 | - | 7.07   | 6.76   |
| ENSG0000(CCDC50   | protein_co chr3  | 1.91E+08 | 1.91E+08 | + | 19.32  | 23.77  |
| ENSG0000(CAMK4    | protein_co chr5  | 1.11E+08 | 1.11E+08 | + | 0.9    | 0.53   |
| ENSG0000(TRIM36   | protein_co chr5  | 1.15E+08 | 1.15E+08 | - | 0.25   | 0.19   |
| ENSG0000(ZFP36L2  | protein_co chr2  | 43222402 | 43226609 | - | 22     | 24.72  |
| ENSG0000(PAN3     | protein_co chr13 | 28138506 | 28295335 | + | 6.43   | 5.66   |
| ENSG0000(PLEKHH2  | protein_co chr2  | 43637273 | 43767987 | + | 0.31   | 0.31   |
| ENSG0000(PFKM     | protein_co chr12 | 48105139 | 48146404 | + | 37.74  | 38.65  |
| ENSG0000(TMEM123  | protein_co chr11 | 1.02E+08 | 1.02E+08 | - | 113.91 | 106.05 |
| ENSG0000(GRIA4    | protein_co chr11 | 1.06E+08 | 1.06E+08 | + | 0      | 0      |
| ENSG0000(IGSF10   | protein_co chr3  | 1.51E+08 | 1.51E+08 | - | 6.13   | 6.54   |
| ENSG0000(SPEF2    | protein_co chr5  | 35617844 | 35814611 | + | 1.38   | 1.11   |
| ENSG0000(SPARCL1  | protein_co chr4  | 87473335 | 87531061 | - | 0.09   | 0.07   |
| ENSG0000(DSPP     | protein_co chr4  | 87608529 | 87616910 | + | 0      | 0      |
| ENSG0000(DMP1     | protein_co chr4  | 87650307 | 87664361 | + | 0      | 0      |
| ENSG0000(MEPE     | protein_co chr4  | 87821411 | 87846817 | + | 0      | 0      |
| ENSG0000(MBNL1    | protein_co chr3  | 1.52E+08 | 1.52E+08 | + | 51.97  | 56.06  |
| ENSG0000(CAPSL    | protein_co chr5  | 35904295 | 35938779 | - | 0      | 0      |
| ENSG0000(NADK2    | protein_co chr5  | 36192592 | 36242279 | - | 9.09   | 10.12  |
| ENSG0000(GPD1L    | protein_co chr3  | 32105689 | 32168713 | + | 2.02   | 0.91   |
| ENSG0000(GJA1     | protein_co chr6  | 1.21E+08 | 1.21E+08 | + | 390.8  | 393.44 |
| ENSG0000(CCNO     | protein_co chr5  | 55231152 | 55233680 | - | 1.45   | 0.94   |
| ENSG0000(DDX4     | protein_co chr5  | 55738017 | 55817157 | + | 0      | 0      |
| ENSG0000(CLEC4F   | protein_co chr2  | 70808643 | 70820600 | - | 0.04   | 0      |
| ENSG0000(SLC30A6  | protein_co chr2  | 32165841 | 32224379 | + | 7.08   | 6.25   |
| ENSG0000(PELO     | protein_co chr5  | 52787940 | 52804046 | + | 8.68   | 8.06   |
| ENSG0000(RASGRP3  | protein_co chr2  | 33436324 | 33564750 | + | 0.29   | 1.04   |
| ENSG0000(SAR1B    | protein_co chr5  | 1.35E+08 | 1.35E+08 | - | 14.42  | 17.32  |
| ENSG0000(CATSPER3 | protein_co chr5  | 1.35E+08 | 1.35E+08 | + | 0.23   | 0.09   |
| ENSG0000(GPR180   | protein_co chr13 | 94601903 | 94634645 | + | 1.23   | 1.22   |
| ENSG0000(TCTEX1D1 | protein_co chr1  | 66752459 | 66778787 | + | 0      | 0      |
| ENSG0000(WDR78    | protein_co chr1  | 66812885 | 66924887 | - | 1.94   | 1.27   |
| ENSG0000(ANKRD22  | protein_co chr10 | 88822132 | 88851818 | - | 0.18   | 0      |
| ENSG0000(FARP1    | protein_co chr13 | 98142562 | 98455176 | + | 13.49  | 13.63  |

|                 |          |                  |          |          |   |        |        |
|-----------------|----------|------------------|----------|----------|---|--------|--------|
| ENSG00000101515 | IFIT5    | protein_co chr10 | 89414586 | 89421001 | + | 3.98   | 3.69   |
| ENSG00000101516 | SLC16A12 | protein_co chr10 | 89430299 | 89556641 | - | 0.03   | 0.08   |
| ENSG00000101517 | PANK1    | protein_co chr10 | 89579497 | 89645572 | - | 2.32   | 2.26   |
| ENSG00000101518 | PRDM8    | protein_co chr4  | 80183879 | 80204329 | + | 7.42   | 4.27   |
| ENSG00000101519 | BMP3     | protein_co chr4  | 81030965 | 81057531 | + | 0.02   | 0.03   |
| ENSG00000101520 | HNRNPDL  | protein_co chr4  | 82422564 | 82430408 | - | 60.99  | 54.82  |
| ENSG00000101521 | HHEX     | protein_co chr10 | 92689951 | 92695646 | + | 1.77   | 1.66   |
| ENSG00000101522 | UTRN     | protein_co chr6  | 1.44E+08 | 1.45E+08 | + | 27.01  | 30.01  |
| ENSG00000101523 | GRM1     | protein_co chr6  | 1.46E+08 | 1.46E+08 | + | 0.05   | 0.05   |
| ENSG00000101524 | PTPRK    | protein_co chr6  | 1.28E+08 | 1.29E+08 | - | 34.45  | 32.46  |
| ENSG00000101525 | GGPS1    | protein_co chr1  | 2.35E+08 | 2.35E+08 | + | 10.38  | 15.04  |
| ENSG00000101526 | CNTNAP4  | protein_co chr16 | 76277278 | 76559238 | + | 0.01   | 0.28   |
| ENSG00000101527 | ZNF117   | protein_co chr7  | 64971776 | 65006684 | - | 9.17   | 10.36  |
| ENSG00000101528 | PART1    | lincRNA chr5     | 60487713 | 60547657 | + | 0      | 0      |
| ENSG00000101529 | RAB3C    | protein_co chr5  | 58582221 | 58859394 | + | 0      | 0      |
| ENSG00000101530 | LMNTD1   | protein_co chr12 | 25409307 | 25648579 | - | 0      | 0      |
| ENSG00000101531 | MARVELD2 | protein_co chr5  | 69415112 | 69444330 | + | 0.11   | 0.09   |
| ENSG00000101532 | RAD17    | protein_co chr5  | 69369293 | 69414801 | + | 10.36  | 9.58   |
| ENSG00000101533 | MED21    | protein_co chr12 | 27022546 | 27066343 | + | 18.25  | 18.15  |
| ENSG00000101534 | PLOD2    | protein_co chr3  | 1.46E+08 | 1.46E+08 | - | 139.28 | 113.47 |
| ENSG00000101535 | STK32B   | protein_co chr4  | 5051442  | 5500998  | + | 0.8    | 0.61   |
| ENSG00000101536 | NRSN1    | protein_co chr6  | 24126122 | 24154900 | + | 0      | 0      |
| ENSG00000101537 | JAKMIP1  | protein_co chr4  | 6026199  | 6200591  | - | 0      | 0      |
| ENSG00000101538 | ZIC1     | protein_co chr3  | 1.47E+08 | 1.48E+08 | + | 0      | 0.28   |
| ENSG00000101539 | ADGRA3   | protein_co chr4  | 22345071 | 22516054 | - | 9.96   | 10.01  |
| ENSG00000101540 | CPB1     | protein_co chr3  | 1.49E+08 | 1.49E+08 | + | 0      | 0      |
| ENSG00000101541 | SREK1IP1 | protein_co chr5  | 64718144 | 64768685 | - | 4.71   | 6.18   |
| ENSG00000101542 | LGI2     | protein_co chr4  | 24998847 | 25030879 | - | 0.07   | 0.04   |
| ENSG00000101543 | CWC27    | protein_co chr5  | 64768930 | 65018763 | + | 7.21   | 6.97   |
| ENSG00000101544 | MR1      | protein_co chr1  | 1.81E+08 | 1.81E+08 | + | 12.72  | 13.5   |
| ENSG00000101545 | SRP19    | protein_co chr5  | 1.13E+08 | 1.13E+08 | + | 26.76  | 27.8   |
| ENSG00000101546 | CENPH    | protein_co chr5  | 69189548 | 69210357 | + | 1.67   | 1.67   |
| ENSG00000101547 | CDYL     | protein_co chr6  | 4706159  | 4955551  | + | 7.72   | 9.28   |
| ENSG00000101548 | CARHSP1  | protein_co chr16 | 8852942  | 8869012  | - | 120.78 | 124.36 |
| ENSG00000101549 | TEKT5    | protein_co chr16 | 10627501 | 10694945 | - | 0      | 0      |
| ENSG00000101550 | BANK1    | protein_co chr4  | 1.01E+08 | 1.02E+08 | + | 0.17   | 0.17   |
| ENSG00000101551 | TXNDC11  | protein_co chr16 | 11679080 | 11742878 | - | 14.22  | 11.56  |
| ENSG00000101552 | DAB2     | protein_co chr5  | 39371675 | 39462300 | - | 136.96 | 130.62 |
| ENSG00000101553 | ACMSD    | protein_co chr2  | 1.35E+08 | 1.35E+08 | + | 0      | 0      |
| ENSG00000101554 | ACOXL    | protein_co chr2  | 1.11E+08 | 1.11E+08 | + | 0      | 0      |
| ENSG00000101555 | BCL2L11  | protein_co chr2  | 1.11E+08 | 1.11E+08 | + | 2.02   | 2.98   |
| ENSG00000101556 | ANAPC1   | protein_co chr2  | 1.12E+08 | 1.12E+08 | - | 6.78   | 9.59   |
| ENSG00000101557 | CAST     | protein_co chr5  | 96525267 | 96779595 | + | 106.13 | 97.96  |
| ENSG00000101558 | SCOC     | protein_co chr4  | 1.4E+08  | 1.4E+08  | + | 17.49  | 15.45  |
| ENSG00000101559 | CLGN     | protein_co chr4  | 1.4E+08  | 1.4E+08  | - | 1.07   | 0.57   |

|                    |                  |          |          |   |       |       |
|--------------------|------------------|----------|----------|---|-------|-------|
| ENSG0000(CETN3     | protein_co chr5  | 90392261 | 90409786 | - | 8.98  | 11.64 |
| ENSG0000(SMARCA5   | protein_co chr4  | 1.44E+08 | 1.44E+08 | + | 9.85  | 14.17 |
| ENSG0000(SYCP2L    | protein_co chr6  | 10886831 | 10979320 | + | 0.02  | 0     |
| ENSG0000(BMP6      | protein_co chr6  | 7726797  | 7881422  | + | 4.74  | 7.62  |
| ENSG0000(RGPD3     | protein_co chr2  | 1.06E+08 | 1.06E+08 | - | 0.17  | 0.28  |
| ENSG0000(RASSF3    | protein_co chr12 | 64507001 | 64697567 | + | 5.53  | 3.78  |
| ENSG0000(HNRNPU    | protein_co chr1  | 2.45E+08 | 2.45E+08 | - | 99.99 | 97.54 |
| ENSG0000(RANBP2    | protein_co chr2  | 1.09E+08 | 1.09E+08 | + | 10.2  | 10.59 |
| ENSG0000(AHCTF1    | protein_co chr1  | 2.47E+08 | 2.47E+08 | - | 9.93  | 12.18 |
| ENSG0000(MERTK     | protein_co chr2  | 1.12E+08 | 1.12E+08 | + | 0.11  | 0.37  |
| ENSG0000(TMEM87B   | protein_co chr2  | 1.12E+08 | 1.12E+08 | + | 8.26  | 8.5   |
| ENSG0000(OR14K1    | protein_co chr1  | 2.48E+08 | 2.48E+08 | + | 0     | 0     |
| ENSG0000(PTPRR     | protein_co chr12 | 70638073 | 70920843 | - | 0.03  | 0.14  |
| ENSG0000(NR4A2     | protein_co chr2  | 1.56E+08 | 1.56E+08 | - | 0.92  | 0.56  |
| ENSG0000(CCDC148   | protein_co chr2  | 1.58E+08 | 1.58E+08 | - | 0.05  | 0.36  |
| ENSG0000(PLA2R1    | protein_co chr2  | 1.6E+08  | 1.6E+08  | - | 16.31 | 13.97 |
| ENSG0000(RBMS1     | protein_co chr2  | 1.6E+08  | 1.6E+08  | - | 32.16 | 33.29 |
| ENSG0000(SCN3A     | protein_co chr2  | 1.65E+08 | 1.65E+08 | - | 0.02  | 0.02  |
| ENSG0000(FEZF2     | protein_co chr3  | 62369681 | 62374324 | - | 0     | 0     |
| ENSG0000(CD96      | protein_co chr3  | 1.11E+08 | 1.12E+08 | + | 0.13  | 0.02  |
| ENSG0000(SLC25A27  | protein_co chr6  | 46652915 | 46678193 | + | 4.68  | 5.09  |
| ENSG0000(ADGRF1    | protein_co chr6  | 46997703 | 47042363 | - | 0.01  | 0.01  |
| ENSG0000(ADGRF4    | protein_co chr6  | 47685864 | 47722021 | + | 1.5   | 1.35  |
| ENSG0000(FRMD1     | protein_co chr6  | 1.68E+08 | 1.68E+08 | - | 0     | 0     |
| ENSG0000(FAM49B    | protein_co chr8  | 1.3E+08  | 1.3E+08  | - | 8.39  | 8.85  |
| ENSG0000(ASAP1     | protein_co chr8  | 1.3E+08  | 1.3E+08  | - | 25.76 | 27.58 |
| ENSG0000(TRAPPC8   | protein_co chr18 | 31829173 | 31953136 | - | 7.79  | 9.67  |
| ENSG0000(FAM81B    | protein_co chr5  | 95391344 | 95450454 | + | 0     | 0     |
| ENSG0000(LINC00467 | lincRNA chr1     | 2.11E+08 | 2.11E+08 | + | 2.99  | 1.79  |
| ENSG0000(INO80C    | protein_co chr18 | 35452230 | 35497991 | - | 5.29  | 3.54  |
| ENSG0000(LPCAT1    | protein_co chr5  | 1456480  | 1523977  | - | 20.96 | 21.34 |
| ENSG0000(PLEKHG4B  | protein_co chr5  | 92151    | 189972   | + | 0     | 0     |
| ENSG0000(NMRAL1    | protein_co chr16 | 4461680  | 4495763  | - | 17.2  | 18.02 |
| ENSG0000(UBALD1    | protein_co chr16 | 4608883  | 4615027  | - | 13.72 | 13.76 |
| ENSG0000(C16orf89  | protein_co chr16 | 5044122  | 5066110  | - | 0.83  | 0.39  |
| ENSG0000(TMEM251   | protein_co chr14 | 93184951 | 93187089 | + | 5.47  | 3.76  |
| ENSG0000(ING1      | protein_co chr13 | 1.11E+08 | 1.11E+08 | + | 5.64  | 4.57  |
| ENSG0000(TEX29     | protein_co chr13 | 1.11E+08 | 1.11E+08 | + | 0.37  | 0     |
| ENSG0000(SPACA7    | protein_co chr13 | 1.12E+08 | 1.12E+08 | + | 0     | 0     |
| ENSG0000(ADPRHL1   | protein_co chr13 | 1.13E+08 | 1.13E+08 | - | 1.54  | 1.44  |
| ENSG0000(CMTM7     | protein_co chr3  | 32391671 | 32483067 | + | 13.49 | 15.65 |
| ENSG0000(FBXL2     | protein_co chr3  | 33277025 | 33403662 | + | 6.72  | 7.22  |
| ENSG0000(UBP1      | protein_co chr3  | 33388336 | 33441371 | - | 27.82 | 28.05 |
| ENSG0000(RMND5A    | protein_co chr2  | 86720173 | 86778041 | + | 10.17 | 7.15  |
| ENSG0000(CD8A      | protein_co chr2  | 86784610 | 86808396 | - | 0     | 0     |

|                   |                  |          |          |   |       |       |
|-------------------|------------------|----------|----------|---|-------|-------|
| ENSG0000(RPIA     | protein_co chr2  | 88691644 | 88750935 | + | 4.28  | 4.54  |
| ENSG0000(GOLGA8F  | protein_co chr15 | 28378621 | 28392018 | + | 0     | 0     |
| ENSG0000(PTPRD    | protein_co chr9  | 8314246  | 10612723 | - | 8.28  | 10.85 |
| ENSG0000(LURAP1L  | protein_co chr9  | 12775021 | 12822131 | + | 24.18 | 20.35 |
| ENSG0000(CNKSR3   | protein_co chr6  | 1.54E+08 | 1.55E+08 | - | 2.74  | 2.75  |
| ENSG0000(GTF2E1   | protein_co chr3  | 1.21E+08 | 1.21E+08 | + | 4.46  | 4.17  |
| ENSG0000(CFDP1    | protein_co chr16 | 75293698 | 75433485 | - | 34.98 | 39.42 |
| ENSG0000(TGIF2LX  | protein_co chrX  | 89921882 | 89922883 | + | 0     | 0     |
| ENSG0000(ZDHHC7   | protein_co chr16 | 84974181 | 85011535 | - | 27.46 | 28.2  |
| ENSG0000(FAM92B   | protein_co chr16 | 85098358 | 85112508 | - | 0     | 0     |
| ENSG0000(C7orf31  | protein_co chr7  | 25134697 | 25180356 | - | 2.31  | 1.64  |
| ENSG0000(TMPRS11  | protein_co chr4  | 67820876 | 67884032 | - | 0     | 0     |
| ENSG0000(JAZF1    | protein_co chr7  | 27830573 | 28180743 | - | 6.71  | 7.88  |
| ENSG0000(CMIP     | protein_co chr16 | 81445170 | 81711762 | + | 15.06 | 15.68 |
| ENSG0000(SPHKAP   | protein_co chr2  | 2.28E+08 | 2.28E+08 | - | 0     | 0     |
| ENSG0000(KCNJ16   | protein_co chr17 | 70053429 | 70135608 | + | 0     | 0     |
| ENSG0000(PID1     | protein_co chr2  | 2.29E+08 | 2.29E+08 | - | 31.66 | 27.06 |
| ENSG0000(TRIP12   | protein_co chr2  | 2.3E+08  | 2.3E+08  | - | 50.41 | 45    |
| ENSG0000(FBXO36   | protein_co chr2  | 2.3E+08  | 2.3E+08  | + | 1.16  | 1.1   |
| ENSG0000(CEBPG    | protein_co chr19 | 33373330 | 33382686 | + | 8.1   | 8.59  |
| ENSG0000(KCTD15   | protein_co chr19 | 33795933 | 33815763 | + | 8.83  | 9.47  |
| ENSG0000(ZNF599   | protein_co chr19 | 34758076 | 34773229 | - | 3.41  | 3     |
| ENSG0000(MCOLN2   | protein_co chr1  | 84925583 | 84997113 | - | 0.66  | 0.4   |
| ENSG0000(LGI4     | protein_co chr19 | 35124513 | 35142451 | - | 0.68  | 0.58  |
| ENSG0000(DDAH1    | protein_co chr1  | 85318481 | 85578363 | - | 11.28 | 12.36 |
| ENSG0000(SREK1    | protein_co chr5  | 66139971 | 66183615 | + | 27.45 | 30.52 |
| ENSG0000(CHD1     | protein_co chr5  | 98853985 | 98928957 | - | 5.61  | 7.59  |
| ENSG0000(CLCA3P   | transcribec chr1 | 86634273 | 86655376 | + | 0     | 0.02  |
| ENSG0000(ANKFN1   | protein_co chr17 | 55882301 | 56511659 | + | 0     | 0     |
| ENSG0000(DGKE     | protein_co chr17 | 56834099 | 56869567 | + | 3     | 2     |
| ENSG0000(HS2ST1   | protein_co chr1  | 86914648 | 87109998 | + | 16.83 | 12.09 |
| ENSG0000(MSI2     | protein_co chr17 | 57255851 | 57684685 | + | 7.93  | 9.22  |
| ENSG0000(CACNA2D1 | protein_co chr7  | 81946444 | 82443798 | - | 13    | 11.49 |
| ENSG0000(ZUFSP    | protein_co chr6  | 1.17E+08 | 1.17E+08 | - | 1.7   | 2.06  |
| ENSG0000(HS3ST3A1 | protein_co chr17 | 13495689 | 13601927 | - | 1.99  | 1.2   |
| ENSG0000(GDPD1    | protein_co chr17 | 59220467 | 59275967 | + | 0.69  | 0.92  |
| ENSG0000(NUS1     | protein_co chr6  | 1.18E+08 | 1.18E+08 | + | 8.65  | 7.77  |
| ENSG0000(SEMA3D   | protein_co chr7  | 84995553 | 85186855 | - | 0.57  | 1.39  |
| ENSG0000(PPP2R5E  | protein_co chr14 | 63371357 | 63543374 | - | 11.83 | 10.56 |
| ENSG0000(ASB17    | protein_co chr1  | 75918873 | 75932431 | - | 0     | 0     |
| ENSG0000(GRAP     | protein_co chr17 | 19020673 | 19047637 | - | 0     | 0.12  |
| ENSG0000(SLC5A10  | protein_co chr17 | 18950345 | 19022595 | + | 0.02  | 0.03  |
| ENSG0000(AK5      | protein_co chr1  | 77282051 | 77559969 | + | 5.94  | 6.14  |
| ENSG0000(CABYR    | protein_co chr18 | 24138956 | 24161603 | + | 1.6   | 1.38  |
| ENSG0000(IMPACT   | protein_co chr18 | 24426616 | 24453535 | + | 13.39 | 12.32 |



|                    |                  |          |            |        |        |
|--------------------|------------------|----------|------------|--------|--------|
| ENSG0000( ANKRD29  | protein_co chr18 | 23598926 | 23662885 - | 4.23   | 3.03   |
| ENSG0000( SDHAF4   | protein_co chr6  | 70566917 | 70589569 + | 6.01   | 4.7    |
| ENSG0000( CHST9    | protein_co chr18 | 26906481 | 27185317 - | 0      | 0      |
| ENSG0000( THY1     | protein_co chr11 | 1.19E+08 | 1.19E+08 - | 103.05 | 98.38  |
| ENSG0000( DNAAF1   | protein_co chr16 | 84145287 | 84178767 + | 0.15   | 0.26   |
| ENSG0000( C16orf74 | protein_co chr16 | 85690084 | 85751129 - | 11.53  | 9.37   |
| ENSG0000( TBCEL    | protein_co chr11 | 1.21E+08 | 1.21E+08 + | 8.96   | 9.28   |
| ENSG0000( JPH3     | protein_co chr16 | 87601835 | 87698156 + | 0      | 0      |
| ENSG0000( ANKH     | protein_co chr5  | 14704804 | 14871778 - | 25.25  | 24.79  |
| ENSG0000( OTULIN   | protein_co chr5  | 14664664 | 14699711 + | 6.67   | 6.37   |
| ENSG0000( UBASH3B  | protein_co chr11 | 1.23E+08 | 1.23E+08 + | 0.73   | 1.35   |
| ENSG0000( ROBO4    | protein_co chr11 | 1.25E+08 | 1.25E+08 - | 1.84   | 1.93   |
| ENSG0000( ROBO3    | protein_co chr11 | 1.25E+08 | 1.25E+08 + | 24.86  | 32.97  |
| ENSG0000( PANX3    | protein_co chr11 | 1.25E+08 | 1.25E+08 + | 0      | 0      |
| ENSG0000( TBRG1    | protein_co chr11 | 1.25E+08 | 1.25E+08 + | 15.29  | 19.35  |
| ENSG0000( NRGN     | protein_co chr11 | 1.25E+08 | 1.25E+08 + | 0.87   | 0.71   |
| ENSG0000( FAM134B  | protein_co chr5  | 16473038 | 16617058 - | 0.53   | 0.32   |
| ENSG0000( CDH12    | protein_co chr5  | 21750673 | 22853622 - | 0      | 0      |
| ENSG0000( GPR15    | protein_co chr3  | 98531899 | 98533150 + | 0      | 0      |
| ENSG0000( TOMM70   | protein_co chr3  | 1E+08    | 1E+08 -    | 13.93  | 12.01  |
| ENSG0000( ABI3BP   | protein_co chr3  | 1.01E+08 | 1.01E+08 - | 392.37 | 322.63 |
| ENSG0000( ANGPT1   | protein_co chr8  | 1.07E+08 | 1.07E+08 - | 9.1    | 8.81   |
| ENSG0000( CYP4Z2P  | transcribec chr1 | 46843095 | 46900437 - | 0      | 0      |
| ENSG0000( PITPNC1  | protein_co chr17 | 67377281 | 67697261 + | 5.49   | 4.58   |
| ENSG0000( CC2D1B   | protein_co chr1  | 52345723 | 52366193 - | 13.15  | 13.28  |
| ENSG0000( CERS3    | protein_co chr15 | 1E+08    | 1.01E+08 - | 0      | 0      |
| ENSG0000( PRKCA    | protein_co chr17 | 66302636 | 66810743 + | 21.25  | 20.36  |
| ENSG0000( LRRK1    | protein_co chr15 | 1.01E+08 | 1.01E+08 + | 10.02  | 11.26  |
| ENSG0000( CEP112   | protein_co chr17 | 65635538 | 66192084 - | 6.12   | 7.01   |
| ENSG0000( GAL3ST2  | protein_co chr2  | 2.42E+08 | 2.42E+08 + | 0      | 0      |
| ENSG0000( ABCA9    | protein_co chr17 | 68974488 | 69061064 - | 76.63  | 74.35  |
| ENSG0000( ABCA6    | protein_co chr17 | 69078702 | 69141888 - | 34.53  | 40.45  |
| ENSG0000( ABCA10   | protein_co chr17 | 69147214 | 69244846 - | 0.96   | 1.01   |
| ENSG0000( ABCA5    | protein_co chr17 | 69244311 | 69327244 - | 4.78   | 4.65   |
| ENSG0000( ENPP3    | protein_co chr6  | 1.32E+08 | 1.32E+08 + | 0.11   | 0.14   |
| ENSG0000( C4orf19  | protein_co chr4  | 37453941 | 37623495 + | 0.32   | 0      |
| ENSG0000( UCHL1    | protein_co chr4  | 41256413 | 41268455 + | 82.11  | 81.08  |
| ENSG0000( MIA3     | protein_co chr1  | 2.23E+08 | 2.23E+08 + | 33.48  | 34.22  |
| ENSG0000( DISP1    | protein_co chr1  | 2.23E+08 | 2.23E+08 + | 3.15   | 2.88   |
| ENSG0000( TNIK     | protein_co chr3  | 1.71E+08 | 1.71E+08 - | 13.79  | 10.75  |
| ENSG0000( TDH      | transcribec chr8 | 11339637 | 11368452 + | 0.08   | 0      |
| ENSG0000( FAM167A  | protein_co chr8  | 11421463 | 11474715 - | 2.18   | 2.34   |
| ENSG0000( NEIL2    | protein_co chr8  | 11769639 | 11787346 + | 4.48   | 5.09   |
| ENSG0000( PGM5     | protein_co chr9  | 68328308 | 68531061 + | 0.14   | 0      |
| ENSG0000( WNT3A    | protein_co chr1  | 2.28E+08 | 2.28E+08 + | 0      | 0.02   |

|                   |                  |          |          |   |       |       |
|-------------------|------------------|----------|----------|---|-------|-------|
| ENSG0000(OBSCN    | protein_co chr1  | 2.28E+08 | 2.28E+08 | + | 2.24  | 2.33  |
| ENSG0000(LONRF1   | protein_co chr8  | 12721894 | 12756073 | - | 5.3   | 4.7   |
| ENSG0000(TRIM11   | protein_co chr1  | 2.28E+08 | 2.28E+08 | - | 9.87  | 8.7   |
| ENSG0000(ENAH     | protein_co chr1  | 2.25E+08 | 2.26E+08 | - | 24.48 | 25.38 |
| ENSG0000(PPP1R3A  | protein_co chr7  | 1.14E+08 | 1.14E+08 | - | 0     | 0     |
| ENSG0000(CCSAP    | protein_co chr1  | 2.29E+08 | 2.29E+08 | - | 1     | 1.29  |
| ENSG0000(ASZ1     | protein_co chr7  | 1.17E+08 | 1.17E+08 | - | 0     | 0     |
| ENSG0000(SH3RF1   | protein_co chr4  | 1.69E+08 | 1.69E+08 | - | 9.23  | 8.95  |
| ENSG0000(GBP5     | protein_co chr1  | 89258950 | 89272804 | - | 0.35  | 0.21  |
| ENSG0000(BUB3     | protein_co chr10 | 1.23E+08 | 1.23E+08 | + | 35.49 | 35.38 |
| ENSG0000(GPR26    | protein_co chr10 | 1.24E+08 | 1.24E+08 | + | 0     | 0     |
| ENSG0000(CCDC173  | protein_co chr2  | 1.7E+08  | 1.7E+08  | - | 1.36  | 1.03  |
| ENSG0000(MMP21    | protein_co chr10 | 1.26E+08 | 1.26E+08 | - | 0     | 0     |
| ENSG0000(C10orf90 | protein_co chr10 | 1.26E+08 | 1.27E+08 | - | 0.27  | 0.2   |
| ENSG0000(FAM69A   | protein_co chr1  | 92832737 | 92961522 | - | 8     | 7.64  |
| ENSG0000(ATP5G3   | protein_co chr2  | 1.75E+08 | 1.75E+08 | - | 92.8  | 98.73 |
| ENSG0000(CNTNAP3B | protein_co chr9  | 41890314 | 42129510 | - | 6     | 7.29  |
| ENSG0000(FAM27C   | lincRNA chr9     | 61854162 | 61855331 | + | 2.02  | 3.45  |
| ENSG0000(MAGED4   | protein_co chrX  | 52184823 | 52192268 | + | 8.68  | 8.1   |
| ENSG0000(SRSF12   | protein_co chr6  | 89095959 | 89118081 | - | 0.01  | 0     |
| ENSG0000(PDLIM3   | protein_co chr4  | 1.86E+08 | 1.86E+08 | - | 5.63  | 5.52  |
| ENSG0000(SORBS2   | protein_co chr4  | 1.86E+08 | 1.86E+08 | - | 4.51  | 4.22  |
| ENSG0000(ELOC     | protein_co chr8  | 73939169 | 73972287 | - | 41.02 | 38.68 |
| ENSG0000(LY96     | protein_co chr8  | 73991352 | 74029087 | + | 37.51 | 41.69 |
| ENSG0000(CEP170P1 | transcribec chr4 | 1.18E+08 | 1.19E+08 | + | 0.2   | 0.22  |
| ENSG0000(PSMA8    | protein_co chr18 | 26133852 | 26193355 | + | 0     | 0     |
| ENSG0000(TMSB4Y   | protein_co chrY  | 13703567 | 13706024 | + | 0.14  | 0.11  |
| ENSG0000(CXADR    | protein_co chr21 | 17512382 | 17593579 | + | 0.11  | 0.15  |
| ENSG0000(BTG3     | protein_co chr21 | 17593653 | 17612947 | - | 11.95 | 11.52 |
| ENSG0000(C21orf91 | protein_co chr21 | 17788967 | 17819386 | - | 4.07  | 3.44  |
| ENSG0000(CHODL    | protein_co chr21 | 17901263 | 18267373 | + | 0     | 0.08  |
| ENSG0000(TMPRS15  | protein_co chr21 | 18269116 | 18485879 | - | 0     | 0     |
| ENSG0000(NCAM2    | protein_co chr21 | 20998315 | 21543329 | + | 4.31  | 4.61  |
| ENSG0000(L3MBTL4  | protein_co chr18 | 5954706  | 6415237  | - | 0     | 0     |
| ENSG0000(PDE1C    | protein_co chr7  | 31751179 | 32299329 | - | 0.43  | 0.16  |
| ENSG0000(RABGEF1  | protein_co chr7  | 66682164 | 66811464 | + | 11.21 | 10.02 |
| ENSG0000(MRPL39   | protein_co chr21 | 25585656 | 25607517 | - | 12.99 | 12.16 |
| ENSG0000(JAM2     | protein_co chr21 | 25639272 | 25717562 | + | 1.83  | 2.07  |
| ENSG0000(ATP5J    | protein_co chr21 | 25716503 | 25735673 | - | 69.19 | 72.52 |
| ENSG0000(GABPA    | protein_co chr21 | 25734570 | 25772460 | + | 4.9   | 6.42  |
| ENSG0000(ADAMTS1  | protein_co chr21 | 26835747 | 26845409 | - | 65.74 | 56.56 |
| ENSG0000(ADAMTS5  | protein_co chr21 | 26917912 | 26966513 | - | 5.87  | 6.15  |
| ENSG0000(TSEN2    | protein_co chr3  | 12484432 | 12539623 | + | 4.11  | 4.65  |
| ENSG0000(SLFN13   | protein_co chr17 | 35435096 | 35448837 | - | 1.85  | 1.98  |
| ENSG0000(WNT7A    | protein_co chr3  | 13816258 | 13880121 | - | 0.03  | 0     |

|                   |                   |          |          |   |       |       |
|-------------------|-------------------|----------|----------|---|-------|-------|
| ENSG0000(XPC      | protein_co chr3   | 14145147 | 14178783 | - | 29.28 | 29.86 |
| ENSG0000(CCDC174  | protein_co chr3   | 14651746 | 14672659 | + | 10.78 | 11.92 |
| ENSG0000(FGD5     | protein_co chr3   | 14810853 | 14934565 | + | 0.42  | 0.28  |
| ENSG0000(FLCN     | protein_co chr17  | 17212212 | 17237188 | - | 47.11 | 46.34 |
| ENSG0000(DPH3     | protein_co chr3   | 16257978 | 16264972 | - | 5.14  | 4.45  |
| ENSG0000(OXNAD1   | protein_co chr3   | 16265160 | 16350299 | + | 2.24  | 2.37  |
| ENSG0000(PLCL2    | protein_co chr3   | 16802651 | 17090594 | + | 1.91  | 2.05  |
| ENSG0000(CXXC1    | protein_co chr18  | 50282343 | 50288304 | - | 25.85 | 21.78 |
| ENSG0000(SKA1     | protein_co chr18  | 50374995 | 50394173 | + | 2.75  | 2.97  |
| ENSG0000(PPP4R1   | protein_co chr18  | 9546791  | 9615240  | - | 20.09 | 21.66 |
| ENSG0000(APCDD1   | protein_co chr18  | 10454628 | 10489948 | + | 0.01  | 0     |
| ENSG0000(PIEZO2   | protein_co chr18  | 10666483 | 11148762 | - | 2.62  | 2.48  |
| ENSG0000(CCDC144B | transcribec chr17 | 18537800 | 18625617 | - | 4.87  | 4.32  |
| ENSG0000(MPPE1    | protein_co chr18  | 11882622 | 11909223 | - | 17.78 | 19.97 |
| ENSG0000(CCDC144C | transcribec chr17 | 20321164 | 20403557 | + | 0.06  | 0.03  |
| ENSG0000(USP43    | protein_co chr17  | 9644698  | 9729691  | + | 0     | 0     |
| ENSG0000(RAB6B    | protein_co chr3   | 1.34E+08 | 1.34E+08 | - | 0.56  | 0.82  |
| ENSG0000(EME1     | protein_co chr17  | 50373220 | 50381483 | + | 0.76  | 0.36  |
| ENSG0000(EPHB1    | protein_co chr3   | 1.35E+08 | 1.35E+08 | + | 0.16  | 0.32  |
| ENSG0000(ACSS1    | protein_co chr20  | 25006230 | 25058980 | - | 1.91  | 2.16  |
| ENSG0000(ANKRD40  | protein_co chr17  | 50693190 | 50707924 | - | 10.49 | 11.54 |
| ENSG0000(ZNF18    | protein_co chr17  | 11977439 | 11997510 | - | 3.86  | 3.29  |
| ENSG0000(CA10     | protein_co chr17  | 51630313 | 52160017 | - | 0     | 0     |
| ENSG0000(VOPP1    | protein_co chr7   | 55436056 | 55572988 | - | 38.92 | 42.87 |
| ENSG0000(14-Sep   | protein_co chr7   | 55793544 | 55862789 | - | 0.13  | 0.17  |
| ENSG0000(APOOL    | protein_co chrX   | 85003826 | 85093316 | + | 2.41  | 2.72  |
| ENSG0000(DKK2     | protein_co chr4   | 1.07E+08 | 1.07E+08 | - | 0     | 0.07  |
| ENSG0000(CYP2U1   | protein_co chr4   | 1.08E+08 | 1.08E+08 | + | 7.99  | 7.3   |
| ENSG0000(RSPH10B  | protein_co chr7   | 5925550  | 5970683  | - | 0.28  | 0.26  |
| ENSG0000(FBXL18   | protein_co chr7   | 5431335  | 5513798  | - | 3.7   | 4.95  |
| ENSG0000(CNTNAP5  | protein_co chr2   | 1.24E+08 | 1.25E+08 | + | 0.02  | 0.02  |
| ENSG0000(PROM2    | protein_co chr2   | 95274453 | 95291308 | + | 0.11  | 0.55  |
| ENSG0000(UNC93B2  | processed_chr7    | 6855485  | 6859830  | - | 0     | 0     |
| ENSG0000(AK9      | protein_co chr6   | 1.09E+08 | 1.1E+08  | - | 2.61  | 3.05  |
| ENSG0000(ODF1     | protein_co chr8   | 1.03E+08 | 1.03E+08 | + | 0     | 0     |
| ENSG0000(KLF10    | protein_co chr8   | 1.03E+08 | 1.03E+08 | - | 8.59  | 11.88 |
| ENSG0000(PTPRN2   | protein_co chr7   | 1.58E+08 | 1.59E+08 | - | 0.92  | 0.85  |
| ENSG0000(AZIN1    | protein_co chr8   | 1.03E+08 | 1.03E+08 | - | 24.58 | 21.51 |
| ENSG0000(ATP6V1C1 | protein_co chr8   | 1.03E+08 | 1.03E+08 | + | 25.16 | 22.17 |
| ENSG0000(TMEM55A  | protein_co chr8   | 90993796 | 91041064 | - | 26.94 | 24.38 |
| ENSG0000(OTUD6B   | protein_co chr8   | 91070196 | 91087095 | + | 3.59  | 3.95  |
| ENSG0000(CDK19    | protein_co chr6   | 1.11E+08 | 1.11E+08 | - | 11.66 | 9.49  |
| ENSG0000(GTF3C6   | protein_co chr6   | 1.11E+08 | 1.11E+08 | + | 21.31 | 21.06 |
| ENSG0000(TTC39B   | protein_co chr9   | 15163622 | 15307360 | - | 2.35  | 2.59  |
| ENSG0000(AGPAT5   | protein_co chr8   | 6708357  | 6759666  | + | 4.14  | 5.67  |

|                   |                  |          |          |   |        |        |
|-------------------|------------------|----------|----------|---|--------|--------|
| ENSG0000(MMS19    | protein_co chr10 | 97458324 | 97498794 | - | 21.56  | 21.86  |
| ENSG0000(OR4K1    | protein_co chr14 | 19935608 | 19936683 | + | 0      | 0      |
| ENSG0000(PI4K2A   | protein_co chr10 | 97640686 | 97676434 | + | 14.77  | 15.49  |
| ENSG0000(MARVELD1 | protein_co chr10 | 97713173 | 97718152 | + | 36.76  | 35.88  |
| ENSG0000(ZFYVE27  | protein_co chr10 | 97737121 | 97760907 | + | 12.57  | 12.02  |
| ENSG0000(GOLGA7B  | protein_co chr10 | 97850239 | 97871580 | + | 0      | 0.04   |
| ENSG0000(GPR78    | protein_co chr4  | 8558725  | 8619761  | + | 0.02   | 0.13   |
| ENSG0000(TRMT44   | protein_co chr4  | 8436140  | 8493531  | + | 3.9    | 4.14   |
| ENSG0000(SLC25A28 | protein_co chr10 | 99610522 | 99620609 | - | 27.05  | 25.27  |
| ENSG0000(HSPA13   | protein_co chr21 | 14371115 | 14383484 | - | 9.73   | 9.53   |
| ENSG0000(SAMSN1   | protein_co chr21 | 14485228 | 14583402 | - | 0      | 0      |
| ENSG0000(USP25    | protein_co chr21 | 15730025 | 15880069 | + | 13.46  | 15.3   |
| ENSG0000(GRAMD3   | protein_co chr5  | 1.26E+08 | 1.26E+08 | + | 12.76  | 12.76  |
| ENSG0000(ZCCHC10  | protein_co chr5  | 1.33E+08 | 1.33E+08 | - | 6.28   | 8.75   |
| ENSG0000(C16orf87 | protein_co chr16 | 46796607 | 46831411 | - | 3.62   | 2.88   |
| ENSG0000(MOV10    | protein_co chr1  | 1.13E+08 | 1.13E+08 | + | 22.03  | 19.36  |
| ENSG0000(RHOC     | protein_co chr1  | 1.13E+08 | 1.13E+08 | - | 179.44 | 176.81 |
| ENSG0000(PPM1J    | protein_co chr1  | 1.13E+08 | 1.13E+08 | - | 0.36   | 0.43   |
| ENSG0000(DBI      | protein_co chr2  | 1.19E+08 | 1.19E+08 | + | 111.46 | 109.35 |
| ENSG0000(SLC16A1  | protein_co chr1  | 1.13E+08 | 1.13E+08 | - | 46.94  | 44.57  |
| ENSG0000(HEATR3   | protein_co chr16 | 50065941 | 50106387 | + | 3.62   | 4.22   |
| ENSG0000(TRIM74   | protein_co chr7  | 72959485 | 72969466 | - | 0.52   | 0      |
| ENSG0000(NIFK     | protein_co chr2  | 1.22E+08 | 1.22E+08 | - | 23.05  | 19.47  |
| ENSG0000(OXA1L    | protein_co chr14 | 22766522 | 22773041 | + | 72.94  | 70.79  |
| ENSG0000(SLC7A7   | protein_co chr14 | 22773222 | 22829820 | - | 7.03   | 6.39   |
| ENSG0000(MAGEC1   | protein_co chrX  | 1.42E+08 | 1.42E+08 | + | 0      | 0.06   |
| ENSG0000(LARP1    | protein_co chr5  | 1.55E+08 | 1.55E+08 | + | 49.6   | 49.92  |
| ENSG0000(CNOT8    | protein_co chr5  | 1.55E+08 | 1.55E+08 | + | 20.52  | 22.09  |
| ENSG0000(GRIA1    | protein_co chr5  | 1.53E+08 | 1.54E+08 | + | 0.03   | 0      |
| ENSG0000(LRGUK    | protein_co chr7  | 1.34E+08 | 1.34E+08 | + | 0.11   | 0      |
| ENSG0000(SETD9    | protein_co chr5  | 56909260 | 56925532 | + | 5.53   | 4.94   |
| ENSG0000(MIER3    | protein_co chr5  | 56919602 | 56971675 | - | 9.37   | 7.74   |
| ENSG0000(NUP205   | protein_co chr7  | 1.36E+08 | 1.36E+08 | + | 7.24   | 7.63   |
| ENSG0000(ZKSCAN2  | protein_co chr16 | 25236001 | 25257931 | - | 1.53   | 1.43   |
| ENSG0000(C9orf85  | protein_co chr9  | 71911510 | 71986054 | + | 6.79   | 5.83   |
| ENSG0000(XAGE2    | protein_co chrX  | 52369030 | 52375680 | + | 0      | 0      |
| ENSG0000(PIK3AP1  | protein_co chr10 | 96593312 | 96720514 | - | 0      | 0.04   |
| ENSG0000(RBM45    | protein_co chr2  | 1.78E+08 | 1.78E+08 | + | 5.07   | 4.79   |
| ENSG0000(TTN      | protein_co chr2  | 1.79E+08 | 1.79E+08 | - | 0.01   | 0      |
| ENSG0000(VSIG4    | protein_co chrX  | 66021738 | 66040125 | - | 0      | 0      |
| ENSG0000(PDIA4    | protein_co chr7  | 1.49E+08 | 1.49E+08 | - | 97.69  | 90.99  |
| ENSG0000(KDM8     | protein_co chr16 | 27203495 | 27221768 | + | 1.41   | 1.9    |
| ENSG0000(PDZD9    | protein_co chr16 | 21983865 | 22001110 | - | 0      | 0      |
| ENSG0000(OTOA     | protein_co chr16 | 21678514 | 21760729 | + | 0      | 0      |
| ENSG0000(KCTD18   | protein_co chr2  | 2E+08    | 2.01E+08 | - | 9.23   | 9.34   |

|                   |                  |          |          |   |       |       |
|-------------------|------------------|----------|----------|---|-------|-------|
| ENSG0000(FAM126B  | protein_co chr2  | 2.01E+08 | 2.01E+08 | - | 2.16  | 2.43  |
| ENSG0000(ALS2CR12 | protein_co chr2  | 2.01E+08 | 2.01E+08 | - | 1.21  | 1.25  |
| ENSG0000(ALS2CR11 | protein_co chr2  | 2.01E+08 | 2.02E+08 | - | 0.45  | 0.48  |
| ENSG0000(TMEM237  | protein_co chr2  | 2.02E+08 | 2.02E+08 | - | 22.14 | 22.97 |
| ENSG0000(FZD7     | protein_co chr2  | 2.02E+08 | 2.02E+08 | + | 39.16 | 31.41 |
| ENSG0000(SPAG17   | protein_co chr1  | 1.18E+08 | 1.18E+08 | - | 0     | 0     |
| ENSG0000(DEPTOR   | protein_co chr8  | 1.2E+08  | 1.2E+08  | + | 26.29 | 32.43 |
| ENSG0000(FMN2     | protein_co chr1  | 2.4E+08  | 2.4E+08  | + | 0.86  | 0.57  |
| ENSG0000(RNF20    | protein_co chr9  | 1.02E+08 | 1.02E+08 | + | 13.42 | 14.07 |
| ENSG0000(CYLC2    | protein_co chr9  | 1.03E+08 | 1.03E+08 | + | 0     | 0     |
| ENSG0000(PPARGC1B | protein_co chr5  | 1.5E+08  | 1.5E+08  | + | 0.13  | 0.22  |
| ENSG0000(ELMO1    | protein_co chr7  | 36854361 | 37449249 | - | 0.86  | 0.18  |
| ENSG0000(SLC26A2  | protein_co chr5  | 1.5E+08  | 1.5E+08  | + | 3.78  | 4.44  |
| ENSG0000(LSM11    | protein_co chr5  | 1.58E+08 | 1.58E+08 | + | 1.45  | 1.14  |
| ENSG0000(MED7     | protein_co chr5  | 1.57E+08 | 1.57E+08 | - | 4.38  | 4.85  |
| ENSG0000(SAXO1    | protein_co chr9  | 18927658 | 19049354 | - | 0.13  | 0     |
| ENSG0000(RRAGA    | protein_co chr9  | 19049395 | 19050983 | + | 54.22 | 53.74 |
| ENSG0000(SLC24A2  | protein_co chr9  | 19507452 | 19786928 | - | 0     | 0     |
| ENSG0000(TRIM42   | protein_co chr3  | 1.41E+08 | 1.41E+08 | + | 0     | 0     |
| ENSG0000(PXYLP1   | protein_co chr3  | 1.41E+08 | 1.41E+08 | + | 6.93  | 7.28  |
| ENSG0000(ADCY8    | protein_co chr8  | 1.31E+08 | 1.31E+08 | - | 0.13  | 0     |
| ENSG0000(RASA2    | protein_co chr3  | 1.41E+08 | 1.42E+08 | + | 8.91  | 6.04  |
| ENSG0000(RMND1    | protein_co chr6  | 1.51E+08 | 1.51E+08 | - | 10.27 | 9.95  |
| ENSG0000(RAET1L   | protein_co chr6  | 1.5E+08  | 1.5E+08  | - | 0     | 0     |
| ENSG0000(SLA      | protein_co chr8  | 1.33E+08 | 1.33E+08 | - | 0     | 0     |
| ENSG0000(TMBIM4   | protein_co chr12 | 66135846 | 66170072 | - | 59.72 | 59.34 |
| ENSG0000(VBP1     | protein_co chrX  | 1.55E+08 | 1.55E+08 | + | 14.65 | 10.04 |
| ENSG0000(RAB39B   | protein_co chrX  | 1.55E+08 | 1.55E+08 | - | 0.03  | 0.03  |
| ENSG0000(CLIC2    | protein_co chrX  | 1.55E+08 | 1.55E+08 | - | 1.68  | 1.73  |
| ENSG0000(AFF2     | protein_co chrX  | 1.49E+08 | 1.49E+08 | + | 2.35  | 2.53  |
| ENSG0000(MICU3    | protein_co chr8  | 17027238 | 17122644 | + | 2.58  | 2.43  |
| ENSG0000(GRIP1    | protein_co chr12 | 66347431 | 66804186 | - | 0.13  | 0.36  |
| ENSG0000(VPS37A   | protein_co chr8  | 17246571 | 17302427 | + | 30.16 | 30.58 |
| ENSG0000(KIF5A    | protein_co chr12 | 57549998 | 57586632 | + | 0.06  | 0.15  |
| ENSG0000(NAT2     | protein_co chr8  | 18391245 | 18401218 | + | 0     | 0.1   |
| ENSG0000(MAGEA8   | protein_co chrX  | 1.5E+08  | 1.5E+08  | + | 0     | 0     |
| ENSG0000(PSD3     | protein_co chr8  | 18527301 | 19084730 | - | 12.96 | 13.88 |
| ENSG0000(CARNMT1  | protein_co chr9  | 74981020 | 75028423 | - | 3.25  | 2.05  |
| ENSG0000(MCU      | protein_co chr10 | 72692131 | 72887694 | + | 23.02 | 24.71 |
| ENSG0000(ELMSAN1  | protein_co chr14 | 73715122 | 73790285 | - | 10.61 | 8.3   |
| ENSG0000(CFAP70   | protein_co chr10 | 73253759 | 73358859 | - | 0.86  | 0.95  |
| ENSG0000(GNA14    | protein_co chr9  | 77423079 | 77648307 | - | 9.48  | 8.21  |
| ENSG0000(FAM161B  | protein_co chr14 | 73931501 | 73950414 | - | 1.99  | 2.08  |
| ENSG0000(GNAQ     | protein_co chr9  | 77716087 | 78031458 | - | 26.29 | 28.13 |
| ENSG0000(WIF1     | protein_co chr12 | 65050626 | 65121566 | - | 0     | 0     |

|                 |          |                  |          |          |   |       |       |
|-----------------|----------|------------------|----------|----------|---|-------|-------|
| ENSG00000100264 | UGT2B4   | protein_co chr4  | 69480165 | 69526014 | - | 0     | 0.14  |
| ENSG00000100265 | GPR61    | protein_co chr1  | 1.1E+08  | 1.1E+08  | + | 0     | 0.26  |
| ENSG00000100266 | MMP16    | protein_co chr8  | 88032009 | 88328025 | - | 11.44 | 10.89 |
| ENSG00000100267 | ADK      | protein_co chr10 | 74151185 | 74709303 | + | 15.03 | 14.66 |
| ENSG00000100268 | KCNMA1   | protein_co chr10 | 76869601 | 77638369 | - | 2.74  | 2.26  |
| ENSG00000100269 | BATF     | protein_co chr14 | 75522425 | 75547015 | + | 0     | 0     |
| ENSG00000100270 | DCK      | protein_co chr4  | 70992538 | 71030914 | + | 3.5   | 3.87  |
| ENSG00000100271 | ADAMTS3  | protein_co chr4  | 72280969 | 72569386 | - | 1.52  | 2     |
| ENSG00000100272 | ALX3     | protein_co chr1  | 1.1E+08  | 1.1E+08  | - | 0     | 0     |
| ENSG00000100273 | DPY19L4  | protein_co chr8  | 94719703 | 94793836 | + | 7.94  | 9.36  |
| ENSG00000100274 | NDUFAF6  | protein_co chr8  | 94895767 | 95116455 | + | 6.34  | 8.08  |
| ENSG00000100275 | DRAM2    | protein_co chr1  | 1.11E+08 | 1.11E+08 | - | 39.72 | 40.17 |
| ENSG00000100276 | C8orf37  | protein_co chr8  | 95244919 | 95269201 | - | 1.11  | 1.12  |
| ENSG00000100277 | PPEF2    | protein_co chr4  | 75859864 | 75902571 | - | 0.02  | 0     |
| ENSG00000100278 | CFAP161  | protein_co chr15 | 81007033 | 81149175 | + | 0     | 0     |
| ENSG00000100279 | ADAMTSL3 | protein_co chr15 | 83654086 | 84039842 | + | 1.24  | 1.46  |
| ENSG00000100280 | ART3     | protein_co chr4  | 76011184 | 76112802 | + | 0     | 0.19  |
| ENSG00000100281 | SLC28A1  | protein_co chr15 | 84884654 | 84945796 | + | 0.03  | 0     |
| ENSG00000100282 | WHAMM    | protein_co chr15 | 82809628 | 82836108 | + | 4.26  | 3.27  |
| ENSG00000100283 | CXCL13   | protein_co chr4  | 77511753 | 77611834 | + | 0     | 0     |
| ENSG00000100284 | N6AMT1   | protein_co chr21 | 28872191 | 28885371 | - | 3.52  | 3.14  |
| ENSG00000100285 | RWDD2B   | protein_co chr21 | 29004384 | 29019378 | - | 11.08 | 12.37 |
| ENSG00000100286 | USP16    | protein_co chr21 | 29024629 | 29054488 | + | 11.18 | 10.34 |
| ENSG00000100287 | CCT8     | protein_co chr21 | 29055805 | 29073797 | - | 49.52 | 47.86 |
| ENSG00000100288 | MAP3K7CL | protein_co chr21 | 29077471 | 29175889 | + | 4.32  | 5.12  |
| ENSG00000100289 | NAA11    | protein_co chr4  | 79225694 | 79326050 | - | 0     | 0     |
| ENSG00000100290 | BACH1    | protein_co chr21 | 29194071 | 29630751 | + | 13.33 | 12.71 |
| ENSG00000100291 | CLDN17   | protein_co chr21 | 30165564 | 30166756 | - | 0     | 0     |
| ENSG00000100292 | CLDN8    | protein_co chr21 | 30214006 | 30216073 | - | 0     | 0     |
| ENSG00000100293 | TSPAN7   | protein_co chrX  | 38561370 | 38688920 | + | 0     | 0     |
| ENSG00000100294 | TIAM1    | protein_co chr21 | 31118416 | 31559977 | - | 1.5   | 1.8   |
| ENSG00000100295 | SCAF4    | protein_co chr21 | 31671033 | 31732075 | - | 7.01  | 7.23  |
| ENSG00000100296 | RPGR     | protein_co chrX  | 38269163 | 38327564 | - | 4.1   | 4.47  |
| ENSG00000100297 | CDK20    | protein_co chr9  | 87966441 | 87974753 | - | 4.76  | 6.24  |
| ENSG00000100298 | PCGF6    | protein_co chr10 | 1.03E+08 | 1.03E+08 | - | 3.78  | 4.06  |
| ENSG00000100299 | ANKRD9   | protein_co chr14 | 1.03E+08 | 1.03E+08 | - | 4.58  | 4.21  |
| ENSG00000100300 | SFR1     | protein_co chr10 | 1.04E+08 | 1.04E+08 | + | 5.2   | 4.41  |
| ENSG00000100301 | SORCS3   | protein_co chr10 | 1.05E+08 | 1.05E+08 | + | 0     | 0.04  |
| ENSG00000100302 | SFXN2    | protein_co chr10 | 1.03E+08 | 1.03E+08 | + | 0.71  | 0.52  |
| ENSG00000100303 | C14orf2  | protein_co chr14 | 1.04E+08 | 1.04E+08 | - | 79.32 | 71.05 |
| ENSG00000100304 | FUT6     | protein_co chr19 | 5830610  | 5839731  | - | 0.07  | 0     |
| ENSG00000100305 | TDRD9    | protein_co chr14 | 1.04E+08 | 1.04E+08 | + | 0.05  | 0.14  |
| ENSG00000100306 | FGF18    | protein_co chr5  | 1.71E+08 | 1.71E+08 | + | 0.03  | 0.12  |
| ENSG00000100307 | PCDH1    | protein_co chr5  | 1.42E+08 | 1.42E+08 | - | 1.96  | 2.81  |
| ENSG00000100308 | SH3RF2   | protein_co chr5  | 1.46E+08 | 1.46E+08 | + | 7.51  | 8.45  |

|                    |                  |          |            |         |         |
|--------------------|------------------|----------|------------|---------|---------|
| ENSG0000(GDF6      | protein_co chr8  | 96142330 | 96160792 - | 0.62    | 0.66    |
| ENSG0000(UQCRB     | protein_co chr8  | 96225920 | 96235634 - | 147.57  | 155.32  |
| ENSG0000(MTERF3    | protein_co chr8  | 96239398 | 96261610 - | 5.1     | 6.61    |
| ENSG0000(PTDSS1    | protein_co chr8  | 96261715 | 96336995 + | 44.96   | 45.04   |
| ENSG0000(PPP2R2B   | protein_co chr5  | 1.47E+08 | 1.47E+08 - | 0.03    | 0       |
| ENSG0000(RPL30     | protein_co chr8  | 98024851 | 98046469 - | 793.1   | 828.69  |
| ENSG0000(KCNS2     | protein_co chr8  | 98427022 | 98432848 + | 0.33    | 0.35    |
| ENSG0000(FAM122C   | protein_co chrX  | 1.35E+08 | 1.35E+08 + | 2.82    | 3.35    |
| ENSG0000(SUPV3L1   | protein_co chr10 | 69180232 | 69209099 + | 10.66   | 11.47   |
| ENSG0000(FAM122B   | protein_co chrX  | 1.35E+08 | 1.35E+08 - | 6.1     | 8.08    |
| ENSG0000(EEF1A1    | protein_co chr6  | 73515750 | 73523797 - | 6626.44 | 6683.99 |
| ENSG0000(FBXO43    | protein_co chr8  | 1E+08    | 1E+08 -    | 0.21    | 0.09    |
| ENSG0000(HKDC1     | protein_co chr10 | 69220303 | 69267559 + | 0.23    | 0.26    |
| ENSG0000(HK1       | protein_co chr10 | 69269984 | 69401882 + | 47.92   | 44.67   |
| ENSG0000(TYSND1    | protein_co chr10 | 70137981 | 70146676 - | 9.86    | 10.43   |
| ENSG0000(PHF6      | protein_co chrX  | 1.34E+08 | 1.34E+08 + | 4.47    | 5.47    |
| ENSG0000(CD109     | protein_co chr6  | 73695785 | 73828316 + | 12.53   | 11.69   |
| ENSG0000(LRFN2     | protein_co chr6  | 40391586 | 40587465 - | 0       | 0       |
| ENSG0000(NODAL     | protein_co chr10 | 70432315 | 70447951 - | 0       | 0       |
| ENSG0000(PRG3      | protein_co chr11 | 57376769 | 57381150 - | 0       | 0       |
| ENSG0000(UBE2L6    | protein_co chr11 | 57551656 | 57568284 - | 41.21   | 44.1    |
| ENSG0000(ZDHHC5    | protein_co chr11 | 57667747 | 57701187 + | 21.99   | 24.02   |
| ENSG0000(MED19     | protein_co chr11 | 57703714 | 57712323 - | 7.61    | 8.68    |
| ENSG0000(ZFAND3    | protein_co chr6  | 37819499 | 38154624 + | 53.25   | 54.51   |
| ENSG0000(NPTN      | protein_co chr15 | 73560014 | 73634134 - | 108.79  | 107.66  |
| ENSG0000(KAT6B     | protein_co chr10 | 74825582 | 75032622 + | 6.28    | 6.68    |
| ENSG0000(SAMD8     | protein_co chr10 | 75099586 | 75182123 + | 7.02    | 7.04    |
| ENSG0000(RAB11FIP1 | protein_co chr8  | 37858618 | 37899467 - | 11.33   | 11.52   |
| ENSG0000(UNC5D     | protein_co chr8  | 35235457 | 35796550 + | 0       | 0.07    |
| ENSG0000(GLYATL2   | protein_co chr11 | 58834065 | 58904215 - | 0.61    | 0.76    |
| ENSG0000(UTP14A    | protein_co chrX  | 1.3E+08  | 1.3E+08 +  | 8.9     | 8.01    |
| ENSG0000(AIFM1     | protein_co chrX  | 1.3E+08  | 1.3E+08 -  | 11.33   | 12.04   |
| ENSG0000(MAPK13    | protein_co chr6  | 36127809 | 36144524 + | 3.95    | 3.02    |
| ENSG0000(BAG4      | protein_co chr8  | 38176533 | 38213301 + | 5.51    | 5.67    |
| ENSG0000(MS4A1     | protein_co chr11 | 60455752 | 60470760 + | 0       | 0       |
| ENSG0000(IGKV1OR-2 | IG_V_pseu chr9   | 64765054 | 64765535 - | 0       | 0       |
| ENSG0000(TBC1D31   | protein_co chr8  | 1.23E+08 | 1.23E+08 + | 1.56    | 1.59    |
| ENSG0000(WDYHV1    | protein_co chr8  | 1.23E+08 | 1.23E+08 + | 7.84    | 5.83    |
| ENSG0000(ATAD2     | protein_co chr8  | 1.23E+08 | 1.23E+08 - | 2.76    | 2.51    |
| ENSG0000(FBXO32    | protein_co chr8  | 1.23E+08 | 1.24E+08 - | 126.1   | 113.52  |
| ENSG0000(NSMCE2    | protein_co chr8  | 1.25E+08 | 1.25E+08 + | 13.08   | 17.03   |
| ENSG0000(ZNF689    | protein_co chr16 | 30602558 | 30624012 - | 3.2     | 2.46    |
| ENSG0000(PRR14     | protein_co chr16 | 30650717 | 30656440 + | 11.54   | 14.96   |
| ENSG0000(FBRS      | protein_co chr16 | 30658431 | 30670814 + | 17.35   | 18.18   |
| ENSG0000(FRRS1     | protein_co chr1  | 99708703 | 99766631 - | 3.73    | 4.39    |

|                 |          |                  |          |          |   |        |        |
|-----------------|----------|------------------|----------|----------|---|--------|--------|
| ENSG00000108220 | PHKG2    | protein_co chr16 | 30748270 | 30761176 | + | 10.12  | 10.44  |
| ENSG00000108221 | MFSD14A  | protein_co chr1  | 1E+08    | 1E+08    | + | 15.08  | 15.19  |
| ENSG00000108222 | SASS6    | protein_co chr1  | 1E+08    | 1E+08    | - | 0.59   | 0.71   |
| ENSG00000108223 | COX6A2   | protein_co chr16 | 31427731 | 31428428 | - | 0      | 0      |
| ENSG00000108224 | ITGAD    | protein_co chr16 | 31393312 | 31426505 | + | 0      | 0      |
| ENSG00000108225 | ADGRG4   | protein_co chrX  | 1.36E+08 | 1.36E+08 | + | 0      | 0      |
| ENSG00000108226 | ZIC3     | protein_co chrX  | 1.38E+08 | 1.38E+08 | + | 0      | 0.03   |
| ENSG00000108227 | MALSU1   | protein_co chr7  | 23298739 | 23311729 | + | 29.18  | 31.32  |
| ENSG00000108228 | VPS8     | protein_co chr3  | 1.85E+08 | 1.85E+08 | + | 11.94  | 11.2   |
| ENSG00000108229 | GALK2    | protein_co chr15 | 49155656 | 49367869 | + | 13.26  | 12.86  |
| ENSG00000108230 | LHFPL4   | protein_co chr3  | 9498361  | 9553802  | - | 0      | 0      |
| ENSG00000108231 | B3GNT7   | protein_co chr2  | 2.31E+08 | 2.31E+08 | + | 0.12   | 0.16   |
| ENSG00000108232 | MPV17L   | protein_co chr16 | 15395754 | 15413268 | + | 0.1    | 0.11   |
| ENSG00000108233 | BUB1B    | protein_co chr15 | 40161023 | 40221136 | + | 0.66   | 0.29   |
| ENSG00000108234 | PDE6D    | protein_co chr2  | 2.32E+08 | 2.32E+08 | - | 14.1   | 15.37  |
| ENSG00000108235 | EIF4A2   | protein_co chr3  | 1.87E+08 | 1.87E+08 | + | 132.09 | 127.47 |
| ENSG00000108236 | BRPF1    | protein_co chr3  | 9731729  | 9748018  | + | 4.74   | 4.7    |
| ENSG00000108237 | RPUSD3   | protein_co chr3  | 9837849  | 9844602  | - | 14.92  | 14.93  |
| ENSG00000108238 | SST      | protein_co chr3  | 1.88E+08 | 1.88E+08 | - | 0      | 0      |
| ENSG00000108239 | TATDN2   | protein_co chr3  | 10248023 | 10281218 | + | 11.65  | 11.9   |
| ENSG00000108240 | GHRL     | protein_co chr3  | 10285675 | 10292947 | - | 0      | 0      |
| ENSG00000108241 | SEC13    | protein_co chr3  | 10293131 | 10321178 | - | 56.48  | 56.48  |
| ENSG00000108242 | FAM92A1P | unprocessε chr15 | 41163162 | 41164374 | + | 0      | 0      |
| ENSG00000108243 | EXOGL    | protein_co chr3  | 38496127 | 38542161 | + | 4.67   | 3.06   |
| ENSG00000108244 | NTAN1    | protein_co chr16 | 15037853 | 15056079 | - | 26.85  | 31.58  |
| ENSG00000108245 | SHCBP1L  | protein_co chr1  | 1.83E+08 | 1.83E+08 | - | 0      | 0      |
| ENSG00000108246 | NMNAT2   | protein_co chr1  | 1.83E+08 | 1.83E+08 | - | 0.63   | 1.09   |
| ENSG00000108247 | ZFYVE9   | protein_co chr1  | 52142094 | 52346686 | + | 8.39   | 8.22   |
| ENSG00000108248 | ATP2B2   | protein_co chr3  | 10324023 | 10708031 | - | 0      | 0      |
| ENSG00000108249 | LYZL4    | protein_co chr3  | 42397078 | 42410600 | - | 0      | 0      |
| ENSG00000108250 | SLC6A1   | protein_co chr3  | 10992724 | 11039247 | + | 0      | 0.01   |
| ENSG00000108251 | SMG1     | protein_co chr16 | 18804853 | 18926454 | - | 15.88  | 15.57  |
| ENSG00000108252 | FCHO2    | protein_co chr5  | 72955981 | 73090522 | + | 8.76   | 6.99   |
| ENSG00000108253 | RBPMS    | protein_co chr8  | 30384479 | 30572261 | + | 70.42  | 72.43  |
| ENSG00000108254 | TMEM171  | protein_co chr5  | 73120292 | 73131817 | + | 1.63   | 1.66   |
| ENSG00000108255 | KLHL40   | protein_co chr3  | 42685519 | 42692544 | + | 0      | 0      |
| ENSG00000108256 | C8A      | protein_co chr1  | 56854806 | 56918221 | + | 0      | 0.03   |
| ENSG00000108257 | TIMP4    | protein_co chr3  | 12153051 | 12159351 | - | 0.1    | 0.34   |
| ENSG00000108258 | SYN2     | protein_co chr3  | 12004402 | 12191400 | + | 0.31   | 0      |
| ENSG00000108259 | NRG1     | protein_co chr8  | 31639386 | 32767959 | + | 1.01   | 1.26   |
| ENSG00000108260 | C1orf27  | protein_co chr1  | 1.86E+08 | 1.86E+08 | + | 4.05   | 5.59   |
| ENSG00000108261 | CPT2     | protein_co chr1  | 53196429 | 53214197 | + | 9.33   | 9.2    |
| ENSG00000108262 | NECAP2   | protein_co chr1  | 16440672 | 16460078 | + | 30.15  | 28.07  |
| ENSG00000108263 | LRP8     | protein_co chr1  | 53242364 | 53328070 | - | 5.54   | 3.66   |
| ENSG00000108264 | CDCP2    | protein_co chr1  | 54132968 | 54153770 | - | 0      | 0      |



|                    |                  |          |          |   |        |        |
|--------------------|------------------|----------|----------|---|--------|--------|
| ENSG0000(PAXIP1    | protein_co chr7  | 1.55E+08 | 1.55E+08 | - | 3.36   | 3.47   |
| ENSG0000(STEAP2    | protein_co chr7  | 90167590 | 90238137 | + | 9.92   | 9.24   |
| ENSG0000(SSBP3     | protein_co chr1  | 54225432 | 54413479 | - | 21.68  | 24.79  |
| ENSG0000(HTR5A     | protein_co chr7  | 1.55E+08 | 1.55E+08 | + | 0      | 0      |
| ENSG0000(CLDN12    | protein_co chr7  | 90383721 | 90513402 | + | 16.42  | 17.51  |
| ENSG0000(MMP14     | protein_co chr14 | 22836557 | 22849027 | + | 344.45 | 356.74 |
| ENSG0000(FZD1      | protein_co chr7  | 91264364 | 91271326 | + | 2.25   | 2.61   |
| ENSG0000(GATAD1    | protein_co chr7  | 92447453 | 92458836 | + | 12.67  | 14.02  |
| ENSG0000(SUSD3     | protein_co chr9  | 93058688 | 93085138 | + | 0      | 0.28   |
| ENSG0000(ZFHX2-AS1 | processed_chr14  | 23511760 | 23560778 | + | 1.84   | 1.92   |
| ENSG0000(TMED6     | protein_co chr16 | 69343248 | 69351809 | - | 0      | 0      |
| ENSG0000(CLEC18A   | protein_co chr16 | 69950705 | 69964452 | + | 0.04   | 0      |
| ENSG0000(DHRS4     | protein_co chr14 | 23953586 | 23969279 | + | 17.85  | 18.45  |
| ENSG0000(C1orf158  | protein_co chr1  | 12746215 | 12763699 | + | 0.02   | 0.02   |
| ENSG0000(CLEC18C   | protein_co chr16 | 70173322 | 70187361 | + | 0.19   | 0.37   |
| ENSG0000(ARMC12    | protein_co chr6  | 35737032 | 35749079 | + | 0.23   | 0.4    |
| ENSG0000(DDX19B    | protein_co chr16 | 70289663 | 70335283 | + | 14.79  | 13.34  |
| ENSG0000(ST3GAL2   | protein_co chr16 | 70375978 | 70439237 | - | 9.12   | 9.49   |
| ENSG0000(FUK       | protein_co chr16 | 70454421 | 70480274 | + | 3.1    | 2.78   |
| ENSG0000(IL34      | protein_co chr16 | 70579895 | 70660682 | + | 1.91   | 3.76   |
| ENSG0000(DHRS1     | protein_co chr14 | 24290598 | 24299833 | - | 13.52  | 13.13  |
| ENSG0000(CACNA1D   | protein_co chr3  | 53328963 | 53813733 | + | 0.25   | 0.53   |
| ENSG0000(ARSE      | protein_co chrX  | 2934632  | 2968310  | - | 0.09   | 0.33   |
| ENSG0000(KIT       | protein_co chr4  | 54657918 | 54740715 | + | 0.19   | 0.02   |
| ENSG0000(HYDIN     | protein_co chr16 | 70807378 | 71230722 | - | 0.12   | 0.63   |
| ENSG0000(AASDH     | protein_co chr4  | 56338287 | 56387508 | - | 3.27   | 3.51   |
| ENSG0000(ZNF19     | protein_co chr16 | 71464555 | 71565089 | - | 1.28   | 1.23   |
| ENSG0000(CACNA2D3  | protein_co chr3  | 54122547 | 55074557 | + | 0.24   | 0.29   |
| ENSG0000(RNF111    | protein_co chr15 | 58865175 | 59097419 | + | 8.4    | 8.72   |
| ENSG0000(CCNB2     | protein_co chr15 | 59105078 | 59125045 | + | 0.6    | 0.53   |
| ENSG0000(FAM81A    | protein_co chr15 | 59372693 | 59523549 | + | 0.13   | 0.16   |
| ENSG0000(MYO1E     | protein_co chr15 | 59132434 | 59372900 | - | 35.45  | 31.51  |
| ENSG0000(APPL1     | protein_co chr3  | 57227737 | 57273468 | + | 11.11  | 9.72   |
| ENSG0000(MUM1L1    | protein_co chrX  | 1.06E+08 | 1.06E+08 | + | 0.03   | 0.01   |
| ENSG0000(AFAP1L1   | protein_co chr5  | 1.49E+08 | 1.49E+08 | + | 5.3    | 5.22   |
| ENSG0000(TSC22D3   | protein_co chrX  | 1.08E+08 | 1.08E+08 | - | 17.64  | 17.18  |
| ENSG0000(DSCR3     | protein_co chr21 | 37223420 | 37267919 | - | 24.51  | 25.68  |
| ENSG0000(DYRK1A    | protein_co chr21 | 37365790 | 37517450 | + | 16.89  | 16.91  |
| ENSG0000(KCNJ6     | protein_co chr21 | 37607376 | 37916446 | - | 0.01   | 0.01   |
| ENSG0000(KCNJ15    | protein_co chr21 | 38157034 | 38307357 | + | 0.46   | 0.33   |
| ENSG0000(ERG       | protein_co chr21 | 38380027 | 38661780 | - | 0.14   | 0.29   |
| ENSG0000(ETS2      | protein_co chr21 | 38805307 | 38824955 | + | 8.53   | 8.13   |
| ENSG0000(TSPAN18   | protein_co chr11 | 44726465 | 44932421 | + | 0      | 0      |
| ENSG0000(LCA5L     | protein_co chr21 | 39405844 | 39445805 | - | 0.45   | 0.6    |
| ENSG0000(SLC35B2   | protein_co chr6  | 44254096 | 44257890 | - | 54.27  | 52.43  |

|                   |                  |          |            |       |       |
|-------------------|------------------|----------|------------|-------|-------|
| ENSG0000(TMEM164  | protein_co chrX  | 1.1E+08  | 1.1E+08 +  | 9.85  | 7.78  |
| ENSG0000(MX1      | protein_co chr21 | 41420304 | 41459214 + | 6.84  | 7.81  |
| ENSG0000(CREB3L1  | protein_co chr11 | 46277661 | 46321422 + | 33.16 | 32.17 |
| ENSG0000(C2CD2    | protein_co chr21 | 41885112 | 41953890 - | 7.57  | 7.02  |
| ENSG0000(TAB3     | protein_co chrX  | 30827442 | 30975084 - | 13.82 | 10.91 |
| ENSG0000(SLC38A10 | protein_co chr17 | 81245000 | 81295547 - | 49.2  | 49.22 |
| ENSG0000(C9orf43  | protein_co chr9  | 1.13E+08 | 1.13E+08 + | 0.16  | 0.06  |
| ENSG0000(PALM2-AK | protein_co chr9  | 1.1E+08  | 1.1E+08 +  | 1.22  | 1.66  |
| ENSG0000(ZNF618   | protein_co chr9  | 1.14E+08 | 1.14E+08 + | 6.86  | 6.91  |
| ENSG0000(DGKI     | protein_co chr7  | 1.37E+08 | 1.38E+08 - | 0.33  | 1.16  |
| ENSG0000(TMEM268  | protein_co chr9  | 1.15E+08 | 1.15E+08 + | 5     | 5.19  |
| ENSG0000(SVOPL    | protein_co chr7  | 1.39E+08 | 1.39E+08 - | 0     | 0     |
| ENSG0000(SNX22    | protein_co chr15 | 64151715 | 64157481 + | 0.13  | 0.24  |
| ENSG0000(UBN2     | protein_co chr7  | 1.39E+08 | 1.39E+08 + | 2     | 1.78  |
| ENSG0000(BRAF     | protein_co chr7  | 1.41E+08 | 1.41E+08 - | 5.02  | 5.24  |
| ENSG0000(SLC34A2  | protein_co chr4  | 25655301 | 25678748 + | 0     | 0     |
| ENSG0000(ACAN     | protein_co chr15 | 88803443 | 88875354 + | 0     | 0     |
| ENSG0000(PSMG3    | protein_co chr7  | 1567330  | 1571005 -  | 12.27 | 11.84 |
| ENSG0000(CABP1    | protein_co chr12 | 1.21E+08 | 1.21E+08 + | 0.08  | 0.05  |
| ENSG0000(WDR19    | protein_co chr4  | 39182404 | 39285810 + | 25.63 | 27.33 |
| ENSG0000(SLC37A3  | protein_co chr7  | 1.4E+08  | 1.4E+08 -  | 20.16 | 16.4  |
| ENSG0000(AP3S2    | protein_co chr15 | 89830599 | 89894638 - | 13.57 | 11.04 |
| ENSG0000(FMNL2    | protein_co chr2  | 1.52E+08 | 1.53E+08 + | 17.27 | 17.98 |
| ENSG0000(GAREM2   | protein_co chr2  | 26173091 | 26189663 + | 4.14  | 3.43  |
| ENSG0000(SPPL3    | protein_co chr12 | 1.21E+08 | 1.21E+08 - | 38.07 | 36.32 |
| ENSG0000(DPYSL5   | protein_co chr2  | 26847747 | 26950351 + | 0.01  | 0     |
| ENSG0000(DRC1     | protein_co chr2  | 26401916 | 26456711 + | 0     | 0.27  |
| ENSG0000(RAB28    | protein_co chr4  | 13361354 | 13484365 - | 7.69  | 9.04  |
| ENSG0000(FAM213B  | protein_co chr1  | 2586491  | 2591469 +  | 8.88  | 8.72  |
| ENSG0000(TNFRSF14 | protein_co chr1  | 2555639  | 2565382 +  | 14.35 | 17.32 |
| ENSG0000(PANK4    | protein_co chr1  | 2508533  | 2526628 -  | 8.43  | 8.26  |
| ENSG0000(CIB4     | protein_co chr2  | 26581202 | 26641368 - | 0     | 0     |
| ENSG0000(MEGF11   | protein_co chr15 | 65895079 | 66253747 - | 0.15  | 0     |
| ENSG0000(C12orf43 | protein_co chr12 | 1.21E+08 | 1.21E+08 - | 6.06  | 5.69  |
| ENSG0000(PEX10    | protein_co chr1  | 2403964  | 2413797 -  | 10.52 | 10.93 |
| ENSG0000(RER1     | protein_co chr1  | 2391775  | 2405444 +  | 82.02 | 71.64 |
| ENSG0000(RADIL    | protein_co chr7  | 4797055  | 4883719 -  | 1.41  | 0.98  |
| ENSG0000(SKI      | protein_co chr1  | 2228695  | 2310119 +  | 26.78 | 25.47 |
| ENSG0000(WIPI2    | protein_co chr7  | 5190188  | 5233826 +  | 34.33 | 30.36 |
| ENSG0000(SSX8     | unprocessε chrX  | 52624998 | 52632895 + | 0     | 0     |
| ENSG0000(LDLRAP1  | protein_co chr1  | 25543580 | 25568886 + | 9.78  | 9.95  |
| ENSG0000(AGAP1    | protein_co chr2  | 2.35E+08 | 2.36E+08 + | 8.45  | 7.37  |
| ENSG0000(KRTCAP3  | protein_co chr2  | 27442366 | 27446481 + | 0.69  | 0.61  |
| ENSG0000(ANKRD61  | protein_co chr7  | 6031376  | 6036386 +  | 0.05  | 0     |
| ENSG0000(PAFAH2   | protein_co chr1  | 25959767 | 25998157 - | 3.4   | 2.48  |

|                     |                  |          |          |   |       |       |
|---------------------|------------------|----------|----------|---|-------|-------|
| ENSG0000( EXTL1     | protein_co chr1  | 26019884 | 26036464 | + | 0.03  | 0.03  |
| ENSG0000( SLC30A2   | protein_co chr1  | 26037252 | 26046133 | - | 0.02  | 0     |
| ENSG0000( BRE       | protein_co chr2  | 27889941 | 28338901 | + | 20.4  | 20.04 |
| ENSG0000( TRIM63    | protein_co chr1  | 26051304 | 26068436 | - | 0.06  | 0.07  |
| ENSG0000( WDR66     | protein_co chr12 | 1.22E+08 | 1.22E+08 | + | 0.42  | 0.76  |
| ENSG0000( MRPL17    | protein_co chr11 | 6680782  | 6683401  | - | 29.33 | 24.98 |
| ENSG0000( DUSP2     | protein_co chr2  | 96143166 | 96145440 | - | 0.07  | 0.15  |
| ENSG0000( GRHL3     | protein_co chr1  | 24319322 | 24364482 | + | 0     | 0     |
| ENSG0000( UBXN11    | protein_co chr1  | 26281328 | 26318363 | - | 6.02  | 7.43  |
| ENSG0000( NLRP14    | protein_co chr11 | 7020446  | 7071308  | + | 0.01  | 0     |
| ENSG0000( PTPDC1    | protein_co chr9  | 94030794 | 94109856 | + | 1.98  | 2.31  |
| ENSG0000( GALNT14   | protein_co chr2  | 30910467 | 31155202 | - | 0.12  | 0     |
| ENSG0000( NCK1      | protein_co chr3  | 1.37E+08 | 1.37E+08 | + | 34.99 | 31.9  |
| ENSG0000( HPD       | protein_co chr12 | 1.22E+08 | 1.22E+08 | - | 0.69  | 0.54  |
| ENSG0000( RHPN1     | protein_co chr8  | 1.43E+08 | 1.43E+08 | + | 0.39  | 0.44  |
| ENSG0000( TPRG1L    | protein_co chr1  | 3625002  | 3630127  | + | 32.1  | 29.1  |
| ENSG0000( LRRC43    | protein_co chr12 | 1.22E+08 | 1.22E+08 | + | 0.71  | 1.24  |
| ENSG0000( AAED1     | protein_co chr9  | 96639577 | 96655303 | - | 4.36  | 5.76  |
| ENSG0000( XDH       | protein_co chr2  | 31334321 | 31414715 | - | 0.06  | 0     |
| ENSG0000( XKR8      | protein_co chr1  | 27959462 | 27968096 | + | 4.78  | 3.88  |
| ENSG0000( CNNM4     | protein_co chr2  | 96760902 | 96811891 | + | 2.63  | 3.2   |
| ENSG0000( EYA3      | protein_co chr1  | 27970344 | 28088696 | - | 3.96  | 4.23  |
| ENSG0000( DZIP1L    | protein_co chr3  | 1.38E+08 | 1.38E+08 | - | 1.78  | 1.91  |
| ENSG0000( TMSB15A   | protein_co chrX  | 1.03E+08 | 1.03E+08 | - | 0.19  | 0.11  |
| ENSG0000( FANCC     | protein_co chr9  | 95099054 | 95426796 | - | 2.1   | 1.98  |
| ENSG0000( MRAS      | protein_co chr3  | 1.38E+08 | 1.38E+08 | + | 18.4  | 19.09 |
| ENSG0000( WASF2     | protein_co chr1  | 27404226 | 27490158 | - | 36.88 | 37.02 |
| ENSG0000( ABHD3     | protein_co chr18 | 21650897 | 21704805 | - | 2.04  | 1.68  |
| ENSG0000( ESYT3     | protein_co chr3  | 1.38E+08 | 1.38E+08 | + | 0.27  | 0.2   |
| ENSG0000( FAIM      | protein_co chr3  | 1.39E+08 | 1.39E+08 | + | 5.98  | 4.91  |
| ENSG0000( FAM46B    | protein_co chr1  | 27005020 | 27012836 | - | 0.81  | 0.56  |
| ENSG0000( CLSTN2    | protein_co chr3  | 1.4E+08  | 1.41E+08 | + | 0.17  | 0.28  |
| ENSG0000( COLEC12   | protein_co chr18 | 316740   | 500722   | - | 22    | 24.12 |
| ENSG0000( RNF207    | protein_co chr1  | 6205475  | 6221299  | + | 5.1   | 6.26  |
| ENSG0000( CUL4B     | protein_co chrX  | 1.21E+08 | 1.21E+08 | - | 23.71 | 23.42 |
| ENSG0000( GPR153    | protein_co chr1  | 6247346  | 6260975  | - | 4.18  | 5.31  |
| ENSG0000( SLC13A3   | protein_co chr20 | 46557823 | 46684467 | - | 1.38  | 1.58  |
| ENSG0000( GPRASP2   | protein_co chrX  | 1.03E+08 | 1.03E+08 | + | 4.73  | 5.24  |
| ENSG0000( RHBDL2    | protein_co chr1  | 38885807 | 38941799 | - | 0     | 0     |
| ENSG0000( AUTS2     | protein_co chr7  | 69598919 | 70793068 | + | 1.93  | 3.37  |
| ENSG0000( SHROOM4   | protein_co chrX  | 50591647 | 50814302 | - | 1.04  | 1.29  |
| ENSG0000( HIST1H2BD | protein_co chr6  | 26158146 | 26171349 | + | 2.6   | 3.4   |
| ENSG0000( CDC25C    | protein_co chr5  | 1.38E+08 | 1.38E+08 | - | 0.04  | 0.08  |
| ENSG0000( HIST1H4H  | protein_co chr6  | 26277609 | 26285638 | - | 0.76  | 0.77  |
| ENSG0000( MITD1     | protein_co chr2  | 99161427 | 99181058 | - | 15.11 | 14.01 |

|                    |                  |          |            |        |        |
|--------------------|------------------|----------|------------|--------|--------|
| ENSG0000( EIF5B    | protein_co chr2  | 99337353 | 99401326 + | 22.17  | 20.9   |
| ENSG0000( RIBC1    | protein_co chrX  | 53422690 | 53431120 + | 0.39   | 0.29   |
| ENSG0000( TMSB15B  | protein_co chrX  | 1.04E+08 | 1.04E+08 + | 4.66   | 4.55   |
| ENSG0000( CATIP    | protein_co chr2  | 2.18E+08 | 2.18E+08 + | 0      | 0.02   |
| ENSG0000( CNOT11   | protein_co chr2  | 1.01E+08 | 1.01E+08 + | 14.88  | 14.58  |
| ENSG0000( KCNB1    | protein_co chr20 | 49293394 | 49484297 - | 0.29   | 0.23   |
| ENSG0000( TSPAN33  | protein_co chr7  | 1.29E+08 | 1.29E+08 + | 0.29   | 0.5    |
| ENSG0000( NRG2     | protein_co chr5  | 1.4E+08  | 1.4E+08 -  | 0.03   | 0.04   |
| ENSG0000( AHCYL2   | protein_co chr7  | 1.29E+08 | 1.29E+08 + | 5.56   | 5.62   |
| ENSG0000( B4GALT5  | protein_co chr20 | 49632945 | 49713878 - | 17.67  | 16.29  |
| ENSG0000( CD1D     | protein_co chr1  | 1.58E+08 | 1.58E+08 + | 0.1    | 0.19   |
| ENSG0000( CD1A     | protein_co chr1  | 1.58E+08 | 1.58E+08 + | 0      | 0      |
| ENSG0000( SPATA2   | protein_co chr20 | 49903391 | 49915508 - | 2.97   | 3.01   |
| ENSG0000( CD1C     | protein_co chr1  | 1.58E+08 | 1.58E+08 + | 0      | 0      |
| ENSG0000( SNX29P1  | unprocessε chr16 | 21376648 | 21386064 + | 0.4    | 0      |
| ENSG0000( FAM86C1  | protein_co chr11 | 71787510 | 71801236 + | 2.53   | 2.36   |
| ENSG0000( CD1B     | protein_co chr1  | 1.58E+08 | 1.58E+08 - | 0      | 0      |
| ENSG0000( DNAH3    | protein_co chr16 | 20933111 | 21159441 - | 0      | 0.04   |
| ENSG0000( CD1E     | protein_co chr1  | 1.58E+08 | 1.58E+08 + | 0      | 0      |
| ENSG0000( HMHB1    | protein_co chr5  | 1.44E+08 | 1.44E+08 + | 0      | 0      |
| ENSG0000( CPA2     | protein_co chr7  | 1.3E+08  | 1.3E+08 +  | 0.13   | 0      |
| ENSG0000( NCF1     | protein_co chr7  | 74773962 | 74789315 + | 0      | 0      |
| ENSG0000( CPA5     | protein_co chr7  | 1.3E+08  | 1.3E+08 +  | 0      | 0      |
| ENSG0000( TSR2     | protein_co chrX  | 54440401 | 54445487 + | 21.11  | 19.28  |
| ENSG0000( PPP1R9A  | protein_co chr7  | 94907202 | 95296415 + | 0.01   | 0      |
| ENSG0000( ZC3H18   | protein_co chr16 | 88570381 | 88631966 + | 10.5   | 11.03  |
| ENSG0000( ZFAND2B  | protein_co chr2  | 2.19E+08 | 2.19E+08 + | 16.49  | 19.96  |
| ENSG0000( POM121L2 | protein_co chr6  | 27285903 | 27312170 - | 0      | 0      |
| ENSG0000( GDPD5    | protein_co chr11 | 75434640 | 75525903 - | 13.35  | 14.79  |
| ENSG0000( DYNC111  | protein_co chr7  | 95772506 | 96110322 + | 0.5    | 0.09   |
| ENSG0000( PFKFB1   | protein_co chrX  | 54932961 | 54998534 - | 0.09   | 0      |
| ENSG0000( ALAS2    | protein_co chrX  | 55009055 | 55031064 - | 0      | 0      |
| ENSG0000( TMED4    | protein_co chr7  | 44577894 | 44582287 - | 31.89  | 30.61  |
| ENSG0000( PPP1R15B | protein_co chr1  | 2.04E+08 | 2.04E+08 - | 6.5    | 5.76   |
| ENSG0000( COPG2    | protein_co chr7  | 1.31E+08 | 1.31E+08 - | 10.45  | 12.51  |
| ENSG0000( EMSY     | protein_co chr11 | 76444923 | 76553025 + | 5.75   | 4.33   |
| ENSG0000( PAGE5    | protein_co chrX  | 55220355 | 55224108 + | 0      | 0      |
| ENSG0000( GPAT4    | protein_co chr8  | 41577187 | 41625001 + | 49.18  | 52.32  |
| ENSG0000( PKD1L1   | protein_co chr7  | 47774652 | 47948491 - | 0.01   | 0      |
| ENSG0000( ZSCAN12  | protein_co chr6  | 28378955 | 28399734 - | 1.4    | 1.11   |
| ENSG0000( TAGLN2   | protein_co chr1  | 1.6E+08  | 1.6E+08 -  | 229.48 | 219.75 |
| ENSG0000( ELK4     | protein_co chr1  | 2.06E+08 | 2.06E+08 - | 3.58   | 4.23   |
| ENSG0000( SLAMF8   | protein_co chr1  | 1.6E+08  | 1.6E+08 +  | 0      | 0.02   |
| ENSG0000( SLC45A3  | protein_co chr1  | 2.06E+08 | 2.06E+08 - | 1.5    | 2.16   |
| ENSG0000( DUSP23   | protein_co chr1  | 1.6E+08  | 1.6E+08 +  | 10.89  | 13.7   |

|                   |                  |          |            |       |       |
|-------------------|------------------|----------|------------|-------|-------|
| ENSG0000(RNF166   | protein_co chr16 | 88696495 | 88706421 - | 5.89  | 6.39  |
| ENSG0000(OR10J6P  | unprocessε chr1  | 1.6E+08  | 1.6E+08 +  | 0     | 0     |
| ENSG0000(NBL1     | protein_co chr1  | 19640554 | 19658456 + | 98.75 | 93.19 |
| ENSG0000(HTR6     | protein_co chr1  | 19665287 | 19679562 + | 0     | 0     |
| ENSG0000(ITLN2    | protein_co chr1  | 1.61E+08 | 1.61E+08 - | 0     | 0.57  |
| ENSG0000(F11R     | protein_co chr1  | 1.61E+08 | 1.61E+08 - | 16.88 | 14.55 |
| ENSG0000(USF1     | protein_co chr1  | 1.61E+08 | 1.61E+08 - | 22.32 | 21.54 |
| ENSG0000(PLA2G2F  | protein_co chr1  | 20139326 | 20150386 + | 0     | 0     |
| ENSG0000(SPATA2L  | protein_co chr16 | 89696343 | 89701705 - | 3.44  | 3.03  |
| ENSG0000(NIT1     | protein_co chr1  | 1.61E+08 | 1.61E+08 + | 16.32 | 16.49 |
| ENSG0000(DEDD     | protein_co chr1  | 1.61E+08 | 1.61E+08 - | 22.8  | 22.94 |
| ENSG0000(ZNF276   | protein_co chr16 | 89720400 | 89740903 + | 5.56  | 6.34  |
| ENSG0000(NPM2     | protein_co chr8  | 22024125 | 22036897 + | 0.2   | 0.49  |
| ENSG0000(EDA      | protein_co chrX  | 69616067 | 70039469 + | 0.5   | 0.55  |
| ENSG0000(FGF17    | protein_co chr8  | 22042398 | 22048809 + | 0.1   | 0.04  |
| ENSG0000(VWA5B1   | protein_co chr1  | 20290919 | 20354894 + | 0.07  | 0.04  |
| ENSG0000(CDA      | protein_co chr1  | 20588948 | 20618908 + | 2.87  | 2.94  |
| ENSG0000(PINK1    | protein_co chr1  | 20633455 | 20651511 + | 41.44 | 41.28 |
| ENSG0000(B4GALT3  | protein_co chr1  | 1.61E+08 | 1.61E+08 - | 12.5  | 15.62 |
| ENSG0000(DMTN     | protein_co chr8  | 22048995 | 22082527 + | 2.1   | 3.07  |
| ENSG0000(ADAMTS4  | protein_co chr1  | 1.61E+08 | 1.61E+08 - | 0.19  | 1.03  |
| ENSG0000(FAM160B2 | protein_co chr8  | 22089159 | 22104898 + | 20.6  | 25.78 |
| ENSG0000(NDUFS2   | protein_co chr1  | 1.61E+08 | 1.61E+08 + | 37.77 | 38.49 |
| ENSG0000(SLC5A11  | protein_co chr16 | 24845841 | 24911628 + | 0.03  | 0     |
| ENSG0000(FCER1G   | protein_co chr1  | 1.61E+08 | 1.61E+08 + | 0     | 0     |
| ENSG0000(APOA2    | protein_co chr1  | 1.61E+08 | 1.61E+08 - | 0     | 0     |
| ENSG0000(TOMM40L  | protein_co chr1  | 1.61E+08 | 1.61E+08 + | 4.55  | 3.65  |
| ENSG0000(MPZ      | protein_co chr1  | 1.61E+08 | 1.61E+08 - | 0.59  | 0.73  |
| ENSG0000(WFDC8    | protein_co chr20 | 45551153 | 45579326 - | 0.37  | 0.12  |
| ENSG0000(CCAR2    | protein_co chr8  | 22604632 | 22621514 + | 30.87 | 34.83 |
| ENSG0000(WNT9B    | protein_co chr17 | 46833201 | 46886730 + | 0.02  | 0.02  |
| ENSG0000(CACHD1   | protein_co chr1  | 64470792 | 64693058 + | 4.07  | 4.09  |
| ENSG0000(CDC42SE2 | protein_co chr5  | 1.31E+08 | 1.31E+08 + | 4.56  | 4.83  |
| ENSG0000(RAPGEF6  | protein_co chr5  | 1.31E+08 | 1.32E+08 - | 4.33  | 3.77  |
| ENSG0000(EPB41    | protein_co chr1  | 28887091 | 29120046 + | 2.33  | 2.06  |
| ENSG0000(MIS18A   | protein_co chr21 | 32268219 | 32279069 - | 2.61  | 1.35  |
| ENSG0000(ALG8     | protein_co chr11 | 78100936 | 78139660 - | 13.62 | 11.39 |
| ENSG0000(FBXW5    | protein_co chr9  | 1.37E+08 | 1.37E+08 - | 36.83 | 35.95 |
| ENSG0000(C21orf59 | protein_co chr21 | 32592079 | 32612866 - | 13.33 | 15.34 |
| ENSG0000(SYNJ1    | protein_co chr21 | 32628759 | 32728048 - | 3.03  | 3.5   |
| ENSG0000(PAXBP1   | protein_co chr21 | 32733899 | 32771858 - | 9.61  | 9.64  |
| ENSG0000(IFNAR2   | protein_co chr21 | 33229901 | 33265675 + | 11.28 | 10.2  |
| ENSG0000(MRPL10   | protein_co chr17 | 47823272 | 47831534 - | 18.78 | 22.48 |
| ENSG0000(IFNGR2   | protein_co chr21 | 33402896 | 33479348 + | 35.15 | 35.35 |
| ENSG0000(GART     | protein_co chr21 | 33503931 | 33543491 - | 22.07 | 23.31 |

|                    |                  |          |          |   |        |        |
|--------------------|------------------|----------|----------|---|--------|--------|
| ENSG0000(SON       | protein_co chr21 | 33542618 | 33577481 | + | 55.4   | 56.67  |
| ENSG0000(DONSON    | protein_co chr21 | 33559542 | 33588708 | - | 3.65   | 6.49   |
| ENSG0000(SV2A      | protein_co chr1  | 1.5E+08  | 1.5E+08  | - | 6.84   | 6.12   |
| ENSG0000(LAD1      | protein_co chr1  | 2.01E+08 | 2.01E+08 | - | 0      | 0      |
| ENSG0000(STC1      | protein_co chr8  | 23841915 | 23854807 | - | 27.62  | 18.1   |
| ENSG0000(TNNI1     | protein_co chr1  | 2.01E+08 | 2.01E+08 | - | 0      | 0      |
| ENSG0000(CSRP1     | protein_co chr1  | 2.01E+08 | 2.02E+08 | - | 70.02  | 78.27  |
| ENSG0000(PRAC1     | protein_co chr17 | 48721719 | 48722522 | - | 0      | 0      |
| ENSG0000(HOXB13    | protein_co chr17 | 48724763 | 48729178 | - | 0      | 0      |
| ENSG0000(AC007383. | processed_chr2   | 2.06E+08 | 2.06E+08 | - | 0      | 0      |
| ENSG0000(C1QC      | protein_co chr1  | 22643630 | 22648110 | + | 0      | 0      |
| ENSG0000(KCNE2     | protein_co chr21 | 34364024 | 34371389 | + | 0      | 0.06   |
| ENSG0000(ATP5G1    | protein_co chr17 | 48892765 | 48895871 | + | 63.77  | 53.6   |
| ENSG0000(RCAN1     | protein_co chr21 | 34513142 | 34615142 | - | 18.1   | 15.59  |
| ENSG0000(UBE2Z     | protein_co chr17 | 48908369 | 48929056 | + | 57.08  | 57.43  |
| ENSG0000(CIART     | protein_co chr1  | 1.5E+08  | 1.5E+08  | + | 16.44  | 14.82  |
| ENSG0000(SNF8      | protein_co chr17 | 48929316 | 48945117 | - | 58.08  | 60.98  |
| ENSG0000(CLIC6     | protein_co chr21 | 34669389 | 34718227 | + | 0      | 0.02   |
| ENSG0000(CCDC24    | protein_co chr1  | 43991359 | 43996528 | + | 3.98   | 3.71   |
| ENSG0000(RUNX1     | protein_co chr21 | 34787801 | 36004667 | - | 24.99  | 22.77  |
| ENSG0000(IGF2BP1   | protein_co chr17 | 48997412 | 49055650 | + | 0.92   | 0.51   |
| ENSG0000(GIP       | protein_co chr17 | 48958554 | 48968596 | - | 0.18   | 0.3    |
| ENSG0000(CBR1      | protein_co chr21 | 36069941 | 36073166 | + | 44.07  | 46.45  |
| ENSG0000(CBR3      | protein_co chr21 | 36134912 | 36146566 | + | 22.13  | 19.66  |
| ENSG0000(C2orf81   | protein_co chr2  | 74393836 | 74421662 | - | 0.03   | 0.04   |
| ENSG0000(TUBBP5    | transcribec chr9 | 1.38E+08 | 1.38E+08 | + | 0      | 0.28   |
| ENSG0000(GJD2      | protein_co chr15 | 34751032 | 34754965 | - | 0      | 0      |
| ENSG0000(ACTC1     | protein_co chr15 | 34788096 | 34796139 | - | 0      | 0      |
| ENSG0000(MORC3     | protein_co chr21 | 36320189 | 36386148 | + | 7.25   | 6.09   |
| ENSG0000(CHAFF1B   | protein_co chr21 | 36385378 | 36419015 | + | 1.4    | 0.84   |
| ENSG0000(CLDN14    | protein_co chr21 | 36460621 | 36576569 | - | 0.14   | 0.05   |
| ENSG0000(SIM2      | protein_co chr21 | 36699133 | 36749917 | + | 0.31   | 0.52   |
| ENSG0000(HLCS      | protein_co chr21 | 36750888 | 36990236 | - | 8.02   | 7.06   |
| ENSG0000(GOLGA6A   | protein_co chr15 | 74069857 | 74082550 | - | 0.07   | 0.05   |
| ENSG0000(SCUBE1    | protein_co chr22 | 43197283 | 43343388 | - | 0.01   | 0.04   |
| ENSG0000(ARHGAP27  | protein_co chr17 | 45393902 | 45434421 | - | 3.06   | 4.2    |
| ENSG0000(ADPGK     | protein_co chr15 | 72751369 | 72785846 | - | 27.77  | 28.39  |
| ENSG0000(PTMS      | protein_co chr12 | 6765516  | 6770952  | + | 255.63 | 292.82 |
| ENSG0000(PLA2G4D   | protein_co chr15 | 42067009 | 42094554 | - | 0      | 0.07   |
| ENSG0000(PADI4     | protein_co chr1  | 17308195 | 17364004 | + | 0      | 0      |
| ENSG0000(ADIPOR1   | protein_co chr1  | 2.03E+08 | 2.03E+08 | - | 47.72  | 43.89  |
| ENSG0000(CYB5R1    | protein_co chr1  | 2.03E+08 | 2.03E+08 | - | 27.76  | 25.23  |
| ENSG0000(PSMD4     | protein_co chr1  | 1.51E+08 | 1.51E+08 | + | 59.56  | 55.28  |
| ENSG0000(ATP13A2   | protein_co chr1  | 16985958 | 17011928 | - | 7.9    | 7.43   |
| ENSG0000(M1AP      | protein_co chr2  | 74557883 | 74648338 | - | 0.17   | 0.47   |

|                    |                  |          |            |        |         |
|--------------------|------------------|----------|------------|--------|---------|
| ENSG0000( PSMB4    | protein_co chr1  | 1.51E+08 | 1.51E+08 + | 137.86 | 133.17  |
| ENSG0000( IRX6     | protein_co chr16 | 55323760 | 55330760 + | 0      | 0       |
| ENSG0000( BTG2     | protein_co chr1  | 2.03E+08 | 2.03E+08 + | 21.19  | 21.95   |
| ENSG0000( CES5A    | protein_co chr16 | 55846154 | 55956031 - | 0      | 0       |
| ENSG0000( HK2      | protein_co chr2  | 74833981 | 74893359 + | 34.57  | 32.05   |
| ENSG0000( C1R      | protein_co chr12 | 7080209  | 7092607 -  | 1469.7 | 1369.16 |
| ENSG0000( CELF3    | protein_co chr1  | 1.52E+08 | 1.52E+08 - | 0      | 0       |
| ENSG0000( ALDH4A1  | protein_co chr1  | 18871430 | 18902781 - | 3.94   | 4.59    |
| ENSG0000( STARD9   | protein_co chr15 | 42575659 | 42720981 + | 3.1    | 3.41    |
| ENSG0000( THEM4    | protein_co chr1  | 1.52E+08 | 1.52E+08 - | 9.48   | 10.35   |
| ENSG0000( TCHH     | protein_co chr1  | 1.52E+08 | 1.52E+08 - | 0      | 0.01    |
| ENSG0000( LCE2B    | protein_co chr1  | 1.53E+08 | 1.53E+08 + | 0      | 0       |
| ENSG0000( UBR1     | protein_co chr15 | 42942897 | 43106113 - | 4.82   | 4.76    |
| ENSG0000( AMFR     | protein_co chr16 | 56361452 | 56425538 - | 47.26  | 41.2    |
| ENSG0000( MED8     | protein_co chr1  | 43383917 | 43389808 - | 17.04  | 15.43   |
| ENSG0000( TGM7     | protein_co chr15 | 43276280 | 43302255 - | 0      | 0       |
| ENSG0000( RGL4     | protein_co chr22 | 23688136 | 23699176 + | 0.02   | 0       |
| ENSG0000( SPRR2G   | protein_co chr1  | 1.53E+08 | 1.53E+08 - | 0      | 0       |
| ENSG0000( PGLYRP3  | protein_co chr1  | 1.53E+08 | 1.53E+08 - | 0      | 0       |
| ENSG0000( ISL2     | protein_co chr15 | 76336724 | 76342476 + | 0      | 0       |
| ENSG0000( RSPRY1   | protein_co chr16 | 57186137 | 57240475 + | 17.07  | 13.77   |
| ENSG0000( CCDC17   | protein_co chr1  | 45620044 | 45624057 - | 0.54   | 0.07    |
| ENSG0000( GPBP1L1  | protein_co chr1  | 45627304 | 45688113 - | 27.53  | 21.48   |
| ENSG0000( NAE1     | protein_co chr16 | 66802875 | 66873256 - | 18.1   | 19.41   |
| ENSG0000( TMEM69   | protein_co chr1  | 45687214 | 45694443 + | 14.92  | 13.62   |
| ENSG0000( ADGRG5   | protein_co chr16 | 57542421 | 57591681 + | 0.02   | 0.04    |
| ENSG0000( DRC7     | protein_co chr16 | 57694793 | 57731805 + | 0      | 0.16    |
| ENSG0000( ACE      | protein_co chr17 | 63477061 | 63498380 + | 8.4    | 7.88    |
| ENSG0000( TEPP     | protein_co chr16 | 57976435 | 57988116 + | 0.02   | 0       |
| ENSG0000( UROC1    | protein_co chr3  | 1.26E+08 | 1.27E+08 - | 0      | 0       |
| ENSG0000( EFCAB14  | protein_co chr1  | 46675159 | 46719064 - | 24.24  | 26.93   |
| ENSG0000( SPON2    | protein_co chr4  | 1166932  | 1208962 -  | 36.71  | 54.76   |
| ENSG0000( CHCHD6   | protein_co chr3  | 1.27E+08 | 1.27E+08 + | 7.71   | 9.82    |
| ENSG0000( CTBP1    | protein_co chr4  | 1211448  | 1249953 -  | 52.59  | 60.88   |
| ENSG0000( LRRC36   | protein_co chr16 | 67326798 | 67385203 + | 0.01   | 0       |
| ENSG0000( ANKRD18C | unprocessε chr9  | 97156570 | 97221235 - | 0.04   | 0.02    |
| ENSG0000( TPPP3    | protein_co chr16 | 67389809 | 67393535 - | 0.17   | 0.19    |
| ENSG0000( ZDHHC1   | protein_co chr16 | 67394419 | 67416833 - | 7.23   | 8.37    |
| ENSG0000( ATP6V0D1 | protein_co chr16 | 67438014 | 67481237 - | 57.49  | 59.65   |
| ENSG0000( AGRP     | protein_co chr16 | 67482571 | 67483813 - | 0      | 0       |
| ENSG0000( ZFYVE28  | protein_co chr4  | 2269582  | 2418663 -  | 2.86   | 2.76    |
| ENSG0000( CARMIL2  | protein_co chr16 | 67644919 | 67657569 + | 0.45   | 0.29    |
| ENSG0000( C16orf86 | protein_co chr16 | 67666816 | 67668758 + | 2.58   | 2.21    |
| ENSG0000( PIP      | protein_co chr7  | 1.43E+08 | 1.43E+08 + | 2.52   | 1.45    |
| ENSG0000( FAM131B  | protein_co chr7  | 1.43E+08 | 1.43E+08 - | 0.36   | 0.69    |

|                    |                   |          |          |   |        |        |
|--------------------|-------------------|----------|----------|---|--------|--------|
| ENSG0000(RGS12     | protein_co chr4   | 3293028  | 3439913  | + | 7.21   | 9      |
| ENSG0000(PSKH1     | protein_co chr16  | 67893272 | 67929678 | + | 13.06  | 14.09  |
| ENSG0000(ZYX       | protein_co chr7   | 1.43E+08 | 1.43E+08 | + | 130.46 | 140.27 |
| ENSG0000(ABR       | protein_co chr17  | 1003518  | 1229021  | - | 32.55  | 34.67  |
| ENSG0000(TCAF2P1   | unprocessε chr7   | 1.44E+08 | 1.44E+08 | + | 0.31   | 0.06   |
| ENSG0000(LYPD5     | protein_co chr19  | 43795929 | 43827206 | - | 0.15   | 0.37   |
| ENSG0000(CCDC117   | protein_co chr22  | 28772674 | 28789301 | + | 7.06   | 5.86   |
| ENSG0000(ZNF230    | protein_co chr19  | 44002948 | 44013926 | + | 1.7    | 1.61   |
| ENSG0000(CCDC107   | protein_co chr9   | 35658290 | 35661511 | + | 13.23  | 14.17  |
| ENSG0000(ZNF222    | protein_co chr19  | 44025342 | 44033112 | + | 2.2    | 2.81   |
| ENSG0000(NPR2      | protein_co chr9   | 35792154 | 35809732 | + | 17.86  | 18.21  |
| ENSG0000(ZNF890P   | transcribec chr7  | 5121239  | 5144546  | - | 0.08   | 0.07   |
| ENSG0000(ZNF221    | protein_co chr19  | 43951223 | 43967709 | + | 1.43   | 0.94   |
| ENSG0000(ZNF233    | protein_co chr19  | 44259880 | 44275317 | + | 0.63   | 0.17   |
| ENSG0000(ZNF235    | protein_co chr19  | 44228729 | 44305046 | - | 1.56   | 2.12   |
| ENSG0000(GNE       | protein_co chr9   | 36214441 | 36277056 | - | 6.42   | 6.67   |
| ENSG0000(TNFRSF13C | protein_co chr22  | 41922023 | 41926818 | - | 0.1    | 0.1    |
| ENSG0000(OR3A3     | protein_co chr17  | 3420568  | 3421533  | + | 0      | 0      |
| ENSG0000(ARHGAP35  | protein_co chr19  | 46918676 | 47005077 | + | 22.44  | 23.21  |
| ENSG0000(PTGIR     | protein_co chr19  | 46620468 | 46625118 | - | 4.69   | 3.23   |
| ENSG0000(CALM3     | protein_co chr19  | 46601074 | 46610793 | + | 114.66 | 119.07 |
| ENSG0000(DFFA      | protein_co chr1   | 10456522 | 10472526 | - | 12.43  | 13.24  |
| ENSG0000(CCDC28B   | protein_co chr1   | 32200386 | 32205387 | + | 4.95   | 3.89   |
| ENSG0000(IQCC      | protein_co chr1   | 32205661 | 32208687 | + | 1.25   | 1.31   |
| ENSG0000(TMEM234   | protein_co chr1   | 32214472 | 32222359 | - | 15.45  | 14.11  |
| ENSG0000(BSDC1     | protein_co chr1   | 32365103 | 32394731 | - | 47.5   | 44.57  |
| ENSG0000(ZBTB8A    | protein_co chr1   | 32539427 | 32605939 | + | 2.43   | 2.6    |
| ENSG0000(ATAD3B    | protein_co chr1   | 1471769  | 1497848  | + | 6.6    | 5.78   |
| ENSG0000(SSU72     | protein_co chr1   | 1541673  | 1574869  | - | 49.37  | 51.67  |
| ENSG0000(UBE2J2    | protein_co chr1   | 1253909  | 1273885  | - | 19.14  | 20.99  |
| ENSG0000(ZNF362    | protein_co chr1   | 33256545 | 33300719 | + | 9.95   | 10.82  |
| ENSG0000(FNDC5     | protein_co chr1   | 32862268 | 32872482 | - | 5.22   | 8.03   |
| ENSG0000(CPAMD8    | protein_co chr19  | 16892947 | 17026815 | - | 1.75   | 2.06   |
| ENSG0000(NR2F6     | protein_co chr19  | 17231883 | 17245940 | - | 11.14  | 11.69  |
| ENSG0000(ANKLE1    | protein_co chr19  | 17281645 | 17287646 | + | 0.18   | 0.16   |
| ENSG0000(CCDC58    | protein_co chr3   | 1.22E+08 | 1.22E+08 | - | 9.49   | 11.26  |
| ENSG0000(VMA21     | protein_co chrX   | 1.51E+08 | 1.51E+08 | + | 4.06   | 4.04   |
| ENSG0000(KALRN     | protein_co chr3   | 1.24E+08 | 1.25E+08 | + | 0.55   | 0.83   |
| ENSG0000(CILP2     | protein_co chr19  | 19538248 | 19546659 | + | 0.08   | 0.14   |
| ENSG0000(FAM86C2P  | transcribec chr11 | 67791648 | 67805336 | - | 1.74   | 1.31   |
| ENSG0000(ABCG1     | protein_co chr21  | 42199689 | 42297244 | + | 0.62   | 1.11   |
| ENSG0000(TFF3      | protein_co chr21  | 42311667 | 42315651 | - | 0      | 0      |
| ENSG0000(TFF2      | protein_co chr21  | 42346357 | 42351128 | - | 0      | 0      |
| ENSG0000(TFF1      | protein_co chr21  | 42362282 | 42366594 | - | 0      | 0      |
| ENSG0000(TMPRS3    | protein_co chr21  | 42371890 | 42396846 | - | 0      | 0      |



|                    |                  |          |          |   |       |       |
|--------------------|------------------|----------|----------|---|-------|-------|
| ENSG0000( UBASH3A  | protein_co chr21 | 42403447 | 42447681 | + | 0     | 0     |
| ENSG0000( RSPH1    | protein_co chr21 | 42472486 | 42496354 | - | 0.07  | 0.35  |
| ENSG0000( SLC37A1  | protein_co chr21 | 42496008 | 42581440 | + | 1.75  | 1.71  |
| ENSG0000( PDE9A    | protein_co chr21 | 42653636 | 42775509 | + | 0     | 0     |
| ENSG0000( WDR4     | protein_co chr21 | 42843094 | 42879568 | - | 4.33  | 4.2   |
| ENSG0000( NDUFV3   | protein_co chr21 | 42879644 | 42913304 | + | 9.45  | 8.68  |
| ENSG0000( PKNOX1   | protein_co chr21 | 42974510 | 43033931 | + | 3.88  | 4.94  |
| ENSG0000( CBS      | protein_co chr21 | 43053191 | 43076943 | - | 26.5  | 32.29 |
| ENSG0000( U2AF1    | protein_co chr21 | 43092956 | 43107587 | - | 12.12 | 10.16 |
| ENSG0000( CRYAA    | protein_co chr21 | 43169008 | 43172805 | + | 0     | 0     |
| ENSG0000( HSF2BP   | protein_co chr21 | 43529192 | 43659493 | - | 0.32  | 0.68  |
| ENSG0000( RRP1B    | protein_co chr21 | 43659548 | 43696079 | + | 5.16  | 5.2   |
| ENSG0000( PDXK     | protein_co chr21 | 43719094 | 43762307 | + | 53.64 | 53.45 |
| ENSG0000( G6PD     | protein_co chrX  | 1.55E+08 | 1.55E+08 | - | 89.56 | 97.82 |
| ENSG0000( CSTB     | protein_co chr21 | 43772511 | 43776445 | - | 51.32 | 51.75 |
| ENSG0000( RRP1     | protein_co chr21 | 43789513 | 43805293 | + | 9.2   | 6.87  |
| ENSG0000( AGPAT3   | protein_co chr21 | 43865186 | 43986536 | + | 17.16 | 15.9  |
| ENSG0000( TRAPPC10 | protein_co chr21 | 44012319 | 44106552 | + | 9.17  | 9.47  |
| ENSG0000( GAB3     | protein_co chrX  | 1.55E+08 | 1.55E+08 | - | 1.6   | 0.84  |
| ENSG0000( C21orf33 | protein_co chr21 | 44133605 | 44145723 | + | 18.14 | 19.5  |
| ENSG0000( ICOSLG   | protein_co chr21 | 44222991 | 44240966 | - | 0.05  | 0.09  |
| ENSG0000( AIRE     | protein_co chr21 | 44285838 | 44298648 | + | 0     | 0     |
| ENSG0000( C21orf2  | protein_co chr21 | 44328944 | 44339402 | - | 8.49  | 9.03  |
| ENSG0000( ZNF66    | protein_co chr19 | 20776304 | 20807322 | + | 0.17  | 0.07  |
| ENSG0000( LRRC3    | protein_co chr21 | 44455486 | 44462196 | + | 0.35  | 0.28  |
| ENSG0000( ITGB2    | protein_co chr21 | 44885953 | 44931989 | - | 0.21  | 0.59  |
| ENSG0000( FAM207A  | protein_co chr21 | 44940010 | 44976989 | + | 8.38  | 10.06 |
| ENSG0000( RALGDS   | protein_co chr9  | 1.33E+08 | 1.33E+08 | - | 16.47 | 18.03 |
| ENSG0000( FTCD     | protein_co chr21 | 46136262 | 46155567 | - | 0.21  | 0.16  |
| ENSG0000( SPATC1L  | protein_co chr21 | 46161148 | 46184476 | - | 11.34 | 10.35 |
| ENSG0000( LSS      | protein_co chr21 | 46188141 | 46228824 | - | 79.74 | 82.86 |
| ENSG0000( VAV2     | protein_co chr9  | 1.34E+08 | 1.34E+08 | - | 6.02  | 5.46  |
| ENSG0000( MCM3AP   | protein_co chr21 | 46235126 | 46286297 | - | 20.63 | 22.59 |
| ENSG0000( C21orf58 | protein_co chr21 | 46300181 | 46323875 | - | 1.62  | 1.15  |
| ENSG0000( PCNT     | protein_co chr21 | 46324122 | 46445769 | + | 7.59  | 6.9   |
| ENSG0000( DIP2A    | protein_co chr21 | 46458899 | 46569852 | + | 8.41  | 6.5   |
| ENSG0000( S100B    | protein_co chr21 | 46598962 | 46605208 | - | 0.08  | 0     |
| ENSG0000( PRMT2    | protein_co chr21 | 46635167 | 46665124 | + | 65.29 | 63.16 |
| ENSG0000( CLDND2   | protein_co chr19 | 51367098 | 51369003 | - | 0     | 0.71  |
| ENSG0000( ZNF208   | protein_co chr19 | 21932958 | 22010949 | - | 0     | 0.45  |
| ENSG0000( ADAMTS13 | protein_co chr9  | 1.33E+08 | 1.33E+08 | + | 2.6   | 2.57  |
| ENSG0000( CACFD1   | protein_co chr9  | 1.33E+08 | 1.33E+08 | + | 12.16 | 8.84  |
| ENSG0000( SLC2A6   | protein_co chr9  | 1.33E+08 | 1.33E+08 | - | 5.87  | 4.79  |
| ENSG0000( ZNF761   | protein_co chr19 | 53431993 | 53458261 | + | 3.72  | 4.89  |
| ENSG0000( FCN2     | protein_co chr9  | 1.35E+08 | 1.35E+08 | + | 0     | 0     |

|                   |                  |          |          |   |        |        |
|-------------------|------------------|----------|----------|---|--------|--------|
| ENSG0000(C9orf116 | protein_co chr9  | 1.35E+08 | 1.36E+08 | - | 3.16   | 3.06   |
| ENSG0000(LCN1     | protein_co chr9  | 1.36E+08 | 1.36E+08 | + | 0      | 0      |
| ENSG0000(ZNF714   | protein_co chr19 | 21082159 | 21125270 | + | 1.37   | 1.09   |
| ENSG0000(GPSM1    | protein_co chr9  | 1.36E+08 | 1.36E+08 | + | 12.58  | 13.5   |
| ENSG0000(C19orf47 | protein_co chr19 | 40319536 | 40348527 | - | 4.29   | 4.27   |
| ENSG0000(HIPK4    | protein_co chr19 | 40379271 | 40390187 | - | 0.29   | 0.15   |
| ENSG0000(CFAP157  | protein_co chr9  | 1.28E+08 | 1.28E+08 | + | 0.03   | 0.17   |
| ENSG0000(TOR2A    | protein_co chr9  | 1.28E+08 | 1.28E+08 | - | 3.85   | 4.14   |
| ENSG0000(ST6GALNA | protein_co chr9  | 1.28E+08 | 1.28E+08 | - | 42.16  | 40.37  |
| ENSG0000(SHKBP1   | protein_co chr19 | 40576851 | 40591399 | + | 19.74  | 19.38  |
| ENSG0000(RDH13    | protein_co chr19 | 55039108 | 55071291 | - | 4.33   | 4.04   |
| ENSG0000(ZER1     | protein_co chr9  | 1.29E+08 | 1.29E+08 | - | 19.97  | 22.64  |
| ENSG0000(ZDHHC12  | protein_co chr9  | 1.29E+08 | 1.29E+08 | - | 21.28  | 20.62  |
| ENSG0000(PKN3     | protein_co chr9  | 1.29E+08 | 1.29E+08 | + | 1      | 1.55   |
| ENSG0000(SPTBN4   | protein_co chr19 | 40466241 | 40576464 | + | 0.63   | 1.16   |
| ENSG0000(BRSK1    | protein_co chr19 | 55282072 | 55312533 | + | 5.45   | 2.98   |
| ENSG0000(COX6B2   | protein_co chr19 | 55349306 | 55354814 | - | 0.53   | 0.42   |
| ENSG0000(TMEM190  | protein_co chr19 | 55376836 | 55378244 | + | 0.24   | 0.52   |
| ENSG0000(NLRP4    | protein_co chr19 | 55836578 | 55881854 | + | 0      | 0      |
| ENSG0000(PLPP7    | protein_co chr9  | 1.31E+08 | 1.31E+08 | + | 2.28   | 2.69   |
| ENSG0000(TAOK1    | protein_co chr17 | 29390464 | 29551904 | + | 15.51  | 13.86  |
| ENSG0000(MED27    | protein_co chr9  | 1.32E+08 | 1.32E+08 | - | 10.95  | 9.85   |
| ENSG0000(DEDD2    | protein_co chr19 | 42198598 | 42220140 | - | 12.69  | 10.85  |
| ENSG0000(SIK3     | protein_co chr11 | 1.17E+08 | 1.17E+08 | - | 13.83  | 12.83  |
| ENSG0000(MPZL3    | protein_co chr11 | 1.18E+08 | 1.18E+08 | - | 0.63   | 0.55   |
| ENSG0000(JAML     | protein_co chr11 | 1.18E+08 | 1.18E+08 | - | 0      | 0      |
| ENSG0000(NEK8     | protein_co chr17 | 28725897 | 28743455 | + | 3.02   | 2.18   |
| ENSG0000(TLCD1    | protein_co chr17 | 28724348 | 28727935 | - | 4.42   | 4.19   |
| ENSG0000(PCSK7    | protein_co chr11 | 1.17E+08 | 1.17E+08 | - | 20.33  | 23.54  |
| ENSG0000(SAFB     | protein_co chr19 | 5623035  | 5668478  | + | 27.21  | 30.22  |
| ENSG0000(CD3G     | protein_co chr11 | 1.18E+08 | 1.18E+08 | + | 0.12   | 0.04   |
| ENSG0000(S100A1   | protein_co chr1  | 1.54E+08 | 1.54E+08 | + | 0      | 0.13   |
| ENSG0000(HTOP     | protein_co chr1  | 1.54E+08 | 1.54E+08 | + | 21.14  | 20.67  |
| ENSG0000(CXCR5    | protein_co chr11 | 1.19E+08 | 1.19E+08 | + | 0      | 0.01   |
| ENSG0000(ZBTB7B   | protein_co chr1  | 1.55E+08 | 1.55E+08 | + | 11.75  | 12.54  |
| ENSG0000(FLAD1    | protein_co chr1  | 1.55E+08 | 1.55E+08 | + | 9.25   | 11.06  |
| ENSG0000(SHC1     | protein_co chr1  | 1.55E+08 | 1.55E+08 | - | 148.84 | 146.27 |
| ENSG0000(VPS11    | protein_co chr11 | 1.19E+08 | 1.19E+08 | + | 15.11  | 15.84  |
| ENSG0000(NLRX1    | protein_co chr11 | 1.19E+08 | 1.19E+08 | + | 8.67   | 9.37   |
| ENSG0000(ADAR     | protein_co chr1  | 1.55E+08 | 1.55E+08 | - | 44.04  | 43.13  |
| ENSG0000(IL6R     | protein_co chr1  | 1.54E+08 | 1.54E+08 | + | 1.46   | 1.86   |
| ENSG0000(UBE2Q1   | protein_co chr1  | 1.55E+08 | 1.55E+08 | - | 38.82  | 53.91  |
| ENSG0000(CHRNB2   | protein_co chr1  | 1.55E+08 | 1.55E+08 | + | 0.05   | 0.21   |
| ENSG0000(CRTC2    | protein_co chr1  | 1.54E+08 | 1.54E+08 | - | 14.09  | 13.79  |
| ENSG0000(ANO10    | protein_co chr3  | 43354859 | 43691594 | - | 26.29  | 26.98  |

|                   |                  |          |            |        |        |
|-------------------|------------------|----------|------------|--------|--------|
| ENSG0000(FDPS     | protein_co chr1  | 1.55E+08 | 1.55E+08 + | 82.01  | 79.9   |
| ENSG0000(RUSC1    | protein_co chr1  | 1.55E+08 | 1.55E+08 + | 13.53  | 12.38  |
| ENSG0000(GBAP1    | transcribec chr1 | 1.55E+08 | 1.55E+08 - | 4.13   | 7.04   |
| ENSG0000(FAM189B  | protein_co chr1  | 1.55E+08 | 1.55E+08 - | 18.43  | 19.29  |
| ENSG0000(PAQR6    | protein_co chr1  | 1.56E+08 | 1.56E+08 - | 1.89   | 1.75   |
| ENSG0000(PMF1     | protein_co chr1  | 1.56E+08 | 1.56E+08 + | 21.65  | 22.8   |
| ENSG0000(SLC25A44 | protein_co chr1  | 1.56E+08 | 1.56E+08 + | 7.81   | 9.03   |
| ENSG0000(LMNA     | protein_co chr1  | 1.56E+08 | 1.56E+08 + | 245.16 | 241.97 |
| ENSG0000(CCR5     | protein_co chr3  | 46370854 | 46376206 + | 0      | 0      |
| ENSG0000(NBEAL2   | protein_co chr3  | 46979683 | 47009703 + | 1.98   | 1.62   |
| ENSG0000(CCDC12   | protein_co chr3  | 46921726 | 46982010 - | 15.31  | 14.39  |
| ENSG0000(PTH1R    | protein_co chr3  | 46877746 | 46903799 + | 0.03   | 0.1    |
| ENSG0000(UBQLN4   | protein_co chr1  | 1.56E+08 | 1.56E+08 - | 8.96   | 10.51  |
| ENSG0000(MYL3     | protein_co chr3  | 46857872 | 46882169 - | 0      | 0      |
| ENSG0000(PPP1R35  | protein_co chr7  | 1E+08    | 1E+08 -    | 10.49  | 8.75   |
| ENSG0000(GPATCH4  | protein_co chr1  | 1.57E+08 | 1.57E+08 - | 7.62   | 6.34   |
| ENSG0000(LRRC71   | protein_co chr1  | 1.57E+08 | 1.57E+08 + | 0.11   | 0.31   |
| ENSG0000(FCRL3    | protein_co chr1  | 1.58E+08 | 1.58E+08 - | 0      | 0      |
| ENSG0000(AZGP1    | protein_co chr7  | 99966720 | 99976157 - | 0.14   | 0      |
| ENSG0000(FGFR4    | protein_co chr5  | 1.77E+08 | 1.77E+08 + | 0.77   | 0.93   |
| ENSG0000(CYP3A4   | protein_co chr7  | 99756960 | 99784265 - | 0      | 0      |
| ENSG0000(CYP3A7   | protein_co chr7  | 99705037 | 99735196 - | 0      | 0.13   |
| ENSG0000(NACC1    | protein_co chr19 | 13118103 | 13141141 + | 19     | 16.52  |
| ENSG0000(CYP11B1  | protein_co chr8  | 1.43E+08 | 1.43E+08 - | 0      | 0      |
| ENSG0000(HK3      | protein_co chr5  | 1.77E+08 | 1.77E+08 - | 0.04   | 0      |
| ENSG0000(LY6K     | protein_co chr8  | 1.43E+08 | 1.43E+08 + | 0.09   | 0.2    |
| ENSG0000(IER2     | protein_co chr19 | 13150415 | 13154908 + | 14.4   | 13.91  |
| ENSG0000(ZNF394   | protein_co chr7  | 99486519 | 99500324 - | 6.35   | 7.4    |
| ENSG0000(CPSF4    | protein_co chr7  | 99438922 | 99457371 + | 25.76  | 24.5   |
| ENSG0000(LY6E     | protein_co chr8  | 1.43E+08 | 1.43E+08 + | 386.65 | 340.36 |
| ENSG0000(VPS28    | protein_co chr8  | 1.44E+08 | 1.44E+08 - | 54.61  | 60.46  |
| ENSG0000(TONSL    | protein_co chr8  | 1.44E+08 | 1.44E+08 - | 0.8    | 0.99   |
| ENSG0000(PTGER1   | protein_co chr19 | 14472466 | 14475362 - | 0.45   | 0.22   |
| ENSG0000(MUM1     | protein_co chr19 | 1354711  | 1378431 +  | 19.19  | 21.57  |
| ENSG0000(RECQL4   | protein_co chr8  | 1.45E+08 | 1.45E+08 - | 1.08   | 1.81   |
| ENSG0000(LRRC14   | protein_co chr8  | 1.45E+08 | 1.45E+08 + | 7.7    | 7.55   |
| ENSG0000(ZNF333   | protein_co chr19 | 14689801 | 14733746 + | 5.35   | 4.74   |
| ENSG0000(COL26A1  | protein_co chr7  | 1.01E+08 | 1.02E+08 + | 0      | 0      |
| ENSG0000(PPP1R16A | protein_co chr8  | 1.44E+08 | 1.45E+08 + | 12.77  | 18.44  |
| ENSG0000(FOXH1    | protein_co chr8  | 1.44E+08 | 1.44E+08 - | 0.11   | 0.1    |
| ENSG0000(ORAI2    | protein_co chr7  | 1.02E+08 | 1.02E+08 + | 15.21  | 16.1   |
| ENSG0000(ALKBH4   | protein_co chr7  | 1.02E+08 | 1.02E+08 - | 6.41   | 5.05   |
| ENSG0000(CCDC105  | protein_co chr19 | 15010744 | 15023269 + | 0      | 0      |
| ENSG0000(SH2B2    | protein_co chr7  | 1.02E+08 | 1.02E+08 + | 1.08   | 0.68   |
| ENSG0000(MRNIP    | protein_co chr5  | 1.8E+08  | 1.8E+08 -  | 7.6    | 7.7    |

|                     |                   |          |            |        |        |
|---------------------|-------------------|----------|------------|--------|--------|
| ENSG0000(SQSTM1     | protein_co chr5   | 1.8E+08  | 1.8E+08 +  | 768.71 | 788.04 |
| ENSG0000(MGAT4B     | protein_co chr5   | 1.8E+08  | 1.8E+08 -  | 175.14 | 183.77 |
| ENSG0000(RPL8       | protein_co chr8   | 1.45E+08 | 1.45E+08 - | 817.49 | 812.21 |
| ENSG0000(MAML1      | protein_co chr5   | 1.8E+08  | 1.8E+08 +  | 11.5   | 9.9    |
| ENSG0000(PGLYRP2    | protein_co chr19  | 15468645 | 15498956 - | 0      | 0      |
| ENSG0000(LRWD1      | protein_co chr7   | 1.02E+08 | 1.02E+08 + | 6.66   | 7.76   |
| ENSG0000(FBXL13     | protein_co chr7   | 1.03E+08 | 1.03E+08 - | 0.55   | 0.65   |
| ENSG0000(NAPEPLD    | protein_co chr7   | 1.03E+08 | 1.03E+08 - | 4.75   | 6.38   |
| ENSG0000(SCGB3A1    | protein_co chr5   | 1.81E+08 | 1.81E+08 - | 0      | 0      |
| ENSG0000(PSMC2      | protein_co chr7   | 1.03E+08 | 1.03E+08 + | 48.8   | 55.04  |
| ENSG0000(CELF5      | protein_co chr19  | 3224703  | 3297076 +  | 0.12   | 0.03   |
| ENSG0000(MFSD12     | protein_co chr19  | 3538261  | 3574290 -  | 17.8   | 17.23  |
| ENSG0000(AC008132.  | transcribed chr22 | 18846811 | 18861049 + | 0.03   | 0.04   |
| ENSG0000(XXbac-B44. | unprocessed chr22 | 20299760 | 20313216 + | 0      | 0      |
| ENSG0000(USP41      | protein_co chr22  | 20350578 | 20390758 - | 0      | 0      |
| ENSG0000(TUBA3FP    | processed_chr22   | 21008193 | 21014292 - | 1.21   | 1.05   |
| ENSG0000(YDJC       | protein_co chr22  | 21628089 | 21630064 - | 10.15  | 8.84   |
| ENSG0000(CCDC116    | protein_co chr22  | 21632716 | 21637327 + | 0.09   | 0.03   |
| ENSG0000(DVL3       | protein_co chr3   | 1.84E+08 | 1.84E+08 + | 33.33  | 35.61  |
| ENSG0000(AP2M1      | protein_co chr3   | 1.84E+08 | 1.84E+08 + | 251.27 | 262.25 |
| ENSG0000(ABCF3      | protein_co chr3   | 1.84E+08 | 1.84E+08 + | 20.25  | 19     |
| ENSG0000(PCYT1A     | protein_co chr3   | 1.96E+08 | 1.96E+08 - | 21.45  | 19.78  |
| ENSG0000(FBXO27     | protein_co chr19  | 38990714 | 39032785 - | 3.85   | 1.57   |
| ENSG0000(DMKN       | protein_co chr19  | 35497220 | 35513658 - | 100.11 | 99.97  |
| ENSG0000(U2AF1L4    | protein_co chr19  | 35742464 | 35745445 - | 6.58   | 10.58  |
| ENSG0000(BDH1       | protein_co chr3   | 1.98E+08 | 1.98E+08 - | 5.11   | 3.14   |
| ENSG0000(NPHS1      | protein_co chr19  | 35825964 | 35869287 - | 0      | 0      |
| ENSG0000(THAP8      | protein_co chr19  | 36034985 | 36054762 - | 8.46   | 7.86   |
| ENSG0000(COX7A1     | protein_co chr19  | 36150922 | 36152869 - | 11.15  | 9.07   |
| ENSG0000(ZNF382     | protein_co chr19  | 36604817 | 36634113 + | 1.25   | 1.11   |
| ENSG0000(LRRC56     | protein_co chr11  | 537527   | 554916 +   | 0.33   | 0.43   |
| ENSG0000(PLXDC1     | protein_co chr17  | 39063303 | 39154394 - | 0.02   | 0.44   |
| ENSG0000(PGAP3      | protein_co chr17  | 39671122 | 39696797 - | 7.78   | 7.96   |
| ENSG0000(IKZF3      | protein_co chr17  | 39757715 | 39864188 - | 0.1    | 0.15   |
| ENSG0000(GRIN2C     | protein_co chr17  | 74842023 | 74861504 - | 0.03   | 0.01   |
| ENSG0000(FDXR       | protein_co chr17  | 74862497 | 74873031 - | 23.19  | 24.67  |
| ENSG0000(SAP30BP    | protein_co chr17  | 75667116 | 75708062 + | 30.66  | 26.69  |
| ENSG0000(ACOX1      | protein_co chr17  | 75941507 | 75979363 - | 10.21  | 11.09  |
| ENSG0000(PRPSAP1    | protein_co chr17  | 76309486 | 76384521 - | 21.51  | 25.25  |
| ENSG0000(CYGB       | protein_co chr17  | 76527356 | 76551175 - | 73.11  | 77.15  |
| ENSG0000(SRSF2      | protein_co chr17  | 76734115 | 76737374 - | 41.07  | 48     |
| ENSG0000(ZNF577     | protein_co chr19  | 51804816 | 51890950 - | 8.45   | 9.54   |
| ENSG0000(TMEM143    | protein_co chr19  | 48332356 | 48364237 - | 2.82   | 3.36   |
| ENSG0000(KLHL10     | protein_co chr17  | 41835685 | 41848384 + | 0.14   | 0.06   |
| ENSG0000(CCDC155    | protein_co chr19  | 49388218 | 49417994 + | 0      | 0      |

|                    |                   |          |          |   |        |        |
|--------------------|-------------------|----------|----------|---|--------|--------|
| ENSG0000(HCRT      | protein_co chr17  | 42184060 | 42185452 | - | 0      | 0      |
| ENSG0000(ALDH16A1  | protein_co chr19  | 49453169 | 49471048 | + | 5.44   | 7.82   |
| ENSG0000(DCD       | protein_co chr12  | 54644591 | 54648493 | - | 0      | 0      |
| ENSG0000(ITGA5     | protein_co chr12  | 54395261 | 54419460 | - | 189.31 | 164.04 |
| ENSG0000(SIGLEC11  | protein_co chr19  | 49948985 | 49961172 | - | 0.02   | 0      |
| ENSG0000(ZNF385A   | protein_co chr12  | 54369133 | 54391298 | - | 9.85   | 9.61   |
| ENSG0000(SIGLEC16  | transcribec chr19 | 49969673 | 49975814 | + | 0      | 0      |
| ENSG0000(MPP3      | protein_co chr17  | 43800799 | 43833170 | - | 2.48   | 2.36   |
| ENSG0000(CD300LG   | protein_co chr17  | 43847148 | 43863629 | + | 0.04   | 0.11   |
| ENSG0000(IZUMO2    | protein_co chr19  | 50152548 | 50163195 | - | 0.29   | 0      |
| ENSG0000(NAGS      | protein_co chr17  | 44004546 | 44009063 | + | 0.83   | 0.75   |
| ENSG0000(LSM12     | protein_co chr17  | 44034635 | 44067619 | - | 18.5   | 17.52  |
| ENSG0000(ASB16     | protein_co chr17  | 44170447 | 44179083 | + | 0.06   | 0.03   |
| ENSG0000(EMC10     | protein_co chr19  | 50476400 | 50490870 | + | 59.47  | 64.83  |
| ENSG0000(JOSD2     | protein_co chr19  | 50505998 | 50511353 | - | 31.12  | 27.2   |
| ENSG0000(SHANK1    | protein_co chr19  | 50661827 | 50719450 | - | 1.02   | 0.87   |
| ENSG0000(FAM171A2  | protein_co chr17  | 44353215 | 44363875 | - | 4.14   | 4.52   |
| ENSG0000(DBF4B     | protein_co chr17  | 44708608 | 44752264 | + | 2.42   | 1.83   |
| ENSG0000(PLCD3     | protein_co chr17  | 45108967 | 45133354 | - | 51.49  | 68.07  |
| ENSG0000(FMNL3     | protein_co chr12  | 49636499 | 49708165 | - | 7.6    | 7.86   |
| ENSG0000(AQP5      | protein_co chr12  | 49961870 | 49965681 | + | 0.36   | 0.26   |
| ENSG0000(RACGAP1   | protein_co chr12  | 49976923 | 50033136 | - | 6.51   | 4.9    |
| ENSG0000(OR7G1     | protein_co chr19  | 9114828  | 9115763  | - | 0      | 0      |
| ENSG0000(LARP4     | protein_co chr12  | 50392383 | 50480004 | + | 11.39  | 12.88  |
| ENSG0000(GRASP     | protein_co chr12  | 52006940 | 52015889 | + | 14.35  | 13.11  |
| ENSG0000(RAVER1    | protein_co chr19  | 10316212 | 10333640 | - | 10.28  | 10.62  |
| ENSG0000(KRT84     | protein_co chr12  | 52377812 | 52385652 | - | 0      | 0      |
| ENSG0000(KRT82     | protein_co chr12  | 52393931 | 52406355 | - | 0      | 0      |
| ENSG0000(SYCE2     | protein_co chr19  | 12898786 | 12919276 | - | 0.14   | 0.49   |
| ENSG0000(SPC24     | protein_co chr19  | 11131520 | 11155808 | - | 0.79   | 0.54   |
| ENSG0000(IP6K3     | protein_co chr6   | 33721670 | 33746905 | - | 0      | 0      |
| ENSG0000(LEMD2     | protein_co chr6   | 33771202 | 33789136 | - | 23.07  | 23.14  |
| ENSG0000(ALOX15    | protein_co chr17  | 4630902  | 4642294  | - | 0.02   | 0.07   |
| ENSG0000(TREML1    | protein_co chr6   | 41149342 | 41154337 | - | 0      | 0      |
| ENSG0000(ADCY10P1  | transcribec chr6  | 41101022 | 41140835 | + | 0.16   | 0.29   |
| ENSG0000(ZNF653    | protein_co chr19  | 11483427 | 11505923 | - | 2.84   | 2.78   |
| ENSG0000(MED11     | protein_co chr17  | 4731428  | 4733610  | + | 11.25  | 12.44  |
| ENSG0000(CXCL16    | protein_co chr17  | 4733526  | 4739922  | - | 16.81  | 12.3   |
| ENSG0000(SCIMP     | protein_co chr17  | 5208961  | 5234860  | - | 0.03   | 0.23   |
| ENSG0000(RNASEK-C1 | protein_co chr17  | 7012635  | 7017520  | + | 1.15   | 0.73   |
| ENSG0000(BCL6B     | protein_co chr17  | 7023020  | 7030290  | + | 0.17   | 0.08   |
| ENSG0000(ASGR2     | protein_co chr17  | 7101322  | 7115700  | - | 0      | 0      |
| ENSG0000(TNFSF13   | protein_co chr17  | 7558292  | 7561608  | + | 6.41   | 5.56   |
| ENSG0000(SENP3     | protein_co chr17  | 7561875  | 7571969  | + | 18.7   | 18.82  |
| ENSG0000(FGF11     | protein_co chr17  | 7438273  | 7444937  | + | 6.65   | 6.11   |

|                    |                  |          |            |        |         |
|--------------------|------------------|----------|------------|--------|---------|
| ENSG0000( EIF4A1   | protein_co chr17 | 7572706  | 7579005 +  | 326.36 | 335.35  |
| ENSG0000( RPL26    | protein_co chr17 | 8377520  | 8383213 -  | 1124.5 | 1126.54 |
| ENSG0000( CCDC42   | protein_co chr17 | 8729934  | 8745219 -  | 0.17   | 0       |
| ENSG0000( POLR3K   | protein_co chr16 | 46407    | 53628 -    | 4.57   | 4.78    |
| ENSG0000( SNRNP25  | protein_co chr16 | 53010    | 57669 +    | 14.93  | 14.46   |
| ENSG0000( PRR35    | protein_co chr16 | 560422   | 565528 +   | 0      | 0       |
| ENSG0000( WDR90    | protein_co chr16 | 649311   | 667833 +   | 9.2    | 8.41    |
| ENSG0000( JMJD8    | protein_co chr16 | 681671   | 684528 -   | 41.01  | 40.89   |
| ENSG0000( CCDC78   | protein_co chr16 | 722582   | 726954 -   | 1.71   | 1.12    |
| ENSG0000( MSLNL    | protein_co chr16 | 769428   | 783370 -   | 0      | 0       |
| ENSG0000( SSTR5    | protein_co chr16 | 1078781  | 1080142 +  | 0      | 0       |
| ENSG0000( SPSB3    | protein_co chr16 | 1776712  | 1793700 -  | 18.03  | 18.2    |
| ENSG0000( MEIOB    | protein_co chr16 | 1833983  | 1884294 -  | 0      | 0       |
| ENSG0000( HS3ST6   | protein_co chr16 | 1911463  | 1918440 -  | 0      | 0       |
| ENSG0000( C16orf59 | protein_co chr16 | 2460080  | 2464963 +  | 0.27   | 0.66    |
| ENSG0000( CCNF     | protein_co chr16 | 2429394  | 2458854 +  | 0.74   | 0.73    |
| ENSG0000( TBC1D24  | protein_co chr16 | 2475051  | 2509560 +  | 3.16   | 4.82    |
| ENSG0000( AMDHD2   | protein_co chr16 | 2520357  | 2531422 +  | 46.43  | 45.15   |
| ENSG0000( NTN3     | protein_co chr16 | 2471499  | 2474145 +  | 0.08   | 0.19    |
| ENSG0000( BICDL2   | protein_co chr16 | 3027682  | 3036926 -  | 0.22   | 0.1     |
| ENSG0000( PAQR4    | protein_co chr16 | 2969245  | 2973489 +  | 0.71   | 0.97    |
| ENSG0000( FLYWCH2  | protein_co chr16 | 2883186  | 2899382 +  | 22.2   | 23.02   |
| ENSG0000( ZG16B    | protein_co chr16 | 2830169  | 2839585 +  | 0      | 0       |
| ENSG0000( ZNF75A   | protein_co chr16 | 3305406  | 3318852 +  | 8.32   | 9.17    |
| ENSG0000( ADCY9    | protein_co chr16 | 3953387  | 4116185 -  | 8.74   | 8.32    |
| ENSG0000( SHANK2   | protein_co chr11 | 70467856 | 71252577 - | 0.46   | 0.88    |
| ENSG0000( CLPB     | protein_co chr11 | 72292425 | 72434680 - | 2.39   | 3.3     |
| ENSG0000( NEU3     | protein_co chr11 | 74988134 | 75018893 + | 2.28   | 2.02    |
| ENSG0000( CYB561A3 | protein_co chr11 | 61348745 | 61362299 - | 277.23 | 336.33  |
| ENSG0000( PPP1R32  | protein_co chr11 | 61481120 | 61490931 + | 1.62   | 0.82    |
| ENSG0000( ASRGL1   | protein_co chr11 | 62337448 | 62393412 + | 0.06   | 0.19    |
| ENSG0000( GNG3     | protein_co chr11 | 62707658 | 62709201 + | 0      | 0.16    |
| ENSG0000( UBXN1    | protein_co chr11 | 62676498 | 62679117 - | 66.93  | 67.99   |
| ENSG0000( LBHD1    | protein_co chr11 | 62662817 | 62672255 - | 3.77   | 2.29    |
| ENSG0000( TTC9C    | protein_co chr11 | 62728069 | 62740293 + | 17.37  | 16.01   |
| ENSG0000( TAF6L    | protein_co chr11 | 62771303 | 62787342 + | 10.72  | 10.23   |
| ENSG0000( NXF1     | protein_co chr11 | 62792123 | 62806302 - | 23.63  | 24.56   |
| ENSG0000( STX5     | protein_co chr11 | 62806897 | 62832088 - | 23.64  | 23.54   |
| ENSG0000( SLC25A45 | protein_co chr11 | 65375192 | 65383701 - | 3.22   | 3.65    |
| ENSG0000( RPL29    | protein_co chr3  | 51993600 | 51995942 - | 605.54 | 616.99  |
| ENSG0000( ITIH3    | protein_co chr3  | 52794768 | 52809009 + | 0      | 0.03    |
| ENSG0000( SYVN1    | protein_co chr11 | 65121780 | 65134533 - | 16.8   | 16.93   |
| ENSG0000( ZFPL1    | protein_co chr11 | 65084223 | 65088400 + | 23.38  | 24.04   |
| ENSG0000( RPS6KA4  | protein_co chr11 | 64359148 | 64372215 + | 17.97  | 18.48   |
| ENSG0000( LRP5     | protein_co chr11 | 68312609 | 68449275 + | 3.93   | 4.12    |

|                   |                  |          |          |   |       |       |
|-------------------|------------------|----------|----------|---|-------|-------|
| ENSG0000(TPCN2    | protein_co chr11 | 69048897 | 69162440 | + | 4.99  | 4.17  |
| ENSG0000(FGF19    | protein_co chr11 | 69698232 | 69704642 | - | 0     | 0     |
| ENSG0000(CYP4A22  | protein_co chr1  | 47137435 | 47149741 | + | 0     | 0     |
| ENSG0000(PDZK1IP1 | protein_co chr1  | 47183593 | 47191044 | - | 1.88  | 3.26  |
| ENSG0000(TAL1     | protein_co chr1  | 47216290 | 47232220 | - | 0     | 0.7   |
| ENSG0000(CMPK1    | protein_co chr1  | 47333797 | 47378839 | + | 33.93 | 34.96 |
| ENSG0000(BEND5    | protein_co chr1  | 48727523 | 48776969 | - | 0.71  | 0.3   |
| ENSG0000(ELAVL4   | protein_co chr1  | 50048014 | 50203786 | + | 0     | 0     |
| ENSG0000(COA7     | protein_co chr1  | 52684451 | 52698366 | - | 7.6   | 8.14  |
| ENSG0000(ZYG11B   | protein_co chr1  | 52726467 | 52827342 | + | 8.97  | 10.6  |
| ENSG0000(SLC1A7   | protein_co chr1  | 53087179 | 53142632 | - | 0.13  | 0.07  |
| ENSG0000(C1orf123 | protein_co chr1  | 53214099 | 53220617 | - | 36.05 | 38.26 |
| ENSG0000(MAGOH    | protein_co chr1  | 53226892 | 53238610 | - | 15.84 | 15.26 |
| ENSG0000(ACOT11   | protein_co chr1  | 54542257 | 54639192 | + | 1.46  | 1.61  |
| ENSG0000(FAM151A  | protein_co chr1  | 54609182 | 54623556 | - | 0     | 0     |
| ENSG0000(PARS2    | protein_co chr1  | 54756898 | 54764514 | - | 2.74  | 2.04  |
| ENSG0000(LEXM     | protein_co chr1  | 54806063 | 54842252 | + | 0     | 0     |
| ENSG0000(BSND     | protein_co chr1  | 54998933 | 55010883 | + | 0     | 0     |
| ENSG0000(USP24    | protein_co chr1  | 55066359 | 55215113 | - | 8.57  | 9.82  |
| ENSG0000(PLPP3    | protein_co chr1  | 56494747 | 56645301 | - | 40.47 | 43.14 |
| ENSG0000(NOL9     | protein_co chr1  | 6521347  | 6554535  | - | 3.26  | 2.14  |
| ENSG0000(PRKAA2   | protein_co chr1  | 56645322 | 56715335 | + | 0.04  | 0.02  |
| ENSG0000(KLHL21   | protein_co chr1  | 6590724  | 6614607  | - | 27.42 | 30.84 |
| ENSG0000(ZSWIM5   | protein_co chr1  | 45016399 | 45306209 | - | 0.92  | 0.76  |
| ENSG0000(GMEB1    | protein_co chr1  | 28668732 | 28719353 | + | 2.76  | 2.72  |
| ENSG0000(SLC45A1  | protein_co chr1  | 8317826  | 8344167  | + | 1.27  | 1.52  |
| ENSG0000(SELENON  | protein_co chr1  | 25800176 | 25818224 | + | 61.28 | 63.89 |
| ENSG0000(AK4      | protein_co chr1  | 65147549 | 65232145 | + | 31.23 | 30.38 |
| ENSG0000(JAK1     | protein_co chr1  | 64833229 | 64966504 | - | 68.06 | 68.23 |
| ENSG0000(RAVER2   | protein_co chr1  | 64745095 | 64833232 | + | 1.93  | 1.83  |
| ENSG0000(CTRC     | protein_co chr1  | 15438439 | 15449242 | + | 0.06  | 0.38  |
| ENSG0000(LZIC     | protein_co chr1  | 9922113  | 9943407  | - | 10.07 | 10.79 |
| ENSG0000(RBP7     | protein_co chr1  | 9997206  | 10016020 | + | 0.64  | 0.94  |
| ENSG0000(KNCN     | protein_co chr1  | 46545644 | 46551527 | - | 0     | 0     |
| ENSG0000(FBLIM1   | protein_co chr1  | 15756607 | 15786594 | + | 30.66 | 32.92 |
| ENSG0000(TMEM82   | protein_co chr1  | 15742422 | 15747982 | + | 0     | 0     |
| ENSG0000(SLC25A34 | protein_co chr1  | 15736405 | 15741396 | + | 0.4   | 0.55  |
| ENSG0000(AKR7A3   | protein_co chr1  | 19282558 | 19289250 | - | 0.32  | 0.44  |
| ENSG0000(DRAXIN   | protein_co chr1  | 11691729 | 11725857 | + | 0.09  | 0.1   |
| ENSG0000(PDPN     | protein_co chr1  | 13583465 | 13617957 | + | 3.76  | 3.87  |
| ENSG0000(LRRC38   | protein_co chr1  | 13474977 | 13514048 | - | 0.15  | 0.19  |
| ENSG0000(DHRS3    | protein_co chr1  | 12567910 | 12617731 | - | 92.91 | 95.05 |
| ENSG0000(MATN1    | protein_co chr1  | 30711277 | 30723587 | - | 0.01  | 0.07  |
| ENSG0000(LAPTM5   | protein_co chr1  | 30732469 | 30757820 | - | 0.02  | 0.08  |
| ENSG0000(SDC3     | protein_co chr1  | 30869467 | 30908761 | - | 34.2  | 34.96 |

|                    |                 |          |          |   |        |       |
|--------------------|-----------------|----------|----------|---|--------|-------|
| ENSG0000( PEF1     | protein_co chr1 | 31629862 | 31644896 | - | 37.56  | 36.73 |
| ENSG0000( SYNC     | protein_co chr1 | 32680360 | 32703596 | - | 25.73  | 29.24 |
| ENSG0000( RBBP4    | protein_co chr1 | 32651142 | 32686211 | + | 46.56  | 48.72 |
| ENSG0000( KIAA1522 | protein_co chr1 | 32741885 | 32774970 | + | 9.07   | 9.08  |
| ENSG0000( TSSK3    | protein_co chr1 | 32351521 | 32364312 | + | 0.74   | 0.55  |
| ENSG0000( TMC04    | protein_co chr1 | 19682213 | 19799945 | - | 5.9    | 5.74  |
| ENSG0000( UBXN10   | protein_co chr1 | 20186085 | 20196048 | + | 0.01   | 0.04  |
| ENSG0000( CAMK2N1  | protein_co chr1 | 20482391 | 20486220 | - | 7.26   | 8.69  |
| ENSG0000( ALPL     | protein_co chr1 | 21509372 | 21578412 | + | 6.8    | 6.02  |
| ENSG0000( WNT4     | protein_co chr1 | 22117305 | 22143969 | - | 0      | 0     |
| ENSG0000( TTLL10   | protein_co chr1 | 1173884  | 1197935  | + | 0      | 0     |
| ENSG0000( SCNN1D   | protein_co chr1 | 1280436  | 1292029  | + | 1.95   | 1.74  |
| ENSG0000( MXRA8    | protein_co chr1 | 1352689  | 1361777  | - | 311.15 | 336.3 |
| ENSG0000( FAAP20   | protein_co chr1 | 2184461  | 2212720  | - | 29.99  | 30.61 |
| ENSG0000( MEGF6    | protein_co chr1 | 3489920  | 3611495  | - | 66.52  | 66.78 |
| ENSG0000( CCDC27   | protein_co chr1 | 3746460  | 3771645  | + | 0      | 0     |
| ENSG0000( IL23R    | protein_co chr1 | 67138907 | 67259979 | + | 0      | 0     |
| ENSG0000( DIRAS3   | protein_co chr1 | 68045962 | 68051631 | - | 3.22   | 3.79  |
| ENSG0000( C1orf87  | protein_co chr1 | 59987269 | 60073770 | - | 0      | 0     |
| ENSG0000( NFIA     | protein_co chr1 | 60865259 | 61462793 | + | 2.8    | 2.35  |
| ENSG0000( OMA1     | protein_co chr1 | 58415384 | 58546802 | - | 8.31   | 7.57  |
| ENSG0000( MYSM1    | protein_co chr1 | 58654739 | 58700092 | - | 7.5    | 6.13  |
| ENSG0000( TM2D1    | protein_co chr1 | 61681046 | 61725423 | - | 32.29  | 29.55 |
| ENSG0000( USP1     | protein_co chr1 | 62436297 | 62451804 | + | 5.05   | 4.6   |
| ENSG0000( FUBP1    | protein_co chr1 | 77944055 | 77979110 | - | 32.21  | 35.39 |
| ENSG0000( NEXN     | protein_co chr1 | 77888513 | 77943895 | + | 29.19  | 34.17 |
| ENSG0000( DNAJB4   | protein_co chr1 | 77979175 | 78017964 | + | 16.56  | 15.11 |
| ENSG0000( ADGRL4   | protein_co chr1 | 78889764 | 79006718 | - | 18.51  | 19.04 |
| ENSG0000( LRR1Q3   | protein_co chr1 | 74026015 | 74198187 | - | 0.13   | 0.21  |
| ENSG0000( LRRC53   | protein_co chr1 | 74469878 | 74512614 | - | 0      | 0     |
| ENSG0000( TYW3     | protein_co chr1 | 74733152 | 74766678 | + | 5.8    | 6.28  |
| ENSG0000( LHX8     | protein_co chr1 | 75128434 | 75161533 | + | 0      | 0     |
| ENSG0000( SNX7     | protein_co chr1 | 98661701 | 98760500 | + | 17.02  | 20.79 |
| ENSG0000( B3GALT2  | protein_co chr1 | 1.93E+08 | 1.93E+08 | - | 0.16   | 0.33  |
| ENSG0000( NTNG1    | protein_co chr1 | 1.07E+08 | 1.07E+08 | + | 2.52   | 3.51  |
| ENSG0000( FAM102B  | protein_co chr1 | 1.09E+08 | 1.09E+08 | + | 11.62  | 12.17 |
| ENSG0000( HENMT1   | protein_co chr1 | 1.09E+08 | 1.09E+08 | - | 0.66   | 0.7   |
| ENSG0000( AKNAD1   | protein_co chr1 | 1.09E+08 | 1.09E+08 | - | 0      | 0.13  |
| ENSG0000( C1orf52  | protein_co chr1 | 85249953 | 85259672 | - | 13.86  | 11.92 |
| ENSG0000( WDR63    | protein_co chr1 | 84999147 | 85133138 | + | 2.16   | 1.47  |
| ENSG0000( GBP2     | protein_co chr1 | 89106132 | 89150456 | - | 24.67  | 27.31 |
| ENSG0000( ATXN7L2  | protein_co chr1 | 1.09E+08 | 1.09E+08 | + | 1.46   | 1.17  |
| ENSG0000( GBP4     | protein_co chr1 | 89181148 | 89198932 | - | 2.38   | 1.97  |
| ENSG0000( ZNF326   | protein_co chr1 | 89995112 | 90035531 | + | 8.21   | 7.13  |
| ENSG0000( HFM1     | protein_co chr1 | 91260766 | 91404869 | - | 0.08   | 0.13  |



|                   |                 |          |            |        |        |
|-------------------|-----------------|----------|------------|--------|--------|
| ENSG0000(BRINP3   | protein_co chr1 | 1.9E+08  | 1.9E+08 -  | 0      | 0      |
| ENSG0000(GFI1     | protein_co chr1 | 92474762 | 92486876 - | 0.14   | 0.02   |
| ENSG0000(LSP1P3   | processed_chr5  | 28926816 | 28927023 + | 0      | 0      |
| ENSG0000(KCNT2    | protein_co chr1 | 1.96E+08 | 1.97E+08 - | 0.44   | 0.32   |
| ENSG0000(AGL      | protein_co chr1 | 99850084 | 99924023 + | 3.81   | 4.6    |
| ENSG0000(VCAM1    | protein_co chr1 | 1.01E+08 | 1.01E+08 + | 6.92   | 7.05   |
| ENSG0000(EXTL2    | protein_co chr1 | 1.01E+08 | 1.01E+08 - | 9.62   | 14.37  |
| ENSG0000(SLC30A7  | protein_co chr1 | 1.01E+08 | 1.01E+08 + | 5.48   | 5.82   |
| ENSG0000(DNAJA1P5 | processed_chr1  | 1.02E+08 | 1.02E+08 + | 0      | 0      |
| ENSG0000(ZNF281   | protein_co chr1 | 2E+08    | 2E+08 -    | 6.01   | 5.25   |
| ENSG0000(ARPC5    | protein_co chr1 | 1.84E+08 | 1.84E+08 - | 103.01 | 105.69 |
| ENSG0000(CADM3    | protein_co chr1 | 1.59E+08 | 1.59E+08 + | 0.28   | 0.14   |
| ENSG0000(NLRP3    | protein_co chr1 | 2.47E+08 | 2.47E+08 + | 0      | 0.16   |
| ENSG0000(ZNF496   | protein_co chr1 | 2.47E+08 | 2.47E+08 - | 8.56   | 9.52   |
| ENSG0000(TRIM58   | protein_co chr1 | 2.48E+08 | 2.48E+08 + | 2.1    | 1.94   |
| ENSG0000(SLAMF9   | protein_co chr1 | 1.6E+08  | 1.6E+08 -  | 0.1    | 0      |
| ENSG0000(OR2M5    | protein_co chr1 | 2.48E+08 | 2.48E+08 + | 0      | 0      |
| ENSG0000(KCNJ9    | protein_co chr1 | 1.6E+08  | 1.6E+08 +  | 0.08   | 0.08   |
| ENSG0000(IGSF8    | protein_co chr1 | 1.6E+08  | 1.6E+08 -  | 15.15  | 13.27  |
| ENSG0000(DDR2     | protein_co chr1 | 1.63E+08 | 1.63E+08 + | 88.42  | 94.84  |
| ENSG0000(PEA15    | protein_co chr1 | 1.6E+08  | 1.6E+08 +  | 205.78 | 209.2  |
| ENSG0000(PEX19    | protein_co chr1 | 1.6E+08  | 1.6E+08 -  | 20.41  | 23.74  |
| ENSG0000(NCSTN    | protein_co chr1 | 1.6E+08  | 1.6E+08 +  | 111.11 | 107.16 |
| ENSG0000(VANGL2   | protein_co chr1 | 1.6E+08  | 1.6E+08 +  | 3.69   | 4.3    |
| ENSG0000(SLAMF6   | protein_co chr1 | 1.6E+08  | 1.61E+08 - | 0      | 0      |
| ENSG0000(OLFML2B  | protein_co chr1 | 1.62E+08 | 1.62E+08 - | 0.59   | 0.92   |
| ENSG0000(FCRLB    | protein_co chr1 | 1.62E+08 | 1.62E+08 + | 0.37   | 0.77   |
| ENSG0000(FCGR3B   | protein_co chr1 | 1.62E+08 | 1.62E+08 - | 0      | 0.05   |
| ENSG0000(SLC9C2   | protein_co chr1 | 1.74E+08 | 1.74E+08 - | 0      | 0.19   |
| ENSG0000(KLHDC9   | protein_co chr1 | 1.61E+08 | 1.61E+08 + | 0.82   | 0.97   |
| ENSG0000(C1orf74  | protein_co chr1 | 2.1E+08  | 2.1E+08 -  | 0.75   | 0.8    |
| ENSG0000(LMX1A    | protein_co chr1 | 1.65E+08 | 1.65E+08 - | 0      | 0      |
| ENSG0000(LRRC52   | protein_co chr1 | 1.66E+08 | 1.66E+08 + | 0      | 0      |
| ENSG0000(FLVCR1   | protein_co chr1 | 2.13E+08 | 2.13E+08 + | 1.38   | 1.03   |
| ENSG0000(FAM71A   | protein_co chr1 | 2.13E+08 | 2.13E+08 + | 0      | 0      |
| ENSG0000(ATF3     | protein_co chr1 | 2.13E+08 | 2.13E+08 + | 1.38   | 1.32   |
| ENSG0000(RBM15    | protein_co chr1 | 1.1E+08  | 1.1E+08 +  | 2.1    | 2.08   |
| ENSG0000(DENND2D  | protein_co chr1 | 1.11E+08 | 1.11E+08 - | 1.88   | 2.03   |
| ENSG0000(AXDND1   | protein_co chr1 | 1.79E+08 | 1.8E+08 +  | 0.44   | 0.02   |
| ENSG0000(TDRD5    | protein_co chr1 | 1.8E+08  | 1.8E+08 +  | 0      | 0      |
| ENSG0000(IER5     | protein_co chr1 | 1.81E+08 | 1.81E+08 + | 5.97   | 7.17   |
| ENSG0000(SNED1    | protein_co chr2 | 2.41E+08 | 2.41E+08 + | 25.49  | 25.41  |
| ENSG0000(BPNT1    | protein_co chr1 | 2.2E+08  | 2.2E+08 -  | 10.02  | 8.53   |
| ENSG0000(SPATA17  | protein_co chr1 | 2.18E+08 | 2.18E+08 + | 0.56   | 0.37   |
| ENSG0000(C1orf115 | protein_co chr1 | 2.21E+08 | 2.21E+08 + | 0.25   | 0.16   |

|                    |                 |          |            |        |        |
|--------------------|-----------------|----------|------------|--------|--------|
| ENSG0000(BROX      | protein_co chr1 | 2.23E+08 | 2.23E+08 + | 12.96  | 7.92   |
| ENSG0000(NBPF20    | protein_co chr1 | 1.45E+08 | 1.45E+08 - | 3.23   | 3.25   |
| ENSG0000(ACP6      | protein_co chr1 | 1.48E+08 | 1.48E+08 - | 6.37   | 5.58   |
| ENSG0000(MT2P1     | processed_chr4  | 68376323 | 68376505 + | 0      | 0      |
| ENSG0000(WDR64     | protein_co chr1 | 2.42E+08 | 2.42E+08 + | 0      | 0      |
| ENSG0000(KIF26B    | protein_co chr1 | 2.45E+08 | 2.46E+08 + | 12.15  | 13.74  |
| ENSG0000(TFB2M     | protein_co chr1 | 2.47E+08 | 2.47E+08 - | 4.83   | 4.84   |
| ENSG0000(CNST      | protein_co chr1 | 2.47E+08 | 2.47E+08 + | 7.11   | 6.12   |
| ENSG0000(PPP1R21   | protein_co chr2 | 48440598 | 48515391 + | 5.37   | 5.2    |
| ENSG0000(KLHDC8A   | protein_co chr1 | 2.05E+08 | 2.05E+08 - | 0.11   | 0      |
| ENSG0000(PM20D1    | protein_co chr1 | 2.06E+08 | 2.06E+08 - | 0      | 0      |
| ENSG0000(PKDCC     | protein_co chr2 | 42048020 | 42058528 + | 56.89  | 74.04  |
| ENSG0000(OXER1     | protein_co chr2 | 42762481 | 42764261 - | 0      | 0.03   |
| ENSG0000(HAAO      | protein_co chr2 | 42767089 | 42792593 - | 0.17   | 0.19   |
| ENSG0000(B3GALNT2  | protein_co chr1 | 2.35E+08 | 2.36E+08 - | 7.05   | 6.62   |
| ENSG0000(C1orf147  | antisense chr1  | 2.06E+08 | 2.06E+08 - | 0      | 0      |
| ENSG0000(MAPKAPK2  | protein_co chr1 | 2.07E+08 | 2.07E+08 + | 30.84  | 32.94  |
| ENSG0000(IL20      | protein_co chr1 | 2.07E+08 | 2.07E+08 + | 0      | 0      |
| ENSG0000(IL24      | protein_co chr1 | 2.07E+08 | 2.07E+08 + | 0.88   | 0.83   |
| ENSG0000(FCMR      | protein_co chr1 | 2.07E+08 | 2.07E+08 - | 0.98   | 0.3    |
| ENSG0000(PIGR      | protein_co chr1 | 2.07E+08 | 2.07E+08 - | 0.01   | 0.08   |
| ENSG0000(FCAMR     | protein_co chr1 | 2.07E+08 | 2.07E+08 - | 0      | 0      |
| ENSG0000(CAPN2     | protein_co chr1 | 2.24E+08 | 2.24E+08 + | 109.96 | 108.96 |
| ENSG0000(MRPL55    | protein_co chr1 | 2.28E+08 | 2.28E+08 - | 27.48  | 31.2   |
| ENSG0000(C1orf145  | protein_co chr1 | 2.28E+08 | 2.28E+08 - | 0.23   | 0.54   |
| ENSG0000(WDR26     | protein_co chr1 | 2.24E+08 | 2.24E+08 - | 31.76  | 34.37  |
| ENSG0000(REL       | protein_co chr2 | 60881521 | 60931610 + | 1.89   | 1.79   |
| ENSG0000(PUS10     | protein_co chr2 | 60940222 | 61018259 - | 4.06   | 3.88   |
| ENSG0000(PEX13     | protein_co chr2 | 61017225 | 61051990 + | 5.38   | 4.45   |
| ENSG0000(KIAA1841  | protein_co chr2 | 61065871 | 61138034 + | 2.24   | 3.29   |
| ENSG0000(TRIM17    | protein_co chr1 | 2.28E+08 | 2.28E+08 - | 0      | 0.04   |
| ENSG0000(RFTN2     | protein_co chr2 | 1.98E+08 | 1.98E+08 - | 2.88   | 2.58   |
| ENSG0000(DISC1     | protein_co chr1 | 2.32E+08 | 2.32E+08 + | 3.25   | 3.06   |
| ENSG0000(LINC01931 | lincRNA chr2    | 1.5E+08  | 1.5E+08 -  | 0      | 0      |
| ENSG0000(CAPN13    | protein_co chr2 | 30722771 | 30820542 - | 0      | 0      |
| ENSG0000(LRRTM1    | protein_co chr2 | 80288351 | 80304749 - | 0      | 0      |
| ENSG0000(MEMO1     | protein_co chr2 | 31865060 | 32011230 - | 19.76  | 22.98  |
| ENSG0000(DPY30     | protein_co chr2 | 31867809 | 32039812 - | 20.52  | 22.98  |
| ENSG0000(TYW5      | protein_co chr2 | 2E+08    | 2E+08 -    | 2.28   | 1.98   |
| ENSG0000(MAIP1     | protein_co chr2 | 2E+08    | 2E+08 +    | 7.23   | 8.97   |
| ENSG0000(KCNF1     | protein_co chr2 | 10911937 | 10914225 + | 0      | 0      |
| ENSG0000(PQLC3     | protein_co chr2 | 11155198 | 11178874 + | 16.52  | 18.88  |
| ENSG0000(ARL5A     | protein_co chr2 | 1.52E+08 | 1.52E+08 - | 8.1    | 8.85   |
| ENSG0000(FAM84A    | protein_co chr2 | 14632686 | 14650814 + | 0      | 0      |
| ENSG0000(KCNJ3     | protein_co chr2 | 1.55E+08 | 1.55E+08 + | 0      | 0.01   |

|                    |                  |          |          |   |        |        |
|--------------------|------------------|----------|----------|---|--------|--------|
| ENSG0000( NEUROD1  | protein_co chr2  | 1.82E+08 | 1.82E+08 | - | 0      | 0      |
| ENSG0000( CLHC1    | protein_co chr2  | 55174791 | 55232563 | - | 3.1    | 2.72   |
| ENSG0000( PRORS1P  | transcribec chr2 | 55282319 | 55284522 | + | 0.41   | 0.42   |
| ENSG0000( FRZB     | protein_co chr2  | 1.83E+08 | 1.83E+08 | - | 0      | 0      |
| ENSG0000( DUSP19   | protein_co chr2  | 1.83E+08 | 1.83E+08 | + | 1.05   | 0.47   |
| ENSG0000( CFAP36   | protein_co chr2  | 55519604 | 55545879 | + | 29.98  | 28.72  |
| ENSG0000( NUP35    | protein_co chr2  | 1.83E+08 | 1.83E+08 | + | 2.99   | 3.33   |
| ENSG0000( CCDC138  | protein_co chr2  | 1.09E+08 | 1.09E+08 | + | 1.39   | 1.03   |
| ENSG0000( C2orf48  | lincRNA chr2     | 10141382 | 10211725 | + | 0      | 0      |
| ENSG0000( ZSWIM2   | protein_co chr2  | 1.87E+08 | 1.87E+08 | - | 0.03   | 0.12   |
| ENSG0000( FBXO41   | protein_co chr2  | 73254682 | 73284431 | - | 2.2    | 2.21   |
| ENSG0000( ALMS1P1  | transcribec chr2 | 73644919 | 73685576 | + | 0.27   | 0.07   |
| ENSG0000( ACTG2    | protein_co chr2  | 73892314 | 73919865 | + | 1.08   | 0.78   |
| ENSG0000( WDCP     | protein_co chr2  | 24029340 | 24049575 | - | 4.38   | 2.52   |
| ENSG0000( SMC6     | protein_co chr2  | 17663812 | 17800242 | - | 7.77   | 9.17   |
| ENSG0000( VSNL1    | protein_co chr2  | 17539126 | 17657018 | + | 0.12   | 0.19   |
| ENSG0000( CCDC74A  | protein_co chr2  | 1.32E+08 | 1.32E+08 | + | 10.65  | 11.51  |
| ENSG0000( H3F3A    | protein_co chr1  | 2.26E+08 | 2.26E+08 | + | 154.95 | 155.28 |
| ENSG0000( ANKRD30B | protein_co chr2  | 1.32E+08 | 1.32E+08 | - | 0      | 0      |
| ENSG0000( COQ8A    | protein_co chr1  | 2.27E+08 | 2.27E+08 | + | 9.64   | 10.72  |
| ENSG0000( SLC16A14 | protein_co chr2  | 2.3E+08  | 2.3E+08  | - | 0.24   | 0.15   |
| ENSG0000( TEKT4    | protein_co chr2  | 94871433 | 94876829 | + | 0.35   | 0.25   |
| ENSG0000( EN1      | protein_co chr2  | 1.19E+08 | 1.19E+08 | - | 1.96   | 2.84   |
| ENSG0000( SGCB     | protein_co chr4  | 52020706 | 52038482 | - | 24.84  | 16.93  |
| ENSG0000( SPATA18  | protein_co chr4  | 52051331 | 52097292 | + | 6.23   | 6.15   |
| ENSG0000( NOSTRIN  | protein_co chr2  | 1.69E+08 | 1.69E+08 | + | 0.12   | 0.08   |
| ENSG0000( CFAP221  | protein_co chr2  | 1.2E+08  | 1.2E+08  | + | 0.03   | 0      |
| ENSG0000( CCDC140  | protein_co chr2  | 2.22E+08 | 2.22E+08 | + | 0      | 0      |
| ENSG0000( SGPP2    | protein_co chr2  | 2.22E+08 | 2.23E+08 | + | 0      | 0      |
| ENSG0000( INHBB    | protein_co chr2  | 1.2E+08  | 1.2E+08  | + | 0.1    | 0.11   |
| ENSG0000( XIRP2    | protein_co chr2  | 1.67E+08 | 1.67E+08 | + | 0      | 0      |
| ENSG0000( BBS5     | protein_co chr2  | 1.69E+08 | 1.7E+08  | + | 4.88   | 5.69   |
| ENSG0000( BIRC8    | protein_co chr19 | 53289601 | 53291626 | - | 0      | 0      |
| ENSG0000( SMARCD1  | protein_co chr4  | 94207611 | 94291292 | + | 8.16   | 7.04   |
| ENSG0000( HPGDS    | protein_co chr4  | 94298535 | 94342876 | - | 0      | 0      |
| ENSG0000( PDLIM5   | protein_co chr4  | 94451857 | 94668227 | + | 41.36  | 41.41  |
| ENSG0000( PDHA2    | protein_co chr4  | 95840019 | 95841474 | + | 0      | 0      |
| ENSG0000( STPG2    | protein_co chr4  | 97184093 | 98143240 | - | 0.07   | 0      |
| ENSG0000( NEURL3   | protein_co chr2  | 96497643 | 96508109 | - | 0      | 0.04   |
| ENSG0000( RPRD2    | protein_co chr1  | 1.5E+08  | 1.5E+08  | + | 9.96   | 9.89   |
| ENSG0000( ANKRD23  | protein_co chr2  | 96824526 | 96857934 | - | 1.23   | 0.93   |
| ENSG0000( CTSS     | protein_co chr1  | 1.51E+08 | 1.51E+08 | - | 9.96   | 6.83   |
| ENSG0000( MSX1     | protein_co chr4  | 4859666  | 4863936  | + | 6.08   | 7.83   |
| ENSG0000( PACRGL   | protein_co chr4  | 20696282 | 20752907 | + | 10.53  | 12.18  |
| ENSG0000( BNIPL    | protein_co chr1  | 1.51E+08 | 1.51E+08 | + | 0.06   | 0.14   |

|                    |                 |          |          |   |        |        |
|--------------------|-----------------|----------|----------|---|--------|--------|
| ENSG0000(C1QTNF7   | protein_co chr4 | 15339818 | 15446166 | + | 0.15   | 0.04   |
| ENSG0000(TNFAIP8L2 | protein_co chr1 | 1.51E+08 | 1.51E+08 | + | 0      | 0      |
| ENSG0000(LYSMD1    | protein_co chr1 | 1.51E+08 | 1.51E+08 | - | 3.45   | 3.75   |
| ENSG0000(SCNM1     | protein_co chr1 | 1.51E+08 | 1.51E+08 | + | 17.07  | 15.2   |
| ENSG0000(TMOD4     | protein_co chr1 | 1.51E+08 | 1.51E+08 | - | 0      | 0.17   |
| ENSG0000(VPS72     | protein_co chr1 | 1.51E+08 | 1.51E+08 | - | 15.95  | 18.98  |
| ENSG0000(ERCC3     | protein_co chr2 | 1.27E+08 | 1.27E+08 | - | 19.69  | 18.02  |
| ENSG0000(RNF149    | protein_co chr2 | 1.01E+08 | 1.01E+08 | - | 9.98   | 14.27  |
| ENSG0000(IWS1      | protein_co chr2 | 1.27E+08 | 1.28E+08 | - | 12.95  | 14.4   |
| ENSG0000(BOLA3     | protein_co chr2 | 74135398 | 74147994 | - | 13.42  | 12.24  |
| ENSG0000(CDC42EP3  | protein_co chr2 | 37641882 | 37738468 | - | 14.58  | 16.12  |
| ENSG0000(S100A11   | protein_co chr1 | 1.52E+08 | 1.52E+08 | - | 629.81 | 613.75 |
| ENSG0000(LCE3D     | protein_co chr1 | 1.53E+08 | 1.53E+08 | - | 0      | 0      |
| ENSG0000(SMCP      | protein_co chr1 | 1.53E+08 | 1.53E+08 | + | 0      | 0      |
| ENSG0000(IVL       | protein_co chr1 | 1.53E+08 | 1.53E+08 | + | 0      | 0      |
| ENSG0000(SPRR3     | protein_co chr1 | 1.53E+08 | 1.53E+08 | + | 0      | 0      |
| ENSG0000(DHX57     | protein_co chr2 | 38797729 | 38875934 | - | 4.57   | 5.16   |
| ENSG0000(SPRR2D    | protein_co chr1 | 1.53E+08 | 1.53E+08 | - | 0      | 0      |
| ENSG0000(BMP10     | protein_co chr2 | 68865481 | 68871517 | - | 0      | 0      |
| ENSG0000(PGLYRP4   | protein_co chr1 | 1.53E+08 | 1.53E+08 | - | 0      | 0      |
| ENSG0000(ARHGAP25  | protein_co chr2 | 68679601 | 68826833 | + | 0.77   | 0.67   |
| ENSG0000(S100A9    | protein_co chr1 | 1.53E+08 | 1.53E+08 | + | 0      | 0      |
| ENSG0000(S100A12   | protein_co chr1 | 1.53E+08 | 1.53E+08 | - | 0      | 0      |
| ENSG0000(TGFA      | protein_co chr2 | 70447280 | 70554193 | - | 0.01   | 0      |
| ENSG0000(TDRD10    | protein_co chr1 | 1.55E+08 | 1.55E+08 | + | 0      | 0.1    |
| ENSG0000(CCNYL1    | protein_co chr2 | 2.08E+08 | 2.08E+08 | + | 11.07  | 11.03  |
| ENSG0000(FZD5      | protein_co chr2 | 2.08E+08 | 2.08E+08 | - | 0.64   | 0.63   |
| ENSG0000(CRYGC     | protein_co chr2 | 2.08E+08 | 2.08E+08 | - | 0      | 0      |
| ENSG0000(DCAF16    | protein_co chr4 | 17800655 | 17810758 | - | 7.24   | 8.72   |
| ENSG0000(C1orf189  | protein_co chr1 | 1.54E+08 | 1.54E+08 | - | 0      | 0      |
| ENSG0000(NPPC      | protein_co chr2 | 2.32E+08 | 2.32E+08 | - | 0      | 0      |
| ENSG0000(GNPDA2    | protein_co chr4 | 44682200 | 44726595 | - | 8.33   | 7.35   |
| ENSG0000(ALPP      | protein_co chr2 | 2.32E+08 | 2.32E+08 | + | 0      | 0      |
| ENSG0000(GABRG1    | protein_co chr4 | 46035769 | 46124081 | - | 0      | 0      |
| ENSG0000(ALPPL2    | protein_co chr2 | 2.32E+08 | 2.32E+08 | + | 0      | 0      |
| ENSG0000(GABRB1    | protein_co chr4 | 46993723 | 47426444 | + | 0      | 0.42   |
| ENSG0000(PAQR3     | protein_co chr4 | 78887127 | 78939438 | - | 4.58   | 3.55   |
| ENSG0000(NIPAL1    | protein_co chr4 | 47914142 | 48040173 | + | 0.93   | 1.1    |
| ENSG0000(ALPI      | protein_co chr2 | 2.32E+08 | 2.32E+08 | + | 0      | 0      |
| ENSG0000(ANTXR2    | protein_co chr4 | 79901149 | 80125454 | - | 90.13  | 89.14  |
| ENSG0000(HELQ      | protein_co chr4 | 83407343 | 83455856 | - | 4.6    | 3.16   |
| ENSG0000(MRPS18C   | protein_co chr4 | 83455932 | 83469735 | + | 17.58  | 18.3   |
| ENSG0000(CGGBP1    | protein_co chr3 | 88051944 | 88149885 | - | 30.44  | 28.29  |
| ENSG0000(FAM175A   | protein_co chr4 | 83459517 | 83523348 | - | 9.03   | 12.28  |
| ENSG0000(GPR155    | protein_co chr2 | 1.74E+08 | 1.74E+08 | - | 2.22   | 1.99   |

|                    |                 |          |            |        |        |
|--------------------|-----------------|----------|------------|--------|--------|
| ENSG0000(DAPL1     | protein_co chr2 | 1.59E+08 | 1.59E+08 + | 0      | 0      |
| ENSG0000(PMVK      | protein_co chr1 | 1.55E+08 | 1.55E+08 - | 15.46  | 14.04  |
| ENSG0000(PBXIP1    | protein_co chr1 | 1.55E+08 | 1.55E+08 - | 85.88  | 93.32  |
| ENSG0000(CLDN1     | protein_co chr3 | 1.9E+08  | 1.9E+08 -  | 5.1    | 4.4    |
| ENSG0000(PYGO2     | protein_co chr1 | 1.55E+08 | 1.55E+08 - | 11.53  | 9.6    |
| ENSG0000(HIPK1     | protein_co chr1 | 1.14E+08 | 1.14E+08 + | 10.47  | 11.36  |
| ENSG0000(LENEP     | protein_co chr1 | 1.55E+08 | 1.55E+08 + | 0      | 0      |
| ENSG0000(DCST2     | protein_co chr1 | 1.55E+08 | 1.55E+08 - | 0.24   | 0.15   |
| ENSG0000(DCST1     | protein_co chr1 | 1.55E+08 | 1.55E+08 + | 0      | 0      |
| ENSG0000(COL6A3    | protein_co chr2 | 2.37E+08 | 2.37E+08 - | 953.69 | 938.61 |
| ENSG0000(C1orf106  | protein_co chr1 | 2.01E+08 | 2.01E+08 + | 1.08   | 2.91   |
| ENSG0000(LINC01116 | lincRNA chr2    | 1.77E+08 | 1.77E+08 - | 0.44   | 0.34   |
| ENSG0000(YY1AP1    | protein_co chr1 | 1.56E+08 | 1.56E+08 - | 22.21  | 21.28  |
| ENSG0000(KBTBD8    | protein_co chr3 | 66998307 | 67011210 + | 0.36   | 0.4    |
| ENSG0000(FAM19A4   | protein_co chr3 | 68731766 | 68953297 - | 0      | 0      |
| ENSG0000(EOGT      | protein_co chr3 | 68975214 | 69013961 - | 12.39  | 14.86  |
| ENSG0000(LMOD3     | protein_co chr3 | 69106872 | 69123032 - | 0      | 0.01   |
| ENSG0000(NAXE      | protein_co chr1 | 1.57E+08 | 1.57E+08 + | 30.48  | 33.08  |
| ENSG0000(POGLUT1   | protein_co chr3 | 1.19E+08 | 1.19E+08 + | 7.13   | 8.53   |
| ENSG0000(SLC22A15  | protein_co chr1 | 1.16E+08 | 1.16E+08 + | 4.1    | 3.28   |
| ENSG0000(CCKAR     | protein_co chr4 | 26481400 | 26490462 - | 0      | 0      |
| ENSG0000(IGFN1     | protein_co chr1 | 2.01E+08 | 2.01E+08 + | 0      | 0      |
| ENSG0000(ATP1A1    | protein_co chr1 | 1.16E+08 | 1.16E+08 + | 136.47 | 131.26 |
| ENSG0000(SLC15A2   | protein_co chr3 | 1.22E+08 | 1.22E+08 + | 0.12   | 0      |
| ENSG0000(EIF4E3    | protein_co chr3 | 71675416 | 71754773 - | 2.05   | 2.1    |
| ENSG0000(PROK2     | protein_co chr3 | 71771656 | 71785206 - | 0      | 0      |
| ENSG0000(C3orf30   | protein_co chr3 | 1.19E+08 | 1.19E+08 + | 0      | 0      |
| ENSG0000(LRRC58    | protein_co chr3 | 1.2E+08  | 1.2E+08 -  | 4.9    | 5.08   |
| ENSG0000(FSTL1     | protein_co chr3 | 1.2E+08  | 1.2E+08 -  | 928.5  | 862.72 |
| ENSG0000(LMOD1     | protein_co chr1 | 2.02E+08 | 2.02E+08 - | 5.3    | 7.43   |
| ENSG0000(ELF3      | protein_co chr1 | 2.02E+08 | 2.02E+08 + | 0.46   | 0.5    |
| ENSG0000(PDCL2     | protein_co chr4 | 55556525 | 55592212 - | 0      | 0      |
| ENSG0000(TMEM183)  | protein_co chr1 | 2.03E+08 | 2.03E+08 + | 26.54  | 27.1   |
| ENSG0000(TMEM169   | protein_co chr2 | 2.16E+08 | 2.16E+08 + | 0.53   | 0.3    |
| ENSG0000(IGFBP7    | protein_co chr4 | 57030773 | 57110385 - | 770.61 | 724.9  |
| ENSG0000(TRIM46    | protein_co chr1 | 1.55E+08 | 1.55E+08 + | 3.6    | 4.26   |
| ENSG0000(KRTCAP2   | protein_co chr1 | 1.55E+08 | 1.55E+08 - | 120.68 | 119.56 |
| ENSG0000(CXCR1     | protein_co chr2 | 2.18E+08 | 2.18E+08 - | 0      | 0      |
| ENSG0000(ARPC2     | protein_co chr2 | 2.18E+08 | 2.18E+08 + | 198.8  | 203.34 |
| ENSG0000(TSACC     | protein_co chr1 | 1.56E+08 | 1.56E+08 + | 0.29   | 0.48   |
| ENSG0000(CCT3      | protein_co chr1 | 1.56E+08 | 1.56E+08 - | 56.05  | 58.01  |
| ENSG0000(TMEM79    | protein_co chr1 | 1.56E+08 | 1.56E+08 + | 1.64   | 1.68   |
| ENSG0000(SSR2      | protein_co chr1 | 1.56E+08 | 1.56E+08 - | 162.36 | 167.25 |
| ENSG0000(RNF25     | protein_co chr2 | 2.19E+08 | 2.19E+08 - | 14.23  | 14.13  |
| ENSG0000(STK36     | protein_co chr2 | 2.19E+08 | 2.19E+08 + | 14.87  | 15.69  |

|                    |                 |          |          |   |        |        |
|--------------------|-----------------|----------|----------|---|--------|--------|
| ENSG0000( ADORA1   | protein_co chr1 | 2.03E+08 | 2.03E+08 | + | 3.79   | 5.54   |
| ENSG0000( NEK10    | protein_co chr3 | 27110085 | 27369460 | - | 1.96   | 3.22   |
| ENSG0000( CCDC141  | protein_co chr2 | 1.79E+08 | 1.79E+08 | - | 0.03   | 0      |
| ENSG0000( FEV      | protein_co chr2 | 2.19E+08 | 2.19E+08 | - | 0      | 0      |
| ENSG0000( CRYBA2   | protein_co chr2 | 2.19E+08 | 2.19E+08 | - | 0      | 0      |
| ENSG0000( IHH      | protein_co chr2 | 2.19E+08 | 2.19E+08 | - | 0      | 0.06   |
| ENSG0000( KIAA1524 | protein_co chr3 | 1.09E+08 | 1.09E+08 | - | 1.44   | 1.18   |
| ENSG0000( EOMES    | protein_co chr3 | 27715949 | 27722711 | - | 0.03   | 0.02   |
| ENSG0000( CWC22    | protein_co chr2 | 1.8E+08  | 1.8E+08  | - | 6.62   | 8.69   |
| ENSG0000( AZI2     | protein_co chr3 | 28315003 | 28349127 | - | 60.47  | 60.17  |
| ENSG0000( TGFB2    | protein_co chr3 | 30606502 | 30694142 | + | 58.9   | 54.44  |
| ENSG0000( RETNLB   | protein_co chr3 | 1.09E+08 | 1.09E+08 | - | 0      | 0      |
| ENSG0000( ANKZF1   | protein_co chr2 | 2.19E+08 | 2.19E+08 | + | 18.16  | 18.46  |
| ENSG0000( HDAC11   | protein_co chr3 | 13479724 | 13506424 | + | 8.23   | 8.24   |
| ENSG0000( FCRL4    | protein_co chr1 | 1.58E+08 | 1.58E+08 | - | 0      | 0      |
| ENSG0000( TRAT1    | protein_co chr3 | 1.09E+08 | 1.09E+08 | + | 0      | 0      |
| ENSG0000( FBLN2    | protein_co chr3 | 13549131 | 13638422 | + | 360.1  | 352.76 |
| ENSG0000( GLB1L    | protein_co chr2 | 2.19E+08 | 2.19E+08 | - | 5.7    | 4.67   |
| ENSG0000( STT3B    | protein_co chr3 | 31532638 | 31637622 | + | 33.91  | 35.45  |
| ENSG0000( CHCHD4   | protein_co chr3 | 14112077 | 14124870 | - | 3.94   | 4.27   |
| ENSG0000( DPPA2    | protein_co chr3 | 1.09E+08 | 1.09E+08 | - | 0      | 0      |
| ENSG0000( NFASC    | protein_co chr1 | 2.05E+08 | 2.05E+08 | + | 3.59   | 3.32   |
| ENSG0000( FCRL1    | protein_co chr1 | 1.58E+08 | 1.58E+08 | - | 0      | 0      |
| ENSG0000( SGO2     | protein_co chr2 | 2.01E+08 | 2.01E+08 | + | 0.89   | 1.13   |
| ENSG0000( SERPINI1 | protein_co chr3 | 1.68E+08 | 1.68E+08 | + | 1.12   | 1.31   |
| ENSG0000( CLASP2   | protein_co chr3 | 33496245 | 33718356 | - | 10.98  | 13.11  |
| ENSG0000( SUCLG1   | protein_co chr2 | 84423523 | 84460045 | - | 33.64  | 36.07  |
| ENSG0000( NUA2     | protein_co chr1 | 2.05E+08 | 2.05E+08 | - | 1.11   | 0.84   |
| ENSG0000( SPTA1    | protein_co chr1 | 1.59E+08 | 1.59E+08 | - | 0.01   | 0      |
| ENSG0000( PRKCI    | protein_co chr3 | 1.7E+08  | 1.7E+08  | + | 29.73  | 27.59  |
| ENSG0000( MNDA     | protein_co chr1 | 1.59E+08 | 1.59E+08 | + | 0.06   | 0      |
| ENSG0000( PYHIN1   | protein_co chr1 | 1.59E+08 | 1.59E+08 | + | 0.2    | 0.33   |
| ENSG0000( IFI16    | protein_co chr1 | 1.59E+08 | 1.59E+08 | + | 130.96 | 136.26 |
| ENSG0000( AIM2     | protein_co chr1 | 1.59E+08 | 1.59E+08 | - | 0      | 0      |
| ENSG0000( EFHB     | protein_co chr3 | 19879472 | 19947025 | - | 0.08   | 0.28   |
| ENSG0000( EIF5A2   | protein_co chr3 | 1.71E+08 | 1.71E+08 | - | 9.31   | 10.56  |
| ENSG0000( SLC2A2   | protein_co chr3 | 1.71E+08 | 1.71E+08 | - | 0      | 0      |
| ENSG0000( RPL22L1  | protein_co chr3 | 1.71E+08 | 1.71E+08 | - | 22.55  | 27.67  |
| ENSG0000( FABP1    | protein_co chr2 | 88122982 | 88128116 | - | 0      | 0      |
| ENSG0000( PPM1L    | protein_co chr3 | 1.61E+08 | 1.61E+08 | + | 0.24   | 0.17   |
| ENSG0000( ICA1L    | protein_co chr2 | 2.03E+08 | 2.03E+08 | - | 1      | 1.67   |
| ENSG0000( SNHG16   | processed_chr17 | 76557766 | 76565348 | + | 46.16  | 40.27  |
| ENSG0000( CTLA4    | protein_co chr2 | 2.04E+08 | 2.04E+08 | + | 0      | 0      |
| ENSG0000( ICOS     | protein_co chr2 | 2.04E+08 | 2.04E+08 | + | 0      | 0      |
| ENSG0000( RYBP     | protein_co chr3 | 72371825 | 72446621 | - | 2.66   | 2.74   |

|                 |          |                 |          |          |   |        |        |
|-----------------|----------|-----------------|----------|----------|---|--------|--------|
| ENSG00000100000 | PPP4R2   | protein_co chr3 | 72996785 | 73069199 | + | 23.16  | 28.65  |
| ENSG00000100000 | CD200R1  | protein_co chr3 | 1.13E+08 | 1.13E+08 | - | 0.1    | 0      |
| ENSG00000100000 | GTPBP8   | protein_co chr3 | 1.13E+08 | 1.13E+08 | + | 9.81   | 8.66   |
| ENSG00000100000 | NEPRO    | protein_co chr3 | 1.13E+08 | 1.13E+08 | - | 19.5   | 18.82  |
| ENSG00000100000 | SPICE1   | protein_co chr3 | 1.13E+08 | 1.14E+08 | - | 5.87   | 7.17   |
| ENSG00000100000 | FAM86KP  | unprocessε chr4 | 9153296  | 9165451  | + | 0      | 0      |
| ENSG00000100000 | CCDC191  | protein_co chr3 | 1.14E+08 | 1.14E+08 | - | 2.61   | 2.79   |
| ENSG00000100000 | CADPS    | protein_co chr3 | 62398346 | 62875389 | - | 0      | 0      |
| ENSG00000100000 | NKX6-1   | protein_co chr4 | 84491987 | 84498450 | - | 0      | 0      |
| ENSG00000100000 | CDS1     | protein_co chr4 | 84582979 | 84651338 | + | 0.25   | 0.13   |
| ENSG00000100000 | WDFY3    | protein_co chr4 | 84669610 | 84966391 | - | 19.27  | 16.81  |
| ENSG00000100000 | COX18    | protein_co chr4 | 73052362 | 73069755 | - | 4.64   | 3.73   |
| ENSG00000100000 | PTPN13   | protein_co chr4 | 86594315 | 86815171 | + | 6.63   | 6.27   |
| ENSG00000100000 | SYNPR    | protein_co chr3 | 63228315 | 63616921 | + | 0      | 0      |
| ENSG00000100000 | ALB      | protein_co chr4 | 73397114 | 73421412 | + | 0      | 0.04   |
| ENSG00000100000 | C3orf49  | protein_co chr3 | 63819362 | 63848636 | + | 0      | 0      |
| ENSG00000100000 | C4orf36  | protein_co chr4 | 86876205 | 86936202 | - | 3.34   | 2.7    |
| ENSG00000100000 | THOC7    | protein_co chr3 | 63833870 | 63863903 | - | 27.29  | 28.08  |
| ENSG00000100000 | ATXN7    | protein_co chr3 | 63864557 | 64003462 | + | 7.19   | 6.51   |
| ENSG00000100000 | PSMD6    | protein_co chr3 | 64010549 | 64024010 | - | 28.73  | 29.67  |
| ENSG00000100000 | PRICKLE2 | protein_co chr3 | 64092242 | 64445476 | - | 5.71   | 6.28   |
| ENSG00000100000 | ADAMTS9  | protein_co chr3 | 64515654 | 64688000 | - | 0.51   | 0.35   |
| ENSG00000100000 | PPM1K    | protein_co chr4 | 88257620 | 88284769 | - | 2.85   | 2.69   |
| ENSG00000100000 | ERICH6   | protein_co chr3 | 1.51E+08 | 1.51E+08 | - | 0.03   | 0      |
| ENSG00000100000 | CLRN1    | protein_co chr3 | 1.51E+08 | 1.51E+08 | - | 0      | 0      |
| ENSG00000100000 | GMPS     | protein_co chr3 | 1.56E+08 | 1.56E+08 | + | 17.64  | 15.12  |
| ENSG00000100000 | TIPARP   | protein_co chr3 | 1.57E+08 | 1.57E+08 | + | 10.71  | 11.3   |
| ENSG00000100000 | CCNL1    | protein_co chr3 | 1.57E+08 | 1.57E+08 | - | 51.01  | 51.72  |
| ENSG00000100000 | PTX3     | protein_co chr3 | 1.57E+08 | 1.57E+08 | + | 347.52 | 283.56 |
| ENSG00000100000 | HESX1    | protein_co chr3 | 57197843 | 57226521 | - | 0.31   | 0.56   |
| ENSG00000100000 | DCLK3    | protein_co chr3 | 36712422 | 36764349 | - | 0.08   | 0.04   |
| ENSG00000100000 | SLMAP    | protein_co chr3 | 57755450 | 57929168 | + | 15.58  | 15.45  |
| ENSG00000100000 | RPL9     | protein_co chr4 | 39454124 | 39458948 | - | 189.42 | 200.13 |
| ENSG00000100000 | SMIM14   | protein_co chr4 | 39546330 | 39639090 | - | 20.6   | 25.96  |
| ENSG00000100000 | RPP14    | protein_co chr3 | 58306247 | 58324695 | + | 4.22   | 4.39   |
| ENSG00000100000 | ABHD6    | protein_co chr3 | 58237506 | 58295693 | + | 3.05   | 3.26   |
| ENSG00000100000 | DNASE1L3 | protein_co chr3 | 58192257 | 58214697 | - | 0      | 0      |
| ENSG00000100000 | C3orf67  | protein_co chr3 | 58717365 | 59050084 | - | 1.65   | 1.03   |
| ENSG00000100000 | RBM47    | protein_co chr4 | 40423267 | 40630875 | - | 1.39   | 1.15   |
| ENSG00000100000 | APBB2    | protein_co chr4 | 40810027 | 41216714 | - | 12.7   | 13.82  |
| ENSG00000100000 | IL17RE   | protein_co chr3 | 9902612  | 9916402  | + | 0.29   | 0.48   |
| ENSG00000100000 | IL17RC   | protein_co chr3 | 9917074  | 9933630  | + | 22.81  | 22.63  |
| ENSG00000100000 | CRELD1   | protein_co chr3 | 9933822  | 9945413  | + | 21.14  | 20.77  |
| ENSG00000100000 | PRRT3    | protein_co chr3 | 9945542  | 9952394  | - | 1.84   | 1.69   |
| ENSG00000100000 | FANCD2OS | protein_co chr3 | 10081317 | 10108231 | - | 0      | 0.11   |

|                   |                 |          |            |        |       |
|-------------------|-----------------|----------|------------|--------|-------|
| ENSG0000(PCOLCE2  | protein_co chr3 | 1.43E+08 | 1.43E+08 - | 17.5   | 10.55 |
| ENSG0000(U2SURP   | protein_co chr3 | 1.43E+08 | 1.43E+08 + | 20.67  | 17.27 |
| ENSG0000(MTMR14   | protein_co chr3 | 9649433  | 9702393 +  | 12.48  | 14.1  |
| ENSG0000(TTC14    | protein_co chr3 | 1.81E+08 | 1.81E+08 + | 16.37  | 17.94 |
| ENSG0000(CXCL3    | protein_co chr4 | 74036589 | 74038807 - | 4.45   | 3.55  |
| ENSG0000(CXCL5    | protein_co chr4 | 73995642 | 73998779 - | 1.19   | 1.04  |
| ENSG0000(PPBP     | protein_co chr4 | 73987038 | 73988197 - | 0      | 0     |
| ENSG0000(PF4      | protein_co chr4 | 73981077 | 73982124 - | 0.12   | 0.13  |
| ENSG0000(MTHFD2L  | protein_co chr4 | 74114174 | 74303099 + | 1.44   | 1.52  |
| ENSG0000(CXCL1    | protein_co chr4 | 73869393 | 73871242 + | 102.34 | 78.01 |
| ENSG0000(RCHY1    | protein_co chr4 | 75479037 | 75514764 - | 11.91  | 9.05  |
| ENSG0000(PLSCR2   | protein_co chr3 | 1.46E+08 | 1.46E+08 - | 0.06   | 0.04  |
| ENSG0000(CCDC158  | protein_co chr4 | 76312997 | 76421868 - | 0.06   | 0.04  |
| ENSG0000(CPA3     | protein_co chr3 | 1.49E+08 | 1.49E+08 + | 0      | 0     |
| ENSG0000(GYG1     | protein_co chr3 | 1.49E+08 | 1.49E+08 + | 28.23  | 32.03 |
| ENSG0000(HPS3     | protein_co chr3 | 1.49E+08 | 1.49E+08 + | 12.02  | 12.74 |
| ENSG0000(TM4SF18  | protein_co chr3 | 1.49E+08 | 1.49E+08 - | 0      | 0     |
| ENSG0000(TOPBP1   | protein_co chr3 | 1.34E+08 | 1.34E+08 - | 8.94   | 15.05 |
| ENSG0000(RYK      | protein_co chr3 | 1.34E+08 | 1.34E+08 - | 29.95  | 34.81 |
| ENSG0000(SNRK     | protein_co chr3 | 43286512 | 43424764 + | 5.35   | 3.89  |
| ENSG0000(TCF23    | protein_co chr2 | 27149004 | 27156974 + | 0.05   | 0.16  |
| ENSG0000(DNAJC5G  | protein_co chr2 | 27275421 | 27281499 + | 0      | 0     |
| ENSG0000(UCN      | protein_co chr2 | 27307400 | 27308445 - | 0.56   | 0.8   |
| ENSG0000(ZNF513   | protein_co chr2 | 27377231 | 27380790 - | 7.17   | 7.52  |
| ENSG0000(SLC4A1AP | protein_co chr2 | 27663471 | 27694976 + | 9.08   | 9.28  |
| ENSG0000(PLB1     | protein_co chr2 | 28457145 | 28643788 + | 0.57   | 0.84  |
| ENSG0000(SPDYA    | protein_co chr2 | 28782517 | 28850611 + | 0      | 0.3   |
| ENSG0000(KIAA1143 | protein_co chr3 | 44737661 | 44761662 - | 11.97  | 14.8  |
| ENSG0000(KIF15    | protein_co chr3 | 44761717 | 44873376 + | 0.49   | 0.27  |
| ENSG0000(TGM4     | protein_co chr3 | 44874608 | 44914990 + | 0      | 0     |
| ENSG0000(WDR43    | protein_co chr2 | 28894643 | 28948222 + | 12.62  | 17.35 |
| ENSG0000(ZDHHC3   | protein_co chr3 | 44915257 | 44976185 - | 25.57  | 23.89 |
| ENSG0000(CDCP1    | protein_co chr3 | 45082278 | 45146422 - | 5.48   | 5.72  |
| ENSG0000(CLEC3B   | protein_co chr3 | 45001548 | 45036071 + | 1.71   | 2.47  |
| ENSG0000(SLC6A20  | protein_co chr3 | 45755450 | 45796535 - | 0.02   | 0.03  |
| ENSG0000(LZTFL1   | protein_co chr3 | 45823316 | 45916042 - | 12.61  | 11.75 |
| ENSG0000(FYCO1    | protein_co chr3 | 45917899 | 45995824 - | 14.03  | 13.29 |
| ENSG0000(CCR1     | protein_co chr3 | 46201709 | 46208396 - | 0.04   | 0     |
| ENSG0000(RTP3     | protein_co chr3 | 46497491 | 46500949 + | 0      | 0     |
| ENSG0000(LRRC2    | protein_co chr3 | 46515423 | 46580099 - | 2.19   | 2.72  |
| ENSG0000(ELP6     | protein_co chr3 | 47495640 | 47513761 - | 17.17  | 16.38 |
| ENSG0000(FBXO40   | protein_co chr3 | 1.22E+08 | 1.22E+08 + | 0      | 0     |
| ENSG0000(DTX3L    | protein_co chr3 | 1.23E+08 | 1.23E+08 + | 8.48   | 7.87  |
| ENSG0000(ZNF148   | protein_co chr3 | 1.25E+08 | 1.25E+08 - | 10.09  | 12.7  |
| ENSG0000(NMNAT3   | protein_co chr3 | 1.4E+08  | 1.4E+08 -  | 0.16   | 0.22  |



|                    |                 |          |          |   |        |        |
|--------------------|-----------------|----------|----------|---|--------|--------|
| ENSG0000(SMIM12    | protein_co chr1 | 34712737 | 34859816 | - | 16.42  | 17.62  |
| ENSG0000(ZMYM6     | protein_co chr1 | 34986165 | 35031968 | - | 3.75   | 3.11   |
| ENSG0000(TPRA1     | protein_co chr3 | 1.28E+08 | 1.28E+08 | - | 22.68  | 21.61  |
| ENSG0000(YEATS2    | protein_co chr3 | 1.84E+08 | 1.84E+08 | + | 12.5   | 10.83  |
| ENSG0000(GRIK3     | protein_co chr1 | 36795527 | 37034129 | - | 0      | 0      |
| ENSG0000(ZC3H12A   | protein_co chr1 | 37474552 | 37484379 | + | 10.49  | 9.64   |
| ENSG0000(MEAF6     | protein_co chr1 | 37492575 | 37514774 | - | 28.62  | 31.04  |
| ENSG0000(SNIP1     | protein_co chr1 | 37534449 | 37554344 | - | 4.93   | 5.31   |
| ENSG0000(DNALI1    | protein_co chr1 | 37556919 | 37566857 | + | 6.94   | 7.41   |
| ENSG0000(POLR2H    | protein_co chr3 | 1.84E+08 | 1.84E+08 | + | 27.83  | 27.97  |
| ENSG0000(KLF15     | protein_co chr3 | 1.26E+08 | 1.26E+08 | - | 0.93   | 0.63   |
| ENSG0000(CFAP100   | protein_co chr3 | 1.26E+08 | 1.26E+08 | + | 0      | 0      |
| ENSG0000(CAMK2N2   | protein_co chr3 | 1.84E+08 | 1.84E+08 | - | 0.64   | 0.56   |
| ENSG0000(LIPH      | protein_co chr3 | 1.86E+08 | 1.86E+08 | - | 0.1    | 0.27   |
| ENSG0000(TMEM41A   | protein_co chr3 | 1.85E+08 | 1.85E+08 | - | 4.78   | 5.41   |
| ENSG0000(RPN1      | protein_co chr3 | 1.29E+08 | 1.29E+08 | - | 97.8   | 96.27  |
| ENSG0000(SEN2      | protein_co chr3 | 1.86E+08 | 1.86E+08 | + | 11.57  | 13.17  |
| ENSG0000(HEYL      | protein_co chr1 | 39624153 | 39639945 | - | 0.01   | 0      |
| ENSG0000(IFT122    | protein_co chr3 | 1.29E+08 | 1.3E+08  | + | 6.4    | 6.54   |
| ENSG0000(RHO       | protein_co chr3 | 1.3E+08  | 1.3E+08  | + | 0      | 0      |
| ENSG0000(IGF2BP2-A | antisense chr3  | 1.86E+08 | 1.86E+08 | + | 0      | 0      |
| ENSG0000(RFC4      | protein_co chr3 | 1.87E+08 | 1.87E+08 | - | 4.74   | 5.59   |
| ENSG0000(RPL39L    | protein_co chr3 | 1.87E+08 | 1.87E+08 | - | 5.41   | 4.25   |
| ENSG0000(BAP1      | protein_co chr3 | 52401013 | 52410350 | - | 16.78  | 17.81  |
| ENSG0000(TKT       | protein_co chr3 | 53224707 | 53256052 | - | 245.64 | 271.29 |
| ENSG0000(PRKCD     | protein_co chr3 | 53156009 | 53192717 | + | 7.37   | 6.44   |
| ENSG0000(RFT1      | protein_co chr3 | 53088483 | 53130462 | - | 9.13   | 9.05   |
| ENSG0000(SFMBT1    | protein_co chr3 | 52903572 | 53046750 | - | 0.62   | 0.85   |
| ENSG0000(GNL3      | protein_co chr3 | 52681156 | 52694492 | + | 20.49  | 22.53  |
| ENSG0000(PBRM1     | protein_co chr3 | 52545352 | 52685917 | - | 15.67  | 14.99  |
| ENSG0000(UVSSA     | protein_co chr4 | 1347266  | 1388049  | + | 3      | 3.18   |
| ENSG0000(FAM208A   | protein_co chr3 | 56620133 | 56683237 | - | 12.4   | 10.29  |
| ENSG0000(ARHGEF3   | protein_co chr3 | 56727418 | 57079329 | - | 26.98  | 26.46  |
| ENSG0000(SLBP      | protein_co chr4 | 1692800  | 1712555  | - | 23.99  | 22.21  |
| ENSG0000(LRPAP1    | protein_co chr4 | 3506376  | 3532559  | - | 150.51 | 147.7  |
| ENSG0000(ZDHHC19   | protein_co chr3 | 1.96E+08 | 1.96E+08 | - | 0      | 0      |
| ENSG0000(SLC51A    | protein_co chr3 | 1.96E+08 | 1.96E+08 | + | 0      | 0      |
| ENSG0000(UBXN7     | protein_co chr3 | 1.96E+08 | 1.96E+08 | - | 9.5    | 10.25  |
| ENSG0000(RNF168    | protein_co chr3 | 1.96E+08 | 1.97E+08 | - | 3.39   | 3.09   |
| ENSG0000(PIGX      | protein_co chr3 | 1.97E+08 | 1.97E+08 | + | 8.06   | 7.95   |
| ENSG0000(MELTF     | protein_co chr3 | 1.97E+08 | 1.97E+08 | - | 49.05  | 52.1   |
| ENSG0000(OTOP1     | protein_co chr4 | 4188803  | 4226889  | - | 0      | 0      |
| ENSG0000(S100P     | protein_co chr4 | 6693069  | 6697170  | + | 0      | 0      |
| ENSG0000(ABLIM2    | protein_co chr4 | 7965310  | 8158832  | - | 0      | 0      |
| ENSG0000(EXO5      | protein_co chr1 | 40508741 | 40516556 | + | 4.28   | 3.05   |

|                 |         |                 |          |          |   |       |       |
|-----------------|---------|-----------------|----------|----------|---|-------|-------|
| ENSG00000100000 | CLDN19  | protein_co chr1 | 42733093 | 42740254 | - | 0     | 0.02  |
| ENSG00000100000 | C1orf50 | protein_co chr1 | 42767269 | 42775747 | + | 7.2   | 7.01  |
| ENSG00000100000 | ERMAP   | protein_co chr1 | 42817124 | 42844989 | + | 7.01  | 6.64  |
| ENSG00000100000 | ZNF691  | protein_co chr1 | 42846573 | 42852477 | + | 4.12  | 5.3   |
| ENSG00000100000 | AIMP1   | protein_co chr4 | 1.06E+08 | 1.06E+08 | + | 18.35 | 16.96 |
| ENSG00000100000 | SGMS2   | protein_co chr4 | 1.08E+08 | 1.08E+08 | + | 25.15 | 26.02 |
| ENSG00000100000 | METAP1  | protein_co chr4 | 98995620 | 99062813 | + | 17.03 | 16.02 |
| ENSG00000100000 | DNAJB14 | protein_co chr4 | 99896248 | 99946726 | - | 10.58 | 13.49 |
| ENSG00000100000 | H2AFZ   | protein_co chr4 | 99948086 | 99950388 | - | 48.25 | 45.52 |
| ENSG00000100000 | EMCN    | protein_co chr4 | 1E+08    | 1.01E+08 | - | 0.12  | 0.24  |
| ENSG00000100000 | SLC9B1  | protein_co chr4 | 1.03E+08 | 1.03E+08 | - | 0.3   | 0.23  |
| ENSG00000100000 | SLC9B2  | protein_co chr4 | 1.03E+08 | 1.03E+08 | - | 7.53  | 7.7   |
| ENSG00000100000 | BDH2    | protein_co chr4 | 1.03E+08 | 1.03E+08 | - | 46.68 | 46.46 |
| ENSG00000100000 | PGRMC2  | protein_co chr4 | 1.28E+08 | 1.28E+08 | - | 72.26 | 74.31 |
| ENSG00000100000 | CDC25A  | protein_co chr3 | 48157146 | 48188402 | - | 0.28  | 0.64  |
| ENSG00000100000 | CAMP    | protein_co chr3 | 48223347 | 48225491 | + | 0     | 0     |
| ENSG00000100000 | ZNF589  | protein_co chr3 | 48241100 | 48299253 | + | 3.94  | 4.09  |
| ENSG00000100000 | FBXW12  | protein_co chr3 | 48372219 | 48401259 | + | 0     | 0     |
| ENSG00000100000 | PLXNB1  | protein_co chr3 | 48403854 | 48430051 | - | 27.72 | 34.82 |
| ENSG00000100000 | CCDC51  | protein_co chr3 | 48432164 | 48440456 | - | 16.21 | 15.35 |
| ENSG00000100000 | ATRIP   | protein_co chr3 | 48446710 | 48465716 | + | 1.53  | 2.33  |
| ENSG00000100000 | SHISA5  | protein_co chr3 | 48467798 | 48504826 | - | 79.9  | 77.02 |
| ENSG00000100000 | SPRY1   | protein_co chr4 | 1.23E+08 | 1.23E+08 | + | 14.45 | 12.69 |
| ENSG00000100000 | BSN     | protein_co chr3 | 49554489 | 49671545 | + | 0.06  | 0.08  |
| ENSG00000100000 | APEH    | protein_co chr3 | 49674002 | 49683963 | + | 36.83 | 35.63 |
| ENSG00000100000 | INTU    | protein_co chr4 | 1.28E+08 | 1.28E+08 | + | 1.37  | 1.48  |
| ENSG00000100000 | RNF123  | protein_co chr3 | 49689499 | 49721529 | + | 9.86  | 13.86 |
| ENSG00000100000 | HSPA4L  | protein_co chr4 | 1.28E+08 | 1.28E+08 | + | 4.4   | 5.15  |
| ENSG00000100000 | MFSD8   | protein_co chr4 | 1.28E+08 | 1.28E+08 | - | 4.54  | 4.75  |
| ENSG00000100000 | ABHD18  | protein_co chr4 | 1.28E+08 | 1.28E+08 | + | 4.03  | 2.44  |
| ENSG00000100000 | CAMKV   | protein_co chr3 | 49857988 | 49870222 | - | 0     | 0     |
| ENSG00000100000 | MON1A   | protein_co chr3 | 49908862 | 49930173 | - | 5.83  | 5.5   |
| ENSG00000100000 | MST1R   | protein_co chr3 | 49887002 | 49903873 | - | 0.94  | 0.18  |
| ENSG00000100000 | RAD54L2 | protein_co chr3 | 51541144 | 51668667 | + | 2.64  | 3.05  |
| ENSG00000100000 | TEX264  | protein_co chr3 | 51662693 | 51704323 | + | 40.67 | 38.15 |
| ENSG00000100000 | GRM2    | protein_co chr3 | 51707070 | 51718613 | + | 0     | 0     |
| ENSG00000100000 | DUSP7   | protein_co chr3 | 52048919 | 52056550 | - | 4.49  | 4.16  |
| ENSG00000100000 | POC1A   | protein_co chr3 | 52075253 | 52154690 | - | 0.97  | 1.08  |
| ENSG00000100000 | PPM1M   | protein_co chr3 | 52245793 | 52250597 | + | 13.92 | 14.9  |
| ENSG00000100000 | ETNPPL  | protein_co chr4 | 1.09E+08 | 1.09E+08 | - | 0     | 0.11  |
| ENSG00000100000 | WDR82   | protein_co chr3 | 52254421 | 52288020 | - | 29.45 | 29.2  |
| ENSG00000100000 | PITX2   | protein_co chr4 | 1.11E+08 | 1.11E+08 | - | 1.4   | 1.73  |
| ENSG00000100000 | C4orf3  | protein_co chr4 | 1.19E+08 | 1.19E+08 | - | 98.78 | 83.44 |
| ENSG00000100000 | PRSS12  | protein_co chr4 | 1.18E+08 | 1.18E+08 | - | 4.09  | 3.01  |
| ENSG00000100000 | NDST3   | protein_co chr4 | 1.18E+08 | 1.18E+08 | + | 0     | 0.03  |

|                 |          |                 |          |          |   |        |        |
|-----------------|----------|-----------------|----------|----------|---|--------|--------|
| ENSG00000108230 | HMGB2    | protein_co chr4 | 1.73E+08 | 1.73E+08 | - | 12.77  | 16.5   |
| ENSG00000108231 | SAP30    | protein_co chr4 | 1.73E+08 | 1.73E+08 | + | 10.7   | 11.05  |
| ENSG00000108232 | SCRG1    | protein_co chr4 | 1.73E+08 | 1.73E+08 | - | 0.16   | 0.26   |
| ENSG00000108233 | HAND2    | protein_co chr4 | 1.74E+08 | 1.74E+08 | - | 12.74  | 13.1   |
| ENSG00000108234 | MAD2L1   | protein_co chr4 | 1.2E+08  | 1.2E+08  | - | 0.69   | 0.5    |
| ENSG00000108235 | ANXA5    | protein_co chr4 | 1.22E+08 | 1.22E+08 | - | 775.75 | 748.38 |
| ENSG00000108236 | TMEM155  | protein_co chr4 | 1.22E+08 | 1.22E+08 | - | 1.55   | 2.12   |
| ENSG00000108237 | ADAD1    | protein_co chr4 | 1.22E+08 | 1.22E+08 | + | 0      | 0      |
| ENSG00000108238 | MAP9     | protein_co chr4 | 1.55E+08 | 1.55E+08 | - | 4.46   | 3.66   |
| ENSG00000108239 | GUCY1A3  | protein_co chr4 | 1.56E+08 | 1.56E+08 | + | 0      | 0      |
| ENSG00000108240 | FBXO8    | protein_co chr4 | 1.74E+08 | 1.74E+08 | - | 11.28  | 11.78  |
| ENSG00000108241 | CEP44    | protein_co chr4 | 1.74E+08 | 1.74E+08 | + | 3.88   | 3.77   |
| ENSG00000108242 | HPGD     | protein_co chr4 | 1.74E+08 | 1.75E+08 | - | 0.08   | 0.11   |
| ENSG00000108243 | ASB5     | protein_co chr4 | 1.76E+08 | 1.76E+08 | - | 0      | 0.19   |
| ENSG00000108244 | C4orf45  | protein_co chr4 | 1.59E+08 | 1.59E+08 | - | 0      | 0      |
| ENSG00000108245 | TMEM144  | protein_co chr4 | 1.58E+08 | 1.58E+08 | + | 5.63   | 7.15   |
| ENSG00000108246 | FAM198B  | protein_co chr4 | 1.58E+08 | 1.58E+08 | - | 55.98  | 58     |
| ENSG00000108247 | NPY1R    | protein_co chr4 | 1.63E+08 | 1.63E+08 | - | 0      | 0.13   |
| ENSG00000108248 | NPY5R    | protein_co chr4 | 1.63E+08 | 1.63E+08 | + | 0      | 0      |
| ENSG00000108249 | NAA15    | protein_co chr4 | 1.39E+08 | 1.39E+08 | + | 5      | 5.69   |
| ENSG00000108250 | IL15     | protein_co chr4 | 1.42E+08 | 1.42E+08 | + | 0.38   | 0.82   |
| ENSG00000108251 | FAM160A1 | protein_co chr4 | 1.51E+08 | 1.52E+08 | + | 0.12   | 0.14   |
| ENSG00000108252 | ARFIP1   | protein_co chr4 | 1.53E+08 | 1.53E+08 | + | 10.92  | 8.68   |
| ENSG00000108253 | ICE1     | protein_co chr5 | 5420664  | 5490234  | + | 7.66   | 7.52   |
| ENSG00000108254 | HHIP     | protein_co chr4 | 1.45E+08 | 1.45E+08 | + | 13.6   | 8.96   |
| ENSG00000108255 | ANAPC10  | protein_co chr4 | 1.45E+08 | 1.45E+08 | - | 5.79   | 7.35   |
| ENSG00000108256 | ABCE1    | protein_co chr4 | 1.45E+08 | 1.45E+08 | + | 19.33  | 19.59  |
| ENSG00000108257 | OTUD4    | protein_co chr4 | 1.45E+08 | 1.45E+08 | - | 9.93   | 9.27   |
| ENSG00000108258 | LSM6     | protein_co chr4 | 1.46E+08 | 1.46E+08 | + | 7.87   | 9.85   |
| ENSG00000108259 | TMEM184C | protein_co chr4 | 1.48E+08 | 1.48E+08 | + | 18.1   | 18.04  |
| ENSG00000108260 | PRMT9    | protein_co chr4 | 1.48E+08 | 1.48E+08 | - | 3.46   | 3.07   |
| ENSG00000108261 | ITGA2    | protein_co chr5 | 52989326 | 53094779 | + | 7.5    | 7.05   |
| ENSG00000108262 | MOCS2    | protein_co chr5 | 53095679 | 53110063 | - | 26.71  | 28.56  |
| ENSG00000108263 | SLC45A2  | protein_co chr5 | 33944616 | 33984730 | - | 0.03   | 0      |
| ENSG00000108264 | EDIL3    | protein_co chr5 | 83940554 | 84384793 | - | 79.9   | 69.86  |
| ENSG00000108265 | TMEM161F | protein_co chr5 | 88189633 | 88269476 | - | 3.98   | 3.71   |
| ENSG00000108266 | ELOVL7   | protein_co chr5 | 60751791 | 60844389 | - | 0.02   | 0.03   |
| ENSG00000108267 | NDUFAF2  | protein_co chr5 | 60945129 | 61153037 | + | 16.11  | 14.8   |
| ENSG00000108268 | ZNF474   | protein_co chr5 | 1.22E+08 | 1.22E+08 | + | 0.17   | 0.13   |
| ENSG00000108269 | LMBRD2   | protein_co chr5 | 36098412 | 36151961 | - | 3.03   | 4.91   |
| ENSG00000108270 | RANBP3L  | protein_co chr5 | 36248434 | 36302114 | - | 0.02   | 0      |
| ENSG00000108271 | NIPBL    | protein_co chr5 | 36876759 | 37066413 | + | 9.93   | 10.5   |
| ENSG00000108272 | RNF180   | protein_co chr5 | 64165844 | 64372869 | + | 0.02   | 0.07   |
| ENSG00000108273 | ADGRV1   | protein_co chr5 | 90529344 | 91164437 | + | 1.56   | 0.38   |
| ENSG00000108274 | SLC25A46 | protein_co chr5 | 1.11E+08 | 1.11E+08 | + | 16.11  | 15.66  |

|                    |                 |          |          |   |       |       |
|--------------------|-----------------|----------|----------|---|-------|-------|
| ENSG0000( STAR4    | protein_co chr5 | 1.11E+08 | 1.12E+08 | - | 15.66 | 15.39 |
| ENSG0000( PGGT1B   | protein_co chr5 | 1.15E+08 | 1.15E+08 | - | 10.12 | 8.61  |
| ENSG0000( F2RL2    | protein_co chr5 | 76615482 | 76623434 | - | 0.71  | 0.5   |
| ENSG0000( CCDC112  | protein_co chr5 | 1.15E+08 | 1.15E+08 | - | 3.08  | 2.91  |
| ENSG0000( ANKRD33B | protein_co chr5 | 10564330 | 10657816 | + | 2.06  | 2.3   |
| ENSG0000( CMBL     | protein_co chr5 | 10275875 | 10308026 | - | 18.6  | 17.82 |
| ENSG0000( C5orf63  | protein_co chr5 | 1.27E+08 | 1.27E+08 | - | 3.01  | 2.45  |
| ENSG0000( PRRC1    | protein_co chr5 | 1.28E+08 | 1.28E+08 | + | 26.61 | 25.29 |
| ENSG0000( F2RL1    | protein_co chr5 | 76818933 | 76835315 | + | 1.53  | 1.19  |
| ENSG0000( AGGF1    | protein_co chr5 | 77029251 | 77065234 | + | 6.54  | 7.2   |
| ENSG0000( WDR41    | protein_co chr5 | 77425970 | 77620611 | - | 18.26 | 17.97 |
| ENSG0000( PRDM9    | protein_co chr5 | 23443586 | 23528597 | + | 0     | 0     |
| ENSG0000( NDUFS4   | protein_co chr5 | 53560633 | 53683340 | + | 49    | 57.75 |
| ENSG0000( SCGB3A2  | protein_co chr5 | 1.48E+08 | 1.48E+08 | + | 0.39  | 0.25  |
| ENSG0000( SPINK1   | protein_co chr5 | 1.48E+08 | 1.48E+08 | - | 0     | 0     |
| ENSG0000( HTR4     | protein_co chr5 | 1.48E+08 | 1.49E+08 | - | 0     | 0     |
| ENSG0000( ESM1     | protein_co chr5 | 54977864 | 55022671 | - | 6.82  | 5.51  |
| ENSG0000( GRPEL2   | protein_co chr5 | 1.49E+08 | 1.49E+08 | + | 4.22  | 4.41  |
| ENSG0000( CDC20B   | protein_co chr5 | 55112995 | 55173175 | - | 0.04  | 0.07  |
| ENSG0000( ARSK     | protein_co chr5 | 95555074 | 95605064 | + | 6.05  | 5.57  |
| ENSG0000( RHOBTB3  | protein_co chr5 | 95713522 | 95824383 | + | 41.46 | 45.07 |
| ENSG0000( GPX8     | protein_co chr5 | 55160118 | 55167071 | + | 74.42 | 68.81 |
| ENSG0000( TIGD6    | protein_co chr5 | 1.5E+08  | 1.5E+08  | - | 3.55  | 2.91  |
| ENSG0000( SPZ1     | protein_co chr5 | 80319625 | 80321842 | + | 0     | 0     |
| ENSG0000( SERINC5  | protein_co chr5 | 80111651 | 80256079 | - | 6.75  | 7.56  |
| ENSG0000( ENPP6    | protein_co chr4 | 1.84E+08 | 1.84E+08 | - | 0     | 0     |
| ENSG0000( CAGE1    | protein_co chr6 | 7326656  | 7389743  | - | 0.12  | 0     |
| ENSG0000( CASP3    | protein_co chr4 | 1.85E+08 | 1.85E+08 | - | 16.61 | 18.15 |
| ENSG0000( PRIMPOL  | protein_co chr4 | 1.85E+08 | 1.85E+08 | + | 4.45  | 4.82  |
| ENSG0000( ERAP1    | protein_co chr5 | 96760810 | 96808100 | - | 21.25 | 21.24 |
| ENSG0000( ERAP2    | protein_co chr5 | 96875939 | 96919716 | + | 16.14 | 17.95 |
| ENSG0000( CMYA5    | protein_co chr5 | 79689877 | 79800240 | + | 0.61  | 0.59  |
| ENSG0000( EGFLAM   | protein_co chr5 | 38258409 | 38465021 | + | 0.68  | 0.32  |
| ENSG0000( CFAP97   | protein_co chr4 | 1.85E+08 | 1.85E+08 | - | 9.47  | 12.53 |
| ENSG0000( TMEM174  | protein_co chr5 | 73173195 | 73175143 | + | 0     | 0     |
| ENSG0000( CARTPT   | protein_co chr5 | 71719163 | 71721048 | + | 0     | 0     |
| ENSG0000( RICTOR   | protein_co chr5 | 38937919 | 39074408 | - | 4.13  | 4.28  |
| ENSG0000( PAPD4    | protein_co chr5 | 79612120 | 79686648 | + | 15.63 | 14.13 |
| ENSG0000( EBF1     | protein_co chr5 | 1.59E+08 | 1.59E+08 | - | 2.5   | 2.58  |
| ENSG0000( ANKRA2   | protein_co chr5 | 73552335 | 73565686 | - | 14.34 | 21.34 |
| ENSG0000( UBLCP1   | protein_co chr5 | 1.59E+08 | 1.59E+08 | + | 7.7   | 7.13  |
| ENSG0000( FAM170A  | protein_co chr5 | 1.2E+08  | 1.2E+08  | + | 0     | 0.05  |
| ENSG0000( UTP15    | protein_co chr5 | 73565443 | 73583377 | + | 4.02  | 4.12  |
| ENSG0000( TLR3     | protein_co chr4 | 1.86E+08 | 1.86E+08 | + | 1.17  | 0.88  |
| ENSG0000( KLKB1    | protein_co chr4 | 1.86E+08 | 1.86E+08 | + | 0.12  | 0.7   |

|                     |                 |          |          |   |        |        |
|---------------------|-----------------|----------|----------|---|--------|--------|
| ENSG000001NSA2      | protein_co chr5 | 74766991 | 74780113 | + | 56.11  | 53.11  |
| ENSG000001GFM2      | protein_co chr5 | 74721204 | 74767371 | - | 8.08   | 9.07   |
| ENSG000001TERT      | protein_co chr5 | 1253147  | 1295069  | - | 0      | 0      |
| ENSG000001SLC6A18   | protein_co chr5 | 1225355  | 1246189  | + | 0      | 0      |
| ENSG000001CCDC127   | protein_co chr5 | 196871   | 218215   | - | 3.02   | 4.67   |
| ENSG000001FOXQ1     | protein_co chr6 | 1312440  | 1314748  | + | 0      | 0      |
| ENSG000001LINC01600 | lincRNA chr6    | 2621913  | 2634603  | - | 0.05   | 0.1    |
| ENSG000001ADGRF2    | protein_co chr6 | 47656436 | 47697797 | + | 0.02   | 0.09   |
| ENSG000001ACSL6     | protein_co chr5 | 1.32E+08 | 1.32E+08 | - | 0.28   | 0.32   |
| ENSG000001IL3       | protein_co chr5 | 1.32E+08 | 1.32E+08 | + | 0      | 0      |
| ENSG000001CSF2      | protein_co chr5 | 1.32E+08 | 1.32E+08 | + | 0.08   | 0.36   |
| ENSG0000018-Sep     | protein_co chr5 | 1.33E+08 | 1.33E+08 | - | 15.77  | 15.55  |
| ENSG000001SHROOM1   | protein_co chr5 | 1.33E+08 | 1.33E+08 | - | 5.53   | 2.45   |
| ENSG000001GDF9      | protein_co chr5 | 1.33E+08 | 1.33E+08 | - | 0.16   | 0.07   |
| ENSG000001UQCRQ     | protein_co chr5 | 1.33E+08 | 1.33E+08 | + | 131.73 | 140.52 |
| ENSG000001LEAP2     | protein_co chr5 | 1.33E+08 | 1.33E+08 | + | 0      | 0.17   |
| ENSG000001GJB7      | protein_co chr6 | 87282978 | 87329278 | - | 0      | 0      |
| ENSG000001SLC35A1   | protein_co chr6 | 87470623 | 87512336 | + | 11.9   | 11.68  |
| ENSG000001GRIK2     | protein_co chr6 | 1.01E+08 | 1.02E+08 | + | 0.22   | 0.86   |
| ENSG000001MB21D1    | protein_co chr6 | 73413515 | 73452276 | - | 0.84   | 0.61   |
| ENSG000001FABP7     | protein_co chr6 | 1.23E+08 | 1.23E+08 | + | 0      | 0      |
| ENSG000001TLX3      | protein_co chr5 | 1.71E+08 | 1.71E+08 | + | 0      | 0      |
| ENSG000001TXLNB     | protein_co chr6 | 1.39E+08 | 1.39E+08 | - | 0.24   | 0.52   |
| ENSG000001CITED2    | protein_co chr6 | 1.39E+08 | 1.39E+08 | - | 73.24  | 73.48  |
| ENSG000001FAM26D    | protein_co chr6 | 1.17E+08 | 1.17E+08 | + | 0      | 0      |
| ENSG000001T         | protein_co chr6 | 1.66E+08 | 1.66E+08 | - | 0      | 0      |
| ENSG000001CREBRF    | protein_co chr5 | 1.73E+08 | 1.73E+08 | + | 10.12  | 8.77   |
| ENSG000001DCBLD1    | protein_co chr6 | 1.17E+08 | 1.18E+08 | + | 7.6    | 5.22   |
| ENSG000001SFXN1     | protein_co chr5 | 1.75E+08 | 1.76E+08 | + | 19.74  | 17.57  |
| ENSG000001SAMD3     | protein_co chr6 | 1.3E+08  | 1.3E+08  | - | 1.22   | 0.46   |
| ENSG000001TMEM200A  | protein_co chr6 | 1.3E+08  | 1.3E+08  | + | 15.2   | 12.59  |
| ENSG000001IL22RA2   | protein_co chr6 | 1.37E+08 | 1.37E+08 | - | 0      | 0      |
| ENSG000001DACT2     | protein_co chr6 | 1.68E+08 | 1.68E+08 | - | 0.39   | 0.41   |
| ENSG000001PDSS2     | protein_co chr6 | 1.07E+08 | 1.07E+08 | - | 4.8    | 4.41   |
| ENSG000001C7orf72   | protein_co chr7 | 50096036 | 50159830 | + | 0      | 0      |
| ENSG000001STXBP5    | protein_co chr6 | 1.47E+08 | 1.47E+08 | + | 27.66  | 29.02  |
| ENSG000001HIST1H2AA | protein_co chr6 | 25726132 | 25726527 | - | 0      | 0      |
| ENSG000001IL31RA    | protein_co chr5 | 55851379 | 55922853 | + | 0.1    | 0.06   |
| ENSG000001ANKRD55   | protein_co chr5 | 56099678 | 56233359 | - | 0.38   | 0.21   |
| ENSG000001RAET1E    | protein_co chr6 | 1.5E+08  | 1.5E+08  | - | 0.14   | 0.15   |
| ENSG000001PI16      | protein_co chr6 | 36948263 | 36964837 | + | 17.81  | 19.62  |
| ENSG000001TBX20     | protein_co chr7 | 35202430 | 35254147 | - | 3.12   | 3.76   |
| ENSG000001DAGLB     | protein_co chr7 | 6409126  | 6484190  | - | 9.36   | 9.42   |
| ENSG000001KIAA0895  | protein_co chr7 | 36324221 | 36390125 | - | 0.5    | 0.44   |
| ENSG000001STK17A    | protein_co chr7 | 43582758 | 43626786 | + | 10.09  | 11     |

|                    |                  |          |            |         |         |
|--------------------|------------------|----------|------------|---------|---------|
| ENSG0000(TRA2A     | protein_co chr7  | 23504780 | 23532041 - | 25.03   | 26.2    |
| ENSG0000(FAM183BP  | processed_chr7   | 38685346 | 38687037 - | 0       | 0       |
| ENSG0000(GALNT10   | protein_co chr5  | 1.54E+08 | 1.54E+08 + | 37.92   | 36.87   |
| ENSG0000(SAP30L    | protein_co chr5  | 1.54E+08 | 1.54E+08 + | 12.41   | 12.87   |
| ENSG0000(RPS14     | protein_co chr5  | 1.5E+08  | 1.5E+08 -  | 925.59  | 946.87  |
| ENSG0000(HCN1      | protein_co chr5  | 45254950 | 45696498 - | 0       | 0       |
| ENSG0000(MYOZ3     | protein_co chr5  | 1.51E+08 | 1.51E+08 + | 0.75    | 1.09    |
| ENSG0000(COG5      | protein_co chr7  | 1.07E+08 | 1.08E+08 - | 11.05   | 9.79    |
| ENSG0000(NEUROD6   | protein_co chr7  | 31337461 | 31340894 - | 0       | 0       |
| ENSG0000(BMT2      | protein_co chr7  | 1.13E+08 | 1.13E+08 - | 5.34    | 5       |
| ENSG0000(GPR85     | protein_co chr7  | 1.13E+08 | 1.13E+08 - | 0.02    | 0.04    |
| ENSG0000(SLU7      | protein_co chr5  | 1.6E+08  | 1.6E+08 -  | 33.51   | 28.18   |
| ENSG0000(RP9       | protein_co chr7  | 33094797 | 33109401 - | 10.06   | 10.89   |
| ENSG0000(PTTG1     | protein_co chr5  | 1.6E+08  | 1.6E+08 +  | 4.95    | 3.73    |
| ENSG0000(CAMLG     | protein_co chr5  | 1.35E+08 | 1.35E+08 + | 25.83   | 27.86   |
| ENSG0000(FBXL21    | transcribed chr5 | 1.36E+08 | 1.36E+08 + | 8.3     | 8.19    |
| ENSG0000(BMPER     | protein_co chr7  | 33904911 | 34155872 + | 32.19   | 25.35   |
| ENSG0000(RELL2     | protein_co chr5  | 1.42E+08 | 1.42E+08 + | 2.47    | 2.81    |
| ENSG0000(SMAD5-AS  | antisense chr5   | 1.36E+08 | 1.36E+08 - | 0.31    | 0.41    |
| ENSG0000(KCNK5     | protein_co chr6  | 39188973 | 39229450 - | 0.03    | 0       |
| ENSG0000(KIF6      | protein_co chr6  | 39329990 | 39725405 - | 0.03    | 0.03    |
| ENSG0000(ZNF12     | protein_co chr7  | 6688433  | 6706923 -  | 6.48    | 6.09    |
| ENSG0000(SLC29A4   | protein_co chr7  | 5274369  | 5306870 +  | 1.4     | 2       |
| ENSG0000(C7orf62   | protein_co chr7  | 88794106 | 88795721 - | 0       | 0       |
| ENSG0000(STEAP1    | protein_co chr7  | 90154375 | 90164829 + | 35.58   | 29.6    |
| ENSG0000(CDCA7L    | protein_co chr7  | 21900900 | 21946084 - | 2.65    | 4.85    |
| ENSG0000(SP8       | protein_co chr7  | 20782283 | 20786886 - | 0       | 0       |
| ENSG0000(MIOS      | protein_co chr7  | 7566872  | 7608929 +  | 4.34    | 5.43    |
| ENSG0000(KIAA1324L | protein_co chr7  | 86876906 | 87059699 - | 7.8     | 8.69    |
| ENSG0000(USP49     | protein_co chr6  | 41789896 | 41895361 - | 2.16    | 2.12    |
| ENSG0000(INTS4P1   | transcribed chr7 | 65141225 | 65234216 + | 0.71    | 0.52    |
| ENSG0000(SYTL3     | protein_co chr6  | 1.59E+08 | 1.59E+08 + | 1.23    | 1.3     |
| ENSG0000(IQUB      | protein_co chr7  | 1.23E+08 | 1.24E+08 - | 0.22    | 0.35    |
| ENSG0000(HEY1      | protein_co chr8  | 79764010 | 79767863 - | 1.89    | 1.75    |
| ENSG0000(ZNF704    | protein_co chr8  | 80628451 | 80874781 - | 0.03    | 0.05    |
| ENSG0000(FABP5     | protein_co chr8  | 81280363 | 81284777 + | 1.58    | 2.83    |
| ENSG0000(SHH       | protein_co chr7  | 1.56E+08 | 1.56E+08 - | 0       | 0.08    |
| ENSG0000(TAGAP     | protein_co chr6  | 1.59E+08 | 1.59E+08 - | 0       | 0       |
| ENSG0000(COL1A2    | protein_co chr7  | 94394561 | 94431232 + | 5890.78 | 5911.46 |
| ENSG0000(FNDC1     | protein_co chr6  | 1.59E+08 | 1.59E+08 + | 4.15    | 4.19    |
| ENSG0000(CHMP4C    | protein_co chr8  | 81732434 | 81759515 + | 0.03    | 0.07    |
| ENSG0000(SLC13A4   | protein_co chr7  | 1.36E+08 | 1.36E+08 - | 0.11    | 0.51    |
| ENSG0000(PGAM2     | protein_co chr7  | 44062727 | 44065587 - | 0.07    | 0       |
| ENSG0000(BRI3      | protein_co chr7  | 98252379 | 98310441 + | 163.24  | 149.54  |
| ENSG0000(LMTK2     | protein_co chr7  | 98106885 | 98209633 + | 2.96    | 3.15    |

|                    |                   |          |            |        |       |
|--------------------|-------------------|----------|------------|--------|-------|
| ENSG0000(SLC35G3   | protein_co chr17  | 35192520 | 35194523 - | 0      | 0     |
| ENSG0000(CTSB      | protein_co chr8   | 11842524 | 11869448 - | 587.86 | 574.7 |
| ENSG0000(SOX17     | protein_co chr8   | 54457935 | 54460888 + | 5.8    | 5.3   |
| ENSG0000(SEPT7P5   | processed_chr7    | 63495799 | 63502536 + | 0      | 0     |
| ENSG0000(DLC1      | protein_co chr8   | 13083361 | 13604610 - | 13.07  | 15.79 |
| ENSG0000(ADCY1     | protein_co chr7   | 45574140 | 45723116 + | 0      | 0.01  |
| ENSG0000(C8orf48   | protein_co chr8   | 13566843 | 13568287 + | 1.24   | 1.54  |
| ENSG0000(SUN3      | protein_co chr7   | 47987148 | 48029119 - | 0      | 0     |
| ENSG0000(C7orf57   | protein_co chr7   | 48035511 | 48061304 + | 0.09   | 0     |
| ENSG0000(HNF4G     | protein_co chr8   | 75407914 | 75566843 + | 0      | 0     |
| ENSG0000(PEX2      | protein_co chr8   | 76980258 | 77001044 - | 34.27  | 37.54 |
| ENSG0000(RAD21     | protein_co chr8   | 1.17E+08 | 1.17E+08 - | 25.55  | 24.97 |
| ENSG0000(SLC30A8   | protein_co chr8   | 1.17E+08 | 1.17E+08 + | 0      | 0     |
| ENSG0000(MED30     | protein_co chr8   | 1.18E+08 | 1.18E+08 + | 6.33   | 10.07 |
| ENSG0000(TNFRSF11E | protein_co chr8   | 1.19E+08 | 1.19E+08 - | 21.94  | 16.75 |
| ENSG0000(SBSPON    | protein_co chr8   | 73064540 | 73124088 - | 0      | 0     |
| ENSG0000(PHKG1     | protein_co chr7   | 56080283 | 56092996 - | 0.52   | 0.67  |
| ENSG0000(EN2       | protein_co chr7   | 1.55E+08 | 1.55E+08 + | 0      | 0.03  |
| ENSG0000(KCNV1     | protein_co chr8   | 1.1E+08  | 1.1E+08 -  | 0      | 0.02  |
| ENSG0000(CSMD3     | protein_co chr8   | 1.12E+08 | 1.13E+08 - | 0.02   | 0     |
| ENSG0000(SPDR      | protein_co chr8   | 47260575 | 47736306 + | 21.9   | 19.2  |
| ENSG0000(ORC5      | protein_co chr7   | 1.04E+08 | 1.04E+08 - | 6.49   | 6     |
| ENSG0000(DEFA5     | protein_co chr8   | 7055304  | 7056734 -  | 0      | 0     |
| ENSG0000(DNAAF5    | protein_co chr7   | 726701   | 786475 +   | 8.02   | 9.14  |
| ENSG0000(DEFA4     | protein_co chr8   | 6935822  | 6938338 -  | 0      | 0     |
| ENSG0000(DEFA6     | protein_co chr8   | 6924693  | 6926076 -  | 0      | 0     |
| ENSG0000(OSGIN2    | protein_co chr8   | 89901859 | 89927888 + | 7.97   | 9.25  |
| ENSG0000(DEFB1     | protein_co chr8   | 6870575  | 6878022 -  | 0      | 0     |
| ENSG0000(SUN1      | protein_co chr7   | 816615   | 896435 +   | 54.59  | 53.78 |
| ENSG0000(OXR1      | protein_co chr8   | 1.06E+08 | 1.07E+08 + | 11.13  | 13    |
| ENSG0000(TMEM74    | protein_co chr8   | 1.09E+08 | 1.09E+08 - | 0      | 0.04  |
| ENSG0000(FAM86FP   | transcribec chr12 | 8232512  | 8242948 -  | 0.47   | 0.52  |
| ENSG0000(GPR146    | protein_co chr7   | 1044576  | 1059261 +  | 8.86   | 7.83  |
| ENSG0000(GPER1     | protein_co chr7   | 1082208  | 1093815 +  | 5.65   | 5.44  |
| ENSG0000(UNCX      | protein_co chr7   | 1232907  | 1237318 +  | 0      | 0     |
| ENSG0000(TMEM184   | protein_co chr7   | 1542235  | 1560821 -  | 0.01   | 0.25  |
| ENSG0000(NOS3      | protein_co chr7   | 1.51E+08 | 1.51E+08 + | 0.79   | 0.53  |
| ENSG0000(SPAG11B   | protein_co chr8   | 7442684  | 7463674 -  | 0      | 0     |
| ENSG0000(MICALL2   | protein_co chr7   | 1428465  | 1459502 -  | 12.69  | 10.63 |
| ENSG0000(CA3       | protein_co chr8   | 85373436 | 85449040 + | 0      | 0.14  |
| ENSG0000(INTS1     | protein_co chr7   | 1470277  | 1504367 -  | 15.48  | 16.55 |
| ENSG0000(CDK5      | protein_co chr7   | 1.51E+08 | 1.51E+08 - | 10.27  | 9.99  |
| ENSG0000(SLC4A2    | protein_co chr7   | 1.51E+08 | 1.51E+08 + | 42.54  | 44.37 |
| ENSG0000(SLC7A13   | protein_co chr8   | 86214052 | 86321146 - | 0      | 0     |
| ENSG0000(FASTK     | protein_co chr7   | 1.51E+08 | 1.51E+08 - | 31.35  | 34.47 |

|                    |                 |          |            |        |        |
|--------------------|-----------------|----------|------------|--------|--------|
| ENSG0000(TMUB1     | protein_co chr7 | 1.51E+08 | 1.51E+08 - | 20.1   | 23.76  |
| ENSG0000(FMC1      | protein_co chr7 | 1.39E+08 | 1.39E+08 + | 4.55   | 5.08   |
| ENSG0000(GBX1      | protein_co chr7 | 1.51E+08 | 1.51E+08 - | 0      | 0      |
| ENSG0000(PHAX      | protein_co chr5 | 1.27E+08 | 1.27E+08 + | 17.06  | 19.68  |
| ENSG0000(ALDH7A1   | protein_co chr5 | 1.27E+08 | 1.27E+08 - | 31.64  | 28.85  |
| ENSG0000(FOXK1     | protein_co chr7 | 4682309  | 4771443 +  | 5.17   | 5.03   |
| ENSG0000(COX6C     | protein_co chr8 | 99873200 | 99894062 - | 93.1   | 120.51 |
| ENSG0000(OSR2      | protein_co chr8 | 98944403 | 98952104 + | 5.58   | 10.39  |
| ENSG0000(YWHAZ     | protein_co chr8 | 1.01E+08 | 1.01E+08 - | 204.99 | 202.12 |
| ENSG0000(BAALC     | protein_co chr8 | 1.03E+08 | 1.03E+08 + | 0.38   | 1.49   |
| ENSG0000(FZD6      | protein_co chr8 | 1.03E+08 | 1.03E+08 + | 21.02  | 24.8   |
| ENSG0000(CTHRC1    | protein_co chr8 | 1.03E+08 | 1.03E+08 + | 34     | 38.42  |
| ENSG0000(SLC25A32  | protein_co chr8 | 1.03E+08 | 1.03E+08 - | 6.98   | 7.54   |
| ENSG0000(DCAF13    | protein_co chr8 | 1.03E+08 | 1.03E+08 + | 14.14  | 15.45  |
| ENSG0000(DCSTAMP   | protein_co chr8 | 1.04E+08 | 1.04E+08 + | 0      | 0      |
| ENSG0000(TP53INP1  | protein_co chr8 | 94925972 | 94949411 - | 11.93  | 13.43  |
| ENSG0000(INTS8     | protein_co chr8 | 94813311 | 94881746 + | 14.3   | 14.49  |
| ENSG0000(KIAA1429  | protein_co chr8 | 94487693 | 94553529 - | 11.55  | 13.4   |
| ENSG0000(FREM1     | protein_co chr9 | 14734666 | 14910995 - | 0.01   | 0.01   |
| ENSG0000(GEM       | protein_co chr8 | 94249253 | 94262350 - | 9.74   | 12.26  |
| ENSG0000(PDP1      | protein_co chr8 | 93857807 | 93926066 + | 42.42  | 36.84  |
| ENSG0000(TMEM67    | protein_co chr8 | 93754844 | 93819234 + | 9.34   | 7.92   |
| ENSG0000(WASHC5    | protein_co chr8 | 1.25E+08 | 1.25E+08 - | 26.62  | 25.84  |
| ENSG0000(RPP25L    | protein_co chr9 | 34610486 | 34612104 - | 12.5   | 14.26  |
| ENSG0000(FAM219A   | protein_co chr9 | 34398184 | 34458570 - | 9.2    | 9.23   |
| ENSG0000(C9orf24   | protein_co chr9 | 34379019 | 34397832 - | 0      | 0      |
| ENSG0000(SNAPC3    | protein_co chr9 | 15422704 | 15465953 + | 12.61  | 9.87   |
| ENSG0000(KIAA1161  | protein_co chr9 | 34366670 | 34376853 - | 1.41   | 1.79   |
| ENSG0000(NUDT2     | protein_co chr9 | 34329506 | 34343713 + | 25.56  | 24.18  |
| ENSG0000(TMEM65    | protein_co chr8 | 1.24E+08 | 1.24E+08 - | 3.17   | 2.86   |
| ENSG0000(PSIP1     | protein_co chr9 | 15464066 | 15511019 - | 20.04  | 21.32  |
| ENSG0000(CCDC171   | protein_co chr9 | 15553086 | 16061663 + | 0.73   | 1.08   |
| ENSG0000(UBAP1     | protein_co chr9 | 34179005 | 34252523 + | 25.09  | 25.95  |
| ENSG0000(DIRAS2    | protein_co chr9 | 90609832 | 90643105 - | 0.4    | 0.62   |
| ENSG0000(SYK       | protein_co chr9 | 90801787 | 90898549 + | 0      | 0      |
| ENSG0000(NIPSNAP3E | protein_co chr9 | 1.05E+08 | 1.05E+08 + | 0.81   | 0.78   |
| ENSG0000(ABCA1     | protein_co chr9 | 1.05E+08 | 1.05E+08 - | 10.5   | 10.36  |
| ENSG0000(NFIL3     | protein_co chr9 | 91409045 | 91423862 - | 13.26  | 11.1   |
| ENSG0000(LETM2     | protein_co chr8 | 38386207 | 38409527 + | 3.34   | 1.28   |
| ENSG0000(METTL2B   | protein_co chr7 | 1.28E+08 | 1.29E+08 + | 5.79   | 5.77   |
| ENSG0000(PRKACG    | protein_co chr9 | 69012529 | 69014113 - | 0      | 0      |
| ENSG0000(FXN       | protein_co chr9 | 69035259 | 69100178 + | 5.43   | 3.98   |
| ENSG0000(ZMAT4     | protein_co chr8 | 40530590 | 40897833 - | 3.19   | 3.03   |
| ENSG0000(NKX6-3    | protein_co chr8 | 41645178 | 41650669 - | 0      | 0      |
| ENSG0000(TMEM71    | protein_co chr8 | 1.33E+08 | 1.33E+08 - | 0.13   | 0.14   |



|                    |                  |          |          |   |        |       |
|--------------------|------------------|----------|----------|---|--------|-------|
| ENSG0000(MAMDC2    | protein_co chr9  | 70043581 | 70226970 | + | 0.64   | 0.88  |
| ENSG0000(PRSS37    | protein_co chr7  | 1.42E+08 | 1.42E+08 | - | 0      | 0     |
| ENSG0000(CPA6      | protein_co chr8  | 67422038 | 67746385 | - | 0.39   | 0.5   |
| ENSG0000(C8orf34   | protein_co chr8  | 68330722 | 68819022 | + | 0.17   | 0     |
| ENSG0000(TMC1      | protein_co chr9  | 72521801 | 72836351 | + | 0.08   | 0.32  |
| ENSG0000(ALDH1A1   | protein_co chr9  | 72900662 | 73080442 | - | 0.16   | 0.03  |
| ENSG0000(KDM1B     | protein_co chr6  | 18155329 | 18223853 | + | 3.78   | 4.02  |
| ENSG0000(HGSNAT    | protein_co chr8  | 43140455 | 43202855 | + | 26.41  | 26.81 |
| ENSG0000(RASEF     | protein_co chr9  | 82979585 | 83063177 | - | 2.18   | 2.33  |
| ENSG0000(GKAP1     | protein_co chr9  | 83739421 | 83829516 | - | 0.89   | 1.55  |
| ENSG0000(KIF27     | protein_co chr9  | 83836698 | 83921465 | - | 1.44   | 2.08  |
| ENSG0000(C9orf64   | protein_co chr9  | 83938311 | 83956986 | - | 5.27   | 4.98  |
| ENSG0000(HNRNPK    | protein_co chr9  | 83968083 | 83980616 | - | 207.88 | 207   |
| ENSG0000(SSMEM1    | protein_co chr7  | 1.3E+08  | 1.3E+08  | + | 0      | 0     |
| ENSG0000(RP11-213G | transcribed chr9 | 85805359 | 85849542 | + | 1.22   | 1.02  |
| ENSG0000(SVEP1     | protein_co chr9  | 1.1E+08  | 1.11E+08 | - | 48.83  | 48.41 |
| ENSG0000(TRPV6     | protein_co chr7  | 1.43E+08 | 1.43E+08 | - | 0      | 0     |
| ENSG0000(C7orf34   | protein_co chr7  | 1.43E+08 | 1.43E+08 | + | 0      | 0     |
| ENSG0000(ANKS6     | protein_co chr9  | 98731329 | 98796965 | - | 7.18   | 6.67  |
| ENSG0000(FBP1      | protein_co chr9  | 94603133 | 94640249 | - | 0.2    | 0     |
| ENSG0000(TMEM246   | protein_co chr9  | 1.01E+08 | 1.02E+08 | - | 1.12   | 1.12  |
| ENSG0000(ZHX1      | protein_co chr8  | 1.23E+08 | 1.23E+08 | - | 12.52  | 13.75 |
| ENSG0000(CFAP47    | protein_co chrX  | 35919734 | 36385319 | + | 0      | 0     |
| ENSG0000(CYBB      | protein_co chrX  | 37780011 | 37813461 | + | 0      | 0.03  |
| ENSG0000(DYNLT3    | protein_co chrX  | 37836757 | 37847637 | - | 13.67  | 12.5  |
| ENSG0000(WBSCR27   | protein_co chr7  | 73834590 | 73842535 | - | 5.31   | 5.42  |
| ENSG0000(MID1IP1   | protein_co chrX  | 38801432 | 38806537 | + | 20.26  | 18.95 |
| ENSG0000(NCF1C     | unprocess€ chr7  | 75156639 | 75172044 | - | 0      | 0     |
| ENSG0000(C9orf84   | protein_co chr9  | 1.12E+08 | 1.12E+08 | - | 0.01   | 0.06  |
| ENSG0000(CXorf58   | protein_co chrX  | 23907801 | 23939507 | + | 0      | 0     |
| ENSG0000(KIAA1958  | protein_co chr9  | 1.12E+08 | 1.13E+08 | + | 0.07   | 0.16  |
| ENSG0000(PTCHD1    | protein_co chrX  | 23334016 | 23404372 | + | 0      | 0.01  |
| ENSG0000(RNF183    | protein_co chr9  | 1.13E+08 | 1.13E+08 | - | 0.02   | 0.15  |
| ENSG0000(ASB11     | protein_co chrX  | 15281697 | 15315656 | - | 0      | 0     |
| ENSG0000(PCDH19    | protein_co chrX  | 1E+08    | 1E+08    | - | 0.01   | 0     |
| ENSG0000(PIGA      | protein_co chrX  | 15319451 | 15335580 | - | 3.78   | 3.28  |
| ENSG0000(VEGFD     | protein_co chrX  | 15345591 | 15384376 | - | 0.6    | 1.38  |
| ENSG0000(OR1Q1     | protein_co chr9  | 1.23E+08 | 1.23E+08 | + | 3.59   | 2.73  |
| ENSG0000(OR1K1     | protein_co chr9  | 1.23E+08 | 1.23E+08 | + | 0      | 0     |
| ENSG0000(STRBP     | protein_co chr9  | 1.23E+08 | 1.23E+08 | - | 0.91   | 0.92  |
| ENSG0000(CLDN3     | protein_co chr7  | 73768997 | 73770270 | - | 0      | 0     |
| ENSG0000(GAPVD1    | protein_co chr9  | 1.25E+08 | 1.25E+08 | + | 10.13  | 8.79  |
| ENSG0000(CARD19    | protein_co chr9  | 93096218 | 93113283 | + | 28.89  | 26.69 |
| ENSG0000(WNK2      | protein_co chr9  | 93184916 | 93320572 | + | 0      | 0     |
| ENSG0000(ATP7A     | protein_co chrX  | 77910656 | 78050395 | + | 2.78   | 3.26  |

|                   |                  |          |          |   |       |       |
|-------------------|------------------|----------|----------|---|-------|-------|
| ENSG0000(ZNF367   | protein_co chr9  | 96385941 | 96418329 | - | 0.07  | 0.15  |
| ENSG0000(NLGN4Y   | protein_co chrY  | 14522638 | 14845650 | + | 7     | 8.2   |
| ENSG0000(HDX      | protein_co chrX  | 84317874 | 84502479 | - | 0.5   | 0.8   |
| ENSG0000(NDUFB6   | protein_co chr9  | 32552999 | 32573184 | - | 24.4  | 30.18 |
| ENSG0000(AQP7     | protein_co chr9  | 33383179 | 33402682 | - | 0.18  | 0.28  |
| ENSG0000(NOL6     | protein_co chr9  | 33461441 | 33473930 | - | 7.93  | 7.42  |
| ENSG0000(AQP3     | protein_co chr9  | 33441154 | 33447611 | - | 4.67  | 4.77  |
| ENSG0000(TRMT10B  | protein_co chr9  | 37753803 | 37778972 | + | 3.56  | 3.61  |
| ENSG0000(VCP      | protein_co chr9  | 35056064 | 35073249 | - | 68.59 | 70.05 |
| ENSG0000(PIGO     | protein_co chr9  | 35088688 | 35096601 | - | 8.93  | 7.27  |
| ENSG0000(STOML2   | protein_co chr9  | 35099776 | 35103195 | - | 45.4  | 46.1  |
| ENSG0000(BRWD3    | protein_co chrX  | 80670854 | 80809688 | - | 3.23  | 3.38  |
| ENSG0000(SLITRK5  | protein_co chr13 | 87672615 | 87696272 | + | 0.02  | 0.03  |
| ENSG0000(MELK     | protein_co chr9  | 36572862 | 36677683 | + | 1.33  | 0.76  |
| ENSG0000(ARMC3    | protein_co chr10 | 22928024 | 23038523 | + | 0     | 0     |
| ENSG0000(OTUD1    | protein_co chr10 | 23439458 | 23442390 | + | 2.66  | 2.73  |
| ENSG0000(ARHGAP12 | protein_co chr10 | 31805404 | 31928876 | - | 11.42 | 17.63 |
| ENSG0000(FAT3     | protein_co chr11 | 92352096 | 92896470 | + | 0.11  | 0.44  |
| ENSG0000(DEUP1    | protein_co chr11 | 93329971 | 93438487 | + | 0     | 0     |
| ENSG0000(HECTD2   | protein_co chr10 | 91409280 | 91514829 | + | 3.68  | 3.67  |
| ENSG0000(SLC7A3   | protein_co chrX  | 70925582 | 70931125 | - | 0     | 0     |
| ENSG0000(FBXO33   | protein_co chr14 | 39397669 | 39432500 | - | 2.71  | 2.67  |
| ENSG0000(INTS6L   | protein_co chrX  | 1.36E+08 | 1.36E+08 | + | 2.42  | 2.36  |
| ENSG0000(GPR101   | protein_co chrX  | 1.37E+08 | 1.37E+08 | - | 0     | 0     |
| ENSG0000(CLDN2    | protein_co chrX  | 1.07E+08 | 1.07E+08 | + | 0     | 0     |
| ENSG0000(LRFN5    | protein_co chr14 | 41607570 | 41904549 | + | 0.05  | 0.16  |
| ENSG0000(LRRC18   | protein_co chr10 | 48909483 | 48914232 | - | 0     | 0     |
| ENSG0000(SPTSSA   | protein_co chr14 | 34432789 | 34462356 | - | 8.56  | 9.72  |
| ENSG0000(WRN      | protein_co chr8  | 31033801 | 31173769 | + | 3.26  | 3.07  |
| ENSG0000(8-Mar    | protein_co chr10 | 45454585 | 45594906 | - | 16.59 | 15.61 |
| ENSG0000(TSHR     | protein_co chr14 | 80954989 | 81146302 | + | 0     | 0     |
| ENSG0000(CFL2     | protein_co chr14 | 34706769 | 34714823 | - | 61.66 | 58.89 |
| ENSG0000(SUGT1    | protein_co chr13 | 52652709 | 52700909 | + | 25.81 | 23.52 |
| ENSG0000(GTF2A1   | protein_co chr14 | 81175452 | 81221377 | - | 10.26 | 11.05 |
| ENSG0000(ZCCHC24  | protein_co chr10 | 79382325 | 79445627 | - | 41.32 | 44.32 |
| ENSG0000(PGM2L1   | protein_co chr11 | 74330318 | 74398473 | - | 0.99  | 1.02  |
| ENSG0000(PHYHIPL  | protein_co chr10 | 59176590 | 59247774 | + | 0     | 0     |
| ENSG0000(SLC16A9  | protein_co chr10 | 59650761 | 59736002 | - | 1.25  | 1.33  |
| ENSG0000(FOLR2    | protein_co chr11 | 72216601 | 72221950 | + | 0     | 0     |
| ENSG0000(INPPL1   | protein_co chr11 | 72223701 | 72239105 | + | 47.44 | 40.97 |
| ENSG0000(PHOX2A   | protein_co chr11 | 72239077 | 72245664 | - | 0     | 0     |
| ENSG0000(MBL2     | protein_co chr10 | 52765380 | 52771700 | - | 0     | 0     |
| ENSG0000(GJB2     | protein_co chr13 | 20187470 | 20192898 | - | 0.02  | 0     |
| ENSG0000(CRYL1    | protein_co chr13 | 20403667 | 20525857 | - | 12.63 | 12.45 |
| ENSG0000(REEP3    | protein_co chr10 | 63521363 | 63625123 | + | 12.07 | 11.73 |

|                    |                  |          |          |   |        |        |
|--------------------|------------------|----------|----------|---|--------|--------|
| ENSG0000( HEPACAM  | protein_co chr11 | 1.25E+08 | 1.25E+08 | - | 0      | 0      |
| ENSG0000( SKA3     | protein_co chr13 | 21153595 | 21176602 | - | 0.07   | 0.04   |
| ENSG0000( MICU2    | protein_co chr13 | 21492691 | 21604214 | - | 14.33  | 12.85  |
| ENSG0000( DDIAS    | protein_co chr11 | 82899975 | 82958277 | + | 0.08   | 1.49   |
| ENSG0000( PCF11    | protein_co chr11 | 83156988 | 83187451 | + | 18.88  | 13.92  |
| ENSG0000( PKNOX2   | protein_co chr11 | 1.25E+08 | 1.25E+08 | + | 5.53   | 4.97   |
| ENSG0000( RPL10L   | protein_co chr14 | 46651010 | 46651821 | - | 0      | 0      |
| ENSG0000( LRR1     | protein_co chr14 | 49598697 | 49614672 | + | 2.12   | 1.71   |
| ENSG0000( RPL36AL  | protein_co chr14 | 49618519 | 49620685 | - | 111.81 | 117.36 |
| ENSG0000( DNAAF2   | protein_co chr14 | 49625174 | 49635230 | - | 2.18   | 3.17   |
| ENSG0000( C10orf10 | protein_co chr10 | 44970981 | 44978810 | - | 177.93 | 175.19 |
| ENSG0000( MAGEC3   | protein_co chrX  | 1.42E+08 | 1.42E+08 | + | 0      | 0      |
| ENSG0000( C10orf25 | antisense chr10  | 44997698 | 45000888 | - | 0.56   | 0.43   |
| ENSG0000( ZNF22    | protein_co chr10 | 45000475 | 45005326 | + | 8.43   | 8.97   |
| ENSG0000( KLHDC2   | protein_co chr14 | 49767608 | 49786385 | + | 32.77  | 34.24  |
| ENSG0000( EML5     | protein_co chr14 | 88612431 | 88792752 | - | 0.05   | 0.05   |
| ENSG0000( NEMF     | protein_co chr14 | 49782083 | 49853203 | - | 16.52  | 18.29  |
| ENSG0000( RPUUSD4  | protein_co chr11 | 1.26E+08 | 1.26E+08 | - | 14.64  | 15.2   |
| ENSG0000( ARF6     | protein_co chr14 | 49893092 | 49897054 | + | 13.1   | 13.17  |
| ENSG0000( TTC8     | protein_co chr14 | 88824153 | 88881078 | + | 19.9   | 20.96  |
| ENSG0000( TMEM63C  | protein_co chr14 | 77116568 | 77259495 | + | 0      | 0      |
| ENSG0000( NGB      | protein_co chr14 | 77265483 | 77271312 | - | 0      | 0      |
| ENSG0000( NOXRED1  | protein_co chr14 | 77394021 | 77423517 | - | 0.09   | 0.13   |
| ENSG0000( CDX2     | protein_co chr13 | 27962137 | 27971139 | - | 0      | 0      |
| ENSG0000( AMER2    | protein_co chr13 | 25161684 | 25172288 | - | 0      | 0      |
| ENSG0000( AKR1E2   | protein_co chr10 | 4786629  | 4848062  | + | 0.21   | 0.53   |
| ENSG0000( KBTBD6   | protein_co chr13 | 41127569 | 41132746 | - | 1.62   | 1.95   |
| ENSG0000( SSX5     | protein_co chrX  | 48186220 | 48196763 | - | 0      | 0      |
| ENSG0000( SSX3     | protein_co chrX  | 48346428 | 48356707 | - | 0      | 0      |
| ENSG0000( OTX2     | protein_co chr14 | 56799905 | 56810479 | - | 0      | 0      |
| ENSG0000( FAAH2    | protein_co chrX  | 57286706 | 57489196 | + | 0.03   | 0.06   |
| ENSG0000( DRGX     | protein_co chr10 | 49364181 | 49396016 | - | 0      | 0      |
| ENSG0000( NUDT5    | protein_co chr10 | 12165325 | 12196144 | - | 44.2   | 39.4   |
| ENSG0000( DACT1    | protein_co chr14 | 58633967 | 58648321 | + | 33.52  | 30.33  |
| ENSG0000( OXGR1    | protein_co chr13 | 96985719 | 96994730 | - | 0      | 0.12   |
| ENSG0000( UCMA     | protein_co chr10 | 13221767 | 13234334 | - | 0      | 0      |
| ENSG0000( BEND7    | protein_co chr10 | 13438484 | 13528974 | - | 1.62   | 1.74   |
| ENSG0000( ATP5C1   | protein_co chr10 | 7788129  | 7807815  | + | 96.91  | 96.21  |
| ENSG0000( PRPF18   | protein_co chr10 | 13586927 | 13630868 | + | 7.77   | 7.35   |
| ENSG0000( TAF3     | protein_co chr10 | 7818504  | 8016627  | + | 2.25   | 2.74   |
| ENSG0000( VSTM4    | protein_co chr10 | 49014245 | 49115509 | - | 2.17   | 2.33   |
| ENSG0000( VDAC2    | protein_co chr10 | 75210154 | 75231448 | + | 77.61  | 72.78  |
| ENSG0000( SOHLH1   | protein_co chr9  | 1.36E+08 | 1.36E+08 | - | 0.04   | 0      |
| ENSG0000( COMTD1   | protein_co chr10 | 75233969 | 75236030 | - | 7.37   | 7.25   |
| ENSG0000( SLC18A2  | protein_co chr10 | 1.17E+08 | 1.17E+08 | + | 0      | 0      |

|                   |                  |          |            |       |       |
|-------------------|------------------|----------|------------|-------|-------|
| ENSG0000(PDZD8    | protein_co chr10 | 1.17E+08 | 1.17E+08 - | 7.43  | 9.32  |
| ENSG0000(ZNF503   | protein_co chr10 | 75397830 | 75401906 - | 14.63 | 12.87 |
| ENSG0000(FAM175B  | protein_co chr10 | 1.25E+08 | 1.25E+08 + | 4.53  | 3.98  |
| ENSG0000(QSOX2    | protein_co chr9  | 1.36E+08 | 1.36E+08 - | 5.06  | 4.91  |
| ENSG0000(FAM204A  | protein_co chr10 | 1.18E+08 | 1.18E+08 - | 19.87 | 23.29 |
| ENSG0000(NSD1     | protein_co chr5  | 1.77E+08 | 1.77E+08 + | 12.11 | 10.67 |
| ENSG0000(PRDX3    | protein_co chr10 | 1.19E+08 | 1.19E+08 - | 49.02 | 48.14 |
| ENSG0000(ENOX2    | protein_co chrX  | 1.31E+08 | 1.31E+08 - | 6.65  | 5.68  |
| ENSG0000(GHITM    | protein_co chr10 | 84139440 | 84153245 + | 55.46 | 55.14 |
| ENSG0000(CLEC1B   | protein_co chr12 | 9985642  | 10013424 - | 0     | 0     |
| ENSG0000(SNAPC4   | protein_co chr9  | 1.36E+08 | 1.36E+08 - | 5.37  | 5.81  |
| ENSG0000(TMEM52B  | protein_co chr12 | 10170542 | 10191801 + | 0     | 0     |
| ENSG0000(PMPCA    | protein_co chr9  | 1.36E+08 | 1.36E+08 + | 18.44 | 16.31 |
| ENSG0000(SDCCAG3  | protein_co chr9  | 1.36E+08 | 1.36E+08 - | 18.49 | 20.81 |
| ENSG0000(FRMD7    | protein_co chrX  | 1.32E+08 | 1.32E+08 - | 0     | 0     |
| ENSG0000(AK8      | protein_co chr9  | 1.33E+08 | 1.33E+08 - | 0.75  | 0.61  |
| ENSG0000(SPACA9   | protein_co chr9  | 1.33E+08 | 1.33E+08 + | 4.23  | 5.2   |
| ENSG0000(TSC1     | protein_co chr9  | 1.33E+08 | 1.33E+08 - | 8.4   | 10.42 |
| ENSG0000(GFI1B    | protein_co chr9  | 1.33E+08 | 1.33E+08 + | 0     | 0.04  |
| ENSG0000(HPRT1    | protein_co chrX  | 1.34E+08 | 1.35E+08 + | 16.12 | 13.29 |
| ENSG0000(BORCS5   | protein_co chr12 | 12357079 | 12469694 + | 3.62  | 6.43  |
| ENSG0000(FAM69B   | protein_co chr9  | 1.37E+08 | 1.37E+08 + | 4.51  | 5.53  |
| ENSG0000(ZMYND19  | protein_co chr9  | 1.38E+08 | 1.38E+08 - | 8.46  | 8     |
| ENSG0000(STOX1    | protein_co chr10 | 68827541 | 68895432 + | 0     | 0.06  |
| ENSG0000(RET      | protein_co chr10 | 43077027 | 43130351 + | 0     | 0.04  |
| ENSG0000(DDX21    | protein_co chr10 | 68956128 | 68985073 + | 12.85 | 12.17 |
| ENSG0000(BMS1     | protein_co chr10 | 42782801 | 42834937 + | 4.53  | 3.85  |
| ENSG0000(STK32C   | protein_co chr10 | 1.32E+08 | 1.32E+08 - | 6.79  | 5.69  |
| ENSG0000(KIAA1462 | protein_co chr10 | 30012800 | 30115494 - | 0.61  | 0.66  |
| ENSG0000(OR4K2    | protein_co chr14 | 19876232 | 19877309 + | 0     | 0     |
| ENSG0000(FUNDC2   | protein_co chrX  | 1.55E+08 | 1.55E+08 + | 60.97 | 56.46 |
| ENSG0000(TMEM55B  | protein_co chr14 | 20457719 | 20461612 - | 22.53 | 23.29 |
| ENSG0000(METTL17  | protein_co chr14 | 20989770 | 20997035 + | 23.18 | 25.55 |
| ENSG0000(SLC39A2  | protein_co chr14 | 20999255 | 21001871 + | 0.9   | 0.37  |
| ENSG0000(NDRG2    | protein_co chr14 | 21016763 | 21070872 - | 4.74  | 7.12  |
| ENSG0000(RNASE7   | protein_co chr14 | 21042226 | 21044234 + | 0     | 0     |
| ENSG0000(ARHGEF40 | protein_co chr14 | 21070270 | 21090240 + | 16.77 | 16.5  |
| ENSG0000(NSMF     | protein_co chr9  | 1.37E+08 | 1.37E+08 - | 12.98 | 12.13 |
| ENSG0000(ZNF219   | protein_co chr14 | 21090046 | 21104722 - | 21.18 | 21.28 |
| ENSG0000(C12orf50 | protein_co chr12 | 87980035 | 88034037 - | 2.14  | 2.57  |
| ENSG0000(CASP7    | protein_co chr10 | 1.14E+08 | 1.14E+08 + | 9.13  | 9.28  |
| ENSG0000(PPP1R36  | protein_co chr14 | 64549902 | 64589380 + | 0.23  | 0.05  |
| ENSG0000(BTNL9    | protein_co chr5  | 1.81E+08 | 1.81E+08 + | 0     | 0.32  |
| ENSG0000(CCDC186  | protein_co chr10 | 1.14E+08 | 1.14E+08 - | 3.93  | 5.32  |
| ENSG0000(VWA2     | protein_co chr10 | 1.14E+08 | 1.14E+08 + | 0.04  | 0     |

|                    |                   |          |            |        |       |
|--------------------|-------------------|----------|------------|--------|-------|
| ENSG0000(METTL3    | protein_co chr14  | 21498133 | 21511375 - | 15.29  | 15.46 |
| ENSG0000(SALL2     | protein_co chr14  | 21521081 | 21537216 - | 6.78   | 6.09  |
| ENSG0000(PRAP1     | protein_co chr10  | 1.33E+08 | 1.33E+08 + | 0      | 0     |
| ENSG0000(TRUB1     | protein_co chr10  | 1.15E+08 | 1.15E+08 + | 8.29   | 6.52  |
| ENSG0000(ERICH6B   | protein_co chr13  | 45534522 | 45615739 - | 0      | 0     |
| ENSG0000(CYP2C19   | protein_co chr10  | 94762624 | 94853260 + | 0      | 0     |
| ENSG0000(ZFYVE1    | protein_co chr14  | 72969451 | 73027212 - | 14.23  | 15.3  |
| ENSG0000(C10orf82  | protein_co chr10  | 1.17E+08 | 1.17E+08 - | 0.07   | 0.16  |
| ENSG0000(HSPA12A   | protein_co chr10  | 1.17E+08 | 1.17E+08 - | 1.98   | 3.14  |
| ENSG0000(FAM35BP   | transcribec chr10 | 46610474 | 46652025 - | 1.09   | 1.17  |
| ENSG0000(FRAT1     | protein_co chr10  | 97319267 | 97321915 + | 0.95   | 1.45  |
| ENSG0000(UBTD1     | protein_co chr10  | 97498868 | 97571209 + | 23.9   | 24.98 |
| ENSG0000(ANKRD2    | protein_co chr10  | 97572499 | 97583884 + | 0      | 0     |
| ENSG0000(E2F7      | protein_co chr12  | 77021247 | 77065580 - | 1.92   | 2.18  |
| ENSG0000(ARHGAP42  | protein_co chr11  | 1.01E+08 | 1.01E+08 + | 3.07   | 2.9   |
| ENSG0000(ISCA2     | protein_co chr14  | 74493720 | 74497106 + | 8.55   | 9.69  |
| ENSG0000(OTOGL     | protein_co chr12  | 80209453 | 80379090 + | 0.03   | 0.01  |
| ENSG0000(LARGE2    | protein_co chr11  | 45921621 | 45929096 + | 0      | 0     |
| ENSG0000(PACSIN3   | protein_co chr11  | 47177525 | 47186443 - | 12.32  | 12.32 |
| ENSG0000(TTC7B     | protein_co chr14  | 90524564 | 90816479 - | 13.03  | 15.76 |
| ENSG0000(SLC39A13  | protein_co chr11  | 47407132 | 47416501 + | 48.69  | 48.64 |
| ENSG0000(PSMC3     | protein_co chr11  | 47418769 | 47426473 - | 46.69  | 44.73 |
| ENSG0000(RAPSN     | protein_co chr11  | 47437757 | 47449178 - | 0.04   | 0.47  |
| ENSG0000(AGBL2     | protein_co chr11  | 47659591 | 47715389 - | 2.09   | 1.97  |
| ENSG0000(TC2N      | protein_co chr14  | 91779751 | 91867536 - | 0      | 0.03  |
| ENSG0000(CPSF2     | protein_co chr14  | 92121937 | 92172145 + | 14.64  | 14.89 |
| ENSG0000(SMCO2     | protein_co chr12  | 27466810 | 27502185 + | 0.07   | 0.15  |
| ENSG0000(MOAP1     | protein_co chr14  | 93182196 | 93184928 - | 8.64   | 7.56  |
| ENSG0000(IFI27L1   | protein_co chr14  | 94081282 | 94103846 + | 16.47  | 15.37 |
| ENSG0000(IFI27     | protein_co chr14  | 94104836 | 94116698 + | 139.09 | 92.86 |
| ENSG0000(SERPINA12 | protein_co chr14  | 94487274 | 94517844 - | 0      | 0     |
| ENSG0000(CLMN      | protein_co chr14  | 95181940 | 95319906 - | 0.48   | 0.97  |
| ENSG0000(PDZRN4    | protein_co chr12  | 41188448 | 41574590 + | 0      | 0     |
| ENSG0000(SLC6A5    | protein_co chr11  | 20599400 | 20659285 + | 0      | 0     |
| ENSG0000(CCDC38    | protein_co chr12  | 95867048 | 95942974 - | 0      | 0.02  |
| ENSG0000(NELL1     | protein_co chr11  | 20669551 | 21575681 + | 0      | 0     |
| ENSG0000(PTER      | protein_co chr10  | 16436943 | 16513745 + | 3.69   | 4.18  |
| ENSG0000(C1QL3     | protein_co chr10  | 16513743 | 16522005 - | 0      | 0.02  |
| ENSG0000(CACNB2    | protein_co chr10  | 18140677 | 18541869 + | 0.01   | 0.03  |
| ENSG0000(HACD1     | protein_co chr10  | 17589032 | 17617377 - | 9.75   | 12.54 |
| ENSG0000(ARL5B     | protein_co chr10  | 18659405 | 18681639 + | 2.75   | 2.51  |
| ENSG0000(SMCO4     | protein_co chr11  | 93478472 | 93543508 - | 4.77   | 2.16  |
| ENSG0000(CEP295    | protein_co chr11  | 93661639 | 93730358 + | 4.28   | 4.97  |
| ENSG0000(KCNC2     | protein_co chr12  | 75040077 | 75209868 - | 0      | 0     |
| ENSG0000(TRIM51HP  | transcribec chr11 | 55291883 | 55298270 - | 0      | 0     |

|                    |                   |          |          |   |        |        |
|--------------------|-------------------|----------|----------|---|--------|--------|
| ENSG0000(TAF1D     | protein_co chr11  | 93729948 | 93784391 | - | 40.67  | 38.71  |
| ENSG0000(TRIM53BP  | unprocessε chr11  | 89841997 | 89850970 | + | 0      | 0      |
| ENSG0000(ABTB2     | protein_co chr11  | 34150988 | 34358008 | - | 1.28   | 1.59   |
| ENSG0000(R3HCC1L   | protein_co chr10  | 98134624 | 98244897 | + | 5.72   | 6.27   |
| ENSG0000(AMOTL1    | protein_co chr11  | 94706431 | 94876753 | + | 10.22  | 10.89  |
| ENSG0000(HTRA1     | protein_co chr10  | 1.22E+08 | 1.23E+08 | + | 268.9  | 280.06 |
| ENSG0000(LIPC      | protein_co chr15  | 58410569 | 58569843 | + | 1.26   | 1.03   |
| ENSG0000(CEP57     | protein_co chr11  | 95789965 | 95832693 | + | 16.16  | 16.9   |
| ENSG0000(TCP11L2   | protein_co chr12  | 1.06E+08 | 1.06E+08 | + | 9.96   | 10.77  |
| ENSG0000(PASD1     | protein_co chrX   | 1.52E+08 | 1.52E+08 | + | 0      | 0      |
| ENSG0000(SPRED1    | protein_co chr15  | 38252326 | 38357249 | + | 7.04   | 7.09   |
| ENSG0000(TMCO5A    | protein_co chr15  | 37921939 | 37967724 | + | 0      | 0      |
| ENSG0000(GPR176    | protein_co chr15  | 39799032 | 39920892 | - | 98.59  | 95.91  |
| ENSG0000(JAM3      | protein_co chr11  | 1.34E+08 | 1.34E+08 | + | 44.66  | 40.56  |
| ENSG0000(IL25      | protein_co chr14  | 23372809 | 23376403 | + | 0      | 0      |
| ENSG0000(CMTM5     | protein_co chr14  | 23376808 | 23379772 | + | 0      | 0      |
| ENSG0000(RP11-299H | transcribec chr15 | 62227896 | 62253235 | - | 0      | 0.05   |
| ENSG0000(GLB1L3    | protein_co chr11  | 1.34E+08 | 1.34E+08 | + | 0.05   | 0.03   |
| ENSG0000(ADAMTS15  | protein_co chr11  | 1.3E+08  | 1.3E+08  | + | 2.77   | 3.15   |
| ENSG0000(SVOP      | protein_co chr12  | 1.09E+08 | 1.09E+08 | - | 0.04   | 0.08   |
| ENSG0000(SPATA19   | protein_co chr11  | 1.34E+08 | 1.34E+08 | - | 0      | 0      |
| ENSG0000(GPT2      | protein_co chr16  | 46884378 | 46931297 | + | 4.83   | 6.15   |
| ENSG0000(AMN       | protein_co chr14  | 1.03E+08 | 1.03E+08 | + | 0      | 0      |
| ENSG0000(RAB8B     | protein_co chr15  | 63189469 | 63267782 | + | 20.08  | 24.68  |
| ENSG0000(IKBIP     | protein_co chr12  | 98613405 | 98645113 | - | 25.18  | 23.74  |
| ENSG0000(RPUSD2    | protein_co chr15  | 40569300 | 40574943 | + | 2.9    | 3.24   |
| ENSG0000(HIF1AN    | protein_co chr10  | 1.01E+08 | 1.01E+08 | + | 11.26  | 11.52  |
| ENSG0000(NDUFB8    | protein_co chr10  | 1.01E+08 | 1.01E+08 | - | 90.93  | 81.95  |
| ENSG0000(ZFYVE19   | protein_co chr15  | 40807086 | 40815084 | + | 11.23  | 10.56  |
| ENSG0000(PPP1R14D  | protein_co chr15  | 40815445 | 40828709 | - | 0      | 0      |
| ENSG0000(SPINT1    | protein_co chr15  | 40844018 | 40858207 | + | 0.21   | 0.31   |
| ENSG0000(FBN1      | protein_co chr15  | 48408306 | 48645849 | - | 562.56 | 553.57 |
| ENSG0000(AVPR1A    | protein_co chr12  | 63142759 | 63150942 | - | 0.02   | 0.02   |
| ENSG0000(C16orf78  | protein_co chr16  | 49373823 | 49399431 | + | 0      | 0      |
| ENSG0000(DEPDC4    | protein_co chr12  | 1E+08    | 1E+08    | - | 0.14   | 0.48   |
| ENSG0000(LRTM2     | protein_co chr12  | 1820267  | 1836752  | + | 0      | 0      |
| ENSG0000(OPN1MW2   | protein_co chrX   | 1.54E+08 | 1.54E+08 | + | 0      | 0      |
| ENSG0000(BRD7      | protein_co chr16  | 50313487 | 50368934 | - | 23.03  | 22.69  |
| ENSG0000(CKB       | protein_co chr14  | 1.04E+08 | 1.04E+08 | - | 4.93   | 9.57   |
| ENSG0000(TRMT61A   | protein_co chr14  | 1.04E+08 | 1.04E+08 | + | 5.71   | 5.5    |
| ENSG0000(BTRC      | protein_co chr10  | 1.01E+08 | 1.02E+08 | + | 5.12   | 5.59   |
| ENSG0000(POLL      | protein_co chr10  | 1.02E+08 | 1.02E+08 | - | 12.33  | 11.68  |
| ENSG0000(BAG5      | protein_co chr14  | 1.04E+08 | 1.04E+08 | - | 7.34   | 8.35   |
| ENSG0000(DPCD      | protein_co chr10  | 1.02E+08 | 1.02E+08 | + | 27.28  | 23.02  |
| ENSG0000(LARP6     | protein_co chr15  | 70829130 | 70854159 | - | 81.78  | 79.12  |

|                    |                  |          |          |   |        |        |
|--------------------|------------------|----------|----------|---|--------|--------|
| ENSG0000( API5     | protein_co chr11 | 43311963 | 43344529 | + | 26.77  | 24.34  |
| ENSG0000( ASPG     | protein_co chr14 | 1.04E+08 | 1.04E+08 | + | 0      | 0      |
| ENSG0000( ZNF319   | protein_co chr16 | 57994668 | 58000453 | - | 4.07   | 4.92   |
| ENSG0000( HPS6     | protein_co chr10 | 1.02E+08 | 1.02E+08 | + | 8.45   | 8.75   |
| ENSG0000( SENP8    | protein_co chr15 | 72114258 | 72143688 | + | 1.42   | 1.04   |
| ENSG0000( NOLC1    | protein_co chr10 | 1.02E+08 | 1.02E+08 | + | 18.31  | 17.91  |
| ENSG0000( ALKBH3   | protein_co chr11 | 43880811 | 43920266 | + | 15.44  | 15.42  |
| ENSG0000( COPS2    | protein_co chr15 | 49106068 | 49155661 | - | 44.8   | 42.8   |
| ENSG0000( GABRB3   | protein_co chr15 | 26543546 | 26939539 | - | 0.04   | 0.25   |
| ENSG0000( SPIC     | protein_co chr12 | 1.01E+08 | 1.01E+08 | + | 0      | 0      |
| ENSG0000( TBATA    | protein_co chr10 | 70771239 | 70785401 | - | 0      | 0      |
| ENSG0000( SGPL1    | protein_co chr10 | 70815961 | 70881173 | + | 9.65   | 14.57  |
| ENSG0000( FRS2     | protein_co chr12 | 69470349 | 69579789 | + | 13.3   | 14.04  |
| ENSG0000( CCT2     | protein_co chr12 | 69585334 | 69601570 | + | 40.73  | 40.66  |
| ENSG0000( PCBD1    | protein_co chr10 | 70882280 | 70888784 | - | 22.04  | 21.75  |
| ENSG0000( ARIH1    | protein_co chr15 | 72474326 | 72602985 | + | 40.18  | 33.19  |
| ENSG0000( C16orf71 | protein_co chr16 | 4734272  | 4749396  | + | 0.6    | 1.05   |
| ENSG0000( CLMP     | protein_co chr11 | 1.23E+08 | 1.23E+08 | - | 74.14  | 76.76  |
| ENSG0000( SCN3B    | protein_co chr11 | 1.24E+08 | 1.24E+08 | - | 0.13   | 0.13   |
| ENSG0000( COX11    | protein_co chr17 | 54951902 | 54968785 | - | 13.1   | 14.88  |
| ENSG0000( ZNF202   | protein_co chr11 | 1.24E+08 | 1.24E+08 | - | 3.22   | 4.81   |
| ENSG0000( FAM227B  | protein_co chr15 | 49326962 | 49620931 | - | 1.46   | 2.13   |
| ENSG0000( STXBP4   | protein_co chr17 | 54968727 | 55173632 | + | 1.95   | 1.54   |
| ENSG0000( CYR1     | protein_co chr21 | 26466209 | 26573284 | - | 0      | 0      |
| ENSG0000( CUL5     | protein_co chr11 | 1.08E+08 | 1.08E+08 | + | 7.98   | 7.93   |
| ENSG0000( MYRFL    | protein_co chr12 | 69825304 | 69959097 | + | 0.02   | 0.09   |
| ENSG0000( WBP1L    | protein_co chr10 | 1.03E+08 | 1.03E+08 | + | 30.9   | 33.84  |
| ENSG0000( BORCS7   | protein_co chr10 | 1.03E+08 | 1.03E+08 | + | 8.18   | 7.79   |
| ENSG0000( C2       | protein_co chr6  | 31897785 | 31945672 | + | 4.03   | 5.01   |
| ENSG0000( PLEKHF1  | protein_co chr19 | 29665056 | 29675457 | + | 15.88  | 17.72  |
| ENSG0000( TMEM100  | protein_co chr17 | 55719627 | 55732121 | - | 0.54   | 0.14   |
| ENSG0000( ANAPC16  | protein_co chr10 | 72216000 | 72235860 | + | 32.06  | 37.75  |
| ENSG0000( SMPD1    | protein_co chr11 | 6390431  | 6394998  | + | 112.76 | 115.59 |
| ENSG0000( APBB1    | protein_co chr11 | 6395124  | 6419414  | - | 24.73  | 29.19  |
| ENSG0000( SYNPO2L  | protein_co chr10 | 73644881 | 73663803 | - | 0.22   | 0.16   |
| ENSG0000( NUDT13   | protein_co chr10 | 73110375 | 73131828 | + | 1.39   | 1.02   |
| ENSG0000( C11orf65 | protein_co chr11 | 1.08E+08 | 1.08E+08 | - | 0.49   | 0.47   |
| ENSG0000( TRIM44   | protein_co chr11 | 35662805 | 35818007 | + | 20.94  | 21.68  |
| ENSG0000( CCDC182  | protein_co chr17 | 57744481 | 57745312 | - | 0      | 0      |
| ENSG0000( ILK      | protein_co chr11 | 6603708  | 6610874  | + | 73.59  | 72.37  |
| ENSG0000( TAF10    | protein_co chr11 | 6606296  | 6612667  | - | 90.23  | 90.38  |
| ENSG0000( TPP1     | protein_co chr11 | 6612763  | 6619461  | - | 141    | 141.91 |
| ENSG0000( DCHS1    | protein_co chr11 | 6621323  | 6655854  | - | 0.71   | 0.7    |
| ENSG0000( NETO1    | protein_co chr18 | 72742314 | 72868146 | - | 0      | 0      |
| ENSG0000( MSS51    | protein_co chr10 | 73423579 | 73433561 | - | 0.76   | 0.77   |

|                   |                  |          |          |   |        |         |
|-------------------|------------------|----------|----------|---|--------|---------|
| ENSG0000(CYB5A    | protein_co chr18 | 74250847 | 74292016 | - | 154.99 | 157.23  |
| ENSG0000(USP54    | protein_co chr10 | 73497538 | 73625953 | - | 6.26   | 5.65    |
| ENSG0000(RAG1     | protein_co chr11 | 36510709 | 36593156 | + | 0.38   | 0.14    |
| ENSG0000(POTED    | protein_co chr21 | 13609858 | 13641585 | + | 0      | 0       |
| ENSG0000(C11orf74 | protein_co chr11 | 36594493 | 36659290 | + | 13.29  | 16.84   |
| ENSG0000(WDR88    | protein_co chr19 | 33132090 | 33175795 | + | 0      | 0       |
| ENSG0000(OR10A5   | protein_co chr11 | 6845652  | 6846705  | + | 0      | 0       |
| ENSG0000(OR2D2    | protein_co chr11 | 6891490  | 6892599  | - | 0      | 0       |
| ENSG0000(ATP9B    | protein_co chr18 | 79069285 | 79378283 | + | 12.39  | 13.03   |
| ENSG0000(PPFIBP2  | protein_co chr11 | 7513298  | 7657127  | + | 10.71  | 11.95   |
| ENSG0000(MOGAT2   | protein_co chr11 | 75717819 | 75732958 | + | 0      | 0       |
| ENSG0000(CYB5R2   | protein_co chr11 | 7665100  | 7677222  | - | 5.28   | 5.92    |
| ENSG0000(SERPINB7 | protein_co chr18 | 63752935 | 63805376 | + | 0.03   | 0.03    |
| ENSG0000(KIAA0355 | protein_co chr19 | 34254537 | 34355586 | + | 7.75   | 6.7     |
| ENSG0000(SERPINB8 | protein_co chr18 | 63969925 | 64019779 | + | 17.66  | 13.65   |
| ENSG0000(TUB      | protein_co chr11 | 8019244  | 8106112  | + | 1.42   | 1.58    |
| ENSG0000(RIC3     | protein_co chr11 | 8106093  | 8169055  | - | 0.26   | 0       |
| ENSG0000(LMO1     | protein_co chr11 | 8224304  | 8268716  | - | 0      | 0       |
| ENSG0000(OR5P1P   | unprocessε chr11 | 7772890  | 7773814  | - | 0      | 0       |
| ENSG0000(IDH3A    | protein_co chr15 | 78131498 | 78171949 | + | 15.6   | 18.28   |
| ENSG0000(WDR72    | protein_co chr15 | 53513741 | 53762878 | - | 0.14   | 0       |
| ENSG0000(CRABP1   | protein_co chr15 | 78340324 | 78348230 | + | 0      | 0       |
| ENSG0000(PLD4     | protein_co chr14 | 1.05E+08 | 1.05E+08 | + | 0.01   | 0.04    |
| ENSG0000(ZMAT1    | protein_co chrX  | 1.02E+08 | 1.02E+08 | - | 0.57   | 0.41    |
| ENSG0000(XRRA1    | protein_co chr11 | 74807739 | 74949200 | - | 12.03  | 12.29   |
| ENSG0000(TRIM66   | protein_co chr11 | 8612037  | 8671866  | - | 3.36   | 3.41    |
| ENSG0000(RNF169   | protein_co chr11 | 74748868 | 74842413 | + | 3.38   | 3.87    |
| ENSG0000(RPL27A   | protein_co chr11 | 8682411  | 8714759  | + | 1077.6 | 1117.31 |
| ENSG0000(ST5      | protein_co chr11 | 8693351  | 8910951  | - | 36.19  | 39.77   |
| ENSG0000(CDYL2    | protein_co chr16 | 80597906 | 80804329 | - | 1.53   | 2.16    |
| ENSG0000(TMEM130  | protein_co chr7  | 98846488 | 98870771 | - | 0.77   | 0.72    |
| ENSG0000(PRTG     | protein_co chr15 | 55611546 | 55743090 | - | 1.91   | 1.41    |
| ENSG0000(CENPN    | protein_co chr16 | 81006498 | 81033114 | + | 4.91   | 2.64    |
| ENSG0000(AKIP1    | protein_co chr11 | 8911139  | 8920084  | + | 19.62  | 15.02   |
| ENSG0000(ATMIN    | protein_co chr16 | 81035847 | 81047358 | + | 19.3   | 18.32   |
| ENSG0000(C16orf46 | protein_co chr16 | 81053497 | 81077267 | - | 0      | 0       |
| ENSG0000(TMEM41B  | protein_co chr11 | 9280654  | 9314780  | - | 9.6    | 10.69   |
| ENSG0000(PKD1L2   | polymorph chr16  | 81100875 | 81220370 | - | 1.82   | 2.74    |
| ENSG0000(LEO1     | protein_co chr15 | 51938025 | 51971806 | - | 7.54   | 6.44    |
| ENSG0000(ZNF143   | protein_co chr11 | 9460319  | 9528524  | + | 9.08   | 9.09    |
| ENSG0000(TMX3     | protein_co chr18 | 68673688 | 68715298 | - | 18.68  | 16.69   |
| ENSG0000(MFAP4    | protein_co chr17 | 19383442 | 19387240 | - | 175.13 | 253.18  |
| ENSG0000(WEE1     | protein_co chr11 | 9573681  | 9593457  | + | 12.05  | 13.1    |
| ENSG0000(MAPK7    | protein_co chr17 | 19377721 | 19383544 | + | 16.79  | 15.31   |
| ENSG0000(FAM86GP  | unprocessε chr11 | 3410352  | 3422496  | - | 0      | 0       |



|                 |           |                  |          |          |   |         |         |
|-----------------|-----------|------------------|----------|----------|---|---------|---------|
| ENSG00000100000 | PRKCB     | protein_co chr16 | 23836001 | 24220611 | + | 0       | 0       |
| ENSG00000100000 | RP11-382A | protein_co chr15 | 83112738 | 83208018 | - | 18.81   | 18.9    |
| ENSG00000100000 | NDST2     | protein_co chr10 | 73801911 | 73811798 | - | 8.59    | 10.3    |
| ENSG00000100000 | MCM7      | protein_co chr7  | 1E+08    | 1E+08    | - | 18.73   | 22.96   |
| ENSG00000100000 | CLEC3A    | protein_co chr16 | 78022515 | 78066761 | + | 0       | 0       |
| ENSG00000100000 | CCDC68    | protein_co chr18 | 54901509 | 54959508 | - | 1.9     | 2.53    |
| ENSG00000100000 | CLEC4E    | protein_co chr12 | 8533305  | 8540963  | - | 0       | 0       |
| ENSG00000100000 | ZNF3      | protein_co chr7  | 1E+08    | 1E+08    | - | 9.74    | 12      |
| ENSG00000100000 | CLEC4D    | protein_co chr12 | 8509475  | 8522366  | + | 0       | 0       |
| ENSG00000100000 | ZSCAN21   | protein_co chr7  | 1E+08    | 1E+08    | + | 3.94    | 3.93    |
| ENSG00000100000 | HSBP1P2   | processed_chr4   | 1.1E+08  | 1.1E+08  | - | 0       | 0       |
| ENSG00000100000 | RIMKLB    | protein_co chr12 | 8681600  | 8783095  | + | 16.54   | 15.7    |
| ENSG00000100000 | A2ML1     | protein_co chr12 | 8822472  | 8887001  | + | 0       | 0       |
| ENSG00000100000 | BEAN1     | protein_co chr16 | 66427297 | 66493529 | + | 0.85    | 1.43    |
| ENSG00000100000 | TK2       | protein_co chr16 | 66508003 | 66552544 | - | 23.17   | 20.35   |
| ENSG00000100000 | TMED3     | protein_co chr15 | 79311062 | 79427432 | + | 71.19   | 69.16   |
| ENSG00000100000 | SLC38A8   | protein_co chr16 | 84009667 | 84042636 | - | 0       | 0       |
| ENSG00000100000 | SEC11C    | protein_co chr18 | 59139477 | 59158836 | + | 8.63    | 9.49    |
| ENSG00000100000 | CPLX4     | protein_co chr18 | 59275156 | 59318649 | - | 0       | 0       |
| ENSG00000100000 | GALR1     | protein_co chr18 | 77250549 | 77277896 | + | 0       | 0       |
| ENSG00000100000 | TMEM135   | protein_co chr11 | 87037844 | 87323758 | + | 12.17   | 11.62   |
| ENSG00000100000 | IQCD      | protein_co chr12 | 1.13E+08 | 1.13E+08 | - | 0.78    | 0.98    |
| ENSG00000100000 | NDEL1     | protein_co chr17 | 8413131  | 8490411  | + | 24.73   | 18.8    |
| ENSG00000100000 | CENPV     | protein_co chr17 | 16342534 | 16353656 | - | 1.63    | 1.93    |
| ENSG00000100000 | CDH16     | protein_co chr16 | 66908122 | 66918984 | - | 0       | 0       |
| ENSG00000100000 | RRAD      | protein_co chr16 | 66921679 | 66925644 | - | 2.98    | 2.57    |
| ENSG00000100000 | FAM96B    | protein_co chr16 | 66932055 | 66934423 | - | 54.76   | 57      |
| ENSG00000100000 | CFAP52    | protein_co chr17 | 9576627  | 9643459  | + | 0.06    | 0.15    |
| ENSG00000100000 | HSP90B1   | protein_co chr12 | 1.04E+08 | 1.04E+08 | + | 535.45  | 480.64  |
| ENSG00000100000 | MC4R      | protein_co chr18 | 60371110 | 60372775 | - | 0       | 0       |
| ENSG00000100000 | BLCAP     | protein_co chr20 | 37492472 | 37527931 | - | 22.73   | 23.25   |
| ENSG00000100000 | SERPINB12 | protein_co chr18 | 63556160 | 63567011 | + | 0       | 0       |
| ENSG00000100000 | CHRFAM7A  | protein_co chr15 | 30357766 | 30393849 | - | 0.32    | 0.49    |
| ENSG00000100000 | ATF7IP2   | protein_co chr16 | 10326434 | 10483638 | + | 0.16    | 0.44    |
| ENSG00000100000 | MMP10     | protein_co chr11 | 1.03E+08 | 1.03E+08 | - | 0.26    | 0.27    |
| ENSG00000100000 | TVP23A    | protein_co chr16 | 10760919 | 10818794 | - | 0.05    | 0       |
| ENSG00000100000 | BEX3      | protein_co chrX  | 1.03E+08 | 1.03E+08 | + | 90.33   | 98.24   |
| ENSG00000100000 | TMPRSS5   | protein_co chr11 | 1.14E+08 | 1.14E+08 | - | 0.18    | 0.04    |
| ENSG00000100000 | COG1      | protein_co chr17 | 73192632 | 73208507 | + | 12.14   | 12.39   |
| ENSG00000100000 | PLEKHA7   | protein_co chr11 | 16777317 | 17014443 | - | 1.49    | 1.68    |
| ENSG00000100000 | OR5M13P   | unprocessε chr11 | 56597426 | 56598362 | - | 0       | 0       |
| ENSG00000100000 | ZNF606    | protein_co chr19 | 57977053 | 58003349 | - | 3.39    | 3.8     |
| ENSG00000100000 | ZCCHC18   | protein_co chrX  | 1.04E+08 | 1.04E+08 | + | 1.24    | 1.43    |
| ENSG00000100000 | B2M       | protein_co chr15 | 44711477 | 44718877 | + | 4339.52 | 4141.62 |
| ENSG00000100000 | ZNF592    | protein_co chr15 | 84748635 | 84806432 | + | 7.81    | 8.02    |

|                    |                   |          |            |        |        |
|--------------------|-------------------|----------|------------|--------|--------|
| ENSG0000(CASC4     | protein_co chr15  | 44288729 | 44415758 + | 25.4   | 24.63  |
| ENSG0000(HTR3A     | protein_co chr11  | 1.14E+08 | 1.14E+08 + | 0      | 0      |
| ENSG0000(NNMT      | protein_co chr11  | 1.14E+08 | 1.14E+08 + | 754.08 | 720.32 |
| ENSG0000(ACSM1     | protein_co chr16  | 20623237 | 20698890 - | 0      | 0.09   |
| ENSG0000(AP1G1     | protein_co chr16  | 71729000 | 71809201 - | 20.77  | 19.29  |
| ENSG0000(SLFN5     | protein_co chr17  | 35243036 | 35273655 + | 34.84  | 36.16  |
| ENSG0000(CATSPER2  | protein_co chr15  | 43628503 | 43668118 - | 0.88   | 0.69   |
| ENSG0000(STRCP1    | unprocessε chr15  | 43699488 | 43718184 - | 0.01   | 0      |
| ENSG0000(ZNF667-AS | lincRNA chr19     | 56477250 | 56500666 + | 2.21   | 4.14   |
| ENSG0000(C16orf45  | protein_co chr16  | 15434295 | 15625028 + | 25.58  | 25.68  |
| ENSG0000(KIAA0430  | protein_co chr16  | 15594386 | 15643166 - | 17.2   | 18.73  |
| ENSG0000(SAA3P     | transcribec chr11 | 18112472 | 18116132 - | 0      | 0      |
| ENSG0000(SAAL1     | protein_co chr11  | 18069935 | 18106091 - | 3.21   | 3.5    |
| ENSG0000(YPEL4     | protein_co chr11  | 57645087 | 57649944 - | 4.63   | 5.98   |
| ENSG0000(PPIB      | protein_co chr15  | 64155812 | 64163205 - | 635.4  | 616.25 |
| ENSG0000(LDHC      | protein_co chr11  | 18412307 | 18452058 + | 0      | 0      |
| ENSG0000(FAM96A    | protein_co chr15  | 64072559 | 64094018 - | 23.72  | 23.65  |
| ENSG0000(LDHAL6A   | protein_co chr11  | 18455824 | 18479600 + | 0      | 0      |
| ENSG0000(FAM111A   | protein_co chr11  | 59142748 | 59155039 + | 9.46   | 9.13   |
| ENSG0000(PCLAF     | protein_co chr15  | 64364311 | 64387687 - | 0.17   | 0.32   |
| ENSG0000(KIF7      | protein_co chr15  | 89608789 | 89655451 - | 3.4    | 4.26   |
| ENSG0000(LDHD      | protein_co chr16  | 75111860 | 75116771 - | 0.87   | 0.37   |
| ENSG0000(PLIN1     | protein_co chr15  | 89664365 | 89679427 - | 0.24   | 0.14   |
| ENSG0000(PEX11A    | protein_co chr15  | 89677764 | 89690783 - | 5.74   | 5.26   |
| ENSG0000(TMEM170)  | protein_co chr16  | 75443054 | 75465497 - | 3.24   | 2.66   |
| ENSG0000(MESP1     | protein_co chr15  | 89748661 | 89751310 - | 1.38   | 0.76   |
| ENSG0000(ANPEP     | protein_co chr15  | 89784889 | 89815401 - | 85.85  | 78.14  |
| ENSG0000(SCNN1G    | protein_co chr16  | 23182715 | 23216883 + | 0      | 0      |
| ENSG0000(RBPM52    | protein_co chr15  | 64739892 | 64775587 - | 0.06   | 0.07   |
| ENSG0000(NAV2      | protein_co chr11  | 19350724 | 20121598 + | 8.05   | 7.37   |
| ENSG0000(ANKDD1A   | protein_co chr15  | 64911902 | 64958700 + | 2.98   | 2.65   |
| ENSG0000(GLYATL1   | protein_co chr11  | 58905398 | 59043527 + | 0.04   | 0      |
| ENSG0000(C18orf54  | protein_co chr18  | 54357917 | 54385218 + | 0.42   | 0.52   |
| ENSG0000(DCTN5     | protein_co chr16  | 23641392 | 23677455 + | 20.83  | 19.3   |
| ENSG0000(TERF2IP   | protein_co chr16  | 75647786 | 75761872 + | 19.09  | 20.02  |
| ENSG0000(PLK1      | protein_co chr16  | 23677656 | 23690367 + | 0.82   | 0.41   |
| ENSG0000(CLPX      | protein_co chr15  | 65148219 | 65185342 - | 16.04  | 20.67  |
| ENSG0000(GPR182    | protein_co chr12  | 56994446 | 56998441 + | 0      | 0      |
| ENSG0000(ZBTB39    | protein_co chr12  | 56998834 | 57006446 - | 1.63   | 1.45   |
| ENSG0000(CACNG2    | protein_co chr22  | 36563921 | 36703558 - | 0      | 0      |
| ENSG0000(TAC3      | protein_co chr12  | 57010000 | 57028883 - | 2.01   | 2.4    |
| ENSG0000(MYO1A     | protein_co chr12  | 57028517 | 57051198 - | 0      | 0      |
| ENSG0000(CHP2      | protein_co chr16  | 23754627 | 23758951 + | 0.12   | 0.1    |
| ENSG0000(NEMP1     | protein_co chr12  | 57055643 | 57088063 - | 4.63   | 3.65   |
| ENSG0000(OR4D6     | protein_co chr11  | 59456938 | 59457991 + | 0      | 0      |

|                    |                  |          |          |   |        |        |
|--------------------|------------------|----------|----------|---|--------|--------|
| ENSG0000(NAB2      | protein_co chr12 | 57088894 | 57095476 | + | 26.03  | 24.19  |
| ENSG0000(VPS39     | protein_co chr15 | 42158701 | 42208316 | - | 23.62  | 28.71  |
| ENSG0000(STAT6     | protein_co chr12 | 57095408 | 57132139 | - | 97.23  | 103.64 |
| ENSG0000(PATL1     | protein_co chr11 | 59636716 | 59668980 | - | 21.17  | 20.09  |
| ENSG0000(ATP23     | protein_co chr12 | 57941541 | 57957269 | + | 3.62   | 4.87   |
| ENSG0000(ELFN2     | protein_co chr22 | 37367960 | 37427470 | - | 0.08   | 0.17   |
| ENSG0000(STX3      | protein_co chr11 | 59755059 | 59805882 | + | 16.48  | 14.65  |
| ENSG0000(MRPL16    | protein_co chr11 | 59806135 | 59810872 | - | 16.33  | 15.73  |
| ENSG0000(PIP4K2C   | protein_co chr12 | 57591174 | 57603418 | + | 13.81  | 15.14  |
| ENSG0000(MTMR10    | protein_co chr15 | 30938941 | 30991607 | - | 8.36   | 7.9    |
| ENSG0000(YWHAB     | protein_co chr20 | 44885676 | 44908532 | + | 74.6   | 79.55  |
| ENSG0000(MIR202HG  | antisense chr10  | 1.33E+08 | 1.33E+08 | - | 0      | 0      |
| ENSG0000(C15orf48  | protein_co chr15 | 45430529 | 45448761 | + | 0.45   | 0.42   |
| ENSG0000(SCG5      | protein_co chr15 | 32641676 | 32697098 | + | 12.47  | 11.29  |
| ENSG0000(GREM1     | protein_co chr15 | 32717974 | 32745107 | + | 355.06 | 336.7  |
| ENSG0000(NYAP1     | protein_co chr7  | 1E+08    | 1E+08    | + | 0.5    | 0.72   |
| ENSG0000(TSC22D4   | protein_co chr7  | 1E+08    | 1E+08    | - | 28.58  | 25.13  |
| ENSG0000(MS4A6E    | protein_co chr11 | 60334831 | 60396596 | + | 0      | 0      |
| ENSG0000(MS4A7     | protein_co chr11 | 60378482 | 60395951 | + | 0.1    | 0      |
| ENSG0000(MS4A14    | protein_co chr11 | 60378530 | 60417756 | + | 0      | 0      |
| ENSG0000(MS4A5     | protein_co chr11 | 60429589 | 60455214 | + | 0      | 0      |
| ENSG0000(DIS3L     | protein_co chr15 | 66293217 | 66333898 | + | 12.15  | 12.03  |
| ENSG0000(CCNDP1    | protein_co chr15 | 43185118 | 43197176 | + | 33.59  | 29.22  |
| ENSG0000(EPB42     | protein_co chr15 | 43106225 | 43221283 | - | 0      | 0      |
| ENSG0000(TGM6      | protein_co chr20 | 2380908  | 2432753  | + | 0      | 0      |
| ENSG0000(SMAD3     | protein_co chr15 | 67063763 | 67195195 | + | 37.66  | 36.31  |
| ENSG0000(MS4A8     | protein_co chr11 | 60699574 | 60715811 | + | 0      | 0      |
| ENSG0000(CCDC178   | protein_co chr18 | 32937402 | 33441101 | - | 0      | 0      |
| ENSG0000(MS4A15    | protein_co chr11 | 60756953 | 60776732 | + | 0      | 0      |
| ENSG0000(MAP1A     | protein_co chr15 | 43510958 | 43531620 | + | 34.1   | 31.32  |
| ENSG0000(RCCD1     | protein_co chr15 | 90954870 | 90963125 | + | 7      | 7      |
| ENSG0000(AKTIP     | protein_co chr16 | 53491040 | 53504411 | - | 15.62  | 15.91  |
| ENSG0000(MAPRE2    | protein_co chr18 | 34976928 | 35143470 | + | 12.02  | 17.44  |
| ENSG0000(EVA1C     | protein_co chr21 | 32412006 | 32515397 | + | 8.07   | 7.53   |
| ENSG0000(TCP10L2   | protein_co chr6  | 1.67E+08 | 1.67E+08 | + | 0      | 0      |
| ENSG0000(MARS      | protein_co chr12 | 57475445 | 57517569 | + | 57.02  | 63.05  |
| ENSG0000(MBD6      | protein_co chr12 | 57520710 | 57530148 | + | 13.49  | 13.72  |
| ENSG0000(CNPY4     | protein_co chr7  | 1E+08    | 1E+08    | + | 20.66  | 19.4   |
| ENSG0000(PDIA3     | protein_co chr15 | 43746392 | 43773279 | + | 592.91 | 542.87 |
| ENSG0000(NUDT21    | protein_co chr16 | 56429133 | 56452199 | - | 34.84  | 32.14  |
| ENSG0000(NAT16     | protein_co chr7  | 1.01E+08 | 1.01E+08 | - | 0      | 0      |
| ENSG0000(TERB2     | protein_co chr15 | 44956702 | 44979229 | + | 0      | 0      |
| ENSG0000(NKX3-1    | protein_co chr8  | 23678693 | 23682927 | - | 0.94   | 1.59   |
| ENSG0000(SGSM1     | protein_co chr22 | 24806169 | 24927578 | + | 0.13   | 0.04   |
| ENSG0000(RP11-93B1 | antisense chr20  | 62640719 | 62643304 | - | 0.03   | 0.03   |

|                    |                  |          |          |   |        |        |
|--------------------|------------------|----------|----------|---|--------|--------|
| ENSG0000(DUSP18    | protein_co chr22 | 30652051 | 30667890 | - | 3.77   | 3.07   |
| ENSG0000(TEF       | protein_co chr22 | 41367333 | 41399326 | + | 14.86  | 13.36  |
| ENSG0000(MEI1      | protein_co chr22 | 41699499 | 41799456 | + | 2.39   | 1.96   |
| ENSG0000(B4GALNT2  | protein_co chr17 | 49132460 | 49176840 | + | 0.02   | 0.13   |
| ENSG0000(PBX3      | protein_co chr9  | 1.26E+08 | 1.26E+08 | + | 26.28  | 33.67  |
| ENSG0000(GNGT2     | protein_co chr17 | 49202791 | 49210574 | - | 0      | 0.17   |
| ENSG0000(PHB       | protein_co chr17 | 49404049 | 49414905 | - | 43.42  | 47.76  |
| ENSG0000(SNRPD1    | protein_co chr18 | 21612267 | 21633524 | + | 20     | 18.26  |
| ENSG0000(TTC16     | protein_co chr9  | 1.28E+08 | 1.28E+08 | + | 0.06   | 0.05   |
| ENSG0000(SUN5      | protein_co chr20 | 32983773 | 33004433 | - | 0      | 0      |
| ENSG0000(SAMD14    | protein_co chr17 | 50110040 | 50129882 | - | 2.53   | 2.69   |
| ENSG0000(PIP5KL1   | protein_co chr9  | 1.28E+08 | 1.28E+08 | - | 1.07   | 0.93   |
| ENSG0000(BPIFB6    | protein_co chr20 | 33031648 | 33044047 | + | 0      | 0      |
| ENSG0000(TMEM92    | protein_co chr17 | 50271406 | 50281485 | + | 0.12   | 0.13   |
| ENSG0000(FAM102A   | protein_co chr9  | 1.28E+08 | 1.28E+08 | - | 13.89  | 15.05  |
| ENSG0000(ACSF2     | protein_co chr17 | 50426158 | 50474845 | + | 12.43  | 13.04  |
| ENSG0000(GOLGA2    | protein_co chr9  | 1.28E+08 | 1.28E+08 | - | 62.12  | 58.42  |
| ENSG0000(TRUB2     | protein_co chr9  | 1.28E+08 | 1.28E+08 | - | 10.09  | 11.16  |
| ENSG0000(COQ4      | protein_co chr9  | 1.28E+08 | 1.28E+08 | + | 18.74  | 19.03  |
| ENSG0000(SLC27A4   | protein_co chr9  | 1.28E+08 | 1.28E+08 | + | 7.1    | 8.25   |
| ENSG0000(LINC00483 | processed_chr17  | 50761029 | 50767557 | - | 0.2    | 0      |
| ENSG0000(URM1      | protein_co chr9  | 1.28E+08 | 1.28E+08 | + | 26.82  | 22.16  |
| ENSG0000(CERCAM    | protein_co chr9  | 1.28E+08 | 1.28E+08 | + | 128.77 | 124.02 |
| ENSG0000(DOLPP1    | protein_co chr9  | 1.29E+08 | 1.29E+08 | + | 4.42   | 5.19   |
| ENSG0000(CCDC103   | protein_co chr17 | 44899142 | 44905390 | + | 0.19   | 0.33   |
| ENSG0000(ENDOG     | protein_co chr9  | 1.29E+08 | 1.29E+08 | + | 4      | 4.12   |
| ENSG0000(TBC1D21   | protein_co chr15 | 73873608 | 73889214 | + | 0      | 0      |
| ENSG0000(PRRX2     | protein_co chr9  | 1.3E+08  | 1.3E+08  | + | 8.68   | 8.13   |
| ENSG0000(UGT1A6    | protein_co chr2  | 2.34E+08 | 2.34E+08 | + | 0.04   | 0.29   |
| ENSG0000(C15orf39  | protein_co chr15 | 75195643 | 75212169 | + | 7      | 7.11   |
| ENSG0000(ISLR2     | protein_co chr15 | 74100311 | 74138540 | + | 0.27   | 0.53   |
| ENSG0000(SP2       | protein_co chr17 | 47896150 | 47928957 | + | 5.72   | 8.1    |
| ENSG0000(PRR15L    | protein_co chr17 | 47951967 | 47957878 | - | 0      | 0      |
| ENSG0000(COQ7      | protein_co chr16 | 19067599 | 19080095 | + | 7.21   | 7.66   |
| ENSG0000(GPRC5B    | protein_co chr16 | 19856691 | 19886167 | - | 64.82  | 64.14  |
| ENSG0000(CRK       | protein_co chr17 | 1420689  | 1463162  | - | 22.16  | 24.95  |
| ENSG0000(C16orf92  | protein_co chr16 | 30023334 | 30027736 | + | 0      | 0      |
| ENSG0000(GOLGA6C   | protein_co chr15 | 75258599 | 75270199 | + | 0      | 0.01   |
| ENSG0000(FBXO22    | protein_co chr15 | 75903859 | 75942510 | + | 20.73  | 22.86  |
| ENSG0000(TBC1D2B   | protein_co chr15 | 77984036 | 78077724 | - | 34.64  | 34.58  |
| ENSG0000(NOD2      | protein_co chr16 | 50693603 | 50733077 | + | 0.02   | 0.08   |
| ENSG0000(SNX20     | protein_co chr16 | 50666300 | 50681353 | - | 0      | 0      |
| ENSG0000(LOXHD1    | protein_co chr18 | 46476972 | 46657033 | - | 0      | 0      |
| ENSG0000(KATNAL2   | protein_co chr18 | 46917492 | 47102243 | + | 1.83   | 1.58   |
| ENSG0000(HDHD2     | protein_co chr18 | 47107403 | 47150520 | - | 11.4   | 9.32   |

|                    |                  |          |            |        |        |
|--------------------|------------------|----------|------------|--------|--------|
| ENSG0000(ZNF91     | protein_co chr19 | 23304991 | 23395560 - | 4.76   | 6.24   |
| ENSG0000(IGF2      | protein_co chr11 | 2129112  | 2141238 -  | 60.41  | 63.75  |
| ENSG0000(RNF214    | protein_co chr11 | 1.17E+08 | 1.17E+08 + | 6.02   | 6.35   |
| ENSG0000(CDK12     | protein_co chr17 | 39461511 | 39564907 + | 14.67  | 14.19  |
| ENSG0000(DPEP2     | protein_co chr16 | 67987394 | 68000586 - | 0      | 0      |
| ENSG0000(DUS2      | protein_co chr16 | 67987746 | 68079320 + | 3.84   | 4.35   |
| ENSG0000(POP5      | protein_co chr12 | 1.21E+08 | 1.21E+08 - | 13.58  | 13.71  |
| ENSG0000(ENGASE    | protein_co chr17 | 79074939 | 79088599 + | 8.21   | 7.2    |
| ENSG0000(RBFOX3    | protein_co chr17 | 79089345 | 79516148 - | 0      | 0.02   |
| ENSG0000(ATP5L     | protein_co chr11 | 1.18E+08 | 1.18E+08 + | 97.5   | 104.19 |
| ENSG0000(CD3D      | protein_co chr11 | 1.18E+08 | 1.18E+08 - | 0      | 0      |
| ENSG0000(TBC1D16   | protein_co chr17 | 79932343 | 80035848 - | 15.11  | 14.49  |
| ENSG0000(TEPSIN    | protein_co chr17 | 81228277 | 81239091 - | 11.55  | 10.69  |
| ENSG0000(MYO5B     | protein_co chr18 | 49822813 | 50195093 - | 0.17   | 0.04   |
| ENSG0000(ART5      | protein_co chr11 | 3638503  | 3642316 -  | 0.21   | 0.42   |
| ENSG0000(ACAA2     | protein_co chr18 | 49782167 | 49813960 - | 31.56  | 33.21  |
| ENSG0000(STIM1     | protein_co chr11 | 3854527  | 4093210 +  | 30.06  | 32.04  |
| ENSG0000(RRM1      | protein_co chr11 | 4094707  | 4138876 +  | 12.4   | 12.42  |
| ENSG0000(OR51E2    | protein_co chr11 | 4680171  | 4697854 -  | 0      | 0      |
| ENSG0000(TRIM68    | protein_co chr11 | 4598672  | 4608259 -  | 4.96   | 6.38   |
| ENSG0000(MMP26     | protein_co chr11 | 4704927  | 4992429 +  | 0      | 0      |
| ENSG0000(AC104389. | processed_chr11  | 5304976  | 5505652 -  | 0.06   | 0      |
| ENSG0000(OR51I1    | protein_co chr11 | 5440570  | 5441514 -  | 0      | 0      |
| ENSG0000(OR51Q1    | protein_co chr11 | 5422111  | 5423206 +  | 0      | 0      |
| ENSG0000(FN3K      | protein_co chr17 | 82735575 | 82751197 + | 6.25   | 7.82   |
| ENSG0000(PRRT2     | protein_co chr16 | 29811382 | 29815892 + | 2.5    | 3.45   |
| ENSG0000(ZNF23     | protein_co chr16 | 71447597 | 71463095 - | 4.58   | 4.03   |
| ENSG0000(IRGQ      | protein_co chr19 | 43584369 | 43596135 - | 3.57   | 3.88   |
| ENSG0000(ZNF226    | protein_co chr19 | 44165073 | 44178381 + | 13.54  | 11.29  |
| ENSG0000(ZNF180    | protein_co chr19 | 44474428 | 44500524 - | 1.84   | 2.09   |
| ENSG0000(POM121L3  | processed_chr20  | 23989292 | 23990454 + | 0      | 0      |
| ENSG0000(PPP2R3B   | protein_co chrX  | 333963   | 386955 -   | 3.12   | 2.81   |
| ENSG0000(PPP2R3B   | protein_co chrY  | 333963   | 386955 -   | 3.12   | 2.81   |
| ENSG0000(ZNF668    | protein_co chr16 | 31060843 | 31074320 - | 8.13   | 8.07   |
| ENSG0000(ZNF646    | protein_co chr16 | 31074422 | 31084196 + | 6.35   | 5.93   |
| ENSG0000(VKORC1    | protein_co chr16 | 31090842 | 31095980 - | 186.25 | 170.56 |
| ENSG0000(GNG8      | protein_co chr19 | 46634076 | 46634685 - | 0      | 0      |
| ENSG0000(LPO       | protein_co chr17 | 58218548 | 58268518 + | 0.1    | 0.07   |
| ENSG0000(CA4       | protein_co chr17 | 60149936 | 60170899 + | 0      | 0      |
| ENSG0000(SMG8      | protein_co chr17 | 59209400 | 59215247 + | 5.97   | 5.78   |
| ENSG0000(LINC00905 | processed_chr19  | 16031307 | 16042116 + | 0      | 0      |
| ENSG0000(TPM4      | protein_co chr19 | 16067021 | 16103005 + | 609.57 | 626.03 |
| ENSG0000(RAB8A     | protein_co chr19 | 16111629 | 16134234 + | 19.34  | 20.62  |
| ENSG0000(GPX4      | protein_co chr19 | 1103926  | 1106791 +  | 451.54 | 494.37 |
| ENSG0000(MIDN      | protein_co chr19 | 1248553  | 1259140 +  | 19.4   | 20.36  |

|                   |                   |          |            |         |         |
|-------------------|-------------------|----------|------------|---------|---------|
| ENSG0000(JSRP1    | protein_co chr19  | 2252252  | 2269759 -  | 0.15    | 0.25    |
| ENSG0000(FAM129C  | protein_co chr19  | 17523301 | 17553839 + | 0.41    | 0.33    |
| ENSG0000(KLHL26   | protein_co chr19  | 18636965 | 18671714 + | 2.1     | 1.5     |
| ENSG0000(GATAD2A  | protein_co chr19  | 19385826 | 19508931 + | 18.6    | 18.82   |
| ENSG0000(NOS2P2   | transcribec chr17 | 18497095 | 18506313 - | 0       | 0.04    |
| ENSG0000(MVD      | protein_co chr16  | 88651935 | 88663161 - | 19.67   | 21.71   |
| ENSG0000(CDT1     | protein_co chr16  | 88803213 | 88809258 + | 0.63    | 0.58    |
| ENSG0000(TRAPPC2L | protein_co chr16  | 88856220 | 88862686 + | 72.74   | 81.4    |
| ENSG0000(ANKRD11  | protein_co chr16  | 89267627 | 89490561 - | 42.01   | 45.39   |
| ENSG0000(SPATA33  | protein_co chr16  | 89657802 | 89671272 + | 1.81    | 3.69    |
| ENSG0000(SGK494   | protein_co chr17  | 28607964 | 28614200 - | 1.69    | 0.92    |
| ENSG0000(PROCA1   | protein_co chr17  | 28703197 | 28711854 - | 0.69    | 1.08    |
| ENSG0000(RPL13    | protein_co chr16  | 89560657 | 89566828 + | 1456.02 | 1442.93 |
| ENSG0000(ZNF641   | protein_co chr12  | 48337180 | 48351414 - | 4.04    | 7.34    |
| ENSG0000(LALBA    | protein_co chr12  | 48567684 | 48570066 - | 0       | 0       |
| ENSG0000(CACNB3   | protein_co chr12  | 48813794 | 48828941 + | 17.57   | 20.8    |
| ENSG0000(DHRS13   | protein_co chr17  | 28897781 | 28903071 - | 6.29    | 5.05    |
| ENSG0000(TP53I13  | protein_co chr17  | 29566052 | 29573157 + | 19.09   | 19.06   |
| ENSG0000(KMT2D    | protein_co chr12  | 49018975 | 49059774 - | 10.95   | 9.9     |
| ENSG0000(CORO6    | protein_co chr17  | 29614756 | 29622907 - | 7.55    | 8.36    |
| ENSG0000(RHEBL1   | protein_co chr12  | 49064685 | 49070025 - | 0.44    | 0.66    |
| ENSG0000(TUBA1A   | protein_co chr12  | 49184796 | 49189324 - | 212.05  | 221.14  |
| ENSG0000(TUBA1C   | protein_co chr12  | 49188736 | 49274603 + | 146.12  | 146.4   |
| ENSG0000(ZNF610   | protein_co chr19  | 52336245 | 52367778 + | 1.79    | 1.62    |
| ENSG0000(ZNF528   | protein_co chr19  | 52397849 | 52418412 + | 16.03   | 17.86   |
| ENSG0000(ZNF701   | protein_co chr19  | 52555457 | 52587174 + | 2.94    | 3.54    |
| ENSG0000(SERTAD3  | protein_co chr19  | 40440844 | 40444705 - | 9.83    | 8.99    |
| ENSG0000(NCKAP5L  | protein_co chr12  | 49791146 | 49828750 - | 13.49   | 14.34   |
| ENSG0000(RAB4B    | protein_co chr19  | 40778216 | 40796938 + | 14.94   | 15.4    |
| ENSG0000(AQP2     | protein_co chr12  | 49950741 | 49958881 + | 0       | 0       |
| ENSG0000(GPD1     | protein_co chr12  | 50103819 | 50111319 + | 0.12    | 0.02    |
| ENSG0000(PROSER3  | protein_co chr19  | 35758143 | 35771028 + | 8.43    | 5.66    |
| ENSG0000(CYP2S1   | protein_co chr19  | 41193049 | 41207539 + | 3.5     | 3.7     |
| ENSG0000(AXL      | protein_co chr19  | 41219203 | 41261766 + | 40.03   | 40.42   |
| ENSG0000(NFKBID   | protein_co chr19  | 35887653 | 35902303 - | 2.15    | 4.11    |
| ENSG0000(TMC4     | protein_co chr19  | 54160108 | 54173250 - | 0.22    | 0.97    |
| ENSG0000(ANKRD33  | protein_co chr12  | 51887960 | 51891664 + | 0       | 0       |
| ENSG0000(LAIR1    | protein_co chr19  | 54351384 | 54370558 - | 0.31    | 0.47    |
| ENSG0000(TTYH1    | protein_co chr19  | 54415219 | 54436900 + | 0       | 0.09    |
| ENSG0000(LENG8    | protein_co chr19  | 54448887 | 54462037 + | 40.65   | 52.46   |
| ENSG0000(CDC42EP5 | protein_co chr19  | 54465026 | 54473264 - | 27.16   | 29.48   |
| ENSG0000(LAIR2    | protein_co chr19  | 54497879 | 54510687 + | 0       | 0       |
| ENSG0000(TMEM145  | protein_co chr19  | 42313325 | 42325062 + | 0.03    | 0.04    |
| ENSG0000(ZNF526   | protein_co chr19  | 42220271 | 42228201 + | 2.79    | 2.57    |
| ENSG0000(TRAPPC9  | protein_co chr8   | 1.4E+08  | 1.4E+08 -  | 3.72    | 4.17    |

|                    |                  |          |          |   |        |        |
|--------------------|------------------|----------|----------|---|--------|--------|
| ENSG0000(KIR3DL1   | protein_co chr19 | 54816468 | 54830778 | + | 0      | 0      |
| ENSG0000(NLRP7     | protein_co chr19 | 54923509 | 54966312 | - | 0      | 0      |
| ENSG0000(ZNF146    | protein_co chr19 | 36214602 | 36238774 | + | 19.86  | 20.44  |
| ENSG0000(ZNF283    | protein_co chr19 | 43827292 | 43852017 | + | 2.51   | 2.19   |
| ENSG0000(PPP1R14A  | protein_co chr19 | 38251237 | 38256591 | - | 8.99   | 6.75   |
| ENSG0000(SPINT2    | protein_co chr19 | 38244035 | 38292614 | + | 5.58   | 5.99   |
| ENSG0000(C19orf33  | protein_co chr19 | 38304161 | 38305009 | + | 0      | 0.18   |
| ENSG0000(YIF1B     | protein_co chr19 | 38305104 | 38317273 | - | 43.67  | 44.63  |
| ENSG0000(DNAAF3    | protein_co chr19 | 55158661 | 55166722 | - | 0.49   | 0.44   |
| ENSG0000(PSCA      | protein_co chr8  | 1.43E+08 | 1.43E+08 | + | 0.13   | 0.13   |
| ENSG0000(ATCAY     | protein_co chr19 | 3879864  | 3928079  | + | 0.07   | 0.12   |
| ENSG0000(LY6D      | protein_co chr8  | 1.43E+08 | 1.43E+08 | - | 0      | 0      |
| ENSG0000(DAPK3     | protein_co chr19 | 3958453  | 3971123  | - | 40.53  | 39.23  |
| ENSG0000(EEF2      | protein_co chr19 | 3976056  | 3985469  | - | 840.65 | 861.87 |
| ENSG0000(TMIGD2    | protein_co chr19 | 4292232  | 4302431  | - | 0      | 0      |
| ENSG0000(CHAFA1A   | protein_co chr19 | 4402662  | 4445018  | + | 4.12   | 3.62   |
| ENSG0000(UBXN6     | protein_co chr19 | 4444999  | 4457822  | - | 84.6   | 84.71  |
| ENSG0000(CTB-50L17 | protein_co chr19 | 4472287  | 4502211  | + | 27.6   | 29.05  |
| ENSG0000(PLIN4     | protein_co chr19 | 4502180  | 4518465  | - | 0.05   | 0.15   |
| ENSG0000(SEMA6B    | protein_co chr19 | 4542593  | 4559808  | - | 2      | 1.08   |
| ENSG0000(ZNF444    | protein_co chr19 | 56132599 | 56160893 | + | 12.09  | 11.4   |
| ENSG0000(NXN       | protein_co chr17 | 799313   | 979770   | - | 1.37   | 1.08   |
| ENSG0000(FAM57A    | protein_co chr17 | 732412   | 742972   | + | 11.55  | 14.15  |
| ENSG0000(GLOD4     | protein_co chr17 | 757097   | 783390   | - | 16.43  | 25.09  |
| ENSG0000(MFSD3     | protein_co chr8  | 1.45E+08 | 1.45E+08 | + | 6.53   | 6.54   |
| ENSG0000(GPT       | protein_co chr8  | 1.45E+08 | 1.45E+08 | + | 0.03   | 0      |
| ENSG0000(KIFC2     | protein_co chr8  | 1.44E+08 | 1.44E+08 | + | 10.62  | 11.9   |
| ENSG0000(SLC43A2   | protein_co chr17 | 1569267  | 1628886  | - | 7.09   | 6.01   |
| ENSG0000(RILP      | protein_co chr17 | 1646145  | 1650077  | - | 5.67   | 6.98   |
| ENSG0000(SERPINF2  | protein_co chr17 | 1742836  | 1755268  | + | 0.15   | 0.17   |
| ENSG0000(WDR81     | protein_co chr17 | 1716523  | 1738599  | + | 11.25  | 10.04  |
| ENSG0000(SRR       | protein_co chr17 | 2303383  | 2325260  | + | 13.07  | 13.31  |
| ENSG0000(TSR1      | protein_co chr17 | 2322503  | 2337507  | - | 10.94  | 10.71  |
| ENSG0000(TRPV3     | protein_co chr17 | 3510502  | 3557995  | - | 0.48   | 1.2    |
| ENSG0000(HSD11B1L  | protein_co chr19 | 5680604  | 5688523  | + | 9.54   | 8.31   |
| ENSG0000(CYB5D2    | protein_co chr17 | 4143168  | 4187310  | + | 21.91  | 20.74  |
| ENSG0000(GGT6      | protein_co chr17 | 4556927  | 4560818  | - | 0.02   | 0.05   |
| ENSG0000(C19orf48  | protein_co chr19 | 50797704 | 50804929 | - | 11.06  | 12     |
| ENSG0000(KLK1      | protein_co chr19 | 50819148 | 50823787 | - | 0.34   | 0.08   |
| ENSG0000(KLK4      | protein_co chr19 | 50906352 | 50910738 | - | 0      | 0      |
| ENSG0000(KLK2      | protein_co chr19 | 50861568 | 50880567 | + | 0      | 0      |
| ENSG0000(KLK5      | protein_co chr19 | 50943303 | 50953093 | - | 0      | 0      |
| ENSG0000(KLK6      | protein_co chr19 | 50958631 | 50969673 | - | 0      | 0      |
| ENSG0000(KLK11     | protein_co chr19 | 51022216 | 51028039 | - | 0.07   | 0      |
| ENSG0000(KLK13     | protein_co chr19 | 51056206 | 51065114 | - | 0      | 0      |

|                    |                   |          |          |   |        |        |
|--------------------|-------------------|----------|----------|---|--------|--------|
| ENSG0000(ZNF83     | protein_co chr19  | 52594060 | 52690496 | - | 15.57  | 15.86  |
| ENSG0000(KRT80     | protein_co chr12  | 52168996 | 52192000 | - | 0.43   | 0.18   |
| ENSG0000(KRT1      | protein_co chr12  | 52674736 | 52680407 | - | 0      | 0      |
| ENSG0000(ACER1     | protein_co chr19  | 6306142  | 6333629  | - | 0.08   | 0.09   |
| ENSG0000(OTUB1     | protein_co chr11  | 63985853 | 64001811 | + | 33.22  | 34.39  |
| ENSG0000(RCOR2     | protein_co chr11  | 63911221 | 63916844 | - | 0.67   | 1.35   |
| ENSG0000(ANGPTL4   | protein_co chr19  | 8363289  | 8374373  | + | 12.72  | 17.58  |
| ENSG0000(CTD-2550C | protein_co chr19  | 8308283  | 8321379  | - | 0      | 0      |
| ENSG0000(CD320     | protein_co chr19  | 8302127  | 8308356  | - | 45.2   | 43.37  |
| ENSG0000(SPRYD3    | protein_co chr12  | 53064316 | 53079420 | - | 14.4   | 15.63  |
| ENSG0000(IGFBP6    | protein_co chr12  | 53097436 | 53102345 | + | 598.44 | 608.01 |
| ENSG0000(SOAT2     | protein_co chr12  | 53103518 | 53124538 | + | 0      | 0      |
| ENSG0000(ZNF558    | protein_co chr19  | 8806170  | 8832328  | - | 9.27   | 8.05   |
| ENSG0000(CABP2     | protein_co chr11  | 67518912 | 67524517 | - | 0      | 0      |
| ENSG0000(NDUFV1    | protein_co chr11  | 67606852 | 67612535 | + | 56.11  | 66.85  |
| ENSG0000(CDK2AP2   | protein_co chr11  | 67506497 | 67508649 | - | 15.62  | 14.51  |
| ENSG0000(C3P1      | transcribec chr19 | 10037803 | 10074135 | + | 0      | 0      |
| ENSG0000(NUDT8     | protein_co chr11  | 67627938 | 67629930 | - | 3.11   | 3.1    |
| ENSG0000(TBX10     | protein_co chr11  | 67631303 | 67639560 | - | 0      | 0      |
| ENSG0000(CTD-2369P | protein_co chr19  | 10305427 | 10316009 | - | 0.24   | 0.63   |
| ENSG0000(PRX2      | protein_co chr19  | 12796820 | 12801859 | - | 105.8  | 102.3  |
| ENSG0000(OR8J3     | protein_co chr11  | 56136771 | 56137718 | - | 0      | 0      |
| ENSG0000(OR5I1     | protein_co chr11  | 55935456 | 55936400 | - | 0      | 0      |
| ENSG0000(ZNF232    | protein_co chr17  | 5105541  | 5123116  | - | 6.43   | 6.67   |
| ENSG0000(MIS12     | protein_co chr17  | 5486285  | 5490814  | + | 4.19   | 5.22   |
| ENSG0000(CD300C    | protein_co chr17  | 74541108 | 74546143 | - | 0      | 0.08   |
| ENSG0000(CD300A    | protein_co chr17  | 74466416 | 74484796 | + | 0      | 0      |
| ENSG0000(TEKT1     | protein_co chr17  | 6789133  | 6831761  | - | 0      | 0      |
| ENSG0000(HID1      | protein_co chr17  | 74950743 | 74973166 | - | 0.58   | 0.25   |
| ENSG0000(MRPL58    | protein_co chr17  | 75012670 | 75021261 | + | 14.16  | 16.05  |
| ENSG0000(ATP5H     | protein_co chr17  | 75038863 | 75046985 | - | 154.28 | 142.03 |
| ENSG0000(TMEM88    | protein_co chr17  | 7855065  | 7856099  | + | 0.57   | 0.95   |
| ENSG0000(EVPL      | protein_co chr17  | 76004502 | 76027452 | - | 0      | 0      |
| ENSG0000(SRP68     | protein_co chr17  | 76038775 | 76072653 | - | 23.78  | 25.49  |
| ENSG0000(MGAT5B    | protein_co chr17  | 76868456 | 76950393 | + | 0.04   | 0.16   |
| ENSG0000(TMC8      | protein_co chr17  | 78130770 | 78142968 | + | 0.39   | 0.27   |
| ENSG0000(TK1       | protein_co chr17  | 78174075 | 78187233 | - | 0.35   | 0.23   |
| ENSG0000(TMEM68    | protein_co chr8   | 55696424 | 55773407 | - | 5.77   | 5.59   |
| ENSG0000(CYP7A1    | protein_co chr8   | 58490178 | 58500236 | - | 0.02   | 0.02   |
| ENSG0000(RP11-25K1 | antisense chr8    | 59119040 | 59121346 | + | 0      | 0      |
| ENSG0000(GSDMA     | protein_co chr17  | 39953263 | 39977766 | + | 0.04   | 0.09   |
| ENSG0000(KRT24     | protein_co chr17  | 40697991 | 40703750 | - | 0      | 0      |
| ENSG0000(TMEM99    | protein_co chr17  | 40819106 | 40836274 | + | 8.19   | 6      |
| ENSG0000(GHDC      | protein_co chr17  | 42188799 | 42194532 | - | 7.13   | 5.91   |
| ENSG0000(FAM234A   | protein_co chr16  | 234546   | 268971   | + | 56.99  | 61.35  |



|                   |                  |          |          |   |          |          |
|-------------------|------------------|----------|----------|---|----------|----------|
| ENSG0000(SOST     | protein_co chr17 | 43753731 | 43758788 | - | 0.5      | 0.42     |
| ENSG0000(PRR25    | protein_co chr16 | 805443   | 813861   | + | 0        | 0        |
| ENSG0000(ZNF598   | protein_co chr16 | 1997654  | 2009823  | - | 11.47    | 11.7     |
| ENSG0000(RAB26    | protein_co chr16 | 2140803  | 2154165  | + | 0.38     | 0.48     |
| ENSG0000(MLST8    | protein_co chr16 | 2204248  | 2209416  | + | 24.18    | 24.93    |
| ENSG0000(E4F1     | protein_co chr16 | 2223566  | 2235742  | + | 7.87     | 8.87     |
| ENSG0000(DNASE1L2 | protein_co chr16 | 2235816  | 2238711  | + | 0.19     | 0.11     |
| ENSG0000(ECI1     | protein_co chr16 | 2239395  | 2252300  | - | 31.74    | 29.93    |
| ENSG0000(CASKIN1  | protein_co chr16 | 2177180  | 2196525  | - | 0.18     | 0.4      |
| ENSG0000(ABCA3    | protein_co chr16 | 2275881  | 2340746  | - | 0.54     | 0.64     |
| ENSG0000(KCTD5    | protein_co chr16 | 2682475  | 2709030  | + | 8.58     | 9.84     |
| ENSG0000(SRRM2    | protein_co chr16 | 2752329  | 2772538  | + | 104.47   | 116.04   |
| ENSG0000(ZNF597   | protein_co chr16 | 3432422  | 3443542  | - | 0.65     | 0.69     |
| ENSG0000(NLRC3    | protein_co chr16 | 3539033  | 3577400  | - | 0        | 0.02     |
| ENSG0000(SDHAF2   | protein_co chr11 | 61430042 | 61447529 | + | 15.86    | 14.66    |
| ENSG0000(DDB1     | protein_co chr11 | 61299451 | 61342596 | - | 329.01   | 370      |
| ENSG0000(VPS37C   | protein_co chr11 | 61130256 | 61161617 | - | 7.44     | 8.27     |
| ENSG0000(VWCE     | protein_co chr11 | 61258286 | 61295424 | - | 33.15    | 35.57    |
| ENSG0000(RAB31L1  | protein_co chr11 | 61897301 | 61920269 | - | 24       | 23.78    |
| ENSG0000(BEST1    | protein_co chr11 | 61949821 | 61965515 | + | 1.69     | 1.37     |
| ENSG0000(FTH1     | protein_co chr11 | 61959718 | 61967660 | - | 14750.45 | 15005.79 |
| ENSG0000(BSCL2    | protein_co chr11 | 62690275 | 62709845 | - | 14.5     | 15.23    |
| ENSG0000(POLR2G   | protein_co chr11 | 62761544 | 62766710 | + | 47.51    | 44.09    |
| ENSG0000(SLC3A2   | protein_co chr11 | 62856102 | 62888875 | + | 119.96   | 107.18   |
| ENSG0000(HRASLS5  | protein_co chr11 | 63461404 | 63491194 | - | 0.13     | 0.16     |
| ENSG0000(C11orf84 | protein_co chr11 | 63813388 | 63827718 | + | 8.53     | 9.35     |
| ENSG0000(ATG16L2  | protein_co chr11 | 72814308 | 72843674 | + | 5.8      | 6.52     |
| ENSG0000(C2CD3    | protein_co chr11 | 74012714 | 74171210 | - | 5.66     | 7.06     |
| ENSG0000(TRANK1   | protein_co chr3  | 36826820 | 36945057 | - | 30.71    | 25.09    |
| ENSG0000(TTC21A   | protein_co chr3  | 39107704 | 39138903 | + | 4.36     | 3.49     |
| ENSG0000(RPSA     | protein_co chr3  | 39406689 | 39412542 | + | 618.38   | 647.13   |
| ENSG0000(ENTPD3   | protein_co chr3  | 40387156 | 40428619 | + | 0        | 0        |
| ENSG0000(CTNNB1   | protein_co chr3  | 41194837 | 41260096 | + | 66.31    | 66.5     |
| ENSG0000(ULK4     | protein_co chr3  | 41246599 | 41962430 | - | 1.63     | 0.96     |
| ENSG0000(FADD     | protein_co chr11 | 70203163 | 70207390 | + | 18.33    | 19.19    |
| ENSG0000(LTBP3    | protein_co chr11 | 65538805 | 65558930 | - | 97.73    | 99.63    |
| ENSG0000(NAALADL1 | protein_co chr11 | 65044818 | 65058549 | - | 10.71    | 12.54    |
| ENSG0000(SAC3D1   | protein_co chr11 | 65040901 | 65044828 | + | 6.24     | 5        |
| ENSG0000(BATF2    | protein_co chr11 | 64987943 | 64997045 | - | 0.38     | 0.18     |
| ENSG0000(SLC22A11 | protein_co chr11 | 64555626 | 64572875 | + | 0        | 0.03     |
| ENSG0000(SF1      | protein_co chr11 | 64764606 | 64778786 | - | 74.34    | 74.48    |
| ENSG0000(MAP4K2   | protein_co chr11 | 64784914 | 64803241 | - | 4.35     | 4.1      |
| ENSG0000(MAJIN    | protein_co chr11 | 64937517 | 64972085 | - | 0        | 0        |
| ENSG0000(CCDC88B  | protein_co chr11 | 64340223 | 64357534 | + | 1.07     | 1.72     |
| ENSG0000(SCARA3   | protein_co chr8  | 27633868 | 27676776 | + | 40.19    | 44.94    |

|                   |                  |          |            |        |        |
|-------------------|------------------|----------|------------|--------|--------|
| ENSG0000(PBK      | protein_co chr8  | 27809620 | 27838095 - | 0      | 0.29   |
| ENSG0000(SCARA5   | protein_co chr8  | 27869882 | 27992727 - | 1.56   | 1.28   |
| ENSG0000(PNOC     | protein_co chr8  | 28316986 | 28343355 + | 0      | 0      |
| ENSG0000(COPS6    | protein_co chr7  | 1E+08    | 1E+08 +    | 55.64  | 59.48  |
| ENSG0000(PAFAH1B2 | protein_co chr11 | 1.17E+08 | 1.17E+08 + | 20.91  | 19.22  |
| ENSG0000(ANKS3    | protein_co chr16 | 4696510  | 4734378 -  | 8.09   | 9.65   |
| ENSG0000(NUDT16L1 | protein_co chr16 | 4693694  | 4695859 +  | 10.18  | 11.29  |
| ENSG0000(KIAA1586 | protein_co chr6  | 57046532 | 57055239 + | 3.92   | 2.24   |
| ENSG0000(RAB4A    | protein_co chr1  | 2.29E+08 | 2.29E+08 + | 19.18  | 21.97  |
| ENSG0000(ZNF355P  | unprocessε chr21 | 13095305 | 13113790 - | 0      | 0      |
| ENSG0000(OR1F1    | protein_co chr16 | 3204247  | 3205188 +  | 0      | 0      |
| ENSG0000(OR2W6P   | unprocessε chr6  | 27937465 | 27938403 + | 0      | 0      |
| ENSG0000(DHFRP3   | processed_ chr2  | 82856826 | 82857384 + | 0      | 0      |
| ENSG0000(OR2B2    | protein_co chr6  | 27911185 | 27912396 - | 0      | 0      |
| ENSG0000(KCNJ4    | protein_co chr22 | 38426327 | 38455199 - | 0      | 0      |
| ENSG0000(SETD5    | protein_co chr3  | 9397615  | 9479240 +  | 27.72  | 30.01  |
| ENSG0000(VASN     | protein_co chr16 | 4371848  | 4383528 +  | 101.95 | 104.2  |
| ENSG0000(FAM83B   | protein_co chr6  | 54846771 | 54942022 + | 0      | 0      |
| ENSG0000(HIST3H3  | protein_co chr1  | 2.28E+08 | 2.28E+08 - | 0      | 0      |
| ENSG0000(THAP9    | protein_co chr4  | 82900684 | 82919969 + | 1.98   | 1.63   |
| ENSG0000(OR2C1    | protein_co chr16 | 3355889  | 3357294 +  | 0      | 0      |
| ENSG0000(RNF187   | protein_co chr1  | 2.28E+08 | 2.28E+08 + | 58.14  | 54.93  |
| ENSG0000(HOOK3    | protein_co chr8  | 42896932 | 43030539 + | 6.73   | 3.88   |
| ENSG0000(MAPK1IP1 | protein_co chr14 | 55051631 | 55070192 + | 29.38  | 26.31  |
| ENSG0000(DDIT4    | protein_co chr10 | 72273920 | 72276036 + | 137.5  | 138.02 |
| ENSG0000(RBPJ     | protein_co chr4  | 26163455 | 26435131 + | 19.44  | 18.03  |
| ENSG0000(LMBRD1   | protein_co chr6  | 69675802 | 69797111 - | 23.5   | 22.7   |
| ENSG0000(ZCCHC4   | protein_co chr4  | 25312785 | 25370383 + | 3.42   | 2.91   |
| ENSG0000(PTGDR    | protein_co chr14 | 52267713 | 52276724 + | 0.07   | 0.21   |
| ENSG0000(TTC39C   | protein_co chr18 | 23992773 | 24135610 + | 10.25  | 10.88  |
| ENSG0000(GLYCTK   | protein_co chr3  | 52287089 | 52293476 + | 2.16   | 2.79   |
| ENSG0000(GNG4     | protein_co chr1  | 2.36E+08 | 2.36E+08 - | 0.25   | 0.08   |
| ENSG0000(UBTD2    | protein_co chr5  | 1.72E+08 | 1.72E+08 - | 8.36   | 9.7    |
| ENSG0000(POLR2J3  | protein_co chr7  | 1.03E+08 | 1.03E+08 - | 62.82  | 64.71  |
| ENSG0000(NKIRAS2  | protein_co chr17 | 42011382 | 42025644 + | 23     | 23.85  |
| ENSG0000(DNAJC7   | protein_co chr17 | 41976433 | 42021376 - | 44.62  | 42.73  |
| ENSG0000(KCNV2    | protein_co chr9  | 2717502  | 2730037 +  | 0.05   | 0      |
| ENSG0000(IRF2BP2  | protein_co chr1  | 2.35E+08 | 2.35E+08 - | 64.06  | 70.79  |
| ENSG0000(PTF1A    | protein_co chr10 | 23192327 | 23194252 + | 0      | 0      |
| ENSG0000(NT5DC2   | protein_co chr3  | 52524385 | 52535054 - | 26.34  | 30.81  |
| ENSG0000(FOX11    | protein_co chr5  | 1.7E+08  | 1.7E+08 +  | 0.06   | 0      |
| ENSG0000(SMIM4    | protein_co chr3  | 52534013 | 52579237 + | 17.06  | 13.54  |
| ENSG0000(COA6     | protein_co chr1  | 2.34E+08 | 2.34E+08 + | 13.42  | 11.7   |
| ENSG0000(KIF5C    | protein_co chr2  | 1.49E+08 | 1.49E+08 + | 0.02   | 0.05   |
| ENSG0000(MGAT2    | protein_co chr14 | 49620795 | 49623481 + | 16.42  | 16.21  |

|                    |                  |          |          |   |        |        |
|--------------------|------------------|----------|----------|---|--------|--------|
| ENSG0000(BMI1      | protein_co chr10 | 22321211 | 22331484 | + | 17.23  | 19.7   |
| ENSG0000(THAP11    | protein_co chr16 | 67842082 | 67844195 | + | 9.92   | 10.1   |
| ENSG0000(MMADHC    | protein_co chr2  | 1.5E+08  | 1.5E+08  | - | 48.87  | 48.34  |
| ENSG0000(PDHB      | protein_co chr3  | 58427630 | 58433857 | - | 51.76  | 45.89  |
| ENSG0000(PXK       | protein_co chr3  | 58332880 | 58426126 | + | 29.53  | 30.44  |
| ENSG0000(HIST1H1E  | protein_co chr6  | 26156354 | 26157107 | + | 0      | 0      |
| ENSG0000(PCMTD1    | protein_co chr8  | 51817575 | 51899186 | - | 29.71  | 28.76  |
| ENSG0000(KCTD6     | protein_co chr3  | 58492114 | 58502360 | + | 4.11   | 5.87   |
| ENSG0000(MPLKIP    | protein_co chr7  | 40126023 | 40134659 | - | 1.54   | 1.68   |
| ENSG0000(ACOX2     | protein_co chr3  | 58505136 | 58537319 | - | 19.12  | 16.08  |
| ENSG0000(FAM107A   | protein_co chr3  | 58564117 | 58627610 | - | 0.68   | 0.39   |
| ENSG0000(IRF2      | protein_co chr4  | 1.84E+08 | 1.84E+08 | - | 13.33  | 13.32  |
| ENSG0000(MOBP      | protein_co chr3  | 39467198 | 39529479 | + | 0.04   | 0      |
| ENSG0000(CX3CR1    | protein_co chr3  | 39263494 | 39281735 | - | 0      | 0.1    |
| ENSG0000(C8orf22   | protein_co chr8  | 49054311 | 49076090 | + | 0      | 0      |
| ENSG0000(XIRP1     | protein_co chr3  | 39183210 | 39192596 | - | 0      | 0      |
| ENSG0000(INSM2     | protein_co chr14 | 35534042 | 35537054 | + | 0      | 0      |
| ENSG0000(DEGS2     | protein_co chr14 | 1E+08    | 1E+08    | - | 0.08   | 0.01   |
| ENSG0000(SCN11A    | protein_co chr3  | 38845769 | 38950561 | - | 0.06   | 0.08   |
| ENSG0000(LINC00917 | lincRNA chr16    | 86331844 | 86349683 | - | 0      | 0      |
| ENSG0000(ARF4      | protein_co chr3  | 57571363 | 57598220 | - | 161.49 | 149.86 |
| ENSG0000(2-Sep     | protein_co chr2  | 2.41E+08 | 2.41E+08 | + | 193.66 | 181.47 |
| ENSG0000(FILIP1L   | protein_co chr3  | 99830141 | 1E+08    | - | 24.59  | 22.2   |
| ENSG0000(MFSD2A    | protein_co chr1  | 39955112 | 39969968 | + | 1.2    | 1.13   |
| ENSG0000(DTYMK     | protein_co chr2  | 2.42E+08 | 2.42E+08 | - | 8.69   | 7.97   |
| ENSG0000(TAP1      | protein_co chr6  | 32845209 | 32853978 | - | 15.16  | 16.62  |
| ENSG0000(ING5      | protein_co chr2  | 2.42E+08 | 2.42E+08 | + | 10.23  | 10.15  |
| ENSG0000(ATG4B     | protein_co chr2  | 2.42E+08 | 2.42E+08 | + | 23.66  | 23.01  |
| ENSG0000(BDKRB2    | protein_co chr14 | 96204679 | 96244166 | + | 17.84  | 19.38  |
| ENSG0000(MLKL      | protein_co chr16 | 74671855 | 74700960 | - | 5.33   | 4.21   |
| ENSG0000(CMAHP     | processed_chr6   | 25081068 | 25166555 | - | 5.44   | 4.59   |
| ENSG0000(RFWD3     | protein_co chr16 | 74621394 | 74666881 | - | 3.78   | 4.47   |
| ENSG0000(MTNR1A    | protein_co chr4  | 1.87E+08 | 1.87E+08 | - | 0      | 0      |
| ENSG0000(KCNG4     | protein_co chr16 | 84218667 | 84239750 | - | 0.02   | 0      |
| ENSG0000(RHOH      | protein_co chr4  | 40191053 | 40246967 | + | 0      | 0      |
| ENSG0000(KLHL30    | protein_co chr2  | 2.38E+08 | 2.38E+08 | + | 0.01   | 0.03   |
| ENSG0000(COG7      | protein_co chr16 | 23388493 | 23453180 | - | 6.54   | 6.94   |
| ENSG0000(CDC40     | protein_co chr6  | 1.1E+08  | 1.1E+08  | + | 8.12   | 7.07   |
| ENSG0000(STIP1     | protein_co chr11 | 64185272 | 64204543 | + | 33.19  | 31.8   |
| ENSG0000(SCNN1B    | protein_co chr16 | 23278231 | 23381299 | + | 0      | 0      |
| ENSG0000(HR        | protein_co chr8  | 22114415 | 22133384 | - | 1.75   | 3.17   |
| ENSG0000(TXNDC2    | protein_co chr18 | 9885726  | 9889275  | + | 0.13   | 0.07   |
| ENSG0000(RAB31     | protein_co chr18 | 9708165  | 9862551  | + | 32     | 34.33  |
| ENSG0000(REEP4     | protein_co chr8  | 22138020 | 22141951 | - | 6.92   | 6.45   |
| ENSG0000(TNXB      | protein_co chr6  | 32041154 | 32115334 | - | 25.68  | 30.67  |

|                   |                  |          |          |   |         |         |
|-------------------|------------------|----------|----------|---|---------|---------|
| ENSG0000(LGI3     | protein_co chr8  | 22146825 | 22157084 | - | 0.02    | 0.06    |
| ENSG0000(SFTPC    | protein_co chr8  | 22156913 | 22164479 | + | 0       | 0       |
| ENSG0000(BMP1     | protein_co chr8  | 22164736 | 22212326 | + | 64.89   | 64.81   |
| ENSG0000(ATXN2L   | protein_co chr16 | 28823035 | 28837237 | + | 39.93   | 43.75   |
| ENSG0000(PHYHIP   | protein_co chr8  | 22219704 | 22232341 | - | 0.72    | 1.01    |
| ENSG0000(CCDC110  | protein_co chr4  | 1.85E+08 | 1.85E+08 | - | 0.39    | 0.14    |
| ENSG0000(POLR3D   | protein_co chr8  | 22245104 | 22254600 | + | 10.9    | 11.86   |
| ENSG0000(FEN1     | protein_co chr11 | 61792637 | 61797244 | + | 3.6     | 4.18    |
| ENSG0000(S DPR    | protein_co chr2  | 1.92E+08 | 1.92E+08 | - | 17.11   | 17.13   |
| ENSG0000(MTCL1    | protein_co chr18 | 8705661  | 8832778  | + | 31.61   | 38.8    |
| ENSG0000(GBX2     | protein_co chr2  | 2.36E+08 | 2.36E+08 | - | 0       | 0       |
| ENSG0000(HFE2     | protein_co chr1  | 1.46E+08 | 1.46E+08 | - | 0       | 0       |
| ENSG0000(SCGB1D1  | protein_co chr11 | 62190216 | 62193539 | + | 0       | 0       |
| ENSG0000(HEXIM2   | protein_co chr17 | 45160700 | 45170040 | + | 1.97    | 3.99    |
| ENSG0000(FNTA     | protein_co chr8  | 43034194 | 43085788 | + | 31.36   | 29.77   |
| ENSG0000(SERINC2  | protein_co chr1  | 31409565 | 31434680 | + | 10.51   | 10.32   |
| ENSG0000(MYL1     | protein_co chr2  | 2.1E+08  | 2.1E+08  | - | 0       | 0       |
| ENSG0000(TRAPPC11 | protein_co chr4  | 1.84E+08 | 1.84E+08 | + | 10.37   | 11.06   |
| ENSG0000(CHRM1    | protein_co chr11 | 62908679 | 62921807 | - | 0       | 0       |
| ENSG0000(COL3A1   | protein_co chr2  | 1.89E+08 | 1.89E+08 | + | 4652.87 | 4588.03 |
| ENSG0000(GFRA2    | protein_co chr8  | 21690403 | 21812357 | - | 0.03    | 0.04    |
| ENSG0000(ING2     | protein_co chr4  | 1.84E+08 | 1.84E+08 | + | 6.7     | 4.98    |
| ENSG0000(CDKN2AIP | protein_co chr4  | 1.83E+08 | 1.83E+08 | + | 5.69    | 6.7     |
| ENSG0000(SNRNP48  | protein_co chr6  | 7590199  | 7611967  | + | 5.24    | 4.14    |
| ENSG0000(TMEM223  | protein_co chr11 | 62771629 | 62792021 | - | 6.77    | 7.98    |
| ENSG0000(SLC20A2  | protein_co chr8  | 42416475 | 42541926 | - | 10.37   | 11.87   |
| ENSG0000(CRYGA    | protein_co chr2  | 2.08E+08 | 2.08E+08 | - | 0       | 0       |
| ENSG0000(DYNLRB2  | protein_co chr16 | 80540734 | 80550760 | + | 0.76    | 0.17    |
| ENSG0000(TMUB2    | protein_co chr17 | 44186970 | 44191731 | + | 22.45   | 23.73   |
| ENSG0000(ADAM29   | protein_co chr4  | 1.75E+08 | 1.75E+08 | + | 0       | 0       |
| ENSG0000(STAT3    | protein_co chr17 | 42313324 | 42388568 | - | 77.79   | 78.69   |
| ENSG0000(ZSWIM1   | protein_co chr20 | 45881227 | 45885266 | + | 4.8     | 3.79    |
| ENSG0000(ADAM9    | protein_co chr8  | 38996869 | 39105144 | + | 165.64  | 159.77  |
| ENSG0000(ADAM18   | protein_co chr8  | 39584489 | 39730064 | + | 0       | 0       |
| ENSG0000(GDNF     | protein_co chr5  | 37812677 | 37839686 | - | 1.08    | 1.44    |
| ENSG0000(SPINT5P  | processed_chr20  | 45749920 | 45750074 | + | 0       | 0       |
| ENSG0000(DPCR1    | protein_co chr6  | 30934523 | 30954221 | + | 0       | 0.01    |
| ENSG0000(WFDC13   | protein_co chr20 | 45702016 | 45708817 | + | 0       | 0       |
| ENSG0000(AXIN2    | protein_co chr17 | 65528563 | 65561647 | - | 3.8     | 4.78    |
| ENSG0000(NDUFS5   | protein_co chr1  | 39026318 | 39034636 | + | 150.82  | 158.24  |
| ENSG0000(VWA3B    | protein_co chr2  | 98087116 | 98313299 | + | 0       | 0.02    |
| ENSG0000(ZNF30    | protein_co chr19 | 34926903 | 34945170 | + | 0.93    | 1.67    |
| ENSG0000(UGT3A2   | protein_co chr5  | 36035017 | 36071358 | - | 0       | 0       |
| ENSG0000(FAM84B   | protein_co chr8  | 1.27E+08 | 1.27E+08 | - | 0.1     | 0.24    |
| ENSG0000(LDLRAD4  | protein_co chr18 | 13217498 | 13652755 | + | 0       | 0       |

|                    |                   |          |          |   |       |       |
|--------------------|-------------------|----------|----------|---|-------|-------|
| ENSG0000(KCTD19    | protein_co chr16  | 67289428 | 67326763 | - | 0     | 0     |
| ENSG0000(SLC16A4   | protein_co chr1   | 1.1E+08  | 1.1E+08  | - | 15.48 | 16.08 |
| ENSG0000(IL7R      | protein_co chr5   | 35852695 | 35879603 | + | 0.11  | 0.24  |
| ENSG0000(TMEM208   | protein_co chr16  | 67227103 | 67229278 | + | 27    | 27.11 |
| ENSG0000(LRP1B     | protein_co chr2   | 1.4E+08  | 1.42E+08 | - | 0     | 0.02  |
| ENSG0000(WFDC12    | protein_co chr20  | 45123425 | 45124465 | - | 0     | 0     |
| ENSG0000(AHCYL1    | protein_co chr1   | 1.1E+08  | 1.1E+08  | + | 39.6  | 42.57 |
| ENSG0000(DNAJC21   | protein_co chr5   | 34929593 | 34958964 | + | 14.28 | 13.65 |
| ENSG0000(PKIG      | protein_co chr20  | 44531785 | 44624247 | + | 49.41 | 50.49 |
| ENSG0000(NPNT      | protein_co chr4   | 1.06E+08 | 1.06E+08 | + | 0     | 0     |
| ENSG0000(LINC01620 | lincRNA chr20     | 44436172 | 44465349 | - | 0     | 0     |
| ENSG0000(CA7       | protein_co chr16  | 66844379 | 66854153 | + | 0     | 0     |
| ENSG0000(FAM178B   | protein_co chr2   | 96875882 | 96986592 | - | 0.12  | 0.29  |
| ENSG0000(TSPY2     | protein_co chrY   | 6246223  | 6249019  | + | 0     | 0     |
| ENSG0000(SEMA4C    | protein_co chr2   | 96859716 | 96870757 | - | 11.88 | 10.88 |
| ENSG0000(CNNM3     | protein_co chr2   | 96816245 | 96833911 | + | 5.56  | 5.41  |
| ENSG0000(GSTM4     | protein_co chr1   | 1.1E+08  | 1.1E+08  | + | 16.44 | 21.19 |
| ENSG0000(TET2      | protein_co chr4   | 1.05E+08 | 1.05E+08 | + | 5.14  | 4.65  |
| ENSG0000(CXXC4     | protein_co chr4   | 1.04E+08 | 1.04E+08 | - | 0     | 0     |
| ENSG0000(TCTN2     | protein_co chr12  | 1.24E+08 | 1.24E+08 | + | 5.5   | 5.94  |
| ENSG0000(SHOX2     | protein_co chr3   | 1.58E+08 | 1.58E+08 | - | 5.61  | 5.47  |
| ENSG0000(PPIP5K1   | protein_co chr15  | 43533462 | 43590253 | - | 5.4   | 6.06  |
| ENSG0000(TSPAN5    | protein_co chr4   | 98470367 | 98658629 | - | 20.7  | 24.46 |
| ENSG0000(ABHD15    | protein_co chr17  | 29560547 | 29567137 | - | 4.51  | 4.44  |
| ENSG0000(ZBTB5     | protein_co chr9   | 37438114 | 37465399 | - | 3.34  | 3.61  |
| ENSG0000(CTHF8     | protein_co chr16  | 69118010 | 69132584 | - | 42.44 | 38.71 |
| ENSG0000(ADAL      | protein_co chr15  | 43330674 | 43354555 | + | 5.39  | 5.84  |
| ENSG0000(LCMT2     | protein_co chr15  | 43323649 | 43330605 | - | 2.37  | 3.02  |
| ENSG0000(SNTB2     | protein_co chr16  | 69187129 | 69309052 | + | 6.91  | 7.91  |
| ENSG0000(IL12A     | protein_co chr3   | 1.6E+08  | 1.6E+08  | + | 0.73  | 0.29  |
| ENSG0000(ZNF507    | protein_co chr19  | 32345594 | 32387667 | + | 3.58  | 3.99  |
| ENSG0000(STX18     | protein_co chr4   | 4415742  | 4542346  | - | 15.77 | 17.56 |
| ENSG0000(NSG1      | protein_co chr4   | 4348140  | 4419058  | + | 1.73  | 2.15  |
| ENSG0000(ZBTB49    | protein_co chr4   | 4290251  | 4321786  | + | 1.91  | 1.96  |
| ENSG0000(GFM1      | protein_co chr3   | 1.59E+08 | 1.59E+08 | + | 8.63  | 10.29 |
| ENSG0000(OR13J1    | protein_co chr9   | 35869263 | 35870601 | - | 0     | 0     |
| ENSG0000(HTR1E     | protein_co chr6   | 86937306 | 87016683 | + | 0     | 0     |
| ENSG0000(FSTL5     | protein_co chr4   | 1.61E+08 | 1.62E+08 | - | 0     | 0     |
| ENSG0000(TPTE2P5   | transcribec chr13 | 40822296 | 40921749 | - | 0.53  | 0     |
| ENSG0000(DDX19A    | protein_co chr16  | 70346829 | 70373383 | + | 13.07 | 13.02 |
| ENSG0000(ATOX8     | protein_co chr2   | 85751344 | 85788066 | + | 18.6  | 18.88 |
| ENSG0000(SOX14     | protein_co chr3   | 1.38E+08 | 1.38E+08 | + | 0     | 0     |
| ENSG0000(ANKRD49   | protein_co chr11  | 94493629 | 94499583 | + | 3.75  | 3.91  |
| ENSG0000(SFTPBP    | protein_co chr2   | 85657314 | 85668741 | - | 0.12  | 0.03  |
| ENSG0000(USP39     | protein_co chr2   | 85602856 | 85649282 | + | 18.54 | 18.13 |

|                    |                  |          |          |   |        |        |
|--------------------|------------------|----------|----------|---|--------|--------|
| ENSG0000(TNIP2     | protein_co chr4  | 2741648  | 2756376  | - | 19.3   | 20.45  |
| ENSG0000(C2orf68   | protein_co chr2  | 85606654 | 85612066 | - | 9.17   | 11.59  |
| ENSG0000(TMEM150A  | protein_co chr2  | 85598548 | 85603196 | - | 13.11  | 14.61  |
| ENSG0000(RNF181    | protein_co chr2  | 85595725 | 85597613 | + | 96.99  | 103.17 |
| ENSG0000(VAMP5     | protein_co chr2  | 85584408 | 85593412 | + | 69.69  | 61.24  |
| ENSG0000(BTNL3     | protein_co chr5  | 1.81E+08 | 1.81E+08 | + | 0.02   | 0.05   |
| ENSG0000(LRRC28    | protein_co chr15 | 99251362 | 99390729 | + | 9.04   | 10.43  |
| ENSG0000(MAT2A     | protein_co chr2  | 85539165 | 85545280 | + | 81.24  | 77.96  |
| ENSG0000(PLA2G4F   | protein_co chr15 | 42139034 | 42156636 | - | 0      | 0      |
| ENSG0000(ENHO      | protein_co chr9  | 34521040 | 34523041 | - | 0.06   | 0.12   |
| ENSG0000(ZNF608    | protein_co chr5  | 1.25E+08 | 1.25E+08 | - | 2.06   | 3.44   |
| ENSG0000(SLC35G2   | protein_co chr3  | 1.37E+08 | 1.37E+08 | + | 4.45   | 4.65   |
| ENSG0000(INPP5D    | protein_co chr2  | 2.33E+08 | 2.33E+08 | + | 5.05   | 3.87   |
| ENSG0000(LETM1     | protein_co chr4  | 1811479  | 1856247  | - | 8.36   | 8.36   |
| ENSG0000(CTRB1     | protein_co chr16 | 75219000 | 75224924 | + | 0      | 0      |
| ENSG0000(CTRB2     | protein_co chr16 | 75204096 | 75207185 | - | 0      | 0      |
| ENSG0000(TRIM49    | protein_co chr11 | 89797655 | 89808575 | - | 0      | 0      |
| ENSG0000(TMEM129   | protein_co chr4  | 1715952  | 1721358  | - | 26.4   | 24.38  |
| ENSG0000(PPIC      | protein_co chr5  | 1.23E+08 | 1.23E+08 | - | 46.49  | 51.67  |
| ENSG0000(SPRY3     | protein_co chrX  | 1.56E+08 | 1.56E+08 | + | 0.12   | 0.09   |
| ENSG0000(SPRY3     | protein_co chrY  | 56954332 | 56968979 | + | 0.12   | 0.09   |
| ENSG0000(CEP120    | protein_co chr5  | 1.23E+08 | 1.23E+08 | - | 5.99   | 6.3    |
| ENSG0000(STXBP6    | protein_co chr14 | 24809656 | 25050297 | - | 6.46   | 4.85   |
| ENSG0000(TM4SF20   | protein_co chr2  | 2.27E+08 | 2.27E+08 | - | 0.07   | 0      |
| ENSG0000(MFF       | protein_co chr2  | 2.27E+08 | 2.27E+08 | + | 61.2   | 59.34  |
| ENSG0000(GRM5      | protein_co chr11 | 88504576 | 89065945 | - | 0      | 0      |
| ENSG0000(LGALS9    | protein_co chr17 | 27629798 | 27649560 | + | 2.24   | 1.99   |
| ENSG0000(PMCHL1    | transcribec chr5 | 22142352 | 22152356 | + | 0      | 0      |
| ENSG0000(JMJD7-PLA | protein_co chr15 | 41828095 | 41848155 | + | 1.34   | 1.32   |
| ENSG0000(OR7E102P  | unprocessε chr2  | 95546531 | 95547545 | + | 0      | 0      |
| ENSG0000(CPLX1     | protein_co chr4  | 784957   | 826198   | - | 0.03   | 0      |
| ENSG0000(PXDC1     | protein_co chr6  | 3722614  | 3752026  | - | 25.7   | 23.3   |
| ENSG0000(SIGLEC7   | protein_co chr19 | 51142299 | 51153526 | + | 0      | 0.1    |
| ENSG0000(NTSR2     | protein_co chr2  | 11658178 | 11670164 | - | 0      | 0      |
| ENSG0000(E2F6      | protein_co chr2  | 11444375 | 11466177 | - | 6.87   | 6.36   |
| ENSG0000(FEM1B     | protein_co chr15 | 68277803 | 68295865 | + | 14.53  | 14.31  |
| ENSG0000(COMMD8    | protein_co chr4  | 47450796 | 47463719 | - | 5.68   | 6.09   |
| ENSG0000(ATP5I     | protein_co chr4  | 672436   | 674338   | - | 165.58 | 150.62 |
| ENSG0000(UQCRFS1   | protein_co chr19 | 29205321 | 29213541 | - | 13.6   | 14.31  |
| ENSG0000(MFSD7     | protein_co chr4  | 681829   | 689441   | - | 2.89   | 3.11   |
| ENSG0000(COL4A3    | protein_co chr2  | 2.27E+08 | 2.27E+08 | + | 6.66   | 5.92   |
| ENSG0000(MAP2K1    | protein_co chr15 | 66386817 | 66492312 | + | 31.86  | 25.5   |
| ENSG0000(KLK7      | protein_co chr19 | 50976482 | 50984099 | - | 0      | 0      |
| ENSG0000(PMCHL2    | transcribec chr5 | 71375786 | 71385993 | + | 0      | 0      |
| ENSG0000(HNRNPH1   | protein_co chr5  | 1.8E+08  | 1.8E+08  | - | 171.46 | 174.43 |

|                     |                  |          |            |        |        |
|---------------------|------------------|----------|------------|--------|--------|
| ENSG0000( IRS1      | protein_co chr2  | 2.27E+08 | 2.27E+08 - | 3.54   | 4.02   |
| ENSG0000( MECP2     | protein_co chrX  | 1.54E+08 | 1.54E+08 - | 13.65  | 14.51  |
| ENSG0000( VCX3A     | protein_co chrX  | 6533618  | 6535118 -  | 0      | 0      |
| ENSG0000( UPF3A     | protein_co chr13 | 1.14E+08 | 1.14E+08 + | 21.73  | 23.82  |
| ENSG0000( ZBBX      | protein_co chr3  | 1.67E+08 | 1.67E+08 - | 0      | 0      |
| ENSG0000( ACTBL2    | protein_co chr5  | 57480016 | 57482809 - | 0.21   | 0.51   |
| ENSG0000( ROR2      | protein_co chr9  | 91563091 | 91950162 - | 0.23   | 0.59   |
| ENSG0000( RP3-509L4 | processed_ chr6  | 1.19E+08 | 1.19E+08 + | 0      | 0      |
| ENSG0000( AR        | protein_co chrX  | 67544032 | 67730619 + | 0.75   | 0.53   |
| ENSG0000( DHRSX     | protein_co chrX  | 2219516  | 2502805 -  | 10.73  | 10.25  |
| ENSG0000( DHRSX     | protein_co chrY  | 2219516  | 2502805 -  | 10.73  | 10.25  |
| ENSG0000( C8orf46   | protein_co chr8  | 66460003 | 66518524 + | 1.53   | 0.77   |
| ENSG0000( HSPBAP1   | protein_co chr3  | 1.23E+08 | 1.23E+08 - | 4.64   | 4.23   |
| ENSG0000( ASMTL     | protein_co chrX  | 1403139  | 1453762 -  | 7.58   | 7.02   |
| ENSG0000( ASMTL     | protein_co chrY  | 1403139  | 1453762 -  | 7.58   | 7.02   |
| ENSG0000( SLC25A6   | protein_co chrX  | 1386152  | 1392724 -  | 108.97 | 113.54 |
| ENSG0000( SLC25A6   | protein_co chrY  | 1386152  | 1392724 -  | 108.97 | 113.54 |
| ENSG0000( CHST14    | protein_co chr15 | 40470998 | 40474571 + | 14.29  | 13.1   |
| ENSG0000( PARM1     | protein_co chr4  | 74933095 | 75050115 + | 0.35   | 0.15   |
| ENSG0000( CSNK1G1   | protein_co chr15 | 64165517 | 64356259 - | 6.84   | 5.92   |
| ENSG0000( FAM110B   | protein_co chr8  | 57994509 | 58204279 + | 5.68   | 5.26   |
| ENSG0000( ARMC4     | protein_co chr10 | 27812164 | 27999048 - | 0      | 0      |
| ENSG0000( AFAP1L2   | protein_co chr10 | 1.14E+08 | 1.14E+08 - | 0.01   | 0      |
| ENSG0000( ZNF354A   | protein_co chr5  | 1.79E+08 | 1.79E+08 - | 4.07   | 4.83   |
| ENSG0000( ATF5      | protein_co chr19 | 49928702 | 49933935 + | 100.32 | 97.58  |
| ENSG0000( UBE2V2    | protein_co chr8  | 48008400 | 48064708 + | 27.75  | 27.5   |
| ENSG0000( GOT1L1    | protein_co chr8  | 37934281 | 37940129 - | 0      | 0      |
| ENSG0000( ZBTB43    | protein_co chr9  | 1.27E+08 | 1.27E+08 + | 2.89   | 3.92   |
| ENSG0000( RP11-167P | transcribec chrX | 55654709 | 55657014 - | 0      | 0      |
| ENSG0000( CPT1C     | protein_co chr19 | 49690898 | 49713731 + | 21.93  | 21.71  |
| ENSG0000( PCSK9     | protein_co chr1  | 55039548 | 55064852 + | 0.37   | 0.75   |
| ENSG0000( XPO6      | protein_co chr16 | 28097979 | 28211920 - | 37.43  | 33.62  |
| ENSG0000( GSG1L     | protein_co chr16 | 27787535 | 28063509 - | 0      | 0      |
| ENSG0000( MN1       | protein_co chr22 | 27748277 | 27801498 - | 28.31  | 33.06  |
| ENSG0000( APEX2     | protein_co chrX  | 55000357 | 55009057 + | 4.33   | 4.66   |
| ENSG0000( NSMCE1    | protein_co chr16 | 27224991 | 27268794 - | 27.53  | 26.8   |
| ENSG0000( CCDC126   | protein_co chr7  | 23597379 | 23644708 + | 4.07   | 4.27   |
| ENSG0000( IL13      | protein_co chr5  | 1.33E+08 | 1.33E+08 + | 0.05   | 0      |
| ENSG0000( NPIP12    | protein_co chr16 | 29483642 | 29505999 - | 4.5    | 5.25   |
| ENSG0000( OR10G3    | protein_co chr14 | 21569803 | 21570744 - | 0      | 0      |
| ENSG0000( RAB3B     | protein_co chr1  | 51907956 | 51990764 - | 4.54   | 4.12   |
| ENSG0000( OR6F1     | protein_co chr1  | 2.48E+08 | 2.48E+08 - | 0      | 0      |
| ENSG0000( CD2BP2    | protein_co chr16 | 30350766 | 30355361 - | 21.66  | 21.87  |
| ENSG0000( RSPO1     | protein_co chr1  | 37611350 | 37634923 - | 0.15   | 0.37   |
| ENSG0000( RGS14     | protein_co chr5  | 1.77E+08 | 1.77E+08 + | 4.35   | 4.97   |

|                    |                  |          |          |   |        |        |
|--------------------|------------------|----------|----------|---|--------|--------|
| ENSG0000(TBC1D10B  | protein_co chr16 | 30357102 | 30370264 | - | 17.2   | 15.72  |
| ENSG0000(LMAN2     | protein_co chr5  | 1.77E+08 | 1.77E+08 | - | 129.07 | 118.28 |
| ENSG0000(GCSAML    | protein_co chr1  | 2.48E+08 | 2.48E+08 | + | 0      | 0      |
| ENSG0000(RAB24     | protein_co chr5  | 1.77E+08 | 1.77E+08 | - | 26.46  | 24.62  |
| ENSG0000(PRELID1   | protein_co chr5  | 1.77E+08 | 1.77E+08 | + | 49.97  | 48.33  |
| ENSG0000(THBS3     | protein_co chr1  | 1.55E+08 | 1.55E+08 | - | 34.38  | 39.12  |
| ENSG0000(CA5B      | protein_co chrX  | 15688830 | 15788409 | + | 2.45   | 2.87   |
| ENSG0000(SLC50A1   | protein_co chr1  | 1.55E+08 | 1.55E+08 | + | 21.68  | 21.47  |
| ENSG0000(EFNA1     | protein_co chr1  | 1.55E+08 | 1.55E+08 | + | 3.5    | 2.69   |
| ENSG0000(CXCL10    | protein_co chr4  | 76021117 | 76023497 | - | 0      | 0      |
| ENSG0000(NPIP3     | protein_co chr16 | 21402237 | 21448567 | - | 10.82  | 9.66   |
| ENSG0000(SH3TC2    | protein_co chr5  | 1.49E+08 | 1.49E+08 | - | 1.37   | 1.5    |
| ENSG0000(CXCL11    | protein_co chr4  | 76033682 | 76041415 | - | 0      | 0      |
| ENSG0000(ZRSR2     | protein_co chrX  | 15790472 | 15823260 | + | 4.44   | 3.55   |
| ENSG0000(NMD3      | protein_co chr3  | 1.61E+08 | 1.61E+08 | + | 14.05  | 12.89  |
| ENSG0000(ADRB2     | protein_co chr5  | 1.49E+08 | 1.49E+08 | + | 0.02   | 0.12   |
| ENSG0000(RP11-220D | processed_chr9   | 1.09E+08 | 1.09E+08 | + | 0      | 0      |
| ENSG0000(B3GALNT1  | protein_co chr3  | 1.61E+08 | 1.61E+08 | - | 5.83   | 6.2    |
| ENSG0000(GPRIN1    | protein_co chr5  | 1.77E+08 | 1.77E+08 | - | 0.82   | 1.17   |
| ENSG0000(HSPB3     | protein_co chr5  | 54455601 | 54456384 | + | 0      | 0      |
| ENSG0000(KCNAB1    | protein_co chr3  | 1.56E+08 | 1.57E+08 | + | 0.33   | 0.41   |
| ENSG0000(MRPL1     | protein_co chr4  | 77862520 | 77952790 | + | 6.82   | 6.52   |
| ENSG0000(SHE       | protein_co chr1  | 1.54E+08 | 1.55E+08 | - | 0.03   | 0.02   |
| ENSG0000(NROB1     | protein_co chrX  | 30304206 | 30309598 | - | 0.16   | 0      |
| ENSG0000(PGM2      | protein_co chr4  | 37826633 | 37862937 | + | 12.16  | 9.9    |
| ENSG0000(STK32A    | protein_co chr5  | 1.47E+08 | 1.47E+08 | + | 0.13   | 0.26   |
| ENSG0000(IL1RAPL1  | protein_co chrX  | 28587399 | 29956723 | + | 0      | 0.02   |
| ENSG0000(P2RY12    | protein_co chr3  | 1.51E+08 | 1.51E+08 | - | 0.03   | 0.07   |
| ENSG0000(C22orf15  | protein_co chr22 | 23763021 | 23765861 | + | 0      | 0.03   |
| ENSG0000(GUSBP12   | unprocessε chr7  | 57200825 | 57203597 | - | 0      | 0      |
| ENSG0000(OR5AU1    | protein_co chr14 | 21154865 | 21156063 | - | 0      | 0      |
| ENSG0000(KIAA1024  | protein_co chr15 | 79432516 | 79472290 | + | 0.27   | 0.35   |
| ENSG0000(PDILT     | protein_co chr16 | 20359170 | 20404737 | - | 0      | 0      |
| ENSG0000(UMOD      | protein_co chr16 | 20333052 | 20356301 | - | 0      | 0      |
| ENSG0000(GP2       | protein_co chr16 | 20309572 | 20327808 | - | 0.03   | 0      |
| ENSG0000(SLC33A1   | protein_co chr3  | 1.56E+08 | 1.56E+08 | - | 12.49  | 12.46  |
| ENSG0000(SNUPN     | protein_co chr15 | 75598083 | 75626469 | - | 19.68  | 24     |
| ENSG0000(CRADD     | protein_co chr12 | 93677375 | 93894840 | + | 7.02   | 7.93   |
| ENSG0000(SIN3A     | protein_co chr15 | 75369379 | 75455842 | - | 12.82  | 13.1   |
| ENSG0000(ARL13B    | protein_co chr3  | 93980139 | 94055668 | + | 3.93   | 4.15   |
| ENSG0000(RNASE2    | protein_co chr14 | 20955452 | 20956436 | + | 0      | 0      |
| ENSG0000(ELSPBP1   | protein_co chr19 | 47994651 | 48025153 | + | 0      | 0      |
| ENSG0000(RNASE3    | protein_co chr14 | 20891399 | 20892348 | + | 0      | 0      |
| ENSG0000(PTK2      | protein_co chr8  | 1.41E+08 | 1.41E+08 | - | 28.38  | 27.14  |
| ENSG0000(RSPH10B2  | protein_co chr7  | 6754109  | 6799365  | + | 0.29   | 0.26   |



|                   |                  |          |          |   |        |        |
|-------------------|------------------|----------|----------|---|--------|--------|
| ENSG0000(PTAFR    | protein_co chr1  | 28147166 | 28193936 | - | 0.04   | 0.03   |
| ENSG0000(PTPN9    | protein_co chr15 | 75463251 | 75579289 | - | 11.68  | 12.1   |
| ENSG0000(RNASE6   | protein_co chr14 | 20781051 | 20782467 | + | 0      | 0      |
| ENSG0000(NPR1     | protein_co chr1  | 1.54E+08 | 1.54E+08 | + | 3.55   | 4.03   |
| ENSG0000(KCNK9    | protein_co chr8  | 1.4E+08  | 1.4E+08  | - | 0      | 0      |
| ENSG0000(CXCL8    | protein_co chr4  | 73740506 | 73743716 | + | 22.88  | 17.51  |
| ENSG0000(SCN9A    | protein_co chr2  | 1.66E+08 | 1.66E+08 | - | 4.43   | 3.84   |
| ENSG0000(RASSF6   | protein_co chr4  | 73571550 | 73620631 | - | 0      | 0      |
| ENSG0000(COL22A1  | protein_co chr8  | 1.39E+08 | 1.39E+08 | - | 4.04   | 4.63   |
| ENSG0000(SDC2     | protein_co chr8  | 96493351 | 96611780 | + | 17.37  | 16.51  |
| ENSG0000(CD52     | protein_co chr1  | 26317957 | 26320523 | + | 0      | 0.18   |
| ENSG0000(MMGT1    | protein_co chrX  | 1.36E+08 | 1.36E+08 | - | 6.03   | 6.94   |
| ENSG0000(SPRR1B   | protein_co chr1  | 1.53E+08 | 1.53E+08 | + | 0      | 0      |
| ENSG0000(SPRR1A   | protein_co chr1  | 1.53E+08 | 1.53E+08 | + | 0      | 0      |
| ENSG0000(OR4K14   | protein_co chr14 | 20014260 | 20015193 | - | 0      | 0      |
| ENSG0000(OR4K15   | protein_co chr14 | 19975444 | 19976659 | + | 0      | 0      |
| ENSG0000(TM2D2    | protein_co chr8  | 38988808 | 38996824 | - | 17.3   | 20.66  |
| ENSG0000(HTRA4    | protein_co chr8  | 38974164 | 38988662 | + | 0.05   | 0.15   |
| ENSG0000(PLEKHA2  | protein_co chr8  | 38901235 | 38973909 | + | 15.18  | 14.76  |
| ENSG0000(CLIC4    | protein_co chr1  | 24745357 | 24844324 | + | 143.93 | 139.26 |
| ENSG0000(SLC38A11 | protein_co chr2  | 1.65E+08 | 1.65E+08 | - | 0.01   | 0      |
| ENSG0000(GPR183   | protein_co chr13 | 99294530 | 99307405 | - | 0      | 0      |
| ENSG0000(CRCT1    | protein_co chr1  | 1.53E+08 | 1.53E+08 | + | 0      | 0      |
| ENSG0000(CCDC8    | protein_co chr19 | 46410372 | 46413584 | - | 5.66   | 6.75   |
| ENSG0000(METTL15  | protein_co chr11 | 28108248 | 28527041 | + | 2.5    | 2.72   |
| ENSG0000(ZNF280A  | protein_co chr22 | 22513736 | 22520270 | - | 0      | 0      |
| ENSG0000(MUC15    | protein_co chr11 | 26559033 | 26572233 | - | 0      | 0      |
| ENSG0000(CT55     | protein_co chrX  | 1.35E+08 | 1.35E+08 | - | 0      | 0      |
| ENSG0000(ZEB2     | protein_co chr2  | 1.44E+08 | 1.45E+08 | - | 22.74  | 19.18  |
| ENSG0000(GJB1     | protein_co chrX  | 71215194 | 71225516 | + | 0      | 0      |
| ENSG0000(PCBP1    | protein_co chr2  | 70087454 | 70089203 | + | 80.17  | 81.96  |
| ENSG0000(HINT1    | protein_co chr5  | 1.31E+08 | 1.31E+08 | - | 91.33  | 97.95  |
| ENSG0000(DTWD2    | protein_co chr5  | 1.19E+08 | 1.19E+08 | - | 0.77   | 1.81   |
| ENSG0000(VPREB1   | protein_co chr22 | 22244675 | 22245515 | + | 0      | 0      |
| ENSG0000(CLIC3    | protein_co chr9  | 1.37E+08 | 1.37E+08 | - | 5.88   | 6.35   |
| ENSG0000(INO80E   | protein_co chr16 | 29995294 | 30005793 | + | 29.08  | 21.89  |
| ENSG0000(BNC1     | protein_co chr15 | 83255903 | 83284714 | - | 4.9    | 4.78   |
| ENSG0000(DFFB     | protein_co chr1  | 3857267  | 3885429  | + | 2.23   | 2.18   |
| ENSG0000(NFU1     | protein_co chr2  | 69395750 | 69437628 | - | 16.88  | 18.41  |
| ENSG0000(ANTXR1   | protein_co chr2  | 69013178 | 69249327 | + | 44.69  | 47.41  |
| ENSG0000(GKN1     | protein_co chr2  | 68974573 | 68980974 | + | 0.16   | 0.17   |
| ENSG0000(CKAP2L   | protein_co chr2  | 1.13E+08 | 1.13E+08 | - | 0.11   | 0.13   |
| ENSG0000(C15orf40 | protein_co chr15 | 82988441 | 83011641 | - | 14.33  | 11.27  |
| ENSG0000(FAM103A1 | protein_co chr15 | 82986207 | 82991057 | + | 5.5    | 5.8    |
| ENSG0000(PROKR1   | protein_co chr2  | 68643589 | 68658247 | + | 0      | 0      |

|                   |                   |          |          |   |       |       |
|-------------------|-------------------|----------|----------|---|-------|-------|
| ENSG0000(APLF     | protein_co chr2   | 68467561 | 68655862 | + | 1.29  | 1.15  |
| ENSG0000(BOLA2B   | protein_co chr16  | 30192934 | 30194306 | - | 22.1  | 22.34 |
| ENSG0000(RGPD8    | protein_co chr2   | 1.12E+08 | 1.12E+08 | - | 6.62  | 8.05  |
| ENSG0000(HIC2     | protein_co chr22  | 21417404 | 21451463 | + | 1.23  | 0.86  |
| ENSG0000(LUZP1    | protein_co chr1   | 23084023 | 23177808 | - | 11.37 | 12.39 |
| ENSG0000(HEXDC    | protein_co chr17  | 82418318 | 82442645 | + | 7.06  | 9.55  |
| ENSG0000(BCRP6    | unprocessε chr22  | 21290760 | 21294586 | - | 0     | 0     |
| ENSG0000(BCRP2    | transcribec chr22 | 21103016 | 21122285 | + | 1.35  | 1.47  |
| ENSG0000(DRD5     | protein_co chr4   | 9781680  | 9784009  | + | 0     | 0     |
| ENSG0000(BUB1     | protein_co chr2   | 1.11E+08 | 1.11E+08 | - | 0.3   | 0.22  |
| ENSG0000(SPNS1    | protein_co chr16  | 28974221 | 28984548 | + | 40.73 | 42.65 |
| ENSG0000(LRRC45   | protein_co chr17  | 82023302 | 82031151 | + | 6.33  | 3.9   |
| ENSG0000(CHRNA5   | protein_co chr15  | 78565520 | 78595269 | + | 0     | 0.1   |
| ENSG0000(MT1B     | protein_co chr16  | 56651899 | 56653204 | + | 0     | 0     |
| ENSG0000(CENPX    | protein_co chr17  | 82018702 | 82024107 | - | 20.84 | 17.45 |
| ENSG0000(AGPAT2   | protein_co chr9   | 1.37E+08 | 1.37E+08 | - | 29.51 | 24.54 |
| ENSG0000(ASPSCR1  | protein_co chr17  | 81976807 | 82017406 | + | 9.13  | 11.04 |
| ENSG0000(GP9      | protein_co chr3   | 1.29E+08 | 1.29E+08 | + | 0     | 0     |
| ENSG0000(FASN     | protein_co chr17  | 82078333 | 82098332 | - | 23.39 | 23.01 |
| ENSG0000(CNBP     | protein_co chr3   | 1.29E+08 | 1.29E+08 | - | 90.84 | 90.33 |
| ENSG0000(MT1E     | protein_co chr16  | 56625475 | 56627112 | + | 25.37 | 25.33 |
| ENSG0000(ACTRT2   | protein_co chr1   | 3021483  | 3022903  | + | 0     | 0     |
| ENSG0000(DUS1L    | protein_co chr17  | 82057506 | 82065887 | - | 18.31 | 15.87 |
| ENSG0000(GPS1     | protein_co chr17  | 82050691 | 82057470 | + | 33.02 | 33.16 |
| ENSG0000(RFNG     | protein_co chr17  | 82047902 | 82051831 | - | 18.7  | 22.82 |
| ENSG0000(DCXR     | protein_co chr17  | 82035136 | 82037732 | - | 24.92 | 25.84 |
| ENSG0000(ZNF32    | protein_co chr10  | 43643859 | 43648856 | - | 21.49 | 23.06 |
| ENSG0000(LDB2     | protein_co chr4   | 16501541 | 16898809 | - | 4.08  | 4.89  |
| ENSG0000(RAC3     | protein_co chr17  | 82031624 | 82034204 | + | 2.36  | 2.6   |
| ENSG0000(NRG4     | protein_co chr15  | 75935969 | 76059795 | - | 0     | 0     |
| ENSG0000(LIMS1    | protein_co chr2   | 1.09E+08 | 1.09E+08 | + | 40.17 | 37.88 |
| ENSG0000(TMEM266  | protein_co chr15  | 76059837 | 76229121 | + | 0.03  | 0.16  |
| ENSG0000(NLGN1    | protein_co chr3   | 1.73E+08 | 1.74E+08 | + | 0.37  | 0.37  |
| ENSG0000(TAPT1    | protein_co chr4   | 16160505 | 16227410 | - | 11.66 | 9.78  |
| ENSG0000(PRYP3    | transcribec chrY  | 23681440 | 23694579 | - | 0     | 0     |
| ENSG0000(UGP2     | protein_co chr2   | 63840940 | 63891562 | + | 59.97 | 58.39 |
| ENSG0000(TAS2R1   | protein_co chr5   | 9628997  | 9712378  | - | 0     | 0     |
| ENSG0000(LINGO1   | protein_co chr15  | 77613027 | 77820900 | - | 0.12  | 0.02  |
| ENSG0000(PRY      | protein_co chrY   | 22490397 | 22514637 | + | 0     | 0     |
| ENSG0000(RBMY1F   | protein_co chrY   | 22168542 | 22182982 | - | 0     | 0     |
| ENSG0000(PRY2     | protein_co chrY   | 22071756 | 22096007 | - | 0     | 0     |
| ENSG0000(RBMY1HP  | unprocessε chrY   | 21493519 | 21501968 | + | 0     | 0     |
| ENSG0000(HNRNPF   | protein_co chr10  | 43385617 | 43409166 | - | 77.88 | 84    |
| ENSG0000(BTD      | protein_co chr3   | 15601341 | 15645822 | + | 13.52 | 12.3  |
| ENSG0000(CSGALNAC | protein_co chr10  | 43138486 | 43185308 | + | 13.07 | 12.87 |

|                   |                  |          |          |   |       |       |
|-------------------|------------------|----------|----------|---|-------|-------|
| ENSG0000(TACR3    | protein_co chr4  | 1.04E+08 | 1.04E+08 | - | 0     | 0     |
| ENSG0000(GSX1     | protein_co chr13 | 27792643 | 27794768 | + | 0     | 0     |
| ENSG0000(TSPY14P  | unprocessε chrY  | 21468158 | 21470683 | + | 0     | 0     |
| ENSG0000(PCDH7    | protein_co chr4  | 30720415 | 31146805 | + | 0.66  | 0.67  |
| ENSG0000(ROBO1    | protein_co chr3  | 78597240 | 79767815 | - | 19.99 | 16.51 |
| ENSG0000(ONECUT1  | protein_co chr15 | 52756989 | 52791078 | - | 0     | 0     |
| ENSG0000(AVEN     | protein_co chr15 | 33866227 | 34039176 | - | 18.44 | 19.08 |
| ENSG0000(P2RY1    | protein_co chr3  | 1.53E+08 | 1.53E+08 | + | 0.03  | 0.01  |
| ENSG0000(CTNND2   | protein_co chr5  | 10971840 | 11904043 | - | 0     | 0     |
| ENSG0000(TRIM56   | protein_co chr7  | 1.01E+08 | 1.01E+08 | + | 11.54 | 10.09 |
| ENSG0000(MUC17    | protein_co chr7  | 1.01E+08 | 1.01E+08 | + | 0     | 0     |
| ENSG0000(AHSP     | protein_co chr16 | 31527864 | 31528803 | + | 0     | 0     |
| ENSG0000(WNT10B   | protein_co chr12 | 48965340 | 48971763 | - | 0.19  | 0.16  |
| ENSG0000(CALML6   | protein_co chr1  | 1914827  | 1917296  | + | 0.06  | 0.35  |
| ENSG0000(REPS2    | protein_co chrX  | 16946691 | 17153280 | + | 0.12  | 0.14  |
| ENSG0000(MUC3A    | protein_co chr7  | 1.01E+08 | 1.01E+08 | + | 0.04  | 0.04  |
| ENSG0000(SYAP1    | protein_co chrX  | 16719632 | 16765336 | + | 5.71  | 5.16  |
| ENSG0000(ITGAM    | protein_co chr16 | 31259990 | 31332892 | + | 0.01  | 0     |
| ENSG0000(PYDC1    | protein_co chr16 | 31215962 | 31217359 | - | 0     | 0     |
| ENSG0000(TPST1    | protein_co chr7  | 66205199 | 66420543 | + | 75.28 | 84.45 |
| ENSG0000(TM4SF4   | protein_co chr3  | 1.49E+08 | 1.5E+08  | + | 0     | 0     |
| ENSG0000(TOR1AIP2 | protein_co chr1  | 1.8E+08  | 1.8E+08  | - | 11.41 | 11.17 |
| ENSG0000(S100G    | protein_co chrX  | 16650158 | 16654670 | + | 0     | 0     |
| ENSG0000(TM4SF1   | protein_co chr3  | 1.49E+08 | 1.49E+08 | - | 90.02 | 72.82 |
| ENSG0000(OTUD3    | protein_co chr1  | 19882513 | 19912945 | + | 2.12  | 1.37  |
| ENSG0000(OTUD7A   | protein_co chr15 | 31475398 | 31870789 | - | 0.02  | 0.14  |
| ENSG0000(GUSB     | protein_co chr7  | 65960684 | 65982314 | - | 26.64 | 25.61 |
| ENSG0000(BRD3     | protein_co chr9  | 1.34E+08 | 1.34E+08 | - | 9.38  | 7.03  |
| ENSG0000(KLF13    | protein_co chr15 | 31326855 | 31435665 | + | 13.79 | 14.08 |
| ENSG0000(FRMPD4   | protein_co chrX  | 12138466 | 12724523 | + | 4.81  | 3.99  |
| ENSG0000(ZFPM2    | protein_co chr8  | 1.05E+08 | 1.06E+08 | + | 11.35 | 10.88 |
| ENSG0000(ZNF764   | protein_co chr16 | 30553764 | 30558498 | - | 3.38  | 2.8   |
| ENSG0000(HSFY2    | protein_co chrY  | 18731440 | 18828662 | - | 0     | 0     |
| ENSG0000(ZNF747   | protein_co chr16 | 30530367 | 30535347 | - | 2.99  | 3.82  |
| ENSG0000(ZNF768   | protein_co chr16 | 30524001 | 30526821 | - | 13.84 | 12.76 |
| ENSG0000(TAS1R3   | protein_co chr1  | 1331314  | 1335306  | + | 0.03  | 0.02  |
| ENSG0000(TMEM42   | protein_co chr3  | 44861869 | 44865670 | + | 17.19 | 15.19 |
| ENSG0000(MAP3K2   | protein_co chr2  | 1.27E+08 | 1.27E+08 | - | 11.94 | 11.11 |
| ENSG0000(PUSL1    | protein_co chr1  | 1308567  | 1311677  | + | 12.11 | 12.39 |
| ENSG0000(SF3B5    | protein_co chr6  | 1.44E+08 | 1.44E+08 | - | 73.48 | 78.72 |
| ENSG0000(ZNF35    | protein_co chr3  | 44648727 | 44660791 | + | 1.84  | 2.1   |
| ENSG0000(TIGD4    | protein_co chr4  | 1.53E+08 | 1.53E+08 | - | 0.02  | 0.1   |
| ENSG0000(FFO2     | protein_co chr1  | 18904281 | 18956686 | - | 2.51  | 2.73  |
| ENSG0000(NLGN2    | protein_co chr17 | 7404874  | 7419860  | + | 20.03 | 19.47 |
| ENSG0000(MYO7B    | protein_co chr2  | 1.28E+08 | 1.28E+08 | + | 0     | 0.02  |

|                 |           |                  |          |          |   |       |       |
|-----------------|-----------|------------------|----------|----------|---|-------|-------|
| ENSG00000108380 | CHD3      | protein_co chr17 | 7884806  | 7912760  | + | 55.81 | 56.02 |
| ENSG00000108381 | TMEM154   | protein_co chr4  | 1.53E+08 | 1.53E+08 | - | 2.48  | 1.55  |
| ENSG00000108382 | MYRIP     | protein_co chr3  | 39808914 | 40260321 | + | 0.17  | 0.31  |
| ENSG00000108383 | ALCAM     | protein_co chr3  | 1.05E+08 | 1.06E+08 | + | 57.2  | 49.03 |
| ENSG00000108384 | YWHAG     | protein_co chr7  | 76326794 | 76359031 | - | 55.43 | 55.4  |
| ENSG00000108385 | UBE2E3    | protein_co chr2  | 1.81E+08 | 1.81E+08 | + | 74.74 | 81.15 |
| ENSG00000108386 | CNTROB    | protein_co chr17 | 7932101  | 7949918  | + | 11.2  | 12.22 |
| ENSG00000108387 | TRAPPC1   | protein_co chr17 | 7930345  | 7932123  | - | 95.4  | 92.97 |
| ENSG00000108388 | ZPLD1     | protein_co chr3  | 1.02E+08 | 1.02E+08 | + | 0.07  | 0.04  |
| ENSG00000108389 | KCNAB3    | protein_co chr17 | 7921859  | 7929803  | - | 0.13  | 0.2   |
| ENSG00000108390 | SERPINA9  | protein_co chr14 | 94462717 | 94479689 | - | 0     | 0     |
| ENSG00000108391 | FAM153A   | protein_co chr5  | 1.78E+08 | 1.78E+08 | - | 0     | 0     |
| ENSG00000108392 | GPR37L1   | protein_co chr1  | 2.02E+08 | 2.02E+08 | + | 0.02  | 0.01  |
| ENSG00000108393 | SIMC1     | protein_co chr5  | 1.76E+08 | 1.76E+08 | + | 4.59  | 3.97  |
| ENSG00000108394 | TMEM192   | protein_co chr4  | 1.65E+08 | 1.65E+08 | - | 10.11 | 9.94  |
| ENSG00000108395 | RP11-423H | transcribed chr5 | 1.78E+08 | 1.78E+08 | + | 6.81  | 5.29  |
| ENSG00000108396 | HMP19     | protein_co chr5  | 1.74E+08 | 1.74E+08 | + | 0     | 0     |
| ENSG00000108397 | SPDYE5    | protein_co chr7  | 75493625 | 75504304 | + | 0.14  | 0.05  |
| ENSG00000108398 | SERPINA6  | protein_co chr14 | 94304248 | 94323394 | - | 0     | 0     |
| ENSG00000108399 | ZNF778    | protein_co chr16 | 89217703 | 89237071 | + | 1.82  | 2.29  |
| ENSG00000108400 | NIPA1     | protein_co chr15 | 22773063 | 22829791 | + | 4.87  | 4.5   |
| ENSG00000108401 | FOXD4     | protein_co chr9  | 116231   | 118204   | - | 0.08  | 0.09  |
| ENSG00000108402 | GPR25     | protein_co chr1  | 2.01E+08 | 2.01E+08 | + | 0     | 0     |
| ENSG00000108403 | UBE2E1    | protein_co chr3  | 23805903 | 23891316 | + | 56.45 | 50.2  |
| ENSG00000108404 | HNRNPA3   | protein_co chr2  | 1.77E+08 | 1.77E+08 | + | 59.45 | 63.36 |
| ENSG00000108405 | SIK2      | protein_co chr11 | 1.12E+08 | 1.12E+08 | + | 6.81  | 7.9   |
| ENSG00000108406 | RP11-374M | processed_chr9   | 61861853 | 61862567 | - | 0     | 0     |
| ENSG00000108407 | RNF150    | protein_co chr4  | 1.41E+08 | 1.41E+08 | - | 0.15  | 0.26  |
| ENSG00000108408 | CCDC144A  | protein_co chr17 | 16689537 | 16777881 | + | 3.13  | 2.56  |
| ENSG00000108409 | RP11-262H | lincRNA chr9     | 62897449 | 62900104 | + | 0.76  | 0.69  |
| ENSG00000108410 | VGLL2     | protein_co chr6  | 1.17E+08 | 1.17E+08 | + | 0     | 0     |
| ENSG00000108411 | CR848007  | unprocessed_chr9 | 42901238 | 42920095 | + | 0     | 0     |
| ENSG00000108412 | HOXD4     | protein_co chr2  | 1.76E+08 | 1.76E+08 | + | 0     | 0     |
| ENSG00000108413 | CHRNB1    | protein_co chr17 | 7445061  | 7457707  | + | 5.39  | 5.29  |
| ENSG00000108414 | HOXD12    | protein_co chr2  | 1.76E+08 | 1.76E+08 | + | 0     | 0     |
| ENSG00000108415 | GYPA      | protein_co chr4  | 1.44E+08 | 1.44E+08 | - | 0     | 0     |
| ENSG00000108416 | USP38     | protein_co chr4  | 1.43E+08 | 1.43E+08 | + | 4.32  | 4.44  |
| ENSG00000108417 | SLC16A5   | protein_co chr17 | 75087727 | 75106162 | + | 4.72  | 4.1   |
| ENSG00000108418 | NANP      | protein_co chr20 | 25612935 | 25624175 | - | 2.24  | 2.33  |
| ENSG00000108419 | ANKK1     | protein_co chr11 | 1.13E+08 | 1.13E+08 | + | 0.02  | 0.02  |
| ENSG00000108420 | ADRA1B    | protein_co chr5  | 1.6E+08  | 1.6E+08  | + | 0.13  | 0.04  |
| ENSG00000108421 | ADPRM     | protein_co chr17 | 10697594 | 10711233 | + | 5.44  | 3.63  |
| ENSG00000108422 | FABP6     | protein_co chr5  | 1.6E+08  | 1.6E+08  | + | 0.18  | 0     |
| ENSG00000108423 | PWWP2A    | protein_co chr5  | 1.6E+08  | 1.6E+08  | - | 5.23  | 4.95  |
| ENSG00000108424 | USP50     | protein_co chr15 | 50500562 | 50546708 | - | 0.53  | 0.13  |

|                     |                  |          |          |   |        |        |
|---------------------|------------------|----------|----------|---|--------|--------|
| ENSG0000( USP47     | protein_co chr11 | 11841423 | 11959323 | + | 17.6   | 18.32  |
| ENSG0000( PDCD6IP   | protein_co chr3  | 33798352 | 33869707 | + | 119.71 | 122.09 |
| ENSG0000( MRGPRX1   | protein_co chr11 | 18933813 | 18939507 | - | 0      | 0      |
| ENSG0000( ZNF212    | protein_co chr7  | 1.49E+08 | 1.49E+08 | + | 3.52   | 3.99   |
| ENSG0000( MRAP      | protein_co chr21 | 32291813 | 32314784 | + | 0      | 0.78   |
| ENSG0000( FAM161A   | protein_co chr2  | 61824854 | 61854143 | - | 2.8    | 2.08   |
| ENSG0000( ZNF282    | protein_co chr7  | 1.49E+08 | 1.49E+08 | + | 8.76   | 8.72   |
| ENSG0000( GLB1      | protein_co chr3  | 32996608 | 33097230 | - | 71.51  | 68.77  |
| ENSG0000( GON7      | protein_co chr14 | 93202894 | 93207094 | - | 2.47   | 2.49   |
| ENSG0000( FAXDC2    | protein_co chr5  | 1.55E+08 | 1.55E+08 | - | 33.6   | 37.29  |
| ENSG0000( CRTAP     | protein_co chr3  | 33113979 | 33147773 | + | 236.67 | 253.7  |
| ENSG0000( HSPB2     | protein_co chr11 | 1.12E+08 | 1.12E+08 | + | 2.75   | 2.26   |
| ENSG0000( C7orf33   | protein_co chr7  | 1.49E+08 | 1.49E+08 | + | 0      | 0      |
| ENSG0000( CNGB3     | protein_co chr8  | 86553977 | 86743675 | - | 0      | 0      |
| ENSG0000( SLN       | protein_co chr11 | 1.08E+08 | 1.08E+08 | - | 0      | 0      |
| ENSG0000( ELP5      | protein_co chr17 | 7251416  | 7259940  | + | 14.72  | 17.41  |
| ENSG0000( CMTM8     | protein_co chr3  | 32238679 | 32370325 | + | 0.51   | 0.78   |
| ENSG0000( GABARAP   | protein_co chr17 | 7240014  | 7242770  | - | 598.37 | 634.08 |
| ENSG0000( LGALS9B   | protein_co chr17 | 20449395 | 20467539 | - | 0      | 0      |
| ENSG0000( STX8      | protein_co chr17 | 9250471  | 9576591  | - | 38.56  | 35.89  |
| ENSG0000( CDK1      | protein_co chr10 | 60778331 | 60794852 | + | 0.47   | 0.45   |
| ENSG0000( UBB       | protein_co chr17 | 16380798 | 16382745 | + | 514.39 | 506.84 |
| ENSG0000( NFRKB     | protein_co chr11 | 1.3E+08  | 1.3E+08  | - | 6.57   | 7      |
| ENSG0000( FABP4     | protein_co chr8  | 81478419 | 81483263 | - | 0      | 0      |
| ENSG0000( FRMPD2    | protein_co chr10 | 48153088 | 48274870 | - | 0      | 0      |
| ENSG0000( PRDM10    | protein_co chr11 | 1.3E+08  | 1.3E+08  | - | 3.45   | 2.44   |
| ENSG0000( B3GNT2    | protein_co chr2  | 62196113 | 62224731 | + | 3.31   | 4.59   |
| ENSG0000( FOS       | protein_co chr14 | 75278774 | 75282230 | + | 2.01   | 2.8    |
| ENSG0000( TMED10    | protein_co chr14 | 75131470 | 75176631 | - | 237.45 | 219.54 |
| ENSG0000( OR2A20P   | transcribec chr7 | 1.44E+08 | 1.44E+08 | - | 0.44   | 0.35   |
| ENSG0000( SETMAR    | protein_co chr3  | 4303304  | 4317567  | + | 5.73   | 6.32   |
| ENSG0000( SMAD1     | protein_co chr4  | 1.45E+08 | 1.46E+08 | + | 17.46  | 16.93  |
| ENSG0000( CST5      | protein_co chr20 | 23875935 | 23879750 | - | 0      | 0      |
| ENSG0000( CST2      | protein_co chr20 | 23823769 | 23826731 | - | 0.58   | 0.42   |
| ENSG0000( EMX2      | protein_co chr10 | 1.18E+08 | 1.18E+08 | + | 0      | 0      |
| ENSG0000( CST1      | protein_co chr20 | 23747553 | 23751268 | - | 28.24  | 23.88  |
| ENSG0000( SP7       | protein_co chr12 | 53326575 | 53345315 | - | 0      | 0      |
| ENSG0000( TCAF2     | protein_co chr7  | 1.44E+08 | 1.44E+08 | + | 1.73   | 1.53   |
| ENSG0000( SEMA3E    | protein_co chr7  | 83363906 | 83649010 | - | 0.11   | 0      |
| ENSG0000( LRRN2     | protein_co chr1  | 2.05E+08 | 2.05E+08 | - | 0.02   | 0      |
| ENSG0000( SLC30A1   | protein_co chr1  | 2.12E+08 | 2.12E+08 | - | 6.45   | 6.49   |
| ENSG0000( DCLK2     | protein_co chr4  | 1.5E+08  | 1.5E+08  | + | 1.34   | 1.53   |
| ENSG0000( ZNF804A   | protein_co chr2  | 1.85E+08 | 1.85E+08 | + | 0.23   | 0.4    |
| ENSG0000( CTA-313A1 | unprocessε chr7  | 1.02E+08 | 1.02E+08 | - | 0      | 0      |
| ENSG0000( GPRC5C    | protein_co chr17 | 74424851 | 74451653 | + | 6.13   | 8.01   |

|                   |                  |          |            |       |       |
|-------------------|------------------|----------|------------|-------|-------|
| ENSG0000(TMEM182  | protein_co chr2  | 1.03E+08 | 1.03E+08 + | 5.18  | 6.41  |
| ENSG0000(VSTM2A   | protein_co chr7  | 54542325 | 54571080 + | 0     | 0     |
| ENSG0000(KRT8     | protein_co chr12 | 52897187 | 52949954 - | 28.15 | 26.1  |
| ENSG0000(KRT78    | protein_co chr12 | 52837804 | 52849092 - | 0     | 0     |
| ENSG0000(ADORA2B  | protein_co chr17 | 15944917 | 15975746 + | 28.69 | 26.28 |
| ENSG0000(SDR9C7   | protein_co chr12 | 56923154 | 56934405 - | 0.03  | 0.04  |
| ENSG0000(MGMT     | protein_co chr10 | 1.29E+08 | 1.3E+08 +  | 11.22 | 12.77 |
| ENSG0000(METTL7B  | protein_co chr12 | 55681546 | 55684611 + | 1.44  | 1.55  |
| ENSG0000(KRT86    | protein_co chr12 | 52249300 | 52309163 + | 0.08  | 0.06  |
| ENSG0000(HARS     | protein_co chr5  | 1.41E+08 | 1.41E+08 - | 24.58 | 23.8  |
| ENSG0000(NFXL1    | protein_co chr4  | 47847233 | 47914667 - | 1.86  | 2.16  |
| ENSG0000(KRT75    | protein_co chr12 | 52424070 | 52434525 - | 0     | 0     |
| ENSG0000(DENND5B  | protein_co chr12 | 31382223 | 31591097 - | 4.12  | 4.37  |
| ENSG0000(CD14     | protein_co chr5  | 1.41E+08 | 1.41E+08 - | 3.21  | 3.99  |
| ENSG0000(DNAJC18  | protein_co chr5  | 1.39E+08 | 1.39E+08 - | 8.37  | 8.25  |
| ENSG0000(KRT6C    | protein_co chr12 | 52468516 | 52473785 - | 0     | 0     |
| ENSG0000(RIOX1    | protein_co chr14 | 73490964 | 73493392 + | 4.7   | 5.34  |
| ENSG0000(SPATA24  | protein_co chr5  | 1.39E+08 | 1.39E+08 - | 2.42  | 1.62  |
| ENSG0000(RALGAPB  | protein_co chr20 | 38472816 | 38578861 + | 13.95 | 13.62 |
| ENSG0000(PYM1     | protein_co chr12 | 55901413 | 55932618 - | 12.61 | 14.12 |
| ENSG0000(MZB1     | protein_co chr5  | 1.39E+08 | 1.39E+08 - | 0     | 0     |
| ENSG0000(KRT4     | protein_co chr12 | 52806549 | 52814551 - | 0     | 0     |
| ENSG0000(SLC23A1  | protein_co chr5  | 1.39E+08 | 1.39E+08 - | 0     | 0     |
| ENSG0000(KRT74    | protein_co chr12 | 52565782 | 52573825 - | 0     | 0     |
| ENSG0000(NPAS2    | protein_co chr2  | 1.01E+08 | 1.01E+08 + | 13.07 | 10.62 |
| ENSG0000(KRT72    | protein_co chr12 | 52585589 | 52601538 - | 0     | 0     |
| ENSG0000(KISS1    | protein_co chr1  | 2.04E+08 | 2.04E+08 - | 0     | 0     |
| ENSG0000(LONRF2   | protein_co chr2  | 1E+08    | 1E+08 -    | 0.27  | 0.37  |
| ENSG0000(NUDT9    | protein_co chr4  | 87422582 | 87459454 + | 17.5  | 15.34 |
| ENSG0000(HSD17B13 | protein_co chr4  | 87303789 | 87322906 - | 0.17  | 0.14  |
| ENSG0000(PA2G4    | protein_co chr12 | 56104319 | 56113907 + | 34.87 | 34.53 |
| ENSG0000(COX7B2   | protein_co chr4  | 46734827 | 46909235 - | 0     | 0     |
| ENSG0000(ELOVL6   | protein_co chr4  | 1.1E+08  | 1.1E+08 -  | 3.98  | 1.55  |
| ENSG0000(KRT83    | protein_co chr12 | 52314301 | 52321398 - | 0.06  | 0     |
| ENSG0000(PFKFB3   | protein_co chr10 | 6144934  | 6254644 +  | 18.1  | 18.82 |
| ENSG0000(TMC7     | protein_co chr16 | 18983934 | 19063942 + | 0.15  | 0.19  |
| ENSG0000(ARL6IP1  | protein_co chr16 | 18791667 | 18801678 - | 25.54 | 27.02 |
| ENSG0000(SERPINB9 | protein_co chr6  | 2887266  | 2903280 -  | 2.37  | 2.06  |
| ENSG0000(SMAGP    | protein_co chr12 | 51244558 | 51270890 - | 5.64  | 4.26  |
| ENSG0000(IRX1     | protein_co chr5  | 3596054  | 3601403 +  | 0     | 0     |
| ENSG0000(CDH2     | protein_co chr18 | 27950966 | 28177446 - | 69.87 | 57.13 |
| ENSG0000(IRX2     | protein_co chr5  | 2745845  | 2751662 -  | 0     | 0     |
| ENSG0000(EMB      | protein_co chr5  | 50396192 | 50443248 - | 5.19  | 5.35  |
| ENSG0000(SIX2     | protein_co chr2  | 45005161 | 45009430 - | 3.53  | 3.89  |
| ENSG0000(DLGAP1   | protein_co chr18 | 3496032  | 4455335 -  | 0.2   | 0.06  |

|                 |           |             |       |          |          |   |        |        |
|-----------------|-----------|-------------|-------|----------|----------|---|--------|--------|
| ENSG00000108060 | STAT2     | protein_co  | chr12 | 56341597 | 56360155 | - | 124.81 | 135.94 |
| ENSG00000108061 | NUDCD2    | protein_co  | chr5  | 1.63E+08 | 1.63E+08 | - | 8.68   | 7.63   |
| ENSG00000108062 | LINC00266 | lincRNA     | chr6  | 131910   | 144885   | - | 0      | 0      |
| ENSG00000108063 | IRF2BP1   | protein_co  | chr19 | 45883607 | 45886170 | - | 7.7    | 10.54  |
| ENSG00000108064 | OR9K2     | protein_co  | chr12 | 55129681 | 55130802 | + | 0      | 0      |
| ENSG00000108065 | HSPA4     | protein_co  | chr5  | 1.33E+08 | 1.33E+08 | + | 42.9   | 41.27  |
| ENSG00000108066 | FOXA3     | protein_co  | chr19 | 45863989 | 45873797 | + | 0      | 0      |
| ENSG00000108067 | FAM71B    | protein_co  | chr5  | 1.57E+08 | 1.57E+08 | - | 0      | 0      |
| ENSG00000108068 | SLC26A5   | protein_co  | chr7  | 1.03E+08 | 1.03E+08 | - | 0      | 0      |
| ENSG00000108069 | COMMD5    | protein_co  | chr8  | 1.45E+08 | 1.45E+08 | - | 12.76  | 14.07  |
| ENSG00000108070 | SGCD      | protein_co  | chr5  | 1.56E+08 | 1.57E+08 | + | 3.08   | 3      |
| ENSG00000108071 | GTSF1     | protein_co  | chr12 | 54455950 | 54473602 | - | 0      | 0      |
| ENSG00000108072 | DPY19L2P2 | transcribed | chr7  | 1.03E+08 | 1.03E+08 | - | 2.3    | 2.41   |
| ENSG00000108073 | ZNF16     | protein_co  | chr8  | 1.45E+08 | 1.45E+08 | - | 3.17   | 3.42   |
| ENSG00000108074 | ARMC10    | protein_co  | chr7  | 1.03E+08 | 1.03E+08 | + | 19.99  | 20.37  |
| ENSG00000108075 | RNF34     | protein_co  | chr12 | 1.21E+08 | 1.21E+08 | + | 12.46  | 10.98  |
| ENSG00000108076 | ACYP2     | protein_co  | chr2  | 53970838 | 54305300 | + | 4.55   | 6.2    |
| ENSG00000108077 | TRABD     | protein_co  | chr22 | 50185915 | 50199598 | + | 10.14  | 11.56  |
| ENSG00000108078 | TMEM133   | protein_co  | chr11 | 1.01E+08 | 1.01E+08 | + | 1.52   | 1.42   |
| ENSG00000108079 | ATF7      | protein_co  | chr12 | 53507856 | 53626410 | - | 11.36  | 14.14  |
| ENSG00000108080 | RASA4B    | protein_co  | chr7  | 1.02E+08 | 1.03E+08 | - | 6.75   | 8.77   |
| ENSG00000108081 | SOCS6     | protein_co  | chr18 | 70288901 | 70330200 | + | 5.43   | 5.03   |
| ENSG00000108082 | MURC      | protein_co  | chr9  | 1.01E+08 | 1.01E+08 | + | 0.61   | 0.69   |
| ENSG00000108083 | OR10A3    | protein_co  | chr11 | 7938534  | 7939594  | - | 0      | 0      |
| ENSG00000108084 | ZNF296    | protein_co  | chr19 | 45071500 | 45076588 | - | 0.59   | 0.31   |
| ENSG00000108085 | OR5E1P    | unprocessed | chr11 | 7848700  | 7849626  | + | 0      | 0      |
| ENSG00000108086 | HOXB9     | protein_co  | chr17 | 48621159 | 48626356 | - | 0      | 0      |
| ENSG00000108087 | TTL6      | protein_co  | chr17 | 48762235 | 48817214 | - | 0      | 0      |
| ENSG00000108088 | POLH      | protein_co  | chr6  | 43576150 | 43615660 | + | 14.41  | 10.3   |
| ENSG00000108089 | SYT9      | protein_co  | chr11 | 7238778  | 7469042  | + | 0      | 0      |
| ENSG00000108090 | KCNS3     | protein_co  | chr2  | 17877847 | 18361616 | + | 0      | 0      |
| ENSG00000108091 | RBMXL2    | protein_co  | chr11 | 7089027  | 7090900  | + | 0.03   | 0      |
| ENSG00000108092 | KIF5B     | protein_co  | chr10 | 32009010 | 32056431 | - | 22.4   | 25.38  |
| ENSG00000108093 | GPR37     | protein_co  | chr7  | 1.25E+08 | 1.25E+08 | - | 0.05   | 0.08   |
| ENSG00000108094 | AKAP13    | protein_co  | chr15 | 85380571 | 85749358 | + | 11.64  | 13.97  |
| ENSG00000108095 | TPD52L3   | protein_co  | chr9  | 6328375  | 6331900  | + | 0.02   | 0      |
| ENSG00000108096 | CDCA4     | protein_co  | chr14 | 1.05E+08 | 1.05E+08 | - | 4.5    | 3.6    |
| ENSG00000108097 | OR10A4    | protein_co  | chr11 | 6876625  | 6877619  | + | 0      | 0      |
| ENSG00000108098 | SDR16C5   | protein_co  | chr8  | 56300010 | 56320776 | - | 0      | 0      |
| ENSG00000108099 | DYDC1     | protein_co  | chr10 | 80336105 | 80356755 | - | 0.19   | 0      |
| ENSG00000108100 | OR10A2    | protein_co  | chr11 | 6869693  | 6870745  | + | 0      | 0      |
| ENSG00000108101 | CHCHD7    | protein_co  | chr8  | 56211686 | 56218798 | + | 9.59   | 11.49  |
| ENSG00000108102 | HTRA3     | protein_co  | chr4  | 8269765  | 8307111  | + | 6.75   | 7.1    |
| ENSG00000108103 | FOXN2     | protein_co  | chr2  | 48314637 | 48379294 | + | 3.28   | 3.84   |
| ENSG00000108104 | LMOD2     | protein_co  | chr7  | 1.24E+08 | 1.24E+08 | + | 0      | 0.05   |

|                    |                   |          |          |   |        |        |
|--------------------|-------------------|----------|----------|---|--------|--------|
| ENSG0000(BFSP2     | protein_co chr3   | 1.33E+08 | 1.33E+08 | + | 0      | 0      |
| ENSG0000(FSHR      | protein_co chr2   | 48962157 | 49154537 | - | 0      | 0      |
| ENSG0000(CELP      | transcribec chr9  | 1.33E+08 | 1.33E+08 | + | 0.02   | 0.02   |
| ENSG0000(USP32     | protein_co chr17  | 60179094 | 60422470 | - | 18.67  | 18.43  |
| ENSG0000(CEL       | protein_co chr9   | 1.33E+08 | 1.33E+08 | + | 0.35   | 0.46   |
| ENSG0000(PPM1D     | protein_co chr17  | 60600183 | 60666280 | + | 10.13  | 9.63   |
| ENSG0000(GPR27     | protein_co chr3   | 71754050 | 71756496 | + | 0      | 0      |
| ENSG0000(AC093323. | lincRNA chr4      | 6673451  | 6676047  | + | 4.92   | 5.26   |
| ENSG0000(PSG6      | protein_co chr19  | 42902079 | 42919563 | - | 0.02   | 0      |
| ENSG0000(KBTBD2    | protein_co chr7   | 32868172 | 32894131 | - | 9.85   | 9.89   |
| ENSG0000(RIOX2     | protein_co chr3   | 97941818 | 97972457 | - | 6.74   | 6.14   |
| ENSG0000(TRIAP1    | protein_co chr12  | 1.2E+08  | 1.2E+08  | - | 25.61  | 24.89  |
| ENSG0000(LILRP2    | transcribec chr19 | 54707916 | 54713453 | + | 0      | 0      |
| ENSG0000(LSM3      | protein_co chr3   | 14178358 | 14201119 | + | 4.61   | 4.54   |
| ENSG0000(KIAA0232  | protein_co chr4   | 6781375  | 6884170  | + | 7.02   | 8.13   |
| ENSG0000(MTSS1     | protein_co chr8   | 1.25E+08 | 1.25E+08 | - | 38.62  | 30.41  |
| ENSG0000(TMEM43    | protein_co chr3   | 14124940 | 14143679 | + | 38.96  | 37.94  |
| ENSG0000(RNF139    | protein_co chr8   | 1.24E+08 | 1.24E+08 | + | 13.48  | 13.19  |
| ENSG0000(RPS9      | protein_co chr19  | 54200742 | 54249003 | + | 888.86 | 880.2  |
| ENSG0000(PLA2G1B   | protein_co chr12  | 1.2E+08  | 1.2E+08  | - | 0      | 0.21   |
| ENSG0000(CYTL1     | protein_co chr4   | 5014586  | 5019472  | - | 0      | 0.07   |
| ENSG0000(TSEN34    | protein_co chr19  | 54189938 | 54194536 | + | 43.08  | 41.63  |
| ENSG0000(TRH       | protein_co chr3   | 1.3E+08  | 1.3E+08  | + | 0      | 0      |
| ENSG0000(GSTA4     | protein_co chr6   | 52977948 | 52995378 | - | 13.24  | 12.17  |
| ENSG0000(MSANTD4   | protein_co chr11  | 1.06E+08 | 1.06E+08 | - | 6.21   | 6.47   |
| ENSG0000(NDUFA3    | protein_co chr19  | 54102728 | 54109257 | + | 64.66  | 70.94  |
| ENSG0000(OSCAR     | protein_co chr19  | 54094668 | 54102692 | - | 0.65   | 1.86   |
| ENSG0000(PAQR8     | protein_co chr6   | 52361421 | 52407777 | + | 2.16   | 2      |
| ENSG0000(NUDT6     | protein_co chr4   | 1.23E+08 | 1.23E+08 | - | 1.79   | 1.94   |
| ENSG0000(TPT1-AS1  | processed_chr13   | 45341345 | 45393413 | + | 17.41  | 19.51  |
| ENSG0000(OR7G3     | protein_co chr19  | 9126012  | 9126950  | - | 0      | 0      |
| ENSG0000(TANC2     | protein_co chr17  | 63009556 | 63427699 | + | 4.3    | 6.75   |
| ENSG0000(OR7G2     | protein_co chr19  | 9102269  | 9103306  | - | 0      | 0      |
| ENSG0000(TEX13B    | protein_co chrX   | 1.08E+08 | 1.08E+08 | - | 0      | 0      |
| ENSG0000(PKHD1     | protein_co chr6   | 51615300 | 52087625 | - | 0      | 0      |
| ENSG0000(OR1M1     | protein_co chr19  | 9093179  | 9094213  | + | 0      | 0      |
| ENSG0000(NCBP2L    | protein_co chrX   | 1.08E+08 | 1.08E+08 | + | 0      | 0      |
| ENSG0000(DNAJC24   | protein_co chr11  | 31369840 | 31431849 | + | 6.04   | 5.37   |
| ENSG0000(MBD3L1    | protein_co chr19  | 8832398  | 8843340  | + | 0      | 0      |
| ENSG0000(ZNF160    | protein_co chr19  | 53066606 | 53103436 | - | 10.02  | 10.11  |
| ENSG0000(PGK2      | protein_co chr6   | 49785651 | 49787307 | - | 0      | 0      |
| ENSG0000(OR8B12    | protein_co chr11  | 1.25E+08 | 1.25E+08 | - | 0      | 0      |
| ENSG0000(ZNF415    | protein_co chr19  | 53107879 | 53133077 | - | 0.91   | 1.32   |
| ENSG0000(PRKCDBP   | protein_co chr11  | 6318946  | 6320647  | - | 157.08 | 158.86 |
| ENSG0000(CEACAM3   | protein_co chr19  | 41796437 | 41811553 | + | 0      | 0      |



|                     |                   |          |          |   |       |       |
|---------------------|-------------------|----------|----------|---|-------|-------|
| ENSG0000( DCDC1     | protein_co chr11  | 30830369 | 31369810 | - | 0     | 0.07  |
| ENSG0000( HAS2      | protein_co chr8   | 1.22E+08 | 1.22E+08 | - | 0.74  | 1.27  |
| ENSG0000( PDGFD     | protein_co chr11  | 1.04E+08 | 1.04E+08 | - | 7.09  | 7.44  |
| ENSG0000( PLAC1     | protein_co chrX   | 1.35E+08 | 1.35E+08 | - | 0.28  | 0.17  |
| ENSG0000( DDI1      | protein_co chr11  | 1.04E+08 | 1.04E+08 | + | 0.02  | 0     |
| ENSG0000( LINC00208 | lincRNA chr8      | 11576313 | 11581342 | + | 0     | 0     |
| ENSG0000( S1PR1     | protein_co chr1   | 1.01E+08 | 1.01E+08 | + | 13.19 | 11.49 |
| ENSG0000( HS6ST2    | protein_co chrX   | 1.33E+08 | 1.33E+08 | - | 0     | 0     |
| ENSG0000( OR4D5     | protein_co chr11  | 1.24E+08 | 1.24E+08 | + | 0     | 0     |
| ENSG0000( PYGO1     | protein_co chr15  | 55538890 | 55588947 | - | 2.91  | 3.01  |
| ENSG0000( LRRC8E    | protein_co chr19  | 7888505  | 7902021  | + | 3.23  | 2.85  |
| ENSG0000( PKIA      | protein_co chr8   | 78516139 | 78605267 | + | 18.42 | 17.7  |
| ENSG0000( XKR6      | protein_co chr8   | 10896045 | 11201366 | - | 0.8   | 0.44  |
| ENSG0000( TSNARE1   | protein_co chr8   | 1.42E+08 | 1.42E+08 | - | 8.4   | 8.17  |
| ENSG0000( FPR2      | protein_co chr19  | 51752026 | 51770526 | + | 0     | 0     |
| ENSG0000( FPR1      | protein_co chr19  | 51745172 | 51804110 | - | 0.18  | 0.18  |
| ENSG0000( PATE1     | protein_co chr11  | 1.26E+08 | 1.26E+08 | + | 0     | 0     |
| ENSG0000( OR13H1    | protein_co chrX   | 1.32E+08 | 1.32E+08 | + | 0     | 0     |
| ENSG0000( FEZ2      | protein_co chr2   | 36531805 | 36646087 | - | 23.99 | 27.4  |
| ENSG0000( SOX7      | protein_co chr8   | 10723768 | 10730512 | - | 0.08  | 0.03  |
| ENSG0000( C8orf74   | protein_co chr8   | 10672637 | 10700593 | + | 0     | 0     |
| ENSG0000( C11orf24  | protein_co chr11  | 68261335 | 68272001 | - | 22.3  | 23.44 |
| ENSG0000( FAM86JP   | transcribec chr3  | 1.26E+08 | 1.26E+08 | + | 1.29  | 1.57  |
| ENSG0000( ALK       | protein_co chr2   | 29192774 | 29921566 | - | 0     | 0     |
| ENSG0000( KYAT1     | protein_co chr9   | 1.29E+08 | 1.29E+08 | - | 2.61  | 3.4   |
| ENSG0000( MTM1      | protein_co chrX   | 1.51E+08 | 1.51E+08 | + | 3.03  | 3.78  |
| ENSG0000( SIGLEC17P | transcribec chr19 | 51167328 | 51173524 | + | 0     | 0.18  |
| ENSG0000( OBP2B     | protein_co chr9   | 1.33E+08 | 1.33E+08 | - | 0     | 0     |
| ENSG0000( TRMT61B   | protein_co chr2   | 28849821 | 28870301 | - | 4.76  | 3.73  |
| ENSG0000( INSR      | protein_co chr19  | 7112255  | 7294034  | - | 4.79  | 4.02  |
| ENSG0000( MFN1      | protein_co chr3   | 1.79E+08 | 1.79E+08 | + | 14.02 | 10.93 |
| ENSG0000( GIMAP8    | protein_co chr7   | 1.5E+08  | 1.5E+08  | + | 0     | 0     |
| ENSG0000( HSFY1     | protein_co chrX   | 1.5E+08  | 1.5E+08  | + | 0.45  | 0.47  |
| ENSG0000( NRTN      | protein_co chr19  | 5823802  | 5828324  | + | 0     | 0     |
| ENSG0000( KCNMB3    | protein_co chr3   | 1.79E+08 | 1.79E+08 | - | 0.48  | 1.3   |
| ENSG0000( FUT3      | protein_co chr19  | 5842888  | 5851474  | - | 0     | 0     |
| ENSG0000( KCNG3     | protein_co chr2   | 42442017 | 42494097 | - | 0     | 0     |
| ENSG0000( ATP6V0E2  | protein_co chr7   | 1.5E+08  | 1.5E+08  | + | 12.38 | 12.31 |
| ENSG0000( PRKCE     | protein_co chr2   | 45651345 | 46187990 | + | 3.44  | 3.78  |
| ENSG0000( OR2K2     | protein_co chr9   | 1.11E+08 | 1.11E+08 | - | 0     | 0     |
| ENSG0000( JAGN1     | protein_co chr3   | 9890554  | 9894349  | + | 15.24 | 15.37 |
| ENSG0000( RLN3      | protein_co chr19  | 14028148 | 14031042 | + | 0     | 0     |
| ENSG0000( TADA3     | protein_co chr3   | 9779860  | 9793011  | - | 36.83 | 36.48 |
| ENSG0000( SOCS5     | protein_co chr2   | 46698952 | 46763129 | + | 23.32 | 26.48 |
| ENSG0000( C1GALT1C1 | protein_co chrX   | 1.21E+08 | 1.21E+08 | - | 16.19 | 13.27 |

|                   |                  |          |          |   |        |        |
|-------------------|------------------|----------|----------|---|--------|--------|
| ENSG0000(C9orf16  | protein_co chr9  | 1.28E+08 | 1.28E+08 | + | 56.46  | 63.69  |
| ENSG0000(MORN4    | protein_co chr10 | 97614553 | 97633500 | - | 7.47   | 6.66   |
| ENSG0000(ZNF672   | protein_co chr1  | 2.49E+08 | 2.49E+08 | + | 6.24   | 7.11   |
| ENSG0000(ZNF692   | protein_co chr1  | 2.49E+08 | 2.49E+08 | - | 12.19  | 14.33  |
| ENSG0000(NAIF1    | protein_co chr9  | 1.28E+08 | 1.28E+08 | - | 5.46   | 4.4    |
| ENSG0000(RBKS     | protein_co chr2  | 27781364 | 27891098 | - | 0.81   | 0.89   |
| ENSG0000(OR2M4    | protein_co chr1  | 2.48E+08 | 2.48E+08 | + | 0      | 0      |
| ENSG0000(GRIK1    | protein_co chr21 | 29536933 | 29940033 | - | 0      | 0      |
| ENSG0000(MUC7     | protein_co chr4  | 70430492 | 70482997 | + | 0      | 0      |
| ENSG0000(OPRPN    | protein_co chr4  | 70397882 | 70410194 | + | 0      | 0      |
| ENSG0000(SMR3B    | protein_co chr4  | 70370093 | 70390244 | + | 0      | 0      |
| ENSG0000(TMEM126  | protein_co chr11 | 85647967 | 85656547 | + | 12.63  | 12.1   |
| ENSG0000(TMEM126  | protein_co chr11 | 85628573 | 85636539 | + | 25.18  | 28.77  |
| ENSG0000(TRIM8    | protein_co chr10 | 1.03E+08 | 1.03E+08 | + | 53.67  | 55.85  |
| ENSG0000(NETO2    | protein_co chr16 | 47077703 | 47143997 | - | 1.75   | 0.96   |
| ENSG0000(CSN3     | protein_co chr4  | 70242588 | 70251428 | + | 0      | 0      |
| ENSG0000(CLDN20   | protein_co chr6  | 1.55E+08 | 1.55E+08 | + | 0      | 0      |
| ENSG0000(CDC42BPG | protein_co chr11 | 64823387 | 64844569 | - | 0.02   | 0.06   |
| ENSG0000(SCAND1   | protein_co chr20 | 35953617 | 35959472 | - | 28.52  | 33.33  |
| ENSG0000(JUNB     | protein_co chr19 | 12791496 | 12793315 | + | 41.19  | 39.1   |
| ENSG0000(C10orf35 | protein_co chr10 | 69630251 | 69633599 | + | 0.74   | 0.25   |
| ENSG0000(TMEM37   | protein_co chr2  | 1.19E+08 | 1.19E+08 | + | 0      | 0.36   |
| ENSG0000(UGT2B7   | protein_co chr4  | 69051363 | 69112987 | + | 0      | 0.1    |
| ENSG0000(LRG1     | protein_co chr19 | 4536409  | 4540474  | - | 0.24   | 0.14   |
| ENSG0000(SHCBP1   | protein_co chr16 | 46580554 | 46621626 | - | 0.67   | 0.75   |
| ENSG0000(SOSTDC1  | protein_co chr7  | 16461481 | 16530580 | - | 0      | 0      |
| ENSG0000(NPTX1    | protein_co chr17 | 80467148 | 80477843 | - | 0.31   | 0.29   |
| ENSG0000(FAM98B   | protein_co chr15 | 38454127 | 38487710 | + | 7.3    | 5.72   |
| ENSG0000(ZNF439   | protein_co chr19 | 11848726 | 11883750 | + | 0.9    | 0.73   |
| ENSG0000(ZNF440   | protein_co chr19 | 11814284 | 11835201 | + | 1.52   | 1.56   |
| ENSG0000(GAA      | protein_co chr17 | 80101556 | 80119879 | + | 61.74  | 64.67  |
| ENSG0000(CANT1    | protein_co chr17 | 78991717 | 79009867 | - | 24.59  | 24.42  |
| ENSG0000(KCNK3    | protein_co chr2  | 26692690 | 26733420 | + | 0.03   | 0.06   |
| ENSG0000(ZDHHC16  | protein_co chr10 | 97446131 | 97457370 | + | 23.07  | 23.37  |
| ENSG0000(CHST11   | protein_co chr12 | 1.04E+08 | 1.05E+08 | + | 12.64  | 11.96  |
| ENSG0000(EXOSC1   | protein_co chr10 | 97436142 | 97446017 | - | 19.96  | 17.39  |
| ENSG0000(PGAM1    | protein_co chr10 | 97426160 | 97433441 | + | 308.38 | 287.48 |
| ENSG0000(CHD7     | protein_co chr8  | 60678778 | 60868028 | + | 0.92   | 0.36   |
| ENSG0000(ESCO2    | protein_co chr8  | 27771949 | 27812640 | + | 0.1    | 0.13   |
| ENSG0000(KRT19    | protein_co chr17 | 41523617 | 41528308 | - | 2.79   | 2.61   |
| ENSG0000(KRT15    | protein_co chr17 | 41513743 | 41522529 | - | 0.14   | 0.15   |
| ENSG0000(LURAP1   | protein_co chr1  | 46203334 | 46221261 | + | 1.72   | 1.5    |
| ENSG0000(KRT38    | protein_co chr17 | 41436446 | 41440921 | - | 0.02   | 0      |
| ENSG0000(CLCN5    | protein_co chrX  | 49922615 | 50099235 | + | 2.38   | 2.52   |
| ENSG0000(TPPP     | protein_co chr5  | 659862   | 693395   | - | 0.04   | 0.06   |

|                   |                  |          |          |   |       |       |
|-------------------|------------------|----------|----------|---|-------|-------|
| ENSG0000(KCND3    | protein_co chr1  | 1.12E+08 | 1.12E+08 | - | 0.89  | 1.14  |
| ENSG0000(APLN     | protein_co chrX  | 1.3E+08  | 1.3E+08  | - | 7.61  | 6.41  |
| ENSG0000(KRTAP4-4 | protein_co chr17 | 41159651 | 41160731 | - | 0     | 0     |
| ENSG0000(KRT13    | protein_co chr17 | 41500981 | 41505705 | - | 0.07  | 0     |
| ENSG0000(XAGE3    | protein_co chrX  | 52862525 | 52868068 | - | 0     | 0     |
| ENSG0000(KRT9     | protein_co chr17 | 41565841 | 41572058 | - | 0     | 0.04  |
| ENSG0000(XAGE5    | protein_co chrX  | 52812204 | 52818301 | + | 0     | 0     |
| ENSG0000(PDE7B    | protein_co chr6  | 1.36E+08 | 1.36E+08 | + | 7.51  | 7.3   |
| ENSG0000(MRPL36   | protein_co chr5  | 1798386  | 1801366  | - | 25.9  | 27.77 |
| ENSG0000(ZNF581   | protein_co chr19 | 55635459 | 55645622 | + | 20.12 | 20.61 |
| ENSG0000(NAT1     | protein_co chr8  | 18170477 | 18223689 | + | 3.81  | 3.27  |
| ENSG0000(KRT20    | protein_co chr17 | 40875941 | 40885227 | - | 0     | 0     |
| ENSG0000(GLOD5    | protein_co chrX  | 48761750 | 48773648 | + | 0     | 0     |
| ENSG0000(KSR2     | protein_co chr12 | 1.17E+08 | 1.18E+08 | - | 0     | 0     |
| ENSG0000(ZNF524   | protein_co chr19 | 55600022 | 55603138 | + | 11.14 | 9.5   |
| ENSG0000(MCC      | protein_co chr5  | 1.13E+08 | 1.13E+08 | - | 28.28 | 27.58 |
| ENSG0000(KRT27    | protein_co chr17 | 40776808 | 40782534 | - | 0     | 0     |
| ENSG0000(ZBTB26   | protein_co chr9  | 1.23E+08 | 1.23E+08 | - | 2.48  | 1.91  |
| ENSG0000(CDK5R2   | protein_co chr2  | 2.19E+08 | 2.19E+08 | + | 0     | 0     |
| ENSG0000(DSEL     | protein_co chr18 | 67506582 | 67516980 | - | 6.53  | 6.72  |
| ENSG0000(POLR1C   | protein_co chr6  | 43509702 | 43529585 | + | 12.55 | 8.51  |
| ENSG0000(ASXL1    | protein_co chr20 | 32358344 | 32439319 | + | 26.48 | 23.36 |
| ENSG0000(OR1L6    | protein_co chr9  | 1.23E+08 | 1.23E+08 | + | 0     | 0     |
| ENSG0000(DLK2     | protein_co chr6  | 43450352 | 43456632 | - | 0.17  | 0.25  |
| ENSG0000(ZNF562   | protein_co chr19 | 9641808  | 9675086  | - | 4.03  | 3.58  |
| ENSG0000(ZNF318   | protein_co chr6  | 43307134 | 43369478 | - | 7.02  | 6.97  |
| ENSG0000(ZNF561   | protein_co chr19 | 9604680  | 9621399  | - | 15.36 | 12.8  |
| ENSG0000(WIPF2    | protein_co chr17 | 40219304 | 40284136 | + | 10.68 | 10.62 |
| ENSG0000(HOPX     | protein_co chr4  | 56647988 | 56681899 | - | 0.06  | 0.02  |
| ENSG0000(SPACA5B  | protein_co chrX  | 48130657 | 48132613 | + | 0     | 0     |
| ENSG0000(OR1L3    | protein_co chr9  | 1.23E+08 | 1.23E+08 | + | 0.06  | 0.07  |
| ENSG0000(SSX6     | transcribec chrX | 48107992 | 48120210 | + | 0     | 0     |
| ENSG0000(NLRP5    | protein_co chr19 | 55999726 | 56061813 | + | 0     | 0     |
| ENSG0000(LRRC8C   | protein_co chr1  | 89633072 | 89769903 | + | 2.57  | 2.84  |
| ENSG0000(SPACA5   | protein_co chrX  | 48004336 | 48009729 | + | 0     | 0     |
| ENSG0000(RSL1D1   | protein_co chr16 | 11833850 | 11851585 | - | 42.61 | 47.22 |
| ENSG0000(LRRC8D   | protein_co chr1  | 89821014 | 89936611 | + | 13.32 | 13.93 |
| ENSG0000(MROH2B   | protein_co chr5  | 40998017 | 41071342 | - | 0     | 0     |
| ENSG0000(OR1L8    | protein_co chr9  | 1.23E+08 | 1.23E+08 | - | 0     | 0     |
| ENSG0000(PPID     | protein_co chr4  | 1.59E+08 | 1.59E+08 | - | 11.25 | 11.99 |
| ENSG0000(OR1N2    | protein_co chr9  | 1.23E+08 | 1.23E+08 | + | 0     | 0     |
| ENSG0000(COL24A1  | protein_co chr1  | 85729233 | 86156943 | - | 0.42  | 0.37  |
| ENSG0000(ETFDH    | protein_co chr4  | 1.59E+08 | 1.59E+08 | + | 12.35 | 13.21 |
| ENSG0000(OR1N1    | protein_co chr9  | 1.23E+08 | 1.23E+08 | - | 0     | 0     |
| ENSG0000(RXFP1    | protein_co chr4  | 1.58E+08 | 1.59E+08 | + | 0.1   | 0.2   |

|                     |                  |          |          |   |        |        |
|---------------------|------------------|----------|----------|---|--------|--------|
| ENSG0000(LPAR3      | protein_co chr1  | 84811602 | 84893213 | - | 0.8    | 0.43   |
| ENSG0000(PTGER4     | protein_co chr5  | 40679498 | 40693735 | + | 0.73   | 1.88   |
| ENSG0000(TBCA       | protein_co chr5  | 77691166 | 77868780 | - | 80.38  | 82.91  |
| ENSG0000(NEUROD2    | protein_co chr17 | 39603536 | 39609777 | - | 0      | 0      |
| ENSG0000(MAP6       | protein_co chr11 | 75586918 | 75669120 | - | 2.13   | 2.92   |
| ENSG0000(OTP        | protein_co chr5  | 77628712 | 77639688 | - | 0      | 0      |
| ENSG0000(ECEL1      | protein_co chr2  | 2.32E+08 | 2.32E+08 | - | 0      | 0      |
| ENSG0000(BCL2L1     | protein_co chr20 | 31664452 | 31723989 | - | 26.69  | 23.78  |
| ENSG0000(FGG        | protein_co chr4  | 1.55E+08 | 1.55E+08 | - | 0      | 0      |
| ENSG0000(FGA        | protein_co chr4  | 1.55E+08 | 1.55E+08 | - | 0      | 0      |
| ENSG0000(OR2AT4     | protein_co chr11 | 75088713 | 75089754 | - | 0      | 0      |
| ENSG0000(FGB        | protein_co chr4  | 1.55E+08 | 1.55E+08 | + | 0      | 0      |
| ENSG0000(PLRG1      | protein_co chr4  | 1.55E+08 | 1.55E+08 | - | 36.33  | 33.74  |
| ENSG0000(RAB4B-EGF  | protein_co chr19 | 40778242 | 40808198 | + | 1.7    | 0.91   |
| ENSG0000(ZNF584     | protein_co chr19 | 58401504 | 58418327 | + | 7.16   | 7.24   |
| ENSG0000(DSCAM      | protein_co chr21 | 40010999 | 40847139 | - | 0      | 0      |
| ENSG0000(DNAI2      | protein_co chr17 | 74274247 | 74314884 | + | 0      | 0      |
| ENSG0000(NMUR1      | protein_co chr2  | 2.32E+08 | 2.32E+08 | - | 0      | 0      |
| ENSG0000(CLSTN1     | protein_co chr1  | 9729026  | 9824526  | - | 129.08 | 125.92 |
| ENSG0000(CXXC5      | protein_co chr5  | 1.4E+08  | 1.4E+08  | + | 12.79  | 14.53  |
| ENSG0000(ZNF274     | protein_co chr19 | 58183029 | 58213562 | + | 8.16   | 7.97   |
| ENSG0000(PIK3CD     | protein_co chr1  | 9651732  | 9729114  | + | 6.1    | 5.81   |
| ENSG0000(PTCRA      | protein_co chr6  | 42915989 | 42925835 | + | 0      | 0      |
| ENSG0000(SLC25A33   | protein_co chr1  | 9539482  | 9585179  | + | 1.25   | 1.32   |
| ENSG0000(ENC1       | protein_co chr5  | 74627406 | 74641424 | - | 3.61   | 3.47   |
| ENSG0000(SPSB1      | protein_co chr1  | 9292880  | 9369532  | + | 29.13  | 27.29  |
| ENSG0000(P2RY6      | protein_co chr11 | 73264505 | 73298617 | + | 0.48   | 0.45   |
| ENSG0000(BPTF       | protein_co chr17 | 67825524 | 67984378 | + | 15.86  | 18.07  |
| ENSG0000(S100Z      | protein_co chr5  | 76850001 | 76921650 | + | 0      | 0      |
| ENSG0000(ZIK1       | protein_co chr19 | 57578456 | 57593777 | + | 3.26   | 3.98   |
| ENSG0000(GPR82      | protein_co chrX  | 41724155 | 41730135 | + | 0      | 0.04   |
| ENSG0000(NMRAL2P    | transcribec chr3 | 1.86E+08 | 1.86E+08 | + | 4.1    | 5.55   |
| ENSG0000(GPR34      | protein_co chrX  | 41688973 | 41697277 | + | 0      | 0      |
| ENSG0000(SHANK2-AS1 | antisense chr11  | 70862790 | 70865115 | + | 0.03   | 0.04   |
| ENSG0000(PLEKHG5    | protein_co chr1  | 6466092  | 6520061  | - | 8.06   | 8.19   |
| ENSG0000(ATF7IP     | protein_co chr12 | 14365632 | 14502935 | + | 12.3   | 12.96  |
| ENSG0000(LKAAEAR1   | protein_co chr20 | 64083380 | 64084359 | - | 0      | 0      |
| ENSG0000(RGS19      | protein_co chr20 | 64073181 | 64079988 | - | 5.08   | 5.36   |
| ENSG0000(TCEA2      | protein_co chr20 | 64049836 | 64072347 | + | 33.52  | 31.1   |
| ENSG0000(DEFB4A     | protein_co chr8  | 7894629  | 7896711  | + | 0      | 0      |
| ENSG0000(ANO5       | protein_co chr11 | 22193176 | 22283357 | + | 0      | 0      |
| ENSG0000(HDAC3      | protein_co chr5  | 1.42E+08 | 1.42E+08 | - | 27.74  | 30.61  |
| ENSG0000(SPATA46    | protein_co chr1  | 1.62E+08 | 1.62E+08 | - | 0      | 0      |
| ENSG0000(GPHN       | protein_co chr14 | 66507407 | 67181803 | + | 9.16   | 6.94   |
| ENSG0000(VAT1L      | protein_co chr16 | 77788530 | 77980107 | + | 0.42   | 0.34   |

|                   |                  |          |          |   |        |        |
|-------------------|------------------|----------|----------|---|--------|--------|
| ENSG0000(TMEM51   | protein_co chr1  | 15152532 | 15220480 | + | 1.34   | 1.47   |
| ENSG0000(CAMTA1   | protein_co chr1  | 6785324  | 7769706  | + | 30.32  | 28.19  |
| ENSG0000(LGALS4   | protein_co chr19 | 38801671 | 38813364 | - | 0.85   | 1.02   |
| ENSG0000(LRRC34   | protein_co chr3  | 1.7E+08  | 1.7E+08  | - | 0.51   | 1.15   |
| ENSG0000(PAH      | protein_co chr12 | 1.03E+08 | 1.03E+08 | - | 0      | 0      |
| ENSG0000(SPATA5L1 | protein_co chr15 | 45402331 | 45421419 | + | 3.35   | 2.89   |
| ENSG0000(GATM     | protein_co chr15 | 45361124 | 45402327 | - | 0.07   | 0      |
| ENSG0000(SYCE1    | protein_co chr10 | 1.34E+08 | 1.34E+08 | - | 7.22   | 7.81   |
| ENSG0000(NXNL1    | protein_co chr19 | 17455425 | 17460954 | - | 0      | 0      |
| ENSG0000(RASGRP4  | protein_co chr19 | 38409051 | 38426305 | - | 0.02   | 0.03   |
| ENSG0000(NHLH1    | protein_co chr1  | 1.6E+08  | 1.6E+08  | + | 0.09   | 0.07   |
| ENSG0000(SLFNL1   | protein_co chr1  | 41015597 | 41023237 | - | 0.06   | 0.1    |
| ENSG0000(BCL2     | protein_co chr18 | 63123346 | 63320128 | - | 0.19   | 0.18   |
| ENSG0000(RHNO1    | protein_co chr12 | 2876258  | 2889523  | + | 9.96   | 12.35  |
| ENSG0000(CTPS1    | protein_co chr1  | 40979335 | 41012565 | + | 7.5    | 6.62   |
| ENSG0000(UTF1     | protein_co chr10 | 1.33E+08 | 1.33E+08 | + | 0      | 0      |
| ENSG0000(KNDC1    | protein_co chr10 | 1.33E+08 | 1.33E+08 | + | 1.75   | 1.4    |
| ENSG0000(WDR87    | protein_co chr19 | 37884823 | 37906677 | - | 0.01   | 0      |
| ENSG0000(METTL18  | protein_co chr1  | 1.7E+08  | 1.7E+08  | - | 3.08   | 2.58   |
| ENSG0000(CFAP46   | protein_co chr10 | 1.33E+08 | 1.33E+08 | - | 0.32   | 0.47   |
| ENSG0000(COL8A2   | protein_co chr1  | 36095236 | 36125220 | - | 4.81   | 4.7    |
| ENSG0000(PWWP2B   | protein_co chr10 | 1.32E+08 | 1.32E+08 | + | 2.02   | 2.33   |
| ENSG0000(PCDHB1   | protein_co chr5  | 1.41E+08 | 1.41E+08 | + | 0.06   | 0.02   |
| ENSG0000(ZNF540   | protein_co chr19 | 37551406 | 37614097 | + | 0.58   | 0.77   |
| ENSG0000(ANGPTL7  | protein_co chr1  | 11189341 | 11195981 | + | 0.42   | 0.73   |
| ENSG0000(FBXL14   | protein_co chr12 | 1565993  | 1594165  | - | 4.28   | 4.6    |
| ENSG0000(EXOSC10  | protein_co chr1  | 11066618 | 11099881 | - | 18.94  | 21.13  |
| ENSG0000(ZNF570   | protein_co chr19 | 37467585 | 37488652 | + | 2.41   | 1.96   |
| ENSG0000(NINJ2    | protein_co chr12 | 564296   | 663779   | - | 2.43   | 2.38   |
| ENSG0000(MLLT3    | protein_co chr9  | 20341665 | 20622543 | - | 7.61   | 5.69   |
| ENSG0000(FAM90A1  | protein_co chr12 | 8221260  | 8227618  | - | 0      | 0      |
| ENSG0000(RRM2     | protein_co chr2  | 10122328 | 10131419 | + | 0.4    | 0.06   |
| ENSG0000(TRAPPC12 | protein_co chr2  | 3379675  | 3485094  | + | 19.12  | 21.56  |
| ENSG0000(IFNB1    | protein_co chr9  | 21077105 | 21077963 | - | 0      | 0      |
| ENSG0000(RPS21    | protein_co chr20 | 62387116 | 62388520 | + | 690.01 | 683    |
| ENSG0000(C3AR1    | protein_co chr12 | 8058302  | 8066471  | - | 0.43   | 1.01   |
| ENSG0000(MRM3     | protein_co chr17 | 782273   | 792509   | + | 7.04   | 4.89   |
| ENSG0000(PTEN     | protein_co chr10 | 87863113 | 87971930 | + | 50.18  | 45.32  |
| ENSG0000(RPS7     | protein_co chr2  | 3575205  | 3580919  | + | 545.72 | 578.09 |
| ENSG0000(PRND     | protein_co chr20 | 4721910  | 4728460  | + | 0.01   | 0.02   |
| ENSG0000(RNASEH1  | protein_co chr2  | 3544793  | 3558616  | - | 9.86   | 11.07  |
| ENSG0000(PRNP     | protein_co chr20 | 4686236  | 4701590  | + | 172.67 | 162.8  |
| ENSG0000(KLF17    | protein_co chr1  | 44118850 | 44135140 | + | 0.29   | 0.02   |
| ENSG0000(ADRA1D   | protein_co chr20 | 4220631  | 4249074  | - | 0      | 0      |
| ENSG0000(FRMD5    | protein_co chr15 | 43870761 | 44195252 | - | 7.78   | 6.03   |

|                    |                  |          |          |   |        |        |
|--------------------|------------------|----------|----------|---|--------|--------|
| ENSG0000(AQP4      | protein_co chr18 | 26852038 | 26865818 | - | 0      | 0      |
| ENSG0000(MIR31HG   | sense_ovei chr9  | 21455642 | 21559669 | - | 5.42   | 7.98   |
| ENSG0000(CYP4F11   | protein_co chr19 | 15912367 | 15934867 | - | 0      | 0      |
| ENSG0000(TLN2      | protein_co chr15 | 62390526 | 62844631 | + | 5.59   | 6.23   |
| ENSG0000(LGALS9C   | protein_co chr17 | 18476737 | 18494945 | + | 0      | 0      |
| ENSG0000(TVP23B    | protein_co chr17 | 18780995 | 18806714 | + | 21.65  | 23.05  |
| ENSG0000(FBXW10    | protein_co chr17 | 18744024 | 18779349 | + | 0      | 0      |
| ENSG0000(OR10H3    | protein_co chr19 | 15741393 | 15742343 | + | 0      | 0      |
| ENSG0000(ZNF217    | protein_co chr20 | 53567065 | 53609907 | - | 8.31   | 7.42   |
| ENSG0000(OR10H2    | protein_co chr19 | 15728020 | 15729060 | + | 0      | 0      |
| ENSG0000(SRGAP2C   | protein_co chr1  | 1.21E+08 | 1.21E+08 | + | 8.61   | 13.41  |
| ENSG0000(OR52A5    | protein_co chr11 | 5131692  | 5132642  | - | 0      | 0      |
| ENSG0000(SCG2      | protein_co chr2  | 2.24E+08 | 2.24E+08 | - | 3.54   | 4.09   |
| ENSG0000(ATPAF2    | protein_co chr17 | 17977409 | 18039209 | - | 8.7    | 11.72  |
| ENSG0000(CYP4F22   | protein_co chr19 | 15508493 | 15552317 | + | 0      | 0      |
| ENSG0000(FOXB1     | protein_co chr15 | 60004222 | 60061730 | + | 0      | 0      |
| ENSG0000(PPIH      | protein_co chr1  | 42658425 | 42676758 | + | 15.23  | 17.77  |
| ENSG0000(DRC3      | protein_co chr17 | 17972813 | 18016889 | + | 1.29   | 0.62   |
| ENSG0000(ZNF57     | protein_co chr19 | 2900898  | 2918476  | + | 1.4    | 1.07   |
| ENSG0000(C20orf196 | protein_co chr20 | 5750393  | 5863912  | + | 2.04   | 2.2    |
| ENSG0000(C11orf40  | protein_co chr11 | 4571423  | 4577820  | - | 0      | 0      |
| ENSG0000(JMJD1C    | protein_co chr10 | 63167221 | 63521850 | - | 17.03  | 17     |
| ENSG0000(LDHAL6B   | protein_co chr15 | 59206823 | 59208515 | + | 0      | 0      |
| ENSG0000(SYNPO     | protein_co chr5  | 1.51E+08 | 1.51E+08 | + | 36.62  | 37.15  |
| ENSG0000(OR52P2P   | unitary_ps chr11 | 4431323  | 4432277  | - | 0      | 0      |
| ENSG0000(ZNF556    | protein_co chr19 | 2867335  | 2883445  | + | 0.11   | 0.08   |
| ENSG0000(MAL       | protein_co chr2  | 95025677 | 95053996 | + | 0      | 0      |
| ENSG0000(ZNF554    | protein_co chr19 | 2819874  | 2835773  | + | 1.46   | 1.2    |
| ENSG0000(RAB33B    | protein_co chr4  | 1.39E+08 | 1.39E+08 | + | 2.77   | 2.97   |
| ENSG0000(THOP1     | protein_co chr19 | 2785460  | 2815807  | + | 14.61  | 15.3   |
| ENSG0000(ANKRD20A  | protein_co chr9  | 64369394 | 64413142 | + | 0      | 0.08   |
| ENSG0000(REG3A     | protein_co chr2  | 79157003 | 79159753 | - | 0      | 0      |
| ENSG0000(GAP43     | protein_co chr3  | 1.16E+08 | 1.16E+08 | + | 2.21   | 3.54   |
| ENSG0000(REG1B     | protein_co chr2  | 79085030 | 79088019 | - | 0      | 0      |
| ENSG0000(EPHX4     | protein_co chr1  | 92029982 | 92063536 | + | 0.12   | 0.04   |
| ENSG0000(LAMB2     | protein_co chr3  | 49121114 | 49133118 | - | 299.67 | 298.95 |
| ENSG0000(USP19     | protein_co chr3  | 49108046 | 49120938 | - | 14.27  | 15.47  |
| ENSG0000(QARS      | protein_co chr3  | 49095932 | 49105135 | - | 138.91 | 126.25 |
| ENSG0000(ORMDL3    | protein_co chr17 | 39921041 | 39927601 | - | 31.12  | 33.57  |
| ENSG0000(SERF1A    | protein_co chr5  | 70900665 | 70918530 | + | 1.2    | 0      |
| ENSG0000(KLF11     | protein_co chr2  | 10042849 | 10054836 | + | 6.82   | 6.04   |
| ENSG0000(LRRC15    | protein_co chr3  | 1.94E+08 | 1.94E+08 | - | 0.72   | 0.75   |
| ENSG0000(SMN1      | protein_co chr5  | 70925030 | 70953942 | + | 8.26   | 8.78   |
| ENSG0000(EIF2AK3   | protein_co chr2  | 88556741 | 88627576 | - | 12.13  | 9.48   |
| ENSG0000(TEX37     | protein_co chr2  | 88524651 | 88529584 | + | 0      | 0      |

|                  |                  |          |          |   |        |       |
|------------------|------------------|----------|----------|---|--------|-------|
| ENSG0000(MOB3A   | protein_co chr19 | 2071038  | 2096673  | - | 12.46  | 12.51 |
| ENSG0000(KRCC1   | protein_co chr2  | 88027205 | 88055729 | - | 14.16  | 14.8  |
| ENSG0000(NME6    | protein_co chr3  | 48293264 | 48301685 | - | 13.61  | 12.75 |
| ENSG0000(CYCS    | protein_co chr7  | 25120091 | 25125361 | - | 17.08  | 18.38 |
| ENSG0000(CD8B    | protein_co chr2  | 86815339 | 86861924 | - | 0      | 0     |
| ENSG0000(SLFN12  | protein_co chr17 | 35411060 | 35433283 | - | 7.07   | 7.32  |
| ENSG0000(CALB2   | protein_co chr16 | 71358713 | 71390438 | + | 9.87   | 7.35  |
| ENSG0000(SLC9C1  | protein_co chr3  | 1.12E+08 | 1.12E+08 | - | 0.04   | 0.06  |
| ENSG0000(OR1A1   | protein_co chr17 | 3215621  | 3216550  | + | 0      | 0     |
| ENSG0000(OR7A2P  | unprocessε chr19 | 14863786 | 14864715 | - | 0      | 0     |
| ENSG0000(OR1A2   | protein_co chr17 | 3197519  | 3198448  | + | 0      | 0     |
| ENSG0000(OR8I2   | protein_co chr11 | 56093308 | 56094240 | + | 0      | 0     |
| ENSG0000(LCE1D   | protein_co chr1  | 1.53E+08 | 1.53E+08 | + | 0      | 0     |
| ENSG0000(CCL11   | protein_co chr17 | 34285668 | 34288334 | + | 40.34  | 35.92 |
| ENSG0000(FRMD3   | protein_co chr9  | 83242990 | 83538546 | - | 2.46   | 3.22  |
| ENSG0000(SNTB1   | protein_co chr8  | 1.21E+08 | 1.21E+08 | - | 3.41   | 3.82  |
| ENSG0000(MTBP    | protein_co chr8  | 1.2E+08  | 1.21E+08 | + | 1.03   | 0.66  |
| ENSG0000(TEFM    | protein_co chr17 | 30897336 | 30906820 | - | 4.67   | 4.73  |
| ENSG0000(MRPL13  | protein_co chr8  | 1.2E+08  | 1.2E+08  | - | 19.84  | 18.74 |
| ENSG0000(MALT1   | protein_co chr18 | 58671386 | 58754477 | + | 4.83   | 5.96  |
| ENSG0000(PRL     | protein_co chr6  | 22287244 | 22297501 | - | 0.09   | 0     |
| ENSG0000(ISG20   | protein_co chr15 | 88636153 | 88656483 | + | 2.86   | 3.31  |
| ENSG0000(HMGN1P3 | processed_ chrX  | 69174124 | 69174717 | + | 0.12   | 0.26  |
| ENSG0000(OR4C11  | protein_co chr11 | 55603354 | 55604398 | - | 0      | 0     |
| ENSG0000(MBOAT1  | protein_co chr6  | 20102145 | 20212399 | - | 0.47   | 0.62  |
| ENSG0000(OR8U1   | protein_co chr11 | 56375624 | 56376553 | + | 0      | 0     |
| ENSG0000(ID4     | protein_co chr6  | 19837386 | 19840684 | + | 1.69   | 1.21  |
| ENSG0000(OR4X2   | polymorph chr11  | 48245056 | 48246080 | + | 0      | 0     |
| ENSG0000(GPR22   | protein_co chr7  | 1.07E+08 | 1.07E+08 | + | 0      | 0     |
| ENSG0000(CXCR6   | protein_co chr3  | 45940933 | 45948353 | + | 0      | 0     |
| ENSG0000(CEBPB   | protein_co chr20 | 50190734 | 50192689 | + | 31.74  | 32.09 |
| ENSG0000(AZU1    | protein_co chr19 | 825097   | 832018   | + | 0.1    | 0.15  |
| ENSG0000(TPSAB1  | protein_co chr16 | 1240696  | 1242554  | + | 0      | 0     |
| ENSG0000(ATOH1   | protein_co chr4  | 93828753 | 93830964 | + | 0      | 0     |
| ENSG0000(PAIP1   | protein_co chr5  | 43526267 | 43557758 | - | 53.14  | 50.81 |
| ENSG0000(CLEC7A  | protein_co chr12 | 10116777 | 10130258 | - | 0.09   | 0.15  |
| ENSG0000(C5orf34 | protein_co chr5  | 43486701 | 43515145 | - | 0.85   | 0.5   |
| ENSG0000(C1QTNF4 | protein_co chr11 | 47589664 | 47594659 | - | 0.13   | 0     |
| ENSG0000(SERHL   | processed_ chr22 | 42500579 | 42512560 | + | 0.07   | 0     |
| ENSG0000(NEGR1   | protein_co chr1  | 71395940 | 72282734 | - | 4.15   | 4.04  |
| ENSG0000(ZNF131  | protein_co chr5  | 43065176 | 43192021 | + | 12.51  | 13.24 |
| ENSG0000(MACROD2 | protein_co chr20 | 13995369 | 16053197 | + | 0      | 0     |
| ENSG0000(DPAGT1  | protein_co chr11 | 1.19E+08 | 1.19E+08 | - | 18.76  | 19.72 |
| ENSG0000(BSG     | protein_co chr19 | 571277   | 583493   | + | 375.69 | 383.5 |
| ENSG0000(HINFP   | protein_co chr11 | 1.19E+08 | 1.19E+08 | + | 6.66   | 10.47 |

|                 |          |                     |       |          |          |   |        |        |
|-----------------|----------|---------------------|-------|----------|----------|---|--------|--------|
| ENSG00000181440 | PRYP4    | unprocessed protein | chrY  | 25975549 | 25988069 | + | 0      | 0      |
| ENSG00000181441 | CDY1     | protein             | chrY  | 25622162 | 25624902 | + | 0      | 0      |
| ENSG00000181442 | OR10V1   | protein             | chr11 | 59712823 | 59713864 | - | 0      | 0      |
| ENSG00000181443 | CERS6    | protein             | chr2  | 1.68E+08 | 1.69E+08 | + | 2.19   | 2.34   |
| ENSG00000181444 | CSPG4P4Y | unprocessed protein | chrY  | 25478269 | 25483630 | + | 0      | 0      |
| ENSG00000181445 | SPTLC3   | protein             | chr20 | 13008979 | 13169103 | + | 4.74   | 4.4    |
| ENSG00000181446 | GOLGA2P3 | unprocessed protein | chrY  | 25454561 | 25460572 | + | 0      | 0      |
| ENSG00000181447 | COPRS    | protein             | chr17 | 31851864 | 31859337 | - | 56.45  | 59.7   |
| ENSG00000181448 | TP53RK   | protein             | chr20 | 46684365 | 46689779 | - | 5.84   | 6.14   |
| ENSG00000181449 | B3GALT1  | protein             | chr2  | 1.68E+08 | 1.68E+08 | + | 0.22   | 0.27   |
| ENSG00000181450 | OR5A1    | protein             | chr11 | 59443144 | 59444194 | + | 0      | 0      |
| ENSG00000181451 | CLEC12A  | protein             | chr12 | 9951316  | 9995694  | + | 0.47   | 0.66   |
| ENSG00000181452 | OR5A2    | protein             | chr11 | 59421943 | 59422976 | - | 0      | 0      |
| ENSG00000181453 | BPGM     | protein             | chr7  | 1.35E+08 | 1.35E+08 | + | 11.09  | 14.27  |
| ENSG00000181454 | POP7     | protein             | chr7  | 1.01E+08 | 1.01E+08 | + | 11.01  | 12.63  |
| ENSG00000181455 | ALG14    | protein             | chr1  | 94974407 | 95072945 | - | 2.08   | 2.89   |
| ENSG00000181456 | SUCLG2   | protein             | chr3  | 67360460 | 67654614 | - | 13.81  | 13.61  |
| ENSG00000181457 | CSPG4P3Y | unprocessed protein | chrY  | 24186509 | 24191870 | - | 0      | 0      |
| ENSG00000181458 | STARD5   | protein             | chr15 | 81309053 | 81324183 | - | 26.2   | 29.64  |
| ENSG00000181459 | CSDC2    | protein             | chr22 | 41560763 | 41577741 | + | 5.94   | 7.48   |
| ENSG00000181460 | RCAN2    | protein             | chr6  | 46220736 | 46491972 | - | 0.02   | 0.17   |
| ENSG00000181461 | IL16     | protein             | chr15 | 81159575 | 81314058 | + | 1.03   | 1.51   |
| ENSG00000181462 | ABCG4    | protein             | chr11 | 1.19E+08 | 1.19E+08 | + | 0.44   | 0.3    |
| ENSG00000181463 | CDY1B    | protein             | chrY  | 24045229 | 24048019 | - | 0      | 0      |
| ENSG00000181464 | GNB2     | protein             | chr7  | 1.01E+08 | 1.01E+08 | + | 120.84 | 122.66 |
| ENSG00000181465 | CFAP53   | protein             | chr18 | 50227193 | 50266522 | - | 0.18   | 0.53   |
| ENSG00000181466 | OR5B12   | protein             | chr11 | 58439120 | 58440173 | - | 0      | 0      |
| ENSG00000181467 | OR5B2    | protein             | chr11 | 58422265 | 58423313 | - | 0      | 0      |
| ENSG00000181468 | MCRIP2   | protein             | chr16 | 636817   | 648474   | + | 9.79   | 9.67   |
| ENSG00000181469 | PDZD3    | protein             | chr11 | 1.19E+08 | 1.19E+08 | + | 0      | 0      |
| ENSG00000181470 | C2CD2L   | protein             | chr11 | 1.19E+08 | 1.19E+08 | + | 4.11   | 3.22   |
| ENSG00000181471 | OR9I1    | protein             | chr11 | 58118500 | 58119444 | - | 0      | 0      |
| ENSG00000181472 | ARNT2    | protein             | chr15 | 80404350 | 80597937 | + | 7.48   | 6.72   |
| ENSG00000181473 | GNG12    | protein             | chr1  | 67701466 | 67833467 | - | 41.51  | 44.41  |
| ENSG00000181474 | PRSS27   | protein             | chr16 | 2712418  | 2720551  | - | 1.1    | 0.72   |
| ENSG00000181475 | MYOZ2    | protein             | chr4  | 1.19E+08 | 1.19E+08 | + | 0.5    | 0.23   |
| ENSG00000181476 | SYNPO2   | protein             | chr4  | 1.19E+08 | 1.19E+08 | + | 2.57   | 3.03   |
| ENSG00000181477 | DNAJB7   | protein             | chr22 | 40859549 | 40862126 | - | 0      | 0      |
| ENSG00000181478 | CLP1     | protein             | chr11 | 57648992 | 57661868 | + | 6.22   | 6.22   |
| ENSG00000181479 | INSL5    | protein             | chr1  | 66797741 | 66801256 | - | 0      | 0      |
| ENSG00000181480 | EFCAB3   | protein             | chr17 | 62343941 | 62416479 | + | 0.82   | 0.68   |
| ENSG00000181481 | TTC36    | protein             | chr11 | 1.19E+08 | 1.19E+08 | + | 0      | 0      |
| ENSG00000181482 | RSPH9    | protein             | chr6  | 43645046 | 43672599 | + | 0      | 0.05   |
| ENSG00000181483 | COPS9    | protein             | chr2  | 2.4E+08  | 2.4E+08  | - | 52.58  | 59.03  |
| ENSG00000181484 | GTPBP2   | protein             | chr6  | 43605316 | 43629162 | - | 27.77  | 28.26  |



|                   |                  |          |          |   |       |        |
|-------------------|------------------|----------|----------|---|-------|--------|
| ENSG0000( FGGY    | protein_co chr1  | 59296638 | 59810647 | + | 6.44  | 7.04   |
| ENSG0000( OR9G4   | protein_co chr11 | 56742827 | 56743811 | - | 0     | 0      |
| ENSG0000( IL17D   | protein_co chr13 | 20702127 | 20723098 | + | 1.32  | 1.54   |
| ENSG0000( OR5AR1  | polymorph chr11  | 56663662 | 56664687 | + | 0     | 0      |
| ENSG0000( PRSS30P | processed_chr16  | 2839568  | 2842744  | - | 0.63  | 0.54   |
| ENSG0000( FUT9    | protein_co chr6  | 96015984 | 96215612 | + | 0     | 0      |
| ENSG0000( OR5AP2  | protein_co chr11 | 56641466 | 56642471 | - | 0     | 0      |
| ENSG0000( TCEAL1  | protein_co chrX  | 1.04E+08 | 1.04E+08 | + | 11.91 | 10.78  |
| ENSG0000( ZNF24   | protein_co chr18 | 35332212 | 35345482 | - | 7.37  | 7.06   |
| ENSG0000( HSFY1   | protein_co chrY  | 18546671 | 18588963 | + | 0     | 0      |
| ENSG0000( MANEA   | protein_co chr6  | 95577543 | 95609457 | + | 5.63  | 3.56   |
| ENSG0000( RAB40A  | protein_co chrX  | 1.03E+08 | 1.04E+08 | - | 0.23  | 0.24   |
| ENSG0000( C2orf54 | protein_co chr2  | 2.41E+08 | 2.41E+08 | - | 0     | 0      |
| ENSG0000( AGXT    | protein_co chr2  | 2.41E+08 | 2.41E+08 | + | 0     | 0.13   |
| ENSG0000( OR8J1   | protein_co chr11 | 56360215 | 56361288 | + | 0     | 0      |
| ENSG0000( OR5T3   | protein_co chr11 | 56252200 | 56253222 | + | 0     | 0      |
| ENSG0000( AFF1    | protein_co chr4  | 86935002 | 87141054 | + | 12.44 | 13.1   |
| ENSG0000( ACOT12  | protein_co chr5  | 81330005 | 81394179 | - | 0     | 0      |
| ENSG0000( FIBP    | protein_co chr11 | 65883741 | 65888539 | - | 34.24 | 38.72  |
| ENSG0000( CARNS1  | protein_co chr11 | 67414968 | 67425607 | + | 0.03  | 0.05   |
| ENSG0000( OR10H5  | protein_co chr19 | 15793951 | 15795082 | + | 0     | 0      |
| ENSG0000( BANP    | protein_co chr16 | 87949244 | 88077318 | + | 7.46  | 6.24   |
| ENSG0000( PPP1CA  | protein_co chr11 | 67398183 | 67421183 | - | 58.46 | 55.82  |
| ENSG0000( HCFC1   | protein_co chrX  | 1.54E+08 | 1.54E+08 | - | 7.03  | 7.71   |
| ENSG0000( FAM170B | protein_co chr10 | 49131154 | 49134008 | - | 0     | 0      |
| ENSG0000( CTSW    | protein_co chr11 | 65879809 | 65883741 | + | 0     | 0.36   |
| ENSG0000( NIPAL4  | protein_co chr5  | 1.57E+08 | 1.57E+08 | + | 0.05  | 0.02   |
| ENSG0000( MUCL1   | protein_co chr12 | 54830519 | 54858393 | + | 0     | 0      |
| ENSG0000( SNTG2   | protein_co chr2  | 950868   | 1367613  | + | 0     | 0      |
| ENSG0000( FNDC9   | protein_co chr5  | 1.57E+08 | 1.57E+08 | - | 0     | 0.06   |
| ENSG0000( PDE3A   | protein_co chr12 | 20369245 | 20684381 | + | 1.33  | 1.88   |
| ENSG0000( RASGRP1 | protein_co chr15 | 38488103 | 38565575 | - | 0     | 0      |
| ENSG0000( KLHL6   | protein_co chr3  | 1.83E+08 | 1.84E+08 | - | 0.18  | 0.16   |
| ENSG0000( CHCHD1  | protein_co chr10 | 73782047 | 73783652 | + | 14.11 | 16.44  |
| ENSG0000( MRPL52  | protein_co chr14 | 22829879 | 22835037 | + | 43.64 | 43.82  |
| ENSG0000( SMPDL3A | protein_co chr6  | 1.23E+08 | 1.23E+08 | + | 22.86 | 21.43  |
| ENSG0000( RND1    | protein_co chr12 | 48857145 | 48865898 | - | 0.37  | 0.41   |
| ENSG0000( RAD9A   | protein_co chr11 | 67317871 | 67398410 | + | 9.64  | 8.46   |
| ENSG0000( EFEMP2  | protein_co chr11 | 65866441 | 65873592 | - | 232.8 | 232.84 |
| ENSG0000( OR10AD1 | protein_co chr12 | 48202083 | 48203387 | - | 0     | 0      |
| ENSG0000( AGAP5   | protein_co chr10 | 73674285 | 73698159 | - | 1.95  | 2.85   |
| ENSG0000( WASHC2C | protein_co chr10 | 45727200 | 45792961 | + | 26.01 | 22.9   |
| ENSG0000( TMEM134 | protein_co chr11 | 67461710 | 67469272 | - | 32.21 | 29.48  |
| ENSG0000( ZMAT3   | protein_co chr3  | 1.79E+08 | 1.79E+08 | - | 22.46 | 23.82  |
| ENSG0000( ZFAND4  | protein_co chr10 | 45615501 | 45672780 | - | 1.58  | 3.73   |

|                 |           |                  |          |          |   |        |        |
|-----------------|-----------|------------------|----------|----------|---|--------|--------|
| ENSG00000108000 | THEMIS    | protein_co chr6  | 1.28E+08 | 1.28E+08 | - | 0      | 0      |
| ENSG00000108000 | MOS       | protein_co chr8  | 56112942 | 56113982 | - | 0      | 0      |
| ENSG00000108000 | ZNF738    | protein_co chr19 | 21358930 | 21379302 | + | 2.63   | 3.15   |
| ENSG00000108000 | MS4A10    | protein_co chr11 | 60785348 | 60801305 | + | 0.04   | 0.13   |
| ENSG00000108000 | SLFN11    | protein_co chr17 | 35350305 | 35373701 | - | 13.78  | 15.91  |
| ENSG00000108000 | FAM71D    | protein_co chr14 | 67189393 | 67228550 | + | 0.18   | 0.15   |
| ENSG00000108000 | CCL19     | protein_co chr9  | 34689567 | 34691277 | - | 0.1    | 0      |
| ENSG00000108000 | CORO1B    | protein_co chr11 | 67435510 | 67443821 | - | 47.91  | 49.2   |
| ENSG00000108000 | FUT10     | protein_co chr8  | 33370824 | 33473422 | - | 4.26   | 5.83   |
| ENSG00000108000 | LRRC20    | protein_co chr10 | 70298970 | 70382650 | - | 5.7    | 8.61   |
| ENSG00000108000 | MUS81     | protein_co chr11 | 65857126 | 65867653 | + | 14.73  | 13.2   |
| ENSG00000108000 | PURG      | protein_co chr8  | 30995802 | 31033715 | - | 0      | 0.04   |
| ENSG00000108000 | TMEM217   | protein_co chr6  | 37212180 | 37258155 | - | 6.46   | 5.66   |
| ENSG00000108000 | OR4D9     | protein_co chr11 | 59514913 | 59515857 | + | 0      | 0      |
| ENSG00000108000 | RPL12P13  | unprocessed chr1 | 26980165 | 26980975 | + | 0      | 0      |
| ENSG00000108000 | ZNF596    | protein_co chr8  | 232137   | 264703   | + | 3.43   | 3.67   |
| ENSG00000108000 | COL6A5    | protein_co chr3  | 1.3E+08  | 1.3E+08  | + | 0      | 0      |
| ENSG00000108000 | CFL1      | protein_co chr11 | 65823022 | 65862026 | - | 546.37 | 546.49 |
| ENSG00000108000 | TMCC1     | protein_co chr3  | 1.3E+08  | 1.3E+08  | - | 5.85   | 10.74  |
| ENSG00000108000 | NAA16     | protein_co chr13 | 41311205 | 41377030 | + | 2.21   | 2.86   |
| ENSG00000108000 | OR5B3     | protein_co chr11 | 58402464 | 58403409 | - | 0      | 0      |
| ENSG00000108000 | EFCAB12   | protein_co chr3  | 1.29E+08 | 1.29E+08 | - | 0.48   | 0.27   |
| ENSG00000108000 | OR10W1    | protein_co chr11 | 58266792 | 58268260 | - | 0      | 0      |
| ENSG00000108000 | FAM192A   | protein_co chr16 | 57152466 | 57186116 | - | 33.17  | 38.94  |
| ENSG00000108000 | RAB43     | protein_co chr3  | 1.29E+08 | 1.29E+08 | - | 5.83   | 7.63   |
| ENSG00000108000 | FADS6     | protein_co chr17 | 74877299 | 74893781 | - | 0      | 0      |
| ENSG00000108000 | CBWD1     | protein_co chr9  | 121038   | 179147   | - | 20.83  | 20.13  |
| ENSG00000108000 | HOXC5     | protein_co chr12 | 54032853 | 54035358 | + | 0      | 0.03   |
| ENSG00000108000 | RAB37     | protein_co chr17 | 74670578 | 74747335 | + | 0.06   | 0      |
| ENSG00000108000 | DCP2      | protein_co chr5  | 1.13E+08 | 1.13E+08 | + | 4.49   | 3.86   |
| ENSG00000108000 | ZBTB80SP2 | processed_ chr2  | 2.31E+08 | 2.31E+08 | - | 0      | 0      |
| ENSG00000108000 | SNX32     | protein_co chr11 | 65833641 | 65856896 | + | 1.73   | 2.62   |
| ENSG00000108000 | RPL38     | protein_co chr17 | 74203582 | 74210655 | + | 647.64 | 644.75 |
| ENSG00000108000 | CYP7B1    | protein_co chr8  | 64587763 | 64798761 | - | 0      | 0      |
| ENSG00000108000 | OVOL1     | protein_co chr11 | 65787022 | 65797219 | + | 0      | 0      |
| ENSG00000108000 | RARG      | protein_co chr12 | 53210567 | 53232980 | - | 23.43  | 24.96  |
| ENSG00000108000 | CES4A     | protein_co chr16 | 66988589 | 67009758 | + | 2.78   | 3.07   |
| ENSG00000108000 | CES3      | protein_co chr16 | 66961237 | 66975148 | + | 0.15   | 0.24   |
| ENSG00000108000 | SSH3      | protein_co chr11 | 67303448 | 67312607 | + | 13.64  | 15.65  |
| ENSG00000108000 | CES2      | protein_co chr16 | 66934444 | 66945096 | + | 19.09  | 17.96  |
| ENSG00000108000 | PDP2      | protein_co chr16 | 66878589 | 66895754 | + | 3.37   | 2.9    |
| ENSG00000108000 | SP3       | protein_co chr2  | 1.74E+08 | 1.74E+08 | - | 28.24  | 30.84  |
| ENSG00000108000 | KRT2      | protein_co chr12 | 52644558 | 52652164 | - | 0      | 0      |
| ENSG00000108000 | DMXL1     | protein_co chr5  | 1.19E+08 | 1.19E+08 | + | 7.53   | 6.93   |
| ENSG00000108000 | METAP1D   | protein_co chr2  | 1.72E+08 | 1.72E+08 | + | 3.3    | 3.48   |

|                    |                   |          |          |   |       |       |
|--------------------|-------------------|----------|----------|---|-------|-------|
| ENSG0000(ZNF621    | protein_co chr3   | 40524878 | 40574685 | + | 8.53  | 9.57  |
| ENSG0000(EGFL7     | protein_co chr9   | 1.37E+08 | 1.37E+08 | + | 41    | 36.07 |
| ENSG0000(NADSYN1   | protein_co chr11  | 71453109 | 71524107 | + | 39.7  | 39.59 |
| ENSG0000(DHCR7     | protein_co chr11  | 71428193 | 71452868 | - | 35.02 | 30.52 |
| ENSG0000(FLJ42102  | transcribed chr11 | 71382601 | 71423423 | - | 0.47  | 0.41  |
| ENSG0000(LVRN      | protein_co chr5   | 1.16E+08 | 1.16E+08 | + | 0.02  | 0.08  |
| ENSG0000(COX6B1P3  | processed_chr22   | 40569286 | 40569895 | + | 0     | 0     |
| ENSG0000(NBEA      | protein_co chr13  | 34942287 | 35673022 | + | 0.96  | 0.54  |
| ENSG0000(RNASEH2C  | protein_co chr11  | 65714896 | 65720947 | - | 28.38 | 23.4  |
| ENSG0000(MYEOV     | protein_co chr11  | 69294138 | 69367726 | + | 0.36  | 0     |
| ENSG0000(ANKRD13D  | protein_co chr11  | 67288547 | 67302485 | + | 13.71 | 11.81 |
| ENSG0000(MRGPRF    | protein_co chr11  | 69004395 | 69013409 | - | 21.41 | 21.63 |
| ENSG0000(MYD88     | protein_co chr3   | 38138478 | 38143022 | + | 14    | 15.18 |
| ENSG0000(MRGPRD    | protein_co chr11  | 68980021 | 68980986 | - | 0     | 0     |
| ENSG0000(OXSR1     | protein_co chr3   | 38165089 | 38255488 | + | 10.16 | 10.07 |
| ENSG0000(SLC22A13  | protein_co chr3   | 38265812 | 38278315 | + | 0.09  | 0.02  |
| ENSG0000(PHF8      | protein_co chrX   | 53936676 | 54048958 | - | 4.93  | 4.58  |
| ENSG0000(LCLAT1    | protein_co chr2   | 30447226 | 30644225 | + | 4.15  | 3     |
| ENSG0000(ADH6      | protein_co chr4   | 99202638 | 99219537 | - | 0.02  | 0.1   |
| ENSG0000(MIR4435-2 | lincRNA chr2      | 1.11E+08 | 1.11E+08 | - | 47.09 | 45.17 |
| ENSG0000(XKR3      | protein_co chr22  | 16783412 | 16821699 | - | 0     | 0     |
| ENSG0000(FRG2C     | protein_co chr3   | 75664330 | 75667220 | + | 0.02  | 0     |
| ENSG0000(UNC93B3   | unprocessed chr3  | 75619506 | 75623849 | - | 0     | 0     |
| ENSG0000(AC007318. | processed_chr2    | 65205108 | 65205988 | + | 0     | 0     |
| ENSG0000(KAT5      | protein_co chr11  | 65711996 | 65719604 | + | 19.13 | 24.88 |
| ENSG0000(SH3RF3    | protein_co chr2   | 1.09E+08 | 1.1E+08  | + | 0.75  | 1.13  |
| ENSG0000(GXYLT2    | protein_co chr3   | 72888073 | 72998138 | + | 24.01 | 29.88 |
| ENSG0000(HPSE2     | protein_co chr10  | 98457077 | 99235862 | - | 0     | 0     |
| ENSG0000(DCAKD     | protein_co chr17  | 45023340 | 45061109 | - | 9.55  | 13.44 |
| ENSG0000(ARPP21    | protein_co chr3   | 35638945 | 35794496 | + | 0.31  | 0.11  |
| ENSG0000(TADA2B    | protein_co chr4   | 7041899  | 7057952  | + | 5.54  | 4.7   |
| ENSG0000(CCDC96    | protein_co chr4   | 7040849  | 7042939  | - | 0.98  | 0.91  |
| ENSG0000(GRK2      | protein_co chr11  | 67266410 | 67286556 | + | 12.12 | 13.49 |
| ENSG0000(RELA      | protein_co chr11  | 65653596 | 65663094 | - | 35.4  | 28.31 |
| ENSG0000(EVC2      | protein_co chr4   | 5542772  | 5709548  | - | 4.49  | 5.78  |
| ENSG0000(ZNF680    | protein_co chr7   | 64519884 | 64563106 | - | 1.35  | 1.48  |
| ENSG0000(HECTD4    | protein_co chr12  | 1.12E+08 | 1.12E+08 | - | 6.35  | 7.42  |
| ENSG0000(FAM222B   | protein_co chr17  | 28755978 | 28855232 | - | 6.07  | 6.33  |
| ENSG0000(BNC2      | protein_co chr9   | 16409503 | 16870843 | - | 23.85 | 23.95 |
| ENSG0000(1-Dec     | protein_co chr9   | 1.15E+08 | 1.15E+08 | + | 0.1   | 0     |
| ENSG0000(RXFP4     | protein_co chr1   | 1.56E+08 | 1.56E+08 | + | 0     | 0     |
| ENSG0000(HPSE      | protein_co chr4   | 83292461 | 83335153 | - | 4.73  | 4.67  |
| ENSG0000(COQ2      | protein_co chr4   | 83261536 | 83284914 | - | 5.93  | 5.14  |
| ENSG0000(CCDC63    | protein_co chr12  | 1.11E+08 | 1.11E+08 | + | 0     | 0     |
| ENSG0000(HSPA6     | protein_co chr1   | 1.62E+08 | 1.62E+08 | + | 0     | 0     |

|                 |                   |          |          |   |       |       |
|-----------------|-------------------|----------|----------|---|-------|-------|
| ENSG00000171112 | protein_co chr11  | 64316460 | 64318084 | - | 58.73 | 61.24 |
| ENSG00000171113 | protein_co chr7   | 1.11E+08 | 1.11E+08 | + | 1.44  | 1.36  |
| ENSG00000171114 | protein_co chr11  | 67119269 | 67258087 | + | 23.92 | 23.09 |
| ENSG00000171115 | protein_co chr10  | 95194200 | 95228928 | + | 0     | 0     |
| ENSG00000171116 | protein_co chr8   | 1.44E+08 | 1.44E+08 | + | 3.77  | 4.14  |
| ENSG00000171117 | protein_co chr13  | 21176645 | 21179084 | + | 7.05  | 8.97  |
| ENSG00000171118 | protein_co chr10  | 94333226 | 94362959 | - | 3.57  | 4.63  |
| ENSG00000171119 | protein_co chr11  | 64305572 | 64316743 | + | 14.55 | 14.91 |
| ENSG00000171120 | protein_co chr11  | 67056818 | 67072013 | + | 7.87  | 10    |
| ENSG00000171121 | protein_co chr12  | 43353866 | 43551921 | - | 0     | 0     |
| ENSG00000171122 | protein_co chr2   | 61888724 | 62147247 | + | 23.02 | 22.13 |
| ENSG00000171123 | protein_co chr2   | 2.03E+08 | 2.04E+08 | - | 10.85 | 11.36 |
| ENSG00000171124 | protein_co chr1   | 1.55E+08 | 1.55E+08 | + | 19.95 | 17.71 |
| ENSG00000171125 | protein_co chr3   | 1.23E+08 | 1.23E+08 | - | 0.38  | 0.23  |
| ENSG00000171126 | protein_co chr3   | 1.23E+08 | 1.23E+08 | + | 8.74  | 7.3   |
| ENSG00000171127 | protein_co chrX   | 78271464 | 78327691 | - | 1.19  | 1.47  |
| ENSG00000171128 | protein_co chr3   | 1.23E+08 | 1.23E+08 | + | 1.08  | 1.38  |
| ENSG00000171129 | protein_co chr1   | 1.55E+08 | 1.55E+08 | + | 14.57 | 15    |
| ENSG00000171130 | protein_co chr12  | 39550033 | 39619751 | - | 0     | 0     |
| ENSG00000171131 | protein_co chr2   | 61177418 | 61191203 | + | 27.69 | 33.66 |
| ENSG00000171132 | protein_co chr5   | 1.49E+08 | 1.49E+08 | + | 21.23 | 23.11 |
| ENSG00000171133 | protein_co chr1   | 1.16E+08 | 1.16E+08 | + | 0.44  | 0.38  |
| ENSG00000171134 | transcribed chr18 | 47390    | 49557    | - | 0     | 0     |
| ENSG00000171135 | protein_co chr6   | 1.11E+08 | 1.11E+08 | + | 0.81  | 1.01  |
| ENSG00000171136 | protein_co chr1   | 1.16E+08 | 1.16E+08 | + | 6.01  | 5.64  |
| ENSG00000171137 | protein_co chr5   | 95751319 | 95823005 | - | 46.43 | 42.99 |
| ENSG00000171138 | protein_co chr3   | 1.22E+08 | 1.22E+08 | - | 4.97  | 4.28  |
| ENSG00000171139 | protein_co chr11  | 67006778 | 67050863 | + | 1.25  | 0.6   |
| ENSG00000171140 | protein_co chr3   | 1.22E+08 | 1.22E+08 | - | 20.11 | 20.05 |
| ENSG00000171141 | processed_chr21   | 13776086 | 13777266 | + | 0     | 0     |
| ENSG00000171142 | protein_co chr11  | 66975277 | 66977004 | + | 0.05  | 0     |
| ENSG00000171143 | protein_co chr10  | 88802730 | 88820546 | + | 3.77  | 4.21  |
| ENSG00000171144 | protein_co chr5   | 1.47E+08 | 1.47E+08 | - | 0     | 0     |
| ENSG00000171145 | protein_co chr9   | 1049858  | 1057552  | + | 0     | 0     |
| ENSG00000171146 | protein_co chr9   | 1.12E+08 | 1.12E+08 | + | 0.2   | 0.03  |
| ENSG00000171147 | protein_co chr5   | 1.46E+08 | 1.46E+08 | - | 0.11  | 0     |
| ENSG00000171148 | protein_co chr12  | 7812512  | 7891148  | - | 0.62  | 0.53  |
| ENSG00000171149 | protein_co chr11  | 64270062 | 64289500 | + | 27.84 | 28.16 |
| ENSG00000171150 | protein_co chr10  | 86958618 | 86963260 | + | 0.71  | 1.1   |
| ENSG00000171151 | protein_co chr10  | 86935540 | 86969481 | - | 1.47  | 1.73  |
| ENSG00000171152 | protein_co chr2   | 1.31E+08 | 1.31E+08 | - | 51.91 | 45.81 |
| ENSG00000171153 | protein_co chr8   | 9555914  | 9782346  | + | 8.45  | 8.71  |
| ENSG00000171154 | protein_co chrX   | 1.35E+08 | 1.35E+08 | + | 4     | 3.9   |
| ENSG00000171155 | protein_co chr21  | 41986831 | 42010387 | - | 1.44  | 2.59  |
| ENSG00000171156 | protein_co chr8   | 9136255  | 9151574  | - | 8.45  | 8.82  |

|                     |                  |          |            |       |       |
|---------------------|------------------|----------|------------|-------|-------|
| ENSG0000( OR10K1    | protein_co chr1  | 1.58E+08 | 1.58E+08 + | 0     | 0     |
| ENSG0000( FAM86B3P  | transcribec chr8 | 8228595  | 8244865 +  | 2.27  | 2.25  |
| ENSG0000( GPR148    | protein_co chr2  | 1.31E+08 | 1.31E+08 + | 0     | 0     |
| ENSG0000( STOX2     | protein_co chr4  | 1.84E+08 | 1.84E+08 + | 0.11  | 0.53  |
| ENSG0000( MAP3K11   | protein_co chr11 | 65597755 | 65615382 - | 13.96 | 14.01 |
| ENSG0000( TRIB1     | protein_co chr8  | 1.25E+08 | 1.25E+08 + | 3.59  | 2.67  |
| ENSG0000( CST9      | protein_co chr20 | 23602410 | 23605876 - | 0     | 0     |
| ENSG0000( KCNK7     | protein_co chr11 | 65592855 | 65595996 - | 0     | 0.1   |
| ENSG0000( SFT2D3    | protein_co chr2  | 1.28E+08 | 1.28E+08 + | 2.3   | 2.79  |
| ENSG0000( AC007967. | transcribec chrY | 8906224  | 8916073 +  | 0     | 0     |
| ENSG0000( RP11-330H | protein_co chr3  | 52221081 | 52231190 - | 0.06  | 0.19  |
| ENSG0000( C1QB      | protein_co chr1  | 22652762 | 22661538 + | 0     | 0     |
| ENSG0000( C1QA      | protein_co chr1  | 22636506 | 22639608 + | 0     | 0     |
| ENSG0000( NDNF      | protein_co chr4  | 1.21E+08 | 1.21E+08 - | 0.07  | 0     |
| ENSG0000( IQCF1     | protein_co chr3  | 51894876 | 51903335 - | 0     | 0     |
| ENSG0000( OLR1      | protein_co chr12 | 10158301 | 10172138 - | 0     | 0     |
| ENSG0000( GLIPR1L1  | protein_co chr12 | 75334639 | 75370560 + | 0     | 0     |
| ENSG0000( DAG1      | protein_co chr3  | 49468703 | 49535618 + | 52.34 | 53.5  |
| ENSG0000( INSM1     | protein_co chr20 | 20368121 | 20370949 + | 0     | 0     |
| ENSG0000( DAB1      | protein_co chr1  | 56994778 | 58546734 - | 0.11  | 0.1   |
| ENSG0000( ARV1      | protein_co chr1  | 2.31E+08 | 2.31E+08 + | 10.72 | 10.09 |
| ENSG0000( NAA20     | protein_co chr20 | 20017116 | 20033655 + | 21.52 | 20.91 |
| ENSG0000( CCDC36    | protein_co chr3  | 49198428 | 49258104 + | 0.29  | 0.16  |
| ENSG0000( RNASE8    | protein_co chr14 | 21057822 | 21058455 + | 0     | 0     |
| ENSG0000( SAA1      | protein_co chr11 | 18266174 | 18269977 + | 3.53  | 4.94  |
| ENSG0000( MINOS1    | protein_co chr1  | 19596977 | 19629821 + | 54.41 | 56.85 |
| ENSG0000( EHBP1L1   | protein_co chr11 | 65576038 | 65592650 + | 23.36 | 19.02 |
| ENSG0000( THAP2     | protein_co chr12 | 71663009 | 71680639 + | 1.28  | 0.87  |
| ENSG0000( TMEM196   | protein_co chr7  | 19719310 | 19773598 - | 0     | 0     |
| ENSG0000( RNF26     | protein_co chr11 | 1.19E+08 | 1.19E+08 + | 14.66 | 14.09 |
| ENSG0000( PPP1R14B  | protein_co chr11 | 64244480 | 64246941 - | 94.47 | 87.4  |
| ENSG0000( RNASE11   | protein_co chr14 | 20583559 | 20609884 - | 0     | 0     |
| ENSG0000( SSSCA1    | protein_co chr11 | 65570430 | 65573942 + | 23.02 | 21.42 |
| ENSG0000( AGR3      | protein_co chr7  | 16859405 | 16881987 - | 0     | 0     |
| ENSG0000( SMARCC1   | protein_co chr3  | 47585272 | 47782106 - | 14.49 | 16.1  |
| ENSG0000( ZNF417    | protein_co chr19 | 57900296 | 57916610 - | 3.47  | 3.22  |
| ENSG0000( PTPRM     | protein_co chr18 | 7566782  | 8406861 +  | 15.74 | 17.39 |
| ENSG0000( FKBP2     | protein_co chr11 | 64241003 | 64244132 + | 58.74 | 58.64 |
| ENSG0000( VEGFB     | protein_co chr11 | 64234538 | 64238793 + | 96.98 | 96.08 |
| ENSG0000( PEAK1     | protein_co chr15 | 77100656 | 77420144 - | 27.99 | 23.21 |
| ENSG0000( TNFRSF10E | protein_co chr8  | 23135588 | 23164030 - | 21.71 | 20.65 |
| ENSG0000( MST1      | protein_co chr3  | 49683947 | 49689501 - | 8.61  | 10.94 |
| ENSG0000( TNFRSF10C | protein_co chr8  | 23084355 | 23117437 + | 4.91  | 4.92  |
| ENSG0000( GMPPB     | protein_co chr3  | 49716844 | 49723951 - | 9.79  | 8.77  |
| ENSG0000( MOB1B     | protein_co chr4  | 70902326 | 71022449 + | 4.66  | 5.59  |

|                   |                   |          |            |        |        |
|-------------------|-------------------|----------|------------|--------|--------|
| ENSG0000(ZNF622   | protein_co chr5   | 16451519 | 16465792 - | 17.48  | 19.71  |
| ENSG0000(CSPG4    | protein_co chr15  | 75674322 | 75712848 - | 1.5    | 1.87   |
| ENSG0000(SNX33    | protein_co chr15  | 75647906 | 75662301 + | 24.84  | 25.76  |
| ENSG0000(C2orf70  | protein_co chr2   | 26562582 | 26579532 + | 0      | 0      |
| ENSG0000(NABP1    | protein_co chr2   | 1.92E+08 | 1.92E+08 + | 40.39  | 34.97  |
| ENSG0000(ADGRF3   | protein_co chr2   | 26308173 | 26346817 - | 0      | 0.07   |
| ENSG0000(NLRP13   | protein_co chr19  | 55891699 | 55932336 - | 0      | 0      |
| ENSG0000(CHD2     | protein_co chr15  | 92900189 | 93028005 + | 30.8   | 26.21  |
| ENSG0000(XCR1     | protein_co chr3   | 46017024 | 46027742 - | 0      | 0.01   |
| ENSG0000(CCDC106  | protein_co chr19  | 55641062 | 55653161 + | 10.4   | 10.28  |
| ENSG0000(CCR9     | protein_co chr3   | 45886504 | 45903177 + | 0      | 0      |
| ENSG0000(CEP83    | protein_co chr12  | 94306449 | 94459988 - | 2.21   | 4.27   |
| ENSG0000(SULT1B1  | protein_co chr4   | 69721162 | 69787961 - | 2.61   | 2.96   |
| ENSG0000(NUDT4    | protein_co chr12  | 93377883 | 93408146 + | 43.41  | 45.95  |
| ENSG0000(PC       | protein_co chr11  | 66848233 | 66958376 - | 12.21  | 13.23  |
| ENSG0000(UGT2A1   | protein_co chr4   | 69588417 | 69653249 - | 0.12   | 0      |
| ENSG0000(SCAI     | protein_co chr9   | 1.25E+08 | 1.25E+08 - | 1.19   | 2.06   |
| ENSG0000(GPRC6A   | protein_co chr6   | 1.17E+08 | 1.17E+08 - | 0      | 0      |
| ENSG0000(NMNAT1   | protein_co chr1   | 9943428  | 9985501 +  | 4.09   | 4.28   |
| ENSG0000(LRFN4    | protein_co chr11  | 66856647 | 66860475 + | 15.28  | 13.98  |
| ENSG0000(TRAPPC3L | protein_co chr6   | 1.16E+08 | 1.17E+08 - | 0.12   | 0.15   |
| ENSG0000(APOBEC4  | protein_co chr1   | 1.84E+08 | 1.84E+08 - | 0      | 0      |
| ENSG0000(SLC19A1  | protein_co chr21  | 45493572 | 45544411 - | 2.49   | 2.61   |
| ENSG0000(HSPB7    | protein_co chr1   | 16014028 | 16019594 - | 8.89   | 10.64  |
| ENSG0000(RCE1     | protein_co chr11  | 66842835 | 66846546 + | 9.89   | 6.99   |
| ENSG0000(UQCRH    | protein_co chr1   | 46303631 | 46316776 + | 144.5  | 142.64 |
| ENSG0000(TAS1R1   | protein_co chr1   | 6555181  | 6579757 +  | 0.06   | 0      |
| ENSG0000(HES3     | protein_co chr1   | 6244192  | 6245578 +  | 0      | 0      |
| ENSG0000(EIF1AX   | protein_co chrX   | 20124518 | 20141844 - | 13.44  | 11.45  |
| ENSG0000(SPDYE2B  | protein_co chr7   | 1.03E+08 | 1.03E+08 + | 0      | 0      |
| ENSG0000(OR1L1    | protein_co chr9   | 1.23E+08 | 1.23E+08 + | 0      | 0.22   |
| ENSG0000(CXorf23  | protein_co chrX   | 19912860 | 19970298 - | 2.21   | 1.93   |
| ENSG0000(PSMD1    | protein_co chr2   | 2.31E+08 | 2.31E+08 + | 27.84  | 27.71  |
| ENSG0000(ADGRG2   | protein_co chrX   | 18989309 | 19122637 - | 0.04   | 0.05   |
| ENSG0000(SPATA3   | protein_co chr2   | 2.31E+08 | 2.31E+08 + | 0      | 0      |
| ENSG0000(MUC13    | protein_co chr3   | 1.25E+08 | 1.25E+08 - | 0.02   | 0.02   |
| ENSG0000(SUSD5    | protein_co chr3   | 33150042 | 33219215 - | 2.02   | 2.01   |
| ENSG0000(HEG1     | protein_co chr3   | 1.25E+08 | 1.25E+08 - | 262.11 | 249.56 |
| ENSG0000(WFIKKN2  | protein_co chr17  | 50834650 | 50842348 + | 0      | 0.03   |
| ENSG0000(C11orf80 | protein_co chr11  | 66744451 | 66843328 + | 3.57   | 5.03   |
| ENSG0000(TOMM20   | protein_co chr1   | 2.35E+08 | 2.35E+08 - | 54.49  | 61.86  |
| ENSG0000(CMB9-22P | transcribec chr11 | 65455258 | 65466720 + | 18.48  | 9.46   |
| ENSG0000(C1orf100 | protein_co chr1   | 2.44E+08 | 2.44E+08 + | 0      | 0      |
| ENSG0000(AGFG1    | protein_co chr2   | 2.27E+08 | 2.28E+08 + | 62.95  | 53.07  |
| ENSG0000(STAT5B   | protein_co chr17  | 42199168 | 42276707 - | 13.48  | 17.13  |

|          |           |                  |          |          |   |        |        |
|----------|-----------|------------------|----------|----------|---|--------|--------|
| ENSG0000 | CD7       | protein_co chr17 | 82314868 | 82317602 | - | 4.09   | 1.85   |
| ENSG0000 | TOPAZ1    | protein_co chr3  | 44241886 | 44332098 | + | 0      | 0      |
| ENSG0000 | CNP       | protein_co chr17 | 41966741 | 41977731 | + | 37.52  | 39.87  |
| ENSG0000 | JUP       | protein_co chr17 | 41754604 | 41786931 | - | 22.37  | 18.82  |
| ENSG0000 | HAP1      | protein_co chr17 | 41717742 | 41734644 | - | 0.09   | 0.13   |
| ENSG0000 | TDRD12    | protein_co chr19 | 32719753 | 32829580 | + | 0      | 0.16   |
| ENSG0000 | PPIAP7    | processed_chr1   | 1.01E+08 | 1.01E+08 | - | 0      | 0      |
| ENSG0000 | CCDC13-AS | antisense chr3   | 42732575 | 42746768 | + | 0      | 0      |
| ENSG0000 | EIF1      | protein_co chr17 | 41688885 | 41692668 | + | 626.35 | 625.05 |
| ENSG0000 | ENDOV     | protein_co chr17 | 80415165 | 80438086 | + | 14.79  | 14.78  |
| ENSG0000 | RNF213    | protein_co chr17 | 80260866 | 80398786 | + | 24.68  | 25.44  |
| ENSG0000 | TIGD3     | protein_co chr11 | 65354767 | 65357613 | + | 0.19   | 0.12   |
| ENSG0000 | KCNH6     | protein_co chr17 | 63523334 | 63548977 | + | 0      | 0      |
| ENSG0000 | 10-Mar    | protein_co chr17 | 62701314 | 62808344 | - | 0.02   | 0      |
| ENSG0000 | PLK3      | protein_co chr1  | 44800225 | 44805990 | + | 12.84  | 12.77  |
| ENSG0000 | NET1      | protein_co chr10 | 5412551  | 5458463  | + | 7.32   | 5.6    |
| ENSG0000 | DPY19L1   | protein_co chr7  | 34928876 | 35038271 | - | 12.16  | 13.95  |
| ENSG0000 | RP11-89N1 | lincRNA chr7     | 33725981 | 33728456 | + | 0      | 0      |
| ENSG0000 | RP11-97O1 | processed_chr15  | 88459717 | 88511521 | - | 0      | 0      |
| ENSG0000 | PHOSPHO1  | protein_co chr17 | 49223362 | 49230766 | - | 0      | 0.1    |
| ENSG0000 | ZNF791    | protein_co chr19 | 12610918 | 12633840 | + | 4.76   | 4.43   |
| ENSG0000 | PHC3      | protein_co chr3  | 1.7E+08  | 1.7E+08  | - | 10     | 11.5   |
| ENSG0000 | GPR160    | protein_co chr3  | 1.7E+08  | 1.7E+08  | + | 0.03   | 0.06   |
| ENSG0000 | CBX2      | protein_co chr17 | 79778132 | 79787983 | + | 0.42   | 0.87   |
| ENSG0000 | SPTBN2    | protein_co chr11 | 66685248 | 66729226 | - | 0.78   | 1.45   |
| ENSG0000 | GOLIM4    | protein_co chr3  | 1.68E+08 | 1.68E+08 | - | 19.77  | 19.32  |
| ENSG0000 | KRT28     | protein_co chr17 | 40792203 | 40799959 | - | 0      | 0      |
| ENSG0000 | RBM4B     | protein_co chr11 | 66664998 | 66677921 | - | 12.59  | 11.75  |
| ENSG0000 | USMG5     | protein_co chr10 | 1.03E+08 | 1.03E+08 | - | 91.77  | 99.95  |
| ENSG0000 | HOXB2     | protein_co chr17 | 48540894 | 48544989 | - | 3.9    | 3.54   |
| ENSG0000 | C1QTNF1   | protein_co chr17 | 79022814 | 79049788 | + | 122.14 | 105.38 |
| ENSG0000 | 3-Mar     | protein_co chr5  | 1.27E+08 | 1.27E+08 | - | 44.68  | 41.59  |
| ENSG0000 | SWSAP1    | protein_co chr19 | 11374685 | 11376951 | + | 0.71   | 0.89   |
| ENSG0000 | SLCO4C1   | protein_co chr5  | 1.02E+08 | 1.02E+08 | - | 0      | 0      |
| ENSG0000 | RBM4      | protein_co chr11 | 66638617 | 66666682 | + | 50.63  | 45.78  |
| ENSG0000 | PIFO      | protein_co chr1  | 1.11E+08 | 1.11E+08 | + | 2.37   | 2.08   |
| ENSG0000 | XXYL1     | protein_co chr3  | 1.95E+08 | 1.95E+08 | - | 10.59  | 12.33  |
| ENSG0000 | SNURFL    | processed_chrX   | 1.39E+08 | 1.39E+08 | + | 0      | 0      |
| ENSG0000 | UBXN2A    | protein_co chr2  | 23927285 | 24004909 | + | 5.89   | 6.59   |
| ENSG0000 | RP11-18M  | processed_chr4   | 53575713 | 53576387 | + | 0      | 0      |
| ENSG0000 | RAX2      | protein_co chr19 | 3769089  | 3772221  | - | 0      | 0      |
| ENSG0000 | LRRC63    | protein_co chr13 | 46211943 | 46277366 | + | 0      | 0      |
| ENSG0000 | TCAP      | protein_co chr17 | 39664187 | 39666555 | + | 0.08   | 0.13   |
| ENSG0000 | CCS       | protein_co chr11 | 66592821 | 66606019 | + | 28.72  | 32.7   |
| ENSG0000 | NRROS     | protein_co chr3  | 1.97E+08 | 1.97E+08 | + | 0.73   | 0.68   |

|                     |                  |          |            |        |        |
|---------------------|------------------|----------|------------|--------|--------|
| ENSG0000( CEP19     | protein_co chr3  | 1.97E+08 | 1.97E+08 - | 1.91   | 2      |
| ENSG0000( KLHL15    | protein_co chrX  | 23983720 | 24027186 - | 1.24   | 1.12   |
| ENSG0000( FBXO45    | protein_co chr3  | 1.97E+08 | 1.97E+08 + | 2.35   | 2.33   |
| ENSG0000( SPERT     | protein_co chr13 | 45702311 | 45714559 + | 0      | 0      |
| ENSG0000( FAM46D    | protein_co chrX  | 80335504 | 80445311 + | 0      | 0      |
| ENSG0000( GNG5      | protein_co chr1  | 84498325 | 84506565 - | 79.34  | 85.76  |
| ENSG0000( FAM3C2    | processed_chrX   | 23075758 | 23076767 + | 46.25  | 53.33  |
| ENSG0000( SLC25A30  | protein_co chr13 | 45393316 | 45418455 - | 5.48   | 6.74   |
| ENSG0000( C9orf131  | protein_co chr9  | 35041095 | 35045991 + | 0      | 0.06   |
| ENSG0000( CD34      | protein_co chr1  | 2.08E+08 | 2.08E+08 - | 1.26   | 2      |
| ENSG0000( CTSF      | protein_co chr11 | 66563463 | 66568841 - | 105.6  | 111.95 |
| ENSG0000( MSRB3     | protein_co chr12 | 65278643 | 65488244 + | 13.62  | 15.58  |
| ENSG0000( LEMD3     | protein_co chr12 | 65169571 | 65248327 + | 5.34   | 5.05   |
| ENSG0000( C16orf91  | protein_co chr16 | 1419744  | 1420800 -  | 3.64   | 4.3    |
| ENSG0000( TLR10     | protein_co chr4  | 38772239 | 38782990 - | 0.07   | 0.06   |
| ENSG0000( TLR1      | protein_co chr4  | 38790677 | 38856817 - | 0.82   | 1.4    |
| ENSG0000( TLR6      | protein_co chr4  | 38823715 | 38856817 - | 1.09   | 1.17   |
| ENSG0000( FAM174A   | protein_co chr5  | 1.01E+08 | 1.01E+08 + | 11.94  | 9.77   |
| ENSG0000( RGMB      | protein_co chr5  | 98768650 | 98798643 + | 16.47  | 12.18  |
| ENSG0000( FAM53A    | protein_co chr4  | 1617915  | 1684302 -  | 2.01   | 1.23   |
| ENSG0000( NWD2      | protein_co chr4  | 37244220 | 37449465 + | 0      | 0      |
| ENSG0000( CYB561D1  | protein_co chr1  | 1.09E+08 | 1.1E+08 +  | 5.82   | 5.97   |
| ENSG0000( GSTA3     | protein_co chr6  | 52896639 | 52909685 - | 0      | 0      |
| ENSG0000( ZDHHC24   | protein_co chr11 | 66520637 | 66546238 - | 8.76   | 9.41   |
| ENSG0000( RP11-23P1 | antisense chr15  | 41892793 | 41898575 + | 0      | 0      |
| ENSG0000( TRMT10C   | protein_co chr3  | 1.02E+08 | 1.02E+08 + | 5.5    | 5.87   |
| ENSG0000( SELP      | protein_co chr1  | 1.7E+08  | 1.7E+08 -  | 0.13   | 0.05   |
| ENSG0000( CTU2      | protein_co chr16 | 88706463 | 88715386 + | 6.3    | 6.84   |
| ENSG0000( MGA       | protein_co chr15 | 41621224 | 41773081 + | 4.44   | 4.33   |
| ENSG0000( C12orf66  | protein_co chr12 | 64186316 | 64222296 - | 1.11   | 1.37   |
| ENSG0000( ARL13A    | protein_co chrX  | 1.01E+08 | 1.01E+08 + | 0      | 0      |
| ENSG0000( SNX31     | protein_co chr8  | 1.01E+08 | 1.01E+08 - | 0      | 0      |
| ENSG0000( PIGG      | protein_co chr4  | 499210   | 540196 +   | 24.26  | 23.4   |
| ENSG0000( PRPF8     | protein_co chr17 | 1650629  | 1684882 -  | 35.77  | 37.19  |
| ENSG0000( ADCY6     | protein_co chr12 | 48766194 | 48789037 - | 19.11  | 19.02  |
| ENSG0000( REP15     | protein_co chr12 | 27696519 | 27697596 + | 1.06   | 0.43   |
| ENSG0000( PITPNA    | protein_co chr17 | 1517718  | 1562816 -  | 31.09  | 33.53  |
| ENSG0000( DDX23     | protein_co chr12 | 48829764 | 48852842 - | 24.28  | 27.23  |
| ENSG0000( ZNF80     | protein_co chr3  | 1.14E+08 | 1.14E+08 - | 0.05   | 0      |
| ENSG0000( ZNHIT2    | protein_co chr11 | 65116403 | 65117708 - | 3.67   | 5.9    |
| ENSG0000( EVX2      | protein_co chr2  | 1.76E+08 | 1.76E+08 - | 0      | 0      |
| ENSG0000( ZBTB4     | protein_co chr17 | 7459366  | 7484263 -  | 27.85  | 29.75  |
| ENSG0000( TNK1      | protein_co chr17 | 7380534  | 7389774 +  | 1.11   | 0.89   |
| ENSG0000( ZHX3      | protein_co chr20 | 41178448 | 41317672 - | 11.17  | 13.23  |
| ENSG0000( PHLDA3    | protein_co chr1  | 2.01E+08 | 2.01E+08 - | 112.72 | 115.31 |



|                    |                  |          |          |   |        |         |
|--------------------|------------------|----------|----------|---|--------|---------|
| ENSG0000(DIRC1     | protein_co chr2  | 1.89E+08 | 1.89E+08 | - | 1.17   | 1.41    |
| ENSG0000(SLC16A11  | protein_co chr17 | 7041630  | 7043923  | - | 1.43   | 1.87    |
| ENSG0000(SLC16A13  | protein_co chr17 | 7036075  | 7040121  | + | 1.42   | 2.33    |
| ENSG0000(GLIS1     | protein_co chr1  | 53506237 | 53738106 | - | 0.06   | 0.13    |
| ENSG0000(OR2Y1     | protein_co chr5  | 1.81E+08 | 1.81E+08 | - | 0      | 0       |
| ENSG0000(CHRNA9    | protein_co chr4  | 40335329 | 40355217 | + | 0      | 0.21    |
| ENSG0000(PODN      | protein_co chr1  | 53062052 | 53085502 | + | 103.34 | 118.74  |
| ENSG0000(STAG3L3   | transcribed chr7 | 72969696 | 73005922 | - | 10.08  | 7.92    |
| ENSG0000(SLC6A19   | protein_co chr5  | 1201595  | 1225117  | + | 0      | 0       |
| ENSG0000(SNHG11    | processed_chr20  | 38446578 | 38450921 | + | 7.08   | 7.81    |
| ENSG0000(C11orf45  | protein_co chr11 | 1.29E+08 | 1.29E+08 | - | 1.27   | 1.8     |
| ENSG0000(EXO1      | protein_co chr1  | 2.42E+08 | 2.42E+08 | + | 0.36   | 0.1     |
| ENSG0000(RALGAPA1  | protein_co chr14 | 35538352 | 35809304 | - | 5.85   | 5.01    |
| ENSG0000(PMS2P6    | unprocessed chr7 | 73093657 | 73105389 | + | 2.5    | 3.74    |
| ENSG0000(C20orf166 | antisense chr20  | 62544343 | 62551526 | - | 0      | 0       |
| ENSG0000(LIG4      | protein_co chr13 | 1.08E+08 | 1.08E+08 | - | 3.1    | 3.4     |
| ENSG0000(MIR1-1HG  | antisense chr20  | 62550453 | 62570764 | + | 0      | 0       |
| ENSG0000(PPIAP24   | processed_chr13  | 1.07E+08 | 1.07E+08 | - | 0      | 0       |
| ENSG0000(TRHR      | protein_co chr8  | 1.09E+08 | 1.09E+08 | + | 0      | 0       |
| ENSG0000(RPL35P9   | processed_chr13  | 1.06E+08 | 1.06E+08 | + | 0      | 0       |
| ENSG0000(GTF2IRD2B | protein_co chr7  | 75092573 | 75149817 | + | 12.68  | 9.64    |
| ENSG0000(ABRA      | protein_co chr8  | 1.07E+08 | 1.07E+08 | - | 0      | 0       |
| ENSG0000(ATP2A2    | protein_co chr12 | 1.1E+08  | 1.1E+08  | + | 48.03  | 44.29   |
| ENSG0000(ZWILCH    | protein_co chr15 | 66504959 | 66550128 | + | 3.23   | 4.74    |
| ENSG0000(RPL4      | protein_co chr15 | 66498015 | 66524532 | - | 1539.3 | 1580.93 |
| ENSG0000(SNAPC5    | protein_co chr15 | 66490135 | 66497813 | - | 11.08  | 14.46   |
| ENSG0000(STARD6    | protein_co chr18 | 54324358 | 54357964 | - | 0      | 0.05    |
| ENSG0000(GOLGA6L2  | protein_co chr15 | 23439498 | 23447234 | - | 0      | 0       |
| ENSG0000(VWC2L     | protein_co chr2  | 2.14E+08 | 2.15E+08 | + | 0      | 0       |
| ENSG0000(C12orf76  | protein_co chr12 | 1.1E+08  | 1.1E+08  | - | 10.22  | 7.99    |
| ENSG0000(ZCCHC12   | protein_co chrX  | 1.19E+08 | 1.19E+08 | + | 0      | 0       |
| ENSG0000(CNTNAP2   | protein_co chr7  | 1.46E+08 | 1.48E+08 | + | 0      | 0       |
| ENSG0000(GALNTL6   | protein_co chr4  | 1.72E+08 | 1.73E+08 | + | 0      | 0       |
| ENSG0000(LINGO2    | protein_co chr9  | 27948078 | 28670286 | - | 0      | 0       |
| ENSG0000(BBS1      | protein_co chr11 | 66510606 | 66533627 | + | 14.22  | 13.89   |
| ENSG0000(DENND4A   | protein_co chr15 | 65658046 | 65792293 | - | 6.17   | 5.74    |
| ENSG0000(AC005017  | processed_chr7   | 28279211 | 28279700 | - | 0      | 0       |
| ENSG0000(IGDCC3    | protein_co chr15 | 65327127 | 65378040 | - | 0      | 0       |
| ENSG0000(GCSAM     | protein_co chr3  | 1.12E+08 | 1.12E+08 | - | 0      | 0       |
| ENSG0000(ANKRD36C  | protein_co chr2  | 95836919 | 95991831 | - | 6.77   | 5.63    |
| ENSG0000(SLC26A9   | protein_co chr1  | 2.06E+08 | 2.06E+08 | - | 0.01   | 0       |
| ENSG0000(MFSD4A    | protein_co chr1  | 2.06E+08 | 2.06E+08 | + | 0.14   | 0.48    |
| ENSG0000(PELI3     | protein_co chr11 | 66466327 | 66477337 | + | 7.34   | 6.51    |
| ENSG0000(TTC9B     | protein_co chr19 | 40216058 | 40218399 | - | 0      | 0       |
| ENSG0000(MYO1H     | protein_co chr12 | 1.09E+08 | 1.09E+08 | + | 0      | 0       |

|                    |                  |          |            |         |         |
|--------------------|------------------|----------|------------|---------|---------|
| ENSG0000(TMEM81    | protein_co chr1  | 2.05E+08 | 2.05E+08 - | 0.66    | 0.63    |
| ENSG0000(MRPL11    | protein_co chr11 | 66435075 | 66466738 - | 19.58   | 21.11   |
| ENSG0000(KLK15     | protein_co chr19 | 50825289 | 50837213 - | 0.47    | 0       |
| ENSG0000(IL20RB    | protein_co chr3  | 1.37E+08 | 1.37E+08 + | 5.06    | 5.02    |
| ENSG0000(GOLT1A    | protein_co chr1  | 2.04E+08 | 2.04E+08 - | 0       | 0       |
| ENSG0000(RPL10P2   | processed_chr6   | 27211244 | 27211913 + | 0.3     | 0       |
| ENSG0000(AKIRIN1   | protein_co chr1  | 38991223 | 39006059 + | 14.24   | 12.16   |
| ENSG0000(NPAS4     | protein_co chr11 | 66421004 | 66426707 + | 0.09    | 0       |
| ENSG0000(MSL2      | protein_co chr3  | 1.36E+08 | 1.36E+08 - | 5.05    | 4.78    |
| ENSG0000(ZNF497    | protein_co chr19 | 58354357 | 58362848 - | 0.1     | 0.12    |
| ENSG0000(TRAM1L1   | protein_co chr4  | 1.17E+08 | 1.17E+08 - | 0.41    | 0.39    |
| ENSG0000(CMKLR1    | protein_co chr12 | 1.08E+08 | 1.08E+08 - | 0       | 0       |
| ENSG0000(ANGEL2    | protein_co chr1  | 2.13E+08 | 2.13E+08 - | 10.6    | 8.97    |
| ENSG0000(UGT8      | protein_co chr4  | 1.15E+08 | 1.15E+08 + | 0.1     | 0.17    |
| ENSG0000(KY        | protein_co chr3  | 1.35E+08 | 1.35E+08 - | 0.27    | 0.4     |
| ENSG0000(IQCK      | protein_co chr16 | 19716456 | 19858467 + | 12.07   | 10.32   |
| ENSG0000(SLCO2A1   | protein_co chr3  | 1.34E+08 | 1.34E+08 - | 0.03    | 0       |
| ENSG0000(ZNF266    | protein_co chr19 | 9412598  | 9435578 -  | 6.67    | 6.73    |
| ENSG0000(OR7D4     | protein_co chr19 | 9213850  | 9214871 -  | 0       | 0       |
| ENSG0000(SLC29A2   | protein_co chr11 | 66362521 | 66372214 - | 0       | 0.03    |
| ENSG0000(BRSK2     | protein_co chr11 | 1389899  | 1462689 +  | 0.45    | 0.23    |
| ENSG0000(VN1R6P    | unitary_ps chr19 | 53315137 | 53316043 + | 0       | 0       |
| ENSG0000(FAM47DP   | processed_chrX   | 37541077 | 37545262 - | 0       | 0       |
| ENSG0000(GRIK1-AS1 | antisense chr21  | 29748175 | 29764002 + | 0.32    | 0.17    |
| ENSG0000(B4GAT1    | protein_co chr11 | 66345372 | 66347692 - | 21.31   | 20.47   |
| ENSG0000(TMEM167   | protein_co chr5  | 83052846 | 83077863 - | 24.07   | 19.88   |
| ENSG0000(LEP       | protein_co chr7  | 1.28E+08 | 1.28E+08 + | 0.02    | 0       |
| ENSG0000(SH3PXD2B  | protein_co chr5  | 1.72E+08 | 1.72E+08 - | 23.08   | 26.68   |
| ENSG0000(RP11-79L9 | processed_chr3   | 1.39E+08 | 1.39E+08 - | 0       | 0       |
| ENSG0000(KIAA1551  | protein_co chr12 | 31959370 | 31993107 + | 17.3    | 16.42   |
| ENSG0000(LARP7     | protein_co chr4  | 1.13E+08 | 1.13E+08 + | 21.03   | 20.32   |
| ENSG0000(FGFBP3    | protein_co chr10 | 91906589 | 91909483 - | 0.15    | 0.17    |
| ENSG0000(NR1D2     | protein_co chr3  | 23945260 | 23980618 + | 21.23   | 18.87   |
| ENSG0000(PABPC5    | protein_co chrX  | 91434595 | 91438584 + | 1.6     | 0.66    |
| ENSG0000(BRMS1     | protein_co chr11 | 66337333 | 66345125 - | 18.73   | 18.85   |
| ENSG0000(RPL15     | protein_co chr3  | 23916545 | 23923692 + | 1038.73 | 1034.75 |
| ENSG0000(C4orf32   | protein_co chr4  | 1.12E+08 | 1.12E+08 + | 2.48    | 2.24    |
| ENSG0000(HRAS      | protein_co chr11 | 532242   | 537287 -   | 28.48   | 29.71   |
| ENSG0000(WDR49     | protein_co chr3  | 1.67E+08 | 1.68E+08 - | 0       | 0       |
| ENSG0000(SRP72     | protein_co chr4  | 56466915 | 56503680 + | 34.94   | 37.31   |
| ENSG0000(PCP2      | protein_co chr19 | 7631611  | 7633748 -  | 0       | 0       |
| ENSG0000(RIN1      | protein_co chr11 | 66330242 | 66336840 - | 8.7     | 7.81    |
| ENSG0000(C4orf26   | protein_co chr4  | 75556048 | 75565885 + | 0.09    | 0       |
| ENSG0000(THAP6     | protein_co chr4  | 75513946 | 75550473 + | 5.51    | 7.91    |
| ENSG0000(CEP135    | protein_co chr4  | 55948871 | 56033363 + | 1.32    | 1.58    |

|                    |                  |          |            |        |        |
|--------------------|------------------|----------|------------|--------|--------|
| ENSG0000(FZD4      | protein_co chr11 | 86945679 | 86955391 - | 8.84   | 12.11  |
| ENSG0000(CD248     | protein_co chr11 | 66314487 | 66317044 - | 190.08 | 216.07 |
| ENSG0000(BTC       | protein_co chr4  | 74744759 | 74794686 - | 0      | 0.06   |
| ENSG0000(PDZK1     | protein_co chr1  | 1.46E+08 | 1.46E+08 - | 0      | 0.06   |
| ENSG0000(ADGRE1    | protein_co chr19 | 6887566  | 6940459 +  | 0.06   | 0.05   |
| ENSG0000(DENND6A   | protein_co chr3  | 57625457 | 57693089 - | 4.43   | 3.4    |
| ENSG0000(PDE12     | protein_co chr3  | 57556276 | 57566844 + | 4.26   | 4.85   |
| ENSG0000(GLMN      | protein_co chr1  | 92246402 | 92298987 - | 2.66   | 3.26   |
| ENSG0000(DNAH12    | protein_co chr3  | 57293699 | 57544344 - | 0.03   | 0.08   |
| ENSG0000(YIF1A     | protein_co chr11 | 66284580 | 66289170 - | 43.63  | 45.98  |
| ENSG0000(CNIH2     | protein_co chr11 | 66278190 | 66285301 + | 0.31   | 0.48   |
| ENSG0000(AMY1B     | protein_co chr1  | 1.04E+08 | 1.04E+08 - | 0      | 0      |
| ENSG0000(NLRP6     | protein_co chr11 | 278365   | 285359 +   | 0      | 0      |
| ENSG0000(NDUFA11   | protein_co chr19 | 5891276  | 5904006 -  | 134.22 | 139.66 |
| ENSG0000(RSRC1     | protein_co chr3  | 1.58E+08 | 1.59E+08 + | 11.19  | 14.33  |
| ENSG0000(CATSPERD  | protein_co chr19 | 5720677  | 5778734 +  | 0      | 0      |
| ENSG0000(PQLC2L    | protein_co chr3  | 1.58E+08 | 1.58E+08 + | 5.79   | 4.96   |
| ENSG0000(RAB1B     | protein_co chr11 | 66268533 | 66277492 + | 80.18  | 74.02  |
| ENSG0000(METTL15P: | processed_chr3   | 1.57E+08 | 1.57E+08 - | 0.43   | 0.41   |
| ENSG0000(OR9G1     | protein_co chr11 | 56700388 | 56701305 + | 0      | 0      |
| ENSG0000(PTDSS2    | protein_co chr11 | 448268   | 491399 +   | 23.09  | 24.16  |
| ENSG0000(C19orf70  | protein_co chr19 | 5678421  | 5680896 -  | 28.51  | 29.77  |
| ENSG0000(C3orf33   | protein_co chr3  | 1.56E+08 | 1.56E+08 - | 0.86   | 1.07   |
| ENSG0000(VN2R1P    | unitary_ps chr3  | 1.56E+08 | 1.56E+08 + | 0      | 0      |
| ENSG0000(OR5M3     | protein_co chr11 | 56469574 | 56470497 - | 0      | 0      |
| ENSG0000(SEZ6L2    | protein_co chr16 | 29871159 | 29899547 - | 29.64  | 28.93  |
| ENSG0000(ASPHD1    | protein_co chr16 | 29900375 | 29919864 + | 6.84   | 5.98   |
| ENSG0000(KCTD13    | protein_co chr16 | 29905012 | 29927035 - | 5.96   | 5.85   |
| ENSG0000(P2RY14    | protein_co chr3  | 1.51E+08 | 1.51E+08 - | 0      | 0      |
| ENSG0000(AMZ1      | protein_co chr7  | 2679522  | 2775500 +  | 0.12   | 0.03   |
| ENSG0000(GPR171    | protein_co chr3  | 1.51E+08 | 1.51E+08 - | 0      | 0      |
| ENSG0000(GPR149    | protein_co chr3  | 1.54E+08 | 1.54E+08 - | 0      | 0      |
| ENSG0000(CD164L2   | protein_co chr1  | 27379176 | 27383380 - | 0      | 0      |
| ENSG0000(FUT1      | protein_co chr19 | 48748011 | 48755390 - | 0.13   | 0.09   |
| ENSG0000(DHX36     | protein_co chr3  | 1.54E+08 | 1.54E+08 - | 20.25  | 16.64  |
| ENSG0000(OR5J2     | protein_co chr11 | 56176618 | 56177556 + | 0      | 0      |
| ENSG0000(ZIC4      | protein_co chr3  | 1.47E+08 | 1.47E+08 - | 0      | 0.1    |
| ENSG0000(OR10AG1   | protein_co chr11 | 55967558 | 55968463 - | 0      | 0      |
| ENSG0000(AC026271. | processed_chr17  | 18650195 | 18651542 + | 0      | 0      |
| ENSG0000(OR4S2     | protein_co chr11 | 55650904 | 55651839 + | 0      | 0      |
| ENSG0000(FBXW8     | protein_co chr12 | 1.17E+08 | 1.17E+08 + | 6.74   | 7.4    |
| ENSG0000(CA5A      | protein_co chr16 | 87881546 | 87936529 - | 0.04   | 0.02   |
| ENSG0000(ZG16      | protein_co chr16 | 29778240 | 29782973 + | 0      | 0      |
| ENSG0000(KLC2      | protein_co chr11 | 66257294 | 66267860 + | 8.31   | 12.33  |
| ENSG0000(SLC22A1   | protein_co chr6  | 1.6E+08  | 1.6E+08 +  | 0.27   | 0.04   |

|                 |           |                  |          |          |   |        |        |
|-----------------|-----------|------------------|----------|----------|---|--------|--------|
| ENSG00000100000 | TEX36     | protein_co chr10 | 1.26E+08 | 1.26E+08 | - | 0      | 0      |
| ENSG00000100000 | CTBP2     | protein_co chr10 | 1.25E+08 | 1.25E+08 | - | 17.58  | 19.46  |
| ENSG00000100000 | CHST2     | protein_co chr3  | 1.43E+08 | 1.43E+08 | + | 1.94   | 2.76   |
| ENSG00000100000 | ZDHHC14   | protein_co chr6  | 1.57E+08 | 1.58E+08 | + | 2.98   | 2.69   |
| ENSG00000100000 | ATR       | protein_co chr3  | 1.42E+08 | 1.43E+08 | - | 2.44   | 5.36   |
| ENSG00000100000 | LRRC75A-A | processed_chr17  | 16438822 | 16478678 | + | 474.56 | 497.67 |
| ENSG00000100000 | UBE2C     | protein_co chr20 | 45812576 | 45816957 | + | 0.58   | 0.5    |
| ENSG00000100000 | DSG4      | protein_co chr18 | 31376777 | 31414912 | + | 0      | 0      |
| ENSG00000100000 | GK5       | protein_co chr3  | 1.42E+08 | 1.42E+08 | - | 5.26   | 7.33   |
| ENSG00000100000 | VCPIP1    | protein_co chr8  | 66628487 | 66667217 | - | 2.35   | 2.37   |
| ENSG00000100000 | RTP1      | protein_co chr3  | 1.87E+08 | 1.87E+08 | + | 0      | 0.03   |
| ENSG00000100000 | DES       | protein_co chr2  | 2.19E+08 | 2.19E+08 | + | 0.17   | 0.18   |
| ENSG00000100000 | PDIK1L    | protein_co chr1  | 26111165 | 26125543 | + | 1.08   | 0.89   |
| ENSG00000100000 | SPSB4     | protein_co chr3  | 1.41E+08 | 1.41E+08 | + | 0      | 0      |
| ENSG00000100000 | RAG2      | protein_co chr11 | 36575574 | 36598279 | - | 0      | 0      |
| ENSG00000100000 | TRAF6     | protein_co chr11 | 36487027 | 36510272 | - | 3.26   | 3.78   |
| ENSG00000100000 | ZNF654    | protein_co chr3  | 88059274 | 88144665 | + | 3.58   | 3.77   |
| ENSG00000100000 | TVP23C    | protein_co chr17 | 15502264 | 15563595 | - | 3.55   | 6.13   |
| ENSG00000100000 | MRPS22    | protein_co chr3  | 1.39E+08 | 1.39E+08 | + | 12.74  | 14.35  |
| ENSG00000100000 | PACS1     | protein_co chr11 | 66070363 | 66244747 | + | 29.96  | 28.9   |
| ENSG00000100000 | WFDC5     | protein_co chr20 | 45109452 | 45115172 | - | 0      | 0      |
| ENSG00000100000 | MARCKSL1  | protein_co chr1  | 32333832 | 32336379 | - | 51.85  | 53.89  |
| ENSG00000100000 | SH3BP5L   | protein_co chr1  | 2.49E+08 | 2.49E+08 | - | 13.76  | 11.97  |
| ENSG00000100000 | OR2T1     | protein_co chr1  | 2.48E+08 | 2.48E+08 | + | 0      | 0      |
| ENSG00000100000 | TMEM51-A  | antisense chr1   | 15111815 | 15152464 | - | 0.04   | 0.05   |
| ENSG00000100000 | YPEL2     | protein_co chr17 | 59331689 | 59401729 | + | 6.2    | 5.72   |
| ENSG00000100000 | CADM2     | protein_co chr3  | 84958981 | 86074429 | + | 0      | 0      |
| ENSG00000100000 | ABO       | protein_co chr9  | 1.33E+08 | 1.33E+08 | - | 0      | 0      |
| ENSG00000100000 | PSMD2     | protein_co chr3  | 1.84E+08 | 1.84E+08 | + | 104.47 | 94.81  |
| ENSG00000100000 | FAM182B   | protein_co chr20 | 25763466 | 25868225 | - | 0.24   | 0.92   |
| ENSG00000100000 | PPM1E     | protein_co chr17 | 58755869 | 58985176 | + | 0.08   | 0.06   |
| ENSG00000100000 | FAM131A   | protein_co chr3  | 1.84E+08 | 1.84E+08 | + | 6.32   | 4.89   |
| ENSG00000100000 | CSRP2     | protein_co chr12 | 76858715 | 76879060 | - | 34.56  | 30.29  |
| ENSG00000100000 | INHBC     | protein_co chr12 | 57434760 | 57450828 | + | 0      | 0      |
| ENSG00000100000 | PARL      | protein_co chr3  | 1.84E+08 | 1.84E+08 | - | 18.91  | 17.4   |
| ENSG00000100000 | DDIT3     | protein_co chr12 | 57516588 | 57520517 | - | 117.46 | 120.09 |
| ENSG00000100000 | PCCA      | protein_co chr13 | 1E+08    | 1.01E+08 | + | 8.36   | 7.3    |
| ENSG00000100000 | HIGD2B    | protein_co chr15 | 72675783 | 72686149 | - | 0      | 0      |
| ENSG00000100000 | DCTN2     | protein_co chr12 | 57530102 | 57547331 | - | 94.31  | 95.03  |
| ENSG00000100000 | NPPA      | protein_co chr1  | 11845709 | 11848345 | - | 0      | 0      |
| ENSG00000100000 | ZNF408    | protein_co chr11 | 46700818 | 46705912 | + | 4.8    | 5.12   |
| ENSG00000100000 | CTDSP2    | protein_co chr12 | 57819927 | 57846739 | - | 109.73 | 120.14 |
| ENSG00000100000 | CKAP5     | protein_co chr11 | 46743048 | 46846308 | - | 30.08  | 27.82  |
| ENSG00000100000 | ARHGAP1   | protein_co chr11 | 46677080 | 46700615 | - | 41.03  | 41.72  |
| ENSG00000100000 | MED16     | protein_co chr19 | 867630   | 893218   | - | 17.47  | 17.45  |

|                    |                  |          |          |   |        |        |
|--------------------|------------------|----------|----------|---|--------|--------|
| ENSG0000( ATG13    | protein_co chr11 | 46617527 | 46674818 | + | 41.96  | 32.78  |
| ENSG0000( GAL3ST3  | protein_co chr11 | 66041952 | 66049180 | - | 0      | 0.04   |
| ENSG0000( C1orf127 | protein_co chr1  | 10946471 | 10982037 | - | 0.02   | 0.03   |
| ENSG0000( CHST1    | protein_co chr11 | 45648877 | 45665622 | - | 0.27   | 0.45   |
| ENSG0000( GOLGA8A  | protein_co chr15 | 34379068 | 34437466 | - | 37.46  | 37.62  |
| ENSG0000( VWA3A    | protein_co chr16 | 22092538 | 22156966 | + | 0.02   | 0.18   |
| ENSG0000( TP53I11  | protein_co chr11 | 44885903 | 44951306 | - | 41.17  | 43.36  |
| ENSG0000( CENPS    | protein_co chr1  | 10430443 | 10442809 | + | 7.57   | 6.82   |
| ENSG0000( DOLK     | protein_co chr9  | 1.29E+08 | 1.29E+08 | - | 11.26  | 11.54  |
| ENSG0000( PHYHD1   | protein_co chr9  | 1.29E+08 | 1.29E+08 | + | 10.63  | 10.34  |
| ENSG0000( CATSPER1 | protein_co chr11 | 66016752 | 66026517 | - | 0      | 0      |
| ENSG0000( ANKRD30B | unprocessε chr21 | 13384249 | 13427773 | - | 0      | 0.03   |
| ENSG0000( CCNE2    | protein_co chr8  | 94879770 | 94896678 | - | 0.12   | 0.09   |
| ENSG0000( PHYKPL   | protein_co chr5  | 1.78E+08 | 1.78E+08 | - | 18.42  | 18.67  |
| ENSG0000( ANKS4B   | protein_co chr16 | 21233665 | 21253845 | + | 0.05   | 0.13   |
| ENSG0000( CST6     | protein_co chr11 | 66011841 | 66013505 | + | 0.26   | 0.09   |
| ENSG0000( GRAMD2   | protein_co chr15 | 72159807 | 72197785 | - | 0.26   | 0.19   |
| ENSG0000( NF1P5    | processed_ chr18 | 14153001 | 14157342 | - | 0      | 0      |
| ENSG0000( ZNF519   | protein_co chr18 | 14057457 | 14132490 | - | 1.05   | 1.37   |
| ENSG0000( LSM1     | protein_co chr8  | 38163321 | 38176730 | - | 18.65  | 19.48  |
| ENSG0000( PROP1    | protein_co chr5  | 1.78E+08 | 1.78E+08 | - | 0      | 0      |
| ENSG0000( ISX      | protein_co chr22 | 35066136 | 35087387 | + | 0      | 0      |
| ENSG0000( BANF1    | protein_co chr11 | 66002079 | 66004149 | + | 58.91  | 58.39  |
| ENSG0000( APOF     | protein_co chr12 | 56360569 | 56362823 | - | 0      | 0      |
| ENSG0000( CHRNA7   | protein_co chr15 | 31923438 | 32173018 | + | 0.33   | 0.13   |
| ENSG0000( TMEM9B   | protein_co chr11 | 8947294  | 8965011  | - | 19.59  | 19.77  |
| ENSG0000( NRIP3    | protein_co chr11 | 8980576  | 9004049  | - | 2.74   | 2.57   |
| ENSG0000( PTPN2    | protein_co chr18 | 12785478 | 12929643 | - | 14.51  | 11.87  |
| ENSG0000( SCUBE2   | protein_co chr11 | 9020391  | 9138114  | - | 1.48   | 1.47   |
| ENSG0000( EIF1AD   | protein_co chr11 | 65996545 | 66002176 | - | 10.06  | 9.36   |
| ENSG0000( SMAD2    | protein_co chr18 | 47808957 | 47931146 | - | 43.64  | 41.91  |
| ENSG0000( EIF3F    | protein_co chr11 | 7970251  | 8001862  | + | 165.91 | 189.54 |
| ENSG0000( ZNF25    | protein_co chr10 | 37949572 | 37976633 | - | 3.9    | 3.9    |
| ENSG0000( OR10P1   | protein_co chr12 | 55636860 | 55637854 | + | 0      | 0      |
| ENSG0000( ARL10    | protein_co chr5  | 1.76E+08 | 1.76E+08 | + | 4.72   | 5.21   |
| ENSG0000( CLTB     | protein_co chr5  | 1.76E+08 | 1.76E+08 | - | 42.82  | 47.27  |
| ENSG0000( PCSK1    | protein_co chr5  | 96390415 | 96434143 | - | 0.58   | 1.23   |
| ENSG0000( LPL      | protein_co chr8  | 19901717 | 19967258 | + | 0      | 0.03   |
| ENSG0000( RFESD    | protein_co chr5  | 95646754 | 95684773 | + | 2.27   | 1.16   |
| ENSG0000( CCDC14   | protein_co chr3  | 1.24E+08 | 1.24E+08 | - | 12.89  | 16.95  |
| ENSG0000( TBC1D10C | protein_co chr11 | 67403915 | 67410089 | + | 0      | 0.12   |
| ENSG0000( SART1    | protein_co chr11 | 65961689 | 65979828 | + | 14.97  | 13.4   |
| ENSG0000( PPP2R2D  | protein_co chr10 | 1.32E+08 | 1.32E+08 | + | 9.28   | 9.72   |
| ENSG0000( MCTP1    | protein_co chr5  | 94703741 | 95284575 | - | 0.98   | 1.08   |
| ENSG0000( POLD4    | protein_co chr11 | 67350777 | 67356972 | - | 73.15  | 66.43  |

|                     |                   |          |            |       |       |
|---------------------|-------------------|----------|------------|-------|-------|
| ENSG0000( OR52W1    | protein_co chr11  | 6199146  | 6200259 +  | 0     | 0     |
| ENSG0000( LRRC25    | protein_co chr19  | 18391144 | 18397617 - | 0.13  | 0.03  |
| ENSG0000( DPP10     | protein_co chr2   | 1.14E+08 | 1.16E+08 + | 0     | 0     |
| ENSG0000( CLCF1     | protein_co chr11  | 67364168 | 67374177 - | 8.26  | 8.15  |
| ENSG0000( RP11-395L | processed_chr2    | 1.14E+08 | 1.14E+08 - | 0     | 0     |
| ENSG0000( TSGA10IP  | protein_co chr11  | 65945445 | 65959963 + | 0     | 0     |
| ENSG0000( GPR152    | protein_co chr11  | 67451301 | 67452729 - | 0     | 0     |
| ENSG0000( UBQLNL    | protein_co chr11  | 5514393  | 5516705 -  | 0.36  | 0.34  |
| ENSG0000( UBQLN3    | protein_co chr11  | 5507300  | 5509985 -  | 0     | 0     |
| ENSG0000( PNLIP     | protein_co chr10  | 1.17E+08 | 1.17E+08 + | 0.56  | 0.43  |
| ENSG0000( LIPT2     | protein_co chr11  | 74491712 | 74493733 - | 1.25  | 1.49  |
| ENSG0000( KCNE3     | protein_co chr11  | 74454841 | 74467729 - | 6.97  | 7.37  |
| ENSG0000( CABP4     | protein_co chr11  | 67452406 | 67460313 + | 0     | 0     |
| ENSG0000( ALG10B    | protein_co chr12  | 38316578 | 38329728 + | 1.92  | 1.87  |
| ENSG0000( DRAP1     | protein_co chr11  | 65919257 | 65921561 + | 85.35 | 81.82 |
| ENSG0000( LONRF3    | protein_co chrX   | 1.19E+08 | 1.19E+08 + | 0.07  | 0.07  |
| ENSG0000( UCP3      | protein_co chr11  | 74000281 | 74009435 - | 0.21  | 0.82  |
| ENSG0000( UCP2      | protein_co chr11  | 73974667 | 73983307 - | 0.06  | 0.64  |
| ENSG0000( C11orf68  | protein_co chr11  | 65916808 | 65919117 - | 31.01 | 30.45 |
| ENSG0000( PAAF1     | protein_co chr11  | 73876699 | 73931124 + | 11.7  | 10.75 |
| ENSG0000( MRPL48    | protein_co chr11  | 73787316 | 73865133 + | 13.14 | 15.97 |
| ENSG0000( RAB6A     | protein_co chr11  | 73675638 | 73761137 - | 52.95 | 48.78 |
| ENSG0000( P2RY2     | protein_co chr11  | 73218298 | 73236352 + | 0.08  | 0.03  |
| ENSG0000( FOSL1     | protein_co chr11  | 65892049 | 65900573 - | 5.94  | 8.77  |
| ENSG0000( ERCC4     | protein_co chr16  | 13920157 | 13952345 + | 3.33  | 2.86  |
| ENSG0000( SUGCT     | protein_co chr7   | 40134977 | 40860763 + | 9.96  | 8.37  |
| ENSG0000( CCDC85B   | protein_co chr11  | 65890112 | 65891635 + | 35.09 | 36.41 |
| ENSG0000( RP11-276H | antisense chr16   | 12086746 | 12090302 - | 0     | 0     |
| ENSG0000( TMEM70    | protein_co chr8   | 73972437 | 73982783 + | 14.65 | 14.25 |
| ENSG0000( LINC00476 | processed_chr9    | 95759231 | 95875977 - | 3.92  | 4.68  |
| ENSG0000( OR4B1     | protein_co chr11  | 48216792 | 48217762 + | 0     | 0     |
| ENSG0000( RPS6KB2   | protein_co chr11  | 67428460 | 67435408 + | 14.93 | 15.55 |
| ENSG0000( RMI2      | protein_co chr16  | 11249619 | 11351762 + | 0.99  | 0.83  |
| ENSG0000( PRM1      | protein_co chr16  | 11280836 | 11281350 - | 0     | 0     |
| ENSG0000( DRD5P2    | processed_chr1    | 1.44E+08 | 1.44E+08 - | 0     | 0     |
| ENSG0000( TOM1L2    | protein_co chr17  | 17843511 | 17972422 - | 15.92 | 16.65 |
| ENSG0000( TEX26     | protein_co chr13  | 30932703 | 30975502 + | 0     | 0     |
| ENSG0000( GOLGA8EP  | transcribed chr15 | 23157366 | 23170711 + | 0.01  | 0     |
| ENSG0000( ZNF77     | protein_co chr19  | 2933218  | 2944971 -  | 0.81  | 1.04  |
| ENSG0000( GPR156    | protein_co chr3   | 1.2E+08  | 1.2E+08 -  | 0.09  | 0.16  |
| ENSG0000( LINC00521 | protein_co chr14  | 93987225 | 94008863 + | 0     | 0     |
| ENSG0000( LINC00116 | protein_co chr2   | 1.1E+08  | 1.1E+08 -  | 17.94 | 20.14 |
| ENSG0000( KDF1      | protein_co chr1   | 26949562 | 26960406 - | 0     | 0     |
| ENSG0000( B3GNTL1   | protein_co chr17  | 82942155 | 83051810 - | 1.94  | 2.63  |
| ENSG0000( RBMXL3    | protein_co chrX   | 1.15E+08 | 1.15E+08 + | 0     | 0     |

|                 |               |                          |       |          |          |   |       |       |
|-----------------|---------------|--------------------------|-------|----------|----------|---|-------|-------|
| ENSG00000100000 | MLXIP         | protein_coding           | chr12 | 1.22E+08 | 1.22E+08 | + | 21.2  | 19.92 |
| ENSG00000100000 | C11orf44      | lincRNA                  | chr11 | 1.31E+08 | 1.31E+08 | + | 0.02  | 0     |
| ENSG00000100000 | BAK1P1        | processed_transcript     | chr20 | 32690180 | 32690815 | - | 0     | 0.39  |
| ENSG00000100000 | RWDD4P2       | processed_transcript     | chr7  | 39854494 | 39855056 | - | 0     | 0     |
| ENSG00000100000 | NR2F1         | protein_coding           | chr5  | 93583337 | 93594615 | + | 12.04 | 11.07 |
| ENSG00000100000 | C15orf54      | lincRNA                  | chr15 | 39250684 | 39254845 | + | 0     | 0     |
| ENSG00000100000 | EIF3KP1       | processed_transcript     | chr5  | 1.03E+08 | 1.03E+08 | + | 0     | 0     |
| ENSG00000100000 | AURKAIP1      | protein_coding           | chr1  | 1373730  | 1375495  | - | 44.06 | 42.7  |
| ENSG00000100000 | TLL11         | protein_coding           | chr9  | 1.22E+08 | 1.22E+08 | - | 2.24  | 2.32  |
| ENSG00000100000 | EIF4E1B       | protein_coding           | chr5  | 1.77E+08 | 1.77E+08 | + | 0     | 0     |
| ENSG00000100000 | TOMM5         | protein_coding           | chr9  | 37582646 | 37592642 | - | 33.23 | 35.25 |
| ENSG00000100000 | LINC01106     | lincRNA                  | chr2  | 1.1E+08  | 1.1E+08  | - | 1.59  | 1.58  |
| ENSG00000100000 | RP11-121M11.1 | lincRNA                  | chr11 | 1.3E+08  | 1.3E+08  | + | 0     | 0     |
| ENSG00000100000 | C15orf53      | protein_coding           | chr15 | 38696598 | 38700038 | + | 0     | 0     |
| ENSG00000100000 | SLC35E3       | protein_coding           | chr12 | 68746106 | 68793964 | + | 5.74  | 5.59  |
| ENSG00000100000 | PRIMA1        | protein_coding           | chr14 | 93718298 | 93788481 | - | 0     | 0     |
| ENSG00000100000 | ZNF169        | protein_coding           | chr9  | 94259311 | 94301454 | + | 0.95  | 2.46  |
| ENSG00000100000 | RUVBL1        | protein_coding           | chr3  | 1.28E+08 | 1.28E+08 | - | 11.28 | 12.87 |
| ENSG00000100000 | SFN           | protein_coding           | chr1  | 26863138 | 26864457 | + | 0     | 0     |
| ENSG00000100000 | OR52B3P       | unitary_prime_transcript | chr11 | 4378282  | 4379209  | + | 0     | 0     |
| ENSG00000100000 | MSRA          | protein_coding           | chr8  | 10054268 | 10428891 | + | 5.85  | 7.23  |
| ENSG00000100000 | ZNF645        | protein_coding           | chrX  | 22272943 | 22274461 | + | 0     | 0     |
| ENSG00000100000 | CCDC168       | protein_coding           | chr13 | 1.03E+08 | 1.03E+08 | - | 0.01  | 0.01  |
| ENSG00000100000 | CTDNEP1       | protein_coding           | chr17 | 7243591  | 7252491  | - | 68.19 | 63.64 |
| ENSG00000100000 | ETV4          | protein_coding           | chr17 | 43527844 | 43579620 | - | 0.62  | 1.42  |
| ENSG00000100000 | FAM172BP      | processed_transcript     | chr3  | 1.02E+08 | 1.02E+08 | + | 0     | 0     |
| ENSG00000100000 | SWI5          | protein_coding           | chr9  | 1.28E+08 | 1.28E+08 | + | 22.05 | 26.11 |
| ENSG00000100000 | GAPT          | protein_coding           | chr5  | 58491435 | 58497090 | + | 0     | 0     |
| ENSG00000100000 | BAIAP2        | protein_coding           | chr17 | 81035122 | 81117432 | + | 9.29  | 11.39 |
| ENSG00000100000 | CALCB         | protein_coding           | chr11 | 14904997 | 15082342 | + | 0     | 0.05  |
| ENSG00000100000 | CREG2         | protein_coding           | chr2  | 1.01E+08 | 1.01E+08 | - | 0.62  | 0.94  |
| ENSG00000100000 | WBSCR28       | protein_coding           | chr7  | 73861159 | 73865893 | + | 0     | 0     |
| ENSG00000100000 | HOXD8         | protein_coding           | chr2  | 1.76E+08 | 1.76E+08 | + | 0.19  | 0     |
| ENSG00000100000 | RPL7AP66      | processed_transcript     | chr18 | 39334872 | 39335672 | - | 0     | 0     |
| ENSG00000100000 | ZDHHC21       | protein_coding           | chr9  | 14611071 | 14693471 | - | 1.29  | 1.06  |
| ENSG00000100000 | TSPEAR        | protein_coding           | chr21 | 44497892 | 44711580 | - | 0     | 0     |
| ENSG00000100000 | PLEKHF2       | protein_coding           | chr8  | 95133804 | 95156684 | + | 2.14  | 2.69  |
| ENSG00000100000 | A2M           | protein_coding           | chr12 | 9067664  | 9116229  | - | 6.36  | 8.95  |
| ENSG00000100000 | ARL4D         | protein_coding           | chr17 | 43398959 | 43401137 | + | 21.88 | 27.14 |
| ENSG00000100000 | DOK7          | protein_coding           | chr4  | 3463311  | 3494483  | + | 0     | 0     |
| ENSG00000100000 | LRRN1         | protein_coding           | chr3  | 3799437  | 3847703  | + | 0     | 0     |
| ENSG00000100000 | UBE2O         | protein_coding           | chr17 | 76389451 | 76453206 | - | 7.17  | 6.95  |
| ENSG00000100000 | ORAI3         | protein_coding           | chr16 | 30949066 | 30956461 | + | 31.09 | 28.33 |
| ENSG00000100000 | KLHL38        | protein_coding           | chr8  | 1.24E+08 | 1.24E+08 | - | 0.11  | 0.12  |
| ENSG00000100000 | RP11-544L11.1 | antisense                | chr6  | 1.14E+08 | 1.14E+08 | + | 0.05  | 0.05  |

|                     |                  |          |          |   |        |        |
|---------------------|------------------|----------|----------|---|--------|--------|
| ENSG0000(UNC119B    | protein_co chr12 | 1.21E+08 | 1.21E+08 | + | 14.39  | 14.65  |
| ENSG0000(DENND2C    | protein_co chr1  | 1.15E+08 | 1.15E+08 | - | 1.09   | 0.89   |
| ENSG0000(PLEKHD1    | protein_co chr14 | 69484692 | 69531551 | + | 0.22   | 0.16   |
| ENSG0000(FAM220BP   | processed_chr9   | 38527097 | 38527912 | + | 0      | 0      |
| ENSG0000(ASCL3      | protein_co chr11 | 8937579  | 8938211  | - | 0      | 0      |
| ENSG0000(TUBB6      | protein_co chr18 | 12307669 | 12344320 | + | 128.72 | 131.69 |
| ENSG0000(LYSMD3     | protein_co chr5  | 90515611 | 90529584 | - | 5.41   | 5.03   |
| ENSG0000(AMIGO3     | protein_co chr3  | 49716834 | 49719695 | - | 0      | 0      |
| ENSG0000(B3GALT6    | protein_co chr1  | 1232265  | 1235041  | + | 8.05   | 8.17   |
| ENSG0000(ZNF613     | protein_co chr19 | 51927147 | 51948759 | + | 1.81   | 3.29   |
| ENSG0000(C11orf16   | protein_co chr11 | 8920076  | 8933006  | - | 0      | 0      |
| ENSG0000(TMPRS7     | protein_co chr3  | 1.12E+08 | 1.12E+08 | + | 0.05   | 0.05   |
| ENSG0000(RP1-146I3. | processed_chr14  | 72929612 | 72929930 | - | 0      | 0      |
| ENSG0000(NUPR1      | protein_co chr16 | 28532708 | 28539174 | - | 275.2  | 324.95 |
| ENSG0000(JAKMIP2    | protein_co chr5  | 1.48E+08 | 1.48E+08 | - | 0.01   | 0.03   |
| ENSG0000(RPL23P2    | processed_chr21  | 28997613 | 28998033 | - | 0.58   | 0.64   |
| ENSG0000(MBLAC2     | protein_co chr5  | 90458203 | 90474768 | - | 1.61   | 2.04   |
| ENSG0000(TPRN       | protein_co chr9  | 1.37E+08 | 1.37E+08 | - | 3.56   | 3.58   |
| ENSG0000(LINC00302  | lincRNA chr1     | 1.53E+08 | 1.53E+08 | + | 0      | 0      |
| ENSG0000(KCNE5      | protein_co chrX  | 1.1E+08  | 1.1E+08  | - | 0.16   | 0.21   |
| ENSG0000(ZNF683     | protein_co chr1  | 26361634 | 26374522 | - | 0      | 0      |
| ENSG0000(SLC35A4    | protein_co chr5  | 1.41E+08 | 1.41E+08 | + | 24.4   | 26.41  |
| ENSG0000(AIM1L      | protein_co chr1  | 26321859 | 26360052 | - | 0      | 0      |
| ENSG0000(IP6K1      | protein_co chr3  | 49724294 | 49786542 | - | 18.89  | 18.67  |
| ENSG0000(SSNA1      | protein_co chr9  | 1.37E+08 | 1.37E+08 | + | 29.36  | 32.39  |
| ENSG0000(CSTF3      | protein_co chr11 | 33077188 | 33162371 | - | 5.72   | 6.18   |
| ENSG0000(YES1       | protein_co chr18 | 721588   | 812546   | - | 20.09  | 20.89  |
| ENSG0000(CHMP6      | protein_co chr17 | 80991598 | 81009517 | + | 12.64  | 14     |
| ENSG0000(AQP7P4     | unprocessε chr9  | 63127359 | 63143401 | + | 0      | 0      |
| ENSG0000(DLEU1      | protein_co chr13 | 50082171 | 50723236 | + | 3.22   | 5.43   |
| ENSG0000(UFSP1      | protein_co chr7  | 1.01E+08 | 1.01E+08 | - | 1.29   | 1.35   |
| ENSG0000(RP11-574E  | transcribec chr9 | 64637845 | 64652556 | + | 0      | 0      |
| ENSG0000(MC5R       | protein_co chr18 | 13824149 | 13827323 | + | 0.04   | 0      |
| ENSG0000(TMEM39A    | protein_co chr3  | 1.19E+08 | 1.19E+08 | - | 18.37  | 18.6   |
| ENSG0000(TCP11L1    | protein_co chr11 | 33039417 | 33105943 | + | 9.15   | 8.72   |
| ENSG0000(GPX2       | protein_co chr14 | 64939152 | 64942905 | - | 0      | 0      |
| ENSG0000(CCDC57     | protein_co chr17 | 82101460 | 82212830 | - | 20.45  | 16.92  |
| ENSG0000(HSF5       | protein_co chr17 | 58420167 | 58488384 | - | 0      | 0      |
| ENSG0000(FOXG1      | protein_co chr14 | 28760330 | 28770277 | + | 0.05   | 0.04   |
| ENSG0000(SPHK1      | protein_co chr17 | 76376584 | 76387860 | + | 17.89  | 19.21  |
| ENSG0000(BNIP3      | protein_co chr10 | 1.32E+08 | 1.32E+08 | - | 95.43  | 71.05  |
| ENSG0000(ENTHD1     | protein_co chr22 | 39743044 | 39893864 | - | 0      | 0      |
| ENSG0000(MYPOP      | protein_co chr19 | 45890020 | 45902604 | - | 4.5    | 4.56   |
| ENSG0000(CH17-12M   | processed_chr5   | 98338744 | 98339832 | + | 0      | 0      |
| ENSG0000(CIDEA      | protein_co chr18 | 12254319 | 12277595 | + | 0      | 0      |



|                     |                  |          |            |        |        |
|---------------------|------------------|----------|------------|--------|--------|
| ENSG0000( OR11H4    | protein_co chr14 | 20242739 | 20243820 + | 0      | 0      |
| ENSG0000( OR4D11    | protein_co chr11 | 59503576 | 59504511 + | 0      | 0      |
| ENSG0000( LRRTM4    | protein_co chr2  | 76747719 | 77593319 - | 0.13   | 0      |
| ENSG0000( ATAD5     | protein_co chr17 | 30831970 | 30895869 + | 0.11   | 0.25   |
| ENSG0000( SMIM19    | protein_co chr8  | 42541155 | 42555193 + | 13.9   | 13.26  |
| ENSG0000( OR11H6    | protein_co chr14 | 20223632 | 20224805 + | 0      | 0      |
| ENSG0000( ZNF404    | protein_co chr19 | 43872363 | 43901385 - | 2.3    | 1.77   |
| ENSG0000( RTTN      | protein_co chr18 | 70003031 | 70205945 - | 1.87   | 1.86   |
| ENSG0000( OR4K17    | protein_co chr14 | 20117407 | 20118438 + | 0      | 0      |
| ENSG0000( OR10H4    | protein_co chr19 | 15949008 | 15949958 + | 0      | 0      |
| ENSG0000( RP5-1193P | transcribed chr7 | 63980385 | 63981477 - | 0      | 0      |
| ENSG0000( C10orf111 | antisense chr10  | 15095385 | 15097319 - | 0.14   | 0.07   |
| ENSG0000( OR51B6    | protein_co chr11 | 5351508  | 5352446 +  | 0      | 0      |
| ENSG0000( CDV3P1    | processed_chr3   | 96776945 | 96777683 + | 0      | 0      |
| ENSG0000( ACBD7     | protein_co chr10 | 15077523 | 15088776 - | 0.15   | 0.2    |
| ENSG0000( OR4L1     | protein_co chr14 | 20060045 | 20060983 + | 0      | 0      |
| ENSG0000( ANAPC2    | protein_co chr9  | 1.37E+08 | 1.37E+08 - | 17.72  | 17.81  |
| ENSG0000( OR4K13    | protein_co chr14 | 20033844 | 20034760 - | 0      | 0      |
| ENSG0000( HMGB4     | protein_co chr1  | 33860475 | 33864791 + | 0      | 0      |
| ENSG0000( ZBTB8OS   | protein_co chr1  | 32600172 | 32650903 - | 18.06  | 15.82  |
| ENSG0000( CYCSP34   | processed_chr13  | 40863599 | 40863902 - | 0      | 0      |
| ENSG0000( OR4F21    | protein_co chr8  | 166049   | 167043 -   | 0.12   | 0      |
| ENSG0000( SLC35G1   | protein_co chr10 | 93893973 | 93956062 + | 1.19   | 1.85   |
| ENSG0000( OR4K5     | protein_co chr14 | 19920582 | 19921659 + | 0      | 0      |
| ENSG0000( IDSP1     | unprocessε chrX  | 1.5E+08  | 1.5E+08 +  | 0      | 0      |
| ENSG0000( OR4K3     | unprocessε chr14 | 19868242 | 19869143 - | 0      | 0      |
| ENSG0000( ZNF135    | protein_co chr19 | 58059239 | 58086310 + | 0.17   | 0.29   |
| ENSG0000( OR4N2     | protein_co chr14 | 19719015 | 19828372 + | 0      | 0      |
| ENSG0000( OR4M1     | protein_co chr14 | 19780242 | 19781357 + | 0      | 0      |
| ENSG0000( FOXR1     | protein_co chr11 | 1.19E+08 | 1.19E+08 + | 0      | 0      |
| ENSG0000( OR4H12P   | unprocessε chr14 | 19759868 | 19760774 + | 0      | 0      |
| ENSG0000( FOXN3P1   | processed_chrX   | 1.03E+08 | 1.03E+08 - | 0      | 0      |
| ENSG0000( RP11-404C | lincRNA chr1     | 1.58E+08 | 1.58E+08 - | 0      | 0.11   |
| ENSG0000( COX8A     | protein_co chr11 | 63974607 | 63976543 + | 189.66 | 189.24 |
| ENSG0000( RPL37AP8  | processed_chr11  | 1.12E+08 | 1.12E+08 - | 0      | 0      |
| ENSG0000( AC110781. | antisense chr7   | 1838586  | 1849931 +  | 0      | 0      |
| ENSG0000( TAC4      | protein_co chr17 | 49838309 | 49848017 - | 0      | 0      |
| ENSG0000( ZSCAN2    | protein_co chr15 | 84600986 | 84627796 + | 4.34   | 4.42   |
| ENSG0000( PFN1P10   | processed_chr1   | 21459756 | 21460082 - | 0      | 0      |
| ENSG0000( PRR18     | protein_co chr6  | 1.66E+08 | 1.66E+08 - | 0      | 0      |
| ENSG0000( B3GNT4    | protein_co chr12 | 1.22E+08 | 1.22E+08 + | 0.56   | 0.3    |
| ENSG0000( CDC26     | protein_co chr9  | 1.13E+08 | 1.13E+08 - | 18.75  | 18.27  |
| ENSG0000( HSD11B2   | protein_co chr16 | 67430652 | 67437553 + | 0      | 0.16   |
| ENSG0000( CRLF3     | protein_co chr17 | 30769388 | 30824776 - | 4.47   | 2.28   |
| ENSG0000( RNPEP     | protein_co chr1  | 2.02E+08 | 2.02E+08 + | 39.04  | 40.55  |

|                    |                   |          |          |   |       |       |
|--------------------|-------------------|----------|----------|---|-------|-------|
| ENSG0000(EID2      | protein_co chr19  | 39538705 | 39540333 | - | 6.38  | 5.76  |
| ENSG0000(DMRTA1    | protein_co chr9   | 22446841 | 22455740 | + | 0.02  | 0.03  |
| ENSG0000(EID2B     | protein_co chr19  | 39530990 | 39532854 | - | 1.71  | 1.45  |
| ENSG0000(GJC3      | protein_co chr7   | 99923269 | 99929620 | - | 0     | 0     |
| ENSG0000(RIMS2     | protein_co chr8   | 1.04E+08 | 1.04E+08 | + | 0.04  | 1.33  |
| ENSG0000(KCMF1     | protein_co chr2   | 84971093 | 85059472 | + | 23.55 | 21.32 |
| ENSG0000(DNAJC30   | protein_co chr7   | 73680969 | 73683453 | - | 6.31  | 6.58  |
| ENSG0000(SPRYD4    | protein_co chr12  | 56468567 | 56479707 | + | 0.89  | 0.82  |
| ENSG0000(VPS37D    | protein_co chr7   | 73667825 | 73672112 | + | 3.5   | 3.89  |
| ENSG0000(CLEC14A   | protein_co chr14  | 38254103 | 38256369 | - | 0.56  | 0.43  |
| ENSG0000(SYNE3     | protein_co chr14  | 95407266 | 95475836 | - | 1.64  | 1.44  |
| ENSG0000(CLK2      | protein_co chr1   | 1.55E+08 | 1.55E+08 | - | 16.57 | 16.8  |
| ENSG0000(LPCAT4    | protein_co chr15  | 34358618 | 34367278 | - | 17.55 | 20.15 |
| ENSG0000(SLCO3A1   | protein_co chr15  | 91853695 | 92172435 | + | 13.68 | 13.17 |
| ENSG0000(ZNF575    | protein_co chr19  | 43525497 | 43536130 | + | 1.29  | 1.71  |
| ENSG0000(WDR25     | protein_co chr14  | 1E+08    | 1.01E+08 | + | 4.99  | 7.94  |
| ENSG0000(SGF29     | protein_co chr16  | 28553915 | 28591790 | + | 6.22  | 7.35  |
| ENSG0000(PLA2G16   | protein_co chr11  | 63573195 | 63616883 | - | 25.79 | 25.82 |
| ENSG0000(DIRAS1    | protein_co chr19  | 2714567  | 2721418  | - | 0.25  | 0.57  |
| ENSG0000(OR5AN1    | protein_co chr11  | 59364412 | 59365448 | + | 0     | 0     |
| ENSG0000(OR10AC1   | polymorph chr7    | 1.44E+08 | 1.44E+08 | - | 0     | 0     |
| ENSG0000(RP5-856G1 | lincRNA chr6      | 1079929  | 1104946  | + | 0     | 0     |
| ENSG0000(PHLDB3    | protein_co chr19  | 43474954 | 43504935 | - | 7.72  | 7.43  |
| ENSG0000(PRR15     | protein_co chr7   | 29563811 | 29567295 | + | 4.47  | 3.41  |
| ENSG0000(GNG7      | protein_co chr19  | 2511219  | 2702709  | - | 0.1   | 0.1   |
| ENSG0000(OR4C5     | protein_co chr11  | 48365485 | 48366465 | - | 0     | 0     |
| ENSG0000(USF3      | protein_co chr3   | 1.14E+08 | 1.14E+08 | - | 1.51  | 1.46  |
| ENSG0000(OR4C3     | protein_co chr11  | 48324920 | 48328471 | + | 0     | 0     |
| ENSG0000(OR4S1     | protein_co chr11  | 48306223 | 48307152 | + | 0     | 0     |
| ENSG0000(CNTD1     | protein_co chr17  | 42798792 | 42811587 | + | 0     | 0     |
| ENSG0000(DCAF4L2   | protein_co chr8   | 87870743 | 87874068 | - | 0     | 0     |
| ENSG0000(OR4X1     | protein_co chr11  | 48263861 | 48264778 | + | 0     | 0     |
| ENSG0000(CNBD1     | protein_co chr8   | 86866442 | 87615219 | + | 0     | 0     |
| ENSG0000(DMBT1P1   | transcribec chr10 | 1.23E+08 | 1.23E+08 | + | 0.02  | 0     |
| ENSG0000(CTD-2368P | processed_chr19   | 58002061 | 58011232 | + | 2.07  | 1.83  |
| ENSG0000(KBTBD11   | protein_co chr8   | 1973878  | 2006936  | + | 0.08  | 0.06  |
| ENSG0000(B3GNT5    | protein_co chr3   | 1.83E+08 | 1.83E+08 | + | 2.98  | 2.88  |
| ENSG0000(MAP3K19   | protein_co chr2   | 1.35E+08 | 1.35E+08 | - | 0.12  | 0     |
| ENSG0000(C14orf177 | protein_co chr14  | 98711613 | 98717761 | + | 0     | 0     |
| ENSG0000(LMNB2     | protein_co chr19  | 2427638  | 2456996  | - | 7.01  | 7.37  |
| ENSG0000(RMDN1     | protein_co chr8   | 86468257 | 86514357 | - | 25.17 | 28.82 |
| ENSG0000(MEX3C     | protein_co chr18  | 51174550 | 51218304 | - | 13.67 | 12.6  |
| ENSG0000(HORMAD2   | protein_co chr22  | 30080174 | 30177075 | + | 0     | 0     |
| ENSG0000(RNF152    | protein_co chr18  | 61808063 | 61894247 | - | 0.59  | 0.92  |
| ENSG0000(NANOGP1   | transcribec chr12 | 7890801  | 7900140  | + | 0     | 0     |

|                 |           |             |       |          |          |   |       |       |
|-----------------|-----------|-------------|-------|----------|----------|---|-------|-------|
| ENSG00000109210 | MYO1D     | protein_co  | chr17 | 32492522 | 32877177 | - | 3.67  | 3.58  |
| ENSG00000109211 | C20orf197 | lincRNA     | chr20 | 60055925 | 60072953 | + | 0     | 0     |
| ENSG00000109212 | FOXL1     | protein_co  | chr16 | 86576368 | 86582160 | + | 0.89  | 0.31  |
| ENSG00000109213 | TGIF2LY   | protein_co  | chrY  | 3579041  | 3580041  | + | 0     | 0     |
| ENSG00000109214 | LRRC37A   | protein_co  | chr17 | 46292733 | 46337794 | + | 0.5   | 0.51  |
| ENSG00000109215 | FOXC2     | protein_co  | chr16 | 86567251 | 86569728 | + | 1.79  | 2.19  |
| ENSG00000109216 | OR4F17    | protein_co  | chr19 | 107461   | 111696   | + | 0     | 0     |
| ENSG00000109217 | BDNF      | protein_co  | chr11 | 27654893 | 27722058 | - | 3.53  | 3.02  |
| ENSG00000109218 | SCAND2P   | transcribed | chr15 | 84631451 | 84647478 | + | 3.04  | 4.84  |
| ENSG00000109219 | CCDC121   | protein_co  | chr2  | 27625639 | 27629012 | - | 0.87  | 1.03  |
| ENSG00000109220 | ACSF3     | protein_co  | chr16 | 89088375 | 89155846 | + | 6.96  | 6.92  |
| ENSG00000109221 | OR10AB1P  | unprocessed | chr11 | 7728400  | 7729337  | + | 0     | 0     |
| ENSG00000109222 | BOK       | protein_co  | chr2  | 2.42E+08 | 2.42E+08 | + | 24.37 | 25.69 |
| ENSG00000109223 | ZNF843    | protein_co  | chr16 | 31432593 | 31443160 | - | 0.64  | 0.31  |
| ENSG00000109224 | TTY14     | lincRNA     | chrY  | 18872501 | 19077416 | - | 3.39  | 5.8   |
| ENSG00000109225 | C8orf59   | protein_co  | chr8  | 85214076 | 85220421 | - | 35.8  | 37.79 |
| ENSG00000109226 | PFN4      | protein_co  | chr2  | 24115371 | 24123477 | - | 1     | 0.35  |
| ENSG00000109227 | OR51V1    | protein_co  | chr11 | 5199735  | 5200700  | - | 0     | 0     |
| ENSG00000109228 | MAGEB6    | protein_co  | chrX  | 26192440 | 26195646 | + | 0     | 0     |
| ENSG00000109229 | OR52Z1    | polymorph   | chr11 | 5177714  | 5178610  | - | 0     | 0     |
| ENSG00000109230 | CDK5R1    | protein_co  | chr17 | 32486619 | 32491256 | + | 0.59  | 0.43  |
| ENSG00000109231 | OR51A1P   | unitary_ps  | chr11 | 5170351  | 5171296  | - | 0     | 0     |
| ENSG00000109232 | C15orf56  | processed   | chr15 | 40250664 | 40252969 | - | 0     | 0     |
| ENSG00000109233 | LINC00303 | lincRNA     | chr1  | 2.04E+08 | 2.04E+08 | - | 0     | 0     |
| ENSG00000109234 | ZNF285B   | unprocessed | chr19 | 44467641 | 44473227 | + | 0     | 0     |
| ENSG00000109235 | TCERG1L   | protein_co  | chr10 | 1.31E+08 | 1.31E+08 | - | 0     | 0     |
| ENSG00000109236 | NCKAP5    | protein_co  | chr2  | 1.33E+08 | 1.34E+08 | - | 0.55  | 0.79  |
| ENSG00000109237 | MAGEB18   | protein_co  | chrX  | 26138343 | 26140735 | + | 0     | 0     |
| ENSG00000109238 | DEFB104A  | protein_co  | chr8  | 7836471  | 7841242  | + | 0     | 0     |
| ENSG00000109239 | RUFY1     | protein_co  | chr5  | 1.8E+08  | 1.8E+08  | + | 23.14 | 22.04 |
| ENSG00000109240 | OR52E2    | protein_co  | chr11 | 5058650  | 5059627  | - | 0     | 0     |
| ENSG00000109241 | BASP1     | protein_co  | chr5  | 17065598 | 17276843 | + | 86.25 | 78.98 |
| ENSG00000109242 | DEFB103A  | protein_co  | chr8  | 7881204  | 7882664  | + | 0     | 0     |
| ENSG00000109243 | OR51L1    | protein_co  | chr11 | 4998983  | 4999930  | + | 0     | 0     |
| ENSG00000109244 | LRRC37A3  | protein_co  | chr17 | 64854312 | 64919480 | - | 1.98  | 2.23  |
| ENSG00000109245 | RP11-629C | processed   | chrX  | 25194381 | 25195207 | - | 0     | 0     |
| ENSG00000109246 | FKBP9P1   | transcribed | chr7  | 55681074 | 55713252 | - | 4.89  | 5.83  |
| ENSG00000109247 | VSIG10    | protein_co  | chr12 | 1.18E+08 | 1.18E+08 | - | 6.74  | 7.65  |
| ENSG00000109248 | MIR7-3HG  | lincRNA     | chr19 | 4769140  | 4772533  | + | 0     | 0     |
| ENSG00000109249 | IRX5      | protein_co  | chr16 | 54930862 | 54934485 | + | 0.25  | 0.07  |
| ENSG00000109250 | METRNL    | protein_co  | chr17 | 83079691 | 83095119 | + | 99.74 | 92.63 |
| ENSG00000109251 | FAM91A1   | protein_co  | chr8  | 1.24E+08 | 1.24E+08 | + | 18.3  | 21.38 |
| ENSG00000109252 | KRT18P28  | processed   | chr1  | 1.83E+08 | 1.83E+08 | - | 0     | 0     |
| ENSG00000109253 | GJA1P1    | processed   | chr5  | 1.09E+08 | 1.09E+08 | - | 0     | 0     |
| ENSG00000109254 | RP11-334J | antisense   | chr9  | 1.31E+08 | 1.32E+08 | - | 0.21  | 0.02  |

|                 |              |                   |          |          |   |        |        |
|-----------------|--------------|-------------------|----------|----------|---|--------|--------|
| ENSG00000103220 | WSB2         | protein_co chr12  | 1.18E+08 | 1.18E+08 | - | 38.15  | 39.44  |
| ENSG00000103221 | RP11-432N1.1 | processed_chr13   | 49620314 | 49620646 | + | 0      | 0      |
| ENSG00000103222 | GRIN1        | protein_co chr9   | 1.37E+08 | 1.37E+08 | + | 0      | 0      |
| ENSG00000103223 | SOX11        | protein_co chr2   | 5692667  | 5701385  | + | 0      | 0.01   |
| ENSG00000103224 | TYMS         | protein_co chr18  | 657604   | 673578   | + | 11.18  | 10.46  |
| ENSG00000103225 | OR51G2       | protein_co chr11  | 4914719  | 4915663  | - | 0      | 0      |
| ENSG00000103226 | PXMP2        | protein_co chr12  | 1.33E+08 | 1.33E+08 | + | 5.69   | 7.54   |
| ENSG00000103227 | OR51A7       | protein_co chr11  | 4907370  | 4908308  | + | 0      | 0      |
| ENSG00000103228 | TCEANC       | protein_co chrX   | 13653189 | 13681964 | + | 0.52   | 0.68   |
| ENSG00000103229 | OR51T1       | protein_co chr11  | 4881819  | 4882883  | + | 0      | 0      |
| ENSG00000103230 | PNMA1        | protein_co chr14  | 73711783 | 73714372 | - | 18.86  | 20.38  |
| ENSG00000103231 | OR51H1       | protein_co chr11  | 4859656  | 4860564  | - | 0      | 0      |
| ENSG00000103232 | C8orf4       | protein_co chr8   | 40153455 | 40155308 | + | 13.1   | 14.11  |
| ENSG00000103233 | MAMSTR       | protein_co chr19  | 48712742 | 48719721 | - | 3.97   | 5.18   |
| ENSG00000103234 | TYMSOS       | processed_chr18   | 641320   | 658340   | - | 2.47   | 2.88   |
| ENSG00000103235 | ANKLE2       | protein_co chr12  | 1.33E+08 | 1.33E+08 | - | 33.48  | 25.22  |
| ENSG00000103236 | C8G          | protein_co chr9   | 1.37E+08 | 1.37E+08 | + | 0.19   | 0      |
| ENSG00000103237 | FUT2         | protein_co chr19  | 48695971 | 48705950 | + | 0.06   | 0.02   |
| ENSG00000103238 | OR51S1       | protein_co chr11  | 4848237  | 4849208  | - | 0      | 0      |
| ENSG00000103239 | OR7A15P      | unprocessed_chr19 | 14927058 | 14928024 | + | 0      | 0      |
| ENSG00000103240 | OR51F2       | protein_co chr11  | 4821386  | 4822414  | + | 0      | 0      |
| ENSG00000103241 | EFCAB5       | protein_co chr17  | 29929200 | 30108452 | + | 0.08   | 0.25   |
| ENSG00000103242 | GCNT4        | protein_co chr5   | 75025346 | 75030899 | - | 0.13   | 0.13   |
| ENSG00000103243 | TOB2P1       | processed_chr6    | 28217643 | 28218634 | - | 0.55   | 0.95   |
| ENSG00000103244 | MUC20        | protein_co chr3   | 1.96E+08 | 1.96E+08 | + | 1.07   | 0.62   |
| ENSG00000103245 | THAP4        | protein_co chr2   | 2.42E+08 | 2.42E+08 | - | 19.9   | 16.77  |
| ENSG00000103246 | OR51N1P      | unprocessed_chr11 | 4786754  | 4787705  | + | 0      | 0      |
| ENSG00000103247 | NFATC2IP     | protein_co chr16  | 28950807 | 28967097 | + | 13.34  | 11.88  |
| ENSG00000103248 | LY6H         | protein_co chr8   | 1.43E+08 | 1.43E+08 | - | 0      | 0      |
| ENSG00000103249 | RPL7L1P11    | processed_chrX    | 1.48E+08 | 1.48E+08 | + | 0      | 0      |
| ENSG00000103250 | FIBIN        | protein_co chr11  | 26994184 | 26996121 | + | 14.01  | 13.83  |
| ENSG00000103251 | FAM89B       | protein_co chr11  | 65572349 | 65574198 | + | 23.53  | 27.1   |
| ENSG00000103252 | SHMT1        | protein_co chr17  | 18327860 | 18363563 | - | 5.95   | 5.77   |
| ENSG00000103253 | DPP7         | protein_co chr9   | 1.37E+08 | 1.37E+08 | - | 132.96 | 137.29 |
| ENSG00000103254 | TRIM60       | protein_co chr4   | 1.65E+08 | 1.65E+08 | + | 0      | 0.04   |
| ENSG00000103255 | AP000679.1   | antisense chr11   | 1.2E+08  | 1.2E+08  | + | 0      | 0      |
| ENSG00000103256 | SEC24C       | protein_co chr10  | 73744384 | 73772161 | + | 24.16  | 24.57  |
| ENSG00000103257 | FMR1NB       | protein_co chrX   | 1.48E+08 | 1.48E+08 | + | 0      | 0      |
| ENSG00000103258 | SMCR8        | protein_co chr17  | 18315310 | 18328055 | + | 8.14   | 8.31   |
| ENSG00000103259 | HCG4         | unprocessed_chr6  | 29791753 | 29792750 | - | 0.43   | 0.47   |
| ENSG00000103260 | MTHFR        | protein_co chr1   | 11785723 | 11806920 | - | 12.25  | 12.25  |
| ENSG00000103261 | DEFB104B     | protein_co chr8   | 7470308  | 7475082  | - | 0      | 0      |
| ENSG00000103262 | C19orf18     | protein_co chr19  | 57958437 | 57974534 | - | 0.54   | 0.3    |
| ENSG00000103263 | DEAF1        | protein_co chr11  | 644233   | 706715   | - | 22.51  | 19.62  |
| ENSG00000103264 | MTX3         | protein_co chr5   | 79976731 | 79991262 | - | 4.94   | 4.3    |

|                    |                  |          |          |   |       |       |
|--------------------|------------------|----------|----------|---|-------|-------|
| ENSG0000(TMEM80    | protein_co chr11 | 695428   | 705028   | + | 7.17  | 11.06 |
| ENSG0000(SIX5      | protein_co chr19 | 45764785 | 45769226 | - | 14.29 | 11.57 |
| ENSG0000(IFNW1     | protein_co chr9  | 21140214 | 21142145 | - | 0     | 0     |
| ENSG0000(FBXO46    | protein_co chr19 | 45710629 | 45730904 | - | 5.42  | 5.67  |
| ENSG0000(ZDHC13    | protein_co chr11 | 19117099 | 19176422 | + | 7.68  | 7.99  |
| ENSG0000(SLC38A9   | protein_co chr5  | 55625845 | 55773194 | - | 13.96 | 14.54 |
| ENSG0000(ACER2     | protein_co chr9  | 19409059 | 19452020 | + | 1.7   | 2.12  |
| ENSG0000(WDR73     | protein_co chr15 | 84639281 | 84654343 | - | 10.11 | 9.88  |
| ENSG0000(POLE      | protein_co chr12 | 1.33E+08 | 1.33E+08 | - | 2.42  | 2.93  |
| ENSG0000(FAM109B   | protein_co chr22 | 42074251 | 42079441 | + | 8.96  | 9.92  |
| ENSG0000(SCN4B     | protein_co chr11 | 1.18E+08 | 1.18E+08 | - | 0.09  | 0.25  |
| ENSG0000(DSCAML1   | protein_co chr11 | 1.17E+08 | 1.18E+08 | - | 0.12  | 0     |
| ENSG0000(RHOG      | protein_co chr11 | 3826978  | 3840983  | - | 30.54 | 28.49 |
| ENSG0000(EPS8L2    | protein_co chr11 | 694438   | 727727   | + | 25.77 | 24.92 |
| ENSG0000(ZDHC22    | protein_co chr14 | 77131270 | 77142734 | - | 0     | 0     |
| ENSG0000(MRVI1-AS1 | antisense chr11  | 10541272 | 10599932 | + | 0.12  | 0.18  |
| ENSG0000(ANO6      | protein_co chr12 | 45215987 | 45440404 | + | 20.71 | 20.72 |
| ENSG0000(ZBTB34    | protein_co chr9  | 1.27E+08 | 1.27E+08 | + | 1.93  | 2.12  |
| ENSG0000(LINC00982 | antisense chr1   | 3059615  | 3068437  | - | 0     | 0     |
| ENSG0000(FAM9B     | protein_co chrX  | 9024232  | 9164639  | - | 0.03  | 0.03  |
| ENSG0000(CETN1     | protein_co chr18 | 580357   | 582114   | + | 0     | 0     |
| ENSG0000(NUDT4P1   | protein_co chr1  | 1.49E+08 | 1.49E+08 | + | 0.65  | 0.44  |
| ENSG0000(FAM210A   | protein_co chr18 | 13663347 | 13726663 | - | 7.44  | 7.63  |
| ENSG0000(OR2T35    | protein_co chr1  | 2.49E+08 | 2.49E+08 | - | 0     | 0     |
| ENSG0000(TALDO1    | protein_co chr11 | 747329   | 765024   | + | 53.19 | 52.2  |
| ENSG0000(ULK1      | protein_co chr12 | 1.32E+08 | 1.32E+08 | + | 17.78 | 15.6  |
| ENSG0000(NAP1L4P1  | processed_chr1   | 1.17E+08 | 1.17E+08 | - | 0.26  | 0.11  |
| ENSG0000(OR14C36   | protein_co chr1  | 2.48E+08 | 2.48E+08 | + | 0     | 0     |
| ENSG0000(RIMKLA    | protein_co chr1  | 42380795 | 42422578 | + | 0.02  | 0.02  |
| ENSG0000(CLVS1     | protein_co chr8  | 61057158 | 61501645 | + | 0     | 0     |
| ENSG0000(OR2M7     | protein_co chr1  | 2.48E+08 | 2.48E+08 | - | 0     | 0     |
| ENSG0000(RPS6KA3   | protein_co chrX  | 20149911 | 20267100 | - | 24.3  | 25.81 |
| ENSG0000(B3GNT8    | protein_co chr19 | 41425359 | 41428730 | - | 1.64  | 2.93  |
| ENSG0000(PUS1      | protein_co chr12 | 1.32E+08 | 1.32E+08 | + | 4.97  | 5.05  |
| ENSG0000(PCNPP5    | processed_chr13  | 48328084 | 48328564 | - | 0     | 0     |
| ENSG0000(CHD9      | protein_co chr16 | 53055033 | 53329150 | + | 8.97  | 8.75  |
| ENSG0000(OR2T12    | protein_co chr1  | 2.48E+08 | 2.48E+08 | - | 0.04  | 0     |
| ENSG0000(SPACA4    | protein_co chr19 | 48606743 | 48607714 | + | 0     | 0     |
| ENSG0000(OR2T33    | protein_co chr1  | 2.48E+08 | 2.48E+08 | - | 0.04  | 0     |
| ENSG0000(PDDC1     | protein_co chr11 | 767220   | 777488   | - | 28.85 | 25.41 |
| ENSG0000(OR2M1P    | unprocessε chr1  | 2.48E+08 | 2.48E+08 | + | 0     | 0     |
| ENSG0000(LINC01561 | lincRNA chr10    | 1.21E+08 | 1.21E+08 | + | 0     | 0     |
| ENSG0000(TRIM72    | protein_co chr16 | 31214021 | 31231537 | + | 0     | 0.04  |
| ENSG0000(MAN1B1    | protein_co chr9  | 1.37E+08 | 1.37E+08 | + | 50.36 | 49.77 |
| ENSG0000(DEFB103B  | protein_co chr8  | 7428888  | 7430348  | - | 0     | 0     |

|                      |                   |          |            |        |        |
|----------------------|-------------------|----------|------------|--------|--------|
| ENSG0000( DEFB4B     | protein_co chr8   | 7414860  | 7416863 -  | 0      | 0      |
| ENSG0000( ENSAP3     | processed_chr2    | 2.15E+08 | 2.15E+08 + | 0      | 0      |
| ENSG0000( KCNA3      | protein_co chr1   | 1.11E+08 | 1.11E+08 - | 0      | 0      |
| ENSG0000( OR2AJ1     | protein_co chr1   | 2.48E+08 | 2.48E+08 + | 0      | 0      |
| ENSG0000( FZD8       | protein_co chr10  | 35638249 | 35642278 - | 9.75   | 11.33  |
| ENSG0000( GJD4       | protein_co chr10  | 35605410 | 35608935 + | 0      | 0.04   |
| ENSG0000( FBXO39     | protein_co chr17  | 6776223  | 6797101 +  | 0.34   | 0.19   |
| ENSG0000( CLDN22     | protein_co chr4   | 1.83E+08 | 1.83E+08 - | 0      | 0      |
| ENSG0000( KCNA2      | protein_co chr1   | 1.11E+08 | 1.11E+08 - | 0      | 0      |
| ENSG0000( TOP3A      | protein_co chr17  | 18271428 | 18315007 - | 8.96   | 8.56   |
| ENSG0000( CASKIN2    | protein_co chr17  | 75500261 | 75515583 - | 4.35   | 5.3    |
| ENSG0000( OR7E125P   | unprocessε chr8   | 7246726  | 7247571 -  | 0.39   | 0.45   |
| ENSG0000( ZBTB38     | protein_co chr3   | 1.41E+08 | 1.41E+08 + | 33.72  | 34.69  |
| ENSG0000( BEND2      | protein_co chrX   | 18162931 | 18220883 - | 0      | 0      |
| ENSG0000( C8orf31    | processed_chr8    | 1.43E+08 | 1.43E+08 + | 1.03   | 0.98   |
| ENSG0000( DLGAP1-AS  | antisense chr18   | 3593732  | 3598352 +  | 8.62   | 7.74   |
| ENSG0000( LINC00469  | lincRNA chr17     | 73750330 | 73828520 - | 0      | 0      |
| ENSG0000( FLJ13224   | antisense chr12   | 31324316 | 31325829 + | 0      | 0      |
| ENSG0000( RPL13AP3   | transcribec chr14 | 55766177 | 55767717 + | 0      | 0.25   |
| ENSG0000( CCDC71     | protein_co chr3   | 49162535 | 49166321 - | 12.87  | 12.11  |
| ENSG0000( C10orf71   | protein_co chr10  | 49299193 | 49327487 + | 0      | 0      |
| ENSG0000( OVOS2      | protein_co chr12  | 31111652 | 31206154 - | 0      | 0      |
| ENSG0000( LRRN4CL    | protein_co chr11  | 62686402 | 62689899 - | 17.67  | 18.59  |
| ENSG0000( FLJ40194   | processed_chr17   | 49248239 | 49258662 + | 0.05   | 0      |
| ENSG0000( TIMM22     | protein_co chr17  | 997117   | 1003671 +  | 4.92   | 4.54   |
| ENSG0000( HIC1       | protein_co chr17  | 2054154  | 2063241 +  | 11.9   | 17.11  |
| ENSG0000( PPFIA3     | protein_co chr19  | 49119389 | 49151026 + | 1.36   | 1.91   |
| ENSG0000( MAGEF1     | protein_co chr3   | 1.85E+08 | 1.85E+08 - | 11.18  | 13.1   |
| ENSG0000( UMODL1     | protein_co chr21  | 42062959 | 42143453 + | 0      | 0      |
| ENSG0000( OR7E8P     | unprocessε chr8   | 12684154 | 12685153 - | 0      | 0      |
| ENSG0000( RP11-218M  | antisense chr12   | 630891   | 663706 +   | 2.51   | 3.17   |
| ENSG0000( SAMD9L     | protein_co chr7   | 93130055 | 93148369 - | 5.61   | 6.2    |
| ENSG0000( ZFAS1      | antisense chr20   | 49278178 | 49295738 + | 202.08 | 210.27 |
| ENSG0000( UBE2U      | protein_co chr1   | 64203627 | 64267368 + | 0      | 0      |
| ENSG0000( RP4-756H1  | processed_chr7    | 66556889 | 66557362 - | 0      | 0      |
| ENSG0000( PAWR       | protein_co chr12  | 79574979 | 79691097 - | 14.48  | 12.36  |
| ENSG0000( TGIF1      | protein_co chr18  | 3411608  | 3459978 +  | 44.3   | 41.89  |
| ENSG0000( MIEF2      | protein_co chr17  | 18260534 | 18266552 + | 5.43   | 4.89   |
| ENSG0000( NAP1L5     | protein_co chr4   | 88695915 | 88698235 - | 1.19   | 1.25   |
| ENSG0000( CBX3P1     | processed_chr11   | 27806443 | 27806996 + | 0      | 0      |
| ENSG0000( RP4-597J3. | processed_chr1    | 63788721 | 63789304 - | 0.12   | 0      |
| ENSG0000( NIM1K      | protein_co chr5   | 43192071 | 43280850 + | 1.98   | 1.05   |
| ENSG0000( CD19       | protein_co chr16  | 28931939 | 28939346 + | 0      | 0      |
| ENSG0000( ERICH5     | protein_co chr8   | 98064311 | 98093610 + | 0.11   | 0      |
| ENSG0000( OR2T8      | protein_co chr1   | 2.48E+08 | 2.48E+08 + | 0      | 0      |

|                    |                  |          |          |   |        |        |
|--------------------|------------------|----------|----------|---|--------|--------|
| ENSG0000(NR2C2     | protein_co chr3  | 14947584 | 15053600 | + | 12.09  | 13.72  |
| ENSG0000(GPR4      | protein_co chr19 | 45589764 | 45602208 | - | 3.57   | 4.19   |
| ENSG0000(ACOT4     | protein_co chr14 | 73591706 | 73596496 | + | 0.16   | 0.13   |
| ENSG0000(OLIG3     | protein_co chr6  | 1.37E+08 | 1.37E+08 | - | 0      | 0      |
| ENSG0000(PTRF      | protein_co chr17 | 42402452 | 42423517 | - | 238.82 | 233.95 |
| ENSG0000(OR2G3     | protein_co chr1  | 2.48E+08 | 2.48E+08 | + | 0      | 0      |
| ENSG0000(ARIH2     | protein_co chr3  | 48918821 | 48986382 | + | 24.87  | 25.67  |
| ENSG0000(RBM44     | protein_co chr2  | 2.38E+08 | 2.38E+08 | + | 0.06   | 0.13   |
| ENSG0000(ZBTB33    | protein_co chrX  | 1.2E+08  | 1.2E+08  | + | 3.23   | 3.44   |
| ENSG0000(OR2G2     | protein_co chr1  | 2.48E+08 | 2.48E+08 | + | 0      | 0      |
| ENSG0000(ZBED2     | protein_co chr3  | 1.12E+08 | 1.12E+08 | - | 0.02   | 0.08   |
| ENSG0000(VCX2      | protein_co chrX  | 8169944  | 8171267  | - | 0      | 0      |
| ENSG0000(IRX3      | protein_co chr16 | 54283304 | 54286763 | - | 1.08   | 1.45   |
| ENSG0000(ST8SIA3   | protein_co chr18 | 57350813 | 57371731 | + | 0      | 0      |
| ENSG0000(RPRM      | protein_co chr2  | 1.53E+08 | 1.53E+08 | - | 0      | 0      |
| ENSG0000(OR2B11    | protein_co chr1  | 2.47E+08 | 2.47E+08 | - | 0      | 0      |
| ENSG0000(SLC25A22  | protein_co chr11 | 790475   | 798333   | - | 4.93   | 5.3    |
| ENSG0000(RABEP2    | protein_co chr16 | 28904421 | 28936526 | - | 10.81  | 10.04  |
| ENSG0000(NHLH2     | protein_co chr1  | 1.16E+08 | 1.16E+08 | - | 0      | 0.02   |
| ENSG0000(RP11-56N1 | antisense chr1   | 11777077 | 11779619 | - | 0      | 0.03   |
| ENSG0000(ATOX1     | protein_co chr5  | 1.52E+08 | 1.52E+08 | - | 99.24  | 94.75  |
| ENSG0000(FAM187B   | protein_co chr19 | 35224800 | 35228729 | - | 0      | 0      |
| ENSG0000(TBL1XR1   | protein_co chr3  | 1.77E+08 | 1.77E+08 | - | 29.37  | 31.68  |
| ENSG0000(SAMD12    | protein_co chr8  | 1.18E+08 | 1.19E+08 | - | 0.03   | 0.24   |
| ENSG0000(CD163     | protein_co chr12 | 7470813  | 7503893  | - | 0.11   | 0.17   |
| ENSG0000(C18orf32  | protein_co chr18 | 49477250 | 49487252 | - | 18.36  | 16.55  |
| ENSG0000(OR7E149P  | unprocessε chr12 | 8437403  | 8438425  | - | 0      | 0      |
| ENSG0000(GIMAP3P   | processed_ chr7  | 1.51E+08 | 1.51E+08 | - | 0      | 0      |
| ENSG0000(PIDD1     | protein_co chr11 | 799179   | 809753   | - | 8.61   | 10.39  |
| ENSG0000(RP11-512C | lincRNA chr13    | 74412957 | 74419115 | - | 0      | 0      |
| ENSG0000(ZNF491    | protein_co chr19 | 11797667 | 11809622 | + | 0.38   | 0.76   |
| ENSG0000(RPLP2     | protein_co chr11 | 809647   | 812880   | + | 595.63 | 594.78 |
| ENSG0000(GSG2      | protein_co chr17 | 3723903  | 3726699  | + | 0.12   | 0.15   |
| ENSG0000(JUN       | protein_co chr1  | 58780788 | 58784327 | - | 28.42  | 33.05  |
| ENSG0000(CSTF2T    | protein_co chr10 | 51695487 | 51699591 | - | 9.44   | 9.66   |
| ENSG0000(PGBD5     | protein_co chr1  | 2.3E+08  | 2.3E+08  | - | 0.14   | 0.12   |
| ENSG0000(C12orf54  | protein_co chr12 | 48482503 | 48496512 | + | 1.73   | 1.37   |
| ENSG0000(GBA       | protein_co chr1  | 1.55E+08 | 1.55E+08 | - | 129.53 | 122.87 |
| ENSG0000(CASC2     | antisense chr10  | 1.18E+08 | 1.18E+08 | + | 0.83   | 0.71   |
| ENSG0000(ACAD9     | protein_co chr3  | 1.29E+08 | 1.29E+08 | + | 13.71  | 14.7   |
| ENSG0000(IL17RA    | protein_co chr22 | 17084954 | 17115694 | + | 12.26  | 10.64  |
| ENSG0000(PNPLA2    | protein_co chr11 | 818902   | 825573   | + | 51.46  | 47.31  |
| ENSG0000(MBOAT4    | protein_co chr8  | 30131824 | 30144686 | - | 0      | 0      |
| ENSG0000(TEX44     | protein_co chr2  | 2.32E+08 | 2.32E+08 | + | 0      | 0      |
| ENSG0000(AGTRAP    | protein_co chr1  | 11736084 | 11754802 | + | 59.79  | 54.86  |

|                     |                  |          |            |        |        |
|---------------------|------------------|----------|------------|--------|--------|
| ENSG0000( CD163L1   | protein_co chr12 | 7346685  | 7479897 -  | 0.18   | 0.22   |
| ENSG0000( SRRM3     | protein_co chr7  | 76201900 | 76287288 + | 0.82   | 0.79   |
| ENSG0000( THAP5     | protein_co chr7  | 1.09E+08 | 1.09E+08 - | 4.38   | 5.58   |
| ENSG0000( DEFB114   | protein_co chr6  | 49960249 | 49964105 - | 0      | 0      |
| ENSG0000( CRACR2B   | protein_co chr11 | 826144   | 831991 +   | 0.38   | 0.82   |
| ENSG0000( SUMO4     | protein_co chr6  | 1.49E+08 | 1.49E+08 + | 0      | 0.06   |
| ENSG0000( MAGEB10   | protein_co chrX  | 27807990 | 27823014 + | 0      | 0.03   |
| ENSG0000( DNAJC28   | protein_co chr21 | 33485530 | 33491720 - | 0.75   | 1.42   |
| ENSG0000( OR4F4     | protein_co chr15 | 1.02E+08 | 1.02E+08 - | 0      | 0      |
| ENSG0000( NAALADL2  | protein_co chr3  | 1.74E+08 | 1.76E+08 + | 5.94   | 5.33   |
| ENSG0000( CD151     | protein_co chr11 | 832843   | 839831 +   | 242.18 | 248.63 |
| ENSG0000( RP11-16K1 | antisense chr15  | 78978889 | 78985926 + | 0      | 0      |
| ENSG0000( POLR2L    | protein_co chr11 | 837356   | 842545 -   | 201.09 | 205.45 |
| ENSG0000( FAM20C    | protein_co chr7  | 192969   | 260745 +   | 37.18  | 30.49  |
| ENSG0000( NECTIN3   | protein_co chr3  | 1.11E+08 | 1.11E+08 + | 19.38  | 15.53  |
| ENSG0000( SLC35G5   | protein_co chr8  | 11330888 | 11332208 + | 0.09   | 0.05   |
| ENSG0000( ANXA2R    | protein_co chr5  | 43039081 | 43043170 - | 0.83   | 1.12   |
| ENSG0000( CTD-2530N | sense_ovei chr8  | 22169338 | 22171710 + | 0      | 0      |
| ENSG0000( TMEM94    | protein_co chr17 | 75441159 | 75500090 + | 15.72  | 19.99  |
| ENSG0000( FLII      | protein_co chr17 | 18244836 | 18258916 - | 47.34  | 52.81  |
| ENSG0000( SOX12     | protein_co chr20 | 325595   | 330224 +   | 10.16  | 10.82  |
| ENSG0000( HNRNPA0   | protein_co chr5  | 1.38E+08 | 1.38E+08 - | 13.6   | 14.61  |
| ENSG0000( FXNP2     | processed_ chr9  | 1.25E+08 | 1.25E+08 - | 0.13   | 0      |
| ENSG0000( CTD-2201E | sense_ovei chr5  | 43014414 | 43067419 - | 2.94   | 0.57   |
| ENSG0000( YIPF7     | protein_co chr4  | 44622065 | 44678556 - | 0      | 0      |
| ENSG0000( FAM87B    | lincRNA chr1     | 817371   | 819837 +   | 0.06   | 0.22   |
| ENSG0000( CDKN2AIP1 | processed_ chr1  | 2.26E+08 | 2.26E+08 - | 0      | 0      |
| ENSG0000( RPS2P2    | processed_ chr14 | 74377818 | 74378418 - | 0      | 0      |
| ENSG0000( RP5-1061H | lincRNA chr1     | 2.29E+08 | 2.29E+08 - | 1.04   | 0.79   |
| ENSG0000( MYOZ1     | protein_co chr10 | 73631654 | 73641757 - | 0.04   | 0.12   |
| ENSG0000( TMEM78    | protein_co chr1  | 2.29E+08 | 2.29E+08 + | 0      | 0.03   |
| ENSG0000( RP11-606P | processed_ chr4  | 1.64E+08 | 1.64E+08 + | 0      | 0      |
| ENSG0000( KCNJ10    | protein_co chr1  | 1.6E+08  | 1.6E+08 -  | 0      | 0      |
| ENSG0000( AC108142. | antisense chr4   | 1.82E+08 | 1.82E+08 - | 0      | 0.03   |
| ENSG0000( CHID1     | protein_co chr11 | 867860   | 915058 -   | 79.03  | 76.53  |
| ENSG0000( PCDHB9    | protein_co chr5  | 1.41E+08 | 1.41E+08 + | 0.89   | 0.61   |
| ENSG0000( ZNF620    | protein_co chr3  | 40505992 | 40518736 + | 0.33   | 0.24   |
| ENSG0000( ZNF518A   | protein_co chr10 | 96129715 | 96205288 + | 2.42   | 2.47   |
| ENSG0000( TMEM187   | protein_co chrX  | 1.54E+08 | 1.54E+08 + | 5.9    | 5.27   |
| ENSG0000( CACYBPP2  | processed_ chr2  | 1.84E+08 | 1.84E+08 - | 0      | 0      |
| ENSG0000( SVBP      | protein_co chr1  | 42807052 | 42817252 - | 15.63  | 15.15  |
| ENSG0000( ZNF619    | protein_co chr3  | 40477113 | 40490236 + | 1.44   | 1.31   |
| ENSG0000( CCDC184   | protein_co chr12 | 48183584 | 48185926 + | 0.26   | 0.34   |
| ENSG0000( AP3S1     | protein_co chr5  | 1.16E+08 | 1.16E+08 + | 77.58  | 72.61  |
| ENSG0000( GRB2      | protein_co chr17 | 75318076 | 75405709 - | 34.64  | 33.95  |



|                 |           |             |       |          |          |   |         |         |
|-----------------|-----------|-------------|-------|----------|----------|---|---------|---------|
| ENSG00000100000 | ZBTB41    | protein_co  | chr1  | 1.97E+08 | 1.97E+08 | - | 1.79    | 2.15    |
| ENSG00000100000 | UBE2N     | protein_co  | chr12 | 93405673 | 93442262 | - | 25.75   | 26.75   |
| ENSG00000100000 | SPATA31C2 | unprocessed | chr9  | 88129458 | 88138446 | - | 0       | 0       |
| ENSG00000100000 | ARL6IP6   | protein_co  | chr2  | 1.53E+08 | 1.53E+08 | + | 8.25    | 7.87    |
| ENSG00000100000 | ZNF354C   | protein_co  | chr5  | 1.79E+08 | 1.79E+08 | + | 2.02    | 1.72    |
| ENSG00000100000 | CAPZA3    | protein_co  | chr12 | 18738101 | 18739187 | + | 0       | 0       |
| ENSG00000100000 | MAMDC4    | protein_co  | chr9  | 1.37E+08 | 1.37E+08 | + | 1.68    | 2.43    |
| ENSG00000100000 | CENPBD1   | protein_co  | chr16 | 89969791 | 89972534 | - | 4.7     | 4.86    |
| ENSG00000100000 | ODF3      | protein_co  | chr11 | 196738   | 200261   | + | 0       | 0       |
| ENSG00000100000 | BET1L     | protein_co  | chr11 | 167784   | 207428   | - | 25.89   | 25.73   |
| ENSG00000100000 | RPS27     | protein_co  | chr1  | 1.54E+08 | 1.54E+08 | + | 2263.73 | 2269.54 |
| ENSG00000100000 | RIC8A     | protein_co  | chr11 | 207511   | 215113   | + | 43.76   | 45.48   |
| ENSG00000100000 | IMP3      | protein_co  | chr15 | 75639085 | 75648706 | - | 31.25   | 30.96   |
| ENSG00000100000 | ASB8      | protein_co  | chr12 | 48147788 | 48181213 | - | 13.89   | 16.06   |
| ENSG00000100000 | LCN15     | protein_co  | chr9  | 1.37E+08 | 1.37E+08 | - | 0       | 0       |
| ENSG00000100000 | ODF3B     | protein_co  | chr22 | 50529710 | 50532580 | - | 4.05    | 3.86    |
| ENSG00000100000 | DPY19L2   | protein_co  | chr12 | 63558913 | 63668939 | - | 2.81    | 4.36    |
| ENSG00000100000 | SPATA31E1 | protein_co  | chr9  | 87882826 | 87888899 | + | 0       | 0       |
| ENSG00000100000 | ZNRF3-AS1 | antisense   | chr22 | 29024999 | 29031476 | - | 0.35    | 0.49    |
| ENSG00000100000 | C2orf73   | protein_co  | chr2  | 54330034 | 54383742 | + | 0.13    | 0       |
| ENSG00000100000 | GPR150    | protein_co  | chr5  | 95620078 | 95622142 | + | 0.75    | 0.74    |
| ENSG00000100000 | TSPYL6    | protein_co  | chr2  | 54253184 | 54256272 | - | 0       | 0       |
| ENSG00000100000 | LRRC75B   | protein_co  | chr22 | 24585620 | 24593208 | - | 9.17    | 8.89    |
| ENSG00000100000 | DMAP1     | protein_co  | chr1  | 44213455 | 44220681 | + | 14.57   | 14.59   |
| ENSG00000100000 | ADAMTSL1  | protein_co  | chr9  | 17906563 | 18910950 | + | 6.46    | 7       |
| ENSG00000100000 | FAM26E    | protein_co  | chr6  | 1.17E+08 | 1.17E+08 | + | 5.37    | 5.06    |
| ENSG00000100000 | IMPDH2    | protein_co  | chr3  | 49024325 | 49029408 | - | 100.12  | 101.03  |
| ENSG00000100000 | ALS2CL    | protein_co  | chr3  | 46668997 | 46693704 | - | 0.48    | 0.36    |
| ENSG00000100000 | MLF1      | protein_co  | chr3  | 1.59E+08 | 1.59E+08 | + | 6.34    | 5.22    |
| ENSG00000100000 | PRSS42    | protein_co  | chr3  | 46829542 | 46834095 | - | 0       | 0       |
| ENSG00000100000 | NDUFAF3   | protein_co  | chr3  | 49020459 | 49023495 | + | 54.13   | 56.72   |
| ENSG00000100000 | C2orf69   | protein_co  | chr2  | 2E+08    | 2E+08    | + | 2.34    | 2.8     |
| ENSG00000100000 | GRAMD1C   | protein_co  | chr3  | 1.14E+08 | 1.14E+08 | + | 1.55    | 2.02    |
| ENSG00000100000 | STAP2     | protein_co  | chr19 | 4324043  | 4342786  | - | 5.16    | 3.02    |
| ENSG00000100000 | ULK4P3    | transcribed | chr15 | 30103720 | 30131757 | + | 0.18    | 0.2     |
| ENSG00000100000 | TWF1P1    | processed   | chr17 | 29203426 | 29204474 | - | 0       | 0       |
| ENSG00000100000 | HTR3C     | protein_co  | chr3  | 1.84E+08 | 1.84E+08 | + | 0       | 0       |
| ENSG00000100000 | TSSK6     | protein_co  | chr19 | 19512418 | 19515685 | - | 1.59    | 1.82    |
| ENSG00000100000 | BOLA1     | protein_co  | chr1  | 1.5E+08  | 1.5E+08  | + | 6.63    | 8.91    |
| ENSG00000100000 | PDE4DIP   | protein_co  | chr1  | 1.49E+08 | 1.49E+08 | + | 97.53   | 106.6   |
| ENSG00000100000 | DDX10     | protein_co  | chr11 | 1.09E+08 | 1.09E+08 | + | 6.42    | 5.42    |
| ENSG00000100000 | RP11-998D | lincRNA     | chr14 | 21108043 | 21116703 | + | 0       | 0       |
| ENSG00000100000 | GOLGA8Q   | protein_co  | chr15 | 30552078 | 30562501 | + | 0.73    | 0.5     |
| ENSG00000100000 | PPP1R42   | protein_co  | chr8  | 66964099 | 67056604 | - | 0       | 0       |
| ENSG00000100000 | NDUFV2    | protein_co  | chr18 | 9102630  | 9134345  | + | 63.37   | 64.73   |

|                    |                |       |          |          |   |       |       |
|--------------------|----------------|-------|----------|----------|---|-------|-------|
| ENSG0000(FAM27E5   | lincRNA        | chr17 | 22298691 | 22299893 | + | 0     | 0     |
| ENSG0000(RP1-232L2 | processed_chrX |       | 1.02E+08 | 1.02E+08 | - | 0     | 0     |
| ENSG0000(DALRD3    | protein_co     | chr3  | 49015488 | 49022293 | - | 14.27 | 14.56 |
| ENSG0000(ZNF114    | protein_co     | chr19 | 48270102 | 48287608 | + | 0.38  | 0.17  |
| ENSG0000(FAR2P2    | transcribed    | chr2  | 1.3E+08  | 1.3E+08  | - | 0.14  | 0.06  |
| ENSG0000(ZNF518B   | protein_co     | chr4  | 10439874 | 10457410 | - | 6.25  | 5.65  |
| ENSG0000(AMER3     | protein_co     | chr2  | 1.31E+08 | 1.31E+08 | + | 0     | 0     |
| ENSG0000(SPINK6    | protein_co     | chr5  | 1.48E+08 | 1.48E+08 | + | 0     | 0     |
| ENSG0000(ZNF366    | protein_co     | chr5  | 72442652 | 72507727 | - | 0     | 0     |
| ENSG0000(LCORL     | protein_co     | chr4  | 17841199 | 18021876 | - | 2.23  | 2.43  |
| ENSG0000(PARD6G    | protein_co     | chr18 | 80157232 | 80247546 | - | 0.89  | 0.55  |
| ENSG0000(ZNF454    | protein_co     | chr5  | 1.79E+08 | 1.79E+08 | + | 0.07  | 0.13  |
| ENSG0000(SH2B1     | protein_co     | chr16 | 28846600 | 28874212 | + | 17.07 | 20.69 |
| ENSG0000(RP4-682C2 | antisense      | chr1  | 75710003 | 75724011 | - | 0     | 0     |
| ENSG0000(ZC3H12D   | protein_co     | chr6  | 1.49E+08 | 1.49E+08 | - | 0.08  | 0.02  |
| ENSG0000(VN1R1     | protein_co     | chr19 | 57454790 | 57457142 | - | 0.05  | 0.23  |
| ENSG0000(KDEL2     | protein_co     | chr11 | 1.08E+08 | 1.08E+08 | - | 14.74 | 12.43 |
| ENSG0000(PLC       | protein_co     | chr8  | 1.44E+08 | 1.44E+08 | - | 33.22 | 35.43 |
| ENSG0000(SH2D4B    | protein_co     | chr10 | 80537902 | 80646560 | + | 0     | 0     |
| ENSG0000(RNF212    | protein_co     | chr4  | 1056250  | 1113562  | - | 0.81  | 1.52  |
| ENSG0000(PRSS36    | protein_co     | chr16 | 31138925 | 31150094 | - | 1.12  | 0.67  |
| ENSG0000(ZNF543    | protein_co     | chr19 | 57320509 | 57330776 | + | 1.12  | 1.11  |
| ENSG0000(TMEM151   | protein_co     | chr6  | 44270466 | 44307506 | + | 0     | 0     |
| ENSG0000(GALNT11   | protein_co     | chr7  | 1.52E+08 | 1.52E+08 | + | 16.07 | 15.46 |
| ENSG0000(SLITRK1   | protein_co     | chr13 | 83877205 | 83882393 | - | 0     | 0     |
| ENSG0000(C9orf62   | lincRNA        | chr9  | 1.35E+08 | 1.35E+08 | + | 0     | 0     |
| ENSG0000(LINC01658 | lincRNA        | chr22 | 23462086 | 23486980 | - | 0     | 0     |
| ENSG0000(WDR6      | protein_co     | chr3  | 49007062 | 49015953 | + | 61.45 | 60.89 |
| ENSG0000(PRM3      | protein_co     | chr16 | 11273218 | 11273641 | - | 0     | 0     |
| ENSG0000(TNP2      | protein_co     | chr16 | 11267748 | 11269533 | - | 0     | 0     |
| ENSG0000(SPAG11A   | protein_co     | chr8  | 7847876  | 7868867  | + | 0     | 0     |
| ENSG0000(GEN1      | protein_co     | chr2  | 17753858 | 17788941 | + | 1.38  | 2.04  |
| ENSG0000(TMPRSS9   | protein_co     | chr19 | 2389771  | 2426239  | + | 0     | 0     |
| ENSG0000(AQP11     | protein_co     | chr11 | 77589391 | 77610355 | + | 2.08  | 1.5   |
| ENSG0000(TMEM11    | protein_co     | chr17 | 21197280 | 21214624 | - | 11.94 | 10.49 |
| ENSG0000(ZNF354B   | protein_co     | chr5  | 1.79E+08 | 1.79E+08 | + | 4.81  | 5.94  |
| ENSG0000(KCNG2     | protein_co     | chr18 | 79863668 | 79900184 | + | 0.07  | 0     |
| ENSG0000(SHISA3    | protein_co     | chr4  | 42397839 | 42402487 | + | 0.2   | 0.44  |
| ENSG0000(OR2D3     | protein_co     | chr11 | 6920974  | 6922043  | + | 0     | 0     |
| ENSG0000(CALML3    | protein_co     | chr10 | 5524009  | 5526771  | + | 0     | 0     |
| ENSG0000(CALML5    | protein_co     | chr10 | 5498697  | 5499555  | - | 0     | 0     |
| ENSG0000(ZFAND2A   | protein_co     | chr7  | 1152071  | 1160759  | - | 15.15 | 12.79 |
| ENSG0000(PLEKHM3   | protein_co     | chr2  | 2.08E+08 | 2.08E+08 | - | 2.09  | 2.18  |
| ENSG0000(ZNF223    | protein_co     | chr19 | 44051367 | 44067991 | + | 2.25  | 1.3   |
| ENSG0000(HTR1A     | protein_co     | chr5  | 63960356 | 63962507 | - | 0     | 0     |

|                 |           |             |       |          |          |   |       |       |
|-----------------|-----------|-------------|-------|----------|----------|---|-------|-------|
| ENSG00000100000 | CCDC185   | protein_co  | chr1  | 2.23E+08 | 2.23E+08 | + | 0     | 0     |
| ENSG00000100000 | FAM220A   | protein_co  | chr7  | 6329409  | 6348981  | - | 7.1   | 10.32 |
| ENSG00000100000 | DNAJC22   | protein_co  | chr12 | 49346917 | 49357546 | + | 0.66  | 0.7   |
| ENSG00000100000 | NEUROG2   | protein_co  | chr4  | 1.13E+08 | 1.13E+08 | - | 0     | 0     |
| ENSG00000100000 | CEP295NL  | protein_co  | chr17 | 78870910 | 78903217 | - | 0.03  | 0.2   |
| ENSG00000100000 | BEND3     | protein_co  | chr6  | 1.07E+08 | 1.07E+08 | - | 0.29  | 0.33  |
| ENSG00000100000 | RP11-567M | lincRNA     | chr18 | 79638928 | 79679745 | - | 0     | 0     |
| ENSG00000100000 | NT5DC1    | protein_co  | chr6  | 1.16E+08 | 1.16E+08 | + | 36.45 | 32.82 |
| ENSG00000100000 | RPS3AP5   | processed   | chr10 | 84560443 | 84561263 | + | 0     | 0.09  |
| ENSG00000100000 | LINC00843 | lincRNA     | chr10 | 49972763 | 49982053 | + | 0.47  | 0.31  |
| ENSG00000100000 | GLDC      | protein_co  | chr9  | 6532464  | 6645783  | - | 1.16  | 1.18  |
| ENSG00000100000 | COX14     | protein_co  | chr12 | 50111979 | 50120457 | + | 25.2  | 27.2  |
| ENSG00000100000 | LINC00314 | lincRNA     | chr21 | 28013363 | 28023233 | + | 0     | 0     |
| ENSG00000100000 | H3F3AP6   | processed   | chr4  | 1.4E+08  | 1.4E+08  | - | 0     | 0.35  |
| ENSG00000100000 | MCMDC2    | protein_co  | chr8  | 66870749 | 66922048 | + | 0.16  | 0.08  |
| ENSG00000100000 | TUBAL3    | protein_co  | chr10 | 5393098  | 5404830  | - | 0.27  | 0.23  |
| ENSG00000100000 | RPL10P16  | processed   | chr19 | 12643275 | 12643919 | - | 0     | 0     |
| ENSG00000100000 | P4HTM     | protein_co  | chr3  | 48989886 | 49007154 | + | 17.4  | 16.86 |
| ENSG00000100000 | UCN3      | protein_co  | chr10 | 5365009  | 5374692  | + | 0     | 0     |
| ENSG00000100000 | DTX3      | protein_co  | chr12 | 57604622 | 57609804 | + | 9.97  | 9.83  |
| ENSG00000100000 | KLHL11    | protein_co  | chr17 | 41853545 | 41865431 | - | 1.38  | 1.73  |
| ENSG00000100000 | NECAP1P1  | processed   | chr7  | 37585500 | 37586329 | - | 0     | 0     |
| ENSG00000100000 | AMBN      | protein_co  | chr4  | 70592256 | 70607288 | + | 0     | 0     |
| ENSG00000100000 | CTXN1     | protein_co  | chr19 | 7924485  | 7926166  | - | 8.37  | 12.04 |
| ENSG00000100000 | SLC25A20  | protein_co  | chr3  | 48856931 | 48898993 | - | 10.28 | 7.84  |
| ENSG00000100000 | CA8       | protein_co  | chr8  | 60187347 | 60281412 | - | 0     | 0     |
| ENSG00000100000 | CKS1BP6   | processed   | chrX  | 30617454 | 30617693 | + | 0     | 0     |
| ENSG00000100000 | CD28      | protein_co  | chr2  | 2.04E+08 | 2.04E+08 | + | 0.01  | 0.03  |
| ENSG00000100000 | EPM2AIP1  | protein_co  | chr3  | 36985043 | 36993168 | - | 5.68  | 6     |
| ENSG00000100000 | ERBB4     | protein_co  | chr2  | 2.11E+08 | 2.13E+08 | - | 0     | 0     |
| ENSG00000100000 | MAF       | protein_co  | chr16 | 79585843 | 79600714 | - | 0.1   | 0.03  |
| ENSG00000100000 | CTNBP1    | protein_co  | chr1  | 9848276  | 9910336  | - | 13.95 | 15.66 |
| ENSG00000100000 | OR6B3     | protein_co  | chr2  | 2.4E+08  | 2.4E+08  | - | 0     | 0     |
| ENSG00000100000 | DEFB125   | protein_co  | chr20 | 87250    | 97094    | + | 0     | 0     |
| ENSG00000100000 | GAPDHP29  | processed   | chr1  | 94302038 | 94303022 | + | 0     | 0     |
| ENSG00000100000 | PSAPL1    | protein_co  | chr4  | 7430294  | 7434973  | - | 0     | 0     |
| ENSG00000100000 | OTOS      | protein_co  | chr2  | 2.4E+08  | 2.4E+08  | - | 0     | 0     |
| ENSG00000100000 | GTPBP6    | protein_co  | chrX  | 304529   | 318819   | - | 7     | 7.25  |
| ENSG00000100000 | GTPBP6    | protein_co  | chrY  | 304529   | 318819   | - | 7     | 7.25  |
| ENSG00000100000 | ERN1      | protein_co  | chr17 | 64039142 | 64130819 | - | 6.69  | 6.55  |
| ENSG00000100000 | GPR35     | protein_co  | chr2  | 2.41E+08 | 2.41E+08 | + | 0.29  | 0.18  |
| ENSG00000100000 | ACTG1P1   | processed   | chr3  | 1.39E+08 | 1.39E+08 | + | 0     | 0     |
| ENSG00000100000 | RP11-455G | transcribed | chr4  | 1.19E+08 | 1.19E+08 | - | 0.08  | 0.42  |
| ENSG00000100000 | C10orf53  | protein_co  | chr10 | 49679651 | 49710261 | + | 0     | 0     |
| ENSG00000100000 | PPIAP33   | processed   | chr9  | 7597823  | 7598377  | + | 0.13  | 0     |

|                     |                  |          |          |   |        |        |
|---------------------|------------------|----------|----------|---|--------|--------|
| ENSG0000( ARMC10P1  | processed_ chr3  | 94506766 | 94507620 | - | 0      | 0      |
| ENSG0000( CSRNP3    | protein_co chr2  | 1.65E+08 | 1.66E+08 | + | 0.01   | 0      |
| ENSG0000( ZNF713    | protein_co chr7  | 55887475 | 55942225 | + | 0.88   | 0.61   |
| ENSG0000( PARP10    | protein_co chr8  | 1.44E+08 | 1.44E+08 | - | 9.81   | 8.62   |
| ENSG0000( DYNAP     | protein_co chr18 | 54587757 | 54599493 | + | 0      | 0      |
| ENSG0000( SUZ12     | protein_co chr17 | 31937018 | 32001045 | + | 5.36   | 6.38   |
| ENSG0000( NSUN3     | protein_co chr3  | 94062916 | 94128545 | + | 2.66   | 3.92   |
| ENSG0000( KCTD12    | protein_co chr13 | 76880166 | 76886390 | - | 13.04  | 13.52  |
| ENSG0000( DHFR2     | protein_co chr3  | 94047836 | 94063389 | - | 4.14   | 3.94   |
| ENSG0000( RP11-169K | processed_ chr1  | 15828232 | 15828669 | + | 0      | 0      |
| ENSG0000( RPP25     | protein_co chr15 | 74954416 | 74957464 | - | 9.57   | 11.11  |
| ENSG0000( GRINA     | protein_co chr8  | 1.44E+08 | 1.44E+08 | + | 121.95 | 119.97 |
| ENSG0000( C5orf64   | processed_ chr5  | 61637708 | 61751763 | + | 0.04   | 0      |
| ENSG0000( GLULP4    | processed_ chr9  | 34917175 | 34918296 | + | 0      | 0      |
| ENSG0000( THBD      | protein_co chr20 | 23045633 | 23049741 | - | 1.16   | 1.5    |
| ENSG0000( GP5       | protein_co chr3  | 1.94E+08 | 1.94E+08 | - | 0.12   | 0.03   |
| ENSG0000( LMO7DN    | protein_co chr13 | 75871038 | 75883811 | + | 0      | 0      |
| ENSG0000( COX5A     | protein_co chr15 | 74919791 | 74938168 | - | 70.46  | 68.56  |
| ENSG0000( STX19     | protein_co chr3  | 94014369 | 94028610 | - | 0      | 0      |
| ENSG0000( ERFE      | protein_co chr2  | 2.38E+08 | 2.38E+08 | + | 1.39   | 1.75   |
| ENSG0000( FAM219B   | protein_co chr15 | 74899987 | 74907121 | - | 22.31  | 24.26  |
| ENSG0000( HIST1H2BP | unprocessε chr6  | 25731782 | 25732091 | - | 0      | 0      |
| ENSG0000( ZHX2      | protein_co chr8  | 1.23E+08 | 1.23E+08 | + | 21.44  | 19.62  |
| ENSG0000( CPN2      | protein_co chr3  | 1.94E+08 | 1.94E+08 | - | 0      | 0      |
| ENSG0000( CPNE7     | protein_co chr16 | 89575768 | 89597246 | + | 3.6    | 5.7    |
| ENSG0000( C5orf46   | protein_co chr5  | 1.48E+08 | 1.48E+08 | - | 2.72   | 2.62   |
| ENSG0000( CD300LB   | protein_co chr17 | 74521174 | 74531474 | - | 0      | 0      |
| ENSG0000( GDPD4     | protein_co chr11 | 77216558 | 77301687 | - | 0      | 0      |
| ENSG0000( RIIAD1    | protein_co chr1  | 1.52E+08 | 1.52E+08 | + | 0      | 0      |
| ENSG0000( MPI       | protein_co chr15 | 74890005 | 74902219 | + | 25.87  | 22.52  |
| ENSG0000( ADORA2A-  | antisense chr22  | 24429206 | 24495074 | - | 0      | 0      |
| ENSG0000( H1FOO     | protein_co chr3  | 1.3E+08  | 1.3E+08  | + | 0      | 0      |
| ENSG0000( TRIM73    | protein_co chr7  | 75395063 | 75410996 | + | 1.69   | 1.21   |
| ENSG0000( OPLAH     | protein_co chr8  | 1.44E+08 | 1.44E+08 | - | 1.86   | 1.47   |
| ENSG0000( TMEM52    | protein_co chr1  | 1917590  | 1919273  | - | 0.64   | 0.33   |
| ENSG0000( TMEM139   | protein_co chr7  | 1.43E+08 | 1.43E+08 | + | 0      | 0      |
| ENSG0000( RNF186    | protein_co chr1  | 19814029 | 19815278 | - | 0      | 0      |
| ENSG0000( AC114812. | transcribec chr2 | 2.34E+08 | 2.34E+08 | - | 0      | 0      |
| ENSG0000( EFCAB13   | protein_co chr17 | 47323290 | 47441312 | + | 0.79   | 0.83   |
| ENSG0000( MSC       | protein_co chr8  | 71841549 | 71844468 | - | 29.3   | 33.14  |
| ENSG0000( APOLD1    | protein_co chr12 | 12725917 | 12829975 | + | 1.78   | 1.7    |
| ENSG0000( RFLNA     | protein_co chr12 | 1.24E+08 | 1.24E+08 | + | 0.22   | 0.03   |
| ENSG0000( EXOSC4    | protein_co chr8  | 1.44E+08 | 1.44E+08 | + | 9.08   | 9.45   |
| ENSG0000( DPY19L3   | protein_co chr19 | 32405543 | 32485895 | + | 15.64  | 9.63   |
| ENSG0000( TAF7      | protein_co chr5  | 1.41E+08 | 1.41E+08 | - | 30.14  | 29.29  |

|                    |                   |          |          |   |        |        |
|--------------------|-------------------|----------|----------|---|--------|--------|
| ENSG0000(ZNF852    | protein_co chr3   | 44498970 | 44510636 | - | 1.52   | 1.57   |
| ENSG0000(FOXE1     | protein_co chr9   | 97853254 | 97856715 | + | 0      | 0      |
| ENSG0000(PFAS      | protein_co chr17  | 8247618  | 8270491  | + | 3.95   | 5.5    |
| ENSG0000(HYI       | protein_co chr1   | 43451003 | 43453989 | - | 13.84  | 15.47  |
| ENSG0000(C17orf62  | protein_co chr17  | 82442589 | 82450829 | - | 33.22  | 33.43  |
| ENSG0000(TPRX1     | protein_co chr19  | 47801243 | 47819051 | - | 0      | 0      |
| ENSG0000(LGALS7B   | protein_co chr19  | 38789211 | 38791749 | + | 0      | 0      |
| ENSG0000(ZNF552    | protein_co chr19  | 57803841 | 57814913 | - | 1.65   | 1.65   |
| ENSG0000(SMIM10L2  | protein_co chrX   | 1.35E+08 | 1.35E+08 | + | 0.18   | 0.27   |
| ENSG0000(GAK       | protein_co chr4   | 849276   | 932373   | - | 19.98  | 19.41  |
| ENSG0000(ZBTB7A    | protein_co chr19  | 4044364  | 4066945  | - | 12.1   | 11.93  |
| ENSG0000(TUFM      | protein_co chr16  | 28842411 | 28846408 | - | 56.2   | 47.04  |
| ENSG0000(ERICH3    | protein_co chr1   | 74568111 | 74673738 | - | 0      | 0.03   |
| ENSG0000(RMI1      | protein_co chr9   | 83980711 | 84004074 | + | 2.72   | 2.05   |
| ENSG0000(CTC1      | protein_co chr17  | 8224821  | 8248044  | - | 4.79   | 4.91   |
| ENSG0000(FBXO34    | protein_co chr14  | 55271303 | 55361918 | + | 5.03   | 4.98   |
| ENSG0000(LINC00324 | lincRNA chr17     | 8220642  | 8224043  | - | 0.27   | 0.18   |
| ENSG0000(SELENOW   | protein_co chr19  | 47778572 | 47784686 | + | 64.93  | 80.16  |
| ENSG0000(EIF3K     | protein_co chr19  | 38619082 | 38636955 | + | 104.73 | 102.01 |
| ENSG0000(MRFAP1L1  | protein_co chr4   | 6707701  | 6709880  | - | 25.39  | 27.9   |
| ENSG0000(SNX18     | protein_co chr5   | 54517759 | 54546585 | + | 17.85  | 18.9   |
| ENSG0000(EXD1      | protein_co chr15  | 41182725 | 41230743 | - | 0.33   | 0.67   |
| ENSG0000(AURKB     | protein_co chr17  | 8204733  | 8210600  | - | 0.35   | 0.78   |
| ENSG0000(TAS1R2    | protein_co chr1   | 18839599 | 18859682 | - | 0      | 0      |
| ENSG0000(C14orf39  | protein_co chr14  | 60396469 | 60515543 | - | 0.04   | 0      |
| ENSG0000(MRFAP1    | protein_co chr4   | 6640091  | 6642745  | + | 148.65 | 144.25 |
| ENSG0000(C3orf38   | protein_co chr3   | 88149743 | 88168729 | + | 6.52   | 6.91   |
| ENSG0000(KLHDC7A   | protein_co chr1   | 18480982 | 18486126 | + | 0      | 0      |
| ENSG0000(RP11-363G | lincRNA chrX      | 52199840 | 52203235 | + | 0      | 0      |
| ENSG0000(TMEM107   | protein_co chr17  | 8173237  | 8176399  | - | 10.85  | 8.87   |
| ENSG0000(LLOXNC01- | processed_chrX    | 1.01E+08 | 1.01E+08 | + | 0      | 0      |
| ENSG0000(RP11-157K | transcribec chr11 | 67195569 | 67197167 | - | 0      | 0      |
| ENSG0000(RRS1      | protein_co chr8   | 66429028 | 66430733 | + | 4.94   | 7      |
| ENSG0000(EXOC3L1   | protein_co chr16  | 67184366 | 67190204 | - | 0.17   | 0.26   |
| ENSG0000(TRIML2    | protein_co chr4   | 1.88E+08 | 1.88E+08 | - | 0.03   | 0      |
| ENSG0000(RCC2      | protein_co chr1   | 17406760 | 17439724 | - | 20.19  | 21.87  |
| ENSG0000(OR13D1    | protein_co chr9   | 1.05E+08 | 1.05E+08 | + | 0      | 0      |
| ENSG0000(IGSF22    | protein_co chr11  | 18704305 | 18726230 | - | 0.14   | 0      |
| ENSG0000(C9orf50   | protein_co chr9   | 1.3E+08  | 1.3E+08  | - | 0.18   | 0.15   |
| ENSG0000(ZFP42     | protein_co chr4   | 1.88E+08 | 1.88E+08 | + | 0.02   | 0.03   |
| ENSG0000(CTD-2527I | lincRNA chr19     | 35105969 | 35107318 | + | 0      | 0      |
| ENSG0000(CCDC89    | protein_co chr11  | 85684866 | 85686277 | - | 2.09   | 1.76   |
| ENSG0000(TAAR3P    | transcribec chr6  | 1.33E+08 | 1.33E+08 | - | 0      | 0      |
| ENSG0000(C9orf106  | lincRNA chr9      | 1.29E+08 | 1.29E+08 | + | 0.17   | 0.25   |
| ENSG0000(FAM133A   | protein_co chrX   | 93674013 | 93712274 | + | 0.02   | 0.02   |

|                 |           |            |       |          |          |   |        |        |
|-----------------|-----------|------------|-------|----------|----------|---|--------|--------|
| ENSG00000100000 | DPM3      | protein_co | chr1  | 1.55E+08 | 1.55E+08 | - | 20.86  | 21.32  |
| ENSG00000100000 | C12orf42  | protein_co | chr12 | 1.03E+08 | 1.03E+08 | - | 0      | 0      |
| ENSG00000100000 | CYC1      | protein_co | chr8  | 1.44E+08 | 1.44E+08 | + | 30.52  | 31.97  |
| ENSG00000100000 | PER1      | protein_co | chr17 | 8140472  | 8156506  | - | 10.1   | 7.25   |
| ENSG00000100000 | HTR1F     | protein_co | chr3  | 87990696 | 87993835 | + | 0.03   | 0.08   |
| ENSG00000100000 | RP11-349N | processed  | chrX  | 1.24E+08 | 1.24E+08 | + | 0      | 0      |
| ENSG00000100000 | TMTC2     | protein_co | chr12 | 82686880 | 83134870 | + | 7.9    | 7.57   |
| ENSG00000100000 | HES7      | protein_co | chr17 | 8120590  | 8124092  | - | 0      | 0.33   |
| ENSG00000100000 | FARSA     | protein_co | chr19 | 12922479 | 12934037 | - | 22.66  | 20.17  |
| ENSG00000100000 | SPTY2D1   | protein_co | chr11 | 18606401 | 18634791 | - | 6.04   | 5.76   |
| ENSG00000100000 | RP11-458F | processed  | chr7  | 66914581 | 66914943 | + | 0      | 0      |
| ENSG00000100000 | C10orf67  | protein_co | chr10 | 23201916 | 23344845 | - | 0      | 0      |
| ENSG00000100000 | SAMD4B    | protein_co | chr19 | 39342396 | 39385710 | + | 71.33  | 66.27  |
| ENSG00000100000 | LINC00670 | lincRNA    | chr17 | 12549782 | 12642854 | + | 0.02   | 0      |
| ENSG00000100000 | MTUS2-AS1 | antisense  | chr13 | 29476515 | 29490105 | - | 0      | 0      |
| ENSG00000100000 | CYP11B2   | protein_co | chr8  | 1.43E+08 | 1.43E+08 | - | 0      | 0      |
| ENSG00000100000 | GIMAP7    | protein_co | chr7  | 1.51E+08 | 1.51E+08 | + | 0      | 0      |
| ENSG00000100000 | ALOXE3    | protein_co | chr17 | 8095900  | 8119047  | - | 0      | 0.09   |
| ENSG00000100000 | EDC3      | protein_co | chr15 | 74630558 | 74696292 | - | 10     | 10.95  |
| ENSG00000100000 | TCAIM     | protein_co | chr3  | 44338119 | 44409451 | + | 7.47   | 6.87   |
| ENSG00000100000 | RPS2P28   | processed  | chr6  | 43363479 | 43364219 | + | 0      | 0.1    |
| ENSG00000100000 | FUCA1     | protein_co | chr1  | 23845077 | 23868294 | - | 12.14  | 14.08  |
| ENSG00000100000 | PXT1      | protein_co | chr6  | 36390551 | 36442889 | - | 0      | 0      |
| ENSG00000100000 | GGN       | protein_co | chr19 | 38384265 | 38388082 | - | 1.02   | 0.9    |
| ENSG00000100000 | OR7E97P   | unprocess  | chr3  | 1.26E+08 | 1.26E+08 | + | 0      | 0      |
| ENSG00000100000 | HNRNPCL1  | protein_co | chr1  | 12847408 | 12848725 | - | 0      | 0      |
| ENSG00000100000 | TMEM125   | protein_co | chr1  | 43269994 | 43274002 | + | 0      | 0      |
| ENSG00000100000 | ZNF664    | protein_co | chr12 | 1.24E+08 | 1.24E+08 | + | 30.86  | 31.52  |
| ENSG00000100000 | SIGLECL1  | protein_co | chr19 | 51246348 | 51269330 | + | 0      | 0      |
| ENSG00000100000 | CALR      | protein_co | chr19 | 12938578 | 12944489 | + | 560.37 | 526.86 |
| ENSG00000100000 | LINC00311 | lincRNA    | chr16 | 85282958 | 85285963 | + | 0.02   | 0.12   |
| ENSG00000100000 | MAGED1    | protein_co | chrX  | 51803007 | 51902357 | + | 168.04 | 163.74 |
| ENSG00000100000 | RP11-111N | protein_co | chr11 | 76381313 | 76414619 | + | 1.89   | 1.54   |
| ENSG00000100000 | LDLRAD3   | protein_co | chr11 | 35943981 | 36232136 | + | 4      | 4.11   |
| ENSG00000100000 | CDH4      | protein_co | chr20 | 61252426 | 61940617 | + | 0.28   | 0.08   |
| ENSG00000100000 | RP11-429E | antisense  | chr20 | 61717506 | 61719748 | - | 0      | 0      |
| ENSG00000100000 | SMCO3     | protein_co | chr12 | 14804650 | 14814182 | - | 0.08   | 0.17   |
| ENSG00000100000 | RAD23A    | protein_co | chr19 | 12945855 | 12953642 | + | 31.19  | 33.38  |
| ENSG00000100000 | C2orf71   | protein_co | chr2  | 29060976 | 29074261 | - | 0      | 0      |
| ENSG00000100000 | GADD45G1  | protein_co | chr19 | 12953119 | 12957236 | - | 18.3   | 15.75  |
| ENSG00000100000 | MEIS3P1   | processed  | chr17 | 15786618 | 15787575 | + | 4.72   | 5.84   |
| ENSG00000100000 | DAND5     | protein_co | chr19 | 12965159 | 12974762 | + | 0.05   | 0.04   |
| ENSG00000100000 | TMEM151   | protein_co | chr11 | 66291870 | 66296664 | + | 0.09   | 0.09   |
| ENSG00000100000 | PTPN11    | protein_co | chr12 | 1.12E+08 | 1.13E+08 | + | 36.97  | 32.88  |
| ENSG00000100000 | NSUN7     | protein_co | chr4  | 40749897 | 40809985 | + | 0      | 0      |

|                    |                   |          |          |   |       |       |
|--------------------|-------------------|----------|----------|---|-------|-------|
| ENSG0000(ZCCHC5    | protein_co chrX   | 78656069 | 78659328 | - | 0.43  | 0.11  |
| ENSG0000(FAM156B   | protein_co chrX   | 52891306 | 52908560 | + | 2     | 3.78  |
| ENSG0000(WSCD1     | protein_co chr17  | 5772234  | 6124427  | + | 0.31  | 0.08  |
| ENSG0000(RAB39A    | protein_co chr11  | 1.08E+08 | 1.08E+08 | + | 0     | 0     |
| ENSG0000(CLK3      | protein_co chr15  | 74598500 | 74645414 | + | 27.72 | 28.66 |
| ENSG0000(GS1-124K5 | processed_chr7    | 66505155 | 66506223 | - | 0.11  | 0     |
| ENSG0000(HLA-DQB1  | protein_co chr6   | 32659467 | 32668383 | - | 0     | 0     |
| ENSG0000(GATA2     | protein_co chr3   | 1.28E+08 | 1.28E+08 | - | 2.61  | 3.2   |
| ENSG0000(ARID3B    | protein_co chr15  | 74541177 | 74598131 | + | 0.56  | 0.66  |
| ENSG0000(HMGN2P4   | transcribed chr15 | 45511136 | 45586290 | + | 0.1   | 0.03  |
| ENSG0000(TMEM31    | protein_co chrX   | 1.04E+08 | 1.04E+08 | + | 0     | 0     |
| ENSG0000(PACS2     | protein_co chr14  | 1.05E+08 | 1.05E+08 | + | 24.98 | 23.76 |
| ENSG0000(OR4K11P   | processed_chr21   | 13544282 | 13545185 | - | 0     | 0     |
| ENSG0000(ELMOD2    | protein_co chr4   | 1.41E+08 | 1.41E+08 | + | 9.89  | 8.19  |
| ENSG0000(EGR3      | protein_co chr8   | 22687659 | 22693302 | - | 2.02  | 4.23  |
| ENSG0000(C1orf101  | protein_co chr1   | 2.44E+08 | 2.45E+08 | + | 0.9   | 1.01  |
| ENSG0000(GPC5      | protein_co chr13  | 91398607 | 92873682 | + | 0     | 0.02  |
| ENSG0000(VWA1      | protein_co chr1   | 1434861  | 1442882  | + | 9.86  | 8.4   |
| ENSG0000(LINC00174 | processed_chr7    | 66376044 | 66493566 | - | 7.67  | 5.93  |
| ENSG0000(DNAJB8    | protein_co chr3   | 1.28E+08 | 1.28E+08 | - | 0     | 0     |
| ENSG0000(GEMIN4    | protein_co chr17  | 744414   | 753999   | - | 6.46  | 7.48  |
| ENSG0000(HNRNPCL4  | protein_co chr1   | 13164586 | 13165467 | - | 0     | 0     |
| ENSG0000(OR6W1P    | transcribed chr7  | 1.43E+08 | 1.43E+08 | - | 0     | 0     |
| ENSG0000(AC073072. | antisense chr7    | 22725395 | 22727620 | - | 0.13  | 0.09  |
| ENSG0000(FJX1      | protein_co chr11  | 35618419 | 35620868 | + | 6.83  | 5.63  |
| ENSG0000(OR13C6P   | unprocessed chr9  | 35991336 | 35992285 | - | 0     | 0     |
| ENSG0000(RP5-1027G | antisense chr20   | 19242302 | 19284596 | - | 0     | 0     |
| ENSG0000(LINC01699 | lincRNA chr1      | 1.81E+08 | 1.81E+08 | + | 0     | 0     |
| ENSG0000(KLHL28    | protein_co chr14  | 44924319 | 45042322 | - | 3.46  | 2.7   |
| ENSG0000(MKRN3     | protein_co chr15  | 23565678 | 23630075 | + | 0     | 0     |
| ENSG0000(ZBTB18    | protein_co chr1   | 2.44E+08 | 2.44E+08 | + | 1.85  | 2.05  |
| ENSG0000(EEF1A1P27 | processed_chr7    | 20582072 | 20583206 | + | 0     | 0     |
| ENSG0000(OR9A2     | protein_co chr7   | 1.43E+08 | 1.43E+08 | - | 0.06  | 0     |
| ENSG0000(C14orf28  | protein_co chr14  | 44897295 | 44907257 | + | 3.27  | 3.3   |
| ENSG0000(ALOX12B   | protein_co chr17  | 8072636  | 8087703  | - | 0.07  | 0     |
| ENSG0000(SLC17A8   | protein_co chr12  | 1E+08    | 1E+08    | + | 0     | 0     |
| ENSG0000(EIF3J-AS1 | lincRNA chr15     | 44527257 | 44536923 | - | 4.08  | 2.34  |
| ENSG0000(SHARPIN   | protein_co chr8   | 1.44E+08 | 1.44E+08 | - | 25.02 | 24.49 |
| ENSG0000(LBX2      | protein_co chr2   | 74497517 | 74503316 | - | 2.8   | 3.47  |
| ENSG0000(DNHD1     | protein_co chr11  | 6497260  | 6593758  | + | 1.77  | 2.68  |
| ENSG0000(SLITRK4   | protein_co chrX   | 1.44E+08 | 1.44E+08 | - | 3.33  | 2.77  |
| ENSG0000(HTR1D     | protein_co chr1   | 23191895 | 23194729 | - | 0     | 0     |
| ENSG0000(GCC1      | protein_co chr7   | 1.28E+08 | 1.28E+08 | - | 9.04  | 8.35  |
| ENSG0000(LSMEM2    | protein_co chr3   | 50279027 | 50288114 | + | 0     | 0     |
| ENSG0000(NBPF17P   | unprocessed chr1  | 1.44E+08 | 1.44E+08 | - | 0     | 0     |

|                     |                      |       |          |          |   |       |       |
|---------------------|----------------------|-------|----------|----------|---|-------|-------|
| ENSG0000(KB-1552D7) | sense_intron         | chr8  | 1.04E+08 | 1.04E+08 | - | 0     | 0     |
| ENSG0000(RNF151)    | protein_coding       | chr16 | 1966823  | 1968975  | + | 0     | 0     |
| ENSG0000(CIITA)     | protein_coding       | chr16 | 10866222 | 10932281 | + | 0.01  | 0.04  |
| ENSG0000(ZFPM1)     | protein_coding       | chr16 | 88453317 | 88537016 | + | 3.61  | 3.6   |
| ENSG0000(ALOX15B)   | protein_coding       | chr17 | 8039017  | 8049134  | + | 0.71  | 0.83  |
| ENSG0000(PLD6)      | protein_coding       | chr17 | 17200995 | 17206315 | - | 0.89  | 0.84  |
| ENSG0000(GPHB5)     | protein_coding       | chr14 | 63312835 | 63318879 | - | 0     | 0     |
| ENSG0000(GRM8)      | protein_coding       | chr7  | 1.26E+08 | 1.27E+08 | - | 0     | 0     |
| ENSG0000(CDC42EP4)  | protein_coding       | chr17 | 73283624 | 73312175 | - | 22.12 | 22.83 |
| ENSG0000(DGKZP1)    | processed_transcript | chr13 | 43968424 | 43971199 | + | 0     | 0     |
| ENSG0000(OR2AP1)    | protein_coding       | chr12 | 55574415 | 55575344 | + | 0     | 0     |
| ENSG0000(OR6C4)     | protein_coding       | chr12 | 55551199 | 55552244 | + | 0     | 0     |
| ENSG0000(ZBTB42)    | protein_coding       | chr14 | 1.05E+08 | 1.05E+08 | + | 1.44  | 2.04  |
| ENSG0000(LACC1)     | protein_coding       | chr13 | 43879284 | 43893932 | + | 20.44 | 18.16 |
| ENSG0000(MAF1)      | protein_coding       | chr8  | 1.44E+08 | 1.44E+08 | + | 54.26 | 53.44 |
| ENSG0000(TPPP2)     | protein_coding       | chr14 | 21024109 | 21036276 | + | 0     | 0     |
| ENSG0000(FCER1A)    | protein_coding       | chr1  | 1.59E+08 | 1.59E+08 | + | 0     | 0     |
| ENSG0000(RPRML)     | protein_coding       | chr17 | 46978156 | 46979248 | - | 0     | 0     |
| ENSG0000(ARL14)     | protein_coding       | chr3  | 1.61E+08 | 1.61E+08 | + | 0     | 0     |
| ENSG0000(LINC00305) | lincRNA              | chr18 | 64080009 | 64149030 | - | 0     | 0     |
| ENSG0000(OR6C2)     | protein_coding       | chr12 | 55452214 | 55453152 | + | 0     | 0     |
| ENSG0000(WDR97)     | protein_coding       | chr8  | 1.44E+08 | 1.44E+08 | + | 0.07  | 0.12  |
| ENSG0000(NLRP8)     | protein_coding       | chr19 | 55947832 | 55988629 | + | 0     | 0     |
| ENSG0000(PCED1B)    | protein_coding       | chr12 | 47079603 | 47236662 | + | 1.81  | 1.43  |
| ENSG0000(FLJ37453)  | antisense            | chr1  | 15834474 | 15848147 | - | 1.04  | 0.95  |
| ENSG0000(APOBEC3B)  | protein_coding       | chr22 | 38982347 | 38992804 | + | 0.39  | 0.23  |
| ENSG0000(SYCN)      | protein_coding       | chr19 | 39202831 | 39204266 | - | 0     | 0     |
| ENSG0000(CTD-2144E) | lincRNA              | chr16 | 35021749 | 35024229 | + | 0     | 0     |
| ENSG0000(PIPOX)     | protein_coding       | chr17 | 28950513 | 29057220 | + | 0.61  | 0.34  |
| ENSG0000(ATP8B5P)   | transcribed          | chr9  | 35406755 | 35483035 | + | 0     | 0     |
| ENSG0000(FOXS1)     | protein_coding       | chr20 | 31844301 | 31845619 | - | 0     | 0.1   |
| ENSG0000(ATOX1A)    | protein_coding       | chr10 | 68230624 | 68232103 | - | 0     | 0     |
| ENSG0000(CDH5)      | protein_coding       | chr16 | 66366622 | 66404786 | + | 6.8   | 7.51  |
| ENSG0000(LRRC3B)    | protein_coding       | chr3  | 26622806 | 26710776 | + | 0     | 0     |
| ENSG0000(OR7E22P)   | unprocessed          | chr3  | 75356516 | 75357503 | - | 0     | 0     |
| ENSG0000(FAM216B)   | protein_coding       | chr13 | 42781550 | 42791549 | + | 0     | 0.02  |
| ENSG0000(MRGPRX4)   | protein_coding       | chr11 | 18172837 | 18174280 | + | 0     | 0     |
| ENSG0000(PCBP1-AS1) | processed_transcript | chr2  | 69962263 | 70103220 | - | 13.96 | 10.5  |
| ENSG0000(MYADM)     | protein_coding       | chr19 | 53866223 | 53876437 | + | 78.93 | 75.98 |
| ENSG0000(MRGPRX3)   | protein_coding       | chr11 | 18120955 | 18138480 | + | 0.1   | 0.05  |
| ENSG0000(MROH1)     | protein_coding       | chr8  | 1.44E+08 | 1.44E+08 | + | 7.78  | 8.48  |
| ENSG0000(SERTAD2)   | protein_coding       | chr2  | 64631621 | 64751005 | - | 12.99 | 14.16 |
| ENSG0000(PIK3CD-AS) | antisense            | chr1  | 9652610  | 9654586  | - | 0     | 0     |
| ENSG0000(AKAP5)     | protein_coding       | chr14 | 64465499 | 64474503 | + | 0.17  | 0.23  |
| ENSG0000(NKPD1)     | protein_coding       | chr19 | 45149750 | 45158737 | - | 0.06  | 0.13  |



|                    |                  |          |          |   |       |       |
|--------------------|------------------|----------|----------|---|-------|-------|
| ENSG0000(GIPC3     | protein_co chr19 | 3585553  | 3593541  | + | 0.02  | 0.09  |
| ENSG0000(AC025335  | protein_co chr17 | 7913324  | 7916276  | - | 3.43  | 1.86  |
| ENSG0000(CITED4    | protein_co chr1  | 40861051 | 40862366 | - | 0.93  | 1.17  |
| ENSG0000(ABCA13    | protein_co chr7  | 48171458 | 48647496 | + | 0.2   | 0.01  |
| ENSG0000(NLRP11    | protein_co chr19 | 55785397 | 55836800 | - | 0     | 0.08  |
| ENSG0000(TIGD5     | protein_co chr8  | 1.44E+08 | 1.44E+08 | + | 2.17  | 1.94  |
| ENSG0000(PDXDC1    | protein_co chr16 | 14974591 | 15139339 | + | 26.17 | 26.49 |
| ENSG0000(PHC1P1    | processed_ chr12 | 55411727 | 55414787 | - | 0     | 0     |
| ENSG0000(C1orf194  | protein_co chr1  | 1.09E+08 | 1.09E+08 | - | 0     | 0     |
| ENSG0000(ZNF154    | protein_co chr19 | 57697367 | 57709194 | - | 1     | 1.65  |
| ENSG0000(R3HDM2    | protein_co chr12 | 57253762 | 57431005 | - | 19.3  | 23.16 |
| ENSG0000(B3GNT3    | protein_co chr19 | 17794828 | 17813082 | + | 0     | 0     |
| ENSG0000(ITLN1     | protein_co chr1  | 1.61E+08 | 1.61E+08 | - | 0.13  | 0.72  |
| ENSG0000(NRXN1     | protein_co chr2  | 49918505 | 51225575 | - | 0     | 0     |
| ENSG0000(SEPHS2    | protein_co chr16 | 30443631 | 30446181 | - | 21.62 | 21.52 |
| ENSG0000(OR10A7    | protein_co chr12 | 55221025 | 55221975 | + | 0     | 0     |
| ENSG0000(GPBAR1    | protein_co chr2  | 2.18E+08 | 2.18E+08 | + | 0.04  | 0.16  |
| ENSG0000(ZNF784    | protein_co chr19 | 55620742 | 55624601 | - | 3.09  | 2.88  |
| ENSG0000(ZNF648    | protein_co chr1  | 1.82E+08 | 1.82E+08 | - | 0     | 0     |
| ENSG0000(C14orf119 | protein_co chr14 | 23094765 | 23100462 | + | 49.53 | 50.27 |
| ENSG0000(CCR8      | protein_co chr3  | 39329706 | 39333511 | + | 0     | 0     |
| ENSG0000(LINC00652 | lincRNA chr20    | 18786065 | 18794335 | - | 0.1   | 0.07  |
| ENSG0000(GOLGA8J   | protein_co chr15 | 30083053 | 30093499 | + | 0     | 0     |
| ENSG0000(BBS10     | protein_co chr12 | 76344474 | 76348442 | - | 4.78  | 5.4   |
| ENSG0000(FIZ1      | protein_co chr19 | 55591371 | 55601970 | - | 3.9   | 4.87  |
| ENSG0000(PUF60     | protein_co chr8  | 1.44E+08 | 1.44E+08 | - | 39.3  | 41.24 |
| ENSG0000(SSC5D     | protein_co chr19 | 55488404 | 55519098 | + | 55.92 | 61.13 |
| ENSG0000(DCTPP1    | protein_co chr16 | 30423619 | 30430075 | - | 9.12  | 10.98 |
| ENSG0000(ZNF771    | protein_co chr16 | 30407297 | 30431108 | + | 4.3   | 4.69  |
| ENSG0000(PPP1R14B  | processed_ chr4  | 1.39E+08 | 1.39E+08 | - | 0.63  | 0.65  |
| ENSG0000(RP11-1319 | unprocessε chr5  | 70094659 | 70128434 | - | 0.46  | 0.44  |
| ENSG0000(CRIPAK    | protein_co chr4  | 1391552  | 1395989  | + | 1.68  | 1.65  |
| ENSG0000(TSHZ1     | protein_co chr18 | 75210755 | 75289950 | + | 4.98  | 5.51  |
| ENSG0000(PSTK      | protein_co chr10 | 1.23E+08 | 1.23E+08 | + | 1.92  | 2.03  |
| ENSG0000(SPDYE7P   | transcribec chr7 | 72862757 | 72870510 | - | 0     | 0     |
| ENSG0000(AC010894  | processed_ chr2  | 1.75E+08 | 1.75E+08 | + | 0     | 0     |
| ENSG0000(SOCS4     | protein_co chr14 | 55027230 | 55049488 | + | 2.59  | 4.1   |
| ENSG0000(ZADH2     | protein_co chr18 | 75195108 | 75209348 | - | 13    | 10.44 |
| ENSG0000(RP11-756P | processed_ chr4  | 1.89E+08 | 1.89E+08 | + | 1.09  | 0.95  |
| ENSG0000(OR1E1     | protein_co chr17 | 3397104  | 3398410  | - | 0     | 0     |
| ENSG0000(AC079741  | processed_ chr7  | 1.12E+08 | 1.12E+08 | - | 0     | 0     |
| ENSG0000(ZNF48     | protein_co chr16 | 30378106 | 30400108 | + | 2.73  | 2.8   |
| ENSG0000(OR1R1P    | unprocessε chr17 | 3385930  | 3386833  | + | 0     | 0     |
| ENSG0000(FAM71E2   | protein_co chr19 | 55354908 | 55363260 | - | 0     | 0     |
| ENSG0000(C3orf80   | protein_co chr3  | 1.6E+08  | 1.6E+08  | + | 0.43  | 0.53  |

|                    |                   |          |          |   |       |       |
|--------------------|-------------------|----------|----------|---|-------|-------|
| ENSG0000(NKX2-6    | protein_co chr8   | 23702451 | 23706598 | - | 0     | 0     |
| ENSG0000(TMEM150)  | protein_co chr19  | 55312801 | 55334048 | - | 0     | 0     |
| ENSG0000(C10orf91  | lincRNA chr10     | 1.32E+08 | 1.32E+08 | + | 0     | 0     |
| ENSG0000(OR3A4P    | transcribec chr17 | 3310312  | 3311189  | + | 0     | 0     |
| ENSG0000(ANKRD18A  | protein_co chr9   | 38571358 | 38620660 | - | 0.26  | 0.98  |
| ENSG0000(WFDC11    | protein_co chr20  | 45648563 | 45670270 | - | 0     | 0     |
| ENSG0000(TMEM86B   | protein_co chr19  | 55226639 | 55229264 | - | 0.47  | 1.09  |
| ENSG0000(OR3A1     | protein_co chr17  | 3291635  | 3292600  | - | 0     | 0     |
| ENSG0000(1-Sep     | protein_co chr16  | 30378133 | 30395991 | - | 0.69  | 1     |
| ENSG0000(TRNAU1AP  | protein_co chr1   | 28553085 | 28578545 | + | 17.51 | 14.58 |
| ENSG0000(EXOC3     | protein_co chr5   | 443158   | 471937   | + | 17.12 | 17.7  |
| ENSG0000(AC017081. | processed_chr2    | 2.06E+08 | 2.06E+08 | - | 0     | 0     |
| ENSG0000(TDRD6     | protein_co chr6   | 46687875 | 46704319 | + | 0.02  | 0.03  |
| ENSG0000(C12orf40  | protein_co chr12  | 39626167 | 39908300 | + | 0     | 0     |
| ENSG0000(CSNK1A1L  | protein_co chr13  | 37103259 | 37105664 | - | 0     | 0     |
| ENSG0000(ACTA2-AS1 | antisense chr10   | 88932390 | 88940820 | + | 0.52  | 0.1   |
| ENSG0000(HMGN2P9   | processed_chr22   | 43802544 | 43802772 | + | 0     | 0     |
| ENSG0000(XIAPP3    | processed_chr2    | 1.13E+08 | 1.13E+08 | + | 0     | 0     |
| ENSG0000(LYNX1     | protein_co chr8   | 1.43E+08 | 1.43E+08 | - | 21.03 | 21.07 |
| ENSG0000(RPS12P23  | processed_chr13   | 21094315 | 21094714 | - | 0     | 0     |
| ENSG0000(TH        | protein_co chr11  | 2163929  | 2171877  | - | 0     | 0.04  |
| ENSG0000(FAR2P1    | transcribec chr2  | 1.3E+08  | 1.3E+08  | - | 0.03  | 0.02  |
| ENSG0000(MED14     | protein_co chrX   | 40648306 | 40735858 | - | 10.96 | 11.11 |
| ENSG0000(FAHD1     | protein_co chr16  | 1826941  | 1840207  | + | 18.57 | 16.04 |
| ENSG0000(HMGB1P14  | processed_chr14   | 58284773 | 58285363 | + | 0     | 0     |
| ENSG0000(TDRP      | protein_co chr8   | 489792   | 545781   | - | 0.19  | 0.22  |
| ENSG0000(RCC1      | protein_co chr1   | 28505943 | 28539300 | + | 17.97 | 18.03 |
| ENSG0000(WFDC9     | protein_co chr20  | 45607939 | 45631268 | - | 0     | 0     |
| ENSG0000(MYLPF     | protein_co chr16  | 30370934 | 30377991 | + | 0     | 0     |
| ENSG0000(F2        | protein_co chr11  | 46719180 | 46739506 | + | 0.23  | 0     |
| ENSG0000(RP1-278E1 | processed_chr6    | 39958414 | 39958833 | - | 0     | 0     |
| ENSG0000(FAM71C    | protein_co chr12  | 99647753 | 99650046 | + | 0     | 0     |
| ENSG0000(TPT1P10   | processed_chr10   | 58212541 | 58213036 | - | 0     | 0     |
| ENSG0000(PRKRA     | protein_co chr2   | 1.78E+08 | 1.78E+08 | - | 19    | 17.51 |
| ENSG0000(HERC2P3   | transcribec chr15 | 20379495 | 20506180 | - | 10.34 | 13.35 |
| ENSG0000(NACAP2    | processed_chr10   | 1.2E+08  | 1.2E+08  | - | 0     | 0     |
| ENSG0000(ZNRF2     | protein_co chr7   | 30284307 | 30367692 | + | 1.55  | 1.95  |
| ENSG0000(RRH       | protein_co chr4   | 1.1E+08  | 1.1E+08  | + | 0     | 0     |
| ENSG0000(SLC9A4    | protein_co chr2   | 1.02E+08 | 1.03E+08 | + | 0.61  | 0.36  |
| ENSG0000(ZNF816    | protein_co chr19  | 52949379 | 52962911 | - | 2.56  | 1.49  |
| ENSG0000(PRNT      | protein_co chr20  | 4731282  | 4740668  | - | 0     | 0     |
| ENSG0000(FGD6      | protein_co chr12  | 95076749 | 95217482 | - | 2.61  | 3.12  |
| ENSG0000(ADGRD2    | protein_co chr9   | 1.24E+08 | 1.24E+08 | + | 0     | 0.03  |
| ENSG0000(GPR139    | protein_co chr16  | 20031485 | 20073917 | - | 0     | 0     |
| ENSG0000(LINC01869 | lincRNA chr19     | 50808874 | 50818880 | + | 0.08  | 0     |

|                     |                  |          |          |   |       |       |
|---------------------|------------------|----------|----------|---|-------|-------|
| ENSG000001055C      | processed_chrX   | 1.04E+08 | 1.04E+08 | - | 0     | 0     |
| ENSG000001PLD5      | protein_co chr1  | 2.42E+08 | 2.43E+08 | - | 0     | 0     |
| ENSG000001OAZ2      | protein_co chr15 | 64687573 | 64703281 | - | 74.13 | 74.82 |
| ENSG000001WFDC10A   | protein_co chr20 | 45629526 | 45631196 | + | 0     | 0     |
| ENSG000001PNPLA1    | protein_co chr6  | 36243203 | 36312229 | + | 0.08  | 0.05  |
| ENSG000001ALX1      | protein_co chr12 | 85280107 | 85301784 | + | 0     | 0     |
| ENSG000001CCDC43    | protein_co chr17 | 44673069 | 44689779 | - | 6.95  | 8.32  |
| ENSG000001KCTD4     | protein_co chr13 | 45192853 | 45194717 | - | 0.06  | 0.03  |
| ENSG000001MEIOC     | protein_co chr17 | 44656404 | 44690308 | + | 0.05  | 0.06  |
| ENSG000001FZD2      | protein_co chr17 | 44557459 | 44559570 | + | 17.73 | 21.06 |
| ENSG000001TIGD2     | protein_co chr4  | 89111500 | 89114899 | + | 2.05  | 1.93  |
| ENSG000001CCDC129   | protein_co chr7  | 31514071 | 31658720 | + | 0     | 0     |
| ENSG000001HCLS1     | protein_co chr3  | 1.22E+08 | 1.22E+08 | - | 0.67  | 0.27  |
| ENSG000001MTURN     | protein_co chr7  | 30134810 | 30162762 | + | 16.16 | 14.36 |
| ENSG000001ZNF609    | protein_co chr15 | 64460742 | 64686068 | + | 14.52 | 13.93 |
| ENSG000001PAK2      | protein_co chr3  | 1.97E+08 | 1.97E+08 | + | 16.83 | 18.71 |
| ENSG000001CCDC66    | protein_co chr3  | 56557161 | 56621818 | + | 3.24  | 4.37  |
| ENSG000001DEFB124   | protein_co chr20 | 31465506 | 31476757 | - | 0     | 0     |
| ENSG000001EMC3-AS1  | transcribed chr3 | 9986893  | 10006990 | + | 0.2   | 1.08  |
| ENSG000001KRTAP9-7  | protein_co chr17 | 41275659 | 41276697 | + | 0     | 0     |
| ENSG000001ATP5EP2   | protein_co chr13 | 27945206 | 27945590 | + | 0     | 0     |
| ENSG000001MCFD2     | protein_co chr2  | 46901870 | 46941855 | - | 51.62 | 44.73 |
| ENSG000001OR10AA1P  | unprocessed chr1 | 1.59E+08 | 1.59E+08 | - | 0     | 0     |
| ENSG000001LINC00304 | lincRNA chr16    | 89159146 | 89164245 | + | 0.58  | 0.36  |
| ENSG000001HARBI1    | protein_co chr11 | 46602861 | 46617909 | - | 2.55  | 2.2   |
| ENSG000001DEFB123   | protein_co chr20 | 31440519 | 31450257 | + | 0     | 0     |
| ENSG000001C11orf71  | protein_co chr11 | 1.14E+08 | 1.14E+08 | - | 1.66  | 1.64  |
| ENSG000001CYP8B1    | protein_co chr3  | 42856005 | 42876165 | - | 0     | 0     |
| ENSG000001OR6K6     | protein_co chr1  | 1.59E+08 | 1.59E+08 | + | 0     | 0     |
| ENSG000001OR6K4P    | unprocessed chr1 | 1.59E+08 | 1.59E+08 | - | 0     | 0     |
| ENSG000001TPRXL     | transcribed chr3 | 13937273 | 14082811 | + | 0.03  | 0     |
| ENSG000001SERTM1    | protein_co chr13 | 36673912 | 36697839 | + | 0     | 0     |
| ENSG000001GAS1      | protein_co chr9  | 86944363 | 86947189 | - | 32.51 | 30.31 |
| ENSG000001ARHGAP45  | protein_co chr19 | 1065923  | 1086628  | + | 1.39  | 1.44  |
| ENSG000001CTD-3064H | antisense chr19  | 37545470 | 37549171 | - | 0.02  | 0.04  |
| ENSG000001OR10Q1    | protein_co chr11 | 58227882 | 58228918 | - | 0     | 0     |
| ENSG000001ZNF571    | protein_co chr19 | 37554782 | 37594790 | - | 1.29  | 1.14  |
| ENSG000001GLIPR1L2  | protein_co chr12 | 75391070 | 75432688 | + | 0.73  | 0.79  |
| ENSG000001DEFB119   | protein_co chr20 | 31377164 | 31390603 | - | 0     | 0     |
| ENSG000001MIGA1     | protein_co chr1  | 77779624 | 77879539 | + | 4.01  | 3.2   |
| ENSG000001KCNE1     | protein_co chr21 | 34446688 | 34512275 | - | 0.1   | 0     |
| ENSG000001PRR26     | protein_co chr10 | 649948   | 669581   | + | 0.11  | 0.06  |
| ENSG000001NRIP1     | protein_co chr21 | 14961235 | 15065936 | - | 5.87  | 6.3   |
| ENSG000001ZSCAN4    | protein_co chr19 | 57668935 | 57679152 | + | 0.03  | 0.22  |
| ENSG000001BHLHA15   | protein_co chr7  | 98211427 | 98212979 | + | 0     | 0     |

|                    |                   |          |          |   |       |       |
|--------------------|-------------------|----------|----------|---|-------|-------|
| ENSG0000(RNF182    | protein_co chr6   | 13924446 | 13980302 | + | 0.74  | 0.13  |
| ENSG0000(C9orf139  | antisense chr9    | 1.37E+08 | 1.37E+08 | + | 0.01  | 0     |
| ENSG0000(TSPYL5    | protein_co chr8   | 97273474 | 97277964 | - | 3.06  | 2.75  |
| ENSG0000(FUT7      | protein_co chr9   | 1.37E+08 | 1.37E+08 | - | 0     | 0     |
| ENSG0000(HIST1H2AC | protein_co chr6   | 26124145 | 26139116 | + | 9.7   | 8.35  |
| ENSG0000(EIF2S3L   | protein_co chr12  | 10505602 | 10523135 | + | 0     | 0.06  |
| ENSG0000(SRP9P1    | processed_chr10   | 91807179 | 91807439 | - | 36.63 | 28.85 |
| ENSG0000(SKIDA1    | protein_co chr10  | 21513478 | 21526368 | - | 0.26  | 0.31  |
| ENSG0000(HIST1H2BC | protein_co chr6   | 26114873 | 26123926 | - | 1.43  | 1.09  |
| ENSG0000(ZBTB12BP  | processed_chr4    | 39770081 | 39771371 | - | 0     | 0     |
| ENSG0000(MB21D2    | protein_co chr3   | 1.93E+08 | 1.93E+08 | - | 2.14  | 1.93  |
| ENSG0000(GSX2      | protein_co chr4   | 54099523 | 54102505 | + | 0     | 0     |
| ENSG0000(SSTR2     | protein_co chr17  | 73165012 | 73176633 | + | 0.07  | 0.17  |
| ENSG0000(ZNF594    | protein_co chr17  | 5179536  | 5191883  | - | 2.63  | 2.73  |
| ENSG0000(PCGF5     | protein_co chr10  | 91163012 | 91284331 | + | 10.74 | 9.98  |
| ENSG0000(SLC47A2   | protein_co chr17  | 19678288 | 19718979 | - | 0     | 0     |
| ENSG0000(PRF1      | protein_co chr10  | 70597348 | 70602775 | - | 0.02  | 0     |
| ENSG0000(OR2A4     | protein_co chr6   | 1.32E+08 | 1.32E+08 | - | 0     | 0     |
| ENSG0000(MAB21L1   | protein_co chr13  | 35474182 | 35477209 | - | 0     | 0     |
| ENSG0000(RPL21P8   | processed_chr14   | 65467807 | 65468341 | - | 0     | 0     |
| ENSG0000(VN1R3     | unitary_psi chr16 | 31807926 | 31808844 | - | 0     | 0     |
| ENSG0000(YOD1      | protein_co chr1   | 2.07E+08 | 2.07E+08 | - | 1.06  | 1     |
| ENSG0000(EXOC5P1   | processed_chr4    | 62816826 | 62818794 | + | 0     | 0     |
| ENSG0000(TMEM64    | protein_co chr8   | 90621995 | 90791632 | - | 8.19  | 8.7   |
| ENSG0000(C3orf22   | protein_co chr3   | 1.27E+08 | 1.27E+08 | - | 0     | 0     |
| ENSG0000(OR10K2    | protein_co chr1   | 1.58E+08 | 1.58E+08 | - | 0     | 0     |
| ENSG0000(RP11-290F | lincRNA chr4      | 1.84E+08 | 1.84E+08 | - | 0.03  | 0.16  |
| ENSG0000(OR5AZ1P   | unprocessε chr11  | 57917297 | 57918239 | - | 0     | 0     |
| ENSG0000(CHR4      | protein_co chr11  | 46385098 | 46386608 | - | 0.11  | 0     |
| ENSG0000(OR51A9P   | unitary_psi chr11 | 4660853  | 4661763  | - | 0     | 0     |
| ENSG0000(SHISA2    | protein_co chr13  | 26044597 | 26051031 | - | 0     | 0     |
| ENSG0000(S1PR5     | protein_co chr19  | 10512742 | 10517931 | - | 0     | 0.03  |
| ENSG0000(CLRN3     | protein_co chr10  | 1.28E+08 | 1.28E+08 | - | 0     | 0     |
| ENSG0000(SMG1P3    | transcribed chr16 | 21446683 | 21520444 | - | 6.64  | 6.8   |
| ENSG0000(GPR157    | protein_co chr1   | 9100305  | 9129170  | - | 0.57  | 1.88  |
| ENSG0000(PIPSL     | transcribed chr10 | 93958191 | 93961540 | - | 0.05  | 0.04  |
| ENSG0000(CHST13    | protein_co chr3   | 1.27E+08 | 1.27E+08 | + | 0     | 0     |
| ENSG0000(WDFY3-AS  | processed_chr4    | 84965682 | 85011277 | + | 1.28  | 0.85  |
| ENSG0000(OR7E129P  | unprocessε chr3   | 1.3E+08  | 1.3E+08  | - | 0     | 0     |
| ENSG0000(AGTR2     | protein_co chrX   | 1.16E+08 | 1.16E+08 | + | 0     | 0     |
| ENSG0000(SLC36A4   | protein_co chr11  | 93144171 | 93197964 | - | 6.49  | 5.98  |
| ENSG0000(ZDHHC20   | protein_co chr13  | 21372573 | 21459370 | - | 18.71 | 18.29 |
| ENSG0000(ANKRD30B  | protein_co chr18  | 14728272 | 14852738 | + | 0.03  | 0.11  |
| ENSG0000(OR51E1    | protein_co chr11  | 4643420  | 4655488  | + | 0     | 0     |
| ENSG0000(ZFP3      | protein_co chr17  | 5078248  | 5096374  | + | 0.53  | 0.46  |

|                      |                  |          |            |        |        |
|----------------------|------------------|----------|------------|--------|--------|
| ENSG0000( ARSJ       | protein_co chr4  | 1.14E+08 | 1.14E+08 - | 3.29   | 4.18   |
| ENSG0000( RP11-467D  | processed_chr13  | 25863250 | 25863667 - | 0      | 0      |
| ENSG0000( HOXC9      | protein_co chr12 | 53994895 | 54003337 + | 0.97   | 0.38   |
| ENSG0000( MAP3K15    | protein_co chrX  | 19360056 | 19515261 - | 0.01   | 0      |
| ENSG0000( PPA1       | protein_co chr10 | 70202830 | 70233911 - | 39.78  | 34.32  |
| ENSG0000( HOXC10     | protein_co chr12 | 53985065 | 53990279 + | 0      | 0      |
| ENSG0000( PSMG4      | protein_co chr6  | 3231403  | 3303373 +  | 7.59   | 8.54   |
| ENSG0000( BHLHE22    | protein_co chr8  | 64580367 | 64583628 + | 0      | 0      |
| ENSG0000( MAP6D1     | protein_co chr3  | 1.84E+08 | 1.84E+08 - | 0.97   | 1.07   |
| ENSG0000( CSNK1G2-/- | antisense chr19  | 1952531  | 1954586 -  | 0      | 0      |
| ENSG0000( ZNF443     | protein_co chr19 | 12429707 | 12441112 - | 0.74   | 0.87   |
| ENSG0000( LINC01559  | lincRNA chr12    | 13371089 | 13387167 - | 0      | 0      |
| ENSG0000( PDIA3P1    | processed_chr1   | 1.47E+08 | 1.47E+08 + | 1.13   | 1.13   |
| ENSG0000( LINC01555  | lincRNA chr1     | 84628230 | 84635020 - | 0      | 0      |
| ENSG0000( CXCR2      | protein_co chr2  | 2.18E+08 | 2.18E+08 + | 0      | 0      |
| ENSG0000( DEFB112    | protein_co chr6  | 50043575 | 50048651 - | 0      | 0      |
| ENSG0000( GREM2      | protein_co chr1  | 2.4E+08  | 2.41E+08 - | 1.52   | 1.63   |
| ENSG0000( C11orf42   | protein_co chr11 | 6205566  | 6211132 +  | 0      | 0      |
| ENSG0000( SSR4       | protein_co chrX  | 1.54E+08 | 1.54E+08 + | 267.91 | 257.54 |
| ENSG0000( CAPS2      | protein_co chr12 | 75275979 | 75390928 - | 2.57   | 3.56   |
| ENSG0000( ZNF792     | protein_co chr19 | 34956354 | 34964049 - | 1.09   | 1.08   |
| ENSG0000( CUEDC1     | protein_co chr17 | 57861243 | 57955323 - | 23.19  | 20.81  |
| ENSG0000( SCRIB      | protein_co chr8  | 1.44E+08 | 1.44E+08 - | 14.32  | 14.1   |
| ENSG0000( KCTD2      | protein_co chr17 | 75032575 | 75065889 + | 11.14  | 11.03  |
| ENSG0000( D2HGDH     | protein_co chr2  | 2.42E+08 | 2.42E+08 + | 10.44  | 11.78  |
| ENSG0000( OR52B1P    | unprocessε chr11 | 6151641  | 6152549 -  | 0      | 0      |
| ENSG0000( TTTY11     | lincRNA chrY     | 8783310  | 8817382 -  | 0      | 0      |
| ENSG0000( OR56B3P    | unprocessε chr11 | 6128610  | 6129556 +  | 0      | 0      |
| ENSG0000( OXTR       | protein_co chr3  | 8750408  | 8769628 -  | 1      | 1.32   |
| ENSG0000( CMTR2      | protein_co chr16 | 71281389 | 71289715 - | 8.02   | 7.37   |
| ENSG0000( OR56B4     | protein_co chr11 | 6107684  | 6108835 +  | 0      | 0      |
| ENSG0000( FAM83H     | protein_co chr8  | 1.44E+08 | 1.44E+08 - | 2.43   | 2.44   |
| ENSG0000( OR7E18P    | unprocessε chr19 | 9261015  | 9261716 -  | 0      | 0      |
| ENSG0000( GPR62      | protein_co chr3  | 51955314 | 51957504 + | 0      | 0      |
| ENSG0000( OR56A1     | protein_co chr11 | 6026671  | 6027741 -  | 0      | 0      |
| ENSG0000( ZNF572     | protein_co chr8  | 1.25E+08 | 1.25E+08 + | 0.26   | 0.13   |
| ENSG0000( ST20       | protein_co chr15 | 79898840 | 79923702 - | 2.95   | 2.36   |
| ENSG0000( PITPNB     | protein_co chr22 | 27851669 | 27920134 - | 18.78  | 19.08  |
| ENSG0000( TCEAL8     | protein_co chrX  | 1.03E+08 | 1.03E+08 - | 31.92  | 32.48  |
| ENSG0000( OR52E4     | protein_co chr11 | 5884271  | 5885300 +  | 0      | 0      |
| ENSG0000( LRRC57     | protein_co chr15 | 42537820 | 42548802 - | 4.91   | 4.46   |
| ENSG0000( OR52N2     | protein_co chr11 | 5820314  | 5821348 +  | 0      | 0      |
| ENSG0000( MRPL14     | protein_co chr6  | 44113454 | 44127457 - | 18.32  | 18.33  |
| ENSG0000( GPR137C    | protein_co chr14 | 52553148 | 52637713 + | 0.43   | 0.36   |
| ENSG0000( C1orf105   | protein_co chr1  | 1.72E+08 | 1.72E+08 + | 0      | 0      |

|                     |                   |          |            |        |        |
|---------------------|-------------------|----------|------------|--------|--------|
| ENSG0000( OR52N1    | protein_co chr11  | 5787854  | 5788816 -  | 0      | 0      |
| ENSG0000( BBS12     | protein_co chr4   | 1.23E+08 | 1.23E+08 + | 1.75   | 1.68   |
| ENSG0000( ZFP82     | protein_co chr19  | 36383120 | 36418656 - | 1.76   | 1.54   |
| ENSG0000( OR52N5    | protein_co chr11  | 5777634  | 5778667 -  | 0      | 0      |
| ENSG0000( C17orf47  | protein_co chr17  | 58541587 | 58544368 - | 0      | 0      |
| ENSG0000( LSMEM1    | protein_co chr7   | 1.12E+08 | 1.12E+08 + | 0.47   | 0.22   |
| ENSG0000( OR56B2P   | unprocessε chr11  | 5765096  | 5766049 +  | 0      | 0      |
| ENSG0000( NQO1      | protein_co chr16  | 69706996 | 69726951 - | 81.77  | 88.22  |
| ENSG0000( OR56B1    | protein_co chr11  | 5736517  | 5737491 +  | 0      | 0      |
| ENSG0000( AEN       | protein_co chr15  | 88621296 | 88632282 + | 13.01  | 14.3   |
| ENSG0000( FKRP      | protein_co chr19  | 46746046 | 46776988 + | 6.88   | 9.18   |
| ENSG0000( TRAPPC5   | protein_co chr19  | 7680843  | 7687703 +  | 53.66  | 40.78  |
| ENSG0000( RPH3AL    | protein_co chr17  | 212389   | 386254 -   | 0.34   | 0.33   |
| ENSG0000( SLC25A42  | protein_co chr19  | 19063999 | 19112888 + | 3.86   | 4.81   |
| ENSG0000( FCRL6     | protein_co chr1   | 1.6E+08  | 1.6E+08 +  | 0.04   | 0      |
| ENSG0000( METTL23   | protein_co chr17  | 76726830 | 76733936 + | 16.78  | 14.73  |
| ENSG0000( SLC26A11  | protein_co chr17  | 80219699 | 80253500 + | 9.24   | 10.82  |
| ENSG0000( HIGD1A    | protein_co chr3   | 42784298 | 42804531 - | 27.26  | 26.65  |
| ENSG0000( CHRM2     | protein_co chr7   | 1.37E+08 | 1.37E+08 + | 0      | 0      |
| ENSG0000( OR52N4    | protein_co chr11  | 5754693  | 5755729 +  | 0.23   | 0      |
| ENSG0000( MAPK15    | protein_co chr8   | 1.44E+08 | 1.44E+08 + | 0.07   | 0      |
| ENSG0000( EHMT1     | protein_co chr9   | 1.38E+08 | 1.38E+08 + | 11.76  | 15.85  |
| ENSG0000( ADIPOQ    | protein_co chr3   | 1.87E+08 | 1.87E+08 + | 0      | 0      |
| ENSG0000( RP11-429J | antisense chr8    | 1.44E+08 | 1.44E+08 + | 0.4    | 0.15   |
| ENSG0000( SDCCAG3P  | processed_ chr1   | 1.75E+08 | 1.75E+08 - | 0      | 0      |
| ENSG0000( F2R       | protein_co chr5   | 76716043 | 76735781 + | 30.95  | 29.86  |
| ENSG0000( OR52P1P   | unitary_psι chr11 | 5726502  | 5727464 +  | 0      | 0      |
| ENSG0000( RP4-539M  | antisense chr22   | 30475364 | 30492804 + | 0      | 0      |
| ENSG0000( HLA-V     | transcribec chr6  | 29790954 | 29797811 + | 0.27   | 0.06   |
| ENSG0000( ZNF707    | protein_co chr8   | 1.44E+08 | 1.44E+08 + | 5.32   | 4.79   |
| ENSG0000( MUC16     | protein_co chr19  | 8848844  | 8981342 -  | 0      | 0      |
| ENSG0000( NPM1      | protein_co chr5   | 1.71E+08 | 1.71E+08 + | 681.53 | 649.79 |
| ENSG0000( FER1L6-AS | antisense chr8    | 1.24E+08 | 1.24E+08 - | 0      | 0      |
| ENSG0000( PJA1      | protein_co chrX   | 69160851 | 69165793 - | 9.01   | 10.34  |
| ENSG0000( DHTKD1    | protein_co chr10  | 12068972 | 12123225 + | 3.65   | 3.01   |
| ENSG0000( PENK      | protein_co chr8   | 56436674 | 56446734 - | 0.23   | 0.37   |
| ENSG0000( HIST3H2BA | unitary_psι chr1  | 2.28E+08 | 2.28E+08 - | 0      | 0      |
| ENSG0000( HECW1-IT1 | sense_intrε chr7  | 43117896 | 43163187 + | 0      | 0      |
| ENSG0000( OR8G2P    | unprocessε chr11  | 1.24E+08 | 1.24E+08 + | 0      | 0      |
| ENSG0000( C4orf50   | protein_co chr4   | 5897373  | 6018507 -  | 0      | 0      |
| ENSG0000( HIST3H2A  | protein_co chr1   | 2.28E+08 | 2.28E+08 - | 4.18   | 4.83   |
| ENSG0000( ZNF746    | protein_co chr7   | 1.49E+08 | 1.49E+08 - | 5.89   | 4.54   |
| ENSG0000( POLR2A    | protein_co chr17  | 7484366  | 7514616 +  | 45.69  | 44.27  |
| ENSG0000( DLSTP1    | processed_ chr1   | 75743423 | 75744776 - | 0      | 0      |
| ENSG0000( TMEM132   | protein_co chr12  | 1.28E+08 | 1.29E+08 + | 0      | 0      |

|                     |                  |          |          |   |       |       |
|---------------------|------------------|----------|----------|---|-------|-------|
| ENSG0000(SLC25A41)  | protein_co chr19 | 6426037  | 6433779  | - | 0.08  | 0.14  |
| ENSG0000(MTHFD2P7)  | processed_chr3   | 1.79E+08 | 1.79E+08 | + | 0     | 0     |
| ENSG0000(TMEM136)   | protein_co chr11 | 1.2E+08  | 1.2E+08  | + | 5.22  | 4.36  |
| ENSG0000(OR5AK2)    | protein_co chr11 | 56988872 | 56989867 | + | 0     | 0     |
| ENSG0000(FRAT2)     | protein_co chr10 | 97332497 | 97334709 | - | 2.85  | 2.58  |
| ENSG0000(OR5AK3P)   | unprocessε chr11 | 56970850 | 56972146 | + | 0     | 0     |
| ENSG0000(TMEM102)   | protein_co chr17 | 7435443  | 7437679  | + | 2.16  | 2.47  |
| ENSG0000(TMEM132)   | protein_co chr17 | 34580749 | 34639318 | + | 0     | 0     |
| ENSG0000(OR5G1P)    | unprocessε chr11 | 56775261 | 56776206 | - | 0     | 0     |
| ENSG0000(ZNF322)    | protein_co chr6  | 26634383 | 26659752 | - | 7.01  | 8.58  |
| ENSG0000(NME9)      | protein_co chr3  | 1.38E+08 | 1.38E+08 | - | 0     | 0.21  |
| ENSG0000(SPEM1)     | protein_co chr17 | 7420360  | 7421632  | + | 0     | 0     |
| ENSG0000(OR9G3P)    | unprocessε chr11 | 56740179 | 56741096 | + | 0     | 0     |
| ENSG0000(HEPHL1)    | protein_co chr11 | 94021361 | 94113751 | + | 0     | 0     |
| ENSG0000(LRRC75A)   | protein_co chr17 | 16441577 | 16492153 | - | 0.32  | 0.51  |
| ENSG0000(OFCC1)     | protein_co chr6  | 9596110  | 10211608 | - | 0     | 0     |
| ENSG0000(CTAGE10P)  | processed_chr13  | 49890591 | 49892998 | + | 0     | 0     |
| ENSG0000(HSP90AA6)  | transcribec chr4 | 1.71E+08 | 1.71E+08 | - | 0     | 0     |
| ENSG0000(OR5M8)     | protein_co chr11 | 56490435 | 56491370 | - | 0     | 0     |
| ENSG0000(CCL13)     | protein_co chr17 | 34356452 | 34358610 | + | 5.18  | 4.4   |
| ENSG0000(CFAP65)    | protein_co chr2  | 2.19E+08 | 2.19E+08 | - | 0.1   | 0     |
| ENSG0000(DDX60L)    | protein_co chr4  | 1.68E+08 | 1.69E+08 | - | 7.4   | 7.08  |
| ENSG0000(SYNE4)     | protein_co chr19 | 36003307 | 36008793 | - | 0.02  | 0.33  |
| ENSG0000(OGFOD3)    | protein_co chr17 | 82389223 | 82418637 | - | 18.39 | 19.23 |
| ENSG0000(WASHC1)    | protein_co chr9  | 14521    | 29739    | - | 5.5   | 6.16  |
| ENSG0000(UTS2R)     | protein_co chr17 | 82374230 | 82375586 | + | 0     | 0     |
| ENSG0000(AATK)      | protein_co chr17 | 81117295 | 81166077 | - | 0.21  | 0.15  |
| ENSG0000(DDN)       | protein_co chr12 | 48995149 | 48999309 | - | 0.04  | 0.03  |
| ENSG0000(SAGE1)     | protein_co chrX  | 1.36E+08 | 1.36E+08 | + | 0     | 0     |
| ENSG0000(ZNF467)    | protein_co chr7  | 1.5E+08  | 1.5E+08  | - | 6.77  | 7.73  |
| ENSG0000(SOX2)      | protein_co chr3  | 1.82E+08 | 1.82E+08 | + | 0     | 0     |
| ENSG0000(ZNF678)    | protein_co chr1  | 2.28E+08 | 2.28E+08 | + | 1.12  | 0.81  |
| ENSG0000(TMEM45A)   | protein_co chr3  | 1E+08    | 1.01E+08 | + | 89.93 | 73.45 |
| ENSG0000(RAP2B)     | protein_co chr3  | 1.53E+08 | 1.53E+08 | + | 4.11  | 3.89  |
| ENSG0000(ZBTB2)     | protein_co chr6  | 1.51E+08 | 1.51E+08 | - | 3.92  | 5.05  |
| ENSG0000(RNF135)    | protein_co chr17 | 30968785 | 30999911 | + | 9.29  | 9.47  |
| ENSG0000(OR6T1)     | protein_co chr11 | 1.24E+08 | 1.24E+08 | - | 0     | 0     |
| ENSG0000(RP4-655L2) | processed_chrX   | 1.21E+08 | 1.21E+08 | + | 0     | 0     |
| ENSG0000(ACBD4)     | protein_co chr17 | 45132600 | 45144181 | + | 5.95  | 6.1   |
| ENSG0000(RP3-474G1) | processed_chr6   | 72598451 | 72599634 | - | 0     | 0     |
| ENSG0000(OR8D4)     | protein_co chr11 | 1.24E+08 | 1.24E+08 | + | 0     | 0     |
| ENSG0000(SGSH)      | protein_co chr17 | 80206716 | 80220923 | - | 25.83 | 28.4  |
| ENSG0000(RPL24P4)   | processed_chr6   | 42956345 | 42956765 | - | 0     | 0     |
| ENSG0000(MAB21L2)   | protein_co chr4  | 1.51E+08 | 1.51E+08 | + | 0     | 0.02  |
| ENSG0000(FANCB)     | protein_co chrX  | 14843407 | 14873069 | - | 0.29  | 0.07  |

|                     |                  |          |          |   |       |       |
|---------------------|------------------|----------|----------|---|-------|-------|
| ENSG0000( EDDM3B    | protein_co chr14 | 20768427 | 20770948 | + | 0     | 0     |
| ENSG0000( SETD2     | protein_co chr3  | 47016429 | 47163967 | - | 10.26 | 10.55 |
| ENSG0000( EDDM3A    | protein_co chr14 | 20745892 | 20748380 | + | 0     | 0     |
| ENSG0000( C6orf223  | protein_co chr6  | 44000580 | 44005958 | + | 0.07  | 0     |
| ENSG0000( TMIE      | protein_co chr3  | 46701333 | 46710886 | + | 0.03  | 0.07  |
| ENSG0000( MEX3D     | protein_co chr19 | 1554669  | 1568058  | - | 8.5   | 8.15  |
| ENSG0000( OR52D1    | protein_co chr11 | 5488685  | 5489749  | + | 0     | 0     |
| ENSG0000( MRPS23    | protein_co chr17 | 57834781 | 57850056 | - | 16.74 | 13.99 |
| ENSG0000( OR52H1    | protein_co chr11 | 5544561  | 5545523  | - | 0     | 0     |
| ENSG0000( FDCSP     | protein_co chr4  | 70226071 | 70235252 | + | 0.75  | 0.97  |
| ENSG0000( GPR135    | protein_co chr14 | 59429022 | 59465342 | - | 1.73  | 1.44  |
| ENSG0000( SLX1B     | protein_co chr16 | 29454501 | 29458219 | + | 3.47  | 4.55  |
| ENSG0000( ANKRD62   | protein_co chr18 | 12093853 | 12129749 | + | 0.04  | 0     |
| ENSG0000( P2RY13    | protein_co chr3  | 1.51E+08 | 1.51E+08 | - | 0     | 0     |
| ENSG0000( TNFSF15   | protein_co chr9  | 1.15E+08 | 1.15E+08 | - | 0     | 0     |
| ENSG0000( ZFP41     | protein_co chr8  | 1.43E+08 | 1.43E+08 | + | 5.75  | 6.23  |
| ENSG0000( PHLDA2    | protein_co chr11 | 2928273  | 2929455  | - | 5.15  | 6.3   |
| ENSG0000( ATG9B     | protein_co chr7  | 1.51E+08 | 1.51E+08 | - | 0.57  | 0.61  |
| ENSG0000( GPR88     | protein_co chr1  | 1.01E+08 | 1.01E+08 | + | 0.17  | 0.05  |
| ENSG0000( HKR1      | protein_co chr19 | 37312837 | 37369365 | + | 13.16 | 16.03 |
| ENSG0000( PLAG1     | protein_co chr8  | 56160904 | 56211324 | - | 1.31  | 1.53  |
| ENSG0000( OR8H1     | protein_co chr11 | 56290053 | 56291090 | - | 0     | 0     |
| ENSG0000( OR5T1     | protein_co chr11 | 56275639 | 56276619 | + | 0     | 0     |
| ENSG0000( YIPF6     | protein_co chrX  | 68498323 | 68537285 | + | 12.92 | 13.16 |
| ENSG0000( RP11-11L1 | processed_chr6   | 80499196 | 80499392 | - | 0     | 0     |
| ENSG0000( OR5T2     | protein_co chr11 | 56232106 | 56233185 | - | 0     | 0     |
| ENSG0000( ZBTB20    | protein_co chr3  | 1.14E+08 | 1.15E+08 | - | 1.34  | 1.8   |
| ENSG0000( OR2Z1     | protein_co chr19 | 8730954  | 8732009  | + | 0     | 0     |
| ENSG0000( FDX1P1    | processed_chr20  | 34475924 | 34476474 | - | 0     | 0     |
| ENSG0000( C3orf58   | protein_co chr3  | 1.44E+08 | 1.44E+08 | + | 8.72  | 5.69  |
| ENSG0000( C5orf30   | protein_co chr5  | 1.03E+08 | 1.03E+08 | + | 9.19  | 7.51  |
| ENSG0000( OR8K5     | protein_co chr11 | 56159394 | 56160317 | - | 0     | 0     |
| ENSG0000( AMIGO1    | protein_co chr1  | 1.1E+08  | 1.1E+08  | - | 0.84  | 0.95  |
| ENSG0000( OR8H3     | protein_co chr11 | 56122373 | 56123311 | + | 0     | 0     |
| ENSG0000( OR8H2     | protein_co chr11 | 56105018 | 56106055 | + | 0     | 0     |
| ENSG0000( GPR3      | protein_co chr1  | 27392644 | 27395814 | + | 0.05  | 0.03  |
| ENSG0000( TMEM252   | protein_co chr9  | 68536580 | 68540867 | - | 0     | 0     |
| ENSG0000( OR5J1P    | unprocessε chr11 | 56071111 | 56072049 | + | 0     | 0     |
| ENSG0000( ODF3L2    | protein_co chr19 | 463346   | 474983   | - | 0.08  | 0     |
| ENSG0000( OR5AS1    | protein_co chr11 | 56030419 | 56031393 | + | 0     | 0     |
| ENSG0000( ACTL9     | protein_co chr19 | 8697397  | 8698822  | - | 0     | 0     |
| ENSG0000( SIAH2     | protein_co chr3  | 1.51E+08 | 1.51E+08 | - | 11.26 | 10.62 |
| ENSG0000( COPG1     | protein_co chr3  | 1.29E+08 | 1.29E+08 | + | 65.64 | 57.26 |
| ENSG0000( ADGRB1    | protein_co chr8  | 1.42E+08 | 1.43E+08 | + | 0     | 0.08  |
| ENSG0000( LINC00471 | lincRNA chr2     | 2.32E+08 | 2.32E+08 | - | 0.59  | 0.1   |



|                     |             |       |          |          |   |       |       |
|---------------------|-------------|-------|----------|----------|---|-------|-------|
| ENSG0000( CELF2-AS1 | antisense   | chr10 | 11316834 | 11319884 | - | 0     | 0     |
| ENSG0000( OR6S1     | protein_co  | chr14 | 20640696 | 20641691 | - | 0     | 0     |
| ENSG0000( SLC9A9    | protein_co  | chr3  | 1.43E+08 | 1.44E+08 | - | 1.76  | 1.77  |
| ENSG0000( LSM10     | protein_co  | chr1  | 36391238 | 36397892 | - | 22.39 | 30.78 |
| ENSG0000( KCTD9P2   | processed_  | chrX  | 1.05E+08 | 1.05E+08 | + | 0.06  | 0     |
| ENSG0000( RELL1     | protein_co  | chr4  | 37590800 | 37686376 | - | 6.08  | 5.92  |
| ENSG0000( RFX7      | protein_co  | chr15 | 56087280 | 56243266 | - | 6.02  | 7.09  |
| ENSG0000( SLC35C1   | protein_co  | chr11 | 45804072 | 45813015 | + | 11.09 | 10.18 |
| ENSG0000( OR5D17P   | unprocessε  | chr11 | 55754976 | 55755953 | + | 0     | 0     |
| ENSG0000( TIGIT     | protein_co  | chr3  | 1.14E+08 | 1.14E+08 | + | 0     | 0     |
| ENSG0000( RNF41     | protein_co  | chr12 | 56202175 | 56221933 | - | 46.96 | 44.38 |
| ENSG0000( SLC2A4    | protein_co  | chr17 | 7281667  | 7288257  | + | 0.13  | 0.07  |
| ENSG0000( FTMT      | protein_co  | chr5  | 1.22E+08 | 1.22E+08 | + | 0     | 0     |
| ENSG0000( IBA57     | protein_co  | chr1  | 2.28E+08 | 2.28E+08 | + | 1.58  | 2.07  |
| ENSG0000( CLDN7     | protein_co  | chr17 | 7259903  | 7263983  | - | 0.48  | 0.95  |
| ENSG0000( ZNF329    | protein_co  | chr19 | 58126252 | 58155110 | - | 3.71  | 4.17  |
| ENSG0000( ZNF101    | protein_co  | chr19 | 19668796 | 19683509 | + | 1.73  | 2.26  |
| ENSG0000( OR4C6     | protein_co  | chr11 | 55665167 | 55666096 | + | 0     | 0     |
| ENSG0000( C5orf24   | protein_co  | chr5  | 1.35E+08 | 1.35E+08 | + | 18.16 | 17.35 |
| ENSG0000( AP003774. | lincRNA     | chr11 | 64449074 | 64451657 | + | 0     | 0     |
| ENSG0000( ADO       | protein_co  | chr10 | 62804857 | 62808483 | + | 7     | 6.38  |
| ENSG0000( COA4      | protein_co  | chr11 | 73872667 | 73876988 | - | 27.28 | 24.8  |
| ENSG0000( OR4P4     | protein_co  | chr11 | 55638358 | 55639296 | + | 0     | 0     |
| ENSG0000( PRKAG1    | protein_co  | chr12 | 49002274 | 49019197 | - | 43.98 | 42.78 |
| ENSG0000( GINS3     | protein_co  | chr16 | 58295080 | 58406144 | + | 2.11  | 3.3   |
| ENSG0000( OR4C15    | protein_co  | chr11 | 55554307 | 55555419 | + | 0     | 0     |
| ENSG0000( OR4A21P   | unprocessε  | chr11 | 55491152 | 55492142 | + | 0     | 0     |
| ENSG0000( OR4A13P   | unprocessε  | chr11 | 55466771 | 55467712 | + | 0     | 0     |
| ENSG0000( OR4A15    | protein_co  | chr11 | 55367884 | 55368918 | + | 0     | 0     |
| ENSG0000( OR4A16    | protein_co  | chr11 | 55343201 | 55344187 | + | 0     | 0     |
| ENSG0000( OR52K2    | protein_co  | chr11 | 4449295  | 4450361  | + | 0     | 0     |
| ENSG0000( NEUROG1   | protein_co  | chr5  | 1.36E+08 | 1.36E+08 | - | 0     | 0     |
| ENSG0000( PYY3      | processed_  | chrX  | 50156159 | 50156371 | + | 0     | 0     |
| ENSG0000( CCDC149   | protein_co  | chr4  | 24806117 | 24980204 | - | 5.85  | 4.67  |
| ENSG0000( GOLGA8CP  | unprocessε  | chr15 | 20562375 | 20575696 | + | 0     | 0     |
| ENSG0000( MRPS11    | protein_co  | chr15 | 88467453 | 88480773 | + | 20.28 | 20.95 |
| ENSG0000( LINC00301 | lincRNA     | chr11 | 60615736 | 60687149 | + | 0     | 0     |
| ENSG0000( AQP7P2    | unprocessε  | chr9  | 64621560 | 64637586 | - | 0     | 0     |
| ENSG0000( RP11-651P | processed_  | chr3  | 1.5E+08  | 1.5E+08  | + | 0     | 0     |
| ENSG0000( SNRPE     | protein_co  | chr1  | 2.04E+08 | 2.04E+08 | + | 47.46 | 48.13 |
| ENSG0000( RTKN2     | protein_co  | chr10 | 62183035 | 62268707 | - | 0.12  | 0.16  |
| ENSG0000( PNMAL1    | protein_co  | chr19 | 46466491 | 46471563 | - | 5.81  | 6.57  |
| ENSG0000( RP11-381C | transcribec | chr9  | 63111255 | 63127100 | - | 0     | 0     |
| ENSG0000( CHST15    | protein_co  | chr10 | 1.24E+08 | 1.24E+08 | - | 0.08  | 0.2   |
| ENSG0000( ADIG      | protein_co  | chr20 | 38581195 | 38588463 | + | 0     | 0     |

|                     |                   |          |          |   |        |        |
|---------------------|-------------------|----------|----------|---|--------|--------|
| ENSG0000( USH1G     | protein_co chr17  | 74916084 | 74923256 | - | 0      | 0      |
| ENSG0000( TRPC2     | transcribec chr11 | 3609901  | 3637559  | + | 0      | 0      |
| ENSG0000( MGAT4C    | protein_co chr12  | 85955666 | 86838904 | - | 0.01   | 0.03   |
| ENSG0000( TRIM49B   | protein_co chr11  | 49027501 | 49038451 | + | 0      | 0      |
| ENSG0000( IDH2      | protein_co chr15  | 90083045 | 90102504 | - | 18.05  | 17.75  |
| ENSG0000( OGFRP1    | lincRNA chr22     | 42269753 | 42275196 | + | 0.47   | 0.36   |
| ENSG0000( OR52A1    | protein_co chr11  | 5151009  | 5186382  | - | 0      | 0      |
| ENSG0000( PTCHD3    | protein_co chr10  | 27398187 | 27414368 | - | 0      | 0      |
| ENSG0000( OR6B2     | protein_co chr2   | 2.4E+08  | 2.4E+08  | - | 0      | 0      |
| ENSG0000( TMEM259   | protein_co chr19  | 1009648  | 1021179  | - | 58.48  | 60.88  |
| ENSG0000( WRB       | protein_co chr21  | 39380244 | 39428528 | + | 20.16  | 18.39  |
| ENSG0000( TNRC18    | protein_co chr7   | 5306790  | 5425414  | - | 24.16  | 28.96  |
| ENSG0000( FAM181B   | protein_co chr11  | 82729941 | 82733864 | - | 0.01   | 0      |
| ENSG0000( TMEM30B   | protein_co chr14  | 61277370 | 61281840 | - | 0.28   | 0.3    |
| ENSG0000( DEXI      | protein_co chr16  | 10928891 | 10942460 | - | 19.61  | 18.45  |
| ENSG0000( RP11-69E1 | antisense chr1    | 39522280 | 39546187 | - | 1.87   | 2.22   |
| ENSG0000( ZNF716    | protein_co chr7   | 57450177 | 57473546 | + | 0.01   | 0.03   |
| ENSG0000( NOP10     | protein_co chr15  | 34341713 | 34343177 | - | 117.79 | 125.59 |
| ENSG0000( FAM89A    | protein_co chr1   | 2.31E+08 | 2.31E+08 | - | 1.61   | 1.6    |
| ENSG0000( KCNIP1    | protein_co chr5   | 1.7E+08  | 1.71E+08 | + | 0      | 0      |
| ENSG0000( TDRKH     | protein_co chr1   | 1.52E+08 | 1.52E+08 | - | 0.65   | 1.23   |
| ENSG0000( ZNF708    | protein_co chr19  | 21291160 | 21329425 | - | 1.71   | 1.64   |
| ENSG0000( IST1      | protein_co chr16  | 71845996 | 71931199 | + | 92.02  | 89.96  |
| ENSG0000( ERCC6L2   | protein_co chr9   | 95875701 | 96014571 | + | 7.44   | 8.59   |
| ENSG0000( MRPL41    | protein_co chr9   | 1.38E+08 | 1.38E+08 | + | 16.5   | 18.67  |
| ENSG0000( ENPP7     | protein_co chr17  | 79730919 | 79742222 | + | 0      | 0      |
| ENSG0000( CREB3L2   | protein_co chr7   | 1.38E+08 | 1.38E+08 | - | 10.15  | 9.62   |
| ENSG0000( P2RY8     | protein_co chrX   | 1462572  | 1537107  | - | 0      | 0      |
| ENSG0000( P2RY8     | protein_co chrY   | 1462572  | 1537107  | - | 0      | 0      |
| ENSG0000( TP53TG1   | lincRNA chr7      | 87325225 | 87345515 | - | 21.53  | 19.79  |
| ENSG0000( UNC5C     | protein_co chr4   | 95162504 | 95549206 | - | 0.03   | 0      |
| ENSG0000( MRGPRG    | protein_co chr11  | 3217944  | 3218813  | - | 0      | 0      |
| ENSG0000( TSEN54    | protein_co chr17  | 75516060 | 75524739 | + | 4.54   | 4.74   |
| ENSG0000( RGMA      | protein_co chr15  | 93035273 | 93089204 | - | 4.13   | 4.76   |
| ENSG0000( ASB18     | protein_co chr2   | 2.36E+08 | 2.36E+08 | - | 0.01   | 0      |
| ENSG0000( UBA7      | protein_co chr3   | 49805207 | 49813946 | - | 19.9   | 22.01  |
| ENSG0000( MRPS16    | protein_co chr10  | 73248843 | 73252693 | - | 38.2   | 34.43  |
| ENSG0000( FAM159A   | protein_co chr1   | 52633344 | 52669683 | + | 0.03   | 0      |
| ENSG0000( RAD51B    | protein_co chr14  | 67819779 | 68730218 | + | 6      | 3.65   |
| ENSG0000( CRYGB     | protein_co chr2   | 2.08E+08 | 2.08E+08 | - | 0      | 0      |
| ENSG0000( LDOC1     | protein_co chrX   | 1.41E+08 | 1.41E+08 | - | 27.39  | 29.41  |
| ENSG0000( ARL6IP4   | protein_co chr12  | 1.23E+08 | 1.23E+08 | + | 82.56  | 75.81  |
| ENSG0000( EXT1      | protein_co chr8   | 1.18E+08 | 1.18E+08 | - | 77.06  | 66.28  |
| ENSG0000( SHMT2     | protein_co chr12  | 57229327 | 57234935 | + | 113.32 | 110.05 |
| ENSG0000( MOB2      | protein_co chr11  | 1469457  | 1501247  | - | 18.66  | 20.24  |

|                    |                  |          |          |   |        |        |
|--------------------|------------------|----------|----------|---|--------|--------|
| ENSG0000(HHIPL1    | protein_co chr14 | 99645110 | 99680569 | + | 3.26   | 2.5    |
| ENSG0000(ATP6AP2   | protein_co chrX  | 40579372 | 40606848 | + | 225.6  | 246.71 |
| ENSG0000(ZAR1      | protein_co chr4  | 48490252 | 48494389 | + | 0      | 0      |
| ENSG0000(CYB5D1    | protein_co chr17 | 7857746  | 7862282  | + | 7.3    | 7.16   |
| ENSG0000(FAM153B   | protein_co chr5  | 1.76E+08 | 1.76E+08 | + | 0      | 0.04   |
| ENSG0000(BACE2     | protein_co chr21 | 41167801 | 41282518 | + | 44.79  | 45.34  |
| ENSG0000(UBE2E2    | protein_co chr3  | 23203020 | 23591793 | + | 22.51  | 29.46  |
| ENSG0000(SYNM      | protein_co chr15 | 99098217 | 99135593 | + | 0.61   | 0.59   |
| ENSG0000(KCNA4     | protein_co chr11 | 30009741 | 30017023 | - | 0.4    | 0      |
| ENSG0000(GABRG3    | protein_co chr15 | 26971282 | 27541991 | + | 0      | 0.01   |
| ENSG0000(PRR34     | protein_co chr22 | 46049478 | 46054144 | - | 0.42   | 0.2    |
| ENSG0000(NLRP10    | protein_co chr11 | 7959424  | 7965426  | - | 0.02   | 0      |
| ENSG0000(FIGN      | protein_co chr2  | 1.64E+08 | 1.64E+08 | - | 0.56   | 1.02   |
| ENSG0000(IZUMO1    | protein_co chr19 | 48740852 | 48746909 | - | 0      | 0      |
| ENSG0000(TMIGD1    | protein_co chr17 | 30316333 | 30334059 | - | 0      | 0      |
| ENSG0000(B4GALNT4  | protein_co chr11 | 369796   | 382116   | + | 4.98   | 4.15   |
| ENSG0000(AP1S2     | protein_co chrX  | 15825806 | 15855014 | - | 7.47   | 7.4    |
| ENSG0000(C8orf33   | protein_co chr8  | 1.45E+08 | 1.45E+08 | + | 14.59  | 16.55  |
| ENSG0000(DCAF4L1   | protein_co chr4  | 41981696 | 41986467 | + | 0.01   | 0.04   |
| ENSG0000(SPACA6    | protein_co chr19 | 51693340 | 51712387 | + | 3.08   | 5.14   |
| ENSG0000(MBD3L3    | protein_co chr19 | 7056209  | 7058640  | - | 0      | 0      |
| ENSG0000(ZSCAN22   | protein_co chr19 | 58327019 | 58342332 | + | 1.52   | 1.21   |
| ENSG0000(KCNJ14    | protein_co chr19 | 48455509 | 48466980 | + | 0.22   | 0.24   |
| ENSG0000(FBXL6     | protein_co chr8  | 1.44E+08 | 1.44E+08 | - | 6      | 7.41   |
| ENSG0000(C1S       | protein_co chr12 | 6988259  | 7071032  | + | 993.19 | 986.45 |
| ENSG0000(GLTPD2    | protein_co chr17 | 4788959  | 4790390  | + | 0      | 0      |
| ENSG0000(KIAA2012  | protein_co chr2  | 2.02E+08 | 2.02E+08 | + | 0.61   | 0.7    |
| ENSG0000(PRAMEF8   | protein_co chr1  | 13281035 | 13285174 | - | 0      | 0      |
| ENSG0000(LIPF      | protein_co chr10 | 88664441 | 88678814 | + | 0      | 0      |
| ENSG0000(OR5P3     | protein_co chr11 | 7825037  | 7825972  | - | 0      | 0      |
| ENSG0000(DAOA      | protein_co chr13 | 1.05E+08 | 1.05E+08 | + | 0      | 0      |
| ENSG0000(PDSS1P1   | processed_chr9   | 5084999  | 5086112  | - | 0      | 0      |
| ENSG0000(ZNF804B   | protein_co chr7  | 88759368 | 89337057 | + | 0      | 0      |
| ENSG0000(CRIP1P4   | processed_chr22  | 24712292 | 24712520 | + | 0      | 0      |
| ENSG0000(C17orf77  | antisense chr17  | 74584679 | 74594209 | + | 0      | 0      |
| ENSG0000(KBTBD3    | protein_co chr11 | 1.06E+08 | 1.06E+08 | - | 2.34   | 4.14   |
| ENSG0000(YBEY      | protein_co chr21 | 46286337 | 46297751 | + | 8.76   | 9.19   |
| ENSG0000(OR5F2P    | unprocessε chr11 | 56015017 | 56015957 | - | 0      | 0      |
| ENSG0000(FAM87A    | lincRNA chr8     | 375931   | 383174   | - | 0      | 0      |
| ENSG0000(CLN8      | protein_co chr8  | 1755778  | 1801711  | + | 5.96   | 6.13   |
| ENSG0000(RP5-1142A | antisense chr16  | 88742767 | 88745748 | + | 0      | 0.1    |
| ENSG0000(PLCXD1    | protein_co chrX  | 276322   | 303356   | + | 1.38   | 2.29   |
| ENSG0000(PLCXD1    | protein_co chrY  | 276322   | 303356   | + | 1.19   | 2.29   |
| ENSG0000(NXPH4     | protein_co chr12 | 57216795 | 57226449 | + | 10.1   | 9.81   |
| ENSG0000(RPL27AP5  | processed_chr5   | 74990189 | 74990637 | - | 0      | 0      |

|                    |                   |          |          |   |        |        |
|--------------------|-------------------|----------|----------|---|--------|--------|
| ENSG0000(CACNB4    | protein_co chr2   | 1.52E+08 | 1.52E+08 | - | 0.69   | 0.47   |
| ENSG0000(IFNL1     | protein_co chr19  | 39296325 | 39298673 | + | 0      | 0      |
| ENSG0000(DNM1P46   | transcribec chr15 | 99790156 | 99806927 | - | 0.59   | 0.35   |
| ENSG0000(TRAPPC6B  | protein_co chr14  | 39147811 | 39170532 | - | 7.73   | 8.56   |
| ENSG0000(PGBD4     | protein_co chr15  | 34102073 | 34108684 | + | 0.79   | 0.53   |
| ENSG0000(CDY2A     | protein_co chrY   | 18025787 | 18028597 | + | 0      | 0      |
| ENSG0000(NPLOC4    | protein_co chr17  | 81556887 | 81648465 | - | 27.14  | 28.43  |
| ENSG0000(OTOL1     | protein_co chr3   | 1.61E+08 | 1.62E+08 | + | 0      | 0      |
| ENSG0000(KCNK4     | protein_co chr11  | 64291302 | 64300031 | + | 0.12   | 0.05   |
| ENSG0000(TEX19     | protein_co chr17  | 82359247 | 82363776 | + | 0      | 0      |
| ENSG0000(TSHZ2     | protein_co chr20  | 52972407 | 53495330 | + | 1.19   | 1.3    |
| ENSG0000(CAPN12    | protein_co chr19  | 38730187 | 38769904 | - | 0.66   | 0.12   |
| ENSG0000(EXOC7     | protein_co chr17  | 76081017 | 76121576 | - | 35.71  | 34.42  |
| ENSG0000(OR2B8P    | unprocessε chr6   | 28053228 | 28054165 | - | 0      | 0      |
| ENSG0000(KPNA2     | protein_co chr17  | 68035519 | 68046842 | + | 32.82  | 36.2   |
| ENSG0000(WASH6P    | transcribec chrX  | 1.56E+08 | 1.56E+08 | + | 9.32   | 9.55   |
| ENSG0000(WASH6P    | transcribec chrY  | 57207346 | 57212230 | + | 9.32   | 9.55   |
| ENSG0000(NCF1B     | transcribec chr7  | 73220624 | 73235945 | + | 0      | 0      |
| ENSG0000(XKRX      | protein_co chrX   | 1.01E+08 | 1.01E+08 | - | 0.06   | 0      |
| ENSG0000(BGN       | protein_co chrX   | 1.53E+08 | 1.54E+08 | + | 224.55 | 255.22 |
| ENSG0000(CEP97     | protein_co chr3   | 1.02E+08 | 1.02E+08 | + | 1.89   | 1.58   |
| ENSG0000(LHFPL1    | protein_co chrX   | 1.13E+08 | 1.13E+08 | - | 0      | 0.12   |
| ENSG0000(FES       | protein_co chr15  | 90883695 | 90895776 | + | 7.82   | 8.48   |
| ENSG0000(GLRX5     | protein_co chr14  | 95533503 | 95544724 | + | 10.73  | 13.51  |
| ENSG0000(FAM104B   | protein_co chrX   | 55143102 | 55161310 | - | 4.99   | 6.22   |
| ENSG0000(TBPL2     | protein_co chr14  | 55413541 | 55456726 | - | 0.41   | 0.14   |
| ENSG0000(OR7E115P  | unprocessε chr10  | 15007861 | 15008884 | - | 0      | 0      |
| ENSG0000(CAV3      | protein_co chr3   | 8733800  | 8841808  | + | 0      | 0      |
| ENSG0000(MXRA7     | protein_co chr17  | 76672551 | 76711016 | - | 223.57 | 223.5  |
| ENSG0000(LIMK2     | protein_co chr22  | 31212239 | 31280080 | + | 15.57  | 14.76  |
| ENSG0000(MFSD5     | protein_co chr12  | 53251251 | 53254405 | + | 26.45  | 22.12  |
| ENSG0000(RNASE10   | protein_co chr14  | 20505537 | 20511169 | + | 2.08   | 2.52   |
| ENSG0000(ADI1      | protein_co chr2   | 3497361  | 3519736  | - | 21.67  | 21.55  |
| ENSG0000(RWDD4     | protein_co chr4   | 1.84E+08 | 1.84E+08 | - | 8.8    | 7.9    |
| ENSG0000(SPNS3     | protein_co chr17  | 4433688  | 4488208  | + | 0      | 0      |
| ENSG0000(OR4C2P    | unprocessε chr11  | 48420210 | 48421273 | + | 0      | 0      |
| ENSG0000(CLEC4G    | protein_co chr19  | 7728957  | 7733906  | - | 0      | 0      |
| ENSG0000(SATB1     | protein_co chr3   | 18345387 | 18445588 | - | 6.59   | 6.66   |
| ENSG0000(RP3-341D1 | processed_ chrX   | 1.01E+08 | 1.01E+08 | + | 0      | 0      |
| ENSG0000(NXPH3     | protein_co chr17  | 49575858 | 49583827 | + | 1.52   | 0.88   |
| ENSG0000(CSF1R     | protein_co chr5   | 1.5E+08  | 1.5E+08  | - | 0      | 0      |
| ENSG0000(EPHB3     | protein_co chr3   | 1.85E+08 | 1.85E+08 | + | 1.06   | 1.23   |
| ENSG0000(VCX       | protein_co chrX   | 7842262  | 7844143  | + | 0      | 0      |
| ENSG0000(ACTL10    | protein_co chr20  | 33666498 | 33668525 | + | 0.16   | 0.33   |
| ENSG0000(EPGN      | protein_co chr4   | 74308473 | 74315307 | + | 0      | 0.1    |

|                    |               |       |          |          |   |        |        |
|--------------------|---------------|-------|----------|----------|---|--------|--------|
| ENSG0000(LINC00334 | lincRNA       | chr21 | 45234340 | 45264548 | + | 0      | 0      |
| ENSG0000(KRTAP11-1 | protein_co    | chr21 | 30880644 | 30881555 | - | 0      | 0      |
| ENSG0000(C2orf82   | protein_co    | chr2  | 2.33E+08 | 2.33E+08 | + | 0.39   | 1.66   |
| ENSG0000(HS3ST4    | protein_co    | chr16 | 25692026 | 26137688 | + | 0      | 0      |
| ENSG0000(TRAK1     | protein_co    | chr3  | 42013802 | 42225889 | + | 15.32  | 18.39  |
| ENSG0000(TSPAN10   | protein_co    | chr17 | 81637171 | 81648749 | + | 1.89   | 1.51   |
| ENSG0000(OR2V2     | protein_co    | chr5  | 1.81E+08 | 1.81E+08 | + | 0      | 0      |
| ENSG0000(PLCB1     | protein_co    | chr20 | 8077251  | 8968360  | + | 10.48  | 34.22  |
| ENSG0000(RP11-123C | processed_chr | chr15 | 58686411 | 58686617 | + | 0      | 0      |
| ENSG0000(SKA2      | protein_co    | chr17 | 59109951 | 59155269 | - | 17.74  | 15.22  |
| ENSG0000(RXFP3     | protein_co    | chr5  | 33936386 | 33938237 | + | 0      | 0      |
| ENSG0000(CCNYL2    | transcribec   | chr10 | 42408168 | 42475349 | - | 0.09   | 0.1    |
| ENSG0000(OR10G7    | protein_co    | chr11 | 1.24E+08 | 1.24E+08 | - | 0      | 0      |
| ENSG0000(NDN       | protein_co    | chr15 | 23685400 | 23687330 | - | 11.87  | 10.79  |
| ENSG0000(CCDC172   | protein_co    | chr10 | 1.16E+08 | 1.16E+08 | + | 0      | 0      |
| ENSG0000(LINC01006 | lincRNA       | chr7  | 1.56E+08 | 1.57E+08 | - | 2.83   | 5.37   |
| ENSG0000(OR4Q3     | protein_co    | chr14 | 19747428 | 19748369 | + | 0      | 0      |
| ENSG0000(NTM       | protein_co    | chr11 | 1.31E+08 | 1.32E+08 | + | 5.48   | 4.84   |
| ENSG0000(TTC3      | protein_co    | chr21 | 37073226 | 37203112 | + | 54.65  | 54.08  |
| ENSG0000(KCNB2     | protein_co    | chr8  | 72537391 | 72938349 | + | 0      | 0      |
| ENSG0000(PPP1R27   | protein_co    | chr17 | 81833492 | 81835050 | - | 0      | 0      |
| ENSG0000(BRICD5    | protein_co    | chr16 | 2209253  | 2211950  | - | 1.48   | 0.73   |
| ENSG0000(GALR2     | protein_co    | chr17 | 76074794 | 76077541 | + | 0      | 0      |
| ENSG0000(RESP18    | protein_co    | chr2  | 2.19E+08 | 2.19E+08 | - | 0      | 0      |
| ENSG0000(IGIP      | protein_co    | chr5  | 1.4E+08  | 1.4E+08  | + | 3.39   | 3.42   |
| ENSG0000(TSKU      | protein_co    | chr11 | 76782251 | 76798154 | + | 10.89  | 11.87  |
| ENSG0000(FXYD6P3   | processed_chr | chrX  | 73875068 | 73875635 | + | 0      | 0      |
| ENSG0000(CMC4      | protein_co    | chrX  | 1.55E+08 | 1.55E+08 | - | 10.36  | 7.42   |
| ENSG0000(ANXA2     | protein_co    | chr15 | 60347134 | 60402883 | - | 822.76 | 817.82 |
| ENSG0000(SEPHS1P1  | processed_chr | chr7  | 64852397 | 64853354 | - | 0      | 0      |
| ENSG0000(RGS6      | protein_co    | chr14 | 71932439 | 72566529 | + | 0      | 0      |
| ENSG0000(HOXB4     | protein_co    | chr17 | 48575513 | 48580111 | - | 0.17   | 0.14   |
| ENSG0000(SLC35D3   | protein_co    | chr6  | 1.37E+08 | 1.37E+08 | + | 0      | 0      |
| ENSG0000(PAQR7     | protein_co    | chr1  | 25861210 | 25871253 | - | 4.33   | 3.94   |
| ENSG0000(PAPPA     | protein_co    | chr9  | 1.16E+08 | 1.16E+08 | + | 44.73  | 35.76  |
| ENSG0000(MAFA      | protein_co    | chr8  | 1.43E+08 | 1.43E+08 | - | 0      | 0      |
| ENSG0000(NGRN      | protein_co    | chr15 | 90265659 | 90278141 | + | 24.37  | 24.29  |
| ENSG0000(GRID1     | protein_co    | chr10 | 85599555 | 86366493 | - | 0.02   | 0      |
| ENSG0000(RPS17     | protein_co    | chr15 | 82536753 | 82540564 | - | 766.6  | 734.88 |
| ENSG0000(RP11-114H | lincRNA       | chrX  | 52050860 | 52054255 | - | 0      | 0      |
| ENSG0000(HCAR2     | protein_co    | chr12 | 1.23E+08 | 1.23E+08 | - | 0      | 0      |
| ENSG0000(OR2T29    | protein_co    | chr1  | 2.49E+08 | 2.49E+08 | - | 0      | 0      |
| ENSG0000(CCDC87    | protein_co    | chr11 | 66590176 | 66593083 | - | 0.35   | 0.18   |
| ENSG0000(GSTA5     | protein_co    | chr6  | 52831655 | 52846095 | - | 0      | 0      |
| ENSG0000(C1orf116  | protein_co    | chr1  | 2.07E+08 | 2.07E+08 | - | 0      | 0      |

|                 |                      |       |          |          |   |        |        |
|-----------------|----------------------|-------|----------|----------|---|--------|--------|
| ENSG00000171981 | transcribed          | chr12 | 55829608 | 55836246 | + | 18.27  | 18.13  |
| ENSG00000171982 | protein_coding       | chrX  | 16167481 | 16171464 | + | 0      | 0      |
| ENSG00000171983 | protein_coding       | chr14 | 1.05E+08 | 1.05E+08 | + | 85.69  | 86.94  |
| ENSG00000171984 | protein_coding       | chr16 | 68021274 | 68023442 | - | 2.96   | 3.2    |
| ENSG00000171985 | transcribed          | chr2  | 84290683 | 84292202 | + | 0      | 0.21   |
| ENSG00000171986 | protein_coding       | chr21 | 30371391 | 30372257 | - | 0      | 0      |
| ENSG00000171987 | lincRNA              | chr22 | 18733914 | 18757906 | + | 0      | 0      |
| ENSG00000171988 | protein_coding       | chr1  | 2.26E+08 | 2.26E+08 | - | 14.73  | 16.42  |
| ENSG00000171989 | protein_coding       | chr16 | 9091648  | 9121640  | + | 8.77   | 8.64   |
| ENSG00000171990 | protein_coding       | chr5  | 41306954 | 41510628 | - | 0.15   | 0.13   |
| ENSG00000171991 | transcribed          | chr22 | 42555223 | 42582038 | - | 2.96   | 3.03   |
| ENSG00000171992 | protein_coding       | chr17 | 4785285  | 4786433  | - | 0.62   | 0.11   |
| ENSG00000171993 | protein_coding       | chr15 | 1.02E+08 | 1.02E+08 | + | 0      | 0      |
| ENSG00000171994 | protein_coding       | chr22 | 49900229 | 49918458 | - | 13.43  | 13.4   |
| ENSG00000171995 | protein_coding       | chr1  | 32251239 | 32286165 | + | 0      | 0      |
| ENSG00000171996 | protein_coding       | chr12 | 1.32E+08 | 1.32E+08 | - | 0.03   | 0.15   |
| ENSG00000171997 | protein_coding       | chr21 | 45405137 | 45513720 | + | 63.9   | 65.93  |
| ENSG00000171998 | protein_coding       | chrX  | 47144869 | 47186813 | + | 11.8   | 12.76  |
| ENSG00000171999 | antisense            | chr1  | 2181794  | 2184389  | - | 0.39   | 0.48   |
| ENSG00000172000 | protein_coding       | chr16 | 57668187 | 57689378 | + | 0      | 0      |
| ENSG00000172001 | processed_transcript | chrX  | 3717149  | 3717600  | + | 0      | 0      |
| ENSG00000172002 | protein_coding       | chrX  | 1.21E+08 | 1.21E+08 | + | 0.02   | 0.11   |
| ENSG00000172003 | protein_coding       | chr17 | 7355123  | 7357219  | + | 0      | 0      |
| ENSG00000172004 | protein_coding       | chr1  | 1.52E+08 | 1.52E+08 | - | 0      | 0      |
| ENSG00000172005 | protein_coding       | chr3  | 1.98E+08 | 1.98E+08 | + | 581.07 | 620.07 |
| ENSG00000172006 | protein_coding       | chr1  | 2.41E+08 | 2.41E+08 | - | 0      | 0      |
| ENSG00000172007 | protein_coding       | chr22 | 17563439 | 17590994 | + | 0.08   | 0      |
| ENSG00000172008 | protein_coding       | chr4  | 425815   | 499156   | - | 7.28   | 7.63   |
| ENSG00000172009 | antisense            | chr21 | 44517216 | 44525952 | + | 0.14   | 0.18   |
| ENSG00000172010 | protein_coding       | chrX  | 1.03E+08 | 1.03E+08 | + | 5.19   | 5.37   |
| ENSG00000172011 | protein_coding       | chr11 | 93741591 | 93764749 | + | 10.63  | 9.46   |
| ENSG00000172012 | processed_transcript | chr3  | 73182501 | 73183291 | - | 0      | 0      |
| ENSG00000172013 | protein_coding       | chr3  | 1.34E+08 | 1.35E+08 | + | 15.46  | 10.88  |
| ENSG00000172014 | protein_coding       | chr20 | 45684653 | 45705019 | - | 1.09   | 1.06   |
| ENSG00000172015 | protein_coding       | chr11 | 1.26E+08 | 1.26E+08 | - | 40.19  | 40.53  |
| ENSG00000172016 | protein_coding       | chr17 | 74935719 | 74949992 | + | 0      | 0      |
| ENSG00000172017 | protein_coding       | chr22 | 29268009 | 29300525 | + | 70.13  | 69.71  |
| ENSG00000172018 | protein_coding       | chr15 | 75723977 | 75727688 | + | 0.25   | 0      |
| ENSG00000172019 | protein_coding       | chr6  | 26538405 | 26546254 | + | 27.51  | 28.2   |
| ENSG00000172020 | protein_coding       | chr13 | 23979805 | 24307074 | + | 17.16  | 14.23  |
| ENSG00000172021 | protein_coding       | chr17 | 44798448 | 44830816 | - | 2.59   | 3.57   |
| ENSG00000172022 | processed_transcript | chr7  | 1.13E+08 | 1.13E+08 | + | 0      | 0      |
| ENSG00000172023 | protein_coding       | chr13 | 1.12E+08 | 1.12E+08 | + | 0      | 0      |
| ENSG00000172024 | protein_coding       | chr3  | 32685145 | 32773875 | + | 8.48   | 5.61   |
| ENSG00000172025 | protein_coding       | chr15 | 21637909 | 21638992 | + | 0      | 0      |

|                    |                  |          |          |   |        |        |
|--------------------|------------------|----------|----------|---|--------|--------|
| ENSG0000(MTA1      | protein_co chr14 | 1.05E+08 | 1.05E+08 | + | 33.03  | 34.37  |
| ENSG0000(ZNF662    | protein_co chr3  | 42905731 | 42917641 | + | 0.15   | 0.06   |
| ENSG0000(CADM1     | protein_co chr11 | 1.15E+08 | 1.16E+08 | - | 0.82   | 2.1    |
| ENSG0000(ZNF320    | protein_co chr19 | 52863790 | 52897693 | - | 7.46   | 6.3    |
| ENSG0000(C12orf60  | protein_co chr12 | 14803572 | 14906586 | + | 0.46   | 0.27   |
| ENSG0000(PYCR1     | protein_co chr17 | 81932384 | 81942412 | - | 35.39  | 33.34  |
| ENSG0000(NAA38     | protein_co chr17 | 7856685  | 7885238  | - | 48.69  | 51.97  |
| ENSG0000(SPNS2     | protein_co chr17 | 4498838  | 4539035  | + | 0.42   | 0.61   |
| ENSG0000(MCEMP1    | protein_co chr19 | 7676628  | 7679826  | + | 0      | 0      |
| ENSG0000(AP2A2     | protein_co chr11 | 924894   | 1012245  | + | 28.89  | 28.36  |
| ENSG0000(TPM3P8    | processed_chr2   | 2.31E+08 | 2.31E+08 | - | 0      | 0      |
| ENSG0000(SLC8A1    | protein_co chr2  | 40097270 | 40611053 | - | 0.51   | 1.23   |
| ENSG0000(OR1G1     | protein_co chr17 | 3126584  | 3127581  | - | 0      | 0      |
| ENSG0000(SLC25A21  | protein_co chr14 | 36678431 | 37172866 | - | 0.36   | 0.55   |
| ENSG0000(OTOP2     | protein_co chr17 | 74924275 | 74933912 | + | 0      | 0      |
| ENSG0000(CYLC1     | protein_co chrX  | 83861126 | 83886699 | + | 0      | 0      |
| ENSG0000(PCP4      | protein_co chr21 | 39867317 | 39929397 | + | 0      | 0      |
| ENSG0000(ABAT      | protein_co chr16 | 8674565  | 8784575  | + | 2.11   | 2.24   |
| ENSG0000(SLC25A10  | protein_co chr17 | 81712236 | 81721016 | + | 3.27   | 3.3    |
| ENSG0000(CAMK1D    | protein_co chr10 | 12349482 | 12835545 | + | 0.63   | 0.56   |
| ENSG0000(RGPD6     | protein_co chr2  | 1.11E+08 | 1.11E+08 | - | 7.87   | 8.7    |
| ENSG0000(FAM133CP  | processed_chr10  | 58715554 | 58716257 | + | 0      | 0.11   |
| ENSG0000(LYSMD4    | protein_co chr15 | 99715697 | 99733561 | - | 2.66   | 4.09   |
| ENSG0000(WBP2NL    | protein_co chr22 | 41998725 | 42058456 | + | 0.03   | 0      |
| ENSG0000(IGSF5     | protein_co chr21 | 39745407 | 39802096 | + | 0      | 0      |
| ENSG0000(NKX2-5    | protein_co chr5  | 1.73E+08 | 1.73E+08 | - | 0      | 0      |
| ENSG0000(AFMID     | protein_co chr17 | 78187317 | 78207701 | + | 11.47  | 10.12  |
| ENSG0000(GAS6      | protein_co chr13 | 1.14E+08 | 1.14E+08 | - | 110.42 | 116.59 |
| ENSG0000(FREM3     | protein_co chr4  | 1.44E+08 | 1.44E+08 | - | 0      | 0      |
| ENSG0000(NEB       | protein_co chr2  | 1.51E+08 | 1.52E+08 | - | 0.12   | 0.03   |
| ENSG0000(BEGAIN    | protein_co chr14 | 1.01E+08 | 1.01E+08 | - | 0.01   | 0.02   |
| ENSG0000(GPC6      | protein_co chr13 | 93226842 | 94407401 | + | 49.67  | 45.36  |
| ENSG0000(ARHGEF37  | protein_co chr5  | 1.5E+08  | 1.5E+08  | + | 5.08   | 5.47   |
| ENSG0000(FAM43B    | protein_co chr1  | 20552439 | 20555010 | + | 0.02   | 0.05   |
| ENSG0000(CSMD1     | protein_co chr8  | 2935353  | 4994972  | - | 0      | 0      |
| ENSG0000(OR2A3P    | unprocessε chr7  | 1.44E+08 | 1.44E+08 | + | 0      | 0      |
| ENSG0000(CALHM3    | protein_co chr10 | 1.03E+08 | 1.03E+08 | - | 0      | 0      |
| ENSG0000(PTGDR2    | protein_co chr11 | 60850940 | 60855971 | - | 0.04   | 0.02   |
| ENSG0000(CEP57L1   | protein_co chr6  | 1.09E+08 | 1.09E+08 | + | 7.99   | 8.4    |
| ENSG0000(RIPPLY3   | protein_co chr21 | 37006150 | 37019659 | + | 0      | 0      |
| ENSG0000(PRORY     | protein_co chrY  | 21382954 | 21386360 | - | 0.07   | 0      |
| ENSG0000(ANKRD20A  | protein_co chr9  | 40223285 | 40266392 | + | 0      | 0.08   |
| ENSG0000(GPR19     | protein_co chr12 | 12660891 | 12696207 | - | 0.06   | 0.07   |
| ENSG0000(GJD3      | protein_co chr17 | 40362931 | 40363815 | - | 0.49   | 0.08   |
| ENSG0000(RP11-863K | antisense chr8   | 37734761 | 37737426 | - | 0.08   | 0.12   |

|                    |                   |          |          |   |        |        |
|--------------------|-------------------|----------|----------|---|--------|--------|
| ENSG0000(RABIF     | protein_co chr1   | 2.03E+08 | 2.03E+08 | - | 3.25   | 3.28   |
| ENSG0000(TMEM119   | protein_co chr12  | 1.09E+08 | 1.09E+08 | - | 16.3   | 21.26  |
| ENSG0000(FANCF     | protein_co chr11  | 22622519 | 22626787 | - | 1.81   | 1.38   |
| ENSG0000(CALN1     | protein_co chr7   | 71779491 | 72447151 | - | 0      | 0.01   |
| ENSG0000(POM121L1  | transcribed chr22 | 22639177 | 22644473 | - | 0.07   | 0.03   |
| ENSG0000(RP11-49C9 | processed_chrX    | 1.5E+08  | 1.5E+08  | + | 0.13   | 0.11   |
| ENSG0000(SMDT1     | protein_co chr22  | 42079691 | 42084284 | + | 29.06  | 28.89  |
| ENSG0000(GABRR3    | protein_co chr3   | 97986673 | 98035304 | - | 0      | 0      |
| ENSG0000(C2CD4C    | protein_co chr19  | 405438   | 409170   | - | 0      | 0      |
| ENSG0000(CHST6     | protein_co chr16  | 75472052 | 75495384 | - | 0.24   | 0.47   |
| ENSG0000(HSP90AB3  | processed_chr4    | 87891843 | 87894015 | + | 0.05   | 0      |
| ENSG0000(POTEC     | protein_co chr18  | 14507339 | 14543585 | - | 0.02   | 0.03   |
| ENSG0000(RUVBL2    | protein_co chr19  | 48993448 | 49015995 | + | 22.9   | 22.45  |
| ENSG0000(GDPGP1    | protein_co chr15  | 90233808 | 90245811 | + | 1.74   | 1.32   |
| ENSG0000(CTNNA3    | protein_co chr10  | 65912518 | 67696169 | - | 0      | 0      |
| ENSG0000(RP5-1120P | processed_chr6    | 44089242 | 44089696 | - | 0.35   | 0.19   |
| ENSG0000(WT1-AS    | antisense chr11   | 32435518 | 32458769 | + | 2.12   | 1.45   |
| ENSG0000(RIMBP3C   | protein_co chr22  | 21545357 | 21551461 | - | 0      | 0      |
| ENSG0000(PRR36     | protein_co chr19  | 7868719  | 7874379  | - | 0.28   | 0.11   |
| ENSG0000(NF1P3     | unprocessε chr21  | 14000927 | 14005279 | + | 0      | 0      |
| ENSG0000(LINC01547 | lincRNA chr21     | 44932814 | 44939913 | - | 2.12   | 0.9    |
| ENSG0000(OR51B4    | protein_co chr11  | 5301014  | 5301996  | - | 0      | 0      |
| ENSG0000(PTTG1IP   | protein_co chr21  | 44849585 | 44873903 | - | 161.18 | 146.49 |
| ENSG0000(DDX41     | protein_co chr5   | 1.78E+08 | 1.78E+08 | - | 46.35  | 37.02  |
| ENSG0000(ABHD16B   | protein_co chr20  | 63861498 | 63862988 | + | 0.04   | 0.04   |
| ENSG0000(OR52E8    | protein_co chr11  | 5856674  | 5857734  | - | 0      | 0      |
| ENSG0000(CCDC60    | protein_co chr12  | 1.19E+08 | 1.2E+08  | + | 0      | 0      |
| ENSG0000(PLGLB1    | protein_co chr2   | 87002559 | 87021852 | - | 1.07   | 0.96   |
| ENSG0000(DAZAP2    | protein_co chr12  | 51238292 | 51271362 | + | 158.12 | 154.6  |
| ENSG0000(CCBE1     | protein_co chr18  | 59430940 | 59697380 | - | 31.39  | 37.59  |
| ENSG0000(SELENOF   | protein_co chr1   | 86862445 | 86914424 | - | 111.66 | 103.35 |
| ENSG0000(TISP43    | protein_co chr2   | 1.31E+08 | 1.31E+08 | + | 0.29   | 0.2    |
| ENSG0000(RPSAP19   | processed_chr1    | 1.02E+08 | 1.02E+08 | - | 0      | 0      |
| ENSG0000(OR5P2     | protein_co chr11  | 7795905  | 7796973  | - | 0      | 0      |
| ENSG0000(FAM9A     | protein_co chrX   | 8790795  | 8801383  | - | 0      | 0      |
| ENSG0000(MAGEA2B   | protein_co chrX   | 1.53E+08 | 1.53E+08 | + | 0      | 0      |
| ENSG0000(CECR6     | protein_co chr22  | 17116299 | 17121367 | - | 0.04   | 0      |
| ENSG0000(AC005037. | antisense chr2    | 2.01E+08 | 2.01E+08 | + | 1.56   | 1.27   |
| ENSG0000(ZNF623    | protein_co chr8   | 1.44E+08 | 1.44E+08 | + | 5.32   | 7.19   |
| ENSG0000(OR2T34    | protein_co chr1   | 2.49E+08 | 2.49E+08 | - | 0      | 0      |
| ENSG0000(OR52L1    | protein_co chr11  | 5985892  | 5986985  | - | 0      | 0      |
| ENSG0000(EPHA10    | protein_co chr1   | 37713880 | 37765133 | - | 0.7    | 0.44   |
| ENSG0000(SPDYE4    | protein_co chr17  | 8753106  | 8758559  | - | 0      | 0      |
| ENSG0000(CCDC125   | protein_co chr5   | 69280175 | 69332809 | - | 1.79   | 1.83   |
| ENSG0000(REC114    | protein_co chr15  | 73443158 | 73560014 | + | 0      | 0      |



|                    |                   |          |          |   |       |       |
|--------------------|-------------------|----------|----------|---|-------|-------|
| ENSG0000(BOLA2     | protein_co chr16  | 29443056 | 29454964 | - | 2.28  | 3.7   |
| ENSG0000(BCOR      | protein_co chrX   | 40049815 | 40177329 | - | 4.64  | 5.87  |
| ENSG0000(JRKL      | protein_co chr11  | 96389989 | 96507574 | + | 5.33  | 4.48  |
| ENSG0000(C10orf107 | protein_co chr10  | 61662961 | 61766766 | + | 1.05  | 0.11  |
| ENSG0000(GBP6      | protein_co chr1   | 89364058 | 89386461 | + | 0.03  | 0.1   |
| ENSG0000(KIAA2026  | protein_co chr9   | 5881596  | 6007901  | - | 7.4   | 7.57  |
| ENSG0000(OVCH2     | protein_co chr11  | 7689438  | 7706421  | - | 0.03  | 0     |
| ENSG0000(SYNDIG1L  | protein_co chr14  | 74405893 | 74426102 | - | 0     | 0.02  |
| ENSG0000(TTTY8     | lincRNA chrY      | 9691100  | 9693957  | + | 0     | 0     |
| ENSG0000(FHL3      | protein_co chr1   | 37996770 | 38005606 | - | 25.13 | 29.42 |
| ENSG0000(OR56A4    | protein_co chr11  | 6001986  | 6003194  | - | 0     | 0     |
| ENSG0000(PMCH      | protein_co chr12  | 1.02E+08 | 1.02E+08 | - | 0     | 0.09  |
| ENSG0000(TMEM89    | protein_co chr3   | 48620759 | 48621855 | - | 0.1   | 0.11  |
| ENSG0000(C19orf71  | protein_co chr19  | 3539154  | 3544030  | + | 0     | 0     |
| ENSG0000(CCDC159   | protein_co chr19  | 11344684 | 11354944 | + | 9.56  | 10.95 |
| ENSG0000(RIPK4     | protein_co chr21  | 41739369 | 41767106 | - | 0.08  | 0.09  |
| ENSG0000(LRIT3     | protein_co chr4   | 1.1E+08  | 1.1E+08  | + | 0.02  | 0     |
| ENSG0000(NPIPA1    | protein_co chr16  | 14922802 | 14952060 | + | 44.49 | 46.97 |
| ENSG0000(SF3A3     | protein_co chr1   | 37956975 | 37990921 | - | 22.93 | 24.04 |
| ENSG0000(ZBTB8OSP  | processed_chr4    | 1.51E+08 | 1.51E+08 | + | 0     | 0     |
| ENSG0000(TFDP3     | protein_co chrX   | 1.33E+08 | 1.33E+08 | - | 0     | 0     |
| ENSG0000(TRIM61    | protein_co chr4   | 1.65E+08 | 1.65E+08 | - | 0.8   | 0.61  |
| ENSG0000(OR7E38P   | unprocessε chr7   | 97966090 | 97967074 | - | 7.51  | 5.59  |
| ENSG0000(GRIN2A    | protein_co chr16  | 9753404  | 10182754 | - | 0     | 0.05  |
| ENSG0000(RP11-958N | transcribec chr16 | 14911551 | 14935708 | + | 18.54 | 17.42 |
| ENSG0000(URAD      | protein_co chr13  | 27977714 | 27988654 | - | 0     | 0     |
| ENSG0000(FLJ40288  | lincRNA chr7      | 1.33E+08 | 1.33E+08 | + | 0     | 0     |
| ENSG0000(GTF2H2C   | protein_co chr5   | 69560208 | 69594723 | + | 10.12 | 9.16  |
| ENSG0000(ASB7      | protein_co chr15  | 1.01E+08 | 1.01E+08 | + | 4.26  | 4.68  |
| ENSG0000(SH2D7     | protein_co chr15  | 78077808 | 78104909 | + | 0     | 0     |
| ENSG0000(TREX2     | protein_co chrX   | 1.53E+08 | 1.53E+08 | - | 0.45  | 0.34  |
| ENSG0000(GPR132    | protein_co chr14  | 1.05E+08 | 1.05E+08 | - | 0.02  | 0.16  |
| ENSG0000(MX2       | protein_co chr21  | 41361943 | 41409390 | + | 2.87  | 1.91  |
| ENSG0000(EP400     | protein_co chr12  | 1.32E+08 | 1.32E+08 | + | 8.13  | 8.67  |
| ENSG0000(MEX3B     | protein_co chr15  | 82041778 | 82046141 | - | 5.44  | 5.93  |
| ENSG0000(PI4KAP2   | transcribec chr22 | 21473000 | 21517533 | - | 10.37 | 11.05 |
| ENSG0000(FAM46C    | protein_co chr1   | 1.18E+08 | 1.18E+08 | + | 0.32  | 0.44  |
| ENSG0000(COA5      | protein_co chr2   | 98599310 | 98608515 | - | 15.45 | 15.81 |
| ENSG0000(TDGF1P2   | processed_chr2    | 2.28E+08 | 2.28E+08 | - | 0     | 0     |
| ENSG0000(UTP11     | protein_co chr1   | 38009258 | 38024824 | + | 16.95 | 15.57 |
| ENSG0000(PSMG1     | protein_co chr21  | 39174769 | 39183851 | - | 21.28 | 21.77 |
| ENSG0000(PRR14L    | protein_co chr22  | 31676256 | 31750140 | - | 4.07  | 4.57  |
| ENSG0000(COL18A1-A | antisense chr21   | 45419716 | 45425070 | - | 0     | 0     |
| ENSG0000(KLRC4     | protein_co chr12  | 10407382 | 10409757 | - | 0     | 0     |
| ENSG0000(ACSM5     | protein_co chr16  | 20409534 | 20441336 | + | 0     | 0.35  |

|                    |               |       |          |          |   |        |       |
|--------------------|---------------|-------|----------|----------|---|--------|-------|
| ENSG0000(C10orf120 | protein_co    | chr10 | 1.23E+08 | 1.23E+08 | - | 0      | 0     |
| ENSG0000(IZUMO1R   | protein_co    | chr11 | 94305592 | 94307721 | + | 0      | 0     |
| ENSG0000(CTC-343N3 | antisense     | chr11 | 2989863  | 2991344  | + | 0      | 0     |
| ENSG0000(BPIFA4P   | transcribed   | chr20 | 33193585 | 33210462 | + | 0      | 0     |
| ENSG0000(SERHL2    | protein_co    | chr22 | 42553617 | 42574382 | + | 2.39   | 2.05  |
| ENSG0000(PCBP3     | protein_co    | chr21 | 45643694 | 45942454 | + | 0.61   | 1.03  |
| ENSG0000(PGPEP1L   | protein_co    | chr15 | 98968230 | 99007795 | - | 0      | 0     |
| ENSG0000(SETD3     | protein_co    | chr14 | 99397746 | 99480889 | - | 15.22  | 17.7  |
| ENSG0000(TNFAIP8L3 | protein_co    | chr15 | 51056598 | 51105276 | - | 13.08  | 12.49 |
| ENSG0000(ZNRF3     | protein_co    | chr22 | 28883592 | 29057487 | + | 2.42   | 1.69  |
| ENSG0000(FBXL7     | protein_co    | chr5  | 15500196 | 15939795 | + | 9.52   | 9.19  |
| ENSG0000(HMGN3P1   | processed_chr | 1     | 1.52E+08 | 1.52E+08 | + | 0      | 0     |
| ENSG0000(TANGO2    | protein_co    | chr22 | 20017014 | 20065926 | + | 11.02  | 12.2  |
| ENSG0000(HIST2H3D  | protein_co    | chr1  | 1.5E+08  | 1.5E+08  | - | 0.24   | 0     |
| ENSG0000(SMG1P5    | transcribed   | chr16 | 30267553 | 30335374 | - | 2.15   | 2.85  |
| ENSG0000(SFXN4     | protein_co    | chr10 | 1.19E+08 | 1.19E+08 | - | 6.67   | 6.6   |
| ENSG0000(GKN2      | protein_co    | chr2  | 68945232 | 68952970 | - | 0      | 0     |
| ENSG0000(FAM167B   | protein_co    | chr1  | 32247233 | 32248856 | + | 5.47   | 5.37  |
| ENSG0000(MRPL54    | protein_co    | chr19 | 3762664  | 3768575  | + | 23.25  | 25.24 |
| ENSG0000(ZNF438    | protein_co    | chr10 | 30820207 | 31031937 | - | 2.2    | 1.82  |
| ENSG0000(HMCES     | protein_co    | chr3  | 1.29E+08 | 1.29E+08 | + | 15.26  | 16.37 |
| ENSG0000(CCR3      | protein_co    | chr3  | 46163604 | 46266706 | + | 0      | 0.05  |
| ENSG0000(DGCR6     | protein_co    | chr22 | 18906028 | 18914238 | + | 0.32   | 0.33  |
| ENSG0000(GOLGA8G   | protein_co    | chr15 | 28519611 | 28533014 | - | 0.01   | 0.01  |
| ENSG0000(PRR32     | protein_co    | chrX  | 1.27E+08 | 1.27E+08 | + | 0      | 0     |
| ENSG0000(TP53TG3   | protein_co    | chr16 | 32673528 | 32676732 | - | 0      | 0     |
| ENSG0000(RP1L1     | protein_co    | chr8  | 10606349 | 10712187 | - | 0      | 0.01  |
| ENSG0000(KRTAP8-1  | protein_co    | chr21 | 30812697 | 30813252 | - | 0      | 0     |
| ENSG0000(C15orf32  | lincRNA       | chr15 | 92471654 | 92501117 | + | 0      | 0     |
| ENSG0000(C11orf88  | protein_co    | chr11 | 1.12E+08 | 1.12E+08 | + | 0.02   | 0     |
| ENSG0000(ZNF530    | protein_co    | chr19 | 57599885 | 57612722 | + | 1.36   | 1.67  |
| ENSG0000(NDUFB1    | protein_co    | chr14 | 92116122 | 92121917 | - | 104.62 | 93.57 |
| ENSG0000(11-Mar    | protein_co    | chr5  | 16067139 | 16180762 | - | 0      | 0     |
| ENSG0000(KLHL25    | protein_co    | chr15 | 85759323 | 85795030 | - | 0.87   | 1.57  |
| ENSG0000(FAM19A1   | protein_co    | chr3  | 68004216 | 68545625 | + | 0      | 0     |
| ENSG0000(RP11-44N1 | processed_chr | 8     | 96068729 | 96069681 | - | 0      | 0     |
| ENSG0000(TRMT12    | protein_co    | chr8  | 1.24E+08 | 1.24E+08 | + | 3.71   | 3.97  |
| ENSG0000(GUSBP1    | transcribed   | chr5  | 21341833 | 21589372 | + | 4.66   | 5.27  |
| ENSG0000(PSG9      | protein_co    | chr19 | 43211791 | 43269530 | - | 0.17   | 0.15  |
| ENSG0000(GPR1      | protein_co    | chr2  | 2.06E+08 | 2.06E+08 | - | 42.1   | 40.01 |
| ENSG0000(LINC00518 | lincRNA       | chr6  | 10429255 | 10434874 | - | 0      | 0     |
| ENSG0000(BMP8A     | protein_co    | chr1  | 39491646 | 39525935 | + | 0.03   | 0     |
| ENSG0000(ALYREF    | protein_co    | chr17 | 81887844 | 81891586 | - | 17.56  | 16.45 |
| ENSG0000(RFLNB     | protein_co    | chr17 | 439978   | 445939   | - | 2.02   | 2.35  |
| ENSG0000(EFHC2     | protein_co    | chrX  | 44147882 | 44343672 | - | 0.04   | 0.08  |

|                 |          |                  |          |          |   |       |       |
|-----------------|----------|------------------|----------|----------|---|-------|-------|
| ENSG00000108000 | NOG      | protein_co chr17 | 56593699 | 56595590 | + | 0     | 0     |
| ENSG00000108000 | MRGPRX2  | protein_co chr11 | 19054455 | 19060681 | - | 0     | 0     |
| ENSG00000108000 | UPP1     | protein_co chr7  | 48088628 | 48108733 | + | 5.03  | 8.76  |
| ENSG00000108000 | SLC9B1P1 | unprocessed chrY | 11340579 | 11385687 | - | 0     | 0     |
| ENSG00000108000 | OR4N4    | protein_co chr15 | 22094431 | 22095556 | + | 0     | 0     |
| ENSG00000108000 | IFNL2    | protein_co chr19 | 39268514 | 39270092 | + | 0     | 0     |
| ENSG00000108000 | OPCML    | protein_co chr11 | 1.32E+08 | 1.34E+08 | - | 0     | 0.01  |
| ENSG00000108000 | TRIM52   | protein_co chr5  | 1.81E+08 | 1.81E+08 | - | 5.36  | 5.1   |
| ENSG00000108000 | LHFP     | protein_co chr13 | 39342892 | 39603528 | - | 53.5  | 55.27 |
| ENSG00000108000 | CMTM4    | protein_co chr16 | 66614750 | 66696707 | - | 7.55  | 8.22  |
| ENSG00000108000 | TMEM50A  | protein_co chr1  | 25337917 | 25362361 | + | 94.42 | 91.42 |
| ENSG00000108000 | NPBWR1   | protein_co chr8  | 52938431 | 52941117 | + | 0     | 0     |
| ENSG00000108000 | FIGLA    | protein_co chr2  | 70777310 | 70790643 | - | 0     | 0     |
| ENSG00000108000 | ASCL2    | protein_co chr11 | 2268495  | 2270952  | - | 0.12  | 0.03  |
| ENSG00000108000 | TBK1     | protein_co chr12 | 64451880 | 64502108 | + | 9.46  | 9.33  |
| ENSG00000108000 | CBX6     | protein_co chr22 | 38861450 | 38872314 | - | 14.99 | 16.1  |
| ENSG00000108000 | MACC1    | protein_co chr7  | 20134655 | 20217404 | - | 0.09  | 0.08  |
| ENSG00000108000 | ACSM2A   | protein_co chr16 | 20451461 | 20487667 | + | 0     | 0     |
| ENSG00000108000 | TBL3     | protein_co chr16 | 1972037  | 1982933  | + | 9.07  | 10.08 |
| ENSG00000108000 | BPY2     | protein_co chrY  | 22973819 | 23005465 | + | 0     | 0     |
| ENSG00000108000 | ACP7     | protein_co chr19 | 39083913 | 39111493 | + | 0.02  | 0.1   |
| ENSG00000108000 | KREMEN1  | protein_co chr22 | 29073078 | 29168333 | + | 3.75  | 3.74  |
| ENSG00000108000 | TRAIIP   | protein_co chr3  | 49828599 | 49856574 | - | 1.53  | 0.71  |
| ENSG00000108000 | CHEK2    | protein_co chr22 | 28687743 | 28742422 | - | 10.09 | 10.43 |
| ENSG00000108000 | FOXL2    | protein_co chr3  | 1.39E+08 | 1.39E+08 | - | 0.13  | 0.16  |
| ENSG00000108000 | AIFM3    | protein_co chr22 | 20965108 | 20981360 | + | 0.24  | 0.23  |
| ENSG00000108000 | KCTD16   | protein_co chr5  | 1.44E+08 | 1.44E+08 | + | 0.78  | 1.15  |
| ENSG00000108000 | B3GALT5  | protein_co chr21 | 39556442 | 39673137 | + | 0     | 0     |
| ENSG00000108000 | ZNF703   | protein_co chr8  | 37695751 | 37700021 | + | 9.97  | 11.09 |
| ENSG00000108000 | SLC35F3  | protein_co chr1  | 2.34E+08 | 2.34E+08 | + | 0     | 0     |
| ENSG00000108000 | KCTD8    | protein_co chr4  | 44173909 | 44448807 | - | 2.28  | 3.02  |
| ENSG00000108000 | C9orf66  | protein_co chr9  | 212824   | 215741   | - | 0.09  | 0.02  |
| ENSG00000108000 | TUBA8    | protein_co chr22 | 18110331 | 18146554 | + | 0.64  | 0.29  |
| ENSG00000108000 | ELOA3    | protein_co chr18 | 47028202 | 47030078 | - | 0     | 0     |
| ENSG00000108000 | NPIPA5   | protein_co chr16 | 15363624 | 15381047 | - | 1.17  | 4.02  |
| ENSG00000108000 | BPY2B    | protein_co chrY  | 24607560 | 24639207 | + | 0     | 0     |
| ENSG00000108000 | EMILIN3  | protein_co chr20 | 41359966 | 41366827 | - | 0     | 0     |
| ENSG00000108000 | OLFML1   | protein_co chr11 | 7485388  | 7511377  | + | 3.3   | 4.2   |
| ENSG00000108000 | FAM162B  | protein_co chr6  | 1.17E+08 | 1.17E+08 | - | 0     | 0     |
| ENSG00000108000 | RBM12B   | protein_co chr8  | 93729356 | 93741017 | - | 5.17  | 5.87  |
| ENSG00000108000 | CCR4     | protein_co chr3  | 32951574 | 32956349 | + | 0.06  | 0     |
| ENSG00000108000 | LIN9     | protein_co chr1  | 2.26E+08 | 2.26E+08 | - | 0.83  | 1.02  |
| ENSG00000108000 | NCF4-AS1 | antisense chr22  | 36847372 | 36870441 | - | 0     | 0     |
| ENSG00000108000 | BTBD9    | protein_co chr6  | 38168451 | 38640148 | - | 3.82  | 3.85  |
| ENSG00000108000 | NUDT14   | protein_co chr14 | 1.05E+08 | 1.05E+08 | - | 16.18 | 16.58 |

|                     |                   |          |            |         |        |
|---------------------|-------------------|----------|------------|---------|--------|
| ENSG0000( ANKRD45   | protein_co chr1   | 1.74E+08 | 1.74E+08 - | 0.04    | 0      |
| ENSG0000( MAATS1    | protein_co chr3   | 1.2E+08  | 1.2E+08 +  | 0.18    | 0.23   |
| ENSG0000( PNMA3     | protein_co chrX   | 1.53E+08 | 1.53E+08 + | 0.04    | 0      |
| ENSG0000( GPR39     | protein_co chr2   | 1.32E+08 | 1.33E+08 + | 0.62    | 0.53   |
| ENSG0000( FAM3B     | protein_co chr21  | 41304212 | 41357431 + | 0       | 0      |
| ENSG0000( ZNF730    | protein_co chr19  | 23075210 | 23147219 + | 0.02    | 0      |
| ENSG0000( KIRREL    | protein_co chr1   | 1.58E+08 | 1.58E+08 + | 60.24   | 62.62  |
| ENSG0000( IQGAP3    | protein_co chr1   | 1.57E+08 | 1.57E+08 - | 0       | 0.14   |
| ENSG0000( CNGA2     | protein_co chrX   | 1.52E+08 | 1.52E+08 + | 0       | 0      |
| ENSG0000( TOB2      | protein_co chr22  | 41433492 | 41447023 - | 14.21   | 14.37  |
| ENSG0000( SCN5A     | protein_co chr3   | 38548057 | 38649673 - | 0.03    | 0.02   |
| ENSG0000( ARSI      | protein_co chr5   | 1.5E+08  | 1.5E+08 -  | 2.9     | 3.77   |
| ENSG0000( UTY       | protein_co chrY   | 13248379 | 13480673 - | 3.15    | 2.95   |
| ENSG0000( C1orf64   | protein_co chr1   | 16004236 | 16008807 + | 0       | 0      |
| ENSG0000( AC138969. | protein_co chr16  | 16317444 | 16350590 + | 79.86   | 115.83 |
| ENSG0000( TTC32     | protein_co chr2   | 19896643 | 19901986 - | 4.13    | 3.4    |
| ENSG0000( LRRC55    | protein_co chr11  | 57181747 | 57191717 + | 0       | 0      |
| ENSG0000( OR4G2P    | unprocessε chr15  | 1.02E+08 | 1.02E+08 - | 0       | 0      |
| ENSG0000( RPL21P132 | processed_ chrX   | 1.01E+08 | 1.01E+08 + | 0       | 0      |
| ENSG0000( DNAH2     | protein_co chr17  | 7717354  | 7833744 +  | 0.98    | 1.01   |
| ENSG0000( SH2D1A    | protein_co chrX   | 1.24E+08 | 1.24E+08 + | 0       | 0      |
| ENSG0000( SDR42E2   | protein_co chr16  | 22165583 | 22191754 + | 0       | 0.02   |
| ENSG0000( DUSP5P1   | processed_ chr1   | 2.29E+08 | 2.29E+08 + | 0.16    | 0.17   |
| ENSG0000( HTR7P1    | transcribec chr12 | 13000420 | 13004830 + | 3.4     | 2.82   |
| ENSG0000( TRBV21OR  | TR_V_gene chr9    | 33629121 | 33629586 + | 0       | 0      |
| ENSG0000( PRKX      | protein_co chrX   | 3604370  | 3713608 -  | 5.84    | 7.83   |
| ENSG0000( KMT5A     | protein_co chr12  | 1.23E+08 | 1.23E+08 + | 16.32   | 14.34  |
| ENSG0000( KCNH8     | protein_co chr3   | 19148454 | 19535646 + | 0       | 0      |
| ENSG0000( SMTN      | protein_co chr22  | 31064105 | 31104757 + | 6.28    | 6.75   |
| ENSG0000( NPW       | protein_co chr16  | 2009926  | 2020755 +  | 0.12    | 0.83   |
| ENSG0000( PP2D1     | protein_co chr3   | 19979961 | 20012330 - | 0       | 0      |
| ENSG0000( COA3      | protein_co chr17  | 42795147 | 42798704 - | 27.58   | 25.24  |
| ENSG0000( NPB       | protein_co chr17  | 81900745 | 81902905 + | 0.21    | 0.85   |
| ENSG0000( MAGEA13F  | processed_ chrX   | 1.38E+08 | 1.38E+08 + | 0       | 0      |
| ENSG0000( ST6GALNA  | protein_co chr1   | 76074719 | 76634601 + | 0       | 0.12   |
| ENSG0000( PTP4A2    | protein_co chr1   | 31906421 | 31944856 - | 157.97  | 165.92 |
| ENSG0000( ACTG1     | protein_co chr17  | 81509971 | 81523847 - | 2399.54 | 2562.1 |
| ENSG0000( TMPRSS2   | protein_co chr21  | 41464551 | 41531116 - | 0.03    | 0.04   |
| ENSG0000( DENND5A   | protein_co chr11  | 9138825  | 9265390 -  | 49      | 50.88  |
| ENSG0000( OR2T10    | protein_co chr1   | 2.49E+08 | 2.49E+08 - | 0       | 0      |
| ENSG0000( DSCR4     | protein_co chr21  | 37951425 | 38121360 - | 0       | 0      |
| ENSG0000( KRTAP20-2 | protein_co chr21  | 30635236 | 30635619 + | 0       | 0      |
| ENSG0000( CTAG1B    | protein_co chrX   | 1.55E+08 | 1.55E+08 - | 0       | 0      |
| ENSG0000( DIABLO    | protein_co chr12  | 1.22E+08 | 1.22E+08 - | 29.36   | 32.59  |
| ENSG0000( OR7E87P   | unprocessε chr11  | 71593454 | 71594382 + | 0       | 0      |

|                    |                  |          |          |   |        |        |
|--------------------|------------------|----------|----------|---|--------|--------|
| ENSG0000(VPS33B    | protein_co chr15 | 90998416 | 91022603 | - | 4.93   | 6.54   |
| ENSG0000(TBX1      | protein_co chr22 | 19756703 | 19783593 | + | 0      | 0.15   |
| ENSG0000(ADAP2     | protein_co chr17 | 30906344 | 30959322 | + | 0.55   | 0.58   |
| ENSG0000(RP5-821D1 | antisense chr22  | 41831215 | 41834665 | - | 0.09   | 0.24   |
| ENSG0000(UQCR10    | protein_co chr22 | 29767369 | 29770413 | + | 42.81  | 43.96  |
| ENSG0000(FAM120C   | protein_co chrX  | 54068324 | 54183281 | - | 2.27   | 2.39   |
| ENSG0000(CTD-2372A | processed_chr5   | 73803296 | 73803599 | - | 0      | 0      |
| ENSG0000(BRD7P2    | processed_chr3   | 1.6E+08  | 1.6E+08  | + | 0.07   | 0      |
| ENSG0000(TREML3P   | transcribed chr6 | 41208713 | 41217947 | - | 0.06   | 0      |
| ENSG0000(TRIML1    | protein_co chr4  | 1.88E+08 | 1.88E+08 | + | 0      | 0      |
| ENSG0000(EIF3C     | protein_co chr16 | 28688558 | 28735730 | + | 165.36 | 170.07 |
| ENSG0000(RPL11P4   | processed_chr10  | 92596852 | 92597287 | - | 0.18   | 0      |
| ENSG0000(CLDN5     | protein_co chr22 | 19523024 | 19527545 | - | 0      | 0      |
| ENSG0000(RP13-1039 | transcribed chr2 | 1.1E+08  | 1.1E+08  | - | 0.35   | 0.53   |
| ENSG0000(NIPSNAP1  | protein_co chr22 | 29554808 | 29581337 | - | 20.47  | 20.16  |
| ENSG0000(RPL7AP28  | processed_chr4   | 1.32E+08 | 1.32E+08 | - | 0      | 0.14   |
| ENSG0000(OR4F6     | protein_co chr15 | 1.02E+08 | 1.02E+08 | + | 0      | 0      |
| ENSG0000(CNTN2     | protein_co chr1  | 2.05E+08 | 2.05E+08 | + | 0.1    | 0.04   |
| ENSG0000(SPRR4     | protein_co chr1  | 1.53E+08 | 1.53E+08 | + | 0      | 0      |
| ENSG0000(LRTOMT    | protein_co chr11 | 72080331 | 72110782 | + | 8.31   | 6.28   |
| ENSG0000(OR10J5    | protein_co chr1  | 1.6E+08  | 1.6E+08  | - | 0      | 0      |
| ENSG0000(KCNQ3     | protein_co chr8  | 1.32E+08 | 1.32E+08 | - | 0.02   | 0      |
| ENSG0000(ADRA2C    | protein_co chr4  | 3766348  | 3768526  | + | 0.04   | 0      |
| ENSG0000(NR2C2AP   | protein_co chr19 | 19201416 | 19203424 | - | 4.59   | 4.86   |
| ENSG0000(C1QTNF12  | protein_co chr1  | 1242446  | 1246722  | - | 0.67   | 0.5    |
| ENSG0000(CRELD2    | protein_co chr22 | 49918167 | 49927540 | + | 25.5   | 24.35  |
| ENSG0000(OR1D2     | protein_co chr17 | 3092058  | 3092996  | - | 0      | 0      |
| ENSG0000(SCFD2     | protein_co chr4  | 52872982 | 53366075 | - | 5.22   | 4.32   |
| ENSG0000(UBE2F     | protein_co chr2  | 2.38E+08 | 2.38E+08 | + | 39.72  | 41.99  |
| ENSG0000(KCNJ12    | protein_co chr17 | 21376197 | 21419872 | + | 0.33   | 0.19   |
| ENSG0000(CTC-512J1 | processed_chr5   | 80299678 | 80302847 | - | 0      | 0      |
| ENSG0000(GPR173    | protein_co chrX  | 53049091 | 53080615 | + | 4.02   | 3.76   |
| ENSG0000(PPP1R2    | protein_co chr3  | 1.96E+08 | 1.96E+08 | - | 11.85  | 13.12  |
| ENSG0000(TSPYL2    | protein_co chrX  | 53082367 | 53088540 | + | 8.25   | 8.47   |
| ENSG0000(GOLGA6L4  | protein_co chr15 | 84235773 | 84245368 | + | 1.45   | 1.75   |
| ENSG0000(PGP       | protein_co chr16 | 2211997  | 2214807  | - | 2.74   | 3.32   |
| ENSG0000(C22orf46  | protein_co chr22 | 41688939 | 41698136 | + | 7.83   | 7.48   |
| ENSG0000(SNRNP35   | protein_co chr12 | 1.23E+08 | 1.23E+08 | + | 6.3    | 4.63   |
| ENSG0000(DGAT2L6   | protein_co chrX  | 70177483 | 70205545 | + | 0      | 0      |
| ENSG0000(IRAK1     | protein_co chrX  | 1.54E+08 | 1.54E+08 | - | 54.5   | 60.83  |
| ENSG0000(CMSS1     | protein_co chr3  | 99817834 | 1E+08    | + | 6.74   | 4.08   |
| ENSG0000(OLIG1     | protein_co chr21 | 33070144 | 33072420 | + | 0      | 0      |
| ENSG0000(C11orf72  | lincRNA chr11    | 67602880 | 67606706 | - | 1.03   | 1.5    |
| ENSG0000(PCDH9     | protein_co chr13 | 66302834 | 67230445 | - | 0.59   | 0.73   |
| ENSG0000(ACOT1     | protein_co chr14 | 73537114 | 73543794 | + | 4.28   | 5.6    |

|                    |                   |          |            |        |        |
|--------------------|-------------------|----------|------------|--------|--------|
| ENSG0000(OAF       | protein_co chr11  | 1.2E+08  | 1.2E+08 +  | 29.11  | 27.6   |
| ENSG0000(ALDH1A3   | protein_co chr15  | 1.01E+08 | 1.01E+08 + | 61.66  | 56.4   |
| ENSG0000(CDR1      | protein_co chrX   | 1.41E+08 | 1.41E+08 - | 0      | 0      |
| ENSG0000(HIST2H2AC | protein_co chr1   | 1.5E+08  | 1.5E+08 +  | 0      | 0.25   |
| ENSG0000(KCNK12    | protein_co chr2   | 47516581 | 47570939 - | 0      | 0.01   |
| ENSG0000(HIST2H2AB | protein_co chr1   | 1.5E+08  | 1.5E+08 -  | 0      | 0      |
| ENSG0000(POU6F1    | protein_co chr12  | 51186936 | 51217708 - | 3.72   | 5.89   |
| ENSG0000(LINC00315 | lincRNA chr21     | 45300245 | 45305257 - | 0      | 0      |
| ENSG0000(DEFB108B  | protein_co chr11  | 71833200 | 71837710 + | 0      | 0      |
| ENSG0000(TM2D3     | protein_co chr15  | 1.02E+08 | 1.02E+08 - | 22.02  | 19.25  |
| ENSG0000(TSSC4     | protein_co chr11  | 2400488  | 2403878 +  | 14.39  | 16.17  |
| ENSG0000(TACSTD2   | protein_co chr1   | 58575423 | 58577773 - | 0.02   | 0.08   |
| ENSG0000(CLECL1    | protein_co chr12  | 9715860  | 9733299 -  | 0      | 0      |
| ENSG0000(SIX6      | protein_co chr14  | 60508951 | 60512850 + | 0      | 0      |
| ENSG0000(DRD5P1    | processed_chr2    | 91684447 | 91685884 - | 0      | 0      |
| ENSG0000(PRKD1     | protein_co chr14  | 29576479 | 30191898 - | 4.4    | 4.93   |
| ENSG0000(CCSER1    | protein_co chr4   | 90127535 | 91601913 + | 0      | 0      |
| ENSG0000(ZDHHC23   | protein_co chr3   | 1.14E+08 | 1.14E+08 + | 2.12   | 1.58   |
| ENSG0000(MROH7     | protein_co chr1   | 54641754 | 54710266 + | 0.59   | 0.62   |
| ENSG0000(RPL23AP82 | transcribed chr22 | 50756948 | 50801309 + | 33.16  | 31.71  |
| ENSG0000(OR51J1    | protein_co chr11  | 5402597  | 5403547 +  | 0      | 0      |
| ENSG0000(S100A7A   | protein_co chr1   | 1.53E+08 | 1.53E+08 + | 0      | 0      |
| ENSG0000(SRPK3     | protein_co chrX   | 1.54E+08 | 1.54E+08 + | 0      | 0      |
| ENSG0000(GDF3      | protein_co chr12  | 7689782  | 7695776 -  | 0      | 0      |
| ENSG0000(IQCF2     | protein_co chr3   | 51861629 | 51863424 + | 0      | 0      |
| ENSG0000(SLIT3     | protein_co chr5   | 1.69E+08 | 1.69E+08 - | 123.26 | 119.51 |
| ENSG0000(EFNA5     | protein_co chr5   | 1.07E+08 | 1.08E+08 - | 0.77   | 0.7    |
| ENSG0000(MRGPRES   | protein_co chr11  | 3227698  | 3232386 -  | 0      | 0.05   |
| ENSG0000(KRTAP19-1 | protein_co chr21  | 30479699 | 30480344 - | 0      | 0      |
| ENSG0000(HIST1H1B  | protein_co chr6   | 27866849 | 27867529 - | 0      | 0      |
| ENSG0000(SPATA32   | protein_co chr17  | 45254393 | 45262112 - | 0      | 0      |
| ENSG0000(PKP3      | protein_co chr11  | 392614   | 404908 +   | 0.99   | 0.54   |
| ENSG0000(MAP7D2    | protein_co chrX   | 20006713 | 20116917 - | 0.02   | 0      |
| ENSG0000(CSF1      | protein_co chr1   | 1.1E+08  | 1.1E+08 +  | 41.95  | 42.27  |
| ENSG0000(COLEC10   | protein_co chr8   | 1.19E+08 | 1.19E+08 + | 0      | 0.05   |
| ENSG0000(ACTRT3    | protein_co chr3   | 1.7E+08  | 1.7E+08 -  | 1.31   | 1.16   |
| ENSG0000(PLA2G6    | protein_co chr22  | 38111495 | 38205690 - | 11.3   | 12.53  |
| ENSG0000(MAML2     | protein_co chr11  | 95976598 | 96343180 - | 9.15   | 10.95  |
| ENSG0000(UMODL1-A  | sense_ovei chr21  | 42102134 | 42108534 - | 0      | 0      |
| ENSG0000(PABPC1L2E | protein_co chrX   | 73003517 | 73005713 + | 0      | 0      |
| ENSG0000(A3GALT2   | protein_co chr1   | 33306766 | 33321098 - | 0      | 0      |
| ENSG0000(OR4N5     | protein_co chr14  | 20143736 | 20144662 + | 0      | 0      |
| ENSG0000(SS18L1    | protein_co chr20  | 62143795 | 62182484 + | 5.29   | 4.29   |
| ENSG0000(KCND2     | protein_co chr7   | 1.2E+08  | 1.21E+08 + | 2.66   | 2.24   |
| ENSG0000(IRS3P     | processed_chr7    | 1.01E+08 | 1.01E+08 + | 1.7    | 0.94   |

|                     |                  |          |          |   |       |       |
|---------------------|------------------|----------|----------|---|-------|-------|
| ENSG0000(RPL23AP38) | processed_chr3   | 1595777  | 1596245  | - | 0     | 0     |
| ENSG0000(TOP1MT)    | protein_co chr8  | 1.43E+08 | 1.43E+08 | - | 6.58  | 6.32  |
| ENSG0000(COPB2)     | protein_co chr3  | 1.39E+08 | 1.39E+08 | - | 68.12 | 67.45 |
| ENSG0000(LRRC19)    | protein_co chr9  | 26993136 | 27005693 | - | 0     | 0.02  |
| ENSG0000(THAP7)     | protein_co chr22 | 20999104 | 21002196 | - | 12.8  | 13.46 |
| ENSG0000(AP001062)  | antisense chr21  | 44331234 | 44335851 | + | 1.77  | 1.53  |
| ENSG0000(KNTC1)     | protein_co chr12 | 1.23E+08 | 1.23E+08 | + | 1.59  | 1.37  |
| ENSG0000(CCR10)     | protein_co chr17 | 42678889 | 42683917 | - | 2.26  | 1.89  |
| ENSG0000(NCMAP)     | protein_co chr1  | 24556111 | 24609328 | + | 0     | 0.03  |
| ENSG0000(BPIFC)     | protein_co chr22 | 32413847 | 32464484 | - | 0     | 0     |
| ENSG0000(WDR27)     | protein_co chr6  | 1.69E+08 | 1.7E+08  | - | 14.17 | 12.9  |
| ENSG0000(TXNRD2)    | protein_co chr22 | 19875517 | 19941992 | - | 10.26 | 10.51 |
| ENSG0000(C1QTNF8)   | protein_co chr16 | 1090005  | 1096244  | - | 0     | 0     |
| ENSG0000(OR56A3)    | protein_co chr11 | 5947340  | 5948361  | + | 0     | 0     |
| ENSG0000(FOXO4)     | protein_co chrX  | 71096197 | 71103535 | + | 8.97  | 8.23  |
| ENSG0000(POU3F2)    | protein_co chr6  | 98834592 | 98839470 | + | 0.01  | 0     |
| ENSG0000(PTP4A3)    | protein_co chr8  | 1.41E+08 | 1.41E+08 | + | 0.81  | 0.89  |
| ENSG0000(FOXD4L1)   | protein_co chr2  | 1.13E+08 | 1.14E+08 | + | 0     | 0.07  |
| ENSG0000(TMEM255)   | protein_co chr13 | 1.14E+08 | 1.14E+08 | + | 0.26  | 1.75  |
| ENSG0000(PROS1)     | protein_co chr3  | 93873033 | 93974066 | - | 42.13 | 41.52 |
| ENSG0000(GAST)      | protein_co chr17 | 41712326 | 41715969 | + | 0     | 0     |
| ENSG0000(NUTM1)     | protein_co chr15 | 34343315 | 34357737 | + | 0     | 0     |
| ENSG0000(HDDC3)     | protein_co chr15 | 90929964 | 90932569 | - | 5.71  | 5.47  |
| ENSG0000(BEX5)      | protein_co chrX  | 1.02E+08 | 1.02E+08 | - | 0     | 0.24  |
| ENSG0000(ZFP1)      | protein_co chr16 | 75148492 | 75172236 | + | 4.22  | 3.48  |
| ENSG0000(PTGER4P2)  | processed_chr9   | 62843919 | 62844170 | + | 0     | 0     |
| ENSG0000(CEND1)     | protein_co chr11 | 787104   | 790123   | - | 0.45  | 0.38  |
| ENSG0000(C6orf58)   | protein_co chr6  | 1.28E+08 | 1.28E+08 | + | 0.15  | 0.29  |
| ENSG0000(DHR57C)    | protein_co chr17 | 9771434  | 9791297  | - | 0     | 0     |
| ENSG0000(DUSP8)     | protein_co chr11 | 1554044  | 1571920  | - | 0.32  | 0.24  |
| ENSG0000(SOCS3)     | protein_co chr17 | 78356778 | 78360077 | - | 15.78 | 14.36 |
| ENSG0000(C17orf74)  | protein_co chr17 | 7425615  | 7427568  | + | 0     | 0     |
| ENSG0000(SLITRK6)   | protein_co chr13 | 85792790 | 85799488 | - | 0     | 0     |
| ENSG0000(RP13-786C) | antisense chr11  | 33880643 | 33881800 | + | 0     | 0     |
| ENSG0000(PIWIL3)    | protein_co chr22 | 24719034 | 24774720 | - | 0     | 0     |
| ENSG0000(LPAR5)     | protein_co chr12 | 6618835  | 6636447  | - | 0     | 0     |
| ENSG0000(XPOT)      | protein_co chr12 | 64404350 | 64451127 | + | 70.01 | 71.16 |
| ENSG0000(TMEM173)   | protein_co chr5  | 1.39E+08 | 1.39E+08 | - | 38.82 | 34.95 |
| ENSG0000(PDE4B)     | protein_co chr1  | 65792514 | 66374579 | + | 3.45  | 4.31  |
| ENSG0000(FAM19A3)   | protein_co chr1  | 1.13E+08 | 1.13E+08 | + | 0.23  | 0.44  |
| ENSG0000(C14orf180) | protein_co chr14 | 1.05E+08 | 1.05E+08 | + | 0     | 0     |
| ENSG0000(SNN)       | protein_co chr16 | 11668414 | 11679159 | + | 9.55  | 9.45  |
| ENSG0000(FAM167A-)  | antisense chr8   | 11368402 | 11438658 | + | 0     | 0     |
| ENSG0000(KCNH7)     | protein_co chr2  | 1.62E+08 | 1.63E+08 | - | 0     | 0     |
| ENSG0000(RPL7P26)   | processed_chr6   | 17530899 | 17531652 | - | 0.09  | 0     |

|                    |                   |          |          |   |       |       |
|--------------------|-------------------|----------|----------|---|-------|-------|
| ENSG0000(NELL2     | protein_co chr12  | 44508275 | 44921848 | - | 0     | 0.02  |
| ENSG0000(SPDYE12P  | unprocessε chr7   | 74906673 | 74913256 | - | 0     | 0     |
| ENSG0000(ZNF840P   | unprocessε chr20  | 46484461 | 46492640 | + | 0     | 0     |
| ENSG0000(KRBA2     | protein_co chr17  | 8368637  | 8376711  | - | 1.48  | 1.71  |
| ENSG0000(ZNF72P    | unprocessε chr22  | 15326037 | 15343065 | - | 0     | 0     |
| ENSG0000(MED12     | protein_co chrX   | 71118556 | 71142454 | + | 11.43 | 10.89 |
| ENSG0000(ZNF93     | protein_co chr19  | 19900913 | 19935575 | + | 1.12  | 1.06  |
| ENSG0000( 9-Sep    | protein_co chr17  | 77280569 | 77500596 | + | 85.84 | 90.35 |
| ENSG0000(PRSS55    | protein_co chr8   | 10525546 | 10554166 | + | 0     | 0     |
| ENSG0000(ODF4      | protein_co chr17  | 8339864  | 8346048  | + | 0     | 0     |
| ENSG0000(FOXD4L4   | protein_co chr9   | 65736555 | 65738784 | + | 0     | 0.05  |
| ENSG0000(CDCA2     | protein_co chr8   | 25458997 | 25507920 | + | 0.13  | 0.33  |
| ENSG0000(OR7E14P   | transcribec chr11 | 17013998 | 17053024 | + | 0     | 0     |
| ENSG0000(RALYL     | protein_co chr8   | 84182787 | 84921844 | + | 0     | 0     |
| ENSG0000(AMER1     | protein_co chrX   | 64185117 | 64205744 | - | 1.13  | 1.31  |
| ENSG0000(ZBTB40    | protein_co chr1   | 22451851 | 22531157 | + | 5.85  | 6.42  |
| ENSG0000(HIST2H2BE | protein_co chr1   | 1.5E+08  | 1.5E+08  | - | 2.05  | 2.09  |
| ENSG0000(CLDN6     | protein_co chr16  | 3014712  | 3020071  | - | 0.06  | 0     |
| ENSG0000(OR51M1    | protein_co chr11  | 5389399  | 5390379  | + | 0     | 0     |
| ENSG0000( 5-Sep    | protein_co chr22  | 19714464 | 19724772 | + | 6.54  | 5.84  |
| ENSG0000(EIF4ENIF1 | protein_co chr22  | 31436977 | 31496108 | - | 7.5   | 6.79  |
| ENSG0000(LRRC26    | protein_co chr9   | 1.37E+08 | 1.37E+08 | - | 0     | 0     |
| ENSG0000(SERINC4   | protein_co chr15  | 43794162 | 43800221 | - | 0     | 0.04  |
| ENSG0000(RNLS      | protein_co chr10  | 88273864 | 88584530 | - | 6.98  | 8.85  |
| ENSG0000(KRTAP6-1  | protein_co chr21  | 30613431 | 30613930 | - | 0     | 0     |
| ENSG0000(APOBR     | protein_co chr16  | 28494649 | 28498970 | + | 0.16  | 0.05  |
| ENSG0000(FAM110C   | protein_co chr2   | 38814    | 46870    | - | 0.16  | 0.18  |
| ENSG0000(DDX53     | protein_co chrX   | 22999961 | 23003589 | + | 0     | 0.02  |
| ENSG0000(OR5AQ1P   | unprocessε chr11  | 56054364 | 56055299 | + | 0     | 0     |
| ENSG0000(ATL3      | protein_co chr11  | 63624087 | 63671921 | - | 18.1  | 17.18 |
| ENSG0000(NDUFA12   | protein_co chr12  | 94897055 | 95003770 | - | 34.95 | 41.15 |
| ENSG0000(AC013269. | protein_co chr2   | 1.31E+08 | 1.31E+08 | - | 0     | 0     |
| ENSG0000(MGAT4EP   | transcribec chr1  | 2.03E+08 | 2.03E+08 | + | 0     | 0     |
| ENSG0000(SMIM10    | protein_co chrX   | 1.35E+08 | 1.35E+08 | + | 5.21  | 5     |
| ENSG0000(TCTE3     | protein_co chr6   | 1.7E+08  | 1.7E+08  | - | 0.67  | 0.94  |
| ENSG0000(UBE2G2    | protein_co chr21  | 44768580 | 44802019 | - | 32.51 | 29.21 |
| ENSG0000(SATL1     | protein_co chrX   | 85092287 | 85109048 | - | 0     | 0     |
| ENSG0000(OR4C10P   | unprocessε chr11  | 48432217 | 48433147 | - | 0     | 0     |
| ENSG0000(OSBP2     | protein_co chr22  | 30693782 | 30907824 | + | 0.64  | 0.85  |
| ENSG0000(UNC93B5   | unprocessε chr11  | 67711702 | 67716005 | - | 0     | 0     |
| ENSG0000(B3GALT5-A | antisense chr21   | 39597147 | 39612821 | - | 0     | 0     |
| ENSG0000(TUSC5     | protein_co chr17  | 1279663  | 1300987  | + | 0     | 0     |
| ENSG0000(PRR23B    | protein_co chr3   | 1.39E+08 | 1.39E+08 | - | 0     | 0     |
| ENSG0000(ZBTB7C    | protein_co chr18  | 48026673 | 48410752 | - | 0.03  | 0.22  |
| ENSG0000(APOO      | protein_co chrX   | 23833353 | 23907934 | - | 5.84  | 6.09  |



|                 |           |             |       |          |          |   |        |        |
|-----------------|-----------|-------------|-------|----------|----------|---|--------|--------|
| ENSG00000100000 | PRR16     | protein_co  | chr5  | 1.2E+08  | 1.21E+08 | + | 10.38  | 9.83   |
| ENSG00000100000 | TMED9     | protein_co  | chr5  | 1.78E+08 | 1.78E+08 | + | 210.11 | 207.16 |
| ENSG00000100000 | CYCSP45   | processed   | chrX  | 1.54E+08 | 1.54E+08 | + | 0      | 0      |
| ENSG00000100000 | DRD1      | protein_co  | chr5  | 1.75E+08 | 1.75E+08 | - | 0      | 0      |
| ENSG00000100000 | LINC00308 | lincRNA     | chr21 | 22098617 | 22116528 | + | 0      | 0      |
| ENSG00000100000 | TMEM186   | protein_co  | chr16 | 8780384  | 8797648  | - | 4.42   | 4.07   |
| ENSG00000100000 | SDR42E1   | protein_co  | chr16 | 81988855 | 82011488 | - | 0.15   | 0.27   |
| ENSG00000100000 | RBM33     | protein_co  | chr7  | 1.56E+08 | 1.56E+08 | + | 8.99   | 9.68   |
| ENSG00000100000 | ARMCX2    | protein_co  | chrX  | 1.02E+08 | 1.02E+08 | - | 31.24  | 30.88  |
| ENSG00000100000 | BTBD6     | protein_co  | chr14 | 1.05E+08 | 1.05E+08 | + | 17.54  | 18.32  |
| ENSG00000100000 | SRY       | protein_co  | chrY  | 2786855  | 2787699  | - | 0      | 0      |
| ENSG00000100000 | H1FX      | protein_co  | chr3  | 1.29E+08 | 1.29E+08 | - | 33.63  | 33.44  |
| ENSG00000100000 | RBM43     | protein_co  | chr2  | 1.51E+08 | 1.51E+08 | - | 7.34   | 6.99   |
| ENSG00000100000 | SUMO3     | protein_co  | chr21 | 44805617 | 44818779 | - | 39.17  | 36.95  |
| ENSG00000100000 | IMMP2L    | protein_co  | chr7  | 1.11E+08 | 1.12E+08 | - | 9.35   | 6.79   |
| ENSG00000100000 | TCEAL2    | protein_co  | chrX  | 1.02E+08 | 1.02E+08 | + | 0.05   | 0.06   |
| ENSG00000100000 | AC129778  | transcribed | chr9  | 40497850 | 40566779 | + | 0.15   | 0      |
| ENSG00000100000 | CLCNKB    | protein_co  | chr1  | 16043736 | 16057308 | + | 0.07   | 0.06   |
| ENSG00000100000 | DMRTC1B   | protein_co  | chrX  | 72777009 | 72848802 | + | 0      | 0      |
| ENSG00000100000 | JAG2      | protein_co  | chr14 | 1.05E+08 | 1.05E+08 | - | 1.39   | 1.03   |
| ENSG00000100000 | FMNL1     | protein_co  | chr17 | 45221444 | 45247320 | + | 15.59  | 13.29  |
| ENSG00000100000 | NUTM2A    | protein_co  | chr10 | 87225448 | 87236908 | + | 1.16   | 1.72   |
| ENSG00000100000 | PTRHD1    | protein_co  | chr2  | 24789734 | 24793382 | - | 9.85   | 8.47   |
| ENSG00000100000 | LCN12     | protein_co  | chr9  | 1.37E+08 | 1.37E+08 | + | 0      | 0.2    |
| ENSG00000100000 | OR6A2     | protein_co  | chr11 | 6794627  | 6795783  | - | 0      | 0      |
| ENSG00000100000 | WT1       | protein_co  | chr11 | 32387775 | 32435630 | - | 4.24   | 4.53   |
| ENSG00000100000 | ZFP90     | protein_co  | chr16 | 68530090 | 68576072 | + | 8.43   | 7.48   |
| ENSG00000100000 | AQP12A    | protein_co  | chr2  | 2.41E+08 | 2.41E+08 | + | 0      | 0      |
| ENSG00000100000 | FAM227A   | protein_co  | chr22 | 38578120 | 38656629 | - | 0.56   | 0.58   |
| ENSG00000100000 | OR6C70    | protein_co  | chr12 | 55469200 | 55470138 | - | 0      | 0      |
| ENSG00000100000 | MUC6      | protein_co  | chr11 | 1012821  | 1036706  | - | 0      | 0      |
| ENSG00000100000 | RPL7AP49  | processed   | chr9  | 39983821 | 39984401 | - | 0      | 0      |
| ENSG00000100000 | NOC4L     | protein_co  | chr12 | 1.32E+08 | 1.32E+08 | + | 6.4    | 7.62   |
| ENSG00000100000 | USP18     | protein_co  | chr22 | 18149899 | 18177397 | + | 1.64   | 1.43   |
| ENSG00000100000 | NDUFA6    | protein_co  | chr22 | 42085525 | 42090955 | - | 30.11  | 32.85  |
| ENSG00000100000 | CHRM5     | protein_co  | chr15 | 33968720 | 34067457 | + | 0.2    | 0.04   |
| ENSG00000100000 | SORCS2    | protein_co  | chr4  | 7192538  | 7742836  | + | 2.36   | 2.64   |
| ENSG00000100000 | TMEM121   | protein_co  | chr14 | 1.06E+08 | 1.06E+08 | + | 3.35   | 2.68   |
| ENSG00000100000 | TMEM106A  | protein_co  | chr17 | 43211835 | 43220041 | + | 1.83   | 0.93   |
| ENSG00000100000 | SIVA1     | protein_co  | chr14 | 1.05E+08 | 1.05E+08 | + | 35.72  | 37.69  |
| ENSG00000100000 | TTY13     | lincRNA     | chrY  | 21583600 | 21594666 | - | 0      | 0      |
| ENSG00000100000 | BRI3BP    | protein_co  | chr12 | 1.25E+08 | 1.25E+08 | + | 0.79   | 0.87   |
| ENSG00000100000 | IFNE      | protein_co  | chr9  | 21480839 | 21482313 | - | 1.48   | 1.5    |
| ENSG00000100000 | SLC22A10  | protein_co  | chr11 | 63137867 | 63369718 | + | 0      | 0      |
| ENSG00000100000 | DGAT1     | protein_co  | chr8  | 1.44E+08 | 1.44E+08 | - | 11.2   | 13.35  |

|                    |                  |          |          |   |        |        |
|--------------------|------------------|----------|----------|---|--------|--------|
| ENSG0000(RFX6      | protein_co chr6  | 1.17E+08 | 1.17E+08 | + | 0      | 0      |
| ENSG0000(ROBO2     | protein_co chr3  | 75906695 | 77649964 | + | 0      | 0      |
| ENSG0000(AP3M1     | protein_co chr10 | 74120255 | 74151063 | - | 13.46  | 11.9   |
| ENSG0000(F8        | protein_co chrX  | 1.55E+08 | 1.55E+08 | - | 4.03   | 4.2    |
| ENSG0000(NT5C1B    | protein_co chr2  | 18562872 | 18589572 | - | 0      | 0      |
| ENSG0000(CA13      | protein_co chr8  | 85220587 | 85284073 | + | 0.48   | 0.65   |
| ENSG0000(UBOX5     | protein_co chr20 | 3107573  | 3160196  | - | 2.17   | 1.94   |
| ENSG0000(MAFF      | protein_co chr22 | 38200767 | 38216511 | + | 6.92   | 8.53   |
| ENSG0000(BRF1      | protein_co chr14 | 1.05E+08 | 1.05E+08 | - | 10.14  | 11.21  |
| ENSG0000(LRRC14B   | protein_co chr5  | 191511   | 195353   | + | 0      | 0      |
| ENSG0000(SLC2A3P2  | processed_chr1   | 64984608 | 64986087 | - | 0.04   | 0      |
| ENSG0000(SEMA4B    | protein_co chr15 | 90160604 | 90229679 | + | 14.63  | 14.32  |
| ENSG0000(ZNF733P   | transcribed_chr7 | 63291518 | 63304056 | - | 0      | 0      |
| ENSG0000(MROH2A    | protein_co chr2  | 2.34E+08 | 2.34E+08 | + | 0.01   | 0.11   |
| ENSG0000(SPDYE16   | protein_co chr7  | 76531319 | 76541459 | - | 0.16   | 0.09   |
| ENSG0000(CIB1      | protein_co chr15 | 90229975 | 90234047 | - | 40.91  | 41.75  |
| ENSG0000(ANKS1B    | protein_co chr12 | 98726457 | 99984654 | - | 0.29   | 0      |
| ENSG0000(NELFA     | protein_co chr4  | 1982714  | 2041903  | - | 8.42   | 7.73   |
| ENSG0000(SLC24A3   | protein_co chr20 | 19212646 | 19722937 | + | 0.12   | 0.05   |
| ENSG0000(SGCZ      | protein_co chr8  | 14089864 | 15238339 | - | 0      | 0      |
| ENSG0000(EFCAB10   | protein_co chr7  | 1.06E+08 | 1.06E+08 | - | 0      | 0      |
| ENSG0000(C5orf47   | protein_co chr5  | 1.74E+08 | 1.74E+08 | + | 0.02   | 0      |
| ENSG0000(AC000068. | antisense_chr22  | 19447893 | 19450105 | + | 0.16   | 0.09   |
| ENSG0000(KRT76     | protein_co chr12 | 52768155 | 52777345 | - | 0      | 0      |
| ENSG0000(FLRT2     | protein_co chr14 | 85530144 | 85654426 | + | 14.97  | 12.68  |
| ENSG0000(OR7E31P   | unprocessed_chr9 | 90216039 | 90216924 | + | 0      | 0      |
| ENSG0000(AC093698. | processed_chr2   | 2.08E+08 | 2.08E+08 | - | 0      | 0      |
| ENSG0000(INTS5     | protein_co chr11 | 62646848 | 62653302 | - | 7.62   | 6.64   |
| ENSG0000(RPS27L    | protein_co chr15 | 63125872 | 63158021 | - | 221.24 | 223.95 |
| ENSG0000(MANEAL    | protein_co chr1  | 37793802 | 37801137 | + | 0.26   | 0.24   |
| ENSG0000(ADSSL1    | protein_co chr14 | 1.05E+08 | 1.05E+08 | + | 2.02   | 1.72   |
| ENSG0000(ANO9      | protein_co chr11 | 417933   | 442011   | - | 0.02   | 0.03   |
| ENSG0000(FAF1      | protein_co chr1  | 50437028 | 50960263 | - | 17.19  | 15.8   |
| ENSG0000(MYADML2   | protein_co chr17 | 81939645 | 81947233 | - | 0      | 0      |
| ENSG0000(FAM43A    | protein_co chr3  | 1.95E+08 | 1.95E+08 | + | 5.78   | 6.62   |
| ENSG0000(NSMCE3    | protein_co chr15 | 29264992 | 29269829 | - | 3.41   | 3.76   |
| ENSG0000(HSF1      | protein_co chr8  | 1.44E+08 | 1.44E+08 | + | 21.87  | 21.96  |
| ENSG0000(C6orf120  | protein_co chr6  | 1.7E+08  | 1.7E+08  | + | 12.21  | 13.32  |
| ENSG0000(PURA      | protein_co chr5  | 1.4E+08  | 1.4E+08  | + | 5.59   | 6.09   |
| ENSG0000(HIST1H2BL | protein_co chr6  | 27807444 | 27807931 | - | 0.16   | 0      |
| ENSG0000(INPP5J    | protein_co chr22 | 31122731 | 31134696 | + | 0.2    | 0.2    |
| ENSG0000(NPY2R     | protein_co chr4  | 1.55E+08 | 1.55E+08 | + | 0      | 0      |
| ENSG0000(MIXL1     | protein_co chr1  | 2.26E+08 | 2.26E+08 | + | 0      | 0      |
| ENSG0000(MFSD6L    | protein_co chr17 | 8797162  | 8799349  | - | 0      | 0      |
| ENSG0000(LRRC37B   | protein_co chr17 | 32007872 | 32053504 | + | 4.92   | 6.08   |

|                     |                   |          |            |        |        |
|---------------------|-------------------|----------|------------|--------|--------|
| ENSG0000( DDX51     | protein_co chr12  | 1.32E+08 | 1.32E+08 - | 5.96   | 5.52   |
| ENSG0000( NOMO2     | protein_co chr16  | 18417325 | 18562211 - | 60.15  | 38.04  |
| ENSG0000( LINC00482 | lincRNA chr17     | 81303771 | 81309248 - | 0      | 0      |
| ENSG0000( AQP12B    | protein_co chr2   | 2.41E+08 | 2.41E+08 - | 0      | 0      |
| ENSG0000( ZNF479    | protein_co chr7   | 57119614 | 57139864 - | 0      | 0      |
| ENSG0000( GOLGA8DP  | transcribec chr15 | 22427039 | 22437902 - | 0      | 0      |
| ENSG0000( LINC00313 | lincRNA chr21     | 43462094 | 43479534 - | 0.18   | 0.14   |
| ENSG0000( SIGIRR    | protein_co chr11  | 405716   | 417455 -   | 21.52  | 19.47  |
| ENSG0000( NRBP2     | protein_co chr8   | 1.44E+08 | 1.44E+08 - | 17.19  | 17.86  |
| ENSG0000( PRSS57    | protein_co chr19  | 685546   | 695498 -   | 0      | 0      |
| ENSG0000( IFITM2    | protein_co chr11  | 307631   | 315272 +   | 478.83 | 499.51 |
| ENSG0000( WASIR1    | antisense chrX    | 1.56E+08 | 1.56E+08 - | 0      | 0      |
| ENSG0000( WASIR1    | antisense chrY    | 57201143 | 57203357 - | 0      | 0      |
| ENSG0000( TNFAIP2   | protein_co chr14  | 1.03E+08 | 1.03E+08 + | 38.85  | 28.36  |
| ENSG0000( ZNF445    | protein_co chr3   | 44431720 | 44477670 - | 2.69   | 3.28   |
| ENSG0000( PGBD2     | protein_co chr1   | 2.49E+08 | 2.49E+08 + | 1.32   | 1.78   |
| ENSG0000( GAPDHP24  | processed_chr1    | 2.15E+08 | 2.15E+08 + | 0      | 0      |
| ENSG0000( TCEAL9    | protein_co chrX   | 1.03E+08 | 1.03E+08 + | 82.77  | 82.19  |
| ENSG0000( MC2R      | protein_co chr18  | 13882044 | 13915707 - | 0      | 0.02   |
| ENSG0000( RAB11B    | protein_co chr19  | 8389981  | 8404434 +  | 36.78  | 37.08  |
| ENSG0000( PRMT3     | protein_co chr11  | 20387530 | 20509294 + | 4.86   | 6.23   |
| ENSG0000( GP1BA     | protein_co chr17  | 4932297  | 4935030 +  | 0      | 0      |
| ENSG0000( PRPF39    | protein_co chr14  | 45084099 | 45116282 + | 13.31  | 13.94  |
| ENSG0000( MAGEA11   | protein_co chrX   | 1.5E+08  | 1.5E+08 +  | 0      | 0      |
| ENSG0000( PPIL6     | protein_co chr6   | 1.09E+08 | 1.09E+08 - | 1.6    | 1.2    |
| ENSG0000( ZNF74     | protein_co chr22  | 20394115 | 20408461 + | 3.3    | 3.53   |
| ENSG0000( KIAA0825  | protein_co chr5   | 94152966 | 94618597 - | 0.51   | 0.47   |
| ENSG0000( UBALD2    | protein_co chr17  | 76265202 | 76271299 + | 15.16  | 13.37  |
| ENSG0000( TEX33     | protein_co chr22  | 36991120 | 37007841 - | 0      | 0      |
| ENSG0000( CDNF      | protein_co chr10  | 14819250 | 14838575 - | 1.75   | 0.88   |
| ENSG0000( NOTUM     | protein_co chr17  | 81952507 | 81961840 - | 0.06   | 0      |
| ENSG0000( KLHL33    | protein_co chr14  | 20425870 | 20435811 - | 0.37   | 0.21   |
| ENSG0000( RBM11     | protein_co chr21  | 14216130 | 14228372 + | 0.1    | 0      |
| ENSG0000( WBSCR17   | protein_co chr7   | 71132169 | 71713600 + | 0      | 0      |
| ENSG0000( CD24P4    | processed_chrY    | 18992467 | 18992709 - | 0      | 0.64   |
| ENSG0000( ZBTB37    | protein_co chr1   | 1.74E+08 | 1.74E+08 + | 1.13   | 1.17   |
| ENSG0000( NUPR2     | protein_co chr7   | 56114681 | 56116400 - | 0      | 0      |
| ENSG0000( IL3RA     | protein_co chrX   | 1336616  | 1382689 +  | 0      | 0      |
| ENSG0000( IL3RA     | protein_co chrY   | 1336616  | 1382689 +  | 0      | 0      |
| ENSG0000( SPPL2C    | protein_co chr17  | 45844835 | 45847072 + | 0      | 0      |
| ENSG0000( CTD-2139B | processed_chr5    | 17306381 | 17306960 + | 0      | 0      |
| ENSG0000( CCDC137   | protein_co chr17  | 81666364 | 81673904 + | 6.91   | 7.1    |
| ENSG0000( SFTPA2    | protein_co chr10  | 79555852 | 79560402 - | 0.03   | 0      |
| ENSG0000( RGPD2     | protein_co chr2   | 87755955 | 87825952 - | 0.72   | 0.71   |
| ENSG0000( ARL15     | protein_co chr5   | 53883945 | 54310582 - | 6.46   | 5.09   |

|                    |                  |          |          |   |       |       |
|--------------------|------------------|----------|----------|---|-------|-------|
| ENSG0000(C12orf56  | protein_co chr12 | 64264762 | 64391192 | - | 0     | 0     |
| ENSG0000(SCN10A    | protein_co chr3  | 38696802 | 38794010 | - | 0     | 0     |
| ENSG0000(SSXP4     | unprocessε chrX  | 52598494 | 52603289 | + | 0     | 0     |
| ENSG0000(CDK10     | protein_co chr16 | 89680737 | 89696364 | + | 21.34 | 32.12 |
| ENSG0000(TMEM105   | protein_co chr17 | 81311270 | 81330674 | - | 0.03  | 0.14  |
| ENSG0000(SOCS1     | protein_co chr16 | 11254405 | 11256179 | - | 2.74  | 2.12  |
| ENSG0000(TCN2      | protein_co chr22 | 30606838 | 30627278 | + | 10.01 | 11.47 |
| ENSG0000(GAS2L1    | protein_co chr22 | 29306582 | 29312785 | + | 8.72  | 9.41  |
| ENSG0000(ATP6V0A2  | protein_co chr12 | 1.24E+08 | 1.24E+08 | + | 6.71  | 6.27  |
| ENSG0000(PARK2     | protein_co chr6  | 1.61E+08 | 1.63E+08 | - | 1.1   | 0.62  |
| ENSG0000(C14orf80  | protein_co chr14 | 1.05E+08 | 1.05E+08 | + | 2.42  | 2.45  |
| ENSG0000(HS6ST3    | protein_co chr13 | 96090839 | 96839562 | + | 0.37  | 0.37  |
| ENSG0000(HGS       | protein_co chr17 | 81683326 | 81703138 | + | 35.53 | 41.94 |
| ENSG0000(TNFAIP8L1 | protein_co chr19 | 4639518  | 4655568  | + | 1.77  | 2.29  |
| ENSG0000(OR2V1     | protein_co chr5  | 1.81E+08 | 1.81E+08 | - | 0     | 0     |
| ENSG0000(RAD51D    | protein_co chr17 | 35092208 | 35121522 | - | 7.63  | 8.32  |
| ENSG0000(OR7A17    | protein_co chr19 | 14880426 | 14881452 | - | 0     | 0     |
| ENSG0000(MAPK11    | protein_co chr22 | 50263713 | 50270767 | - | 6.95  | 7.89  |
| ENSG0000(FGF7P2    | unprocessε chr21 | 13349265 | 13350648 | + | 0     | 0     |
| ENSG0000(SP140L    | protein_co chr2  | 2.3E+08  | 2.3E+08  | + | 6.39  | 6.09  |
| ENSG0000(MRPL30    | protein_co chr2  | 99181079 | 99197626 | + | 9.76  | 9     |
| ENSG0000(TARSL2    | protein_co chr15 | 1.02E+08 | 1.02E+08 | - | 2.96  | 4.12  |
| ENSG0000(SMYD3     | protein_co chr1  | 2.46E+08 | 2.47E+08 | - | 10.42 | 15.14 |
| ENSG0000(METTL7A   | protein_co chr12 | 50923472 | 50932517 | + | 11.19 | 17.94 |
| ENSG0000(LINC00158 | lincRNA chr21    | 25385820 | 25431701 | - | 0     | 0     |
| ENSG0000(IFNLR1    | protein_co chr1  | 24154157 | 24187959 | - | 0.57  | 0.69  |
| ENSG0000(SH3BGR    | protein_co chr21 | 39445855 | 39515506 | + | 2.85  | 2.1   |
| ENSG0000(FAM174B   | protein_co chr15 | 92617443 | 92809884 | - | 0.67  | 0.64  |
| ENSG0000(FAM47A    | protein_co chrX  | 34129756 | 34132314 | - | 0     | 0     |
| ENSG0000(C19orf68  | protein_co chr19 | 48170692 | 48197620 | + | 3.76  | 3.62  |
| ENSG0000(KPNA7     | protein_co chr7  | 99173574 | 99207506 | - | 0     | 0     |
| ENSG0000(TMEM179t  | protein_co chr11 | 62787415 | 62790405 | + | 50.3  | 49.62 |
| ENSG0000(GPRIN3    | protein_co chr4  | 89236386 | 89308010 | - | 0.03  | 0.02  |
| ENSG0000(KRT6B     | protein_co chr12 | 52446651 | 52452126 | - | 0     | 0     |
| ENSG0000(PARBP     | protein_co chr12 | 1.02E+08 | 1.02E+08 | + | 1.02  | 0.93  |
| ENSG0000(STAC3     | protein_co chr12 | 57243453 | 57251193 | - | 0.11  | 0.4   |
| ENSG0000(ROR1      | protein_co chr1  | 63774022 | 64181498 | + | 3.38  | 3.71  |
| ENSG0000(SDHAP1    | transcribec chr3 | 1.96E+08 | 1.96E+08 | - | 11.59 | 12.75 |
| ENSG0000(RP11-504P | transcribec chr1 | 2.24E+08 | 2.24E+08 | + | 1.02  | 1     |
| ENSG0000(MUC1      | protein_co chr1  | 1.55E+08 | 1.55E+08 | - | 20.62 | 18.55 |
| ENSG0000(FAAP100   | protein_co chr17 | 81539885 | 81553961 | - | 11.53 | 14.01 |
| ENSG0000(IRF7      | protein_co chr11 | 612553   | 615999   | - | 9.99  | 7.95  |
| ENSG0000(L3MBTL1   | protein_co chr20 | 43507680 | 43550950 | + | 2.35  | 3.74  |
| ENSG0000(BRCC3     | protein_co chrX  | 1.55E+08 | 1.55E+08 | + | 7.81  | 8.82  |
| ENSG0000(SV2B      | protein_co chr15 | 91099950 | 91301309 | + | 0.27  | 0.03  |

|                    |                   |          |          |   |         |        |
|--------------------|-------------------|----------|----------|---|---------|--------|
| ENSG0000(FAM131C   | protein_co chr1   | 16057769 | 16073632 | - | 0.1     | 0.15   |
| ENSG0000(LMNTD2    | protein_co chr11  | 554855   | 560779   | - | 0.55    | 1.19   |
| ENSG0000(SPATA45   | protein_co chr1   | 2.13E+08 | 2.13E+08 | - | 0       | 0      |
| ENSG0000(PDE6G     | protein_co chr17  | 81650459 | 81663112 | - | 0.17    | 0.19   |
| ENSG0000(PRKG1     | protein_co chr10  | 50991358 | 52298350 | + | 11.09   | 10.7   |
| ENSG0000(NR2F2     | protein_co chr15  | 96325938 | 96340263 | + | 19.17   | 20.9   |
| ENSG0000(DLK1      | protein_co chr14  | 1.01E+08 | 1.01E+08 | + | 0       | 0      |
| ENSG0000(TLCD2     | protein_co chr17  | 1702790  | 1710438  | - | 2.16    | 2.53   |
| ENSG0000(LSAMP     | protein_co chr3   | 1.16E+08 | 1.17E+08 | - | 0.59    | 0.27   |
| ENSG0000(AHNAK2    | protein_co chr14  | 1.05E+08 | 1.05E+08 | - | 75.19   | 77.12  |
| ENSG0000(OLFML2A   | protein_co chr9   | 1.25E+08 | 1.25E+08 | + | 1.5     | 1.56   |
| ENSG0000(SP1       | protein_co chr12  | 53380176 | 53416446 | + | 27.55   | 26.14  |
| ENSG0000(SPATA8    | protein_co chr15  | 96783389 | 96785615 | + | 0       | 0      |
| ENSG0000(WASH3P    | transcribed chr15 | 1.02E+08 | 1.02E+08 | + | 20.14   | 18.19  |
| ENSG0000(ACTBP7    | processed_chr15   | 43989061 | 43990184 | - | 0       | 0      |
| ENSG0000(MRPL40    | protein_co chr22  | 19431902 | 19436075 | + | 18.42   | 19.63  |
| ENSG0000(DBX2      | protein_co chr12  | 45014672 | 45051099 | - | 0       | 0      |
| ENSG0000(FAM212A   | protein_co chr3   | 49803254 | 49805030 | + | 3.32    | 2.18   |
| ENSG0000(PDIA2     | protein_co chr16  | 283152   | 287215   | + | 0.1     | 0.69   |
| ENSG0000(PCGF3     | protein_co chr4   | 705748   | 770640   | + | 18.59   | 19.65  |
| ENSG0000(LMLN      | protein_co chr3   | 1.98E+08 | 1.98E+08 | + | 3.78    | 3.81   |
| ENSG0000(P4HB      | protein_co chr17  | 81843159 | 81860694 | - | 1048.19 | 949.72 |
| ENSG0000(PSMD13    | protein_co chr11  | 236546   | 252984   | + | 47.14   | 46.95  |
| ENSG0000(PBX1      | protein_co chr1   | 1.65E+08 | 1.65E+08 | + | 45.85   | 46.05  |
| ENSG0000(AC017079. | processed_chr2    | 1.28E+08 | 1.28E+08 | + | 0       | 0      |
| ENSG0000(NDUFA4L2  | protein_co chr12  | 57234903 | 57240715 | - | 39.98   | 32.37  |
| ENSG0000(SHC4      | protein_co chr15  | 48823735 | 48963444 | - | 1.07    | 1.9    |
| ENSG0000(FTH1P14   | processed_chrX    | 34147036 | 34147586 | + | 0       | 0      |
| ENSG0000(KRT79     | protein_co chr12  | 52821410 | 52834295 | - | 0.03    | 0      |
| ENSG0000(CTD-2287C | processed_chr5    | 1.16E+08 | 1.16E+08 | - | 0       | 0      |
| ENSG0000(ZFP36L1   | protein_co chr14  | 68787660 | 68796253 | - | 104.59  | 119.5  |
| ENSG0000(UBE2L3    | protein_co chr22  | 21549447 | 21624034 | + | 20.04   | 21.44  |
| ENSG0000(NTF3      | protein_co chr12  | 5432112  | 5521536  | + | 0.06    | 0.19   |
| ENSG0000(BRWD1     | protein_co chr21  | 39184176 | 39321559 | - | 5.51    | 6.61   |
| ENSG0000(SMIM23    | protein_co chr5   | 1.72E+08 | 1.72E+08 | + | 0       | 0      |
| ENSG0000(PMEL      | protein_co chr12  | 55954105 | 55973317 | - | 1.26    | 1      |
| ENSG0000(SYN3      | protein_co chr22  | 32512552 | 33058372 | - | 0       | 0      |
| ENSG0000(POU3F1    | protein_co chr1   | 38044611 | 38046794 | - | 0.08    | 0      |
| ENSG0000(SNAI3     | protein_co chr16  | 88677682 | 88686493 | - | 0.1     | 0      |
| ENSG0000(ZBTB3     | protein_co chr11  | 62748319 | 62754188 | - | 1.32    | 1.09   |
| ENSG0000(LYG2      | protein_co chr2   | 99242246 | 99255282 | - | 0       | 0      |
| ENSG0000(MORN5     | protein_co chr9   | 1.22E+08 | 1.22E+08 | + | 0.26    | 0      |
| ENSG0000(EP400NL   | protein_co chr12  | 1.32E+08 | 1.32E+08 | + | 3.62    | 3.25   |
| ENSG0000(PRAME     | protein_co chr22  | 22547701 | 22559361 | - | 0       | 0      |
| ENSG0000(C6orf201  | protein_co chr6   | 4079209  | 4130951  | + | 0       | 0      |

|                 |           |             |       |          |          |   |        |        |
|-----------------|-----------|-------------|-------|----------|----------|---|--------|--------|
| ENSG00000100000 | MYBL1     | protein_co  | chr8  | 66562175 | 66614247 | - | 0.24   | 0.2    |
| ENSG00000100000 | TTY8B     | lincRNA     | chrY  | 6470773  | 6473630  | - | 0      | 0      |
| ENSG00000100000 | OR5M5P    | unprocessed | chr11 | 56526568 | 56527503 | - | 0      | 0      |
| ENSG00000100000 | SMG1P4    | transcribed | chr16 | 21879338 | 21919156 | - | 3.28   | 4.16   |
| ENSG00000100000 | C16orf52  | protein_co  | chr16 | 22007638 | 22087534 | + | 5.74   | 6.1    |
| ENSG00000100000 | DRG1      | protein_co  | chr22 | 31399523 | 31530634 | + | 21.86  | 21.73  |
| ENSG00000100000 | ANKFY1    | protein_co  | chr17 | 4163907  | 4263977  | - | 16.08  | 18.27  |
| ENSG00000100000 | YTHDF3    | protein_co  | chr8  | 63168553 | 63212786 | + | 29.76  | 30.26  |
| ENSG00000100000 | ZNF696    | protein_co  | chr8  | 1.43E+08 | 1.43E+08 | + | 2.43   | 1.78   |
| ENSG00000100000 | ADARB2    | protein_co  | chr10 | 1177318  | 1737476  | - | 0.1    | 0      |
| ENSG00000100000 | NRG3      | protein_co  | chr10 | 81875314 | 82987179 | + | 0      | 0      |
| ENSG00000100000 | SRL       | protein_co  | chr16 | 4189374  | 4242080  | - | 0      | 0.03   |
| ENSG00000100000 | C11orf87  | protein_co  | chr11 | 1.09E+08 | 1.09E+08 | + | 0.25   | 0.12   |
| ENSG00000100000 | IFIT1     | protein_co  | chr10 | 89392546 | 89406486 | + | 19.06  | 19.42  |
| ENSG00000100000 | CXorf38   | protein_co  | chrX  | 40626921 | 40647554 | - | 2.36   | 3.14   |
| ENSG00000100000 | CLDN24    | protein_co  | chr4  | 1.83E+08 | 1.83E+08 | - | 0      | 0      |
| ENSG00000100000 | KCNQ5     | protein_co  | chr6  | 72621792 | 73198851 | + | 0.12   | 0.3    |
| ENSG00000100000 | ADAMTSL5  | protein_co  | chr19 | 1505018  | 1513604  | - | 6.07   | 6.1    |
| ENSG00000100000 | KCNIP4    | protein_co  | chr4  | 20728616 | 21948799 | - | 0      | 0      |
| ENSG00000100000 | SPATA31A  | protein_co  | chr9  | 42183659 | 42189882 | + | 0      | 0      |
| ENSG00000100000 | MORF4L1   | protein_co  | chr15 | 78810487 | 78898133 | + | 252.59 | 246.45 |
| ENSG00000100000 | NLRP9     | protein_co  | chr19 | 55708432 | 55738402 | - | 0      | 0      |
| ENSG00000100000 | WDR53     | protein_co  | chr3  | 1.97E+08 | 1.97E+08 | - | 4.3    | 2.45   |
| ENSG00000100000 | DMWD      | protein_co  | chr19 | 45782947 | 45792802 | - | 16.75  | 19.29  |
| ENSG00000100000 | SLC52A2   | protein_co  | chr8  | 1.44E+08 | 1.44E+08 | + | 19.34  | 20.18  |
| ENSG00000100000 | PIGP      | protein_co  | chr21 | 37059170 | 37073170 | - | 13.07  | 15.63  |
| ENSG00000100000 | IKZF1     | protein_co  | chr7  | 50304124 | 50405101 | + | 0      | 0      |
| ENSG00000100000 | PCYT2     | protein_co  | chr17 | 81900965 | 81911464 | - | 14.78  | 16.02  |
| ENSG00000100000 | NAT8L     | protein_co  | chr4  | 2059512  | 2069089  | + | 0.03   | 0.03   |
| ENSG00000100000 | OR6C76    | protein_co  | chr12 | 55426254 | 55427192 | + | 0      | 0      |
| ENSG00000100000 | NPAP1     | protein_co  | chr15 | 24675868 | 24683393 | + | 0.03   | 0      |
| ENSG00000100000 | BCAP31    | protein_co  | chrX  | 1.54E+08 | 1.54E+08 | - | 77.74  | 75.89  |
| ENSG00000100000 | ARL17A    | protein_co  | chr17 | 46516702 | 46579682 | - | 7.5    | 8.02   |
| ENSG00000100000 | RPL12P4   | processed   | chr20 | 55074644 | 55075140 | + | 0      | 0.19   |
| ENSG00000100000 | CECR5-AS1 | antisense   | chr22 | 17159384 | 17165445 | + | 0.39   | 0.12   |
| ENSG00000100000 | GNB1L     | protein_co  | chr22 | 19783224 | 19854939 | - | 1.53   | 1.42   |
| ENSG00000100000 | RP4-592A1 | processed   | chr1  | 58630841 | 58631530 | - | 0      | 0      |
| ENSG00000100000 | DNAH14    | protein_co  | chr1  | 2.25E+08 | 2.25E+08 | + | 3.62   | 2.42   |
| ENSG00000100000 | LINC01405 | lincRNA     | chr12 | 1.11E+08 | 1.11E+08 | + | 0      | 0      |
| ENSG00000100000 | CCDC190   | protein_co  | chr1  | 1.63E+08 | 1.63E+08 | - | 0.14   | 0.18   |
| ENSG00000100000 | EVI2B     | protein_co  | chr17 | 31303766 | 31314112 | - | 17.18  | 18.48  |
| ENSG00000100000 | TMEM210   | protein_co  | chr9  | 1.37E+08 | 1.37E+08 | - | 0      | 0      |
| ENSG00000100000 | NPIP4     | protein_co  | chr16 | 21834569 | 21880827 | - | 13.8   | 14.65  |
| ENSG00000100000 | ZNF829    | protein_co  | chr19 | 36888124 | 36916291 | - | 1.1    | 1.51   |
| ENSG00000100000 | TMPRSS11  | protein_co  | chr4  | 68226653 | 68245720 | - | 0.02   | 0      |

|                     |                  |          |          |   |        |        |
|---------------------|------------------|----------|----------|---|--------|--------|
| ENSG0000( THNSL1    | protein_co chr10 | 25016658 | 25026664 | + | 1.16   | 1.79   |
| ENSG0000( TRIM69    | protein_co chr15 | 44728988 | 44767829 | + | 10.25  | 10.8   |
| ENSG0000( ATP6VOC   | protein_co chr16 | 2513870  | 2520218  | + | 102.65 | 100.76 |
| ENSG0000( IFITM1    | protein_co chr11 | 313506   | 315272   | + | 146.57 | 113.62 |
| ENSG0000( PRSS38    | protein_co chr1  | 2.28E+08 | 2.28E+08 | + | 0      | 0      |
| ENSG0000( BPY2C     | protein_co chrY  | 25030901 | 25062548 | - | 0      | 0      |
| ENSG0000( LAMP1     | protein_co chr13 | 1.13E+08 | 1.13E+08 | + | 327.15 | 324.53 |
| ENSG0000( FFAR3     | protein_co chr19 | 35358460 | 35360485 | + | 0      | 0      |
| ENSG0000( TAS2R60   | protein_co chr7  | 1.43E+08 | 1.43E+08 | + | 0      | 0      |
| ENSG0000( POMK      | protein_co chr8  | 43093506 | 43123434 | + | 1.89   | 1.94   |
| ENSG0000( OR11N1P   | processed_chrX   | 1.31E+08 | 1.31E+08 | - | 0      | 0      |
| ENSG0000( LINC00839 | lincRNA chr10    | 42475543 | 42495336 | + | 0.97   | 1.48   |
| ENSG0000( C16orf54  | protein_co chr16 | 29742463 | 29746006 | - | 0      | 0      |
| ENSG0000( KLHDC8B   | protein_co chr3  | 49171611 | 49176486 | + | 58.11  | 65.4   |
| ENSG0000( KLHL34    | protein_co chrX  | 21654690 | 21658330 | - | 0      | 0      |
| ENSG0000( SETD4     | protein_co chr21 | 36034541 | 36079389 | - | 7.63   | 7.83   |
| ENSG0000( PTCH1     | protein_co chr9  | 95442980 | 95517057 | - | 4.75   | 2.15   |
| ENSG0000( RTN4RL1   | protein_co chr17 | 1934677  | 2025345  | - | 0.04   | 0      |
| ENSG0000( OR4C46    | protein_co chr11 | 54603069 | 54603998 | - | 0      | 0      |
| ENSG0000( CALHM1    | protein_co chr10 | 1.03E+08 | 1.03E+08 | - | 0      | 0.02   |
| ENSG0000( KRTAP5-5  | protein_co chr11 | 1629775  | 1630707  | + | 0      | 0      |
| ENSG0000( NKAIN3    | protein_co chr8  | 62248591 | 62999652 | + | 0      | 0      |
| ENSG0000( RNPC3     | protein_co chr1  | 1.04E+08 | 1.04E+08 | + | 7.59   | 7.71   |
| ENSG0000( ZNF267    | protein_co chr16 | 31873758 | 31917357 | + | 2.35   | 1.86   |
| ENSG0000( IRS2      | protein_co chr13 | 1.1E+08  | 1.1E+08  | - | 3.99   | 4.21   |
| ENSG0000( C7orf61   | protein_co chr7  | 1E+08    | 1E+08    | - | 0.59   | 0.3    |
| ENSG0000( FAM186A   | protein_co chr12 | 50326230 | 50396622 | - | 0      | 0      |
| ENSG0000( SHOX      | protein_co chrX  | 624344   | 659411   | + | 0.03   | 0.05   |
| ENSG0000( SHOX      | protein_co chrY  | 624344   | 659411   | + | 0.03   | 0.05   |
| ENSG0000( LCE3A     | protein_co chr1  | 1.53E+08 | 1.53E+08 | - | 0      | 0      |
| ENSG0000( BICD2     | protein_co chr9  | 92711363 | 92764812 | - | 9.13   | 8.94   |
| ENSG0000( LCE3E     | protein_co chr1  | 1.53E+08 | 1.53E+08 | - | 0      | 0      |
| ENSG0000( CCIN      | protein_co chr9  | 36169394 | 36171334 | + | 0.2    | 0.47   |
| ENSG0000( TMLHE     | protein_co chrX  | 1.55E+08 | 1.56E+08 | - | 5.75   | 5.89   |
| ENSG0000( GRK1      | protein_co chr13 | 1.14E+08 | 1.14E+08 | + | 0      | 0      |
| ENSG0000( DEFB128   | protein_co chr20 | 187853   | 189681   | - | 0      | 0      |
| ENSG0000( SLITRK2   | protein_co chrX  | 1.46E+08 | 1.46E+08 | + | 0.02   | 0      |
| ENSG0000( SDHAP3    | transcribec chr5 | 1572222  | 1594620  | - | 2.39   | 2.39   |
| ENSG0000( PLK5      | protein_co chr19 | 1524074  | 1535456  | + | 0.37   | 0.71   |
| ENSG0000( RASA3     | protein_co chr13 | 1.14E+08 | 1.14E+08 | - | 10.76  | 11.37  |
| ENSG0000( LRCH3     | protein_co chr3  | 1.98E+08 | 1.98E+08 | + | 15.89  | 14.93  |
| ENSG0000( LEMD1     | protein_co chr1  | 2.05E+08 | 2.05E+08 | - | 0      | 0      |
| ENSG0000( RPS4XP21  | processed_chr19  | 34092561 | 34093310 | - | 0      | 0      |
| ENSG0000( ATP4B     | protein_co chr13 | 1.14E+08 | 1.14E+08 | - | 0      | 0      |
| ENSG0000( NDUFA13   | protein_co chr19 | 19515736 | 19529054 | + | 99.72  | 95.49  |

|                    |                  |          |          |   |       |       |
|--------------------|------------------|----------|----------|---|-------|-------|
| ENSG0000(ZNF566    | protein_co chr19 | 36445119 | 36489902 | - | 3.24  | 2.89  |
| ENSG0000(AC084219. | antisense chr19  | 44105463 | 44113145 | - | 0.96  | 0.98  |
| ENSG0000(ZNF529    | protein_co chr19 | 36534774 | 36605276 | - | 1.97  | 2.37  |
| ENSG0000(ZNF284    | protein_co chr19 | 44072144 | 44089613 | + | 0.68  | 0.99  |
| ENSG0000(HTR3E     | protein_co chr3  | 1.84E+08 | 1.84E+08 | + | 0     | 0     |
| ENSG0000(DLEU7     | protein_co chr13 | 50711008 | 50843939 | - | 0     | 0     |
| ENSG0000(KRT73     | protein_co chr12 | 52607570 | 52618559 | - | 0     | 0     |
| ENSG0000(TAL2      | protein_co chr9  | 1.06E+08 | 1.06E+08 | + | 0.41  | 0     |
| ENSG0000(MATN1-AS  | antisense chr1   | 30718504 | 30726827 | + | 1.22  | 0.66  |
| ENSG0000(AIDA      | protein_co chr1  | 2.23E+08 | 2.23E+08 | - | 32.93 | 32.57 |
| ENSG0000(C15orf41  | protein_co chr15 | 36579611 | 36810248 | + | 3.48  | 5.56  |
| ENSG0000(CD300LF   | protein_co chr17 | 74694311 | 74712978 | - | 0     | 0     |
| ENSG0000(ZBP2      | protein_co chr17 | 39868164 | 39877896 | + | 0     | 0     |
| ENSG0000(RP11-887P | processed_chr12  | 93640822 | 93641586 | - | 0     | 0     |
| ENSG0000(KRT5      | protein_co chr12 | 52514575 | 52520687 | - | 0     | 0     |
| ENSG0000(KRT18P14  | processed_chr11  | 35860249 | 35861498 | - | 0     | 0     |
| ENSG0000(NBPF6     | protein_co chr1  | 1.08E+08 | 1.08E+08 | + | 0     | 0     |
| ENSG0000(GSAP      | protein_co chr7  | 77310751 | 77416400 | - | 2.86  | 3.05  |
| ENSG0000(HTR3D     | protein_co chr3  | 1.84E+08 | 1.84E+08 | + | 0     | 0     |
| ENSG0000(OR4F5     | protein_co chr1  | 69091    | 70008    | + | 0     | 0     |
| ENSG0000(AGBL4     | protein_co chr1  | 48532855 | 50023913 | - | 0     | 0     |
| ENSG0000(ARGFX     | protein_co chr3  | 1.22E+08 | 1.22E+08 | + | 0     | 0     |
| ENSG0000(CYP2R1    | protein_co chr11 | 14877440 | 14892252 | - | 2.88  | 3.3   |
| ENSG0000(LRRC70    | protein_co chr5  | 62578735 | 62581448 | + | 0.03  | 0.1   |
| ENSG0000(ANKRD46   | protein_co chr8  | 1.01E+08 | 1.01E+08 | - | 3.73  | 3.26  |
| ENSG0000(PIP5K1C   | protein_co chr19 | 3630183  | 3700479  | - | 16.03 | 16.99 |
| ENSG0000(OR5D14    | protein_co chr11 | 55795556 | 55796500 | + | 0     | 0     |
| ENSG0000(CYP4F2    | protein_co chr19 | 15878023 | 15898120 | - | 0     | 0     |
| ENSG0000(TEX38     | protein_co chr1  | 46668855 | 46673594 | + | 0     | 0     |
| ENSG0000(OR5D18    | protein_co chr11 | 55819630 | 55820571 | + | 0     | 0     |
| ENSG0000(OR9M1P    | unprocessε chr11 | 55855592 | 55856512 | + | 0     | 0     |
| ENSG0000(ZBTB6     | protein_co chr9  | 1.23E+08 | 1.23E+08 | - | 2.26  | 2     |
| ENSG0000(C2orf76   | protein_co chr2  | 1.19E+08 | 1.19E+08 | - | 6.39  | 6.16  |
| ENSG0000(TAS2R42   | protein_co chr12 | 11185993 | 11186937 | - | 0     | 0     |
| ENSG0000(POLR3C    | protein_co chr1  | 1.46E+08 | 1.46E+08 | + | 12.35 | 12.41 |
| ENSG0000(PRR30     | protein_co chr2  | 27136848 | 27139410 | - | 0     | 0     |
| ENSG0000(DEFB131   | protein_co chr4  | 9444534  | 9450514  | + | 0     | 0     |
| ENSG0000(AC013271. | transcribec chr2 | 1.1E+08  | 1.1E+08  | + | 1.05  | 1.75  |
| ENSG0000(UBL4B     | protein_co chr1  | 1.1E+08  | 1.1E+08  | + | 0     | 0     |
| ENSG0000(LILRP1    | unprocessε chr19 | 54696604 | 54700905 | + | 0     | 0     |
| ENSG0000(WWOX      | protein_co chr16 | 78099413 | 79212667 | + | 3.75  | 3.32  |
| ENSG0000(CYP4Z1    | protein_co chr1  | 47067488 | 47118319 | + | 0     | 0     |
| ENSG0000(CIDECP    | transcribec chr3 | 10014238 | 10026365 | - | 8.55  | 9.45  |
| ENSG0000(TRY2P     | transcribec chr7 | 1.42E+08 | 1.42E+08 | - | 0     | 0     |
| ENSG0000(CCDC84    | protein_co chr11 | 1.19E+08 | 1.19E+08 | + | 6.63  | 6.16  |



|                    |                  |          |            |        |       |
|--------------------|------------------|----------|------------|--------|-------|
| ENSG0000(BCL9L     | protein_co chr11 | 1.19E+08 | 1.19E+08 - | 49.5   | 47.29 |
| ENSG0000(POLR1D    | protein_co chr13 | 27620742 | 27744237 + | 37.68  | 36.34 |
| ENSG0000(KIF18B    | protein_co chr17 | 44924709 | 44947711 - | 0.07   | 0.12  |
| ENSG0000(ZNRF1     | protein_co chr16 | 74999030 | 75110994 + | 10.1   | 9.4   |
| ENSG0000(FFAR4     | protein_co chr10 | 93566665 | 93604480 + | 0      | 0     |
| ENSG0000(BPIFB3    | protein_co chr20 | 33055424 | 33073628 + | 0      | 0     |
| ENSG0000(BPIFB4    | protein_co chr20 | 33079644 | 33111751 + | 0.36   | 0     |
| ENSG0000(SAPCD2    | protein_co chr9  | 1.37E+08 | 1.37E+08 - | 0      | 0     |
| ENSG0000(EDARADD   | protein_co chr1  | 2.36E+08 | 2.36E+08 + | 0.17   | 0.06  |
| ENSG0000(SLC51B    | protein_co chr15 | 65045370 | 65053396 + | 0      | 0     |
| ENSG0000(CYP4F12   | protein_co chr19 | 15672757 | 15697174 + | 0      | 0.07  |
| ENSG0000(1-Mar     | protein_co chr1  | 2.21E+08 | 2.21E+08 + | 0.65   | 0.62  |
| ENSG0000(LCE5A     | protein_co chr1  | 1.53E+08 | 1.53E+08 + | 0      | 0     |
| ENSG0000(SOWAHB    | protein_co chr4  | 76894928 | 76898147 - | 0.02   | 0     |
| ENSG0000(BLOC1S4   | protein_co chr4  | 6716055  | 6717671 +  | 5.59   | 7.12  |
| ENSG0000(LCE1E     | protein_co chr1  | 1.53E+08 | 1.53E+08 + | 0      | 0     |
| ENSG0000(ZNF749    | protein_co chr19 | 57435329 | 57445485 + | 3.23   | 4.77  |
| ENSG0000(KLHL32    | protein_co chr6  | 96924620 | 97140754 + | 0      | 0     |
| ENSG0000(FAM86MP   | unprocessε chr4  | 9692495  | 9702954 +  | 0      | 0     |
| ENSG0000(AC016757. | processed_ chr2  | 2.38E+08 | 2.38E+08 - | 0.03   | 0.64  |
| ENSG0000(RP11-1079 | processed_ chr17 | 49400429 | 49400800 - | 0      | 0     |
| ENSG0000(MKL2      | protein_co chr16 | 14071321 | 14266773 + | 3.68   | 5.18  |
| ENSG0000(BTLA      | protein_co chr3  | 1.12E+08 | 1.12E+08 - | 0      | 0.3   |
| ENSG0000(OR10D4P   | unprocessε chr11 | 1.24E+08 | 1.24E+08 - | 0      | 0     |
| ENSG0000(ZNF17     | protein_co chr19 | 57411163 | 57421939 + | 2.6    | 1.68  |
| ENSG0000(KDM4D     | protein_co chr11 | 94973681 | 94999518 + | 0.36   | 0.32  |
| ENSG0000(GPAT2     | protein_co chr2  | 96021946 | 96039451 - | 0.11   | 0.14  |
| ENSG0000(TOR3A     | protein_co chr1  | 1.79E+08 | 1.79E+08 + | 11.32  | 12.98 |
| ENSG0000(PABPC1L2/ | protein_co chrX  | 73077276 | 73079512 - | 0      | 0     |
| ENSG0000(GABRA5    | protein_co chr15 | 26866363 | 26949207 + | 0      | 0     |
| ENSG0000(PPP1CC    | protein_co chr12 | 1.11E+08 | 1.11E+08 - | 31.5   | 41.81 |
| ENSG0000(ZNF555    | protein_co chr19 | 2841435  | 2860484 +  | 1.78   | 2.08  |
| ENSG0000(MST1P2    | unprocessε chr1  | 16645622 | 16650289 + | 0.44   | 0.47  |
| ENSG0000(OR10T2    | protein_co chr1  | 1.58E+08 | 1.58E+08 - | 0      | 0     |
| ENSG0000(NAP1L3    | protein_co chrX  | 93670930 | 93673568 - | 1.84   | 1.66  |
| ENSG0000(CA5BP1    | transcribec chrX | 15674932 | 15703724 + | 8.44   | 7.12  |
| ENSG0000(PRELID2   | protein_co chr5  | 1.45E+08 | 1.46E+08 - | 8.04   | 6.56  |
| ENSG0000(BACE1     | protein_co chr11 | 1.17E+08 | 1.17E+08 - | 43.92  | 46.79 |
| ENSG0000(RGS9BP    | protein_co chr19 | 32675407 | 32678300 + | 0.06   | 0.08  |
| ENSG0000(RP11-140K | processed_ chr6  | 34715613 | 34715940 + | 0      | 0     |
| ENSG0000(TMEM212   | protein_co chr3  | 1.72E+08 | 1.72E+08 + | 2.47   | 1.38  |
| ENSG0000(SLC36A3   | protein_co chr5  | 1.51E+08 | 1.51E+08 - | 0.09   | 0.08  |
| ENSG0000(SLC36A2   | protein_co chr5  | 1.51E+08 | 1.51E+08 - | 0.02   | 0.04  |
| ENSG0000(THBS2     | protein_co chr6  | 1.69E+08 | 1.69E+08 - | 357.19 | 343.1 |
| ENSG0000(RXRA      | protein_co chr9  | 1.34E+08 | 1.34E+08 + | 14.69  | 16.31 |

|                     |                   |          |            |        |         |
|---------------------|-------------------|----------|------------|--------|---------|
| ENSG0000( ANKRD37   | protein_co chr4   | 1.85E+08 | 1.85E+08 + | 5.82   | 5.93    |
| ENSG0000( C9orf47   | protein_co chr9   | 88990863 | 88996140 + | 0.19   | 0.09    |
| ENSG0000( NUDT17    | protein_co chr1   | 1.46E+08 | 1.46E+08 + | 1.4    | 1.48    |
| ENSG0000( KIAA1024L | protein_co chr5   | 1.3E+08  | 1.3E+08 +  | 0      | 0.03    |
| ENSG0000( LINC00643 | transcribec chr14 | 62114353 | 62130962 + | 0.03   | 0.02    |
| ENSG0000( ZNF75D    | protein_co chrX   | 1.35E+08 | 1.35E+08 - | 3.63   | 3       |
| ENSG0000( CYP4X1    | protein_co chr1   | 47023568 | 47050751 + | 0.16   | 0.18    |
| ENSG0000( KRT26     | protein_co chr17  | 40766238 | 40772162 - | 0      | 0       |
| ENSG0000( KRT10     | protein_co chr17  | 40818117 | 40822595 - | 15.51  | 17.43   |
| ENSG0000( GOLGA8R   | protein_co chr15  | 30403740 | 30414162 - | 1.63   | 1.91    |
| ENSG0000( CD300E    | protein_co chr17  | 74609887 | 74623738 - | 0      | 0       |
| ENSG0000( CCDC30    | protein_co chr1   | 42463330 | 42654664 + | 1.73   | 2.15    |
| ENSG0000( NKRF      | protein_co chrX   | 1.2E+08  | 1.2E+08 -  | 1.81   | 2.2     |
| ENSG0000( GLDN      | protein_co chr15  | 51341629 | 51408013 + | 0.01   | 0.14    |
| ENSG0000( FCAR      | protein_co chr19  | 54874248 | 54890472 + | 0.04   | 0.16    |
| ENSG0000( KPNA4     | protein_co chr3   | 1.6E+08  | 1.61E+08 - | 11.1   | 12.65   |
| ENSG0000( TRDN      | protein_co chr6   | 1.23E+08 | 1.24E+08 - | 0      | 0       |
| ENSG0000( OR6P1     | protein_co chr1   | 1.59E+08 | 1.59E+08 - | 0      | 0       |
| ENSG0000( KRT3      | protein_co chr12  | 52789685 | 52796117 - | 0      | 0       |
| ENSG0000( ZNF501    | protein_co chr3   | 44729596 | 44737083 + | 1.53   | 1.85    |
| ENSG0000( ZNF197    | protein_co chr3   | 44584888 | 44648471 + | 6.32   | 6.31    |
| ENSG0000( SPATA12   | protein_co chr3   | 57060441 | 57075432 + | 0.16   | 0.1     |
| ENSG0000( TMPRSS12  | protein_co chr12  | 50842920 | 50887884 + | 0.02   | 0       |
| ENSG0000( FAM228A   | protein_co chr2   | 24175069 | 24200849 + | 0.32   | 0.31    |
| ENSG0000( DEFB132   | protein_co chr20  | 257736   | 261096 +   | 0      | 0       |
| ENSG0000( NAP1L2    | protein_co chrX   | 73212299 | 73214848 - | 0.04   | 0.05    |
| ENSG0000( AQP7P1    | unprocessε chr9   | 63317067 | 63333091 - | 0      | 0       |
| ENSG0000( RPS23     | protein_co chr5   | 82273358 | 82278577 - | 1035.8 | 1032.17 |
| ENSG0000( GNG2      | protein_co chr14  | 51826195 | 51979342 + | 4.5    | 3.46    |
| ENSG0000( BTN3A2    | protein_co chr6   | 26365159 | 26378320 + | 10.91  | 12.27   |
| ENSG0000( AKAP14    | protein_co chrX   | 1.2E+08  | 1.2E+08 +  | 0.4    | 0.22    |
| ENSG0000( PCLO      | protein_co chr7   | 82754013 | 83162930 - | 0      | 0       |
| ENSG0000( KLK12     | protein_co chr19  | 51029092 | 51035230 - | 0      | 0       |
| ENSG0000( RGS7BP    | protein_co chr5   | 64506257 | 64612312 + | 0      | 0       |
| ENSG0000( INSIG1    | protein_co chr7   | 1.55E+08 | 1.55E+08 + | 32.46  | 36.44   |
| ENSG0000( ANKRD20A  | transcribec chr18 | 14179097 | 14252140 + | 0.06   | 0.02    |
| ENSG0000( MYT1L     | protein_co chr2   | 1789113  | 2331260 -  | 0.12   | 0.15    |
| ENSG0000( C5orf38   | protein_co chr5   | 2752131  | 2755397 +  | 0      | 0       |
| ENSG0000( ZNF396    | protein_co chr18  | 35366697 | 35377337 - | 1.52   | 1.42    |
| ENSG0000( TMEM222   | protein_co chr1   | 27322145 | 27336400 + | 25.78  | 23.28   |
| ENSG0000( OR9I2P    | unprocessε chr11  | 58144495 | 58145397 + | 0      | 0       |
| ENSG0000( OR9Q1     | protein_co chr11  | 58023881 | 58181616 + | 0      | 0       |
| ENSG0000( CLCNKA    | protein_co chr1   | 16018875 | 16034050 + | 0.03   | 0       |
| ENSG0000( OR9Q2     | protein_co chr11  | 58190434 | 58191518 + | 0      | 0       |
| ENSG0000( ARHGAP30  | protein_co chr1   | 1.61E+08 | 1.61E+08 - | 0      | 0       |

|                 |            |             |       |          |          |   |       |       |
|-----------------|------------|-------------|-------|----------|----------|---|-------|-------|
| ENSG00000100000 | 10-Sep     | protein_co  | chr2  | 1.1E+08  | 1.1E+08  | - | 43.93 | 41.49 |
| ENSG00000100000 | FAM86B1    | protein_co  | chr8  | 12182096 | 12194133 | - | 2.69  | 2.08  |
| ENSG00000100000 | CYP4F8     | protein_co  | chr19 | 15615218 | 15630638 | + | 0.07  | 0.02  |
| ENSG00000100000 | CYP4F3     | protein_co  | chr19 | 15640897 | 15662825 | + | 0.02  | 0     |
| ENSG00000100000 | SMYD4      | protein_co  | chr17 | 1779485  | 1830634  | - | 4.01  | 4.31  |
| ENSG00000100000 | CROCCP5    | unprocessε  | chr1  | 21434318 | 21437558 | + | 0     | 0     |
| ENSG00000100000 | DEFB105A   | protein_co  | chr8  | 7821966  | 7823889  | - | 0     | 0     |
| ENSG00000100000 | FOXD2      | protein_co  | chr1  | 47436017 | 47440691 | + | 0.09  | 0.05  |
| ENSG00000100000 | GPATCH8    | protein_co  | chr17 | 44395284 | 44503430 | - | 10.74 | 11.26 |
| ENSG00000100000 | CEACAM19   | protein_co  | chr19 | 44662278 | 44684359 | + | 4.67  | 5.17  |
| ENSG00000100000 | DEFB107A   | protein_co  | chr8  | 7811720  | 7815716  | - | 0     | 0     |
| ENSG00000100000 | NF2        | protein_co  | chr22 | 29603556 | 29698598 | + | 8.57  | 7.77  |
| ENSG00000100000 | C6orf1     | protein_co  | chr6  | 34246380 | 34249470 | - | 17.65 | 16.76 |
| ENSG00000100000 | DEFB106A   | protein_co  | chr8  | 7825172  | 7829053  | + | 0     | 0     |
| ENSG00000100000 | SPATC1     | protein_co  | chr8  | 1.44E+08 | 1.44E+08 | + | 0     | 0     |
| ENSG00000100000 | UBE2H      | protein_co  | chr7  | 1.3E+08  | 1.3E+08  | - | 41.66 | 41.23 |
| ENSG00000100000 | MIR22HG    | lincRNA     | chr17 | 1711493  | 1717174  | - | 32.16 | 32.11 |
| ENSG00000100000 | DEFB105B   | protein_co  | chr8  | 7487669  | 7489593  | + | 0     | 0     |
| ENSG00000100000 | HPDL       | protein_co  | chr1  | 45326905 | 45328533 | + | 0.1   | 0.31  |
| ENSG00000100000 | KTN1-AS1   | antisense   | chr14 | 55499278 | 55580110 | - | 2.17  | 1.47  |
| ENSG00000100000 | KATNA1     | protein_co  | chr6  | 1.5E+08  | 1.5E+08  | - | 9.11  | 11.08 |
| ENSG00000100000 | FSD2       | protein_co  | chr15 | 82755362 | 82806070 | - | 0.08  | 0.05  |
| ENSG00000100000 | ARAP1      | protein_co  | chr11 | 72685069 | 72793599 | - | 42.35 | 40.94 |
| ENSG00000100000 | KIF24      | protein_co  | chr9  | 34252381 | 34311371 | - | 0.45  | 0.46  |
| ENSG00000100000 | PDE2A      | protein_co  | chr11 | 72576141 | 72674591 | - | 0.28  | 0.57  |
| ENSG00000100000 | SPDYE17    | unprocessε  | chr7  | 77024691 | 77030572 | - | 0     | 0     |
| ENSG00000100000 | CARMIL3    | protein_co  | chr14 | 24052000 | 24069728 | + | 0.05  | 0.03  |
| ENSG00000100000 | PRG2       | protein_co  | chr11 | 57386794 | 57390657 | - | 0     | 0     |
| ENSG00000100000 | PRR5       | protein_co  | chr22 | 44668547 | 44737681 | + | 1.36  | 1.39  |
| ENSG00000100000 | ZFP91      | protein_co  | chr11 | 58579111 | 58621042 | + | 19.55 | 20.75 |
| ENSG00000100000 | C17orf58   | protein_co  | chr17 | 67991101 | 67996431 | - | 7.33  | 9.39  |
| ENSG00000100000 | BCDIN3D    | protein_co  | chr12 | 49836039 | 49843129 | - | 1.82  | 2.24  |
| ENSG00000100000 | MAGEE2     | protein_co  | chrX  | 75782988 | 75785236 | - | 0     | 0.03  |
| ENSG00000100000 | EEF1GP1    | processed_  | chr7  | 1.25E+08 | 1.25E+08 | + | 0.09  | 0     |
| ENSG00000100000 | RP11-266I2 | unprocessε  | chrX  | 55172717 | 55176026 | + | 0     | 0     |
| ENSG00000100000 | CYP27C1    | protein_co  | chr2  | 1.27E+08 | 1.27E+08 | - | 0.08  | 0.09  |
| ENSG00000100000 | LYRM7      | protein_co  | chr5  | 1.31E+08 | 1.31E+08 | + | 2.78  | 2.04  |
| ENSG00000100000 | DTX2P1     | transcribec | chr7  | 76978617 | 77004308 | + | 0     | 0.49  |
| ENSG00000100000 | CFAP73     | protein_co  | chr12 | 1.13E+08 | 1.13E+08 | + | 0     | 0     |
| ENSG00000100000 | CCDC73     | protein_co  | chr11 | 32602246 | 32794658 | - | 0     | 0     |
| ENSG00000100000 | MST1L      | transcribec | chr1  | 16754910 | 16770237 | - | 0.53  | 0.86  |
| ENSG00000100000 | BCR        | protein_co  | chr22 | 23179704 | 23318037 | + | 11.98 | 11.89 |
| ENSG00000100000 | OR10H1     | protein_co  | chr19 | 15807003 | 15808126 | - | 0     | 0     |
| ENSG00000100000 | MPPED1     | protein_co  | chr22 | 43411196 | 43507848 | + | 0     | 0     |
| ENSG00000100000 | TP11P3     | processed_  | chr6  | 1.16E+08 | 1.16E+08 | + | 0.09  | 0     |

|                    |                   |          |          |   |       |       |
|--------------------|-------------------|----------|----------|---|-------|-------|
| ENSG0000(FSCN2     | protein_co chr17  | 81528396 | 81537130 | + | 0.38  | 0.36  |
| ENSG0000(FOXI2     | protein_co chr10  | 1.28E+08 | 1.28E+08 | + | 0     | 0     |
| ENSG0000(SPIN4     | protein_co chrX   | 63347228 | 63351344 | - | 0.52  | 0.54  |
| ENSG0000(ZNF732    | protein_co chr4   | 270675   | 305321   | - | 0     | 0     |
| ENSG0000(SPIN2B    | protein_co chrX   | 57118551 | 57121546 | - | 3.89  | 6.31  |
| ENSG0000(SPATA31D: | protein_co chr9   | 81943586 | 81950038 | + | 0     | 0     |
| ENSG0000(FOXE3     | protein_co chr1   | 47416072 | 47418052 | + | 0     | 0     |
| ENSG0000(HYAL3     | protein_co chr3   | 50292831 | 50299468 | - | 2.93  | 2.39  |
| ENSG0000(KCNK18    | protein_co chr10  | 1.17E+08 | 1.17E+08 | + | 0     | 0     |
| ENSG0000(IFNA10    | protein_co chr9   | 21206181 | 21207143 | - | 0     | 0     |
| ENSG0000(VSIG10L   | protein_co chr19  | 51331536 | 51342124 | - | 0.98  | 1.09  |
| ENSG0000(CXCR3     | protein_co chrX   | 71615916 | 71618517 | - | 0     | 0     |
| ENSG0000(ZNF397    | protein_co chr18  | 35241030 | 35267133 | + | 10.08 | 8.1   |
| ENSG0000(ZSCAN30   | protein_co chr18  | 35251058 | 35290245 | - | 16.2  | 14.01 |
| ENSG0000(TPCN1     | protein_co chr12  | 1.13E+08 | 1.13E+08 | + | 19.02 | 17.35 |
| ENSG0000(LILRB4    | protein_co chr19  | 54643889 | 54670359 | + | 0     | 0     |
| ENSG0000(C2orf27B  | lincRNA chr2      | 1.32E+08 | 1.32E+08 | - | 0     | 0     |
| ENSG0000(TNFRSF4   | protein_co chr1   | 1211326  | 1214138  | - | 0     | 0     |
| ENSG0000(KRT17P2   | transcribec chr17 | 18426861 | 18431848 | + | 0.08  | 0.61  |
| ENSG0000(KRT16     | protein_co chr17  | 41609778 | 41615899 | - | 0     | 0.08  |
| ENSG0000(HEXIM1    | protein_co chr17  | 45148502 | 45152101 | + | 12.34 | 11.88 |
| ENSG0000(SELENOV   | protein_co chr19  | 39515113 | 39520686 | + | 0     | 0     |
| ENSG0000(LINC00846 | 3prime_ov chr21   | 32572238 | 32575881 | - | 0.04  | 0.07  |
| ENSG0000(LCE1A     | protein_co chr1   | 1.53E+08 | 1.53E+08 | + | 0     | 0     |
| ENSG0000(KRT14     | protein_co chr17  | 41582279 | 41586921 | - | 0     | 0     |
| ENSG0000(TRABD2A   | protein_co chr2   | 84821650 | 84907008 | - | 4.87  | 5.28  |
| ENSG0000(KRTAP17-1 | protein_co chr17  | 41314917 | 41315695 | - | 0     | 0     |
| ENSG0000(PDZD7     | protein_co chr10  | 1.01E+08 | 1.01E+08 | - | 0.55  | 0.43  |
| ENSG0000(POFUT2    | protein_co chr21  | 45263928 | 45287898 | - | 30.23 | 27.63 |
| ENSG0000(QRFPR     | protein_co chr4   | 1.21E+08 | 1.21E+08 | - | 0     | 0     |
| ENSG0000(MAPT      | protein_co chr17  | 45894382 | 46028334 | + | 1.01  | 0.55  |
| ENSG0000(ERCC6L    | protein_co chrX   | 72204657 | 72239047 | - | 0     | 0.01  |
| ENSG0000(OR13F1    | protein_co chr9   | 1.05E+08 | 1.05E+08 | + | 0     | 0     |
| ENSG0000(OR5D3P    | unprocessε chr11  | 55726118 | 55727158 | + | 0     | 0     |
| ENSG0000(TMEM17    | protein_co chr2   | 62500221 | 62511894 | - | 1.64  | 2.05  |
| ENSG0000(TNFRSF18  | protein_co chr1   | 1203508  | 1206691  | - | 0.22  | 0.72  |
| ENSG0000(FGF3      | protein_co chr11  | 69810224 | 69819024 | - | 0     | 0     |
| ENSG0000(C1QL4     | protein_co chr12  | 49332411 | 49337188 | - | 0     | 0     |
| ENSG0000(RTN4RL2   | protein_co chr11  | 57460549 | 57477534 | + | 3.09  | 3.19  |
| ENSG0000(ZDHHC17   | protein_co chr12  | 76763588 | 76853696 | + | 16.24 | 18.94 |
| ENSG0000(SERPINA11 | protein_co chr14  | 94442464 | 94452790 | - | 0     | 0     |
| ENSG0000(P2RY4     | protein_co chrX   | 70258170 | 70259764 | - | 0.04  | 0.04  |
| ENSG0000(ZNF395    | protein_co chr8   | 28345585 | 28402701 | - | 32.71 | 29.65 |
| ENSG0000(ZACN      | protein_co chr17  | 76071961 | 76083666 | + | 0.14  | 0.02  |
| ENSG0000(KRTAP22-1 | protein_co chr21  | 30601087 | 30601382 | + | 0     | 0     |

|                    |                  |          |          |   |        |        |
|--------------------|------------------|----------|----------|---|--------|--------|
| ENSG0000(KRTAP19-6 | protein_co chr21 | 30541535 | 30541864 | - | 0      | 0      |
| ENSG0000(KRTAP6-2  | protein_co chr21 | 30598590 | 30598902 | - | 0      | 0      |
| ENSG0000(CHCHD2P9  | processed_chr9   | 79391304 | 79391759 | + | 0      | 0      |
| ENSG0000(OR13C8    | protein_co chr9  | 1.05E+08 | 1.05E+08 | + | 0      | 0      |
| ENSG0000(PPARA     | protein_co chr22 | 46150521 | 46243756 | + | 4.72   | 6.44   |
| ENSG0000(TMEM232   | protein_co chr5  | 1.1E+08  | 1.11E+08 | - | 0.64   | 0.82   |
| ENSG0000(LINC01551 | lincRNA chr14    | 28772704 | 28813453 | + | 0.36   | 0.36   |
| ENSG0000(KRTAP19-2 | protein_co chr21 | 30487057 | 30487436 | - | 0      | 0      |
| ENSG0000(KRTAP19-4 | protein_co chr21 | 30496824 | 30497133 | - | 0      | 0      |
| ENSG0000(KRTAP15-1 | protein_co chr21 | 30440275 | 30440945 | + | 0      | 0      |
| ENSG0000(KRTAP13-4 | protein_co chr21 | 30430230 | 30431026 | + | 0      | 0      |
| ENSG0000(FAM183A   | protein_co chr1  | 43145153 | 43156396 | + | 0      | 0.68   |
| ENSG0000(EFCAB6    | protein_co chr22 | 43528744 | 43812337 | - | 0.33   | 0.59   |
| ENSG0000(KRTAP19-5 | protein_co chr21 | 30501657 | 30502117 | - | 0      | 0      |
| ENSG0000(KRTAP23-1 | protein_co chr21 | 30348399 | 30348609 | - | 0      | 0      |
| ENSG0000(KANK3     | protein_co chr19 | 8322584  | 8343262  | - | 0.04   | 0.04   |
| ENSG0000(EMID1     | protein_co chr22 | 29205851 | 29259597 | + | 0.29   | 0.64   |
| ENSG0000(ACTL7A    | protein_co chr9  | 1.09E+08 | 1.09E+08 | + | 0      | 0      |
| ENSG0000(KRTAP21-1 | protein_co chr21 | 30754830 | 30755428 | - | 0      | 0      |
| ENSG0000(RHD       | protein_co chr1  | 25272393 | 25330445 | + | 0.02   | 0.02   |
| ENSG0000(LINC00207 | lincRNA chr22    | 44569339 | 44572341 | + | 0      | 0      |
| ENSG0000(C17orf82  | lincRNA chr17    | 61411751 | 61413280 | + | 0.3    | 0.21   |
| ENSG0000(ESPN      | protein_co chr1  | 6424788  | 6461370  | + | 0.13   | 0.14   |
| ENSG0000(PNLIPRP1  | protein_co chr10 | 1.17E+08 | 1.17E+08 | + | 0      | 0      |
| ENSG0000(PTRH1     | protein_co chr9  | 1.28E+08 | 1.28E+08 | - | 7.2    | 10.13  |
| ENSG0000(KRTAP21-2 | protein_co chr21 | 30746794 | 30747233 | - | 0      | 0      |
| ENSG0000(SAMD7     | protein_co chr3  | 1.7E+08  | 1.7E+08  | + | 0      | 0      |
| ENSG0000(GPR141    | protein_co chr7  | 37683796 | 37833788 | + | 0      | 0      |
| ENSG0000(TMPRS56   | protein_co chr22 | 37065436 | 37109563 | - | 0.02   | 0      |
| ENSG0000(CYP4A11   | protein_co chr1  | 46929177 | 46941484 | - | 0      | 0.06   |
| ENSG0000(TMEM216   | protein_co chr11 | 61391687 | 61398863 | + | 5.9    | 6.3    |
| ENSG0000(RPS19BP1  | protein_co chr22 | 39529093 | 39532855 | - | 37.98  | 40.33  |
| ENSG0000(TMPRS511. | protein_co chr4  | 67909385 | 67964140 | - | 0      | 0      |
| ENSG0000(TMEM262   | protein_co chr11 | 65084979 | 65089375 | - | 0.01   | 0      |
| ENSG0000(C3orf70   | protein_co chr3  | 1.85E+08 | 1.85E+08 | - | 0.01   | 0.01   |
| ENSG0000(TEAD1     | protein_co chr11 | 12674591 | 12944483 | + | 29.3   | 36.06  |
| ENSG0000(OR2AK2    | protein_co chr1  | 2.48E+08 | 2.48E+08 | + | 0.05   | 0      |
| ENSG0000(DEFB106B  | protein_co chr8  | 7482504  | 7486400  | - | 0      | 0      |
| ENSG0000(PLCD1     | protein_co chr3  | 38007496 | 38029762 | - | 13.97  | 13.91  |
| ENSG0000(CCK       | protein_co chr3  | 42257825 | 42266207 | - | 0.26   | 0.1    |
| ENSG0000(ENTPD5    | protein_co chr14 | 73958010 | 74019399 | - | 2.95   | 3.12   |
| ENSG0000(MITF      | protein_co chr3  | 69739435 | 69968337 | + | 2.42   | 2.11   |
| ENSG0000(FUNDC2P3  | processed_chr6   | 1.46E+08 | 1.46E+08 | + | 0      | 0      |
| ENSG0000(HEATR4    | protein_co chr14 | 73478484 | 73558947 | - | 0      | 0      |
| ENSG0000(NAP1L1    | protein_co chr12 | 76036587 | 76085033 | - | 240.92 | 240.12 |

|                     |                   |          |            |        |        |
|---------------------|-------------------|----------|------------|--------|--------|
| ENSG0000(LILRA5     | protein_co chr19  | 54307070 | 54313139 - | 0      | 0      |
| ENSG0000(CMC1       | protein_co chr3   | 28241584 | 28325142 + | 13.56  | 10.45  |
| ENSG0000(SLIT1      | protein_co chr10  | 96998038 | 97185920 - | 0.01   | 0.03   |
| ENSG0000(LYPD6      | protein_co chr2   | 1.49E+08 | 1.49E+08 + | 0      | 0      |
| ENSG0000(AKR1C1     | protein_co chr10  | 4963253  | 4983283 +  | 289.26 | 331.26 |
| ENSG0000(VSTM2B     | protein_co chr19  | 29526499 | 29564479 + | 0      | 0      |
| ENSG0000(FOXD3      | protein_co chr1   | 63323041 | 63325126 + | 0      | 0      |
| ENSG0000(SPATA21    | protein_co chr1   | 16387117 | 16437424 - | 0      | 0      |
| ENSG0000(RNF220     | protein_co chr1   | 44405194 | 44651724 + | 28.95  | 30.11  |
| ENSG0000(ANGPTL5    | protein_co chr11  | 1.02E+08 | 1.02E+08 - | 0.05   | 0.13   |
| ENSG0000(SHTN1      | protein_co chr10  | 1.17E+08 | 1.17E+08 - | 3.75   | 3.87   |
| ENSG0000(H1FNT      | protein_co chr12  | 48328980 | 48330279 + | 0      | 0      |
| ENSG0000(LCE4A      | protein_co chr1   | 1.53E+08 | 1.53E+08 + | 0      | 0      |
| ENSG0000(BAGE2      | transcribec chr21 | 10413477 | 10516431 + | 0      | 0      |
| ENSG0000(LCE2A      | protein_co chr1   | 1.53E+08 | 1.53E+08 + | 0      | 0      |
| ENSG0000(KRTAP12-1  | protein_co chr21  | 44681576 | 44682163 - | 0      | 0      |
| ENSG0000(LCE2C      | protein_co chr1   | 1.53E+08 | 1.53E+08 + | 0      | 0      |
| ENSG0000(CTD-2600C  | lincRNA chr16     | 57798186 | 57816946 + | 0      | 0      |
| ENSG0000(RP11-195F  | protein_co chr9   | 34664163 | 34666112 - | 6.7    | 3.78   |
| ENSG0000(ZNF546     | protein_co chr19  | 39984134 | 40021041 + | 1.23   | 1.87   |
| ENSG0000(TSPYL4     | protein_co chr6   | 1.16E+08 | 1.16E+08 - | 9.26   | 9.11   |
| ENSG0000(DAZ3       | protein_co chrY   | 24763069 | 24813492 - | 0      | 0      |
| ENSG0000(MT1X       | protein_co chr16  | 56682424 | 56684196 + | 9.91   | 10.79  |
| ENSG0000(GCNT1      | protein_co chr9   | 76419850 | 76507416 + | 41.58  | 44.31  |
| ENSG0000(LCE2D      | protein_co chr1   | 1.53E+08 | 1.53E+08 + | 0      | 0      |
| ENSG0000(RP11-16112 | antisense chr8    | 18720905 | 18734405 + | 0      | 0      |
| ENSG0000(SESTD1     | protein_co chr2   | 1.79E+08 | 1.79E+08 - | 61.24  | 59.35  |
| ENSG0000(LCE3B      | protein_co chr1   | 1.53E+08 | 1.53E+08 + | 0      | 0      |
| ENSG0000(FNBP1      | protein_co chr9   | 1.3E+08  | 1.3E+08 -  | 17.02  | 17.55  |
| ENSG0000(DYNC2H1    | protein_co chr11  | 1.03E+08 | 1.03E+08 + | 9.53   | 9.86   |
| ENSG0000(KRT12      | protein_co chr17  | 40861303 | 40867210 - | 0      | 0      |
| ENSG0000(MAGED4B    | protein_co chrX   | 52061827 | 52069248 - | 18.1   | 16.14  |
| ENSG0000(BCAM       | protein_co chr19  | 44809059 | 44821420 + | 15.65  | 15.68  |
| ENSG0000(RSBN1L     | protein_co chr7   | 77696443 | 77783022 + | 4.37   | 4.83   |
| ENSG0000(NPSR1      | protein_co chr7   | 34658239 | 34878332 + | 0      | 0      |
| ENSG0000(WDR86      | protein_co chr7   | 1.51E+08 | 1.51E+08 - | 0.28   | 0.54   |
| ENSG0000(EPOR       | protein_co chr19  | 11377205 | 11384342 - | 8.67   | 7.96   |
| ENSG0000(FAM9C      | protein_co chrX   | 13035618 | 13044682 - | 0.16   | 0.02   |
| ENSG0000(KRTAP9-8   | protein_co chr17  | 41238045 | 41239004 + | 0      | 0      |
| ENSG0000(CIDEC      | protein_co chr3   | 9866711  | 9880254 -  | 0      | 0      |
| ENSG0000(DCC        | protein_co chr18  | 52340172 | 53535903 + | 0      | 0      |
| ENSG0000(TAF9B      | protein_co chrX   | 78129748 | 78139706 - | 2.65   | 2.56   |
| ENSG0000(PCDHB13    | protein_co chr5   | 1.41E+08 | 1.41E+08 + | 0.73   | 1.01   |
| ENSG0000(MAGI2      | protein_co chr7   | 78017057 | 79453574 - | 1.77   | 1.64   |
| ENSG0000(LUZP2      | protein_co chr11  | 24496970 | 25082631 + | 0.12   | 0.68   |

|                    |                   |          |            |        |        |
|--------------------|-------------------|----------|------------|--------|--------|
| ENSG0000(LHFPL3    | protein_co chr7   | 1.04E+08 | 1.05E+08 + | 0      | 0      |
| ENSG0000(CHP1      | protein_co chr15  | 41230839 | 41281890 + | 34.75  | 34.15  |
| ENSG0000(RP11-67P1 | processed_ chr6   | 98780257 | 98780505 - | 0      | 0      |
| ENSG0000(FPR3      | protein_co chr19  | 51795163 | 51826189 + | 0.05   | 0.11   |
| ENSG0000(HIST1H1T  | protein_co chr6   | 26107419 | 26108136 - | 0      | 0      |
| ENSG0000(C11orf96  | protein_co chr11  | 43925342 | 43944338 + | 4.92   | 4.97   |
| ENSG0000(HSD3BP1   | unprocessε chr1   | 1.19E+08 | 1.19E+08 + | 0      | 0      |
| ENSG0000(SERPINA13 | transcribec chr14 | 94640725 | 94646994 + | 0      | 0      |
| ENSG0000(KCNJ11    | protein_co chr11  | 17385859 | 17389331 - | 0.08   | 0      |
| ENSG0000(CDHR4     | protein_co chr3   | 49790732 | 49799835 - | 0.71   | 0.82   |
| ENSG0000(COL4A1    | protein_co chr13  | 1.1E+08  | 1.1E+08 -  | 45.93  | 48     |
| ENSG0000(RPL7P48   | processed_ chr17  | 51502488 | 51503233 - | 0      | 0      |
| ENSG0000(PLEKHG7   | protein_co chr12  | 92721462 | 92772455 + | 0      | 0      |
| ENSG0000(GJA4      | protein_co chr1   | 34792998 | 34795747 + | 0      | 0      |
| ENSG0000(PTMA      | protein_co chr2   | 2.32E+08 | 2.32E+08 + | 352.28 | 330.78 |
| ENSG0000(HYPM      | protein_co chrX   | 37990817 | 37991317 + | 0      | 0      |
| ENSG0000(HSPA14    | protein_co chr10  | 14838164 | 14871741 + | 4.91   | 4.61   |
| ENSG0000(ATP13A5   | protein_co chr3   | 1.93E+08 | 1.93E+08 - | 0      | 0      |
| ENSG0000(SIRT7     | protein_co chr17  | 81911939 | 81921323 - | 8.48   | 11.47  |
| ENSG0000(PRR27     | protein_co chr4   | 70133616 | 70176799 + | 0      | 0      |
| ENSG0000(PRR13P5   | processed_ chr19  | 39943239 | 39943680 - | 0      | 0      |
| ENSG0000(IFT140    | protein_co chr16  | 1510427  | 1612110 -  | 9.86   | 9.95   |
| ENSG0000(TPM3P7    | processed_ chr2   | 25809925 | 25810656 - | 0      | 0      |
| ENSG0000(POTEG     | protein_co chr14  | 19402486 | 19434341 - | 0      | 0      |
| ENSG0000(PRAMEF10  | protein_co chr1   | 12892896 | 12898270 - | 0      | 0      |
| ENSG0000(AGMO      | protein_co chr7   | 15200318 | 15562015 - | 0      | 0      |
| ENSG0000(SBK2      | protein_co chr19  | 55529733 | 55537089 - | 0      | 0      |
| ENSG0000(CYP26C1   | protein_co chr10  | 93060808 | 93069536 + | 0.18   | 0.13   |
| ENSG0000(TLR5      | protein_co chr1   | 2.23E+08 | 2.23E+08 - | 0.16   | 0.32   |
| ENSG0000(USP7      | protein_co chr16  | 8892094  | 8964514 -  | 21.69  | 22.77  |
| ENSG0000(NANOS3    | protein_co chr19  | 13862063 | 13880757 + | 0.37   | 2.24   |
| ENSG0000(FOXD4L3   | protein_co chr9   | 68302867 | 68304905 + | 0      | 0      |
| ENSG0000(NHLRC1    | protein_co chr6   | 18120440 | 18122687 - | 1.57   | 1.11   |
| ENSG0000(DPPA3     | protein_co chr12  | 7711454  | 7717559 +  | 0      | 0      |
| ENSG0000(COX8C     | protein_co chr14  | 93347191 | 93348356 + | 0.14   | 0      |
| ENSG0000(PLEKHN1   | protein_co chr1   | 966497   | 975865 +   | 1.14   | 0.54   |
| ENSG0000(TERF1P2   | processed_ chr18  | 14377546 | 14378757 - | 0      | 0      |
| ENSG0000(ZNF385C   | protein_co chr17  | 42025576 | 42098479 - | 0      | 0.03   |
| ENSG0000(TMEM247   | protein_co chr2   | 46429190 | 46484425 + | 0      | 0      |
| ENSG0000(MAGEH1    | protein_co chrX   | 55452105 | 55453566 + | 11.37  | 12.77  |
| ENSG0000(TET3      | protein_co chr2   | 73986404 | 74108176 + | 3.07   | 3.24   |
| ENSG0000(ZNF286A   | protein_co chr17  | 15699577 | 15720787 + | 6.83   | 7.7    |
| ENSG0000(ISG15     | protein_co chr1   | 1001138  | 1014541 +  | 18.56  | 14.91  |
| ENSG0000(EXD3      | protein_co chr9   | 1.37E+08 | 1.37E+08 - | 6.21   | 5.94   |
| ENSG0000(OR5W2     | protein_co chr11  | 55913650 | 55914582 - | 0      | 0      |

|                    |                   |          |          |   |       |       |
|--------------------|-------------------|----------|----------|---|-------|-------|
| ENSG0000(TMEM8C    | protein_co chr9   | 1.34E+08 | 1.34E+08 | - | 0     | 0     |
| ENSG0000(TCL6      | processed_chr14   | 95650498 | 95679833 | + | 0.48  | 0     |
| ENSG0000(C17orf97  | protein_co chr17  | 410327   | 431062   | + | 2.27  | 2.76  |
| ENSG0000(ZKSCAN4   | protein_co chr6   | 28244623 | 28252224 | - | 2.16  | 2.83  |
| ENSG0000(RGPD1     | protein_co chr2   | 86907953 | 87013981 | + | 0.57  | 0.34  |
| ENSG0000(DHRS4L2   | protein_co chr14  | 23969874 | 24006408 | + | 16.83 | 14.96 |
| ENSG0000(SAMD11    | protein_co chr1   | 923928   | 944581   | + | 1.27  | 1.88  |
| ENSG0000(PERM1     | protein_co chr1   | 975204   | 982093   | - | 0.1   | 0.22  |
| ENSG0000(VMAC      | protein_co chr19  | 5904858  | 5910853  | + | 3.59  | 2.4   |
| ENSG0000(TMSB4XP8  | processed_chr4    | 90838903 | 90839037 | - | 0     | 0     |
| ENSG0000(TSPY13P   | unprocessε chrY   | 9905595  | 9908139  | - | 0     | 0     |
| ENSG0000(C5orf52   | protein_co chr5   | 1.58E+08 | 1.58E+08 | + | 0     | 0     |
| ENSG0000(HAPLN4    | protein_co chr19  | 19255641 | 19262796 | - | 0     | 0     |
| ENSG0000(ERC2      | protein_co chr3   | 55508308 | 56468363 | - | 0     | 0     |
| ENSG0000(B3GLCT    | protein_co chr13  | 31199936 | 31332276 | + | 2.1   | 2.33  |
| ENSG0000(SPRY4     | protein_co chr5   | 1.42E+08 | 1.42E+08 | - | 1.5   | 2.12  |
| ENSG0000(ERAS      | protein_co chrX   | 48826513 | 48830138 | + | 0     | 0     |
| ENSG0000(KRT18P59  | transcribec chr11 | 1.25E+08 | 1.25E+08 | + | 0.02  | 0.16  |
| ENSG0000(TRPV2     | protein_co chr17  | 16415542 | 16437003 | + | 10.48 | 10.46 |
| ENSG0000(AMTN      | protein_co chr4   | 70518540 | 70532742 | + | 0.09  | 0     |
| ENSG0000(CXorf67   | protein_co chrX   | 51406915 | 51408843 | + | 0     | 0     |
| ENSG0000(RP11-723C | protein_co chr3   | 1.29E+08 | 1.29E+08 | - | 0     | 0     |
| ENSG0000(C2orf88   | protein_co chr2   | 1.9E+08  | 1.9E+08  | + | 0.59  | 0.52  |
| ENSG0000(OR2T27    | protein_co chr1   | 2.49E+08 | 2.49E+08 | - | 0     | 0     |
| ENSG0000(TMEM203   | protein_co chr9   | 1.37E+08 | 1.37E+08 | - | 19.26 | 17.88 |
| ENSG0000(SLC18A3   | protein_co chr10  | 49610301 | 49612720 | + | 0     | 0     |
| ENSG0000(KBTBD12   | protein_co chr3   | 1.28E+08 | 1.28E+08 | + | 0.25  | 0.36  |
| ENSG0000(THSD4     | protein_co chr15  | 71096952 | 71783383 | + | 8.66  | 9.88  |
| ENSG0000(GTF2IP3   | unprocessε chr13  | 19026001 | 19032626 | - | 0     | 0     |
| ENSG0000(DNAJB13   | protein_co chr11  | 73950319 | 73970366 | + | 0     | 0     |
| ENSG0000(GABRD     | protein_co chr1   | 2019298  | 2030758  | + | 0.03  | 0.12  |
| ENSG0000(AMY1C     | protein_co chr1   | 1.04E+08 | 1.04E+08 | + | 0     | 0     |
| ENSG0000(TCEA1     | protein_co chr8   | 53966552 | 54022529 | - | 75.44 | 92.4  |
| ENSG0000(NHEJ1     | protein_co chr2   | 2.19E+08 | 2.19E+08 | - | 6.14  | 7.32  |
| ENSG0000(FANCA     | protein_co chr16  | 89737549 | 89816657 | - | 0.68  | 1.14  |
| ENSG0000(SECISBP2  | protein_co chr9   | 89318506 | 89359662 | + | 11.26 | 9.31  |
| ENSG0000(OR52B6    | protein_co chr11  | 5580877  | 5581884  | + | 0     | 0     |
| ENSG0000(C9orf153  | protein_co chr9   | 86220265 | 86259657 | - | 0     | 0.28  |
| ENSG0000(SSX7      | protein_co chrX   | 52644090 | 52654900 | - | 0     | 0     |
| ENSG0000(ADH1A     | protein_co chr4   | 99276367 | 99291028 | - | 0     | 0.05  |
| ENSG0000(HSPE1P11  | processed_chr6    | 35023522 | 35023831 | + | 0     | 0     |
| ENSG0000(OR2B7P    | unprocessε chr6   | 28046434 | 28047367 | + | 0     | 0     |
| ENSG0000(SEMA4D    | protein_co chr9   | 89360787 | 89498130 | - | 0.07  | 0     |
| ENSG0000(KRTAP10-8 | protein_co chr21  | 44612079 | 44612954 | + | 0     | 0     |
| ENSG0000(LIN28B    | protein_co chr6   | 1.05E+08 | 1.05E+08 | + | 0     | 0     |



|                   |                   |          |          |   |       |       |
|-------------------|-------------------|----------|----------|---|-------|-------|
| ENSG0000(FAM69C   | protein_co chr18  | 74434099 | 74457944 | - | 0     | 0     |
| ENSG0000(DNAH17   | protein_co chr17  | 78423697 | 78577394 | - | 0     | 0     |
| ENSG0000(MCRS1    | protein_co chr12  | 49556544 | 49568153 | - | 21.77 | 21.99 |
| ENSG0000(TMEM72   | protein_co chr10  | 44911200 | 44937002 | + | 0     | 0     |
| ENSG0000(FANCM    | protein_co chr14  | 45135940 | 45200890 | + | 1.02  | 0.81  |
| ENSG0000(FAM205C  | protein_co chr9   | 34889064 | 34895778 | - | 0     | 0     |
| ENSG0000(ZNF70    | protein_co chr22  | 23738678 | 23751092 | - | 1.09  | 1.5   |
| ENSG0000(CARD9    | protein_co chr9   | 1.36E+08 | 1.36E+08 | - | 0.42  | 0.45  |
| ENSG0000(PEAR1    | protein_co chr1   | 1.57E+08 | 1.57E+08 | + | 21.06 | 20.34 |
| ENSG0000(ZFP69B   | protein_co chr1   | 40450102 | 40463718 | + | 1.44  | 1.4   |
| ENSG0000(TMEM202  | protein_co chr15  | 72398273 | 72408029 | + | 0     | 0     |
| ENSG0000(SOWAHD   | protein_co chrX   | 1.2E+08  | 1.2E+08  | + | 0.52  | 0.24  |
| ENSG0000(RP11-24M | transcribec chr15 | 75775553 | 75786898 | + | 0     | 0     |
| ENSG0000(ZFP69    | protein_co chr1   | 40477215 | 40496343 | + | 0.92  | 0.96  |
| ENSG0000(HELT     | protein_co chr4   | 1.85E+08 | 1.85E+08 | + | 0     | 0     |
| ENSG0000(ZCCHC16  | protein_co chrX   | 1.12E+08 | 1.12E+08 | + | 0     | 0     |
| ENSG0000(TMEM220  | protein_co chr17  | 10699015 | 10730316 | - | 3     | 2.23  |
| ENSG0000(C2orf78  | protein_co chr2   | 73784189 | 73817147 | + | 0     | 0     |
| ENSG0000(HIST1H1C | protein_co chr6   | 26055787 | 26056428 | - | 6.57  | 7     |
| ENSG0000(PLSCR3   | protein_co chr17  | 7389727  | 7394843  | - | 54.25 | 44.6  |
| ENSG0000(EIF4EBP1 | protein_co chr8   | 38030341 | 38060365 | + | 59.86 | 54.81 |
| ENSG0000(OR7E25P  | unprocessε chr19  | 9204308  | 9205217  | + | 0     | 0     |
| ENSG0000(P2RX2    | protein_co chr12  | 1.33E+08 | 1.33E+08 | + | 0     | 0     |
| ENSG0000(ASCL4    | protein_co chr12  | 1.08E+08 | 1.08E+08 | + | 0     | 0     |
| ENSG0000(OR6C75   | protein_co chr12  | 55365111 | 55366049 | + | 0     | 0     |
| ENSG0000(CCDC157  | protein_co chr22  | 30356635 | 30378658 | + | 2.38  | 2.55  |
| ENSG0000(TTC24    | protein_co chr1   | 1.57E+08 | 1.57E+08 | + | 0     | 0     |
| ENSG0000(FAM122A  | protein_co chr9   | 68780034 | 68784608 | + | 3.5   | 3.8   |
| ENSG0000(PALM3    | protein_co chr19  | 14053365 | 14059159 | - | 0.15  | 0.53  |
| ENSG0000(RNFT1P3  | unprocessε chr17  | 20743333 | 20754501 | - | 0     | 0     |
| ENSG0000(GFRAL    | protein_co chr6   | 55327469 | 55402493 | + | 0     | 0     |
| ENSG0000(C1orf168 | protein_co chr1   | 56718804 | 56819696 | - | 0     | 0     |
| ENSG0000(CXXC1P1  | transcribec chrX  | 47707191 | 47753456 | + | 0.09  | 0.03  |
| ENSG0000(OR5H7P   | unprocessε chr3   | 98238352 | 98239281 | + | 0     | 0     |
| ENSG0000(SHISA7   | protein_co chr19  | 55428740 | 55442863 | - | 0     | 0     |
| ENSG0000(AC097382 | sense_ovei chr4   | 6995341  | 6998958  | + | 0.12  | 0.13  |
| ENSG0000(LRRC74B  | protein_co chr22  | 21045960 | 21064168 | + | 0.05  | 0.03  |
| ENSG0000(DMBT1    | protein_co chr10  | 1.23E+08 | 1.23E+08 | + | 0.04  | 0.01  |
| ENSG0000(CLEC17A  | protein_co chr19  | 14583084 | 14611157 | + | 0.08  | 0     |
| ENSG0000(OR51I2   | protein_co chr11  | 5453489  | 5454427  | + | 0     | 0     |
| ENSG0000(LCN10    | protein_co chr9   | 1.37E+08 | 1.37E+08 | - | 0     | 0     |
| ENSG0000(LDLRAD2  | protein_co chr1   | 21812265 | 21825221 | + | 0.25  | 0.23  |
| ENSG0000(C2orf66  | protein_co chr2   | 1.97E+08 | 1.97E+08 | - | 0.34  | 0.41  |
| ENSG0000(OVCH1    | protein_co chr12  | 29412474 | 29497686 | - | 0.02  | 0     |
| ENSG0000(ARHGAP11 | protein_co chr15  | 30624494 | 30772993 | + | 2.13  | 4.56  |

|                    |                  |          |          |   |       |       |
|--------------------|------------------|----------|----------|---|-------|-------|
| ENSG0000(HS6ST1P1  | processed_chr1   | 21428303 | 21429536 | + | 0     | 0     |
| ENSG0000(PMS2CL    | transcribec_chr7 | 6710128  | 6753862  | + | 4.38  | 6.19  |
| ENSG0000(CYHR1     | protein_co_chr8  | 1.44E+08 | 1.44E+08 | - | 33.25 | 35.96 |
| ENSG0000(COL14A1   | protein_co_chr8  | 1.2E+08  | 1.2E+08  | + | 10.28 | 11.2  |
| ENSG0000(DNER      | protein_co_chr2  | 2.29E+08 | 2.3E+08  | - | 0.74  | 0.62  |
| ENSG0000(CPSF4L    | protein_co_chr17 | 73248449 | 73262352 | - | 0     | 0     |
| ENSG0000(KLHL17    | protein_co_chr1  | 960587   | 965715   | + | 6.73  | 5.36  |
| ENSG0000(ZCCHC13   | protein_co_chrX  | 74304190 | 74305031 | + | 0     | 0     |
| ENSG0000(AC008079. | antisense_chr22  | 18178038 | 18205915 | - | 0     | 0     |
| ENSG0000(PLA2G2C   | protein_co_chr1  | 20161253 | 20177424 | - | 0     | 0.03  |
| ENSG0000(ANKRD19P  | transcribec_chr9 | 92809388 | 92888693 | + | 0.23  | 0.16  |
| ENSG0000(ZSCAN23   | protein_co_chr6  | 28431930 | 28443502 | - | 0.95  | 1.02  |
| ENSG0000(KCTD9P3   | processed_chr9   | 37477149 | 37478317 | + | 0     | 0     |
| ENSG0000(RINL      | protein_co_chr19 | 38867834 | 38878279 | - | 1.08  | 2     |
| ENSG0000(C17orf99  | protein_co_chr17 | 78146353 | 78166177 | + | 0     | 0.05  |
| ENSG0000(HNRNPA1P  | processed_chr2   | 33636502 | 33637425 | + | 0     | 0     |
| ENSG0000(OR7D2     | protein_co_chr19 | 9185594  | 9188817  | + | 0.04  | 0     |
| ENSG0000(TPRG1     | protein_co_chr3  | 1.89E+08 | 1.89E+08 | + | 0.28  | 0     |
| ENSG0000(RP11-43F1 | transcribec_chr5 | 1598920  | 1634005  | - | 7.64  | 6.31  |
| ENSG0000(C1orf204  | protein_co_chr1  | 1.6E+08  | 1.6E+08  | - | 0.68  | 1.26  |
| ENSG0000(MORN2     | protein_co_chr2  | 38875962 | 38929072 | + | 17.6  | 18.32 |
| ENSG0000(RTP5      | protein_co_chr2  | 2.42E+08 | 2.42E+08 | + | 0     | 0     |
| ENSG0000(MEIS3P2   | processed_chr17  | 20589293 | 20590367 | + | 1.99  | 2.31  |
| ENSG0000(S100A3    | protein_co_chr1  | 1.54E+08 | 1.54E+08 | - | 6.39  | 4.34  |
| ENSG0000(UBQLN2    | protein_co_chrX  | 56563639 | 56567868 | + | 11.59 | 11.55 |
| ENSG0000(RILPL1    | protein_co_chr12 | 1.23E+08 | 1.24E+08 | - | 8.14  | 9.68  |
| ENSG0000(CTSL3P    | transcribec_chr9 | 87772453 | 87786884 | + | 0     | 0     |
| ENSG0000(C19orf67  | protein_co_chr19 | 14081619 | 14085875 | - | 0     | 0     |
| ENSG0000(ZNF490    | protein_co_chr19 | 12577961 | 12640098 | - | 0.85  | 0.56  |
| ENSG0000(CLCN1     | protein_co_chr7  | 1.43E+08 | 1.43E+08 | + | 0.02  | 0     |
| ENSG0000(NRN1L     | protein_co_chr16 | 67884805 | 67888855 | + | 0     | 0.28  |
| ENSG0000(NWD1      | protein_co_chr19 | 16719976 | 16817963 | + | 0     | 0.01  |
| ENSG0000(ARL4C     | protein_co_chr2  | 2.34E+08 | 2.34E+08 | - | 17.75 | 16.04 |
| ENSG0000(RNF133    | protein_co_chr7  | 1.23E+08 | 1.23E+08 | - | 0     | 0     |
| ENSG0000(TMEM221   | protein_co_chr19 | 17435509 | 17448567 | - | 0.17  | 0.11  |
| ENSG0000(TREML4    | protein_co_chr6  | 41228324 | 41238882 | + | 0     | 0     |
| ENSG0000(RAB42     | protein_co_chr1  | 28592200 | 28595443 | + | 1.59  | 0.9   |
| ENSG0000(WNT7B     | protein_co_chr22 | 45920362 | 45977129 | - | 0.09  | 0.1   |
| ENSG0000(C11orf95  | protein_co_chr11 | 63759892 | 63768775 | - | 7.77  | 9.1   |
| ENSG0000(SCGB1C1   | protein_co_chr11 | 193080   | 194573   | + | 0     | 0     |
| ENSG0000(RP5-1119A | unprocessε_chr22 | 36536656 | 36537604 | - | 0     | 0     |
| ENSG0000(PRSS45    | protein_co_chr3  | 46742092 | 46744755 | - | 0     | 0     |
| ENSG0000(PLA2G4E   | protein_co_chr15 | 41981582 | 42051190 | - | 0     | 0     |
| ENSG0000(GPR89B    | protein_co_chr1  | 1.48E+08 | 1.48E+08 | + | 5.5   | 6.49  |
| ENSG0000(MESP2     | protein_co_chr15 | 89760591 | 89778754 | + | 0.63  | 0.78  |

|                    |                  |          |          |   |       |       |
|--------------------|------------------|----------|----------|---|-------|-------|
| ENSG0000(FAM25A    | protein_co chr10 | 87020306 | 87024730 | + | 0     | 0     |
| ENSG0000(ALOX15P2  | unprocessε chr9  | 92913156 | 92921560 | + | 0.06  | 0     |
| ENSG0000(EYS       | protein_co chr6  | 63719980 | 65707225 | - | 0.29  | 0.33  |
| ENSG0000(C6orf132  | protein_co chr6  | 42101118 | 42142619 | - | 5.95  | 6.4   |
| ENSG0000(DAZ1      | protein_co chrY  | 23129355 | 23199094 | - | 0     | 0     |
| ENSG0000(OR2AG2    | protein_co chr11 | 6767987  | 6769055  | - | 0.11  | 0.06  |
| ENSG0000(MAPK12    | protein_co chr22 | 50245450 | 50261825 | - | 14.84 | 14.96 |
| ENSG0000(TMEM215   | protein_co chr9  | 32783499 | 32787399 | + | 0     | 0     |
| ENSG0000(NUTM2G    | protein_co chr9  | 96928310 | 96940253 | + | 0     | 0     |
| ENSG0000(COL4A5    | protein_co chrX  | 1.08E+08 | 1.09E+08 | + | 2.3   | 2.57  |
| ENSG0000(KRTAP10-6 | protein_co chr21 | 44591268 | 44592505 | - | 0     | 0     |
| ENSG0000(AGRN      | protein_co chr1  | 1020123  | 1056118  | + | 72.58 | 64.57 |
| ENSG0000(NHS       | protein_co chrX  | 17375420 | 17735994 | + | 2.14  | 2.8   |
| ENSG0000(OTOG      | protein_co chr11 | 17547373 | 17647150 | + | 0     | 0     |
| ENSG0000(FAM166A   | protein_co chr9  | 1.37E+08 | 1.37E+08 | - | 0.05  | 0.07  |
| ENSG0000(TMPPE     | protein_co chr3  | 33090421 | 33096801 | - | 0.8   | 0.6   |
| ENSG0000(ZNF626    | protein_co chr19 | 20620061 | 20661596 | - | 2.52  | 2.39  |
| ENSG0000(HEPACAM2  | protein_co chr7  | 93188586 | 93226524 | - | 0     | 0     |
| ENSG0000(SMTNL2    | protein_co chr17 | 4583999  | 4608319  | + | 0     | 0.03  |
| ENSG0000(ZC3H6     | protein_co chr2  | 1.12E+08 | 1.12E+08 | + | 2     | 0.96  |
| ENSG0000(LINC00265 | lincRNA chr7     | 39733632 | 39793092 | + | 3.24  | 2.22  |
| ENSG0000(LAMTOR4   | protein_co chr7  | 1E+08    | 1E+08    | + | 88.61 | 94.88 |
| ENSG0000(PRKAR1B   | protein_co chr7  | 549197   | 727650   | - | 4.49  | 4.28  |
| ENSG0000(NUTM2B    | protein_co chr10 | 79703227 | 79714681 | + | 0.71  | 1.03  |
| ENSG0000(NCR3LG1   | protein_co chr11 | 17351726 | 17377341 | + | 2.22  | 2.57  |
| ENSG0000(DCUN1D3   | protein_co chr16 | 20854925 | 20900384 | - | 5.45  | 5.24  |
| ENSG0000(POTEE     | protein_co chr2  | 1.31E+08 | 1.31E+08 | + | 0     | 0     |
| ENSG0000(AC002398. | protein_co chr19 | 35745678 | 35754519 | + | 2.92  | 7.33  |
| ENSG0000(ZNF793    | protein_co chr19 | 37506939 | 37548762 | + | 0.39  | 0.57  |
| ENSG0000(TUBB4B    | protein_co chr9  | 1.37E+08 | 1.37E+08 | + | 68.93 | 65.31 |
| ENSG0000(AGAP4     | protein_co chr10 | 45825594 | 45853875 | - | 4.64  | 6.08  |
| ENSG0000(PP7080    | antisense chr5   | 466124   | 473098   | - | 10.93 | 9.55  |
| ENSG0000(COMMD6    | protein_co chr13 | 75525219 | 75549439 | - | 79.73 | 88.84 |
| ENSG0000(PLA2G2A   | protein_co chr1  | 19975431 | 19980416 | - | 15.84 | 15.69 |
| ENSG0000(IL17REL   | protein_co chr22 | 49994513 | 50012659 | - | 0     | 0     |
| ENSG0000(HYKK      | protein_co chr15 | 78507564 | 78537372 | + | 2.61  | 3.28  |
| ENSG0000(OR7A5     | protein_co chr19 | 14792490 | 14835376 | - | 0     | 0     |
| ENSG0000(C15orf62  | protein_co chr15 | 40770080 | 40772449 | + | 0.26  | 0.13  |
| ENSG0000(AC007731. | antisense chr22  | 20338805 | 20354372 | + | 0     | 0     |
| ENSG0000(RUFY4     | protein_co chr2  | 2.18E+08 | 2.18E+08 | + | 0     | 0     |
| ENSG0000(ZNF383    | protein_co chr19 | 37217926 | 37248738 | + | 1.99  | 3.58  |
| ENSG0000(HES4      | protein_co chr1  | 998962   | 1000172  | - | 1.98  | 2.05  |
| ENSG0000(IGFL1     | protein_co chr19 | 46229752 | 46231243 | + | 0     | 0     |
| ENSG0000(ZNF669    | protein_co chr1  | 2.47E+08 | 2.47E+08 | - | 3.13  | 2.72  |
| ENSG0000(C19orf35  | protein_co chr19 | 2274622  | 2282176  | - | 0     | 0     |

|                    |                  |          |            |       |       |
|--------------------|------------------|----------|------------|-------|-------|
| ENSG0000(LRRIQ4    | protein_co chr3  | 1.7E+08  | 1.7E+08 +  | 0     | 0     |
| ENSG0000(CENPP     | protein_co chr9  | 92325484 | 92620533 + | 1.73  | 2.35  |
| ENSG0000(PLSCR1    | protein_co chr3  | 1.47E+08 | 1.47E+08 - | 49.63 | 58.24 |
| ENSG0000(OR7D1P    | unprocessε chr19 | 9235144  | 9236076 +  | 0     | 0     |
| ENSG0000(C3orf62   | protein_co chr3  | 49268602 | 49277909 - | 2.27  | 3.33  |
| ENSG0000(ENO4      | protein_co chr10 | 1.17E+08 | 1.17E+08 + | 0.22  | 0.3   |
| ENSG0000(ZNF559    | protein_co chr19 | 9323772  | 9351162 +  | 6.25  | 6.74  |
| ENSG0000(SBK1      | protein_co chr16 | 28292519 | 28323849 + | 0.02  | 0.02  |
| ENSG0000(OR6C6     | protein_co chr12 | 55294288 | 55295232 - | 0     | 0     |
| ENSG0000(BSPH1     | protein_co chr19 | 47968046 | 47992170 - | 0     | 0     |
| ENSG0000(SLC38A3   | protein_co chr3  | 50205246 | 50221486 + | 0.02  | 0.23  |
| ENSG0000(OR6N2     | protein_co chr1  | 1.59E+08 | 1.59E+08 - | 0     | 0     |
| ENSG0000(GTF2F2    | protein_co chr13 | 45120515 | 45284909 + | 5.65  | 6.48  |
| ENSG0000(FAM92A    | protein_co chr8  | 93698561 | 93731527 + | 26.24 | 21.39 |
| ENSG0000(FOCAD     | protein_co chr9  | 20658309 | 20995955 + | 5.69  | 6.62  |
| ENSG0000(AC092171. | antisense chr7   | 5419846  | 5423122 +  | 0     | 0     |
| ENSG0000(PRR19     | protein_co chr19 | 42302098 | 42310821 + | 0.76  | 0.62  |
| ENSG0000(ZP3       | protein_co chr7  | 76397518 | 76442071 + | 1.69  | 0.74  |
| ENSG0000(C10orf99  | protein_co chr10 | 84173738 | 84185294 + | 0     | 0     |
| ENSG0000(H3F3C     | protein_co chr12 | 31791185 | 31792241 - | 0.12  | 0     |
| ENSG0000(IFNA2     | protein_co chr9  | 21384254 | 21385388 - | 0     | 0     |
| ENSG0000(GPAT2P2   | unprocessε chr2  | 97081098 | 97083249 + | 0     | 0     |
| ENSG0000(JAKMIP3   | protein_co chr10 | 1.32E+08 | 1.32E+08 + | 0.05  | 0.08  |
| ENSG0000(PPP3R2    | protein_co chr9  | 1.02E+08 | 1.02E+08 - | 0     | 0     |
| ENSG0000(GOLGA6L3  | unprocessε chr15 | 85240472 | 85247170 + | 0.27  | 0.43  |
| ENSG0000(PDCD1     | protein_co chr2  | 2.42E+08 | 2.42E+08 - | 0     | 0     |
| ENSG0000(CLEC2A    | protein_co chr12 | 9898673  | 9932381 -  | 0     | 0     |
| ENSG0000(GPR21     | protein_co chr9  | 1.23E+08 | 1.23E+08 + | 0     | 0     |
| ENSG0000(TCTEX1D4  | protein_co chr1  | 44805913 | 44806675 - | 0.34  | 0.09  |
| ENSG0000(ANKRD36P  | unprocessε chrY  | 26409815 | 26420535 + | 0     | 0     |
| ENSG0000(IGHV1OR1. | IG_V_gene chr15  | 19964666 | 19965101 - | 0     | 0     |
| ENSG0000(SELL      | protein_co chr1  | 1.7E+08  | 1.7E+08 -  | 0.78  | 0.76  |
| ENSG0000(MAGEB5    | protein_co chrX  | 26216169 | 26218270 + | 0     | 0     |
| ENSG0000(CHM       | protein_co chrX  | 85861180 | 86047562 - | 5.16  | 5.59  |
| ENSG0000(NANOS2    | protein_co chr19 | 45913214 | 45914870 - | 0     | 0     |
| ENSG0000(BLOC1S5   | protein_co chr6  | 8013567  | 8064414 -  | 7.79  | 7.78  |
| ENSG0000(RP11-1396 | unprocessε chr4  | 9399204  | 9403565 +  | 0     | 0     |
| ENSG0000(OR4P1P    | unprocessε chr11 | 55683239 | 55684374 + | 0     | 0     |
| ENSG0000(SRP72P2   | processed_ chr6  | 1.58E+08 | 1.58E+08 - | 0     | 0     |
| ENSG0000(CERKL     | protein_co chr2  | 1.82E+08 | 1.82E+08 - | 0.04  | 0     |
| ENSG0000(WASF4P    | processed_ chrX  | 47803296 | 47804789 + | 0     | 0     |
| ENSG0000(ACTBP11   | processed_ chr1  | 2.24E+08 | 2.24E+08 - | 0.05  | 0.17  |
| ENSG0000(SLC24A5   | protein_co chr15 | 48120972 | 48142672 + | 0     | 0     |
| ENSG0000(IER5L     | protein_co chr9  | 1.29E+08 | 1.29E+08 - | 23.14 | 26.76 |
| ENSG0000(H2AFX     | protein_co chr11 | 1.19E+08 | 1.19E+08 - | 7.44  | 9.28  |

|                 |           |             |       |          |          |   |        |        |
|-----------------|-----------|-------------|-------|----------|----------|---|--------|--------|
| ENSG00000103921 | INSC      | protein_co  | chr11 | 15112424 | 15247208 | + | 0      | 0      |
| ENSG00000103922 | SERPINA5  | protein_co  | chr14 | 94561442 | 94593120 | + | 0.04   | 0.15   |
| ENSG00000103923 | C19orf54  | protein_co  | chr19 | 40740856 | 40751553 | - | 4.86   | 5.93   |
| ENSG00000103924 | LCTL      | protein_co  | chr15 | 66547179 | 66565979 | - | 0.08   | 0.14   |
| ENSG00000103925 | NCCRP1    | protein_co  | chr19 | 39196961 | 39201884 | + | 0      | 0      |
| ENSG00000103926 | KRTDAP    | protein_co  | chr19 | 35487324 | 35495558 | - | 0      | 0.19   |
| ENSG00000103927 | C22orf34  | lincRNA     | chr22 | 49414524 | 49657542 | - | 0      | 0      |
| ENSG00000103928 | RP1-273G1 | processed   | chr8  | 33969567 | 33969879 | - | 0      | 0      |
| ENSG00000103929 | COL25A1   | protein_co  | chr4  | 1.09E+08 | 1.09E+08 | - | 0.06   | 0.06   |
| ENSG00000103930 | FAM83G    | protein_co  | chr17 | 18968789 | 19004804 | - | 5.25   | 6.01   |
| ENSG00000103931 | CFAP77    | protein_co  | chr9  | 1.32E+08 | 1.33E+08 | + | 0      | 0      |
| ENSG00000103932 | AC010969  | antisense   | chr2  | 10003158 | 10006030 | - | 0      | 0      |
| ENSG00000103933 | SRSF10    | protein_co  | chr1  | 23964804 | 23980927 | - | 32.49  | 31.98  |
| ENSG00000103934 | HBA2      | protein_co  | chr16 | 172847   | 173710   | + | 0      | 0      |
| ENSG00000103935 | DUSP28    | protein_co  | chr2  | 2.41E+08 | 2.41E+08 | + | 1.62   | 2.51   |
| ENSG00000103936 | C15orf52  | protein_co  | chr15 | 40331452 | 40340967 | - | 7.46   | 6.1    |
| ENSG00000103937 | NBR1      | protein_co  | chr17 | 43170481 | 43211689 | + | 52.32  | 52.03  |
| ENSG00000103938 | OR2G6     | protein_co  | chr1  | 2.49E+08 | 2.49E+08 | + | 0      | 0      |
| ENSG00000103939 | RALGAPA2  | protein_co  | chr20 | 20389552 | 20712488 | - | 2.71   | 3.37   |
| ENSG00000103940 | NDOR1     | protein_co  | chr9  | 1.37E+08 | 1.37E+08 | + | 4.42   | 5.43   |
| ENSG00000103941 | FBLL1     | protein_co  | chr5  | 1.69E+08 | 1.69E+08 | + | 0.15   | 0.21   |
| ENSG00000103942 | NKAIN2    | protein_co  | chr6  | 1.24E+08 | 1.25E+08 | + | 0      | 0      |
| ENSG00000103943 | KRTAP1-1  | protein_co  | chr17 | 41040559 | 41041461 | - | 0      | 0      |
| ENSG00000103944 | PAQR9     | protein_co  | chr3  | 1.43E+08 | 1.43E+08 | - | 0      | 0      |
| ENSG00000103945 | CLEC20A   | protein_co  | chr1  | 1.78E+08 | 1.78E+08 | - | 0      | 0      |
| ENSG00000103946 | CFAP54    | protein_co  | chr12 | 96489571 | 96875555 | + | 1.2    | 1.05   |
| ENSG00000103947 | NPIPP1    | transcribed | chr16 | 15104312 | 15123498 | - | 10.32  | 9.22   |
| ENSG00000103948 | CLN3      | protein_co  | chr16 | 28474111 | 28495575 | - | 34.8   | 32.29  |
| ENSG00000103949 | FAM72B    | protein_co  | chr1  | 1.21E+08 | 1.21E+08 | - | 1.91   | 1.33   |
| ENSG00000103950 | ASAH2     | protein_co  | chr10 | 50182778 | 50248610 | - | 0.6    | 0.22   |
| ENSG00000103951 | SUMO2     | protein_co  | chr17 | 75165586 | 75182983 | - | 158.7  | 168.61 |
| ENSG00000103952 | NANOS1    | protein_co  | chr10 | 1.19E+08 | 1.19E+08 | + | 0.21   | 0.24   |
| ENSG00000103953 | HMX3      | protein_co  | chr10 | 1.23E+08 | 1.23E+08 | + | 0      | 0      |
| ENSG00000103954 | IGFL3     | protein_co  | chr19 | 46120071 | 46124674 | - | 0.1    | 0      |
| ENSG00000103955 | GOLGA8M   | protein_co  | chr15 | 28701954 | 28738384 | - | 2.1    | 2.63   |
| ENSG00000103956 | ZNF177    | protein_co  | chr19 | 9363020  | 9382617  | + | 0.87   | 1.23   |
| ENSG00000103957 | LDOC1L    | protein_co  | chr22 | 44492572 | 44498298 | - | 14.09  | 14.09  |
| ENSG00000103958 | DPYD      | protein_co  | chr1  | 97077743 | 97921049 | - | 22.14  | 21.17  |
| ENSG00000103959 | S100A16   | protein_co  | chr1  | 1.54E+08 | 1.54E+08 | - | 131.45 | 126.95 |
| ENSG00000103960 | RP11-361A | processed   | chr12 | 74663774 | 74664141 | - | 0      | 0      |
| ENSG00000103961 | PTAR1     | protein_co  | chr9  | 69709522 | 69759959 | - | 8.08   | 8.53   |
| ENSG00000103962 | CC2D2B    | protein_co  | chr10 | 95907603 | 96032684 | + | 0.06   | 0      |
| ENSG00000103963 | RNASE9    | protein_co  | chr14 | 20556093 | 20560931 | - | 0      | 0      |
| ENSG00000103964 | TSPY7P    | unprocessed | chrY  | 9378122  | 9380871  | + | 0      | 0      |
| ENSG00000103965 | SAXO2     | protein_co  | chr15 | 82262810 | 82284930 | + | 1.63   | 0.69   |

|                    |                |       |          |          |   |       |       |
|--------------------|----------------|-------|----------|----------|---|-------|-------|
| ENSG0000(LINC00319 | lincRNA        | chr21 | 43446601 | 43453893 | + | 0     | 0     |
| ENSG0000(HILS1     | transcribed    | chr17 | 50171428 | 50181178 | - | 0     | 0.05  |
| ENSG0000(OR7E90P   | unprocessed    | chr2  | 1.59E+08 | 1.59E+08 | + | 0     | 0     |
| ENSG0000(RHCE      | protein_coding | chr1  | 25362249 | 25430192 | - | 0.42  | 0.49  |
| ENSG0000(C2orf80   | protein_coding | chr2  | 2.08E+08 | 2.08E+08 | - | 0     | 0     |
| ENSG0000(IDO2      | protein_coding | chr8  | 39934614 | 40016391 | + | 0.05  | 0     |
| ENSG0000(PARVB     | protein_coding | chr22 | 43999211 | 44172949 | + | 21.17 | 22.54 |
| ENSG0000(TEKT4P2   | transcribed    | chr21 | 9068361  | 9129752  | - | 3.55  | 3.9   |
| ENSG0000(SLC4A5    | protein_coding | chr2  | 74216242 | 74343414 | - | 0.53  | 0.98  |
| ENSG0000(UROS      | protein_coding | chr10 | 1.26E+08 | 1.26E+08 | - | 32.73 | 35.29 |
| ENSG0000(OR56A5    | protein_coding | chr11 | 5967177  | 5968494  | - | 0     | 0     |
| ENSG0000(CYP51A1-A | antisense      | chr7  | 92134604 | 92180725 | + | 0.11  | 0.1   |
| ENSG0000(KRTAP24-1 | protein_coding | chr21 | 30281309 | 30282958 | - | 0     | 0     |
| ENSG0000(ZDHHC9    | protein_coding | chrX  | 1.3E+08  | 1.3E+08  | - | 25.18 | 23.1  |
| ENSG0000(ZBED6CL   | protein_coding | chr7  | 1.5E+08  | 1.5E+08  | + | 0.37  | 0.55  |
| ENSG0000(QRFP      | protein_coding | chr9  | 1.31E+08 | 1.31E+08 | - | 0     | 0     |
| ENSG0000(OR13D3P   | unprocessed    | chr9  | 1.05E+08 | 1.05E+08 | + | 0     | 0     |
| ENSG0000(DUPD1     | protein_coding | chr10 | 75037836 | 75058514 | - | 0     | 0     |
| ENSG0000(SMIM15    | protein_coding | chr5  | 61157709 | 61162474 | - | 28.13 | 24.21 |
| ENSG0000(OSTN      | protein_coding | chr3  | 1.91E+08 | 1.91E+08 | + | 0     | 0     |
| ENSG0000(VWC2      | protein_coding | chr7  | 49773661 | 49921950 | + | 0     | 0     |
| ENSG0000(FAM221A   | protein_coding | chr7  | 23680130 | 23703249 | + | 0.82  | 1.29  |
| ENSG0000(TMEM120f  | protein_coding | chr12 | 1.22E+08 | 1.22E+08 | + | 4.35  | 3.56  |
| ENSG0000(FSIP2     | protein_coding | chr2  | 1.86E+08 | 1.86E+08 | + | 1.37  | 2.23  |
| ENSG0000(RBM34     | protein_coding | chr1  | 2.35E+08 | 2.35E+08 | - | 16.96 | 14.83 |
| ENSG0000(NOXA1     | protein_coding | chr9  | 1.37E+08 | 1.37E+08 | + | 0.7   | 0.71  |
| ENSG0000(TBC1D3P2  | transcribed    | chr17 | 62264705 | 62275655 | - | 0     | 0     |
| ENSG0000(TMEM198   | protein_coding | chr2  | 2.2E+08  | 2.2E+08  | + | 3.88  | 2.85  |
| ENSG0000(BCL2L15   | protein_coding | chr1  | 1.14E+08 | 1.14E+08 | - | 0.19  | 0.03  |
| ENSG0000(FZD9      | protein_coding | chr7  | 73433783 | 73436120 | + | 0.09  | 0.21  |
| ENSG0000(TMSB4XP2  | unprocessed    | chr2  | 3617548  | 3617757  | - | 0     | 0     |
| ENSG0000(SPRED3    | protein_coding | chr19 | 38388421 | 38399587 | + | 1.36  | 1.77  |
| ENSG0000(OPTC      | protein_coding | chr1  | 2.03E+08 | 2.04E+08 | + | 0     | 0     |
| ENSG0000(PLET1     | protein_coding | chr11 | 1.12E+08 | 1.12E+08 | - | 0     | 0     |
| ENSG0000(ADRB3     | protein_coding | chr8  | 37962991 | 37966965 | - | 0     | 0     |
| ENSG0000(SKOR1     | protein_coding | chr15 | 67819704 | 67834561 | + | 0.06  | 0.17  |
| ENSG0000(CATSPER4  | protein_coding | chr1  | 26190561 | 26202968 | + | 0     | 0     |
| ENSG0000(PRELP     | protein_coding | chr1  | 2.03E+08 | 2.03E+08 | + | 2.72  | 3.04  |
| ENSG0000(PLA2G2E   | protein_coding | chr1  | 19920009 | 19923617 | - | 0     | 0     |
| ENSG0000(ZNF548    | protein_coding | chr19 | 57389850 | 57402992 | + | 5.32  | 6.18  |
| ENSG0000(MTF1      | protein_coding | chr1  | 37809567 | 37859620 | - | 3.44  | 3.7   |
| ENSG0000(TMCO2     | protein_coding | chr1  | 40245947 | 40251691 | + | 0     | 0     |
| ENSG0000(ZNF322P1  | processed      | chr9  | 97198303 | 97199511 | - | 0     | 0     |
| ENSG0000(SHISA6    | protein_coding | chr17 | 11241263 | 11564063 | + | 0     | 0     |
| ENSG0000(TMEM201   | protein_coding | chr1  | 9588922  | 9614873  | + | 3.08  | 2.73  |

|                    |                   |          |          |   |       |        |
|--------------------|-------------------|----------|----------|---|-------|--------|
| ENSG0000(NHLRC3    | protein_co chr13  | 39038306 | 39050109 | + | 8.52  | 8.79   |
| ENSG0000(HMX2      | protein_co chr10  | 1.23E+08 | 1.23E+08 | + | 0     | 0      |
| ENSG0000(SNTN      | protein_co chr3   | 63652668 | 63679020 | + | 0     | 0      |
| ENSG0000(ZDHHC11   | protein_co chr5   | 795606   | 850986   | - | 1.35  | 1.22   |
| ENSG0000(FAM26F    | protein_co chr6   | 1.16E+08 | 1.16E+08 | + | 0.67  | 0.38   |
| ENSG0000(CNR2      | protein_co chr1   | 23870526 | 23913362 | - | 0.04  | 0.16   |
| ENSG0000(LINC00910 | lincRNA chr17     | 43369845 | 43389199 | - | 1.22  | 0.85   |
| ENSG0000(SLX4      | protein_co chr16  | 3581181  | 3611598  | - | 1.03  | 1.19   |
| ENSG0000(GLRA4     | protein_co chrX   | 1.04E+08 | 1.04E+08 | - | 0     | 0      |
| ENSG0000(DPPA3P2   | transcribec chr14 | 36371165 | 36372383 | + | 0.1   | 0      |
| ENSG0000(ENTPD8    | protein_co chr9   | 1.37E+08 | 1.37E+08 | - | 0     | 0.14   |
| ENSG0000(RPL14     | protein_co chr3   | 40457292 | 40468587 | + | 534.5 | 568.38 |
| ENSG0000(BEND4     | protein_co chr4   | 42110938 | 42152878 | - | 0     | 0      |
| ENSG0000(RP11-159F | transcribec chr5  | 43336164 | 43348716 | + | 0     | 0      |
| ENSG0000(RPSAP47   | processed_chr8    | 80558870 | 80559757 | + | 0     | 0      |
| ENSG0000(FAM78B    | protein_co chr1   | 1.66E+08 | 1.66E+08 | - | 0.5   | 0.48   |
| ENSG0000(ZNF563    | protein_co chr19  | 12317477 | 12333720 | - | 1.39  | 1.87   |
| ENSG0000(TMC3      | protein_co chr15  | 81331217 | 81374213 | - | 0.07  | 0.05   |
| ENSG0000(RPL10AP2  | processed_chr8    | 47157118 | 47157771 | + | 0     | 0      |
| ENSG0000(POTEA     | polymorph chr8    | 43292483 | 43363518 | + | 0     | 0      |
| ENSG0000(FBF1      | protein_co chr17  | 75909574 | 75941140 | - | 2.26  | 2.52   |
| ENSG0000(KLRG2     | protein_co chr7   | 1.39E+08 | 1.39E+08 | - | 0     | 0      |
| ENSG0000(ASTL      | protein_co chr2   | 96123850 | 96138436 | - | 0     | 0      |
| ENSG0000(MSL1      | protein_co chr17  | 40122298 | 40136916 | + | 37.64 | 37.82  |
| ENSG0000(CTD-3088G | protein_co chr16  | 11359845 | 11523588 | - | 0.41  | 0.24   |
| ENSG0000(LRRK2     | protein_co chr12  | 40196744 | 40369285 | + | 2.44  | 3.26   |
| ENSG0000(BSX       | protein_co chr11  | 1.23E+08 | 1.23E+08 | - | 0     | 0      |
| ENSG0000(GJB3      | protein_co chr1   | 34781189 | 34786369 | + | 0     | 0      |
| ENSG0000(FAM196A   | protein_co chr10  | 1.27E+08 | 1.27E+08 | - | 0.03  | 0.15   |
| ENSG0000(TRMT2B    | protein_co chrX   | 1.01E+08 | 1.01E+08 | - | 3.22  | 3.63   |
| ENSG0000(HACD4     | protein_co chr9   | 20999515 | 21031636 | - | 1.1   | 1.37   |
| ENSG0000(CFAP126   | protein_co chr1   | 1.61E+08 | 1.61E+08 | - | 0     | 0      |
| ENSG0000(USP32P1   | transcribec chr17 | 16786489 | 16804455 | + | 23.03 | 22.25  |
| ENSG0000(NYX       | protein_co chrX   | 41447434 | 41475710 | + | 0     | 0      |
| ENSG0000(FAM120AC  | protein_co chr9   | 93446494 | 93453592 | - | 19.33 | 18.12  |
| ENSG0000(UTS2B     | protein_co chr3   | 1.91E+08 | 1.91E+08 | - | 0.55  | 0.43   |
| ENSG0000(C9orf152  | protein_co chr9   | 1.1E+08  | 1.1E+08  | - | 0.02  | 0.02   |
| ENSG0000(NOC2L     | protein_co chr1   | 944204   | 959309   | - | 19.68 | 18.69  |
| ENSG0000(MSANTD1   | protein_co chr4   | 3244369  | 3271738  | + | 0.07  | 0.04   |
| ENSG0000(AADAACL3  | protein_co chr1   | 12716115 | 12728759 | + | 0     | 0      |
| ENSG0000(DHFRP1    | processed_chr18   | 26170726 | 26171284 | - | 0.2   | 0.25   |
| ENSG0000(NELFB     | protein_co chr9   | 1.37E+08 | 1.37E+08 | + | 21.78 | 22.02  |
| ENSG0000(SLC15A5   | protein_co chr12  | 16188485 | 16277685 | - | 0.02  | 0.02   |
| ENSG0000(LIPI      | protein_co chr21  | 14108813 | 14210891 | - | 0     | 0      |
| ENSG0000(LRRC66    | protein_co chr4   | 51993702 | 52017620 | - | 0.24  | 0.23   |

|                    |                   |          |          |   |       |       |
|--------------------|-------------------|----------|----------|---|-------|-------|
| ENSG0000(ZNF292    | protein_co chr6   | 87152833 | 87264196 | + | 6.06  | 6.02  |
| ENSG0000(HUS1B     | protein_co chr6   | 655939   | 656963   | - | 0     | 0     |
| ENSG0000(KCTD21    | protein_co chr11  | 78171249 | 78188822 | - | 8.2   | 5.24  |
| ENSG0000(SBSN      | protein_co chr19  | 35523367 | 35528351 | - | 37.52 | 37.76 |
| ENSG0000(PROS2P    | unprocessε chr3   | 90202316 | 90257415 | - | 0.03  | 0     |
| ENSG0000(ADAT2     | protein_co chr6   | 1.43E+08 | 1.43E+08 | - | 1.88  | 2.29  |
| ENSG0000(KIR2DL4   | protein_co chr19  | 54803535 | 54814517 | + | 0     | 0     |
| ENSG0000(FAM35DP   | unprocessε chr10  | 47689707 | 47730436 | + | 0.23  | 0.16  |
| ENSG0000(MAGEB16   | protein_co chrX   | 35798342 | 35803735 | + | 0     | 0     |
| ENSG0000(VHLL      | protein_co chr1   | 1.56E+08 | 1.56E+08 | - | 0     | 0     |
| ENSG0000(DUSP21    | protein_co chrX   | 44844004 | 44844888 | + | 0     | 0     |
| ENSG0000(ZNF567    | protein_co chr19  | 36687612 | 36727701 | + | 3.78  | 3.18  |
| ENSG0000(NDUFA4    | protein_co chr7   | 10931951 | 10940256 | - | 84.32 | 85.12 |
| ENSG0000(ANKDD1B   | protein_co chr5   | 75611459 | 75671846 | + | 0.31  | 0.2   |
| ENSG0000(ALKBH2    | protein_co chr12  | 1.09E+08 | 1.09E+08 | - | 6.21  | 7.01  |
| ENSG0000(RNFT1     | protein_co chr17  | 59952240 | 59964761 | - | 5.06  | 4.95  |
| ENSG0000(RNF222    | protein_co chr17  | 8390704  | 8397826  | - | 0.04  | 0     |
| ENSG0000(CGB5      | protein_co chr19  | 49043884 | 49045311 | + | 0     | 0     |
| ENSG0000(RELN      | protein_co chr7   | 1.03E+08 | 1.04E+08 | - | 0.11  | 0.12  |
| ENSG0000(FAM111B   | protein_co chr11  | 59107185 | 59127410 | + | 0     | 0     |
| ENSG0000(APOD      | protein_co chr3   | 1.96E+08 | 1.96E+08 | - | 1.43  | 0.91  |
| ENSG0000(H1FO      | protein_co chr22  | 37805093 | 37807436 | + | 39.56 | 36.96 |
| ENSG0000(GAGE2A    | protein_co chrX   | 49589529 | 49596827 | + | 0     | 0     |
| ENSG0000(LITAF     | protein_co chr16  | 11547722 | 11636381 | - | 44.51 | 49.64 |
| ENSG0000(VSTM1     | protein_co chr19  | 54040825 | 54063953 | - | 0     | 0     |
| ENSG0000(TMEM120A  | protein_co chr7   | 75986837 | 75994659 | - | 23.18 | 25.07 |
| ENSG0000(ARID2     | protein_co chr12  | 45729665 | 45908040 | + | 4.67  | 5.32  |
| ENSG0000(RIMKLBP1  | processed_ chr21  | 36050214 | 36051377 | + | 0     | 0     |
| ENSG0000(FAM25G    | protein_co chr10  | 47487219 | 47491693 | - | 0     | 0     |
| ENSG0000(SF3B3     | protein_co chr16  | 70523788 | 70577670 | + | 54.61 | 56.77 |
| ENSG0000(PRSS48    | protein_co chr4   | 1.51E+08 | 1.51E+08 | + | 0     | 0     |
| ENSG0000(IL1RAPL2  | protein_co chrX   | 1.05E+08 | 1.06E+08 | + | 0     | 0     |
| ENSG0000(BLOC1S3   | protein_co chr19  | 45178745 | 45181801 | + | 6.3   | 7.17  |
| ENSG0000(SP6       | protein_co chr17  | 47844908 | 47855874 | - | 0.13  | 0.31  |
| ENSG0000(ANKRD34B  | protein_co chr5   | 80556755 | 80570488 | - | 0     | 0     |
| ENSG0000(PLAC9     | protein_co chr10  | 80131682 | 80145359 | + | 36.66 | 40.82 |
| ENSG0000(FAM47B    | protein_co chrX   | 34942796 | 34944915 | + | 0     | 0     |
| ENSG0000(NKAPL     | protein_co chr6   | 28259320 | 28260958 | + | 1.77  | 1.37  |
| ENSG0000(UBE2Q2P1  | transcribed chr15 | 84526781 | 84571216 | - | 5.83  | 5.37  |
| ENSG0000(FSCB      | protein_co chr14  | 44504342 | 44507279 | - | 0.02  | 0     |
| ENSG0000(CLDN4     | protein_co chr7   | 73799542 | 73832693 | + | 0.18  | 0.03  |
| ENSG0000(ZNF573    | protein_co chr19  | 37735833 | 37817300 | - | 0.52  | 1.61  |
| ENSG0000(RP11-77G2 | processed_ chrX   | 40907987 | 40908391 | + | 0     | 0     |
| ENSG0000(CRYM-AS1  | bidirection chr16 | 21300849 | 21318591 | + | 0.27  | 0.14  |
| ENSG0000(GRAPL     | protein_co chr17  | 19127469 | 19159176 | + | 0     | 0     |



|                    |                   |          |          |   |        |        |
|--------------------|-------------------|----------|----------|---|--------|--------|
| ENSG0000(FAM47E    | protein_co chr4   | 76214040 | 76283780 | + | 0.33   | 0.36   |
| ENSG0000(HN1       | protein_co chr17  | 75135248 | 75168281 | - | 28.82  | 30.31  |
| ENSG0000(ZNF527    | protein_co chr19  | 37371061 | 37393066 | + | 2.27   | 1.57   |
| ENSG0000(TNRC18P3  | unprocessε chr7   | 56991888 | 57009149 | + | 0      | 0      |
| ENSG0000(ZAR1L     | protein_co chr13  | 32303700 | 32315344 | - | 0      | 0      |
| ENSG0000(KRTAP10-1 | protein_co chr21  | 44697172 | 44698044 | + | 0      | 0      |
| ENSG0000(S100A13   | protein_co chr1   | 1.54E+08 | 1.54E+08 | - | 169.16 | 178.22 |
| ENSG0000(ZNF33A    | protein_co chr10  | 38010650 | 38065088 | + | 6.77   | 6.8    |
| ENSG0000(OR14I1    | protein_co chr1   | 2.49E+08 | 2.49E+08 | - | 0      | 0      |
| ENSG0000(KRT77     | protein_co chr12  | 52689626 | 52703463 | - | 0      | 0      |
| ENSG0000(PCDH18    | protein_co chr4   | 1.38E+08 | 1.38E+08 | - | 42.47  | 47.12  |
| ENSG0000(DCAF8L2   | protein_co chrX   | 27590382 | 27748821 | + | 0      | 0.28   |
| ENSG0000(ZNF600    | protein_co chr19  | 52764195 | 52786791 | - | 2.89   | 1.47   |
| ENSG0000(BTBD8     | protein_co chr1   | 92080305 | 92184725 | + | 0.5    | 0.31   |
| ENSG0000(LINC00994 | lincRNA chr3      | 64078361 | 64087363 | - | 0      | 0      |
| ENSG0000(DPY19L2P1 | transcribec chr7  | 35079989 | 35186041 | - | 0.73   | 1.02   |
| ENSG0000(MAOA      | protein_co chrX   | 43654907 | 43746824 | + | 0      | 0.07   |
| ENSG0000(PAX8-AS1  | processed_ chr2   | 1.13E+08 | 1.13E+08 | + | 15.52  | 13.77  |
| ENSG0000(C15orf61  | protein_co chr15  | 67521068 | 67530143 | + | 2.27   | 2.63   |
| ENSG0000(AC069277. | lincRNA chr3      | 6490479  | 6736129  | + | 0      | 0      |
| ENSG0000(NUGGC     | protein_co chr8   | 28021964 | 28083871 | - | 0      | 0.03   |
| ENSG0000(LINC00943 | lincRNA chr12     | 1.27E+08 | 1.27E+08 | + | 0.02   | 0      |
| ENSG0000(TSPYL1    | protein_co chr6   | 1.16E+08 | 1.16E+08 | - | 18.8   | 18.82  |
| ENSG0000(SPANXN3   | protein_co chrX   | 1.44E+08 | 1.44E+08 | - | 0.12   | 0      |
| ENSG0000(TRIM64B   | protein_co chr11  | 89869282 | 89876017 | - | 0      | 0      |
| ENSG0000(PNRC2     | protein_co chr1   | 23959109 | 23963462 | + | 30.55  | 32.32  |
| ENSG0000(DRICH1    | protein_co chr22  | 23608452 | 23632321 | - | 0      | 0      |
| ENSG0000(LINC01164 | lincRNA chr10     | 1.32E+08 | 1.32E+08 | - | 0      | 0      |
| ENSG0000(GJB5      | protein_co chr1   | 34755047 | 34758512 | + | 0      | 0      |
| ENSG0000(FHIT      | protein_co chr3   | 59749310 | 61251459 | - | 0.22   | 0.8    |
| ENSG0000(ALKAL2    | protein_co chr2   | 279558   | 288851   | - | 0      | 0      |
| ENSG0000(ANKRD62P  | processed_ chr22  | 16654066 | 16675540 | - | 0      | 0      |
| ENSG0000(ZKSCAN3   | protein_co chr6   | 28349914 | 28369177 | + | 2.62   | 2.01   |
| ENSG0000(FOXR2     | protein_co chrX   | 55623400 | 55625325 | + | 0      | 0      |
| ENSG0000(RRP7A     | protein_co chr22  | 42509968 | 42519802 | - | 7.66   | 9.97   |
| ENSG0000(LIN54     | protein_co chr4   | 82909973 | 83012926 | - | 3.28   | 2.92   |
| ENSG0000(RP11-797H | antisense chr7    | 64888527 | 64890100 | - | 0      | 0      |
| ENSG0000(FAM53B    | protein_co chr10  | 1.25E+08 | 1.25E+08 | - | 3.44   | 3.67   |
| ENSG0000(FAM180A   | protein_co chr7   | 1.36E+08 | 1.36E+08 | - | 20.56  | 22.66  |
| ENSG0000(C6orf222  | protein_co chr6   | 36315757 | 36336885 | - | 0      | 0      |
| ENSG0000(SPANXN4   | protein_co chrX   | 1.43E+08 | 1.43E+08 | + | 0      | 0      |
| ENSG0000(RP11-113D | transcribec chr11 | 18209138 | 18214562 | + | 0.69   | 1.31   |
| ENSG0000(S100A14   | protein_co chr1   | 1.54E+08 | 1.54E+08 | - | 0.23   | 0.2    |
| ENSG0000(KAZN      | protein_co chr1   | 13892792 | 15118043 | + | 7.71   | 7.85   |
| ENSG0000(SLC35E2B  | protein_co chr1   | 1659529  | 1692728  | - | 26.99  | 30.11  |

|                    |                   |          |          |   |        |        |
|--------------------|-------------------|----------|----------|---|--------|--------|
| ENSG0000(RPS2P46   | processed_ chr17  | 19445970 | 19446852 | - | 0.07   | 0.43   |
| ENSG0000(FAM90A27  | transcribec chr19 | 53281559 | 53284944 | + | 0      | 0      |
| ENSG0000(TOGARAM   | protein_co chr2   | 28956611 | 29061373 | + | 0.28   | 0.68   |
| ENSG0000(SPATA31D  | protein_co chr9   | 81928514 | 81934948 | + | 0      | 0      |
| ENSG0000(NEMP2     | protein_co chr2   | 1.91E+08 | 1.91E+08 | - | 2.12   | 1.93   |
| ENSG0000(ALG1L     | protein_co chr3   | 1.26E+08 | 1.26E+08 | - | 0.47   | 0.21   |
| ENSG0000(KIAA0408  | protein_co chr6   | 1.27E+08 | 1.27E+08 | - | 0.32   | 2.44   |
| ENSG0000(GSPT2     | protein_co chrX   | 51743431 | 51746232 | + | 4.46   | 4.19   |
| ENSG0000(RP6-149D1 | unprocessε chrX   | 1.08E+08 | 1.08E+08 | + | 0      | 0      |
| ENSG0000(TBC1D28   | protein_co chr17  | 18635006 | 18661950 | - | 0      | 0      |
| ENSG0000(C8orf76   | protein_co chr8   | 1.23E+08 | 1.23E+08 | - | 10.35  | 8.89   |
| ENSG0000(CXCL17    | protein_co chr19  | 42428288 | 42443048 | - | 0      | 0      |
| ENSG0000(FAM90A14  | unprocessε chr8   | 7715443  | 7718453  | + | 0      | 0      |
| ENSG0000(OR7E12P   | unprocessε chr11  | 3390780  | 3391752  | - | 0      | 0      |
| ENSG0000(OTUD6A    | protein_co chrX   | 70062491 | 70064179 | + | 0.11   | 0.12   |
| ENSG0000(HMGB1     | protein_co chr13  | 30456704 | 30617597 | - | 104.57 | 113.56 |
| ENSG0000(MMP23B    | protein_co chr1   | 1632095  | 1635263  | + | 6.36   | 5.41   |
| ENSG0000(SH2D5     | protein_co chr1   | 20719732 | 20732837 | - | 1.88   | 2.53   |
| ENSG0000(SPATA41   | lincRNA chr15     | 1E+08    | 1E+08    | - | 0      | 0.18   |
| ENSG0000(ZFP92     | protein_co chrX   | 1.53E+08 | 1.53E+08 | + | 0.08   | 0.08   |
| ENSG0000(USP32P3   | transcribec chr17 | 20415547 | 20431008 | + | 0.23   | 0.5    |
| ENSG0000(NCR1      | protein_co chr19  | 54906150 | 54916140 | + | 0.04   | 0      |
| ENSG0000(RASSF10   | protein_co chr11  | 13009577 | 13012106 | + | 0.02   | 0.05   |
| ENSG0000(GJB4      | protein_co chr1   | 34759741 | 34763724 | + | 0      | 0      |
| ENSG0000(RNU1-75P  | snRNA chr1        | 1.19E+08 | 1.19E+08 | - | 0      | 0      |
| ENSG0000(MIR494    | miRNA chr14       | 1.01E+08 | 1.01E+08 | + | 0      | 0      |
| ENSG0000(RNU1-15P  | snRNA chr7        | 21381363 | 21381506 | + | 0      | 0      |
| ENSG0000(Y_RNA     | misc_RNA chr10    | 68735720 | 68735823 | - | 0      | 0      |
| ENSG0000(OR2L13    | protein_co chr1   | 2.48E+08 | 2.48E+08 | + | 0.43   | 0.29   |
| ENSG0000(BLOC1S2   | protein_co chr10  | 1E+08    | 1E+08    | - | 23.97  | 22.73  |
| ENSG0000(SYCP2     | protein_co chr20  | 59863563 | 59933655 | - | 0.24   | 0.03   |
| ENSG0000(ZNF724    | protein_co chr19  | 23221599 | 23250390 | - | 0.67   | 0.91   |
| ENSG0000(IL1RAP    | protein_co chr3   | 1.91E+08 | 1.91E+08 | + | 10.49  | 7.72   |
| ENSG0000(AC013442  | processed_ chr2   | 35219377 | 35219604 | - | 0      | 0      |
| ENSG0000(PTPRT     | protein_co chr20  | 42072752 | 43189970 | - | 0      | 0      |
| ENSG0000(MYBPC1    | protein_co chr12  | 1.02E+08 | 1.02E+08 | + | 0      | 0      |
| ENSG0000(PAX5      | protein_co chr9   | 36833275 | 37034185 | - | 0      | 0      |
| ENSG0000(AC079610  | lincRNA chr2      | 2.13E+08 | 2.13E+08 | - | 0.04   | 0.23   |
| ENSG0000(OR5K4     | protein_co chr3   | 98353854 | 98354819 | + | 0      | 0      |
| ENSG0000(OR6M1     | protein_co chr11  | 1.24E+08 | 1.24E+08 | - | 0      | 0      |
| ENSG0000(SPOCK3    | protein_co chr4   | 1.67E+08 | 1.67E+08 | - | 1.74   | 0.71   |
| ENSG0000(ZNF676    | protein_co chr19  | 22179091 | 22196951 | - | 0      | 0      |
| ENSG0000(ZNF699    | protein_co chr19  | 9294275  | 9309838  | - | 1.66   | 1.27   |
| ENSG0000(RP3-391O2 | processed_ chr6   | 34576258 | 34576656 | - | 0      | 0      |
| ENSG0000(ADAM5     | transcribec chr8  | 39314591 | 39417378 | + | 0      | 0      |

|                    |                  |          |          |   |        |        |
|--------------------|------------------|----------|----------|---|--------|--------|
| ENSG0000(TDRD7     | protein_co chr9  | 97411950 | 97496125 | + | 3.88   | 3.83   |
| ENSG0000(CCDC189   | protein_co chr16 | 30757423 | 30762710 | - | 2.95   | 4.3    |
| ENSG0000(OR8A1     | protein_co chr11 | 1.25E+08 | 1.25E+08 | + | 0      | 0      |
| ENSG0000(KIAA0895L | protein_co chr16 | 67175602 | 67184040 | - | 7.69   | 7.27   |
| ENSG0000(HLA-DRB1  | protein_co chr6  | 32578769 | 32589848 | - | 0      | 0      |
| ENSG0000(VN1R2     | protein_co chr19 | 53258292 | 53261837 | + | 0.04   | 0      |
| ENSG0000(MYT1      | protein_co chr20 | 64151791 | 64242253 | + | 0      | 0      |
| ENSG0000(SERPINA3  | protein_co chr14 | 94612377 | 94624055 | + | 24.36  | 31.09  |
| ENSG0000(AKR1C3    | protein_co chr10 | 5035354  | 5107686  | + | 154.14 | 163.62 |
| ENSG0000(SPATS2L   | protein_co chr2  | 2E+08    | 2E+08    | + | 68.61  | 67.82  |
| ENSG0000(OR11H13P  | processed_chr14  | 19180291 | 19181269 | + | 0      | 0      |
| ENSG0000(ZNF250    | protein_co chr8  | 1.45E+08 | 1.45E+08 | - | 4.23   | 3.59   |
| ENSG0000(WDSUB1    | protein_co chr2  | 1.59E+08 | 1.59E+08 | - | 5.38   | 5.69   |
| ENSG0000(ZNF79     | protein_co chr9  | 1.27E+08 | 1.27E+08 | + | 3.13   | 2.71   |
| ENSG0000(S100A4    | protein_co chr1  | 1.54E+08 | 1.54E+08 | - | 349.44 | 327.16 |
| ENSG0000(PLEKHG4   | protein_co chr16 | 67277510 | 67289499 | + | 2.03   | 2.31   |
| ENSG0000(KRTAP4-3  | protein_co chr17 | 41167231 | 41168194 | - | 0      | 0      |
| ENSG0000(FAT4      | protein_co chr4  | 1.25E+08 | 1.25E+08 | + | 3.54   | 4.49   |
| ENSG0000(C8orf86   | protein_co chr8  | 38510834 | 38528662 | - | 0      | 0      |
| ENSG0000(COLCA1    | antisense chr11  | 1.11E+08 | 1.11E+08 | - | 0.2    | 0.13   |
| ENSG0000(KIF19     | protein_co chr17 | 74326210 | 74355820 | + | 0      | 0      |
| ENSG0000(OR6K2     | protein_co chr1  | 1.59E+08 | 1.59E+08 | - | 0      | 0      |
| ENSG0000(ZNF681    | protein_co chr19 | 23739195 | 23758891 | - | 0.14   | 0.04   |
| ENSG0000(ACADSB    | protein_co chr10 | 1.23E+08 | 1.23E+08 | + | 5.38   | 5.56   |
| ENSG0000(STK40     | protein_co chr1  | 36339624 | 36385896 | - | 10.06  | 8.3    |
| ENSG0000(RPS2P4    | processed_chr14  | 1.05E+08 | 1.05E+08 | - | 0      | 0      |
| ENSG0000(OR10J1    | protein_co chr1  | 1.59E+08 | 1.59E+08 | + | 0      | 0      |
| ENSG0000(TMEM63A   | protein_co chr1  | 2.26E+08 | 2.26E+08 | - | 11.74  | 10.85  |
| ENSG0000(CTSE      | protein_co chr1  | 2.06E+08 | 2.06E+08 | - | 0      | 0      |
| ENSG0000(SEMA4A    | protein_co chr1  | 1.56E+08 | 1.56E+08 | + | 0.37   | 0.38   |
| ENSG0000(HRCT1     | protein_co chr9  | 35906192 | 35907141 | + | 2.59   | 2.92   |
| ENSG0000(MPHOSPH1  | protein_co chr13 | 19633681 | 19673459 | + | 20.43  | 21.02  |
| ENSG0000(RNF216P1  | transcribed chr7 | 4973988  | 5040675  | + | 9.1    | 9.11   |
| ENSG0000(EEF1A1P5  | processed_chr9   | 1.33E+08 | 1.33E+08 | + | 5.16   | 4.36   |
| ENSG0000(GREB1     | protein_co chr2  | 11482341 | 11642788 | + | 0.77   | 0.55   |
| ENSG0000(SIRPB2    | protein_co chr20 | 1470741  | 1491587  | - | 0      | 0      |
| ENSG0000(ZNF766    | protein_co chr19 | 52269571 | 52296046 | + | 5.66   | 5.54   |
| ENSG0000(RYR1      | protein_co chr19 | 38433699 | 38587564 | + | 0      | 0.01   |
| ENSG0000(SRGAP3    | protein_co chr3  | 8980591  | 9363053  | - | 0.87   | 1.29   |
| ENSG0000(KRTAP5-3  | protein_co chr11 | 1607565  | 1608463  | - | 0      | 0      |
| ENSG0000(FAM217B   | protein_co chr20 | 59933764 | 59948680 | + | 4.83   | 2.75   |
| ENSG0000(SULT1C3   | protein_co chr2  | 1.08E+08 | 1.08E+08 | + | 0      | 0      |
| ENSG0000(TUBB      | protein_co chr6  | 30720201 | 30725426 | + | 345.48 | 349.57 |
| ENSG0000(LCOR      | protein_co chr10 | 96832260 | 96995959 | + | 2.18   | 2.15   |
| ENSG0000(SUPT5H    | protein_co chr19 | 39436156 | 39476670 | + | 37.58  | 34.04  |

|                    |                   |          |          |   |         |         |
|--------------------|-------------------|----------|----------|---|---------|---------|
| ENSG0000(XPNPEP3   | protein_co chr22  | 40857077 | 40932815 | + | 4.81    | 5.8     |
| ENSG0000(OR2T2     | protein_co chr1   | 2.48E+08 | 2.48E+08 | + | 0       | 0       |
| ENSG0000(OR2C3     | protein_co chr1   | 2.48E+08 | 2.48E+08 | - | 0       | 0       |
| ENSG0000(LINC00615 | lincRNA chr12     | 90918023 | 90948669 | + | 0       | 0       |
| ENSG0000(ZNF107    | protein_co chr7   | 64666083 | 64711582 | + | 0.69    | 0.79    |
| ENSG0000(OR10S1    | protein_co chr11  | 1.24E+08 | 1.24E+08 | - | 0       | 0       |
| ENSG0000(SFTA2     | protein_co chr6   | 30931353 | 30955636 | - | 0       | 0       |
| ENSG0000(PPIA      | protein_co chr7   | 44796680 | 44824564 | + | 1075.18 | 1028.63 |
| ENSG0000(ZNF471    | protein_co chr19  | 56507843 | 56530221 | + | 1.46    | 2.83    |
| ENSG0000(OR10J3    | protein_co chr1   | 1.59E+08 | 1.59E+08 | - | 0       | 0       |
| ENSG0000(ZNF836    | protein_co chr19  | 52153864 | 52171643 | - | 4.23    | 3.73    |
| ENSG0000(ZNF493    | protein_co chr19  | 21397119 | 21427573 | + | 2.38    | 1.85    |
| ENSG0000(LINC00523 | lincRNA chr14     | 1.01E+08 | 1.01E+08 | + | 0       | 0       |
| ENSG0000(Metazoa_S | misc_RNA chr15    | 76230048 | 76230390 | - | 9.37    | 7.19    |
| ENSG0000(GTF2IRD2  | protein_co chr7   | 74796144 | 74851551 | - | 8.43    | 7       |
| ENSG0000(GRM7      | protein_co chr3   | 6770001  | 7741533  | + | 0       | 0       |
| ENSG0000(SUPT3H    | protein_co chr6   | 44809317 | 45377953 | - | 4.41    | 5.45    |
| ENSG0000(BECN2     | protein_co chr1   | 2.42E+08 | 2.42E+08 | + | 0       | 0       |
| ENSG0000(NIF3L1    | protein_co chr2   | 2.01E+08 | 2.01E+08 | + | 10.14   | 9.41    |
| ENSG0000(AC005154. | processed_chr7    | 30516309 | 30594809 | - | 25.07   | 22.11   |
| ENSG0000(ATP2A1    | protein_co chr16  | 28878405 | 28904509 | + | 0.08    | 0.06    |
| ENSG0000(HLA-DRB9  | unprocessε chr6   | 32459821 | 32473500 | - | 0       | 0       |
| ENSG0000(RP11-497H | unprocessε chr5   | 70516387 | 70555266 | - | 0.05    | 0.69    |
| ENSG0000(IARS      | protein_co chr9   | 92210207 | 92293756 | - | 57.49   | 59.68   |
| ENSG0000(MFSD14C   | protein_co chr9   | 96897917 | 97013708 | - | 8.37    | 10.44   |
| ENSG0000(POM121    | protein_co chr7   | 72879365 | 72951440 | + | 8.38    | 9.1     |
| ENSG0000(ZBTB44    | protein_co chr11  | 1.3E+08  | 1.3E+08  | - | 8.9     | 9.23    |
| ENSG0000(GIMAP5    | protein_co chr7   | 1.51E+08 | 1.51E+08 | + | 0       | 0       |
| ENSG0000(STK31     | protein_co chr7   | 23710167 | 23832513 | + | 0       | 0.15    |
| ENSG0000(CGB7      | protein_co chr19  | 49054275 | 49058860 | - | 0.2     | 0.2     |
| ENSG0000(NLGN3     | protein_co chrX   | 71144831 | 71171201 | + | 0.19    | 0.26    |
| ENSG0000(OR8D1     | protein_co chr11  | 1.24E+08 | 1.24E+08 | - | 0       | 0       |
| ENSG0000(ADH7      | protein_co chr4   | 99412261 | 99435737 | - | 0       | 0       |
| ENSG0000(ZKSCAN7   | protein_co chr3   | 44555193 | 44594173 | + | 1.79    | 1.72    |
| ENSG0000(ZNF729    | protein_co chr19  | 22286408 | 22317176 | + | 0       | 0       |
| ENSG0000(CD55      | protein_co chr1   | 2.07E+08 | 2.07E+08 | + | 58.08   | 55.1    |
| ENSG0000(CPNE4     | protein_co chr3   | 1.32E+08 | 1.32E+08 | - | 0       | 0       |
| ENSG0000(ZNF565    | protein_co chr19  | 36182060 | 36246257 | - | 1.29    | 2.14    |
| ENSG0000(NTNG2     | protein_co chr9   | 1.32E+08 | 1.32E+08 | + | 2.95    | 2.66    |
| ENSG0000(ELAVL3    | protein_co chr19  | 11451326 | 11481046 | - | 0       | 0       |
| ENSG0000(WDR5      | protein_co chr9   | 1.34E+08 | 1.34E+08 | + | 11.34   | 10.78   |
| ENSG0000(PRSS29P   | transcribec chr16 | 1260952  | 1263845  | - | 0       | 0       |
| ENSG0000(LONP1     | protein_co chr19  | 5691834  | 5720572  | - | 43.23   | 41.93   |
| ENSG0000(C9orf163  | lincRNA chr9      | 1.36E+08 | 1.36E+08 | + | 0.17    | 0.07    |
| ENSG0000(TRRAP     | protein_co chr7   | 98877933 | 99013243 | + | 7.58    | 8.23    |

|                    |                  |          |          |   |       |       |
|--------------------|------------------|----------|----------|---|-------|-------|
| ENSG0000(NUDT11    | protein_co chrX  | 51490011 | 51496596 | - | 3.65  | 3.35  |
| ENSG0000(SRGAP2B   | protein_co chr1  | 1.45E+08 | 1.45E+08 | - | 42.64 | 42.23 |
| ENSG0000(FUT4      | protein_co chr11 | 94543840 | 94549898 | + | 1.71  | 1.59  |
| ENSG0000(ASB13     | protein_co chr10 | 5638867  | 5666595  | - | 6.82  | 5.62  |
| ENSG0000(SLC35F1   | protein_co chr6  | 1.18E+08 | 1.18E+08 | + | 0.03  | 0.01  |
| ENSG0000(ZNF34     | protein_co chr8  | 1.45E+08 | 1.45E+08 | - | 2.12  | 2.63  |
| ENSG0000(ZNF781    | protein_co chr19 | 37667751 | 37692322 | - | 0.02  | 0.06  |
| ENSG0000(OR4Q2     | polymorph chr14  | 20002163 | 20003163 | + | 0     | 0     |
| ENSG0000(ZNF140    | protein_co chr12 | 1.33E+08 | 1.33E+08 | + | 6.13  | 6.87  |
| ENSG0000(INCA1     | protein_co chr17 | 4988130  | 4997610  | - | 0.75  | 0.97  |
| ENSG0000(CTD-2503C | processed_chr5   | 74929880 | 74930566 | + | 0     | 0     |
| ENSG0000(ZNF774    | protein_co chr15 | 90352245 | 90369146 | + | 0.85  | 0.64  |
| ENSG0000(RP13-7701 | unprocessε chrX  | 52824269 | 52829267 | - | 0     | 0     |
| ENSG0000(PTPN1     | protein_co chr20 | 50510321 | 50585241 | + | 13.78 | 14.49 |
| ENSG0000(OR10D1P   | unprocessε chr11 | 1.24E+08 | 1.24E+08 | + | 0     | 0     |
| ENSG0000(EVL       | protein_co chr14 | 99971449 | 1E+08    | + | 28.04 | 26.83 |
| ENSG0000(SPANXD    | protein_co chrX  | 1.42E+08 | 1.42E+08 | - | 0     | 0     |
| ENSG0000(THEM5     | protein_co chr1  | 1.52E+08 | 1.52E+08 | - | 0.12  | 0.21  |
| ENSG0000(NOXO1     | protein_co chr16 | 1978917  | 1984192  | - | 0.05  | 0.34  |
| ENSG0000(EPHB4     | protein_co chr7  | 1.01E+08 | 1.01E+08 | - | 19.75 | 18.64 |
| ENSG0000(PRTN3     | protein_co chr19 | 840960   | 848175   | + | 0.06  | 0.07  |
| ENSG0000(ZNF765    | protein_co chr19 | 53389793 | 53430413 | + | 3.08  | 2.26  |
| ENSG0000(ZNF124    | protein_co chr1  | 2.47E+08 | 2.47E+08 | - | 0.71  | 1.15  |
| ENSG0000(XRCC6     | protein_co chr22 | 41621119 | 41664048 | + | 83.8  | 85.35 |
| ENSG0000(S100A5    | protein_co chr1  | 1.54E+08 | 1.54E+08 | - | 0     | 0     |
| ENSG0000(LINC00176 | protein_co chr20 | 64034344 | 64039962 | + | 0.07  | 0.04  |
| ENSG0000(PPP1R26   | protein_co chr9  | 1.35E+08 | 1.35E+08 | + | 3.9   | 3.69  |
| ENSG0000(NBPF4     | protein_co chr1  | 1.08E+08 | 1.08E+08 | - | 0     | 0     |
| ENSG0000(TSC22D2   | protein_co chr3  | 1.5E+08  | 1.5E+08  | + | 4.76  | 6.75  |
| ENSG0000(CRYBA4    | protein_co chr22 | 26621964 | 26630672 | + | 0     | 0     |
| ENSG0000(ASMT      | protein_co chrX  | 1615001  | 1643081  | + | 0     | 0     |
| ENSG0000(ASMT      | protein_co chrY  | 1615001  | 1643081  | + | 0     | 0     |
| ENSG0000(NPIP15    | protein_co chr16 | 74377878 | 74392080 | + | 0.17  | 0.76  |
| ENSG0000(ZNF569    | protein_co chr19 | 37411155 | 37469275 | - | 1.09  | 1.24  |
| ENSG0000(ARMCX4    | protein_co chrX  | 1.01E+08 | 1.02E+08 | + | 3.06  | 1.74  |
| ENSG0000(YRDC      | protein_co chr1  | 37802944 | 37808185 | - | 4.4   | 3.22  |
| ENSG0000(ZNF777    | protein_co chr7  | 1.49E+08 | 1.49E+08 | - | 5.21  | 4.98  |
| ENSG0000(PIK3R4    | protein_co chr3  | 1.31E+08 | 1.31E+08 | - | 5.17  | 8.37  |
| ENSG0000(ZNF775    | protein_co chr7  | 1.5E+08  | 1.5E+08  | + | 2.41  | 3.24  |
| ENSG0000(ZNF605    | protein_co chr12 | 1.33E+08 | 1.33E+08 | - | 4.29  | 5.39  |
| ENSG0000(TRAPPC2   | protein_co chrX  | 13712244 | 13734635 | - | 3.59  | 3.7   |
| ENSG0000(RFX8      | protein_co chr2  | 1.01E+08 | 1.01E+08 | - | 0.83  | 0.41  |
| ENSG0000(MYL6B     | protein_co chr12 | 56152256 | 56159647 | + | 56.17 | 65.92 |
| ENSG0000(ZNF799    | protein_co chr19 | 12390016 | 12401271 | - | 0.84  | 0.51  |
| ENSG0000(FGF16     | protein_co chrX  | 77447405 | 77457278 | + | 1.86  | 1.36  |

|                     |             |       |          |          |   |        |        |
|---------------------|-------------|-------|----------|----------|---|--------|--------|
| ENSG0000(SIAH1      | protein_co  | chr16 | 48356364 | 48448402 | - | 12.97  | 13.82  |
| ENSG0000(RP13-644N  | transcribec | chr4  | 69181660 | 69182372 | + | 0      | 0      |
| ENSG0000(GK2        | protein_co  | chr4  | 79406352 | 79408293 | - | 0      | 0      |
| ENSG0000(C20orf96   | protein_co  | chr20 | 270863   | 290778   | - | 4.98   | 7.71   |
| ENSG0000(ESRRG      | protein_co  | chr1  | 2.17E+08 | 2.17E+08 | - | 0.06   | 0.02   |
| ENSG0000(IPO4       | protein_co  | chr14 | 24180219 | 24188964 | - | 8.92   | 10.17  |
| ENSG0000(NCOR2      | protein_co  | chr12 | 1.24E+08 | 1.25E+08 | - | 43.55  | 41.55  |
| ENSG0000(SULT1A1    | protein_co  | chr16 | 28605196 | 28623625 | - | 21.83  | 20.46  |
| ENSG0000(ARL9       | protein_co  | chr4  | 56505209 | 56524448 | + | 0.21   | 1.04   |
| ENSG0000(PRPF40A    | protein_co  | chr2  | 1.53E+08 | 1.53E+08 | - | 38.21  | 38.72  |
| ENSG0000(GDAP2      | protein_co  | chr1  | 1.18E+08 | 1.18E+08 | - | 3.84   | 4.02   |
| ENSG0000(TCEAL3     | protein_co  | chrX  | 1.04E+08 | 1.04E+08 | + | 23.81  | 20.16  |
| ENSG0000(ANAPC7     | protein_co  | chr12 | 1.1E+08  | 1.1E+08  | - | 13.2   | 12.58  |
| ENSG0000(TPK1       | protein_co  | chr7  | 1.44E+08 | 1.45E+08 | - | 2.81   | 4.15   |
| ENSG0000(SLC6A9     | protein_co  | chr1  | 43991500 | 44031467 | - | 14.51  | 14.3   |
| ENSG0000(AFAP1      | protein_co  | chr4  | 7758714  | 7939926  | - | 31.03  | 31.45  |
| ENSG0000(NACA       | protein_co  | chr12 | 56712428 | 56731628 | - | 674.72 | 708.46 |
| ENSG0000(OR9K1P     | unitary_ps  | chr12 | 55115533 | 55116473 | + | 0      | 0      |
| ENSG0000(MYO18A     | protein_co  | chr17 | 29071124 | 29180412 | - | 23.39  | 18.18  |
| ENSG0000(OR2T3      | protein_co  | chr1  | 2.48E+08 | 2.48E+08 | + | 0      | 0      |
| ENSG0000(SPTSSB     | protein_co  | chr3  | 1.61E+08 | 1.61E+08 | - | 0      | 0      |
| ENSG0000(BORCS6     | protein_co  | chr17 | 8188333  | 8190907  | - | 4.2    | 3.04   |
| ENSG0000(MAN2A2     | protein_co  | chr15 | 90902218 | 90922584 | + | 18.17  | 14.65  |
| ENSG0000(MME        | protein_co  | chr3  | 1.55E+08 | 1.55E+08 | + | 99.15  | 73.31  |
| ENSG0000(FAM72A     | protein_co  | chr1  | 2.06E+08 | 2.06E+08 | - | 3.97   | 2.6    |
| ENSG0000(LINC00238  | protein_co  | chr14 | 66486354 | 66498553 | + | 0      | 0      |
| ENSG0000(CACNA1H    | protein_co  | chr16 | 1153121  | 1221772  | + | 0      | 0.04   |
| ENSG0000(SULF2      | protein_co  | chr20 | 47656348 | 47786616 | - | 46.72  | 52.68  |
| ENSG0000(RP3-499B1  | processed_  | chrX  | 18838709 | 18839452 | - | 0.09   | 0.3    |
| ENSG0000(HBG2       | protein_co  | chr11 | 5253190  | 5645789  | - | 2.12   | 0.08   |
| ENSG0000(RP11-57C1  | antisense   | chr10 | 87610163 | 87660003 | - | 0.48   | 0.41   |
| ENSG0000(LAMA2      | protein_co  | chr6  | 1.29E+08 | 1.3E+08  | + | 27.21  | 26.92  |
| ENSG0000(PFN3       | protein_co  | chr5  | 1.77E+08 | 1.77E+08 | - | 0      | 0      |
| ENSG0000(PLXNB2     | protein_co  | chr22 | 50274979 | 50307627 | - | 114.23 | 114.52 |
| ENSG0000(OR5AC2     | protein_co  | chr3  | 98087173 | 98088102 | + | 0      | 0      |
| ENSG0000(AJAP1      | protein_co  | chr1  | 4654732  | 4792534  | + | 0      | 0      |
| ENSG0000(XRCC2      | protein_co  | chr7  | 1.53E+08 | 1.53E+08 | - | 0.54   | 0.5    |
| ENSG0000(MYO6       | protein_co  | chr6  | 75749192 | 75919537 | + | 5.09   | 5.73   |
| ENSG0000(MKL1       | protein_co  | chr22 | 40410281 | 40636702 | - | 16.23  | 16.3   |
| ENSG0000(CTB-25J19. | protein_co  | chr19 | 7018969  | 7021450  | - | 0      | 0      |
| ENSG0000(HDAC2      | protein_co  | chr6  | 1.14E+08 | 1.14E+08 | - | 41.87  | 44.69  |
| ENSG0000(ANKRD20A   | transcribec | chr13 | 23939557 | 23946782 | - | 0      | 0.06   |
| ENSG0000(ZNF782     | protein_co  | chr9  | 96816472 | 96875623 | - | 2.27   | 1.78   |
| ENSG0000(SLC22A25   | protein_co  | chr11 | 63163776 | 63229652 | - | 0      | 0      |
| ENSG0000(POTEF      | protein_co  | chr2  | 1.3E+08  | 1.3E+08  | - | 0      | 0      |

|                    |                  |          |            |        |        |
|--------------------|------------------|----------|------------|--------|--------|
| ENSG0000(ZNF846    | protein_co chr19 | 9751993  | 9793180 -  | 10.94  | 11.28  |
| ENSG0000(MMP1      | protein_co chr11 | 1.03E+08 | 1.03E+08 - | 172.39 | 134.54 |
| ENSG0000(ADH1B     | protein_co chr4  | 99304964 | 99352760 - | 10.52  | 18.63  |
| ENSG0000(UGT2B15   | protein_co chr4  | 68646630 | 68670628 - | 0      | 0      |
| ENSG0000(TCF4      | protein_co chr18 | 55222331 | 55664787 - | 12.88  | 18.81  |
| ENSG0000(WNK3      | protein_co chrX  | 54192823 | 54358642 - | 0.01   | 0.02   |
| ENSG0000(LUADT1    | lincRNA chr6     | 1.47E+08 | 1.47E+08 + | 0.6    | 0.61   |
| ENSG0000(SDHAF3    | protein_co chr7  | 97116590 | 97181763 + | 6.22   | 4.44   |
| ENSG0000(HRH1      | protein_co chr3  | 11137093 | 11263557 + | 10.03  | 9.91   |
| ENSG0000(RABL6     | protein_co chr9  | 1.37E+08 | 1.37E+08 + | 23.36  | 23.22  |
| ENSG0000(ZNF136    | protein_co chr19 | 12163064 | 12189881 + | 2.66   | 1.88   |
| ENSG0000(ZKSCAN5   | protein_co chr7  | 99504651 | 99534700 + | 4.12   | 3.87   |
| ENSG0000(ZNF502    | protein_co chr3  | 44712643 | 44723831 + | 1.31   | 1.56   |
| ENSG0000(TRAPPC4   | protein_co chr11 | 1.19E+08 | 1.19E+08 + | 27.87  | 26.33  |
| ENSG0000(AC004057. | transcribed chr4 | 1.13E+08 | 1.13E+08 - | 569.72 | 603.67 |
| ENSG0000(TTC30B    | protein_co chr2  | 1.78E+08 | 1.78E+08 - | 1.39   | 1.44   |
| ENSG0000(SLC30A10  | protein_co chr1  | 2.2E+08  | 2.2E+08 -  | 0      | 0      |
| ENSG0000(OR8B3     | protein_co chr11 | 1.24E+08 | 1.24E+08 - | 0      | 0      |
| ENSG0000(TECPR2    | protein_co chr14 | 1.02E+08 | 1.03E+08 + | 9.46   | 9.12   |
| ENSG0000(TLR7      | protein_co chrX  | 12867083 | 12890380 + | 0.05   | 0.04   |
| ENSG0000(FAM180B   | protein_co chr11 | 47586693 | 47589194 + | 0.38   | 0.5    |
| ENSG0000(LINC00173 | processed_chr12  | 1.17E+08 | 1.17E+08 + | 0.07   | 0.36   |
| ENSG0000(ZFP62     | protein_co chr5  | 1.81E+08 | 1.81E+08 - | 6.79   | 7.08   |
| ENSG0000(ERI2      | protein_co chr16 | 20780193 | 20900349 - | 4.51   | 5.29   |
| ENSG0000(TOMM7     | protein_co chr7  | 22812628 | 22822852 - | 156.75 | 164.95 |
| ENSG0000(HSH2D     | protein_co chr19 | 16134028 | 16158575 + | 0      | 0      |
| ENSG0000(TRPV1     | protein_co chr17 | 3565444  | 3609411 -  | 2.72   | 2.23   |
| ENSG0000(ZNF33B    | protein_co chr10 | 42574185 | 42638568 - | 5.89   | 3.45   |
| ENSG0000(PDXDC2P   | processed_chr16  | 69976297 | 70065948 - | 5.1    | 5.29   |
| ENSG0000(ZNF512B   | protein_co chr20 | 63956702 | 63969865 - | 10.07  | 9.9    |
| ENSG0000(AMZ2      | protein_co chr17 | 68247574 | 68257164 + | 39.65  | 38.8   |
| ENSG0000(ZNF431    | protein_co chr19 | 21142024 | 21196053 + | 4.73   | 2.97   |
| ENSG0000(ALKAL1    | protein_co chr8  | 52534037 | 52565507 - | 0      | 0      |
| ENSG0000(NF1       | protein_co chr17 | 31094927 | 31382116 + | 12.91  | 15.67  |
| ENSG0000(VKORC1L1  | protein_co chr7  | 65873267 | 65959563 + | 8.14   | 8.17   |
| ENSG0000(ZNF418    | protein_co chr19 | 57921884 | 57935393 - | 1.23   | 1.16   |
| ENSG0000(DAPK1     | protein_co chr9  | 87497228 | 87708633 + | 1.77   | 1.29   |
| ENSG0000(LCE1B     | protein_co chr1  | 1.53E+08 | 1.53E+08 + | 0      | 0      |
| ENSG0000(HLA-DQA1  | protein_co chr6  | 32628179 | 32647062 + | 0      | 0      |
| ENSG0000(COL27A1   | protein_co chr9  | 1.14E+08 | 1.14E+08 + | 3.05   | 3.78   |
| ENSG0000(LINC01560 | lincRNA chrX     | 47483571 | 47484823 + | 1.47   | 1.05   |
| ENSG0000(GM2A      | protein_co chr5  | 1.51E+08 | 1.51E+08 + | 27.98  | 27.81  |
| ENSG0000(HIST1H2AI | protein_co chr6  | 27808199 | 27808701 + | 0      | 0      |
| ENSG0000(CLPSL2    | protein_co chr6  | 35776594 | 35779552 + | 0      | 0      |
| ENSG0000(S100A2    | protein_co chr1  | 1.54E+08 | 1.54E+08 - | 4.38   | 3.75   |

|                    |                  |          |          |   |       |       |
|--------------------|------------------|----------|----------|---|-------|-------|
| ENSG0000(SNHG17    | processed_chr20  | 38420588 | 38435353 | - | 6.78  | 5.72  |
| ENSG0000(ZNF700    | protein_co chr19 | 11925068 | 11950773 | + | 3.16  | 3.01  |
| ENSG0000(AC079612. | lincRNA chr2     | 2.4E+08  | 2.4E+08  | + | 0     | 0     |
| ENSG0000(POU3F4    | protein_co chrX  | 83508250 | 83512127 | + | 0     | 0     |
| ENSG0000(OR14A16   | protein_co chr1  | 2.48E+08 | 2.48E+08 | - | 0     | 0     |
| ENSG0000(CD47      | protein_co chr3  | 1.08E+08 | 1.08E+08 | - | 26.68 | 28.22 |
| ENSG0000(OR52K1    | protein_co chr11 | 4488879  | 4489908  | + | 0     | 0     |
| ENSG0000(TLE1      | protein_co chr9  | 81583683 | 81689305 | - | 18.01 | 16.74 |
| ENSG0000(MAML3     | protein_co chr4  | 1.4E+08  | 1.4E+08  | - | 3.76  | 3.07  |
| ENSG0000(HIST1H2AC | protein_co chr6  | 27133042 | 27135291 | + | 0.22  | 0.36  |
| ENSG0000(STRN3     | protein_co chr14 | 30893799 | 31026401 | - | 16.06 | 12.93 |
| ENSG0000(ZNF239    | protein_co chr10 | 43556344 | 43574618 | - | 1.58  | 1.39  |
| ENSG0000(NPIPB10P  | unprocessε chr16 | 29038655 | 29052726 | + | 0.05  | 0     |
| ENSG0000(SPINK14   | protein_co chr5  | 1.48E+08 | 1.48E+08 | + | 0     | 0     |
| ENSG0000(SPRR2B    | protein_co chr1  | 1.53E+08 | 1.53E+08 | - | 0     | 0     |
| ENSG0000(CTBP1-AS2 | antisense chr4   | 1249300  | 1288291  | + | 9.61  | 8.78  |
| ENSG0000(CHRNG     | protein_co chr2  | 2.33E+08 | 2.33E+08 | + | 0     | 0     |
| ENSG0000(ZSCAN16   | protein_co chr6  | 28124560 | 28130082 | + | 1.75  | 1.88  |
| ENSG0000(MVB12B    | protein_co chr9  | 1.26E+08 | 1.27E+08 | + | 2.39  | 2.55  |
| ENSG0000(C6orf106  | protein_co chr6  | 34587288 | 34696859 | - | 27.31 | 27.67 |
| ENSG0000(CTD-2192J | protein_co chr19 | 12461559 | 12551474 | - | 0     | 0.13  |
| ENSG0000(OR11G2    | protein_co chr14 | 20197336 | 20198446 | + | 0     | 0     |
| ENSG0000(POTE1     | protein_co chr2  | 1.3E+08  | 1.31E+08 | - | 0.27  | 0.46  |
| ENSG0000(ADA       | protein_co chr20 | 44619522 | 44652233 | - | 11.22 | 13.38 |
| ENSG0000(ARID5A    | protein_co chr2  | 96536743 | 96552638 | + | 5.51  | 4.48  |
| ENSG0000(PATE2     | protein_co chr11 | 1.26E+08 | 1.26E+08 | - | 0.18  | 0     |
| ENSG0000(PPTC7     | protein_co chr12 | 1.11E+08 | 1.11E+08 | - | 3.44  | 3.12  |
| ENSG0000(KRT39     | protein_co chr17 | 40958417 | 40966892 | - | 0     | 0     |
| ENSG0000(TOMM20L   | protein_co chr14 | 58395916 | 58408701 | + | 0     | 0     |
| ENSG0000(RGPD4     | protein_co chr2  | 1.08E+08 | 1.08E+08 | + | 0     | 0.03  |
| ENSG0000(NHLRC2    | protein_co chr10 | 1.14E+08 | 1.14E+08 | + | 1.89  | 2.76  |
| ENSG0000(HIST1H2AC | protein_co chr6  | 26198851 | 26199243 | - | 0.38  | 0     |
| ENSG0000(ZFP28     | protein_co chr19 | 56538948 | 56556810 | + | 2.14  | 2.78  |
| ENSG0000(KIAA1211L | protein_co chr2  | 98793846 | 98936259 | - | 0     | 0     |
| ENSG0000(CBWD3     | protein_co chr9  | 68232003 | 68300015 | + | 8.32  | 6.77  |
| ENSG0000(SCN8A     | protein_co chr12 | 51590266 | 51812864 | + | 0.27  | 0.26  |
| ENSG0000(LAMB3     | protein_co chr1  | 2.1E+08  | 2.1E+08  | - | 18.91 | 14.68 |
| ENSG0000(HIST3H2BB | protein_co chr1  | 2.28E+08 | 2.28E+08 | + | 0.21  | 0.16  |
| ENSG0000(AC090286. | antisense chr17  | 18951625 | 18954149 | - | 0     | 0     |
| ENSG0000(TEX43     | protein_co chr5  | 1.27E+08 | 1.27E+08 | + | 0     | 0     |
| ENSG0000(KPNA5     | protein_co chr6  | 1.17E+08 | 1.17E+08 | + | 2.43  | 2.2   |
| ENSG0000(ANKRD36B  | protein_co chr2  | 97492663 | 97589965 | - | 2.66  | 2.58  |
| ENSG0000(ARHGEF12  | protein_co chr11 | 1.2E+08  | 1.2E+08  | + | 25.58 | 25.57 |
| ENSG0000(HCAR1     | protein_co chr12 | 1.23E+08 | 1.23E+08 | - | 0.12  | 0.03  |
| ENSG0000(ZNF252P   | transcribec chr8 | 1.45E+08 | 1.45E+08 | - | 6.88  | 6.09  |



|                    |                   |          |            |        |        |
|--------------------|-------------------|----------|------------|--------|--------|
| ENSG0000(PDLIM7    | protein_co chr5   | 1.77E+08 | 1.77E+08 - | 120.6  | 132.03 |
| ENSG0000(FLNA      | protein_co chrX   | 1.54E+08 | 1.54E+08 - | 408.91 | 448.91 |
| ENSG0000(TMEM26    | protein_co chr10  | 61406643 | 61453450 - | 0.19   | 0.07   |
| ENSG0000(RPS26P11  | processed_chrX    | 72044545 | 72044892 + | 0      | 0.3    |
| ENSG0000(SRGAP1    | protein_co chr12  | 63844293 | 64162221 + | 7.02   | 6.01   |
| ENSG0000(FAM3C     | protein_co chr7   | 1.21E+08 | 1.21E+08 - | 30.21  | 26.73  |
| ENSG0000(NOP9      | protein_co chr14  | 24299862 | 24309124 + | 7.24   | 6.35   |
| ENSG0000(OR2T4     | protein_co chr1   | 2.48E+08 | 2.48E+08 + | 0      | 0      |
| ENSG0000(ZNF705A   | protein_co chr12  | 8157034  | 8188537 +  | 0      | 0      |
| ENSG0000(SLC39A10  | protein_co chr2   | 1.96E+08 | 1.96E+08 + | 18.23  | 15.77  |
| ENSG0000(SCOC-AS1  | antisense chr4    | 1.4E+08  | 1.4E+08 -  | 0.55   | 1.07   |
| ENSG0000(CASP4     | protein_co chr11  | 1.05E+08 | 1.05E+08 - | 47.19  | 45.83  |
| ENSG0000(AP2A1     | protein_co chr19  | 49766968 | 49807113 + | 62.11  | 65.38  |
| ENSG0000(ZNF585A   | protein_co chr19  | 37106734 | 37172741 - | 5.17   | 4.98   |
| ENSG0000(FUT11     | protein_co chr10  | 73772291 | 73780251 + | 19.42  | 17.16  |
| ENSG0000(NXF4      | transcribed chrX  | 1.03E+08 | 1.03E+08 + | 0      | 0      |
| ENSG0000(SMIM10L2  | protein_co chrX   | 1.35E+08 | 1.35E+08 - | 0.86   | 0.74   |
| ENSG0000(ANXA4     | protein_co chr2   | 69644425 | 69827100 + | 129.65 | 132.42 |
| ENSG0000(LAGE3     | protein_co chrX   | 1.54E+08 | 1.54E+08 - | 14.47  | 16.06  |
| ENSG0000(RP11-88G1 | lincRNA chr9      | 1.3E+08  | 1.3E+08 -  | 0      | 0      |
| ENSG0000(WDR5B     | protein_co chr3   | 1.22E+08 | 1.22E+08 - | 1.63   | 1.85   |
| ENSG0000(FAM163B   | protein_co chr9   | 1.34E+08 | 1.34E+08 - | 0.05   | 0.35   |
| ENSG0000(NPIPB9    | protein_co chr16  | 28751787 | 28772807 + | 0.46   | 0      |
| ENSG0000(WDR45     | protein_co chrX   | 49071470 | 49101170 - | 47.8   | 40.83  |
| ENSG0000(METTL9    | protein_co chr16  | 21597218 | 21657473 + | 48.78  | 53.21  |
| ENSG0000(ZNF138    | protein_co chr7   | 64794388 | 64833681 + | 1.28   | 1.33   |
| ENSG0000(ZNF429    | protein_co chr19  | 21496682 | 21556270 + | 2.4    | 1.51   |
| ENSG0000(ZNF470    | protein_co chr19  | 56567511 | 56588911 + | 1.7    | 1.6    |
| ENSG0000(SERTAD1   | protein_co chr19  | 40421592 | 40426025 - | 6.07   | 6.75   |
| ENSG0000(ZNF100    | protein_co chr19  | 21722766 | 21767628 - | 2.1    | 1.68   |
| ENSG0000(CXorf40B  | protein_co chrX   | 1.5E+08  | 1.5E+08 -  | 11.11  | 12.85  |
| ENSG0000(OR51A6P   | unprocessed chr11 | 4889593  | 4890596 -  | 0      | 0      |
| ENSG0000(ZNF398    | protein_co chr7   | 1.49E+08 | 1.49E+08 + | 2.53   | 2.71   |
| ENSG0000(ZSCAN25   | protein_co chr7   | 99616946 | 99632407 + | 4.96   | 3.46   |
| ENSG0000(RBMY1A3P  | unprocessed chrY  | 9311130  | 9322869 -  | 0      | 0      |
| ENSG0000(ANXA6     | protein_co chr5   | 1.51E+08 | 1.51E+08 - | 118.76 | 118.92 |
| ENSG0000(ZNF441    | protein_co chr19  | 11767000 | 11784078 + | 3.49   | 2.69   |
| ENSG0000(GMFB      | protein_co chr14  | 54474484 | 54489196 - | 11.22  | 14.83  |
| ENSG0000(SIGLEC15  | protein_co chr18  | 45825512 | 45844080 + | 0.78   | 0.63   |
| ENSG0000(ZNF420    | protein_co chr19  | 37007857 | 37130314 + | 2.27   | 3.7    |
| ENSG0000(ZNF763    | protein_co chr19  | 11965037 | 11980381 + | 1.55   | 0.92   |
| ENSG0000(ZMYM1     | protein_co chr1   | 35059786 | 35115859 + | 1.86   | 1.89   |
| ENSG0000(DTHD1     | protein_co chr4   | 36281622 | 36345756 + | 0      | 0      |
| ENSG0000(HIST1H4C  | protein_co chr6   | 26103876 | 26104310 + | 0      | 0      |
| ENSG0000(ZSCAN26   | protein_co chr6   | 28267010 | 28278224 + | 9.77   | 9.63   |

|                 |           |             |       |          |          |   |        |        |
|-----------------|-----------|-------------|-------|----------|----------|---|--------|--------|
| ENSG00000100000 | MAFG      | protein_co  | chr17 | 81918270 | 81927714 | - | 12.42  | 12.52  |
| ENSG00000100000 | OR2T32P   | unprocessε  | chr1  | 2.48E+08 | 2.48E+08 | - | 0.04   | 0      |
| ENSG00000100000 | ARRDC1    | protein_co  | chr9  | 1.38E+08 | 1.38E+08 | + | 9.94   | 10.82  |
| ENSG00000100000 | KIAA1671  | protein_co  | chr22 | 24952730 | 25197448 | + | 3.87   | 4.14   |
| ENSG00000100000 | KRT35     | protein_co  | chr17 | 41476689 | 41481140 | - | 0      | 0      |
| ENSG00000100000 | IGF2R     | protein_co  | chr6  | 1.6E+08  | 1.6E+08  | + | 53.19  | 59.72  |
| ENSG00000100000 | ZNF300P1  | transcribec | chr5  | 1.51E+08 | 1.51E+08 | - | 0.62   | 0.64   |
| ENSG00000100000 | LCE1C     | protein_co  | chr1  | 1.53E+08 | 1.53E+08 | - | 0      | 0      |
| ENSG00000100000 | NPSR1-AS1 | processed_  | chr7  | 34346512 | 34871582 | - | 0      | 0      |
| ENSG00000100000 | GOLGA6L1  | unprocessε  | chrY  | 25495651 | 25501958 | - | 0      | 0      |
| ENSG00000100000 | GAL3ST4   | protein_co  | chr7  | 1E+08    | 1E+08    | - | 11.82  | 12.75  |
| ENSG00000100000 | RP11-573D | antisense   | chr3  | 1.87E+08 | 1.87E+08 | - | 1.29   | 0.78   |
| ENSG00000100000 | DYNC1H1   | protein_co  | chr14 | 1.02E+08 | 1.02E+08 | + | 63.82  | 62.84  |
| ENSG00000100000 | SLC6A17   | protein_co  | chr1  | 1.1E+08  | 1.1E+08  | + | 0.02   | 0      |
| ENSG00000100000 | IFNL3     | protein_co  | chr19 | 39243553 | 39245129 | - | 0      | 0      |
| ENSG00000100000 | PCBP2     | protein_co  | chr12 | 53452102 | 53481162 | + | 297.56 | 315.45 |
| ENSG00000100000 | ZGPAT     | protein_co  | chr20 | 63707465 | 63736142 | + | 11.35  | 10.52  |
| ENSG00000100000 | SLC25A29  | protein_co  | chr14 | 1E+08    | 1E+08    | - | 20.57  | 19.67  |
| ENSG00000100000 | PGAP1     | protein_co  | chr2  | 1.97E+08 | 1.97E+08 | - | 2.77   | 2.75   |
| ENSG00000100000 | SRC       | protein_co  | chr20 | 37344685 | 37406050 | + | 14.26  | 14.36  |
| ENSG00000100000 | ZNF679    | protein_co  | chr7  | 64228474 | 64266931 | + | 0      | 0      |
| ENSG00000100000 | ZNF682    | protein_co  | chr19 | 19997058 | 20039506 | - | 1.19   | 2.01   |
| ENSG00000100000 | OR8B8     | protein_co  | chr11 | 1.24E+08 | 1.24E+08 | - | 0      | 0      |
| ENSG00000100000 | ZNF772    | protein_co  | chr19 | 57466663 | 57477570 | - | 3.29   | 3.53   |
| ENSG00000100000 | ZNF257    | protein_co  | chr19 | 22052452 | 22091480 | + | 0.45   | 0.09   |
| ENSG00000100000 | PCNX3     | protein_co  | chr11 | 65615773 | 65637439 | + | 9.77   | 9.25   |
| ENSG00000100000 | ADAM32    | protein_co  | chr8  | 39106990 | 39284911 | + | 0.49   | 0.28   |
| ENSG00000100000 | ACSL5     | protein_co  | chr10 | 1.12E+08 | 1.12E+08 | + | 0.84   | 1.13   |
| ENSG00000100000 | LRRRC8B   | protein_co  | chr1  | 89524836 | 89597864 | + | 0.44   | 1.13   |
| ENSG00000100000 | RP11-452G | processed_  | chr11 | 17228279 | 17229151 | + | 0      | 0      |
| ENSG00000100000 | ABCB8     | protein_co  | chr7  | 1.51E+08 | 1.51E+08 | + | 14.04  | 11.34  |
| ENSG00000100000 | HIST1H3J  | protein_co  | chr6  | 27890382 | 27893106 | - | 0      | 0      |
| ENSG00000100000 | SND1      | protein_co  | chr7  | 1.28E+08 | 1.28E+08 | + | 67.54  | 68.94  |
| ENSG00000100000 | OR4C4P    | unprocessε  | chr11 | 48345351 | 48352447 | - | 0      | 0      |
| ENSG00000100000 | ZNF785    | protein_co  | chr16 | 30573740 | 30585771 | - | 4.17   | 4.46   |
| ENSG00000100000 | SULT1A2   | protein_co  | chr16 | 28591943 | 28597109 | - | 0.98   | 0.6    |
| ENSG00000100000 | NEK5      | protein_co  | chr13 | 52033611 | 52129078 | - | 0.12   | 0.28   |
| ENSG00000100000 | PSMD12    | protein_co  | chr17 | 67337916 | 67366627 | - | 14.06  | 15.35  |
| ENSG00000100000 | OR2B4P    | unprocessε  | chr6  | 29290711 | 29291653 | + | 0      | 0      |
| ENSG00000100000 | MAGEA6    | protein_co  | chrX  | 1.53E+08 | 1.53E+08 | - | 0      | 0      |
| ENSG00000100000 | RP11-76E1 | lincRNA     | chr14 | 97632647 | 97686658 | - | 0      | 0      |
| ENSG00000100000 | ADGRA1    | protein_co  | chr10 | 1.33E+08 | 1.33E+08 | + | 0      | 0      |
| ENSG00000100000 | CH17-340N | lincRNA     | chrX  | 1.54E+08 | 1.54E+08 | - | 4.2    | 2.05   |
| ENSG00000100000 | PIWIL2    | protein_co  | chr8  | 22275297 | 22357563 | + | 0.27   | 0.1    |
| ENSG00000100000 | MIRLET7Bf | lincRNA     | chr22 | 46053869 | 46113928 | + | 1.86   | 2.9    |

|                    |                  |          |          |   |        |       |
|--------------------|------------------|----------|----------|---|--------|-------|
| ENSG0000(NOL4L     | protein_co chr20 | 32443059 | 32585074 | - | 2.98   | 3.8   |
| ENSG0000(SSXP1     | unprocessε chrX  | 52606535 | 52611758 | - | 0      | 0     |
| ENSG0000(CYSRT1    | protein_co chr9  | 1.37E+08 | 1.37E+08 | + | 0.5    | 0.64  |
| ENSG0000(SLC22A4   | protein_co chr5  | 1.32E+08 | 1.32E+08 | + | 3.93   | 2.74  |
| ENSG0000(KB-1592A4 | lincRNA chr22    | 21114607 | 21124451 | - | 0.07   | 0.01  |
| ENSG0000(ZSCAN5B   | protein_co chr19 | 56189570 | 56197920 | - | 0      | 0.04  |
| ENSG0000(TCEA1P1   | processed_chr9   | 97067749 | 97068628 | + | 0      | 0     |
| ENSG0000(ENTPD4    | protein_co chr8  | 23385783 | 23457695 | - | 20.4   | 20.27 |
| ENSG0000(C1D       | protein_co chr2  | 68041130 | 68110948 | - | 15.71  | 11    |
| ENSG0000(TBC1D9B   | protein_co chr5  | 1.8E+08  | 1.8E+08  | - | 54.12  | 56.89 |
| ENSG0000(OR1J2     | protein_co chr9  | 1.23E+08 | 1.23E+08 | + | 0.52   | 0.29  |
| ENSG0000(HIST1H4J  | protein_co chr6  | 27824108 | 27824480 | + | 3.1    | 4.71  |
| ENSG0000(SLC2A7    | protein_co chr1  | 9003300  | 9026345  | - | 0      | 0     |
| ENSG0000(FAM110D   | protein_co chr1  | 26159020 | 26163962 | + | 0.59   | 0.46  |
| ENSG0000(SERPINA1  | protein_co chr14 | 94376747 | 94390693 | - | 0.23   | 0.25  |
| ENSG0000(LINC00336 | lincRNA chr6     | 33586106 | 33593338 | - | 0      | 0     |
| ENSG0000(TPSB2     | protein_co chr16 | 1227272  | 1230184  | - | 0      | 0     |
| ENSG0000(AP000445. | processed_chr11  | 58685086 | 58691861 | + | 0      | 0     |
| ENSG0000(KANK2     | protein_co chr19 | 11164267 | 11197791 | - | 66.9   | 67.43 |
| ENSG0000(EIF4BP6   | processed_chr7   | 1.05E+08 | 1.05E+08 | + | 0.08   | 0     |
| ENSG0000(C6orf141  | protein_co chr6  | 49550646 | 49561907 | + | 0.87   | 0.93  |
| ENSG0000(GTF2E2    | protein_co chr8  | 30578318 | 30658251 | - | 13.41  | 15    |
| ENSG0000(IL27      | protein_co chr16 | 28499362 | 28512051 | - | 0      | 0     |
| ENSG0000(GUCA2A    | protein_co chr1  | 42162691 | 42164718 | - | 0      | 0     |
| ENSG0000(RAD54B    | protein_co chr8  | 94371960 | 94475109 | - | 1.44   | 3.86  |
| ENSG0000(ZNF165    | protein_co chr6  | 28080975 | 28089563 | + | 0.18   | 0.41  |
| ENSG0000(SYNGAP1   | protein_co chr6  | 33419661 | 33457541 | + | 9.24   | 11.54 |
| ENSG0000(RAMP2-AS  | lincRNA chr17    | 42753914 | 42761257 | - | 0.86   | 1.09  |
| ENSG0000(FITM2     | protein_co chr20 | 44302838 | 44311169 | - | 1.99   | 2.38  |
| ENSG0000(BLM       | protein_co chr15 | 90717327 | 90816165 | + | 0.15   | 0.2   |
| ENSG0000(RP11-366L | antisense chr12  | 65851340 | 65882167 | - | 0.64   | 0.64  |
| ENSG0000(ZNF720    | protein_co chr16 | 31713229 | 31794869 | + | 9.55   | 7.59  |
| ENSG0000(GATA3-AS1 | lincRNA chr10    | 8050450  | 8053484  | - | 0      | 0     |
| ENSG0000(OR10D3    | protein_co chr11 | 1.24E+08 | 1.24E+08 | + | 0      | 0     |
| ENSG0000(DDI2      | protein_co chr1  | 15617500 | 15669044 | + | 4.84   | 5.59  |
| ENSG0000(AC060834. | processed_chr7   | 9726241  | 9728272  | + | 0      | 0     |
| ENSG0000(SVIL      | protein_co chr10 | 29457338 | 29736781 | - | 16.72  | 13.18 |
| ENSG0000(C17orf102 | lincRNA chr17    | 34574123 | 34579369 | - | 0      | 0     |
| ENSG0000(TRIM33    | protein_co chr1  | 1.14E+08 | 1.15E+08 | - | 13.21  | 11.83 |
| ENSG0000(LRP10     | protein_co chr14 | 22871613 | 22881580 | + | 169.62 | 169.5 |
| ENSG0000(PELI1     | protein_co chr2  | 64092652 | 64144454 | - | 4.62   | 3.69  |
| ENSG0000(CTC-499B1 | lincRNA chr19    | 11639776 | 11686569 | + | 0.15   | 0     |
| ENSG0000(Metazoa_S | misc_RNA chr8    | 9091240  | 9091508  | + | 2.69   | 0     |
| ENSG0000(ZNF655    | protein_co chr7  | 99558406 | 99576453 | + | 21.64  | 20.78 |
| ENSG0000(MRPL21    | protein_co chr11 | 68891276 | 68903835 | - | 32.92  | 32.8  |

|                    |                   |          |            |       |       |
|--------------------|-------------------|----------|------------|-------|-------|
| ENSG0000(LYPD2     | protein_co chr8   | 1.43E+08 | 1.43E+08 - | 0     | 0     |
| ENSG0000(UAP1L1    | protein_co chr9   | 1.37E+08 | 1.37E+08 + | 19.67 | 19.59 |
| ENSG0000(BNIP3P1   | transcribec chr14 | 28264390 | 28265974 + | 0     | 0     |
| ENSG0000(ZNF98     | protein_co chr19  | 22391019 | 22532485 - | 0     | 0     |
| ENSG0000(FBXL22    | protein_co chr15  | 63597353 | 63602428 + | 0.91  | 0.52  |
| ENSG0000(ZNF786    | protein_co chr7   | 1.49E+08 | 1.49E+08 - | 1.57  | 1.46  |
| ENSG0000(ZNF517    | protein_co chr8   | 1.45E+08 | 1.45E+08 + | 2.04  | 2.87  |
| ENSG0000(S100A7L2  | protein_co chr1   | 1.53E+08 | 1.53E+08 - | 0     | 0     |
| ENSG0000(ZNF675    | protein_co chr19  | 23525631 | 23687220 - | 1.52  | 1.37  |
| ENSG0000(SLC22A5   | protein_co chr5   | 1.32E+08 | 1.32E+08 + | 2.61  | 2.36  |
| ENSG0000(OR8S1     | protein_co chr12  | 48507354 | 48529897 + | 0     | 0     |
| ENSG0000(DACT3     | protein_co chr19  | 46647612 | 46661138 - | 5.23  | 5.55  |
| ENSG0000(ADARB1    | protein_co chr21  | 45073853 | 45226560 + | 2.88  | 3.6   |
| ENSG0000(ZNF860    | protein_co chr3   | 31981771 | 31991628 + | 0.05  | 0.1   |
| ENSG0000(HTT       | protein_co chr4   | 3074681  | 3243959 +  | 9.9   | 6.95  |
| ENSG0000(OR6N1     | protein_co chr1   | 1.59E+08 | 1.59E+08 - | 0     | 0     |
| ENSG0000(C5AR1     | protein_co chr19  | 47290023 | 47322066 + | 0.17  | 0.08  |
| ENSG0000(DIO3      | protein_co chr14  | 1.02E+08 | 1.02E+08 + | 0     | 0     |
| ENSG0000(CYP2B6    | protein_co chr19  | 40991299 | 41018398 + | 0     | 0.02  |
| ENSG0000(HIST1H3D  | protein_co chr6   | 26196840 | 26197250 - | 0     | 0     |
| ENSG0000(DCHS2     | protein_co chr4   | 1.54E+08 | 1.54E+08 - | 0     | 0     |
| ENSG0000(VEPH1     | protein_co chr3   | 1.57E+08 | 1.58E+08 - | 16.31 | 13.75 |
| ENSG0000(FABP12    | protein_co chr8   | 81524981 | 81531378 - | 0     | 0     |
| ENSG0000(SHPK      | protein_co chr17  | 3608262  | 3636322 -  | 5.49  | 4.02  |
| ENSG0000(GGT3P     | transcribec chr22 | 18773665 | 18843399 - | 0     | 0     |
| ENSG0000(OR51D1    | protein_co chr11  | 4639715  | 4640838 +  | 0     | 0     |
| ENSG0000(IPP       | protein_co chr1   | 45694324 | 45750650 - | 4.9   | 4.78  |
| ENSG0000(OPALIN    | protein_co chr10  | 96343216 | 96359365 - | 0     | 0     |
| ENSG0000(OR13G1    | protein_co chr1   | 2.48E+08 | 2.48E+08 - | 0     | 0     |
| ENSG0000(MAP3K5    | protein_co chr6   | 1.37E+08 | 1.37E+08 - | 2.9   | 4.12  |
| ENSG0000(OGDHL     | protein_co chr10  | 49734643 | 49762379 - | 0.03  | 0.04  |
| ENSG0000(C16orf47  | lincRNA chr16     | 73126637 | 73144447 - | 0.36  | 0.05  |
| ENSG0000(CYP2F1    | protein_co chr19  | 41114432 | 41128366 + | 0     | 0     |
| ENSG0000(GSTK1     | protein_co chr7   | 1.43E+08 | 1.43E+08 + | 65.3  | 65.48 |
| ENSG0000(HNRNPAB   | protein_co chr5   | 1.78E+08 | 1.78E+08 + | 31.7  | 34.1  |
| ENSG0000(OR2L5     | protein_co chr1   | 2.48E+08 | 2.48E+08 + | 0     | 0     |
| ENSG0000(STMN3     | protein_co chr20  | 63639705 | 63657682 - | 19.65 | 21.31 |
| ENSG0000(PDGFA     | protein_co chr7   | 497258   | 520296 -   | 2.61  | 3.45  |
| ENSG0000(AC005276. | lincRNA chr7      | 1.26E+08 | 1.26E+08 + | 0.08  | 0     |
| ENSG0000(GYPE      | protein_co chr4   | 1.44E+08 | 1.44E+08 - | 1.06  | 1.18  |
| ENSG0000(COL13A1   | protein_co chr10  | 69801931 | 69964275 + | 17.14 | 9.15  |
| ENSG0000(RP11-747H | unprocessε chr4   | 8949630  | 8950559 +  | 0     | 0     |
| ENSG0000(SPN       | protein_co chr16  | 29662979 | 29670876 + | 0.17  | 0.17  |
| ENSG0000(ZNF695    | protein_co chr1   | 2.47E+08 | 2.47E+08 - | 0.16  | 0.1   |
| ENSG0000(ADAM3A    | transcribec chr8  | 39451045 | 39522852 - | 0.02  | 0     |

|                     |                   |          |          |   |       |        |
|---------------------|-------------------|----------|----------|---|-------|--------|
| ENSG0000(RP11-170L) | processed_chr16   | 31962063 | 31962381 | + | 0     | 0      |
| ENSG0000(PCDHB11)   | protein_co chr5   | 1.41E+08 | 1.41E+08 | + | 0.12  | 0.16   |
| ENSG0000(ZNF628)    | protein_co chr19  | 55476332 | 55484487 | + | 3.05  | 1.96   |
| ENSG0000(GALP)      | protein_co chr19  | 56176020 | 56185775 | + | 0     | 0      |
| ENSG0000(SLC2A10)   | protein_co chr20  | 46709487 | 46736347 | + | 14.76 | 13.72  |
| ENSG0000(ZNF665)    | protein_co chr19  | 53159213 | 53193386 | - | 1.42  | 1.75   |
| ENSG0000(RPF2)      | protein_co chr6   | 1.11E+08 | 1.11E+08 | + | 10.92 | 12.09  |
| ENSG0000(LINC00477) | lincRNA chr12     | 24566964 | 24584168 | - | 0     | 0      |
| ENSG0000(SLC28A3)   | protein_co chr9   | 84275457 | 84340683 | - | 0     | 0.01   |
| ENSG0000(FAM177B)   | protein_co chr1   | 2.23E+08 | 2.23E+08 | + | 0     | 0      |
| ENSG0000(MIB2)      | protein_co chr1   | 1615415  | 1630610  | + | 26.78 | 24.19  |
| ENSG0000(OR6Y1)     | protein_co chr1   | 1.59E+08 | 1.59E+08 | - | 0     | 0      |
| ENSG0000(MYO5A)     | protein_co chr15  | 52307283 | 52529050 | - | 12.89 | 11.93  |
| ENSG0000(C5orf56)   | protein_co chr5   | 1.32E+08 | 1.32E+08 | + | 4.92  | 4.54   |
| ENSG0000(GZMM)      | protein_co chr19  | 544034   | 549924   | + | 0.07  | 0      |
| ENSG0000(ATG7)      | protein_co chr3   | 11272309 | 11557665 | + | 17.3  | 13.66  |
| ENSG0000(PRAMENP)   | transcribed chr22 | 21991099 | 22043934 | - | 0     | 0      |
| ENSG0000(RP11-460N) | unprocessed chr9  | 64817870 | 64836341 | + | 0.12  | 0.09   |
| ENSG0000(SIPA1L1)   | protein_co chr14  | 71320449 | 71741229 | + | 27.52 | 21.85  |
| ENSG0000(TTC30A)    | protein_co chr2   | 1.78E+08 | 1.78E+08 | - | 1.91  | 1.89   |
| ENSG0000(SSPO)      | protein_co chr7   | 1.5E+08  | 1.5E+08  | + | 2.38  | 0.94   |
| ENSG0000(ELANE)     | protein_co chr19  | 851014   | 856247   | + | 1.28  | 0.91   |
| ENSG0000(RAB40C)    | protein_co chr16  | 589357   | 629272   | + | 7.55  | 8.03   |
| ENSG0000(PIGN)      | protein_co chr18  | 61905255 | 62187118 | - | 18.02 | 15.84  |
| ENSG0000(COL4A6)    | protein_co chrX   | 1.08E+08 | 1.08E+08 | - | 0.12  | 0.1    |
| ENSG0000(ZNF624)    | protein_co chr17  | 16620737 | 16653856 | - | 2.45  | 0.91   |
| ENSG0000(HHLA3)     | protein_co chr1   | 70354805 | 70385339 | + | 10.05 | 6.41   |
| ENSG0000(RPS17P2)   | processed_chr5    | 1.17E+08 | 1.17E+08 | + | 0     | 0      |
| ENSG0000(HOXA4)     | protein_co chr7   | 27128507 | 27130799 | - | 0     | 0      |
| ENSG0000(TOPORS)    | protein_co chr9   | 32540544 | 32552553 | - | 6.65  | 5.85   |
| ENSG0000(BCO2)      | protein_co chr11  | 1.12E+08 | 1.12E+08 | + | 0.25  | 1.17   |
| ENSG0000(GPX1P1)    | processed_chrX    | 13378735 | 13379340 | - | 7.9   | 8.52   |
| ENSG0000(KCNMB2)    | protein_co chr3   | 1.78E+08 | 1.79E+08 | + | 0     | 0      |
| ENSG0000(AC107218)  | antisense chr2    | 2.14E+08 | 2.15E+08 | - | 0     | 0      |
| ENSG0000(ENTPD6)    | protein_co chr20  | 25195693 | 25226729 | + | 17.84 | 16.64  |
| ENSG0000(DMBX1)     | protein_co chr1   | 46506996 | 46514226 | + | 0     | 0      |
| ENSG0000(KLKP1)     | transcribed chr19 | 50882096 | 50896398 | - | 0     | 0      |
| ENSG0000(OR11L1)    | protein_co chr1   | 2.48E+08 | 2.48E+08 | - | 0     | 0      |
| ENSG0000(ENPP1)     | protein_co chr6   | 1.32E+08 | 1.32E+08 | + | 0.87  | 0.77   |
| ENSG0000(ATP11AUN)  | lincRNA chr13     | 1.13E+08 | 1.13E+08 | + | 0     | 0      |
| ENSG0000(CCDC154)   | protein_co chr16  | 1434383  | 1444556  | - | 0.09  | 0.93   |
| ENSG0000(FAR1)      | protein_co chr11  | 13668670 | 13732346 | + | 17.83 | 15.84  |
| ENSG0000(C5orf42)   | protein_co chr5   | 37106228 | 37249428 | - | 5.05  | 8.4    |
| ENSG0000(ZNF841)    | protein_co chr19  | 52064466 | 52095765 | - | 5.97  | 5.13   |
| ENSG0000(MFAP5)     | protein_co chr12  | 8637346  | 8662888  | - | 584.2 | 603.65 |

|                 |           |            |       |          |          |   |         |         |
|-----------------|-----------|------------|-------|----------|----------|---|---------|---------|
| ENSG00000101551 | MYH6      | protein_co | chr14 | 23381990 | 23408277 | - | 0       | 0       |
| ENSG00000101552 | VN1R5     | polymorph  | chr1  | 2.47E+08 | 2.47E+08 | + | 0       | 0       |
| ENSG00000101553 | ZNF615    | protein_co | chr19 | 51991332 | 52008230 | - | 2.69    | 4.07    |
| ENSG00000101554 | CXorf40A  | protein_co | chrX  | 1.5E+08  | 1.5E+08  | + | 8.21    | 9.26    |
| ENSG00000101555 | CDC42SE1  | protein_co | chr1  | 1.51E+08 | 1.51E+08 | - | 27.86   | 31.03   |
| ENSG00000101556 | UBE2Q2P1  | unprocessε | chr15 | 84491480 | 84500599 | - | 0       | 0       |
| ENSG00000101557 | MPEG1     | protein_co | chr11 | 59208510 | 59212951 | - | 0       | 0       |
| ENSG00000101558 | SERPINB2  | protein_co | chr18 | 63871692 | 63903890 | + | 0       | 0       |
| ENSG00000101559 | DPP4      | protein_co | chr2  | 1.62E+08 | 1.62E+08 | - | 314.26  | 292.73  |
| ENSG00000101560 | SERPINB13 | protein_co | chr18 | 63586989 | 63604639 | + | 0       | 0       |
| ENSG00000101561 | AC106870  | antisense  | chr2  | 29899597 | 29907199 | + | 0       | 0       |
| ENSG00000101562 | PDCD1LG2  | protein_co | chr9  | 5510570  | 5571254  | + | 3.56    | 4.35    |
| ENSG00000101563 | ZNF433    | protein_co | chr19 | 12014732 | 12035741 | - | 2.19    | 1.84    |
| ENSG00000101564 | CCER1     | protein_co | chr12 | 90905622 | 90955176 | - | 0       | 0       |
| ENSG00000101565 | DNAH10    | protein_co | chr12 | 1.24E+08 | 1.24E+08 | + | 0.01    | 0.1     |
| ENSG00000101566 | SLC22A24  | protein_co | chr11 | 63079940 | 63144221 | - | 0       | 0       |
| ENSG00000101567 | AC007952  | antisense  | chr17 | 19155727 | 19159111 | - | 0.03    | 0       |
| ENSG00000101568 | RP4-724E1 | antisense  | chr20 | 53552770 | 53575863 | + | 0       | 0       |
| ENSG00000101569 | OR51C1P   | unprocessε | chr11 | 4690761  | 4691702  | - | 0       | 0       |
| ENSG00000101570 | KRTAP26-1 | protein_co | chr21 | 30319124 | 30320316 | - | 0       | 0       |
| ENSG00000101571 | CBX3P7    | processed_ | chr11 | 89293745 | 89294246 | - | 0       | 0       |
| ENSG00000101572 | SPTAN1    | protein_co | chr9  | 1.29E+08 | 1.29E+08 | + | 101.56  | 98.32   |
| ENSG00000101573 | NMB       | protein_co | chr15 | 84655129 | 84658563 | - | 23.42   | 18.06   |
| ENSG00000101574 | PARVA     | protein_co | chr11 | 12377185 | 12530801 | + | 41.32   | 40.89   |
| ENSG00000101575 | KLHL14    | protein_co | chr18 | 32672671 | 32773062 | - | 0       | 0       |
| ENSG00000101576 | OR6C74    | protein_co | chr12 | 55247198 | 55248302 | + | 0       | 0       |
| ENSG00000101577 | FAM114A1  | protein_co | chr4  | 38867677 | 38945739 | + | 69.74   | 67.02   |
| ENSG00000101578 | RPE       | protein_co | chr2  | 2.1E+08  | 2.1E+08  | + | 23.24   | 21.46   |
| ENSG00000101579 | ZNF460    | protein_co | chr19 | 57280051 | 57293569 | + | 0.37    | 0.6     |
| ENSG00000101580 | CR1L      | protein_co | chr1  | 2.08E+08 | 2.08E+08 | + | 0       | 0       |
| ENSG00000101581 | PHF2      | protein_co | chr9  | 93576407 | 93679587 | + | 7.13    | 7.75    |
| ENSG00000101582 | RPS26     | protein_co | chr12 | 56041853 | 56044675 | + | 354.63  | 357.06  |
| ENSG00000101583 | C14orf178 | protein_co | chr14 | 77760830 | 77769742 | + | 0.16    | 0.29    |
| ENSG00000101584 | PTMAP2    | processed_ | chr5  | 1.19E+08 | 1.19E+08 | + | 0.45    | 0       |
| ENSG00000101585 | SCGB1D4   | protein_co | chr11 | 62296277 | 62299064 | - | 0       | 0       |
| ENSG00000101586 | PSAP      | protein_co | chr10 | 71816298 | 71851375 | - | 1715.51 | 1780.64 |
| ENSG00000101587 | S100A10   | protein_co | chr1  | 1.52E+08 | 1.52E+08 | - | 520.27  | 543.76  |
| ENSG00000101588 | CFAP43    | protein_co | chr10 | 1.04E+08 | 1.04E+08 | - | 0.39    | 0.21    |
| ENSG00000101589 | LHFPL5    | protein_co | chr6  | 35805293 | 35833874 | + | 0.03    | 0       |
| ENSG00000101590 | RPL37A    | protein_co | chr2  | 2.16E+08 | 2.17E+08 | + | 2042.59 | 1985.76 |
| ENSG00000101591 | HOXC6     | protein_co | chr12 | 53990624 | 54030823 | + | 0.41    | 0       |
| ENSG00000101592 | TXNRD3    | protein_co | chr3  | 1.27E+08 | 1.27E+08 | - | 5.06    | 4.96    |
| ENSG00000101593 | CFD       | protein_co | chr19 | 859643   | 863630   | + | 38.9    | 41.29   |
| ENSG00000101594 | STPG3     | protein_co | chr9  | 1.37E+08 | 1.37E+08 | + | 0       | 0       |
| ENSG00000101595 | MAP1LC3C  | protein_co | chr1  | 2.42E+08 | 2.42E+08 | - | 1.58    | 0.86    |

|                    |                   |          |          |   |        |        |
|--------------------|-------------------|----------|----------|---|--------|--------|
| ENSG0000(MCMBP     | protein_co chr10  | 1.2E+08  | 1.2E+08  | - | 19.81  | 17.86  |
| ENSG0000(EME2      | protein_co chr16  | 1773207  | 1781708  | + | 2.64   | 4.58   |
| ENSG0000(KLHDC1    | protein_co chr14  | 49693105 | 49753152 | + | 1.03   | 1.82   |
| ENSG0000(ZNF81     | protein_co chrX   | 47836902 | 48002561 | + | 2.08   | 1.39   |
| ENSG0000(TAF13     | protein_co chr1   | 1.09E+08 | 1.09E+08 | - | 14.28  | 15.88  |
| ENSG0000(ZNF780A   | protein_co chr19  | 40069152 | 40090938 | - | 5.49   | 7.7    |
| ENSG0000(ATAD3A    | protein_co chr1   | 1512151  | 1534687  | + | 7.51   | 7      |
| ENSG0000(OR5B17    | protein_co chr11  | 58358124 | 58359069 | - | 0      | 0      |
| ENSG0000(OR52M1    | protein_co chr11  | 4545191  | 4546144  | + | 0      | 0      |
| ENSG0000(IGKV7-3   | IG_V_pseu chr2    | 88915081 | 88915378 | - | 0      | 0      |
| ENSG0000(FAM118B   | protein_co chr11  | 1.26E+08 | 1.26E+08 | + | 9.05   | 9.26   |
| ENSG0000(ZNF461    | protein_co chr19  | 36637192 | 36666853 | - | 2.24   | 1.64   |
| ENSG0000(CTC-301O7 | lincRNA chr19     | 49331617 | 49340303 | - | 0.15   | 0.54   |
| ENSG0000(RP1-253P7 | antisense chr17   | 17858227 | 17860041 | + | 0.15   | 0.1    |
| ENSG0000(CCDC180   | protein_co chr9   | 97307304 | 97378524 | + | 0.65   | 0.94   |
| ENSG0000(SLC9A8    | protein_co chr20  | 49812713 | 49892242 | + | 3.71   | 3.28   |
| ENSG0000(OCLN      | protein_co chr5   | 69492292 | 69558104 | + | 0.39   | 0.52   |
| ENSG0000(C4orf22   | protein_co chr4   | 80335720 | 80963756 | + | 0.57   | 0.02   |
| ENSG0000(HIST4H4   | protein_co chr12  | 14767999 | 14771131 | - | 0.8    | 0.62   |
| ENSG0000(CYP2A13   | protein_co chr19  | 41088472 | 41096195 | + | 0      | 0      |
| ENSG0000(ZNF181    | protein_co chr19  | 34734155 | 34745378 | + | 6.18   | 6.59   |
| ENSG0000(SLC22A20  | transcribec chr11 | 65213840 | 65242757 | + | 0.19   | 0.31   |
| ENSG0000(OR8G1     | protein_co chr11  | 1.24E+08 | 1.24E+08 | + | 0      | 0      |
| ENSG0000(FAM212B   | protein_co chr1   | 1.12E+08 | 1.12E+08 | - | 3.27   | 3.42   |
| ENSG0000(ZNF44     | protein_co chr19  | 12224686 | 12294887 | - | 2.95   | 2.01   |
| ENSG0000(GPAA1     | protein_co chr8   | 1.44E+08 | 1.44E+08 | + | 58.01  | 61.92  |
| ENSG0000(ADAMTSL2  | protein_co chr9   | 1.34E+08 | 1.34E+08 | + | 1.03   | 1.11   |
| ENSG0000(SGTB      | protein_co chr5   | 65665928 | 65723035 | - | 4.47   | 4.97   |
| ENSG0000(ZNF790    | protein_co chr19  | 36817428 | 36850787 | - | 2.62   | 2.5    |
| ENSG0000(OR5M12P   | unprocessε chr11  | 56628932 | 56629860 | + | 0      | 0      |
| ENSG0000(PRB3      | protein_co chr12  | 11265924 | 11269805 | - | 0      | 0      |
| ENSG0000(FAM49A    | protein_co chr2   | 16549459 | 16666331 | - | 3.29   | 3.41   |
| ENSG0000(MYO1C     | protein_co chr17  | 1464098  | 1492812  | - | 60.27  | 63.98  |
| ENSG0000(MDS2      | protein_co chr1   | 23581495 | 23640568 | + | 0      | 0      |
| ENSG0000(OR7E13P   | unprocessε chr11  | 86832540 | 86833449 | - | 0.07   | 0      |
| ENSG0000(NKIRAS1   | protein_co chr3   | 23891660 | 23946591 | - | 5.25   | 5.62   |
| ENSG0000(OR1S2     | protein_co chr11  | 58203202 | 58204181 | - | 0      | 0      |
| ENSG0000(UGT2B17   | protein_co chr4   | 68537184 | 68568527 | - | 0      | 0      |
| ENSG0000(MEIG1     | protein_co chr10  | 14959439 | 14988050 | + | 0      | 0.32   |
| ENSG0000(SLC22A12  | protein_co chr11  | 64590641 | 64602353 | + | 0      | 0      |
| ENSG0000(KIF13B    | protein_co chr8   | 29067279 | 29263124 | - | 4.54   | 3.96   |
| ENSG0000(NRAP      | protein_co chr10  | 1.14E+08 | 1.14E+08 | - | 0      | 0      |
| ENSG0000(ADH5      | protein_co chr4   | 99070978 | 99088801 | - | 198.94 | 202.09 |
| ENSG0000(SLC22A6   | protein_co chr11  | 62936385 | 62984983 | - | 0      | 0      |
| ENSG0000(HIST1H2BK | protein_co chr6   | 27146418 | 27146798 | - | 10.64  | 10.36  |

|                     |                  |          |            |         |         |
|---------------------|------------------|----------|------------|---------|---------|
| ENSG0000( TEAD4     | protein_co chr12 | 2959330  | 3040673 +  | 6.63    | 6.22    |
| ENSG0000( SPG7      | protein_co chr16 | 89490917 | 89557768 + | 23.41   | 23.23   |
| ENSG0000( HRNR      | protein_co chr1  | 1.52E+08 | 1.52E+08 - | 0       | 0       |
| ENSG0000( IFNA1     | protein_co chr9  | 21440454 | 21441316 + | 0       | 0       |
| ENSG0000( HES5      | protein_co chr1  | 2528745  | 2530245 -  | 0       | 0       |
| ENSG0000( C2orf27A  | transcribec chr2 | 1.32E+08 | 1.32E+08 + | 3.12    | 1.65    |
| ENSG0000( ZNF677    | protein_co chr19 | 53235381 | 53254898 - | 8.42    | 10.66   |
| ENSG0000( ERO1A     | protein_co chr14 | 52639916 | 52695900 - | 47.75   | 38.86   |
| ENSG0000( ZNF823    | protein_co chr19 | 11721265 | 11739009 - | 0.86    | 1.28    |
| ENSG0000( CYR1-AS1  | antisense chr21  | 26393635 | 26569252 + | 0       | 0       |
| ENSG0000( ZNF311    | protein_co chr6  | 28994785 | 29005316 - | 1.38    | 1.01    |
| ENSG0000( ZNF347    | protein_co chr19 | 53124072 | 53159075 - | 4.13    | 4.72    |
| ENSG0000( OR5H2     | protein_co chr3  | 98282888 | 98283832 + | 0       | 0       |
| ENSG0000( PLCG2     | protein_co chr16 | 81739097 | 81962693 + | 0.01    | 0.14    |
| ENSG0000( FCHSD1    | protein_co chr5  | 1.42E+08 | 1.42E+08 - | 15.69   | 12.48   |
| ENSG0000( ZNF71     | protein_co chr19 | 56595264 | 56626481 + | 3.73    | 2.14    |
| ENSG0000( AADAACL2  | protein_co chr3  | 1.52E+08 | 1.52E+08 + | 0.04    | 0       |
| ENSG0000( S100A6    | protein_co chr1  | 1.54E+08 | 1.54E+08 - | 2161.46 | 2148.87 |
| ENSG0000( RPL12     | protein_co chr9  | 1.27E+08 | 1.27E+08 - | 1077.85 | 1075.84 |
| ENSG0000( DNMT3     | protein_co chr1  | 1.72E+08 | 1.72E+08 + | 0.2     | 0.08    |
| ENSG0000( ZNF121    | protein_co chr19 | 9560353  | 9584533 -  | 1.23    | 0.73    |
| ENSG0000( MPZL1     | protein_co chr1  | 1.68E+08 | 1.68E+08 + | 111.95  | 120.86  |
| ENSG0000( VPS13A    | protein_co chr9  | 77177353 | 77421541 + | 9.75    | 10.28   |
| ENSG0000( MBP       | protein_co chr18 | 76978827 | 77133683 - | 11.99   | 12.33   |
| ENSG0000( AKAP17A   | protein_co chrX  | 1591593  | 1602514 +  | 6.93    | 7.14    |
| ENSG0000( AKAP17A   | protein_co chrY  | 1591593  | 1602514 +  | 6.93    | 7.14    |
| ENSG0000( ELOVL2    | protein_co chr6  | 10980759 | 11044314 - | 0.03    | 0.03    |
| ENSG0000( GOLGA6L9  | protein_co chr15 | 82430018 | 82439153 + | 1.27    | 0.85    |
| ENSG0000( LEKR1     | protein_co chr3  | 1.57E+08 | 1.57E+08 + | 0.73    | 0.35    |
| ENSG0000( C1orf122  | protein_co chr1  | 37806979 | 37809454 + | 40.55   | 45.21   |
| ENSG0000( OR51A8P   | unprocessε chr11 | 4832133  | 4833072 +  | 0       | 0       |
| ENSG0000( SNHG12    | antisense chr1   | 28578538 | 28582983 - | 11.42   | 10.23   |
| ENSG0000( ZNF734P   | unprocessε chr7  | 63449819 | 63456687 + | 0       | 0       |
| ENSG0000( RP11-310K | protein_co chr13 | 61409858 | 61427849 - | 0       | 0       |
| ENSG0000( CLEC9A    | protein_co chr12 | 10030677 | 10066027 + | 0       | 0       |
| ENSG0000( KEL       | protein_co chr7  | 1.43E+08 | 1.43E+08 - | 0.86    | 0.7     |
| ENSG0000( NOL8      | protein_co chr9  | 92297358 | 92325636 - | 11.88   | 13.03   |
| ENSG0000( IRAK4     | protein_co chr12 | 43758944 | 43789543 + | 7       | 9.14    |
| ENSG0000( CCDC151   | protein_co chr19 | 11420604 | 11435782 - | 0.21    | 0.49    |
| ENSG0000( DLGAP2    | protein_co chr8  | 737596   | 1708474 +  | 0       | 0.01    |
| ENSG0000( MRPL42    | protein_co chr12 | 93467488 | 93516213 + | 16.57   | 15.17   |
| ENSG0000( ENTPD7    | protein_co chr10 | 99659506 | 99706240 + | 11.65   | 10.52   |
| ENSG0000( FCGR1B    | protein_co chr1  | 1.21E+08 | 1.21E+08 + | 0       | 0       |
| ENSG0000( SPANXA1   | protein_co chrX  | 1.42E+08 | 1.42E+08 - | 0       | 0.05    |
| ENSG0000( SAGE2P    | unprocessε chrX  | 1.36E+08 | 1.36E+08 - | 0       | 0       |



|                    |                  |          |          |   |        |        |
|--------------------|------------------|----------|----------|---|--------|--------|
| ENSG0000(ZNF335    | protein_co chr20 | 45948653 | 45972172 | - | 5.26   | 5.37   |
| ENSG0000(ZNF560    | protein_co chr19 | 9466507  | 9498607  | - | 0      | 0.02   |
| ENSG0000(TUBA3C    | protein_co chr13 | 19173770 | 19181852 | - | 0      | 0      |
| ENSG0000(RPS4X     | protein_co chrX  | 72255679 | 72277300 | - | 537.78 | 588.42 |
| ENSG0000(ZNF273    | protein_co chr7  | 64870172 | 64930966 | + | 0.83   | 0.62   |
| ENSG0000(ZNF84     | protein_co chr12 | 1.33E+08 | 1.33E+08 | + | 11.04  | 9.81   |
| ENSG0000(MAK16     | protein_co chr8  | 33484750 | 33501260 | + | 4.28   | 4.89   |
| ENSG0000(ZNF667    | protein_co chr19 | 56439325 | 56478065 | - | 1.15   | 1.29   |
| ENSG0000(AVPR1B    | protein_co chr1  | 2.06E+08 | 2.06E+08 | - | 0      | 0      |
| ENSG0000(SIRPA     | protein_co chr20 | 1894167  | 1940592  | + | 43.41  | 40.54  |
| ENSG0000(DSCR8     | protein_co chr21 | 38121451 | 38188016 | + | 0      | 0      |
| ENSG0000(GRK6      | protein_co chr5  | 1.77E+08 | 1.77E+08 | + | 7.43   | 8.67   |
| ENSG0000(PRIM1     | protein_co chr12 | 56731596 | 56752373 | - | 1      | 1.81   |
| ENSG0000(5-Mar     | protein_co chr10 | 92291163 | 92353964 | + | 22.23  | 23.09  |
| ENSG0000(POTEH     | protein_co chr22 | 15690026 | 15721631 | + | 0      | 0      |
| ENSG0000(NPIP13    | protein_co chr16 | 30222937 | 30254510 | - | 2.78   | 2.66   |
| ENSG0000(AKR1B10   | protein_co chr7  | 1.35E+08 | 1.35E+08 | + | 1.61   | 1.79   |
| ENSG0000(SULT1C4   | protein_co chr2  | 1.08E+08 | 1.08E+08 | + | 0      | 0      |
| ENSG0000(CYP2A7    | protein_co chr19 | 40875439 | 40882752 | - | 0      | 0      |
| ENSG0000(ZBTB14    | protein_co chr18 | 5289019  | 5297053  | - | 4.59   | 3.74   |
| ENSG0000(KRTAP9-9  | protein_co chr17 | 41255384 | 41256364 | + | 0      | 0      |
| ENSG0000(CD2AP     | protein_co chr6  | 47477789 | 47627263 | + | 5.88   | 5.64   |
| ENSG0000(NUP62CL   | protein_co chrX  | 1.07E+08 | 1.07E+08 | - | 0.1    | 0      |
| ENSG0000(SFI1      | protein_co chr22 | 31488688 | 31618586 | + | 7.58   | 9.41   |
| ENSG0000(KRTAP4-6  | protein_co chr17 | 41139433 | 41140487 | - | 0      | 0      |
| ENSG0000(TMPRSS11  | protein_co chr4  | 68053198 | 68129880 | - | 0      | 0      |
| ENSG0000(ZNF649    | protein_co chr19 | 51889224 | 51905040 | - | 2.27   | 2.51   |
| ENSG0000(ADH4      | protein_co chr4  | 99123657 | 99157792 | - | 0.6    | 0.15   |
| ENSG0000(OR2T6     | protein_co chr1  | 2.48E+08 | 2.48E+08 | + | 0      | 0      |
| ENSG0000(ZNF248    | protein_co chr10 | 37776526 | 37858106 | - | 5.18   | 3.86   |
| ENSG0000(RP11-231C | lincRNA chr16    | 29291220 | 29372110 | + | 0.26   | 0.23   |
| ENSG0000(CHSY3     | protein_co chr5  | 1.3E+08  | 1.3E+08  | + | 1.1    | 0.84   |
| ENSG0000(TOR4A     | protein_co chr9  | 1.37E+08 | 1.37E+08 | + | 9.88   | 9.42   |
| ENSG0000(LPAR1     | protein_co chr9  | 1.11E+08 | 1.11E+08 | - | 73.07  | 67.3   |
| ENSG0000(MB        | protein_co chr22 | 35606764 | 35637951 | - | 0.06   | 0.15   |
| ENSG0000(OR2L3     | protein_co chr1  | 2.48E+08 | 2.48E+08 | + | 0      | 0.14   |
| ENSG0000(DEFB107B  | protein_co chr8  | 7495846  | 7509311  | + | 0      | 0      |
| ENSG0000(HIBCH     | protein_co chr2  | 1.9E+08  | 1.9E+08  | - | 9.05   | 10.12  |
| ENSG0000(ZNF544    | protein_co chr19 | 58228594 | 58277495 | + | 7.13   | 7.26   |
| ENSG0000(TMEM229   | protein_co chr14 | 67447084 | 67533739 | - | 0.75   | 0.52   |
| ENSG0000(RP11-267J | processed_ch     | 12111163 | 12111489 | + | 0      | 0      |
| ENSG0000(SOWAHC    | protein_co chr2  | 1.1E+08  | 1.1E+08  | + | 2.3    | 2.81   |
| ENSG0000(ZNF770    | protein_co chr15 | 34978341 | 34988287 | - | 7.14   | 5.78   |
| ENSG0000(ZNF849P   | unprocessε chr19 | 22685167 | 22686732 | + | 0      | 0      |
| ENSG0000(ZNF876P   | transcribec chr4 | 212610   | 255985   | + | 0.12   | 0.04   |

|                    |                  |          |          |   |        |        |
|--------------------|------------------|----------|----------|---|--------|--------|
| ENSG0000(NPIPB6    | protein_co chr16 | 28342555 | 28363508 | - | 0      | 0.11   |
| ENSG0000(HMGN5     | protein_co chrX  | 81113701 | 81201942 | - | 1.77   | 4.01   |
| ENSG0000(MIER1     | protein_co chr1  | 66924895 | 66988619 | + | 12.05  | 11.71  |
| ENSG0000(MAN1A2    | protein_co chr1  | 1.17E+08 | 1.18E+08 | + | 12.63  | 13.67  |
| ENSG0000(SVIP      | protein_co chr11 | 22813799 | 22830299 | - | 5.49   | 5.24   |
| ENSG0000(ZNF251    | protein_co chr8  | 1.45E+08 | 1.45E+08 | - | 8.1    | 8.04   |
| ENSG0000(DDR GK1   | protein_co chr20 | 3190350  | 3204685  | - | 31.12  | 29.01  |
| ENSG0000(FAM47C    | protein_co chrX  | 37008397 | 37011666 | + | 0      | 0      |
| ENSG0000(TFDP1     | protein_co chr13 | 1.14E+08 | 1.14E+08 | + | 21.1   | 24.71  |
| ENSG0000(CLEC4C    | protein_co chr12 | 7729415  | 7751605  | - | 0      | 0      |
| ENSG0000(ZNF607    | protein_co chr19 | 37696363 | 37719790 | - | 0.96   | 1.19   |
| ENSG0000(BPIFA1    | protein_co chr20 | 33235995 | 33243311 | + | 0      | 0      |
| ENSG0000(ZNF334    | protein_co chr20 | 46499630 | 46513559 | - | 0.93   | 1.1    |
| ENSG0000(HSD17B11  | protein_co chr4  | 87336610 | 87391386 | - | 17.65  | 22.41  |
| ENSG0000(SZT2      | protein_co chr1  | 43389882 | 43454247 | + | 6.7    | 7.46   |
| ENSG0000(SULT1C2   | protein_co chr2  | 1.08E+08 | 1.08E+08 | + | 0.03   | 0.01   |
| ENSG0000(ZXDA      | protein_co chrX  | 57906708 | 57910820 | - | 0.83   | 0.94   |
| ENSG0000(RPS6KL1   | protein_co chr14 | 74903954 | 74923396 | - | 0.12   | 0.24   |
| ENSG0000(RP11-566K | protein_co chr16 | 89919165 | 89936092 | + | 0      | 0      |
| ENSG0000(CACNA1E   | protein_co chr1  | 1.81E+08 | 1.82E+08 | + | 0      | 0      |
| ENSG0000(OR51H2P   | unprocessε chr11 | 4876557  | 4877462  | + | 0      | 0      |
| ENSG0000(QRICH1    | protein_co chr3  | 49029707 | 49094363 | - | 22.84  | 26.81  |
| ENSG0000(AFDN-AS1  | lincRNA chr6     | 1.68E+08 | 1.68E+08 | - | 0.03   | 0.1    |
| ENSG0000(CSF2RA    | protein_co chrX  | 1268800  | 1310381  | + | 0      | 0.19   |
| ENSG0000(CSF2RA    | protein_co chrY  | 1268800  | 1310381  | + | 0      | 0.19   |
| ENSG0000(FKBP1C    | protein_co chr6  | 63211446 | 63213024 | + | 0.47   | 0.13   |
| ENSG0000(DDX42     | protein_co chr17 | 63773603 | 63819317 | + | 50.32  | 46.19  |
| ENSG0000(RP11-98J2 | unprocessε chr5  | 69875271 | 69920867 | + | 2.92   | 3.66   |
| ENSG0000(RPL23A    | protein_co chr17 | 28719393 | 28724359 | + | 535.22 | 540.15 |
| ENSG0000(SLC29A3   | protein_co chr10 | 71319258 | 71363385 | + | 2.65   | 2.74   |
| ENSG0000(CTC-490E2 | unprocessε chr19 | 40908480 | 40910685 | - | 0      | 0      |
| ENSG0000(STYX      | protein_co chr14 | 52730180 | 52774998 | + | 3.44   | 3.12   |
| ENSG0000(UBL5      | protein_co chr19 | 9827892  | 9830115  | + | 182.7  | 195.87 |
| ENSG0000(OR5BB1P   | unprocessε chr11 | 59391354 | 59392292 | - | 0      | 0      |
| ENSG0000(HELZ      | protein_co chr17 | 67070438 | 67245989 | - | 7.44   | 7.82   |
| ENSG0000(TMEM116   | protein_co chr12 | 1.12E+08 | 1.12E+08 | - | 6.07   | 5.54   |
| ENSG0000(KRTAP4-5  | protein_co chr17 | 41148924 | 41149802 | - | 0      | 0      |
| ENSG0000(UCKL1     | protein_co chr20 | 63939829 | 63956415 | - | 13.34  | 13.99  |
| ENSG0000(RP11-468N | unprocessε chr4  | 68914928 | 68924741 | - | 0      | 0      |
| ENSG0000(OR5B21    | protein_co chr11 | 58507175 | 58508105 | - | 0      | 0.07   |
| ENSG0000(NUP210P1  | transcribec chr3 | 1.27E+08 | 1.27E+08 | + | 0      | 0      |
| ENSG0000(CARD11    | protein_co chr7  | 2906141  | 3043945  | - | 2.23   | 2.46   |
| ENSG0000(ZNF485    | protein_co chr10 | 43606407 | 43617903 | + | 0.41   | 0.76   |
| ENSG0000(PEG3      | protein_co chr19 | 56810083 | 56840728 | - | 0      | 0      |
| ENSG0000(SDAD1     | protein_co chr4  | 75940950 | 75990962 | - | 10.86  | 11.27  |

|                    |             |       |          |          |   |        |        |
|--------------------|-------------|-------|----------|----------|---|--------|--------|
| ENSG0000(BMS1P9    | unprocessε  | chr9  | 63055641 | 63059217 | + | 0.42   | 0.19   |
| ENSG0000(ZKSCAN8   | protein_co  | chr6  | 28141910 | 28159472 | + | 9.77   | 10.81  |
| ENSG0000(FAM109A   | protein_co  | chr12 | 1.11E+08 | 1.11E+08 | - | 6.02   | 6.05   |
| ENSG0000(TMEM239   | protein_co  | chr20 | 2816302  | 2820284  | + | 0      | 0.02   |
| ENSG0000(HYLS1     | protein_co  | chr11 | 1.26E+08 | 1.26E+08 | + | 1.59   | 1.89   |
| ENSG0000(MYL4      | protein_co  | chr17 | 47200446 | 47223679 | + | 0      | 0.24   |
| ENSG0000(ZNF442    | protein_co  | chr19 | 12345949 | 12365905 | - | 0.32   | 0.28   |
| ENSG0000(ZNF813    | protein_co  | chr19 | 53467735 | 53496255 | + | 0.76   | 1      |
| ENSG0000(HOXC4     | protein_co  | chr12 | 54016931 | 54056030 | + | 0.58   | 0.52   |
| ENSG0000(DCAF12L2  | protein_co  | chrX  | 1.26E+08 | 1.26E+08 | - | 0      | 0      |
| ENSG0000(PIM3      | protein_co  | chr22 | 49960513 | 49964080 | + | 14.07  | 12.97  |
| ENSG0000(ASNA1     | protein_co  | chr19 | 12737139 | 12748323 | + | 45.01  | 48.05  |
| ENSG0000(RP11-544M | antisense   | chr1  | 1.61E+08 | 1.61E+08 | + | 0.45   | 0.29   |
| ENSG0000(ASPH      | protein_co  | chr8  | 61500556 | 61714640 | - | 143.91 | 132.36 |
| ENSG0000(OR7A11P   | unprocessε  | chr19 | 14916428 | 14917380 | + | 0      | 0      |
| ENSG0000(SPRED2    | protein_co  | chr2  | 65310851 | 65432637 | - | 10.93  | 10.39  |
| ENSG0000(WWP2      | protein_co  | chr16 | 69762306 | 69941741 | + | 13.37  | 12.23  |
| ENSG0000(GFPT1     | protein_co  | chr2  | 69319769 | 69387254 | - | 14.82  | 14.42  |
| ENSG0000(UVRAG     | protein_co  | chr11 | 75815167 | 76143195 | + | 8.44   | 7.65   |
| ENSG0000(TPTE2P3   | unprocessε  | chr13 | 52522632 | 52586906 | + | 0      | 0      |
| ENSG0000(KRTAP13-1 | protein_co  | chr21 | 30396074 | 30396822 | + | 0      | 0      |
| ENSG0000(ZNF26     | protein_co  | chr12 | 1.33E+08 | 1.33E+08 | + | 2.34   | 2.77   |
| ENSG0000(TMEM207   | protein_co  | chr3  | 1.9E+08  | 1.9E+08  | - | 0      | 0      |
| ENSG0000(ITSN2     | protein_co  | chr2  | 24202864 | 24360714 | - | 10.21  | 10.6   |
| ENSG0000(NTRK1     | protein_co  | chr1  | 1.57E+08 | 1.57E+08 | + | 0.18   | 0.02   |
| ENSG0000(BZW1P2    | processed_  | chr3  | 1.17E+08 | 1.17E+08 | - | 32.48  | 31.17  |
| ENSG0000(MGEA5     | protein_co  | chr10 | 1.02E+08 | 1.02E+08 | - | 36.06  | 36.16  |
| ENSG0000(TATDN2P1  | processed_  | chrX  | 44283916 | 44286246 | + | 0      | 0      |
| ENSG0000(ZNF658B   | transcribec | chr9  | 39443815 | 39508885 | - | 0.63   | 0.69   |
| ENSG0000(MT1F      | protein_co  | chr16 | 56657694 | 56660698 | + | 0.29   | 0.21   |
| ENSG0000(TCAF1     | protein_co  | chr7  | 1.44E+08 | 1.44E+08 | - | 21.36  | 19.73  |
| ENSG0000(ZNF69     | protein_co  | chr19 | 11887784 | 11914329 | + | 0.96   | 0.91   |
| ENSG0000(TXNRD1    | protein_co  | chr12 | 1.04E+08 | 1.04E+08 | + | 357.54 | 336.79 |
| ENSG0000(NRARP     | protein_co  | chr9  | 1.37E+08 | 1.37E+08 | - | 0.25   | 0.11   |
| ENSG0000(ZNF583    | protein_co  | chr19 | 56397966 | 56436035 | + | 1.97   | 3.04   |
| ENSG0000(KRTAP4-1  | protein_co  | chr17 | 41184102 | 41185342 | - | 0      | 0      |
| ENSG0000(CCT8L2    | protein_co  | chr22 | 16590751 | 16592810 | - | 0      | 0.03   |
| ENSG0000(OR14L1P   | unprocessε  | chr1  | 2.48E+08 | 2.48E+08 | + | 0      | 0      |
| ENSG0000(ZNF568    | protein_co  | chr19 | 36916329 | 36998700 | + | 3.07   | 3.87   |
| ENSG0000(PRR31     | lincRNA     | chr9  | 1.37E+08 | 1.37E+08 | + | 0      | 0      |
| ENSG0000(ZXDB      | protein_co  | chrX  | 57591652 | 57597545 | + | 2.67   | 2.6    |
| ENSG0000(ZNF480    | protein_co  | chr19 | 52297177 | 52325922 | + | 5.3    | 4.3    |
| ENSG0000(ZNF587    | protein_co  | chr19 | 57849857 | 57865112 | + | 7.17   | 7.86   |
| ENSG0000(TPM2      | protein_co  | chr9  | 35681992 | 35691020 | - | 291.29 | 331.54 |
| ENSG0000(FLVCR1-AS | lincRNA     | chr1  | 2.13E+08 | 2.13E+08 | - | 1.3    | 1.51   |

|                    |                   |          |          |   |       |        |
|--------------------|-------------------|----------|----------|---|-------|--------|
| ENSG0000(RTP2      | protein_co chr3   | 1.88E+08 | 1.88E+08 | - | 0     | 0      |
| ENSG0000(SH3BGR2   | protein_co chr6   | 79631283 | 79703659 | + | 0.59  | 0.41   |
| ENSG0000(ZNF808    | protein_co chr19  | 52527652 | 52564464 | + | 1.3   | 2.39   |
| ENSG0000(ANKRD35   | protein_co chr1   | 1.46E+08 | 1.46E+08 | - | 2.13  | 1.6    |
| ENSG0000(B3GNT6    | protein_co chr11  | 77034398 | 77041973 | + | 0     | 0.02   |
| ENSG0000(RP11-208N | antisense chr3    | 1.87E+08 | 1.87E+08 | - | 0     | 0      |
| ENSG0000(YTHDF2    | protein_co chr1   | 28736621 | 28769775 | + | 27.46 | 25.35  |
| ENSG0000(NBR2      | transcribed chr17 | 43125610 | 43153671 | + | 4.16  | 4.5    |
| ENSG0000(TMA16     | protein_co chr4   | 1.63E+08 | 1.64E+08 | + | 6.03  | 6.37   |
| ENSG0000(HLA-DRB5  | protein_co chr6   | 32517343 | 32530287 | - | 0     | 0      |
| ENSG0000(ATL1      | protein_co chr14  | 50532509 | 50633068 | + | 2.24  | 2.29   |
| ENSG0000(CNGA1     | protein_co chr4   | 47935977 | 48016672 | - | 0.59  | 0.92   |
| ENSG0000(MAFK      | protein_co chr7   | 1530714  | 1543043  | + | 16.44 | 17.34  |
| ENSG0000(C1orf228  | protein_co chr1   | 44674692 | 44725591 | + | 2.07  | 2.59   |
| ENSG0000(ZNF43     | protein_co chr19  | 21804949 | 21852125 | - | 2.1   | 2.02   |
| ENSG0000(GPN1      | protein_co chr2   | 27628247 | 27651508 | + | 13.84 | 14.7   |
| ENSG0000(PLN       | protein_co chr6   | 1.19E+08 | 1.19E+08 | + | 0.19  | 0.43   |
| ENSG0000(PABPC1P2  | processed_chr2    | 1.47E+08 | 1.47E+08 | + | 0     | 0.03   |
| ENSG0000(C2CD4A    | protein_co chr15  | 62066977 | 62070917 | + | 0.2   | 0.17   |
| ENSG0000(ZNF28     | protein_co chr19  | 52797409 | 52857600 | - | 4.16  | 3.47   |
| ENSG0000(ITGBL1    | protein_co chr13  | 1.01E+08 | 1.02E+08 | + | 61.82 | 59.32  |
| ENSG0000(ZNF511    | protein_co chr10  | 1.33E+08 | 1.33E+08 | + | 14.67 | 13.19  |
| ENSG0000(C20orf203 | lincRNA chr20     | 32631652 | 32673941 | - | 0.02  | 0      |
| ENSG0000(ZNF627    | protein_co chr19  | 11559374 | 11619135 | + | 3.48  | 3.49   |
| ENSG0000(KCNRG     | protein_co chr13  | 50015254 | 50020922 | + | 0     | 0.34   |
| ENSG0000(WDHD1     | protein_co chr14  | 54938950 | 55027105 | - | 2.68  | 2.33   |
| ENSG0000(RP11-598D | unprocessed chr16 | 33976039 | 33987630 | + | 0.07  | 0.08   |
| ENSG0000(ZNF789    | protein_co chr7   | 99472841 | 99503650 | + | 2.3   | 2.43   |
| ENSG0000(CTNND1    | protein_co chr11  | 57753243 | 57819546 | + | 39.9  | 44.2   |
| ENSG0000(DDX39B    | protein_co chr6   | 31530219 | 31542448 | - | 129.2 | 113.14 |
| ENSG0000(SLC34A3   | protein_co chr9   | 1.37E+08 | 1.37E+08 | + | 0     | 0      |
| ENSG0000(RD3       | protein_co chr1   | 2.11E+08 | 2.11E+08 | - | 0     | 0      |
| ENSG0000(SPANXC    | protein_co chrX   | 1.41E+08 | 1.41E+08 | - | 0     | 0      |
| ENSG0000(SH2D1B    | protein_co chr1   | 1.62E+08 | 1.62E+08 | - | 0     | 0.02   |
| ENSG0000(ARC       | protein_co chr8   | 1.43E+08 | 1.43E+08 | - | 0     | 0.04   |
| ENSG0000(RP11-611L | unprocessed chr7  | 6673494  | 6676366  | + | 0.42  | 0.11   |
| ENSG0000(NUDT16    | protein_co chr3   | 1.31E+08 | 1.31E+08 | + | 8.15  | 7.56   |
| ENSG0000(TLK1      | protein_co chr2   | 1.71E+08 | 1.71E+08 | - | 15.25 | 15.64  |
| ENSG0000(LRBA      | protein_co chr4   | 1.5E+08  | 1.51E+08 | - | 6.72  | 8.13   |
| ENSG0000(C3orf35   | protein_co chr3   | 37386269 | 37435497 | + | 0.26  | 0.29   |
| ENSG0000(ZNF536    | protein_co chr19  | 30228290 | 30713538 | + | 0     | 0      |
| ENSG0000(MMP17     | protein_co chr12  | 1.32E+08 | 1.32E+08 | + | 10.84 | 8.15   |
| ENSG0000(OR2M2     | protein_co chr1   | 2.48E+08 | 2.48E+08 | + | 0     | 0      |
| ENSG0000(BAZ1A     | protein_co chr14  | 34752731 | 34875647 | - | 6.45  | 6.99   |
| ENSG0000(AKR1C4    | protein_co chr10  | 5195462  | 5218949  | + | 0     | 0      |

|                     |                  |          |            |         |         |
|---------------------|------------------|----------|------------|---------|---------|
| ENSG0000(COPS8      | protein_co chr2  | 2.37E+08 | 2.37E+08 + | 36.01   | 34.06   |
| ENSG0000(PPIAP22    | processed_chr21  | 18857779 | 18858276 + | 0.93    | 0       |
| ENSG0000(CCDC69     | protein_co chr5  | 1.51E+08 | 1.51E+08 - | 27.73   | 26.26   |
| ENSG0000(MDM4       | protein_co chr1  | 2.05E+08 | 2.05E+08 + | 2.93    | 3.37    |
| ENSG0000(RYR2       | protein_co chr1  | 2.37E+08 | 2.38E+08 + | 0       | 0       |
| ENSG0000(ZNF534     | protein_co chr19 | 52429187 | 52452315 + | 0.06    | 0.14    |
| ENSG0000(KLHL9      | protein_co chr9  | 21329671 | 21335380 - | 7.44    | 7.87    |
| ENSG0000(FAM3D      | protein_co chr3  | 58633946 | 58666848 - | 0       | 0       |
| ENSG0000(NCOA6      | protein_co chr20 | 34689097 | 34825649 - | 7.43    | 7.54    |
| ENSG0000(STK39      | protein_co chr2  | 1.68E+08 | 1.68E+08 - | 3.41    | 3.45    |
| ENSG0000(TAT        | protein_co chr16 | 71565660 | 71577130 - | 0       | 0       |
| ENSG0000(ABHD17AP   | unprocessε chr1  | 1.48E+08 | 1.48E+08 + | 0       | 0       |
| ENSG0000(C6orf89    | protein_co chr6  | 36871870 | 36928964 + | 33.18   | 31.92   |
| ENSG0000(CALM1      | protein_co chr14 | 90396502 | 90408261 + | 137.17  | 117.37  |
| ENSG0000(LPA        | protein_co chr6  | 1.61E+08 | 1.61E+08 - | 0       | 0       |
| ENSG0000(RP11-168J1 | antisense chr12  | 65017468 | 65054124 + | 0.06    | 0       |
| ENSG0000(FAM19A2    | protein_co chr12 | 61708259 | 62279150 - | 1.24    | 1.08    |
| ENSG0000(OR10G6     | protein_co chr11 | 1.24E+08 | 1.24E+08 - | 0       | 0       |
| ENSG0000(TTC37      | protein_co chr5  | 95463895 | 95555007 - | 24.31   | 25.89   |
| ENSG0000(OR5BS1P    | unprocessε chr12 | 48559882 | 48562956 + | 0       | 0       |
| ENSG0000(TUSC1      | protein_co chr9  | 25676389 | 25678440 - | 4.85    | 4.95    |
| ENSG0000(MAGEA1     | protein_co chrX  | 1.53E+08 | 1.53E+08 + | 0       | 0       |
| ENSG0000(PAPSS2     | protein_co chr10 | 87659613 | 87747705 + | 45.12   | 41.18   |
| ENSG0000(LINC01565  | lincRNA chr3     | 1.29E+08 | 1.29E+08 - | 0       | 0       |
| ENSG0000(SLC9A6     | protein_co chrX  | 1.36E+08 | 1.36E+08 + | 4.93    | 5.08    |
| ENSG0000(FAN1       | protein_co chr15 | 30903852 | 30943108 + | 5.43    | 5.76    |
| ENSG0000(ABCA4      | protein_co chr1  | 93992835 | 94121132 - | 0.27    | 0.65    |
| ENSG0000(EIF1AY     | protein_co chrY  | 20575725 | 20593154 + | 8.72    | 11.08   |
| ENSG0000(MT-ND6     | protein_co chrM  | 14149    | 14673 -    | 44.74   | 49.53   |
| ENSG0000(IPO9       | protein_co chr1  | 2.02E+08 | 2.02E+08 + | 18.89   | 19.14   |
| ENSG0000(OR10R3P    | unprocessε chr1  | 1.58E+08 | 1.58E+08 + | 0       | 0       |
| ENSG0000(GPX6       | protein_co chr6  | 28503296 | 28528215 - | 0       | 0       |
| ENSG0000(CEP290     | protein_co chr12 | 88049014 | 88142216 - | 2.99    | 2.75    |
| ENSG0000(SSBP3-AS1  | antisense chr1   | 54236440 | 54239063 + | 0.02    | 0.07    |
| ENSG0000(MT-CO2     | protein_co chrM  | 7586     | 8269 +     | 4479.74 | 4487.32 |
| ENSG0000(GLMP       | protein_co chr1  | 1.56E+08 | 1.56E+08 - | 103.75  | 105.08  |
| ENSG0000(TOGARAM    | protein_co chr14 | 44962208 | 45074431 + | 4.18    | 3.92    |
| ENSG0000(DLL1       | protein_co chr6  | 1.7E+08  | 1.7E+08 -  | 0.15    | 0.09    |
| ENSG0000(ANKRD13B   | protein_co chr17 | 29589769 | 29614761 + | 3.92    | 4.38    |
| ENSG0000(ECI2       | protein_co chr6  | 4115689  | 4135597 -  | 35.38   | 34.72   |
| ENSG0000(UNC13B     | protein_co chr9  | 35161992 | 35405338 + | 6.67    | 5.27    |
| ENSG0000(C19orf45   | protein_co chr19 | 7492976  | 7508450 +  | 0       | 0.13    |
| ENSG0000(MT-CYB     | protein_co chrM  | 14747    | 15887 +    | 1486.73 | 1492.14 |
| ENSG0000(LDB1       | protein_co chr10 | 1.02E+08 | 1.02E+08 - | 47.21   | 52.33   |
| ENSG0000(PPP1R14C   | protein_co chr6  | 1.5E+08  | 1.5E+08 +  | 0.23    | 0.11    |

|                   |                  |          |          |   |         |         |
|-------------------|------------------|----------|----------|---|---------|---------|
| ENSG0000(CTR9     | protein_co chr11 | 10750987 | 10779743 | + | 15.03   | 12.69   |
| ENSG0000(SMOC1    | protein_co chr14 | 69854131 | 70032366 | + | 0.14    | 0.43    |
| ENSG0000(F5       | protein_co chr1  | 1.7E+08  | 1.7E+08  | - | 0.04    | 0.02    |
| ENSG0000(MSRB1    | protein_co chr16 | 1938210  | 1943326  | - | 12.92   | 12.42   |
| ENSG0000(SMIM11P1 | processed_chr6   | 85735744 | 85735921 | - | 0       | 0       |
| ENSG0000(LRRTM3   | protein_co chr10 | 66926006 | 67099830 | + | 0       | 0       |
| ENSG0000(ZNF652   | protein_co chr17 | 49289206 | 49362473 | - | 1.94    | 2.26    |
| ENSG0000(SMURF1   | protein_co chr7  | 99027438 | 99144100 | - | 7.61    | 8.05    |
| ENSG0000(SLC5A3   | protein_co chr21 | 34073570 | 34106262 | + | 1.85    | 2.15    |
| ENSG0000(MTCO3P12 | unprocessε chr1  | 634376   | 634922   | + | 1.07    | 0.31    |
| ENSG0000(GPATCH3  | protein_co chr1  | 26890488 | 26900466 | - | 6.79    | 6.69    |
| ENSG0000(CDC42BPB | protein_co chr14 | 1.03E+08 | 1.03E+08 | - | 37.08   | 38.18   |
| ENSG0000(PLXNB3   | protein_co chrX  | 1.54E+08 | 1.54E+08 | + | 1.32    | 1.13    |
| ENSG0000(OXCT2    | protein_co chr1  | 39769523 | 39771348 | - | 0.23    | 0.07    |
| ENSG0000(RPL10A   | protein_co chr6  | 35468408 | 35470785 | + | 800.37  | 802.27  |
| ENSG0000(COLGALT2 | protein_co chr1  | 1.84E+08 | 1.84E+08 | - | 0.4     | 0.52    |
| ENSG0000(EPS8L3   | protein_co chr1  | 1.1E+08  | 1.1E+08  | - | 0       | 0       |
| ENSG0000(EGFL6    | protein_co chrX  | 13569605 | 13633575 | + | 0       | 0       |
| ENSG0000(MT-ND2   | protein_co chrM  | 4470     | 5511     | + | 1196.46 | 1229.07 |
| ENSG0000(SYCP1    | protein_co chr1  | 1.15E+08 | 1.15E+08 | + | 0       | 0       |
| ENSG0000(APCDD1L  | protein_co chr20 | 58459101 | 58515131 | - | 2.66    | 1.83    |
| ENSG0000(RCSD1    | protein_co chr1  | 1.68E+08 | 1.68E+08 | + | 0.2     | 0.08    |
| ENSG0000(RASSF9   | protein_co chr12 | 85800697 | 85836570 | - | 1.36    | 1.58    |
| ENSG0000(FAM169A  | protein_co chr5  | 74777574 | 74866951 | - | 0       | 0       |
| ENSG0000(ZNF830   | protein_co chr17 | 34961530 | 34963775 | + | 3.55    | 3.81    |
| ENSG0000(GRIN3A   | protein_co chr9  | 1.02E+08 | 1.02E+08 | - | 0       | 0       |
| ENSG0000(MT-ND5   | protein_co chrM  | 12337    | 14148    | + | 1003.77 | 1152.51 |
| ENSG0000(OR4D12P  | unprocessε chr4  | 4126659  | 4127569  | - | 0       | 0       |
| ENSG0000(MUC2     | processed_chr11  | 1074875  | 1110511  | + | 0       | 0       |
| ENSG0000(CNOT7    | protein_co chr8  | 17224964 | 17246878 | - | 29.04   | 28.25   |
| ENSG0000(TMEM184f | protein_co chr22 | 38219291 | 38273034 | - | 27.44   | 30.79   |
| ENSG0000(MTOR     | protein_co chr1  | 11106535 | 11262507 | - | 6.5     | 8.3     |
| ENSG0000(SCAMP5   | protein_co chr15 | 74957219 | 75021496 | + | 7.83    | 9.12    |
| ENSG0000(ZNF521   | protein_co chr18 | 25061926 | 25352190 | - | 2.11    | 2.5     |
| ENSG0000(ALPK2    | protein_co chr18 | 58481247 | 58628957 | - | 2.02    | 2.35    |
| ENSG0000(BRINP2   | protein_co chr1  | 1.77E+08 | 1.77E+08 | + | 0.03    | 0       |
| ENSG0000(MAGEB3   | protein_co chrX  | 30230436 | 30237492 | + | 0       | 0       |
| ENSG0000(LRIG2    | protein_co chr1  | 1.13E+08 | 1.13E+08 | + | 2.29    | 2.12    |
| ENSG0000(MT-CO1   | protein_co chrM  | 5904     | 7445     | + | 7254.75 | 7393.06 |
| ENSG0000(PNP      | protein_co chr14 | 20468954 | 20477094 | + | 10.04   | 10.36   |
| ENSG0000(PAX9     | protein_co chr14 | 36657568 | 36679715 | + | 0.49    | 0.52    |
| ENSG0000(LRRC10   | protein_co chr12 | 69608564 | 69611162 | - | 0       | 0       |
| ENSG0000(GK       | protein_co chrX  | 30653359 | 30731456 | + | 4.42    | 2.82    |
| ENSG0000(FOXJ3    | protein_co chr1  | 42176539 | 42335877 | - | 10.52   | 11.54   |
| ENSG0000(ZNF358   | protein_co chr19 | 7515292  | 7521026  | + | 30.71   | 27.76   |

|                   |                  |          |          |   |         |         |
|-------------------|------------------|----------|----------|---|---------|---------|
| ENSG0000(SFT2D1   | protein_co chr6  | 1.66E+08 | 1.66E+08 | - | 21.35   | 19.2    |
| ENSG0000(CD247    | protein_co chr1  | 1.67E+08 | 1.68E+08 | - | 0       | 0       |
| ENSG0000(GRM3     | protein_co chr7  | 86643914 | 86864884 | + | 0       | 0       |
| ENSG0000(CHAMP1   | protein_co chr13 | 1.14E+08 | 1.14E+08 | + | 12.2    | 9.33    |
| ENSG0000(INPP5F   | protein_co chr10 | 1.2E+08  | 1.2E+08  | + | 5.25    | 6.34    |
| ENSG0000(ARHGAP11 | protein_co chr15 | 32615144 | 32639949 | + | 4.94    | 4.29    |
| ENSG0000(SUCNR1   | protein_co chr3  | 1.52E+08 | 1.52E+08 | + | 0.06    | 0.07    |
| ENSG0000(HMGN2    | protein_co chr1  | 26472450 | 26475972 | + | 122.15  | 130.61  |
| ENSG0000(SELENOM  | protein_co chr22 | 31104772 | 31120069 | - | 198.5   | 196.12  |
| ENSG0000(UBE2J1   | protein_co chr6  | 89326625 | 89352848 | - | 10.9    | 10.07   |
| ENSG0000(GJC2     | protein_co chr1  | 2.28E+08 | 2.28E+08 | + | 1.62    | 1.33    |
| ENSG0000(OPA1     | protein_co chr3  | 1.94E+08 | 1.94E+08 | + | 29.63   | 32.29   |
| ENSG0000(DENND4B  | protein_co chr1  | 1.54E+08 | 1.54E+08 | - | 9.68    | 11.24   |
| ENSG0000(RYR3     | protein_co chr15 | 33310945 | 33866121 | + | 0.04    | 0.03    |
| ENSG0000(ZNF277   | protein_co chr7  | 1.12E+08 | 1.12E+08 | + | 11.56   | 10.69   |
| ENSG0000(MT-ND3   | protein_co chrM  | 10059    | 10404    | + | 1320.23 | 1402.7  |
| ENSG0000(KT112    | protein_co chr1  | 52032103 | 52033816 | - | 4.32    | 3.88    |
| ENSG0000(DUSP27   | protein_co chr1  | 1.67E+08 | 1.67E+08 | + | 0       | 0       |
| ENSG0000(SELENOT  | protein_co chr3  | 1.51E+08 | 1.51E+08 | + | 46.61   | 47.81   |
| ENSG0000(ARHGEF15 | protein_co chr17 | 8310241  | 8322516  | + | 0       | 0       |
| ENSG0000(TOX      | protein_co chr8  | 58805418 | 59119208 | - | 0.04    | 0       |
| ENSG0000(CES1     | protein_co chr16 | 55802851 | 55833337 | - | 0.22    | 0.85    |
| ENSG0000(CD3E     | protein_co chr11 | 1.18E+08 | 1.18E+08 | + | 0       | 0       |
| ENSG0000(RUSC2    | protein_co chr9  | 35490127 | 35561898 | + | 16.89   | 18.16   |
| ENSG0000(C1orf68  | protein_co chr1  | 1.53E+08 | 1.53E+08 | + | 0       | 0       |
| ENSG0000(FICD     | protein_co chr12 | 1.09E+08 | 1.09E+08 | + | 2.73    | 2.53    |
| ENSG0000(OSTC     | protein_co chr4  | 1.09E+08 | 1.09E+08 | + | 75.65   | 71.67   |
| ENSG0000(HSD3BP5  | transcribec chr1 | 1.2E+08  | 1.2E+08  | + | 0       | 0       |
| ENSG0000(R3HDM4   | protein_co chr19 | 896503   | 913245   | - | 21.86   | 25.83   |
| ENSG0000(TSEN15   | protein_co chr1  | 1.84E+08 | 1.84E+08 | + | 14.11   | 13.12   |
| ENSG0000(LTN1     | protein_co chr21 | 28928144 | 28992956 | - | 5.23    | 4.29    |
| ENSG0000(RUNDC1   | protein_co chr17 | 42980565 | 42993690 | + | 6.36    | 5.5     |
| ENSG0000(CCDC152  | protein_co chr5  | 42756801 | 42802360 | + | 0.91    | 0.87    |
| ENSG0000(MTND4LP3 | processed_chr5   | 1.35E+08 | 1.35E+08 | - | 0       | 0       |
| ENSG0000(STKLD1   | protein_co chr9  | 1.33E+08 | 1.33E+08 | + | 0.34    | 1       |
| ENSG0000(GRK5     | protein_co chr10 | 1.19E+08 | 1.19E+08 | + | 14.57   | 16.53   |
| ENSG0000(TYW1     | protein_co chr7  | 66995173 | 67239519 | + | 4.45    | 5.64    |
| ENSG0000(DCAF12   | protein_co chr9  | 34086387 | 34127399 | - | 17.83   | 14.73   |
| ENSG0000(SFMBT2   | protein_co chr10 | 7158624  | 7411486  | - | 0.1     | 0.01    |
| ENSG0000(ASB12    | protein_co chrX  | 64224196 | 64230631 | - | 0       | 0       |
| ENSG0000(PNMA5    | protein_co chrX  | 1.53E+08 | 1.53E+08 | - | 0       | 0       |
| ENSG0000(ITPRIPL1 | protein_co chr2  | 96325331 | 96330517 | + | 0.28    | 0.14    |
| ENSG0000(MT-ND4   | protein_co chrM  | 10760    | 12137    | + | 2338.86 | 2345.96 |
| ENSG0000(SMC5     | protein_co chr9  | 70258962 | 70354888 | + | 7.67    | 13.08   |
| ENSG0000(MT-ND1   | protein_co chrM  | 3307     | 4262     | + | 1503.5  | 1544.52 |

|                    |                  |          |            |         |         |
|--------------------|------------------|----------|------------|---------|---------|
| ENSG0000(DCAF12L1  | protein_co chrX  | 1.27E+08 | 1.27E+08 - | 0       | 0       |
| ENSG0000(PRMT6     | protein_co chr1  | 1.07E+08 | 1.07E+08 + | 6.49    | 6.84    |
| ENSG0000(SHISA4    | protein_co chr1  | 2.02E+08 | 2.02E+08 + | 25.38   | 27.07   |
| ENSG0000(CIPC      | protein_co chr14 | 77098097 | 77117287 + | 6.33    | 5.98    |
| ENSG0000(CAPZA2    | protein_co chr7  | 1.17E+08 | 1.17E+08 + | 63.62   | 65.41   |
| ENSG0000(MT-ATP6   | protein_co chrM  | 8527     | 9207 +     | 3475.9  | 3471.27 |
| ENSG0000(TOP1      | protein_co chr20 | 41028818 | 41124487 + | 12.23   | 12.47   |
| ENSG0000(PRC1      | protein_co chr15 | 90966038 | 90995629 - | 2.97    | 3.06    |
| ENSG0000(BHLHB9    | protein_co chrX  | 1.03E+08 | 1.03E+08 + | 0.74    | 0.95    |
| ENSG0000(MAP3K3    | protein_co chr17 | 63622415 | 63696303 + | 12.38   | 12.59   |
| ENSG0000(L1CAM     | protein_co chrX  | 1.54E+08 | 1.54E+08 - | 0.46    | 0.44    |
| ENSG0000(SREBF2    | protein_co chr22 | 41833079 | 41907308 + | 56.63   | 59.85   |
| ENSG0000(C1orf174  | protein_co chr1  | 3889125  | 3900293 -  | 9.07    | 9.35    |
| ENSG0000(POU3F3    | protein_co chr2  | 1.05E+08 | 1.05E+08 + | 0       | 0       |
| ENSG0000(RASGEF1A  | protein_co chr10 | 43194535 | 43266919 - | 1.9     | 2.3     |
| ENSG0000(SPOUT1    | protein_co chr9  | 1.29E+08 | 1.29E+08 - | 8.68    | 7.61    |
| ENSG0000(RPL39     | protein_co chrX  | 1.2E+08  | 1.2E+08 -  | 1291.51 | 1272.36 |
| ENSG0000(DZIP3     | protein_co chr3  | 1.09E+08 | 1.09E+08 + | 3.23    | 2.79    |
| ENSG0000(KIAA0753  | protein_co chr17 | 6578148  | 6640927 -  | 7.2     | 6.88    |
| ENSG0000(RP11-290L | processed_chr12  | 75964799 | 75964995 + | 0       | 0       |
| ENSG0000(DCLRE1A   | protein_co chr10 | 1.14E+08 | 1.14E+08 - | 1.27    | 1.73    |
| ENSG0000(ATG9A     | protein_co chr2  | 2.19E+08 | 2.19E+08 - | 37.75   | 38.59   |
| ENSG0000(NOS1AP    | protein_co chr1  | 1.62E+08 | 1.62E+08 + | 0.09    | 0       |
| ENSG0000(CSAG1     | protein_co chrX  | 1.53E+08 | 1.53E+08 - | 0.11    | 0.12    |
| ENSG0000(APRT      | protein_co chr16 | 88809339 | 88811944 - | 86.38   | 87.02   |
| ENSG0000(GPRASP1   | protein_co chrX  | 1.03E+08 | 1.03E+08 + | 0.63    | 1.34    |
| ENSG0000(TBKBP1    | protein_co chr17 | 47694081 | 47712050 + | 5.66    | 7.42    |
| ENSG0000(MAGEE1    | protein_co chrX  | 76427724 | 76431353 + | 1.42    | 1.53    |
| ENSG0000(CCDC167   | protein_co chr6  | 37482920 | 37499922 - | 10.24   | 12.74   |
| ENSG0000(MT-CO3    | protein_co chrM  | 9207     | 9990 +     | 4954.76 | 5056.33 |
| ENSG0000(ZFP2      | protein_co chr5  | 1.79E+08 | 1.79E+08 + | 0.25    | 0.58    |
| ENSG0000(SOWAHA    | protein_co chr5  | 1.33E+08 | 1.33E+08 + | 0       | 0       |
| ENSG0000(L3MBTL3   | protein_co chr6  | 1.3E+08  | 1.3E+08 +  | 6.29    | 7.7     |
| ENSG0000(DMD       | protein_co chrX  | 31097677 | 33339441 - | 0.75    | 0.9     |
| ENSG0000(MFAP3L    | protein_co chr4  | 1.7E+08  | 1.7E+08 -  | 0.97    | 0.31    |
| ENSG0000(NAGA      | protein_co chr22 | 42058354 | 42070842 - | 16.22   | 17.49   |
| ENSG0000(SMG5      | protein_co chr1  | 1.56E+08 | 1.56E+08 - | 25.46   | 24.43   |
| ENSG0000(KIF1BP    | protein_co chr10 | 68988721 | 69043544 + | 11.43   | 12.24   |
| ENSG0000(TGM2      | protein_co chr20 | 38127387 | 38166578 - | 10.55   | 13.43   |
| ENSG0000(ARMCX6    | protein_co chrX  | 1.02E+08 | 1.02E+08 - | 34.95   | 31.98   |
| ENSG0000(PJA2      | protein_co chr5  | 1.09E+08 | 1.09E+08 - | 26.44   | 26.46   |
| ENSG0000(RORB      | protein_co chr9  | 74497365 | 74693177 + | 0       | 0.04    |
| ENSG0000(SGMS1     | protein_co chr10 | 50305586 | 50625163 - | 14.36   | 12.33   |
| ENSG0000(OR10R2    | protein_co chr1  | 1.58E+08 | 1.58E+08 + | 0       | 0       |
| ENSG0000(OR10Z1    | protein_co chr1  | 1.59E+08 | 1.59E+08 + | 0       | 0       |



|                 |           |       |       |          |          |   |   |       |
|-----------------|-----------|-------|-------|----------|----------|---|---|-------|
| ENSG00000103070 | MIRLET7E  | miRNA | chr19 | 51692786 | 51692864 | + | 0 | 0     |
| ENSG00000103071 | MIR375    | miRNA | chr2  | 2.19E+08 | 2.19E+08 | - | 0 | 0     |
| ENSG00000103072 | MIR30E    | miRNA | chr1  | 40754355 | 40754446 | + | 0 | 0     |
| ENSG00000103073 | MIRLET7A2 | miRNA | chr11 | 1.22E+08 | 1.22E+08 | - | 0 | 0     |
| ENSG00000103074 | MIR429    | miRNA | chr1  | 1169005  | 1169087  | + | 0 | 0     |
| ENSG00000103075 | MIR380    | miRNA | chr14 | 1.01E+08 | 1.01E+08 | + | 0 | 0     |
| ENSG00000103076 | MIR449A   | miRNA | chr5  | 55170532 | 55170622 | - | 0 | 0     |
| ENSG00000103077 | MIR345    | miRNA | chr14 | 1E+08    | 1E+08    | + | 0 | 0     |
| ENSG00000103078 | MIR16-2   | miRNA | chr3  | 1.6E+08  | 1.6E+08  | + | 0 | 0     |
| ENSG00000103079 | MIR340    | miRNA | chr5  | 1.8E+08  | 1.8E+08  | - | 0 | 0     |
| ENSG00000103080 | MIR107    | miRNA | chr10 | 89592747 | 89592827 | - | 0 | 0     |
| ENSG00000103081 | MIR448    | miRNA | chrX  | 1.15E+08 | 1.15E+08 | + | 0 | 0     |
| ENSG00000103082 | MIR370    | miRNA | chr14 | 1.01E+08 | 1.01E+08 | + | 0 | 0     |
| ENSG00000103083 | MIR412    | miRNA | chr14 | 1.01E+08 | 1.01E+08 | + | 0 | 0     |
| ENSG00000103084 | MIR377    | miRNA | chr14 | 1.01E+08 | 1.01E+08 | + | 0 | 0     |
| ENSG00000103085 | MIR1-1    | miRNA | chr20 | 62554306 | 62554376 | + | 0 | 0     |
| ENSG00000103086 | MIR381    | miRNA | chr14 | 1.01E+08 | 1.01E+08 | + | 0 | 0     |
| ENSG00000103087 | MIR339    | miRNA | chr7  | 1022933  | 1023026  | - | 0 | 0     |
| ENSG00000103088 | MIR103A2  | miRNA | chr20 | 3917494  | 3917571  | + | 0 | 0     |
| ENSG00000103089 | MIR369    | miRNA | chr14 | 1.01E+08 | 1.01E+08 | + | 0 | 0     |
| ENSG00000103090 | MIRLET7C  | miRNA | chr21 | 16539828 | 16539911 | + | 0 | 0     |
| ENSG00000103091 | MIR371A   | miRNA | chr19 | 53787675 | 53787741 | + | 0 | 0     |
| ENSG00000103092 | MIR425    | miRNA | chr3  | 49020148 | 49020234 | - | 0 | 0     |
| ENSG00000103093 | MIR103A1  | miRNA | chr5  | 1.69E+08 | 1.69E+08 | - | 0 | 0     |
| ENSG00000103094 | MIR219A1  | miRNA | chr6  | 33207835 | 33207944 | + | 0 | 0     |
| ENSG00000103095 | MIR210    | miRNA | chr11 | 568089   | 568198   | - | 0 | 18.15 |
| ENSG00000103096 | MIR335    | miRNA | chr7  | 1.3E+08  | 1.3E+08  | + | 0 | 0     |
| ENSG00000103097 | MIR378A   | miRNA | chr5  | 1.5E+08  | 1.5E+08  | + | 0 | 0     |
| ENSG00000103098 | MIR361    | miRNA | chrX  | 85903636 | 85903707 | - | 0 | 0     |
| ENSG00000103099 | MIR324    | miRNA | chr17 | 7223297  | 7223379  | - | 0 | 0     |
| ENSG00000103100 | MIR135B   | miRNA | chr1  | 2.05E+08 | 2.05E+08 | - | 0 | 0     |
| ENSG00000103101 | MIR101-2  | miRNA | chr9  | 4850297  | 4850375  | + | 0 | 0     |
| ENSG00000103102 | MIR323A   | miRNA | chr14 | 1.01E+08 | 1.01E+08 | + | 0 | 0     |
| ENSG00000103103 | MIRLET7F1 | miRNA | chr9  | 94176347 | 94176433 | + | 0 | 0     |
| ENSG00000103104 | MIR26A1   | miRNA | chr3  | 37969404 | 37969480 | + | 0 | 0     |
| ENSG00000103105 | MIR129-2  | miRNA | chr11 | 43581394 | 43581483 | + | 0 | 0     |
| ENSG00000103106 | MIR133B   | miRNA | chr6  | 52148923 | 52149041 | + | 0 | 0     |
| ENSG00000103107 | MIR342    | miRNA | chr14 | 1E+08    | 1E+08    | + | 0 | 0     |
| ENSG00000103108 | MIR148A   | miRNA | chr7  | 25949919 | 25949986 | - | 0 | 0     |
| ENSG00000103109 | MIR379    | miRNA | chr14 | 1.01E+08 | 1.01E+08 | + | 0 | 0     |
| ENSG00000103110 | MIR326    | miRNA | chr11 | 75335092 | 75335186 | - | 0 | 0     |
| ENSG00000103111 | MIR410    | miRNA | chr14 | 1.01E+08 | 1.01E+08 | + | 0 | 0     |
| ENSG00000103112 | MIR30C2   | miRNA | chr6  | 71376960 | 71377031 | - | 0 | 0     |
| ENSG00000103113 | MIR372    | miRNA | chr19 | 53787890 | 53787956 | + | 0 | 0     |
| ENSG00000103114 | MIR302C   | miRNA | chr4  | 1.13E+08 | 1.13E+08 | - | 0 | 0     |

|                    |          |       |          |          |   |   |   |
|--------------------|----------|-------|----------|----------|---|---|---|
| ENSG0000(MIR346    | miRNA    | chr10 | 86264694 | 86264788 | - | 0 | 0 |
| ENSG0000(MIR409    | miRNA    | chr14 | 1.01E+08 | 1.01E+08 | + | 0 | 0 |
| ENSG0000(MIR411    | miRNA    | chr14 | 1.01E+08 | 1.01E+08 | + | 0 | 0 |
| ENSG0000(MIR26B    | miRNA    | chr2  | 2.18E+08 | 2.18E+08 | + | 0 | 0 |
| ENSG0000(MIR148B   | miRNA    | chr12 | 54337216 | 54337314 | + | 0 | 0 |
| ENSG0000(MIR383    | miRNA    | chr8  | 14853438 | 14853510 | - | 0 | 0 |
| ENSG0000(MIR365A   | miRNA    | chr16 | 14309285 | 14309371 | + | 0 | 0 |
| ENSG0000(MIR450A1  | miRNA    | chrX  | 1.35E+08 | 1.35E+08 | - | 0 | 0 |
| ENSG0000(MIRLET7D  | miRNA    | chr9  | 94178834 | 94178920 | + | 0 | 0 |
| ENSG0000(MIR101-1  | miRNA    | chr1  | 65058434 | 65058508 | - | 0 | 0 |
| ENSG0000(MIR373    | miRNA    | chr19 | 53788705 | 53788773 | + | 0 | 0 |
| ENSG0000(MIR302D   | miRNA    | chr4  | 1.13E+08 | 1.13E+08 | - | 0 | 0 |
| ENSG0000(MIRLET7G  | miRNA    | chr3  | 52268278 | 52268361 | - | 0 | 0 |
| ENSG0000(MIR337    | miRNA    | chr14 | 1.01E+08 | 1.01E+08 | + | 0 | 0 |
| ENSG0000(MIR30D    | miRNA    | chr8  | 1.35E+08 | 1.35E+08 | - | 0 | 0 |
| ENSG0000(MIR422A   | miRNA    | chr15 | 63870930 | 63871019 | - | 0 | 0 |
| ENSG0000(MIR208A   | miRNA    | chr14 | 23388596 | 23388666 | - | 0 | 0 |
| ENSG0000(MIR96     | miRNA    | chr7  | 1.3E+08  | 1.3E+08  | - | 0 | 0 |
| ENSG0000(MIR126    | miRNA    | chr9  | 1.37E+08 | 1.37E+08 | + | 0 | 0 |
| ENSG0000(MIRLET7A1 | miRNA    | chr9  | 94175957 | 94176036 | + | 0 | 0 |
| ENSG0000(MIR374A   | miRNA    | chrX  | 74287286 | 74287357 | - | 0 | 0 |
| ENSG0000(MIR367    | miRNA    | chr4  | 1.13E+08 | 1.13E+08 | - | 0 | 0 |
| ENSG0000(MIR331    | miRNA    | chr12 | 95308420 | 95308513 | + | 0 | 0 |
| ENSG0000(MIR31     | miRNA    | chr9  | 21512115 | 21512185 | - | 0 | 0 |
| ENSG0000(MIRLET7I  | miRNA    | chr12 | 62603686 | 62603769 | + | 0 | 0 |
| ENSG0000(SNORA25   | snoRNA   | chr13 | 34100711 | 34100838 | - | 0 | 0 |
| ENSG0000(RN7SKP72  | misc_RNA | chr18 | 1323794  | 1324085  | - | 0 | 0 |
| ENSG0000(Y_RNA     | misc_RNA | chr10 | 34201979 | 34202074 | - | 0 | 0 |
| ENSG0000(Y_RNA     | misc_RNA | chr10 | 73192223 | 73192325 | - | 0 | 0 |
| ENSG0000(RNA5SP28  | rRNA     | chr9  | 95905005 | 95905141 | + | 0 | 0 |
| ENSG0000(Y_RNA     | misc_RNA | chr2  | 2.1E+08  | 2.1E+08  | + | 0 | 0 |
| ENSG0000(Y_RNA     | misc_RNA | chr18 | 34001698 | 34001799 | - | 0 | 0 |
| ENSG0000(RNU105C   | snoRNA   | chr8  | 54330687 | 54330895 | + | 0 | 0 |
| ENSG0000(RNU6-112  | snRNA    | chr11 | 1.2E+08  | 1.2E+08  | + | 0 | 0 |
| ENSG0000(RN7SKP18  | misc_RNA | chr20 | 53097652 | 53097984 | + | 0 | 0 |
| ENSG0000(RNU6-500  | snRNA    | chr5  | 1.73E+08 | 1.73E+08 | - | 0 | 0 |
| ENSG0000(Y_RNA     | misc_RNA | chr12 | 1.15E+08 | 1.15E+08 | - | 0 | 0 |
| ENSG0000(Y_RNA     | misc_RNA | chr10 | 21481716 | 21481817 | + | 0 | 0 |
| ENSG0000(Y_RNA     | misc_RNA | chr19 | 6572956  | 6573057  | - | 0 | 0 |
| ENSG0000(Y_RNA     | misc_RNA | chr7  | 1.16E+08 | 1.16E+08 | - | 0 | 0 |
| ENSG0000(RNU6-50P  | snRNA    | chrX  | 46517766 | 46517868 | + | 0 | 0 |
| ENSG0000(snoU2_19  | snoRNA   | chr7  | 63175940 | 63176019 | - | 0 | 0 |
| ENSG0000(RNU6-834  | snRNA    | chr12 | 49593104 | 49593213 | + | 0 | 0 |
| ENSG0000(RNA5SP46  | rRNA     | chr1  | 43196417 | 43196536 | + | 0 | 0 |
| ENSG0000(Y_RNA     | misc_RNA | chr1  | 2.41E+08 | 2.41E+08 | + | 0 | 0 |

|                    |          |       |          |          |   |      |      |
|--------------------|----------|-------|----------|----------|---|------|------|
| ENSG0000(Y_RNA     | misc_RNA | chr12 | 88430442 | 88430550 | + | 0    | 0    |
| ENSG0000(RNU6-896F | snRNA    | chr6  | 1.54E+08 | 1.54E+08 | + | 0    | 0    |
| ENSG0000(RNU6-28P  | snRNA    | chr22 | 31479383 | 31479489 | - | 0    | 0    |
| ENSG0000(RNU6-664F | snRNA    | chr2  | 2.08E+08 | 2.08E+08 | - | 0    | 0    |
| ENSG0000(RNU6-874F | snRNA    | chr11 | 1.29E+08 | 1.29E+08 | + | 0    | 0    |
| ENSG0000(Y_RNA     | misc_RNA | chr16 | 68474553 | 68474664 | - | 0    | 0    |
| ENSG0000(SNORA60   | snoRNA   | chr20 | 38449370 | 38449503 | + | 0    | 0    |
| ENSG0000(RNA5S12   | rRNA     | chr1  | 2.29E+08 | 2.29E+08 | - | 3.61 | 14.5 |
| ENSG0000(RNU6-349F | snRNA    | chr18 | 6454962  | 6455068  | + | 0    | 0    |
| ENSG0000(Y_RNA     | misc_RNA | chr7  | 40128121 | 40128232 | - | 0    | 0    |
| ENSG0000(RNA5SP26  | rRNA     | chr13 | 37854852 | 37854970 | - | 0    | 0    |
| ENSG0000(RNU6-661F | snRNA    | chr5  | 62443176 | 62443282 | + | 0    | 0    |
| ENSG0000(SNORA9    | snoRNA   | chr13 | 72586680 | 72586810 | + | 0    | 0    |
| ENSG0000(RNU1-58P  | snRNA    | chr7  | 1.4E+08  | 1.4E+08  | + | 0    | 0    |
| ENSG0000(Y_RNA     | misc_RNA | chr14 | 38987281 | 38987383 | + | 0    | 0    |
| ENSG0000(RNU6-1094 | snRNA    | chr3  | 96608814 | 96608917 | - | 0    | 0    |
| ENSG0000(RNU6-502F | snRNA    | chr6  | 26519351 | 26519458 | - | 0    | 0    |
| ENSG0000(Y_RNA     | misc_RNA | chr6  | 29750371 | 29750472 | + | 0    | 0    |
| ENSG0000(Y_RNA     | misc_RNA | chr14 | 31258608 | 31258709 | - | 0    | 0    |
| ENSG0000(SNORA21   | snoRNA   | chr17 | 38852863 | 38852994 | - | 4.73 | 0    |
| ENSG0000(RNU6-1312 | snRNA    | chr2  | 83657735 | 83657842 | + | 0    | 0    |
| ENSG0000(RNA5SP43  | rRNA     | chr16 | 75861048 | 75861157 | - | 0    | 0    |
| ENSG0000(RNU6-208F | snRNA    | chr16 | 71666091 | 71666197 | + | 0    | 0    |
| ENSG0000(Y_RNA     | misc_RNA | chr6  | 99642237 | 99642347 | - | 0    | 0    |
| ENSG0000(RNU6-858F | snRNA    | chr3  | 1.98E+08 | 1.98E+08 | + | 0    | 0    |
| ENSG0000(RNU6-222F | snRNA    | chr19 | 54868939 | 54869045 | - | 0    | 0    |
| ENSG0000(SNORD115  | snoRNA   | chr15 | 25232387 | 25232468 | + | 0    | 0    |
| ENSG0000(RNU4-82P  | snRNA    | chr9  | 1.25E+08 | 1.25E+08 | - | 0    | 0    |
| ENSG0000(RNA5SP34  | rRNA     | chr11 | 97657464 | 97657582 | + | 0    | 0    |
| ENSG0000(RNA5SP52  | rRNA     | chr1  | 87453240 | 87453373 | - | 0    | 0    |
| ENSG0000(RN7SKP25  | misc_RNA | chr3  | 1.43E+08 | 1.43E+08 | + | 0    | 0    |
| ENSG0000(SNORD60   | snoRNA   | chr10 | 1.27E+08 | 1.27E+08 | - | 0    | 0    |
| ENSG0000(RNA5SP18  | rRNA     | chr5  | 55777469 | 55777587 | + | 0    | 0    |
| ENSG0000(RNU4-39P  | snRNA    | chr11 | 66614964 | 66615090 | - | 0    | 0    |
| ENSG0000(RNU6-1298 | snRNA    | chr4  | 88226729 | 88226829 | + | 0    | 0    |
| ENSG0000(RNU6-230F | snRNA    | chr3  | 1.25E+08 | 1.25E+08 | - | 0    | 0    |
| ENSG0000(Y_RNA     | misc_RNA | chr9  | 1.09E+08 | 1.09E+08 | - | 0    | 0    |
| ENSG0000(Y_RNA     | misc_RNA | chr6  | 31402152 | 31402250 | - | 0    | 0    |
| ENSG0000(RNA5S11   | rRNA     | chr1  | 2.29E+08 | 2.29E+08 | - | 3.61 | 14.5 |
| ENSG0000(RNU6-204F | snRNA    | chr4  | 3044101  | 3044207  | + | 0    | 0    |
| ENSG0000(RNA5S3    | rRNA     | chr1  | 2.29E+08 | 2.29E+08 | - | 3.61 | 14.5 |
| ENSG0000(RNU5E-1   | snRNA    | chr1  | 11908152 | 11908271 | + | 0    | 0    |
| ENSG0000(RNU6-766F | snRNA    | chr2  | 1.69E+08 | 1.69E+08 | - | 0    | 0    |
| ENSG0000(Y_RNA     | misc_RNA | chr1  | 2.07E+08 | 2.07E+08 | - | 0    | 0    |
| ENSG0000(RNA5SP43  | rRNA     | chr16 | 84039918 | 84040033 | - | 0    | 0    |

|                    |          |       |          |          |   |      |      |
|--------------------|----------|-------|----------|----------|---|------|------|
| ENSG0000(RNA5S1    | rRNA     | chr1  | 2.29E+08 | 2.29E+08 | - | 3.61 | 14.5 |
| ENSG0000(RNA5SP27: | rRNA     | chr8  | 90511128 | 90511240 | + | 0    | 0    |
| ENSG0000(Y_RNA     | misc_RNA | chr18 | 23456371 | 23456467 | + | 0    | 0    |
| ENSG0000(RNU6-1115 | snRNA    | chr6  | 1.11E+08 | 1.11E+08 | + | 0    | 0    |
| ENSG0000(RNU1-150F | snRNA    | chr5  | 40269558 | 40269719 | + | 0    | 0    |
| ENSG0000(Y_RNA     | misc_RNA | chr11 | 75837544 | 75837645 | - | 0    | 0    |
| ENSG0000(SNORA63   | snoRNA   | chr3  | 1.83E+08 | 1.83E+08 | + | 0    | 0    |
| ENSG0000(RNA5SP32: | rRNA     | chr10 | 1.11E+08 | 1.11E+08 | + | 0    | 0    |
| ENSG0000(Y_RNA     | misc_RNA | chr18 | 23582016 | 23582121 | - | 0    | 0    |
| ENSG0000(RNU6-1084 | snRNA    | chr8  | 11392411 | 11392517 | - | 0    | 0    |
| ENSG0000(U3        | snoRNA   | chr7  | 1.48E+08 | 1.48E+08 | + | 0    | 0    |
| ENSG0000(RNA5SP45: | rRNA     | chr18 | 32176050 | 32176168 | - | 0    | 0    |
| ENSG0000(RNU5F-1   | snRNA    | chr1  | 44721786 | 44721902 | - | 0    | 0    |
| ENSG0000(Y_RNA     | misc_RNA | chr5  | 1E+08    | 1E+08    | + | 0    | 0    |
| ENSG0000(RNU6-79P  | snRNA    | chr13 | 72881108 | 72881214 | - | 0    | 0    |
| ENSG0000(RNU6-369F | snRNA    | chr1  | 44390722 | 44390823 | + | 0    | 0    |
| ENSG0000(SNORD114  | snoRNA   | chr14 | 1.01E+08 | 1.01E+08 | + | 0    | 0    |
| ENSG0000(SNORA25   | snoRNA   | chr18 | 77431563 | 77431689 | - | 0    | 0    |
| ENSG0000(RNU6-600F | snRNA    | chr12 | 48892130 | 48892228 | - | 0    | 0    |
| ENSG0000(RNA5SP93  | rRNA     | chr2  | 56235217 | 56235330 | - | 0    | 0    |
| ENSG0000(RNA5S5    | rRNA     | chr1  | 2.29E+08 | 2.29E+08 | - | 3.61 | 14.5 |
| ENSG0000(Y_RNA     | misc_RNA | chr5  | 1.6E+08  | 1.6E+08  | + | 0    | 0    |
| ENSG0000(RNY4P19   | misc_RNA | chr2  | 2.3E+08  | 2.3E+08  | - | 0    | 0    |
| ENSG0000(RNA5SP30: | rRNA     | chr10 | 28874393 | 28874507 | - | 0    | 0    |
| ENSG0000(RNA5SP25: | rRNA     | chr7  | 1.53E+08 | 1.53E+08 | - | 0    | 0    |
| ENSG0000(SNORA1    | snoRNA   | chr8  | 55902723 | 55902855 | - | 0    | 0    |
| ENSG0000(RNA5SP30: | rRNA     | chr10 | 13727796 | 13727916 | + | 0    | 0    |
| ENSG0000(Y_RNA     | misc_RNA | chr5  | 1.5E+08  | 1.5E+08  | + | 0    | 0    |
| ENSG0000(Y_RNA     | misc_RNA | chrX  | 16912215 | 16912317 | - | 0    | 0    |
| ENSG0000(SNORD62   | snoRNA   | chr9  | 1.37E+08 | 1.37E+08 | + | 0    | 0    |
| ENSG0000(RNA5SP37: | rRNA     | chr12 | 1.04E+08 | 1.04E+08 | + | 0    | 0    |
| ENSG0000(RN7SKP17: | misc_RNA | chr4  | 15093767 | 15094094 | - | 0    | 0    |
| ENSG0000(VTRNA3-1F | misc_RNA | chrX  | 53462209 | 53462310 | + | 0    | 0    |
| ENSG0000(Y_RNA     | misc_RNA | chrX  | 1.37E+08 | 1.37E+08 | - | 0    | 0    |
| ENSG0000(RNU1-108F | snRNA    | chr17 | 58666537 | 58666697 | - | 0    | 0    |
| ENSG0000(SNORD9    | snoRNA   | chr14 | 21392150 | 21392253 | - | 0    | 0    |
| ENSG0000(Y_RNA     | misc_RNA | chr14 | 77821030 | 77821142 | - | 0    | 0    |
| ENSG0000(Y_RNA     | misc_RNA | chr1  | 2.48E+08 | 2.48E+08 | + | 0    | 0    |
| ENSG0000(Y_RNA     | misc_RNA | chr19 | 12088245 | 12088346 | - | 0    | 0    |
| ENSG0000(RNU6-543F | snRNA    | chr10 | 63110139 | 63110246 | + | 0    | 0    |
| ENSG0000(RNU6-845F | snRNA    | chr16 | 46556089 | 46556191 | - | 0    | 0    |
| ENSG0000(RNA5SP27: | rRNA     | chr8  | 1.16E+08 | 1.16E+08 | - | 0    | 0    |
| ENSG0000(SNORD115  | snoRNA   | chr15 | 25191416 | 25191497 | + | 0    | 0    |
| ENSG0000(RNA5SP38: | rRNA     | chr14 | 78177803 | 78177921 | - | 0    | 0    |
| ENSG0000(RNA5SP19: | rRNA     | chr5  | 1.3E+08  | 1.3E+08  | + | 0    | 0    |

|                     |          |       |          |          |   |   |   |
|---------------------|----------|-------|----------|----------|---|---|---|
| ENSG0000(RNU4-35P)  | snRNA    | chr6  | 1.21E+08 | 1.21E+08 | - | 0 | 0 |
| ENSG0000(Y_RNA)     | misc_RNA | chr1  | 85435175 | 85435284 | - | 0 | 0 |
| ENSG0000(RNU6-121f) | snRNA    | chr2  | 69182877 | 69182983 | + | 0 | 0 |
| ENSG0000(Y_RNA)     | misc_RNA | chr14 | 20679411 | 20679512 | + | 0 | 0 |
| ENSG0000(Y_RNA)     | misc_RNA | chr10 | 1.25E+08 | 1.25E+08 | + | 0 | 0 |
| ENSG0000(RNU6-556F) | snRNA    | chr5  | 1.57E+08 | 1.57E+08 | + | 0 | 0 |
| ENSG0000(RNU1-62P)  | snRNA    | chr3  | 72576691 | 72576854 | + | 0 | 0 |
| ENSG0000(SNORA64)   | snoRNA   | chr7  | 12700758 | 12700889 | - | 0 | 0 |
| ENSG0000(Y_RNA)     | misc_RNA | chr1  | 2.03E+08 | 2.03E+08 | - | 0 | 0 |
| ENSG0000(Y_RNA)     | misc_RNA | chr14 | 73906316 | 73906427 | - | 0 | 0 |
| ENSG0000(SNORA63)   | snoRNA   | chr7  | 17373201 | 17373326 | - | 0 | 0 |
| ENSG0000(SNORA27)   | snoRNA   | chr16 | 12842487 | 12842610 | - | 0 | 0 |
| ENSG0000(RN7SKP10)  | misc_RNA | chr7  | 97598933 | 97599260 | - | 0 | 0 |
| ENSG0000(Y_RNA)     | misc_RNA | chr3  | 48288587 | 48288694 | + | 0 | 0 |
| ENSG0000(SNORA31)   | snoRNA   | chr13 | 45337480 | 45337609 | - | 0 | 0 |
| ENSG0000(RNA5SP38)  | rRNA     | chr14 | 1.07E+08 | 1.07E+08 | + | 0 | 0 |
| ENSG0000(RNU6-633F) | snRNA    | chr16 | 10496272 | 10496374 | + | 0 | 0 |
| ENSG0000(RNU4-15P)  | snRNA    | chr9  | 83596444 | 83596584 | - | 0 | 0 |
| ENSG0000(Y_RNA)     | misc_RNA | chr5  | 41963868 | 41963969 | - | 0 | 0 |
| ENSG0000(RNU1-70P)  | snRNA    | chr3  | 1.71E+08 | 1.71E+08 | - | 0 | 0 |
| ENSG0000(SNORD115)  | snoRNA   | chr15 | 25215541 | 25215622 | + | 0 | 0 |
| ENSG0000(Y_RNA)     | misc_RNA | chr20 | 49920597 | 49920694 | - | 0 | 0 |
| ENSG0000(RNU6-131)  | snRNA    | chr17 | 49966075 | 49966176 | - | 0 | 0 |
| ENSG0000(RNU1-94P)  | snRNA    | chr20 | 31901254 | 31901426 | + | 0 | 0 |
| ENSG0000(RNU6-247F) | snRNA    | chr12 | 95792529 | 95792635 | - | 0 | 0 |
| ENSG0000(RNA5SP11)  | rRNA     | chr2  | 1.65E+08 | 1.65E+08 | + | 0 | 0 |
| ENSG0000(RNA5SP47)  | rRNA     | chr20 | 21138956 | 21139074 | - | 0 | 0 |
| ENSG0000(RNU6-212F) | snRNA    | chr15 | 59341314 | 59341417 | - | 0 | 0 |
| ENSG0000(RNU6-235F) | snRNA    | chr3  | 38303773 | 38303879 | - | 0 | 0 |
| ENSG0000(Y_RNA)     | misc_RNA | chr22 | 41065554 | 41065646 | - | 0 | 0 |
| ENSG0000(Y_RNA)     | misc_RNA | chr7  | 1.3E+08  | 1.3E+08  | + | 0 | 0 |
| ENSG0000(RNU6-386F) | snRNA    | chr3  | 77092057 | 77092163 | + | 0 | 0 |
| ENSG0000(RNA5SP22)  | rRNA     | chr6  | 1.65E+08 | 1.65E+08 | + | 0 | 0 |
| ENSG0000(RNA5SP29)  | rRNA     | chr9  | 1.12E+08 | 1.12E+08 | + | 0 | 0 |
| ENSG0000(RNU6-462F) | snRNA    | chr4  | 1.02E+08 | 1.02E+08 | + | 0 | 0 |
| ENSG0000(Y_RNA)     | misc_RNA | chr4  | 82944738 | 82944845 | - | 0 | 0 |
| ENSG0000(RNA5SP30)  | rRNA     | chr10 | 24640166 | 24640284 | + | 0 | 0 |
| ENSG0000(RNU6-315F) | snRNA    | chr3  | 1.7E+08  | 1.7E+08  | + | 0 | 0 |
| ENSG0000(Y_RNA)     | misc_RNA | chr5  | 144087   | 144197   | - | 0 | 0 |
| ENSG0000(RNA5SP19)  | rRNA     | chr5  | 1.39E+08 | 1.39E+08 | + | 0 | 0 |
| ENSG0000(Y_RNA)     | misc_RNA | chr3  | 49270132 | 49270239 | + | 0 | 0 |
| ENSG0000(Y_RNA)     | misc_RNA | chr11 | 2372638  | 2372750  | + | 0 | 0 |
| ENSG0000(RNU6-545F) | snRNA    | chr12 | 12226674 | 12226777 | + | 0 | 0 |
| ENSG0000(SNORA63)   | snoRNA   | chr5  | 40654963 | 40655094 | + | 0 | 0 |
| ENSG0000(RNA5SP36)  | rRNA     | chr12 | 45117771 | 45117888 | + | 0 | 0 |

|                    |          |       |          |          |   |   |      |
|--------------------|----------|-------|----------|----------|---|---|------|
| ENSG0000(RNU6-37P  | snRNA    | chr1  | 10298966 | 10299072 | + | 0 | 1.24 |
| ENSG0000(RNA5SP50) | rRNA     | chrX  | 41292798 | 41292916 | + | 0 | 0    |
| ENSG0000(Y_RNA     | misc_RNA | chr1  | 1.54E+08 | 1.54E+08 | - | 0 | 0    |
| ENSG0000(SNORA64   | snoRNA   | chr12 | 47346166 | 47346297 | - | 0 | 0    |
| ENSG0000(Y_RNA     | misc_RNA | chrX  | 86019608 | 86019715 | + | 0 | 0    |
| ENSG0000(RNU5A-1   | snRNA    | chr15 | 65296051 | 65296166 | + | 0 | 0    |
| ENSG0000(RNU6-228F | snRNA    | chr20 | 14352320 | 14352425 | + | 0 | 0    |
| ENSG0000(SNORA22   | snoRNA   | chr12 | 39819750 | 39819883 | - | 0 | 0    |
| ENSG0000(RNA5SP17) | rRNA     | chr4  | 1.9E+08  | 1.9E+08  | + | 0 | 0    |
| ENSG0000(SNORD18C  | snoRNA   | chr15 | 66501250 | 66501318 | - | 0 | 0    |
| ENSG0000(SNORD114  | snoRNA   | chr14 | 1.01E+08 | 1.01E+08 | + | 0 | 0    |
| ENSG0000(RNU6-822F | snRNA    | chr3  | 20268965 | 20269070 | - | 0 | 0    |
| ENSG0000(Y_RNA     | misc_RNA | chr15 | 74983274 | 74983376 | - | 0 | 0    |
| ENSG0000(Y_RNA     | misc_RNA | chr12 | 1.28E+08 | 1.28E+08 | - | 0 | 0    |
| ENSG0000(RNA5SP11) | rRNA     | chr2  | 2.12E+08 | 2.12E+08 | + | 0 | 0    |
| ENSG0000(Y_RNA     | misc_RNA | chr3  | 47931808 | 47931914 | - | 0 | 0    |
| ENSG0000(RNA5SP32) | rRNA     | chr10 | 77587049 | 77587159 | + | 0 | 0    |
| ENSG0000(SNORD114  | snoRNA   | chr14 | 1.01E+08 | 1.01E+08 | + | 0 | 0    |
| ENSG0000(RNU6-130) | snRNA    | chr3  | 37140327 | 37140430 | + | 0 | 0    |
| ENSG0000(Y_RNA     | misc_RNA | chr1  | 1.62E+08 | 1.62E+08 | + | 0 | 0    |
| ENSG0000(RNU6-859F | snRNA    | chr21 | 43919795 | 43919901 | - | 0 | 0    |
| ENSG0000(RNU6-562F | snRNA    | chrX  | 75202703 | 75202809 | + | 0 | 0    |
| ENSG0000(RNU6-951F | snRNA    | chr2  | 38147415 | 38147521 | + | 0 | 0    |
| ENSG0000(RNY4P24   | misc_RNA | chr13 | 52400004 | 52400099 | + | 0 | 0    |
| ENSG0000(RNA5SP12) | rRNA     | chr3  | 14394648 | 14394757 | + | 0 | 0    |
| ENSG0000(RNA5SP25) | rRNA     | chr8  | 26136880 | 26136998 | + | 0 | 0    |
| ENSG0000(RN7SKP20  | misc_RNA | chrX  | 13596236 | 13596548 | + | 0 | 0    |
| ENSG0000(RNU6-989F | snRNA    | chr2  | 1.87E+08 | 1.87E+08 | - | 0 | 0    |
| ENSG0000(RNU6-101) | snRNA    | chr7  | 1.31E+08 | 1.31E+08 | - | 0 | 0    |
| ENSG0000(RNU1-14P  | snRNA    | chr7  | 53366058 | 53366209 | + | 0 | 0    |
| ENSG0000(Y_RNA     | misc_RNA | chr6  | 89841329 | 89841424 | + | 0 | 0    |
| ENSG0000(SNORD33   | snoRNA   | chr19 | 49490615 | 49490699 | + | 0 | 0    |
| ENSG0000(SNORA63   | snoRNA   | chr15 | 78091172 | 78091297 | - | 0 | 0    |
| ENSG0000(RNU4-79P  | snRNA    | chr4  | 1.58E+08 | 1.58E+08 | + | 0 | 0    |
| ENSG0000(Y_RNA     | misc_RNA | chr9  | 21160235 | 21160336 | - | 0 | 0    |
| ENSG0000(Y_RNA     | misc_RNA | chr18 | 24429505 | 24429609 | + | 0 | 0    |
| ENSG0000(RNA5SP31) | rRNA     | chr10 | 68461407 | 68461525 | + | 0 | 0    |
| ENSG0000(RN7SKP29) | misc_RNA | chr8  | 49330210 | 49330547 | + | 0 | 0    |
| ENSG0000(RNU4-90P  | snRNA    | chr5  | 91270727 | 91270867 | + | 0 | 0    |
| ENSG0000(RNU6-133) | snRNA    | chr5  | 74779309 | 74779413 | + | 0 | 0    |
| ENSG0000(RNU6-127) | snRNA    | chr7  | 1.39E+08 | 1.39E+08 | - | 0 | 0    |
| ENSG0000(RNU1-35P  | snRNA    | chr8  | 1.36E+08 | 1.36E+08 | - | 0 | 0    |
| ENSG0000(RNU6-126) | snRNA    | chr10 | 77776951 | 77777055 | - | 0 | 0    |
| ENSG0000(U3        | snoRNA   | chr1  | 90657750 | 90657964 | + | 0 | 0    |
| ENSG0000(Y_RNA     | misc_RNA | chr8  | 1E+08    | 1E+08    | + | 0 | 0    |

|                    |          |       |          |          |   |   |      |
|--------------------|----------|-------|----------|----------|---|---|------|
| ENSG0000(Y_RNA     | misc_RNA | chr16 | 11315067 | 11315178 | + | 0 | 0    |
| ENSG0000(RNU4-21P  | snRNA    | chr1  | 2.3E+08  | 2.3E+08  | - | 0 | 0    |
| ENSG0000(SNORD16   | snoRNA   | chr15 | 66502812 | 66502910 | - | 0 | 0    |
| ENSG0000(RNU6-862F | snRNA    | chr17 | 16137768 | 16137872 | - | 0 | 0    |
| ENSG0000(Y_RNA     | misc_RNA | chr20 | 35853252 | 35853364 | - | 0 | 0    |
| ENSG0000(Y_RNA     | misc_RNA | chr5  | 1.33E+08 | 1.33E+08 | - | 0 | 0    |
| ENSG0000(RN7SKP18  | misc_RNA | chr20 | 37975156 | 37975481 | - | 0 | 0    |
| ENSG0000(RNU1-38P  | snRNA    | chr2  | 85728194 | 85728337 | - | 0 | 0    |
| ENSG0000(RN7SKP17  | misc_RNA | chr20 | 38761528 | 38761842 | + | 0 | 0    |
| ENSG0000(RNU6-112  | snRNA    | chr22 | 31222745 | 31222853 | - | 0 | 0    |
| ENSG0000(RNU6-446F | snRNA    | chr17 | 62683905 | 62684010 | + | 0 | 47.9 |
| ENSG0000(Y_RNA     | misc_RNA | chr21 | 23432181 | 23432282 | - | 0 | 0    |
| ENSG0000(RNU6-223F | snRNA    | chr7  | 1.36E+08 | 1.36E+08 | + | 0 | 0    |
| ENSG0000(Y_RNA     | misc_RNA | chr8  | 94713715 | 94713812 | - | 0 | 0    |
| ENSG0000(RNU6-170F | snRNA    | chr18 | 12304091 | 12304194 | - | 0 | 0    |
| ENSG0000(SNORD115  | snoRNA   | chr15 | 25223246 | 25223327 | + | 0 | 0    |
| ENSG0000(Y_RNA     | misc_RNA | chrX  | 1.24E+08 | 1.24E+08 | - | 0 | 0    |
| ENSG0000(RNU4-23P  | snRNA    | chr11 | 1.23E+08 | 1.23E+08 | + | 0 | 0    |
| ENSG0000(Y_RNA     | misc_RNA | chr1  | 1.11E+08 | 1.11E+08 | - | 0 | 0    |
| ENSG0000(Y_RNA     | misc_RNA | chr7  | 99936610 | 99936711 | + | 0 | 0    |
| ENSG0000(SNORD115  | snoRNA   | chr15 | 25172635 | 25172716 | + | 0 | 0    |
| ENSG0000(U8        | snoRNA   | chr18 | 58818883 | 58819016 | - | 0 | 0    |
| ENSG0000(Y_RNA     | misc_RNA | chr6  | 18273165 | 18273266 | - | 0 | 0    |
| ENSG0000(Y_RNA     | misc_RNA | chr14 | 22867818 | 22867917 | + | 0 | 0    |
| ENSG0000(RN7SKP74  | misc_RNA | chr20 | 18295143 | 18295451 | - | 0 | 0    |
| ENSG0000(RNU6-655F | snRNA    | chr18 | 78036739 | 78036845 | + | 0 | 0    |
| ENSG0000(RN7SKP95  | misc_RNA | chr15 | 58703852 | 58704154 | - | 0 | 0    |
| ENSG0000(RNU6-107  | snRNA    | chr5  | 32234766 | 32234875 | - | 0 | 0    |
| ENSG0000(Y_RNA     | misc_RNA | chr8  | 96309221 | 96309322 | - | 0 | 0    |
| ENSG0000(RNA5SP30  | rRNA     | chr10 | 26509589 | 26509704 | + | 0 | 0    |
| ENSG0000(RNU6-227F | snRNA    | chr17 | 76656320 | 76656422 | + | 0 | 0    |
| ENSG0000(RNU6-552F | snRNA    | chr14 | 45274359 | 45274477 | - | 0 | 0    |
| ENSG0000(Y_RNA     | misc_RNA | chr12 | 50939927 | 50940026 | - | 0 | 0    |
| ENSG0000(SNORD36A  | snoRNA   | chr9  | 1.33E+08 | 1.33E+08 | + | 0 | 0    |
| ENSG0000(Y_RNA     | misc_RNA | chrX  | 71491066 | 71491167 | - | 0 | 0    |
| ENSG0000(SNORD104  | snoRNA   | chr17 | 64146083 | 64146152 | + | 0 | 0    |
| ENSG0000(Y_RNA     | misc_RNA | chr14 | 67340068 | 67340176 | + | 0 | 0    |
| ENSG0000(Y_RNA     | misc_RNA | chr1  | 28881726 | 28881835 | - | 0 | 0    |
| ENSG0000(Y_RNA     | misc_RNA | chr6  | 47489067 | 47489170 | + | 0 | 0    |
| ENSG0000(Y_RNA     | misc_RNA | chr7  | 1.15E+08 | 1.15E+08 | - | 0 | 0    |
| ENSG0000(RNU6-363F | snRNA    | chr5  | 31595565 | 31595669 | - | 0 | 0    |
| ENSG0000(RNU6-78P  | snRNA    | chr13 | 25517119 | 25517225 | + | 0 | 0    |
| ENSG0000(RNA5SP42  | rRNA     | chr16 | 50869455 | 50869575 | - | 0 | 0    |
| ENSG0000(RNU1-76P  | snRNA    | chr5  | 7980146  | 7980304  | + | 0 | 0    |
| ENSG0000(Y_RNA     | misc_RNA | chr4  | 59533786 | 59533898 | + | 0 | 0    |

|                    |          |       |          |          |   |   |   |
|--------------------|----------|-------|----------|----------|---|---|---|
| ENSG0000(Y_RNA     | misc_RNA | chr2  | 2.33E+08 | 2.33E+08 | + | 0 | 0 |
| ENSG0000(SNORD115  | snoRNA   | chr15 | 25185631 | 25185712 | + | 0 | 0 |
| ENSG0000(SNORD56   | snoRNA   | chr22 | 24901147 | 24901214 | - | 0 | 0 |
| ENSG0000(RNU6-1287 | snRNA    | chr15 | 56274530 | 56274636 | - | 0 | 0 |
| ENSG0000(SNORA52   | snoRNA   | chr11 | 811681   | 811814   | + | 0 | 0 |
| ENSG0000(RNA5SP18  | rRNA     | chr5  | 1.02E+08 | 1.02E+08 | - | 0 | 0 |
| ENSG0000(SNORA42   | snoRNA   | chr16 | 30419625 | 30419759 | - | 0 | 0 |
| ENSG0000(RNY3P2    | misc_RNA | chr13 | 49095391 | 49095492 | + | 0 | 0 |
| ENSG0000(RNU6-836F | snRNA    | chr4  | 41084607 | 41084713 | + | 0 | 0 |
| ENSG0000(RNU6-451F | snRNA    | chr2  | 2.31E+08 | 2.31E+08 | + | 0 | 0 |
| ENSG0000(RNU6-1233 | snRNA    | chr3  | 1.75E+08 | 1.75E+08 | - | 0 | 0 |
| ENSG0000(RNU6-924F | snRNA    | chr19 | 46306470 | 46306577 | - | 0 | 0 |
| ENSG0000(Y_RNA     | misc_RNA | chr22 | 28303754 | 28303850 | + | 0 | 0 |
| ENSG0000(SNORD114  | snoRNA   | chr14 | 1.01E+08 | 1.01E+08 | + | 0 | 0 |
| ENSG0000(Y_RNA     | misc_RNA | chr17 | 69985986 | 69986094 | + | 0 | 0 |
| ENSG0000(RNU6-1155 | snRNA    | chr20 | 15021553 | 15021659 | - | 0 | 0 |
| ENSG0000(RNA5SP38  | rRNA     | chr14 | 24158603 | 24158722 | + | 0 | 0 |
| ENSG0000(RNU1-134F | snRNA    | chr20 | 63908955 | 63909119 | + | 0 | 0 |
| ENSG0000(RNA5SP49  | rRNA     | chr21 | 36851911 | 36852028 | + | 0 | 0 |
| ENSG0000(RNA5SP37  | rRNA     | chr12 | 1.19E+08 | 1.19E+08 | + | 0 | 0 |
| ENSG0000(RNU6-428F | snRNA    | chr3  | 1.47E+08 | 1.47E+08 | + | 0 | 0 |
| ENSG0000(RNU6-126  | snRNA    | chr9  | 14850429 | 14850535 | + | 0 | 0 |
| ENSG0000(SNORA17   | snoRNA   | chr3  | 8931506  | 8931631  | + | 0 | 0 |
| ENSG0000(RNU6-199F | snRNA    | chr12 | 51162901 | 51163007 | + | 0 | 0 |
| ENSG0000(RNU6-129  | snRNA    | chr2  | 1.75E+08 | 1.75E+08 | + | 0 | 0 |
| ENSG0000(RN7SKP29  | misc_RNA | chr1  | 55376526 | 55376852 | - | 0 | 0 |
| ENSG0000(Y_RNA     | misc_RNA | chrX  | 1.07E+08 | 1.07E+08 | + | 0 | 0 |
| ENSG0000(SNORD115  | snoRNA   | chr15 | 25208083 | 25208163 | + | 0 | 0 |
| ENSG0000(RNU1-47P  | snRNA    | chr14 | 99945315 | 99945477 | + | 0 | 0 |
| ENSG0000(RNA5SP71  | rRNA     | chr1  | 1.83E+08 | 1.83E+08 | - | 0 | 0 |
| ENSG0000(RNA5SP15  | rRNA     | chr3  | 1.82E+08 | 1.82E+08 | - | 0 | 0 |
| ENSG0000(Y_RNA     | misc_RNA | chr1  | 1.84E+08 | 1.84E+08 | - | 0 | 0 |
| ENSG0000(RNA5SP35  | rRNA     | chr12 | 38161466 | 38161582 | - | 0 | 0 |
| ENSG0000(RNA5SP37  | rRNA     | chr12 | 1.23E+08 | 1.23E+08 | - | 0 | 0 |
| ENSG0000(RNU1-72P  | snRNA    | chr7  | 1.29E+08 | 1.29E+08 | + | 0 | 0 |
| ENSG0000(RNU5F-6P  | snRNA    | chr1  | 1.64E+08 | 1.64E+08 | + | 0 | 0 |
| ENSG0000(U3        | snoRNA   | chr6  | 28015568 | 28015777 | + | 0 | 0 |
| ENSG0000(RNU6-490F | snRNA    | chr10 | 27088321 | 27088427 | - | 0 | 0 |
| ENSG0000(U3        | snoRNA   | chr18 | 7995570  | 7995785  | + | 0 | 0 |
| ENSG0000(SNORD50   | snoRNA   | chr4  | 76402076 | 76402146 | + | 0 | 0 |
| ENSG0000(RNU6-112  | snRNA    | chr3  | 1.78E+08 | 1.78E+08 | - | 0 | 0 |
| ENSG0000(RNU6-582F | snRNA    | chr4  | 1.57E+08 | 1.57E+08 | - | 0 | 0 |
| ENSG0000(Y_RNA     | misc_RNA | chr4  | 1.27E+08 | 1.27E+08 | - | 0 | 0 |
| ENSG0000(RNU6-495F | snRNA    | chr22 | 41377177 | 41377283 | - | 0 | 0 |
| ENSG0000(Y_RNA     | misc_RNA | chr2  | 1.73E+08 | 1.73E+08 | - | 0 | 0 |



|                    |          |       |          |          |   |      |      |
|--------------------|----------|-------|----------|----------|---|------|------|
| ENSG0000(Y_RNA     | misc_RNA | chr18 | 62330812 | 62330913 | + | 0    | 0    |
| ENSG0000(Y_RNA     | misc_RNA | chr7  | 75353885 | 75353986 | - | 0    | 0    |
| ENSG0000(RNU6-942F | snRNA    | chr2  | 26042675 | 26042781 | + | 0    | 0    |
| ENSG0000(RNA5SP45: | rRNA     | chr18 | 24170505 | 24170623 | - | 0    | 0    |
| ENSG0000(Y_RNA     | misc_RNA | chr11 | 93719603 | 93719715 | + | 0    | 0    |
| ENSG0000(RN7SKP14: | misc_RNA | chrX  | 1.43E+08 | 1.43E+08 | - | 0    | 0    |
| ENSG0000(RNU1-120F | snRNA    | chr1  | 1.48E+08 | 1.48E+08 | + | 0    | 0    |
| ENSG0000(RNU6-888F | snRNA    | chr5  | 1.38E+08 | 1.38E+08 | - | 0    | 0    |
| ENSG0000(Y_RNA     | misc_RNA | chr10 | 92272147 | 92272250 | - | 0    | 0    |
| ENSG0000(RN7SKP90  | misc_RNA | chr11 | 16842253 | 16842587 | + | 0    | 0    |
| ENSG0000(Y_RNA     | misc_RNA | chr2  | 1.52E+08 | 1.52E+08 | - | 0    | 0    |
| ENSG0000(RNU6-330F | snRNA    | chrX  | 74680053 | 74680159 | + | 0    | 0    |
| ENSG0000(RNU6-249F | snRNA    | chr12 | 42398550 | 42398651 | + | 0    | 0    |
| ENSG0000(Y_RNA     | misc_RNA | chr1  | 1.11E+08 | 1.11E+08 | + | 0    | 0    |
| ENSG0000(RNU1-17P  | snRNA    | chr5  | 1.81E+08 | 1.81E+08 | + | 0    | 0    |
| ENSG0000(snoU2_19  | snoRNA   | chr4  | 1.1E+08  | 1.1E+08  | - | 0    | 0    |
| ENSG0000(Y_RNA     | misc_RNA | chr12 | 92170353 | 92170453 | - | 0    | 0    |
| ENSG0000(Y_RNA     | misc_RNA | chr12 | 1.13E+08 | 1.13E+08 | - | 0    | 0    |
| ENSG0000(RNA5SP46: | rRNA     | chr19 | 7886977  | 7887096  | - | 0    | 0    |
| ENSG0000(Y_RNA     | misc_RNA | chr4  | 52786537 | 52786638 | + | 0    | 0    |
| ENSG0000(RNU6-127: | snRNA    | chr12 | 51037499 | 51037602 | + | 0    | 0    |
| ENSG0000(RNU6-492F | snRNA    | chr9  | 1.07E+08 | 1.07E+08 | - | 0    | 0    |
| ENSG0000(RNU5B-2P  | snRNA    | chr3  | 40498891 | 40499003 | - | 0    | 0    |
| ENSG0000(RNA5S10   | rRNA     | chr1  | 2.29E+08 | 2.29E+08 | - | 3.61 | 14.5 |
| ENSG0000(Y_RNA     | misc_RNA | chr5  | 24910594 | 24910695 | + | 0    | 0    |
| ENSG0000(Y_RNA     | misc_RNA | chr12 | 7800361  | 7800467  | - | 0    | 0    |
| ENSG0000(Y_RNA     | misc_RNA | chr7  | 73095357 | 73095458 | + | 0    | 0    |
| ENSG0000(SNORD114  | snoRNA   | chr14 | 1.01E+08 | 1.01E+08 | + | 0    | 0    |
| ENSG0000(RNU4-44P  | snRNA    | chrX  | 1.35E+08 | 1.35E+08 | - | 0    | 0    |
| ENSG0000(RNU6-161F | snRNA    | chr1  | 76753135 | 76753240 | + | 0    | 0    |
| ENSG0000(RNU6-125: | snRNA    | chr4  | 52494849 | 52494952 | + | 0    | 0    |
| ENSG0000(ACEA_U3   | snoRNA   | chr3  | 30304320 | 30304536 | - | 0    | 0    |
| ENSG0000(RNA5SP40: | rRNA     | chr16 | 26028912 | 26029025 | + | 0    | 0    |
| ENSG0000(RNU1-18P  | snRNA    | chr6  | 1.22E+08 | 1.22E+08 | + | 0    | 0    |
| ENSG0000(RNY1P16   | misc_RNA | chr12 | 1.02E+08 | 1.02E+08 | + | 0    | 0    |
| ENSG0000(SNORD81   | snoRNA   | chr1  | 85592280 | 85592356 | + | 0    | 0    |
| ENSG0000(Y_RNA     | misc_RNA | chr2  | 85460144 | 85460252 | - | 0    | 0    |
| ENSG0000(Y_RNA     | misc_RNA | chr6  | 38565950 | 38566055 | + | 0    | 0    |
| ENSG0000(RN7SKP75  | misc_RNA | chr7  | 71685452 | 71685747 | - | 0    | 0    |
| ENSG0000(SNORD114  | snoRNA   | chr14 | 1.01E+08 | 1.01E+08 | + | 0    | 0    |
| ENSG0000(RNU6-653F | snRNA    | chr6  | 1.09E+08 | 1.09E+08 | - | 0    | 0    |
| ENSG0000(Y_RNA     | misc_RNA | chr16 | 86275429 | 86275523 | - | 0    | 0    |
| ENSG0000(RNA5SP44: | rRNA     | chr17 | 45327366 | 45327497 | - | 0    | 0    |
| ENSG0000(SNORA2    | snoRNA   | chr1  | 84277321 | 84277457 | + | 0    | 0    |
| ENSG0000(SNORD115  | snoRNA   | chr15 | 25194921 | 25195001 | + | 0    | 0    |

|                    |          |       |          |          |   |       |     |
|--------------------|----------|-------|----------|----------|---|-------|-----|
| ENSG0000(SNORD1B   | snoRNA   | chr17 | 76561109 | 76561192 | + | 0     | 0   |
| ENSG0000(Y_RNA     | misc_RNA | chr21 | 17576798 | 17576906 | + | 0     | 0   |
| ENSG0000(RNU6-605F | snRNA    | chr1  | 38926870 | 38926977 | + | 0     | 0   |
| ENSG0000(Y_RNA     | misc_RNA | chr2  | 64834056 | 64834157 | - | 0     | 0   |
| ENSG0000(SNORD115  | snoRNA   | chr15 | 25204357 | 25204438 | + | 0     | 0   |
| ENSG0000(SNORD115  | snoRNA   | chr15 | 25174927 | 25175008 | + | 0     | 0   |
| ENSG0000(RNU6-797F | snRNA    | chr7  | 1.4E+08  | 1.4E+08  | - | 0     | 0   |
| ENSG0000(RN7SKP24  | misc_RNA | chr11 | 73832382 | 73832690 | - | 0     | 0   |
| ENSG0000(SNORA73   | snoRNA   | chr18 | 21817624 | 21817828 | + | 0     | 0   |
| ENSG0000(Y_RNA     | misc_RNA | chr16 | 68885576 | 68885677 | - | 0     | 0   |
| ENSG0000(RNA5SP26  | rRNA     | chr8  | 36764445 | 36764551 | + | 0     | 0   |
| ENSG0000(RNU6-486F | snRNA    | chr3  | 1.81E+08 | 1.81E+08 | + | 0     | 0   |
| ENSG0000(VTRNA1-1  | misc_RNA | chr5  | 1.41E+08 | 1.41E+08 | + | 0     | 0   |
| ENSG0000(RNA5SP14  | rRNA     | chr3  | 1.51E+08 | 1.51E+08 | + | 0     | 0   |
| ENSG0000(RNU6-986F | snRNA    | chr2  | 27475494 | 27475595 | - | 0     | 0   |
| ENSG0000(Y_RNA     | misc_RNA | chr15 | 33722492 | 33722596 | + | 0     | 0   |
| ENSG0000(Y_RNA     | misc_RNA | chr12 | 93460725 | 93460826 | - | 0     | 0   |
| ENSG0000(RNU6-623F | snRNA    | chr17 | 60662333 | 60662437 | - | 0     | 0   |
| ENSG0000(RNA5SP44  | rRNA     | chr17 | 74417594 | 74417704 | - | 0     | 0   |
| ENSG0000(Y_RNA     | misc_RNA | chr4  | 87743952 | 87744053 | - | 0     | 0   |
| ENSG0000(U8        | snoRNA   | chr9  | 38147428 | 38147561 | + | 0     | 0   |
| ENSG0000(RNA5SP98  | rRNA     | chr2  | 76772909 | 76773045 | + | 0     | 0   |
| ENSG0000(RNU6-642F | snRNA    | chr2  | 2.19E+08 | 2.19E+08 | - | 0     | 0   |
| ENSG0000(RNU6-403F | snRNA    | chr1  | 2.22E+08 | 2.22E+08 | - | 25.45 | 0   |
| ENSG0000(RNU4-73P  | snRNA    | chr2  | 9740643  | 9740783  | - | 0     | 0   |
| ENSG0000(RNA5SP65  | rRNA     | chr1  | 1.67E+08 | 1.67E+08 | + | 0     | 0   |
| ENSG0000(Y_RNA     | misc_RNA | chr6  | 75928513 | 75928625 | + | 0     | 0   |
| ENSG0000(Y_RNA     | misc_RNA | chr9  | 75181520 | 75181621 | - | 0     | 0   |
| ENSG0000(RN7SKP11  | misc_RNA | chr11 | 1.01E+08 | 1.01E+08 | + | 0     | 0   |
| ENSG0000(RNU6-812F | snRNA    | chr2  | 78882628 | 78882734 | + | 0     | 0   |
| ENSG0000(Y_RNA     | misc_RNA | chr4  | 1.43E+08 | 1.43E+08 | + | 0     | 0   |
| ENSG0000(SNORD45   | snoRNA   | chr5  | 1.41E+08 | 1.41E+08 | - | 0     | 0   |
| ENSG0000(Y_RNA     | misc_RNA | chr3  | 1.65E+08 | 1.65E+08 | - | 0     | 0   |
| ENSG0000(RN7SKP63  | misc_RNA | chr22 | 21389191 | 21389491 | + | 0.09  | 0   |
| ENSG0000(RNA5SP21  | rRNA     | chr6  | 1.34E+08 | 1.34E+08 | + | 0     | 0   |
| ENSG0000(Y_RNA     | misc_RNA | chr16 | 2131851  | 2131950  | + | 0     | 7.6 |
| ENSG0000(Y_RNA     | misc_RNA | chr12 | 1.09E+08 | 1.09E+08 | + | 0     | 0   |
| ENSG0000(RNU4-58P  | snRNA    | chr16 | 59540126 | 59540266 | + | 0     | 0   |
| ENSG0000(SNORA30   | snoRNA   | chr17 | 78399935 | 78400063 | + | 0     | 0   |
| ENSG0000(RNY4P9    | misc_RNA | chr13 | 49908634 | 49908730 | - | 0     | 0   |
| ENSG0000(Y_RNA     | misc_RNA | chr5  | 32134738 | 32134834 | + | 0     | 0   |
| ENSG0000(RNU4-80P  | snRNA    | chr15 | 59212648 | 59212788 | - | 0     | 0   |
| ENSG0000(SNORD44   | snoRNA   | chr13 | 1.12E+08 | 1.12E+08 | + | 0     | 0   |
| ENSG0000(SNORA25   | snoRNA   | chr8  | 1.3E+08  | 1.3E+08  | - | 0     | 0   |
| ENSG0000(RNA5SP32  | rRNA     | chr10 | 1.07E+08 | 1.07E+08 | + | 0     | 0   |

|                    |          |       |          |          |   |   |       |
|--------------------|----------|-------|----------|----------|---|---|-------|
| ENSG0000(SNORD68   | snoRNA   | chr16 | 89561434 | 89561517 | + | 0 | 0     |
| ENSG0000(Y_RNA     | misc_RNA | chr1  | 2.48E+08 | 2.48E+08 | + | 0 | 0     |
| ENSG0000(RNU6-433F | snRNA    | chr2  | 55014418 | 55014521 | - | 0 | 0     |
| ENSG0000(SNORA73B  | snoRNA   | chr1  | 28508559 | 28508762 | + | 0 | 5.01  |
| ENSG0000(SNORD114  | snoRNA   | chr14 | 1.01E+08 | 1.01E+08 | + | 0 | 0     |
| ENSG0000(Y_RNA     | misc_RNA | chr11 | 47726894 | 47726992 | - | 0 | 41.22 |
| ENSG0000(RN7SKP16: | misc_RNA | chr6  | 75654970 | 75655299 | - | 0 | 0     |
| ENSG0000(RNU6-181F | snRNA    | chr15 | 1.01E+08 | 1.01E+08 | - | 0 | 0     |
| ENSG0000(RNU6-1167 | snRNA    | chr10 | 35250959 | 35251052 | - | 0 | 0     |
| ENSG0000(RNU6-508F | snRNA    | chr2  | 59647621 | 59647723 | + | 0 | 0     |
| ENSG0000(RNU6-252F | snRNA    | chr14 | 21113639 | 21113745 | - | 0 | 0     |
| ENSG0000(RNU6-251F | snRNA    | chr12 | 15671707 | 15671810 | - | 0 | 0     |
| ENSG0000(RNU6-984F | snRNA    | chr9  | 1.09E+08 | 1.09E+08 | - | 0 | 0     |
| ENSG0000(RNU6-1249 | snRNA    | chr17 | 55551810 | 55551920 | + | 0 | 0     |
| ENSG0000(RNU6-774F | snRNA    | chr4  | 84233657 | 84233763 | + | 0 | 0     |
| ENSG0000(SNORD56   | snoRNA   | chr12 | 1.16E+08 | 1.16E+08 | - | 0 | 0     |
| ENSG0000(SNORA51   | snoRNA   | chr7  | 37419628 | 37419767 | + | 0 | 0     |
| ENSG0000(RNA5SP12: | rRNA     | chr3  | 12511095 | 12511213 | - | 0 | 0     |
| ENSG0000(Y_RNA     | misc_RNA | chr3  | 1.7E+08  | 1.7E+08  | + | 0 | 0     |
| ENSG0000(Y_RNA     | misc_RNA | chr15 | 49137762 | 49137863 | - | 0 | 0     |
| ENSG0000(Y_RNA     | misc_RNA | chr2  | 1.75E+08 | 1.75E+08 | - | 0 | 0     |
| ENSG0000(RN7SKP77  | misc_RNA | chr9  | 1.07E+08 | 1.07E+08 | + | 0 | 0     |
| ENSG0000(RNU6-1021 | snRNA    | chr18 | 14531676 | 14531782 | - | 0 | 0     |
| ENSG0000(Y_RNA     | misc_RNA | chr12 | 1.12E+08 | 1.12E+08 | + | 0 | 0     |
| ENSG0000(RNY1P10   | misc_RNA | chr16 | 28183318 | 28183430 | + | 0 | 0     |
| ENSG0000(RNU6-778F | snRNA    | chr1  | 2E+08    | 2E+08    | + | 0 | 0     |
| ENSG0000(Y_RNA     | misc_RNA | chr15 | 90977208 | 90977305 | - | 0 | 0     |
| ENSG0000(RNU6-544F | snRNA    | chr11 | 80527960 | 80528066 | + | 0 | 0     |
| ENSG0000(SNORD113  | snoRNA   | chr14 | 1.01E+08 | 1.01E+08 | + | 0 | 0     |
| ENSG0000(RN7SKP23: | misc_RNA | chr8  | 91594965 | 91595241 | + | 0 | 0     |
| ENSG0000(RNU6-216F | snRNA    | chr11 | 74968189 | 74968292 | - | 0 | 0     |
| ENSG0000(RNU6-23P  | snRNA    | chr16 | 70445293 | 70445399 | - | 0 | 0     |
| ENSG0000(RNU5B-1   | snRNA    | chr15 | 65304677 | 65304792 | + | 0 | 0     |
| ENSG0000(RN7SKP14: | misc_RNA | chr5  | 1.49E+08 | 1.49E+08 | - | 0 | 0     |
| ENSG0000(Y_RNA     | misc_RNA | chr3  | 1.54E+08 | 1.54E+08 | + | 0 | 0     |
| ENSG0000(SNORD115  | snoRNA   | chr15 | 25203227 | 25203308 | + | 0 | 0     |
| ENSG0000(Y_RNA     | misc_RNA | chr16 | 69191123 | 69191223 | + | 0 | 0     |
| ENSG0000(RNA5SP35: | rRNA     | chr11 | 1.11E+08 | 1.11E+08 | - | 0 | 0     |
| ENSG0000(RNU5D-1   | snRNA    | chr1  | 44731055 | 44731170 | - | 0 | 0     |
| ENSG0000(Y_RNA     | misc_RNA | chr10 | 72220752 | 72220852 | + | 0 | 0     |
| ENSG0000(Y_RNA     | misc_RNA | chr1  | 44153385 | 44153480 | - | 0 | 0     |
| ENSG0000(Y_RNA     | misc_RNA | chr1  | 62211557 | 62211666 | + | 0 | 0     |
| ENSG0000(RNU6-1309 | snRNA    | chr1  | 1.51E+08 | 1.51E+08 | - | 0 | 0     |
| ENSG0000(RNU1-19P  | snRNA    | chr10 | 86889569 | 86889733 | + | 0 | 0     |
| ENSG0000(Y_RNA     | misc_RNA | chr19 | 36203347 | 36203459 | - | 0 | 0     |

|                     |          |       |          |          |   |   |   |
|---------------------|----------|-------|----------|----------|---|---|---|
| ENSG0000(RNU6-238F) | snRNA    | chr12 | 50656973 | 50657078 | + | 0 | 0 |
| ENSG0000(RNU1-20P)  | snRNA    | chr3  | 1.93E+08 | 1.93E+08 | - | 0 | 0 |
| ENSG0000(RNU6-832F) | snRNA    | chr7  | 69125270 | 69125376 | + | 0 | 0 |
| ENSG0000(U8)        | snoRNA   | chr8  | 71815494 | 71815625 | - | 0 | 0 |
| ENSG0000(RNU1-21P)  | snRNA    | chr11 | 1.24E+08 | 1.24E+08 | + | 0 | 0 |
| ENSG0000(RN7SKP21)  | misc_RNA | chr6  | 1.06E+08 | 1.06E+08 | + | 0 | 0 |
| ENSG0000(Y_RNA)     | misc_RNA | chr11 | 3665164  | 3665259  | - | 0 | 0 |
| ENSG0000(RNU1-22P)  | snRNA    | chr16 | 3086143  | 3086300  | + | 0 | 0 |
| ENSG0000(SNORD74)   | snoRNA   | chr15 | 86173198 | 86173270 | - | 0 | 0 |
| ENSG0000(Y_RNA)     | misc_RNA | chr20 | 23457584 | 23457685 | - | 0 | 0 |
| ENSG0000(Y_RNA)     | misc_RNA | chr19 | 38294544 | 38294636 | + | 0 | 0 |
| ENSG0000(RNY4P27)   | misc_RNA | chr13 | 95336106 | 95336201 | - | 0 | 0 |
| ENSG0000(RNU6-992F) | snRNA    | chr21 | 36066545 | 36066652 | + | 0 | 0 |
| ENSG0000(SNORD113)  | snoRNA   | chr14 | 1.01E+08 | 1.01E+08 | + | 0 | 0 |
| ENSG0000(RNU6-745F) | snRNA    | chr15 | 70193236 | 70193341 | + | 0 | 0 |
| ENSG0000(RNU6-839F) | snRNA    | chr10 | 1.09E+08 | 1.09E+08 | + | 0 | 0 |
| ENSG0000(RNU6-697F) | snRNA    | chr10 | 68846805 | 68846911 | + | 0 | 0 |
| ENSG0000(RNU6-179F) | snRNA    | chr1  | 1.54E+08 | 1.54E+08 | - | 0 | 0 |
| ENSG0000(U3)        | snoRNA   | chr3  | 64071807 | 64072019 | - | 0 | 0 |
| ENSG0000(RNU6-626F) | snRNA    | chr6  | 56945730 | 56945836 | + | 0 | 0 |
| ENSG0000(RNA5SP38)  | rRNA     | chr14 | 20414987 | 20415098 | + | 0 | 0 |
| ENSG0000(RNA5SP19)  | rRNA     | chr5  | 1.51E+08 | 1.51E+08 | - | 0 | 0 |
| ENSG0000(RNU1-23P)  | snRNA    | chr20 | 24237255 | 24237398 | + | 0 | 0 |
| ENSG0000(SNORA27)   | snoRNA   | chr5  | 1.41E+08 | 1.41E+08 | + | 0 | 0 |
| ENSG0000(SNORA70)   | snoRNA   | chr19 | 9819954  | 9820094  | + | 0 | 0 |
| ENSG0000(RNA5SP13)  | rRNA     | chr3  | 56185104 | 56185222 | + | 0 | 0 |
| ENSG0000(Y_RNA)     | misc_RNA | chr2  | 86159956 | 86160066 | - | 0 | 0 |
| ENSG0000(RN7SKP79)  | misc_RNA | chr5  | 6848127  | 6848462  | - | 0 | 0 |
| ENSG0000(RNA5SP26)  | rRNA     | chr8  | 32256496 | 32256623 | + | 0 | 0 |
| ENSG0000(RNU6-254F) | snRNA    | chr12 | 19445949 | 19446055 | - | 0 | 0 |
| ENSG0000(RNA5SP21)  | rRNA     | chr6  | 1.17E+08 | 1.17E+08 | + | 0 | 0 |
| ENSG0000(RNU6-114)  | snRNA    | chr2  | 1.27E+08 | 1.27E+08 | + | 0 | 0 |
| ENSG0000(Y_RNA)     | misc_RNA | chr15 | 59408905 | 59409015 | + | 0 | 0 |
| ENSG0000(RNU6-529F) | snRNA    | chr10 | 87041238 | 87041341 | - | 0 | 0 |
| ENSG0000(RNU6-536F) | snRNA    | chr1  | 42569033 | 42569139 | + | 0 | 0 |
| ENSG0000(Y_RNA)     | misc_RNA | chr11 | 75835215 | 75835323 | - | 0 | 0 |
| ENSG0000(RNU6-97P)  | snRNA    | chr17 | 76752912 | 76753015 | + | 0 | 0 |
| ENSG0000(SNORD35A)  | snoRNA   | chr19 | 49491175 | 49491260 | + | 0 | 0 |
| ENSG0000(Y_RNA)     | misc_RNA | chr9  | 1.12E+08 | 1.12E+08 | + | 0 | 0 |
| ENSG0000(Y_RNA)     | misc_RNA | chr1  | 51107222 | 51107331 | + | 0 | 0 |
| ENSG0000(RNU6-66P)  | snRNA    | chr13 | 73112915 | 73113018 | - | 0 | 0 |
| ENSG0000(RNU6-838F) | snRNA    | chr4  | 48106081 | 48106188 | - | 0 | 0 |
| ENSG0000(RNU4-32P)  | snRNA    | chr12 | 1.1E+08  | 1.1E+08  | - | 0 | 0 |
| ENSG0000(RNA5SP19)  | rRNA     | chr5  | 1.56E+08 | 1.56E+08 | + | 0 | 0 |
| ENSG0000(RNA5SP35)  | rRNA     | chr11 | 1.25E+08 | 1.25E+08 | + | 0 | 0 |

|                             |       |          |          |   |      |      |
|-----------------------------|-------|----------|----------|---|------|------|
| ENSG0000(SNORD114 snoRNA    | chr14 | 1.01E+08 | 1.01E+08 | + | 0    | 0    |
| ENSG0000(RNU6-624F snRNA    | chr2  | 2.28E+08 | 2.28E+08 | + | 0    | 0    |
| ENSG0000(Y_RNA misc_RNA     | chr2  | 28972414 | 28972521 | - | 0    | 0    |
| ENSG0000(Y_RNA misc_RNA     | chr2  | 1.44E+08 | 1.44E+08 | + | 0    | 0    |
| ENSG0000(SNORA18 snoRNA     | chr3  | 1.78E+08 | 1.78E+08 | - | 0    | 0    |
| ENSG0000(Y_RNA misc_RNA     | chrX  | 1.18E+08 | 1.18E+08 | - | 0    | 0    |
| ENSG0000(RNA5SP39: rRNA     | chr15 | 41851913 | 41852029 | - | 0    | 0    |
| ENSG0000(SNORA36 snoRNA     | chr10 | 72180858 | 72180989 | + | 0    | 0    |
| ENSG0000(RNU6-527F snRNA    | chr6  | 1.07E+08 | 1.07E+08 | + | 0    | 0    |
| ENSG0000(RNU1-83P snRNA     | chr12 | 62850738 | 62850901 | - | 0    | 0    |
| ENSG0000(Y_RNA misc_RNA     | chr14 | 72022407 | 72022516 | - | 0    | 0    |
| ENSG0000(RNA5SP48: rRNA     | chr20 | 35195306 | 35195423 | + | 0    | 0    |
| ENSG0000(RNU6-940F snRNA    | chr12 | 48975543 | 48975646 | + | 0    | 0    |
| ENSG0000(RNU6-1255 snRNA    | chr8  | 1.3E+08  | 1.3E+08  | - | 0    | 0    |
| ENSG0000(Y_RNA misc_RNA     | chr15 | 39922782 | 39922886 | - | 0    | 0    |
| ENSG0000(Y_RNA misc_RNA     | chr12 | 49132853 | 49132947 | - | 0    | 0    |
| ENSG0000(RNA5SP21: rRNA     | chr6  | 1.21E+08 | 1.21E+08 | + | 0    | 0    |
| ENSG0000(RN7SKP25: misc_RNA | chr14 | 89712511 | 89712823 | + | 0    | 0    |
| ENSG0000(RNA5-8SP7 rRNA     | chr20 | 5346006  | 5346160  | - | 0    | 0    |
| ENSG0000(Y_RNA misc_RNA     | chr6  | 1.06E+08 | 1.06E+08 | + | 0    | 0    |
| ENSG0000(U3 snoRNA          | chr15 | 58760466 | 58760681 | - | 0    | 0    |
| ENSG0000(SNORA63 snoRNA     | chr3  | 1.87E+08 | 1.87E+08 | + | 0    | 0    |
| ENSG0000(Y_RNA misc_RNA     | chr20 | 30309015 | 30309126 | - | 0    | 0    |
| ENSG0000(RNA5SP39: rRNA     | chr15 | 27280318 | 27280436 | - | 0    | 0    |
| ENSG0000(RNA5SP62 rRNA      | chr1  | 1.63E+08 | 1.63E+08 | - | 0    | 0    |
| ENSG0000(RNU6-183F snRNA    | chr5  | 78314916 | 78315025 | - | 0    | 0    |
| ENSG0000(Y_RNA misc_RNA     | chr22 | 41648089 | 41648190 | - | 0    | 0    |
| ENSG0000(Y_RNA misc_RNA     | chr5  | 1.5E+08  | 1.5E+08  | - | 0    | 0    |
| ENSG0000(RNA5SP33: rRNA     | chr11 | 18248389 | 18248506 | - | 0    | 0    |
| ENSG0000(RNU1-49P snRNA     | chr4  | 41771945 | 41772103 | - | 0    | 0    |
| ENSG0000(RNU1-105F snRNA    | chr6  | 47823390 | 47823550 | + | 0    | 0    |
| ENSG0000(RNA5S8 rRNA        | chr1  | 2.29E+08 | 2.29E+08 | - | 3.61 | 14.5 |
| ENSG0000(Y_RNA misc_RNA     | chr1  | 7982881  | 7982983  | - | 0    | 0    |
| ENSG0000(RNU6-485F snRNA    | chr12 | 7118785  | 7118891  | + | 0    | 0    |
| ENSG0000(RNU6-1285 snRNA    | chr4  | 1.55E+08 | 1.55E+08 | - | 0    | 0    |
| ENSG0000(Y_RNA misc_RNA     | chr5  | 98936638 | 98936747 | - | 0    | 0    |
| ENSG0000(SNORA71D snoRNA    | chr20 | 38433865 | 38433998 | - | 0    | 0    |
| ENSG0000(SNORA72 snoRNA     | chr3  | 1.73E+08 | 1.73E+08 | - | 0    | 0    |
| ENSG0000(RNU6-833F snRNA    | chr10 | 73279062 | 73279168 | + | 0    | 0    |
| ENSG0000(RNU6-792F snRNA    | chr1  | 1.11E+08 | 1.11E+08 | - | 0    | 0    |
| ENSG0000(Y_RNA misc_RNA     | chr3  | 1.07E+08 | 1.07E+08 | + | 0    | 0    |
| ENSG0000(RNU6-511F snRNA    | chr3  | 93977029 | 93977135 | + | 0    | 0    |
| ENSG0000(SNORD113 snoRNA    | chr14 | 1.01E+08 | 1.01E+08 | + | 0    | 0    |
| ENSG0000(RNU6-666F snRNA    | chr10 | 27315120 | 27315226 | + | 0    | 0    |
| ENSG0000(RNA5S17 rRNA       | chr1  | 2.29E+08 | 2.29E+08 | - | 3.61 | 14.5 |

|                     |          |       |          |          |   |      |      |
|---------------------|----------|-------|----------|----------|---|------|------|
| ENSG0000(RNU5E-8P)  | snRNA    | chr3  | 1.17E+08 | 1.17E+08 | - | 0    | 0    |
| ENSG0000(RNU5E-10F) | snRNA    | chr11 | 47576471 | 47576588 | - | 0    | 0    |
| ENSG0000(SNORD56)   | snoRNA   | chr2  | 1.53E+08 | 1.53E+08 | - | 0    | 0    |
| ENSG0000(RNU5B-4P)  | snRNA    | chr5  | 1.39E+08 | 1.39E+08 | + | 0    | 0    |
| ENSG0000(RN7SKP45)  | misc_RNA | chr3  | 56072104 | 56072407 | + | 0    | 0    |
| ENSG0000(RNA5S4)    | rRNA     | chr1  | 2.29E+08 | 2.29E+08 | - | 3.61 | 14.5 |
| ENSG0000(SNORA42)   | snoRNA   | chr14 | 37720425 | 37720561 | + | 0    | 0    |
| ENSG0000(RNU6-618F) | snRNA    | chr12 | 31396390 | 31396501 | + | 0    | 0    |
| ENSG0000(RNU6-509F) | snRNA    | chr3  | 1.42E+08 | 1.42E+08 | - | 0    | 0    |
| ENSG0000(Y_RNA)     | misc_RNA | chr2  | 1.28E+08 | 1.28E+08 | - | 0    | 0    |
| ENSG0000(Y_RNA)     | misc_RNA | chr15 | 43863893 | 43864005 | - | 0    | 0    |
| ENSG0000(RNU6-698F) | snRNA    | chr19 | 53653685 | 53653791 | + | 0    | 0    |
| ENSG0000(SNORA38B)  | snoRNA   | chr17 | 67740669 | 67740799 | + | 0    | 0    |
| ENSG0000(Y_RNA)     | misc_RNA | chr7  | 87218611 | 87218712 | - | 0    | 0    |
| ENSG0000(SNORD115)  | snoRNA   | chr15 | 25213648 | 25213729 | + | 0    | 0    |
| ENSG0000(RNU6-109G) | snRNA    | chr1  | 19305076 | 19305182 | - | 0    | 0    |
| ENSG0000(SNORD114)  | snoRNA   | chr14 | 1.01E+08 | 1.01E+08 | + | 0    | 0    |
| ENSG0000(RNU6-116G) | snRNA    | chr15 | 41448742 | 41448844 | - | 0    | 0    |
| ENSG0000(RNA5SP74)  | rRNA     | chr1  | 2.05E+08 | 2.05E+08 | - | 0    | 0    |
| ENSG0000(RNA5SP34)  | rRNA     | chr11 | 96474572 | 96474692 | - | 0    | 0    |
| ENSG0000(SNORD114)  | snoRNA   | chr14 | 1.01E+08 | 1.01E+08 | + | 0    | 0    |
| ENSG0000(SNORA63)   | snoRNA   | chr3  | 1.87E+08 | 1.87E+08 | + | 0    | 0    |
| ENSG0000(Y_RNA)     | misc_RNA | chr15 | 45591984 | 45592085 | + | 0    | 0    |
| ENSG0000(Y_RNA)     | misc_RNA | chr1  | 37737955 | 37738054 | - | 0    | 0    |
| ENSG0000(SNORD45)   | snoRNA   | chrX  | 87146733 | 87146804 | + | 0    | 0    |
| ENSG0000(RNU6-115G) | snRNA    | chr16 | 58744251 | 58744357 | - | 0    | 0    |
| ENSG0000(Y_RNA)     | misc_RNA | chr6  | 85777639 | 85777755 | - | 0    | 0    |
| ENSG0000(Y_RNA)     | misc_RNA | chr12 | 50743568 | 50743684 | + | 0    | 0    |
| ENSG0000(RNU4-81P)  | snRNA    | chrX  | 70450879 | 70451022 | + | 0    | 0    |
| ENSG0000(Y_RNA)     | misc_RNA | chr2  | 1.28E+08 | 1.28E+08 | + | 0    | 0    |
| ENSG0000(RNA5-8SP2) | rRNA     | chr16 | 34162959 | 34163110 | + | 0    | 0    |
| ENSG0000(Y_RNA)     | misc_RNA | chrX  | 1.13E+08 | 1.13E+08 | + | 0    | 0    |
| ENSG0000(RNU6-799F) | snRNA    | chr17 | 15311345 | 15311451 | + | 0    | 0    |
| ENSG0000(RNU6-106G) | snRNA    | chr22 | 27035887 | 27035991 | + | 0    | 0    |
| ENSG0000(RNU6-133G) | snRNA    | chr15 | 83824863 | 83824953 | - | 0    | 0    |
| ENSG0000(RNU6-108G) | snRNA    | chr7  | 35930158 | 35930264 | - | 0    | 0    |
| ENSG0000(Y_RNA)     | misc_RNA | chr22 | 42762860 | 42762959 | - | 0    | 0    |
| ENSG0000(RNU6-111G) | snRNA    | chr4  | 40077884 | 40077982 | + | 0    | 0    |
| ENSG0000(RNU6-109G) | snRNA    | chr7  | 44503773 | 44503879 | - | 0    | 0    |
| ENSG0000(RNU6-727F) | snRNA    | chr5  | 87420341 | 87420447 | - | 0    | 0    |
| ENSG0000(SNORD118)  | snoRNA   | chr17 | 8173454  | 8173587  | - | 0    | 0    |
| ENSG0000(RNA5SP40)  | rRNA     | chr16 | 9564390  | 9564497  | - | 0    | 0    |
| ENSG0000(RNU6-112F) | snRNA    | chr4  | 88275205 | 88275308 | - | 0    | 0    |
| ENSG0000(RNU6-112G) | snRNA    | chr7  | 54621025 | 54621131 | + | 0    | 0    |
| ENSG0000(RN7SKP44)  | misc_RNA | chr18 | 31718893 | 31719208 | + | 0    | 0    |

|                             |       |          |          |   |   |   |
|-----------------------------|-------|----------|----------|---|---|---|
| ENSG0000(RNA5SP50: rRNA     | chrX  | 70253042 | 70253162 | + | 0 | 0 |
| ENSG0000(RN7SKP16: misc_RNA | chr12 | 13683542 | 13683886 | + | 0 | 0 |
| ENSG0000(SNORD115 snoRNA    | chr15 | 25245478 | 25245559 | + | 0 | 0 |
| ENSG0000(SNORD114 snoRNA    | chr14 | 1.01E+08 | 1.01E+08 | + | 0 | 0 |
| ENSG0000(RNU6-101: snRNA    | chr12 | 1.32E+08 | 1.32E+08 | - | 0 | 0 |
| ENSG0000(RNU6-124: snRNA    | chr10 | 32394558 | 32394665 | - | 0 | 0 |
| ENSG0000(Y_RNA misc_RNA     | chr11 | 33196547 | 33196637 | - | 0 | 0 |
| ENSG0000(SNORD115 snoRNA    | chr15 | 25189414 | 25189495 | + | 0 | 0 |
| ENSG0000(RNA5SP32: rRNA     | chr10 | 86052448 | 86052566 | + | 0 | 0 |
| ENSG0000(RN7SKP20: misc_RNA | chr2  | 76445079 | 76445410 | - | 0 | 0 |
| ENSG0000(U3 snoRNA          | chr6  | 92119423 | 92119633 | + | 0 | 0 |
| ENSG0000(Y_RNA misc_RNA     | chr20 | 16670641 | 16670742 | - | 0 | 0 |
| ENSG0000(RNU6-120: snRNA    | chr1  | 2.49E+08 | 2.49E+08 | - | 0 | 0 |
| ENSG0000(U8 snoRNA          | chr11 | 1.23E+08 | 1.23E+08 | + | 0 | 0 |
| ENSG0000(Y_RNA misc_RNA     | chr9  | 37160137 | 37160237 | + | 0 | 0 |
| ENSG0000(SNORD115 snoRNA    | chr15 | 25178738 | 25178819 | + | 0 | 0 |
| ENSG0000(Y_RNA misc_RNA     | chr14 | 99583017 | 99583118 | + | 0 | 0 |
| ENSG0000(Y_RNA misc_RNA     | chr1  | 64066640 | 64066741 | - | 0 | 0 |
| ENSG0000(RNA5SP37: rRNA     | chr12 | 1.32E+08 | 1.32E+08 | - | 0 | 0 |
| ENSG0000(RNU6-121: snRNA    | chr4  | 1.39E+08 | 1.39E+08 | + | 0 | 0 |
| ENSG0000(Y_RNA misc_RNA     | chr4  | 1.58E+08 | 1.58E+08 | - | 0 | 0 |
| ENSG0000(RNU6-957: snRNA    | chr6  | 1.11E+08 | 1.11E+08 | - | 0 | 0 |
| ENSG0000(RNU6-120: snRNA    | chr8  | 95055214 | 95055320 | + | 0 | 0 |
| ENSG0000(RNY4P14 misc_RNA   | chr13 | 39785415 | 39785510 | - | 0 | 0 |
| ENSG0000(RNA5SP45: rRNA     | chr18 | 49946266 | 49946389 | - | 0 | 0 |
| ENSG0000(RNU6-133: snRNA    | chr8  | 53914719 | 53914824 | + | 0 | 0 |
| ENSG0000(SNORD35B snoRNA    | chr19 | 49497720 | 49497806 | + | 0 | 0 |
| ENSG0000(SNORA33 snoRNA     | chr6  | 1.33E+08 | 1.33E+08 | + | 0 | 0 |
| ENSG0000(SNORA25 snoRNA     | chr1  | 1.1E+08  | 1.1E+08  | + | 0 | 0 |
| ENSG0000(RNY4P6 misc_RNA    | chr11 | 1.17E+08 | 1.17E+08 | + | 0 | 0 |
| ENSG0000(U3 snoRNA          | chr17 | 48382371 | 48382586 | - | 0 | 0 |
| ENSG0000(Y_RNA misc_RNA     | chr9  | 33352788 | 33352874 | - | 0 | 0 |
| ENSG0000(U3 snoRNA          | chr10 | 19598247 | 19598463 | + | 0 | 0 |
| ENSG0000(Y_RNA misc_RNA     | chr1  | 1.16E+08 | 1.16E+08 | + | 0 | 0 |
| ENSG0000(RNU6-137: snRNA    | chr2  | 42712740 | 42712847 | + | 0 | 0 |
| ENSG0000(Y_RNA misc_RNA     | chr7  | 1.02E+08 | 1.02E+08 | + | 0 | 0 |
| ENSG0000(Y_RNA misc_RNA     | chr4  | 1.2E+08  | 1.2E+08  | + | 0 | 0 |
| ENSG0000(RNU6-102: snRNA    | chr9  | 1.25E+08 | 1.25E+08 | - | 0 | 0 |
| ENSG0000(RNU6-525: snRNA    | chr5  | 1.8E+08  | 1.8E+08  | + | 0 | 0 |
| ENSG0000(RNU6-103: snRNA    | chr16 | 58496908 | 58497014 | + | 0 | 0 |
| ENSG0000(RNA5SP42: rRNA     | chr16 | 68742480 | 68742588 | + | 0 | 0 |
| ENSG0000(RNU6-288: snRNA    | chr17 | 63573242 | 63573345 | - | 0 | 0 |
| ENSG0000(RNU6-640: snRNA    | chr2  | 86515204 | 86515308 | - | 0 | 0 |
| ENSG0000(SNORD115 snoRNA    | chr15 | 25241746 | 25241827 | + | 0 | 0 |
| ENSG0000(RNU5F-7P snRNA     | chrX  | 15916189 | 15916303 | - | 0 | 0 |

|                             |       |          |          |   |      |      |
|-----------------------------|-------|----------|----------|---|------|------|
| ENSG0000(RNU6-829F) snRNA   | chr9  | 93375556 | 93375667 | + | 0    | 0    |
| ENSG0000(RNU6-1284) snRNA   | chr3  | 1.36E+08 | 1.36E+08 | - | 0    | 0    |
| ENSG0000(Y_RNA) misc_RNA    | chrX  | 1.34E+08 | 1.34E+08 | - | 0    | 0    |
| ENSG0000(RNU6-414F) snRNA   | chr1  | 61816419 | 61816522 | + | 0    | 0    |
| ENSG0000(Y_RNA) misc_RNA    | chr3  | 38014568 | 38014669 | + | 0    | 0    |
| ENSG0000(RNA5SP51) rRNA     | chrX  | 1.32E+08 | 1.32E+08 | - | 0    | 0    |
| ENSG0000(Y_RNA) misc_RNA    | chr1  | 32639951 | 32640052 | + | 0    | 0    |
| ENSG0000(SNORD115) snoRNA   | chr15 | 25230838 | 25230919 | + | 0    | 0    |
| ENSG0000(RNU6-824F) snRNA   | chr6  | 1.55E+08 | 1.55E+08 | - | 0    | 0    |
| ENSG0000(RNU1-87P) snRNA    | chr6  | 37915573 | 37915742 | + | 0    | 0    |
| ENSG0000(Y_RNA) misc_RNA    | chr5  | 23994502 | 23994603 | - | 0    | 0    |
| ENSG0000(RNA5SP50) rRNA     | chr1  | 73749517 | 73749623 | - | 0    | 0    |
| ENSG0000(Y_RNA) misc_RNA    | chr15 | 50221888 | 50221996 | + | 0    | 0    |
| ENSG0000(SNORD114) snoRNA   | chr14 | 1.01E+08 | 1.01E+08 | + | 0    | 0    |
| ENSG0000(Y_RNA) misc_RNA    | chr3  | 1.07E+08 | 1.07E+08 | + | 0    | 0    |
| ENSG0000(SNORD114) snoRNA   | chr14 | 1.01E+08 | 1.01E+08 | + | 0    | 0    |
| ENSG0000(RNA5SP34) rRNA     | chr11 | 1.09E+08 | 1.09E+08 | - | 0    | 0    |
| ENSG0000(Y_RNA) misc_RNA    | chr11 | 33004250 | 33004345 | - | 0    | 0    |
| ENSG0000(Y_RNA) misc_RNA    | chr3  | 1.79E+08 | 1.79E+08 | + | 0    | 0    |
| ENSG0000(RNA5SP44) rRNA     | chr17 | 67268110 | 67268228 | + | 0    | 0    |
| ENSG0000(SNORA7) snoRNA     | chrX  | 15716208 | 15716346 | + | 0    | 0    |
| ENSG0000(RNU6-1055) snRNA   | chr4  | 95868667 | 95868764 | - | 0    | 0    |
| ENSG0000(SNORD18A) snoRNA   | chr15 | 66503243 | 66503314 | - | 0    | 0    |
| ENSG0000(RNA5S6) rRNA       | chr1  | 2.29E+08 | 2.29E+08 | - | 3.61 | 14.5 |
| ENSG0000(RNA5SP32) rRNA     | chr10 | 1.07E+08 | 1.07E+08 | + | 0    | 0    |
| ENSG0000(RNY1P11) misc_RNA  | chr7  | 1.29E+08 | 1.29E+08 | + | 0    | 0    |
| ENSG0000(Y_RNA) misc_RNA    | chr8  | 13160178 | 13160279 | + | 0    | 0    |
| ENSG0000(SNORD113) snoRNA   | chr14 | 1.01E+08 | 1.01E+08 | + | 0    | 0    |
| ENSG0000(Y_RNA) misc_RNA    | chrX  | 55582733 | 55582834 | + | 0    | 0    |
| ENSG0000(SNORD114) snoRNA   | chr14 | 1.01E+08 | 1.01E+08 | + | 0    | 0    |
| ENSG0000(RNU5F-3P) snRNA    | chr18 | 6017723  | 6017839  | - | 0    | 0    |
| ENSG0000(SNORD115) snoRNA   | chr15 | 25237986 | 25238067 | + | 0    | 0    |
| ENSG0000(RNU6-121C) snRNA   | chr18 | 14759188 | 14759294 | + | 0    | 0    |
| ENSG0000(Y_RNA) misc_RNA    | chr19 | 56316524 | 56316636 | - | 0    | 0    |
| ENSG0000(RNU6-226F) snRNA   | chr5  | 1.76E+08 | 1.76E+08 | + | 0    | 0    |
| ENSG0000(RNA5SP11) rRNA     | chr2  | 1.88E+08 | 1.88E+08 | - | 0    | 0    |
| ENSG0000(Y_RNA) misc_RNA    | chr17 | 77442109 | 77442213 | + | 0    | 0    |
| ENSG0000(SNORA25) snoRNA    | chr16 | 28179098 | 28179223 | + | 0    | 0    |
| ENSG0000(RNU4-92P) snRNA    | chr14 | 88820297 | 88820432 | + | 0    | 0    |
| ENSG0000(SNORA5B) snoRNA    | chr7  | 45105968 | 45106099 | - | 0    | 0    |
| ENSG0000(SNORD116) snoRNA   | chr15 | 25074114 | 25074215 | + | 0    | 0    |
| ENSG0000(Y_RNA) misc_RNA    | chr2  | 1.36E+08 | 1.36E+08 | - | 0    | 0    |
| ENSG0000(RNU6-1188) snRNA   | chr12 | 1.16E+08 | 1.16E+08 | + | 0    | 0    |
| ENSG0000(RNU6-912F) snRNA   | chr7  | 65814672 | 65814775 | + | 0    | 0    |
| ENSG0000(RN7SKP17) misc_RNA | chr7  | 1.45E+08 | 1.45E+08 | - | 0    | 0    |



|                     |          |       |          |          |   |   |   |
|---------------------|----------|-------|----------|----------|---|---|---|
| ENSG0000(RN7SKP16)  | misc_RNA | chr1  | 1.74E+08 | 1.74E+08 | + | 0 | 0 |
| ENSG0000(SNORD18)   | snoRNA   | chr15 | 90755243 | 90755312 | - | 0 | 0 |
| ENSG0000(SNORD115)  | snoRNA   | chr15 | 25176832 | 25176913 | + | 0 | 0 |
| ENSG0000(RNU6-263F) | snRNA    | chr6  | 18306973 | 18307079 | - | 0 | 0 |
| ENSG0000(RNU6-379F) | snRNA    | chr22 | 40917743 | 40917846 | + | 0 | 0 |
| ENSG0000(Y_RNA)     | misc_RNA | chr11 | 13686550 | 13686658 | - | 0 | 0 |
| ENSG0000(RNY3P3)    | misc_RNA | chr13 | 78355227 | 78355328 | - | 0 | 0 |
| ENSG0000(RNA5SP33)  | rRNA     | chr11 | 19401872 | 19401981 | - | 0 | 0 |
| ENSG0000(Y_RNA)     | misc_RNA | chr12 | 1.12E+08 | 1.12E+08 | + | 0 | 0 |
| ENSG0000(U3)        | snoRNA   | chr14 | 63651296 | 63651499 | - | 0 | 0 |
| ENSG0000(RNU6-674F) | snRNA    | chr2  | 85204926 | 85205032 | + | 0 | 0 |
| ENSG0000(Y_RNA)     | misc_RNA | chrX  | 44401603 | 44401704 | + | 0 | 0 |
| ENSG0000(RNU6-873F) | snRNA    | chr3  | 87742543 | 87742649 | - | 0 | 0 |
| ENSG0000(SNORD45)   | snoRNA   | chr6  | 38207274 | 38207345 | + | 0 | 0 |
| ENSG0000(RN7SKP93)  | misc_RNA | chr2  | 1.34E+08 | 1.34E+08 | + | 0 | 0 |
| ENSG0000(RNA5SP27)  | rRNA     | chr13 | 45551485 | 45551603 | - | 0 | 0 |
| ENSG0000(RNA5SP28)  | rRNA     | chr13 | 50812988 | 50813106 | - | 0 | 0 |
| ENSG0000(RNU6-682F) | snRNA    | chr8  | 8895813  | 8895918  | + | 0 | 0 |
| ENSG0000(Y_RNA)     | misc_RNA | chr8  | 65592731 | 65592820 | + | 0 | 0 |
| ENSG0000(RN7SKP10)  | misc_RNA | chr2  | 1.33E+08 | 1.33E+08 | + | 0 | 0 |
| ENSG0000(RNA5SP26)  | rRNA     | chr8  | 29048494 | 29048604 | - | 0 | 0 |
| ENSG0000(RNU6-931F) | snRNA    | chr4  | 45480030 | 45480136 | + | 0 | 0 |
| ENSG0000(SNORD115)  | snoRNA   | chr15 | 25184306 | 25184387 | + | 0 | 0 |
| ENSG0000(RNU6-271F) | snRNA    | chr10 | 96112747 | 96112851 | + | 0 | 0 |
| ENSG0000(RNU1-124F) | snRNA    | chr8  | 43073474 | 43073618 | + | 0 | 0 |
| ENSG0000(RNU6-194F) | snRNA    | chr6  | 1.19E+08 | 1.19E+08 | + | 0 | 0 |
| ENSG0000(SNORD38)   | snoRNA   | chr13 | 89837170 | 89837237 | + | 0 | 0 |
| ENSG0000(Y_RNA)     | misc_RNA | chr10 | 97421195 | 97421307 | - | 0 | 0 |
| ENSG0000(RNA5SP47)  | rRNA     | chr19 | 32243965 | 32244083 | - | 0 | 0 |
| ENSG0000(RNA5SP16)  | rRNA     | chr4  | 56097390 | 56097504 | + | 0 | 0 |
| ENSG0000(Y_RNA)     | misc_RNA | chr14 | 55651534 | 55651634 | + | 0 | 0 |
| ENSG0000(RNU1-31P)  | snRNA    | chr2  | 2.36E+08 | 2.36E+08 | - | 0 | 0 |
| ENSG0000(Y_RNA)     | misc_RNA | chr18 | 21724119 | 21724229 | + | 0 | 0 |
| ENSG0000(Y_RNA)     | misc_RNA | chr18 | 50959267 | 50959379 | - | 0 | 0 |
| ENSG0000(SNORD56)   | snoRNA   | chr7  | 20377331 | 20377401 | + | 0 | 0 |
| ENSG0000(Y_RNA)     | misc_RNA | chr21 | 17527140 | 17527247 | - | 0 | 0 |
| ENSG0000(RNA5SP68)  | rRNA     | chr1  | 1.74E+08 | 1.74E+08 | - | 0 | 0 |
| ENSG0000(RNU6-236F) | snRNA    | chr5  | 1.4E+08  | 1.4E+08  | - | 0 | 0 |
| ENSG0000(SNORD115)  | snoRNA   | chr15 | 25199448 | 25199529 | + | 0 | 0 |
| ENSG0000(RNU6-884F) | snRNA    | chr1  | 1.51E+08 | 1.51E+08 | - | 0 | 0 |
| ENSG0000(RN7SKP11)  | misc_RNA | chr4  | 4920770  | 4921064  | - | 0 | 0 |
| ENSG0000(RNU6-961F) | snRNA    | chr2  | 20175805 | 20175909 | + | 0 | 0 |
| ENSG0000(Y_RNA)     | misc_RNA | chr2  | 2.08E+08 | 2.08E+08 | + | 0 | 0 |
| ENSG0000(Y_RNA)     | misc_RNA | chr7  | 92202243 | 92202334 | - | 0 | 0 |
| ENSG0000(RNU6-478F) | snRNA    | chr10 | 83067962 | 83068071 | - | 0 | 0 |

|                     |          |       |          |          |   |      |   |
|---------------------|----------|-------|----------|----------|---|------|---|
| ENSG0000(RNU6-105F) | snRNA    | chr2  | 71379755 | 71379858 | - | 0    | 0 |
| ENSG0000(RN7SKP18)  | misc_RNA | chr17 | 72663823 | 72664152 | - | 0    | 0 |
| ENSG0000(SNORD8)    | snoRNA   | chr14 | 21397292 | 21397401 | - | 0    | 0 |
| ENSG0000(RNA5SP23)  | rRNA     | chr7  | 79654109 | 79654227 | + | 0    | 0 |
| ENSG0000(Y_RNA)     | misc_RNA | chr9  | 1.27E+08 | 1.27E+08 | + | 0    | 0 |
| ENSG0000(RNU1-65P)  | snRNA    | chr10 | 84003332 | 84003479 | + | 0    | 0 |
| ENSG0000(RNU6-631F) | snRNA    | chr15 | 21866210 | 21866316 | - | 0    | 0 |
| ENSG0000(SNORA80A)  | snoRNA   | chr21 | 32377187 | 32377322 | - | 0    | 0 |
| ENSG0000(RN7SKP25)  | misc_RNA | chr12 | 1.1E+08  | 1.1E+08  | - | 0    | 0 |
| ENSG0000(RNU4-1)    | snRNA    | chr12 | 1.2E+08  | 1.2E+08  | - | 3.67 | 0 |
| ENSG0000(RNU6-753F) | snRNA    | chr1  | 38396659 | 38396765 | + | 0    | 0 |
| ENSG0000(RNU6-770F) | snRNA    | chr6  | 1.08E+08 | 1.08E+08 | + | 0    | 0 |
| ENSG0000(RNU1-130F) | snRNA    | chr1  | 96225901 | 96226060 | + | 0    | 0 |
| ENSG0000(SNORD115)  | snoRNA   | chr15 | 25222348 | 25222428 | + | 0    | 0 |
| ENSG0000(RNA5SP27)  | rRNA     | chr8  | 1.08E+08 | 1.08E+08 | + | 0    | 0 |
| ENSG0000(RNU1-32P)  | snRNA    | chr2  | 60384605 | 60384763 | + | 0    | 0 |
| ENSG0000(SNORD115)  | snoRNA   | chr15 | 25180497 | 25180578 | + | 0    | 0 |
| ENSG0000(RNU6-595F) | snRNA    | chr12 | 62334091 | 62334197 | - | 0    | 0 |
| ENSG0000(RNU6-109)  | snRNA    | chr7  | 50435380 | 50435486 | + | 0    | 0 |
| ENSG0000(SNORA38)   | snoRNA   | chr6  | 31623079 | 31623210 | + | 0    | 0 |
| ENSG0000(RNU6-899F) | snRNA    | chr11 | 58026706 | 58026812 | - | 0    | 0 |
| ENSG0000(RNU6-120)  | snRNA    | chr14 | 56824986 | 56825092 | + | 0    | 0 |
| ENSG0000(Y_RNA)     | misc_RNA | chr2  | 2.22E+08 | 2.22E+08 | + | 0    | 0 |
| ENSG0000(SNORD114)  | snoRNA   | chr14 | 1.01E+08 | 1.01E+08 | + | 0    | 0 |
| ENSG0000(RNU6-324F) | snRNA    | chr18 | 12098427 | 12098532 | + | 0    | 0 |
| ENSG0000(Y_RNA)     | misc_RNA | chr2  | 20480844 | 20480955 | + | 0    | 0 |
| ENSG0000(RN7SKP13)  | misc_RNA | chr12 | 14553702 | 14553970 | - | 0    | 0 |
| ENSG0000(SNORD36B)  | snoRNA   | chr9  | 1.33E+08 | 1.33E+08 | + | 0    | 0 |
| ENSG0000(SNORD114)  | snoRNA   | chr14 | 1.01E+08 | 1.01E+08 | + | 0    | 0 |
| ENSG0000(Y_RNA)     | misc_RNA | chr9  | 33830978 | 33831078 | + | 0    | 0 |
| ENSG0000(RNA5SP48)  | rRNA     | chr1  | 51973410 | 51973535 | + | 0    | 0 |
| ENSG0000(RNU6-82P)  | snRNA    | chr13 | 28232501 | 28232607 | + | 0    | 0 |
| ENSG0000(Y_RNA)     | misc_RNA | chr17 | 62036833 | 62036945 | + | 0    | 0 |
| ENSG0000(Y_RNA)     | misc_RNA | chr7  | 23491792 | 23491893 | - | 0    | 0 |
| ENSG0000(Y_RNA)     | misc_RNA | chr10 | 10232611 | 10232712 | + | 0    | 0 |
| ENSG0000(RNA5SP49)  | rRNA     | chrX  | 9133828  | 9133946  | + | 0    | 0 |
| ENSG0000(Y_RNA)     | misc_RNA | chr11 | 1.08E+08 | 1.08E+08 | + | 0    | 0 |
| ENSG0000(Y_RNA)     | misc_RNA | chr7  | 69507510 | 69507622 | - | 0    | 0 |
| ENSG0000(Y_RNA)     | misc_RNA | chr14 | 66177527 | 66177635 | - | 0    | 0 |
| ENSG0000(RN7SKP36)  | misc_RNA | chr4  | 7112088  | 7112399  | - | 0    | 0 |
| ENSG0000(RNU6-457F) | snRNA    | chr16 | 6873899  | 6874005  | + | 0    | 0 |
| ENSG0000(RNU6-810F) | snRNA    | chr22 | 29134014 | 29134120 | + | 0    | 0 |
| ENSG0000(RNA5SP45)  | rRNA     | chr18 | 48475487 | 48475600 | - | 0    | 0 |
| ENSG0000(RNA5SP39)  | rRNA     | chr15 | 71858570 | 71858686 | + | 0    | 0 |
| ENSG0000(Y_RNA)     | misc_RNA | chr7  | 75513025 | 75513126 | - | 0    | 0 |

|                     |          |       |          |          |   |   |   |
|---------------------|----------|-------|----------|----------|---|---|---|
| ENSG0000(RNU6-340F) | snRNA    | chr18 | 2649761  | 2649867  | - | 0 | 0 |
| ENSG0000(RNU6-560F) | snRNA    | chr11 | 86153227 | 86153334 | + | 0 | 0 |
| ENSG0000(SNORD14E)  | snoRNA   | chr11 | 1.23E+08 | 1.23E+08 | - | 0 | 0 |
| ENSG0000(RNU6-681F) | snRNA    | chr3  | 1.77E+08 | 1.77E+08 | - | 0 | 0 |
| ENSG0000(Y_RNA)     | misc_RNA | chr18 | 9249649  | 9249746  | - | 0 | 0 |
| ENSG0000(Y_RNA)     | misc_RNA | chr5  | 96962656 | 96962757 | - | 0 | 0 |
| ENSG0000(RNU1-146F) | snRNA    | chr12 | 19724435 | 19724599 | + | 0 | 0 |
| ENSG0000(RNU6-598F) | snRNA    | chr10 | 30299569 | 30299673 | - | 0 | 0 |
| ENSG0000(Y_RNA)     | misc_RNA | chr17 | 45071442 | 45071543 | + | 0 | 0 |
| ENSG0000(RNU4-13P)  | snRNA    | chr17 | 59537359 | 59537499 | - | 0 | 0 |
| ENSG0000(RNA5SP99)  | rRNA     | chr2  | 81496214 | 81496327 | - | 0 | 0 |
| ENSG0000(SNORD74)   | snoRNA   | chr10 | 87994618 | 87994695 | - | 0 | 0 |
| ENSG0000(RNU6-944F) | snRNA    | chr16 | 20784509 | 20784615 | + | 0 | 0 |
| ENSG0000(RN7SKP24)  | misc_RNA | chr6  | 1.32E+08 | 1.32E+08 | + | 0 | 0 |
| ENSG0000(SNORD74)   | snoRNA   | chr12 | 1.07E+08 | 1.07E+08 | + | 0 | 0 |
| ENSG0000(RNU6-124)  | snRNA    | chr11 | 61937894 | 61938000 | + | 0 | 0 |
| ENSG0000(RNU6-627F) | snRNA    | chr2  | 1.63E+08 | 1.63E+08 | + | 0 | 0 |
| ENSG0000(RNU1-42P)  | snRNA    | chr17 | 48949361 | 48949520 | - | 0 | 0 |
| ENSG0000(RNU6-854F) | snRNA    | chrX  | 77837289 | 77837395 | + | 0 | 0 |
| ENSG0000(SNORD46)   | snoRNA   | chr1  | 44776490 | 44776593 | + | 0 | 0 |
| ENSG0000(RNA5SP43)  | rRNA     | chr17 | 6600944  | 6601051  | - | 0 | 0 |
| ENSG0000(RNU6-553F) | snRNA    | chr4  | 1.05E+08 | 1.05E+08 | + | 0 | 0 |
| ENSG0000(Y_RNA)     | misc_RNA | chr9  | 71902455 | 71902550 | - | 0 | 0 |
| ENSG0000(RNU6-104)  | snRNA    | chr2  | 43892690 | 43892796 | + | 0 | 0 |
| ENSG0000(RNU6-960F) | snRNA    | chr6  | 1.11E+08 | 1.11E+08 | - | 0 | 0 |
| ENSG0000(RNU6-109)  | snRNA    | chr10 | 1.17E+08 | 1.17E+08 | + | 0 | 0 |
| ENSG0000(RNU6-694F) | snRNA    | chr9  | 4386410  | 4386556  | - | 0 | 0 |
| ENSG0000(RNU6-501F) | snRNA    | chr1  | 2.02E+08 | 2.02E+08 | + | 0 | 0 |
| ENSG0000(SNORD115)  | snoRNA   | chr15 | 25228967 | 25229048 | + | 0 | 0 |
| ENSG0000(Y_RNA)     | misc_RNA | chr12 | 51156868 | 51156977 | - | 0 | 0 |
| ENSG0000(RNU6-801F) | snRNA    | chr6  | 19642425 | 19642529 | - | 0 | 0 |
| ENSG0000(SNORA74A)  | snoRNA   | chr5  | 1.39E+08 | 1.39E+08 | + | 1 | 0 |
| ENSG0000(RNU6-289F) | snRNA    | chr4  | 1.11E+08 | 1.11E+08 | + | 0 | 0 |
| ENSG0000(RN7SKP87)  | misc_RNA | chr9  | 1.01E+08 | 1.01E+08 | - | 0 | 0 |
| ENSG0000(SNORD95)   | snoRNA   | chr9  | 81888918 | 81888985 | + | 0 | 0 |
| ENSG0000(RNU5A-8P)  | snRNA    | chr1  | 2.1E+08  | 2.1E+08  | - | 0 | 0 |
| ENSG0000(RNU4-87P)  | snRNA    | chr4  | 1.65E+08 | 1.65E+08 | + | 0 | 0 |
| ENSG0000(RNU1-7P)   | snRNA    | chr1  | 8206434  | 8206597  | - | 0 | 0 |
| ENSG0000(Y_RNA)     | misc_RNA | chr22 | 29758758 | 29758859 | + | 0 | 0 |
| ENSG0000(Y_RNA)     | misc_RNA | chr1  | 2.48E+08 | 2.48E+08 | + | 0 | 0 |
| ENSG0000(SNORA3A)   | snoRNA   | chr11 | 8684227  | 8684356  | + | 0 | 0 |
| ENSG0000(RNA5SP49)  | rRNA     | chr22 | 21792434 | 21792524 | + | 0 | 0 |
| ENSG0000(RNU6-819F) | snRNA    | chr8  | 47131781 | 47131887 | - | 0 | 0 |
| ENSG0000(SNORD115)  | snoRNA   | chr15 | 25225203 | 25225284 | + | 0 | 0 |
| ENSG0000(SNORA25)   | snoRNA   | chr15 | 84852498 | 84852615 | - | 0 | 0 |

|                     |          |       |          |          |   |   |   |
|---------------------|----------|-------|----------|----------|---|---|---|
| ENSG0000(RNU1-85P)  | snRNA    | chr17 | 58679527 | 58679690 | - | 0 | 0 |
| ENSG0000(Y_RNA)     | misc_RNA | chr4  | 78632273 | 78632385 | - | 0 | 0 |
| ENSG0000(SNORD74)   | snoRNA   | chr4  | 26702309 | 26702388 | + | 0 | 0 |
| ENSG0000(RNA5SP51)  | rRNA     | chrX  | 1.42E+08 | 1.42E+08 | + | 0 | 0 |
| ENSG0000(RNU6-270F) | snRNA    | chr10 | 28760699 | 28760803 | - | 0 | 0 |
| ENSG0000(SNORA58)   | snoRNA   | chr1  | 53771018 | 53771153 | - | 0 | 0 |
| ENSG0000(Y_RNA)     | misc_RNA | chr2  | 1.21E+08 | 1.21E+08 | + | 0 | 0 |
| ENSG0000(SNORD46)   | snoRNA   | chr7  | 1.33E+08 | 1.33E+08 | + | 0 | 0 |
| ENSG0000(RN7SKP22)  | misc_RNA | chr2  | 48217575 | 48217899 | + | 0 | 0 |
| ENSG0000(Y_RNA)     | misc_RNA | chr6  | 1.35E+08 | 1.35E+08 | - | 0 | 0 |
| ENSG0000(Y_RNA)     | misc_RNA | chr2  | 2.33E+08 | 2.33E+08 | - | 0 | 0 |
| ENSG0000(RNA5SP23)  | rRNA     | chr7  | 71913738 | 71913856 | - | 0 | 0 |
| ENSG0000(RNU6-280F) | snRNA    | chr6  | 67546651 | 67546754 | + | 0 | 0 |
| ENSG0000(RNU6-374F) | snRNA    | chr5  | 25701217 | 25701324 | - | 0 | 0 |
| ENSG0000(RNU6-743F) | snRNA    | chr20 | 43405473 | 43405578 | + | 0 | 0 |
| ENSG0000(RNY3P11)   | misc_RNA | chr6  | 1.09E+08 | 1.09E+08 | + | 0 | 0 |
| ENSG0000(SNORD74)   | snoRNA   | chr21 | 16284696 | 16284768 | - | 0 | 0 |
| ENSG0000(Y_RNA)     | misc_RNA | chr5  | 2184710  | 2184820  | + | 0 | 0 |
| ENSG0000(RN7SKP10)  | misc_RNA | chr14 | 89621918 | 89622207 | + | 0 | 0 |
| ENSG0000(RNU6-151F) | snRNA    | chr1  | 1.12E+08 | 1.12E+08 | - | 0 | 0 |
| ENSG0000(Y_RNA)     | misc_RNA | chr3  | 1.49E+08 | 1.49E+08 | - | 0 | 0 |
| ENSG0000(RNU6-704F) | snRNA    | chr1  | 2.01E+08 | 2.01E+08 | - | 0 | 0 |
| ENSG0000(RNU1-96P)  | snRNA    | chr3  | 27513871 | 27514032 | + | 0 | 0 |
| ENSG0000(Y_RNA)     | misc_RNA | chr16 | 439297   | 439397   | - | 0 | 0 |
| ENSG0000(RNA5SP46)  | rRNA     | chr19 | 21113128 | 21113236 | - | 0 | 0 |
| ENSG0000(SNORD113)  | snoRNA   | chr14 | 1.01E+08 | 1.01E+08 | + | 0 | 0 |
| ENSG0000(RNA5SP24)  | rRNA     | chr7  | 1.29E+08 | 1.29E+08 | + | 0 | 0 |
| ENSG0000(SNORA38)   | snoRNA   | chr12 | 1.19E+08 | 1.19E+08 | - | 0 | 0 |
| ENSG0000(RNU6-268F) | snRNA    | chr2  | 2.31E+08 | 2.31E+08 | + | 0 | 0 |
| ENSG0000(Y_RNA)     | misc_RNA | chr10 | 73082494 | 73082595 | - | 0 | 0 |
| ENSG0000(Y_RNA)     | misc_RNA | chr6  | 10674658 | 10674768 | - | 0 | 0 |
| ENSG0000(RNU6-668F) | snRNA    | chr4  | 1.65E+08 | 1.65E+08 | + | 0 | 0 |
| ENSG0000(RNA5SP33)  | rRNA     | chr11 | 21000881 | 21000997 | - | 0 | 0 |
| ENSG0000(RNU6-461F) | snRNA    | chr3  | 1.03E+08 | 1.03E+08 | - | 0 | 0 |
| ENSG0000(RN7SKP28)  | misc_RNA | chr7  | 1.55E+08 | 1.55E+08 | + | 0 | 0 |
| ENSG0000(RNU4-84P)  | snRNA    | chr2  | 98782410 | 98782548 | + | 0 | 0 |
| ENSG0000(Y_RNA)     | misc_RNA | chr15 | 64111458 | 64111569 | - | 0 | 0 |
| ENSG0000(Y_RNA)     | misc_RNA | chr9  | 93417855 | 93417966 | + | 0 | 0 |
| ENSG0000(Y_RNA)     | misc_RNA | chr16 | 14275508 | 14275600 | + | 0 | 0 |
| ENSG0000(RNU4-51P)  | snRNA    | chr2  | 60911303 | 60911442 | + | 0 | 0 |
| ENSG0000(RNU6-188F) | snRNA    | chr15 | 42427591 | 42427697 | - | 0 | 0 |
| ENSG0000(RN7SKP21)  | misc_RNA | chr22 | 37055033 | 37055347 | - | 0 | 0 |
| ENSG0000(Y_RNA)     | misc_RNA | chr15 | 32175247 | 32175351 | - | 0 | 0 |
| ENSG0000(RNU6-173F) | snRNA    | chr4  | 1.88E+08 | 1.88E+08 | - | 0 | 0 |
| ENSG0000(RNA5SP39)  | rRNA     | chr15 | 49982443 | 49982561 | + | 0 | 0 |

|                    |          |       |          |          |   |   |      |
|--------------------|----------|-------|----------|----------|---|---|------|
| ENSG0000(Y_RNA     | misc_RNA | chr2  | 1.74E+08 | 1.74E+08 | - | 0 | 0    |
| ENSG0000(RNU6-266F | snRNA    | chrX  | 22527835 | 22527941 | + | 0 | 0    |
| ENSG0000(RNA5SP38  | rRNA     | chr14 | 75604173 | 75604278 | + | 0 | 0    |
| ENSG0000(RNU6-366F | snRNA    | chr14 | 92265702 | 92265807 | + | 0 | 0    |
| ENSG0000(RNY1      | misc_RNA | chr7  | 1.49E+08 | 1.49E+08 | - | 0 | 0    |
| ENSG0000(Y_RNA     | misc_RNA | chr2  | 1.77E+08 | 1.77E+08 | + | 0 | 0    |
| ENSG0000(RNU6-11P  | snRNA    | chr7  | 1.24E+08 | 1.24E+08 | - | 0 | 1.24 |
| ENSG0000(RNA5SP24  | rRNA     | chr7  | 1.3E+08  | 1.3E+08  | + | 0 | 0    |
| ENSG0000(RNU6-647F | snRNA    | chr2  | 32214456 | 32214562 | - | 0 | 0    |
| ENSG0000(Y_RNA     | misc_RNA | chr1  | 1.14E+08 | 1.14E+08 | + | 0 | 0    |
| ENSG0000(Y_RNA     | misc_RNA | chr9  | 19089593 | 19089688 | + | 0 | 0    |
| ENSG0000(RNU1-33P  | snRNA    | chr6  | 1.45E+08 | 1.45E+08 | - | 0 | 0    |
| ENSG0000(RNY1P12   | misc_RNA | chr3  | 1.02E+08 | 1.02E+08 | - | 0 | 0    |
| ENSG0000(SNORA58   | snoRNA   | chr1  | 1.54E+08 | 1.54E+08 | + | 0 | 0    |
| ENSG0000(SNORA4    | snoRNA   | chr7  | 50935350 | 50935493 | - | 0 | 0    |
| ENSG0000(Y_RNA     | misc_RNA | chr1  | 1.52E+08 | 1.52E+08 | - | 0 | 0    |
| ENSG0000(RNU6-777F | snRNA    | chr1  | 12077881 | 12077984 | - | 0 | 0    |
| ENSG0000(RNU6-353F | snRNA    | chr15 | 43702363 | 43702470 | + | 0 | 0    |
| ENSG0000(RN7SKP12  | misc_RNA | chr9  | 1.17E+08 | 1.17E+08 | + | 0 | 0    |
| ENSG0000(RNVU1-8   | snRNA    | chr1  | 1.47E+08 | 1.47E+08 | + | 0 | 0    |
| ENSG0000(SNORD115  | snoRNA   | chr15 | 25247345 | 25247426 | + | 0 | 0    |
| ENSG0000(RNA5SP17  | rRNA     | chr4  | 1.9E+08  | 1.9E+08  | + | 0 | 0    |
| ENSG0000(RNA5SP42  | rRNA     | chr1  | 34112949 | 34113063 | + | 0 | 0    |
| ENSG0000(SNORD56   | snoRNA   | chr20 | 35117136 | 35117207 | - | 0 | 0    |
| ENSG0000(RNU6-371F | snRNA    | chr1  | 62298149 | 62298256 | - | 0 | 0    |
| ENSG0000(RNU1-24P  | snRNA    | chr13 | 1.02E+08 | 1.02E+08 | - | 0 | 0    |
| ENSG0000(SNORA62   | snoRNA   | chr8  | 18979619 | 18979772 | + | 0 | 0    |
| ENSG0000(Y_RNA     | misc_RNA | chr2  | 25697076 | 25697188 | - | 0 | 0    |
| ENSG0000(RN7SKP10  | misc_RNA | chr13 | 1.1E+08  | 1.1E+08  | + | 0 | 0    |
| ENSG0000(RNU6-454F | snRNA    | chr3  | 15339749 | 15339855 | + | 0 | 0    |
| ENSG0000(RNU4-36P  | snRNA    | chr16 | 68535515 | 68535658 | + | 0 | 0    |
| ENSG0000(RNU6-122  | snRNA    | chr7  | 65023204 | 65023310 | - | 0 | 0    |
| ENSG0000(RNA5SP36  | rRNA     | chr12 | 1.02E+08 | 1.02E+08 | + | 0 | 0    |
| ENSG0000(RNU1-132F | snRNA    | chr1  | 2.45E+08 | 2.45E+08 | - | 0 | 0    |
| ENSG0000(RNU6-853F | snRNA    | chr4  | 1.69E+08 | 1.69E+08 | + | 0 | 0    |
| ENSG0000(Y_RNA     | misc_RNA | chr17 | 32830219 | 32830329 | - | 0 | 0    |
| ENSG0000(RNU6-132  | snRNA    | chr7  | 1.05E+08 | 1.05E+08 | + | 0 | 0    |
| ENSG0000(RNU6-115F | snRNA    | chr20 | 15022852 | 15022958 | + | 0 | 0    |
| ENSG0000(RNU6-670F | snRNA    | chr3  | 10037552 | 10037655 | + | 0 | 0    |
| ENSG0000(RNVU1-3   | snRNA    | chr1  | 1.48E+08 | 1.48E+08 | + | 0 | 0    |
| ENSG0000(RNU4-68P  | snRNA    | chr14 | 1.04E+08 | 1.04E+08 | + | 0 | 0    |
| ENSG0000(RNA5SP20  | rRNA     | chr6  | 4427963  | 4428081  | + | 0 | 0    |
| ENSG0000(RNU4-33P  | snRNA    | chr4  | 1.19E+08 | 1.19E+08 | + | 0 | 0    |
| ENSG0000(Y_RNA     | misc_RNA | chr10 | 52852607 | 52852703 | + | 0 | 0    |
| ENSG0000(RNU6-879F | snRNA    | chr12 | 57415296 | 57415403 | + | 0 | 0    |

|                     |          |       |          |          |   |   |   |
|---------------------|----------|-------|----------|----------|---|---|---|
| ENSG000001RN7SKP111 | misc_RNA | chr16 | 67321658 | 67321987 | - | 0 | 0 |
| ENSG000001Y_RNA     | misc_RNA | chr6  | 31663288 | 31663401 | + | 0 | 0 |
| ENSG000001Y_RNA     | misc_RNA | chr12 | 1.13E+08 | 1.13E+08 | - | 0 | 0 |
| ENSG000001SNORD42   | snoRNA   | chr22 | 28232756 | 28232823 | - | 0 | 0 |
| ENSG000001RNA5SP13  | rRNA     | chr3  | 1.28E+08 | 1.28E+08 | + | 0 | 0 |
| ENSG000001Y_RNA     | misc_RNA | chr8  | 1.03E+08 | 1.03E+08 | - | 0 | 0 |
| ENSG000001Y_RNA     | misc_RNA | chr3  | 1.52E+08 | 1.52E+08 | + | 0 | 0 |
| ENSG000001Y_RNA     | misc_RNA | chr7  | 7102573  | 7102681  | - | 0 | 0 |
| ENSG000001RNU4-40P  | snRNA    | chr20 | 35887659 | 35887801 | + | 0 | 0 |
| ENSG000001RNU6-1305 | snRNA    | chr5  | 36155119 | 36155222 | + | 0 | 0 |
| ENSG000001Y_RNA     | misc_RNA | chr12 | 31506303 | 31506404 | - | 0 | 0 |
| ENSG000001SNORA63   | snoRNA   | chr3  | 1.83E+08 | 1.83E+08 | + | 0 | 0 |
| ENSG000001RNU4-50P  | snRNA    | chr8  | 58814412 | 58814552 | - | 0 | 0 |
| ENSG000001Y_RNA     | misc_RNA | chr17 | 82417226 | 82417321 | + | 0 | 0 |
| ENSG000001SNORD114  | snoRNA   | chr14 | 1.01E+08 | 1.01E+08 | + | 0 | 0 |
| ENSG000001RNU6-978F | snRNA    | chr15 | 19883614 | 19883716 | + | 0 | 0 |
| ENSG000001RNY1P1    | misc_RNA | chr13 | 27402476 | 27402587 | - | 0 | 0 |
| ENSG000001RNU6-654F | snRNA    | chr11 | 1.09E+08 | 1.09E+08 | + | 0 | 0 |
| ENSG000001SNORA25   | snoRNA   | chr13 | 99783857 | 99783983 | - | 0 | 0 |
| ENSG000001SNORD114  | snoRNA   | chr14 | 1.01E+08 | 1.01E+08 | + | 0 | 0 |
| ENSG000001RNU4-10P  | snRNA    | chr13 | 73191528 | 73191667 | + | 0 | 0 |
| ENSG000001RNU6-990F | snRNA    | chr17 | 30360463 | 30360566 | + | 0 | 0 |
| ENSG000001RNU6-1075 | snRNA    | chr10 | 16207821 | 16207927 | - | 0 | 0 |
| ENSG000001SNORD114  | snoRNA   | chr14 | 1.01E+08 | 1.01E+08 | + | 0 | 0 |
| ENSG000001SNORD73B  | snoRNA   | chr4  | 1.51E+08 | 1.51E+08 | + | 0 | 0 |
| ENSG000001RNU6-755F | snRNA    | chr1  | 1.65E+08 | 1.65E+08 | - | 0 | 0 |
| ENSG000001RNU1-112F | snRNA    | chrX  | 72740706 | 72740869 | - | 0 | 0 |
| ENSG000001RNU6-776F | snRNA    | chr1  | 22010985 | 22011088 | + | 0 | 0 |
| ENSG000001RNA5SP19  | rRNA     | chr5  | 1.33E+08 | 1.33E+08 | + | 0 | 0 |
| ENSG000001Y_RNA     | misc_RNA | chr5  | 1.73E+08 | 1.73E+08 | - | 0 | 0 |
| ENSG000001Y_RNA     | misc_RNA | chr11 | 3663815  | 3663911  | - | 0 | 0 |
| ENSG000001Y_RNA     | misc_RNA | chr7  | 73011144 | 73011245 | + | 0 | 0 |
| ENSG0000015S_rRNA   | rRNA     | chrX  | 1.48E+08 | 1.48E+08 | - | 0 | 0 |
| ENSG000001RN7SKP17  | misc_RNA | chr9  | 37661747 | 37662049 | - | 0 | 0 |
| ENSG000001RNU6-1047 | snRNA    | chr3  | 1.27E+08 | 1.27E+08 | - | 0 | 0 |
| ENSG000001RN7SKP76  | misc_RNA | chr16 | 61743154 | 61743476 | - | 0 | 0 |
| ENSG000001RNU1-34P  | snRNA    | chr6  | 75473738 | 75473894 | - | 0 | 0 |
| ENSG000001RNU6-153F | snRNA    | chr6  | 1.66E+08 | 1.66E+08 | + | 0 | 0 |
| ENSG000001RNU6-1015 | snRNA    | chr20 | 3360036  | 3360142  | + | 0 | 0 |
| ENSG000001RNU4-41P  | snRNA    | chr12 | 98417896 | 98418038 | - | 0 | 0 |
| ENSG000001Y_RNA     | misc_RNA | chr4  | 1.25E+08 | 1.25E+08 | + | 0 | 0 |
| ENSG000001RNU6-1164 | snRNA    | chr5  | 1.35E+08 | 1.35E+08 | - | 0 | 0 |
| ENSG000001SNORD115  | snoRNA   | chr15 | 25220497 | 25220578 | + | 0 | 0 |
| ENSG000001RNA5SP13  | rRNA     | chr3  | 49467115 | 49467228 | - | 0 | 0 |
| ENSG000001SNORA65   | snoRNA   | chr9  | 1.27E+08 | 1.27E+08 | - | 0 | 0 |

|                     |          |       |          |          |   |      |      |
|---------------------|----------|-------|----------|----------|---|------|------|
| ENSG0000(RNU6-512F) | snRNA    | chr2  | 1.36E+08 | 1.36E+08 | - | 0    | 0    |
| ENSG0000(Y_RNA)     | misc_RNA | chr6  | 1.34E+08 | 1.34E+08 | + | 0    | 0    |
| ENSG0000(Y_RNA)     | misc_RNA | chr2  | 82307067 | 82307168 | - | 0    | 0    |
| ENSG0000(RNA5SP72)  | rRNA     | chr1  | 1.85E+08 | 1.85E+08 | - | 0    | 0    |
| ENSG0000(Y_RNA)     | misc_RNA | chr4  | 1.46E+08 | 1.46E+08 | - | 0    | 0    |
| ENSG0000(RN7SKP22)  | misc_RNA | chr3  | 36685040 | 36685369 | + | 0    | 0    |
| ENSG0000(SNORA7)    | snoRNA   | chr8  | 51015021 | 51015165 | + | 0    | 0    |
| ENSG0000(RNU4-59P)  | snRNA    | chr1  | 92700819 | 92700934 | - | 0    | 0    |
| ENSG0000(SNORD114)  | snoRNA   | chr14 | 1.01E+08 | 1.01E+08 | + | 0    | 0    |
| ENSG0000(RNA5S9)    | rRNA     | chr1  | 2.29E+08 | 2.29E+08 | - | 0    | 0    |
| ENSG0000(RNU6-361F) | snRNA    | chr12 | 1.09E+08 | 1.09E+08 | - | 0    | 0    |
| ENSG0000(RNA5SP14)  | rRNA     | chr3  | 1.38E+08 | 1.38E+08 | - | 0    | 0    |
| ENSG0000(SNORD115)  | snoRNA   | chr15 | 25209918 | 25209999 | + | 0    | 0    |
| ENSG0000(U3)        | snoRNA   | chr8  | 43378297 | 43378510 | + | 0    | 0    |
| ENSG0000(SNORD32B)  | snoRNA   | chr6  | 29582249 | 29582332 | + | 0    | 0    |
| ENSG0000(SNORD115)  | snoRNA   | chr15 | 25211796 | 25211877 | + | 0    | 0    |
| ENSG0000(Y_RNA)     | misc_RNA | chr3  | 93967926 | 93968020 | + | 0    | 0    |
| ENSG0000(Y_RNA)     | misc_RNA | chr17 | 50696644 | 50696760 | + | 0    | 0    |
| ENSG0000(RNU6-421F) | snRNA    | chrX  | 49945336 | 49945442 | - | 0    | 0    |
| ENSG0000(RNU4-38P)  | snRNA    | chr3  | 1.7E+08  | 1.7E+08  | + | 0    | 0    |
| ENSG0000(Y_RNA)     | misc_RNA | chr3  | 1.77E+08 | 1.77E+08 | - | 0    | 0    |
| ENSG0000(U3)        | snoRNA   | chr20 | 3384229  | 3384440  | + | 0    | 0    |
| ENSG0000(RNA5SP69)  | rRNA     | chr1  | 1.79E+08 | 1.79E+08 | + | 0    | 0    |
| ENSG0000(RNU105B)   | snoRNA   | chr20 | 8831186  | 8831393  | + | 0    | 0    |
| ENSG0000(Y_RNA)     | misc_RNA | chr14 | 90177222 | 90177330 | + | 0    | 0    |
| ENSG0000(Y_RNA)     | misc_RNA | chr7  | 1.41E+08 | 1.41E+08 | + | 0    | 0    |
| ENSG0000(RNA5S14)   | rRNA     | chr1  | 2.29E+08 | 2.29E+08 | - | 3.61 | 14.5 |
| ENSG0000(RNA5SP50)  | rRNA     | chrX  | 28982852 | 28982970 | - | 0    | 0    |
| ENSG0000(RN7SKP19)  | misc_RNA | chr14 | 50068568 | 50068873 | + | 0    | 0    |
| ENSG0000(RNA5SP43)  | rRNA     | chr16 | 84262815 | 84262928 | - | 0    | 0    |
| ENSG0000(Y_RNA)     | misc_RNA | chr20 | 44344839 | 44344933 | + | 0    | 0    |
| ENSG0000(RN7SKP37)  | misc_RNA | chr10 | 21933143 | 21933438 | + | 0    | 0    |
| ENSG0000(Y_RNA)     | misc_RNA | chr8  | 66653469 | 66653576 | + | 0    | 0    |
| ENSG0000(RNU6-522F) | snRNA    | chr6  | 15314920 | 15315026 | + | 0    | 0    |
| ENSG0000(U3)        | snoRNA   | chr5  | 35429064 | 35429277 | + | 0    | 0    |
| ENSG0000(Y_RNA)     | misc_RNA | chr5  | 16623004 | 16623095 | - | 0    | 0    |
| ENSG0000(Y_RNA)     | misc_RNA | chr16 | 27722284 | 27722392 | - | 0    | 0    |
| ENSG0000(RNU6-1251) | snRNA    | chr20 | 43473013 | 43473119 | + | 0    | 0    |
| ENSG0000(SNORA70)   | snoRNA   | chr14 | 51244090 | 51244224 | + | 0    | 0    |
| ENSG0000(RNY4P23)   | misc_RNA | chrX  | 70396279 | 70396375 | + | 0    | 0    |
| ENSG0000(RNU4-76P)  | snRNA    | chr6  | 1.22E+08 | 1.22E+08 | - | 0    | 0    |
| ENSG0000(RNU6-558F) | snRNA    | chr12 | 1.17E+08 | 1.17E+08 | + | 0    | 0    |
| ENSG0000(SNORA32)   | snoRNA   | chr14 | 77201026 | 77201140 | - | 0    | 0    |
| ENSG0000(RNU6-1163) | snRNA    | chr6  | 1.13E+08 | 1.13E+08 | + | 0    | 0    |
| ENSG0000(SNORA68)   | snoRNA   | chr19 | 32608337 | 32608469 | - | 0    | 0    |

|                    |          |       |          |          |   |   |   |
|--------------------|----------|-------|----------|----------|---|---|---|
| ENSG0000(RNU6-114) | snRNA    | chr10 | 21661635 | 21661741 | - | 0 | 0 |
| ENSG0000(RNU6-107) | snRNA    | chrX  | 71965972 | 71966074 | - | 0 | 0 |
| ENSG0000(SNORA71)  | snoRNA   | chr10 | 78367507 | 78367623 | + | 0 | 0 |
| ENSG0000(RNA5SP14) | rRNA     | chr3  | 1.34E+08 | 1.34E+08 | - | 0 | 0 |
| ENSG0000(RN7SKP25) | misc_RNA | chr14 | 36593839 | 36594147 | - | 0 | 0 |
| ENSG0000(U8)       | snoRNA   | chr3  | 1.54E+08 | 1.54E+08 | - | 0 | 0 |
| ENSG0000(SNORD14B) | snoRNA   | chr11 | 17075779 | 17075868 | - | 0 | 0 |
| ENSG0000(Y_RNA)    | misc_RNA | chr1  | 23370254 | 23370346 | + | 0 | 0 |
| ENSG0000(SNORA68)  | snoRNA   | chrX  | 24133186 | 24133317 | + | 0 | 0 |
| ENSG0000(snoZ40)   | snoRNA   | chr3  | 86125216 | 86125287 | + | 0 | 0 |
| ENSG0000(Y_RNA)    | misc_RNA | chr10 | 92710499 | 92710608 | - | 0 | 0 |
| ENSG0000(RNA5SP14) | rRNA     | chr3  | 1.35E+08 | 1.35E+08 | - | 0 | 0 |
| ENSG0000(RNA5SP20) | rRNA     | chr6  | 17721786 | 17721903 | - | 0 | 0 |
| ENSG0000(RNA5SP51) | rRNA     | chrX  | 1.12E+08 | 1.12E+08 | - | 0 | 0 |
| ENSG0000(Y_RNA)    | misc_RNA | chr1  | 1.85E+08 | 1.85E+08 | + | 0 | 0 |
| ENSG0000(RN7SKP24) | misc_RNA | chr5  | 1.45E+08 | 1.45E+08 | - | 0 | 0 |
| ENSG0000(Y_RNA)    | misc_RNA | chr3  | 1.11E+08 | 1.11E+08 | + | 0 | 0 |
| ENSG0000(RN7SKP71) | misc_RNA | chr12 | 1.12E+08 | 1.12E+08 | + | 0 | 0 |
| ENSG0000(RNU6-127) | snRNA    | chr14 | 37827798 | 37827904 | - | 0 | 0 |
| ENSG0000(Y_RNA)    | misc_RNA | chr7  | 36337667 | 36337778 | - | 0 | 0 |
| ENSG0000(RNU6-335) | snRNA    | chr4  | 1.84E+08 | 1.84E+08 | - | 0 | 0 |
| ENSG0000(RNU4-24P) | snRNA    | chr12 | 96303375 | 96303513 | - | 0 | 0 |
| ENSG0000(RNU6-660) | snRNA    | chr5  | 16941843 | 16941951 | - | 0 | 0 |
| ENSG0000(RNU4-67P) | snRNA    | chr12 | 25404288 | 25404428 | - | 0 | 0 |
| ENSG0000(RNA5SP51) | rRNA     | chrX  | 1.35E+08 | 1.35E+08 | - | 0 | 0 |
| ENSG0000(RNU6-646) | snRNA    | chr3  | 1.97E+08 | 1.97E+08 | - | 0 | 0 |
| ENSG0000(Y_RNA)    | misc_RNA | chr6  | 17737458 | 17737556 | - | 0 | 0 |
| ENSG0000(RNU6-309) | snRNA    | chrX  | 1.09E+08 | 1.09E+08 | + | 0 | 0 |
| ENSG0000(RNU6-108) | snRNA    | chr9  | 1.18E+08 | 1.18E+08 | - | 0 | 0 |
| ENSG0000(RNA5SP50) | rRNA     | chrX  | 77066709 | 77066827 | + | 0 | 0 |
| ENSG0000(SNORA63)  | snoRNA   | chr1  | 36418450 | 36418578 | - | 0 | 0 |
| ENSG0000(Y_RNA)    | misc_RNA | chr9  | 1.33E+08 | 1.33E+08 | - | 0 | 0 |
| ENSG0000(RNU6-131) | snRNA    | chr3  | 1.76E+08 | 1.76E+08 | + | 0 | 0 |
| ENSG0000(SNORA55)  | snoRNA   | chr1  | 39567374 | 39567508 | - | 0 | 0 |
| ENSG0000(RNU4-4P)  | snRNA    | chr3  | 1.73E+08 | 1.73E+08 | - | 0 | 0 |
| ENSG0000(Y_RNA)    | misc_RNA | chr6  | 79301963 | 79302066 | - | 0 | 0 |
| ENSG0000(SNORA51)  | snoRNA   | chr7  | 1.38E+08 | 1.38E+08 | - | 0 | 0 |
| ENSG0000(Y_RNA)    | misc_RNA | chr18 | 12760717 | 12760818 | + | 0 | 0 |
| ENSG0000(SNORA16)  | snoRNA   | chrX  | 17044380 | 17044511 | - | 0 | 0 |
| ENSG0000(RNA5SP37) | rRNA     | chr12 | 1.33E+08 | 1.33E+08 | - | 0 | 0 |
| ENSG0000(RNY4P7)   | misc_RNA | chr2  | 1.28E+08 | 1.28E+08 | - | 0 | 0 |
| ENSG0000(RNU6-164) | snRNA    | chr5  | 1.62E+08 | 1.62E+08 | + | 0 | 0 |
| ENSG0000(RNA5SP35) | rRNA     | chr12 | 13440884 | 13441001 | - | 0 | 0 |
| ENSG0000(SNORD115) | snoRNA   | chr15 | 25201323 | 25201404 | + | 0 | 0 |
| ENSG0000(Y_RNA)    | misc_RNA | chr6  | 7187582  | 7187686  | - | 0 | 0 |



|                             |       |          |          |   |   |   |
|-----------------------------|-------|----------|----------|---|---|---|
| ENSG0000(SNORD45B snoRNA    | chr1  | 75789477 | 75789548 | + | 0 | 0 |
| ENSG0000(Y_RNA misc_RNA     | chr17 | 7537096  | 7537196  | - | 0 | 0 |
| ENSG0000(RNU4-75P snRNA     | chr1  | 99784740 | 99784885 | - | 0 | 0 |
| ENSG0000(RNA5SP78 rRNA      | chr1  | 2.3E+08  | 2.3E+08  | + | 0 | 0 |
| ENSG0000(RNU1-141F snRNA    | chr1  | 2.18E+08 | 2.18E+08 | + | 0 | 0 |
| ENSG0000(RN7SKP27! misc_RNA | chr4  | 5458581  | 5458881  | - | 0 | 0 |
| ENSG0000(Y_RNA misc_RNA     | chr20 | 34384165 | 34384265 | - | 0 | 0 |
| ENSG0000(RNU6-312F snRNA    | chr2  | 2.01E+08 | 2.01E+08 | - | 0 | 0 |
| ENSG0000(SNORD113 snoRNA    | chr14 | 1.01E+08 | 1.01E+08 | + | 0 | 0 |
| ENSG0000(Y_RNA misc_RNA     | chr20 | 50563009 | 50563110 | + | 0 | 0 |
| ENSG0000(SNORD74 snoRNA     | chr12 | 93266017 | 93266096 | + | 0 | 0 |
| ENSG0000(RN7SKP21! misc_RNA | chr15 | 76736641 | 76736980 | + | 0 | 0 |
| ENSG0000(Y_RNA misc_RNA     | chr3  | 1.02E+08 | 1.02E+08 | + | 0 | 0 |
| ENSG0000(SNORA71C snoRNA    | chr20 | 38429670 | 38429803 | - | 0 | 0 |
| ENSG0000(SNORA51 snoRNA     | chr4  | 1.76E+08 | 1.76E+08 | + | 0 | 0 |
| ENSG0000(RNU6-707F snRNA    | chrX  | 48153980 | 48154074 | - | 0 | 0 |
| ENSG0000(RNA5SP51: rRNA     | chrX  | 1.29E+08 | 1.29E+08 | - | 0 | 0 |
| ENSG0000(RNU6-645F snRNA    | chr6  | 15324367 | 15324472 | - | 0 | 0 |
| ENSG0000(RNA5SP20! rRNA     | chr6  | 19438283 | 19438418 | + | 0 | 0 |
| ENSG0000(RNU6-450F snRNA    | chr17 | 59847438 | 59847544 | - | 0 | 0 |
| ENSG0000(RNA5SP47! rRNA     | chr20 | 23160857 | 23160971 | - | 0 | 0 |
| ENSG0000(Y_RNA misc_RNA     | chr14 | 67617302 | 67617415 | - | 0 | 0 |
| ENSG0000(RNA5SP19: rRNA     | chr5  | 1.39E+08 | 1.39E+08 | + | 0 | 0 |
| ENSG0000(RN7SKP23! misc_RNA | chr4  | 1.4E+08  | 1.4E+08  | - | 0 | 0 |
| ENSG0000(Y_RNA misc_RNA     | chr11 | 1.19E+08 | 1.19E+08 | + | 0 | 0 |
| ENSG0000(SNORA1 snoRNA      | chr16 | 24333415 | 24333547 | - | 0 | 0 |
| ENSG0000(SNORA62 snoRNA     | chr1  | 35310274 | 35310425 | + | 0 | 0 |
| ENSG0000(SNORA16B snoRNA    | chr1  | 2.12E+08 | 2.12E+08 | + | 0 | 0 |
| ENSG0000(RNU4-85P snRNA     | chr3  | 19996803 | 19996925 | + | 0 | 0 |
| ENSG0000(Y_RNA misc_RNA     | chr17 | 67408774 | 67408881 | - | 0 | 0 |
| ENSG0000(Y_RNA misc_RNA     | chr10 | 88585638 | 88585733 | - | 0 | 0 |
| ENSG0000(Y_RNA misc_RNA     | chr12 | 7784403  | 7784511  | - | 0 | 0 |
| ENSG0000(RNU6-726F snRNA    | chr3  | 1.31E+08 | 1.31E+08 | - | 0 | 0 |
| ENSG0000(Y_RNA misc_RNA     | chr3  | 1.01E+08 | 1.01E+08 | + | 0 | 0 |
| ENSG0000(Y_RNA misc_RNA     | chr6  | 31778817 | 31778905 | - | 0 | 0 |
| ENSG0000(SNORD114 snoRNA    | chr14 | 1.01E+08 | 1.01E+08 | + | 0 | 0 |
| ENSG0000(RNVU1-6 snRNA      | chr1  | 1.46E+08 | 1.46E+08 | - | 0 | 0 |
| ENSG0000(RNU6-973F snRNA    | chr7  | 65859660 | 65859766 | - | 0 | 0 |
| ENSG0000(Y_RNA misc_RNA     | chr12 | 32705403 | 32705506 | - | 0 | 0 |
| ENSG0000(RN7SKP50 misc_RNA  | chr11 | 9680924  | 9681238  | + | 0 | 0 |
| ENSG0000(Y_RNA misc_RNA     | chr7  | 67297653 | 67297754 | - | 0 | 0 |
| ENSG0000(Y_RNA misc_RNA     | chr7  | 37435115 | 37435216 | + | 0 | 0 |
| ENSG0000(RNA5SP51! rRNA     | chrX  | 95582064 | 95582162 | + | 0 | 0 |
| ENSG0000(SNORD114 snoRNA    | chr14 | 1.01E+08 | 1.01E+08 | + | 0 | 0 |
| ENSG0000(RNU4-56P snRNA     | chr3  | 39970125 | 39970266 | + | 0 | 0 |

|                    |          |       |          |          |   |      |      |
|--------------------|----------|-------|----------|----------|---|------|------|
| ENSG0000(Y_RNA     | misc_RNA | chr14 | 50468397 | 50468498 | - | 0    | 0    |
| ENSG0000(RNU1-93P  | snRNA    | chr2  | 2.31E+08 | 2.31E+08 | + | 0    | 0    |
| ENSG0000(RNU6-343F | snRNA    | chr12 | 56588518 | 56588621 | + | 0    | 0    |
| ENSG0000(RN7SKP78  | misc_RNA | chr10 | 6149623  | 6149940  | + | 0    | 0.35 |
| ENSG0000(RN7SKP19  | misc_RNA | chr9  | 1.05E+08 | 1.05E+08 | + | 0    | 0    |
| ENSG0000(Y_RNA     | misc_RNA | chr2  | 1.21E+08 | 1.21E+08 | - | 0    | 0    |
| ENSG0000(RNU6-593F | snRNA    | chr11 | 17115652 | 17115763 | - | 0    | 0    |
| ENSG0000(RNA5S2    | rRNA     | chr1  | 2.29E+08 | 2.29E+08 | - | 3.61 | 14.5 |
| ENSG0000(RNU6-99P  | snRNA    | chr11 | 39261107 | 39261213 | + | 0    | 0    |
| ENSG0000(snoU2_19  | snoRNA   | chrX  | 20136306 | 20136385 | - | 0    | 0    |
| ENSG0000(RNA5SP51  | rRNA     | chrX  | 1.46E+08 | 1.46E+08 | - | 0    | 0    |
| ENSG0000(RNA5SP13  | rRNA     | chr3  | 51694465 | 51694582 | - | 0    | 0    |
| ENSG0000(Y_RNA     | misc_RNA | chr1  | 1.86E+08 | 1.86E+08 | - | 0    | 0    |
| ENSG0000(RNU6-219F | snRNA    | chr18 | 58805268 | 58805374 | + | 0    | 0    |
| ENSG0000(RN7SKP12  | misc_RNA | chr3  | 1.4E+08  | 1.4E+08  | - | 0    | 0    |
| ENSG0000(Y_RNA     | misc_RNA | chr1  | 2.49E+08 | 2.49E+08 | - | 0    | 0    |
| ENSG0000(RNU6-740F | snRNA    | chr10 | 90922731 | 90922835 | - | 0    | 0    |
| ENSG0000(RNU4-16P  | snRNA    | chr7  | 95098227 | 95098367 | + | 0    | 0    |
| ENSG0000(RNU4-42P  | snRNA    | chr1  | 1.6E+08  | 1.6E+08  | - | 0    | 0    |
| ENSG0000(RNU4-28P  | snRNA    | chr1  | 19510593 | 19510733 | + | 0    | 0    |
| ENSG0000(RNA5SP84  | rRNA     | chr2  | 11517397 | 11517503 | + | 0    | 0    |
| ENSG0000(RN7SKP15  | misc_RNA | chr12 | 27806082 | 27806390 | - | 0    | 0    |
| ENSG0000(RNU6-200F | snRNA    | chr6  | 1.27E+08 | 1.27E+08 | - | 0    | 0    |
| ENSG0000(RNU1-91P  | snRNA    | chr11 | 3048359  | 3048521  | - | 0    | 0    |
| ENSG0000(RNA5SP50  | rRNA     | chrX  | 53909054 | 53909161 | + | 0    | 0    |
| ENSG0000(SNORA67   | snoRNA   | chr1  | 1.79E+08 | 1.79E+08 | + | 0    | 0    |
| ENSG0000(RNA5SP51  | rRNA     | chr1  | 85883680 | 85883798 | - | 0    | 0    |
| ENSG0000(RNU6-621F | snRNA    | chr3  | 1.98E+08 | 1.98E+08 | + | 0    | 0    |
| ENSG0000(RNU6-923F | snRNA    | chr5  | 33888056 | 33888162 | - | 0    | 0    |
| ENSG0000(Y_RNA     | misc_RNA | chr12 | 33982465 | 33982566 | - | 0    | 0    |
| ENSG0000(Y_RNA     | misc_RNA | chr8  | 1.06E+08 | 1.06E+08 | - | 0    | 0    |
| ENSG0000(RNU4-7P   | snRNA    | chr6  | 1.5E+08  | 1.5E+08  | - | 0    | 0    |
| ENSG0000(Y_RNA     | misc_RNA | chr4  | 83636196 | 83636290 | - | 0    | 0    |
| ENSG0000(SNORD115  | snoRNA   | chr15 | 25269783 | 25269858 | + | 0    | 0    |
| ENSG0000(Y_RNA     | misc_RNA | chr3  | 45903187 | 45903298 | + | 0    | 0    |
| ENSG0000(RNY4P16   | misc_RNA | chr1  | 2.35E+08 | 2.35E+08 | + | 0    | 0    |
| ENSG0000(RN7SKP28  | misc_RNA | chr4  | 96348734 | 96349038 | - | 0    | 0    |
| ENSG0000(RNU6-118  | snRNA    | chr4  | 77150328 | 77150437 | - | 0    | 0    |
| ENSG0000(RNU6-865F | snRNA    | chr3  | 1.01E+08 | 1.01E+08 | + | 0    | 0    |
| ENSG0000(SNORA14A  | snoRNA   | chr7  | 75943782 | 75943916 | + | 0    | 0    |
| ENSG0000(Y_RNA     | misc_RNA | chr4  | 75662120 | 75662213 | - | 0    | 0    |
| ENSG0000(RNU4-91P  | snRNA    | chr3  | 1.76E+08 | 1.76E+08 | + | 0    | 0    |
| ENSG0000(RNY4P34   | misc_RNA | chr2  | 2E+08    | 2E+08    | + | 0    | 0    |
| ENSG0000(RNU6-7    | snRNA    | chr14 | 32202045 | 32202151 | + | 0    | 1.24 |
| ENSG0000(RNU6-283F | snRNA    | chr6  | 31370134 | 31370240 | + | 0    | 0    |

|                    |          |       |          |          |   |      |   |
|--------------------|----------|-------|----------|----------|---|------|---|
| ENSG0000(RNU12-2P  | snRNA    | chrX  | 47132671 | 47132826 | + | 0    | 0 |
| ENSG0000(SNORA20   | snoRNA   | chrX  | 5410122  | 5410251  | + | 0    | 0 |
| ENSG0000(RNU6-60P  | snRNA    | chr13 | 48987915 | 48988017 | + | 0    | 0 |
| ENSG0000(Y_RNA     | misc_RNA | chr12 | 7850717  | 7850818  | - | 0    | 0 |
| ENSG0000(RN7SKP6   | misc_RNA | chr13 | 56885284 | 56885602 | - | 0    | 0 |
| ENSG0000(SNORD74   | snoRNA   | chrX  | 28924069 | 28924138 | + | 0    | 0 |
| ENSG0000(Y_RNA     | misc_RNA | chr18 | 49871555 | 49871666 | - | 0    | 0 |
| ENSG0000(RNA5SP90  | rRNA     | chr2  | 31228312 | 31228410 | + | 0    | 0 |
| ENSG0000(SNORD113  | snoRNA   | chr14 | 1.01E+08 | 1.01E+08 | + | 0    | 0 |
| ENSG0000(U3        | snoRNA   | chrX  | 1.14E+08 | 1.14E+08 | - | 0    | 0 |
| ENSG0000(SNORD32A  | snoRNA   | chr19 | 49489965 | 49490048 | + | 0    | 0 |
| ENSG0000(Y_RNA     | misc_RNA | chr4  | 59833175 | 59833276 | + | 0    | 0 |
| ENSG0000(SNORD115  | snoRNA   | chr15 | 25197576 | 25197656 | + | 0    | 0 |
| ENSG0000(Y_RNA     | misc_RNA | chr6  | 31496689 | 31496790 | - | 0    | 0 |
| ENSG0000(Y_RNA     | misc_RNA | chr6  | 20500175 | 20500276 | + | 0    | 0 |
| ENSG0000(RN7SKP23  | misc_RNA | chr11 | 67362414 | 67362708 | + | 0.37 | 0 |
| ENSG0000(RNU6-110  | snRNA    | chr11 | 1.14E+08 | 1.14E+08 | + | 0    | 0 |
| ENSG0000(SNORD114  | snoRNA   | chr14 | 1.01E+08 | 1.01E+08 | + | 0    | 0 |
| ENSG0000(RNY1P2    | misc_RNA | chr13 | 1.02E+08 | 1.02E+08 | - | 0    | 0 |
| ENSG0000(RNA5SP33  | rRNA     | chr11 | 18266393 | 18266510 | + | 0    | 0 |
| ENSG0000(RNU1-59P  | snRNA    | chr1  | 1.49E+08 | 1.49E+08 | - | 0    | 0 |
| ENSG0000(SNORD113  | snoRNA   | chr14 | 1.01E+08 | 1.01E+08 | + | 0    | 0 |
| ENSG0000(SNORA25   | snoRNA   | chr3  | 32037526 | 32037653 | + | 0    | 0 |
| ENSG0000(RNA5SP39  | rRNA     | chr15 | 59574103 | 59574222 | - | 0    | 0 |
| ENSG0000(RNU6-818F | snRNA    | chr4  | 88201703 | 88201810 | + | 0    | 0 |
| ENSG0000(RNA5SP35  | rRNA     | chr12 | 38163403 | 38163515 | - | 0    | 0 |
| ENSG0000(RNU6-686F | snRNA    | chr15 | 65229861 | 65229967 | + | 0    | 0 |
| ENSG0000(SNORD113  | snoRNA   | chr14 | 1.01E+08 | 1.01E+08 | + | 0    | 0 |
| ENSG0000(RNU6-130  | snRNA    | chr9  | 77635203 | 77635309 | - | 0    | 0 |
| ENSG0000(RNA5SP12  | rRNA     | chr3  | 25025007 | 25025126 | + | 0    | 0 |
| ENSG0000(RN7SKP13  | misc_RNA | chr5  | 17345616 | 17345955 | + | 0    | 0 |
| ENSG0000(Y_RNA     | misc_RNA | chr18 | 78544095 | 78544188 | - | 0    | 0 |
| ENSG0000(Y_RNA     | misc_RNA | chr15 | 99681786 | 99681877 | - | 0    | 0 |
| ENSG0000(RNU6-304F | snRNA    | chr1  | 8883427  | 8883533  | - | 0    | 0 |
| ENSG0000(RNA5SP17  | rRNA     | chr4  | 1.78E+08 | 1.78E+08 | + | 0    | 0 |
| ENSG0000(RNA5SP47  | rRNA     | chr20 | 23380896 | 23381012 | - | 0    | 0 |
| ENSG0000(SNORA43   | snoRNA   | chr11 | 66432763 | 66432902 | + | 0    | 0 |
| ENSG0000(RNA5SP16  | rRNA     | chr4  | 40990154 | 40990273 | + | 0    | 0 |
| ENSG0000(RNU1-133F | snRNA    | chr2  | 2.01E+08 | 2.01E+08 | + | 0    | 0 |
| ENSG0000(Y_RNA     | misc_RNA | chr17 | 17460444 | 17460522 | + | 0    | 0 |
| ENSG0000(RNU6-563F | snRNA    | chr20 | 47492978 | 47493085 | - | 0    | 0 |
| ENSG0000(RNU6-34P  | snRNA    | chr4  | 96152297 | 96152403 | - | 0    | 0 |
| ENSG0000(RNU6-828F | snRNA    | chr1  | 10163268 | 10163374 | + | 0    | 0 |
| ENSG0000(RNU6-534F | snRNA    | chr7  | 7906519  | 7906624  | + | 0    | 0 |
| ENSG0000(Y_RNA     | misc_RNA | chr9  | 1.15E+08 | 1.15E+08 | - | 0    | 0 |

|                     |          |       |          |          |   |      |   |
|---------------------|----------|-------|----------|----------|---|------|---|
| ENSG0000(RNU6-119F) | snRNA    | chr4  | 1.17E+08 | 1.17E+08 | + | 0    | 0 |
| ENSG0000(SNORD52)   | snoRNA   | chr6  | 31837076 | 31837142 | + | 0    | 0 |
| ENSG0000(Y_RNA)     | misc_RNA | chr11 | 76404140 | 76404252 | - | 0    | 0 |
| ENSG0000(RN7SKP55)  | misc_RNA | chr1  | 2.45E+08 | 2.45E+08 | + | 0    | 0 |
| ENSG0000(RNU6-336F) | snRNA    | chr8  | 22434391 | 22434497 | + | 0    | 0 |
| ENSG0000(RNA5SP26)  | rRNA     | chr8  | 59455885 | 59456010 | + | 0    | 0 |
| ENSG0000(RNA5SP30)  | rRNA     | chr10 | 14663395 | 14663494 | - | 0    | 0 |
| ENSG0000(RNU6-384F) | snRNA    | chr20 | 31581089 | 31581192 | + | 0    | 0 |
| ENSG0000(SNORA5C)   | snoRNA   | chr7  | 45104906 | 45105042 | - | 8.48 | 0 |
| ENSG0000(Y_RNA)     | misc_RNA | chr7  | 10901978 | 10902074 | + | 0    | 0 |
| ENSG0000(RNU6-132F) | snRNA    | chr4  | 59834063 | 59834167 | + | 0    | 0 |
| ENSG0000(Y_RNA)     | misc_RNA | chr3  | 1.57E+08 | 1.57E+08 | + | 0    | 0 |
| ENSG0000(RNU6-275F) | snRNA    | chr12 | 8484746  | 8484852  | + | 0    | 0 |
| ENSG0000(RN7SKP22)  | misc_RNA | chr8  | 1.28E+08 | 1.28E+08 | + | 0    | 0 |
| ENSG0000(SNORD117)  | snoRNA   | chr6  | 31536374 | 31536449 | - | 0    | 0 |
| ENSG0000(Y_RNA)     | misc_RNA | chr4  | 1.53E+08 | 1.53E+08 | - | 0    | 0 |
| ENSG0000(Y_RNA)     | misc_RNA | chr12 | 44880868 | 44880969 | - | 0    | 0 |
| ENSG0000(RNU6-107J) | snRNA    | chr1  | 1.46E+08 | 1.46E+08 | + | 0    | 0 |
| ENSG0000(RNA5SP18)  | rRNA     | chr5  | 1.06E+08 | 1.06E+08 | - | 0    | 0 |
| ENSG0000(SNORA63)   | snoRNA   | chr1  | 1.79E+08 | 1.79E+08 | - | 0    | 0 |
| ENSG0000(RN7SKP9)   | misc_RNA | chr13 | 99205708 | 99206006 | + | 0    | 0 |
| ENSG0000(RN7SKP13)  | misc_RNA | chr7  | 2999094  | 2999394  | + | 0    | 0 |
| ENSG0000(RNU6-392F) | snRNA    | chr7  | 1.06E+08 | 1.06E+08 | + | 0    | 0 |
| ENSG0000(Y_RNA)     | misc_RNA | chr3  | 1.26E+08 | 1.26E+08 | + | 0    | 0 |
| ENSG0000(RNU5E-4P)  | snRNA    | chr1  | 11909808 | 11909927 | - | 0    | 0 |
| ENSG0000(RNU6-118G) | snRNA    | chr2  | 1.13E+08 | 1.13E+08 | + | 0    | 0 |
| ENSG0000(RNU4-8P)   | snRNA    | chr2  | 97664591 | 97664731 | - | 0    | 0 |
| ENSG0000(SNORA27)   | snoRNA   | chr6  | 1.37E+08 | 1.37E+08 | - | 0    | 0 |
| ENSG0000(U8)        | snoRNA   | chr12 | 73764279 | 73764413 | - | 0    | 0 |
| ENSG0000(U8)        | snoRNA   | chr3  | 1.81E+08 | 1.81E+08 | + | 0    | 0 |
| ENSG0000(SNORA71)   | snoRNA   | chr20 | 38442036 | 38442169 | + | 0    | 0 |
| ENSG0000(RNA5SP48)  | rRNA     | chr21 | 14070871 | 14070986 | + | 0    | 0 |
| ENSG0000(RNU6-915F) | snRNA    | chr2  | 1.96E+08 | 1.96E+08 | - | 0    | 0 |
| ENSG0000(RNU6-526F) | snRNA    | chr8  | 9371090  | 9371195  | - | 0    | 0 |
| ENSG0000(SNORA73)   | snoRNA   | chr18 | 56079394 | 56079594 | - | 0    | 0 |
| ENSG0000(RNY4P17)   | misc_RNA | chr4  | 1.69E+08 | 1.69E+08 | + | 0    | 0 |
| ENSG0000(Y_RNA)     | misc_RNA | chr14 | 51253933 | 51254023 | - | 0    | 0 |
| ENSG0000(RNU4-9P)   | snRNA    | chr13 | 21038529 | 21038667 | - | 0    | 0 |
| ENSG0000(RNA5SP14)  | rRNA     | chr3  | 1.8E+08  | 1.8E+08  | - | 0    | 0 |
| ENSG0000(SNORD48)   | snoRNA   | chr6  | 31835263 | 31835326 | + | 0    | 0 |
| ENSG0000(RNU6-113J) | snRNA    | chr18 | 47234442 | 47234548 | - | 0    | 0 |
| ENSG0000(RNU6-867F) | snRNA    | chrX  | 76244968 | 76245074 | + | 0    | 0 |
| ENSG0000(SNORA33)   | snoRNA   | chr3  | 1.34E+08 | 1.34E+08 | + | 0    | 0 |
| ENSG0000(Y_RNA)     | misc_RNA | chr9  | 97915690 | 97915796 | + | 0    | 0 |
| ENSG0000(SNORD115)  | snoRNA   | chr15 | 25170723 | 25170804 | + | 0    | 0 |

|                    |          |       |          |          |   |      |      |
|--------------------|----------|-------|----------|----------|---|------|------|
| ENSG0000(SNORD114) | snoRNA   | chr14 | 1.01E+08 | 1.01E+08 | + | 0    | 0    |
| ENSG0000(Y_RNA)    | misc_RNA | chr9  | 1.33E+08 | 1.33E+08 | + | 0    | 0    |
| ENSG0000(RNA5SP16) | rRNA     | chr4  | 1.49E+08 | 1.49E+08 | + | 0    | 0    |
| ENSG0000(SNORD31)  | snoRNA   | chr13 | 1.07E+08 | 1.07E+08 | - | 0    | 0    |
| ENSG0000(Y_RNA)    | misc_RNA | chr16 | 68089449 | 68089543 | - | 0    | 0    |
| ENSG0000(RNU6-702) | snRNA    | chr18 | 22180112 | 22180218 | - | 0    | 0    |
| ENSG0000(RNA5SP33) | rRNA     | chr11 | 13907484 | 13907590 | - | 0    | 0    |
| ENSG0000(Y_RNA)    | misc_RNA | chr3  | 1.92E+08 | 1.92E+08 | + | 0    | 0    |
| ENSG0000(RNA5SP29) | rRNA     | chr10 | 282015   | 282125   | - | 0    | 0    |
| ENSG0000(SNORA51)  | snoRNA   | chr4  | 40082983 | 40083106 | + | 0    | 0    |
| ENSG0000(Y_RNA)    | misc_RNA | chr11 | 34189174 | 34189275 | + | 0    | 0    |
| ENSG0000(Y_RNA)    | misc_RNA | chr1  | 35195969 | 35196062 | + | 0    | 0    |
| ENSG0000(RNU6-294) | snRNA    | chr5  | 64573569 | 64573670 | + | 0    | 0    |
| ENSG0000(RN7SKP17) | misc_RNA | chr2  | 2.06E+08 | 2.06E+08 | + | 0    | 0    |
| ENSG0000(RNA5SP97) | rRNA     | chr2  | 73968123 | 73968206 | - | 0    | 0    |
| ENSG0000(Y_RNA)    | misc_RNA | chr10 | 72654165 | 72654276 | - | 0    | 0    |
| ENSG0000(snoU2-30) | snoRNA   | chrX  | 20136066 | 20136135 | - | 0    | 0    |
| ENSG0000(Y_RNA)    | misc_RNA | chr10 | 1.22E+08 | 1.22E+08 | + | 0    | 0    |
| ENSG0000(Y_RNA)    | misc_RNA | chr7  | 77013583 | 77013684 | + | 0    | 0    |
| ENSG0000(Y_RNA)    | misc_RNA | chr2  | 1.41E+08 | 1.41E+08 | + | 0    | 0    |
| ENSG0000(RNU6-967) | snRNA    | chr19 | 31787148 | 31787255 | - | 0    | 0    |
| ENSG0000(RN7SKP15) | misc_RNA | chr8  | 1.2E+08  | 1.2E+08  | - | 0    | 0    |
| ENSG0000(SNORA72)  | snoRNA   | chr1  | 2.24E+08 | 2.24E+08 | + | 0    | 0    |
| ENSG0000(SNORD114) | snoRNA   | chr14 | 1.01E+08 | 1.01E+08 | + | 0    | 0    |
| ENSG0000(RNY1P13)  | misc_RNA | chr1  | 1.15E+08 | 1.15E+08 | + | 0    | 0    |
| ENSG0000(RN7SKP48) | misc_RNA | chr4  | 85100496 | 85100823 | + | 0    | 0    |
| ENSG0000(SNORD115) | snoRNA   | chr15 | 25239838 | 25239919 | + | 0    | 0    |
| ENSG0000(RNU6-590) | snRNA    | chr12 | 13459670 | 13459776 | - | 0    | 0    |
| ENSG0000(RNU1-140) | snRNA    | chr5  | 1.04E+08 | 1.04E+08 | + | 0    | 0    |
| ENSG0000(RN7SKP18) | misc_RNA | chrX  | 1.45E+08 | 1.45E+08 | + | 0    | 0    |
| ENSG0000(Y_RNA)    | misc_RNA | chr7  | 1E+08    | 1E+08    | - | 0    | 0    |
| ENSG0000(Y_RNA)    | misc_RNA | chr22 | 20481158 | 20481268 | + | 0    | 0    |
| ENSG0000(RNU6-102) | snRNA    | chr1  | 21987816 | 21987919 | + | 0    | 0    |
| ENSG0000(RNA5SP44) | rRNA     | chr17 | 41718154 | 41718260 | + | 0    | 0    |
| ENSG0000(RNU1-43P) | snRNA    | chr3  | 1.03E+08 | 1.03E+08 | + | 0    | 0    |
| ENSG0000(RNA5SP48) | rRNA     | chr20 | 45559758 | 45559876 | - | 0    | 0    |
| ENSG0000(RNA5S15)  | rRNA     | chr1  | 2.29E+08 | 2.29E+08 | - | 3.61 | 14.5 |
| ENSG0000(RNA5SP17) | rRNA     | chr4  | 1.77E+08 | 1.77E+08 | - | 0    | 0    |
| ENSG0000(Y_RNA)    | misc_RNA | chr7  | 43096732 | 43096844 | + | 0    | 0    |
| ENSG0000(Y_RNA)    | misc_RNA | chr9  | 96103079 | 96103174 | - | 0    | 0    |
| ENSG0000(RNA5SP22) | rRNA     | chr6  | 1.53E+08 | 1.53E+08 | - | 0    | 0    |
| ENSG0000(RNA5SP36) | rRNA     | chr12 | 79878305 | 79878419 | - | 0    | 0    |
| ENSG0000(SNORD115) | snoRNA   | chr15 | 25187536 | 25187616 | + | 0    | 0    |
| ENSG0000(SNORA72)  | snoRNA   | chr1  | 2.06E+08 | 2.06E+08 | - | 0    | 0    |
| ENSG0000(SNORA70)  | snoRNA   | chr12 | 1.21E+08 | 1.21E+08 | + | 0    | 0    |

|                     |          |       |          |          |   |   |   |
|---------------------|----------|-------|----------|----------|---|---|---|
| ENSG0000(SNORD113)  | snoRNA   | chr14 | 1.01E+08 | 1.01E+08 | + | 0 | 0 |
| ENSG0000(RNU6-673F) | snRNA    | chr10 | 76260800 | 76260903 | - | 0 | 0 |
| ENSG0000(RNY3P1)    | misc_RNA | chr5  | 79170234 | 79170335 | - | 0 | 0 |
| ENSG0000(SNORA25)   | snoRNA   | chr3  | 1.79E+08 | 1.79E+08 | - | 0 | 0 |
| ENSG0000(Y_RNA)     | misc_RNA | chr7  | 77041647 | 77041748 | + | 0 | 0 |
| ENSG0000(RNA5SP12)  | rRNA     | chr3  | 25352284 | 25352392 | - | 0 | 0 |
| ENSG0000(Y_RNA)     | misc_RNA | chr3  | 38125292 | 38125394 | - | 0 | 0 |
| ENSG0000(RNA5-8SP4) | rRNA     | chr19 | 24004358 | 24004507 | - | 0 | 0 |
| ENSG0000(RN7SKP22)  | misc_RNA | chr19 | 32862800 | 32863092 | - | 0 | 0 |
| ENSG0000(RNA5SP13)  | rRNA     | chr3  | 1.27E+08 | 1.27E+08 | - | 0 | 0 |
| ENSG0000(SNORD115)  | snoRNA   | chr15 | 25206262 | 25206343 | + | 0 | 0 |
| ENSG0000(SNORA62)   | snoRNA   | chr11 | 4756645  | 4756797  | + | 0 | 0 |
| ENSG0000(Y_RNA)     | misc_RNA | chr21 | 29139283 | 29139384 | - | 0 | 0 |
| ENSG0000(Y_RNA)     | misc_RNA | chr1  | 1.65E+08 | 1.65E+08 | + | 0 | 0 |
| ENSG0000(Y_RNA)     | misc_RNA | chr6  | 30736304 | 30736414 | - | 0 | 0 |
| ENSG0000(Y_RNA)     | misc_RNA | chr7  | 6004283  | 6004385  | - | 0 | 0 |
| ENSG0000(SNORD115)  | snoRNA   | chr15 | 25234247 | 25234328 | + | 0 | 0 |
| ENSG0000(SNORA23)   | snoRNA   | chr11 | 9428773  | 9428954  | + | 0 | 0 |
| ENSG0000(RNA5SP42)  | rRNA     | chr16 | 66301809 | 66301940 | + | 0 | 0 |
| ENSG0000(RNU1-36P)  | snRNA    | chr4  | 88000237 | 88000401 | + | 0 | 0 |
| ENSG0000(Y_RNA)     | misc_RNA | chr8  | 1.01E+08 | 1.01E+08 | - | 0 | 0 |
| ENSG0000(Y_RNA)     | misc_RNA | chr2  | 2.01E+08 | 2.01E+08 | + | 0 | 0 |
| ENSG0000(Y_RNA)     | misc_RNA | chr4  | 48153434 | 48153535 | + | 0 | 0 |
| ENSG0000(RNU6-619F) | snRNA    | chr2  | 2.22E+08 | 2.22E+08 | + | 0 | 0 |
| ENSG0000(RNU6-806F) | snRNA    | chr5  | 60304047 | 60304151 | - | 0 | 0 |
| ENSG0000(Y_RNA)     | misc_RNA | chr22 | 31230071 | 31230172 | - | 0 | 0 |
| ENSG0000(Y_RNA)     | misc_RNA | chr7  | 75325959 | 75326060 | - | 0 | 0 |
| ENSG0000(SNORD81)   | snoRNA   | chr7  | 1.37E+08 | 1.37E+08 | + | 0 | 0 |
| ENSG0000(RNU6-934F) | snRNA    | chrX  | 1.01E+08 | 1.01E+08 | + | 0 | 0 |
| ENSG0000(RNU6-124C) | snRNA    | chr1  | 1.86E+08 | 1.86E+08 | - | 0 | 0 |
| ENSG0000(RNU6-1134) | snRNA    | chr17 | 31713753 | 31713853 | + | 0 | 0 |
| ENSG0000(Y_RNA)     | misc_RNA | chr1  | 1.55E+08 | 1.55E+08 | + | 0 | 0 |
| ENSG0000(RNU6-580F) | snRNA    | chr2  | 1.59E+08 | 1.59E+08 | - | 0 | 0 |
| ENSG0000(SNORD38A)  | snoRNA   | chr1  | 44777843 | 44777912 | + | 0 | 0 |
| ENSG0000(RNU6-399F) | snRNA    | chr12 | 62545582 | 62545679 | - | 0 | 0 |
| ENSG0000(Y_RNA)     | misc_RNA | chr7  | 73403788 | 73403889 | - | 0 | 0 |
| ENSG0000(RNU6-215F) | snRNA    | chr7  | 5180061  | 5180162  | + | 0 | 0 |
| ENSG0000(Y_RNA)     | misc_RNA | chr1  | 2.4E+08  | 2.4E+08  | - | 0 | 0 |
| ENSG0000(RNA5SP22)  | rRNA     | chr6  | 1.52E+08 | 1.52E+08 | + | 0 | 0 |
| ENSG0000(Y_RNA)     | misc_RNA | chr2  | 1.2E+08  | 1.2E+08  | + | 0 | 0 |
| ENSG0000(RNA5SP32)  | rRNA     | chr10 | 96619376 | 96619483 | + | 0 | 0 |
| ENSG0000(SNORD114)  | snoRNA   | chr14 | 1.01E+08 | 1.01E+08 | + | 0 | 0 |
| ENSG0000(RNU6-391F) | snRNA    | chr6  | 24365651 | 24365754 | + | 0 | 0 |
| ENSG0000(RNU6-382F) | snRNA    | chrX  | 1.48E+08 | 1.48E+08 | + | 0 | 0 |
| ENSG0000(RNA5SP15)  | rRNA     | chr4  | 8393015  | 8393124  | + | 0 | 0 |

|                    |          |       |          |          |   |     |   |
|--------------------|----------|-------|----------|----------|---|-----|---|
| ENSG0000(RNA5SP19  | rRNA     | chr1  | 2.29E+08 | 2.29E+08 | + | 0   | 0 |
| ENSG0000(RN7SKP80  | misc_RNA | chr22 | 42565048 | 42565330 | - | 0.8 | 0 |
| ENSG0000(SNORA1    | snoRNA   | chr2  | 2.03E+08 | 2.03E+08 | - | 0   | 0 |
| ENSG0000(RNA5SP45  | rRNA     | chr18 | 44071583 | 44071701 | + | 0   | 0 |
| ENSG0000(RNA5SP79  | rRNA     | chr1  | 2.31E+08 | 2.31E+08 | + | 0   | 0 |
| ENSG0000(RNU4-66P  | snRNA    | chr6  | 71652474 | 71652611 | - | 0   | 0 |
| ENSG0000(RNU6-117  | snRNA    | chr11 | 70075363 | 70075469 | + | 0   | 0 |
| ENSG0000(Y_RNA     | misc_RNA | chr3  | 66003839 | 66003940 | - | 0   | 0 |
| ENSG0000(RNU6-715  | snRNA    | chr2  | 1.47E+08 | 1.47E+08 | - | 0   | 0 |
| ENSG0000(Y_RNA     | misc_RNA | chr1  | 1.6E+08  | 1.6E+08  | - | 0   | 0 |
| ENSG0000(Y_RNA     | misc_RNA | chr1  | 2.47E+08 | 2.47E+08 | + | 0   | 0 |
| ENSG0000(RNU6-128  | snRNA    | chr15 | 85651522 | 85651628 | - | 0   | 0 |
| ENSG0000(RNU6-290  | snRNA    | chr5  | 1.27E+08 | 1.27E+08 | - | 0   | 0 |
| ENSG0000(RNU6-130  | snRNA    | chr11 | 63882587 | 63882685 | - | 0   | 0 |
| ENSG0000(RNA5SP19  | rRNA     | chr5  | 1.19E+08 | 1.19E+08 | + | 0   | 0 |
| ENSG0000(SNORD58   | snoRNA   | chr18 | 49489245 | 49489308 | - | 0   | 0 |
| ENSG0000(RNU6-117  | snRNA    | chr8  | 96431054 | 96431160 | - | 0   | 0 |
| ENSG0000(RNU6-234  | snRNA    | chr2  | 2.38E+08 | 2.38E+08 | + | 0   | 0 |
| ENSG0000(Y_RNA     | misc_RNA | chr17 | 32463374 | 32463482 | - | 0   | 0 |
| ENSG0000(RNU4-12P  | snRNA    | chr6  | 85993021 | 85993159 | - | 0   | 0 |
| ENSG0000(VTRNA1-2  | misc_RNA | chr5  | 1.41E+08 | 1.41E+08 | + | 0   | 0 |
| ENSG0000(RNU6-690  | snRNA    | chr8  | 95599114 | 95599219 | + | 0   | 0 |
| ENSG0000(RNU6-302  | snRNA    | chr6  | 1.51E+08 | 1.51E+08 | + | 0   | 0 |
| ENSG0000(RNY4P3    | misc_RNA | chr16 | 50098264 | 50098358 | + | 0   | 0 |
| ENSG0000(RNU1-100  | snRNA    | chr3  | 1.42E+08 | 1.42E+08 | - | 0   | 0 |
| ENSG0000(Y_RNA     | misc_RNA | chr2  | 2.02E+08 | 2.02E+08 | + | 0   | 0 |
| ENSG0000(Y_RNA     | misc_RNA | chr2  | 1.83E+08 | 1.83E+08 | - | 0   | 0 |
| ENSG0000(SNORD114  | snoRNA   | chr14 | 1.01E+08 | 1.01E+08 | + | 0   | 0 |
| ENSG0000(Y_RNA     | misc_RNA | chrX  | 19376774 | 19376875 | + | 0   | 0 |
| ENSG0000(Y_RNA     | misc_RNA | chr12 | 54099191 | 54099302 | - | 0   | 0 |
| ENSG0000(RNA5SP32  | rRNA     | chr11 | 6016996  | 6017114  | + | 0   | 0 |
| ENSG0000(RNU6-407  | snRNA    | chr20 | 35030317 | 35030420 | - | 0   | 0 |
| ENSG0000(RNY4P28   | misc_RNA | chr13 | 60187738 | 60187830 | - | 0   | 0 |
| ENSG0000(RNU4-11P  | snRNA    | chr5  | 83803554 | 83803685 | + | 0   | 0 |
| ENSG0000(RNU6-742  | snRNA    | chr18 | 57755394 | 57755500 | + | 0   | 0 |
| ENSG0000(RNU5E-7P  | snRNA    | chr2  | 15864935 | 15865051 | + | 0   | 0 |
| ENSG0000(RNA5SP11  | rRNA     | chr2  | 2.09E+08 | 2.09E+08 | - | 0   | 0 |
| ENSG0000(RNU1-114  | snRNA    | chr1  | 1.44E+08 | 1.44E+08 | - | 0   | 0 |
| ENSG0000(Y_RNA     | misc_RNA | chr4  | 61906313 | 61906408 | + | 0   | 0 |
| ENSG0000(RNU6-132  | snRNA    | chr9  | 558826   | 558930   | + | 0   | 0 |
| ENSG0000(RNA5-8SP5 | rRNA     | chr2  | 1.32E+08 | 1.32E+08 | - | 0   | 0 |
| ENSG0000(RNA5SP12  | rRNA     | chr3  | 33491983 | 33492098 | - | 0   | 0 |
| ENSG0000(Y_RNA     | misc_RNA | chr3  | 1.02E+08 | 1.02E+08 | + | 0   | 0 |
| ENSG0000(Y_RNA     | misc_RNA | chr14 | 63848261 | 63848362 | - | 0   | 0 |
| ENSG0000(SNORA4    | snoRNA   | chrX  | 82561201 | 82561347 | + | 0   | 0 |

|                             |       |          |          |   |      |      |
|-----------------------------|-------|----------|----------|---|------|------|
| ENSG0000(RNU6-1283) snRNA   | chr1  | 2.46E+08 | 2.46E+08 | - | 0    | 0    |
| ENSG0000(RNU6-497F) snRNA   | chr20 | 47484278 | 47484381 | - | 0    | 0    |
| ENSG0000(RNA5SP35) rRNA     | chr12 | 28505394 | 28505528 | + | 0    | 0    |
| ENSG0000(SNORD115) snoRNA   | chr15 | 25227109 | 25227190 | + | 0    | 0    |
| ENSG0000(SNORA30) snoRNA    | chr9  | 20786927 | 20787055 | + | 0    | 0    |
| ENSG0000(Y_RNA) misc_RNA    | chr10 | 60081741 | 60081854 | + | 0    | 0    |
| ENSG0000(SNORD113) snoRNA   | chr14 | 1.01E+08 | 1.01E+08 | + | 0    | 0    |
| ENSG0000(RNA5SP42) rRNA     | chr16 | 53337453 | 53337571 | + | 0    | 0    |
| ENSG0000(Y_RNA) misc_RNA    | chr2  | 52297995 | 52298096 | + | 0    | 0    |
| ENSG0000(7SK) misc_RNA      | chr6  | 52995620 | 52995950 | + | 0    | 0    |
| ENSG0000(RNU1-115F) snRNA   | chrX  | 1.33E+08 | 1.33E+08 | - | 0    | 0    |
| ENSG0000(Y_RNA) misc_RNA    | chr6  | 1.29E+08 | 1.29E+08 | - | 0    | 0    |
| ENSG0000(RNU6-1034) snRNA   | chr17 | 29445300 | 29445400 | - | 0    | 0    |
| ENSG0000(RNU6-169F) snRNA   | chr2  | 1.96E+08 | 1.96E+08 | + | 0    | 0    |
| ENSG0000(Y_RNA) misc_RNA    | chr15 | 43247680 | 43247781 | + | 0    | 0    |
| ENSG0000(RNU1-51P) snRNA    | chr4  | 1.9E+08  | 1.9E+08  | - | 0    | 0    |
| ENSG0000(SNORA17) snoRNA    | chr2  | 1.8E+08  | 1.8E+08  | - | 0    | 0    |
| ENSG0000(RN7SKP47) misc_RNA | chr9  | 74799895 | 74800222 | + | 0    | 0    |
| ENSG0000(Y_RNA) misc_RNA    | chr1  | 39881566 | 39881678 | - | 0    | 0    |
| ENSG0000(Y_RNA) misc_RNA    | chr18 | 2621090  | 2621201  | + | 0    | 0    |
| ENSG0000(RNA5SP24) rRNA     | chr7  | 1.21E+08 | 1.21E+08 | - | 0    | 0    |
| ENSG0000(RNU6-282F) snRNA   | chr2  | 48501922 | 48502024 | - | 0    | 0    |
| ENSG0000(RNU6-1138) snRNA   | chr14 | 23156309 | 23156414 | - | 0    | 0    |
| ENSG0000(SNORA9) snoRNA     | chrX  | 1.01E+08 | 1.01E+08 | - | 0    | 0    |
| ENSG0000(U3) snoRNA         | chr7  | 25264656 | 25264882 | + | 0    | 0    |
| ENSG0000(RNU6-53P) snRNA    | chr13 | 28703702 | 28703807 | - | 0    | 0    |
| ENSG0000(RNU6-396F) snRNA   | chr21 | 46525618 | 46525722 | + | 0    | 0    |
| ENSG0000(RNU6-737F) snRNA   | chr18 | 57284602 | 57284708 | - | 0    | 0    |
| ENSG0000(RN7SKP18) misc_RNA | chr6  | 30864250 | 30864552 | + | 0    | 0    |
| ENSG0000(RNU6-1276) snRNA   | chr8  | 27773645 | 27773748 | + | 0    | 0    |
| ENSG0000(RNU6-728F) snRNA   | chr10 | 1.22E+08 | 1.22E+08 | + | 0    | 0    |
| ENSG0000(RNA5SP85) rRNA     | chr2  | 11561661 | 11561779 | - | 0    | 0    |
| ENSG0000(RNU5E-5P) snRNA    | chr12 | 1.01E+08 | 1.01E+08 | + | 0    | 0    |
| ENSG0000(Y_RNA) misc_RNA    | chr17 | 7266055  | 7266166  | - | 0    | 0    |
| ENSG0000(SNORD14C) snoRNA   | chr11 | 1.23E+08 | 1.23E+08 | - | 0    | 0    |
| ENSG0000(Y_RNA) misc_RNA    | chr1  | 99791662 | 99791753 | + | 0    | 0    |
| ENSG0000(Y_RNA) misc_RNA    | chr20 | 36668559 | 36668670 | - | 0    | 0    |
| ENSG0000(RNA5S16) rRNA      | chr1  | 2.29E+08 | 2.29E+08 | - | 3.61 | 14.5 |
| ENSG0000(RNU6-1318) snRNA   | chr1  | 1E+08    | 1E+08    | - | 0    | 0    |
| ENSG0000(RN7SKP69) misc_RNA | chr20 | 17576206 | 17576510 | - | 0    | 0    |
| ENSG0000(SNORD115) snoRNA   | chr15 | 25250859 | 25250940 | + | 0    | 0    |
| ENSG0000(RNA5SP22) rRNA     | chr1  | 78094807 | 78094915 | - | 0    | 0    |
| ENSG0000(RNA5SP77) rRNA     | chr1  | 2.28E+08 | 2.28E+08 | + | 0    | 0    |
| ENSG0000(RNU6-596F) snRNA   | chr8  | 57289552 | 57289649 | + | 0    | 0    |
| ENSG0000(U3) snoRNA         | chr3  | 45255409 | 45255620 | - | 0    | 0    |



|                   |          |       |          |          |   |      |      |
|-------------------|----------|-------|----------|----------|---|------|------|
| ENSG0000(U8       | snoRNA   | chr5  | 15110786 | 15110920 | - | 0    | 0    |
| ENSG0000(SNORD114 | snoRNA   | chr14 | 1.01E+08 | 1.01E+08 | + | 0    | 0    |
| ENSG0000(Y_RNA    | misc_RNA | chrX  | 23782210 | 23782310 | + | 0    | 0    |
| ENSG0000(Y_RNA    | misc_RNA | chr7  | 6212638  | 6212740  | - | 0    | 0    |
| ENSG0000(SNORD51  | snoRNA   | chr14 | 1.04E+08 | 1.04E+08 | - | 0    | 0    |
| ENSG0000(Y_RNA    | misc_RNA | chr11 | 8877417  | 8877518  | - | 0    | 0    |
| ENSG0000(Y_RNA    | misc_RNA | chrX  | 1.37E+08 | 1.37E+08 | - | 0    | 0    |
| ENSG0000(RNA5SP23 | rRNA     | chr7  | 83017898 | 83018011 | + | 0    | 0    |
| ENSG0000(SNORA33  | snoRNA   | chr6  | 1.04E+08 | 1.04E+08 | + | 0    | 0    |
| ENSG0000(RNU6-117 | snRNA    | chr6  | 1.07E+08 | 1.07E+08 | - | 0    | 0    |
| ENSG0000(RNA5SP37 | rRNA     | chr13 | 97362972 | 97363101 | - | 0    | 0    |
| ENSG0000(SNORD114 | snoRNA   | chr14 | 1.01E+08 | 1.01E+08 | + | 0    | 0    |
| ENSG0000(RNU6-133 | snRNA    | chr7  | 56340231 | 56340337 | - | 0    | 0    |
| ENSG0000(RNY3P12  | misc_RNA | chr10 | 92334463 | 92334564 | + | 0    | 0    |
| ENSG0000(RNU6-487 | snRNA    | chr1  | 2.03E+08 | 2.03E+08 | - | 0    | 0    |
| ENSG0000(RNU6-113 | snRNA    | chrX  | 1.3E+08  | 1.3E+08  | - | 0    | 0    |
| ENSG0000(Y_RNA    | misc_RNA | chr14 | 93397139 | 93397234 | - | 0    | 0    |
| ENSG0000(RNU6-996 | snRNA    | chr9  | 1.08E+08 | 1.08E+08 | - | 0    | 0    |
| ENSG0000(Y_RNA    | misc_RNA | chr2  | 39128826 | 39128927 | - | 0    | 0    |
| ENSG0000(Y_RNA    | misc_RNA | chr8  | 1E+08    | 1E+08    | + | 0    | 0    |
| ENSG0000(RNU1-64P | snRNA    | chr6  | 11503509 | 11503671 | - | 0    | 0    |
| ENSG0000(SNORD6   | snoRNA   | chr11 | 93731502 | 93731574 | - | 0    | 0    |
| ENSG0000(RNU1-84P | snRNA    | chr11 | 66393449 | 66393612 | + | 0    | 0    |
| ENSG0000(Y_RNA    | misc_RNA | chr12 | 6234345  | 6234455  | - | 0    | 0    |
| ENSG0000(RNA5SP13 | rRNA     | chr3  | 50419781 | 50419899 | + | 0    | 0    |
| ENSG0000(RNA5SP36 | rRNA     | chr12 | 99083783 | 99083905 | - | 0    | 0    |
| ENSG0000(RNU6-609 | snRNA    | chr1  | 2E+08    | 2E+08    | - | 0    | 0    |
| ENSG0000(RNA5SP16 | rRNA     | chr4  | 1.5E+08  | 1.5E+08  | + | 0    | 0    |
| ENSG0000(Y_RNA    | misc_RNA | chr17 | 75431990 | 75432087 | + | 0    | 0    |
| ENSG0000(RNA5SP23 | rRNA     | chr7  | 1.15E+08 | 1.15E+08 | - | 0    | 0    |
| ENSG0000(SNORD50  | snoRNA   | chr12 | 1.1E+08  | 1.1E+08  | - | 0    | 0    |
| ENSG0000(RNU6-359 | snRNA    | chr16 | 68017710 | 68017817 | - | 0    | 0    |
| ENSG0000(RNU6-8   | snRNA    | chr14 | 32203163 | 32203269 | - | 0    | 1.24 |
| ENSG0000(RNU4-45P | snRNA    | chr21 | 22205192 | 22205332 | + | 0    | 0    |
| ENSG0000(RNU6-105 | snRNA    | chr2  | 2.37E+08 | 2.37E+08 | - | 0    | 0    |
| ENSG0000(SNORA2   | snoRNA   | chr6  | 1.5E+08  | 1.5E+08  | + | 0    | 0    |
| ENSG0000(RN7SKP20 | misc_RNA | chr2  | 55951654 | 55952014 | - | 0    | 0    |
| ENSG0000(Y_RNA    | misc_RNA | chr5  | 1.69E+08 | 1.69E+08 | + | 0    | 0    |
| ENSG0000(RNU1-16P | snRNA    | chr13 | 1.13E+08 | 1.13E+08 | - | 1.91 | 0    |
| ENSG0000(RNU6-326 | snRNA    | chr7  | 45843634 | 45843740 | + | 0    | 0    |
| ENSG0000(RN7SKP20 | misc_RNA | chr6  | 13547704 | 13548013 | + | 0    | 0    |
| ENSG0000(RNY3     | misc_RNA | chr7  | 1.49E+08 | 1.49E+08 | + | 0    | 0    |
| ENSG0000(RNA5SP27 | rRNA     | chr8  | 1.2E+08  | 1.2E+08  | - | 0    | 0    |
| ENSG0000(Y_RNA    | misc_RNA | chr19 | 11408772 | 11408880 | + | 0    | 0    |
| ENSG0000(RNU6-652 | snRNA    | chr4  | 55885595 | 55885701 | + | 0    | 0    |

|                    |          |       |          |          |   |      |   |
|--------------------|----------|-------|----------|----------|---|------|---|
| ENSG0000(RN7SKP24) | misc_RNA | chr8  | 1.01E+08 | 1.01E+08 | + | 0    | 0 |
| ENSG0000(Y_RNA     | misc_RNA | chr17 | 61874084 | 61874182 | - | 0    | 0 |
| ENSG0000(SNORA62   | snoRNA   | chr3  | 39411054 | 39411206 | + | 2.86 | 0 |
| ENSG0000(Y_RNA     | misc_RNA | chr12 | 96979528 | 96979629 | - | 0    | 0 |
| ENSG0000(SNORD115  | snoRNA   | chr15 | 25249198 | 25249279 | + | 0    | 0 |
| ENSG0000(SNORA62   | snoRNA   | chr4  | 67747236 | 67747386 | + | 0    | 0 |
| ENSG0000(SNORA25   | snoRNA   | chr7  | 1.16E+08 | 1.16E+08 | - | 0    | 0 |
| ENSG0000(SNORA70   | snoRNA   | chr3  | 1.09E+08 | 1.09E+08 | + | 0    | 0 |
| ENSG0000(RNU1-55P  | snRNA    | chr20 | 5890055  | 5890212  | + | 0    | 0 |
| ENSG0000(Y_RNA     | misc_RNA | chr2  | 85367585 | 85367686 | + | 0    | 0 |
| ENSG0000(RNA5SP27) | rRNA     | chr9  | 1333837  | 1333953  | + | 0    | 0 |
| ENSG0000(Y_RNA     | misc_RNA | chr1  | 89020246 | 89020365 | - | 0    | 0 |
| ENSG0000(RNA5SP21) | rRNA     | chr6  | 1.06E+08 | 1.06E+08 | + | 0    | 0 |
| ENSG0000(Y_RNA     | misc_RNA | chr3  | 1.22E+08 | 1.22E+08 | - | 0    | 0 |
| ENSG0000(SNORA70   | snoRNA   | chr17 | 28022330 | 28022464 | - | 0    | 0 |
| ENSG0000(RN7SKP29) | misc_RNA | chr4  | 6997012  | 6997328  | + | 0    | 0 |
| ENSG0000(RN7SKP1   | misc_RNA | chr13 | 37166352 | 37166658 | - | 0    | 0 |
| ENSG0000(RNU6-61P  | snRNA    | chr13 | 80369426 | 80369534 | - | 0    | 0 |
| ENSG0000(Y_RNA     | misc_RNA | chr8  | 97772313 | 97772425 | + | 0    | 0 |
| ENSG0000(SNORD82   | snoRNA   | chr2  | 2.31E+08 | 2.31E+08 | - | 0    | 0 |
| ENSG0000(Y_RNA     | misc_RNA | chr14 | 31244761 | 31244861 | + | 0    | 0 |
| ENSG0000(RN7SKP18) | misc_RNA | chr7  | 1.12E+08 | 1.12E+08 | + | 0    | 0 |
| ENSG0000(Y_RNA     | misc_RNA | chrX  | 1.06E+08 | 1.06E+08 | + | 0    | 0 |
| ENSG0000(RNU1-122F | snRNA    | chr1  | 1.48E+08 | 1.48E+08 | - | 0    | 0 |
| ENSG0000(Y_RNA     | misc_RNA | chrX  | 94178005 | 94178106 | + | 0    | 0 |
| ENSG0000(RNA5SP25) | rRNA     | chr8  | 28530411 | 28530519 | + | 0    | 0 |
| ENSG0000(RNY3P13   | misc_RNA | chr3  | 1.3E+08  | 1.3E+08  | + | 0    | 0 |
| ENSG0000(Y_RNA     | misc_RNA | chr20 | 25214698 | 25214798 | + | 0    | 0 |
| ENSG0000(RN7SKP26) | misc_RNA | chr1  | 9947318  | 9947636  | + | 0    | 0 |
| ENSG0000(Y_RNA     | misc_RNA | chr5  | 1.33E+08 | 1.33E+08 | + | 0    | 0 |
| ENSG0000(RNA5SP30  | rRNA     | chr13 | 57991350 | 57991464 | + | 0    | 0 |
| ENSG0000(RNU6-827F | snRNA    | chr2  | 78882447 | 78882552 | + | 0    | 0 |
| ENSG0000(RNU6-744F | snRNA    | chr2  | 1.14E+08 | 1.14E+08 | + | 0    | 0 |
| ENSG0000(RNU6-108F | snRNA    | chr3  | 57536252 | 57536358 | - | 0    | 0 |
| ENSG0000(RNU4-48P  | snRNA    | chr2  | 1.27E+08 | 1.27E+08 | + | 0    | 0 |
| ENSG0000(RNA5SP88  | rRNA     | chr2  | 24564630 | 24564738 | - | 0    | 0 |
| ENSG0000(RNU6-438F | snRNA    | chr7  | 34297496 | 34297598 | - | 0    | 0 |
| ENSG0000(RNU6-54P  | snRNA    | chr13 | 70459464 | 70459570 | + | 0    | 0 |
| ENSG0000(SNORA4    | snoRNA   | chr2  | 1.97E+08 | 1.97E+08 | + | 0    | 0 |
| ENSG0000(Y_RNA     | misc_RNA | chr6  | 1.31E+08 | 1.31E+08 | - | 0    | 0 |
| ENSG0000(SNORD42   | snoRNA   | chr4  | 82402638 | 82402706 | - | 0    | 0 |
| ENSG0000(RNY4P10   | misc_RNA | chr6  | 33199601 | 33199696 | + | 0    | 0 |
| ENSG0000(RNU5E-6P  | snRNA    | chr1  | 44819883 | 44819997 | - | 0    | 0 |
| ENSG0000(RNU6-669F | snRNA    | chr9  | 94507738 | 94507844 | + | 0    | 0 |
| ENSG0000(SNORA63   | snoRNA   | chr4  | 14690710 | 14690832 | + | 0    | 0 |

|                    |          |       |          |          |   |      |      |
|--------------------|----------|-------|----------|----------|---|------|------|
| ENSG0000(Y_RNA     | misc_RNA | chr14 | 1.03E+08 | 1.03E+08 | + | 0    | 0    |
| ENSG0000(Y_RNA     | misc_RNA | chr1  | 12024012 | 12024124 | - | 0    | 0    |
| ENSG0000(RNU4-17P  | snRNA    | chr18 | 60163567 | 60163707 | + | 0    | 0    |
| ENSG0000(Y_RNA     | misc_RNA | chrX  | 10061222 | 10061323 | + | 0    | 0    |
| ENSG0000(Y_RNA     | misc_RNA | chr12 | 95275770 | 95275872 | + | 0    | 0    |
| ENSG0000(RNU4-20P  | snRNA    | chr12 | 59586793 | 59586943 | - | 0    | 0    |
| ENSG0000(RNA5SP24: | rRNA     | chr7  | 1.4E+08  | 1.4E+08  | - | 0    | 0    |
| ENSG0000(RN7SKP81  | misc_RNA | chrX  | 1.43E+08 | 1.43E+08 | + | 0    | 0    |
| ENSG0000(RNA5SP28: | rRNA     | chr9  | 62802320 | 62802438 | - | 0    | 0    |
| ENSG0000(Y_RNA     | misc_RNA | chr16 | 30453997 | 30454097 | - | 0    | 0    |
| ENSG0000(RNU6-81P  | snRNA    | chr13 | 63783801 | 63783904 | + | 0    | 0    |
| ENSG0000(SNORD14   | snoRNA   | chr2  | 24969388 | 24969477 | - | 0    | 0    |
| ENSG0000(RNU6-499F | snRNA    | chr4  | 82174547 | 82174653 | + | 0    | 0    |
| ENSG0000(RNU6-597F | snRNA    | chr14 | 63618043 | 63618144 | + | 0    | 0    |
| ENSG0000(RNU6-716F | snRNA    | chr1  | 2E+08    | 2E+08    | - | 0    | 0    |
| ENSG0000(Y_RNA     | misc_RNA | chrX  | 50171197 | 50171297 | - | 0    | 0    |
| ENSG0000(RNU6-898F | snRNA    | chr16 | 69007052 | 69007155 | - | 0    | 0    |
| ENSG0000(SNORD116  | snoRNA   | chr1  | 2.16E+08 | 2.16E+08 | - | 0    | 0    |
| ENSG0000(SNORD115  | snoRNA   | chr15 | 25236085 | 25236166 | + | 0    | 0    |
| ENSG0000(RNA5SP15: | rRNA     | chr3  | 1.83E+08 | 1.83E+08 | - | 0    | 0    |
| ENSG0000(SNORD34   | snoRNA   | chr19 | 49490904 | 49490974 | + | 0    | 0    |
| ENSG0000(Y_RNA     | misc_RNA | chr10 | 13511206 | 13511313 | - | 0    | 0    |
| ENSG0000(RN7SKP23: | misc_RNA | chr5  | 1.1E+08  | 1.1E+08  | - | 0    | 0    |
| ENSG0000(RNU6-805F | snRNA    | chr10 | 72391964 | 72392069 | + | 0    | 0    |
| ENSG0000(Y_RNA     | misc_RNA | chr8  | 42949388 | 42949495 | - | 0    | 0    |
| ENSG0000(VTRNA1-3  | misc_RNA | chr5  | 1.41E+08 | 1.41E+08 | + | 0    | 0    |
| ENSG0000(SNORA64   | snoRNA   | chr3  | 40238608 | 40238741 | + | 0    | 0    |
| ENSG0000(RNA5S7    | rRNA     | chr1  | 2.29E+08 | 2.29E+08 | - | 3.61 | 14.5 |
| ENSG0000(Y_RNA     | misc_RNA | chr11 | 72766004 | 72766116 | + | 0    | 0    |
| ENSG0000(Y_RNA     | misc_RNA | chr9  | 83992932 | 83993033 | + | 0    | 0    |
| ENSG0000(RNA5S13   | rRNA     | chr1  | 2.29E+08 | 2.29E+08 | - | 3.61 | 14.5 |
| ENSG0000(RNU6-650F | snRNA    | chr7  | 1.49E+08 | 1.49E+08 | + | 0    | 0    |
| ENSG0000(SNORD18B  | snoRNA   | chr15 | 66502020 | 66502091 | - | 0    | 0    |
| ENSG0000(RNU6-395F | snRNA    | chr2  | 1.28E+08 | 1.28E+08 | + | 0    | 0    |
| ENSG0000(Y_RNA     | misc_RNA | chr5  | 1.32E+08 | 1.32E+08 | + | 0    | 0    |
| ENSG0000(RNU6-132: | snRNA    | chr12 | 92952639 | 92952745 | + | 0    | 0    |
| ENSG0000(Y_RNA     | misc_RNA | chr4  | 1.13E+08 | 1.13E+08 | - | 0    | 0    |
| ENSG0000(U8        | snoRNA   | chr2  | 86347062 | 86347195 | - | 0    | 0    |
| ENSG0000(RNU4-2    | snRNA    | chr12 | 1.2E+08  | 1.2E+08  | - | 0    | 0    |
| ENSG0000(Y_RNA     | misc_RNA | chr15 | 48325558 | 48325671 | - | 0    | 0    |
| ENSG0000(MIR539    | miRNA    | chr14 | 1.01E+08 | 1.01E+08 | + | 0    | 0    |
| ENSG0000(MIR421    | miRNA    | chrX  | 74218377 | 74218461 | - | 0    | 0    |
| ENSG0000(MIR146B   | miRNA    | chr10 | 1.02E+08 | 1.02E+08 | + | 0    | 0    |
| ENSG0000(MIR582    | miRNA    | chr5  | 59703606 | 59703703 | - | 0    | 0    |
| ENSG0000(MIR488    | miRNA    | chr1  | 1.77E+08 | 1.77E+08 | - | 0    | 0    |

|                                |           |       |          |          |   |       |       |
|--------------------------------|-----------|-------|----------|----------|---|-------|-------|
| ENSG0000(RP11-47J1)            | antisense | chr11 | 12921186 | 12922925 | - | 0     | 0     |
| ENSG0000(RP5-961K1)            | processed | chrX  | 96070669 | 96071778 | - | 0     | 0     |
| ENSG0000(RP11-560A)            | lincRNA   | chr20 | 57114915 | 57122092 | + | 0     | 0     |
| ENSG0000(RP11-498P)            | lincRNA   | chr9  | 97200475 | 97238700 | - | 0.67  | 0.28  |
| ENSG0000(CTA-221G9)            | antisense | chr22 | 25102433 | 25112692 | - | 0     | 0.07  |
| ENSG0000(Metazoa_S misc_RNA)   |           | chr9  | 1.29E+08 | 1.29E+08 | - | 0.41  | 0.89  |
| ENSG0000(TDRKH-AS1)            | antisense | chr1  | 1.52E+08 | 1.52E+08 | + | 0.87  | 0.37  |
| ENSG0000(RP11-375H)            | antisense | chr1  | 1.66E+08 | 1.66E+08 | + | 0.12  | 0.24  |
| ENSG0000(C9orf41-AS)           | antisense | chr9  | 74952968 | 74996293 | + | 0     | 0     |
| ENSG0000(RP11-277A)            | antisense | chr1  | 32052291 | 32073474 | - | 1.01  | 1.27  |
| ENSG0000(ZNF525 protein_co)    |           | chr19 | 53365693 | 53392217 | + | 1.97  | 1.56  |
| ENSG0000(AC012358)             | antisense | chr2  | 55214387 | 55216126 | - | 0.14  | 0.37  |
| ENSG0000(RP11-25I9)            | lincRNA   | chr11 | 1.09E+08 | 1.09E+08 | + | 0     | 0     |
| ENSG0000(AC006019)             | antisense | chr7  | 1.54E+08 | 1.54E+08 | - | 0.04  | 0.05  |
| ENSG0000(LINC01562)            | lincRNA   | chr1  | 51195095 | 51235096 | - | 0.06  | 0.03  |
| ENSG0000(RP3-337H4)            | antisense | chr6  | 43588230 | 43591362 | - | 0     | 0     |
| ENSG0000(AC012454)             | processed | chr2  | 85686053 | 85687047 | - | 0     | 0.07  |
| ENSG0000(RP11-370F)            | lincRNA   | chr9  | 93147040 | 93148556 | + | 0.63  | 0.49  |
| ENSG0000(LINC01317)            | lincRNA   | chr2  | 33706886 | 34297753 | + | 0.25  | 0.22  |
| ENSG0000(AC074019)             | processed | chr2  | 2.28E+08 | 2.28E+08 | - | 0     | 0.19  |
| ENSG0000(CTD-2026K)            | antisense | chr15 | 75678548 | 75680752 | + | 0.83  | 0.88  |
| ENSG0000(AC015969)             | antisense | chr2  | 68361214 | 68365584 | - | 0     | 0     |
| ENSG0000(RP11-217C)            | processed | chr9  | 1.04E+08 | 1.04E+08 | - | 0     | 0     |
| ENSG0000(RP13-36G1)            | processed | chrX  | 74066083 | 74066592 | + | 0     | 0     |
| ENSG0000(RP11-571E)            | lincRNA   | chrX  | 47297852 | 47298721 | + | 1.74  | 1.77  |
| ENSG0000(OR6C71P unprocessε)   |           | chr12 | 55376824 | 55377736 | - | 0     | 0     |
| ENSG0000(Metazoa_S misc_RNA)   |           | chr15 | 75120265 | 75120562 | - | 0     | 0.36  |
| ENSG0000(ACTBP6 processed)     |           | chr8  | 84948585 | 84949674 | + | 0     | 0     |
| ENSG0000(BTBD7P1 processed)    |           | chr10 | 13156684 | 13158136 | - | 0     | 0     |
| ENSG0000(FAM32BP processed)    |           | chr22 | 17213516 | 17214155 | + | 0     | 0     |
| ENSG0000(RP11-163F)            | lincRNA   | chr10 | 1.09E+08 | 1.09E+08 | - | 0     | 0     |
| ENSG0000(E2F3P2 processed)     |           | chr2  | 1.96E+08 | 1.96E+08 | - | 0.92  | 0.29  |
| ENSG0000(Metazoa_S misc_RNA)   |           | chr4  | 9711953  | 9712233  | - | 0     | 0.65  |
| ENSG0000(RP11-820K)            | processed | chr12 | 31465062 | 31465842 | + | 0     | 0     |
| ENSG0000(LINC00449)            | antisense | chr13 | 99499727 | 99501052 | - | 0.08  | 0.16  |
| ENSG0000(AC004988)             | antisense | chr7  | 40538127 | 40546928 | - | 0.33  | 0.18  |
| ENSG0000(RP11-814E unprocessε) |           | chr7  | 56322804 | 56323601 | + | 0     | 0     |
| ENSG0000(RP5-1113E)            | antisense | chr1  | 10458555 | 10459338 | + | 0     | 0.37  |
| ENSG0000(RP11-77K1)            | antisense | chr16 | 75475896 | 75495407 | + | 0.21  | 0.99  |
| ENSG0000(INF2 protein_co)      |           | chr14 | 1.05E+08 | 1.05E+08 | + | 23.26 | 24.79 |
| ENSG0000(HMGB1P3 processed)    |           | chr6  | 75319101 | 75319980 | - | 0.08  | 0.14  |
| ENSG0000(OR2N1P unprocessε)    |           | chr6  | 29137880 | 29138816 | - | 0     | 0     |
| ENSG0000(RP11-291L)            | lincRNA   | chr10 | 38453181 | 38466176 | + | 0     | 0     |
| ENSG0000(PDCD4-AS1)            | antisense | chr10 | 1.11E+08 | 1.11E+08 | - | 1.66  | 1.27  |
| ENSG0000(RP11-556C)            | lincRNA   | chr6  | 6993191  | 6995554  | + | 0     | 0     |

|                                     |          |          |   |       |       |
|-------------------------------------|----------|----------|---|-------|-------|
| ENSG0000(FAM83H-A protein_co chr8   | 1.44E+08 | 1.44E+08 | + | 0.59  | 0.46  |
| ENSG0000(RBMS3-AS1 antisense chr3   | 29526251 | 29642809 | - | 0.4   | 0.41  |
| ENSG0000(RP11-697H antisense chr11  | 63616308 | 63621671 | + | 0     | 0     |
| ENSG0000(TAS2R2P processed_chr7     | 12491095 | 12492004 | + | 0     | 0     |
| ENSG0000(Z99756.1 antisense chr22   | 43275955 | 43283830 | + | 0.03  | 0     |
| ENSG0000(AC016712. processed_chr2   | 2.23E+08 | 2.23E+08 | - | 0     | 0     |
| ENSG0000(RP11-176H protein_co chr14 | 31334312 | 31457441 | - | 1.08  | 1.77  |
| ENSG0000(OR52J1P unprocessε chr11   | 5104153  | 5105084  | + | 0     | 0     |
| ENSG0000(RP13-259N lincRNA chr10    | 33684755 | 33687064 | + | 0     | 0     |
| ENSG0000(Metazoa_S misc_RNA chr15   | 40585454 | 40585751 | - | 0     | 0.4   |
| ENSG0000(OR1F2P unprocessε chr16    | 3215611  | 3216543  | + | 0     | 0     |
| ENSG0000(RP11-542B lincRNA chr12    | 67519829 | 67567126 | + | 0     | 0.11  |
| ENSG0000(IGBP1-AS1 antisense chrX   | 70163842 | 70165206 | - | 0     | 0     |
| ENSG0000(RP5-1096D antisense chr12  | 2004666  | 2011392  | + | 0.21  | 0.12  |
| ENSG0000(LINC00970 antisense chr1   | 1.69E+08 | 1.69E+08 | - | 0.34  | 0.06  |
| ENSG0000(RP11-335E lincRNA chr1     | 63139250 | 63163153 | + | 0.08  | 0.14  |
| ENSG0000(RHOT1P2 processed_chr21    | 13936993 | 13937325 | - | 0     | 0     |
| ENSG0000(GP1BB protein_co chr22     | 19722945 | 19724771 | + | 0.3   | 0.28  |
| ENSG0000(RP11-84A1 lincRNA chr1     | 31842019 | 31855568 | - | 0.33  | 0.35  |
| ENSG0000(AC144450. lincRNA chr2     | 1620510  | 1625419  | - | 0.31  | 0.38  |
| ENSG0000(AC012456. antisense chr2   | 11721619 | 11724222 | - | 0     | 0     |
| ENSG0000(RP11-332N sense_intrε chr3 | 1.3E+08  | 1.3E+08  | - | 1.23  | 1.65  |
| ENSG0000(LINC00501 lincRNA chr3     | 1.77E+08 | 1.77E+08 | + | 0.02  | 0.14  |
| ENSG0000(RP11-320P processed_chr3   | 66008770 | 66009200 | - | 0     | 0     |
| ENSG0000(AC007618. processed_chr12  | 2659937  | 2660969  | + | 0     | 0     |
| ENSG0000(LINC01285 lincRNA chrX     | 1.19E+08 | 1.19E+08 | + | 0.28  | 0.21  |
| ENSG0000(OR2T5 protein_co chr1      | 2.48E+08 | 2.48E+08 | + | 0     | 0     |
| ENSG0000(OR2L2 protein_co chr1      | 2.48E+08 | 2.48E+08 | + | 0     | 0     |
| ENSG0000(OR2W5 transcribec chr1     | 2.47E+08 | 2.47E+08 | + | 0     | 0     |
| ENSG0000(EFCAB2 protein_co chr1     | 2.45E+08 | 2.45E+08 | + | 4.09  | 3.74  |
| ENSG0000(COX20 protein_co chr1      | 2.45E+08 | 2.45E+08 | + | 25.78 | 24.86 |
| ENSG0000(CHML protein_co chr1       | 2.42E+08 | 2.42E+08 | - | 1.23  | 1.51  |
| ENSG0000(IBA57-AS1 lincRNA chr1     | 2.28E+08 | 2.28E+08 | - | 0.53  | 0.2   |
| ENSG0000(STUM protein_co chr1       | 2.27E+08 | 2.27E+08 | + | 0.04  | 0.1   |
| ENSG0000(RP11-351J lincRNA chr6     | 1.68E+08 | 1.68E+08 | - | 0     | 0     |
| ENSG0000(TCP10 protein_co chr6      | 1.67E+08 | 1.67E+08 | - | 0     | 0     |
| ENSG0000(CAPN8 protein_co chr1      | 2.24E+08 | 2.24E+08 | - | 0     | 0     |
| ENSG0000(TATDN3 protein_co chr1     | 2.13E+08 | 2.13E+08 | + | 8.46  | 7.83  |
| ENSG0000(SERTAD4-A antisense chr1   | 2.1E+08  | 2.1E+08  | - | 4     | 3.57  |
| ENSG0000(C1orf132 lincRNA chr1      | 2.08E+08 | 2.08E+08 | - | 0.29  | 0.43  |
| ENSG0000(CR1 protein_co chr1        | 2.07E+08 | 2.08E+08 | + | 0.03  | 0     |
| ENSG0000(C6orf99 lincRNA chr6       | 1.59E+08 | 1.59E+08 | + | 0     | 0     |
| ENSG0000(LINC00862 lincRNA chr1     | 2E+08    | 2E+08    | - | 0.04  | 0     |
| ENSG0000(RAET1G protein_co chr6     | 1.5E+08  | 1.5E+08  | - | 2.49  | 2.08  |
| ENSG0000(C1orf53 protein_co chr1    | 1.98E+08 | 1.98E+08 | + | 3.46  | 3.28  |

|                     |             |       |          |          |   |       |       |
|---------------------|-------------|-------|----------|----------|---|-------|-------|
| ENSG0000(SAMD5      | protein_co  | chr6  | 1.48E+08 | 1.48E+08 | + | 0     | 0.02  |
| ENSG0000(LINC00272  | lincRNA     | chr1  | 1.82E+08 | 1.82E+08 | + | 0     | 0     |
| ENSG0000(TEDDM1     | protein_co  | chr1  | 1.82E+08 | 1.82E+08 | - | 0     | 0     |
| ENSG0000(GJE1       | protein_co  | chr6  | 1.42E+08 | 1.42E+08 | + | 0     | 0     |
| ENSG0000(ECT2L      | protein_co  | chr6  | 1.39E+08 | 1.39E+08 | + | 0.02  | 0.04  |
| ENSG0000(GPR52      | protein_co  | chr1  | 1.74E+08 | 1.74E+08 | + | 0     | 0     |
| ENSG0000(RP11-296C  | antisense   | chr1  | 1.73E+08 | 1.73E+08 | - | 0.65  | 0.36  |
| ENSG0000(METTL11B   | protein_co  | chr1  | 1.7E+08  | 1.7E+08  | + | 0     | 0     |
| ENSG0000(FCGR3A     | protein_co  | chr1  | 1.62E+08 | 1.62E+08 | - | 0     | 0     |
| ENSG0000(TMEM244    | protein_co  | chr6  | 1.3E+08  | 1.3E+08  | - | 0     | 0     |
| ENSG0000(OR6K3      | protein_co  | chr1  | 1.59E+08 | 1.59E+08 | - | 0     | 0     |
| ENSG0000(OR10T1P    | unprocessε  | chr1  | 1.58E+08 | 1.58E+08 | - | 0     | 0     |
| ENSG0000(CENPW      | protein_co  | chr6  | 1.26E+08 | 1.26E+08 | + | 2.95  | 2.87  |
| ENSG0000(MSTO2P     | unprocessε  | chr1  | 1.56E+08 | 1.56E+08 | + | 1.83  | 1.38  |
| ENSG0000(SPRN       | protein_co  | chr10 | 1.33E+08 | 1.33E+08 | - | 0.16  | 0.44  |
| ENSG0000(FAM229B    | protein_co  | chr6  | 1.12E+08 | 1.12E+08 | + | 22.33 | 19.13 |
| ENSG0000(FANK1      | protein_co  | chr10 | 1.26E+08 | 1.26E+08 | + | 7.21  | 7.69  |
| ENSG0000(AL591704.  | unprocessε  | chr1  | 1.53E+08 | 1.53E+08 | - | 0     | 0     |
| ENSG0000(LOR        | protein_co  | chr1  | 1.53E+08 | 1.53E+08 | + | 0     | 0     |
| ENSG0000(PRR9       | protein_co  | chr1  | 1.53E+08 | 1.53E+08 | + | 0.1   | 0     |
| ENSG0000(LERP1      | protein_co  | chr1  | 1.53E+08 | 1.53E+08 | + | 0     | 0     |
| ENSG0000(SPRR2E     | protein_co  | chr1  | 1.53E+08 | 1.53E+08 | - | 0     | 0     |
| ENSG0000(KPRP       | protein_co  | chr1  | 1.53E+08 | 1.53E+08 | + | 0     | 0     |
| ENSG0000(METTL10    | protein_co  | chr10 | 1.25E+08 | 1.25E+08 | - | 6.78  | 7.05  |
| ENSG0000(FAM24A     | protein_co  | chr10 | 1.23E+08 | 1.23E+08 | + | 0     | 0     |
| ENSG0000(DDO        | protein_co  | chr6  | 1.1E+08  | 1.1E+08  | - | 0     | 0     |
| ENSG0000(CCDC162P   | transcribec | chr6  | 1.09E+08 | 1.09E+08 | + | 0.22  | 0.49  |
| ENSG0000(LINC00222  | lincRNA     | chr6  | 1.09E+08 | 1.09E+08 | + | 0     | 0     |
| ENSG0000(ADAMTSL4   | processed_  | chr1  | 1.51E+08 | 1.51E+08 | - | 0.23  | 0.06  |
| ENSG0000(PLPP4      | protein_co  | chr10 | 1.2E+08  | 1.21E+08 | + | 0.56  | 0.8   |
| ENSG0000(BVES-AS1   | antisense   | chr6  | 1.05E+08 | 1.05E+08 | + | 0.08  | 0.36  |
| ENSG0000(LIN28B-AS: | lincRNA     | chr6  | 1.05E+08 | 1.05E+08 | - | 0     | 0     |
| ENSG0000(HIST2H3C   | protein_co  | chr1  | 1.5E+08  | 1.5E+08  | - | 0     | 0     |
| ENSG0000(HIST2H2AA  | protein_co  | chr1  | 1.5E+08  | 1.5E+08  | - | 5.18  | 12.37 |
| ENSG0000(HIST2H2BF  | protein_co  | chr1  | 1.5E+08  | 1.5E+08  | - | 4.59  | 5.27  |
| ENSG0000(HIST2H3PS  | protein_co  | chr1  | 1.44E+08 | 1.44E+08 | - | 1.42  | 3.12  |
| ENSG0000(HIST2H2BC  | processed_  | chr1  | 1.5E+08  | 1.5E+08  | - | 0.43  | 1.2   |
| ENSG0000(RP11-744H  | unprocessε  | chr1  | 1.44E+08 | 1.44E+08 | + | 0     | 0     |
| ENSG0000(PNLIPRP3   | protein_co  | chr10 | 1.16E+08 | 1.16E+08 | + | 0     | 0.03  |
| ENSG0000(HIST2H3A   | protein_co  | chr1  | 1.5E+08  | 1.5E+08  | + | 0     | 0     |
| ENSG0000(HSD3BP4    | unprocessε  | chr1  | 1.2E+08  | 1.2E+08  | + | 0     | 0     |
| ENSG0000(HSD3B1     | protein_co  | chr1  | 1.2E+08  | 1.2E+08  | + | 0     | 0     |
| ENSG0000(HSD3BP2    | unprocessε  | chr1  | 1.19E+08 | 1.19E+08 | + | 0     | 0     |
| ENSG0000(HSD3B2     | protein_co  | chr1  | 1.19E+08 | 1.19E+08 | + | 0     | 0     |
| ENSG0000(C1orf137   | lincRNA     | chr1  | 1.17E+08 | 1.17E+08 | + | 0     | 0     |

|                     |                  |          |          |   |        |        |
|---------------------|------------------|----------|----------|---|--------|--------|
| ENSG0000(ATP1A1-AS) | processed_chr1   | 1.16E+08 | 1.16E+08 | - | 0.6    | 2.07   |
| ENSG0000(RBM20)     | protein_co chr10 | 1.11E+08 | 1.11E+08 | + | 0      | 0.08   |
| ENSG0000(SMIM9)     | protein_co chrX  | 1.55E+08 | 1.55E+08 | - | 0      | 0      |
| ENSG0000(C6orf163)  | protein_co chr6  | 87344849 | 87365463 | + | 0.38   | 1.13   |
| ENSG0000(SNHG5)     | processed_chr6   | 85660950 | 85678736 | - | 313.95 | 306.97 |
| ENSG0000(ADD3-AS1)  | processed_chr10  | 1.1E+08  | 1.1E+08  | - | 0.54   | 0.14   |
| ENSG0000(RIPPLY2)   | protein_co chr6  | 83853266 | 83857515 | + | 0      | 0      |
| ENSG0000(CHIAP2)    | transcribed chr1 | 1.11E+08 | 1.11E+08 | + | 0.02   | 0      |
| ENSG0000(GDI1)      | protein_co chrX  | 1.54E+08 | 1.54E+08 | + | 49.57  | 48.5   |
| ENSG0000(PCMTD2)    | protein_co chr20 | 64255695 | 64287821 | + | 19.91  | 17.74  |
| ENSG0000(SOX18)     | protein_co chr20 | 64047582 | 64049641 | - | 0.09   | 0.17   |
| ENSG0000(CYP17A1-A) | antisense chr10  | 1.03E+08 | 1.03E+08 | + | 0.31   | 0      |
| ENSG0000(LIME1)     | protein_co chr20 | 63736283 | 63739103 | + | 3.09   | 2.2    |
| ENSG0000(SPATA42)   | antisense chr1   | 1.09E+08 | 1.09E+08 | + | 0      | 0      |
| ENSG0000(RP11-261N) | antisense chr20  | 63359988 | 63371177 | + | 0      | 0      |
| ENSG0000(OOEP)      | protein_co chr6  | 73368555 | 73395133 | - | 0      | 0      |
| ENSG0000(KHDC3L)    | protein_co chr6  | 73362677 | 73364171 | + | 0.06   | 0      |
| ENSG0000(DPPA5)     | protein_co chr6  | 73353062 | 73354295 | - | 0      | 0      |
| ENSG0000(C1orf146)  | protein_co chr1  | 92217940 | 92245813 | + | 0      | 0      |
| ENSG0000(HSP90B3P)  | processed_chr1   | 91642516 | 91644082 | + | 0.04   | 0      |
| ENSG0000(SPANXN1)   | protein_co chrX  | 1.45E+08 | 1.45E+08 | + | 0      | 0      |
| ENSG0000(SPANXA2)   | protein_co chrX  | 1.42E+08 | 1.42E+08 | + | 0      | 0.05   |
| ENSG0000(LINC00632) | lincRNA chrX     | 1.41E+08 | 1.41E+08 | + | 0.36   | 0.2    |
| ENSG0000(CXorf66)   | protein_co chrX  | 1.4E+08  | 1.4E+08  | - | 0      | 0      |
| ENSG0000(C10orf62)  | protein_co chr10 | 97589727 | 97590934 | + | 0.1    | 0      |
| ENSG0000(SAMD13)    | protein_co chr1  | 84298366 | 84389957 | + | 0.25   | 0.3    |
| ENSG0000(FAM127B)   | protein_co chrX  | 1.35E+08 | 1.35E+08 | - | 56.43  | 57.78  |
| ENSG0000(CCDC160)   | protein_co chrX  | 1.34E+08 | 1.34E+08 | + | 0      | 0      |
| ENSG0000(C1orf141)  | protein_co chr1  | 67092165 | 67231853 | - | 0      | 0      |
| ENSG0000(EFCAB7)    | protein_co chr1  | 63523372 | 63572693 | + | 7.81   | 8.57   |
| ENSG0000(DEFB110)   | protein_co chr6  | 50009138 | 50021981 | - | 0      | 0      |
| ENSG0000(RP13-379L) | lincRNA chr20    | 57957126 | 57959660 | - | 0      | 0      |
| ENSG0000(GLYATL3)   | protein_co chr6  | 49499958 | 49527047 | + | 0      | 0      |
| ENSG0000(LDLRAD1)   | protein_co chr1  | 54007299 | 54018186 | - | 0      | 0      |
| ENSG0000(RP11-188C) | antisense chr9   | 1.38E+08 | 1.38E+08 | - | 0      | 0      |
| ENSG0000(RHOXF2B)   | protein_co chrX  | 1.2E+08  | 1.2E+08  | - | 0      | 0      |
| ENSG0000(ARRDC1-AS) | antisense chr9   | 1.38E+08 | 1.38E+08 | - | 5.4    | 6.7    |
| ENSG0000(ZYG11A)    | protein_co chr1  | 52842511 | 52894998 | + | 0.09   | 0.06   |
| ENSG0000(LINC01270) | lincRNA chr20    | 50292720 | 50314922 | + | 0.29   | 0.43   |
| ENSG0000(LCN8)      | protein_co chr9  | 1.37E+08 | 1.37E+08 | - | 0      | 0      |
| ENSG0000(RP11-216L) | protein_co chr9  | 1.37E+08 | 1.37E+08 | - | 0      | 0      |
| ENSG0000(C1orf185)  | protein_co chr1  | 51102234 | 51148086 | + | 0      | 0      |
| ENSG0000(GLT6D1)    | protein_co chr9  | 1.36E+08 | 1.36E+08 | - | 0      | 0      |
| ENSG0000(IFIT1B)    | protein_co chr10 | 89378056 | 89385205 | + | 0      | 0      |
| ENSG0000(COL5A1-AS) | antisense chr9   | 1.35E+08 | 1.35E+08 | - | 0      | 0      |

|                     |                  |          |            |       |       |
|---------------------|------------------|----------|------------|-------|-------|
| ENSG0000( CT83      | protein_co chrX  | 1.16E+08 | 1.16E+08 - | 0     | 0     |
| ENSG0000( LIPN      | protein_co chr10 | 88761406 | 88778242 + | 0     | 0.11  |
| ENSG0000( LIPK      | protein_co chr10 | 88724544 | 88752786 + | 0     | 0.11  |
| ENSG0000( LIPJ      | protein_co chr10 | 88586753 | 88606976 + | 0.05  | 0     |
| ENSG0000( TRPC5OS   | protein_co chrX  | 1.12E+08 | 1.12E+08 + | 0     | 0     |
| ENSG0000( LCN1P2    | unprocessε chr9  | 1.33E+08 | 1.33E+08 + | 0     | 0     |
| ENSG0000( LRIT2     | protein_co chr10 | 84220495 | 84225589 - | 0     | 0     |
| ENSG0000( RP11-465L | antisense chr20  | 46013500 | 46022073 - | 0     | 0     |
| ENSG0000( RP11-126H | antisense chr10  | 77866875 | 77869610 + | 0     | 0     |
| ENSG0000( LRRC73    | protein_co chr6  | 43506969 | 43510686 - | 0.84  | 0.69  |
| ENSG0000( MYCLP1    | processed_ chrX  | 1.07E+08 | 1.07E+08 + | 0     | 0     |
| ENSG0000( LINC00963 | processed_ chr9  | 1.29E+08 | 1.3E+08 +  | 31.75 | 29.56 |
| ENSG0000( RP11-247A | antisense chr9   | 1.29E+08 | 1.29E+08 + | 0.08  | 0.18  |
| ENSG0000( FOXO6     | protein_co chr1  | 41361922 | 41383590 + | 0.27  | 0.15  |
| ENSG0000( TCEAL5    | protein_co chrX  | 1.03E+08 | 1.03E+08 - | 0     | 0     |
| ENSG0000( SYS1      | protein_co chr20 | 45361937 | 45376798 + | 14.82 | 15.57 |
| ENSG0000( TCEAL6    | protein_co chrX  | 1.02E+08 | 1.02E+08 - | 0     | 0.07  |
| ENSG0000( ARMCX7P   | transcribec chrX | 1.02E+08 | 1.02E+08 + | 0     | 0     |
| ENSG0000( INPP5B    | protein_co chr1  | 37860697 | 37947057 - | 7.49  | 5.84  |
| ENSG0000( RPA4      | protein_co chrX  | 96883908 | 96885467 + | 0.18  | 0     |
| ENSG0000( TDRG1     | antisense chr6   | 40334954 | 40379887 + | 0     | 0     |
| ENSG0000( LINC00951 | lincRNA chr6     | 40344344 | 40346151 - | 0     | 0     |
| ENSG0000( NEU4      | protein_co chr2  | 2.42E+08 | 2.42E+08 + | 0     | 0     |
| ENSG0000( MAFB      | protein_co chr20 | 40685848 | 40689240 - | 0.68  | 0.66  |
| ENSG0000( TRAF3IP1  | protein_co chr2  | 2.38E+08 | 2.38E+08 + | 7.81  | 8.5   |
| ENSG0000( RP1-153P1 | lincRNA chr6     | 37507348 | 37535616 + | 0     | 0     |
| ENSG0000( BMP2KL    | processed_ chrX  | 74185929 | 74187153 + | 0     | 0     |
| ENSG0000( CHIC1     | protein_co chrX  | 73563200 | 73687102 + | 4.26  | 4.38  |
| ENSG0000( RP4-640H8 | lincRNA chr20    | 37676910 | 37683234 + | 0     | 0     |
| ENSG0000( NAP1L6    | protein_co chrX  | 73126037 | 73128080 - | 0     | 0     |
| ENSG0000( GIGYF2    | protein_co chr2  | 2.33E+08 | 2.33E+08 + | 15.41 | 16.85 |
| ENSG0000( ECEL1P1   | unprocessε chr2  | 2.32E+08 | 2.32E+08 - | 0     | 0     |
| ENSG0000( C2orf72   | protein_co chr2  | 2.31E+08 | 2.31E+08 + | 0.25  | 0.54  |
| ENSG0000( RUFY2     | protein_co chr10 | 68341107 | 68407294 - | 5.64  | 5.67  |
| ENSG0000( NHSL2     | protein_co chrX  | 71910818 | 72161750 + | 0.36  | 0.3   |
| ENSG0000( GGTA1P    | transcribec chr9 | 1.21E+08 | 1.22E+08 - | 0.04  | 0     |
| ENSG0000( PHACTR4   | protein_co chr1  | 28369582 | 28500369 + | 9.26  | 7.09  |
| ENSG0000( CLPSL1    | protein_co chr6  | 35781017 | 35793675 + | 0     | 0     |
| ENSG0000( ASAH2B    | protein_co chr10 | 50739318 | 50816495 + | 1.34  | 1.19  |
| ENSG0000( LINC00474 | lincRNA chr9     | 1.16E+08 | 1.16E+08 - | 0     | 0     |
| ENSG0000( AGAP6     | protein_co chr10 | 49982190 | 50010499 + | 4.14  | 4.19  |
| ENSG0000( TIMM23B   | protein_co chr10 | 49942033 | 49974850 + | 4.33  | 5.57  |
| ENSG0000( ZDHHC18   | protein_co chr1  | 26826710 | 26857602 + | 8.24  | 8.75  |
| ENSG0000( C10orf128 | protein_co chr10 | 49154725 | 49188585 - | 0     | 0     |
| ENSG0000( CXorf65   | protein_co chrX  | 71103889 | 71106788 - | 0     | 0     |



|                     |                   |          |          |   |        |        |
|---------------------|-------------------|----------|----------|---|--------|--------|
| ENSG0000( AGAP9     | protein_co chr10  | 47501854 | 47523638 | - | 3.51   | 3.15   |
| ENSG0000( LRRC37A5F | transcribec chr9  | 1.12E+08 | 1.12E+08 | - | 0      | 0.12   |
| ENSG0000( NPY4R     | protein_co chr10  | 46461099 | 46465881 | - | 0.27   | 0      |
| ENSG0000( GPRIN2    | protein_co chr10  | 46549044 | 46555530 | - | 0      | 0.04   |
| ENSG0000( SYT15     | protein_co chr10  | 46578217 | 46594173 | + | 1.27   | 1.51   |
| ENSG0000( BMS1P1    | transcribec chr10 | 46786674 | 46811989 | + | 2.84   | 2.51   |
| ENSG0000( TMEM57    | protein_co chr1   | 25430858 | 25500209 | + | 8.1    | 7.62   |
| ENSG0000( PTPN20    | protein_co chr10  | 46911396 | 47002488 | + | 0.06   | 0      |
| ENSG0000( GDF5OS    | protein_co chr20  | 35433029 | 35435450 | + | 0      | 0      |
| ENSG0000( ZDBF2     | protein_co chr2   | 2.06E+08 | 2.06E+08 | + | 1.7    | 1.53   |
| ENSG0000( LINC00619 | lincRNA chr10     | 43845306 | 43850622 | + | 0      | 0      |
| ENSG0000( GGNBP1    | transcribec chr6  | 33540046 | 33589026 | + | 0      | 0      |
| ENSG0000( TXNDC8    | protein_co chr9   | 1.1E+08  | 1.1E+08  | - | 0      | 0      |
| ENSG0000( RPL12P1   | processed_chr6    | 33400059 | 33400556 | - | 0      | 0      |
| ENSG0000( AWAT1     | protein_co chrX   | 70234655 | 70240627 | + | 0      | 0      |
| ENSG0000( RPL12P16  | processed_chr2    | 2.03E+08 | 2.03E+08 | + | 0      | 0      |
| ENSG0000( DAXX      | protein_co chr6   | 33318558 | 33329286 | - | 30.33  | 26.97  |
| ENSG0000( BMPR2     | protein_co chr2   | 2.02E+08 | 2.03E+08 | + | 12.75  | 12.32  |
| ENSG0000( TCEA3     | protein_co chr1   | 23381061 | 23424740 | - | 7.44   | 5.79   |
| ENSG0000( PFDN6     | protein_co chr6   | 33289302 | 33298401 | + | 20.49  | 22.6   |
| ENSG0000( RING1     | protein_co chr6   | 33208495 | 33212722 | + | 23.64  | 24.31  |
| ENSG0000( HSD17B8   | protein_co chr6   | 33204642 | 33206831 | + | 2.1    | 2.1    |
| ENSG0000( RXRB      | protein_co chr6   | 33193588 | 33200688 | - | 24.08  | 23.33  |
| ENSG0000( OXLD1     | protein_co chr17  | 81665036 | 81666635 | - | 17.93  | 13.81  |
| ENSG0000( RP11-713P | lincRNA chr11     | 1.34E+08 | 1.34E+08 | + | 0.52   | 0.18   |
| ENSG0000( OR13C3    | protein_co chr9   | 1.05E+08 | 1.05E+08 | - | 0      | 0      |
| ENSG0000( COL11A2   | protein_co chr6   | 33162681 | 33192499 | - | 0.34   | 0.15   |
| ENSG0000( LINC00587 | lincRNA chr9      | 1.03E+08 | 1.03E+08 | + | 0      | 0      |
| ENSG0000( HLA-DOA   | protein_co chr6   | 33004178 | 33009612 | - | 0.02   | 0      |
| ENSG0000( HNRNPCP2  | processed_chr2    | 1.9E+08  | 1.9E+08  | + | 0      | 0      |
| ENSG0000( BRD2      | protein_co chr6   | 32968660 | 32981505 | + | 71.29  | 70.35  |
| ENSG0000( HLA-DMA   | protein_co chr6   | 32948613 | 32969094 | - | 9.65   | 7.52   |
| ENSG0000( PSMB8-AS: | lincRNA chr6      | 32844086 | 32846495 | + | 2.61   | 2.37   |
| ENSG0000( COL5A2    | protein_co chr2   | 1.89E+08 | 1.89E+08 | - | 285.45 | 278.48 |
| ENSG0000( PSMB8     | protein_co chr6   | 32840717 | 32844703 | - | 36.64  | 36.43  |
| ENSG0000( TAP2      | protein_co chr6   | 32821833 | 32838780 | - | 7.35   | 7.53   |
| ENSG0000( SPIN3     | protein_co chrX   | 56818298 | 56995827 | - | 6.47   | 5.75   |
| ENSG0000( NBDY      | protein_co chrX   | 56729241 | 56818380 | + | 22.08  | 21.78  |
| ENSG0000( LINC01993 | lincRNA chr17     | 78261349 | 78278492 | - | 0.06   | 0      |
| ENSG0000( TMEM235   | protein_co chr17  | 78231310 | 78240987 | + | 0      | 0      |
| ENSG0000( PAGE3     | protein_co chrX   | 55258412 | 55264846 | - | 0      | 0      |
| ENSG0000( TNRC6C-AS | processed_chr17   | 78107398 | 78111799 | - | 0      | 0      |
| ENSG0000( LINC01973 | lincRNA chr17     | 77879027 | 77884087 | - | 0      | 0      |
| ENSG0000( HLA-DRA   | protein_co chr6   | 32439842 | 32445046 | + | 0      | 0      |
| ENSG0000( BTNL2     | protein_co chr6   | 32393963 | 32407128 | - | 0      | 0      |

|                    |                  |          |          |   |       |        |
|--------------------|------------------|----------|----------|---|-------|--------|
| ENSG0000(COL15A1   | protein_co chr9  | 98943179 | 99070792 | + | 2.6   | 2.87   |
| ENSG0000(OR8B2     | protein_co chr11 | 1.24E+08 | 1.24E+08 | - | 0     | 0      |
| ENSG0000(C6orf10   | protein_co chr6  | 32288526 | 32371912 | - | 0     | 0      |
| ENSG0000(TMEM225   | protein_co chr11 | 1.24E+08 | 1.24E+08 | - | 0     | 0      |
| ENSG0000(NOTCH4    | protein_co chr6  | 32194843 | 32224067 | - | 0.94  | 0.65   |
| ENSG0000(PBX2      | protein_co chr6  | 32184741 | 32190186 | - | 22.23 | 23.3   |
| ENSG0000(AGER      | protein_co chr6  | 32180968 | 32184324 | - | 1.39  | 0.88   |
| ENSG0000(RNF5      | protein_co chr6  | 32178354 | 32180793 | + | 29.32 | 28.02  |
| ENSG0000(AGPAT1    | protein_co chr6  | 32168212 | 32178096 | - | 41.61 | 40.64  |
| ENSG0000(DFNB59    | protein_co chr2  | 1.78E+08 | 1.78E+08 | + | 1.3   | 1.49   |
| ENSG0000(PRRT1     | protein_co chr6  | 32148359 | 32154373 | - | 3.34  | 4.35   |
| ENSG0000(FKBPL     | protein_co chr6  | 32128707 | 32130291 | - | 3.76  | 3.57   |
| ENSG0000(MRPL38    | protein_co chr17 | 75898643 | 75905413 | - | 14.04 | 15.45  |
| ENSG0000(SMIM5     | protein_co chr17 | 75633434 | 75641404 | + | 0     | 0      |
| ENSG0000(ERICH2    | protein_co chr2  | 1.71E+08 | 1.71E+08 | + | 0.12  | 0.13   |
| ENSG0000(SP5       | protein_co chr2  | 1.71E+08 | 1.71E+08 | + | 0     | 0      |
| ENSG0000(CYP21A1P  | transcribed chr6 | 32005636 | 32008451 | + | 0.08  | 0.09   |
| ENSG0000(STK19     | protein_co chr6  | 31971091 | 31982821 | + | 15.33 | 15.29  |
| ENSG0000(CD300LD   | protein_co chr17 | 74579365 | 74592283 | - | 0     | 0      |
| ENSG0000(BTBD17    | protein_co chr17 | 74356416 | 74361946 | - | 0     | 0      |
| ENSG0000(DXO       | protein_co chr6  | 31969810 | 31972292 | - | 7.71  | 9.46   |
| ENSG0000(SKIV2L    | protein_co chr6  | 31959080 | 31969755 | + | 23.08 | 21.81  |
| ENSG0000(C9orf129  | protein_co chr9  | 93318199 | 93346414 | - | 0     | 0      |
| ENSG0000(NELFE     | protein_co chr6  | 31952087 | 31959110 | - | 35.34 | 32.59  |
| ENSG0000(NXPE2     | protein_co chr11 | 1.15E+08 | 1.15E+08 | + | 0.24  | 0.13   |
| ENSG0000(RP11-380J | lincRNA chr1     | 17189783 | 17197617 | + | 0.09  | 0.19   |
| ENSG0000(SPANXN5   | protein_co chrX  | 52796144 | 52798101 | - | 0     | 0      |
| ENSG0000(C10orf126 | lincRNA chr10    | 28846408 | 28881898 | + | 0     | 0      |
| ENSG0000(ZBTB12    | protein_co chr6  | 31899607 | 31901992 | - | 3.89  | 4.67   |
| ENSG0000(RP11-552E | processed_chrX   | 48212791 | 48218010 | + | 0     | 0      |
| ENSG0000(SDHD      | protein_co chr11 | 1.12E+08 | 1.12E+08 | + | 34.6  | 37.78  |
| ENSG0000(EHMT2     | protein_co chr6  | 31879759 | 31897687 | - | 23.21 | 21.89  |
| ENSG0000(XAGE1A    | protein_co chrX  | 52495676 | 52500812 | + | 0     | 0      |
| ENSG0000(PKP4-AS1  | antisense chr2   | 1.59E+08 | 1.59E+08 | - | 0     | 0      |
| ENSG0000(LAYN      | protein_co chr11 | 1.12E+08 | 1.12E+08 | + | 1.86  | 3.84   |
| ENSG0000(XAGE1B    | protein_co chrX  | 52512077 | 52520803 | - | 0     | 0      |
| ENSG0000(SLC44A4   | protein_co chr6  | 31863192 | 31879046 | - | 0     | 0      |
| ENSG0000(NEU1      | protein_co chr6  | 31857659 | 31862906 | - | 74.69 | 76.92  |
| ENSG0000(C6orf48   | protein_co chr6  | 31834608 | 31839766 | + | 156.2 | 158.47 |
| ENSG0000(HSPA1B    | protein_co chr6  | 31827735 | 31830255 | + | 33.56 | 29.03  |
| ENSG0000(HSPA1A    | protein_co chr6  | 31815464 | 31817946 | + | 29.65 | 32.15  |
| ENSG0000(HSPA1L    | protein_co chr6  | 31809619 | 31815065 | - | 0.88  | 0.59   |
| ENSG0000(LSM2      | protein_co chr6  | 31797396 | 31806984 | - | 19.4  | 22.24  |
| ENSG0000(RP11-410N | lincRNA chr20    | 32564992 | 32608893 | + | 0     | 0      |
| ENSG0000(VARS      | protein_co chr6  | 31777518 | 31795953 | - | 13.11 | 13.31  |

|                     |                  |          |          |   |       |       |
|---------------------|------------------|----------|----------|---|-------|-------|
| ENSG0000(VWA7       | protein_co chr6  | 31765590 | 31777294 | - | 0.55  | 0.53  |
| ENSG0000(CARD16     | protein_co chr11 | 1.05E+08 | 1.05E+08 | - | 8.89  | 7.66  |
| ENSG0000(RP11-65D2  | lincRNA chr13    | 1.12E+08 | 1.12E+08 | + | 0     | 0     |
| ENSG0000(AC012306.  | processed_chr2   | 1.28E+08 | 1.28E+08 | + | 0     | 0     |
| ENSG0000(CASP12     | polymorph chr11  | 1.05E+08 | 1.05E+08 | - | 0     | 0     |
| ENSG0000(MBD5       | protein_co chr2  | 1.48E+08 | 1.49E+08 | + | 16.08 | 16.3  |
| ENSG0000(MSH5       | protein_co chr6  | 31739948 | 31762834 | + | 3.57  | 4.17  |
| ENSG0000(CSHL1      | protein_co chr17 | 63909597 | 63918838 | - | 0     | 0     |
| ENSG0000(MPIG6B     | protein_co chr6  | 31718594 | 31726714 | + | 0.11  | 0.05  |
| ENSG0000(LY6G6C     | protein_co chr6  | 31718648 | 31721845 | - | 0     | 0     |
| ENSG0000(XXbac-BPG  | protein_co chr6  | 31686962 | 31714072 | - | 0     | 0     |
| ENSG0000(LY6G6F     | protein_co chr6  | 31706885 | 31710595 | + | 0     | 0     |
| ENSG0000(ABHD16A    | protein_co chr6  | 31686949 | 31703444 | - | 19.46 | 17.46 |
| ENSG0000(LY6G5C     | protein_co chr6  | 31676684 | 31684040 | - | 1.83  | 1.15  |
| ENSG0000(RP11-1E11  | processed_chr9   | 88180673 | 88181447 | + | 0     | 0     |
| ENSG0000(POTEKP     | unprocessε chr2  | 1.32E+08 | 1.32E+08 | + | 0     | 0     |
| ENSG0000(CSNK2B     | protein_co chr6  | 31665236 | 31670343 | + | 95.48 | 91.19 |
| ENSG0000(CTSLP6     | unprocessε chr10 | 79870375 | 79873903 | - | 0     | 0     |
| ENSG0000(GPANK1     | protein_co chr6  | 31661229 | 31666283 | - | 11.98 | 9.36  |
| ENSG0000(C6orf47    | protein_co chr6  | 31658298 | 31660772 | - | 10.37 | 9.19  |
| ENSG0000(FAM155A    | protein_co chr13 | 1.07E+08 | 1.08E+08 | - | 0.03  | 0.01  |
| ENSG0000(APOM       | protein_co chr6  | 31652416 | 31658210 | + | 2.85  | 4.92  |
| ENSG0000(C9orf170   | lincRNA chr9     | 87148644 | 87159556 | + | 0     | 0     |
| ENSG0000(TRIM49C    | protein_co chr11 | 90031106 | 90042025 | + | 0     | 0     |
| ENSG0000(TRIM64     | protein_co chr11 | 89968502 | 89975228 | + | 0     | 0     |
| ENSG0000(TRIM51BP   | unprocessε chr11 | 89854953 | 89862893 | + | 0     | 0     |
| ENSG0000(RP11-313I2 | unprocessε chr11 | 89766440 | 89768836 | - | 0     | 0     |
| ENSG0000(LINC01854  | lincRNA chr2     | 1.29E+08 | 1.29E+08 | - | 0     | 0     |
| ENSG0000(BAG6       | protein_co chr6  | 31639028 | 31652705 | - | 78.35 | 81.42 |
| ENSG0000(C1orf195   | lincRNA chr1     | 15164344 | 15171317 | - | 0     | 0     |
| ENSG0000(PRRC2A     | protein_co chr6  | 31620720 | 31637771 | + | 32.26 | 34.05 |
| ENSG0000(TBC1D3P4   | unprocessε chr17 | 18393480 | 18400961 | + | 0     | 0     |
| ENSG0000(AIF1       | protein_co chr6  | 31615184 | 31617021 | + | 0     | 0     |
| ENSG0000(NCR3       | protein_co chr6  | 31588895 | 31592985 | - | 0     | 0     |
| ENSG0000(PRAMEF20   | protein_co chr1  | 13410450 | 13421328 | + | 0     | 0     |
| ENSG0000(PRAMEF17   | protein_co chr1  | 13389632 | 13392629 | + | 0     | 0     |
| ENSG0000(PRAMEF19   | protein_co chr1  | 13369067 | 13371693 | - | 0     | 0     |
| ENSG0000(PRAMEF14   | protein_co chr1  | 13342034 | 13347134 | - | 0     | 0     |
| ENSG0000(LST1       | protein_co chr6  | 31586124 | 31588909 | + | 0     | 0     |
| ENSG0000(NFKBIL1    | protein_co chr6  | 31546870 | 31558829 | + | 14.13 | 13.69 |
| ENSG0000(PRAMEF15   | protein_co chr1  | 13315581 | 13322598 | + | 0     | 0     |
| ENSG0000(PRAMEF9    | protein_co chr1  | 13172455 | 13179464 | + | 0     | 0     |
| ENSG0000(PRAMEF7    | protein_co chr1  | 12916610 | 12920482 | + | 0     | 0     |
| ENSG0000(MCCD1      | protein_co chr6  | 31528717 | 31530232 | + | 0     | 0     |
| ENSG0000(ZNF814     | protein_co chr19 | 57848731 | 57889074 | - | 3.94  | 5.42  |

|                 |           |                        |       |          |          |   |        |        |
|-----------------|-----------|------------------------|-------|----------|----------|---|--------|--------|
| ENSG00000101000 | MICB      | protein_coding         | chr6  | 31494881 | 31511124 | + | 8.28   | 8.38   |
| ENSG00000101000 | AADA4L4   | protein_coding         | chr1  | 12644547 | 12667086 | + | 0.22   | 0.04   |
| ENSG00000101000 | ZNF551    | protein_coding         | chr19 | 57681969 | 57717301 | + | 1.73   | 1.55   |
| ENSG00000101000 | MICA      | protein_coding         | chr6  | 31399784 | 31415315 | + | 15.92  | 16.1   |
| ENSG00000101000 | ZNF805    | protein_coding         | chr19 | 57240685 | 57255135 | + | 1.51   | 1.75   |
| ENSG00000101000 | HLA-C     | protein_coding         | chr6  | 31268749 | 31272130 | - | 818.91 | 761.9  |
| ENSG00000101000 | PSORS1C3  | sense_intronic         | chr6  | 31173735 | 31177899 | - | 0      | 0.13   |
| ENSG00000101000 | GUCY2EP   | transcribed            | chr11 | 76694041 | 76719801 | - | 0      | 0      |
| ENSG00000101000 | POU5F1    | protein_coding         | chr6  | 31164337 | 31180731 | - | 0.92   | 1.04   |
| ENSG00000101000 | ZSCAN5C   | protein_coding         | chr19 | 56202301 | 56209452 | + | 0      | 0      |
| ENSG00000101000 | CCHCR1    | protein_coding         | chr6  | 31142439 | 31158238 | - | 8.57   | 9.68   |
| ENSG00000101000 | PSORS1C2  | protein_coding         | chr6  | 31137536 | 31139350 | - | 0      | 0      |
| ENSG00000101000 | CDSN      | protein_coding         | chr6  | 31115090 | 31120446 | - | 0      | 0      |
| ENSG00000101000 | PSORS1C1  | protein_coding         | chr6  | 31114750 | 31140092 | + | 3.02   | 5.59   |
| ENSG00000101000 | C6orf15   | protein_coding         | chr6  | 31111223 | 31112559 | - | 0      | 0      |
| ENSG00000101000 | MUC21     | protein_coding         | chr6  | 30983718 | 30989903 | + | 0      | 0      |
| ENSG00000101000 | DEFB122   | transcribed            | chr20 | 31421436 | 31429180 | - | 0      | 0      |
| ENSG00000101000 | DEFB121   | protein_coding         | chr20 | 31404845 | 31412838 | - | 0      | 0      |
| ENSG00000101000 | CFTRP3    | processed_transcript   | chr20 | 30214765 | 30214976 | - | 0      | 0      |
| ENSG00000101000 | CTD-2514C | unprocessed_transcript | chr20 | 26018832 | 26020684 | + | 1.25   | 1      |
| ENSG00000101000 | DHX16     | protein_coding         | chr6  | 30653119 | 30673037 | - | 11.35  | 11.52  |
| ENSG00000101000 | C6orf136  | protein_coding         | chr6  | 30647039 | 30653210 | + | 5.1    | 5.19   |
| ENSG00000101000 | MRPS18B   | protein_coding         | chr6  | 30617709 | 30626395 | + | 22.41  | 22.12  |
| ENSG00000101000 | PPP1R10   | protein_coding         | chr6  | 30600400 | 30618612 | - | 8.4    | 10.67  |
| ENSG00000101000 | KRTAP5-11 | protein_coding         | chr11 | 71579714 | 71603353 | - | 0.11   | 0      |
| ENSG00000101000 | KRTAP5-10 | protein_coding         | chr11 | 71565563 | 71566738 | + | 0      | 0      |
| ENSG00000101000 | ABCF1     | protein_coding         | chr6  | 30571376 | 30597179 | + | 26.83  | 27.31  |
| ENSG00000101000 | PRR3      | protein_coding         | chr6  | 30556886 | 30563723 | + | 6.6    | 5.91   |
| ENSG00000101000 | LILRB3    | protein_coding         | chr19 | 54216278 | 54223506 | - | 0.19   | 0.06   |
| ENSG00000101000 | DDR1      | protein_coding         | chr6  | 30876421 | 30900156 | + | 37.92  | 47.84  |
| ENSG00000101000 | ACOXL-AS1 | antisense              | chr2  | 1.11E+08 | 1.11E+08 | - | 0.02   | 0.44   |
| ENSG00000101000 | LRCOL1    | protein_coding         | chr12 | 1.33E+08 | 1.33E+08 | - | 0      | 0      |
| ENSG00000101000 | RP11-304F | antisense              | chr17 | 49845910 | 49848837 | + | 0      | 0      |
| ENSG00000101000 | LINC01123 | lincRNA                | chr2  | 1.1E+08  | 1.1E+08  | + | 1.59   | 1.8    |
| ENSG00000101000 | GNL1      | protein_coding         | chr6  | 30541377 | 30557174 | - | 42.68  | 42.95  |
| ENSG00000101000 | HLA-E     | protein_coding         | chr6  | 30489467 | 30494205 | + | 177.37 | 170.81 |
| ENSG00000101000 | DPRX      | protein_coding         | chr19 | 53632056 | 53637009 | + | 0      | 0      |
| ENSG00000101000 | TRIM39    | protein_coding         | chr6  | 30326479 | 30343729 | + | 6.85   | 6.88   |
| ENSG00000101000 | LINC01257 | lincRNA                | chr12 | 1.31E+08 | 1.31E+08 | + | 0      | 0      |
| ENSG00000101000 | ZNF468    | protein_coding         | chr19 | 52838008 | 52857649 | - | 2.15   | 2.93   |
| ENSG00000101000 | TRIM15    | protein_coding         | chr6  | 30163206 | 30172696 | + | 0      | 0      |
| ENSG00000101000 | ZNF616    | protein_coding         | chr19 | 52113091 | 52139922 | - | 5.8    | 4.01   |
| ENSG00000101000 | FOXB2     | protein_coding         | chr9  | 77019655 | 77020953 | + | 0      | 0      |
| ENSG00000101000 | TRIM10    | protein_coding         | chr6  | 30151945 | 30160934 | - | 0      | 0      |
| ENSG00000101000 | TRIM40    | protein_coding         | chr6  | 30136108 | 30148735 | + | 0      | 0      |

|                 |            |                 |       |          |          |   |         |         |
|-----------------|------------|-----------------|-------|----------|----------|---|---------|---------|
| ENSG00000171311 | TRIM31     | protein_coding  | chr6  | 30102897 | 30113106 | - | 0       | 0       |
| ENSG00000171312 | RNF39      | protein_coding  | chr6  | 30070266 | 30075887 | - | 0       | 0       |
| ENSG00000171313 | PPP1R11    | protein_coding  | chr6  | 30066709 | 30070333 | + | 33.28   | 31.65   |
| ENSG00000171314 | RP11-1148  | antisense       | chrX  | 48568014 | 48574860 | - | 1.24    | 0.34    |
| ENSG00000171315 | HLA-J      | transcribed     | chr6  | 30005971 | 30009956 | + | 1.11    | 1.69    |
| ENSG00000171316 | ZNRD1ASP   | transcribed     | chr6  | 30001011 | 30061640 | - | 1.39    | 1.61    |
| ENSG00000171317 | DISP3      | protein_coding  | chr1  | 11479166 | 11537584 | + | 0       | 0.16    |
| ENSG00000171318 | HCG9       | lincRNA         | chr6  | 29975112 | 29978410 | + | 0       | 0       |
| ENSG00000171319 | RACK1      | protein_coding  | chr5  | 1.81E+08 | 1.81E+08 | - | 1346.18 | 1348.93 |
| ENSG00000171320 | HLA-G      | protein_coding  | chr6  | 29826967 | 29831125 | + | 1.02    | 1.62    |
| ENSG00000171321 | TBC1D8     | protein_coding  | chr2  | 1.01E+08 | 1.01E+08 | - | 8.54    | 9.16    |
| ENSG00000171322 | AC068538   | processed       | chr2  | 1.01E+08 | 1.01E+08 | + | 0       | 0       |
| ENSG00000171323 | NMS        | protein_coding  | chr2  | 1E+08    | 1E+08    | + | 0       | 0       |
| ENSG00000171324 | HLA-F      | protein_coding  | chr6  | 29722775 | 29738528 | + | 23.88   | 25.82   |
| ENSG00000171325 | ZFP57      | protein_coding  | chr6  | 29672392 | 29681110 | - | 0       | 0       |
| ENSG00000171326 | SSX9       | transcribed     | chrX  | 48296816 | 48306179 | - | 0       | 0       |
| ENSG00000171327 | LINC02210  | transcribed     | chr17 | 45620328 | 45655156 | + | 5.43    | 4.37    |
| ENSG00000171328 | RPS26P8    | processed       | chr17 | 45608571 | 45608918 | + | 0       | 0       |
| ENSG00000171329 | ASPDH      | protein_coding  | chr19 | 50511600 | 50514690 | - | 0       | 0       |
| ENSG00000171330 | MOG        | protein_coding  | chr6  | 29656981 | 29672372 | + | 0.07    | 0.11    |
| ENSG00000171331 | OR2H2      | protein_coding  | chr6  | 29587455 | 29589038 | + | 0       | 0       |
| ENSG00000171332 | CST9LP2    | unprocessed     | chr20 | 23583645 | 23586510 | + | 0       | 0       |
| ENSG00000171333 | CBY3       | protein_coding  | chr5  | 1.8E+08  | 1.8E+08  | - | 0       | 0       |
| ENSG00000171334 | C5orf60    | processed       | chr5  | 1.8E+08  | 1.8E+08  | - | 0       | 0       |
| ENSG00000171335 | CST9LP1    | unprocessed     | chr20 | 23547764 | 23550652 | - | 0       | 0       |
| ENSG00000171336 | CST13P     | transcribed     | chr20 | 23519146 | 23542018 | + | 0       | 0       |
| ENSG00000171337 | CTD-2126E  | sense_intronic  | chr19 | 50050589 | 50066793 | + | 0.11    | 0.08    |
| ENSG00000171338 | C9orf57    | protein_coding  | chr9  | 72051376 | 72072721 | - | 0       | 0       |
| ENSG00000171339 | IGKV1OR2   | IG_V_pseudogene | chr2  | 97060128 | 97060415 | + | 0       | 0       |
| ENSG00000171340 | IL31       | protein_coding  | chr12 | 1.22E+08 | 1.22E+08 | - | 0       | 0       |
| ENSG00000171341 | AKT1S1     | protein_coding  | chr19 | 49869033 | 49878459 | - | 27.95   | 28.24   |
| ENSG00000171342 | FAM153C    | protein_coding  | chr5  | 1.78E+08 | 1.78E+08 | + | 0.4     | 0.09    |
| ENSG00000171343 | GABBR1     | protein_coding  | chr6  | 29555629 | 29633976 | - | 14.76   | 18.06   |
| ENSG00000171344 | CASC10     | protein_coding  | chr10 | 21492658 | 21497262 | - | 0.86    | 0.67    |
| ENSG00000171345 | C10orf113  | protein_coding  | chr10 | 21125763 | 21146559 | - | 0       | 0       |
| ENSG00000171346 | RP5-1004I9 | lincRNA         | chr20 | 22371216 | 22471557 | - | 0       | 0       |
| ENSG00000171347 | STARD7-AS1 | processed       | chr2  | 96208416 | 96242621 | + | 3.48    | 3.11    |
| ENSG00000171348 | MAS1L      | protein_coding  | chr6  | 29486697 | 29487956 | - | 0       | 0       |
| ENSG00000171349 | OR2H1      | protein_coding  | chr6  | 29457181 | 29464328 | + | 0       | 0       |
| ENSG00000171350 | OR11A1     | protein_coding  | chr6  | 29425504 | 29457071 | - | 0       | 0       |
| ENSG00000171351 | OR14J1     | protein_coding  | chr6  | 29306690 | 29307655 | + | 0       | 0       |
| ENSG00000171352 | OR2U1P     | unprocessed     | chr6  | 29262703 | 29264079 | - | 0       | 0       |
| ENSG00000171353 | UBTFL3     | unprocessed     | chr2  | 95625213 | 95626236 | + | 0       | 0       |
| ENSG00000171354 | OR2J2      | protein_coding  | chr6  | 29173303 | 29174574 | + | 0       | 0       |
| ENSG00000171355 | OR2J3      | protein_coding  | chr6  | 29111891 | 29112826 | + | 0       | 0       |

|                      |             |       |          |          |   |       |       |
|----------------------|-------------|-------|----------|----------|---|-------|-------|
| ENSG0000( OR2J1      | polymorph   | chr6  | 29100609 | 29101881 | + | 0     | 0     |
| ENSG0000( OR2B3      | protein_co  | chr6  | 29086208 | 29087313 | - | 0     | 0     |
| ENSG0000( OR2W1      | protein_co  | chr6  | 29044213 | 29045240 | - | 0     | 0     |
| ENSG0000( UBTF5      | unprocessε  | chr2  | 95450310 | 95451500 | - | 0     | 0     |
| ENSG0000( MAMDC2-    | antisense   | chr9  | 70033921 | 70175888 | - | 0.08  | 0.14  |
| ENSG0000( LINC01556  | lincRNA     | chr6  | 28943877 | 28944537 | + | 0     | 0     |
| ENSG0000( SPDYC      | protein_co  | chr11 | 65170154 | 65173244 | + | 0     | 0     |
| ENSG0000( C9orf135   | protein_co  | chr9  | 69820793 | 69906232 | + | 0     | 0     |
| ENSG0000( TRIM27     | protein_co  | chr6  | 28903002 | 28923989 | - | 18.67 | 17.65 |
| ENSG0000( AC073464.  | unprocessε  | chr2  | 94795808 | 94806452 | - | 0     | 0     |
| ENSG0000( CNN2P12    | processed_  | chr13 | 18726706 | 18727414 | + | 0     | 0     |
| ENSG0000( MALRD1     | protein_co  | chr10 | 19048771 | 19790401 | + | 0.06  | 0.11  |
| ENSG0000( AC083899.  | unprocessε  | chr2  | 87125390 | 87196647 | + | 0.62  | 0.67  |
| ENSG0000( LINC01951  | lincRNA     | chr5  | 1.75E+08 | 1.75E+08 | - | 0.06  | 0.06  |
| ENSG0000( CTC-308K2  | antisense   | chr5  | 1.73E+08 | 1.73E+08 | - | 0.6   | 0.52  |
| ENSG0000( RANBP17    | protein_co  | chr5  | 1.71E+08 | 1.71E+08 | + | 1.13  | 1.48  |
| ENSG0000( FAM196B    | protein_co  | chr5  | 1.7E+08  | 1.7E+08  | - | 7     | 7.06  |
| ENSG0000( IGKV1OR-3  | IG_V_pseu   | chr9  | 65770955 | 65771434 | + | 0     | 0     |
| ENSG0000( CBWD4P     | unprocessε  | chr9  | 65287914 | 65323015 | - | 0.58  | 0.71  |
| ENSG0000( FOXD4L5    | protein_co  | chr9  | 65282101 | 65285209 | - | 0     | 0     |
| ENSG0000( IGKV1OR9-  | IG_V_pseu   | chr9  | 65250543 | 65250826 | - | 0     | 0     |
| ENSG0000( REG1CP     | transcribec | chr2  | 79135503 | 79138427 | - | 0     | 0     |
| ENSG0000( ZNF204P    | processed_  | chr6  | 27357825 | 27360221 | - | 0.21  | 0.15  |
| ENSG0000( BX255923.  | unprocessε  | chr9  | 63974762 | 64004155 | - | 0     | 0.31  |
| ENSG0000( SMPD5      | transcribec | chr8  | 1.44E+08 | 1.44E+08 | + | 0     | 0     |
| ENSG0000( LINC01291  | lincRNA     | chr2  | 74918148 | 74938418 | + | 0.36  | 0     |
| ENSG0000( FGF7P7     | unprocessε  | chr9  | 62474948 | 62476333 | - | 0     | 0     |
| ENSG0000( RP11-111F  | lincRNA     | chr9  | 62374128 | 62376836 | - | 0.68  | 1.68  |
| ENSG0000( FAM27E4    | processed_  | chr9  | 61861995 | 61862336 | + | 0     | 0     |
| ENSG0000( RP11-160N  | lincRNA     | chr9  | 61659733 | 61662690 | + | 0     | 0.1   |
| ENSG0000( TTC25      | protein_co  | chr17 | 41930635 | 41965651 | + | 0.5   | 0.6   |
| ENSG0000( FGF7P5     | unprocessε  | chr9  | 42625436 | 42626813 | + | 1.11  | 0.92  |
| ENSG0000( ADGRF5P2   | unprocessε  | chr9  | 42795392 | 42800672 | + | 0     | 0.04  |
| ENSG0000( MRPL53     | protein_co  | chr2  | 74471958 | 74473322 | - | 22.9  | 17.44 |
| ENSG0000( ST8SIA6-AS | antisense   | chr10 | 17386936 | 17413503 | + | 0.03  | 0     |
| ENSG0000( FGF7P3     | transcribec | chr9  | 39816542 | 40106661 | - | 0.29  | 0.31  |
| ENSG0000( MROH6      | protein_co  | chr8  | 1.44E+08 | 1.44E+08 | - | 4.17  | 4.7   |
| ENSG0000( ATXN2      | protein_co  | chr12 | 1.11E+08 | 1.12E+08 | - | 15.62 | 16.97 |
| ENSG0000( DCTN1      | protein_co  | chr2  | 74361154 | 74392087 | - | 73    | 78.04 |
| ENSG0000( SPATA31A:  | protein_co  | chr9  | 39355669 | 39361959 | + | 0     | 0     |
| ENSG0000( CTB-158D1  | antisense   | chr19 | 46494508 | 46496502 | + | 0.11  | 0.25  |
| ENSG0000( PNMAL2     | protein_co  | chr19 | 46486906 | 46496498 | - | 0.24  | 0.2   |
| ENSG0000( TCTN1      | protein_co  | chr12 | 1.11E+08 | 1.11E+08 | + | 34.98 | 36.54 |
| ENSG0000( FAM216A    | protein_co  | chr12 | 1.1E+08  | 1.1E+08  | + | 5.55  | 4.91  |
| ENSG0000( ZBTB48     | protein_co  | chr1  | 6580001  | 6589280  | + | 6.44  | 6.97  |

|                    |            |       |          |          |   |      |      |
|--------------------|------------|-------|----------|----------|---|------|------|
| ENSG0000(FAM201A   | antisense  | chr9  | 38620474 | 38624990 | + | 0    | 0.11 |
| ENSG0000(IGFL2     | protein_co | chr19 | 46143106 | 46161299 | + | 0.34 | 0.49 |
| ENSG0000(IGFL4     | protein_co | chr19 | 46039748 | 46077118 | - | 0    | 0.04 |
| ENSG0000(NAT8B     | polymorph  | chr2  | 73700576 | 73701340 | - | 0    | 0    |
| ENSG0000(KRTAP9-3  | protein_co | chr17 | 41232463 | 41233454 | + | 0    | 0    |
| ENSG0000(AC021218. | lincRNA    | chr7  | 1.56E+08 | 1.56E+08 | + | 0    | 0    |
| ENSG0000(KRTAP4-8  | protein_co | chr17 | 41096981 | 41098141 | - | 0    | 0    |
| ENSG0000(GPR20     | protein_co | chr8  | 1.41E+08 | 1.41E+08 | - | 0    | 0    |
| ENSG0000(KRTAP1-4  | protein_co | chr17 | 41029697 | 41030104 | - | 0    | 0    |
| ENSG0000(KRT40     | protein_co | chr17 | 40977716 | 40987135 | - | 0    | 0    |
| ENSG0000(RP11-208G | processed_ | chr7  | 1.52E+08 | 1.52E+08 | + | 0    | 0    |
| ENSG0000(KRT25     | protein_co | chr17 | 40748021 | 40755332 | - | 0    | 0    |
| ENSG0000(MZT1      | protein_co | chr13 | 72708357 | 72727687 | - | 1.65 | 1.87 |
| ENSG0000(LINC01545 | lincRNA    | chrX  | 46887417 | 46899703 | - | 0    | 0.21 |
| ENSG0000(SPINK9    | protein_co | chr5  | 1.48E+08 | 1.48E+08 | + | 0    | 0.16 |
| ENSG0000(LRRC3C    | protein_co | chr17 | 39941474 | 39944747 | + | 0    | 0    |
| ENSG0000(RP6-99M1. | processed_ | chrX  | 45730752 | 45731688 | + | 0    | 0    |
| ENSG0000(PRR20B    | protein_co | chr13 | 57147488 | 57150509 | + | 0    | 0    |
| ENSG0000(PRR20A    | protein_co | chr13 | 57140918 | 57143939 | + | 0    | 0    |
| ENSG0000(ZNF155    | protein_co | chr19 | 43967862 | 43998325 | + | 3.18 | 2.89 |
| ENSG0000(UQCC3     | protein_co | chr11 | 62670273 | 62673687 | + | 4.16 | 4.92 |
| ENSG0000(FBXO48    | protein_co | chr2  | 68459419 | 68467258 | - | 0.71 | 0.5  |
| ENSG0000(GRXCR2    | protein_co | chr5  | 1.46E+08 | 1.46E+08 | - | 0    | 0    |
| ENSG0000(AC074391. | processed_ | chr2  | 65436711 | 66084639 | + | 0.15 | 0.18 |
| ENSG0000(FAM221B   | protein_co | chr9  | 35816391 | 35828747 | - | 0    | 0    |
| ENSG0000(CD177P1   | unprocessε | chr19 | 43372742 | 43379123 | - | 0    | 0    |
| ENSG0000(ATP6V0E2- | antisense  | chr7  | 1.5E+08  | 1.5E+08  | - | 0.49 | 0.54 |
| ENSG0000(CD177     | protein_co | chr19 | 43353659 | 43363172 | + | 0.08 | 0.3  |
| ENSG0000(PSG5      | protein_co | chr19 | 43166256 | 43186536 | - | 2.81 | 2.21 |
| ENSG0000(ZNF783    | protein_co | chr7  | 1.49E+08 | 1.49E+08 | + | 5.61 | 7.3  |
| ENSG0000(ZNF425    | protein_co | chr7  | 1.49E+08 | 1.49E+08 | - | 2.37 | 2.59 |
| ENSG0000(FAM83A-A  | antisense  | chr8  | 1.23E+08 | 1.23E+08 | - | 0    | 0    |
| ENSG0000(LRRC10B   | protein_co | chr11 | 61508800 | 61511018 | + | 0.02 | 0    |
| ENSG0000(FBXO47    | protein_co | chr17 | 38936432 | 38967402 | - | 0    | 0.03 |
| ENSG0000(C12orf73  | protein_co | chr12 | 1.04E+08 | 1.04E+08 | - | 5.35 | 5.7  |
| ENSG0000(PCDHGA1   | protein_co | chr5  | 1.41E+08 | 1.42E+08 | + | 1.09 | 1.01 |
| ENSG0000(ARHGEF34  | unprocessε | chr7  | 1.44E+08 | 1.44E+08 | - | 2.21 | 2.22 |
| ENSG0000(BLACE     | protein_co | chr7  | 1.55E+08 | 1.55E+08 | - | 0    | 0    |
| ENSG0000(PCDHA9    | protein_co | chr5  | 1.41E+08 | 1.41E+08 | + | 0.03 | 0.05 |
| ENSG0000(PCDHA8    | protein_co | chr5  | 1.41E+08 | 1.41E+08 | + | 0    | 0    |
| ENSG0000(PCDHA7    | protein_co | chr5  | 1.41E+08 | 1.41E+08 | + | 0.08 | 0.05 |
| ENSG0000(PCDHA5    | protein_co | chr5  | 1.41E+08 | 1.41E+08 | + | 0.03 | 0.03 |
| ENSG0000(PCDHA4    | protein_co | chr5  | 1.41E+08 | 1.41E+08 | + | 0.16 | 0.18 |
| ENSG0000(PCDHA2    | protein_co | chr5  | 1.41E+08 | 1.41E+08 | + | 0.1  | 0.02 |
| ENSG0000(PCDHA1    | protein_co | chr5  | 1.41E+08 | 1.41E+08 | + | 0    | 0.02 |

|                     |             |       |          |          |   |       |       |
|---------------------|-------------|-------|----------|----------|---|-------|-------|
| ENSG0000(RP11-807H) | antisense   | chr11 | 72163322 | 72209241 | - | 0     | 0     |
| ENSG0000(TRIM13)    | protein_co  | chr13 | 49995888 | 50020481 | + | 8.91  | 8.39  |
| ENSG0000(ERICH4)    | protein_co  | chr19 | 41443158 | 41444765 | + | 0     | 0     |
| ENSG0000(MS4A13)    | protein_co  | chr11 | 60515413 | 60542721 | + | 0     | 0     |
| ENSG0000(PRSS3P4)   | unprocessε  | chr9  | 33613848 | 33614009 | - | 0     | 0     |
| ENSG0000(PRSS1)     | protein_co  | chr7  | 1.43E+08 | 1.43E+08 | + | 0     | 0.09  |
| ENSG0000(OR4D8P)    | unprocessε  | chr11 | 59491652 | 59492581 | + | 0     | 0     |
| ENSG0000(RP5-842K1) | lincRNA     | chr7  | 1.41E+08 | 1.41E+08 | - | 0     | 0     |
| ENSG0000(SPIRE2)    | protein_co  | chr16 | 89818179 | 89871319 | + | 0.7   | 0.95  |
| ENSG0000(AC139712)  | processed_  | chr2  | 52570648 | 52572522 | + | 0     | 0     |
| ENSG0000(AARD)      | protein_co  | chr8  | 1.17E+08 | 1.17E+08 | + | 0.04  | 0     |
| ENSG0000(LINC02138) | lincRNA     | chr16 | 89166383 | 89169147 | + | 0     | 0     |
| ENSG0000(RP11-830F) | antisense   | chr16 | 88939789 | 88951524 | + | 0     | 0     |
| ENSG0000(PABPN1L)   | protein_co  | chr16 | 88863333 | 88866660 | - | 0     | 0     |
| ENSG0000(OR5G5P)    | transcribec | chr11 | 56801856 | 56820422 | - | 0     | 0     |
| ENSG0000(OR5D16)    | protein_co  | chr11 | 55838752 | 55839738 | + | 0     | 0     |
| ENSG0000(OR5L2)     | protein_co  | chr11 | 55827219 | 55828154 | + | 0     | 0     |
| ENSG0000(RP11-707N) | transcribec | chr11 | 49558546 | 49810419 | + | 0     | 0     |
| ENSG0000(RP11-863P) | lincRNA     | chr16 | 88088041 | 88100985 | - | 0.03  | 0.05  |
| ENSG0000(PKHD1L1)   | protein_co  | chr8  | 1.09E+08 | 1.1E+08  | + | 0.01  | 0.19  |
| ENSG0000(CTC-425O2) | sense_intrε | chr19 | 40273489 | 40275479 | - | 0.2   | 0.48  |
| ENSG0000(RP11-56P9) | transcribec | chr11 | 49009959 | 49015894 | - | 0     | 0     |
| ENSG0000(SLFN12L)   | protein_co  | chr17 | 35464249 | 35537861 | - | 0     | 0.04  |
| ENSG0000(LINC01121) | processed_  | chr2  | 45164870 | 45323295 | - | 0.08  | 0     |
| ENSG0000(RP11-693J) | lincRNA     | chr12 | 92466451 | 92492091 | + | 0     | 0     |
| ENSG0000(CLLU1OS)   | protein_co  | chr12 | 92420094 | 92428148 | - | 0     | 0     |
| ENSG0000(SLC35B4)   | protein_co  | chr7  | 1.34E+08 | 1.34E+08 | - | 4.2   | 4.49  |
| ENSG0000(LGALS7)    | protein_co  | chr19 | 38770971 | 38773492 | - | 0     | 0     |
| ENSG0000(SYCE1L)    | protein_co  | chr16 | 77199397 | 77213215 | + | 4.44  | 1.61  |
| ENSG0000(TMEM231)   | protein_co  | chr16 | 75536744 | 75556286 | - | 7.25  | 7.83  |
| ENSG0000(FAM71F2)   | protein_co  | chr7  | 1.29E+08 | 1.29E+08 | + | 0.29  | 0.21  |
| ENSG0000(C2orf91)   | protein_co  | chr2  | 41935368 | 41954266 | - | 0.14  | 0.05  |
| ENSG0000(CCN12)     | protein_co  | chr5  | 1.33E+08 | 1.33E+08 | + | 0     | 0     |
| ENSG0000(TMEM240)   | protein_co  | chr1  | 1535174  | 1540453  | - | 3.87  | 4.68  |
| ENSG0000(FRG2)      | protein_co  | chr4  | 1.9E+08  | 1.9E+08  | - | 0     | 0     |
| ENSG0000(HSP90AA4)  | transcribec | chr4  | 1.89E+08 | 1.89E+08 | + | 0     | 0     |
| ENSG0000(COX17P1)   | processed_  | chr13 | 46490930 | 46491121 | + | 0     | 0     |
| ENSG0000(DKFZp779N) | lincRNA     | chr11 | 45771432 | 45772358 | + | 0.21  | 0.23  |
| ENSG0000(FAM205A)   | protein_co  | chr9  | 34723055 | 34729467 | - | 0     | 0     |
| ENSG0000(CDKL4)     | protein_co  | chr2  | 39175646 | 39229588 | - | 0.22  | 0.11  |
| ENSG0000(TMEM88B)   | protein_co  | chr1  | 1426128  | 1427787  | + | 0     | 0     |
| ENSG0000(ACCSL)     | protein_co  | chr11 | 44047981 | 44059977 | + | 0     | 0     |
| ENSG0000(C4orf47)   | protein_co  | chr4  | 1.85E+08 | 1.85E+08 | + | 1.72  | 0.87  |
| ENSG0000(TRIQK)     | protein_co  | chr8  | 92883530 | 93017673 | - | 20.53 | 16.54 |
| ENSG0000(SDHAF1)    | protein_co  | chr19 | 35995199 | 35996315 | + | 8.13  | 8.95  |



|                 |           |                |       |          |          |   |       |       |
|-----------------|-----------|----------------|-------|----------|----------|---|-------|-------|
| ENSG00000100000 | ARID3C    | protein_coding | chr9  | 34621379 | 34628107 | - | 0.12  | 0.18  |
| ENSG00000100000 | PSENFEN   | protein_coding | chr19 | 35745114 | 35747519 | + | 46.99 | 44.67 |
| ENSG00000100000 | C7orf66   | lincRNA        | chr7  | 1.09E+08 | 1.09E+08 | - | 0     | 0     |
| ENSG00000100000 | REXO1L1P  | transcribed    | chr8  | 85656442 | 85663497 | - | 0     | 0     |
| ENSG00000100000 | C11orf91  | protein_coding | chr11 | 33698261 | 33700801 | - | 0     | 0.26  |
| ENSG00000100000 | LINC00654 | lincRNA        | chr20 | 5496067  | 5504613  | - | 1.86  | 1.88  |
| ENSG00000100000 | SLC10A5P1 | unprocessed    | chr8  | 81634357 | 81635662 | - | 0     | 0     |
| ENSG00000100000 | FABP9     | protein_coding | chr8  | 81458341 | 81461579 | - | 0     | 0     |
| ENSG00000100000 | ZBTB10    | protein_coding | chr8  | 80485619 | 80526265 | + | 2.31  | 2.6   |
| ENSG00000100000 | C4orf46   | protein_coding | chr4  | 1.59E+08 | 1.59E+08 | - | 3.03  | 3.43  |
| ENSG00000100000 | SCGB2B2   | protein_coding | chr19 | 34593329 | 34675699 | - | 0.15  | 0.68  |
| ENSG00000100000 | CCDC144N  | protein_coding | chr17 | 20836447 | 20896140 | - | 0     | 0     |
| ENSG00000100000 | LGR4      | protein_coding | chr11 | 27365961 | 27472775 | - | 36.77 | 34.72 |
| ENSG00000100000 | KRT17P7   | transcribed    | chr17 | 20519312 | 20528687 | - | 0     | 0     |
| ENSG00000100000 | PSMB10    | protein_coding | chr16 | 67934502 | 67937087 | - | 19.78 | 18.6  |
| ENSG00000100000 | VIT       | protein_coding | chr2  | 36696690 | 36814792 | + | 2.84  | 3.48  |
| ENSG00000100000 | TLL10-AS1 | antisense      | chr1  | 1173056  | 1179555  | - | 0.03  | 0     |
| ENSG00000100000 | RP11-514P | protein_coding | chr7  | 1.03E+08 | 1.03E+08 | - | 1.76  | 0.86  |
| ENSG00000100000 | SPDYE2    | protein_coding | chr7  | 1.03E+08 | 1.03E+08 | + | 0.05  | 0     |
| ENSG00000100000 | OR7E36P   | unprocessed    | chr13 | 41431248 | 41432201 | - | 0     | 0     |
| ENSG00000100000 | E2F4      | protein_coding | chr16 | 67192169 | 67198918 | + | 16.66 | 20.35 |
| ENSG00000100000 | KRT17P5   | transcribed    | chr17 | 18415728 | 18425097 | + | 0     | 0.03  |
| ENSG00000100000 | DGAT2L7P  | unprocessed    | chr7  | 1.01E+08 | 1.01E+08 | - | 0     | 0     |
| ENSG00000100000 | PDE7A     | protein_coding | chr8  | 65717510 | 65842322 | - | 8.68  | 10.01 |
| ENSG00000100000 | TMEM170F  | protein_coding | chr6  | 11538278 | 11583524 | + | 0.11  | 0.11  |
| ENSG00000100000 | TRBV20OR  | TR_V_gene      | chr9  | 33617762 | 33618506 | + | 0     | 0.22  |
| ENSG00000100000 | MUC12     | protein_coding | chr7  | 1.01E+08 | 1.01E+08 | + | 0.13  | 0.16  |
| ENSG00000100000 | CTXN3     | protein_coding | chr5  | 1.28E+08 | 1.28E+08 | + | 0     | 0     |
| ENSG00000100000 | LINC01602 | lincRNA        | chr8  | 57978358 | 57984126 | + | 0     | 0     |
| ENSG00000100000 | RP11-352D | lincRNA        | chr20 | 4070152  | 4075165  | - | 0.1   | 0     |
| ENSG00000100000 | MGAT4D    | protein_coding | chr4  | 1.4E+08  | 1.4E+08  | - | 0     | 0     |
| ENSG00000100000 | SNX2      | protein_coding | chr5  | 1.23E+08 | 1.23E+08 | + | 42.82 | 41.23 |
| ENSG00000100000 | SAP25     | protein_coding | chr7  | 1.01E+08 | 1.01E+08 | - | 0     | 0.13  |
| ENSG00000100000 | NT5M      | protein_coding | chr17 | 17303335 | 17347663 | + | 0.94  | 0.86  |
| ENSG00000100000 | KRT17P4   | transcribed    | chr17 | 16847635 | 16852777 | - | 0     | 0     |
| ENSG00000100000 | GCNT6     | processed      | chr6  | 10633762 | 10634695 | + | 0     | 0     |
| ENSG00000100000 | SARNP     | protein_coding | chr12 | 55752463 | 55817756 | - | 42.31 | 40.54 |
| ENSG00000100000 | AC005863  | lincRNA        | chr17 | 14767583 | 14780203 | - | 0     | 0     |
| ENSG00000100000 | OR6C68    | protein_coding | chr12 | 55492378 | 55493316 | + | 0     | 0     |
| ENSG00000100000 | OR6C65    | protein_coding | chr12 | 55400430 | 55401505 | + | 0     | 0     |
| ENSG00000100000 | OR6C3     | protein_coding | chr12 | 55331701 | 55332636 | + | 0     | 0     |
| ENSG00000100000 | OR6C1     | protein_coding | chr12 | 55320561 | 55321624 | + | 0     | 0     |
| ENSG00000100000 | OR6C72P   | unprocessed    | chr12 | 55283750 | 55284641 | + | 0     | 0     |
| ENSG00000100000 | GOLGA2P1  | processed      | chr8  | 86657388 | 86660293 | - | 0     | 0     |
| ENSG00000100000 | LINC01460 | lincRNA        | chr2  | 27705786 | 27715732 | - | 0.03  | 0.07  |

|                     |                   |          |          |   |       |       |
|---------------------|-------------------|----------|----------|---|-------|-------|
| ENSG0000( ADGRG1    | protein_co chr16  | 57610652 | 57665580 | + | 1.66  | 2.03  |
| ENSG0000( IPO7      | protein_co chr11  | 9384622  | 9448126  | + | 27.55 | 33.3  |
| ENSG0000( PRR13     | protein_co chr12  | 53441605 | 53446645 | + | 95.99 | 92.93 |
| ENSG0000( TECPR1    | protein_co chr7   | 98214624 | 98252251 | - | 11.56 | 12.72 |
| ENSG0000( MT1H      | protein_co chr16  | 56669814 | 56671129 | + | 0     | 0     |
| ENSG0000( SLC06A1   | protein_co chr5   | 1.02E+08 | 1.02E+08 | - | 0     | 0     |
| ENSG0000( MT1CP     | transcribec chr16 | 56648248 | 56649514 | + | 0     | 0     |
| ENSG0000( MT1DP     | transcribec chr16 | 56643705 | 56644786 | + | 0     | 1.23  |
| ENSG0000( MT1A      | protein_co chr16  | 56638666 | 56640087 | + | 0.65  | 1.66  |
| ENSG0000( C15orf59  | protein_co chr15  | 73735431 | 73752747 | - | 3.12  | 3.96  |
| ENSG0000( MT1M      | protein_co chr16  | 56632233 | 56633986 | + | 0.99  | 0.67  |
| ENSG0000( LINC00661 | processed_chr19   | 16015287 | 16027462 | + | 0     | 0     |
| ENSG0000( CFI       | protein_co chr4   | 1.1E+08  | 1.1E+08  | - | 12.48 | 13.26 |
| ENSG0000( OR52E6    | protein_co chr11  | 5840928  | 5841952  | - | 0     | 0     |
| ENSG0000( HNRNPA1P  | processed_chr3    | 1.48E+08 | 1.48E+08 | - | 0     | 0     |
| ENSG0000( SAMD9     | protein_co chr7   | 93099513 | 93118023 | - | 5.06  | 4.5   |
| ENSG0000( RP11-401P | antisense chr16   | 50606076 | 50613684 | - | 0     | 0     |
| ENSG0000( KRT6A     | protein_co chr12  | 52487174 | 52493257 | - | 0     | 0     |
| ENSG0000( CNEP1R1   | protein_co chr16  | 50024410 | 50037088 | + | 7.55  | 6.02  |
| ENSG0000( AL592528. | antisense chr21   | 45827961 | 45836419 | - | 0     | 0     |
| ENSG0000( KRT81     | protein_co chr12  | 52285913 | 52291534 | - | 0.04  | 0     |
| ENSG0000( SNRPGP6   | processed_chr10   | 1.16E+08 | 1.16E+08 | + | 0     | 0     |
| ENSG0000( EXOC3L4   | protein_co chr14  | 1.03E+08 | 1.03E+08 | + | 0.66  | 0.22  |
| ENSG0000( KRTAP12-3 | protein_co chr21  | 44657932 | 44658341 | + | 0     | 0     |
| ENSG0000( IZUMO3    | protein_co chr9   | 24542952 | 24545946 | - | 0     | 0     |
| ENSG0000( RP4-529N6 | lincRNA chr6      | 4610656  | 4611304  | + | 0     | 0.17  |
| ENSG0000( KRTAP10-2 | protein_co chr21  | 44550357 | 44551505 | - | 0     | 0     |
| ENSG0000( NBPF22P   | transcribec chr5  | 86282460 | 86296463 | + | 0     | 0     |
| ENSG0000( RP11-812E | lincRNA chr16     | 33972912 | 33976346 | - | 0     | 0     |
| ENSG0000( TP53TG3D  | protein_co chr16  | 32252719 | 32255922 | + | 0.88  | 0.93  |
| ENSG0000( TP53TG3C  | protein_co chr16  | 33193659 | 33196858 | + | 0.05  | 0     |
| ENSG0000( ATP6AP1L  | protein_co chr5   | 82279462 | 82386977 | + | 3.07  | 2.26  |
| ENSG0000( CCDC85C   | protein_co chr14  | 99500180 | 99604026 | - | 7.1   | 5.33  |
| ENSG0000( SPDYE18   | unprocessε chr7   | 77052785 | 77060512 | - | 0.33  | 0     |
| ENSG0000( AC004980. | transcribec chr7  | 76549360 | 76627982 | + | 2.07  | 1.99  |
| ENSG0000( CALML3-A5 | antisense chr10   | 5514244  | 5526246  | - | 0.02  | 0     |
| ENSG0000( OR52A4P   | transcribec chr11 | 5120621  | 5124513  | - | 0     | 0     |
| ENSG0000( OR52J3    | protein_co chr11  | 5046526  | 5047461  | + | 0     | 0     |
| ENSG0000( OR51A2    | protein_co chr11  | 4954772  | 4955713  | - | 0     | 0     |
| ENSG0000( OR51A4    | protein_co chr11  | 4946159  | 4947100  | - | 0     | 0     |
| ENSG0000( AC013472. | processed_chr2    | 26984776 | 27014612 | - | 0.27  | 0.26  |
| ENSG0000( C2CD4B    | protein_co chr15  | 62163535 | 62165283 | - | 0.33  | 0.48  |
| ENSG0000( RGL3      | protein_co chr19  | 11384341 | 11419342 | - | 0.3   | 1.51  |
| ENSG0000( NAP1L4    | protein_co chr11  | 2944431  | 2992377  | - | 34.49 | 36.59 |
| ENSG0000( SMG1P2    | unprocessε chr16  | 29527568 | 29594966 | - | 0.92  | 0.82  |

|                     |             |       |          |          |   |         |         |
|---------------------|-------------|-------|----------|----------|---|---------|---------|
| ENSG0000(RP11-89H1) | antisense   | chr12 | 47882649 | 47901525 | + | 0       | 0       |
| ENSG0000(TMSB4X)    | protein_co  | chrX  | 12975108 | 12977227 | + | 4466.21 | 4426.26 |
| ENSG0000(TMEM256)   | protein_co  | chr17 | 7402975  | 7404137  | - | 55.79   | 49.49   |
| ENSG0000(C9orf92)   | protein_co  | chr9  | 16203935 | 16276313 | - | 0.46    | 0.82    |
| ENSG0000(CHKB-AS1)  | antisense   | chr22 | 50583026 | 50583877 | + | 1.1     | 0.54    |
| ENSG0000(CPT1B)     | protein_co  | chr22 | 50568861 | 50578465 | - | 2.21    | 3.27    |
| ENSG0000(RP11-497E) | lincRNA     | chr14 | 85524432 | 85529988 | - | 0.34    | 0.52    |
| ENSG0000(SMN2)      | protein_co  | chr5  | 70049612 | 70078522 | + | 10.8    | 9.01    |
| ENSG0000(SERF1B)    | protein_co  | chr5  | 70025247 | 70043113 | + | 14.49   | 16.09   |
| ENSG0000(POM121B)   | unprocessε  | chr7  | 73293497 | 73301161 | + | 0.15    | 0.21    |
| ENSG0000(DYNLL1P1)  | processed_  | chr14 | 81246295 | 81246563 | - | 0       | 0       |
| ENSG0000(HMGN1)     | protein_co  | chr21 | 39342315 | 39349647 | - | 61.66   | 60.46   |
| ENSG0000(STAG3L1)   | transcribec | chr7  | 75359194 | 75395383 | + | 3.1     | 2.69    |
| ENSG0000(AC005488)  | unprocessε  | chr7  | 72969814 | 72971727 | + | 0       | 0       |
| ENSG0000(MUC19)     | processed_  | chr12 | 40393395 | 40570832 | + | 0.15    | 0.29    |
| ENSG0000(DENND6B)   | protein_co  | chr22 | 50309030 | 50327060 | - | 3.72    | 2.94    |
| ENSG0000(RP5-1132H) | processed_  | chr7  | 66070904 | 66071318 | - | 0.2     | 0       |
| ENSG0000(EIF3CL)    | protein_co  | chr16 | 28379579 | 28403879 | - | 1.4     | 5.53    |
| ENSG0000(LINC01597) | lincRNA     | chr20 | 30278906 | 30288479 | - | 0.01    | 0.05    |
| ENSG0000(AF064858)  | lincRNA     | chr21 | 38863676 | 38956467 | - | 0       | 0       |
| ENSG0000(RP11-15G8) | processed_  | chr6  | 1.55E+08 | 1.55E+08 | + | 0       | 0       |
| ENSG0000(LINC01446) | lincRNA     | chr7  | 53655509 | 53811931 | - | 0       | 0       |
| ENSG0000(LCMT1)     | protein_co  | chr16 | 25111729 | 25178231 | + | 17.41   | 16.68   |
| ENSG0000(LINC01310) | lincRNA     | chr22 | 48866770 | 48898386 | + | 0       | 0       |
| ENSG0000(LINC00898) | lincRNA     | chr22 | 47621043 | 47631569 | - | 0       | 0       |
| ENSG0000(LINC00583) | lincRNA     | chr9  | 13927971 | 13945610 | + | 0       | 0       |
| ENSG0000(MFSD2B)    | protein_co  | chr2  | 24010081 | 24063321 | + | 0.23    | 0.56    |
| ENSG0000(VCX3B)     | protein_co  | chrX  | 8464830  | 8466510  | + | 0       | 0       |
| ENSG0000(CDPF1)     | protein_co  | chr22 | 46244011 | 46250679 | - | 4.74    | 4.9     |
| ENSG0000(CTD-2375G) | processed_  | chr5  | 65415353 | 65416222 | + | 0       | 0       |
| ENSG0000(HTN3)      | protein_co  | chr4  | 70028413 | 70036538 | + | 0       | 0       |
| ENSG0000(RP3-416J7) | lincRNA     | chr6  | 203313   | 206392   | + | 0       | 0       |
| ENSG0000(LIN52)     | protein_co  | chr14 | 74084796 | 74201235 | + | 2.88    | 2.02    |
| ENSG0000(RP11-706C) | lincRNA     | chrX  | 3929869  | 3937855  | - | 0       | 0       |
| ENSG0000(RP11-706C) | lincRNA     | chrX  | 3891438  | 3920746  | - | 0       | 0.4     |
| ENSG0000(RP11-706C) | lincRNA     | chrX  | 3817528  | 3843857  | - | 4.82    | 8.09    |
| ENSG0000(ARSH)      | protein_co  | chrX  | 3006613  | 3033571  | + | 0       | 0       |
| ENSG0000(ACOT6)     | protein_co  | chr14 | 73610945 | 73619888 | + | 0.06    | 0       |
| ENSG0000(SMIM11A)   | protein_co  | chr21 | 34375480 | 34407866 | + | 3.21    | 5.19    |
| ENSG0000(TECL)      | protein_co  | chr4  | 64275257 | 64409468 | - | 0       | 0       |
| ENSG0000(RP11-798L) | lincRNA     | chr4  | 61420246 | 61428221 | - | 0.29    | 0.27    |
| ENSG0000(DPF3)      | protein_co  | chr14 | 72619296 | 72894116 | - | 0.06    | 0.88    |
| ENSG0000(MANSC4)    | protein_co  | chr12 | 27762738 | 27771276 | - | 0       | 0.13    |
| ENSG0000(RP11-15H7) | processed_  | chr6  | 1.4E+08  | 1.4E+08  | + | 0       | 0       |
| ENSG0000(ADARB2-A)  | antisense   | chr10 | 1526637  | 1556984  | + | 0       | 0       |

|                    |             |       |          |          |   |       |       |
|--------------------|-------------|-------|----------|----------|---|-------|-------|
| ENSG0000(CYP2D7    | polymorph   | chr22 | 42140203 | 42144577 | - | 0.25  | 0.25  |
| ENSG0000(LINC00634 | transcribec | chr22 | 41952165 | 41958933 | + | 0     | 0.08  |
| ENSG0000(ETFRF1    | protein_co  | chr12 | 25195216 | 25209645 | + | 6.66  | 8.31  |
| ENSG0000(C17orf107 | protein_co  | chr17 | 4899418  | 4902932  | + | 0.73  | 0.99  |
| ENSG0000(FAM183DP  | processed_  | chr2  | 1.02E+08 | 1.02E+08 | - | 0     | 0     |
| ENSG0000(MBD3L4    | protein_co  | chr19 | 7037748  | 7040179  | - | 0     | 0     |
| ENSG0000(ITSN1     | protein_co  | chr21 | 33642400 | 33899861 | + | 32.25 | 30.36 |
| ENSG0000(ITPRIPL2  | protein_co  | chr16 | 19113932 | 19121629 | + | 9.23  | 10.27 |
| ENSG0000(RP11-363N | processed_  | chr10 | 971146   | 988341   | - | 0.27  | 0.31  |
| ENSG0000(DENND1C   | protein_co  | chr19 | 6467207  | 6482557  | - | 0     | 0     |
| ENSG0000(AC083864. | lincRNA     | chr7  | 36079084 | 36085736 | + | 0     | 0     |
| ENSG0000(RP11-1212 | transcribec | chr16 | 18334400 | 18352476 | - | 44.61 | 53.78 |
| ENSG0000(SLCO1B7   | protein_co  | chr12 | 21015696 | 21092745 | + | 0     | 0     |
| ENSG0000(CRLF2     | protein_co  | chrX  | 1187549  | 1212750  | - | 0     | 0.02  |
| ENSG0000(CRLF2     | protein_co  | chrY  | 1187549  | 1212750  | - | 0     | 0.02  |
| ENSG0000(CRYZL1    | protein_co  | chr21 | 33589341 | 33643926 | - | 18.59 | 22.71 |
| ENSG0000(RP9P      | transcribec | chr7  | 32916815 | 32943176 | - | 4.25  | 3.99  |
| ENSG0000(C5orf51   | protein_co  | chr5  | 41904188 | 41921636 | + | 9.35  | 9.35  |
| ENSG0000(CTD-2302E | processed_  | chr14 | 63567958 | 63568308 | + | 0     | 0     |
| ENSG0000(CATSPER2F | transcribec | chr15 | 43726918 | 43747094 | - | 1.19  | 1.5   |
| ENSG0000(GAGE1     | protein_co  | chrX  | 49589496 | 49608536 | + | 0     | 0     |
| ENSG0000(ARRDC5    | protein_co  | chr19 | 4890437  | 4902867  | - | 0     | 0     |
| ENSG0000(LINC01531 | lincRNA     | chr19 | 35399511 | 35419385 | + | 0     | 0     |
| ENSG0000(DPP9-AS1  | antisense   | chr19 | 4679282  | 4685948  | + | 0     | 0     |
| ENSG0000(LOH12CR2  | lincRNA     | chr12 | 12355406 | 12357067 | - | 0.74  | 1.05  |
| ENSG0000(RP11-333E | transcribec | chr4  | 40042917 | 40057199 | - | 0.04  | 0     |
| ENSG0000(CYS1      | protein_co  | chr2  | 10056780 | 10080944 | - | 1.41  | 2.49  |
| ENSG0000(PLPP6     | protein_co  | chr9  | 4662315  | 4665258  | + | 4     | 4.09  |
| ENSG0000(KLRC2     | protein_co  | chr12 | 10426854 | 10442300 | - | 0     | 0     |
| ENSG0000(KLRC3     | protein_co  | chr12 | 10412312 | 10420595 | - | 0     | 0     |
| ENSG0000(TPTE2P6   | transcribec | chr13 | 24408157 | 24597676 | + | 0     | 0.2   |
| ENSG0000(AC024132. | lincRNA     | chr4  | 27207505 | 27218404 | - | 0     | 0     |
| ENSG0000(C16orf96  | protein_co  | chr16 | 4556490  | 4600714  | + | 0.03  | 0     |
| ENSG0000(GMNC      | protein_co  | chr3  | 1.91E+08 | 1.91E+08 | - | 0.02  | 0     |
| ENSG0000(LINC00487 | lincRNA     | chr2  | 6728177  | 6770311  | - | 0     | 0     |
| ENSG0000(TTC23L    | protein_co  | chr5  | 34838833 | 34899456 | + | 0.06  | 0.3   |
| ENSG0000(CLEC6A    | protein_co  | chr12 | 8455926  | 8478330  | + | 0     | 0     |
| ENSG0000(OR7E91P   | unprocessε  | chr2  | 71029028 | 71029893 | + | 0     | 0     |
| ENSG0000(RFPL3S    | protein_co  | chr22 | 32359906 | 32382052 | - | 0.19  | 0     |
| ENSG0000(C22orf42  | protein_co  | chr22 | 32149006 | 32159322 | - | 0     | 0     |
| ENSG0000(NANOGNB   | protein_co  | chr12 | 7765216  | 7774121  | + | 0     | 0     |
| ENSG0000(LRRC72    | protein_co  | chr7  | 16526880 | 16581568 | + | 0     | 0     |
| ENSG0000(PCOTH     | protein_co  | chr13 | 23888889 | 23897263 | + | 1.47  | 2.28  |
| ENSG0000(C1QTNF9B  | protein_co  | chr13 | 23890525 | 23902655 | - | 0     | 0     |
| ENSG0000(KRTAP5-6  | protein_co  | chr11 | 1697195  | 1697755  | + | 0     | 0     |

|                     |             |       |          |          |   |       |       |
|---------------------|-------------|-------|----------|----------|---|-------|-------|
| ENSG0000(FAM99B     | antisense   | chr11 | 1683269  | 1685629  | - | 0     | 0     |
| ENSG0000(FAM99A     | lincRNA     | chr11 | 1665597  | 1667856  | + | 0     | 0     |
| ENSG0000(KRTAP5-2   | protein_co  | chr11 | 1597177  | 1598294  | - | 0     | 0     |
| ENSG0000(KRTAP5-1   | protein_co  | chr11 | 1584342  | 1585283  | - | 0     | 0     |
| ENSG0000(RPS3AP47   | processed_  | chr15 | 43115702 | 43116493 | - | 0     | 0     |
| ENSG0000(FAM90A2P   | unprocessε  | chr8  | 12172761 | 12175771 | - | 0.04  | 0.05  |
| ENSG0000(DEFB134    | protein_co  | chr8  | 11993174 | 11996312 | - | 0     | 0     |
| ENSG0000(DEFB135    | protein_co  | chr8  | 11982321 | 11984590 | + | 0     | 0     |
| ENSG0000(DEFB136    | protein_co  | chr8  | 11973937 | 11974599 | - | 0     | 0     |
| ENSG0000(C1RL-AS1   | antisense   | chr12 | 7108052  | 7122501  | + | 8.42  | 6.73  |
| ENSG0000(RP11-473M  | antisense   | chr16 | 3032481  | 3039133  | + | 0     | 0     |
| ENSG0000(OR7E136P   | unprocessε  | chr7  | 6866658  | 6867672  | - | 0     | 0     |
| ENSG0000(RP11-3B12  | processed_  | chr7  | 1.25E+08 | 1.25E+08 | - | 0     | 0     |
| ENSG0000(BHLHA9     | protein_co  | chr17 | 1270559  | 1271460  | + | 0     | 0     |
| ENSG0000(ZNF316     | protein_co  | chr7  | 6637322  | 6656432  | + | 9.46  | 9.38  |
| ENSG0000(SRRM2-AS:  | antisense   | chr16 | 2737076  | 2752600  | - | 0.32  | 0.24  |
| ENSG0000(DAZ4       | protein_co  | chrY  | 24833843 | 24907040 | + | 0     | 0     |
| ENSG0000(PDPK2P     | transcribec | chr16 | 2616121  | 2643296  | - | 0.11  | 0.26  |
| ENSG0000(ONECUT3    | protein_co  | chr19 | 1752373  | 1780988  | + | 0     | 0     |
| ENSG0000(CEMP1      | protein_co  | chr16 | 2530035  | 2531417  | - | 0     | 0     |
| ENSG0000(OLIG2      | protein_co  | chr21 | 33025845 | 33029196 | + | 0     | 0     |
| ENSG0000(C21orf62   | protein_co  | chr21 | 32793564 | 32813743 | - | 0     | 0     |
| ENSG0000(C21orf62-A | antisense   | chr21 | 32772100 | 32893735 | + | 0.52  | 1.41  |
| ENSG0000(PPP1R12BF  | unprocessε  | chrY  | 23379484 | 23392697 | + | 0     | 0     |
| ENSG0000(RNPS1      | protein_co  | chr16 | 2253116  | 2268412  | - | 41.68 | 44.95 |
| ENSG0000(HSP90AB2I  | transcribec | chr4  | 13333414 | 13338657 | + | 0.05  | 0     |
| ENSG0000(DAZ2       | protein_co  | chrY  | 23219434 | 23291356 | + | 0     | 0     |
| ENSG0000(USP17L6P   | unprocessε  | chr4  | 9367874  | 9369070  | + | 0     | 0     |
| ENSG0000(HSP90AA5I  | transcribec | chr3  | 1.84E+08 | 1.84E+08 | + | 0     | 0     |
| ENSG0000(RP11-689P  | lincRNA     | chr4  | 8482270  | 8512610  | + | 0.09  | 0.13  |
| ENSG0000(AC074389.  | lincRNA     | chr7  | 1692810  | 1694325  | - | 0     | 0     |
| ENSG0000(RP11-404K  | unprocessε  | chr5  | 7299774  | 7306592  | - | 0     | 0     |
| ENSG0000(NYNRIN     | protein_co  | chr14 | 24398786 | 24419288 | + | 9.14  | 11.65 |
| ENSG0000(DNAJC19    | protein_co  | chr3  | 1.81E+08 | 1.81E+08 | - | 15.09 | 14.15 |
| ENSG0000(DEFB109    | unprocessε  | chr8  | 7990415  | 7997521  | - | 0     | 0     |
| ENSG0000(IFITM5     | protein_co  | chr11 | 298200   | 299526   | - | 0     | 0     |
| ENSG0000(OR7E161P   | unprocessε  | chr8  | 11928597 | 11929563 | - | 0     | 0     |
| ENSG0000(SMIM21     | protein_co  | chr18 | 75409476 | 75427703 | - | 0     | 0     |
| ENSG0000(CTA-373H7  | lincRNA     | chr22 | 26667693 | 26672654 | - | 0.06  | 0     |
| ENSG0000(DEFB109P1  | unprocessε  | chr8  | 7312846  | 7319951  | + | 0     | 0     |
| ENSG0000(DEFA7P     | unprocessε  | chr8  | 7038571  | 7039439  | - | 0     | 0     |
| ENSG0000(C18orf63   | protein_co  | chr18 | 74315813 | 74359187 | + | 0     | 0     |
| ENSG0000(DEFA1      | protein_co  | chr8  | 6977649  | 6980080  | - | 0     | 0     |
| ENSG0000(DOK6       | protein_co  | chr18 | 69401055 | 69849087 | + | 0     | 0.02  |
| ENSG0000(HN1L       | protein_co  | chr16 | 1678256  | 1702280  | + | 15.89 | 13.93 |

|                 |            |                |       |          |          |   |      |      |
|-----------------|------------|----------------|-------|----------|----------|---|------|------|
| ENSG00000101314 | RP13-212L1 | lincRNA        | chrX  | 91307781 | 91308878 | + | 0    | 0    |
| ENSG00000101315 | IGLL3P     | unprocessed    | chr22 | 25318256 | 25320080 | + | 0    | 0    |
| ENSG00000101316 | TMEM211    | protein_coding | chr22 | 24934954 | 24946695 | - | 0    | 0    |
| ENSG00000101317 | SERPINB11  | protein_coding | chr18 | 63647579 | 63726432 | + | 0    | 0    |
| ENSG00000101318 | SERPINB4   | protein_coding | chr18 | 63637259 | 63644298 | - | 0    | 0.04 |
| ENSG00000101319 | SERPINB5   | protein_coding | chr18 | 63476761 | 63505085 | + | 0    | 0    |
| ENSG00000101320 | ZDHHC11B   | protein_coding | chr5  | 710360   | 766952   | - | 0.02 | 0.03 |
| ENSG00000101321 | AP000350   | unprocessed    | chr22 | 23939998 | 23942798 | + | 0    | 0    |
| ENSG00000101322 | KRTAP19-8  | protein_coding | chr21 | 31038159 | 31038476 | - | 0    | 0    |
| ENSG00000101323 | KRTAP20-3  | protein_coding | chr21 | 30642864 | 30643136 | + | 0    | 0    |
| ENSG00000101324 | KRTAP20-4  | protein_coding | chr21 | 30620627 | 30620850 | + | 0    | 0    |
| ENSG00000101325 | KRTAP22-2  | protein_coding | chr21 | 30590105 | 30590397 | - | 0    | 0    |
| ENSG00000101326 | KRTAP27-1  | protein_coding | chr21 | 30337013 | 30337694 | - | 0    | 0    |
| ENSG00000101327 | CFAP99     | protein_coding | chr4  | 2418974  | 2462942  | + | 0.09 | 0.17 |
| ENSG00000101328 | EGFEM1P    | transcribed    | chr3  | 1.68E+08 | 1.69E+08 | + | 0.05 | 0.1  |
| ENSG00000101329 | GOLGA80    | protein_coding | chr15 | 32445106 | 32455634 | - | 1.39 | 2.05 |
| ENSG00000101330 | CTD-2008L  | lincRNA        | chr18 | 56003613 | 56191262 | - | 0    | 0    |
| ENSG00000101331 | TMEM191    | protein_coding | chr22 | 21466423 | 21471269 | + | 2.61 | 2.73 |
| ENSG00000101332 | KB-1183D5  | lincRNA        | chr22 | 21300990 | 21325042 | - | 0    | 0    |
| ENSG00000101333 | RP11-400K  | processed      | chr8  | 53537060 | 53540300 | + | 0    | 0    |
| ENSG00000101334 | P2RX6P     | transcribed    | chr22 | 21035243 | 21045017 | - | 0.4  | 0.18 |
| ENSG00000101335 | RPL23AP57  | processed      | chr9  | 6639139  | 6639604  | + | 0    | 0.73 |
| ENSG00000101336 | HERC2P9    | transcribed    | chr15 | 28589492 | 28685264 | + | 9.48 | 9.24 |
| ENSG00000101337 | RNASE13    | protein_coding | chr14 | 21032820 | 21034785 | - | 0    | 0    |
| ENSG00000101338 | GYG2P1     | transcribed    | chrY  | 12354416 | 12420456 | - | 2.78 | 0    |
| ENSG00000101339 | Z69890.1   | processed      | chr16 | 231134   | 231472   | + | 0    | 0.93 |
| ENSG00000101340 | HBA1       | protein_coding | chr16 | 176680   | 177522   | + | 0.24 | 0.16 |
| ENSG00000101341 | HBM        | protein_coding | chr16 | 153892   | 166768   | + | 0    | 0    |
| ENSG00000101342 | HBZP1      | unprocessed    | chr16 | 163122   | 165156   | + | 0    | 0    |
| ENSG00000101343 | ELOA2      | protein_coding | chr18 | 47032572 | 47035621 | - | 0    | 0    |
| ENSG00000101344 | RP11-1084  | lincRNA        | chr15 | 25902360 | 26053120 | + | 0    | 0    |
| ENSG00000101345 | ATP10A     | protein_coding | chr15 | 25677273 | 25865172 | - | 0.38 | 0.23 |
| ENSG00000101346 | ANKRD20A   | unprocessed    | chr13 | 18816718 | 18871967 | - | 0    | 0    |
| ENSG00000101347 | DUXAP8     | processed      | chr22 | 15784959 | 15829984 | + | 0.7  | 0.87 |
| ENSG00000101348 | ANKUB1     | protein_coding | chr3  | 1.5E+08  | 1.5E+08  | - | 0.02 | 0    |
| ENSG00000101349 | TSSK2      | protein_coding | chr22 | 19130808 | 19132623 | + | 0    | 0    |
| ENSG00000101350 | HNRNPA1P   | processed      | chr8  | 82291624 | 82292379 | - | 0    | 0    |
| ENSG00000101351 | CTD-2308N  | antisense      | chr20 | 38288331 | 38326536 | - | 0    | 0    |
| ENSG00000101352 | PRR23A     | protein_coding | chr3  | 1.39E+08 | 1.39E+08 | - | 0    | 0    |
| ENSG00000101353 | FOXL2NB    | protein_coding | chr3  | 1.39E+08 | 1.39E+08 | + | 0.17 | 0.03 |
| ENSG00000101354 | HCP5       | sense_intronic | chr6  | 31400702 | 31477506 | + | 1.33 | 1.04 |
| ENSG00000101355 | HLA-H      | unprocessed    | chr6  | 29887752 | 29890482 | + | 6.53 | 5.66 |
| ENSG00000101356 | HCG27      | lincRNA        | chr6  | 31197760 | 31203968 | + | 0.56 | 0.92 |
| ENSG00000101357 | RP11-9301  | processed      | chr5  | 99522311 | 99525462 | - | 0    | 0    |
| ENSG00000101358 | COL6A6     | protein_coding | chr3  | 1.31E+08 | 1.31E+08 | + | 0.02 | 0.01 |

|                    |            |       |          |          |   |        |        |
|--------------------|------------|-------|----------|----------|---|--------|--------|
| ENSG0000(H1FX-AS1  | antisense  | chr3  | 1.29E+08 | 1.29E+08 | + | 2.23   | 2.82   |
| ENSG0000(RAB12     | protein_co | chr18 | 8609445  | 8639381  | + | 12.91  | 14.4   |
| ENSG0000(LRRC30    | protein_co | chr18 | 7231125  | 7232047  | + | 0      | 0      |
| ENSG0000(TMEM200   | protein_co | chr18 | 5882072  | 5895955  | - | 0.03   | 0.06   |
| ENSG0000(PPIAP30   | processed_ | chr10 | 15154802 | 15155320 | - | 0      | 0      |
| ENSG0000(OR10C1    | protein_co | chr6  | 29439306 | 29440977 | + | 0      | 0      |
| ENSG0000(TXNRD3NB  | protein_co | chr3  | 1.27E+08 | 1.27E+08 | - | 0      | 0      |
| ENSG0000(HLA-A     | protein_co | chr6  | 29941260 | 29945884 | + | 602.23 | 589.43 |
| ENSG0000(HACD2     | protein_co | chr3  | 1.23E+08 | 1.24E+08 | - | 7.94   | 10.01  |
| ENSG0000(CFAP44    | protein_co | chr3  | 1.13E+08 | 1.13E+08 | - | 4.29   | 4.54   |
| ENSG0000(CD200R1L  | protein_co | chr3  | 1.13E+08 | 1.13E+08 | - | 0      | 0      |
| ENSG0000(RP11-553A | lincRNA    | chr3  | 1.11E+08 | 1.11E+08 | - | 0.7    | 0.43   |
| ENSG0000(LNP1      | protein_co | chr3  | 1E+08    | 1E+08    | + | 1.67   | 1.41   |
| ENSG0000(OR5K3     | protein_co | chr3  | 98390666 | 98391631 | + | 0      | 0      |
| ENSG0000(VGLL3     | protein_co | chr3  | 86876388 | 86991119 | - | 7.41   | 5.06   |
| ENSG0000(PRSS50    | protein_co | chr3  | 46712115 | 46812574 | - | 0      | 0      |
| ENSG0000(KRBOX1-AS | antisense  | chr3  | 42934252 | 42936785 | - | 0      | 0      |
| ENSG0000(TRIM71    | protein_co | chr3  | 32818018 | 32897826 | + | 0      | 0      |
| ENSG0000(ZCWPW2    | protein_co | chr3  | 28349146 | 28538122 | + | 0.51   | 0.44   |
| ENSG0000(ANKRD28   | protein_co | chr3  | 15667236 | 15859771 | - | 15.6   | 16.2   |
| ENSG0000(COLQ      | protein_co | chr3  | 15450133 | 15521751 | - | 1.04   | 0.82   |
| ENSG0000(METTL6    | protein_co | chr3  | 15381275 | 15440566 | - | 8.68   | 9.04   |
| ENSG0000(AC022007. | lincRNA    | chr3  | 10006418 | 10011209 | - | 3.13   | 2.43   |
| ENSG0000(THUMPD3-  | antisense  | chr3  | 9349689  | 9398579  | - | 15.92  | 15.36  |
| ENSG0000(XKR4      | protein_co | chr8  | 55102389 | 55542054 | + | 0      | 0.04   |
| ENSG0000(Y_RNA     | misc_RNA   | chr20 | 34526510 | 34526606 | - | 0      | 0      |
| ENSG0000(RNU6-1292 | snRNA      | chr11 | 85509938 | 85510044 | + | 0      | 0      |
| ENSG0000(RNVU1-7   | snRNA      | chr1  | 1.48E+08 | 1.48E+08 | - | 1.72   | 1.68   |
| ENSG0000(RNU6-46P  | snRNA      | chr11 | 67895631 | 67895737 | + | 0      | 0      |
| ENSG0000(RNU1-28P  | snRNA      | chr14 | 34556226 | 34556389 | - | 1.72   | 1.68   |
| ENSG0000(RNU6-354F | snRNA      | chr15 | 43734179 | 43734285 | - | 0      | 0      |
| ENSG0000(RNU6-132F | snRNA      | chr15 | 89714232 | 89714338 | + | 0      | 0      |
| ENSG0000(SNORA18   | snoRNA     | chr5  | 79220942 | 79221073 | + | 0      | 0      |
| ENSG0000(RNU6-47P  | snRNA      | chr5  | 1.09E+08 | 1.09E+08 | - | 0      | 0      |
| ENSG0000(RNU6-877F | snRNA      | chr1  | 51382308 | 51382414 | + | 0      | 0      |
| ENSG0000(RNU1-27P  | snRNA      | chr14 | 34546714 | 34546877 | + | 1.72   | 1.68   |
| ENSG0000(SNORA57   | snoRNA     | chr11 | 62665422 | 62665570 | + | 0.97   | 2.1    |
| ENSG0000(RNU6-128f | snRNA      | chr6  | 1.21E+08 | 1.21E+08 | + | 0      | 0      |
| ENSG0000(RNU6-841F | snRNA      | chr19 | 49764524 | 49764630 | - | 0      | 0      |
| ENSG0000(RNU6-25P  | snRNA      | chr3  | 1.95E+08 | 1.95E+08 | + | 0      | 1.24   |
| ENSG0000(RNU6-431F | snRNA      | chr4  | 1.09E+08 | 1.09E+08 | + | 0      | 0      |
| ENSG0000(SNORD58A  | snoRNA     | chr18 | 49491283 | 49491347 | - | 0      | 0      |
| ENSG0000(SNORA22   | snoRNA     | chr7  | 56055365 | 56055502 | + | 0      | 0      |
| ENSG0000(RNU6-425F | snRNA      | chr3  | 1.42E+08 | 1.42E+08 | + | 0      | 0      |
| ENSG0000(RNU6-946F | snRNA      | chr10 | 26790540 | 26790646 | - | 0      | 0      |

|                           |       |          |          |   |      |      |
|---------------------------|-------|----------|----------|---|------|------|
| ENSG0000(RNU6-129) snRNA  | chr5  | 51167541 | 51167647 | - | 0    | 0    |
| ENSG0000(SNORD116) snoRNA | chr15 | 25075929 | 25076020 | + | 0    | 0    |
| ENSG0000(SNORD24) snoRNA  | chr9  | 1.33E+08 | 1.33E+08 | + | 0    | 0    |
| ENSG0000(SNORA2A) snoRNA  | chr12 | 48656648 | 48656782 | - | 0    | 0    |
| ENSG0000(RNU6-133) snRNA  | chr4  | 1.69E+08 | 1.69E+08 | - | 0    | 0    |
| ENSG0000(RNU6-477) snRNA  | chr5  | 1.7E+08  | 1.7E+08  | + | 0    | 0    |
| ENSG0000(RNU6-338) snRNA  | chr22 | 31388733 | 31388837 | - | 0    | 0    |
| ENSG0000(RNU6-741) snRNA  | chr15 | 23777437 | 23777543 | - | 0    | 0    |
| ENSG0000(RNY1P5) misc_RNA | chr13 | 74289100 | 74289214 | - | 0    | 0    |
| ENSG0000(RNU6-126) snRNA  | chr17 | 6207163  | 6207269  | + | 0    | 0    |
| ENSG0000(SNORD45C) snoRNA | chr1  | 75787072 | 75787150 | + | 0    | 0    |
| ENSG0000(SNORD116) snoRNA | chr15 | 25080142 | 25080233 | + | 0    | 0    |
| ENSG0000(SNORA69) snoRNA  | chrX  | 1.2E+08  | 1.2E+08  | - | 0    | 0    |
| ENSG0000(RNU6-979) snRNA  | chr7  | 28118113 | 28118219 | - | 0    | 0    |
| ENSG0000(RNU1-39P) snRNA  | chr5  | 1.79E+08 | 1.79E+08 | + | 1.21 | 0    |
| ENSG0000(RNU6-1) snRNA    | chr15 | 67839939 | 67840045 | - | 0    | 1.24 |
| ENSG0000(RNU6-969) snRNA  | chr1  | 52805108 | 52805212 | - | 0    | 0    |
| ENSG0000(RNU1-63P) snRNA  | chr4  | 67429591 | 67429754 | - | 0    | 0    |
| ENSG0000(SNORD60) snoRNA  | chr16 | 2155023  | 2155105  | - | 0    | 0    |
| ENSG0000(RNU6-657) snRNA  | chr10 | 94155639 | 94155745 | - | 0    | 0    |
| ENSG0000(SNORA80B) snoRNA | chr2  | 10446714 | 10446849 | - | 0    | 0    |
| ENSG0000(SNORA22) snoRNA  | chr7  | 65755526 | 65755659 | + | 0    | 0    |
| ENSG0000(RNU6-106) snRNA  | chr1  | 1.52E+08 | 1.52E+08 | + | 0    | 0    |
| ENSG0000(Y_RNA) misc_RNA  | chr12 | 7976259  | 7976360  | + | 0    | 0    |
| ENSG0000(SNORA70) snoRNA  | chr1  | 2.02E+08 | 2.02E+08 | + | 0    | 0    |
| ENSG0000(RNU6-672) snRNA  | chr11 | 72869544 | 72869650 | - | 0    | 0    |
| ENSG0000(Y_RNA) misc_RNA  | chrX  | 21872707 | 21872808 | + | 0    | 0    |
| ENSG0000(Y_RNA) misc_RNA  | chr1  | 1.85E+08 | 1.85E+08 | - | 0    | 0    |
| ENSG0000(RNU6-449) snRNA  | chr15 | 53764204 | 53764310 | + | 0    | 0    |
| ENSG0000(RNU6-127) snRNA  | chr3  | 1.96E+08 | 1.96E+08 | - | 0    | 0    |
| ENSG0000(Y_RNA) misc_RNA  | chr3  | 37093133 | 37093234 | - | 0    | 0    |
| ENSG0000(Y_RNA) misc_RNA  | chrX  | 68361075 | 68361187 | + | 0    | 0    |
| ENSG0000(SNORA2) snoRNA   | chr2  | 10155072 | 10155206 | - | 0    | 0    |
| ENSG0000(SNORA20) snoRNA  | chr8  | 80316939 | 80317069 | - | 0    | 0    |
| ENSG0000(SNORA70G) snoRNA | chr12 | 68627234 | 68627375 | - | 0    | 0    |
| ENSG0000(Y_RNA) misc_RNA  | chr1  | 1.56E+08 | 1.56E+08 | - | 0    | 0    |
| ENSG0000(RNU1-1) snRNA    | chr1  | 16514122 | 16514285 | - | 1.72 | 1.68 |
| ENSG0000(RNU6-608) snRNA  | chr1  | 39120940 | 39121043 | - | 0    | 0    |
| ENSG0000(SNORD116) snoRNA | chr15 | 25083588 | 25083679 | + | 0    | 0    |
| ENSG0000(RNU6-103) snRNA  | chr9  | 1.1E+08  | 1.1E+08  | - | 0    | 0    |
| ENSG0000(Y_RNA) misc_RNA  | chr1  | 1.75E+08 | 1.75E+08 | - | 0    | 0    |
| ENSG0000(Y_RNA) misc_RNA  | chr10 | 32056746 | 32056839 | + | 0    | 0    |
| ENSG0000(SNORA70) snoRNA  | chr8  | 5128279  | 5128412  | - | 0    | 0    |
| ENSG0000(Y_RNA) misc_RNA  | chr12 | 17710934 | 17711046 | + | 0    | 0    |
| ENSG0000(Y_RNA) misc_RNA  | chrX  | 19985058 | 19985159 | - | 0    | 0    |



|                     |          |       |          |          |   |   |     |
|---------------------|----------|-------|----------|----------|---|---|-----|
| ENSG0000(RNU6-573F) | snRNA    | chr4  | 35495898 | 35496003 | + | 0 | 0   |
| ENSG0000(Y_RNA)     | misc_RNA | chr19 | 36858227 | 36858329 | - | 0 | 0   |
| ENSG0000(RNU6-471F) | snRNA    | chr6  | 27596412 | 27596517 | + | 0 | 0   |
| ENSG0000(Y_RNA)     | misc_RNA | chr6  | 67625356 | 67625464 | + | 0 | 0   |
| ENSG0000(RNU6-945F) | snRNA    | chr19 | 40299478 | 40299584 | - | 0 | 0   |
| ENSG0000(RNU6-32P)  | snRNA    | chr4  | 39297605 | 39297711 | - | 0 | 0   |
| ENSG0000(Y_RNA)     | misc_RNA | chr15 | 37050828 | 37050930 | - | 0 | 0   |
| ENSG0000(Y_RNA)     | misc_RNA | chrX  | 40492844 | 40492941 | + | 0 | 0   |
| ENSG0000(RNU6-144F) | snRNA    | chr8  | 1.37E+08 | 1.37E+08 | + | 0 | 0   |
| ENSG0000(Y_RNA)     | misc_RNA | chr1  | 95125511 | 95125609 | - | 0 | 0   |
| ENSG0000(SNORD21)   | snoRNA   | chr1  | 92837289 | 92837383 | + | 0 | 0   |
| ENSG0000(RNU6-730F) | snRNA    | chr6  | 1.66E+08 | 1.66E+08 | - | 0 | 0   |
| ENSG0000(Y_RNA)     | misc_RNA | chr5  | 31505684 | 31505788 | + | 0 | 0   |
| ENSG0000(RNU6-157F) | snRNA    | chr1  | 1.72E+08 | 1.72E+08 | + | 0 | 0   |
| ENSG0000(RNU6-118F) | snRNA    | chrX  | 47087506 | 47087612 | + | 0 | 0   |
| ENSG0000(RNU6-103F) | snRNA    | chr5  | 1.81E+08 | 1.81E+08 | + | 0 | 0   |
| ENSG0000(RNU1-109F) | snRNA    | chr18 | 797989   | 798135   | - | 0 | 0   |
| ENSG0000(SNORD116)  | snoRNA   | chr15 | 25085385 | 25085476 | + | 0 | 0   |
| ENSG0000(Y_RNA)     | misc_RNA | chr11 | 88099995 | 88100105 | + | 0 | 0   |
| ENSG0000(Y_RNA)     | misc_RNA | chr1  | 1.71E+08 | 1.71E+08 | - | 0 | 0   |
| ENSG0000(SNORA56)   | snoRNA   | chrX  | 1.55E+08 | 1.55E+08 | + | 0 | 0   |
| ENSG0000(RNU6-442F) | snRNA    | chr8  | 1.26E+08 | 1.26E+08 | + | 0 | 0   |
| ENSG0000(RNY1P8)    | misc_RNA | chr13 | 73227147 | 73227260 | + | 0 | 0   |
| ENSG0000(RNU1-73P)  | snRNA    | chr5  | 97175950 | 97176113 | - | 0 | 0   |
| ENSG0000(Y_RNA)     | misc_RNA | chr8  | 99527826 | 99527927 | + | 0 | 0   |
| ENSG0000(RNU6-723F) | snRNA    | chr1  | 48344209 | 48344315 | + | 0 | 0   |
| ENSG0000(RNU6-104F) | snRNA    | chr8  | 84665759 | 84665865 | - | 0 | 0   |
| ENSG0000(RNU1-11P)  | snRNA    | chr6  | 13214056 | 13214219 | + | 0 | 0   |
| ENSG0000(RNU6-128F) | snRNA    | chr4  | 1.59E+08 | 1.59E+08 | - | 0 | 0   |
| ENSG0000(Y_RNA)     | misc_RNA | chr1  | 28985710 | 28985810 | + | 0 | 0   |
| ENSG0000(Y_RNA)     | misc_RNA | chr7  | 1.36E+08 | 1.36E+08 | - | 0 | 0   |
| ENSG0000(Y_RNA)     | misc_RNA | chr16 | 16314112 | 16314211 | - | 0 | 7.6 |
| ENSG0000(RNU6-122F) | snRNA    | chr3  | 39025987 | 39026093 | + | 0 | 0   |
| ENSG0000(RNU6-108F) | snRNA    | chr7  | 73339094 | 73339200 | - | 0 | 0   |
| ENSG0000(RNU6-147F) | snRNA    | chr20 | 49972106 | 49972212 | + | 0 | 0   |
| ENSG0000(Y_RNA)     | misc_RNA | chr4  | 1.66E+08 | 1.66E+08 | - | 0 | 0   |
| ENSG0000(RNU6-26P)  | snRNA    | chr3  | 98804978 | 98805084 | - | 0 | 0   |
| ENSG0000(Y_RNA)     | misc_RNA | chr17 | 75089862 | 75089974 | - | 0 | 0   |
| ENSG0000(Y_RNA)     | misc_RNA | chr5  | 78317036 | 78317137 | + | 0 | 0   |
| ENSG0000(RNU6-444F) | snRNA    | chr6  | 87488445 | 87488552 | + | 0 | 0   |
| ENSG0000(RNU6-133F) | snRNA    | chrX  | 21214637 | 21214743 | + | 0 | 0   |
| ENSG0000(Y_RNA)     | misc_RNA | chr6  | 34821445 | 34821542 | + | 0 | 0   |
| ENSG0000(RNU6-546F) | snRNA    | chr2  | 1.55E+08 | 1.55E+08 | + | 0 | 0   |
| ENSG0000(Y_RNA)     | misc_RNA | chr8  | 1.14E+08 | 1.14E+08 | + | 0 | 0   |
| ENSG0000(Y_RNA)     | misc_RNA | chr3  | 1.2E+08  | 1.2E+08  | + | 0 | 0   |

|                    |          |       |          |          |   |      |      |
|--------------------|----------|-------|----------|----------|---|------|------|
| ENSG0000(RNU6-1074 | snRNA    | chr4  | 1.39E+08 | 1.39E+08 | - | 0    | 0    |
| ENSG0000(RNU6-1056 | snRNA    | chrX  | 48724455 | 48724561 | - | 0    | 0    |
| ENSG0000(RNU6-756F | snRNA    | chr8  | 1.24E+08 | 1.24E+08 | + | 0    | 0    |
| ENSG0000(RNU6-1027 | snRNA    | chr2  | 2.3E+08  | 2.3E+08  | + | 0    | 0    |
| ENSG0000(RNU6-259F | snRNA    | chr2  | 1.25E+08 | 1.25E+08 | + | 0    | 0    |
| ENSG0000(SNORD116  | snoRNA   | chr15 | 25073107 | 25073201 | + | 0    | 0    |
| ENSG0000(Y_RNA     | misc_RNA | chr3  | 23273807 | 23273910 | + | 0    | 0    |
| ENSG0000(RNU6-1126 | snRNA    | chr7  | 55789368 | 55789474 | + | 0    | 0    |
| ENSG0000(RNU6-468F | snRNA    | chr17 | 17578631 | 17578739 | + | 0    | 0    |
| ENSG0000(SNORA36   | snoRNA   | chr2  | 27642043 | 27642169 | - | 0    | 0    |
| ENSG0000(RNU6-936F | snRNA    | chr2  | 24676309 | 24676415 | + | 0    | 0    |
| ENSG0000(RNU6-641F | snRNA    | chrX  | 36021939 | 36022045 | - | 0    | 0    |
| ENSG0000(Y_RNA     | misc_RNA | chr17 | 47557413 | 47557514 | + | 0    | 0    |
| ENSG0000(RNVU1-18  | snRNA    | chr1  | 1.44E+08 | 1.44E+08 | - | 1.72 | 1.68 |
| ENSG0000(Y_RNA     | misc_RNA | chr4  | 2615124  | 2615224  | - | 0    | 0    |
| ENSG0000(Y_RNA     | misc_RNA | chr22 | 19045256 | 19045367 | + | 0    | 0    |
| ENSG0000(Y_RNA     | misc_RNA | chr5  | 1.73E+08 | 1.73E+08 | - | 0    | 0    |
| ENSG0000(RNU6-484F | snRNA    | chr5  | 37700331 | 37700437 | - | 0    | 0    |
| ENSG0000(RNU6-620F | snRNA    | chr5  | 83703448 | 83703543 | + | 0    | 0    |
| ENSG0000(RNU6-643F | snRNA    | chr6  | 41302466 | 41302572 | - | 0    | 0    |
| ENSG0000(RNU6-142F | snRNA    | chr18 | 62731226 | 62731332 | - | 0    | 0    |
| ENSG0000(RNU6-245F | snRNA    | chrX  | 68539443 | 68539549 | - | 0    | 0    |
| ENSG0000(RNU6-1083 | snRNA    | chr12 | 57806154 | 57806260 | - | 0    | 0    |
| ENSG0000(Y_RNA     | misc_RNA | chr14 | 72853224 | 72853331 | - | 0    | 0    |
| ENSG0000(RNU6-1323 | snRNA    | chrX  | 1.17E+08 | 1.17E+08 | - | 0    | 0    |
| ENSG0000(SNORD101  | snoRNA   | chr6  | 1.33E+08 | 1.33E+08 | + | 0    | 0    |
| ENSG0000(SNORA30   | snoRNA   | chr16 | 30710537 | 30710665 | + | 0    | 0    |
| ENSG0000(Y_RNA     | misc_RNA | chr10 | 74551392 | 74551493 | + | 0    | 0    |
| ENSG0000(RNU6-317F | snRNA    | chr19 | 48793152 | 48793258 | - | 0    | 0    |
| ENSG0000(RNU6-787F | snRNA    | chr3  | 66293114 | 66293220 | - | 0    | 0    |
| ENSG0000(SNORA6    | snoRNA   | chr3  | 39408389 | 39408539 | + | 0    | 0    |
| ENSG0000(RNU6-418F | snRNA    | chr1  | 2.06E+08 | 2.06E+08 | + | 0    | 0    |
| ENSG0000(RNU6-10P  | snRNA    | chr7  | 92701708 | 92701814 | - | 0    | 0    |
| ENSG0000(RNU6-152F | snRNA    | chr1  | 1.82E+08 | 1.82E+08 | + | 0    | 0    |
| ENSG0000(RNU6-203F | snRNA    | chrX  | 1.34E+08 | 1.34E+08 | - | 0    | 0    |
| ENSG0000(RNU6-435F | snRNA    | chr18 | 24218300 | 24218404 | + | 0    | 0    |
| ENSG0000(RNU6-949F | snRNA    | chr1  | 27675603 | 27675709 | - | 0    | 0    |
| ENSG0000(Y_RNA     | misc_RNA | chr14 | 69143852 | 69143953 | - | 0    | 0    |
| ENSG0000(RNU6-116F | snRNA    | chr18 | 61391595 | 61391703 | + | 0    | 0    |
| ENSG0000(Y_RNA     | misc_RNA | chr5  | 72768702 | 72768811 | + | 0    | 0    |
| ENSG0000(RNU6-44P  | snRNA    | chr11 | 1.12E+08 | 1.12E+08 | - | 0    | 0    |
| ENSG0000(RNU6-211F | snRNA    | chr5  | 80365726 | 80365832 | - | 0    | 0    |
| ENSG0000(SNORD37   | snoRNA   | chr19 | 3982507  | 3982572  | - | 0    | 0    |
| ENSG0000(SNORA32   | snoRNA   | chr8  | 1.19E+08 | 1.19E+08 | + | 0    | 0    |
| ENSG0000(RNU6-637F | snRNA    | chr3  | 1.7E+08  | 1.7E+08  | - | 0    | 0    |

|                     |          |       |          |          |   |   |      |
|---------------------|----------|-------|----------|----------|---|---|------|
| ENSG0000(RNU6-213F) | snRNA    | chr16 | 15877163 | 15877266 | - | 0 | 0    |
| ENSG0000(Y_RNA)     | misc_RNA | chr1  | 28422555 | 28422655 | - | 0 | 0    |
| ENSG0000(SNORA75)   | snoRNA   | chr4  | 17320746 | 17320882 | - | 0 | 0    |
| ENSG0000(Y_RNA)     | misc_RNA | chr15 | 64445130 | 64445243 | - | 0 | 0    |
| ENSG0000(RNU6-224F) | snRNA    | chr4  | 1.31E+08 | 1.31E+08 | + | 0 | 0    |
| ENSG0000(Y_RNA)     | misc_RNA | chr9  | 37322259 | 37322371 | + | 0 | 0    |
| ENSG0000(SNORA15)   | snoRNA   | chr7  | 65760052 | 65760186 | + | 0 | 0    |
| ENSG0000(RNU6-701F) | snRNA    | chr5  | 1.19E+08 | 1.19E+08 | + | 0 | 0    |
| ENSG0000(RNU6-76P)  | snRNA    | chr13 | 18880054 | 18880157 | + | 0 | 0    |
| ENSG0000(RNU6-629F) | snRNA    | chr2  | 1.78E+08 | 1.78E+08 | + | 0 | 0    |
| ENSG0000(Y_RNA)     | misc_RNA | chr12 | 1E+08    | 1E+08    | - | 0 | 0    |
| ENSG0000(RNU1-129F) | snRNA    | chr1  | 1.48E+08 | 1.48E+08 | - | 0 | 0    |
| ENSG0000(Y_RNA)     | misc_RNA | chrX  | 12054824 | 12054926 | - | 0 | 0    |
| ENSG0000(Y_RNA)     | misc_RNA | chrX  | 12149126 | 12149238 | + | 0 | 0    |
| ENSG0000(RNU6-811F) | snRNA    | chr10 | 37135237 | 37135343 | + | 0 | 0    |
| ENSG0000(Y_RNA)     | misc_RNA | chr20 | 450663   | 450762   | + | 0 | 0    |
| ENSG0000(SNORA32)   | snoRNA   | chr11 | 93730979 | 93731099 | - | 0 | 2.34 |
| ENSG0000(RNY3P7)    | misc_RNA | chr13 | 77623372 | 77623472 | + | 0 | 0    |
| ENSG0000(RNU6-639F) | snRNA    | chr20 | 43796437 | 43796543 | - | 0 | 0    |
| ENSG0000(RNU6-926F) | snRNA    | chr21 | 26190707 | 26190813 | + | 0 | 0    |
| ENSG0000(RNU6-968F) | snRNA    | chr1  | 2.36E+08 | 2.36E+08 | + | 0 | 0    |
| ENSG0000(RNU6-129G) | snRNA    | chr9  | 64880369 | 64880475 | - | 0 | 0    |
| ENSG0000(Y_RNA)     | misc_RNA | chr17 | 48479097 | 48479198 | + | 0 | 0    |
| ENSG0000(Y_RNA)     | misc_RNA | chr11 | 40351564 | 40351672 | + | 0 | 0    |
| ENSG0000(RNU6-815F) | snRNA    | chr3  | 20507644 | 20507756 | - | 0 | 0    |
| ENSG0000(Y_RNA)     | misc_RNA | chr11 | 33171381 | 33171490 | - | 0 | 0    |
| ENSG0000(SNORA10)   | snoRNA   | chr16 | 1962334  | 1962466  | - | 0 | 0    |
| ENSG0000(RNU6-38P)  | snRNA    | chr13 | 75109587 | 75109693 | + | 0 | 0    |
| ENSG0000(Y_RNA)     | misc_RNA | chr22 | 41747312 | 41747413 | + | 0 | 0    |
| ENSG0000(Y_RNA)     | misc_RNA | chr5  | 17117576 | 17117686 | - | 0 | 0    |
| ENSG0000(RNU6-483F) | snRNA    | chr3  | 57548838 | 57548945 | + | 0 | 0    |
| ENSG0000(Y_RNA)     | misc_RNA | chr11 | 77691650 | 77691751 | + | 0 | 0    |
| ENSG0000(Y_RNA)     | misc_RNA | chr1  | 91261625 | 91261724 | + | 0 | 0    |
| ENSG0000(RNU6-849F) | snRNA    | chr7  | 79912104 | 79912208 | - | 0 | 0    |
| ENSG0000(RNU6-260F) | snRNA    | chr5  | 1.58E+08 | 1.58E+08 | + | 0 | 0    |
| ENSG0000(RNU1-138F) | snRNA    | chr4  | 1.13E+08 | 1.13E+08 | + | 0 | 0    |
| ENSG0000(Y_RNA)     | misc_RNA | chr14 | 63621760 | 63621871 | + | 0 | 0    |
| ENSG0000(Y_RNA)     | misc_RNA | chr17 | 50386145 | 50386246 | - | 0 | 0    |
| ENSG0000(RNU6-974F) | snRNA    | chrX  | 82001220 | 82001327 | - | 0 | 0    |
| ENSG0000(RNU6-103G) | snRNA    | chr18 | 22647582 | 22647688 | + | 0 | 0    |
| ENSG0000(U1)        | snRNA    | chr1  | 1.5E+08  | 1.5E+08  | + | 0 | 0    |
| ENSG0000(RNU6V)     | snRNA    | chr1  | 1.1E+08  | 1.1E+08  | - | 0 | 0    |
| ENSG0000(RNU6-20P)  | snRNA    | chr16 | 57830536 | 57830642 | - | 0 | 0    |
| ENSG0000(SNORA1)    | snoRNA   | chr11 | 93732004 | 93732133 | - | 0 | 0    |
| ENSG0000(RNU1-74P)  | snRNA    | chr1  | 2.33E+08 | 2.33E+08 | - | 0 | 0    |

|                           |       |          |          |   |   |      |
|---------------------------|-------|----------|----------|---|---|------|
| ENSG0000(RNU6-102) snRNA  | chr2  | 1.97E+08 | 1.97E+08 | + | 0 | 0    |
| ENSG0000(SNORA5A) snoRNA  | chr7  | 45104349 | 45104482 | - | 0 | 0    |
| ENSG0000(RNU6-746) snRNA  | chr4  | 55294490 | 55294598 | + | 0 | 0    |
| ENSG0000(Y_RNA) misc_RNA  | chr10 | 37994863 | 37994975 | + | 0 | 0    |
| ENSG0000(RNU6-409) snRNA  | chr22 | 50691260 | 50691363 | - | 0 | 0    |
| ENSG0000(RNU6-413) snRNA  | chr10 | 22787393 | 22787499 | + | 0 | 0    |
| ENSG0000(RNU6-206) snRNA  | chr7  | 1.39E+08 | 1.39E+08 | - | 0 | 0    |
| ENSG0000(Y_RNA) misc_RNA  | chrX  | 9874601  | 9874701  | - | 0 | 0    |
| ENSG0000(RNU6-209) snRNA  | chr5  | 1.65E+08 | 1.65E+08 | - | 0 | 0    |
| ENSG0000(Y_RNA) misc_RNA  | chr15 | 30673750 | 30673843 | + | 0 | 0    |
| ENSG0000(Y_RNA) misc_RNA  | chr11 | 1.29E+08 | 1.29E+08 | + | 0 | 0    |
| ENSG0000(RNU6-890) snRNA  | chr6  | 42664162 | 42664268 | + | 0 | 0    |
| ENSG0000(SNORA18) snoRNA  | chr15 | 31928303 | 31928434 | + | 0 | 0    |
| ENSG0000(Y_RNA) misc_RNA  | chr12 | 1.31E+08 | 1.31E+08 | + | 0 | 0    |
| ENSG0000(RNU6-895) snRNA  | chr8  | 41298163 | 41298265 | + | 0 | 0    |
| ENSG0000(SNORA51) snoRNA  | chr8  | 59137372 | 59137502 | - | 0 | 0    |
| ENSG0000(RNY3P5) misc_RNA | chr13 | 60789560 | 60789661 | + | 0 | 0    |
| ENSG0000(RNU6-571) snRNA  | chr10 | 68911653 | 68911759 | - | 0 | 0    |
| ENSG0000(RNU6-214) snRNA  | chr6  | 1.21E+08 | 1.21E+08 | - | 0 | 0    |
| ENSG0000(Y_RNA) misc_RNA  | chr11 | 10725903 | 10726004 | + | 0 | 0    |
| ENSG0000(RNU6-767) snRNA  | chr17 | 17170083 | 17170189 | + | 0 | 0    |
| ENSG0000(Y_RNA) misc_RNA  | chrX  | 1.19E+08 | 1.19E+08 | - | 0 | 0    |
| ENSG0000(RNU5A-6P) snRNA  | chr18 | 24124170 | 24124285 | - | 0 | 0    |
| ENSG0000(RNU6-207) snRNA  | chrX  | 1.06E+08 | 1.06E+08 | - | 0 | 0    |
| ENSG0000(Y_RNA) misc_RNA  | chr18 | 56753226 | 56753326 | - | 0 | 0    |
| ENSG0000(RNU6-187) snRNA  | chr2  | 1.77E+08 | 1.77E+08 | - | 0 | 0    |
| ENSG0000(RNU6-356) snRNA  | chr8  | 41032892 | 41032998 | + | 0 | 0    |
| ENSG0000(SNORA70F) snoRNA | chr2  | 1.65E+08 | 1.65E+08 | - | 0 | 0    |
| ENSG0000(RNU6-398) snRNA  | chr14 | 60974327 | 60974435 | + | 0 | 0    |
| ENSG0000(RNU6-533) snRNA  | chr8  | 36309584 | 36309690 | - | 0 | 0    |
| ENSG0000(RNU6-761) snRNA  | chr6  | 42018408 | 42018514 | - | 0 | 0    |
| ENSG0000(RNU6-110) snRNA  | chr7  | 24537332 | 24537438 | + | 0 | 0    |
| ENSG0000(SNORA51) snoRNA  | chr1  | 2.29E+08 | 2.29E+08 | + | 0 | 0    |
| ENSG0000(RNU6-131) snRNA  | chr1  | 1.68E+08 | 1.68E+08 | - | 0 | 0    |
| ENSG0000(RNU6-190) snRNA  | chr6  | 17619533 | 17619634 | + | 0 | 0    |
| ENSG0000(RNA5SP87) rRNA   | chr2  | 22338886 | 22339003 | - | 0 | 0    |
| ENSG0000(SNORA75) snoRNA  | chr2  | 2.31E+08 | 2.31E+08 | - | 0 | 0    |
| ENSG0000(SNORA70) snoRNA  | chr6  | 81764024 | 81764156 | + | 0 | 0    |
| ENSG0000(RNU6-100) snRNA  | chr1  | 2.24E+08 | 2.24E+08 | + | 0 | 0    |
| ENSG0000(RNU6-48P) snRNA  | chr1  | 27325219 | 27325325 | + | 0 | 1.24 |
| ENSG0000(RNU6-120) snRNA  | chr3  | 1.18E+08 | 1.18E+08 | + | 0 | 0    |
| ENSG0000(RNU6-217) snRNA  | chr3  | 77811741 | 77811844 | - | 0 | 0    |
| ENSG0000(RNU6-42P) snRNA  | chr3  | 1.97E+08 | 1.97E+08 | - | 0 | 0    |
| ENSG0000(Y_RNA) misc_RNA  | chr7  | 4811188  | 4811289  | - | 0 | 0    |
| ENSG0000(RNU6-112) snRNA  | chrX  | 42174279 | 42174385 | - | 0 | 0    |

|                    |          |       |          |          |   |   |      |
|--------------------|----------|-------|----------|----------|---|---|------|
| ENSG0000(SNORA9    | snoRNA   | chr12 | 1.24E+08 | 1.24E+08 | + | 0 | 0    |
| ENSG0000(SNORA51   | snoRNA   | chr2  | 10296047 | 10296180 | - | 0 | 0    |
| ENSG0000(RNU6-36P  | snRNA    | chr12 | 97721716 | 97721822 | + | 0 | 1.24 |
| ENSG0000(RNU6-98P  | snRNA    | chrX  | 1.33E+08 | 1.33E+08 | - | 0 | 0    |
| ENSG0000(SNORA72   | snoRNA   | chr2  | 1.4E+08  | 1.4E+08  | + | 0 | 0    |
| ENSG0000(SNORA24   | snoRNA   | chr15 | 65285461 | 65285591 | - | 0 | 0    |
| ENSG0000(Y_RNA     | misc_RNA | chr1  | 1.81E+08 | 1.81E+08 | - | 0 | 0    |
| ENSG0000(RNU6-458F | snRNA    | chr14 | 18343038 | 18343144 | + | 0 | 0    |
| ENSG0000(RNU6-1013 | snRNA    | chr9  | 1.12E+08 | 1.12E+08 | + | 0 | 0    |
| ENSG0000(RNU1-136F | snRNA    | chr6  | 53219261 | 53219424 | + | 0 | 0    |
| ENSG0000(SNORA70   | snoRNA   | chr5  | 1.71E+08 | 1.71E+08 | + | 0 | 0    |
| ENSG0000(SNORA29   | snoRNA   | chr6  | 1.6E+08  | 1.6E+08  | - | 0 | 0    |
| ENSG0000(Y_RNA     | misc_RNA | chr11 | 93827622 | 93827734 | + | 0 | 0    |
| ENSG0000(Y_RNA     | misc_RNA | chr5  | 23299155 | 23299262 | + | 0 | 0    |
| ENSG0000(SNORA7    | snoRNA   | chr11 | 74252414 | 74252552 | - | 0 | 0    |
| ENSG0000(Y_RNA     | misc_RNA | chr12 | 1.23E+08 | 1.23E+08 | + | 0 | 0    |
| ENSG0000(RNU6-439F | snRNA    | chr2  | 49233794 | 49233899 | - | 0 | 0    |
| ENSG0000(RNU1-52P  | snRNA    | chr17 | 58677574 | 58677737 | - | 0 | 0    |
| ENSG0000(RNU6-1181 | snRNA    | chr3  | 57512450 | 57512555 | + | 0 | 0    |
| ENSG0000(RNY1P6    | misc_RNA | chr13 | 51586424 | 51586532 | - | 0 | 0    |
| ENSG0000(RNU6-481F | snRNA    | chr1  | 1.61E+08 | 1.61E+08 | + | 0 | 0    |
| ENSG0000(RNU6-80P  | snRNA    | chr13 | 72706017 | 72706123 | - | 0 | 0    |
| ENSG0000(RNU6-432F | snRNA    | chr9  | 1.11E+08 | 1.11E+08 | + | 0 | 0    |
| ENSG0000(RNU6-689F | snRNA    | chr14 | 75020761 | 75020867 | + | 0 | 0    |
| ENSG0000(Y_RNA     | misc_RNA | chr19 | 40342329 | 40342441 | + | 0 | 0    |
| ENSG0000(RNU6-1024 | snRNA    | chr3  | 15433110 | 15433216 | - | 0 | 0    |
| ENSG0000(Y_RNA     | misc_RNA | chr16 | 18397937 | 18398036 | + | 0 | 7.6  |
| ENSG0000(Y_RNA     | misc_RNA | chr12 | 1.01E+08 | 1.01E+08 | + | 0 | 0    |
| ENSG0000(RNU6-1042 | snRNA    | chr1  | 1.51E+08 | 1.51E+08 | + | 0 | 0    |
| ENSG0000(RNU6-4P   | snRNA    | chr3  | 1.81E+08 | 1.81E+08 | + | 0 | 1.24 |
| ENSG0000(RNU6-514F | snRNA    | chr1  | 23162704 | 23162810 | + | 0 | 0    |
| ENSG0000(RNU4-52P  | snRNA    | chrX  | 49082028 | 49082165 | + | 0 | 0    |
| ENSG0000(SNORA70B  | snoRNA   | chr2  | 61417244 | 61417378 | - | 0 | 0    |
| ENSG0000(RNU4-31P  | snRNA    | chr7  | 1.57E+08 | 1.57E+08 | + | 0 | 0    |
| ENSG0000(RNU6-281F | snRNA    | chr3  | 70808350 | 70808452 | + | 0 | 0    |
| ENSG0000(SNORD15A  | snoRNA   | chr11 | 75400391 | 75400538 | + | 0 | 0    |
| ENSG0000(RNU6-708F | snRNA    | chr18 | 48169784 | 48169890 | - | 0 | 0    |
| ENSG0000(SNORA20   | snoRNA   | chr7  | 39329003 | 39329134 | - | 0 | 0    |
| ENSG0000(SNORA36A  | snoRNA   | chrX  | 1.55E+08 | 1.55E+08 | + | 0 | 0    |
| ENSG0000(RNU6-1324 | snRNA    | chr8  | 66501205 | 66501311 | - | 0 | 0    |
| ENSG0000(Y_RNA     | misc_RNA | chr8  | 14332555 | 14332663 | + | 0 | 0    |
| ENSG0000(Y_RNA     | misc_RNA | chr2  | 32945339 | 32945451 | - | 0 | 0    |
| ENSG0000(SNORA50A  | snoRNA   | chr16 | 58559796 | 58559929 | - | 0 | 0    |
| ENSG0000(RNU6-1201 | snRNA    | chr17 | 48088678 | 48088784 | - | 0 | 0    |
| ENSG0000(Y_RNA     | misc_RNA | chr15 | 44697333 | 44697430 | - | 0 | 0    |

|                    |          |       |          |          |   |      |      |
|--------------------|----------|-------|----------|----------|---|------|------|
| ENSG0000(SNORA70   | snoRNA   | chr5  | 88382772 | 88382907 | + | 0    | 0    |
| ENSG0000(Y_RNA     | misc_RNA | chr20 | 53544615 | 53544725 | + | 0    | 0    |
| ENSG0000(RNU6-793F | snRNA    | chr6  | 14646535 | 14646638 | + | 0    | 0    |
| ENSG0000(SNORA51   | snoRNA   | chr2  | 1.7E+08  | 1.7E+08  | + | 0    | 0    |
| ENSG0000(RNU6-74P  | snRNA    | chr13 | 41905118 | 41905224 | + | 0    | 0    |
| ENSG0000(RNU6-675F | snRNA    | chr2  | 1.27E+08 | 1.27E+08 | - | 0    | 0    |
| ENSG0000(Y_RNA     | misc_RNA | chr2  | 55286018 | 55286128 | + | 0    | 0    |
| ENSG0000(RNU6-5P   | snRNA    | chr2  | 1.75E+08 | 1.75E+08 | - | 0    | 1.24 |
| ENSG0000(Y_RNA     | misc_RNA | chr11 | 1.08E+08 | 1.08E+08 | - | 0    | 0    |
| ENSG0000(RNU6-131f | snRNA    | chr14 | 1.03E+08 | 1.03E+08 | + | 0    | 0    |
| ENSG0000(RNU6-474F | snRNA    | chr2  | 2.04E+08 | 2.04E+08 | + | 0    | 0    |
| ENSG0000(RNU6-17P  | snRNA    | chr15 | 30254402 | 30254508 | - | 0    | 0    |
| ENSG0000(RNU6-114f | snRNA    | chr2  | 61605616 | 61605722 | + | 0    | 0    |
| ENSG0000(RNU6-114f | snRNA    | chr6  | 1.08E+08 | 1.08E+08 | + | 0    | 0    |
| ENSG0000(RNU6-13P  | snRNA    | chr8  | 56917084 | 56917190 | + | 0    | 0    |
| ENSG0000(SNORA7    | snoRNA   | chr11 | 3922567  | 3922703  | + | 0    | 0    |
| ENSG0000(SNORA8    | snoRNA   | chr6  | 41832854 | 41832993 | + | 0    | 0    |
| ENSG0000(Y_RNA     | misc_RNA | chr4  | 1.59E+08 | 1.59E+08 | - | 0    | 0    |
| ENSG0000(SNORD61   | snoRNA   | chrX  | 1.37E+08 | 1.37E+08 | - | 0    | 0    |
| ENSG0000(RNU6-662F | snRNA    | chr1  | 1.52E+08 | 1.52E+08 | - | 0    | 0    |
| ENSG0000(RNU6-40P  | snRNA    | chr1  | 31497577 | 31497683 | - | 0    | 0    |
| ENSG0000(Y_RNA     | misc_RNA | chr6  | 1.29E+08 | 1.29E+08 | + | 0    | 0    |
| ENSG0000(RNU6-49P  | snRNA    | chrX  | 37870109 | 37870215 | + | 0    | 0    |
| ENSG0000(RNU6-198F | snRNA    | chr2  | 39082589 | 39082692 | + | 0    | 0    |
| ENSG0000(U8        | snoRNA   | chr15 | 32426288 | 32426420 | - | 0    | 0    |
| ENSG0000(SNORD63   | snoRNA   | chr5  | 1.39E+08 | 1.39E+08 | - | 0    | 0    |
| ENSG0000(Y_RNA     | misc_RNA | chr1  | 1.66E+08 | 1.66E+08 | - | 8.75 | 0    |
| ENSG0000(RNU6-610F | snRNA    | chr15 | 43637632 | 43637738 | - | 0    | 0    |
| ENSG0000(RNU6-574F | snRNA    | chr12 | 51987657 | 51987763 | + | 0    | 0    |
| ENSG0000(Y_RNA     | misc_RNA | chr15 | 52162751 | 52162852 | + | 0    | 0    |
| ENSG0000(RNU6-842F | snRNA    | chr8  | 13044350 | 13044456 | + | 0    | 0    |
| ENSG0000(RNU6-524F | snRNA    | chr5  | 96210121 | 96210227 | - | 0    | 0    |
| ENSG0000(Y_RNA     | misc_RNA | chr20 | 43451159 | 43451260 | - | 0    | 0    |
| ENSG0000(RNU6-622F | snRNA    | chr1  | 75183045 | 75183147 | + | 0    | 0    |
| ENSG0000(RNU6-820F | snRNA    | chr9  | 68935873 | 68935979 | - | 0    | 0    |
| ENSG0000(SNORD116  | snoRNA   | chr15 | 25054210 | 25054304 | + | 0    | 0    |
| ENSG0000(SNORA5    | snoRNA   | chr3  | 1.24E+08 | 1.24E+08 | + | 0    | 0    |
| ENSG0000(RNU6-611F | snRNA    | chr19 | 45047458 | 45047561 | + | 0    | 0    |
| ENSG0000(RNU6-301F | snRNA    | chr14 | 51724103 | 51724209 | + | 0    | 0    |
| ENSG0000(RNU1-2    | snRNA    | chr1  | 16895980 | 16896143 | + | 1.72 | 1.68 |
| ENSG0000(RNU6-891F | snRNA    | chr4  | 70852130 | 70852240 | + | 0    | 0    |
| ENSG0000(SNORA54   | snoRNA   | chr11 | 2963771  | 2963893  | - | 0    | 0    |
| ENSG0000(Y_RNA     | misc_RNA | chr4  | 1683420  | 1683529  | - | 0    | 0    |
| ENSG0000(RNU6-318F | snRNA    | chr12 | 12289227 | 12289329 | - | 0    | 0    |
| ENSG0000(RNY4P13   | misc_RNA | chr17 | 30059052 | 30059147 | - | 0    | 0    |

|                    |          |       |          |          |   |   |      |
|--------------------|----------|-------|----------|----------|---|---|------|
| ENSG0000(RNU6-72P  | snRNA    | chr11 | 72047873 | 72047951 | - | 0 | 0    |
| ENSG0000(RNU6-804F | snRNA    | chr5  | 86663144 | 86663250 | - | 0 | 0    |
| ENSG0000(SNORD116  | snoRNA   | chr15 | 25056860 | 25056954 | + | 0 | 0    |
| ENSG0000(SNORA36C  | snoRNA   | chr2  | 69520043 | 69520174 | - | 0 | 0    |
| ENSG0000(RNU6-167F | snRNA    | chr18 | 31345362 | 31345467 | - | 0 | 0    |
| ENSG0000(Y_RNA     | misc_RNA | chr5  | 1.4E+08  | 1.4E+08  | - | 0 | 0    |
| ENSG0000(Y_RNA     | misc_RNA | chr17 | 81573490 | 81573602 | + | 0 | 0    |
| ENSG0000(SNORA51   | snoRNA   | chr1  | 92846059 | 92846182 | + | 0 | 0    |
| ENSG0000(RNU6-975F | snRNA    | chr6  | 73464073 | 73464177 | + | 0 | 0    |
| ENSG0000(Y_RNA     | misc_RNA | chr11 | 64296037 | 64296138 | + | 0 | 0    |
| ENSG0000(Y_RNA     | misc_RNA | chrX  | 18395994 | 18396095 | - | 0 | 0    |
| ENSG0000(RNU6-472F | snRNA    | chr12 | 33923374 | 33923480 | - | 0 | 0    |
| ENSG0000(SNORA67   | snoRNA   | chr8  | 23806229 | 23806377 | - | 0 | 0    |
| ENSG0000(RNU6-43P  | snRNA    | chr10 | 1.03E+08 | 1.03E+08 | + | 0 | 0    |
| ENSG0000(SNORD59A  | snoRNA   | chr12 | 56645027 | 56645101 | - | 0 | 0    |
| ENSG0000(Y_RNA     | misc_RNA | chr9  | 34389943 | 34390051 | - | 0 | 0    |
| ENSG0000(RNU6-154F | snRNA    | chrX  | 1.16E+08 | 1.16E+08 | - | 0 | 0    |
| ENSG0000(Y_RNA     | misc_RNA | chr18 | 2778941  | 2779057  | + | 0 | 0    |
| ENSG0000(RNY3P14   | misc_RNA | chr8  | 70357347 | 70357448 | + | 0 | 0    |
| ENSG0000(RNU6-339F | snRNA    | chr15 | 84938416 | 84938522 | - | 0 | 0    |
| ENSG0000(Y_RNA     | misc_RNA | chr1  | 1.54E+08 | 1.54E+08 | - | 0 | 0    |
| ENSG0000(RNU6-3P   | snRNA    | chrX  | 1.41E+08 | 1.41E+08 | - | 0 | 1.24 |
| ENSG0000(RNU6-196F | snRNA    | chr16 | 21642294 | 21642400 | + | 0 | 0    |
| ENSG0000(RNU6-122E | snRNA    | chr6  | 1.12E+08 | 1.12E+08 | - | 0 | 0    |
| ENSG0000(RNU6-532F | snRNA    | chr7  | 96330638 | 96330744 | + | 0 | 0    |
| ENSG0000(RNU6-886F | snRNA    | chr14 | 37434469 | 37434573 | - | 0 | 0    |
| ENSG0000(SNORD51   | snoRNA   | chr2  | 2.06E+08 | 2.06E+08 | + | 0 | 0    |
| ENSG0000(Y_RNA     | misc_RNA | chr2  | 2.36E+08 | 2.36E+08 | - | 0 | 0    |
| ENSG0000(SNORA27   | snoRNA   | chr13 | 27255401 | 27255526 | + | 0 | 0    |
| ENSG0000(RNU6-378F | snRNA    | chr5  | 32309662 | 32309768 | + | 0 | 0    |
| ENSG0000(RNU6-937F | snRNA    | chr20 | 35928570 | 35928675 | - | 0 | 0    |
| ENSG0000(RNU1-8P   | snRNA    | chr1  | 7219360  | 7219524  | + | 0 | 0    |
| ENSG0000(RNU6-784F | snRNA    | chr4  | 70703018 | 70703123 | - | 0 | 0    |
| ENSG0000(RNU6-480F | snRNA    | chr5  | 51055353 | 51055459 | - | 0 | 0    |
| ENSG0000(Y_RNA     | misc_RNA | chr7  | 1.56E+08 | 1.56E+08 | - | 0 | 0    |
| ENSG0000(SNORA15   | snoRNA   | chr7  | 65070538 | 65070672 | + | 0 | 0    |
| ENSG0000(SNORD116  | snoRNA   | chr15 | 25051477 | 25051571 | + | 0 | 0    |
| ENSG0000(RNU5A-2P  | snRNA    | chr4  | 81334303 | 81334418 | + | 0 | 0    |
| ENSG0000(SNORA72   | snoRNA   | chr8  | 98042086 | 98042217 | - | 0 | 0    |
| ENSG0000(RNU6-463F | snRNA    | chr10 | 1.06E+08 | 1.06E+08 | + | 0 | 0    |
| ENSG0000(Y_RNA     | misc_RNA | chr2  | 25008845 | 25008946 | - | 0 | 0    |
| ENSG0000(RNU6-120I | snRNA    | chr10 | 45188790 | 45188896 | - | 0 | 0    |
| ENSG0000(RNU6-39P  | snRNA    | chr18 | 68858934 | 68859040 | + | 0 | 0    |
| ENSG0000(Y_RNA     | misc_RNA | chr19 | 49566672 | 49566772 | + | 0 | 0    |
| ENSG0000(Y_RNA     | misc_RNA | chr4  | 37699895 | 37700002 | - | 0 | 0    |

|                           |       |          |          |   |   |      |
|---------------------------|-------|----------|----------|---|---|------|
| ENSG0000(RNU6-111) snRNA  | chr6  | 43474186 | 43474292 | + | 0 | 0    |
| ENSG0000(RNU6-111) snRNA  | chr5  | 1E+08    | 1E+08    | + | 0 | 0    |
| ENSG0000(Y_RNA misc_RNA)  | chr1  | 1.84E+08 | 1.84E+08 | + | 0 | 0    |
| ENSG0000(RNU6-616) snRNA  | chrX  | 1.35E+08 | 1.35E+08 | - | 0 | 0    |
| ENSG0000(RNU6-171) snRNA  | chr1  | 1.65E+08 | 1.65E+08 | + | 0 | 0    |
| ENSG0000(RNU6-22) snRNA   | chr16 | 69175671 | 69175777 | - | 0 | 0    |
| ENSG0000(SNORA72) snoRNA  | chr3  | 1.61E+08 | 1.61E+08 | + | 0 | 0    |
| ENSG0000(Y_RNA misc_RNA)  | chr2  | 9615267  | 9615373  | + | 0 | 0    |
| ENSG0000(RNU6-242) snRNA  | chr2  | 43091388 | 43091494 | - | 0 | 0    |
| ENSG0000(SNORA7B) snoRNA  | chr3  | 1.29E+08 | 1.29E+08 | - | 0 | 0    |
| ENSG0000(RNU6-921) snRNA  | chr14 | 68735922 | 68736028 | - | 0 | 0    |
| ENSG0000(RNU6-517) snRNA  | chr7  | 1.21E+08 | 1.21E+08 | - | 0 | 0    |
| ENSG0000(Y_RNA misc_RNA)  | chr15 | 34314728 | 34314828 | + | 0 | 0    |
| ENSG0000(Y_RNA misc_RNA)  | chr18 | 9250110  | 9250211  | + | 0 | 0    |
| ENSG0000(SNORD116) snoRNA | chr15 | 25070432 | 25070526 | + | 0 | 0    |
| ENSG0000(SNORA67) snoRNA  | chr7  | 88449092 | 88449231 | - | 0 | 0    |
| ENSG0000(RNU6-424) snRNA  | chr1  | 27693731 | 27693835 | + | 0 | 0    |
| ENSG0000(RNU6-614) snRNA  | chr21 | 13047583 | 13047689 | + | 0 | 0    |
| ENSG0000(SNORA70) snoRNA  | chr21 | 32841861 | 32841995 | - | 0 | 0    |
| ENSG0000(RNU6-166) snRNA  | chr12 | 65095749 | 65095855 | + | 0 | 0    |
| ENSG0000(SNORA8) snoRNA   | chrX  | 1.33E+08 | 1.33E+08 | + | 0 | 0    |
| ENSG0000(Y_RNA misc_RNA)  | chr8  | 41803349 | 41803450 | + | 0 | 0    |
| ENSG0000(RNU6-434) snRNA  | chrX  | 54343546 | 54343652 | + | 0 | 0    |
| ENSG0000(Y_RNA misc_RNA)  | chr15 | 48995912 | 48996022 | - | 0 | 0    |
| ENSG0000(Y_RNA misc_RNA)  | chr1  | 1.86E+08 | 1.86E+08 | - | 0 | 0    |
| ENSG0000(SNORD38) snoRNA  | chr3  | 53333060 | 53333128 | - | 0 | 0    |
| ENSG0000(RNU1-106) snRNA  | chr8  | 1.28E+08 | 1.28E+08 | + | 0 | 0    |
| ENSG0000(SNORA25) snoRNA  | chr11 | 93730513 | 93730646 | - | 0 | 0    |
| ENSG0000(RNU6-16) snRNA   | chr11 | 88612805 | 88612911 | - | 0 | 1.24 |
| ENSG0000(RNU6-348) snRNA  | chr3  | 1.72E+08 | 1.72E+08 | - | 0 | 0    |
| ENSG0000(RNU6-364) snRNA  | chr7  | 96341140 | 96341246 | + | 0 | 0    |
| ENSG0000(RNU6-31) snRNA   | chr2  | 2.01E+08 | 2.01E+08 | + | 0 | 0    |
| ENSG0000(Y_RNA misc_RNA)  | chr2  | 1.6E+08  | 1.6E+08  | - | 0 | 0    |
| ENSG0000(SNORD14D) snoRNA | chr11 | 1.23E+08 | 1.23E+08 | - | 0 | 0    |
| ENSG0000(U3) snoRNA       | chr15 | 69457941 | 69458149 | - | 0 | 0    |
| ENSG0000(RNU6-123) snRNA  | chr4  | 1.5E+08  | 1.5E+08  | + | 0 | 0    |
| ENSG0000(RNU6-591) snRNA  | chrX  | 39081180 | 39081285 | - | 0 | 0    |
| ENSG0000(Y_RNA misc_RNA)  | chr17 | 62122320 | 62122421 | + | 0 | 0    |
| ENSG0000(RNU6-163) snRNA  | chr10 | 4514952  | 4515057  | + | 0 | 0    |
| ENSG0000(Y_RNA misc_RNA)  | chr17 | 49416744 | 49416850 | - | 0 | 0    |
| ENSG0000(RNU6-729) snRNA  | chr8  | 10476223 | 10476329 | + | 0 | 0    |
| ENSG0000(RNA5SP18) rRNA   | chr5  | 88274258 | 88274376 | - | 0 | 0    |
| ENSG0000(SNORA24) snoRNA  | chr3  | 1.29E+08 | 1.29E+08 | - | 0 | 0    |
| ENSG0000(Y_RNA misc_RNA)  | chr6  | 87826173 | 87826285 | - | 0 | 0    |
| ENSG0000(Y_RNA misc_RNA)  | chr17 | 30344503 | 30344604 | - | 0 | 0    |



|                           |       |          |          |   |   |     |
|---------------------------|-------|----------|----------|---|---|-----|
| ENSG0000(SNORD116 snoRNA  | chr15 | 25067788 | 25067882 | + | 0 | 0   |
| ENSG0000(RNU6-106F snRNA  | chr1  | 1.55E+08 | 1.55E+08 | - | 0 | 0   |
| ENSG0000(RNU6-452F snRNA  | chr10 | 27335501 | 27335607 | - | 0 | 0   |
| ENSG0000(RNU6-769F snRNA  | chr12 | 50633273 | 50633376 | + | 0 | 0   |
| ENSG0000(SNORD116 snoRNA  | chr15 | 25079058 | 25079149 | + | 0 | 0   |
| ENSG0000(RNU6-869F snRNA  | chr8  | 1.27E+08 | 1.27E+08 | + | 0 | 0   |
| ENSG0000(Y_RNA misc_RNA   | chr1  | 1.98E+08 | 1.98E+08 | - | 0 | 0   |
| ENSG0000(Y_RNA misc_RNA   | chr12 | 42454720 | 42454821 | + | 0 | 0   |
| ENSG0000(RNU6-129 snRNA   | chr1  | 1.55E+08 | 1.55E+08 | + | 0 | 0   |
| ENSG0000(SNORA18 snoRNA   | chr11 | 93733466 | 93733597 | - | 0 | 0   |
| ENSG0000(Y_RNA misc_RNA   | chrX  | 1.09E+08 | 1.09E+08 | - | 0 | 0   |
| ENSG0000(SNORA51 snoRNA   | chr21 | 40513144 | 40513279 | + | 0 | 0   |
| ENSG0000(Y_RNA misc_RNA   | chr4  | 1.21E+08 | 1.21E+08 | - | 0 | 0   |
| ENSG0000(RNU6-465F snRNA  | chr1  | 1.2E+08  | 1.2E+08  | + | 0 | 0   |
| ENSG0000(RNU6-185F snRNA  | chr15 | 87474183 | 87474289 | - | 0 | 0   |
| ENSG0000(Y_RNA misc_RNA   | chrX  | 11116092 | 11116193 | - | 0 | 0   |
| ENSG0000(RNU6-933F snRNA  | chr11 | 60985061 | 60985167 | - | 0 | 0   |
| ENSG0000(RNU1-46P snRNA   | chr18 | 51283733 | 51283896 | - | 0 | 0   |
| ENSG0000(RNY1P14 misc_RNA | chr4  | 1.41E+08 | 1.41E+08 | - | 0 | 0   |
| ENSG0000(RNU6-505F snRNA  | chr3  | 1.47E+08 | 1.47E+08 | - | 0 | 0   |
| ENSG0000(RNY3P4 misc_RNA  | chr13 | 23152586 | 23152686 | - | 0 | 0   |
| ENSG0000(RNU6-929F snRNA  | chr20 | 56785981 | 56786087 | - | 0 | 0   |
| ENSG0000(RNU6-128 snRNA   | chr18 | 26366301 | 26366406 | - | 0 | 0   |
| ENSG0000(Y_RNA misc_RNA   | chr2  | 1.47E+08 | 1.47E+08 | - | 0 | 0   |
| ENSG0000(RNU6-549F snRNA  | chr15 | 64671263 | 64671369 | + | 0 | 0   |
| ENSG0000(RNU6-905F snRNA  | chr3  | 14530982 | 14531088 | - | 0 | 0   |
| ENSG0000(Y_RNA misc_RNA   | chr14 | 28901236 | 28901347 | - | 0 | 0   |
| ENSG0000(SNORA70 snoRNA   | chrX  | 1.54E+08 | 1.54E+08 | + | 0 | 7.8 |
| ENSG0000(SNORA68 snoRNA   | chr19 | 17862588 | 17862720 | + | 0 | 0   |
| ENSG0000(RNU6-134C snRNA  | chr16 | 19012157 | 19012263 | + | 0 | 0   |
| ENSG0000(SNORA15 snoRNA   | chr7  | 56060470 | 56060602 | + | 0 | 0   |
| ENSG0000(RNU6-24P snRNA   | chr17 | 76337316 | 76337422 | + | 0 | 0   |
| ENSG0000(RNU6-121 snRNA   | chr2  | 18583367 | 18583468 | - | 0 | 0   |
| ENSG0000(SNORA51 snoRNA   | chr4  | 1.68E+08 | 1.68E+08 | + | 0 | 0   |
| ENSG0000(RNU6-116 snRNA   | chr14 | 63630678 | 63630781 | + | 0 | 0   |
| ENSG0000(Y_RNA misc_RNA   | chr16 | 58083068 | 58083168 | - | 0 | 0   |
| ENSG0000(SNORD116 snoRNA  | chr15 | 25081287 | 25081378 | + | 0 | 0   |
| ENSG0000(RNU1-67P snRNA   | chrX  | 1.19E+08 | 1.19E+08 | + | 0 | 0   |
| ENSG0000(Y_RNA misc_RNA   | chr12 | 32396050 | 32396147 | - | 0 | 0   |
| ENSG0000(SNORA51 snoRNA   | chr5  | 1.11E+08 | 1.11E+08 | - | 0 | 0   |
| ENSG0000(RNU6-112 snRNA   | chr2  | 1.83E+08 | 1.83E+08 | + | 0 | 0   |
| ENSG0000(RNU6-411F snRNA  | chr6  | 71182612 | 71182718 | + | 0 | 0   |
| ENSG0000(SNORA14B snoRNA  | chr1  | 2.35E+08 | 2.35E+08 | - | 0 | 0   |
| ENSG0000(RNU1-44P snRNA   | chr4  | 1.47E+08 | 1.47E+08 | + | 0 | 0   |
| ENSG0000(RNU6-843F snRNA  | chr2  | 12411398 | 12411501 | - | 0 | 0   |

|                           |       |          |          |   |       |   |
|---------------------------|-------|----------|----------|---|-------|---|
| ENSG0000(RNU6-1157) snRNA | chr11 | 1.19E+08 | 1.19E+08 | + | 0     | 0 |
| ENSG0000(RNA5SP12) rRNA   | chr2  | 2.42E+08 | 2.42E+08 | + | 0     | 0 |
| ENSG0000(SNORA64) snoRNA  | chr2  | 30187434 | 30187566 | + | 0     | 0 |
| ENSG0000(Y_RNA) misc_RNA  | chr12 | 1.23E+08 | 1.23E+08 | - | 0     | 0 |
| ENSG0000(RNU6-809F) snRNA | chr1  | 64028894 | 64029000 | - | 0     | 0 |
| ENSG0000(SNORD116) snoRNA | chr15 | 25062333 | 25062427 | + | 0     | 0 |
| ENSG0000(RNU6-649F) snRNA | chr2  | 4945277  | 4945383  | + | 0     | 0 |
| ENSG0000(Y_RNA) misc_RNA  | chr6  | 16232231 | 16232330 | - | 0     | 0 |
| ENSG0000(RNU6-102F) snRNA | chr1  | 50582404 | 50582511 | + | 0     | 0 |
| ENSG0000(Y_RNA) misc_RNA  | chr4  | 40826655 | 40826765 | - | 0     | 0 |
| ENSG0000(Y_RNA) misc_RNA  | chr11 | 70705167 | 70705269 | - | 0     | 0 |
| ENSG0000(SNORD116) snoRNA | chr15 | 25077051 | 25077142 | + | 0     | 0 |
| ENSG0000(RNU6-119F) snRNA | chr4  | 41113942 | 41114045 | + | 0     | 0 |
| ENSG0000(SNORD38) snoRNA  | chr8  | 39018615 | 39018683 | - | 0     | 0 |
| ENSG0000(RNU6-45P) snRNA  | chr11 | 63970470 | 63970576 | + | 0     | 0 |
| ENSG0000(RNU1-148F) snRNA | chr8  | 24076997 | 24077158 | - | 0     | 0 |
| ENSG0000(RNU6-800F) snRNA | chrX  | 10582817 | 10582919 | + | 0     | 0 |
| ENSG0000(RNU6-71P) snRNA  | chr13 | 36267168 | 36267274 | + | 0     | 0 |
| ENSG0000(RNU6-393F) snRNA | chr7  | 98794718 | 98794824 | - | 0     | 0 |
| ENSG0000(RNVU1-15) snRNA  | chr1  | 1.44E+08 | 1.44E+08 | + | 0     | 0 |
| ENSG0000(RNU6-103F) snRNA | chr9  | 81725243 | 81725349 | - | 0     | 0 |
| ENSG0000(Y_RNA) misc_RNA  | chr2  | 85434507 | 85434619 | + | 0     | 0 |
| ENSG0000(RNU6-790F) snRNA | chr14 | 1.02E+08 | 1.02E+08 | + | 0     | 0 |
| ENSG0000(Y_RNA) misc_RNA  | chr1  | 1.47E+08 | 1.47E+08 | - | 0     | 0 |
| ENSG0000(Y_RNA) misc_RNA  | chr5  | 1.73E+08 | 1.73E+08 | - | 0     | 0 |
| ENSG0000(RNU6-102F) snRNA | chr7  | 1.25E+08 | 1.25E+08 | + | 0     | 0 |
| ENSG0000(U3) snoRNA       | chr8  | 97358265 | 97358478 | + | 0     | 0 |
| ENSG0000(SNORA42) snoRNA  | chr7  | 6016877  | 6017011  | + | 0     | 0 |
| ENSG0000(Y_RNA) misc_RNA  | chr2  | 41857271 | 41857372 | - | 0     | 0 |
| ENSG0000(RNU1-57P) snRNA  | chrX  | 1.14E+08 | 1.14E+08 | + | 0     | 0 |
| ENSG0000(SNORA70E) snoRNA | chr11 | 83041464 | 83041598 | - | 0     | 0 |
| ENSG0000(RNU6-456F) snRNA | chr5  | 1.35E+08 | 1.35E+08 | - | 0     | 0 |
| ENSG0000(Y_RNA) misc_RNA  | chr15 | 64652888 | 64652989 | + | 0     | 0 |
| ENSG0000(RNU6-692F) snRNA | chr2  | 1.47E+08 | 1.47E+08 | + | 0     | 0 |
| ENSG0000(RNU6-900F) snRNA | chr22 | 37891347 | 37891448 | + | 0     | 0 |
| ENSG0000(Y_RNA) misc_RNA  | chr5  | 55040847 | 55040945 | + | 0     | 0 |
| ENSG0000(Y_RNA) misc_RNA  | chr4  | 1.85E+08 | 1.85E+08 | - | 12.87 | 0 |
| ENSG0000(SNORA37) snoRNA  | chr18 | 54222284 | 54222412 | - | 0     | 0 |
| ENSG0000(RNU6-125F) snRNA | chr1  | 88816779 | 88816885 | + | 0     | 0 |
| ENSG0000(Y_RNA) misc_RNA  | chr17 | 59260748 | 59260846 | + | 0     | 0 |
| ENSG0000(RNU6-110F) snRNA | chr1  | 25964197 | 25964300 | + | 0     | 0 |
| ENSG0000(Y_RNA) misc_RNA  | chr18 | 31382317 | 31382430 | + | 0     | 0 |
| ENSG0000(SNORD45A) snoRNA | chr1  | 75787889 | 75787972 | + | 0     | 0 |
| ENSG0000(RNU6-106F) snRNA | chr17 | 10857899 | 10858004 | - | 0     | 0 |
| ENSG0000(Y_RNA) misc_RNA  | chr16 | 178554   | 178656   | + | 0     | 0 |

|                   |          |       |          |          |   |   |      |
|-------------------|----------|-------|----------|----------|---|---|------|
| ENSG0000(SNORA70  | snoRNA   | chr8  | 8961575  | 8961708  | + | 0 | 0    |
| ENSG0000(SNORD116 | snoRNA   | chr15 | 25106521 | 25106603 | + | 0 | 0    |
| ENSG0000(Y_RNA    | misc_RNA | chr6  | 1.37E+08 | 1.37E+08 | + | 0 | 0    |
| ENSG0000(RNU6-100 | snRNA    | chr16 | 21642054 | 21642160 | + | 0 | 0    |
| ENSG0000(SNORA72  | snoRNA   | chr2  | 1.05E+08 | 1.05E+08 | + | 0 | 0    |
| ENSG0000(RNU6-342 | snRNA    | chr3  | 27265580 | 27265683 | - | 0 | 0    |
| ENSG0000(Y_RNA    | misc_RNA | chr11 | 24455911 | 24456010 | + | 0 | 0    |
| ENSG0000(RNU6-111 | snRNA    | chr2  | 35471605 | 35471708 | + | 0 | 0    |
| ENSG0000(RNU6-880 | snRNA    | chr1  | 42991438 | 42991544 | + | 0 | 0    |
| ENSG0000(RNU6-18P | snRNA    | chr15 | 32284152 | 32284258 | + | 0 | 0    |
| ENSG0000(Y_RNA    | misc_RNA | chr8  | 38744020 | 38744131 | + | 0 | 0    |
| ENSG0000(RNU6-35P | snRNA    | chr4  | 1.1E+08  | 1.1E+08  | + | 0 | 0    |
| ENSG0000(RNU6-738 | snRNA    | chr5  | 27111569 | 27111674 | + | 0 | 0    |
| ENSG0000(SNORD116 | snoRNA   | chr15 | 25082768 | 25082859 | + | 0 | 0    |
| ENSG0000(RNU6-15P | snRNA    | chr10 | 21321961 | 21322067 | + | 0 | 1.24 |
| ENSG0000(Y_RNA    | misc_RNA | chr19 | 52259076 | 52259187 | - | 0 | 0    |
| ENSG0000(RNU6-124 | snRNA    | chr16 | 27998295 | 27998401 | - | 0 | 0    |
| ENSG0000(RNU6-108 | snRNA    | chr2  | 11233988 | 11234094 | + | 0 | 0    |
| ENSG0000(SNORA70C | snoRNA   | chr9  | 1.17E+08 | 1.17E+08 | - | 0 | 0    |
| ENSG0000(RN7SKP62 | misc_RNA | chr5  | 1.01E+08 | 1.01E+08 | + | 0 | 0    |
| ENSG0000(RNU6-601 | snRNA    | chr2  | 1.5E+08  | 1.5E+08  | - | 0 | 0    |
| ENSG0000(Y_RNA    | misc_RNA | chr10 | 36626015 | 36626138 | - | 0 | 0    |
| ENSG0000(SNORA70  | snoRNA   | chr2  | 2.15E+08 | 2.15E+08 | + | 0 | 0    |
| ENSG0000(RNU6-441 | snRNA    | chr10 | 82340771 | 82340876 | + | 0 | 0    |
| ENSG0000(RNU6-116 | snRNA    | chr9  | 96256216 | 96256319 | - | 0 | 0    |
| ENSG0000(RNA5SP28 | rRNA     | chr9  | 63813190 | 63813307 | + | 0 | 0    |
| ENSG0000(RNU6-831 | snRNA    | chr18 | 3894699  | 3894805  | - | 0 | 0    |
| ENSG0000(SNORD116 | snoRNA   | chr15 | 25094037 | 25094128 | + | 0 | 0    |
| ENSG0000(SNORD20  | snoRNA   | chr2  | 2.31E+08 | 2.31E+08 | - | 0 | 0    |
| ENSG0000(Y_RNA    | misc_RNA | chr19 | 40339059 | 40339164 | - | 0 | 0    |
| ENSG0000(Y_RNA    | misc_RNA | chr20 | 18113467 | 18113579 | - | 0 | 0    |
| ENSG0000(Y_RNA    | misc_RNA | chr3  | 5086178  | 5086279  | - | 0 | 0    |
| ENSG0000(Y_RNA    | misc_RNA | chr6  | 25287432 | 25287533 | - | 0 | 0    |
| ENSG0000(RNU6-127 | snRNA    | chr10 | 96743167 | 96743273 | + | 0 | 0    |
| ENSG0000(RNU6-123 | snRNA    | chr15 | 21307749 | 21307855 | + | 0 | 0    |
| ENSG0000(Y_RNA    | misc_RNA | chr5  | 1.28E+08 | 1.28E+08 | - | 0 | 0    |
| ENSG0000(RNU6-30P | snRNA    | chrX  | 1.02E+08 | 1.02E+08 | - | 0 | 0    |
| ENSG0000(Y_RNA    | misc_RNA | chr6  | 1.5E+08  | 1.5E+08  | + | 0 | 0    |
| ENSG0000(Y_RNA    | misc_RNA | chr5  | 57169108 | 57169209 | - | 0 | 0    |
| ENSG0000(Y_RNA    | misc_RNA | chr16 | 15150697 | 15150796 | + | 0 | 7.6  |
| ENSG0000(RNU6-851 | snRNA    | chr2  | 38884560 | 38884666 | - | 0 | 0    |
| ENSG0000(RNU6-140 | snRNA    | chr19 | 38797002 | 38797109 | - | 0 | 0    |
| ENSG0000(SNORD7   | snoRNA   | chr17 | 35573657 | 35573753 | + | 0 | 0    |
| ENSG0000(RNU6-83P | snRNA    | chr13 | 99025234 | 99025345 | + | 0 | 0    |
| ENSG0000(SNORD56  | snoRNA   | chr11 | 90118391 | 90118461 | + | 0 | 0    |

|                   |          |       |          |          |   |       |      |
|-------------------|----------|-------|----------|----------|---|-------|------|
| ENSG0000(Y_RNA    | misc_RNA | chr6  | 1.38E+08 | 1.38E+08 | + | 0     | 0    |
| ENSG0000(Y_RNA    | misc_RNA | chr1  | 25877496 | 25877605 | + | 0     | 0    |
| ENSG0000(Y_RNA    | misc_RNA | chr2  | 2.16E+08 | 2.16E+08 | + | 0     | 0    |
| ENSG0000(SNORA8   | snoRNA   | chr11 | 93732361 | 93732499 | - | 0     | 2.31 |
| ENSG0000(Y_RNA    | misc_RNA | chr20 | 2453010  | 2453117  | - | 0     | 0    |
| ENSG0000(RNU6-115 | snRNA    | chr17 | 48196680 | 48196786 | - | 0     | 0    |
| ENSG0000(RNU6-145 | snRNA    | chr4  | 76532222 | 76532327 | - | 0     | 0    |
| ENSG0000(RNU6-878 | snRNA    | chr11 | 2321718  | 2321827  | + | 0     | 0    |
| ENSG0000(RNU4-70P | snRNA    | chr6  | 96649453 | 96649591 | - | 0     | 0    |
| ENSG0000(RNU6-112 | snRNA    | chr3  | 1.19E+08 | 1.19E+08 | - | 0     | 0    |
| ENSG0000(RNU6-429 | snRNA    | chr5  | 11027200 | 11027307 | + | 0     | 0    |
| ENSG0000(SNORA2B  | snoRNA   | chr12 | 48667457 | 48667593 | - | 4.24  | 0    |
| ENSG0000(Y_RNA    | misc_RNA | chr3  | 88431191 | 88431309 | + | 0     | 0    |
| ENSG0000(Y_RNA    | misc_RNA | chr5  | 1.4E+08  | 1.4E+08  | + | 0     | 0    |
| ENSG0000(RNU6-118 | snRNA    | chr7  | 1.48E+08 | 1.48E+08 | + | 0     | 0    |
| ENSG0000(Y_RNA    | misc_RNA | chr2  | 2.07E+08 | 2.07E+08 | - | 0     | 0    |
| ENSG0000(Y_RNA    | misc_RNA | chrX  | 3641443  | 3641555  | - | 0     | 0    |
| ENSG0000(RNU6-160 | snRNA    | chr1  | 1.53E+08 | 1.53E+08 | + | 0     | 0    |
| ENSG0000(RNU1-89P | snRNA    | chr4  | 1.36E+08 | 1.36E+08 | - | 0     | 0    |
| ENSG0000(RNU6-901 | snRNA    | chr3  | 1.53E+08 | 1.53E+08 | - | 0     | 0    |
| ENSG0000(RNY1P4   | misc_RNA | chr13 | 32763438 | 32763552 | - | 0     | 0    |
| ENSG0000(Y_RNA    | misc_RNA | chr1  | 2.46E+08 | 2.46E+08 | - | 0     | 0    |
| ENSG0000(RNU6-883 | snRNA    | chr10 | 73529051 | 73529157 | - | 0     | 0    |
| ENSG0000(RNU6-636 | snRNA    | chr1  | 37203610 | 37203716 | + | 0     | 0    |
| ENSG0000(Y_RNA    | misc_RNA | chr9  | 1.09E+08 | 1.09E+08 | + | 0     | 0    |
| ENSG0000(RNU6-73P | snRNA    | chr13 | 27828763 | 27828869 | + | 0     | 0    |
| ENSG0000(RNU6-126 | snRNA    | chr3  | 98908459 | 98908564 | + | 0     | 0    |
| ENSG0000(RNU6-146 | snRNA    | chrX  | 3607258  | 3607365  | - | 0     | 0    |
| ENSG0000(RNU6-680 | snRNA    | chr5  | 75709495 | 75709599 | - | 0     | 0    |
| ENSG0000(RNU6-12P | snRNA    | chr8  | 1.19E+08 | 1.19E+08 | + | 0     | 0    |
| ENSG0000(RNU6-658 | snRNA    | chr5  | 74725099 | 74725204 | - | 0     | 0    |
| ENSG0000(RNU6-296 | snRNA    | chr7  | 1.23E+08 | 1.23E+08 | - | 0     | 0    |
| ENSG0000(RNVU1-1  | snRNA    | chr1  | 1.48E+08 | 1.48E+08 | - | 0     | 0    |
| ENSG0000(RNA5SP64 | rRNA     | chr1  | 1.66E+08 | 1.66E+08 | + | 0     | 0    |
| ENSG0000(Y_RNA    | misc_RNA | chr14 | 88840165 | 88840263 | + | 37.84 | 0    |
| ENSG0000(RNU6-225 | snRNA    | chr22 | 20416797 | 20416899 | - | 0     | 0    |
| ENSG0000(SNORA22  | snoRNA   | chr7  | 65065999 | 65066132 | + | 0     | 0    |
| ENSG0000(RNU6-122 | snRNA    | chr6  | 1.48E+08 | 1.48E+08 | + | 0     | 0    |
| ENSG0000(RNU6-306 | snRNA    | chr10 | 21564471 | 21564577 | - | 0     | 0    |
| ENSG0000(RNVU1-17 | snRNA    | chr1  | 1.44E+08 | 1.44E+08 | - | 0     | 0    |
| ENSG0000(Y_RNA    | misc_RNA | chr3  | 1.84E+08 | 1.84E+08 | - | 0     | 0    |
| ENSG0000(RNU6-540 | snRNA    | chr5  | 65604661 | 65604761 | - | 0     | 0    |
| ENSG0000(RNU6-125 | snRNA    | chr20 | 24974171 | 24974280 | + | 0     | 0    |
| ENSG0000(Y_RNA    | misc_RNA | chr1  | 39944890 | 39944998 | - | 0     | 0    |
| ENSG0000(RNU6-2   | snRNA    | chr19 | 1021522  | 1021628  | + | 0     | 1.24 |

|                     |          |       |          |          |   |      |      |
|---------------------|----------|-------|----------|----------|---|------|------|
| ENSG0000(RNU6-925F) | snRNA    | chr8  | 89900721 | 89900824 | - | 0    | 0    |
| ENSG0000(RNU6-14P)  | snRNA    | chr9  | 15776181 | 15776286 | - | 0    | 0    |
| ENSG0000(RNU6-178F) | snRNA    | chr8  | 28416448 | 28416551 | + | 0    | 0    |
| ENSG0000(RNU6-422F) | snRNA    | chr10 | 1E+08    | 1E+08    | + | 0    | 0    |
| ENSG0000(Y_RNA)     | misc_RNA | chrX  | 1.08E+08 | 1.08E+08 | - | 0    | 0    |
| ENSG0000(RNU6-939F) | snRNA    | chr2  | 37331770 | 37331876 | - | 0    | 0    |
| ENSG0000(Y_RNA)     | misc_RNA | chr12 | 93021606 | 93021712 | + | 0    | 0    |
| ENSG0000(RNU6-297F) | snRNA    | chr14 | 48341226 | 48341332 | - | 0    | 0    |
| ENSG0000(RNU6-29P)  | snRNA    | chrX  | 48776965 | 48777071 | - | 0    | 1.24 |
| ENSG0000(Y_RNA)     | misc_RNA | chr3  | 1.95E+08 | 1.95E+08 | - | 0    | 0    |
| ENSG0000(RNU6-665F) | snRNA    | chr8  | 47667771 | 47667877 | + | 0    | 0    |
| ENSG0000(Y_RNA)     | misc_RNA | chr3  | 1.94E+08 | 1.94E+08 | + | 0    | 0    |
| ENSG0000(Y_RNA)     | misc_RNA | chr6  | 41917416 | 41917526 | - | 0    | 0    |
| ENSG0000(SNORD116)  | snoRNA   | chr15 | 25091786 | 25091877 | + | 0    | 0    |
| ENSG0000(RNU6-748F) | snRNA    | chr8  | 98462944 | 98463050 | - | 0    | 0    |
| ENSG0000(Y_RNA)     | misc_RNA | chr1  | 93385711 | 93385817 | + | 0    | 0    |
| ENSG0000(Y_RNA)     | misc_RNA | chr20 | 5964538  | 5964650  | + | 0    | 0    |
| ENSG0000(RNU6-950F) | snRNA    | chr12 | 54317781 | 54317887 | - | 0    | 0    |
| ENSG0000(Y_RNA)     | misc_RNA | chr17 | 62661621 | 62661725 | - | 0    | 0    |
| ENSG0000(Y_RNA)     | misc_RNA | chr2  | 1.13E+08 | 1.13E+08 | - | 0    | 0    |
| ENSG0000(Y_RNA)     | misc_RNA | chr4  | 1.39E+08 | 1.39E+08 | + | 0    | 0    |
| ENSG0000(RNU6-310F) | snRNA    | chr4  | 53265461 | 53265567 | - | 0    | 0    |
| ENSG0000(Y_RNA)     | misc_RNA | chr2  | 2.06E+08 | 2.06E+08 | + | 0    | 0    |
| ENSG0000(Y_RNA)     | misc_RNA | chr12 | 70906917 | 70907018 | + | 0    | 0    |
| ENSG0000(RNU1-4)    | snRNA    | chr1  | 16740516 | 16740679 | + | 1.72 | 1.68 |
| ENSG0000(Y_RNA)     | misc_RNA | chr5  | 79534853 | 79534954 | + | 0    | 0    |
| ENSG0000(SNORA20)   | snoRNA   | chr6  | 1.6E+08  | 1.6E+08  | - | 0    | 0    |
| ENSG0000(RNU6-136F) | snRNA    | chr2  | 2.19E+08 | 2.19E+08 | - | 0    | 0    |
| ENSG0000(RNU6-106C) | snRNA    | chr6  | 23124981 | 23125087 | - | 0    | 0    |
| ENSG0000(Y_RNA)     | misc_RNA | chr15 | 69406441 | 69406552 | + | 0    | 0    |
| ENSG0000(RNU6-117I) | snRNA    | chr19 | 22555261 | 22555367 | + | 0    | 0    |
| ENSG0000(RNU6-101I) | snRNA    | chr8  | 1.03E+08 | 1.03E+08 | + | 0    | 0    |
| ENSG0000(Y_RNA)     | misc_RNA | chr9  | 1.11E+08 | 1.11E+08 | + | 0    | 0    |
| ENSG0000(RNU6-959F) | snRNA    | chr2  | 1.91E+08 | 1.91E+08 | + | 0    | 0    |
| ENSG0000(Y_RNA)     | misc_RNA | chr6  | 1.21E+08 | 1.21E+08 | - | 0    | 0    |
| ENSG0000(Y_RNA)     | misc_RNA | chr5  | 1.09E+08 | 1.09E+08 | + | 0    | 0    |
| ENSG0000(SNORA64)   | snoRNA   | chr16 | 1962973  | 1963106  | - | 0    | 0    |
| ENSG0000(SNORA41)   | snoRNA   | chr2  | 2.06E+08 | 2.06E+08 | + | 0    | 0    |
| ENSG0000(SNORA1)    | snoRNA   | chr11 | 19591156 | 19591291 | - | 0    | 0    |
| ENSG0000(Y_RNA)     | misc_RNA | chrX  | 53324562 | 53324674 | + | 0    | 0    |
| ENSG0000(SNORA8)    | snoRNA   | chr17 | 67271469 | 67271607 | + | 0    | 0    |
| ENSG0000(Y_RNA)     | misc_RNA | chr2  | 43620878 | 43620984 | - | 0    | 0    |
| ENSG0000(RNU6-455F) | snRNA    | chr14 | 31686692 | 31686798 | - | 0    | 0    |
| ENSG0000(RNU6-768F) | snRNA    | chr12 | 1.01E+08 | 1.01E+08 | - | 0    | 0    |
| ENSG0000(RNU6-115I) | snRNA    | chr8  | 9287472  | 9287578  | - | 0    | 0    |

|                    |          |       |          |          |   |   |     |
|--------------------|----------|-------|----------|----------|---|---|-----|
| ENSG0000(Y_RNA     | misc_RNA | chr21 | 36986739 | 36986851 | - | 0 | 0   |
| ENSG0000(Y_RNA     | misc_RNA | chr8  | 74376687 | 74376793 | + | 0 | 0   |
| ENSG0000(SNORA67   | snoRNA   | chr6  | 11709819 | 11709960 | + | 0 | 0   |
| ENSG0000(Y_RNA     | misc_RNA | chr5  | 1.77E+08 | 1.77E+08 | + | 0 | 0   |
| ENSG0000(SNORD38B  | snoRNA   | chr1  | 44778390 | 44778456 | + | 0 | 0   |
| ENSG0000(RNU6-813F | snRNA    | chr6  | 1.52E+08 | 1.52E+08 | - | 0 | 0   |
| ENSG0000(Y_RNA     | misc_RNA | chr16 | 14915457 | 14915556 | - | 0 | 7.6 |
| ENSG0000(Y_RNA     | misc_RNA | chrX  | 96701507 | 96701619 | - | 0 | 0   |
| ENSG0000(RNU6-95P  | snRNA    | chr4  | 68003895 | 68004001 | + | 0 | 0   |
| ENSG0000(U8        | snoRNA   | chr15 | 30581184 | 30581316 | + | 0 | 0   |
| ENSG0000(RNU6-906F | snRNA    | chr6  | 1.47E+08 | 1.47E+08 | + | 0 | 0   |
| ENSG0000(U8        | snoRNA   | chr15 | 30112198 | 30112330 | + | 0 | 0   |
| ENSG0000(RNU6-246F | snRNA    | chr9  | 15544188 | 15544294 | + | 0 | 0   |
| ENSG0000(RNU6-107Z | snRNA    | chr1  | 12922554 | 12922660 | + | 0 | 0   |
| ENSG0000(RNU6-114F | snRNA    | chrX  | 3572857  | 3572961  | + | 0 | 0   |
| ENSG0000(Y_RNA     | misc_RNA | chr10 | 68503152 | 68503259 | + | 0 | 0   |
| ENSG0000(Y_RNA     | misc_RNA | chr5  | 65123369 | 65123474 | + | 0 | 0   |
| ENSG0000(RNU6-541F | snRNA    | chr14 | 31142939 | 31143048 | + | 0 | 0   |
| ENSG0000(RNU6-21P  | snRNA    | chr16 | 62187540 | 62187646 | - | 0 | 0   |
| ENSG0000(SNORD116  | snoRNA   | chr15 | 25065026 | 25065121 | + | 0 | 0   |
| ENSG0000(RNU6-417F | snRNA    | chr7  | 63011463 | 63011569 | - | 0 | 0   |
| ENSG0000(SNORD56B  | snoRNA   | chr14 | 71398337 | 71398407 | + | 0 | 0   |
| ENSG0000(SNORD15B  | snoRNA   | chr11 | 75404421 | 75404566 | + | 0 | 0   |
| ENSG0000(RNU6-520F | snRNA    | chr4  | 70701755 | 70701858 | + | 0 | 0   |
| ENSG0000(RNU6-19P  | snRNA    | chr15 | 65553081 | 65553187 | - | 0 | 0   |
| ENSG0000(Y_RNA     | misc_RNA | chr8  | 47805079 | 47805179 | - | 0 | 0   |
| ENSG0000(RNU6-291F | snRNA    | chr1  | 11226254 | 11226360 | + | 0 | 0   |
| ENSG0000(RNU6-606F | snRNA    | chr5  | 87299687 | 87299797 | - | 0 | 0   |
| ENSG0000(RNU6-535F | snRNA    | chr10 | 7486703  | 7486809  | - | 0 | 0   |
| ENSG0000(RNU6-1104 | snRNA    | chr7  | 1.01E+08 | 1.01E+08 | - | 0 | 0   |
| ENSG0000(RNU6-331F | snRNA    | chr22 | 29899587 | 29899693 | - | 0 | 0   |
| ENSG0000(RNU6-997F | snRNA    | chr2  | 53570374 | 53570480 | - | 0 | 0   |
| ENSG0000(RNU6-476F | snRNA    | chr22 | 41679711 | 41679817 | + | 0 | 0   |
| ENSG0000(RNY3P9    | misc_RNA | chr13 | 40226827 | 40226932 | + | 0 | 0   |
| ENSG0000(RNU6-1311 | snRNA    | chr5  | 1.35E+08 | 1.35E+08 | - | 0 | 0   |
| ENSG0000(SNORD116  | snoRNA   | chr15 | 25086527 | 25086618 | + | 0 | 0   |
| ENSG0000(RNU6-253F | snRNA    | chr6  | 1.17E+08 | 1.17E+08 | - | 0 | 0   |
| ENSG0000(RNU6-376F | snRNA    | chr11 | 1.19E+08 | 1.19E+08 | + | 0 | 0   |
| ENSG0000(Y_RNA     | misc_RNA | chr1  | 38950825 | 38950925 | - | 0 | 0   |
| ENSG0000(Y_RNA     | misc_RNA | chr12 | 48809911 | 48810016 | + | 0 | 0   |
| ENSG0000(SNORA19   | snoRNA   | chr10 | 1.19E+08 | 1.19E+08 | - | 0 | 0   |
| ENSG0000(RNU6-41P  | snRNA    | chr1  | 1.83E+08 | 1.83E+08 | - | 0 | 0   |
| ENSG0000(Y_RNA     | misc_RNA | chr10 | 73346936 | 73347048 | + | 0 | 0   |
| ENSG0000(RNY1P7    | misc_RNA | chr13 | 24703556 | 24703665 | - | 0 | 0   |
| ENSG0000(SNORA80E  | snoRNA   | chr1  | 1.56E+08 | 1.56E+08 | - | 0 | 0   |

|                     |          |       |          |          |   |      |      |
|---------------------|----------|-------|----------|----------|---|------|------|
| ENSG0000(RNU6-286F) | snRNA    | chr21 | 13621577 | 13621683 | + | 0    | 0    |
| ENSG0000(Y_RNA)     | misc_RNA | chr4  | 88330176 | 88330278 | - | 0    | 0    |
| ENSG0000(Y_RNA)     | misc_RNA | chr4  | 41303237 | 41303337 | - | 0    | 0    |
| ENSG0000(RNU6-1067) | snRNA    | chr10 | 28667919 | 28668025 | + | 0    | 0    |
| ENSG0000(Y_RNA)     | misc_RNA | chr15 | 51884556 | 51884653 | + | 0    | 0    |
| ENSG0000(RNU6-1044) | snRNA    | chrX  | 73397531 | 73397637 | - | 0    | 0    |
| ENSG0000(Y_RNA)     | misc_RNA | chr7  | 90251923 | 90252020 | + | 0    | 0    |
| ENSG0000(RNU6-987F) | snRNA    | chr6  | 25383599 | 25383702 | + | 0    | 0    |
| ENSG0000(RNU6-713F) | snRNA    | chr12 | 40554161 | 40554267 | - | 0    | 0    |
| ENSG0000(SNORA46)   | snoRNA   | chr16 | 58548499 | 58548633 | - | 0    | 0    |
| ENSG0000(Y_RNA)     | misc_RNA | chr10 | 1.25E+08 | 1.25E+08 | - | 0    | 0    |
| ENSG0000(RNY3P10)   | misc_RNA | chr13 | 69802940 | 69803041 | + | 0    | 0    |
| ENSG0000(SNORA7A)   | snoRNA   | chr3  | 12840312 | 12840450 | - | 0    | 0    |
| ENSG0000(Y_RNA)     | misc_RNA | chr4  | 1.86E+08 | 1.86E+08 | - | 0    | 0    |
| ENSG0000(Y_RNA)     | misc_RNA | chr6  | 1.06E+08 | 1.06E+08 | + | 0    | 0    |
| ENSG0000(SNORD102)  | snoRNA   | chr13 | 27255064 | 27255135 | + | 0    | 0    |
| ENSG0000(RNVU1-14)  | snRNA    | chr1  | 1.45E+08 | 1.45E+08 | + | 0    | 0    |
| ENSG0000(SNORA42)   | snoRNA   | chr1  | 1.16E+08 | 1.16E+08 | - | 0    | 0    |
| ENSG0000(SNORA32)   | snoRNA   | chr21 | 41539206 | 41539326 | + | 0    | 0    |
| ENSG0000(RNU6-1031) | snRNA    | chr1  | 67541127 | 67541233 | + | 0    | 0    |
| ENSG0000(RNU6-1105) | snRNA    | chr3  | 1.87E+08 | 1.87E+08 | - | 0    | 0    |
| ENSG0000(RNU6-9)    | snRNA    | chr19 | 893484   | 893590   | + | 0    | 1.24 |
| ENSG0000(RNU6-1237) | snRNA    | chr1  | 40177843 | 40177949 | + | 0    | 0    |
| ENSG0000(RNU6-771F) | snRNA    | chr1  | 13279125 | 13279231 | - | 0    | 0    |
| ENSG0000(Y_RNA)     | misc_RNA | chr3  | 38505480 | 38505581 | - | 0    | 0    |
| ENSG0000(RNU1-3)    | snRNA    | chr1  | 16666785 | 16666948 | - | 1.72 | 1.68 |
| ENSG0000(RNU6-555F) | snRNA    | chrX  | 90597235 | 90597340 | - | 0    | 0    |
| ENSG0000(SNORA41)   | snoRNA   | chr15 | 45537250 | 45537377 | + | 0    | 0    |
| ENSG0000(RNU6-59P)  | snRNA    | chr13 | 21551304 | 21551410 | - | 0    | 0    |
| ENSG0000(SNORA66)   | snoRNA   | chr1  | 92840719 | 92840851 | + | 0    | 0    |
| ENSG0000(RNU6-33P)  | snRNA    | chr4  | 88684848 | 88684954 | - | 0    | 1.24 |
| ENSG0000(Y_RNA)     | misc_RNA | chr16 | 74463888 | 74463988 | - | 0    | 0    |
| ENSG0000(MIR548C)   | miRNA    | chr12 | 64622509 | 64622605 | + | 0    | 0    |
| ENSG0000(MIR25)     | miRNA    | chr7  | 1E+08    | 1E+08    | - | 0    | 0    |
| ENSG0000(MIR217)    | miRNA    | chr2  | 55982967 | 55983076 | - | 0    | 0    |
| ENSG0000(MIR521-2)  | miRNA    | chr19 | 53716594 | 53716680 | + | 0    | 0    |
| ENSG0000(MIR99B)    | miRNA    | chr19 | 51692612 | 51692681 | + | 0    | 0    |
| ENSG0000(MIR608)    | miRNA    | chr10 | 1.01E+08 | 1.01E+08 | + | 0    | 0    |
| ENSG0000(MIR633)    | miRNA    | chr17 | 62944215 | 62944312 | + | 0    | 0    |
| ENSG0000(MIR647)    | miRNA    | chr20 | 63942631 | 63942726 | - | 0    | 0    |
| ENSG0000(MIR578)    | miRNA    | chr4  | 1.65E+08 | 1.65E+08 | + | 0    | 0    |
| ENSG0000(MIR635)    | miRNA    | chr17 | 68424451 | 68424548 | - | 0    | 0    |
| ENSG0000(MIR34C)    | miRNA    | chr11 | 1.12E+08 | 1.12E+08 | + | 0    | 0    |
| ENSG0000(MIR23B)    | miRNA    | chr9  | 95085208 | 95085304 | + | 0    | 0    |
| ENSG0000(MIR203A)   | miRNA    | chr14 | 1.04E+08 | 1.04E+08 | + | 0    | 0    |

|                   |          |       |       |          |          |   |   |   |
|-------------------|----------|-------|-------|----------|----------|---|---|---|
| ENSG00000101433   | MIR433   | miRNA | chr14 | 1.01E+08 | 1.01E+08 | + | 0 | 0 |
| ENSG00000101615   | MIR615   | miRNA | chr12 | 54033950 | 54034045 | + | 0 | 0 |
| ENSG00000101502   | MIR550A2 | miRNA | chr7  | 32732981 | 32733077 | + | 0 | 0 |
| ENSG00000101661   | MIR661   | miRNA | chr8  | 1.44E+08 | 1.44E+08 | - | 0 | 0 |
| ENSG00000101649   | MIR649   | miRNA | chr22 | 21034176 | 21034272 | - | 0 | 0 |
| ENSG00000101587   | MIR587   | miRNA | chr6  | 1.07E+08 | 1.07E+08 | + | 0 | 0 |
| ENSG00000101583   | MIR583   | miRNA | chr5  | 96079138 | 96079212 | + | 0 | 0 |
| ENSG00000101662   | MIR662   | miRNA | chr16 | 770183   | 770277   | + | 0 | 0 |
| ENSG00000101526   | MIR526B  | miRNA | chr19 | 53694393 | 53694475 | + | 0 | 0 |
| ENSG0000010199B   | MIR199B  | miRNA | chr9  | 1.28E+08 | 1.28E+08 | - | 0 | 0 |
| ENSG0000010130B   | MIR30B   | miRNA | chr8  | 1.35E+08 | 1.35E+08 | - | 0 | 0 |
| ENSG00000101606   | MIR606   | miRNA | chr10 | 75552458 | 75552553 | + | 0 | 0 |
| ENSG0000010181D   | MIR181D  | miRNA | chr19 | 13874875 | 13875011 | + | 0 | 0 |
| ENSG0000010135A2  | MIR135A2 | miRNA | chr12 | 97563812 | 97563911 | + | 0 | 0 |
| ENSG00000101544A  | MIR544A  | miRNA | chr14 | 1.01E+08 | 1.01E+08 | + | 0 | 0 |
| ENSG00000101593   | MIR593   | miRNA | chr7  | 1.28E+08 | 1.28E+08 | + | 0 | 0 |
| ENSG00000101508   | MIR508   | miRNA | chrX  | 1.47E+08 | 1.47E+08 | - | 0 | 0 |
| ENSG00000101215   | MIR215   | miRNA | chr1  | 2.2E+08  | 2.2E+08  | - | 0 | 0 |
| ENSG00000101520A  | MIR520A  | miRNA | chr19 | 53690881 | 53690965 | + | 0 | 0 |
| ENSG0000010181A2  | MIR181A2 | miRNA | chr9  | 1.25E+08 | 1.25E+08 | + | 0 | 0 |
| ENSG00000101490   | MIR490   | miRNA | chr7  | 1.37E+08 | 1.37E+08 | + | 0 | 0 |
| ENSG0000010124-3  | MIR124-3 | miRNA | chr20 | 63178500 | 63178586 | + | 0 | 0 |
| ENSG00000101520E  | MIR520E  | miRNA | chr19 | 53675711 | 53675797 | + | 0 | 0 |
| ENSG00000101598   | MIR598   | miRNA | chr8  | 11035206 | 11035302 | - | 0 | 0 |
| ENSG00000101206   | MIR206   | miRNA | chr6  | 52144349 | 52144434 | + | 0 | 0 |
| ENSG00000101191   | MIR191   | miRNA | chr3  | 49020618 | 49020709 | - | 0 | 0 |
| ENSG00000101554   | MIR554   | miRNA | chr1  | 1.52E+08 | 1.52E+08 | + | 0 | 0 |
| ENSG00000101200A  | MIR200A  | miRNA | chr1  | 1167863  | 1167952  | + | 0 | 0 |
| ENSG00000101127   | MIR127   | miRNA | chr14 | 1.01E+08 | 1.01E+08 | + | 0 | 0 |
| ENSG00000101491   | MIR491   | miRNA | chr9  | 20716105 | 20716188 | + | 0 | 0 |
| ENSG00000101149   | MIR149   | miRNA | chr2  | 2.4E+08  | 2.4E+08  | + | 0 | 0 |
| ENSG00000101604   | MIR604   | miRNA | chr10 | 29545004 | 29545097 | - | 0 | 0 |
| ENSG0000010181C   | MIR181C  | miRNA | chr19 | 13874699 | 13874808 | + | 0 | 0 |
| ENSG0000010193A   | MIR193A  | miRNA | chr17 | 31559996 | 31560083 | + | 0 | 0 |
| ENSG00000101515-2 | MIR515-2 | miRNA | chr19 | 53685009 | 53685091 | + | 0 | 0 |
| ENSG00000101515-1 | MIR515-1 | miRNA | chr19 | 53679003 | 53679085 | + | 0 | 0 |
| ENSG000001013074  | MIR3074  | miRNA | chr9  | 95086014 | 95086094 | - | 0 | 0 |
| ENSG00000101585   | MIR585   | miRNA | chr5  | 1.69E+08 | 1.69E+08 | - | 0 | 0 |
| ENSG00000101516A2 | MIR516A2 | miRNA | chr19 | 53761133 | 53761222 | + | 0 | 0 |
| ENSG00000101619   | MIR619   | miRNA | chr12 | 1.09E+08 | 1.09E+08 | - | 0 | 0 |
| ENSG0000010194-1  | MIR194-1 | miRNA | chr1  | 2.2E+08  | 2.2E+08  | - | 0 | 0 |
| ENSG0000010128-2  | MIR128-2 | miRNA | chr3  | 35744476 | 35744559 | + | 0 | 0 |
| ENSG00000101562   | MIR562   | miRNA | chr2  | 2.32E+08 | 2.32E+08 | + | 0 | 0 |
| ENSG00000101581   | MIR581   | miRNA | chr5  | 53951504 | 53951599 | - | 0 | 0 |
| ENSG00000101651   | MIR651   | miRNA | chrX  | 8126965  | 8127061  | + | 0 | 0 |



|                 |          |       |       |          |          |   |   |   |
|-----------------|----------|-------|-------|----------|----------|---|---|---|
| ENSG00000102621 | MIR526A1 | miRNA | chr19 | 53706252 | 53706336 | + | 0 | 0 |
| ENSG00000102622 | MIR7-3   | miRNA | chr19 | 4770670  | 4770779  | + | 0 | 0 |
| ENSG00000102623 | MIR641   | miRNA | chr19 | 40282543 | 40282641 | - | 0 | 0 |
| ENSG00000102624 | MIR588   | miRNA | chr6  | 1.26E+08 | 1.26E+08 | + | 0 | 0 |
| ENSG00000102625 | MIR505   | miRNA | chrX  | 1.4E+08  | 1.4E+08  | - | 0 | 0 |
| ENSG00000102626 | MIR521-1 | miRNA | chr19 | 53748636 | 53748722 | + | 0 | 0 |
| ENSG00000102627 | MIR499A  | miRNA | chr20 | 34990376 | 34990497 | + | 0 | 0 |
| ENSG00000102628 | MIR595   | miRNA | chr7  | 1.59E+08 | 1.59E+08 | - | 0 | 0 |
| ENSG00000102629 | MIR99A   | miRNA | chr21 | 16539089 | 16539169 | + | 0 | 0 |
| ENSG00000102630 | MIR193B  | miRNA | chr16 | 14303967 | 14304049 | + | 0 | 0 |
| ENSG00000102631 | MIR510   | miRNA | chrX  | 1.47E+08 | 1.47E+08 | - | 0 | 0 |
| ENSG00000102632 | MIR571   | miRNA | chr4  | 350157   | 350252   | + | 0 | 0 |
| ENSG00000102633 | MIR512-2 | miRNA | chr19 | 53669157 | 53669254 | + | 0 | 0 |
| ENSG00000102634 | MIR512-1 | miRNA | chr19 | 53666679 | 53666762 | + | 0 | 0 |
| ENSG00000102635 | MIR655   | miRNA | chr14 | 1.01E+08 | 1.01E+08 | + | 0 | 0 |
| ENSG00000102636 | MIR153-1 | miRNA | chr2  | 2.19E+08 | 2.19E+08 | - | 0 | 0 |
| ENSG00000102637 | MIR138-2 | miRNA | chr16 | 56858518 | 56858601 | + | 0 | 0 |
| ENSG00000102638 | MIR570   | miRNA | chr3  | 1.96E+08 | 1.96E+08 | + | 0 | 0 |
| ENSG00000102639 | MIR28    | miRNA | chr3  | 1.89E+08 | 1.89E+08 | + | 0 | 0 |
| ENSG00000102640 | MIR621   | miRNA | chr13 | 40810766 | 40810861 | + | 0 | 0 |
| ENSG00000102641 | MIR558   | miRNA | chr2  | 32532153 | 32532246 | + | 0 | 0 |
| ENSG00000102642 | MIR128-1 | miRNA | chr2  | 1.36E+08 | 1.36E+08 | + | 0 | 0 |
| ENSG00000102643 | MIR489   | miRNA | chr7  | 93483936 | 93484019 | - | 0 | 0 |
| ENSG00000102644 | MIR548AA | miRNA | chr17 | 67471489 | 67471585 | + | 0 | 0 |
| ENSG00000102645 | MIR548A2 | miRNA | chr6  | 1.35E+08 | 1.35E+08 | + | 0 | 0 |
| ENSG00000102646 | MIR183   | miRNA | chr7  | 1.3E+08  | 1.3E+08  | - | 0 | 0 |
| ENSG00000102647 | MIR592   | miRNA | chr7  | 1.27E+08 | 1.27E+08 | - | 0 | 0 |
| ENSG00000102648 | MIR602   | miRNA | chr9  | 1.38E+08 | 1.38E+08 | + | 0 | 0 |
| ENSG00000102649 | MIR184   | miRNA | chr15 | 79209788 | 79209871 | + | 0 | 0 |
| ENSG00000102650 | MIR659   | miRNA | chr22 | 37847678 | 37847774 | - | 0 | 0 |
| ENSG00000102651 | MIR573   | miRNA | chr4  | 24520192 | 24520290 | - | 0 | 0 |
| ENSG00000102652 | MIR32    | miRNA | chr9  | 1.09E+08 | 1.09E+08 | - | 0 | 0 |
| ENSG00000102653 | MIR518A2 | miRNA | chr19 | 53739333 | 53739419 | + | 0 | 0 |
| ENSG00000102654 | MIR597   | miRNA | chr8  | 9741672  | 9741768  | + | 0 | 0 |
| ENSG00000102655 | MIR211   | miRNA | chr15 | 31065032 | 31065141 | - | 0 | 0 |
| ENSG00000102656 | MIR7-2   | miRNA | chr15 | 88611825 | 88611934 | + | 0 | 0 |
| ENSG00000102657 | MIR548D1 | miRNA | chr8  | 1.23E+08 | 1.23E+08 | + | 0 | 0 |
| ENSG00000102658 | MIR129-1 | miRNA | chr7  | 1.28E+08 | 1.28E+08 | + | 0 | 0 |
| ENSG00000102659 | MIR518F  | miRNA | chr19 | 53700015 | 53700101 | + | 0 | 0 |
| ENSG00000102660 | MIR141   | miRNA | chr12 | 6964097  | 6964191  | + | 0 | 0 |
| ENSG00000102661 | MIR525   | miRNA | chr19 | 53697533 | 53697617 | + | 0 | 0 |
| ENSG00000102662 | MIR627   | miRNA | chr15 | 42199570 | 42199666 | - | 0 | 0 |
| ENSG00000102663 | MIR200C  | miRNA | chr12 | 6963699  | 6963766  | + | 0 | 0 |
| ENSG00000102664 | MIR584   | miRNA | chr5  | 1.49E+08 | 1.49E+08 | - | 0 | 0 |
| ENSG00000102665 | MIR572   | miRNA | chr4  | 11368827 | 11368921 | + | 0 | 0 |

|                 |          |           |       |          |          |   |   |      |
|-----------------|----------|-----------|-------|----------|----------|---|---|------|
| ENSG00000101511 | MIR551B  | miRNA     | chr3  | 1.69E+08 | 1.69E+08 | + | 0 | 0    |
| ENSG00000101512 | MIR623   | miRNA     | chr13 | 99356131 | 99356228 | + | 0 | 0    |
| ENSG00000101513 | MIR186   | miRNA     | chr1  | 71067631 | 71067716 | - | 0 | 0    |
| ENSG00000101514 | MIR520B  | miRNA     | chr19 | 53701227 | 53701287 | + | 0 | 0    |
| ENSG00000101515 | MIR222   | miRNA     | chrX  | 45747015 | 45747124 | - | 0 | 0    |
| ENSG00000101516 | MIR455   | miRNA     | chr9  | 1.14E+08 | 1.14E+08 | + | 0 | 0    |
| ENSG00000101517 | MIR449B  | miRNA     | chr5  | 55170646 | 55170742 | - | 0 | 0    |
| ENSG00000101518 | MIR556   | miRNA     | chr1  | 1.62E+08 | 1.62E+08 | + | 0 | 0    |
| ENSG00000101519 | MIR200B  | miRNA     | chr1  | 1167104  | 1167198  | + | 0 | 0    |
| ENSG00000101520 | MIR506   | miRNA     | chrX  | 1.47E+08 | 1.47E+08 | - | 0 | 0    |
| ENSG00000101521 | MIR218-1 | miRNA     | chr4  | 20528275 | 20528384 | + | 0 | 0    |
| ENSG00000101522 | MIR517A  | miRNA     | chr19 | 53712268 | 53712354 | + | 0 | 0    |
| ENSG00000101523 | MIR520D  | miRNA     | chr19 | 53720096 | 53720182 | + | 0 | 0    |
| ENSG00000101524 | MIR657   | miRNA     | chr17 | 81125276 | 81125373 | - | 0 | 0    |
| ENSG00000101525 | MIR181B2 | miRNA     | chr9  | 1.25E+08 | 1.25E+08 | + | 0 | 0    |
| ENSG00000101526 | MIR520C  | miRNA     | chr19 | 53707453 | 53707539 | + | 0 | 0    |
| ENSG00000101527 | MIR218-2 | miRNA     | chr5  | 1.69E+08 | 1.69E+08 | - | 0 | 0    |
| ENSG00000101528 | MIR590   | miRNA     | chr7  | 74191198 | 74191294 | + | 0 | 0    |
| ENSG00000101529 | MIR487A  | miRNA     | chr14 | 1.01E+08 | 1.01E+08 | + | 0 | 0    |
| ENSG00000101530 | MIR495   | miRNA     | chr14 | 1.01E+08 | 1.01E+08 | + | 0 | 0    |
| ENSG00000101531 | MIR10B   | miRNA     | chr2  | 1.76E+08 | 1.76E+08 | + | 0 | 0    |
| ENSG00000101532 | MIR575   | miRNA     | chr4  | 82753337 | 82753430 | - | 0 | 0    |
| ENSG00000101533 | MIR299   | miRNA     | chr14 | 1.01E+08 | 1.01E+08 | + | 0 | 0    |
| ENSG00000101534 | MIR553   | miRNA     | chr1  | 1E+08    | 1E+08    | + | 0 | 0    |
| ENSG00000101535 | MIR130B  | processed | chr22 | 21652270 | 21670237 | + | 0 | 0.07 |
| ENSG00000101536 | MIR199A1 | miRNA     | chr19 | 10817426 | 10817496 | - | 0 | 0    |
| ENSG00000101537 | MIR487B  | miRNA     | chr14 | 1.01E+08 | 1.01E+08 | + | 0 | 0    |
| ENSG00000101538 | MIR450A2 | miRNA     | chrX  | 1.35E+08 | 1.35E+08 | - | 0 | 0    |
| ENSG00000101539 | MIR580   | miRNA     | chr5  | 36147892 | 36147988 | - | 0 | 0    |
| ENSG00000101540 | MIR93    | miRNA     | chr7  | 1E+08    | 1E+08    | - | 0 | 0    |
| ENSG00000101541 | MIR532   | miRNA     | chrX  | 50003148 | 50003238 | + | 0 | 0    |
| ENSG00000101542 | MIR181A1 | miRNA     | chr1  | 1.99E+08 | 1.99E+08 | - | 0 | 0    |
| ENSG00000101543 | MIR329-1 | miRNA     | chr14 | 1.01E+08 | 1.01E+08 | + | 0 | 0    |
| ENSG00000101544 | MIR329-2 | miRNA     | chr14 | 1.01E+08 | 1.01E+08 | + | 0 | 0    |
| ENSG00000101545 | MIR617   | miRNA     | chr12 | 80832533 | 80832629 | - | 0 | 0    |
| ENSG00000101546 | MIR626   | miRNA     | chr15 | 41691585 | 41691678 | + | 0 | 0    |
| ENSG00000101547 | MIR516A1 | miRNA     | chr19 | 53756741 | 53756830 | + | 0 | 0    |
| ENSG00000101548 | MIR188   | miRNA     | chrX  | 50003503 | 50003588 | + | 0 | 0    |
| ENSG00000101549 | MIR586   | miRNA     | chr6  | 45197674 | 45197770 | - | 0 | 0    |
| ENSG00000101550 | MIR550A1 | miRNA     | chr7  | 30289794 | 30289890 | + | 0 | 0    |
| ENSG00000101551 | MIR642A  | miRNA     | chr19 | 45674928 | 45675024 | + | 0 | 0    |
| ENSG00000101552 | MIR548A1 | miRNA     | chr6  | 18571784 | 18571880 | + | 0 | 0    |
| ENSG00000101553 | MIR551A  | miRNA     | chr1  | 3560695  | 3560790  | - | 0 | 0    |
| ENSG00000101554 | MIR3591  | miRNA     | chr18 | 58451080 | 58451152 | - | 0 | 0    |
| ENSG00000101555 | MIR15B   | miRNA     | chr3  | 1.6E+08  | 1.6E+08  | + | 0 | 0    |

|                 |          |       |       |          |          |   |   |   |
|-----------------|----------|-------|-------|----------|----------|---|---|---|
| ENSG00000101614 | MIR648   | miRNA | chr22 | 17980868 | 17980961 | - | 0 | 0 |
| ENSG00000101615 | MIR625   | miRNA | chr14 | 65471102 | 65471186 | + | 0 | 0 |
| ENSG00000101616 | MIR150   | miRNA | chr19 | 49500785 | 49500868 | - | 0 | 0 |
| ENSG00000101617 | MIR542   | miRNA | chrX  | 1.35E+08 | 1.35E+08 | - | 0 | 0 |
| ENSG00000101618 | MIR500A  | miRNA | chrX  | 50008431 | 50008514 | + | 0 | 0 |
| ENSG00000101619 | MIR519C  | miRNA | chr19 | 53686469 | 53686555 | + | 0 | 0 |
| ENSG00000101620 | MIR26A2  | miRNA | chr12 | 57824609 | 57824692 | - | 0 | 0 |
| ENSG00000101621 | MIR187   | miRNA | chr18 | 35904818 | 35904926 | - | 0 | 0 |
| ENSG00000101622 | MIR216A  | miRNA | chr2  | 55988950 | 55989059 | - | 0 | 0 |
| ENSG00000101623 | MIR520G  | miRNA | chr19 | 53722166 | 53722255 | + | 0 | 0 |
| ENSG00000101624 | MIR504   | miRNA | chrX  | 1.39E+08 | 1.39E+08 | - | 0 | 0 |
| ENSG00000101625 | MIR646   | miRNA | chr20 | 60308474 | 60308567 | + | 0 | 0 |
| ENSG00000101626 | MIR518A1 | miRNA | chr19 | 53731006 | 53731090 | + | 0 | 0 |
| ENSG00000101627 | MIR599   | miRNA | chr8  | 99536636 | 99536730 | - | 0 | 0 |
| ENSG00000101628 | MIR483   | miRNA | chr11 | 2134134  | 2134209  | - | 0 | 0 |
| ENSG00000101629 | MIR95    | miRNA | chr4  | 8005301  | 8005381  | - | 0 | 0 |
| ENSG00000101630 | MIR27A   | miRNA | chr19 | 13836440 | 13836517 | - | 0 | 0 |
| ENSG00000101631 | MIR519E  | miRNA | chr19 | 53679940 | 53680023 | + | 0 | 0 |
| ENSG00000101632 | MIR34B   | miRNA | chr11 | 1.12E+08 | 1.12E+08 | + | 0 | 0 |
| ENSG00000101633 | MIR605   | miRNA | chr10 | 51299573 | 51299655 | + | 0 | 0 |
| ENSG00000101634 | MIR147A  | miRNA | chr9  | 1.2E+08  | 1.2E+08  | - | 0 | 0 |
| ENSG00000101635 | MIR563   | miRNA | chr3  | 15873771 | 15873849 | + | 0 | 0 |
| ENSG00000101636 | MIR124-2 | miRNA | chr8  | 64379149 | 64379257 | + | 0 | 0 |
| ENSG00000101637 | MIR105-2 | miRNA | chrX  | 1.52E+08 | 1.52E+08 | - | 0 | 0 |
| ENSG00000101638 | MIR545   | miRNA | chrX  | 74287104 | 74287209 | - | 0 | 0 |
| ENSG00000101639 | MIR640   | miRNA | chr19 | 19435063 | 19435158 | + | 0 | 0 |
| ENSG00000101640 | MIR519B  | miRNA | chr19 | 53695213 | 53695293 | + | 0 | 0 |
| ENSG00000101641 | MIR596   | miRNA | chr8  | 1817231  | 1817307  | + | 0 | 0 |
| ENSG00000101642 | MIR30A   | miRNA | chr6  | 71403551 | 71403621 | - | 0 | 0 |
| ENSG00000101643 | MIR517B  | miRNA | chr19 | 53721076 | 53721142 | + | 0 | 0 |
| ENSG00000101644 | MIR517C  | miRNA | chr19 | 53741313 | 53741407 | + | 0 | 0 |
| ENSG00000101645 | MIR33B   | miRNA | chr17 | 17813836 | 17813931 | - | 0 | 0 |
| ENSG00000101646 | MIR520H  | miRNA | chr19 | 53742512 | 53742599 | + | 0 | 0 |
| ENSG00000101647 | MIR518B  | miRNA | chr19 | 53702737 | 53702819 | + | 0 | 0 |
| ENSG00000101648 | MIR125B2 | miRNA | chr21 | 16590237 | 16590325 | + | 0 | 0 |
| ENSG00000101649 | MIR27B   | miRNA | chr9  | 95085445 | 95085541 | + | 0 | 0 |
| ENSG00000101650 | MIR514A2 | miRNA | chrX  | 1.47E+08 | 1.47E+08 | - | 0 | 0 |
| ENSG00000101651 | MIR514A3 | miRNA | chrX  | 1.47E+08 | 1.47E+08 | - | 0 | 0 |
| ENSG00000101652 | MIR514A1 | miRNA | chrX  | 1.47E+08 | 1.47E+08 | - | 0 | 0 |
| ENSG00000101653 | MIR498   | miRNA | chr19 | 53674197 | 53674320 | + | 0 | 0 |
| ENSG00000101654 | MIR221   | miRNA | chrX  | 45746157 | 45746266 | - | 0 | 0 |
| ENSG00000101655 | MIR513B  | miRNA | chrX  | 1.47E+08 | 1.47E+08 | - | 0 | 0 |
| ENSG00000101656 | MIR513A1 | miRNA | chrX  | 1.47E+08 | 1.47E+08 | - | 0 | 0 |
| ENSG00000101657 | MIR610   | miRNA | chr11 | 28056815 | 28056910 | + | 0 | 0 |
| ENSG00000101658 | MIR566   | miRNA | chr3  | 50173326 | 50173419 | + | 0 | 0 |

|                |          |         |       |          |          |   |   |   |
|----------------|----------|---------|-------|----------|----------|---|---|---|
| ENSG0000010559 | MIR559   | miRNA   | chr2  | 47377675 | 47377770 | + | 0 | 0 |
| ENSG0000010560 | MIR196A2 | miRNA   | chr12 | 53991738 | 53991847 | + | 0 | 0 |
| ENSG0000010561 | MIR516B2 | miRNA   | chr19 | 53725442 | 53725526 | + | 0 | 0 |
| ENSG0000010562 | MIR135A1 | miRNA   | chr3  | 52294219 | 52294308 | - | 0 | 0 |
| ENSG0000010563 | MIR302A  | miRNA   | chr4  | 1.13E+08 | 1.13E+08 | - | 0 | 0 |
| ENSG0000010564 | MIR603   | miRNA   | chr10 | 24275685 | 24275781 | + | 0 | 0 |
| ENSG0000010565 | MIR577   | miRNA   | chr4  | 1.15E+08 | 1.15E+08 | + | 0 | 0 |
| ENSG0000010566 | MIR33A   | miRNA   | chr22 | 41900944 | 41901012 | + | 0 | 0 |
| ENSG0000010567 | MIR9-1   | miRNA   | chr1  | 1.56E+08 | 1.56E+08 | - | 0 | 0 |
| ENSG0000010568 | MIR654   | miRNA   | chr14 | 1.01E+08 | 1.01E+08 | + | 0 | 0 |
| ENSG0000010569 | MIR204   | miRNA   | chr9  | 70809975 | 70810084 | - | 0 | 0 |
| ENSG0000010570 | MIR511   | miRNA   | chr10 | 17845107 | 17845193 | + | 0 | 0 |
| ENSG0000010571 | MIR567   | miRNA   | chr3  | 1.12E+08 | 1.12E+08 | + | 0 | 0 |
| ENSG0000010572 | MIR552   | miRNA   | chr1  | 34669599 | 34669694 | - | 0 | 0 |
| ENSG0000010573 | MIR136   | miRNA   | chr14 | 1.01E+08 | 1.01E+08 | + | 0 | 0 |
| ENSG0000010574 | MIR634   | miRNA   | chr17 | 66787072 | 66787168 | + | 0 | 0 |
| ENSG0000010575 | MIR574   | miRNA   | chr4  | 38868032 | 38868127 | + | 0 | 0 |
| ENSG0000010576 | MIR516B1 | miRNA   | chr19 | 53736845 | 53736934 | + | 0 | 0 |
| ENSG0000010577 | MIR152   | miRNA   | chr17 | 48037161 | 48037247 | - | 0 | 0 |
| ENSG0000010578 | MIR328   | miRNA   | chr16 | 67202321 | 67202395 | - | 0 | 0 |
| ENSG0000010579 | MIR561   | miRNA   | chr2  | 1.88E+08 | 1.88E+08 | + | 0 | 0 |
| ENSG0000010580 | MIR624   | miRNA   | chr14 | 31014646 | 31014742 | - | 0 | 0 |
| ENSG0000010581 | MIR138-1 | miRNA   | chr3  | 44114212 | 44114310 | + | 0 | 0 |
| ENSG0000010582 | MIR219A2 | lincRNA | chr9  | 1.28E+08 | 1.28E+08 | - | 0 | 0 |
| ENSG0000010583 | MIR579   | miRNA   | chr5  | 32394378 | 32394475 | - | 0 | 0 |
| ENSG0000010584 | MIR105-1 | miRNA   | chrX  | 1.52E+08 | 1.52E+08 | - | 0 | 0 |
| ENSG0000010585 | MIR656   | miRNA   | chr14 | 1.01E+08 | 1.01E+08 | + | 0 | 0 |
| ENSG0000010586 | MIR153-2 | miRNA   | chr7  | 1.58E+08 | 1.58E+08 | - | 0 | 0 |
| ENSG0000010587 | MIR496   | miRNA   | chr14 | 1.01E+08 | 1.01E+08 | + | 0 | 0 |
| ENSG0000010588 | MIR30C1  | miRNA   | chr1  | 40757284 | 40757372 | + | 0 | 0 |
| ENSG0000010589 | MIR569   | miRNA   | chr3  | 1.71E+08 | 1.71E+08 | - | 0 | 0 |
| ENSG0000010590 | MIR629   | miRNA   | chr15 | 70079372 | 70079468 | - | 0 | 0 |
| ENSG0000010591 | MIR620   | miRNA   | chr12 | 1.16E+08 | 1.16E+08 | - | 0 | 0 |
| ENSG0000010592 | MIR507   | miRNA   | chrX  | 1.47E+08 | 1.47E+08 | - | 0 | 0 |
| ENSG0000010593 | MIR660   | miRNA   | chrX  | 50013241 | 50013337 | + | 0 | 0 |
| ENSG0000010594 | MIR125B1 | miRNA   | chr11 | 1.22E+08 | 1.22E+08 | - | 0 | 0 |
| ENSG0000010595 | MIR638   | miRNA   | chr19 | 10718404 | 10718503 | + | 0 | 0 |
| ENSG0000010596 | MIR589   | miRNA   | chr7  | 5495819  | 5495917  | - | 0 | 0 |
| ENSG0000010597 | MIR557   | miRNA   | chr1  | 1.68E+08 | 1.68E+08 | + | 0 | 0 |
| ENSG0000010598 | MIR181B1 | miRNA   | chr1  | 1.99E+08 | 1.99E+08 | - | 0 | 0 |
| ENSG0000010599 | MIR607   | miRNA   | chr10 | 96828669 | 96828764 | - | 0 | 0 |
| ENSG0000010600 | MIR154   | miRNA   | chr14 | 1.01E+08 | 1.01E+08 | + | 0 | 0 |
| ENSG0000010601 | MIR527   | miRNA   | chr19 | 53754018 | 53754102 | + | 0 | 0 |
| ENSG0000010602 | MIR23A   | miRNA   | chr19 | 13836587 | 13836659 | - | 0 | 0 |
| ENSG0000010603 | MIR519D  | miRNA   | chr19 | 53713347 | 53713434 | + | 0 | 0 |

|                 |           |        |       |          |          |   |   |   |
|-----------------|-----------|--------|-------|----------|----------|---|---|---|
| ENSG00000101411 | MIR548B   | miRNA  | chr6  | 1.19E+08 | 1.19E+08 | - | 0 | 0 |
| ENSG00000101412 | MIR613    | miRNA  | chr12 | 12764649 | 12764743 | + | 0 | 0 |
| ENSG00000101413 | MIR513A2  | miRNA  | chrX  | 1.47E+08 | 1.47E+08 | - | 0 | 0 |
| ENSG00000101414 | MIR518E   | miRNA  | chr19 | 53729838 | 53729925 | + | 0 | 0 |
| ENSG00000101415 | MIR576    | miRNA  | chr4  | 1.09E+08 | 1.09E+08 | + | 0 | 0 |
| ENSG00000101416 | MIR493    | miRNA  | chr14 | 1.01E+08 | 1.01E+08 | + | 0 | 0 |
| ENSG00000101417 | MIR182    | miRNA  | chr7  | 1.3E+08  | 1.3E+08  | - | 0 | 0 |
| ENSG00000101418 | MIR601    | miRNA  | chr9  | 1.23E+08 | 1.23E+08 | - | 0 | 0 |
| ENSG00000101419 | MIR519A1  | miRNA  | chr19 | 53752397 | 53752481 | + | 0 | 0 |
| ENSG00000101420 | MIR134    | miRNA  | chr14 | 1.01E+08 | 1.01E+08 | + | 0 | 0 |
| ENSG00000101421 | MIR100    | miRNA  | chr11 | 1.22E+08 | 1.22E+08 | - | 0 | 0 |
| ENSG00000101422 | MIR325    | miRNA  | chrX  | 77005404 | 77005501 | - | 0 | 0 |
| ENSG00000101423 | MIR301A   | miRNA  | chr17 | 59151136 | 59151221 | - | 0 | 0 |
| ENSG00000101424 | MIR644A   | miRNA  | chr20 | 34466325 | 34466418 | + | 0 | 0 |
| ENSG00000101425 | MIR509-1  | miRNA  | chrX  | 1.47E+08 | 1.47E+08 | - | 0 | 0 |
| ENSG00000101426 | MIR431    | miRNA  | chr14 | 1.01E+08 | 1.01E+08 | + | 0 | 0 |
| ENSG00000101427 | MIR643    | miRNA  | chr19 | 52281797 | 52281893 | + | 0 | 0 |
| ENSG00000101428 | MIR549A   | miRNA  | chr15 | 80841978 | 80842073 | - | 0 | 0 |
| ENSG00000101429 | MIR323B   | miRNA  | chr14 | 1.01E+08 | 1.01E+08 | + | 0 | 0 |
| ENSG00000101430 | MIR503    | miRNA  | chrX  | 1.35E+08 | 1.35E+08 | - | 0 | 0 |
| ENSG00000101431 | MIR16-1   | miRNA  | chr13 | 50048973 | 50049061 | - | 0 | 0 |
| ENSG00000101432 | MIR125A   | miRNA  | chr19 | 51693254 | 51693339 | + | 0 | 0 |
| ENSG00000101433 | MIR130A   | miRNA  | chr11 | 57641198 | 57641286 | + | 0 | 0 |
| ENSG00000101434 | MIRLET7F2 | miRNA  | chrX  | 53557192 | 53557274 | - | 0 | 0 |
| ENSG00000101435 | MIR652    | miRNA  | chrX  | 1.1E+08  | 1.1E+08  | + | 0 | 0 |
| ENSG00000101436 | MIR653    | miRNA  | chr7  | 93482760 | 93482855 | - | 0 | 0 |
| ENSG00000101437 | MIR362    | miRNA  | chrX  | 50008964 | 50009028 | + | 0 | 0 |
| ENSG00000101438 | MIR140    | miRNA  | chr16 | 69933081 | 69933180 | + | 0 | 0 |
| ENSG00000101439 | MIR645    | miRNA  | chr20 | 50585786 | 50585879 | + | 0 | 0 |
| ENSG00000101440 | MIR618    | miRNA  | chr12 | 80935736 | 80935833 | - | 0 | 0 |
| ENSG00000101441 | MIR185    | miRNA  | chr22 | 20033139 | 20033220 | + | 0 | 0 |
| ENSG00000101442 | MIR199A2  | miRNA  | chr1  | 1.72E+08 | 1.72E+08 | - | 0 | 0 |
| ENSG00000101443 | MIR591    | miRNA  | chr7  | 96219662 | 96219756 | - | 0 | 0 |
| ENSG00000101444 | MIR485    | miRNA  | chr14 | 1.01E+08 | 1.01E+08 | + | 0 | 0 |
| ENSG00000101445 | MIR616    | miRNA  | chr12 | 57519163 | 57519259 | - | 0 | 0 |
| ENSG00000101446 | MIR548A3  | miRNA  | chr8  | 1.04E+08 | 1.04E+08 | - | 0 | 0 |
| ENSG00000101447 | MIR609    | miRNA  | chr10 | 1.04E+08 | 1.04E+08 | - | 0 | 0 |
| ENSG00000101448 | MIR106B   | miRNA  | chr7  | 1E+08    | 1E+08    | - | 0 | 0 |
| ENSG00000101449 | MIR320A   | miRNA  | chr8  | 22244962 | 22245043 | - | 0 | 0 |
| ENSG00000101450 | SNORA40   | snoRNA | chr2  | 1.35E+08 | 1.35E+08 | + | 0 | 0 |
| ENSG00000101451 | SNORD94   | snoRNA | chr2  | 86135870 | 86136006 | + | 0 | 0 |
| ENSG00000101452 | SNORD73A  | snoRNA | chr4  | 1.51E+08 | 1.51E+08 | + | 0 | 0 |
| ENSG00000101453 | SNORA35   | snoRNA | chrX  | 1.15E+08 | 1.15E+08 | + | 0 | 0 |
| ENSG00000101454 | SNORD96B  | snoRNA | chrX  | 1.1E+08  | 1.1E+08  | - | 0 | 0 |
| ENSG00000101455 | SNORA49   | snoRNA | chr12 | 1.32E+08 | 1.32E+08 | + | 0 | 0 |

|                             |       |          |          |   |         |         |
|-----------------------------|-------|----------|----------|---|---------|---------|
| ENSG0000(SNORD12C snoRNA    | chr20 | 49278940 | 49279028 | + | 0       | 0       |
| ENSG0000(MT-TL1 Mt_tRNA     | chrM  | 3230     | 3304     | + | 0       | 0       |
| ENSG0000(SNORD83B snoRNA    | chr22 | 39313819 | 39313911 | - | 0       | 0       |
| ENSG0000(SNORD83A snoRNA    | chr22 | 39315213 | 39315307 | - | 0       | 0       |
| ENSG0000(SNORA48 snoRNA     | chr17 | 7574713  | 7574847  | + | 0       | 0       |
| ENSG0000(SNORD105 snoRNA    | chr19 | 10107651 | 10107735 | + | 0       | 0       |
| ENSG0000(SNORD41 snoRNA     | chr19 | 12706449 | 12706518 | - | 0       | 0       |
| ENSG0000(MT-TF Mt_tRNA      | chrM  | 577      | 647      | + | 0       | 0       |
| ENSG0000(MT-TV Mt_tRNA      | chrM  | 1602     | 1670     | + | 0       | 0       |
| ENSG0000(MT-RNR2 Mt_rRNA    | chrM  | 1671     | 3229     | + | 2172.31 | 2242.37 |
| ENSG0000(MT-TI Mt_tRNA      | chrM  | 4263     | 4331     | + | 0       | 0       |
| ENSG0000(MT-TQ Mt_tRNA      | chrM  | 4329     | 4400     | - | 0       | 0       |
| ENSG0000(MT-TM Mt_tRNA      | chrM  | 4402     | 4469     | + | 0       | 0       |
| ENSG0000(MT-TW Mt_tRNA      | chrM  | 5512     | 5579     | + | 0       | 0       |
| ENSG0000(MT-TA Mt_tRNA      | chrM  | 5587     | 5655     | - | 0       | 0       |
| ENSG0000(MT-TN Mt_tRNA      | chrM  | 5657     | 5729     | - | 0       | 0       |
| ENSG0000(MT-TC Mt_tRNA      | chrM  | 5761     | 5826     | - | 0       | 0       |
| ENSG0000(MT-TY Mt_tRNA      | chrM  | 5826     | 5891     | - | 0       | 0       |
| ENSG0000(MT-TS1 Mt_tRNA     | chrM  | 7446     | 7514     | - | 0       | 0       |
| ENSG0000(MT-TD Mt_tRNA      | chrM  | 7518     | 7585     | + | 0       | 0       |
| ENSG0000(MT-TK Mt_tRNA      | chrM  | 8295     | 8364     | + | 0       | 0       |
| ENSG0000(MT-TG Mt_tRNA      | chrM  | 9991     | 10058    | + | 0       | 0       |
| ENSG0000(MT-TR Mt_tRNA      | chrM  | 10405    | 10469    | + | 0       | 0       |
| ENSG0000(MT-TH Mt_tRNA      | chrM  | 12138    | 12206    | + | 0       | 0       |
| ENSG0000(RNU6ATAC snRNA     | chr3  | 36968191 | 36968316 | - | 0       | 0       |
| ENSG0000(MT-TS2 Mt_tRNA     | chrM  | 12207    | 12265    | + | 0       | 0       |
| ENSG0000(MT-TL2 Mt_tRNA     | chrM  | 12266    | 12336    | + | 0       | 0       |
| ENSG0000(MT-TE Mt_tRNA      | chrM  | 14674    | 14742    | - | 0       | 0       |
| ENSG0000(MT-TT Mt_tRNA      | chrM  | 15888    | 15953    | + | 0       | 0       |
| ENSG0000(MT-TP Mt_tRNA      | chrM  | 15956    | 16023    | - | 0       | 0       |
| ENSG0000(RNU6ATAC snRNA     | chr5  | 56297564 | 56297689 | - | 0       | 0       |
| ENSG0000(RNU6ATAC snRNA     | chr17 | 46921124 | 46921249 | + | 0       | 0       |
| ENSG0000(MIR196A1 miRNA     | chr17 | 48632490 | 48632559 | - | 0       | 0       |
| ENSG0000(SNORA40 snoRNA     | chr11 | 93735111 | 93735236 | - | 0       | 0       |
| ENSG0000(RNU6ATAC snRNA     | chr4  | 73026748 | 73026873 | + | 0       | 0       |
| ENSG0000(RNU6ATAC snRNA     | chr3  | 57619447 | 57619572 | + | 0       | 0       |
| ENSG0000(MIR190A miRNA      | chr15 | 62823957 | 62824041 | + | 0       | 0       |
| ENSG0000(GPX3 protein_co    | chr5  | 1.51E+08 | 1.51E+08 | + | 35.62   | 40.65   |
| ENSG0000(DIO2 protein_co    | chr14 | 80197527 | 80387757 | - | 0.46    | 0.18    |
| ENSG0000(SELENOH protein_co | chr11 | 57741250 | 57743554 | + | 43.43   | 39.88   |
| ENSG0000(GNRHR2 transcribec | chr1  | 1.46E+08 | 1.46E+08 | + | 1.91    | 2.01    |
| ENSG0000(DIO1 protein_co    | chr1  | 53891239 | 53911086 | + | 0       | 0       |
| ENSG0000(AKR7L polymorph    | chr1  | 19265982 | 19274194 | - | 0.24    | 0.03    |
| ENSG0000(STK38L protein_co  | chr12 | 27243968 | 27325959 | + | 15.05   | 17.14   |
| ENSG0000(SACM1L protein_co  | chr3  | 45689056 | 45745424 | + | 11.75   | 10.9    |

|                 |           |                |       |          |          |   |        |        |
|-----------------|-----------|----------------|-------|----------|----------|---|--------|--------|
| ENSG00000108000 | MT-RNR1   | Mt_rRNA        | chrM  | 648      | 1601     | + | 350.45 | 376.34 |
| ENSG00000108000 | TSN       | protein_coding | chr2  | 1.22E+08 | 1.22E+08 | + | 15.51  | 13.64  |
| ENSG00000108000 | MIR320D1  | miRNA          | chr13 | 40727828 | 40727875 | - | 0      | 0      |
| ENSG00000108000 | MIR320E   | miRNA          | chr19 | 46709293 | 46709345 | - | 0      | 0      |
| ENSG00000108000 | MIR454    | miRNA          | chr17 | 59137758 | 59137872 | - | 0      | 0      |
| ENSG00000108000 | MIR216B   | miRNA          | chr2  | 56000714 | 56000795 | - | 0      | 0      |
| ENSG00000108000 | MIR526A2  | miRNA          | chr19 | 53726922 | 53726986 | + | 0      | 0      |
| ENSG00000108000 | MIR501    | miRNA          | chrX  | 50009722 | 50009805 | + | 0      | 0      |
| ENSG00000108000 | MIR320B1  | miRNA          | chr1  | 1.17E+08 | 1.17E+08 | + | 0      | 0      |
| ENSG00000108000 | MIR3065   | miRNA          | chr17 | 81125877 | 81125955 | + | 0      | 0      |
| ENSG00000108000 | MIR670    | miRNA          | chr11 | 43559656 | 43559753 | + | 0      | 0      |
| ENSG00000108000 | MIR770    | miRNA          | chr14 | 1.01E+08 | 1.01E+08 | + | 0      | 0      |
| ENSG00000108000 | MIR760    | miRNA          | chr1  | 93846832 | 93846911 | + | 0      | 0      |
| ENSG00000108000 | MIR766    | miRNA          | chrX  | 1.2E+08  | 1.2E+08  | - | 0      | 0      |
| ENSG00000108000 | MIR759    | miRNA          | chr13 | 52810050 | 52810140 | + | 0      | 0      |
| ENSG00000108000 | MIR769    | miRNA          | chr19 | 46018932 | 46019049 | + | 0      | 0      |
| ENSG00000108000 | MIR765    | miRNA          | chr1  | 1.57E+08 | 1.57E+08 | - | 0      | 0      |
| ENSG00000108000 | MIR758    | miRNA          | chr14 | 1.01E+08 | 1.01E+08 | + | 0      | 0      |
| ENSG00000108000 | MIR767    | miRNA          | chrX  | 1.52E+08 | 1.52E+08 | - | 0      | 0      |
| ENSG00000108000 | SLC48A1   | protein_coding | chr12 | 47753916 | 47782753 | + | 7.23   | 8.68   |
| ENSG00000108000 | MIR802    | miRNA          | chr21 | 35720715 | 35720808 | + | 0      | 0      |
| ENSG00000108000 | MIR762    | miRNA          | chr16 | 30893903 | 30893985 | + | 0      | 0      |
| ENSG00000108000 | IGKC      | IG_C_gene      | chr2  | 88857161 | 88857683 | - | 0      | 0      |
| ENSG00000108000 | IGKJ5     | IG_J_gene      | chr2  | 88860568 | 88860605 | - | 0      | 0      |
| ENSG00000108000 | IGKJ4     | IG_J_gene      | chr2  | 88860886 | 88860922 | - | 0      | 0      |
| ENSG00000108000 | IGKJ3     | IG_J_gene      | chr2  | 88861221 | 88861258 | - | 0      | 0      |
| ENSG00000108000 | IGKJ2     | IG_J_gene      | chr2  | 88861525 | 88861563 | - | 0      | 0      |
| ENSG00000108000 | IGKJ1     | IG_J_gene      | chr2  | 88861886 | 88861923 | - | 0      | 0      |
| ENSG00000108000 | IGKV4-1   | IG_V_gene      | chr2  | 88885397 | 88886153 | + | 0      | 0      |
| ENSG00000108000 | IGKV5-2   | IG_V_gene      | chr2  | 88897232 | 88897784 | + | 0      | 0      |
| ENSG00000108000 | IGKV6-21  | IG_V_gene      | chr2  | 89159751 | 89160366 | - | 0      | 0      |
| ENSG00000108000 | IGKV2D-26 | IG_V_gene      | chr2  | 89985922 | 89986702 | + | 0      | 0      |
| ENSG00000108000 | IGKV3D-20 | IG_V_gene      | chr2  | 90038848 | 90039479 | + | 0      | 0      |
| ENSG00000108000 | IGKV6D-41 | IG_V_gene      | chr2  | 90069662 | 90070238 | + | 0      | 0      |
| ENSG00000108000 | IGKV3D-11 | IG_V_gene      | chr2  | 90172802 | 90173414 | + | 0      | 0      |
| ENSG00000108000 | IGKV1D-42 | IG_V_gene      | chr2  | 90190193 | 90190681 | + | 0      | 0      |
| ENSG00000108000 | IGLV4-69  | IG_V_gene      | chr22 | 22030934 | 22031472 | + | 0      | 0      |
| ENSG00000108000 | IGLV8-61  | IG_V_gene      | chr22 | 22098700 | 22099212 | + | 0      | 0      |
| ENSG00000108000 | IGLV4-60  | IG_V_gene      | chr22 | 22162199 | 22162681 | + | 0      | 0      |
| ENSG00000108000 | IGLV6-57  | IG_V_gene      | chr22 | 22195799 | 22196276 | + | 0      | 0      |
| ENSG00000108000 | IGLV11-55 | IG_V_gene      | chr22 | 22201663 | 22202161 | + | 0      | 0      |
| ENSG00000108000 | IGLV10-54 | IG_V_gene      | chr22 | 22038643 | 22215270 | + | 0      | 0      |
| ENSG00000108000 | IGLV5-52  | IG_V_gene      | chr22 | 22318727 | 22319226 | + | 2.78   | 1.78   |
| ENSG00000108000 | IGLV1-51  | IG_V_gene      | chr22 | 22322472 | 22322969 | + | 0      | 0.24   |
| ENSG00000108000 | IGLV1-50  | IG_V_gene      | chr22 | 22327300 | 22327814 | + | 0      | 0      |

|                 |           |                 |          |          |   |   |      |
|-----------------|-----------|-----------------|----------|----------|---|---|------|
| ENSG00000101450 | IGLV5-48  | IG_V_gene chr22 | 22352940 | 22353433 | + | 0 | 0    |
| ENSG00000101451 | IGLV1-47  | IG_V_gene chr22 | 22357739 | 22358260 | + | 0 | 0    |
| ENSG00000101452 | IGLV7-46  | IG_V_gene chr22 | 22369614 | 22370087 | + | 0 | 0    |
| ENSG00000101453 | IGLV5-45  | IG_V_gene chr22 | 22375986 | 22376505 | + | 0 | 0    |
| ENSG00000101454 | IGLV1-44  | IG_V_gene chr22 | 22380766 | 22381347 | + | 0 | 0    |
| ENSG00000101455 | IGLV7-43  | IG_V_gene chr22 | 22395018 | 22395489 | + | 0 | 0    |
| ENSG00000101456 | IGLV1-40  | IG_V_gene chr22 | 22409766 | 22410282 | + | 0 | 0    |
| ENSG00000101457 | IGLV5-37  | IG_V_gene chr22 | 22427540 | 22428035 | + | 0 | 0    |
| ENSG00000101458 | IGLV1-36  | IG_V_gene chr22 | 22431958 | 22432465 | + | 0 | 0    |
| ENSG00000101459 | IGLV2-33  | IG_V_gene chr22 | 22588155 | 22588688 | + | 0 | 0    |
| ENSG00000101460 | IGLV3-32  | IG_V_gene chr22 | 22594528 | 22595056 | + | 0 | 0    |
| ENSG00000101461 | IGLV3-27  | IG_V_gene chr22 | 22668288 | 22668806 | + | 0 | 0    |
| ENSG00000101462 | IGLV3-25  | IG_V_gene chr22 | 22686726 | 22687271 | + | 0 | 0    |
| ENSG00000101463 | IGLV2-23  | IG_V_gene chr22 | 22697789 | 22698407 | + | 0 | 0    |
| ENSG00000101464 | IGLV3-22  | IG_V_gene chr22 | 22704265 | 22704822 | + | 0 | 0    |
| ENSG00000101465 | IGLV3-21  | IG_V_gene chr22 | 22711689 | 22713203 | + | 0 | 0    |
| ENSG00000101466 | IGLV3-19  | IG_V_gene chr22 | 22720623 | 22721145 | + | 0 | 0    |
| ENSG00000101467 | IGLV2-18  | IG_V_gene chr22 | 22734607 | 22735096 | + | 0 | 0    |
| ENSG00000101468 | IGLV3-16  | IG_V_gene chr22 | 22747383 | 22747911 | + | 0 | 0    |
| ENSG00000101469 | IGLV2-14  | IG_V_gene chr22 | 22758700 | 22759218 | + | 0 | 0    |
| ENSG00000101470 | IGLV3-12  | IG_V_gene chr22 | 22771824 | 22772586 | + | 0 | 0    |
| ENSG00000101471 | IGLV2-11  | IG_V_gene chr22 | 22792491 | 22793007 | + | 0 | 0    |
| ENSG00000101472 | IGLV3-10  | IG_V_gene chr22 | 22811747 | 22812285 | + | 0 | 0    |
| ENSG00000101473 | IGLV3-9   | IG_V_gene chr22 | 22819010 | 22819756 | + | 0 | 0    |
| ENSG00000101474 | IGLV4-3   | IG_V_gene chr22 | 22871507 | 22872035 | + | 0 | 0    |
| ENSG00000101475 | IGLV3-1   | IG_V_gene chr22 | 22880706 | 22881396 | + | 0 | 0    |
| ENSG00000101476 | IGLJ1     | IG_J_gene chr22 | 22893692 | 22893818 | + | 0 | 0    |
| ENSG00000101477 | IGLC1     | IG_C_gene chr22 | 22895375 | 22895834 | + | 0 | 0    |
| ENSG00000101478 | IGLJ2     | IG_J_gene chr22 | 22899481 | 22899655 | + | 0 | 0    |
| ENSG00000101479 | IGLC2     | IG_C_gene chr22 | 22900976 | 22901437 | + | 0 | 0    |
| ENSG00000101480 | IGLJ3     | IG_J_gene chr22 | 22904850 | 22905025 | + | 0 | 0    |
| ENSG00000101481 | IGLC3     | IG_C_gene chr22 | 22906342 | 22906803 | + | 0 | 0    |
| ENSG00000101482 | IGLJ4     | IG_J_gene chr22 | 22910574 | 22910606 | + | 0 | 0    |
| ENSG00000101483 | IGLJ5     | IG_J_gene chr22 | 22914237 | 22914308 | + | 0 | 0    |
| ENSG00000101484 | IGLJ6     | IG_J_gene chr22 | 22918132 | 22918201 | + | 0 | 0    |
| ENSG00000101485 | KB-1572G7 | processed_chr22 | 23630618 | 23638941 | - | 0 | 0.06 |
| ENSG00000101486 | IGLJ7     | IG_J_gene chr22 | 22921390 | 22921435 | + | 0 | 0    |
| ENSG00000101487 | IGLC7     | IG_C_gene chr22 | 22922594 | 22923034 | + | 0 | 0    |
| ENSG00000101488 | TRGJ2     | TR_J_gene chr7  | 38253380 | 38253429 | - | 0 | 0    |
| ENSG00000101489 | TRGJP2    | TR_J_gene chr7  | 38256337 | 38256396 | - | 0 | 0    |
| ENSG00000101490 | TRGC1     | TR_C_gene chr7  | 38257879 | 38265678 | - | 0 | 0    |
| ENSG00000101491 | TRGJ1     | TR_J_gene chr7  | 38269491 | 38269540 | - | 0 | 0    |
| ENSG00000101492 | TRGJP     | TR_J_gene chr7  | 38273587 | 38273647 | - | 0 | 0    |
| ENSG00000101493 | TRGJP1    | TR_J_gene chr7  | 38276259 | 38276318 | - | 0 | 0    |
| ENSG00000101494 | TRGV11    | TR_V_gene chr7  | 38291616 | 38292078 | - | 0 | 0    |



|                    |                 |          |            |      |   |
|--------------------|-----------------|----------|------------|------|---|
| ENSG0000( TRGV10   | TR_V_gene chr7  | 38299811 | 38300322 - | 0    | 0 |
| ENSG0000( TRGV9    | TR_V_gene chr7  | 38317017 | 38318861 - | 0    | 0 |
| ENSG0000( TRGV8    | TR_V_gene chr7  | 38330343 | 38330935 - | 0.17 | 0 |
| ENSG0000( TRGV5    | TR_V_gene chr7  | 38349355 | 38350022 - | 0    | 0 |
| ENSG0000( TRGV4    | TR_V_gene chr7  | 38353715 | 38354517 - | 0    | 0 |
| ENSG0000( TRGV3    | TR_V_gene chr7  | 38358512 | 38359162 - | 0    | 0 |
| ENSG0000( TRGV1    | TR_V_gene chr7  | 38367586 | 38368169 - | 0    | 0 |
| ENSG0000( TRBV6-1  | TR_V_gene chr7  | 1.42E+08 | 1.42E+08 + | 0    | 0 |
| ENSG0000( TRBV7-1  | TR_V_gene chr7  | 1.42E+08 | 1.42E+08 + | 0    | 0 |
| ENSG0000( TRBV4-1  | TR_V_gene chr7  | 1.42E+08 | 1.42E+08 + | 0    | 0 |
| ENSG0000( TRBV6-4  | TR_V_gene chr7  | 1.42E+08 | 1.42E+08 + | 0    | 0 |
| ENSG0000( TRBV7-3  | TR_V_gene chr7  | 1.42E+08 | 1.42E+08 + | 0    | 0 |
| ENSG0000( TRBV5-3  | TR_V_gene chr7  | 1.42E+08 | 1.42E+08 + | 0    | 0 |
| ENSG0000( TRBV9    | TR_V_gene chr7  | 1.42E+08 | 1.42E+08 + | 0    | 0 |
| ENSG0000( TRBV10-1 | TR_V_gene chr7  | 1.42E+08 | 1.42E+08 + | 0    | 0 |
| ENSG0000( TRBV11-1 | TR_V_gene chr7  | 1.42E+08 | 1.42E+08 + | 0    | 0 |
| ENSG0000( TRBV6-5  | TR_V_gene chr7  | 1.42E+08 | 1.42E+08 + | 0    | 0 |
| ENSG0000( TRBV6-6  | TR_V_gene chr7  | 1.42E+08 | 1.42E+08 + | 0    | 0 |
| ENSG0000( TRBV5-5  | TR_V_gene chr7  | 1.42E+08 | 1.42E+08 + | 0    | 0 |
| ENSG0000( TRBV7-6  | TR_V_gene chr7  | 1.42E+08 | 1.42E+08 + | 0    | 0 |
| ENSG0000( TRBV5-6  | TR_V_gene chr7  | 1.43E+08 | 1.43E+08 + | 0    | 0 |
| ENSG0000( TRBV5-7  | TR_V_gene chr7  | 1.43E+08 | 1.43E+08 + | 0    | 0 |
| ENSG0000( TRBV5-1  | TR_V_gene chr7  | 1.42E+08 | 1.42E+08 + | 0    | 0 |
| ENSG0000( TRBV12-2 | TR_V_pseu chr7  | 1.42E+08 | 1.42E+08 + | 0    | 0 |
| ENSG0000( TRBV4-2  | TR_V_gene chr7  | 1.42E+08 | 1.42E+08 + | 0    | 0 |
| ENSG0000( TRBV19   | TR_V_gene chr7  | 1.43E+08 | 1.43E+08 + | 0    | 0 |
| ENSG0000( TRBV20-1 | TR_V_gene chr7  | 1.43E+08 | 1.43E+08 + | 0    | 0 |
| ENSG0000( TRBV23-1 | TR_V_gene chr7  | 1.43E+08 | 1.43E+08 + | 0    | 0 |
| ENSG0000( TRBV24-1 | TR_V_gene chr7  | 1.43E+08 | 1.43E+08 + | 0    | 0 |
| ENSG0000( TRBC1    | TR_C_gene chr7  | 1.43E+08 | 1.43E+08 + | 0    | 0 |
| ENSG0000( TRBV27   | TR_V_gene chr7  | 1.43E+08 | 1.43E+08 + | 0    | 0 |
| ENSG0000( TRBV28   | TR_V_gene chr7  | 1.43E+08 | 1.43E+08 + | 0    | 0 |
| ENSG0000( TRBJ2-1  | TR_J_gene chr7  | 1.43E+08 | 1.43E+08 + | 0    | 0 |
| ENSG0000( TRBJ2-2  | TR_J_gene chr7  | 1.43E+08 | 1.43E+08 + | 0    | 0 |
| ENSG0000( TRBJ2-2P | TR_J_gene chr7  | 1.43E+08 | 1.43E+08 + | 0    | 0 |
| ENSG0000( TRBJ2-3  | TR_J_gene chr7  | 1.43E+08 | 1.43E+08 + | 0    | 0 |
| ENSG0000( TRBJ2-4  | TR_J_gene chr7  | 1.43E+08 | 1.43E+08 + | 0    | 0 |
| ENSG0000( TRBJ2-5  | TR_J_gene chr7  | 1.43E+08 | 1.43E+08 + | 0    | 0 |
| ENSG0000( TRBJ2-6  | TR_J_gene chr7  | 1.43E+08 | 1.43E+08 + | 0    | 0 |
| ENSG0000( TRBJ2-7  | TR_J_gene chr7  | 1.43E+08 | 1.43E+08 + | 0    | 0 |
| ENSG0000( TRBC2    | TR_C_gene chr7  | 1.43E+08 | 1.43E+08 + | 0    | 0 |
| ENSG0000( TRAV2    | TR_V_gene chr14 | 21712321 | 21712843 + | 0    | 0 |
| ENSG0000( TRAV3    | TR_V_gene chr14 | 21723713 | 21724321 + | 0    | 0 |
| ENSG0000( TRAV4    | TR_V_gene chr14 | 21736152 | 21736982 + | 0    | 0 |
| ENSG0000( TRAV5    | TR_V_gene chr14 | 21749178 | 21749705 + | 0    | 0 |

|                |                 |          |          |   |   |   |
|----------------|-----------------|----------|----------|---|---|---|
| ENSG0000017466 | TR_V_gene chr14 | 21768489 | 21769080 | + | 0 | 0 |
| ENSG0000017467 | TR_V_gene chr14 | 21782993 | 21783503 | + | 0 | 0 |
| ENSG0000017468 | TR_V_gene chr14 | 21797287 | 21797886 | + | 0 | 0 |
| ENSG0000017469 | TR_V_gene chr14 | 21811502 | 21811977 | + | 0 | 0 |
| ENSG0000017470 | TR_V_gene chr14 | 21825472 | 21826075 | + | 0 | 0 |
| ENSG0000017471 | TR_V_gene chr14 | 21841240 | 21841774 | + | 0 | 0 |
| ENSG0000017472 | TR_V_gene chr14 | 21846537 | 21847221 | + | 0 | 0 |
| ENSG0000017473 | TR_V_gene chr14 | 21852558 | 21853006 | + | 0 | 0 |
| ENSG0000017474 | TR_V_gene chr14 | 21868839 | 21869365 | + | 0 | 0 |
| ENSG0000017475 | TR_V_gene chr14 | 21887857 | 21888502 | + | 0 | 0 |
| ENSG0000017476 | TR_V_gene chr14 | 21894433 | 21895030 | + | 0 | 0 |
| ENSG0000017477 | TR_V_gene chr14 | 21918188 | 21918756 | + | 0 | 0 |
| ENSG0000017478 | TR_V_gene chr14 | 21924063 | 21924651 | + | 0 | 0 |
| ENSG0000017479 | TR_V_gene chr14 | 21941128 | 21941657 | + | 0 | 0 |
| ENSG0000017480 | TR_V_gene chr14 | 21965451 | 21966061 | + | 0 | 0 |
| ENSG0000017481 | TR_V_gene chr14 | 21978459 | 21979120 | + | 0 | 0 |
| ENSG0000017482 | TR_V_gene chr14 | 21990496 | 21990938 | + | 0 | 0 |
| ENSG0000017483 | TR_V_gene chr14 | 21997539 | 21998168 | + | 0 | 0 |
| ENSG0000017484 | TR_V_gene chr14 | 22003106 | 22003673 | + | 0 | 0 |
| ENSG0000017485 | TR_V_gene chr14 | 22007512 | 22008181 | + | 0 | 0 |
| ENSG0000017486 | TR_V_gene chr14 | 22040594 | 22041153 | + | 0 | 0 |
| ENSG0000017487 | TR_V_gene chr14 | 22052514 | 22053056 | + | 0 | 0 |
| ENSG0000017488 | TR_V_gene chr14 | 22070557 | 22071208 | + | 0 | 0 |
| ENSG0000017489 | TR_V_gene chr14 | 22086407 | 22086961 | + | 0 | 0 |
| ENSG0000017490 | TR_V_gene chr14 | 22096032 | 22096619 | + | 0 | 0 |
| ENSG0000017491 | TR_V_gene chr14 | 22105343 | 22105846 | + | 0 | 0 |
| ENSG0000017492 | TR_V_gene chr14 | 22112347 | 22113031 | + | 0 | 0 |
| ENSG0000017493 | TR_V_gene chr14 | 22123318 | 22124285 | + | 0 | 0 |
| ENSG0000017494 | TR_V_gene chr14 | 22132553 | 22133034 | + | 0 | 0 |
| ENSG0000017495 | TR_V_gene chr14 | 22147995 | 22148633 | + | 0 | 0 |
| ENSG0000017496 | TR_V_gene chr14 | 22163238 | 22163870 | + | 0 | 0 |
| ENSG0000017497 | TR_V_gene chr14 | 22202583 | 22203368 | + | 0 | 0 |
| ENSG0000017498 | TR_V_gene chr14 | 22207522 | 22208129 | + | 0 | 0 |
| ENSG0000017499 | TR_V_pseu chr14 | 22221896 | 22222475 | + | 0 | 0 |
| ENSG0000017500 | TR_V_gene chr14 | 22226746 | 22227254 | + | 0 | 0 |
| ENSG0000017501 | TR_V_gene chr14 | 22271968 | 22272563 | + | 0 | 0 |
| ENSG0000017502 | TR_V_gene chr14 | 22281105 | 22281748 | + | 0 | 0 |
| ENSG0000017503 | TR_V_gene chr14 | 22304054 | 22304553 | + | 0 | 0 |
| ENSG0000017504 | TR_V_gene chr14 | 22314490 | 22314919 | + | 0 | 0 |
| ENSG0000017505 | TR_V_gene chr14 | 22320188 | 22320691 | + | 0 | 0 |
| ENSG0000017506 | TR_V_gene chr14 | 22422371 | 22423042 | + | 0 | 0 |
| ENSG0000017507 | TR_J_gene chr14 | 22450089 | 22450139 | + | 0 | 0 |
| ENSG0000017508 | TR_J_gene chr14 | 22455249 | 22455296 | + | 0 | 0 |
| ENSG0000017509 | TR_J_gene chr14 | 22456689 | 22456742 | + | 0 | 0 |
| ENSG0000017510 | TR_J_gene chr14 | 22459098 | 22459156 | + | 0 | 0 |

|                  |                 |          |            |      |   |
|------------------|-----------------|----------|------------|------|---|
| ENSG0000( TRDC   | TR_C_gene chr14 | 22462932 | 22465787 + | 0.09 | 0 |
| ENSG0000( TRAJ61 | TR_J_gene chr14 | 22475316 | 22475375 + | 0    | 0 |
| ENSG0000( TRAJ59 | TR_J_gene chr14 | 22476553 | 22476606 + | 0    | 0 |
| ENSG0000( TRAJ58 | TR_J_gene chr14 | 22477707 | 22477769 + | 0    | 0 |
| ENSG0000( TRAJ57 | TR_J_gene chr14 | 22478872 | 22478934 + | 0    | 0 |
| ENSG0000( TRAJ56 | TR_J_gene chr14 | 22479521 | 22479582 + | 0    | 0 |
| ENSG0000( TRAJ54 | TR_J_gene chr14 | 22482287 | 22482346 + | 0    | 0 |
| ENSG0000( TRAJ53 | TR_J_gene chr14 | 22483004 | 22483069 + | 0    | 0 |
| ENSG0000( TRAJ52 | TR_J_gene chr14 | 22486228 | 22486296 + | 0    | 0 |
| ENSG0000( TRAJ50 | TR_J_gene chr14 | 22488593 | 22488652 + | 0    | 0 |
| ENSG0000( TRAJ49 | TR_J_gene chr14 | 22489488 | 22489543 + | 0    | 0 |
| ENSG0000( TRAJ48 | TR_J_gene chr14 | 22490491 | 22490553 + | 0    | 0 |
| ENSG0000( TRAJ47 | TR_J_gene chr14 | 22492851 | 22492907 + | 0    | 0 |
| ENSG0000( TRAJ46 | TR_J_gene chr14 | 22493403 | 22493465 + | 0    | 0 |
| ENSG0000( TRAJ45 | TR_J_gene chr14 | 22493925 | 22493990 + | 0    | 0 |
| ENSG0000( TRAJ44 | TR_J_gene chr14 | 22494821 | 22494883 + | 0    | 0 |
| ENSG0000( TRAJ43 | TR_J_gene chr14 | 22495913 | 22495966 + | 0    | 0 |
| ENSG0000( TRAJ42 | TR_J_gene chr14 | 22496887 | 22496952 + | 0    | 0 |
| ENSG0000( TRAJ41 | TR_J_gene chr14 | 22497657 | 22497718 + | 0    | 0 |
| ENSG0000( TRAJ40 | TR_J_gene chr14 | 22499689 | 22499749 + | 0    | 0 |
| ENSG0000( TRAJ39 | TR_J_gene chr14 | 22501601 | 22501663 + | 0    | 0 |
| ENSG0000( TRAJ38 | TR_J_gene chr14 | 22502231 | 22502292 + | 0    | 0 |
| ENSG0000( TRAJ35 | TR_J_gene chr14 | 22506644 | 22506702 + | 0    | 0 |
| ENSG0000( TRAJ34 | TR_J_gene chr14 | 22507666 | 22507723 + | 0    | 0 |
| ENSG0000( TRAJ33 | TR_J_gene chr14 | 22508602 | 22508658 + | 0    | 0 |
| ENSG0000( TRAJ32 | TR_J_gene chr14 | 22509341 | 22509406 + | 0    | 0 |
| ENSG0000( TRAJ31 | TR_J_gene chr14 | 22510968 | 22511024 + | 0    | 0 |
| ENSG0000( TRAJ30 | TR_J_gene chr14 | 22512852 | 22512908 + | 0    | 0 |
| ENSG0000( TRAJ29 | TR_J_gene chr14 | 22513939 | 22513998 + | 0    | 0 |
| ENSG0000( TRAJ28 | TR_J_gene chr14 | 22515623 | 22515688 + | 0    | 0 |
| ENSG0000( TRAJ27 | TR_J_gene chr14 | 22516273 | 22516331 + | 0    | 0 |
| ENSG0000( TRAJ26 | TR_J_gene chr14 | 22518446 | 22518505 + | 0    | 0 |
| ENSG0000( TRAJ25 | TR_J_gene chr14 | 22518812 | 22518871 + | 0    | 0 |
| ENSG0000( TRAJ24 | TR_J_gene chr14 | 22519969 | 22520031 + | 0    | 0 |
| ENSG0000( TRAJ23 | TR_J_gene chr14 | 22520416 | 22520478 + | 0    | 0 |
| ENSG0000( TRAJ22 | TR_J_gene chr14 | 22522040 | 22522102 + | 0    | 0 |
| ENSG0000( TRAJ21 | TR_J_gene chr14 | 22523600 | 22523654 + | 0    | 0 |
| ENSG0000( TRAJ20 | TR_J_gene chr14 | 22524325 | 22524381 + | 0    | 0 |
| ENSG0000( TRAJ19 | TR_J_gene chr14 | 22525263 | 22525322 + | 0    | 0 |
| ENSG0000( TRAJ18 | TR_J_gene chr14 | 22525650 | 22525715 + | 0    | 0 |
| ENSG0000( TRAJ17 | TR_J_gene chr14 | 22526844 | 22526906 + | 0    | 0 |
| ENSG0000( TRAJ16 | TR_J_gene chr14 | 22528527 | 22528586 + | 0    | 0 |
| ENSG0000( TRAJ14 | TR_J_gene chr14 | 22530327 | 22530378 + | 0    | 0 |
| ENSG0000( TRAJ13 | TR_J_gene chr14 | 22531076 | 22531138 + | 0    | 0 |
| ENSG0000( TRAJ12 | TR_J_gene chr14 | 22531939 | 22531998 + | 0    | 0 |

|                    |                 |          |            |   |   |
|--------------------|-----------------|----------|------------|---|---|
| ENSG0000( TRAJ11   | TR_J_gene chr14 | 22532502 | 22532561 + | 0 | 0 |
| ENSG0000( TRAJ10   | TR_J_gene chr14 | 22533497 | 22533560 + | 0 | 0 |
| ENSG0000( TRAJ9    | TR_J_gene chr14 | 22535554 | 22535614 + | 0 | 0 |
| ENSG0000( TRAJ8    | TR_J_pseu chr14 | 22536145 | 22536204 + | 0 | 0 |
| ENSG0000( TRAJ7    | TR_J_gene chr14 | 22537622 | 22537680 + | 0 | 0 |
| ENSG0000( TRAJ6    | TR_J_gene chr14 | 22539073 | 22539134 + | 0 | 0 |
| ENSG0000( TRAJ5    | TR_J_gene chr14 | 22540247 | 22540306 + | 0 | 0 |
| ENSG0000( TRAJ4    | TR_J_gene chr14 | 22542199 | 22542261 + | 0 | 0 |
| ENSG0000( TRAJ3    | TR_J_gene chr14 | 22543179 | 22543240 + | 0 | 0 |
| ENSG0000( TRAJ2    | TR_J_gene chr14 | 22544071 | 22544136 + | 0 | 0 |
| ENSG0000( TRAJ1    | TR_J_gene chr14 | 22545037 | 22545098 + | 0 | 0 |
| ENSG0000( IGHA2    | IG_C_gene chr14 | 1.06E+08 | 1.06E+08 - | 0 | 0 |
| ENSG0000( IGHE     | IG_C_gene chr14 | 1.06E+08 | 1.06E+08 - | 0 | 0 |
| ENSG0000( IGHG4    | IG_C_gene chr14 | 1.06E+08 | 1.06E+08 - | 0 | 0 |
| ENSG0000( IGHG2    | IG_C_gene chr14 | 1.06E+08 | 1.06E+08 - | 0 | 0 |
| ENSG0000( IGHA1    | IG_C_gene chr14 | 1.06E+08 | 1.06E+08 - | 0 | 0 |
| ENSG0000( IGHG1    | IG_C_gene chr14 | 1.06E+08 | 1.06E+08 - | 0 | 0 |
| ENSG0000( IGHG3    | IG_C_gene chr14 | 1.06E+08 | 1.06E+08 - | 0 | 0 |
| ENSG0000( IGHD     | IG_C_gene chr14 | 1.06E+08 | 1.06E+08 - | 0 | 0 |
| ENSG0000( IGHM     | IG_C_gene chr14 | 1.06E+08 | 1.06E+08 - | 0 | 0 |
| ENSG0000( IGHJ6    | IG_J_gene chr14 | 1.06E+08 | 1.06E+08 - | 0 | 0 |
| ENSG0000( IGHJ2    | IG_J_gene chr14 | 1.06E+08 | 1.06E+08 - | 0 | 0 |
| ENSG0000( IGHJ1    | IG_J_gene chr14 | 1.06E+08 | 1.06E+08 - | 0 | 0 |
| ENSG0000( IGHD1-26 | IG_D_gene chr14 | 1.06E+08 | 1.06E+08 - | 0 | 0 |
| ENSG0000( IGHD5-24 | IG_D_gene chr14 | 1.06E+08 | 1.06E+08 - | 0 | 0 |
| ENSG0000( IGHD3-22 | IG_D_gene chr14 | 1.06E+08 | 1.06E+08 - | 0 | 0 |
| ENSG0000( IGHD2-21 | IG_D_gene chr14 | 1.06E+08 | 1.06E+08 - | 0 | 0 |
| ENSG0000( IGHD6-19 | IG_D_gene chr14 | 1.06E+08 | 1.06E+08 - | 0 | 0 |
| ENSG0000( IGHD5-18 | IG_D_gene chr14 | 1.06E+08 | 1.06E+08 - | 0 | 0 |
| ENSG0000( IGHD3-16 | IG_D_gene chr14 | 1.06E+08 | 1.06E+08 - | 0 | 0 |
| ENSG0000( IGHD2-15 | IG_D_gene chr14 | 1.06E+08 | 1.06E+08 - | 0 | 0 |
| ENSG0000( IGHD6-13 | IG_D_gene chr14 | 1.06E+08 | 1.06E+08 - | 0 | 0 |
| ENSG0000( IGHD5-12 | IG_D_gene chr14 | 1.06E+08 | 1.06E+08 - | 0 | 0 |
| ENSG0000( IGHD3-10 | IG_D_gene chr14 | 1.06E+08 | 1.06E+08 - | 0 | 0 |
| ENSG0000( IGHD3-9  | IG_D_gene chr14 | 1.06E+08 | 1.06E+08 - | 0 | 0 |
| ENSG0000( IGHD2-8  | IG_D_gene chr14 | 1.06E+08 | 1.06E+08 - | 0 | 0 |
| ENSG0000( IGHD5-5  | IG_D_gene chr14 | 1.06E+08 | 1.06E+08 - | 0 | 0 |
| ENSG0000( IGHD3-3  | IG_D_gene chr14 | 1.06E+08 | 1.06E+08 - | 0 | 0 |
| ENSG0000( IGHD2-2  | IG_D_gene chr14 | 1.06E+08 | 1.06E+08 - | 0 | 0 |
| ENSG0000( IGHV6-1  | IG_V_gene chr14 | 1.06E+08 | 1.06E+08 - | 0 | 0 |
| ENSG0000( IGHV1-2  | IG_V_gene chr14 | 1.06E+08 | 1.06E+08 - | 0 | 0 |
| ENSG0000( IGHV1-3  | IG_V_gene chr14 | 1.06E+08 | 1.06E+08 - | 0 | 0 |
| ENSG0000( IGHV2-5  | IG_V_gene chr14 | 1.06E+08 | 1.06E+08 - | 0 | 0 |
| ENSG0000( IGHV3-7  | IG_V_gene chr14 | 1.06E+08 | 1.06E+08 - | 0 | 0 |
| ENSG0000( IGHV3-11 | IG_V_gene chr14 | 1.06E+08 | 1.06E+08 - | 0 | 0 |

|                 |           |            |       |          |          |   |      |      |
|-----------------|-----------|------------|-------|----------|----------|---|------|------|
| ENSG00000108760 | IGHV3-13  | IG_V_gene  | chr14 | 1.06E+08 | 1.06E+08 | - | 0    | 0    |
| ENSG00000108761 | IGHV3-15  | IG_V_gene  | chr14 | 1.06E+08 | 1.06E+08 | - | 0    | 0    |
| ENSG00000108762 | IGHV3-16  | IG_V_gene  | chr14 | 1.06E+08 | 1.06E+08 | - | 0    | 0    |
| ENSG00000108763 | IGHV1-18  | IG_V_gene  | chr14 | 1.06E+08 | 1.06E+08 | - | 0    | 0    |
| ENSG00000108764 | IGHV3-20  | IG_V_gene  | chr14 | 1.06E+08 | 1.06E+08 | - | 0    | 0    |
| ENSG00000108765 | IGHV3-21  | IG_V_gene  | chr14 | 1.06E+08 | 1.06E+08 | - | 0    | 0    |
| ENSG00000108766 | IGHV3-23  | IG_V_gene  | chr14 | 1.06E+08 | 1.06E+08 | - | 0    | 0    |
| ENSG00000108767 | IGHV1-24  | IG_V_gene  | chr14 | 1.06E+08 | 1.06E+08 | - | 0    | 0    |
| ENSG00000108768 | IGHV2-26  | IG_V_gene  | chr14 | 1.06E+08 | 1.06E+08 | - | 0    | 0    |
| ENSG00000108769 | IGHV4-28  | IG_V_gene  | chr14 | 1.06E+08 | 1.06E+08 | - | 0    | 0    |
| ENSG00000108770 | IGHV3-33  | IG_V_gene  | chr14 | 1.06E+08 | 1.06E+08 | - | 0    | 0    |
| ENSG00000108771 | IGHV4-34  | IG_V_gene  | chr14 | 1.06E+08 | 1.06E+08 | - | 0    | 0    |
| ENSG00000108772 | IGHV3-35  | IG_V_gene  | chr14 | 1.06E+08 | 1.06E+08 | - | 0    | 0    |
| ENSG00000108773 | IGHV3-38  | IG_V_gene  | chr14 | 1.06E+08 | 1.06E+08 | - | 0    | 0    |
| ENSG00000108774 | IGHV4-39  | IG_V_gene  | chr14 | 1.06E+08 | 1.06E+08 | - | 0    | 0    |
| ENSG00000108775 | IGHV1-45  | IG_V_gene  | chr14 | 1.07E+08 | 1.07E+08 | - | 0    | 0    |
| ENSG00000108776 | IGHV1-46  | IG_V_gene  | chr14 | 1.07E+08 | 1.07E+08 | - | 0    | 0    |
| ENSG00000108777 | IGHV3-48  | IG_V_gene  | chr14 | 1.07E+08 | 1.07E+08 | - | 0    | 0    |
| ENSG00000108778 | IGHV3-49  | IG_V_gene  | chr14 | 1.07E+08 | 1.07E+08 | - | 0    | 0    |
| ENSG00000108779 | IGHV5-51  | IG_V_gene  | chr14 | 1.07E+08 | 1.07E+08 | - | 0    | 0    |
| ENSG00000108780 | IGHV3-53  | IG_V_gene  | chr14 | 1.07E+08 | 1.07E+08 | - | 0    | 0    |
| ENSG00000108781 | IGHV1-58  | IG_V_gene  | chr14 | 1.07E+08 | 1.07E+08 | - | 0    | 0    |
| ENSG00000108782 | IGHV4-61  | IG_V_gene  | chr14 | 1.07E+08 | 1.07E+08 | - | 0    | 0    |
| ENSG00000108783 | IGHV3-66  | IG_V_gene  | chr14 | 1.07E+08 | 1.07E+08 | - | 0    | 0    |
| ENSG00000108784 | IGHV1-69  | IG_V_gene  | chr14 | 1.07E+08 | 1.07E+08 | - | 0    | 0    |
| ENSG00000108785 | IGHV2-70D | IG_V_gene  | chr14 | 1.07E+08 | 1.07E+08 | - | 0    | 0    |
| ENSG00000108786 | IGHV3-73  | IG_V_gene  | chr14 | 1.07E+08 | 1.07E+08 | - | 0    | 0    |
| ENSG00000108787 | IGHV5-78  | IG_V_pseu  | chr14 | 1.07E+08 | 1.07E+08 | - | 0    | 0    |
| ENSG00000108788 | IGHV7-81  | IG_V_gene  | chr14 | 1.07E+08 | 1.07E+08 | - | 0    | 0    |
| ENSG00000108789 | MIR676    | miRNA      | chrX  | 70022857 | 70022923 | + | 0    | 0    |
| ENSG00000108790 | MIR708    | miRNA      | chr11 | 79402022 | 79402109 | - | 0    | 0    |
| ENSG00000108791 | MIR509-2  | miRNA      | chrX  | 1.47E+08 | 1.47E+08 | - | 0    | 0    |
| ENSG00000108792 | MIR509-3  | miRNA      | chrX  | 1.47E+08 | 1.47E+08 | - | 0    | 0    |
| ENSG00000108793 | MIR548U   | miRNA      | chr6  | 57390132 | 57390212 | + | 0    | 0    |
| ENSG00000108794 | MIR550A3  | miRNA      | chr7  | 29680734 | 29680828 | - | 0    | 0    |
| ENSG00000108795 | MIR374B   | miRNA      | chrX  | 74218547 | 74218618 | - | 0    | 0    |
| ENSG00000108796 | MIR548BA  | miRNA      | chr2  | 49059603 | 49059658 | + | 0    | 0    |
| ENSG00000108797 | MIR543    | miRNA      | chr14 | 1.01E+08 | 1.01E+08 | + | 0    | 0    |
| ENSG00000108798 | MIR320C2  | miRNA      | chr18 | 24321686 | 24321735 | + | 0    | 0    |
| ENSG00000108799 | MIR764    | miRNA      | chrX  | 1.15E+08 | 1.15E+08 | + | 0    | 0    |
| ENSG00000108800 | MIR301B   | miRNA      | chr22 | 21652981 | 21653058 | + | 0    | 0    |
| ENSG00000108801 | TSSK1B    | protein_co | chr5  | 1.13E+08 | 1.13E+08 | - | 0    | 0.05 |
| ENSG00000108802 | PRR22     | protein_co | chr19 | 5782960  | 5784765  | - | 0.36 | 0.37 |
| ENSG00000108803 | TAS2R19   | protein_co | chr12 | 11021619 | 11022620 | - | 0.49 | 0    |
| ENSG00000108804 | TAS2R15P  | processed  | chr12 | 10964425 | 10965352 | - | 0.07 | 0.66 |

|                    |            |       |          |          |   |      |      |
|--------------------|------------|-------|----------|----------|---|------|------|
| ENSG0000(TAS2R50   | protein_co | chr12 | 10985913 | 10986912 | - | 0    | 0    |
| ENSG0000(TAS2R14   | protein_co | chr12 | 10937406 | 11171573 | - | 0.27 | 0.47 |
| ENSG0000(TAS2R13   | protein_co | chr12 | 10907926 | 10909562 | - | 0.03 | 0.04 |
| ENSG0000(RNU6-1168 | snRNA      | chr2  | 88383494 | 88383597 | - | 0    | 0    |
| ENSG0000(SNORA40   | snoRNA     | chr20 | 31376319 | 31376446 | + | 0    | 0    |
| ENSG0000(SNORD67   | snoRNA     | chr11 | 46762389 | 46762499 | - | 0    | 17   |
| ENSG0000(RNU6-696F | snRNA      | chr21 | 37045530 | 37045636 | + | 0    | 0    |
| ENSG0000(RNA5SP37  | rRNA       | chr12 | 1.09E+08 | 1.09E+08 | + | 0    | 0    |
| ENSG0000(RNU6-132C | snRNA      | chr2  | 94846533 | 94846639 | - | 0    | 0    |
| ENSG0000(U8        | snoRNA     | chr1  | 2.35E+08 | 2.35E+08 | + | 0    | 0    |
| ENSG0000(U8        | snoRNA     | chr3  | 41899111 | 41899253 | - | 0    | 0    |
| ENSG0000(RNU6-910F | snRNA      | chr3  | 1.96E+08 | 1.96E+08 | - | 0    | 0    |
| ENSG0000(RNU6-110C | snRNA      | chr6  | 1.05E+08 | 1.05E+08 | - | 0    | 0    |
| ENSG0000(SNORA40   | snoRNA     | chr17 | 42940575 | 42940702 | - | 0    | 0    |
| ENSG0000(RNU1-82P  | snRNA      | chr7  | 1.42E+08 | 1.42E+08 | + | 0    | 0    |
| ENSG0000(RNA5SP37  | rRNA       | chr12 | 1.32E+08 | 1.32E+08 | + | 0    | 0    |
| ENSG0000(RNU6-576F | snRNA      | chr10 | 2199387  | 2199488  | + | 0    | 0    |
| ENSG0000(RNU6-131F | snRNA      | chr1  | 2.24E+08 | 2.24E+08 | - | 0    | 0    |
| ENSG0000(SNORD66   | snoRNA     | chr3  | 1.84E+08 | 1.84E+08 | + | 0    | 0    |
| ENSG0000(RNU6-205F | snRNA      | chr4  | 1.1E+08  | 1.1E+08  | + | 0    | 0    |
| ENSG0000(SNORD64   | snoRNA     | chr1  | 1.6E+08  | 1.6E+08  | - | 0    | 0    |
| ENSG0000(SNORD91A  | snoRNA     | chr17 | 2330180  | 2330370  | - | 0    | 0    |
| ENSG0000(U3        | snoRNA     | chr20 | 16982831 | 16983033 | - | 0    | 0    |
| ENSG0000(RNU6-763F | snRNA      | chr2  | 1.75E+08 | 1.75E+08 | + | 0    | 0    |
| ENSG0000(SNORD78   | snoRNA     | chr2  | 57544535 | 57544599 | + | 0    | 0    |
| ENSG0000(RNU1-77P  | snRNA      | chr15 | 82174224 | 82174385 | - | 0    | 0    |
| ENSG0000(RNA5SP86  | rRNA       | chr2  | 20401627 | 20401724 | - | 0    | 0    |
| ENSG0000(RNU1-149F | snRNA      | chr12 | 22195469 | 22195629 | - | 0    | 0    |
| ENSG0000(SNORA12   | snoRNA     | chr2  | 55565703 | 55565850 | + | 0    | 0    |
| ENSG0000(RNA5SP20  | rRNA       | chr6  | 41239520 | 41239626 | - | 0    | 0    |
| ENSG0000(SNORA48   | snoRNA     | chr2  | 1.48E+08 | 1.48E+08 | - | 0    | 0    |
| ENSG0000(U3        | snoRNA     | chr2  | 1.14E+08 | 1.14E+08 | - | 0    | 0    |
| ENSG0000(RNU6-440F | snRNA      | chr2  | 2.02E+08 | 2.02E+08 | + | 0    | 0    |
| ENSG0000(RNU6-258F | snRNA      | chr17 | 20126388 | 20126488 | - | 0    | 0    |
| ENSG0000(SNORA26   | snoRNA     | chr1  | 2.12E+08 | 2.12E+08 | + | 0    | 0    |
| ENSG0000(RNU6-328F | snRNA      | chr16 | 7004007  | 7004112  | - | 0    | 0    |
| ENSG0000(RNU6-298F | snRNA      | chr17 | 30861843 | 30861938 | + | 0    | 0    |
| ENSG0000(SNORD65   | snoRNA     | chr4  | 1.79E+08 | 1.79E+08 | - | 0    | 0    |
| ENSG0000(U3        | snoRNA     | chr17 | 58631641 | 58631836 | - | 0    | 0    |
| ENSG0000(RNU6-127F | snRNA      | chr2  | 1.31E+08 | 1.31E+08 | + | 0    | 0    |
| ENSG0000(RNA5SP91  | rRNA       | chr2  | 33285769 | 33285887 | - | 0    | 0    |
| ENSG0000(Y_RNA     | misc_RNA   | chr1  | 2.12E+08 | 2.12E+08 | + | 0    | 0    |
| ENSG0000(SNORA69   | snoRNA     | chr17 | 8329583  | 8329719  | + | 0    | 0    |
| ENSG0000(RNU6-132J | snRNA      | chrX  | 41570923 | 41571029 | - | 0    | 0    |
| ENSG0000(U3        | snoRNA     | chr3  | 60856389 | 60856605 | - | 0    | 0    |

|                     |          |       |          |          |   |   |   |
|---------------------|----------|-------|----------|----------|---|---|---|
| ENSG0000(SNORA48)   | snoRNA   | chrX  | 3532117  | 3532251  | - | 0 | 0 |
| ENSG0000(RNU6-913F) | snRNA    | chr5  | 61664145 | 61664239 | - | 0 | 0 |
| ENSG0000(RNU6-816F) | snRNA    | chr22 | 15701459 | 15701565 | + | 0 | 0 |
| ENSG0000(RNU6-604F) | snRNA    | chr7  | 1.52E+08 | 1.52E+08 | + | 0 | 0 |
| ENSG0000(RNU6-220F) | snRNA    | chr8  | 1.43E+08 | 1.43E+08 | + | 0 | 0 |
| ENSG0000(SNORA26)   | snoRNA   | chr20 | 41712479 | 41712600 | - | 0 | 0 |
| ENSG0000(RNU6-907F) | snRNA    | chr4  | 89130852 | 89130953 | + | 0 | 0 |
| ENSG0000(SNORA48)   | snoRNA   | chr16 | 11274113 | 11274236 | - | 0 | 0 |
| ENSG0000(SNORD65)   | snoRNA   | chr6  | 67210408 | 67210480 | - | 0 | 0 |
| ENSG0000(RNU6-747F) | snRNA    | chr1  | 2.43E+08 | 2.43E+08 | - | 0 | 0 |
| ENSG0000(SNORD17)   | snoRNA   | chr20 | 17962710 | 17962946 | - | 0 | 0 |
| ENSG0000(RNA5SP18)  | rRNA     | chr1  | 2.29E+08 | 2.29E+08 | - | 0 | 0 |
| ENSG0000(RNA5SP24)  | rRNA     | chr7  | 1.3E+08  | 1.3E+08  | + | 0 | 0 |
| ENSG0000(RNU6-930F) | snRNA    | chr6  | 28915645 | 28915744 | + | 0 | 0 |
| ENSG0000(Y_RNA)     | misc_RNA | chrX  | 1.15E+08 | 1.15E+08 | - | 0 | 0 |
| ENSG0000(RNA5SP21)  | rRNA     | chr6  | 1.37E+08 | 1.37E+08 | + | 0 | 0 |
| ENSG0000(RNU6-360F) | snRNA    | chr2  | 2.08E+08 | 2.08E+08 | - | 0 | 0 |
| ENSG0000(RNU6-278F) | snRNA    | chr20 | 13973316 | 13973424 | - | 0 | 0 |
| ENSG0000(RNU6-750F) | snRNA    | chr1  | 99978939 | 99979045 | + | 0 | 0 |
| ENSG0000(U8)        | snoRNA   | chr5  | 68873954 | 68874087 | + | 0 | 0 |
| ENSG0000(RNA5SP37)  | rRNA     | chr12 | 1.31E+08 | 1.31E+08 | - | 0 | 0 |
| ENSG0000(RNU6-117)  | snRNA    | chr1  | 65022968 | 65023074 | - | 0 | 0 |
| ENSG0000(RNA5SP17)  | rRNA     | chr5  | 7047227  | 7047336  | + | 0 | 0 |
| ENSG0000(RNU6-308F) | snRNA    | chr5  | 95521369 | 95521475 | + | 0 | 0 |
| ENSG0000(RNU6-724F) | snRNA    | chr5  | 69530613 | 69530717 | - | 0 | 0 |
| ENSG0000(SNORD65)   | snoRNA   | chr7  | 23396446 | 23396516 | + | 0 | 0 |
| ENSG0000(RNA5SP18)  | rRNA     | chr5  | 56260333 | 56260446 | - | 0 | 0 |
| ENSG0000(SNORA40)   | snoRNA   | chr1  | 1.18E+08 | 1.18E+08 | - | 0 | 0 |
| ENSG0000(RNU6-788F) | snRNA    | chr3  | 23641489 | 23641592 | - | 0 | 0 |
| ENSG0000(SNORD37)   | snoRNA   | chr14 | 25806648 | 25806712 | - | 0 | 0 |
| ENSG0000(SNORA40)   | snoRNA   | chr8  | 1.34E+08 | 1.34E+08 | - | 0 | 0 |
| ENSG0000(RNA5SP29)  | rRNA     | chr9  | 1.07E+08 | 1.07E+08 | - | 0 | 0 |
| ENSG0000(SNORD81)   | snoRNA   | chr5  | 18236123 | 18236196 | + | 0 | 0 |
| ENSG0000(SNORD77)   | snoRNA   | chr15 | 74490959 | 74491028 | - | 0 | 0 |
| ENSG0000(RNA5SP25)  | rRNA     | chr8  | 17748118 | 17748230 | + | 0 | 0 |
| ENSG0000(RNU6-578F) | snRNA    | chr4  | 12312588 | 12312690 | + | 0 | 0 |
| ENSG0000(SNORD89)   | snoRNA   | chr2  | 1.01E+08 | 1.01E+08 | - | 0 | 0 |
| ENSG0000(RNA5SP33)  | rRNA     | chr11 | 27521605 | 27521726 | - | 0 | 0 |
| ENSG0000(RNA5SP42)  | rRNA     | chr16 | 47450347 | 47450461 | - | 0 | 0 |
| ENSG0000(RNU6-239F) | snRNA    | chr1  | 1.54E+08 | 1.54E+08 | + | 0 | 0 |
| ENSG0000(SNORA16)   | snoRNA   | chr13 | 32420390 | 32420516 | - | 0 | 0 |
| ENSG0000(SNORD28)   | snoRNA   | chr6  | 1.56E+08 | 1.56E+08 | + | 0 | 0 |
| ENSG0000(SNORD72)   | snoRNA   | chr5  | 40832656 | 40832735 | - | 0 | 0 |
| ENSG0000(RNU6-821F) | snRNA    | chr3  | 1.98E+08 | 1.98E+08 | - | 0 | 0 |
| ENSG0000(RNU6-100)  | snRNA    | chr12 | 64204793 | 64204899 | + | 0 | 0 |

|                     |          |       |          |          |   |   |   |
|---------------------|----------|-------|----------|----------|---|---|---|
| ENSG0000(SNORD41)   | snoRNA   | chr14 | 22756761 | 22756829 | - | 0 | 0 |
| ENSG0000(RNU6-1154) | snRNA    | chr7  | 1.36E+08 | 1.36E+08 | - | 0 | 0 |
| ENSG0000(SNORD12)   | snoRNA   | chr20 | 49280683 | 49280772 | + | 0 | 0 |
| ENSG0000(RNU6-679F) | snRNA    | chr5  | 12297399 | 12297504 | - | 0 | 0 |
| ENSG0000(Y_RNA)     | misc_RNA | chr15 | 1.01E+08 | 1.01E+08 | + | 0 | 0 |
| ENSG0000(RNA5SP23)  | rRNA     | chr1  | 78375164 | 78375268 | - | 0 | 0 |
| ENSG0000(SNORD70)   | snoRNA   | chr2  | 2.02E+08 | 2.02E+08 | + | 0 | 0 |
| ENSG0000(RNA5SP10)  | rRNA     | chr2  | 1.62E+08 | 1.62E+08 | + | 0 | 0 |
| ENSG0000(RNU6-1307) | snRNA    | chr19 | 54263951 | 54264053 | - | 0 | 0 |
| ENSG0000(RNU6-1228) | snRNA    | chr9  | 75198071 | 75198177 | + | 0 | 0 |
| ENSG0000(Y_RNA)     | misc_RNA | chr3  | 1.02E+08 | 1.02E+08 | - | 0 | 0 |
| ENSG0000(U3)        | snoRNA   | chrX  | 1.23E+08 | 1.23E+08 | + | 0 | 0 |
| ENSG0000(RNU6-129F) | snRNA    | chr10 | 83764358 | 83764464 | + | 0 | 0 |
| ENSG0000(Y_RNA)     | misc_RNA | chr10 | 1E+08    | 1E+08    | - | 0 | 0 |
| ENSG0000(RNU6-882F) | snRNA    | chr3  | 9919051  | 9919153  | - | 0 | 0 |
| ENSG0000(RNU6-316F) | snRNA    | chr18 | 14190700 | 14190806 | + | 0 | 0 |
| ENSG0000(RNU6-244F) | snRNA    | chr14 | 1.03E+08 | 1.03E+08 | + | 0 | 0 |
| ENSG0000(RNA5SP29)  | rRNA     | chr10 | 154831   | 154943   | - | 0 | 0 |
| ENSG0000(RNU6-780F) | snRNA    | chr10 | 86488446 | 86488549 | + | 0 | 0 |
| ENSG0000(RNA5SP21)  | rRNA     | chr6  | 1.14E+08 | 1.14E+08 | - | 0 | 0 |
| ENSG0000(Y_RNA)     | misc_RNA | chr14 | 22852616 | 22852728 | - | 0 | 0 |
| ENSG0000(RNA5SP21)  | rRNA     | chr6  | 81622200 | 81622319 | + | 0 | 0 |
| ENSG0000(SNORA67)   | snoRNA   | chr1  | 1.79E+08 | 1.79E+08 | + | 0 | 0 |
| ENSG0000(RNU6-739F) | snRNA    | chr3  | 64511755 | 64511857 | + | 0 | 0 |
| ENSG0000(SNORA12)   | snoRNA   | chr8  | 1.3E+08  | 1.3E+08  | + | 0 | 0 |
| ENSG0000(RNU6-823F) | snRNA    | chr3  | 1.28E+08 | 1.28E+08 | - | 0 | 0 |
| ENSG0000(RNU6-700F) | snRNA    | chr12 | 9624122  | 9624228  | - | 0 | 0 |
| ENSG0000(SNORD77)   | snoRNA   | chrX  | 45892912 | 45892979 | - | 0 | 0 |
| ENSG0000(RNU6-130)  | snRNA    | chr8  | 74048677 | 74048784 | + | 0 | 0 |
| ENSG0000(RNU6-1242) | snRNA    | chr18 | 39678520 | 39678622 | - | 0 | 0 |
| ENSG0000(RNU6-837F) | snRNA    | chr12 | 17071398 | 17071505 | - | 0 | 0 |
| ENSG0000(RNU6-550F) | snRNA    | chr4  | 1.21E+08 | 1.21E+08 | + | 0 | 0 |
| ENSG0000(RNU6-117)  | snRNA    | chr1  | 61852499 | 61852602 | + | 0 | 0 |
| ENSG0000(SNORA40)   | snoRNA   | chr5  | 74882656 | 74882783 | - | 0 | 0 |
| ENSG0000(RNA5SP33)  | rRNA     | chr11 | 14134986 | 14135100 | + | 0 | 0 |
| ENSG0000(RNU6-124)  | snRNA    | chr1  | 72717663 | 72717769 | - | 0 | 0 |
| ENSG0000(RNU6-100)  | snRNA    | chr4  | 76356610 | 76356715 | - | 0 | 0 |
| ENSG0000(RNU6-482F) | snRNA    | chr5  | 1.13E+08 | 1.13E+08 | + | 0 | 0 |
| ENSG0000(SNORA46)   | snoRNA   | chr14 | 77466284 | 77466436 | + | 0 | 0 |
| ENSG0000(RNA5SP17)  | rRNA     | chr4  | 1.67E+08 | 1.67E+08 | - | 0 | 0 |
| ENSG0000(RNU6-401F) | snRNA    | chr15 | 83717427 | 83717522 | + | 0 | 0 |
| ENSG0000(SNORD37)   | snoRNA   | chr13 | 72453902 | 72453967 | - | 0 | 0 |
| ENSG0000(SNORD78)   | snoRNA   | chr2  | 72760534 | 72760602 | + | 0 | 0 |
| ENSG0000(RNU6-269F) | snRNA    | chr16 | 58378052 | 58378148 | - | 0 | 0 |
| ENSG0000(SNORD115)  | snoRNA   | chr15 | 25264510 | 25264590 | + | 0 | 0 |



|                            |       |          |          |   |   |      |
|----------------------------|-------|----------|----------|---|---|------|
| ENSG0000(RNU6-159F) snRNA  | chr16 | 27863251 | 27863356 | + | 0 | 0    |
| ENSG0000(SNORA48) snoRNA   | chr12 | 56861375 | 56861508 | + | 0 | 0    |
| ENSG0000(SNORD113) snoRNA  | chr14 | 1.01E+08 | 1.01E+08 | + | 0 | 0    |
| ENSG0000(RNU6-817F) snRNA  | chr1  | 1.16E+08 | 1.16E+08 | - | 0 | 0    |
| ENSG0000(RNU6-105F) snRNA  | chr4  | 1.87E+08 | 1.87E+08 | + | 0 | 0    |
| ENSG0000(RNU6-796F) snRNA  | chr15 | 84939617 | 84939723 | - | 0 | 0    |
| ENSG0000(RNU6-127F) snRNA  | chr2  | 1.48E+08 | 1.48E+08 | + | 0 | 0    |
| ENSG0000(SNORA48) snoRNA   | chr2  | 2.27E+08 | 2.27E+08 | - | 0 | 0    |
| ENSG0000(Y_RNA) misc_RNA   | chr3  | 57493667 | 57493780 | + | 0 | 0    |
| ENSG0000(SNORA67) snoRNA   | chr9  | 1.32E+08 | 1.32E+08 | - | 0 | 0    |
| ENSG0000(RNA5SP32) rRNA    | chr10 | 93510548 | 93510680 | - | 0 | 0    |
| ENSG0000(snosnR66) snoRNA  | chr11 | 1.13E+08 | 1.13E+08 | - | 0 | 0    |
| ENSG0000(RNU6-124F) snRNA  | chr1  | 2.24E+08 | 2.24E+08 | + | 0 | 0    |
| ENSG0000(SNORA74B) snoRNA  | chr5  | 1.73E+08 | 1.73E+08 | + | 0 | 0    |
| ENSG0000(Y_RNA) misc_RNA   | chr2  | 1.83E+08 | 1.83E+08 | + | 0 | 0    |
| ENSG0000(RNU6-663F) snRNA  | chr8  | 32911493 | 32911598 | - | 0 | 0    |
| ENSG0000(RNY4P18) misc_RNA | chr9  | 1.11E+08 | 1.11E+08 | - | 0 | 0    |
| ENSG0000(RNU6-932F) snRNA  | chr2  | 1.58E+08 | 1.58E+08 | - | 0 | 0    |
| ENSG0000(SNORD115) snoRNA  | chr10 | 29575306 | 29575381 | + | 0 | 0    |
| ENSG0000(RNU11-3P) snRNA   | chr10 | 1.03E+08 | 1.03E+08 | - | 0 | 0    |
| ENSG0000(SNORD77) snoRNA   | chr8  | 1E+08    | 1E+08    | + | 0 | 0    |
| ENSG0000(SNORD77) snoRNA   | chr15 | 32970727 | 32970791 | + | 0 | 0    |
| ENSG0000(RNY4P36) misc_RNA | chr17 | 76703632 | 76703727 | - | 0 | 0    |
| ENSG0000(RNU6-111F) snRNA  | chr15 | 89886485 | 89886591 | - | 0 | 0    |
| ENSG0000(SNORA26) snoRNA   | chr9  | 87260450 | 87260585 | + | 0 | 0    |
| ENSG0000(U3) snoRNA        | chr7  | 10222797 | 10223011 | + | 0 | 0    |
| ENSG0000(RNU1-119F) snRNA  | chr15 | 44884616 | 44884780 | + | 0 | 0    |
| ENSG0000(RNA5SP10) rRNA    | chr2  | 1.38E+08 | 1.38E+08 | - | 0 | 0    |
| ENSG0000(SNORD115) snoRNA  | chr15 | 25159221 | 25159279 | + | 0 | 0    |
| ENSG0000(RNU11-6P) snRNA   | chr8  | 80749561 | 80749693 | - | 0 | 0    |
| ENSG0000(SNORA75) snoRNA   | chr12 | 9445058  | 9445205  | + | 0 | 0    |
| ENSG0000(RNA5SP25) rRNA    | chr8  | 10686569 | 10686687 | + | 0 | 0    |
| ENSG0000(U3) snoRNA        | chrX  | 69692956 | 69693155 | + | 0 | 0    |
| ENSG0000(SNORA75) snoRNA   | chr12 | 9286673  | 9286822  | - | 0 | 0    |
| ENSG0000(RNU6-126F) snRNA  | chr9  | 40233923 | 40234029 | + | 0 | 0    |
| ENSG0000(RNU6-243F) snRNA  | chr3  | 35256840 | 35256946 | - | 0 | 0    |
| ENSG0000(SNORA53) snoRNA   | chr12 | 98599635 | 98599883 | + | 0 | 1.77 |
| ENSG0000(SNORA48) snoRNA   | chr16 | 68189287 | 68189421 | + | 0 | 5.02 |
| ENSG0000(RNU6-131F) snRNA  | chr17 | 44135883 | 44135989 | - | 0 | 0    |
| ENSG0000(SNORD90) snoRNA   | chr9  | 1.23E+08 | 1.23E+08 | - | 0 | 0    |
| ENSG0000(Y_RNA) misc_RNA   | chr12 | 95617689 | 95617786 | + | 0 | 0    |
| ENSG0000(RNU6-241F) snRNA  | chr7  | 45789585 | 45789688 | + | 0 | 0    |
| ENSG0000(RNU11-4P) snRNA   | chr8  | 1.27E+08 | 1.27E+08 | + | 0 | 0    |
| ENSG0000(SNORD69) snoRNA   | chr3  | 52692736 | 52692812 | + | 0 | 0    |
| ENSG0000(RNA5SP28) rRNA    | chr9  | 73750972 | 73751077 | - | 0 | 0    |

|                     |          |       |          |          |   |   |   |
|---------------------|----------|-------|----------|----------|---|---|---|
| ENSG0000(SNORA40)   | snoRNA   | chr2  | 18040606 | 18040733 | - | 0 | 0 |
| ENSG0000(RNU6-644F) | snRNA    | chr5  | 1.16E+08 | 1.16E+08 | - | 0 | 0 |
| ENSG0000(SNORA48)   | snoRNA   | chr4  | 1118884  | 1119013  | + | 0 | 0 |
| ENSG0000(RNU6-695F) | snRNA    | chr1  | 90253456 | 90253559 | - | 0 | 0 |
| ENSG0000(RNU6-460F) | snRNA    | chr5  | 1.38E+08 | 1.38E+08 | + | 0 | 0 |
| ENSG0000(SNORA17)   | snoRNA   | chr12 | 71639355 | 71639483 | + | 0 | 0 |
| ENSG0000(SNORA12)   | snoRNA   | chr10 | 1E+08    | 1E+08    | - | 0 | 0 |
| ENSG0000(RNU6-952F) | snRNA    | chr11 | 1.02E+08 | 1.02E+08 | + | 0 | 0 |
| ENSG0000(RNU6-754F) | snRNA    | chr6  | 46018745 | 46018851 | + | 0 | 0 |
| ENSG0000(RNU6-115E) | snRNA    | chr17 | 56871170 | 56871276 | + | 0 | 0 |
| ENSG0000(RNU1-101F) | snRNA    | chr8  | 70077906 | 70078032 | - | 0 | 0 |
| ENSG0000(RNU6-400F) | snRNA    | chr12 | 33576095 | 33576200 | + | 0 | 0 |
| ENSG0000(U3)        | snoRNA   | chr21 | 29180425 | 29180639 | - | 0 | 0 |
| ENSG0000(RNU6-530F) | snRNA    | chr7  | 79343266 | 79343372 | - | 0 | 0 |
| ENSG0000(RNU6-119G) | snRNA    | chr8  | 74079537 | 74079643 | + | 0 | 0 |
| ENSG0000(RNU6-110G) | snRNA    | chr3  | 1.9E+08  | 1.9E+08  | - | 0 | 0 |
| ENSG0000(SNORA26)   | snoRNA   | chr4  | 52748137 | 52748259 | + | 0 | 0 |
| ENSG0000(SNORD19)   | snoRNA   | chr3  | 52689248 | 52689315 | + | 0 | 0 |
| ENSG0000(RNU6-332F) | snRNA    | chrX  | 94003815 | 94003922 | - | 0 | 0 |
| ENSG0000(RNU6-109G) | snRNA    | chr12 | 50256238 | 50256344 | - | 0 | 0 |
| ENSG0000(RNA5SP46)  | rRNA     | chr19 | 12027913 | 12028021 | - | 0 | 0 |
| ENSG0000(SNORD86)   | snoRNA   | chr20 | 2656097  | 2656182  | + | 0 | 0 |
| ENSG0000(RNA5SP30)  | rRNA     | chr10 | 12924679 | 12924785 | - | 0 | 0 |
| ENSG0000(RNA5SP29)  | rRNA     | chr10 | 8656716  | 8656831  | - | 0 | 0 |
| ENSG0000(RNU6-972F) | snRNA    | chrX  | 1.37E+08 | 1.37E+08 | + | 0 | 0 |
| ENSG0000(U3)        | snoRNA   | chr15 | 36852640 | 36852859 | + | 0 | 0 |
| ENSG0000(Y_RNA)     | misc_RNA | chr1  | 2.02E+08 | 2.02E+08 | + | 0 | 0 |
| ENSG0000(RNU6-126E) | snRNA    | chr14 | 19422815 | 19422921 | - | 0 | 0 |
| ENSG0000(SNORA26)   | snoRNA   | chr20 | 5121417  | 5121539  | - | 0 | 0 |
| ENSG0000(RNU11-5P)  | snRNA    | chr14 | 29476784 | 29476912 | + | 0 | 0 |
| ENSG0000(RNU6-125C) | snRNA    | chr10 | 67808502 | 67808608 | + | 0 | 0 |
| ENSG0000(RNU6-918F) | snRNA    | chr9  | 98032230 | 98032335 | + | 0 | 0 |
| ENSG0000(RNA5SP21)  | rRNA     | chr6  | 1.08E+08 | 1.08E+08 | + | 0 | 0 |
| ENSG0000(RNU6-466F) | snRNA    | chr15 | 30956248 | 30956350 | - | 0 | 0 |
| ENSG0000(RNA5SP63)  | rRNA     | chr1  | 1.64E+08 | 1.64E+08 | + | 0 | 0 |
| ENSG0000(SNORD115)  | snoRNA   | chr15 | 25268466 | 25268551 | + | 0 | 0 |
| ENSG0000(SNORA57)   | snoRNA   | chr5  | 1.72E+08 | 1.72E+08 | - | 0 | 0 |
| ENSG0000(SNORD66)   | snoRNA   | chr6  | 51464690 | 51464765 | + | 0 | 0 |
| ENSG0000(SNORA75)   | snoRNA   | chr12 | 31076867 | 31077016 | - | 0 | 0 |
| ENSG0000(SNORD70)   | snoRNA   | chr2  | 2.02E+08 | 2.02E+08 | + | 0 | 0 |
| ENSG0000(RNU6-808F) | snRNA    | chr12 | 95290692 | 95290799 | + | 0 | 0 |
| ENSG0000(RNA5SP47)  | rRNA     | chr20 | 5098387  | 5098476  | - | 0 | 0 |
| ENSG0000(U3)        | snoRNA   | chr1  | 1.64E+08 | 1.64E+08 | + | 0 | 0 |
| ENSG0000(U3)        | snoRNA   | chr18 | 56957270 | 56957469 | + | 0 | 0 |
| ENSG0000(RNU6-510F) | snRNA    | chr1  | 37991462 | 37991569 | + | 0 | 0 |

|                           |       |          |          |   |   |      |
|---------------------------|-------|----------|----------|---|---|------|
| ENSG0000(RNA5SP49) rRNA   | chr22 | 31305404 | 31305512 | + | 0 | 0    |
| ENSG0000(RNU6-337F) snRNA | chr7  | 79030240 | 79030345 | + | 0 | 0    |
| ENSG0000(RNU6-995F) snRNA | chrX  | 80936434 | 80936540 | + | 0 | 0    |
| ENSG0000(RNA5SP35) rRNA   | chr12 | 26373598 | 26373733 | - | 0 | 0    |
| ENSG0000(RNU1-78P) snRNA  | chr15 | 45002864 | 45003028 | - | 0 | 0    |
| ENSG0000(U3) snoRNA       | chr11 | 32081764 | 32081973 | + | 0 | 0    |
| ENSG0000(SNORD116) snoRNA | chr13 | 39857135 | 39857227 | - | 0 | 0    |
| ENSG0000(RNU6-192F) snRNA | chr20 | 17903762 | 17903861 | + | 0 | 0    |
| ENSG0000(Y_RNA) misc_RNA  | chr3  | 1.27E+08 | 1.27E+08 | - | 0 | 0    |
| ENSG0000(SNORA26) snoRNA  | chr2  | 10090205 | 10090319 | - | 0 | 0    |
| ENSG0000(RNA5SP35) rRNA   | chr13 | 94025470 | 94025598 | - | 0 | 0    |
| ENSG0000(RNU6-630F) snRNA | chrX  | 42139425 | 42139530 | - | 0 | 0    |
| ENSG0000(RNU6-381F) snRNA | chr5  | 44066624 | 44066731 | - | 0 | 0    |
| ENSG0000(RNU6-132G) snRNA | chr21 | 15614283 | 15614389 | + | 0 | 0    |
| ENSG0000(SNORA68) snoRNA  | chr17 | 48880840 | 48880967 | + | 0 | 0    |
| ENSG0000(SNORA57) snoRNA  | chr5  | 40790077 | 40790204 | - | 0 | 0    |
| ENSG0000(RNU6-125G) snRNA | chr7  | 66891188 | 66891291 | + | 0 | 0    |
| ENSG0000(Y_RNA) misc_RNA  | chr22 | 50669804 | 50669901 | + | 0 | 0    |
| ENSG0000(RNA5SP48) rRNA   | chr20 | 32050588 | 32050705 | + | 0 | 0    |
| ENSG0000(RNU6-903F) snRNA | chr18 | 9617964  | 9618072  | - | 0 | 0    |
| ENSG0000(RNA5SP46) rRNA   | chr19 | 12106497 | 12106614 | + | 0 | 0    |
| ENSG0000(SNORA40) snoRNA  | chr6  | 35651818 | 35651945 | + | 0 | 0    |
| ENSG0000(SNORA75) snoRNA  | chr2  | 49888868 | 49888986 | - | 0 | 0    |
| ENSG0000(U8) snoRNA       | chr2  | 1.86E+08 | 1.86E+08 | + | 0 | 0    |
| ENSG0000(RNU6-587F) snRNA | chrX  | 1.02E+08 | 1.02E+08 | + | 0 | 0    |
| ENSG0000(SNORA8) snoRNA   | chr6  | 38822307 | 38822404 | - | 0 | 0    |
| ENSG0000(SNORA40) snoRNA  | chr6  | 1.11E+08 | 1.11E+08 | + | 0 | 0    |
| ENSG0000(SNORA26) snoRNA  | chr4  | 52713249 | 52713370 | + | 0 | 0    |
| ENSG0000(SNORA17) snoRNA  | chr10 | 1.14E+08 | 1.14E+08 | + | 0 | 0    |
| ENSG0000(SNORA26) snoRNA  | chr7  | 1.53E+08 | 1.53E+08 | + | 0 | 0    |
| ENSG0000(SNORA75) snoRNA  | chr16 | 23441841 | 23441921 | + | 0 | 0    |
| ENSG0000(U8) snoRNA       | chr12 | 1.04E+08 | 1.04E+08 | + | 0 | 0    |
| ENSG0000(5S_rRNA) rRNA    | chrX  | 1.51E+08 | 1.51E+08 | - | 0 | 0    |
| ENSG0000(RNU6-876F) snRNA | chr11 | 1.29E+08 | 1.29E+08 | - | 0 | 0    |
| ENSG0000(U3) snoRNA       | chr3  | 90030284 | 90030495 | + | 0 | 0    |
| ENSG0000(RNU6-279F) snRNA | chr12 | 59369051 | 59369151 | - | 0 | 0    |
| ENSG0000(RNA5SP53) rRNA   | chr1  | 93488333 | 93488452 | - | 0 | 0    |
| ENSG0000(SNORA48) snoRNA  | chr15 | 26008940 | 26009074 | - | 0 | 0    |
| ENSG0000(RNU1-56P) snRNA  | chrX  | 71020275 | 71020438 | - | 0 | 0    |
| ENSG0000(SNORA3B) snoRNA  | chr11 | 8685439  | 8685569  | + | 0 | 5.91 |
| ENSG0000(SNORA26) snoRNA  | chr3  | 53387713 | 53387836 | - | 0 | 0    |
| ENSG0000(RNU1-139F) snRNA | chr21 | 19345148 | 19345312 | + | 0 | 0    |
| ENSG0000(U3) snoRNA       | chr1  | 2.19E+08 | 2.19E+08 | - | 0 | 0    |
| ENSG0000(SNORD30) snoRNA  | chrX  | 1.14E+08 | 1.14E+08 | + | 0 | 0    |
| ENSG0000(RNU6-123G) snRNA | chr14 | 18978847 | 18978953 | + | 0 | 0    |

|                      |            |       |          |          |   |         |         |
|----------------------|------------|-------|----------|----------|---|---------|---------|
| ENSG0000(SNORD58)    | snoRNA     | chr14 | 45088243 | 45088308 | + | 0       | 0       |
| ENSG0000(snoMBII-2C) | snoRNA     | chr17 | 18943999 | 18944073 | + | 0       | 0       |
| ENSG0000(SNORA75)    | snoRNA     | chr4  | 79843102 | 79843228 | + | 0       | 0       |
| ENSG0000(RNU6-493F)  | snRNA      | chrX  | 80900757 | 80900864 | + | 0       | 0       |
| ENSG0000(SNORA26)    | snoRNA     | chr1  | 51724775 | 51724896 | - | 0       | 0       |
| ENSG0000(RNA5SP39)   | rRNA       | chr15 | 60736769 | 60736886 | + | 0       | 0       |
| ENSG0000(SNORA48)    | snoRNA     | chr18 | 7301020  | 7301153  | - | 0       | 0       |
| ENSG0000(RNA5SP24)   | rRNA       | chr7  | 1.21E+08 | 1.21E+08 | - | 0       | 0       |
| ENSG0000(ZRSR1)      | protein_co | chr5  | 1.13E+08 | 1.13E+08 | + | 0       | 0       |
| ENSG0000(KRTAP16-1)  | protein_co | chr17 | 41307700 | 41309253 | - | 0       | 0       |
| ENSG0000(KRTAP29-1)  | protein_co | chr17 | 41301826 | 41302851 | - | 0       | 0       |
| ENSG0000(KRTAP9-6)   | protein_co | chr17 | 41265339 | 41266641 | + | 0       | 0       |
| ENSG0000(RP1-122K4)  | lincRNA    | chrX  | 13980066 | 13988820 | - | 3.52    | 4.44    |
| ENSG0000(RP11-592N)  | processed  | chr15 | 71341158 | 71341712 | - | 0.16    | 0       |
| ENSG0000(LINC01089)  | lincRNA    | chr12 | 1.22E+08 | 1.22E+08 | - | 9.22    | 11.09   |
| ENSG0000(RP11-134K)  | processed  | chr9  | 8713311  | 8713841  | + | 0       | 0       |
| ENSG0000(CTAGE1)     | protein_co | chr18 | 22413601 | 22417915 | - | 0.04    | 0.03    |
| ENSG0000(AP002414)   | processed  | chr18 | 12056676 | 12057822 | - | 0       | 0       |
| ENSG0000(DEFB117)    | processed  | chr20 | 31360790 | 31360930 | + | 0       | 0       |
| ENSG0000(C17orf51)   | protein_co | chr17 | 21524790 | 21574458 | - | 3.52    | 5.5     |
| ENSG0000(KRTAP4-11)  | protein_co | chr17 | 41117181 | 41118360 | - | 0       | 0       |
| ENSG0000(KRTAP4-9)   | protein_co | chr17 | 41105332 | 41106488 | + | 0       | 0       |
| ENSG0000(KRTAP2-3)   | protein_co | chr17 | 41059240 | 41060114 | - | 0.21    | 0       |
| ENSG0000(KRTAP2-1)   | protein_co | chr17 | 41046541 | 41047316 | - | 0.24    | 0       |
| ENSG0000(RP11-563J)  | lincRNA    | chr10 | 6350316  | 6352762  | + | 0       | 0       |
| ENSG0000(FAM127C)    | protein_co | chrX  | 1.35E+08 | 1.35E+08 | - | 10.4    | 10.11   |
| ENSG0000(EWSAT1)     | lincRNA    | chr15 | 69072926 | 69095820 | + | 0       | 0       |
| ENSG0000(HMGN2P8)    | processed  | chr10 | 84081429 | 84081995 | + | 0       | 0       |
| ENSG0000(ST13P5)     | processed  | chr11 | 18261982 | 18263091 | + | 0       | 0       |
| ENSG0000(RPL15P3)    | processed  | chr6  | 12514110 | 12514724 | + | 0.57    | 0.2     |
| ENSG0000(OR2A42)     | protein_co | chr7  | 1.44E+08 | 1.44E+08 | - | 0.03    | 0       |
| ENSG0000(RPS26P3)    | processed  | chr9  | 9090898  | 9091245  | + | 0       | 0       |
| ENSG0000(TTTY2)      | lincRNA    | chrY  | 9740584  | 9758476  | + | 0       | 0       |
| ENSG0000(TTTY2B)     | lincRNA    | chrY  | 6406244  | 6424145  | - | 0       | 0       |
| ENSG0000(RNF208)     | protein_co | chr9  | 1.37E+08 | 1.37E+08 | - | 2.62    | 2.58    |
| ENSG0000(KRTAP3-3)   | protein_co | chr17 | 40993430 | 40994133 | - | 0       | 0       |
| ENSG0000(KRTAP3-2)   | protein_co | chr17 | 40999193 | 40999894 | - | 0       | 0       |
| ENSG0000(KRTAP3-1)   | protein_co | chr17 | 41008521 | 41019324 | - | 0       | 0       |
| ENSG0000(MT-ND4L)    | protein_co | chrM  | 10470    | 10766    | + | 2450.42 | 2376.47 |
| ENSG0000(MAP10)      | protein_co | chr1  | 2.33E+08 | 2.33E+08 | + | 0.06    | 0.24    |
| ENSG0000(RP11-414H)  | lincRNA    | chr5  | 91223419 | 91223967 | + | 0       | 0       |
| ENSG0000(RPL23AP4)   | processed  | chr21 | 46690764 | 46691226 | + | 0       | 0       |
| ENSG0000(KRTAP12-4)  | protein_co | chr21 | 44654213 | 44654659 | - | 0       | 0       |
| ENSG0000(KRTAP10-3)  | protein_co | chr21 | 44557790 | 44558760 | - | 0       | 0       |
| ENSG0000(KRTAP6-3)   | protein_co | chr21 | 30592440 | 30593075 | + | 0       | 0       |

|                                     |          |          |   |       |       |
|-------------------------------------|----------|----------|---|-------|-------|
| ENSG0000(RP1-29C18 lincRNA chr22    | 49548681 | 49556473 | + | 0     | 0     |
| ENSG0000(RP11-211N unprocessε chr9  | 62532397 | 62532853 | - | 0     | 0     |
| ENSG0000(RP11-475L2 processed_ chr9 | 42568865 | 42569315 | + | 0     | 0     |
| ENSG0000(HNRNPA1P processed_ chr11  | 74354443 | 74355720 | + | 0     | 0.13  |
| ENSG0000(AC016747. processed_ chr2  | 61141592 | 61144969 | - | 6.38  | 6.71  |
| ENSG0000(RP11-351E processed_ chr8  | 72429620 | 72430112 | + | 0     | 0     |
| ENSG0000(POU5F1B protein_co chr8    | 1.27E+08 | 1.27E+08 | + | 0.08  | 0.09  |
| ENSG0000(RPS26P6 processed_ chr8    | 1.01E+08 | 1.01E+08 | + | 0.16  | 0     |
| ENSG0000(BTF3P12 processed_ chr8    | 70273369 | 70273837 | + | 0     | 0.54  |
| ENSG0000(PTTG3P processed_ chr8     | 66767400 | 66768005 | - | 0     | 0     |
| ENSG0000(RPS15AP3ε processed_ chr19 | 58216180 | 58216561 | + | 0     | 0.25  |
| ENSG0000(VN2R17P processed_ chr19   | 56317177 | 56318008 | - | 0     | 0     |
| ENSG0000(ZNF580 protein_co chr19    | 55635016 | 55643469 | + | 13.13 | 16.66 |
| ENSG0000(AC008746. unprocessε chr19 | 54521723 | 54522031 | + | 0     | 0     |
| ENSG0000(AL590762. processed_ chrX  | 71420083 | 71420514 | - | 0     | 0     |
| ENSG0000(ZNF611 protein_co chr19    | 52702813 | 52735073 | - | 1.84  | 2.54  |
| ENSG0000(KLK9 protein_co chr19      | 51003111 | 51009634 | - | 0     | 0     |
| ENSG0000(SYT3 protein_co chr19      | 50621307 | 50639827 | - | 0.55  | 0.7   |
| ENSG0000(NUP62 protein_co chr19     | 49906825 | 49929763 | - | 14.44 | 13.33 |
| ENSG0000(COX20P1 processed_ chr10   | 68632371 | 68632727 | + | 0     | 0     |
| ENSG0000(CFL1P4 processed_ chr1     | 2.42E+08 | 2.42E+08 | + | 0     | 0     |
| ENSG0000(RP11-108F processed_ chr1  | 2.3E+08  | 2.3E+08  | - | 0     | 0     |
| ENSG0000(SPHAR protein_co chr1      | 2.29E+08 | 2.29E+08 | + | 0     | 0     |
| ENSG0000(CGB8 protein_co chr19      | 49047638 | 49049106 | - | 0     | 0.16  |
| ENSG0000(NDUFA3P3 processed_ chr1   | 2.26E+08 | 2.26E+08 | + | 0     | 0     |
| ENSG0000(AURKAPS1 transcribec chr1  | 2.2E+08  | 2.2E+08  | - | 0.15  | 0.21  |
| ENSG0000(RPL23AP8C processed_ chr19 | 47794467 | 47794890 | - | 0     | 0     |
| ENSG0000(RP11-365D processed_ chr1  | 2.14E+08 | 2.14E+08 | - | 0     | 0     |
| ENSG0000(RP11-383G processed_ chr1  | 2.05E+08 | 2.05E+08 | + | 0     | 0     |
| ENSG0000(RP11-532L. processed_ chr1 | 2E+08    | 2E+08    | + | 0     | 0     |
| ENSG0000(EEF1A1P32 unprocessε chr1  | 1.98E+08 | 1.98E+08 | + | 0     | 0     |
| ENSG0000(DENND1B protein_co chr1    | 1.98E+08 | 1.98E+08 | - | 2.07  | 1.85  |
| ENSG0000(OR5S1P unitary_psι chr2    | 2.4E+08  | 2.4E+08  | + | 0     | 0     |
| ENSG0000(HNRNPA1P processed_ chr12  | 9027532  | 9029089  | - | 0     | 0     |
| ENSG0000(TPM3P1 processed_ chr7     | 1.17E+08 | 1.17E+08 | - | 0     | 0     |
| ENSG0000(RPL5P5 processed_ chr1     | 1.85E+08 | 1.85E+08 | - | 0     | 0     |
| ENSG0000(EEF1B2P7 processed_ chr2   | 2.33E+08 | 2.33E+08 | - | 0     | 0     |
| ENSG0000(C1orf220 lincRNA chr1      | 1.79E+08 | 1.79E+08 | + | 0.42  | 0.46  |
| ENSG0000(RP4-765C7 processed_ chr1  | 1.78E+08 | 1.78E+08 | + | 0     | 0     |
| ENSG0000(RP4-612B1 processed_ chr1  | 1.72E+08 | 1.72E+08 | + | 0     | 0     |
| ENSG0000(PFN1P11 processed_ chr10   | 1.03E+08 | 1.03E+08 | - | 0     | 0     |
| ENSG0000(RP1-206D1 lincRNA chr1     | 1.69E+08 | 1.69E+08 | + | 0.48  | 0.37  |
| ENSG0000(RPL29P7 processed_ chr1    | 1.69E+08 | 1.69E+08 | + | 0.17  | 0     |
| ENSG0000(SFT2D2 protein_co chr1     | 1.68E+08 | 1.68E+08 | + | 9.09  | 10.68 |
| ENSG0000(RP3-431P2 processed_ chr6  | 1.68E+08 | 1.68E+08 | - | 0     | 0     |

|                    |             |       |          |          |   |      |       |
|--------------------|-------------|-------|----------|----------|---|------|-------|
| ENSG0000(FGFR1OP   | protein_co  | chr6  | 1.67E+08 | 1.67E+08 | + | 5.11 | 5.08  |
| ENSG0000(RP11-760D | processed_  | chr7  | 56597379 | 56598342 | + | 0    | 0     |
| ENSG0000(RP11-277B | processed_  | chr1  | 1.67E+08 | 1.67E+08 | - | 0    | 0     |
| ENSG0000(KRT8P40   | processed_  | chr2  | 1.77E+08 | 1.77E+08 | + | 0    | 0     |
| ENSG0000(HMGB3P6   | processed_  | chr1  | 1.64E+08 | 1.64E+08 | + | 0    | 0     |
| ENSG0000(LPAL2     | transcribec | chr6  | 1.6E+08  | 1.61E+08 | - | 1.45 | 0.37  |
| ENSG0000(RP11-288H | transcribec | chr6  | 1.6E+08  | 1.6E+08  | + | 2.15 | 2.02  |
| ENSG0000(RPL31P11  | transcribec | chr1  | 1.62E+08 | 1.62E+08 | - | 0.23 | 0     |
| ENSG0000(yR211F11. | processed_  | chr6  | 1.59E+08 | 1.59E+08 | - | 0    | 0     |
| ENSG0000(FAM106A   | protein_co  | chr17 | 18524566 | 18526846 | - | 0.63 | 0.36  |
| ENSG0000(RP5-933K2 | processed_  | chr6  | 1.57E+08 | 1.57E+08 | - | 0    | 0     |
| ENSG0000(SCAF8     | protein_co  | chr6  | 1.55E+08 | 1.55E+08 | + | 9.39 | 8.56  |
| ENSG0000(RP11-312J | processed_  | chr1  | 1.61E+08 | 1.61E+08 | + | 0    | 0     |
| ENSG0000(AC012362. | processed_  | chr2  | 2.08E+08 | 2.08E+08 | - | 0    | 0     |
| ENSG0000(PPP1R14BF | processed_  | chr2  | 2.08E+08 | 2.08E+08 | + | 0    | 0     |
| ENSG0000(AC010731. | processed_  | chr2  | 2.07E+08 | 2.07E+08 | - | 0    | 0     |
| ENSG0000(CFAP45    | protein_co  | chr1  | 1.6E+08  | 1.6E+08  | - | 0.15 | 0.11  |
| ENSG0000(RP11-613F | processed_  | chr6  | 1.51E+08 | 1.51E+08 | - | 0.21 | 0     |
| ENSG0000(ACKR1     | protein_co  | chr1  | 1.59E+08 | 1.59E+08 | + | 0.03 | 0.14  |
| ENSG0000(PDCL3P5   | processed_  | chr6  | 1.51E+08 | 1.51E+08 | + | 0.1  | 0     |
| ENSG0000(AC007256. | processed_  | chr2  | 2.01E+08 | 2.01E+08 | - | 0    | 0.02  |
| ENSG0000(PHBP1     | processed_  | chr6  | 1.5E+08  | 1.5E+08  | + | 0    | 0     |
| ENSG0000(ZNF254    | protein_co  | chr19 | 24033405 | 24129961 | + | 2.05 | 2.09  |
| ENSG0000(KRT18P68  | processed_  | chrX  | 45983365 | 45984364 | + | 0    | 0     |
| ENSG0000(NPM1P46   | processed_  | chr2  | 1.97E+08 | 1.97E+08 | - | 0.87 | 0.08  |
| ENSG0000(AHCYP5    | processed_  | chr2  | 1.96E+08 | 1.96E+08 | - | 0    | 0     |
| ENSG0000(BTF3L4P3  | processed_  | chr6  | 1.38E+08 | 1.38E+08 | - | 0    | 0     |
| ENSG0000(RP11-55K2 | transcribec | chr6  | 1.37E+08 | 1.37E+08 | - | 0.09 | 0.15  |
| ENSG0000(AC019178. | processed_  | chr2  | 1.9E+08  | 1.9E+08  | - | 0    | 0     |
| ENSG0000(COX5BP2   | transcribec | chr6  | 1.36E+08 | 1.36E+08 | - | 0    | 0     |
| ENSG0000(TUBB8P8   | unprocessε  | chr3  | 1.98E+08 | 1.98E+08 | + | 0    | 0     |
| ENSG0000(AC104131. | processed_  | chr2  | 1.88E+08 | 1.88E+08 | + | 0    | 0     |
| ENSG0000(RP3-352A2 | processed_  | chr6  | 1.35E+08 | 1.35E+08 | + | 0    | 0     |
| ENSG0000(CHCHD2P4  | processed_  | chr6  | 1.34E+08 | 1.34E+08 | - | 0    | 0     |
| ENSG0000(LIN28AP1  | processed_  | chr2  | 1.83E+08 | 1.83E+08 | + | 0    | 0     |
| ENSG0000(RP11-306C | lincRNA     | chr6  | 1.53E+08 | 1.53E+08 | + | 5.4  | 3.68  |
| ENSG0000(RPL23AP4ε | processed_  | chr6  | 1.33E+08 | 1.33E+08 | - | 0    | 0     |
| ENSG0000(TCTEX1D2  | protein_co  | chr3  | 1.96E+08 | 1.96E+08 | - | 6.9  | 11.86 |
| ENSG0000(AC092642. | processed_  | chr2  | 1.8E+08  | 1.8E+08  | + | 0    | 0     |
| ENSG0000(RPL32P31  | processed_  | chr17 | 80542203 | 80542605 | + | 0    | 0     |
| ENSG0000(EEF1DP5   | processed_  | chr6  | 1.29E+08 | 1.29E+08 | - | 0.08 | 0.18  |
| ENSG0000(YWHAZP4   | processed_  | chr6  | 1.27E+08 | 1.27E+08 | + | 0.37 | 0.41  |
| ENSG0000(PPP1R14BF | processed_  | chr6  | 1.26E+08 | 1.26E+08 | - | 0    | 0     |
| ENSG0000(ARF1P2    | processed_  | chr12 | 1.21E+08 | 1.21E+08 | - | 0    | 0     |
| ENSG0000(CRYGS     | protein_co  | chr3  | 1.87E+08 | 1.87E+08 | - | 0.61 | 0.61  |

|                      |                  |          |            |       |       |
|----------------------|------------------|----------|------------|-------|-------|
| ENSG0000( ELK2AP     | processed_ chr14 | 1.06E+08 | 1.06E+08 - | 0     | 0     |
| ENSG0000( RP11-64B1  | processed_ chr12 | 1.19E+08 | 1.19E+08 + | 0.16  | 0.34  |
| ENSG0000( CRIP1      | protein_co chr14 | 1.05E+08 | 1.05E+08 + | 71.86 | 82.61 |
| ENSG0000( RPL23AP6C  | processed_ chr10 | 1.34E+08 | 1.34E+08 + | 1.14  | 1.36  |
| ENSG0000( AC073465.  | processed_ chr2  | 1.73E+08 | 1.73E+08 - | 0     | 0     |
| ENSG0000( CNN2P9     | processed_ chr6  | 1.11E+08 | 1.11E+08 + | 0.27  | 0.08  |
| ENSG0000( RP11-346C  | processed_ chr6  | 1.11E+08 | 1.11E+08 + | 0     | 0     |
| ENSG0000( RPL7AP60   | processed_ chr12 | 1.12E+08 | 1.12E+08 - | 0     | 0     |
| ENSG0000( RP11-259P  | processed_ chr11 | 1.34E+08 | 1.34E+08 - | 0     | 0     |
| ENSG0000( RP11-252C  | processed_ chr3  | 1.82E+08 | 1.82E+08 - | 0     | 0     |
| ENSG0000( RP11-259P  | processed_ chr3  | 1.81E+08 | 1.81E+08 - | 0     | 0.23  |
| ENSG0000( GAPDHP36   | processed_ chr3  | 1.8E+08  | 1.8E+08 +  | 0     | 0     |
| ENSG0000( CEND1P1    | processed_ chr14 | 1.04E+08 | 1.04E+08 + | 0     | 0     |
| ENSG0000( KLHL23     | protein_co chr2  | 1.7E+08  | 1.7E+08 +  | 1.57  | 1.56  |
| ENSG0000( Metazoa_S  | misc_RNA chr7    | 1.16E+08 | 1.16E+08 + | 0     | 0     |
| ENSG0000( RP11-393N  | processed_ chr3  | 1.74E+08 | 1.74E+08 + | 0     | 0     |
| ENSG0000( SAR1AP2    | processed_ chr10 | 1.26E+08 | 1.26E+08 + | 0     | 0     |
| ENSG0000( LINGO4     | protein_co chr1  | 1.52E+08 | 1.52E+08 - | 0     | 0     |
| ENSG0000( RP1-228H1  | processed_ chr1  | 40364766 | 40365183 + | 0     | 0     |
| ENSG0000( RP11-373E  | processed_ chr3  | 1.71E+08 | 1.71E+08 - | 0     | 0     |
| ENSG0000( RPL13P6    | processed_ chr14 | 1.03E+08 | 1.03E+08 + | 0     | 0     |
| ENSG0000( PRDX2P4    | processed_ chr6  | 1E+08    | 1E+08 +    | 0     | 0     |
| ENSG0000( RP11-641D  | processed_ chr3  | 1.69E+08 | 1.69E+08 - | 49.47 | 39.86 |
| ENSG0000( RPL17P41   | processed_ chr17 | 67784753 | 67785293 + | 0     | 0     |
| ENSG0000( RPL36AP48  | processed_ chr17 | 67224728 | 67225041 + | 0     | 0     |
| ENSG0000( OR10N1P    | unprocessε chr11 | 1.24E+08 | 1.24E+08 - | 0     | 0     |
| ENSG0000( OR10D5P    | unprocessε chr11 | 1.24E+08 | 1.24E+08 + | 0     | 0     |
| ENSG0000( RPS7P8     | processed_ chr6  | 96648489 | 96649069 - | 0     | 0     |
| ENSG0000( RP11-335F  | processed_ chr11 | 1.23E+08 | 1.23E+08 + | 0     | 0     |
| ENSG0000( FAM24B     | protein_co chr10 | 1.23E+08 | 1.23E+08 - | 1.47  | 0.93  |
| ENSG0000( TRIM59     | protein_co chr3  | 1.6E+08  | 1.6E+08 -  | 2.24  | 1.45  |
| ENSG0000( COPS5P1    | processed_ chr6  | 93091976 | 93092760 - | 0     | 0     |
| ENSG0000( YBX1P4     | processed_ chr7  | 1.52E+08 | 1.52E+08 + | 0     | 0     |
| ENSG0000( BTF3L4P2   | processed_ chr2  | 1.59E+08 | 1.59E+08 + | 33.57 | 42.05 |
| ENSG0000( MLLT11     | protein_co chr1  | 1.51E+08 | 1.51E+08 + | 3.63  | 4.51  |
| ENSG0000( CDK7P1     | processed_ chr2  | 1.57E+08 | 1.57E+08 - | 0     | 0     |
| ENSG0000( AC012066.  | processed_ chr2  | 1.52E+08 | 1.52E+08 + | 0.19  | 0.11  |
| ENSG0000( ASIC3      | protein_co chr7  | 1.51E+08 | 1.51E+08 + | 0.95  | 1.14  |
| ENSG0000( FABP5P10   | processed_ chr2  | 1.51E+08 | 1.51E+08 + | 0     | 0     |
| ENSG0000( GIMAP1     | protein_co chr7  | 1.51E+08 | 1.51E+08 + | 0.04  | 0.04  |
| ENSG0000( RP3-382I1C | protein_co chr6  | 87408012 | 87511634 + | 0.19  | 0.5   |
| ENSG0000( STRADBP1   | processed_ chr7  | 1.51E+08 | 1.51E+08 - | 0     | 0     |
| ENSG0000( AC005229.  | processed_ chr7  | 1.49E+08 | 1.49E+08 + | 0     | 0     |
| ENSG0000( AC005229.  | processed_ chr7  | 1.49E+08 | 1.49E+08 + | 0     | 0     |
| ENSG0000( KRT18P64   | processed_ chr6  | 85287789 | 85289007 + | 0     | 0     |

|                    |                   |          |            |       |       |
|--------------------|-------------------|----------|------------|-------|-------|
| ENSG0000(NCLP1     | processed_ chr9   | 1.37E+08 | 1.37E+08 - | 0     | 0     |
| ENSG0000(CCDC183   | protein_co chr9   | 1.37E+08 | 1.37E+08 + | 0.38  | 0.43  |
| ENSG0000(ARHGFEF35 | protein_co chr7   | 1.44E+08 | 1.44E+08 - | 0.32  | 0.47  |
| ENSG0000(OR2F1     | polymorph chr7    | 1.44E+08 | 1.44E+08 + | 0     | 0     |
| ENSG0000(RP11-355C | processed_ chr9   | 1.23E+08 | 1.23E+08 - | 0     | 0     |
| ENSG0000(CSH2      | protein_co chr17  | 63872012 | 63873766 - | 0     | 0     |
| ENSG0000(DNLZ      | protein_co chr9   | 1.36E+08 | 1.36E+08 - | 6.22  | 5.55  |
| ENSG0000(AC093724. | processed_ chr2   | 1.32E+08 | 1.32E+08 - | 0     | 0     |
| ENSG0000(NOC2LP1   | transcribec chr2  | 1.3E+08  | 1.3E+08 +  | 0     | 0     |
| ENSG0000(RP11-337C | processed_ chr1   | 1.47E+08 | 1.47E+08 + | 0     | 0     |
| ENSG0000(RPL12P38  | transcribec chr17 | 60433678 | 60435996 - | 0.63  | 0.16  |
| ENSG0000(TCL1B     | protein_co chr14  | 95686417 | 95692643 + | 0     | 0     |
| ENSG0000(PPP1R2P1C | processed_ chr13  | 63811014 | 63811608 - | 0     | 0     |
| ENSG0000(RPL23AP62 | processed_ chr11  | 1.12E+08 | 1.12E+08 - | 0     | 0     |
| ENSG0000(ST13P10   | processed_ chr11  | 1.12E+08 | 1.12E+08 - | 0     | 0     |
| ENSG0000(EEF1A1P16 | processed_ chr12  | 16990670 | 16992083 + | 0     | 0.12  |
| ENSG0000(YWHAZP2   | processed_ chr2   | 1.27E+08 | 1.27E+08 - | 0     | 0     |
| ENSG0000(AC008155. | processed_ chr7   | 1.38E+08 | 1.38E+08 - | 0     | 0     |
| ENSG0000(AC008155. | processed_ chr7   | 1.38E+08 | 1.38E+08 - | 0     | 0     |
| ENSG0000(NPM1P32   | processed_ chr2   | 1.22E+08 | 1.22E+08 - | 0     | 0     |
| ENSG0000(RP11-458D | protein_co chr1   | 1.46E+08 | 1.46E+08 - | 0.18  | 0     |
| ENSG0000(HIST2H3DF | unprocessε chr1   | 1.21E+08 | 1.21E+08 - | 1.11  | 0.77  |
| ENSG0000(SUPT4H1   | protein_co chr17  | 58345175 | 58353093 - | 42.53 | 47.8  |
| ENSG0000(RP11-479A | processed_ chr10  | 1.11E+08 | 1.11E+08 + | 0     | 0     |
| ENSG0000(RBMS2P1   | processed_ chr12  | 94423744 | 94424969 - | 0     | 0     |
| ENSG0000(RP11-819N | processed_ chr11  | 1.07E+08 | 1.07E+08 - | 0     | 0     |
| ENSG0000(RPL12P42  | processed_ chr19  | 13157959 | 13158788 - | 0     | 0     |
| ENSG0000(YWHAZP5   | processed_ chr10  | 1.06E+08 | 1.06E+08 + | 0     | 0     |
| ENSG0000(EEF1B2P6  | processed_ chr7   | 1.32E+08 | 1.32E+08 - | 0     | 0     |
| ENSG0000(VDAC2P3   | processed_ chr1   | 1.18E+08 | 1.18E+08 - | 0     | 0     |
| ENSG0000(NIP7P2    | processed_ chr3   | 1.32E+08 | 1.32E+08 + | 0     | 0     |
| ENSG0000(TSGA13    | protein_co chr7   | 1.31E+08 | 1.31E+08 - | 0.49  | 0.5   |
| ENSG0000(AC004386. | processed_ chrX   | 74376125 | 74376885 - | 0     | 0     |
| ENSG0000(RPL6P25   | processed_ chr12  | 83151331 | 83152190 + | 0.07  | 0.08  |
| ENSG0000(RP11-613N | processed_ chr12  | 76599671 | 76600470 + | 0.08  | 0     |
| ENSG0000(IFITM9P   | processed_ chr11  | 69303412 | 69303807 - | 0     | 0     |
| ENSG0000(MARCKSL1  | processed_ chr10  | 1.03E+08 | 1.03E+08 + | 0     | 0     |
| ENSG0000(RP1-29C18 | lincRNA chr22     | 49572264 | 49575426 - | 0     | 0     |
| ENSG0000(RP11-212P | processed_ chr7   | 1.29E+08 | 1.29E+08 - | 0     | 0     |
| ENSG0000(NRAS      | protein_co chr1   | 1.15E+08 | 1.15E+08 - | 10.45 | 10.91 |
| ENSG0000(RPL23AP45 | processed_ chr5   | 1.81E+08 | 1.81E+08 + | 0     | 0     |
| ENSG0000(RP11-680L | processed_ chr11  | 87258851 | 87259259 - | 0     | 0     |
| ENSG0000(PGK1P2    | processed_ chr19  | 12559571 | 12561105 + | 0.05  | 0.11  |
| ENSG0000(RP11-420H | processed_ chr7   | 1.25E+08 | 1.25E+08 - | 0     | 0     |
| ENSG0000(CTD-2666L | processed_ chr19  | 12260126 | 12260537 + | 0     | 0     |



|                                      |          |            |       |       |
|--------------------------------------|----------|------------|-------|-------|
| ENSG0000( AC092106. processed_ chr2  | 1.06E+08 | 1.06E+08 + | 0.24  | 0.26  |
| ENSG0000( RP5-1106E processed_ chr7  | 1.24E+08 | 1.24E+08 + | 0.07  | 0.08  |
| ENSG0000( ZNF625-ZN protein_co chr19 | 12132117 | 12156731 - | 1.38  | 1.7   |
| ENSG0000( HNRNPA3P processed_ chr3   | 75214631 | 75215636 + | 0     | 0.3   |
| ENSG0000( HMGB3P1 processed_ chr2    | 1.05E+08 | 1.05E+08 + | 0     | 0     |
| ENSG0000( RP11-560I1 processed_ chr7 | 1.22E+08 | 1.22E+08 + | 0     | 0     |
| ENSG0000( CTC-398G3 processed_ chr19 | 11523436 | 11523831 + | 0.43  | 0     |
| ENSG0000( CTC-398G3 processed_ chr19 | 11521968 | 11522498 + | 0     | 0     |
| ENSG0000( HNRNPCP6 processed_ chr11  | 85020785 | 85021655 - | 0     | 0     |
| ENSG0000( RPL18P11 processed_ chr15  | 78661047 | 78661576 - | 0     | 0     |
| ENSG0000( RPL9P18 processed_ chr6    | 63615827 | 63616361 - | 0     | 0     |
| ENSG0000( CYCSP19 processed_ chr7    | 1.21E+08 | 1.21E+08 + | 0     | 0     |
| ENSG0000( RPL7AP34 processed_ chr6   | 63548708 | 63549508 - | 0     | 0     |
| ENSG0000( CTD-3035D processed_ chr14 | 90766531 | 90766989 + | 0     | 0     |
| ENSG0000( LTC4S protein_co chr5      | 1.8E+08  | 1.8E+08 +  | 3.17  | 5.83  |
| ENSG0000( RP11-331F processed_ chr16 | 75192465 | 75193247 - | 0     | 0     |
| ENSG0000( RPS7P11 processed_ chr17   | 46721582 | 46722167 - | 0.43  | 0.16  |
| ENSG0000( RP11-281C processed_ chr5  | 1.79E+08 | 1.79E+08 - | 0     | 0     |
| ENSG0000( RP11-713C processed_ chr4  | 1.88E+08 | 1.88E+08 + | 0     | 0     |
| ENSG0000( SLC25A5P6 processed_ chr4  | 1.86E+08 | 1.86E+08 - | 0     | 0     |
| ENSG0000( NPM1P50 processed_ chr11   | 75079265 | 75080131 - | 0     | 0     |
| ENSG0000( CLNS1AP1 processed_ chr6   | 54485169 | 54485850 - | 0     | 0     |
| ENSG0000( ANKRD39 protein_co chr2    | 96836611 | 96858095 - | 5.92  | 5.18  |
| ENSG0000( ATF4P1 processed_ chrX     | 1.55E+08 | 1.55E+08 - | 0     | 0     |
| ENSG0000( QTRT1 protein_co chr19     | 10701430 | 10713437 + | 17.48 | 19.05 |
| ENSG0000( CHUK protein_co chr10      | 1E+08    | 1E+08 -    | 4.99  | 5.74  |
| ENSG0000( RPL21P18 processed_ chr12  | 66037235 | 66037714 + | 0     | 0.18  |
| ENSG0000( PCNPP3 processed_ chr12    | 65645992 | 65646462 - | 0.16  | 0.18  |
| ENSG0000( MXD3 protein_co chr5       | 1.77E+08 | 1.77E+08 - | 1.55  | 1.44  |
| ENSG0000( GAPDHP44 processed_ chr12  | 62755227 | 62756233 + | 0     | 0.13  |
| ENSG0000( CNN2P8 processed_ chr2     | 94737337 | 94738249 + | 0     | 0     |
| ENSG0000( AC092933. unprocessε chr3  | 1.97E+08 | 1.97E+08 - | 0.21  | 0.08  |
| ENSG0000( RP4-778K6 processed_ chr7  | 1.05E+08 | 1.05E+08 + | 0     | 0     |
| ENSG0000( FTH1P12 processed_ chr9    | 15527133 | 15527683 - | 1.05  | 1.01  |
| ENSG0000( RPS3P6 processed_ chr12    | 62021570 | 62022174 - | 0.46  | 0.13  |
| ENSG0000( AP000593. processed_ chr11 | 72280151 | 72281178 + | 0     | 0     |
| ENSG0000( GSTM2 protein_co chr1      | 1.1E+08  | 1.1E+08 +  | 37.29 | 42.52 |
| ENSG0000( ST13P11 processed_ chr11   | 94913047 | 94913766 + | 0     | 0     |
| ENSG0000( RANP6 processed_ chr4      | 1.74E+08 | 1.74E+08 - | 0     | 0     |
| ENSG0000( NAP1L1P3 processed_ chr3   | 1.21E+08 | 1.21E+08 + | 0.12  | 0.08  |
| ENSG0000( LINC00671 lincRNA chr17    | 42874670 | 42898704 - | 0     | 0     |
| ENSG0000( GAPDHP71 processed_ chr5   | 1.75E+08 | 1.75E+08 + | 0.06  | 0.33  |
| ENSG0000( COG8 protein_co chr16      | 69320140 | 69339583 - | 8.04  | 8.11  |
| ENSG0000( AC104297. processed_ chr3  | 17871729 | 17872598 - | 0     | 0     |
| ENSG0000( EIF4E2P1 processed_ chr20  | 20659710 | 20659964 + | 0     | 0     |

|                      |                   |          |          |   |       |       |
|----------------------|-------------------|----------|----------|---|-------|-------|
| ENSG0000(RP11-577H)  | processed_chr7    | 1.03E+08 | 1.03E+08 | + | 0.64  | 0.36  |
| ENSG0000(RP11-779C)  | processed_chr5    | 1.73E+08 | 1.73E+08 | - | 0     | 0     |
| ENSG0000(ARHGAP19)   | protein_co_chr10  | 97222173 | 97292673 | - | 1.04  | 1.95  |
| ENSG0000(RP11-66N1)  | processed_chrX    | 1.54E+08 | 1.54E+08 | + | 0     | 0     |
| ENSG0000(RP11-546B)  | processed_chr5    | 1.71E+08 | 1.71E+08 | - | 0     | 0     |
| ENSG0000(RPSAP46)    | processed_chr7    | 1.01E+08 | 1.01E+08 | - | 0     | 0     |
| ENSG0000(HAUS7)      | protein_co_chrX   | 1.53E+08 | 1.53E+08 | - | 13.13 | 17.18 |
| ENSG0000(LCAT)       | protein_co_chr16  | 67939750 | 67944131 | - | 8.24  | 8.18  |
| ENSG0000(AC022210)   | processed_chr2    | 84915868 | 84916660 | + | 0     | 0     |
| ENSG0000(RPL12P18)   | processed_chr2    | 84874696 | 84875020 | + | 0     | 0     |
| ENSG0000(MAGEA12)    | protein_co_chrX   | 1.53E+08 | 1.53E+08 | + | 0.04  | 0     |
| ENSG0000(PTPRCAP)    | protein_co_chr11  | 67435510 | 67438067 | - | 0     | 0     |
| ENSG0000(CISD1P1)    | processed_chr2    | 19826249 | 19826575 | + | 0     | 0     |
| ENSG0000(ANXA2P1)    | processed_chr4    | 1.53E+08 | 1.53E+08 | - | 0     | 0     |
| ENSG0000(C1QBPP2)    | processed_chr11   | 66761575 | 66762399 | - | 0     | 0     |
| ENSG0000(RBM22P2)    | processed_chr13   | 30539597 | 30543461 | - | 0.53  | 0.74  |
| ENSG0000(HNRNPA1P)   | processed_chr10   | 46415853 | 46416413 | + | 1.79  | 1.54  |
| ENSG0000(PVRIG)      | protein_co_chr7   | 1E+08    | 1E+08    | + | 0     | 0     |
| ENSG0000(CTB-47B8.5) | processed_chr5    | 1.58E+08 | 1.58E+08 | - | 0     | 0     |
| ENSG0000(KRTAP4-12)  | protein_co_chr17  | 41123091 | 41124167 | - | 0     | 0     |
| ENSG0000(KRTAP2-4)   | protein_co_chr17  | 41065116 | 41065879 | - | 0     | 0     |
| ENSG0000(GPC2)       | protein_co_chr7   | 1E+08    | 1E+08    | - | 2.06  | 2.6   |
| ENSG0000(RP11-84O1)  | processed_chr1    | 1.01E+08 | 1.01E+08 | - | 0     | 0     |
| ENSG0000(RBMX2P2)    | processed_chrX    | 1.41E+08 | 1.41E+08 | - | 0     | 0     |
| ENSG0000(KRT222)     | protein_co_chr17  | 40654665 | 40665181 | - | 0     | 0     |
| ENSG0000(HSPD1P1)    | processed_chr5    | 21882585 | 21884310 | + | 0     | 0     |
| ENSG0000(RP11-301G)  | processed_chr3    | 1.01E+08 | 1.01E+08 | - | 0     | 0     |
| ENSG0000(RPL17P34)   | processed_chr10   | 93284004 | 93284558 | - | 0.26  | 0.14  |
| ENSG0000(RPLP1P6)    | transcribed_chr5  | 1.52E+08 | 1.52E+08 | - | 0.65  | 0.94  |
| ENSG0000(VTI1BP2)    | processed_chr4    | 1.83E+08 | 1.83E+08 | + | 0     | 0     |
| ENSG0000(ATP6VOCP)   | processed_chr6    | 42727234 | 42727700 | + | 0     | 0     |
| ENSG0000(YBX2P1)     | processed_chr10   | 1.24E+08 | 1.24E+08 | + | 0     | 0     |
| ENSG0000(OR5AC1)     | polymorph_chr3    | 98064472 | 98065396 | + | 0     | 0     |
| ENSG0000(H2AFZP1)    | processed_chr21   | 44046347 | 44047041 | - | 0     | 0     |
| ENSG0000(RPL18AP3)   | processed_chr12   | 1.04E+08 | 1.04E+08 | + | 0     | 0.34  |
| ENSG0000(RP11-75L1)  | processed_chr12   | 9695384  | 9696227  | + | 0     | 0     |
| ENSG0000(SIPA1)      | protein_co_chr11  | 65638097 | 65650930 | + | 6.29  | 6.77  |
| ENSG0000(RPS23P2)    | processed_chr4    | 1.37E+08 | 1.37E+08 | + | 0     | 0     |
| ENSG0000(GAPDHP28)   | processed_chr10   | 91666780 | 91667782 | - | 0     | 0     |
| ENSG0000(VDAC1P7)    | processed_chr3    | 77316752 | 77317598 | - | 0     | 0     |
| ENSG0000(OR6C69P)    | unprocessed_chr12 | 55262539 | 55263431 | + | 0     | 0     |
| ENSG0000(AKR1B1P2)   | processed_chr3    | 74135959 | 74136892 | + | 0     | 0     |
| ENSG0000(FTH1P3)     | processed_chr2    | 27392784 | 27393367 | - | 0     | 0.66  |
| ENSG0000(AC091654)   | processed_chr7    | 98454119 | 98454617 | - | 0     | 0     |
| ENSG0000(RP13-235E)  | processed_chr6    | 41308166 | 41308565 | - | 0     | 0     |

|          |            |             |       |          |          |   |       |       |
|----------|------------|-------------|-------|----------|----------|---|-------|-------|
| ENSG0000 | (ERV3-1    | protein_co  | chr7  | 64990809 | 65006743 | - | 14.94 | 13.94 |
| ENSG0000 | (SYNJ2BP   | protein_co  | chr14 | 70366496 | 70417061 | - | 9     | 6.96  |
| ENSG0000 | (ARL2      | protein_co  | chr11 | 65014113 | 65022184 | + | 62.82 | 64.94 |
| ENSG0000 | (HMGB1P3)  | processed_  | chr9  | 1.22E+08 | 1.22E+08 | - | 1.25  | 1.38  |
| ENSG0000 | (FIRRE     | lincRNA     | chrX  | 1.32E+08 | 1.32E+08 | - | 0     | 0.06  |
| ENSG0000 | (RP11-972K | processed_  | chr12 | 53632788 | 53633151 | - | 0     | 0     |
| ENSG0000 | (TTLL13P   | protein_co  | chr15 | 90249530 | 90265482 | + | 0.11  | 0.41  |
| ENSG0000 | (CFL1P2    | processed_  | chr1  | 51157788 | 51158471 | - | 0     | 0     |
| ENSG0000 | (RP11-364P | processed_  | chr4  | 1.21E+08 | 1.21E+08 | - | 0     | 0     |
| ENSG0000 | (NDUFAF4P  | processed_  | chr7  | 93844789 | 93845308 | + | 0     | 0     |
| ENSG0000 | (EIF4A1P8  | processed_  | chr10 | 92136875 | 92138370 | + | 0     | 0     |
| ENSG0000 | (AC108039. | processed_  | chr2  | 61710076 | 61710978 | - | 0     | 0     |
| ENSG0000 | (ASS1P4    | processed_  | chrX  | 3367149  | 3368382  | + | 0     | 0     |
| ENSG0000 | (CTB-85P21 | processed_  | chr5  | 1.45E+08 | 1.45E+08 | + | 0     | 0     |
| ENSG0000 | (RP13-147D | processed_  | chrX  | 1.25E+08 | 1.25E+08 | - | 0     | 0     |
| ENSG0000 | (NT5C3AP1  | transcribec | chr4  | 1.18E+08 | 1.18E+08 | - | 0     | 0     |
| ENSG0000 | (ACTN4P1   | processed_  | chr4  | 1.17E+08 | 1.17E+08 | + | 0     | 0     |
| ENSG0000 | (RP11-416L | processed_  | chr2  | 60711484 | 60711920 | + | 0     | 0     |
| ENSG0000 | (TPT1P13   | processed_  | chrX  | 1.22E+08 | 1.22E+08 | - | 0     | 0     |
| ENSG0000 | (LAP3P2    | processed_  | chr6  | 36673817 | 36675270 | + | 0     | 0.04  |
| ENSG0000 | (PPIAP16   | processed_  | chr3  | 57941818 | 57942304 | + | 0.16  | 0     |
| ENSG0000 | (GBP7      | protein_co  | chr1  | 89131751 | 89176040 | - | 0     | 0.03  |
| ENSG0000 | (IMPDH1P5  | processed_  | chr10 | 77780337 | 77781876 | - | 0.11  | 0     |
| ENSG0000 | (RP11-428P | processed_  | chr10 | 77730766 | 77734769 | + | 0.01  | 0.03  |
| ENSG0000 | (RBMXL1    | protein_co  | chr1  | 88979456 | 88992960 | - | 2.61  | 3.58  |
| ENSG0000 | (AC132008. | processed_  | chr3  | 1.98E+08 | 1.98E+08 | - | 0     | 0.87  |
| ENSG0000 | (RAC1P5    | processed_  | chr4  | 1.07E+08 | 1.07E+08 | - | 0     | 0     |
| ENSG0000 | (SRA1      | protein_co  | chr5  | 1.41E+08 | 1.41E+08 | - | 14.04 | 15.83 |
| ENSG0000 | (RP11-383B | processed_  | chr10 | 74744386 | 74744707 | - | 0     | 0     |
| ENSG0000 | (SETP8     | processed_  | chrX  | 1.17E+08 | 1.17E+08 | + | 0     | 0     |
| ENSG0000 | (RP11-591L | processed_  | chr15 | 79751689 | 79752049 | - | 0     | 0     |
| ENSG0000 | (RP11-432F | processed_  | chr9  | 1.12E+08 | 1.12E+08 | + | 0     | 0     |
| ENSG0000 | (MTHFD2P5  | processed_  | chr7  | 82589848 | 82590691 | - | 0     | 0     |
| ENSG0000 | (TMEM110   | protein_co  | chr3  | 52836219 | 52897596 | - | 5.86  | 6.88  |
| ENSG0000 | (GNG5P1    | processed_  | chr6  | 1.66E+08 | 1.66E+08 | - | 0     | 0     |
| ENSG0000 | (KRT8P41   | processed_  | chr11 | 9094377  | 9095890  | + | 0     | 0     |
| ENSG0000 | (YBX1P6    | processed_  | chr9  | 1.1E+08  | 1.1E+08  | - | 0     | 0     |
| ENSG0000 | (RP11-486G | processed_  | chr1  | 84085741 | 84086233 | + | 0     | 0     |
| ENSG0000 | (RP11-467H | processed_  | chr7  | 77115399 | 77116192 | - | 0.13  | 0.36  |
| ENSG0000 | (RARRES2P2 | processed_  | chr10 | 1.34E+08 | 1.34E+08 | - | 0     | 0     |
| ENSG0000 | (VN1R64P   | unitary_ps  | chr16 | 31546805 | 31547737 | + | 0     | 0     |
| ENSG0000 | (AC005522. | processed_  | chr7  | 76361768 | 76362113 | + | 0     | 0     |
| ENSG0000 | (AC005077. | processed_  | chr7  | 76113026 | 76113400 | - | 0     | 0     |
| ENSG0000 | (DNAJC9    | protein_co  | chr10 | 73183362 | 73248862 | - | 5.58  | 5.36  |
| ENSG0000 | (RPLP0P6   | processed_  | chr2  | 38481851 | 38482804 | + | 0.27  | 0.1   |

|                                      |          |            |        |        |
|--------------------------------------|----------|------------|--------|--------|
| ENSG0000(RP11-3J11. processed_ chr9  | 1.09E+08 | 1.09E+08 + | 0      | 0      |
| ENSG0000(RP11-240E processed_ chr9   | 1.08E+08 | 1.08E+08 + | 0.23   | 0.25   |
| ENSG0000(HMGN2P3: processed_ chr9    | 1.07E+08 | 1.07E+08 - | 0      | 0      |
| ENSG0000(HNRNPA1P processed_ chr1    | 80451083 | 80452004 - | 0      | 0      |
| ENSG0000(RP11-3861J processed_ chr1  | 78091499 | 78092054 + | 0      | 0      |
| ENSG0000(RP11-3861J processed_ chr1  | 78043383 | 78044148 - | 0      | 0      |
| ENSG0000(C8orf82 protein_co chr8     | 1.45E+08 | 1.45E+08 - | 10.26  | 12.98  |
| ENSG0000(HNRNPA1P processed_ chr5    | 1.36E+08 | 1.36E+08 + | 0      | 0      |
| ENSG0000(RP13-383K processed_ chrX   | 1.07E+08 | 1.07E+08 + | 0      | 0      |
| ENSG0000(LDHAP5 processed_ chr10     | 1.19E+08 | 1.19E+08 - | 0      | 0      |
| ENSG0000(CPLX3 protein_co chr15      | 74826547 | 74831802 + | 0      | 0.03   |
| ENSG0000(RP4-595K1 processed_ chr1   | 75582099 | 75582555 + | 0      | 0      |
| ENSG0000(VDAC1 protein_co chr5       | 1.34E+08 | 1.34E+08 - | 85.07  | 77.57  |
| ENSG0000(RP11-646D processed_ chr3   | 50719482 | 50719951 - | 0      | 0      |
| ENSG0000(ZBTB9 protein_co chr6       | 33453970 | 33457548 + | 3.12   | 3.12   |
| ENSG0000(RP11-229P processed_ chr9   | 1.37E+08 | 1.37E+08 + | 0.04   | 0.1    |
| ENSG0000(AP000662. processed_ chr11  | 57718044 | 57718530 - | 0      | 0      |
| ENSG0000(TMX2 protein_co chr11       | 57712600 | 57740973 + | 26.3   | 24.24  |
| ENSG0000(GAPDHP25 processed_ chr2    | 38285410 | 38286410 + | 0      | 0      |
| ENSG0000(RP11-112J: processed_ chr14 | 58794654 | 58795029 + | 0      | 0      |
| ENSG0000(SLX1A-SUL: processed_ chr16 | 30193892 | 30204310 + | 1.74   | 3.08   |
| ENSG0000(XXcos-LUC.sense_intr( chr3  | 50239618 | 50239984 + | 0      | 0.27   |
| ENSG0000(KRT18P19 processed_ chr2    | 1.89E+08 | 1.89E+08 - | 0      | 0      |
| ENSG0000(RP11-444K processed_ chr11  | 56205125 | 56205625 - | 0      | 0      |
| ENSG0000(AC111200. processed_ chr2   | 86885075 | 86885731 - | 0      | 0      |
| ENSG0000(AKR1B10P: processed_ chr10  | 67750284 | 67751225 + | 0.13   | 0      |
| ENSG0000(OR4A45P unprocess( chr11    | 48579436 | 48580336 + | 0      | 0      |
| ENSG0000(SLC25A14P processed_ chr4   | 83477524 | 83478424 + | 0      | 0      |
| ENSG0000(RPL7AP50 processed_ chr10   | 63902451 | 63903245 - | 0      | 0      |
| ENSG0000(FAM220CP processed_ chr9    | 97121659 | 97122489 + | 0      | 0      |
| ENSG0000(RPL11P3 processed_ chr10    | 87945502 | 87946024 + | 0.14   | 0      |
| ENSG0000(HEXA protein_co chr15       | 72340919 | 72376476 - | 285.58 | 273.27 |
| ENSG0000(NDUFS3 protein_co chr11     | 47565336 | 47584562 + | 37.4   | 34.81  |
| ENSG0000(AL121657.4 processed_ chr2  | 31290762 | 31291604 + | 0      | 0      |
| ENSG0000(RPSAP54 processed_ chr13    | 20961310 | 20962195 + | 0.07   | 0.08   |
| ENSG0000(LEPROT protein_co chr1      | 65420587 | 65436007 + | 65.18  | 71.63  |
| ENSG0000(LBH protein_co chr2         | 30231531 | 30323730 + | 26.27  | 25.36  |
| ENSG0000(BOLA3P3 processed_ chr5     | 1.27E+08 | 1.27E+08 - | 0      | 0      |
| ENSG0000(ADAT3 protein_co chr19      | 1905378  | 1913447 +  | 1.34   | 2.18   |
| ENSG0000(PPP1CB protein_co chr2      | 28751640 | 28802940 + | 39.72  | 39.25  |
| ENSG0000(EEF1DP4 processed_ chr7     | 64862999 | 64864370 + | 0      | 0      |
| ENSG0000(RPL7AP4 processed_ chr14    | 55543401 | 55544169 + | 0      | 0      |
| ENSG0000(RP11-561N processed_ chr7   | 64569428 | 64570437 - | 0      | 0      |
| ENSG0000(VN1R37P processed_ chr7     | 64149685 | 64150432 - | 0      | 0      |
| ENSG0000(SAPCD2P1 processed_ chr7    | 64181710 | 64182893 + | 0      | 0      |

|                                     |          |          |   |       |        |
|-------------------------------------|----------|----------|---|-------|--------|
| ENSG0000(SLC25A1P3 processed_ chr7  | 63931141 | 63931968 | + | 0     | 0      |
| ENSG0000(SULT1A4 protein_co chr16   | 29459889 | 29464976 | + | 6.7   | 5.29   |
| ENSG0000(RP11-760D processed_ chr7  | 56567906 | 56568858 | - | 0     | 0      |
| ENSG0000(HMGB3P3 processed_ chrX    | 1.13E+08 | 1.13E+08 | + | 0     | 0      |
| ENSG0000(RPL22P22 processed_ chrX   | 82506434 | 82506812 | - | 0     | 0      |
| ENSG0000(GPSM3 protein_co chr6      | 32190766 | 32195523 | - | 1.64  | 1.56   |
| ENSG0000(CTD-23471 processed_ chr5  | 1.23E+08 | 1.23E+08 | + | 0     | 0      |
| ENSG0000(RPL31P44 processed_ chr10  | 52389112 | 52389488 | - | 0     | 0      |
| ENSG0000(LAT protein_co chr16       | 28984826 | 28990783 | + | 2.23  | 1.76   |
| ENSG0000(RSU1P3 processed_ chr10    | 51319826 | 51320660 | + | 0.08  | 0      |
| ENSG0000(RP11-5101 processed_ chr5  | 1.22E+08 | 1.22E+08 | + | 0     | 0.14   |
| ENSG0000(CTD-2158P processed_ chr5  | 1.2E+08  | 1.2E+08  | - | 0     | 0      |
| ENSG0000(RPS16P8 processed_ chr17   | 27280482 | 27280912 | + | 0     | 0      |
| ENSG0000(PGGT1BP1 processed_ chr10  | 50726947 | 50727969 | - | 0     | 0      |
| ENSG0000(RP11-476B processed_ chr9  | 92676943 | 92677407 | - | 0     | 0      |
| ENSG0000(OLA1P2 processed_ chr17    | 20775642 | 20776905 | + | 0.09  | 0.11   |
| ENSG0000(NCKIPSD protein_co chr3    | 48673844 | 48686364 | - | 11.26 | 10.07  |
| ENSG0000(SLC25A5P3 processed_ chr7  | 54419444 | 54420328 | + | 0     | 0      |
| ENSG0000(ATF6B protein_co chr6      | 32098176 | 32128253 | - | 47.66 | 44.99  |
| ENSG0000(AC002056 processed_ chr22  | 50754675 | 50755434 | - | 0     | 0      |
| ENSG0000(LDHBP2 processed_ chrX     | 76334841 | 76335845 | - | 0     | 0      |
| ENSG0000(TREX1 protein_co chr3      | 48465811 | 48467645 | + | 11.1  | 13.43  |
| ENSG0000(RP11-513D processed_ chr1  | 2.42E+08 | 2.42E+08 | - | 0     | 0      |
| ENSG0000(SEC14L1P1 processed_ chr11 | 43897456 | 43899636 | + | 0.25  | 0.33   |
| ENSG0000(S1PR3 protein_co chr9      | 88991447 | 89005010 | + | 8.65  | 9.36   |
| ENSG0000(RPS7P14 processed_ chrX    | 74409518 | 74410100 | + | 0     | 0      |
| ENSG0000(CTBP2P6 processed_ chr11   | 43522036 | 43523264 | + | 0     | 0      |
| ENSG0000(RP1-172N1 processed_ chrX  | 72727977 | 72728821 | - | 0     | 0      |
| ENSG0000(SLC35F6 protein_co chr2    | 26764284 | 26781231 | + | 12.54 | 12.78  |
| ENSG0000(RPL17P50 processed_ chr10  | 73005833 | 73006595 | - | 1.33  | 1.76   |
| ENSG0000(SETP22 processed_ chr5     | 97056402 | 97057358 | - | 0     | 0      |
| ENSG0000(RP5-849H1 processed_ chr1  | 62641122 | 62641667 | - | 0     | 0      |
| ENSG0000(EEF1A1P15 processed_ chrX  | 98389512 | 98390919 | + | 0     | 0      |
| ENSG0000(AL590762 processed_ chrX   | 71352418 | 71352988 | + | 0     | 0      |
| ENSG0000(HMGB1P1 processed_ chr22   | 26560526 | 26561088 | + | 0     | 0      |
| ENSG0000(SLC16A14P unprocessε chr8  | 1.06E+08 | 1.06E+08 | + | 0     | 0      |
| ENSG0000(PHBP7 processed_ chr9      | 85898903 | 85899716 | + | 0     | 0      |
| ENSG0000(PIGCP1 processed_ chr11    | 33075566 | 33076460 | - | 0     | 0      |
| ENSG0000(FAM209B protein_co chr20   | 56533246 | 56536520 | + | 0.1   | 0.21   |
| ENSG0000(FABP5P5 processed_ chr5    | 95973041 | 95973446 | - | 0     | 0      |
| ENSG0000(AC004692 processed_ chr7   | 43274159 | 43274582 | + | 0     | 0      |
| ENSG0000(CLIC1 protein_co chr6      | 31730581 | 31739763 | - | 175.4 | 161.27 |
| ENSG0000(HMGN2P3 processed_ chr7    | 42113365 | 42113620 | + | 0     | 0      |
| ENSG0000(DDAH2 protein_co chr6      | 31727038 | 31730617 | - | 72.58 | 75.15  |
| ENSG0000(PRDX2P2 processed_ chr10   | 34965069 | 34966259 | + | 0     | 0      |

|                                      |          |          |   |        |        |
|--------------------------------------|----------|----------|---|--------|--------|
| ENSG0000(RPS2P52 processed_ chr19    | 690353   | 691172   | + | 0      | 0      |
| ENSG0000(LA16c-60G processed_ chr22  | 15572089 | 15573265 | - | 0      | 0      |
| ENSG0000(AC098828. processed_ chr2   | 20155618 | 20156057 | - | 0      | 0      |
| ENSG0000(POLD2P1 processed_ chr5     | 93267429 | 93268425 | + | 0      | 0      |
| ENSG0000(RAB5CP1 processed_ chr10    | 74423435 | 74424014 | - | 0      | 0      |
| ENSG0000(ANAPC10P processed_ chr1    | 52253621 | 52254176 | + | 0      | 0      |
| ENSG0000(RP11-6621I processed_ chr12 | 24967127 | 24967504 | - | 0      | 0      |
| ENSG0000(AC007679. processed_ chr2   | 2.06E+08 | 2.06E+08 | + | 0      | 0      |
| ENSG0000(SERBP1P1 processed_ chrX    | 68783472 | 68785066 | + | 0      | 0      |
| ENSG0000(RPS29 protein_co chr14      | 49570984 | 49599164 | - | 982.86 | 982.96 |
| ENSG0000(ZNF337-AS antisense chr20   | 25624045 | 25678074 | + | 2.1    | 2.69   |
| ENSG0000(RPS10P14 processed_ chr7    | 37375522 | 37376023 | + | 0      | 0      |
| ENSG0000(RP13-278H processed_ chrX   | 70857163 | 70857502 | + | 0      | 0      |
| ENSG0000(KB-1683C8 processed_ chr8   | 97624203 | 97625079 | - | 0      | 0      |
| ENSG0000(CTA-268H5 processed_ chr22  | 45275599 | 45276085 | + | 0      | 0      |
| ENSG0000(CENPBD1P transcribed chr19  | 58573503 | 58599801 | + | 16.84  | 16.41  |
| ENSG0000(RP11-284B processed_ chrX   | 64305047 | 64306733 | - | 0      | 0      |
| ENSG0000(RP11-342F processed_ chr5   | 79510434 | 79510919 | + | 0      | 0      |
| ENSG0000(CTC-451P1 processed_ chr5   | 79284132 | 79284918 | - | 0.08   | 0      |
| ENSG0000(UGT2B11 protein_co chr4     | 69199951 | 69214731 | - | 0      | 0      |
| ENSG0000(ATP6V1G2 protein_co chr6    | 31544462 | 31548427 | - | 4.61   | 3.9    |
| ENSG0000(MT1P1 processed_ chr9       | 95413267 | 95413449 | - | 0      | 0      |
| ENSG0000(ZNF134 protein_co chr19     | 57614233 | 57624723 | + | 6.14   | 6.5    |
| ENSG0000(ACTBP2 processed_ chr5      | 77784881 | 77786003 | + | 0      | 0      |
| ENSG0000(FAM210CP processed_ chr10   | 27349717 | 27350290 | - | 0      | 0      |
| ENSG0000(KRT8P37 processed_ chr10    | 8513687  | 8515106  | - | 0      | 0      |
| ENSG0000(EIF1P7 processed_ chr2      | 9271292  | 9271628  | - | 0      | 0      |
| ENSG0000(AC010904. processed_ chr2   | 7324748  | 7325062  | - | 0      | 0      |
| ENSG0000(CTD-2224J transcribed chr19 | 53503392 | 53512687 | + | 0.45   | 0.4    |
| ENSG0000(HNRNPA1P processed_ chr10   | 30517616 | 30518861 | - | 0      | 0      |
| ENSG0000(RP11-452G processed_ chr11  | 17193489 | 17194308 | + | 0      | 0      |
| ENSG0000(GTF2H4 protein_co chr6      | 30908184 | 30914106 | + | 10.76  | 11.12  |
| ENSG0000(PSMC1P2 processed_ chr7     | 27461766 | 27462969 | + | 0      | 0      |
| ENSG0000(DDX47 protein_co chr12      | 12813316 | 12829981 | + | 23.69  | 25.83  |
| ENSG0000(RPL35P4 processed_ chr7     | 27269357 | 27269678 | - | 0      | 0      |
| ENSG0000(AKR1B1P3 processed_ chr11   | 16484084 | 16484671 | - | 0      | 0      |
| ENSG0000(NHP2P2 processed_ chr7      | 27048169 | 27048628 | + | 0      | 0      |
| ENSG0000(RPL7AP38 processed_ chr7    | 26922110 | 26922912 | + | 0      | 0      |
| ENSG0000(OLA1P1 processed_ chr22     | 42107765 | 42108953 | - | 0      | 0      |
| ENSG0000(RP11-941H processed_ chr8   | 80300869 | 80301481 | + | 0      | 0      |
| ENSG0000(ZNF888 protein_co chr19     | 52904417 | 52923481 | - | 1.02   | 0.81   |
| ENSG0000(AC004129. processed_ chr7   | 25212170 | 25212965 | - | 0      | 0      |
| ENSG0000(ZNF845 protein_co chr19     | 53333749 | 53354869 | + | 2.59   | 1.95   |
| ENSG0000(ZNF321P transcribed chr19   | 52927135 | 52942601 | - | 1.78   | 0.61   |
| ENSG0000(KLRK1 protein_co chr12      | 10372353 | 10391874 | - | 0      | 0      |

|                     |                  |          |          |   |      |      |
|---------------------|------------------|----------|----------|---|------|------|
| ENSG0000(CNN2P4     | processed_ chr9  | 42972386 | 42973289 | - | 0    | 0    |
| ENSG0000(RPL13P2    | processed_ chr20 | 46099518 | 46100176 | + | 0    | 0.23 |
| ENSG0000(CEACAM18   | protein_co chr19 | 51478622 | 51490952 | + | 0    | 0    |
| ENSG0000(CFL1P5     | processed_ chr5  | 69313371 | 69313872 | - | 0.45 | 0.41 |
| ENSG0000(TMX2P1     | processed_ chr9  | 37885683 | 37886390 | + | 0    | 0.1  |
| ENSG0000(SUGT1P2    | processed_ chr3  | 32752910 | 32753901 | + | 0    | 0.07 |
| ENSG0000(AC098614.  | transcribed chr3 | 27632976 | 27635427 | + | 1.94 | 2.61 |
| ENSG0000(AC104306.  | processed_ chr3  | 32507955 | 32508325 | + | 0    | 0    |
| ENSG0000(RP11-324J. | processed_ chr4  | 43410041 | 43410937 | - | 0    | 0    |
| ENSG0000(EMP2       | protein_co chr16 | 10528422 | 10580698 | - | 6.44 | 7.59 |
| ENSG0000(CNN2P6     | processed_ chr3  | 31181751 | 31182650 | - | 0    | 0    |
| ENSG0000(VDAC1P2    | processed_ chrX  | 49632500 | 49633349 | - | 0.37 | 0.25 |
| ENSG0000(RP11-12M!  | processed_ chr22 | 41074180 | 41075239 | - | 0.06 | 0    |
| ENSG0000(KCTD11     | protein_co chr17 | 7351889  | 7354944  | + | 19.1 | 18.7 |
| ENSG0000(RPL21P75   | processed_ chr7  | 20002765 | 20003247 | + | 1.57 | 0    |
| ENSG0000(CTD-2270N  | processed_ chr15 | 47730144 | 47730935 | - | 0    | 0    |
| ENSG0000(XX-C2158C  | lincRNA chr6     | 1.71E+08 | 1.71E+08 | + | 0.94 | 0.29 |
| ENSG0000(EEF1B2P2   | processed_ chr5  | 68159218 | 68159893 | - | 0.1  | 0    |
| ENSG0000(C8orf44    | protein_co chr8  | 66667615 | 66685564 | + | 2.07 | 2.08 |
| ENSG0000(YBX1P10    | processed_ chr9  | 35971344 | 35972318 | - | 0    | 0.07 |
| ENSG0000(RP11-829H  | processed_ chr14 | 30821419 | 30821843 | + | 0    | 0    |
| ENSG0000(TAF9BP1    | processed_ chr3  | 25754925 | 25755670 | + | 0    | 0    |
| ENSG0000(AC092798.  | processed_ chr3  | 25749488 | 25749896 | + | 0    | 0    |
| ENSG0000(RP11-678D  | processed_ chr8  | 65377592 | 65378111 | + | 0    | 0    |
| ENSG0000(AC005019.  | processed_ chr7  | 13871856 | 13872513 | + | 0    | 0    |
| ENSG0000(RPL7AP64   | processed_ chr17 | 7140930  | 7141592  | + | 0    | 0    |
| ENSG0000(CFL1P7     | processed_ chr3  | 25324174 | 25324659 | + | 0    | 0    |
| ENSG0000(RPL7AP7    | processed_ chr6  | 29803195 | 29803991 | - | 0    | 0    |
| ENSG0000(NPM1P6     | processed_ chr8  | 61202350 | 61203220 | + | 0.07 | 0.32 |
| ENSG0000(CYB5AP4    | processed_ chr20 | 22885670 | 22886068 | - | 0    | 0    |
| ENSG0000(RPL13AP7   | processed_ chr21 | 25361821 | 25362431 | + | 1.46 | 1.23 |
| ENSG0000(UBD        | protein_co chr6  | 29555515 | 29559925 | - | 0    | 0    |
| ENSG0000(LINC01521  | lincRNA chr22    | 31346777 | 31348719 | + | 1.02 | 1.24 |
| ENSG0000(PPM1N      | protein_co chr19 | 45488777 | 45502510 | + | 0.83 | 1.17 |
| ENSG0000(RPL3P6     | processed_ chr5  | 61390668 | 61391871 | - | 0    | 0    |
| ENSG0000(CEACAM16   | protein_co chr19 | 44699151 | 44710714 | + | 0    | 0    |
| ENSG0000(RP11-546N  | processed_ chr5  | 60429903 | 60430276 | - | 0    | 0    |
| ENSG0000(RPS17P1    | processed_ chr6  | 29489271 | 29489676 | - | 0    | 0    |
| ENSG0000(SLC23A3    | protein_co chr2  | 2.19E+08 | 2.19E+08 | - | 0.22 | 0.62 |
| ENSG0000(LTB4R      | protein_co chr14 | 24311450 | 24318036 | + | 1.99 | 1.91 |
| ENSG0000(LIPE-AS1   | antisense chr19  | 42397128 | 42652355 | + | 2.33 | 3.51 |
| ENSG0000(LTB4R2     | protein_co chr14 | 24305734 | 24312053 | + | 1.24 | 1.18 |
| ENSG0000(CYP2A7P1   | unprocessε chr19 | 41024268 | 41027720 | - | 0    | 0    |
| ENSG0000(OR2G1P     | unprocessε chr6  | 29229227 | 29230157 | - | 0    | 0    |
| ENSG0000(RPL13P     | processed_ chr6  | 28861416 | 28862047 | + | 0    | 0    |

|                    |                  |          |          |   |        |        |
|--------------------|------------------|----------|----------|---|--------|--------|
| ENSG0000(RPL5P8    | processed_chr2   | 2.14E+08 | 2.14E+08 | - | 0.65   | 1.2    |
| ENSG0000(DNASE1    | protein_co chr16 | 3611728  | 3680143  | + | 9.8    | 8.7    |
| ENSG0000(MDP1      | protein_co chr14 | 24213937 | 24216070 | - | 11.96  | 11.48  |
| ENSG0000(LEUTX     | protein_co chr19 | 39776595 | 39786167 | + | 0      | 0      |
| ENSG0000(CSNK1E    | protein_co chr22 | 38290691 | 38318084 | - | 65.82  | 62.51  |
| ENSG0000(HNRNPH1F  | processed_chrX   | 1.44E+08 | 1.44E+08 | - | 0      | 0      |
| ENSG0000(NPM1P33   | processed_chr2   | 2.04E+08 | 2.04E+08 | - | 0      | 0      |
| ENSG0000(MSRB1P1   | processed_chr19  | 39254916 | 39255269 | - | 0      | 0      |
| ENSG0000(CCL27     | protein_co chr9  | 34661880 | 34664048 | - | 0.13   | 0      |
| ENSG0000(IRF9      | protein_co chr14 | 24161053 | 24166565 | + | 37.89  | 36.55  |
| ENSG0000(GALT      | protein_co chr9  | 34638133 | 34651035 | + | 17.58  | 16     |
| ENSG0000(HBE1      | protein_co chr11 | 5268345  | 5505617  | - | 0      | 0      |
| ENSG0000(HBG1      | protein_co chr11 | 5248083  | 5249892  | - | 0.13   | 0.16   |
| ENSG0000(AC092610. | processed_chr7   | 4865432  | 4865804  | - | 0      | 0.26   |
| ENSG0000(CLDN9     | protein_co chr16 | 3012456  | 3014505  | + | 0      | 0      |
| ENSG0000(SEPHS1P6  | processed_chr2   | 2E+08    | 2E+08    | + | 0      | 0      |
| ENSG0000(RP11-314A | processed_chr17  | 4704816  | 4705217  | - | 0      | 0      |
| ENSG0000(RP11-94D2 | processed_chr5   | 53206561 | 53207176 | + | 0      | 0      |
| ENSG0000(RP1-102E2 | processed_chr12  | 6409637  | 6410013  | - | 0      | 0.26   |
| ENSG0000(KRT18P17  | processed_chr3   | 12787393 | 12788671 | - | 0      | 0      |
| ENSG0000(DNAJB1P1  | processed_chr2   | 1.92E+08 | 1.92E+08 | - | 0      | 0      |
| ENSG0000(ITGA1     | protein_co chr5  | 52787896 | 52959210 | + | 13.56  | 11.07  |
| ENSG0000(RPS10P2   | processed_chr20  | 14757563 | 14758056 | + | 0      | 0      |
| ENSG0000(ATP5HP3   | processed_chr9   | 14068932 | 14069417 | + | 0      | 0      |
| ENSG0000(RP11-269N | processed_chr5   | 50633124 | 50633602 | + | 0      | 0      |
| ENSG0000(KRT18P29  | processed_chr2   | 1.82E+08 | 1.82E+08 | - | 0      | 0      |
| ENSG0000(RP5-1100H | processed_chr20  | 38614913 | 38615476 | - | 0      | 0      |
| ENSG0000(API5P2    | processed_chr2   | 1.78E+08 | 1.78E+08 | - | 0      | 0      |
| ENSG0000(AC074286. | sense_ovei chr2  | 1.77E+08 | 1.77E+08 | - | 1.62   | 1.9    |
| ENSG0000(CHCHD4P4  | processed_chr3   | 11234256 | 11234582 | - | 0      | 0      |
| ENSG0000(NUDT19    | protein_co chr19 | 32691961 | 32713796 | + | 2.99   | 3.13   |
| ENSG0000(ZNF726    | protein_co chr19 | 23914876 | 23945159 | + | 0.53   | 0.41   |
| ENSG0000(RP11-264F | processed_chr12  | 4324372  | 4324811  | - | 0      | 0      |
| ENSG0000(RP3-522P1 | processed_chr6   | 25272200 | 25273751 | - | 0      | 0      |
| ENSG0000(ZNF99     | protein_co chr19 | 22752183 | 22784107 | - | 0      | 0.01   |
| ENSG0000(CTD-2561J | unprocessε chr19 | 21382865 | 21387177 | + | 0.22   | 0.14   |
| ENSG0000(TAX1BP3   | protein_co chr17 | 3662896  | 3668682  | - | 130.97 | 141.02 |
| ENSG0000(RPL7AP14  | processed_chr20  | 37444733 | 37445534 | - | 0      | 0      |
| ENSG0000(AC007277. | antisense chr2   | 1.71E+08 | 1.71E+08 | - | 0      | 0      |
| ENSG0000(AP1G2     | protein_co chr14 | 23559565 | 23568070 | - | 6.4    | 7.22   |
| ENSG0000(AC078899. | processed_chr19  | 20257720 | 20259418 | + | 0      | 0      |
| ENSG0000(RP11-399E | processed_chr1   | 41264550 | 41264862 | - | 0      | 0      |
| ENSG0000(ZNF90     | protein_co chr19 | 20077994 | 20127076 | + | 2.5    | 3.87   |
| ENSG0000(RP11-414H | antisense chr10  | 6197612  | 6202693  | - | 0      | 0      |
| ENSG0000(NAXD      | protein_co chr13 | 1.11E+08 | 1.11E+08 | + | 13.24  | 14.53  |



|                    |                  |          |          |   |        |        |
|--------------------|------------------|----------|----------|---|--------|--------|
| ENSG0000(TM6SF2    | protein_co chr19 | 19264364 | 19273391 | - | 0.69   | 0.94   |
| ENSG0000(PGAM1P7   | processed_chrX   | 46646594 | 46647330 | - | 0.09   | 0      |
| ENSG0000(MEF2B     | protein_co chr19 | 19145568 | 19170289 | - | 0.09   | 0.13   |
| ENSG0000(ATP5F1P3  | processed_chr7   | 1.53E+08 | 1.53E+08 | + | 0      | 0      |
| ENSG0000(PCNAP3    | processed_chrX   | 46058751 | 46059528 | - | 0      | 0      |
| ENSG0000(KRT18P38  | processed_chr6   | 19612755 | 19614036 | + | 0      | 0      |
| ENSG0000(GANC      | protein_co chr15 | 42273233 | 42356935 | + | 9.79   | 8.08   |
| ENSG0000(RPL32P23  | processed_chr10  | 6071514  | 6071918  | - | 0      | 0      |
| ENSG0000(RPSAP61   | processed_chrX   | 44741087 | 44741964 | + | 0      | 0      |
| ENSG0000(RRM2P3    | processed_chrX   | 44309314 | 44310476 | - | 0      | 0      |
| ENSG0000(RP6-218J1 | processed_chrX   | 44029332 | 44030921 | + | 0      | 0      |
| ENSG0000(FTLP4     | processed_chr9   | 30935485 | 30935977 | + | 0      | 0      |
| ENSG0000(TTLL3     | protein_co chr3  | 9808086  | 9855138  | + | 22.4   | 23.38  |
| ENSG0000(REPIN1    | protein_co chr7  | 1.5E+08  | 1.5E+08  | + | 32.22  | 33.47  |
| ENSG0000(RPL23AP2  | processed_chr2   | 1.53E+08 | 1.53E+08 | + | 0      | 0      |
| ENSG0000(ATP5F1P4  | processed_chr2   | 1.53E+08 | 1.53E+08 | + | 0      | 0      |
| ENSG0000(MRPL23    | protein_co chr11 | 1947278  | 1984522  | + | 21.88  | 23.31  |
| ENSG0000(ARPC3P5   | processed_chr6   | 15934782 | 15935315 | + | 0      | 0      |
| ENSG0000(ZNF891    | protein_co chr12 | 1.33E+08 | 1.33E+08 | - | 0.43   | 0.46   |
| ENSG0000(RP11-169L | processed_chrX   | 40760104 | 40761270 | - | 0      | 0      |
| ENSG0000(AC073310  | processed_chr7   | 1.45E+08 | 1.45E+08 | + | 0      | 0      |
| ENSG0000(RP11-474D | lincRNA chr12    | 1.3E+08  | 1.3E+08  | - | 0.03   | 0      |
| ENSG0000(PGAM1P4   | processed_chr3   | 9348443  | 9349192  | + | 0      | 0      |
| ENSG0000(IFNA7     | protein_co chr9  | 21201469 | 21202205 | - | 0      | 0      |
| ENSG0000(RP5-944M  | lincRNA chr12    | 1.26E+08 | 1.26E+08 | + | 0      | 0      |
| ENSG0000(RP6-186E3 | processed_chrX   | 40359183 | 40360726 | - | 0      | 0      |
| ENSG0000(SMIM7     | protein_co chr19 | 16630751 | 16660442 | - | 34.03  | 32.06  |
| ENSG0000(RPS11P7   | processed_chrX   | 39865424 | 39865888 | + | 0      | 0      |
| ENSG0000(UCA1      | processed_chr19  | 15828961 | 15836320 | + | 0      | 0      |
| ENSG0000(FBXO16    | protein_co chr8  | 28348287 | 28490318 | - | 0      | 0      |
| ENSG0000(ARF4P3    | processed_chr13  | 1.01E+08 | 1.01E+08 | - | 0      | 0      |
| ENSG0000(RPL7P17   | processed_chr4   | 77082403 | 77083126 | - | 0      | 0      |
| ENSG0000(TSPAN4    | protein_co chr11 | 842808   | 867116   | + | 113.88 | 126.25 |
| ENSG0000(RPL6P5    | processed_chr2   | 1.45E+08 | 1.45E+08 | + | 0      | 0      |
| ENSG0000(RP11-549L | processed_chr10  | 1.1E+08  | 1.1E+08  | + | 0      | 0.18   |
| ENSG0000(AC011999  | processed_chr2   | 1.36E+08 | 1.36E+08 | - | 0      | 0.07   |
| ENSG0000(RP11-31H1 | unprocessε chrX  | 37077851 | 37078401 | - | 0      | 0      |
| ENSG0000(RPL21P17  | processed_chr3   | 1905651  | 1906125  | + | 0      | 0      |
| ENSG0000(RPL23AP3  | processed_chr3   | 1730070  | 1730474  | + | 0      | 0      |
| ENSG0000(CPSF1P1   | processed_chr22  | 32269381 | 32273110 | + | 0      | 0      |
| ENSG0000(GNAQP1    | processed_chr2   | 1.31E+08 | 1.31E+08 | - | 0      | 0      |
| ENSG0000(CPNE1     | protein_co chr20 | 35626031 | 35664956 | - | 72.32  | 72.32  |
| ENSG0000(CYP4F30P  | transcribec chr2 | 1.31E+08 | 1.31E+08 | + | 0      | 0      |
| ENSG0000(ARL16     | protein_co chr17 | 81681174 | 81683924 | - | 23.7   | 25.34  |
| ENSG0000(RPL9P21   | processed_chr10  | 44414649 | 44415153 | - | 0      | 0      |

|                     |                   |          |          |   |       |       |
|---------------------|-------------------|----------|----------|---|-------|-------|
| ENSG0000(RP11-2471) | processed_chr22   | 31559483 | 31559939 | + | 0     | 0     |
| ENSG0000(SMCO1)     | protein_co chr3   | 1.97E+08 | 1.97E+08 | - | 0     | 0     |
| ENSG0000(PLAC9P1)   | transcribec chr2  | 1.3E+08  | 1.3E+08  | - | 0.42  | 0.93  |
| ENSG0000(WEE2)      | protein_co chr7   | 1.42E+08 | 1.42E+08 | + | 0     | 0     |
| ENSG0000(PAXIP1-AS) | antisense chr7    | 1.55E+08 | 1.55E+08 | + | 3.1   | 3.8   |
| ENSG0000(MAGEB1)    | protein_co chrX   | 30243730 | 30252038 | + | 0     | 0     |
| ENSG0000(TPT1P5)    | processed_chr5    | 31908361 | 31909186 | + | 0     | 0     |
| ENSG0000(LDHAP4)    | processed_chr9    | 14921337 | 14922334 | - | 4.27  | 3.49  |
| ENSG0000(RP1-258N2) | processed_chrX    | 25029545 | 25030235 | + | 0     | 0     |
| ENSG0000(LYRM4)     | protein_co chr6   | 5102593  | 5260939  | - | 15.54 | 17.45 |
| ENSG0000(MYCBP)     | protein_co chr1   | 38862964 | 38874105 | - | 1.25  | 3.42  |
| ENSG0000(PRDX1P1)   | processed_chr9    | 12972843 | 12973438 | - | 0     | 0     |
| ENSG0000(SNRPEP9)   | processed_chrX    | 24513450 | 24513687 | + | 0     | 0     |
| ENSG0000(RP3-412A9) | processed_chr22   | 31155966 | 31156647 | - | 0     | 0     |
| ENSG0000(TMEM213)   | protein_co chr7   | 1.39E+08 | 1.39E+08 | + | 0     | 0     |
| ENSG0000(RP11-420C) | processed_chr5    | 20304045 | 20305448 | - | 0     | 0     |
| ENSG0000(AC024560)  | transcribec chr3  | 1.98E+08 | 1.98E+08 | - | 6.67  | 7.29  |
| ENSG0000(PRCD)      | protein_co chr17  | 76527586 | 76553578 | + | 7.6   | 8.65  |
| ENSG0000(ACTN4P2)   | processed_chr1    | 37776670 | 37779418 | + | 0     | 0     |
| ENSG0000(RPL7P60)   | processed_chr7    | 1E+08    | 1E+08    | - | 0     | 0     |
| ENSG0000(RP11-488L) | processed_chr1    | 2.47E+08 | 2.47E+08 | + | 0     | 0.03  |
| ENSG0000(LINC00887) | lincRNA chr3      | 1.94E+08 | 1.94E+08 | - | 2.43  | 2.36  |
| ENSG0000(LINC02026) | lincRNA chr3      | 1.94E+08 | 1.94E+08 | - | 0     | 0     |
| ENSG0000(RP11-332P) | processed_chr3    | 1.91E+08 | 1.91E+08 | + | 0     | 0     |
| ENSG0000(ALG3)      | protein_co chr3   | 1.84E+08 | 1.84E+08 | - | 21    | 21.97 |
| ENSG0000(SDC4P)     | processed_chr22   | 30481311 | 30481911 | - | 0     | 0     |
| ENSG0000(AMZ2P1)    | transcribec chr17 | 64966550 | 64975576 | - | 4.5   | 5.41  |
| ENSG0000(PLEKHM1P)  | transcribec chr17 | 64779259 | 64837154 | - | 6.95  | 7.46  |
| ENSG0000(PPIAP23)   | processed_chr13   | 91272081 | 91272577 | - | 0     | 0     |
| ENSG0000(PTMAP5)    | transcribec chr13 | 81689911 | 81691072 | + | 0.21  | 0.23  |
| ENSG0000(GCC2-AS1)  | antisense chr2    | 1.09E+08 | 1.09E+08 | - | 1.27  | 0.28  |
| ENSG0000(XPOTP1)    | processed_chr20   | 34213495 | 34215892 | - | 0.28  | 0.18  |
| ENSG0000(ST7-OT4)   | sense_intr chr7   | 1.17E+08 | 1.17E+08 | + | 0.19  | 0.24  |
| ENSG0000(ZNF788)    | protein_co chr19  | 12092263 | 12137235 | + | 1.1   | 1.03  |
| ENSG0000(RNF152P1)  | processed_chr9    | 5418373  | 5418976  | - | 0     | 0     |
| ENSG0000(UBE2V1P2)  | processed_chr3    | 1.76E+08 | 1.76E+08 | - | 0     | 0     |
| ENSG0000(SH3D21)    | protein_co chr1   | 36306387 | 36324886 | + | 9.19  | 6.27  |
| ENSG0000(LINC00998) | protein_co chr7   | 1.13E+08 | 1.13E+08 | - | 17.85 | 17.2  |
| ENSG0000(HMGN2P3)   | processed_chr9    | 5311444  | 5311716  | + | 0     | 0     |
| ENSG0000(TTC41P)    | transcribec chr12 | 1.04E+08 | 1.04E+08 | - | 0.23  | 0.61  |
| ENSG0000(EEF1A1P12) | processed_chr2    | 1.07E+08 | 1.07E+08 | - | 0.21  | 0.09  |
| ENSG0000(TPM3P2)    | processed_chr20   | 33912323 | 33913336 | - | 0     | 0     |
| ENSG0000(RPS4XP1)   | processed_chr12   | 1E+08    | 1E+08    | - | 0.33  | 0     |
| ENSG0000(HNRNPA1P)  | processed_chr1    | 1.16E+08 | 1.16E+08 | - | 0     | 0     |
| ENSG0000(KRT18P10)  | processed_chrY    | 5573145  | 5574431  | + | 0     | 0     |

|                     |                  |          |          |   |       |        |
|---------------------|------------------|----------|----------|---|-------|--------|
| ENSG0000(RP11-208P) | processed_chr3   | 1.64E+08 | 1.64E+08 | - | 0     | 0.15   |
| ENSG0000(CTAGE14P)  | processed_chr2   | 1.68E+08 | 1.68E+08 | - | 0     | 0      |
| ENSG0000(C19orf38)  | protein_co chr19 | 10836575 | 10869790 | + | 0.3   | 0.32   |
| ENSG0000(C12orf74)  | protein_co chr12 | 92702843 | 92708549 | + | 0     | 0      |
| ENSG0000(IQCJ)      | protein_co chr3  | 1.59E+08 | 1.59E+08 | + | 0     | 0      |
| ENSG0000(TUBBP2)    | processed_chr13  | 41384773 | 41385183 | - | 0     | 0      |
| ENSG0000(HNRNPA1P)  | processed_chr19  | 11666069 | 11667030 | - | 0.23  | 0      |
| ENSG0000(C17orf67)  | protein_co chr17 | 56791913 | 56838773 | - | 0.64  | 0.91   |
| ENSG0000(MINDY4B)   | protein_co chr3  | 1.51E+08 | 1.51E+08 | - | 0     | 0      |
| ENSG0000(AC004980)  | processed_chr7   | 76650401 | 76650897 | - | 0     | 0      |
| ENSG0000(SETP21)    | processed_chr5   | 60459848 | 60460739 | - | 0     | 0      |
| ENSG0000(PUDPP3)    | processed_chr20  | 33047517 | 33048152 | - | 0     | 0      |
| ENSG0000(CTD-3193C) | antisense chr19  | 7898804  | 7903542  | - | 0.06  | 0.05   |
| ENSG0000(CTAGE11P)  | processed_chr13  | 75237944 | 75240296 | - | 0.07  | 0.03   |
| ENSG0000(AZGP1P2)   | unprocessε chr7  | 1.01E+08 | 1.01E+08 | - | 0     | 0      |
| ENSG0000(FIS1)      | protein_co chr7  | 1.01E+08 | 1.01E+08 | - | 92.84 | 109.12 |
| ENSG0000(AC136896)  | processed_chr15  | 27208089 | 27208635 | - | 0     | 0      |
| ENSG0000(RPS2P6)    | processed_chr18  | 70430231 | 70431125 | + | 0.14  | 0      |
| ENSG0000(RP11-568J) | processed_chr16  | 85815873 | 85816536 | - | 0     | 0      |
| ENSG0000(ANKRD36B)  | transcribed chr1 | 1.68E+08 | 1.68E+08 | - | 0     | 0      |
| ENSG0000(RPSAP53)   | processed_chr13  | 67266845 | 67267706 | - | 0     | 0.08   |
| ENSG0000(KCTD9P4)   | processed_chr11  | 1.12E+08 | 1.12E+08 | + | 0     | 0      |
| ENSG0000(RP11-701H) | protein_co chr15 | 24955034 | 25000276 | + | 0.06  | 0      |
| ENSG0000(STARP1)    | processed_chr13  | 65309855 | 65310953 | - | 0     | 0      |
| ENSG0000(RPS3AP33)  | processed_chr8   | 7190901  | 7191563  | - | 0     | 0      |
| ENSG0000(LGMNP1)    | processed_chr13  | 64958097 | 64959396 | - | 0     | 0      |
| ENSG0000(AGGF1P1)   | processed_chr4   | 1.9E+08  | 1.9E+08  | + | 0     | 0      |
| ENSG0000(ANG)       | protein_co chr14 | 20684177 | 20698971 | + | 26.39 | 26.18  |
| ENSG0000(CTD-2228K) | processed_chr5   | 403731   | 404546   | - | 0     | 0      |
| ENSG0000(SCART1)    | protein_co chr10 | 1.33E+08 | 1.34E+08 | + | 0.36  | 0.24   |
| ENSG0000(RP11-553K) | processed_chr3   | 1.4E+08  | 1.4E+08  | - | 0     | 0      |
| ENSG0000(HMGN2P3)   | processed_chr13  | 59010332 | 59010604 | + | 0     | 0      |
| ENSG0000(KRT8P14)   | processed_chrX   | 45632292 | 45633733 | - | 0     | 0      |
| ENSG0000(RAD51AP1)  | processed_chr3   | 1.37E+08 | 1.37E+08 | - | 0     | 0      |
| ENSG0000(NPS)       | protein_co chr10 | 1.28E+08 | 1.28E+08 | + | 0     | 0      |
| ENSG0000(PDCL3P3)   | processed_chr3   | 17877455 | 17878169 | - | 0     | 0      |
| ENSG0000(HMGB3P1)   | processed_chr3   | 1.34E+08 | 1.34E+08 | + | 0     | 0      |
| ENSG0000(RPL39P5)   | transcribed chr3 | 1.34E+08 | 1.34E+08 | - | 0     | 0      |
| ENSG0000(COLCA2)    | protein_co chr11 | 1.11E+08 | 1.11E+08 | + | 0     | 0      |
| ENSG0000(APTR)      | lincRNA chr7     | 77657660 | 77696265 | - | 6.93  | 5.75   |
| ENSG0000(FOXO1B)    | processed_chr5   | 1.81E+08 | 1.81E+08 | - | 0     | 0      |
| ENSG0000(ALDOAP2)   | processed_chr10  | 1.26E+08 | 1.26E+08 | - | 0     | 0      |
| ENSG0000(MRPS21P6)  | processed_chr10  | 1.25E+08 | 1.25E+08 | + | 0     | 0      |
| ENSG0000(SPDYE3)    | protein_co chr7  | 1E+08    | 1E+08    | + | 0.03  | 0      |
| ENSG0000(RP11-91K8) | processed_chr3   | 1.33E+08 | 1.33E+08 | + | 0     | 0      |

|                                      |          |          |   |       |      |
|--------------------------------------|----------|----------|---|-------|------|
| ENSG0000(Metazoa_S misc_RNA chr3     | 39161270 | 39161520 | + | 0.79  | 0.58 |
| ENSG0000(MBLAC1 protein_co chr7      | 1E+08    | 1E+08    | + | 1.72  | 2.11 |
| ENSG0000(AZGP1P1 transcribed chr7    | 99980762 | 99987535 | + | 0     | 0    |
| ENSG0000(ATP5G1P6 processed_chr18    | 63496989 | 63497400 | + | 0     | 0    |
| ENSG0000(CXADRP1 processed_chr21     | 13676022 | 13677116 | + | 0     | 0    |
| ENSG0000(CBX1P4 processed_chrX       | 17282637 | 17283093 | + | 0     | 0    |
| ENSG0000(CBX1P2 processed_chrX       | 17099782 | 17100239 | - | 0     | 0    |
| ENSG0000(C3orf56 lincRNA chr3        | 1.27E+08 | 1.27E+08 | + | 0     | 0    |
| ENSG0000(RPL31P1 processed_chr21     | 43551229 | 43551600 | + | 0     | 0    |
| ENSG0000(SLC9B1P2 transcribed chr2   | 91883076 | 91931714 | - | 0     | 0    |
| ENSG0000(ABCD1P5 unprocessed chr2    | 91840601 | 91843802 | + | 0     | 0    |
| ENSG0000(RP11-252A transcribed chr16 | 74332402 | 74368240 | - | 5.48  | 3.97 |
| ENSG0000(CTAGE16P processed_chr13    | 58528615 | 58531026 | + | 0     | 0    |
| ENSG0000(FOXI3 protein_co chr2       | 88446787 | 88452656 | - | 0.04  | 0.02 |
| ENSG0000(SOGA3 protein_co chr6       | 1.27E+08 | 1.28E+08 | - | 0.29  | 0.2  |
| ENSG0000(ATP5F1P2 processed_chr7     | 94738652 | 94739411 | + | 0     | 0    |
| ENSG0000(OR4F13P transcribed chr15   | 1.02E+08 | 1.02E+08 | + | 0     | 0    |
| ENSG0000(CTB-180A7 transcribed chr19 | 6393809  | 6412404  | + | 0     | 0    |
| ENSG0000(OR1X5P unprocessed chr5     | 1.78E+08 | 1.78E+08 | - | 0     | 0    |
| ENSG0000(VAC14-AS1 antisense chr16   | 70755098 | 70773251 | + | 0.03  | 0    |
| ENSG0000(AC133644 processed_chr2     | 87565828 | 87566764 | - | 0     | 0    |
| ENSG0000(NEURL1B protein_co chr5     | 1.73E+08 | 1.73E+08 | + | 0.04  | 0.05 |
| ENSG0000(RPL18P10 processed_chr13    | 50099331 | 50099868 | + | 0     | 0    |
| ENSG0000(EFCAB9 protein_co chr5      | 1.72E+08 | 1.72E+08 | + | 0     | 0    |
| ENSG0000(RPS3AP36 processed_chr10    | 95594598 | 95595372 | + | 0     | 0    |
| ENSG0000(EIF4EP5 processed_chr8      | 14309033 | 14309672 | + | 0     | 0    |
| ENSG0000(HAUS3 protein_co chr4       | 2227464  | 2242164  | - | 2.73  | 3.26 |
| ENSG0000(AC009967 processed_chr2     | 1.7E+08  | 1.7E+08  | + | 0.21  | 0.18 |
| ENSG0000(RPLP2P1 processed_chr6      | 27965175 | 27965514 | + | 0     | 0    |
| ENSG0000(VSTM5 protein_co chr11      | 93818232 | 93850531 | - | 0     | 0.49 |
| ENSG0000(RP11-457K processed_chr3    | 1.1E+08  | 1.1E+08  | - | 0     | 0    |
| ENSG0000(LINC00488 lincRNA chr3      | 1.09E+08 | 1.09E+08 | + | 0     | 0    |
| ENSG0000(RPS3AP26 processed_chr7     | 98385801 | 98386584 | - | 0.22  | 0.12 |
| ENSG0000(TUBAP2 processed_chr11      | 90282560 | 90284172 | + | 0     | 0    |
| ENSG0000(KANSL1-AS antisense chr17   | 46193576 | 46196723 | + | 0.86  | 1.89 |
| ENSG0000(LCNL1 protein_co chr9       | 1.37E+08 | 1.37E+08 | + | 0.94  | 1.32 |
| ENSG0000(RAP1BP2 processed_chr3      | 1.04E+08 | 1.04E+08 | + | 0     | 0    |
| ENSG0000(LINC02085 lincRNA chr3      | 1.02E+08 | 1.02E+08 | + | 0     | 0    |
| ENSG0000(BBIP1 protein_co chr10      | 1.11E+08 | 1.11E+08 | - | 16.11 | 15.7 |
| ENSG0000(TRIM77 protein_co chr11     | 89710299 | 89717872 | + | 0     | 0    |
| ENSG0000(GNAT3 protein_co chr7       | 80458671 | 80512020 | - | 0     | 0    |
| ENSG0000(KRT18P13 processed_chr9     | 97698922 | 97700734 | + | 0     | 0    |
| ENSG0000(FAM149B1 processed_chr15    | 96756987 | 96758596 | + | 0     | 0    |
| ENSG0000(LRRC37A4F transcribed chr17 | 45506741 | 45550335 | - | 5     | 5.37 |
| ENSG0000(NPM1P10 processed_chr6      | 1.04E+08 | 1.04E+08 | - | 0     | 0    |

|                     |                   |          |          |   |        |        |
|---------------------|-------------------|----------|----------|---|--------|--------|
| ENSG0000(CYCSP6     | processed_chr2    | 78412793 | 78413094 | - | 0      | 0      |
| ENSG0000(AC068831.  | antisense_chr15   | 91022619 | 91036611 | + | 0.44   | 0      |
| ENSG0000(GOLGA2P8   | transcribed_chr15 | 90291962 | 90295683 | + | 0      | 0      |
| ENSG0000(NIFKP1     | processed_chr10   | 30380174 | 30381062 | + | 0      | 0      |
| ENSG0000(AS3MT      | protein_co_chr10  | 1.03E+08 | 1.03E+08 | + | 3.04   | 3.13   |
| ENSG0000(FAM185BP   | unprocessed_chr7  | 77083886 | 77122116 | - | 0.64   | 0.63   |
| ENSG0000(FAM187A    | protein_co_chr17  | 44899712 | 44905390 | + | 1.27   | 1.06   |
| ENSG0000(RCN1P2     | processed_chr13   | 45390353 | 45391267 | - | 1.43   | 0.56   |
| ENSG0000(PLIN5      | protein_co_chr19  | 4522531  | 4535224  | - | 0      | 0      |
| ENSG0000(RPL7P29    | processed_chr6    | 86970466 | 86971193 | + | 0      | 0      |
| ENSG0000(TPT1P6     | processed_chr6    | 85427453 | 85427966 | - | 0      | 0      |
| ENSG0000(SMARCE1P   | processed_chr2    | 26149204 | 26150731 | + | 0.05   | 0      |
| ENSG0000(RPSAP28    | processed_chr2    | 73370019 | 73370892 | + | 0      | 0      |
| ENSG0000(RPL7P1     | processed_chr5    | 1.5E+08  | 1.5E+08  | + | 0.2    | 0      |
| ENSG0000(OR7E148P   | unprocessed_chr12 | 8427640  | 8428610  | - | 0      | 0      |
| ENSG0000(SEC14L6    | protein_co_chr22  | 30522799 | 30546682 | - | 0.1    | 0.11   |
| ENSG0000(SPINK13    | protein_co_chr5   | 1.48E+08 | 1.48E+08 | + | 0      | 0      |
| ENSG0000(HIGD1C     | protein_co_chr12  | 50953922 | 50970506 | + | 0      | 0      |
| ENSG0000(NOTO       | protein_co_chr2   | 73202258 | 73212513 | + | 0      | 0      |
| ENSG0000(KRT42P     | transcribed_chr17 | 41626327 | 41640199 | - | 0.2    | 0.06   |
| ENSG0000(PPME1      | protein_co_chr11  | 74171099 | 74254703 | + | 20.85  | 21.45  |
| ENSG0000(KRTAP2-2   | protein_co_chr17  | 41054498 | 41055230 | - | 0      | 0      |
| ENSG0000(AC130709.  | processed_chr2    | 68528241 | 68529452 | - | 0      | 0      |
| ENSG0000(AP000343.  | processed_chr22   | 23322543 | 23322927 | - | 0      | 0      |
| ENSG0000(STARD10    | protein_co_chr11  | 72754729 | 72794168 | - | 10.34  | 11.36  |
| ENSG0000(KRT18P33   | processed_chr2    | 65666695 | 65667737 | + | 0      | 0      |
| ENSG0000(ZNF705E    | protein_co_chr11  | 71814045 | 71821548 | - | 0      | 0      |
| ENSG0000(RPS15AP1   | processed_chr20   | 21166206 | 21166596 | - | 0.44   | 1.46   |
| ENSG0000(RPS4XP3    | processed_chr20   | 56601701 | 56602113 | + | 0      | 0      |
| ENSG0000(GTF2IRD2P  | transcribed_chr7  | 73242751 | 73280119 | - | 0.05   | 0.05   |
| ENSG0000(AC087491.  | lincRNA_chr17     | 39619613 | 39622513 | + | 0      | 0      |
| ENSG0000(MEG3       | lincRNA_chr14     | 1.01E+08 | 1.01E+08 | + | 106.56 | 107.96 |
| ENSG0000(SDHCP2     | processed_chr10   | 92118664 | 92119164 | + | 0      | 0      |
| ENSG0000(COPS8P2    | processed_chr3    | 68145004 | 68145630 | + | 0      | 0      |
| ENSG0000(LRRC37A11  | transcribed_chr17 | 39027277 | 39053205 | + | 0      | 0      |
| ENSG0000(RP11-74E2  | processed_chr6    | 65302522 | 65304957 | + | 0      | 0      |
| ENSG0000(RP11-323J. | antisense_chr4    | 98251688 | 98261630 | - | 0.48   | 0.24   |
| ENSG0000(RPL21P41   | processed_chr3    | 66637149 | 66637412 | + | 0      | 0      |
| ENSG0000(RBBP4P4    | processed_chr6    | 58119741 | 58121029 | - | 0      | 0      |
| ENSG0000(NUTM2D     | protein_co_chr10  | 87357668 | 87370695 | + | 3.22   | 2.54   |
| ENSG0000(GAPDHP15   | processed_chr6    | 57967687 | 57968661 | - | 0      | 0      |
| ENSG0000(CPEB1      | protein_co_chr15  | 82543201 | 82648861 | - | 5.95   | 4.47   |
| ENSG0000(HMGN2P1.   | processed_chr17   | 42753530 | 42753799 | - | 0.89   | 1      |
| ENSG0000(ZNF971P    | transcribed_chr16 | 35446898 | 35449411 | - | 0      | 0      |
| ENSG0000(PGGT1BP2   | processed_chr10   | 79892148 | 79893175 | - | 0      | 0      |

|                     |                   |          |          |   |       |       |
|---------------------|-------------------|----------|----------|---|-------|-------|
| ENSG0000(RP11-65N1) | processed_chr9    | 1.25E+08 | 1.25E+08 | - | 0     | 0     |
| ENSG0000(EML6)      | protein_co chr2   | 54723499 | 54972025 | + | 0.26  | 0.46  |
| ENSG0000(CTBP2P5)   | processed_chr2    | 48915267 | 48916530 | - | 0     | 0     |
| ENSG0000(NPM1P36)   | processed_chr6    | 55939790 | 55940624 | - | 0     | 0     |
| ENSG0000(ADAM24P)   | unitary_ps chr8   | 17469518 | 17471618 | + | 0     | 0     |
| ENSG0000(RPS19P1)   | processed_chr20   | 18504633 | 18505066 | + | 0     | 0.61  |
| ENSG0000(RP11-989E) | lincRNA chr16     | 32885194 | 32888874 | + | 0     | 0     |
| ENSG0000(SLC6A10P)  | transcribed chr16 | 32877469 | 32885501 | - | 0.13  | 0.18  |
| ENSG0000(POLR3DP1)  | processed_chr10   | 74654956 | 74656131 | + | 0     | 0.06  |
| ENSG0000(NDUFB5P2)  | processed_chrX    | 96953630 | 96954195 | - | 0     | 0     |
| ENSG0000(RPSAP6)    | processed_chr10   | 74371535 | 74372416 | + | 0     | 0     |
| ENSG0000(RP11-793K) | processed_chr6    | 51537155 | 51537543 | - | 0     | 0     |
| ENSG0000(DEFB113)   | protein_co chr6   | 49968677 | 49969625 | - | 0     | 0     |
| ENSG0000(DEFB133)   | protein_co chr6   | 49946021 | 49950265 | - | 0     | 0     |
| ENSG0000(RP11-114H) | transcribed chr15 | 77941442 | 77944582 | - | 0     | 0     |
| ENSG0000(RP11-83B2) | lincRNA chr12     | 1.25E+08 | 1.25E+08 | + | 0.05  | 0.05  |
| ENSG0000(RP11-477J) | processed_chr9    | 1.21E+08 | 1.21E+08 | - | 0     | 0     |
| ENSG0000(ZNF727)    | protein_co chr7   | 64045443 | 64078549 | + | 0     | 0     |
| ENSG0000(HNRNPA3F)  | processed_chrX    | 1.4E+08  | 1.4E+08  | + | 0     | 0     |
| ENSG0000(RP11-271I) | protein_co chr9   | 1.21E+08 | 1.21E+08 | + | 1.43  | 1.94  |
| ENSG0000(ZSWIM8)    | protein_co chr10  | 73785582 | 73801797 | + | 39.01 | 37.05 |
| ENSG0000(RP11-120J) | processed_chr2    | 15869939 | 15870243 | + | 0     | 0     |
| ENSG0000(KRT8P26)   | processed_chr11   | 65726939 | 65728214 | + | 0     | 0     |
| ENSG0000(SLC29A4P2) | unprocessed chr7  | 63556598 | 63562588 | + | 0     | 0     |
| ENSG0000(SLC29A4P1) | unprocessed chr7  | 57014285 | 57020273 | - | 0     | 0     |
| ENSG0000(RP11-18B1) | processed_chr9    | 1.14E+08 | 1.14E+08 | - | 0     | 0     |
| ENSG0000(RPL6P12)   | processed_chr4    | 1.69E+08 | 1.69E+08 | + | 0     | 0     |
| ENSG0000(RPL9P16)   | processed_chr4    | 1.69E+08 | 1.69E+08 | + | 0     | 0     |
| ENSG0000(IQCF5)     | protein_co chr3   | 51873721 | 51875584 | - | 0     | 0     |
| ENSG0000(AC003045)  | processed_chr7    | 1.17E+08 | 1.17E+08 | - | 0     | 0     |
| ENSG0000(IQCF6)     | protein_co chr3   | 51778561 | 51779187 | - | 0     | 0     |
| ENSG0000(C10orf105) | protein_co chr10  | 71711702 | 71737824 | - | 0.06  | 0.06  |
| ENSG0000(LINC01913) | lincRNA chr2      | 41877074 | 41894046 | + | 0.09  | 0     |
| ENSG0000(ARHGEF33)  | protein_co chr2   | 38889880 | 38975449 | + | 0.69  | 0.27  |
| ENSG0000(NPAP1P2)   | processed_chr10   | 79860573 | 79861806 | + | 0     | 0     |
| ENSG0000(C12orf71)  | protein_co chr12  | 27081058 | 27082514 | - | 0     | 0     |
| ENSG0000(RP11-247C) | unprocessed chr15 | 74097106 | 74098414 | - | 0     | 0     |
| ENSG0000(IFRD2)     | protein_co chr3   | 50287732 | 50292918 | - | 12.8  | 10.89 |
| ENSG0000(AC090616)  | antisense chr17   | 32141226 | 32143135 | - | 0.11  | 0.24  |
| ENSG0000(CAPN14)    | protein_co chr2   | 31173056 | 31233858 | - | 0     | 0.05  |
| ENSG0000(ZBED1)     | protein_co chrX   | 2486414  | 2500967  | - | 6.12  | 5.56  |
| ENSG0000(ZBED1)     | protein_co chrY   | 2486414  | 2500967  | - | 6.12  | 5.56  |
| ENSG0000(AC005562)  | processed_chr17   | 30576464 | 30672789 | + | 3.77  | 3.11  |
| ENSG0000(KRT18P49)  | processed_chrX    | 1.07E+08 | 1.07E+08 | + | 0     | 0     |
| ENSG0000(CDIPT-AS1) | transcribed chr16 | 29863593 | 29868053 | + | 0     | 0.3   |

|                     |             |       |          |          |   |       |       |
|---------------------|-------------|-------|----------|----------|---|-------|-------|
| ENSG0000(RPL5P35    | unprocessε  | chr22 | 49757627 | 49758980 | - | 0     | 0     |
| ENSG0000(RP1-139D8  | protein_co  | chr6  | 42155426 | 42163439 | + | 0     | 0     |
| ENSG0000(TOMM6      | protein_co  | chr6  | 41787662 | 41789898 | + | 70.58 | 69.73 |
| ENSG0000(MRPS5P3    | processed_  | chr5  | 1.27E+08 | 1.27E+08 | - | 0     | 0     |
| ENSG0000(RP11-54I5. | processed_  | chrX  | 55961208 | 55962482 | + | 0     | 0     |
| ENSG0000(RP11-332E  | processed_  | chrX  | 1.37E+08 | 1.37E+08 | - | 0     | 0     |
| ENSG0000(HNRNPUL2   | protein_co  | chr11 | 62712630 | 62727349 | - | 16.06 | 15.69 |
| ENSG0000(AC004870.  | processed_  | chr7  | 47052793 | 47053674 | + | 0     | 0     |
| ENSG0000(METTL12    | protein_co  | chr11 | 62665309 | 62668496 | + | 3.5   | 3     |
| ENSG0000(CTD-2509C  | processed_  | chr14 | 65268829 | 65269098 | + | 0     | 0     |
| ENSG0000(RPL21P1    | processed_  | chr12 | 1.22E+08 | 1.22E+08 | + | 0     | 0     |
| ENSG0000(HNRNPA1P   | processed_  | chr9  | 1.26E+08 | 1.26E+08 | + | 0     | 0.07  |
| ENSG0000(SEPT7P2    | transcribec | chr7  | 45723780 | 45768985 | - | 4.52  | 2.94  |
| ENSG0000(RP11-544I  | antisense   | chr14 | 64329431 | 64338599 | - | 0.15  | 0.37  |
| ENSG0000(RP11-174G  | antisense   | chr12 | 14665655 | 14757963 | + | 0     | 0     |
| ENSG0000(RP11-717D  | sense_intr  | chr3  | 47601715 | 47604677 | - | 0     | 0     |
| ENSG0000(RP11-726G  | protein_co  | chr12 | 9467552  | 9576275  | + | 0.01  | 0.03  |
| ENSG0000(MS4A18     | protein_co  | chr11 | 60729304 | 60744212 | + | 0     | 0     |
| ENSG0000(POLR2J4    | processed_  | chr7  | 43940895 | 44019175 | - | 2.22  | 1.96  |
| ENSG0000(AC010468.  | processed_  | chr5  | 1.11E+08 | 1.11E+08 | - | 0.05  | 0     |
| ENSG0000(MS4A4E     | protein_co  | chr11 | 60201253 | 60243088 | - | 1.51  | 1.28  |
| ENSG0000(OOSP1      | unitary_ps  | chr11 | 59938455 | 59995845 | + | 0     | 0     |
| ENSG0000(KRT18P42   | processed_  | chr5  | 1.1E+08  | 1.1E+08  | + | 0     | 0     |
| ENSG0000(RP11-480I  | transcribec | chr1  | 2.03E+08 | 2.03E+08 | - | 0     | 0.35  |
| ENSG0000(RP11-1036  | lincRNA     | chr11 | 59268876 | 59284033 | - | 0     | 0     |
| ENSG0000(RP11-37N2  | lincRNA     | chr8  | 1.24E+08 | 1.24E+08 | - | 0.11  | 0     |
| ENSG0000(NPM1P31    | processed_  | chr10 | 1.25E+08 | 1.25E+08 | + | 0     | 0     |
| ENSG0000(CYCSP55    | processed_  | chr6  | 34219439 | 34220066 | + | 0     | 0     |
| ENSG0000(RP5-1053E  | processed_  | chr1  | 28120449 | 28121321 | - | 0     | 0     |
| ENSG0000(FER1L6     | protein_co  | chr8  | 1.24E+08 | 1.24E+08 | + | 0.88  | 0.84  |
| ENSG0000(IMPDH1P3   | processed_  | chr7  | 1.38E+08 | 1.38E+08 | + | 0     | 0     |
| ENSG0000(CDRT15L2   | protein_co  | chr17 | 20579724 | 20580911 | + | 0     | 0     |
| ENSG0000(MPRIPP1    | processed_  | chr3  | 44579938 | 44581026 | - | 0     | 0.06  |
| ENSG0000(HMGB1P4    | processed_  | chr2  | 1.71E+08 | 1.71E+08 | - | 0     | 0     |
| ENSG0000(KRT16P3    | transcribec | chr17 | 20501513 | 20512357 | - | 0     | 0     |
| ENSG0000(NXT1P1     | processed_  | chr13 | 39169636 | 39169951 | - | 0     | 0     |
| ENSG0000(EI24P3     | processed_  | chr3  | 44524744 | 44525805 | - | 0     | 0     |
| ENSG0000(DDX12P     | unprocessε  | chr12 | 9418673  | 9448229  | - | 0.1   | 0.06  |
| ENSG0000(MTCP1      | protein_co  | chrX  | 1.55E+08 | 1.55E+08 | - | 8.29  | 11.71 |
| ENSG0000(UPF3AP2    | transcribec | chr17 | 20375369 | 20376840 | - | 0.19  | 0     |
| ENSG0000(RPL23AP6   | processed_  | chr20 | 10349157 | 10349628 | - | 0     | 0     |
| ENSG0000(LINC01347  | transcribec | chr1  | 2.43E+08 | 2.43E+08 | - | 0.53  | 0.52  |
| ENSG0000(RAD51AP2   | protein_co  | chr2  | 17510584 | 17518439 | - | 0     | 0     |
| ENSG0000(ZFYVE9P2   | processed_  | chr2  | 17284292 | 17284895 | + | 0     | 0     |
| ENSG0000(RP11-115L  | processed_  | chr4  | 15730962 | 15731627 | - | 0     | 0     |

|                      |              |       |          |          |   |      |      |
|----------------------|--------------|-------|----------|----------|---|------|------|
| ENSG0000(LINC00612)  | processed_ch | 12    | 9055586  | 9065070  | - | 0.02 | 0.03 |
| ENSG0000(RP11-509N)  | processed_ch | 5     | 84999812 | 85000315 | - | 0    | 0    |
| ENSG0000(APOC1P1)    | transcribed  | chr19 | 44926804 | 44931386 | + | 0    | 0    |
| ENSG0000(KRT16P1)    | transcribed  | chr17 | 18432051 | 18442895 | + | 0    | 0    |
| ENSG0000(SEM1P1)     | processed_ch | 5     | 81892490 | 81892721 | + | 0    | 0    |
| ENSG0000(EVPLL)      | protein_co   | chr17 | 18377662 | 18389647 | + | 0    | 0    |
| ENSG0000(DCDC2C)     | protein_co   | chr2  | 3703592  | 3847411  | + | 0    | 0    |
| ENSG0000(SRSF9P1)    | processed_ch | 21    | 36295173 | 36295702 | - | 0    | 0    |
| ENSG0000(TPM3P4)     | processed_ch | 7     | 27023737 | 27024907 | + | 0    | 0    |
| ENSG0000(AC004540)   | lincRNA      | chr7  | 26398593 | 26494256 | + | 0    | 0    |
| ENSG0000(SMTNL1)     | protein_co   | chr11 | 57542641 | 57550274 | + | 0    | 0    |
| ENSG0000(MED28P1)    | processed_ch | 10    | 68991137 | 68991707 | + | 0    | 0    |
| ENSG0000(RPL5P31)    | processed_ch | 13    | 51161723 | 51162357 | - | 0    | 0    |
| ENSG0000(OR7E5P)     | unprocess    | chr11 | 55979398 | 55980103 | - | 0    | 0    |
| ENSG0000(TMEM14D)    | processed_ch | 10    | 68544489 | 68544833 | - | 0    | 0    |
| ENSG0000(RP11-574N)  | unprocess    | chr11 | 50409042 | 50422316 | + | 0    | 0    |
| ENSG0000(FAM177A1)   | processed_ch | 4     | 98955982 | 98956767 | + | 0    | 0    |
| ENSG0000(XXyac-YM2)  | antisense    | chr9  | 87857015 | 87859399 | - | 0    | 0    |
| ENSG0000(RPS9P1)     | processed_ch | 21    | 36132450 | 36133032 | + | 0    | 0    |
| ENSG0000(CTD-2299I)  | processed_ch | 5     | 79000112 | 79001124 | - | 0    | 0    |
| ENSG0000(TRIM64C)    | protein_co   | chr11 | 49053714 | 49059112 | - | 0    | 0    |
| ENSG0000(USP8P1)     | processed_ch | 6     | 31275572 | 31278754 | + | 0    | 0    |
| ENSG0000(LINC00243)  | lincRNA      | chr6  | 30798654 | 30830659 | - | 0.03 | 0.1  |
| ENSG0000(RPSAP55)    | processed_ch | 15    | 52885595 | 52886470 | + | 0    | 0    |
| ENSG0000(U82695.5)   | protein_co   | chrX  | 1.53E+08 | 1.53E+08 | - | 0    | 0    |
| ENSG0000(LINC01588)  | lincRNA      | chr14 | 49927571 | 50092643 | - | 0.18 | 0.29 |
| ENSG0000(RPS15AP3)   | processed_ch | 14    | 47444106 | 47444494 | - | 0    | 0    |
| ENSG0000(DUTP8)      | processed_ch | 4     | 98048555 | 98049043 | + | 0    | 0    |
| ENSG0000(RP11-229N)  | processed_ch | 9     | 86374966 | 86375706 | - | 0    | 0    |
| ENSG0000(RPL23AP3)   | processed_ch | 21    | 36016079 | 36016546 | - | 0    | 0    |
| ENSG0000(XX-FW802)   | lincRNA      | chrX  | 1.52E+08 | 1.52E+08 | + | 0    | 0    |
| ENSG0000(RP11-5316)  | processed_ch | 18    | 32075885 | 32076272 | - | 0    | 0    |
| ENSG0000(RP11-674E)  | sense_intr   | chr3  | 1.56E+08 | 1.56E+08 | - | 0.25 | 0.04 |
| ENSG0000(HLA-F-AS1)  | processed_ch | 6     | 29726601 | 29749049 | - | 2.16 | 2.23 |
| ENSG0000(RP3-507I15) | processed_ch | X     | 1.41E+08 | 1.41E+08 | + | 0    | 0    |
| ENSG0000(SPATA31D)   | protein_co   | chr9  | 81988772 | 81995256 | + | 0    | 0    |
| ENSG0000(KRT8P6)     | processed_ch | X     | 1.38E+08 | 1.38E+08 | - | 0    | 0    |
| ENSG0000(NPIPA8)     | protein_co   | chr16 | 18317942 | 18336736 | - | 0.24 | 0    |
| ENSG0000(ZSWIM7)     | protein_co   | chr17 | 15976560 | 15999717 | - | 5.37 | 5.96 |
| ENSG0000(AC113167)   | lincRNA      | chr5  | 89900664 | 89904908 | + | 0    | 0.22 |
| ENSG0000(GPR33)      | protein_co   | chr14 | 31482875 | 31488142 | - | 0    | 0    |
| ENSG0000(ARHGEF28)   | protein_co   | chr5  | 73626158 | 73941993 | + | 5.25 | 5.76 |
| ENSG0000(TBC1D26)    | protein_co   | chr17 | 15732247 | 15749192 | + | 0    | 0    |
| ENSG0000(LRRC69)     | protein_co   | chr8  | 91101832 | 91219236 | + | 0.64 | 0.33 |
| ENSG0000(AP000318)   | lincRNA      | chr21 | 34205055 | 34325034 | + | 0    | 0    |



|                 |            |            |       |          |          |   |       |       |
|-----------------|------------|------------|-------|----------|----------|---|-------|-------|
| ENSG00000181500 | ISPD       | protein_co | chr7  | 16087527 | 16421322 | - | 0.43  | 0.39  |
| ENSG00000181501 | RP11-355K  | processed  | chrX  | 1.34E+08 | 1.34E+08 | + | 0     | 0     |
| ENSG00000181502 | NPIPA7     | protein_co | chr16 | 16379055 | 16393954 | + | 3.38  | 3.6   |
| ENSG00000181503 | CTC-297N7  | antisense  | chr17 | 10579040 | 10623036 | + | 0     | 0     |
| ENSG00000181504 | CHCHD3P3   | processed  | chr1  | 27200834 | 27201473 | - | 0     | 0     |
| ENSG00000181505 | PPIAP29    | processed  | chr6  | 24976419 | 24976982 | + | 0.16  | 0     |
| ENSG00000181506 | VDAC2P1    | processed  | chr21 | 16094415 | 16095372 | - | 0     | 0     |
| ENSG00000181507 | GSG1L2     | protein_co | chr17 | 9802386  | 9822071  | - | 0     | 0     |
| ENSG00000181508 | RP11-274J  | processed  | chr4  | 84244003 | 84245488 | + | 0     | 0     |
| ENSG00000181509 | RPL7AP26   | processed  | chr4  | 82490823 | 82491635 | - | 0     | 0     |
| ENSG00000181510 | AKAP17BP   | unprocess  | chrX  | 1.19E+08 | 1.19E+08 | - | 0     | 0     |
| ENSG00000181511 | CCNB2P1    | processed  | chr7  | 7909300  | 7910449  | - | 0     | 0     |
| ENSG00000181512 | AC129492   | antisense  | chr17 | 8079482  | 8081565  | + | 0.09  | 0     |
| ENSG00000181513 | RP1-31B8.1 | processed  | chrX  | 1.09E+08 | 1.09E+08 | + | 0     | 0     |
| ENSG00000181514 | RPL23AP59  | processed  | chr10 | 1.07E+08 | 1.07E+08 | + | 0     | 0     |
| ENSG00000181515 | RPL15P20   | processed  | chr16 | 15931697 | 15932294 | - | 0     | 0.13  |
| ENSG00000181516 | MESTP4     | processed  | chr3  | 29087396 | 29088599 | + | 0     | 0     |
| ENSG00000181517 | HSPD1P7    | processed  | chr21 | 28887280 | 28889272 | - | 0     | 0     |
| ENSG00000181518 | CHCHD2P2   | processed  | chr5  | 69333929 | 69334249 | + | 0     | 0     |
| ENSG00000181519 | DNAJA1P3   | processed  | chrX  | 1.07E+08 | 1.07E+08 | - | 0     | 0.05  |
| ENSG00000181520 | ACSM4      | protein_co | chr12 | 7304284  | 7328724  | + | 0     | 0     |
| ENSG00000181521 | C22orf29   | protein_co | chr22 | 19846138 | 19854896 | - | 3.09  | 3.71  |
| ENSG00000181522 | RP5-832C2  | lincRNA    | chr1  | 1574975  | 1577075  | + | 0.62  | 0.56  |
| ENSG00000181523 | RPL24P7    | processed  | chr3  | 23134372 | 23134824 | + | 0     | 0     |
| ENSG00000181524 | COL28A1    | protein_co | chr7  | 7356203  | 7535853  | - | 0.19  | 0.27  |
| ENSG00000181525 | PHB2       | protein_co | chr12 | 6965327  | 6970825  | - | 77.12 | 75.53 |
| ENSG00000181526 | RP1-257A7  | antisense  | chr6  | 13264861 | 13295586 | - | 1.47  | 0.52  |
| ENSG00000181527 | AC114730   | antisense  | chr2  | 2.42E+08 | 2.42E+08 | - | 0     | 0     |
| ENSG00000181528 | TCP11X2    | protein_co | chrX  | 1.02E+08 | 1.02E+08 | - | 0     | 0     |
| ENSG00000181529 | RPL13P12   | processed  | chr17 | 17383377 | 17384012 | - | 15.59 | 16.4  |
| ENSG00000181530 | GNL3LP1    | processed  | chr5  | 60891935 | 60893577 | - | 0.17  | 0     |
| ENSG00000181531 | DSTNP4     | processed  | chr3  | 39214199 | 39214672 | + | 0     | 0     |
| ENSG00000181532 | FDPSP5     | processed  | chrX  | 44476027 | 44477422 | - | 0     | 0     |
| ENSG00000181533 | VENTXP2    | processed  | chr13 | 83907301 | 83907781 | - | 0     | 0     |
| ENSG00000181534 | CD27-AS1   | processed  | chr12 | 6439001  | 6451567  | - | 23.35 | 23.02 |
| ENSG00000181535 | NEURL4     | protein_co | chr17 | 7315628  | 7329393  | - | 7.68  | 7.31  |
| ENSG00000181536 | GLULP6     | processed  | chr2  | 1.94E+08 | 1.94E+08 | - | 0     | 0     |
| ENSG00000181537 | GRID2IP    | protein_co | chr7  | 6497462  | 6551436  | - | 0     | 0     |
| ENSG00000181538 | PRDX2P1    | processed  | chr13 | 30296147 | 30296735 | + | 0     | 0     |
| ENSG00000181539 | HNRNPCP1   | processed  | chrX  | 1.45E+08 | 1.45E+08 | + | 0     | 0     |
| ENSG00000181540 | PKMP5      | processed  | chr6  | 5972412  | 5974012  | + | 0     | 0     |
| ENSG00000181541 | RPL21P2    | processed  | chr20 | 4059633  | 4060113  | - | 0     | 0     |
| ENSG00000181542 | DUSP8P4    | processed  | chr10 | 47564256 | 47566016 | + | 0     | 0     |
| ENSG00000181543 | ALOX12-AS  | antisense  | chr17 | 6876635  | 7012349  | - | 7.52  | 8.2   |
| ENSG00000181544 | AC025171   | antisense  | chr5  | 43041575 | 43045390 | + | 1.97  | 2.68  |

|                    |                   |          |          |   |      |       |
|--------------------|-------------------|----------|----------|---|------|-------|
| ENSG0000(XRCC6P5   | processed_ chrX   | 99719364 | 99721158 | - | 0    | 0     |
| ENSG0000(RP11-471G | processed_ chrX   | 95584303 | 95584942 | + | 0    | 0     |
| ENSG0000(NPM1P24   | processed_ chr10  | 72917641 | 72918534 | - | 0    | 0     |
| ENSG0000(RPS5P3    | processed_ chr21  | 33481580 | 33482195 | - | 0    | 0     |
| ENSG0000(KRT18P11  | processed_ chrX   | 92459670 | 92460952 | + | 0    | 0     |
| ENSG0000(EEF1A1P29 | processed_ chrX   | 86160264 | 86161359 | - | 0    | 0     |
| ENSG0000(RP11-244K | processed_ chr6   | 1.5E+08  | 1.5E+08  | + | 0    | 0     |
| ENSG0000(IFITM8P   | processed_ chr8   | 63409064 | 63409457 | + | 0    | 0     |
| ENSG0000(DUSP8P3   | processed_ chr10  | 46774421 | 46776180 | - | 0.13 | 0.07  |
| ENSG0000(TERF1P4   | processed_ chrX   | 83748825 | 83749939 | - | 0    | 0     |
| ENSG0000(TTC3P1    | processed_ chrX   | 75740831 | 75746911 | - | 1    | 1.16  |
| ENSG0000(UGT2B25P  | processed_ chr4   | 69389492 | 69402081 | + | 0    | 0     |
| ENSG0000(FAM74A1   | lincRNA chr9      | 39371065 | 39376916 | + | 0    | 0     |
| ENSG0000(CXorf49B  | protein_co chrX   | 71763424 | 71767204 | + | 0.07 | 0.08  |
| ENSG0000(UBXN2B    | protein_co chr8   | 58411264 | 58451501 | + | 8.72 | 6.99  |
| ENSG0000(CXorf49   | protein_co chrX   | 71714371 | 71718151 | - | 0.07 | 0.08  |
| ENSG0000(LINC00588 | lincRNA chr8      | 57279543 | 57284731 | + | 0.03 | 0     |
| ENSG0000(AL590763. | processed_ chrX   | 71527814 | 71530225 | - | 0    | 0     |
| ENSG0000(AMD1P4    | processed_ chr6   | 11861626 | 11862970 | - | 0    | 0.05  |
| ENSG0000(CBWD7     | protein_co chr9   | 41131306 | 41199261 | - | 3.85 | 2.91  |
| ENSG0000(SYT14P1   | transcribed chr4  | 68061822 | 68063269 | - | 0    | 0     |
| ENSG0000(C16orf90  | protein_co chr16  | 3493484  | 3495480  | - | 0    | 0     |
| ENSG0000(RP11-313J | transcribed chr10 | 42331866 | 42367974 | - | 0    | 0     |
| ENSG0000(PRSS41    | protein_co chr16  | 2798485  | 2805302  | + | 0    | 0     |
| ENSG0000(KRT18P32  | processed_ chr1   | 2.38E+08 | 2.38E+08 | + | 0    | 0     |
| ENSG0000(ABCD1P2   | unprocessε chr10  | 38601418 | 38605609 | + | 0    | 0     |
| ENSG0000(AC141586. | transcribed chr16 | 2603350  | 2630494  | + | 1.64 | 1.55  |
| ENSG0000(RP11-1023 | processed_ chr5   | 34190056 | 34193653 | + | 0    | 0     |
| ENSG0000(RP11-1023 | transcribed chr5  | 34164698 | 34244796 | - | 2.87 | 1.79  |
| ENSG0000(RP11-629N | antisense chr12   | 64759521 | 64779318 | + | 0    | 0     |
| ENSG0000(OR7E122P  | unprocessε chr3   | 8688143  | 8689159  | + | 0    | 0     |
| ENSG0000(LINC00269 | lincRNA chrX      | 69179557 | 69209924 | + | 0.05 | 0.06  |
| ENSG0000(TCEA1P3   | processed_ chr9   | 38478471 | 38479350 | + | 0    | 0     |
| ENSG0000(RP11-30M  | processed_ chrX   | 66055587 | 66056587 | - | 0    | 0     |
| ENSG0000(NLRP2B    | protein_co chrX   | 57677067 | 57680260 | - | 0    | 0     |
| ENSG0000(IGLV8OR8- | IG_V_pseu chr8    | 47202444 | 47202897 | - | 0    | 0     |
| ENSG0000(MAPK6PS4  | processed_ chr8   | 46972476 | 46974617 | - | 0    | 0.09  |
| ENSG0000(MUC5AC    | protein_co chr11  | 1157953  | 1201138  | + | 0    | 0     |
| ENSG0000(MSMP      | protein_co chr9   | 35752990 | 35756613 | - | 0    | 0     |
| ENSG0000(RPS12P16  | processed_ chr10  | 34675635 | 34676041 | - | 0    | 0     |
| ENSG0000(GOLGA6B   | protein_co chr15  | 72654738 | 72666394 | + | 0    | 0     |
| ENSG0000(FAM166B   | protein_co chr9   | 35561831 | 35563899 | - | 0    | 0     |
| ENSG0000(LINC00680 | transcribed chr6  | 57946074 | 57961501 | - | 3.87 | 7.9   |
| ENSG0000(PEX26     | protein_co chr22  | 18077920 | 18131138 | + | 7.72 | 10.12 |
| ENSG0000(AC091878. | antisense chr5    | 17130028 | 17217047 | - | 0.06 | 0.04  |

|                                      |          |          |   |       |       |
|--------------------------------------|----------|----------|---|-------|-------|
| ENSG0000(PGAM4P1 processed_ chrX     | 54671985 | 54672638 | + | 0     | 0     |
| ENSG0000(RP11-182N processed_ chr9   | 35147410 | 35149184 | - | 0     | 0     |
| ENSG0000(YWHAZP6 processed_ chr9     | 34922184 | 34922921 | - | 1.68  | 2.04  |
| ENSG0000(GRXC1 protein_co chr4       | 42893267 | 43030658 | + | 0     | 0     |
| ENSG0000(TRBV24OR TR_V_pseu chr9     | 33649047 | 33649614 | + | 0     | 0     |
| ENSG0000(KRT18P60 processed_ chr12   | 65418731 | 65420027 | - | 0     | 0     |
| ENSG0000(RBMXP2 processed_ chr9      | 30689105 | 30690272 | + | 0     | 0.06  |
| ENSG0000(C5orf49 protein_co chr5     | 7830378  | 7851490  | - | 0.3   | 0.07  |
| ENSG0000(UBE2QL1 protein_co chr5     | 6448623  | 6494909  | + | 0     | 0.03  |
| ENSG0000(UBA52P6 processed_ chr9     | 22012155 | 22012536 | + | 0.23  | 0.25  |
| ENSG0000(CYP51A1P3 processed_ chr6   | 1.48E+08 | 1.48E+08 | + | 0     | 0     |
| ENSG0000(NUTF2P5 processed_ chr10    | 13870797 | 13871175 | + | 0     | 0     |
| ENSG0000(LINC01020 lincRNA chr5      | 5034359  | 5070004  | + | 0     | 0     |
| ENSG0000(RPL7P33 processed_ chr9     | 15361393 | 15362134 | + | 0     | 0     |
| ENSG0000(RP11-54D1 unprocessε chr9   | 14993312 | 15019729 | + | 0     | 0     |
| ENSG0000(RP11-266K lincRNA chr12     | 8235415  | 8242564  | + | 2.8   | 1.34  |
| ENSG0000(RP11-563J; lincRNA chr10    | 6277687  | 6335982  | + | 0.04  | 0     |
| ENSG0000(RP11-43F1 antisense chr5    | 987180   | 997308   | - | 0.19  | 0.27  |
| ENSG0000(FASTKD5 protein_co chr20    | 3146519  | 3159897  | - | 4.64  | 5.05  |
| ENSG0000(GOLGA8B protein_co chr15    | 34525207 | 34588503 | - | 24.83 | 34.48 |
| ENSG0000(DHRS4-AS1 antisense chr14   | 23938731 | 23988839 | - | 9.36  | 7.81  |
| ENSG0000(KCNU1 protein_co chr8       | 36784324 | 36936128 | + | 0     | 0     |
| ENSG0000(AC025750. processed_ chr2   | 42532766 | 42533442 | - | 0     | 0     |
| ENSG0000(RPL10AP3 processed_ chr8    | 34322992 | 34323642 | - | 0     | 0     |
| ENSG0000(AKR1C7P transcribed chr10   | 5275173  | 5288470  | - | 0.12  | 0     |
| ENSG0000(LA16c-60G processed_ chr22  | 15562017 | 15564276 | - | 0     | 0     |
| ENSG0000(GAGE12G protein_co chrX     | 49570434 | 49577754 | + | 0     | 0     |
| ENSG0000(LA16c-60H processed_ chr22  | 15854195 | 15855243 | - | 0     | 0     |
| ENSG0000(HOMEZ protein_co chr14      | 23272422 | 23299447 | - | 6.67  | 5.83  |
| ENSG0000(GAGE10 protein_co chrX      | 49303669 | 49319844 | + | 0     | 0     |
| ENSG0000(RNF212B protein_co chr14    | 23185316 | 23273477 | + | 0     | 0     |
| ENSG0000(RPS7P6 processed_ chr4      | 17427696 | 17428274 | - | 0     | 0     |
| ENSG0000(HMGB3P2; processed_ chr9    | 36303499 | 36304924 | - | 0     | 0     |
| ENSG0000(RP11-198M processed_ chrX   | 46725164 | 46725818 | - | 0     | 0     |
| ENSG0000(RP5-1158E processed_ chrX   | 45913118 | 45913871 | + | 0     | 0     |
| ENSG0000(RP11-613H processed_ chr8   | 27011147 | 27012371 | - | 0     | 0     |
| ENSG0000(TMCO5B transcribed chr15    | 33235552 | 33247621 | - | 0     | 0     |
| ENSG0000(RP11-62E1 processed_ chr9   | 3364329  | 3364792  | - | 0     | 0     |
| ENSG0000(DDX3X protein_co chrX       | 41333348 | 41364472 | + | 58.39 | 58.05 |
| ENSG0000(CTD-3092A transcribed chr15 | 30470779 | 30507623 | + | 1.26  | 1.16  |
| ENSG0000(RP13-395E processed_ chr15  | 32398956 | 32435233 | - | 0.07  | 0     |
| ENSG0000(VPS16 protein_co chr20      | 2840703  | 2866732  | + | 16.58 | 16.38 |
| ENSG0000(RP6-60B16 processed_ chrX   | 33410944 | 33412173 | + | 0     | 0     |
| ENSG0000(NPM1P12 processed_ chr7     | 1.49E+08 | 1.49E+08 | + | 0.08  | 0     |
| ENSG0000(RPL6P30 processed_ chrX     | 16198428 | 16199289 | - | 0     | 0.08  |

|                      |                   |          |            |       |       |
|----------------------|-------------------|----------|------------|-------|-------|
| ENSG0000( THUMPD1)   | processed_ chr21  | 28901779 | 28903697 - | 0     | 0     |
| ENSG0000( EIF5P1     | processed_ chrX   | 9818239  | 9819469 -  | 0     | 0.05  |
| ENSG0000( ASS1P10    | processed_ chr5   | 1.45E+08 | 1.45E+08 + | 0     | 0     |
| ENSG0000( GPX1P2     | processed_ chr21  | 27143344 | 27143949 - | 0     | 0.13  |
| ENSG0000( KRT18P23   | processed_ chr22  | 44566965 | 44568247 + | 0     | 0     |
| ENSG0000( ZNF705CP   | unprocessε chr8   | 12356136 | 12359391 + | 0     | 0     |
| ENSG0000( ZNF705D    | protein_co chr8   | 12104389 | 12115516 + | 0     | 0     |
| ENSG0000( SLC25A5P1  | processed_ chr22  | 42001069 | 42001966 - | 0     | 0     |
| ENSG0000( MRPL3P1    | processed_ chr13  | 19304593 | 19305625 - | 0     | 0     |
| ENSG0000( PPIAP1     | processed_ chr21  | 20828127 | 20828622 - | 0     | 0     |
| ENSG0000( C1QBPP1    | processed_ chr21  | 19759359 | 19760128 - | 0     | 0     |
| ENSG0000( FAM90A24   | transcribec chr8  | 8019429  | 8024652 -  | 0     | 0     |
| ENSG0000( ZNF705B    | protein_co chr8   | 7926337  | 7952413 +  | 0     | 0     |
| ENSG0000( HSPD1P8    | processed_ chr13  | 78849231 | 78851208 + | 0     | 0     |
| ENSG0000( FAM90A22   | unprocessε chr8   | 7571995  | 7575006 -  | 0     | 0     |
| ENSG0000( TMED11P    | transcribec chr4  | 1115197  | 1153726 -  | 0     | 0     |
| ENSG0000( BOD1P2     | processed_ chr18  | 5132749  | 5133229 -  | 0     | 0     |
| ENSG0000( RPL37P3    | processed_ chr21  | 17894193 | 17894485 - | 0     | 0     |
| ENSG0000( DEFB108P2  | unprocessε chr8   | 7373114  | 7377500 +  | 0     | 0     |
| ENSG0000( ZNF705G    | protein_co chr8   | 7355517  | 7385558 -  | 0     | 0     |
| ENSG0000( FAM90A5P   | unprocessε chr8   | 7287392  | 7290402 +  | 0     | 0     |
| ENSG0000( FAM66B     | lincRNA chr8      | 7301611  | 7355354 -  | 2.1   | 2.63  |
| ENSG0000( MYL5       | protein_co chr4   | 673580   | 682033 +   | 13.49 | 14.56 |
| ENSG0000( DEFT1P     | unprocessε chr8   | 6987178  | 6989721 -  | 0     | 0     |
| ENSG0000( AC090625.  | processed_ chr11  | 35374265 | 35374474 + | 0     | 0     |
| ENSG0000( RP5-1057J  | processed_ chr1   | 23244765 | 23245224 + | 0.34  | 0     |
| ENSG0000( MIR99AHG   | lincRNA chr21     | 15928296 | 16627397 + | 1.61  | 1.37  |
| ENSG0000( ACTG1P3    | processed_ chr20  | 1160584  | 1161697 +  | 0.21  | 0.3   |
| ENSG0000( SCRT2      | protein_co chr20  | 661596   | 676179 -   | 0     | 0     |
| ENSG0000( RP11-754I2 | transcribec chr14 | 18333726 | 18341859 + | 0     | 0     |
| ENSG0000( HMGB3P7    | processed_ chr13  | 1.02E+08 | 1.02E+08 + | 0     | 0.12  |
| ENSG0000( LL22NC01-  | antisense chr22   | 36965248 | 36968172 + | 0     | 0     |
| ENSG0000( RP11-748L  | unprocessε chr10  | 27331357 | 27341252 - | 0     | 0     |
| ENSG0000( PSMA6P1    | processed_ chrY   | 13286638 | 13287378 + | 0     | 0     |
| ENSG0000( MIR17HG    | processed_ chr13  | 91347820 | 91354579 + | 0.22  | 0.23  |
| ENSG0000( PEX12P1    | processed_ chr13  | 89991831 | 89992878 + | 0     | 0     |
| ENSG0000( ZNF407     | protein_co chr18  | 74597870 | 75065671 + | 2.22  | 2.15  |
| ENSG0000( MCM3AP-/-  | antisense chr21   | 46229217 | 46259390 + | 1.42  | 2.86  |
| ENSG0000( NPEPL1     | protein_co chr20  | 58689131 | 58719238 + | 21.75 | 25.07 |
| ENSG0000( CTAGE12P   | processed_ chr9   | 27608382 | 27610745 - | 0     | 0.13  |
| ENSG0000( RP5-827A1  | processed_ chr20  | 51734533 | 51735067 + | 0     | 0     |
| ENSG0000( BX322557.  | processed_ chr21  | 45288052 | 45291738 + | 4.61  | 4.24  |
| ENSG0000( SRMP1      | processed_ chr20  | 47859788 | 47860672 + | 0     | 0     |
| ENSG0000( RP5-890O1  | processed_ chr20  | 47160838 | 47161700 - | 0     | 0     |
| ENSG0000( ZNF663P    | processed_ chr20  | 46414228 | 46459276 - | 0     | 0     |

|                                      |          |          |   |      |      |
|--------------------------------------|----------|----------|---|------|------|
| ENSG0000(KRTAP10-4 protein_co chr21  | 44573724 | 44638284 | + | 0    | 0    |
| ENSG0000(KRTAP10-1 protein_co chr21  | 44538981 | 44540195 | - | 0    | 0    |
| ENSG0000(BCRP4 unprocessε chr22      | 22630065 | 22636153 | + | 0    | 0    |
| ENSG0000(RPS8P3 processed_ chr18     | 51845007 | 51845628 | - | 0    | 0    |
| ENSG0000(AATBC antisense chr21       | 43805758 | 43812567 | - | 0.05 | 0.14 |
| ENSG0000(AP000354. processed_ chr22  | 24269346 | 24270134 | - | 0    | 0    |
| ENSG0000(RPL27AP processed_ chr20    | 43652523 | 43653291 | + | 0    | 0    |
| ENSG0000(RPL17-C18 protein_co chr18  | 49481681 | 49492479 | - | 5.3  | 7.44 |
| ENSG0000(SKOR2 protein_co chr18      | 47206322 | 47251603 | - | 0    | 0    |
| ENSG0000(SIAH3 protein_co chr13      | 45777243 | 45851736 | - | 0    | 0    |
| ENSG0000(RCN1P1 processed_ chr6      | 87121693 | 87122688 | - | 0    | 0    |
| ENSG0000(CES5AP1 transcribec chr22   | 23359603 | 23387731 | - | 0    | 0    |
| ENSG0000(OR7E37P unprocessε chr13    | 41442770 | 41443666 | + | 0    | 0    |
| ENSG0000(BCRP3 processed_ chr22      | 24632915 | 24650012 | + | 0    | 0.21 |
| ENSG0000(CALM2P3 processed_ chr13    | 41170700 | 41171148 | - | 0    | 0    |
| ENSG0000(LINC00598 lincRNA chr13     | 40079106 | 40535807 | - | 0.27 | 0.13 |
| ENSG0000(ARL2BPP3 transcribec chr13  | 36789332 | 36795050 | + | 0    | 0    |
| ENSG0000(HNRNPA1P processed_ chr18   | 32412214 | 32413176 | - | 0    | 0    |
| ENSG0000(XXbac-B56. processed_ chr22 | 20450122 | 20451824 | + | 0    | 0    |
| ENSG0000(FAM230B processed_ chr22    | 21167758 | 21302681 | + | 0    | 0    |
| ENSG0000(TPTE2P4 unprocessε chrY     | 26508213 | 26579690 | + | 0    | 0    |
| ENSG0000(RBMY2DP transcribec chrY    | 26123674 | 26133308 | + | 0    | 0    |
| ENSG0000(AP005901. transcribec chr18 | 15307663 | 15330282 | - | 0.02 | 0    |
| ENSG0000(IFIT1P1 processed_ chr13    | 32384660 | 32386108 | + | 0    | 0    |
| ENSG0000(RPS4XP4 processed_ chr1     | 20525989 | 20526751 | + | 0    | 0    |
| ENSG0000(EFCAB8 protein_co chr20     | 32858923 | 32961609 | + | 0.08 | 0    |
| ENSG0000(LINC00189 sense_ovei chr21  | 29193480 | 29288205 | + | 0.08 | 0.18 |
| ENSG0000(ZNF736P11 processed_ chrY   | 22866544 | 22867756 | - | 0    | 0    |
| ENSG0000(RBMY2CP transcribec chrY    | 23537308 | 23546942 | - | 0    | 0    |
| ENSG0000(BCRP7 unprocessε chr22      | 18855621 | 18858640 | - | 0    | 0    |
| ENSG0000(DEFB116 protein_co chr20    | 31303212 | 31308585 | - | 0    | 0    |
| ENSG0000(DKKL1P1 processed_ chr20    | 31274170 | 31274867 | + | 0    | 0    |
| ENSG0000(DEFB115 protein_co chr20    | 31257664 | 31259632 | + | 0    | 0    |
| ENSG0000(FRG1JP unprocessε chr9      | 63832127 | 63859641 | - | 1.24 | 0.3  |
| ENSG0000(KRT18P3 processed_ chr20    | 22732802 | 22734089 | - | 0    | 0    |
| ENSG0000(ANKRD20A transcribec chr21  | 13909574 | 13980437 | - | 0    | 0.03 |
| ENSG0000(TTTY5 lincRNA chrY          | 22296798 | 22298876 | - | 0    | 0    |
| ENSG0000(CNN2P7 processed_ chr21     | 13826696 | 13827627 | + | 0    | 0    |
| ENSG0000(RP11-79C2 unprocessε chr15  | 19878555 | 19887814 | + | 0    | 0    |
| ENSG0000(GAB4 protein_co chr22       | 16961936 | 17008222 | - | 0    | 0    |
| ENSG0000(GRK6P1 processed_ chr13     | 21319156 | 21320866 | + | 0.03 | 0    |
| ENSG0000(ESRRAP1 processed_ chr13    | 19560013 | 19561269 | - | 0    | 0    |
| ENSG0000(BCORP1 transcribec chrY     | 19455431 | 19503153 | - | 0    | 0.01 |
| ENSG0000(ASS1P6 processed_ chrY      | 11922536 | 11923769 | - | 0    | 0    |
| ENSG0000(RP5-836E8 processed_ chr20  | 7831798  | 7832322  | - | 0    | 0    |

|                     |                  |          |          |   |       |       |
|---------------------|------------------|----------|----------|---|-------|-------|
| ENSG0000(KANK1P1    | processed_ chr20 | 5928085  | 5929318  | - | 0     | 0     |
| ENSG0000(C20orf202  | protein_co chr20 | 1203454  | 1208274  | + | 0     | 0     |
| ENSG0000(TSPY24P    | unprocessε chrY  | 8280198  | 8282209  | + | 0     | 0     |
| ENSG0000(ZNF92P1Y   | processed_ chrY  | 7853686  | 7854876  | - | 0     | 0     |
| ENSG0000(ZNF962P    | unprocessε chr13 | 18467172 | 18485448 | - | 0     | 0.02  |
| ENSG0000(KRT18P35   | processed_ chr3  | 1.41E+08 | 1.41E+08 | - | 0     | 0     |
| ENSG0000(HMX1       | protein_co chr4  | 8846076  | 8871817  | - | 0     | 0     |
| ENSG0000(GUSBP9     | unprocessε chr5  | 71197646 | 71208130 | - | 1.21  | 1.09  |
| ENSG0000(GCGR       | protein_co chr17 | 81804132 | 81814013 | + | 0     | 0.03  |
| ENSG0000(AC114730.  | antisense chr2   | 2.42E+08 | 2.42E+08 | - | 0.49  | 0.36  |
| ENSG0000(RSC1A1     | protein_co chr1  | 15659869 | 15661722 | + | 2.36  | 2.69  |
| ENSG0000(CELA2B     | protein_co chr1  | 15465909 | 15491400 | + | 0.08  | 0     |
| ENSG0000(TMEM242    | protein_co chr6  | 1.57E+08 | 1.57E+08 | - | 3.97  | 4.83  |
| ENSG0000(TMEM167I   | protein_co chr1  | 1.09E+08 | 1.09E+08 | + | 24.18 | 23.15 |
| ENSG0000(RP1-21O18  | processed_ chr1  | 15191828 | 15192845 | - | 0     | 0     |
| ENSG0000(MRPL20P1   | processed_ chr21 | 36994643 | 36995075 | + | 0     | 0     |
| ENSG0000(TAF9BP2    | processed_ chr10 | 1.15E+08 | 1.15E+08 | + | 0     | 0     |
| ENSG0000(CTB-61M7.  | processed_ chr19 | 54724496 | 54798285 | + | 0     | 0     |
| ENSG0000(ARHGAP27   | processed_ chr17 | 64749663 | 64781707 | - | 3.82  | 3.99  |
| ENSG0000(LRRC37A14  | processed_ chr22 | 41189727 | 41190188 | - | 0     | 0     |
| ENSG0000(FAM72D     | protein_co chr1  | 1.45E+08 | 1.45E+08 | + | 0.06  | 0.36  |
| ENSG0000(CFL1P6     | processed_ chr1  | 10990978 | 10991797 | - | 0     | 0     |
| ENSG0000(TNFRSF25   | protein_co chr1  | 6461151  | 6466195  | - | 5.3   | 5.3   |
| ENSG0000(SLC35E2    | protein_co chr1  | 1724838  | 1745992  | - | 8.47  | 8.49  |
| ENSG0000(RP11-488L. | processed_ chr1  | 2.47E+08 | 2.47E+08 | - | 0     | 0     |
| ENSG0000(RP11-551G  | processed_ chr1  | 2.47E+08 | 2.47E+08 | + | 0     | 0     |
| ENSG0000(RSL24D1P4  | processed_ chr1  | 2.43E+08 | 2.43E+08 | + | 0     | 0     |
| ENSG0000(RFKP1      | transcribec chr1 | 2.41E+08 | 2.41E+08 | - | 0     | 0     |
| ENSG0000(RP11-438C  | processed_ chr1  | 2.4E+08  | 2.4E+08  | + | 0     | 0     |
| ENSG0000(KRT18P65   | processed_ chr6  | 1.12E+08 | 1.12E+08 | - | 0     | 0     |
| ENSG0000(LINC01139  | lincRNA chr1     | 2.38E+08 | 2.38E+08 | - | 0.3   | 0.45  |
| ENSG0000(BTNL10     | transcribec chr1 | 2.29E+08 | 2.29E+08 | - | 0     | 0     |
| ENSG0000(ZNF847P    | unprocessε chr1  | 2.28E+08 | 2.28E+08 | - | 0     | 0     |
| ENSG0000(ZC3H11B    | protein_co chr1  | 2.2E+08  | 2.2E+08  | - | 0.09  | 0.1   |
| ENSG0000(KRT18P12   | processed_ chr1  | 2.15E+08 | 2.15E+08 | + | 0     | 0     |
| ENSG0000(QRSL1P1    | processed_ chr1  | 1.68E+08 | 1.68E+08 | - | 0     | 0     |
| ENSG0000(FMO9P      | transcribec chr1 | 1.67E+08 | 1.67E+08 | + | 0     | 0     |
| ENSG0000(RP11-9L18. | processed_ chr1  | 1.66E+08 | 1.66E+08 | - | 0     | 0     |
| ENSG0000(SDHAP2     | transcribec chr3 | 1.96E+08 | 1.96E+08 | + | 0     | 0     |
| ENSG0000(RP11-466F  | transcribec chr1 | 1.66E+08 | 1.66E+08 | + | 0     | 0     |
| ENSG0000(RP11-122G  | processed_ chr1  | 1.61E+08 | 1.61E+08 | + | 0     | 0.16  |
| ENSG0000(RP11-800A  | antisense chr11  | 73214998 | 73215913 | - | 3.27  | 0.62  |
| ENSG0000(TSTD1      | protein_co chr1  | 1.61E+08 | 1.61E+08 | - | 11.64 | 12.09 |
| ENSG0000(MPTX1      | processed_ chr1  | 1.59E+08 | 1.59E+08 | + | 0     | 0     |
| ENSG0000(RPTN       | protein_co chr1  | 1.52E+08 | 1.52E+08 | - | 0     | 0     |

|                 |           |                |       |          |          |   |       |       |
|-----------------|-----------|----------------|-------|----------|----------|---|-------|-------|
| ENSG00000174066 | RP6-74066 | lincRNA        | chr1  | 1.48E+08 | 1.48E+08 | - | 0     | 0     |
| ENSG00000189606 | WI2-18960 | unprocessed    | chr1  | 1.49E+08 | 1.49E+08 | - | 18.26 | 19.12 |
| ENSG00000189607 | NBPF7     | unprocessed    | chr1  | 1.2E+08  | 1.2E+08  | - | 0     | 0     |
| ENSG00000189608 | LINC01356 | lincRNA        | chr1  | 1.13E+08 | 1.13E+08 | - | 0     | 0     |
| ENSG00000189609 | KRT18P57  | processed      | chr1  | 1.12E+08 | 1.12E+08 | - | 0     | 0     |
| ENSG00000189610 | RP11-364B | transcribed    | chr1  | 1.04E+08 | 1.04E+08 | + | 0.42  | 0.03  |
| ENSG00000189611 | RP5-837M  | processed      | chr1  | 1E+08    | 1E+08    | - | 0     | 0     |
| ENSG00000189612 | FEN1P1    | processed      | chr1  | 91328369 | 91329513 | + | 0     | 0     |
| ENSG00000189613 | CAPNS1P1  | processed      | chr1  | 89394033 | 89394665 | + | 0     | 0     |
| ENSG00000189614 | ST13P20   | transcribed    | chr1  | 81721693 | 81723068 | + | 0.06  | 0.19  |
| ENSG00000189615 | MARCKSL1  | processed      | chr6  | 1.38E+08 | 1.38E+08 | - | 0     | 0     |
| ENSG00000189616 | RP11-65D2 | lincRNA        | chr13 | 1.12E+08 | 1.12E+08 | + | 0     | 0     |
| ENSG00000189617 | CYB5RL    | protein_coding | chr1  | 54169651 | 54200036 | - | 4.46  | 4.89  |
| ENSG00000189618 | ZNF859P   | unprocessed    | chr1  | 49841821 | 49846400 | + | 0     | 0     |
| ENSG00000189619 | RPL23AP17 | processed      | chr1  | 41098638 | 41099136 | + | 0     | 0     |
| ENSG00000189620 | RP11-334L | processed      | chr1  | 38708931 | 38710890 | + | 0     | 0     |
| ENSG00000189621 | RP11-439L | processed      | chr1  | 31487589 | 31488930 | - | 0     | 0     |
| ENSG00000189622 | SELENOWP  | processed      | chr1  | 31094987 | 31095558 | - | 0     | 0     |
| ENSG00000189623 | RP11-4M2  | processed      | chr1  | 24007881 | 24008519 | - | 0     | 0     |
| ENSG00000189624 | LACTBL1   | protein_coding | chr1  | 22953043 | 22965338 | - | 0     | 0     |
| ENSG00000189625 | CROCCP2   | transcribed    | chr1  | 16618253 | 16657232 | - | 7.13  | 6.85  |
| ENSG00000189626 | BRWD1P1   | processed      | chr1  | 13555001 | 13555694 | + | 0     | 0     |
| ENSG00000189627 | C1orf167  | protein_coding | chr1  | 11761787 | 11789585 | + | 0.81  | 0.31  |
| ENSG00000189628 | TTC34     | protein_coding | chr1  | 2635976  | 2801717  | - | 0.07  | 0.12  |
| ENSG00000189629 | MMP23A    | unprocessed    | chr1  | 1699942  | 1701782  | + | 2.65  | 3.71  |
| ENSG00000189630 | ATAD3C    | protein_coding | chr1  | 1449689  | 1470158  | + | 0.5   | 1.18  |
| ENSG00000189631 | MIR942    | miRNA          | chr1  | 1.17E+08 | 1.17E+08 | + | 0     | 0     |
| ENSG00000189632 | MIR190B   | miRNA          | chr1  | 1.54E+08 | 1.54E+08 | - | 0     | 0     |
| ENSG00000189633 | MIR873    | miRNA          | chr9  | 28888879 | 28888955 | - | 0     | 0     |
| ENSG00000189634 | MIR892A   | miRNA          | chrX  | 1.46E+08 | 1.46E+08 | - | 0     | 0     |
| ENSG00000189635 | MIR921    | miRNA          | chr1  | 1.66E+08 | 1.66E+08 | - | 0     | 0     |
| ENSG00000189636 | MIR300    | miRNA          | chr14 | 1.01E+08 | 1.01E+08 | + | 0     | 0     |
| ENSG00000189637 | MIR297    | miRNA          | chr4  | 1.11E+08 | 1.11E+08 | - | 0     | 0     |
| ENSG00000189638 | MIR876    | miRNA          | chr9  | 28863626 | 28863706 | - | 0     | 0     |
| ENSG00000189639 | MIR933    | miRNA          | chr2  | 1.75E+08 | 1.75E+08 | - | 0     | 0     |
| ENSG00000189640 | MIR208B   | miRNA          | chr14 | 23417987 | 23418063 | - | 0     | 0     |
| ENSG00000189641 | MIR450B   | miRNA          | chrX  | 1.35E+08 | 1.35E+08 | - | 0     | 0     |
| ENSG00000189642 | MIR888    | miRNA          | chrX  | 1.46E+08 | 1.46E+08 | - | 0     | 0     |
| ENSG00000189643 | MIR874    | miRNA          | chr5  | 1.38E+08 | 1.38E+08 | - | 0     | 0     |
| ENSG00000189644 | MIR298    | miRNA          | chr20 | 58818226 | 58818313 | - | 0     | 0     |
| ENSG00000189645 | MIR938    | miRNA          | chr10 | 29602264 | 29602346 | - | 0     | 0     |
| ENSG00000189646 | MIR891A   | miRNA          | chrX  | 1.46E+08 | 1.46E+08 | - | 0     | 0     |
| ENSG00000189647 | MIR944    | miRNA          | chr3  | 1.9E+08  | 1.9E+08  | + | 0     | 0     |
| ENSG00000189648 | MIR934    | miRNA          | chrX  | 1.37E+08 | 1.37E+08 | + | 0     | 0     |
| ENSG00000189649 | MIR891B   | miRNA          | chrX  | 1.46E+08 | 1.46E+08 | - | 0     | 0     |

|                     |             |       |          |          |   |       |       |
|---------------------|-------------|-------|----------|----------|---|-------|-------|
| ENSG0000(MIR875     | miRNA       | chr8  | 99536786 | 99536861 | - | 0     | 0     |
| ENSG0000(MIR890     | miRNA       | chrX  | 1.46E+08 | 1.46E+08 | - | 0     | 0     |
| ENSG0000(MIR887     | miRNA       | chr5  | 15935182 | 15935260 | + | 0     | 0     |
| ENSG0000(MIR892B    | miRNA       | chrX  | 1.46E+08 | 1.46E+08 | - | 0     | 0     |
| ENSG0000(MIR889     | miRNA       | chr14 | 1.01E+08 | 1.01E+08 | + | 0     | 0     |
| ENSG0000(MIR877     | miRNA       | chr6  | 30584332 | 30584417 | + | 0     | 0     |
| ENSG0000(MIR885     | miRNA       | chr3  | 10394489 | 10394562 | - | 0     | 0     |
| ENSG0000(MIR941-2   | miRNA       | chr20 | 63919505 | 63919576 | + | 0     | 0     |
| ENSG0000(MIR513C    | miRNA       | chrX  | 1.47E+08 | 1.47E+08 | - | 0     | 0     |
| ENSG0000(MIR541     | miRNA       | chr14 | 1.01E+08 | 1.01E+08 | + | 0     | 0     |
| ENSG0000(MIR8485    | miRNA       | chr2  | 50696172 | 50696262 | - | 0     | 0     |
| ENSG0000(MIR920     | miRNA       | chr12 | 24212421 | 24212495 | + | 0     | 0     |
| ENSG0000(MIR941-4   | miRNA       | chr20 | 63919756 | 63919827 | + | 0     | 0     |
| ENSG0000(FABP12P1   | processed_  | chr6  | 1.49E+08 | 1.49E+08 | - | 0     | 0     |
| ENSG0000(RP11-490H  | processed_  | chr12 | 1.04E+08 | 1.04E+08 | + | 0     | 0     |
| ENSG0000(KRT19P2    | transcribec | chr12 | 94834147 | 94835158 | + | 0     | 0     |
| ENSG0000(RP3-400B1  | processed_  | chr6  | 4189116  | 4189806  | + | 0     | 0     |
| ENSG0000(RP3-354N1  | processed_  | chr6  | 1.19E+08 | 1.19E+08 | - | 0.24  | 0     |
| ENSG0000(RP3-3821C  | processed_  | chr6  | 87425795 | 87426088 | - | 0     | 0     |
| ENSG0000(HIST1H1PS  | unprocessε  | chr6  | 26195554 | 26196633 | + | 0.12  | 0     |
| ENSG0000(RPL10P10   | processed_  | chr6  | 54602487 | 54603150 | - | 0     | 0     |
| ENSG0000(RP11-486E  | processed_  | chr6  | 80555841 | 80557189 | - | 0     | 0     |
| ENSG0000(RP11-360C  | processed_  | chr6  | 10514282 | 10514973 | + | 0     | 0     |
| ENSG0000(RP1-182O1  | processed_  | chr6  | 5817421  | 5818366  | - | 0     | 0     |
| ENSG0000(MRPL42P2   | processed_  | chr6  | 16171606 | 16172031 | + | 0     | 0     |
| ENSG0000(RPL37P15   | processed_  | chr6  | 70098390 | 70098676 | - | 0     | 0     |
| ENSG0000(RP3-486D2  | processed_  | chr6  | 10118452 | 10119253 | + | 0     | 0     |
| ENSG0000(RP3-344J2  | processed_  | chr6  | 1E+08    | 1E+08    | + | 0     | 0     |
| ENSG0000(RPL12P2    | processed_  | chr6  | 37091314 | 37091806 | + | 0     | 0     |
| ENSG0000(AC004066.  | processed_  | chr4  | 1.06E+08 | 1.06E+08 | - | 0     | 0     |
| ENSG0000(HIST1H2AP  | unprocessε  | chr6  | 25732497 | 25732827 | + | 0     | 0     |
| ENSG0000(DUTP5      | processed_  | chr6  | 85426657 | 85427125 | - | 0     | 0     |
| ENSG0000(RAET1M     | processed_  | chr6  | 1.5E+08  | 1.5E+08  | + | 0     | 0     |
| ENSG0000(RPSAP43    | processed_  | chr6  | 1.14E+08 | 1.14E+08 | - | 0     | 0     |
| ENSG0000(RP1-91J24. | processed_  | chr6  | 1.44E+08 | 1.44E+08 | - | 0     | 0     |
| ENSG0000(RP3-393E1  | processed_  | chr6  | 1.6E+08  | 1.6E+08  | - | 0     | 0     |
| ENSG0000(IFI30      | protein_co  | chr19 | 18173162 | 18178117 | + | 26.82 | 28.74 |
| ENSG0000(RP11-317N  | processed_  | chr6  | 1.6E+08  | 1.6E+08  | - | 0     | 0     |
| ENSG0000(EEF1GP6    | processed_  | chr6  | 96750824 | 96751728 | + | 0     | 0     |
| ENSG0000(RP3-406A7  | processed_  | chr6  | 1.36E+08 | 1.36E+08 | + | 0     | 0     |
| ENSG0000(RP3-435K1  | processed_  | chr6  | 84966397 | 84966625 | - | 0     | 0     |
| ENSG0000(RP11-471B  | processed_  | chr6  | 1.41E+08 | 1.41E+08 | - | 0     | 0     |
| ENSG0000(LINC00955  | processed_  | chr4  | 3576869  | 3590711  | + | 0     | 0     |
| ENSG0000(IGSF23     | protein_co  | chr19 | 44613630 | 44636781 | + | 0     | 0.54  |
| ENSG0000(RP3-406A7  | processed_  | chr6  | 1.36E+08 | 1.36E+08 | - | 0     | 0     |



|                                     |          |            |      |      |
|-------------------------------------|----------|------------|------|------|
| ENSG0000(RP11-550C processed_ chr6  | 47752828 | 47753240 - | 0    | 0    |
| ENSG0000(RP11-244K transcribed chr6 | 1.5E+08  | 1.5E+08 +  | 0    | 0    |
| ENSG0000(GAPDHP72 transcribed chr6  | 1.66E+08 | 1.66E+08 + | 0.06 | 0    |
| ENSG0000(OR2W4P unprocessed_ chr6   | 27977150 | 27978075 + | 0    | 0    |
| ENSG0000(RPL7P25 processed_ chr6    | 34616538 | 34617258 + | 0    | 0    |
| ENSG0000(RP3-355L5 processed_ chr6  | 1.05E+08 | 1.05E+08 + | 0    | 0    |
| ENSG0000(RP1-95L4.3 processed_ chr6 | 1.43E+08 | 1.43E+08 + | 0    | 0    |
| ENSG0000(GAGE12E protein_co chrX    | 49551333 | 49558649 + | 0    | 0    |
| ENSG0000(GLRX3P2 processed_ chr6    | 3978062  | 3979099 +  | 0    | 0    |
| ENSG0000(RP11-506B processed_ chr6  | 1.12E+08 | 1.12E+08 - | 0    | 0    |
| ENSG0000(CCNYL3 unprocessed_ chr16  | 35040164 | 35084313 + | 0    | 0    |
| ENSG0000(RP1-15D7.1 processed_ chr6 | 27652602 | 27652825 - | 0    | 0    |
| ENSG0000(RP11-278J processed_ chr6  | 58071720 | 58073134 - | 0    | 0    |
| ENSG0000(CIR1P3 processed_ chr11    | 34430880 | 34431649 + | 0    | 0    |
| ENSG0000(COX6A1P3 processed_ chr6   | 1.21E+08 | 1.21E+08 + | 0    | 0    |
| ENSG0000(MTND4P13 processed_ chr6   | 1.54E+08 | 1.54E+08 + | 0    | 0    |
| ENSG0000(RP3-522P1 processed_ chr6  | 25261239 | 25261731 + | 0    | 0    |
| ENSG0000(AC093850 processed_ chr2   | 2.16E+08 | 2.16E+08 - | 0    | 0    |
| ENSG0000(NUDT19P3 processed_ chr6   | 1.14E+08 | 1.14E+08 - | 0    | 0    |
| ENSG0000(ANXA2P3 processed_ chr10   | 64825572 | 64826579 + | 0    | 0    |
| ENSG0000(HMGA1P7 processed_ chr6    | 1.34E+08 | 1.34E+08 - | 0    | 0    |
| ENSG0000(RP1-190J2 processed_ chr6  | 15102946 | 15104130 - | 0    | 0    |
| ENSG0000(VN1R13P processed_ chr6    | 27060365 | 27061249 - | 0    | 0    |
| ENSG0000(RP1-152L7 transcribed chr6 | 52665148 | 52669155 + | 6.88 | 6.76 |
| ENSG0000(PRRC2CP1 processed_ chrY   | 3549652  | 3549810 -  | 0    | 0    |
| ENSG0000(RP1-290I1 processed_ chr6  | 10365593 | 10366582 - | 0    | 0    |
| ENSG0000(RP11-390P processed_ chr6  | 1.39E+08 | 1.39E+08 - | 0    | 0    |
| ENSG0000(RP11-57K1 processed_ chr6  | 1.18E+08 | 1.18E+08 - | 0.2  | 0.19 |
| ENSG0000(RP1-69B13 processed_ chr6  | 1.46E+08 | 1.46E+08 - | 0    | 0    |
| ENSG0000(RP11-812I2 processed_ chr6 | 47562622 | 47563018 + | 0    | 0    |
| ENSG0000(R3HDM2P2 processed_ chr6   | 1.04E+08 | 1.04E+08 - | 0    | 0    |
| ENSG0000(TUBB2BP1 unprocessed_ chr6 | 3177044  | 3179764 -  | 0    | 0    |
| ENSG0000(ZNF736P1C processed_ chrY  | 8418791  | 8419900 -  | 0    | 0    |
| ENSG0000(FGF7P4 unprocessed_ chr9   | 42667506 | 42668887 - | 0    | 0    |
| ENSG0000(RBMXP1 processed_ chr6     | 48213604 | 48214794 - | 0    | 0    |
| ENSG0000(AC009494 processed_ chrY   | 20843256 | 20843710 - | 0    | 0    |
| ENSG0000(MTCYBP36 processed_ chr6   | 94446740 | 94447179 - | 0    | 0    |
| ENSG0000(RPL17P26 processed_ chr6   | 56871191 | 56871743 + | 0    | 0    |
| ENSG0000(DHFRP5 processed_ chr6     | 62460940 | 62461503 - | 0    | 0    |
| ENSG0000(LY86-AS1 antisense chr6    | 6346465  | 6622771 -  | 0    | 0    |
| ENSG0000(RPS2P55 processed_ chrX    | 40934982 | 40935864 - | 0.31 | 0.67 |
| ENSG0000(AC114776 processed_ chr2   | 1.11E+08 | 1.11E+08 + | 0    | 0    |
| ENSG0000(AC009403 antisense chr7    | 1.56E+08 | 1.56E+08 - | 1.79 | 3.49 |
| ENSG0000(ZNF603P unprocessed_ chr6  | 28176188 | 28176674 + | 0    | 0    |
| ENSG0000(RP1-161C1 processed_ chr6  | 85257328 | 85257694 + | 0    | 0    |

|                                     |          |            |       |       |
|-------------------------------------|----------|------------|-------|-------|
| ENSG0000(SOCS5P5 processed_ chr6    | 1.13E+08 | 1.13E+08 + | 0     | 0     |
| ENSG0000(RP11-350J processed_ chr6  | 1.5E+08  | 1.5E+08 +  | 0.15  | 0.11  |
| ENSG0000(RP4-753D5 processed_ chr6  | 50897615 | 50898225 - | 0     | 0     |
| ENSG0000(GPR89P processed_ chr6     | 27737000 | 27738494 - | 0     | 0     |
| ENSG0000(RP5-988G1 processed_ chr6  | 1.32E+08 | 1.32E+08 - | 0     | 0     |
| ENSG0000(AC131097. protein_co chr2  | 2.42E+08 | 2.42E+08 - | 0     | 0     |
| ENSG0000(CCDC7 protein_co chr10     | 32446140 | 32882874 + | 1.33  | 0.64  |
| ENSG0000(RPL7P58 processed_ chrX    | 26686026 | 26687955 + | 0     | 0     |
| ENSG0000(RP11-568A processed_ chr6  | 1.67E+08 | 1.67E+08 - | 0     | 0     |
| ENSG0000(RPL21P65 processed_ chr6   | 1.07E+08 | 1.07E+08 + | 0     | 0     |
| ENSG0000(HSPD1P10 processed_ chr6   | 87298772 | 87300447 + | 0     | 0     |
| ENSG0000(CYP2AC1P unitary_ps chr6   | 49565924 | 49580166 - | 0     | 0     |
| ENSG0000(RP3-329A5 unprocessε chr6  | 35279177 | 35279819 - | 0     | 0     |
| ENSG0000(RPL10P1 processed_ chr21   | 27420380 | 27421023 - | 0     | 0.12  |
| ENSG0000(TPT1P4 processed_ chr6     | 1.44E+08 | 1.44E+08 - | 0.14  | 0.16  |
| ENSG0000(RP11-428J processed_ chr6  | 4979072  | 4979494 +  | 0     | 0     |
| ENSG0000(RP11-346C processed_ chr6  | 1.11E+08 | 1.11E+08 + | 0     | 0     |
| ENSG0000(MTCO3P31 processed_ chr6   | 1.54E+08 | 1.54E+08 + | 0     | 0     |
| ENSG0000(RP11-30P6 unprocessε chr6  | 85286076 | 85290849 + | 0     | 0     |
| ENSG0000(RP11-448N unprocessε chr6  | 62547427 | 62548272 + | 0     | 0     |
| ENSG0000(RP1-13D10 processed_ chr6  | 16163377 | 16163762 - | 0     | 0     |
| ENSG0000(MTCO2P33 processed_ chr6   | 24947880 | 24948344 + | 0     | 0     |
| ENSG0000(HMGB3P15 processed_ chr6   | 1.54E+08 | 1.54E+08 - | 0     | 0     |
| ENSG0000(RPS29P13 processed_ chr6   | 1.17E+08 | 1.17E+08 - | 0     | 0     |
| ENSG0000(PPIAP31 processed_ chr10   | 32188323 | 32188817 - | 0.15  | 0     |
| ENSG0000(RP1-76C18 processed_ chr6  | 1.03E+08 | 1.03E+08 + | 0.22  | 0.05  |
| ENSG0000(FNIP1 protein_co chr5      | 1.32E+08 | 1.32E+08 - | 10.19 | 10.26 |
| ENSG0000(RP3-375P9 processed_ chr6  | 34744176 | 34744673 + | 0     | 0     |
| ENSG0000(RP1-140K8 processed_ chr6  | 3921847  | 3922146 +  | 0     | 0     |
| ENSG0000(RP11-129H processed_ chr6  | 1.22E+08 | 1.22E+08 + | 0     | 0     |
| ENSG0000(LARP1P1 processed_ chr6    | 26164072 | 26164363 + | 0     | 0     |
| ENSG0000(MTCO2P31 processed_ chr6   | 1.54E+08 | 1.54E+08 + | 0     | 0     |
| ENSG0000(ANKRD18E processed_ chr6   | 39110321 | 39112952 + | 0     | 0     |
| ENSG0000(MTHFD2P2 processed_ chr6   | 87000045 | 87000291 - | 0     | 0     |
| ENSG0000(RP11-9G10 processed_ chr6  | 74282266 | 74282660 + | 0     | 0     |
| ENSG0000(MTCYBP2 processed_ chrY    | 18872102 | 18872272 + | 0     | 0     |
| ENSG0000(RP11-360C processed_ chr6  | 10574749 | 10575227 - | 0     | 0     |
| ENSG0000(RP11-277I2 processed_ chr6 | 1.45E+08 | 1.45E+08 - | 0     | 0     |
| ENSG0000(RP1-319M processed_ chr6   | 38587323 | 38588529 + | 0     | 0     |
| ENSG0000(GSTA12P unprocessε chr6    | 52765280 | 52778347 - | 0     | 0     |
| ENSG0000(RP3-340H1 processed_ chr6  | 1.44E+08 | 1.44E+08 + | 0     | 0     |
| ENSG0000(SP9 protein_co chr2        | 1.74E+08 | 1.74E+08 + | 0     | 0     |
| ENSG0000(RP1-182O1 processed_ chr6  | 5788346  | 5788699 -  | 0     | 0     |
| ENSG0000(CBX3P9 processed_ chr6     | 1.16E+08 | 1.16E+08 - | 0     | 0.16  |
| ENSG0000(AC007249. lincRNA chr2     | 10452319 | 10455552 + | 0     | 0     |

|                                     |          |          |   |       |       |
|-------------------------------------|----------|----------|---|-------|-------|
| ENSG0000(POM121L4 transcribed chr22 | 20689929 | 20698938 | + | 0     | 0     |
| ENSG0000(TXNP7 processed_chr6       | 74004520 | 74004812 | - | 0     | 0     |
| ENSG0000(RP1-263J7 processed_chr6   | 86170447 | 86171018 | - | 0     | 0     |
| ENSG0000(RP1-34B20 processed_chr6   | 26202156 | 26202654 | + | 0     | 0     |
| ENSG0000(AC018865 processed_chr2    | 1.3E+08  | 1.3E+08  | + | 0     | 0     |
| ENSG0000(UQCRFS1P processed_chr6    | 19638040 | 19638808 | - | 0     | 0     |
| ENSG0000(OR2W2P unprocessed_chr6    | 28033947 | 28034855 | + | 0     | 0     |
| ENSG0000(PRELID1P1 transcribed chr6 | 1.27E+08 | 1.27E+08 | + | 0.11  | 0     |
| ENSG0000(RPS7P5 processed_chr1      | 2.4E+08  | 2.4E+08  | + | 0     | 0     |
| ENSG0000(SSXP10 processed_chr6      | 1.19E+08 | 1.19E+08 | + | 0     | 0     |
| ENSG0000(RP11-304C processed_chr6   | 96672129 | 96672969 | - | 0     | 0     |
| ENSG0000(RP11-33E2 processed_chr6   | 85731371 | 85732011 | + | 0     | 0     |
| ENSG0000(TUBB4BP7 processed_chr6    | 1.53E+08 | 1.53E+08 | + | 0     | 0     |
| ENSG0000(AK4P5 processed_chr6       | 80077729 | 80078362 | - | 0     | 0     |
| ENSG0000(RP11-254A processed_chr6   | 19143695 | 19144160 | + | 0     | 0     |
| ENSG0000(PSMC1P11 processed_chr6    | 4702463  | 4703779  | + | 0     | 0     |
| ENSG0000(RPS4XP9 processed_chr6     | 1.27E+08 | 1.27E+08 | + | 0     | 0     |
| ENSG0000(PRELID1P2 processed_chr6   | 25678769 | 25679164 | - | 0     | 0     |
| ENSG0000(DDX18P3 processed_chr6     | 18363417 | 18365423 | - | 0     | 0     |
| ENSG0000(ISCA1P1 processed_chr5     | 62776877 | 62777263 | - | 1.36  | 2.72  |
| ENSG0000(SYCE3 protein_co chr22     | 50551112 | 50562905 | - | 0     | 0     |
| ENSG0000(RP3-366N2 processed_chr6   | 1.67E+08 | 1.67E+08 | + | 0     | 0     |
| ENSG0000(AC091801 lincRNA chr7      | 3140234  | 3174654  | - | 0.06  | 0     |
| ENSG0000(RP11-184C processed_chr6   | 63193072 | 63193630 | - | 0     | 0     |
| ENSG0000(HMGB1P1 processed_chr6     | 1.36E+08 | 1.36E+08 | - | 0     | 0     |
| ENSG0000(RP11-135N processed_chr6   | 72522641 | 72523238 | + | 0     | 0     |
| ENSG0000(RP11-474L transcribed chr6 | 75610958 | 75611945 | - | 0     | 0     |
| ENSG0000(RP1-95L4.2 processed_chr6  | 1.43E+08 | 1.43E+08 | - | 0     | 0     |
| ENSG0000(RP11-477E processed_chr6   | 79067692 | 79068138 | - | 0     | 0     |
| ENSG0000(RP3-495O1 processed_chr6   | 1.63E+08 | 1.63E+08 | + | 0     | 0     |
| ENSG0000(RPS16P5 transcribed chr6   | 53336943 | 53337346 | - | 0     | 0     |
| ENSG0000(IQCB2P processed_chr6      | 28010723 | 28012355 | + | 0     | 0     |
| ENSG0000(CKLF protein_co chr16      | 66552563 | 66566251 | + | 28.48 | 27.23 |
| ENSG0000(RP11-157L processed_chr6   | 1.63E+08 | 1.63E+08 | - | 0     | 0     |
| ENSG0000(TDGF1P4 processed_chr6     | 3941282  | 3941801  | + | 0     | 0     |
| ENSG0000(RP11-248G processed_chr13  | 52167709 | 52291557 | - | 0     | 0.29  |
| ENSG0000(RP1-13D10 processed_chr6   | 16107622 | 16108593 | + | 0     | 0     |
| ENSG0000(RP1-28C20 processed_chr6   | 1.45E+08 | 1.45E+08 | - | 0     | 0.1   |
| ENSG0000(RP11-204C processed_chrX   | 41675760 | 41676494 | - | 0     | 0     |
| ENSG0000(RP1-142O9 processed_chr6   | 49273600 | 49273794 | + | 0     | 0     |
| ENSG0000(PTGES3P2 processed_chr2    | 25822469 | 25822950 | + | 0     | 0     |
| ENSG0000(RP4-803A2 processed_chr1   | 32979947 | 32980472 | + | 0     | 0     |
| ENSG0000(HIST1H2BP processed_chr6   | 27864062 | 27864401 | - | 0     | 0     |
| ENSG0000(RP1-95L4.4 processed_chr6  | 1.43E+08 | 1.43E+08 | + | 0.58  | 0.46  |
| ENSG0000(RP11-63K6 processed_chr6   | 89814709 | 89815463 | + | 0     | 0     |

|                                      |          |          |   |       |      |
|--------------------------------------|----------|----------|---|-------|------|
| ENSG0000(UBE2V1P1) processed_ chr6   | 75465123 | 75465570 | + | 0     | 0    |
| ENSG0000(RPS3AP24) processed_ chr6   | 1.41E+08 | 1.41E+08 | + | 0     | 0    |
| ENSG0000(NUS1P4) processed_ chr13    | 98610292 | 98610876 | - | 0     | 0    |
| ENSG0000(RP11-287D) lincRNA chr2     | 74130583 | 74135395 | + | 0.07  | 0.07 |
| ENSG0000(SERPINB8P) unprocessε chr6  | 3048835  | 3049211  | + | 0     | 0    |
| ENSG0000(RPS10P3) processed_ chr9    | 88016300 | 88016793 | + | 0     | 0    |
| ENSG0000(NDUFB4P4) processed_ chr2   | 25886964 | 25887206 | - | 0     | 0    |
| ENSG0000(CCT7P1) processed_ chr6     | 1.5E+08  | 1.5E+08  | + | 0.07  | 0.04 |
| ENSG0000(RP1-303A1) processed_ chr6  | 7938430  | 7939322  | - | 0     | 0    |
| ENSG0000(NDUFAB1P) processed_ chr6   | 70734503 | 70734962 | + | 0     | 0    |
| ENSG0000(RP11-76H1) processed_ chr6  | 86897118 | 86897421 | + | 0     | 0    |
| ENSG0000(FEM1AP3) processed_ chr6    | 1.12E+08 | 1.12E+08 | - | 0     | 0    |
| ENSG0000(RP11-156F) processed_ chr6  | 87070156 | 87070461 | - | 0     | 0    |
| ENSG0000(LDHAL6FP) processed_ chr6   | 1.57E+08 | 1.57E+08 | - | 0     | 0.06 |
| ENSG0000(RP3-508D1) processed_ chr6  | 79326568 | 79327207 | - | 0     | 0    |
| ENSG0000(ASS1P9) processed_ chr5     | 53859166 | 53860401 | + | 0     | 0    |
| ENSG0000(RP11-465B) transcribec chr1 | 1059734  | 1069355  | + | 0.9   | 0.87 |
| ENSG0000(RP11-191A) processed_ chr6  | 25181359 | 25181745 | + | 0     | 0    |
| ENSG0000(FAT1P1) processed_ chr20    | 10888582 | 10889088 | - | 0     | 0    |
| ENSG0000(HNRNPDP2) processed_ chr6   | 64631205 | 64631682 | - | 0     | 0    |
| ENSG0000(SNRPEP6) processed_ chr6    | 1.49E+08 | 1.49E+08 | - | 0     | 0    |
| ENSG0000(AC099552) lincRNA chr7      | 1.55E+08 | 1.55E+08 | - | 0     | 0    |
| ENSG0000(RP6-159A1) processed_ chrX  | 65956289 | 65957196 | - | 0     | 0    |
| ENSG0000(HIST1H4PS) processed_ chr6  | 27807075 | 27807339 | + | 0     | 0    |
| ENSG0000(OR4F7P) unprocessε chr6     | 1.71E+08 | 1.71E+08 | + | 0     | 0    |
| ENSG0000(RP11-534P) processed_ chr6  | 1.65E+08 | 1.65E+08 | - | 0     | 0    |
| ENSG0000(KRT18P48) processed_ chrX   | 1.54E+08 | 1.54E+08 | - | 0     | 0    |
| ENSG0000(ZNF839P1) processed_ chrY   | 18985175 | 18986398 | + | 0     | 0    |
| ENSG0000(HSPE1P8) processed_ chr1    | 39304294 | 39304898 | - | 0     | 0    |
| ENSG0000(CICP18) processed_ chr6     | 142272   | 145083   | - | 4.1   | 4.01 |
| ENSG0000(PAM16) protein_co chr16     | 4331549  | 4355607  | - | 10.57 | 9.87 |
| ENSG0000(NOC2LP2) processed_ chr2    | 1.31E+08 | 1.31E+08 | - | 0     | 0    |
| ENSG0000(KRT19P1) processed_ chr6    | 71584721 | 71585906 | + | 0     | 0    |
| ENSG0000(ZNF192P2) unprocessε chr6   | 28188050 | 28189432 | + | 0     | 0    |
| ENSG0000(RP4-800J2) antisense chr20  | 57384160 | 57393062 | - | 0     | 0    |
| ENSG0000(THAP12P5) transcribec chr6  | 11514192 | 11516466 | + | 0     | 0    |
| ENSG0000(RP11-157J) processed_ chr6  | 1513698  | 1515289  | - | 0     | 0    |
| ENSG0000(RP1-232L2) processed_ chr6  | 79354443 | 79354713 | - | 0     | 0    |
| ENSG0000(RP3-407E4) unprocessε chr6  | 63440766 | 63443580 | + | 0     | 0    |
| ENSG0000(RPL31P33) processed_ chr6   | 53368670 | 53369009 | + | 0     | 0    |
| ENSG0000(ADAMTS7F) transcribec chr15 | 85255369 | 85330334 | - | 0.36  | 0.28 |
| ENSG0000(RSL24D1P1) processed_ chr6  | 27780619 | 27781111 | - | 0     | 0    |
| ENSG0000(RP1-13D10) processed_ chr6  | 16160926 | 16161411 | + | 0     | 0    |
| ENSG0000(DNAJA1P4) processed_ chr6   | 1.14E+08 | 1.14E+08 | - | 0     | 0    |
| ENSG0000(RP1-261G2) processed_ chr6  | 43705949 | 43706751 | - | 0     | 0    |

|                                 |                  |          |          |   |      |      |
|---------------------------------|------------------|----------|----------|---|------|------|
| ENSG0000(KIRREL3-AS1 antisense) | chr11            | 1.27E+08 | 1.27E+08 | + | 0.08 | 0.08 |
| ENSG0000(AP000567.unprocessed)  | chr21            | 30526546 | 30526701 | - | 0    | 0    |
| ENSG0000(ERHP2)                 | processed_chr6   | 54016479 | 54016777 | - | 0    | 0    |
| ENSG0000(KRT18P22)              | processed_chr6   | 1.16E+08 | 1.16E+08 | - | 0    | 0    |
| ENSG0000(RP11-427E)             | processed_chr6   | 1.05E+08 | 1.05E+08 | + | 0    | 0    |
| ENSG0000(AC016739)              | processed_chr2   | 1.76E+08 | 1.76E+08 | - | 0    | 0    |
| ENSG0000(SLC25A5P7)             | processed_chr6   | 1.22E+08 | 1.22E+08 | + | 0    | 0    |
| ENSG0000(KRT8P43)               | processed_chr6   | 24598012 | 24599790 | + | 0    | 0    |
| ENSG0000(RP11-325C)             | processed_chr6   | 1.28E+08 | 1.28E+08 | - | 0    | 0    |
| ENSG0000(POM121L1)              | processed_chr6   | 57937458 | 57939015 | + | 0    | 0    |
| ENSG0000(HLFP1)                 | processed_chr6   | 1.33E+08 | 1.33E+08 | + | 0    | 0    |
| ENSG0000(RPS20P32)              | processed_chr13  | 27017554 | 27017909 | - | 0    | 0    |
| ENSG0000(RPS27AP11)             | processed_chr6   | 1.14E+08 | 1.14E+08 | + | 0    | 0    |
| ENSG0000(FTH1P26)               | processed_chr6   | 1.34E+08 | 1.34E+08 | - | 0    | 0    |
| ENSG0000(TATDN2P2)              | processed_chr6   | 1.59E+08 | 1.59E+08 | - | 0    | 0    |
| ENSG0000(RP11-889L)             | processed_chr5   | 1.78E+08 | 1.78E+08 | + | 0    | 0    |
| ENSG0000(NEPNP)                 | unitary_psi_chr6 | 1.18E+08 | 1.18E+08 | + | 0    | 0    |
| ENSG0000(RP11-96J1)             | processed_chr6   | 53378503 | 53378861 | + | 0    | 0    |
| ENSG0000(RPS4XP7)               | processed_chr6   | 13521266 | 13522045 | + | 0    | 0    |
| ENSG0000(RP3-407E4)             | unprocessed_chr6 | 63395007 | 63397106 | - | 0    | 0    |
| ENSG0000(HIST1H2AP)             | unprocessed_chr6 | 26233122 | 26233255 | + | 0    | 0    |
| ENSG0000(MORF4L1P)              | processed_chr1   | 2.2E+08  | 2.2E+08  | + | 0    | 0    |
| ENSG0000(RP11-63K6)             | processed_chr6   | 89876544 | 89876878 | + | 0    | 0    |
| ENSG0000(CDC14C)                | processed_chr7   | 48919765 | 48926013 | + | 0    | 0    |
| ENSG0000(RP11-393I2)            | processed_chr6   | 87173368 | 87174303 | - | 0    | 0    |
| ENSG0000(TENM3)                 | protein_co_chr4  | 1.82E+08 | 1.83E+08 | + | 1.03 | 0.14 |
| ENSG0000(RP4-724P1)             | processed_chr6   | 49077712 | 49078051 | - | 0    | 0    |
| ENSG0000(HNRNPA1P)              | processed_chr6   | 27523076 | 27524339 | + | 0    | 0    |
| ENSG0000(LYPLA1P3)              | processed_chr6   | 71165076 | 71165770 | + | 0    | 0    |
| ENSG0000(RPS3AP23)              | transcribed_chr6 | 1.42E+08 | 1.42E+08 | - | 0    | 0    |
| ENSG0000(LINC01644)             | lincRNA_chr22    | 47461299 | 47487111 | - | 0    | 0    |
| ENSG0000(RAET1K)                | transcribed_chr6 | 1.5E+08  | 1.5E+08  | - | 0.03 | 0.04 |
| ENSG0000(SUMO2P13)              | processed_chr6   | 17582034 | 17582305 | + | 0    | 0    |
| ENSG0000(SLC25A20P)             | processed_chr6   | 52246460 | 52247362 | + | 0    | 0    |
| ENSG0000(AC012078)              | processed_chrY   | 3851224  | 3852869  | - | 0    | 0    |
| ENSG0000(PP14571)               | processed_chr2   | 2.4E+08  | 2.4E+08  | - | 0.07 | 0.07 |
| ENSG0000(RP11-296E)             | processed_chr6   | 80064286 | 80070199 | - | 0.02 | 0.03 |
| ENSG0000(NDUFS5P1)              | processed_chr6   | 1.36E+08 | 1.36E+08 | - | 0    | 0    |
| ENSG0000(RP11-475C)             | processed_chr6   | 1.53E+08 | 1.53E+08 | - | 0    | 0    |
| ENSG0000(NIP7P3)                | processed_chr6   | 1.16E+08 | 1.16E+08 | - | 0    | 0    |
| ENSG0000(HNRNPA1P)              | processed_chr17  | 20771058 | 20771427 | - | 0    | 0    |
| ENSG0000(RPS27P15)              | processed_chr6   | 73618346 | 73618597 | + | 0    | 0    |
| ENSG0000(RP1-140K8)             | processed_chr6   | 3913922  | 3914292  | - | 0.24 | 0.53 |
| ENSG0000(ACTG1P18)              | processed_chr6   | 1.01E+08 | 1.01E+08 | - | 0    | 0    |
| ENSG0000(RP11-108N)             | processed_chr6   | 23102680 | 23103546 | + | 0    | 0    |

|                     |                  |          |          |   |       |       |
|---------------------|------------------|----------|----------|---|-------|-------|
| ENSG0000(RP11-554D) | processed_chr6   | 74610449 | 74610715 | - | 0     | 0     |
| ENSG0000(FCF1P10)   | processed_chr6   | 1.13E+08 | 1.13E+08 | + | 0     | 0     |
| ENSG0000(RP3-422G2) | processed_chr6   | 1.38E+08 | 1.38E+08 | + | 0     | 0     |
| ENSG0000(H2AFZP3)   | processed_chr13  | 99215372 | 99215758 | - | 0     | 0     |
| ENSG0000(LINC00339) | lincRNA_chr1     | 22024531 | 22031225 | + | 10.85 | 12.48 |
| ENSG0000(SPTLC1P2)  | processed_chr6   | 23856698 | 23856818 | - | 0     | 0     |
| ENSG0000(RP11-184C) | processed_chr6   | 63229087 | 63230110 | - | 0     | 0     |
| ENSG0000(RP11-420A) | processed_chr6   | 38002832 | 38003313 | - | 0     | 0     |
| ENSG0000(AP002530)  | processed_chr6   | 1.02E+08 | 1.02E+08 | + | 0     | 0     |
| ENSG0000(MIF-AS1)   | antisense_chr22  | 23894426 | 23898930 | - | 0.55  | 0.6   |
| ENSG0000(OR4K12P)   | processed_chr21  | 13581044 | 13582004 | - | 0     | 0     |
| ENSG0000(RP1-253B1) | processed_chr6   | 86729708 | 86730108 | - | 0     | 0     |
| ENSG0000(RP11-12A2) | processed_chr6   | 1.39E+08 | 1.39E+08 | + | 0     | 0     |
| ENSG0000(HNRNPA1P)  | processed_chr6   | 5609227  | 5610195  | - | 0     | 0     |
| ENSG0000(RP3-416J7) | unprocessε_chr6  | 167607   | 170631   | - | 0     | 0     |
| ENSG0000(GAPDHP63)  | processed_chr6   | 79953005 | 79954011 | - | 0.12  | 0     |
| ENSG0000(RP4-791C1) | processed_chr7   | 54933699 | 54938184 | + | 0     | 0     |
| ENSG0000(RP11-2J18) | processed_chr6   | 1.57E+08 | 1.57E+08 | + | 0     | 0     |
| ENSG0000(RP3-407E4) | processed_chr6   | 63392222 | 63392606 | + | 0     | 0     |
| ENSG0000(RP3-395C1) | processed_chr6   | 1.57E+08 | 1.57E+08 | - | 0.22  | 0.37  |
| ENSG0000(RPL7P28)   | processed_chr6   | 1.09E+08 | 1.09E+08 | - | 0     | 0     |
| ENSG0000(RPL5P20)   | processed_chr6   | 19348181 | 19349076 | + | 0     | 0     |
| ENSG0000(AC008060)  | lincRNA_chr7     | 1.55E+08 | 1.55E+08 | + | 0     | 0     |
| ENSG0000(BRD7P4)    | processed_chr6   | 1.11E+08 | 1.11E+08 | + | 0     | 0     |
| ENSG0000(AC010150)  | processed_chr2   | 25856461 | 25856966 | - | 0     | 0     |
| ENSG0000(RPL5P21)   | processed_chr6   | 1.3E+08  | 1.3E+08  | - | 0     | 0     |
| ENSG0000(HIST1H2AP) | transcribed_chr6 | 26272021 | 26272701 | - | 0     | 0     |
| ENSG0000(ST13P16)   | processed_chr6   | 87444395 | 87445175 | - | 0     | 0     |
| ENSG0000(RP1-34L19) | processed_chr6   | 53206598 | 53208697 | - | 0     | 0.03  |
| ENSG0000(RPL12P23)  | processed_chr6   | 1.7E+08  | 1.7E+08  | + | 0     | 0     |
| ENSG0000(B3GALNT2)  | processed_chr6   | 1.3E+08  | 1.3E+08  | + | 0     | 0     |
| ENSG0000(KRT18P44)  | processed_chrX   | 1.29E+08 | 1.29E+08 | + | 0     | 0     |
| ENSG0000(RP3-453I5) | processed_chr6   | 90116700 | 90117105 | - | 0     | 0     |
| ENSG0000(RP5-1046G) | processed_chr6   | 72316599 | 72317436 | - | 0     | 0     |
| ENSG0000(CEBPZOS)   | protein_co_chr2  | 37196488 | 37216193 | + | 11.9  | 13.31 |
| ENSG0000(DBIP1)     | processed_chr6   | 79436908 | 79437167 | - | 0     | 0     |
| ENSG0000(RP3-340B1) | processed_chr6   | 35607628 | 35607934 | + | 0     | 0     |
| ENSG0000(RPL18AP8)  | processed_chr3   | 96619304 | 96619831 | + | 0     | 0     |
| ENSG0000(RP3-472M)  | processed_chr6   | 1.55E+08 | 1.55E+08 | - | 0     | 0     |
| ENSG0000(RP11-207F) | processed_chr6   | 85868953 | 85869464 | + | 0     | 0     |
| ENSG0000(FAM8A6P)   | processed_chr6   | 1.35E+08 | 1.35E+08 | - | 0.11  | 0     |
| ENSG0000(MTATP6P3)  | processed_chr6   | 1.54E+08 | 1.54E+08 | + | 0     | 0     |
| ENSG0000(HSPD1P16)  | processed_chr6   | 1.53E+08 | 1.53E+08 | + | 0     | 0.48  |
| ENSG0000(RP3-382I1) | processed_chr6   | 87441165 | 87442146 | - | 0     | 0     |
| ENSG0000(GSTM2P1)   | processed_chr6   | 1.11E+08 | 1.11E+08 | - | 0     | 0     |

|                                    |          |          |   |        |        |
|------------------------------------|----------|----------|---|--------|--------|
| ENSG0000(RP3-369A1 processed_ chr6 | 24750671 | 24751625 | - | 0      | 0      |
| ENSG0000(RP1-229K2 unprocessε chr6 | 41269875 | 41270239 | - | 0      | 0      |
| ENSG0000(RP11-59D5 processed_ chr6 | 63797189 | 63798031 | + | 0      | 0      |
| ENSG0000(TDRD15 protein_co chr2    | 21123917 | 21143272 | + | 0      | 0      |
| ENSG0000(PAPOLB protein_co chr7    | 4857733  | 4861994  | - | 0      | 0      |
| ENSG0000(RP11-361F processed_ chr6 | 68598204 | 68598393 | - | 0      | 0      |
| ENSG0000(FAM138C lincRNA chr9      | 34394    | 35871    | - | 0      | 0.06   |
| ENSG0000(RP1-209B5 processed_ chr6 | 1.31E+08 | 1.31E+08 | - | 0      | 0      |
| ENSG0000(CNN3P1 processed_ chr6    | 6534697  | 6535631  | + | 0      | 0      |
| ENSG0000(SLC25A6P6 processed_ chr6 | 70663502 | 70664279 | - | 0      | 0      |
| ENSG0000(RP11-249L processed_ chr6 | 1.09E+08 | 1.09E+08 | - | 0      | 0      |
| ENSG0000(NUFIP1P processed_ chr6   | 66093431 | 66094909 | - | 0      | 0      |
| ENSG0000(ZNF579 protein_co chr19   | 55576770 | 55580845 | - | 4.66   | 6.82   |
| ENSG0000(SUMO2P12 processed_ chr6  | 12319453 | 12319592 | + | 0      | 0      |
| ENSG0000(TUBB8P2 processed_ chr6   | 1.43E+08 | 1.43E+08 | + | 0      | 0      |
| ENSG0000(PTMAP3 processed_ chr20   | 18011955 | 18012284 | + | 0      | 0      |
| ENSG0000(NACAP7 processed_ chr6    | 89422099 | 89423048 | - | 0      | 0      |
| ENSG0000(RP11-528A unprocessε chr6 | 18366736 | 18368644 | - | 0      | 0      |
| ENSG0000(FTH1P15 processed_ chr6   | 57004520 | 57004799 | + | 0      | 0      |
| ENSG0000(RP1-137F1 processed_ chr6 | 39353747 | 39354172 | + | 0      | 0      |
| ENSG0000(CCNG1P1 processed_ chr6   | 1.33E+08 | 1.33E+08 | + | 0      | 0      |
| ENSG0000(ARL4AP5 processed_ chr6   | 1.51E+08 | 1.51E+08 | + | 0.24   | 0      |
| ENSG0000(RP3-340B1 processed_ chr6 | 35555873 | 35556264 | + | 0.22   | 0.24   |
| ENSG0000(RPS3AP2 processed_ chr16  | 1477830  | 1478583  | + | 0      | 0      |
| ENSG0000(AC005102. processed_ chr7 | 75835663 | 75836141 | + | 0      | 0      |
| ENSG0000(TRIM51FP unprocessε chr11 | 49833140 | 49839320 | - | 0      | 0      |
| ENSG0000(CELA3B protein_co chr1    | 21977021 | 21998642 | + | 0      | 0      |
| ENSG0000(SOD1P1 processed_ chr6    | 53196720 | 53197159 | - | 0      | 0      |
| ENSG0000(NPM1P37 processed_ chr6   | 69705287 | 69706160 | - | 0.14   | 0      |
| ENSG0000(MTND4LP1 processed_ chr6  | 91727159 | 91727324 | + | 0      | 0      |
| ENSG0000(RP3-359N1 processed_ chr6 | 1.06E+08 | 1.06E+08 | + | 0      | 0      |
| ENSG0000(DHFRP6 processed_ chr6    | 56276529 | 56276796 | - | 0      | 0      |
| ENSG0000(HNRNPA3F processed_ chr1  | 53974969 | 53976031 | - | 0.23   | 0      |
| ENSG0000(RP11-203F processed_ chr1 | 2.04E+08 | 2.04E+08 | - | 0      | 0      |
| ENSG0000(RPL23AP4ε processed_ chr6 | 1.22E+08 | 1.22E+08 | - | 0      | 0      |
| ENSG0000(TYMSP1 processed_ chr6    | 96653274 | 96654142 | + | 0      | 0      |
| ENSG0000(RPS4XP8 processed_ chr6   | 1.55E+08 | 1.55E+08 | + | 0      | 0      |
| ENSG0000(RP11-214N processed_ chr9 | 76549282 | 76549771 | - | 0      | 0      |
| ENSG0000(RP11-569A processed_ chr6 | 1.11E+08 | 1.11E+08 | - | 0      | 0      |
| ENSG0000(AC011298. lincRNA chr2    | 2.41E+08 | 2.41E+08 | + | 0      | 0      |
| ENSG0000(HMGB1P2( processed_ chr6  | 53235621 | 53236297 | - | 0      | 0      |
| ENSG0000(FTH1P19 unprocessε chrX   | 37492021 | 37492548 | + | 0      | 0      |
| ENSG0000(CACYBPP3 processed_ chr6  | 1.59E+08 | 1.59E+08 | - | 0      | 0      |
| ENSG0000(RP1-253B1 processed_ chr6 | 86768522 | 86768932 | - | 0      | 0      |
| ENSG0000(RNASEK protein_co chr17   | 7012417  | 7014532  | + | 184.73 | 193.51 |

|                                      |          |          |   |       |       |
|--------------------------------------|----------|----------|---|-------|-------|
| ENSG0000(RP11-181C processed_ chr1   | 77810861 | 77811781 | - | 0     | 0     |
| ENSG0000(RPL12P47 processed_ chr6    | 43310231 | 43310357 | + | 0     | 0     |
| ENSG0000(RP11-63K6 processed_ chr6   | 89886156 | 89887848 | + | 0     | 0     |
| ENSG0000(AMZ2P2 processed_ chr6      | 1.59E+08 | 1.59E+08 | - | 0     | 0     |
| ENSG0000(RPS6P7 processed_ chr6      | 77496119 | 77496671 | + | 0     | 0     |
| ENSG0000(NPM1P38 processed_ chr6     | 1E+08    | 1E+08    | - | 0     | 0     |
| ENSG0000(OR2E1P unprocessε chr6      | 28455648 | 28456141 | - | 0     | 0     |
| ENSG0000(RP1-217P2 processed_ chr6   | 38762905 | 38764694 | + | 0     | 0     |
| ENSG0000(RPS20P2 processed_ chr16    | 1329078  | 1329777  | + | 0     | 0     |
| ENSG0000(VN1R8P processed_ chr21     | 13476371 | 13477263 | + | 0     | 0     |
| ENSG0000(RP11-151M unprocessε chr6   | 1.28E+08 | 1.28E+08 | - | 0     | 0     |
| ENSG0000(PIP5K1P1 processed_ chr6    | 7986537  | 7988192  | + | 0     | 0     |
| ENSG0000(MRPL42P3 processed_ chr6    | 1.44E+08 | 1.44E+08 | + | 0     | 0     |
| ENSG0000(RP11-472G processed_ chr6   | 1.5E+08  | 1.5E+08  | + | 0     | 0     |
| ENSG0000(RP11-174C processed_ chr6   | 1.3E+08  | 1.3E+08  | - | 0     | 0     |
| ENSG0000(RP1-273P1 processed_ chr6   | 17381367 | 17382120 | + | 0     | 0     |
| ENSG0000(RP11-397G processed_ chr6   | 1.11E+08 | 1.11E+08 | + | 0     | 0     |
| ENSG0000(RPL31P52 processed_ chr12   | 1.2E+08  | 1.2E+08  | - | 0     | 0     |
| ENSG0000(RPSAP72 processed_ chr6     | 80470071 | 80470428 | - | 0     | 0     |
| ENSG0000(ZNF299P processed_ chr21    | 23090028 | 23091831 | - | 0     | 0     |
| ENSG0000(RP11-69L1 processed_ chr6   | 7331286  | 7331676  | - | 0     | 0     |
| ENSG0000(RP11-491H processed_ chr6   | 45158870 | 45159511 | + | 0     | 0     |
| ENSG0000(ATF1P1 processed_ chr6      | 92887251 | 92888581 | - | 0     | 0     |
| ENSG0000(AC019129. processed_ chr2   | 44065894 | 44066154 | - | 0     | 0     |
| ENSG0000(ZNF602P unprocessε chr6     | 28115628 | 28116551 | + | 0     | 0     |
| ENSG0000(HSPA8P15 processed_ chr6    | 1.51E+08 | 1.51E+08 | - | 0.08  | 0     |
| ENSG0000(RP11-524C processed_ chr6   | 22213306 | 22214237 | - | 0     | 0     |
| ENSG0000(RP11-106E processed_ chr6   | 1.44E+08 | 1.44E+08 | + | 0     | 0     |
| ENSG0000(RP4-761J1. antisense_ chr12 | 6663260  | 6672069  | + | 0.04  | 0     |
| ENSG0000(MBL3P unprocessε chr10      | 79582298 | 79584877 | - | 0     | 0     |
| ENSG0000(BTBD10P2 processed_ chr6    | 1.5E+08  | 1.5E+08  | + | 0     | 0     |
| ENSG0000(TEX40 protein_co chr11      | 64300391 | 64304770 | + | 0.09  | 0     |
| ENSG0000(FAM19A5 protein_co chr22    | 48489460 | 48850912 | + | 0.08  | 0.08  |
| ENSG0000(RP11-3B12 lincRNA_ chr7     | 1.25E+08 | 1.25E+08 | - | 0     | 0     |
| ENSG0000(RPL23P8 processed_ chr7     | 20827326 | 20827753 | + | 0     | 0     |
| ENSG0000(RP4-810F7 processed_ chr6   | 23649496 | 23649774 | + | 0     | 0     |
| ENSG0000(RPSAP42 processed_ chr6     | 1.38E+08 | 1.38E+08 | + | 0     | 0     |
| ENSG0000(RP3-337H4 processed_ chr6   | 43538822 | 43539703 | - | 0.14  | 0     |
| ENSG0000(NBPF1 protein_co chr1       | 16562319 | 16613562 | - | 16.33 | 18.72 |
| ENSG0000(RP11-365H processed_ chr6   | 1.49E+08 | 1.49E+08 | - | 0     | 0     |
| ENSG0000(TPT1P8 unprocessε chr8      | 36888482 | 36889307 | + | 0     | 0     |
| ENSG0000(RP11-1396 unprocessε chr4   | 9384017  | 9388983  | - | 0     | 0     |
| ENSG0000(RP11-15J2. processed_ chr6  | 86432244 | 86432669 | + | 0     | 0     |
| ENSG0000(FTH1P8 processed_ chrX      | 1.48E+08 | 1.48E+08 | + | 0.32  | 1.44  |
| ENSG0000(AP000580. processed_ chr11  | 77813319 | 77813676 | - | 1.11  | 1.7   |



|                                     |          |            |      |      |
|-------------------------------------|----------|------------|------|------|
| ENSG0000(RP3-323K2 processed_ chr6  | 1.32E+08 | 1.32E+08 - | 0    | 0    |
| ENSG0000(UMAD1 protein_co chr7      | 7640711  | 7968020 +  | 6.31 | 6.01 |
| ENSG0000(RPL17P25 processed_ chr6   | 80374015 | 80374569 - | 0    | 0    |
| ENSG0000(RP11-374I1 processed_ chr6 | 95630115 | 95632929 - | 0    | 0    |
| ENSG0000(RP1-281H8 processed_ chr6  | 1.49E+08 | 1.49E+08 - | 0    | 0    |
| ENSG0000(RP11-346C processed_ chr6  | 1.11E+08 | 1.11E+08 - | 0    | 0    |
| ENSG0000(ZNF259P1 transcribec chr6  | 1.09E+08 | 1.09E+08 - | 0    | 0    |
| ENSG0000(RP1-288M processed_ chr6   | 71550958 | 71551643 - | 0    | 0    |
| ENSG0000(HNRNPA1P processed_ chr6   | 24001824 | 24002433 + | 0    | 0    |
| ENSG0000(NCSTNP1 processed_ chr21   | 27492118 | 27492261 + | 0    | 0    |
| ENSG0000(RP11-132M processed_ chr6  | 84689292 | 84689429 - | 0    | 0    |
| ENSG0000(PPP1R3G protein_co chr6    | 5084581  | 5089487 +  | 0.82 | 0.9  |
| ENSG0000(HIGD1AP1 processed_ chr20  | 35878476 | 35878733 + | 0    | 0    |
| ENSG0000(RP11-126M processed_ chr6  | 1.15E+08 | 1.15E+08 - | 0    | 0    |
| ENSG0000(RP11-291C processed_ chr6  | 1.51E+08 | 1.51E+08 - | 0    | 0    |
| ENSG0000(FAM228B protein_co chr2    | 24076526 | 24169640 + | 7.91 | 8.76 |
| ENSG0000(CYCSP17 processed_ chr6    | 95504182 | 95504496 + | 0    | 0    |
| ENSG0000(BMPR1APS processed_ chr6   | 1.29E+08 | 1.29E+08 - | 0    | 0    |
| ENSG0000(GCNT1P4 processed_ chr6    | 63857441 | 63857769 + | 0    | 0    |
| ENSG0000(CTD-2006C processed_ chr19 | 11987617 | 12046275 + | 4.54 | 3.63 |
| ENSG0000(RP11-174C processed_ chr6  | 1.3E+08  | 1.3E+08 -  | 0    | 0    |
| ENSG0000(BECN1P2 processed_ chr6    | 71075564 | 71076375 + | 0    | 0    |
| ENSG0000(RP11-191A processed_ chr6  | 25218688 | 25219069 + | 0    | 0    |
| ENSG0000(RP3-425P1 processed_ chr6  | 25140003 | 25141403 + | 0.05 | 0    |
| ENSG0000(FGF7P8 unprocessε chr9     | 62888535 | 62889921 + | 2.41 | 4.15 |
| ENSG0000(RP11-325C unprocessε chr6  | 1.28E+08 | 1.28E+08 - | 0    | 0    |
| ENSG0000(PTCHD3P3 processed_ chr6   | 1.09E+08 | 1.09E+08 - | 0    | 0    |
| ENSG0000(RP5-991C6 processed_ chr6  | 81764211 | 81764503 + | 0    | 0    |
| ENSG0000(RAP1BP3 processed_ chr6    | 1.17E+08 | 1.17E+08 + | 0    | 0    |
| ENSG0000(RP11-532F processed_ chr6  | 669081   | 670307 -   | 0    | 0.05 |
| ENSG0000(RPL26P20 processed_ chr6   | 75499705 | 75500136 + | 0    | 0    |
| ENSG0000(RP11-560C processed_ chr6  | 74849077 | 74850484 - | 0    | 0    |
| ENSG0000(CD83P1 processed_ chr6     | 27560822 | 27561744 - | 0    | 0    |
| ENSG0000(RP1-292B1 processed_ chr6  | 1.51E+08 | 1.51E+08 + | 0.83 | 0.46 |
| ENSG0000(RP1-199J3 processed_ chr6  | 99575712 | 99576456 + | 2.1  | 1.54 |
| ENSG0000(RP11-793L processed_ chr6  | 1.02E+08 | 1.02E+08 - | 0    | 0    |
| ENSG0000(RP1-249H1 processed_ chr6  | 1.14E+08 | 1.14E+08 + | 0    | 0    |
| ENSG0000(VN1R11P unitary_psι chr6   | 27083280 | 27084147 + | 0    | 0    |
| ENSG0000(RPSAP45 processed_ chr6    | 1.12E+08 | 1.12E+08 - | 0    | 0    |
| ENSG0000(RPL21P67 processed_ chr6   | 1.31E+08 | 1.31E+08 + | 0    | 0    |
| ENSG0000(RP1-172I2 processed_ chr6  | 1.21E+08 | 1.21E+08 - | 0    | 0    |
| ENSG0000(OSTCP6 processed_ chr6     | 56975606 | 56976062 - | 0    | 0    |
| ENSG0000(PPIAP9 processed_ chr6     | 31519480 | 31520291 - | 0    | 0    |
| ENSG0000(ATP5F1P6 processed_ chr6   | 1.4E+08  | 1.4E+08 -  | 0    | 0    |
| ENSG0000(ARF1P1 processed_ chr7     | 94833904 | 94834447 + | 0    | 0    |

|                                      |          |            |       |       |
|--------------------------------------|----------|------------|-------|-------|
| ENSG0000(RPL23AP47 processed_ chr6   | 1.71E+08 | 1.71E+08 + | 0     | 0     |
| ENSG0000(RPL31P28 processed_ chr6    | 53354715 | 53355065 + | 0     | 0     |
| ENSG0000(RP11-40G1 processed_ chr6   | 91815843 | 91816428 - | 0     | 0     |
| ENSG0000(RP11-430A processed_ chrX   | 9179385  | 9179606 +  | 0     | 0     |
| ENSG0000(GAPDHP42 processed_ chr6    | 69745871 | 69746851 + | 0     | 0     |
| ENSG0000(ZSCAN12P: transcribed chr6  | 28091154 | 28093664 + | 0.39  | 0.04  |
| ENSG0000(RPL35P3 processed_ chr6     | 1.05E+08 | 1.05E+08 - | 0.24  | 0     |
| ENSG0000(RP11-394A lincRNA chr13     | 63828840 | 63844125 - | 0.85  | 0.55  |
| ENSG0000(RP11-40C6 processed_ chr9   | 87525302 | 87525475 + | 0     | 0     |
| ENSG0000(GAPDHP67 processed_ chrX    | 1.36E+08 | 1.36E+08 + | 0     | 0     |
| ENSG0000(RPL12P8 processed_ chr10    | 67874332 | 67874911 + | 0     | 0     |
| ENSG0000(SPTLC1P3 processed_ chr6    | 63227485 | 63227743 + | 0     | 0     |
| ENSG0000(KRT18P50 processed_ chr6    | 95991107 | 95992349 + | 0     | 0     |
| ENSG0000(RP11-378G processed_ chr6   | 83392416 | 83393409 + | 0.06  | 0     |
| ENSG0000(BTF3P7 processed_ chr6      | 6794915  | 6795402 -  | 0     | 0.17  |
| ENSG0000(RP11-420L processed_ chr6   | 3754099  | 3754840 +  | 0.55  | 0.81  |
| ENSG0000(RP11-288G processed_ chr6   | 7506203  | 7506549 +  | 0     | 0     |
| ENSG0000(LINGO3 protein_co chr19     | 2289784  | 2292024 -  | 0     | 0.03  |
| ENSG0000(RP1-91N13 processed_ chr6   | 61240898 | 61241311 + | 0     | 0     |
| ENSG0000(RPL7P27 processed_ chr6     | 86086415 | 86087134 - | 0     | 0     |
| ENSG0000(RP1-207H1 processed_ chr6   | 38928031 | 38928153 + | 0     | 0     |
| ENSG0000(LAP3P1 processed_ chr6      | 82924829 | 82925122 - | 0     | 0     |
| ENSG0000(RP11-307I1 processed_ chr9  | 4781475  | 4782078 -  | 0     | 0     |
| ENSG0000(RP1-6P5.2 processed_ chr6   | 1.29E+08 | 1.29E+08 - | 0     | 0     |
| ENSG0000(MTCYBP4 processed_ chr6     | 1.33E+08 | 1.33E+08 + | 0     | 0     |
| ENSG0000(MRPL32P1 processed_ chrX    | 48583093 | 48583339 - | 0     | 0     |
| ENSG0000(RP1-72A23 processed_ chr6   | 89001548 | 89001814 + | 0     | 0     |
| ENSG0000(RP4-570O1 processed_ chr6   | 88265158 | 88265511 + | 0     | 0     |
| ENSG0000(AF238380: processed_ chrX   | 49911620 | 49912362 - | 0     | 0     |
| ENSG0000(RP3-354N1 processed_ chr6   | 1.19E+08 | 1.19E+08 + | 0     | 0     |
| ENSG0000(RP11-46B1 processed_ chr6   | 79278105 | 79278427 - | 0     | 0     |
| ENSG0000(HNRNPA1P processed_ chr5    | 80359080 | 80360040 - | 0     | 0.07  |
| ENSG0000(LINC02076 lincRNA chr17     | 18411159 | 18414380 + | 0     | 0.13  |
| ENSG0000(RP11-486M processed_ chr6   | 1.55E+08 | 1.55E+08 + | 0     | 0     |
| ENSG0000(HMGB3P1: processed_ chr6    | 1.22E+08 | 1.22E+08 - | 0     | 0     |
| ENSG0000(ZGLP1 protein_co chr19      | 10304803 | 10309880 - | 0.46  | 0.75  |
| ENSG0000(RP1-53C18 processed_ chr11  | 34404663 | 34404949 - | 0     | 0     |
| ENSG0000(VAMP2 protein_co chr17      | 8159149  | 8163546 -  | 21.22 | 22.47 |
| ENSG0000(OR4F1P unprocessed_ chr6    | 105919   | 106856 -   | 0     | 0     |
| ENSG0000(RPS24P12 processed_ chr6    | 1.07E+08 | 1.07E+08 + | 0     | 0     |
| ENSG0000(RP11-76H1 unprocessed_ chr6 | 86897547 | 86897683 + | 0     | 0     |
| ENSG0000(ZNF402P processed_ chr22    | 16857619 | 16860718 - | 0     | 0     |
| ENSG0000(AC093802: lincRNA chr2      | 2.4E+08  | 2.4E+08 +  | 0     | 0.02  |
| ENSG0000(ACTBP8 processed_ chr6      | 88275882 | 88276989 - | 0     | 0     |
| ENSG0000(RP3-455E7 unprocessed_ chr6 | 85155667 | 85167749 + | 0     | 0     |

|                                      |          |            |       |      |
|--------------------------------------|----------|------------|-------|------|
| ENSG0000(HNRNPH1F processed_ chr6    | 1.6E+08  | 1.6E+08 -  | 0.25  | 0.11 |
| ENSG0000(RPL35AP18 processed_ chr6   | 79964215 | 79964519 + | 0     | 0    |
| ENSG0000(HIST2H2BC processed_ chr1   | 1.5E+08  | 1.5E+08 +  | 1.6   | 0    |
| ENSG0000(RP11-129H processed_ chr6   | 1.22E+08 | 1.22E+08 - | 0     | 0    |
| ENSG0000(MTCO1P56 processed_ chr6    | 91727282 | 91727505 - | 0     | 0    |
| ENSG0000(RP11-440K processed_ chr3   | 1.67E+08 | 1.67E+08 + | 0     | 0    |
| ENSG0000(RP11-230C processed_ chr6   | 1.57E+08 | 1.57E+08 + | 0     | 0    |
| ENSG0000(RP3-431A1 processed_ chr6   | 36737050 | 36737986 + | 0.13  | 0    |
| ENSG0000(RP3-399J4. processed_ chr6  | 94344737 | 94344962 + | 25.99 | 46.7 |
| ENSG0000(GSTA8P unprocessε chr6      | 52687930 | 52703825 - | 0     | 0    |
| ENSG0000(KRT8P42 processed_ chr6     | 1.34E+08 | 1.34E+08 - | 0     | 0.05 |
| ENSG0000(FCF1P5 processed_ chr6      | 1.11E+08 | 1.11E+08 + | 0     | 0    |
| ENSG0000(RP11-95M: processed_ chr6   | 1.38E+08 | 1.38E+08 - | 0     | 0    |
| ENSG0000(TUBB3P1 processed_ chr6     | 89301783 | 89303114 + | 0     | 0    |
| ENSG0000(RP3-520B1 processed_ chr6   | 5291030  | 5291388 -  | 0     | 0    |
| ENSG0000(RP1-276J1: processed_ chr6  | 1.21E+08 | 1.21E+08 + | 0     | 0    |
| ENSG0000(RP11-69L1 processed_ chr6   | 7338839  | 7339568 -  | 0     | 0    |
| ENSG0000(SLC25A51P processed_ chr6   | 65788417 | 65789287 + | 0     | 0    |
| ENSG0000(YAP1P1 processed_ chr6      | 1.47E+08 | 1.47E+08 + | 0.17  | 0.27 |
| ENSG0000(EIF4EBP2P: processed_ chr6  | 98179499 | 98179832 - | 0     | 0    |
| ENSG0000(RP3-415N1 processed_ chr6   | 1.11E+08 | 1.11E+08 - | 0     | 0    |
| ENSG0000(MTND4LP2 processed_ chr6    | 1.54E+08 | 1.54E+08 + | 0     | 0    |
| ENSG0000(PGAM1P1C processed_ chr6    | 73055097 | 73055857 + | 0     | 0    |
| ENSG0000(ASS1P1 processed_ chr6      | 25023247 | 25024483 - | 0     | 0    |
| ENSG0000(RP1-177A1 processed_ chr6   | 1.27E+08 | 1.27E+08 - | 0     | 0    |
| ENSG0000(RP3-492P1 processed_ chr6   | 82263996 | 82264974 - | 0     | 0    |
| ENSG0000(RP1-298M: processed_ chr20  | 17188134 | 17188344 + | 0     | 0    |
| ENSG0000(RP5-1170D processed_ chrX   | 1.14E+08 | 1.14E+08 + | 0     | 0    |
| ENSG0000(VIM2P processed_ chr6       | 1.27E+08 | 1.27E+08 - | 0     | 0    |
| ENSG0000(RPL5P19 processed_ chr6     | 92013842 | 92014734 + | 0     | 0    |
| ENSG0000(RP1-202I21 processed_ chr6  | 39039603 | 39039985 - | 0     | 0    |
| ENSG0000(HMGB1P1: processed_ chr6    | 1.33E+08 | 1.33E+08 - | 0     | 0    |
| ENSG0000(PKMP3 processed_ chr6       | 85659892 | 85660606 - | 0.09  | 0.41 |
| ENSG0000(HTR5A-AS1 antisense chr7    | 1.55E+08 | 1.55E+08 - | 0     | 0    |
| ENSG0000(VN1R12P unitary_ψ: chr6     | 27033435 | 27034310 - | 0     | 0    |
| ENSG0000(RPL35P2 processed_ chr6     | 34263311 | 34263673 - | 0     | 0    |
| ENSG0000(DDX18P6 processed_ chr10    | 91053051 | 91055047 + | 0     | 0    |
| ENSG0000(TUBBP9 processed_ chr6      | 39992815 | 40000233 + | 0     | 0    |
| ENSG0000(SSR1P1 processed_ chr6      | 1.5E+08  | 1.5E+08 -  | 0     | 0    |
| ENSG0000(RP3-509I1: transcribed chr6 | 1.39E+08 | 1.39E+08 - | 0     | 0    |
| ENSG0000(RP11-480N processed_ chr6   | 43328134 | 43328476 + | 0     | 0    |
| ENSG0000(KRASP1 processed_ chr6      | 54770583 | 54771134 + | 0     | 0    |
| ENSG0000(RP3-391O2 processed_ chr6   | 34686602 | 34687106 + | 0     | 0    |
| ENSG0000(RP3-406A7 transcribed chr6  | 1.36E+08 | 1.36E+08 + | 0.13  | 0.15 |
| ENSG0000(RCC2P7 processed_ chr6      | 56431950 | 56433213 - | 0     | 0    |

|                                     |          |            |        |       |
|-------------------------------------|----------|------------|--------|-------|
| ENSG0000(RP11-530A processed_ chr6  | 5065795  | 5066982 -  | 0.05   | 0.05  |
| ENSG0000(RP3-403A1 processed_ chr6  | 1.27E+08 | 1.27E+08 + | 0      | 0     |
| ENSG0000(RP1-121G1 processed_ chr6  | 1.01E+08 | 1.01E+08 + | 0      | 0     |
| ENSG0000(RP1-32I10. lincRNA chr22   | 44365551 | 44366284 + | 0      | 0     |
| ENSG0000(OR1F12 unprocessε chr6     | 28073316 | 28074233 + | 0      | 0     |
| ENSG0000(RP11-228C processed_ chr6  | 55680642 | 55681021 - | 0      | 0     |
| ENSG0000(RP11-474L processed_ chr6  | 75586122 | 75586461 + | 0      | 0     |
| ENSG0000(MTND3P2C processed_ chr6   | 1.54E+08 | 1.54E+08 + | 0      | 0     |
| ENSG0000(RP3-510O8 processed_ chr6  | 35765908 | 35766927 + | 0      | 0     |
| ENSG0000(RP11-277I2 processed_ chr6 | 1.45E+08 | 1.45E+08 - | 0      | 0     |
| ENSG0000(RPL5P18 processed_ chr6    | 1.27E+08 | 1.27E+08 + | 0.14   | 0.15  |
| ENSG0000(RP1-101K1 processed_ chr6  | 1.53E+08 | 1.53E+08 - | 0      | 0     |
| ENSG0000(RP1-59B16 processed_ chr6  | 23971879 | 23972941 + | 0      | 0     |
| ENSG0000(RPL21P28 processed_ chr1   | 2.12E+08 | 2.12E+08 - | 0.57   | 0.41  |
| ENSG0000(VN1R10P unprocessε chr6    | 27324894 | 27325768 + | 0      | 0     |
| ENSG0000(BOLA2P3 processed_ chr6    | 21602128 | 21602383 + | 0      | 0     |
| ENSG0000(RPSAP44 processed_ chr6    | 54624605 | 54625488 + | 0      | 0     |
| ENSG0000(MTMR9LP transcribec chr1   | 32231658 | 32241620 - | 6.98   | 6.39  |
| ENSG0000(RPL21P119 processed_ chr16 | 9156402  | 9156881 -  | 0      | 0     |
| ENSG0000(LINC01881 transcribec chr2 | 2.42E+08 | 2.42E+08 + | 5.05   | 4.37  |
| ENSG0000(NDUFA5P9 processed_ chr6   | 86214237 | 86214576 - | 0      | 0     |
| ENSG0000(RPL21P16 processed_ chr10  | 1.2E+08  | 1.2E+08 -  | 571.54 | 561.9 |
| ENSG0000(RPS18P9 processed_ chr6    | 1.5E+08  | 1.5E+08 +  | 3.57   | 2.99  |
| ENSG0000(HSPE1P26 processed_ chr6   | 1.58E+08 | 1.58E+08 + | 0      | 0     |
| ENSG0000(MRPL35P1 processed_ chr6   | 13949095 | 13949666 + | 0      | 0     |
| ENSG0000(DNAJC19P( processed_ chr6  | 89797598 | 89797877 + | 0      | 0     |
| ENSG0000(HIST1H3PS processed_ chr6  | 26321876 | 26322292 - | 0      | 0     |
| ENSG0000(MESTP1 processed_ chr6     | 1.29E+08 | 1.29E+08 - | 0      | 0     |
| ENSG0000(LL22NC03- antisense chr22  | 22559343 | 22566602 + | 0.02   | 0     |
| ENSG0000(RP11-127B lincRNA chr6     | 92723003 | 92723829 - | 0      | 0     |
| ENSG0000(RP11-235G unprocessε chr6  | 1.61E+08 | 1.61E+08 + | 0      | 0     |
| ENSG0000(RP1-92C4.1 processed_ chr6 | 79854684 | 79855632 + | 0      | 0     |
| ENSG0000(RP3-525L6. unprocessε chr6 | 17953572 | 17953930 + | 0      | 0     |
| ENSG0000(OSTCP4 processed_ chr4     | 1.13E+08 | 1.13E+08 + | 0      | 0     |
| ENSG0000(IGBP1-AS2 antisense chrX   | 70148582 | 70149654 - | 0      | 0     |
| ENSG0000(HNRNPA1P processed_ chr9   | 4944670  | 4945902 -  | 0      | 0     |
| ENSG0000(TRIM51GP unprocessε chr11  | 48975501 | 48981695 - | 0      | 0     |
| ENSG0000(CTC-499B1 unprocessε chr19 | 11756533 | 11759933 - | 0      | 0     |
| ENSG0000(RP1-72A23 processed_ chr6  | 89059628 | 89060109 + | 0      | 0     |
| ENSG0000(SNORA50 snoRNA chr5        | 69160806 | 69160939 + | 0      | 0     |
| ENSG0000(SNORD88C snoRNA chr19      | 50802328 | 50802418 - | 0      | 0     |
| ENSG0000(RNU6ATAC snRNA chr3        | 51611438 | 51611562 - | 0      | 0     |
| ENSG0000(MIR1323 miRNA chr19        | 53671968 | 53672040 + | 0      | 0     |
| ENSG0000(RNU6ATAC snRNA chr2        | 1.82E+08 | 1.82E+08 + | 0      | 0     |
| ENSG0000(MIR1250 miRNA chr17        | 81133196 | 81133308 - | 0      | 0     |

|                   |             |          |       |          |          |   |   |   |
|-------------------|-------------|----------|-------|----------|----------|---|---|---|
| ENSG00000101231   | MIR1231     | miRNA    | chr1  | 2.02E+08 | 2.02E+08 | + | 0 | 0 |
| ENSG00000101232   | CoTC_riboz  | ribozyme | chr11 | 5224448  | 5224639  | - | 0 | 0 |
| ENSG00000101272   | MIR1272     | miRNA    | chr15 | 64762387 | 64762515 | - | 0 | 0 |
| ENSG00000101193   | MIR1193     | miRNA    | chr14 | 1.01E+08 | 1.01E+08 | + | 0 | 0 |
| ENSG00000101600   | RNU6ATAC    | snRNA    | chr17 | 31563768 | 31563894 | - | 0 | 0 |
| ENSG00000101286   | MIR1286     | miRNA    | chr22 | 20249134 | 20249211 | - | 0 | 0 |
| ENSG00000101000   | U3          | snoRNA   | chr1  | 1.16E+08 | 1.16E+08 | + | 0 | 0 |
| ENSG00000101001   | CPEB3_riboz | ribozyme | chr10 | 92204229 | 92204306 | - | 0 | 0 |
| ENSG00000101002   | U3          | snoRNA   | chr5  | 1.5E+08  | 1.5E+08  | - | 0 | 0 |
| ENSG00000101003   | U3          | snoRNA   | chr17 | 44025020 | 44025223 | - | 0 | 1 |
| ENSG00000101601   | RNU6ATAC    | snRNA    | chr20 | 45778698 | 45778823 | + | 0 | 0 |
| ENSG00000101266   | MIR1266     | miRNA    | chr15 | 52277117 | 52277200 | - | 0 | 0 |
| ENSG00000101302-3 | MIR1302-3   | miRNA    | chr2  | 1.14E+08 | 1.14E+08 | - | 0 | 0 |
| ENSG00000101602   | RNU6ATAC    | snRNA    | chr3  | 87910220 | 87910345 | + | 0 | 0 |
| ENSG00000101004   | SNORA11     | snoRNA   | chr14 | 69804203 | 69804331 | - | 0 | 0 |
| ENSG00000101296   | MIR1296     | miRNA    | chr10 | 63372957 | 63373048 | - | 0 | 0 |
| ENSG00000101233-2 | MIR1233-2   | miRNA    | chr15 | 34528290 | 34528371 | - | 0 | 0 |
| ENSG00000101111   | SNORD111    | snoRNA   | chr16 | 70538005 | 70538098 | + | 0 | 0 |
| ENSG00000101320D2 | MIR320D2    | miRNA    | chrX  | 1.41E+08 | 1.41E+08 | - | 0 | 0 |
| ENSG00000101005   | SNORA77     | snoRNA   | chr1  | 8511795  | 8511919  | - | 0 | 0 |
| ENSG00000101302-5 | MIR1302-5   | miRNA    | chr20 | 50614636 | 50614785 | - | 0 | 0 |
| ENSG00000101006   | SNORA3      | snoRNA   | chr8  | 56121242 | 56121352 | - | 0 | 0 |
| ENSG00000101007   | SNORA11B    | snoRNA   | chr14 | 91126425 | 91126553 | + | 0 | 0 |
| ENSG00000101603   | RNU6ATAC    | snRNA    | chr14 | 49684544 | 49684665 | + | 0 | 0 |
| ENSG00000101110   | SNORD110    | snoRNA   | chr20 | 2654212  | 2654286  | + | 0 | 0 |
| ENSG00000101224   | MIR1224     | miRNA    | chr3  | 1.84E+08 | 1.84E+08 | + | 0 | 0 |
| ENSG00000101008   | U3          | snoRNA   | chr19 | 49949316 | 49949527 | - | 0 | 0 |
| ENSG00000101009   | SNORD23     | snoRNA   | chr18 | 21450653 | 21450756 | - | 0 | 0 |
| ENSG00000101000   | SNORA3      | snoRNA   | chr12 | 84183324 | 84183448 | - | 0 | 0 |
| ENSG00000101001   | SNORA11     | snoRNA   | chr10 | 73126080 | 73126207 | - | 0 | 0 |
| ENSG00000101207   | MIR1207     | miRNA    | chr8  | 1.28E+08 | 1.28E+08 | + | 0 | 0 |
| ENSG00000101254-1 | MIR1254-1   | miRNA    | chr10 | 68759318 | 68759414 | + | 0 | 0 |
| ENSG00000101548M  | MIR548M     | miRNA    | chrX  | 95063141 | 95063226 | - | 0 | 0 |
| ENSG00000101184-2 | MIR1184-2   | miRNA    | chrX  | 1.55E+08 | 1.55E+08 | - | 0 | 0 |
| ENSG00000101253   | MIR1253     | miRNA    | chr17 | 2748078  | 2748182  | - | 0 | 0 |
| ENSG00000101262   | MIR1262     | miRNA    | chr1  | 68183518 | 68183610 | - | 0 | 0 |
| ENSG00000101604   | RNU6ATAC    | snRNA    | chr3  | 1.11E+08 | 1.11E+08 | - | 0 | 0 |
| ENSG00000101548E  | MIR548E     | miRNA    | chr10 | 1.11E+08 | 1.11E+08 | + | 0 | 0 |
| ENSG00000101605   | RNU6ATAC    | snRNA    | chr1  | 28481362 | 28481480 | + | 0 | 0 |
| ENSG00000101305   | MIR1305     | miRNA    | chr4  | 1.82E+08 | 1.82E+08 | + | 0 | 0 |
| ENSG00000101548L  | MIR548L     | miRNA    | chr11 | 94466495 | 94466580 | - | 0 | 0 |
| ENSG00000101285-2 | MIR1285-2   | miRNA    | chr2  | 70252918 | 70253005 | - | 0 | 0 |
| ENSG00000101258   | MIR1258     | miRNA    | chr2  | 1.8E+08  | 1.8E+08  | - | 0 | 0 |
| ENSG00000101008   | SNORD88A    | snoRNA   | chr19 | 50799442 | 50799532 | - | 0 | 0 |
| ENSG00000101009   | SNORA11     | snoRNA   | chr4  | 1.2E+08  | 1.2E+08  | + | 0 | 0 |

|                   |        |       |          |          |   |   |   |
|-------------------|--------|-------|----------|----------|---|---|---|
| ENSG000001263     | miRNA  | chr3  | 1.64E+08 | 1.64E+08 | - | 0 | 0 |
| ENSG0000016ATAC   | snRNA  | chr2  | 7576841  | 7576971  | + | 0 | 0 |
| ENSG000001208     | miRNA  | chr8  | 1.28E+08 | 1.28E+08 | + | 0 | 0 |
| ENSG000001548P    | miRNA  | chr5  | 1.01E+08 | 1.01E+08 | - | 0 | 0 |
| ENSG000001284     | miRNA  | chr3  | 71541970 | 71542089 | - | 0 | 0 |
| ENSG000001255A    | miRNA  | chr4  | 1.01E+08 | 1.01E+08 | - | 0 | 0 |
| ENSG000001302-8   | miRNA  | chr9  | 97363554 | 97363681 | - | 0 | 0 |
| ENSG000001237     | miRNA  | chr11 | 64368602 | 64368703 | + | 0 | 0 |
| ENSG000001548I2   | miRNA  | chr4  | 9556168  | 9556316  | - | 0 | 0 |
| ENSG000001289-2   | miRNA  | chr5  | 1.33E+08 | 1.33E+08 | - | 0 | 0 |
| ENSG000001663B    | miRNA  | chr2  | 1.32E+08 | 1.32E+08 | - | 0 | 0 |
| ENSG000001548T    | miRNA  | chr4  | 1.73E+08 | 1.73E+08 | + | 0 | 0 |
| ENSG000001NORD75  | snoRNA | chr2  | 42440377 | 42440436 | + | 0 | 0 |
| ENSG000001NORA79  | snoRNA | chr14 | 81202695 | 81202834 | - | 0 | 0 |
| ENSG000001548I3   | miRNA  | chr8  | 8088941  | 8089089  | - | 0 | 0 |
| ENSG000001200     | miRNA  | chr7  | 36919357 | 36919432 | - | 0 | 0 |
| ENSG000001548Q    | miRNA  | chr10 | 12725254 | 12725353 | - | 0 | 0 |
| ENSG000001U3      | snoRNA | chr6  | 75398860 | 75399067 | - | 0 | 0 |
| ENSG000001548K    | miRNA  | chr11 | 70283955 | 70284070 | + | 0 | 0 |
| ENSG0000016ATAC   | snRNA  | chr1  | 12569972 | 12570072 | - | 0 | 0 |
| ENSG000001U3      | snoRNA | chr6  | 71126893 | 71127105 | - | 0 | 0 |
| ENSG000001548F5   | miRNA  | chrX  | 32641474 | 32641559 | - | 0 | 0 |
| ENSG000001288     | miRNA  | chr17 | 16282014 | 16282088 | + | 0 | 0 |
| ENSG0000016ATAC   | snRNA  | chr18 | 22130603 | 22130729 | - | 0 | 0 |
| ENSG000001228     | miRNA  | chr12 | 57194504 | 57194576 | + | 0 | 0 |
| ENSG000001548G    | miRNA  | chr4  | 1.47E+08 | 1.47E+08 | - | 0 | 0 |
| ENSG000001265     | miRNA  | chr10 | 14436576 | 14436661 | + | 0 | 0 |
| ENSG0000016ATAC   | snRNA  | chrX  | 1.4E+08  | 1.4E+08  | + | 0 | 0 |
| ENSG000001NORD88B | snoRNA | chr19 | 50799032 | 50799122 | - | 0 | 0 |
| ENSG0000016ATAC   | snRNA  | chr8  | 1.02E+08 | 1.02E+08 | + | 0 | 0 |
| ENSG000001295A    | miRNA  | chr1  | 1.71E+08 | 1.71E+08 | - | 0 | 0 |
| ENSG000001302-6   | miRNA  | chr7  | 18127220 | 18127309 | - | 0 | 0 |
| ENSG000001229     | miRNA  | chr5  | 1.8E+08  | 1.8E+08  | - | 0 | 0 |
| ENSG000001NORA11  | snoRNA | chr21 | 34456110 | 34456237 | - | 0 | 0 |
| ENSG000001U3      | snoRNA | chr10 | 43417249 | 43417438 | - | 0 | 0 |
| ENSG000001320B2   | miRNA  | chr1  | 2.24E+08 | 2.24E+08 | - | 0 | 0 |
| ENSG000001238     | miRNA  | chr19 | 10552122 | 10552204 | + | 0 | 0 |
| ENSG000001227     | miRNA  | chr19 | 2234062  | 2234149  | - | 0 | 0 |
| ENSG000001NORA81  | snoRNA | chr3  | 1.87E+08 | 1.87E+08 | + | 0 | 0 |
| ENSG000001283-1   | miRNA  | chr19 | 53688481 | 53688567 | + | 0 | 0 |
| ENSG000001294     | miRNA  | chr5  | 1.54E+08 | 1.54E+08 | + | 0 | 0 |
| ENSG000001548F3   | miRNA  | chr5  | 1.11E+08 | 1.11E+08 | - | 0 | 0 |
| ENSG0000014ATAC   | snRNA  | chr12 | 781133   | 781258   | + | 0 | 0 |
| ENSG0000016ATAC   | snRNA  | chr4  | 88206427 | 88206552 | - | 0 | 0 |
| ENSG000001548F4   | miRNA  | chr7  | 1.47E+08 | 1.47E+08 | - | 0 | 0 |

|                    |         |       |          |          |   |      |   |
|--------------------|---------|-------|----------|----------|---|------|---|
| ENSG0000(MIR1301   | miRNA   | chr2  | 25328640 | 25328721 | - | 0    | 0 |
| ENSG0000(U3        | snoRNA  | chr6  | 92790453 | 92790665 | + | 0    | 0 |
| ENSG0000(MIR1202   | miRNA   | chr6  | 1.56E+08 | 1.56E+08 | + | 0    | 0 |
| ENSG0000(SNORA11C  | snoRNA  | chrX  | 47388649 | 47388777 | + | 0    | 0 |
| ENSG0000(U3        | snoRNA  | chr8  | 1.23E+08 | 1.23E+08 | - | 0    | 0 |
| ENSG0000(MIR1277   | miRNA   | chrX  | 1.18E+08 | 1.18E+08 | + | 0    | 0 |
| ENSG0000(MIR1271   | miRNA   | chr5  | 1.76E+08 | 1.76E+08 | + | 0    | 0 |
| ENSG0000(MIR548AJ2 | miRNA   | chrX  | 38023895 | 38023986 | - | 0    | 0 |
| ENSG0000(RNU6ATAC  | snRNA   | chr10 | 43341786 | 43341910 | + | 0    | 0 |
| ENSG0000(SNORA11D  | snoRNA  | chrX  | 52190621 | 52190748 | + | 0    | 0 |
| ENSG0000(MIR1827   | miRNA   | chr12 | 1E+08    | 1E+08    | + | 0    | 0 |
| ENSG0000(MIR1251   | miRNA   | chr12 | 97491909 | 97491978 | + | 0    | 0 |
| ENSG0000(SNORA2C   | snoRNA  | chr12 | 48654382 | 48654518 | - | 4.24 | 0 |
| ENSG0000(MIR320C1  | miRNA   | chr18 | 21683510 | 21683597 | + | 0    | 0 |
| ENSG0000(MIR548I4  | miRNA   | chrX  | 84225752 | 84225828 | - | 0    | 0 |
| ENSG0000(U3        | snoRNA  | chr17 | 44303965 | 44304203 | + | 0    | 0 |
| ENSG0000(SNORA77   | snoRNA  | chr2  | 1.83E+08 | 1.83E+08 | - | 0    | 0 |
| ENSG0000(SNORD100  | snoRNA  | chr6  | 1.33E+08 | 1.33E+08 | + | 0    | 0 |
| ENSG0000(MIR1245A  | miRNA   | chr2  | 1.89E+08 | 1.89E+08 | + | 0    | 0 |
| ENSG0000(RNU6ATAC  | snRNA   | chr7  | 1.44E+08 | 1.44E+08 | + | 0    | 0 |
| ENSG0000(MIR548O   | miRNA   | chr7  | 1.02E+08 | 1.02E+08 | - | 0    | 0 |
| ENSG0000(SNORD111  | snoRNA  | chr16 | 70529509 | 70529588 | + | 0    | 0 |
| ENSG0000(RNU6ATAC  | snRNA   | chr3  | 52560570 | 52560707 | + | 0    | 0 |
| ENSG0000(MIR1285-1 | miRNA   | chr7  | 92204015 | 92204098 | - | 0    | 0 |
| ENSG0000(MIR1185-1 | miRNA   | chr14 | 1.01E+08 | 1.01E+08 | + | 0    | 0 |
| ENSG0000(RNU6ATAC  | snRNA   | chr8  | 1.01E+08 | 1.01E+08 | - | 0    | 0 |
| ENSG0000(MIR1184-1 | miRNA   | chrX  | 1.55E+08 | 1.55E+08 | - | 0    | 0 |
| ENSG0000(MIR548H1  | miRNA   | chr14 | 64095024 | 64095125 | - | 0    | 0 |
| ENSG0000(SNORD99   | snoRNA  | chr1  | 28578749 | 28578822 | - | 0    | 0 |
| ENSG0000(MIR1180   | miRNA   | chr17 | 19344506 | 19344574 | - | 0    | 0 |
| ENSG0000(MIR1255B  | miRNA   | chr1  | 1.68E+08 | 1.68E+08 | + | 0    | 0 |
| ENSG0000(MIR1283-2 | miRNA   | chr19 | 53758232 | 53758318 | + | 0    | 0 |
| ENSG0000(MIR1303   | miRNA   | chr5  | 1.55E+08 | 1.55E+08 | + | 0    | 0 |
| ENSG0000(RNU6ATAC  | snRNA   | chr5  | 1.3E+08  | 1.3E+08  | + | 0    | 0 |
| ENSG0000(MIR1269A  | miRNA   | chr4  | 66276824 | 66276928 | + | 0    | 0 |
| ENSG0000(RNU6ATAC  | snRNA   | chr12 | 64939023 | 64939117 | + | 0    | 0 |
| ENSG0000(RNU6ATAC  | lincRNA | chr1  | 2.21E+08 | 2.21E+08 | + | 0    | 0 |
| ENSG0000(RNU6ATAC  | snRNA   | chr11 | 10399192 | 10399317 | - | 0    | 0 |
| ENSG0000(RNU6ATAC  | snRNA   | chr6  | 10222036 | 10222161 | + | 0    | 0 |
| ENSG0000(MIR1226   | miRNA   | chr3  | 47849555 | 47849629 | + | 0    | 0 |
| ENSG0000(MIR1261   | miRNA   | chr11 | 90869121 | 90869202 | - | 0    | 0 |
| ENSG0000(MIR548F1  | miRNA   | chr10 | 54607874 | 54607957 | - | 0    | 0 |
| ENSG0000(MIR1249   | miRNA   | chr22 | 45200954 | 45201019 | - | 0    | 0 |
| ENSG0000(RNU4ATAC  | snRNA   | chr5  | 1.59E+08 | 1.59E+08 | + | 0    | 0 |
| ENSG0000(MIR1184-3 | miRNA   | chrX  | 1.55E+08 | 1.55E+08 | + | 0    | 0 |

|                   |           |        |       |          |          |   |   |       |
|-------------------|-----------|--------|-------|----------|----------|---|---|-------|
| ENSG00000101293   | MIR1293   | miRNA  | chr12 | 50234142 | 50234212 | - | 0 | 0     |
| ENSG00000101288   | SNORD88   | snoRNA | chr12 | 12972053 | 12972143 | + | 0 | 0     |
| ENSG00000101185-2 | MIR1185-2 | miRNA  | chr14 | 1.01E+08 | 1.01E+08 | + | 0 | 0     |
| ENSG00000101548H4 | MIR548H4  | miRNA  | chr8  | 27048853 | 27048963 | - | 0 | 0     |
| ENSG00000101302-4 | MIR1302-4 | miRNA  | chr2  | 2.07E+08 | 2.07E+08 | - | 0 | 0     |
| ENSG00000101179   | MIR1179   | miRNA  | chr15 | 88608107 | 88608197 | + | 0 | 0     |
| ENSG0000010103    | U3        | snoRNA | chr3  | 1.09E+08 | 1.09E+08 | - | 0 | 0     |
| ENSG00000101276   | MIR1276   | miRNA  | chr15 | 85770496 | 85770578 | - | 0 | 0     |
| ENSG0000010103    | U3        | snoRNA | chr2  | 75627950 | 75628168 | + | 0 | 0     |
| ENSG0000010103    | SNORA3    | snoRNA | chr4  | 73263960 | 73264084 | + | 0 | 0     |
| ENSG00000101268A  | MIR1268A  | miRNA  | chr15 | 22225278 | 22225329 | - | 0 | 0     |
| ENSG0000010103    | SNORA77   | snoRNA | chr1  | 2.04E+08 | 2.04E+08 | + | 0 | 0     |
| ENSG00000101233-1 | MIR1233-1 | miRNA  | chr15 | 34382069 | 34382150 | - | 0 | 0     |
| ENSG00000101267   | MIR1267   | miRNA  | chr13 | 1.08E+08 | 1.08E+08 | - | 0 | 0     |
| ENSG00000101225   | MIR1225   | miRNA  | chr16 | 2090195  | 2090284  | - | 0 | 0     |
| ENSG00000101290   | MIR1290   | miRNA  | chr1  | 18897071 | 18897148 | - | 0 | 0     |
| ENSG00000101548N  | MIR548N   | miRNA  | chr7  | 34940760 | 34940834 | - | 0 | 0     |
| ENSG0000010103    | U3        | snoRNA | chr1  | 2.2E+08  | 2.2E+08  | + | 0 | 0     |
| ENSG000001016ATAC | RNU6ATAC  | snRNA  | chr9  | 1.34E+08 | 1.34E+08 | - | 0 | 0     |
| ENSG00000101278   | MIR1278   | miRNA  | chr1  | 1.93E+08 | 1.93E+08 | + | 0 | 0     |
| ENSG00000101275   | MIR1275   | miRNA  | chr6  | 33999972 | 34000051 | - | 0 | 0     |
| ENSG00000101548H3 | MIR548H3  | miRNA  | chr17 | 13543529 | 13543646 | - | 0 | 0     |
| ENSG00000101302E  | MIR302E   | miRNA  | chr11 | 7234766  | 7234837  | + | 0 | 0     |
| ENSG0000010103    | SNORA11E  | snoRNA | chrX  | 52063347 | 52063474 | - | 0 | 0     |
| ENSG00000101298   | MIR1298   | miRNA  | chrX  | 1.15E+08 | 1.15E+08 | + | 0 | 0     |
| ENSG0000010103    | SNORD75   | snoRNA | chr4  | 77702746 | 77702803 | - | 0 | 0     |
| ENSG0000010103    | SNORA11   | snoRNA | chrX  | 54814370 | 54814497 | + | 0 | 0     |
| ENSG0000010103    | SNORA3    | snoRNA | chr16 | 2796408  | 2796532  | - | 0 | 0     |
| ENSG000001016ATAC | RNU6ATAC  | snRNA  | chr16 | 70852698 | 70852814 | + | 0 | 0     |
| ENSG00000101548I1 | MIR548I1  | miRNA  | chr3  | 1.26E+08 | 1.26E+08 | - | 0 | 0     |
| ENSG00000101203   | MIR1203   | miRNA  | chr17 | 48156427 | 48156511 | - | 0 | 0     |
| ENSG0000010103    | SNORD93   | snoRNA | chr7  | 22856613 | 22856686 | + | 0 | 0     |
| ENSG00000101197   | MIR1197   | miRNA  | chr14 | 1.01E+08 | 1.01E+08 | + | 0 | 0     |
| ENSG0000010103    | SNORA11   | snoRNA | chrX  | 54927305 | 54927433 | + | 0 | 0     |
| ENSG00000101273A  | MIR1273A  | miRNA  | chr8  | 1E+08    | 1E+08    | - | 0 | 0     |
| ENSG00000101260A  | MIR1260A  | miRNA  | chr14 | 77266218 | 77266290 | + | 0 | 0     |
| ENSG00000101548J  | MIR548J   | miRNA  | chr22 | 26555212 | 26555323 | - | 0 | 0     |
| ENSG00000101289-1 | MIR1289-1 | miRNA  | chr20 | 35453954 | 35454097 | - | 0 | 0     |
| ENSG00000101302-7 | MIR1302-7 | miRNA  | chr8  | 1.42E+08 | 1.42E+08 | - | 0 | 0     |
| ENSG00000101205   | MIR1205   | miRNA  | chr8  | 1.28E+08 | 1.28E+08 | + | 0 | 0     |
| ENSG00000101548F2 | MIR548F2  | miRNA  | chr2  | 2.12E+08 | 2.12E+08 | - | 0 | 0     |
| ENSG00000101183   | MIR1183   | miRNA  | chr7  | 21471058 | 21471146 | + | 0 | 0     |
| ENSG00000101252   | MIR1252   | miRNA  | chr12 | 79419257 | 79419321 | + | 0 | 0     |
| ENSG00000101282   | MIR1282   | miRNA  | chr15 | 43793659 | 43793759 | - | 0 | 35.05 |
| ENSG00000101548H2 | MIR548H2  | miRNA  | chr16 | 11306440 | 11306527 | - | 0 | 0     |



|                 |            |              |       |          |          |   |       |       |
|-----------------|------------|--------------|-------|----------|----------|---|-------|-------|
| ENSG00000108223 | SNORD23    | snoRNA       | chr19 | 47755853 | 47755962 | + | 0     | 0     |
| ENSG00000108224 | RNU6ATAC   | snRNA        | chr20 | 18611047 | 18611167 | - | 0     | 0     |
| ENSG00000108225 | MIR1256    | miRNA        | chr1  | 20988314 | 20988432 | - | 0     | 0     |
| ENSG00000108226 | OR6B1      | protein_co   | chr7  | 1.44E+08 | 1.44E+08 | + | 0     | 0     |
| ENSG00000108227 | PPP3CB-AS1 | processed_co | chr10 | 73495525 | 73520070 | + | 2.46  | 2.41  |
| ENSG00000108228 | EBF2       | protein_co   | chr8  | 25841730 | 26045397 | - | 0.36  | 0.55  |
| ENSG00000108229 | GAS8-AS1   | antisense    | chr16 | 90028908 | 90029367 | - | 0     | 0     |
| ENSG00000108230 | C6orf226   | protein_co   | chr6  | 42890265 | 42890816 | - | 4.95  | 6.45  |
| ENSG00000108231 | PPP3R1     | protein_co   | chr2  | 68178857 | 68256237 | - | 20.52 | 16.34 |
| ENSG00000108232 | PSG3       | protein_co   | chr19 | 42721638 | 42740569 | - | 0.08  | 0.04  |
| ENSG00000108233 | FANCG      | protein_co   | chr9  | 35073835 | 35080016 | - | 5.04  | 7.02  |
| ENSG00000108234 | OR2A5      | protein_co   | chr7  | 1.44E+08 | 1.44E+08 | + | 0     | 0     |
| ENSG00000108235 | KRTAP10-9  | protein_co   | chr21 | 44627123 | 44628293 | + | 0     | 0     |
| ENSG00000108236 | AP4M1      | protein_co   | chr7  | 1E+08    | 1E+08    | + | 11.56 | 9.93  |
| ENSG00000108237 | OR4A5      | protein_co   | chr11 | 54706885 | 54707832 | + | 0     | 0     |
| ENSG00000108238 | C2orf16    | protein_co   | chr2  | 27537386 | 27582721 | + | 0     | 0     |
| ENSG00000108239 | DPP3P2     | processed_co | chr9  | 73474378 | 73476073 | - | 0     | 0     |
| ENSG00000108240 | C7orf65    | lincRNA      | chr7  | 47655244 | 47661648 | + | 0     | 0.02  |
| ENSG00000108241 | AC018880.1 | processed_co | chr2  | 1.04E+08 | 1.04E+08 | + | 0     | 0     |
| ENSG00000108242 | KRTAP1-5   | protein_co   | chr17 | 41026026 | 41027202 | - | 0     | 0.06  |
| ENSG00000108243 | TAS2R41    | protein_co   | chr7  | 1.43E+08 | 1.43E+08 | + | 0     | 0     |
| ENSG00000108244 | CTD-2527L1 | processed_co | chr19 | 35138824 | 35151336 | + | 0     | 0     |
| ENSG00000108245 | OR2A12     | protein_co   | chr7  | 1.44E+08 | 1.44E+08 | + | 0     | 0     |
| ENSG00000108246 | KRTAP10-1  | protein_co   | chr21 | 44637356 | 44638455 | + | 0     | 0     |
| ENSG00000108247 | KRTAP12-2  | protein_co   | chr21 | 44666189 | 44666927 | - | 0     | 0     |
| ENSG00000108248 | PLXNA4     | protein_co   | chr7  | 1.32E+08 | 1.33E+08 | - | 3.75  | 3.88  |
| ENSG00000108249 | MAGEA3     | protein_co   | chrX  | 1.53E+08 | 1.53E+08 | + | 0     | 0     |
| ENSG00000108250 | CEBPD      | protein_co   | chr8  | 47736909 | 47739086 | - | 60.74 | 55.84 |
| ENSG00000108251 | TMEM257    | protein_co   | chrX  | 1.46E+08 | 1.46E+08 | + | 0     | 0     |
| ENSG00000108252 | ZNF816-ZN  | protein_co   | chr19 | 52928475 | 52962823 | - | 0.01  | 0.14  |
| ENSG00000108253 | PSG7       | protein_co   | chr19 | 42924132 | 42937178 | - | 0     | 0     |
| ENSG00000108254 | MRPS21P3   | processed_co | chr1  | 1.97E+08 | 1.97E+08 | + | 0     | 0     |
| ENSG00000108255 | KRTAP1-3   | protein_co   | chr17 | 41033884 | 41034855 | - | 0     | 0     |
| ENSG00000108256 | OR3A2      | protein_co   | chr17 | 3277899  | 3278974  | - | 0     | 0     |
| ENSG00000108257 | ARIH2OS    | protein_co   | chr3  | 48917788 | 48919385 | - | 1.07  | 1.34  |
| ENSG00000108258 | ZBED8      | protein_co   | chr5  | 1.6E+08  | 1.6E+08  | - | 1.36  | 1.36  |
| ENSG00000108259 | HMSD       | protein_co   | chr18 | 63949301 | 63981774 | + | 0.47  | 0.06  |
| ENSG00000108260 | OR1C1      | protein_co   | chr1  | 2.48E+08 | 2.48E+08 | - | 0     | 0     |
| ENSG00000108261 | NPTXR      | protein_co   | chr22 | 38818452 | 38843982 | - | 0.61  | 0.79  |
| ENSG00000108262 | FAM218BP   | processed_co | chr4  | 1.65E+08 | 1.65E+08 | - | 0     | 0     |
| ENSG00000108263 | POM121L1   | protein_co   | chr7  | 53035642 | 53036924 | + | 0     | 0     |
| ENSG00000108264 | FAM200A    | protein_co   | chr7  | 99546308 | 99558536 | - | 2.55  | 2.82  |
| ENSG00000108265 | OR2F2      | protein_co   | chr7  | 1.44E+08 | 1.44E+08 | + | 0     | 0     |
| ENSG00000108266 | PPP2R2A    | protein_co   | chr8  | 26291491 | 26372680 | + | 22    | 18.32 |
| ENSG00000108267 | C19orf73   | protein_co   | chr19 | 49118397 | 49119140 | - | 0.79  | 0.39  |

|                    |                   |          |          |   |        |        |
|--------------------|-------------------|----------|----------|---|--------|--------|
| ENSG0000(ZNF880    | protein_co chr19  | 52369917 | 52385795 | + | 11.49  | 10.81  |
| ENSG0000(TRIM16    | protein_co chr17  | 15627960 | 15684311 | - | 10.82  | 10.52  |
| ENSG0000(FAM45BP   | transcribec chrX  | 1.3E+08  | 1.3E+08  | + | 0.23   | 0.32   |
| ENSG0000(OR6X1     | protein_co chr11  | 1.24E+08 | 1.24E+08 | - | 0      | 0      |
| ENSG0000(HEPN1     | protein_co chr11  | 1.25E+08 | 1.25E+08 | + | 0      | 0      |
| ENSG0000(OR2A25    | protein_co chr7   | 1.44E+08 | 1.44E+08 | + | 0      | 0      |
| ENSG0000(TAS2R40   | protein_co chr7   | 1.43E+08 | 1.43E+08 | + | 0      | 0      |
| ENSG0000(OR2A14    | protein_co chr7   | 1.44E+08 | 1.44E+08 | + | 0      | 0      |
| ENSG0000(TIGD1     | protein_co chr2   | 2.33E+08 | 2.33E+08 | - | 2.25   | 1.99   |
| ENSG0000(FXYD7     | protein_co chr19  | 35143250 | 35154301 | + | 0      | 0      |
| ENSG0000(XKR9      | protein_co chr8   | 70669365 | 70790371 | + | 0.39   | 0.1    |
| ENSG0000(LINC01465 | lincRNA chr12     | 62601751 | 62603690 | - | 2.07   | 2.04   |
| ENSG0000(C1orf229  | lincRNA chr1      | 2.47E+08 | 2.47E+08 | - | 0.31   | 0.3    |
| ENSG0000(OR4C12    | protein_co chr11  | 49981473 | 49982535 | - | 0      | 0      |
| ENSG0000(SLC12A8   | protein_co chr3   | 1.25E+08 | 1.25E+08 | - | 10.4   | 9.08   |
| ENSG0000(KIR2DS4   | polymorph chr19   | 54832676 | 54848569 | + | 0      | 0      |
| ENSG0000(PRR21     | protein_co chr2   | 2.4E+08  | 2.4E+08  | - | 0      | 0      |
| ENSG0000(TMEM14EF  | transcribec chr3  | 1.52E+08 | 1.52E+08 | - | 0      | 0      |
| ENSG0000(APOL6     | protein_co chr22  | 35648395 | 35668409 | + | 5.05   | 5.77   |
| ENSG0000(FADS3     | protein_co chr11  | 61873519 | 61892051 | - | 46.18  | 45.38  |
| ENSG0000(OR2A1     | protein_co chr7   | 1.44E+08 | 1.44E+08 | + | 0.03   | 0      |
| ENSG0000(TTC4P1    | processed_chr7    | 45999621 | 46000778 | - | 0      | 0      |
| ENSG0000(C3orf36   | protein_co chr3   | 1.34E+08 | 1.34E+08 | - | 0      | 0      |
| ENSG0000(OR4E2     | protein_co chr14  | 21665083 | 21666024 | + | 0      | 0      |
| ENSG0000(CCNL2     | protein_co chr1   | 1385711  | 1399328  | - | 92.91  | 95.66  |
| ENSG0000(UBA52     | protein_co chr19  | 18571730 | 18577550 | + | 607.05 | 591.57 |
| ENSG0000(MYBPHL    | protein_co chr1   | 1.09E+08 | 1.09E+08 | - | 0.07   | 0      |
| ENSG0000(PPT2      | protein_co chr6   | 32153441 | 32163680 | + | 10     | 11.51  |
| ENSG0000(OR2A2     | protein_co chr7   | 1.44E+08 | 1.44E+08 | + | 0      | 0      |
| ENSG0000(EXOC3-AS1 | antisense chr5    | 441498   | 443160   | - | 2.01   | 2.68   |
| ENSG0000(ZNF630    | protein_co chrX   | 47983356 | 48071658 | - | 0.91   | 0.57   |
| ENSG0000(TIAF1     | protein_co chr17  | 29073521 | 29078857 | - | 0.47   | 0.59   |
| ENSG0000(OR52B4    | polymorph chr11   | 4367263  | 4368386  | - | 0      | 0      |
| ENSG0000(AC092675. | antisense chr2    | 98331389 | 98356005 | - | 0      | 0      |
| ENSG0000(AC106876. | processed_chr2    | 2.33E+08 | 2.33E+08 | + | 0      | 0      |
| ENSG0000(C7orf71   | lincRNA chr7      | 26637871 | 26647305 | + | 0      | 0      |
| ENSG0000(LINC01118 | lincRNA chr2      | 46816668 | 46822657 | + | 0.18   | 0.27   |
| ENSG0000(AC064874. | antisense chr2    | 2.36E+08 | 2.36E+08 | - | 0      | 0      |
| ENSG0000(BTBD19    | protein_co chr1   | 44808482 | 44815585 | + | 14.44  | 15.38  |
| ENSG0000(FAM185A   | protein_co chr7   | 1.03E+08 | 1.03E+08 | + | 3      | 2.67   |
| ENSG0000(AC005481. | antisense chr7    | 1.58E+08 | 1.58E+08 | + | 0.02   | 0      |
| ENSG0000(RAB6C     | protein_co chr2   | 1.3E+08  | 1.3E+08  | + | 0      | 0      |
| ENSG0000(AC011997. | antisense chr2    | 1.98E+08 | 1.98E+08 | + | 0      | 0      |
| ENSG0000(C21orf140 | protein_co chr21  | 34400317 | 34401072 | - | 0      | 0      |
| ENSG0000(URAHF     | transcribec chr16 | 90039761 | 90047773 | - | 0.29   | 0.09   |

|                                |       |          |          |   |       |       |
|--------------------------------|-------|----------|----------|---|-------|-------|
| ENSG0000( AC062017. antisense  | chr2  | 2.39E+08 | 2.39E+08 | + | 0.23  | 0.38  |
| ENSG0000( AC112721. lincRNA    | chr2  | 2.37E+08 | 2.37E+08 | - | 0     | 0.13  |
| ENSG0000( AC004945. processed_ | chr7  | 79353410 | 79354392 | + | 0     | 0     |
| ENSG0000( PSMB11 protein_co    | chr14 | 23042167 | 23044276 | + | 0.05  | 0     |
| ENSG0000( LINC01793 lincRNA    | chr2  | 59217708 | 59279400 | + | 0     | 0     |
| ENSG0000( AC023469. lincRNA    | chr2  | 1.51E+08 | 1.51E+08 | - | 0     | 0     |
| ENSG0000( AC112721. lincRNA    | chr2  | 2.37E+08 | 2.37E+08 | - | 0     | 0.15  |
| ENSG0000( LINC01124 lincRNA    | chr2  | 1.71E+08 | 1.71E+08 | - | 0     | 0     |
| ENSG0000( AC079354. antisense  | chr2  | 2.02E+08 | 2.02E+08 | - | 0.12  | 0.15  |
| ENSG0000( POTEM protein_co     | chr14 | 18967434 | 18999012 | + | 0     | 0     |
| ENSG0000( IGLC6 IG_C_pseu      | chr22 | 22919535 | 22919851 | + | 0     | 0     |
| ENSG0000( POTEJ protein_co     | chr2  | 1.31E+08 | 1.31E+08 | + | 0     | 0     |
| ENSG0000( CYTOR lincRNA        | chr2  | 87455368 | 87606805 | + | 83.71 | 81.32 |
| ENSG0000( AP000233. lincRNA    | chr21 | 25169431 | 25333825 | - | 0.08  | 0     |
| ENSG0000( AC079305. antisense  | chr2  | 1.77E+08 | 1.77E+08 | + | 0.3   | 0.17  |
| ENSG0000( RP5-1039K antisense  | chr22 | 38032165 | 38034228 | - | 0     | 0     |
| ENSG0000( DCDC2B protein_co    | chr1  | 32209094 | 32216196 | + | 0     | 0     |
| ENSG0000( C10orf55 protein_co  | chr10 | 73909969 | 73922777 | - | 0.02  | 0.05  |
| ENSG0000( RNU6-1165 snRNA      | chr10 | 1.02E+08 | 1.02E+08 | + | 0     | 0     |
| ENSG0000( RNA5SP17 rRNA        | chr5  | 9760907  | 9761013  | + | 0     | 0     |
| ENSG0000( RNU4-62P snRNA       | chr3  | 1.22E+08 | 1.22E+08 | - | 0     | 0     |
| ENSG0000( RNU4-86P snRNA       | chr11 | 1.26E+08 | 1.26E+08 | - | 0     | 0     |
| ENSG0000( RN7SKP15 misc_RNA    | chr2  | 1.33E+08 | 1.33E+08 | - | 0     | 0     |
| ENSG0000( RN7SKP28 misc_RNA    | chr1  | 1.04E+08 | 1.04E+08 | + | 0     | 0     |
| ENSG0000( MIR1915 miRNA        | chr10 | 21496562 | 21496641 | - | 0     | 0     |
| ENSG0000( Y_RNA misc_RNA       | chr10 | 1.01E+08 | 1.01E+08 | - | 0     | 0     |
| ENSG0000( RNU2-3P snRNA        | chr15 | 95745804 | 95745994 | + | 0     | 0     |
| ENSG0000( RN7SKP11 misc_RNA    | chr6  | 90001222 | 90001506 | - | 0     | 0     |
| ENSG0000( RNU6-721F snRNA      | chr18 | 15320840 | 15320944 | - | 0     | 0     |
| ENSG0000( RNU6-908F snRNA      | chr10 | 29711915 | 29712008 | + | 0     | 0     |
| ENSG0000( RNU2-65P snRNA       | chr15 | 72045183 | 72045367 | + | 0     | 0     |
| ENSG0000( SNORD113 snoRNA      | chr14 | 1.01E+08 | 1.01E+08 | + | 0     | 0     |
| ENSG0000( RN7SKP32 misc_RNA    | chr8  | 47068021 | 47068323 | - | 0     | 0     |
| ENSG0000( RN7SKP23 misc_RNA    | chr5  | 1.52E+08 | 1.52E+08 | - | 0     | 0     |
| ENSG0000( RN7SKP11 misc_RNA    | chr5  | 1.25E+08 | 1.25E+08 | - | 0     | 0     |
| ENSG0000( RNA5SP31 rRNA        | chr10 | 49979665 | 49979780 | - | 0     | 0     |
| ENSG0000( RN7SKP14 misc_RNA    | chr5  | 1.76E+08 | 1.76E+08 | + | 0     | 0     |
| ENSG0000( RN7SKP16 misc_RNA    | chr1  | 33336566 | 33336864 | - | 0.72  | 0     |
| ENSG0000( RNU6-985F snRNA      | chrX  | 1.38E+08 | 1.38E+08 | - | 0     | 0     |
| ENSG0000( RNA5SP48 rRNA        | chr20 | 56205052 | 56205173 | - | 0     | 0     |
| ENSG0000( RNU6-648F snRNA      | chrX  | 1.15E+08 | 1.15E+08 | + | 0     | 0     |
| ENSG0000( RNA5SP39 rRNA        | chr15 | 25738508 | 25738620 | + | 0     | 0     |
| ENSG0000( RNU2-9P snRNA        | chr2  | 1.49E+08 | 1.49E+08 | - | 0     | 0     |
| ENSG0000( RNA5SP36 rRNA        | chr13 | 94651397 | 94651529 | - | 0     | 0     |
| ENSG0000( RNU6-380F snRNA      | chr15 | 80663772 | 80663878 | + | 0     | 0     |

|                     |          |       |          |          |   |   |   |
|---------------------|----------|-------|----------|----------|---|---|---|
| ENSG0000(SNORA73)   | snoRNA   | chr6  | 88714242 | 88714430 | - | 0 | 0 |
| ENSG0000(RNU4-37P)  | snRNA    | chr8  | 1.12E+08 | 1.12E+08 | - | 0 | 0 |
| ENSG0000(RNY4P30)   | misc_RNA | chr13 | 49889634 | 49889728 | - | 0 | 0 |
| ENSG0000(RNA5SP23)  | rRNA     | chr7  | 1.17E+08 | 1.17E+08 | - | 0 | 0 |
| ENSG0000(RN7SKP21)  | misc_RNA | chr7  | 53490148 | 53490439 | - | 0 | 0 |
| ENSG0000(Y_RNA)     | misc_RNA | chr12 | 1.08E+08 | 1.08E+08 | + | 0 | 0 |
| ENSG0000(RN7SKP15)  | misc_RNA | chr11 | 13353208 | 13353523 | + | 0 | 0 |
| ENSG0000(RN7SKP26)  | misc_RNA | chr7  | 18807993 | 18808279 | - | 0 | 0 |
| ENSG0000(RNU6-257F) | snRNA    | chr16 | 48731704 | 48731801 | - | 0 | 0 |
| ENSG0000(RN7SKP14)  | misc_RNA | chr18 | 586517   | 586850   | - | 0 | 0 |
| ENSG0000(RNU4-30P)  | snRNA    | chr16 | 68329387 | 68329529 | - | 0 | 0 |
| ENSG0000(RNA5SP18)  | rRNA     | chr5  | 36485343 | 36485440 | + | 0 | 0 |
| ENSG0000(RN7SKP26)  | misc_RNA | chr18 | 45989653 | 45989945 | - | 0 | 0 |
| ENSG0000(RNA5SP15)  | rRNA     | chr4  | 11414051 | 11414160 | - | 0 | 0 |
| ENSG0000(SNORD113)  | snoRNA   | chr14 | 1.01E+08 | 1.01E+08 | + | 0 | 0 |
| ENSG0000(RNU4-26P)  | snRNA    | chr9  | 20418321 | 20418427 | + | 0 | 0 |
| ENSG0000(RNA5SP26)  | rRNA     | chr8  | 57126655 | 57126762 | - | 0 | 0 |
| ENSG0000(Y_RNA)     | misc_RNA | chr4  | 27223319 | 27223427 | - | 0 | 0 |
| ENSG0000(RNA5SP40)  | rRNA     | chr16 | 35734639 | 35734748 | + | 0 | 0 |
| ENSG0000(RNA5SP12)  | rRNA     | chr3  | 37341649 | 37341766 | + | 0 | 0 |
| ENSG0000(RNA5SP56)  | rRNA     | chr1  | 1.18E+08 | 1.18E+08 | - | 0 | 0 |
| ENSG0000(RN7SKP65)  | misc_RNA | chr12 | 57977965 | 57978277 | - | 0 | 0 |
| ENSG0000(RNU6-588F) | snRNA    | chr5  | 1.5E+08  | 1.5E+08  | - | 0 | 0 |
| ENSG0000(RN7SKP12)  | misc_RNA | chr7  | 94801514 | 94801812 | + | 0 | 0 |
| ENSG0000(RNU2-17P)  | snRNA    | chr1  | 1.5E+08  | 1.5E+08  | + | 0 | 0 |
| ENSG0000(Y_RNA)     | misc_RNA | chr2  | 28927243 | 28927340 | - | 0 | 0 |
| ENSG0000(RNU6-447F) | snRNA    | chr11 | 152999   | 153102   | - | 0 | 0 |
| ENSG0000(RNA5SP15)  | rRNA     | chr4  | 38758791 | 38758892 | - | 0 | 0 |
| ENSG0000(RNU2-54P)  | snRNA    | chr8  | 76265543 | 76265732 | - | 0 | 0 |
| ENSG0000(RNA5SP89)  | rRNA     | chr2  | 28683976 | 28684083 | + | 0 | 0 |
| ENSG0000(RNA5SP16)  | rRNA     | chr4  | 71759518 | 71759616 | - | 0 | 0 |
| ENSG0000(RNU2-43P)  | snRNA    | chr10 | 1.01E+08 | 1.01E+08 | + | 0 | 0 |
| ENSG0000(RN7SKP15)  | misc_RNA | chr1  | 1.88E+08 | 1.88E+08 | - | 0 | 0 |
| ENSG0000(RNA5SP43)  | rRNA     | chr16 | 79264454 | 79264573 | + | 0 | 0 |
| ENSG0000(MIR1471)   | miRNA    | chr2  | 2.32E+08 | 2.32E+08 | - | 0 | 0 |
| ENSG0000(RNA5SP20)  | rRNA     | chr6  | 3088686  | 3088809  | - | 0 | 0 |
| ENSG0000(RNU6-262F) | snRNA    | chr11 | 1.19E+08 | 1.19E+08 | - | 0 | 0 |
| ENSG0000(RNA5SP95)  | rRNA     | chr2  | 60998752 | 60998888 | + | 0 | 0 |
| ENSG0000(RNU6-101F) | snRNA    | chr12 | 1.02E+08 | 1.02E+08 | - | 0 | 0 |
| ENSG0000(RN7SKP19)  | misc_RNA | chr4  | 45995119 | 45995423 | + | 0 | 0 |
| ENSG0000(RN7SKP11)  | misc_RNA | chr9  | 34049966 | 34050244 | + | 0 | 0 |
| ENSG0000(RNU6-757F) | snRNA    | chr5  | 1.35E+08 | 1.35E+08 | + | 0 | 0 |
| ENSG0000(RNU6-892F) | snRNA    | chr8  | 20229779 | 20229877 | + | 0 | 0 |
| ENSG0000(RNA5SP42)  | rRNA     | chr16 | 47505432 | 47505543 | + | 0 | 0 |
| ENSG0000(RNU2-33P)  | snRNA    | chr14 | 96384624 | 96384815 | + | 0 | 0 |

|                             |       |          |          |   |      |   |
|-----------------------------|-------|----------|----------|---|------|---|
| ENSG0000(RN7SKP11: misc_RNA | chr20 | 11818821 | 11819091 | - | 0    | 0 |
| ENSG0000(RNU6-584F snRNA    | chr1  | 37885023 | 37885117 | + | 0    | 0 |
| ENSG0000(RNA5SP19: rRNA     | chr5  | 1.37E+08 | 1.37E+08 | - | 0    | 0 |
| ENSG0000(RNU6-104: snRNA    | chr16 | 30701337 | 30701435 | - | 0    | 0 |
| ENSG0000(RNU2-36P snRNA     | chr9  | 86422938 | 86423128 | - | 0    | 0 |
| ENSG0000(RNU6-115: snRNA    | chr11 | 1.26E+08 | 1.26E+08 | + | 0    | 0 |
| ENSG0000(RNU2-21P snRNA     | chr2  | 1.59E+08 | 1.59E+08 | - | 0    | 0 |
| ENSG0000(RNA5SP37: rRNA     | chr12 | 1.07E+08 | 1.07E+08 | - | 0    | 0 |
| ENSG0000(RNU6-935F snRNA    | chrX  | 50649641 | 50649740 | + | 0    | 0 |
| ENSG0000(Y_RNA misc_RNA     | chr10 | 90880040 | 90880179 | - | 0    | 0 |
| ENSG0000(RNA5SP19: rRNA     | chr5  | 1.52E+08 | 1.52E+08 | - | 0    | 0 |
| ENSG0000(RNA5SP17: rRNA     | chr5  | 16033229 | 16033356 | - | 0    | 0 |
| ENSG0000(RN7SKP26: misc_RNA | chrX  | 1.49E+08 | 1.49E+08 | - | 0    | 0 |
| ENSG0000(RNU6-111: snRNA    | chr10 | 38423625 | 38423728 | + | 0    | 0 |
| ENSG0000(RNA5SP11: rRNA     | chr2  | 2.1E+08  | 2.1E+08  | - | 0    | 0 |
| ENSG0000(RNU6-105: snRNA    | chr18 | 31937533 | 31937639 | + | 0    | 0 |
| ENSG0000(MIR1912 miRNA      | chrX  | 1.15E+08 | 1.15E+08 | + | 0    | 0 |
| ENSG0000(RNU6-855F snRNA    | chr9  | 1.12E+08 | 1.12E+08 | + | 0    | 0 |
| ENSG0000(RNU2-2P snRNA      | chr11 | 62841619 | 62841809 | - | 0    | 0 |
| ENSG0000(RNU6-107: snRNA    | chr19 | 223158   | 223261   | - | 0    | 0 |
| ENSG0000(Y_RNA misc_RNA     | chr3  | 1.96E+08 | 1.96E+08 | + | 0    | 0 |
| ENSG0000(RN7SKP22: misc_RNA | chr9  | 99284022 | 99284373 | + | 0    | 0 |
| ENSG0000(RNU6-174F snRNA    | chr12 | 3726222  | 3726327  | - | 0    | 0 |
| ENSG0000(RN7SKP13: misc_RNA | chr15 | 47272597 | 47272889 | + | 0    | 0 |
| ENSG0000(RNU6-613F snRNA    | chr2  | 2.3E+08  | 2.3E+08  | + | 0    | 0 |
| ENSG0000(SNORD19 snoRNA     | chr3  | 52691378 | 52691453 | + | 0    | 0 |
| ENSG0000(RNA5SP23: rRNA     | chr7  | 1.12E+08 | 1.12E+08 | - | 0    | 0 |
| ENSG0000(RNY1P15 misc_RNA   | chr9  | 1.23E+08 | 1.23E+08 | - | 0    | 0 |
| ENSG0000(RN7SKP22: misc_RNA | chr22 | 21545344 | 21545644 | - | 0.09 | 0 |
| ENSG0000(RNU2-29P snRNA     | chr7  | 53776136 | 53776324 | + | 0    | 0 |
| ENSG0000(RNU6-710F snRNA    | chr9  | 1.12E+08 | 1.12E+08 | - | 0    | 0 |
| ENSG0000(RNU2-20P snRNA     | chr3  | 1.68E+08 | 1.68E+08 | + | 0    | 0 |
| ENSG0000(RNU6-355F snRNA    | chr16 | 90144592 | 90144695 | + | 0    | 0 |
| ENSG0000(RNU6-118: snRNA    | chr15 | 98074667 | 98074763 | - | 0    | 0 |
| ENSG0000(RNU4-34P snRNA     | chr17 | 29388560 | 29388683 | + | 0    | 0 |
| ENSG0000(SNORD12B snoRNA    | chr20 | 49280319 | 49280409 | + | 0    | 0 |
| ENSG0000(SNORA36B snoRNA    | chr1  | 2.2E+08  | 2.2E+08  | - | 0    | 0 |
| ENSG0000(RN7SKP20: misc_RNA | chr10 | 68158079 | 68158408 | + | 0    | 0 |
| ENSG0000(RN7SKP12: misc_RNA | chr16 | 29731051 | 29731404 | - | 0    | 0 |
| ENSG0000(RN7SKP15: misc_RNA | chr2  | 1.66E+08 | 1.66E+08 | - | 0    | 0 |
| ENSG0000(RNA5SP44 rRNA      | chr1  | 39154164 | 39154296 | - | 0    | 0 |
| ENSG0000(RNA5SP20: rRNA     | chr6  | 10752791 | 10752926 | - | 0    | 0 |
| ENSG0000(RN7SKP15: misc_RNA | chr11 | 28261194 | 28261519 | - | 0    | 0 |
| ENSG0000(RN7SKP86 misc_RNA  | chr7  | 1.03E+08 | 1.03E+08 | - | 0    | 0 |
| ENSG0000(RNU2-28P snRNA     | chr3  | 81509476 | 81509664 | + | 0    | 0 |

|                    |          |       |          |          |   |   |   |
|--------------------|----------|-------|----------|----------|---|---|---|
| ENSG0000(Y_RNA     | misc_RNA | chr2  | 1.38E+08 | 1.38E+08 | + | 0 | 0 |
| ENSG0000(Y_RNA     | misc_RNA | chr18 | 32263135 | 32263234 | - | 0 | 0 |
| ENSG0000(RN7SKP22  | misc_RNA | chr1  | 1.82E+08 | 1.82E+08 | - | 0 | 0 |
| ENSG0000(RNU6-554F | snRNA    | chr15 | 43602543 | 43602648 | + | 0 | 0 |
| ENSG0000(RNU6-791F | snRNA    | chr1  | 2.23E+08 | 2.23E+08 | - | 0 | 0 |
| ENSG0000(RN7SKP28  | misc_RNA | chr2  | 1.57E+08 | 1.57E+08 | - | 0 | 0 |
| ENSG0000(RNU4-65P  | snRNA    | chr12 | 70443784 | 70443923 | - | 0 | 0 |
| ENSG0000(RNA5SP80  | rRNA     | chr1  | 2.31E+08 | 2.31E+08 | - | 0 | 0 |
| ENSG0000(Y_RNA     | misc_RNA | chr10 | 31756042 | 31756136 | - | 0 | 0 |
| ENSG0000(RN7SKP12  | misc_RNA | chr9  | 1.17E+08 | 1.17E+08 | + | 0 | 0 |
| ENSG0000(RNU2-59P  | snRNA    | chr10 | 1.01E+08 | 1.01E+08 | - | 0 | 0 |
| ENSG0000(RNA5SP27  | rRNA     | chr8  | 93441277 | 93441384 | + | 0 | 0 |
| ENSG0000(RNA5SP11  | rRNA     | chr2  | 1.82E+08 | 1.82E+08 | + | 0 | 0 |
| ENSG0000(RNA5SP51  | rRNA     | chrX  | 1.04E+08 | 1.04E+08 | - | 0 | 0 |
| ENSG0000(Y_RNA     | misc_RNA | chr9  | 1.28E+08 | 1.28E+08 | - | 0 | 0 |
| ENSG0000(RNU2-50P  | snRNA    | chr9  | 34282528 | 34282670 | - | 0 | 0 |
| ENSG0000(RNA5SP33  | rRNA     | chr11 | 22688351 | 22688435 | + | 0 | 0 |
| ENSG0000(RNA5SP23  | rRNA     | chr7  | 68723911 | 68724048 | - | 0 | 0 |
| ENSG0000(RNU6-955F | snRNA    | chr17 | 4619749  | 4619852  | - | 0 | 0 |
| ENSG0000(Y_RNA     | misc_RNA | chr10 | 1.02E+08 | 1.02E+08 | - | 0 | 0 |
| ENSG0000(RNU6-141F | snRNA    | chr6  | 20452369 | 20452473 | - | 0 | 0 |
| ENSG0000(Y_RNA     | misc_RNA | chr7  | 77895880 | 77895992 | + | 0 | 0 |
| ENSG0000(RN7SKP27  | misc_RNA | chr10 | 1.09E+08 | 1.09E+08 | - | 0 | 0 |
| ENSG0000(RNU6-107  | snRNA    | chr12 | 1.31E+08 | 1.31E+08 | - | 0 | 0 |
| ENSG0000(RNU6-994F | snRNA    | chr20 | 63337339 | 63337449 | + | 0 | 0 |
| ENSG0000(RNU2-26P  | snRNA    | chrX  | 91798093 | 91798283 | + | 0 | 0 |
| ENSG0000(RN7SKP56  | misc_RNA | chr6  | 1.26E+08 | 1.26E+08 | + | 0 | 0 |
| ENSG0000(RN7SKP15  | misc_RNA | chr5  | 1.8E+08  | 1.8E+08  | + | 0 | 0 |
| ENSG0000(RNU6-114  | snRNA    | chr2  | 2.38E+08 | 2.38E+08 | + | 0 | 0 |
| ENSG0000(RN7SKP14  | misc_RNA | chr10 | 90163651 | 90163960 | - | 0 | 0 |
| ENSG0000(RN7SKP59  | misc_RNA | chr9  | 78165465 | 78165778 | + | 0 | 0 |
| ENSG0000(RNA5SP29  | rRNA     | chr9  | 1.28E+08 | 1.28E+08 | - | 0 | 0 |
| ENSG0000(RNU6-121F | snRNA    | chr1  | 1.54E+08 | 1.54E+08 | + | 0 | 0 |
| ENSG0000(RNA5SP29  | rRNA     | chr9  | 1.08E+08 | 1.08E+08 | - | 0 | 0 |
| ENSG0000(RN7SKP27  | misc_RNA | chr20 | 35643143 | 35643462 | + | 0 | 0 |
| ENSG0000(RNU2-5P   | snRNA    | chr9  | 70188571 | 70188750 | - | 0 | 0 |
| ENSG0000(Y_RNA     | misc_RNA | chr2  | 1.22E+08 | 1.22E+08 | - | 0 | 0 |
| ENSG0000(RNA5SP26  | rRNA     | chr8  | 31598099 | 31598204 | - | 0 | 0 |
| ENSG0000(RN7SKP7   | misc_RNA | chr13 | 96949249 | 96949533 | - | 0 | 0 |
| ENSG0000(RNU2-23P  | snRNA    | chr11 | 65147584 | 65147778 | + | 0 | 0 |
| ENSG0000(RNU6-77P  | snRNA    | chr13 | 81265747 | 81265837 | + | 0 | 0 |
| ENSG0000(RNU6-285F | snRNA    | chr8  | 73018945 | 73019044 | - | 0 | 0 |
| ENSG0000(SNORA79   | snoRNA   | chr14 | 20323179 | 20323326 | - | 0 | 0 |
| ENSG0000(RNU6-712F | snRNA    | chr3  | 90184634 | 90184733 | + | 0 | 0 |
| ENSG0000(RN7SKP20  | misc_RNA | chr2  | 2.06E+08 | 2.06E+08 | + | 0 | 0 |

|                             |       |          |          |   |   |   |
|-----------------------------|-------|----------|----------|---|---|---|
| ENSG0000(RN7SKP17: misc_RNA | chr3  | 1.57E+08 | 1.57E+08 | + | 0 | 0 |
| ENSG0000(RNA5SP47: rRNA     | chr20 | 15280764 | 15280873 | - | 0 | 0 |
| ENSG0000(RNU4-25P snRNA     | chr8  | 1.28E+08 | 1.28E+08 | - | 0 | 0 |
| ENSG0000(Y_RNA misc_RNA     | chr10 | 1.04E+08 | 1.04E+08 | + | 0 | 0 |
| ENSG0000(Y_RNA misc_RNA     | chr3  | 1.71E+08 | 1.71E+08 | + | 0 | 0 |
| ENSG0000(Y_RNA misc_RNA     | chr2  | 1.71E+08 | 1.71E+08 | + | 0 | 0 |
| ENSG0000(Y_RNA misc_RNA     | chr1  | 8796571  | 8796673  | - | 0 | 0 |
| ENSG0000(RN7SKP22: misc_RNA | chr7  | 1.38E+08 | 1.38E+08 | + | 0 | 0 |
| ENSG0000(RN7SKP24: misc_RNA | chr6  | 22085544 | 22085918 | + | 0 | 0 |
| ENSG0000(RNA5SP45: rRNA     | chr18 | 21928985 | 21929094 | - | 0 | 0 |
| ENSG0000(RNU6-519F snRNA    | chr8  | 47979414 | 47979521 | + | 0 | 0 |
| ENSG0000(RN7SKP10: misc_RNA | chr19 | 55737285 | 55737600 | + | 0 | 0 |
| ENSG0000(Y_RNA misc_RNA     | chr11 | 1.19E+08 | 1.19E+08 | + | 0 | 0 |
| ENSG0000(MIR1468 miRNA      | chrX  | 63786002 | 63786087 | - | 0 | 0 |
| ENSG0000(RNU6-705F snRNA    | chr5  | 1.81E+08 | 1.81E+08 | + | 0 | 0 |
| ENSG0000(RNU2-39P snRNA     | chr2  | 72721806 | 72722003 | + | 0 | 0 |
| ENSG0000(RN7SKP22: misc_RNA | chr10 | 25393557 | 25393844 | - | 0 | 0 |
| ENSG0000(RNU6-735F snRNA    | chr12 | 95438737 | 95438843 | - | 0 | 0 |
| ENSG0000(RNA5SP25: rRNA     | chr8  | 3700492  | 3700628  | + | 0 | 0 |
| ENSG0000(RNA5SP60 rRNA      | chr1  | 1.59E+08 | 1.59E+08 | + | 0 | 0 |
| ENSG0000(RNU6-1064 snRNA    | chr9  | 1.08E+08 | 1.08E+08 | - | 0 | 0 |
| ENSG0000(RNU4-43P snRNA     | chr5  | 26012889 | 26013025 | + | 0 | 0 |
| ENSG0000(RNU6-1025 snRNA    | chr11 | 948421   | 948524   | + | 0 | 0 |
| ENSG0000(RN7SKP61 misc_RNA  | chr3  | 78161698 | 78161992 | + | 0 | 0 |
| ENSG0000(RNA5SP34: rRNA     | chr11 | 95840017 | 95840124 | - | 0 | 0 |
| ENSG0000(Y_RNA misc_RNA     | chr12 | 1.05E+08 | 1.05E+08 | + | 0 | 0 |
| ENSG0000(RNU2-47P snRNA     | chr9  | 12300266 | 12300451 | - | 0 | 0 |
| ENSG0000(RNU2-66P snRNA     | chr4  | 1.55E+08 | 1.55E+08 | + | 0 | 0 |
| ENSG0000(RN7SKP22: misc_RNA | chr3  | 1.92E+08 | 1.92E+08 | + | 0 | 0 |
| ENSG0000(RNA5SP49: rRNA     | chr22 | 25715041 | 25715169 | - | 0 | 0 |
| ENSG0000(SNORA19 snoRNA     | chr10 | 1.19E+08 | 1.19E+08 | - | 0 | 0 |
| ENSG0000(RN7SKP15: misc_RNA | chr8  | 5910945  | 5911236  | - | 0 | 0 |
| ENSG0000(RNU6-887F snRNA    | chr4  | 39399149 | 39399248 | + | 0 | 0 |
| ENSG0000(RN7SKP23: misc_RNA | chr4  | 1.45E+08 | 1.45E+08 | + | 0 | 0 |
| ENSG0000(RNU2-49P snRNA     | chr5  | 1.16E+08 | 1.16E+08 | - | 0 | 0 |
| ENSG0000(Y_RNA misc_RNA     | chr12 | 1.21E+08 | 1.21E+08 | - | 0 | 0 |
| ENSG0000(SNORA7 snoRNA      | chr14 | 74711936 | 74712045 | + | 0 | 0 |
| ENSG0000(RNU6-628F snRNA    | chr8  | 1.23E+08 | 1.23E+08 | + | 0 | 0 |
| ENSG0000(RNA5SP50: rRNA     | chrX  | 52665231 | 52665347 | + | 0 | 0 |
| ENSG0000(RNU4-69P snRNA     | chr5  | 1.21E+08 | 1.21E+08 | - | 0 | 0 |
| ENSG0000(RNU6-402F snRNA    | chr5  | 98889731 | 98889833 | + | 0 | 0 |
| ENSG0000(RNU2-52P snRNA     | chr20 | 41024205 | 41024394 | + | 0 | 0 |
| ENSG0000(Y_RNA misc_RNA     | chr4  | 1.41E+08 | 1.41E+08 | - | 0 | 0 |
| ENSG0000(Y_RNA misc_RNA     | chr19 | 46736312 | 46736419 | + | 0 | 0 |
| ENSG0000(RN7SKP27 misc_RNA  | chr2  | 22861552 | 22861884 | + | 0 | 0 |

|                    |          |       |          |          |   |      |   |
|--------------------|----------|-------|----------|----------|---|------|---|
| ENSG000001RN7SKP25 | misc_RNA | chr15 | 96486582 | 96486891 | + | 0    | 0 |
| ENSG000001RNU6-110 | snRNA    | chr1  | 157784   | 157887   | - | 0    | 0 |
| ENSG000001RNU2-15P | snRNA    | chr1  | 65415816 | 65416006 | + | 0    | 0 |
| ENSG000001RNU2-48P | snRNA    | chr5  | 1.58E+08 | 1.58E+08 | - | 0    | 0 |
| ENSG000001RNU2-37P | snRNA    | chr3  | 1.28E+08 | 1.28E+08 | - | 0    | 0 |
| ENSG000001RNU2-42P | snRNA    | chr10 | 1.26E+08 | 1.26E+08 | - | 0    | 0 |
| ENSG000001RN7SKP13 | misc_RNA | chr22 | 18605802 | 18606102 | - | 0.09 | 0 |
| ENSG000001RNU6-120 | snRNA    | chr12 | 48081319 | 48081428 | + | 0    | 0 |
| ENSG000001RN7SKP54 | misc_RNA | chr7  | 1.01E+08 | 1.01E+08 | + | 0    | 0 |
| ENSG000001RNU2-51P | snRNA    | chr14 | 70360892 | 70361088 | + | 0    | 0 |
| ENSG000001RNU2-16P | snRNA    | chr4  | 75829454 | 75829589 | - | 0    | 0 |
| ENSG000001Y_RNA    | misc_RNA | chr6  | 1.19E+08 | 1.19E+08 | + | 0    | 0 |
| ENSG000001RNU2-70P | snRNA    | chr1  | 2.36E+08 | 2.36E+08 | + | 0    | 0 |
| ENSG000001RNU6-248 | snRNA    | chr6  | 76092834 | 76092940 | + | 0    | 0 |
| ENSG000001Y_RNA    | misc_RNA | chr9  | 12885321 | 12885417 | + | 0    | 0 |
| ENSG000001RNU2-8P  | snRNA    | chr6  | 1.22E+08 | 1.22E+08 | - | 0    | 0 |
| ENSG000001RNU4-55P | snRNA    | chr11 | 1.06E+08 | 1.06E+08 | + | 0    | 0 |
| ENSG000001RN7SKP12 | misc_RNA | chr1  | 93026252 | 93026542 | + | 0    | 0 |
| ENSG000001U3       | snoRNA   | chr10 | 28408039 | 28408251 | - | 0    | 0 |
| ENSG000001RNU6-394 | snRNA    | chrX  | 66676258 | 66676364 | - | 0    | 0 |
| ENSG000001RNA5SP14 | rRNA     | chr3  | 1.57E+08 | 1.57E+08 | - | 0    | 0 |
| ENSG000001RN7SKP21 | misc_RNA | chr2  | 2.2E+08  | 2.2E+08  | - | 0    | 0 |
| ENSG000001RNU6-126 | snRNA    | chr17 | 30288071 | 30288177 | - | 0    | 0 |
| ENSG000001RNA5SP38 | rRNA     | chr13 | 1.06E+08 | 1.06E+08 | - | 0    | 0 |
| ENSG000001RN7SKP11 | misc_RNA | chr2  | 47359505 | 47359777 | - | 0    | 0 |
| ENSG000001RNU4-72P | snRNA    | chr6  | 85751581 | 85751753 | + | 0    | 0 |
| ENSG000001RNU6-733 | snRNA    | chr4  | 1.08E+08 | 1.08E+08 | - | 0    | 0 |
| ENSG000001RN7SKP12 | misc_RNA | chr9  | 25088811 | 25089151 | - | 0    | 0 |
| ENSG000001Y_RNA    | misc_RNA | chr22 | 41045497 | 41045591 | + | 0    | 0 |
| ENSG000001Y_RNA    | misc_RNA | chr16 | 30471587 | 30471703 | + | 0    | 0 |
| ENSG000001RN7SKP18 | misc_RNA | chr18 | 39016047 | 39016344 | - | 0    | 0 |
| ENSG000001RN7SKP39 | misc_RNA | chr10 | 28442575 | 28442896 | - | 0    | 0 |
| ENSG000001RN7SKP89 | misc_RNA | chr5  | 1.14E+08 | 1.14E+08 | + | 0    | 0 |
| ENSG000001RN7SKP51 | misc_RNA | chr6  | 1.17E+08 | 1.17E+08 | + | 0    | 0 |
| ENSG000001RN7SKP38 | misc_RNA | chr2  | 2.19E+08 | 2.19E+08 | - | 0    | 0 |
| ENSG000001MIR1911  | miRNA    | chrX  | 1.15E+08 | 1.15E+08 | + | 0    | 0 |
| ENSG000001RN7SKP18 | misc_RNA | chr4  | 1.68E+08 | 1.68E+08 | + | 0    | 0 |
| ENSG000001RNU2-63P | snRNA    | chr2  | 88016354 | 88016547 | - | 0    | 0 |
| ENSG000001RNU2-7P  | snRNA    | chr13 | 20612161 | 20612338 | + | 0    | 0 |
| ENSG000001RNU4-64P | snRNA    | chr4  | 1.86E+08 | 1.86E+08 | - | 0    | 0 |
| ENSG000001RNY4P29  | misc_RNA | chr13 | 58527655 | 58527751 | - | 0    | 0 |
| ENSG000001RNU4-6P  | snRNA    | chrX  | 16875146 | 16875267 | - | 0    | 0 |
| ENSG000001RNA5SP32 | rRNA     | chr10 | 1.26E+08 | 1.26E+08 | - | 0    | 0 |
| ENSG000001RNA5SP22 | rRNA     | chr7  | 33177740 | 33177838 | + | 0    | 0 |
| ENSG000001RNU6-119 | snRNA    | chr5  | 37619985 | 37620088 | - | 0    | 0 |



|                     |          |       |          |          |   |   |   |
|---------------------|----------|-------|----------|----------|---|---|---|
| ENSG000001RN7SKP16  | misc_RNA | chr12 | 66292683 | 66292987 | + | 0 | 0 |
| ENSG000001RNA5SP25  | rRNA     | chr13 | 21369790 | 21369899 | - | 0 | 0 |
| ENSG000001RNU4-46P  | snRNA    | chr16 | 19498610 | 19498747 | + | 0 | 0 |
| ENSG000001RN7SKP20  | misc_RNA | chr8  | 1.29E+08 | 1.29E+08 | + | 0 | 0 |
| ENSG000001RNU4-53P  | snRNA    | chr9  | 36267783 | 36267922 | + | 0 | 0 |
| ENSG000001RNU6-684F | snRNA    | chr14 | 1.04E+08 | 1.04E+08 | - | 0 | 0 |
| ENSG000001RN7SKP10  | misc_RNA | chr6  | 1.41E+08 | 1.41E+08 | - | 0 | 0 |
| ENSG000001RNU2-40P  | snRNA    | chr4  | 65807240 | 65807435 | - | 0 | 0 |
| ENSG000001Y_RNA     | misc_RNA | chr16 | 47313027 | 47313121 | - | 0 | 0 |
| ENSG000001RN7SKP12  | misc_RNA | chr11 | 1.27E+08 | 1.27E+08 | - | 0 | 0 |
| ENSG000001RNU6-233F | snRNA    | chr17 | 39546104 | 39546244 | - | 0 | 0 |
| ENSG000001RNA5SP14  | rRNA     | chr3  | 1.44E+08 | 1.44E+08 | - | 0 | 0 |
| ENSG000001RN7SKP21  | misc_RNA | chr3  | 1.31E+08 | 1.31E+08 | - | 0 | 0 |
| ENSG000001RN7SKP91  | misc_RNA | chr1  | 30843823 | 30844110 | + | 0 | 0 |
| ENSG000001RNU2-38P  | snRNA    | chr1  | 1.49E+08 | 1.49E+08 | - | 0 | 0 |
| ENSG000001RNU4-14P  | snRNA    | chr5  | 1.4E+08  | 1.4E+08  | - | 0 | 0 |
| ENSG000001RNU6-67P  | snRNA    | chr13 | 83298071 | 83298167 | - | 0 | 0 |
| ENSG000001RNU6-860F | snRNA    | chr3  | 1.98E+08 | 1.98E+08 | + | 0 | 0 |
| ENSG000001RNU4-83P  | snRNA    | chr8  | 1.01E+08 | 1.01E+08 | - | 0 | 0 |
| ENSG000001RNU6-383F | snRNA    | chrX  | 1.51E+08 | 1.51E+08 | - | 0 | 0 |
| ENSG000001RNU2-62P  | snRNA    | chr6  | 27109790 | 27109980 | - | 0 | 0 |
| ENSG000001RNA5SP22  | rRNA     | chr6  | 1.53E+08 | 1.53E+08 | + | 0 | 0 |
| ENSG000001RNU4-47P  | snRNA    | chr17 | 77152561 | 77152674 | - | 0 | 0 |
| ENSG000001RNU2-68P  | snRNA    | chrX  | 72376979 | 72377169 | - | 0 | 0 |
| ENSG000001RNU4-27P  | snRNA    | chr1  | 36402721 | 36402859 | - | 0 | 0 |
| ENSG000001RN7SKP28  | misc_RNA | chr2  | 1.39E+08 | 1.39E+08 | - | 0 | 0 |
| ENSG000001MIR1537   | miRNA    | chr1  | 2.36E+08 | 2.36E+08 | - | 0 | 0 |
| ENSG000001RNA5SP12  | rRNA     | chr2  | 2.17E+08 | 2.17E+08 | - | 0 | 0 |
| ENSG000001RNA5SP10  | rRNA     | chr2  | 91674857 | 91674966 | + | 0 | 0 |
| ENSG000001RNA5SP13  | rRNA     | chr3  | 72691705 | 72691811 | - | 0 | 0 |
| ENSG000001RN7SKP16  | misc_RNA | chr2  | 17122841 | 17123140 | - | 0 | 0 |
| ENSG000001RNU6-321F | snRNA    | chr11 | 1.25E+08 | 1.25E+08 | + | 0 | 0 |
| ENSG000001RN7SKP42  | misc_RNA | chr2  | 1.87E+08 | 1.87E+08 | - | 0 | 0 |
| ENSG000001RNA5SP21  | rRNA     | chr1  | 77779904 | 77779999 | + | 0 | 0 |
| ENSG000001Y_RNA     | misc_RNA | chr5  | 1.81E+08 | 1.81E+08 | + | 0 | 0 |
| ENSG000001RNA5SP59  | rRNA     | chr1  | 1.45E+08 | 1.45E+08 | - | 0 | 0 |
| ENSG000001RNU6-920F | snRNA    | chr17 | 29641611 | 29641702 | - | 0 | 0 |
| ENSG000001RN7SKP13  | misc_RNA | chr4  | 1.77E+08 | 1.77E+08 | + | 0 | 0 |
| ENSG000001RNU6-108  | snRNA    | chr8  | 27679836 | 27679935 | + | 0 | 0 |
| ENSG000001RNU6-565F | snRNA    | chr7  | 37351143 | 37351242 | + | 0 | 0 |
| ENSG000001RNU6-132  | snRNA    | chr7  | 94495299 | 94495404 | + | 0 | 0 |
| ENSG000001RNU4-78P  | snRNA    | chr3  | 42221840 | 42221965 | + | 0 | 0 |
| ENSG000001RN7SKP33  | misc_RNA | chr20 | 46859333 | 46859672 | + | 0 | 0 |
| ENSG000001RN7SKP26  | misc_RNA | chr12 | 80343515 | 80343792 | - | 0 | 0 |
| ENSG000001Y_RNA     | misc_RNA | chr17 | 40391232 | 40391338 | - | 0 | 0 |

|                   |          |       |          |          |   |      |      |
|-------------------|----------|-------|----------|----------|---|------|------|
| ENSG0000(Y_RNA    | misc_RNA | chr3  | 75964980 | 75965069 | - | 0    | 0    |
| ENSG0000(RN7SKP29 | misc_RNA | chr8  | 69700224 | 69700495 | + | 0    | 0    |
| ENSG0000(RNU6-106 | snRNA    | chr12 | 1.01E+08 | 1.01E+08 | + | 0    | 0    |
| ENSG0000(RNU6-113 | snRNA    | chr6  | 31083010 | 31083109 | + | 0    | 0    |
| ENSG0000(RN7SKP97 | misc_RNA | chr8  | 61631680 | 61632012 | - | 0.58 | 0.32 |
| ENSG0000(RNU6-193 | snRNA    | chr10 | 34942969 | 34943075 | + | 0    | 0    |
| ENSG0000(RNU6-564 | snRNA    | chr22 | 30421045 | 30421148 | + | 0    | 0    |
| ENSG0000(RNA5SP29 | rRNA     | chr13 | 51027747 | 51027852 | - | 0    | 0    |
| ENSG0000(RNA5SP10 | rRNA     | chr2  | 1.34E+08 | 1.34E+08 | + | 0    | 0    |
| ENSG0000(RNA5SP50 | rRNA     | chrX  | 32102065 | 32102176 | + | 0    | 0    |
| ENSG0000(RNU2-41P | snRNA    | chr2  | 1.14E+08 | 1.14E+08 | + | 0    | 0    |
| ENSG0000(RNU6-114 | snRNA    | chr5  | 1.38E+08 | 1.38E+08 | - | 0    | 0    |
| ENSG0000(RN7SKP20 | misc_RNA | chr14 | 23791930 | 23792236 | + | 0    | 0    |
| ENSG0000(RNU6-172 | snRNA    | chr12 | 1.02E+08 | 1.02E+08 | - | 0    | 0    |
| ENSG0000(RN7SKP28 | misc_RNA | chr3  | 86362132 | 86362474 | + | 0    | 0    |
| ENSG0000(SNORD63  | snoRNA   | chr5  | 1.39E+08 | 1.39E+08 | - | 0    | 0    |
| ENSG0000(RNU6-370 | snRNA    | chr2  | 24045835 | 24045938 | + | 0    | 0    |
| ENSG0000(Y_RNA    | misc_RNA | chr7  | 1.52E+08 | 1.52E+08 | + | 0    | 0    |
| ENSG0000(RN7SKP58 | misc_RNA | chr3  | 41766615 | 41766919 | - | 0    | 0    |
| ENSG0000(RN7SKP26 | misc_RNA | chr12 | 25779287 | 25779569 | - | 0    | 0    |
| ENSG0000(RNA5SP41 | rRNA     | chr1  | 13623184 | 13623284 | - | 0    | 0    |
| ENSG0000(RNA5SP26 | rRNA     | chr8  | 55745232 | 55745342 | + | 0    | 0    |
| ENSG0000(MIR1913  | miRNA    | chr6  | 1.67E+08 | 1.67E+08 | - | 0    | 0    |
| ENSG0000(RNU6-272 | snRNA    | chr5  | 53912020 | 53912123 | - | 0    | 0    |
| ENSG0000(SNORA40  | snoRNA   | chr7  | 99952033 | 99952158 | + | 0    | 0    |
| ENSG0000(RN7SKP8  | misc_RNA | chr13 | 98203835 | 98204192 | - | 0    | 0    |
| ENSG0000(RNA5SP22 | rRNA     | chr6  | 1.46E+08 | 1.46E+08 | + | 0    | 0    |
| ENSG0000(RNU6-651 | snRNA    | chr2  | 2.02E+08 | 2.02E+08 | + | 0    | 0    |
| ENSG0000(RNU2-25P | snRNA    | chr9  | 2162763  | 2162953  | - | 0    | 0    |
| ENSG0000(RN7SKP22 | misc_RNA | chr7  | 12876684 | 12876946 | + | 0    | 0    |
| ENSG0000(RN7SKP94 | misc_RNA | chr17 | 57789449 | 57789732 | + | 0    | 0    |
| ENSG0000(RN7SKP16 | misc_RNA | chr10 | 1.21E+08 | 1.21E+08 | + | 0    | 0    |
| ENSG0000(RN7SKP21 | misc_RNA | chr12 | 1.15E+08 | 1.15E+08 | - | 0    | 0    |
| ENSG0000(RNA5SP12 | rRNA     | chr3  | 31228715 | 31228847 | + | 0    | 0    |
| ENSG0000(RNU2-14P | snRNA    | chr14 | 65124352 | 65124542 | - | 0    | 0    |
| ENSG0000(RNU5A-5P | snRNA    | chr1  | 2.32E+08 | 2.32E+08 | + | 0    | 0    |
| ENSG0000(RN7SKP68 | misc_RNA | chr5  | 1.02E+08 | 1.02E+08 | + | 0    | 0    |
| ENSG0000(RNU4-22P | snRNA    | chr14 | 88513498 | 88513663 | + | 0    | 0    |
| ENSG0000(Y_RNA    | misc_RNA | chr10 | 1.31E+08 | 1.31E+08 | + | 0    | 0    |
| ENSG0000(RN7SKP25 | misc_RNA | chr11 | 57451690 | 57452022 | + | 0    | 0    |
| ENSG0000(RNU2-61P | snRNA    | chr6  | 89063500 | 89063690 | - | 0    | 0    |
| ENSG0000(RNA5SP18 | rRNA     | chr5  | 56146739 | 56146846 | - | 0    | 0    |
| ENSG0000(SNORD29  | snoRNA   | chr5  | 24811481 | 24811548 | + | 0    | 0    |
| ENSG0000(RN7SKP13 | misc_RNA | chr4  | 1.21E+08 | 1.21E+08 | - | 0    | 0    |
| ENSG0000(RN7SKP73 | misc_RNA | chr5  | 5126046  | 5126337  | + | 0    | 0    |

|                             |       |          |          |   |      |      |
|-----------------------------|-------|----------|----------|---|------|------|
| ENSG0000(RN7SKP26) misc_RNA | chr9  | 86258358 | 86258646 | - | 0    | 0    |
| ENSG0000(RNA5SP34) rRNA     | chr11 | 75934936 | 75935039 | + | 0    | 0    |
| ENSG0000(RNU6-113) snRNA    | chr11 | 87606783 | 87606885 | + | 0    | 0    |
| ENSG0000(RNA5SP30) rRNA     | chr10 | 25813811 | 25813917 | - | 0    | 0    |
| ENSG0000(Y_RNA) misc_RNA    | chr18 | 23024596 | 23024703 | + | 0    | 0    |
| ENSG0000(RNU6-55P) snRNA    | chr13 | 18869185 | 18869291 | - | 0    | 0    |
| ENSG0000(RN7SKP24) misc_RNA | chr1  | 81251789 | 81252096 | + | 0    | 0    |
| ENSG0000(SNORA57) snoRNA    | chr10 | 26789017 | 26789157 | + | 0    | 0    |
| ENSG0000(RNU6-284) snRNA    | chr4  | 1.65E+08 | 1.65E+08 | + | 0    | 0    |
| ENSG0000(RN7SKP26) misc_RNA | chr6  | 1.51E+08 | 1.51E+08 | + | 0    | 0    |
| ENSG0000(RN7SKP14) misc_RNA | chr3  | 2088933  | 2089211  | - | 0    | 0    |
| ENSG0000(RN7SKP16) misc_RNA | chr12 | 10084186 | 10084490 | + | 0    | 0    |
| ENSG0000(RNU6-130) snRNA    | chr6  | 82210338 | 82210440 | - | 0    | 0    |
| ENSG0000(RNA5SP36) rRNA     | chr12 | 1.02E+08 | 1.02E+08 | + | 0    | 0    |
| ENSG0000(RNU6-847) snRNA    | chr10 | 34926775 | 34926882 | + | 0    | 0    |
| ENSG0000(RN7SKP16) misc_RNA | chr22 | 25963983 | 25964273 | - | 0    | 0    |
| ENSG0000(Y_RNA) misc_RNA    | chr19 | 56105416 | 56105510 | + | 0    | 0    |
| ENSG0000(RNU6-124) snRNA    | chr1  | 27824538 | 27824643 | + | 0    | 0    |
| ENSG0000(RNU6-325) snRNA    | chr10 | 85537379 | 85537483 | + | 0    | 0    |
| ENSG0000(RN7SKP12) misc_RNA | chr1  | 1.93E+08 | 1.93E+08 | - | 0    | 0    |
| ENSG0000(RNA5SP31) rRNA     | chr13 | 60613608 | 60613734 | + | 0    | 0    |
| ENSG0000(RNU2-55P) snRNA    | chr21 | 23281736 | 23281909 | - | 0    | 0    |
| ENSG0000(Y_RNA) misc_RNA    | chr11 | 8943380  | 8943467  | - | 0    | 0    |
| ENSG0000(RNA5SP15) rRNA     | chr4  | 10115756 | 10115884 | - | 0    | 0    |
| ENSG0000(RNU6-602) snRNA    | chr14 | 31662039 | 31662143 | - | 0    | 0    |
| ENSG0000(RMRPP5) ribozyme   | chr9  | 24905469 | 24905735 | + | 0    | 0    |
| ENSG0000(RNA5SP11) rRNA     | chr2  | 2.01E+08 | 2.01E+08 | - | 0    | 0    |
| ENSG0000(RNU5E-9P) snRNA    | chr2  | 1.78E+08 | 1.78E+08 | + | 0    | 0    |
| ENSG0000(RNU2-72P) snRNA    | chr10 | 60912765 | 60912927 | - | 0    | 0    |
| ENSG0000(MIR1538) miRNA     | chr16 | 69565808 | 69565868 | - | 0    | 0    |
| ENSG0000(SNORA74) snoRNA    | chr10 | 49954214 | 49954414 | + | 0    | 0    |
| ENSG0000(RNA5SP24) rRNA     | chr7  | 1.4E+08  | 1.4E+08  | + | 0    | 0    |
| ENSG0000(RN7SKP29) misc_RNA | chr3  | 1.91E+08 | 1.91E+08 | + | 0.84 | 0.61 |
| ENSG0000(RN7SKP10) misc_RNA | chr2  | 1.24E+08 | 1.24E+08 | - | 0    | 0    |
| ENSG0000(RN7SKP18) misc_RNA | chr15 | 96842069 | 96842384 | + | 0    | 0    |
| ENSG0000(RNU2-32P) snRNA    | chr17 | 41467956 | 41468146 | + | 0    | 0    |
| ENSG0000(RN7SKP26) misc_RNA | chr12 | 94008739 | 94009047 | - | 0    | 0    |
| ENSG0000(RN7SKP14) misc_RNA | chr20 | 21424758 | 21425041 | - | 0    | 0    |
| ENSG0000(RNA5SP30) rRNA     | chr10 | 22997255 | 22997358 | + | 0    | 0    |
| ENSG0000(RN7SKP20) misc_RNA | chr5  | 29948828 | 29949130 | + | 0    | 0    |
| ENSG0000(RNA5SP45) rRNA     | chr18 | 9923920  | 9924021  | + | 0    | 0    |
| ENSG0000(RN7SKP25) misc_RNA | chr22 | 49738677 | 49739003 | + | 0    | 0    |
| ENSG0000(RN7SKP11) misc_RNA | chr2  | 7141227  | 7141544  | - | 0    | 0    |
| ENSG0000(RNU4-88P) snRNA    | chr1  | 66094461 | 66094546 | - | 0    | 0    |
| ENSG0000(RNU2-18P) snRNA    | chr10 | 16476003 | 16476164 | + | 0    | 0    |

|                    |          |       |          |          |   |      |   |
|--------------------|----------|-------|----------|----------|---|------|---|
| ENSG0000(RNY1P3    | misc_RNA | chr13 | 25950704 | 25950821 | - | 0    | 0 |
| ENSG0000(RNA5SP28  | rRNA     | chr9  | 27198287 | 27198401 | + | 0    | 0 |
| ENSG0000(RN7SKP14  | misc_RNA | chr16 | 51671236 | 51671563 | - | 0    | 0 |
| ENSG0000(RNA5SP20  | rRNA     | chr6  | 75865239 | 75865335 | - | 0    | 0 |
| ENSG0000(RN7SKP17  | misc_RNA | chr14 | 76890263 | 76890613 | + | 0    | 0 |
| ENSG0000(RNU4-61P  | snRNA    | chr1  | 48447936 | 48448042 | + | 0    | 0 |
| ENSG0000(RNA5SP39  | rRNA     | chr13 | 1.08E+08 | 1.08E+08 | - | 0    | 0 |
| ENSG0000(RNU6-373F | snRNA    | chr5  | 1.19E+08 | 1.19E+08 | + | 0    | 0 |
| ENSG0000(RNU6-119  | snRNA    | chr1  | 758233   | 758336   | - | 0    | 0 |
| ENSG0000(Y_RNA     | misc_RNA | chr9  | 1.3E+08  | 1.3E+08  | + | 0    | 0 |
| ENSG0000(RNU6-177F | snRNA    | chr7  | 1.29E+08 | 1.29E+08 | + | 0    | 0 |
| ENSG0000(RN7SKP10  | misc_RNA | chr20 | 43063326 | 43063609 | + | 0    | 0 |
| ENSG0000(RNU6-293F | snRNA    | chr6  | 1.59E+08 | 1.59E+08 | - | 0    | 0 |
| ENSG0000(RNU6-100  | snRNA    | chr2  | 1.55E+08 | 1.55E+08 | - | 0    | 0 |
| ENSG0000(RNU2-22P  | snRNA    | chr2  | 2.32E+08 | 2.32E+08 | - | 0    | 0 |
| ENSG0000(RN7SKP29  | misc_RNA | chr11 | 74685224 | 74685505 | + | 0.41 | 0 |
| ENSG0000(RNA5SP22  | rRNA     | chr6  | 1.43E+08 | 1.43E+08 | + | 0    | 0 |
| ENSG0000(RNU6-121  | snRNA    | chr4  | 1.19E+08 | 1.19E+08 | - | 0    | 0 |
| ENSG0000(RNU4-74P  | snRNA    | chr7  | 1.41E+08 | 1.41E+08 | + | 0    | 0 |
| ENSG0000(RNU6-607F | snRNA    | chr8  | 37668898 | 37669005 | + | 0    | 0 |
| ENSG0000(RNU6-938F | snRNA    | chr17 | 75409086 | 75409188 | - | 0    | 0 |
| ENSG0000(Y_RNA     | misc_RNA | chr8  | 70780914 | 70781008 | - | 0    | 0 |
| ENSG0000(RN7SKP19  | misc_RNA | chr11 | 59706057 | 59706383 | - | 0    | 0 |
| ENSG0000(SNORD71   | snoRNA   | chr16 | 71758402 | 71758487 | - | 0    | 0 |
| ENSG0000(RNU6-105  | snRNA    | chr4  | 1.19E+08 | 1.19E+08 | + | 0    | 0 |
| ENSG0000(RN7SKP27  | misc_RNA | chr1  | 96695856 | 96696167 | - | 0    | 0 |
| ENSG0000(RNA5SP29  | rRNA     | chr9  | 1.11E+08 | 1.11E+08 | - | 0    | 0 |
| ENSG0000(RNU4-63P  | snRNA    | chr2  | 41871271 | 41871388 | + | 0    | 0 |
| ENSG0000(RNU2-64P  | snRNA    | chr3  | 73110992 | 73111182 | + | 0    | 0 |
| ENSG0000(Y_RNA     | misc_RNA | chr1  | 85264296 | 85264402 | + | 0    | 0 |
| ENSG0000(RNU6-785F | snRNA    | chr9  | 1.38E+08 | 1.38E+08 | + | 0    | 0 |
| ENSG0000(RNU6-575F | snRNA    | chr7  | 43207762 | 43207866 | - | 0    | 0 |
| ENSG0000(RNA5SP50  | rRNA     | chrX  | 76655009 | 76655127 | - | 0    | 0 |
| ENSG0000(RN7SKP19  | misc_RNA | chrX  | 96410432 | 96410782 | - | 0    | 0 |
| ENSG0000(RNA5SP49  | rRNA     | chr21 | 42221173 | 42221286 | + | 0    | 0 |
| ENSG0000(RNU6-387F | snRNA    | chr1  | 67417214 | 67417318 | + | 0    | 0 |
| ENSG0000(RNU6-592F | snRNA    | chr11 | 1.23E+08 | 1.23E+08 | - | 0    | 0 |
| ENSG0000(RN7SKP53  | misc_RNA | chr11 | 99120176 | 99120490 | + | 0    | 0 |
| ENSG0000(Y_RNA     | misc_RNA | chr15 | 66348276 | 66348375 | + | 0    | 0 |
| ENSG0000(RN7SKP17  | misc_RNA | chr12 | 76315751 | 76316048 | + | 0    | 0 |
| ENSG0000(RNA5SP49  | rRNA     | chrX  | 1300256  | 1300375  | - | 0    | 0 |
| ENSG0000(RNA5SP49  | rRNA     | chrY  | 1300256  | 1300375  | - | 0    | 0 |
| ENSG0000(RNU6-57P  | snRNA    | chr13 | 41354557 | 41354659 | - | 0    | 0 |
| ENSG0000(RN7SKP85  | misc_RNA | chr8  | 98921233 | 98921550 | - | 0    | 0 |
| ENSG0000(RN7SKP16  | misc_RNA | chr1  | 2.26E+08 | 2.26E+08 | + | 0    | 0 |

|                     |             |       |          |          |   |       |       |
|---------------------|-------------|-------|----------|----------|---|-------|-------|
| ENSG0000(RNU6-195F) | snRNA       | chr19 | 40708055 | 40708163 | - | 0     | 0     |
| ENSG0000(RNU6-954F) | snRNA       | chr21 | 13968489 | 13968595 | - | 0     | 0     |
| ENSG0000(RNA5SP10)  | rRNA        | chr2  | 1.55E+08 | 1.55E+08 | + | 0     | 0     |
| ENSG0000(RNA5SP27)  | rRNA        | chr8  | 69929905 | 69930022 | + | 0     | 0     |
| ENSG0000(SNORD83)   | snoRNA      | chr12 | 64575665 | 64575741 | + | 0     | 0     |
| ENSG0000(RNY3P8)    | misc_RNA    | chr13 | 95310830 | 95310955 | - | 0     | 0     |
| ENSG0000(RN7SKP10)  | misc_RNA    | chr14 | 96638187 | 96638514 | - | 0     | 0     |
| ENSG0000(Y_RNA)     | misc_RNA    | chr14 | 73858061 | 73858165 | - | 0     | 0     |
| ENSG0000(Y_RNA)     | misc_RNA    | chr10 | 1.11E+08 | 1.11E+08 | - | 0     | 0     |
| ENSG0000(RN7SKP30)  | misc_RNA    | chr4  | 55540502 | 55540835 | - | 0     | 0.32  |
| ENSG0000(RNU6-1304) | snRNA       | chr1  | 2.26E+08 | 2.26E+08 | + | 0     | 0     |
| ENSG0000(RN7SKP10)  | misc_RNA    | chr15 | 46720193 | 46720512 | - | 0     | 0     |
| ENSG0000(RNU6-722F) | snRNA       | chrX  | 48959179 | 48959282 | - | 0     | 0     |
| ENSG0000(RNU6-516F) | snRNA       | chr15 | 40529570 | 40529673 | + | 0     | 0     |
| ENSG0000(RN7SKP27)  | misc_RNA    | chr11 | 1.27E+08 | 1.27E+08 | + | 0     | 0     |
| ENSG0000(RNA5SP11)  | rRNA        | chr2  | 1.65E+08 | 1.65E+08 | - | 0     | 0     |
| ENSG0000(RN7SKP29)  | misc_RNA    | chr6  | 12406486 | 12406781 | - | 0     | 0     |
| ENSG0000(RN7SKP27)  | misc_RNA    | chr11 | 1.12E+08 | 1.12E+08 | + | 0     | 0     |
| ENSG0000(RNU2-71P)  | snRNA       | chr8  | 80585585 | 80585773 | - | 0     | 0     |
| ENSG0000(RNU6-1052) | snRNA       | chr7  | 56402070 | 56402173 | - | 0     | 0     |
| ENSG0000(RNU6-603F) | snRNA       | chr6  | 32352877 | 32352983 | + | 0     | 0     |
| ENSG0000(RNU2-6P)   | snRNA       | chr13 | 46374401 | 46374590 | - | 0     | 0     |
| ENSG0000(RN7SKP3)   | misc_RNA    | chr13 | 45060729 | 45061086 | + | 0     | 0     |
| ENSG0000(RP3-42906) | lincRNA     | chr6  | 6901022  | 6918715  | - | 0     | 0     |
| ENSG0000(RP13-131K) | antisense   | chr3  | 48985049 | 48989988 | - | 0.33  | 0.27  |
| ENSG0000(RP11-541F) | lincRNA     | chr1  | 1.92E+08 | 1.92E+08 | - | 0     | 0     |
| ENSG0000(HIST2H2BA) | transcribed | chr1  | 1.21E+08 | 1.21E+08 | - | 1.57  | 0.99  |
| ENSG0000(KLF2P3)    | processed   | chr2  | 1.31E+08 | 1.31E+08 | - | 0     | 0     |
| ENSG0000(IGLV9-49)  | IG_V_gene   | chr22 | 22343187 | 22343732 | + | 0     | 0     |
| ENSG0000(ZNF385D-A) | lincRNA     | chr3  | 21942566 | 21979828 | + | 0     | 0     |
| ENSG0000(RP11-290P) | processed   | chr1  | 2.45E+08 | 2.45E+08 | - | 0     | 0     |
| ENSG0000(RP11-66D1) | antisense   | chr1  | 1.57E+08 | 1.57E+08 | - | 0     | 0.21  |
| ENSG0000(EHHADH-A)  | antisense   | chr3  | 1.85E+08 | 1.85E+08 | + | 0     | 0     |
| ENSG0000(AC096559)  | lincRNA     | chr2  | 12598987 | 12605145 | + | 0     | 0     |
| ENSG0000(FTH1P10)   | transcribed | chr5  | 17353695 | 17354624 | - | 48.17 | 67.27 |
| ENSG0000(CDY15P)    | unprocessed | chrY  | 23855522 | 23857091 | - | 0     | 0     |
| ENSG0000(RP11-401G) | processed   | chr9  | 73870896 | 73873297 | - | 0     | 0     |
| ENSG0000(AC108066)  | lincRNA     | chr2  | 2.13E+08 | 2.13E+08 | + | 0     | 0     |
| ENSG0000(AC005104)  | antisense   | chr2  | 2.41E+08 | 2.41E+08 | - | 0     | 0     |
| ENSG0000(RP11-224C) | processed   | chr1  | 2.18E+08 | 2.18E+08 | + | 0     | 0     |
| ENSG0000(RP5-1014C) | unprocessed | chrX  | 1.5E+08  | 1.5E+08  | - | 0     | 0     |
| ENSG0000(RP11-374M) | lincRNA     | chr9  | 61868727 | 61887084 | + | 0     | 0     |
| ENSG0000(RP11-655H) | lincRNA     | chr10 | 1.09E+08 | 1.09E+08 | + | 0     | 0     |
| ENSG0000(LINC01778) | lincRNA     | chr1  | 30824228 | 30834431 | + | 0     | 0.16  |
| ENSG0000(HIST1H2AP) | processed   | chr13 | 36490078 | 36490441 | - | 0     | 0     |

|                                      |          |          |   |      |      |
|--------------------------------------|----------|----------|---|------|------|
| ENSG0000(LINC02068 lincRNA chr3      | 1.73E+08 | 1.73E+08 | - | 0    | 0    |
| ENSG0000(SDCBP2P1 processed_chr6     | 73322837 | 73323450 | + | 0    | 0    |
| ENSG0000(RP11-91A1 antisense chr1    | 52033391 | 52044279 | + | 0    | 0    |
| ENSG0000(GS1-309P1 processed_chrX    | 27517771 | 27517881 | - | 0    | 0    |
| ENSG0000(CLDN10-AS antisense chr13   | 95479444 | 95533910 | - | 0    | 0    |
| ENSG0000(RP5-858B6 antisense chr1    | 2.31E+08 | 2.31E+08 | + | 0    | 0.18 |
| ENSG0000(TRBV29OR TR_V_pseu chr9     | 33786221 | 33786828 | + | 0    | 0    |
| ENSG0000(RBM22P7 processed_chrX      | 52509903 | 52510182 | + | 0    | 0    |
| ENSG0000(RP11-134G lincRNA chr1      | 2.02E+08 | 2.02E+08 | + | 0.28 | 0.38 |
| ENSG0000(AC027124. processed_chr3    | 13460424 | 13460889 | - | 0    | 0    |
| ENSG0000(AP006748. lincRNA chr21     | 41576135 | 41581319 | - | 0    | 0    |
| ENSG0000(RP11-211G protein_co chr3   | 1.88E+08 | 1.88E+08 | + | 0    | 0.06 |
| ENSG0000(AC074121. processed_chr7    | 98478551 | 98479225 | - | 0    | 0    |
| ENSG0000(MEG9 lincRNA chr14          | 1.01E+08 | 1.01E+08 | + | 0.46 | 0.55 |
| ENSG0000(LINC00397 lincRNA chr13     | 87801036 | 87803808 | - | 0    | 0    |
| ENSG0000(XKRYP5 unprocessε chrY      | 25752388 | 25752870 | + | 0    | 0    |
| ENSG0000(USP9YP18 unprocessε chrY    | 23659466 | 23667822 | - | 0    | 0    |
| ENSG0000(RPL17P17 processed_chr3     | 65843890 | 65844446 | + | 0    | 0    |
| ENSG0000(RP1-191L6. lincRNA chr20    | 40121041 | 40126357 | + | 0    | 0    |
| ENSG0000(LINC00473 lincRNA chr6      | 1.66E+08 | 1.66E+08 | - | 0    | 0.28 |
| ENSG0000(RPS26P15 processed_chr1     | 58056133 | 58056480 | - | 0    | 0    |
| ENSG0000(TRIM49D1 protein_co chr11   | 89911111 | 89921767 | - | 0    | 0    |
| ENSG0000(GS1-590J6. processed_chrX   | 11704123 | 11705590 | - | 0    | 0    |
| ENSG0000(AC006022. processed_chr7    | 30742431 | 30742818 | - | 0    | 0    |
| ENSG0000(RP11-572H processed_chr9    | 31165618 | 31166980 | - | 0    | 0    |
| ENSG0000(AC007274. unprocessε chrY   | 7678899  | 7681028  | + | 0    | 0    |
| ENSG0000(AC016716. processed_chr2    | 80162428 | 80163135 | - | 0    | 0    |
| ENSG0000(RP11-399K transcribec chr10 | 75288333 | 75288682 | - | 0    | 0    |
| ENSG0000(RP4-800M: processed_chr1    | 52162186 | 52163026 | - | 0    | 0    |
| ENSG0000(AC011243. lincRNA chr2      | 1.34E+08 | 1.34E+08 | + | 0    | 0    |
| ENSG0000(MTND6P21 processed_chr21    | 44472895 | 44473739 | + | 0    | 0    |
| ENSG0000(RP11-62L1: lincRNA chr10    | 1.22E+08 | 1.22E+08 | - | 0    | 0    |
| ENSG0000(RPS29P9 processed_chr2      | 2.08E+08 | 2.08E+08 | + | 0    | 0    |
| ENSG0000(AC011625. antisense chr7    | 1.32E+08 | 1.32E+08 | + | 0.14 | 0    |
| ENSG0000(TMSB4XP3 processed_chr7     | 29625870 | 29625983 | + | 0    | 0    |
| ENSG0000(RP1-171K1 lincRNA chrX      | 1.42E+08 | 1.42E+08 | + | 0    | 0    |
| ENSG0000(RP11-555J: antisense chr9   | 32633454 | 32648685 | + | 0    | 0    |
| ENSG0000(TH2LCRR antisense chr5      | 1.33E+08 | 1.33E+08 | - | 0    | 0    |
| ENSG0000(USP17L2 protein_co chr8     | 12137168 | 12139077 | - | 0    | 0    |
| ENSG0000(RPL6P21 processed_chr7      | 14070535 | 14071380 | - | 0    | 0    |
| ENSG0000(RP11-274J: antisense chr9   | 93094939 | 93095529 | - | 0    | 0    |
| ENSG0000(RP11-5211ε processed_chr1   | 1.8E+08  | 1.8E+08  | - | 0    | 0    |
| ENSG0000(HMGN2P1: processed_chr1     | 1.55E+08 | 1.55E+08 | + | 0    | 0    |
| ENSG0000(RP11-781P processed_chr10   | 1.2E+08  | 1.2E+08  | - | 0    | 0    |
| ENSG0000(HTATSF1P1 processed_chr6    | 33237799 | 33239690 | + | 0    | 0    |

|                                       |          |          |   |       |       |
|---------------------------------------|----------|----------|---|-------|-------|
| ENSG0000(LMO7DN-1 sense_intr) chr13   | 75876886 | 75881127 | + | 0     | 0     |
| ENSG0000(TCAF1P1 unprocess) chr7      | 1.44E+08 | 1.44E+08 | + | 6.6   | 6.58  |
| ENSG0000(GAPDHP69 processed) chr13    | 29306778 | 29307785 | + | 0     | 0     |
| ENSG0000(AC004471. antisense) chr22   | 19121529 | 19124503 | + | 0     | 0     |
| ENSG0000(RP11-285G lincRNA) chr10     | 44937508 | 44955725 | + | 0     | 0     |
| ENSG0000(LINC01825 lincRNA) chr2      | 1.96E+08 | 1.96E+08 | + | 0     | 0.16  |
| ENSG0000(CALM1P1 processed) chrX      | 95499604 | 95500036 | + | 0     | 0     |
| ENSG0000(RP11-344J lincRNA) chr6      | 43851757 | 43852333 | - | 0     | 0     |
| ENSG0000(RP11-490C lincRNA) chr10     | 33909238 | 33917804 | + | 0     | 0     |
| ENSG0000(RP11-310H antisense) chr7    | 55573171 | 55588336 | + | 0.13  | 0     |
| ENSG0000(VN1R42P processed) chr7      | 64933273 | 64933616 | + | 0     | 0     |
| ENSG0000(RP11-545E antisense) chr9    | 1.29E+08 | 1.29E+08 | + | 3.72  | 3.36  |
| ENSG0000(RP4-788P1 lincRNA) chr1      | 73635216 | 73715214 | + | 0     | 0     |
| ENSG0000(NUTM2A-A antisense) chr10    | 87203875 | 87342612 | - | 15.66 | 16    |
| ENSG0000(TRPC6P processed) chrX       | 1.56E+08 | 1.56E+08 | - | 0     | 0     |
| ENSG0000(TRPC6P processed) chrY       | 57171890 | 57172769 | - | 0     | 0     |
| ENSG0000(LINC01615 lincRNA) chr6      | 1.69E+08 | 1.69E+08 | - | 20.77 | 24.34 |
| ENSG0000(AC092198. lincRNA) chrX      | 40009276 | 40012182 | + | 0     | 0     |
| ENSG0000(FRMPD4-A antisense) chrX     | 12373167 | 12375133 | - | 0     | 0     |
| ENSG0000(MAPK6PS2 processed) chr21    | 22436290 | 22438349 | - | 0     | 0     |
| ENSG0000(NEFHP1 processed) chr1       | 1.17E+08 | 1.17E+08 | - | 0     | 0     |
| ENSG0000(CHCHD2P5 processed) chr1     | 93921268 | 93921667 | - | 0     | 0     |
| ENSG0000(RP11-15M. antisense) chr20   | 53168643 | 53179550 | - | 0     | 0     |
| ENSG0000(RP11-763B processed) chr1    | 1.43E+08 | 1.43E+08 | + | 0     | 0     |
| ENSG0000(EXOSC6 protein_co) chr16     | 70246778 | 70251930 | - | 4.38  | 4.47  |
| ENSG0000(AC063979. unitary_ps) chr5   | 72733833 | 72734209 | + | 0     | 0     |
| ENSG0000(RP11-716A processed) chrX    | 16897651 | 16898521 | - | 0     | 0     |
| ENSG0000(AC083862. processed) chr7    | 1.35E+08 | 1.35E+08 | + | 0.05  | 0     |
| ENSG0000(VPS52 protein_co) chr6       | 33250272 | 33272047 | - | 18.73 | 17.11 |
| ENSG0000(RP11-96B5 antisense) chr10   | 51062579 | 51068553 | - | 0.39  | 0     |
| ENSG0000(RP11-29H2 processed) chr1    | 1.56E+08 | 1.56E+08 | - | 0     | 0     |
| ENSG0000(RP11-542F lincRNA) chr6      | 68055351 | 68060502 | + | 0     | 0     |
| ENSG0000(RP11-397P processed) chr1    | 2.04E+08 | 2.04E+08 | - | 0     | 0     |
| ENSG0000(SLC20A1P1 processed) chr14   | 1.07E+08 | 1.07E+08 | - | 0     | 0     |
| ENSG0000(RPL23AP53 transcribec) chr8  | 213186   | 232231   | - | 5.71  | 7.12  |
| ENSG0000(RP11-632K transcribec) chr15 | 32519848 | 32536926 | - | 13.98 | 11.88 |
| ENSG0000(CDRT15 protein_co) chr17     | 14235673 | 14236862 | - | 0     | 0     |
| ENSG0000(RP13-297E lincRNA) chrX      | 1732584  | 1755985  | + | 0.18  | 0.1   |
| ENSG0000(RP13-297E lincRNA) chrY      | 1732584  | 1755985  | + | 0.18  | 0.1   |
| ENSG0000(ATP6V0E1F processed) chr3    | 41859350 | 41859594 | - | 0     | 0     |
| ENSG0000(AC004866. processed) chr7    | 81335106 | 81335183 | + | 0     | 0     |
| ENSG0000(AFF2-IT1 sense_intr) chrX    | 1.49E+08 | 1.49E+08 | + | 0     | 0     |
| ENSG0000(AC010723. lincRNA) chrY      | 14276212 | 14277489 | - | 0     | 0     |
| ENSG0000(CSNK1A1P. transcribec) chr15 | 36798596 | 36818459 | - | 0     | 0     |
| ENSG0000(KIF28P transcribec) chr1     | 2.47E+08 | 2.47E+08 | - | 0     | 0     |

|                                      |          |            |      |      |
|--------------------------------------|----------|------------|------|------|
| ENSG0000( AC093690. antisense chr2   | 28307691 | 28310459 - | 0    | 0    |
| ENSG0000( AC079613. sense_ovei chr2  | 1.89E+08 | 1.89E+08 - | 0    | 0.09 |
| ENSG0000( RABGAP1L. sense_intr chr1  | 1.75E+08 | 1.75E+08 + | 0.71 | 1.06 |
| ENSG0000( RP11-223P antisense chr10  | 1.27E+08 | 1.27E+08 - | 0    | 0    |
| ENSG0000( EEF1A1P8 processed_ chr3   | 1.84E+08 | 1.84E+08 - | 0.13 | 0.11 |
| ENSG0000( AC012506. lincRNA chr2     | 23330664 | 23332044 - | 0    | 0    |
| ENSG0000( HLA-DQB1. antisense chr6   | 32659880 | 32660729 + | 0    | 0    |
| ENSG0000( FAM90A17 unprocessε chr8   | 7746034  | 7749606 +  | 0    | 0    |
| ENSG0000( AC008069. lincRNA chr2     | 16728124 | 16767555 + | 0    | 0    |
| ENSG0000( RP5-919F1 antisense chr6   | 1.09E+08 | 1.1E+08 +  | 0.23 | 0    |
| ENSG0000( RP11-216P processed_ chr12 | 1.21E+08 | 1.21E+08 + | 0    | 0    |
| ENSG0000( AC011431. unprocessε chr5  | 1.36E+08 | 1.36E+08 - | 0    | 0    |
| ENSG0000( RPS15AP5 processed_ chr10  | 1.22E+08 | 1.22E+08 + | 0    | 0    |
| ENSG0000( RP1-283K1 antisense chr6   | 1.33E+08 | 1.33E+08 - | 0    | 0    |
| ENSG0000( TCEAL4P1 processed_ chr13  | 36741878 | 36742465 - | 0    | 0.13 |
| ENSG0000( AC005838. unprocessε chr17 | 15588852 | 15589084 + | 0    | 0    |
| ENSG0000( LINC00630 lincRNA chrX     | 1.03E+08 | 1.03E+08 + | 1.8  | 2.9  |
| ENSG0000( ZNF844 protein_co chr19    | 12064699 | 12081565 + | 2    | 1.87 |
| ENSG0000( AC034228. antisense chr5   | 1.32E+08 | 1.32E+08 + | 0    | 0    |
| ENSG0000( MTND5P2ε processed_ chr2   | 1.2E+08  | 1.2E+08 +  | 0    | 0    |
| ENSG0000( SNRPBP1 processed_ chr7    | 80377554 | 80377835 - | 0    | 0    |
| ENSG0000( TMSB4XP4 processed_ chr9   | 1.28E+08 | 1.28E+08 + | 1.9  | 2.71 |
| ENSG0000( RP11-24F1 antisense chr3   | 46364955 | 46407059 - | 0    | 0    |
| ENSG0000( SMPD4P1 transcribec chr22  | 20602595 | 20656914 - | 0    | 0    |
| ENSG0000( AC078851. lincRNA chr2     | 1.4E+08  | 1.4E+08 -  | 0    | 0    |
| ENSG0000( USP9YP23 unprocessε chrY   | 17782210 | 17784815 + | 0    | 0    |
| ENSG0000( TRIM60P1 processed_ chr7   | 64085560 | 64086576 + | 0    | 0    |
| ENSG0000( RP11-700P processed_ chr7  | 56288230 | 56291425 + | 0    | 0    |
| ENSG0000( AC003090. lincRNA chr7     | 25593351 | 25750994 - | 0.03 | 0    |
| ENSG0000( AP001601. antisense chr21  | 26889376 | 26939742 + | 0    | 0    |
| ENSG0000( CYP4F32P unprocessε chr2   | 94759259 | 94760279 - | 0    | 0    |
| ENSG0000( RP11-344L processed_ chr10 | 83735506 | 83736493 + | 0    | 0    |
| ENSG0000( TNRC18P2 unprocessε chr7   | 63567743 | 63585075 - | 0.06 | 0.03 |
| ENSG0000( RPL3P11 processed_ chr9    | 14040716 | 14041861 - | 0    | 0    |
| ENSG0000( USP17L15 protein_co chr4   | 9234385  | 9236334 +  | 0    | 0    |
| ENSG0000( RP11-2751 processed_ chr1  | 2.26E+08 | 2.26E+08 - | 0    | 0    |
| ENSG0000( DHRSX-IT1 sense_intr chrX  | 2334295  | 2336410 -  | 0.05 | 0    |
| ENSG0000( DHRSX-IT1 sense_intr chrY  | 2334295  | 2336410 -  | 0.05 | 0    |
| ENSG0000( CKMT1A protein_co chr15    | 43692886 | 43699222 + | 0    | 0    |
| ENSG0000( TINCR protein_co chr19     | 5558167  | 5568034 -  | 0.01 | 0.05 |
| ENSG0000( TPMTP4 processed_ chrX     | 86128893 | 86129570 - | 0    | 0    |
| ENSG0000( RBMX2P3 processed_ chr1    | 1.19E+08 | 1.19E+08 - | 0    | 0    |
| ENSG0000( RP11-61K9 antisense chr13  | 19841827 | 19843672 + | 0    | 0    |
| ENSG0000( RP11-393K lincRNA chr10    | 7097152  | 7097675 +  | 0    | 0    |
| ENSG0000( RP3-476K8 processed_ chr1  | 26454653 | 26455187 - | 0.14 | 0.15 |



|                                      |          |          |   |      |      |
|--------------------------------------|----------|----------|---|------|------|
| ENSG0000(TVP23CP1 processed_ chr7    | 90631906 | 90632568 | + | 0    | 0    |
| ENSG0000(LINC01312 lincRNA chr6      | 1.34E+08 | 1.34E+08 | + | 0.08 | 0    |
| ENSG0000(LINC01986 lincRNA chr3      | 23757    | 24501    | + | 0    | 0    |
| ENSG0000(RP5-884C9 processed_ chr1   | 38080572 | 38080911 | - | 0    | 0    |
| ENSG0000(CENPVL1 protein_co chrX     | 51710512 | 51712131 | + | 0    | 0    |
| ENSG0000(FNDC3CP unitary_ps chrX     | 78165696 | 78172422 | - | 0    | 0    |
| ENSG0000(AL356806 processed_ chr14   | 34416687 | 34417602 | - | 0    | 0    |
| ENSG0000(LYPLA1P1 processed_ chr7    | 1.23E+08 | 1.23E+08 | - | 0    | 0    |
| ENSG0000(LINC02142 lincRNA chr5      | 7373117  | 7379790  | + | 0    | 0.15 |
| ENSG0000(RP1-292B1 antisense chr6    | 1.51E+08 | 1.51E+08 | - | 0    | 0    |
| ENSG0000(RP11-216N processed_ chr1   | 1.54E+08 | 1.54E+08 | - | 0    | 0    |
| ENSG0000(EEF1A1P41 processed_ chrY   | 2995067  | 2995273  | - | 0    | 0    |
| ENSG0000(EBLN1 protein_co chr10      | 22208814 | 22210021 | - | 0.05 | 0    |
| ENSG0000(AC125634.unprocessε chr9    | 64878790 | 64889063 | - | 0    | 0    |
| ENSG0000(CRPP1 unprocessε chr1       | 1.6E+08  | 1.6E+08  | - | 0    | 0    |
| ENSG0000(AC007394.processed_ chr2    | 1.49E+08 | 1.49E+08 | + | 0    | 0    |
| ENSG0000(AC107399.unprocessε chr4    | 1.17E+08 | 1.17E+08 | + | 0    | 0    |
| ENSG0000(DSCR4-IT1 sense_intrε chr21 | 38006544 | 38010618 | - | 0    | 0    |
| ENSG0000(HBD protein_co chr11        | 5232678  | 5235370  | - | 0    | 0    |
| ENSG0000(SUPT20HL2 processed_ chrX   | 24310907 | 24313315 | - | 0    | 0    |
| ENSG0000(RP11-2891 processed_ chr1   | 1.45E+08 | 1.45E+08 | + | 0    | 0    |
| ENSG0000(ZNF735 protein_co chr7      | 64207090 | 64220508 | + | 0    | 0    |
| ENSG0000(RP11-1961 processed_ chr9   | 1.07E+08 | 1.07E+08 | + | 0    | 0    |
| ENSG0000(LINC00370 lincRNA chr13     | 1.09E+08 | 1.09E+08 | + | 0    | 0    |
| ENSG0000(MTCO1P17 unprocessε chr2    | 2.03E+08 | 2.03E+08 | + | 0    | 0    |
| ENSG0000(RBM48P1 processed_ chr4     | 1.27E+08 | 1.27E+08 | + | 0    | 0    |
| ENSG0000(AK4P4 processed_ chr9       | 5855781  | 5856426  | - | 0.11 | 0    |
| ENSG0000(GSTA6P unprocessε chr6      | 52805613 | 52813460 | - | 0    | 0    |
| ENSG0000(RP3-425P1 lincRNA chr6      | 25053627 | 25057073 | - | 0    | 0    |
| ENSG0000(RP1-125I3.processed_ chr1   | 25888970 | 25889109 | + | 0    | 0    |
| ENSG0000(CYCSP32 processed_ chr13    | 19458398 | 19458718 | - | 0    | 0    |
| ENSG0000(LINC01044 lincRNA chr13     | 1.12E+08 | 1.12E+08 | - | 0    | 0    |
| ENSG0000(AC023449.processed_ chr15   | 25580969 | 25581122 | + | 0    | 0    |
| ENSG0000(DEFA8P unprocessε chr8      | 6950726  | 6951599  | - | 0    | 0    |
| ENSG0000(LINC01120 lincRNA chr2      | 1.31E+08 | 1.31E+08 | + | 0    | 0    |
| ENSG0000(RP11-143A lincRNA chr6      | 58162610 | 58187582 | + | 0    | 0    |
| ENSG0000(AC012506.lincRNA chr2       | 23357516 | 23360376 | - | 0    | 0    |
| ENSG0000(RP4-613A2 antisense chr1    | 2.3E+08  | 2.3E+08  | + | 0    | 0    |
| ENSG0000(UBE2Q2P5 unprocessε chrY    | 25431156 | 25437315 | + | 0    | 0    |
| ENSG0000(RBMY2EP transcribec chrY    | 21394991 | 21401585 | - | 0    | 0    |
| ENSG0000(RFPL4A protein_co chr19     | 55759014 | 55763175 | + | 0.06 | 0    |
| ENSG0000(RPL30P3 processed_ chr2     | 9081395  | 9081727  | - | 0    | 0    |
| ENSG0000(TTTY17C lincRNA chrY        | 25183643 | 25184773 | - | 0    | 0    |
| ENSG0000(AC008277.antisense chr2     | 1.59E+08 | 1.59E+08 | + | 0    | 0    |
| ENSG0000(RP11-108M lincRNA chr1      | 16851257 | 16853129 | - | 0    | 0    |

|                                 |       |          |          |   |       |      |
|---------------------------------|-------|----------|----------|---|-------|------|
| ENSG0000( AC002463. lincRNA     | chr7  | 1.13E+08 | 1.13E+08 | + | 0     | 0    |
| ENSG0000( LINC01946 lincRNA     | chr2  | 31793823 | 31803980 | - | 0     | 0    |
| ENSG0000( IGHV3-64 IG_V_gene    | chr14 | 1.07E+08 | 1.07E+08 | - | 0     | 0    |
| ENSG0000( RP11-359E lincRNA     | chr1  | 2.11E+08 | 2.11E+08 | + | 0     | 0    |
| ENSG0000( UHRF2P1 processed_    | chrX  | 74105572 | 74107958 | + | 0     | 0    |
| ENSG0000( RP5-1121H processed_  | chr20 | 41997131 | 41999397 | - | 0     | 0    |
| ENSG0000( AC106786. antisense   | chr5  | 1.23E+08 | 1.23E+08 | - | 0     | 0.3  |
| ENSG0000( RP11-131L. antisense  | chr1  | 85276715 | 85448124 | + | 0.03  | 0    |
| ENSG0000( RAB9AP3 processed_    | chrY  | 25918323 | 25918895 | - | 0     | 0    |
| ENSG0000( HMGB3P1( processed_   | chr1  | 99698242 | 99699178 | + | 0     | 0    |
| ENSG0000( KRT8P51 processed_    | chr7  | 1.37E+08 | 1.37E+08 | - | 0     | 0    |
| ENSG0000( C1GALT1C1. protein_co | chr2  | 43675151 | 43676322 | - | 0.1   | 0.22 |
| ENSG0000( AC012314. lincRNA     | chr19 | 54199454 | 54199971 | - | 0     | 0    |
| ENSG0000( SAMSN1-A antisense    | chr21 | 14582202 | 14598303 | + | 0     | 0    |
| ENSG0000( NDUFB4P8 processed_   | chr1  | 1378666  | 1379032  | + | 0     | 0    |
| ENSG0000( CTB-111F1 lincRNA     | chr7  | 91638847 | 91643512 | - | 0     | 0    |
| ENSG0000( EEF1A1P24 processed_  | chr3  | 39358545 | 39359922 | + | 0.38  | 0.65 |
| ENSG0000( RP11-93B1 antisense   | chr20 | 62732566 | 62735347 | - | 0     | 0    |
| ENSG0000( RPL34P3 processed_    | chr21 | 35472095 | 35472432 | - | 0     | 0    |
| ENSG0000( RP11-272P processed_  | chr9  | 13322806 | 13323450 | - | 0     | 0    |
| ENSG0000( RP11-86H7 lincRNA     | chr1  | 94585556 | 94592297 | - | 0     | 0    |
| ENSG0000( RPL34P26 processed_   | chr13 | 50361410 | 50361763 | - | 0     | 0    |
| ENSG0000( OR2AD1P unprocessε    | chr6  | 29026680 | 29027607 | - | 0     | 0    |
| ENSG0000( RP11-311H antisense   | chr9  | 33402857 | 33409948 | + | 0     | 0    |
| ENSG0000( AP000362. unprocessε  | chr22 | 22990690 | 23008356 | + | 0     | 0    |
| ENSG0000( RPSAP65 processed_    | chr1  | 63262113 | 63262707 | + | 0     | 0    |
| ENSG0000( IFNWP18 unprocessε    | chr9  | 21209189 | 21209779 | - | 0     | 0    |
| ENSG0000( LINC00571 lincRNA     | chr13 | 38050817 | 38143232 | - | 0.85  | 0.47 |
| ENSG0000( RPS24P14 processed_   | chr11 | 3559657  | 3560022  | + | 0     | 0    |
| ENSG0000( AC068044. processed_  | chr2  | 22188336 | 22190313 | + | 0     | 0    |
| ENSG0000( DIP2A-IT1 sense_intrε | chr21 | 46462471 | 46469306 | + | 0     | 0    |
| ENSG0000( ADH5P3 processed_     | chr1  | 2.4E+08  | 2.4E+08  | + | 0     | 0    |
| ENSG0000( RP4-633O1 lincRNA     | chr22 | 36388626 | 36396517 | + | 0     | 0    |
| ENSG0000( AF230666. antisense   | chr8  | 1.33E+08 | 1.33E+08 | - | 0     | 0.08 |
| ENSG0000( GOLGA6L1 unprocessε   | chrY  | 24168187 | 24174494 | + | 0     | 0    |
| ENSG0000( RAET1E-AS antisense   | chr6  | 1.5E+08  | 1.5E+08  | + | 0.34  | 1.16 |
| ENSG0000( ZDHHC20P processed_   | chr6  | 31380411 | 31380839 | + | 0     | 0    |
| ENSG0000( AC027612. unprocessε  | chr2  | 91736726 | 91767439 | + | 0     | 0    |
| ENSG0000( LINC01422 lincRNA     | chr22 | 26858634 | 26865786 | + | 0.04  | 0.06 |
| ENSG0000( NSUN5P1 transcribec   | chr7  | 75410322 | 75416787 | + | 10.81 | 12.3 |
| ENSG0000( SFR1P2 processed_     | chrX  | 85849410 | 85850139 | - | 0     | 0    |
| ENSG0000( TRIM64EP unprocessε   | chr11 | 90057605 | 90062999 | - | 0     | 0    |
| ENSG0000( CRYGGP unprocessε     | chr2  | 51775258 | 51775402 | - | 0     | 0    |
| ENSG0000( AC091633. antisense   | chr3  | 1.96E+08 | 1.96E+08 | + | 0.18  | 0.46 |
| ENSG0000( RP5-1172N lincRNA     | chrX  | 41275739 | 41276778 | + | 0     | 0    |

|                                      |          |          |   |      |       |
|--------------------------------------|----------|----------|---|------|-------|
| ENSG0000(LINC01208 lincRNA chr3      | 1.77E+08 | 1.77E+08 | - | 0    | 0.08  |
| ENSG0000(RP11-113C lincRNA chr9      | 38360427 | 38376430 | + | 0    | 0     |
| ENSG0000(DNAJA1P1 processed_ chr13   | 58751047 | 58752233 | - | 0    | 0     |
| ENSG0000(AC093107. processed_ chr7   | 1.36E+08 | 1.36E+08 | + | 0    | 0     |
| ENSG0000(AC024162. processed_ chr3   | 6692319  | 6693088  | + | 0    | 0     |
| ENSG0000(RP5-1024N lincRNA chr1      | 48172972 | 48206857 | + | 0    | 0     |
| ENSG0000(UQCRFS1P. processed_ chr7   | 1.39E+08 | 1.39E+08 | + | 0    | 0     |
| ENSG0000(RP11-467L. processed_ chr12 | 31754720 | 31755121 | + | 0.21 | 0     |
| ENSG0000(BX842568. processed_ chrX   | 36962196 | 36963425 | - | 0    | 0     |
| ENSG0000(RAD17P2 processed_ chr13    | 49044079 | 49046794 | - | 0    | 0     |
| ENSG0000(AC007879. antisense chr2    | 2.07E+08 | 2.08E+08 | - | 0.13 | 0.59  |
| ENSG0000(CTA-929C8 lincRNA chr22     | 27307483 | 27318538 | - | 0    | 0     |
| ENSG0000(AC026188. lincRNA chr3      | 3250687  | 3627296  | - | 0    | 0     |
| ENSG0000(RP11-314N processed_ chr1   | 1.48E+08 | 1.48E+08 | + | 0    | 0     |
| ENSG0000(RP11-145E lincRNA chr9      | 1.34E+08 | 1.34E+08 | - | 0    | 0     |
| ENSG0000(RP1-127B2 transcribed chr22 | 44901547 | 44902471 | + | 0    | 0     |
| ENSG0000(SUPT20HL1 processed_ chrX   | 24362761 | 24365378 | + | 0    | 0     |
| ENSG0000(RP11-321C lincRNA chr13     | 44982077 | 45083125 | - | 0    | 0     |
| ENSG0000(RPL18AP14 processed_ chrX   | 1.05E+08 | 1.05E+08 | + | 0    | 0     |
| ENSG0000(RP11-644K lincRNA chr2      | 20052134 | 20054496 | + | 0    | 0.14  |
| ENSG0000(OR51B3P unprocessed_ chr11  | 5314772  | 5315684  | - | 0    | 0     |
| ENSG0000(RP11-781E processed_ chr3   | 74101349 | 74103553 | + | 0    | 0     |
| ENSG0000(AC007389. processed_ chr2   | 65511771 | 65512076 | - | 0    | 0     |
| ENSG0000(RP11-760D processed_ chr7   | 56525428 | 56526113 | - | 0    | 0     |
| ENSG0000(PSMD4P1 processed_ chr21    | 36485983 | 36487411 | - | 0    | 0     |
| ENSG0000(RP11-149B lincRNA chrX      | 28571532 | 28586395 | - | 0    | 0     |
| ENSG0000(RBMY2GP unprocessed_ chrY   | 6328052  | 6343323  | + | 0    | 0     |
| ENSG0000(CCDC18-AS processed_ chr1   | 93262186 | 93346025 | - | 7.9  | 10.69 |
| ENSG0000(ELOCP30 processed_ chr10    | 43741437 | 43742350 | - | 0    | 0     |
| ENSG0000(MIR503HG lincRNA chrX       | 1.35E+08 | 1.35E+08 | - | 2.31 | 4.28  |
| ENSG0000(SIRPB3P unprocessed_ chr20  | 1665283  | 1708200  | - | 0    | 0     |
| ENSG0000(AC116609. lincRNA chr2      | 742488   | 747767   | + | 0    | 0     |
| ENSG0000(GHc-602D8 processed_ chrX   | 1.02E+08 | 1.02E+08 | + | 0    | 0     |
| ENSG0000(AC008073. antisense chr2    | 24199839 | 24201698 | - | 0    | 0     |
| ENSG0000(TSSC2 transcribed chr11     | 3380961  | 3408978  | + | 0.52 | 1.09  |
| ENSG0000(MED15P9 transcribed chr2    | 1.3E+08  | 1.3E+08  | + | 0.03 | 0.14  |
| ENSG0000(RP11-57C1 lincRNA chr10     | 87591607 | 87606024 | - | 0    | 0     |
| ENSG0000(RP11-54O7 lincRNA chr1      | 916865   | 921016   | - | 1.02 | 1.19  |
| ENSG0000(LINC01626 lincRNA chr6      | 71450834 | 71458874 | + | 0    | 0     |
| ENSG0000(LINC00205 lincRNA chr21     | 45293285 | 45297354 | + | 1.91 | 1.05  |
| ENSG0000(AC006145. antisense chr7    | 82009177 | 82029955 | + | 0    | 0.02  |
| ENSG0000(GEMIN8P3 processed_ chrX    | 86304367 | 86305086 | + | 0    | 0     |
| ENSG0000(CD99P1 transcribed chrX     | 2609348  | 2657229  | + | 3.12 | 2.95  |
| ENSG0000(CD99P1 transcribed chrY     | 2609348  | 2657229  | + | 3.12 | 2.95  |
| ENSG0000(RP11-307B antisense chr1    | 2.02E+08 | 2.02E+08 | + | 0.31 | 0     |

|                                       |          |          |   |       |      |
|---------------------------------------|----------|----------|---|-------|------|
| ENSG0000(LGALS8-AS antisense chr1     | 2.37E+08 | 2.37E+08 | - | 0.16  | 0.13 |
| ENSG0000(AC092162. processed_ chr2    | 1.77E+08 | 1.77E+08 | - | 0     | 0    |
| ENSG0000(RP11-4031I unprocessε chr1   | 1.44E+08 | 1.44E+08 | + | 0     | 0    |
| ENSG0000(RPS21P8 processed_ chr13     | 26977543 | 26977789 | + | 0     | 0    |
| ENSG0000(LINC01983 lincRNA chr3       | 1.96E+08 | 1.96E+08 | - | 0     | 0    |
| ENSG0000(LINP1 lincRNA chr10          | 6737382  | 6739026  | + | 0     | 0    |
| ENSG0000(RP11-554D lincRNA chr6       | 74069451 | 74690727 | + | 0.1   | 0    |
| ENSG0000(RP4-593M processed_ chr1     | 92580476 | 92580821 | - | 0     | 0    |
| ENSG0000(DIS3L2P1 unprocessε chr2     | 2.32E+08 | 2.32E+08 | + | 0     | 0    |
| ENSG0000(UBE2E1-AS antisense chr3     | 23804024 | 23806905 | - | 0     | 0    |
| ENSG0000(COX5BP8 processed_ chr1      | 1.79E+08 | 1.79E+08 | + | 0     | 0    |
| ENSG0000(RP11-473E lincRNA chr9       | 1.35E+08 | 1.35E+08 | + | 0     | 0    |
| ENSG0000(ENTPD3-AS antisense chr3     | 40313802 | 40453329 | - | 1.49  | 1.19 |
| ENSG0000(IL10RB-AS1 antisense chr21   | 33263873 | 33266260 | - | 0.05  | 0.08 |
| ENSG0000(RP11-598C lincRNA chr10      | 55468327 | 55469222 | + | 0     | 0    |
| ENSG0000(CERS1 protein_co chr19       | 18868545 | 18896727 | - | 2.58  | 3.75 |
| ENSG0000(RPS20P14 processed_ chr3     | 1.87E+08 | 1.87E+08 | + | 0     | 0    |
| ENSG0000(CH17-472C transcribec chr1   | 1.2E+08  | 1.2E+08  | - | 11.68 | 10.4 |
| ENSG0000(LINC00114 lincRNA chr21      | 38739021 | 38747460 | - | 0     | 0    |
| ENSG0000(BOLA3P4 processed_ chr9      | 32926051 | 32926450 | + | 0     | 0    |
| ENSG0000(RP11-428L lincRNA chr10      | 8970125  | 8973468  | + | 0     | 0    |
| ENSG0000(RP11-85L2 lincRNA chrX       | 1.35E+08 | 1.35E+08 | - | 0     | 0    |
| ENSG0000(KRT8P28 processed_ chr1      | 1.52E+08 | 1.52E+08 | - | 0     | 0    |
| ENSG0000(RP11-437J lincRNA chr6       | 1.13E+08 | 1.13E+08 | - | 0     | 0    |
| ENSG0000(RP11-197K lincRNA chr3       | 1.92E+08 | 1.92E+08 | + | 0.14  | 0.34 |
| ENSG0000(AC007255. antisense chr7     | 29514225 | 29563670 | - | 1.22  | 1.19 |
| ENSG0000(RP11-543D lincRNA chr1       | 47761132 | 47765547 | - | 0     | 0    |
| ENSG0000(DIAPH3-AS antisense chr13    | 60144698 | 60153505 | + | 0     | 0    |
| ENSG0000(IGKV1OR2- unprocessε chr2    | 92034522 | 92035000 | - | 0     | 0    |
| ENSG0000(CDH23-AS1 antisense chr10    | 71508153 | 71511873 | - | 0     | 0    |
| ENSG0000(RP3-347M processed_ chrX     | 1.01E+08 | 1.01E+08 | - | 0     | 0    |
| ENSG0000(CFL1P1 transcribec chr10     | 87817928 | 87845612 | + | 2.34  | 3.03 |
| ENSG0000(RP11-505P antisense chr6     | 73492025 | 73492742 | - | 0.24  | 0    |
| ENSG0000(EEF1A1P1 processed_ chr21    | 23390258 | 23390996 | + | 0     | 0    |
| ENSG0000(LINC01342 lincRNA chr1       | 1137017  | 1144056  | + | 0     | 0    |
| ENSG0000(AC019178. processed_ chr2    | 1.9E+08  | 1.9E+08  | - | 0     | 0    |
| ENSG0000(DAZAP2P1 processed_ chr2     | 2.02E+08 | 2.02E+08 | - | 0     | 0    |
| ENSG0000(LINC01870 lincRNA chr2       | 1.01E+08 | 1.01E+08 | + | 0     | 0    |
| ENSG0000(BANF1P4 processed_ chr1      | 1.75E+08 | 1.75E+08 | - | 0     | 0    |
| ENSG0000(AC004870. processed_ chr7    | 46969702 | 47027481 | + | 0     | 0    |
| ENSG0000(RP1-56J10. sense_intrε chr22 | 30598309 | 30606687 | + | 0     | 0    |
| ENSG0000(RP11-472N lincRNA chr10      | 31604600 | 31606218 | + | 0     | 0    |
| ENSG0000(RP11-548K unprocessε chr7    | 57820032 | 57820410 | - | 0     | 0    |
| ENSG0000(XXbac-BPG sense_intrε chr6   | 32970232 | 32970886 | + | 0     | 0    |
| ENSG0000(AC007091. lincRNA chr7       | 19353534 | 19578606 | + | 0     | 0    |

|                                     |          |          |   |      |      |
|-------------------------------------|----------|----------|---|------|------|
| ENSG0000(FAM95B1 lincRNA chr9       | 40321299 | 40329221 | + | 0.19 | 0.67 |
| ENSG0000(RP11-448K processed_chr10  | 57955295 | 57957178 | + | 0    | 0    |
| ENSG0000(RP11-135J lincRNA chr1     | 2.19E+08 | 2.19E+08 | - | 0    | 0    |
| ENSG0000(EFCAB6-AS antisense chr22  | 43516107 | 43537117 | + | 0    | 0    |
| ENSG0000(VN1R40P unitary_psi chr7   | 64443802 | 64444742 | - | 0    | 0    |
| ENSG0000(RP5-925F1 processed_chr1   | 1.88E+08 | 1.88E+08 | - | 0    | 0    |
| ENSG0000(RP11-80115 processed_chr9  | 95123521 | 95123868 | + | 0    | 0    |
| ENSG0000(MYCNU1 lincRNA chr2        | 15920399 | 15936017 | + | 0    | 0    |
| ENSG0000(HRAT92 lincRNA chr7        | 520391   | 525232   | + | 0.11 | 0.15 |
| ENSG0000(RAB9AP2 unprocessed_chrY   | 25709908 | 25713557 | - | 0    | 0    |
| ENSG0000(AC007403 lincRNA chr2      | 67040546 | 67041966 | + | 0    | 0    |
| ENSG0000(RP11-74C1 processed_chr1   | 1.52E+08 | 1.52E+08 | + | 0    | 0    |
| ENSG0000(LINC01805 lincRNA chr2     | 64486353 | 64500904 | + | 0    | 0    |
| ENSG0000(NPM1P19 processed_chr20    | 38977711 | 38978422 | - | 0    | 0    |
| ENSG0000(HLA-DPB1 protein_code chr6 | 33075926 | 33087201 | + | 6.22 | 7.46 |
| ENSG0000(AC002486 processed_chr7    | 20641558 | 20641948 | - | 0    | 0    |
| ENSG0000(AC098592 processed_chr7    | 16938225 | 16938557 | + | 0    | 0    |
| ENSG0000(RP11-323K processed_chr1   | 2.15E+08 | 2.15E+08 | + | 0    | 0    |
| ENSG0000(AP000233 lincRNA chr21     | 25127469 | 25135247 | + | 0    | 0    |
| ENSG0000(AC006372 lincRNA chr7      | 1.58E+08 | 1.58E+08 | + | 0    | 0    |
| ENSG0000(SAP18P2 processed_chr2     | 1.82E+08 | 1.82E+08 | + | 0    | 0    |
| ENSG0000(LINC01921 lincRNA chr2     | 2.17E+08 | 2.17E+08 | + | 0    | 0    |
| ENSG0000(NBEAP3 unprocessed_chr22   | 15852990 | 15893942 | + | 0.04 | 0    |
| ENSG0000(RPS27P1 processed_chr10    | 91544852 | 91545098 | + | 0    | 0    |
| ENSG0000(RPS8P10 unprocessed_chr15  | 22152276 | 22152897 | - | 0    | 0    |
| ENSG0000(AC005517 processed_chr17   | 15506866 | 15507354 | + | 0    | 0    |
| ENSG0000(LINC01078 lincRNA chr13    | 75250480 | 75252012 | + | 0    | 0    |
| ENSG0000(RP11-553K lincRNA chr1     | 1.99E+08 | 1.99E+08 | - | 0    | 0    |
| ENSG0000(ABCC5-AS1 antisense chr3   | 1.84E+08 | 1.84E+08 | + | 0    | 0    |
| ENSG0000(LINC01707 lincRNA chr1     | 69055898 | 69185003 | + | 0    | 0    |
| ENSG0000(AC019048 antisense chr2    | 7062727  | 7077880  | - | 0    | 0    |
| ENSG0000(FAM90A13 unprocessed_chr8  | 7279770  | 7282780  | + | 0    | 0    |
| ENSG0000(RP11-251G processed_chr7   | 1.06E+08 | 1.06E+08 | + | 0    | 0    |
| ENSG0000(RP11-73B2 processed_chr7   | 63393749 | 63394109 | - | 0    | 0    |
| ENSG0000(AC008171 processed_chr2    | 2.05E+08 | 2.05E+08 | - | 0    | 0    |
| ENSG0000(OSER1-AS1 lincRNA chr20    | 44210960 | 44226027 | + | 4.63 | 4.23 |
| ENSG0000(GNL2P1 processed_chr7      | 49942251 | 49944440 | - | 0    | 0    |
| ENSG0000(CCNJP2 processed_chr1      | 92755794 | 92756956 | + | 0    | 0    |
| ENSG0000(AC069157 processed_chr2    | 53486144 | 53486280 | - | 0    | 0    |
| ENSG0000(SEC13P1 processed_chr3     | 33033863 | 33034810 | + | 0    | 0    |
| ENSG0000(AP001469 antisense chr21   | 46220269 | 46225364 | + | 0    | 0    |
| ENSG0000(RPL23P4 processed_chr2     | 2.2E+08  | 2.2E+08  | + | 0    | 0    |
| ENSG0000(HMGB1P1 processed_chrX     | 1.11E+08 | 1.11E+08 | + | 0    | 0    |
| ENSG0000(RP11-335E processed_chr1   | 76353583 | 76354246 | - | 0    | 0    |
| ENSG0000(RP5-837M lincRNA chr1      | 1E+08    | 1E+08    | + | 0    | 0    |

|                                      |          |            |       |       |
|--------------------------------------|----------|------------|-------|-------|
| ENSG0000( AC068657. processed_ chr5  | 1.6E+08  | 1.6E+08 -  | 0     | 0     |
| ENSG0000( ZNF32-AS3 antisense chr10  | 43628817 | 43674703 + | 0     | 0     |
| ENSG0000( AC009480. antisense chr2   | 1.48E+08 | 1.48E+08 - | 0     | 0     |
| ENSG0000( EEF1A1P36 processed_ chr6  | 1.32E+08 | 1.32E+08 + | 0     | 0     |
| ENSG0000( AC079630. lincRNA chr12    | 40156239 | 40167707 + | 0     | 0     |
| ENSG0000( DPPA2P1 processed_ chrY    | 13230884 | 13231439 + | 0     | 0     |
| ENSG0000( RP11-353H processed_ chr3  | 43484972 | 43485880 - | 0     | 0     |
| ENSG0000( AC009237. unprocessε chr2  | 95486480 | 95488627 - | 0     | 0     |
| ENSG0000( RP13-461N processed_ chr9  | 1.11E+08 | 1.11E+08 - | 0     | 0     |
| ENSG0000( RP11-430G processed_ chr1  | 61654194 | 61654908 + | 0     | 0     |
| ENSG0000( MTND1P27 processed_ chr2   | 1.4E+08  | 1.4E+08 -  | 0     | 0     |
| ENSG0000( ASS1P2 processed_ chr2     | 38810432 | 38811654 - | 0.05  | 0.16  |
| ENSG0000( AC010136. antisense chr2   | 2.18E+08 | 2.18E+08 + | 0.25  | 0.96  |
| ENSG0000( NUP35P1 processed_ chr10   | 24157835 | 24158781 + | 0     | 0     |
| ENSG0000( MIR4432H lincRNA chr2      | 60359216 | 60391375 - | 0     | 0     |
| ENSG0000( RP11-33A1 lincRNA chr3     | 1.78E+08 | 1.78E+08 - | 0     | 0.18  |
| ENSG0000( RP11-1166 unprocessε chr16 | 32051825 | 32052280 + | 0     | 0     |
| ENSG0000( AC008074. antisense chr2   | 64395220 | 64453798 - | 0.18  | 0.1   |
| ENSG0000( KRT8P8 processed_ chrX     | 1.52E+08 | 1.52E+08 + | 0     | 0     |
| ENSG0000( LINC01014 sense_intrε chr3 | 1.78E+08 | 1.78E+08 + | 0     | 0     |
| ENSG0000( RP11-252P sense_intrε chr6 | 1.66E+08 | 1.66E+08 - | 0     | 0     |
| ENSG0000( RP5-1180C lincRNA chr1     | 37262739 | 37325100 - | 0     | 0     |
| ENSG0000( RP11-458I7 processed_ chr1 | 1.5E+08  | 1.5E+08 +  | 0     | 0     |
| ENSG0000( RP11-533C lincRNA chr6     | 42030053 | 42031382 + | 0     | 0     |
| ENSG0000( AC016738. antisense chr2   | 1.01E+08 | 1.01E+08 - | 0.02  | 0     |
| ENSG0000( RP11-421N processed_ chr7  | 67769629 | 67770468 - | 0     | 0     |
| ENSG0000( ROR1-AS1 antisense chr1    | 64094442 | 64171297 - | 2.25  | 1.68  |
| ENSG0000( AL133244. processed_ chr2  | 33056333 | 33063113 - | 0     | 0     |
| ENSG0000( C1QTNF5 protein_co chr11   | 1.19E+08 | 1.19E+08 - | 15.69 | 18.19 |
| ENSG0000( MTND6P1 processed_ chrY    | 8363536  | 8363959 -  | 0     | 0     |
| ENSG0000( LINC01767 lincRNA chr1     | 56414963 | 56415966 + | 0     | 0     |
| ENSG0000( RP11-552J5 processed_ chrX | 52707602 | 52709933 + | 0     | 0     |
| ENSG0000( AFG3L1P transcribec chr16  | 89972586 | 90002161 + | 5.5   | 7.09  |
| ENSG0000( AC009948. antisense chr2   | 1.78E+08 | 1.78E+08 + | 3.98  | 4.44  |
| ENSG0000( UBBP3 processed_ chr2      | 1.49E+08 | 1.49E+08 - | 0     | 0     |
| ENSG0000( THAP12P8 processed_ chr1   | 2.41E+08 | 2.41E+08 - | 0.03  | 0.03  |
| ENSG0000( ZNF587P1 processed_ chr3   | 31794470 | 31796175 + | 0     | 0     |
| ENSG0000( RP11-141J. antisense chr9  | 70726040 | 70730856 + | 0     | 0     |
| ENSG0000( RP11-505P processed_ chr6  | 73526744 | 73526879 - | 0     | 0     |
| ENSG0000( AC098614. processed_ chr3  | 27624202 | 27624456 - | 0     | 0     |
| ENSG0000( AC002456. antisense chr7   | 90590619 | 90597353 - | 0.58  | 0     |
| ENSG0000( RP11-598C processed_ chr7  | 53002420 | 53003429 + | 0     | 0     |
| ENSG0000( DDX11L1 transcribec chr1   | 11869    | 14409 +    | 0     | 0     |
| ENSG0000( AC068491. transcribec chr2 | 1.11E+08 | 1.11E+08 + | 0     | 0     |
| ENSG0000( BNIP3P42 processed_ chr7   | 64551498 | 64552066 + | 0     | 0     |

|                                      |          |          |   |       |      |
|--------------------------------------|----------|----------|---|-------|------|
| ENSG0000( AP001048. lincRNA chr21    | 43465309 | 43467298 | + | 0     | 0    |
| ENSG0000( EXTL2P1 processed_chr2     | 1.76E+08 | 1.76E+08 | + | 0     | 0    |
| ENSG0000( AC138623. processed_chr2   | 83218890 | 83219105 | - | 0     | 0    |
| ENSG0000( ZNF736P1\ processed_chrY   | 24985201 | 24986476 | - | 0     | 0    |
| ENSG0000( SMC2R2 lincRNA chr17       | 17674026 | 17677688 | - | 0     | 0    |
| ENSG0000( SNRPD2P2 processed_chr1    | 2.31E+08 | 2.31E+08 | - | 0     | 0    |
| ENSG0000( HNRNPRP1 processed_chr10   | 21624592 | 21626286 | - | 0     | 0    |
| ENSG0000( LINC01874 lincRNA chr2     | 490944   | 492655   | - | 0     | 0    |
| ENSG0000( RP11-528A processed_chr3   | 1.94E+08 | 1.94E+08 | + | 0     | 0    |
| ENSG0000( RPL26P28 processed_chr10   | 5304431  | 5304865  | - | 0     | 0    |
| ENSG0000( RP11-84A1 antisense chr1   | 9848318  | 9850154  | + | 0     | 0    |
| ENSG0000( AC104809. antisense chr2   | 2.41E+08 | 2.41E+08 | - | 0     | 0    |
| ENSG0000( RP11-475D lincRNA chr10    | 85431943 | 85432515 | - | 0     | 0    |
| ENSG0000( RPL32P35 processed_chrX    | 1.29E+08 | 1.29E+08 | - | 0     | 0    |
| ENSG0000( TRDD1 TR_D_gene chr14      | 22438547 | 22438554 | + | 0     | 0    |
| ENSG0000( LL22NC03- lincRNA chr22    | 22692778 | 22693312 | - | 0     | 0    |
| ENSG0000( RP3-471M: lincRNA chr1     | 1.73E+08 | 1.73E+08 | + | 0     | 0    |
| ENSG0000( RP11-270F processed_chr9   | 98234709 | 98235567 | + | 0     | 0    |
| ENSG0000( YES1P1 processed_chr22     | 25647261 | 25649232 | + | 0     | 0    |
| ENSG0000( ATP5C1P1 processed_chr14   | 53991101 | 53991995 | - | 0     | 0    |
| ENSG0000( AC019070. processed_chr2   | 1.48E+08 | 1.48E+08 | - | 0     | 0    |
| ENSG0000( LINC01441 lincRNA chr20    | 55420336 | 55427197 | - | 0.14  | 0.39 |
| ENSG0000( AC111155. processed_chr17  | 60727165 | 60727482 | - | 0     | 0    |
| ENSG0000( RP11-756G processed_chr5   | 1.64E+08 | 1.64E+08 | - | 0     | 0    |
| ENSG0000( RP11-488L. processed_chr1  | 2.47E+08 | 2.47E+08 | + | 0     | 0    |
| ENSG0000( AC063976. lincRNA chr5     | 1.32E+08 | 1.32E+08 | - | 0     | 0    |
| ENSG0000( RP11-728K unprocessε chr7  | 1.5E+08  | 1.5E+08  | - | 0     | 0    |
| ENSG0000( LINC01449 lincRNA chr7     | 41101604 | 41133507 | + | 0     | 0.11 |
| ENSG0000( AP000470. lincRNA chr21    | 24155170 | 24188342 | - | 0     | 0    |
| ENSG0000( RPL21P32 processed_chr2    | 1.86E+08 | 1.86E+08 | - | 0.16  | 0    |
| ENSG0000( MIR181A2\ antisense chr9   | 1.25E+08 | 1.25E+08 | + | 0.1   | 0    |
| ENSG0000( FLJ37035 lincRNA chr10     | 1.26E+08 | 1.26E+08 | - | 1.1   | 1.58 |
| ENSG0000( RP11-274B processed_chr9   | 68609125 | 68611984 | + | 0     | 0    |
| ENSG0000( RP1-231P7 lincRNA chr22    | 27563839 | 27573573 | - | 0     | 0    |
| ENSG0000( LINC01853 lincRNA chr2     | 1.4E+08  | 1.4E+08  | - | 0     | 0    |
| ENSG0000( RP11-136K sense_intrε chr6 | 1.51E+08 | 1.51E+08 | + | 0     | 0    |
| ENSG0000( TCEAL3-AS antisense chrX   | 1.04E+08 | 1.04E+08 | - | 0     | 0    |
| ENSG0000( EPB41L4A- lincRNA chr5     | 1.12E+08 | 1.12E+08 | + | 28.96 | 36.1 |
| ENSG0000( CDY8P unprocessε chrY      | 18022299 | 18023908 | + | 0     | 0    |
| ENSG0000( RP11-445P lincRNA chr10    | 5266033  | 5271236  | - | 0.19  | 0    |
| ENSG0000( SFPQP1 processed_chrY      | 13083790 | 13095805 | + | 0     | 0    |
| ENSG0000( RP11-347J: lincRNA chr9    | 39384506 | 39405305 | - | 0     | 0    |
| ENSG0000( CDYLP1 unprocessε chr3     | 16692745 | 16694202 | - | 0     | 0    |
| ENSG0000( HMG1P4 processed_chr1      | 1.83E+08 | 1.83E+08 | - | 0     | 0    |
| ENSG0000( IGKV3D-15 IG_V_gene chr2   | 90114838 | 90115402 | + | 0     | 0    |

|                                     |          |            |      |      |
|-------------------------------------|----------|------------|------|------|
| ENSG0000(MTND4P6 processed_ chr7    | 1.17E+08 | 1.17E+08 + | 0    | 0    |
| ENSG0000(CCNT2-AS1 antisense chr2   | 1.35E+08 | 1.35E+08 - | 0.87 | 0.78 |
| ENSG0000(RP11-98L5.transcribec chr9 | 1.36E+08 | 1.36E+08 + | 0    | 0    |
| ENSG0000(AC005076.antisense chr7    | 87151423 | 87152420 - | 1.53 | 0.31 |
| ENSG0000(AC104777.lincRNA chr2      | 1.51E+08 | 1.51E+08 + | 0    | 0    |
| ENSG0000(RP11-3001.lincRNA chr3     | 1.88E+08 | 1.88E+08 + | 0    | 0    |
| ENSG0000(RP1-90G24.lincRNA chr22    | 32273420 | 32277186 + | 0    | 0    |
| ENSG0000(CPTP protein_co chr1       | 1324756  | 1328897 +  | 9.19 | 9.45 |
| ENSG0000(RP4-551E1 processed_ chrX  | 44466691 | 44468955 + | 0    | 0    |
| ENSG0000(GAPDHP55 processed_ chr15  | 44063511 | 44064313 + | 0    | 0    |
| ENSG0000(EGFR-AS1 antisense chr7    | 55179750 | 55188934 - | 0    | 0    |
| ENSG0000(AC006509.processed_ chr2   | 47731402 | 47732035 - | 0    | 0    |
| ENSG0000(HSPA8P16 processed_ chr7   | 85027828 | 85029692 + | 0    | 0    |
| ENSG0000(ARSEP1 transcribec chrY    | 12339813 | 12347495 + | 0    | 0    |
| ENSG0000(AC092106.processed_ chr2   | 1.06E+08 | 1.06E+08 - | 0    | 0    |
| ENSG0000(TUBB4BP5 processed_ chr4   | 1.21E+08 | 1.21E+08 + | 0    | 0    |
| ENSG0000(AC007319.antisense chr2    | 1.87E+08 | 1.88E+08 + | 0.48 | 0    |
| ENSG0000(RP11-344H processed_ chr1  | 26983628 | 26984024 + | 0    | 0    |
| ENSG0000(SRIP2 processed_ chrX      | 89367435 | 89367600 - | 0    | 0    |
| ENSG0000(RP4-622L5.antisense chr1   | 32204769 | 32206814 - | 0.75 | 0.76 |
| ENSG0000(RP11-430K processed_ chr9  | 1.12E+08 | 1.12E+08 + | 0    | 0    |
| ENSG0000(CTD-2183H processed_ chrX  | 1.55E+08 | 1.55E+08 - | 0    | 0    |
| ENSG0000(HMGN1P6 processed_ chr2    | 2.06E+08 | 2.06E+08 - | 0    | 0    |
| ENSG0000(AC009474.processed_ chr2   | 66820684 | 66822570 - | 0    | 0    |
| ENSG0000(RP11-75A9 processed_ chrX  | 46454097 | 46457199 - | 0    | 0.03 |
| ENSG0000(LINC00691.lincRNA chr3     | 24096269 | 24103238 - | 0    | 0    |
| ENSG0000(TTTY22.lincRNA chrY        | 9801153  | 9813245 +  | 0    | 0    |
| ENSG0000(AC009487.antisense chr2    | 1.61E+08 | 1.61E+08 - | 0    | 0    |
| ENSG0000(AP000936.antisense chr11   | 1.17E+08 | 1.17E+08 + | 0    | 0    |
| ENSG0000(SNHG14 processed_ chr15    | 24978583 | 25419462 + | 8.44 | 7.77 |
| ENSG0000(AC091729.antisense chr7    | 1074450  | 1078036 +  | 0    | 0    |
| ENSG0000(UBE2FP1 processed_ chr3    | 37143512 | 37143958 - | 0.35 | 0    |
| ENSG0000(SLC44A3-A transcribec chr1 | 94613814 | 94855426 - | 0.52 | 1.07 |
| ENSG0000(UBTFL8 unprocessε chr3     | 5080212  | 5084429 -  | 0    | 0    |
| ENSG0000(MTCO1P11 unprocessε chr9   | 5096666  | 5098193 +  | 0    | 0    |
| ENSG0000(RPL23AP41 processed_ chr3  | 1.41E+08 | 1.41E+08 + | 0    | 0    |
| ENSG0000(LL22NC03-.antisense chr22  | 21938293 | 21977632 + | 0.07 | 0.08 |
| ENSG0000(AC018804.antisense chr2    | 1.3E+08  | 1.3E+08 +  | 0    | 0    |
| ENSG0000(CT47A10 protein_co chrX    | 1.21E+08 | 1.21E+08 - | 0    | 0    |
| ENSG0000(AC097468.antisense chr2    | 2.19E+08 | 2.19E+08 + | 0    | 0    |
| ENSG0000(AC104389.antisense chr11   | 5205041  | 5207308 +  | 0    | 0    |
| ENSG0000(RP11-443B processed_ chr9  | 1977784  | 1978547 -  | 0    | 0    |
| ENSG0000(RP5-1033H antisense chr1   | 93592199 | 93605573 + | 0    | 0    |
| ENSG0000(RPS24P8 processed_ chr3    | 45159774 | 45160175 - | 0    | 0    |
| ENSG0000(LINC01935.lincRNA chr2     | 1.03E+08 | 1.03E+08 - | 0    | 0    |



|                                       |          |          |   |      |      |
|---------------------------------------|----------|----------|---|------|------|
| ENSG0000(RP11-472B transcribed chr4   | 39480255 | 39481905 | + | 0.08 | 0.14 |
| ENSG0000(AC064834. lincRNA chr2       | 1.95E+08 | 1.95E+08 | + | 0    | 0.14 |
| ENSG0000(AP001630. antisense chr21    | 42964639 | 42965363 | - | 0    | 0    |
| ENSG0000(ELMO1-AS. antisense chr7     | 36997796 | 37013630 | + | 0    | 0    |
| ENSG0000(AC079809. processed_ chr7    | 1.53E+08 | 1.53E+08 | - | 0    | 0    |
| ENSG0000(CYP4F25P unprocessed_ chr9   | 64465463 | 64466498 | + | 0    | 0    |
| ENSG0000(LINC00633 protein_co chrX    | 1.35E+08 | 1.35E+08 | - | 0    | 0    |
| ENSG0000(CENPVL3 protein_co chrX      | 51618055 | 51618918 | - | 0    | 0    |
| ENSG0000(MTRF1LP2 processed_ chr8     | 1.3E+08  | 1.3E+08  | + | 0    | 0    |
| ENSG0000(RP11-343H processed_ chr1    | 2.07E+08 | 2.07E+08 | - | 0    | 0    |
| ENSG0000(INHBA-AS1 antisense chr7     | 41693916 | 41779388 | + | 0.34 | 0.08 |
| ENSG0000(PTPN2P2 processed_ chr13     | 30553670 | 30554693 | + | 0    | 0    |
| ENSG0000(ATG12P2 processed_ chr2      | 2.23E+08 | 2.23E+08 | - | 0    | 0    |
| ENSG0000(POU6F2-AS antisense chr7     | 39404598 | 39406346 | - | 0    | 0    |
| ENSG0000(POM121L1 processed_ chr22    | 24657481 | 24658765 | - | 0    | 0    |
| ENSG0000(UBE2SP2 processed_ chr17     | 18677261 | 18677757 | + | 0    | 0    |
| ENSG0000(RP11-510C antisense chr1     | 75127830 | 75133058 | - | 0    | 0    |
| ENSG0000(LINC01248 antisense chr2     | 5602505  | 5691488  | - | 0    | 0    |
| ENSG0000(DPPA2P2 processed_ chr1      | 26519354 | 26520250 | - | 0    | 0    |
| ENSG0000(AC112715. lincRNA chr2       | 2.37E+08 | 2.37E+08 | + | 0.8  | 1.17 |
| ENSG0000(AC004866. unprocessed_ chr7  | 81431731 | 81432796 | + | 0    | 0    |
| ENSG0000(AC007568. processed_ chr7    | 1.18E+08 | 1.18E+08 | + | 0    | 0    |
| ENSG0000(LINC01857 lincRNA chr2       | 2.08E+08 | 2.08E+08 | + | 0    | 0    |
| ENSG0000(AC000123. antisense chr7     | 1.27E+08 | 1.27E+08 | + | 0    | 0    |
| ENSG0000(MIR548XH. lincRNA chr21      | 18561265 | 18760003 | - | 0.23 | 0.11 |
| ENSG0000(AMMECR1 sense_intr chrX      | 1.1E+08  | 1.1E+08  | - | 0    | 0    |
| ENSG0000(ASH2LP1 processed_ chr22     | 22420326 | 22421310 | + | 0    | 0    |
| ENSG0000(RP11-510C antisense chr1     | 75129974 | 75132576 | - | 0    | 0    |
| ENSG0000(USP9YP28 unprocessed_ chrY   | 18833002 | 18839313 | - | 0    | 0    |
| ENSG0000(AC009506. antisense chr2     | 1.6E+08  | 1.6E+08  | + | 1.27 | 2.32 |
| ENSG0000(LINC02054 lincRNA chr3       | 1.84E+08 | 1.84E+08 | + | 0    | 0.14 |
| ENSG0000(RP11-700P processed_ chr7    | 56304678 | 56305526 | - | 0    | 0    |
| ENSG0000(HCG14 antisense chr6         | 28896530 | 28897322 | + | 0    | 0    |
| ENSG0000(HMGB1P9 processed_ chr2      | 2.18E+08 | 2.18E+08 | + | 0    | 0    |
| ENSG0000(CICP10 processed_ chr2       | 2.42E+08 | 2.42E+08 | - | 0    | 0    |
| ENSG0000(RPS26P54 processed_ chr18    | 59761558 | 59761905 | + | 0    | 0    |
| ENSG0000(UQCRHP3 processed_ chr10     | 43732334 | 43732584 | + | 0    | 0    |
| ENSG0000(RP11-309L. unprocessed_ chr7 | 1.29E+08 | 1.29E+08 | - | 0    | 0    |
| ENSG0000(RP3-369A1 lincRNA chr6       | 24742302 | 24751921 | + | 0    | 0    |
| ENSG0000(DNAJC27-A antisense chr2     | 24971390 | 25039694 | + | 0.36 | 0.74 |
| ENSG0000(PRYP1 unprocessed_ chrY      | 17729528 | 17744596 | - | 0    | 0    |
| ENSG0000(RP3-522D1 lincRNA chr1       | 1.13E+08 | 1.13E+08 | + | 0.31 | 0.17 |
| ENSG0000(HSFY6P unprocessed_ chrY     | 23657839 | 23659058 | - | 0    | 0    |
| ENSG0000(RP11-416N processed_ chr7    | 64735933 | 64736743 | - | 0    | 0    |
| ENSG0000(AC007422. lincRNA chr2       | 67562067 | 67574044 | + | 0    | 0    |

|                                |       |          |          |   |      |      |
|--------------------------------|-------|----------|----------|---|------|------|
| ENSG0000(RP4-798A1 lincRNA     | chr1  | 16520694 | 16521796 | + | 0    | 0    |
| ENSG0000(LINC00570 lincRNA     | chr2  | 11393981 | 11403077 | + | 0.04 | 0    |
| ENSG0000(SDHDP6 processed_     | chr1  | 25294164 | 25294643 | - | 2.2  | 1.96 |
| ENSG0000(MIR3681H lincRNA      | chr2  | 11848622 | 12578348 | + | 0    | 0.14 |
| ENSG0000(SNX18P9 processed_    | chr9  | 64439346 | 64440180 | + | 0.08 | 0.17 |
| ENSG0000(C5orf66 antisense     | chr5  | 1.35E+08 | 1.35E+08 | + | 0    | 0    |
| ENSG0000(LINC01991 lincRNA     | chr3  | 1.88E+08 | 1.88E+08 | - | 0    | 0    |
| ENSG0000(UBE2D3P4 processed_   | chr13 | 84020327 | 84020762 | + | 0    | 0    |
| ENSG0000(HAGLR antisense       | chr2  | 1.76E+08 | 1.76E+08 | - | 0    | 0    |
| ENSG0000(RP11-442C lincRNA     | chr10 | 1.29E+08 | 1.29E+08 | + | 0    | 0    |
| ENSG0000(RP11-259P antisense   | chr22 | 26241331 | 26254092 | - | 0    | 0    |
| ENSG0000(AC008278. antisense   | chr2  | 15668684 | 15680484 | - | 0    | 0    |
| ENSG0000(RP11-574K antisense   | chr10 | 73813518 | 73814737 | + | 0.36 | 0    |
| ENSG0000(RPS23P10 unprocess    | chr1  | 1.62E+08 | 1.62E+08 | - | 0    | 0    |
| ENSG0000(PHEX-AS1 antisense    | chrX  | 22162733 | 22172983 | - | 0    | 0    |
| ENSG0000(AP000351. unprocess   | chr22 | 23987320 | 23991421 | - | 0    | 0    |
| ENSG0000(RP11-10L1. processed_ | chr4  | 1.03E+08 | 1.03E+08 | + | 0    | 0    |
| ENSG0000(AL590762. processed_  | chrX  | 71314912 | 71315879 | - | 0    | 0.12 |
| ENSG0000(LINC00466 processed_  | chr1  | 63159087 | 63317274 | - | 0    | 0    |
| ENSG0000(TRIM60P5) processed_  | chrY  | 24494709 | 24495583 | - | 0    | 0    |
| ENSG0000(RP11-371A antisense   | chr10 | 23343957 | 23345181 | + | 0.14 | 0    |
| ENSG0000(RP13-228J. antisense  | chrX  | 1.55E+08 | 1.55E+08 | - | 0    | 0.05 |
| ENSG0000(RP11-232D processed_  | chrX  | 1.17E+08 | 1.17E+08 | - | 0    | 0    |
| ENSG0000(RP11-359D antisense   | chr4  | 76758554 | 76801964 | - | 0    | 0    |
| ENSG0000(AC074290. processed_  | chr2  | 1.94E+08 | 1.94E+08 | - | 0    | 0    |
| ENSG0000(AC104699. antisense   | chr2  | 25421117 | 25427643 | + | 0    | 0    |
| ENSG0000(RPS6P8 processed_     | chr6  | 73391038 | 73391767 | - | 0    | 0    |
| ENSG0000(RP11-262I2 lincRNA    | chr10 | 69994626 | 70007836 | - | 0    | 0    |
| ENSG0000(VSTM2A-O sense_ove    | chr7  | 54556970 | 54571726 | + | 0    | 0    |
| ENSG0000(HAUS1P2 processed_    | chrX  | 18865771 | 18866554 | + | 0    | 0    |
| ENSG0000(OR2L1P unprocess      | chr1  | 2.48E+08 | 2.48E+08 | + | 0.13 | 0.22 |
| ENSG0000(RP1-15D23 lincRNA     | chr1  | 1.73E+08 | 1.73E+08 | + | 0    | 0    |
| ENSG0000(LINC01832 lincRNA     | chr2  | 1.38E+08 | 1.38E+08 | + | 0    | 0    |
| ENSG0000(AC110299. processed_  | chr2  | 2.41E+08 | 2.41E+08 | + | 0.1  | 0    |
| ENSG0000(OR2J4P unprocess      | chr6  | 29181510 | 29182445 | + | 0    | 0    |
| ENSG0000(LINC01773 lincRNA     | chr1  | 87899909 | 87905714 | - | 0    | 0    |
| ENSG0000(MRRFP1 processed_     | chrX  | 1.23E+08 | 1.23E+08 | - | 0    | 0    |
| ENSG0000(MINOS1P3 processed_   | chr3  | 27214816 | 27215018 | - | 0    | 0    |
| ENSG0000(WARS2-IT1 antisense   | chr1  | 1.19E+08 | 1.19E+08 | + | 0.57 | 0.59 |
| ENSG0000(AC090044. lincRNA     | chr3  | 857124   | 858091   | + | 0    | 0    |
| ENSG0000(CYCSP49 processed_    | chrY  | 26549425 | 26549743 | + | 0    | 0    |
| ENSG0000(LINC00403 lincRNA     | chr13 | 1.12E+08 | 1.12E+08 | + | 0.13 | 0    |
| ENSG0000(AC090283. unprocess   | chr17 | 40687038 | 40689360 | - | 0    | 0    |
| ENSG0000(RP11-533K unprocess   | chr9  | 94496275 | 94512879 | + | 0    | 0    |
| ENSG0000(AJ009632.3 lincRNA    | chr21 | 15493932 | 15496124 | - | 0    | 0    |

|                                     |          |            |       |       |
|-------------------------------------|----------|------------|-------|-------|
| ENSG0000(RP11-78A1 antisense chr10  | 1.22E+08 | 1.22E+08 + | 0     | 0     |
| ENSG0000(RP11-499C antisense chr10  | 4995488  | 4997380 +  | 0.77  | 1.16  |
| ENSG0000(AC113618. processed_ chr2  | 2.39E+08 | 2.39E+08 - | 0     | 0     |
| ENSG0000(MTCO1P39 unprocessε chr17  | 19605454 | 19605933 + | 0     | 0     |
| ENSG0000(PDCL3P6 processed_ chr1    | 52179848 | 52180553 + | 0     | 0     |
| ENSG0000(CTA-292E1 processed_ chr22 | 28835893 | 28836137 - | 0     | 0     |
| ENSG0000(VWC2L-IT1 sense_intrε chr2 | 2.15E+08 | 2.15E+08 + | 0     | 0     |
| ENSG0000(LINC01133 lincRNA chr1     | 1.6E+08  | 1.6E+08 +  | 24.53 | 21.67 |
| ENSG0000(RP1-272L1 lincRNA chr1     | 2.1E+08  | 2.1E+08 -  | 0     | 0     |
| ENSG0000(RPSAP18 processed_ chr1    | 1.6E+08  | 1.6E+08 -  | 0.15  | 0     |
| ENSG0000(CYCSP12 processed_ chr3    | 11878830 | 11879129 - | 0.36  | 0     |
| ENSG0000(RP11-168L lincRNA chr10    | 43323665 | 43327932 + | 0     | 0     |
| ENSG0000(RP11-149F lincRNA chr9     | 63728877 | 63744910 + | 0     | 0     |
| ENSG0000(AP000697. antisense chr21  | 36698773 | 36701564 - | 0     | 0     |
| ENSG0000(RP11-191L lincRNA chr22    | 47631674 | 47855600 + | 0     | 0     |
| ENSG0000(AC114730. antisense chr2   | 2.42E+08 | 2.42E+08 - | 0     | 0     |
| ENSG0000(AC005077. transcribed chr7 | 76108434 | 76132187 - | 0     | 0     |
| ENSG0000(ENSAP1 processed_ chr20    | 15619494 | 15619819 - | 0     | 0     |
| ENSG0000(RP11-336K antisense chr1   | 1.56E+08 | 1.56E+08 + | 0     | 0     |
| ENSG0000(AP000345. antisense chr22  | 23567064 | 23573507 + | 0     | 0     |
| ENSG0000(RP11-405P processed_ chr1  | 1.88E+08 | 1.88E+08 - | 0     | 0     |
| ENSG0000(RPS29P31 processed_ chr22  | 38574931 | 38575431 - | 0     | 0     |
| ENSG0000(AC005014. processed_ chr7  | 16583782 | 16586757 - | 0     | 0     |
| ENSG0000(SLC25A5-A processed_ chrX  | 1.19E+08 | 1.19E+08 - | 0.04  | 0.38  |
| ENSG0000(CTD-2290C processed_ chr5  | 31822561 | 31823136 - | 0     | 0     |
| ENSG0000(LINC01142 lincRNA chr1     | 1.7E+08  | 1.7E+08 -  | 0     | 0     |
| ENSG0000(MSL3P1 transcribed chr2    | 2.34E+08 | 2.34E+08 - | 1.77  | 0.37  |
| ENSG0000(MTCYBP11 processed_ chr2   | 1.43E+08 | 1.43E+08 - | 0     | 0     |
| ENSG0000(IFIT6P unprocessε chr10    | 89362294 | 89363487 + | 0     | 0     |
| ENSG0000(AC012671. processed_ chr2  | 88428078 | 88428615 + | 0     | 0     |
| ENSG0000(AF196972. antisense chrX   | 48506523 | 48508838 - | 0     | 0     |
| ENSG0000(RP3-326I1 lincRNA chrX     | 43176994 | 43226598 + | 0.27  | 0.11  |
| ENSG0000(OLFM5P unprocessε chr11    | 5518441  | 5524955 -  | 0.04  | 0.17  |
| ENSG0000(MRPL49P1 processed_ chr5   | 64674853 | 64675387 + | 0     | 0     |
| ENSG0000(RP11-197P processed_ chr9  | 74935176 | 74935696 + | 0     | 0     |
| ENSG0000(MTATP6P1 unprocessε chr2   | 2.02E+08 | 2.02E+08 + | 0     | 0     |
| ENSG0000(OR51P1P unprocessε chr11   | 5015138  | 5016079 +  | 0     | 0     |
| ENSG0000(RP11-144G antisense chr10  | 63123938 | 63125537 - | 0     | 0     |
| ENSG0000(RP11-302K processed_ chr10 | 1.02E+08 | 1.02E+08 - | 0     | 0     |
| ENSG0000(RP11-344B lincRNA chr9     | 1.29E+08 | 1.29E+08 + | 0     | 0     |
| ENSG0000(LINC01527 antisense chr1   | 1.53E+08 | 1.53E+08 - | 0     | 0     |
| ENSG0000(ANKRD30B transcribed chr21 | 13038160 | 13067033 + | 0     | 0     |
| ENSG0000(LINC01567 lincRNA chr16    | 24661422 | 24671062 - | 0.02  | 0     |
| ENSG0000(RP11-40H2 antisense chr1   | 27229106 | 27234352 - | 0     | 0     |
| ENSG0000(MCCD1P2 unprocessε chr6    | 29994437 | 29995314 - | 0     | 0     |

|                     |                   |          |          |   |      |       |
|---------------------|-------------------|----------|----------|---|------|-------|
| ENSG0000(RP3-378P9) | processed_chrX    | 1.17E+08 | 1.17E+08 | + | 0    | 0     |
| ENSG0000(RPL7P7)    | processed_chr1    | 8786211  | 8786913  | - | 0.09 | 0     |
| ENSG0000(GTF2IP5)   | unprocessε chr7   | 65773620 | 65802067 | + | 0    | 0     |
| ENSG0000(CHL1-AS2)  | processed_chr3    | 195758   | 197341   | - | 0    | 0     |
| ENSG0000(RPL12P14)  | processed_chr1    | 15792796 | 15793285 | + | 0    | 0     |
| ENSG0000(AC004009)  | lincRNA chr7      | 27361843 | 27409938 | + | 0    | 0     |
| ENSG0000(DPRXP1)    | processed_chr2    | 1.86E+08 | 1.86E+08 | - | 0    | 0     |
| ENSG0000(THAP5P1)   | processed_chr7    | 1.59E+08 | 1.59E+08 | - | 0    | 0     |
| ENSG0000(RP5-933B4) | lincRNA chr1      | 80534978 | 80584363 | - | 0    | 0     |
| ENSG0000(MDC1-AS1)  | antisense chr6    | 30703067 | 30713184 | + | 0    | 0     |
| ENSG0000(LINC00297) | lincRNA chr13     | 29872613 | 29888405 | - | 0    | 0     |
| ENSG0000(AC005019)  | lincRNA chr7      | 13854355 | 13859025 | - | 0    | 0.28  |
| ENSG0000(AC019181)  | processed_chr2    | 1.65E+08 | 1.65E+08 | - | 0    | 1.1   |
| ENSG0000(GAPDHP20)  | processed_chr1    | 32402109 | 32403115 | - | 0    | 0     |
| ENSG0000(AP000357)  | processed_chr22   | 24686923 | 24688087 | + | 0    | 0     |
| ENSG0000(RP11-301M) | unprocessε chr1   | 1.48E+08 | 1.48E+08 | + | 0    | 0     |
| ENSG0000(FAM197Y1)  | unprocessε chrY   | 9544917  | 9547147  | - | 0    | 0     |
| ENSG0000(FAM8A3P)   | processed_chr2    | 1.49E+08 | 1.49E+08 | + | 0    | 0     |
| ENSG0000(MTCYBP45)  | processed_chr1    | 11425257 | 11425821 | - | 0    | 0     |
| ENSG0000(AL121578)  | processed_chrX    | 37945884 | 37946775 | + | 0    | 0     |
| ENSG0000(RP11-496H) | processed_chr1    | 10054445 | 10054781 | - | 0    | 0     |
| ENSG0000(RP4-562J1) | processed_chrX    | 1.19E+08 | 1.19E+08 | - | 0    | 0     |
| ENSG0000(AC007879)  | lincRNA chr2      | 2.07E+08 | 2.07E+08 | + | 0    | 0     |
| ENSG0000(KNOP1P3)   | processed_chr2    | 51511058 | 51511483 | + | 0    | 0     |
| ENSG0000(BICD1P1)   | processed_chr2    | 2.01E+08 | 2.01E+08 | + | 0    | 0     |
| ENSG0000(SCEL-AS1)  | antisense chr13   | 77599755 | 77606551 | - | 0    | 0     |
| ENSG0000(RP11-306K) | processed_chr1    | 2.41E+08 | 2.41E+08 | - | 0    | 0     |
| ENSG0000(RP11-462G) | antisense chr6    | 70412828 | 70413950 | - | 0    | 0     |
| ENSG0000(CDKN2AIP)  | processed_chr13   | 39817741 | 39818049 | - | 0    | 0     |
| ENSG0000(AC132479)  | unprocessε chr2   | 1.3E+08  | 1.3E+08  | - | 0    | 0     |
| ENSG0000(ACE3P)     | transcribec chr17 | 63507056 | 63519806 | + | 0    | 0     |
| ENSG0000(MTND2P5)   | processed_chr7    | 1.42E+08 | 1.42E+08 | - | 0    | 0     |
| ENSG0000(RP11-151A) | sense_intrε chr13 | 1.01E+08 | 1.01E+08 | - | 0    | 0.03  |
| ENSG0000(ATG3P1)    | processed_chr20   | 39329014 | 39329924 | - | 0    | 0     |
| ENSG0000(RP11-466F) | antisense chr1    | 1.66E+08 | 1.66E+08 | + | 0.08 | 0.11  |
| ENSG0000(RP11-467I) | antisense chr1    | 2.41E+08 | 2.41E+08 | + | 0    | 0     |
| ENSG0000(AC011239)  | antisense chr2    | 23507043 | 23524344 | - | 0    | 0     |
| ENSG0000(RP11-289H) | lincRNA chr1      | 1.45E+08 | 1.45E+08 | + | 0    | 0     |
| ENSG0000(RP11-252P) | processed_chr7    | 66004017 | 66004137 | + | 2.1  | 27.61 |
| ENSG0000(AC138472)  | unprocessε chr19  | 44570304 | 44570564 | - | 0    | 0     |
| ENSG0000(OACYLP)    | transcribec chr18 | 58996734 | 59069338 | + | 0    | 0     |
| ENSG0000(ARAFP2)    | processed_chr7    | 63404842 | 63405400 | - | 0    | 0     |
| ENSG0000(RP11-814E) | processed_chr7    | 56380976 | 56381312 | + | 0    | 0     |
| ENSG0000(RP11-235G) | lincRNA chr6      | 1.61E+08 | 1.61E+08 | - | 0    | 0     |
| ENSG0000(HLA-N)     | unprocessε chr6   | 30351416 | 30351550 | + | 0    | 0     |

|                                     |          |          |   |      |      |
|-------------------------------------|----------|----------|---|------|------|
| ENSG0000(IGHV4-59 IG_V_gene chr14   | 1.07E+08 | 1.07E+08 | - | 0    | 0    |
| ENSG0000(RP1-32B1.4 antisense chr6  | 1.35E+08 | 1.35E+08 | + | 0    | 0    |
| ENSG0000(AC009276. lincRNA chr7     | 1.35E+08 | 1.35E+08 | + | 0    | 0    |
| ENSG0000(AC017104. processed_chr2   | 2.31E+08 | 2.31E+08 | + | 0.63 | 0.4  |
| ENSG0000(LINC00703 lincRNA chr10    | 4384246  | 4410612  | + | 0    | 0    |
| ENSG0000(PRR29 protein_co chr17     | 63998351 | 64004304 | + | 2.24 | 1.7  |
| ENSG0000(RP3-417O2 antisense chr6   | 96785137 | 96795821 | + | 0    | 0    |
| ENSG0000(RP3-395M: antisense chr1   | 2492300  | 2493258  | - | 0    | 0    |
| ENSG0000(BACE2-IT1 antisense chr21  | 41180097 | 41180626 | + | 0.46 | 0    |
| ENSG0000(C4B protein_co chr6        | 32014762 | 32035418 | + | 6.44 | 5.63 |
| ENSG0000(LINC01280 antisense chr2   | 2.17E+08 | 2.17E+08 | - | 0    | 0    |
| ENSG0000(GPC6-AS2 antisense chr13   | 93818424 | 93836144 | - | 0    | 0    |
| ENSG0000(METTLL15P: processed_chrX  | 22435598 | 22436818 | + | 0    | 0    |
| ENSG0000(SMIM25 lincRNA chr20       | 50267486 | 50279795 | + | 0    | 0.15 |
| ENSG0000(AC010880. lincRNA chr2     | 16354256 | 16432702 | + | 0    | 0    |
| ENSG0000(RPL7P57 processed_chrX     | 47840963 | 47841702 | - | 0    | 0    |
| ENSG0000(OR6D1P unitary_ps: chr10   | 45258185 | 45259123 | + | 0    | 0    |
| ENSG0000(DPPA2P3 processed_chr3     | 1.94E+08 | 1.94E+08 | - | 0    | 0    |
| ENSG0000(LL22NC03- lincRNA chr22    | 34208141 | 34209262 | - | 0    | 0    |
| ENSG0000(LINC00572 antisense chr13  | 29918647 | 29926651 | - | 0    | 0    |
| ENSG0000(LINC02052 lincRNA chr3     | 1.86E+08 | 1.86E+08 | - | 0    | 0    |
| ENSG0000(RP5-956O1 antisense chr1   | 2.3E+08  | 2.3E+08  | - | 0    | 0    |
| ENSG0000(USP9YP22 unprocess: chrY   | 9183694  | 9185803  | + | 0    | 0    |
| ENSG0000(RP11-114B antisense chr1   | 32717734 | 32725237 | - | 0.22 | 0    |
| ENSG0000(AC097499. processed_chr2   | 1.26E+08 | 1.26E+08 | + | 0    | 0    |
| ENSG0000(HSP90AA2: processed_chr11  | 27888838 | 27891033 | - | 0    | 0    |
| ENSG0000(RP11-351C processed_chr10  | 63489461 | 63489638 | + | 0    | 0    |
| ENSG0000(AP001476. lincRNA chr21    | 46037052 | 46039807 | + | 0.02 | 0.03 |
| ENSG0000(AC010886. processed_chr2   | 2.18E+08 | 2.18E+08 | + | 0    | 0    |
| ENSG0000(RP11-401L: processed_chr7  | 1.03E+08 | 1.03E+08 | - | 0    | 0.13 |
| ENSG0000(IFNA22P unprocess: chr9    | 21278050 | 21278619 | - | 0    | 0    |
| ENSG0000(RP11-503C sense_intr: chr6 | 1.68E+08 | 1.68E+08 | - | 0    | 0    |
| ENSG0000(STK24-AS1 antisense chr13  | 98577244 | 98578830 | + | 0.23 | 0.2  |
| ENSG0000(KRT18P27 processed_chr13   | 90230384 | 90231682 | + | 0    | 0    |
| ENSG0000(ADM5 protein_co chr19      | 49688664 | 49690575 | + | 0.03 | 0.07 |
| ENSG0000(ATP5J2LP processed_chr21   | 36388878 | 36389112 | - | 0    | 0    |
| ENSG0000(PRKAR2A- antisense chr3    | 48847572 | 48851981 | + | 0.59 | 0.6  |
| ENSG0000(AC073869. processed_chr2   | 1.31E+08 | 1.31E+08 | - | 0    | 0    |
| ENSG0000(SLC31A1P1 processed_chr3   | 1.73E+08 | 1.73E+08 | - | 0    | 0    |
| ENSG0000(AP000281. processed_chr21  | 32841496 | 32841811 | - | 0    | 0    |
| ENSG0000(LINC00539 lincRNA chr13    | 21303515 | 21348721 | - | 0    | 0    |
| ENSG0000(MKRN5P processed_chrX      | 74161062 | 74162528 | - | 0    | 0.04 |
| ENSG0000(AC063976. processed_chr5   | 1.32E+08 | 1.32E+08 | + | 0    | 0    |
| ENSG0000(NF1P6 unprocess: chr22     | 15622601 | 15632051 | - | 0    | 0    |
| ENSG0000(RP11-284L: processed_chr1  | 2.32E+08 | 2.32E+08 | - | 0    | 0    |

|                                     |          |          |   |      |      |
|-------------------------------------|----------|----------|---|------|------|
| ENSG0000(PIGUP1 processed_ chr9     | 70916997 | 70917501 | - | 0    | 0    |
| ENSG0000(RPL23AP14 processed_ chr12 | 2781904  | 2782371  | + | 0    | 0    |
| ENSG0000(RPSAP10 processed_ chr10   | 28436201 | 28437078 | + | 0    | 0    |
| ENSG0000(CXorf51A protein_co chrX   | 1.47E+08 | 1.47E+08 | - | 0    | 0    |
| ENSG0000(AC068831. antisense chr15  | 90932586 | 90935130 | - | 0    | 0.73 |
| ENSG0000(AC017035. processed_ chr2  | 1.97E+08 | 1.97E+08 | - | 0    | 0    |
| ENSG0000(AC006509. processed_ chr2  | 47705468 | 47705979 | + | 0    | 0    |
| ENSG0000(LINC01708 lincRNA chr1     | 99472332 | 99600995 | - | 0    | 0    |
| ENSG0000(HIST1H1PS unprocessε chr6  | 26016379 | 26016601 | + | 0    | 0    |
| ENSG0000(GS1-259H1 processed_ chr7  | 99638242 | 99638767 | - | 0    | 0    |
| ENSG0000(ATP5F1P1 processed_ chr13  | 51598416 | 51599460 | + | 0    | 0    |
| ENSG0000(RSL24D1P6 processed_ chr20 | 32170390 | 32170790 | - | 0    | 0    |
| ENSG0000(GUSBP6 transcribec chr7    | 64100305 | 64150721 | + | 0    | 0    |
| ENSG0000(RP11-169K antisense chr1   | 15740051 | 15749896 | - | 0.11 | 0    |
| ENSG0000(C4BPAP1 unprocessε chr1    | 2.07E+08 | 2.07E+08 | + | 0    | 0    |
| ENSG0000(AC079354. processed_ chr2  | 2.02E+08 | 2.02E+08 | + | 0    | 0    |
| ENSG0000(PGAM1P6 processed_ chr2    | 23872268 | 23873014 | - | 0    | 0    |
| ENSG0000(SOCS2P2 processed_ chr22   | 22170983 | 22171556 | - | 0    | 0    |
| ENSG0000(CDCA4P2 processed_ chr1    | 86552625 | 86553342 | - | 0    | 0    |
| ENSG0000(AC009313. antisense chr2   | 1.61E+08 | 1.61E+08 | - | 0    | 0    |
| ENSG0000(RP11-181K antisense chr1   | 1.83E+08 | 1.83E+08 | - | 0    | 0    |
| ENSG0000(AC009517. processed_ chr7  | 1.37E+08 | 1.37E+08 | + | 0    | 0    |
| ENSG0000(ATXN1L protein_co chr16    | 71845991 | 71885268 | + | 8.92 | 9.5  |
| ENSG0000(MTCO3P19 processed_ chrX   | 1.03E+08 | 1.03E+08 | + | 0    | 0    |
| ENSG0000(CCND3P1 processed_ chr10   | 30403197 | 30403776 | - | 0.24 | 0    |
| ENSG0000(AC073900. processed_ chr7  | 97200708 | 97201483 | - | 0    | 0    |
| ENSG0000(RPL36P16 processed_ chr19  | 41169861 | 41170166 | + | 0    | 0    |
| ENSG0000(RP1-81D8.3 lincRNA chr6    | 1.61E+08 | 1.61E+08 | + | 0.75 | 0    |
| ENSG0000(RP11-13P5 lincRNA chr6     | 1.59E+08 | 1.59E+08 | + | 0    | 0    |
| ENSG0000(AC136289. transcribec chr3 | 63741827 | 63827445 | - | 0    | 0    |
| ENSG0000(RP11-495P lincRNA chr1     | 1.48E+08 | 1.48E+08 | + | 0    | 0    |
| ENSG0000(HSFY4P unprocessε chrY     | 20808776 | 20811809 | - | 0    | 0    |
| ENSG0000(RP11-548K unprocessε chr7  | 57776972 | 57777521 | - | 0    | 0    |
| ENSG0000(USP9YP7 unprocessε chrY    | 17908755 | 17910806 | + | 0    | 0    |
| ENSG0000(HCG19P processed_ chr6     | 30359278 | 30359911 | - | 0    | 0    |
| ENSG0000(SAMM50P processed_ chr9    | 17447145 | 17448543 | - | 0    | 0    |
| ENSG0000(TTC21B-AS processed_ chr2  | 1.66E+08 | 1.66E+08 | + | 0.13 | 0.05 |
| ENSG0000(RP11-87O1 processed_ chr1  | 75521562 | 75522231 | + | 0    | 0    |
| ENSG0000(HNRNPA3P processed_ chr1   | 81426456 | 81427605 | + | 0    | 0    |
| ENSG0000(RPL36P4 processed_ chr20   | 35544430 | 35544747 | - | 0    | 0    |
| ENSG0000(MAPKAPK5 processed_ chr10  | 1.09E+08 | 1.09E+08 | + | 0    | 0    |
| ENSG0000(RP11-328K antisense chr10  | 77313941 | 77315694 | + | 0    | 0    |
| ENSG0000(RP11-475D lincRNA chr10    | 85432863 | 85448961 | + | 0    | 0    |
| ENSG0000(AC002117. antisense chr17  | 45150400 | 45161510 | - | 0.48 | 0.27 |
| ENSG0000(RP1-293L8. lincRNA chr6    | 1.26E+08 | 1.26E+08 | + | 0    | 0    |

|                                 |       |          |          |   |      |      |
|---------------------------------|-------|----------|----------|---|------|------|
| ENSG0000( AC010884. antisense   | chr2  | 1.05E+08 | 1.05E+08 | - | 0    | 0    |
| ENSG0000( POLR2KP2 processed_   | chr13 | 48134358 | 48134534 | - | 0    | 0    |
| ENSG0000( LINC00365 lincRNA     | chr13 | 30103178 | 30108875 | - | 0    | 0    |
| ENSG0000( AC109309. antisense   | chr11 | 3226061  | 3232838  | + | 0    | 0    |
| ENSG0000( LINC00620 antisense   | chr3  | 13650696 | 13746637 | + | 0    | 0    |
| ENSG0000( RP11-5K23 antisense   | chr1  | 1.62E+08 | 1.62E+08 | - | 0    | 0    |
| ENSG0000( AC068134. antisense   | chr2  | 2.32E+08 | 2.32E+08 | - | 0    | 0    |
| ENSG0000( HTR2A-AS1 antisense   | chr13 | 46852143 | 46856299 | + | 0    | 0    |
| ENSG0000( AC006989. processed_  | chrY  | 14941746 | 14942715 | + | 0    | 0    |
| ENSG0000( HMGN1P1: processed_   | chr7  | 46634614 | 46634946 | + | 0    | 0    |
| ENSG0000( KRT8P45 processed_    | chr1  | 1.57E+08 | 1.57E+08 | + | 0    | 0    |
| ENSG0000( RP11-438F antisense   | chr1  | 2.49E+08 | 2.49E+08 | + | 0    | 0    |
| ENSG0000( RP13-52K8 unprocessε  | chrX  | 81408938 | 81427276 | + | 0    | 0    |
| ENSG0000( CYCSP42 processed_    | chr21 | 15490530 | 15490767 | - | 0    | 0    |
| ENSG0000( RP11-5611: antisense  | chr1  | 2.42E+08 | 2.42E+08 | + | 0    | 0.09 |
| ENSG0000( AC093698. processed_  | chr2  | 2.08E+08 | 2.08E+08 | - | 0    | 0    |
| ENSG0000( PPIAP10 processed_    | chr20 | 53421199 | 53421656 | + | 0    | 0    |
| ENSG0000( SMIM13 protein_co     | chr6  | 11094033 | 11138733 | + | 2.25 | 2.16 |
| ENSG0000( RP3-470L2. lincRNA    | chr6  | 6758276  | 6759291  | - | 0    | 0    |
| ENSG0000( TMLHE-AS: antisense   | chrX  | 1.55E+08 | 1.56E+08 | + | 0.07 | 0    |
| ENSG0000( RP11-61J1: lincRNA    | chr1  | 2.12E+08 | 2.12E+08 | - | 0    | 0    |
| ENSG0000( RP11-134G antisense   | chr1  | 2.02E+08 | 2.02E+08 | + | 0.34 | 0.21 |
| ENSG0000( MEP1AP4 unprocessε    | chr9  | 42817105 | 42823213 | - | 0    | 0    |
| ENSG0000( SAGE4P unprocessε     | chrX  | 1.36E+08 | 1.36E+08 | + | 0    | 0    |
| ENSG0000( RP11-385N processed_  | chr1  | 2.09E+08 | 2.09E+08 | + | 0    | 0    |
| ENSG0000( AP001439. antisense   | chr21 | 26158091 | 26175824 | + | 0    | 0    |
| ENSG0000( SNRPGP15 processed_   | chr19 | 14489388 | 14489609 | + | 0    | 0    |
| ENSG0000( AC008264. processed_  | chr7  | 1.32E+08 | 1.32E+08 | + | 0.24 | 0    |
| ENSG0000( EIF4BP3 processed_    | chr9  | 96146007 | 96147856 | + | 0    | 0    |
| ENSG0000( ZNF619P1 processed_   | chr7  | 46144937 | 46145688 | + | 0    | 0    |
| ENSG0000( RP1-107N3 processed_  | chrX  | 1.28E+08 | 1.28E+08 | + | 0    | 0    |
| ENSG0000( RP11-370B lincRNA     | chr9  | 22767175 | 22768316 | + | 0    | 0    |
| ENSG0000( RP11-270C processed_  | chr1  | 1.08E+08 | 1.08E+08 | + | 0    | 0    |
| ENSG0000( HMGB3P2: processed_   | chr7  | 97135015 | 97135561 | - | 0    | 0    |
| ENSG0000( AC008065. processed_  | chr2  | 1.71E+08 | 1.71E+08 | - | 0    | 0    |
| ENSG0000( RP11-438N processed_  | chr11 | 3989163  | 3989463  | - | 0    | 0    |
| ENSG0000( RP11-485B unprocessε  | chrX  | 52422069 | 52459066 | + | 0    | 0    |
| ENSG0000( HLA-DPB2 transcribed  | chr6  | 33112451 | 33129084 | + | 0    | 0    |
| ENSG0000( LINC01087 lincRNA     | chr2  | 1.32E+08 | 1.32E+08 | + | 0    | 0    |
| ENSG0000( RP11-270L: processed_ | chr4  | 45414337 | 45414910 | - | 0    | 0    |
| ENSG0000( LPP-AS1 antisense     | chr3  | 1.89E+08 | 1.89E+08 | - | 0    | 0    |
| ENSG0000( LINC01754 lincRNA     | chr20 | 47391929 | 47412327 | - | 0    | 0    |
| ENSG0000( FAM96AP2 processed_   | chr1  | 2.28E+08 | 2.28E+08 | - | 0    | 0    |
| ENSG0000( RP11-295P processed_  | chrY  | 11445708 | 11446101 | - | 0    | 0    |
| ENSG0000( LINC01886 lincRNA     | chr2  | 1.08E+08 | 1.08E+08 | + | 0    | 0    |

|                                     |          |          |   |       |       |
|-------------------------------------|----------|----------|---|-------|-------|
| ENSG0000(RP11-341G processed_ chr4  | 13977166 | 13978028 | + | 0     | 0     |
| ENSG0000(RP11-430H processed_ chr1  | 65576129 | 65578380 | - | 0     | 0     |
| ENSG0000(USP9YP13 unprocessε chrY   | 23919905 | 23921510 | + | 0     | 0     |
| ENSG0000(AC083863. processed_ chr7  | 32951426 | 32951656 | + | 0     | 0     |
| ENSG0000(COL18A1-A antisense chr21  | 45407386 | 45410065 | - | 0     | 0     |
| ENSG0000(LINC01117 lincRNA chr2     | 1.77E+08 | 1.77E+08 | + | 0     | 0     |
| ENSG0000(HNRNPA1P transcribec chr16 | 51645756 | 51647132 | + | 2.51  | 1.94  |
| ENSG0000(AC012314. unprocessε chr19 | 54209092 | 54209418 | - | 0     | 0     |
| ENSG0000(LINC01015 antisense chr6   | 29529420 | 29533665 | + | 0     | 0     |
| ENSG0000(RP11-554D lincRNA chr6     | 74642384 | 74652002 | + | 0     | 0     |
| ENSG0000(UBE2V1P1: processed_ chr1  | 2.15E+08 | 2.15E+08 | - | 0     | 0     |
| ENSG0000(AC103563. unprocessε chr2  | 94971954 | 94972167 | - | 0     | 0     |
| ENSG0000(GPX5 protein_co chr6       | 28525925 | 28534952 | + | 0     | 0     |
| ENSG0000(RP11-12D5 processed_ chrX  | 27893348 | 27894059 | - | 0     | 0     |
| ENSG0000(MTND3P1ε unprocessε chr2   | 2.02E+08 | 2.02E+08 | + | 0     | 0     |
| ENSG0000(RP5-884C9 lincRNA chr1     | 38047314 | 38119025 | + | 0.12  | 0.27  |
| ENSG0000(RP11-30B1 transcribec chr7 | 3337889  | 3338601  | + | 0     | 0     |
| ENSG0000(RPL29P19 processed_ chr8   | 48384590 | 48385049 | + | 1.02  | 0.75  |
| ENSG0000(AC073626. antisense chr7   | 1.14E+08 | 1.14E+08 | - | 0     | 0     |
| ENSG0000(ZMIZ1-AS1 antisense chr10  | 78943328 | 79067895 | - | 1.12  | 1.21  |
| ENSG0000(SVIL-AS1 antisense chr10   | 29409402 | 29487745 | + | 24.24 | 22.52 |
| ENSG0000(RPS5P2 processed_ chr21    | 34135432 | 34136071 | - | 0     | 0     |
| ENSG0000(BMS1P12 unprocessε chr9    | 65189995 | 65193610 | - | 0.4   | 0.27  |
| ENSG0000(RP4-612B1 processed_ chr1  | 1.72E+08 | 1.72E+08 | - | 0     | 0     |
| ENSG0000(RPS26P5 processed_ chr21   | 16121310 | 16121644 | - | 0     | 0     |
| ENSG0000(RP11-96J1: processed_ chr9 | 62444256 | 62444634 | - | 0     | 0     |
| ENSG0000(AC008069. processed_ chr2  | 16853820 | 16855284 | - | 0     | 0     |
| ENSG0000(RP1-177I1( lincRNA chr6    | 91390313 | 91393000 | - | 0     | 0     |
| ENSG0000(TGFA-IT1 sense_intrε chr2  | 70467385 | 70468495 | - | 0     | 0     |
| ENSG0000(IGKV1D-27 IG_V_pseu chr2   | 89968867 | 89969335 | + | 0     | 0     |
| ENSG0000(HSD52 processed_ chr1      | 59131936 | 59208121 | - | 0     | 0     |
| ENSG0000(RP11-265P lincRNA chrX     | 39226103 | 39299786 | - | 0     | 0     |
| ENSG0000(AC007919. processed_ chr3  | 1.73E+08 | 1.73E+08 | + | 0     | 0     |
| ENSG0000(AC011901. lincRNA chr2     | 1.53E+08 | 1.53E+08 | - | 0     | 0     |
| ENSG0000(RP11-153F antisense chr1   | 1.03E+08 | 1.04E+08 | - | 0     | 0     |
| ENSG0000(TNK2-AS1 antisense chr3    | 1.96E+08 | 1.96E+08 | + | 0     | 0     |
| ENSG0000(RTCA-AS1 antisense chr1    | 1E+08    | 1E+08    | - | 1.16  | 0.43  |
| ENSG0000(RP11-402P processed_ chrX  | 71789386 | 71789636 | - | 0     | 0     |
| ENSG0000(AC096921. processed_ chr3  | 30626423 | 30626797 | - | 0     | 0     |
| ENSG0000(MEF2AP1 processed_ chr1    | 1.79E+08 | 1.79E+08 | - | 0     | 0     |
| ENSG0000(RP11-276H antisense chr1   | 16159266 | 16161883 | + | 0     | 0     |
| ENSG0000(OR9R1P unprocessε chr12    | 55158847 | 55159723 | + | 0     | 0     |
| ENSG0000(TUBB8P6 unprocessε chr1    | 2.42E+08 | 2.42E+08 | + | 0     | 0     |
| ENSG0000(AC106053. lincRNA chr2     | 18784807 | 18787752 | + | 0     | 0     |
| ENSG0000(RPL37P10 processed_ chr2   | 83594956 | 83595243 | + | 0     | 0     |



|                                     |          |          |   |       |       |
|-------------------------------------|----------|----------|---|-------|-------|
| ENSG0000(RP5-854E1 processed_ chr20 | 31285317 | 31286835 | - | 0     | 0     |
| ENSG0000(RP5-1142J processed_ chr7  | 1.57E+08 | 1.57E+08 | - | 0     | 0     |
| ENSG0000(RP1-169P2 processed_ chrX  | 1.44E+08 | 1.44E+08 | - | 0     | 0     |
| ENSG0000(RPS27AP1 transcribed chr16 | 61055399 | 61055964 | - | 12.89 | 14.47 |
| ENSG0000(LLOXNC01 processed_ chrX   | 1.03E+08 | 1.03E+08 | + | 0     | 0     |
| ENSG0000(ZNF736P6 processed_ chrY   | 8350931  | 8352143  | + | 0     | 0     |
| ENSG0000(RP4-564F2 lincRNA chr20    | 38406011 | 38416797 | - | 0     | 0     |
| ENSG0000(PDSS1P2 unprocessed chr2   | 44166266 | 44166943 | + | 0     | 0     |
| ENSG0000(AC106900 lincRNA chr2      | 1.74E+08 | 1.74E+08 | - | 0     | 0     |
| ENSG0000(SRSF1P1 processed_ chr13   | 69408216 | 69408735 | - | 0     | 0     |
| ENSG0000(AC064871 antisense chr2    | 1.83E+08 | 1.83E+08 | - | 0     | 0     |
| ENSG0000(RP11-16L2 antisense chr9   | 1.12E+08 | 1.12E+08 | + | 0     | 0     |
| ENSG0000(RP11-126K antisense chr1   | 1.51E+08 | 1.51E+08 | + | 0     | 0     |
| ENSG0000(AC007387 processed_ chr2   | 74754670 | 74754819 | - | 0     | 0     |
| ENSG0000(AC026954 unitary_psi chr17 | 7330452  | 7335413  | + | 0     | 0     |
| ENSG0000(LINC01627 lincRNA chr9     | 37383178 | 37384434 | - | 0     | 0     |
| ENSG0000(AF124730 antisense chr21   | 29182027 | 29187795 | - | 0     | 0     |
| ENSG0000(IGHV3-74 IG_V_gene chr14   | 1.07E+08 | 1.07E+08 | - | 0     | 0     |
| ENSG0000(LINC00885 lincRNA chr3     | 1.96E+08 | 1.96E+08 | + | 0     | 0     |
| ENSG0000(RP11-548K unprocessed chr7 | 57819819 | 57820627 | + | 0     | 0     |
| ENSG0000(LINC01823 lincRNA chr2     | 1.22E+08 | 1.22E+08 | + | 0     | 0     |
| ENSG0000(RP1-212G6 processed_ chrX  | 47718002 | 47719099 | - | 0     | 0     |
| ENSG0000(RBMY2BP transcribed chrY   | 22649245 | 22658878 | + | 0     | 0     |
| ENSG0000(RP11-631F antisense chr6   | 1.48E+08 | 1.48E+08 | - | 0     | 0     |
| ENSG0000(GAGE12J protein_code chrX  | 49322057 | 49329384 | + | 0     | 0     |
| ENSG0000(SH3BP5-AS antisense chr3   | 15254184 | 15264493 | + | 2.54  | 3.74  |
| ENSG0000(AC010907 antisense chr2    | 3702585  | 3704153  | - | 0     | 0     |
| ENSG0000(ATP6V1G1 processed_ chr9   | 1.37E+08 | 1.37E+08 | + | 0     | 0     |
| ENSG0000(RPL36AP53 processed_ chrX  | 1.15E+08 | 1.15E+08 | + | 0     | 0     |
| ENSG0000(RP1-50J22 antisense chr6   | 36386831 | 36393462 | + | 0.32  | 0     |
| ENSG0000(AC013470 processed_ chr7   | 12506007 | 12507478 | + | 0     | 0     |
| ENSG0000(IPO8P1 processed_ chr1     | 2.11E+08 | 2.11E+08 | - | 0.02  | 0     |
| ENSG0000(RP11-561N processed_ chr7  | 64582733 | 64583207 | + | 0     | 0     |
| ENSG0000(AC068135 processed_ chr2   | 1.94E+08 | 1.94E+08 | + | 0     | 0     |
| ENSG0000(RP11-335C antisense chr1   | 2.03E+08 | 2.03E+08 | - | 0     | 0     |
| ENSG0000(RPL17P10 processed_ chr2   | 2.01E+08 | 2.01E+08 | - | 0     | 0     |
| ENSG0000(EIF3EP2 processed_ chr2    | 1.62E+08 | 1.62E+08 | + | 0     | 0     |
| ENSG0000(AC009227 antisense chr2    | 1.54E+08 | 1.54E+08 | - | 0     | 0.03  |
| ENSG0000(PDIA3P2 unprocessed chr15  | 43649123 | 43649280 | + | 0     | 0     |
| ENSG0000(GAPDHP46 processed_ chr1   | 92114803 | 92115796 | - | 0     | 0     |
| ENSG0000(MED15P4 unprocessed chr2   | 1.32E+08 | 1.32E+08 | - | 0     | 0     |
| ENSG0000(PLA2G12A1 processed_ chr1  | 52368677 | 52369244 | + | 0.18  | 0     |
| ENSG0000(RP11-146D unprocessed chr9 | 40332995 | 40333460 | - | 0     | 0     |
| ENSG0000(SOCS5P2 processed_ chr9    | 1.35E+08 | 1.35E+08 | + | 0     | 0     |
| ENSG0000(RPL36AP25 processed_ chr7  | 16208945 | 16209265 | + | 0     | 0     |

|                                       |          |            |      |      |
|---------------------------------------|----------|------------|------|------|
| ENSG0000(RP11-84O1 processed_ chr1    | 1.01E+08 | 1.01E+08 + | 0    | 0    |
| ENSG0000(ELOCP23 processed_ chr13     | 78488182 | 78488513 + | 0    | 0    |
| ENSG0000(RASAL2-AS lincRNA chr1       | 1.78E+08 | 1.78E+08 - | 0.68 | 0.34 |
| ENSG0000(E2F6P2 processed_ chr22      | 21141624 | 21142371 - | 0    | 0    |
| ENSG0000(ZNF812P transcribed chr19    | 9689924  | 9700776 -  | 0    | 0    |
| ENSG0000(UBE2D3P3 processed_ chr1     | 1.51E+08 | 1.51E+08 + | 0    | 0    |
| ENSG0000(GS1-174L6 antisense chr1     | 1.86E+08 | 1.86E+08 - | 0    | 0    |
| ENSG0000(LLOXNC01- processed_ chrX    | 1.03E+08 | 1.03E+08 - | 0    | 0    |
| ENSG0000(MTND6P7 processed_ chr2      | 82817538 | 82818061 - | 0    | 0    |
| ENSG0000(NEFMP1 processed_ chr10      | 54599678 | 54600683 + | 0    | 0    |
| ENSG0000(RP11-131J: lincRNA chr1      | 1.08E+08 | 1.08E+08 + | 0    | 0    |
| ENSG0000(LAMTOR5- processed_ chr1     | 1.1E+08  | 1.1E+08 +  | 0.75 | 3.26 |
| ENSG0000(RP11-697E antisense chr11    | 1.32E+08 | 1.32E+08 - | 0    | 0    |
| ENSG0000(MED28P4 processed_ chrX      | 45951762 | 45952333 - | 0    | 0    |
| ENSG0000(RP11-38C1 antisense chr1     | 1.65E+08 | 1.65E+08 + | 0    | 0    |
| ENSG0000(RPS17P13 processed_ chr7     | 37116779 | 37117185 + | 0    | 0    |
| ENSG0000(E2F3-IT1 sense_intron chr6   | 20437821 | 20440178 + | 0    | 0    |
| ENSG0000(OR11M1P unitary_psi chr12    | 48627888 | 48628782 + | 0    | 0    |
| ENSG0000(FAM90A8P unprocessed chr8    | 7738387  | 7741396 +  | 0    | 0    |
| ENSG0000(LINC01706 lincRNA chr20      | 7347467  | 7367632 +  | 0    | 0    |
| ENSG0000(NPIPA3 protein_coding chr16  | 14708944 | 14726338 + | 3.56 | 3.06 |
| ENSG0000(AC025165. antisense chr12    | 57612118 | 57619638 - | 0    | 0.05 |
| ENSG0000(RP11-179K lincRNA chr10      | 64901136 | 64924518 - | 0    | 0    |
| ENSG0000(CITF22-49E lincRNA chr22     | 47345569 | 47373541 + | 0.09 | 0.09 |
| ENSG0000(RP11-576D lincRNA chr1       | 2.05E+08 | 2.05E+08 + | 0.06 | 0    |
| ENSG0000(LINC01657 lincRNA chr1       | 1.76E+08 | 1.76E+08 + | 0    | 0    |
| ENSG0000(AC009237. unprocessed chr2   | 95502791 | 95505059 + | 0    | 0    |
| ENSG0000(AC007182. antisense chr14    | 75574888 | 75579588 - | 0    | 0    |
| ENSG0000(RP11-255B processed_ chr8    | 1.27E+08 | 1.27E+08 - | 0    | 0    |
| ENSG0000(GUSBP10 unprocessed chr7     | 57177409 | 57180052 - | 0    | 0    |
| ENSG0000(CEP57L1P1 processed_ chr10   | 70389426 | 70390626 + | 0    | 0    |
| ENSG0000(FCF1P7 processed_ chr1       | 2.43E+08 | 2.43E+08 - | 0    | 0    |
| ENSG0000(IMPDH1P8 processed_ chr3     | 15878047 | 15879571 + | 0.04 | 0    |
| ENSG0000(PCOLCE-AS antisense chr7     | 1.01E+08 | 1.01E+08 - | 0.28 | 0.14 |
| ENSG0000(AC009892. antisense chr19    | 54635722 | 54638892 - | 0    | 0    |
| ENSG0000(AC016716. antisense chr2     | 80028012 | 80030551 - | 0    | 0    |
| ENSG0000(MAGEA7P unprocessed chrX     | 1.5E+08  | 1.5E+08 +  | 0    | 0    |
| ENSG0000(RP1-86D1.1 antisense chr6    | 1.29E+08 | 1.29E+08 + | 0    | 0    |
| ENSG0000(RP11-272G processed_ chrX    | 53759026 | 53759204 + | 0    | 0    |
| ENSG0000(AC099850. antisense chr17    | 59106598 | 59118267 + | 0.83 | 0.57 |
| ENSG0000(AC016735. lincRNA chr2       | 43001355 | 43006060 - | 0    | 0    |
| ENSG0000(TEX26-AS1 antisense chr13    | 30881933 | 30933846 - | 0.08 | 0.27 |
| ENSG0000(RP11-380G sense_intron chr10 | 87878692 | 87880427 + | 0    | 0    |
| ENSG0000(AC015987. antisense chr7     | 1.36E+08 | 1.36E+08 + | 0    | 0.17 |
| ENSG0000(MTCYBP21 processed_ chr21    | 44469929 | 44472516 - | 0    | 0    |

|                           |                     |          |          |   |      |      |
|---------------------------|---------------------|----------|----------|---|------|------|
| ENSG0000(RP11-94M:lincRNA | chr10               | 90454170 | 90502968 | + | 0    | 0    |
| ENSG0000(SHMT1P1          | processed_chr1      | 43850300 | 43851611 | - | 0    | 0    |
| ENSG0000(VN1R21P          | unitary_psi_chr3    | 14089107 | 14089871 | - | 0    | 0    |
| ENSG0000(HMGN1P3          | processed_chrX      | 78519593 | 78520186 | - | 0    | 0.42 |
| ENSG0000(LINC01167        | lincRNA_chr10       | 1.33E+08 | 1.33E+08 | - | 0    | 0    |
| ENSG0000(C1DP3            | processed_chr10     | 80024737 | 80025159 | - | 0    | 0    |
| ENSG0000(RP11-508N        | transcribed_chr10   | 38164648 | 38212417 | + | 0    | 0    |
| ENSG0000(CR769776         | processed_chr9      | 64473040 | 64473826 | - | 0    | 0    |
| ENSG0000(FDPSP8           | processed_chr1      | 2.12E+08 | 2.12E+08 | - | 0    | 0    |
| ENSG0000(RP11-54O1        | antisense_chr9      | 94928551 | 94934946 | - | 0    | 0    |
| ENSG0000(RP1-137H1        | antisense_chrX      | 1.38E+08 | 1.38E+08 | - | 0    | 0    |
| ENSG0000(MUC20P1          | unprocessed_chr3    | 1.96E+08 | 1.96E+08 | + | 0.02 | 0.18 |
| ENSG0000(ATP2B2-IT2       | sense_intronic_chr3 | 10626021 | 10626807 | - | 0    | 0    |
| ENSG0000(HSPA8P7          | processed_chrX      | 1.15E+08 | 1.15E+08 | - | 0    | 0    |
| ENSG0000(BRAFP1           | unprocessed_chrX    | 75582676 | 75585506 | + | 0    | 0    |
| ENSG0000(RPSAP50          | processed_chr11     | 1.1E+08  | 1.1E+08  | + | 0    | 0    |
| ENSG0000(OR4F2P           | unprocessed_chr11   | 86649    | 87586    | - | 0    | 0    |
| ENSG0000(CENPIP1          | unprocessed_chr13   | 19126399 | 19139611 | + | 0    | 0    |
| ENSG0000(EIF4A2P4         | processed_chrX      | 52832704 | 52833899 | - | 0    | 0    |
| ENSG0000(MIPEPP2          | processed_chr1      | 2.39E+08 | 2.39E+08 | - | 0    | 0    |
| ENSG0000(AL591704         | processed_chr1      | 1.53E+08 | 1.53E+08 | - | 0    | 0    |
| ENSG0000(AC006026         | processed_chr7      | 23562459 | 23564261 | - | 0    | 0    |
| ENSG0000(CETN4P           | unitary_psi_chr4    | 1.23E+08 | 1.23E+08 | - | 0    | 0    |
| ENSG0000(RP5-933E2        | lincRNA_chr10       | 10058722 | 10063502 | + | 0    | 0    |
| ENSG0000(AC012363         | antisense_chr2      | 1.2E+08  | 1.2E+08  | - | 0    | 0    |
| ENSG0000(AP000704         | lincRNA_chr21       | 36966492 | 36975164 | + | 0.27 | 0.88 |
| ENSG0000(KRT18P39         | processed_chr2      | 2.04E+08 | 2.04E+08 | - | 0    | 0    |
| ENSG0000(IQCF4            | transcribed_chr3    | 51817603 | 51819635 | + | 0    | 0    |
| ENSG0000(RP3-333H2        | antisense_chr22     | 39292988 | 39295563 | + | 0.03 | 0    |
| ENSG0000(NTM-AS1          | lincRNA_chr11       | 1.32E+08 | 1.32E+08 | - | 0    | 0    |
| ENSG0000(RPL32P1          | processed_chr6      | 33079451 | 33079860 | + | 0    | 0    |
| ENSG0000(RP11-57C1        | processed_chr9      | 1.31E+08 | 1.31E+08 | - | 0    | 0    |
| ENSG0000(RP11-445C        | antisense_chrX      | 56973510 | 56974796 | + | 0.11 | 0    |
| ENSG0000(RPS27AP6         | processed_chr1      | 1.51E+08 | 1.51E+08 | - | 1.24 | 0.78 |
| ENSG0000(TUBB4BP2         | processed_chr9      | 34109171 | 34109968 | - | 0    | 0    |
| ENSG0000(LINC00853        | antisense_chr1      | 47179250 | 47180339 | + | 0    | 0.11 |
| ENSG0000(ARL5AP4          | processed_chr22     | 24686168 | 24686679 | + | 0    | 0    |
| ENSG0000(DUX4L9           | unprocessed_chr4    | 1.9E+08  | 1.9E+08  | - | 0    | 0    |
| ENSG0000(SRGAP3-AS        | antisense_chr3      | 9014123  | 9015979  | + | 0    | 0    |
| ENSG0000(BEND3P2          | processed_chr9      | 92171241 | 92173494 | + | 0    | 0    |
| ENSG0000(RP11-538D        | lincRNA_chr1        | 1.82E+08 | 1.82E+08 | - | 0.11 | 0.22 |
| ENSG0000(TMEM72-A         | antisense_chr10     | 44811024 | 44959689 | - | 0.03 | 0.05 |
| ENSG0000(SEPT14P13        | transcribed_chr1    | 485026   | 485208   | - | 0    | 0    |
| ENSG0000(AC114812         | antisense_chr2      | 2.34E+08 | 2.34E+08 | - | 0    | 0    |
| ENSG0000(RP11-307E        | processed_chr9      | 94338347 | 94338733 | - | 0    | 0    |

|                                      |          |            |       |       |
|--------------------------------------|----------|------------|-------|-------|
| ENSG0000(NAP1L4P2 processed_ chrX    | 1.06E+08 | 1.06E+08 - | 0     | 0     |
| ENSG0000(RP11-190J.lincRNA chr10     | 1.02E+08 | 1.02E+08 - | 0     | 0     |
| ENSG0000(RP11-134G 3prime_ov chr1    | 2.01E+08 | 2.01E+08 - | 0     | 0     |
| ENSG0000(AC093843.lincRNA chr2       | 2.21E+08 | 2.21E+08 + | 0     | 0     |
| ENSG0000(BTF3P4 processed_ chr9      | 72107818 | 72108312 - | 0     | 0     |
| ENSG0000(COL4A2-AS antisense chr13   | 1.1E+08  | 1.1E+08 -  | 0     | 0     |
| ENSG0000(THRB-IT1 sense_intr chr3    | 24455136 | 24459434 - | 0     | 0.11  |
| ENSG0000(RORB-AS1 antisense chr9     | 74485551 | 74499127 - | 0     | 0     |
| ENSG0000(AC019109.processed_ chr2    | 2.24E+08 | 2.24E+08 + | 0.06  | 0.03  |
| ENSG0000(LINC00265 processed_ chrY   | 24276245 | 24277026 + | 0     | 0     |
| ENSG0000(TOMM20P processed_ chr11    | 77313606 | 77314032 + | 0     | 0     |
| ENSG0000(OR2X1P unprocess chr1       | 2.48E+08 | 2.48E+08 + | 0     | 0     |
| ENSG0000(RP11-651P processed_ chr3   | 1.5E+08  | 1.5E+08 -  | 0     | 0     |
| ENSG0000(LINC01689 lincRNA chr21     | 24304550 | 24321377 - | 0     | 0     |
| ENSG0000(BTF3P9 processed_ chr1      | 2.27E+08 | 2.27E+08 + | 0     | 0     |
| ENSG0000(RP11-341G processed_ chr9   | 1151807  | 1152140 -  | 0     | 0     |
| ENSG0000(GCSHP5 processed_ chr1      | 1.68E+08 | 1.68E+08 - | 6.16  | 6.9   |
| ENSG0000(RPL12P17 processed_ chr2    | 2.08E+08 | 2.08E+08 - | 0     | 0     |
| ENSG0000(RP11-123K antisense chr9    | 1.27E+08 | 1.27E+08 - | 0     | 0     |
| ENSG0000(LINC00240 lincRNA chr6      | 26956992 | 27023924 + | 0.22  | 0.65  |
| ENSG0000(AC107079.lincRNA chr2       | 2.37E+08 | 2.37E+08 - | 0     | 0     |
| ENSG0000(RP1-90J20.antisense chr6    | 2989722  | 2999134 -  | 0.2   | 0.45  |
| ENSG0000(RP11-535M lincRNA chr9      | 96687056 | 96721121 + | 0     | 0     |
| ENSG0000(LINC00502 lincRNA chr10     | 91047166 | 91062159 + | 0     | 0     |
| ENSG0000(MTND5P24 processed_ chr2    | 1.43E+08 | 1.43E+08 - | 0     | 0     |
| ENSG0000(LINC00393 lincRNA chr13     | 73413473 | 73648253 - | 0     | 0     |
| ENSG0000(CDKN2A-A.lincRNA chr9       | 21966929 | 21967751 + | 0     | 0     |
| ENSG0000(OPA1-AS1 antisense chr3     | 1.94E+08 | 1.94E+08 - | 0     | 0     |
| ENSG0000(RP4-796I17 processed_ chr22 | 43957027 | 43957348 + | 0     | 1.03  |
| ENSG0000(LINC01691 lincRNA chr1      | 1.22E+08 | 1.22E+08 - | 0     | 0     |
| ENSG0000(RPL29P11 processed_ chr3    | 37016523 | 37017014 - | 0.34  | 0     |
| ENSG0000(GXYLT1P2 processed_ chr21   | 13824406 | 13825635 - | 0     | 0     |
| ENSG0000(YBX1P1 processed_ chr14     | 66012830 | 66013789 - | 0     | 0     |
| ENSG0000(LINC01398 processed_ chr1   | 46446673 | 46451281 - | 0     | 0     |
| ENSG0000(CTC-260E6 transcribed chr19 | 20125044 | 20125484 + | 0     | 0.08  |
| ENSG0000(AC009518.lincRNA chr7       | 1.32E+08 | 1.32E+08 + | 0     | 0     |
| ENSG0000(USP9YP25 unprocess chrY     | 23734193 | 23736249 + | 0     | 0     |
| ENSG0000(AC062016.processed_ chr2    | 1.17E+08 | 1.17E+08 - | 0     | 0     |
| ENSG0000(RP4-758J11 processed_ chr1  | 1399522  | 1402046 +  | 6.24  | 5.64  |
| ENSG0000(CDY13P unprocess chrY       | 22520681 | 22521695 - | 0     | 0     |
| ENSG0000(AC083949.antisense chr2     | 42143238 | 42170301 - | 0.1   | 0     |
| ENSG0000(RP11-49G1 antisense chr20   | 33214920 | 33217067 - | 0     | 0     |
| ENSG0000(NDUFAF8 protein_co chr17    | 81239239 | 81241281 + | 42.98 | 52.91 |
| ENSG0000(AC011754.sense_ovei chr2    | 79158374 | 79185523 + | 0     | 0     |
| ENSG0000(MTCYBP29 unprocess chr7     | 57173357 | 57174362 + | 0     | 0     |

|                                       |          |            |      |      |
|---------------------------------------|----------|------------|------|------|
| ENSG0000( AC068279. processed_ chr2   | 87379880 | 87380767 - | 0.14 | 0.54 |
| ENSG0000( CTA-250D1 antisense chr22   | 41981304 | 41982217 - | 0    | 0    |
| ENSG0000( AC034187. lincRNA chr3      | 8573726  | 8593124 -  | 0    | 0    |
| ENSG0000( TSSC1-IT1 sense_intr chr2   | 3298341  | 3301465 -  | 0    | 0    |
| ENSG0000( RP11-119F transcribed chr10 | 79684494 | 79684983 - | 3.09 | 0.51 |
| ENSG0000( RP11-276H processed_ chr9   | 87084161 | 87085151 - | 0    | 0    |
| ENSG0000( RP5-1142A antisense chr16   | 88731180 | 88741425 + | 0    | 0    |
| ENSG0000( AC007899. processed_ chr2   | 37148530 | 37149304 + | 0    | 0    |
| ENSG0000( RPS4XP16 transcribed chr13  | 51454164 | 51461315 + | 1.03 | 1.43 |
| ENSG0000( RP1-200K1 lincRNA chr6      | 1.53E+08 | 1.53E+08 - | 0    | 0    |
| ENSG0000( VPS26BP1 processed_ chr3    | 47960327 | 47961081 - | 0    | 0    |
| ENSG0000( SIGLEC30P processed_ chr1   | 1.7E+08  | 1.7E+08 +  | 0    | 0    |
| ENSG0000( POT1-AS1 antisense chr7     | 1.25E+08 | 1.25E+08 + | 1.72 | 1.48 |
| ENSG0000( RP11-3B12 lincRNA chr7      | 1.25E+08 | 1.25E+08 - | 0    | 0    |
| ENSG0000( RP11-448G antisense chr1    | 1.98E+08 | 1.98E+08 + | 0    | 0    |
| ENSG0000( GAGE12H protein_co chrX     | 49579983 | 49587301 + | 0    | 0    |
| ENSG0000( AC005534. antisense chr7    | 1.57E+08 | 1.57E+08 - | 0    | 0    |
| ENSG0000( RP5-934G1 processed_ chr1   | 11877770 | 11880406 + | 0    | 0    |
| ENSG0000( AP001347. antisense chr21   | 14027421 | 14144468 + | 0.72 | 0.99 |
| ENSG0000( RP1-102E2 processed_ chr12  | 6438498  | 6438852 +  | 0    | 0    |
| ENSG0000( RPL21P91 processed_ chr10   | 1.1E+08  | 1.1E+08 +  | 0    | 0    |
| ENSG0000( TIMM8BP2 processed_ chrX    | 1.34E+08 | 1.34E+08 + | 0    | 0    |
| ENSG0000( LINC01766 lincRNA chr19     | 35597907 | 35601501 + | 0    | 0    |
| ENSG0000( LINC00863 lincRNA chr10     | 87342736 | 87357882 + | 4.02 | 4.3  |
| ENSG0000( APOC4-AP( protein_co chr19  | 44942238 | 44949565 + | 0    | 0    |
| ENSG0000( AC016694. unprocessε chrY   | 22670616 | 22672859 - | 0    | 0    |
| ENSG0000( AY269186. lincRNA chr3      | 53348    | 54346 -    | 0    | 0    |
| ENSG0000( RP11-144G antisense chr10   | 47496212 | 47502195 + | 0    | 0.34 |
| ENSG0000( TACC1P1 unprocessε chr10    | 37523011 | 37544701 + | 0    | 0    |
| ENSG0000( AL050303. lincRNA chr21     | 13769932 | 13771740 + | 0    | 0    |
| ENSG0000( LINC00320 lincRNA chr21     | 20742590 | 20803216 - | 0    | 0    |
| ENSG0000( NDUFA5P1 processed_ chr1    | 1.1E+08  | 1.1E+08 -  | 0    | 0    |
| ENSG0000( KRT8P30 processed_ chr2     | 2.19E+08 | 2.19E+08 - | 0    | 0    |
| ENSG0000( AC152010. unprocessε chrX   | 1.53E+08 | 1.53E+08 - | 0    | 0    |
| ENSG0000( AC107399. lincRNA chr4      | 1.17E+08 | 1.17E+08 - | 0    | 0    |
| ENSG0000( LINC01034 lincRNA chr13     | 76013023 | 76014501 - | 0    | 0    |
| ENSG0000( RP11-441C lincRNA chr10     | 99431191 | 99438117 + | 0.25 | 0.42 |
| ENSG0000( RP11-74C3 lincRNA chr9      | 12098660 | 12159147 - | 0    | 0    |
| ENSG0000( SUCLA2P1 processed_ chr6    | 30468882 | 30470251 + | 0    | 0    |
| ENSG0000( LINC00184 lincRNA chr1      | 2.35E+08 | 2.35E+08 + | 0.07 | 0.05 |
| ENSG0000( PRRT4 protein_co chr7       | 1.28E+08 | 1.28E+08 - | 0.34 | 0.38 |
| ENSG0000( RP11-51C1 processed_ chrX   | 1.4E+08  | 1.4E+08 +  | 0    | 0    |
| ENSG0000( RP11-180D lincRNA chr1      | 1.59E+08 | 1.59E+08 + | 0    | 0    |
| ENSG0000( CASC6 lincRNA chr6          | 91629915 | 91690428 - | 0    | 0    |
| ENSG0000( RP11-82L1: sense_intr chr9  | 89088604 | 89109934 - | 5.18 | 4.51 |

|                                      |          |          |   |      |      |
|--------------------------------------|----------|----------|---|------|------|
| ENSG0000( AC007312. processed_ chr7  | 33276834 | 33277091 | - | 0    | 0    |
| ENSG0000( VN1R25P processed_ chr7    | 56559221 | 56559958 | + | 0    | 0    |
| ENSG0000( ATP5G1P8 processed_ chr10  | 76836568 | 76836861 | + | 0    | 0    |
| ENSG0000( RP11-161N processed_ chrX  | 54147372 | 54147659 | + | 0    | 0    |
| ENSG0000( RP5-1086K lincRNA chr1     | 1.16E+08 | 1.16E+08 | - | 1.05 | 0.82 |
| ENSG0000( SRIP3 processed_ chrY      | 6718962  | 6719180  | - | 0    | 0    |
| ENSG0000( KCTD10P1 processed_ chr9   | 28598668 | 28599292 | - | 0    | 0    |
| ENSG0000( LINC01266 lincRNA chr3     | 536231   | 846015   | + | 0    | 0    |
| ENSG0000( PGM5-AS1 antisense chr9    | 68355189 | 68357852 | - | 0    | 0    |
| ENSG0000( AC017002. lincRNA chr2     | 1.11E+08 | 1.11E+08 | - | 0.14 | 0.31 |
| ENSG0000( PPP4R3CP protein_co chrX   | 27460211 | 27463341 | - | 0    | 0    |
| ENSG0000( LINC01752 lincRNA chr20    | 10753090 | 10753966 | + | 0.37 | 0    |
| ENSG0000( PSAT1P4 processed_ chr3    | 1.67E+08 | 1.67E+08 | + | 0    | 0    |
| ENSG0000( U82695.9 transcribed chrX  | 1.53E+08 | 1.53E+08 | + | 0.06 | 0.1  |
| ENSG0000( TRAPPC2P: unprocessε chrY  | 17797983 | 17800696 | - | 0    | 0    |
| ENSG0000( KCNC4-AS1 antisense chr1   | 1.1E+08  | 1.1E+08  | - | 0    | 0    |
| ENSG0000( TBC1D3P6 unprocessε chr1   | 15989871 | 15994751 | + | 0    | 0    |
| ENSG0000( AC009303. processed_ chr2  | 1.18E+08 | 1.18E+08 | - | 0    | 0    |
| ENSG0000( LINC01645 lincRNA chr1     | 1.77E+08 | 1.77E+08 | + | 0    | 0    |
| ENSG0000( RP11-5407 antisense chr1   | 1011997  | 1013193  | - | 0    | 0    |
| ENSG0000( RP11-114L antisense chr7   | 1.43E+08 | 1.43E+08 | + | 0    | 0    |
| ENSG0000( SUMO2P3 processed_ chr7    | 55732144 | 55732431 | + | 0    | 0    |
| ENSG0000( RP11-403H sense_intrε chr9 | 6902670  | 6978859  | + | 0    | 0    |
| ENSG0000( LARGE-AS1 processed_ chr22 | 33725014 | 33750843 | + | 0    | 0    |
| ENSG0000( INE1 sense_intrε chrX      | 47204921 | 47205865 | + | 0.59 | 1.15 |
| ENSG0000( PARP4P2 unprocessε chr13   | 19349137 | 19407962 | + | 0    | 0    |
| ENSG0000( RP11-160H lincRNA chr1     | 1.74E+08 | 1.74E+08 | + | 0    | 0    |
| ENSG0000( RP13-228J: processed_ chrX | 1.55E+08 | 1.55E+08 | - | 0    | 0    |
| ENSG0000( RPL23AP85 processed_ chr1  | 56585612 | 56586242 | - | 0    | 0    |
| ENSG0000( AC000367. processed_ chr7  | 1.27E+08 | 1.27E+08 | - | 0    | 0    |
| ENSG0000( TMEM233 protein_co chr12   | 1.2E+08  | 1.2E+08  | + | 0.11 | 0.18 |
| ENSG0000( RP11-524H antisense chr6   | 54840118 | 54840855 | - | 0    | 0    |
| ENSG0000( RP11-297K antisense chr1   | 1.61E+08 | 1.61E+08 | - | 0    | 0    |
| ENSG0000( PPP1R8P1 processed_ chr1   | 48325080 | 48326123 | - | 0.06 | 0    |
| ENSG0000( RP1-191J1: processed_ chr6 | 1.08E+08 | 1.08E+08 | - | 0    | 0    |
| ENSG0000( RP11-409K processed_ chr9  | 1.3E+08  | 1.3E+08  | - | 0    | 0    |
| ENSG0000( FAM41AY1 lincRNA chrY      | 17500958 | 17515018 | + | 0    | 0    |
| ENSG0000( RP11-295G sense_intrε chr9 | 1.33E+08 | 1.33E+08 | - | 0.12 | 0.26 |
| ENSG0000( RPL29P12 processed_ chr5   | 43666766 | 43667232 | - | 0    | 0    |
| ENSG0000( LINC01526 lincRNA chr6     | 81813286 | 81814157 | - | 0    | 0    |
| ENSG0000( VTA1P1 processed_ chr6     | 1.69E+08 | 1.69E+08 | - | 0    | 0    |
| ENSG0000( AC010082. antisense chr7   | 18429062 | 18430738 | - | 0    | 0    |
| ENSG0000( RP11-6F6.1 lincRNA chr9    | 1.06E+08 | 1.06E+08 | - | 0    | 0    |
| ENSG0000( OR51A5P unprocessε chr11   | 4972943  | 4973884  | - | 0    | 0    |
| ENSG0000( RP11-483G processed_ chr7  | 73314107 | 73315213 | + | 0.05 | 0    |

|                                     |          |          |   |      |      |
|-------------------------------------|----------|----------|---|------|------|
| ENSG0000(RP11-669M lincRNA chr1     | 1.89E+08 | 1.89E+08 | + | 0    | 0    |
| ENSG0000(AC000067. lincRNA chr22    | 19667023 | 19667555 | + | 0    | 0    |
| ENSG0000(RP13-228J. processed_ chrX | 1.55E+08 | 1.55E+08 | - | 0    | 0    |
| ENSG0000(RP11-810H unprocessε chr1  | 29488193 | 29496893 | - | 0    | 0    |
| ENSG0000(RP13-348B lincRNA chrX     | 89423738 | 89446983 | + | 0    | 0    |
| ENSG0000(KCTD9P1 transcribec chr17  | 20111824 | 20112990 | + | 0    | 0    |
| ENSG0000(LINC00328 processed_ chr13 | 18809830 | 18810048 | + | 0    | 0    |
| ENSG0000(AP004289. processed_ chr8  | 99346052 | 99348256 | - | 0    | 0    |
| ENSG0000(RP11-419M processed_ chr7  | 55876738 | 55877024 | - | 0    | 0    |
| ENSG0000(UBE2D3P1 processed_ chr20  | 5292388  | 5292831  | - | 0    | 0    |
| ENSG0000(AC015977. processed_ chr2  | 26678219 | 26678510 | - | 0    | 0    |
| ENSG0000(KIF4CP processed_ chrX     | 79323446 | 79325217 | + | 0    | 0    |
| ENSG0000(AC091492. processed_ chr3  | 12328003 | 12328274 | + | 0    | 0    |
| ENSG0000(IFNWP4 processed_ chr9     | 21106543 | 21106836 | + | 0    | 0    |
| ENSG0000(RP11-330M lincRNA chr1     | 47818066 | 47820237 | + | 0    | 0    |
| ENSG0000(RP4-784A1 sense_intrε chr1 | 53291791 | 53292138 | - | 0    | 0    |
| ENSG0000(EIF4BP7 processed_ chrX    | 1.12E+08 | 1.12E+08 | - | 0.12 | 0.14 |
| ENSG0000(RP11-228B antisense chr9   | 1.28E+08 | 1.28E+08 | + | 0.51 | 0.39 |
| ENSG0000(CDK4P1 processed_ chr1     | 1.05E+08 | 1.05E+08 | + | 0    | 0    |
| ENSG0000(EIF1AX-AS1 antisense chrX  | 20139968 | 20140444 | + | 0    | 0    |
| ENSG0000(LINC01058 lincRNA chr13    | 30419519 | 30422237 | - | 0.35 | 0    |
| ENSG0000(RPL18AP2 processed_ chr21  | 46420553 | 46421034 | - | 0    | 0.17 |
| ENSG0000(RP11-204C lincRNA chr3     | 1962381  | 1987470  | - | 0    | 0    |
| ENSG0000(MTND5P27 processed_ chr2   | 82815809 | 82817528 | + | 0    | 0    |
| ENSG0000(RP1-20I3.3 processed_ chrX | 1.3E+08  | 1.3E+08  | + | 0    | 0    |
| ENSG0000(RP11-349E lincRNA chr9     | 1.19E+08 | 1.19E+08 | - | 0    | 0    |
| ENSG0000(HMGB3P2; transcribec chr5  | 1.8E+08  | 1.8E+08  | + | 0.35 | 0.14 |
| ENSG0000(PRP38AP1 processed_ chr10  | 8161260  | 8162192  | + | 0    | 0    |
| ENSG0000(RP11-344N processed_ chrX  | 48357125 | 48359495 | + | 0    | 0    |
| ENSG0000(RP11-218C lincRNA chr20    | 23655225 | 23656390 | - | 0    | 0    |
| ENSG0000(AC096574. processed_ chr2  | 2.38E+08 | 2.38E+08 | + | 0    | 0    |
| ENSG0000(RP11-132N lincRNA chr3     | 1.88E+08 | 1.88E+08 | - | 0    | 0    |
| ENSG0000(CATIP-AS1 processed_ chr2  | 2.18E+08 | 2.18E+08 | - | 0    | 0    |
| ENSG0000(RP11-383G antisense chr1   | 2.05E+08 | 2.05E+08 | - | 0    | 0    |
| ENSG0000(LINC01802 lincRNA chr2     | 2.07E+08 | 2.07E+08 | + | 0    | 0    |
| ENSG0000(RP1-272E8 processed_ chrX  | 17933349 | 17934823 | + | 0    | 0    |
| ENSG0000(RPL23AP2 processed_ chr19  | 15611657 | 15612122 | + | 0    | 0    |
| ENSG0000(RP5-1025A processed_ chr20 | 25099105 | 25099928 | + | 0    | 0    |
| ENSG0000(GS1-184P1 processed_ chrX  | 24429573 | 24429920 | - | 0    | 0    |
| ENSG0000(OR7E116P unprocessε chr9   | 90232185 | 90233141 | + | 0    | 0    |
| ENSG0000(RP11-426L antisense chr1   | 1.13E+08 | 1.13E+08 | - | 0    | 0    |
| ENSG0000(WWC3-AS1 antisense chrX    | 10024842 | 10038654 | - | 0    | 0    |
| ENSG0000(LINC00337 lincRNA chr1     | 6236240  | 6239444  | + | 0    | 0.06 |
| ENSG0000(RP11-123N processed_ chr9  | 1.23E+08 | 1.23E+08 | - | 0    | 0    |
| ENSG0000(FTH1P22 processed_ chr1    | 1.17E+08 | 1.17E+08 | - | 0    | 0    |

|                    |                 |          |          |          |   |      |      |
|--------------------|-----------------|----------|----------|----------|---|------|------|
| ENSG0000(PFN1P4    | processed_chr1  | 1.48E+08 | 1.48E+08 | +        | 0 | 0    |      |
| ENSG0000(DAP3P1    | unprocessε      | chr1     | 1.56E+08 | 1.56E+08 | + | 0    | 0    |
| ENSG0000(GRTP1-AS1 | antisense       | chr13    | 1.13E+08 | 1.13E+08 | + | 0    | 0    |
| ENSG0000(AL450226. | antisense       | chr17    | 2232680  | 2233610  | + | 0    | 0    |
| ENSG0000(RP11-15B2 | lincRNA         | chr9     | 82405188 | 82406239 | + | 0    | 0    |
| ENSG0000(RP4-660H1 | lincRNA         | chr1     | 72748921 | 72899140 | - | 0    | 0    |
| ENSG0000(SNORA71A  | snoRNA          | chr20    | 38427309 | 38427442 | - | 0    | 0    |
| ENSG0000(RP11-405C | sense_intrε     | chr6     | 7183083  | 7185287  | + | 0.03 | 0    |
| ENSG0000(RPL3P7    | processed_chr6  |          | 1.08E+08 | 1.08E+08 | - | 0    | 0    |
| ENSG0000(SETP20    | processed_chr4  |          | 1.1E+08  | 1.1E+08  | - | 0.3  | 0.08 |
| ENSG0000(XXbac-BPG | lincRNA         | chr6     | 57965630 | 57972218 | + | 0    | 0    |
| ENSG0000(BCRP1     | unprocessε      | chr22    | 24259929 | 24263764 | - | 0    | 0    |
| ENSG0000(ATP6V1E1F | processed_chr1  |          | 42903232 | 42903912 | + | 0    | 0    |
| ENSG0000(DPY19L2P5 | processed_chr10 |          | 79982910 | 79983240 | - | 0    | 0    |
| ENSG0000(OR52K3P   | unprocessε      | chr11    | 4474813  | 4475755  | + | 0.07 | 0    |
| ENSG0000(RP11-456H | antisense       | chr6     | 11990343 | 11992012 | - | 0    | 0    |
| ENSG0000(LINC01076 | lincRNA         | chr13    | 25193107 | 25210295 | - | 0    | 0    |
| ENSG0000(RP11-429E | antisense       | chr20    | 61738219 | 61755056 | - | 0.1  | 0.14 |
| ENSG0000(AC092484. | lincRNA         | chr2     | 1.46E+08 | 1.46E+08 | - | 0    | 0    |
| ENSG0000(ZBTB45P1  | processed_chr2  |          | 1.1E+08  | 1.1E+08  | - | 0    | 0    |
| ENSG0000(LLOXNC01- | protein_co      | chrX     | 1.53E+08 | 1.53E+08 | - | 0    | 0    |
| ENSG0000(AC083900. | sense_intrε     | chr2     | 2.08E+08 | 2.08E+08 | - | 0    | 0    |
| ENSG0000(RP11-295P | antisense       | chr10    | 13710415 | 13712054 | + | 0    | 0    |
| ENSG0000(RP5-1160K | sense_ovei      | chr1     | 1.1E+08  | 1.1E+08  | + | 0    | 0    |
| ENSG0000(RP11-137F | processed_chr20 |          | 3465177  | 3465444  | - | 0    | 0    |
| ENSG0000(ARSDP1    | unprocessε      | chrY     | 12354096 | 12387328 | + | 0    | 0    |
| ENSG0000(RP11-477L | processed_chr10 |          | 92878092 | 92878289 | - | 0    | 0    |
| ENSG0000(EEF1B2P5  | unprocessε      | chr6     | 63480134 | 63481876 | + | 0    | 0    |
| ENSG0000(RP11-408E | unprocessε      | chr1     | 1.63E+08 | 1.63E+08 | - | 0    | 0    |
| ENSG0000(RP11-255A | processed_chr9  |          | 33574361 | 33574588 | - | 0    | 0    |
| ENSG0000(RPL23AP3ε | processed_chr2  |          | 2.03E+08 | 2.03E+08 | - | 0    | 0    |
| ENSG0000(RANP4     | processed_chrX  |          | 1.37E+08 | 1.37E+08 | - | 0.72 | 0.68 |
| ENSG0000(RP4-549F1 | antisense       | chr1     | 7441096  | 7441554  | - | 0    | 0    |
| ENSG0000(LINC00237 | lincRNA         | chr20    | 21087604 | 21106358 | - | 0    | 0    |
| ENSG0000(LINC00972 | lincRNA         | chr7     | 85421122 | 85489293 | + | 0    | 0    |
| ENSG0000(RP4-614C1 | lincRNA         | chr20    | 59352195 | 59357774 | - | 0    | 0    |
| ENSG0000(PSME2P2   | processed_chr13 |          | 48771128 | 48771827 | + | 0    | 0    |
| ENSG0000(MORF4L1P  | processed_chr13 |          | 41199832 | 41200807 | - | 0    | 0    |
| ENSG0000(PGBD4P5   | processed_chr2  |          | 88922328 | 88922753 | - | 0    | 0    |
| ENSG0000(DYNC112P1 | processed_chr10 |          | 50264978 | 50266815 | + | 0    | 0    |
| ENSG0000(CTD-2228K | processed_chr5  |          | 473236   | 480884   | + | 5.95 | 4.99 |
| ENSG0000(RP11-809C | antisense       | chr10    | 628638   | 631255   | + | 0    | 0    |
| ENSG0000(RP11-490K | processed_chr1  |          | 31108188 | 31108623 | - | 0    | 0    |
| ENSG0000(AC018643. | antisense       | chr7     | 1.32E+08 | 1.32E+08 | + | 0    | 0    |
| ENSG0000(AC073957. | antisense       | chr7     | 1029025  | 1043891  | + | 0.14 | 0    |



|                                      |          |            |       |       |
|--------------------------------------|----------|------------|-------|-------|
| ENSG0000(RPS12P10 processed_ chr5    | 1.43E+08 | 1.43E+08 + | 0     | 0     |
| ENSG0000(RP5-899B1 lincRNA chr6      | 1.4E+08  | 1.4E+08 -  | 0     | 0     |
| ENSG0000(GOLGA2P7 transcribed chr15  | 84199311 | 84230136 - | 18.37 | 22.3  |
| ENSG0000(RP11-338C lincRNA chr10     | 1.23E+08 | 1.23E+08 - | 0     | 0     |
| ENSG0000(RP11-184J processed_ chr1   | 47074778 | 47075979 - | 0.05  | 0     |
| ENSG0000(TOMM22P processed_ chr10    | 1.19E+08 | 1.19E+08 + | 0     | 0     |
| ENSG0000(AC012354. lincRNA chr2      | 44954664 | 44968762 + | 0     | 0     |
| ENSG0000(HSPE1P24 processed_ chr1    | 10895761 | 10895998 + | 0     | 0     |
| ENSG0000(NPM1P39 processed_ chr1     | 27206930 | 27207796 + | 0     | 0     |
| ENSG0000(LINC00618 sense_ovei chr14  | 96931367 | 96945394 + | 0     | 0     |
| ENSG0000(CTD-2538A processed_ chr5   | 95440044 | 95440687 + | 0     | 0     |
| ENSG0000(AC012462. lincRNA chr2      | 2.15E+08 | 2.15E+08 + | 0     | 0     |
| ENSG0000(TXNP2 processed_ chr1       | 68514375 | 68514669 - | 0     | 0     |
| ENSG0000(BRI3P1 processed_ chr1      | 1E+08    | 1E+08 +    | 0     | 0     |
| ENSG0000(RP5-828K2 processed_ chr20  | 22272052 | 22273454 - | 0     | 0     |
| ENSG0000(DUTP6 processed_ chr1       | 1.67E+08 | 1.67E+08 + | 0.17  | 0.37  |
| ENSG0000(RP11-16L9. lincRNA chr1     | 1.99E+08 | 1.99E+08 + | 0     | 0     |
| ENSG0000(XXbac-BPG lincRNA chr6      | 28837869 | 28839006 - | 0     | 0     |
| ENSG0000(OSTM1-AS. lincRNA chr6      | 1.08E+08 | 1.08E+08 + | 0     | 0     |
| ENSG0000(RP11-795A unprocessε chr3   | 1.87E+08 | 1.87E+08 + | 0     | 0     |
| ENSG0000(ATP5LP4 processed_ chr4     | 1.49E+08 | 1.49E+08 - | 0     | 0     |
| ENSG0000(RP11-390P antisense chr6    | 1.39E+08 | 1.39E+08 + | 1.87  | 1.59  |
| ENSG0000(RPSAP58 processed_ chr19    | 23827162 | 23828049 + | 0.16  | 0     |
| ENSG0000(LINC00457 lincRNA chr13     | 34435450 | 34640685 - | 0     | 0     |
| ENSG0000(AATK-AS1 protein_co chr17   | 81165507 | 81183164 + | 0     | 0     |
| ENSG0000(RP11-388K antisense chr20   | 15552157 | 15552885 - | 0     | 0     |
| ENSG0000(AC092601. processed_ chr2   | 1.67E+08 | 1.67E+08 - | 0     | 0     |
| ENSG0000(RP4-758J2 processed_ chr1   | 54089856 | 54090093 + | 0     | 0     |
| ENSG0000(RP11-481K processed_ chr12  | 98590723 | 98591214 - | 0     | 0     |
| ENSG0000(AC073283. antisense chr2    | 47067822 | 47071204 + | 0.07  | 0     |
| ENSG0000(RREP1Y unprocessε chrY      | 23462465 | 23472280 + | 0     | 0     |
| ENSG0000(PLEKHM1 protein_co chr17    | 45435900 | 45490749 - | 17.23 | 17.78 |
| ENSG0000(RP11-97C1 processed_ chr1   | 1.04E+08 | 1.04E+08 + | 0     | 0     |
| ENSG0000(ZNF33BP1 processed_ chr10   | 37794276 | 37796109 - | 0     | 0.03  |
| ENSG0000(RPS12P26 transcribed chr15  | 90206572 | 90206967 + | 0.22  | 0     |
| ENSG0000(LINC00092 lincRNA chr9      | 96019732 | 96027965 - | 0.03  | 0.04  |
| ENSG0000(RP11-338E sense_intrε chr12 | 64628344 | 64629976 + | 0     | 0     |
| ENSG0000(RPL10P17 processed_ chr1    | 12220794 | 12221109 - | 0     | 0     |
| ENSG0000(SSXP3 unprocessε chrX       | 48156367 | 48166350 + | 0     | 0     |
| ENSG0000(AB019441. processed_ chr14  | 1.06E+08 | 1.06E+08 - | 0     | 0.12  |
| ENSG0000(RP11-182N antisense chr13   | 75375511 | 75377294 - | 0     | 0     |
| ENSG0000(AC093818. antisense chr2    | 1.72E+08 | 1.73E+08 - | 4     | 4.51  |
| ENSG0000(MIR137HG lincRNA chr1       | 97986740 | 98049863 - | 0.46  | 0.43  |
| ENSG0000(RP11-107I1 lincRNA chr10    | 1.01E+08 | 1.01E+08 + | 0     | 0     |
| ENSG0000(RP11-358N lincRNA chr7      | 68020253 | 68032690 + | 0     | 0     |

|                     |             |       |          |          |   |      |      |
|---------------------|-------------|-------|----------|----------|---|------|------|
| ENSG0000(DUXAP9     | transcribed | chr14 | 19062316 | 19115270 | + | 4.32 | 3.32 |
| ENSG0000(AKR1B1P6   | processed   | chr18 | 8545635  | 8546817  | + | 0    | 0    |
| ENSG0000(RP11-197N  | sense_intr  | chr10 | 16721352 | 16748377 | - | 0    | 0    |
| ENSG0000(AC079790.  | antisense   | chr2  | 1.52E+08 | 1.52E+08 | + | 0    | 0    |
| ENSG0000(SMARCE1P   | processed   | chr11 | 1.07E+08 | 1.07E+08 | - | 0    | 0    |
| ENSG0000(AC007362.  | antisense   | chr2  | 2.06E+08 | 2.06E+08 | - | 0    | 0    |
| ENSG0000(HSPA7      | unprocess   | chr1  | 1.62E+08 | 1.62E+08 | + | 0.03 | 0    |
| ENSG0000(AP001628.  | lincRNA     | chr21 | 42831040 | 42836477 | - | 0    | 0    |
| ENSG0000(PLA2G12A1  | processed   | chr13 | 38902387 | 38902650 | + | 0    | 0    |
| ENSG0000(CHCHD4P5   | processed   | chr1  | 2.46E+08 | 2.46E+08 | + | 0    | 0    |
| ENSG0000(RPS27AP12  | processed   | chr7  | 1.57E+08 | 1.57E+08 | + | 0    | 0    |
| ENSG0000(ARL2BPP1C  | processed   | chr22 | 18102457 | 18103649 | - | 0    | 0    |
| ENSG0000(LINC01795  | lincRNA     | chr2  | 58275877 | 58296548 | + | 0.85 | 0.09 |
| ENSG0000(AC008937.  | antisense   | chr5  | 56900041 | 56910714 | - | 0    | 0    |
| ENSG0000(AC091814.  | lincRNA     | chr12 | 9936579  | 9943495  | - | 0    | 0    |
| ENSG0000(RP11-554K  | lincRNA     | chr1  | 2.13E+08 | 2.14E+08 | + | 0    | 0    |
| ENSG0000(TRAPPC12-  | antisense   | chr2  | 3481242  | 3482409  | - | 0    | 0    |
| ENSG0000(INTS6L-AS1 | antisense   | chrX  | 1.36E+08 | 1.36E+08 | - | 0.21 | 0    |
| ENSG0000(AP000936.  | processed   | chr11 | 1.17E+08 | 1.17E+08 | - | 0    | 0    |
| ENSG0000(RP1-169I5. | processed   | chrX  | 41472264 | 41472653 | - | 0    | 0    |
| ENSG0000(RPL21P107  | processed   | chr13 | 1.11E+08 | 1.11E+08 | - | 0    | 0    |
| ENSG0000(AC117490.  | unprocess   | chr3  | 1.96E+08 | 1.96E+08 | - | 0    | 0    |
| ENSG0000(COX6B1P7   | processed   | chr1  | 68282388 | 68282622 | + | 0    | 0    |
| ENSG0000(RP1-127D3  | antisense   | chr1  | 1.71E+08 | 1.71E+08 | - | 0    | 0    |
| ENSG0000(RP11-220H  | unprocess   | chr7  | 56940341 | 56944353 | - | 0    | 0    |
| ENSG0000(RPS2P1     | processed   | chr20 | 34122470 | 34123290 | + | 0    | 0.09 |
| ENSG0000(LINC00378  | lincRNA     | chr13 | 60685199 | 60694528 | + | 0    | 0    |
| ENSG0000(RPL5P25    | processed   | chr10 | 13057902 | 13058676 | - | 0.08 | 0    |
| ENSG0000(AC011225.  | processed   | chr18 | 41819053 | 41819421 | + | 0    | 0    |
| ENSG0000(ARMC8P1    | processed   | chr9  | 38452782 | 38454070 | - | 0    | 0    |
| ENSG0000(LINC01297  | lincRNA     | chr22 | 15746630 | 15778297 | + | 0    | 0    |
| ENSG0000(TRAPPC2P1  | unprocess   | chrY  | 25699451 | 25702562 | + | 0    | 0    |
| ENSG0000(AC009478.  | lincRNA     | chr2  | 1.81E+08 | 1.81E+08 | - | 0    | 0    |
| ENSG0000(ST13P6     | processed   | chr8  | 1.33E+08 | 1.33E+08 | + | 0    | 0    |
| ENSG0000(PCDH9-AS3  | antisense   | chr13 | 66977432 | 66985776 | + | 0    | 0    |
| ENSG0000(ZNRF2P2    | transcribed | chr7  | 29598795 | 29685255 | - | 1.32 | 2.38 |
| ENSG0000(TAF1A-AS1  | antisense   | chr1  | 2.23E+08 | 2.23E+08 | + | 0.77 | 1.05 |
| ENSG0000(RPL8P2     | processed   | chr21 | 30263380 | 30263881 | - | 0    | 0    |
| ENSG0000(LINC00705  | lincRNA     | chr10 | 4655427  | 4662419  | + | 0    | 0    |
| ENSG0000(CICP12     | processed   | chr7  | 55798034 | 55798876 | + | 0    | 0    |
| ENSG0000(RP11-66N5  | processed   | chrX  | 8980425  | 8982505  | - | 0    | 0    |
| ENSG0000(RP11-466F  | processed   | chr1  | 1.66E+08 | 1.66E+08 | + | 0    | 0    |
| ENSG0000(NUP210P2   | unprocess   | chr3  | 11900011 | 11901245 | + | 0    | 0    |
| ENSG0000(MTND1P18   | processed   | chr10 | 37600796 | 37601368 | - | 0    | 0    |
| ENSG0000(RP11-536C  | antisense   | chr1  | 1.6E+08  | 1.6E+08  | + | 1.9  | 0.46 |

|                                             |          |          |   |      |      |
|---------------------------------------------|----------|----------|---|------|------|
| ENSG0000(RP11-227D antisense chr20          | 21397818 | 21400391 | + | 0    | 0    |
| ENSG0000(AP000350. processed_ chr22         | 23926900 | 23929574 | + | 0    | 0    |
| ENSG0000(AC018693. antisense chr2           | 38861720 | 38863133 | + | 0    | 0    |
| ENSG0000(LINC01770 lincRNA chr1             | 1430539  | 1434573  | - | 0.75 | 0    |
| ENSG0000(AC005105. processed_ chr7          | 28615097 | 28615888 | - | 0    | 0    |
| ENSG0000(OFD1P13Y unprocessed_ chrY         | 25675060 | 25697346 | - | 0    | 0    |
| ENSG0000(RPL29P29 processed_ chr13          | 88236547 | 88236969 | - | 0    | 0    |
| ENSG0000(RP11-57H1 sense_intron chr10       | 1.13E+08 | 1.13E+08 | + | 0    | 0    |
| ENSG0000(ABCD1P4 unprocessed_ chr22         | 16387694 | 16390887 | + | 0    | 0    |
| ENSG0000(OSTCP2 processed_ chr1             | 26985897 | 26986340 | - | 0    | 0    |
| ENSG0000(MTND4P4 unprocessed_ chr7          | 57169406 | 57170771 | + | 0    | 0    |
| ENSG0000(RP4-612C1 processed_ chr1          | 93199755 | 93199939 | - | 0    | 0    |
| ENSG0000(LINC00113 lincRNA chr21            | 27722379 | 27751233 | + | 0    | 0    |
| ENSG0000(RP11-344A antisense chr10          | 67052609 | 67055028 | + | 0    | 0    |
| ENSG0000(RP11-1086 sense_intron chr1        | 2.47E+08 | 2.47E+08 | + | 0.03 | 0.16 |
| ENSG0000(RP11-5391E processed_ chr10        | 1.17E+08 | 1.17E+08 | - | 0.42 | 0.52 |
| ENSG0000(RP11-512N antisense chr10          | 50472814 | 50474246 | + | 0    | 0    |
| ENSG0000(AC106901. processed_ chr2          | 2.04E+08 | 2.04E+08 | + | 0    | 0    |
| ENSG0000(ASS1P11 processed_ chr7            | 21220213 | 21221428 | - | 0    | 0    |
| ENSG0000(DNAJC19P4 processed_ chr3          | 2985231  | 2985575  | - | 0    | 0    |
| ENSG0000(RP1-91J24. antisense chr6          | 1.44E+08 | 1.44E+08 | - | 0    | 0    |
| ENSG0000(RP11-415J8 antisense chr1          | 33307348 | 33349245 | + | 0    | 0.13 |
| ENSG0000(AC018634. processed_ chr7          | 37821210 | 37821610 | + | 0    | 0    |
| ENSG0000(RP11-293P antisense chr1           | 24040835 | 24086799 | + | 0    | 0    |
| ENSG0000(LINC00350 lincRNA chr13            | 19587118 | 19588350 | + | 0    | 0    |
| ENSG0000(LINC01427 lincRNA chr20            | 22263065 | 22284029 | - | 0.19 | 0.13 |
| ENSG0000(Z84721.4 unprocessed_ chr16        | 168679   | 169334   | + | 0    | 0    |
| ENSG0000(RP11-479J1 lincRNA chr1            | 1.66E+08 | 1.66E+08 | - | 0    | 0    |
| ENSG0000(USP9YP19 unprocessed_ chrY         | 25748596 | 25750206 | - | 0    | 0    |
| ENSG0000(USP17L3 protein_coding chr8        | 7976393  | 7977985  | - | 0    | 0    |
| ENSG0000(LINC01594 antisense chr2           | 1.08E+08 | 1.08E+08 | - | 0    | 0    |
| ENSG0000(LHFPL3-AS1 processed_ chr7         | 1.05E+08 | 1.05E+08 | - | 0    | 0    |
| ENSG0000(AF064860.1 sense_overlapping chr21 | 39630271 | 39726085 | + | 0    | 0    |
| ENSG0000(LINC01678 lincRNA chr21            | 44158740 | 44160076 | - | 0    | 0    |
| ENSG0000(RP1-144F1 processed_ chr1          | 39718028 | 39718595 | + | 0    | 0    |
| ENSG0000(RP11-449J1 antisense chr1          | 2.25E+08 | 2.25E+08 | + | 0    | 0    |
| ENSG0000(XXbac-B47 antisense chr22          | 18076527 | 18078884 | - | 0.21 | 0.18 |
| ENSG0000(HMGB3P1 processed_ chr20           | 34833575 | 34834462 | - | 0    | 0    |
| ENSG0000(RP11-561C lincRNA chr9             | 68307393 | 68308445 | + | 0    | 0    |
| ENSG0000(RPL23AP18 processed_ chr1          | 2.12E+08 | 2.12E+08 | - | 0    | 0    |
| ENSG0000(RP11-513I1 processed_ chr6         | 34248568 | 34286768 | + | 2.55 | 2.1  |
| ENSG0000(AC013269. antisense chr2           | 1.31E+08 | 1.31E+08 | + | 0    | 0    |
| ENSG0000(AC079630. antisense chr12          | 40186009 | 40224915 | - | 0.18 | 0.44 |
| ENSG0000(RPL21P66 processed_ chr6           | 1.33E+08 | 1.33E+08 | - | 0    | 0    |
| ENSG0000(RP4-738P1 processed_ chr20         | 25161167 | 25162061 | - | 0    | 0    |

|                                       |          |            |      |      |
|---------------------------------------|----------|------------|------|------|
| ENSG0000(SNX18P3 transcribed chr9     | 38566260 | 38568211 - | 0.35 | 0.34 |
| ENSG0000(SLC25A5P8 processed_ chr9    | 32333457 | 32334354 - | 0    | 0    |
| ENSG0000(RP11-820K processed_ chr12   | 31534715 | 31535247 - | 0    | 0    |
| ENSG0000(FREM2-AS1 antisense chr13    | 38821798 | 38827570 - | 0    | 0    |
| ENSG0000(RPL31P53 processed_ chr13    | 57391171 | 57391518 - | 0    | 0    |
| ENSG0000(RPL7AP52 processed_ chr10    | 94882554 | 94883343 + | 0    | 0    |
| ENSG0000(ARL6IP1P2 processed_ chr10   | 36995023 | 36995585 + | 0    | 0    |
| ENSG0000(RP11-433C processed_ chr4    | 1.82E+08 | 1.82E+08 + | 0    | 0    |
| ENSG0000(RPF2P1 processed_ chr20      | 35752814 | 35753719 + | 0    | 0    |
| ENSG0000(MIPEPP1 processed_ chr7      | 1.13E+08 | 1.13E+08 - | 0    | 0    |
| ENSG0000(RP11-540K lincRNA chr1       | 1.81E+08 | 1.81E+08 - | 0    | 0    |
| ENSG0000(RP11-149F processed_ chr9    | 63729702 | 63730173 + | 0    | 0    |
| ENSG0000(PPP1R26-A antisense chr9     | 1.35E+08 | 1.35E+08 - | 1.23 | 1.38 |
| ENSG0000(CT62 protein_co chr15        | 71110244 | 71115494 - | 0    | 0    |
| ENSG0000(ATP6V0E1F processed_ chr5    | 1.33E+08 | 1.33E+08 + | 0    | 0    |
| ENSG0000(AC078942. antisense chr7     | 1.59E+08 | 1.59E+08 + | 0    | 0    |
| ENSG0000(TDGF1P3 transcribed chrX     | 1.11E+08 | 1.11E+08 + | 0    | 0    |
| ENSG0000(AC009506. processed_ chr2    | 1.59E+08 | 1.59E+08 - | 0    | 0.03 |
| ENSG0000(AC011515. unprocessed_ chr19 | 54671231 | 54672591 + | 0    | 0    |
| ENSG0000(CICP8 processed_ chr7        | 56362458 | 56365270 + | 0    | 0    |
| ENSG0000(TMEM246- antisense chr9      | 1.01E+08 | 1.01E+08 + | 0    | 0    |
| ENSG0000(NRSN2-AS1 antisense chr20    | 320313   | 348224 -   | 4.51 | 4.17 |
| ENSG0000(AC015977. antisense chr2     | 26671254 | 26674464 - | 0    | 0    |
| ENSG0000(IGKV1OR9- IG_V_pseu chr9     | 40641841 | 40642117 - | 0    | 0    |
| ENSG0000(RPS5P7 processed_ chrX       | 1.1E+08  | 1.1E+08 +  | 0    | 0    |
| ENSG0000(SFTA1P lincRNA chr10         | 10784437 | 10794980 - | 0    | 0.58 |
| ENSG0000(RP13-643D processed_ chrX    | 34717440 | 34717992 - | 0    | 0    |
| ENSG0000(RP11-350E processed_ chr9    | 88066915 | 88068037 + | 0    | 0    |
| ENSG0000(AC099754. lincRNA chr3       | 26619330 | 26622690 - | 0    | 0    |
| ENSG0000(RP11-422P lincRNA chr1       | 18385829 | 18388514 + | 0    | 0    |
| ENSG0000(NHEG1 lincRNA chr6           | 1.37E+08 | 1.37E+08 - | 0    | 0    |
| ENSG0000(AC016700. processed_ chr2    | 70102551 | 70102862 + | 0    | 0    |
| ENSG0000(RP11-218L. antisense chrX    | 1.55E+08 | 1.55E+08 + | 0    | 0    |
| ENSG0000(AC106883. processed_ chr2    | 1.94E+08 | 1.94E+08 - | 0    | 0    |
| ENSG0000(FAM236D protein_co chrX      | 72807425 | 72808210 - | 0    | 0    |
| ENSG0000(RP11-552J. processed_ chrX   | 52722338 | 52722524 + | 0    | 0    |
| ENSG0000(PGM5P4 unprocessed_ chr2     | 1.14E+08 | 1.14E+08 + | 0    | 0.2  |
| ENSG0000(RP11-3B7.1 lincRNA chr3      | 49260085 | 49261316 + | 0.1  | 0    |
| ENSG0000(RAB28P5 processed_ chrX      | 1.37E+08 | 1.37E+08 + | 0    | 0    |
| ENSG0000(TGIF2P1 processed_ chr1      | 2.44E+08 | 2.44E+08 - | 0.1  | 0    |
| ENSG0000(AC010878. processed_ chr2    | 37816915 | 37817961 + | 0    | 0    |
| ENSG0000(RPL26P34 processed_ chr13    | 24704338 | 24704788 - | 0    | 0    |
| ENSG0000(RPS15AP17 processed_ chr4    | 62105660 | 62106049 - | 0    | 0    |
| ENSG0000(AC080125. processed_ chr2    | 1.86E+08 | 1.86E+08 - | 0    | 0    |
| ENSG0000(CTD-2384B antisense chr5     | 76691439 | 76716215 - | 0    | 0    |

|                 |                       |       |          |          |   |      |      |
|-----------------|-----------------------|-------|----------|----------|---|------|------|
| ENSG00000100000 | RP11-207C antisense   | chr9  | 5719021  | 5720244  | - | 0    | 0    |
| ENSG00000100000 | RP11-764K lincRNA     | chr9  | 63802144 | 63814159 | - | 0.08 | 0    |
| ENSG00000100000 | AP000345. lincRNA     | chr22 | 23512494 | 23513602 | - | 0    | 0    |
| ENSG00000100000 | CCRL1P1 processed     | chr6  | 1.39E+08 | 1.39E+08 | + | 0    | 0    |
| ENSG00000100000 | AC104843. processed   | chr7  | 1.53E+08 | 1.53E+08 | - | 0    | 0    |
| ENSG00000100000 | RP5-1178H antisense   | chr20 | 20214299 | 20215262 | - | 0    | 0    |
| ENSG00000100000 | AKR1C5P unprocessed   | chr10 | 5122087  | 5135226  | - | 0    | 0    |
| ENSG00000100000 | RPL21P3 processed     | chr20 | 18485265 | 18486052 | + | 0.16 | 0    |
| ENSG00000100000 | AC104134. antisense   | chr2  | 88538720 | 88575610 | + | 0    | 0    |
| ENSG00000100000 | AC019330. lincRNA     | chr2  | 1.98E+08 | 1.99E+08 | - | 0    | 0    |
| ENSG00000100000 | RBMS1P1 processed     | chr12 | 66234079 | 66235234 | - | 0.06 | 0    |
| ENSG00000100000 | TNPO1P1 processed     | chr10 | 84390908 | 84392045 | + | 0    | 0    |
| ENSG00000100000 | RP11-168C lincRNA     | chr10 | 1.29E+08 | 1.29E+08 | + | 0    | 0    |
| ENSG00000100000 | LINC00331 lincRNA     | chr13 | 78787319 | 78792307 | - | 0    | 0    |
| ENSG00000100000 | NDUFB4P7 processed    | chr2  | 87968609 | 87968971 | + | 0    | 0    |
| ENSG00000100000 | LINC01671 lincRNA     | chr21 | 42599280 | 42615058 | - | 0    | 0    |
| ENSG00000100000 | MTND1P12 unprocessed  | chrY  | 11445418 | 11445564 | - | 0    | 0    |
| ENSG00000100000 | LINC01504 lincRNA     | chr9  | 72305430 | 72343210 | + | 0    | 0.13 |
| ENSG00000100000 | PACRG-AS2 antisense   | chr6  | 1.63E+08 | 1.63E+08 | - | 0    | 0    |
| ENSG00000100000 | KRT41P unprocessed    | chr17 | 41406512 | 41411775 | - | 0    | 0    |
| ENSG00000100000 | BOLA3-AS1 antisense   | chr2  | 74148009 | 74150061 | + | 1.31 | 1.81 |
| ENSG00000100000 | MPRIP-AS1 antisense   | chr17 | 17076038 | 17077752 | - | 0    | 0    |
| ENSG00000100000 | AC004938. processed   | chr7  | 44511025 | 44511332 | - | 0    | 0    |
| ENSG00000100000 | LINC01867 lincRNA     | chr2  | 52373118 | 52390012 | + | 0    | 0    |
| ENSG00000100000 | LINC01763 lincRNA     | chr1  | 90851759 | 90855253 | + | 0    | 0    |
| ENSG00000100000 | RPS15AP1 processed    | chr1  | 45645816 | 45646197 | - | 0    | 0.25 |
| ENSG00000100000 | AC009477. processed   | chr2  | 1.31E+08 | 1.31E+08 | - | 0    | 0    |
| ENSG00000100000 | RAB6C-AS1 transcribed | chr2  | 1.3E+08  | 1.3E+08  | - | 0    | 0.03 |
| ENSG00000100000 | RP3-508115 antisense  | chr22 | 38739003 | 38749041 | + | 0    | 0    |
| ENSG00000100000 | RP11-34016 processed  | chr7  | 63876341 | 63877350 | + | 0    | 0    |
| ENSG00000100000 | TP11P4 processed      | chr4  | 49016682 | 49017154 | - | 0    | 0    |
| ENSG00000100000 | RP11-736E processed   | chr7  | 1.13E+08 | 1.13E+08 | + | 0    | 0    |
| ENSG00000100000 | RP5-1121H antisense   | chr20 | 41991140 | 42063969 | + | 0    | 0    |
| ENSG00000100000 | RP13-93L1. processed  | chr9  | 89472237 | 89472692 | + | 0    | 0    |
| ENSG00000100000 | FDPSP1 processed      | chr1  | 1.88E+08 | 1.88E+08 | + | 0    | 0    |
| ENSG00000100000 | ZNF70P1 processed     | chr6  | 33215705 | 33216328 | + | 0    | 0    |
| ENSG00000100000 | RFPL1S antisense      | chr22 | 29436534 | 29478175 | - | 0    | 0.04 |
| ENSG00000100000 | OFD1P10Y unprocessed  | chrY  | 23581595 | 23614640 | + | 0    | 0    |
| ENSG00000100000 | RP3-406C1 unprocessed | chrX  | 1.42E+08 | 1.42E+08 | - | 0    | 0    |
| ENSG00000100000 | JPX lincRNA           | chrX  | 73944184 | 74070408 | + | 7.41 | 9.15 |
| ENSG00000100000 | RP11-262D transcribed | chrX  | 72159845 | 72160346 | + | 0    | 0    |
| ENSG00000100000 | RP11-120J. antisense  | chr9  | 14317085 | 14357908 | + | 0.7  | 0.49 |
| ENSG00000100000 | ATP13A4-A antisense   | chr3  | 1.94E+08 | 1.94E+08 | + | 0    | 0    |
| ENSG00000100000 | RP11-377K processed   | chr1  | 56619409 | 56619549 | - | 0    | 0    |
| ENSG00000100000 | MTCO3P5 processed     | chr2  | 1.43E+08 | 1.43E+08 | - | 0    | 0    |

|                                           |          |          |   |      |       |
|-------------------------------------------|----------|----------|---|------|-------|
| ENSG0000(CTD-2302A processed_ chr11       | 21283779 | 21284955 | + | 0    | 0     |
| ENSG0000(RP1-8B22.2 processed_ chr1       | 18595414 | 18595636 | + | 0    | 0     |
| ENSG0000(PLCB1-IT1 sense_intronic chr20   | 8248704  | 8256918  | + | 0    | 0     |
| ENSG0000(AC006548. processed_ chr22       | 16897445 | 16897546 | + | 0    | 0     |
| ENSG0000(RPS6P14 processed_ chr10         | 48292699 | 48293417 | + | 0    | 0     |
| ENSG0000(RP11-38J2.2 processed_ chr1      | 2.06E+08 | 2.06E+08 | - | 0    | 0     |
| ENSG0000(NUTM2B-A antisense_ chr10        | 79663088 | 79826594 | - | 9.52 | 10.49 |
| ENSG0000(RP11-301G processed_ chr1        | 2.34E+08 | 2.34E+08 | - | 0    | 0     |
| ENSG0000(RP11-403P processed_ chr1        | 1.65E+08 | 1.65E+08 | - | 0    | 0     |
| ENSG0000(RP11-760D lincRNA_ chr7          | 56482105 | 56483295 | - | 0    | 0     |
| ENSG0000(RP11-390F. lincRNA_ chr9         | 6716495  | 6727438  | + | 0    | 0.37  |
| ENSG0000(UBE2Q2P4 unprocessed_ chrY       | 24232826 | 24238984 | - | 0    | 0     |
| ENSG0000(GBP1P1 transcribed_ chr1         | 89407679 | 89426243 | + | 0.13 | 0.32  |
| ENSG0000(LINC01107 lincRNA_ chr2          | 2.39E+08 | 2.39E+08 | - | 0    | 0     |
| ENSG0000(AC104651. processed_ chr2        | 1.12E+08 | 1.12E+08 | - | 0    | 0     |
| ENSG0000(KCNMA1-A antisense_ chr10        | 77147652 | 77150100 | + | 0    | 0     |
| ENSG0000(AC002064. lincRNA_ chr7          | 90312496 | 90322592 | + | 0.09 | 0     |
| ENSG0000(RPL15P4 processed_ chr6          | 31528114 | 31528693 | + | 0    | 0     |
| ENSG0000(SNRPF3 processed_ chr13          | 69101832 | 69102056 | - | 0    | 0     |
| ENSG0000(GAPDHP16 processed_ chr21        | 14774301 | 14775262 | + | 0    | 0     |
| ENSG0000(RP11-330C processed_ chr1        | 92732000 | 92733257 | + | 0    | 0     |
| ENSG0000(CYP4A22-A lincRNA_ chr1          | 47096653 | 47179271 | - | 0.27 | 0.44  |
| ENSG0000(AC069282. processed_ chr7        | 47956793 | 47957318 | + | 0    | 0     |
| ENSG0000(SSXP5 unprocessed_ chrX          | 52672718 | 52677051 | + | 0    | 0     |
| ENSG0000(AIFM1P1 processed_ chr10         | 18735745 | 18738631 | + | 0    | 0     |
| ENSG0000(PCDH8P1 transcribed_ chr13       | 53199981 | 53202753 | + | 0    | 0     |
| ENSG0000(LINC00475 lincRNA_ chr9          | 92141298 | 92160114 | + | 2.41 | 2.65  |
| ENSG0000(RP11-165N processed_ chr9        | 1.12E+08 | 1.12E+08 | - | 0    | 0     |
| ENSG0000(MTND1P34 transcribed_ chr1       | 47164510 | 47165920 | - | 0    | 0     |
| ENSG0000(FAM197Y5 lincRNA_ chrY           | 9458613  | 9465974  | - | 0    | 0     |
| ENSG0000(LINC01703 lincRNA_ chr1          | 2.26E+08 | 2.26E+08 | + | 2.36 | 1.54  |
| ENSG0000(RP11-236B lincRNA_ chr10         | 90994620 | 91006390 | + | 0    | 0     |
| ENSG0000(TTTY16 lincRNA_ chrY             | 7699357  | 7701247  | - | 1.1  | 1.21  |
| ENSG0000(AC005237. antisense_ chr2        | 2.41E+08 | 2.41E+08 | - | 0    | 0     |
| ENSG0000(RP11-203F processed_ chr1        | 2.04E+08 | 2.04E+08 | + | 0    | 0     |
| ENSG0000(IGKV6D-21 IG_V_gene_ chr2        | 90021567 | 90022185 | + | 0    | 0     |
| ENSG0000(MKRN2OS protein_coding_ chr3     | 12514934 | 12561059 | - | 0    | 0     |
| ENSG0000(RP11-383B antisense_ chr10       | 18531849 | 18533336 | - | 0    | 0     |
| ENSG0000(RP3-370M.1 protein_coding_ chr22 | 39960397 | 39964718 | + | 0    | 0     |
| ENSG0000(SP3P processed_ chr13            | 89361160 | 89363224 | - | 0    | 0     |
| ENSG0000(RP11-1961J processed_ chr9       | 1.07E+08 | 1.07E+08 | + | 0    | 0     |
| ENSG0000(XX-C2158C lincRNA_ chr6          | 1.71E+08 | 1.71E+08 | - | 0    | 0     |
| ENSG0000(PAWRP1 processed_ chr10          | 95183653 | 95184217 | + | 0    | 0     |
| ENSG0000(LINC01393 lincRNA_ chr7          | 1.15E+08 | 1.15E+08 | + | 0.19 | 0.11  |
| ENSG0000(STIP1P3 processed_ chrX          | 86084716 | 86086339 | - | 0    | 0     |

|                                 |       |          |          |   |      |      |
|---------------------------------|-------|----------|----------|---|------|------|
| ENSG0000( AC073325. lincRNA     | chr7  | 45460712 | 45542182 | + | 0    | 0    |
| ENSG0000( OR5BE1P unprocessε    | chr11 | 56082801 | 56083739 | + | 0    | 0    |
| ENSG0000( LINC01821 lincRNA     | chr2  | 1.94E+08 | 1.94E+08 | + | 0    | 0    |
| ENSG0000( AC002480. sense_ovei  | chr7  | 22571607 | 22661792 | - | 0    | 0    |
| ENSG0000( ZNF385D-A antisense   | chr3  | 21542816 | 21579959 | + | 0    | 0    |
| ENSG0000( KB-1027C1 processed_  | chr22 | 21885282 | 21885673 | - | 0.41 | 0    |
| ENSG0000( RP11-545I1 lincRNA    | chr1  | 1.71E+08 | 1.71E+08 | - | 0    | 0    |
| ENSG0000( LVCAT5 lincRNA        | chr7  | 1.2E+08  | 1.2E+08  | - | 0    | 0    |
| ENSG0000( LINC01980 lincRNA     | chr3  | 27802762 | 27891301 | + | 0.13 | 0    |
| ENSG0000( RP11-210H transcribec | chr6  | 1.19E+08 | 1.19E+08 | + | 0    | 0    |
| ENSG0000( RP11-19J3. unprocessε | chr9  | 92539053 | 92539184 | - | 0    | 0    |
| ENSG0000( NAALADL2. antisense   | chr3  | 1.76E+08 | 1.76E+08 | - | 0    | 0    |
| ENSG0000( RP11-527D lincRNA     | chr1  | 2.41E+08 | 2.41E+08 | + | 0    | 0    |
| ENSG0000( AP000320. antisense   | chr21 | 34370802 | 34375348 | - | 0.49 | 0    |
| ENSG0000( C2CD4D protein_co     | chr1  | 1.52E+08 | 1.52E+08 | - | 0    | 0.04 |
| ENSG0000( MTCO3P2C processed_   | chr22 | 36175167 | 36175854 | + | 0    | 0    |
| ENSG0000( UBE2D3P2 processed_   | chr3  | 37134658 | 37135102 | + | 0    | 0    |
| ENSG0000( AC083867. lincRNA     | chr7  | 1.38E+08 | 1.38E+08 | + | 0    | 0    |
| ENSG0000( FAM197Y8 transcribec  | chrY  | 9347511  | 9356814  | - | 0    | 0    |
| ENSG0000( LINC01710 lincRNA     | chr1  | 2.19E+08 | 2.19E+08 | - | 0    | 0    |
| ENSG0000( AC006076. lincRNA     | chr20 | 53799823 | 53801318 | - | 0    | 0    |
| ENSG0000( LINC01492 lincRNA     | chr9  | 1.03E+08 | 1.03E+08 | - | 0.07 | 0.08 |
| ENSG0000( RP11-384B processed_  | chr1  | 87045875 | 87046700 | + | 0    | 0    |
| ENSG0000( CCT4P2 processed_     | chrX  | 65270913 | 65273019 | + | 0    | 0    |
| ENSG0000( AC013733. lincRNA     | chr2  | 1.82E+08 | 1.82E+08 | - | 0    | 0    |
| ENSG0000( DOCK4-AS1 antisense   | chr7  | 1.12E+08 | 1.12E+08 | + | 0    | 0    |
| ENSG0000( RPL35P5 processed_    | chr7  | 66606738 | 66607107 | - | 0    | 0    |
| ENSG0000( DRAXINP1 processed_   | chrX  | 8783514  | 8784461  | - | 0    | 0    |
| ENSG0000( NCBP2-AS1 antisense   | chr3  | 1.97E+08 | 1.97E+08 | + | 0.13 | 0    |
| ENSG0000( EDNRB-AS1 lincRNA     | chr13 | 77828222 | 77833950 | + | 0    | 0    |
| ENSG0000( RP1-159M; processed_  | chr6  | 1.13E+08 | 1.13E+08 | - | 0    | 0    |
| ENSG0000( TRIM53AP unprocessε   | chr11 | 89993536 | 89999741 | - | 0    | 0    |
| ENSG0000( AC011193. lincRNA     | chr17 | 34479312 | 34479957 | + | 0    | 0    |
| ENSG0000( RP4-630C2 processed_  | chr7  | 1.24E+08 | 1.24E+08 | + | 0    | 0    |
| ENSG0000( IPPKP1 processed_     | chr13 | 21103003 | 21104371 | - | 0    | 0    |
| ENSG0000( AC096669. lincRNA     | chr2  | 1.07E+08 | 1.07E+08 | + | 0    | 0    |
| ENSG0000( RP11-360D processed_  | chr1  | 1.74E+08 | 1.74E+08 | + | 0    | 0    |
| ENSG0000( AC098826. unprocessε  | chr2  | 1.32E+08 | 1.32E+08 | + | 0    | 0    |
| ENSG0000( LINC01623 lincRNA     | chr6  | 28859625 | 28864630 | - | 0.09 | 0    |
| ENSG0000( RP11-339D lincRNA     | chr1  | 80373364 | 80374621 | - | 0    | 0    |
| ENSG0000( MTOR-AS1 antisense    | chr1  | 11143898 | 11149537 | + | 0    | 0    |
| ENSG0000( RP11-325P processed_  | chr1  | 1.47E+08 | 1.47E+08 | + | 0    | 0    |
| ENSG0000( RP11-550H lincRNA     | chr1  | 75932479 | 76019356 | + | 0    | 0    |
| ENSG0000( AC005281. antisense   | chr7  | 12570125 | 12571392 | - | 0    | 0    |
| ENSG0000( CDY20P unprocessε     | chrY  | 25618644 | 25620253 | + | 0    | 0    |

|                                 |       |          |          |   |       |       |
|---------------------------------|-------|----------|----------|---|-------|-------|
| ENSG0000( AC007679. antisense   | chr2  | 2.06E+08 | 2.06E+08 | + | 0     | 0     |
| ENSG0000( LINC02158 antisense   | chr3  | 42770612 | 42773635 | + | 0.28  | 0     |
| ENSG0000( AC099552. lincRNA     | chr7  | 1.55E+08 | 1.55E+08 | + | 0     | 0     |
| ENSG0000( LINCMD1 lincRNA       | chr6  | 52146814 | 52151119 | - | 0     | 0     |
| ENSG0000( ZNF469 protein_co     | chr16 | 88427471 | 88440757 | + | 3.59  | 3.32  |
| ENSG0000( RBMY2UP unprocessε    | chrY  | 22198429 | 22203712 | + | 0     | 0     |
| ENSG0000( RP4-604A2 processed_  | chr1  | 28982278 | 28982608 | - | 0     | 0     |
| ENSG0000( MYT1L-AS1 antisense   | chr2  | 2319232  | 2327110  | + | 0     | 0     |
| ENSG0000( RP11-569A lincRNA     | chr1  | 2.03E+08 | 2.03E+08 | + | 0     | 0     |
| ENSG0000( PPIAP17 processed_    | chr20 | 16223750 | 16224535 | - | 0     | 0     |
| ENSG0000( AGBL4-IT1 sense_intrε | chr1  | 49374201 | 49472085 | - | 0     | 0     |
| ENSG0000( TBL1YP1 unprocessε    | chrY  | 20727254 | 20742900 | + | 0     | 0     |
| ENSG0000( RP11-31H5 processed_  | chr15 | 56846340 | 56846605 | + | 0     | 0     |
| ENSG0000( C9orf135-A lincRNA    | chr9  | 69818983 | 69820739 | - | 0     | 0     |
| ENSG0000( MTND2P2ε unprocessε   | chr1  | 629640   | 630683   | + | 4.78  | 4.94  |
| ENSG0000( RP5-997D2 antisense   | chr1  | 54285405 | 54287371 | + | 0     | 0     |
| ENSG0000( HNRNPA3F processed_   | chr2  | 1.97E+08 | 1.97E+08 | + | 0     | 0     |
| ENSG0000( AP001046. lincRNA     | chr21 | 43363332 | 43366566 | + | 0     | 0     |
| ENSG0000( PABPC1P1: processed_  | chr10 | 38635908 | 38638082 | + | 0     | 0     |
| ENSG0000( PGAM1P2 processed_    | chr9  | 35943210 | 35943934 | - | 0     | 0     |
| ENSG0000( LINC01729 lincRNA     | chr20 | 5507875  | 5510002  | - | 0     | 0     |
| ENSG0000( SNRPEP5 processed_    | chr2  | 8603082  | 8603359  | + | 0     | 0     |
| ENSG0000( RP11-70P1 lincRNA     | chr1  | 25581478 | 25590356 | + | 0     | 0     |
| ENSG0000( RPL35AP4 processed_   | chr6  | 33389374 | 33389475 | - | 0     | 0     |
| ENSG0000( AC005487. lincRNA     | chr7  | 1.09E+08 | 1.09E+08 | + | 0     | 0     |
| ENSG0000( SBDSP1 transcribec    | chr7  | 72829425 | 72836701 | + | 16    | 21.1  |
| ENSG0000( AC064875. processed_  | chr2  | 12966784 | 13007013 | - | 0     | 0     |
| ENSG0000( EIF2S2P5 processed_   | chr1  | 1.14E+08 | 1.14E+08 | + | 0.13  | 0.07  |
| ENSG0000( KCNMA1-A antisense    | chr10 | 77354404 | 77376613 | + | 0     | 0     |
| ENSG0000( RNF19BPY processed_   | chrY  | 3777997  | 3779546  | - | 0     | 0     |
| ENSG0000( RP11-58A1 lincRNA     | chr9  | 41073710 | 41076392 | + | 0     | 0     |
| ENSG0000( RP5-858B6 lincRNA     | chr1  | 2.31E+08 | 2.31E+08 | - | 0     | 0     |
| ENSG0000( LINC01716 lincRNA     | chr20 | 56577563 | 56598621 | + | 0     | 0     |
| ENSG0000( TAF13P2 processed_    | chr2  | 74351134 | 74351419 | + | 0     | 0     |
| ENSG0000( RP1-73A14 processed_  | chrX  | 1.47E+08 | 1.47E+08 | + | 0     | 0     |
| ENSG0000( RPL14P5 processed_    | chrX  | 1008503  | 1010101  | - | 0     | 0     |
| ENSG0000( RPL14P5 processed_    | chrY  | 1008503  | 1010101  | - | 0     | 0     |
| ENSG0000( RP11-1036 processed_  | chr3  | 62779176 | 62779785 | - | 0     | 0     |
| ENSG0000( MCRIP1 protein_co     | chr17 | 81822361 | 81833302 | - | 60.02 | 61.46 |
| ENSG0000( YWHAZP8 processed_    | chrX  | 73274785 | 73275515 | + | 0     | 0     |
| ENSG0000( SAR1P3 processed_     | chr4  | 1.2E+08  | 1.2E+08  | + | 0     | 0     |
| ENSG0000( RPL23AP27 processed_  | chr2  | 1.05E+08 | 1.05E+08 | + | 0     | 0     |
| ENSG0000( CADM3-AS antisense    | chr1  | 1.59E+08 | 1.59E+08 | - | 0     | 0     |
| ENSG0000( FCF1P6 processed_     | chr1  | 50405430 | 50406024 | - | 0     | 0     |
| ENSG0000( CCNT2P1 processed_    | chr1  | 1.11E+08 | 1.11E+08 | - | 0     | 0     |



|                                      |          |          |   |       |       |
|--------------------------------------|----------|----------|---|-------|-------|
| ENSG0000(RP11-641C processed_ chr3   | 60730055 | 60730644 | - | 0     | 0     |
| ENSG0000(IPO7P2 processed_ chr13     | 24122065 | 24123814 | - | 0     | 0     |
| ENSG0000(LINC01771 lincRNA chr1      | 53328233 | 53336509 | + | 0.13  | 0     |
| ENSG0000(RP3-438O4 antisense chr22   | 30184644 | 30207109 | - | 0     | 0     |
| ENSG0000(AP000619. transcribed chr11 | 1.03E+08 | 1.03E+08 | - | 0     | 0     |
| ENSG0000(AL163953. lincRNA chr14     | 53599832 | 53614026 | - | 0     | 0     |
| ENSG0000(AC005730. transcribed chr17 | 20056287 | 20056630 | + | 0     | 0     |
| ENSG0000(PACRG-AS3 antisense chr6    | 1.63E+08 | 1.63E+08 | - | 0     | 0     |
| ENSG0000(FAM225B lincRNA chr9        | 1.13E+08 | 1.13E+08 | - | 0.03  | 0.28  |
| ENSG0000(TSPY5P transcribed chrY     | 10066554 | 10069151 | - | 0     | 0     |
| ENSG0000(RP1-30E17 lincRNA chrX      | 1.28E+08 | 1.29E+08 | - | 0     | 0     |
| ENSG0000(TREML5P unprocessed chr6    | 41247369 | 41249649 | + | 0     | 0     |
| ENSG0000(LAGE3P1 processed_ chr9     | 33019682 | 33020165 | - | 0.63  | 0.17  |
| ENSG0000(HNRNPA1P processed_ chr2    | 2.01E+08 | 2.01E+08 | + | 0     | 0     |
| ENSG0000(SLC26A6 protein_code chr3   | 48625723 | 48635493 | - | 9.81  | 8.77  |
| ENSG0000(IGHV3-72 IG_V_gene chr14    | 1.07E+08 | 1.07E+08 | - | 0     | 0     |
| ENSG0000(EIF4A1P13 processed_ chr7   | 88448788 | 88449017 | - | 0     | 0     |
| ENSG0000(AC005522. lincRNA chr7      | 76972679 | 76976961 | - | 0     | 0     |
| ENSG0000(RP4-798A1 processed_ chr1   | 1.71E+08 | 1.71E+08 | + | 0     | 0     |
| ENSG0000(AC004899. processed_ chr7   | 48846426 | 48852898 | - | 0     | 0     |
| ENSG0000(PTPRD-AS1 lincRNA chr9      | 8858130  | 8862255  | + | 0.64  | 0.35  |
| ENSG0000(RP13-379L lincRNA chr20     | 58069054 | 58072070 | - | 0     | 0     |
| ENSG0000(RP5-875O1 unprocessed chr1  | 16548651 | 16552531 | - | 0.07  | 0     |
| ENSG0000(RP11-345I1 processed_ chr1  | 1.79E+08 | 1.79E+08 | + | 0     | 0     |
| ENSG0000(ATP5G2P1 processed_ chr1    | 2.09E+08 | 2.09E+08 | - | 0     | 0     |
| ENSG0000(RPL30P1 processed_ chr1     | 1.74E+08 | 1.74E+08 | - | 0     | 0     |
| ENSG0000(RP11-325E processed_ chrX   | 80709928 | 80710705 | + | 0     | 0     |
| ENSG0000(ELOCP13 processed_ chrY     | 18440797 | 18441125 | + | 0     | 0     |
| ENSG0000(RP11-3P22 lincRNA chr7      | 69224696 | 69430923 | - | 0     | 0     |
| ENSG0000(NMNAT1P; processed_ chr1    | 1.64E+08 | 1.64E+08 | + | 0     | 0     |
| ENSG0000(RP4-742C1 transcribed chr22 | 39091586 | 39092855 | + | 0     | 0     |
| ENSG0000(RP11-269F antisense chr1    | 44759037 | 44775810 | - | 0     | 0     |
| ENSG0000(RP11-706C processed_ chrX   | 3953056  | 3953561  | + | 0     | 0     |
| ENSG0000(MTND6P15 processed_ chr1    | 2.38E+08 | 2.38E+08 | + | 0     | 0     |
| ENSG0000(ASH2LP3 unprocessed chr22   | 22339573 | 22341214 | + | 0     | 0     |
| ENSG0000(FAM66E lincRNA chr8         | 7955014  | 8008755  | + | 0     | 0     |
| ENSG0000(AC007000. processed_ chr7   | 77071751 | 77072237 | - | 0.16  | 0     |
| ENSG0000(RP11-71C5 transcribed chr13 | 44437207 | 44452827 | + | 0     | 0     |
| ENSG0000(RP6-191P2 processed_ chrX   | 1.08E+08 | 1.08E+08 | - | 0     | 0     |
| ENSG0000(RP3-365O1 antisense chr6    | 46903471 | 46909078 | + | 0     | 0     |
| ENSG0000(AP001627. antisense chr21   | 42733594 | 42741758 | - | 0     | 0     |
| ENSG0000(FGD5-AS1 antisense chr3     | 14920347 | 14948424 | - | 33.61 | 32.63 |
| ENSG0000(NEK4P1 processed_ chr21     | 17210469 | 17211347 | - | 0     | 0     |
| ENSG0000(NRG3-AS1 processed_ chr10   | 82228985 | 82232920 | - | 0     | 0     |
| ENSG0000(NPM1P18 processed_ chr7     | 36818959 | 36819690 | + | 0     | 0     |

|                 |            |                |       |          |          |   |      |      |
|-----------------|------------|----------------|-------|----------|----------|---|------|------|
| ENSG00000100000 | ELOCP6     | processed      | chrY  | 17837201 | 17837528 | - | 0    | 0    |
| ENSG00000100000 | LL22NC03   | unprocessed    | chr22 | 22103219 | 22104857 | + | 0    | 0    |
| ENSG00000100000 | LINC02036  | lincRNA        | chr3  | 1.94E+08 | 1.94E+08 | - | 0    | 0    |
| ENSG00000100000 | AC017002   | lincRNA        | chr2  | 1.12E+08 | 1.12E+08 | + | 0    | 0    |
| ENSG00000100000 | AL773572   | antisense      | chr21 | 41176322 | 41186788 | - | 0    | 0    |
| ENSG00000100000 | SNHG23     | lincRNA        | chr14 | 1.01E+08 | 1.01E+08 | + | 1.72 | 1.57 |
| ENSG00000100000 | RP11-242C  | lincRNA        | chr1  | 29144494 | 29146994 | - | 0    | 0    |
| ENSG00000100000 | AC087501   | antisense      | chr17 | 9452197  | 9470014  | + | 0    | 0    |
| ENSG00000100000 | RP1-45I4.2 | antisense      | chr6  | 1.43E+08 | 1.43E+08 | - | 0    | 0    |
| ENSG00000100000 | RP11-267N  | processed      | chr1  | 1.63E+08 | 1.63E+08 | + | 0    | 0    |
| ENSG00000100000 | DBH-AS1    | antisense      | chr9  | 1.34E+08 | 1.34E+08 | - | 0.49 | 0.23 |
| ENSG00000100000 | RPS17P17   | processed      | chrX  | 1.4E+08  | 1.4E+08  | - | 0    | 0    |
| ENSG00000100000 | LINC00489  | lincRNA        | chr20 | 37619298 | 37623119 | - | 0    | 0    |
| ENSG00000100000 | LINC00431  | transcribed    | chr13 | 1.11E+08 | 1.11E+08 | + | 0.05 | 0    |
| ENSG00000100000 | RP11-417C  | sense_intronic | chr10 | 74005137 | 74027915 | + | 0    | 0    |
| ENSG00000100000 | LINC01389  | antisense      | chr1  | 47380928 | 47408477 | - | 0    | 0    |
| ENSG00000100000 | P3H2-AS1   | antisense      | chr3  | 1.9E+08  | 1.9E+08  | + | 0.13 | 0.1  |
| ENSG00000100000 | LINC01831  | lincRNA        | chr2  | 1.04E+08 | 1.04E+08 | - | 0    | 0    |
| ENSG00000100000 | DHRS4L1    | processed      | chr14 | 24036453 | 24051370 | + | 0.18 | 0.09 |
| ENSG00000100000 | RP5-850O1  | antisense      | chr1  | 50461469 | 50471150 | + | 0    | 0    |
| ENSG00000100000 | RP11-127C  | lincRNA        | chr10 | 1.04E+08 | 1.04E+08 | - | 0    | 0    |
| ENSG00000100000 | CROCCP1    | processed      | chrX  | 1.35E+08 | 1.35E+08 | + | 0    | 0    |
| ENSG00000100000 | RPS29P3    | processed      | chr3  | 1.97E+08 | 1.97E+08 | + | 0    | 0    |
| ENSG00000100000 | SIRPAP1    | processed      | chr22 | 30542536 | 30544305 | + | 2.01 | 2.01 |
| ENSG00000100000 | RP11-354I1 | lincRNA        | chr6  | 9124221  | 9161777  | - | 0    | 0    |
| ENSG00000100000 | DDX39AP1   | processed      | chr13 | 22704739 | 22706206 | - | 0    | 0    |
| ENSG00000100000 | PROSER2-A  | antisense      | chr10 | 11849608 | 11894700 | - | 0    | 0.04 |
| ENSG00000100000 | RP4-603I14 | processed      | chr1  | 46370586 | 46370955 | + | 0    | 0    |
| ENSG00000100000 | OR6V1      | protein_coding | chr7  | 1.43E+08 | 1.43E+08 | + | 0    | 0    |
| ENSG00000100000 | MIAT       | lincRNA        | chr22 | 26646428 | 26676475 | + | 1.27 | 1.38 |
| ENSG00000100000 | RP4-583K8  | lincRNA        | chr20 | 52451464 | 52455619 | - | 0    | 0    |
| ENSG00000100000 | LSM3P3     | processed      | chr2  | 85102389 | 85102694 | - | 0    | 0    |
| ENSG00000100000 | RP11-2L8.1 | lincRNA        | chr3  | 1.78E+08 | 1.78E+08 | + | 0    | 0.14 |
| ENSG00000100000 | TRAM2-AS   | lincRNA        | chr6  | 52577307 | 52583993 | + | 4.57 | 6.22 |
| ENSG00000100000 | AC004540   | antisense      | chr7  | 26372144 | 26376701 | - | 0    | 0    |
| ENSG00000100000 | RP1-234P1  | lincRNA        | chr6  | 75285014 | 75297003 | + | 0.45 | 0.62 |
| ENSG00000100000 | AC073321   | lincRNA        | chr2  | 2.17E+08 | 2.17E+08 | + | 0    | 0    |
| ENSG00000100000 | RP11-395G  | processed      | chr7  | 1.23E+08 | 1.23E+08 | + | 0    | 0    |
| ENSG00000100000 | MTND4P23   | unprocessed    | chr2  | 2.01E+08 | 2.01E+08 | - | 0    | 0    |
| ENSG00000100000 | UBDP1      | unprocessed    | chr6  | 29464596 | 29469806 | - | 0    | 0    |
| ENSG00000100000 | AC025918   | antisense      | chr15 | 58889967 | 58894082 | + | 0    | 0    |
| ENSG00000100000 | RABEPK1    | processed      | chr13 | 71296210 | 71297235 | + | 0    | 0    |
| ENSG00000100000 | WARSP1     | unprocessed    | chr11 | 59255360 | 59259486 | + | 0    | 0    |
| ENSG00000100000 | MRPS11P1   | processed      | chr20 | 20854121 | 20854642 | - | 0    | 0    |
| ENSG00000100000 | CTD-2313N  | protein_coding | chr11 | 71878453 | 71884561 | + | 0    | 0    |

|                                 |       |          |          |   |       |       |
|---------------------------------|-------|----------|----------|---|-------|-------|
| ENSG0000(RP1-309F2) antisense   | chr20 | 58863528 | 58888809 | - | 0.51  | 0.21  |
| ENSG0000(RP11-44M) lincRNA      | chr7  | 1.01E+08 | 1.01E+08 | + | 0     | 0     |
| ENSG0000(DNAJC19P) processed    | chr2  | 1.77E+08 | 1.77E+08 | - | 0.97  | 0     |
| ENSG0000(RBMY2KP) unprocessed   | chrY  | 8264449  | 8277188  | - | 0     | 0     |
| ENSG0000(RP11-547I) antisense   | chr1  | 1.9E+08  | 1.9E+08  | + | 0     | 0     |
| ENSG0000(AC009299) processed    | chr2  | 1.61E+08 | 1.61E+08 | + | 0     | 0.3   |
| ENSG0000(GRPEL2P2) processed    | chrX  | 64697878 | 64698547 | - | 0     | 0     |
| ENSG0000(AC092669) lincRNA      | chr2  | 66327349 | 66328984 | + | 0     | 0     |
| ENSG0000(GTF3AP5) processed     | chr7  | 14985378 | 14986074 | - | 0     | 0     |
| ENSG0000(AC118653) lincRNA      | chr17 | 71596338 | 71597279 | + | 0     | 0     |
| ENSG0000(AC013269) antisense    | chr2  | 1.31E+08 | 1.31E+08 | - | 0     | 0     |
| ENSG0000(UBXN7-AS) antisense    | chr3  | 1.96E+08 | 1.96E+08 | + | 0     | 0     |
| ENSG0000(RPL7P45) processed     | chr13 | 1.05E+08 | 1.05E+08 | + | 0     | 0     |
| ENSG0000(IGHD6-25) IG_D_gene    | chr14 | 1.06E+08 | 1.06E+08 | - | 0     | 0     |
| ENSG0000(LINC00626) lincRNA     | chr1  | 1.69E+08 | 1.69E+08 | + | 0     | 0     |
| ENSG0000(SFTPA3P) processed     | chr10 | 79595294 | 79595660 | - | 0     | 0     |
| ENSG0000(FAM229A) protein_co    | chr1  | 32361270 | 32364278 | - | 2.6   | 2.39  |
| ENSG0000(ERCC6) protein_co      | chr10 | 49455368 | 49539538 | - | 17.17 | 15.07 |
| ENSG0000(RPS18P1) processed     | chr20 | 5532878  | 5533335  | + | 0     | 0     |
| ENSG0000(RP3-348I2) processed   | chr6  | 20722328 | 20723655 | - | 0     | 0     |
| ENSG0000(GS1-594A7) antisense   | chrX  | 15602881 | 15621484 | + | 0     | 0     |
| ENSG0000(RP11-80H5) lincRNA     | chr10 | 89646289 | 89650822 | - | 0     | 0     |
| ENSG0000(TRMT2B-A) sense_ove    | chrX  | 1.01E+08 | 1.01E+08 | - | 0     | 0     |
| ENSG0000(AC010970) processed    | chrY  | 10197256 | 10199103 | - | 0     | 0.03  |
| ENSG0000(AC139712) processed    | chr2  | 52474073 | 52474411 | - | 0     | 0     |
| ENSG0000(NIPA2P1) processed     | chr7  | 91320128 | 91321103 | - | 0     | 0     |
| ENSG0000(RP11-630D) processed   | chr4  | 76036750 | 76037064 | - | 0     | 0     |
| ENSG0000(MKRN7P) transcribed    | chr20 | 46463719 | 46477232 | - | 0     | 0     |
| ENSG0000(RP11-452K) antisense   | chr10 | 97334564 | 97343203 | + | 0     | 0.09  |
| ENSG0000(HLA-S) unprocessed     | chr6  | 31382074 | 31382288 | - | 0     | 0     |
| ENSG0000(RP11-569G) processed   | chr1  | 26326688 | 26327033 | + | 0     | 0     |
| ENSG0000(RUSC1-AS1) antisense   | chr1  | 1.55E+08 | 1.55E+08 | - | 0.55  | 0.49  |
| ENSG0000(PCNPP2) processed      | chr9  | 88970887 | 88971341 | - | 0     | 0     |
| ENSG0000(RP11-46A1) lincRNA     | chr1  | 1.81E+08 | 1.81E+08 | + | 0     | 0     |
| ENSG0000(RP1-172N1) processed   | chrX  | 72660470 | 72660719 | + | 0     | 0     |
| ENSG0000(LINC02072) lincRNA     | chr17 | 51336715 | 51342571 | + | 0.06  | 0.12  |
| ENSG0000(HCG4P11) unprocessed   | chr6  | 29722981 | 29723971 | - | 0     | 0.07  |
| ENSG0000(RP5-1177I5) antisense  | chr22 | 37550026 | 37551735 | + | 0     | 0     |
| ENSG0000(AC016582) transcribed  | chr19 | 37823722 | 37855215 | - | 0     | 0     |
| ENSG0000(CTB-70D19) processed   | chr5  | 1.44E+08 | 1.44E+08 | - | 0     | 0     |
| ENSG0000(LINC00368) lincRNA     | chr13 | 1.11E+08 | 1.11E+08 | + | 0     | 0     |
| ENSG0000(RP11-495P) processed   | chr1  | 1.48E+08 | 1.48E+08 | + | 0     | 0     |
| ENSG0000(LINC01529) transcribed | chr19 | 35785697 | 35797902 | - | 0     | 0.25  |
| ENSG0000(LINC00694) protein_co  | chr3  | 44421127 | 44439946 | - | 0.09  | 0.1   |
| ENSG0000(AC024067) unprocessed  | chrY  | 26244351 | 26244573 | - | 0     | 0     |

|                 |            |                        |       |          |          |   |       |       |
|-----------------|------------|------------------------|-------|----------|----------|---|-------|-------|
| ENSG00000108881 | PSG8-AS1   | lincRNA                | chr19 | 42821863 | 42826878 | + | 0     | 0     |
| ENSG00000108882 | SERBP1P2   | processed_transcript   | chrY  | 4801685  | 4802848  | - | 0     | 0     |
| ENSG00000108883 | RP3-495K2  | lincRNA                | chr6  | 1.69E+08 | 1.69E+08 | - | 0     | 0     |
| ENSG00000108884 | LINC00115  | lincRNA                | chr1  | 826206   | 827522   | - | 1.31  | 2.22  |
| ENSG00000108885 | AC009365   | antisense              | chr7  | 1.33E+08 | 1.33E+08 | + | 0     | 0     |
| ENSG00000108886 | LINC01456  | lincRNA                | chrX  | 17970197 | 18104644 | - | 0     | 0     |
| ENSG00000108887 | BMS1P11    | unprocessed_transcript | chr9  | 64705734 | 64709311 | - | 0.7   | 0.1   |
| ENSG00000108888 | AC098872   | antisense              | chr2  | 1.92E+08 | 1.92E+08 | + | 0     | 0     |
| ENSG00000108889 | AC023590   | antisense              | chr8  | 1.18E+08 | 1.18E+08 | + | 0.73  | 0     |
| ENSG00000108890 | RP11-288L1 | antisense              | chr1  | 27669468 | 27703063 | + | 0     | 0     |
| ENSG00000108891 | AC074289   | antisense              | chr2  | 64143239 | 64252859 | + | 0.53  | 0.2   |
| ENSG00000108892 | RP3-476K8  | antisense              | chr1  | 26462756 | 26467282 | - | 0     | 0     |
| ENSG00000108893 | RP11-6J24  | processed_transcript   | chr9  | 4633027  | 4633756  | + | 0     | 0     |
| ENSG00000108894 | TRAPP2P1   | unprocessed_transcript | chrY  | 18105314 | 18108102 | + | 0     | 0     |
| ENSG00000108895 | AC007742   | processed_transcript   | chrY  | 17726752 | 17727080 | + | 0     | 0     |
| ENSG00000108896 | AC002075   | processed_transcript   | chr7  | 93777839 | 93778514 | + | 0     | 0     |
| ENSG00000108897 | FRG2B      | protein_coding         | chr10 | 1.34E+08 | 1.34E+08 | - | 0     | 0     |
| ENSG00000108898 | HSPE1P13   | processed_transcript   | chr2  | 39098149 | 39098445 | - | 0     | 0     |
| ENSG00000108899 | MTND2P9    | unprocessed_transcript | chr9  | 80565032 | 80565962 | - | 0     | 0     |
| ENSG00000108900 | RP1-144F1  | antisense              | chr1  | 39633416 | 39633903 | + | 0     | 0     |
| ENSG00000108901 | MORF4L1P   | processed_transcript   | chr1  | 1.76E+08 | 1.76E+08 | - | 0     | 0     |
| ENSG00000108902 | RP4-758J1  | antisense              | chr1  | 1420245  | 1422691  | + | 0     | 0.15  |
| ENSG00000108903 | AP000949   | processed_transcript   | chr21 | 22882582 | 22884000 | + | 0     | 0     |
| ENSG00000108904 | RPS27P16   | processed_transcript   | chr7  | 30167804 | 30168004 | + | 0     | 0     |
| ENSG00000108905 | AC009310   | processed_transcript   | chr2  | 2.2E+08  | 2.2E+08  | - | 0     | 0     |
| ENSG00000108906 | RP13-258C  | processed_transcript   | chrX  | 92676519 | 92676954 | - | 0     | 0     |
| ENSG00000108907 | RP11-57C1  | lincRNA                | chr10 | 87607985 | 87659279 | + | 0     | 0     |
| ENSG00000108908 | XXbac-BPG  | antisense              | chr6  | 32255711 | 32265838 | + | 2.54  | 2.78  |
| ENSG00000108909 | AC007879   | lincRNA                | chr2  | 2.07E+08 | 2.07E+08 | + | 0.52  | 0.29  |
| ENSG00000108910 | RPL7P59    | processed_transcript   | chr7  | 1.45E+08 | 1.45E+08 | - | 0     | 0.07  |
| ENSG00000108911 | LINC01745  | lincRNA                | chr1  | 2.33E+08 | 2.33E+08 | + | 0     | 0     |
| ENSG00000108912 | RIMKLBP2   | processed_transcript   | chr1  | 2.19E+08 | 2.19E+08 | - | 0     | 0     |
| ENSG00000108913 | NOL7       | protein_coding         | chr6  | 13615327 | 13632739 | + | 27.13 | 27.86 |
| ENSG00000108914 | RPL21P92   | processed_transcript   | chr10 | 67793770 | 67794245 | + | 0     | 0     |
| ENSG00000108915 | RP4-736I1  | processed_transcript   | chr1  | 96390652 | 96391393 | + | 0     | 0     |
| ENSG00000108916 | RP1-111D6  | lincRNA                | chr6  | 1.49E+08 | 1.49E+08 | - | 0     | 0     |
| ENSG00000108917 | RP13-313G  | processed_transcript   | chrX  | 68474710 | 68476874 | + | 0     | 0     |
| ENSG00000108918 | CACYBPP1   | processed_transcript   | chr10 | 84454679 | 84456056 | - | 0     | 0     |
| ENSG00000108919 | AC000036   | antisense              | chr22 | 50735825 | 50738139 | - | 0     | 0     |
| ENSG00000108920 | DKFZP434L  | lincRNA                | chr15 | 30196036 | 30214540 | + | 0.01  | 0     |
| ENSG00000108921 | RP3-395M   | TEC                    | chr1  | 2566410  | 2569888  | + | 0     | 0.1   |
| ENSG00000108922 | CTAGE4     | protein_coding         | chr7  | 1.44E+08 | 1.44E+08 | + | 0.46  | 0.44  |
| ENSG00000108923 | AC133965   | processed_transcript   | chr2  | 87654890 | 87655243 | + | 0     | 0     |
| ENSG00000108924 | RP4-566D2  | processed_transcript   | chr1  | 2.28E+08 | 2.28E+08 | - | 0     | 0     |
| ENSG00000108925 | BANF1P5    | processed_transcript   | chr7  | 1.08E+08 | 1.08E+08 | - | 0     | 0     |

|                 |            |             |       |          |          |   |      |      |
|-----------------|------------|-------------|-------|----------|----------|---|------|------|
| ENSG00000180100 | RP11-501J2 | antisense   | chr10 | 1.17E+08 | 1.17E+08 | - | 0    | 0    |
| ENSG00000180101 | PCA3       | antisense   | chr9  | 76764436 | 76787569 | + | 0.03 | 0.01 |
| ENSG00000180102 | RP4-575N6  | antisense   | chr1  | 1.01E+08 | 1.01E+08 | - | 0.42 | 0    |
| ENSG00000180103 | C5orf67    | protein_co  | chr5  | 56511567 | 56606232 | - | 0    | 0    |
| ENSG00000180104 | LINC01875  | lincRNA     | chr2  | 545805   | 546667   | + | 0    | 0    |
| ENSG00000180105 | AC016907   | processed   | chr2  | 30077093 | 30078272 | + | 0    | 0    |
| ENSG00000180106 | RIOK3P1    | processed   | chr13 | 74828553 | 74830080 | + | 0    | 0    |
| ENSG00000180107 | RP3-441A1  | antisense   | chr6  | 37815777 | 37819218 | - | 0    | 0    |
| ENSG00000180108 | RP11-313E  | processed   | chr9  | 72470374 | 72471076 | + | 0    | 0    |
| ENSG00000180109 | RP11-554I8 | lincRNA     | chr10 | 6618716  | 6625346  | + | 0    | 0    |
| ENSG00000180110 | RP3-358H7  | processed   | chrX  | 1.33E+08 | 1.33E+08 | - | 0    | 0    |
| ENSG00000180111 | NTF4       | protein_co  | chr19 | 49061066 | 49065054 | - | 0.55 | 0.25 |
| ENSG00000180112 | ODF2-AS1   | antisense   | chr9  | 1.28E+08 | 1.28E+08 | - | 0    | 0    |
| ENSG00000180113 | RP11-69E9  | antisense   | chr1  | 22835713 | 22836849 | - | 0    | 0    |
| ENSG00000180114 | SATB2-AS1  | antisense   | chr2  | 1.99E+08 | 1.99E+08 | + | 0    | 0    |
| ENSG00000180115 | RP5-1077I2 | antisense   | chr20 | 13244064 | 13245369 | - | 0    | 0    |
| ENSG00000180116 | CTD-2267C  | unprocessε  | chrX  | 52382053 | 52385614 | + | 0    | 0    |
| ENSG00000180117 | MTND4P3    | unprocessε  | chr7  | 68266319 | 68266859 | - | 0    | 0    |
| ENSG00000180118 | RP11-360A  | lincRNA     | chr9  | 1.2E+08  | 1.2E+08  | + | 0    | 0    |
| ENSG00000180119 | AC009950   | antisense   | chr2  | 2.3E+08  | 2.3E+08  | + | 0.25 | 0.05 |
| ENSG00000180120 | NRIR       | antisense   | chr2  | 6828514  | 6840464  | - | 0    | 0    |
| ENSG00000180121 | RP11-508N  | processed   | chr10 | 38161570 | 38161749 | + | 0    | 0    |
| ENSG00000180122 | ELFN1      | protein_co  | chr7  | 1688119  | 1747954  | + | 0.04 | 0.05 |
| ENSG00000180123 | ABHD11-A   | antisense   | chr7  | 73735038 | 73736054 | + | 0.51 | 1.41 |
| ENSG00000180124 | RP3-526F5  | lincRNA     | chrX  | 1.44E+08 | 1.44E+08 | + | 0    | 0    |
| ENSG00000180125 | CTA-85E5   | processed   | chr22 | 30136673 | 30137681 | - | 0    | 0    |
| ENSG00000180126 | MTND1P2    | unprocessε  | chr1  | 629062   | 629433   | + | 0.27 | 0    |
| ENSG00000180127 | PIGBOS1    | protein_co  | chr15 | 55317184 | 55319161 | - | 8.78 | 9.16 |
| ENSG00000180128 | AC005550   | lincRNA     | chr7  | 15689075 | 15690854 | - | 0    | 0    |
| ENSG00000180129 | LINC01534  | lincRNA     | chr19 | 36685440 | 36687449 | - | 0.64 | 1.63 |
| ENSG00000180130 | CKS1BP2    | processed   | chr10 | 29697935 | 29698174 | + | 0    | 0    |
| ENSG00000180131 | HAR1A      | lincRNA     | chr20 | 63102205 | 63104386 | + | 0.06 | 0.23 |
| ENSG00000180132 | AC010746   | antisense   | chr2  | 1.97E+08 | 1.97E+08 | + | 0    | 0    |
| ENSG00000180133 | OR7E19P    | transcribed | chr19 | 9265440  | 9266283  | - | 0    | 0    |
| ENSG00000180134 | AC102953   | antisense   | chr7  | 1459937  | 1464008  | + | 0.3  | 0.33 |
| ENSG00000180135 | RP11-538D  | lincRNA     | chr1  | 1.82E+08 | 1.82E+08 | + | 0    | 0    |
| ENSG00000180136 | HMGB1P2    | processed   | chr1  | 2.3E+08  | 2.3E+08  | - | 0    | 0    |
| ENSG00000180137 | UBXN10-A   | antisense   | chr1  | 20184242 | 20186486 | - | 0    | 0    |
| ENSG00000180138 | LAMP5-AS   | antisense   | chr20 | 9505180  | 9514998  | - | 0    | 0    |
| ENSG00000180139 | SNRPEP7    | processed   | chr1  | 27211265 | 27211484 | + | 0    | 0    |
| ENSG00000180140 | RPL23AP34  | processed   | chr2  | 28308161 | 28308570 | + | 0.2  | 0    |
| ENSG00000180141 | TRGVA      | TR_V_pseu   | chr7  | 38322446 | 38322730 | - | 0    | 0    |
| ENSG00000180142 | OR4A8      | polymorph   | chr11 | 54682877 | 54683821 | + | 0    | 0    |
| ENSG00000180143 | NDUFA12P   | processed   | chr13 | 1E+08    | 1E+08    | - | 0    | 0    |
| ENSG00000180144 | GTF2IP14   | unprocessε  | chr7  | 65084103 | 65100232 | + | 0    | 0.13 |

|                                      |          |          |   |      |      |
|--------------------------------------|----------|----------|---|------|------|
| ENSG0000(RP11-312J):processed_chr1   | 1.61E+08 | 1.61E+08 | + | 0    | 0    |
| ENSG0000(RP11-10J5).lincRNA_chr6     | 1.38E+08 | 1.38E+08 | - | 0    | 0    |
| ENSG0000(RP11-464C).lincRNA_chr10    | 3934519  | 3935813  | + | 0    | 0    |
| ENSG0000(RP11-211N).lincRNA_chr9     | 62532337 | 62534724 | + | 0.86 | 0.19 |
| ENSG0000(SEPT14P3).unprocessed_chr3  | 1.98E+08 | 1.98E+08 | + | 0    | 0    |
| ENSG0000(KCNIP2-AS).antisense_chr10  | 1.02E+08 | 1.02E+08 | + | 0    | 0    |
| ENSG0000(RP11-403E).processed_chrX   | 64144872 | 64147052 | - | 0.1  | 0    |
| ENSG0000(OFD1P1Y).unprocessed_chrY   | 17809807 | 17825329 | + | 0    | 0    |
| ENSG0000(AP001434).lincRNA_chr21     | 38237217 | 38238201 | - | 0    | 0    |
| ENSG0000(MRPS18BP).processed_chr1    | 2.16E+08 | 2.16E+08 | - | 0    | 0    |
| ENSG0000(RP11-467I2).processed_chr1  | 2.41E+08 | 2.41E+08 | - | 0    | 0    |
| ENSG0000(CCT8P1).processed_chr1      | 1.47E+08 | 1.47E+08 | - | 0.1  | 0.26 |
| ENSG0000(RPL36AP55).processed_chr10  | 27904209 | 27905162 | + | 0    | 0    |
| ENSG0000(PRICKLE2-1).antisense_chr3  | 64187544 | 64200965 | + | 0.05 | 0.11 |
| ENSG0000(CDK2AP2P).processed_chr9    | 63774870 | 63775241 | - | 0    | 0    |
| ENSG0000(AC026167).lincRNA_chr3      | 6148484  | 6365885  | + | 0    | 0    |
| ENSG0000(CT47A6).protein_code_chrX   | 1.21E+08 | 1.21E+08 | - | 0    | 0    |
| ENSG0000(COX5BP7).processed_chr22    | 39120293 | 39120566 | - | 0    | 0.13 |
| ENSG0000(LGALS17A).transcribed_chr19 | 39679374 | 39686373 | + | 0    | 0    |
| ENSG0000(RP11-57H1).antisense_chr1   | 95163219 | 95233982 | - | 0.34 | 0.35 |
| ENSG0000(PFN1P12).processed_chr1     | 1.44E+08 | 1.44E+08 | + | 0    | 0    |
| ENSG0000(LINC01772).lincRNA_chr1     | 16460948 | 16468481 | + | 0.18 | 0.2  |
| ENSG0000(HLA-DQB3).unprocessed_chr6  | 32730758 | 32731695 | - | 0    | 0    |
| ENSG0000(FGF13-AS1).antisense_chrX   | 1.39E+08 | 1.39E+08 | + | 0    | 0    |
| ENSG0000(RP1-111C2).lincRNA_chr6     | 1.59E+08 | 1.59E+08 | - | 0    | 0    |
| ENSG0000(NANOGNB).processed_chr2     | 1.01E+08 | 1.01E+08 | + | 0    | 0    |
| ENSG0000(RP11-338C).processed_chr1   | 2.13E+08 | 2.13E+08 | + | 0    | 0    |
| ENSG0000(LINC01040).lincRNA_chr13    | 89477608 | 89500509 | - | 0    | 0    |
| ENSG0000(PPIAP21).processed_chr20    | 43230760 | 43231260 | + | 0    | 0    |
| ENSG0000(AC005740).processed_chr5    | 1.42E+08 | 1.42E+08 | - | 0    | 0    |
| ENSG0000(AC010745).lincRNA_chr2      | 16202430 | 16204226 | + | 0    | 0    |
| ENSG0000(CDY10P).unprocessed_chrY    | 21637475 | 21639041 | - | 0    | 0    |
| ENSG0000(AP000705).lincRNA_chr21     | 22209939 | 22420819 | + | 0    | 0    |
| ENSG0000(AC009274).processed_chr7    | 1.31E+08 | 1.31E+08 | - | 0    | 0    |
| ENSG0000(AP1S2P1).processed_chr7     | 97437518 | 97437896 | + | 0    | 0    |
| ENSG0000(RP11-196I1).lincRNA_chr9    | 1.07E+08 | 1.07E+08 | - | 0    | 0    |
| ENSG0000(YBX1P8).processed_chrX      | 46684765 | 46685707 | - | 0    | 0    |
| ENSG0000(TLK2P1).processed_chr17     | 34036681 | 34039872 | - | 0.04 | 0    |
| ENSG0000(ZNF503-AS).lincRNA_chr10    | 75269819 | 75373500 | + | 0    | 0    |
| ENSG0000(LINC01776).lincRNA_chr1     | 98210747 | 98272658 | + | 0.02 | 0    |
| ENSG0000(MEMO1P1).processed_chr21    | 36130489 | 36131376 | + | 0    | 0    |
| ENSG0000(PAICSP1).processed_chr9     | 37878116 | 37879493 | + | 0.1  | 0.16 |
| ENSG0000(MTND4P32).processed_chrX    | 1.03E+08 | 1.03E+08 | + | 0    | 0    |
| ENSG0000(PHF2P2).transcribed_chr13   | 18946755 | 19062718 | - | 0    | 0    |
| ENSG0000(AC092570).processed_chr2    | 1.01E+08 | 1.01E+08 | + | 0    | 0    |

|                                         |          |          |   |      |      |
|-----------------------------------------|----------|----------|---|------|------|
| ENSG0000(HMGB3P2) processed_chr7        | 26982768 | 26983367 | - | 0    | 0    |
| ENSG0000(PCMTD1P1) unprocessed_chrY     | 10173853 | 10174207 | + | 0    | 0    |
| ENSG0000(AC009531) lincRNA_chr7         | 35258381 | 35259729 | - | 0    | 0    |
| ENSG0000(PGBD4P6) processed_chrX        | 1.43E+08 | 1.43E+08 | + | 0    | 0    |
| ENSG0000(ZBTB45P2) processed_chr2       | 1.1E+08  | 1.1E+08  | + | 0    | 0    |
| ENSG0000(AC009541) processed_chr7       | 1.36E+08 | 1.36E+08 | + | 0    | 0    |
| ENSG0000(LINC00623) lincRNA_chr1        | 1.21E+08 | 1.21E+08 | + | 3.04 | 3.68 |
| ENSG0000(HNRNPA3F) processed_chr6       | 48149203 | 48150005 | - | 0    | 0    |
| ENSG0000(RP11-552E) lincRNA_chr6        | 40358744 | 40369474 | - | 0    | 0    |
| ENSG0000(AC016772) processed_chr2       | 1.7E+08  | 1.7E+08  | - | 0    | 0    |
| ENSG0000(PRSS44) transcribed_chr3       | 46809359 | 46812558 | - | 0    | 0    |
| ENSG0000(PHKG1P1) unprocessed_chr7      | 63233035 | 63234245 | - | 0    | 0    |
| ENSG0000(RP11-205K) lincRNA_chr9        | 1.27E+08 | 1.27E+08 | + | 0    | 0    |
| ENSG0000(RP3-399L1) lincRNA_chr6        | 1.15E+08 | 1.15E+08 | - | 0    | 0    |
| ENSG0000(RP11-345J) processed_chr2      | 11102142 | 11102997 | + | 0    | 0    |
| ENSG0000(USP12PX) processed_chrX        | 90112650 | 90113706 | + | 0    | 0    |
| ENSG0000(RP11-24H1) processed_chr3      | 62926371 | 62926882 | + | 0    | 0    |
| ENSG0000(SLC39A12-) antisense_chr10     | 18001786 | 18010562 | - | 0    | 0    |
| ENSG0000(RP4-706A1) processed_chr1      | 77129114 | 77129668 | + | 0    | 0.22 |
| ENSG0000(UQCRFS1P) processed_chr22      | 39875289 | 39876108 | + | 3.46 | 1.75 |
| ENSG0000(EIF3LP3) processed_chr10       | 38080056 | 38080877 | - | 0    | 0    |
| ENSG0000(AC106869) lincRNA_chr2         | 47225794 | 47239225 | + | 0    | 0    |
| ENSG0000(RP11-180C) antisense_chr1      | 70359562 | 70360437 | - | 0    | 0    |
| ENSG0000(RP1-300G1) sense_intronic_chr6 | 81527102 | 81534915 | - | 0    | 0    |
| ENSG0000(LINC00937) lincRNA_chr12       | 8295986  | 8396803  | - | 0.45 | 2.54 |
| ENSG0000(RBMY2AP) unprocessed_chrY      | 21927521 | 21937150 | - | 0    | 0    |
| ENSG0000(RPS28P8) processed_chr13       | 42003430 | 42003637 | + | 0    | 0    |
| ENSG0000(RPL7P3) processed_chr20        | 62572671 | 62573384 | + | 0    | 0    |
| ENSG0000(AC087499) processed_chr17      | 20609462 | 20609610 | - | 0    | 0    |
| ENSG0000(AC099342) lincRNA_chr7         | 20296708 | 20311712 | + | 0    | 0    |
| ENSG0000(SEC11B) processed_chr8         | 54522799 | 54523297 | - | 0    | 0    |
| ENSG0000(LINC02097) lincRNA_chr17       | 72072333 | 72093481 | + | 0    | 0    |
| ENSG0000(SEPT7P3) unprocessed_chr7      | 35946294 | 35972587 | + | 0    | 0    |
| ENSG0000(AC004383) processed_chrX       | 1.35E+08 | 1.35E+08 | + | 0.38 | 0    |
| ENSG0000(RAB28P1) processed_chr9        | 39734670 | 39735628 | + | 0    | 0    |
| ENSG0000(RP11-272G) processed_chrX      | 53768986 | 53769219 | - | 0    | 0    |
| ENSG0000(FCF1P4) processed_chrX         | 1.11E+08 | 1.11E+08 | + | 0    | 0    |
| ENSG0000(RP11-672F) transcribed_chr10   | 38247922 | 38333155 | + | 0    | 0    |
| ENSG0000(NDUFB4P5) processed_chr2       | 86934462 | 86934822 | - | 0    | 0    |
| ENSG0000(AP001476) lincRNA_chr21        | 46056516 | 46057567 | + | 0    | 0    |
| ENSG0000(USP9YP6) unprocessed_chrY      | 17912699 | 17921630 | - | 0    | 0    |
| ENSG0000(AC079199) processed_chr17      | 39839369 | 39839524 | - | 0    | 0    |
| ENSG0000(MTND3P1) processed_chr13       | 22113119 | 22113338 | - | 0    | 0    |
| ENSG0000(RP1-197J1) processed_chrX      | 1.02E+08 | 1.02E+08 | + | 0    | 0    |
| ENSG0000(AC009487) processed_chr2       | 1.62E+08 | 1.62E+08 | - | 0    | 0.01 |

|                                    |          |          |   |      |      |
|------------------------------------|----------|----------|---|------|------|
| ENSG0000(DDC-AS1 antisense chr7    | 50531759 | 50543463 | + | 0    | 0    |
| ENSG0000(FTCDNL1 protein_co chr2   | 2E+08    | 2E+08    | - | 0.16 | 0    |
| ENSG0000(LINC01907 lincRNA chr2    | 2.31E+08 | 2.31E+08 | - | 0    | 0.02 |
| ENSG0000(PSMC1P12 processed_chr1   | 1.19E+08 | 1.19E+08 | - | 0    | 0    |
| ENSG0000(RPL26P9 processed_chr1    | 97585862 | 97586294 | + | 0    | 0    |
| ENSG0000(AC013248.lincRNA chr17    | 14725729 | 14729686 | + | 0    | 0    |
| ENSG0000(AC073465.processed_chr2   | 1.73E+08 | 1.73E+08 | - | 0    | 0    |
| ENSG0000(RPS3AP46 processed_chr14  | 53612724 | 53613405 | + | 0    | 0    |
| ENSG0000(RP4-683M.lincRNA chr1     | 48050659 | 48091736 | + | 0    | 0    |
| ENSG0000(RP11-120E lincRNA chr13   | 97675011 | 97677963 | - | 0    | 0    |
| ENSG0000(BAIAP2-AS.lincRNA chr17   | 81029130 | 81034881 | - | 7.21 | 7.23 |
| ENSG0000(RP1-228P1 processed_chr12 | 48085062 | 48085421 | + | 0    | 0    |
| ENSG0000(RP11-461K lincRNA chr10   | 16278701 | 16295858 | + | 0    | 0    |
| ENSG0000(AF277315.unprocessε chrX  | 1.55E+08 | 1.55E+08 | + | 0    | 0    |
| ENSG0000(RPL35P8 processed_chr22   | 49213911 | 49214247 | - | 0    | 0    |
| ENSG0000(RP1-138B7 antisense chr20 | 43549389 | 43550949 | - | 0    | 0    |
| ENSG0000(RPS27AP3 processed_chr20  | 37049254 | 37049707 | + | 0    | 0    |
| ENSG0000(KRT16P6 transcribec chr17 | 16817983 | 16822579 | - | 0    | 0    |
| ENSG0000(TUBBP10 processed_chr1    | 52994726 | 52996026 | + | 0.35 | 0.15 |
| ENSG0000(SLC25A39P processed_chr1  | 2.03E+08 | 2.03E+08 | + | 0    | 0    |
| ENSG0000(RP1-69D17 lincRNA chr6    | 1.3E+08  | 1.3E+08  | - | 0    | 0.2  |
| ENSG0000(RP3-389A2 processed_chrX  | 17705339 | 17705691 | - | 0    | 0    |
| ENSG0000(AC124944.antisense chr3   | 1.96E+08 | 1.96E+08 | + | 0    | 0.12 |
| ENSG0000(RPL23AP7ε processed_chr17 | 14947741 | 14948198 | - | 0    | 0    |
| ENSG0000(OR52E3P unprocessε chr11  | 5092676  | 5093611  | + | 0    | 0    |
| ENSG0000(CLCP2 processed_chr13     | 1.14E+08 | 1.14E+08 | + | 0    | 0    |
| ENSG0000(LINC01375 lincRNA chr10   | 89915489 | 89957373 | - | 0    | 0    |
| ENSG0000(LA16c-17H processed_chr22 | 16405330 | 16405417 | + | 0    | 0    |
| ENSG0000(EIF4A1P5 processed_chr13  | 36938400 | 36939494 | - | 0    | 0    |
| ENSG0000(RP11-167P antisense chr10 | 72501746 | 72502956 | + | 0    | 0    |
| ENSG0000(FGFR3P6 processed_chr1    | 2.47E+08 | 2.47E+08 | + | 0    | 0    |
| ENSG0000(RP11-474C processed_chr1  | 12692909 | 12693020 | + | 0    | 0    |
| ENSG0000(AP4B1-AS1 antisense chr1  | 1.14E+08 | 1.14E+08 | + | 0.13 | 0    |
| ENSG0000(RP11-564C processed_chr10 | 50695592 | 50695981 | + | 0    | 0    |
| ENSG0000(RP11-375H antisense chr22 | 27716480 | 27721677 | + | 0    | 0    |
| ENSG0000(RP4-712E4 lincRNA chr1    | 1.19E+08 | 1.19E+08 | - | 0    | 0    |
| ENSG0000(TEX22 protein_co chr14    | 1.05E+08 | 1.05E+08 | + | 0.52 | 0.14 |
| ENSG0000(LINC00685 antisense chrX  | 320990   | 321851   | + | 1.04 | 1.25 |
| ENSG0000(LINC00685 antisense chrY  | 320990   | 321851   | + | 1.04 | 1.25 |
| ENSG0000(RP11-278A lincRNA chr16   | 87693537 | 87696147 | - | 0.04 | 0.05 |
| ENSG0000(RP1-92C8.3 antisense chr6 | 1.17E+08 | 1.17E+08 | - | 0    | 0    |
| ENSG0000(RANP7 processed_chr3      | 22904135 | 22905151 | + | 0    | 0    |
| ENSG0000(TRIM64FP unprocessε chr2  | 95514827 | 95520107 | + | 0    | 0    |
| ENSG0000(ELOCP21 processed_chr2    | 70955899 | 70956234 | - | 0    | 0    |
| ENSG0000(HNRNPA1P processed_chr20  | 45745737 | 45746287 | - | 0.26 | 0.14 |



|                                      |          |            |      |      |
|--------------------------------------|----------|------------|------|------|
| ENSG0000( CLK3P2 processed_ chr1     | 2.48E+08 | 2.48E+08 - | 0.04 | 0    |
| ENSG0000( RP3-398G3 antisense chr6   | 1.52E+08 | 1.52E+08 + | 0    | 0    |
| ENSG0000( RP1-137D1 lincRNA chr6     | 1.69E+08 | 1.69E+08 - | 0.26 | 0    |
| ENSG0000( GAPDHP75 processed_ chr1   | 1.89E+08 | 1.89E+08 - | 0    | 0    |
| ENSG0000( RP11-536C lincRNA chr9     | 13446491 | 13487511 + | 0.43 | 0.16 |
| ENSG0000( RP11-12D5 processed_ chrX  | 27832175 | 27833204 + | 0    | 0    |
| ENSG0000( SGMS1-AS: antisense chr10  | 50624951 | 50641451 + | 0.6  | 0.65 |
| ENSG0000( LINC01733 lincRNA chr20    | 25955812 | 25969288 + | 0.01 | 0    |
| ENSG0000( AL157359.: lincRNA chr21   | 18953264 | 18967058 - | 0    | 0    |
| ENSG0000( AC007790. processed_ chr7  | 1.34E+08 | 1.34E+08 - | 0.16 | 0.18 |
| ENSG0000( RP5-1050E lincRNA chr9     | 89799695 | 89821753 + | 0    | 0    |
| ENSG0000( RP1-104O1 lincRNA chr6     | 97710953 | 97717197 - | 0    | 0    |
| ENSG0000( RP11-99H8 lincRNA chr1     | 70715933 | 70720289 - | 0    | 0    |
| ENSG0000( C8orf59P1 processed_ chr10 | 13308145 | 13308447 - | 0    | 0    |
| ENSG0000( ABC7-4238 unprocessε chr12 | 14522    | 32015 -    | 2.42 | 2.13 |
| ENSG0000( RP11-453C processed_ chr1  | 2.21E+08 | 2.21E+08 - | 0    | 0    |
| ENSG0000( TRGV6 TR_V_pseu chr7       | 38340700 | 38340998 - | 0    | 0    |
| ENSG0000( UBQLN4P2 processed_ chr2   | 1.53E+08 | 1.53E+08 + | 0    | 0    |
| ENSG0000( RPS12P5 processed_ chr3    | 29390848 | 29391218 + | 0    | 0    |
| ENSG0000( RPL19P1 processed_ chr20   | 2780614  | 2781041 +  | 0    | 0    |
| ENSG0000( AC079163. lincRNA chr2     | 1.46E+08 | 1.46E+08 - | 0    | 0    |
| ENSG0000( CICP22 processed_ chr7     | 39796593 | 39797911 - | 0    | 0    |
| ENSG0000( RPL26P19 processed_ chr5   | 56504635 | 56505072 - | 0    | 0    |
| ENSG0000( RP11-753E processed_ chrX  | 24632257 | 24632601 + | 0    | 0    |
| ENSG0000( TSPY16P unprocessε chrY    | 9640249  | 9640716 -  | 0    | 0    |
| ENSG0000( PRELID3BP processed_ chr1  | 2.2E+08  | 2.2E+08 +  | 0    | 0    |
| ENSG0000( RPLP0P1 processed_ chr20   | 16586333 | 16586693 - | 0    | 0    |
| ENSG0000( AC007237. processed_ chr7  | 78486530 | 78487028 + | 0    | 0    |
| ENSG0000( NPIPB14P transcribec chr16 | 69976388 | 69996188 - | 0.29 | 1.25 |
| ENSG0000( RP1-151B1 processed_ chr22 | 37215738 | 37215891 - | 0    | 0    |
| ENSG0000( KRT18P24 processed_ chr9   | 79036413 | 79037568 - | 0    | 0    |
| ENSG0000( LEMD1-AS: antisense chr1   | 2.05E+08 | 2.05E+08 + | 0    | 0.02 |
| ENSG0000( GAS1RR lincRNA chr9        | 86948699 | 87002033 + | 0.3  | 0.31 |
| ENSG0000( AC132807. lincRNA chr3     | 17990023 | 17995544 + | 0    | 0    |
| ENSG0000( RP1-310O1 antisense chr20  | 32027753 | 32031575 - | 0    | 0    |
| ENSG0000( LINC00381 lincRNA chr13    | 74419173 | 74435159 + | 0    | 0    |
| ENSG0000( LLOXNC01- processed_ chrX  | 1.03E+08 | 1.03E+08 + | 0    | 0    |
| ENSG0000( RPS17P8 processed_ chr2    | 1.93E+08 | 1.93E+08 + | 0    | 0    |
| ENSG0000( RPL37AP1 processed_ chr20  | 44466564 | 44466842 - | 0    | 0    |
| ENSG0000( ZNF32-AS1 antisense chr10  | 43643872 | 43645047 + | 0    | 0    |
| ENSG0000( KRT18P36 processed_ chr9   | 30799471 | 30800746 - | 0    | 0    |
| ENSG0000( SUPT4H1P: processed_ chr2  | 75651288 | 75651627 - | 0    | 0    |
| ENSG0000( RP11-307P lincRNA chr6     | 1.48E+08 | 1.48E+08 - | 0    | 0    |
| ENSG0000( LINC00408 lincRNA chr13    | 18905439 | 18907810 + | 0    | 0    |
| ENSG0000( RP11-151I1 lincRNA chr1    | 2.12E+08 | 2.12E+08 - | 0    | 0    |

|                                    |          |          |   |      |      |
|------------------------------------|----------|----------|---|------|------|
| ENSG0000(RP1-18D14 antisense chr1  | 47225797 | 47230750 | + | 0    | 0    |
| ENSG0000(MRPL35P3 processed_chr10  | 74527584 | 74527947 | + | 0    | 0    |
| ENSG0000(PTP4A1P3 processed_chr7   | 91107374 | 91107793 | + | 0    | 0    |
| ENSG0000(UBE2V2P1 processed_chr10  | 19051455 | 19052170 | + | 0    | 0    |
| ENSG0000(GRM7-AS3 lincRNA chr3     | 6631689  | 6805449  | - | 0    | 0    |
| ENSG0000(GTF2H2B transcribed chr5  | 70415352 | 70448015 | + | 4.79 | 3.88 |
| ENSG0000(AC064836. processed_chr2  | 2.02E+08 | 2.02E+08 | - | 0    | 0    |
| ENSG0000(PHKBP1 processed_chr20    | 8097824  | 8099774  | - | 0    | 0    |
| ENSG0000(ISM1-AS1 antisense chr20  | 13237801 | 13239674 | - | 0    | 0    |
| ENSG0000(AC009961. lincRNA chr2    | 1.6E+08  | 1.6E+08  | - | 0.84 | 0.48 |
| ENSG0000(RP11-61N2 processed_chr11 | 49433480 | 49434438 | - | 0.34 | 0.04 |
| ENSG0000(ZNF736P2) processed_chrY  | 24683657 | 24684935 | + | 0    | 0    |
| ENSG0000(ARHGAP26 antisense chr5   | 1.43E+08 | 1.43E+08 | - | 0    | 0    |
| ENSG0000(AC079305. processed_chr2  | 1.77E+08 | 1.77E+08 | + | 0    | 0    |
| ENSG0000(AC093382. lincRNA chr2    | 2.16E+08 | 2.16E+08 | - | 0    | 0    |
| ENSG0000(AC105393. lincRNA chr2    | 421057   | 422303   | + | 0    | 0    |
| ENSG0000(PSPHP1 unprocessed chr7   | 55764797 | 55773288 | + | 0    | 0    |
| ENSG0000(RPL12P10 processed_chr7   | 22881893 | 22882390 | + | 0.3  | 0    |
| ENSG0000(RP6-22P16 processed_chrX  | 67373573 | 67375520 | + | 0    | 0    |
| ENSG0000(RP1-80N2. lincRNA chr6    | 6692744  | 6711002  | - | 0    | 0    |
| ENSG0000(ARPC3P1 processed_chr20   | 49134480 | 49135012 | + | 0    | 0    |
| ENSG0000(NUP35P2 processed_chr7    | 79543911 | 79544853 | - | 0    | 0    |
| ENSG0000(RP1-163G9 antisense chr1  | 3132927  | 3133709  | - | 0    | 0    |
| ENSG0000(TMEM191 transcribed chr22 | 20701114 | 20704606 | + | 1.63 | 2.9  |
| ENSG0000(OR52I2 protein_code chr11 | 4586791  | 4587905  | + | 0    | 0    |
| ENSG0000(CDCA4P3 unprocessed chr1  | 2.08E+08 | 2.08E+08 | + | 0    | 0    |
| ENSG0000(AC091729. antisense chr7  | 1080863  | 1082178  | + | 0    | 0    |
| ENSG0000(RP11-7G12 processed_chr1  | 1.66E+08 | 1.66E+08 | + | 0    | 0    |
| ENSG0000(RP11-71J2. lincRNA chr10  | 53291072 | 53311065 | - | 0    | 0    |
| ENSG0000(AC007677. processed_chr2  | 2.29E+08 | 2.29E+08 | + | 0    | 0    |
| ENSG0000(RAD23BLP processed_chr21  | 15694300 | 15696581 | - | 0    | 0    |
| ENSG0000(RPSAP62 processed_chrX    | 53322990 | 53323822 | + | 0    | 0    |
| ENSG0000(PDCL3P1 processed_chr8    | 60387262 | 60387995 | + | 0    | 0    |
| ENSG0000(RP11-528N lincRNA chr3    | 40603125 | 40605427 | - | 0    | 0    |
| ENSG0000(RP11-435N antisense chr10 | 25924448 | 25933710 | - | 0    | 0    |
| ENSG0000(NPY6R transcribed chr5    | 1.38E+08 | 1.38E+08 | + | 0    | 0    |
| ENSG0000(HNRNPDLP processed_chrX   | 95638375 | 95638924 | + | 0    | 0    |
| ENSG0000(RP4-813D1 lincRNA chr20   | 57266797 | 57282998 | + | 0    | 0    |
| ENSG0000(SMARCE1P processed_chr6   | 84429584 | 84430802 | - | 0    | 0    |
| ENSG0000(RP3-323P2 antisense chrX  | 57121662 | 57127243 | + | 0.1  | 0    |
| ENSG0000(CFLAR-AS1 antisense chr2  | 2.01E+08 | 2.01E+08 | - | 0.36 | 0.57 |
| ENSG0000(MTCYBP12 processed_chrX   | 5169512  | 5170645  | + | 0    | 0    |
| ENSG0000(ZNF192P1 transcribed chr6 | 28161781 | 28169594 | + | 1.79 | 0.55 |
| ENSG0000(LINC00351 lincRNA chr13   | 85363601 | 85544570 | + | 0    | 0    |
| ENSG0000(RPS3AP38 processed_chr10  | 67960702 | 67961464 | - | 0.42 | 0.65 |

|                                     |          |          |   |      |      |
|-------------------------------------|----------|----------|---|------|------|
| ENSG0000(LINC01811 lincRNA chr3     | 34159334 | 34562877 | + | 0    | 0    |
| ENSG0000(CROCC2 protein_co chr2     | 2.41E+08 | 2.41E+08 | + | 0.02 | 0.13 |
| ENSG0000(AC006150. antisense chr7   | 14814131 | 14816565 | + | 0    | 0    |
| ENSG0000(RP11-115N processed_ chr1  | 71367054 | 71367303 | - | 0    | 0    |
| ENSG0000(RPSAP49 processed_ chr9    | 88324454 | 88325339 | + | 0    | 0    |
| ENSG0000(NUP50-AS1 lincRNA chr22    | 45133020 | 45163781 | - | 2.99 | 3.19 |
| ENSG0000(AC005682. unprocessε chr7  | 22863874 | 22881350 | - | 0    | 0    |
| ENSG0000(RP11-739N antisense chr1   | 2.04E+08 | 2.04E+08 | + | 0    | 0    |
| ENSG0000(RPL23AP2ε processed_ chr2  | 2.22E+08 | 2.22E+08 | - | 0    | 0    |
| ENSG0000(RP11-157P antisense chr20  | 62305432 | 62306325 | - | 0    | 0.11 |
| ENSG0000(RP11-217B antisense chr9   | 1.05E+08 | 1.05E+08 | + | 0.99 | 0.73 |
| ENSG0000(MRPS16P3 processed_ chr22  | 35703803 | 35704176 | + | 0    | 0    |
| ENSG0000(RP11-274B lincRNA chr9     | 68541036 | 68644442 | + | 0    | 0    |
| ENSG0000(AC079150. processed_ chr2  | 1.53E+08 | 1.53E+08 | - | 0    | 0    |
| ENSG0000(RPS26P56 processed_ chrX   | 1.29E+08 | 1.29E+08 | + | 0    | 0    |
| ENSG0000(AC105402. processed_ chr2  | 1.49E+08 | 1.49E+08 | - | 0    | 0    |
| ENSG0000(MTCYBP39 processed_ chr2   | 1.17E+08 | 1.17E+08 | + | 0    | 0    |
| ENSG0000(NMD3P1 processed_ chr7     | 63908966 | 63910453 | - | 0    | 0    |
| ENSG0000(CST12P unitary_psι chr20   | 23475700 | 23479798 | + | 0    | 0    |
| ENSG0000(AC083822. processed_ chr3  | 1.96E+08 | 1.96E+08 | + | 0    | 0    |
| ENSG0000(VN2R10P unitary_psι chr16  | 77220406 | 77221258 | + | 0    | 0    |
| ENSG0000(RP11-145A sense_intrε chr1 | 2.26E+08 | 2.26E+08 | - | 0    | 0    |
| ENSG0000(PSPC1-AS2 antisense chr13  | 19674624 | 19675884 | + | 0    | 0    |
| ENSG0000(TAF9P1 processed_ chrY     | 17628513 | 17629402 | + | 0    | 0    |
| ENSG0000(RP11-65J3. lincRNA chr9    | 1.29E+08 | 1.29E+08 | + | 0.32 | 0.09 |
| ENSG0000(RPS6P20 unprocessε chr12   | 1.31E+08 | 1.31E+08 | - | 0.27 | 0.97 |
| ENSG0000(KRT8P38 processed_ chr10   | 88727485 | 88728914 | + | 0    | 0    |
| ENSG0000(ACTG1P24 processed_ chr17  | 17242010 | 17242886 | + | 0.14 | 0    |
| ENSG0000(RPL10AP6 processed_ chr3   | 61742455 | 61743106 | - | 0    | 0    |
| ENSG0000(TERF1P5 processed_ chr13   | 18680494 | 18681700 | + | 0    | 0    |
| ENSG0000(FAM41AY2 lincRNA chrY      | 18390994 | 18405046 | - | 0    | 0    |
| ENSG0000(HAGLROS lincRNA chr2       | 1.76E+08 | 1.76E+08 | + | 0    | 0    |
| ENSG0000(LINC02089 lincRNA chr17    | 52862121 | 52899588 | + | 0    | 0    |
| ENSG0000(AC097463. processed_ chr2  | 51926882 | 51927362 | - | 0    | 0    |
| ENSG0000(ST7-AS2 antisense chr7     | 1.17E+08 | 1.17E+08 | - | 0    | 0    |
| ENSG0000(USP9YP11 unprocessε chrY   | 23934953 | 23940101 | + | 0    | 0    |
| ENSG0000(LINC00375 lincRNA chr13    | 85065087 | 85078920 | - | 0    | 0    |
| ENSG0000(DCAF8L1 protein_co chrX    | 27977993 | 27981449 | - | 0    | 0    |
| ENSG0000(LINC01345 lincRNA chr1     | 3944547  | 3948980  | - | 0    | 0    |
| ENSG0000(RP3-395P1 lincRNA chr1     | 1.73E+08 | 1.73E+08 | - | 0    | 0    |
| ENSG0000(RP11-29B9 lincRNA chr9     | 7930827  | 7935137  | - | 0    | 0    |
| ENSG0000(AC084809. antisense chr17  | 32876759 | 32878637 | + | 0    | 0    |
| ENSG0000(AC058791. lincRNA chr7     | 1.31E+08 | 1.31E+08 | - | 0.53 | 0.7  |
| ENSG0000(LINC01876 lincRNA chr2     | 1.56E+08 | 1.56E+08 | - | 0    | 0    |
| ENSG0000(PARD3-AS1 antisense chr10  | 34815767 | 34816386 | + | 0    | 1.16 |

|                                      |          |            |      |      |
|--------------------------------------|----------|------------|------|------|
| ENSG0000(SORCS3-AS antisense chr10   | 1.05E+08 | 1.05E+08 - | 0    | 0    |
| ENSG0000(ELL2P4 processed_chrX       | 1.47E+08 | 1.47E+08 + | 0    | 0    |
| ENSG0000(MAPK6PS6 processed_chr10    | 49771841 | 49773299 + | 0    | 0    |
| ENSG0000(RP11-358D antisense chr20   | 63448051 | 63449329 + | 0    | 0    |
| ENSG0000(MTATP6P2 unprocessε chr7    | 67627831 | 67628019 + | 0    | 0    |
| ENSG0000(IFNA20P unprocessε chr9     | 21321300 | 21321827 + | 0    | 0    |
| ENSG0000(RP11-413E processed_chr1    | 89661212 | 89661353 - | 0    | 0    |
| ENSG0000(MRPS21P5 processed_chr10    | 28004702 | 28004932 + | 0    | 0    |
| ENSG0000(RP5-1056L processed_chr1    | 19608114 | 19608568 + | 0    | 0    |
| ENSG0000(C12orf77 lincRNA chr12      | 24993424 | 25006403 - | 0    | 0    |
| ENSG0000(AC013480. antisense chr2    | 42015625 | 42025302 - | 0    | 0    |
| ENSG0000(CTD-2269E processed_chr5    | 28927029 | 28927284 + | 0    | 0    |
| ENSG0000(RP5-965K1 unprocessε chr7   | 63632608 | 63636617 + | 0    | 0    |
| ENSG0000(RP11-31F1 sense_intrε chr9  | 547317   | 549531 +   | 0    | 0.54 |
| ENSG0000(RP5-984P4 processed_chr20   | 21488244 | 21488625 - | 0    | 0    |
| ENSG0000(RBMX2P1 processed_chr21     | 14829154 | 14829989 - | 0    | 0    |
| ENSG0000(RPL23P11 processed_chr10    | 33864313 | 33864723 + | 0    | 0    |
| ENSG0000(RP11-735G lincRNA chr6      | 1.25E+08 | 1.25E+08 - | 0    | 0    |
| ENSG0000(AC104058. processed_chr2    | 1.86E+08 | 1.86E+08 - | 0    | 0.4  |
| ENSG0000(CTD-2526L unprocessε chr7   | 63699390 | 63700441 + | 0    | 0    |
| ENSG0000(RP11-476F lincRNA chr10     | 33578931 | 33600040 - | 0    | 0    |
| ENSG0000(OR8T1P unprocessε chr12     | 48442030 | 48442947 - | 0    | 0    |
| ENSG0000(MTCYBP38 processed_chrX     | 1.27E+08 | 1.27E+08 + | 0    | 0    |
| ENSG0000(TP11P1 processed_chr1       | 76699789 | 76700538 + | 0.27 | 0    |
| ENSG0000(MRPL23-A' antisense chr11   | 1983237  | 1989920 -  | 0    | 0    |
| ENSG0000(SLC16A1-A antisense chr1    | 1.13E+08 | 1.13E+08 + | 2.29 | 1.55 |
| ENSG0000(IGLV3-4 IG_V_pseu chr22     | 22858025 | 22858268 + | 0    | 0    |
| ENSG0000(SLC25A5P5 processed_chr7    | 32471513 | 32472409 + | 0    | 0    |
| ENSG0000(AC093642. lincRNA chr2      | 2.42E+08 | 2.42E+08 - | 0    | 0    |
| ENSG0000(RP11-348J' antisense chr10  | 93059663 | 93060426 - | 0    | 0.2  |
| ENSG0000(RP11-174J' lincRNA chr10    | 64036345 | 64037280 - | 0    | 0    |
| ENSG0000(HMGN2P7 processed_chr3      | 15375373 | 15375645 - | 0    | 0    |
| ENSG0000(RPL15P13 processed_chr10    | 1.15E+08 | 1.15E+08 + | 0    | 0    |
| ENSG0000(RP11-111F unprocessε chr9   | 62395370 | 62395678 - | 0    | 0    |
| ENSG0000(USP17L7 protein_co chr8     | 12132417 | 12134438 - | 0    | 0    |
| ENSG0000(RP11-416N sense_intrε chr10 | 1.04E+08 | 1.04E+08 + | 0    | 0    |
| ENSG0000(CTD-2015B processed_chr5    | 24170370 | 24171246 + | 0    | 0    |
| ENSG0000(AP000290. antisense chr21   | 33156632 | 33159110 + | 0    | 0    |
| ENSG0000(RP11-1L9.1 lincRNA chrX     | 13377188 | 13403019 + | 0.54 | 0.21 |
| ENSG0000(ANKRD18D transcribed chr3   | 1.98E+08 | 1.98E+08 - | 0    | 0    |
| ENSG0000(RP1-22N22 processed_chrX    | 28659065 | 28659469 - | 0    | 0    |
| ENSG0000(RP11-420K antisense chr1    | 39249838 | 39257649 - | 0    | 0    |
| ENSG0000(RP11-621K processed_chr4    | 61775449 | 61775850 - | 0    | 0    |
| ENSG0000(RP11-506B antisense chr6    | 1.12E+08 | 1.12E+08 + | 0    | 0    |
| ENSG0000(PLCL2-AS1 antisense chr3    | 17042742 | 17044192 - | 0    | 0    |

|                                  |       |          |          |   |       |       |
|----------------------------------|-------|----------|----------|---|-------|-------|
| ENSG0000( AC006037. lincRNA      | chr2  | 2.34E+08 | 2.34E+08 | + | 0     | 0     |
| ENSG0000( GAPDHP32 processed_    | chr1  | 1.2E+08  | 1.2E+08  | - | 0     | 0     |
| ENSG0000( ACTR3BP6 processed_    | chr22 | 11124337 | 11125705 | + | 0     | 0     |
| ENSG0000( XXyac-YX6! antisense   | chr6  | 1.69E+08 | 1.69E+08 | + | 0.19  | 0     |
| ENSG0000( NOTCH2P1 processed_    | chr1  | 1.2E+08  | 1.2E+08  | + | 0     | 0     |
| ENSG0000( RP11-393J: lincRNA     | chr10 | 37976825 | 37992467 | + | 0     | 0     |
| ENSG0000( RPL7AP51 processed_    | chr10 | 67334123 | 67334882 | + | 0     | 0     |
| ENSG0000( CDY5P unprocessε       | chrY  | 17721598 | 17723177 | + | 0     | 0     |
| ENSG0000( CYP2D8P unprocessε     | chr22 | 42149886 | 42155001 | - | 0.04  | 0.13  |
| ENSG0000( RP11-379B lincRNA      | chr6  | 81845185 | 81933480 | - | 0.31  | 0.34  |
| ENSG0000( RP3-462C1 sense_intr   | chr6  | 40516336 | 40523933 | - | 0     | 0     |
| ENSG0000( RP3-512E2 antisense    | chr6  | 89950116 | 89953186 | + | 0     | 0     |
| ENSG0000( RP11-430L processed_   | chr1  | 16369150 | 16369530 | - | 0     | 0     |
| ENSG0000( OR10G5P unprocessε     | chr11 | 1.24E+08 | 1.24E+08 | + | 0     | 0     |
| ENSG0000( RP13-401N antisense    | chr20 | 25751218 | 25752761 | + | 0     | 0     |
| ENSG0000( RPA2P2 processed_      | chr10 | 81136540 | 81137335 | - | 0     | 0     |
| ENSG0000( AC018641. processed_   | chr7  | 32456963 | 32457758 | - | 0     | 0     |
| ENSG0000( ADAM1B unitary_ps      | chr12 | 1.12E+08 | 1.12E+08 | + | 0     | 0     |
| ENSG0000( RPS29P33 processed_    | chr9  | 17096301 | 17096446 | - | 0     | 0     |
| ENSG0000( CTA-292E1 antisense    | chr22 | 28800683 | 28848559 | + | 1.35  | 0.56  |
| ENSG0000( RP11-551L. transcribec | chr12 | 30978308 | 31006010 | - | 0.12  | 0.26  |
| ENSG0000( AC079807. processed_   | chr2  | 47939738 | 47940218 | - | 0.16  | 0     |
| ENSG0000( LA16c-2F2. unprocessε  | chr22 | 15615402 | 15615578 | - | 0     | 0     |
| ENSG0000( LINC01748 lincRNA      | chr1  | 60515716 | 60640491 | - | 0.05  | 0.04  |
| ENSG0000( LL22NC03- unprocessε   | chr22 | 22814671 | 22814926 | + | 0     | 0     |
| ENSG0000( UPF3AP1 processed_     | chr17 | 16745636 | 16746761 | - | 0     | 0     |
| ENSG0000( TMEM185! protein_co    | chr2  | 1.2E+08  | 1.2E+08  | - | 14.07 | 14.02 |
| ENSG0000( OR7H1P unprocessε      | chr19 | 9278448  | 9279369  | - | 0     | 0     |
| ENSG0000( ACTR3BP2 processed_    | chr2  | 91940668 | 91942040 | + | 0     | 0     |
| ENSG0000( ADIPOQ-A! antisense    | chr3  | 1.87E+08 | 1.87E+08 | - | 0     | 0.03  |
| ENSG0000( RP5-964H1 processed_   | chr1  | 1.09E+08 | 1.09E+08 | + | 0     | 0     |
| ENSG0000( RP11-87M: antisense    | chrX  | 36365626 | 36440292 | - | 0     | 0     |
| ENSG0000( RBM22P3 processed_     | chr7  | 56490682 | 56491635 | + | 0     | 0     |
| ENSG0000( LINC01035 lincRNA      | chr1  | 1.89E+08 | 1.89E+08 | + | 0     | 0     |
| ENSG0000( RP4-749H3 lincRNA      | chr1  | 20412304 | 20413253 | - | 0     | 0     |
| ENSG0000( LINC01824 lincRNA      | chr2  | 6496003  | 6503806  | + | 0     | 0     |
| ENSG0000( AC104308. processed_   | chr3  | 35871866 | 35872198 | + | 0     | 0     |
| ENSG0000( AC138647. protein_co   | chr8  | 1.42E+08 | 1.42E+08 | + | 0     | 0     |
| ENSG0000( FTOP1 processed_       | chr2  | 42797225 | 42798712 | - | 0.07  | 0     |
| ENSG0000( RPL26P27 processed_    | chr10 | 68499532 | 68499968 | + | 0     | 0     |
| ENSG0000( LINC00323 antisense    | chr21 | 41141493 | 41148133 | - | 0.25  | 0.19  |
| ENSG0000( RP11-406C lincRNA      | chr6  | 68226972 | 68329899 | - | 0     | 0     |
| ENSG0000( RPSAP21 transcribec    | chr1  | 2.37E+08 | 2.37E+08 | + | 0     | 0     |
| ENSG0000( RP5-882O7 processed_   | chr1  | 44843921 | 44844082 | - | 0     | 0     |
| ENSG0000( RP11-196G processed_   | chr1  | 1.5E+08  | 1.5E+08  | - | 0     | 0     |

|                     |              |       |          |          |   |      |      |
|---------------------|--------------|-------|----------|----------|---|------|------|
| ENSG0000(USF1P1     | processed_ch | chr21 | 33334571 | 33335096 | + | 0    | 0.15 |
| ENSG0000(KRT8P27    | processed_ch | chrX  | 64623117 | 64624573 | + | 0    | 0    |
| ENSG0000(TMEM167    | processed_ch | chrY  | 20907344 | 20907562 | - | 0    | 0    |
| ENSG0000(AC007463.  | lincRNA      | chr2  | 7886770  | 7899655  | - | 0    | 0    |
| ENSG0000(IPMKP1     | processed_ch | chr13 | 22837026 | 22837880 | - | 0.07 | 0    |
| ENSG0000(LINC01918  | lincRNA      | chr2  | 1.05E+08 | 1.05E+08 | + | 0    | 0    |
| ENSG0000(AC005588.  | processed_ch | chr7  | 1.54E+08 | 1.54E+08 | - | 0    | 0    |
| ENSG0000(UPK1A-AS1  | antisense    | chr19 | 35667948 | 35673291 | - | 0.32 | 0.09 |
| ENSG0000(AC004386.  | processed_ch | chrX  | 74342713 | 74342860 | - | 0    | 0    |
| ENSG0000(FAM138B    | lincRNA      | chr2  | 1.14E+08 | 1.14E+08 | + | 0.1  | 0    |
| ENSG0000(LINC00390  | lincRNA      | chr13 | 44106378 | 44137236 | - | 0    | 0    |
| ENSG0000(KIRREL-IT1 | sense_intr   | chr1  | 1.58E+08 | 1.58E+08 | + | 0    | 0.13 |
| ENSG0000(AC126365.  | transcribed  | chr17 | 20716481 | 20737127 | + | 0    | 0    |
| ENSG0000(AC004744.  | antisense    | chr7  | 18892096 | 18899433 | - | 0    | 0    |
| ENSG0000(AC074375.  | processed_ch | chr2  | 42680088 | 42680279 | - | 0    | 0    |
| ENSG0000(RPS7P10    | processed_ch | chr13 | 21628413 | 21629015 | - | 0    | 0    |
| ENSG0000(RP1-37C10  | antisense    | chr1  | 16978926 | 17005091 | + | 0.11 | 0.24 |
| ENSG0000(AP000289.  | lincRNA      | chr21 | 33111699 | 33123703 | - | 0    | 0    |
| ENSG0000(MTND1P1    | processed_ch | chrY  | 8371663  | 8372030  | + | 0    | 0    |
| ENSG0000(RP11-348F  | lincRNA      | chrX  | 51396511 | 51465661 | + | 0    | 0    |
| ENSG0000(RP5-1052N  | processed_ch | chrX  | 1.24E+08 | 1.24E+08 | - | 0    | 0    |
| ENSG0000(BTBD9-AS1  | antisense    | chr6  | 38481692 | 38482531 | + | 0    | 0    |
| ENSG0000(KB-1183D5  | processed_ch | chr22 | 21370064 | 21371945 | + | 0    | 0    |
| ENSG0000(RP11-417L  | processed_ch | chr9  | 1.07E+08 | 1.07E+08 | - | 0    | 0    |
| ENSG0000(SETP15     | processed_ch | chrX  | 15917548 | 15918631 | + | 0    | 0    |
| ENSG0000(OR7E33P    | unprocess    | chr13 | 67910986 | 67911951 | + | 0    | 0    |
| ENSG0000(AC012512.  | processed_ch | chr2  | 2.24E+08 | 2.24E+08 | + | 0    | 0    |
| ENSG0000(GAPDHP73   | processed_ch | chr6  | 1.36E+08 | 1.36E+08 | - | 0    | 0    |
| ENSG0000(RP11-795J  | processed_ch | chr6  | 46438310 | 46438619 | + | 0    | 0    |
| ENSG0000(AC114814.  | lincRNA      | chr2  | 2.35E+08 | 2.35E+08 | - | 0    | 0    |
| ENSG0000(MYL6P1     | processed_ch | chr21 | 43855890 | 43856342 | - | 0    | 0    |
| ENSG0000(RPL7P22    | processed_ch | chr5  | 72725419 | 72726151 | + | 0    | 0    |
| ENSG0000(RP4-633I8. | unprocess    | chr1  | 8798475  | 8799506  | + | 0    | 0    |
| ENSG0000(SSU72P1    | processed_ch | chrX  | 1.14E+08 | 1.14E+08 | + | 0    | 0    |
| ENSG0000(AC016722.  | lincRNA      | chr2  | 46852020 | 46853496 | - | 0    | 0    |
| ENSG0000(SCDP1      | processed_ch | chr17 | 20784645 | 20785725 | + | 0    | 0    |
| ENSG0000(RP5-1092L  | processed_ch | chr1  | 1.71E+08 | 1.71E+08 | + | 0    | 0    |
| ENSG0000(AC018735.  | processed_ch | chr2  | 1.87E+08 | 1.87E+08 | - | 0    | 0.04 |
| ENSG0000(MTCL1P1    | processed_ch | chr13 | 70923664 | 70924455 | + | 0    | 0    |
| ENSG0000(AGKP1      | processed_ch | chrY  | 14639096 | 14640358 | + | 0    | 0    |
| ENSG0000(NPM1P49    | processed_ch | chrX  | 47438736 | 47439774 | - | 0    | 0    |
| ENSG0000(TRAF6P1    | processed_ch | chr10 | 59136625 | 59138182 | - | 0    | 0    |
| ENSG0000(RP11-213N  | processed_ch | chr6  | 43364220 | 43364294 | + | 0    | 0    |
| ENSG0000(CYP4F26P   | lincRNA      | chr9  | 33580695 | 33605293 | + | 0.5  | 0.15 |
| ENSG0000(FTH1P20    | processed_ch | chr2  | 1.81E+08 | 1.81E+08 | - | 0    | 0.13 |

|                                      |          |          |   |      |      |
|--------------------------------------|----------|----------|---|------|------|
| ENSG0000(RP11-164C processed_ chr1   | 2.07E+08 | 2.07E+08 | - | 0    | 0    |
| ENSG0000(RP11-436F lincRNA chr9      | 1.03E+08 | 1.03E+08 | - | 0    | 0    |
| ENSG0000(LINC00606 lincRNA chr3      | 10759484 | 10764192 | - | 0    | 0    |
| ENSG0000(RP11-505C processed_ chr1   | 1.83E+08 | 1.83E+08 | - | 0    | 0    |
| ENSG0000(RP11-445F antisense chr6    | 1.39E+08 | 1.39E+08 | + | 0    | 0    |
| ENSG0000(SNORD57 snoRNA chr20        | 2656939  | 2657010  | + | 0    | 0    |
| ENSG0000(CTA-85E5.7 processed_ chr22 | 30105094 | 30105408 | - | 0    | 0    |
| ENSG0000(RP11-523C antisense chr10   | 48984564 | 49018897 | + | 0    | 0    |
| ENSG0000(MICC unprocessε chr6        | 30414715 | 30419319 | + | 0    | 0    |
| ENSG0000(RP11-258F lincRNA chr10     | 37775371 | 37784131 | - | 0.1  | 0.12 |
| ENSG0000(MTCYBP31 processed_ chrX    | 70120353 | 70121474 | - | 0    | 0    |
| ENSG0000(RPL39P40 processed_ chr21   | 17500679 | 17500824 | - | 0    | 3.41 |
| ENSG0000(RP11-340Iε lincRNA chr7     | 63900823 | 63917994 | + | 0    | 0    |
| ENSG0000(UBE2V1P5 processed_ chr10   | 1.14E+08 | 1.14E+08 | + | 0    | 0    |
| ENSG0000(RP5-905H7 lincRNA chr7      | 63326674 | 63354326 | - | 0    | 0    |
| ENSG0000(UBE2V1P1( processed_ chr9   | 85159682 | 85159950 | + | 0    | 0    |
| ENSG0000(AC004911. processed_ chr7   | 1.45E+08 | 1.45E+08 | + | 0    | 0    |
| ENSG0000(RP11-550C lincRNA chr6      | 47729827 | 47740741 | - | 0    | 0    |
| ENSG0000(KB-288A10 unprocessε chr22  | 22465659 | 22465986 | + | 0    | 0    |
| ENSG0000(IFNWP9 unprocessε chr9      | 21190654 | 21191244 | - | 0    | 0    |
| ENSG0000(RP11-136K lincRNA chr6      | 1.51E+08 | 1.51E+08 | - | 0    | 0    |
| ENSG0000(CT47A9 protein_co chrX      | 1.21E+08 | 1.21E+08 | - | 0    | 0    |
| ENSG0000(RP11-239E lincRNA chr1      | 2.23E+08 | 2.23E+08 | + | 0    | 0    |
| ENSG0000(PAPPA-AS2 antisense chr9    | 1.16E+08 | 1.16E+08 | - | 0    | 0.13 |
| ENSG0000(AC007098. antisense chr2    | 62826064 | 62858438 | - | 0    | 0    |
| ENSG0000(FTLP3 processed_ chr20      | 4023917  | 4024444  | + | 0.42 | 0    |
| ENSG0000(RP11-276E antisense chr9    | 1.13E+08 | 1.13E+08 | - | 0.39 | 0    |
| ENSG0000(OFD1P2Y unprocessε chrY     | 18080681 | 18096202 | - | 0    | 0    |
| ENSG0000(OR52M2P unprocessε chr11    | 4514966  | 4515924  | - | 0    | 0    |
| ENSG0000(RPL21P110 processed_ chr13  | 72703693 | 72704138 | + | 0    | 0    |
| ENSG0000(RP11-301J: antisense chr13  | 19027837 | 19028701 | + | 0    | 0    |
| ENSG0000(LINC00343 processed_ chr13  | 1.06E+08 | 1.06E+08 | + | 0    | 0    |
| ENSG0000(AC083855. processed_ chr3   | 11290406 | 11290663 | - | 0    | 0    |
| ENSG0000(AC092155. antisense chr2    | 62590255 | 62662654 | - | 0    | 0    |
| ENSG0000(CTA-351J1. processed_ chr7  | 1.06E+08 | 1.06E+08 | + | 0    | 0    |
| ENSG0000(RBM17P1 processed_ chr9     | 39154075 | 39155479 | + | 0    | 0    |
| ENSG0000(NOP56P2 processed_ chr9     | 23681894 | 23682662 | + | 0    | 0    |
| ENSG0000(SHANK2-Aε antisense chr11   | 70631094 | 70635490 | + | 0    | 0    |
| ENSG0000(LINC00974 lincRNA chr17     | 41549606 | 41554495 | - | 0.03 | 0.03 |
| ENSG0000(SLC9A3P3 processed_ chr10   | 50025135 | 50027363 | - | 0    | 0    |
| ENSG0000(UBE2V1P1 processed_ chr20   | 3361880  | 3362324  | - | 0    | 0    |
| ENSG0000(PPIAP28 processed_ chr13    | 20178978 | 20179462 | - | 0    | 0    |
| ENSG0000(RP5-1049N processed_ chr7   | 1.22E+08 | 1.22E+08 | + | 0    | 0    |
| ENSG0000(RP11-21J7. lincRNA chr1     | 1.94E+08 | 1.94E+08 | + | 0    | 0    |
| ENSG0000(RP13-13A3 processed_ chrX   | 41322601 | 41323111 | - | 0    | 0    |

|                                      |          |          |   |      |      |
|--------------------------------------|----------|----------|---|------|------|
| ENSG0000( ACTG1P12 processed_ chr3   | 12070195 | 12071360 | + | 0    | 0    |
| ENSG0000( RP11-358H lincRNA chr1     | 2.22E+08 | 2.22E+08 | - | 0    | 0    |
| ENSG0000( RP11-128M lincRNA chr20    | 2207217  | 2213151  | + | 0.14 | 0    |
| ENSG0000( AP006216. antisense chr11  | 1.17E+08 | 1.17E+08 | + | 0    | 0.22 |
| ENSG0000( RPL7P37 processed_ chr10   | 35697300 | 35698037 | + | 0.18 | 0    |
| ENSG0000( RP11-336A antisense chr10  | 5712174  | 5744067  | - | 0    | 0    |
| ENSG0000( PLCG1-AS1 antisense chr20  | 41098329 | 41138003 | - | 0.16 | 0.26 |
| ENSG0000( AC019118. lincRNA chr2     | 3156756  | 3157797  | + | 0    | 0    |
| ENSG0000( KIF4B protein_co chr5      | 1.55E+08 | 1.55E+08 | + | 0    | 0    |
| ENSG0000( PSMD10P2 transcribed chr3  | 1.87E+08 | 1.87E+08 | + | 0.08 | 0.1  |
| ENSG0000( OR13Z1P unitary_ps chr1    | 1.47E+08 | 1.47E+08 | + | 0    | 0    |
| ENSG0000( AC096732. lincRNA chr4     | 1.24E+08 | 1.24E+08 | - | 0    | 0    |
| ENSG0000( RPL23AP3C processed_ chr2  | 2.01E+08 | 2.01E+08 | + | 0    | 0    |
| ENSG0000( RP11-137H antisense chr10  | 80529597 | 80535942 | - | 0    | 0.26 |
| ENSG0000( TRBV2 TR_V_gene chr7       | 1.42E+08 | 1.42E+08 | + | 0    | 0    |
| ENSG0000( RP5-1139I1 antisense chrX  | 1.19E+08 | 1.19E+08 | - | 0    | 0    |
| ENSG0000( CHMP1AP1 processed_ chr1   | 27686810 | 27687471 | - | 0    | 0    |
| ENSG0000( MTND4P1C processed_ chr1   | 2.36E+08 | 2.36E+08 | - | 0    | 0    |
| ENSG0000( RP4-745E8 antisense chr1   | 20294211 | 20323187 | - | 0    | 0    |
| ENSG0000( SSR1P2 processed_ chr13    | 75136154 | 75136940 | + | 0    | 0    |
| ENSG0000( HSPA9P1 processed_ chr2    | 2.22E+08 | 2.22E+08 | + | 0    | 0    |
| ENSG0000( RP11-526D transcribed chr9 | 92882567 | 92899608 | + | 0    | 0    |
| ENSG0000( RP11-509J. lincRNA chr9    | 3684076  | 3689626  | - | 0    | 0    |
| ENSG0000( BCAS2P3 processed_ chr13   | 79166119 | 79166885 | + | 0    | 0    |
| ENSG0000( AC005008. processed_ chr7  | 81191398 | 81192009 | + | 0    | 0    |
| ENSG0000( LINC01108 lincRNA chr6     | 14280127 | 14285454 | - | 0    | 0    |
| ENSG0000( TEX41 lincRNA chr2         | 1.45E+08 | 1.45E+08 | + | 0.37 | 0.11 |
| ENSG0000( RP11-589B lincRNA chr10    | 79628757 | 79632188 | - | 0    | 0    |
| ENSG0000( IGBP1P1 processed_ chr14   | 34939324 | 34940332 | + | 0    | 0.07 |
| ENSG0000( RP13-43E1 antisense chrX   | 38221391 | 38223667 | + | 0    | 0.34 |
| ENSG0000( RP11-61D3 lincRNA chr7     | 1.23E+08 | 1.23E+08 | - | 0    | 0    |
| ENSG0000( AC020595. lincRNA chr2     | 1.81E+08 | 1.81E+08 | - | 0    | 0    |
| ENSG0000( PWWP2AP processed_ chr13   | 80654755 | 80657027 | + | 0    | 0    |
| ENSG0000( CT47A12 protein_co chrX    | 1.21E+08 | 1.21E+08 | - | 0    | 0    |
| ENSG0000( LINC01535 lincRNA chr19    | 37251912 | 37265535 | + | 0.13 | 0.14 |
| ENSG0000( ENTPD1-AS antisense chr10  | 95753206 | 96090238 | - | 2.16 | 2.53 |
| ENSG0000( AC005281. protein_co chr7  | 12483344 | 12541910 | + | 0.03 | 0    |
| ENSG0000( NXNP1 processed_ chr1      | 2.19E+08 | 2.19E+08 | - | 0    | 0    |
| ENSG0000( RP11-69C1 lincRNA chr10    | 2071845  | 2081097  | + | 0    | 0    |
| ENSG0000( ANKRD20A processed_ chr13  | 24750657 | 24752171 | - | 0    | 0    |
| ENSG0000( LENG8-AS1 antisense chr19  | 54444813 | 54449045 | - | 1.41 | 1.17 |
| ENSG0000( RP1-50Q24 antisense chr1   | 26876133 | 26878245 | + | 0    | 0    |
| ENSG0000( RP11-122K antisense chr10  | 1.33E+08 | 1.33E+08 | - | 0    | 0    |
| ENSG0000( MTND4P25 processed_ chr2   | 82814984 | 82815516 | + | 0    | 0    |
| ENSG0000( RPL15P14 processed_ chr10  | 72189941 | 72190576 | + | 0    | 0    |



|                                     |          |          |   |       |       |
|-------------------------------------|----------|----------|---|-------|-------|
| ENSG0000(MIR217HG lincRNA chr2      | 55963191 | 56047326 | - | 0     | 0     |
| ENSG0000(NPM1P4 processed_chr13     | 27696393 | 27697204 | - | 0     | 0     |
| ENSG0000(SDCBPP1 processed_chr10    | 6293100  | 6294684  | - | 0     | 0     |
| ENSG0000(RP11-426A antisense chr9   | 1.36E+08 | 1.36E+08 | - | 0     | 0     |
| ENSG0000(RP11-719J lincRNA chr6     | 49823712 | 49824782 | - | 0     | 0     |
| ENSG0000(AC073409 lincRNA chr2      | 1.23E+08 | 1.23E+08 | - | 0     | 0     |
| ENSG0000(FGF12-AS3 antisense chr3   | 1.93E+08 | 1.93E+08 | + | 0     | 0     |
| ENSG0000(FAM66C antisense chr12     | 8180209  | 8216151  | + | 2.89  | 4.77  |
| ENSG0000(LINC01709 lincRNA chr1     | 1.02E+08 | 1.02E+08 | + | 0     | 0     |
| ENSG0000(AL589986 antisense chr1    | 1.52E+08 | 1.52E+08 | + | 0     | 0     |
| ENSG0000(PTPRD-AS2 lincRNA chr9     | 10613202 | 10620420 | + | 0     | 0     |
| ENSG0000(SNRPGP8 processed_chr2     | 2.28E+08 | 2.28E+08 | - | 0     | 0     |
| ENSG0000(EEF1DP2 processed_chr9     | 92836826 | 92837668 | - | 0.22  | 0.08  |
| ENSG0000(LINC00424 lincRNA chr13    | 21872770 | 21878160 | - | 0     | 0     |
| ENSG0000(RP11-142L processed_chr1   | 1.92E+08 | 1.92E+08 | - | 0     | 0     |
| ENSG0000(RP11-795A unprocessε chr3  | 1.87E+08 | 1.87E+08 | + | 0     | 0     |
| ENSG0000(PABPC1L2E antisense chrX   | 72998388 | 73002856 | - | 0     | 0     |
| ENSG0000(TMEM256f processed_chr2    | 2.22E+08 | 2.22E+08 | + | 0     | 0     |
| ENSG0000(RPL35AP3C processed_chr12  | 1.2E+08  | 1.2E+08  | + | 0     | 0     |
| ENSG0000(RP11-397G protein_co chr6  | 50093616 | 50181007 | + | 0     | 0     |
| ENSG0000(SNRPGP12 processed_chr10   | 1.1E+08  | 1.1E+08  | - | 0     | 0     |
| ENSG0000(CTA-384D8 antisense chr22  | 50546415 | 50547652 | + | 0     | 0     |
| ENSG0000(RP11-347L lincRNA chr6     | 1.64E+08 | 1.64E+08 | - | 0     | 0     |
| ENSG0000(CTA-929C8 lincRNA chr22    | 27310651 | 27317456 | + | 0     | 0     |
| ENSG0000(HSBP1L1 protein_co chr18   | 79964561 | 79970822 | + | 6.22  | 6.18  |
| ENSG0000(AC079781 processed_chr7    | 97870167 | 97870289 | + | 0     | 0     |
| ENSG0000(RP11-115D processed_chr1   | 40132764 | 40133448 | + | 0     | 0     |
| ENSG0000(SMCR5 antisense chr17      | 17776686 | 17779529 | - | 0     | 0     |
| ENSG0000(AC007966 antisense chr2    | 1.86E+08 | 1.86E+08 | - | 0     | 0     |
| ENSG0000(RP11-513D unprocessε chr1  | 2.42E+08 | 2.42E+08 | + | 0     | 0     |
| ENSG0000(AF127936 lincRNA chr21     | 14761710 | 14763090 | - | 0     | 0     |
| ENSG0000(PSMD5-AS transcribec chr9  | 1.21E+08 | 1.21E+08 | + | 18.72 | 19.09 |
| ENSG0000(RP11-212D processed_chrX   | 75888700 | 75888888 | + | 0     | 0     |
| ENSG0000(RP5-1024G antisense chr1   | 53238610 | 53242783 | + | 0.5   | 0.5   |
| ENSG0000(VPS25P1 processed_chr1     | 1.18E+08 | 1.18E+08 | + | 0     | 0     |
| ENSG0000(AC007365 lincRNA chr2      | 64644612 | 64646698 | + | 0     | 0.12  |
| ENSG0000(PP12613 antisense chr4     | 1.22E+08 | 1.22E+08 | + | 0.05  | 0.14  |
| ENSG0000(DISC1-IT1 sense_intrε chr1 | 2.32E+08 | 2.32E+08 | + | 0.25  | 0     |
| ENSG0000(DAB1-AS1 antisense chr1    | 57860532 | 57880905 | + | 0     | 0     |
| ENSG0000(TAS2R46 protein_co chr12   | 11061365 | 11062294 | - | 0     | 0.08  |
| ENSG0000(RP11-298E lincRNA chr10    | 3240371  | 3257210  | - | 0     | 0     |
| ENSG0000(SRRM5 protein_co chr19     | 43596617 | 43614497 | + | 0.09  | 0.08  |
| ENSG0000(AC010145 lincRNA chr2      | 15997049 | 16062885 | - | 0     | 0     |
| ENSG0000(RPSAP33 processed_chr3     | 1.69E+08 | 1.69E+08 | + | 0     | 0     |
| ENSG0000(FABP7P1 processed_chr1     | 2.44E+08 | 2.44E+08 | - | 0     | 0     |

|                                     |          |          |   |      |      |
|-------------------------------------|----------|----------|---|------|------|
| ENSG0000(RP11-328P processed_ chr7  | 65508773 | 65508944 | - | 0    | 0    |
| ENSG0000(GAPDHP54 processed_ chr20  | 46997596 | 46998488 | + | 0    | 0    |
| ENSG0000(AC000124. lincRNA chr7     | 1.27E+08 | 1.27E+08 | + | 0    | 0    |
| ENSG0000(AP001136. antisense chr21  | 21223295 | 21226829 | - | 0    | 0    |
| ENSG0000(CTA-747E2 antisense chr22  | 29099041 | 29111683 | - | 0    | 0    |
| ENSG0000(RP4-775D1 processed_ chr1  | 92203148 | 92203991 | + | 0    | 0    |
| ENSG0000(RP11-654E processed_ chrX  | 23351013 | 23351450 | + | 0    | 0    |
| ENSG0000(KRTAP3-4P unprocessε chr17 | 41004481 | 41004760 | - | 0    | 0    |
| ENSG0000(FAM30A lincRNA chr14       | 1.06E+08 | 1.06E+08 | + | 0    | 0    |
| ENSG0000(NAALADL2 antisense chr3    | 1.75E+08 | 1.75E+08 | - | 0    | 0    |
| ENSG0000(RP11-38J2. antisense chr1  | 2.06E+08 | 2.06E+08 | + | 0    | 0    |
| ENSG0000(TBCAP1 processed_ chrX     | 33041395 | 33041721 | + | 0    | 0    |
| ENSG0000(RP11-706D lincRNA chr3     | 1.77E+08 | 1.77E+08 | - | 0    | 0    |
| ENSG0000(TLK1P1 processed_ chr9     | 1.23E+08 | 1.23E+08 | + | 0    | 0    |
| ENSG0000(PGAM4 protein_co chrX      | 77968874 | 77969638 | - | 0    | 0    |
| ENSG0000(AC073218. lincRNA chr2     | 34383788 | 34635340 | + | 0    | 0    |
| ENSG0000(AC110926. processed_ chr2  | 1.27E+08 | 1.27E+08 | + | 0.11 | 0.11 |
| ENSG0000(HNRNPA3P processed_ chr10  | 43789249 | 43790387 | - | 0    | 0.06 |
| ENSG0000(AC109826. lincRNA chr2     | 98761938 | 98772920 | - | 0    | 0.07 |
| ENSG0000(LINC00371 protein_co chr13 | 51082119 | 51200252 | - | 0.15 | 0.25 |
| ENSG0000(MTND1P2( processed_ chr10  | 69595487 | 69596436 | - | 0    | 0    |
| ENSG0000(AC015923. antisense chr17  | 63381231 | 63414312 | - | 0    | 0    |
| ENSG0000(RP11-289F. lincRNA chr9    | 80869758 | 80871295 | - | 0    | 0    |
| ENSG0000(CACTIN-AS antisense chr19  | 3607247  | 3613930  | + | 0.26 | 0.42 |
| ENSG0000(OSTCP8 processed_ chr9     | 33968071 | 33968518 | - | 0    | 0    |
| ENSG0000(RP11-7211ε processed_ chrX | 1.28E+08 | 1.28E+08 | + | 0    | 0    |
| ENSG0000(RP11-203B antisense chr6   | 57114894 | 57174236 | - | 0    | 0    |
| ENSG0000(RP4-675G8 processed_ chr1  | 44150594 | 44151753 | - | 0    | 0    |
| ENSG0000(AC011893. antisense chr2   | 1.36E+08 | 1.36E+08 | + | 0    | 0    |
| ENSG0000(MROH5 polymorph chr8       | 1.41E+08 | 1.42E+08 | - | 0    | 0    |
| ENSG0000(LINC00840 lincRNA chr10    | 43859411 | 43895433 | + | 0    | 0.06 |
| ENSG0000(RP11-45H2 processed_ chr5  | 54857272 | 54858491 | + | 0    | 0    |
| ENSG0000(RP5-881L2. antisense chr20 | 44347552 | 44355185 | - | 0    | 0    |
| ENSG0000(LINC01941 lincRNA chr2     | 1.26E+08 | 1.26E+08 | - | 0    | 0    |
| ENSG0000(RP3-419C1 processed_ chr1  | 1.93E+08 | 1.93E+08 | + | 0    | 0    |
| ENSG0000(AC005082. lincRNA chr7     | 23206013 | 23208045 | + | 0.08 | 0.15 |
| ENSG0000(SLC6A6P1 processed_ chr21  | 19244543 | 19246392 | + | 0    | 0    |
| ENSG0000(MEIS1-AS3 antisense chr2   | 66426735 | 66433470 | - | 0    | 0    |
| ENSG0000(RP11-7471ε unprocessε chrX | 66437345 | 66440668 | + | 0    | 0    |
| ENSG0000(RP11-356N lincRNA chr1     | 1.08E+08 | 1.08E+08 | + | 0    | 0    |
| ENSG0000(SUGT1P1 unprocessε chr9    | 33503655 | 33510711 | - | 0.32 | 0.53 |
| ENSG0000(RP4-756H1 sense_intrε chr7 | 66654538 | 66669855 | + | 2.61 | 0.48 |
| ENSG0000(LINC01509 lincRNA chr9     | 1.07E+08 | 1.07E+08 | - | 0    | 0    |
| ENSG0000(NPM1P11 processed_ chr7    | 11257681 | 11258535 | - | 0    | 0    |
| ENSG0000(RP11-278H lincRNA chr1     | 2.44E+08 | 2.44E+08 | + | 0    | 0    |

|                                     |          |          |   |      |      |
|-------------------------------------|----------|----------|---|------|------|
| ENSG0000(RP5-945F2 lincRNA chr7     | 68150283 | 68288233 | - | 0    | 0    |
| ENSG0000(MED15P3 processed_chr2     | 1.31E+08 | 1.31E+08 | - | 0    | 0    |
| ENSG0000(AC097724. antisense chr2   | 28708953 | 28736205 | - | 0.09 | 0.5  |
| ENSG0000(RP11-148B lincRNA chr1     | 94247866 | 94334848 | + | 0.31 | 0.52 |
| ENSG0000(RP11-77B2 processed_chr8   | 15943127 | 15943532 | + | 0    | 0    |
| ENSG0000(HMGB1P3. processed_chrX    | 98422138 | 98422809 | + | 0    | 0    |
| ENSG0000(AC096582. unprocessε chr7  | 45816557 | 45821064 | + | 0    | 0    |
| ENSG0000(MTND6P11 processed_chr2    | 1.43E+08 | 1.43E+08 | + | 0    | 0    |
| ENSG0000(PAICSP3 processed_chr6     | 73327524 | 73329017 | + | 0    | 0    |
| ENSG0000(RP11-166N antisense chr10  | 32281686 | 32282829 | + | 0    | 0    |
| ENSG0000(RP11-2P2.1 processed_chr1  | 2.08E+08 | 2.08E+08 | - | 0    | 0    |
| ENSG0000(EEF1GP3 processed_chr3     | 40596207 | 40597494 | - | 0    | 0    |
| ENSG0000(LINC00348 lincRNA chr13    | 71015141 | 71168417 | + | 0    | 0    |
| ENSG0000(PRPS1P1 processed_chr2     | 1.64E+08 | 1.64E+08 | + | 0    | 0    |
| ENSG0000(RP4-635E1 antisense chr1   | 11068471 | 11073097 | + | 0.14 | 0.07 |
| ENSG0000(AC004112. antisense chr7   | 1.12E+08 | 1.12E+08 | - | 0    | 0    |
| ENSG0000(AC010894. lincRNA chr2     | 1.74E+08 | 1.74E+08 | + | 0    | 0.96 |
| ENSG0000(RP11-212D lincRNA chrX     | 75903105 | 75904858 | + | 0.05 | 0    |
| ENSG0000(RPSAP17 processed_chr1     | 1.54E+08 | 1.54E+08 | - | 0    | 0    |
| ENSG0000(AC093901. lincRNA chr2     | 1.18E+08 | 1.18E+08 | - | 0.17 | 0    |
| ENSG0000(DUTP3 transcribed chr7     | 1.47E+08 | 1.47E+08 | + | 0    | 0    |
| ENSG0000(LINC02051 lincRNA chr3     | 1.86E+08 | 1.86E+08 | + | 0.29 | 0.11 |
| ENSG0000(AC109638. processed_chr2   | 82609652 | 82609977 | + | 0    | 0    |
| ENSG0000(RP5-1119C lincRNA chr10    | 8298897  | 8301667  | + | 0    | 0    |
| ENSG0000(RP11-569A antisense chr1   | 2.03E+08 | 2.03E+08 | + | 0.65 | 0.36 |
| ENSG0000(SHROOM2 unprocessε chrY    | 12537773 | 12544883 | + | 0    | 0    |
| ENSG0000(ATE1-AS1 transcribed chr10 | 1.22E+08 | 1.22E+08 | + | 0.06 | 0.43 |
| ENSG0000(RP13-77O1 unprocessε chrX  | 52781452 | 52785786 | - | 0    | 0    |
| ENSG0000(RP11-122M lincRNA chr1     | 2.12E+08 | 2.12E+08 | - | 0    | 0    |
| ENSG0000(LHFPL3-AS. processed_chr7  | 1.05E+08 | 1.05E+08 | - | 0    | 0    |
| ENSG0000(RP11-402P transcribed chrX | 71719142 | 71721278 | + | 1.65 | 0    |
| ENSG0000(AC135178. antisense chr17  | 8318088  | 8318712  | - | 0    | 0    |
| ENSG0000(AC002472. antisense chr22  | 21031357 | 21043969 | + | 0    | 0    |
| ENSG0000(CDY14P unprocessε chrY     | 23674379 | 23675392 | + | 0    | 0    |
| ENSG0000(AC005154. processed_chr7   | 30544053 | 30544431 | + | 0.23 | 0    |
| ENSG0000(ZNF877P unprocessε chr20   | 21265854 | 21266465 | + | 0    | 0    |
| ENSG0000(RP11-36N2 antisense chr1   | 2.46E+08 | 2.46E+08 | + | 0    | 0    |
| ENSG0000(RP11-575L antisense chr9   | 83829656 | 83837861 | + | 0    | 0    |
| ENSG0000(GSTM3P2 processed_chr2     | 1.59E+08 | 1.59E+08 | - | 0    | 0    |
| ENSG0000(H3F3AP5 processed_chrX     | 50905438 | 50905866 | + | 0    | 0    |
| ENSG0000(RP4-782L2. antisense chr1  | 59754747 | 59789182 | - | 0    | 0    |
| ENSG0000(RPS29P10 processed_chr2    | 61589498 | 61589663 | - | 0    | 0    |
| ENSG0000(E2F6P3 processed_chr22     | 21268161 | 21268903 | + | 0.15 | 0    |
| ENSG0000(AC093787. processed_chr2   | 1.32E+08 | 1.32E+08 | - | 0    | 0    |
| ENSG0000(ERVMER34 protein_co chr4   | 52722618 | 52751640 | - | 0    | 0    |

|                                     |          |          |   |       |      |
|-------------------------------------|----------|----------|---|-------|------|
| ENSG0000(RPLP1P10 processed_ chr10  | 59088701 | 59089039 | - | 0     | 0    |
| ENSG0000(RP11-4741 antisense chr1   | 1.62E+08 | 1.62E+08 | - | 0     | 0    |
| ENSG0000(LA16c-395 antisense chr16  | 1625628  | 1626160  | - | 0     | 0    |
| ENSG0000(LINC01359 processed_ chr1  | 64972225 | 65002489 | - | 0.1   | 0.14 |
| ENSG0000(RP11-298J antisense chr10  | 1.25E+08 | 1.25E+08 | - | 0     | 0    |
| ENSG0000(RP11-432J lincRNA chr10    | 1.33E+08 | 1.33E+08 | - | 0     | 0    |
| ENSG0000(CHCHD2P1 processed_ chrX   | 1.24E+08 | 1.24E+08 | + | 0     | 0    |
| ENSG0000(LINC00354 lincRNA chr13    | 1.12E+08 | 1.12E+08 | + | 0     | 0    |
| ENSG0000(RP11-561C antisense chr9   | 68228651 | 68229312 | + | 0     | 0    |
| ENSG0000(AC005040. processed_ chr2  | 1.07E+08 | 1.07E+08 | + | 0     | 0    |
| ENSG0000(TTTY4 lincRNA chrY         | 22936455 | 22973284 | + | 0     | 0    |
| ENSG0000(HIST1H2BP processed_ chr13 | 21483834 | 21484174 | - | 0     | 0    |
| ENSG0000(ISCA2P1 processed_ chr22   | 26644889 | 26645336 | - | 0     | 0    |
| ENSG0000(BSN-AS2 lincRNA chr3       | 49549306 | 49554366 | - | 0.02  | 0    |
| ENSG0000(AC068137. processed_ chr2  | 1.3E+08  | 1.3E+08  | + | 0     | 0    |
| ENSG0000(LINC01276 lincRNA chr6     | 41502444 | 41519852 | + | 0     | 0    |
| ENSG0000(AC010086. unprocessε chrY  | 21311268 | 21318895 | + | 0     | 0    |
| ENSG0000(RP11-80B9 antisense chr1   | 2.41E+08 | 2.41E+08 | + | 0     | 0    |
| ENSG0000(RP5-1068B 3prime_ov chr1   | 2.29E+08 | 2.29E+08 | - | 0     | 0    |
| ENSG0000(LINC00454 lincRNA chr13    | 1.14E+08 | 1.14E+08 | - | 0     | 0    |
| ENSG0000(AC007271. antisense chr2   | 1.02E+08 | 1.02E+08 | - | 0     | 0    |
| ENSG0000(PDZPH1P transcribec chr5   | 1.03E+08 | 1.04E+08 | - | 0.06  | 0.53 |
| ENSG0000(RP11-3021J lincRNA chr1    | 2.2E+08  | 2.2E+08  | - | 0     | 0    |
| ENSG0000(RPS14P4 processed_ chr2    | 1.11E+08 | 1.11E+08 | - | 0     | 0    |
| ENSG0000(CT47A11 protein_co chrX    | 1.21E+08 | 1.21E+08 | - | 0     | 0    |
| ENSG0000(GTF2IP2 unprocessε chr21   | 13443373 | 13489176 | - | 0     | 0    |
| ENSG0000(NRBF2P2 processed_ chr3    | 46023296 | 46024156 | + | 0     | 0    |
| ENSG0000(LINC00161 lincRNA chr21    | 28539318 | 28540355 | + | 0     | 0    |
| ENSG0000(CEP164P1 transcribec chr10 | 45002222 | 45076066 | - | 0.02  | 0.18 |
| ENSG0000(RP11-117D lincRNA chr1     | 53348488 | 53349233 | - | 0     | 0    |
| ENSG0000(AC062021. lincRNA chr2     | 1.39E+08 | 1.39E+08 | + | 0     | 0    |
| ENSG0000(RBMY1J protein_co chrY     | 22403461 | 22417881 | + | 0     | 0    |
| ENSG0000(IL9RP3 unprocessε chr16    | 29336    | 38321    | - | 0     | 0    |
| ENSG0000(ALG1L5P unprocessε chr7    | 6923804  | 6930835  | + | 0     | 0    |
| ENSG0000(RP1-120G2 antisense chr1   | 6204840  | 6205780  | - | 0.47  | 0.26 |
| ENSG0000(RP11-564A processed_ chr1  | 2.07E+08 | 2.07E+08 | + | 0     | 0    |
| ENSG0000(AC062022. processed_ chr2  | 1.62E+08 | 1.62E+08 | - | 0     | 0    |
| ENSG0000(RP1-52J10. unprocessε chr1 | 1.53E+08 | 1.53E+08 | - | 0     | 0    |
| ENSG0000(RPS4XP2 processed_ chr20   | 4629427  | 4630219  | - | 0     | 0    |
| ENSG0000(OR6K5P unprocessε chr1     | 1.59E+08 | 1.59E+08 | - | 0     | 0    |
| ENSG0000(DANCR processed_ chr4      | 52712404 | 52720351 | + | 13.71 | 14.6 |
| ENSG0000(RP4-714D9 processed_ chr1  | 1E+08    | 1E+08    | + | 0     | 0    |
| ENSG0000(AC010890. antisense chr2   | 1.33E+08 | 1.33E+08 | + | 0.13  | 0    |
| ENSG0000(RP5-983L1 lincRNA chr22    | 49718053 | 49724506 | - | 0.06  | 0    |
| ENSG0000(AC104306. processed_ chr3  | 32592972 | 32593312 | - | 0     | 0    |

|                                 |       |          |          |   |      |      |
|---------------------------------|-------|----------|----------|---|------|------|
| ENSG000001AP000432. lincRNA     | chr21 | 17659276 | 17660384 | - | 0    | 0    |
| ENSG000001RP4-533D7 antisense   | chr1  | 46046818 | 46048368 | + | 0    | 0    |
| ENSG000001MTCO1P21 unprocessed  | chr1  | 93927714 | 93928302 | - | 0    | 0    |
| ENSG000001AC018463. processed   | chr2  | 11351627 | 11352118 | + | 0    | 0    |
| ENSG000001RAC1P6 processed      | chr7  | 1.15E+08 | 1.15E+08 | - | 0    | 0    |
| ENSG000001AC078883. antisense   | chr2  | 1.72E+08 | 1.72E+08 | - | 0.26 | 0.28 |
| ENSG000001RHEBP2 processed      | chr10 | 47706203 | 47706802 | + | 1.98 | 0.8  |
| ENSG000001AC003088. lincRNA     | chr7  | 1.1E+08  | 1.11E+08 | - | 0    | 0    |
| ENSG000001HAUS4P1 processed     | chr1  | 1.7E+08  | 1.7E+08  | - | 0    | 0.06 |
| ENSG000001LINC00423 lincRNA     | chr13 | 32877431 | 32911650 | - | 0    | 0    |
| ENSG000001RP11-547D antisense   | chr1  | 2049203  | 2050070  | - | 0    | 0    |
| ENSG000001RP11-82H1 processed   | chr1  | 84244334 | 84244577 | + | 0    | 0    |
| ENSG000001AF196972. processed   | chrX  | 48446893 | 48448879 | - | 0    | 0    |
| ENSG000001RPL12P19 processed    | chr2  | 44270621 | 44271106 | + | 0    | 0    |
| ENSG000001RP4-663N1 unprocessed | chr1  | 1.15E+08 | 1.15E+08 | + | 0    | 0    |
| ENSG000001AC006987. unprocessed | chrY  | 10169788 | 10170314 | - | 0    | 0.15 |
| ENSG000001COX6A1P2 processed    | chr6  | 37044860 | 37045189 | + | 0    | 0    |
| ENSG000001HMGN1P2. processed    | chr13 | 95809310 | 95809607 | - | 0    | 0    |
| ENSG000001MAGI2-AS2 antisense   | chr7  | 79008988 | 79012277 | + | 0    | 0    |
| ENSG000001LTA protein_co        | chr6  | 31572054 | 31574324 | + | 0    | 0    |
| ENSG000001ABHD17AP unprocessed  | chr17 | 20814620 | 20844257 | + | 0    | 0    |
| ENSG000001CENPCP1 processed     | chr12 | 89500093 | 89502670 | + | 0    | 0    |
| ENSG000001LINC01692 lincRNA     | chr21 | 24840550 | 25057746 | + | 0    | 0    |
| ENSG000001RP4-591B8 processed   | chr1  | 1.14E+08 | 1.14E+08 | + | 0    | 0    |
| ENSG000001LINC01203 lincRNA     | chrX  | 13335241 | 13373634 | + | 0    | 0    |
| ENSG000001RP11-543B processed   | chr1  | 2.11E+08 | 2.11E+08 | + | 0    | 0    |
| ENSG000001RP11-544A processed   | chr9  | 1.31E+08 | 1.31E+08 | + | 0    | 0    |
| ENSG000001ALO49758. processed   | chr22 | 42853403 | 42853799 | - | 0    | 0    |
| ENSG000001RP11-543F. lincRNA    | chr10 | 8400860  | 8461863  | + | 0    | 0    |
| ENSG000001AC112229. processed   | chr2  | 1.1E+08  | 1.1E+08  | + | 0    | 0    |
| ENSG000001AC144525. lincRNA     | chr2  | 2.39E+08 | 2.39E+08 | - | 0    | 0    |
| ENSG000001AC012593. lincRNA     | chr2  | 34799850 | 35185689 | + | 0    | 0    |
| ENSG000001LINC00658 lincRNA     | chr20 | 5426895  | 5471094  | - | 0.13 | 0    |
| ENSG000001AP000477. lincRNA     | chr21 | 24043257 | 24050286 | + | 0    | 0    |
| ENSG000001MTATP6P3 unprocessed  | chr9  | 31505280 | 31505943 | + | 0    | 0    |
| ENSG000001AC073325. processed   | chr7  | 45534523 | 45534681 | - | 0    | 0    |
| ENSG000001HSPD1P14 processed    | chr1  | 33838523 | 33840140 | + | 0    | 0    |
| ENSG000001NBPFP2P unprocessed   | chr1  | 21424625 | 21427967 | - | 0.43 | 0.72 |
| ENSG000001SNRPEP10 processed    | chr1  | 2.24E+08 | 2.24E+08 | - | 0    | 0    |
| ENSG000001AC108032. processed   | chr2  | 2E+08    | 2E+08    | + | 0    | 0    |
| ENSG000001RP5-956O1 antisense   | chr1  | 2.3E+08  | 2.3E+08  | - | 0    | 0    |
| ENSG000001LINC01247 lincRNA     | chr2  | 6366010  | 6375422  | - | 0.05 | 0.08 |
| ENSG000001RP3-417G1 processed   | chrX  | 1.34E+08 | 1.34E+08 | + | 0    | 0    |
| ENSG000001FUNDC2P4 processed    | chr22 | 39155525 | 39155945 | + | 0    | 0    |
| ENSG000001C17orf112 lincRNA     | chr17 | 52985520 | 52987652 | + | 0    | 0    |

|                                     |          |          |   |       |       |
|-------------------------------------|----------|----------|---|-------|-------|
| ENSG0000(RP1-97J1.2 lincRNA chr6    | 1.12E+08 | 1.12E+08 | - | 0     | 0     |
| ENSG0000(OR7E96P unprocessε chr8    | 8039978  | 8040953  | + | 0     | 0     |
| ENSG0000(AC007285. antisense chr7   | 29988600 | 30025660 | + | 0     | 0.12  |
| ENSG0000(RP11-548K unprocessε chr7  | 57770619 | 57770946 | - | 0     | 0     |
| ENSG0000(RP11-262K lincRNA chr1     | 72765031 | 72791282 | + | 0     | 0     |
| ENSG0000(AC007036. lincRNA chr7     | 30176387 | 30179014 | - | 0     | 0     |
| ENSG0000(IL6STP1 processed_ chr17   | 15783288 | 15784307 | + | 0     | 0     |
| ENSG0000(OR7E101P unprocessε chr13  | 46460609 | 46461121 | + | 0     | 0     |
| ENSG0000(AC007557. lincRNA chr2     | 2.17E+08 | 2.17E+08 | + | 0     | 0     |
| ENSG0000(OR51A3P unprocessε chr11   | 4937371  | 4938294  | - | 0     | 0     |
| ENSG0000(SLC8A1-AS antisense chr2   | 39786453 | 40255209 | + | 0     | 0     |
| ENSG0000(RP11-168P lincRNA chr10    | 43912444 | 43914236 | + | 0     | 0     |
| ENSG0000(RPS2P36 processed_ chr10   | 96620877 | 96621707 | - | 0     | 0     |
| ENSG0000(AC105461. antisense chr2   | 2.32E+08 | 2.32E+08 | - | 0     | 0     |
| ENSG0000(RP11-234N processed_ chr1  | 99008218 | 99008474 | + | 0     | 0     |
| ENSG0000(MTATP6P1 unprocessε chr7   | 64106822 | 64107572 | - | 0     | 0     |
| ENSG0000(LINC00511 lincRNA chr17    | 72323123 | 72640472 | - | 1.03  | 0.51  |
| ENSG0000(GTF2IP7 transcribec chr7   | 76090431 | 76108779 | - | 0.05  | 0.33  |
| ENSG0000(ITGB2-AS1 antisense chr21  | 44921051 | 44929678 | + | 0.1   | 0.05  |
| ENSG0000(RP11-533F processed_ chr4  | 56760919 | 56761485 | - | 0     | 0     |
| ENSG0000(RP6-1O2.1 lincRNA chrX     | 10242339 | 10365323 | + | 0     | 0     |
| ENSG0000(LINC01682 lincRNA chr1     | 2.3E+08  | 2.3E+08  | - | 0     | 0     |
| ENSG0000(RP11-98D1 antisense chr1   | 1.52E+08 | 1.52E+08 | + | 0     | 0     |
| ENSG0000(AC012065. lincRNA chr2     | 20499571 | 20501311 | - | 0     | 0     |
| ENSG0000(RP11-134G processed_ chr1  | 2.01E+08 | 2.01E+08 | + | 0     | 0     |
| ENSG0000(RP11-460I1 antisense chr1  | 27938875 | 27960193 | - | 0     | 0     |
| ENSG0000(C14orf132 protein_co chr14 | 96039324 | 96093889 | + | 23.12 | 23.15 |
| ENSG0000(RP11-395B antisense chr7   | 1.01E+08 | 1.01E+08 | - | 2.43  | 0.26  |
| ENSG0000(FDX1P2 processed_ chr21    | 25692180 | 25692554 | + | 0     | 0     |
| ENSG0000(AC009961. processed_ chr2  | 1.6E+08  | 1.6E+08  | - | 0     | 0     |
| ENSG0000(RPL6P2 processed_ chr1     | 1.19E+08 | 1.19E+08 | - | 0     | 0     |
| ENSG0000(WDR46 protein_co chr6      | 33279108 | 33289527 | - | 16.12 | 15.03 |
| ENSG0000(RP13-34L8. unprocessε chrX | 52545151 | 52547695 | + | 0     | 0     |
| ENSG0000(ANHX protein_co chr12      | 1.33E+08 | 1.33E+08 | - | 0     | 0     |
| ENSG0000(LINC00629 lincRNA chrX     | 1.35E+08 | 1.35E+08 | + | 0     | 0.2   |
| ENSG0000(AC079779. antisense chr2   | 197569   | 202605   | + | 0     | 0     |
| ENSG0000(RP11-115A processed_ chr1  | 80464301 | 80464718 | - | 0     | 0     |
| ENSG0000(RPL41P1 processed_ chr20   | 21755270 | 21755350 | + | 0     | 0     |
| ENSG0000(RP3-363L9. processed_ chrX | 1.33E+08 | 1.33E+08 | - | 0     | 0     |
| ENSG0000(RP3-340N1 lincRNA chr1     | 20154338 | 20160568 | + | 0.07  | 0.06  |
| ENSG0000(DPPA3P1 processed_ chrX    | 1.04E+08 | 1.04E+08 | - | 0     | 0     |
| ENSG0000(RP11-12A1 antisense chr9   | 1.26E+08 | 1.26E+08 | + | 0.11  | 0     |
| ENSG0000(CNN2P2 processed_ chr9     | 40346144 | 40347052 | - | 0     | 0     |
| ENSG0000(RP11-191G antisense chr1   | 51518309 | 51561629 | + | 1.52  | 0.55  |
| ENSG0000(FOCAD-AS: lincRNA chr9     | 20683304 | 20684688 | - | 0     | 0     |

|                                      |          |          |   |        |        |
|--------------------------------------|----------|----------|---|--------|--------|
| ENSG0000(RP3-466I7. processed_ chr6  | 1.08E+08 | 1.08E+08 | + | 0      | 0      |
| ENSG0000(SDHDP2 processed_ chr7      | 1.35E+08 | 1.35E+08 | + | 0      | 0      |
| ENSG0000(AP000472. lincRNA chr21     | 21933315 | 21975681 | - | 0      | 0      |
| ENSG0000(RP11-4C20 sense_intr( chr10 | 1.28E+08 | 1.28E+08 | + | 0      | 0      |
| ENSG0000(AC107983. processed_ chr17  | 18572752 | 18572961 | + | 0      | 0      |
| ENSG0000(LINC02094 lincRNA chr17     | 19419035 | 19424357 | + | 0      | 0      |
| ENSG0000(CTD-2021A processed_ chr7   | 51388430 | 51389114 | - | 0.39   | 0.6    |
| ENSG0000(RP11-543P processed_ chr12  | 3211663  | 3211917  | - | 1.33   | 0      |
| ENSG0000(CH17-437K lincRNA chr1      | 1.21E+08 | 1.21E+08 | + | 0.76   | 0.56   |
| ENSG0000(L29074.3 antisense chrX     | 1.48E+08 | 1.48E+08 | - | 0      | 0      |
| ENSG0000(RBMX2P5 processed_ chr5     | 80331573 | 80332541 | - | 0      | 0      |
| ENSG0000(AC084149. lincRNA chr2      | 77652413 | 77654668 | - | 0      | 0      |
| ENSG0000(RP1-135L2. lincRNA chr6     | 21354411 | 21355296 | - | 0      | 0      |
| ENSG0000(AP000402. lincRNA chr21     | 24886676 | 24902756 | - | 0      | 0      |
| ENSG0000(RP5-1028L. antisense chr1   | 1.1E+08  | 1.1E+08  | - | 0      | 0      |
| ENSG0000(RP11-565P antisense chr1    | 1.62E+08 | 1.62E+08 | - | 0      | 0      |
| ENSG0000(HMGB3P8 processed_ chr10    | 1.16E+08 | 1.16E+08 | - | 0      | 0      |
| ENSG0000(RPS28P7 processed_ chr11    | 82689559 | 82689768 | + | 870.61 | 796.04 |
| ENSG0000(AC073636. lincRNA chr2      | 1.77E+08 | 1.77E+08 | - | 0      | 0      |
| ENSG0000(RP11-433J. lincRNA chr10    | 4024940  | 4028394  | + | 0      | 0      |
| ENSG0000(OR2AS1P unprocess( chr1     | 2.49E+08 | 2.49E+08 | - | 0      | 0      |
| ENSG0000(PIGQP1 transcribed chr1     | 55938714 | 55939280 | - | 0      | 0      |
| ENSG0000(PARP1P1 processed_ chr13    | 1.11E+08 | 1.11E+08 | + | 0      | 0      |
| ENSG0000(AC096574. lincRNA chr2      | 2.38E+08 | 2.38E+08 | + | 0      | 0      |
| ENSG0000(IGHD1-14 IG_D_gene chr14    | 1.06E+08 | 1.06E+08 | - | 0      | 0      |
| ENSG0000(CRIP1P3 processed_ chr1     | 2.02E+08 | 2.02E+08 | + | 0      | 0      |
| ENSG0000(LMCD1-AS. antisense chr3    | 7952805  | 8611924  | - | 0.14   | 0.31   |
| ENSG0000(RP11-460N unprocess( chr7   | 65075023 | 65078780 | + | 0      | 0      |
| ENSG0000(LINC01630 lincRNA chr18     | 51346249 | 51643939 | + | 0      | 0      |
| ENSG0000(HORMAD2 antisense chr22     | 30008742 | 30080480 | - | 0      | 0      |
| ENSG0000(BTF3P13 processed_ chr4     | 98740742 | 98741231 | + | 0      | 0      |
| ENSG0000(AC009238. processed_ chr2   | 95436133 | 95436556 | + | 0      | 0      |
| ENSG0000(RP11-319F lincRNA chr10     | 52973488 | 52975815 | - | 0      | 0      |
| ENSG0000(RPL12P44 processed_ chr3    | 44937673 | 44938482 | + | 0      | 0      |
| ENSG0000(ZNF717 protein_co chr3      | 75709643 | 75785583 | - | 4.03   | 2.28   |
| ENSG0000(AP002856. lincRNA chr11     | 1.31E+08 | 1.31E+08 | + | 0      | 0      |
| ENSG0000(LBX1-AS1 processed_ chr10   | 1.01E+08 | 1.01E+08 | + | 0      | 0      |
| ENSG0000(RP11-552E lincRNA chr6      | 40271566 | 40276237 | - | 0      | 0      |
| ENSG0000(AC011742. processed_ chr2   | 26160023 | 26161136 | + | 0      | 0      |
| ENSG0000(AC093084. processed_ chr2   | 1.46E+08 | 1.46E+08 | + | 0      | 0      |
| ENSG0000(GCSAML-A. antisense chr1    | 2.48E+08 | 2.48E+08 | - | 0      | 0      |
| ENSG0000(RP11-421B processed_ chr9   | 10777357 | 10777525 | + | 0      | 0      |
| ENSG0000(RP11-533N lincRNA chr1      | 1.48E+08 | 1.48E+08 | + | 0      | 0      |
| ENSG0000(USP17L5 protein_co chr4     | 9339403  | 9340995  | + | 0      | 0      |
| ENSG0000(RP11-545A processed_ chr1   | 1.8E+08  | 1.8E+08  | + | 0      | 0      |

|                     |             |       |          |          |   |      |      |
|---------------------|-------------|-------|----------|----------|---|------|------|
| ENSG0000(LINC01153  | lincRNA     | chr10 | 1.21E+08 | 1.21E+08 | + | 0    | 0    |
| ENSG0000(IL21-AS1   | antisense   | chr4  | 1.23E+08 | 1.23E+08 | + | 0    | 0    |
| ENSG0000(RP11-196D  | lincRNA     | chr7  | 63044827 | 63054431 | - | 0    | 0    |
| ENSG0000(MTCO1P44   | processed_  | chr2  | 1.4E+08  | 1.4E+08  | - | 0    | 0    |
| ENSG0000(RP11-473E  | lincRNA     | chr9  | 1.35E+08 | 1.35E+08 | + | 0    | 0    |
| ENSG0000(PRR20D     | protein_co  | chr13 | 57160632 | 57163653 | + | 0    | 0    |
| ENSG0000(OR2T7      | unprocessε  | chr1  | 2.48E+08 | 2.48E+08 | + | 0    | 0    |
| ENSG0000(MKRNP2     | unprocessε  | chr6  | 35443044 | 35449866 | + | 0    | 0    |
| ENSG0000(RP11-165F  | antisense   | chr9  | 452492   | 492248   | - | 0    | 0    |
| ENSG0000(AC068535.  | lincRNA     | chr2  | 1.04E+08 | 1.04E+08 | + | 0    | 0    |
| ENSG0000(AC073621.  | processed_  | chr17 | 17422681 | 17423704 | + | 0.06 | 0.26 |
| ENSG0000(DDX11L16   | unprocessε  | chrX  | 1.56E+08 | 1.56E+08 | - | 0    | 0    |
| ENSG0000(DDX11L16   | unprocessε  | chrY  | 57212184 | 57214397 | - | 0    | 0    |
| ENSG0000(THEM7P     | transcribec | chr11 | 32112049 | 32343409 | - | 0    | 0    |
| ENSG0000(AC092755.  | sense_ovei  | chr15 | 59644298 | 59672302 | - | 0    | 0    |
| ENSG0000(RP5-1198C  | processed_  | chr1  | 44087958 | 44088477 | - | 0    | 0    |
| ENSG0000(WDR11-AS   | antisense   | chr10 | 1.21E+08 | 1.21E+08 | - | 0.06 | 0.14 |
| ENSG0000(STSP1      | unprocessε  | chrY  | 15547216 | 15593331 | + | 0    | 0    |
| ENSG0000(RP11-570H  | lincRNA     | chr9  | 18360597 | 18362220 | - | 0    | 0    |
| ENSG0000(RP1-37J18. | lincRNA     | chr1  | 4551735  | 4552145  | - | 0    | 0    |
| ENSG0000(AF178030.  | antisense   | chr8  | 1.16E+08 | 1.16E+08 | + | 0    | 0    |
| ENSG0000(AC011290.  | antisense   | chr7  | 39545646 | 39566239 | - | 0    | 0    |
| ENSG0000(MYL6P3     | processed_  | chr10 | 65169438 | 65169869 | - | 0.19 | 0    |
| ENSG0000(RP11-214D  | antisense   | chr10 | 13528516 | 13530262 | + | 0    | 0    |
| ENSG0000(AC092641.  | processed_  | chr2  | 1.7E+08  | 1.7E+08  | - | 0    | 0    |
| ENSG0000(AIMP1P2    | processed_  | chr1  | 1.73E+08 | 1.73E+08 | - | 0    | 0    |
| ENSG0000(PGCP1      | transcribec | chr1  | 1.11E+08 | 1.11E+08 | - | 0    | 0    |
| ENSG0000(AC013467.  | processed_  | chr2  | 1.74E+08 | 1.74E+08 | - | 0    | 0    |
| ENSG0000(LINC01688  | lincRNA     | chr1  | 1.83E+08 | 1.83E+08 | + | 0    | 0    |
| ENSG0000(VN1R28P    | unitary_ps  | chr7  | 57422830 | 57423725 | - | 0    | 0    |
| ENSG0000(HDGFP1     | processed_  | chrX  | 1.32E+08 | 1.32E+08 | + | 0    | 0    |
| ENSG0000(RP11-77G2  | antisense   | chr10 | 75023475 | 75024251 | - | 0    | 0    |
| ENSG0000(RP11-6C10  | processed_  | chr2  | 1.75E+08 | 1.75E+08 | - | 0    | 0    |
| ENSG0000(MGAT3-AS   | antisense   | chr22 | 39475807 | 39476822 | - | 0    | 0    |
| ENSG0000(AC092535.  | antisense   | chr4  | 1151372  | 1153701  | + | 0    | 0.03 |
| ENSG0000(TRGC2      | TR_C_gene   | chr7  | 38239580 | 38249572 | - | 0    | 0    |
| ENSG0000(RP1-45I4.3 | lincRNA     | chr6  | 1.43E+08 | 1.43E+08 | - | 0    | 0.57 |
| ENSG0000(RP11-439A  | lincRNA     | chr1  | 1.21E+08 | 1.21E+08 | + | 0    | 0.34 |
| ENSG0000(MIR663AH   | processed_  | chr20 | 26186920 | 26251526 | - | 0    | 0.5  |
| ENSG0000(IGHD4-23   | IG_D_gene   | chr14 | 1.06E+08 | 1.06E+08 | - | 0    | 0    |
| ENSG0000(AC009518.  | antisense   | chr7  | 1.33E+08 | 1.33E+08 | + | 0    | 0    |
| ENSG0000(C6orf47-AS | antisense   | chr6  | 31658329 | 31660721 | + | 0    | 0    |
| ENSG0000(ST7-AS1    | antisense   | chr7  | 1.17E+08 | 1.17E+08 | - | 0.36 | 0.29 |
| ENSG0000(RP11-121A  | sense_intr  | chr9  | 1.24E+08 | 1.24E+08 | + | 0    | 0    |
| ENSG0000(CNN2P1     | processed_  | chr22 | 30046276 | 30047193 | - | 0    | 0    |



|                     |                   |          |          |   |      |      |
|---------------------|-------------------|----------|----------|---|------|------|
| ENSG0000(SUB1P1)    | processed_chr8    | 11790005 | 11790386 | + | 0    | 0    |
| ENSG0000(RBMY2JP)   | unprocessε chrY   | 8127130  | 8144203  | + | 0    | 0    |
| ENSG0000(PFN1P9)    | processed_chr1    | 1.2E+08  | 1.2E+08  | + | 0    | 0    |
| ENSG0000(XXbac-BCX) | lincRNA chr6      | 29124210 | 29128908 | + | 0    | 0    |
| ENSG0000(RPL31P12)  | processed_chr1    | 72301472 | 72301829 | + | 0    | 0    |
| ENSG0000(WARS2P1)   | processed_chr10   | 80940665 | 80941201 | - | 0    | 0    |
| ENSG0000(AC079145)  | antisense chr2    | 19990217 | 20004210 | + | 0.4  | 0.15 |
| ENSG0000(RP5-1100E) | processed_chrX    | 1.03E+08 | 1.03E+08 | - | 0    | 0    |
| ENSG0000(PFN1P6)    | processed_chr1    | 1.44E+08 | 1.44E+08 | + | 0    | 0    |
| ENSG0000(SPATA13-A) | antisense chr13   | 24252749 | 24254439 | - | 0    | 0    |
| ENSG0000(HCG15)     | antisense chr6    | 28986203 | 28987484 | + | 0.7  | 0.53 |
| ENSG0000(RP11-445L) | antisense chr6    | 82932601 | 82938677 | + | 0    | 0    |
| ENSG0000(RP11-367J) | antisense chr1    | 1.58E+08 | 1.58E+08 | + | 0    | 0    |
| ENSG0000(RP11-203J) | antisense chr9    | 1.28E+08 | 1.28E+08 | + | 0.31 | 0    |
| ENSG0000(RP11-69I8) | antisense chr6    | 1.32E+08 | 1.32E+08 | + | 0    | 0    |
| ENSG0000(RP11-72H1) | processed_chr3    | 53474700 | 53475089 | - | 0    | 0    |
| ENSG0000(MTND1P14)  | unprocessε chr17  | 19602259 | 19603208 | + | 0    | 0    |
| ENSG0000(AC017101)  | antisense chr2    | 1.87E+08 | 1.87E+08 | - | 0    | 0    |
| ENSG0000(RP11-261C) | antisense chr1    | 2.43E+08 | 2.43E+08 | + | 0.1  | 0    |
| ENSG0000(WASH7P)    | unprocessε chr1   | 14404    | 29570    | - | 3.9  | 6.54 |
| ENSG0000(CICP17)    | processed_chr7    | 51382284 | 51384660 | + | 0    | 0    |
| ENSG0000(SPANXB1)   | protein_co chrX   | 1.41E+08 | 1.41E+08 | + | 0    | 0    |
| ENSG0000(RP11-365D) | processed_chr1    | 2.36E+08 | 2.36E+08 | + | 0    | 0    |
| ENSG0000(AL672294)  | antisense chr1    | 2.49E+08 | 2.49E+08 | + | 0    | 0    |
| ENSG0000(TTC39DP)   | unitary_psι chr2  | 38763534 | 38765221 | + | 0    | 0    |
| ENSG0000(RP11-563D) | lincRNA chr1      | 1.94E+08 | 1.94E+08 | + | 0    | 0    |
| ENSG0000(AC011998)  | processed_chr2    | 1.78E+08 | 1.78E+08 | + | 0    | 0    |
| ENSG0000(NBPF13P)   | unprocessε chr1   | 1.47E+08 | 1.47E+08 | - | 0    | 0    |
| ENSG0000(SLAMF6P1)  | unprocessε chr1   | 1.62E+08 | 1.62E+08 | + | 0    | 0    |
| ENSG0000(LINC00845) | lincRNA chr10     | 61016275 | 61026420 | + | 0    | 0    |
| ENSG0000(RP11-136C) | lincRNA chr3      | 43087479 | 43088068 | + | 0    | 0    |
| ENSG0000(TRIM60P13) | processed_chr13   | 89248818 | 89250100 | - | 0    | 0    |
| ENSG0000(FAM155A-l) | sense_intrι chr13 | 1.08E+08 | 1.08E+08 | - | 0    | 0    |
| ENSG0000(AC000374)  | processed_chr7    | 1.27E+08 | 1.27E+08 | + | 0    | 0    |
| ENSG0000(TRIM60P9)  | processed_chrY    | 23058030 | 23059186 | + | 0    | 0    |
| ENSG0000(AC105760)  | antisense chr2    | 2.37E+08 | 2.37E+08 | - | 0.35 | 0.62 |
| ENSG0000(RP11-166N) | antisense chr10   | 32266289 | 32269474 | + | 0    | 0    |
| ENSG0000(VDAC1P12)  | processed_chr13   | 34082429 | 34083310 | - | 0    | 0    |
| ENSG0000(CDRT15P2)  | unprocessε chr17  | 15764703 | 15765664 | + | 0    | 0    |
| ENSG0000(MIS18A-AS) | antisense chr21   | 32277863 | 32280988 | + | 0    | 0    |
| ENSG0000(RP11-330N) | processed_chr9    | 96918928 | 96919318 | + | 0    | 0    |
| ENSG0000(SMIM2-AS)  | antisense chr13   | 44110451 | 44240517 | + | 0.07 | 0.06 |
| ENSG0000(HMGN2P2)   | processed_chr2    | 1.01E+08 | 1.01E+08 | - | 0    | 0    |
| ENSG0000(LINC01985) | lincRNA chr3      | 30524745 | 30527185 | + | 0    | 0    |
| ENSG0000(YWHAZP7)   | processed_chrX    | 64612632 | 64613262 | - | 0    | 0    |

|                 |            |                 |       |          |          |   |      |      |
|-----------------|------------|-----------------|-------|----------|----------|---|------|------|
| ENSG00000103440 | HCG4B      | unprocessed     | chr6  | 29925983 | 29926973 | - | 0.12 | 0    |
| ENSG00000103441 | ACTR3BP5   | processed       | chr10 | 38696424 | 38697902 | + | 0    | 0    |
| ENSG00000103442 | AC073464   | processed       | chr2  | 94734655 | 94735844 | - | 0    | 0    |
| ENSG00000103443 | RP11-305C  | processed       | chr3  | 1.36E+08 | 1.36E+08 | + | 0    | 0    |
| ENSG00000103444 | KLLN       | protein_coding  | chr10 | 87859161 | 87863437 | - | 0.47 | 0.66 |
| ENSG00000103445 | RP11-96L7  | lincRNA         | chr9  | 99183373 | 99184891 | + | 0    | 0    |
| ENSG00000103446 | AC009963   | unprocessed     | chr2  | 1.08E+08 | 1.08E+08 | + | 0    | 0    |
| ENSG00000103447 | RPL39P25   | processed       | chr10 | 75269392 | 75269545 | - | 0    | 0    |
| ENSG00000103448 | AC005358   | antisense       | chr17 | 12671862 | 12706135 | - | 0    | 0    |
| ENSG00000103449 | MTND6P1    | unprocessed     | chr2  | 1.31E+08 | 1.31E+08 | + | 0    | 0    |
| ENSG00000103450 | RP11-656D  | antisense       | chr1  | 40514461 | 40515057 | - | 0    | 0    |
| ENSG00000103451 | AC015933   | antisense       | chr18 | 27954519 | 27963687 | + | 0    | 0    |
| ENSG00000103452 | RP11-164D  | lincRNA         | chr20 | 59515191 | 59516039 | + | 0    | 0    |
| ENSG00000103453 | RPL35AP12  | processed       | chr4  | 1.63E+08 | 1.63E+08 | + | 0    | 0    |
| ENSG00000103454 | MARK2P10   | processed       | chr7  | 96858182 | 96859618 | + | 0    | 0    |
| ENSG00000103455 | RP5-837I24 | processed       | chr1  | 81501794 | 81503468 | + | 0    | 0    |
| ENSG00000103456 | HSFY3P     | unprocessed     | chrY  | 2881683  | 2883652  | - | 0.1  | 0.11 |
| ENSG00000103457 | LINC01364  | lincRNA         | chr1  | 87353524 | 87371655 | - | 0    | 0    |
| ENSG00000103458 | AC092170   | processed       | chr2  | 1.17E+08 | 1.17E+08 | - | 0    | 0    |
| ENSG00000103459 | AC009229   | lincRNA         | chr2  | 38203363 | 38239590 | - | 0    | 0    |
| ENSG00000103460 | AC118345   | lincRNA         | chr2  | 66235377 | 66236213 | - | 0    | 0    |
| ENSG00000103461 | AC016994   | antisense       | chr2  | 1.07E+08 | 1.07E+08 | + | 0    | 0    |
| ENSG00000103462 | ELL2P1     | processed       | chr1  | 1.58E+08 | 1.58E+08 | - | 0    | 0    |
| ENSG00000103463 | RP4-718J7  | lincRNA         | chr20 | 57599695 | 57601200 | - | 0    | 0    |
| ENSG00000103464 | ARAFP3     | processed       | chr7  | 63342711 | 63343200 | + | 0    | 0    |
| ENSG00000103465 | KRT16P2    | transcribed     | chr17 | 16829999 | 16832830 | - | 0    | 0    |
| ENSG00000103466 | RP11-384P  | lincRNA         | chr9  | 33719690 | 33722555 | + | 0    | 0    |
| ENSG00000103467 | SSXP9      | unprocessed     | chrX  | 48322349 | 48326683 | + | 0    | 0    |
| ENSG00000103468 | GS1-256O2  | antisense       | chrX  | 1.43E+08 | 1.44E+08 | + | 0    | 0    |
| ENSG00000103469 | RP11-791G  | transcribed     | chr4  | 82494786 | 82496278 | - | 0.02 | 0    |
| ENSG00000103470 | RP11-340I6 | lincRNA         | chr7  | 63393788 | 63422046 | + | 0    | 0    |
| ENSG00000103471 | AP006285   | lincRNA         | chr11 | 1688297  | 1689056  | + | 0    | 0    |
| ENSG00000103472 | RP11-951I6 | lincRNA         | chr10 | 1.21E+08 | 1.21E+08 | - | 0    | 0    |
| ENSG00000103473 | AC009502   | lincRNA         | chr2  | 2.2E+08  | 2.2E+08  | + | 0.06 | 0.34 |
| ENSG00000103474 | AC140076   | processed       | chr3  | 17465150 | 17465510 | + | 0    | 0    |
| ENSG00000103475 | RP1-228H1  | processed       | chr1  | 40333078 | 40333557 | - | 0    | 0    |
| ENSG00000103476 | RP11-496D  | processed       | chr1  | 24563627 | 24563974 | + | 0    | 0    |
| ENSG00000103477 | RP11-309N  | lincRNA         | chr10 | 35896874 | 35898963 | - | 0    | 0    |
| ENSG00000103478 | MTND4P15   | unprocessed     | chr9  | 92110865 | 92111897 | + | 0    | 0    |
| ENSG00000103479 | RP11-258C  | processed       | chrX  | 53164391 | 53164557 | - | 0    | 0    |
| ENSG00000103480 | AP000998   | lincRNA         | chr21 | 18022370 | 18114904 | - | 0    | 0    |
| ENSG00000103481 | AC005042   | processed       | chr2  | 1.59E+08 | 1.59E+08 | + | 0    | 0    |
| ENSG00000103482 | IGHJ1P     | IG_J_pseudogene | chr14 | 1.06E+08 | 1.06E+08 | - | 0    | 0    |
| ENSG00000103483 | LINC00434  | lincRNA         | chr13 | 60214352 | 60214946 | - | 0    | 0    |
| ENSG00000103484 | RPL23AP43  | processed       | chr3  | 32785646 | 32786116 | + | 0    | 0    |

|                      |             |       |          |          |   |      |      |
|----------------------|-------------|-------|----------|----------|---|------|------|
| ENSG0000(RP11-195B)  | lincRNA     | chr10 | 3266003  | 3267015  | + | 0    | 0    |
| ENSG0000(THRAP3P1)   | processed   | chr3  | 31452832 | 31455894 | + | 0    | 0    |
| ENSG0000(LINC00307)  | lincRNA     | chr21 | 30209151 | 30211783 | - | 0    | 0    |
| ENSG0000(RPL15P1)    | processed   | chr20 | 18090116 | 18090715 | - | 0    | 0    |
| ENSG0000(HAUS6P1)    | processed   | chr7  | 53187388 | 53188938 | + | 0    | 0.09 |
| ENSG0000(PARG)       | protein_co  | chr10 | 49818279 | 49970203 | - | 7.17 | 6.94 |
| ENSG0000(HNRNPKP2)   | processed   | chr2  | 1.36E+08 | 1.36E+08 | - | 0    | 0    |
| ENSG0000(MTND5P25)   | unprocess   | chr2  | 2.01E+08 | 2.01E+08 | - | 0    | 0    |
| ENSG0000(CEACAMP7)   | unprocess   | chr19 | 42949503 | 42950387 | - | 0    | 0    |
| ENSG0000(RP11-438P)  | processed   | chr9  | 1.08E+08 | 1.08E+08 | - | 0    | 0    |
| ENSG0000(NANOGP6)    | processed   | chr10 | 99788564 | 99789410 | - | 0    | 0    |
| ENSG0000(ARHGEF7-)   | antisense   | chr13 | 1.11E+08 | 1.11E+08 | - | 0    | 0    |
| ENSG0000(RAB28P3)    | processed   | chr9  | 42492663 | 42493570 | + | 0    | 0    |
| ENSG0000(RBM26-AS)   | antisense   | chr13 | 79406309 | 79424328 | + | 1.08 | 0.9  |
| ENSG0000(RP11-162D)  | antisense   | chr9  | 1.21E+08 | 1.21E+08 | + | 0.16 | 0.14 |
| ENSG0000(LINC00866)  | lincRNA     | chr10 | 97828478 | 97849798 | - | 0    | 0    |
| ENSG0000(RP11-180I4) | processed   | chr9  | 95652912 | 95653266 | + | 0    | 0    |
| ENSG0000(AC017074)   | lincRNA     | chr2  | 1.14E+08 | 1.14E+08 | - | 0.89 | 0.28 |
| ENSG0000(RP11-518I1) | lincRNA     | chr6  | 1.56E+08 | 1.56E+08 | - | 0    | 0    |
| ENSG0000(RPS24P7)    | processed   | chr2  | 61803143 | 61803388 | + | 0    | 0    |
| ENSG0000(AC018685)   | lincRNA     | chr2  | 2729908  | 2730957  | - | 0    | 0    |
| ENSG0000(AC008060)   | antisense   | chr7  | 1.56E+08 | 1.56E+08 | + | 0    | 0    |
| ENSG0000(SLC9B1P4)   | unprocess   | chr22 | 16428947 | 16476870 | - | 0    | 0    |
| ENSG0000(CDK8P2)     | processed   | chr2  | 1.13E+08 | 1.13E+08 | + | 0    | 0    |
| ENSG0000(RP4-669P1)  | processed   | chr22 | 42132543 | 42132998 | + | 0    | 0    |
| ENSG0000(RP11-3L10)  | processed   | chr7  | 1.21E+08 | 1.21E+08 | + | 0    | 0    |
| ENSG0000(TP73-AS1)   | transcribec | chr1  | 3735601  | 3747336  | - | 8.31 | 9.42 |
| ENSG0000(RP11-160H)  | lincRNA     | chr1  | 1.74E+08 | 1.74E+08 | - | 0    | 0    |
| ENSG0000(RP11-109A)  | lincRNA     | chr10 | 1.3E+08  | 1.3E+08  | + | 0    | 0.17 |
| ENSG0000(DLG1-AS1)   | antisense   | chr3  | 1.97E+08 | 1.97E+08 | + | 0    | 0    |
| ENSG0000(FTH1P16)    | processed   | chr11 | 77734475 | 77735026 | - | 0.13 | 0.13 |
| ENSG0000(PPIAP2)     | processed   | chr20 | 25368275 | 25368766 | - | 0    | 0    |
| ENSG0000(EIF4A2P2)   | processed   | chr10 | 73199826 | 73201225 | + | 0    | 0    |
| ENSG0000(RP11-571F)  | processed   | chr9  | 34191555 | 34191881 | + | 0    | 0    |
| ENSG0000(AC091705)   | lincRNA     | chr7  | 25547762 | 25551062 | - | 0    | 0    |
| ENSG0000(RP11-112J)  | lincRNA     | chr9  | 35772163 | 35790432 | + | 0    | 0    |
| ENSG0000(SALL1P1)    | processed   | chrX  | 49664844 | 49668680 | - | 0    | 0    |
| ENSG0000(HPN-AS1)    | antisense   | chr19 | 35059059 | 35106304 | - | 0    | 0    |
| ENSG0000(RP6-127F1)  | processed   | chrX  | 29369001 | 29369845 | - | 0    | 0    |
| ENSG0000(AC007386)   | processed   | chr2  | 64960053 | 64960634 | - | 0    | 0    |
| ENSG0000(EIF2AP4)    | processed   | chr10 | 44806443 | 44808223 | + | 0    | 0    |
| ENSG0000(CTD-2526L)  | processed   | chr7  | 63789909 | 63790098 | + | 0    | 0    |
| ENSG0000(KIF9-AS1)   | antisense   | chr3  | 47164497 | 47246601 | + | 0.56 | 0.71 |
| ENSG0000(RP11-118F)  | processed   | chr9  | 92006062 | 92006544 | + | 0    | 0    |
| ENSG0000(AC012501)   | sense_ove   | chr2  | 1.53E+08 | 1.54E+08 | - | 0    | 0    |

|                     |                   |          |          |   |      |      |
|---------------------|-------------------|----------|----------|---|------|------|
| ENSG0000(RPL37P1)   | processed_chr20   | 35588324 | 35588607 | + | 0    | 0    |
| ENSG0000(LINC01806) | lincRNA_chr2      | 1.61E+08 | 1.61E+08 | + | 0.08 | 0    |
| ENSG0000(KRT8P20)   | processed_chr7    | 38655205 | 38656613 | + | 0    | 0    |
| ENSG0000(RNF6P1)    | processed_chr21   | 39373763 | 39377066 | - | 0    | 0    |
| ENSG0000(AC008746)  | antisense_chr19   | 54430654 | 54434698 | - | 0    | 0.3  |
| ENSG0000(AMYP1)     | unprocessed_chr1  | 1.04E+08 | 1.04E+08 | + | 0    | 0    |
| ENSG0000(ZMYM4-AS)  | antisense_chr1    | 35358822 | 35366077 | - | 0    | 0    |
| ENSG0000(BAATP1)    | unitary_psi_chr9  | 1.01E+08 | 1.01E+08 | - | 0    | 0    |
| ENSG0000(STK33P1)   | processed_chr9    | 85492579 | 85494094 | + | 0    | 0    |
| ENSG0000(RP5-1042K) | processed_chr22   | 40433136 | 40433641 | + | 0    | 0    |
| ENSG0000(RP11-109P) | processed_chr1    | 37782457 | 37782885 | - | 0    | 0    |
| ENSG0000(RP11-397P) | processed_chr1    | 2.04E+08 | 2.04E+08 | - | 0    | 0    |
| ENSG0000(PCGEM1)    | lincRNA_chr2      | 1.93E+08 | 1.93E+08 | + | 0    | 0    |
| ENSG0000(LINC01724) | lincRNA_chr1      | 1.96E+08 | 1.96E+08 | - | 0    | 0    |
| ENSG0000(OR10U1P)   | unprocessed_chr12 | 55193882 | 55194786 | - | 0    | 0    |
| ENSG0000(MRPS21P2)  | processed_chr1    | 1.58E+08 | 1.58E+08 | + | 0    | 0    |
| ENSG0000(VN1R33P)   | unitary_psi_chr7  | 63401385 | 63402271 | - | 0    | 0    |
| ENSG0000(RP1-49C23) | processed_chrX    | 57766320 | 57767292 | + | 0    | 0    |
| ENSG0000(AC019185)  | processed_chr2    | 2.08E+08 | 2.08E+08 | - | 0    | 0    |
| ENSG0000(CSE1L-AS1) | antisense_chr20   | 49040463 | 49046044 | - | 0    | 0    |
| ENSG0000(AC053503)  | antisense_chr2    | 2.19E+08 | 2.2E+08  | - | 0    | 0    |
| ENSG0000(AC069213)  | processed_chr3    | 1.95E+08 | 1.95E+08 | + | 0    | 0    |
| ENSG0000(RNF19BPX)  | processed_chrX    | 90209796 | 90210420 | - | 0    | 0    |
| ENSG0000(FCF1P1)    | processed_chr7    | 23619333 | 23622826 | + | 0    | 0    |
| ENSG0000(RPS8P4)    | processed_chr10   | 1.2E+08  | 1.2E+08  | + | 0    | 0    |
| ENSG0000(AP001471)  | antisense_chr21   | 46093264 | 46097530 | - | 0.7  | 0.33 |
| ENSG0000(TTTY17B)   | lincRNA_chrY      | 24485332 | 24486463 | + | 0    | 0    |
| ENSG0000(ATP5G1P4)  | processed_chr3    | 1.73E+08 | 1.73E+08 | - | 0    | 0    |
| ENSG0000(RP11-344A) | processed_chr9    | 21638285 | 21638676 | + | 0    | 0    |
| ENSG0000(AC007322)  | unprocessed_chrY  | 21918935 | 21921106 | + | 0    | 0    |
| ENSG0000(OR10R1P)   | unprocessed_chr1  | 1.59E+08 | 1.59E+08 | + | 0    | 0    |
| ENSG0000(XGY1)      | unprocessed_chrY  | 12440046 | 12507369 | - | 0    | 0    |
| ENSG0000(FGF7P6)    | transcribed_chr9  | 62376161 | 62435199 | + | 0.37 | 0.33 |
| ENSG0000(HNRNPA1F)  | processed_chr1    | 54536796 | 54537758 | + | 0    | 0    |
| ENSG0000(MTND4P3C)  | unprocessed_chr2  | 2.03E+08 | 2.03E+08 | + | 0    | 0    |
| ENSG0000(RP11-300M) | lincRNA_chr6      | 1.65E+08 | 1.65E+08 | + | 0    | 0    |
| ENSG0000(LINC00310) | lincRNA_chr21     | 34157724 | 34190244 | + | 0.11 | 0.23 |
| ENSG0000(AC079612)  | lincRNA_chr2      | 2.4E+08  | 2.4E+08  | + | 0    | 0    |
| ENSG0000(PSME2P6)   | processed_chr10   | 22225698 | 22226024 | + | 0    | 0    |
| ENSG0000(RP11-158D) | lincRNA_chr9      | 84063443 | 84094577 | + | 0    | 0    |
| ENSG0000(GPN3P1)    | processed_chr10   | 25647570 | 25648104 | - | 0    | 0    |
| ENSG0000(RP11-397C) | antisense_chr1    | 66042500 | 66050718 | - | 0    | 0    |
| ENSG0000(LINC01537) | lincRNA_chr11     | 72570660 | 72573229 | + | 0.07 | 0.05 |
| ENSG0000(AC073415)  | processed_chr2    | 1.09E+08 | 1.09E+08 | + | 0    | 2.78 |
| ENSG0000(AKR1B15)   | protein_co_chr7   | 1.35E+08 | 1.35E+08 | + | 0.17 | 0.19 |

|                     |             |       |          |          |   |       |       |
|---------------------|-------------|-------|----------|----------|---|-------|-------|
| ENSG0000(TSSK5P     | unitary_psi | chr8  | 1.44E+08 | 1.44E+08 | - | 0     | 0     |
| ENSG0000(RPL6P24    | processed_  | chr10 | 13591460 | 13592323 | - | 0     | 0     |
| ENSG0000(RP11-810B  | lincRNA     | chr10 | 36089086 | 36089389 | - | 0     | 0     |
| ENSG0000(STK4-AS1   | lincRNA     | chr20 | 44963794 | 44966402 | - | 0.53  | 0.42  |
| ENSG0000(AC124861.  | lincRNA     | chr2  | 2.4E+08  | 2.4E+08  | - | 0     | 0     |
| ENSG0000(CCDC148-A  | antisense   | chr2  | 1.58E+08 | 1.58E+08 | + | 0     | 0     |
| ENSG0000(RP11-89N1  | antisense   | chr7  | 33730292 | 33732064 | - | 0     | 0.67  |
| ENSG0000(RP11-18B1  | lincRNA     | chr9  | 1.14E+08 | 1.14E+08 | + | 0     | 0.05  |
| ENSG0000(XX-C283C7  | antisense   | chr22 | 50314631 | 50316008 | + | 0     | 0     |
| ENSG0000(RP11-5P4.2 | lincRNA     | chr1  | 63024207 | 63025658 | + | 0     | 0     |
| ENSG0000(RP13-188A  | lincRNA     | chrX  | 55908123 | 56015173 | + | 0.36  | 0     |
| ENSG0000(NCAM1-AS   | antisense   | chr11 | 1.13E+08 | 1.13E+08 | - | 0     | 0     |
| ENSG0000(GAGE12D    | protein_co  | chrX  | 49541767 | 49549094 | + | 0     | 0     |
| ENSG0000(AC006458.  | lincRNA     | chr7  | 15066207 | 15068651 | + | 0     | 0     |
| ENSG0000(CCNJP1     | processed_  | chr7  | 56228634 | 56229782 | - | 0     | 0     |
| ENSG0000(RP11-316M  | antisense   | chr10 | 1E+08    | 1E+08    | + | 0     | 0     |
| ENSG0000(RP11-104D  | unprocessε  | chrX  | 51030422 | 51031357 | - | 0     | 0     |
| ENSG0000(USP9YP14   | unprocessε  | chrY  | 18481087 | 18487400 | + | 0     | 0     |
| ENSG0000(AC109333.  | antisense   | chr17 | 5019214  | 5020093  | - | 0     | 0     |
| ENSG0000(RP11-145A  | antisense   | chr1  | 2.26E+08 | 2.26E+08 | + | 0.04  | 0.04  |
| ENSG0000(PABPC1P6   | processed_  | chr2  | 91877969 | 91880195 | + | 0     | 0     |
| ENSG0000(AC018359.  | lincRNA     | chr3  | 34524818 | 34543880 | - | 0     | 0     |
| ENSG0000(RP11-419N  | processed_  | chr7  | 55877912 | 55878164 | + | 0     | 0     |
| ENSG0000(SCAMP4     | protein_co  | chr19 | 1905214  | 1926013  | + | 38.09 | 34.27 |
| ENSG0000(LINC01268  | lincRNA     | chr6  | 1.14E+08 | 1.14E+08 | - | 0     | 0     |
| ENSG0000(RP11-434J  | processed_  | chrX  | 1.48E+08 | 1.48E+08 | + | 0     | 0     |
| ENSG0000(LTB        | protein_co  | chr6  | 31580525 | 31582522 | - | 0     | 0.1   |
| ENSG0000(LINC01624  | lincRNA     | chr6  | 1.7E+08  | 1.7E+08  | + | 0     | 0     |
| ENSG0000(LINC01839  | lincRNA     | chr3  | 1.85E+08 | 1.85E+08 | + | 0     | 0     |
| ENSG0000(LINC01442  | lincRNA     | chr13 | 60917001 | 60941768 | + | 0     | 0     |
| ENSG0000(GS1-466O4  | unprocessε  | chrX  | 26170052 | 26170913 | + | 0     | 0     |
| ENSG0000(RP11-413N  | antisense   | chr9  | 1.37E+08 | 1.37E+08 | + | 0     | 0     |
| ENSG0000(AC114755.  | processed_  | chr2  | 1.06E+08 | 1.06E+08 | + | 0     | 0     |
| ENSG0000(RP11-709P  | processed_  | chr8  | 1.13E+08 | 1.13E+08 | + | 0     | 0     |
| ENSG0000(C1DP4      | processed_  | chr10 | 80040621 | 80041044 | - | 0     | 0     |
| ENSG0000(RP5-973N2  | lincRNA     | chr6  | 41868622 | 41869731 | + | 0     | 0     |
| ENSG0000(LINC01483  | lincRNA     | chr17 | 69577251 | 69903000 | + | 0     | 0.14  |
| ENSG0000(XXyac-YRM  | antisense   | chr9  | 27657    | 30891    | + | 0     | 0.03  |
| ENSG0000(CTA-342B1  | lincRNA     | chr22 | 31963357 | 31970400 | + | 0     | 0     |
| ENSG0000(RP13-213K  | processed_  | chrX  | 94319038 | 94320025 | + | 0     | 0     |
| ENSG0000(RPS20P15   | processed_  | chr3  | 27462506 | 27462816 | + | 0     | 0     |
| ENSG0000(RPL7P6     | processed_  | chr12 | 19089151 | 19089888 | + | 0     | 0     |
| ENSG0000(RP11-223A  | sense_ovei  | chr1  | 42335386 | 42338376 | - | 0     | 0     |
| ENSG0000(DIAPH3-AS  | antisense   | chr13 | 60012751 | 60044357 | + | 0     | 0     |
| ENSG0000(RP11-202G  | lincRNA     | chr9  | 1.11E+08 | 1.11E+08 | - | 0     | 0     |

|                                      |          |            |      |      |
|--------------------------------------|----------|------------|------|------|
| ENSG0000( AC002542. processed_ chr7  | 1.17E+08 | 1.17E+08 - | 0    | 0    |
| ENSG0000( SLC2A1-AS lincRNA chr1     | 42959049 | 42983358 + | 0.8  | 1.06 |
| ENSG0000( RP3-323B6 processed_ chrX  | 65469087 | 65470380 + | 0    | 0    |
| ENSG0000( RP11-809N sense_ovei chr6  | 1.05E+08 | 1.05E+08 - | 0    | 0    |
| ENSG0000( SOCS5P4 processed_ chrX    | 71043214 | 71045470 - | 0.07 | 0.16 |
| ENSG0000( RP11-215C processed_ chr10 | 23258211 | 23258545 + | 0    | 0    |
| ENSG0000( HNRNPFP1 processed_ chr1   | 42040597 | 42041729 + | 0    | 0    |
| ENSG0000( DNAJC9-AS antisense chr10  | 73252791 | 73254349 + | 1.7  | 1.66 |
| ENSG0000( SFR1P1 processed_ chrX     | 1.2E+08  | 1.2E+08 -  | 0    | 0    |
| ENSG0000( AC092614. lincRNA chr2     | 1.91E+08 | 1.91E+08 - | 0.61 | 0.83 |
| ENSG0000( SPAG5-AS1 processed_ chr17 | 28598790 | 28617377 + | 0.11 | 0.17 |
| ENSG0000( AC018647. lincRNA chr7     | 35715034 | 35734887 + | 0.3  | 0.1  |
| ENSG0000( RP5-905H7 processed_ chr7  | 63349154 | 63350059 - | 0    | 0    |
| ENSG0000( OR4A2P unprocessε chr11    | 54667298 | 54668210 + | 0    | 0    |
| ENSG0000( AC116035. lincRNA chr3     | 30524990 | 30526213 - | 0    | 0    |
| ENSG0000( TRBV7-5 TR_V_pseu chr7     | 1.42E+08 | 1.42E+08 + | 0    | 0    |
| ENSG0000( USP17L12 protein_co chr4   | 9220152  | 9221744 +  | 0    | 0    |
| ENSG0000( RP11-444D antisense chr1   | 1.84E+08 | 1.84E+08 - | 0    | 0    |
| ENSG0000( MIR4290H lincRNA chr9      | 90020654 | 90041499 - | 0    | 0    |
| ENSG0000( RP11-472F unprocessε chr1  | 78317157 | 78317263 - | 0    | 0    |
| ENSG0000( MTND3P9 processed_ chr2    | 1.43E+08 | 1.43E+08 - | 0    | 0    |
| ENSG0000( RPS15AP3C processed_ chr10 | 1.13E+08 | 1.13E+08 + | 0    | 0    |
| ENSG0000( RP11-796I2 antisense chr7  | 1.52E+08 | 1.52E+08 - | 0    | 0    |
| ENSG0000( RNF11P2 processed_ chr20   | 14547184 | 14547623 - | 0    | 0    |
| ENSG0000( LINC00376 lincRNA chr13    | 63183101 | 63328094 - | 0    | 0    |
| ENSG0000( SNX18P26 processed_ chr13  | 18807279 | 18808018 - | 0    | 0.1  |
| ENSG0000( RP5-1166A processed_ chr7  | 1.23E+08 | 1.23E+08 + | 0    | 0    |
| ENSG0000( RP13-1039 antisense chr2   | 1.1E+08  | 1.1E+08 +  | 0    | 0.18 |
| ENSG0000( RPS3AP53 processed_ chr3   | 15141380 | 15142157 + | 0    | 0    |
| ENSG0000( RP1-35C21 lincRNA chr1     | 1.77E+08 | 1.78E+08 - | 0    | 0    |
| ENSG0000( RP13-140E processed_ chrX  | 90039213 | 90039834 - | 0    | 0    |
| ENSG0000( ADGRF5P1 transcribec chr9  | 62860873 | 62864957 - | 0    | 0    |
| ENSG0000( RPS3AP37 processed_ chr10  | 68674356 | 68675100 + | 0    | 0    |
| ENSG0000( MTND4P5 unprocessε chr7    | 57192695 | 57194068 + | 0    | 0    |
| ENSG0000( RP11-103C processed_ chr1  | 2.22E+08 | 2.22E+08 - | 0    | 0    |
| ENSG0000( RPS26P39 processed_ chr10  | 1.23E+08 | 1.23E+08 - | 0    | 0    |
| ENSG0000( CNTN4-AS2 lincRNA chr3     | 2110409  | 2144241 -  | 0    | 0    |
| ENSG0000( RP5-1092A antisense chr1   | 3658938  | 3668772 -  | 0    | 0    |
| ENSG0000( ATP5G1P5 processed_ chr13  | 1.07E+08 | 1.07E+08 + | 0    | 0    |
| ENSG0000( RP1-28O1C antisense chr1   | 2.1E+08  | 2.1E+08 -  | 1.6  | 1.31 |
| ENSG0000( PIGFP3 processed_ chrX     | 30017160 | 30017881 - | 0    | 0    |
| ENSG0000( PHBP16 processed_ chr11    | 94055023 | 94055972 - | 0    | 0    |
| ENSG0000( WASF1P1 processed_ chr2    | 1.08E+08 | 1.08E+08 + | 0    | 0    |
| ENSG0000( RP1-167A1 antisense chr6   | 1.67E+08 | 1.67E+08 - | 0    | 0    |
| ENSG0000( RP4-753D4 antisense chr20  | 42968743 | 42971492 + | 0    | 0    |

|                                       |          |          |   |       |       |
|---------------------------------------|----------|----------|---|-------|-------|
| ENSG0000(RP3-445N2 sense_intron) chr6 | 56331788 | 56332117 | - | 0     | 0     |
| ENSG0000(RP11-165J) antisense chr9    | 93435332 | 93437121 | - | 0.29  | 0.32  |
| ENSG0000(TOMM22P processed) chr13     | 32954057 | 32954401 | - | 0     | 0     |
| ENSG0000(AC005392) lincRNA chr19      | 43153279 | 43160862 | + | 0     | 0     |
| ENSG0000(SUMO2P2 processed) chr9      | 23632106 | 23632360 | + | 0     | 0     |
| ENSG0000(TMEM183) processed) chr6     | 29577459 | 29577748 | + | 0     | 0     |
| ENSG0000(FRMPD3-A antisense chrX      | 1.08E+08 | 1.08E+08 | - | 0     | 0     |
| ENSG0000(LINC01074 lincRNA chr13      | 62321305 | 62322398 | + | 0     | 0     |
| ENSG0000(QRSL1P2 processed) chr1      | 2.22E+08 | 2.22E+08 | - | 0     | 0     |
| ENSG0000(RP11-864N processed) chr11   | 74745716 | 74746114 | - | 0     | 0.25  |
| ENSG0000(AC063976) unprocessed) chr5  | 1.32E+08 | 1.32E+08 | - | 0     | 0     |
| ENSG0000(CERS6-AS1 processed) chr2    | 1.69E+08 | 1.69E+08 | - | 0     | 0     |
| ENSG0000(RP11-492E lincRNA chr9       | 1.3E+08  | 1.3E+08  | + | 0     | 0     |
| ENSG0000(ALG1L8P unprocessed) chr11   | 67785273 | 67792335 | + | 0     | 0     |
| ENSG0000(PHBP11 processed) chr1       | 2.24E+08 | 2.24E+08 | - | 0     | 0     |
| ENSG0000(AC073987) processed) chr2    | 1.03E+08 | 1.03E+08 | + | 0     | 0     |
| ENSG0000(SNRPEP3 processed) chr16     | 20238972 | 20239247 | - | 0     | 0     |
| ENSG0000(RP11-520H processed) chr1    | 2.28E+08 | 2.28E+08 | - | 0     | 0     |
| ENSG0000(RP1-101K1 antisense chr6     | 1.53E+08 | 1.53E+08 | + | 0.3   | 0.74  |
| ENSG0000(SLC25A15P unprocessed) chrY  | 26586642 | 26591601 | - | 0     | 0     |
| ENSG0000(LINC01132 lincRNA chr1       | 2.35E+08 | 2.35E+08 | + | 0     | 0.03  |
| ENSG0000(AC018804) unprocessed) chr2  | 1.3E+08  | 1.3E+08  | + | 0.18  | 0.19  |
| ENSG0000(RBMY2YP unprocessed) chrY    | 25266584 | 25273531 | + | 0     | 0     |
| ENSG0000(LINC01714 lincRNA chr1       | 8202429  | 8215210  | + | 0     | 0     |
| ENSG0000(USP9YP21 unprocessed) chrY   | 25933833 | 25935881 | - | 0     | 0     |
| ENSG0000(HNRNPA1F processed) chr9     | 88410529 | 88411463 | - | 0     | 0     |
| ENSG0000(SOX21-AS1 lincRNA chr13      | 94712716 | 94716246 | + | 0     | 0     |
| ENSG0000(HIGD1AP1) processed) chr1    | 53073110 | 53073389 | - | 0     | 0     |
| ENSG0000(RPL7P54 processed) chrX      | 78763226 | 78763899 | + | 0     | 0     |
| ENSG0000(STEAP2-AS processed) chr7    | 89882353 | 90211635 | - | 0     | 0     |
| ENSG0000(MTND6P3) processed) chrX     | 1.03E+08 | 1.03E+08 | - | 0     | 0     |
| ENSG0000(ISCA1P6 processed) chr2      | 1.29E+08 | 1.29E+08 | - | 0     | 0     |
| ENSG0000(SERPINA7P unprocessed) chrX  | 1.07E+08 | 1.07E+08 | - | 0     | 0     |
| ENSG0000(AC005160) sense_intron) chr7 | 40775558 | 40785217 | + | 0     | 0     |
| ENSG0000(CLYBL-AS2 antisense chr13    | 99690081 | 99690971 | - | 0     | 0     |
| ENSG0000(UST-AS1 antisense chr6       | 1.49E+08 | 1.49E+08 | - | 0     | 0     |
| ENSG0000(MTCO3P18 unprocessed) chr2   | 1.31E+08 | 1.31E+08 | - | 0     | 0     |
| ENSG0000(RPL7P2 processed) chr20      | 2075555  | 2075822  | + | 0     | 0     |
| ENSG0000(CYCSP24 processed) chr9      | 94038030 | 94038345 | + | 0.32  | 0     |
| ENSG0000(RP11-331H processed) chr1    | 1.63E+08 | 1.63E+08 | - | 0     | 0     |
| ENSG0000(RP11-488L) transcribed) chr1 | 2.47E+08 | 2.47E+08 | - | 16.39 | 16.54 |
| ENSG0000(RP11-243J) antisense chr1    | 1.56E+08 | 1.56E+08 | - | 0     | 0     |
| ENSG0000(LINC00355 lincRNA chr13      | 63986371 | 64076011 | - | 0.03  | 0     |
| ENSG0000(LINC01068 lincRNA chr13      | 79566727 | 79571436 | + | 0     | 0.27  |
| ENSG0000(RP11-7306) antisense chr6    | 1.3E+08  | 1.3E+08  | - | 0     | 0.3   |

|                                         |          |          |   |      |      |
|-----------------------------------------|----------|----------|---|------|------|
| ENSG0000(RP11-453N processed_ chr10     | 38762095 | 38762491 | - | 0    | 0    |
| ENSG0000(AC108051. lincRNA chr2         | 1.03E+08 | 1.03E+08 | + | 0    | 0    |
| ENSG0000(RP11-307P lincRNA chr6         | 1.48E+08 | 1.48E+08 | + | 0    | 0    |
| ENSG0000(ATP5A1P2 transcribed chr2      | 1.55E+08 | 1.55E+08 | + | 0.54 | 0.4  |
| ENSG0000(RP11-445N lincRNA chr10        | 45164228 | 45181427 | - | 0    | 0    |
| ENSG0000(CROCCP4 transcribed chr1       | 16740280 | 16750968 | + | 0.36 | 0    |
| ENSG0000(LINC02088 lincRNA chr17        | 20612912 | 20633234 | - | 0    | 0    |
| ENSG0000(RP4-681L3. antisense chr1      | 2.06E+08 | 2.06E+08 | + | 0    | 0    |
| ENSG0000(HNRNPA3P unprocessed chr20     | 36620403 | 36621423 | + | 0    | 0    |
| ENSG0000(SRP68P2 processed_ chr17       | 18527557 | 18528461 | + | 0    | 0    |
| ENSG0000(MED28P3 processed_ chr2        | 1.86E+08 | 1.86E+08 | + | 0    | 0    |
| ENSG0000(GSTM3P1 processed_ chr20       | 21501395 | 21501968 | + | 0    | 0    |
| ENSG0000(RPL23AP74 processed_ chr17     | 61069871 | 61070341 | + | 0    | 0    |
| ENSG0000(DNMBP-AS antisense chr10       | 99927010 | 99958381 | + | 0    | 0    |
| ENSG0000(AP001619. sense_intronic chr21 | 41874756 | 41877613 | - | 0.18 | 0    |
| ENSG0000(RP11-301M processed_ chr1      | 1.48E+08 | 1.48E+08 | + | 0.14 | 0    |
| ENSG0000(LINC00111 lincRNA chr21        | 41679181 | 41697336 | + | 0    | 0    |
| ENSG0000(RP1-266L2. antisense chr6      | 1.7E+08  | 1.7E+08  | + | 0    | 0    |
| ENSG0000(RP11-15M. antisense chr20      | 53196229 | 53208705 | - | 0    | 0    |
| ENSG0000(RP11-301G lincRNA chr6         | 67887646 | 67889339 | - | 0    | 0    |
| ENSG0000(SDAD1P3 processed_ chr3        | 33771963 | 33772295 | + | 0    | 0    |
| ENSG0000(LINC01850 lincRNA chr2         | 1.53E+08 | 1.53E+08 | + | 0    | 0    |
| ENSG0000(RP11-118D processed_ chr3      | 1.56E+08 | 1.56E+08 | - | 0    | 0    |
| ENSG0000(LL22NC03. unprocessed chr22    | 22168289 | 22168634 | + | 0    | 0    |
| ENSG0000(FAM166AP unprocessed chr1      | 2.28E+08 | 2.28E+08 | - | 0    | 0    |
| ENSG0000(RP11-418J. lincRNA chr1        | 1.19E+08 | 1.19E+08 | - | 0    | 0    |
| ENSG0000(AC116609. lincRNA chr2         | 724966   | 731224   | - | 0    | 0    |
| ENSG0000(MTND6P18 processed_ chr13      | 95693983 | 95694495 | - | 0    | 0    |
| ENSG0000(AP000459. lincRNA chr21        | 23477641 | 23490724 | + | 0    | 0    |
| ENSG0000(RP11-578F unprocessed chr15    | 28553638 | 28561379 | + | 0    | 0    |
| ENSG0000(AC016730. lincRNA chr2         | 13723048 | 13758152 | + | 0    | 0    |
| ENSG0000(AC006042. antisense chr7       | 8114025  | 8116561  | + | 0    | 0    |
| ENSG0000(RPSAP64 processed_ chr21       | 38894917 | 38895252 | + | 0    | 0    |
| ENSG0000(RP5-1059H transcribed chr1     | 1.68E+08 | 1.68E+08 | + | 0    | 0    |
| ENSG0000(CTA-31J9.2 lincRNA chr6        | 1.35E+08 | 1.35E+08 | + | 0    | 0    |
| ENSG0000(GCOM2 processed_ chr4          | 68038544 | 68039647 | + | 0.06 | 0    |
| ENSG0000(AP001271. sense_intronic chr11 | 70477277 | 70477592 | - | 0    | 0    |
| ENSG0000(RP11-690C unprocessed chr1     | 2.47E+08 | 2.47E+08 | - | 0    | 0    |
| ENSG0000(RD3L protein_coding chr14      | 1.04E+08 | 1.04E+08 | - | 0    | 0    |
| ENSG0000(MTND6P5 unprocessed chr9       | 5091093  | 5091604  | + | 0    | 0    |
| ENSG0000(RP4-565E6 lincRNA chr1         | 1.48E+08 | 1.48E+08 | - | 0.69 | 0.76 |
| ENSG0000(RP11-49L2. antisense chr10     | 19290223 | 19291480 | - | 0    | 0    |
| ENSG0000(CYCSP5 processed_ chr1         | 2.45E+08 | 2.45E+08 | - | 0    | 0    |
| ENSG0000(MTCO3P16 unprocessed chr2      | 2.02E+08 | 2.02E+08 | + | 0    | 0    |
| ENSG0000(OR8B1P unprocessed chr11       | 1.24E+08 | 1.24E+08 | - | 0    | 0    |



|                                       |          |          |   |      |      |
|---------------------------------------|----------|----------|---|------|------|
| ENSG0000( AC092646. processed_ chr2   | 1.24E+08 | 1.24E+08 | + | 0    | 0    |
| ENSG0000( RP11-318C lincRNA chr1      | 1.76E+08 | 1.76E+08 | - | 0    | 0    |
| ENSG0000( RP11-536C antisense chr1    | 1.6E+08  | 1.6E+08  | - | 0.04 | 0    |
| ENSG0000( CALR4P unitary_ps chr1      | 51561866 | 51594897 | - | 0    | 0    |
| ENSG0000( RP4-745K6 lincRNA chr7      | 1.22E+08 | 1.22E+08 | - | 0    | 0    |
| ENSG0000( LINC01940 lincRNA chr2      | 2.39E+08 | 2.39E+08 | - | 0.09 | 0.14 |
| ENSG0000( AC098826. unprocessε chr2   | 1.32E+08 | 1.32E+08 | - | 0    | 0    |
| ENSG0000( RP11-16L9. processed_ chr1  | 1.99E+08 | 1.99E+08 | + | 0    | 0    |
| ENSG0000( RP11-497D lincRNA chr6      | 1.47E+08 | 1.47E+08 | + | 0    | 0    |
| ENSG0000( RP1-20B21 antisense chr1    | 17406760 | 17407382 | + | 0    | 0    |
| ENSG0000( RP11-216N processed_ chr8   | 86016819 | 86017126 | + | 0    | 0    |
| ENSG0000( AP000344. transcribec chr22 | 23446598 | 23460833 | + | 0.12 | 0.13 |
| ENSG0000( AP000282. antisense chr21   | 32913649 | 33071104 | - | 0    | 0    |
| ENSG0000( HCG9P5 unprocessε chr6      | 29748289 | 29748513 | + | 0    | 0    |
| ENSG0000( VT11BP4 processed_ chr9     | 1.29E+08 | 1.29E+08 | + | 0    | 0    |
| ENSG0000( RP11-298E processed_ chr12  | 14192002 | 14192284 | + | 0    | 0    |
| ENSG0000( GUSBP8 unprocessε chr5      | 99532628 | 99534611 | + | 0    | 0    |
| ENSG0000( LINC01693 lincRNA chr1      | 2.12E+08 | 2.12E+08 | + | 0    | 0    |
| ENSG0000( MYL12BP2 processed_ chr4    | 1.84E+08 | 1.84E+08 | - | 0    | 0    |
| ENSG0000( HCG4P5 unprocessε chr6      | 29942075 | 29943067 | - | 0.68 | 0.54 |
| ENSG0000( AC072062. antisense chr2    | 2.15E+08 | 2.15E+08 | + | 0    | 0    |
| ENSG0000( RPL7P12 processed_ chr2     | 38231568 | 38232317 | + | 0.09 | 0.1  |
| ENSG0000( ASH1L-IT1 sense_intr chr1   | 1.55E+08 | 1.55E+08 | - | 0    | 0    |
| ENSG0000( RP1-283E3 transcribec chr1  | 1724512  | 1737251  | + | 0.06 | 0.07 |
| ENSG0000( AKR1D1P1 processed_ chr1    | 1.68E+08 | 1.68E+08 | + | 0    | 0    |
| ENSG0000( RP4-738P1 processed_ chr1   | 1.69E+08 | 1.69E+08 | + | 0    | 0    |
| ENSG0000( GS1-164F2 processed_ chrX   | 1.41E+08 | 1.41E+08 | + | 0    | 0    |
| ENSG0000( CTC-529I1 antisense chr17   | 16040472 | 16041273 | + | 0.4  | 0.09 |
| ENSG0000( ZNF965P processed_ chr13    | 18734080 | 18734896 | + | 0    | 0    |
| ENSG0000( AC092013. processed_ chr7   | 85636013 | 85636344 | - | 0    | 0    |
| ENSG0000( MTCO3P43 processed_ chr2    | 1.2E+08  | 1.2E+08  | + | 0    | 0    |
| ENSG0000( MTCYBP7 processed_ chr2     | 82818131 | 82819264 | + | 0    | 0    |
| ENSG0000( AC015922. transcribec chr17 | 15829369 | 15908632 | + | 0.25 | 0    |
| ENSG0000( AC007365. processed_ chr2   | 64665607 | 64666064 | + | 0    | 0    |
| ENSG0000( MTND4LP9 processed_ chr3    | 29797652 | 29797825 | - | 0    | 0    |
| ENSG0000( AC012358. processed_ chr2   | 55224280 | 55225908 | + | 0.04 | 0.04 |
| ENSG0000( IGHD4-17 IG_D_gene chr14    | 1.06E+08 | 1.06E+08 | - | 0    | 0    |
| ENSG0000( DNAJB3 transcribec chr2     | 2.34E+08 | 2.34E+08 | - | 0    | 0    |
| ENSG0000( RP11-239H antisense chr6    | 20212087 | 20317739 | + | 0    | 0    |
| ENSG0000( RPL21P90 processed_ chr10   | 95999778 | 96000243 | - | 0    | 0    |
| ENSG0000( OR5W1P unprocessε chr11     | 55903341 | 55904278 | - | 0    | 0    |
| ENSG0000( RP11-171A lincRNA chr9      | 74371531 | 74383530 | + | 0    | 0    |
| ENSG0000( FAM212B- antisense chr1     | 1.12E+08 | 1.12E+08 | + | 0.4  | 0.36 |
| ENSG0000( RP1-180M: processed_ chr22  | 31890344 | 31891434 | - | 0    | 0    |
| ENSG0000( MRPS17P9 processed_ chrX    | 1.19E+08 | 1.19E+08 | + | 0    | 0    |

|                                 |       |          |          |   |      |      |
|---------------------------------|-------|----------|----------|---|------|------|
| ENSG0000(RP11-195C unprocessed) | chr1  | 1.76E+08 | 1.76E+08 | + | 0    | 0    |
| ENSG0000(ARHGAP42 unprocessed)  | chr2  | 1.31E+08 | 1.31E+08 | - | 0    | 0    |
| ENSG0000(RP11-227F lincRNA)     | chr1  | 1.62E+08 | 1.62E+08 | + | 0    | 0    |
| ENSG0000(AC122136 lincRNA)      | chr2  | 2.16E+08 | 2.16E+08 | + | 0    | 0.18 |
| ENSG0000(SLC9A7P1 transcribed)  | chr12 | 98453835 | 98457145 | - | 0.02 | 0.04 |
| ENSG0000(RP11-958N unprocessed) | chr16 | 16356224 | 16377507 | + | 0.05 | 0.25 |
| ENSG0000(TRIM60P3 processed)    | chrY  | 8413037  | 8414054  | - | 0    | 0    |
| ENSG0000(ST13P21 processed)     | chr1  | 1.09E+08 | 1.09E+08 | + | 0    | 0    |
| ENSG0000(AP003385 unitary)      | chr11 | 67651576 | 67653404 | - | 0    | 0    |
| ENSG0000(CARM1P1 transcribed)   | chr9  | 2907073  | 3053408  | - | 0    | 0    |
| ENSG0000(AC008850 processed)    | chr5  | 96942299 | 96943184 | + | 0    | 0    |
| ENSG0000(TRIM60P11 processed)   | chrY  | 24691791 | 24692932 | + | 0    | 0    |
| ENSG0000(RP1-213J1 lincRNA)     | chr22 | 27676559 | 27714970 | - | 0    | 0.09 |
| ENSG0000(KRTAP8-3P unprocessed) | chr21 | 30806932 | 30807119 | - | 0    | 0    |
| ENSG0000(MTND5P31 unprocessed)  | chr2  | 2.02E+08 | 2.02E+08 | + | 0    | 0    |
| ENSG0000(AC093166 processed)    | chr2  | 1.12E+08 | 1.12E+08 | + | 0    | 0    |
| ENSG0000(RP11-184B processed)   | chr9  | 1.25E+08 | 1.25E+08 | - | 0    | 0    |
| ENSG0000(UGT1A11P unprocessed)  | chr2  | 2.34E+08 | 2.34E+08 | + | 0    | 0    |
| ENSG0000(RP11-420H processed)   | chr7  | 1.25E+08 | 1.25E+08 | + | 0    | 0    |
| ENSG0000(SUCLA2-AS antisense)   | chr13 | 48001389 | 48002552 | + | 0    | 0    |
| ENSG0000(SEPT2P1 processed)     | chr1  | 1.06E+08 | 1.06E+08 | + | 0    | 0    |
| ENSG0000(RP11-381K lincRNA)     | chr10 | 1.11E+08 | 1.11E+08 | - | 0    | 0    |
| ENSG0000(RPS29P17 processed)    | chr9  | 35592786 | 35592951 | + | 0    | 0    |
| ENSG0000(RP11-307C processed)   | chr1  | 2.39E+08 | 2.39E+08 | - | 0    | 0    |
| ENSG0000(DPY19L2P3 transcribed) | chr7  | 29650227 | 29742594 | + | 0.1  | 0.07 |
| ENSG0000(RP4-533D7 antisense)   | chr1  | 46134531 | 46139081 | + | 0    | 0    |
| ENSG0000(MTND5P18 processed)    | chr1  | 2.38E+08 | 2.38E+08 | - | 0    | 0    |
| ENSG0000(HNRNPA1P processed)    | chr13 | 80619098 | 80620067 | - | 0    | 0    |
| ENSG0000(AC002383 lincRNA)      | chr7  | 89443974 | 89494262 | + | 0    | 0    |
| ENSG0000(ARL5AP1 processed)     | chrX  | 1.19E+08 | 1.19E+08 | - | 0    | 0    |
| ENSG0000(ELOCP11 processed)     | chrY  | 25991241 | 25991572 | - | 0    | 0    |
| ENSG0000(C1orf234 protein)      | chr1  | 23010834 | 23015850 | - | 0    | 0    |
| ENSG0000(RP11-807H lincRNA)     | chr7  | 1.25E+08 | 1.25E+08 | + | 0    | 0    |
| ENSG0000(USP9YP12 unprocessed)  | chrY  | 23945927 | 23952293 | - | 0    | 0    |
| ENSG0000(RP3-389A2 processed)   | chrX  | 17769005 | 17769398 | - | 0    | 0    |
| ENSG0000(GRAMD4P processed)     | chr21 | 13665868 | 13667546 | - | 0    | 0    |
| ENSG0000(RPL23AP8 processed)    | chr1  | 12080293 | 12080547 | - | 0    | 0    |
| ENSG0000(MRLN protein)          | chr10 | 59736692 | 59756041 | - | 0    | 0    |
| ENSG0000(AC114760 processed)    | chr2  | 1.96E+08 | 1.96E+08 | - | 0    | 0    |
| ENSG0000(PSPC1P1 unprocessed)   | chr13 | 19201637 | 19227432 | - | 0    | 0    |
| ENSG0000(RP11-46E1 lincRNA)     | chr22 | 27457247 | 27460060 | - | 0.08 | 0    |
| ENSG0000(ASS1P5 processed)      | chrX  | 1.16E+08 | 1.16E+08 | + | 0    | 0    |
| ENSG0000(THAP12P6 processed)    | chr13 | 26234213 | 26237129 | + | 0    | 0    |
| ENSG0000(ATP6V0E1F processed)   | chr1  | 47550196 | 47550753 | + | 0    | 0    |
| ENSG0000(RP11-79N2 lincRNA)     | chr6  | 53740749 | 53747022 | - | 0.07 | 0    |

|                     |                   |          |          |   |      |      |
|---------------------|-------------------|----------|----------|---|------|------|
| ENSG0000(RPS26P13)  | processed_chr1    | 2.09E+08 | 2.09E+08 | - | 0    | 0    |
| ENSG0000(FAM66A)    | lincRNA_chr8      | 12362019 | 12388296 | + | 0.14 | 0.78 |
| ENSG0000(PSMA2P3)   | processed_chr2    | 2.02E+08 | 2.02E+08 | + | 0    | 0    |
| ENSG0000(OR5P4P)    | unprocessε chr11  | 7745990  | 7746906  | + | 0    | 0    |
| ENSG0000(LINC00352) | lincRNA_chr13     | 23498796 | 23502874 | + | 0    | 0.2  |
| ENSG0000(ISX-AS1)   | lincRNA_chr22     | 34997719 | 35002862 | - | 0    | 0    |
| ENSG0000(RP11-77P6) | antisense_chr10   | 86521945 | 86525101 | + | 0.28 | 0.23 |
| ENSG0000(AC062032)  | lincRNA_chr2      | 1.47E+08 | 1.47E+08 | + | 0    | 0    |
| ENSG0000(MED6P1)    | processed_chr10   | 88048135 | 88049823 | - | 0    | 0    |
| ENSG0000(SNAP25-AS) | antisense_chr20   | 10021978 | 10368776 | - | 0    | 0    |
| ENSG0000(RP11-102C) | antisense_chr1    | 1.67E+08 | 1.67E+08 | + | 0    | 0    |
| ENSG0000(FLJ31104)  | antisense_chr5    | 55995167 | 56003649 | + | 0.26 | 0.31 |
| ENSG0000(RP11-73B2) | transcribec chr7  | 63924787 | 63926306 | - | 0    | 0    |
| ENSG0000(RP11-141M) | lincRNA_chr13     | 33333679 | 33335277 | - | 0    | 0    |
| ENSG0000(RP11-69C1) | lincRNA_chr10     | 2166332  | 2169460  | + | 0    | 0    |
| ENSG0000(KRT8P44)   | processed_chr6    | 1.63E+08 | 1.63E+08 | + | 0    | 0    |
| ENSG0000(RP11-130C) | antisense_chr9    | 673478   | 685555   | - | 0.05 | 0    |
| ENSG0000(ELOCP16)   | unprocessε chrY   | 23678504 | 23678835 | + | 0    | 0    |
| ENSG0000(RP11-143M) | lincRNA_chr9      | 100804   | 102941   | - | 0    | 0    |
| ENSG0000(AL353997)  | unprocessε chr17  | 18452955 | 18453062 | + | 0    | 0    |
| ENSG0000(RP1-153P1) | lincRNA_chr6      | 37545145 | 37550860 | + | 0    | 0    |
| ENSG0000(SPTLC1P5)  | processed_chr13   | 77659413 | 77659664 | + | 0    | 0    |
| ENSG0000(RP5-905H7) | processed_chr7    | 63354033 | 63354365 | + | 0    | 0    |
| ENSG0000(RBPJP6)    | processed_chr9    | 42497704 | 42499134 | - | 0    | 0    |
| ENSG0000(LINC01655) | lincRNA_chr1      | 2.22E+08 | 2.22E+08 | - | 1.94 | 0.43 |
| ENSG0000(MACROD2)   | sense_intrε chr20 | 14554384 | 14636524 | + | 0    | 0    |
| ENSG0000(SRGAP3-AS) | antisense_chr3    | 9216895  | 9219508  | + | 0    | 0    |
| ENSG0000(AC009508)  | lincRNA_chr7      | 23891704 | 23897335 | - | 0    | 0    |
| ENSG0000(RP13-16H1) | transcribec chr10 | 26664206 | 26697295 | - | 0    | 0    |
| ENSG0000(RP11-331F) | antisense_chr9    | 35646270 | 35647099 | + | 0    | 0    |
| ENSG0000(RP11-423F) | processed_chr1    | 2.31E+08 | 2.31E+08 | + | 0    | 0    |
| ENSG0000(RP6-102O1) | lincRNA_chr1      | 57386576 | 57387450 | + | 0    | 0    |
| ENSG0000(MTND2P3C)  | processed_chr1    | 81080790 | 81081171 | + | 0    | 0    |
| ENSG0000(AC104695)  | lincRNA_chr2      | 28448167 | 28450184 | - | 0    | 0    |
| ENSG0000(RPL3P2)    | processed_chr6    | 31280317 | 31281519 | + | 0    | 0    |
| ENSG0000(LINC01696) | lincRNA_chr1      | 2.09E+08 | 2.09E+08 | + | 0    | 0    |
| ENSG0000(UQCRBP2)   | processed_chr1    | 1.63E+08 | 1.63E+08 | - | 0    | 0    |
| ENSG0000(FRMD8P1)   | processed_chrX    | 65550898 | 65552421 | - | 0    | 0    |
| ENSG0000(RP11-103C) | antisense_chr6    | 1.28E+08 | 1.28E+08 | + | 0    | 0    |
| ENSG0000(AC007383)  | lincRNA_chr2      | 2.06E+08 | 2.06E+08 | + | 5.4  | 4.92 |
| ENSG0000(LINC01738) | lincRNA_chr1      | 47688463 | 47703383 | + | 0    | 0    |
| ENSG0000(AC003989)  | processed_chr7    | 1.11E+08 | 1.11E+08 | + | 0    | 0    |
| ENSG0000(CYCSP46)   | processed_chrY    | 14941547 | 14941750 | - | 0    | 0    |
| ENSG0000(RP11-312B) | processed_chr1    | 6834333  | 6834618  | - | 0    | 0    |
| ENSG0000(RPL18AP17) | processed_chr13   | 72460132 | 72460329 | - | 0    | 0    |

|                                     |          |            |      |      |
|-------------------------------------|----------|------------|------|------|
| ENSG0000(LINC01341 processed_ chr1  | 2.47E+08 | 2.47E+08 + | 1.24 | 0.53 |
| ENSG0000(TARID antisense chr6       | 1.34E+08 | 1.34E+08 - | 0.22 | 0.41 |
| ENSG0000(RP11-399H lincRNA chr9     | 1.35E+08 | 1.35E+08 - | 0    | 0    |
| ENSG0000(RP11-276H antisense chr1   | 16155211 | 16157329 + | 0.41 | 0.38 |
| ENSG0000(RP5-837I24 sense_intr chr1 | 81505099 | 81506296 + | 0    | 0    |
| ENSG0000(RP11-382D processed_ chr1  | 2.35E+08 | 2.35E+08 + | 0    | 0    |
| ENSG0000(RP5-1074L antisense chr1   | 1.1E+08  | 1.1E+08 -  | 0    | 0    |
| ENSG0000(LINC01429 lincRNA chr20    | 51831797 | 51862912 - | 0    | 0    |
| ENSG0000(AC098592. processed_ chr7  | 16888621 | 16888885 + | 0    | 0    |
| ENSG0000(BUB3P1 processed_ chr7     | 1.09E+08 | 1.09E+08 - | 0    | 0    |
| ENSG0000(NPM1P22 processed_ chr13   | 67831876 | 67832827 - | 0.13 | 0    |
| ENSG0000(NR1H5P unitary_ps chr1     | 1.15E+08 | 1.15E+08 + | 0    | 0    |
| ENSG0000(RP11-600G processed_ chr3  | 1.9E+08  | 1.9E+08 -  | 0    | 0    |
| ENSG0000(THAP12P3 processed_ chr10  | 52411135 | 52413492 + | 0    | 0    |
| ENSG0000(PIN4P1 processed_ chr15    | 43875849 | 43876244 - | 0    | 0.24 |
| ENSG0000(AC002127. processed_ chr7  | 88749470 | 88749694 + | 0    | 0    |
| ENSG0000(AC012668. lincRNA chr2     | 2.16E+08 | 2.16E+08 - | 0    | 0    |
| ENSG0000(RPL7P30 processed_ chr7    | 84528122 | 84528830 - | 0    | 0    |
| ENSG0000(BRK1P2 processed_ chr13    | 91023732 | 91023954 - | 0    | 0    |
| ENSG0000(TRIM60P18 unprocess chr7   | 64355078 | 64356199 + | 0.15 | 0.08 |
| ENSG0000(AC092675. sense_intr chr2  | 98346995 | 98351140 + | 0    | 0    |
| ENSG0000(TDGF1P1 processed_ chrX    | 38395369 | 38395895 - | 0    | 0    |
| ENSG0000(AC010141. unprocess chrY   | 21555852 | 21558070 - | 0    | 0    |
| ENSG0000(AC108463. processed_ chr2  | 1.11E+08 | 1.11E+08 - | 0.54 | 1.49 |
| ENSG0000(RP5-891H2 processed_ chr1  | 44172506 | 44172719 - | 0    | 0    |
| ENSG0000(RAB11AP1 processed_ chr10  | 93881293 | 93881938 - | 0    | 0    |
| ENSG0000(MTND5P1 processed_ chr21   | 44473723 | 44475097 - | 0    | 0    |
| ENSG0000(RPL7AP65 processed_ chr17  | 18311904 | 18312651 + | 0    | 0    |
| ENSG0000(DHX9P1 processed_ chr13    | 76984868 | 76987943 + | 0    | 0    |
| ENSG0000(MYCLP2 processed_ chrX     | 57933837 | 57934803 - | 0    | 0    |
| ENSG0000(AC020743. antisense chr7   | 50141540 | 50142823 - | 0    | 0    |
| ENSG0000(AC011933. processed_ chr17 | 75338827 | 75339147 + | 0    | 0    |
| ENSG0000(CTD-2330K antisense chr3   | 49903845 | 49916937 + | 0    | 0    |
| ENSG0000(AC073343. antisense chr7   | 6663974  | 6708901 +  | 1.35 | 0.45 |
| ENSG0000(RP11-350G antisense chr1   | 1.54E+08 | 1.54E+08 - | 0.03 | 0.07 |
| ENSG0000(ZNF680P1 processed_ chr7   | 64469185 | 64470653 + | 0    | 0.04 |
| ENSG0000(AC074338. processed_ chr7  | 33128988 | 33129143 - | 0    | 0    |
| ENSG0000(RAPGEF4-A antisense chr2   | 1.73E+08 | 1.73E+08 - | 0    | 0    |
| ENSG0000(RP11-166C unprocess chr7   | 67307605 | 67308356 - | 0.23 | 0    |
| ENSG0000(HNRNPA1P processed_ chr1   | 1.91E+08 | 1.91E+08 - | 0    | 0    |
| ENSG0000(RP11-383C processed_ chr10 | 1.26E+08 | 1.26E+08 + | 0.25 | 0    |
| ENSG0000(HCG20 lincRNA chr6         | 30766825 | 30792250 + | 0.15 | 0.27 |
| ENSG0000(CYP1D1P unprocess chr9     | 73042745 | 73056528 + | 0    | 0    |
| ENSG0000(RP1-251M! antisense chr10  | 11010164 | 11011119 - | 0    | 0    |
| ENSG0000(AC069257. antisense chr3   | 1.96E+08 | 1.96E+08 + | 0    | 0    |

|                                      |          |            |       |       |
|--------------------------------------|----------|------------|-------|-------|
| ENSG0000( AC019084. processed_ chr7  | 1.59E+08 | 1.59E+08 + | 0     | 0     |
| ENSG0000( AC078842. lincRNA chr7     | 1.37E+08 | 1.37E+08 - | 0     | 0     |
| ENSG0000( AC010967. lincRNA chr2     | 52722677 | 52910020 - | 0     | 0     |
| ENSG0000( HMGN2P2. processed_ chr2   | 70803157 | 70803426 + | 0     | 0     |
| ENSG0000( RP4-663N1 antisense chr1   | 1.15E+08 | 1.15E+08 + | 0.1   | 0.28  |
| ENSG0000( HSPD1P9 processed_ chr13   | 37993085 | 37994720 - | 0     | 0.04  |
| ENSG0000( RP3-395M. lincRNA chr1     | 2581560  | 2584533 +  | 0     | 0     |
| ENSG0000( VN1R51P processed_ chr9    | 97093694 | 97094638 - | 0     | 0     |
| ENSG0000( KB-1125A3 processed_ chr22 | 23963780 | 23964374 + | 0     | 0     |
| ENSG0000( RP3-522D1 processed_ chr1  | 1.13E+08 | 1.13E+08 - | 0     | 0     |
| ENSG0000( RP4-581F1 processed_ chrX  | 82497669 | 82497924 - | 0     | 0     |
| ENSG0000( RP11-441A processed_ chrX  | 1.11E+08 | 1.11E+08 + | 0     | 0     |
| ENSG0000( AC097721. lincRNA chr2     | 1.38E+08 | 1.39E+08 - | 0.43  | 0.4   |
| ENSG0000( RP4-781K5 lincRNA chr1     | 2.35E+08 | 2.35E+08 + | 0     | 0     |
| ENSG0000( DNAJA1P6 processed_ chr22  | 17518676 | 17519029 - | 0     | 0     |
| ENSG0000( MTCO3P4C processed_ chr9   | 82427350 | 82428025 - | 0     | 0     |
| ENSG0000( RP11-598C lincRNA chr10    | 55506219 | 55513217 + | 0     | 0     |
| ENSG0000( POLR2J2 protein_co chr7    | 1.03E+08 | 1.03E+08 - | 1.58  | 1.02  |
| ENSG0000( TOP3BP1 processed_ chr22   | 22223187 | 22224566 - | 0.06  | 0.06  |
| ENSG0000( RP11-325E processed_ chrX  | 80560146 | 80562054 + | 0     | 0     |
| ENSG0000( RP11-151F processed_ chr9  | 1.1E+08  | 1.1E+08 -  | 0     | 0     |
| ENSG0000( RANP5 processed_ chr1      | 1.09E+08 | 1.09E+08 + | 0     | 0     |
| ENSG0000( LINC00864 lincRNA chr10    | 87397023 | 87424792 - | 0     | 0     |
| ENSG0000( CFL1P3 processed_ chr1     | 63843196 | 63843685 - | 0     | 0     |
| ENSG0000( SEC63P1 processed_ chr1    | 97545701 | 97546958 + | 0.49  | 0.71  |
| ENSG0000( LINC01736 lincRNA chr1     | 2.3E+08  | 2.3E+08 +  | 0     | 0     |
| ENSG0000( RP11-69E1 antisense chr1   | 39565160 | 39573203 + | 0     | 0     |
| ENSG0000( Z83001.1 antisense chr11   | 31637328 | 31767953 - | 0     | 0     |
| ENSG0000( LYPLAL1-A antisense chr1   | 2.19E+08 | 2.19E+08 - | 0.45  | 0.1   |
| ENSG0000( AC023469. antisense chr2   | 1.51E+08 | 1.51E+08 + | 0     | 0     |
| ENSG0000( LINC01515 lincRNA chr10    | 65570338 | 65768835 + | 0.26  | 0.28  |
| ENSG0000( LINC01740 lincRNA chr1     | 2.13E+08 | 2.13E+08 + | 0     | 0     |
| ENSG0000( MTCO3P29 unprocess€ chr9   | 92109013 | 92110095 + | 0     | 0     |
| ENSG0000( RPL7P47 processed_ chr16   | 17932720 | 17933275 + | 0.13  | 0     |
| ENSG0000( RP11-255A antisense chr9   | 33512959 | 33514773 - | 0     | 0     |
| ENSG0000( AC133106. antisense chr2   | 1.89E+08 | 1.89E+08 + | 0     | 0     |
| ENSG0000( UBBP5 processed_ chr13     | 87219004 | 87219269 + | 0     | 0     |
| ENSG0000( BOD1L2 protein_co chr18    | 57147062 | 57150300 + | 0     | 0     |
| ENSG0000( RP11-475E processed_ chr1  | 1.09E+08 | 1.09E+08 - | 0     | 0     |
| ENSG0000( HLA-U unprocess€ chr6      | 29934101 | 29934286 + | 19.18 | 20.37 |
| ENSG0000( AC012368. lincRNA chr2     | 64086353 | 64088246 - | 0     | 0     |
| ENSG0000( RP11-385M processed_ chr1  | 2.09E+08 | 2.09E+08 + | 0     | 0     |
| ENSG0000( RP1-121G1 antisense chr6   | 1E+08    | 1E+08 +    | 0     | 0     |
| ENSG0000( IFNA14 protein_co chr9     | 21239002 | 21239991 - | 0     | 0     |
| ENSG0000( RP5-884G6 antisense chr1   | 99968383 | 99969864 - | 0.83  | 0.91  |

|                                       |          |          |   |      |      |
|---------------------------------------|----------|----------|---|------|------|
| ENSG0000( AC004920. processed_ chr7   | 50843578 | 50843732 | - | 0    | 0    |
| ENSG0000( RP5-837M. antisense_ chr1   | 1E+08    | 1E+08    | - | 0    | 0    |
| ENSG0000( PNKDP1 processed_ chrX      | 1.32E+08 | 1.32E+08 | - | 0    | 0    |
| ENSG0000( COX6CP15 processed_ chr10   | 77433572 | 77433782 | - | 0    | 0    |
| ENSG0000( RP11-361N processed_ chr9   | 84604111 | 84604425 | - | 0    | 0    |
| ENSG0000( MTATP6P1 unprocessε chr9    | 5099560  | 5100229  | + | 0    | 0    |
| ENSG0000( AC110620. processed_ chr2   | 1.35E+08 | 1.35E+08 | + | 0    | 0    |
| ENSG0000( LINC01820 lincRNA chr2      | 46392297 | 46394167 | - | 0    | 0    |
| ENSG0000( LINC01757 lincRNA chr1      | 20243095 | 20244655 | + | 0    | 0    |
| ENSG0000( RP11-452F lincRNA chr1      | 2.23E+08 | 2.23E+08 | + | 4.64 | 4.64 |
| ENSG0000( AP000692. sense_ovei chr21  | 36360630 | 36362040 | + | 0.47 | 0.36 |
| ENSG0000( AC092839. antisense chr2    | 54516048 | 54540697 | - | 0    | 0    |
| ENSG0000( MELTF-AS1 antisense chr3    | 1.97E+08 | 1.97E+08 | + | 2    | 2.14 |
| ENSG0000( ST13P19 processed_ chr1     | 2.1E+08  | 2.1E+08  | - | 0    | 0    |
| ENSG0000( TPT1P2 processed_ chr2      | 2.08E+08 | 2.08E+08 | - | 0    | 0    |
| ENSG0000( AC112220. processed_ chr3   | 33727250 | 33727604 | - | 0    | 0    |
| ENSG0000( AC003991. antisense chr7    | 88219359 | 88304367 | + | 0.6  | 0.25 |
| ENSG0000( RP11-165F sense_intrε chr9  | 487774   | 495610   | + | 0    | 0    |
| ENSG0000( MYL6P5 processed_ chr17     | 71620978 | 71621436 | + | 0    | 0    |
| ENSG0000( AP001631. lincRNA chr21     | 43159066 | 43162277 | - | 0    | 0    |
| ENSG0000( PHBP3 processed_ chr1       | 58999676 | 59000494 | + | 0    | 0    |
| ENSG0000( MTND1P17 processed_ chr22   | 16876218 | 16876421 | - | 0    | 0    |
| ENSG0000( RP11-15B2 processed_ chr9   | 82431889 | 82432905 | - | 0    | 0    |
| ENSG0000( RP1-12208 antisense chr6    | 89673469 | 89675783 | + | 0    | 0    |
| ENSG0000( AKIRIN1P2 processed_ chrX   | 68132868 | 68133437 | + | 0    | 0    |
| ENSG0000( FALEC lincRNA chr1          | 1.51E+08 | 1.51E+08 | + | 0    | 0.83 |
| ENSG0000( LINC01649 lincRNA chr1      | 1.16E+08 | 1.16E+08 | + | 0    | 0    |
| ENSG0000( IGHD6-6 IG_D_gene chr14     | 1.06E+08 | 1.06E+08 | - | 0    | 0    |
| ENSG0000( RP11-279E processed_ chr9   | 6276640  | 6276974  | + | 0.29 | 0    |
| ENSG0000( AC099684. antisense chr17   | 2017716  | 2020706  | + | 0    | 0    |
| ENSG0000( UBE2V1P1. processed_ chr2   | 1.43E+08 | 1.43E+08 | + | 0    | 0    |
| ENSG0000( LINC01494 antisense chr2    | 2.19E+08 | 2.19E+08 | - | 0    | 0    |
| ENSG0000( RP11-216N lincRNA chr9      | 40130921 | 40153147 | + | 0    | 0    |
| ENSG0000( AP001469. antisense chr21   | 46246890 | 46247682 | + | 0.88 | 0    |
| ENSG0000( LINC01402 lincRNA chrX      | 1.2E+08  | 1.2E+08  | - | 0    | 0    |
| ENSG0000( RP3-467K1 lincRNA chr1      | 15402979 | 15409433 | - | 0.07 | 0.07 |
| ENSG0000( AC105339. transcribec chr15 | 82710471 | 82714029 | - | 0    | 0    |
| ENSG0000( RP11-180I4 lincRNA chr9     | 95650154 | 95715718 | + | 0    | 0    |
| ENSG0000( RP11-308N processed_ chr9   | 1.07E+08 | 1.07E+08 | + | 0    | 0    |
| ENSG0000( RP11-745C protein_co chr12  | 66123917 | 66169985 | - | 1.08 | 0    |
| ENSG0000( CASP16P transcribec chr16   | 3144219  | 3149963  | + | 0    | 0.02 |
| ENSG0000( RPL3P1 processed_ chr21     | 36168970 | 36170180 | - | 0    | 0    |
| ENSG0000( RP11-84A1 sense_intrε chr1  | 9942923  | 9949974  | + | 0    | 0    |
| ENSG0000( AC004941. antisense chr7    | 1.49E+08 | 1.49E+08 | + | 0    | 0    |
| ENSG0000( RP11-23I7. lincRNA chr1     | 2.05E+08 | 2.05E+08 | + | 0    | 0    |

|                                     |          |          |   |      |      |
|-------------------------------------|----------|----------|---|------|------|
| ENSG0000(RP11-302F processed_ chr4  | 25622777 | 25623601 | + | 0    | 0    |
| ENSG0000(RP11-410N antisense chr20  | 32581963 | 32593900 | + | 0    | 0    |
| ENSG0000(AC007952. processed_ chr17 | 19092974 | 19096837 | + | 0.1  | 0.17 |
| ENSG0000(TLE1P1 processed_ chrX     | 65408084 | 65408672 | + | 0    | 0.15 |
| ENSG0000(LINC01674 lincRNA chr21    | 13546033 | 13558461 | + | 0    | 0    |
| ENSG0000(RP13-57D9 lincRNA chrX     | 69569669 | 69570357 | - | 0    | 0    |
| ENSG0000(LL22NC03- unprocessε chr22 | 22046430 | 22046591 | + | 0    | 0    |
| ENSG0000(AC097713. lincRNA chr2     | 2.34E+08 | 2.34E+08 | + | 0    | 0    |
| ENSG0000(RP11-125K antisense chr9   | 4850299  | 4850373  | - | 0    | 0    |
| ENSG0000(MTND1P11 unprocessε chr9   | 5094139  | 5095014  | + | 0    | 0    |
| ENSG0000(RP11-489C processed_ chr1  | 1.95E+08 | 1.95E+08 | + | 0    | 0    |
| ENSG0000(HNRNPA1F processed_ chr3   | 39334979 | 39335939 | + | 0    | 0    |
| ENSG0000(PPIAP19 processed_ chr10   | 1.15E+08 | 1.15E+08 | - | 0.28 | 0    |
| ENSG0000(RP1-40E16 antisense chr6   | 3138394  | 3153062  | - | 0    | 0    |
| ENSG0000(AC121251. unprocessε chr3  | 23389661 | 23389909 | - | 0    | 0    |
| ENSG0000(RP1-317E2 antisense chr1   | 25816749 | 25820797 | - | 0.29 | 0.39 |
| ENSG0000(AC091770. lincRNA chr7     | 48660575 | 48663305 | - | 0    | 0    |
| ENSG0000(RP11-244N antisense chr9   | 97512706 | 97517836 | - | 0    | 0    |
| ENSG0000(GEMIN8P4 processed_ chr1   | 89993593 | 89994321 | - | 0.54 | 0.89 |
| ENSG0000(RP4-656G2 lincRNA chr1     | 29708851 | 29709547 | - | 0    | 0    |
| ENSG0000(RP11-455B processed_ chr10 | 15171036 | 15171278 | - | 0    | 0    |
| ENSG0000(MTND2P25 processed_ chrX   | 62843697 | 62844306 | + | 0    | 0    |
| ENSG0000(SNX19P1 processed_ chr21   | 13525599 | 13528579 | + | 0    | 0    |
| ENSG0000(RP11-363H processed_ chr1  | 77194825 | 77195395 | + | 0    | 0    |
| ENSG0000(RP13-60M lincRNA chr9      | 88627189 | 88652160 | - | 0    | 0    |
| ENSG0000(RPL23AP1ε processed_ chr1  | 1.99E+08 | 1.99E+08 | + | 0    | 0    |
| ENSG0000(RP11-345I1 processed_ chr1 | 1.79E+08 | 1.79E+08 | - | 0    | 0    |
| ENSG0000(RP11-342N antisense chr1   | 42834681 | 42846422 | - | 0.71 | 0.62 |
| ENSG0000(ELOCP14 processed_ chrY    | 18787750 | 18788080 | + | 0    | 0    |
| ENSG0000(CTA-415G2 processed_ chr22 | 33014980 | 33015461 | + | 0    | 0    |
| ENSG0000(RPL5P27 processed_ chr10   | 1.17E+08 | 1.17E+08 | + | 0    | 0    |
| ENSG0000(PTPN2P1 processed_ chr1    | 1.79E+08 | 1.79E+08 | - | 0    | 0    |
| ENSG0000(OR2M3 protein_co chr1      | 2.48E+08 | 2.48E+08 | + | 0    | 0    |
| ENSG0000(AL022341. antisense chr16  | 648473   | 649200   | - | 0    | 0.49 |
| ENSG0000(RNF144A-A processed_ chr2  | 6912277  | 6918709  | - | 0.34 | 0.76 |
| ENSG0000(RP4-724E1 antisense chr7   | 50866747 | 51022990 | + | 0    | 0    |
| ENSG0000(RP11-778D processed_ chr3  | 1.84E+08 | 1.84E+08 | + | 0    | 0    |
| ENSG0000(AC016717. processed_ chr2  | 2.26E+08 | 2.26E+08 | + | 0    | 0    |
| ENSG0000(AC007967. unprocessε chrY  | 8901203  | 8903276  | - | 0    | 0    |
| ENSG0000(C1orf143 lincRNA chr1      | 2.19E+08 | 2.19E+08 | + | 0    | 0    |
| ENSG0000(AC073091. processed_ chr2  | 76258034 | 76258897 | - | 0    | 0    |
| ENSG0000(RPL7AL2 processed_ chr20   | 4590993  | 4591300  | - | 0    | 0    |
| ENSG0000(HYALP1 unitary_psι chr7    | 1.24E+08 | 1.24E+08 | + | 0    | 0    |
| ENSG0000(OFD1P17 processed_ chr5    | 37209364 | 37212381 | + | 0    | 0    |
| ENSG0000(NLGN1-AS antisense chr3    | 1.74E+08 | 1.74E+08 | - | 0    | 0    |

|                     |             |       |          |          |   |        |         |
|---------------------|-------------|-------|----------|----------|---|--------|---------|
| ENSG0000(RP11-541F) | lincRNA     | chr1  | 1.92E+08 | 1.92E+08 | + | 0      | 0       |
| ENSG0000(RP11-367F) | lincRNA     | chr9  | 90957260 | 90965393 | - | 0      | 0       |
| ENSG0000(PNRC2P1)   | processed   | chr1  | 1.18E+08 | 1.18E+08 | - | 0      | 0       |
| ENSG0000(ATF4P3)    | processed   | chr17 | 76225751 | 76226806 | - | 0      | 0       |
| ENSG0000(NPM1P30)   | processed   | chr10 | 21110682 | 21113388 | + | 0      | 0       |
| ENSG0000(LINC00578) | lincRNA     | chr3  | 1.77E+08 | 1.78E+08 | + | 0.13   | 0       |
| ENSG0000(AC074363)  | lincRNA     | chr2  | 1.67E+08 | 1.68E+08 | + | 0      | 0       |
| ENSG0000(HCG11)     | lincRNA     | chr6  | 26523450 | 26526579 | + | 1.87   | 1.95    |
| ENSG0000(NACAP1)    | transcribed | chr8  | 1.01E+08 | 1.01E+08 | + | 0.22   | 0.08    |
| ENSG0000(AC016908)  | processed   | chr2  | 84031140 | 84032358 | + | 0      | 0       |
| ENSG0000(AC074019)  | lincRNA     | chr2  | 2.29E+08 | 2.29E+08 | - | 0      | 0       |
| ENSG0000(RP11-219C) | lincRNA     | chr1  | 13324039 | 13324518 | + | 0      | 0       |
| ENSG0000(RP11-124I) | antisense   | chr6  | 54365335 | 54369971 | - | 0      | 0       |
| ENSG0000(GAPDHP1)   | processed   | chrX  | 39787132 | 39788136 | - | 0      | 0       |
| ENSG0000(GLRXP1)    | processed   | chr20 | 37602852 | 37603185 | - | 0      | 0       |
| ENSG0000(AP001476)  | lincRNA     | chr21 | 46052596 | 46053105 | + | 0      | 0       |
| ENSG0000(TXNP5)     | processed   | chr2  | 1.49E+08 | 1.49E+08 | - | 0      | 0       |
| ENSG0000(EFCAB14-A) | antisense   | chr1  | 46674036 | 46692098 | + | 0      | 0       |
| ENSG0000(GS1-304P7) | processed   | chr1  | 1.87E+08 | 1.87E+08 | + | 0      | 0.39    |
| ENSG0000(RP11-85G2) | lincRNA     | chr1  | 1.57E+08 | 1.57E+08 | - | 0      | 0       |
| ENSG0000(TTTY17A)   | lincRNA     | chrY  | 22851584 | 22852715 | + | 0      | 0       |
| ENSG0000(MOB1AP1)   | processed   | chr13 | 85968999 | 85969533 | + | 0      | 0       |
| ENSG0000(AC093495)  | antisense   | chr3  | 14144637 | 14165978 | + | 0.84   | 0.55    |
| ENSG0000(UBBP2)     | processed   | chr1  | 2.18E+08 | 2.18E+08 | - | 0      | 0       |
| ENSG0000(NUTF2P3)   | processed   | chr9  | 77580245 | 77580628 | + | 0      | 0       |
| ENSG0000(AC012442)  | lincRNA     | chr2  | 1.13E+08 | 1.13E+08 | + | 0      | 0.15    |
| ENSG0000(COL6A4P2)  | transcribed | chr3  | 1.3E+08  | 1.3E+08  | + | 0      | 0       |
| ENSG0000(MT-ATP8)   | protein_co  | chrM  | 8366     | 8572     | + | 4575.8 | 4414.24 |
| ENSG0000(RP11-323I) | lincRNA     | chr1  | 2.14E+08 | 2.14E+08 | + | 0      | 0       |
| ENSG0000(AC010141)  | unprocessed | chrY  | 21531839 | 21534011 | - | 0      | 0       |
| ENSG0000(RP11-1379) | unprocessed | chr5  | 1.8E+08  | 1.8E+08  | + | 0      | 0       |
| ENSG0000(RP11-127L) | lincRNA     | chr10 | 1.04E+08 | 1.04E+08 | + | 0      | 0       |
| ENSG0000(LINC01320) | lincRNA     | chr2  | 34677555 | 34738231 | + | 0.28   | 0       |
| ENSG0000(PSMD8P1)   | processed   | chr1  | 1.54E+08 | 1.54E+08 | - | 0      | 0       |
| ENSG0000(RALY-AS1)  | lincRNA     | chr20 | 33983052 | 33994357 | - | 1.53   | 1.64    |
| ENSG0000(LINC02048) | lincRNA     | chr3  | 1.94E+08 | 1.94E+08 | + | 0      | 0       |
| ENSG0000(AC106874)  | lincRNA     | chr2  | 84315108 | 84350774 | + | 0      | 0       |
| ENSG0000(RP3-508I)  | antisense   | chr22 | 38667585 | 38681820 | - | 1.99   | 0.94    |
| ENSG0000(ARMCX3-A)  | antisense   | chrX  | 1.02E+08 | 1.02E+08 | - | 0      | 0       |
| ENSG0000(AC112518)  | lincRNA     | chr4  | 73710302 | 73714527 | + | 0      | 0       |
| ENSG0000(ORM2)      | protein_co  | chr9  | 1.14E+08 | 1.14E+08 | + | 0      | 0       |
| ENSG0000(RP11-367B) | sense_intr  | chr10 | 75742740 | 75743755 | + | 0.19   | 0       |
| ENSG0000(KATNBL1P)  | transcribed | chr6  | 1.47E+08 | 1.47E+08 | - | 0      | 0       |
| ENSG0000(LYPLA2P1)  | processed   | chr6  | 33365548 | 33366243 | - | 0      | 0       |
| ENSG0000(AP000593)  | processed   | chr11 | 72249856 | 72251288 | - | 0      | 0       |



|                    |             |       |          |          |   |       |       |
|--------------------|-------------|-------|----------|----------|---|-------|-------|
| ENSG0000(PCAT6     | antisense   | chr1  | 2.03E+08 | 2.03E+08 | + | 8.46  | 7.57  |
| ENSG0000(RP4-640E2 | processed_  | chr1  | 1.64E+08 | 1.64E+08 | - | 0     | 0     |
| ENSG0000(TBX18-AS1 | antisense   | chr6  | 84687712 | 84709578 | + | 0     | 0     |
| ENSG0000(ARL4AP3   | processed_  | chr10 | 5207169  | 5207742  | + | 0     | 0     |
| ENSG0000(RP11-2201 | processed_  | chr9  | 37205112 | 37205368 | - | 0     | 0     |
| ENSG0000(RP4-686C3 | antisense   | chr20 | 2664352  | 2665874  | + | 0     | 0     |
| ENSG0000(BMS1P17   | transcribec | chr14 | 19301704 | 19316914 | + | 0     | 0     |
| ENSG0000(LINC00392 | lincRNA     | chr13 | 73564244 | 73588070 | + | 0     | 0     |
| ENSG0000(TTTY4C    | lincRNA     | chrY  | 25063083 | 25099892 | - | 0     | 0     |
| ENSG0000(C19orf24  | protein_co  | chr19 | 1275438  | 1279249  | + | 29.22 | 29.03 |
| ENSG0000(RPL7P55   | processed_  | chrX  | 93573834 | 93574579 | + | 0     | 0     |
| ENSG0000(RP11-186N | antisense   | chr10 | 12244751 | 12247845 | - | 0     | 0.08  |
| ENSG0000(RP11-10F1 | unprocessε  | chr7  | 56638943 | 56650696 | - | 0     | 0     |
| ENSG0000(OR4K6P    | unprocessε  | chr14 | 19847367 | 19848263 | + | 0     | 0     |
| ENSG0000(AC016734. | processed_  | chr2  | 63622178 | 63622831 | - | 0     | 0     |
| ENSG0000(OR2S1P    | unprocessε  | chr9  | 36013184 | 36014133 | + | 0     | 0     |
| ENSG0000(LINC01209 | lincRNA     | chr3  | 1.77E+08 | 1.77E+08 | - | 0.1   | 0.14  |
| ENSG0000(LINC01350 | lincRNA     | chr1  | 1.86E+08 | 1.86E+08 | - | 0     | 0     |
| ENSG0000(GAPDHP45  | processed_  | chr10 | 15093263 | 15093611 | - | 0     | 0     |
| ENSG0000(CYP4F29P  | transcribec | chr21 | 13843133 | 13848364 | - | 0     | 0     |
| ENSG0000(GUSBP11   | processed_  | chr22 | 23638487 | 23717356 | - | 8.04  | 8.79  |
| ENSG0000(MTATP6P1  | processed_  | chrX  | 1.03E+08 | 1.03E+08 | + | 0     | 0     |
| ENSG0000(RP11-235C | antisense   | chr9  | 1.06E+08 | 1.06E+08 | - | 0.11  | 0     |
| ENSG0000(AP001610. | antisense   | chr21 | 41441056 | 41445708 | - | 0     | 0     |
| ENSG0000(SPATA2P1  | processed_  | chr13 | 56214373 | 56216942 | + | 0     | 0     |
| ENSG0000(RP11-358N | antisense   | chr9  | 4299390  | 4306046  | + | 0     | 0     |
| ENSG0000(AC008753. | antisense   | chr19 | 53854581 | 53869107 | - | 0     | 0     |
| ENSG0000(IGKV3D-7  | IG_V_gene   | chr2  | 90234812 | 90235370 | + | 0     | 0     |
| ENSG0000(RP11-206L | transcribec | chr1  | 725885   | 778626   | - | 2.51  | 2.94  |
| ENSG0000(RP11-516A | processed_  | chrX  | 68070520 | 68071767 | - | 0     | 0     |
| ENSG0000(LINC01890 | lincRNA     | chr2  | 68832816 | 68837192 | - | 0     | 0     |
| ENSG0000(RP11-730A | processed_  | chr10 | 13142185 | 13142977 | - | 0     | 0     |
| ENSG0000(RPL17P43  | processed_  | chr17 | 19496943 | 19497528 | + | 0     | 0     |
| ENSG0000(AC024028. | lincRNA     | chr7  | 3083252  | 3086421  | - | 0     | 0     |
| ENSG0000(AC073063. | processed_  | chr7  | 99442890 | 99443496 | - | 0.34  | 0     |
| ENSG0000(OR9H1P    | unitary_ps  | chr1  | 2.48E+08 | 2.48E+08 | + | 0     | 0     |
| ENSG0000(RP11-804H | processed_  | chr3  | 50685551 | 50685791 | - | 0     | 0     |
| ENSG0000(LINC01784 | lincRNA     | chr1  | 12822686 | 12823159 | - | 0     | 0     |
| ENSG0000(AMD1P1    | processed_  | chr10 | 20350049 | 20351100 | + | 0     | 0     |
| ENSG0000(MIR646HG  | lincRNA     | chr20 | 60087840 | 60527458 | + | 0.59  | 0.59  |
| ENSG0000(CTB-20D2. | processed_  | chr7  | 1.07E+08 | 1.07E+08 | + | 0     | 0     |
| ENSG0000(RP11-1148 | antisense   | chrX  | 48579774 | 48581157 | - | 0     | 0     |
| ENSG0000(RP11-12D5 | processed_  | chrX  | 27854323 | 27855353 | + | 0     | 0     |
| ENSG0000(FTLP17    | processed_  | chr1  | 1.04E+08 | 1.04E+08 | - | 0     | 0     |
| ENSG0000(EFCAB14P1 | processed_  | chr1  | 35122022 | 35122484 | + | 0     | 0     |

|                                       |          |          |   |      |      |
|---------------------------------------|----------|----------|---|------|------|
| ENSG0000(RPS26P4 processed_ chr21     | 39491544 | 39491898 | - | 0    | 0    |
| ENSG0000(CELSR3-AS. antisense chr3    | 48663776 | 48669174 | + | 0    | 0    |
| ENSG0000(AC018832. lincRNA chr3       | 8079322  | 8112924  | + | 0    | 0    |
| ENSG0000(RP11-537H antisense chr9     | 34084332 | 34096225 | + | 0    | 0    |
| ENSG0000(RP11-184A antisense chr10    | 3767915  | 3768751  | + | 0    | 0    |
| ENSG0000(RP11-552J processed_ chrX    | 52655207 | 52657254 | + | 0    | 0    |
| ENSG0000(BX322559. antisense chr21    | 45378201 | 45379635 | - | 0    | 0    |
| ENSG0000(AC113617. lincRNA chr4       | 1.17E+08 | 1.17E+08 | + | 0    | 0    |
| ENSG0000(RP11-365F processed_ chr7    | 1.39E+08 | 1.39E+08 | - | 0    | 0    |
| ENSG0000(RP11-503C lincRNA chr6       | 1.68E+08 | 1.68E+08 | + | 0    | 0    |
| ENSG0000(AC015971. antisense chr2     | 86562070 | 86618766 | + | 0    | 0.09 |
| ENSG0000(SAR1P1 processed_ chr6       | 29076573 | 29077168 | - | 0    | 0    |
| ENSG0000(RP1-90J20. lincRNA chr6      | 2916894  | 2917733  | + | 0    | 0    |
| ENSG0000(RP11-18B3 processed_ chr9    | 1.06E+08 | 1.06E+08 | - | 0    | 0    |
| ENSG0000(RP11-524L processed_ chr5    | 75920670 | 75921660 | - | 0    | 0    |
| ENSG0000(AC106873. antisense chr7     | 1.17E+08 | 1.17E+08 | - | 0    | 0    |
| ENSG0000(TXNDC12- antisense chr1      | 52050918 | 52052683 | + | 0    | 0    |
| ENSG0000(RP11-85L2. lincRNA chrX      | 1.35E+08 | 1.35E+08 | + | 0    | 0    |
| ENSG0000(RP11-497K processed_ chr9    | 87423634 | 87423893 | + | 0    | 0    |
| ENSG0000(AC012497. processed_ chr2    | 1.4E+08  | 1.4E+08  | - | 0    | 0    |
| ENSG0000(RPS20P25 processed_ chr9     | 81410279 | 81410630 | + | 0    | 0    |
| ENSG0000(GAS2L1P2 transcribed chr9    | 97075671 | 97081945 | - | 0    | 0    |
| ENSG0000(AC010891. lincRNA chrY       | 9813315  | 9817513  | + | 0    | 0    |
| ENSG0000(MYL6BP1 processed_ chr2      | 2.08E+08 | 2.08E+08 | - | 0    | 0    |
| ENSG0000(ITPKB-IT1 sense_intron chr1  | 2.27E+08 | 2.27E+08 | - | 0    | 0.2  |
| ENSG0000(FAM197Y7 transcribed chrY    | 9367803  | 9377092  | - | 0    | 0    |
| ENSG0000(AC007040. antisense chr2     | 70994510 | 71002754 | + | 0    | 0    |
| ENSG0000(RP5-1125A lincRNA chr20      | 34014969 | 34017749 | - | 0    | 0    |
| ENSG0000(AC011995. lincRNA chr2       | 2870558  | 2871231  | - | 0    | 0    |
| ENSG0000(RP11-343J. lincRNA chr9      | 1.26E+08 | 1.26E+08 | - | 0    | 0    |
| ENSG0000(LINC01004 antisense chr7     | 1.05E+08 | 1.05E+08 | - | 0.95 | 0.72 |
| ENSG0000(RP11-216B antisense chr9     | 1.29E+08 | 1.29E+08 | - | 1.1  | 0.34 |
| ENSG0000(LINC01635 lincRNA chr1       | 22023990 | 22026048 | - | 0.09 | 0.31 |
| ENSG0000(HMGN2P2 processed_ chr3      | 1.42E+08 | 1.42E+08 | - | 0    | 0    |
| ENSG0000(RP4-575N6 processed_ chr1    | 1.01E+08 | 1.01E+08 | + | 0    | 0    |
| ENSG0000(AC079154. antisense chr2     | 1.24E+08 | 1.24E+08 | - | 0    | 0    |
| ENSG0000(HSPC324 antisense chr9       | 1.37E+08 | 1.37E+08 | - | 0    | 0    |
| ENSG0000(RP11-563N sense_intron chr10 | 48878022 | 48878649 | + | 0    | 0    |
| ENSG0000(AP001468. antisense chr21    | 46185079 | 46188941 | + | 0    | 0.14 |
| ENSG0000(RP4-800M processed_ chr1     | 52160261 | 52160600 | - | 0    | 0    |
| ENSG0000(RP1-111D6 lincRNA chr6       | 1.49E+08 | 1.49E+08 | + | 0    | 0    |
| ENSG0000(CCT6P1 transcribed chr7      | 65751142 | 65763354 | + | 1.06 | 0.98 |
| ENSG0000(ELOCP24 processed_ chrX      | 1.56E+08 | 1.56E+08 | - | 0    | 0    |
| ENSG0000(ELOCP24 processed_ chrY      | 57165512 | 57165845 | - | 0    | 0    |
| ENSG0000(CDY4P processed_ chrY        | 12801973 | 12803830 | - | 0    | 0    |

|                                       |       |          |          |   |        |        |
|---------------------------------------|-------|----------|----------|---|--------|--------|
| ENSG0000(RP4-625H1 antisense)         | chr6  | 19324988 | 19839080 | - | 0.57   | 0.1    |
| ENSG0000(AC024937. processed)         | chr3  | 1.96E+08 | 1.96E+08 | + | 0      | 0      |
| ENSG0000(LINC01185 lincRNA)           | chr2  | 60825132 | 60881314 | - | 0      | 0      |
| ENSG0000(PTMAP1 processed)            | chr6  | 30633632 | 30633956 | + | 0      | 0      |
| ENSG0000(RP11-549L antisense)         | chr10 | 1.1E+08  | 1.1E+08  | - | 0      | 0      |
| ENSG0000(LINC01768 lincRNA)           | chr1  | 1.1E+08  | 1.1E+08  | + | 0      | 0      |
| ENSG0000(AC005013. lincRNA)           | chr7  | 28957667 | 28959345 | + | 0      | 0      |
| ENSG0000(LINC00687 lincRNA)           | chr20 | 11800463 | 11870715 | - | 0      | 0      |
| ENSG0000(RP4-633I8. lincRNA)          | chr1  | 8805860  | 8807051  | - | 0      | 0      |
| ENSG0000(RP11-402L lincRNA)           | chr10 | 43665668 | 43667005 | + | 0      | 0      |
| ENSG0000(RP5-1091N antisense)         | chrX  | 71183559 | 71198175 | - | 0.09   | 0      |
| ENSG0000(RP5-859M processed)          | chr7  | 68640798 | 68641584 | + | 0      | 0      |
| ENSG0000(RP11-15B2 transcribed)       | chr9  | 81977614 | 82780194 | + | 0      | 0      |
| ENSG0000(ARL5AP3 processed)           | chr1  | 68049360 | 68049745 | - | 0      | 0      |
| ENSG0000(DHFRP2 processed)            | chr6  | 31366352 | 31366898 | - | 0      | 0      |
| ENSG0000(OR7E23P processed)           | chr21 | 32621049 | 32622096 | + | 0      | 0      |
| ENSG0000(AC004951. lincRNA)           | chr7  | 44004046 | 44007866 | - | 1.38   | 1.41   |
| ENSG0000(RP5-864K1 antisense)         | chr1  | 38860000 | 38919396 | + | 5.59   | 4.76   |
| ENSG0000(RP11-400N lincRNA)           | chr1  | 2.22E+08 | 2.22E+08 | + | 0      | 0      |
| ENSG0000(RP5-859I17 processed)        | chr20 | 8929895  | 8930038  | - | 0      | 0      |
| ENSG0000(TSTD3 protein_coding)        | chr6  | 99520693 | 99531918 | + | 3.63   | 2.18   |
| ENSG0000(MTND5P6 unprocessed)         | chr7  | 57170974 | 57172771 | + | 0      | 0      |
| ENSG0000(RP11-173B sense_intronic)    | chr13 | 75631271 | 75632135 | + | 0      | 0      |
| ENSG0000(UGT1A2P unprocessed)         | chr2  | 2.34E+08 | 2.34E+08 | + | 0      | 0      |
| ENSG0000(AC073052. processed)         | chr2  | 2.24E+08 | 2.25E+08 | - | 0      | 0.1    |
| ENSG0000(RP1-154J1 processed)         | chrX  | 1.31E+08 | 1.31E+08 | - | 0      | 0      |
| ENSG0000(SDAD1P1 transcribed)         | chr8  | 26379259 | 26382953 | - | 1.79   | 1.93   |
| ENSG0000(RP5-994D1 antisense)         | chr1  | 42775813 | 42776790 | - | 0      | 0      |
| ENSG0000(RPS15AP9 processed)          | chr1  | 1.17E+08 | 1.17E+08 | + | 0      | 0      |
| ENSG0000(LINC01546 lincRNA)           | chrX  | 3271820  | 3284653  | + | 0      | 0      |
| ENSG0000(CYP2C59P unprocessed)        | chr10 | 95007126 | 95007556 | - | 0      | 0      |
| ENSG0000(RPS19P7 processed)           | chr10 | 45073146 | 45073541 | - | 0      | 0      |
| ENSG0000(AP006222. lincRNA)           | chr1  | 257864   | 297502   | - | 1.5    | 2.11   |
| ENSG0000(RP11-617C processed)         | chrX  | 26345236 | 26346242 | + | 0      | 0      |
| ENSG0000(TRAPPC2P unprocessed)        | chrY  | 23967564 | 23970694 | - | 0      | 0      |
| ENSG0000(TUBB4AP1 processed)          | chrX  | 1.24E+08 | 1.24E+08 | + | 0      | 0      |
| ENSG0000(RP11-402N lincRNA)           | chr9  | 38804007 | 38851916 | + | 0      | 0      |
| ENSG0000(RP11-176D sense_overlapping) | chr1  | 2.14E+08 | 2.14E+08 | - | 0      | 0      |
| ENSG0000(AC018865. processed)         | chr2  | 1.3E+08  | 1.3E+08  | - | 0      | 0      |
| ENSG0000(LIN28AP2 processed)          | chr13 | 87379472 | 87380258 | - | 0      | 0      |
| ENSG0000(OST4 protein_coding)         | chr2  | 27070472 | 27071773 | - | 291.02 | 308.14 |
| ENSG0000(CSTP1 unprocessed)           | chr20 | 23918771 | 23922169 | - | 0      | 0      |
| ENSG0000(RP3-342P2 processed)         | chr1  | 39962680 | 39963404 | + | 0.09   | 0      |
| ENSG0000(RP1-290I1 lincRNA)           | chr6  | 10423140 | 10426176 | - | 0      | 0      |
| ENSG0000(AC130464. unprocessed)       | chr16 | 26354796 | 26358355 | - | 0      | 0      |

|                                     |          |          |   |      |      |
|-------------------------------------|----------|----------|---|------|------|
| ENSG0000(U51244.2 antisense chr2    | 45674701 | 45675476 | - | 0    | 0    |
| ENSG0000(LINC01713 lincRNA chr20    | 6731258  | 6736136  | - | 0    | 0    |
| ENSG0000(RP11-106M lincRNA chr10    | 1.15E+08 | 1.15E+08 | + | 0    | 0    |
| ENSG0000(GRK5-IT1 sense_intr chr10  | 1.19E+08 | 1.19E+08 | + | 0    | 0    |
| ENSG0000(LINC01125 protein_co chr2  | 97664217 | 97703064 | + | 2.14 | 1.67 |
| ENSG0000(RP13-225C antisense chr9   | 1.27E+08 | 1.27E+08 | - | 0    | 0    |
| ENSG0000(AC092168. lincRNA chr2     | 1.01E+08 | 1.01E+08 | - | 0    | 0    |
| ENSG0000(RPL21P50 processed_ chr4   | 1.24E+08 | 1.24E+08 | - | 0    | 0    |
| ENSG0000(RAB11FIP1 processed_ chrX  | 74202834 | 74204595 | + | 0    | 0    |
| ENSG0000(LINC01013 lincRNA chr6     | 1.32E+08 | 1.32E+08 | + | 0.14 | 0.1  |
| ENSG0000(AC106875. sense_intr chr2  | 11681460 | 11683328 | + | 0    | 0    |
| ENSG0000(TMSB10P1 processed_ chr2   | 2.36E+08 | 2.36E+08 | - | 0    | 5.66 |
| ENSG0000(RPL15P18 processed_ chr13  | 1E+08    | 1E+08    | - | 0    | 0    |
| ENSG0000(EEF1A1P11 processed_ chr1  | 96446930 | 96448318 | + | 0.03 | 0.29 |
| ENSG0000(RP11-347D lincRNA chr20    | 47958022 | 47958603 | + | 0    | 0    |
| ENSG0000(LINC01760 lincRNA chr1     | 95310928 | 95318263 | - | 0    | 0    |
| ENSG0000(AC011897. lincRNA chr2     | 14616428 | 14630192 | + | 0    | 0    |
| ENSG0000(RP11-98I9. antisense chr6  | 99424922 | 99431373 | + | 1.42 | 0.84 |
| ENSG0000(DAP3P2 processed_ chr2     | 1.71E+08 | 1.71E+08 | + | 0.44 | 0.16 |
| ENSG0000(AC006460. antisense chr2   | 1.91E+08 | 1.91E+08 | - | 0.17 | 0    |
| ENSG0000(RP11-339B processed_ chr9  | 1.28E+08 | 1.28E+08 | + | 0.1  | 0.07 |
| ENSG0000(RP11-281A lincRNA chr9     | 1.18E+08 | 1.18E+08 | + | 0    | 0    |
| ENSG0000(AC023271. processed_ chr2  | 2.03E+08 | 2.03E+08 | - | 0    | 0    |
| ENSG0000(CT47A7 protein_co chrX     | 1.21E+08 | 1.21E+08 | - | 0    | 0    |
| ENSG0000(SURF6P1 processed_ chrY    | 17192826 | 17193652 | + | 0    | 0    |
| ENSG0000(RP11-298C processed_ chrX  | 25645722 | 25646327 | - | 0    | 0    |
| ENSG0000(AC099552. lincRNA chr7     | 1.55E+08 | 1.55E+08 | + | 0    | 0    |
| ENSG0000(RP11-236F transcribec chr9 | 63330326 | 63343660 | + | 0    | 0    |
| ENSG0000(RP11-131C processed_ chr1  | 67278052 | 67278779 | + | 0    | 0    |
| ENSG0000(RP5-1087E processed_ chr1  | 2.27E+08 | 2.27E+08 | - | 0    | 0    |
| ENSG0000(MIR34AHG lincRNA chr1      | 9148011  | 9196983  | - | 7.87 | 8.26 |
| ENSG0000(RP11-179B lincRNA chr10    | 58304553 | 58305621 | + | 0    | 0    |
| ENSG0000(AC068057. lincRNA chr2     | 1.05E+08 | 1.05E+08 | + | 0    | 0.1  |
| ENSG0000(RP11-567B processed_ chr1  | 2E+08    | 2E+08    | + | 0    | 0    |
| ENSG0000(RP1-241P1 processed_ chrX  | 1.16E+08 | 1.16E+08 | - | 0    | 0    |
| ENSG0000(RP11-392C lincRNA chr1     | 2.19E+08 | 2.19E+08 | - | 0.17 | 0.71 |
| ENSG0000(AC009411. lincRNA chr2     | 21638431 | 21649563 | - | 0    | 0    |
| ENSG0000(RP11-526K antisense chr20  | 24491472 | 24502345 | - | 0    | 0    |
| ENSG0000(AC073326. sense_intr chr7  | 1.11E+08 | 1.11E+08 | - | 0    | 0.14 |
| ENSG0000(AC093159. lincRNA chr2     | 62463127 | 62464070 | + | 0    | 0    |
| ENSG0000(GS1-519E5 lincRNA chrX     | 9249920  | 9275206  | + | 0    | 0    |
| ENSG0000(CCDC183-A antisense chr9   | 1.37E+08 | 1.37E+08 | - | 1.27 | 1.37 |
| ENSG0000(CTA-313A1 unprocessε chr7  | 1.02E+08 | 1.02E+08 | + | 0    | 0    |
| ENSG0000(OR7E26P unprocessε chr10   | 14999050 | 15000055 | - | 0    | 0    |
| ENSG0000(ITPKB-AS1 antisense chr1   | 2.27E+08 | 2.27E+08 | + | 0    | 0    |

|                     |            |       |          |          |   |       |       |
|---------------------|------------|-------|----------|----------|---|-------|-------|
| ENSG0000(RP11-108M) | lincRNA    | chr1  | 16870945 | 16874092 | + | 0     | 0     |
| ENSG0000(RP11-483M) | processed  | chrX  | 7113005  | 7113404  | - | 0     | 0     |
| ENSG0000(SNRPGP9)   | processed  | chr2  | 1.09E+08 | 1.09E+08 | + | 0     | 0     |
| ENSG0000(RP11-391J) | antisense  | chr10 | 94225160 | 94227288 | - | 0     | 0     |
| ENSG0000(AC004837)  | antisense  | chr7  | 39700341 | 39703296 | - | 0     | 0     |
| ENSG0000(HSPA8P17)  | processed  | chr9  | 30988085 | 30990572 | + | 0     | 0     |
| ENSG0000(RP3-340B1) | lincRNA    | chr6  | 35544632 | 35545669 | + | 0     | 0     |
| ENSG0000(RP11-550P) | antisense  | chr1  | 1.59E+08 | 1.59E+08 | - | 0     | 0     |
| ENSG0000(RP11-114M) | lincRNA    | chr3  | 1.78E+08 | 1.78E+08 | + | 0     | 0     |
| ENSG0000(AL133247)  | antisense  | chr2  | 31526942 | 31563464 | + | 0     | 0     |
| ENSG0000(LINC01005) | antisense  | chr7  | 64027852 | 64030105 | - | 0     | 0     |
| ENSG0000(RP11-170M) | lincRNA    | chr10 | 63664664 | 63990568 | + | 0     | 0     |
| ENSG0000(VN1R4)     | protein_co | chr19 | 53266676 | 53267723 | - | 0     | 0     |
| ENSG0000(AC006461)  | processed  | chr2  | 72288785 | 72289110 | + | 0     | 0     |
| ENSG0000(AC073133)  | lincRNA    | chr7  | 1.56E+08 | 1.56E+08 | - | 0     | 0     |
| ENSG0000(NUTM2E)    | protein_co | chr10 | 79841358 | 79850878 | + | 0.08  | 0.2   |
| ENSG0000(HSFY7P)    | unprocess  | chrY  | 22537047 | 22537849 | + | 0     | 0     |
| ENSG0000(LLOYNC03)  | unprocess  | chrX  | 253743   | 255091   | + | 0     | 0     |
| ENSG0000(LLOYNC03)  | unprocess  | chrY  | 253743   | 255091   | + | 0     | 0     |
| ENSG0000(RP11-279N) | lincRNA    | chr13 | 47825330 | 47835956 | - | 0.2   | 0     |
| ENSG0000(AC010731)  | antisense  | chr2  | 2.07E+08 | 2.07E+08 | - | 0     | 0     |
| ENSG0000(TUBB1P2)   | unprocess  | chrY  | 17516836 | 17519038 | - | 0     | 0     |
| ENSG0000(AC073143)  | processed  | chr2  | 5313740  | 5314134  | - | 0     | 0     |
| ENSG0000(AC005042)  | lincRNA    | chr2  | 1.59E+08 | 1.59E+08 | + | 0     | 0     |
| ENSG0000(RP1-41P2)  | lincRNA    | chr22 | 35685940 | 35689373 | + | 0     | 0     |
| ENSG0000(SPCS2P4)   | processed  | chr1  | 28095742 | 28096422 | - | 3.97  | 4.32  |
| ENSG0000(AC007381)  | lincRNA    | chr2  | 60350595 | 60353016 | - | 0     | 0     |
| ENSG0000(D21S2088E) | lincRNA    | chr21 | 23361104 | 23384861 | - | 0     | 0     |
| ENSG0000(CFTRP1)    | unprocess  | chr20 | 25919499 | 25919681 | - | 0     | 0     |
| ENSG0000(FNDC10)    | protein_co | chr1  | 1598012  | 1600096  | - | 15.37 | 15.44 |
| ENSG0000(PAICSP2)   | processed  | chr9  | 91611343 | 91612492 | + | 0     | 0     |
| ENSG0000(AC013436)  | antisense  | chr7  | 44785050 | 44787340 | - | 0     | 0     |
| ENSG0000(MTND4P1)   | processed  | chr13 | 84520103 | 84521568 | + | 0     | 0     |
| ENSG0000(MACC1-AS)  | antisense  | chr7  | 20141916 | 20153531 | + | 0     | 0     |
| ENSG0000(RPL7P52)   | processed  | chr22 | 40106325 | 40107066 | - | 0.53  | 0     |
| ENSG0000(POLR2CP1)  | processed  | chr21 | 14757588 | 14758352 | + | 0     | 0     |
| ENSG0000(RPL39P)    | processed  | chr20 | 56459428 | 56459583 | - | 0     | 0     |
| ENSG0000(RP5-872K7) | antisense  | chr20 | 21148741 | 21162890 | - | 0     | 0     |
| ENSG0000(RP11-574F) | antisense  | chr1  | 1.6E+08  | 1.6E+08  | + | 0.26  | 0     |
| ENSG0000(CLDN25)    | protein_co | chr11 | 1.14E+08 | 1.14E+08 | + | 0     | 0     |
| ENSG0000(PDCL2P1)   | processed  | chrX  | 23198339 | 23198690 | + | 0     | 0     |
| ENSG0000(HNF4GP1)   | processed  | chr13 | 55999200 | 56000448 | - | 0     | 0     |
| ENSG0000(HK2P1)     | processed  | chrX  | 80571871 | 80574607 | - | 0     | 0.02  |
| ENSG0000(AC144450)  | antisense  | chr2  | 1546665  | 1620113  | - | 0     | 0     |
| ENSG0000(RP13-476E) | antisense  | chr6  | 53790875 | 53794274 | - | 0     | 0     |

|                                      |          |            |      |      |
|--------------------------------------|----------|------------|------|------|
| ENSG0000( AC093166. processed_ chr2  | 1.12E+08 | 1.12E+08 + | 0    | 0    |
| ENSG0000( RP11-66N1 lincRNA chrX     | 1.54E+08 | 1.54E+08 + | 0    | 0    |
| ENSG0000( AC012462. lincRNA chr2     | 2.15E+08 | 2.15E+08 + | 0    | 0    |
| ENSG0000( RP3-434P1 antisense chr22  | 38424288 | 38427336 + | 0    | 0    |
| ENSG0000( RP1-302D9 lincRNA chr22    | 33105383 | 33106059 - | 0    | 0    |
| ENSG0000( ZNF883 protein_co chr9     | 1.13E+08 | 1.13E+08 - | 0.55 | 0.66 |
| ENSG0000( RP3-399L1 antisense chr6   | 1.14E+08 | 1.14E+08 + | 0.42 | 1.16 |
| ENSG0000( RP11-1B20 antisense chr1   | 2.27E+08 | 2.27E+08 + | 0    | 0    |
| ENSG0000( RP11-495P unprocessε chr1  | 1.48E+08 | 1.48E+08 - | 0    | 0    |
| ENSG0000( GS1-278J2 lincRNA chr7     | 53559214 | 53568249 - | 0    | 0    |
| ENSG0000( AC092295. antisense chr19  | 36528318 | 36535235 + | 0    | 0.2  |
| ENSG0000( HOTAIR antisense chr12     | 53962308 | 53974956 - | 0    | 0    |
| ENSG0000( RP4-534N1 lincRNA chr1     | 31933020 | 31933975 + | 0    | 0    |
| ENSG0000( RP5-1051H lincRNA chr10    | 9758783  | 9759237 -  | 0.55 | 0    |
| ENSG0000( FCF1P2 processed_ chr3     | 48290793 | 48291375 - | 2.9  | 3.72 |
| ENSG0000( LINC02095 lincRNA chr17    | 72021851 | 72034092 - | 0    | 0    |
| ENSG0000( AC079779. processed_ chr2  | 286419   | 301515 +   | 0    | 0    |
| ENSG0000( PHKG1P2 processed_ chr7    | 63509303 | 63510165 + | 0    | 0    |
| ENSG0000( RPL31P13 processed_ chr1   | 2.13E+08 | 2.13E+08 - | 0    | 0    |
| ENSG0000( RP11-568A lincRNA chr6     | 1.67E+08 | 1.67E+08 + | 0    | 0    |
| ENSG0000( AC005682. processed_ chr7  | 22854178 | 22861579 + | 1.35 | 1.01 |
| ENSG0000( AC008940. lincRNA chr5     | 56770799 | 56772303 + | 0    | 0    |
| ENSG0000( RP11-556E antisense chr10  | 52556702 | 52755409 - | 0    | 0    |
| ENSG0000( HNRNPCP7 processed_ chr7   | 64500825 | 64501729 + | 0    | 0    |
| ENSG0000( AC096558. antisense chr2   | 1.43E+08 | 1.43E+08 - | 0    | 0    |
| ENSG0000( MYO5BP3 processed_ chr9    | 63761546 | 63762824 - | 0    | 0    |
| ENSG0000( RPL23AP58 processed_ chr10 | 1.03E+08 | 1.03E+08 - | 0    | 0    |
| ENSG0000( RP11-791C lincRNA chr9     | 88971638 | 88976298 + | 0    | 0    |
| ENSG0000( LINC01201 antisense chrX   | 1.31E+08 | 1.31E+08 - | 0    | 0    |
| ENSG0000( VN1R35P transcribed chr7   | 63963431 | 63964123 - | 0    | 0    |
| ENSG0000( AC090587. antisense chr11  | 3854318  | 3855509 -  | 0    | 0    |
| ENSG0000( PSMD10P1 processed_ chr20  | 50913731 | 50914411 + | 0    | 0    |
| ENSG0000( RP11-416K processed_ chr1  | 1.82E+08 | 1.82E+08 + | 0    | 0    |
| ENSG0000( RP11-2002 processed_ chr1  | 1.09E+08 | 1.09E+08 + | 0    | 0.57 |
| ENSG0000( KRT18P1 processed_ chr6    | 28969130 | 28970460 - | 0    | 0    |
| ENSG0000( RP11-129C processed_ chr10 | 24867645 | 24868190 + | 0    | 0    |
| ENSG0000( TRGV5P TR_V_pseu chr7      | 38345030 | 38345499 - | 0    | 0    |
| ENSG0000( LINC00448 lincRNA chr13    | 62672285 | 62732359 - | 0    | 0    |
| ENSG0000( NANOGP2 processed_ chr2    | 2.22E+08 | 2.22E+08 - | 0    | 0    |
| ENSG0000( PROB1 protein_co chr5      | 1.39E+08 | 1.39E+08 - | 0.31 | 0.15 |
| ENSG0000( CTB-147C2 processed_ chr19 | 50927079 | 50927571 - | 0    | 0    |
| ENSG0000( AC006482. lincRNA chr7     | 17679549 | 17680659 + | 0    | 0    |
| ENSG0000( TTC3-AS1 antisense chr21   | 37187666 | 37193926 - | 0    | 0    |
| ENSG0000( RP4-676J1 lincRNA chr6     | 83983728 | 84007323 + | 0    | 0    |
| ENSG0000( AC004692. antisense chr7   | 43239066 | 43249268 - | 0    | 0    |

|                                       |          |          |   |      |      |
|---------------------------------------|----------|----------|---|------|------|
| ENSG0000( AC008072. processed_ chr2   | 2.24E+08 | 2.24E+08 | + | 0    | 0    |
| ENSG0000( RP11-31E1 lincRNA chr10     | 78696062 | 78697022 | - | 0    | 0    |
| ENSG0000( RP11-336A processed_ chr10  | 5624931  | 5625126  | + | 0    | 0    |
| ENSG0000( RP11-492I2 antisense chr1   | 1.76E+08 | 1.76E+08 | + | 0    | 0    |
| ENSG0000( RP3-419C1 unprocessε chr1   | 1.93E+08 | 1.93E+08 | + | 0    | 0    |
| ENSG0000( COL11A2P: unprocessε chr6   | 33103794 | 33107330 | - | 0    | 0    |
| ENSG0000( RP3-335N1 antisense chr6    | 51599723 | 51622884 | + | 0.06 | 0    |
| ENSG0000( RP5-826L7. lincRNA chr6     | 1.64E+08 | 1.64E+08 | - | 0    | 0    |
| ENSG0000( MTND4P18 processed_ chr10   | 36434710 | 36435174 | - | 0    | 0    |
| ENSG0000( CES1P1 transcribed chr16    | 55760566 | 55793960 | + | 0.07 | 0.09 |
| ENSG0000( ARL17B protein_co chr17     | 46274784 | 46361797 | - | 5.01 | 5.02 |
| ENSG0000( RP5-968D2 lincRNA chr1      | 1.68E+08 | 1.68E+08 | - | 0    | 0    |
| ENSG0000( RP11-155G processed_ chr7   | 1.28E+08 | 1.28E+08 | - | 0    | 0    |
| ENSG0000( TNKS2-AS1 antisense chr10   | 91782839 | 91798291 | - | 0    | 0    |
| ENSG0000( RP11-671E processed_ chr10  | 45725694 | 45726038 | - | 0    | 0    |
| ENSG0000( RP5-1160K antisense chr1    | 1.1E+08  | 1.1E+08  | - | 0    | 0    |
| ENSG0000( LINC00659 antisense chr20   | 62774128 | 62775412 | - | 0    | 0    |
| ENSG0000( RP11-787B lincRNA chr9      | 1.16E+08 | 1.16E+08 | + | 0.44 | 0    |
| ENSG0000( AL109763.: sense_ovei chr21 | 18477358 | 18486599 | - | 0    | 0    |
| ENSG0000( AP001065. lincRNA chr21     | 44485577 | 44490288 | + | 0    | 0    |
| ENSG0000( AC004006. processed_ chr7   | 82657035 | 82657411 | + | 0    | 0    |
| ENSG0000( RP11-284G lincRNA chr9      | 1.16E+08 | 1.16E+08 | - | 0    | 0    |
| ENSG0000( DHFR protein_co chr5        | 80626228 | 80654983 | - | 3.13 | 2.63 |
| ENSG0000( AF013593. processed_ chrX   | 1.51E+08 | 1.51E+08 | - | 0    | 0    |
| ENSG0000( RP11-145H lincRNA chr6      | 2636936  | 2640001  | + | 0    | 0    |
| ENSG0000( RP5-1119A lincRNA chr22     | 36445395 | 36454944 | - | 0    | 0    |
| ENSG0000( AC016909. processed_ chr2   | 1.33E+08 | 1.33E+08 | - | 0    | 0    |
| ENSG0000( SRGAP3-AS antisense chr3    | 9192493  | 9194453  | + | 0    | 0    |
| ENSG0000( MTND2P12 unprocessε chr17   | 19603797 | 19605048 | + | 0    | 0.04 |
| ENSG0000( SAPCD1 protein_co chr6      | 31762799 | 31764851 | + | 0.09 | 0.33 |
| ENSG0000( RP11-316K processed_ chrX   | 1.51E+08 | 1.51E+08 | + | 0    | 0    |
| ENSG0000( RP11-211A processed_ chr1   | 2.27E+08 | 2.27E+08 | + | 0    | 0    |
| ENSG0000( LINC02013 lincRNA chr3      | 1.91E+08 | 1.91E+08 | - | 0    | 0    |
| ENSG0000( RP11-335E lincRNA chr1      | 63249920 | 63251771 | + | 0    | 0    |
| ENSG0000( GS1-18A18 lincRNA chr7      | 54576052 | 54578794 | - | 0    | 0    |
| ENSG0000( AC008781. antisense chr5    | 1.42E+08 | 1.42E+08 | + | 0    | 0    |
| ENSG0000( RP11-218I7 lincRNA chr9     | 6047360  | 6066714  | + | 0    | 0    |
| ENSG0000( GABRG3-A: antisense chr15   | 27157615 | 27161319 | - | 0    | 0    |
| ENSG0000( SPATA13 lincRNA chr13       | 23979810 | 24035027 | + | 0.84 | 0.72 |
| ENSG0000( RP5-884M: lincRNA chr7      | 1.07E+08 | 1.07E+08 | + | 0    | 0    |
| ENSG0000( RPS3AP30 processed_ chr8    | 7122857  | 7123704  | + | 0.14 | 0.24 |
| ENSG0000( RP13-39P1 antisense chr10   | 77782866 | 77793176 | + | 0    | 0    |
| ENSG0000( LINC01672 lincRNA chr1      | 6724637  | 6730012  | + | 0    | 0.04 |
| ENSG0000( AC004022. processed_ chr7   | 95350164 | 95351229 | + | 0    | 0    |
| ENSG0000( EIF4BP2 processed_ chr10    | 21028999 | 21030792 | + | 0    | 0    |

|                                     |          |          |   |      |      |
|-------------------------------------|----------|----------|---|------|------|
| ENSG0000(RPL13AP19 processed_ chr10 | 48745545 | 48746128 | - | 0    | 0    |
| ENSG0000(PABPC1P8 processed_ chr10  | 42279734 | 42281819 | - | 0    | 0    |
| ENSG0000(AB019438.unprocessε chr14  | 1.06E+08 | 1.06E+08 | - | 0    | 0    |
| ENSG0000(FAF2P1 processed_ chr10    | 91765899 | 91767196 | - | 0    | 0    |
| ENSG0000(LIMS1-AS1 antisense chr2   | 1.09E+08 | 1.09E+08 | - | 0    | 0    |
| ENSG0000(ZNF885P processed_ chrY    | 20390051 | 20396796 | + | 0    | 0    |
| ENSG0000(RPL7L1P8 processed_ chr3   | 1.83E+08 | 1.83E+08 | + | 0    | 0    |
| ENSG0000(KRT8P18 processed_ chr3    | 35215705 | 35217149 | - | 0    | 0    |
| ENSG0000(AC003101.lincRNA chr17     | 31571142 | 31575659 | + | 0    | 0    |
| ENSG0000(ABCF2P2 unprocessε chr7    | 72103181 | 72104209 | + | 0    | 0    |
| ENSG0000(AC007327.processed_ chr7   | 36228621 | 36228884 | - | 0    | 0    |
| ENSG0000(RP11-552J.unprocessε chrX  | 52583989 | 52586312 | + | 0    | 0    |
| ENSG0000(RP1-309H1 lincRNA chr6     | 22589137 | 22593833 | - | 0    | 0    |
| ENSG0000(WEE2-AS1 antisense chr7    | 1.42E+08 | 1.42E+08 | - | 0.39 | 1.14 |
| ENSG0000(RP11-319C processed_ chr1  | 42140635 | 42141391 | + | 0    | 0    |
| ENSG0000(RP11-282C lincRNA chr6     | 1.16E+08 | 1.16E+08 | - | 0    | 0    |
| ENSG0000(RP11-129J.lincRNA chr10    | 99526948 | 99528467 | + | 0    | 0    |
| ENSG0000(Z69666.2 antisense chr16   | 125737   | 127219   | + | 0    | 0    |
| ENSG0000(RP1-50A13 processed_ chrX  | 42150511 | 42150744 | - | 0    | 0    |
| ENSG0000(RP11-336N processed_ chr9  | 78180214 | 78180693 | - | 0    | 0.18 |
| ENSG0000(MRPL45P2 transcribed chr17 | 47450568 | 47492492 | - | 3.08 | 2.69 |
| ENSG0000(RP11-147I1 processed_ chr9 | 1011085  | 1011799  | + | 0    | 0    |
| ENSG0000(LINC00954 lincRNA chr2     | 19868860 | 19885047 | + | 0.24 | 0.14 |
| ENSG0000(LINC00266 lincRNA chrY     | 25378300 | 25394719 | - | 0    | 0    |
| ENSG0000(NLGN4Y-A antisense chrY    | 14793642 | 14804033 | - | 0    | 0    |
| ENSG0000(HCG22 lincRNA chr6         | 31053450 | 31059890 | + | 0    | 0.27 |
| ENSG0000(AC098784.unprocessε chr19  | 54703952 | 54704235 | + | 0    | 0    |
| ENSG0000(THRB-AS1 processed_ chr3   | 24494087 | 24681711 | + | 0    | 0    |
| ENSG0000(RP11-354K lincRNA chr1     | 2.12E+08 | 2.12E+08 | - | 0    | 0    |
| ENSG0000(RP1-223B1 lincRNA chr6     | 3594247  | 3624747  | - | 0    | 0    |
| ENSG0000(LINC01128 processed_ chr1  | 825138   | 859446   | + | 5.8  | 7.94 |
| ENSG0000(FAM207BP processed_ chr13  | 18697003 | 18697507 | + | 0    | 0    |
| ENSG0000(AP000473.lincRNA chr21     | 16630827 | 16640683 | + | 0    | 0    |
| ENSG0000(LINC01939 lincRNA chr2     | 900216   | 905451   | - | 0    | 0    |
| ENSG0000(RP11-253D lincRNA chr10    | 30553854 | 30554483 | - | 0    | 0    |
| ENSG0000(RP11-110G antisense chr8   | 51899325 | 51947173 | + | 3.33 | 1.59 |
| ENSG0000(AC073641.antisense chr2    | 2.24E+08 | 2.24E+08 | - | 0    | 0    |
| ENSG0000(MTCYBP42 processed_ chr7   | 22747675 | 22748804 | - | 0    | 0    |
| ENSG0000(RP11-211G antisense chr3   | 1.88E+08 | 1.88E+08 | + | 0    | 0    |
| ENSG0000(AC092628.unprocessε chr7   | 1.55E+08 | 1.55E+08 | + | 0    | 0    |
| ENSG0000(MRPS18CP processed_ chr22  | 44483495 | 44483717 | - | 0    | 0    |
| ENSG0000(HMGB3P4 processed_ chr13   | 99372173 | 99372686 | + | 0.29 | 0.32 |
| ENSG0000(RP4-705D1 processed_ chr20 | 16714844 | 16730948 | - | 0    | 0    |
| ENSG0000(PABPC1P1:processed_ chr9   | 17589161 | 17591318 | - | 0    | 0    |
| ENSG0000(LAMA5-AS.antisense chr20   | 62352995 | 62356480 | + | 0    | 0    |



|                                         |          |          |   |      |      |
|-----------------------------------------|----------|----------|---|------|------|
| ENSG0000(RP11-119H) transcribed chr4    | 1.13E+08 | 1.13E+08 | - | 0    | 0    |
| ENSG0000(MARK2P13) processed_ chr7      | 36109024 | 36110872 | - | 0    | 0    |
| ENSG0000(AK3P5) processed_ chr10        | 32944481 | 32944999 | + | 0    | 0    |
| ENSG0000(BACH1-IT2) lincRNA chr21       | 29370497 | 29373709 | + | 0.16 | 0    |
| ENSG0000(RP11-567G) processed_ chr1     | 2.4E+08  | 2.4E+08  | - | 0.02 | 0    |
| ENSG0000(RP1-305B1) processed_ chrX     | 1.32E+08 | 1.32E+08 | - | 0    | 0    |
| ENSG0000(RPSAP1) processed_ chr20       | 51130788 | 51131667 | - | 0    | 0    |
| ENSG0000(RP11-293F) unprocessed_ chr1   | 21411460 | 21413293 | - | 0.21 | 0.34 |
| ENSG0000(MIR4500H) lincRNA chr13        | 87427214 | 87671259 | - | 0    | 0    |
| ENSG0000(LAMTOR3F) processed_ chr13     | 36922539 | 36922908 | + | 0    | 0    |
| ENSG0000(RP11-344P) lincRNA chr1        | 1.21E+08 | 1.22E+08 | - | 0    | 0    |
| ENSG0000(RP11-234P) unprocessed_ chrX   | 51903338 | 51903850 | - | 0    | 0    |
| ENSG0000(TLK2P2) processed_ chr10       | 37818606 | 37820982 | - | 0.02 | 0.08 |
| ENSG0000(AC005077) transcribed chr7     | 76173733 | 76177205 | + | 0    | 0    |
| ENSG0000(RP4-781K5) antisense chr1      | 2.35E+08 | 2.35E+08 | + | 0.19 | 0.21 |
| ENSG0000(RP5-1014C) unprocessed_ chrX   | 1.5E+08  | 1.5E+08  | + | 0    | 0    |
| ENSG0000(RP11-249L) processed_ chr6     | 1.09E+08 | 1.09E+08 | - | 0    | 0    |
| ENSG0000(AC012123) antisense chr18      | 32769795 | 32774413 | + | 0    | 0    |
| ENSG0000(CT45A5) protein_co chrX        | 1.36E+08 | 1.36E+08 | - | 0    | 0    |
| ENSG0000(CBX3P6) processed_ chr2        | 1.55E+08 | 1.55E+08 | - | 0    | 0    |
| ENSG0000(RP4-784A1) antisense chr1      | 53288024 | 53289706 | + | 0    | 0    |
| ENSG0000(PIK3IP1-AS) antisense chr22    | 31292499 | 31338021 | + | 0.39 | 0    |
| ENSG0000(PCDH9-AS2) antisense chr13     | 66825169 | 66915031 | + | 0    | 0    |
| ENSG0000(RP11-112J) antisense chr9      | 35756712 | 35757940 | - | 0    | 0    |
| ENSG0000(RP11-467I) processed_ chr1     | 2.41E+08 | 2.41E+08 | - | 0    | 0    |
| ENSG0000(ATP5G2P4) processed_ chrX      | 42098754 | 42099173 | - | 0    | 0    |
| ENSG0000(AC105402) processed_ chr2      | 1.49E+08 | 1.49E+08 | - | 0    | 0    |
| ENSG0000(CDY12P) unprocessed_ chrY      | 22064698 | 22065712 | + | 0    | 0    |
| ENSG0000(MTCO3P4) unprocessed_ chr7     | 57191141 | 57191927 | + | 0    | 0    |
| ENSG0000(RP11-57H1) antisense chr1      | 95243167 | 95278940 | - | 0    | 0    |
| ENSG0000(NEGR1-IT1) sense_intronic chr1 | 71794232 | 71837012 | - | 0    | 0    |
| ENSG0000(RP3-433G1) processed_ chrX     | 1.48E+08 | 1.48E+08 | - | 0    | 0    |
| ENSG0000(USP17L30) protein_co chr4      | 9363129  | 9364721  | + | 0    | 0    |
| ENSG0000(AC104653) lincRNA chr2         | 1.14E+08 | 1.14E+08 | - | 0.22 | 0.24 |
| ENSG0000(RP11-565H) processed_ chr10    | 21217891 | 21218279 | + | 0    | 0    |
| ENSG0000(RPL23AP12) processed_ chr21    | 39127568 | 39128040 | + | 0    | 0    |
| ENSG0000(RP11-91I2) lincRNA chr8        | 60631509 | 60636271 | - | 0.08 | 0.03 |
| ENSG0000(RP11-404F) antisense chr1      | 1.61E+08 | 1.61E+08 | + | 3.03 | 2.07 |
| ENSG0000(MYLKP1) unprocessed_ chr3      | 75328549 | 75339071 | - | 0    | 0    |
| ENSG0000(COX4I1P2) processed_ chr13     | 45671845 | 45672391 | + | 0    | 0    |
| ENSG0000(AC096664) processed_ chr2      | 63717122 | 63717899 | + | 0    | 0    |
| ENSG0000(AC012307) lincRNA chr2         | 96145602 | 96147012 | - | 0    | 0    |
| ENSG0000(AC090954) processed_ chr3      | 15131848 | 15132208 | - | 0    | 0    |
| ENSG0000(AC010745) lincRNA chr2         | 16224047 | 16229140 | + | 0    | 0    |
| ENSG0000(RP11-473E) lincRNA chr9        | 1.35E+08 | 1.35E+08 | + | 0    | 0    |

|                                      |          |          |   |      |      |
|--------------------------------------|----------|----------|---|------|------|
| ENSG0000( SEPT7-AS1 lincRNA chr7     | 35751856 | 35800616 | - | 0.06 | 0.05 |
| ENSG0000( RP11-439E processed_ chr1  | 2.47E+08 | 2.47E+08 | - | 0    | 0    |
| ENSG0000( C1CP9 processed_ chr10     | 38452987 | 38455365 | - | 0    | 0    |
| ENSG0000( RPL23AP2 processed_ chr2   | 2.32E+08 | 2.32E+08 | + | 0    | 0    |
| ENSG0000( RP11-290D lincRNA chr13    | 45350323 | 45351350 | + | 0    | 0    |
| ENSG0000( EE1DP1 processed_ chr19    | 14070342 | 14071237 | + | 0    | 0.08 |
| ENSG0000( LINC01428 lincRNA chr20    | 7146467  | 7254202  | - | 0    | 0    |
| ENSG0000( UBAC2-AS1 lincRNA chr13    | 99196377 | 99200710 | - | 0.19 | 0.11 |
| ENSG0000( TTTY21 lincRNA chrY        | 9717653  | 9721296  | - | 0    | 0    |
| ENSG0000( CTD-2021A processed_ chr7  | 51386363 | 51387101 | - | 0.88 | 0.83 |
| ENSG0000( MTCO1P4 unprocessε chr2    | 1.17E+08 | 1.17E+08 | + | 0    | 0    |
| ENSG0000( HMGN2P3 processed_ chr11   | 13610363 | 13610771 | - | 0    | 0    |
| ENSG0000( ST6GALNA processed_ chr2   | 84039885 | 84040720 | - | 0    | 0    |
| ENSG0000( RASA4CP transcribed chr7   | 44026951 | 44041892 | - | 1.12 | 0.41 |
| ENSG0000( RP13-216E lincRNA chrX     | 73948973 | 73949558 | + | 0.35 | 0.19 |
| ENSG0000( LINC01803 lincRNA chr2     | 2.2E+08  | 2.2E+08  | - | 0    | 0    |
| ENSG0000( OR1H1P unprocessε chr9     | 1.23E+08 | 1.23E+08 | + | 4.08 | 4.49 |
| ENSG0000( OR7E128P unprocessε chr11  | 71893410 | 71894433 | + | 0    | 0    |
| ENSG0000( RP11-544M antisense chr1   | 1.61E+08 | 1.61E+08 | + | 0.22 | 0    |
| ENSG0000( LINC01344 lincRNA chr1     | 1.82E+08 | 1.82E+08 | - | 0    | 0.02 |
| ENSG0000( AC097381. lincRNA chr4     | 7939001  | 7940296  | + | 0.05 | 0.3  |
| ENSG0000( RP13-210D unprocessε chrX  | 1.35E+08 | 1.35E+08 | + | 0    | 0    |
| ENSG0000( AP000355. antisense chr22  | 24516508 | 24518386 | + | 0    | 0    |
| ENSG0000( AC016722. antisense chr2   | 46899275 | 46908678 | + | 0    | 0    |
| ENSG0000( TSPY3 protein_co chrY      | 9398421  | 9401223  | + | 0    | 0    |
| ENSG0000( KPNA2P2 processed_ chr7    | 88564793 | 88566281 | - | 0    | 0    |
| ENSG0000( RPS13P2 processed_ chr1    | 52772194 | 52772648 | - | 0    | 0    |
| ENSG0000( MTCO1P3 processed_ chr21   | 45376191 | 45376382 | - | 0    | 0    |
| ENSG0000( RP11-268G lincRNA chrX     | 27174920 | 27398997 | - | 0    | 0    |
| ENSG0000( RP11-189G processed_ chr20 | 22960534 | 22966063 | - | 0    | 0    |
| ENSG0000( AC005539. processed_ chr2  | 1.58E+08 | 1.58E+08 | - | 0    | 0    |
| ENSG0000( SNRPD2P1 processed_ chr10  | 89978717 | 89979070 | + | 0    | 0    |
| ENSG0000( AKT3-IT1 sense_intrε chr1  | 2.44E+08 | 2.44E+08 | - | 0    | 0    |
| ENSG0000( RP11-348A unprocessε chr1  | 40938104 | 40939763 | - | 0    | 0    |
| ENSG0000( UBE3AP2 processed_ chr21   | 31060600 | 31063168 | - | 0    | 0    |
| ENSG0000( RP5-1053E processed_ chr1  | 28109739 | 28110298 | + | 0    | 0    |
| ENSG0000( AC004485. antisense chr7   | 24196662 | 24255719 | - | 0    | 0    |
| ENSG0000( CLUHP2 unprocessε chrY     | 18280178 | 18284761 | + | 0    | 0    |
| ENSG0000( SLC25A6P5 processed_ chr9  | 1.06E+08 | 1.06E+08 | + | 0    | 0    |
| ENSG0000( UGT1A12P unprocessε chr2   | 2.34E+08 | 2.34E+08 | + | 0    | 0    |
| ENSG0000( AC023137. lincRNA chr2     | 20451042 | 20452947 | + | 0    | 0    |
| ENSG0000( RP11-336A lincRNA chr10    | 5616862  | 5618161  | - | 0    | 0    |
| ENSG0000( LINC02041 lincRNA chr3     | 1.87E+08 | 1.87E+08 | + | 0    | 0    |
| ENSG0000( AC006026. processed_ chr7  | 23655682 | 23655861 | + | 0    | 0    |
| ENSG0000( RP11-452J processed_ chr1  | 2.47E+08 | 2.47E+08 | - | 0    | 0    |

|                                      |          |          |   |      |      |
|--------------------------------------|----------|----------|---|------|------|
| ENSG0000(SATB1-AS1 processed_ chr3   | 18445024 | 18920401 | + | 0    | 0    |
| ENSG0000(RP11-23J9.unprocessε chr9   | 97386240 | 97396112 | - | 0    | 0    |
| ENSG0000(PIGPP3 processed_ chr20     | 33965162 | 33965576 | + | 0    | 0    |
| ENSG0000(RP5-1121H lincRNA chr20     | 42014034 | 42015478 | - | 0    | 0    |
| ENSG0000(OR2A9P transcribec chr7     | 1.44E+08 | 1.44E+08 | + | 0.64 | 0.42 |
| ENSG0000(AP000282.lincRNA chr21      | 32958888 | 32960566 | + | 0    | 0    |
| ENSG0000(HCG23 antisense chr6        | 32390510 | 32393686 | + | 0    | 0    |
| ENSG0000(OR7E93P unprocessε chr3     | 1.26E+08 | 1.26E+08 | + | 0    | 0    |
| ENSG0000(RPSAP60 processed_ chrX     | 1.52E+08 | 1.52E+08 | - | 0    | 0    |
| ENSG0000(HOMER2P1 processed_ chr14   | 1.06E+08 | 1.06E+08 | - | 0    | 0    |
| ENSG0000(AC096554.lincRNA chr2       | 1.04E+08 | 1.04E+08 | - | 0    | 0    |
| ENSG0000(UBTFL6 unprocessε chr2      | 97636780 | 97637803 | - | 0    | 0    |
| ENSG0000(RP11-286B lincRNA chr1      | 95510116 | 95782342 | + | 0    | 0    |
| ENSG0000(AC009955.antisense chr2     | 2.2E+08  | 2.2E+08  | - | 0    | 0    |
| ENSG0000(AC006483.processed_ chr7    | 5560743  | 5561055  | + | 0    | 0    |
| ENSG0000(SUMO2P8 processed_ chr6     | 1.09E+08 | 1.09E+08 | - | 0    | 0    |
| ENSG0000(CTD-2501B processed_ chr17  | 63471604 | 63472093 | + | 0    | 0    |
| ENSG0000(LINC01205 lincRNA chr3      | 1.09E+08 | 1.09E+08 | + | 0.04 | 0    |
| ENSG0000(RP11-364L.processed_ chr4   | 1.43E+08 | 1.43E+08 | - | 0    | 0    |
| ENSG0000(RP11-107G unprocessε chr1   | 2.47E+08 | 2.47E+08 | - | 0    | 0    |
| ENSG0000(SLC47A1P1 transcribec chr17 | 19579943 | 19596058 | + | 0    | 0    |
| ENSG0000(RP11-101E processed_ chr8   | 46784800 | 46785928 | + | 0    | 0    |
| ENSG0000(TRDD3 TR_D_geneε chr14      | 22449113 | 22449125 | + | 0    | 0    |
| ENSG0000(RP13-228J1 processed_ chrX  | 1.55E+08 | 1.55E+08 | + | 0    | 0    |
| ENSG0000(RP4-677H1 antisense chr1    | 70218589 | 70221023 | - | 0    | 0    |
| ENSG0000(RPL5P32 processed_ chr15    | 27895704 | 27896582 | + | 0    | 0    |
| ENSG0000(MTND1P9 processed_ chr20    | 57357426 | 57358369 | - | 0    | 0    |
| ENSG0000(RP1-186E2 processed_ chr10  | 10776223 | 10776661 | - | 0    | 0    |
| ENSG0000(RP11-697E transcribec chr15 | 90275129 | 90275716 | + | 0.12 | 0.01 |
| ENSG0000(AC068490.lincRNA chr2       | 21942178 | 21965680 | - | 0    | 0    |
| ENSG0000(SEPT7P8 processed_ chr19    | 53772506 | 53773280 | - | 0    | 0    |
| ENSG0000(ACTBP14 processed_ chr10    | 69022778 | 69023866 | + | 0    | 0    |
| ENSG0000(RP11-666A unprocessε chr1   | 1.44E+08 | 1.44E+08 | - | 0    | 0    |
| ENSG0000(HNF4A-AS1 antisense chr20   | 44372746 | 44395706 | - | 0    | 0    |
| ENSG0000(EXOSC3P1 processed_ chr21   | 32496812 | 32497311 | + | 0.32 | 0    |
| ENSG0000(TMPRSS11 transcribec chr4   | 67991684 | 68015768 | - | 0    | 0    |
| ENSG0000(RP5-979D1 processed_ chr1   | 23140325 | 23141142 | + | 0    | 0    |
| ENSG0000(LINC01038 lincRNA chr13     | 79804418 | 79805685 | + | 0    | 0    |
| ENSG0000(GS1-542M.lincRNA chrX       | 8863861  | 8867601  | - | 0    | 0    |
| ENSG0000(AC083939.processed_ chr2    | 35471716 | 35471841 | + | 0    | 0    |
| ENSG0000(RPL30P13 processed_ chr12   | 40068243 | 40068590 | - | 0    | 0    |
| ENSG0000(RP11-265D transcribec chrX  | 1.35E+08 | 1.35E+08 | + | 0    | 0    |
| ENSG0000(RP11-224C processed_ chr1   | 2.18E+08 | 2.18E+08 | - | 0    | 0    |
| ENSG0000(LINC01277 lincRNA chr6      | 1.43E+08 | 1.43E+08 | - | 0    | 0    |
| ENSG0000(PMS2P7 unprocessε chr7      | 73005541 | 73021103 | + | 0.82 | 0.93 |

|                                        |          |          |   |      |      |
|----------------------------------------|----------|----------|---|------|------|
| ENSG0000(RP11-8811)sense_intronic chr9 | 68426843 | 68429369 | + | 0    | 0    |
| ENSG0000(AKR7A2P1)processed chr1       | 1.13E+08 | 1.13E+08 | + | 0    | 0    |
| ENSG0000(AL591893)antisense chr1       | 1.52E+08 | 1.52E+08 | + | 0.52 | 0.6  |
| ENSG0000(RP11-553N)processed chr1      | 2.42E+08 | 2.42E+08 | + | 0    | 0    |
| ENSG0000(AC067945)processed chr2       | 1.91E+08 | 1.91E+08 | - | 0    | 0    |
| ENSG0000(AP001595)lincRNA chr21        | 26349780 | 26350634 | - | 0.29 | 0    |
| ENSG0000(HSFY1P1)transcribed chr22     | 16827474 | 16829335 | + | 0    | 0    |
| ENSG0000(KRT223P)transcribed chr17     | 40717235 | 40721932 | - | 0    | 0    |
| ENSG0000(CDCA4P1)processed chr9        | 14593577 | 14594200 | + | 0    | 0    |
| ENSG0000(RP11-402P)processed chrX      | 71848775 | 71849004 | + | 0    | 0    |
| ENSG0000(MTCO1P25)unprocessed chr7     | 69331835 | 69333633 | - | 0    | 0    |
| ENSG0000(RP11-91A1)processed chr1      | 51980473 | 51980814 | + | 0    | 0    |
| ENSG0000(SPRR2C)unprocessed chr1       | 1.53E+08 | 1.53E+08 | - | 0    | 0    |
| ENSG0000(VDAC1P8)transcribed chr6      | 1.43E+08 | 1.44E+08 | + | 0.23 | 0.33 |
| ENSG0000(RP11-272G)processed chrX      | 53807776 | 53808623 | + | 0    | 0    |
| ENSG0000(RP1-232N1)antisense chr20     | 42685404 | 42688562 | + | 0    | 0    |
| ENSG0000(AC091729)antisense chr7       | 1160374  | 1165267  | + | 3.36 | 3.13 |
| ENSG0000(RP11-266K)antisense chr1      | 31333067 | 31346799 | - | 0    | 0    |
| ENSG0000(HMGN1P2)processed chr21       | 31706555 | 31706864 | + | 0    | 0    |
| ENSG0000(AF127577)antisense chr21      | 14961309 | 14964233 | + | 0    | 0    |
| ENSG0000(DUTP1)processed chr3          | 1.25E+08 | 1.25E+08 | + | 0    | 0    |
| ENSG0000(LINC01788)lincRNA chr1        | 70706453 | 70786468 | + | 0    | 0    |
| ENSG0000(RP11-386I2)transcribed chr1   | 92930696 | 92934098 | + | 0    | 0    |
| ENSG0000(RPS29P14)processed chr7       | 33036212 | 33036382 | - | 1.63 | 0    |
| ENSG0000(AC020571)antisense chr2       | 1.96E+08 | 1.96E+08 | + | 0.39 | 0.18 |
| ENSG0000(RPS3AP54)processed chr9       | 6662424  | 6663792  | + | 0    | 0    |
| ENSG0000(RP11-20P5)processed chr9      | 28148211 | 28149236 | + | 0    | 0    |
| ENSG0000(TRBV23OR)TR_V_gene chr9       | 33638035 | 33638494 | + | 0    | 0    |
| ENSG0000(RP11-746P)processed chr7      | 65247608 | 65247758 | - | 0    | 0    |
| ENSG0000(RP11-80I15)antisense chr9     | 95113708 | 95114461 | + | 0    | 0.15 |
| ENSG0000(AC096649)lincRNA chr2         | 1.75E+08 | 1.75E+08 | + | 0    | 0    |
| ENSG0000(RP11-91I11)processed chr1     | 91600171 | 91600321 | + | 0    | 0    |
| ENSG0000(TMPOP1)processed chr6         | 30466452 | 30467994 | + | 0    | 0    |
| ENSG0000(HMGN2P2)processed chr3        | 40699066 | 40699338 | - | 0    | 0    |
| ENSG0000(CR848007)processed chr9       | 42959280 | 42960066 | - | 0    | 0    |
| ENSG0000(MTCO3P3C)unprocessed chr9     | 31505946 | 31506615 | + | 0    | 0    |
| ENSG0000(LINC01165)antisense chr10     | 1.33E+08 | 1.33E+08 | - | 0.11 | 0.04 |
| ENSG0000(OR5AW1P)processed chrX        | 1.31E+08 | 1.31E+08 | - | 0    | 0    |
| ENSG0000(PSMA6P2)processed chrX        | 12825840 | 12826833 | + | 0    | 0    |
| ENSG0000(LINC01548)lincRNA chr21       | 33165470 | 33170649 | - | 0    | 0    |
| ENSG0000(RP11-32P2)processed chr2      | 15397435 | 15397782 | - | 0    | 0    |
| ENSG0000(MTND1P1C)processed chr22      | 36178554 | 36179385 | + | 0    | 0    |
| ENSG0000(ANKRD20A)transcribed chr2     | 94811046 | 94857282 | - | 0.03 | 0    |
| ENSG0000(RP1-232L2)processed chrX      | 1.02E+08 | 1.02E+08 | - | 0    | 0    |
| ENSG0000(HSPA8P8)processed chr7        | 10451311 | 10453252 | + | 0    | 0    |

|                               |       |          |          |   |         |         |
|-------------------------------|-------|----------|----------|---|---------|---------|
| ENSG0000(IGHV3-47 IG_V_pseu   | chr14 | 1.07E+08 | 1.07E+08 | - | 0       | 0       |
| ENSG0000(OR51AB1P unprocessε  | chr11 | 5291761  | 5292380  | - | 0       | 0       |
| ENSG0000(CALM2P2 processed_   | chr10 | 70163685 | 70164124 | + | 0       | 0       |
| ENSG0000(ELOCP20 unprocessε   | chr1  | 1.16E+08 | 1.16E+08 | + | 0       | 0       |
| ENSG0000(RP11-360P lincRNA    | chr3  | 1.79E+08 | 1.79E+08 | - | 0       | 0       |
| ENSG0000(YY1P2 processed_     | chr2  | 1.39E+08 | 1.39E+08 | + | 0       | 0       |
| ENSG0000(ASTN2-AS1 antisense  | chr9  | 1.17E+08 | 1.17E+08 | + | 0       | 0       |
| ENSG0000(BTBD6P1 processed_   | chr1  | 23901471 | 23902737 | - | 0       | 0       |
| ENSG0000(ABHD17AP processed_  | chr22 | 20667836 | 20670984 | - | 0       | 0       |
| ENSG0000(MEOX2-AS lincRNA     | chr7  | 15688378 | 15695491 | + | 0       | 0       |
| ENSG0000(RP11-439K antisense  | chr9  | 83219331 | 83234242 | + | 0.18    | 0.2     |
| ENSG0000(AC006355. processed_ | chr7  | 79124739 | 79125750 | + | 0       | 0       |
| ENSG0000(MED4-AS1 antisense   | chr13 | 48077137 | 48079991 | + | 0       | 0       |
| ENSG0000(RP11-690C unprocessε | chr1  | 2.47E+08 | 2.47E+08 | - | 0       | 0       |
| ENSG0000(RP11-417B processed_ | chr9  | 1.24E+08 | 1.24E+08 | + | 0       | 0       |
| ENSG0000(RP11-20J1 lincRNA    | chr10 | 44282926 | 44293709 | - | 0       | 0.36    |
| ENSG0000(RPL41 protein_co     | chr12 | 56116586 | 56117943 | + | 3105.64 | 3115.17 |
| ENSG0000(AC068491. lincRNA    | chr2  | 1.11E+08 | 1.11E+08 | + | 0       | 0       |
| ENSG0000(CTB-63M2 processed_  | chr5  | 1.66E+08 | 1.66E+08 | + | 0       | 0       |
| ENSG0000(CYCSP4 processed_    | chr1  | 2.02E+08 | 2.02E+08 | - | 0       | 0       |
| ENSG0000(AGBL5-IT1 sense_intr | chr2  | 27061038 | 27061815 | + | 0       | 0       |
| ENSG0000(VIM-AS1 antisense    | chr10 | 17214239 | 17229985 | - | 5.44    | 4.95    |
| ENSG0000(AC007038. antisense  | chr2  | 2.1E+08  | 2.1E+08  | + | 0.15    | 0.08    |
| ENSG0000(ACTG1P2 processed_   | chrY  | 17757001 | 17758125 | - | 0       | 0       |
| ENSG0000(AC016710. lincRNA    | chr2  | 1.39E+08 | 1.39E+08 | + | 0       | 0       |
| ENSG0000(EIF4A1P10 processed_ | chrX  | 92113246 | 92114461 | - | 0       | 0       |
| ENSG0000(RPS7P4 processed_    | chr1  | 68242474 | 68243055 | - | 0       | 0       |
| ENSG0000(CDY6P unprocessε     | chrY  | 17882099 | 17883708 | - | 0       | 0       |
| ENSG0000(CCDC26 lincRNA       | chr8  | 1.29E+08 | 1.3E+08  | - | 0       | 0       |
| ENSG0000(HCG4P8 unprocessε    | chr6  | 29827385 | 29828364 | - | 0       | 0.07    |
| ENSG0000(AC009480. processed_ | chr2  | 1.48E+08 | 1.48E+08 | + | 0       | 0       |
| ENSG0000(ACTBP1 processed_    | chrX  | 46288016 | 46289128 | - | 0       | 0       |
| ENSG0000(SNX18P4 processed_   | chr9  | 66082350 | 66083187 | - | 0       | 0       |
| ENSG0000(SMPD4P2 unprocessε   | chr13 | 19152567 | 19171194 | - | 0       | 0       |
| ENSG0000(CRYGEP transcribec   | chr2  | 2.08E+08 | 2.08E+08 | - | 0       | 0       |
| ENSG0000(RP11-348F antisense  | chrX  | 51356944 | 51396462 | - | 0       | 0       |
| ENSG0000(ANKRD10-l sense_intr | chr13 | 1.11E+08 | 1.11E+08 | - | 2.88    | 1.32    |
| ENSG0000(EPHA1-AS1 antisense  | chr7  | 1.43E+08 | 1.44E+08 | + | 0.08    | 0.05    |
| ENSG0000(KCNQ5-AS: antisense  | chr6  | 73134803 | 73143514 | - | 0       | 0       |
| ENSG0000(LINC02038 lincRNA    | chr3  | 1.94E+08 | 1.94E+08 | - | 0       | 0       |
| ENSG0000(RP11-250H processed_ | chr9  | 64462819 | 64463196 | + | 0.16    | 0       |
| ENSG0000(TSPY23P unprocessε   | chrY  | 22183850 | 22186021 | + | 0       | 0       |
| ENSG0000(AC009229. lincRNA    | chr2  | 38132637 | 38138946 | - | 0       | 0       |
| ENSG0000(TCP1P1 unprocessε    | chr7  | 42794906 | 42802494 | + | 0       | 0       |
| ENSG0000(RP11-84D1 antisense  | chr1  | 24961345 | 24963097 | + | 0       | 0       |

|                                       |          |          |   |      |      |
|---------------------------------------|----------|----------|---|------|------|
| ENSG0000(NAP1L1P2 processed_ chrY     | 2929001  | 2931120  | - | 0    | 0    |
| ENSG0000(GDI2P1 processed_ chr7       | 48902556 | 48903891 | - | 0    | 0    |
| ENSG0000(RP11-73M1 antisense_ chr1    | 31571585 | 31575573 | - | 0    | 0    |
| ENSG0000(RPL19P20 processed_ chrX     | 44649129 | 44649719 | + | 0    | 0    |
| ENSG0000(RP11-24711 processed_ chr22  | 31538352 | 31538589 | - | 0    | 0    |
| ENSG0000(AC073065. processed_ chr2    | 2.28E+08 | 2.28E+08 | + | 0.04 | 0    |
| ENSG0000(AC108059. processed_ chr2    | 1.28E+08 | 1.28E+08 | - | 0    | 0    |
| ENSG0000(LINC00382 lincRNA_ chr13     | 79872586 | 79917944 | + | 0    | 0    |
| ENSG0000(AC008154. lincRNA_ chr7      | 1.34E+08 | 1.34E+08 | - | 0    | 0    |
| ENSG0000(AC069513. lincRNA_ chr3      | 1.96E+08 | 1.96E+08 | - | 0.22 | 0.15 |
| ENSG0000(GS1-124K5 transcribed_ chr7  | 66526088 | 66592397 | - | 7.76 | 8.88 |
| ENSG0000(MRPS16P1 processed_ chr8     | 91917507 | 91917918 | + | 0    | 0    |
| ENSG0000(PGA4 protein_co_ chr11       | 61222216 | 61231927 | + | 0.29 | 0.2  |
| ENSG0000(ATP5HP2 processed_ chr9      | 2900320  | 2900804  | - | 0    | 0    |
| ENSG0000(ADAM1A unitary_ps_ chr12     | 1.12E+08 | 1.12E+08 | + | 0    | 0    |
| ENSG0000(RP4-553F4 antisense_ chr20   | 33728931 | 33731828 | - | 0    | 0    |
| ENSG0000(RP11-390B antisense_ chr10   | 17695709 | 17700232 | - | 0    | 0    |
| ENSG0000(RP11-168C antisense_ chr1    | 2.01E+08 | 2.01E+08 | + | 0.02 | 0    |
| ENSG0000(AC004870. lincRNA_ chr7      | 47000620 | 47079128 | - | 0    | 0    |
| ENSG0000(AC009495. lincRNA_ chr2      | 1.66E+08 | 1.66E+08 | - | 0    | 0    |
| ENSG0000(RP11-775D antisense_ chr7    | 1.3E+08  | 1.3E+08  | + | 0    | 0    |
| ENSG0000(RPS15AP28 processed_ chr10   | 69300432 | 69300817 | - | 0    | 0    |
| ENSG0000(RP5-827O9 lincRNA_ chr1      | 90510910 | 90533472 | - | 0    | 0    |
| ENSG0000(AC103564. lincRNA_ chr2      | 1.32E+08 | 1.32E+08 | - | 0    | 0.14 |
| ENSG0000(PTGES3P3 processed_ chr4     | 1.7E+08  | 1.7E+08  | - | 0    | 0    |
| ENSG0000(LINC00200 lincRNA_ chr10     | 1159768  | 1164672  | + | 0    | 0    |
| ENSG0000(RP11-397C lincRNA_ chr10     | 11030334 | 11030868 | - | 0    | 0    |
| ENSG0000(SERPINH1P processed_ chr9    | 34318407 | 34319655 | + | 0    | 0    |
| ENSG0000(RBMY2NP unprocessed_ chrY    | 9831418  | 9846696  | - | 0    | 0    |
| ENSG0000(AC073987. lincRNA_ chr2      | 1.03E+08 | 1.03E+08 | - | 0    | 0    |
| ENSG0000(KCTD9P6 processed_ chr8      | 31219894 | 31220984 | - | 0    | 0    |
| ENSG0000(RP11-561C transcribed_ chr15 | 85205440 | 85234795 | - | 2.64 | 3.43 |
| ENSG0000(RP1-118J2: unprocessed_ chr1 | 39795843 | 39795996 | - | 0    | 0    |
| ENSG0000(LINC00242 lincRNA_ chr6      | 1.7E+08  | 1.7E+08  | - | 0.14 | 0.2  |
| ENSG0000(CYCSP11 processed_ chr3      | 10057973 | 10058287 | - | 0    | 0    |
| ENSG0000(RP11-47A1 processed_ chr1    | 2E+08    | 2E+08    | - | 0    | 0    |
| ENSG0000(HNRNPA1P processed_ chr2     | 63751697 | 63752630 | - | 0    | 0    |
| ENSG0000(KRT18P4 processed_ chr20     | 49956745 | 49958032 | + | 0    | 0.1  |
| ENSG0000(AC105398. antisense_ chr2    | 29096843 | 29097525 | - | 0    | 0    |
| ENSG0000(RP11-5P4.3 lincRNA_ chr1     | 63078081 | 63079031 | - | 0    | 0    |
| ENSG0000(BTF3L4P4 processed_ chr4     | 1.69E+08 | 1.69E+08 | - | 0    | 0    |
| ENSG0000(RP11-38L1. lincRNA_ chr10    | 46597918 | 46612154 | + | 0.59 | 1.06 |
| ENSG0000(LINC00582 antisense_ chr1    | 2.32E+08 | 2.32E+08 | - | 0    | 0    |
| ENSG0000(AC022201. antisense_ chr2    | 70402934 | 70422678 | + | 0    | 0    |
| ENSG0000(MT1P3 processed_ chr20       | 35218009 | 35218185 | + | 0    | 0    |

|                                     |          |          |   |      |      |
|-------------------------------------|----------|----------|---|------|------|
| ENSG0000(FEM1AP1 processed_ chr21   | 13762338 | 13764332 | + | 0    | 0    |
| ENSG0000(KRT18P53 processed_ chrX   | 545236   | 545352   | - | 0    | 0    |
| ENSG0000(KRT18P53 processed_ chrY   | 545236   | 545352   | - | 0    | 0    |
| ENSG0000(CTD-2320J sense_ over chr7 | 12654179 | 12654985 | + | 0    | 0    |
| ENSG0000(RBMY1KP unprocessε chrY    | 22209331 | 22216580 | + | 0    | 0    |
| ENSG0000(RPL37P18 processed_ chr10  | 34663859 | 34664101 | - | 0    | 0    |
| ENSG0000(TTTY10 lincRNA chrY        | 20465668 | 20519228 | - | 0    | 0.59 |
| ENSG0000(HMGN1P3 processed_ chrX    | 1.55E+08 | 1.55E+08 | - | 0    | 0    |
| ENSG0000(PPP1R12BF unprocessε chrY  | 26277923 | 26354418 | - | 0    | 0    |
| ENSG0000(RP11-223J unprocessε chr1  | 23670294 | 23680259 | + | 0    | 0    |
| ENSG0000(LINC00710 processed_ chr10 | 10917880 | 10952234 | - | 0    | 0    |
| ENSG0000(PNPT1P1 processed_ chr3    | 3981981  | 3984295  | - | 0    | 0    |
| ENSG0000(RP5-1111A antisense chr1   | 2.16E+08 | 2.16E+08 | + | 0    | 0    |
| ENSG0000(LINC01981 lincRNA chr3     | 27830888 | 27834136 | - | 0    | 0    |
| ENSG0000(RP11-542K antisense chr9   | 1.22E+08 | 1.22E+08 | + | 0.7  | 1.55 |
| ENSG0000(LINC00377 lincRNA chr13    | 81043670 | 81044442 | + | 0    | 0    |
| ENSG0000(RP11-492N processed_ chr1  | 26640377 | 26640614 | - | 0    | 0    |
| ENSG0000(WBP2P1 processed_ chr18    | 25016434 | 25017204 | - | 0    | 0    |
| ENSG0000(LINC00446 lincRNA chr13    | 78012883 | 78053595 | + | 0    | 0    |
| ENSG0000(USP9YP31 unprocessε chrY   | 24081704 | 24090346 | - | 0    | 0    |
| ENSG0000(HNRNPA1F processed_ chr7   | 84983556 | 84984506 | + | 0    | 0    |
| ENSG0000(OR8C1P unprocessε chr11    | 1.24E+08 | 1.24E+08 | - | 0    | 0    |
| ENSG0000(RP11-407H lincRNA chr1     | 2.48E+08 | 2.48E+08 | - | 0    | 0    |
| ENSG0000(ST13P13 processed_ chr10   | 1.03E+08 | 1.03E+08 | + | 0    | 0.06 |
| ENSG0000(RP11-229P antisense chr9   | 1.37E+08 | 1.37E+08 | + | 0    | 0    |
| ENSG0000(RP11-552D antisense chr1   | 2.12E+08 | 2.12E+08 | + | 0    | 0    |
| ENSG0000(LRRC37A12 unprocessε chr1  | 32423214 | 32426789 | - | 0    | 0    |
| ENSG0000(RP11-227H antisense chr10  | 69215333 | 69232490 | - | 0    | 0    |
| ENSG0000(RP4-726N1 antisense chr20  | 18059493 | 18071008 | + | 0    | 0    |
| ENSG0000(AC004691. antisense chr7   | 30796691 | 30803410 | - | 0    | 0    |
| ENSG0000(POM121L8 processed_ chr22  | 21282881 | 21284161 | + | 0    | 0    |
| ENSG0000(AC072062. antisense chr2   | 2.15E+08 | 2.15E+08 | + | 0.18 | 0.23 |
| ENSG0000(PES1P2 processed_ chr9     | 13986175 | 13987909 | + | 0    | 0    |
| ENSG0000(RP11-298A lincRNA chrX     | 1.41E+08 | 1.41E+08 | + | 0    | 0    |
| ENSG0000(AC091493. lincRNA chr3     | 16687986 | 16697479 | - | 0    | 0    |
| ENSG0000(RP11-498J antisense chr10  | 1.19E+08 | 1.19E+08 | - | 0    | 0    |
| ENSG0000(RP11-104G processed_ chr9  | 39809562 | 39810019 | + | 0.51 | 0.37 |
| ENSG0000(XXbac-BPG lincRNA chr6     | 29497509 | 29510556 | + | 0    | 0    |
| ENSG0000(LL22NC03- lincRNA chr22    | 48141542 | 48143229 | + | 0    | 0    |
| ENSG0000(REV3L-IT1 sense_intrε chr6 | 1.11E+08 | 1.11E+08 | - | 0    | 0    |
| ENSG0000(RP11-483F antisense chr10  | 99651989 | 99653905 | - | 0    | 0.38 |
| ENSG0000(EEF1DP6 processed_ chr1    | 4175528  | 4175899  | - | 0    | 0    |
| ENSG0000(GPR53P unprocessε chr6     | 29537704 | 29538787 | - | 0    | 0    |
| ENSG0000(RP1-40E16 lincRNA chr6     | 3055890  | 3056761  | + | 0    | 0    |
| ENSG0000(RP5-1125N antisense chr1   | 1.11E+08 | 1.11E+08 | - | 0    | 0    |

|                                    |       |          |          |   |      |      |
|------------------------------------|-------|----------|----------|---|------|------|
| ENSG0000(LA16c-4G1 unprocessed)    | chr22 | 15901791 | 15901911 | + | 0    | 0    |
| ENSG0000(FABP5P4 processed)        | chr13 | 92180715 | 92180885 | - | 0    | 0    |
| ENSG0000(RP11-1E11 processed)      | chr9  | 88187735 | 88190202 | - | 0    | 0    |
| ENSG0000(AP000431. lincRNA)        | chr21 | 19130523 | 19134423 | + | 0    | 0    |
| ENSG0000(RP4-580N2 lincRNA)        | chr1  | 2.36E+08 | 2.36E+08 | - | 0    | 0    |
| ENSG0000(RFPL4AL1 protein_coding)  | chr19 | 55769141 | 55773179 | + | 0    | 0    |
| ENSG0000(RP5-1044H antisense)      | chr1  | 65279456 | 65306521 | - | 0    | 0    |
| ENSG0000(RP11-540H lincRNA)        | chr9  | 1.07E+08 | 1.07E+08 | - | 0    | 0    |
| ENSG0000(TUBB8P1 processed)        | chr9  | 21811621 | 21812347 | - | 0    | 0    |
| ENSG0000(RP4-583P1 antisense)      | chr20 | 63744689 | 63745958 | + | 0.8  | 0    |
| ENSG0000(RP5-905H7 lincRNA)        | chr7  | 63354457 | 63359306 | + | 0    | 0    |
| ENSG0000(TAF9P2 processed)         | chrY  | 18276607 | 18277495 | - | 0    | 0    |
| ENSG0000(PPIAP25 processed)        | chr13 | 45436121 | 45436660 | + | 0    | 0    |
| ENSG0000(RP11-431K processed)      | chr1  | 8189824  | 8192770  | + | 0    | 0    |
| ENSG0000(AP001464. lincRNA)        | chr21 | 12999676 | 13016692 | - | 0    | 0    |
| ENSG0000(LINC00459 lincRNA)        | chr13 | 62323657 | 62328833 | + | 0    | 0    |
| ENSG0000(AC010084. lincRNA)        | chrY  | 4036497  | 4100320  | + | 0.38 | 0.99 |
| ENSG0000(RP11-452B lincRNA)        | chr13 | 81250438 | 81302407 | + | 0    | 0    |
| ENSG0000(RPP40P1 processed)        | chrX  | 25591353 | 25591808 | - | 0    | 0    |
| ENSG0000(RP11-475I2 lincRNA)       | chr9  | 42579414 | 42586534 | - | 0    | 0    |
| ENSG0000(RP11-470P antisense)      | chr9  | 69472466 | 69494513 | + | 0    | 0    |
| ENSG0000(RP3-425P1 antisense)      | chr6  | 25041839 | 25056664 | + | 0    | 0    |
| ENSG0000(ORM1 protein_coding)      | chr9  | 1.14E+08 | 1.14E+08 | + | 0    | 0    |
| ENSG0000(MCHR2-AS antisense)       | chr6  | 99993944 | 1E+08    | + | 0    | 0    |
| ENSG0000(HMGB1P4 processed)        | chr1  | 50398825 | 50399773 | - | 0    | 0    |
| ENSG0000(KRT8P12 transcribed)      | chr3  | 1.61E+08 | 1.61E+08 | + | 2.69 | 2.56 |
| ENSG0000(AC008269. lincRNA)        | chr2  | 2.07E+08 | 2.07E+08 | + | 0    | 0    |
| ENSG0000(RP5-937E2 processed)      | chrX  | 1.5E+08  | 1.5E+08  | - | 0    | 0    |
| ENSG0000(DLEU1-AS1 lincRNA)        | chr13 | 50520933 | 50527449 | - | 0    | 0    |
| ENSG0000(NUTF2P7 processed)        | chrX  | 71016531 | 71016905 | - | 0    | 0    |
| ENSG0000(ACAP2-IT1 sense_intronic) | chr3  | 1.95E+08 | 1.95E+08 | - | 0    | 0    |
| ENSG0000(AC069154. processed)      | chr2  | 1.2E+08  | 1.2E+08  | + | 0    | 0    |
| ENSG0000(RP11-135A antisense)      | chr10 | 32347397 | 32374488 | + | 0    | 0    |
| ENSG0000(AC006947. sense_intronic) | chr17 | 66676372 | 66677404 | + | 0    | 0    |
| ENSG0000(GK-IT1 sense_intronic)    | chrX  | 30671635 | 30672166 | + | 0    | 0    |
| ENSG0000(PGBD4P8 processed)        | chr1  | 60097415 | 60097976 | + | 0    | 0    |
| ENSG0000(AC046143. antisense)      | chr3  | 1.95E+08 | 1.95E+08 | + | 2.27 | 2.43 |
| ENSG0000(DANT1 antisense)          | chrX  | 1.16E+08 | 1.16E+08 | + | 0    | 0    |
| ENSG0000(AP000568. processed)      | chr21 | 19739709 | 19740150 | + | 0    | 0    |
| ENSG0000(AC079305. antisense)      | chr2  | 1.77E+08 | 1.77E+08 | - | 0    | 0.83 |
| ENSG0000(RP11-92C4 processed)      | chr9  | 98890590 | 98891937 | + | 0    | 0    |
| ENSG0000(RP11-193I2 processed)     | chr3  | 42051181 | 42051694 | - | 0    | 0    |
| ENSG0000(CDY22P unprocessed)       | chrY  | 25813013 | 25814566 | + | 0    | 0    |
| ENSG0000(MTCO2P12 unprocessed)     | chr1  | 632757   | 633438   | + | 0.32 | 0.22 |
| ENSG0000(RP11-332M lincRNA)        | chr9  | 95599545 | 95606286 | - | 0    | 0    |



|                     |                   |          |          |   |      |      |
|---------------------|-------------------|----------|----------|---|------|------|
| ENSG0000(RP11-504E) | processed_chrx    | 35058927 | 35059974 | + | 0    | 0    |
| ENSG0000(HYI-AS1)   | 3prime_ov chr1    | 43453927 | 43456995 | + | 0    | 0    |
| ENSG0000(ACTG1P9)   | processed_chr6    | 46204729 | 46207386 | + | 0    | 0.05 |
| ENSG0000(KRTAP9-11) | unprocessε chr17  | 41271311 | 41271835 | + | 0    | 0    |
| ENSG0000(AC007563)  | lincRNA chr2      | 2.17E+08 | 2.17E+08 | + | 0    | 0    |
| ENSG0000(LRRC3-AS1) | antisense chr21   | 44450986 | 44455284 | - | 0    | 0    |
| ENSG0000(CYCSP51)   | processed_chr1    | 1.51E+08 | 1.51E+08 | + | 0    | 0    |
| ENSG0000(DPY19L1P1) | unprocessε chr7   | 32580949 | 32761787 | - | 0.19 | 0.09 |
| ENSG0000(PIN1P1)    | transcribec chr1  | 69919322 | 69920317 | + | 0    | 0    |
| ENSG0000(PPP1R2P5)  | processed_chr2    | 1.07E+08 | 1.07E+08 | - | 0    | 0    |
| ENSG0000(UBTFL7)    | processed_chr11   | 49081907 | 49083097 | + | 0    | 0    |
| ENSG0000(RP4-639J1) | processed_chr7    | 1.57E+08 | 1.57E+08 | - | 0    | 0    |
| ENSG0000(HMGN2P1)   | processed_chr1    | 2.3E+08  | 2.3E+08  | + | 0    | 0    |
| ENSG0000(AC090587)  | sense_ovei chr11  | 3854612  | 3855399  | + | 0.56 | 0.92 |
| ENSG0000(RP13-225C) | processed_chr9    | 1.27E+08 | 1.27E+08 | - | 0    | 0    |
| ENSG0000(AC092635)  | lincRNA chr2      | 13537673 | 13609168 | + | 0    | 0    |
| ENSG0000(SZT2-AS1)  | antisense chr1    | 43447776 | 43448644 | - | 0    | 0    |
| ENSG0000(LINC00452) | lincRNA chr13     | 1.14E+08 | 1.14E+08 | + | 0    | 0    |
| ENSG0000(USP24P1)   | unprocessε chr13  | 19015487 | 19019336 | - | 0    | 0    |
| ENSG0000(CICP3)     | processed_chr1    | 722092   | 724903   | + | 0    | 0    |
| ENSG0000(AC006041)  | lincRNA chr7      | 15841297 | 15842360 | - | 0    | 0    |
| ENSG0000(AC147651)  | antisense chr7    | 561958   | 565619   | + | 0    | 0    |
| ENSG0000(BX322557)  | lincRNA chr21     | 45336707 | 45338665 | + | 0    | 0    |
| ENSG0000(HMGB1P1)   | processed_chrx    | 36211096 | 36211635 | + | 0    | 0    |
| ENSG0000(AC010975)  | antisense chr2    | 79493716 | 79500844 | - | 0    | 0    |
| ENSG0000(OR8B9P)    | unprocessε chr11  | 1.24E+08 | 1.24E+08 | - | 0    | 0    |
| ENSG0000(LINC01715) | lincRNA chr1      | 28643228 | 28648581 | + | 0.33 | 0    |
| ENSG0000(CTD-2022H) | transcribec chr15 | 30052942 | 30073064 | - | 0    | 0    |
| ENSG0000(MICD)      | unprocessε chr6   | 29970801 | 29972464 | - | 0    | 0.09 |
| ENSG0000(HLA-DRB6)  | transcribec chr6  | 32552713 | 32560022 | - | 0    | 0    |
| ENSG0000(RP3-395M)  | antisense chr1    | 2493437  | 2494479  | - | 0    | 0.32 |
| ENSG0000(AC013401)  | lincRNA chr2      | 1.93E+08 | 1.93E+08 | + | 0    | 0    |
| ENSG0000(RP4-620E1) | processed_chr20   | 41382383 | 41383107 | + | 0    | 0    |
| ENSG0000(RP11-378J) | processed_chr1    | 2.23E+08 | 2.23E+08 | - | 0    | 0    |
| ENSG0000(RP11-3L21) | antisense chr1    | 2.25E+08 | 2.25E+08 | - | 0.53 | 0    |
| ENSG0000(MIR5689H)  | lincRNA chr6      | 10434316 | 10456781 | + | 0    | 0    |
| ENSG0000(AL162151)  | antisense chr14   | 99158416 | 99159669 | + | 0    | 0    |
| ENSG0000(RP4-718N1) | lincRNA chr7      | 51614251 | 51630870 | + | 0    | 0    |
| ENSG0000(LINC00858) | lincRNA chr10     | 84279980 | 84294659 | + | 0    | 0    |
| ENSG0000(AC092580)  | processed_chr2    | 7736438  | 7737095  | - | 0    | 0    |
| ENSG0000(OFD1P4Y)   | unprocessε chrY   | 18453150 | 18472137 | - | 0    | 0    |
| ENSG0000(RP11-12M)  | antisense chr1    | 1.8E+08  | 1.8E+08  | - | 0    | 0    |
| ENSG0000(RP11-494C) | processed_chr22   | 49845929 | 49846090 | + | 0    | 0    |
| ENSG0000(RP11-274B) | processed_chr7    | 1.29E+08 | 1.29E+08 | - | 0    | 0    |
| ENSG0000(KCNQ1-AS)  | antisense chr11   | 2840135  | 2861568  | - | 0    | 0    |

|                     |            |       |          |          |   |      |      |
|---------------------|------------|-------|----------|----------|---|------|------|
| ENSG0000(SFTA3      | protein_co | chr14 | 36473288 | 36513829 | - | 0    | 0    |
| ENSG0000(USP9YP8    | unprocessε | chrY  | 21677246 | 21681118 | - | 0    | 0    |
| ENSG0000(NPM1P25    | processed_ | chr10 | 96189366 | 96190219 | - | 0.07 | 0    |
| ENSG0000(RP11-35J2: | antisense  | chr10 | 96292685 | 96306695 | - | 0    | 0    |
| ENSG0000(RALGAPA1   | processed_ | chr9  | 1.06E+08 | 1.06E+08 | + | 0.04 | 0.11 |
| ENSG0000(AC133141.  | processed_ | chr3  | 25441164 | 25441502 | - | 0    | 0    |
| ENSG0000(RP11-262H  | processed_ | chr9  | 62837748 | 62838372 | - | 0    | 0.23 |
| ENSG0000(RPL27AP8   | processed_ | chr13 | 47766640 | 47767085 | - | 0    | 0    |
| ENSG0000(AC007349.  | lincRNA    | chr7  | 36750687 | 36763081 | + | 0    | 0    |
| ENSG0000(AJ006998.  | lincRNA    | chr21 | 15370500 | 15627342 | - | 0    | 0    |
| ENSG0000(ANKRD26P   | processed_ | chr13 | 31311289 | 31312921 | + | 0    | 0.07 |
| ENSG0000(RP1-92O14  | antisense  | chr1  | 43385113 | 43389155 | + | 0    | 0    |
| ENSG0000(LINC02069  | lincRNA    | chr3  | 1.85E+08 | 1.85E+08 | - | 0.02 | 0    |
| ENSG0000(AC017048.  | lincRNA    | chr2  | 1.77E+08 | 1.77E+08 | - | 0    | 0    |
| ENSG0000(PIP5K1P2   | unprocessε | chr7  | 1.59E+08 | 1.59E+08 | + | 0    | 0    |
| ENSG0000(AC073850.  | processed_ | chr7  | 80662331 | 80662585 | - | 0    | 0    |
| ENSG0000(LINC00366  | lincRNA    | chr13 | 38576640 | 38578994 | + | 0    | 0    |
| ENSG0000(RP5-1033K  | processed_ | chr1  | 68381441 | 68381657 | - | 0    | 0    |
| ENSG0000(THEMIS3P   | unitary_ps | chr18 | 8486997  | 8513849  | + | 0    | 0    |
| ENSG0000(LINC00433  | lincRNA    | chr13 | 88540864 | 88545509 | + | 0    | 0    |
| ENSG0000(RP11-184I1 | antisense  | chr1  | 43709392 | 43727343 | - | 0    | 0    |
| ENSG0000(RP11-490K  | processed_ | chr1  | 31263245 | 31263681 | - | 0    | 0.2  |
| ENSG0000(AC005162.  | antisense  | chr7  | 29080284 | 29082527 | + | 0    | 0    |
| ENSG0000(SPINK8     | protein_co | chr3  | 48306842 | 48328341 | - | 0    | 0    |
| ENSG0000(RP11-202I1 | lincRNA    | chr9  | 85756042 | 85765112 | - | 0    | 0    |
| ENSG0000(RPS10P18   | processed_ | chr10 | 1.24E+08 | 1.24E+08 | - | 0    | 0    |
| ENSG0000(RLIMP1     | processed_ | chr13 | 40618738 | 40621348 | + | 0    | 0    |
| ENSG0000(LINC01789  | lincRNA    | chr2  | 1.07E+08 | 1.07E+08 | - | 0    | 0    |
| ENSG0000(RP11-202D  | antisense  | chr10 | 82224213 | 82229179 | - | 0    | 0    |
| ENSG0000(AC023669.  | lincRNA    | chr7  | 46261064 | 46294469 | + | 0.28 | 0.31 |
| ENSG0000(AC127383.  | unprocessε | chr2  | 68445710 | 68449174 | - | 0    | 0    |
| ENSG0000(LYST-AS1   | antisense  | chr1  | 2.36E+08 | 2.36E+08 | + | 0    | 0    |
| ENSG0000(ACTG1P11   | processed_ | chrY  | 18147884 | 18149008 | + | 0    | 0    |
| ENSG0000(RP11-56I2: | lincRNA    | chr10 | 1.06E+08 | 1.06E+08 | - | 0    | 0    |
| ENSG0000(RPL39P18   | processed_ | chr3  | 20012452 | 20012606 | + | 0    | 0    |
| ENSG0000(RGS17P1    | processed_ | chr13 | 40992779 | 40993331 | - | 0    | 0    |
| ENSG0000(PATL2      | protein_co | chr15 | 44665732 | 44711316 | - | 0.44 | 1.09 |
| ENSG0000(FAM90A16   | unprocessε | chr8  | 7730739  | 7733749  | + | 0    | 0    |
| ENSG0000(ROBO2P1    | processed_ | chr7  | 51600286 | 51600573 | - | 0    | 0    |
| ENSG0000(LINC00362  | lincRNA    | chr13 | 23169835 | 23170597 | - | 0    | 0    |
| ENSG0000(RP5-888M:  | lincRNA    | chr1  | 12527724 | 12528420 | + | 0    | 0    |
| ENSG0000(KSR1P1     | processed_ | chr10 | 42149310 | 42149549 | - | 0    | 0    |
| ENSG0000(RP4-552O1  | processed_ | chr1  | 84015865 | 84018371 | - | 0    | 0    |
| ENSG0000(ALG13-AS1  | antisense  | chrX  | 1.12E+08 | 1.12E+08 | - | 0    | 0    |
| ENSG0000(RP11-342D  | antisense  | chrX  | 45183251 | 45333917 | + | 0    | 0    |

|                                       |          |          |   |      |      |
|---------------------------------------|----------|----------|---|------|------|
| ENSG0000( AC004019. processed_ chr22  | 17418697 | 17419828 | + | 0    | 0    |
| ENSG0000( AC012494. lincRNA chr2      | 78088730 | 78127806 | + | 0    | 0    |
| ENSG0000( RP11-173D lincRNA chr6      | 78809715 | 78813303 | - | 0    | 0    |
| ENSG0000( AC005189. processed_ chr7   | 43767290 | 43767599 | + | 0    | 0    |
| ENSG0000( AC105053. antisense chr2    | 85815130 | 85825391 | + | 0.17 | 0.11 |
| ENSG0000( RPL17P1 processed_ chr20    | 20253303 | 20253838 | - | 0    | 0    |
| ENSG0000( RP11-52J3. antisense chr6   | 1.58E+08 | 1.58E+08 | - | 0    | 0    |
| ENSG0000( AC092155. processed_ chr2   | 62532583 | 62533059 | - | 0    | 0    |
| ENSG0000( RP4-682E1 processed_ chr1   | 86029854 | 86030589 | + | 0    | 0    |
| ENSG0000( PHKG1P4 unprocessε chr7     | 57060590 | 57061301 | - | 0    | 0    |
| ENSG0000( RP11-421E unprocessε chr1   | 2.06E+08 | 2.06E+08 | - | 0    | 0    |
| ENSG0000( GAS2L1P1 processed_ chr9    | 38486859 | 38488338 | - | 0    | 0    |
| ENSG0000( AC068580. sense_intrε chr11 | 1763009  | 1763749  | - | 0.52 | 0.57 |
| ENSG0000( FLT1P1 processed_ chr3      | 46142358 | 46143677 | - | 0    | 0    |
| ENSG0000( UBE2V1P3 processed_ chrY    | 3866306  | 3866722  | - | 0    | 0    |
| ENSG0000( RP11-58A1 processed_ chr1   | 6547905  | 6548619  | + | 0    | 0    |
| ENSG0000( LINC00404 lincRNA chr13     | 1.12E+08 | 1.12E+08 | - | 0    | 0    |
| ENSG0000( MYCBP2-A. sense_intrε chr13 | 77080511 | 77081190 | - | 0    | 0    |
| ENSG0000( LINC01523 lincRNA chr20     | 47983404 | 47984313 | + | 0    | 0    |
| ENSG0000( AC053503. antisense chr2    | 2.19E+08 | 2.19E+08 | + | 0.07 | 0.12 |
| ENSG0000( KRT16P4 transcribec chr17   | 18450244 | 18475920 | + | 0    | 0    |
| ENSG0000( RP5-1066H antisense chr1    | 40863914 | 40876670 | + | 0    | 0    |
| ENSG0000( RP11-62C3 processed_ chr9   | 92339658 | 92341663 | - | 0    | 0    |
| ENSG0000( RP1-102G2 antisense chr1    | 1.75E+08 | 1.75E+08 | - | 0    | 0    |
| ENSG0000( AC105443. processed_ chr7   | 1.32E+08 | 1.32E+08 | + | 0    | 0    |
| ENSG0000( AC003986. antisense chr7    | 19144293 | 19146253 | + | 0    | 0    |
| ENSG0000( HNRNPA1P processed_ chr11   | 5571247  | 5572192  | - | 0    | 0.07 |
| ENSG0000( AC079776. lincRNA chr2      | 1.3E+08  | 1.3E+08  | - | 0    | 0    |
| ENSG0000( LINC01739 lincRNA chr1      | 63000497 | 63012471 | - | 0    | 0    |
| ENSG0000( RP11-119B antisense chr20   | 3888239  | 3888868  | - | 0.18 | 1.2  |
| ENSG0000( GAPDHP26 processed_ chr9    | 1.01E+08 | 1.01E+08 | + | 0    | 0    |
| ENSG0000( RP11-90J7. lincRNA chr10    | 78293842 | 78301003 | + | 0    | 0    |
| ENSG0000( NKX1-2 protein_co chr10     | 1.24E+08 | 1.24E+08 | - | 0    | 0    |
| ENSG0000( LINC00428 lincRNA chr13     | 42842414 | 42842887 | - | 0    | 0    |
| ENSG0000( UBE2DNL transcribec chrX    | 84934151 | 84934890 | + | 0.72 | 0    |
| ENSG0000( TSPY8 protein_co chrY       | 9357797  | 9360599  | + | 0    | 0    |
| ENSG0000( AC012445. lincRNA chr2      | 4136644  | 4140731  | - | 0    | 0    |
| ENSG0000( GAPDHP17 processed_ chrY    | 20861337 | 20862337 | + | 0    | 0    |
| ENSG0000( USP9YP17 unprocessε chrY    | 22049755 | 22058113 | - | 0    | 0    |
| ENSG0000( RPL21P24 processed_ chr1    | 47497894 | 47498341 | - | 0    | 0    |
| ENSG0000( LINC00379 lincRNA chr13     | 91127613 | 91131407 | - | 0    | 0    |
| ENSG0000( SACS-AS1 lincRNA chr13      | 23418971 | 23428869 | + | 0    | 0    |
| ENSG0000( RP1-153P1 transcribec chr6  | 37543553 | 37547280 | - | 0    | 0    |
| ENSG0000( LYARP1 processed_ chr2      | 82268427 | 82269927 | - | 0    | 0    |
| ENSG0000( ZFYVE9P1 processed_ chrX    | 1.38E+08 | 1.38E+08 | + | 0    | 0    |

|                                     |          |          |   |      |      |
|-------------------------------------|----------|----------|---|------|------|
| ENSG0000(LINC01204 lincRNA chrX     | 45505388 | 45630202 | + | 0.06 | 0.1  |
| ENSG0000(AC108056. lincRNA chr4     | 1.18E+08 | 1.18E+08 | + | 0    | 0    |
| ENSG0000(RP4-717I23 processed_ chr1 | 93278961 | 93279129 | - | 0    | 0    |
| ENSG0000(SMC4P1 unprocessε chr2     | 1.37E+08 | 1.37E+08 | + | 0    | 0    |
| ENSG0000(RP11-481G lincRNA chr10    | 79000484 | 79003803 | - | 0.03 | 0    |
| ENSG0000(GAPDHP58 processed_ chr1   | 1.19E+08 | 1.19E+08 | - | 0    | 0    |
| ENSG0000(PRAMEF25 protein_co chr1   | 13068677 | 13077884 | + | 0    | 0    |
| ENSG0000(EIF4BP4 processed_ chr3    | 42340588 | 42342367 | + | 0    | 0    |
| ENSG0000(LINC00358 lincRNA chr13    | 62003525 | 62029548 | - | 0    | 0    |
| ENSG0000(USP17L26 protein_co chr4   | 9334658  | 9336609  | + | 0    | 0    |
| ENSG0000(RP11-423C processed_ chr9  | 1.26E+08 | 1.26E+08 | - | 0.03 | 0.06 |
| ENSG0000(RPL21P44 processed_ chr4   | 53986587 | 53987058 | - | 0    | 0    |
| ENSG0000(TNPO1P3 processed_ chr17   | 20481330 | 20483991 | - | 0    | 0    |
| ENSG0000(RP11-197P sense_intrε chr9 | 75009828 | 75016036 | - | 0    | 0    |
| ENSG0000(RP11-479J lincRNA chr1     | 1.66E+08 | 1.66E+08 | + | 0    | 0    |
| ENSG0000(ACVR2B-AS antisense chr3   | 38451027 | 38454820 | - | 0.26 | 0.22 |
| ENSG0000(MSX2P1 processed_ chr17    | 58157028 | 58157800 | + | 0    | 0    |
| ENSG0000(RP5-981O7 antisense chr7   | 1.52E+08 | 1.52E+08 | - | 0    | 0.11 |
| ENSG0000(SUCLA2P3 processed_ chr2   | 25079901 | 25081689 | - | 0    | 0    |
| ENSG0000(RP11-167P unprocessε chrX  | 55633031 | 55635656 | - | 0    | 0    |
| ENSG0000(RP5-1097F processed_ chr1  | 2.31E+08 | 2.31E+08 | - | 0    | 0    |
| ENSG0000(MYL8P processed_ chr6      | 33338978 | 33339495 | + | 0    | 0    |
| ENSG0000(PRD3P1 processed_ chr22    | 38722743 | 38723505 | - | 0    | 0    |
| ENSG0000(LINC00411 lincRNA chr13    | 1.01E+08 | 1.01E+08 | - | 0    | 0    |
| ENSG0000(RP11-524K lincRNA chr6     | 93886900 | 93889410 | + | 0    | 0    |
| ENSG0000(AL590762. processed_ chrX  | 71413834 | 71414086 | - | 0    | 0    |
| ENSG0000(AC004014. lincRNA chr7     | 1.09E+08 | 1.09E+08 | + | 0    | 0    |
| ENSG0000(MTATP8P2 processed_ chr2   | 87824942 | 87825143 | + | 0    | 0    |
| ENSG0000(RPL21P93 processed_ chr10  | 28898996 | 28899484 | - | 0    | 0    |
| ENSG0000(LINC01718 lincRNA chr20    | 61079140 | 61080179 | + | 0    | 0    |
| ENSG0000(RP5-1125N lincRNA chr1     | 30810378 | 30815553 | - | 0    | 0    |
| ENSG0000(GOLGA2P4 unprocessε chr22  | 42784462 | 42787100 | + | 0    | 0    |
| ENSG0000(LINC01079 lincRNA chr13    | 27373348 | 27374366 | + | 0    | 0    |
| ENSG0000(RP11-390F lincRNA chr9     | 6704471  | 6707780  | + | 0    | 0    |
| ENSG0000(SUMO1P2 processed_ chr1    | 1.69E+08 | 1.69E+08 | + | 0    | 0    |
| ENSG0000(LINC01501 lincRNA chr9     | 90463524 | 90582744 | - | 0    | 0    |
| ENSG0000(RP11-369J unprocessε chr10 | 80017713 | 80017911 | - | 0    | 0    |
| ENSG0000(AC011288. lincRNA chr7     | 12726152 | 13751920 | + | 0.02 | 0    |
| ENSG0000(MBNL1-AS antisense chr3    | 1.52E+08 | 1.52E+08 | - | 4.43 | 3.52 |
| ENSG0000(LINC01822 lincRNA chr2     | 21687434 | 21710623 | - | 0    | 0    |
| ENSG0000(MTND5P2 processed_ chr13   | 95692538 | 95693972 | + | 0    | 0    |
| ENSG0000(METTL21A processed_ chr21  | 39235386 | 39236020 | - | 0    | 0    |
| ENSG0000(RP11-44N1 lincRNA chr8     | 98961428 | 98968284 | + | 3.26 | 3.7  |
| ENSG0000(PIGCP2 processed_ chr7     | 1.08E+08 | 1.08E+08 | + | 0    | 0    |
| ENSG0000(BSNP4 processed_ chr7      | 57638725 | 57639112 | + | 0    | 0    |

|                                 |       |          |          |   |      |      |
|---------------------------------|-------|----------|----------|---|------|------|
| ENSG0000( AC073115. lincRNA     | chr7  | 45990905 | 46000898 | + | 0    | 0    |
| ENSG0000( RP11-302K processed_  | chr10 | 1.02E+08 | 1.02E+08 | + | 0    | 0    |
| ENSG0000( LINC01264 lincRNA     | chr10 | 42979017 | 42981507 | - | 0    | 0    |
| ENSG0000( RP4-713B5 processed_  | chr1  | 93384487 | 93384998 | - | 0    | 0    |
| ENSG0000( KRT8P21 processed_    | chr1  | 73104792 | 73106282 | + | 0    | 0    |
| ENSG0000( PRAC2 protein_co      | chr17 | 48723168 | 48724758 | + | 0    | 0    |
| ENSG0000( RPL4P4 processed_     | chr3  | 1.85E+08 | 1.85E+08 | - | 0.21 | 0.16 |
| ENSG0000( LINC01758 lincRNA     | chr1  | 69433255 | 69435409 | + | 0    | 0    |
| ENSG0000( CYP2C56P processed_   | chr2  | 1.64E+08 | 1.64E+08 | + | 0    | 0    |
| ENSG0000( AC027119. lincRNA     | chr3  | 5962842  | 6124120  | + | 0    | 0    |
| ENSG0000( LINC00280 lincRNA     | chrY  | 6357219  | 6361413  | - | 0    | 0    |
| ENSG0000( NAMPTP1 processed_    | chr10 | 36521721 | 36524234 | - | 4.91 | 3.18 |
| ENSG0000( RP11-330A lincRNA     | chr6  | 14597514 | 14599690 | - | 0    | 0    |
| ENSG0000( MYOSLID lincRNA       | chr2  | 2.07E+08 | 2.07E+08 | + | 1.86 | 1.97 |
| ENSG0000( RPSAP22 processed_    | chr2  | 85490930 | 85491780 | - | 0    | 0    |
| ENSG0000( RP11-1071J lincRNA    | chr10 | 1.01E+08 | 1.01E+08 | - | 0.02 | 0    |
| ENSG0000( RP11-435P processed_  | chr1  | 2.03E+08 | 2.03E+08 | - | 0    | 0    |
| ENSG0000( RP1-60O19 lincRNA     | chr6  | 1.07E+08 | 1.07E+08 | + | 0    | 0.43 |
| ENSG0000( RP11-462L lincRNA     | chr10 | 32958845 | 33082102 | + | 1.8  | 1.66 |
| ENSG0000( RP11-494K processed_  | chr1  | 2.05E+08 | 2.05E+08 | + | 0    | 0.14 |
| ENSG0000( PABPC1P9 unprocessε   | chr22 | 16423943 | 16426031 | + | 0    | 0    |
| ENSG0000( RPL26P6 processed_    | chr10 | 73422259 | 73422696 | - | 0.55 | 0    |
| ENSG0000( RP5-1142J lincRNA     | chr7  | 1.57E+08 | 1.57E+08 | - | 0    | 0    |
| ENSG0000( BUD31P2 processed_    | chrX  | 75201491 | 75201790 | + | 0    | 0    |
| ENSG0000( RP11-552E processed_  | chrX  | 48244894 | 48245745 | + | 0    | 0    |
| ENSG0000( AL672296. processed_  | chr1  | 2.49E+08 | 2.49E+08 | - | 0    | 0    |
| ENSG0000( RP11-536K antisense   | chr10 | 6025978  | 6036427  | + | 0.16 | 0.18 |
| ENSG0000( PRR20C protein_co     | chr13 | 57140918 | 57157082 | + | 0    | 0    |
| ENSG0000( MAST4-AS antisense    | chr5  | 67001383 | 67003953 | - | 0.33 | 0.18 |
| ENSG0000( UBE2V1P9 processed_   | chrX  | 90289536 | 90289903 | - | 0    | 0    |
| ENSG0000( RP11-317F processed_  | chr10 | 1.15E+08 | 1.15E+08 | - | 0    | 0    |
| ENSG0000( PKP4P1 unprocessε     | chr2  | 2.09E+08 | 2.09E+08 | + | 0    | 0    |
| ENSG0000( LINC01150 lincRNA     | chr11 | 1902647  | 1907915  | + | 0    | 0    |
| ENSG0000( RP11-184A antisense   | chr10 | 3751067  | 3763226  | + | 0    | 0    |
| ENSG0000( LL22NC01- antisense   | chr22 | 32783177 | 32784982 | + | 0    | 0    |
| ENSG0000( AL121578. processed_  | chrX  | 37994344 | 37994790 | + | 0    | 0    |
| ENSG0000( ZNF492 protein_co     | chr19 | 22634324 | 22667670 | + | 0.07 | 0.1  |
| ENSG0000( RP11-383F processed_  | chr7  | 1.39E+08 | 1.39E+08 | - | 0    | 0    |
| ENSG0000( AC007327. antisense   | chr7  | 36229280 | 36231107 | - | 0    | 0    |
| ENSG0000( AC114755. processed_  | chr2  | 1.06E+08 | 1.06E+08 | - | 0    | 0    |
| ENSG0000( SNORD56 snoRNA        | chr20 | 2656624  | 2656694  | + | 0    | 0    |
| ENSG0000( RP4-654H1 processed_  | chr1  | 53841547 | 53841832 | + | 0    | 0    |
| ENSG0000( ISPD-AS1 antisense    | chr7  | 16210488 | 16270604 | + | 0    | 0    |
| ENSG0000( AC009237. transcribec | chr2  | 95525345 | 95532405 | + | 0.6  | 0.75 |
| ENSG0000( MTCO2P1 processed_    | chr20 | 60414396 | 60414872 | - | 0    | 0    |

|                                  |       |          |          |   |      |      |
|----------------------------------|-------|----------|----------|---|------|------|
| ENSG0000(SOS1-IT1 sense_intron)  | chr2  | 38992279 | 38993857 | - | 0.89 | 0.56 |
| ENSG0000(RP11-25C1 processed)    | chrX  | 96620654 | 96621903 | + | 0    | 0    |
| ENSG0000(LINC00484 lincRNA)      | chr9  | 91119062 | 91182762 | + | 0    | 0    |
| ENSG0000(AC011242. processed)    | chr2  | 43680465 | 43681622 | - | 0    | 0    |
| ENSG0000(KARSP1 processed)       | chr13 | 41925598 | 41927349 | + | 0    | 0    |
| ENSG0000(RP11-374M lincRNA)      | chr9  | 61898805 | 61911022 | - | 0    | 0    |
| ENSG0000(RP1-140J1. lincRNA)     | chr1  | 1.53E+08 | 1.53E+08 | + | 0    | 0    |
| ENSG0000(RP1-130G2 processed)    | chr6  | 20042455 | 20042940 | - | 0    | 0    |
| ENSG0000(MTND2P2C processed)     | chr2  | 1.55E+08 | 1.55E+08 | - | 0    | 0    |
| ENSG0000(XX-CR54.1 transcribed)  | chr1  | 2.49E+08 | 2.49E+08 | + | 0    | 0    |
| ENSG0000(EIF2S2P2 processed)     | chr3  | 1.85E+08 | 1.85E+08 | - | 0.12 | 0    |
| ENSG0000(SKP1P3 processed)       | chr9  | 39485379 | 39485865 | + | 0    | 0    |
| ENSG0000(MARK2P12 processed)     | chr13 | 73407768 | 73408352 | - | 0    | 0    |
| ENSG0000(USP9YP36 unprocessed)   | chrY  | 25579790 | 25588444 | + | 0    | 0    |
| ENSG0000(RP11-449C sense_intron) | chr10 | 50822692 | 50824525 | - | 0    | 0    |
| ENSG0000(RP1-43O17 unprocessed)  | chr1  | 1.53E+08 | 1.53E+08 | + | 0    | 0    |
| ENSG0000(EEF1DP3 transcribed)    | chr13 | 31846841 | 31953472 | + | 0.04 | 0.09 |
| ENSG0000(RPL23AP19 processed)    | chr1  | 8831007  | 8831375  | + | 0    | 0    |
| ENSG0000(RP11-556N antisense)    | chr4  | 75830751 | 75832705 | + | 0    | 0.14 |
| ENSG0000(MIR194-2H lincRNA)      | chr11 | 64889560 | 64893449 | - | 0.04 | 0.02 |
| ENSG0000(RP3-495K2 lincRNA)      | chr6  | 1.69E+08 | 1.69E+08 | - | 0.07 | 0.22 |
| ENSG0000(RP11-252I1 processed)   | chr5  | 1.8E+08  | 1.8E+08  | - | 0    | 0    |
| ENSG0000(RP11-557H lincRNA)      | chr6  | 1.35E+08 | 1.35E+08 | - | 0    | 0    |
| ENSG0000(LINC01054 antisense)    | chr13 | 1.14E+08 | 1.14E+08 | - | 0.43 | 0    |
| ENSG0000(OR2AQ1P unprocessed)    | chr1  | 1.59E+08 | 1.59E+08 | + | 0    | 0    |
| ENSG0000(AC007322. unprocessed)  | chrY  | 21871331 | 21873550 | + | 0    | 0    |
| ENSG0000(AC013460. processed)    | chr2  | 7421261  | 7450254  | + | 0    | 0    |
| ENSG0000(RP11-314N antisense)    | chr20 | 1361622  | 1362585  | + | 0.64 | 0    |
| ENSG0000(AC013268. processed)    | chr2  | 1.1E+08  | 1.1E+08  | - | 0    | 0    |
| ENSG0000(RP11-501H processed)    | chrX  | 27811885 | 27812902 | + | 0    | 0    |
| ENSG0000(AC019349. antisense)    | chr17 | 41500983 | 41502409 | + | 0    | 0    |
| ENSG0000(RP5-1189B processed)    | chrX  | 1.24E+08 | 1.24E+08 | + | 0    | 0    |
| ENSG0000(FTLP16 processed)       | chrX  | 38484752 | 38485264 | - | 0    | 0    |
| ENSG0000(AC010240. processed)    | chr5  | 1.33E+08 | 1.33E+08 | - | 0    | 0    |
| ENSG0000(RP11-295K antisense)    | chr1  | 1.86E+08 | 1.86E+08 | + | 0    | 0.15 |
| ENSG0000(U91324.1 lincRNA)       | chr2  | 8139402  | 8143269  | + | 0.35 | 0    |
| ENSG0000(RP11-365C processed)    | chr1  | 2.24E+08 | 2.24E+08 | + | 0    | 0    |
| ENSG0000(LINC01159 processed)    | chr2  | 1.05E+08 | 1.05E+08 | - | 0    | 0    |
| ENSG0000(AC011998. processed)    | chr2  | 1.78E+08 | 1.78E+08 | + | 0    | 0    |
| ENSG0000(BPY2DP unprocessed)     | chrY  | 7932997  | 7937640  | - | 0    | 0    |
| ENSG0000(RP11-567B processed)    | chr1  | 2E+08    | 2E+08    | + | 0    | 0    |
| ENSG0000(COTL1P1 processed)      | chr17 | 16853935 | 16854309 | + | 0    | 0    |
| ENSG0000(AC096649. antisense)    | chr2  | 1.75E+08 | 1.75E+08 | + | 0.15 | 0.33 |
| ENSG0000(RP11-142N antisense)    | chr10 | 13991815 | 14007526 | + | 0    | 0    |
| ENSG0000(RPL7P10 processed)      | chr1  | 81098267 | 81099005 | - | 0    | 0    |

|                                     |          |          |   |      |      |
|-------------------------------------|----------|----------|---|------|------|
| ENSG0000(RPS27AP15 processed_ chr9  | 72741152 | 72741617 | - | 0    | 0    |
| ENSG0000(CXCR2P1 transcribed chr2   | 2.18E+08 | 2.18E+08 | - | 0    | 0    |
| ENSG0000(RP5-827L5. lincRNA chr20   | 61077224 | 61077816 | - | 0    | 0    |
| ENSG0000(RPL31P20 processed_ chr3   | 24430748 | 24431107 | + | 0    | 0    |
| ENSG0000(RP4-738P1 processed_ chr1  | 1.69E+08 | 1.69E+08 | - | 0    | 0    |
| ENSG0000(DYNLT3P2 processed_ chr2   | 1.28E+08 | 1.28E+08 | + | 0    | 0    |
| ENSG0000(MRPS18AP processed_ chr3   | 48256350 | 48256938 | - | 0    | 0    |
| ENSG0000(MTCO1P52 processed_ chrX   | 55178207 | 55178737 | - | 0    | 0    |
| ENSG0000(RPS20P1 processed_ chr21   | 35724747 | 35725100 | - | 0    | 0    |
| ENSG0000(RP11-419N processed_ chr7  | 55810779 | 55811411 | - | 0    | 0    |
| ENSG0000(RP11-339A processed_ chr6  | 10213881 | 10214362 | - | 0    | 0    |
| ENSG0000(RP5-971N1 antisense chr20  | 8019223  | 8043512  | + | 0.03 | 0    |
| ENSG0000(TRBV10-2 TR_V_gene chr7    | 1.42E+08 | 1.42E+08 | + | 0    | 0    |
| ENSG0000(CTA-796E4 antisense chr22  | 26161910 | 26163214 | - | 0    | 0    |
| ENSG0000(RP4-644L1. lincRNA chr20   | 40696499 | 40698616 | - | 0    | 0    |
| ENSG0000(AC018866. lincRNA chr2     | 1.21E+08 | 1.21E+08 | - | 0    | 0    |
| ENSG0000(RP11-298H lincRNA chr10    | 1.06E+08 | 1.06E+08 | + | 0    | 0    |
| ENSG0000(C4B-AS1 antisense chr6     | 32032713 | 32036258 | - | 0    | 0.01 |
| ENSG0000(AC016751. lincRNA chr2     | 1.76E+08 | 1.76E+08 | - | 0    | 0    |
| ENSG0000(UBE2Q1-A antisense chr1    | 1.55E+08 | 1.55E+08 | + | 0    | 0    |
| ENSG0000(AC013444. processed_ chr2  | 1.43E+08 | 1.43E+08 | + | 0    | 0    |
| ENSG0000(AC118754. antisense chr17  | 4497394  | 4499674  | - | 0    | 0    |
| ENSG0000(SLC25A38P processed_ chr1  | 1.73E+08 | 1.73E+08 | + | 0    | 0    |
| ENSG0000(SNRFPF2 processed_ chr1    | 25887360 | 25887610 | + | 0    | 0    |
| ENSG0000(LINC00388 lincRNA chr13    | 18610298 | 18611675 | - | 0    | 0    |
| ENSG0000(RP11-385E lincRNA chr13    | 19408042 | 19409529 | - | 0.06 | 0    |
| ENSG0000(LINC00399 lincRNA chr13    | 1.09E+08 | 1.09E+08 | + | 0    | 0    |
| ENSG0000(MTCYBP32 processed_ chrX   | 1.03E+08 | 1.03E+08 | + | 0    | 0    |
| ENSG0000(RPS21P1 processed_ chr1    | 2.35E+08 | 2.35E+08 | + | 0    | 1.81 |
| ENSG0000(AC140481. antisense chr2   | 1.31E+08 | 1.31E+08 | - | 0    | 0    |
| ENSG0000(KRT18P26 processed_ chr2   | 74306728 | 74308008 | - | 0    | 0    |
| ENSG0000(ATP8A2P2 processed_ chr13  | 32477274 | 32478841 | + | 0    | 0    |
| ENSG0000(LINC01813 lincRNA chr2     | 56077417 | 56090382 | - | 0    | 0    |
| ENSG0000(RPS15P5 processed_ chr3    | 54626215 | 54626646 | + | 0    | 0.2  |
| ENSG0000(XIST lincRNA chrX          | 73820651 | 73852753 | - | 0.01 | 0.03 |
| ENSG0000(RP11-456P transcribed chr1 | 1.62E+08 | 1.62E+08 | + | 0    | 0.29 |
| ENSG0000(ZNF688 protein_co chr16    | 30569346 | 30572734 | - | 8.1  | 9.13 |
| ENSG0000(RPL35AP21 processed_ chr9  | 71589601 | 71589933 | + | 0    | 0    |
| ENSG0000(CCNB1IP1P processed_ chr1  | 44958557 | 44959395 | + | 0    | 0    |
| ENSG0000(DDX50P1 processed_ chr2    | 32201600 | 32203999 | + | 0.02 | 0.1  |
| ENSG0000(RP11-78H1 processed_ chr9  | 1.15E+08 | 1.15E+08 | + | 0    | 0    |
| ENSG0000(RP1-308E4 processed_ chr1  | 28453541 | 28453934 | + | 0    | 0    |
| ENSG0000(RP11-567E antisense chr1   | 2.01E+08 | 2.01E+08 | - | 0    | 0    |
| ENSG0000(RP5-1174J processed_ chrX  | 41748222 | 41748608 | + | 0    | 0    |
| ENSG0000(RPL12P34 processed_ chr13  | 68654572 | 68655050 | + | 0    | 0    |

|                                         |          |          |   |       |       |
|-----------------------------------------|----------|----------|---|-------|-------|
| ENSG0000(RP11-552J) processed_chrX      | 52735901 | 52736107 | - | 0     | 0     |
| ENSG0000(AC093899) processed_chr2       | 1.7E+08  | 1.7E+08  | - | 0     | 0     |
| ENSG0000(PDE4DIPP1) unprocessed_chr1    | 1.48E+08 | 1.48E+08 | + | 0     | 0     |
| ENSG0000(DUTP4) processed_chrX          | 1.5E+08  | 1.5E+08  | + | 0     | 0     |
| ENSG0000(RP11-341A) processed_chr9      | 1.03E+08 | 1.03E+08 | + | 0     | 0     |
| ENSG0000(AC108039) processed_chr2       | 61820208 | 61820566 | + | 0     | 0     |
| ENSG0000(RP11-384C) sense_intronic_chr1 | 2.12E+08 | 2.12E+08 | + | 0     | 0     |
| ENSG0000(PET100) protein_coding_chr19   | 7629737  | 7631956  | + | 29.09 | 38.99 |
| ENSG0000(RP11-48L1) processed_chr9      | 29636486 | 29636853 | + | 0     | 0     |
| ENSG0000(KHSRPP1) processed_chr9        | 21695176 | 21696943 | + | 0     | 0     |
| ENSG0000(XXbac-BPG) unprocessed_chr6    | 31307815 | 31308549 | - | 0     | 0     |
| ENSG0000(AC018462) antisense_chr2       | 62069447 | 62146881 | - | 0.12  | 0     |
| ENSG0000(ISCA1P2) processed_chr1        | 2.29E+08 | 2.29E+08 | + | 0     | 0     |
| ENSG0000(MTATP6P1) unprocessed_chr1     | 93925406 | 93926072 | - | 0     | 0     |
| ENSG0000(RP11-141A) antisense_chr1      | 49048316 | 49187585 | + | 0     | 0     |
| ENSG0000(EMX2OS) antisense_chr10        | 1.17E+08 | 1.18E+08 | - | 0.04  | 0.02  |
| ENSG0000(RP13-766D) antisense_chr17     | 81514047 | 81527776 | + | 0.57  | 0.28  |
| ENSG0000(PYHIN5P) unprocessed_chr1      | 1.59E+08 | 1.59E+08 | + | 0     | 0     |
| ENSG0000(ARSD-AS1) antisense_chrX       | 2904904  | 2906081  | + | 0     | 0     |
| ENSG0000(RP11-398K) antisense_chr6      | 73263215 | 73301401 | + | 2.5   | 3.47  |
| ENSG0000(RP5-1049G) processed_chr20     | 47630266 | 47631438 | - | 0     | 0     |
| ENSG0000(RP11-524G) antisense_chr9      | 1.22E+08 | 1.22E+08 | - | 0     | 0     |
| ENSG0000(CTC-546K2) lincRNA_chr5        | 1.21E+08 | 1.21E+08 | + | 0     | 0     |
| ENSG0000(RP11-159H) processed_chr9      | 76992099 | 76993108 | + | 0     | 0     |
| ENSG0000(AC016831) processed_chr7       | 1.31E+08 | 1.31E+08 | - | 0     | 0     |
| ENSG0000(PGA3) protein_coding_chr11     | 61203307 | 61213098 | + | 0     | 0.06  |
| ENSG0000(RP11-505P) antisense_chr6      | 73523618 | 73570596 | + | 0     | 0     |
| ENSG0000(RP11-157F) processed_chr3      | 57134142 | 57134723 | + | 0     | 0     |
| ENSG0000(RPL31P54) processed_chr13      | 78422823 | 78423192 | + | 0     | 0     |
| ENSG0000(STEAP3-AS) antisense_chr2      | 1.19E+08 | 1.19E+08 | - | 0.03  | 0.04  |
| ENSG0000(RP11-363N) antisense_chr10     | 933026   | 942743   | + | 0     | 0     |
| ENSG0000(RPL21P89) processed_chr10      | 49815096 | 49815562 | + | 0     | 0     |
| ENSG0000(RPSAP20) processed_chr1        | 56207567 | 56208456 | - | 0     | 0     |
| ENSG0000(OGFR-AS1) antisense_chr20      | 62800627 | 62805587 | - | 0     | 0.22  |
| ENSG0000(EIF1P1) processed_chr9         | 659986   | 660326   | + | 0     | 0     |
| ENSG0000(CASC20) lincRNA_chr20          | 6446723  | 6528459  | + | 0     | 0     |
| ENSG0000(PAICSP5) processed_chr7        | 1.44E+08 | 1.44E+08 | - | 0     | 0     |
| ENSG0000(RP11-479G) processed_chr10     | 33035469 | 33035664 | - | 0     | 0     |
| ENSG0000(IMMTP1) processed_chr21        | 44675868 | 44678086 | - | 0     | 0     |
| ENSG0000(RP11-321E) lincRNA_chr7        | 64140495 | 64150058 | + | 0     | 0     |
| ENSG0000(RP13-30A9) antisense_chr20     | 62633772 | 62635862 | + | 0     | 0     |
| ENSG0000(RP13-77O1) processed_chrX      | 52801400 | 52801529 | - | 0     | 0     |
| ENSG0000(RP5-1132H) processed_chr7      | 66025126 | 66031544 | - | 0     | 0     |
| ENSG0000(HNRNPA1F) transcribed_chr1     | 58047889 | 58049335 | - | 0     | 0     |
| ENSG0000(ACTP1) processed_chr2          | 1.08E+08 | 1.08E+08 | + | 0     | 0     |



|                                     |          |          |   |      |      |
|-------------------------------------|----------|----------|---|------|------|
| ENSG0000(LINC01315 lincRNA chr22    | 42364400 | 42369236 | - | 0    | 0.5  |
| ENSG0000(RP4-730D4 processed_ chr20 | 42606694 | 42607559 | + | 0    | 0    |
| ENSG0000(AC004549. antisense chr7   | 27733064 | 27740395 | - | 0    | 0    |
| ENSG0000(GK3P protein_co chr4       | 1.65E+08 | 1.65E+08 | - | 0    | 0    |
| ENSG0000(RP11-456H lincRNA chr6     | 12007670 | 12008856 | + | 0    | 0    |
| ENSG0000(SEPT7P7 processed_ chr9    | 98606833 | 98608133 | + | 0    | 0    |
| ENSG0000(AC084290. processed_ chr12 | 40286289 | 40286662 | + | 0    | 0    |
| ENSG0000(HSPD1P21 processed_ chr20  | 45539983 | 45540227 | - | 0    | 0    |
| ENSG0000(RP11-399E antisense chr1   | 41375004 | 41375669 | - | 0    | 0.24 |
| ENSG0000(RP11-206L antisense chr1   | 760911   | 761989   | + | 0    | 0    |
| ENSG0000(SNRPGP11 processed_ chr13  | 51496020 | 51496251 | - | 0    | 0    |
| ENSG0000(DEFB108P1 unprocessε chr8  | 7934412  | 7938770  | - | 0    | 0    |
| ENSG0000(TRIM60P1ε processed_ chr7  | 56631739 | 56632727 | - | 0    | 0    |
| ENSG0000(HNRNPA1F processed_ chr13  | 68301605 | 68303302 | - | 0    | 0    |
| ENSG0000(RP4-630J1ε processed_ chr1 | 1.19E+08 | 1.19E+08 | + | 0    | 0    |
| ENSG0000(AC128709. lincRNA chr3     | 1.97E+08 | 1.97E+08 | - | 0    | 0    |
| ENSG0000(RP11-378I1 antisense chr1  | 56823679 | 56826920 | - | 0    | 0    |
| ENSG0000(RP11-404C processed_ chr1  | 1.58E+08 | 1.58E+08 | - | 0    | 0    |
| ENSG0000(AC016999. antisense chr2   | 2.38E+08 | 2.38E+08 | - | 0.35 | 0.77 |
| ENSG0000(RPL7P46 processed_ chr16   | 11027024 | 11027763 | + | 0    | 0    |
| ENSG0000(DOCK9-AS1 antisense chr13  | 98832084 | 98834629 | + | 0    | 0    |
| ENSG0000(ELOCP3 processed_ chr10    | 10174230 | 10174577 | + | 0    | 0    |
| ENSG0000(RPS4XP5 transcribed chr2   | 63642455 | 63644038 | - | 0    | 0    |
| ENSG0000(KIF25-AS1 lincRNA chr6     | 1.68E+08 | 1.68E+08 | - | 0    | 0    |
| ENSG0000(RP11-240M lincRNA chr6     | 1.38E+08 | 1.38E+08 | + | 0    | 0    |
| ENSG0000(RP11-102N lincRNA chr6     | 1.31E+08 | 1.31E+08 | + | 0    | 0    |
| ENSG0000(FAM90A26 protein_co chr4   | 9170409  | 9176730  | + | 0    | 0    |
| ENSG0000(APO01043. lincRNA chr21    | 38888772 | 38903905 | + | 0    | 0    |
| ENSG0000(RP11-424E unprocessε chr9  | 1.38E+08 | 1.38E+08 | + | 0    | 0    |
| ENSG0000(RHEBP1 processed_ chr10    | 46634911 | 46635466 | - | 0    | 1.28 |
| ENSG0000(LINC00400 lincRNA chr13    | 43158631 | 43159466 | + | 0    | 0    |
| ENSG0000(RP11-504P unprocessε chr1  | 2.24E+08 | 2.24E+08 | - | 0    | 0    |
| ENSG0000(RP1-151F1 antisense chr6   | 16761138 | 16762652 | + | 2    | 2.13 |
| ENSG0000(YWHAZP3 processed_ chr10   | 23136924 | 23137661 | + | 0.1  | 0    |
| ENSG0000(MTCYBP9 processed_ chr2    | 1.55E+08 | 1.55E+08 | + | 0    | 0    |
| ENSG0000(PRPS1L1 protein_co chr7    | 18026774 | 18027863 | - | 0    | 0    |
| ENSG0000(MYO16-AS antisense chr13   | 1.09E+08 | 1.09E+08 | - | 0    | 0    |
| ENSG0000(RP11-111F processed_ chrX  | 1.12E+08 | 1.12E+08 | + | 0    | 0    |
| ENSG0000(TSPY22P unprocessε chrY    | 22305925 | 22307951 | - | 0    | 0    |
| ENSG0000(AC012499. antisense chr2   | 1.78E+08 | 1.78E+08 | + | 0    | 0    |
| ENSG0000(RP11-93N2 lincRNA chr1     | 74963314 | 74965118 | + | 0    | 0    |
| ENSG0000(EIF4EP2 processed_ chr17   | 49424269 | 49424922 | - | 0.2  | 2.54 |
| ENSG0000(B3GNT2P1 processed_ chrX   | 99886740 | 99887691 | - | 0    | 0    |
| ENSG0000(RP13-766D unitary_ψε chr17 | 81513063 | 81513184 | + | 0    | 0    |
| ENSG0000(B3GALNT1 processed_ chr2   | 69597353 | 69598951 | + | 0    | 0    |

|                                       |          |          |   |      |      |
|---------------------------------------|----------|----------|---|------|------|
| ENSG0000( AC005094. processed_ chr7   | 21400920 | 21401613 | - | 0    | 0    |
| ENSG0000( TFAP2A-AS antisense chr6    | 10409340 | 10416446 | + | 0.84 | 0.67 |
| ENSG0000( FLJ31356 antisense chr2     | 28384409 | 28394672 | - | 0.47 | 0.32 |
| ENSG0000( RP11-284F antisense chr1    | 1.57E+08 | 1.57E+08 | - | 0.6  | 0.75 |
| ENSG0000( MTND2P2 processed_ chrX     | 1.03E+08 | 1.03E+08 | + | 0    | 0    |
| ENSG0000( RP1-5O6.4 sense_intr( chr22 | 38387918 | 38388857 | - | 0    | 0    |
| ENSG0000( ZRANB2-AS processed_ chr1   | 71081324 | 71489976 | + | 0.74 | 0.38 |
| ENSG0000( RP5-998H6 lincRNA chr20     | 46168404 | 46171237 | - | 0    | 0    |
| ENSG0000( RP11-278H lincRNA chr1      | 2.44E+08 | 2.44E+08 | - | 0    | 0    |
| ENSG0000( RP11-71G1 transcribed chr1  | 1.57E+08 | 1.57E+08 | + | 0    | 0    |
| ENSG0000( AP000221. lincRNA chr21     | 25515473 | 25518338 | - | 0    | 0    |
| ENSG0000( RP11-135A lincRNA chr3      | 1.94E+08 | 1.94E+08 | + | 0    | 0    |
| ENSG0000( RP11-118H processed_ chr1   | 2.26E+08 | 2.26E+08 | + | 0.08 | 0.09 |
| ENSG0000( RP11-366F antisense chrX    | 1.52E+08 | 1.52E+08 | - | 0    | 0    |
| ENSG0000( RP3-393P1 processed_ chrX   | 47776827 | 47778697 | - | 0    | 0    |
| ENSG0000( RP11-96C2 antisense chr10   | 87009785 | 87015782 | - | 0    | 0.34 |
| ENSG0000( AC007128. antisense chr7    | 8262264  | 8344516  | + | 0    | 0    |
| ENSG0000( RP5-1119A antisense chr22   | 36552165 | 36552700 | + | 0    | 0    |
| ENSG0000( IQCF3 protein_co chr3       | 51817604 | 51830856 | + | 0    | 0    |
| ENSG0000( LIPT1P1 processed_ chr13    | 1.02E+08 | 1.02E+08 | + | 0    | 0    |
| ENSG0000( RP5-1031J lincRNA chr20     | 39785721 | 39813229 | + | 0    | 0    |
| ENSG0000( AC073264. processed_ chr7   | 1.44E+08 | 1.44E+08 | - | 0    | 0    |
| ENSG0000( PRAMEF36 transcribed chr1   | 13128818 | 13131615 | + | 0    | 0    |
| ENSG0000( U82670.9 processed_ chrX    | 1.53E+08 | 1.53E+08 | - | 0    | 0    |
| ENSG0000( TOB1-AS1 processed_ chr17   | 50866679 | 50909737 | + | 0.43 | 0.09 |
| ENSG0000( LINC01435 lincRNA chr10     | 1.08E+08 | 1.08E+08 | - | 0.11 | 0.24 |
| ENSG0000( GTF3AP6 processed_ chr7     | 1.19E+08 | 1.19E+08 | - | 0    | 0    |
| ENSG0000( RP11-15I11 lincRNA chr1     | 2.12E+08 | 2.12E+08 | + | 0    | 0    |
| ENSG0000( RP11-40H2 processed_ chr1   | 27176751 | 27177277 | + | 0.14 | 0.15 |
| ENSG0000( AP001042. lincRNA chr21     | 38846247 | 38848644 | + | 0    | 0    |
| ENSG0000( HBBP1 transcribed chr11     | 5241954  | 5243537  | - | 0.18 | 0    |
| ENSG0000( MIR181A1 lincRNA chr1       | 1.99E+08 | 1.99E+08 | - | 0.07 | 0.29 |
| ENSG0000( RP11-574K antisense chr10   | 73841833 | 73847115 | + | 0    | 0    |
| ENSG0000( AKR1B1P1 processed_ chr1    | 2.25E+08 | 2.25E+08 | + | 0    | 0    |
| ENSG0000( HMGB3P9 processed_ chr1     | 92647048 | 92647630 | - | 0    | 0.4  |
| ENSG0000( RPL5P4 processed_ chr1      | 35350722 | 35351607 | + | 0    | 0    |
| ENSG0000( AC093585. antisense chr2    | 2.41E+08 | 2.41E+08 | - | 0    | 0    |
| ENSG0000( RP5-1042K antisense chr22   | 40372664 | 40388290 | - | 0    | 0    |
| ENSG0000( RP5-905H7 processed_ chr7   | 63348861 | 63351774 | + | 0.11 | 0    |
| ENSG0000( RP11-70J1 sense_intr( chr9  | 4070906  | 4071884  | - | 0.11 | 0    |
| ENSG0000( ALMS1-IT1 sense_intr( chr2  | 73456764 | 73459484 | + | 0    | 0.09 |
| ENSG0000( RP11-217F processed_ chr9   | 72445754 | 72445969 | - | 0    | 0    |
| ENSG0000( SNAP47-AS antisense chr1    | 2.28E+08 | 2.28E+08 | - | 0    | 0    |
| ENSG0000( ANKRD36B transcribed chr2   | 88765807 | 88806612 | + | 0.1  | 0.07 |
| ENSG0000( MTCO2P3 processed_ chr13    | 57204379 | 57204799 | + | 0    | 0    |

|                                     |          |          |   |      |      |
|-------------------------------------|----------|----------|---|------|------|
| ENSG0000(RP4-568F9 lincRNA chr20    | 18322552 | 18359300 | - | 0    | 0    |
| ENSG0000(CTSLP4 unprocessε chr10    | 50705380 | 50708906 | - | 0    | 0    |
| ENSG0000(RP11-217B lincRNA chr9     | 1.05E+08 | 1.05E+08 | - | 0.11 | 0    |
| ENSG0000(LINC00709 lincRNA chr10    | 9275833  | 9287057  | + | 0    | 0    |
| ENSG0000(RP11-80B9 lincRNA chr1     | 2.41E+08 | 2.41E+08 | - | 0    | 0    |
| ENSG0000(RP11-481H processed_ chr10 | 1.13E+08 | 1.13E+08 | + | 0    | 0    |
| ENSG0000(YWHAQP9 processed_ chr1    | 2.38E+08 | 2.38E+08 | - | 0    | 0    |
| ENSG0000(NHS-AS1 antisense chrX     | 17552349 | 17557387 | - | 0    | 0    |
| ENSG0000(RP5-857K2 lincRNA chr1     | 585989   | 827796   | - | 0.74 | 0.25 |
| ENSG0000(FNTAP2 processed_ chr13    | 21530690 | 21531323 | + | 0    | 0    |
| ENSG0000(RP11-10N1 lincRNA chr1     | 24200240 | 24211693 | + | 0    | 0    |
| ENSG0000(AC007967. unprocessε chrY  | 8971751  | 8974095  | - | 0    | 0    |
| ENSG0000(RP11-382D processed_ chr1  | 2.35E+08 | 2.35E+08 | + | 0    | 0    |
| ENSG0000(RP11-550H lincRNA chr1     | 76041691 | 76066228 | + | 0    | 0    |
| ENSG0000(CDY11P unprocessε chrY     | 21696570 | 21698220 | + | 0    | 0    |
| ENSG0000(RP11-505C lincRNA chr9     | 1.08E+08 | 1.08E+08 | - | 0    | 0    |
| ENSG0000(POTE2 protein_co chr15     | 20835372 | 20866314 | - | 0    | 0    |
| ENSG0000(RP5-1121A lincRNA chr7     | 1.57E+08 | 1.57E+08 | + | 0    | 0    |
| ENSG0000(RP11-174G antisense chr1   | 18166929 | 18179346 | - | 0    | 0    |
| ENSG0000(UBBP1 processed_ chr2      | 1.36E+08 | 1.36E+08 | - | 0    | 0    |
| ENSG0000(RP11-314A processed_ chrX  | 65821255 | 65822249 | - | 0    | 0    |
| ENSG0000(LINC00364 lincRNA chr13    | 67372387 | 67379976 | + | 0    | 0    |
| ENSG0000(AK3P3 processed_ chr7      | 23129178 | 23129841 | + | 0.1  | 0.11 |
| ENSG0000(TMSB4XP6 processed_ chr20  | 50840615 | 50840749 | - | 0    | 0    |
| ENSG0000(AC110754. processed_ chr2  | 11665369 | 11665969 | - | 0    | 0    |
| ENSG0000(FAM90A15 unprocessε chr8   | 7256904  | 7259914  | + | 0    | 0    |
| ENSG0000(BIRC6-AS1 antisense chr2   | 32377631 | 32379599 | - | 0    | 0    |
| ENSG0000(AC017104. processed_ chr2  | 2.31E+08 | 2.31E+08 | - | 0    | 0    |
| ENSG0000(CTA-929C8 lincRNA chr22    | 27331787 | 27379265 | + | 0    | 0    |
| ENSG0000(MTND3P2 unprocessε chr7    | 64105654 | 64105995 | - | 0    | 0    |
| ENSG0000(RP11-76N2 processed_ chr1  | 88498309 | 88498676 | - | 0    | 0    |
| ENSG0000(RP11-402G protein_co chr9  | 1.15E+08 | 1.15E+08 | - | 0    | 0    |
| ENSG0000(DDX6P1 processed_ chr6     | 29329626 | 29331061 | - | 0    | 0    |
| ENSG0000(TRPM2-AS antisense chr21   | 44414588 | 44425272 | - | 0    | 0    |
| ENSG0000(ANKRD66 protein_co chr6    | 46746917 | 46759506 | + | 0    | 0    |
| ENSG0000(RP11-384C sense_intrε chr1 | 2.12E+08 | 2.12E+08 | + | 0    | 0    |
| ENSG0000(RP11-244N processed_ chr9  | 1.33E+08 | 1.33E+08 | + | 0    | 0.18 |
| ENSG0000(AC010974. antisense chr2   | 1.33E+08 | 1.33E+08 | + | 0    | 0    |
| ENSG0000(FAM197Y3 transcribec chrY  | 9497287  | 9506566  | - | 0    | 0    |
| ENSG0000(HSPD1P6 transcribec chr3   | 36767117 | 36784167 | - | 0    | 0    |
| ENSG0000(CDC42-IT1 sense_intrε chr1 | 22059197 | 22064199 | + | 0.29 | 0.11 |
| ENSG0000(LRRC37A15 processed_ chr4  | 1.03E+08 | 1.03E+08 | - | 0.77 | 0.33 |
| ENSG0000(RPL4P6 processed_ chr22    | 40586700 | 40588003 | - | 0.31 | 0.05 |
| ENSG0000(AC009947. unprocessε chrY  | 23523321 | 23525369 | + | 0    | 0    |
| ENSG0000(RP11-195F antisense chr9   | 34665665 | 34681298 | + | 3.24 | 2.23 |

|                                      |          |            |       |       |
|--------------------------------------|----------|------------|-------|-------|
| ENSG0000(RPL10P6 processed_ chr2     | 2.15E+08 | 2.15E+08 + | 0.32  | 0     |
| ENSG0000(MTAPP2 processed_ chr3      | 1.9E+08  | 1.9E+08 -  | 0     | 0     |
| ENSG0000(STK24P1 processed_ chrX     | 1.36E+08 | 1.36E+08 - | 0     | 0     |
| ENSG0000(AC139143. processed_ chr11  | 1802889  | 1804095 -  | 0     | 0     |
| ENSG0000(HSPE1P28 processed_ chr9    | 1.12E+08 | 1.12E+08 - | 0     | 0     |
| ENSG0000(PRRT3-AS1 antisense chr3    | 9947404  | 9954787 +  | 0.79  | 0.5   |
| ENSG0000(AC009237. processed_ chr2   | 95590969 | 95591206 - | 0     | 0     |
| ENSG0000(RP4-613B2 antisense chr3    | 42601963 | 42654388 - | 1.47  | 0.93  |
| ENSG0000(VN1R96P unitary_ps chr19    | 40121311 | 40122168 - | 0     | 0     |
| ENSG0000(AC104389. processed_ chr11  | 5354692  | 5355578 +  | 0     | 0     |
| ENSG0000(KRT16P5 processed_ chr17    | 20493634 | 20494155 - | 0     | 0     |
| ENSG0000(AC108025. processed_ chr2   | 5618327  | 5691118 -  | 0     | 0     |
| ENSG0000(TMEM254- antisense chr10    | 80046860 | 80078912 - | 0.35  | 0.52  |
| ENSG0000(RP11-206L. transcribed chr1 | 800879   | 817712 -   | 0.76  | 0.34  |
| ENSG0000(RP11-34C1 lincRNA chr10     | 4415305  | 4426179 -  | 0     | 0     |
| ENSG0000(ME2P1 processed_ chr9       | 29824742 | 29826711 - | 0     | 0     |
| ENSG0000(TCERG1L-A antisense chr10   | 1.31E+08 | 1.31E+08 + | 0     | 0     |
| ENSG0000(TRBV5-4 TR_V_gene chr7      | 1.42E+08 | 1.42E+08 + | 0     | 0     |
| ENSG0000(RP11-344N lincRNA chrX      | 48333675 | 48334439 - | 0     | 0     |
| ENSG0000(TUBB3P2 processed_ chr7     | 1.35E+08 | 1.35E+08 - | 0     | 0     |
| ENSG0000(LINC02028 processed_ chr3   | 1.94E+08 | 1.94E+08 - | 0     | 0     |
| ENSG0000(AC018712. processed_ chr2   | 1.73E+08 | 1.73E+08 - | 0     | 0     |
| ENSG0000(RP11-431N lincRNA chrX      | 56618391 | 56624458 + | 0     | 0.1   |
| ENSG0000(SNRPCP15 processed_ chr8    | 7170550  | 7170741 +  | 0     | 0     |
| ENSG0000(CTA-126B4 lincRNA chr22     | 42438023 | 42446195 + | 0     | 0     |
| ENSG0000(RP11-275N lincRNA chr10     | 21340233 | 21372950 - | 0     | 0     |
| ENSG0000(AC115283. processed_ chr3   | 31269007 | 31269406 + | 0     | 0     |
| ENSG0000(RP11-56H7 processed_ chr10  | 20841375 | 20841560 + | 0     | 0     |
| ENSG0000(AC091177. antisense chr17   | 30956280 | 30956961 - | 0     | 0     |
| ENSG0000(RP11-141A antisense chr1    | 49257411 | 49269285 + | 0     | 0     |
| ENSG0000(TPRG1-AS2 antisense chr3    | 1.89E+08 | 1.89E+08 - | 0     | 0     |
| ENSG0000(RP11-163G processed_ chr1   | 42491739 | 42492493 + | 0     | 0     |
| ENSG0000(AC092569. processed_ chr2   | 30746444 | 30746701 - | 0     | 0     |
| ENSG0000(AC123900. processed_ chr3   | 33190233 | 33190328 - | 0     | 0     |
| ENSG0000(RP1-90G24 lincRNA chr22     | 32159454 | 32160392 - | 0     | 0     |
| ENSG0000(RP11-385N antisense chr10   | 7533207  | 7536565 +  | 0     | 0     |
| ENSG0000(ECEL1P3 unprocessed chr2    | 2.32E+08 | 2.32E+08 - | 0     | 0     |
| ENSG0000(DLEC1P1 unprocessed chr3    | 38325237 | 38329070 - | 0     | 0     |
| ENSG0000(ACBD6 protein_co chr1       | 1.8E+08  | 1.81E+08 - | 24.74 | 25.17 |
| ENSG0000(EEF1A1P39 processed_ chr10  | 30301823 | 30302072 - | 0     | 0     |
| ENSG0000(FGF12-AS2 antisense chr3    | 1.93E+08 | 1.93E+08 + | 0     | 0     |
| ENSG0000(MTND2P39 processed_ chrX    | 1.43E+08 | 1.43E+08 + | 0     | 0     |
| ENSG0000(RP11-2821J lincRNA chr10    | 1.23E+08 | 1.24E+08 + | 0     | 0     |
| ENSG0000(RP5-1193P processed_ chr7   | 63480598 | 63480989 - | 0     | 0     |
| ENSG0000(LINC01721 lincRNA chr20     | 24199767 | 24224588 + | 0     | 0     |

|                                         |          |          |   |      |      |
|-----------------------------------------|----------|----------|---|------|------|
| ENSG0000(RP4-539M) processed_chr22      | 30439837 | 30440318 | + | 0    | 0    |
| ENSG0000(RP11-117D) lincRNA chr1        | 53366668 | 53368245 | - | 0    | 0    |
| ENSG0000(AC016738) antisense chr2       | 1.01E+08 | 1.01E+08 | - | 0    | 0    |
| ENSG0000(LINC01075) lincRNA chr13       | 62212577 | 62249947 | + | 0    | 0    |
| ENSG0000(SEPHS1P4) processed_chrX       | 73769248 | 73770423 | + | 0    | 0    |
| ENSG0000(RP11-305L) processed_chr9      | 91169585 | 91170045 | - | 0    | 0.19 |
| ENSG0000(HOXB-AS1) antisense chr17      | 48543551 | 48551250 | + | 3.02 | 5.6  |
| ENSG0000(RP3-508I1) antisense chr22     | 38734730 | 38738990 | + | 0.7  | 0.31 |
| ENSG0000(AF003626) lincRNA chrX         | 1.51E+08 | 1.51E+08 | + | 0    | 0    |
| ENSG0000(AC018463) processed_chr2       | 11308025 | 11308941 | + | 0    | 0    |
| ENSG0000(RP3-477O4) antisense chr20     | 35476203 | 35490982 | - | 0.16 | 0    |
| ENSG0000(LINC00443) lincRNA chr13       | 1.07E+08 | 1.07E+08 | + | 0    | 0    |
| ENSG0000(ATP5G1P1) processed_chr14      | 1.06E+08 | 1.06E+08 | - | 0    | 0    |
| ENSG0000(MTND1P2) unprocessed_chr2      | 1.17E+08 | 1.17E+08 | + | 0    | 0    |
| ENSG0000(RP11-232D) lincRNA chrX        | 1.17E+08 | 1.17E+08 | - | 0    | 0    |
| ENSG0000(AC004854) processed_chr7       | 44919669 | 44920329 | + | 0    | 0    |
| ENSG0000(RP11-62L1) processed_chr9      | 1.01E+08 | 1.01E+08 | + | 0    | 0    |
| ENSG0000(CT45A11P) unprocessed_chrX     | 1.36E+08 | 1.36E+08 | - | 0    | 0.06 |
| ENSG0000(RP5-997D1) antisense chr1      | 34850694 | 34851555 | + | 0    | 0    |
| ENSG0000(MAS1LP1) unprocessed_chr6      | 29475025 | 29476071 | - | 0    | 0    |
| ENSG0000(AURKAPS2) processed_chr10      | 1.14E+08 | 1.14E+08 | + | 0    | 0    |
| ENSG0000(RPL35AP24) processed_chr10     | 49909613 | 49909942 | + | 0    | 0    |
| ENSG0000(RPL30P16) processed_chr8       | 1.13E+08 | 1.13E+08 | + | 0    | 0    |
| ENSG0000(HNRNPA1P) processed_chrX       | 1.19E+08 | 1.19E+08 | + | 0    | 0    |
| ENSG0000(RPL22P18) processed_chr10      | 80125941 | 80126317 | + | 0    | 0    |
| ENSG0000(AC090957) antisense chr3       | 14764952 | 14767440 | - | 0    | 0    |
| ENSG0000(LINC01790) lincRNA chr2        | 1.95E+08 | 1.95E+08 | + | 0    | 0    |
| ENSG0000(LINC01149) lincRNA chr6        | 31441667 | 31446973 | + | 0    | 0    |
| ENSG0000(RP11-466F) processed_chr1      | 1.66E+08 | 1.66E+08 | + | 0    | 0    |
| ENSG0000(LINC01433) antisense chr20     | 4193065  | 4195943  | + | 0    | 0    |
| ENSG0000(RP5-1112D) antisense chr6      | 1.11E+08 | 1.11E+08 | + | 0.26 | 0.42 |
| ENSG0000(OR4F3) protein_coding chr5     | 1.81E+08 | 1.81E+08 | + | 0    | 0    |
| ENSG0000(RPL12P49) processed_chrX       | 16803233 | 16803353 | + | 0    | 0    |
| ENSG0000(RNF10P1) processed_chr3        | 5068676  | 5069044  | - | 0    | 0    |
| ENSG0000(CNOT6LP1) processed_chr15      | 56005715 | 56007176 | - | 0    | 0.14 |
| ENSG0000(SMYD3-IT1) sense_intronic chr1 | 2.46E+08 | 2.46E+08 | - | 0    | 0    |
| ENSG0000(C9orf147) antisense chr9       | 1.12E+08 | 1.12E+08 | - | 0    | 0    |
| ENSG0000(RP5-998N2) antisense chr1      | 1.44E+08 | 1.44E+08 | + | 0    | 0    |
| ENSG0000(RP11-291C) processed_chrX      | 70672895 | 70673515 | - | 0    | 0    |
| ENSG0000(RP11-405L) processed_chr9      | 37490421 | 37490893 | - | 0    | 0    |
| ENSG0000(GS1-124K5) transcribed chr7    | 66427949 | 66453634 | - | 0    | 0.07 |
| ENSG0000(AC005518) sense_intronic chr7  | 1.48E+08 | 1.48E+08 | + | 0    | 0    |
| ENSG0000(RP4-725G1) processed_chr7      | 56163145 | 56163533 | + | 0    | 0    |
| ENSG0000(AC073387) processed_chr7       | 1.1E+08  | 1.1E+08  | + | 0    | 0    |
| ENSG0000(AC000081) processed_chr22      | 19238443 | 19238739 | - | 0    | 0    |

|                                       |          |          |   |      |      |
|---------------------------------------|----------|----------|---|------|------|
| ENSG0000(DDX43P3 processed_ chr7      | 81610884 | 81611326 | - | 0    | 0    |
| ENSG0000(RP11-160E lincRNA chr17      | 19077775 | 19087878 | + | 0    | 0    |
| ENSG0000(RPL37P4 processed_ chr21     | 19593841 | 19594108 | + | 0    | 0    |
| ENSG0000(RP11-331N processed_ chr1    | 2.43E+08 | 2.43E+08 | + | 0    | 0    |
| ENSG0000(ATP6V0CP: processed_ chr17   | 4856757  | 4857374  | - | 0    | 0    |
| ENSG0000(RP11-632C processed_ chr6    | 1.18E+08 | 1.18E+08 | + | 0.9  | 0.63 |
| ENSG0000(CTB-1048E processed_ chr22   | 26422071 | 26423193 | - | 0    | 0    |
| ENSG0000(FTH1P5 processed_ chr6       | 50912712 | 50913256 | - | 0.81 | 0.98 |
| ENSG0000(RP11-631F lincRNA chr6       | 1.48E+08 | 1.48E+08 | - | 0    | 0    |
| ENSG0000(RPL4P5 processed_ chr9       | 7477045  | 7478320  | - | 0.09 | 0    |
| ENSG0000(IFNNP1 processed_ chr9       | 21058771 | 21059323 | - | 0    | 0    |
| ENSG0000(AP000688. sense_intron chr21 | 36069642 | 36126640 | - | 0    | 0    |
| ENSG0000(OR8V1P unprocessed_ chr11    | 56188379 | 56189251 | - | 0    | 0    |
| ENSG0000(FTLP18 processed_ chr1       | 36630335 | 36630857 | + | 0    | 0    |
| ENSG0000(LINC01840 antisense chr3     | 1.85E+08 | 1.85E+08 | - | 0.66 | 0.14 |
| ENSG0000(HSPB1P2 processed_ chrX      | 49233956 | 49234501 | - | 0    | 0    |
| ENSG0000(FAM92A1P transcribed chr4    | 1.83E+08 | 1.83E+08 | + | 0.02 | 0.02 |
| ENSG0000(RP11-173G processed_ chr9    | 95292338 | 95294810 | + | 0    | 0    |
| ENSG0000(ATXN8OS antisense chr13      | 70107213 | 70139429 | + | 0    | 0    |
| ENSG0000(PHBP9 processed_ chr10       | 1E+08    | 1E+08    | + | 0    | 0    |
| ENSG0000(MTND5P14 unprocessed_ chr9   | 5109496  | 5110762  | + | 0    | 0    |
| ENSG0000(RP4-697K1 antisense chr20    | 63502287 | 63505111 | + | 0    | 0    |
| ENSG0000(SIAH1P1 processed_ chrX      | 35626142 | 35627064 | + | 0    | 0    |
| ENSG0000(RP11-4M2: processed_ chr1    | 23949016 | 23949383 | - | 0    | 0    |
| ENSG0000(RP11-90J7. lincRNA chr10     | 78352597 | 78356100 | + | 0    | 0    |
| ENSG0000(FMO7P unprocessed_ chr1      | 1.66E+08 | 1.66E+08 | + | 0    | 0    |
| ENSG0000(AF240627. lincRNA chr21      | 18614431 | 18650360 | + | 0    | 0    |
| ENSG0000(RP1-276N6 lincRNA chr6       | 1.6E+08  | 1.6E+08  | + | 0    | 0    |
| ENSG0000(AC010975. processed_ chr2    | 79573764 | 79575593 | - | 0    | 0    |
| ENSG0000(RP11-108M lincRNA chr1       | 16855407 | 16859284 | + | 0    | 0    |
| ENSG0000(RPL34P19 processed_ chr10    | 31983885 | 31984554 | + | 0    | 0    |
| ENSG0000(RP11-38O2 processed_ chrX    | 48135658 | 48136159 | - | 0    | 0    |
| ENSG0000(FKBP1AP3 processed_ chr13    | 46505118 | 46505436 | + | 0    | 0    |
| ENSG0000(RAD23BP2 processed_ chr7     | 83663419 | 83664625 | + | 0    | 0    |
| ENSG0000(RP11-475I2 processed_ chr9   | 42636788 | 42637139 | - | 0    | 0    |
| ENSG0000(SPATA31C1 transcribed chr9   | 87914493 | 87923505 | + | 0    | 0    |
| ENSG0000(HNRNPH3F processed_ chrX     | 80529037 | 80530027 | + | 0    | 0    |
| ENSG0000(RP1-128O3 lincRNA chr6       | 1.08E+08 | 1.08E+08 | + | 0    | 0    |
| ENSG0000(RP13-824C processed_ chrX    | 3112900  | 3113596  | - | 0    | 0    |
| ENSG0000(LINC01753 lincRNA chr1       | 55915607 | 55944974 | - | 0    | 0    |
| ENSG0000(PHBP4 processed_ chr2        | 1.54E+08 | 1.54E+08 | + | 0    | 0    |
| ENSG0000(MTND2P4 unprocessed_ chr7    | 64110547 | 64111550 | - | 0    | 0    |
| ENSG0000(FGFR1OP2 processed_ chr13    | 26905362 | 26905861 | + | 0    | 0    |
| ENSG0000(NFE4 protein_code chr7       | 1.03E+08 | 1.03E+08 | + | 0.06 | 0.07 |
| ENSG0000(AC002539. antisense chr17    | 70017324 | 70128859 | - | 0    | 0    |

|                                         |          |          |   |      |      |
|-----------------------------------------|----------|----------|---|------|------|
| ENSG0000(RP11-75C2 antisense chr1       | 1.97E+08 | 1.97E+08 | - | 0    | 0    |
| ENSG0000(OR52J2P unprocessed chr11      | 5037013  | 5037951  | + | 0    | 0    |
| ENSG0000(MIRLET7D lincRNA chr9          | 94176602 | 94204568 | - | 0    | 0    |
| ENSG0000(RP11-702C processed_chrX       | 26557675 | 26558330 | + | 0    | 0    |
| ENSG0000(XXYLT1-AS antisense chr3       | 1.95E+08 | 1.95E+08 | + | 0    | 0    |
| ENSG0000(HERC2P4 transcribed chr16      | 32103245 | 32188107 | - | 2.45 | 2.91 |
| ENSG0000(SSU72P8 protein_codon chr7     | 1.24E+08 | 1.24E+08 | + | 0    | 0    |
| ENSG0000(RP1-40E16 lincRNA chr6         | 3182744  | 3195756  | - | 0    | 0    |
| ENSG0000(RP11-548K unprocessed chr7     | 57772584 | 57773199 | - | 0    | 0    |
| ENSG0000(AC087163 processed_chr17       | 17981192 | 17981572 | - | 0    | 0    |
| ENSG0000(PGAM1P3 processed_chr3         | 40322715 | 40323279 | - | 0    | 0    |
| ENSG0000(SERBP1P4 processed_chrX        | 91560436 | 91561597 | - | 0    | 0    |
| ENSG0000(RP11-373A processed_chr9       | 29254075 | 29254426 | - | 0    | 0    |
| ENSG0000(HNRNPA1P processed_chr1        | 2.03E+08 | 2.03E+08 | + | 0    | 0    |
| ENSG0000(RPL7P61 processed_chr2         | 1.63E+08 | 1.63E+08 | - | 0    | 0    |
| ENSG0000(RPS12P24 processed_chr13       | 37220860 | 37221246 | - | 0    | 0    |
| ENSG0000(RP11-402G processed_chr9       | 1.15E+08 | 1.15E+08 | - | 0    | 0    |
| ENSG0000(RP11-290M lincRNA chr1         | 85599131 | 85600734 | + | 0    | 0    |
| ENSG0000(AC013472 antisense chr2        | 26950308 | 27009807 | - | 0    | 0    |
| ENSG0000(RP11-305E processed_chr1       | 1E+08    | 1E+08    | + | 0    | 0    |
| ENSG0000(RP11-334J antisense chr9       | 1.32E+08 | 1.32E+08 | - | 0    | 0    |
| ENSG0000(ARMC2-AS antisense chr6        | 1.09E+08 | 1.09E+08 | - | 0    | 0    |
| ENSG0000(RP11-244J processed_chr12      | 80102899 | 80103333 | - | 0    | 0    |
| ENSG0000(NAALADL2 processed_chr3        | 1.75E+08 | 1.75E+08 | - | 0    | 0    |
| ENSG0000(RP13-507P lincRNA chr12        | 1.31E+08 | 1.31E+08 | + | 0    | 0    |
| ENSG0000(GTF2IP23 unprocessed chr7      | 66880708 | 66882981 | + | 0.79 | 0    |
| ENSG0000(RP11-253D lincRNA chr10        | 30576699 | 30580182 | + | 0    | 0    |
| ENSG0000(AC093162 processed_chr2        | 85262144 | 85262267 | - | 0    | 0    |
| ENSG0000(STARD13-1 sense_intronic chr13 | 33158587 | 33164409 | - | 0    | 0    |
| ENSG0000(OR5H6 protein_codon chr3       | 98264244 | 98265356 | + | 0    | 0    |
| ENSG0000(MTND3P4 processed_chr9         | 1.02E+08 | 1.02E+08 | - | 0    | 0    |
| ENSG0000(RP11-213G lincRNA chr9         | 85785722 | 85793480 | - | 0    | 0    |
| ENSG0000(CICP6 processed_chr3           | 1.98E+08 | 1.98E+08 | - | 0    | 0    |
| ENSG0000(AC004980 unprocessed chr7      | 76524515 | 76532692 | + | 0.29 | 0.3  |
| ENSG0000(BANF1P2 processed_chr10        | 1.33E+08 | 1.33E+08 | - | 0    | 0    |
| ENSG0000(OR6C5P unprocessed chr12       | 55311835 | 55312757 | + | 0    | 0    |
| ENSG0000(RP3-390M lincRNA chr6          | 78604467 | 78606036 | - | 0    | 0    |
| ENSG0000(CTD-2192J lincRNA chr19        | 12552597 | 12553644 | + | 0    | 0    |
| ENSG0000(TOMM20P processed_chrX         | 73223124 | 73223558 | + | 0    | 0    |
| ENSG0000(LLOXNC01 processed_chrX        | 1.04E+08 | 1.04E+08 | + | 0.13 | 0.07 |
| ENSG0000(HCG24 antisense chr6           | 33144783 | 33147767 | + | 0    | 0    |
| ENSG0000(ELOVL2-AS antisense chr6       | 11043524 | 11078226 | + | 0    | 0    |
| ENSG0000(FEZF1-AS1 antisense chr7       | 1.22E+08 | 1.22E+08 | + | 0    | 0    |
| ENSG0000(LINC01284 lincRNA chrX         | 51095844 | 51171400 | - | 0    | 0    |
| ENSG0000(XRCC6P3 processed_chr1         | 2.2E+08  | 2.2E+08  | - | 0    | 0    |

|                                     |          |          |   |      |      |
|-------------------------------------|----------|----------|---|------|------|
| ENSG0000(AL022476.: antisense chr22 | 43038585 | 43052366 | + | 0    | 0.03 |
| ENSG0000(BEND7P1 processed_chrX     | 1.03E+08 | 1.03E+08 | + | 0    | 0    |
| ENSG0000(MTCO2P27 unprocessε chr19  | 12504905 | 12505976 | + | 0    | 0    |
| ENSG0000(RP3-323N1 antisense chr10  | 11168922 | 11171376 | - | 0    | 0    |
| ENSG0000(LINC00159 lincRNA chr21    | 32080316 | 32197813 | - | 0    | 0    |
| ENSG0000(LINC01734 lincRNA chr20    | 39213777 | 39224748 | - | 0    | 0    |
| ENSG0000(RP11-385F antisense chr1   | 2.37E+08 | 2.37E+08 | - | 0.17 | 0.38 |
| ENSG0000(HMGN1P3: processed_chrX    | 9865093  | 9865543  | - | 0    | 0    |
| ENSG0000(MTCO1P42 processed_chr2    | 50588690 | 50589415 | - | 0    | 0    |
| ENSG0000(RP11-35N6 processed_chr9   | 1.01E+08 | 1.01E+08 | + | 0    | 0    |
| ENSG0000(HMGN2P3 processed_chr16    | 26032539 | 26032811 | - | 0    | 0    |
| ENSG0000(RP5-1068B processed_chr1   | 2.29E+08 | 2.29E+08 | + | 0    | 0    |
| ENSG0000(AC004538. processed_chr7   | 11180902 | 11520175 | + | 2.34 | 3.83 |
| ENSG0000(DNAJB5P1 processed_chr9    | 76931261 | 76932066 | - | 0    | 0    |
| ENSG0000(RP4-635E1 antisense chr1   | 11099675 | 11102100 | + | 0.51 | 0.2  |
| ENSG0000(MTND4P1ε processed_chr10   | 94774156 | 94774633 | - | 0    | 0    |
| ENSG0000(RP11-434D processed_chr17  | 20554137 | 20554380 | + | 0    | 0    |
| ENSG0000(FANCD2P2 unprocessε chr3   | 11859674 | 11891172 | + | 0    | 0    |
| ENSG0000(AC018892. unprocessε chr2  | 97034442 | 97034706 | + | 0    | 0    |
| ENSG0000(RP13-455A lincRNA chr22    | 47860671 | 47862062 | + | 0    | 0    |
| ENSG0000(CT47A8 protein_co chrX     | 1.21E+08 | 1.21E+08 | - | 0    | 0    |
| ENSG0000(RPL35AP3 processed_chr6    | 1.37E+08 | 1.37E+08 | - | 0    | 0    |
| ENSG0000(RP4-614C1 lincRNA chr20    | 59360927 | 59364773 | - | 0    | 0    |
| ENSG0000(AC114755. processed_chr2   | 1.06E+08 | 1.06E+08 | - | 0    | 0    |
| ENSG0000(AC009474. processed_chr2   | 66881087 | 66881222 | - | 0    | 0    |
| ENSG0000(NCAPD2P1 processed_chr7    | 34750253 | 34752053 | - | 0    | 0    |
| ENSG0000(SPDYE21P unprocessε chr7   | 67279778 | 67286230 | + | 0    | 0    |
| ENSG0000(TPI1P2 transcribec chr7    | 1.29E+08 | 1.29E+08 | + | 0.25 | 0.33 |
| ENSG0000(DDX10P2 processed_chr9     | 82086155 | 82088768 | - | 0    | 0    |
| ENSG0000(VN1R32P unitary_psι chr7   | 63377329 | 63378233 | + | 0    | 0    |
| ENSG0000(ACTG1P23 processed_chr3    | 1.76E+08 | 1.76E+08 | - | 0    | 0    |
| ENSG0000(RPL4P3 processed_chr1      | 1.72E+08 | 1.72E+08 | - | 0    | 0    |
| ENSG0000(RP11-23D5 lincRNA chr9     | 11275314 | 11276314 | - | 0    | 0    |
| ENSG0000(DSCR9 lincRNA chr21        | 37208503 | 37221736 | + | 0.14 | 0    |
| ENSG0000(FAM41C lincRNA chr1        | 868071   | 876903   | - | 1.12 | 0.06 |
| ENSG0000(RPL23AP52 processed_chr7   | 11006399 | 11006876 | - | 0.16 | 0.18 |
| ENSG0000(KARSP2 processed_chr13     | 1.13E+08 | 1.13E+08 | + | 0    | 0.04 |
| ENSG0000(RP3-425P1 lincRNA chr6     | 25061625 | 25063507 | - | 0    | 0    |
| ENSG0000(GOLGA6L5 transcribec chr15 | 84507885 | 84516814 | - | 6.53 | 6.56 |
| ENSG0000(GSTA11P unprocessε chr6    | 52847910 | 52870329 | - | 0    | 0    |
| ENSG0000(MEMO1P4 processed_chrX     | 1.24E+08 | 1.24E+08 | + | 0    | 0    |
| ENSG0000(ELOCP7 processed_chrY      | 18532326 | 18532656 | - | 0    | 0    |
| ENSG0000(AP000146. lincRNA chr21    | 24938431 | 24992817 | - | 0    | 0    |
| ENSG0000(RP4-655J1: lincRNA chr1    | 1.16E+08 | 1.16E+08 | - | 0    | 0    |
| ENSG0000(AC009245. processed_chr7   | 1.38E+08 | 1.38E+08 | + | 0    | 0    |



|                                      |          |            |      |      |
|--------------------------------------|----------|------------|------|------|
| ENSG0000(RPSAP25 processed_ chr2     | 1.76E+08 | 1.76E+08 + | 0    | 0    |
| ENSG0000(AC012507. antisense chr2    | 2.31E+08 | 2.31E+08 + | 0    | 0    |
| ENSG0000(RP13-157F unprocessε chr7   | 65617077 | 65619214 + | 0    | 0    |
| ENSG0000(RP4-737E2 lincRNA chr20     | 23187961 | 23190307 + | 0    | 0    |
| ENSG0000(LINC01048 lincRNA chr13     | 37481467 | 37484769 - | 0    | 0    |
| ENSG0000(RPSAP23 processed_ chr2     | 1.15E+08 | 1.15E+08 + | 0    | 0    |
| ENSG0000(RP5-1139I1 lincRNA chrX     | 1.19E+08 | 1.19E+08 + | 0.09 | 0.08 |
| ENSG0000(AC092667. antisense chr2    | 1E+08    | 1E+08 +    | 0    | 0    |
| ENSG0000(RP11-692P lincRNA chrX      | 8007378  | 8018160 +  | 0    | 0    |
| ENSG0000(AC092651. unprocessε chr2   | 87118534 | 87120980 - | 0    | 0    |
| ENSG0000(SPTLC1P1 transcribec chr10  | 31360955 | 31361215 + | 0    | 0.78 |
| ENSG0000(HINT2P1 processed_ chr3     | 2362258  | 2362738 +  | 0    | 0    |
| ENSG0000(RBBP8P1 processed_ chrX     | 1.19E+08 | 1.19E+08 - | 0    | 0    |
| ENSG0000(LINC01747 lincRNA chr20     | 22668484 | 22685344 - | 0.05 | 0.05 |
| ENSG0000(LINC01972 lincRNA chr3      | 1.95E+08 | 1.95E+08 - | 0    | 0    |
| ENSG0000(LINC01349 lincRNA chr1      | 1.01E+08 | 1.01E+08 - | 0    | 0    |
| ENSG0000(LINC01066 lincRNA chr13     | 30995162 | 30996138 - | 0    | 0    |
| ENSG0000(RP5-855F1. lincRNA chr1     | 2.35E+08 | 2.35E+08 + | 0    | 0    |
| ENSG0000(RPS3AP52 processed_ chr13   | 68634190 | 68634486 + | 0    | 0    |
| ENSG0000(AC079834. processed_ chr2   | 2.22E+08 | 2.22E+08 + | 0    | 0    |
| ENSG0000(AC018717. processed_ chr2   | 1.99E+08 | 1.99E+08 + | 0    | 0    |
| ENSG0000(AC007163. antisense chr2    | 2.01E+08 | 2.01E+08 - | 0.07 | 0.08 |
| ENSG0000(TCEA1P2 processed_ chr3     | 37275693 | 37276598 + | 0.18 | 0    |
| ENSG0000(OR3D1P unprocessε chr1      | 2.48E+08 | 2.48E+08 + | 0    | 0    |
| ENSG0000(ELOCP12 processed_ chrY     | 18068483 | 18068810 + | 0    | 0    |
| ENSG0000(LINC01786 lincRNA chr1      | 1275223  | 1280420 +  | 1.55 | 1.22 |
| ENSG0000(OR5M4P unprocessε chr11     | 56448668 | 56449592 + | 0    | 0    |
| ENSG0000(LINC00856 lincRNA chr10     | 78179185 | 78551355 + | 0.37 | 0.97 |
| ENSG0000(ARL2BPP7 processed_ chr9    | 1.02E+08 | 1.02E+08 - | 0    | 0    |
| ENSG0000(XX-C2158C lincRNA chr6      | 1.71E+08 | 1.71E+08 + | 0    | 0    |
| ENSG0000(RP1-43E13 antisense chr1    | 19210501 | 19240704 + | 1.32 | 1.78 |
| ENSG0000(RSU1P1 unprocessε chr10     | 42725857 | 42737159 + | 0    | 0    |
| ENSG0000(ERVMER61 lincRNA chr1       | 1.88E+08 | 1.88E+08 + | 0    | 0    |
| ENSG0000(RP11-313A antisense chr1    | 95061596 | 95067545 + | 0    | 0    |
| ENSG0000(RP1-196A1 transcribec chr16 | 451404   | 453461 +   | 0    | 0    |
| ENSG0000(USP17L25 protein_co chr4    | 9329911  | 9331862 +  | 0    | 0    |
| ENSG0000(AC114803. antisense chr2    | 2.19E+08 | 2.19E+08 + | 1.66 | 2.56 |
| ENSG0000(RP1-20B11 antisense chr6    | 524171   | 525581 +   | 0    | 0    |
| ENSG0000(LINC01650 lincRNA chr1      | 95351251 | 95352254 - | 0    | 0    |
| ENSG0000(AC004160. antisense chr7    | 11406955 | 11414078 + | 0.38 | 0.42 |
| ENSG0000(RP11-102J. lincRNA chr20    | 12305613 | 12316485 - | 0    | 0    |
| ENSG0000(SERPINB9P lincRNA chr6      | 2854657  | 2881407 -  | 0.51 | 0.23 |
| ENSG0000(RP11-488P sense_intrε chr1  | 93752924 | 93775444 - | 0.07 | 0.11 |
| ENSG0000(RP13-329D lincRNA chr20     | 26132887 | 26134198 - | 0    | 0    |
| ENSG0000(RP11-390E antisense chr7    | 1.24E+08 | 1.24E+08 - | 0    | 0    |

|                             |                   |          |          |   |      |      |
|-----------------------------|-------------------|----------|----------|---|------|------|
| ENSG0000(TFAMP1             | processed_ chr7   | 1614590  | 1615325  | + | 0    | 0    |
| ENSG0000(LRRC37A6F          | transcribed chr10 | 27246350 | 27259455 | - | 0.01 | 0    |
| ENSG0000(CTF2P              | unitary_psi chr16 | 30904348 | 30910208 | - | 0    | 0    |
| ENSG0000(LINC00276          | lincRNA chr2      | 13710531 | 14400963 | - | 0    | 0    |
| ENSG0000(RPL7P4             | processed_ chr6   | 30696806 | 30697535 | - | 0    | 0    |
| ENSG0000(NEK2P4             | processed_ chr2   | 1.31E+08 | 1.31E+08 | - | 0    | 0    |
| ENSG0000(RPS29P6            | processed_ chr1   | 37330852 | 37330996 | + | 0    | 0    |
| ENSG0000(LINC01381          | antisense chr2    | 25204313 | 25209202 | + | 0    | 0    |
| ENSG0000(ANKRD18B           | protein_co chr9   | 33524394 | 33573009 | + | 1.44 | 0.71 |
| ENSG0000(U73166.2           | lincRNA chr3      | 50260303 | 50263358 | + | 0.71 | 0.45 |
| ENSG0000(PA2G4P4            | processed_ chr3   | 1.57E+08 | 1.57E+08 | - | 0.1  | 0.06 |
| ENSG0000(GPM6BP1            | unprocessε chrY   | 18578417 | 18578560 | + | 0    | 0    |
| ENSG0000(RP11-741G          | processed_ chr15  | 77278465 | 77278774 | + | 0    | 0    |
| ENSG0000(PROX1-AS1          | processed_ chr1   | 2.14E+08 | 2.14E+08 | - | 0    | 0.01 |
| ENSG0000(VENTXP4            | processed_ chr3   | 26346681 | 26347638 | - | 0    | 0    |
| ENSG0000(CLUHP5             | unprocessε chr10  | 1.34E+08 | 1.34E+08 | - | 0    | 0    |
| ENSG0000(RPL5P26            | processed_ chr10  | 69778962 | 69779838 | + | 0    | 0    |
| ENSG0000(GS1-115G2          | sense_intrε chr1  | 1.84E+08 | 1.84E+08 | + | 0    | 0    |
| ENSG0000(LA16c-2F2.         | lincRNA chr22     | 15600908 | 15604882 | - | 0    | 0    |
| ENSG0000(RP1-28O17          | lincRNA chr6      | 50587607 | 50637205 | - | 0    | 0    |
| ENSG0000(ATP6V1G1           | processed_ chr13  | 1.03E+08 | 1.03E+08 | - | 0    | 0    |
| ENSG0000(OFD1P9Y            | unprocessε chrY   | 22580989 | 22614081 | - | 0    | 0    |
| ENSG0000(AC005034.          | processed_ chr2   | 75598071 | 75598559 | + | 0    | 0    |
| ENSG0000(RP1-52D1.          | processed_ chrX   | 87425583 | 87425690 | - | 0    | 0    |
| ENSG0000(AP000695.          | antisense chr21   | 36430360 | 36481070 | + | 1.54 | 0.69 |
| ENSG0000(AC093142.          | processed_ chr3   | 28447725 | 28448073 | + | 0    | 0    |
| ENSG0000(IGKV1OR2:IG_V_pseu | chr22             | 16904219 | 16904696 | - | 0    | 0    |
| ENSG0000(ATP5G2P3           | processed_ chr2   | 1.97E+08 | 1.97E+08 | + | 0    | 0    |
| ENSG0000(AC124057.          | antisense chr11   | 2404515  | 2407908  | + | 0    | 0    |
| ENSG0000(OR51A10P           | unitary_psi chr11 | 5468486  | 5469422  | - | 0    | 0    |
| ENSG0000(AC000077.          | processed_ chr22  | 19630750 | 19633574 | - | 0    | 0    |
| ENSG0000(PSMG3-AS           | lincRNA chr7      | 1570073  | 1589626  | + | 6.21 | 6.23 |
| ENSG0000(VAV3-AS1           | antisense chr1    | 1.08E+08 | 1.08E+08 | + | 0    | 0    |
| ENSG0000(RP11-141M          | lincRNA chr13     | 33355206 | 33676768 | - | 0.07 | 0    |
| ENSG0000(RP13-228J          | processed_ chrX   | 1.55E+08 | 1.55E+08 | + | 0    | 0    |
| ENSG0000(RP4-753D1          | antisense chr20   | 23010209 | 23030785 | - | 0    | 0    |
| ENSG0000(RP11-462D          | processed_ chr20  | 17599255 | 17599807 | - | 0    | 0    |
| ENSG0000(MTCO2P7            | unprocessε chr2   | 1.3E+08  | 1.3E+08  | + | 0    | 0    |
| ENSG0000(EEF1B2P8           | processed_ chr3   | 1.75E+08 | 1.75E+08 | - | 0    | 0    |
| ENSG0000(RP4-564M:          | antisense chr1    | 77067920 | 77078482 | + | 0    | 0    |
| ENSG0000(AC108463.          | lincRNA chr2      | 1.11E+08 | 1.11E+08 | + | 0    | 0    |
| ENSG0000(MKX-AS1            | antisense chr10   | 27744786 | 27767794 | + | 0    | 0    |
| ENSG0000(ANKRD30B           | unprocessε chr10  | 45156775 | 45176925 | + | 0    | 0    |
| ENSG0000(CTD-2230M          | processed_ chrX   | 1.14E+08 | 1.14E+08 | - | 0    | 0    |
| ENSG0000(RP11-416N          | lincRNA chr20     | 10173520 | 10196990 | + | 0    | 0    |

|                                     |          |          |   |      |      |
|-------------------------------------|----------|----------|---|------|------|
| ENSG0000(RPL7AP8 processed_ chr10   | 86630825 | 86631628 | - | 0    | 0    |
| ENSG0000(RPL19P21 processed_ chrX   | 1.51E+08 | 1.51E+08 | + | 0    | 0    |
| ENSG0000(PPP5D1 protein_co chr19    | 46480796 | 46601200 | - | 0.19 | 0.64 |
| ENSG0000(THAP7-AS1 antisense chr22  | 21001886 | 21010342 | + | 2.27 | 3.71 |
| ENSG0000(AC092580. lincRNA chr2     | 7671604  | 7672246  | - | 0    | 0    |
| ENSG0000(RP11-555J. lincRNA chr9    | 32643103 | 32645026 | - | 0    | 0    |
| ENSG0000(RP11-1060 processed_ chr12 | 27702338 | 27702906 | + | 0    | 0.14 |
| ENSG0000(RP11-533K processed_ chr7  | 1.19E+08 | 1.19E+08 | - | 0    | 0    |
| ENSG0000(HCG4P7 unprocessε chr6     | 29887294 | 29888268 | - | 0.31 | 0.14 |
| ENSG0000(MBD3L2 protein_co chr19    | 7049321  | 7051735  | + | 0    | 0    |
| ENSG0000(LINC01756 lincRNA chr1     | 29329620 | 29350114 | - | 0    | 0    |
| ENSG0000(COL6A4P1 transcribec chr3  | 15151833 | 15205959 | - | 0    | 0    |
| ENSG0000(LINC01799 lincRNA chr2     | 66904436 | 66971462 | + | 0    | 0    |
| ENSG0000(RP11-472G lincRNA chr10    | 71878356 | 71879107 | + | 0    | 0    |
| ENSG0000(NOS2P3 transcribec chr17   | 20436337 | 20447249 | + | 0.02 | 0    |
| ENSG0000(CEACAMP9 unprocessε chr19  | 43096456 | 43097360 | - | 0    | 0    |
| ENSG0000(LIMD1-AS1 antisense chr3   | 45679043 | 45689134 | - | 0.04 | 0.2  |
| ENSG0000(MTND5P7 unprocessε chr7    | 57194257 | 57196054 | + | 0    | 0    |
| ENSG0000(AC091133. antisense chr17  | 48931791 | 48937100 | + | 0    | 0.35 |
| ENSG0000(RP11-95M. lincRNA chr6     | 1.38E+08 | 1.38E+08 | + | 0    | 0    |
| ENSG0000(RP11-297A antisense chr10  | 35098006 | 35127020 | - | 0.1  | 0    |
| ENSG0000(BASP1P1 processed_ chr13   | 22897341 | 22898005 | - | 0    | 0    |
| ENSG0000(RP11-379C antisense chr9   | 1.28E+08 | 1.28E+08 | - | 0    | 0    |
| ENSG0000(RP11-305L lincRNA chr9     | 91104957 | 91107304 | - | 0.08 | 0    |
| ENSG0000(RP3-428A1 processed_ chrX  | 1.27E+08 | 1.27E+08 | + | 0    | 0    |
| ENSG0000(AOAH-IT1 sense_intrε chr7  | 36597834 | 36600120 | - | 0    | 0    |
| ENSG0000(LINC00102 lincRNA chrX     | 2612988  | 2615347  | - | 0    | 0.02 |
| ENSG0000(LINC00102 lincRNA chrY     | 2612988  | 2615347  | - | 0    | 0.02 |
| ENSG0000(SNX3P1X processed_ chrX    | 92515323 | 92515497 | - | 0    | 0    |
| ENSG0000(RP11-393I2 unprocessε chr1 | 58084419 | 58084559 | + | 0    | 0    |
| ENSG0000(HMGB1P11 processed_ chr1   | 1.71E+08 | 1.71E+08 | - | 0    | 0    |
| ENSG0000(MTND4P27 unprocessε chr2   | 1.3E+08  | 1.3E+08  | + | 0    | 0    |
| ENSG0000(USP17L1 protein_co chr8    | 7332387  | 7333979  | + | 0    | 0    |
| ENSG0000(RP11-74C1 antisense chr1   | 2.04E+08 | 2.04E+08 | + | 0    | 0.06 |
| ENSG0000(CTB-89H12 processed_ chr5  | 1.49E+08 | 1.5E+08  | - | 3.05 | 2.84 |
| ENSG0000(AC092162. lincRNA chr2     | 1.77E+08 | 1.77E+08 | - | 0    | 0    |
| ENSG0000(RP11-517P lincRNA chr10    | 43420738 | 43422100 | + | 2.3  | 2.53 |
| ENSG0000(AC073264. processed_ chr7  | 1.44E+08 | 1.44E+08 | + | 0    | 0    |
| ENSG0000(CEACAMP2 unprocessε chr19  | 42560433 | 42561750 | - | 0    | 0    |
| ENSG0000(RPL17P12 processed_ chr2   | 1.46E+08 | 1.46E+08 | + | 0    | 0    |
| ENSG0000(CCDC192 protein_co chr5    | 1.28E+08 | 1.28E+08 | + | 0    | 0    |
| ENSG0000(FAM133DP processed_ chr2   | 1.57E+08 | 1.57E+08 | - | 0    | 0    |
| ENSG0000(RP5-828H9 lincRNA chr20    | 5471207  | 5475182  | + | 0.52 | 1.61 |
| ENSG0000(CALM1P2 processed_ chr7    | 55259809 | 55260256 | - | 0    | 0    |
| ENSG0000(ZNF32-AS2 antisense chr10  | 43645942 | 43648019 | + | 0    | 0    |

|                                     |          |          |   |       |       |
|-------------------------------------|----------|----------|---|-------|-------|
| ENSG0000(SF3A3P1 processed_ chr20   | 3489529  | 3491005  | - | 0     | 0     |
| ENSG0000(AC114763. lincRNA chr2     | 1.38E+08 | 1.38E+08 | + | 0     | 0     |
| ENSG0000(RP11-69L1 processed_ chr6  | 7340854  | 7342056  | - | 0     | 0     |
| ENSG0000(CTD-2533K processed_ chr5  | 26669346 | 26669736 | + | 0     | 0     |
| ENSG0000(AC027612. transcribed chr2 | 91686102 | 91714745 | - | 0     | 0     |
| ENSG0000(RP11-464C lincRNA chr10    | 3833950  | 3834728  | + | 0     | 0     |
| ENSG0000(RP11-369F antisense chr10  | 76437408 | 76438775 | - | 0     | 0     |
| ENSG0000(OR6R1P unprocessed chr1    | 2.48E+08 | 2.48E+08 | - | 0     | 0     |
| ENSG0000(RP13-228J transcribed chrX | 1.55E+08 | 1.55E+08 | + | 1.1   | 0.39  |
| ENSG0000(AC021016. processed_ chr2  | 2.18E+08 | 2.18E+08 | + | 0.15  | 0     |
| ENSG0000(ACTG1P14 processed_ chr9   | 6834456  | 6835577  | + | 0.05  | 0     |
| ENSG0000(GTF2IRD1P transcribed chr7 | 66809993 | 66844826 | - | 0     | 0.02  |
| ENSG0000(CCT5P2 processed_ chr13    | 78908919 | 78910542 | + | 0     | 0     |
| ENSG0000(PHBP12 processed_ chr1     | 50780340 | 50781150 | + | 0     | 0     |
| ENSG0000(AC093609. lincRNA chr2     | 43097746 | 43102691 | - | 0     | 0     |
| ENSG0000(IMP3P1 processed_ chr9     | 10829752 | 10830308 | - | 0     | 0     |
| ENSG0000(FTX lincRNA chrX           | 73946555 | 74293574 | - | 5.68  | 5.82  |
| ENSG0000(RPSAP8 processed_ chrX     | 1E+08    | 1E+08    | - | 0     | 0     |
| ENSG0000(AC090804. processed_ chr11 | 3892398  | 3892887  | - | 0.31  | 0     |
| ENSG0000(CT47A4 protein_co chrX     | 1.21E+08 | 1.21E+08 | - | 0     | 0     |
| ENSG0000(RSL24D1P2 processed_ chr2  | 62561058 | 62561423 | - | 0     | 0     |
| ENSG0000(GPAA1P2 transcribed chr2   | 1.1E+08  | 1.1E+08  | - | 1.43  | 0.87  |
| ENSG0000(RP3-331H2 lincRNA chr6     | 71328942 | 71329806 | + | 0     | 0     |
| ENSG0000(OR2H4P unprocessed chr6    | 29215236 | 29216179 | + | 0     | 0     |
| ENSG0000(AC018495. lincRNA chr3     | 10767464 | 10771718 | + | 0     | 0     |
| ENSG0000(RP11-73B2 lincRNA chr7     | 63380466 | 63385789 | - | 0     | 0     |
| ENSG0000(RP11-402G protein_co chr9  | 1.15E+08 | 1.15E+08 | - | 0     | 0     |
| ENSG0000(AC011753. processed_ chr2  | 1.1E+08  | 1.1E+08  | + | 0     | 0     |
| ENSG0000(TSEN15P2 processed_ chr1   | 51859778 | 51860135 | + | 0     | 0     |
| ENSG0000(MTCYBP6 processed_ chr7    | 1.17E+08 | 1.17E+08 | - | 0     | 0     |
| ENSG0000(AC159540. lincRNA chr2     | 97416165 | 97433527 | - | 26.01 | 25.64 |
| ENSG0000(AC005722. processed_ chr17 | 19755244 | 19756207 | + | 0     | 0     |
| ENSG0000(RP11-167P processed_ chr10 | 72560264 | 72560456 | + | 0     | 0     |
| ENSG0000(HMGB1P2 processed_ chr2    | 1.91E+08 | 1.91E+08 | + | 0     | 0     |
| ENSG0000(AC004237. antisense chr5   | 1.33E+08 | 1.33E+08 | + | 1.47  | 0.79  |
| ENSG0000(HM13-AS1 antisense chr20   | 31567707 | 31573263 | - | 0     | 0     |
| ENSG0000(DYNLL1P7 processed_ chr7   | 85381118 | 85381375 | - | 0     | 0     |
| ENSG0000(RP5-1198C lincRNA chr1     | 44030443 | 44115913 | + | 1.58  | 3.66  |
| ENSG0000(AC079987. processed_ chr7  | 83424880 | 83425002 | + | 0     | 0     |
| ENSG0000(H3F3AP3 processed_ chr3    | 1.09E+08 | 1.09E+08 | - | 0     | 0     |
| ENSG0000(AC080002. processed_ chr2  | 2.26E+08 | 2.26E+08 | - | 0     | 0     |
| ENSG0000(UQCRHP1 processed_ chr6    | 31611083 | 31611356 | - | 0     | 0     |
| ENSG0000(RP11-469A lincRNA chr1     | 2E+08    | 2E+08    | + | 0     | 0.09  |
| ENSG0000(RP11-286H protein_co chr7  | 1.29E+08 | 1.29E+08 | + | 0     | 0     |
| ENSG0000(RP1-155D2 lincRNA chr6     | 1.64E+08 | 1.64E+08 | - | 0     | 0     |

|                     |             |       |          |          |   |      |      |
|---------------------|-------------|-------|----------|----------|---|------|------|
| ENSG0000(RP4-781K5) | lincRNA     | chr1  | 2.35E+08 | 2.35E+08 | - | 0    | 0    |
| ENSG0000(RPS23P8)   | processed   | chrX  | 70962964 | 70963293 | + | 1.5  | 0.4  |
| ENSG0000(DNM3OS)    | antisense   | chr1  | 1.72E+08 | 1.72E+08 | - | 2.57 | 2.22 |
| ENSG0000(RP11-359N) | lincRNA     | chr6  | 14229775 | 14231570 | - | 0    | 0    |
| ENSG0000(RP5-996D2) | processed   | chr22 | 46481329 | 46481760 | - | 0    | 0    |
| ENSG0000(CYP4F60P)  | unprocess   | chr9  | 42950566 | 42951630 | + | 0    | 0    |
| ENSG0000(RPL36P1)   | processed   | chr20 | 52890162 | 52890386 | + | 0    | 0    |
| ENSG0000(CTA-246H3) | unprocess   | chr22 | 25327252 | 25339975 | + | 0    | 0    |
| ENSG0000(RP11-486B) | processed   | chr1  | 41542069 | 41544310 | + | 0    | 0    |
| ENSG0000(VN1R36P)   | unprocess   | chr7  | 63965834 | 63966124 | - | 0    | 0    |
| ENSG0000(USP12-AS2) | antisense   | chr13 | 27172259 | 27182998 | + | 2.07 | 0    |
| ENSG0000(LA16c-60G) | unprocess   | chr22 | 15588361 | 15588478 | + | 0    | 0    |
| ENSG0000(LINC01818) | lincRNA     | chr2  | 1.5E+08  | 1.5E+08  | + | 0    | 0    |
| ENSG0000(KLF2P2)    | processed   | chr2  | 1.3E+08  | 1.3E+08  | + | 0    | 0    |
| ENSG0000(AC022816)  | lincRNA     | chr17 | 14374139 | 14421026 | + | 0.03 | 0.45 |
| ENSG0000(RP3-406P2) | antisense   | chr6  | 4018843  | 4021215  | - | 1.7  | 0.93 |
| ENSG0000(AC024084)  | lincRNA     | chr7  | 1.36E+08 | 1.36E+08 | + | 0    | 0    |
| ENSG0000(AC112229)  | processed   | chr2  | 1.1E+08  | 1.1E+08  | - | 0.1  | 0.15 |
| ENSG0000(RGPD4-AS1) | lincRNA     | chr2  | 1.08E+08 | 1.08E+08 | - | 0.33 | 0.22 |
| ENSG0000(MTCO2P25)  | unprocess   | chr7  | 69330698 | 69331378 | - | 0    | 0    |
| ENSG0000(OR7E55P)   | unprocess   | chr3  | 75370448 | 75371342 | - | 0    | 0    |
| ENSG0000(PRB4)      | protein_co  | chr12 | 11307083 | 11310435 | - | 0    | 0    |
| ENSG0000(KLHL7-AS1) | lincRNA     | chr7  | 23101228 | 23105703 | - | 0.32 | 0.33 |
| ENSG0000(RP11-466F) | processed   | chr1  | 1.66E+08 | 1.66E+08 | + | 0    | 0    |
| ENSG0000(YY1P1)     | processed   | chr10 | 70485336 | 70486325 | - | 0    | 0    |
| ENSG0000(TNPO1P2)   | processed   | chr17 | 18460391 | 18463055 | + | 0.06 | 0.09 |
| ENSG0000(FAM224B)   | lincRNA     | chrY  | 17552800 | 17579754 | - | 0    | 0    |
| ENSG0000(THAP12P1)  | processed   | chrX  | 74396871 | 74399550 | - | 0    | 0    |
| ENSG0000(CEACAM22)  | transcribec | chr19 | 44537058 | 44620821 | - | 0.02 | 0.07 |
| ENSG0000(SETSIP)    | protein_co  | chr1  | 92074533 | 92075441 | - | 0    | 0    |
| ENSG0000(XXyac-YR2) | lincRNA     | chrX  | 1.41E+08 | 1.41E+08 | - | 0    | 0    |
| ENSG0000(NDUFS5P5)  | processed   | chr4  | 1.18E+08 | 1.18E+08 | - | 0    | 0    |
| ENSG0000(PABPC1P3)  | processed   | chrX  | 74583088 | 74583546 | - | 0    | 0    |
| ENSG0000(RP11-65J3) | lincRNA     | chr9  | 1.29E+08 | 1.29E+08 | - | 0    | 0    |
| ENSG0000(ENO1-AS1)  | antisense   | chr1  | 8878835  | 8879894  | + | 0.17 | 0    |
| ENSG0000(AC004869)  | lincRNA     | chr7  | 46477822 | 46481578 | - | 0    | 0    |
| ENSG0000(CEACAMP4)  | unprocess   | chr19 | 43303171 | 43304523 | - | 0    | 0    |
| ENSG0000(GRPEL2P3)  | processed   | chr7  | 94782886 | 94783525 | + | 0    | 0    |
| ENSG0000(DDTP1)     | processed   | chr3  | 38515448 | 38515830 | - | 0    | 0    |
| ENSG0000(RP11-409K) | antisense   | chr9  | 1.3E+08  | 1.3E+08  | + | 0    | 0    |
| ENSG0000(AC067945)  | antisense   | chr2  | 1.91E+08 | 1.91E+08 | + | 0    | 0    |
| ENSG0000(RP5-1114G) | lincRNA     | chr1  | 1.75E+08 | 1.75E+08 | - | 0    | 0    |
| ENSG0000(AC013402)  | lincRNA     | chr2  | 1.05E+08 | 1.05E+08 | + | 0    | 0    |
| ENSG0000(MRPL35P4)  | processed   | chrX  | 12844865 | 12845430 | - | 0    | 0    |
| ENSG0000(RP11-62F2) | antisense   | chr9  | 16625676 | 16626390 | + | 0    | 0    |

|                                     |          |            |      |      |
|-------------------------------------|----------|------------|------|------|
| ENSG0000( AC012462. antisense chr2  | 2.15E+08 | 2.15E+08 + | 0    | 0    |
| ENSG0000( AC011753. sense_intr chr2 | 1.1E+08  | 1.1E+08 -  | 0    | 0    |
| ENSG0000( SAP18P3 processed_ chr3   | 20007852 | 20008247 - | 0    | 0    |
| ENSG0000( CTD-2330K antisense chr3  | 49899302 | 49903757 + | 0    | 0    |
| ENSG0000( RP11-5407 lincRNA chr1    | 911435   | 914948 +   | 0.04 | 0.12 |
| ENSG0000( FBXW4P1 processed_ chr22  | 23262767 | 23265005 + | 0.1  | 0.03 |
| ENSG0000( RP11-681L processed_ chr2 | 61856695 | 61857055 + | 0    | 0    |
| ENSG0000( RP11-293P antisense chr1  | 24066774 | 24083565 + | 0    | 0    |
| ENSG0000( RP1-117P2 lincRNA chr1    | 1.7E+08  | 1.7E+08 -  | 0    | 0    |
| ENSG0000( RP5-998G2 processed_ chrX | 88061590 | 88062844 - | 0    | 0    |
| ENSG0000( RP11-364B processed_ chrX | 1.4E+08  | 1.4E+08 +  | 0    | 0    |
| ENSG0000( AC104024. lincRNA chr17   | 16975999 | 16981353 - | 0    | 0    |
| ENSG0000( LINC00332 lincRNA chr13   | 40181809 | 40189028 + | 0    | 0.17 |
| ENSG0000( CTAGE13P processed_ chr6  | 1.68E+08 | 1.68E+08 - | 0    | 0    |
| ENSG0000( GGTL4P unprocessε chr22   | 24248074 | 24249466 - | 0    | 0    |
| ENSG0000( RP11-152L lincRNA chr1    | 2.18E+08 | 2.18E+08 + | 0    | 0    |
| ENSG0000( RP11-274B processed_ chr7 | 1.29E+08 | 1.29E+08 + | 5.97 | 5.2  |
| ENSG0000( KRT8P7 processed_ chr11   | 1.2E+08  | 1.2E+08 -  | 0    | 0    |
| ENSG0000( RP11-272L processed_ chr1 | 97774669 | 97775026 + | 0    | 0    |
| ENSG0000( RP11-14C2 lincRNA chr10   | 30723251 | 30723740 + | 0    | 0    |
| ENSG0000( RP4-612B1 processed_ chr1 | 86784913 | 86785467 + | 0    | 0    |
| ENSG0000( LINC01001 lincRNA chr11   | 127204   | 139612 -   | 3.12 | 4.3  |
| ENSG0000( RP4-738P1 lincRNA chr20   | 25140789 | 25149258 - | 0    | 0    |
| ENSG0000( RBMY2WP unprocessε chrY   | 22762851 | 22769787 - | 0    | 0    |
| ENSG0000( RP11-240D sense_ovei chr1 | 54621477 | 54628438 - | 0    | 0    |
| ENSG0000( RP11-296L antisense chr9  | 34521527 | 34524241 + | 0    | 0    |
| ENSG0000( AC074011. antisense chr2  | 28633282 | 28664540 - | 0    | 0.27 |
| ENSG0000( RP11-478K lincRNA chr13   | 44234118 | 44243192 - | 0    | 0    |
| ENSG0000( AC127904. sense_intr chr3 | 1.97E+08 | 1.97E+08 + | 0.12 | 0.22 |
| ENSG0000( AC092171. lincRNA chr7    | 5475804  | 5479811 +  | 0    | 0    |
| ENSG0000( RPL10P3 processed_ chr9   | 1.17E+08 | 1.17E+08 - | 0    | 0.18 |
| ENSG0000( RP11-413E sense_intr chr1 | 89629725 | 89676386 + | 0    | 0    |
| ENSG0000( RP1-149A1 lincRNA chr22   | 32376664 | 32384343 + | 0    | 0    |
| ENSG0000( AC106870. antisense chr2  | 29890371 | 29892354 + | 0    | 0    |
| ENSG0000( RP11-331H unprocessε chr1 | 1.63E+08 | 1.63E+08 + | 0    | 0    |
| ENSG0000( SC22CB-1D antisense chr22 | 33320865 | 33322813 + | 0    | 0    |
| ENSG0000( AC006007. lincRNA chr7    | 1.46E+08 | 1.46E+08 - | 0    | 0    |
| ENSG0000( AC021188. antisense chr2  | 96307263 | 96321731 - | 0.44 | 0.29 |
| ENSG0000( RP11-541H processed_ chr1 | 1.65E+08 | 1.65E+08 + | 0    | 0    |
| ENSG0000( MEIS1-AS2 antisense chr2  | 66439088 | 66441836 - | 0    | 0    |
| ENSG0000( SDAD1P2 processed_ chr20  | 10385779 | 10387806 + | 0    | 0    |
| ENSG0000( AC007036. sense_intr chr7 | 30140870 | 30141417 + | 0    | 0    |
| ENSG0000( ZNF341-AS antisense chr20 | 33787373 | 33811097 - | 0.21 | 0    |
| ENSG0000( MTATP6P2 processed_ chr10 | 69589880 | 69590355 - | 0    | 0    |
| ENSG0000( RHOQP3 processed_ chr2    | 1.3E+08  | 1.3E+08 -  | 0.61 | 0    |

|                                      |          |          |   |      |      |
|--------------------------------------|----------|----------|---|------|------|
| ENSG0000(NFU1P1 processed_ chr3      | 39643638 | 39644705 | + | 0    | 0    |
| ENSG0000(SNAP23P1 processed_ chr20   | 49038357 | 49038602 | - | 0    | 0    |
| ENSG0000(RP11-153F lincRNA chr1      | 1.03E+08 | 1.03E+08 | + | 0    | 0    |
| ENSG0000(MTND1P4 unprocessε chr7     | 57185788 | 57186202 | + | 0    | 0    |
| ENSG0000(LINC01676 lincRNA chr1      | 1.06E+08 | 1.06E+08 | - | 0    | 0    |
| ENSG0000(RP3-408N2 processed_ chr22  | 40788777 | 40789267 | - | 0    | 0.34 |
| ENSG0000(VN1R108P unprocessε chr20   | 25734264 | 25735093 | + | 0.46 | 0.17 |
| ENSG0000(AC079807. lincRNA chr2      | 47941696 | 48240983 | - | 0    | 0    |
| ENSG0000(RPS29P5 processed_ chr1     | 1.76E+08 | 1.76E+08 | + | 0    | 0    |
| ENSG0000(ANKRD63 protein_co chr15    | 40281444 | 40282586 | - | 0    | 0    |
| ENSG0000(RP1-140J1. processed_ chr1  | 1.53E+08 | 1.53E+08 | + | 0    | 0    |
| ENSG0000(RP1-215K1 unitary_psι chrX  | 84973217 | 84977829 | + | 0    | 0    |
| ENSG0000(RP11-508N antisense chr9    | 1.07E+08 | 1.07E+08 | - | 0    | 0    |
| ENSG0000(AC009961. processed_ chr2   | 1.6E+08  | 1.6E+08  | - | 0    | 0    |
| ENSG0000(AC006326. processed_ chr7   | 1.17E+08 | 1.17E+08 | - | 0    | 0    |
| ENSG0000(PSAT1P3 processed_ chr1     | 79054945 | 79056055 | - | 0    | 0    |
| ENSG0000(RP11-560L. processed_ chrX  | 1.06E+08 | 1.06E+08 | + | 0    | 0    |
| ENSG0000(ARHGAP26 sense_intrι chr5   | 1.43E+08 | 1.43E+08 | + | 0    | 0    |
| ENSG0000(AC012456. antisense chr2    | 11740997 | 11745301 | - | 0    | 0    |
| ENSG0000(SMARCE1P processed_ chr13   | 44594858 | 44596082 | + | 0    | 0.11 |
| ENSG0000(AF015720. lincRNA chr21     | 35713139 | 35732942 | - | 0    | 0    |
| ENSG0000(HLA-K unprocessε chr6       | 29926459 | 29929232 | + | 0.07 | 0.32 |
| ENSG0000(RP11-368N unprocessε chr7   | 57650381 | 57651119 | - | 0    | 0    |
| ENSG0000(YY2 protein_co chrX         | 21855987 | 21858727 | + | 0.33 | 0.53 |
| ENSG0000(FOXD3-AS1 antisense chr1    | 63320884 | 63324441 | - | 0    | 0    |
| ENSG0000(AC007279. processed_ chr2   | 2.02E+08 | 2.02E+08 | + | 0    | 0    |
| ENSG0000(RP11-243J. processed_ chr20 | 31808503 | 31808749 | - | 0    | 0    |
| ENSG0000(AC097532. lincRNA chr2      | 1.32E+08 | 1.32E+08 | - | 0    | 0    |
| ENSG0000(C2orf27AP. unprocessε chr9  | 40121962 | 40122540 | + | 0    | 0    |
| ENSG0000(AL132709. lincRNA chr14     | 1.01E+08 | 1.01E+08 | - | 0    | 0    |
| ENSG0000(SRGAP2-AS antisense chr1    | 1.21E+08 | 1.21E+08 | - | 0    | 0    |
| ENSG0000(AC099535. processed_ chr3   | 27486247 | 27486617 | + | 0    | 0    |
| ENSG0000(RPS6P15 processed_ chr10    | 1.11E+08 | 1.11E+08 | - | 0    | 0    |
| ENSG0000(RP11-690C unprocessε chr1   | 2.47E+08 | 2.47E+08 | + | 0    | 0    |
| ENSG0000(USP9YP24 unprocessε chrY    | 22528281 | 22536639 | + | 0    | 0    |
| ENSG0000(RP11-4901 sense_intrι chr9  | 94824272 | 94824773 | + | 0    | 0    |
| ENSG0000(LINC01362 lincRNA chr1      | 82903183 | 83166815 | + | 0    | 0    |
| ENSG0000(MTND2P1ε processed_ chr10   | 19747823 | 19748621 | + | 0    | 0    |
| ENSG0000(ZNF736P5) processed_ chrY   | 25018499 | 25019303 | - | 0    | 0    |
| ENSG0000(AC000362. processed_ chr7   | 1.27E+08 | 1.27E+08 | + | 0    | 0    |
| ENSG0000(KB-288A10 processed_ chr22  | 22446686 | 22448336 | + | 0    | 0    |
| ENSG0000(CBX1P1 processed_ chrX      | 63299247 | 63299673 | - | 0    | 0    |
| ENSG0000(AC005532. processed_ chr7   | 7255154  | 7277779  | + | 0    | 0    |
| ENSG0000(RP11-417B antisense chr9    | 1.24E+08 | 1.24E+08 | + | 0    | 0    |
| ENSG0000(RP11-4921ε processed_ chr1  | 50114937 | 50115282 | + | 0    | 0    |

|                                     |          |          |   |      |      |
|-------------------------------------|----------|----------|---|------|------|
| ENSG0000(CTD-2186N processed_ chr5  | 32221932 | 32222347 | + | 0    | 0    |
| ENSG0000(ARPP21-AS antisense chr3   | 35650197 | 35651961 | - | 0    | 0    |
| ENSG0000(AC007349. antisense chr7   | 36838972 | 36841373 | + | 0    | 0    |
| ENSG0000(RP11-325P processed_ chr1  | 1.47E+08 | 1.47E+08 | - | 0    | 0    |
| ENSG0000(RPEP3 processed_ chr1      | 27739954 | 27740629 | + | 0    | 0    |
| ENSG0000(AC068580. lincRNA chr11    | 1776930  | 1778388  | - | 0    | 0    |
| ENSG0000(AP001187. processed_ chr11 | 64881535 | 64881945 | + | 0    | 0    |
| ENSG0000(LINC01293 lincRNA chr2     | 74940258 | 74942670 | + | 0    | 0.15 |
| ENSG0000(RPL31P2 processed_ chr20   | 33752167 | 33752543 | - | 0    | 0    |
| ENSG0000(LINC01614 lincRNA chr2     | 2.16E+08 | 2.16E+08 | + | 0.21 | 0.23 |
| ENSG0000(RP5-968J1. lincRNA chr20   | 1804016  | 1817606  | - | 0    | 0    |
| ENSG0000(AC097463. processed_ chr2  | 51925692 | 51925833 | - | 0    | 0    |
| ENSG0000(RPL23AP15 processed_ chr1  | 2.28E+08 | 2.28E+08 | - | 0.17 | 0    |
| ENSG0000(RP11-380D lincRNA chr20    | 56295967 | 56299160 | - | 0    | 0    |
| ENSG0000(ZNF674-AS lincRNA chrX     | 46545493 | 46548408 | + | 1.42 | 1.44 |
| ENSG0000(GSTA10P unprocessε chr6    | 52873014 | 52879940 | - | 0    | 0    |
| ENSG0000(RP11-383M lincRNA chr9     | 81928021 | 81931368 | - | 0    | 0    |
| ENSG0000(RP11-195E unprocessε chr5  | 71074225 | 71093193 | - | 0.32 | 1.13 |
| ENSG0000(RP11-379C antisense chr9   | 1.28E+08 | 1.28E+08 | - | 0    | 0    |
| ENSG0000(GOT2P2 processed_ chr1     | 1.73E+08 | 1.73E+08 | - | 0    | 0    |
| ENSG0000(AP006294. processed_ chr11 | 3591277  | 3591615  | - | 0    | 0    |
| ENSG0000(RP11-51G5 lincRNA chr6     | 84023055 | 84024553 | + | 0    | 0    |
| ENSG0000(RPL10P11 processed_ chr7   | 80096600 | 80097215 | - | 0    | 0    |
| ENSG0000(USP9YP20 unprocessε chrY   | 25923388 | 25929826 | + | 0    | 0    |
| ENSG0000(YRDCP3 processed_ chr21    | 40863994 | 40864473 | + | 0    | 0    |
| ENSG0000(CCNB1IP1P processed_ chr20 | 45567990 | 45568807 | - | 0    | 0    |
| ENSG0000(RP4-595K1 processed_ chr1  | 75641346 | 75642087 | - | 0    | 0    |
| ENSG0000(RP5-936J1. lincRNA chr1    | 1.03E+08 | 1.03E+08 | - | 0    | 0    |
| ENSG0000(TSEN15P1 processed_ chr17  | 17456427 | 17457259 | + | 0    | 0    |
| ENSG0000(CTA-342B1 lincRNA chr22    | 31970823 | 31973475 | + | 0    | 0    |
| ENSG0000(RP11-462B processed_ chr9  | 32727069 | 32727522 | - | 0    | 0    |
| ENSG0000(AGAP10P unprocessε chr10   | 45678692 | 45700532 | + | 0    | 0.21 |
| ENSG0000(FBXW11P1 processed_ chr21  | 31627127 | 31628600 | - | 0.08 | 0.3  |
| ENSG0000(RPS6P23 processed_ chr13   | 99173593 | 99174490 | + | 0    | 0    |
| ENSG0000(MFSD13B unitary_ psι chr16 | 22382436 | 22407428 | + | 0    | 0    |
| ENSG0000(STMND1 protein_co chr6     | 17102258 | 17131372 | + | 0    | 0    |
| ENSG0000(LINC00486 lincRNA chr2     | 32825443 | 32926693 | + | 0    | 0    |
| ENSG0000(RBMX2P4 processed_ chr7    | 12922545 | 12922920 | - | 0    | 0    |
| ENSG0000(RP11-486B antisense chr1   | 41535443 | 41535868 | + | 0    | 0    |
| ENSG0000(AC005077. processed_ chr7  | 76071469 | 76074963 | - | 0.11 | 0.12 |
| ENSG0000(HMGB1P25 processed_ chr2   | 9018293  | 9018899  | - | 0    | 0    |
| ENSG0000(SHC1P1 processed_ chrX     | 64432401 | 64434145 | + | 0    | 0    |
| ENSG0000(LINC00692 processed_ chr3  | 25858533 | 25873700 | - | 0    | 0    |
| ENSG0000(RP11-67K1 antisense chr9   | 1.17E+08 | 1.17E+08 | + | 0    | 0    |
| ENSG0000(RP11-767N sense_intrε chr1 | 45694684 | 45697075 | - | 0.7  | 2.69 |



|                                       |          |          |   |      |      |
|---------------------------------------|----------|----------|---|------|------|
| ENSG0000(RPS18P12 processed_ chr17    | 14705076 | 14705534 | - | 0    | 0    |
| ENSG0000(RP11-9L18. sense_intron chr1 | 1.66E+08 | 1.66E+08 | - | 0    | 0    |
| ENSG0000(MAGEA8-A antisense chrX      | 1.5E+08  | 1.5E+08  | - | 0    | 0    |
| ENSG0000(FAM204CP processed_ chr13    | 75688556 | 75689197 | - | 0    | 0    |
| ENSG0000(XKRYP2 unprocessed chrY      | 18811338 | 18811829 | - | 0    | 0    |
| ENSG0000(XXyac-YX6 antisense chr20    | 23798141 | 23805663 | + | 0    | 0    |
| ENSG0000(RP3-525N1 antisense chr6     | 68629962 | 68635027 | - | 0.02 | 0    |
| ENSG0000(PPIHP1 processed_ chr11      | 1.12E+08 | 1.12E+08 | - | 0    | 0    |
| ENSG0000(RP3-508I15 antisense chr22   | 38666508 | 38668750 | - | 0    | 0    |
| ENSG0000(NPM1P51 processed_ chr6      | 41666906 | 41667649 | + | 0.88 | 0.48 |
| ENSG0000(AC004840. transcribed chr7   | 2383698  | 2388652  | + | 0.11 | 0    |
| ENSG0000(MTCO1P53 processed_ chrX     | 1.26E+08 | 1.26E+08 | + | 0.19 | 1.04 |
| ENSG0000(AC008063. antisense chr2     | 1.62E+08 | 1.62E+08 | + | 6.39 | 7.5  |
| ENSG0000(RP11-527D lincRNA chr9       | 9799423  | 9803784  | + | 0    | 0    |
| ENSG0000(HAO2-IT1 sense_intron chr1   | 1.19E+08 | 1.19E+08 | + | 0    | 0    |
| ENSG0000(RP4-753M1 sense_intron chr22 | 45000565 | 45003619 | - | 0    | 0    |
| ENSG0000(LINC00309 lincRNA chr2       | 64185078 | 64205485 | - | 0    | 0    |
| ENSG0000(RP11-104D unprocessed chrX   | 51082818 | 51091228 | + | 0    | 0    |
| ENSG0000(TMBIM7P unitary_psi chr7     | 92412976 | 92439562 | - | 0    | 0    |
| ENSG0000(RP11-34A1 antisense chr10    | 98252023 | 98256575 | + | 0    | 0.22 |
| ENSG0000(RP11-395C processed_ chr5    | 1.27E+08 | 1.27E+08 | - | 0    | 0    |
| ENSG0000(GXYLT1P1 processed_ chr13    | 18724415 | 18724904 | - | 0    | 0    |
| ENSG0000(RP5-947P1 processed_ chr1    | 1.06E+08 | 1.06E+08 | - | 0    | 0    |
| ENSG0000(RP11-402P processed_ chrX    | 71691932 | 71692179 | + | 0    | 0    |
| ENSG0000(RPS3P1 processed_ chr20      | 14003508 | 14003699 | + | 0    | 0    |
| ENSG0000(RP11-775L. processed_ chr7   | 55342316 | 55344958 | + | 0    | 0    |
| ENSG0000(MIR205HG processed_ chr1     | 2.09E+08 | 2.09E+08 | + | 0    | 0    |
| ENSG0000(RP11-314C lincRNA chr6       | 8784178  | 8785445  | + | 0.16 | 0    |
| ENSG0000(AC002386. lincRNA chr7       | 1.09E+08 | 1.09E+08 | - | 0    | 0    |
| ENSG0000(HMGN1P5 processed_ chr1      | 1.58E+08 | 1.58E+08 | - | 0    | 0    |
| ENSG0000(RP11-367G lincRNA chr6       | 1.14E+08 | 1.14E+08 | - | 0.3  | 0    |
| ENSG0000(AC026202. lincRNA chr3       | 5255535  | 5256761  | - | 0    | 0    |
| ENSG0000(LINC01507 lincRNA chr9       | 80030579 | 80034555 | + | 0    | 0    |
| ENSG0000(HNRNPA1F processed_ chr1     | 1.01E+08 | 1.01E+08 | - | 0    | 0    |
| ENSG0000(AP000356. sense_intron chr22 | 24598054 | 24599398 | + | 0    | 0    |
| ENSG0000(AP001331. processed_ chr8    | 1.08E+08 | 1.08E+08 | - | 0    | 0    |
| ENSG0000(MTND2P21 unprocessed chr2    | 1.17E+08 | 1.17E+08 | + | 0    | 0    |
| ENSG0000(GPS2P2 processed_ chr3       | 1.87E+08 | 1.87E+08 | + | 0    | 0    |
| ENSG0000(AC099344. lincRNA chr2       | 11357515 | 11365636 | - | 0    | 0    |
| ENSG0000(RP4-631H1 processed_ chr1    | 52920422 | 52920596 | + | 0    | 0    |
| ENSG0000(RP11-109P antisense chr1     | 37860697 | 37861580 | + | 0    | 0    |
| ENSG0000(RP3-452M1 processed_ chrX    | 88096393 | 88097225 | - | 0    | 0    |
| ENSG0000(AC093166. processed_ chr2    | 1.12E+08 | 1.12E+08 | + | 0    | 0    |
| ENSG0000(RP5-1086L1 antisense chr6    | 1.7E+08  | 1.7E+08  | - | 0    | 0    |
| ENSG0000(LINC01520 lincRNA chr10      | 85449592 | 85491996 | + | 0    | 0    |

|                                      |          |          |   |       |       |
|--------------------------------------|----------|----------|---|-------|-------|
| ENSG0000( AC018696. processed_ chr2  | 91578478 | 91578573 | + | 0     | 0     |
| ENSG0000( SNX18P13 processed_ chr21  | 13905960 | 13906488 | - | 0     | 0     |
| ENSG0000( RP11-1071J lincRNA chr10   | 1.01E+08 | 1.01E+08 | - | 0     | 0     |
| ENSG0000( AC084149. lincRNA chr2     | 77672215 | 77673792 | + | 0     | 0     |
| ENSG0000( LINC02090 lincRNA chr17    | 16988329 | 16990177 | + | 0     | 0     |
| ENSG0000( HHATL-AS1 antisense chr3   | 42702653 | 42706776 | + | 0     | 0     |
| ENSG0000( AC005703. lincRNA chr17    | 15267461 | 15272290 | - | 0     | 0     |
| ENSG0000( AP001255. lincRNA chr21    | 23065491 | 23131206 | + | 0     | 0     |
| ENSG0000( RP1-154J1: processed_ chrX | 1.31E+08 | 1.31E+08 | - | 0     | 0     |
| ENSG0000( AC084193. lincRNA chr2     | 80699388 | 80870190 | - | 0     | 0     |
| ENSG0000( AC023274. unprocessε chrY  | 24182477 | 24183071 | + | 0     | 0     |
| ENSG0000( LINC00160 lincRNA chr21    | 34723807 | 34737181 | - | 0     | 0     |
| ENSG0000( AC079250. processed_ chr2  | 47690716 | 47691246 | - | 0.15  | 0.17  |
| ENSG0000( RPL36AP3ε processed_ chr11 | 1792553  | 1792870  | + | 0     | 0     |
| ENSG0000( DSTNP1 processed_ chr21    | 46653558 | 46654022 | - | 0     | 0     |
| ENSG0000( DDX3P2 processed_ chrX     | 74133004 | 74133114 | - | 0     | 0     |
| ENSG0000( RP11-113I2 processed_ chr1 | 1.9E+08  | 1.9E+08  | - | 0     | 0     |
| ENSG0000( RPL23AP11 processed_ chr14 | 1.03E+08 | 1.03E+08 | - | 0     | 0.18  |
| ENSG0000( HSBP1 protein_co chr16     | 83807843 | 83819737 | + | 49.07 | 52.95 |
| ENSG0000( RP4-734C1 lincRNA chr20    | 11234170 | 11301525 | - | 0     | 0     |
| ENSG0000( AC092625. lincRNA chr2     | 1.55E+08 | 1.55E+08 | - | 0     | 0     |
| ENSG0000( FAM201B processed_ chr2    | 1.32E+08 | 1.32E+08 | + | 0     | 0.13  |
| ENSG0000( RPL12P15 processed_ chr2   | 1.22E+08 | 1.22E+08 | - | 0     | 0.17  |
| ENSG0000( FGFR3P1 processed_ chr6    | 31377419 | 31378019 | + | 0     | 0     |
| ENSG0000( RAB42P1 processed_ chr14   | 89892128 | 89892443 | + | 0     | 0     |
| ENSG0000( MTND5P8 unprocessε chr7    | 1.12E+08 | 1.12E+08 | + | 0     | 0     |
| ENSG0000( CCNB1IP1P processed_ chrX  | 94776739 | 94777567 | - | 0     | 0     |
| ENSG0000( CECR9 TEC chr22            | 17329034 | 17329232 | + | 0     | 0     |
| ENSG0000( RPL39P39 processed_ chr20  | 57328546 | 57328696 | + | 0     | 0     |
| ENSG0000( RPL7P32 processed_ chr7    | 1.09E+08 | 1.09E+08 | + | 0.09  | 0     |
| ENSG0000( CDC20P1 processed_ chr9    | 87011652 | 87013151 | + | 0.5   | 0.25  |
| ENSG0000( CUBNP1 unprocessε chr10    | 42694371 | 42714575 | - | 0     | 0     |
| ENSG0000( RP6-109B7 lincRNA chr22    | 46055740 | 46058160 | - | 0     | 0     |
| ENSG0000( RP11-494Iε processed_ chrX | 22616744 | 22617143 | - | 0     | 0     |
| ENSG0000( AC013275. antisense chr2   | 1.19E+08 | 1.19E+08 | + | 0     | 0     |
| ENSG0000( RP5-860P4 lincRNA chr20    | 24679547 | 24680991 | + | 0     | 0     |
| ENSG0000( AC013404. processed_ chr2  | 2.11E+08 | 2.11E+08 | - | 0     | 0     |
| ENSG0000( EIF4A1P3 processed_ chr9   | 1.32E+08 | 1.32E+08 | - | 0     | 0     |
| ENSG0000( RP11-545P lincRNA chr13    | 88142867 | 88236082 | + | 0     | 0     |
| ENSG0000( RP11-357J: processed_ chr1 | 1.76E+08 | 1.76E+08 | - | 0     | 0     |
| ENSG0000( RPS3AP9 processed_ chr1    | 1.89E+08 | 1.89E+08 | + | 0     | 0     |
| ENSG0000( LINC00326 lincRNA chr6     | 1.33E+08 | 1.33E+08 | + | 0     | 0     |
| ENSG0000( AC092431. lincRNA chr2     | 69700192 | 69713847 | - | 0     | 0     |
| ENSG0000( XKRYP4 unprocessε chrY     | 23917241 | 23917723 | - | 0     | 0     |
| ENSG0000( LINC00271 lincRNA chr6     | 1.35E+08 | 1.36E+08 | + | 0.29  | 0.19  |

|                                    |          |          |   |      |      |
|------------------------------------|----------|----------|---|------|------|
| ENSG0000(RP3-455J7.processed_chr1  | 1.68E+08 | 1.68E+08 | + | 0    | 0    |
| ENSG0000(LINC01804.lincRNA_chr2    | 15690782 | 15744339 | + | 0    | 0    |
| ENSG0000(AC114814.processed_chr2   | 2.35E+08 | 2.35E+08 | - | 0    | 0    |
| ENSG0000(RP11-346K.processed_chr20 | 34688688 | 34688978 | + | 0    | 0    |
| ENSG0000(RPL7L1P9.processed_chr2   | 2.18E+08 | 2.18E+08 | - | 0.09 | 0    |
| ENSG0000(RP11-445P.lincRNA_chr10   | 5234358  | 5263408  | + | 0    | 0    |
| ENSG0000(LINC01911.lincRNA_chr2    | 1.47E+08 | 1.47E+08 | + | 0    | 0    |
| ENSG0000(AC007238.processed_chr2   | 58460292 | 58462032 | - | 0    | 0    |
| ENSG0000(RP11-428F.antisense_chr6  | 1.11E+08 | 1.11E+08 | - | 0    | 0    |
| ENSG0000(GCNT1P3.processed_chr3    | 1.91E+08 | 1.91E+08 | + | 0    | 0    |
| ENSG0000(OR52B5P.unprocessεchr11   | 5560967  | 5561917  | + | 0    | 0    |
| ENSG0000(RP1-140A9.antisense_chr1  | 1891471  | 1892658  | + | 0.34 | 0.08 |
| ENSG0000(USP17L28.protein_cochr4   | 9348893  | 9350485  | + | 0    | 0    |
| ENSG0000(RP11-91N2.lincRNA_chr9    | 2541097  | 2541635  | + | 0    | 0    |
| ENSG0000(RP13-26D1.processed_chrX  | 70361486 | 70362374 | - | 0    | 0    |
| ENSG0000(AC009236.lincRNA_chr2     | 45168583 | 45169414 | + | 0    | 0    |
| ENSG0000(RP1-290I1C.lincRNA_chr6   | 10474500 | 10478502 | - | 0    | 0    |
| ENSG0000(RP11-122N.antisense_chr1  | 2.12E+08 | 2.12E+08 | + | 0    | 0.07 |
| ENSG0000(MSANTD2F.processed_chr21  | 23101223 | 23103074 | + | 0    | 0    |
| ENSG0000(FARSBP1.processed_chr10   | 80776165 | 80778088 | - | 0    | 0    |
| ENSG0000(LINC00395.antisense_chr13 | 63667681 | 63738018 | - | 0    | 0    |
| ENSG0000(AC103563.antisense_chr2   | 95051395 | 95053176 | - | 0    | 0    |
| ENSG0000(AC006994.processed_chr2   | 2.1E+08  | 2.1E+08  | + | 0    | 0    |
| ENSG0000(RP11-263K.antisense_chr1  | 1.55E+08 | 1.55E+08 | + | 2.25 | 0.7  |
| ENSG0000(NPM1P9.processed_chrX     | 14834476 | 14835319 | - | 0    | 0    |
| ENSG0000(KRTAP21-3.protein_cochr21 | 30718525 | 30718777 | - | 0    | 0    |
| ENSG0000(BX842568.unprocessεchrX   | 36985523 | 36986093 | - | 0    | 0    |
| ENSG0000(OR52Y1P.unprocessεchr11   | 4793778  | 4795284  | - | 0    | 0    |
| ENSG0000(RP5-1068H.processed_chr20 | 4735669  | 4736673  | - | 0    | 0    |
| ENSG0000(GAPDHP64.processed_chr1   | 1.17E+08 | 1.17E+08 | - | 0    | 0    |
| ENSG0000(RP11-316N.antisense_chr1  | 1.51E+08 | 1.51E+08 | + | 0    | 0    |
| ENSG0000(HCG18.antisense_chr6      | 30287397 | 30327150 | - | 9.84 | 8.82 |
| ENSG0000(RP11-560A.lincRNA_chr20   | 57105741 | 57107128 | + | 0    | 0    |
| ENSG0000(AC105402.antisense_chr2   | 1.49E+08 | 1.49E+08 | - | 0    | 0    |
| ENSG0000(RP11-342H.antisense_chr1  | 66826942 | 66828558 | + | 0    | 0    |
| ENSG0000(RP4-760C5.lincRNA_chr20   | 26008791 | 26010531 | - | 0.4  | 0.15 |
| ENSG0000(RP11-514F.lincRNA_chr10   | 80649797 | 80653732 | + | 0    | 0    |
| ENSG0000(AC011747.lincRNA_chr2     | 8600892  | 8622942  | - | 0    | 0    |
| ENSG0000(CTA-253N1.processed_chr1  | 1.85E+08 | 1.85E+08 | - | 0.94 | 0    |
| ENSG0000(TSSK1A.unitary_ψchr22     | 19124879 | 19125646 | + | 0    | 0    |
| ENSG0000(FDPSP7.processed_chr7     | 76968197 | 76969250 | - | 0    | 0    |
| ENSG0000(RP11-101C.lincRNA_chr1    | 55217861 | 55234177 | + | 0    | 0    |
| ENSG0000(AC012513.antisense_chr2   | 2.16E+08 | 2.16E+08 | + | 0    | 0    |
| ENSG0000(RP13-150K.processed_chrX  | 1.46E+08 | 1.46E+08 | + | 0    | 0    |
| ENSG0000(GYG1P3.processed_chr1     | 55222379 | 55223372 | + | 0    | 0    |

|                                      |          |          |   |      |      |
|--------------------------------------|----------|----------|---|------|------|
| ENSG0000(NDUFB4P3 processed_ chr17   | 19840126 | 19840515 | + | 0    | 0    |
| ENSG0000(AC008154. antisense chr7    | 1.34E+08 | 1.34E+08 | + | 0    | 0    |
| ENSG0000(BMS1P19 processed_ chr2     | 1.1E+08  | 1.1E+08  | + | 0    | 0    |
| ENSG0000(RP11-740C unprocessε chr1   | 1.6E+08  | 1.6E+08  | + | 0    | 0    |
| ENSG0000(RP11-298J. antisense chr6   | 41720396 | 41734032 | + | 0    | 0    |
| ENSG0000(PRAMEF30 unprocessε chr1    | 12838125 | 12841357 | - | 0    | 0    |
| ENSG0000(RP11-354N antisense chr10   | 1.18E+08 | 1.18E+08 | + | 0    | 0    |
| ENSG0000(RP5-1071N antisense chr1    | 21293290 | 21299774 | + | 0.07 | 0.02 |
| ENSG0000(LINC01436 lincRNA chr21     | 36005338 | 36007838 | + | 0    | 0    |
| ENSG0000(LINC01508 lincRNA chr9      | 90300902 | 90433505 | - | 0    | 0    |
| ENSG0000(PRELID3BP processed_ chr9   | 6734598  | 6735076  | - | 0    | 0    |
| ENSG0000(AC004070. lincRNA chrX      | 1.4E+08  | 1.4E+08  | - | 0    | 0    |
| ENSG0000(MTHFD2P3 processed_ chr6    | 1.08E+08 | 1.08E+08 | - | 0    | 0    |
| ENSG0000(RP3-475N1 antisense chr6    | 42940364 | 42948360 | + | 0.3  | 0.54 |
| ENSG0000(AC078842. lincRNA chr7      | 1.37E+08 | 1.37E+08 | + | 0    | 0    |
| ENSG0000(RP4-569M. antisense chr20   | 47352561 | 47354633 | + | 0.16 | 0.14 |
| ENSG0000(BTF3P10 processed_ chr6     | 1.5E+08  | 1.5E+08  | + | 0    | 0    |
| ENSG0000(FAM25E transcribed chr10    | 45815428 | 45817324 | - | 0    | 0    |
| ENSG0000(SPATA20P1 processed_ chr21  | 38238227 | 38238664 | - | 0    | 0    |
| ENSG0000(UBE2V1P1. processed_ chr2   | 2.02E+08 | 2.02E+08 | + | 0    | 0    |
| ENSG0000(AF129075. sense_intrε chr21 | 29058073 | 29060095 | - | 0.32 | 0.36 |
| ENSG0000(RP5-1073C antisense chr1    | 1.14E+08 | 1.14E+08 | + | 0    | 0    |
| ENSG0000(HLA-T unprocessε chr6       | 29896654 | 29897786 | + | 0    | 0    |
| ENSG0000(LINC01468 lincRNA chr10     | 52450874 | 52470533 | - | 0    | 0.14 |
| ENSG0000(RP11-40C1 antisense chr10   | 51244894 | 51245806 | - | 0    | 0    |
| ENSG0000(HAR1B lincRNA chr20         | 63095493 | 63102319 | - | 0.49 | 0.31 |
| ENSG0000(TCF7L1-IT1 sense_intrε chr2 | 85186409 | 85187253 | + | 0.17 | 0    |
| ENSG0000(AP000705. processed_ chr21  | 22153950 | 22154299 | - | 0    | 0    |
| ENSG0000(RBM22P5 processed_ chr9     | 76286494 | 76288081 | - | 0    | 0    |
| ENSG0000(RP11-391N antisense chr10   | 1.24E+08 | 1.24E+08 | + | 0    | 0    |
| ENSG0000(AC104843. unprocessε chr7   | 1.53E+08 | 1.53E+08 | - | 0    | 0    |
| ENSG0000(RP11-347J. lincRNA chr9     | 39395737 | 39397406 | - | 0    | 0    |
| ENSG0000(TTTY3 lincRNA chrY          | 25728490 | 25733388 | + | 0    | 0    |
| ENSG0000(RP3-463P1 lincRNA chr6      | 94163920 | 94194658 | + | 0    | 0    |
| ENSG0000(EEF1A1P4C processed_ chrX   | 1.07E+08 | 1.07E+08 | + | 0    | 0    |
| ENSG0000(ARHGAP42 unprocessε chr2    | 1.3E+08  | 1.3E+08  | + | 0    | 0    |
| ENSG0000(HMGB1P7 processed_ chr10    | 31913143 | 31913754 | + | 0    | 0    |
| ENSG0000(RP11-10J1. lincRNA chr9     | 1.25E+08 | 1.25E+08 | - | 0    | 0    |
| ENSG0000(RP1-207H1 antisense chr6    | 38923029 | 38953099 | - | 0    | 0    |
| ENSG0000(MTND2P15 processed_ chr10   | 69594041 | 69594932 | - | 0    | 0    |
| ENSG0000(AC002429. processed_ chr7   | 95018407 | 95018554 | + | 0    | 0    |
| ENSG0000(MORF4L2-1 antisense chrX    | 1.04E+08 | 1.04E+08 | + | 0.16 | 0.2  |
| ENSG0000(AC093702. lincRNA chr2      | 45013214 | 45013668 | - | 0.24 | 0.54 |
| ENSG0000(PTP4A1P1 processed_ chr2    | 1.58E+08 | 1.58E+08 | + | 0    | 0    |
| ENSG0000(OFD1P8Y unprocessε chrY     | 21972313 | 22005349 | + | 0    | 0    |

|                                     |          |          |   |      |      |
|-------------------------------------|----------|----------|---|------|------|
| ENSG0000(KLF3-AS1 processed_ chr4   | 38612701 | 38664883 | - | 3.08 | 3.57 |
| ENSG0000(COX11P1 processed_ chr6    | 28446973 | 28447807 | + | 0    | 0    |
| ENSG0000(CSMD2-AS antisense chr1    | 33868953 | 33885458 | + | 0    | 0    |
| ENSG0000(RPL7P56 processed_ chrX    | 1.37E+08 | 1.37E+08 | + | 0    | 0    |
| ENSG0000(TRBV26OR TR_V_pseu chr9    | 33695767 | 33696059 | + | 0    | 0    |
| ENSG0000(TUBB4BP6 processed_ chr9   | 1.19E+08 | 1.19E+08 | + | 0    | 0    |
| ENSG0000(YBX1P2 processed_ chr7     | 1.06E+08 | 1.06E+08 | - | 0    | 0    |
| ENSG0000(EEF1B2P1 processed_ chr15  | 52505191 | 52505862 | + | 0    | 0    |
| ENSG0000(AC002451. antisense chr7   | 95596682 | 95613719 | + | 0.08 | 0    |
| ENSG0000(LINC01098 lincRNA chr4     | 1.78E+08 | 1.78E+08 | + | 0.06 | 0    |
| ENSG0000(AC007099. antisense chr2   | 75524068 | 75542706 | + | 0    | 0    |
| ENSG0000(AC116609. lincRNA chr2     | 741977   | 749856   | + | 0    | 0    |
| ENSG0000(LINC01720 lincRNA chr1     | 1.91E+08 | 1.91E+08 | + | 0.05 | 0    |
| ENSG0000(LINC00852 antisense chr3   | 10284419 | 10285746 | + | 0.35 | 0.14 |
| ENSG0000(RP11-125D lincRNA chr6     | 1.59E+08 | 1.59E+08 | - | 0    | 0    |
| ENSG0000(RP13-15M: processed_ chr1  | 9576427  | 9576985  | + | 0    | 0.14 |
| ENSG0000(AC007003. processed_ chr7  | 76902491 | 76919191 | + | 0    | 0    |
| ENSG0000(FAM58DP processed_ chr13   | 19382454 | 19383072 | + | 0    | 0    |
| ENSG0000(AC005592. antisense chr5   | 1.42E+08 | 1.43E+08 | + | 0    | 0    |
| ENSG0000(RP11-38L1: antisense chr10 | 46582782 | 46598145 | - | 5.03 | 3.12 |
| ENSG0000(RP11-34D1 antisense chr10  | 1E+08    | 1E+08    | - | 0    | 0    |
| ENSG0000(AC013448. lincRNA chr2     | 2.23E+08 | 2.24E+08 | + | 0.09 | 0.09 |
| ENSG0000(OR5H1 protein_co chr3      | 98132698 | 98133639 | + | 0    | 0    |
| ENSG0000(RP11-462B lincRNA chr9     | 32840598 | 32841762 | - | 0    | 0    |
| ENSG0000(FARP1-AS1 antisense chr13  | 98435405 | 98435840 | - | 0    | 0    |
| ENSG0000(IFNA11P unprocess€ chr9    | 21398614 | 21399139 | - | 0    | 0    |
| ENSG0000(AC004987. processed_ chr7  | 39833286 | 39833793 | - | 0    | 0    |
| ENSG0000(MTND5P1€ processed_ chr1   | 2.36E+08 | 2.36E+08 | - | 0    | 0    |
| ENSG0000(LINC01830 lincRNA chr2     | 21933336 | 22531105 | - | 0    | 0    |
| ENSG0000(AF127577. antisense chr21  | 14971470 | 14992854 | + | 0    | 0    |
| ENSG0000(TRGVB TR_V_pseu chr7       | 38295763 | 38296233 | - | 0    | 0    |
| ENSG0000(KRT8P10 processed_ chr2    | 1.83E+08 | 1.83E+08 | - | 0    | 0    |
| ENSG0000(AC011752. lincRNA chr2     | 21317660 | 21561313 | + | 0    | 0    |
| ENSG0000(ZNF826P transcribec chr19  | 20340269 | 20424969 | - | 0.85 | 0.59 |
| ENSG0000(HNRNPA1P processed_ chrX   | 74473017 | 74473953 | - | 0.07 | 0    |
| ENSG0000(RP1-144C9 processed_ chr1  | 27389468 | 27390145 | + | 0    | 0    |
| ENSG0000(ZBTB46-AS antisense chr20  | 63808076 | 63816521 | + | 0    | 0.15 |
| ENSG0000(LINC01510 lincRNA chr7     | 1.17E+08 | 1.17E+08 | - | 0    | 0    |
| ENSG0000(RPL17P49 processed_ chrX   | 12395757 | 12396167 | - | 0    | 0    |
| ENSG0000(RP11-111F lincRNA chr9     | 62349941 | 62351536 | - | 0.13 | 0    |
| ENSG0000(PLSCR5 protein_co chr3     | 1.47E+08 | 1.47E+08 | - | 0    | 0    |
| ENSG0000(GS1-600G& antisense chrX   | 13310652 | 13319933 | + | 0    | 0    |
| ENSG0000(RP11-1M1: lincRNA chrX     | 6667865  | 6721544  | - | 0    | 0    |
| ENSG0000(PRAMEF32 unprocess€ chr1   | 13273539 | 13275627 | - | 0    | 0    |
| ENSG0000(LINC01593 lincRNA chr2     | 1.08E+08 | 1.08E+08 | - | 0    | 0    |

|                 |            |                |       |          |          |   |      |      |
|-----------------|------------|----------------|-------|----------|----------|---|------|------|
| ENSG00000108440 | ARF4P4     | processed      | chr13 | 80888348 | 80888867 | + | 0    | 0    |
| ENSG00000108441 | TRIM31-AS  | antisense      | chr6  | 30105240 | 30114724 | + | 0    | 0    |
| ENSG00000108442 | RP11-85O2  | sense          | chr9  | 1.24E+08 | 1.24E+08 | + | 0    | 0    |
| ENSG00000108443 | CTD-2593A  | processed      | chr5  | 1.81E+08 | 1.81E+08 | + | 0    | 0    |
| ENSG00000108444 | LINC01423  | lincRNA        | chr21 | 38323635 | 38333421 | - | 0    | 0    |
| ENSG00000108445 | RP11-548K  | unprocessed    | chr7  | 57822465 | 57822801 | - | 0    | 0    |
| ENSG00000108446 | CFAP58-AS  | antisense      | chr10 | 1.04E+08 | 1.04E+08 | - | 0.56 | 0.27 |
| ENSG00000108447 | SKP1P1     | transcribed    | chr7  | 66423405 | 66423893 | - | 0.25 | 0    |
| ENSG00000108448 | RP11-75A9  | processed      | chrX  | 46418450 | 46420079 | - | 0    | 0    |
| ENSG00000108449 | AP001604   | lincRNA        | chr21 | 27358885 | 27448579 | - | 0    | 0    |
| ENSG00000108450 | OR6K1P     | unprocessed    | chr1  | 1.59E+08 | 1.59E+08 | - | 0    | 0    |
| ENSG00000108451 | LINC00349  | lincRNA        | chr13 | 18540497 | 18550697 | + | 0    | 0    |
| ENSG00000108452 | KLF2P1     | processed      | chr2  | 1.3E+08  | 1.3E+08  | + | 0    | 0    |
| ENSG00000108453 | RPS3AP3    | processed      | chr20 | 37021743 | 37021984 | - | 0    | 0    |
| ENSG00000108454 | RP11-134J  | antisense      | chr3  | 38823902 | 38825302 | + | 0    | 0    |
| ENSG00000108455 | PSMC1P3    | processed      | chr7  | 1.37E+08 | 1.37E+08 | + | 0    | 0.1  |
| ENSG00000108456 | C1DP1      | processed      | chr10 | 32511336 | 32511737 | - | 0.84 | 0    |
| ENSG00000108457 | RP5-965F6  | lincRNA        | chr1  | 1.12E+08 | 1.12E+08 | - | 0.13 | 0    |
| ENSG00000108458 | RP11-160N  | lincRNA        | chr9  | 61615876 | 61627683 | + | 0    | 0    |
| ENSG00000108459 | ITPR1-AS1  | antisense      | chr3  | 4490891  | 4493163  | - | 0.22 | 0.48 |
| ENSG00000108460 | RP3-35711  | processed      | chr1  | 30226523 | 30226615 | + | 0    | 0    |
| ENSG00000108461 | RP11-436K  | lincRNA        | chr1  | 60659631 | 60867998 | - | 0    | 0    |
| ENSG00000108462 | LINC01640  | lincRNA        | chr22 | 33108529 | 33116294 | + | 0    | 0    |
| ENSG00000108463 | PCED1CP    | processed      | chr2  | 2.13E+08 | 2.13E+08 | + | 0    | 0    |
| ENSG00000108464 | AC005009   | antisense      | chr7  | 86775081 | 86776022 | - | 0    | 0    |
| ENSG00000108465 | C17orf105  | protein_coding | chr17 | 43780435 | 43787612 | + | 0.07 | 0.04 |
| ENSG00000108466 | ZSWIM5P2   | unprocessed    | chr17 | 20583758 | 20591180 | - | 0    | 0    |
| ENSG00000108467 | AC125232   | unprocessed    | chr2  | 87031815 | 87053069 | - | 4.66 | 5.08 |
| ENSG00000108468 | HMGN2P1    | processed      | chr22 | 41709225 | 41709489 | - | 0    | 0    |
| ENSG00000108469 | ARAFP1     | processed      | chr7  | 63937905 | 63938509 | - | 0    | 0    |
| ENSG00000108470 | TRERNA1    | lincRNA        | chr20 | 50040716 | 50041504 | - | 0    | 0    |
| ENSG00000108471 | AC010745   | lincRNA        | chr2  | 16227027 | 16228194 | - | 0    | 0    |
| ENSG00000108472 | RP13-347D  | processed      | chrX  | 1.19E+08 | 1.19E+08 | + | 0    | 0    |
| ENSG00000108473 | AP000350   | unprocessed    | chr22 | 23949918 | 23954042 | + | 0    | 0    |
| ENSG00000108474 | RP4-799P1  | sense          | chr1  | 2.34E+08 | 2.34E+08 | + | 0    | 0    |
| ENSG00000108475 | SBK3       | protein_coding | chr19 | 55540656 | 55545543 | - | 0    | 0    |
| ENSG00000108476 | E2F4P1     | processed      | chr6  | 39553811 | 39554943 | + | 0    | 0    |
| ENSG00000108477 | OR9S24P    | unprocessed    | chr2  | 2.4E+08  | 2.4E+08  | + | 0    | 0    |
| ENSG00000108478 | SALL4P6    | processed      | chr3  | 42321005 | 42322695 | + | 0    | 0    |
| ENSG00000108479 | APCDD1L-1  | processed      | chr20 | 58515379 | 58619888 | + | 0.28 | 0.32 |
| ENSG00000108480 | RP11-445C  | lincRNA        | chr5  | 4512262  | 4516776  | + | 0    | 0    |
| ENSG00000108481 | IGKV1OR2-1 | IG_V_gene      | chr2  | 1.13E+08 | 1.13E+08 | + | 0    | 0    |
| ENSG00000108482 | RPL36AP6   | processed      | chr9  | 1.08E+08 | 1.08E+08 | - | 0    | 0    |
| ENSG00000108483 | RP4-797C5  | antisense      | chr7  | 1.21E+08 | 1.21E+08 | - | 0    | 0    |
| ENSG00000108484 | RP1-39G22  | processed      | chr1  | 40262672 | 40262984 | - | 0    | 0    |

|                      |                |       |          |          |   |       |      |
|----------------------|----------------|-------|----------|----------|---|-------|------|
| ENSG0000(RP11-459F)  | lincRNA        | chr6  | 1.66E+08 | 1.66E+08 | + | 0     | 0    |
| ENSG0000(LINC00704)  | lincRNA        | chr10 | 4650185  | 4678154  | - | 0.39  | 0.51 |
| ENSG0000(SEPT14P24)  | unprocessed    | chr7  | 56360362 | 56360541 | - | 0     | 0    |
| ENSG0000(EZH2P1)     | processed      | chr21 | 35599732 | 35600022 | - | 0     | 0    |
| ENSG0000(RPL13AP)    | processed      | chr6  | 29582508 | 29583025 | + | 0     | 0    |
| ENSG0000(RPL36P2)    | processed      | chr20 | 50620763 | 50621077 | + | 0     | 0    |
| ENSG0000(SG01-AS1)   | processed      | chr3  | 20174244 | 21145967 | + | 0.15  | 0.24 |
| ENSG0000(RP11-723C)  | antisense      | chr3  | 1.29E+08 | 1.29E+08 | - | 0.39  | 0.1  |
| ENSG0000(RPS3P2)     | processed      | chr20 | 38537758 | 38538458 | + | 0.19  | 0.1  |
| ENSG0000(TBL1XR1-A)  | antisense      | chr3  | 1.77E+08 | 1.77E+08 | + | 0     | 0    |
| ENSG0000(PRYP2)      | unprocessed    | chrY  | 18161366 | 18176484 | + | 0     | 0    |
| ENSG0000(AC007246)   | antisense      | chr2  | 39436637 | 39665343 | + | 12.09 | 9.02 |
| ENSG0000(CLIC1P1)    | processed      | chr12 | 1.21E+08 | 1.21E+08 | + | 0     | 0    |
| ENSG0000(RP11-134L)  | processed      | chr6  | 1.55E+08 | 1.55E+08 | - | 0     | 0    |
| ENSG0000(RP11-310H)  | unprocessed    | chr7  | 55656768 | 55678490 | - | 0     | 0    |
| ENSG0000(RPL13AP17)  | transcribed    | chr7  | 78347142 | 78359458 | + | 0     | 0    |
| ENSG0000(AP000696)   | lincRNA        | chr21 | 36632681 | 36637033 | - | 0.05  | 0.12 |
| ENSG0000(RP11-69C1)  | lincRNA        | chr10 | 2169140  | 2189474  | - | 0     | 0    |
| ENSG0000(LINC01816)  | lincRNA        | chr2  | 70124036 | 70125317 | - | 0.41  | 0.11 |
| ENSG0000(TPT1P7)     | processed      | chr7  | 23811144 | 23811660 | - | 0     | 0    |
| ENSG0000(RP1-225E1)  | antisense      | chr6  | 1.39E+08 | 1.39E+08 | - | 0     | 0.13 |
| ENSG0000(AC103563)   | unprocessed    | chr2  | 94953161 | 94953593 | - | 0     | 0    |
| ENSG0000(OOEP-AS1)   | antisense      | chr6  | 73369704 | 73387717 | + | 0     | 0    |
| ENSG0000(RPL34P6)    | processed      | chr1  | 2.01E+08 | 2.01E+08 | + | 0     | 0.9  |
| ENSG0000(AC104781)   | antisense      | chr2  | 54747103 | 54748404 | - | 0     | 0    |
| ENSG0000(AC107072)   | sense_intronic | chr4  | 76637623 | 76644368 | + | 0     | 0    |
| ENSG0000(AC017006)   | antisense      | chr2  | 46166789 | 46167978 | - | 0     | 0    |
| ENSG0000(ACTG1P10)   | processed      | chrX  | 53142832 | 53143913 | - | 0     | 0    |
| ENSG0000(VDAC1P6)    | processed      | chrY  | 5207215  | 5208069  | - | 0     | 0.08 |
| ENSG0000(RP3-426I6)  | processed      | chr1  | 27739091 | 27739439 | + | 0     | 0    |
| ENSG0000(BEND3P1)    | transcribed    | chr10 | 50655967 | 50660472 | + | 0     | 0    |
| ENSG0000(LINC01160)  | lincRNA        | chr1  | 1.12E+08 | 1.12E+08 | - | 0.99  | 1.07 |
| ENSG0000(RP11-444C)  | processed      | chr1  | 86404176 | 86404866 | - | 0     | 0    |
| ENSG0000(AC111200)   | processed      | chr2  | 86930250 | 86930754 | - | 0     | 0    |
| ENSG0000(RP11-5P18)  | unprocessed    | chr1  | 15988182 | 15988441 | + | 0     | 0    |
| ENSG0000(AP000302)   | antisense      | chr21 | 33482499 | 33484258 | - | 0     | 0    |
| ENSG0000(RP13-238N)  | processed      | chrX  | 66360766 | 66361776 | - | 0     | 0    |
| ENSG0000(AC006028)   | processed      | chr7  | 2835621  | 2836022  | + | 0     | 0    |
| ENSG0000(RP11-442J)  | lincRNA        | chr13 | 18921889 | 18923765 | - | 0     | 0    |
| ENSG0000(AC072052)   | processed      | chr7  | 6490793  | 6491098  | - | 0     | 0    |
| ENSG0000(RPS29P23)   | processed      | chr19 | 12373609 | 12373731 | + | 0     | 0    |
| ENSG0000(RP11-715I4) | processed      | chr3  | 13052967 | 13053122 | - | 0     | 0    |
| ENSG0000(LINC01712)  | lincRNA        | chr1  | 83445967 | 83462687 | + | 0     | 0    |
| ENSG0000(RP11-418J)  | antisense      | chr1  | 1.19E+08 | 1.19E+08 | + | 2.49  | 3.36 |
| ENSG0000(RPS26P40)   | processed      | chr10 | 70794230 | 70794523 | - | 0     | 0    |

|                                 |       |          |          |   |      |      |
|---------------------------------|-------|----------|----------|---|------|------|
| ENSG0000( AC016995. lincRNA     | chr2  | 38406719 | 38515740 | - | 0    | 0.21 |
| ENSG0000( RPSAP40 processed_    | chr6  | 1.49E+08 | 1.49E+08 | - | 0    | 0    |
| ENSG0000( RP1-40G4P processed_  | chr22 | 26886909 | 26887548 | - | 0.12 | 0    |
| ENSG0000( AKR1B1P8 processed_   | chrX  | 1.16E+08 | 1.16E+08 | + | 0    | 0    |
| ENSG0000( GNA14-AS1 antisense   | chr9  | 77456295 | 77526697 | + | 0    | 0    |
| ENSG0000( CDY17P unprocessε     | chrY  | 24049878 | 24051487 | - | 0    | 0    |
| ENSG0000( HMGN2P1 processed_    | chr9  | 15588355 | 15588615 | + | 0    | 0    |
| ENSG0000( NDUFAF4P processed_   | chr1  | 1.75E+08 | 1.75E+08 | - | 0    | 0    |
| ENSG0000( RNF2P1 processed_     | chr9  | 6668999  | 6670008  | - | 0.12 | 0    |
| ENSG0000( NBPFP21P unprocessε   | chr3  | 36616006 | 36637457 | - | 0    | 0    |
| ENSG0000( FGF12-AS1 antisense   | chr3  | 1.92E+08 | 1.92E+08 | + | 0    | 0    |
| ENSG0000( AC007919. processed_  | chr3  | 1.73E+08 | 1.73E+08 | + | 0    | 0    |
| ENSG0000( AC007395. processed_  | chr2  | 70810798 | 70811474 | - | 0    | 0    |
| ENSG0000( RP11-702C processed_  | chrX  | 26496936 | 26505603 | + | 0    | 0    |
| ENSG0000( HLA-DPA1 protein_co   | chr6  | 33064569 | 33080775 | - | 3.58 | 6.14 |
| ENSG0000( SNX18P8 unprocessε    | chr9  | 40293082 | 40293955 | + | 0    | 0.08 |
| ENSG0000( LL22NC03- unprocessε  | chr22 | 22774529 | 22774691 | + | 0    | 0    |
| ENSG0000( RP11-331F antisense   | chr9  | 35642514 | 35643517 | + | 0    | 0    |
| ENSG0000( RP11-310H lincRNA     | chr7  | 55593777 | 55595006 | + | 0    | 0    |
| ENSG0000( ARL4AP4 processed_    | chr3  | 23878981 | 23879498 | - | 0    | 0    |
| ENSG0000( USP17L10 protein_co   | chr4  | 9210657  | 9212608  | + | 0    | 0    |
| ENSG0000( AC004941. processed_  | chr7  | 1.49E+08 | 1.49E+08 | - | 0    | 0    |
| ENSG0000( RP11-375N processed_  | chr10 | 97275012 | 97278097 | + | 0    | 0    |
| ENSG0000( SNRPEP8 processed_    | chr10 | 53038285 | 53038544 | + | 0    | 0    |
| ENSG0000( AC023481. lincRNA     | chr3  | 8364707  | 8366392  | - | 0    | 0    |
| ENSG0000( WASF5P processed_     | chr6  | 31287510 | 31288964 | - | 0    | 0    |
| ENSG0000( AC099344. lincRNA     | chr2  | 11388023 | 11390367 | - | 0    | 0    |
| ENSG0000( RAC1P3 processed_     | chr13 | 41287741 | 41288320 | - | 0    | 0    |
| ENSG0000( CTA-992D9 lincRNA     | chr22 | 27143478 | 27159878 | + | 0    | 0    |
| ENSG0000( RP11-576I2 antisense  | chr1  | 1.7E+08  | 1.71E+08 | - | 0.13 | 0    |
| ENSG0000( RP11-83J16 processed_ | chr15 | 34943080 | 34943394 | + | 0.99 | 0    |
| ENSG0000( DUX4L31 unprocessε    | chrY  | 10171590 | 10172725 | - | 0    | 0    |
| ENSG0000( CTC-490G2 lincRNA     | chr19 | 43329295 | 43331430 | - | 0    | 0    |
| ENSG0000( RP11-193P lincRNA     | chr1  | 48078787 | 48082196 | - | 0    | 0    |
| ENSG0000( AC016700. processed_  | chr2  | 70253855 | 70254010 | - | 0    | 3.1  |
| ENSG0000( RP11-422P processed_  | chr1  | 1.54E+08 | 1.54E+08 | + | 0    | 0    |
| ENSG0000( IRX1P1 unprocessε     | chr13 | 24742677 | 24746184 | + | 0    | 0    |
| ENSG0000( AC006380. lincRNA     | chr7  | 31414645 | 31421286 | - | 0    | 0    |
| ENSG0000( LINC00689 processed_  | chr7  | 1.59E+08 | 1.59E+08 | + | 0    | 0.02 |
| ENSG0000( LINC01817 lincRNA     | chr2  | 1.5E+08  | 1.5E+08  | - | 0    | 0    |
| ENSG0000( AC006050. processed_  | chr17 | 30573471 | 30577000 | - | 0    | 0    |
| ENSG0000( LINC01516 lincRNA     | chr10 | 25113058 | 25161236 | + | 0    | 0    |
| ENSG0000( RAB9AP5 unprocessε    | chrY  | 23956569 | 23960218 | + | 0    | 0    |
| ENSG0000( RP1-45C12 antisense   | chr1  | 1.71E+08 | 1.71E+08 | - | 0    | 0    |
| ENSG0000( RP5-899B1 lincRNA     | chr6  | 1.4E+08  | 1.4E+08  | + | 0    | 0    |



|                                        |          |          |   |      |      |
|----------------------------------------|----------|----------|---|------|------|
| ENSG0000(LINC01445 lincRNA chr7        | 54330697 | 54349849 | + | 0    | 0    |
| ENSG0000(LINC00396 lincRNA chr13       | 1.1E+08  | 1.1E+08  | + | 0    | 0    |
| ENSG0000(RP11-343N lincRNA chr1        | 1.21E+08 | 1.21E+08 | + | 0    | 0.76 |
| ENSG0000(FAR2P4 transcribed chr2       | 1.31E+08 | 1.31E+08 | + | 0    | 0    |
| ENSG0000(RP11-144L processed_ chr1     | 1.59E+08 | 1.59E+08 | + | 0    | 0    |
| ENSG0000(AC011747. lincRNA chr2        | 8543592  | 8575501  | - | 0    | 0    |
| ENSG0000(RBMY3AP unprocessed chrY      | 9610571  | 9621276  | - | 0    | 0    |
| ENSG0000(LINC01750 lincRNA chr1        | 1.12E+08 | 1.12E+08 | + | 0.23 | 0.1  |
| ENSG0000(WASIR2 lincRNA chr16          | 22910    | 25123    | + | 0.23 | 0.13 |
| ENSG0000(RP11-467L sense_intronic chr1 | 2.41E+08 | 2.41E+08 | - | 0    | 0    |
| ENSG0000(RP11-472M antisense chr6      | 56844002 | 56864078 | + | 0    | 0    |
| ENSG0000(LARP1BP1 processed_ chr4      | 63350114 | 63351472 | + | 0    | 0    |
| ENSG0000(AC024937. processed_ chr3     | 1.96E+08 | 1.96E+08 | + | 0    | 0    |
| ENSG0000(TIMM8AP1 processed_ chr2      | 1.62E+08 | 1.62E+08 | - | 0.43 | 0.41 |
| ENSG0000(RP1-14D6. antisense chrX      | 1.53E+08 | 1.53E+08 | + | 0    | 0    |
| ENSG0000(AC097359. processed_ chr3     | 37196204 | 37196666 | + | 0    | 0.56 |
| ENSG0000(LINC01305 lincRNA chr2        | 1.74E+08 | 1.74E+08 | + | 0    | 0    |
| ENSG0000(RP11-160N processed_ chr9     | 61665579 | 61666386 | + | 0    | 0    |
| ENSG0000(RNASEH1P processed_ chr17     | 16683438 | 16684227 | + | 0    | 0    |
| ENSG0000(RP11-321L lincRNA chr9        | 23829670 | 23849914 | + | 0    | 0    |
| ENSG0000(HLA-DPA2 unprocessed chr6     | 33091753 | 33097295 | - | 0    | 0    |
| ENSG0000(AC024937. processed_ chr3     | 1.96E+08 | 1.96E+08 | + | 0    | 0    |
| ENSG0000(RP11-542K antisense chr9      | 1.22E+08 | 1.22E+08 | + | 0    | 0    |
| ENSG0000(CTA-246H3 processed_ chr22    | 25349543 | 25350322 | - | 0    | 0.27 |
| ENSG0000(RP5-1170K antisense chr22     | 37080068 | 37082847 | + | 0    | 0    |
| ENSG0000(PRX3P2 processed_ chr1        | 28526318 | 28527227 | - | 0    | 0    |
| ENSG0000(HMGB3P2 processed_ chr20      | 36076018 | 36076601 | - | 0    | 0    |
| ENSG0000(HMGN2P3. processed_ chr10     | 72636497 | 72636765 | - | 0    | 0    |
| ENSG0000(LINC00441 lincRNA chr13       | 48296513 | 48303661 | - | 0    | 0    |
| ENSG0000(IGHV4-31 IG_V_gene chr14      | 1.06E+08 | 1.06E+08 | - | 0    | 0    |
| ENSG0000(AC074389. lincRNA chr7        | 1620654  | 1621405  | + | 0    | 0    |
| ENSG0000(CTB-187M. lincRNA chr17       | 19457080 | 19458399 | + | 0    | 0    |
| ENSG0000(FCF1P9 transcribed chrX       | 86481532 | 86481813 | + | 0    | 0    |
| ENSG0000(SNRPGP13 processed_ chr21     | 38502445 | 38502621 | + | 0    | 0    |
| ENSG0000(AC141930. lincRNA chr2        | 1572554  | 1580311  | - | 0    | 0    |
| ENSG0000(RP11-336A lincRNA chr10       | 5608475  | 5610793  | - | 0    | 0    |
| ENSG0000(RP11-548K unprocessed chr7    | 57828331 | 57837046 | + | 0    | 0    |
| ENSG0000(RP4-535B2 lincRNA chr1        | 65066627 | 65067737 | - | 0.33 | 0.37 |
| ENSG0000(AP006285. lincRNA chr11       | 1662584  | 1663343  | - | 0    | 0    |
| ENSG0000(AF196972. processed_ chrX     | 48423342 | 48423468 | - | 0    | 0    |
| ENSG0000(RPL7L1P2 processed_ chr7      | 51259429 | 51260167 | - | 0    | 0    |
| ENSG0000(JKAMPP1 processed_ chr9       | 12287320 | 12288238 | + | 0    | 0    |
| ENSG0000(AP003774. lincRNA chr11       | 64420391 | 64432670 | + | 0    | 0    |
| ENSG0000(AC104634. processed_ chr2     | 2.32E+08 | 2.32E+08 | + | 0    | 0.19 |
| ENSG0000(RP1-213J1 lincRNA chr22       | 27707580 | 27709931 | + | 0    | 0    |

|                      |                                    |       |          |          |   |         |         |
|----------------------|------------------------------------|-------|----------|----------|---|---------|---------|
| ENSG0000(RP1-251M1)  | lincRNA                            | chr10 | 10960151 | 10970816 | + | 0       | 0       |
| ENSG0000(RPS18)      | protein_coding                     | chr6  | 33272010 | 33276510 | + | 1741.66 | 1700.92 |
| ENSG0000(MTND4LP1)   | processed_transcript               | chrX  | 1.26E+08 | 1.26E+08 | + | 0       | 0       |
| ENSG0000(PTMAP4)     | processed_transcript               | chr12 | 9239986  | 9240331  | - | 0       | 0       |
| ENSG0000(NMD3P2)     | processed_transcript               | chr7  | 56502284 | 56503044 | - | 0       | 0       |
| ENSG0000(AC108868)   | lincRNA                            | chr2  | 1.07E+08 | 1.07E+08 | - | 0       | 0       |
| ENSG0000(LINC01353)  | lincRNA                            | chr1  | 2.03E+08 | 2.03E+08 | + | 0       | 0       |
| ENSG0000(RPL34P20)   | processed_transcript               | chr10 | 97393197 | 97393547 | - | 0       | 0       |
| ENSG0000(RP11-574F)  | lincRNA                            | chr9  | 5584490  | 5588994  | + | 0       | 0       |
| ENSG0000(RP11-542C)  | lincRNA                            | chr1  | 5086459  | 5090899  | - | 0       | 0       |
| ENSG0000(LINC01347)  | lincRNA                            | chr1  | 2.43E+08 | 2.43E+08 | - | 0.71    | 0.14    |
| ENSG0000(E2F6P4)     | processed_transcript               | chrX  | 1.36E+08 | 1.36E+08 | - | 0       | 0       |
| ENSG0000(FAM58CP)    | processed_transcript               | chrY  | 26626520 | 26627159 | - | 0       | 0       |
| ENSG0000(AC006003)   | sense_intronic                     | chr7  | 1.58E+08 | 1.58E+08 | - | 0       | 0       |
| ENSG0000(CBX1P5)     | processed_transcript               | chr3  | 1.67E+08 | 1.67E+08 | + | 0       | 0       |
| ENSG0000(AC007285)   | antisense                          | chr7  | 30069658 | 30075115 | - | 0       | 0       |
| ENSG0000(RP11-244N)  | antisense                          | chr9  | 97634515 | 97636051 | - | 0       | 0       |
| ENSG0000(SEPT14P1)   | unprocessed_transcript             | chr7  | 63117501 | 63154934 | - | 0       | 0       |
| ENSG0000(AC002486)   | processed_transcript               | chr7  | 20588990 | 20590085 | + | 0       | 0       |
| ENSG0000(RP11-374N)  | processed_transcript               | chr9  | 61972240 | 61976380 | + | 0.41    | 0.81    |
| ENSG0000(FAM225A)    | lincRNA                            | chr9  | 1.13E+08 | 1.13E+08 | + | 0.43    | 0.17    |
| ENSG0000(RP11-410C)  | lincRNA                            | chr1  | 2.2E+08  | 2.2E+08  | - | 0       | 0       |
| ENSG0000(RP11-187A)  | antisense                          | chr13 | 42043727 | 42044247 | - | 0.25    | 0       |
| ENSG0000(HINT1P1)    | processed_transcript               | chr7  | 1.43E+08 | 1.43E+08 | - | 0       | 0       |
| ENSG0000(LINC01249)  | lincRNA                            | chr2  | 4628222  | 4656215  | - | 0       | 0       |
| ENSG0000(RP1-232L2)  | lincRNA                            | chr6  | 79420297 | 79421305 | + | 0       | 0       |
| ENSG0000(FBXO36-IT1) | sense_intronic                     | chr2  | 2.3E+08  | 2.3E+08  | + | 0       | 0       |
| ENSG0000(LINC00278)  | lincRNA                            | chrY  | 3002912  | 3102272  | + | 0.72    | 0.53    |
| ENSG0000(AC123886)   | antisense                          | chr2  | 1.11E+08 | 1.11E+08 | + | 0       | 0       |
| ENSG0000(MTCO3P10)   | unprocessed_transcript             | chr7  | 57167880 | 57168651 | + | 0       | 0       |
| ENSG0000(DPP10-AS3)  | antisense                          | chr2  | 1.15E+08 | 1.15E+08 | - | 0       | 0       |
| ENSG0000(AC010132)   | lincRNA                            | chr7  | 42829672 | 42844438 | - | 0       | 0       |
| ENSG0000(ELOCP9)     | processed_transcript               | chrY  | 23808821 | 23809059 | - | 0       | 0       |
| ENSG0000(RPS6P2)     | processed_transcript               | chr2  | 1.79E+08 | 1.79E+08 | + | 0       | 0       |
| ENSG0000(TAB3-AS1)   | antisense                          | chrX  | 30834623 | 30835300 | + | 0       | 0       |
| ENSG0000(RSL24D1P1)  | processed_transcript               | chr18 | 57838476 | 57838966 | + | 0       | 0       |
| ENSG0000(RPL3P5)     | transcribed_unprocessed_transcript | chr2  | 2.36E+08 | 2.36E+08 | - | 0       | 0       |
| ENSG0000(RP11-380I)  | unprocessed_transcript             | chr1  | 2.03E+08 | 2.03E+08 | + | 0       | 0       |
| ENSG0000(OR55B1P)    | unitary_pseudogene                 | chr11 | 4146282  | 4147295  | - | 0       | 0       |
| ENSG0000(USMG5P1)    | processed_transcript               | chrX  | 74173890 | 74174066 | + | 0       | 0       |
| ENSG0000(PTCHD3P2)   | processed_transcript               | chr2  | 1.7E+08  | 1.7E+08  | - | 0       | 0.16    |
| ENSG0000(RP11-495P)  | transcribed_unprocessed_transcript | chr1  | 1.48E+08 | 1.48E+08 | + | 0.34    | 0.14    |
| ENSG0000(IGBP1P3)    | processed_transcript               | chr3  | 32620903 | 32621902 | - | 0       | 0       |
| ENSG0000(RNMTL1P1)   | processed_transcript               | chr10 | 21394033 | 21394592 | + | 0       | 0       |
| ENSG0000(RSL24D1P3)  | processed_transcript               | chr7  | 65335174 | 65335668 | - | 0       | 0       |

|                                  |       |          |          |   |      |      |
|----------------------------------|-------|----------|----------|---|------|------|
| ENSG0000( AC018717. lincRNA      | chr2  | 1.99E+08 | 1.99E+08 | - | 0    | 0    |
| ENSG0000( RP3-354J5. processed_  | chr6  | 1.09E+08 | 1.09E+08 | + | 0    | 0    |
| ENSG0000( AC091814. lincRNA      | chr12 | 9948137  | 9953336  | - | 0.61 | 0.93 |
| ENSG0000( CEACAMP5 unprocessε    | chr19 | 42654200 | 42669076 | + | 0    | 0.07 |
| ENSG0000( RP11-508N processed_   | chr9  | 1.07E+08 | 1.07E+08 | - | 0    | 0    |
| ENSG0000( RP11-245P antisense    | chr1  | 2.28E+08 | 2.28E+08 | + | 0    | 0    |
| ENSG0000( EIF4A1P11 processed_   | chr1  | 1.79E+08 | 1.79E+08 | + | 0    | 0    |
| ENSG0000( NEK2P2 processed_      | chr22 | 15611759 | 15613096 | - | 0    | 0    |
| ENSG0000( RP5-1158E lincRNA      | chrX  | 45848074 | 45851490 | - | 0    | 0    |
| ENSG0000( MTND2P1ε unprocessε    | chr2  | 1.4E+08  | 1.4E+08  | - | 0    | 0    |
| ENSG0000( RP11-552E processed_   | chrX  | 48228833 | 48228959 | - | 0    | 0    |
| ENSG0000( RP11-399L processed_   | chr10 | 87408044 | 87408258 | - | 0    | 0    |
| ENSG0000( AC008173. processed_   | chr2  | 56750300 | 56750563 | + | 0    | 0    |
| ENSG0000( LINC02015 lincRNA      | chr3  | 1.78E+08 | 1.78E+08 | + | 0.51 | 0.12 |
| ENSG0000( RP11-162K sense_intrε  | chr10 | 94109116 | 94121107 | + | 0    | 0    |
| ENSG0000( MTCO2P2C processed_    | chr22 | 36172934 | 36173948 | + | 0    | 0    |
| ENSG0000( RPL7P21 processed_     | chr5  | 1.43E+08 | 1.43E+08 | + | 0    | 0    |
| ENSG0000( MTND4LP2 processed_    | chr1  | 2.36E+08 | 2.36E+08 | - | 0    | 0    |
| ENSG0000( AC108938. unprocessε   | chr2  | 1.11E+08 | 1.11E+08 | + | 0    | 0    |
| ENSG0000( FAHD2CP transcribed    | chr2  | 96010551 | 96023380 | + | 2.51 | 2.5  |
| ENSG0000( AC034228. antisense    | chr5  | 1.32E+08 | 1.32E+08 | + | 0    | 0    |
| ENSG0000( RPS23P9 unprocessε     | chr1  | 1.62E+08 | 1.62E+08 | - | 0    | 0    |
| ENSG0000( SNORD62B snoRNA        | chr9  | 1.31E+08 | 1.31E+08 | + | 0    | 0    |
| ENSG0000( SHQ1P1 processed_      | chr10 | 50629532 | 50631075 | - | 0    | 0    |
| ENSG0000( AC009110. lincRNA      | chr16 | 62596372 | 62598449 | + | 0    | 0    |
| ENSG0000( RP11-353J. unitary_psε | chrX  | 1.02E+08 | 1.02E+08 | - | 0    | 0    |
| ENSG0000( RP13-34L8. unprocessε  | chrX  | 52561769 | 52562301 | - | 0    | 0    |
| ENSG0000( AC005224. lincRNA      | chr17 | 14210488 | 14217922 | + | 0.3  | 0.08 |
| ENSG0000( AC007557. antisense    | chr2  | 2.17E+08 | 2.17E+08 | - | 0    | 0    |
| ENSG0000( LINC01037 lincRNA      | chr1  | 1.87E+08 | 1.87E+08 | + | 0    | 0    |
| ENSG0000( AC151960. unprocessε   | chrX  | 1.53E+08 | 1.53E+08 | - | 0    | 0    |
| ENSG0000( RP11-164C lincRNA      | chr10 | 743992   | 744958   | + | 0    | 0    |
| ENSG0000( RP11-344N processed_   | chrX  | 48412303 | 48415285 | + | 0    | 0    |
| ENSG0000( RP5-897D1 lincRNA      | chr20 | 56730397 | 56731460 | + | 0    | 0    |
| ENSG0000( LINC01363 antisense    | chr1  | 1.67E+08 | 1.67E+08 | - | 0    | 0    |
| ENSG0000( RP11-344F lincRNA      | chr1  | 14221891 | 14223118 | - | 0    | 0    |
| ENSG0000( DLEU2 antisense        | chr13 | 49982552 | 50125720 | - | 0.23 | 0.57 |
| ENSG0000( AC009501. antisense    | chr2  | 63043922 | 63048640 | - | 0.03 | 0    |
| ENSG0000( PIK3CDP1 processed_    | chr2  | 6495877  | 6496798  | - | 0    | 0    |
| ENSG0000( RP11-522N antisense    | chr1  | 2.46E+08 | 2.46E+08 | - | 0    | 0.2  |
| ENSG0000( RP5-943J3. sense_intrε | chr1  | 89788914 | 89790492 | + | 0    | 0    |
| ENSG0000( RP11-296C processed_   | chr1  | 1.73E+08 | 1.73E+08 | - | 0    | 0    |
| ENSG0000( RP11-575L antisense    | chr9  | 83831586 | 83868532 | + | 0    | 0.1  |
| ENSG0000( GS1-542M. processed_   | chrX  | 8856665  | 8857059  | - | 0    | 0    |
| ENSG0000( AP000855. lincRNA      | chr21 | 19301613 | 19303739 | + | 0    | 0    |

|                                       |          |            |      |      |
|---------------------------------------|----------|------------|------|------|
| ENSG0000( AC013264. antisense chr2    | 1.97E+08 | 1.97E+08 + | 0    | 0    |
| ENSG0000( RPS29P7 processed_chr1      | 65154480 | 65154650 + | 0    | 0    |
| ENSG0000( CTD-2104P transcribec chr17 | 19615789 | 19633825 + | 0    | 0    |
| ENSG0000( AC013402. lincRNA chr2      | 1.05E+08 | 1.05E+08 - | 0    | 0    |
| ENSG0000( RP3-355L5. antisense chr6   | 1.05E+08 | 1.05E+08 + | 0    | 0    |
| ENSG0000( RP11-740P lincRNA chr1      | 2814432  | 2814998 -  | 0    | 0    |
| ENSG0000( LINC00283 antisense chr13   | 1.03E+08 | 1.03E+08 + | 0    | 0    |
| ENSG0000( ATP5BP1 processed_chr2      | 98206151 | 98207724 + | 0    | 0    |
| ENSG0000( AGBL5-AS1 antisense chr2    | 27049683 | 27050264 - | 0.21 | 0    |
| ENSG0000( USP17L29 protein_co chr4    | 9353638  | 9355230 +  | 0    | 0    |
| ENSG0000( AC011738. antisense chr7    | 43508728 | 43522542 - | 0    | 0    |
| ENSG0000( GHc-210E9 processed_chrX    | 1.01E+08 | 1.01E+08 - | 0    | 0    |
| ENSG0000( KRT17P6 transcribec chr17   | 20512560 | 20517479 - | 0    | 0    |
| ENSG0000( FSIP2-AS1 antisense chr2    | 1.86E+08 | 1.86E+08 - | 0    | 0    |
| ENSG0000( LINC01698 lincRNA chr1      | 2.09E+08 | 2.09E+08 + | 0    | 0    |
| ENSG0000( SPATA31B: unprocessε chr9   | 82057647 | 82063682 - | 0    | 0    |
| ENSG0000( RFESDP1 processed_chr13     | 22850101 | 22850561 + | 0    | 0    |
| ENSG0000( DLG3-AS1 antisense chrX     | 70452958 | 70455994 - | 0    | 0    |
| ENSG0000( RP11-553A antisense chr6    | 73693903 | 73696131 - | 0.25 | 0.4  |
| ENSG0000( AC010731. antisense chr2    | 2.07E+08 | 2.07E+08 + | 0    | 0    |
| ENSG0000( RPS6KA2-A antisense chr6    | 1.67E+08 | 1.67E+08 + | 0    | 0    |
| ENSG0000( AC011742. processed_chr2    | 26140263 | 26141264 - | 0    | 0    |
| ENSG0000( FAM90A18 unprocessε chr8    | 7723091  | 7726101 +  | 0    | 0    |
| ENSG0000( RPS8P6 processed_chr3       | 308714   | 309322 -   | 0    | 0    |
| ENSG0000( RP11-686D lincRNA chr6      | 19290319 | 19321021 - | 0    | 0    |
| ENSG0000( RP5-827C2 antisense chr1    | 2.34E+08 | 2.34E+08 - | 0.74 | 0.41 |
| ENSG0000( OGFOD1P1 processed_chr13    | 49210422 | 49212294 - | 0.11 | 0    |
| ENSG0000( LINC01704 lincRNA chr1      | 1.58E+08 | 1.58E+08 - | 0    | 0    |
| ENSG0000( OR7E111P unprocessε chr13   | 67902208 | 67903221 + | 0    | 0    |
| ENSG0000( PPP2R2DP: processed_chr3    | 38051759 | 38052395 + | 0    | 0    |
| ENSG0000( LINC01307 lincRNA chr1      | 1.01E+08 | 1.01E+08 + | 0    | 0    |
| ENSG0000( DIRC3 protein_co chr2       | 2.17E+08 | 2.18E+08 - | 0    | 0.04 |
| ENSG0000( LINC00410 lincRNA chr13     | 90890954 | 90926597 - | 0.03 | 0    |
| ENSG0000( AC005042. processed_chr2    | 1.59E+08 | 1.59E+08 + | 0    | 0    |
| ENSG0000( RP11-339N lincRNA chr9      | 1.09E+08 | 1.09E+08 - | 0    | 0    |
| ENSG0000( AP003774. lincRNA chr11     | 64394342 | 64395831 - | 0    | 0.07 |
| ENSG0000( AC020743. lincRNA chr7      | 50202001 | 50262994 - | 0    | 0    |
| ENSG0000( LINC01891 lincRNA chr2      | 2.34E+08 | 2.34E+08 - | 0    | 0    |
| ENSG0000( RP1-27K12 lincRNA chr6      | 53561289 | 53617171 - | 0    | 0.04 |
| ENSG0000( EIF1P3 processed_chr1       | 1.82E+08 | 1.82E+08 + | 0    | 0.32 |
| ENSG0000( RP1-203P1 processed_chrX    | 1.47E+08 | 1.47E+08 - | 0    | 0    |
| ENSG0000( RPL21P43 processed_chr3     | 1.69E+08 | 1.69E+08 - | 0    | 0    |
| ENSG0000( LINC01090 lincRNA chr2      | 1.88E+08 | 1.88E+08 - | 0    | 0    |
| ENSG0000( LINC00574 lincRNA chr6      | 1.7E+08  | 1.7E+08 +  | 0.07 | 0    |
| ENSG0000( RP11-203F antisense chr1    | 2.04E+08 | 2.04E+08 + | 0    | 0    |

|                |             |                |         |          |          |   |      |      |
|----------------|-------------|----------------|---------|----------|----------|---|------|------|
| ENSG0000010140 | unprocessed | chrX           | 1.5E+08 | 1.5E+08  | +        | 0 | 0    |      |
| ENSG0000010140 | NANOGP5     | transcribed    | chr9    | 1E+08    | 1E+08    | + | 0    | 0    |
| ENSG0000010140 | AP002856    | lincRNA        | chr11   | 1.31E+08 | 1.31E+08 | + | 0.12 | 0    |
| ENSG0000010140 | AC020550    | processed      | chr2    | 1.98E+08 | 1.98E+08 | + | 0    | 0    |
| ENSG0000010140 | RP11-367J   | processed      | chr1    | 1.58E+08 | 1.58E+08 | + | 0    | 0    |
| ENSG0000010140 | BMS1P13     | unprocessed    | chr9    | 65828120 | 65831696 | + | 0    | 0    |
| ENSG0000010140 | RP11-5407   | processed      | chr1    | 1008076  | 1008229  | - | 0    | 0    |
| ENSG0000010140 | RP4-669H2   | antisense      | chr20   | 53397661 | 53412910 | - | 0.08 | 0.04 |
| ENSG0000010140 | AC004895    | lincRNA        | chr7    | 6081103  | 6093085  | + | 0    | 0    |
| ENSG0000010140 | RP11-432J   | lincRNA        | chr10   | 1.32E+08 | 1.32E+08 | + | 0    | 0    |
| ENSG0000010140 | CYCSP43     | processed      | chrX    | 69485343 | 69485652 | - | 0    | 0    |
| ENSG0000010140 | PABPC1P1    | processed      | chr4    | 39973444 | 39974338 | + | 0    | 0    |
| ENSG0000010140 | LINC00899   | processed      | chr22   | 46039907 | 46044853 | - | 1.71 | 1.85 |
| ENSG0000010140 | AC104698    | processed      | chr2    | 30209995 | 30210307 | + | 0    | 0    |
| ENSG0000010140 | AF064860    | lincRNA        | chr21   | 39727755 | 39730680 | + | 0    | 0    |
| ENSG0000010140 | RP11-476H   | lincRNA        | chr1    | 1.94E+08 | 1.94E+08 | + | 0    | 0    |
| ENSG0000010140 | COX6CP2     | processed      | chr20   | 50479767 | 50479991 | + | 0    | 0    |
| ENSG0000010140 | CDY23P      | unprocessed    | chrY    | 25994684 | 25995697 | - | 0    | 0    |
| ENSG0000010140 | RP11-382E   | lincRNA        | chr1    | 1.99E+08 | 1.99E+08 | + | 0    | 0    |
| ENSG0000010140 | RP11-568A   | lincRNA        | chr6    | 1.67E+08 | 1.67E+08 | - | 0    | 0    |
| ENSG0000010140 | LINC-PINT   | antisense      | chr7    | 1.31E+08 | 1.31E+08 | - | 4.45 | 4.1  |
| ENSG0000010140 | AC012075    | processed      | chr2    | 81418723 | 81419302 | - | 0    | 0    |
| ENSG0000010140 | AC018880    | processed      | chr2    | 1.04E+08 | 1.04E+08 | + | 0    | 0    |
| ENSG0000010140 | RP11-573D   | antisense      | chr3    | 1.87E+08 | 1.87E+08 | + | 0    | 0    |
| ENSG0000010140 | VN1R110P    | processed      | chrX    | 48636165 | 48637135 | + | 0    | 0    |
| ENSG0000010140 | HMG2P3      | processed      | chr11   | 73580253 | 73580517 | + | 0    | 0    |
| ENSG0000010140 | LLOXNC01-   | antisense      | chrX    | 1.04E+08 | 1.04E+08 | - | 0.38 | 0.31 |
| ENSG0000010140 | ARHGEF9-I   | sense_intronic | chrX    | 63670196 | 63671502 | - | 0    | 0    |
| ENSG0000010140 | AC010976    | antisense      | chr2    | 1.27E+08 | 1.28E+08 | + | 0    | 0    |
| ENSG0000010140 | RP11-107    | processed      | chr2    | 1.73E+08 | 1.73E+08 | + | 0    | 0.08 |
| ENSG0000010140 | TSPAN19     | protein_coding | chr12   | 85014311 | 85036277 | - | 0    | 0    |
| ENSG0000010140 | GAPDHP59    | processed      | chr2    | 1.87E+08 | 1.87E+08 | + | 0    | 0    |
| ENSG0000010140 | RP11-63G1   | lincRNA        | chr1    | 58838448 | 58851254 | - | 0    | 0    |
| ENSG0000010140 | RP11-213G   | processed      | chr9    | 85934588 | 85936599 | + | 0    | 0    |
| ENSG0000010140 | LINC01273   | lincRNA        | chr20   | 50172550 | 50176671 | + | 0    | 0.64 |
| ENSG0000010140 | RP11-89K1   | processed      | chr10   | 2936021  | 2936441  | + | 0    | 0    |
| ENSG0000010140 | RP11-164H   | processed      | chr9    | 1.25E+08 | 1.25E+08 | - | 0    | 0    |
| ENSG0000010140 | AC079922    | processed      | chr2    | 1.13E+08 | 1.13E+08 | - | 0.26 | 0    |
| ENSG0000010140 | RP11-227H   | antisense      | chr10   | 69265342 | 69268148 | - | 0    | 0    |
| ENSG0000010140 | ABCA9-AS1   | antisense      | chr17   | 68944531 | 69042784 | + | 0    | 0    |
| ENSG0000010140 | NANOGP1     | processed      | chrX    | 43407665 | 43408559 | - | 0    | 0    |
| ENSG0000010140 | EMBP1       | transcribed    | chr1    | 1.22E+08 | 1.22E+08 | + | 0.32 | 0.1  |
| ENSG0000010140 | RP11-204E   | lincRNA        | chr6    | 21521678 | 21523783 | - | 0    | 0.03 |
| ENSG0000010140 | CHODL-AS1   | lincRNA        | chr21   | 17835016 | 17885608 | - | 0    | 0    |
| ENSG0000010140 | RP11-183I   | antisense      | chr9    | 16473188 | 16476237 | + | 0    | 0    |

|                                      |          |            |      |      |
|--------------------------------------|----------|------------|------|------|
| ENSG0000( AC092652. antisense chr2   | 1.44E+08 | 1.44E+08 - | 0    | 0    |
| ENSG0000( RP11-350J. antisense chr6  | 1.5E+08  | 1.5E+08 -  | 1    | 0.63 |
| ENSG0000( RP11-354K processed_ chr6  | 76660486 | 76662770 + | 0    | 0    |
| ENSG0000( PQLC1P1 processed_ chr7    | 88610241 | 88610669 - | 0    | 0    |
| ENSG0000( DLX6-AS1 antisense chr7    | 96955141 | 97014065 - | 0    | 0.14 |
| ENSG0000( PPP1R11P2 processed_ chrX  | 57229034 | 57229415 + | 0    | 0    |
| ENSG0000( MTCO2P5 processed_ chr2    | 1.43E+08 | 1.43E+08 - | 0    | 0    |
| ENSG0000( RP11-92K2 processed_ chr1  | 1.93E+08 | 1.93E+08 + | 0.5  | 0    |
| ENSG0000( LINC01354 lincRNA chr1     | 2.35E+08 | 2.35E+08 - | 1.11 | 1.55 |
| ENSG0000( RP1-8B1.4 antisense chr6   | 46097093 | 46129706 - | 0    | 0    |
| ENSG0000( TMEM44-A antisense chr3    | 1.95E+08 | 1.95E+08 + | 0    | 0.45 |
| ENSG0000( RP1-154K9 lincRNA chrX     | 42252459 | 42699385 + | 0    | 0    |
| ENSG0000( LINC01611 lincRNA chr6     | 84421028 | 84556152 - | 0    | 0.22 |
| ENSG0000( MTND4P21 unprocessε chr2   | 1.31E+08 | 1.31E+08 - | 0    | 0    |
| ENSG0000( AC090960. processed_ chr3  | 17333126 | 17333431 + | 0    | 0    |
| ENSG0000( AC079896. lincRNA chr2     | 81983272 | 82005700 - | 0    | 0    |
| ENSG0000( LINC00575 lincRNA chr4     | 82613113 | 82621437 - | 0    | 0    |
| ENSG0000( DBIL5P transcribec chr17   | 752660   | 755336 +   | 0.45 | 0.04 |
| ENSG0000( RP11-370B processed_ chrX  | 1.04E+08 | 1.04E+08 - | 0    | 0.21 |
| ENSG0000( RPL31P50 processed_ chr12  | 31597114 | 31597409 - | 0    | 0    |
| ENSG0000( PIK3CD-AS. antisense chr1  | 9672426  | 9687555 -  | 1.05 | 1.3  |
| ENSG0000( RP11-382D lincRNA chr1     | 1.84E+08 | 1.84E+08 + | 0    | 0    |
| ENSG0000( DOC2GP transcribec chr11   | 67612651 | 67616257 - | 0    | 0    |
| ENSG0000( AC009542. antisense chr7   | 1.35E+08 | 1.35E+08 + | 0    | 0    |
| ENSG0000( ITCH-IT1 sense_intrε chr20 | 34450930 | 34454552 + | 0    | 0    |
| ENSG0000( PA2G4P6 processed_ chr9    | 89449558 | 89450754 + | 0    | 0    |
| ENSG0000( ANP32BP2 processed_ chr22  | 44651835 | 44652379 + | 0    | 0    |
| ENSG0000( AC009502. processed_ chr2  | 2.2E+08  | 2.2E+08 -  | 0    | 0    |
| ENSG0000( RP11-317B processed_ chr9  | 88484852 | 88485325 - | 0    | 0    |
| ENSG0000( PCAT7 antisense chr9       | 94555069 | 94568127 + | 0    | 0    |
| ENSG0000( LINC01388 lincRNA chr9     | 112713   | 113754 -   | 0    | 0    |
| ENSG0000( NANOGP9 processed_ chrX    | 65772741 | 65773632 - | 0    | 0    |
| ENSG0000( RPL36AP35 processed_ chr9  | 1.09E+08 | 1.09E+08 + | 0    | 0    |
| ENSG0000( RP3-527G5 lincRNA chr6     | 4345743  | 4347037 -  | 0    | 0    |
| ENSG0000( SNRPCP9 processed_ chr7    | 97885868 | 97886074 + | 0    | 0    |
| ENSG0000( LINC00210 lincRNA chr1     | 2.18E+08 | 2.18E+08 + | 0    | 0    |
| ENSG0000( AC007179. lincRNA chr2     | 59435213 | 59442261 + | 0    | 0    |
| ENSG0000( LINC01198 lincRNA chr13    | 46455135 | 46486506 - | 0.22 | 0.49 |
| ENSG0000( NPM1P48 processed_ chr2    | 4514204  | 4515056 -  | 0.07 | 0.32 |
| ENSG0000( AC019097. processed_ chr2  | 99102018 | 99102752 + | 0    | 0    |
| ENSG0000( AKAIN1 protein_co chr18    | 5145285  | 5197503 -  | 0    | 0    |
| ENSG0000( LINC01819 lincRNA chr2     | 43027853 | 43039547 - | 0    | 0    |
| ENSG0000( RP11-216N transcribec chr1 | 1.54E+08 | 1.54E+08 + | 0    | 0    |
| ENSG0000( RP11-310E lincRNA chr10    | 95141925 | 95168425 - | 0    | 0    |
| ENSG0000( XX-FW831. antisense chrX   | 1.54E+08 | 1.54E+08 - | 0.56 | 0    |

|                                      |          |          |   |      |      |
|--------------------------------------|----------|----------|---|------|------|
| ENSG0000(MTHFD1P1 processed_ chrX    | 57392646 | 57395409 | - | 0    | 0.02 |
| ENSG0000(RPS7P2 processed_ chr1      | 1.54E+08 | 1.54E+08 | + | 0    | 0    |
| ENSG0000(RP11-449H lincRNA chr9      | 62028426 | 62076349 | + | 0    | 0    |
| ENSG0000(AC073055. processed_ chr7   | 1.46E+08 | 1.46E+08 | + | 0    | 0    |
| ENSG0000(AC073342. antisense chr7    | 1.43E+08 | 1.43E+08 | - | 0    | 0    |
| ENSG0000(FAM192BP processed_ chr4    | 1.53E+08 | 1.53E+08 | + | 0    | 0    |
| ENSG0000(RP11-527F lincRNA chr6      | 1.26E+08 | 1.26E+08 | + | 0    | 0    |
| ENSG0000(HMGB3P14 processed_ chr3    | 1.34E+08 | 1.34E+08 | + | 0    | 0    |
| ENSG0000(RP11-494I lincRNA chrX      | 22428132 | 22494713 | + | 0    | 0    |
| ENSG0000(AC012354. processed_ chr2   | 44996413 | 44996873 | + | 0    | 0    |
| ENSG0000(UBE2V2P4 processed_ chr1    | 36241898 | 36242156 | - | 0    | 0    |
| ENSG0000(UTAT33 antisense chr2       | 1.05E+08 | 1.05E+08 | - | 0    | 0    |
| ENSG0000(CYP21A2 protein_co chr6     | 32038265 | 32041670 | + | 0.35 | 0.6  |
| ENSG0000(GLUDP5 unprocessε chr10     | 31628540 | 31628599 | - | 0    | 0    |
| ENSG0000(RP11-327P antisense chr13   | 51803838 | 51813832 | + | 0.69 | 0.48 |
| ENSG0000(MORF4L1P processed_ chrX    | 65327988 | 65331233 | - | 0    | 0    |
| ENSG0000(AC067945. processed_ chr2   | 1.91E+08 | 1.91E+08 | + | 0    | 0    |
| ENSG0000(AC007875. processed_ chr7   | 97906429 | 97906822 | + | 0    | 0    |
| ENSG0000(OR5K2 protein_co chr3       | 98497604 | 98498663 | + | 0    | 0    |
| ENSG0000(RP3-428L1 antisense chr6    | 1.61E+08 | 1.61E+08 | + | 0    | 0    |
| ENSG0000(RP11-229P antisense chr9    | 1.37E+08 | 1.37E+08 | + | 0    | 0    |
| ENSG0000(RP4-631H1 processed_ chr1   | 52925249 | 52925423 | - | 0    | 0    |
| ENSG0000(AP001625. sense_intrε chr21 | 42508624 | 42509661 | + | 0    | 0    |
| ENSG0000(RP1-202O8 antisense chr1    | 6443034  | 6447006  | - | 0    | 0    |
| ENSG0000(KRT17P3 unprocessε chr17    | 30567700 | 30571748 | - | 0    | 0    |
| ENSG0000(IPO9-AS1 antisense chr1     | 2.02E+08 | 2.02E+08 | - | 0.65 | 0.76 |
| ENSG0000(RP11-761N lincRNA chr3      | 40766207 | 40862626 | + | 0    | 0    |
| ENSG0000(TSPY18P unprocessε chrY     | 9869664  | 9870781  | + | 0    | 0    |
| ENSG0000(RP11-346E processed_ chrX   | 81363268 | 81364170 | + | 0    | 0    |
| ENSG0000(AC009158. lincRNA chr16     | 26302064 | 26334428 | + | 0    | 0    |
| ENSG0000(RP11-177F lincRNA chr1      | 2.38E+08 | 2.39E+08 | + | 0.08 | 0.06 |
| ENSG0000(SNRFPF1 processed_ chr20    | 49729591 | 49729842 | - | 0    | 0    |
| ENSG0000(TXNL1P1 processed_ chr13    | 86725500 | 86726053 | + | 0    | 0    |
| ENSG0000(RP11-761I2 antisense chr11  | 47577725 | 47578277 | + | 0    | 0.29 |
| ENSG0000(RP5-1120P lincRNA chr6      | 44073913 | 44077952 | + | 0    | 0    |
| ENSG0000(F10-AS1 antisense chr13     | 1.13E+08 | 1.13E+08 | - | 0    | 0    |
| ENSG0000(RP1-297M: lincRNA chr6      | 1.51E+08 | 1.51E+08 | - | 0    | 0    |
| ENSG0000(NDUFB1P1 processed_ chr3    | 48181547 | 48181726 | + | 0    | 0    |
| ENSG0000(PRH1 protein_co chr12       | 10824960 | 11171544 | - | 0.35 | 2.06 |
| ENSG0000(MTND5P15 processed_ chr3    | 1.77E+08 | 1.77E+08 | - | 0    | 0    |
| ENSG0000(TRAF3IP2- antisense chr6    | 1.11E+08 | 1.12E+08 | + | 2.69 | 4.09 |
| ENSG0000(DARS-AS1 antisense chr2     | 1.36E+08 | 1.36E+08 | + | 7.1  | 4.3  |
| ENSG0000(AC073316. lincRNA chr7      | 3196626  | 3198256  | - | 0    | 0    |
| ENSG0000(WDR95P unitary_ψε chr13     | 31063306 | 31115699 | + | 0    | 0    |
| ENSG0000(AC019185. sense_intrε chr2  | 2.08E+08 | 2.09E+08 | + | 0    | 0    |

|                                   |       |          |          |   |       |       |
|-----------------------------------|-------|----------|----------|---|-------|-------|
| ENSG0000(MARK2P14 unprocessed)    | chr3  | 11906527 | 11912313 | + | 0     | 0     |
| ENSG0000(AC012594. antisense)     | chr2  | 1.7E+08  | 1.7E+08  | - | 0     | 0     |
| ENSG0000(GOT2P1 processed)        | chr1  | 55367466 | 55368774 | + | 0     | 0     |
| ENSG0000(RP11-281A lincRNA)       | chr9  | 1.18E+08 | 1.18E+08 | - | 0.11  | 0     |
| ENSG0000(RP11-29B9 lincRNA)       | chr9  | 7960413  | 7961080  | - | 0     | 0     |
| ENSG0000(AC079354. antisense)     | chr2  | 2.02E+08 | 2.02E+08 | - | 0     | 0     |
| ENSG0000(SETP10 processed)        | chr1  | 1.79E+08 | 1.79E+08 | + | 0     | 0     |
| ENSG0000(RP11-541N processed)     | chr10 | 48546472 | 48546713 | - | 0     | 0     |
| ENSG0000(GAPDHP37 processed)      | chr22 | 40673484 | 40674451 | - | 0     | 0     |
| ENSG0000(IDH1-AS1 antisense)      | chr2  | 2.08E+08 | 2.08E+08 | + | 0.84  | 0.55  |
| ENSG0000(MAP1LC3B transcribed)    | chr9  | 19460926 | 19464524 | - | 0     | 0     |
| ENSG0000(GAMTP2 processed)        | chr13 | 34574204 | 34574666 | - | 0     | 0     |
| ENSG0000(TPRKBP1 processed)       | chr10 | 28658987 | 28659467 | + | 0     | 0     |
| ENSG0000(RP1-249H1 lincRNA)       | chr6  | 1.14E+08 | 1.14E+08 | - | 0     | 0     |
| ENSG0000(RARRES2P3 processed)     | chrX  | 21421822 | 21422294 | - | 0     | 0     |
| ENSG0000(LINC00387 lincRNA)       | chr13 | 18672827 | 18676163 | + | 0     | 0     |
| ENSG0000(SALL4P5 unprocessed)     | chr3  | 22989823 | 22991582 | + | 0     | 0     |
| ENSG0000(AC006033. processed)     | chr7  | 38311383 | 38311808 | + | 0     | 0     |
| ENSG0000(AC007682. lincRNA)       | chr2  | 51032601 | 52407917 | + | 0     | 0     |
| ENSG0000(NEBL-AS1 antisense)      | chr10 | 21174014 | 21175048 | + | 0     | 0     |
| ENSG0000(AL138479. processed)     | chr14 | 53917270 | 53917753 | - | 0     | 0     |
| ENSG0000(AC024082. processed)     | chr7  | 1.38E+08 | 1.38E+08 | + | 0     | 0     |
| ENSG0000(PSG1 protein)            | chr19 | 42866464 | 42879822 | - | 0.19  | 0.35  |
| ENSG0000(TAPBP protein)           | chr6  | 33299694 | 33314387 | - | 46.39 | 50.44 |
| ENSG0000(SEPHS1P7 processed)      | chr2  | 1.14E+08 | 1.14E+08 | - | 0     | 0     |
| ENSG0000(AC102953. antisense)     | chr7  | 1508655  | 1509427  | - | 0     | 0     |
| ENSG0000(HMGB3P31 processed)      | chrX  | 1.35E+08 | 1.35E+08 | - | 0     | 0     |
| ENSG0000(AF228730. processed)     | chr8  | 7200756  | 7200857  | + | 0     | 0     |
| ENSG0000(AC024082. processed)     | chr7  | 1.38E+08 | 1.38E+08 | + | 0     | 0     |
| ENSG0000(CTA-125H2 antisense)     | chr22 | 25876854 | 25903247 | - | 0     | 0     |
| ENSG0000(LINC01598 antisense)     | chr20 | 30323812 | 30361730 | - | 0     | 0     |
| ENSG0000(RP11-329E antisense)     | chrX  | 1.52E+08 | 1.52E+08 | + | 0     | 0     |
| ENSG0000(RPS7P3 processed)        | chr1  | 2.33E+08 | 2.33E+08 | - | 0.12  | 0     |
| ENSG0000(HNRNPA1F processed)      | chr8  | 81807772 | 81808726 | + | 0.06  | 0     |
| ENSG0000(PGM5P4-A lincRNA)        | chr2  | 1.14E+08 | 1.14E+08 | - | 0     | 0.03  |
| ENSG0000(PHKA1-AS1 antisense)     | chrX  | 72688950 | 72712348 | + | 0     | 0     |
| ENSG0000(MTND2P24 processed)      | chrX  | 55179194 | 55179999 | - | 0     | 0     |
| ENSG0000(HS1BP3-IT: sense_intron) | chr2  | 20590775 | 20592548 | - | 0.12  | 0     |
| ENSG0000(RP4-591L5. lincRNA)      | chr1  | 30415825 | 30421108 | + | 0     | 0     |
| ENSG0000(AC004837. antisense)     | chr7  | 39609610 | 39610290 | - | 0     | 0     |
| ENSG0000(DPY19L1P2 unprocessed)   | chr7  | 32812757 | 32838570 | + | 0     | 0.09  |
| ENSG0000(RP4-706G2 antisense)     | chr1  | 25208139 | 25209437 | + | 0.06  | 0.03  |
| ENSG0000(MTND2P22 unprocessed)    | chr2  | 1.3E+08  | 1.3E+08  | + | 0     | 0     |
| ENSG0000(AC007383. antisense)     | chr2  | 2.06E+08 | 2.06E+08 | + | 0     | 0     |
| ENSG0000(HNRNPA1F processed)      | chr7  | 87521461 | 87522410 | + | 0     | 0     |



|                                        |          |          |   |      |      |
|----------------------------------------|----------|----------|---|------|------|
| ENSG0000(GNAI2P2 processed_ chr10      | 78068623 | 78069538 | - | 0    | 0    |
| ENSG0000(RP5-967N2 processed_ chr20    | 5965180  | 5965511  | + | 0    | 0    |
| ENSG0000(RP11-493K antisense chrX      | 73080167 | 73084635 | + | 0    | 0    |
| ENSG0000(RP11-67C2 antisense chr10     | 45444570 | 45453121 | - | 0.51 | 0    |
| ENSG0000(AF131215. processed_ chr8     | 11175051 | 11175570 | + | 0    | 0    |
| ENSG0000(RP11-12M! lincRNA chr1        | 1.8E+08  | 1.8E+08  | - | 0    | 0    |
| ENSG0000(RP11-12D2 processed_ chr9     | 5356312  | 5356525  | - | 0    | 0    |
| ENSG0000(AC144449. antisense chr2      | 1.5E+08  | 1.5E+08  | + | 0.42 | 0.2  |
| ENSG0000(RP11-452K antisense chr10     | 97401115 | 97419524 | + | 0    | 0    |
| ENSG0000(RP11-557H lincRNA chr6        | 1.34E+08 | 1.35E+08 | - | 0.25 | 0.28 |
| ENSG0000(LINC00202 transcribed chr10   | 26647986 | 26653454 | + | 0    | 0    |
| ENSG0000(RP5-963E2 lincRNA chr20       | 63166797 | 63180903 | - | 0    | 0    |
| ENSG0000(RP11-132G processed_ chr1     | 21768269 | 21768575 | + | 0    | 0    |
| ENSG0000(RP11-35L1 lincRNA chr1        | 2.4E+08  | 2.4E+08  | - | 0    | 0    |
| ENSG0000(AC011899. antisense chr7      | 1.58E+08 | 1.58E+08 | + | 0    | 0    |
| ENSG0000(RPL7L1P12 processed_ chr13    | 98949719 | 98950447 | - | 0    | 0    |
| ENSG0000(RP11-573D unprocessed chr3    | 1.87E+08 | 1.87E+08 | + | 0    | 0    |
| ENSG0000(LINC00415 lincRNA chr13       | 26052276 | 26053385 | - | 0    | 0    |
| ENSG0000(RP11-2L13. processed_ chr1    | 2E+08    | 2E+08    | + | 0    | 0    |
| ENSG0000(RP11-82L2! antisense chr1     | 71570956 | 71573558 | + | 0    | 0    |
| ENSG0000(AP000474. lincRNA chr21       | 23888798 | 23890541 | - | 0    | 0    |
| ENSG0000(LINC01787 lincRNA chr1        | 96254069 | 96374125 | - | 0.06 | 0.09 |
| ENSG0000(OFD1P3Y unprocessed chrY      | 9030594  | 9039988  | + | 0    | 0    |
| ENSG0000(PPP1R2P3 protein_co chr5      | 1.57E+08 | 1.57E+08 | + | 0    | 0    |
| ENSG0000(RP11-53B5 lincRNA chr9        | 93857083 | 93858333 | + | 0    | 0    |
| ENSG0000(ANXA2P2 processed_ chr9       | 33624274 | 33625293 | + | 0.07 | 0    |
| ENSG0000(RP11-57H1 sense_intronic chr1 | 95120147 | 95138554 | + | 0    | 0    |
| ENSG0000(EP300-AS1 antisense chr22     | 41174591 | 41197456 | - | 0    | 0    |
| ENSG0000(RP11-111F processed_ chr9     | 62266319 | 62266919 | + | 1.02 | 0.19 |
| ENSG0000(RP4-581O6 processed_ chr1     | 99842610 | 99842761 | + | 0    | 0    |
| ENSG0000(FLJ27354 antisense chr1       | 89583241 | 89632894 | - | 1.09 | 1.17 |
| ENSG0000(CLCN3P1 transcribed chr9      | 14987302 | 15146401 | - | 0    | 0    |
| ENSG0000(AC108868. lincRNA chr2        | 1.07E+08 | 1.07E+08 | + | 0    | 0    |
| ENSG0000(LINC01880 lincRNA chr2        | 2.42E+08 | 2.42E+08 | - | 0    | 0    |
| ENSG0000(ZNF736P12 processed_ chrY     | 24500263 | 24501505 | - | 0    | 0    |
| ENSG0000(CAP1P2 processed_ chr10       | 43604843 | 43606251 | - | 0.04 | 0    |
| ENSG0000(AC005537. lincRNA chr7        | 42954135 | 43113931 | - | 0    | 0.09 |
| ENSG0000(RP11-571E processed_ chrX     | 47389961 | 47392300 | - | 0    | 0    |
| ENSG0000(AP001059. antisense chr21     | 44250813 | 44251520 | + | 0    | 0    |
| ENSG0000(HSPE1P25 processed_ chr1      | 77853355 | 77853893 | + | 0    | 0    |
| ENSG0000(AC074183. lincRNA chr7        | 84939349 | 84940245 | - | 0    | 0    |
| ENSG0000(LEF1-AS1 processed_ chr4      | 1.08E+08 | 1.08E+08 | + | 0.02 | 0    |
| ENSG0000(FAAHP1 transcribed chr1       | 46432129 | 46482493 | + | 0.17 | 0.21 |
| ENSG0000(LINC01807 lincRNA chr2        | 2.28E+08 | 2.29E+08 | - | 0.1  | 0    |
| ENSG0000(LSM12P1 processed_ chr8       | 35525176 | 35525763 | - | 9.49 | 7.91 |

|                                        |          |          |   |      |      |
|----------------------------------------|----------|----------|---|------|------|
| ENSG0000(RP11-275F processed_ chr1     | 51372270 | 51373224 | + | 0    | 0    |
| ENSG0000(AC007391. lincRNA chr2        | 37325340 | 37326797 | + | 0.15 | 0    |
| ENSG0000(ELOCP15 processed_ chrY       | 22068820 | 22069151 | + | 0    | 0    |
| ENSG0000(MAGEB6P1 protein_co chrX      | 26160601 | 26161824 | + | 0    | 0    |
| ENSG0000(RP5-991C6 sense_intron chr6   | 81724722 | 81736353 | - | 0    | 0    |
| ENSG0000(AC079781. processed_ chr7     | 97908256 | 97908424 | + | 0    | 0    |
| ENSG0000(AC092168. sense_intron chr2   | 1.01E+08 | 1.01E+08 | + | 0    | 0    |
| ENSG0000(RP11-87N2 lincRNA chr9        | 10631750 | 10632203 | - | 0    | 0    |
| ENSG0000(GS1-115G2 processed_ chr1     | 1.85E+08 | 1.85E+08 | + | 0    | 0    |
| ENSG0000(RP11-26H1 processed_ chr1     | 21908098 | 21908580 | + | 0    | 0    |
| ENSG0000(DEFT1P2 unprocessed_ chr8     | 7006293  | 7007389  | - | 0    | 0    |
| ENSG0000(ZBED9 protein_co chr6         | 28571630 | 28616212 | - | 0.02 | 0.01 |
| ENSG0000(PSMD10P3 processed_ chr13     | 73036401 | 73036848 | + | 0    | 0    |
| ENSG0000(RP11-45J1. processed_ chrX    | 1.2E+08  | 1.2E+08  | + | 0    | 0    |
| ENSG0000(RP4-530I15 antisense chr20    | 50570975 | 50578041 | - | 0.01 | 0    |
| ENSG0000(LINC01105 processed_ chr2     | 5932687  | 6001275  | + | 0    | 0    |
| ENSG0000(LINC01798 lincRNA chr2        | 66574030 | 66730157 | + | 0.2  | 0    |
| ENSG0000(HNRNPCP9 processed_ chr1      | 67660155 | 67661013 | - | 0    | 0    |
| ENSG0000(CTA-125H2 processed_ chr22    | 26006389 | 26006532 | - | 0    | 0    |
| ENSG0000(AC009784. lincRNA chr7        | 1.36E+08 | 1.36E+08 | + | 0.07 | 0    |
| ENSG0000(NPM1P34 processed_ chrX       | 1.24E+08 | 1.24E+08 | + | 0.07 | 0    |
| ENSG0000(AC092687. lincRNA chr2        | 10847577 | 10854955 | + | 0    | 0    |
| ENSG0000(AC093390. antisense chr2      | 1824412  | 1828667  | + | 0    | 0    |
| ENSG0000(AC005772. lincRNA chr17       | 15014805 | 15052276 | + | 0    | 0    |
| ENSG0000(RP11-173A processed_ chr1     | 2.45E+08 | 2.45E+08 | - | 0    | 0    |
| ENSG0000(SLC4A1APF processed_ chr9     | 30558880 | 30559481 | - | 0    | 0    |
| ENSG0000(RP11-307E lincRNA chr9        | 94332476 | 94360948 | + | 1.86 | 1.58 |
| ENSG0000(USP9YP33 unprocessed_ chrY    | 25590323 | 25592345 | - | 0    | 0    |
| ENSG0000(LINC01063 antisense chr3      | 1.97E+08 | 1.97E+08 | - | 0    | 0    |
| ENSG0000(AF003529. unprocessed_ chrX   | 1.34E+08 | 1.34E+08 | + | 0    | 0    |
| ENSG0000(RPS29P28 processed_ chrX      | 96195477 | 96195617 | + | 0    | 0    |
| ENSG0000(TMEM253 protein_co chr14      | 21098937 | 21103724 | + | 0.62 | 0.76 |
| ENSG0000(AC004901. lincRNA chr7        | 46890625 | 47049678 | - | 0    | 0    |
| ENSG0000(RP1-302D9 antisense chr22     | 33164063 | 33166439 | + | 0    | 0    |
| ENSG0000(MRPL35P2 processed_ chr10     | 63634317 | 63634827 | - | 0    | 0    |
| ENSG0000(LINC01031 lincRNA chr1        | 1.93E+08 | 1.93E+08 | + | 0    | 0    |
| ENSG0000(LINC01697 processed_ chr21    | 28048404 | 28137611 | + | 0.13 | 0    |
| ENSG0000(XXbac-BPG processed_ chr6     | 32718005 | 32719170 | + | 0    | 0    |
| ENSG0000(LARGE-IT1 sense_intron chr22  | 33723832 | 33724912 | - | 0    | 0    |
| ENSG0000(RPS6KA2-IT1 sense_intron chr6 | 1.66E+08 | 1.66E+08 | - | 0.12 | 0    |
| ENSG0000(RPL31P7 processed_ chr17      | 80602549 | 80602926 | - | 0    | 0    |
| ENSG0000(LINC01104 lincRNA chr2        | 1E+08    | 1E+08    | + | 0    | 0    |
| ENSG0000(RP11-261C antisense chr1      | 2.43E+08 | 2.43E+08 | + | 0    | 0    |
| ENSG0000(RP11-141J. antisense chr9     | 70708047 | 70712863 | + | 0    | 0    |
| ENSG0000(HCFC2P1 processed_ chr13      | 1.08E+08 | 1.08E+08 | + | 0    | 0    |

|                                      |          |            |        |        |
|--------------------------------------|----------|------------|--------|--------|
| ENSG0000( AC011233. processed_ chr2  | 2.21E+08 | 2.21E+08 + | 0      | 0      |
| ENSG0000( AC016724. processed_ chr2  | 1.13E+08 | 1.13E+08 + | 0      | 0      |
| ENSG0000( PNLIPP1 unprocessε chr10   | 1.17E+08 | 1.17E+08 + | 0      | 0      |
| ENSG0000( DCST1-AS1 antisense chr1   | 1.55E+08 | 1.55E+08 - | 0      | 0.17   |
| ENSG0000( YPEL5P1 processed_ chr1    | 1.82E+08 | 1.82E+08 - | 0      | 0      |
| ENSG0000( AC079781. processed_ chr7  | 97938439 | 97938794 - | 0      | 0      |
| ENSG0000( CTD-2619J. lincRNA chr19   | 58404238 | 58408484 - | 6.2    | 5.68   |
| ENSG0000( LINC01653 lincRNA chr1     | 2.18E+08 | 2.18E+08 + | 0      | 0      |
| ENSG0000( AC108059. processed_ chr2  | 1.28E+08 | 1.28E+08 - | 0      | 0      |
| ENSG0000( MTCO3P2 processed_ chr13   | 23765934 | 23766104 - | 0      | 0      |
| ENSG0000( RFX3-AS1 lincRNA chr9      | 3526723  | 3691814 +  | 0.41   | 0.18   |
| ENSG0000( RPL32P28 processed_ chr13  | 62327988 | 62328384 + | 0      | 0      |
| ENSG0000( VN1R54P processed_ chr10   | 42660728 | 42661776 + | 0      | 0      |
| ENSG0000( RP11-149I2 antisense chr10 | 89283765 | 89292125 + | 0.12   | 0.13   |
| ENSG0000( RP11-126C processed_ chrX  | 9402751  | 9404802 +  | 0      | 0      |
| ENSG0000( TMA7 protein_co chr3       | 48440257 | 48444208 + | 132.29 | 139.16 |
| ENSG0000( RP11-360D protein_co chr1  | 1.74E+08 | 1.74E+08 + | 0      | 0      |
| ENSG0000( AC018693. processed_ chr2  | 38769265 | 38770124 + | 0      | 0      |
| ENSG0000( RP11-123G processed_ chr10 | 58106423 | 58106879 - | 0      | 0      |
| ENSG0000( LINC00384 lincRNA chr13    | 30151886 | 30159621 - | 0.01   | 0      |
| ENSG0000( BACH1-AS1 lincRNA chr21    | 29370019 | 29376339 - | 0.09   | 0.33   |
| ENSG0000( MCTS1 protein_co chrX      | 1.21E+08 | 1.21E+08 + | 18.55  | 22.13  |
| ENSG0000( RP11-349P antisense chr6   | 64377795 | 64412779 + | 0      | 0      |
| ENSG0000( RP13-30A9 antisense chr20  | 62633681 | 62635504 - | 0      | 0      |
| ENSG0000( AP001057. antisense chr21  | 44201290 | 44202696 + | 0      | 0      |
| ENSG0000( DYTN protein_co chr2       | 2.07E+08 | 2.07E+08 - | 0      | 0      |
| ENSG0000( MTCO3P45 processed_ chr2   | 94900990 | 94901602 + | 0      | 0      |
| ENSG0000( RP11-143P lincRNA chr3     | 1.93E+08 | 1.93E+08 - | 0      | 0      |
| ENSG0000( NCOA7-AS: antisense chr6   | 1.26E+08 | 1.26E+08 - | 0.15   | 0.16   |
| ENSG0000( NDFIP2-AS antisense chr13  | 79477364 | 79481231 - | 0      | 0      |
| ENSG0000( IMPDH1P1 processed_ chr2   | 2.01E+08 | 2.01E+08 - | 0      | 0      |
| ENSG0000( RPS15AP12 processed_ chr1  | 2.2E+08  | 2.2E+08 -  | 0      | 0      |
| ENSG0000( RP3-461P1 processed_ chr20 | 45536796 | 45537014 - | 0      | 0      |
| ENSG0000( DUXAP7 processed_ chr20    | 18642782 | 18643634 - | 0      | 0      |
| ENSG0000( IFNWP5 unprocessε chr9     | 21231266 | 21231853 - | 0      | 0      |
| ENSG0000( LINC00867 lincRNA chr10    | 1.18E+08 | 1.18E+08 + | 1.11   | 0      |
| ENSG0000( AC073257. lincRNA chr2     | 1.21E+08 | 1.21E+08 - | 0      | 0      |
| ENSG0000( RPS25P9 processed_ chr10   | 70198988 | 70199239 - | 0      | 0      |
| ENSG0000( PSAT1P2 processed_ chr2    | 62552463 | 62553434 - | 0      | 0      |
| ENSG0000( RP11-307I2 processed_ chr7 | 1.44E+08 | 1.44E+08 + | 0      | 0      |
| ENSG0000( FMO11P unitary_psι chr1    | 1.67E+08 | 1.67E+08 + | 0      | 0      |
| ENSG0000( FERP1 processed_ chrX      | 1.24E+08 | 1.24E+08 + | 0      | 0      |
| ENSG0000( ST13P4 processed_ chr13    | 50172089 | 50173181 + | 0      | 0      |
| ENSG0000( AC073218. lincRNA chr2     | 34734975 | 34737118 - | 0      | 0      |
| ENSG0000( MTCYBP15 processed_ chr1   | 2.38E+08 | 2.38E+08 - | 0      | 0      |

|                                     |          |            |      |      |
|-------------------------------------|----------|------------|------|------|
| ENSG0000(AF277315. processed_ chrX  | 1.55E+08 | 1.55E+08 + | 0    | 0    |
| ENSG0000(C11orf98P. processed_ chr9 | 19705338 | 19705655 + | 0    | 0    |
| ENSG0000(RAB9BP1 processed_ chr5    | 1.05E+08 | 1.05E+08 + | 0    | 0    |
| ENSG0000(RAP2C-AS1 antisense_ chrX  | 1.32E+08 | 1.32E+08 + | 0.42 | 0.95 |
| ENSG0000(RP11-548K unprocessε chr7  | 57770966 | 57771173 + | 0    | 0    |
| ENSG0000(USP12-AS1 antisense_ chr13 | 27162855 | 27169135 + | 0    | 0    |
| ENSG0000(RPLP1P13 processed_ chr13  | 23373423 | 23374061 + | 0    | 0    |
| ENSG0000(LINC01873 lincRNA_ chr2    | 66383306 | 66392450 + | 4.88 | 3.99 |
| ENSG0000(RP5-905H7 processed_ chr7  | 63345840 | 63346732 + | 0    | 0    |
| ENSG0000(RP4-799P1 processed_ chr1  | 2.34E+08 | 2.34E+08 + | 0    | 0    |
| ENSG0000(AC137675. processed_ chr3  | 27525353 | 27525394 + | 0    | 0    |
| ENSG0000(P2RY10P2 processed_ chrX   | 79084936 | 79085848 + | 0    | 0    |
| ENSG0000(LINC00708 lincRNA_ chr10   | 8259331  | 8268305 -  | 0    | 0    |
| ENSG0000(RP11-57C1 processed_ chr9  | 1.31E+08 | 1.31E+08 + | 0    | 0    |
| ENSG0000(OR2H5P unprocessε chr6     | 29573909 | 29574836 + | 0    | 0    |
| ENSG0000(CTB-164L2 processed_ chr5  | 1.39E+08 | 1.39E+08 + | 0    | 0    |
| ENSG0000(RP4-659I1ε processed_ chr1 | 2.33E+08 | 2.33E+08 + | 0    | 0    |
| ENSG0000(RP11-146N processed_ chr9  | 19200335 | 19201046 - | 0    | 0    |
| ENSG0000(MTND4P24 processed_ chrX   | 1.26E+08 | 1.26E+08 + | 0    | 0    |
| ENSG0000(MTATP6P2 unprocessε chr9   | 92108858 | 92108989 + | 0    | 0    |
| ENSG0000(RP6-27P15 antisense_ chrX  | 1.39E+08 | 1.39E+08 + | 0    | 0    |
| ENSG0000(RP11-370K sense_intrε chr1 | 2.44E+08 | 2.44E+08 - | 0    | 0    |
| ENSG0000(CNOT7P2 processed_ chr1    | 1.16E+08 | 1.16E+08 + | 0    | 0    |
| ENSG0000(RP11-311P processed_ chrX  | 75326772 | 75327999 - | 0    | 0    |
| ENSG0000(FTH1P7 processed_ chr13    | 22696023 | 22696574 - | 0.28 | 0.82 |
| ENSG0000(RP11-312J. lincRNA_ chr1   | 1.61E+08 | 1.61E+08 - | 0    | 0.14 |
| ENSG0000(LINC02181 lincRNA_ chr16   | 87057784 | 87063991 + | 0.01 | 0    |
| ENSG0000(RP11-62I21 antisense_ chr1 | 2.45E+08 | 2.45E+08 - | 0    | 0    |
| ENSG0000(AL157359. lincRNA_ chr21   | 18917934 | 18935859 - | 0    | 0    |
| ENSG0000(RP1-313L4. antisense_ chr1 | 1.68E+08 | 1.68E+08 + | 0.18 | 0    |
| ENSG0000(TOMM22P processed_ chrY    | 2827982  | 2828218 +  | 0    | 0    |
| ENSG0000(MTRNR2L4 protein_co chr16  | 3370979  | 3372740 -  | 0    | 0.11 |
| ENSG0000(RP11-302L. antisense_ chr6 | 1.7E+08  | 1.7E+08 +  | 0    | 0    |
| ENSG0000(MTCO2P34 processed_ chr1   | 55372710 | 55373316 - | 0    | 0    |
| ENSG0000(RPL3P8 processed_ chr7     | 1.1E+08  | 1.1E+08 -  | 0    | 0    |
| ENSG0000(RP4-564O4 lincRNA_ chr20   | 24297585 | 24318086 - | 0    | 0    |
| ENSG0000(AC098824. processed_ chr2  | 42826322 | 42827617 - | 0    | 0    |
| ENSG0000(SLC25A6P2 processed_ chr9  | 31253901 | 31254777 + | 0    | 0    |
| ENSG0000(TET1P1 processed_ chr13    | 87890172 | 87892472 - | 0    | 0    |
| ENSG0000(CDY18P unprocessε chrY     | 24104107 | 24106018 + | 0    | 0    |
| ENSG0000(RP3-477M. processed_ chr1  | 8907393  | 8907744 -  | 0    | 0    |
| ENSG0000(RP11-395D lincRNA_ chr9    | 86632147 | 86696496 + | 0    | 0    |
| ENSG0000(LINC01701 lincRNA_ chr1    | 1.9E+08  | 1.9E+08 +  | 0    | 0    |
| ENSG0000(OR2L6P unprocessε chr1     | 2.48E+08 | 2.48E+08 + | 0.07 | 0    |
| ENSG0000(IGHV3-43 IG_V_gene chr14   | 1.06E+08 | 1.06E+08 - | 0    | 0    |

|                     |                  |          |          |   |      |      |
|---------------------|------------------|----------|----------|---|------|------|
| ENSG0000(F TLP8     | processed_ chr13 | 97986950 | 97987216 | - | 0    | 0    |
| ENSG0000(RP1-149A1  | unprocessε chr22 | 32386668 | 32386868 | + | 0    | 0    |
| ENSG0000(AC008440.  | antisense chr19  | 53874626 | 53876049 | - | 0    | 0    |
| ENSG0000(CNN2P10    | processed_ chr1  | 1.67E+08 | 1.67E+08 | + | 0    | 0    |
| ENSG0000(LINC01047  | lincRNA chr13    | 89214847 | 89236890 | - | 0    | 0    |
| ENSG0000(ARSP1      | unprocessε chrY  | 12252321 | 12258033 | - | 0    | 0    |
| ENSG0000(AC013401.  | lincRNA chr2     | 1.93E+08 | 1.93E+08 | - | 0    | 0    |
| ENSG0000(RP11-7707  | processed_ chr2  | 69594741 | 69595058 | - | 0    | 0    |
| ENSG0000(LINC00865  | lincRNA chr10    | 89829510 | 89840861 | + | 0.04 | 0.06 |
| ENSG0000(TPM4P1     | processed_ chr10 | 1E+08    | 1E+08    | - | 0    | 0    |
| ENSG0000(LINC02043  | lincRNA chr3     | 1.87E+08 | 1.87E+08 | - | 1.15 | 1.98 |
| ENSG0000(RP11-203H  | lincRNA chr6     | 8329655  | 8342455  | + | 0    | 0    |
| ENSG0000(CDY3P      | processed_ chrY  | 9166085  | 9167702  | - | 0    | 0    |
| ENSG0000(ASCL5      | protein_co chr1  | 2.01E+08 | 2.01E+08 | - | 0    | 0    |
| ENSG0000(RPS29P8    | processed_ chr2  | 1.49E+08 | 1.49E+08 | + | 0    | 0    |
| ENSG0000(RBPJP5     | processed_ chr9  | 39739747 | 39741193 | - | 0    | 0    |
| ENSG0000(RP5-1125N  | processed_ chr1  | 1.11E+08 | 1.11E+08 | + | 0    | 0    |
| ENSG0000(DYNLT3P1   | processed_ chr20 | 17479085 | 17479431 | - | 0    | 0    |
| ENSG0000(ZYG11AP1   | processed_ chr9  | 1.03E+08 | 1.03E+08 | - | 0    | 0    |
| ENSG0000(RP11-408E  | lincRNA chr13    | 19262797 | 19263873 | - | 0    | 0    |
| ENSG0000(RP4-705F1  | lincRNA chr1     | 54416256 | 54420860 | + | 0    | 0    |
| ENSG0000(LLOXNC01-  | unprocessε chrX  | 1.53E+08 | 1.53E+08 | + | 0    | 0    |
| ENSG0000(RP11-30L8. | lincRNA chr13    | 86060813 | 86170890 | + | 0    | 0    |
| ENSG0000(CSF2RBP1   | unprocessε chr22 | 36950529 | 36953723 | - | 0    | 0    |
| ENSG0000(TMEM114    | protein_co chr16 | 8537605  | 8590193  | - | 0    | 0    |
| ENSG0000(RP11-4C20  | lincRNA chr10    | 1.28E+08 | 1.28E+08 | - | 0    | 0    |
| ENSG0000(BTF3L4P1   | processed_ chr21 | 17518526 | 17518993 | - | 0    | 0    |
| ENSG0000(RP4-560B9  | unprocessε chr1  | 1.72E+08 | 1.72E+08 | - | 0    | 0    |
| ENSG0000(KRTAP25-1  | protein_co chr21 | 30289145 | 30289514 | - | 0    | 0    |
| ENSG0000(USP17L24   | protein_co chr4  | 9325165  | 9327116  | + | 0    | 0    |
| ENSG0000(XXyac-YX1! | lincRNA chr1     | 1.48E+08 | 1.48E+08 | + | 0    | 0    |
| ENSG0000(ACTR3P2    | processed_ chrX  | 68771322 | 68772578 | + | 0    | 0    |
| ENSG0000(OR5211     | protein_co chr11 | 4593750  | 4595013  | + | 0    | 0    |
| ENSG0000(RP4-764O2  | lincRNA chr20    | 7069614  | 7146656  | + | 0    | 0    |
| ENSG0000(FTH1P1     | processed_ chr1  | 37544763 | 37545294 | + | 0.82 | 0.91 |
| ENSG0000(AC104651.  | processed_ chr2  | 1.12E+08 | 1.12E+08 | - | 0    | 0    |
| ENSG0000(IFNWP15    | unprocessε chr9  | 21178589 | 21179188 | - | 0    | 0    |
| ENSG0000(MTND1P32   | processed_ chrX  | 1.03E+08 | 1.03E+08 | + | 0    | 0    |
| ENSG0000(RP11-240L  | antisense chr9   | 96246462 | 96250393 | + | 0    | 0    |
| ENSG0000(GNG12-AS:  | antisense chr1   | 67832303 | 68202987 | + | 0.23 | 0.19 |
| ENSG0000(ELOBP3     | processed_ chr2  | 48780602 | 48780895 | + | 0    | 0    |
| ENSG0000(RP11-80K6  | lincRNA chr20    | 52858338 | 52862855 | - | 0    | 0    |
| ENSG0000(SLC6A1-AS  | antisense chr3   | 11006098 | 11019224 | - | 0    | 0    |
| ENSG0000(RP1-292B1  | antisense chr6   | 1.51E+08 | 1.51E+08 | - | 0    | 0    |
| ENSG0000(ALDH7A1P.  | processed_ chr2  | 1.73E+08 | 1.73E+08 | - | 0    | 0    |

|                                     |          |          |   |      |      |
|-------------------------------------|----------|----------|---|------|------|
| ENSG0000(PAICSP7 processed_ chrX    | 94636663 | 94639570 | - | 0    | 0    |
| ENSG0000(RP4-715N1 lincRNA chr20    | 52671917 | 52690929 | + | 0    | 0    |
| ENSG0000(RP11-154D processed_ chr6  | 71221457 | 71328228 | - | 0.28 | 0.11 |
| ENSG0000(RP11-510N processed_ chr1  | 2.02E+08 | 2.02E+08 | + | 0    | 0    |
| ENSG0000(RP11-10N1 antisense chr1   | 24307556 | 24321901 | - | 0    | 0    |
| ENSG0000(RP1-105O1 lincRNA chr6     | 1.12E+08 | 1.12E+08 | - | 0    | 0    |
| ENSG0000(FAM215B lincRNA chr17      | 46558830 | 46562795 | - | 0.03 | 0.22 |
| ENSG0000(LNCPRESS1 antisense chr7   | 1.01E+08 | 1.01E+08 | + | 0.09 | 0    |
| ENSG0000(DFFBP1 processed_ chr9     | 32566148 | 32567126 | - | 0.25 | 0.41 |
| ENSG0000(CLCP1 processed_ chr22     | 17424388 | 17424775 | - | 0    | 0    |
| ENSG0000(AC012485. lincRNA chr2     | 2.38E+08 | 2.38E+08 | - | 0    | 0    |
| ENSG0000(DAOA-AS1 antisense chr13   | 1.05E+08 | 1.06E+08 | - | 0.07 | 0    |
| ENSG0000(GS1-122H1 lincRNA chr1     | 1.82E+08 | 1.82E+08 | - | 0    | 0    |
| ENSG0000(RP11-557H lincRNA chr6     | 1.35E+08 | 1.35E+08 | - | 0.35 | 1.07 |
| ENSG0000(RP1-249I4. lincRNA chr6    | 1.1E+08  | 1.1E+08  | + | 0    | 0    |
| ENSG0000(PSMC1P13 processed_ chr13  | 69894101 | 69895085 | - | 0    | 0    |
| ENSG0000(RP1-124C6 lincRNA chr6     | 1.13E+08 | 1.13E+08 | - | 0.15 | 0.16 |
| ENSG0000(AC009299. processed_ chr2  | 1.61E+08 | 1.61E+08 | - | 0    | 0    |
| ENSG0000(AC008440. lincRNA chr19    | 53864763 | 53866140 | + | 0    | 0    |
| ENSG0000(AC093627. lincRNA chr7     | 70972    | 95683    | - | 0    | 0    |
| ENSG0000(RP11-395C processed_ chr4  | 80386178 | 80388716 | - | 0    | 0    |
| ENSG0000(AC011286. lincRNA chr2     | 2.37E+08 | 2.37E+08 | + | 0    | 0    |
| ENSG0000(RP3-481A1 processed_ chrX  | 76029895 | 76030330 | + | 0    | 0    |
| ENSG0000(RPS27AP2 processed_ chr20  | 17516843 | 17517307 | + | 0    | 0    |
| ENSG0000(RP11-47G1 processed_ chr10 | 1.24E+08 | 1.24E+08 | - | 0    | 0    |
| ENSG0000(RP11-435D antisense chr1   | 35739389 | 35743576 | + | 0    | 0    |
| ENSG0000(AC009313. processed_ chr2  | 1.61E+08 | 1.61E+08 | - | 0    | 0    |
| ENSG0000(RPL4P2 processed_ chr1     | 1.67E+08 | 1.67E+08 | + | 0.68 | 0.75 |
| ENSG0000(RP11-46O2 antisense chr10  | 74506081 | 74530553 | - | 0    | 0    |
| ENSG0000(AC087163. processed_ chr17 | 18010643 | 18011822 | + | 0.22 | 0    |
| ENSG0000(SC22CB-1E processed_ chr22 | 32039490 | 32039896 | + | 0    | 0    |
| ENSG0000(RP11-488L. lincRNA chr1    | 2.47E+08 | 2.47E+08 | - | 0.1  | 0    |
| ENSG0000(LINC00279 lincRNA chrY     | 8638294  | 8644842  | + | 0    | 0    |
| ENSG0000(YBX1P7 processed_ chr2     | 1.32E+08 | 1.32E+08 | - | 0    | 0    |
| ENSG0000(LL22NC03- unprocessε chr22 | 22689831 | 22689978 | + | 0    | 0    |
| ENSG0000(SEMA3B-A. antisense chr3   | 50266641 | 50267371 | - | 0    | 0    |
| ENSG0000(RP11-655G lincRNA chr3     | 1.92E+08 | 1.92E+08 | + | 0    | 0    |
| ENSG0000(VIPR1-AS1 antisense chr3   | 42506465 | 42533258 | - | 0.12 | 0    |
| ENSG0000(RP11-263F unprocessε chr9  | 1.35E+08 | 1.35E+08 | + | 0    | 0    |
| ENSG0000(RP5-955M. antisense chr20  | 50999370 | 51010019 | + | 0    | 0    |
| ENSG0000(AC104777. lincRNA chr2     | 1.51E+08 | 1.51E+08 | - | 0    | 0    |
| ENSG0000(AP000281. antisense chr21  | 32844367 | 32849934 | - | 0    | 0    |
| ENSG0000(RP11-632K processed_ chr7  | 1.51E+08 | 1.51E+08 | - | 0    | 0    |
| ENSG0000(ATP5LP2 processed_ chr6    | 1.23E+08 | 1.23E+08 | - | 0.33 | 0    |
| ENSG0000(RP1-102D2 antisense chr22  | 45435864 | 45448743 | - | 0.27 | 0.29 |

|                      |                   |          |          |   |       |       |
|----------------------|-------------------|----------|----------|---|-------|-------|
| ENSG0000( VDAC1P9    | processed_ chr1   | 1.58E+08 | 1.58E+08 | - | 0     | 0     |
| ENSG0000( FTLP2      | processed_ chrX   | 30630298 | 30630825 | + | 0     | 0     |
| ENSG0000( RP5-882O7  | processed_ chr1   | 44988234 | 44988725 | - | 0     | 0     |
| ENSG0000( AF241726.  | processed_ chrX   | 38479215 | 38479913 | + | 0     | 0     |
| ENSG0000( MTCYBP3    | processed_ chr13  | 95694569 | 95695705 | + | 0     | 0     |
| ENSG0000( GPR79      | processed_ chr3   | 1.59E+08 | 1.59E+08 | - | 0     | 0     |
| ENSG0000( RP11-136C  | unprocessε chr3   | 43037121 | 43037451 | + | 0     | 0     |
| ENSG0000( AC016910.  | antisense chr2    | 1.44E+08 | 1.44E+08 | + | 0     | 0     |
| ENSG0000( RPL29P28   | processed_ chr13  | 36926438 | 36927219 | - | 0     | 0     |
| ENSG0000( RP11-308D  | processed_ chrX   | 1.37E+08 | 1.37E+08 | - | 0     | 0     |
| ENSG0000( ZDHHC20P   | processed_ chr13  | 68985058 | 68986064 | + | 0     | 0     |
| ENSG0000( OR52U1P    | unitary_psι chr11 | 5719290  | 5720212  | + | 0     | 0     |
| ENSG0000( OR5K1      | protein_co chr3   | 98469480 | 98470576 | + | 0     | 0     |
| ENSG0000( AC010677.  | processed_ chr7   | 26276195 | 26276606 | + | 0     | 0     |
| ENSG0000( RPS3AP25   | processed_ chr7   | 94695027 | 94695819 | - | 0.08  | 0.09  |
| ENSG0000( RP11-66B2  | lincRNA chr15     | 1.01E+08 | 1.01E+08 | + | 0.65  | 0.79  |
| ENSG0000( SKA2P1     | processed_ chr9   | 1.23E+08 | 1.23E+08 | + | 0     | 0     |
| ENSG0000( LINC00493  | protein_co chr20  | 18567347 | 18569563 | + | 38.95 | 34.94 |
| ENSG0000( RP11-134K  | processed_ chr6   | 70608234 | 70609334 | - | 0     | 0     |
| ENSG0000( NDUFA5P1   | processed_ chr11  | 3321862  | 3322202  | + | 0     | 0     |
| ENSG0000( RANP2      | processed_ chr7   | 1.47E+08 | 1.47E+08 | + | 0     | 0     |
| ENSG0000( AC002366.  | processed_ chrX   | 11334233 | 11335901 | - | 0     | 0     |
| ENSG0000( RPL5P6     | processed_ chr1   | 91023919 | 91024804 | + | 0.07  | 0     |
| ENSG0000( AC090696.  | antisense chr15   | 27775621 | 27776798 | + | 0     | 0     |
| ENSG0000( RP3-399L1. | lincRNA chr6      | 1.14E+08 | 1.14E+08 | - | 0     | 0     |
| ENSG0000( RP1-76B20  | antisense chr22   | 29705256 | 29719859 | - | 0     | 0     |
| ENSG0000( TMPRSS11.  | unprocessε chr4   | 67766480 | 67773854 | - | 0     | 0     |
| ENSG0000( USP17L13   | protein_co chr4   | 9224896  | 9226847  | + | 0     | 0     |
| ENSG0000( RAD17P1    | processed_ chr7   | 16864267 | 16866308 | - | 0     | 0     |
| ENSG0000( LINC00112  | antisense chr21   | 41716436 | 41717580 | + | 0     | 0     |
| ENSG0000( RP11-5111. | processed_ chr2   | 63108118 | 63108429 | - | 0     | 0     |
| ENSG0000( RP11-234K  | antisense chr20   | 36148726 | 36155760 | - | 0.1   | 0.13  |
| ENSG0000( RP11-641C  | processed_ chr3   | 60690225 | 60690719 | - | 0     | 0     |
| ENSG0000( AC140481.  | antisense chr2    | 1.31E+08 | 1.31E+08 | - | 0     | 0     |
| ENSG0000( AC019185.  | processed_ chr2   | 2.09E+08 | 2.09E+08 | + | 0     | 0     |
| ENSG0000( AC009495.  | lincRNA chr2      | 1.66E+08 | 1.66E+08 | - | 0.29  | 0     |
| ENSG0000( RP1-315G1  | lincRNA chrX      | 1.24E+08 | 1.24E+08 | - | 0     | 0     |
| ENSG0000( RP11-343J. | lincRNA chr9      | 1.26E+08 | 1.26E+08 | + | 0     | 0     |
| ENSG0000( CTB-51J22. | antisense chr7    | 74059576 | 74062284 | - | 0.41  | 0.45  |
| ENSG0000( BPESC1     | lincRNA chr3      | 1.39E+08 | 1.39E+08 | + | 0     | 0     |
| ENSG0000( RP11-678B  | processed_ chr7   | 53787167 | 53787298 | + | 0     | 0     |
| ENSG0000( TTTY19     | lincRNA chrY      | 8704472  | 8705283  | + | 0     | 0     |
| ENSG0000( IL9RP2     | unprocessε chr10  | 80394    | 86265    | - | 0     | 0     |
| ENSG0000( KNOP1P4    | processed_ chr6   | 72986313 | 72987750 | + | 0     | 0     |
| ENSG0000( PRAMEF6    | protein_co chr1   | 12938472 | 12947580 | - | 0     | 0     |

|                                 |       |          |          |   |      |      |
|---------------------------------|-------|----------|----------|---|------|------|
| ENSG0000( USP9YP29 unprocessε   | chrY  | 23740258 | 23746693 | - | 0    | 0    |
| ENSG0000( RPL21P131 processed_  | chr19 | 33589206 | 33589688 | - | 0    | 0    |
| ENSG0000( RPL31P15 processed_   | chr2  | 1.83E+08 | 1.83E+08 | + | 0    | 0.2  |
| ENSG0000( RP11-578F transcribec | chr15 | 28788243 | 28792002 | + | 0    | 0    |
| ENSG0000( GXYL1P3 processed_    | chr9  | 40348599 | 40349791 | + | 0    | 0    |
| ENSG0000( C9orf172 protein_co   | chr9  | 1.37E+08 | 1.37E+08 | + | 1.8  | 1.63 |
| ENSG0000( RP11-103C lincRNA     | chr1  | 2.22E+08 | 2.22E+08 | + | 0    | 0    |
| ENSG0000( RPS26P42 processed_   | chr10 | 75125217 | 75125862 | + | 0    | 0    |
| ENSG0000( RPL18AP7 processed_   | chr3  | 38526802 | 38527325 | - | 0    | 0    |
| ENSG0000( CTD-3184A antisense   | chr20 | 63627227 | 63628824 | + | 2.47 | 1.67 |
| ENSG0000( AC010745. lincRNA     | chr2  | 16316324 | 16319566 | - | 0    | 0    |
| ENSG0000( RP11-132A antisense   | chr7  | 1.01E+08 | 1.01E+08 | + | 0.19 | 0    |
| ENSG0000( RP13-60P5 unprocessε  | chrX  | 26147774 | 26148281 | + | 0    | 0    |
| ENSG0000( MTND5P3 processed_    | chr13 | 84521725 | 84523915 | + | 0    | 0    |
| ENSG0000( RP11-416N lincRNA     | chr20 | 10180235 | 10185775 | + | 0    | 0    |
| ENSG0000( RP4-730K3 transcribec | chr1  | 1.14E+08 | 1.14E+08 | - | 0.52 | 0.96 |
| ENSG0000( AC016768. lincRNA     | chr2  | 23018125 | 23199056 | - | 0    | 0    |
| ENSG0000( RP4-794H1 lincRNA     | chr1  | 58882868 | 58903747 | - | 0.19 | 0.79 |
| ENSG0000( RP11-3J10. processed_ | chr9  | 37836044 | 37836394 | + | 0    | 0    |
| ENSG0000( LARS2-AS1 antisense   | chr3  | 45483974 | 45509545 | - | 0    | 0    |
| ENSG0000( RP11-5P18 unprocessε  | chr1  | 16035178 | 16040029 | - | 0    | 0    |
| ENSG0000( SLC16A6P1 transcribec | chr17 | 64953683 | 64956546 | + | 0    | 0    |
| ENSG0000( LINC01450 lincRNA     | chr7  | 40964667 | 40979939 | - | 0    | 0    |
| ENSG0000( OR4F14P unprocessε    | chr15 | 1.02E+08 | 1.02E+08 | + | 0    | 0    |
| ENSG0000( BMPR1APS processed_   | chr11 | 1.21E+08 | 1.21E+08 | - | 0    | 0    |
| ENSG0000( RP11-644C lincRNA     | chr3  | 1.77E+08 | 1.77E+08 | - | 0    | 0    |
| ENSG0000( RP11-195C processed_  | chr1  | 1.76E+08 | 1.76E+08 | - | 0    | 0    |
| ENSG0000( CTA-125H2 antisense   | chr22 | 25959074 | 25983526 | - | 0    | 0    |
| ENSG0000( RP5-1022J. lincRNA    | chr20 | 52487922 | 52500591 | - | 0    | 0    |
| ENSG0000( RP11-337A processed_  | chr9  | 26880178 | 26880549 | - | 0    | 0    |
| ENSG0000( TMA16P2 processed_    | chr1  | 45846994 | 45847594 | - | 0    | 0    |
| ENSG0000( RP11-313D lincRNA     | chr10 | 1.11E+08 | 1.11E+08 | + | 0    | 0    |
| ENSG0000( RP11-241F unprocessε  | chr4  | 49550032 | 49557400 | + | 0    | 0    |
| ENSG0000( EEF1B2P3 processed_   | chrX  | 24788392 | 24789069 | - | 0    | 0.14 |
| ENSG0000( NCKAP5-IT sense_intrε | chr2  | 1.33E+08 | 1.33E+08 | - | 0    | 0    |
| ENSG0000( HSFY5P unprocessε     | chrY  | 22048554 | 22049347 | - | 0    | 0    |
| ENSG0000( AC010900. processed_  | chr2  | 2.03E+08 | 2.03E+08 | + | 0    | 0    |
| ENSG0000( TGFB2-AS1 antisense   | chr1  | 2.18E+08 | 2.18E+08 | - | 0.13 | 0.28 |
| ENSG0000( RP4-654C1 processed_  | chr1  | 23410832 | 23412146 | + | 0    | 0    |
| ENSG0000( AC098820. processed_  | chr2  | 2.16E+08 | 2.16E+08 | - | 0.17 | 0.48 |
| ENSG0000( RP11-18B3 processed_  | chr9  | 1.06E+08 | 1.06E+08 | + | 0    | 0    |
| ENSG0000( RASA3-IT1 sense_intrε | chr13 | 1.14E+08 | 1.14E+08 | - | 0    | 0    |
| ENSG0000( MFAP1P1 processed_    | chr13 | 30541643 | 30542897 | - | 0    | 0.05 |
| ENSG0000( OSBPL10-A antisense   | chr3  | 31704058 | 31721652 | + | 0.52 | 0    |
| ENSG0000( SAPCD2P3 processed_   | chr7  | 66556216 | 66557065 | + | 0    | 0    |



|                                       |          |          |   |       |       |
|---------------------------------------|----------|----------|---|-------|-------|
| ENSG0000(NPM1P13 processed_ chr7      | 18948898 | 18949762 | - | 0     | 0     |
| ENSG0000(RPL12P11 processed_ chr20    | 41547422 | 41547922 | + | 0     | 0     |
| ENSG0000(RP11-403N lincRNA chr9       | 79874696 | 79886678 | - | 0     | 0     |
| ENSG0000(RPL3P12 processed_ chrX      | 1.23E+08 | 1.23E+08 | + | 0     | 0     |
| ENSG0000(ADIPOR1P1 processed_ chr10   | 22162992 | 22165794 | + | 0     | 0     |
| ENSG0000(RP5-1011C antisense chr1     | 1.93E+08 | 1.93E+08 | - | 0     | 0     |
| ENSG0000(RP11-512F processed_ chr1    | 1.13E+08 | 1.13E+08 | + | 0.06  | 0     |
| ENSG0000(AP005273. lincRNA chr11      | 64500853 | 64505386 | + | 0     | 0     |
| ENSG0000(AC073464. processed_ chr2    | 94760774 | 94761116 | - | 0     | 0     |
| ENSG0000(CYCSP8 processed_ chr2       | 1.31E+08 | 1.31E+08 | + | 0     | 0     |
| ENSG0000(ST3GAL5-A lincRNA chr2       | 85889280 | 85890980 | + | 0.49  | 0.27  |
| ENSG0000(XXbac-BPG lincRNA chr6       | 29223973 | 29290440 | + | 0     | 0     |
| ENSG0000(MRPL45P1 processed_ chr2     | 88364695 | 88365608 | - | 0     | 0     |
| ENSG0000(OR2AH1P unprocessε chr11     | 56669017 | 56669944 | - | 0     | 0     |
| ENSG0000(AP000233. lincRNA chr21      | 25095022 | 25103670 | + | 0     | 0     |
| ENSG0000(RP11-329A processed_ chr1    | 48497263 | 48497736 | - | 0     | 0     |
| ENSG0000(LL22NC03- unprocessε chr22   | 22347807 | 22348164 | + | 0     | 0     |
| ENSG0000(AC112198. unitary_ψε chr5    | 54808210 | 54872551 | - | 0.77  | 0.59  |
| ENSG0000(AC074366. antisense chr2     | 38668202 | 38671421 | - | 0     | 0     |
| ENSG0000(RP11-29H2 antisense chr1     | 1.56E+08 | 1.56E+08 | - | 0     | 0     |
| ENSG0000(AC012507. antisense chr2     | 2.31E+08 | 2.31E+08 | + | 0     | 0     |
| ENSG0000(ZNF886P unprocessε chrY      | 20001185 | 20012204 | - | 0     | 0     |
| ENSG0000(RP11-332K antisense chr7     | 1.23E+08 | 1.23E+08 | + | 0     | 0     |
| ENSG0000(SS18L2P1 processed_ chr10    | 34875210 | 34875422 | + | 0     | 0     |
| ENSG0000(VDAC1P13 processed_ chr2     | 42463139 | 42463997 | - | 0     | 0     |
| ENSG0000(RP11-14N7 lincRNA chr1       | 1.44E+08 | 1.44E+08 | - | 40.45 | 55.54 |
| ENSG0000(RP4-673D2 transcribec chr20  | 1767957  | 1779995  | - | 0     | 0.14  |
| ENSG0000(RP1-257I9. lincRNA chr6      | 1.55E+08 | 1.55E+08 | - | 0     | 0     |
| ENSG0000(RP1-102K2 antisense chr22    | 30239194 | 30240538 | + | 0.08  | 0     |
| ENSG0000(AC027612. processed_ chr2    | 91747940 | 91748986 | - | 0     | 0     |
| ENSG0000(AC093673. antisense chr7     | 1.43E+08 | 1.43E+08 | - | 8.9   | 9.1   |
| ENSG0000(OR5H8 polymorph chr3         | 98311913 | 98312843 | + | 0     | 0     |
| ENSG0000(RP11-74C1 sense_intrε chr1   | 1.52E+08 | 1.52E+08 | + | 0.14  | 0.15  |
| ENSG0000(RP11-385M lincRNA chr1       | 2.09E+08 | 2.09E+08 | - | 0     | 0     |
| ENSG0000(LINC00945 lincRNA chr21      | 33057829 | 33064983 | + | 0     | 0     |
| ENSG0000(RPL36P19 processed_ chr13    | 43394525 | 43394825 | + | 0     | 0     |
| ENSG0000(DPYD-IT1 sense_intrε chr1    | 97394154 | 97420141 | - | 0     | 0     |
| ENSG0000(IGHD4-11 IG_D_gene chr14     | 1.06E+08 | 1.06E+08 | - | 0     | 0     |
| ENSG0000(KB-318B8.7 sense_intrε chr22 | 24101689 | 24103354 | + | 1.28  | 0.28  |
| ENSG0000(RP11-458F unprocessε chr7    | 66848496 | 66858136 | + | 0     | 0     |
| ENSG0000(LINC01809 lincRNA chr2       | 83522814 | 83523502 | + | 0     | 0     |
| ENSG0000(SRD5A1P1 processed_ chrX     | 1.39E+08 | 1.39E+08 | + | 0     | 0     |
| ENSG0000(MTCO1P14 processed_ chr1     | 1.07E+08 | 1.07E+08 | - | 0     | 0     |
| ENSG0000(CLK2P1 processed_ chr7       | 23585062 | 23586355 | - | 0     | 0     |
| ENSG0000(RSU1P2 transcribec chr10     | 45099487 | 45154596 | - | 0     | 0     |

|                                 |       |          |          |   |      |      |
|---------------------------------|-------|----------|----------|---|------|------|
| ENSG0000( AC104088. lincRNA     | chr2  | 1.72E+08 | 1.72E+08 | + | 0    | 0.16 |
| ENSG0000( AC092570. processed_  | chr2  | 1.02E+08 | 1.02E+08 | - | 0    | 0    |
| ENSG0000( RP11-4M2: antisense   | chr1  | 23907111 | 23907885 | + | 0    | 0    |
| ENSG0000( KCND3-IT1 sense_intr  | chr1  | 1.12E+08 | 1.12E+08 | - | 0    | 0    |
| ENSG0000( LINC01549 lincRNA     | chr21 | 17438890 | 17449185 | + | 0    | 0    |
| ENSG0000( TPMTP3 processed_     | chrX  | 51979223 | 51980012 | - | 0    | 0    |
| ENSG0000( CRB3P1 processed_     | chr3  | 1394173  | 1394448  | - | 0    | 0    |
| ENSG0000( RP4-591N1 antisense   | chr22 | 40521800 | 40526707 | + | 0.1  | 0.07 |
| ENSG0000( RPL23AP35 processed_  | chr2  | 1.86E+08 | 1.86E+08 | - | 0    | 0    |
| ENSG0000( RPL3P4 processed_     | chr14 | 98972879 | 98973301 | - | 0    | 0.66 |
| ENSG0000( RP11-137D processed_  | chrX  | 88908403 | 88908763 | + | 0    | 0    |
| ENSG0000( CTC-303L1. processed_ | chr5  | 94592771 | 94594791 | + | 0.03 | 0    |
| ENSG0000( MTCO1P27 unprocess    | chr19 | 12504665 | 12504890 | + | 0    | 0    |
| ENSG0000( AC079742. antisense   | chr7  | 6578565  | 6588974  | - | 0    | 0    |
| ENSG0000( RP11-85L2. processed_ | chrX  | 1.35E+08 | 1.35E+08 | - | 0    | 0    |
| ENSG0000( GPR143P unprocess     | chrY  | 7100733  | 7106502  | - | 0    | 0    |
| ENSG0000( OFD1P12Y unprocess    | chrY  | 23972780 | 23995081 | + | 0    | 0    |
| ENSG0000( KIAA1614- antisense   | chr1  | 1.81E+08 | 1.81E+08 | - | 0.2  | 0.4  |
| ENSG0000( EEF1A1P3 processed_   | chr13 | 28214513 | 28215897 | + | 0    | 0    |
| ENSG0000( RP11-128I7 lincRNA    | chr9  | 73573615 | 73579498 | + | 0    | 0    |
| ENSG0000( RP5-1031D lincRNA     | chr10 | 7445558  | 7471942  | - | 0    | 0    |
| ENSG0000( KANTR protein_co      | chrX  | 53094145 | 53170914 | + | 2.77 | 2.5  |
| ENSG0000( AC103563. unprocess   | chr2  | 94961047 | 94961503 | - | 0    | 0    |
| ENSG0000( CST2P1 unprocess      | chr20 | 23711320 | 23711406 | - | 0    | 0    |
| ENSG0000( LINC01646 lincRNA     | chr1  | 4571481  | 4594009  | + | 0    | 0    |
| ENSG0000( AC013727. lincRNA     | chr2  | 1.04E+08 | 1.04E+08 | - | 0    | 0    |
| ENSG0000( RP1-90K10 lincRNA     | chr6  | 36940071 | 36944675 | - | 0    | 0    |
| ENSG0000( RP1-161N1 processed_  | chrX  | 1.25E+08 | 1.25E+08 | - | 0    | 0    |
| ENSG0000( TONSL-AS1 antisense   | chr8  | 1.44E+08 | 1.44E+08 | + | 1.14 | 1.88 |
| ENSG0000( RP11-393N processed_  | chr3  | 1.74E+08 | 1.74E+08 | - | 0    | 0    |
| ENSG0000( LL22NC03- unprocess   | chr22 | 22370829 | 22371120 | + | 0    | 0    |
| ENSG0000( AC010967. lincRNA     | chr2  | 52864235 | 52866631 | + | 0    | 0    |
| ENSG0000( HMGN2P1: processed_   | chr7  | 84876554 | 84876956 | + | 0    | 0    |
| ENSG0000( LINC01412 lincRNA     | chr2  | 1.45E+08 | 1.45E+08 | + | 0    | 0.55 |
| ENSG0000( TIMM9P2 processed_    | chr21 | 39216624 | 39217506 | + | 0    | 0    |
| ENSG0000( CCT6P4 processed_     | chr3  | 1.91E+08 | 1.91E+08 | + | 0    | 0    |
| ENSG0000( RP11-1114 lincRNA     | chrX  | 1.37E+08 | 1.37E+08 | - | 0.34 | 0.4  |
| ENSG0000( RPL31P35 processed_   | chr7  | 54656358 | 54656734 | + | 0    | 0    |
| ENSG0000( AC007386. antisense   | chr2  | 65030727 | 65053017 | + | 0    | 0    |
| ENSG0000( USP9YP9 unprocess     | chrY  | 25730011 | 25735160 | - | 0    | 0    |
| ENSG0000( CTD-2012J: processed_ | chr5  | 1614836  | 1616334  | + | 0    | 0    |
| ENSG0000( AC017019. unprocess   | chrY  | 9665229  | 9669010  | + | 0    | 0    |
| ENSG0000( RP11-439L. lincRNA    | chr6  | 1.43E+08 | 1.43E+08 | + | 0.26 | 0    |
| ENSG0000( TSPY17P unprocess     | chrY  | 6520463  | 6520929  | + | 0    | 0    |
| ENSG0000( C4BPAP2 unprocess     | chr1  | 2.07E+08 | 2.07E+08 | + | 0    | 0    |

|                                      |          |          |   |       |       |
|--------------------------------------|----------|----------|---|-------|-------|
| ENSG0000(RP11-484D processed_ chr1   | 84636158 | 84637106 | - | 0     | 0     |
| ENSG0000(AP000266. antisense_ chr21  | 32306464 | 32308737 | - | 0     | 0     |
| ENSG0000(LINC01517 processed_ chr10  | 28792668 | 28808219 | + | 0     | 0     |
| ENSG0000(RPL23AP31 processed_ chr2   | 2.19E+08 | 2.19E+08 | + | 0     | 0     |
| ENSG0000(RP11-175B transcribed chr1  | 2.02E+08 | 2.02E+08 | + | 0     | 0     |
| ENSG0000(AC021876. processed_ chr7   | 23365618 | 23365976 | + | 0     | 0     |
| ENSG0000(RP11-365C sense_intron chr1 | 2.24E+08 | 2.24E+08 | - | 0     | 0     |
| ENSG0000(HLA-DQB2 protein_code chr6  | 32756098 | 32763534 | - | 0     | 0     |
| ENSG0000(PRPS1P2 processed_ chr9     | 1.25E+08 | 1.25E+08 | + | 0     | 0     |
| ENSG0000(MTND2P23 processed_ chr2    | 2.12E+08 | 2.12E+08 | + | 0     | 0     |
| ENSG0000(CTD-2201C antisense_ chr5   | 1.13E+08 | 1.13E+08 | + | 0.07  | 0.05  |
| ENSG0000(NEFLP1 processed_ chrY      | 21221106 | 21222089 | - | 0     | 0     |
| ENSG0000(RP11-342C lincRNA_ chr13    | 87427200 | 87447235 | - | 0     | 0     |
| ENSG0000(RP11-379F lincRNA_ chr10    | 8051541  | 8053084  | + | 0     | 0     |
| ENSG0000(RP1-266L2 antisense_ chr6   | 1.7E+08  | 1.7E+08  | - | 0     | 0     |
| ENSG0000(AC008073. antisense_ chr2   | 24165884 | 24175005 | - | 0     | 0     |
| ENSG0000(LINC00385 lincRNA_ chr13    | 30154066 | 30154586 | + | 0     | 0     |
| ENSG0000(GS1-466O4 unprocessed chrX  | 26200042 | 26200647 | + | 0     | 0     |
| ENSG0000(LINC01431 lincRNA_ chr20    | 23356594 | 23358116 | - | 0.64  | 0.16  |
| ENSG0000(RP11-344N processed_ chr10  | 73065126 | 73065467 | + | 0     | 0     |
| ENSG0000(POLR3KP1 processed_ chr13   | 59071462 | 59071803 | - | 0     | 0     |
| ENSG0000(RP11-367N antisense_ chr4   | 1.83E+08 | 1.84E+08 | - | 0     | 0.14  |
| ENSG0000(LINC01780 lincRNA_ chr1     | 1.19E+08 | 1.19E+08 | + | 0     | 0     |
| ENSG0000(GOLGA8N protein_code chr15  | 32593456 | 32607310 | + | 5.07  | 5.2   |
| ENSG0000(FAM136BP processed_ chr6    | 3045384  | 3045800  | + | 0     | 0     |
| ENSG0000(LINC01656 lincRNA_ chr22    | 44443327 | 44444788 | + | 0     | 0     |
| ENSG0000(IDI2-AS1 antisense_ chr10   | 1022666  | 1044201  | + | 0     | 0     |
| ENSG0000(AC092638. processed_ chr2   | 1.93E+08 | 1.93E+08 | + | 0     | 0     |
| ENSG0000(AC000111. antisense_ chr7   | 1.18E+08 | 1.18E+08 | - | 0     | 0     |
| ENSG0000(LDHP1 processed_ chr13      | 1.13E+08 | 1.13E+08 | + | 0.16  | 0.26  |
| ENSG0000(RP3-477M processed_ chr1    | 8909742  | 8909904  | + | 0     | 0     |
| ENSG0000(LARP1BP3 processed_ chrX    | 1.34E+08 | 1.34E+08 | + | 0     | 0     |
| ENSG0000(PHBP10 processed_ chrX      | 1.05E+08 | 1.05E+08 | - | 0     | 0     |
| ENSG0000(AC004862. antisense_ chr7   | 80312574 | 80391474 | - | 0     | 0     |
| ENSG0000(AC010967. processed_ chr2   | 52883243 | 52883455 | + | 0     | 0     |
| ENSG0000(RP11-126K antisense_ chr1   | 1.51E+08 | 1.51E+08 | - | 1.1   | 0.61  |
| ENSG0000(ACTG1P21 processed_ chr1    | 77773865 | 77774864 | - | 0     | 0     |
| ENSG0000(RP4-718D2 processed_ chr20  | 19693209 | 19697576 | - | 0     | 0     |
| ENSG0000(ADH5P2 processed_ chr1      | 79521080 | 79522203 | + | 0     | 0     |
| ENSG0000(LINC00665 lincRNA_ chr19    | 36313067 | 36331718 | - | 1.03  | 0.95  |
| ENSG0000(SPTLC1P4 processed_ chr1    | 1.52E+08 | 1.52E+08 | + | 0     | 0     |
| ENSG0000(LINC01705 lincRNA_ chr1     | 2.22E+08 | 2.22E+08 | - | 59.32 | 69.45 |
| ENSG0000(AC002511. lincRNA_ chr19    | 35432957 | 35434642 | - | 0     | 0     |
| ENSG0000(RP11-388P antisense_ chr10  | 60050668 | 60060743 | + | 0     | 0     |
| ENSG0000(ATP11A-AS antisense_ chr13  | 1.13E+08 | 1.13E+08 | - | 0     | 0     |

|                                     |          |          |   |      |      |
|-------------------------------------|----------|----------|---|------|------|
| ENSG0000(LINC00442 antisense chr13  | 19008259 | 19012559 | + | 0    | 0    |
| ENSG0000(RPL12P9 processed_chr21    | 29127701 | 29128188 | - | 0    | 0    |
| ENSG0000(LINC01628 lincRNA chr2     | 66921510 | 66922457 | - | 0    | 0    |
| ENSG0000(HSPE1P9 unprocessε chr2    | 2.34E+08 | 2.34E+08 | - | 0    | 0    |
| ENSG0000(AP001596. antisense chr21  | 26378552 | 26471698 | + | 0.06 | 0    |
| ENSG0000(AC012370. sense_intrε chr2 | 65373700 | 65380685 | - | 0    | 0    |
| ENSG0000(ELOCP17 processed_chrY     | 25860943 | 25861268 | + | 0    | 0    |
| ENSG0000(AC017006. antisense chr2   | 46078015 | 46078828 | - | 0    | 0    |
| ENSG0000(AP001058. lincRNA chr21    | 44206525 | 44207399 | - | 0    | 0    |
| ENSG0000(BDH2P1 processed_chr6      | 99174744 | 99175479 | + | 0    | 0    |
| ENSG0000(RPL21P108 processed_chr13  | 74377163 | 74377951 | - | 0    | 0    |
| ENSG0000(RP3-437C1 processed_chr6   | 51410081 | 51410537 | - | 0    | 0    |
| ENSG0000(NUTM2HP unprocessε chr10   | 50676743 | 50686326 | + | 0    | 0.02 |
| ENSG0000(AP1B1P2 unprocessε chr22   | 32134028 | 32134133 | + | 0    | 0    |
| ENSG0000(MARK2P9 processed_chr10    | 92418667 | 92420875 | + | 0    | 0    |
| ENSG0000(RP4-669P1 lincRNA chr22    | 42136433 | 42139927 | - | 0.1  | 0.22 |
| ENSG0000(KIZ-AS1 antisense chr20    | 21154023 | 21218289 | - | 0.01 | 0    |
| ENSG0000(AC010733. processed_chr2   | 60938204 | 60938604 | - | 0.84 | 0.23 |
| ENSG0000(MTND3P8 processed_chr1     | 2.36E+08 | 2.36E+08 | - | 0    | 0    |
| ENSG0000(LINC01022 antisense chr7   | 1.59E+08 | 1.59E+08 | + | 0    | 0    |
| ENSG0000(AC016831. processed_chr7   | 1.31E+08 | 1.31E+08 | - | 0    | 0    |
| ENSG0000(TRIM51JP unprocessε chr2   | 95574899 | 95580764 | + | 0    | 0    |
| ENSG0000(GAPDHP48 processed_chr2    | 3688021  | 3688981  | - | 0    | 0    |
| ENSG0000(RP11-13J8. lincRNA chr2    | 2.01E+08 | 2.01E+08 | + | 0    | 0.05 |
| ENSG0000(RP11-403I1 lincRNA chr1    | 1.44E+08 | 1.44E+08 | + | 0    | 0    |
| ENSG0000(MROH4P unitary_psε chr8    | 1.43E+08 | 1.43E+08 | - | 0    | 0    |
| ENSG0000(AC013399. processed_chr2   | 1.21E+08 | 1.21E+08 | + | 0    | 0    |
| ENSG0000(TRIM80P unitary_psε chr17  | 75074306 | 75079549 | + | 0.02 | 0.02 |
| ENSG0000(U52111.14 antisense chrX   | 1.54E+08 | 1.54E+08 | - | 0    | 0    |
| ENSG0000(YWHAEP1 processed_chr7     | 64433830 | 64434592 | + | 0    | 0    |
| ENSG0000(PHB2P1 processed_chr10     | 1.1E+08  | 1.1E+08  | + | 0    | 0    |
| ENSG0000(AC083884. processed_chr7   | 74688939 | 74729001 | - | 0.08 | 0    |
| ENSG0000(FAM8A4P processed_chrY     | 12321623 | 12322835 | + | 0    | 0    |
| ENSG0000(AC073043. processed_chr2   | 2E+08    | 2E+08    | - | 0    | 0    |
| ENSG0000(ATP5G1P7 processed_chr10   | 69432972 | 69433371 | - | 0    | 0    |
| ENSG0000(ATG4AP1 processed_chrX     | 82998699 | 82999236 | + | 0    | 0    |
| ENSG0000(AC007551. processed_chr7   | 35768122 | 35768640 | - | 0    | 0    |
| ENSG0000(RP5-986I17 antisense chr20 | 9575608  | 9577689  | + | 0    | 0    |
| ENSG0000(RP11-25G1 antisense chr10  | 15237492 | 15241767 | + | 0    | 0    |
| ENSG0000(LINC01826 lincRNA chr2     | 1.23E+08 | 1.23E+08 | - | 0    | 0    |
| ENSG0000(RHOQP2 processed_chr2      | 1.31E+08 | 1.31E+08 | + | 0    | 0    |
| ENSG0000(ELF2P3 processed_chr9      | 87816465 | 87817970 | + | 0    | 0    |
| ENSG0000(USP9YP16 unprocessε chrY   | 18121195 | 18123799 | - | 0    | 0    |
| ENSG0000(LINC02022 lincRNA chr3     | 12877522 | 12885211 | - | 0    | 0    |
| ENSG0000(IGKV1D-35 IG_V_pseu chr2   | 89895502 | 89895772 | + | 0    | 0    |

|                                     |          |          |   |      |      |
|-------------------------------------|----------|----------|---|------|------|
| ENSG0000(RP11-196G lincRNA chr16    | 31056460 | 31062803 | + | 0.03 | 0.04 |
| ENSG0000(RP11-15B2 lincRNA chr9     | 82451656 | 82455225 | + | 0    | 0    |
| ENSG0000(RP11-177A processed_chr1   | 1.79E+08 | 1.79E+08 | - | 0    | 0    |
| ENSG0000(RP11-296C processed_chr1   | 1.73E+08 | 1.73E+08 | + | 0    | 0    |
| ENSG0000(MTCO3P21 unprocessε chr1   | 93924743 | 93925385 | - | 0    | 0    |
| ENSG0000(RP1-85F18 antisense chr22  | 41169190 | 41183144 | - | 0    | 0    |
| ENSG0000(RP5-1185I7 antisense chr7  | 77990384 | 77995171 | + | 0    | 0    |
| ENSG0000(ETF1P1 processed_chr6      | 30031713 | 30033003 | + | 0    | 0    |
| ENSG0000(AC002480. antisense chr7   | 22563337 | 22573996 | + | 0    | 0    |
| ENSG0000(AC103564. unprocessε chr2  | 1.32E+08 | 1.32E+08 | - | 0    | 0    |
| ENSG0000(RP4-784A1 antisense chr1   | 53304536 | 53307462 | + | 0    | 0    |
| ENSG0000(TRIM60P8) processed_chrY   | 23025594 | 23026663 | + | 0    | 0    |
| ENSG0000(RP11-382F transcribed chrX | 55279839 | 55288785 | + | 0    | 0    |
| ENSG0000(AC098614. processed_chr3   | 27703129 | 27703568 | - | 0    | 0    |
| ENSG0000(RP11-498B antisense chr10  | 1.17E+08 | 1.17E+08 | + | 0    | 0    |
| ENSG0000(RP11-201C processed_chr1   | 31050872 | 31051034 | + | 0    | 0    |
| ENSG0000(PPP1R26P5 processed_chr22  | 21341595 | 21345258 | + | 0    | 0    |
| ENSG0000(MTND4P22 processed_chr2    | 1.43E+08 | 1.43E+08 | - | 0    | 0    |
| ENSG0000(RP11-1396 unprocessε chr4  | 9422313  | 9429702  | + | 0    | 0    |
| ENSG0000(FLJ22447 lincRNA chr14     | 61570540 | 61658696 | + | 8.11 | 7.32 |
| ENSG0000(BMS1P22 transcribed chr22  | 15805263 | 15820884 | - | 0    | 0    |
| ENSG0000(MRPL51P2 processed_chr21   | 43115334 | 43115709 | - | 0    | 0    |
| ENSG0000(RPL23AP5C processed_chr6   | 1.08E+08 | 1.08E+08 | + | 0    | 0    |
| ENSG0000(GAPDHP74 transcribed chr1  | 1.19E+08 | 1.19E+08 | - | 0    | 0    |
| ENSG0000(FRG2FP transcribed chr3    | 1.98E+08 | 1.98E+08 | + | 0    | 0    |
| ENSG0000(TIMM9P3 processed_chr13    | 45552863 | 45553136 | - | 0    | 0    |
| ENSG0000(OR7L1P processed_chrX      | 1.32E+08 | 1.32E+08 | + | 0    | 0    |
| ENSG0000(AC078883. antisense chr2   | 1.72E+08 | 1.72E+08 | - | 3.22 | 5.06 |
| ENSG0000(AC053503. unprocessε chr2  | 2.19E+08 | 2.19E+08 | - | 0    | 0    |
| ENSG0000(LINC01162 lincRNA chr7     | 20835431 | 21023148 | + | 0    | 0    |
| ENSG0000(OR1111P unitary_ψ chr1     | 1.11E+08 | 1.11E+08 | + | 0    | 0    |
| ENSG0000(FTH1P25 processed_chr1     | 1.85E+08 | 1.85E+08 | - | 0    | 0    |
| ENSG0000(DNAJC19P8 processed_chr1   | 2.45E+08 | 2.45E+08 | - | 0    | 0    |
| ENSG0000(HNRNPDP1 processed_chrX    | 64044305 | 64045058 | + | 0    | 0    |
| ENSG0000(SCAND3P1 processed_chr13   | 35185294 | 35186679 | + | 0    | 0    |
| ENSG0000(FAM207CP processed_chr21   | 13792635 | 13793141 | + | 0    | 0    |
| ENSG0000(RP11-204M processed_chr9   | 39892550 | 39892895 | + | 0    | 0    |
| ENSG0000(CRYGFP unprocessε chr2     | 2.09E+08 | 2.09E+08 | + | 0    | 0    |
| ENSG0000(SLC7A15P unitary_ψ chr2    | 20386386 | 20396588 | + | 0    | 0    |
| ENSG0000(SDCBPP3 processed_chrX     | 40890647 | 40891537 | - | 0    | 0    |
| ENSG0000(SLCO4A1-A antisense chr20  | 62663019 | 62666724 | - | 0    | 0    |
| ENSG0000(NIP7P1 processed_chr10     | 93106872 | 93107383 | - | 0    | 0    |
| ENSG0000(AP001610. lincRNA chr21    | 41559125 | 41562958 | - | 0    | 0    |
| ENSG0000(RP11-536K antisense chr10  | 5934270  | 5945900  | - | 6.75 | 1.84 |
| ENSG0000(TTTY20 antisense chrY      | 9329880  | 9334832  | - | 0    | 0    |

|                                     |          |            |      |      |
|-------------------------------------|----------|------------|------|------|
| ENSG0000(VDAC1P10 processed_ chr1   | 2.15E+08 | 2.15E+08 + | 0    | 0    |
| ENSG0000(TNF protein_co chr6        | 31575567 | 31578336 + | 0    | 0    |
| ENSG0000(RP11-96K1 antisense chr1   | 1.11E+08 | 1.11E+08 + | 0    | 0    |
| ENSG0000(LINC01717 lincRNA chr1     | 2.09E+08 | 2.09E+08 + | 0    | 0    |
| ENSG0000(RP11-344N processed_ chrX  | 48274904 | 48275047 - | 0    | 0    |
| ENSG0000(COL4A2-AS antisense chr13  | 1.11E+08 | 1.11E+08 - | 0    | 0    |
| ENSG0000(DUX4L50 unprocessε chr9    | 63817748 | 63818462 - | 0.18 | 0.3  |
| ENSG0000(RP11-73B2 lincRNA chr7     | 63388808 | 63393657 - | 0    | 0    |
| ENSG0000(RPS2P32 processed_ chr7    | 23490473 | 23491364 + | 0.07 | 0.08 |
| ENSG0000(AC003986. antisense chr7   | 19112474 | 19114271 + | 0.03 | 0    |
| ENSG0000(TXNP1 processed_ chr10     | 1.2E+08  | 1.2E+08 -  | 0    | 0    |
| ENSG0000(PRR13P1 processed_ chr1    | 1.98E+08 | 1.98E+08 - | 0    | 0    |
| ENSG0000(RP5-896L1 antisense chr1   | 99004276 | 99148852 + | 0    | 0    |
| ENSG0000(LINC01189 lincRNA chr9     | 62515191 | 62522018 + | 0    | 0    |
| ENSG0000(AF196970. antisense chrX   | 48698963 | 48737163 - | 0.07 | 0    |
| ENSG0000(GSTO3P processed_ chr3     | 1.31E+08 | 1.31E+08 + | 0    | 0    |
| ENSG0000(RP11-144C processed_ chr3  | 1.01E+08 | 1.01E+08 + | 0    | 0    |
| ENSG0000(LMLN-AS1 antisense chr3    | 1.98E+08 | 1.98E+08 - | 0    | 0    |
| ENSG0000(RP11-12D5 processed_ chrX  | 27847588 | 27847939 - | 0    | 0    |
| ENSG0000(AC107057. lincRNA chr2     | 5549780  | 5556031 -  | 0    | 0    |
| ENSG0000(LINC01700 lincRNA chr21    | 38974429 | 38977774 - | 0    | 0    |
| ENSG0000(PET117 protein_co chr20    | 18137873 | 18143169 + | 4.37 | 3.59 |
| ENSG0000(BRWD1P3 processed_ chr7    | 17033089 | 17033478 - | 0    | 0    |
| ENSG0000(RP5-961K1 processed_ chrX  | 95973328 | 95974315 - | 0    | 0.14 |
| ENSG0000(SNX18P2 processed_ chr9    | 92893698 | 92894505 - | 0    | 0    |
| ENSG0000(TRAPP2P2 unprocessε chrY   | 23762838 | 23765583 - | 0    | 0    |
| ENSG0000(SLC25A6P3 processed_ chr1  | 51709062 | 51709940 + | 0    | 0    |
| ENSG0000(CTA-215D1 processed_ chr1  | 8057245  | 8058463 -  | 0    | 0.09 |
| ENSG0000(LINC00363 lincRNA chr13    | 93056657 | 93057926 + | 0    | 0    |
| ENSG0000(PTGES2-AS lincRNA chr9     | 1.28E+08 | 1.28E+08 + | 0.85 | 0.62 |
| ENSG0000(ATP5J2P3 processed_ chr9   | 77040416 | 77040673 + | 0    | 0    |
| ENSG0000(CICP4 processed_ chr20     | 64290187 | 64292998 - | 0    | 0    |
| ENSG0000(LUZP4P1 processed_ chr10   | 21247752 | 21248095 + | 0    | 0    |
| ENSG0000(AF131217. lincRNA chr21    | 28439346 | 28674848 - | 0.2  | 0.56 |
| ENSG0000(KATNBL1P2 processed_ chr1  | 94650544 | 94651378 - | 0    | 0    |
| ENSG0000(RPL34P27 processed_ chr13  | 24988577 | 24988925 - | 0    | 0    |
| ENSG0000(LYRM9 protein_co chr17     | 27878314 | 27894752 - | 5.06 | 5.04 |
| ENSG0000(SMG7-AS1 processed_ chr1   | 1.83E+08 | 1.83E+08 - | 0.1  | 0.11 |
| ENSG0000(RP4-665N4 transcribec chr1 | 36080066 | 36084026 - | 0    | 0.08 |
| ENSG0000(NUCKS1P1 processed_ chr1   | 2.27E+08 | 2.27E+08 - | 0.47 | 0.73 |
| ENSG0000(RP11-179D processed_ chr9  | 27210327 | 27210626 + | 0    | 0    |
| ENSG0000(TRBV29-1 TR_V_gene chr7    | 1.43E+08 | 1.43E+08 + | 0    | 0    |
| ENSG0000(SEC1P unitary_psι chr19    | 48638071 | 48682245 + | 0.34 | 0.21 |
| ENSG0000(CTAGE3P processed_ chr13   | 51908218 | 51910621 - | 0.09 | 0    |
| ENSG0000(RPL23AP93 processed_ chr3  | 1.95E+08 | 1.95E+08 - | 0    | 0    |

|                                      |          |          |   |      |   |
|--------------------------------------|----------|----------|---|------|---|
| ENSG0000(RP11-135A antisense chr3    | 1.94E+08 | 1.94E+08 | - | 0    | 0 |
| ENSG0000(HMGN2P3 processed chr10     | 96915633 | 96915902 | - | 0    | 0 |
| ENSG0000(CTA-212D2 antisense chr6    | 1.35E+08 | 1.35E+08 | + | 0    | 0 |
| ENSG0000(DPYD-AS1 antisense chr1     | 97095923 | 97322955 | + | 0    | 0 |
| ENSG0000(RP11-544N processed chr1    | 1.61E+08 | 1.61E+08 | + | 0    | 0 |
| ENSG0000(NDUFB4P1 processed chr20    | 45388347 | 45388705 | - | 0    | 0 |
| ENSG0000(RPS10P21 processed chr13    | 71913704 | 71914178 | - | 0    | 0 |
| ENSG0000(PHKA1P1 processed chr1      | 90892992 | 90893612 | - | 0.86 | 0 |
| ENSG0000(RP11-3021 processed chr1    | 2.2E+08  | 2.2E+08  | - | 0    | 0 |
| ENSG0000(AF127936 lincRNA chr21      | 14746762 | 14753863 | - | 0    | 0 |
| ENSG0000(GPC5-AS2 antisense chr13    | 92339794 | 92340603 | - | 0    | 0 |
| ENSG0000(AF212831 lincRNA chr21      | 16862875 | 16873691 | - | 0    | 0 |
| ENSG0000(AC006466 processed chr7     | 31119284 | 31119572 | - | 0    | 0 |
| ENSG0000(RPS11P5 processed chr12     | 1.33E+08 | 1.33E+08 | + | 0    | 0 |
| ENSG0000(AC087499 processed chr17    | 20595531 | 20595708 | + | 0    | 0 |
| ENSG0000(RP11-136K sense intron chr6 | 1.51E+08 | 1.51E+08 | + | 0    | 0 |
| ENSG0000(RP11-267N antisense chr1    | 1.63E+08 | 1.63E+08 | + | 0    | 0 |
| ENSG0000(IQCA1-AS1 antisense chr2    | 2.36E+08 | 2.36E+08 | + | 0    | 0 |
| ENSG0000(MRPS31P2 unprocessed chr13  | 19552571 | 19570288 | - | 0    | 0 |
| ENSG0000(RP4-543J1 lincRNA chr1      | 1.14E+08 | 1.14E+08 | - | 0    | 0 |
| ENSG0000(RP11-410K lincRNA chr9      | 1.11E+08 | 1.11E+08 | + | 0.11 | 0 |
| ENSG0000(RP11-191L processed chr22   | 47662559 | 47663603 | - | 0    | 0 |
| ENSG0000(CDY9P unprocessed chrY      | 18182835 | 18184414 | - | 0    | 0 |
| ENSG0000(RP4-697P8 lincRNA chr20     | 10875333 | 10909272 | - | 0    | 0 |
| ENSG0000(CYCSP10 processed chr3      | 10000647 | 10000940 | - | 0.37 | 0 |
| ENSG0000(LINC01166 lincRNA chr10     | 1.33E+08 | 1.33E+08 | - | 0    | 0 |
| ENSG0000(RP11-534I8 processed chr9   | 1.14E+08 | 1.14E+08 | - | 0    | 0 |
| ENSG0000(RP11-746P processed chr7    | 65355934 | 65357176 | + | 0    | 0 |
| ENSG0000(DLGAP4-AS antisense chr20   | 36507702 | 36573391 | - | 0    | 0 |
| ENSG0000(HSD17B7P processed chr1     | 2.48E+08 | 2.48E+08 | + | 0    | 0 |
| ENSG0000(RP3-510O8 antisense chr6    | 35733867 | 35736947 | - | 0    | 0 |
| ENSG0000(RAB9AP1 unprocessed chrY    | 23751188 | 23751760 | + | 0    | 0 |
| ENSG0000(RP5-1115A antisense chr1    | 8424645  | 8434838  | + | 0    | 0 |
| ENSG0000(PLCE1-AS2 antisense chr10   | 94081950 | 94108814 | - | 0    | 0 |
| ENSG0000(TRAPPC2P unprocessed chrY   | 25904518 | 25907250 | + | 0    | 0 |
| ENSG0000(AC097721 processed chr2     | 1.38E+08 | 1.38E+08 | - | 0    | 0 |
| ENSG0000(HMGN2P2 processed chr5      | 1.16E+08 | 1.16E+08 | - | 0    | 0 |
| ENSG0000(HSPE1P6 processed chr1      | 2.04E+08 | 2.04E+08 | - | 0    | 0 |
| ENSG0000(RP11-366L processed chr1    | 94406395 | 94406882 | - | 0    | 0 |
| ENSG0000(LINC01400 lincRNA chr9      | 37073531 | 37075792 | - | 0    | 0 |
| ENSG0000(MTND6P2 unprocessed chr7    | 1.12E+08 | 1.12E+08 | - | 0    | 0 |
| ENSG0000(ELOCP4 processed chrY       | 9230915  | 9231247  | + | 0    | 0 |
| ENSG0000(MRPS16P2 processed chr20    | 59113224 | 59113631 | + | 0    | 0 |
| ENSG0000(AC000078 processed chr22    | 19887289 | 19887970 | + | 0    | 0 |
| ENSG0000(USP12PY processed chrY      | 3682805  | 3683868  | + | 0    | 0 |

|                                       |          |          |   |      |      |
|---------------------------------------|----------|----------|---|------|------|
| ENSG0000( DDX3P1 processed_ chrX      | 74121012 | 74131923 | + | 0    | 0    |
| ENSG0000( AC083864. lincRNA chr7      | 36029611 | 36055431 | + | 0    | 0    |
| ENSG0000( LINC00342 lincRNA chr2      | 95807118 | 95816215 | - | 5.36 | 6.24 |
| ENSG0000( RP11-324C antisense chr10   | 1.12E+08 | 1.12E+08 | - | 0    | 0.11 |
| ENSG0000( RP11-223P antisense chr10   | 1.27E+08 | 1.27E+08 | - | 0    | 0    |
| ENSG0000( RP11-80H5 antisense chr10   | 89645282 | 89650667 | + | 0    | 0    |
| ENSG0000( RP11-98D1 sense_intr chr1   | 1.52E+08 | 1.52E+08 | + | 0    | 0    |
| ENSG0000( RPL23AP87 transcribed chr17 | 83226897 | 83240804 | + | 0.12 | 0.07 |
| ENSG0000( RP11-406C antisense chr9    | 1.1E+08  | 1.1E+08  | - | 0    | 0    |
| ENSG0000( HCG25 antisense chr6        | 33249534 | 33254989 | + | 0.37 | 1.28 |
| ENSG0000( RP4-717M: processed_ chr20  | 18220113 | 18220512 | + | 0    | 0    |
| ENSG0000( RP13-492C processed_ chr7   | 56408699 | 56409210 | - | 0    | 0    |
| ENSG0000( RP11-390F processed_ chr9   | 6675284  | 6675614  | + | 0    | 0    |
| ENSG0000( RP11-401E lincRNA chr6      | 15994944 | 15999797 | + | 0    | 0    |
| ENSG0000( DEFB130 protein_co chr8     | 12310962 | 12318316 | - | 0    | 0    |
| ENSG0000( AC002480. antisense chr7    | 22589705 | 22591622 | + | 0.26 | 0    |
| ENSG0000( ZNF519P1 processed_ chr10   | 80297720 | 80299655 | + | 0    | 0    |
| ENSG0000( IPO7P1 processed_ chrX      | 51921864 | 51922499 | - | 0    | 0    |
| ENSG0000( RP11-90H3 processed_ chr1   | 1.06E+08 | 1.06E+08 | + | 0    | 0.04 |
| ENSG0000( HSPA8P18 processed_ chr3    | 19940269 | 19943310 | - | 0    | 0    |
| ENSG0000( LINC00374 lincRNA chr13     | 58211697 | 58233117 | - | 0    | 0    |
| ENSG0000( SNHG15 lincRNA chr7         | 44983023 | 44986961 | - | 5.61 | 4.5  |
| ENSG0000( AC091069. unprocess chr3    | 6208269  | 6208571  | + | 0    | 0    |
| ENSG0000( RP11-332H antisense chr1    | 1.7E+08  | 1.7E+08  | + | 0    | 0    |
| ENSG0000( HMGN2P2( processed_ chr2    | 24330402 | 24330674 | + | 0    | 0    |
| ENSG0000( LINC01737 lincRNA chr1      | 2.31E+08 | 2.31E+08 | - | 0    | 0    |
| ENSG0000( RPS12P18 processed_ chr10   | 79544087 | 79544356 | + | 0    | 0    |
| ENSG0000( EIF4EP4 processed_ chr7     | 81463036 | 81463613 | - | 0    | 0    |
| ENSG0000( AP001062. antisense chr21   | 44339376 | 44340470 | + | 0    | 0    |
| ENSG0000( POLHP1 processed_ chr2      | 2.16E+08 | 2.16E+08 | - | 0    | 0    |
| ENSG0000( RP11-293A antisense chr1    | 1.09E+08 | 1.09E+08 | - | 0    | 0    |
| ENSG0000( CYP1B1-AS antisense chr2    | 38073447 | 38231651 | + | 4.33 | 3.72 |
| ENSG0000( MTCO1P57 unprocess chr7     | 68097737 | 68098250 | + | 0    | 0    |
| ENSG0000( TRIM60P1( processed_ chrY   | 24659337 | 24660406 | + | 0    | 0    |
| ENSG0000( LINC00327 lincRNA chr13     | 23466571 | 23487464 | + | 0.24 | 0.42 |
| ENSG0000( RP11-146N antisense chr9    | 19291337 | 19292576 | - | 0    | 0    |
| ENSG0000( AC092580. processed_ chr2   | 7735645  | 7735783  | - | 0    | 0    |
| ENSG0000( MTCO1P51 unprocess chr9     | 80563571 | 80564630 | - | 0    | 0    |
| ENSG0000( MTCO1P45 processed_ chr2    | 1.55E+08 | 1.55E+08 | - | 0    | 0    |
| ENSG0000( RP11-296L: processed_ chr9  | 34546524 | 34546996 | - | 0    | 0    |
| ENSG0000( RP11-442C lincRNA chr10     | 1.29E+08 | 1.29E+08 | - | 0    | 0    |
| ENSG0000( RP11-179A lincRNA chr13     | 33657436 | 33659928 | + | 0    | 0    |
| ENSG0000( LINC01219 lincRNA chr11     | 1991096  | 1993469  | + | 0    | 0    |
| ENSG0000( RP11-136B processed_ chr1   | 2.38E+08 | 2.38E+08 | - | 0    | 0    |
| ENSG0000( MTATP6P7 unprocess chr2     | 1.3E+08  | 1.3E+08  | + | 0    | 0    |



|                     |             |       |          |          |   |       |       |
|---------------------|-------------|-------|----------|----------|---|-------|-------|
| ENSG0000(GACAT1     | lincRNA     | chr2  | 1.08E+08 | 1.08E+08 | + | 0     | 0     |
| ENSG0000(AHCYP4     | processed_  | chr2  | 1.39E+08 | 1.39E+08 | - | 0     | 0     |
| ENSG0000(RP11-334A  | antisense   | chr1  | 53069938 | 53085502 | - | 0     | 0     |
| ENSG0000(RPL7P14    | processed_  | chr2  | 2.03E+08 | 2.03E+08 | + | 0     | 0     |
| ENSG0000(RGS5       | antisense   | chr1  | 1.63E+08 | 1.63E+08 | - | 0.9   | 1.33  |
| ENSG0000(VPS13A-AS  | antisense   | chr9  | 77176756 | 77177994 | - | 0     | 0     |
| ENSG0000(RP1-90J20. | unitary_ps  | chr6  | 2910613  | 2912113  | - | 0     | 0     |
| ENSG0000(AC005324.  | antisense   | chr17 | 15735023 | 15749192 | - | 0     | 0     |
| ENSG0000(CICP26     | unprocessε  | chr1  | 2.28E+08 | 2.28E+08 | - | 0     | 0     |
| ENSG0000(AC067959.  | lincRNA     | chr2  | 21221175 | 21970959 | + | 0     | 0     |
| ENSG0000(AC034220.  | processed_  | chr5  | 1.32E+08 | 1.32E+08 | - | 2.14  | 2.08  |
| ENSG0000(UBTFL11    | processed_  | chrX  | 38531923 | 38534174 | - | 0     | 0     |
| ENSG0000(LINC01725  | lincRNA     | chr1  | 83575776 | 83861023 | - | 0     | 0     |
| ENSG0000(NALCN-AS1  | antisense   | chr13 | 1.01E+08 | 1.01E+08 | + | 0     | 0     |
| ENSG0000(RPEP4      | processed_  | chr22 | 29608900 | 29609501 | + | 0     | 0     |
| ENSG0000(SLC9A3P1   | processed_  | chr10 | 50150603 | 50152287 | + | 0     | 0     |
| ENSG0000(HDAC1P2    | transcribec | chr1  | 2.21E+08 | 2.21E+08 | + | 0     | 0     |
| ENSG0000(FAM157B    | transcribec | chr9  | 1.38E+08 | 1.38E+08 | + | 0.37  | 0.45  |
| ENSG0000(TBC1D3P7   | unprocessε  | chr17 | 41323427 | 41329545 | + | 0     | 0     |
| ENSG0000(SLC25A6P1  | processed_  | chr20 | 21742303 | 21743077 | - | 0     | 0     |
| ENSG0000(SNHG7      | antisense   | chr9  | 1.37E+08 | 1.37E+08 | - | 43.84 | 47.57 |
| ENSG0000(RP5-908M:  | antisense   | chr20 | 62427827 | 62447621 | + | 0     | 0     |
| ENSG0000(RP4-597N1  | processed_  | chr1  | 2.35E+08 | 2.35E+08 | - | 0     | 0     |
| ENSG0000(RP11-4201  | processed_  | chr1  | 70530526 | 70531492 | + | 0     | 0     |
| ENSG0000(RP11-490E  | antisense   | chr10 | 437561   | 441170   | + | 0     | 0     |
| ENSG0000(RP11-1212  | protein_co  | chr16 | 18358086 | 18379331 | - | 87.68 | 38.89 |
| ENSG0000(CRYZP1     | processed_  | chr7  | 1.03E+08 | 1.03E+08 | - | 0     | 0     |
| ENSG0000(MTCO1P5    | processed_  | chr3  | 12165299 | 12165642 | - | 0     | 0     |
| ENSG0000(RP4-725G1  | processed_  | chr7  | 56175634 | 56176412 | + | 0     | 0     |
| ENSG0000(RP11-439A  | antisense   | chr1  | 1.21E+08 | 1.21E+08 | - | 0     | 0     |
| ENSG0000(RP11-196G  | antisense   | chr1  | 1.5E+08  | 1.5E+08  | - | 0.02  | 0.03  |
| ENSG0000(AC125238.  | processed_  | chr2  | 2.04E+08 | 2.04E+08 | - | 0     | 0     |
| ENSG0000(CASK-AS1   | antisense   | chrX  | 41520036 | 41522336 | + | 0     | 0     |
| ENSG0000(KRTAP8-2P  | unprocessε  | chr21 | 30802242 | 30802427 | - | 0     | 0     |
| ENSG0000(AC009237.  | processed_  | chr2  | 95542730 | 95543230 | - | 0     | 0     |
| ENSG0000(AC011899.  | antisense   | chr7  | 1.58E+08 | 1.58E+08 | + | 0     | 0     |
| ENSG0000(MTND5P3C   | processed_  | chr2  | 1.55E+08 | 1.55E+08 | + | 0     | 0     |
| ENSG0000(FAM204BP   | processed_  | chr1  | 1.98E+08 | 1.98E+08 | - | 0     | 0     |
| ENSG0000(PHGR1      | protein_co  | chr15 | 40351033 | 40356434 | + | 0     | 0     |
| ENSG0000(RP1-137K2  | antisense   | chr6  | 1.57E+08 | 1.57E+08 | - | 0     | 0     |
| ENSG0000(AC097523.  | processed_  | chr2  | 1.38E+08 | 1.38E+08 | + | 0     | 0     |
| ENSG0000(LINC01677  | lincRNA     | chr1  | 1.06E+08 | 1.06E+08 | - | 0     | 0     |
| ENSG0000(LINC01722  | lincRNA     | chr20 | 12865202 | 12952519 | - | 0     | 0     |
| ENSG0000(RP11-1236  | protein_co  | chr8  | 12064389 | 12071747 | - | 0     | 0     |
| ENSG0000(RP11-398B  | sense_intr  | chr10 | 1361001  | 1361637  | - | 0     | 0     |

|                                    |          |          |   |      |      |
|------------------------------------|----------|----------|---|------|------|
| ENSG0000(RP11-490D processed_ chr9 | 1.02E+08 | 1.02E+08 | - | 0    | 0    |
| ENSG0000(ERVH48-1 lincRNA chr21    | 42916803 | 42925646 | - | 0    | 0    |
| ENSG0000(EEF1A1P14 processed_ chr1 | 1.94E+08 | 1.94E+08 | + | 0.04 | 0.05 |
| ENSG0000(LINC00884 antisense chr3  | 1.94E+08 | 1.95E+08 | + | 2.4  | 3.23 |
| ENSG0000(AC016700. lincRNA chr2    | 70089721 | 70096100 | + | 0    | 0    |
| ENSG0000(TTLL7-IT1 sense_intr chr1 | 83979118 | 83984300 | - | 0    | 0    |
| ENSG0000(SAR1AP4 processed_ chrX   | 75884546 | 75885136 | + | 0    | 0    |
| ENSG0000(RP3-380B8 lincRNA chr6    | 5851506  | 5870220  | + | 0    | 0    |
| ENSG0000(PTCHD1-AS lincRNA chrX    | 22259797 | 23293146 | - | 0    | 0    |
| ENSG0000(RP1-140K8 lincRNA chr6    | 3893126  | 3894292  | + | 0    | 0    |
| ENSG0000(RP5-930J4. antisense chr1 | 20732880 | 20733952 | + | 0    | 0    |
| ENSG0000(ZFY-AS1 antisense chrY    | 2966844  | 3002626  | - | 0.15 | 0.5  |
| ENSG0000(RPSAP59 processed_ chrX   | 1.03E+08 | 1.03E+08 | - | 0    | 0    |
| ENSG0000(RPS15AP6 processed_ chr1  | 21003550 | 21003934 | - | 0    | 0    |
| ENSG0000(AC005009. antisense chr7  | 86784226 | 86786670 | - | 0    | 0    |
| ENSG0000(LINC01271 lincRNA chr20   | 50310711 | 50321342 | - | 0    | 0.03 |
| ENSG0000(RP11-5P18 antisense chr1  | 16006160 | 16006671 | - | 0    | 0    |
| ENSG0000(LINC01755 lincRNA chr1    | 55945087 | 55950119 | + | 0    | 0    |
| ENSG0000(LINC01399 lincRNA chr22   | 35119824 | 35231056 | - | 0    | 0    |
| ENSG0000(RP11-440G lincRNA chr9    | 91426238 | 91427144 | + | 0    | 0    |
| ENSG0000(AC073094. lincRNA chr7    | 1267353  | 1269267  | + | 0    | 0    |
| ENSG0000(FTH1P6 processed_ chr2    | 52629743 | 52630078 | + | 0    | 0    |
| ENSG0000(RPL23AP25 processed_ chr1 | 2.49E+08 | 2.49E+08 | + | 1.24 | 0.47 |
| ENSG0000(XXyac-YX6 lincRNA chr6    | 1.69E+08 | 1.69E+08 | - | 0    | 0    |
| ENSG0000(RP11-375C lincRNA chr9    | 79505804 | 79532342 | - | 0    | 0.02 |
| ENSG0000(WTH3DI protein_co chr2    | 1.31E+08 | 1.31E+08 | - | 0    | 0    |
| ENSG0000(AC015922. unprocess chr17 | 15792862 | 15793045 | + | 0    | 0    |
| ENSG0000(LINC00892 processed_ chrX | 1.37E+08 | 1.37E+08 | + | 0    | 0    |
| ENSG0000(RP11-520A lincRNA chr3    | 40970541 | 40971578 | - | 0    | 0    |
| ENSG0000(CCDC144N antisense chr17  | 20868433 | 21002276 | + | 0.73 | 0.85 |
| ENSG0000(RP11-375A antisense chr1  | 77346046 | 77349585 | - | 0    | 0    |
| ENSG0000(HOXB-AS3 antisense chr17  | 48549630 | 48606414 | + | 0    | 0    |
| ENSG0000(RP11-524P lincRNA chrX    | 42047883 | 42054836 | - | 0    | 0    |
| ENSG0000(AC103563. unprocess chr2  | 94964473 | 94964836 | - | 0    | 0    |
| ENSG0000(RPL12P3 processed_ chr20  | 33272262 | 33272657 | - | 0    | 0    |
| ENSG0000(SUCLA2P2 processed_ chr2  | 76106016 | 76107324 | - | 0    | 0    |
| ENSG0000(AC006042. antisense chr7  | 7958183  | 7969903  | - | 0    | 0    |
| ENSG0000(RP11-22C8 processed_ chr8 | 48913916 | 48914380 | + | 0    | 0    |
| ENSG0000(RP11-301L antisense chr4  | 1.86E+08 | 1.86E+08 | + | 0    | 0    |
| ENSG0000(RAB1C processed_ chr9     | 37636688 | 37637293 | - | 0    | 0    |
| ENSG0000(RP4-533D7 processed_ chr1 | 46104950 | 46105175 | + | 0    | 0    |
| ENSG0000(FAM90A11 unprocess chr8   | 8011782  | 8017011  | - | 0    | 0    |
| ENSG0000(LINC00702 lincRNA chr10   | 4201141  | 4243912  | - | 0.08 | 0    |
| ENSG0000(UBE2V1P8 processed_ chr1  | 40942251 | 40942515 | - | 0    | 0    |
| ENSG0000(USP9YP15 unprocess chrY   | 18116527 | 18117695 | + | 0    | 0    |

|                     |             |       |          |          |   |      |      |
|---------------------|-------------|-------|----------|----------|---|------|------|
| ENSG0000(VN1R20P    | unitary_psi | chr3  | 13926813 | 13927778 | + | 0    | 0.07 |
| ENSG0000(CTAGE7P    | processed_  | chr10 | 1.3E+08  | 1.3E+08  | + | 0    | 0    |
| ENSG0000(LINC01007  | lincRNA     | chr7  | 1.02E+08 | 1.02E+08 | - | 0    | 0    |
| ENSG0000(LINC00456  | lincRNA     | chr13 | 97172469 | 97179622 | - | 0    | 0    |
| ENSG0000(ACTBP12    | processed_  | chr1  | 92229018 | 92229435 | - | 0    | 0    |
| ENSG0000(ZNF736P3)  | processed_  | chrY  | 23049247 | 23051195 | + | 0    | 0    |
| ENSG0000(LINC01794  | lincRNA     | chr2  | 40746487 | 40767452 | + | 0    | 0    |
| ENSG0000(RP5-837O2  | processed_  | chr1  | 93934479 | 93935244 | - | 0    | 0    |
| ENSG0000(AC096649.  | processed_  | chr2  | 1.75E+08 | 1.75E+08 | + | 0    | 1.2  |
| ENSG0000(FAM90A3P   | unprocessε  | chr8  | 7264526  | 7267536  | + | 0    | 0    |
| ENSG0000(AC104451.  | unprocessε  | chr3  | 17706058 | 17706233 | - | 0    | 0.99 |
| ENSG0000(MTND3P17   | unprocessε  | chr2  | 2.03E+08 | 2.03E+08 | + | 0    | 0    |
| ENSG0000(RPS27P18   | unprocessε  | chr10 | 1.25E+08 | 1.25E+08 | - | 0    | 0    |
| ENSG0000(USP17L11   | protein_co  | chr4  | 9215405  | 9217356  | + | 0    | 0    |
| ENSG0000(RP1-67K17  | antisense   | chr6  | 1.43E+08 | 1.43E+08 | + | 0    | 0    |
| ENSG0000(RP11-38O2  | processed_  | chrX  | 48153868 | 48155941 | - | 0    | 0    |
| ENSG0000(DIRC3-AS1  | lincRNA     | chr2  | 2.17E+08 | 2.17E+08 | + | 0    | 0    |
| ENSG0000(RP11-537A  | antisense   | chr10 | 73381433 | 73383496 | + | 0    | 0    |
| ENSG0000(RP11-364B  | lincRNA     | chrX  | 1.4E+08  | 1.4E+08  | + | 0    | 0    |
| ENSG0000(BPIFB5P    | unitary_psi | chr20 | 33316869 | 33329969 | + | 0    | 0    |
| ENSG0000(SYF2P2     | processed_  | chr9  | 35010703 | 35011285 | + | 0    | 0    |
| ENSG0000(UBE2E2-AS  | antisense   | chr3  | 23195070 | 23202578 | - | 0    | 0    |
| ENSG0000(LINC01762  | lincRNA     | chr1  | 1.16E+08 | 1.16E+08 | - | 0    | 0    |
| ENSG0000(HMGA1P8    | processed_  | chr2  | 74418122 | 74418442 | - | 0.94 | 0.35 |
| ENSG0000(HSFY8P     | unprocessε  | chrY  | 26011435 | 26012237 | + | 0    | 0    |
| ENSG0000(RP3-388M!  | processed_  | chr22 | 43759199 | 43759910 | - | 0    | 0    |
| ENSG0000(RPS24P6    | processed_  | chr2  | 94912432 | 94912831 | + | 0    | 0    |
| ENSG0000(AC007390.  | processed_  | chr2  | 37194382 | 37194737 | - | 0    | 0    |
| ENSG0000(MORF4L1P   | processed_  | chrX  | 73474563 | 73474830 | + | 0    | 0    |
| ENSG0000(RPS12P17   | processed_  | chr10 | 69161530 | 69161906 | - | 0    | 0    |
| ENSG0000(EEF1A1P2ε  | processed_  | chr7  | 14190795 | 14192157 | + | 0    | 0    |
| ENSG0000(RP11-863K  | processed_  | chr8  | 37747338 | 37748004 | - | 0.2  | 0.57 |
| ENSG0000(VN1R34P    | unitary_psi | chr7  | 63934449 | 63935331 | - | 0    | 0    |
| ENSG0000(CTD-2020K  | antisense   | chr17 | 45238028 | 45241734 | - | 0.32 | 0.03 |
| ENSG0000(OR7E157P   | unprocessε  | chr8  | 7592006  | 7592916  | + | 0    | 0    |
| ENSG0000(RP11-8811ε | antisense   | chr9  | 68393881 | 68406500 | - | 4.28 | 4.17 |
| ENSG0000(RP11-536P  | lincRNA     | chr22 | 48448890 | 48451217 | + | 0    | 0    |
| ENSG0000(RP3-468B3  | lincRNA     | chr6  | 33893323 | 33927631 | + | 0.09 | 0.11 |
| ENSG0000(RP11-421L  | antisense   | chr1  | 1.01E+08 | 1.01E+08 | + | 4.01 | 3.84 |
| ENSG0000(KLF4P1     | processed_  | chr9  | 4803788  | 4804972  | - | 0    | 0    |
| ENSG0000(RPL12P29   | processed_  | chr10 | 84389170 | 84389626 | - | 0    | 0    |
| ENSG0000(RPS24P13   | processed_  | chr10 | 32231849 | 32232245 | - | 0.43 | 0.24 |
| ENSG0000(AC006372.  | antisense   | chr7  | 1.58E+08 | 1.58E+08 | + | 0    | 0    |
| ENSG0000(AC005324.  | lincRNA     | chr17 | 15761614 | 15763769 | - | 0    | 0    |
| ENSG0000(GS1-304P7  | processed_  | chr1  | 1.87E+08 | 1.87E+08 | - | 0    | 0    |

|                                       |          |          |   |      |      |
|---------------------------------------|----------|----------|---|------|------|
| ENSG0000(TMEM256) processed_ chr10    | 69523311 | 69523650 | - | 0    | 0    |
| ENSG0000(RNF224) protein_co chr9      | 1.37E+08 | 1.37E+08 | + | 0    | 0    |
| ENSG0000(RP11-324) lincRNA chr10      | 35219894 | 35230598 | - | 0    | 0    |
| ENSG0000(RP11-67L3) antisense chr1    | 54887563 | 54888850 | + | 0    | 0.9  |
| ENSG0000(MAPRE1P3) processed_ chr2    | 1.65E+08 | 1.65E+08 | + | 0    | 0    |
| ENSG0000(AC108479) processed_ chr2    | 87972656 | 87973082 | + | 0    | 0    |
| ENSG0000(RPS3AP1) processed_ chr21    | 20430443 | 20430762 | - | 0    | 0    |
| ENSG0000(LINC00642) lincRNA chr14     | 90455230 | 90458905 | + | 0    | 0    |
| ENSG0000(GRPEL2P1) processed_ chr13   | 88978447 | 88978785 | - | 0    | 0    |
| ENSG0000(KCNJ6-AS1) sense_intr chr21  | 37717102 | 37719569 | - | 0    | 0    |
| ENSG0000(AC002511) lincRNA chr19      | 35424062 | 35424652 | - | 0    | 0    |
| ENSG0000(LINC01687) lincRNA chr21     | 22008944 | 22098459 | - | 0    | 0    |
| ENSG0000(RP11-414C) processed_ chr1   | 58228682 | 58229003 | - | 0    | 0    |
| ENSG0000(MROH3P) transcribed chr1     | 2.01E+08 | 2.01E+08 | + | 0    | 0    |
| ENSG0000(RP11-89N1) lincRNA chr7      | 33868501 | 33874231 | - | 0    | 0    |
| ENSG0000(LINC00167) lincRNA chr11     | 1.3E+08  | 1.3E+08  | + | 0    | 0.09 |
| ENSG0000(AC133785) antisense chr2     | 1.31E+08 | 1.31E+08 | - | 0    | 0    |
| ENSG0000(RP11-216N) antisense chr1    | 1.54E+08 | 1.54E+08 | - | 0    | 0    |
| ENSG0000(AC113189) antisense chr17    | 7581964  | 7584072  | - | 5.78 | 3.89 |
| ENSG0000(AC004987) processed_ chr7    | 39833571 | 39834718 | + | 0    | 0    |
| ENSG0000(LPCAT2BP) unitary_psi chr1   | 92066306 | 92067839 | + | 0    | 0    |
| ENSG0000(CNOT7P1) processed_ chrX     | 69937166 | 69938017 | - | 0    | 0    |
| ENSG0000(AC079807) antisense chr2     | 47905678 | 47907810 | + | 0.41 | 0.68 |
| ENSG0000(HNRNPA1P) processed_ chr6    | 1.66E+08 | 1.66E+08 | + | 0    | 0    |
| ENSG0000(NPIP7) protein_co chr16      | 28456372 | 28471175 | - | 0    | 0.09 |
| ENSG0000(RP11-740P) lincRNA chr1      | 2811850  | 2812692  | - | 0    | 0    |
| ENSG0000(RP5-908D6) unprocessed chr1  | 89324522 | 89334880 | + | 0    | 0    |
| ENSG0000(AP001171) lincRNA chr21      | 20256752 | 20258820 | - | 0    | 0    |
| ENSG0000(LINC00472) lincRNA chr6      | 71344344 | 71420769 | - | 0.63 | 1.97 |
| ENSG0000(DEF9P) unprocessed chr8      | 6959289  | 6960161  | - | 0    | 0    |
| ENSG0000(RP11-220) antisense chr9     | 37112548 | 37115490 | - | 0    | 0    |
| ENSG0000(RP11-12D5) processed_ chrX   | 27863893 | 27864349 | + | 0    | 0    |
| ENSG0000(RP11-415) antisense chr1     | 33350352 | 33363245 | + | 0    | 0    |
| ENSG0000(GS1-257G1) processed_ chrX   | 14244382 | 14244928 | + | 0    | 0    |
| ENSG0000(MTND6P9) processed_ chr2     | 1.55E+08 | 1.55E+08 | - | 0    | 0    |
| ENSG0000(RP3-339A1) antisense chrX    | 53432722 | 53433032 | - | 0    | 0    |
| ENSG0000(AC007743) antisense chr2     | 56173534 | 56185770 | - | 2.37 | 2.55 |
| ENSG0000(CRIP1P1) processed_ chr3     | 12673699 | 12673883 | + | 0    | 0    |
| ENSG0000(RPL21P134) processed_ chrX   | 75384346 | 75384828 | + | 0    | 0    |
| ENSG0000(RP11-445K) antisense chr10   | 13415202 | 13423133 | + | 0    | 0    |
| ENSG0000(RP11-219F) lincRNA chr10     | 83911654 | 83912922 | - | 0    | 0    |
| ENSG0000(FABP3P2) processed_ chr13    | 42369259 | 42369657 | - | 0    | 0    |
| ENSG0000(RPSAP63) processed_ chrX     | 1.34E+08 | 1.34E+08 | + | 0    | 0    |
| ENSG0000(LINC00264) transcribed chr10 | 26589865 | 26594330 | + | 0    | 0    |
| ENSG0000(RP11-380F) antisense chr9    | 84278219 | 84290131 | + | 0    | 0    |

|                                      |          |          |   |        |        |
|--------------------------------------|----------|----------|---|--------|--------|
| ENSG0000( AC009518. processed_ chr7  | 1.32E+08 | 1.32E+08 | - | 0      | 0      |
| ENSG0000( AC006042. processed_ chr7  | 7980312  | 7982228  | + | 0      | 0      |
| ENSG0000( MICF unprocessε chr6       | 29852363 | 29852491 | - | 0      | 0      |
| ENSG0000( HMGB1P31 processed_ chr2   | 54051334 | 54051760 | + | 0      | 0.63   |
| ENSG0000( RP11-558F processed_ chr1  | 9660828  | 9662626  | - | 0      | 0      |
| ENSG0000( SNRPEP4 processed_ chr19   | 5576660  | 5576938  | - | 0      | 0      |
| ENSG0000( RP11-12C1 antisense chr1   | 54980950 | 54992274 | - | 0      | 0      |
| ENSG0000( PNPT1P2 processed_ chr7    | 1.22E+08 | 1.22E+08 | - | 0      | 0      |
| ENSG0000( AMMECR1 processed_ chr13   | 96573659 | 96574499 | + | 0      | 0      |
| ENSG0000( AC009238. processed_ chr2  | 95434759 | 95435113 | + | 0      | 0      |
| ENSG0000( GPX1 protein_co chr3       | 49357176 | 49358600 | - | 243.73 | 242.11 |
| ENSG0000( LINC01728 lincRNA chr20    | 43894720 | 43895468 | + | 0      | 0      |
| ENSG0000( RPS26P2 processed_ chr9    | 30831878 | 30832225 | - | 0      | 0      |
| ENSG0000( MTCYBP10 unprocessε chr2   | 1.31E+08 | 1.31E+08 | - | 0      | 0      |
| ENSG0000( MTND3P1( processed_ chr2   | 1.2E+08  | 1.2E+08  | + | 0      | 0      |
| ENSG0000( AC009362. processed_ chr7  | 1.31E+08 | 1.31E+08 | + | 0      | 0      |
| ENSG0000( RP11-760D lincRNA chr7     | 56534230 | 56538130 | - | 0.02   | 0.05   |
| ENSG0000( RP11-147G lincRNA chr1     | 82215220 | 82261133 | - | 0      | 0      |
| ENSG0000( RPL7AP61 processed_ chr13  | 97901653 | 97902288 | + | 0      | 0      |
| ENSG0000( RP11-341B processed_ chr10 | 89139044 | 89139458 | + | 0.2    | 0      |
| ENSG0000( RP11-410N antisense chr20  | 32561093 | 32573888 | + | 0      | 0      |
| ENSG0000( FAM90A20 unprocessε chr8   | 7295014  | 7298024  | + | 0      | 0      |
| ENSG0000( AC092159. antisense chr2   | 677186   | 697371   | + | 0.03   | 0      |
| ENSG0000( RASA4DP unprocessε chr7    | 1.03E+08 | 1.03E+08 | - | 0.07   | 0.38   |
| ENSG0000( HIGD1AP4 processed_ chr2   | 2.23E+08 | 2.23E+08 | - | 0      | 0      |
| ENSG0000( EIF4A1P1 processed_ chr21  | 27367014 | 27367947 | - | 0      | 0      |
| ENSG0000( OR4C14P unprocessε chr11   | 55537002 | 55537924 | + | 0      | 0      |
| ENSG0000( XXYLT1-AS: antisense chr3  | 1.95E+08 | 1.95E+08 | + | 0      | 0      |
| ENSG0000( LINC01346 lincRNA chr1     | 3940565  | 3955262  | + | 0      | 0      |
| ENSG0000( TRGV2 TR_V_gene chr7       | 38362864 | 38363518 | - | 0      | 0      |
| ENSG0000( AC109815. processed_ chr2  | 1.1E+08  | 1.1E+08  | + | 0      | 0      |
| ENSG0000( OSTN-AS1 antisense chr3    | 1.91E+08 | 1.91E+08 | - | 0      | 0      |
| ENSG0000( RPS6P12 processed_ chr9    | 82744067 | 82744792 | - | 0      | 0      |
| ENSG0000( MTCO1P54 processed_ chr2   | 2.03E+08 | 2.03E+08 | - | 0      | 0      |
| ENSG0000( HMGA1P5 processed_ chr10   | 75276376 | 75276646 | - | 0      | 0      |
| ENSG0000( DSCR10 sense_intrε chr21   | 38206156 | 38208644 | + | 0      | 0      |
| ENSG0000( RPL31P45 processed_ chr10  | 22266991 | 22267346 | + | 0      | 0      |
| ENSG0000( PPIAP32 processed_ chr10   | 1.3E+08  | 1.3E+08  | - | 0      | 0      |
| ENSG0000( RP11-482E lincRNA chr10    | 3486894  | 3502838  | - | 0      | 0      |
| ENSG0000( EE1A1P34 processed_ chr20  | 18782424 | 18783690 | - | 0      | 0      |
| ENSG0000( MIPEPP3 transcribec chr13  | 21298139 | 21306373 | + | 1.35   | 1.34   |
| ENSG0000( USP32P2 transcribec chr17  | 18511262 | 18525930 | - | 1.79   | 0.81   |
| ENSG0000( PFN1P1 processed_ chr1     | 1.72E+08 | 1.72E+08 | - | 0      | 0      |
| ENSG0000( AC068287. processed_ chr2  | 1.41E+08 | 1.41E+08 | - | 0      | 0      |
| ENSG0000( RP1-12G14 antisense chr6   | 1.5E+08  | 1.5E+08  | - | 0      | 0      |

|                                     |          |          |   |       |       |
|-------------------------------------|----------|----------|---|-------|-------|
| ENSG0000(RP4-799P1 antisense chr1   | 2.34E+08 | 2.34E+08 | - | 0     | 0     |
| ENSG0000(RNFT1P2 processed_chr1     | 78170481 | 78171237 | - | 0     | 0     |
| ENSG0000(FAM53B-A antisense chr10   | 1.25E+08 | 1.25E+08 | + | 0.13  | 0     |
| ENSG0000(AC016696 processed_chr2    | 46256860 | 46257177 | - | 0     | 0     |
| ENSG0000(RP13-221M lincRNA chr1     | 13146981 | 13147460 | - | 0     | 0     |
| ENSG0000(UBE2FP3 processed_chr1     | 1.11E+08 | 1.11E+08 | + | 0     | 0     |
| ENSG0000(TLR8-AS1 antisense chrX    | 12902817 | 12908333 | - | 0     | 0     |
| ENSG0000(AC018878 antisense chr2    | 1.06E+08 | 1.06E+08 | + | 0     | 0     |
| ENSG0000(RP11-25C1 antisense chr10  | 1.13E+08 | 1.13E+08 | - | 0     | 0     |
| ENSG0000(RP11-235G lincRNA chr6     | 1.61E+08 | 1.61E+08 | + | 0     | 0     |
| ENSG0000(ATP6V1G1 processed_chr10   | 35158306 | 35158640 | + | 0     | 0     |
| ENSG0000(ERP29P1 processed_chr20    | 52110344 | 52111049 | - | 0     | 0     |
| ENSG0000(LINC00333 lincRNA chr13    | 84562364 | 84563236 | + | 0     | 0     |
| ENSG0000(RP1-69D17 antisense chr6   | 1.29E+08 | 1.29E+08 | - | 0     | 0     |
| ENSG0000(RP1-300I2 unprocessε chr20 | 45229817 | 45230191 | + | 0     | 0     |
| ENSG0000(RPS7P9 processed_chr10     | 80716483 | 80717068 | - | 0     | 0     |
| ENSG0000(LINC00028 lincRNA chr20    | 31485778 | 31487574 | + | 0     | 0     |
| ENSG0000(CHRM3-AS antisense chr1    | 2.4E+08  | 2.4E+08  | - | 0     | 0     |
| ENSG0000(RPL30P15 processed_chrX    | 13574746 | 13575066 | + | 0     | 0     |
| ENSG0000(RP1-209A6 lincRNA chr6     | 22744395 | 23031780 | - | 0     | 0     |
| ENSG0000(RP11-202K lincRNA chr1     | 1.02E+08 | 1.02E+08 | - | 0     | 0     |
| ENSG0000(Z83844.1 antisense chr22   | 37641832 | 37658377 | - | 0     | 0     |
| ENSG0000(AC006019 antisense chr7    | 1.54E+08 | 1.54E+08 | - | 0     | 0     |
| ENSG0000(RP4-655C5 lincRNA chr6     | 1.66E+08 | 1.66E+08 | + | 0     | 0     |
| ENSG0000(ZNF90P2 processed_chr6     | 28888832 | 28889906 | - | 0     | 0     |
| ENSG0000(RP11-307L antisense chr9   | 6415145  | 6449558  | - | 0     | 0     |
| ENSG0000(GTF2IP4 transcribec chr7   | 73154938 | 73207283 | + | 33.79 | 35.62 |
| ENSG0000(AC092664 processed_chr2    | 1.1E+08  | 1.1E+08  | + | 0.11  | 0     |
| ENSG0000(RP5-893G2 lincRNA chr1     | 30140263 | 30141607 | + | 0     | 0     |
| ENSG0000(RP5-881L2 antisense chr20  | 44389624 | 44391537 | - | 0     | 0     |
| ENSG0000(MTND4P2 processed_chr10    | 94940253 | 94941121 | - | 0     | 0     |
| ENSG0000(USP9YP34 unprocessε chrY   | 17984349 | 17993260 | + | 0     | 0     |
| ENSG0000(RP11-318G lincRNA chr13    | 77939162 | 77944874 | - | 0     | 0     |
| ENSG0000(RPS2P48 processed_chr17    | 53756989 | 53757870 | - | 0     | 0     |
| ENSG0000(AK4P3 processed_chr12      | 31615771 | 31616439 | - | 0     | 0     |
| ENSG0000(NKAPP1 transcribec chrX    | 1.2E+08  | 1.2E+08  | - | 1.26  | 0.67  |
| ENSG0000(RP11-324F processed_chr7   | 67089257 | 67089470 | - | 0     | 0     |
| ENSG0000(RP11-100E bidirection chr1 | 2.25E+08 | 2.25E+08 | - | 0.49  | 0.11  |
| ENSG0000(MTCO3P8 unprocessε chr7    | 64106065 | 64106819 | - | 0     | 0     |
| ENSG0000(RP11-342D lincRNA chr10    | 33096257 | 33116672 | - | 0     | 0     |
| ENSG0000(RP4-569D1 processed_chr22  | 35501861 | 35503586 | - | 0.13  | 0.04  |
| ENSG0000(AC104809 processed_chr2    | 2.41E+08 | 2.41E+08 | - | 0.02  | 0     |
| ENSG0000(AP000688 lincRNA chr21     | 36104881 | 36109690 | + | 0     | 0     |
| ENSG0000(LINC00841 lincRNA chr10    | 43939003 | 43944466 | + | 0     | 0     |
| ENSG0000(LINC01719 lincRNA chr1     | 1.46E+08 | 1.46E+08 | + | 1.38  | 1.23  |

|                                 |       |          |          |   |      |      |
|---------------------------------|-------|----------|----------|---|------|------|
| ENSG0000( AC008063. lincRNA     | chr2  | 1.62E+08 | 1.62E+08 | + | 0.78 | 0.24 |
| ENSG0000( LINC01648 lincRNA     | chr1  | 30013952 | 30037612 | - | 0    | 0    |
| ENSG0000( PRKAR1AP processed_   | chr1  | 92125301 | 92126462 | + | 0    | 0    |
| ENSG0000( TARDBPP1 processed_   | chr20 | 6200989  | 6202191  | - | 0    | 0    |
| ENSG0000( RP11-86A5 lincRNA     | chrX  | 25878339 | 25893544 | + | 0.13 | 0.72 |
| ENSG0000( LINC01046 lincRNA     | chr13 | 21234568 | 21235204 | + | 0    | 0.68 |
| ENSG0000( RP11-296A processed_  | chr1  | 51250603 | 51251472 | - | 0    | 0    |
| ENSG0000( RP11-567C antisense   | chr1  | 50206084 | 50223127 | - | 0    | 0    |
| ENSG0000( LA16c-23H antisense   | chr22 | 15557577 | 15560694 | - | 0    | 0    |
| ENSG0000( FANK1-AS1 antisense   | chr10 | 1.26E+08 | 1.26E+08 | - | 0    | 0    |
| ENSG0000( LINC01222 lincRNA     | chr1  | 1.99E+08 | 1.99E+08 | - | 0    | 0    |
| ENSG0000( RP11-104L sense_intr  | chr1  | 1.67E+08 | 1.67E+08 | - | 0    | 0    |
| ENSG0000( OR5H15 protein_co     | chr3  | 98168700 | 98169733 | + | 0    | 0    |
| ENSG0000( RP11-101E lincRNA     | chr20 | 40031585 | 40043889 | + | 0    | 0    |
| ENSG0000( AC012065. processed_  | chr2  | 20606280 | 20606654 | - | 0    | 0    |
| ENSG0000( RP4-742N3 lincRNA     | chr7  | 1.2E+08  | 1.2E+08  | - | 0    | 0    |
| ENSG0000( RP4-781L3. processed_ | chr1  | 25125053 | 25125454 | - | 0    | 0    |
| ENSG0000( AC002127. lincRNA     | chr7  | 88710631 | 88756725 | + | 0    | 0    |
| ENSG0000( LINC01783 lincRNA     | chr1  | 16533886 | 16536172 | - | 0    | 0    |
| ENSG0000( RP4-736H5 lincRNA     | chr7  | 67691058 | 67697029 | - | 0    | 0    |
| ENSG0000( RP11-175I6 lincRNA    | chr9  | 42707800 | 42714539 | + | 0    | 0    |
| ENSG0000( KRT18P67 processed_   | chr9  | 1.23E+08 | 1.23E+08 | + | 0    | 0    |
| ENSG0000( EIF3FP3 processed_    | chr2  | 58251440 | 58252525 | + | 0.85 | 1.59 |
| ENSG0000( RP1-212P9 antisense   | chr1  | 28870483 | 28877336 | - | 0.11 | 0.06 |
| ENSG0000( AC019050. processed_  | chr2  | 1.29E+08 | 1.29E+08 | + | 0    | 0    |
| ENSG0000( HOTAIRM1 antisense    | chr7  | 27095647 | 27100265 | + | 0.41 | 0    |
| ENSG0000( RP11-403I1 unprocess  | chr1  | 1.44E+08 | 1.44E+08 | - | 0    | 0    |
| ENSG0000( RP11-63N8 antisense   | chr1  | 21586472 | 21591187 | + | 0    | 0    |
| ENSG0000( RP11-344P processed_  | chr1  | 1.22E+08 | 1.22E+08 | + | 0    | 0    |
| ENSG0000( RP1-296G1 processed_  | chrX  | 1.21E+08 | 1.21E+08 | - | 0    | 0    |
| ENSG0000( AGGF1P2 processed_    | chr10 | 1.34E+08 | 1.34E+08 | + | 0.21 | 0.26 |
| ENSG0000( BTBD18 protein_co     | chr11 | 57743514 | 57751781 | - | 0    | 0    |
| ENSG0000( RP13-580B transcribec | chr7  | 56875385 | 56882146 | - | 0    | 0    |
| ENSG0000( HMGA1P6 processed_    | chr13 | 23134174 | 23134564 | + | 0    | 0    |
| ENSG0000( CYP2AB1P transcribec  | chr3  | 1.84E+08 | 1.84E+08 | - | 0    | 0    |
| ENSG0000( PPP6R2P1 unprocess    | chr21 | 14007134 | 14014880 | + | 0    | 0    |
| ENSG0000( AC013262. processed_  | chr2  | 81666477 | 81666728 | - | 0    | 0    |
| ENSG0000( RPL17P11 processed_   | chr2  | 2.34E+08 | 2.34E+08 | - | 0    | 0    |
| ENSG0000( XXyac-YR1: processed_ | chrX  | 81600072 | 81601306 | + | 0    | 0    |
| ENSG0000( AC103563. unprocess   | chr2  | 94974544 | 94974838 | - | 0    | 0    |
| ENSG0000( PMS2P9 transcribec    | chr7  | 77039944 | 77043776 | + | 0.11 | 0    |
| ENSG0000( MTATP6P1 processed_   | chr1  | 1.07E+08 | 1.07E+08 | - | 0    | 0    |
| ENSG0000( RP11-301N sense_ovei  | chr10 | 22361172 | 22413067 | + | 0    | 0    |
| ENSG0000( STXBP5-AS antisense   | chr6  | 1.47E+08 | 1.47E+08 | - | 3.04 | 2.32 |
| ENSG0000( RP11-196D unprocess   | chr7  | 63057453 | 63060084 | + | 0    | 0    |

|                                     |          |          |   |      |      |
|-------------------------------------|----------|----------|---|------|------|
| ENSG0000(RP4-667H1 processed_ chr1  | 2.1E+08  | 2.1E+08  | + | 0    | 0    |
| ENSG0000(LINC01077 lincRNA chr13    | 48570639 | 48573317 | - | 0    | 0    |
| ENSG0000(RP11-336N processed_ chr9  | 78150532 | 78151193 | - | 0    | 0    |
| ENSG0000(AC125238. processed_ chr2  | 2.04E+08 | 2.04E+08 | - | 0    | 0    |
| ENSG0000(RPL35AP31 processed_ chr13 | 71845981 | 71846317 | + | 0    | 0    |
| ENSG0000(RP11-295G antisense chr1   | 2.32E+08 | 2.32E+08 | - | 3.68 | 2.59 |
| ENSG0000(NANOGP11 antisense chr6    | 1.53E+08 | 1.53E+08 | + | 0    | 0    |
| ENSG0000(U40455.1 processed_ chrX   | 1.48E+08 | 1.48E+08 | - | 0    | 0    |
| ENSG0000(ST6GALNA1 processed_ chr13 | 19818121 | 19818619 | - | 0.15 | 0.17 |
| ENSG0000(RP11-524K lincRNA chr6     | 50514035 | 50521104 | + | 0    | 0    |
| ENSG0000(KRT18P62 processed_ chr22  | 19257520 | 19258806 | + | 0    | 0    |
| ENSG0000(RP11-218D lincRNA chr10    | 27999788 | 28049615 | + | 0    | 0    |
| ENSG0000(RAD1P2 processed_ chr1     | 1.59E+08 | 1.59E+08 | - | 0    | 0    |
| ENSG0000(EEF1A1P6 processed_ chr7   | 22510616 | 22511999 | - | 1.28 | 0.98 |
| ENSG0000(RP11-45P2 processed_ chr10 | 1.06E+08 | 1.06E+08 | - | 0    | 0    |
| ENSG0000(RP1-187B2 antisense chr1   | 25644544 | 25659111 | - | 0    | 0    |
| ENSG0000(AC017074. lincRNA chr2     | 1.14E+08 | 1.14E+08 | + | 0    | 0    |
| ENSG0000(LINC01683 lincRNA chr21    | 19893279 | 19899755 | - | 0    | 0    |
| ENSG0000(RP11-78O9 antisense chr1   | 94145111 | 94145619 | + | 0    | 0    |
| ENSG0000(CTD-2020K antisense chr17  | 45245186 | 45248836 | - | 0    | 0.24 |
| ENSG0000(RP11-74B2 transcribed chrX | 84403898 | 84404024 | - | 0    | 0    |
| ENSG0000(RP3-467K1 antisense chr1   | 15326680 | 15343876 | - | 0    | 0    |
| ENSG0000(RPSAP69 transcribed chr3   | 1.97E+08 | 1.97E+08 | - | 0    | 0    |
| ENSG0000(PAXBP1P1 processed_ chr7   | 1.53E+08 | 1.53E+08 | + | 0    | 0    |
| ENSG0000(AC010091. transcribed chr7 | 81489204 | 81691406 | - | 0.19 | 0.12 |
| ENSG0000(RP5-984P4 lincRNA chr20    | 21530202 | 21530744 | + | 0    | 0    |
| ENSG0000(TMEM238 protein_co chr19   | 55379245 | 55384598 | - | 0.24 | 0.54 |
| ENSG0000(AC009963. processed_ chr2  | 1.08E+08 | 1.08E+08 | - | 0    | 0    |
| ENSG0000(SYNJ2-IT1 sense_intr chr6  | 1.58E+08 | 1.58E+08 | + | 0    | 0    |
| ENSG0000(HNRNPA1P1 processed_ chr11 | 1.11E+08 | 1.11E+08 | - | 0    | 0    |
| ENSG0000(OR5B1P unprocessed chr11   | 58365836 | 58366763 | - | 0    | 0    |
| ENSG0000(AC104794. lincRNA chr2     | 10083781 | 10086101 | + | 0    | 0    |
| ENSG0000(HNRNPLP1 processed_ chr6   | 7481094  | 7482594  | - | 0    | 0    |
| ENSG0000(RP1-269M: lincRNA chr20    | 43190101 | 43202599 | + | 0    | 0    |
| ENSG0000(ZNF197-AS antisense chr3   | 44617128 | 44624797 | - | 0    | 0    |
| ENSG0000(RP1-128O3 processed_ chr6  | 1.08E+08 | 1.08E+08 | + | 0    | 0    |
| ENSG0000(RP11-570P processed_ chr1  | 44122153 | 44122512 | - | 0    | 0    |
| ENSG0000(LINC01518 lincRNA chr10    | 42674197 | 42691723 | - | 0    | 0    |
| ENSG0000(RP11-388N lincRNA chr9     | 1.17E+08 | 1.17E+08 | - | 0    | 0    |
| ENSG0000(AC005162. antisense chr7   | 28987028 | 28988899 | + | 0    | 0    |
| ENSG0000(RPL7P35 processed_ chr10   | 1.11E+08 | 1.11E+08 | - | 0    | 0    |
| ENSG0000(RP11-177F antisense chr1   | 2.4E+08  | 2.4E+08  | - | 0    | 0    |
| ENSG0000(LINC01638 lincRNA chr22    | 27221349 | 27224727 | - | 7.05 | 4.67 |
| ENSG0000(FAM224A lincRNA chrY       | 18326253 | 18353210 | + | 0.03 | 0    |
| ENSG0000(PHBP5 processed_ chr7      | 73187969 | 73188736 | - | 0    | 0    |



|                     |                  |          |          |   |      |      |
|---------------------|------------------|----------|----------|---|------|------|
| ENSG0000(RANP8      | processed_ chr13 | 20747035 | 20748057 | - | 0    | 0    |
| ENSG0000(RFC5P1     | processed_ chr9  | 77072100 | 77073295 | + | 0    | 0    |
| ENSG0000(ZNF529-AS  | antisense_ chr19 | 36573070 | 36594708 | + | 2.66 | 1.24 |
| ENSG0000(LINC00430  | lincRNA_ chr13   | 86909586 | 86937108 | + | 0    | 0    |
| ENSG0000(HCG21      | antisense_ chr6  | 30945979 | 30954862 | - | 0    | 0    |
| ENSG0000(DEFA10P    | unprocessε chr8  | 6968141  | 6969113  | - | 0    | 0    |
| ENSG0000(LINC00460  | lincRNA_ chr13   | 1.06E+08 | 1.06E+08 | + | 0    | 0    |
| ENSG0000(MKNK2P1    | processed_ chr10 | 36944111 | 36944738 | - | 0    | 0    |
| ENSG0000(RP1-38C16  | lincRNA_ chr6    | 1.36E+08 | 1.36E+08 | - | 0    | 0    |
| ENSG0000(RP1-122K4  | lincRNA_ chrX    | 13955393 | 13963904 | + | 0    | 0    |
| ENSG0000(RP11-867G  | lincRNA_ chr11   | 94638038 | 94640833 | + | 0    | 0    |
| ENSG0000(TEDDM2P    | unitary_psι chr1 | 1.82E+08 | 1.82E+08 | + | 0    | 0    |
| ENSG0000(AC017104.  | lincRNA_ chr2    | 2.31E+08 | 2.31E+08 | + | 0.13 | 0.14 |
| ENSG0000(AC011294.  | lincRNA_ chr7    | 46673785 | 46759851 | - | 0.07 | 0.03 |
| ENSG0000(DNM3-IT1   | sense_intrε chr1 | 1.72E+08 | 1.72E+08 | + | 0    | 0    |
| ENSG0000(RPL31P47   | processed_ chr11 | 1.23E+08 | 1.23E+08 | + | 0    | 0    |
| ENSG0000(RP11-547D  | antisense_ chr1  | 2013213  | 2015530  | - | 0    | 0    |
| ENSG0000(CHTF8P1    | processed_ chrX  | 44633692 | 44635232 | + | 0    | 0    |
| ENSG0000(EIF3KP2    | processed_ chr3  | 24555834 | 24556459 | + | 0    | 0    |
| ENSG0000(CYCSP33    | processed_ chr13 | 24400703 | 24401029 | + | 0    | 0    |
| ENSG0000(PRYP5      | unprocessε chrY  | 18529358 | 18529623 | + | 0    | 0    |
| ENSG0000(RP11-57H1  | antisense_ chr10 | 1.13E+08 | 1.13E+08 | - | 0.17 | 0.19 |
| ENSG0000(CYCSP44    | processed_ chrX  | 1.45E+08 | 1.45E+08 | + | 0    | 0    |
| ENSG0000(CYCSP35    | processed_ chr13 | 98629686 | 98629989 | - | 0    | 0    |
| ENSG0000(MTCYBP8    | unprocessε chr2  | 1.3E+08  | 1.3E+08  | + | 0    | 0    |
| ENSG0000(LSM1P1     | processed_ chr9  | 16775573 | 16775845 | - | 0    | 0    |
| ENSG0000(AC108462.  | antisense_ chr2  | 1341044  | 1346568  | - | 0    | 0    |
| ENSG0000(B4GALT1-A  | antisense_ chr9  | 33166975 | 33179983 | + | 1.4  | 1.07 |
| ENSG0000(RP11-452D  | processed_ chr9  | 63581254 | 63581834 | - | 0    | 0    |
| ENSG0000(NFU1P2     | processed_ chr1  | 98077000 | 98077468 | + | 0    | 0    |
| ENSG0000(RP3-486I3. | processed_ chr6  | 1.16E+08 | 1.16E+08 | - | 0    | 0    |
| ENSG0000(LINC00513  | lincRNA_ chr7    | 1.31E+08 | 1.31E+08 | + | 0.07 | 0.12 |
| ENSG0000(KRT8P39    | processed_ chr12 | 68705634 | 68707066 | + | 0    | 0.04 |
| ENSG0000(RP11-548N  | processed_ chr1  | 1.83E+08 | 1.83E+08 | + | 0    | 0    |
| ENSG0000(OR52E7P    | unprocessε chr11 | 5873960  | 5874892  | + | 0    | 0    |
| ENSG0000(RP11-42D2  | processed_ chr3  | 1.87E+08 | 1.87E+08 | - | 0    | 0    |
| ENSG0000(RP11-500B  | lincRNA_ chr9    | 1.18E+08 | 1.18E+08 | + | 0    | 0    |
| ENSG0000(LINC00690  | lincRNA_ chr3    | 16536320 | 16541373 | + | 0    | 0    |
| ENSG0000(RP11-545D  | lincRNA_ chrX    | 34206725 | 34415537 | - | 0    | 0    |
| ENSG0000(CTA-929C8  | lincRNA_ chr22   | 27276240 | 27286349 | + | 0    | 0    |
| ENSG0000(RP11-459D  | processed_ chr9  | 1328664  | 1328987  | + | 0    | 0    |
| ENSG0000(RP11-778D  | unprocessε chr3  | 1.84E+08 | 1.84E+08 | + | 0    | 0    |
| ENSG0000(RP3-462D8  | lincRNA_ chr22   | 25279529 | 25282674 | - | 0    | 0    |
| ENSG0000(EIF4EP1    | processed_ chr20 | 5548840  | 5549481  | + | 0    | 0    |
| ENSG0000(KRT8P15    | processed_ chr2  | 2.03E+08 | 2.03E+08 | - | 0    | 0    |

|                                 |       |          |          |   |      |       |
|---------------------------------|-------|----------|----------|---|------|-------|
| ENSG0000( AC069155. antisense   | chr2  | 2.16E+08 | 2.16E+08 | + | 0    | 0     |
| ENSG0000( RP4-635A2 processed_  | chr1  | 1.85E+08 | 1.85E+08 | - | 0    | 0     |
| ENSG0000( AC115617. processed_  | chrX  | 48775993 | 48776970 | - | 0.06 | 0     |
| ENSG0000( RP11-763B processed_  | chr1  | 1.44E+08 | 1.44E+08 | + | 0    | 0     |
| ENSG0000( LINC01884 lincRNA     | chr2  | 22536479 | 22538288 | + | 0    | 0     |
| ENSG0000( CYP51A1P2 processed_  | chr13 | 28722386 | 28724021 | - | 0.04 | 0     |
| ENSG0000( RP4-694A7 antisense   | chr1  | 68479129 | 68483539 | + | 0    | 0     |
| ENSG0000( RP11-153K lincRNA     | chr10 | 68233251 | 68242379 | - | 0    | 0     |
| ENSG0000( RP4-665J2: processed_ | chr1  | 90782983 | 90851657 | - | 0.77 | 1.62  |
| ENSG0000( BTF3P5 processed_     | chr2  | 55435156 | 55435622 | - | 0    | 0     |
| ENSG0000( MTND2P2 processed_    | chr1  | 50017092 | 50017503 | + | 0    | 0     |
| ENSG0000( RP11-343B processed_  | chr3  | 1.42E+08 | 1.42E+08 | - | 0.12 | 0     |
| ENSG0000( NCOR1P3 unprocessε    | chr7  | 57599794 | 57610104 | + | 0    | 0     |
| ENSG0000( ERI3-IT1 sense_intrε  | chr1  | 44243408 | 44244273 | - | 0.22 | 0.61  |
| ENSG0000( JTBP1 processed_      | chr22 | 40798039 | 40798285 | + | 0    | 0     |
| ENSG0000( LINC01851 lincRNA     | chr2  | 77915934 | 77918011 | + | 0    | 0     |
| ENSG0000( OR6C66P unprocessε    | chr12 | 55388445 | 55389374 | + | 0    | 0     |
| ENSG0000( LINC01392 lincRNA     | chr7  | 1.15E+08 | 1.15E+08 | - | 0    | 0     |
| ENSG0000( TWIST2 protein_co     | chr2  | 2.39E+08 | 2.39E+08 | + | 20.8 | 22.35 |
| ENSG0000( RPL10P19 transcribec  | chr8  | 8961200  | 8979025  | + | 0    | 0     |
| ENSG0000( LINC00462 lincRNA     | chr13 | 48576974 | 48578088 | - | 0    | 0.07  |
| ENSG0000( AC079135. antisense   | chr2  | 2.36E+08 | 2.36E+08 | + | 0    | 0     |
| ENSG0000( DCUN1D2- antisense    | chr13 | 1.13E+08 | 1.13E+08 | + | 0    | 0     |
| ENSG0000( DDX11L10 transcribec  | chr16 | 11555    | 14090    | + | 0    | 0     |
| ENSG0000( HNRNPA1P processed_   | chr1  | 2.41E+08 | 2.41E+08 | + | 0    | 0     |
| ENSG0000( RP11-542K lincRNA     | chr9  | 1.22E+08 | 1.22E+08 | - | 0    | 0     |
| ENSG0000( AC006328. processed_  | chrY  | 25487284 | 25487662 | - | 0    | 0     |
| ENSG0000( RP11-22M: antisense   | chr1  | 2.16E+08 | 2.16E+08 | + | 0    | 0     |
| ENSG0000( LINC01137 antisense   | chr1  | 37454879 | 37474411 | - | 1.66 | 2.24  |
| ENSG0000( CYP2T1P unitary_psε   | chr19 | 40808525 | 40811390 | - | 0.14 | 0.05  |
| ENSG0000( PGAM1P1 processed_    | chr1  | 10058671 | 10059648 | + | 0    | 0     |
| ENSG0000( RP5-905G1 lincRNA     | chr20 | 17887363 | 17888160 | - | 0    | 0     |
| ENSG0000( RP11-565J: processed_ | chr1  | 2.12E+08 | 2.12E+08 | + | 0    | 0     |
| ENSG0000( C4A-AS1 antisense     | chr6  | 31999976 | 32003521 | - | 0    | 0.01  |
| ENSG0000( RP1-302D9 processed_  | chr22 | 33137140 | 33137338 | + | 0    | 0     |
| ENSG0000( AC093326. lincRNA     | chr2  | 558204   | 578145   | + | 0    | 0     |
| ENSG0000( GOT2P5 processed_     | chrY  | 6837707  | 6838252  | + | 0    | 0     |
| ENSG0000( AC037445. antisense   | chr17 | 63193930 | 63339053 | - | 0    | 0     |
| ENSG0000( LINC01158 processed_  | chr2  | 1.05E+08 | 1.05E+08 | - | 0    | 0     |
| ENSG0000( KRTAP13-5 unprocessε  | chr21 | 30436466 | 30436964 | - | 0    | 0     |
| ENSG0000( GPR158-AS antisense   | chr10 | 25158072 | 25176276 | - | 0    | 0     |
| ENSG0000( RP11-491H lincRNA     | chr10 | 61781745 | 61821246 | - | 0    | 0     |
| ENSG0000( ARHGEF7-l sense_intrε | chr13 | 1.11E+08 | 1.11E+08 | + | 0    | 0     |
| ENSG0000( RP11-431K lincRNA     | chr1  | 8218190  | 8220529  | - | 0    | 0     |
| ENSG0000( OR52T1P unprocessε    | chr11 | 5566678  | 5567616  | - | 0    | 0     |

|                                    |          |          |   |      |      |
|------------------------------------|----------|----------|---|------|------|
| ENSG0000(NENFP1 processed_chr1     | 46665910 | 46666375 | - | 0    | 0    |
| ENSG0000(AC010095. processed_chr2  | 1.09E+08 | 1.09E+08 | - | 0    | 0    |
| ENSG0000(RP11-111F lincRNA chr9    | 62387171 | 62394004 | - | 0    | 0    |
| ENSG0000(CICP1 processed_chrY      | 25388992 | 25391811 | + | 0    | 0    |
| ENSG0000(CICP7 processed_chr1      | 487101   | 489906   | + | 0    | 0    |
| ENSG0000(AC093388. antisense chr2  | 1.91E+08 | 1.91E+08 | + | 0    | 0    |
| ENSG0000(IGHD4-4 IG_D_gene chr14   | 1.06E+08 | 1.06E+08 | - | 0    | 0    |
| ENSG0000(RP11-716C lincRNA chr6    | 11417350 | 11481239 | + | 0    | 0    |
| ENSG0000(NDUFA5P4 processed_chr9   | 35874810 | 35875194 | - | 0    | 0    |
| ENSG0000(SPIN4-AS1 antisense chrX  | 63349646 | 63352178 | + | 0    | 0    |
| ENSG0000(CALM2P4 processed_chr13   | 98640814 | 98641239 | - | 0    | 0    |
| ENSG0000(RP11-497J. processed_chrX | 35710911 | 35711942 | + | 0    | 0    |
| ENSG0000(NDUFS5P3 processed_chr1   | 52709122 | 52709442 | + | 0    | 0    |
| ENSG0000(RP11-523C processed_chr10 | 48976554 | 48993046 | - | 0.14 | 0.35 |
| ENSG0000(RP11-571F processed_chr9  | 34223984 | 34224628 | - | 0    | 0    |
| ENSG0000(PIRT protein_co chr17     | 10822475 | 10838445 | - | 0    | 0    |
| ENSG0000(AC083899. processed_chr2  | 87221113 | 87222488 | - | 0.04 | 0    |
| ENSG0000(RNASEH2B antisense chr13  | 50862172 | 50910764 | - | 0.05 | 0.28 |
| ENSG0000(ANAPC1P1 transcribed chr2 | 86861825 | 86922693 | + | 0    | 0    |
| ENSG0000(RP11-184I processed_chr1  | 43743471 | 43743741 | + | 0    | 0    |
| ENSG0000(FDPSP6 processed_chr21    | 20388334 | 20388845 | + | 0    | 0    |
| ENSG0000(DDX39BP1 unprocessε chr6  | 29906543 | 29906909 | + | 0    | 0    |
| ENSG0000(HNRNPA1F processed_chrX   | 1.01E+08 | 1.01E+08 | - | 0.06 | 0    |
| ENSG0000(CEACAMP1 unprocessε chr19 | 42620212 | 42633034 | - | 0    | 0    |
| ENSG0000(RP11-13P5 antisense chr6  | 1.59E+08 | 1.59E+08 | - | 0    | 0    |
| ENSG0000(RP5-1106H processed_chr7  | 1.01E+08 | 1.01E+08 | - | 0    | 0    |
| ENSG0000(LINC01865 lincRNA chr2    | 317912   | 342118   | + | 0    | 0    |
| ENSG0000(OR6L1P unprocessε chr10   | 1.34E+08 | 1.34E+08 | - | 0    | 0    |
| ENSG0000(PIEZO1P1 processed_chr20  | 59460619 | 59460837 | - | 0    | 0    |
| ENSG0000(CTD-2183H processed_chrX  | 1.55E+08 | 1.55E+08 | - | 0    | 0    |
| ENSG0000(RP11-123C lincRNA chr7    | 69040152 | 69046803 | + | 0    | 0    |
| ENSG0000(EBAG9P1 processed_chr10   | 99697407 | 99697949 | - | 0.13 | 0.44 |
| ENSG0000(RP11-312J. processed_chr1 | 1.61E+08 | 1.61E+08 | + | 0    | 0    |
| ENSG0000(RP11-506C antisense chr1  | 1.65E+08 | 1.65E+08 | - | 0    | 0    |
| ENSG0000(AC007365. lincRNA chr2    | 64606975 | 64616482 | + | 0    | 0    |
| ENSG0000(GAS6-AS1 antisense chr13  | 1.14E+08 | 1.14E+08 | + | 1.56 | 1.59 |
| ENSG0000(TTTY18 lincRNA chrY       | 8683370  | 8683878  | - | 0    | 0    |
| ENSG0000(PRR23C protein_co chr3    | 1.39E+08 | 1.39E+08 | - | 0.02 | 0    |
| ENSG0000(AC107083. processed_chr2  | 62507545 | 62507823 | - | 0    | 0    |
| ENSG0000(RP11-20E2 processed_chr10 | 80749632 | 80751231 | - | 0    | 0    |
| ENSG0000(SLC26A4-A antisense chr7  | 1.08E+08 | 1.08E+08 | - | 0    | 0    |
| ENSG0000(RP5-1087E antisense chr1  | 2.27E+08 | 2.27E+08 | + | 0    | 0    |
| ENSG0000(RPL22P11 processed_chr2   | 1.1E+08  | 1.1E+08  | - | 0    | 0.5  |
| ENSG0000(RP11-342N processed_chr1  | 42886597 | 42888767 | - | 0    | 0    |
| ENSG0000(MTND4P2ε processed_chr2   | 1.55E+08 | 1.55E+08 | + | 0    | 0    |

|                                      |          |          |   |      |      |
|--------------------------------------|----------|----------|---|------|------|
| ENSG0000(RP4-808O4)processed_chrX    | 67533163 | 67533987 | + | 0    | 0    |
| ENSG0000(EIF4EBP2P)processed_chr20   | 43423196 | 43423538 | - | 0    | 0    |
| ENSG0000(RP4-801G2)unprocessε_chr1   | 1.58E+08 | 1.58E+08 | - | 0    | 0    |
| ENSG0000(RP11-379P)processed_chr9    | 86132622 | 86132851 | + | 0    | 0    |
| ENSG0000(AC012506)lincRNA_chr2       | 23347654 | 23351864 | + | 0    | 0    |
| ENSG0000(AC074367)processed_chr2     | 63232453 | 63233577 | - | 0    | 0    |
| ENSG0000(RPS29P29)processed_chr1     | 1.51E+08 | 1.51E+08 | - | 0    | 0    |
| ENSG0000(MYC NOS)protein_co_chr2     | 15939898 | 15941723 | - | 0    | 0    |
| ENSG0000(GOT2P3)transcribec_chr12    | 9641723  | 9643011  | + | 0    | 0    |
| ENSG0000(LL22NC03-)unprocessε_chr22  | 22157382 | 22157631 | + | 0    | 0    |
| ENSG0000(RP11-205K)lincRNA_chr9      | 1.27E+08 | 1.27E+08 | + | 0    | 0    |
| ENSG0000(LINC01122)lincRNA_chr2      | 58427799 | 59063766 | + | 0    | 0    |
| ENSG0000(RP11-252C)processed_chr10   | 65248032 | 65248792 | - | 0    | 0    |
| ENSG0000(LINC00284)lincRNA_chr13     | 43908669 | 44030461 | + | 0    | 0    |
| ENSG0000(RP11-380I2)processed_chr9   | 1.08E+08 | 1.08E+08 | - | 0    | 0    |
| ENSG0000(RP11-109P)antisense_chr1    | 37799720 | 37800879 | - | 0    | 0    |
| ENSG0000(AC016909)antisense_chr2     | 1.33E+08 | 1.33E+08 | + | 0    | 0    |
| ENSG0000(LINC01765)lincRNA_chr1      | 1.15E+08 | 1.15E+08 | + | 0    | 0    |
| ENSG0000(IGHV3OR1)IG_V_gene_chr16    | 32995048 | 32995505 | + | 0    | 0    |
| ENSG0000(H2AFZP6)processed_chr22     | 31521199 | 31521592 | - | 0    | 0    |
| ENSG0000(RP11-567G)antisense_chr1    | 2.4E+08  | 2.4E+08  | - | 0    | 0    |
| ENSG0000(RP11-573M)processed_chr11   | 93221486 | 93221630 | - | 0    | 0    |
| ENSG0000(RP5-1039K)antisense_chr22   | 38057180 | 38073940 | - | 0    | 0    |
| ENSG0000(CICP2)processed_chrY        | 24278337 | 24281140 | - | 0    | 0    |
| ENSG0000(AC016691)processed_chr2     | 1.2E+08  | 1.2E+08  | - | 0    | 0    |
| ENSG0000(LINC00656)lincRNA_chr20     | 23125068 | 23132621 | - | 0    | 0    |
| ENSG0000(RPL36AP13)processed_chr2    | 24334512 | 24335152 | + | 0    | 0    |
| ENSG0000(CICP27)processed_chr1       | 131025   | 134836   | + | 0.01 | 0    |
| ENSG0000(AC104772)processed_chr2     | 2.23E+08 | 2.23E+08 | - | 0    | 0    |
| ENSG0000(AC009414)processed_chr2     | 36299388 | 36299830 | - | 0    | 0    |
| ENSG0000(AP001628)lincRNA_chr21      | 42781074 | 42782229 | - | 0    | 0    |
| ENSG0000(RP4-799D1)lincRNA_chr1      | 25043707 | 25113120 | - | 0    | 0    |
| ENSG0000(DSCAM-IT1)sense_intrε_chr21 | 40615378 | 40630767 | - | 0    | 0    |
| ENSG0000(AC092835)protein_co_chr2    | 95207535 | 95259774 | + | 0.66 | 0.71 |
| ENSG0000(AC004947)lincRNA_chr7       | 26551822 | 26557200 | + | 0    | 0    |
| ENSG0000(AC007969)processed_chr2     | 1.72E+08 | 1.72E+08 | - | 0.4  | 0.43 |
| ENSG0000(MTCO1P2C)processed_chr22    | 36172422 | 36172779 | + | 0    | 0    |
| ENSG0000(RP11-154P)unprocessε_chr9   | 66253424 | 66254464 | - | 0    | 0.12 |
| ENSG0000(AC098617)antisense_chr2     | 1.92E+08 | 1.92E+08 | + | 0.15 | 0.11 |
| ENSG0000(PSMA6P3)processed_chr21     | 46072085 | 46072248 | - | 0    | 0    |
| ENSG0000(CICP5)unprocessε_chr1       | 2.24E+08 | 2.24E+08 | + | 0    | 0    |
| ENSG0000(MED14P1)unprocessε_chrY     | 12618983 | 12634402 | - | 0    | 0    |
| ENSG0000(RP4-811H2)lincRNA_chr1      | 32349194 | 32350663 | - | 0.19 | 0.11 |
| ENSG0000(LINC01251)antisense_chr9    | 33732975 | 33738416 | - | 0    | 0    |
| ENSG0000(RP11-777J)processed_chr8    | 92144088 | 92144435 | - | 0    | 0    |

|                                        |          |          |   |      |      |
|----------------------------------------|----------|----------|---|------|------|
| ENSG0000(HNRNPA1P transcribed chr13    | 20938564 | 20949599 | - | 0.06 | 0    |
| ENSG0000(ZNF90P3 processed_chr7        | 63087070 | 63088261 | - | 0    | 0    |
| ENSG0000(AP001442. processed_chr21     | 25928754 | 25942686 | + | 0.13 | 0    |
| ENSG0000(RP13-314C antisense chrX      | 23772992 | 23782956 | - | 0    | 0.11 |
| ENSG0000(CDC27P1 processed_chr2        | 1.32E+08 | 1.32E+08 | + | 0.4  | 0    |
| ENSG0000(CTD-2057J processed_chr5      | 29881709 | 29882945 | - | 0    | 0    |
| ENSG0000(LINC01136 lincRNA chr1        | 2.03E+08 | 2.03E+08 | - | 0    | 0.02 |
| ENSG0000(PUDPP2 transcribed chr1       | 1.52E+08 | 1.52E+08 | - | 0    | 0    |
| ENSG0000(UFL1-AS1 antisense chr6       | 96358374 | 96521669 | - | 0    | 0    |
| ENSG0000(AC139887. antisense chr4      | 764487   | 765074   | - | 0    | 0    |
| ENSG0000(TRIM49D2 protein_co chr11     | 89924064 | 89933063 | + | 0    | 0    |
| ENSG0000(TSPY4 protein_co chrY         | 9337464  | 9340284  | + | 0    | 0    |
| ENSG0000(RP11-449J processed_chr10     | 53766400 | 53766614 | + | 0    | 0    |
| ENSG0000(LINC01237 processed_chr2      | 2.42E+08 | 2.42E+08 | + | 0.45 | 0    |
| ENSG0000(RP11-268G processed_chrX      | 27218131 | 27218678 | - | 0    | 0    |
| ENSG0000(MOB1AP2 processed_chrX        | 37291168 | 37292227 | + | 0    | 0    |
| ENSG0000(RP11-66C2 processed_chr9      | 76419934 | 76420631 | + | 0    | 0    |
| ENSG0000(IFNA13 protein_co chr9        | 21367424 | 21368962 | - | 0    | 0    |
| ENSG0000(RP11-168K lincRNA chr9        | 1.14E+08 | 1.14E+08 | + | 0    | 0.04 |
| ENSG0000(AP000695. antisense chr21     | 36445731 | 36532408 | + | 1.57 | 0.65 |
| ENSG0000(RP1-43O17 unprocessed chr1    | 1.53E+08 | 1.53E+08 | + | 0    | 0    |
| ENSG0000(RP11-535M transcribed chr9    | 96725890 | 96727469 | + | 0    | 0    |
| ENSG0000(ENOX1-AS1 lincRNA chr13       | 43543918 | 43548056 | + | 0    | 0    |
| ENSG0000(HIST1H2BM protein_co chr6     | 27837760 | 27865798 | + | 0.26 | 0.2  |
| ENSG0000(RP3-443C4 antisense chr6      | 1.52E+08 | 1.52E+08 | - | 0    | 0    |
| ENSG0000(AC003985. lincRNA chr7        | 25321302 | 25326815 | - | 0    | 0    |
| ENSG0000(RP11-135A antisense chr10     | 32346499 | 32347179 | + | 0    | 0    |
| ENSG0000(FAM58BP processed_chr1        | 2E+08    | 2E+08    | + | 0    | 0    |
| ENSG0000(LINC01949 lincRNA chr5        | 87205408 | 87240145 | - | 0.19 | 0.2  |
| ENSG0000(AC017078. processed_chr2      | 46003942 | 46004309 | - | 0    | 0    |
| ENSG0000(EIF4HP1 processed_chr7        | 27458163 | 27458849 | - | 0    | 0    |
| ENSG0000(RP11-96F8 processed_chr10     | 38783004 | 38783108 | + | 0    | 0    |
| ENSG0000(ETF1P3 processed_chrX         | 65794345 | 65795835 | + | 0    | 0    |
| ENSG0000(AC005083. processed_chr7      | 20217577 | 20221700 | + | 0    | 0    |
| ENSG0000(RP1-92C4.2 lincRNA chr6       | 79871873 | 79874610 | + | 0    | 0    |
| ENSG0000(RP11-255H transcribed chr19   | 23762944 | 23833314 | + | 0    | 0    |
| ENSG0000(EIF3LP2 processed_chr10       | 42566677 | 42567483 | + | 0    | 0    |
| ENSG0000(DPH3P1 processed_chr20        | 62845664 | 62845912 | + | 0    | 0    |
| ENSG0000(RP11-389C processed_chr1      | 1.13E+08 | 1.13E+08 | + | 0    | 0    |
| ENSG0000(PCDH9-AS4 antisense chr13     | 66990886 | 67002007 | + | 0    | 0    |
| ENSG0000(AC062031. lincRNA chr2        | 1.46E+08 | 1.46E+08 | + | 0    | 0    |
| ENSG0000(CYCSP48 processed_chrY        | 26400611 | 26401230 | + | 0    | 0    |
| ENSG0000(KCNQ5-IT1 sense_intronic chr6 | 72630495 | 72678558 | + | 0    | 0    |
| ENSG0000(AC093732. antisense chr2      | 47035279 | 47040524 | - | 0    | 0    |
| ENSG0000(RP11-307L processed_chr9      | 6278667  | 6279153  | + | 0    | 0    |

|                                 |       |          |          |   |      |       |
|---------------------------------|-------|----------|----------|---|------|-------|
| ENSG0000( AC104113. antisense   | chr5  | 60917490 | 60919573 | + | 0    | 0     |
| ENSG0000( RP3-348I23 antisense  | chr6  | 20756103 | 20800694 | - | 0    | 0     |
| ENSG0000( AC022201. antisense   | chr2  | 70301451 | 70302072 | + | 0    | 1.29  |
| ENSG0000( AC103563. antisense   | chr2  | 95025193 | 95026709 | - | 0    | 0     |
| ENSG0000( LATS2-AS1 antisense   | chr13 | 21005157 | 21018122 | + | 0    | 0     |
| ENSG0000( AC005304. lincRNA     | chr17 | 13932720 | 13940594 | - | 0    | 0     |
| ENSG0000( POU6F2-AS antisense   | chr7  | 38984243 | 39013551 | - | 0    | 0     |
| ENSG0000( AC026904. lincRNA     | chr8  | 48590401 | 48594621 | + | 0.03 | 0     |
| ENSG0000( ADH5P4 processed_     | chr6  | 65836930 | 65838039 | - | 0.05 | 0.12  |
| ENSG0000( RP11-359D antisense   | chr4  | 76756960 | 76758474 | - | 0.13 | 0     |
| ENSG0000( MGAT2P1 processed_    | chrX  | 1.36E+08 | 1.36E+08 | - | 0    | 0     |
| ENSG0000( AC016907. antisense   | chr2  | 30051066 | 30143804 | - | 0.2  | 0.2   |
| ENSG0000( TTTY15 lincRNA        | chrY  | 12662334 | 12692233 | + | 4.23 | 4.15  |
| ENSG0000( LA16c-4G1 lincRNA     | chr22 | 15914721 | 15915800 | - | 0    | 0     |
| ENSG0000( SLC9B1P3 unprocessε   | chr10 | 38640971 | 38689068 | - | 0    | 0     |
| ENSG0000( AC009302. processed_  | chr2  | 2.22E+08 | 2.22E+08 | + | 0    | 0     |
| ENSG0000( RPSAP27 processed_    | chr2  | 2.08E+08 | 2.08E+08 | + | 0    | 0     |
| ENSG0000( AC007881. unprocessε  | chr2  | 71178587 | 71178773 | + | 0    | 0     |
| ENSG0000( DLG5-AS1 processed_   | chr10 | 77927372 | 77929824 | + | 0.96 | 0.45  |
| ENSG0000( AC005033. processed_  | chr2  | 74618856 | 74620979 | - | 0    | 0     |
| ENSG0000( RPL7P44 processed_    | chr13 | 76981175 | 76981916 | - | 0    | 0     |
| ENSG0000( RP1-136J1 processed_  | chrX  | 1.1E+08  | 1.1E+08  | + | 0    | 0     |
| ENSG0000( RP11-61L1. antisense  | chr1  | 1.55E+08 | 1.55E+08 | - | 0    | 0     |
| ENSG0000( GAPDHP68 processed_   | chr7  | 9614978  | 9615985  | + | 0    | 0     |
| ENSG0000( RP11-182I1 processed_ | chr1  | 64941979 | 64942365 | + | 0    | 0     |
| ENSG0000( AC073133. lincRNA     | chr7  | 1.56E+08 | 1.56E+08 | - | 0    | 0     |
| ENSG0000( RP11-497J processed_  | chrX  | 35761499 | 35762479 | + | 0    | 0     |
| ENSG0000( LINC01680 lincRNA     | chr1  | 1.91E+08 | 1.91E+08 | - | 0    | 0     |
| ENSG0000( XXyac-YM2 antisense   | chr9  | 87848113 | 87853442 | - | 0    | 0     |
| ENSG0000( YEATS2-AS antisense   | chr3  | 1.84E+08 | 1.84E+08 | - | 0.07 | 0.21  |
| ENSG0000( ERVWE2 processed_     | chrX  | 97847263 | 97849017 | + | 0    | 0     |
| ENSG0000( MTCO2P17 unprocessε   | chr2  | 2.03E+08 | 2.03E+08 | + | 0    | 0     |
| ENSG0000( AC007131. lincRNA     | chr2  | 59238714 | 59733396 | - | 0    | 0     |
| ENSG0000( PAIP1P1 processed_    | chr6  | 30186798 | 30188614 | - | 0.1  | 0.22  |
| ENSG0000( EZR-AS1 antisense     | chr6  | 1.59E+08 | 1.59E+08 | + | 0    | 0     |
| ENSG0000( RP4-650F1 antisense   | chr1  | 74468195 | 74469543 | + | 0    | 0     |
| ENSG0000( RP1-122P2 lincRNA     | chr20 | 19757708 | 19809675 | + | 6.77 | 4.51  |
| ENSG0000( RP4-684O2 antisense   | chr20 | 1947246  | 2007517  | + | 0    | 0     |
| ENSG0000( RPL17P35 processed_   | chr10 | 64620374 | 64620922 | - | 0    | 0     |
| ENSG0000( LINC01503 lincRNA     | chr9  | 1.29E+08 | 1.29E+08 | + | 8.86 | 10.25 |
| ENSG0000( XXbac-BPG unprocessε  | chr6  | 31462728 | 31463336 | - | 0    | 0.13  |
| ENSG0000( Z83851.4 lincRNA      | chr22 | 42276355 | 42277052 | + | 0.8  | 0.15  |
| ENSG0000( LONRF2P2 processed_   | chr13 | 18609132 | 18609702 | + | 0    | 0     |
| ENSG0000( RP11-315I1 lincRNA    | chr9  | 23671788 | 23672399 | - | 0    | 0     |
| ENSG0000( LINC01761 lincRNA     | chr1  | 95474737 | 95479356 | + | 0.1  | 0.13  |

|                                     |          |            |        |        |
|-------------------------------------|----------|------------|--------|--------|
| ENSG0000(RP11-425D processed_ chr6  | 1.09E+08 | 1.09E+08 + | 0      | 0      |
| ENSG0000(UBE2V1P4 processed_ chr9   | 1.3E+08  | 1.3E+08 +  | 0      | 0      |
| ENSG0000(GTF2F2P2 processed_ chr1   | 40593633 | 40594353 - | 0      | 0      |
| ENSG0000(AC026202. antisense_ chr3  | 5156905  | 5187329 -  | 0.1    | 0      |
| ENSG0000(RPL10P9 processed_ chr5    | 1.69E+08 | 1.69E+08 + | 0      | 0.12   |
| ENSG0000(UBE2Q2P1 processed_ chr8   | 86660525 | 86661922 - | 0      | 0      |
| ENSG0000(ZDHHC20P processed_ chr6   | 29708125 | 29708547 - | 0      | 0      |
| ENSG0000(POTEB protein_co chr15     | 21846329 | 21877703 - | 0      | 0      |
| ENSG0000(RP11-715L processed_ chr7  | 62275361 | 62275678 - | 0      | 0      |
| ENSG0000(RP11-372H lincRNA_ chr3    | 41162287 | 41168547 - | 0      | 0      |
| ENSG0000(RP5-1061H antisense_ chr1  | 2.29E+08 | 2.29E+08 - | 0      | 0      |
| ENSG0000(RPS15AP4C processed_ chrX  | 36374793 | 36375183 - | 0      | 0      |
| ENSG0000(LINC01694 lincRNA_ chr21   | 45593654 | 45603056 + | 0.07   | 0.03   |
| ENSG0000(RPSAP13 processed_ chr14   | 55004813 | 55005687 - | 0      | 0      |
| ENSG0000(RP11-154D lincRNA_ chr9    | 81689713 | 81776900 + | 0      | 0      |
| ENSG0000(RPS28 protein_co chr19     | 8321158  | 8323340 +  | 766.12 | 791.01 |
| ENSG0000(RP11-305F lincRNA_ chrX    | 33726508 | 33942280 + | 0      | 0      |
| ENSG0000(MT1XP1 processed_ chr1     | 16241213 | 16241398 - | 0      | 0      |
| ENSG0000(KRTAP5-AS antisense_ chr11 | 1571353  | 1599184 +  | 0      | 0      |
| ENSG0000(CTXN2 protein_co chr15     | 48191539 | 48203756 + | 0      | 0      |
| ENSG0000(RP11-63P1 processed_ chr9  | 72275453 | 72275973 + | 0      | 0.43   |
| ENSG0000(RPL21P38 processed_ chr2   | 1.72E+08 | 1.72E+08 + | 0      | 0      |
| ENSG0000(RP11-399H lincRNA_ chr9    | 1.35E+08 | 1.35E+08 - | 0      | 0      |
| ENSG0000(CTC-338M: processed_ chr5  | 1.81E+08 | 1.81E+08 + | 5.36   | 5.22   |
| ENSG0000(AC114755. processed_ chr2  | 1.06E+08 | 1.06E+08 + | 0      | 0      |
| ENSG0000(RPL12P45 processed_ chr1   | 35053468 | 35059271 + | 0      | 0      |
| ENSG0000(RP11-404H antisense_ chr6  | 1.06E+08 | 1.06E+08 - | 0      | 0      |
| ENSG0000(AC004012. lincRNA_ chr7    | 95471835 | 95473998 + | 0      | 0      |
| ENSG0000(AC114973. processed_ chr5  | 56975593 | 56976224 - | 0      | 0      |
| ENSG0000(LINC00265 processed_ chrY  | 25393154 | 25394056 - | 0      | 0      |
| ENSG0000(RP11-344L. lincRNA_ chr10  | 83672406 | 83675439 - | 0      | 0      |
| ENSG0000(RPS29P4 processed_ chr1    | 1.75E+08 | 1.75E+08 + | 0      | 0      |
| ENSG0000(RP11-336N processed_ chr9  | 78178263 | 78179512 + | 0      | 0      |
| ENSG0000(RCC2P3 processed_ chr7     | 1.38E+08 | 1.38E+08 + | 0      | 0      |
| ENSG0000(FTLP15 processed_ chr7     | 45997540 | 45998071 - | 0      | 0      |
| ENSG0000(AC009970. antisense_ chr2  | 60495686 | 60499964 + | 0      | 0      |
| ENSG0000(UQCRHL protein_co chr1     | 15807169 | 15809348 - | 0.05   | 0.29   |
| ENSG0000(AHCYP3 processed_ chr2     | 1.04E+08 | 1.04E+08 - | 0      | 0      |
| ENSG0000(BTF3P6 processed_ chr21    | 33518610 | 33519108 - | 0.3    | 0      |
| ENSG0000(RP11-153N lincRNA_ chr7    | 52165235 | 52192913 - | 0      | 0      |
| ENSG0000(RP11-368N unprocessε chr7  | 57652736 | 57653459 - | 0      | 0      |
| ENSG0000(ATP8A2P3 unprocessε chr13  | 26094724 | 26154175 - | 0      | 0      |
| ENSG0000(UBE2SP1 processed_ chr17   | 15704232 | 15704900 - | 0      | 0      |
| ENSG0000(RP11-250B lincRNA_ chr6    | 80443344 | 80465927 + | 0.89   | 1.62   |
| ENSG0000(RP11-354E antisense_ chr10 | 19710328 | 19728550 - | 0      | 0      |

|                                            |          |          |   |      |      |
|--------------------------------------------|----------|----------|---|------|------|
| ENSG0000(RP5-1006K lincRNA chr7            | 1.2E+08  | 1.2E+08  | + | 0    | 0    |
| ENSG0000(AC092159. antisense chr2          | 692083   | 693235   | - | 0    | 0    |
| ENSG0000(RPS20P10 processed_ chr2          | 71984182 | 71984434 | - | 0    | 0    |
| ENSG0000(LINC01360 lincRNA chr1            | 73306170 | 73355253 | + | 0    | 0    |
| ENSG0000(RP11-823P processed_ chr5         | 21481327 | 21484011 | - | 0    | 0    |
| ENSG0000(RP11-288L lincRNA chr1            | 27660328 | 27662722 | - | 0    | 0    |
| ENSG0000(RP11-310H lincRNA chr7            | 55592074 | 55593193 | + | 0    | 0    |
| ENSG0000(AC016735. lincRNA chr2            | 43041193 | 43043782 | - | 0    | 0    |
| ENSG0000(AC002553. processed_ chr17        | 16084042 | 16084381 | + | 0    | 0    |
| ENSG0000(FDPSP2 processed_ chr7            | 76470162 | 76471058 | - | 0    | 0    |
| ENSG0000(RP3-380E1 lincRNA chr6            | 14004920 | 14006901 | + | 0    | 0    |
| ENSG0000(RP4-735N2 processed_ chr1         | 99464378 | 99464776 | + | 0    | 0    |
| ENSG0000(RPSAP14 processed_ chrX           | 74031462 | 74031820 | + | 0.26 | 0    |
| ENSG0000(LINC01681 lincRNA chr1            | 1.7E+08  | 1.7E+08  | + | 0    | 0    |
| ENSG0000(AC106706. lincRNA chr3            | 1.95E+08 | 1.95E+08 | + | 0    | 0    |
| ENSG0000(RP11-401E processed_ chr10        | 7833618  | 7833957  | - | 0    | 0    |
| ENSG0000(RP11-379J lincRNA antisense chr20 | 18674395 | 18698709 | - | 0    | 0    |
| ENSG0000(GDI2P2 processed_ chr1            | 72274552 | 72275159 | + | 0    | 0    |
| ENSG0000(KB-67B5.1 unprocessed_ chr22      | 16572027 | 16574637 | + | 0    | 0    |
| ENSG0000(AC013439. processed_ chr2         | 1.89E+08 | 1.89E+08 | - | 0    | 0    |
| ENSG0000(LINC01425 lincRNA chr21           | 21746973 | 21797415 | + | 0    | 0.87 |
| ENSG0000(SETP5 processed_ chr9             | 1.38E+08 | 1.38E+08 | - | 0    | 0    |
| ENSG0000(IGKV3OR2- IG_V_gene chr2          | 87338511 | 87339035 | + | 0    | 0    |
| ENSG0000(AC000111. processed_ chr7         | 1.18E+08 | 1.18E+08 | - | 0    | 0    |
| ENSG0000(MTATP6P2 unprocessed_ chr19       | 12506249 | 12508030 | + | 0    | 0    |
| ENSG0000(RP11-543B processed_ chr1         | 2.11E+08 | 2.11E+08 | + | 0    | 0    |
| ENSG0000(GAPDHP22 processed_ chr13         | 99190579 | 99190991 | - | 0    | 0    |
| ENSG0000(DDX39B-AS1 antisense chr6         | 31542304 | 31543138 | + | 0.17 | 0    |
| ENSG0000(PPP1R2P2 processed_ chr21         | 35887195 | 35887807 | + | 0    | 0.25 |
| ENSG0000(RPL5P34 processed_ chr22          | 42776406 | 42777296 | - | 0    | 0    |
| ENSG0000(RP11-125M lincRNA chr6            | 12582915 | 12585404 | - | 0    | 0    |
| ENSG0000(GNG10P1 processed_ chr10          | 1.26E+08 | 1.26E+08 | - | 0    | 0    |
| ENSG0000(RP11-214N processed_ chr10        | 1.13E+08 | 1.13E+08 | - | 0    | 0    |
| ENSG0000(RP11-236P lincRNA chrX            | 53093710 | 53094858 | - | 0    | 0    |
| ENSG0000(CHIAP3 unprocessed_ chr1          | 1.11E+08 | 1.11E+08 | - | 0    | 0    |
| ENSG0000(RP11-75C9 lincRNA chr9            | 8936079  | 8963077  | + | 0    | 0    |
| ENSG0000(AC008278. antisense chr2          | 15564170 | 15573868 | + | 0    | 0    |
| ENSG0000(RBPMS2P1 processed_ chr6          | 73157517 | 73158139 | - | 0    | 0    |
| ENSG0000(RP11-310E antisense chr10         | 95228243 | 95231144 | - | 0    | 0    |
| ENSG0000(AC062029. antisense chr2          | 88627539 | 88631821 | + | 0.29 | 0.6  |
| ENSG0000(TMEM97P processed_ chr21          | 43783123 | 43783573 | + | 0    | 0    |
| ENSG0000(RPS3AP44 processed_ chr13         | 26576886 | 26577675 | + | 0    | 0    |
| ENSG0000(RAC1P8 processed_ chr13           | 61805150 | 61805676 | + | 0    | 0    |
| ENSG0000(AP000959. lincRNA chr21           | 22500604 | 22520058 | - | 0    | 0    |
| ENSG0000(TXNP6 processed_ chr4             | 76958860 | 76959169 | - | 0    | 0    |



|                                      |          |          |   |      |      |
|--------------------------------------|----------|----------|---|------|------|
| ENSG0000(NDUFA5P7 processed_ chrX    | 86066227 | 86066468 | - | 0    | 0    |
| ENSG0000(RPL10P12 processed_ chr12   | 68626870 | 68627187 | - | 0    | 0    |
| ENSG0000(RP11-345I1 processed_ chr1  | 1.79E+08 | 1.79E+08 | + | 0    | 0    |
| ENSG0000(RP11-452D processed_ chr9   | 63703065 | 63703755 | + | 0    | 0    |
| ENSG0000(NUDT9P1 processed_ chr10    | 91152605 | 91153349 | - | 0.09 | 0.1  |
| ENSG0000(AC108059. processed_ chr2   | 1.28E+08 | 1.28E+08 | + | 0    | 0    |
| ENSG0000(FAM96AP1 processed_ chr3    | 28427963 | 28428444 | - | 0    | 0    |
| ENSG0000(LLOXNC01- antisense_ chrX   | 1.03E+08 | 1.03E+08 | - | 0    | 0    |
| ENSG0000(LINC01673 lincRNA_ chr21    | 27638693 | 27653491 | + | 0    | 0    |
| ENSG0000(RP11-247A antisense_ chr9   | 1.29E+08 | 1.29E+08 | + | 0    | 0    |
| ENSG0000(LINC00463 lincRNA_ chr13    | 25172828 | 25180079 | - | 0    | 0    |
| ENSG0000(CASKP1 unprocessε_ chrY     | 12930165 | 12948182 | - | 0    | 0    |
| ENSG0000(EDDM3CP processed_ chr2     | 1.34E+08 | 1.34E+08 | - | 0    | 0    |
| ENSG0000(AC007969. processed_ chr2   | 1.71E+08 | 1.71E+08 | + | 0    | 0    |
| ENSG0000(RP11-308D transcribed_ chrX | 1.37E+08 | 1.37E+08 | + | 0.66 | 0.79 |
| ENSG0000(PRAMEF29 unprocessε_ chr1   | 12926162 | 12928253 | + | 0    | 0    |
| ENSG0000(MTND4P2ε processed_ chr2    | 1.2E+08  | 1.2E+08  | + | 0    | 0    |
| ENSG0000(TAS2R62P unitary_ψ_ chr7    | 1.43E+08 | 1.43E+08 | + | 0    | 0    |
| ENSG0000(RPL5P10 processed_ chr3     | 40586535 | 40587428 | - | 0    | 0    |
| ENSG0000(PAGE2 protein_co_ chrX      | 55089008 | 55092842 | + | 0    | 0    |
| ENSG0000(GAPDHP53 processed_ chr20   | 24445391 | 24446314 | + | 0    | 0    |
| ENSG0000(SPATA17-A antisense_ chr1   | 2.18E+08 | 2.18E+08 | - | 0    | 0    |
| ENSG0000(RP11-420H processed_ chr7   | 1.25E+08 | 1.25E+08 | + | 0    | 0    |
| ENSG0000(AC074117. antisense_ chr2   | 27356246 | 27367622 | + | 6.27 | 5.61 |
| ENSG0000(AC011816. processed_ chr3   | 36880184 | 36880729 | - | 0    | 0    |
| ENSG0000(RPL35AP processed_ chr20    | 47478214 | 47479010 | - | 0    | 0    |
| ENSG0000(TPRG1-AS1 lincRNA_ chr3     | 1.89E+08 | 1.89E+08 | - | 0    | 0    |
| ENSG0000(RP11-183G processed_ chr1   | 50326131 | 50327007 | + | 0    | 0    |
| ENSG0000(ELOCP10 processed_ chrY     | 24006911 | 24007237 | - | 0    | 0    |
| ENSG0000(AJ006995.ε lincRNA_ chr21   | 27954922 | 27985295 | + | 0    | 0    |
| ENSG0000(RP3-388E2 antisense_ chr6   | 1.35E+08 | 1.35E+08 | + | 0    | 0    |
| ENSG0000(RP11-368M unprocessε_ chr7  | 57654822 | 57655392 | + | 0    | 0    |
| ENSG0000(CTD-3216D processed_ chr20  | 34347671 | 34347785 | - | 0    | 0    |
| ENSG0000(RPS15AP7 processed_ chr1    | 62190522 | 62190926 | + | 0    | 0    |
| ENSG0000(RP11-1217 lincRNA_ chr7     | 57209865 | 57222174 | - | 0    | 0    |
| ENSG0000(RP11-353M antisense_ chr10  | 13729383 | 13756200 | + | 0    | 0    |
| ENSG0000(RPS15AP11 processed_ chr1   | 44780331 | 44780715 | - | 0    | 0    |
| ENSG0000(MTND4P11 unprocessε_ chr1   | 93922574 | 93923945 | - | 0    | 0    |
| ENSG0000(KRT19P4 processed_ chr10    | 68260557 | 68261499 | + | 0    | 0    |
| ENSG0000(RP5-1177M lincRNA_ chr20    | 20970448 | 20972562 | + | 0    | 0    |
| ENSG0000(GS1-278J2. lincRNA_ chr7    | 53514992 | 53517116 | - | 0    | 0    |
| ENSG0000(RP11-288E processed_ chr11  | 93535468 | 93535816 | + | 0    | 0    |
| ENSG0000(TPT1P1 processed_ chr21     | 31840341 | 31840858 | + | 0    | 0    |
| ENSG0000(RP11-115A processed_ chr1   | 80495903 | 80496233 | + | 0    | 0    |
| ENSG0000(RPL7P36 processed_ chr10    | 99047639 | 99048319 | + | 0    | 0    |

|                                      |          |            |       |       |
|--------------------------------------|----------|------------|-------|-------|
| ENSG0000(TSPY25P unprocessε chrY     | 9624183  | 9626352 +  | 0     | 0     |
| ENSG0000(RP11-364P lincRNA chr4      | 1.58E+08 | 1.58E+08 + | 0     | 0     |
| ENSG0000(RP11-145A processed_ chr1   | 2.26E+08 | 2.26E+08 + | 0     | 0     |
| ENSG0000(RP11-288G processed_ chr6   | 7516600  | 7517840 -  | 0     | 0     |
| ENSG0000(RP11-261C lincRNA chr1      | 2.43E+08 | 2.43E+08 - | 0     | 0     |
| ENSG0000(RP11-259P antisense chr6    | 1.16E+08 | 1.16E+08 + | 0     | 0     |
| ENSG0000(RPL13AP6 processed_ chr10   | 1.11E+08 | 1.11E+08 - | 0     | 0     |
| ENSG0000(AC079248. processed_ chr2   | 1.46E+08 | 1.46E+08 - | 0     | 0     |
| ENSG0000(AF228730. processed_ chr8   | 7112314  | 7113728 -  | 0     | 0     |
| ENSG0000(GPM6BP3 processed_ chr22    | 16837522 | 16837666 + | 0     | 0     |
| ENSG0000(TRBV22OR TR_V_pseu chr9     | 33634111 | 33634246 + | 0     | 0     |
| ENSG0000(RHBDF1P1 processed_ chr3    | 14572852 | 14574792 - | 0     | 0     |
| ENSG0000(CSN1S2AP transcribec chr4   | 70067386 | 70085290 + | 0     | 0     |
| ENSG0000(EEF1GP8 processed_ chr4     | 1.3E+08  | 1.3E+08 +  | 0     | 0     |
| ENSG0000(TRIM26 protein_co chr6      | 30184455 | 30213427 - | 13.26 | 13.54 |
| ENSG0000(RP11-120D lincRNA chrX      | 10847877 | 11111141 - | 0     | 0.14  |
| ENSG0000(RP13-88F2 processed_ chrX   | 93222220 | 93225015 - | 0     | 0.04  |
| ENSG0000(ELOCP8 processed_ chrY      | 22517242 | 22517573 - | 0     | 0     |
| ENSG0000(RP11-168C antisense chr1    | 2.01E+08 | 2.01E+08 + | 0     | 0     |
| ENSG0000(RP11-383C sense_intrε chr10 | 1.26E+08 | 1.26E+08 - | 0     | 0.79  |
| ENSG0000(RPL23AP83 processed_ chrX   | 56242937 | 56243409 - | 0.16  | 0     |
| ENSG0000(AC055764. antisense chr3    | 1.98E+08 | 1.98E+08 - | 0     | 0     |
| ENSG0000(RP4-550H1 lincRNA chr20     | 36072441 | 36085260 + | 0     | 0     |
| ENSG0000(AC009473. antisense chr7    | 7949853  | 7950709 -  | 0     | 0     |
| ENSG0000(LINC01675 lincRNA chr1      | 1.66E+08 | 1.66E+08 - | 0     | 0     |
| ENSG0000(UGT1A13P unprocessε chr2    | 2.34E+08 | 2.34E+08 + | 0     | 0     |
| ENSG0000(COX6CP13 processed_ chr1    | 65298755 | 65298980 - | 0     | 0     |
| ENSG0000(NAP1L4P3 processed_ chr13   | 47763460 | 47764606 + | 0     | 0     |
| ENSG0000(AKAP8P1 processed_ chr9     | 11011748 | 11013096 + | 0     | 0     |
| ENSG0000(RP3-460G2 lincRNA chr6      | 1.41E+08 | 1.41E+08 - | 0     | 0     |
| ENSG0000(LINC01961 lincRNA chr2      | 1.14E+08 | 1.14E+08 + | 0     | 0     |
| ENSG0000(RP11-77G2 antisense chr10   | 75003055 | 75025174 - | 0     | 0     |
| ENSG0000(ELOBP1 processed_ chr13     | 25365799 | 25366155 - | 0     | 0     |
| ENSG0000(RP11-30P6 lincRNA chr6      | 85387219 | 85390186 - | 0.07  | 0.07  |
| ENSG0000(RP11-64P1 antisense chr9    | 1.23E+08 | 1.23E+08 + | 3.18  | 1.17  |
| ENSG0000(RPEP2 processed_ chr3       | 26015669 | 26016369 + | 0     | 0     |
| ENSG0000(RBPMSLP processed_ chr21    | 15744004 | 15745080 - | 0     | 0     |
| ENSG0000(RP11-613M antisense chr9    | 37509150 | 37510299 + | 3.85  | 1.7   |
| ENSG0000(PABPC5-AS antisense chrX    | 91414878 | 91434999 - | 0     | 0     |
| ENSG0000(AC009505. lincRNA chr2      | 1.06E+08 | 1.06E+08 - | 0     | 0     |
| ENSG0000(MTND4LP1 processed_ chr10   | 33023368 | 33023647 - | 0     | 0     |
| ENSG0000(AC114877. lincRNA chr3      | 26712307 | 26713364 + | 0     | 0     |
| ENSG0000(ARHGEF19 antisense chr1     | 16197854 | 16198357 + | 0     | 0     |
| ENSG0000(ELOBP4 processed_ chr10     | 34488583 | 34488878 - | 0     | 0     |
| ENSG0000(LINC01039 lincRNA chr13     | 99577112 | 99580368 + | 0     | 0     |

|                                |       |          |          |   |      |      |
|--------------------------------|-------|----------|----------|---|------|------|
| ENSG0000(LINC01868 lincRNA     | chr2  | 1.01E+08 | 1.01E+08 | - | 0    | 0    |
| ENSG0000(RP11-446F lincRNA     | chr10 | 2446253  | 2447352  | - | 0    | 0    |
| ENSG0000(RNASEH1- antisense    | chr2  | 3558492  | 3561745  | + | 1.11 | 0.71 |
| ENSG0000(AC093639. lincRNA     | chr2  | 1.84E+08 | 1.84E+08 | + | 0    | 0    |
| ENSG0000(RP11-2571 antisense   | chr10 | 54486230 | 54656051 | + | 0    | 0    |
| ENSG0000(AC016683. antisense   | chr2  | 1.13E+08 | 1.13E+08 | - | 0    | 0    |
| ENSG0000(RP11-730A processed_  | chr10 | 13139196 | 13139533 | - | 0    | 0    |
| ENSG0000(HSPA8P1 processed_    | chrX  | 1.21E+08 | 1.21E+08 | - | 0.03 | 0    |
| ENSG0000(LINC01114 lincRNA     | chr2  | 1.05E+08 | 1.05E+08 | - | 0    | 0    |
| ENSG0000(DEFA11P unprocessε    | chr8  | 7028641  | 7029489  | - | 0    | 0    |
| ENSG0000(MTCYBP1 processed_    | chrY  | 8364032  | 8365150  | + | 0    | 0    |
| ENSG0000(RP11-182N antisense   | chr9  | 35096378 | 35098141 | + | 0    | 0    |
| ENSG0000(RP11-118K lincRNA     | chr10 | 3010531  | 3013111  | + | 0    | 0    |
| ENSG0000(LINC01952 antisense   | chr7  | 44848416 | 44849568 | + | 0    | 0    |
| ENSG0000(LINC01781 lincRNA     | chr1  | 80535755 | 80646788 | + | 0    | 0    |
| ENSG0000(RP5-1132H antisense   | chr7  | 66119603 | 66165011 | - | 0    | 0    |
| ENSG0000(C16orf82 protein_co   | chr16 | 27066707 | 27069165 | + | 0    | 0    |
| ENSG0000(AIMP1P1 processed_    | chr20 | 14127400 | 14128336 | + | 0    | 0    |
| ENSG0000(AC099799. processed_  | chr2  | 22317053 | 22317244 | + | 0    | 0    |
| ENSG0000(RP11-433J lincRNA     | chr1  | 1.48E+08 | 1.48E+08 | + | 0    | 0    |
| ENSG0000(RP11-157D lincRNA     | chrX  | 39401252 | 39434824 | - | 0    | 0    |
| ENSG0000(RPS26P38 processed_   | chr10 | 87642607 | 87642954 | + | 0    | 0    |
| ENSG0000(AC097461. antisense   | chr2  | 2.23E+08 | 2.23E+08 | - | 0    | 0    |
| ENSG0000(ETV5-AS1 antisense    | chr3  | 1.86E+08 | 1.86E+08 | + | 0    | 0    |
| ENSG0000(LINC01191 lincRNA     | chr2  | 1.14E+08 | 1.14E+08 | + | 0    | 0.08 |
| ENSG0000(U82671.8 unprocessε   | chrX  | 1.53E+08 | 1.53E+08 | + | 0    | 0    |
| ENSG0000(BMI1P1 processed_     | chrX  | 67791955 | 67792895 | - | 0    | 0    |
| ENSG0000(RP11-330C processed_  | chr1  | 92749175 | 92749330 | - | 0    | 0    |
| ENSG0000(RP5-1050D antisense   | chr17 | 4972851  | 4974681  | + | 0.18 | 0    |
| ENSG0000(PIGPP2 processed_     | chr1  | 62189131 | 62189953 | + | 0    | 0    |
| ENSG0000(RP1-67A8. antisense   | chr6  | 1.08E+08 | 1.08E+08 | - | 0    | 0    |
| ENSG0000(AC096570. lincRNA     | chr2  | 22377594 | 22482004 | + | 0    | 0    |
| ENSG0000(CTA-256D1 sense_intrε | chr22 | 29513889 | 29535390 | - | 0    | 0    |
| ENSG0000(AC006372. lincRNA     | chr7  | 1.57E+08 | 1.57E+08 | + | 0    | 0    |
| ENSG0000(RP11-25K2 antisense   | chr1  | 1.62E+08 | 1.62E+08 | - | 0    | 0    |
| ENSG0000(FHP1 processed_       | chr13 | 42255873 | 42256575 | + | 0    | 0    |
| ENSG0000(RP5-94211ε lincRNA    | chr7  | 69595958 | 69597448 | - | 0    | 0    |
| ENSG0000(RBPJP7 processed_     | chr9  | 62601226 | 62602672 | + | 0    | 0    |
| ENSG0000(CDCA4P4 unprocessε    | chr1  | 2.08E+08 | 2.08E+08 | + | 0    | 0    |
| ENSG0000(LIX1L-AS1 antisense   | chr1  | 1.46E+08 | 1.46E+08 | + | 0    | 0.11 |
| ENSG0000(AC003988. lincRNA     | chr7  | 80246409 | 80312456 | - | 0    | 0    |
| ENSG0000(TMEM229ε protein_co   | chr7  | 1.24E+08 | 1.24E+08 | - | 0    | 0    |
| ENSG0000(RP4-704D2 lincRNA     | chr1  | 1.47E+08 | 1.47E+08 | - | 0    | 0    |
| ENSG0000(NDUFS5P2 processed_   | chr1  | 96584422 | 96584727 | - | 0    | 0    |
| ENSG0000(RPL7L1P1 processed_   | chr13 | 89833157 | 89833941 | - | 0    | 0    |

|                                     |          |            |      |      |
|-------------------------------------|----------|------------|------|------|
| ENSG0000(NCLP2 processed_ chrX      | 1.35E+08 | 1.35E+08 - | 0    | 0    |
| ENSG0000(LINC01505 lincRNA chr9     | 1.07E+08 | 1.07E+08 + | 0    | 0    |
| ENSG0000(ZFX-AS1 antisense chrX     | 24146225 | 24149654 - | 0    | 0    |
| ENSG0000(AC093616.unprocessε chr2   | 87700984 | 87738105 + | 2.1  | 1.8  |
| ENSG0000(RP11-353N transcribec chr1 | 1.5E+08  | 1.5E+08 -  | 0    | 0    |
| ENSG0000(KCNH1-IT1 sense_intrε chr1 | 2.11E+08 | 2.11E+08 - | 0    | 0    |
| ENSG0000(MTCO2P8 unprocessε chr7    | 64107829 | 64108486 - | 0    | 0    |
| ENSG0000(BOK-AS1 antisense chr2     | 2.42E+08 | 2.42E+08 - | 0    | 0    |
| ENSG0000(RP11-430L lincRNA chr3     | 1.88E+08 | 1.88E+08 + | 0    | 0    |
| ENSG0000(CFL1P8 processed_ chr13    | 99582706 | 99583180 + | 0    | 0    |
| ENSG0000(RP4-775C1 processed_ chr20 | 6213699  | 6215381 +  | 0    | 0    |
| ENSG0000(RP11-139J lincRNA chr10    | 18746433 | 18747853 + | 0    | 0    |
| ENSG0000(RP11-100E processed_ chr1  | 2.25E+08 | 2.25E+08 - | 0    | 0.1  |
| ENSG0000(RP11-799C lincRNA chr10    | 6891457  | 6920472 -  | 0    | 0    |
| ENSG0000(RPL7P13 processed_ chr2    | 49878623 | 49879363 + | 0    | 0    |
| ENSG0000(AC012370.lincRNA chr2      | 65439888 | 65456571 - | 0    | 0    |
| ENSG0000(PTCD2P2 processed_ chr10   | 88876450 | 88877544 + | 0    | 0    |
| ENSG0000(SOD2P1 processed_ chr1     | 1.03E+08 | 1.03E+08 - | 0    | 0    |
| ENSG0000(CTC-507E1 processed_ chr5  | 1.2E+08  | 1.2E+08 +  | 0    | 0    |
| ENSG0000(RP11-146I2 lincRNA chr6    | 14661829 | 15090003 - | 0    | 0    |
| ENSG0000(RP1-20N18 unprocessε chr1  | 1.53E+08 | 1.53E+08 + | 0    | 0    |
| ENSG0000(RP3-325F2 antisense chr6   | 1.37E+08 | 1.37E+08 + | 0    | 0    |
| ENSG0000(DEPDC1-AS antisense chr1   | 68496676 | 68538627 + | 0    | 0    |
| ENSG0000(LINC01723 lincRNA chr20    | 12950338 | 12951627 + | 0    | 0    |
| ENSG0000(TULP3P1 transcribec chr13  | 96947637 | 96948927 - | 0    | 0    |
| ENSG0000(AP000936.processed_ chr11  | 1.17E+08 | 1.17E+08 - | 0    | 0    |
| ENSG0000(RP11-338N processed_ chr9  | 1.03E+08 | 1.03E+08 + | 0    | 0    |
| ENSG0000(RPL36P20 processed_ chr3   | 41955445 | 41955763 + | 0    | 0    |
| ENSG0000(RP1-138B7 processed_ chr20 | 43523261 | 43523572 - | 0    | 0    |
| ENSG0000(RPL30P2 processed_ chr2    | 1.52E+08 | 1.52E+08 + | 0    | 0    |
| ENSG0000(AC073071.lincRNA chr7      | 1.1E+08  | 1.1E+08 -  | 0    | 0    |
| ENSG0000(COX7BP2 processed_ chr20   | 35850674 | 35850915 - | 0    | 0    |
| ENSG0000(AC017053.lincRNA chr2      | 6312954  | 6325646 -  | 0    | 0    |
| ENSG0000(SDR42E1Pε processed_ chr9  | 62690033 | 62690534 + | 0    | 0    |
| ENSG0000(LINC01641 lincRNA chr1     | 2.27E+08 | 2.27E+08 + | 0.2  | 0.62 |
| ENSG0000(PRR20E protein_co chr13    | 57167197 | 57170218 + | 0    | 0    |
| ENSG0000(LINC01937 lincRNA chr2     | 2.39E+08 | 2.39E+08 + | 0    | 0    |
| ENSG0000(LANCL1-AS antisense chr2   | 2.1E+08  | 2.1E+08 +  | 0    | 0    |
| ENSG0000(RP4-673D2 unprocessε chr20 | 1722045  | 1722537 -  | 0    | 0    |
| ENSG0000(LINC01731 lincRNA chr1     | 1.48E+08 | 1.48E+08 - | 0    | 0    |
| ENSG0000(ZNF879 protein_co chr5     | 1.79E+08 | 1.79E+08 + | 1.07 | 1.5  |
| ENSG0000(GAPDHP49 processed_ chr2   | 2.23E+08 | 2.23E+08 - | 0    | 0    |
| ENSG0000(AC006026.antisense chr7    | 23680195 | 23680786 - | 0    | 0    |
| ENSG0000(RP11-761N processed_ chr3  | 40761545 | 40761799 + | 0    | 0    |
| ENSG0000(OR1AA1P processed_ chrX    | 1.31E+08 | 1.31E+08 + | 0    | 0    |

|                     |             |       |          |          |   |      |      |
|---------------------|-------------|-------|----------|----------|---|------|------|
| ENSG0000(H2BFS      | protein_co  | chr21 | 43565189 | 43565648 | + | 2.43 | 1.68 |
| ENSG0000(AC116366.  | antisense   | chr5  | 1.32E+08 | 1.32E+08 | - | 0    | 0.05 |
| ENSG0000(RP11-213H  | lincRNA     | chr5  | 91280097 | 91281142 | - | 0    | 0.13 |
| ENSG0000(BACH1-IT3  | sense_intr  | chr21 | 29496047 | 29500386 | + | 0    | 0    |
| ENSG0000(RP13-16H1  | lincRNA     | chr10 | 26643228 | 26645016 | + | 0    | 0    |
| ENSG0000(RP11-54D1  | processed_  | chr9  | 15055057 | 15056052 | + | 0    | 0    |
| ENSG0000(LINC00229  | lincRNA     | chr22 | 44606939 | 44625419 | - | 0    | 0    |
| ENSG0000(CLYBL-AS1  | antisense   | chr13 | 99726247 | 99727491 | - | 0    | 0    |
| ENSG0000(SGO1P2     | processed_  | chr7  | 52891837 | 52897807 | - | 0    | 0    |
| ENSG0000(RP11-271F  | lincRNA     | chr10 | 10365180 | 10366487 | - | 0    | 0    |
| ENSG0000(LINC01878  | lincRNA     | chr2  | 2.13E+08 | 2.13E+08 | + | 0    | 0    |
| ENSG0000(SLC25A18P  | processed_  | chr10 | 1.19E+08 | 1.19E+08 | + | 0    | 0    |
| ENSG0000(RP11-432J  | antisense   | chr10 | 1.32E+08 | 1.32E+08 | - | 0    | 0    |
| ENSG0000(SAPCD2P4   | processed_  | chr7  | 63113635 | 63114805 | - | 0    | 0    |
| ENSG0000(OSTCP5     | processed_  | chr1  | 45069977 | 45070429 | - | 0    | 0    |
| ENSG0000(RP4-771M   | lincRNA     | chr1  | 62896009 | 62901639 | + | 0.18 | 0    |
| ENSG0000(RPS12P2    | processed_  | chr10 | 80215851 | 80216119 | - | 0    | 0    |
| ENSG0000(ST13P18    | processed_  | chrX  | 93287733 | 93288759 | - | 0    | 0    |
| ENSG0000(LINC01505  | lincRNA     | chr9  | 1.06E+08 | 1.07E+08 | + | 0    | 0    |
| ENSG0000(RPL9P2     | processed_  | chr17 | 15443639 | 15444191 | + | 0    | 0    |
| ENSG0000(MRPS10P2   | processed_  | chr3  | 4414580  | 4414960  | - | 0    | 0    |
| ENSG0000(AC012146.  | processed_  | chr17 | 5111468  | 5115004  | + | 2.95 | 6.68 |
| ENSG0000(RP11-767N  | processed_  | chr1  | 45651039 | 45651826 | - | 0.24 | 0.72 |
| ENSG0000(BCAS2P2    | processed_  | chr1  | 1E+08    | 1E+08    | - | 0    | 0    |
| ENSG0000(CYCSP53    | processed_  | chr1  | 1.71E+08 | 1.71E+08 | - | 0    | 0    |
| ENSG0000(RPS4XP11   | processed_  | chr10 | 32102522 | 32103293 | - | 0    | 0    |
| ENSG0000(JAZF1-AS1  | antisense   | chr7  | 28180322 | 28243917 | + | 0.11 | 0    |
| ENSG0000(RP11-297L  | processed_  | chr16 | 52655307 | 52656045 | + | 0    | 0    |
| ENSG0000(RP11-797H  | processed_  | chr7  | 64835280 | 64836882 | - | 0    | 0    |
| ENSG0000(AP000705.  | processed_  | chr21 | 22134698 | 22136083 | - | 0    | 0    |
| ENSG0000(LLOXNC01-  | processed_  | chrX  | 1.04E+08 | 1.04E+08 | - | 0.17 | 0.19 |
| ENSG0000(GLUD1P9    | processed_  | chrX  | 1.11E+08 | 1.11E+08 | - | 0    | 0    |
| ENSG0000(AC007405.  | lincRNA     | chr2  | 1.71E+08 | 1.71E+08 | - | 0.05 | 0.06 |
| ENSG0000(AC009264.  | antisense   | chr7  | 1.37E+08 | 1.37E+08 | - | 0    | 0    |
| ENSG0000(AP000347.  | transcribed | chr22 | 23638492 | 23640762 | - | 0.39 | 0.35 |
| ENSG0000(RPS26P47   | processed_  | chr13 | 1.01E+08 | 1.01E+08 | - | 0    | 0    |
| ENSG0000(FTH1P27    | unprocess   | chrX  | 37505310 | 37505860 | + | 0    | 0    |
| ENSG0000(AC009945.  | processed_  | chr7  | 10476581 | 10476878 | + | 0    | 0    |
| ENSG0000(AC003080.  | processed_  | chr7  | 1.12E+08 | 1.12E+08 | - | 0    | 0    |
| ENSG0000(ELK1P1     | processed_  | chr7  | 45391626 | 45392205 | - | 0    | 0    |
| ENSG0000(RP11-87N2  | processed_  | chr9  | 10532145 | 10532411 | + | 0    | 0    |
| ENSG0000(RP11-52J3. | antisense   | chr6  | 1.58E+08 | 1.58E+08 | - | 0    | 0    |
| ENSG0000(LINC01914  | lincRNA     | chr2  | 41931599 | 41933723 | - | 2.86 | 3.23 |
| ENSG0000(PPIAP27    | processed_  | chr13 | 20956179 | 20956443 | - | 0    | 0    |
| ENSG0000(PFN1P3     | processed_  | chr1  | 1.45E+08 | 1.45E+08 | + | 0    | 0    |

|                                     |          |          |   |      |      |
|-------------------------------------|----------|----------|---|------|------|
| ENSG0000(TATDN1P1 processed_ chr10  | 63222155 | 63223045 | + | 0    | 0    |
| ENSG0000(RPSAP31 transcribec chr3   | 1.84E+08 | 1.84E+08 | + | 0.07 | 0.15 |
| ENSG0000(SNX18P7 processed_ chr9    | 33576380 | 33577014 | + | 0.22 | 0    |
| ENSG0000(UBTFL2 processed_ chr11    | 89752785 | 89753975 | - | 0    | 0    |
| ENSG0000(RNF219-AS antisense chr13  | 77919689 | 78617328 | + | 0    | 0.03 |
| ENSG0000(AC098828. lincRNA chr2     | 20063856 | 20106829 | - | 0    | 0    |
| ENSG0000(HMGB1P4 unprocessε chr1    | 45530927 | 45532139 | + | 0    | 0    |
| ENSG0000(LINC01426 antisense chr21  | 34745757 | 34784886 | + | 1.42 | 1.56 |
| ENSG0000(MED15P7 unprocessε chr22   | 15635180 | 15644330 | - | 0    | 0    |
| ENSG0000(RP11-40F6 unprocessε chr10 | 80233664 | 80245367 | + | 0.11 | 0    |
| ENSG0000(CTBP2P8 processed_ chr1    | 68161761 | 68163090 | - | 0.31 | 0.29 |
| ENSG0000(LINC01049 lincRNA chr13    | 90493287 | 90535080 | + | 0    | 0    |
| ENSG0000(RCC2P1 processed_ chrY     | 11781052 | 11782527 | - | 0    | 0    |
| ENSG0000(OR7E162P unprocessε chr4   | 3901566  | 3902594  | - | 0    | 0    |
| ENSG0000(RP11-340I lincRNA chr7     | 63394277 | 63395439 | + | 0    | 0    |
| ENSG0000(TXNP3 processed_ chr1      | 1.12E+08 | 1.12E+08 | + | 0    | 0    |
| ENSG0000(AC007278. sense_intrε chr2 | 1.02E+08 | 1.02E+08 | + | 0    | 0    |
| ENSG0000(USP27X-AS lincRNA chrX     | 49876724 | 49879241 | - | 0.66 | 0.87 |
| ENSG0000(RP11-344N processed_ chrX  | 48306769 | 48309055 | + | 0    | 0    |
| ENSG0000(RP11-211N antisense chr10  | 1.14E+08 | 1.14E+08 | - | 0    | 0    |
| ENSG0000(RP11-561C lincRNA chr9     | 68306528 | 68330626 | + | 0    | 0.03 |
| ENSG0000(RP11-181G lincRNA chr1     | 2212523  | 2220738  | + | 0    | 0    |
| ENSG0000(RP11-415K processed_ chr1  | 22322840 | 22323331 | - | 0    | 0    |
| ENSG0000(AC134915. unprocessε chr2  | 1.3E+08  | 1.3E+08  | + | 0    | 0    |
| ENSG0000(RBMY2XP unprocessε chrY    | 24396604 | 24403526 | - | 0    | 0    |
| ENSG0000(ELK2BP unprocessε chr14    | 1.06E+08 | 1.06E+08 | - | 0    | 0    |
| ENSG0000(SPRYD7P1 processed_ chrX   | 77374212 | 77381319 | + | 0    | 0    |
| ENSG0000(LLOXNC01- antisense chrX   | 1.03E+08 | 1.04E+08 | + | 0    | 1.07 |
| ENSG0000(AC004129. processed_ chr7  | 25185623 | 25188724 | + | 0    | 0    |
| ENSG0000(CCDC188 protein_co chr22   | 20148427 | 20151065 | - | 0    | 0    |
| ENSG0000(RP6-29D12 processed_ chrX  | 53340986 | 53341505 | + | 0    | 0    |
| ENSG0000(RBMY1A1 protein_co chrY    | 21511372 | 21549326 | + | 0    | 0.01 |
| ENSG0000(RPL5P7 processed_ chr2     | 1.74E+08 | 1.74E+08 | - | 0    | 0    |
| ENSG0000(RP11-560I lincRNA chr7     | 1.22E+08 | 1.22E+08 | + | 0    | 0    |
| ENSG0000(CICP13 processed_ chr1     | 2.22E+08 | 2.22E+08 | + | 0    | 0    |
| ENSG0000(ZNF37BP transcribec chr10  | 42513510 | 42552822 | - | 4.86 | 5.09 |
| ENSG0000(SLC25A5P4 processed_ chr13 | 57314739 | 57315909 | + | 0    | 0    |
| ENSG0000(UBE2WP1 processed_ chr1    | 96418594 | 96418933 | + | 0    | 0    |
| ENSG0000(LINC01250 lincRNA chr2     | 2895048  | 3126026  | - | 0    | 0    |
| ENSG0000(RP11-213G unprocessε chr9  | 85753306 | 85786575 | + | 0    | 0    |
| ENSG0000(RP11-528G antisense chr1   | 1.61E+08 | 1.61E+08 | + | 0    | 0    |
| ENSG0000(RP11-459C lincRNA chr6     | 88298950 | 88421033 | - | 0    | 0    |
| ENSG0000(RP3-413H6 lincRNA chr6     | 11810602 | 11811248 | + | 0.13 | 0    |
| ENSG0000(RP11-666F antisense chr12  | 26623369 | 26649479 | + | 0    | 0    |
| ENSG0000(AC105342. processed_ chr2  | 81194337 | 81201184 | - | 0    | 0    |

|                                      |          |            |       |       |
|--------------------------------------|----------|------------|-------|-------|
| ENSG0000( AC007283. 3prime_ov chr2   | 2.01E+08 | 2.01E+08 + | 0     | 0     |
| ENSG0000( RP11-1275 lincRNA chr7     | 5426277  | 5428927 -  | 0.33  | 0.29  |
| ENSG0000( LINC01432 lincRNA chr20    | 22054090 | 22074654 + | 0     | 0     |
| ENSG0000( AC008984. unprocessε chr19 | 54301758 | 54306026 - | 0     | 0     |
| ENSG0000( KBTBD13 protein_co chr15   | 65076816 | 65078192 + | 0     | 0     |
| ENSG0000( KRT18P2 processed_ chr21   | 20424949 | 20426206 - | 0     | 0     |
| ENSG0000( RP5-1108N unprocessε chr1  | 1.04E+08 | 1.04E+08 - | 0     | 0     |
| ENSG0000( RP11-402P transcribec chrX | 71760764 | 71763075 - | 0     | 0     |
| ENSG0000( ZNF736 protein_co chr7     | 64307459 | 64354860 + | 2.15  | 2.31  |
| ENSG0000( FGF14-AS1 antisense chr13  | 1.02E+08 | 1.02E+08 + | 0     | 0     |
| ENSG0000( AC068489. lincRNA chr2     | 2.22E+08 | 2.22E+08 + | 0     | 0     |
| ENSG0000( RP11-344N processed_ chrX  | 48371905 | 48372095 + | 0     | 0     |
| ENSG0000( RP11-706C lincRNA chrX     | 3853010  | 3882317 -  | 0.41  | 0.68  |
| ENSG0000( AC005534. processed_ chr7  | 1.57E+08 | 1.57E+08 + | 0     | 0     |
| ENSG0000( RP11-211N processed_ chr9  | 62609725 | 62610799 - | 0     | 0     |
| ENSG0000( SLC16A12-. antisense chr10 | 89456064 | 89468140 + | 0     | 0     |
| ENSG0000( AC067960. lincRNA chr2     | 1.21E+08 | 1.21E+08 - | 0     | 0     |
| ENSG0000( MAGI2-AS3 processed_ chr7  | 79452877 | 79471208 + | 28.94 | 27.92 |
| ENSG0000( AC006960. processed_ chr7  | 36305631 | 36305904 + | 0     | 0     |
| ENSG0000( OR7E130P unprocessε chr3   | 1.26E+08 | 1.26E+08 + | 0     | 0     |
| ENSG0000( AC002064. antisense chr7   | 90266034 | 90270216 - | 0     | 0     |
| ENSG0000( XXyac-YM2 lincRNA chr9     | 87864166 | 87866290 + | 0     | 0.19  |
| ENSG0000( COX6CP12 processed_ chrX   | 68645326 | 68645527 - | 0     | 0     |
| ENSG0000( RP11-136B lincRNA chr1     | 2.38E+08 | 2.38E+08 + | 0     | 0     |
| ENSG0000( PINLYP protein_co chr19    | 43576800 | 43583964 + | 0.8   | 0.34  |
| ENSG0000( RP11-266I3 processed_ chrX | 55054945 | 55055838 - | 0     | 0     |
| ENSG0000( SLC25A1P2 processed_ chr7  | 63398046 | 63398957 + | 0     | 0     |
| ENSG0000( CLDN34 protein_co chrX     | 9967358  | 9968352 +  | 0     | 0     |
| ENSG0000( AC147651. lincRNA chr7     | 484107   | 496118 -   | 0     | 0     |
| ENSG0000( ZNF101P2 processed_ chr1   | 1.93E+08 | 1.93E+08 - | 0     | 0     |
| ENSG0000( MIR3663H lincRNA chr10     | 1.17E+08 | 1.17E+08 - | 0     | 0     |
| ENSG0000( RP11-496N sense_intrε chr1 | 2.25E+08 | 2.25E+08 - | 0     | 0     |
| ENSG0000( AC004231. antisense chr17  | 40921430 | 40975926 + | 0     | 0     |
| ENSG0000( ACBD3-AS1 antisense chr1   | 2.26E+08 | 2.26E+08 + | 0     | 0     |
| ENSG0000( AP1B1P1 transcribec chr22  | 32121977 | 32133469 + | 0.23  | 0     |
| ENSG0000( MTCO2P18 unprocessε chr2   | 1.31E+08 | 1.31E+08 - | 0     | 0     |
| ENSG0000( RP4-614N2 antisense chr1   | 36773140 | 36775768 + | 0     | 0     |
| ENSG0000( RP1-55C23 antisense chr6   | 1.33E+08 | 1.33E+08 + | 0     | 0     |
| ENSG0000( OR7E46P unprocessε chr2    | 71037685 | 71038703 + | 0     | 0     |
| ENSG0000( AC096664. processed_ chr2  | 63684305 | 63684710 + | 0     | 0     |
| ENSG0000( ALDH7A1P. processed_ chr10 | 62741208 | 62741385 - | 0     | 0     |
| ENSG0000( HNRNPA1P processed_ chr2   | 2.06E+08 | 2.06E+08 - | 0     | 0     |
| ENSG0000( RPL34-AS1 lincRNA chr4     | 1.09E+08 | 1.09E+08 - | 0.21  | 0.42  |
| ENSG0000( RHOXF1P1 transcribec chrX  | 1.2E+08  | 1.2E+08 -  | 0     | 0     |
| ENSG0000( SP2-AS1 antisense chr17    | 47897330 | 47941410 - | 0.54  | 0.73  |

|                                     |          |          |   |      |      |
|-------------------------------------|----------|----------|---|------|------|
| ENSG0000(MRPS21P1 processed_ chr1   | 65092392 | 65092614 | - | 0    | 0    |
| ENSG0000(ERICH3-AS antisense chr1   | 74577430 | 74626098 | + | 0    | 0    |
| ENSG0000(RPL13AP2C processed_ chr12 | 12875499 | 12876107 | + | 0    | 0.13 |
| ENSG0000(GS1-124K5 unprocessε chr7  | 66511556 | 66545066 | + | 0    | 0    |
| ENSG0000(FYTTD1P1 processed_ chr9   | 1.01E+08 | 1.01E+08 | - | 0    | 0    |
| ENSG0000(KB-1592A4 lincRNA chr22    | 21177892 | 21179875 | - | 0    | 0    |
| ENSG0000(RP11-285G antisense chr10  | 44899614 | 44920220 | - | 0    | 0    |
| ENSG0000(LINC01506 lincRNA chr9     | 68543541 | 68546589 | - | 0    | 0    |
| ENSG0000(AP000253. lincRNA chr21    | 31653593 | 31659500 | - | 0.36 | 0.64 |
| ENSG0000(C5orf58 protein_co chr5    | 1.7E+08  | 1.7E+08  | + | 0    | 0    |
| ENSG0000(TLR12P unitary_psi chr1    | 33466249 | 33468954 | + | 0    | 0    |
| ENSG0000(AC073072. processed_ chr7  | 22773646 | 22773993 | - | 0    | 0.3  |
| ENSG0000(PPP1R2P1 transcribed chr6  | 32879171 | 32879848 | - | 0    | 0    |
| ENSG0000(PTGES3P1 processed_ chr1   | 89104285 | 89104767 | - | 0.63 | 0.87 |
| ENSG0000(RP3-495K2 lincRNA chr6     | 1.69E+08 | 1.69E+08 | + | 0    | 0    |
| ENSG0000(HRAT17 lincRNA chr7        | 1.13E+08 | 1.13E+08 | - | 0.49 | 0.28 |
| ENSG0000(AC005041. transcribed chr2 | 74407797 | 74413603 | - | 0    | 0    |
| ENSG0000(RP11-572P unprocessε chr10 | 1.2E+08  | 1.2E+08  | + | 0    | 0    |
| ENSG0000(NDUFB1P2 processed_ chr1   | 2.23E+08 | 2.23E+08 | + | 0    | 0    |
| ENSG0000(RPL12P43 processed_ chrX   | 1.18E+08 | 1.18E+08 | + | 0    | 0    |
| ENSG0000(PCDH9-AS1 antisense chr13  | 66303871 | 66323561 | + | 0    | 0    |
| ENSG0000(GAPDHP19 processed_ chrY   | 19327569 | 19328573 | + | 0    | 0    |
| ENSG0000(CSNK1G2P processed_ chr9   | 5040945  | 5041940  | + | 0    | 0    |
| ENSG0000(RP11-37L2. lincRNA chr13   | 33610967 | 33611522 | + | 0    | 0    |
| ENSG0000(RP11-100G unprocessε chr9  | 92132398 | 92138629 | + | 0.12 | 0.26 |
| ENSG0000(ZNF114P1 processed_ chr21  | 13839118 | 13839409 | + | 0    | 0    |
| ENSG0000(RP3-448I9. lincRNA chr6    | 14394326 | 14404289 | + | 0    | 0    |
| ENSG0000(CHEK2P5 unprocessε chr10   | 38713195 | 38719229 | + | 0    | 0    |
| ENSG0000(RP11-282I1 lincRNA chr10   | 1.24E+08 | 1.24E+08 | + | 0    | 0    |
| ENSG0000(PTGES3P5 processed_ chr10  | 1.08E+08 | 1.08E+08 | + | 0    | 0    |
| ENSG0000(FAM133B protein_co chr7    | 92560793 | 92590394 | - | 7.93 | 6.99 |
| ENSG0000(LINC01759 lincRNA chr1     | 9182004  | 9196284  | + | 3.7  | 5.72 |
| ENSG0000(LINC02020 lincRNA chr3     | 1.86E+08 | 1.86E+08 | + | 0    | 0    |
| ENSG0000(LINC01309 lincRNA chr13    | 1.03E+08 | 1.03E+08 | + | 0    | 0    |
| ENSG0000(AC022431. sense_intrε chr5 | 56536583 | 56537826 | - | 0    | 0.15 |
| ENSG0000(LINC00701 lincRNA chr10    | 2305083  | 2315075  | - | 0    | 0    |
| ENSG0000(RP1-164F3 processed_ chrX  | 1.01E+08 | 1.01E+08 | - | 0    | 0    |
| ENSG0000(API5P1 processed_ chrX     | 1.16E+08 | 1.16E+08 | - | 0    | 0    |
| ENSG0000(AC079776. processed_ chr2  | 1.3E+08  | 1.3E+08  | - | 0    | 0    |
| ENSG0000(OR10G8 protein_co chr11    | 1.24E+08 | 1.24E+08 | + | 0    | 0    |
| ENSG0000(TPMT2P2 processed_ chr3    | 42145646 | 42146371 | - | 0    | 0    |
| ENSG0000(HSPA8P20 processed_ chrX   | 1.24E+08 | 1.24E+08 | - | 0    | 0    |
| ENSG0000(COX6B1P1 processed_ chr7   | 1.49E+08 | 1.49E+08 | + | 0    | 0    |
| ENSG0000(RPL7AP71 processed_ chrX   | 54223324 | 54224062 | + | 0    | 0    |
| ENSG0000(RP1-283K1 antisense chr6   | 1.33E+08 | 1.33E+08 | - | 0    | 0    |



|                     |                   |          |          |   |       |       |
|---------------------|-------------------|----------|----------|---|-------|-------|
| ENSG0000(BIN2P1     | processed_ chr4   | 82275071 | 82276600 | + | 0     | 0     |
| ENSG0000(RAD1P1     | processed_ chr10  | 1.2E+08  | 1.2E+08  | + | 0     | 0     |
| ENSG0000(ZFRP1      | processed_ chrX   | 62878811 | 62884842 | - | 0     | 0     |
| ENSG0000(RP5-998N2  | lincRNA chr1      | 1.44E+08 | 1.44E+08 | - | 0.04  | 0.07  |
| ENSG0000(LINC01800  | lincRNA chr2      | 64846130 | 64863626 | - | 0     | 0     |
| ENSG0000(RP5-1116H  | processed_ chr20  | 5013520  | 5013724  | - | 0     | 0     |
| ENSG0000(CTSLP8     | unprocessε chr9   | 87844152 | 87847314 | + | 0     | 0     |
| ENSG0000(MTND1P2ε   | unprocessε chr2   | 1.31E+08 | 1.31E+08 | - | 0     | 0     |
| ENSG0000(SYNE1-AS1  | antisense chr6    | 1.52E+08 | 1.52E+08 | + | 0.13  | 0     |
| ENSG0000(RP4-784A1  | antisense chr1    | 53267935 | 53268601 | + | 0     | 0     |
| ENSG0000(AC009305.  | antisense chr2    | 30986939 | 30991426 | + | 0     | 0     |
| ENSG0000(RP11-733D  | lincRNA chr10     | 44591208 | 44602104 | - | 0     | 0     |
| ENSG0000(TSPY19P    | unprocessε chrY   | 6303957  | 6305074  | - | 0     | 0     |
| ENSG0000(AC019186.  | lincRNA chr2      | 1.58E+08 | 1.58E+08 | - | 0     | 0     |
| ENSG0000(CCT6P3     | transcribed chr7  | 65038354 | 65074713 | + | 0.68  | 0.66  |
| ENSG0000(RP11-382H  | processed_ chr9   | 13021694 | 13022892 | - | 0     | 0     |
| ENSG0000(MRPL50P1   | processed_ chr2   | 35724759 | 35725142 | - | 0     | 0     |
| ENSG0000(FABP5P14   | processed_ chr2   | 2.17E+08 | 2.17E+08 | - | 0     | 0     |
| ENSG0000(RP11-253E  | processed_ chr12  | 3071532  | 3072145  | - | 0     | 0     |
| ENSG0000(GNG5P5     | processed_ chr13  | 47307082 | 47307301 | + | 0     | 0     |
| ENSG0000(RP11-41L1. | processed_ chrX   | 1.29E+08 | 1.29E+08 | - | 0     | 0     |
| ENSG0000(RP4-704D2  | lincRNA chr1      | 14348955 | 14391575 | - | 0     | 0     |
| ENSG0000(RP11-263C  | processed_ chr3   | 1.72E+08 | 1.72E+08 | + | 0     | 0     |
| ENSG0000(AC013733.  | antisense chr2    | 1.82E+08 | 1.82E+08 | + | 0     | 0     |
| ENSG0000(AC010096.  | lincRNA chr2      | 19458220 | 19468961 | - | 0.03  | 0.07  |
| ENSG0000(CHRM3-AS   | antisense chr1    | 2.4E+08  | 2.4E+08  | - | 0     | 0     |
| ENSG0000(MCIDAS     | protein_co chr5   | 55219614 | 55227315 | - | 0.08  | 0.14  |
| ENSG0000(RP1-206D1  | processed_ chr1   | 1.69E+08 | 1.69E+08 | - | 0     | 0     |
| ENSG0000(RP11-5P18  | processed_ chr1   | 15969632 | 15970194 | + | 0     | 0     |
| ENSG0000(MAPKAPK5   | lincRNA chr12     | 1.12E+08 | 1.12E+08 | - | 14.79 | 15.75 |
| ENSG0000(OR2AT2P    | unitary_psi chr11 | 75071148 | 75072052 | - | 0     | 0     |
| ENSG0000(H2AFZP5    | processed_ chr10  | 77953495 | 77953876 | + | 0     | 0     |
| ENSG0000(RP5-1158E  | lincRNA chrX      | 45913267 | 45917040 | - | 0     | 0     |
| ENSG0000(AL450992.: | antisense chr1    | 1.52E+08 | 1.52E+08 | + | 2.95  | 2.43  |
| ENSG0000(JRK        | protein_co chr8   | 1.43E+08 | 1.43E+08 | - | 3.46  | 4.18  |
| ENSG0000(SNRK-AS1   | antisense chr3    | 43349644 | 43351962 | - | 0.17  | 0.29  |
| ENSG0000(RPSAP9     | processed_ chr9   | 76398699 | 76399586 | + | 0.61  | 0.78  |
| ENSG0000(RPL7P11    | processed_ chr1   | 8750430  | 8751087  | + | 0     | 0     |
| ENSG0000(PUDPP1     | unprocessε chrY   | 15348662 | 15456074 | - | 0     | 0     |
| ENSG0000(RP13-297E  | lincRNA chrX      | 1767347  | 1768776  | + | 0     | 0     |
| ENSG0000(RP13-297E  | lincRNA chrY      | 1767347  | 1768776  | + | 0     | 0     |
| ENSG0000(AC016894.  | processed_ chr2   | 61416887 | 61417197 | - | 0     | 0     |
| ENSG0000(LINC00380  | lincRNA chr13     | 91087254 | 91089593 | - | 0     | 0     |
| ENSG0000(RP1-149A1  | antisense chr22   | 32327171 | 32343105 | - | 0     | 0     |
| ENSG0000(NUS1P3     | processed_ chr13  | 24328211 | 24329072 | + | 0     | 0     |

|                                      |          |          |   |       |       |
|--------------------------------------|----------|----------|---|-------|-------|
| ENSG0000(WDR82P1 processed_ chr3     | 94937086 | 94938024 | - | 0     | 0     |
| ENSG0000(LL22NC03- lincRNA chr22     | 22293733 | 22294794 | + | 0     | 0     |
| ENSG0000(NECAP1P2 processed_ chr2    | 74350069 | 74351009 | + | 0     | 0     |
| ENSG0000(LINC02093 lincRNA chr17     | 13299184 | 13306760 | - | 0     | 0     |
| ENSG0000(MED14OS antisense chrX      | 40735400 | 40738701 | + | 0.35  | 0     |
| ENSG0000(RPS19P6 processed_ chr9     | 80782338 | 80782770 | - | 0     | 0     |
| ENSG0000(AC053503. antisense chr2    | 2.19E+08 | 2.19E+08 | - | 0     | 0     |
| ENSG0000(AC009263. processed_ chr7   | 1.38E+08 | 1.38E+08 | + | 0     | 0     |
| ENSG0000(RP11-264E lincRNA chr10     | 1.28E+08 | 1.28E+08 | - | 0     | 0     |
| ENSG0000(OTX2P1 processed_ chr9      | 75724222 | 75724575 | - | 0     | 0     |
| ENSG0000(YWHAEP5 processed_ chr2     | 1.38E+08 | 1.38E+08 | - | 0     | 0.09  |
| ENSG0000(RP4-753D1 sense_ovei chr20  | 23031542 | 23039236 | + | 0     | 0     |
| ENSG0000(RP11-503C lincRNA chr6      | 1.68E+08 | 1.68E+08 | + | 0     | 0     |
| ENSG0000(AL162151.: processed_ chr14 | 98973314 | 98973471 | + | 41.43 | 66.28 |
| ENSG0000(PCCA-AS1 antisense chr13    | 1E+08    | 1E+08    | - | 0     | 0     |
| ENSG0000(AGPAT5P1 processed_ chrY    | 3293808  | 3294826  | + | 0     | 0     |
| ENSG0000(AC079117. antisense chr2    | 76985965 | 77009791 | + | 0     | 0     |
| ENSG0000(OR7E155P unprocessε chr13   | 41439834 | 41440847 | - | 0     | 0     |
| ENSG0000(AC013429. processed_ chr7   | 1.39E+08 | 1.39E+08 | - | 0     | 0     |
| ENSG0000(LINC00440 lincRNA chr13     | 89273203 | 89280240 | + | 0     | 0     |
| ENSG0000(CHL1-AS1 antisense chr3     | 363370   | 385795   | - | 0     | 0     |
| ENSG0000(LINC01934 lincRNA chr2      | 1.81E+08 | 1.81E+08 | + | 0     | 0     |
| ENSG0000(HMGN2P5 processed_ chr15    | 29730713 | 29730985 | + | 0     | 0     |
| ENSG0000(RP11-262H lincRNA chr9      | 62856999 | 62898087 | - | 0.04  | 0.04  |
| ENSG0000(ACTBP13 unitary_psi chr3    | 49873347 | 49877980 | - | 0.08  | 0.03  |
| ENSG0000(OR6C64P unprocessε chr12    | 55522593 | 55523417 | + | 0     | 0     |
| ENSG0000(MTCYBP5 unprocessε chr7     | 57196638 | 57197772 | + | 0     | 0     |
| ENSG0000(RP11-242F lincRNA chr6      | 1.48E+08 | 1.48E+08 | - | 0     | 0     |
| ENSG0000(IFT74-AS1 antisense chr9    | 26955780 | 26956295 | - | 0     | 0     |
| ENSG0000(RP11-285A sense_intrε chr10 | 1.24E+08 | 1.24E+08 | - | 0     | 0     |
| ENSG0000(ELF3-AS1 antisense chr1     | 2.02E+08 | 2.02E+08 | - | 0     | 0     |
| ENSG0000(VN2R3P unitary_psi chr9     | 39016969 | 39039594 | + | 0     | 0     |
| ENSG0000(VDAC2P4 processed_ chr2     | 1.35E+08 | 1.35E+08 | + | 0     | 0     |
| ENSG0000(RP5-837I24 processed_ chr1  | 81596157 | 81596506 | - | 0     | 0     |
| ENSG0000(SDCBP2-AS antisense chr20   | 1325405  | 1378734  | + | 1.06  | 1.51  |
| ENSG0000(NUS1P2 processed_ chr13     | 22915651 | 22916523 | + | 0     | 0     |
| ENSG0000(AC010971. lincRNA chr7      | 49230137 | 49254816 | + | 0     | 0     |
| ENSG0000(RP1-293L6. antisense chr22  | 36703918 | 36721472 | + | 0     | 0     |
| ENSG0000(LINC00444 lincRNA chr13     | 47905329 | 47907357 | - | 0     | 0     |
| ENSG0000(AC073283. lincRNA chr2      | 47192405 | 47345074 | - | 0     | 0.03  |
| ENSG0000(RP11-445L lincRNA chr9      | 1.15E+08 | 1.15E+08 | - | 0     | 0     |
| ENSG0000(RP4-530I15 antisense chr20  | 50645471 | 50662275 | + | 0     | 0     |
| ENSG0000(RP1-92O14 antisense chr1    | 43354684 | 43358658 | - | 0     | 0     |
| ENSG0000(AC002076. antisense chr7    | 93890913 | 93893601 | + | 0.14  | 0.15  |
| ENSG0000(GPR50-AS1 antisense chrX    | 1.51E+08 | 1.51E+08 | - | 0     | 0     |

|                                    |       |          |          |   |         |         |
|------------------------------------|-------|----------|----------|---|---------|---------|
| ENSG0000(RP11-112L) lincRNA        | chr20 | 50166362 | 50171742 | + | 0       | 0       |
| ENSG0000(RP11-225H) antisense      | chr10 | 1.03E+08 | 1.03E+08 | + | 0.51    | 0.11    |
| ENSG0000(MTCO1P8) unprocessed      | chr7  | 64108625 | 64110147 | - | 0       | 0       |
| ENSG0000(PRDX3P3) processed        | chr13 | 38617419 | 38617940 | - | 0       | 0       |
| ENSG0000(VDAC1P3) processed        | chrX  | 91982655 | 91983505 | - | 0       | 0       |
| ENSG0000(AF015262) lincRNA         | chr21 | 35136638 | 35139222 | + | 0       | 0       |
| ENSG0000(HMGA1P4) antisense        | chr9  | 1.29E+08 | 1.29E+08 | - | 0       | 0       |
| ENSG0000(PRUNEP1) processed        | chr13 | 26117548 | 26118964 | - | 0       | 0       |
| ENSG0000(RP11-745C) antisense      | chr7  | 54759425 | 54804928 | + | 0       | 0       |
| ENSG0000(UPF3AP3) transcribed      | chr9  | 99998301 | 99999069 | - | 0.25    | 0       |
| ENSG0000(AC060834) lincRNA         | chr7  | 9737322  | 9769513  | + | 0       | 0       |
| ENSG0000(TUBB8P11) unprocessed     | chr1  | 873292   | 874349   | + | 0       | 0       |
| ENSG0000(RP11-143G) antisense      | chrX  | 1.45E+08 | 1.45E+08 | - | 0       | 0       |
| ENSG0000(RP11-726G) processed      | chr8  | 43276270 | 43276823 | - | 0       | 0       |
| ENSG0000(AC009965) lincRNA         | chr2  | 2.04E+08 | 2.04E+08 | + | 0       | 0       |
| ENSG0000(CTB-107G1) antisense      | chr7  | 1.03E+08 | 1.04E+08 | + | 0       | 0       |
| ENSG0000(RP11-760D) processed      | chr7  | 56577848 | 56578866 | + | 0       | 0       |
| ENSG0000(TMEM212) lincRNA          | chr3  | 1.72E+08 | 1.72E+08 | - | 0       | 0       |
| ENSG0000(AC007161) lincRNA         | chr7  | 7738524  | 7742574  | - | 0       | 0       |
| ENSG0000(NPIP2) protein_coding     | chr16 | 11927373 | 11976643 | - | 9.69    | 6       |
| ENSG0000(ATP5A1P8) processed       | chr9  | 39654241 | 39655531 | - | 0       | 0       |
| ENSG0000(LINC02092) lincRNA        | chr17 | 73786802 | 73800793 | + | 0       | 0       |
| ENSG0000(LINC01287) lincRNA        | chr7  | 1.53E+08 | 1.53E+08 | - | 0       | 0       |
| ENSG0000(AC092421) unprocessed     | chr3  | 22670201 | 22670711 | - | 0       | 0       |
| ENSG0000(HDAC1P1) processed        | chr10 | 94137748 | 94139500 | + | 0       | 0       |
| ENSG0000(LL22NC03) processed       | chr22 | 22228719 | 22230469 | - | 0       | 0       |
| ENSG0000(AF241725) lincRNA         | chr21 | 21566763 | 21615437 | + | 0       | 0       |
| ENSG0000(MTND4LP1) unprocessed     | chr2  | 2.02E+08 | 2.02E+08 | + | 0       | 0       |
| ENSG0000(RPEP5) processed          | chr2  | 1.62E+08 | 1.62E+08 | - | 0       | 0       |
| ENSG0000(ALO22237) processed       | chr22 | 43092167 | 43092524 | + | 0       | 0       |
| ENSG0000(FAM170B) antisense        | chr10 | 49121839 | 49151547 | + | 0       | 0       |
| ENSG0000(KRT18P15) processed       | chr3  | 32258940 | 32260230 | + | 0       | 0       |
| ENSG0000(RP11-272P) sense_intronic | chr9  | 13274510 | 13279187 | - | 0       | 0.76    |
| ENSG0000(GAS5) processed           | chr1  | 1.74E+08 | 1.74E+08 | - | 246.83  | 258.53  |
| ENSG0000(AC144530) processed       | chr3  | 1.98E+08 | 1.98E+08 | - | 0.13    | 0       |
| ENSG0000(EIF5AP4) processed        | chr10 | 80247219 | 80247683 | - | 0       | 0       |
| ENSG0000(USP9YP26) unprocessed     | chrY  | 26002254 | 26008856 | + | 0       | 0       |
| ENSG0000(HLA-B) protein_coding     | chr6  | 31269491 | 31357188 | - | 1161.02 | 1068.49 |
| ENSG0000(RP11-183K) processed      | chrX  | 1.47E+08 | 1.47E+08 | + | 0       | 0       |
| ENSG0000(FAM90A21) unprocessed     | chr8  | 7564350  | 7567360  | - | 0       | 0       |
| ENSG0000(CTD-2666L) processed      | chr19 | 12284337 | 12285185 | + | 0.07    | 0       |
| ENSG0000(AP002381) processed       | chr11 | 72940498 | 72941112 | + | 0       | 0       |
| ENSG0000(RP11-428L) lincRNA        | chr10 | 8897989  | 8914596  | + | 0       | 0       |
| ENSG0000(FOXP4-AS1) antisense      | chr6  | 41494853 | 41548621 | - | 0.98    | 0       |
| ENSG0000(C1orf140) lincRNA         | chr1  | 2.21E+08 | 2.21E+08 | - | 0.01    | 0.03    |

|                 |            |                |       |          |          |   |      |      |
|-----------------|------------|----------------|-------|----------|----------|---|------|------|
| ENSG00000100000 | RP11-120C  | lincRNA        | chr10 | 62289521 | 62304033 | + | 0    | 0.1  |
| ENSG00000100000 | AC034228.  | antisense      | chr5  | 1.32E+08 | 1.32E+08 | + | 0    | 0    |
| ENSG00000100000 | RP11-3801  | transcribed    | chr1  | 2.03E+08 | 2.03E+08 | - | 0    | 0    |
| ENSG00000100000 | RP11-203H  | lincRNA        | chr6  | 8341937  | 8343021  | - | 0    | 0    |
| ENSG00000100000 | E2F6P1     | processed      | chr22 | 18833694 | 18834438 | + | 0    | 0    |
| ENSG00000100000 | ELL2P3     | processed      | chr13 | 68289679 | 68291280 | - | 0    | 0    |
| ENSG00000100000 | LINC01496  | lincRNA        | chrX  | 51502090 | 51511005 | - | 0    | 0    |
| ENSG00000100000 | LINC01052  | lincRNA        | chr13 | 65866174 | 65878219 | + | 0    | 0    |
| ENSG00000100000 | RP11-503C  | lincRNA        | chr6  | 1.68E+08 | 1.68E+08 | + | 0    | 0    |
| ENSG00000100000 | WASH4P     | unprocessed    | chr16 | 14381    | 18068    | - | 0.73 | 1    |
| ENSG00000100000 | GULOP      | unitary_psi    | chr8  | 27560274 | 27589073 | + | 0    | 0    |
| ENSG00000100000 | SLC25A25-  | antisense      | chr9  | 1.28E+08 | 1.28E+08 | - | 0.62 | 0.89 |
| ENSG00000100000 | LINC00412  | antisense      | chr13 | 27236282 | 27236811 | - | 0    | 0    |
| ENSG00000100000 | CTD-2666L  | transcribed    | chr19 | 12195015 | 12237767 | + | 0.07 | 0.53 |
| ENSG00000100000 | RP11-335C  | antisense      | chr1  | 2.03E+08 | 2.03E+08 | - | 0    | 0.25 |
| ENSG00000100000 | C11orf94   | protein_coding | chr11 | 45906513 | 45907282 | - | 0.17 | 0.09 |
| ENSG00000100000 | RP11-125D  | lincRNA        | chr6  | 1.59E+08 | 1.59E+08 | + | 0    | 0    |
| ENSG00000100000 | RP11-62F2. | antisense      | chr9  | 16726814 | 16727524 | + | 1.52 | 1.67 |
| ENSG00000100000 | RP11-552E  | processed      | chrX  | 48197221 | 48199431 | + | 0    | 0    |
| ENSG00000100000 | LINC01103  | lincRNA        | chr2  | 1.04E+08 | 1.05E+08 | - | 0    | 0    |
| ENSG00000100000 | TPT1P9     | processed      | chr9  | 1.18E+08 | 1.18E+08 | - | 0    | 0    |
| ENSG00000100000 | RP11-1821I | processed      | chr1  | 64918443 | 64918683 | + | 0    | 0    |
| ENSG00000100000 | EEF1GP5    | processed      | chrX  | 1.16E+08 | 1.16E+08 | + | 0    | 0    |
| ENSG00000100000 | LINC00458  | lincRNA        | chr13 | 54115783 | 54132866 | - | 0    | 0    |
| ENSG00000100000 | HSPA8P3    | processed      | chr10 | 26714622 | 26715832 | + | 0    | 0    |
| ENSG00000100000 | RP11-483H  | antisense      | chr9  | 1.3E+08  | 1.3E+08  | + | 0    | 0    |
| ENSG00000100000 | NUTF2P4    | processed      | chr1  | 1.13E+08 | 1.13E+08 | + | 0    | 0    |
| ENSG00000100000 | AC108448.  | antisense      | chr11 | 3189546  | 3189929  | + | 0    | 0    |
| ENSG00000100000 | RP11-552J. | processed      | chrX  | 52612656 | 52613523 | + | 0    | 0    |
| ENSG00000100000 | AC114730.  | antisense      | chr2  | 2.42E+08 | 2.42E+08 | - | 0    | 0    |
| ENSG00000100000 | RFTN1P1    | transcribed    | chrY  | 7712985  | 7809261  | - | 0.76 | 0.65 |
| ENSG00000100000 | AC113607.  | antisense      | chr2  | 910926   | 921124   | - | 0    | 0    |
| ENSG00000100000 | RPS3AP6    | processed      | chr15 | 59768352 | 59769146 | + | 0    | 0.19 |
| ENSG00000100000 | PCMTD1P3   | processed      | chr7  | 23721311 | 23721782 | - | 0    | 0    |
| ENSG00000100000 | MORF4      | processed      | chr4  | 1.74E+08 | 1.74E+08 | - | 0    | 0    |
| ENSG00000100000 | FAM197Y2   | transcribed    | chrY  | 9517599  | 9526897  | - | 0    | 0    |
| ENSG00000100000 | AC090505.  | processed      | chr3  | 1.95E+08 | 1.95E+08 | + | 0    | 0    |
| ENSG00000100000 | RPL26P29   | processed      | chr10 | 68424560 | 68424997 | + | 0    | 0    |
| ENSG00000100000 | LINC01135  | lincRNA        | chr1  | 58785160 | 58899594 | + | 0    | 0.2  |
| ENSG00000100000 | RP11-90C4  | lincRNA        | chr1  | 55581037 | 55868248 | + | 0.22 | 0.27 |
| ENSG00000100000 | RP11-2411I | processed      | chr10 | 32111644 | 32111789 | - | 0    | 0    |
| ENSG00000100000 | RP11-146D  | processed      | chr9  | 40291275 | 40291502 | - | 0    | 0    |
| ENSG00000100000 | RP11-288D  | processed      | chr10 | 18940501 | 18940953 | + | 0    | 0    |
| ENSG00000100000 | SVILP1     | transcribed    | chr10 | 30655489 | 30717266 | + | 0.49 | 0.5  |
| ENSG00000100000 | HIST1H2AP  | unprocessed    | chr6  | 26043989 | 26044357 | + | 0    | 0    |

|                                     |          |          |   |        |        |
|-------------------------------------|----------|----------|---|--------|--------|
| ENSG0000(RP3-400B1 lincRNA chr6     | 4136072  | 4157385  | + | 0.02   | 0.13   |
| ENSG0000(AC092687. antisense chr2   | 10589166 | 10604830 | + | 0      | 0      |
| ENSG0000(RP11-336N processed_ chr9  | 78219120 | 78219357 | + | 0      | 0      |
| ENSG0000(MRPS33P4 processed_ chr20  | 52511252 | 52511568 | + | 0      | 0      |
| ENSG0000(XRCC6P2 processed_ chrX    | 1.5E+08  | 1.5E+08  | - | 0      | 0      |
| ENSG0000(AC003084. lincRNA chr7     | 1.18E+08 | 1.18E+08 | - | 0      | 0      |
| ENSG0000(RP11-526A protein_co chr4  | 1.49E+08 | 1.5E+08  | - | 0      | 0      |
| ENSG0000(IFNA17 protein_co chr9     | 21227243 | 21228222 | - | 0      | 0      |
| ENSG0000(FAM197Y9 transcribed chrY  | 6256267  | 6263953  | - | 0      | 0.3    |
| ENSG0000(RP3-322G1 antisense chr20  | 23346941 | 23351486 | - | 0      | 0      |
| ENSG0000(PHBP13 processed_ chr13    | 35251070 | 35251829 | + | 0.09   | 0      |
| ENSG0000(AC073464. processed_ chr2  | 94750582 | 94751293 | + | 0      | 0      |
| ENSG0000(RP11-5P22 processed_ chr5  | 66572057 | 66572546 | + | 0.15   | 0      |
| ENSG0000(RPS26P30 processed_ chr7   | 20843627 | 20843961 | + | 0      | 0      |
| ENSG0000(LINC01239 lincRNA chr9     | 22646200 | 22824213 | + | 0.19   | 0.1    |
| ENSG0000(RP11-119H processed_ chr4  | 1.13E+08 | 1.13E+08 | + | 0      | 0.05   |
| ENSG0000(MTCO2P16 unprocessed_ chr2 | 2.02E+08 | 2.02E+08 | + | 0      | 0      |
| ENSG0000(CDC42P2 processed_ chr7    | 55638274 | 55638842 | - | 0      | 0      |
| ENSG0000(CTD-3105H antisense chr19  | 12450935 | 12460705 | + | 0      | 0      |
| ENSG0000(MTND2P3 processed_ chrY    | 8372241  | 8372710  | + | 0      | 0      |
| ENSG0000(RPL23AP42 processed_ chr3  | 1.61E+08 | 1.61E+08 | - | 625.36 | 590.82 |
| ENSG0000(NDUFA5P3 processed_ chr9   | 19383217 | 19383887 | - | 0      | 0      |
| ENSG0000(LINC00676 antisense chr13  | 1.1E+08  | 1.1E+08  | + | 0      | 0      |
| ENSG0000(SLIT1-AS1 antisense chr10  | 97102756 | 97103747 | + | 0      | 0      |
| ENSG0000(HNRNPUL2 protein_co chr11  | 62690275 | 62727384 | - | 22.51  | 20.37  |
| ENSG0000(AC003958. antisense chr17  | 41402416 | 41425049 | + | 0      | 0      |
| ENSG0000(RP11-547C lincRNA chr9     | 99531696 | 99536924 | + | 0      | 0      |
| ENSG0000(ATP5A1P1 processed_ chr9   | 42410830 | 42412150 | - | 0      | 0      |
| ENSG0000(RP5-1097P lincRNA chr20    | 22220554 | 22223283 | + | 0      | 0      |
| ENSG0000(RP11-410C processed_ chr1  | 2.2E+08  | 2.2E+08  | - | 0      | 0      |
| ENSG0000(AL022344. lincRNA chr10    | 42696035 | 42706453 | + | 0      | 0      |
| ENSG0000(CTD-2138C transcribed chr5 | 23980587 | 23980938 | + | 0      | 0      |
| ENSG0000(RP3-439F8 antisense chr22  | 46541495 | 46548196 | + | 0.04   | 0.02   |
| ENSG0000(LINC01032 lincRNA chr1     | 1.93E+08 | 1.93E+08 | - | 0      | 0      |
| ENSG0000(RP11-467I2 processed_ chr1 | 2.41E+08 | 2.41E+08 | + | 0      | 0      |
| ENSG0000(AC092660. lincRNA chr2     | 78597911 | 78599406 | + | 0      | 0      |
| ENSG0000(HSPE1P1 processed_ chr20   | 39932922 | 39933239 | - | 0      | 0      |
| ENSG0000(LINC00163 lincRNA chr21    | 44989864 | 44994086 | - | 0      | 0      |
| ENSG0000(PIGFP2 processed_ chr9     | 1.24E+08 | 1.24E+08 | + | 0      | 0      |
| ENSG0000(EIF3EP1 processed_ chr6    | 73291962 | 73293277 | + | 0.71   | 1.12   |
| ENSG0000(MIR155HG lincRNA chr21     | 25561909 | 25575168 | + | 0.07   | 0.04   |
| ENSG0000(CTA-407F1 antisense chr22  | 25561117 | 25564462 | - | 0      | 0      |
| ENSG0000(MTND5P2 processed_ chrX    | 1.03E+08 | 1.03E+08 | + | 0      | 0      |
| ENSG0000(OFD1P15Y unprocessed_ chrY | 26055779 | 26088493 | - | 0      | 0      |
| ENSG0000(RP13-130D processed_ chrX  | 97975878 | 97978641 | - | 0      | 0      |

|                 |           |                |       |          |          |   |      |      |
|-----------------|-----------|----------------|-------|----------|----------|---|------|------|
| ENSG00000108000 | HNRNPDL   | unprocessed    | chr2  | 1.58E+08 | 1.58E+08 | + | 0    | 0    |
| ENSG00000108000 | RP1-288L1 | lincRNA        | chr22 | 34703126 | 34704885 | - | 0    | 0    |
| ENSG00000108000 | Z82214.2  | antisense      | chr22 | 43232141 | 43239010 | + | 0    | 0    |
| ENSG00000108000 | RP11-408E | unprocessed    | chr13 | 19151554 | 19152307 | - | 0    | 0    |
| ENSG00000108000 | OR52X1P   | unitary_psi    | chr11 | 6066873  | 6067786  | - | 0    | 0    |
| ENSG00000108000 | OR7E62P   | unprocessed    | chr2  | 71055527 | 71056003 | + | 0    | 0    |
| ENSG00000108000 | CHEK2P3   | unprocessed    | chr2  | 91957436 | 91963610 | + | 0    | 0    |
| ENSG00000108000 | SOX9-AS1  | processed      | chr17 | 72034107 | 72237203 | - | 0    | 1.06 |
| ENSG00000108000 | RP1-278O2 | lincRNA        | chr20 | 10753278 | 10765286 | - | 0    | 0    |
| ENSG00000108000 | MTND6P13  | processed      | chrX  | 1.02E+08 | 1.02E+08 | - | 0    | 0    |
| ENSG00000108000 | AC007879  | lincRNA        | chr2  | 2.07E+08 | 2.07E+08 | - | 0.13 | 0.14 |
| ENSG00000108000 | AC133104  | unprocessed    | chr2  | 95468863 | 95469778 | - | 0    | 0    |
| ENSG00000108000 | APOC2     | protein_coding | chr19 | 44945982 | 44949565 | + | 0.07 | 0.08 |
| ENSG00000108000 | RP11-415H | processed      | chr9  | 1.33E+08 | 1.33E+08 | + | 0    | 0    |
| ENSG00000108000 | IL6RP1    | processed      | chr9  | 90081297 | 90082569 | - | 0    | 0    |
| ENSG00000108000 | TEX21P    | unitary_psi    | chr14 | 64346171 | 64374666 | - | 0.04 | 0    |
| ENSG00000108000 | SNHG20    | processed      | chr17 | 77086716 | 77094990 | + | 2.41 | 2.56 |
| ENSG00000108000 | XXbac-B47 | sense_intronic | chr22 | 18004270 | 18007308 | - | 0.02 | 0    |
| ENSG00000108000 | RP11-384C | antisense      | chr1  | 2.12E+08 | 2.12E+08 | - | 0    | 0    |
| ENSG00000108000 | RP5-994D1 | lincRNA        | chr1  | 42678735 | 42681659 | + | 0.12 | 0    |
| ENSG00000108000 | RP11-20F2 | lincRNA        | chr10 | 37240887 | 37242049 | + | 0.29 | 0    |
| ENSG00000108000 | LINC01827 | lincRNA        | chr2  | 1.96E+08 | 1.96E+08 | - | 0    | 0    |
| ENSG00000108000 | RP11-85O2 | antisense      | chr9  | 1.24E+08 | 1.24E+08 | - | 0    | 0    |
| ENSG00000108000 | TSEN15P3  | processed      | chr7  | 25265924 | 25266290 | - | 0    | 0    |
| ENSG00000108000 | ATP5HP4   | processed      | chr12 | 68642519 | 68642993 | - | 0    | 0    |
| ENSG00000108000 | HMG11P1   | processed      | chr7  | 1.21E+08 | 1.21E+08 | + | 0.44 | 0.37 |
| ENSG00000108000 | LINC01659 | lincRNA        | chr22 | 23433564 | 23435071 | + | 0    | 0    |
| ENSG00000108000 | AC018685  | lincRNA        | chr2  | 2641989  | 2656630  | - | 0    | 0    |
| ENSG00000108000 | MARK2P15  | processed      | chr10 | 83311628 | 83314475 | - | 0    | 0    |
| ENSG00000108000 | AC009969  | processed      | chr2  | 1.53E+08 | 1.53E+08 | - | 0    | 0    |
| ENSG00000108000 | CDC42P1   | processed      | chr20 | 34402149 | 34402696 | - | 0    | 0    |
| ENSG00000108000 | MTND5P25  | unprocessed    | chr2  | 1.3E+08  | 1.3E+08  | + | 0    | 0    |
| ENSG00000108000 | AC010883  | antisense      | chr2  | 43229573 | 43233394 | + | 0.85 | 0    |
| ENSG00000108000 | RP11-101C | processed      | chr1  | 1.56E+08 | 1.56E+08 | + | 0    | 0    |
| ENSG00000108000 | AC012668  | lincRNA        | chr2  | 2.16E+08 | 2.16E+08 | - | 0    | 0    |
| ENSG00000108000 | MTND2P18  | unprocessed    | chr2  | 1.31E+08 | 1.31E+08 | - | 0    | 0    |
| ENSG00000108000 | AC023128  | lincRNA        | chr2  | 1.45E+08 | 1.45E+08 | - | 0    | 0    |
| ENSG00000108000 | RP11-508N | processed      | chr10 | 38250442 | 38250603 | - | 0    | 0    |
| ENSG00000108000 | GRID1-AS1 | antisense      | chr10 | 85577731 | 85607213 | + | 0    | 0    |
| ENSG00000108000 | AC092839  | antisense      | chr2  | 54545368 | 54546677 | - | 0    | 0    |
| ENSG00000108000 | RP11-124C | lincRNA        | chr10 | 42871521 | 42874060 | + | 0.1  | 0    |
| ENSG00000108000 | GTF3C2-AS | antisense      | chr2  | 27335535 | 27342599 | + | 0.14 | 0.47 |
| ENSG00000108000 | SDHCP3    | processed      | chr2  | 23943846 | 23944351 | + | 0    | 0    |
| ENSG00000108000 | LINC01524 | lincRNA        | chr20 | 52210645 | 52650431 | + | 0.02 | 0    |
| ENSG00000108000 | AC104667  | antisense      | chr2  | 2.38E+08 | 2.38E+08 | + | 0    | 0    |

|                                      |          |          |   |      |      |
|--------------------------------------|----------|----------|---|------|------|
| ENSG0000(RBMY2OP unprocessε chrY     | 9951553  | 9959423  | + | 0    | 0    |
| ENSG0000(RP11-328K lincRNA chr10     | 1.18E+08 | 1.18E+08 | + | 0    | 0    |
| ENSG0000(RP5-837I2 antisense chr1    | 81513880 | 81557702 | - | 0    | 0    |
| ENSG0000(RP11-356I2 lincRNA chr6     | 1.38E+08 | 1.38E+08 | - | 0    | 0    |
| ENSG0000(FABP5P13 processed_ chrX    | 523775   | 524102   | - | 0    | 0    |
| ENSG0000(FABP5P13 processed_ chrY    | 523775   | 524102   | - | 0    | 0    |
| ENSG0000(RP11-124N antisense chr10   | 17233325 | 17234833 | - | 0.28 | 0.31 |
| ENSG0000(LINC00700 lincRNA chr10     | 2005473  | 2014348  | - | 0    | 0.15 |
| ENSG0000(FABP5P7 processed_ chr11    | 59781318 | 59781722 | - | 3.66 | 5.08 |
| ENSG0000(SHISA8 protein_co chr22     | 41909554 | 41914667 | - | 0    | 0    |
| ENSG0000(RP11-347D lincRNA chr20     | 47950799 | 47952055 | + | 0    | 0    |
| ENSG0000(RP13-33H1 processed_ chrX   | 74069276 | 74070832 | + | 0    | 0    |
| ENSG0000(RP11-272J lincRNA chr10     | 43777562 | 43778825 | - | 0    | 0    |
| ENSG0000(FTH1P2 processed_ chr1      | 2.29E+08 | 2.29E+08 | + | 1.74 | 0    |
| ENSG0000(AC074389. lincRNA chr7      | 1691906  | 1692450  | - | 0    | 0    |
| ENSG0000(CITF22-24E antisense chr22  | 36816326 | 36819736 | + | 0    | 0    |
| ENSG0000(RP11-534L processed_ chr1   | 2.07E+08 | 2.07E+08 | + | 0    | 0    |
| ENSG0000(RP11-280C processed_ chr9   | 14204248 | 14205039 | + | 0    | 0    |
| ENSG0000(AC010132. processed_ chr7   | 42918741 | 42920084 | + | 0.12 | 0    |
| ENSG0000(FMO10P unitary_psι chr1     | 1.67E+08 | 1.67E+08 | + | 0    | 0    |
| ENSG0000(RP11-3L10. processed_ chr7  | 1.21E+08 | 1.21E+08 | - | 0    | 0    |
| ENSG0000(XX-C2158C lincRNA chr6      | 1.71E+08 | 1.71E+08 | + | 0    | 0    |
| ENSG0000(LINC01849 lincRNA chr2      | 1.01E+08 | 1.01E+08 | + | 0    | 0    |
| ENSG0000(CUBNP2 unprocessε chr10     | 45232026 | 45247361 | - | 0    | 0    |
| ENSG0000(AC013429. processed_ chr7   | 1.38E+08 | 1.38E+08 | - | 0    | 0    |
| ENSG0000(RP11-480I1 transcribec chr1 | 2.03E+08 | 2.03E+08 | + | 0.12 | 0.03 |
| ENSG0000(AC016745. antisense chr2    | 1.13E+08 | 1.13E+08 | + | 0    | 0    |
| ENSG0000(RP11-439A antisense chr1    | 1.21E+08 | 1.21E+08 | - | 0    | 0    |
| ENSG0000(SNRPCP19 processed_ chr7    | 24906135 | 24906594 | - | 0    | 0    |
| ENSG0000(EIF4A1P2 processed_ chrY    | 5337745  | 5338964  | - | 0    | 0    |
| ENSG0000(RP11-157D processed_ chr1   | 42412398 | 42412794 | - | 0    | 0    |
| ENSG0000(USP9YP30 unprocessε chrY    | 25723016 | 25724186 | + | 0    | 0    |
| ENSG0000(RP11-195N antisense chr1    | 1.1E+08  | 1.1E+08  | - | 0    | 0    |
| ENSG0000(RP11-344B lincRNA chr9      | 1.29E+08 | 1.29E+08 | + | 0    | 0    |
| ENSG0000(RP3-497J2. processed_ chr6  | 1.67E+08 | 1.67E+08 | - | 0    | 0    |
| ENSG0000(LINC01883 lincRNA chr2      | 38431294 | 38433573 | + | 0    | 0    |
| ENSG0000(RP11-140A antisense chr10   | 1.32E+08 | 1.32E+08 | - | 0    | 0    |
| ENSG0000(RP4-726F1 lincRNA chr1      | 79323769 | 79324863 | + | 0    | 0    |
| ENSG0000(AF121897. processed_ chr21  | 39525583 | 39529855 | + | 0    | 0    |
| ENSG0000(COX20P2 processed_ chr2     | 2.31E+08 | 2.31E+08 | + | 0    | 0    |
| ENSG0000(REREP2Y unprocessε chrY     | 26198331 | 26208148 | - | 0    | 0    |
| ENSG0000(GEMIN2P1 processed_ chr1    | 1.54E+08 | 1.54E+08 | - | 0    | 0    |
| ENSG0000(SEMA3F-A antisense chr3     | 50116022 | 50156085 | - | 0    | 0    |
| ENSG0000(RP11-11M. processed_ chr20  | 62037429 | 62037956 | - | 0    | 0    |
| ENSG0000(RP11-109I1 processed_ chr10 | 18206127 | 18261194 | - | 0    | 0    |

|                     |            |       |          |          |   |      |      |
|---------------------|------------|-------|----------|----------|---|------|------|
| ENSG0000(RP11-439E) | lincRNA    | chr1  | 2.47E+08 | 2.47E+08 | + | 0    | 0    |
| ENSG0000(AP001626)  | antisense  | chr21 | 42648271 | 42651244 | - | 0    | 0.04 |
| ENSG0000(AC097468)  | antisense  | chr2  | 2.19E+08 | 2.19E+08 | - | 0    | 0    |
| ENSG0000(DPP10-AS1) | antisense  | chr2  | 1.15E+08 | 1.15E+08 | - | 0    | 0    |
| ENSG0000(AC068580)  | antisense  | chr11 | 1760348  | 1762486  | + | 0    | 0    |
| ENSG0000(HMGN1P3)   | processed  | chr18 | 58018794 | 58019061 | - | 0    | 0    |
| ENSG0000(MNX1-AS2)  | antisense  | chr7  | 1.57E+08 | 1.57E+08 | + | 0    | 0    |
| ENSG0000(BMP7-AS1)  | antisense  | chr20 | 57214872 | 57215866 | + | 0    | 0    |
| ENSG0000(RP11-6111) | antisense  | chr6  | 39881804 | 39900071 | - | 0.23 | 0.09 |
| ENSG0000(C19orf81)  | protein_co | chr19 | 50649445 | 50659310 | + | 2.4  | 1.74 |
| ENSG0000(AC007395)  | antisense  | chr2  | 70687142 | 70691824 | + | 0    | 0    |
| ENSG0000(RP5-1099D) | processed  | chr20 | 10612861 | 10614229 | - | 0    | 0    |
| ENSG0000(RP11-3931) | lincRNA    | chr1  | 58060139 | 58080274 | + | 0    | 0    |
| ENSG0000(MTND6P1)   | processed  | chrX  | 5168918  | 5169439  | - | 0    | 0    |
| ENSG0000(MTCO3P1)   | unprocess  | chr6  | 32706124 | 32706955 | - | 0    | 0    |
| ENSG0000(AC098820)  | antisense  | chr2  | 2.16E+08 | 2.16E+08 | - | 0    | 0    |
| ENSG0000(TECRP1)    | processed  | chr4  | 86949669 | 86950113 | - | 0    | 0    |
| ENSG0000(PPIAP3)    | processed  | chr20 | 37530039 | 37530543 | + | 0    | 0    |
| ENSG0000(RPL7P8)    | processed  | chr1  | 1.1E+08  | 1.1E+08  | + | 0    | 0    |
| ENSG0000(AC016751)  | antisense  | chr2  | 1.76E+08 | 1.76E+08 | + | 0    | 0    |
| ENSG0000(LINC00940) | lincRNA    | chr12 | 1929202  | 1936574  | - | 0    | 0.03 |
| ENSG0000(MLIP-AS1)  | antisense  | chr6  | 53978549 | 54079726 | - | 0    | 0    |
| ENSG0000(RP11-637C) | antisense  | chr6  | 10881780 | 10884349 | + | 0    | 0    |
| ENSG0000(RP1-15005) | lincRNA    | chr1  | 23549139 | 23550915 | - | 0    | 0    |
| ENSG0000(LINC01777) | lincRNA    | chr1  | 4412027  | 4424689  | + | 0    | 0    |
| ENSG0000(RP4-609E1) | processed  | chr1  | 68043330 | 68044233 | + | 0    | 0    |
| ENSG0000(AC010983)  | lincRNA    | chr2  | 1.95E+08 | 1.95E+08 | - | 0    | 0    |
| ENSG0000(ZMYND10)   | antisense  | chr3  | 50341106 | 50345697 | + | 0    | 0    |
| ENSG0000(AC008175)  | lincRNA    | chrY  | 22438940 | 22485592 | + | 0    | 0    |
| ENSG0000(VDAC1P4)   | processed  | chr1  | 1.8E+08  | 1.8E+08  | + | 0    | 0    |
| ENSG0000(UBE2V1P7)  | processed  | chrX  | 78554412 | 78554751 | - | 0    | 0    |
| ENSG0000(BCRP5)     | unprocess  | chr22 | 20697962 | 20698934 | - | 0    | 0    |
| ENSG0000(SLC25A5P2) | processed  | chr2  | 33839782 | 33840678 | - | 0    | 0    |
| ENSG0000(RPL24P2)   | processed  | chr20 | 21114723 | 21115197 | + | 3.25 | 3.39 |
| ENSG0000(AC009303)  | antisense  | chr2  | 1.18E+08 | 1.18E+08 | + | 0    | 0    |
| ENSG0000(RP4-785J1) | processed  | chr1  | 26647447 | 26647681 | + | 0    | 0    |
| ENSG0000(AC068138)  | lincRNA    | chr2  | 2.26E+08 | 2.26E+08 | - | 0    | 0    |
| ENSG0000(RP11-759L) | processed  | chrX  | 16474342 | 16475340 | - | 0    | 0    |
| ENSG0000(AC012074)  | lincRNA    | chr2  | 25369136 | 25375845 | - | 0.07 | 0.04 |
| ENSG0000(GAPDHP52)  | processed  | chr13 | 21358373 | 21359314 | + | 0.07 | 0.07 |
| ENSG0000(AC073842)  | antisense  | chr7  | 1E+08    | 1E+08    | + | 0    | 0    |
| ENSG0000(AC142528)  | antisense  | chr2  | 3519275  | 3523197  | + | 0    | 0.07 |
| ENSG0000(ZRANB2-AS) | antisense  | chr1  | 71048855 | 71067184 | + | 0    | 0    |
| ENSG0000(MTND5P2)   | unprocess  | chr2  | 1.31E+08 | 1.31E+08 | - | 0    | 0    |
| ENSG0000(AC010492)  | processed  | chr19 | 54229036 | 54230213 | + | 0    | 0    |



|                                      |          |            |      |       |
|--------------------------------------|----------|------------|------|-------|
| ENSG0000(SUMO1P3 processed_ chr1     | 1.6E+08  | 1.6E+08 +  | 0    | 0     |
| ENSG0000(RP11-669N processed_ chr1   | 1.89E+08 | 1.89E+08 + | 0    | 0     |
| ENSG0000(CHCHD2P6 processed_ chr1    | 15604597 | 15605043 + | 0.18 | 0     |
| ENSG0000(AC091153. antisense chr17   | 4673830  | 4696831 +  | 0    | 0     |
| ENSG0000(FNDC1-IT1 sense_intr chr6   | 1.59E+08 | 1.59E+08 + | 0    | 0     |
| ENSG0000(RP4-620E1 processed_ chr20  | 41459354 | 41461944 - | 0    | 0     |
| ENSG0000(RP3-445O1 processed_ chr1   | 81208568 | 81209210 + | 0    | 0     |
| ENSG0000(RPL7L1P3 processed_ chr7    | 75922755 | 75923443 + | 0    | 0     |
| ENSG0000(WI2-85898 lincRNA chr22     | 45875999 | 45887748 - | 0    | 0     |
| ENSG0000(ID2-AS1 antisense chr2      | 8666636  | 8681863 -  | 2.86 | 2.34  |
| ENSG0000(AC006335. unprocess chrY    | 6306042  | 6307920 +  | 0    | 0     |
| ENSG0000(RP11-1217 unprocess chr7    | 57147986 | 57150347 - | 0    | 0     |
| ENSG0000(RP11-83A1 antisense chr1    | 2.46E+08 | 2.46E+08 + | 0    | 0     |
| ENSG0000(LINC00330 lincRNA chr13     | 44799503 | 44809630 - | 0    | 0     |
| ENSG0000(ANKRD65 protein_co chr1     | 1418420  | 1421769 -  | 0.64 | 0.8   |
| ENSG0000(RP1-23E21 lincRNA chr6      | 93070387 | 93103384 + | 0    | 0     |
| ENSG0000(RP11-80H5 lincRNA chr10     | 89667181 | 89699671 - | 0    | 0     |
| ENSG0000(SETP9 transcribec chr1      | 1.61E+08 | 1.61E+08 + | 0    | 0     |
| ENSG0000(ADI1P1 processed_ chr20     | 41331123 | 41331660 + | 0    | 0     |
| ENSG0000(RP11-329A processed_ chr1   | 48435967 | 48437223 + | 0.07 | 0     |
| ENSG0000(LINC00094 protein_co chr9   | 1.34E+08 | 1.34E+08 + | 17.5 | 15.81 |
| ENSG0000(IFNA12P unprocess chr9      | 21403081 | 21403651 + | 0    | 0     |
| ENSG0000(ZSCAN31 protein_co chr6     | 28324693 | 28356271 - | 6    | 7.39  |
| ENSG0000(RP11-8J23. processed_ chr3  | 1.44E+08 | 1.44E+08 - | 0    | 0     |
| ENSG0000(RP1-29C18 sense_intr chr22  | 49612657 | 49615716 - | 0    | 0     |
| ENSG0000(HSPE1P27 processed_ chr1    | 21161475 | 21162081 + | 0    | 0     |
| ENSG0000(RP11-241I2 processed_ chr10 | 32109861 | 32111666 + | 0    | 0     |
| ENSG0000(CHCHD2P8 processed_ chr13   | 28107431 | 28107877 + | 0    | 0     |
| ENSG0000(AC010731. protein_co chr2   | 2.07E+08 | 2.07E+08 + | 0    | 0     |
| ENSG0000(RP11-9M1(lincRNA chr9       | 1.14E+08 | 1.14E+08 - | 1.56 | 3.44  |
| ENSG0000(BSN-AS1 antisense chr3      | 49640483 | 49641769 - | 0    | 0     |
| ENSG0000(RP11-90L2l antisense chr1   | 2.02E+08 | 2.02E+08 - | 0.09 | 0     |
| ENSG0000(RP3-417L2l antisense chr6   | 49817430 | 49820442 + | 0    | 0     |
| ENSG0000(DSCAM-AS antisense chr21    | 40383083 | 40385358 + | 0    | 0     |
| ENSG0000(KRT8P17 processed_ chrX     | 57984686 | 57986133 + | 0    | 0     |
| ENSG0000(AC128709. lincRNA chr3      | 1.97E+08 | 1.97E+08 - | 0    | 0     |
| ENSG0000(AC068286. lincRNA chr2      | 14886647 | 14907664 - | 0    | 0     |
| ENSG0000(AC013474. processed_ chr2   | 1.27E+08 | 1.27E+08 + | 0    | 0.09  |
| ENSG0000(FABP7P2 processed_ chr2     | 95368507 | 95368885 - | 0    | 0     |
| ENSG0000(RP5-1092A antisense chr1    | 3712200  | 3714298 -  | 0    | 0     |
| ENSG0000(RPL35AP22 processed_ chr9   | 1.18E+08 | 1.18E+08 - | 0    | 0     |
| ENSG0000(RP13-146A processed_ chrX   | 55599663 | 55600106 - | 0    | 0     |
| ENSG0000(HSP90AB6l processed_ chr13  | 96883842 | 96885821 - | 0    | 0     |
| ENSG0000(RP11-374P antisense chr9    | 1.34E+08 | 1.34E+08 + | 0    | 0     |
| ENSG0000(AC003984. lincRNA chr7      | 84532476 | 84584322 + | 0    | 0     |

|                                   |       |          |          |   |       |       |
|-----------------------------------|-------|----------|----------|---|-------|-------|
| ENSG0000(RP11-135D) lincRNA       | chr10 | 59589150 | 59611248 | + | 0     | 0     |
| ENSG0000(COX6CP17) processed      | chr10 | 7295106  | 7295290  | - | 0     | 0     |
| ENSG0000(RP1-60O19) lincRNA       | chr6  | 1.07E+08 | 1.07E+08 | - | 0     | 0     |
| ENSG0000(RP1-65J11) antisense     | chr1  | 30858158 | 30860254 | + | 0     | 0     |
| ENSG0000(RPSAP16) processed       | chr1  | 1.8E+08  | 1.8E+08  | + | 0.08  | 0     |
| ENSG0000(RP5-857K2) lincRNA       | chr1  | 587629   | 594768   | + | 0     | 0     |
| ENSG0000(AC128677) processed      | chr2  | 92006680 | 92007121 | - | 0     | 0     |
| ENSG0000(HMGB3P2) processed       | chr9  | 31644576 | 31645160 | - | 0     | 0     |
| ENSG0000(RP11-45I2C) lincRNA      | chr4  | 1.86E+08 | 1.86E+08 | + | 0     | 0     |
| ENSG0000(RCBTB2P1) processed      | chr10 | 88785600 | 88787061 | - | 0     | 0     |
| ENSG0000(AC114730) lincRNA        | chr2  | 2.42E+08 | 2.42E+08 | + | 0     | 0     |
| ENSG0000(RP5-865N1) lincRNA       | chr1  | 2.32E+08 | 2.32E+08 | + | 0     | 0     |
| ENSG0000(CTA-280A3) lincRNA       | chr22 | 48044710 | 48048549 | - | 0     | 0     |
| ENSG0000(TMEM30C) transcribed     | chr3  | 1E+08    | 1E+08    | + | 0     | 0     |
| ENSG0000(AC087430) lincRNA        | chr3  | 1008135  | 1012934  | + | 0     | 0     |
| ENSG0000(RP6-109B7) lincRNA       | chr22 | 46067356 | 46069891 | - | 0     | 0     |
| ENSG0000(AC009878) lincRNA        | chr15 | 26395072 | 26446774 | + | 0     | 0     |
| ENSG0000(C12orf75) protein_coding | chr12 | 1.05E+08 | 1.05E+08 | + | 42.74 | 41.87 |
| ENSG0000(RP11-410C) processed     | chr1  | 2.2E+08  | 2.2E+08  | + | 0     | 0     |
| ENSG0000(CDK5P1) processed        | chr8  | 1.23E+08 | 1.23E+08 | + | 0     | 0     |
| ENSG0000(LINC01440) lincRNA       | chr20 | 55408898 | 55482777 | + | 0     | 0     |
| ENSG0000(RP1-12G14) lincRNA       | chr6  | 1.5E+08  | 1.5E+08  | + | 0     | 0     |
| ENSG0000(SMIM1) protein_coding    | chr1  | 3772788  | 3775982  | + | 1.51  | 0.75  |
| ENSG0000(MTND1P3) processed       | chrX  | 62842542 | 62843502 | + | 0     | 0     |
| ENSG0000(LINC01366) lincRNA       | chr5  | 1.7E+08  | 1.7E+08  | + | 0.15  | 0     |
| ENSG0000(HGH1) protein_coding     | chr8  | 1.44E+08 | 1.44E+08 | + | 9.23  | 8.58  |
| ENSG0000(RPL39P3) processed       | chr6  | 73373108 | 73373263 | - | 6.67  | 0     |
| ENSG0000(RPL26P37) processed      | chrY  | 5793300  | 5793737  | - | 0     | 0     |
| ENSG0000(LINC00601) lincRNA       | chr10 | 1.26E+08 | 1.26E+08 | - | 0.15  | 0.17  |
| ENSG0000(AC009892) unprocessed    | chr19 | 54551970 | 54552256 | + | 0     | 0     |
| ENSG0000(RP11-348H) processed     | chr1  | 2.13E+08 | 2.13E+08 | + | 0     | 0     |
| ENSG0000(RP11-613C) processed     | chr17 | 49795343 | 49795669 | + | 0     | 0     |
| ENSG0000(RP5-1056L) antisense     | chr1  | 19591802 | 19596832 | - | 0     | 0     |
| ENSG0000(AC103563) unprocessed    | chr2  | 94991880 | 94994362 | + | 0     | 0     |
| ENSG0000(RP4-537K2) antisense     | chrX  | 1.3E+08  | 1.3E+08  | - | 0     | 0     |
| ENSG0000(RP1-197O1) processed     | chrX  | 1.32E+08 | 1.32E+08 | + | 0     | 0     |
| ENSG0000(NUCB1-AS) antisense      | chr19 | 48910930 | 48918891 | - | 0     | 0     |
| ENSG0000(AC009495) lincRNA        | chr2  | 1.66E+08 | 1.66E+08 | + | 0     | 0     |
| ENSG0000(AC006987) unprocessed    | chrY  | 10088026 | 10089586 | + | 0     | 0.15  |
| ENSG0000(PPP1R3E) protein_coding  | chr14 | 23295643 | 23302848 | - | 5.08  | 5.19  |
| ENSG0000(RP1-3E10) processed      | chrX  | 1.02E+08 | 1.02E+08 | + | 0     | 0     |
| ENSG0000(ZNF33CP) processed       | chr10 | 37894637 | 37896666 | + | 0     | 0     |
| ENSG0000(CTA-109P1) lincRNA       | chr10 | 1.18E+08 | 1.18E+08 | - | 0     | 0     |
| ENSG0000(CYP2C58P) processed      | chr10 | 94865852 | 94873129 | - | 0     | 0     |
| ENSG0000(LINC01702) lincRNA       | chr1  | 67522347 | 67532612 | + | 0     | 0     |

|                                |       |          |          |   |      |      |
|--------------------------------|-------|----------|----------|---|------|------|
| ENSG0000(RP11-127L: lincRNA    | chr9  | 1.19E+08 | 1.19E+08 | + | 0    | 0    |
| ENSG0000(LINC01525: lincRNA    | chr1  | 1.17E+08 | 1.17E+08 | + | 0    | 0    |
| ENSG0000(TBC1D3P3: unprocessε  | chr17 | 20543481 | 20550963 | - | 0    | 0    |
| ENSG0000(RP11-121A: antisense  | chr9  | 1.24E+08 | 1.24E+08 | - | 0    | 0    |
| ENSG0000(TATDN2P3: processed_  | chr13 | 23243520 | 23247184 | + | 0    | 0    |
| ENSG0000(TUBBP6: processed_    | chr7  | 55645620 | 55646951 | + | 0.04 | 0    |
| ENSG0000(RPL7AL3: processed_   | chr20 | 16684108 | 16684404 | - | 0    | 0    |
| ENSG0000(CTA-150C2: lincRNA    | chr22 | 38921227 | 38924708 | + | 0    | 0.33 |
| ENSG0000(TMSB10P2: processed_  | chrX  | 18341216 | 18341346 | + | 0    | 0    |
| ENSG0000(OR6E1P: unprocessε    | chr14 | 22702143 | 22703065 | + | 0    | 0    |
| ENSG0000(FAM83C-A: antisense   | chr20 | 35285251 | 35285756 | + | 0    | 0    |
| ENSG0000(RP11-145N: lincRNA    | chr1  | 59055999 | 59078116 | - | 0    | 0    |
| ENSG0000(TSPY26P: transcribed  | chr20 | 32186477 | 32190527 | - | 0.83 | 0.86 |
| ENSG0000(AC092638: processed_  | chr2  | 1.93E+08 | 1.93E+08 | - | 0    | 0    |
| ENSG0000(CTC-233O1: unprocessε | chrX  | 1.53E+08 | 1.53E+08 | + | 0    | 0    |
| ENSG0000(RP11-459J: lincRNA    | chr13 | 69311333 | 69322101 | + | 0    | 0    |
| ENSG0000(RP11-236P: processed_ | chrX  | 53113018 | 53113274 | - | 0    | 0    |
| ENSG0000(AC016712: processed_  | chr2  | 2.23E+08 | 2.23E+08 | + | 0    | 0    |
| ENSG0000(RP11-419N: processed_ | chr1  | 1.6E+08  | 1.6E+08  | + | 0    | 0    |
| ENSG0000(VN1R38P: unitary_ps   | chr7  | 64180006 | 64180892 | - | 0    | 0    |
| ENSG0000(MRPS18BP: processed_  | chr2  | 1.4E+08  | 1.4E+08  | + | 0    | 0    |
| ENSG0000(IGKV1OR2-IG_V_pseu    | chr2  | 91817771 | 91818248 | + | 0    | 0    |
| ENSG0000(RP13-131K: antisense  | chr3  | 48979918 | 48983985 | - | 0    | 0    |
| ENSG0000(RP1-151B1: antisense  | chr22 | 37166757 | 37182850 | + | 0    | 0.12 |
| ENSG0000(SUMO2P1: processed_   | chr6  | 29636060 | 29636343 | - | 0    | 0    |
| ENSG0000(RP1-203C2: processed_ | chrX  | 1.28E+08 | 1.28E+08 | - | 0    | 0    |
| ENSG0000(AC026185: unprocessε  | chr3  | 11488300 | 11488473 | - | 0    | 0    |
| ENSG0000(RP11-108N: processed_ | chr1  | 16889095 | 16889602 | + | 0    | 0    |
| ENSG0000(AC010982: lincRNA     | chr2  | 1.14E+08 | 1.14E+08 | - | 0    | 0    |
| ENSG0000(AC093716: processed_  | chr7  | 84847877 | 84848253 | - | 0    | 0    |
| ENSG0000(DANT2: lincRNA        | chrX  | 1.16E+08 | 1.16E+08 | - | 0.03 | 0.18 |
| ENSG0000(RP11-122K: antisense  | chr10 | 1.33E+08 | 1.33E+08 | - | 0.77 | 0.97 |
| ENSG0000(RP1-5O6.5: antisense  | chr22 | 38231320 | 38232248 | + | 0    | 0    |
| ENSG0000(OR13C1P: unprocessε   | chr9  | 1.05E+08 | 1.05E+08 | - | 0.06 | 0    |
| ENSG0000(RP11-384B: processed_ | chr1  | 87044935 | 87045871 | - | 0    | 0    |
| ENSG0000(AC010240: processed_  | chr5  | 1.33E+08 | 1.33E+08 | + | 0    | 0    |
| ENSG0000(TMEM185: unprocessε   | chrX  | 1.5E+08  | 1.5E+08  | + | 0    | 0    |
| ENSG0000(FKBP4P7: processed_   | chr9  | 62710036 | 62711398 | - | 0    | 0    |
| ENSG0000(ITGA9-AS1: processed_ | chr3  | 37745432 | 37861780 | - | 3.81 | 3.57 |
| ENSG0000(NDUFB4P6: processed_  | chr2  | 1.12E+08 | 1.12E+08 | - | 0    | 0    |
| ENSG0000(KDM5C-IT1: sense_intr | chrX  | 53212408 | 53214679 | - | 0.26 | 0.12 |
| ENSG0000(RP13-392I: lincRNA    | chr1  | 9501092  | 9503471  | - | 0    | 0    |
| ENSG0000(RPL5P28: processed_   | chr10 | 1.33E+08 | 1.33E+08 | - | 0    | 0    |
| ENSG0000(RPL22P17: processed_  | chr10 | 1.03E+08 | 1.03E+08 | - | 0    | 0    |
| ENSG0000(AC074117: processed_  | chr2  | 27455156 | 27455862 | + | 0    | 0    |

|                                       |          |          |   |       |       |
|---------------------------------------|----------|----------|---|-------|-------|
| ENSG0000(KDM4E protein_co chr11       | 95025258 | 95027596 | + | 0     | 0     |
| ENSG0000(AL162759.lincRNA chr14       | 53768942 | 53850882 | - | 0     | 0     |
| ENSG0000(LINC01422 lincRNA chr22      | 26903292 | 26920611 | + | 0     | 0.16  |
| ENSG0000(FAM103A2 processed_chr6      | 1.67E+08 | 1.67E+08 | - | 21.64 | 15.29 |
| ENSG0000(RP1-107N3 processed_chrX     | 1.28E+08 | 1.28E+08 | - | 0     | 0     |
| ENSG0000(KRT18P16 processed_chr5      | 1.24E+08 | 1.24E+08 | + | 0     | 0     |
| ENSG0000(AF127577.antisense chr21     | 14918534 | 14947096 | + | 0     | 0     |
| ENSG0000(ZNF652P1 processed_chr3      | 50786674 | 50788285 | - | 0     | 0     |
| ENSG0000(RP11-539E sense_intron chr10 | 51302566 | 51306709 | + | 0     | 0     |
| ENSG0000(MCF2L-AS1 antisense chr13    | 1.13E+08 | 1.13E+08 | - | 0     | 0     |
| ENSG0000(RP11-526P lincRNA chr10      | 2501783  | 2567239  | + | 0     | 0     |
| ENSG0000(DYNLL1P3 processed_chr1      | 18513118 | 18513383 | + | 0     | 0     |
| ENSG0000(SNORD62A snoRNA chr9         | 1.31E+08 | 1.31E+08 | + | 0     | 0     |
| ENSG0000(SMIM2-IT1 sense_intron chr13 | 44146470 | 44158222 | - | 0     | 0     |
| ENSG0000(AP000925. processed_chr11    | 1.12E+08 | 1.12E+08 | - | 0     | 0     |
| ENSG0000(RP11-70C1 antisense chr3     | 42785087 | 42852428 | - | 9.89  | 12.8  |
| ENSG0000(BRD7P6 processed_chr2        | 70353010 | 70355915 | + | 0     | 0     |
| ENSG0000(HLA-W unprocessed chr6       | 29956596 | 29958570 | + | 0     | 0     |
| ENSG0000(RP4-796I8.lincRNA chr20      | 12243895 | 12244296 | - | 0     | 0     |
| ENSG0000(AC114814.lincRNA chr2        | 2.35E+08 | 2.35E+08 | + | 0     | 0     |
| ENSG0000(RPL7AP25 processed_chr3      | 1.82E+08 | 1.82E+08 | - | 0     | 0     |
| ENSG0000(LINC01634 lincRNA chr22      | 18029385 | 18037968 | + | 0     | 0     |
| ENSG0000(AC137723.antisense chr17     | 81941869 | 81947601 | + | 0     | 0     |
| ENSG0000(FAUP1 processed_chr18        | 74389884 | 74390297 | - | 0     | 0     |
| ENSG0000(RP11-575L antisense chr9     | 83972233 | 83975777 | + | 0     | 0     |
| ENSG0000(MRPL53P1 processed_chr1      | 1.13E+08 | 1.13E+08 | - | 0     | 0     |
| ENSG0000(THRA1/BTF antisense chr17    | 48294335 | 48308762 | + | 0     | 0     |
| ENSG0000(HLA-Z unprocessed chr6       | 32896416 | 32896490 | + | 0     | 0     |
| ENSG0000(RP1-79C4.1 lincRNA chr1      | 1.71E+08 | 1.71E+08 | + | 0     | 0.03  |
| ENSG0000(LINC01281 lincRNA chrX       | 39304956 | 39327362 | - | 0     | 0     |
| ENSG0000(GAPDHP34 processed_chr13     | 36740041 | 36740863 | + | 0     | 0     |
| ENSG0000(RP11-82K1 processed_chr1     | 88923370 | 88923844 | + | 0     | 0     |
| ENSG0000(GXYLT1P6 processed_chr9      | 64488600 | 64489786 | + | 0     | 0     |
| ENSG0000(KRTAP19-1 unprocessed chr21  | 30514613 | 30514799 | - | 0     | 0     |
| ENSG0000(HM13-IT1 sense_intron chr20  | 31563166 | 31564076 | + | 0.52  | 0.57  |
| ENSG0000(LINC00957 lincRNA chr7       | 44039171 | 44042306 | + | 2.49  | 2.12  |
| ENSG0000(RPL23AP6 processed_chr13     | 25206049 | 25206506 | + | 0     | 0.19  |
| ENSG0000(DUSP8P5 processed_chr10      | 73731824 | 73733638 | + | 1.21  | 1.16  |
| ENSG0000(MTND4LP1 unprocessed chr2    | 2.01E+08 | 2.01E+08 | - | 0     | 0     |
| ENSG0000(AC012360.lincRNA chr2        | 1.05E+08 | 1.05E+08 | + | 0     | 0     |
| ENSG0000(AC007556.antisense chr2      | 1.69E+08 | 1.69E+08 | + | 0.68  | 0     |
| ENSG0000(COTL1P2 processed_chr17      | 20564538 | 20564889 | + | 0     | 0     |
| ENSG0000(AC009963. processed_chr2     | 1.08E+08 | 1.08E+08 | - | 0     | 0     |
| ENSG0000(AC006946. processed_chr22    | 17093612 | 17093939 | - | 0     | 0     |
| ENSG0000(RP5-1168A processed_chrX     | 1.13E+08 | 1.13E+08 | + | 0     | 0     |

|                    |                |       |          |          |   |      |      |
|--------------------|----------------|-------|----------|----------|---|------|------|
| ENSG0000(RPL12P25  | transcribed    | chr9  | 477750   | 478423   | + | 0.15 | 0.17 |
| ENSG0000(RPSAP76   | processed      | chr9  | 1.25E+08 | 1.25E+08 | - | 0    | 0.08 |
| ENSG0000(PVRIG2P   | transcribed    | chr7  | 1E+08    | 1E+08    | + | 0    | 0.7  |
| ENSG0000(BTG3P1    | processed      | chrX  | 1.28E+08 | 1.28E+08 | + | 0    | 0    |
| ENSG0000(AC016723. | antisense      | chr2  | 1.68E+08 | 1.68E+08 | - | 0    | 0    |
| ENSG0000(AC114765. | lincRNA        | chr2  | 2.2E+08  | 2.2E+08  | + | 0    | 0    |
| ENSG0000(DUSP5P2   | processed      | chr3  | 9600748  | 9602728  | + | 0    | 0    |
| ENSG0000(GEMIN2P2  | processed      | chr3  | 41977008 | 41978034 | + | 0    | 0    |
| ENSG0000(LINC01665 | lincRNA        | chr22 | 16746869 | 16748645 | - | 0    | 0    |
| ENSG0000(RP1-37M3. | processed      | chr22 | 45792418 | 45793636 | - | 0    | 0    |
| ENSG0000(RP11-561N | processed      | chr7  | 64566814 | 64567443 | - | 0    | 0    |
| ENSG0000(AF196972. | unprocessed    | chrX  | 48433201 | 48441619 | + | 0    | 0    |
| ENSG0000(AC114730. | antisense      | chr2  | 2.42E+08 | 2.42E+08 | - | 0    | 0    |
| ENSG0000(AC023128. | processed      | chr2  | 1.45E+08 | 1.45E+08 | - | 0    | 0    |
| ENSG0000(RPS29P16  | processed      | chr7  | 1.03E+08 | 1.03E+08 | + | 0    | 0    |
| ENSG0000(RP11-428G | lincRNA        | chr10 | 65313785 | 65314970 | + | 0    | 0    |
| ENSG0000(LINC01621 | lincRNA        | chr6  | 79803583 | 79807225 | - | 0    | 0    |
| ENSG0000(RP11-399E | lincRNA        | chr1  | 41242373 | 41284861 | + | 0.11 | 0    |
| ENSG0000(AC016292. | antisense      | chr17 | 1181893  | 1185086  | + | 0    | 0    |
| ENSG0000(SNRPGP10  | processed      | chr1  | 2.05E+08 | 2.05E+08 | + | 0    | 0    |
| ENSG0000(LINC01055 | lincRNA        | chr13 | 45680184 | 45701184 | - | 0    | 0    |
| ENSG0000(SAPCD2P2  | processed      | chr7  | 57424503 | 57425676 | + | 0    | 0    |
| ENSG0000(RPL36AP15 | processed      | chr2  | 47797826 | 47798091 | - | 0    | 1.01 |
| ENSG0000(DNM1P51   | transcribed    | chr15 | 84398316 | 84411701 | - | 0.31 | 0.78 |
| ENSG0000(RP4-764D2 | processed      | chr1  | 2.36E+08 | 2.36E+08 | + | 0    | 0    |
| ENSG0000(SSR4P1    | transcribed    | chr21 | 45070952 | 45074165 | - | 1.08 | 1.18 |
| ENSG0000(RPEL1     | protein_coding | chr10 | 1.03E+08 | 1.03E+08 | + | 0    | 0    |
| ENSG0000(RP11-388B | processed      | chr9  | 82130752 | 82131632 | + | 0    | 0    |
| ENSG0000(MRPS10P1  | processed      | chr1  | 1.7E+08  | 1.7E+08  | + | 0    | 0    |
| ENSG0000(RPL7P31   | processed      | chr7  | 34710757 | 34711480 | + | 0    | 0    |
| ENSG0000(RP11-477D | antisense      | chr6  | 1.55E+08 | 1.55E+08 | - | 0.09 | 0.15 |
| ENSG0000(MTND4P31  | processed      | chrX  | 70124972 | 70129071 | - | 0    | 0    |
| ENSG0000(LINC02154 | lincRNA        | chrX  | 13266048 | 13303452 | - | 1.35 | 1.79 |
| ENSG0000(RP11-397A | unprocessed    | chr1  | 2.47E+08 | 2.47E+08 | + | 0    | 0    |
| ENSG0000(SPAAR     | protein_coding | chr9  | 35909483 | 35937153 | + | 0.14 | 0.32 |
| ENSG0000(RP11-134K | sense_intronic | chr9  | 8700595  | 8701552  | - | 0    | 0    |
| ENSG0000(CTD-2651B | processed      | chr15 | 45321077 | 45321692 | - | 0    | 0    |
| ENSG0000(EPN2-AS1  | antisense      | chr17 | 19296596 | 19306261 | - | 0    | 0    |
| ENSG0000(RP11-204P | antisense      | chr6  | 1.37E+08 | 1.37E+08 | + | 0    | 0    |
| ENSG0000(RP4-641G1 | processed      | chr1  | 78749073 | 78750659 | + | 0    | 0    |
| ENSG0000(AC114808. | antisense      | chr2  | 1059133  | 1068341  | - | 0    | 0    |
| ENSG0000(CYMP-AS1  | lincRNA        | chr1  | 1.1E+08  | 1.1E+08  | - | 0    | 0    |
| ENSG0000(SNORA71B  | snoRNA         | chr20 | 38425083 | 38425354 | - | 4.77 | 0    |
| ENSG0000(RP11-397C | antisense      | chr10 | 14074284 | 14087605 | + | 0.16 | 0    |
| ENSG0000(AC007041. | processed      | chr2  | 20239892 | 20241046 | - | 0    | 0    |

|                     |             |       |          |          |   |       |      |
|---------------------|-------------|-------|----------|----------|---|-------|------|
| ENSG0000(TTTY4B     | lincRNA     | chrY  | 24570202 | 24607025 | + | 0     | 0    |
| ENSG0000(KRT18P63   | processed_  | chr4  | 17911674 | 17912976 | + | 0     | 0    |
| ENSG0000(RPSAP24    | processed_  | chr2  | 1.74E+08 | 1.74E+08 | + | 0     | 0    |
| ENSG0000(AC005808.  | lincRNA     | chr20 | 53608354 | 53634590 | + | 0     | 0    |
| ENSG0000(RP3-339A1  | processed_  | chrX  | 53456273 | 53457029 | - | 0     | 0    |
| ENSG0000(AC010149.  | antisense   | chr2  | 2.31E+08 | 2.31E+08 | - | 0     | 0    |
| ENSG0000(RPL29P30   | transcribec | chr15 | 70796597 | 70802688 | - | 0     | 0    |
| ENSG0000(RP11-667F  | unprocessε  | chr7  | 65525629 | 65554744 | - | 0     | 0    |
| ENSG0000(KATNBL1P:  | processed_  | chr18 | 2593674  | 2594913  | - | 0     | 0    |
| ENSG0000(RP11-282C  | antisense   | chr12 | 1.23E+08 | 1.23E+08 | - | 2.12  | 2.26 |
| ENSG0000(SUMO2P1(   | processed_  | chr3  | 33077204 | 33077491 | + | 0     | 0    |
| ENSG0000(RPS7P13    | processed_  | chrX  | 95679130 | 95679627 | - | 0     | 0    |
| ENSG0000(RP11-342N  | antisense   | chr10 | 79382328 | 79409274 | + | 0     | 0    |
| ENSG0000(AC006159.  | antisense   | chr7  | 1.17E+08 | 1.17E+08 | - | 0     | 0    |
| ENSG0000(AC083875.  | processed_  | chr7  | 1.33E+08 | 1.33E+08 | - | 0     | 0    |
| ENSG0000(ZSWIM5P1   | processed_  | chr17 | 15768717 | 15771426 | - | 0     | 0    |
| ENSG0000(AC006373.  | lincRNA     | chr7  | 9961024  | 9981817  | + | 0     | 0    |
| ENSG0000(RP5-930J4. | unprocessε  | chr1  | 20692734 | 20694013 | - | 0     | 0    |
| ENSG0000(MTATP6P1   | unprocessε  | chr2  | 2.03E+08 | 2.03E+08 | + | 0     | 0    |
| ENSG0000(RP11-91K1  | antisense   | chr1  | 19814367 | 19819502 | + | 0     | 0    |
| ENSG0000(AC064865.  | lincRNA     | chr2  | 1.45E+08 | 1.45E+08 | - | 0     | 0    |
| ENSG0000(DPY19L2P4  | transcribec | chr7  | 90119400 | 90125600 | + | 0.01  | 0    |
| ENSG0000(LINC01278  | processed_  | chrX  | 63343227 | 63561071 | - | 10.39 | 10.2 |
| ENSG0000(ESRRAP2    | transcribec | chr13 | 21260015 | 21295003 | + | 0     | 0.08 |
| ENSG0000(RP11-214J: | processed_  | chr2  | 26101317 | 26102136 | - | 0     | 0    |
| ENSG0000(PSMB3P2    | processed_  | chr2  | 2.17E+08 | 2.17E+08 | - | 0     | 0    |
| ENSG0000(XXbac-B47  | sense_intr  | chr22 | 17983205 | 17983619 | - | 0     | 0    |
| ENSG0000(RP11-74K1  | lincRNA     | chr1  | 69243372 | 69249423 | - | 0     | 0    |
| ENSG0000(TRAPPC13f  | processed_  | chrX  | 76655498 | 76656559 | - | 0     | 0    |
| ENSG0000(LURAP1L-A  | antisense   | chr9  | 12700100 | 12814345 | - | 0.24  | 0.09 |
| ENSG0000(RP11-480I: | processed_  | chr1  | 2.03E+08 | 2.03E+08 | - | 0     | 0    |
| ENSG0000(RP11-142A  | lincRNA     | chr7  | 91380778 | 91556848 | - | 0     | 0    |
| ENSG0000(PNPLA4P1   | unprocessε  | chrY  | 14081075 | 14086600 | + | 0     | 0    |
| ENSG0000(TOPORS-A:  | protein_co  | chr9  | 32551144 | 32567005 | + | 9.49  | 9.9  |
| ENSG0000(HAUS6P3    | processed_  | chr7  | 53862233 | 53863339 | + | 0     | 0    |
| ENSG0000(IQCF5-AS1  | antisense   | chr3  | 51873596 | 51875767 | + | 0     | 0    |
| ENSG0000(RPS26P31   | processed_  | chr7  | 1.23E+08 | 1.23E+08 | + | 0     | 0    |
| ENSG0000(RP5-928E2  | lincRNA     | chrX  | 85210706 | 85219698 | + | 0     | 0    |
| ENSG0000(TAB3P1     | transcribec | chrY  | 13153931 | 13162214 | - | 0.07  | 0    |
| ENSG0000(AC078974.  | processed_  | chr2  | 85068809 | 85069031 | - | 0     | 0    |
| ENSG0000(AC007652.  | lincRNA     | chr7  | 35496021 | 35510263 | - | 0     | 0    |
| ENSG0000(RPL10AP5   | processed_  | chr1  | 2.42E+08 | 2.42E+08 | + | 0     | 0    |
| ENSG0000(MRPL50P4   | processed_  | chr10 | 59551404 | 59551878 | - | 0     | 0    |
| ENSG0000(NEURL1-AS  | antisense   | chr10 | 1.03E+08 | 1.04E+08 | - | 0     | 0    |
| ENSG0000(EIF4A1P7   | processed_  | chr13 | 28598833 | 28600052 | + | 0     | 0    |

|                                        |          |          |   |       |      |
|----------------------------------------|----------|----------|---|-------|------|
| ENSG0000(LINC01372 lincRNA chr7        | 67335976 | 67340024 | + | 0.62  | 0.68 |
| ENSG0000(LINC01664 lincRNA chr22       | 17121586 | 17132104 | + | 0     | 0    |
| ENSG0000(RAB9AP4 unprocessed chrY      | 18649671 | 18650279 | + | 0     | 0    |
| ENSG0000(RP11-363D antisense chr2      | 96527940 | 96532306 | - | 0.18  | 0.2  |
| ENSG0000(UBE2R2-AS antisense chr9      | 33785950 | 33818795 | - | 0.21  | 0    |
| ENSG0000(RPL21P135 processed_ chr3     | 37748110 | 37748900 | + | 0.08  | 0.09 |
| ENSG0000(GYG2-AS1 antisense chrX       | 2852740  | 2853760  | - | 0     | 0    |
| ENSG0000(RP1-101G1 processed_ chr22    | 34589085 | 34591278 | - | 0     | 0    |
| ENSG0000(AC114755. unprocessed chr2    | 1.06E+08 | 1.06E+08 | + | 0     | 0    |
| ENSG0000(JARID2-AS1 antisense chr6     | 15247815 | 15248634 | - | 0     | 0    |
| ENSG0000(DBF4P1 processed_ chr10       | 64168959 | 64170850 | - | 0.03  | 0    |
| ENSG0000(LINC01889 lincRNA chr2        | 1.26E+08 | 1.26E+08 | + | 0     | 0    |
| ENSG0000(LINC01221 lincRNA chr1        | 1.99E+08 | 1.99E+08 | + | 0     | 0    |
| ENSG0000(LINC01967 lincRNA chr3        | 27997210 | 28028604 | - | 1.25  | 0.52 |
| ENSG0000(RP11-498P lincRNA chr9        | 97233201 | 97235014 | + | 0     | 0    |
| ENSG0000(AC010987. lincRNA chr2        | 67565604 | 67684077 | - | 0     | 0    |
| ENSG0000(AC012506. lincRNA chr2        | 23375229 | 23381299 | - | 0     | 0    |
| ENSG0000(AC073046. lincRNA chr2        | 73985132 | 73986343 | + | 0.88  | 0.73 |
| ENSG0000(SNX19P2 processed_ chr13      | 18892260 | 18895230 | - | 0     | 0    |
| ENSG0000(RP4-639F2 antisense chr1      | 94927566 | 94963270 | + | 2.21  | 1.94 |
| ENSG0000(AC079799. antisense chr7      | 83355154 | 83362266 | + | 0     | 0    |
| ENSG0000(RP11-693N transcribed chr11   | 1.05E+08 | 1.05E+08 | - | 0.47  | 0    |
| ENSG0000(RPS2P7 processed_ chr20       | 45640486 | 45641370 | - | 0     | 0.16 |
| ENSG0000(BX842568. unprocessed chrX    | 36957913 | 36958139 | + | 0     | 0    |
| ENSG0000(OFD1P18Y unprocessed chrY     | 25871931 | 25898653 | - | 0     | 0    |
| ENSG0000(TAB3-AS2 antisense chrX       | 30854321 | 30854707 | + | 0     | 0    |
| ENSG0000(RP4-756G2 antisense chr22     | 41209122 | 41217627 | - | 2.33  | 4.13 |
| ENSG0000(LLPHP2 processed_ chr21       | 25762938 | 25763333 | - | 0     | 0    |
| ENSG0000(AC011196. lincRNA chr15       | 26657030 | 26658763 | - | 0     | 0    |
| ENSG0000(LINC01815 lincRNA chr2        | 81462695 | 81466946 | - | 0     | 0    |
| ENSG0000(USP9YP27 unprocessed chrY     | 17788315 | 17789484 | - | 0     | 0    |
| ENSG0000(AC009505. antisense chr2      | 1.06E+08 | 1.06E+08 | - | 0     | 0.14 |
| ENSG0000(RP11-63P1 lincRNA chr9        | 72257336 | 72257783 | + | 0     | 0    |
| ENSG0000(MTCO1P23 processed_ chr10     | 69591406 | 69592931 | - | 0     | 0    |
| ENSG0000(FTLP1 processed_ chr20        | 45975249 | 45976075 | - | 0     | 0    |
| ENSG0000(RP5-1028L antisense chr1      | 1.1E+08  | 1.1E+08  | - | 0     | 0    |
| ENSG0000(HIPK1-AS1 antisense chr1      | 1.14E+08 | 1.14E+08 | - | 0.04  | 0.06 |
| ENSG0000(AGAP1-IT1 sense_intronic chr2 | 2.36E+08 | 2.36E+08 | + | 0.1   | 0    |
| ENSG0000(AC087294. antisense chr17     | 21214331 | 21230035 | + | 0.1   | 0.17 |
| ENSG0000(MSC-AS1 antisense chr8        | 71828167 | 72118393 | + | 27.87 | 29.7 |
| ENSG0000(LINC00402 lincRNA chr13       | 74231457 | 74259976 | + | 0     | 0    |
| ENSG0000(RP11-284P lincRNA chr9        | 14025971 | 14030115 | + | 0     | 0    |
| ENSG0000(FEHP1 processed_ chr3         | 34872641 | 34873854 | + | 0     | 0    |
| ENSG0000(RP11-532N antisense chr6      | 1.23E+08 | 1.24E+08 | + | 0.44  | 3.25 |
| ENSG0000(AC009411. lincRNA chr2        | 21630548 | 21636309 | - | 0     | 0    |

|                               |       |          |          |   |      |      |
|-------------------------------|-------|----------|----------|---|------|------|
| ENSG0000(RP1-230L1) lincRNA   | chr6  | 1.64E+08 | 1.64E+08 | + | 0    | 0    |
| ENSG0000(MTND1P3) processed   | chrX  | 1.43E+08 | 1.43E+08 | + | 0    | 0    |
| ENSG0000(RPS11P1) processed   | chr20 | 11345383 | 11345855 | - | 0    | 0    |
| ENSG0000(RP11-230B) antisense | chr1  | 62688482 | 62710694 | + | 0.1  | 0.05 |
| ENSG0000(AC087499) processed  | chr17 | 20612667 | 20614008 | + | 0    | 0    |
| ENSG0000(NDUFB11P) processed  | chr11 | 92336032 | 92336496 | - | 0    | 0    |
| ENSG0000(AC073551) processed  | chr2  | 1.56E+08 | 1.56E+08 | - | 0    | 0    |
| ENSG0000(EIF1P2) processed    | chr1  | 38958275 | 38958925 | - | 0    | 0    |
| ENSG0000(ANKRD26P) unprocess  | chr13 | 38922727 | 38936199 | - | 0    | 0    |
| ENSG0000(RPL6P27) transcribed | chr18 | 6462144  | 6463015  | - | 0.14 | 0.16 |
| ENSG0000(AC005822) processed  | chr17 | 16616848 | 16617881 | - | 0    | 0    |
| ENSG0000(SUMO1P4) processed   | chr19 | 49275119 | 49275420 | + | 0    | 0    |
| ENSG0000(RP11-1198) unprocess | chr5  | 71220356 | 71259238 | - | 0    | 0    |
| ENSG0000(NOP56P1) processed   | chr6  | 28783633 | 28784004 | - | 0    | 0    |
| ENSG0000(AC002310) antisense  | chr16 | 30534752 | 30537144 | + | 0.62 | 0.53 |
| ENSG0000(RP11-334A) antisense | chr1  | 53114576 | 53118609 | + | 0.12 | 0.26 |
| ENSG0000(AP000477) lincRNA    | chr21 | 23960905 | 23967273 | - | 0    | 0    |
| ENSG0000(NFAM1) protein_co    | chr22 | 42380410 | 42432395 | - | 0.01 | 0    |
| ENSG0000(LINC00533) lincRNA   | chr6  | 28648286 | 28649066 | - | 0    | 0    |
| ENSG0000(SNX18P14) processed  | chr2  | 94786688 | 94787261 | - | 0    | 0    |
| ENSG0000(RP11-555H) lincRNA   | chr9  | 1.35E+08 | 1.35E+08 | + | 0    | 0    |
| ENSG0000(RP3-412A9) processed | chr22 | 31113017 | 31113396 | + | 0    | 0    |
| ENSG0000(AC073150) processed  | chr7  | 27491682 | 27492765 | - | 0    | 0    |
| ENSG0000(RP4-800F2) antisense | chr1  | 1.69E+08 | 1.69E+08 | + | 0    | 0    |
| ENSG0000(LINC01871) lincRNA   | chr2  | 7725801  | 7730705  | + | 0    | 0    |
| ENSG0000(XXbac-B33) lincRNA   | chr22 | 20343203 | 20344365 | - | 0    | 0    |
| ENSG0000(AC007283) processed  | chr2  | 2.01E+08 | 2.01E+08 | - | 0    | 0    |
| ENSG0000(GS1-111G1) processed | chr7  | 71942259 | 71942468 | + | 0    | 0    |
| ENSG0000(RP11-448G) processed | chr1  | 1.98E+08 | 1.98E+08 | + | 0    | 0    |
| ENSG0000(AC007562) unprocess  | chrY  | 25512301 | 25527786 | - | 0    | 0    |
| ENSG0000(AC008268) lincRNA    | chr2  | 95666084 | 95668715 | + | 0    | 0.23 |
| ENSG0000(AC011247) antisense  | chr2  | 38601598 | 38602178 | + | 0    | 0    |
| ENSG0000(GAPDHP65) processed  | chrX  | 46439709 | 46440714 | - | 0    | 0.06 |
| ENSG0000(GNAS-AS1) antisense  | chr20 | 58818919 | 58850903 | - | 0.18 | 0.36 |
| ENSG0000(GS1-600G8) unprocess | chrX  | 13327937 | 13329867 | + | 0    | 0    |
| ENSG0000(RBMS3-AS) antisense  | chr3  | 29926811 | 29934156 | - | 0    | 0    |
| ENSG0000(RP11-380D) processed | chr20 | 56267872 | 56269231 | + | 0    | 0    |
| ENSG0000(GAPDHP23) processed  | chr1  | 1.19E+08 | 1.19E+08 | - | 0    | 0    |
| ENSG0000(LINC01102) lincRNA   | chr2  | 1.04E+08 | 1.05E+08 | + | 0    | 0.03 |
| ENSG0000(RRM2P4) processed    | chrX  | 1.44E+08 | 1.44E+08 | + | 0    | 0    |
| ENSG0000(BARX1-AS1) lincRNA   | chr9  | 93955597 | 93959140 | + | 0    | 0    |
| ENSG0000(POU5F1P3) processed  | chr12 | 8133772  | 8134849  | - | 0    | 0    |
| ENSG0000(RP5-827C2) processed | chr1  | 2.34E+08 | 2.34E+08 | - | 0    | 0    |
| ENSG0000(AK4P6) processed     | chr4  | 1.51E+08 | 1.51E+08 | + | 0    | 0    |
| ENSG0000(NKX1-1) protein_co   | chr4  | 1402932  | 1406331  | - | 0    | 0    |



|                               |       |          |          |   |        |        |
|-------------------------------|-------|----------|----------|---|--------|--------|
| ENSG0000(AF127936.lincRNA     | chr21 | 14818843 | 15014430 | - | 0.38   | 0.42   |
| ENSG0000(AC013448.lincRNA     | chr2  | 2.24E+08 | 2.24E+08 | + | 0      | 0      |
| ENSG0000(RP1-158P9.lincRNA    | chr1  | 56145721 | 56155224 | + | 0      | 0      |
| ENSG0000(NSRP1P1.processed_   | chr1  | 77847110 | 77848802 | + | 0      | 0      |
| ENSG0000(AJ239322.1.lincRNA   | chr2  | 1.32E+08 | 1.32E+08 | - | 0      | 0      |
| ENSG0000(ST13P2.processed_    | chr2  | 1.88E+08 | 1.88E+08 | + | 0      | 0      |
| ENSG0000(XXbac-B47.unprocessε | chr22 | 18101612 | 18101888 | + | 0      | 0      |
| ENSG0000(FAM21EP.transcribec  | chr10 | 50021182 | 50067803 | - | 0.8    | 0.26   |
| ENSG0000(RPL36AP33.processed_ | chr9  | 35507564 | 35507873 | + | 0      | 0      |
| ENSG0000(AC020743.lincRNA     | chr7  | 50274790 | 50275622 | - | 0      | 0      |
| ENSG0000(LINC00494.lincRNA    | chr20 | 48359950 | 48370629 | + | 0      | 0      |
| ENSG0000(OR7E110P.unprocessε  | chr10 | 14986942 | 14987515 | - | 0      | 0      |
| ENSG0000(RP11-203P.lincRNA    | chr13 | 78275720 | 78277514 | - | 0      | 0      |
| ENSG0000(KRT18P66.processed_  | chr9  | 30773464 | 30774732 | + | 0      | 0      |
| ENSG0000(SNRPFP4.processed_   | chr3  | 48161176 | 48161417 | + | 0      | 0      |
| ENSG0000(TNR-IT1.sense_intrc  | chr1  | 1.76E+08 | 1.76E+08 | - | 0      | 0      |
| ENSG0000(AC090952.antisense   | chr3  | 14648194 | 14649432 | - | 0      | 0      |
| ENSG0000(RNF148.protein_co    | chr7  | 1.23E+08 | 1.23E+08 | - | 0      | 0      |
| ENSG0000(AC016644.antisense   | chr5  | 56941307 | 56947152 | + | 0      | 0      |
| ENSG0000(NUS1P1.processed_    | chrX  | 47512602 | 47513483 | - | 0      | 0      |
| ENSG0000(RP11-457D.antisense  | chr10 | 17862887 | 17865471 | - | 0      | 0      |
| ENSG0000(MTND6P14.processed_  | chr1  | 2.36E+08 | 2.36E+08 | + | 0      | 0      |
| ENSG0000(AC002069.processed_  | chr7  | 88512029 | 88513187 | - | 0      | 0      |
| ENSG0000(AC092646.processed_  | chr2  | 1.24E+08 | 1.24E+08 | + | 0      | 0      |
| ENSG0000(LINC00484.lincRNA    | chr9  | 91159573 | 91165658 | + | 0      | 0      |
| ENSG0000(PTP4A1P5.processed_  | chrX  | 27427777 | 27428231 | - | 0      | 0      |
| ENSG0000(LINC01647.lincRNA    | chr1  | 11609531 | 11613355 | + | 0.05   | 0      |
| ENSG0000(RPL10P5.processed_   | chr2  | 1.09E+08 | 1.09E+08 | - | 0      | 0      |
| ENSG0000(RP11-242G.lincRNA    | chr10 | 69684899 | 69692452 | + | 0      | 0      |
| ENSG0000(MTND1P2.unprocessε   | chr7  | 64111752 | 64112572 | - | 0      | 0      |
| ENSG0000(RP1-172B2.processed_ | chr22 | 39750127 | 39751293 | + | 0      | 0      |
| ENSG0000(MXRA5Y.unprocessε    | chrY  | 11957208 | 11987386 | + | 0      | 0      |
| ENSG0000(AC064850.processed_  | chr2  | 1.36E+08 | 1.36E+08 | - | 0      | 0      |
| ENSG0000(RP11-545I5.antisense | chr6  | 1.46E+08 | 1.46E+08 | + | 8.88   | 9.38   |
| ENSG0000(AC007253.processed_  | chr2  | 39929110 | 39929998 | + | 0      | 0      |
| ENSG0000(H3F3AP4.processed_   | chr2  | 1.75E+08 | 1.75E+08 | + | 119.94 | 139.34 |
| ENSG0000(RPL36P18.processed_  | chrX  | 1.15E+08 | 1.15E+08 | + | 0      | 0      |
| ENSG0000(RP11-374M.lincRNA    | chr9  | 61865755 | 61866965 | - | 0      | 0      |
| ENSG0000(LINC00345.lincRNA    | chr13 | 52484161 | 52484680 | - | 0      | 0      |
| ENSG0000(MIR670HG.lincRNA     | chr11 | 43569306 | 43570395 | + | 0      | 0      |
| ENSG0000(SAPCD1-AS.antisense  | chr6  | 31764310 | 31765588 | - | 0      | 0      |
| ENSG0000(LINC00298.lincRNA    | chr2  | 7922425  | 8278084  | - | 0.02   | 0.03   |
| ENSG0000(AC004593.antisense   | chr7  | 29199540 | 29208970 | - | 0      | 0      |
| ENSG0000(RPL21P40.processed_  | chr3  | 32030196 | 32030678 | + | 0      | 0      |
| ENSG0000(AC090286.transcribec | chr17 | 18908279 | 18908865 | + | 0      | 0.53   |

|                     |                   |          |          |   |      |      |
|---------------------|-------------------|----------|----------|---|------|------|
| ENSG0000(RP11-109P) | processed_chr1    | 37840986 | 37841676 | + | 0    | 0    |
| ENSG0000(LDHAP2)    | processed_chr1    | 2.36E+08 | 2.36E+08 | + | 0    | 0    |
| ENSG0000(NPM1P26)   | processed_chr10   | 96560185 | 96560922 | + | 0    | 0    |
| ENSG0000(OR5AN2P)   | unprocessε chr11  | 59309681 | 59310576 | - | 0    | 0    |
| ENSG0000(RP11-4491) | processed_chr10   | 30383400 | 30383622 | + | 0    | 0    |
| ENSG0000(AC008746)  | processed_chr19   | 54446830 | 54447047 | + | 0    | 0    |
| ENSG0000(AC018442)  | processed_chr8    | 99695957 | 99698017 | + | 0    | 0    |
| ENSG0000(RP11-126D) | processed_chrX    | 40514895 | 40515508 | + | 0    | 0    |
| ENSG0000(PPIAP20)   | processed_chr19   | 12508129 | 12508263 | + | 0    | 0    |
| ENSG0000(LINC00993) | lincRNA_chr10     | 37309185 | 37347031 | + | 0    | 0    |
| ENSG0000(AC116614)  | antisense_chr2    | 949627   | 950274   | - | 0    | 0    |
| ENSG0000(AP000351)  | unprocessε chr22  | 24006305 | 24008258 | - | 0    | 0    |
| ENSG0000(CUBNP3)    | unprocessε chr10  | 45127318 | 45148914 | + | 0    | 0    |
| ENSG0000(AC006987)  | unprocessε chrY   | 10090802 | 10091207 | + | 0.21 | 0    |
| ENSG0000(RP11-395P) | processed_chr3    | 47663626 | 47663934 | + | 0    | 0    |
| ENSG0000(PA2G4P2)   | processed_chr20   | 12380056 | 12381255 | + | 0    | 0    |
| ENSG0000(CXorf51B)  | protein_co chrX   | 1.47E+08 | 1.47E+08 | + | 0    | 0    |
| ENSG0000(CYCSP52)   | processed_chr1    | 1.57E+08 | 1.57E+08 | + | 0    | 0    |
| ENSG0000(PCBP2P1)   | processed_chr21   | 39171130 | 39172106 | - | 0    | 0.21 |
| ENSG0000(LINC00894) | antisense_chrX    | 1.5E+08  | 1.5E+08  | + | 1.3  | 1.4  |
| ENSG0000(RP11-342N) | transcribec chr10 | 79507597 | 79510922 | - | 0    | 0    |
| ENSG0000(DICER1-AS) | antisense_chr14   | 95157645 | 95179933 | + | 2.61 | 2.19 |
| ENSG0000(RP11-323A) | processed_chr9    | 75401889 | 75402992 | - | 0    | 0    |
| ENSG0000(RP5-1097F) | antisense_chr1    | 2.31E+08 | 2.31E+08 | - | 0    | 0    |
| ENSG0000(ANKRD34C)  | protein_co chr15  | 79293285 | 79298235 | + | 0    | 0    |
| ENSG0000(RP4-604G5) | unprocessε chr7   | 99992397 | 99993050 | + | 0    | 0    |
| ENSG0000(KRT18P46)  | processed_chr2    | 1.62E+08 | 1.62E+08 | + | 0    | 0    |
| ENSG0000(DPP10-AS2) | antisense_chr2    | 1.15E+08 | 1.15E+08 | - | 0    | 0    |
| ENSG0000(MFRP)      | protein_co chr11  | 1.19E+08 | 1.19E+08 | - | 0    | 0    |
| ENSG0000(FAM197Y1)  | unprocessε chrY   | 21465384 | 21467163 | - | 0    | 0    |
| ENSG0000(GABPAP)    | processed_chr7    | 63893286 | 63894641 | + | 0    | 0    |
| ENSG0000(AC013268)  | processed_chr2    | 1.1E+08  | 1.1E+08  | + | 0    | 0    |
| ENSG0000(AC009299)  | antisense_chr2    | 1.61E+08 | 1.61E+08 | - | 0    | 0    |
| ENSG0000(AC007389)  | lincRNA_chr2      | 65589566 | 65640177 | - | 0.4  | 1.11 |
| ENSG0000(AC010148)  | processed_chr2    | 2.35E+08 | 2.35E+08 | - | 0    | 0.1  |
| ENSG0000(AC007349)  | lincRNA_chr7      | 36781008 | 36782789 | + | 0    | 0    |
| ENSG0000(RP11-2906) | processed_chrX    | 1.44E+08 | 1.44E+08 | + | 0    | 0    |
| ENSG0000(OR2AF1P)   | processed_chrX    | 1.32E+08 | 1.32E+08 | + | 0    | 0    |
| ENSG0000(AC124997)  | lincRNA_chr15     | 25484831 | 25578791 | - | 0    | 0    |
| ENSG0000(RP3-522P1) | antisense_chr6    | 25245356 | 25261411 | - | 0    | 0    |
| ENSG0000(HMGN1P3)   | processed_chr2    | 97827248 | 97827545 | + | 0    | 0    |
| ENSG0000(RPL7AP72)  | processed_chrX    | 1.28E+08 | 1.28E+08 | + | 0    | 0    |
| ENSG0000(RP1-10C16) | lincRNA_chr1      | 1.69E+08 | 1.69E+08 | - | 0    | 0    |
| ENSG0000(TRIM60P1)  | processed_chr13   | 66268997 | 66270458 | + | 0    | 0    |
| ENSG0000(RP11-419N) | processed_chr7    | 55797946 | 55798480 | - | 0    | 0    |

|                                       |       |          |          |   |      |      |
|---------------------------------------|-------|----------|----------|---|------|------|
| ENSG0000( PHACTR2- <i>A</i> antisense | chr6  | 1.44E+08 | 1.44E+08 | - | 0    | 0    |
| ENSG0000( RP5-866L2) lincRNA          | chr1  | 54516412 | 54517259 | - | 0    | 0    |
| ENSG0000( RP11-5G18 processed_        | chr10 | 1.17E+08 | 1.17E+08 | - | 0    | 0    |
| ENSG0000( RP11-439H lincRNA           | chr6  | 23337711 | 23346560 | + | 0    | 0    |
| ENSG0000( CTBP2P2 processed_          | chr10 | 94646364 | 94647996 | - | 0    | 0    |
| ENSG0000( SEPT14P12 processed_        | chr1  | 1.97E+08 | 1.97E+08 | - | 0    | 0    |
| ENSG0000( RP11-634B antisense         | chr1  | 2.48E+08 | 2.48E+08 | + | 0.18 | 0.21 |
| ENSG0000( KIAA0040 protein_co         | chr1  | 1.75E+08 | 1.75E+08 | - | 0.04 | 0.09 |
| ENSG0000( RP11-339A processed_        | chr1  | 80092103 | 80093237 | - | 0    | 0    |
| ENSG0000( ARHGAP42 processed_         | chr22 | 15550904 | 15553838 | - | 0    | 0    |
| ENSG0000( HCG20400) antisense         | chr2  | 47527537 | 47535199 | + | 0    | 0    |
| ENSG0000( MTCO3P46 processed_         | chr1  | 2.36E+08 | 2.36E+08 | - | 0    | 0    |
| ENSG0000( SNRPGP5 processed_          | chr10 | 13104574 | 13104793 | - | 0    | 0    |
| ENSG0000( BRD7P5 processed_           | chr13 | 94757451 | 94759272 | - | 0    | 0    |
| ENSG0000( LINC00607 lincRNA           | chr2  | 2.16E+08 | 2.16E+08 | - | 2.02 | 1.68 |
| ENSG0000( AP001625. antisense         | chr21 | 42560374 | 42561934 | - | 0    | 0    |
| ENSG0000( AC023347. lincRNA           | chr2  | 1.26E+08 | 1.26E+08 | + | 0    | 0    |
| ENSG0000( AC063976. unprocessε        | chr5  | 1.32E+08 | 1.32E+08 | - | 0    | 0    |
| ENSG0000( AC000089. processed_        | chr22 | 19792294 | 19793094 | + | 0    | 0    |
| ENSG0000( DPYD-AS2 antisense          | chr1  | 97796921 | 97798066 | + | 0    | 0    |
| ENSG0000( AC130360. unprocessε        | chr8  | 7341826  | 7342942  | + | 0    | 0    |
| ENSG0000( AC079779. lincRNA           | chr2  | 305111   | 314367   | - | 0    | 0    |
| ENSG0000( USP17L27 protein_co         | chr4  | 9344148  | 9345740  | + | 0    | 0    |
| ENSG0000( XXbac-BPG antisense         | chr6  | 30516266 | 30519217 | + | 0.22 | 0.24 |
| ENSG0000( RP3-333A1 antisense         | chr1  | 70947379 | 70951493 | + | 0.09 | 0    |
| ENSG0000( HNRNPA1F processed_         | chr13 | 93394977 | 93395855 | - | 0    | 0    |
| ENSG0000( AL109767. antisense         | chr14 | 99262948 | 99264735 | + | 0    | 0    |
| ENSG0000( ZNRF3-IT1 sense_intrε       | chr22 | 28992721 | 29018620 | + | 0    | 0    |
| ENSG0000( RP11-219I2 processed_       | chr3  | 42469640 | 42469879 | + | 0    | 0    |
| ENSG0000( RP11-73M) antisense         | chr1  | 31644049 | 31660162 | + | 0    | 0.11 |
| ENSG0000( MTND3P21 unprocessε         | chr1  | 93924386 | 93924716 | - | 0    | 0    |
| ENSG0000( RP11-421L) antisense        | chr1  | 1.01E+08 | 1.01E+08 | + | 0    | 0    |
| ENSG0000( RP11-402G processed_        | chr9  | 1.15E+08 | 1.15E+08 | + | 0    | 0    |
| ENSG0000( HCFC1-AS1 antisense         | chrX  | 1.54E+08 | 1.54E+08 | + | 0    | 0    |
| ENSG0000( MTCO2P23 processed_         | chr10 | 69590583 | 69591262 | - | 0    | 0    |
| ENSG0000( RP4-535B2 processed_        | chr1  | 65077413 | 65078131 | - | 0    | 0    |
| ENSG0000( SOCS5P3 processed_          | chr3  | 44709311 | 44710886 | - | 0.07 | 0    |
| ENSG0000( RP4-646N3 lincRNA           | chrX  | 38770331 | 38799658 | + | 0    | 0    |
| ENSG0000( MYL6P2 processed_           | chr21 | 39488327 | 39488760 | + | 0    | 0    |
| ENSG0000( RP11-550A processed_        | chr10 | 57513157 | 57513425 | + | 0    | 0    |
| ENSG0000( RP11-510N processed_        | chr1  | 2.02E+08 | 2.02E+08 | + | 0    | 0    |
| ENSG0000( ADAM21P1 transcribec        | chr14 | 70245491 | 70247801 | - | 0    | 0    |
| ENSG0000( RP11-308B lincRNA           | chrX  | 1.35E+08 | 1.35E+08 | + | 0.07 | 0.15 |
| ENSG0000( RP1-125N5 lincRNA           | chr6  | 1.69E+08 | 1.69E+08 | + | 0    | 0    |
| ENSG0000( PRELID1P3 processed_        | chr10 | 63427297 | 63427939 | + | 0    | 0    |

|                                     |          |          |   |      |      |
|-------------------------------------|----------|----------|---|------|------|
| ENSG0000(RP11-543E processed_ chr1  | 2.31E+08 | 2.31E+08 | - | 0    | 0    |
| ENSG0000(VN1R17P processed_ chr1    | 2.47E+08 | 2.47E+08 | - | 0    | 0    |
| ENSG0000(RP11-359J lincRNA chr9     | 86414282 | 86414570 | + | 0    | 0    |
| ENSG0000(RP5-1022P antisense chr20  | 5533628  | 5535889  | + | 0    | 0    |
| ENSG0000(IFITM4P processed_ chr6    | 29750729 | 29751148 | - | 0.2  | 0.22 |
| ENSG0000(LINC01073 lincRNA chr13    | 31985685 | 31990997 | + | 0    | 0    |
| ENSG0000(OLMALINC lincRNA chr10     | 1E+08    | 1E+08    | + | 0.73 | 1.01 |
| ENSG0000(LINC00837 lincRNA chr10    | 28789188 | 28796113 | - | 0.07 | 0    |
| ENSG0000(FAM90A9P unprocessε chr8   | 7761330  | 7764340  | + | 0    | 0    |
| ENSG0000(TUBB8P9 unprocessε chr1    | 2.28E+08 | 2.28E+08 | + | 0    | 0    |
| ENSG0000(RPL36AP2ε processed_ chr7  | 15701435 | 15701752 | - | 0    | 0    |
| ENSG0000(TBCAP2 processed_ chr1     | 14692129 | 14692613 | - | 0    | 0    |
| ENSG0000(SRGAP3-AS lincRNA chr3     | 9256759  | 9257507  | + | 0    | 0    |
| ENSG0000(BHLHE40-A antisense chr3   | 4896809  | 4979961  | - | 0.37 | 0.28 |
| ENSG0000(CNN2P3 processed_ chr9     | 64486164 | 64487069 | - | 0    | 0    |
| ENSG0000(AC159540. processed_ chr2  | 97523949 | 97524976 | - | 0    | 0.06 |
| ENSG0000(RP1-60N8. sense_intrε chrX | 17528435 | 17587160 | + | 0    | 0    |
| ENSG0000(KIF3AP1 processed_ chr3    | 1.96E+08 | 1.96E+08 | + | 0    | 0    |
| ENSG0000(AC073333. antisense chr7   | 16695871 | 16719898 | - | 0    | 0    |
| ENSG0000(HSP90AB7I processed_ chr10 | 9721963  | 9724416  | - | 0    | 0    |
| ENSG0000(AC012363. lincRNA chr2     | 1.2E+08  | 1.2E+08  | + | 0    | 0    |
| ENSG0000(RP13-16H1 antisense chr10  | 26717635 | 26718778 | + | 0    | 0    |
| ENSG0000(RP11-272D antisense chr3   | 44899178 | 44900925 | + | 0    | 0    |
| ENSG0000(LDHAP7 processed_ chr2     | 84777259 | 84778223 | - | 0.15 | 0    |
| ENSG0000(RMDN2-AS antisense chr2    | 37949911 | 38067041 | - | 0.44 | 0.24 |
| ENSG0000(HS6ST2-AS antisense chrX   | 1.33E+08 | 1.33E+08 | + | 0    | 0    |
| ENSG0000(AC005540. antisense chr2   | 1.91E+08 | 1.91E+08 | - | 0.34 | 0.22 |
| ENSG0000(OR7E145P unprocessε chr11  | 67722483 | 67723455 | - | 0    | 0    |
| ENSG0000(CTBP2P1 processed_ chrY    | 56855244 | 56855488 | + | 0    | 0    |
| ENSG0000(RP11-36D1 lincRNA chr10    | 80333771 | 80334426 | + | 0    | 0    |
| ENSG0000(AC006978. processed_ chr7  | 30371508 | 30372741 | + | 0.33 | 0.47 |
| ENSG0000(AC005237. processed_ chr2  | 2.41E+08 | 2.41E+08 | + | 0    | 0    |
| ENSG0000(RP11-338C antisense chr1   | 2.13E+08 | 2.13E+08 | - | 0    | 0    |
| ENSG0000(B3GALT4 protein_co chr6    | 33277132 | 33284832 | + | 6.25 | 6.23 |
| ENSG0000(HSPA8P6 processed_ chr2    | 2.09E+08 | 2.09E+08 | - | 0    | 0    |
| ENSG0000(GSN-AS1 antisense chr9     | 1.21E+08 | 1.21E+08 | - | 0.03 | 0.02 |
| ENSG0000(GAPDHP31 processed_ chr12  | 7566369  | 7567382  | + | 0    | 0    |
| ENSG0000(RP1-102G2 processed_ chr1  | 1.75E+08 | 1.75E+08 | - | 0    | 0    |
| ENSG0000(AC062016. processed_ chr2  | 1.17E+08 | 1.17E+08 | + | 0    | 0    |
| ENSG0000(RP11-335C antisense chr12  | 67658991 | 67670919 | - | 0    | 0.09 |
| ENSG0000(ARHGEF7-/- antisense chr13 | 1.11E+08 | 1.11E+08 | - | 0    | 0    |
| ENSG0000(FEM1AP4 processed_ chr13   | 18665235 | 18667221 | + | 0    | 0    |
| ENSG0000(FAR1P1 processed_ chr13    | 90170866 | 90171799 | + | 0    | 0    |
| ENSG0000(RP11-59O6 antisense chr9   | 267966   | 273002   | - | 0    | 0    |
| ENSG0000(AC114776. lincRNA chr2     | 1.11E+08 | 1.11E+08 | - | 0    | 0    |

|                                    |       |          |          |   |      |       |
|------------------------------------|-------|----------|----------|---|------|-------|
| ENSG0000(LINC00941 lincRNA         | chr12 | 30795681 | 30802711 | + | 9.47 | 10.05 |
| ENSG0000(LINC01828 lincRNA         | chr2  | 67086446 | 67311439 | + | 0.1  | 0.12  |
| ENSG0000(RP4-672N1 lincRNA         | chr3  | 43778961 | 43779982 | - | 0    | 0     |
| ENSG0000(RP11-763B lincRNA         | chr1  | 1.43E+08 | 1.44E+08 | - | 0    | 0     |
| ENSG0000(AF064858.lincRNA          | chr21 | 38988707 | 39006153 | - | 0    | 0.14  |
| ENSG0000(TSPEAR-AS antisense       | chr21 | 44506807 | 44516575 | + | 0.05 | 0     |
| ENSG0000(PKMP2 processed_chrX      |       | 66497748 | 66499424 | + | 0    | 0     |
| ENSG0000(RP11-460E processed_chr9  |       | 65816932 | 65817472 | - | 1.21 | 1.76  |
| ENSG0000(AC010154.unprocessε       | chrY  | 6492976  | 6496757  | - | 0    | 0     |
| ENSG0000(TM4SF19- antisense        | chr3  | 1.96E+08 | 1.96E+08 | + | 0.05 | 0.03  |
| ENSG0000(LINC01564 antisense       | chr6  | 53628380 | 53631394 | + | 0    | 0     |
| ENSG0000(RP11-342F processed_chr9  |       | 1.03E+08 | 1.03E+08 | + | 0    | 0     |
| ENSG0000(RP11-626E antisense       | chr4  | 1.86E+08 | 1.86E+08 | + | 0    | 0     |
| ENSG0000(CPB2-AS1 antisense        | chr13 | 46052806 | 46113332 | + | 0.08 | 0.37  |
| ENSG0000(RBMS3-AS: antisense       | chr3  | 29264194 | 29290726 | - | 0.34 | 0.68  |
| ENSG0000(RP4-580O1 processed_chr1  |       | 33512008 | 33512743 | - | 0    | 0     |
| ENSG0000(RHOA-IT1 sense_intrε      | chr3  | 49365145 | 49367006 | - | 0.29 | 0     |
| ENSG0000(APOA1-AS antisense        | chr11 | 1.17E+08 | 1.17E+08 | + | 0    | 0.28  |
| ENSG0000(AC019055.lincRNA          | chr2  | 19711715 | 19717576 | + | 0    | 0     |
| ENSG0000(RP1-159A1 processed_chr1  |       | 27649419 | 27649610 | + | 0    | 0     |
| ENSG0000(MACROD2. antisense        | chr20 | 14884253 | 14929515 | - | 0    | 0     |
| ENSG0000(RP13-444K processed_chrX  |       | 53825887 | 53826309 | + | 0    | 0     |
| ENSG0000(MTCO2P11 unprocessε       | chr9  | 5098341  | 5099325  | + | 0    | 0     |
| ENSG0000(ASH1L-AS1 antisense       | chr1  | 1.56E+08 | 1.56E+08 | + | 0.55 | 0.84  |
| ENSG0000(AC073109. processed_chr7  |       | 11820317 | 11821294 | - | 0    | 0     |
| ENSG0000(RP11-323C processed_chr20 |       | 46863563 | 46864104 | - | 0    | 0     |
| ENSG0000(ZNRF2P3 processed_chr10   |       | 79981839 | 79982212 | + | 0    | 0     |
| ENSG0000(RPS29P15 processed_chr7   |       | 1.01E+08 | 1.01E+08 | + | 0    | 0     |
| ENSG0000(NEXN-AS1 antisense        | chr1  | 77881348 | 77889539 | - | 0.38 | 0.51  |
| ENSG0000(TPT1P14 processed_chrX    |       | 14977959 | 14978463 | - | 0    | 0     |
| ENSG0000(HSPE1P12 processed_chr12  |       | 10770305 | 10770605 | + | 0    | 0     |
| ENSG0000(LINC01553 lincRNA         | chr10 | 59955430 | 59960913 | - | 0.02 | 0     |
| ENSG0000(RP11-250H processed_chr9  |       | 64737403 | 64737755 | - | 0    | 0     |
| ENSG0000(LINC01779 lincRNA         | chr1  | 1.16E+08 | 1.16E+08 | + | 0.07 | 0     |
| ENSG0000(AC007405. antisense       | chr2  | 1.71E+08 | 1.71E+08 | - | 0    | 0     |
| ENSG0000(AC008280. processed_chr2  |       | 54029552 | 54030682 | - | 0    | 0     |
| ENSG0000(RP11-123B antisense       | chr10 | 49419277 | 49472903 | + | 0    | 0     |
| ENSG0000(MTND1P21 processed_chr10  |       | 20804293 | 20804577 | + | 0    | 0     |
| ENSG0000(LCE6A protein_co          | chr1  | 1.53E+08 | 1.53E+08 | + | 0    | 0     |
| ENSG0000(TMEM212- sense_intrε      | chr3  | 1.72E+08 | 1.72E+08 | + | 0    | 0     |
| ENSG0000(ZNF815P transcribec       | chr7  | 5823160  | 5854435  | + | 2.42 | 2.26  |
| ENSG0000(AC002543. processed_chr7  |       | 1.17E+08 | 1.17E+08 | - | 0    | 0     |
| ENSG0000(LLOXNC01- processed_chrX  |       | 1.04E+08 | 1.04E+08 | - | 1.21 | 2.17  |
| ENSG0000(EGOT lincRNA              | chr3  | 4749192  | 4751590  | - | 0    | 0     |
| ENSG0000(AC061961. antisense       | chr2  | 1.55E+08 | 1.55E+08 | - | 0    | 0     |

|                                      |          |            |      |      |
|--------------------------------------|----------|------------|------|------|
| ENSG0000( AC009965. processed_ chr2  | 2.04E+08 | 2.04E+08 + | 0    | 0    |
| ENSG0000( TTC28-AS1 processed_ chr22 | 27919376 | 28008581 + | 1.48 | 2.52 |
| ENSG0000( C1CP20 processed_ chr7     | 45816216 | 45819016 - | 0.02 | 0    |
| ENSG0000( COX7CP1 processed_ chr13   | 49187479 | 49187670 - | 0    | 0    |
| ENSG0000( UBOX5-AS1 antisense_ chr20 | 3106913  | 3150867 +  | 0    | 0    |
| ENSG0000( AC009237. processed_ chr2  | 95640181 | 95640604 - | 0    | 0    |
| ENSG0000( PNMA6A protein_co chrX     | 1.53E+08 | 1.53E+08 + | 1.92 | 2.04 |
| ENSG0000( RPL7AP53 processed_ chr10  | 33057615 | 33058407 - | 0    | 0    |
| ENSG0000( MCCD1P1 unprocessε chr6    | 29907783 | 29908645 - | 0    | 0    |
| ENSG0000( FXYD6P2 processed_ chr10   | 38091764 | 38092051 - | 0    | 0    |
| ENSG0000( AP000431. lincRNA_ chr21   | 19046310 | 19047684 - | 0    | 0    |
| ENSG0000( COX5BP3 processed_ chr7    | 1.34E+08 | 1.34E+08 - | 0    | 0    |
| ENSG0000( AC079112. processed_ chr2  | 68023694 | 68024766 - | 0    | 0    |
| ENSG0000( CHEK2P4 unprocessε chr22   | 16503304 | 16509475 + | 0    | 0    |
| ENSG0000( RP11-472G lincRNA_ chr6    | 1.5E+08  | 1.5E+08 -  | 0    | 0    |
| ENSG0000( VN2R19P unitary_psι chr19  | 58012589 | 58025926 - | 0    | 0    |
| ENSG0000( RP1-106C2 processed_ chrX  | 1.39E+08 | 1.39E+08 + | 0    | 0    |
| ENSG0000( RP1-197J1ε processed_ chrX | 1.02E+08 | 1.02E+08 - | 0    | 0    |
| ENSG0000( AC018816. antisense_ chr3  | 4814294  | 4887293 -  | 0.19 | 0.2  |
| ENSG0000( AC004448. lincRNA_ chr17   | 19417804 | 19492991 - | 0.23 | 0    |
| ENSG0000( AC023274. unprocessε chrY  | 24142358 | 24157843 + | 0    | 0    |
| ENSG0000( GPC5-AS1 antisense_ chr13  | 92701389 | 92721614 - | 0    | 0.25 |
| ENSG0000( RP11-495P processed_ chr1  | 1.48E+08 | 1.48E+08 - | 0    | 0    |
| ENSG0000( MORC2-AS antisense_ chr22  | 30922308 | 30932449 + | 0    | 0.12 |
| ENSG0000( RPL23AP2ε processed_ chr1  | 2.42E+08 | 2.42E+08 + | 0    | 0    |
| ENSG0000( RP11-143H unprocessε chrX  | 1.55E+08 | 1.55E+08 + | 0    | 0    |
| ENSG0000( GRAMD4Pε processed_ chr22  | 15749156 | 15750825 - | 0    | 0    |
| ENSG0000( AC007559. processed_ chr2  | 2.3E+08  | 2.3E+08 +  | 0    | 0    |
| ENSG0000( RP3-470B2 processed_ chr6  | 1.68E+08 | 1.68E+08 - | 0    | 0    |
| ENSG0000( UBE2V1P6 processed_ chr2   | 1.69E+08 | 1.69E+08 + | 0    | 0    |
| ENSG0000( RP11-97N1 antisense_ chr20 | 19212852 | 19213477 - | 0    | 0    |
| ENSG0000( LINC01936 lincRNA_ chr2    | 30346659 | 30352431 + | 0.07 | 0.08 |
| ENSG0000( TAAR7P unitary_psι chr6    | 1.33E+08 | 1.33E+08 + | 0    | 0    |
| ENSG0000( AC007050. antisense_ chr22 | 20522070 | 20523870 - | 0    | 0    |
| ENSG0000( RP4-800Mε processed_ chr1  | 52189916 | 52190309 - | 0    | 0    |
| ENSG0000( RP11-438P processed_ chr9  | 1.08E+08 | 1.08E+08 + | 0    | 0    |
| ENSG0000( MTCO1P4ε processed_ chr2   | 2.12E+08 | 2.12E+08 + | 0    | 0    |
| ENSG0000( LINC01814 lincRNA_ chr2    | 8559833  | 8583792 -  | 0.42 | 0.39 |
| ENSG0000( RP11-293F lincRNA_ chr1    | 21415898 | 21417492 + | 0    | 0    |
| ENSG0000( HIGD1AP1ε processed_ chr1  | 1.11E+08 | 1.11E+08 + | 0    | 0    |
| ENSG0000( RP3-332B2 lincRNA_ chr6    | 1.4E+08  | 1.4E+08 +  | 0    | 0.09 |
| ENSG0000( AC011290. processed_ chr7  | 39569376 | 39570198 - | 0    | 0    |
| ENSG0000( ASMTL-AS1 antisense_ chrX  | 1401769  | 1414028 +  | 1.99 | 2.05 |
| ENSG0000( ASMTL-AS1 antisense_ chrY  | 1401769  | 1414028 +  | 1.99 | 2.05 |
| ENSG0000( RP4-814D1 processed_ chr7  | 1.57E+08 | 1.57E+08 - | 0    | 0    |

|                                |       |          |          |   |      |      |
|--------------------------------|-------|----------|----------|---|------|------|
| ENSG0000(RP11-195C antisense)  | chr1  | 1.76E+08 | 1.76E+08 | + | 0    | 0.4  |
| ENSG0000(RP11-160E lincRNA)    | chr17 | 19203825 | 19214045 | + | 0    | 0    |
| ENSG0000(PRRX2-AS1 antisense)  | chr9  | 1.3E+08  | 1.3E+08  | - | 0    | 0    |
| ENSG0000(RP11-463J processed)  | chr1  | 1.91E+08 | 1.91E+08 | + | 0    | 0    |
| ENSG0000(AC009237 processed)   | chr2  | 95606924 | 95607152 | + | 0    | 0    |
| ENSG0000(PATE3 protein_co)     | chr11 | 1.26E+08 | 1.26E+08 | + | 0    | 0    |
| ENSG0000(RP11-323C lincRNA)    | chr20 | 46901143 | 46901726 | - | 0    | 0    |
| ENSG0000(LINC01036 lincRNA)    | chr1  | 1.87E+08 | 1.87E+08 | + | 0    | 0    |
| ENSG0000(RP11-269F antisense)  | chr1  | 2.44E+08 | 2.44E+08 | + | 0    | 0    |
| ENSG0000(OR5H14 protein_co)    | chr3  | 98149326 | 98150405 | + | 0    | 0    |
| ENSG0000(RP11-9002 processed)  | chr1  | 2.04E+08 | 2.04E+08 | - | 0    | 0    |
| ENSG0000(LINC00445 lincRNA)    | chr13 | 35697524 | 35699256 | + | 0    | 0    |
| ENSG0000(AC017060 lincRNA)     | chr7  | 17405479 | 17558909 | - | 1.14 | 0.24 |
| ENSG0000(CHIAP1 unprocessε)    | chr1  | 1.11E+08 | 1.11E+08 | + | 0    | 0    |
| ENSG0000(COX6CP18 processed)   | chr11 | 2771356  | 2771577  | + | 0    | 0    |
| ENSG0000(RP1-203C2 processed)  | chrX  | 1.28E+08 | 1.28E+08 | - | 0    | 0    |
| ENSG0000(FABP5P2 processed)    | chr13 | 51966742 | 51967149 | + | 0    | 0    |
| ENSG0000(RP3-467K1 antisense)  | chr1  | 15334166 | 15335464 | - | 0    | 0    |
| ENSG0000(AC004920 lincRNA)     | chr7  | 50839363 | 50841992 | - | 0    | 0    |
| ENSG0000(AC073410 processed)   | chr2  | 2.03E+08 | 2.03E+08 | + | 0    | 0    |
| ENSG0000(AC013470 processed)   | chr7  | 12471352 | 12472545 | + | 0    | 0    |
| ENSG0000(LINC01920 lincRNA)    | chr2  | 1.51E+08 | 1.51E+08 | - | 0    | 0    |
| ENSG0000(MYCBP2-A processed)   | chr13 | 77026767 | 77129717 | + | 0    | 0.82 |
| ENSG0000(LINC01643 lincRNA)    | chr22 | 34017473 | 34188425 | + | 0    | 0    |
| ENSG0000(LINC01067 lincRNA)    | chr13 | 1.09E+08 | 1.09E+08 | + | 0.88 | 0.87 |
| ENSG0000(LL22NC03- antisense)  | chr22 | 32583300 | 32584204 | + | 0    | 0    |
| ENSG0000(GAPDHP14 processed)   | chr21 | 29222321 | 29223257 | + | 0    | 0    |
| ENSG0000(RPL17P36 processed)   | chr10 | 1.19E+08 | 1.19E+08 | - | 0.13 | 0    |
| ENSG0000(HSPB1P1 processed)    | chr9  | 72007881 | 72008136 | - | 0    | 0    |
| ENSG0000(GSTM5P1 processed)    | chr3  | 12257801 | 12258460 | - | 0    | 0    |
| ENSG0000(RP6-191P2 antisense)  | chrX  | 1.08E+08 | 1.08E+08 | - | 0.05 | 0.06 |
| ENSG0000(RP1-117O3 antisense)  | chr1  | 32987075 | 33032469 | + | 0    | 0    |
| ENSG0000(AC016561 unitary_ps)  | chr5  | 64404512 | 64486615 | - | 0    | 0    |
| ENSG0000(RP5-1011C lincRNA)    | chr1  | 1.93E+08 | 1.93E+08 | + | 0    | 0    |
| ENSG0000(RP11-281B processed)  | chrX  | 34387722 | 34388464 | + | 0    | 0    |
| ENSG0000(RP11-487E processed)  | chr1  | 21073639 | 21073753 | - | 0    | 0    |
| ENSG0000(RP11-121P sense_intr) | chr6  | 40501631 | 40502393 | - | 0    | 0    |
| ENSG0000(LINC01072 lincRNA)    | chr13 | 20102701 | 20103230 | + | 0    | 0    |
| ENSG0000(RP11-232D unprocessε) | chrX  | 1.17E+08 | 1.17E+08 | - | 0    | 0    |
| ENSG0000(LINC01447 lincRNA)    | chr7  | 47621939 | 47629893 | + | 0.02 | 0.21 |
| ENSG0000(RP1-32I10 processed)  | chr22 | 44413485 | 44414814 | - | 0    | 0    |
| ENSG0000(YAP1P2 processed)     | chrX  | 1.15E+08 | 1.15E+08 | + | 0    | 0    |
| ENSG0000(ELFN1-AS1 lincRNA)    | chr7  | 1738630  | 1742291  | - | 0    | 0    |
| ENSG0000(RP11-217L antisense)  | chr11 | 1.32E+08 | 1.32E+08 | - | 0    | 0    |
| ENSG0000(OR13E1P unitary_ps)   | chr9  | 35859062 | 35859983 | - | 0    | 0    |

|                 |           |            |       |          |          |   |       |      |
|-----------------|-----------|------------|-------|----------|----------|---|-------|------|
| ENSG00000104114 | ACTG1P4   | processed  | chr1  | 1.04E+08 | 1.04E+08 | + | 0     | 0    |
| ENSG00000104115 | HMGN2P2   | processed  | chr6  | 2341450  | 2341711  | + | 0     | 0.52 |
| ENSG00000104116 | COX10-AS1 | processed  | chr17 | 13756478 | 14069495 | - | 4.57  | 3.58 |
| ENSG00000104117 | LDHAP3    | processed  | chr2  | 41819747 | 41820754 | + | 0     | 0    |
| ENSG00000104118 | RP3-473B4 | lincRNA    | chrX  | 1.35E+08 | 1.35E+08 | + | 0     | 0    |
| ENSG00000104119 | LINC00545 | lincRNA    | chr13 | 30882551 | 30883395 | + | 0     | 0.45 |
| ENSG00000104120 | RP11-4901 | sense_intr | chr9  | 94900429 | 94904754 | + | 0     | 0    |
| ENSG00000104121 | BNIP3P2   | processed  | chr22 | 15349467 | 15350043 | + | 0     | 0    |
| ENSG00000104122 | RP11-148B | lincRNA    | chr1  | 94318479 | 94324569 | - | 0.59  | 0.52 |
| ENSG00000104123 | AC013403  | unprocess  | chr2  | 27158563 | 27159229 | - | 0     | 0    |
| ENSG00000104124 | RAC1P7    | processed  | chr1  | 2.34E+08 | 2.34E+08 | - | 0     | 0    |
| ENSG00000104125 | RP4-639J1 | lincRNA    | chr7  | 1.57E+08 | 1.57E+08 | - | 0     | 0    |
| ENSG00000104126 | ZBTB22    | protein_co | chr6  | 33314406 | 33317942 | - | 11.36 | 11.1 |
| ENSG00000104127 | PRELID3BP | processed  | chr7  | 1.27E+08 | 1.27E+08 | + | 0     | 0    |
| ENSG00000104128 | AC010729  | lincRNA    | chr2  | 5726449  | 5730342  | + | 0     | 0    |
| ENSG00000104129 | AC010127  | antisense  | chr2  | 1.66E+08 | 1.66E+08 | + | 0.07  | 0.04 |
| ENSG00000104130 | RP11-383G | processed  | chr1  | 2.05E+08 | 2.05E+08 | + | 0     | 0    |
| ENSG00000104131 | AC013402  | lincRNA    | chr2  | 1.05E+08 | 1.05E+08 | + | 0     | 0    |
| ENSG00000104132 | OR2AM1P   | unprocess  | chr9  | 36021692 | 36022113 | + | 0     | 0    |
| ENSG00000104133 | RP11-630I | processed  | chr1  | 45781277 | 45781957 | + | 0     | 0    |
| ENSG00000104134 | RP11-517P | unprocess  | chr10 | 43523256 | 43525217 | + | 0     | 0    |
| ENSG00000104135 | RP11-62C3 | antisense  | chr9  | 92205356 | 92210158 | + | 0     | 0    |
| ENSG00000104136 | AC064853  | sense_intr | chr2  | 2.28E+08 | 2.28E+08 | - | 0.27  | 0    |
| ENSG00000104137 | LINC01639 | lincRNA    | chr22 | 43400331 | 43409681 | + | 0     | 0    |
| ENSG00000104138 | LL22NC03  | unprocess  | chr22 | 22155582 | 22155942 | + | 0     | 0    |
| ENSG00000104139 | AP000688  | lincRNA    | chr21 | 36082859 | 36090414 | + | 0     | 0    |
| ENSG00000104140 | RP11-733C | lincRNA    | chrX  | 5653421  | 5726305  | - | 0     | 0    |
| ENSG00000104141 | HAUS6P2   | processed  | chr20 | 31341371 | 31344471 | - | 0     | 0    |
| ENSG00000104142 | CEACAMP1  | unprocess  | chr19 | 43278933 | 43284318 | - | 0     | 0    |
| ENSG00000104143 | HMGN2P2   | processed  | chr2  | 1.13E+08 | 1.13E+08 | - | 0     | 0    |
| ENSG00000104144 | USP17L4   | protein_co | chr8  | 7337115  | 7338707  | + | 0     | 0    |
| ENSG00000104145 | CT47A3    | protein_co | chrX  | 1.21E+08 | 1.21E+08 | - | 0     | 0    |
| ENSG00000104146 | AP002856  | lincRNA    | chr11 | 1.31E+08 | 1.31E+08 | + | 0     | 0    |
| ENSG00000104147 | PTCSC2    | lincRNA    | chr9  | 97805935 | 97810008 | - | 0     | 0    |
| ENSG00000104148 | MED13P1   | processed  | chrY  | 14907898 | 14908068 | + | 0     | 0    |
| ENSG00000104149 | CTA-440B3 | processed  | chr22 | 31816379 | 31817491 | - | 0     | 0    |
| ENSG00000104150 | LINC01069 | lincRNA    | chr13 | 77989372 | 77990646 | - | 0     | 0    |
| ENSG00000104151 | ADORA2BP  | processed  | chr1  | 2.1E+08  | 2.1E+08  | + | 0.08  | 0.41 |
| ENSG00000104152 | RP11-27K1 | antisense  | chr1  | 1.17E+08 | 1.17E+08 | - | 0.06  | 0.17 |
| ENSG00000104153 | DUX4L26   | processed  | chr3  | 75668931 | 75670185 | + | 0     | 0.05 |
| ENSG00000104154 | RP11-89F3 | lincRNA    | chr1  | 1.45E+08 | 1.45E+08 | - | 0     | 0    |
| ENSG00000104155 | AC013727  | lincRNA    | chr2  | 1.04E+08 | 1.04E+08 | - | 0     | 0    |
| ENSG00000104156 | TMEM147   | antisense  | chr19 | 35540738 | 35546029 | - | 2.95  | 2.8  |
| ENSG00000104157 | AC079988  | lincRNA    | chr2  | 1.21E+08 | 1.21E+08 | + | 0     | 0    |
| ENSG00000104158 | RP11-65J3 | processed  | chr9  | 1.29E+08 | 1.29E+08 | - | 0     | 0    |



|                                         |          |          |   |      |      |
|-----------------------------------------|----------|----------|---|------|------|
| ENSG0000(RPL23AP37 processed_ chr2      | 64347193 | 64347741 | - | 0    | 0    |
| ENSG0000(RP5-1100I lincRNA chr20        | 24142590 | 24144386 | - | 0    | 0    |
| ENSG0000(MRPS36P1 processed_ chr3       | 6773037  | 6773343  | - | 0    | 0    |
| ENSG0000(AC104076. antisense chr2       | 1.81E+08 | 1.81E+08 | - | 0    | 1.02 |
| ENSG0000(RP11-343J. antisense chr10     | 69575807 | 69577154 | + | 0    | 0    |
| ENSG0000(RP11-231P transcribed chr1     | 26209741 | 26229840 | + | 0.11 | 0.06 |
| ENSG0000(CHCHD4P3 processed_ chr9       | 37434177 | 37434586 | + | 1.83 | 0.46 |
| ENSG0000(RFC3P1 processed_ chr3         | 36169767 | 36170448 | - | 0    | 0    |
| ENSG0000(RP3-343K2 processed_ chr20     | 37165774 | 37166312 | - | 0    | 0    |
| ENSG0000(GS1-541M. processed_ chrX      | 26657291 | 26657507 | - | 0    | 0    |
| ENSG0000(AC092687. lincRNA chr2         | 10717773 | 10720952 | + | 0    | 0    |
| ENSG0000(RP11-268F lincRNA chr6         | 46758296 | 46761158 | - | 0    | 0    |
| ENSG0000(PRADC1P1 processed_ chr3       | 36976316 | 36976840 | + | 0    | 0    |
| ENSG0000(RP3-523C2 lincRNA chr6         | 1.32E+08 | 1.32E+08 | + | 0.31 | 0    |
| ENSG0000(GAPDHP57 processed_ chr2       | 75455994 | 75456578 | - | 0    | 0    |
| ENSG0000(RP5-831C2 unprocessed chr20    | 23980585 | 23980734 | - | 0    | 0    |
| ENSG0000(IGHD1-1 IG_D_gene chr14        | 1.06E+08 | 1.06E+08 | - | 0    | 0    |
| ENSG0000(RPL12P26 processed_ chr10      | 1.17E+08 | 1.17E+08 | - | 0    | 0    |
| ENSG0000(MIR7515H lincRNA chr2          | 6615389  | 6650535  | - | 0    | 0    |
| ENSG0000(RP1-182D1 lincRNA chr6         | 1.7E+08  | 1.7E+08  | - | 0    | 0    |
| ENSG0000(SSU72P6 processed_ chr11       | 4278705  | 4279192  | + | 0    | 0    |
| ENSG0000(LINC00353 lincRNA chr13        | 89548691 | 89553804 | - | 0    | 0    |
| ENSG0000(PRAMEF35 unprocessed chr1      | 13104403 | 13105689 | - | 0    | 0    |
| ENSG0000(RP11-163G processed_ chr1      | 42570970 | 42571390 | + | 0    | 0    |
| ENSG0000(RP11-297K processed_ chr3      | 1.89E+08 | 1.89E+08 | - | 0    | 0    |
| ENSG0000(TCEA1P4 processed_ chr9        | 32979560 | 32980403 | - | 0.07 | 0.16 |
| ENSG0000(HNRNPDL processed_ chrX        | 95610578 | 95610957 | + | 0    | 0    |
| ENSG0000(GJA6P processed_ chrX          | 18535079 | 18536120 | + | 0    | 0    |
| ENSG0000(PRKX-AS1 antisense chrX        | 3659487  | 3668192  | + | 0    | 0    |
| ENSG0000(RPL18AP15 processed_ chrX      | 1.12E+08 | 1.12E+08 | - | 0    | 0    |
| ENSG0000(RP3-431C2 processed_ chrX      | 86888586 | 86888816 | + | 0    | 0    |
| ENSG0000(RPS15AP25 processed_ chr8      | 68525517 | 68525906 | - | 0    | 0    |
| ENSG0000(LINC01953 lincRNA chr2         | 2.13E+08 | 2.13E+08 | - | 0    | 0    |
| ENSG0000(AC003104. sense_intronic chr17 | 42270517 | 42272683 | - | 0    | 0    |
| ENSG0000(RNMTL1P2 processed_ chr7       | 17962079 | 17963029 | + | 0    | 0    |
| ENSG0000(AC002429. protein_coding chr7  | 95035731 | 95214332 | - | 0    | 0    |
| ENSG0000(RP11-264I1 antisense chr9      | 2041900  | 2046023  | - | 0    | 0    |
| ENSG0000(KDM4A-AS antisense chr1        | 43699765 | 43708138 | - | 0.19 | 0.13 |
| ENSG0000(GRM7-AS1 antisense chr3        | 7519741  | 7560333  | - | 0    | 0    |
| ENSG0000(LINC01376 lincRNA chr2         | 18986451 | 19346748 | - | 0.49 | 0.78 |
| ENSG0000(RP3-406C1 unprocessed chrX     | 1.42E+08 | 1.42E+08 | - | 0    | 0    |
| ENSG0000(RP11-306I1 lincRNA chr1        | 1.66E+08 | 1.66E+08 | + | 0    | 0    |
| ENSG0000(C10orf71-A antisense chr10     | 49296112 | 49299018 | - | 0    | 0    |
| ENSG0000(AC104135. lincRNA chr2         | 74919555 | 74924846 | - | 0.06 | 0    |
| ENSG0000(MTCO1P7 unprocessed chr2       | 1.3E+08  | 1.3E+08  | + | 0    | 0    |

|                                       |          |          |   |      |      |
|---------------------------------------|----------|----------|---|------|------|
| ENSG0000( AC009262. lincRNA chr7      | 34209526 | 34256343 | + | 0    | 0    |
| ENSG0000( AC006369. antisense chr2    | 37600136 | 37646698 | + | 0.13 | 0    |
| ENSG0000( PPP1R11P1 processed_ chr1   | 21397987 | 21398362 | + | 0    | 0    |
| ENSG0000( C1DP2 processed_ chr10      | 80031968 | 80032393 | - | 0    | 0    |
| ENSG0000( RP11-645N antisense chr7    | 1.03E+08 | 1.03E+08 | + | 0    | 0    |
| ENSG0000( VEZF1P1 processed_ chr3     | 1.93E+08 | 1.93E+08 | - | 0    | 0    |
| ENSG0000( RP11-400N lincRNA chr1      | 2.22E+08 | 2.22E+08 | - | 0    | 0.11 |
| ENSG0000( AC017048. lincRNA chr2      | 1.77E+08 | 1.77E+08 | - | 0    | 0    |
| ENSG0000( MTCYBP24 unprocessε chr7    | 1.12E+08 | 1.12E+08 | + | 0    | 0    |
| ENSG0000( AC091132. antisense chr17   | 45452844 | 45464065 | + | 0    | 0    |
| ENSG0000( LA16c-13E4 unprocessε chr22 | 15290718 | 15297196 | + | 0    | 0    |
| ENSG0000( AC093106. processed_ chr7   | 1.32E+08 | 1.32E+08 | + | 0    | 0    |
| ENSG0000( GPC5-IT1 sense_intrε chr13  | 92484606 | 92510094 | + | 0    | 0    |
| ENSG0000( RP11-744C processed_ chr3   | 1.76E+08 | 1.76E+08 | - | 0    | 0    |
| ENSG0000( MYO16-AS antisense chr13    | 1.09E+08 | 1.09E+08 | - | 0    | 0    |
| ENSG0000( RPL6P29 processed_ chrX     | 98251679 | 98252543 | + | 0    | 0    |
| ENSG0000( RP4-799P1 antisense chr1    | 2.34E+08 | 2.34E+08 | - | 0    | 0    |
| ENSG0000( FAM166AP unprocessε chr3    | 1.98E+08 | 1.98E+08 | - | 0    | 0    |
| ENSG0000( AC104389. processed_ chr11  | 5362615  | 5362849  | + | 0    | 0    |
| ENSG0000( RP11-15J1( transcribec chr9 | 65219987 | 65230861 | - | 0.07 | 0    |
| ENSG0000( SLC25A3P1 transcribec chr1  | 53413149 | 53440020 | - | 0    | 0    |
| ENSG0000( MTND4P14 unprocessε chr9    | 5107937  | 5109290  | + | 0    | 0    |
| ENSG0000( AC009404. lincRNA chr2      | 1.18E+08 | 1.18E+08 | + | 1.69 | 1.26 |
| ENSG0000( DIAPH2-AS antisense chrX    | 97431286 | 97642589 | - | 0    | 0    |
| ENSG0000( EI24P2 processed_ chr1      | 1.58E+08 | 1.58E+08 | + | 0    | 0    |
| ENSG0000( TIMM8BP1 processed_ chr13   | 29865959 | 29866169 | - | 0    | 0    |
| ENSG0000( AC017083. processed_ chr2   | 68125265 | 68125747 | + | 0    | 0    |
| ENSG0000( RP11-368N unprocessε chr7   | 57652875 | 57653208 | + | 0    | 0    |
| ENSG0000( SHANK2-A5 antisense chr11   | 70646165 | 70647562 | + | 0    | 0    |
| ENSG0000( RP11-263K antisense chr1    | 1.55E+08 | 1.55E+08 | - | 6.51 | 6.2  |
| ENSG0000( RPL26P30 transcribec chr11  | 2335132  | 2335776  | - | 0.12 | 0.13 |
| ENSG0000( RP3-467L1. antisense chr1   | 7810242  | 7827342  | - | 0    | 0    |
| ENSG0000( AP006216. antisense chr11   | 1.17E+08 | 1.17E+08 | - | 0    | 0    |
| ENSG0000( LINC01361 lincRNA chr1      | 82973882 | 82986208 | - | 0    | 0    |
| ENSG0000( ENO1-IT1 sense_intrε chr1   | 8875788  | 8878007  | - | 0.18 | 0    |
| ENSG0000( Z82214.3 antisense chr22    | 43212674 | 43213661 | + | 0    | 0    |
| ENSG0000( RP4-728D4 processed_ chr1   | 35509742 | 35511438 | + | 0    | 0    |
| ENSG0000( NDP-AS1 antisense chrX      | 43949732 | 43969620 | + | 0    | 0    |
| ENSG0000( NIPA2P5 processed_ chr13    | 79090783 | 79094119 | + | 0    | 0    |
| ENSG0000( PEBP1P3 processed_ chr1     | 1.99E+08 | 1.99E+08 | - | 0    | 0    |
| ENSG0000( CLEC2L protein_co chr7      | 1.4E+08  | 1.4E+08  | + | 0    | 0    |
| ENSG0000( AC114737. processed_ chr7   | 76968346 | 76968518 | + | 0    | 0    |
| ENSG0000( NDUFB9P2 processed_ chr7    | 1.32E+08 | 1.32E+08 | - | 0    | 0    |
| ENSG0000( AC013463. antisense chr2    | 1.65E+08 | 1.65E+08 | + | 0    | 0    |
| ENSG0000( VN1R31P processed_ chr7     | 63367427 | 63368156 | - | 0    | 0    |

|                     |                 |          |          |   |       |       |
|---------------------|-----------------|----------|----------|---|-------|-------|
| ENSG0000(NPM1P8     | processed_chrx  | 32205902 | 32206738 | + | 0.08  | 0     |
| ENSG0000(ZBED5      | protein_co      | 10812074 | 10858796 | - | 16.02 | 13.05 |
| ENSG0000(GACAT3     | lincRNA         | 16050427 | 16085801 | + | 0     | 0     |
| ENSG0000(EEF1GP7    | processed_chr1  | 52573114 | 52573816 | + | 0     | 0     |
| ENSG0000(RP5-1099E  | antisense       | 2.16E+08 | 2.16E+08 | + | 0     | 0     |
| ENSG0000(AC007563.  | lincRNA         | 2.17E+08 | 2.17E+08 | - | 0     | 0     |
| ENSG0000(GUSBP5     | transcribed     | 1.44E+08 | 1.44E+08 | + | 0.94  | 0.48  |
| ENSG0000(RP11-175P  | transcribed     | 1.94E+08 | 1.94E+08 | - | 0.23  | 0     |
| ENSG0000(RP11-340I  | lincRNA         | 63888200 | 63900794 | - | 0     | 0     |
| ENSG0000(MTND4LP1   | processed_chr2  | 1.43E+08 | 1.43E+08 | - | 0     | 0     |
| ENSG0000(MRGPRG-A   | antisense       | 3218332  | 3223131  | + | 0     | 0     |
| ENSG0000(RP11-540N  | lincRNA         | 1.3E+08  | 1.3E+08  | + | 0     | 0     |
| ENSG0000(AP001189.  | antisense       | 76657056 | 76663866 | + | 0     | 0     |
| ENSG0000(SLC12A9-A  | antisense       | 1.01E+08 | 1.01E+08 | - | 0     | 0     |
| ENSG0000(LINC01241  | lincRNA         | 25780056 | 25812968 | + | 0     | 0     |
| ENSG0000(EEF1E1P1   | processed_chr2  | 1.12E+08 | 1.12E+08 | + | 0     | 0.41  |
| ENSG0000(RP11-316N  | antisense       | 1E+08    | 1E+08    | + | 0     | 0.13  |
| ENSG0000(TLX1NB     | processed_chr10 | 1.01E+08 | 1.01E+08 | - | 0     | 0     |
| ENSG0000(RPL34P34   | processed_chr19 | 22368599 | 22368952 | - | 0     | 0     |
| ENSG0000(VN1R53P    | processed_chr10 | 37348616 | 37349572 | + | 0     | 0     |
| ENSG0000(OR7E109P   | unprocessed     | 90742526 | 90743380 | - | 0     | 0     |
| ENSG0000(RP11-348H  | processed_chr1  | 2.13E+08 | 2.13E+08 | - | 0     | 0     |
| ENSG0000(KCCAT333   | lincRNA         | 17374867 | 17467256 | + | 0     | 0.08  |
| ENSG0000(CTD-2033D  | transcribed     | 55526964 | 55561577 | - | 0     | 0     |
| ENSG0000(SLFN14     | protein_co      | 35548125 | 35558098 | - | 0     | 0     |
| ENSG0000(BMP6P1     | processed_chr22 | 22185941 | 22186619 | + | 0     | 0     |
| ENSG0000(RP3-403L1  | antisense       | 1.58E+08 | 1.58E+08 | - | 0     | 0     |
| ENSG0000(AC005300.  | processed_chr22 | 17192936 | 17193308 | + | 0.24  | 0.79  |
| ENSG0000(RP3-486I3. | antisense       | 1.16E+08 | 1.16E+08 | - | 0     | 0     |
| ENSG0000(RP11-759F  | processed_chr1  | 1.54E+08 | 1.54E+08 | + | 0     | 0     |
| ENSG0000(RPL5P9     | processed_chr2  | 1.11E+08 | 1.11E+08 | + | 0     | 0     |
| ENSG0000(AP001605.  | lincRNA         | 27361164 | 27395787 | + | 0     | 0     |
| ENSG0000(TRHDE-AS1  | processed_chr12 | 72253508 | 72274907 | - | 0.33  | 0.37  |
| ENSG0000(PPIAL4G    | protein_co      | 1.48E+08 | 1.48E+08 | - | 0.24  | 0.2   |
| ENSG0000(RP4-591L5. | lincRNA         | 30409560 | 30411638 | - | 0     | 0     |
| ENSG0000(RP3-430A1  | antisense       | 4774526  | 4775408  | - | 0     | 0     |
| ENSG0000(FMR1-IT1   | sense_intr      | 1.48E+08 | 1.48E+08 | + | 0.28  | 0     |
| ENSG0000(POM121L1   | processed_chr13 | 28778558 | 28778937 | + | 0     | 0     |
| ENSG0000(AC000099.  | antisense       | 1.27E+08 | 1.27E+08 | + | 0     | 0     |
| ENSG0000(RP5-1103B  | antisense       | 56963886 | 56996757 | + | 0     | 0     |
| ENSG0000(EI24P4     | processed_chr7  | 1.45E+08 | 1.45E+08 | + | 0     | 0     |
| ENSG0000(RP11-59D5  | antisense       | 63806836 | 63822642 | + | 0     | 0.04  |
| ENSG0000(RP11-346D  | lincRNA         | 1.14E+08 | 1.14E+08 | + | 0     | 0     |
| ENSG0000(PSMC1P10   | processed_chr2  | 17385091 | 17386417 | + | 0     | 0     |
| ENSG0000(SUCLG2P2   | processed_chr12 | 94548241 | 94549536 | + | 0     | 0     |

|                                 |       |          |          |   |      |      |
|---------------------------------|-------|----------|----------|---|------|------|
| ENSG0000( AC005220. antisense   | chr20 | 53940160 | 53942508 | + | 0    | 0    |
| ENSG0000( LINC00437 lincRNA     | chr13 | 38533343 | 38545299 | - | 0    | 0    |
| ENSG0000( RP3-503A6 lincRNA     | chr6  | 38714051 | 38715217 | - | 0    | 0    |
| ENSG0000( AC079584. lincRNA     | chr2  | 1.44E+08 | 1.44E+08 | + | 0    | 0    |
| ENSG0000( EI24P1 processed_     | chr3  | 1.76E+08 | 1.76E+08 | - | 0    | 0    |
| ENSG0000( RP5-827C2 antisense   | chr1  | 2.34E+08 | 2.34E+08 | + | 0    | 0    |
| ENSG0000( OR51B8P unprocessε    | chr11 | 5330592  | 5331360  | - | 0    | 0    |
| ENSG0000( RP11-334A processed_  | chr1  | 52993201 | 52993702 | - | 0    | 0    |
| ENSG0000( GAGE12F protein_co    | chrX  | 49551278 | 49568218 | + | 0    | 0    |
| ENSG0000( RP11-525G antisense   | chr1  | 1.66E+08 | 1.66E+08 | - | 0.11 | 0    |
| ENSG0000( RP5-849L7. processed_ | chrX  | 82875649 | 82875885 | + | 0    | 0    |
| ENSG0000( RP11-440G lincRNA     | chr6  | 1.43E+08 | 1.43E+08 | - | 0    | 0    |
| ENSG0000( CT47A1 protein_co     | chrX  | 1.21E+08 | 1.21E+08 | - | 0    | 0    |
| ENSG0000( RP5-865N1 lincRNA     | chr1  | 2.32E+08 | 2.32E+08 | - | 0    | 0    |
| ENSG0000( RP11-15K3 lincRNA     | chr10 | 90402521 | 90540805 | - | 0    | 0    |
| ENSG0000( POU5F1P5 processed_   | chr10 | 68010205 | 68010862 | - | 0.1  | 0    |
| ENSG0000( RP11-470F lincRNA     | chr9  | 75579669 | 75588548 | + | 0    | 0    |
| ENSG0000( AC084809. lincRNA     | chr17 | 32905662 | 32906584 | + | 0    | 0    |
| ENSG0000( RP11-394G lincRNA     | chr6  | 1.36E+08 | 1.36E+08 | - | 0    | 0    |
| ENSG0000( ZNF736P4Y processed_  | chrY  | 25168599 | 25169841 | + | 0    | 0    |
| ENSG0000( VENTXP7 processed_    | chr3  | 21405737 | 21406508 | + | 0    | 0    |
| ENSG0000( KRTAP10-1 unprocessε  | chr21 | 44702221 | 44702791 | + | 0    | 0    |
| ENSG0000( LINC00854 protein_co  | chr17 | 43216941 | 43305397 | - | 0    | 0    |
| ENSG0000( LINC00479 lincRNA     | chr21 | 41711520 | 41715775 | - | 0    | 0    |
| ENSG0000( RP11-114M lincRNA     | chr3  | 1.78E+08 | 1.78E+08 | - | 0    | 0    |
| ENSG0000( AC009518. processed_  | chr7  | 1.32E+08 | 1.32E+08 | + | 0    | 0    |
| ENSG0000( RP11-307C lincRNA     | chr20 | 4431161  | 4431673  | - | 0    | 0    |
| ENSG0000( ITCH-AS1 antisense    | chr20 | 34441592 | 34442025 | - | 0    | 0    |
| ENSG0000( RP1-287H1 lincRNA     | chr6  | 1.35E+08 | 1.35E+08 | - | 0    | 0    |
| ENSG0000( RP11-25B7 antisense   | chr1  | 2.02E+08 | 2.02E+08 | - | 0    | 0    |
| ENSG0000( AC092573. transcribec | chr2  | 1.73E+08 | 1.73E+08 | - | 0    | 0    |
| ENSG0000( AC100848. lincRNA     | chr18 | 64147209 | 64159299 | + | 0    | 0    |
| ENSG0000( RP11-320G lincRNA     | chrX  | 40262917 | 40287720 | + | 0.14 | 0.19 |
| ENSG0000( RP11-229P antisense   | chr9  | 1.37E+08 | 1.37E+08 | + | 0    | 0    |
| ENSG0000( AC093106. processed_  | chr7  | 1.32E+08 | 1.32E+08 | - | 0    | 0    |
| ENSG0000( SLC35G4 protein_co    | chr18 | 11609596 | 11610612 | + | 0    | 0    |
| ENSG0000( DDX11L2 unprocessε    | chr2  | 1.14E+08 | 1.14E+08 | - | 0.91 | 0.32 |
| ENSG0000( TAS2R39 protein_co    | chr7  | 1.43E+08 | 1.43E+08 | + | 0    | 0    |
| ENSG0000( KRTAP21-4 unprocessε  | chr21 | 30741780 | 30742595 | - | 0    | 0    |
| ENSG0000( SLC4A1APF unprocessε  | chr1  | 1.88E+08 | 1.88E+08 | + | 0    | 0    |
| ENSG0000( RP11-447M lincRNA     | chr9  | 1.35E+08 | 1.35E+08 | + | 0    | 0    |
| ENSG0000( VLDLR-AS1 antisense   | chr9  | 2422702  | 2643359  | - | 2.11 | 3.61 |
| ENSG0000( UBQLN1P1 processed_   | chr6  | 30363112 | 30364280 | - | 0    | 0    |
| ENSG0000( HMGB1P1ε processed_   | chr1  | 80283352 | 80283970 | + | 0    | 0    |
| ENSG0000( RP11-476H antisense   | chr7  | 1.55E+08 | 1.55E+08 | - | 0    | 0    |

|                                      |          |          |   |      |      |
|--------------------------------------|----------|----------|---|------|------|
| ENSG0000(NRADDP unitary_psi chr3     | 47011542 | 47013146 | + | 0    | 0    |
| ENSG0000(NDUFAF4P processed_ chr3    | 37789921 | 37790445 | - | 0.28 | 0.62 |
| ENSG0000(RP11-132N lincRNA chr3      | 1.88E+08 | 1.88E+08 | - | 0    | 0    |
| ENSG0000(RP13-24G8 processed_ chrX   | 91422309 | 91422538 | + | 0    | 0    |
| ENSG0000(AC004535. lincRNA chr7      | 10702676 | 10707406 | + | 0    | 0    |
| ENSG0000(CTSLP1 unprocessε chr10     | 87386685 | 87390203 | - | 0    | 0    |
| ENSG0000(CHCHD3P1 processed_ chr10   | 8619933  | 8620608  | + | 0    | 0    |
| ENSG0000(LINC01134 lincRNA chr1      | 3900372  | 3917225  | + | 0.18 | 0.18 |
| ENSG0000(TSPY10 protein_co chrY      | 9527880  | 9530682  | + | 0    | 0    |
| ENSG0000(AC090018. processed_ chr3   | 1.96E+08 | 1.96E+08 | - | 0    | 0    |
| ENSG0000(RP11-79M: antisense chr10   | 1.19E+08 | 1.19E+08 | - | 0    | 0    |
| ENSG0000(RP11-107N lincRNA chr1      | 1.52E+08 | 1.52E+08 | + | 0    | 0    |
| ENSG0000(GPM6BP2 unprocessε chrY     | 18741843 | 18741986 | - | 0    | 0    |
| ENSG0000(KRT8P29 processed_ chr1     | 2.04E+08 | 2.04E+08 | - | 0    | 0    |
| ENSG0000(AC009237. processed_ chr2   | 95536117 | 95536495 | - | 0    | 0    |
| ENSG0000(AC097662. antisense chr2    | 2.27E+08 | 2.27E+08 | - | 2.14 | 1.84 |
| ENSG0000(RPL37P21 processed_ chr13   | 68331338 | 68331613 | - | 0    | 0    |
| ENSG0000(RP11-296A antisense chr1    | 51264916 | 51266074 | - | 0.19 | 0    |
| ENSG0000(TSPY12P unprocessε chrY     | 7687739  | 7689548  | - | 0    | 0    |
| ENSG0000(AC012361. lincRNA chr2      | 20859771 | 20861661 | + | 0    | 0    |
| ENSG0000(LINC02151 lincRNA chr11     | 1.16E+08 | 1.17E+08 | - | 0    | 0    |
| ENSG0000(FAM157A transcribed chr3    | 1.98E+08 | 1.98E+08 | + | 0.38 | 0.45 |
| ENSG0000(RP11-175B processed_ chr1   | 2.02E+08 | 2.02E+08 | - | 0.81 | 0    |
| ENSG0000(AC117947. processed_ chr2   | 1.41E+08 | 1.41E+08 | - | 0    | 0    |
| ENSG0000(ANKRD54P processed_ chr10   | 45151445 | 45151915 | - | 0    | 0    |
| ENSG0000(UBE2L5P protein_co chr13    | 30422488 | 30428616 | + | 0    | 0    |
| ENSG0000(LINC00608 antisense chr2    | 2.19E+08 | 2.19E+08 | + | 0.19 | 0.14 |
| ENSG0000(CT47B1 protein_co chrX      | 1.21E+08 | 1.21E+08 | - | 0    | 0    |
| ENSG0000(ATG10-IT1 sense_intrε chr5  | 81991995 | 81992481 | + | 0    | 0    |
| ENSG0000(AC018890. antisense chr2    | 1.75E+08 | 1.75E+08 | + | 0    | 0    |
| ENSG0000(RP11-111F processed_ chr9   | 62357834 | 62358140 | - | 0    | 0    |
| ENSG0000(AC067956. lincRNA chr2      | 2.2E+08  | 2.21E+08 | + | 0    | 0    |
| ENSG0000(AC123023. lincRNA chr3      | 34203244 | 34268811 | + | 0    | 0    |
| ENSG0000(AC003092. lincRNA chr7      | 94022833 | 94066661 | + | 0.11 | 0.12 |
| ENSG0000(RP4-785G1 processed_ chr20  | 34245953 | 34246537 | - | 0    | 0    |
| ENSG0000(AC130689. sense_intrε chr17 | 2215482  | 2216015  | - | 0    | 0    |
| ENSG0000(HNRNPA1P processed_ chr3    | 42889361 | 42890306 | + | 0    | 0    |
| ENSG0000(SNX2P2 processed_ chr7      | 31941261 | 31941583 | + | 0    | 0    |
| ENSG0000(RP11-523L lincRNA chr9      | 1.15E+08 | 1.15E+08 | - | 0    | 0    |
| ENSG0000(LINC00427 lincRNA chr13     | 30316360 | 30319903 | - | 0    | 0    |
| ENSG0000(CTA-796E4 lincRNA chr22     | 26161834 | 26164303 | + | 0    | 0    |
| ENSG0000(RP11-795J: antisense chr6   | 46492052 | 46532758 | + | 0    | 0    |
| ENSG0000(KCNMA1-A antisense chr10    | 76888044 | 76980624 | + | 0    | 0    |
| ENSG0000(RP11-104D processed_ chr1   | 1.99E+08 | 1.99E+08 | + | 0.04 | 0    |
| ENSG0000(AC007040. antisense chr2    | 71002531 | 71064743 | - | 0    | 0    |

|                                 |       |          |          |   |      |      |
|---------------------------------|-------|----------|----------|---|------|------|
| ENSG0000(AF127577.lincRNA       | chr21 | 15067070 | 15067837 | + | 0    | 0    |
| ENSG0000(AC002401.antisense     | chr17 | 50135586 | 50146176 | + | 0    | 0    |
| ENSG0000(KRT43P.unprocessε      | chr17 | 41448183 | 41454055 | - | 0    | 0    |
| ENSG0000(GCNT1P1.processed_     | chr20 | 18420160 | 18421454 | - | 0    | 0.1  |
| ENSG0000(TRIM26BP.unprocessε    | chr6  | 30238301 | 30242279 | + | 0    | 0    |
| ENSG0000(RP11-8J9.5.processed_  | chr1  | 46742329 | 46743133 | + | 0    | 0    |
| ENSG0000(RPS24P1.processed_     | chrY  | 12244752 | 12245457 | + | 0    | 0    |
| ENSG0000(AC012513.processed_    | chr2  | 2.16E+08 | 2.16E+08 | - | 0    | 0    |
| ENSG0000(PKMP1.processed_       | chr1  | 1.15E+08 | 1.15E+08 | + | 0    | 0    |
| ENSG0000(LINC02195.lincRNA      | chr16 | 26584755 | 26594813 | - | 0    | 0    |
| ENSG0000(MTND2P4C.unprocessε    | chr19 | 12502675 | 12504106 | + | 0    | 0    |
| ENSG0000(RRM2P2.processed_      | chr1  | 1.61E+08 | 1.61E+08 | - | 0    | 0    |
| ENSG0000(LINC01945.lincRNA      | chr2  | 1.32E+08 | 1.32E+08 | - | 0    | 0    |
| ENSG0000(RP11-753E.processed_   | chrX  | 24681909 | 24682634 | + | 0    | 0    |
| ENSG0000(RP11-5371J1.processed_ | chr3  | 1.86E+08 | 1.86E+08 | + | 0    | 0.4  |
| ENSG0000(RP13-565C.unprocessε   | chrX  | 1.35E+08 | 1.35E+08 | - | 0    | 0    |
| ENSG0000(EIF2S2P3.processed_    | chr10 | 92668745 | 92669743 | - | 0.12 | 0    |
| ENSG0000(RP11-89N1.lincRNA      | chr7  | 33793168 | 33803156 | - | 0    | 0.11 |
| ENSG0000(RP11-7C6.1.antisense   | chr10 | 14652742 | 14661691 | + | 0    | 0    |
| ENSG0000(GPS2P1.processed_      | chr9  | 2875442  | 2876427  | - | 0    | 0    |
| ENSG0000(LINC01744.lincRNA      | chr1  | 2.33E+08 | 2.33E+08 | - | 0    | 0    |
| ENSG0000(AC107081.antisense     | chr2  | 61868432 | 61886082 | + | 0    | 0    |
| ENSG0000(LINC00896.lincRNA      | chr22 | 20206397 | 20208524 | + | 0.18 | 0.09 |
| ENSG0000(CD24P1.processed_      | chr1  | 15614643 | 15614867 | - | 0    | 0    |
| ENSG0000(AC079305.lincRNA       | chr2  | 1.77E+08 | 1.77E+08 | - | 0    | 0    |
| ENSG0000(SIX3-AS1.lincRNA       | chr2  | 44940154 | 44941873 | - | 0    | 0    |
| ENSG0000(AC009784.processed_    | chr7  | 1.36E+08 | 1.36E+08 | - | 0    | 0    |
| ENSG0000(AC087499.unprocessε    | chr17 | 20647287 | 20681799 | + | 0    | 0    |
| ENSG0000(RP1-63P18.unprocessε   | chr1  | 40563534 | 40563659 | + | 0    | 0    |
| ENSG0000(RP5-1050E.lincRNA      | chr9  | 89801727 | 89803061 | - | 0    | 0    |
| ENSG0000(ATP13A5-A.antisense    | chr3  | 1.93E+08 | 1.93E+08 | + | 0    | 0    |
| ENSG0000(RPL21P133.processed_   | chrX  | 1.35E+08 | 1.35E+08 | + | 0.16 | 0    |
| ENSG0000(AC011284.antisense     | chr7  | 3642815  | 3643784  | - | 0    | 0    |
| ENSG0000(LINC01231.lincRNA      | chr9  | 3181589  | 3198517  | + | 0    | 0    |
| ENSG0000(RP3-336K2.processed_   | chr6  | 7620422  | 7620878  | + | 0    | 0    |
| ENSG0000(RP11-707P.lincRNA      | chrX  | 4627200  | 4633572  | - | 0    | 0    |
| ENSG0000(RP11-162G.antisense    | chr10 | 37857740 | 37859110 | + | 0.23 | 0.17 |
| ENSG0000(KLF2P4.processed_      | chr2  | 1.31E+08 | 1.31E+08 | - | 0    | 0    |
| ENSG0000(LINC01424.antisense    | chr21 | 44802577 | 44804717 | + | 0    | 0    |
| ENSG0000(GPC6-AS1.antisense     | chr13 | 94154193 | 94187991 | - | 0    | 0    |
| ENSG0000(NPAP1P4.processed_     | chr9  | 80357029 | 80360338 | - | 0    | 0    |
| ENSG0000(NPM1P40.processed_     | chr1  | 2.03E+08 | 2.03E+08 | + | 0    | 0    |
| ENSG0000(AC007278.sense_intrε   | chr2  | 1.02E+08 | 1.02E+08 | + | 0    | 0    |
| ENSG0000(RP4-742J2.antisense    | chr20 | 11909404 | 11918677 | - | 0    | 0    |
| ENSG0000(ARF4P2.processed_      | chr20 | 62872250 | 62873076 | - | 0    | 0.15 |

|                                     |          |          |   |      |      |
|-------------------------------------|----------|----------|---|------|------|
| ENSG0000(RP1-125I3. antisense chr1  | 25859613 | 25863420 | + | 0.15 | 0.33 |
| ENSG0000(RP13-254B processed_ chr7  | 65840212 | 65840596 | + | 0    | 0    |
| ENSG0000(KPNA2P1 processed_ chr4    | 80079532 | 80081122 | + | 0    | 0    |
| ENSG0000(RP5-945F2 lincRNA chr7     | 68091223 | 68119209 | + | 0    | 0    |
| ENSG0000(LINC01695 lincRNA chr21    | 28116094 | 28228667 | - | 0    | 0.22 |
| ENSG0000(AC009413. processed_ chr2  | 41850203 | 41850601 | - | 0    | 0    |
| ENSG0000(H3F3BP1 processed_ chr13   | 71675067 | 71675469 | + | 0    | 0    |
| ENSG0000(RC3H1-IT1 sense_intr chr1  | 1.74E+08 | 1.74E+08 | - | 0    | 0    |
| ENSG0000(AC003986. antisense chr7   | 19119933 | 19121916 | + | 0    | 0.32 |
| ENSG0000(ZNF863P processed_ chr2    | 52071355 | 52077197 | + | 0    | 0    |
| ENSG0000(HNRNPA1F processed_ chr1   | 1.79E+08 | 1.79E+08 | - | 0.06 | 0.04 |
| ENSG0000(AC006547. antisense chr22  | 20058030 | 20070569 | - | 0    | 0    |
| ENSG0000(VN2R9P unitary_psi chr11   | 58040708 | 58041660 | - | 0    | 0    |
| ENSG0000(MED28P7 processed_ chr20   | 25669857 | 25670386 | - | 0    | 0    |
| ENSG0000(RP11-98L5. protein_co chr9 | 1.36E+08 | 1.36E+08 | + | 0    | 0    |
| ENSG0000(AC008060. lincRNA chr7     | 1.55E+08 | 1.55E+08 | - | 0    | 0    |
| ENSG0000(AP001619. antisense chr21  | 41870633 | 41872054 | + | 0    | 0    |
| ENSG0000(RP1-118J2. antisense chr1  | 39897745 | 39899098 | + | 0.08 | 0    |
| ENSG0000(RNF217-AS antisense chr6   | 1.25E+08 | 1.25E+08 | - | 0    | 0.06 |
| ENSG0000(RPS27AP7 processed_ chr2   | 47883455 | 47883909 | + | 0    | 0    |
| ENSG0000(RP4-673D2 unprocess chr20  | 1676662  | 1676907  | - | 0    | 0    |
| ENSG0000(RPL13AP5 processed_ chr10  | 96750288 | 96750899 | + | 0.47 | 0.43 |
| ENSG0000(ASNSP3 processed_ chr13    | 1E+08    | 1E+08    | - | 0.04 | 0    |
| ENSG0000(AC115115. processed_ chr2  | 1.12E+08 | 1.12E+08 | + | 0    | 0    |
| ENSG0000(RP11-443C antisense chr10  | 59282147 | 59282835 | + | 0    | 0    |
| ENSG0000(RP11-243J. antisense chr20 | 31686216 | 31716825 | + | 0    | 0    |
| ENSG0000(RP11-396N processed_ chr4  | 66094142 | 66094526 | + | 0    | 0    |
| ENSG0000(YWHAQP5 processed_ chr2    | 98694109 | 98695490 | + | 0    | 0    |
| ENSG0000(HNRNPA3F processed_ chr13  | 65787932 | 65788764 | - | 0    | 0    |
| ENSG0000(TCF3P1 processed_ chr9     | 5110913  | 5112849  | + | 0    | 0    |
| ENSG0000(HNRNPA1F processed_ chr7   | 27328607 | 27329534 | - | 0    | 0    |
| ENSG0000(RAD23BP1 processed_ chr3   | 18538673 | 18539899 | + | 0    | 0    |
| ENSG0000(RP6-29D12 processed_ chrX  | 53337783 | 53337973 | - | 0    | 0    |
| ENSG0000(AC006369. lincRNA chr2     | 37744333 | 37747046 | + | 0    | 0    |
| ENSG0000(RP11-340I6 processed_ chr7 | 63843314 | 63843505 | + | 0    | 0    |
| ENSG0000(RP11-22B1 processed_ chrX  | 51856968 | 51858066 | + | 0    | 0    |
| ENSG0000(SNRPGP14 processed_ chr13  | 49488970 | 49489364 | + | 0    | 0    |
| ENSG0000(RP11-95P9 processed_ chr7  | 1.14E+08 | 1.14E+08 | - | 0    | 0    |
| ENSG0000(STARD13-A processed_ chr13 | 33180401 | 33281584 | + | 0    | 0    |
| ENSG0000(PRPF38AP2 processed_ chr10 | 17577362 | 17578212 | + | 0    | 0    |
| ENSG0000(AP004290. processed_ chr8  | 99233048 | 99234459 | - | 0    | 0    |
| ENSG0000(MTATP6P4 unprocess chr2    | 1.31E+08 | 1.31E+08 | - | 0    | 0    |
| ENSG0000(RP11-162J8 antisense chr6  | 1.49E+08 | 1.49E+08 | - | 0    | 0    |
| ENSG0000(S100A11P2 processed_ chr7  | 35169224 | 35169535 | + | 0    | 0    |
| ENSG0000(RPS27AP14 processed_ chr9  | 1164414  | 1164867  | - | 0    | 0    |

|                                     |          |            |       |       |
|-------------------------------------|----------|------------|-------|-------|
| ENSG0000(MED15P5 processed_ chr2    | 1.3E+08  | 1.3E+08 +  | 0     | 0     |
| ENSG0000(AC092568. processed_ chr2  | 1.03E+08 | 1.03E+08 + | 0     | 0     |
| ENSG0000(IGHD7-27 IG_D_gene chr14   | 1.06E+08 | 1.06E+08 - | 0     | 0     |
| ENSG0000(ELOCP26 processed_ chrY    | 18178932 | 18179260 - | 0     | 0     |
| ENSG0000(RP4-669L1 lincRNA chr1     | 358857   | 366052 +   | 0     | 0     |
| ENSG0000(RANP1 processed_ chr6      | 30485940 | 30486590 + | 0     | 0     |
| ENSG0000(LYPLA2P3 processed_ chr9   | 76970322 | 76971028 + | 0     | 0     |
| ENSG0000(AC023115. lincRNA chr2     | 67324627 | 67325304 + | 0     | 0     |
| ENSG0000(RP11-93H1 processed_ chr10 | 85708760 | 85709167 + | 0     | 0     |
| ENSG0000(EEF1DP8 processed_ chr11   | 62169293 | 62169828 + | 0     | 0     |
| ENSG0000(EIF4A1P6 processed_ chr13  | 60636888 | 60638097 - | 0     | 0     |
| ENSG0000(ZNF853 protein_co chr7     | 6615617  | 6624290 +  | 0.33  | 0.31  |
| ENSG0000(SOCS5P1 processed_ chr7    | 86216785 | 86217733 - | 0     | 0     |
| ENSG0000(AP000343. lincRNA chr22    | 23326616 | 23328493 + | 0.54  | 0     |
| ENSG0000(KRTAP19-1 unprocessε chr21 | 30537278 | 30537381 - | 0     | 0     |
| ENSG0000(AC010086. unprocessε chrY  | 21405770 | 21405995 + | 0     | 0     |
| ENSG0000(BAK1P2 processed_ chr11    | 1.31E+08 | 1.31E+08 - | 0     | 0     |
| ENSG0000(RP11-46H1 antisense chr12  | 1.33E+08 | 1.33E+08 + | 0     | 0     |
| ENSG0000(PITPNA-AS antisense chr17  | 1516931  | 1518096 +  | 11.89 | 10.58 |
| ENSG0000(XKRYP3 unprocessε chrY     | 23715922 | 23726808 - | 0     | 0     |
| ENSG0000(MTND5P17 processed_ chr10  | 36432882 | 36434484 - | 0     | 0     |
| ENSG0000(RP11-252P antisense chr6   | 1.66E+08 | 1.66E+08 + | 0     | 0     |
| ENSG0000(AC016903. lincRNA chr2     | 2.04E+08 | 2.04E+08 - | 0     | 0     |
| ENSG0000(RP11-35J1. lincRNA chr6    | 76522451 | 76593623 - | 0     | 0     |
| ENSG0000(RP11-211A processed_ chr1  | 2.27E+08 | 2.27E+08 - | 0     | 0     |
| ENSG0000(IFNA4 protein_co chr9      | 21186694 | 21187671 - | 0     | 0     |
| ENSG0000(RP5-905H7 processed_ chr7  | 63263065 | 63263456 + | 0     | 0     |
| ENSG0000(CTA-221G9 lincRNA chr22    | 25212742 | 25213685 + | 0     | 0     |
| ENSG0000(RP11-175D antisense chr9   | 1.25E+08 | 1.25E+08 + | 0     | 0     |
| ENSG0000(LAMTOR5P processed_ chr1   | 62038842 | 62039111 + | 0     | 0     |
| ENSG0000(AC009947. unprocessε chrY  | 23549809 | 23551385 + | 0     | 0     |
| ENSG0000(RP11-473A lincRNA chr1     | 17717687 | 17749978 + | 0     | 0     |
| ENSG0000(DLX2-AS1 lincRNA chr2      | 1.72E+08 | 1.72E+08 + | 0     | 0     |
| ENSG0000(LINC01923 lincRNA chr2     | 1.98E+08 | 1.98E+08 - | 0     | 0     |
| ENSG0000(AC079780. processed_ chr7  | 23480753 | 23480959 + | 0     | 0     |
| ENSG0000(AC023347. processed_ chr2  | 1.26E+08 | 1.26E+08 - | 0     | 0     |
| ENSG0000(RP11-144L. antisense chr1  | 1.58E+08 | 1.58E+08 - | 0     | 0     |
| ENSG0000(RP11-83J2. antisense chr9  | 1.31E+08 | 1.31E+08 + | 0     | 0     |
| ENSG0000(FAM90A7P unprocessε chr8   | 7556700  | 7559712 -  | 0     | 0     |
| ENSG0000(RP11-108L. antisense chr10 | 1.01E+08 | 1.01E+08 - | 0     | 0.31  |
| ENSG0000(FRGCA antisense chr21      | 43140523 | 43141092 - | 0     | 0     |
| ENSG0000(AC011998. sense_intrε chr2 | 1.78E+08 | 1.78E+08 - | 0     | 0     |
| ENSG0000(AC114808. antisense chr2   | 1158310  | 1160424 -  | 0     | 0     |
| ENSG0000(POTEH-AS1 antisense chr22  | 15699361 | 15703403 - | 0     | 0     |
| ENSG0000(AC104076. processed_ chr2  | 1.81E+08 | 1.81E+08 - | 0     | 0     |



|                                      |          |            |      |      |
|--------------------------------------|----------|------------|------|------|
| ENSG0000(RP11-85O2 antisense chr9    | 1.24E+08 | 1.24E+08 - | 0    | 0    |
| ENSG0000(KRT18P5 processed_chr22     | 20482815 | 20484105 - | 0.32 | 0.35 |
| ENSG0000(PRKG1-AS1 antisense chr10   | 52230742 | 52314128 - | 0.56 | 0.35 |
| ENSG0000(RP11-69I8. lincRNA chr6     | 1.32E+08 | 1.32E+08 + | 0.14 | 0.25 |
| ENSG0000(RP4-792G4 processed_chr1    | 63359823 | 63361179 - | 0    | 0    |
| ENSG0000(MTX1P1 unprocessε chr1      | 1.55E+08 | 1.55E+08 + | 0    | 0    |
| ENSG0000(RP5-837I24 antisense chr1   | 81585941 | 81625713 - | 0    | 0    |
| ENSG0000(AP000688. antisense chr21   | 36060432 | 36064408 + | 0    | 0    |
| ENSG0000(LINC00347 lincRNA chr13     | 74552503 | 74565445 + | 0    | 0    |
| ENSG0000(RPL23AP24 processed_chr1    | 347982   | 348366 -   | 1.22 | 0    |
| ENSG0000(RP11-296P processed_chr9    | 19026892 | 19028129 + | 0    | 0    |
| ENSG0000(DSTNP5 processed_chr2       | 2.04E+08 | 2.04E+08 + | 0    | 0    |
| ENSG0000(AC068282. lincRNA chr2      | 1.27E+08 | 1.27E+08 + | 1.43 | 1.73 |
| ENSG0000(HMGA1P1 processed_chrX      | 26748029 | 26749090 + | 0    | 0    |
| ENSG0000(BZW1P1 processed_chr3       | 1.72E+08 | 1.72E+08 - | 0.14 | 0    |
| ENSG0000(RP11-323H lincRNA chr9      | 1.32E+08 | 1.32E+08 + | 0.05 | 0    |
| ENSG0000(MTCO2P21 unprocessε chr1    | 93926615 | 93927569 - | 0    | 0    |
| ENSG0000(AC007274. unprocessε chrY   | 7690511  | 7692678 +  | 0    | 0    |
| ENSG0000(NDUFA4P2 processed_chr3     | 1.03E+08 | 1.03E+08 + | 0    | 0    |
| ENSG0000(RP11-1217 unprocessε chr7   | 57187892 | 57189437 + | 0    | 0    |
| ENSG0000(HNRNPA1F processed_chr2     | 1.94E+08 | 1.94E+08 + | 0    | 0    |
| ENSG0000(EIF1AXP1 processed_chr1     | 16685621 | 16686055 - | 3.89 | 0.59 |
| ENSG0000(ARHGEF38 protein_co chr4    | 1.06E+08 | 1.06E+08 + | 0    | 0.19 |
| ENSG0000(LINC01010 lincRNA chr6      | 1.34E+08 | 1.35E+08 + | 0.04 | 0    |
| ENSG0000(RP11-549A processed_chr9    | 73648828 | 73649839 + | 0    | 0    |
| ENSG0000(MYB-AS1 antisense chr6      | 1.35E+08 | 1.35E+08 - | 0    | 0    |
| ENSG0000(CNOT4P1 processed_chr13     | 20921664 | 20923233 - | 0    | 0    |
| ENSG0000(AC073316. antisense chr7    | 3264032  | 3302452 -  | 0    | 0    |
| ENSG0000(DAPK1-IT1 sense_intrε chr9  | 87553454 | 87554459 + | 0    | 0    |
| ENSG0000(AC108448. processed_chr11   | 3084393  | 3085443 -  | 0.18 | 0.2  |
| ENSG0000(SMAD9-IT1 sense_intrε chr13 | 36849366 | 36850046 - | 0    | 0    |
| ENSG0000(AC079448. processed_chr7    | 7293508  | 7293880 +  | 0    | 0    |
| ENSG0000(RP11-363I2 processed_chr1   | 1.51E+08 | 1.51E+08 + | 0    | 0    |
| ENSG0000(LINC01844 lincRNA chr5      | 1.43E+08 | 1.43E+08 + | 0    | 0    |
| ENSG0000(RP11-478H lincRNA chr10     | 28743745 | 28744663 + | 0    | 0    |
| ENSG0000(RP11-100G unprocessε chr9   | 92150382 | 92157445 - | 0    | 0    |
| ENSG0000(RBMY2QP unprocessε chrY     | 10022489 | 10034187 - | 0    | 0    |
| ENSG0000(OVAAL lincRNA chr1          | 1.81E+08 | 1.81E+08 + | 0    | 0    |
| ENSG0000(LINC01741 lincRNA chr1      | 1.78E+08 | 1.78E+08 + | 0    | 0    |
| ENSG0000(RP11-359I1 processed_chr3   | 58511310 | 58511676 + | 0    | 0    |
| ENSG0000(RP5-1024G antisense chr1    | 53209783 | 53213775 - | 0.57 | 0.39 |
| ENSG0000(RP11-252N antisense chr9    | 3875584  | 3878809 +  | 0    | 0    |
| ENSG0000(RP4-801G2 unprocessε chr1   | 1.58E+08 | 1.58E+08 - | 0    | 0    |
| ENSG0000(AC094019. unprocessε chr3   | 32151083 | 32151895 - | 0    | 0    |
| ENSG0000(RP11-203L antisense chr9    | 68822403 | 68843275 - | 0    | 0    |

|                                     |          |          |   |      |      |
|-------------------------------------|----------|----------|---|------|------|
| ENSG0000(RPL31P63 processed_ chrX   | 68600099 | 68600473 | + | 0    | 0    |
| ENSG0000(UQCRC2P1 processed_ chr3   | 46310591 | 46311922 | - | 0    | 0    |
| ENSG0000(GAGE12B protein_co chrX    | 49529869 | 49529985 | + | 0    | 0    |
| ENSG0000(CLIC4P1 processed_ chr9    | 22747700 | 22748234 | + | 0    | 0    |
| ENSG0000(RP11-411K lincRNA chr6     | 53930022 | 53997667 | + | 0    | 0.14 |
| ENSG0000(RP4-560B9 processed_ chr1  | 1.72E+08 | 1.72E+08 | + | 0    | 0    |
| ENSG0000(RP5-857K2 lincRNA chr1     | 357383   | 359681   | - | 0    | 0    |
| ENSG0000(RP11-168C sense_intr chr10 | 55247755 | 55597233 | - | 0    | 0    |
| ENSG0000(YRDCP2 processed_ chr9     | 96954820 | 96955461 | + | 0    | 0    |
| ENSG0000(LINC01282 lincRNA chrX     | 39367285 | 39391774 | - | 0    | 0    |
| ENSG0000(AC009500. processed_ chr7  | 8938787  | 8939369  | + | 0    | 0    |
| ENSG0000(AC009237. processed_ chr2  | 95641634 | 95641980 | - | 0    | 0    |
| ENSG0000(LINC01186 lincRNA chrX     | 46325924 | 46327645 | - | 0    | 0    |
| ENSG0000(MKLN1-AS processed_ chr7   | 1.31E+08 | 1.31E+08 | - | 1.67 | 2.35 |
| ENSG0000(AC004019. antisense chr22  | 17580157 | 17589192 | - | 0    | 0    |
| ENSG0000(DNAJC9-AS antisense chr10  | 73247360 | 73276984 | + | 0.02 | 0.06 |
| ENSG0000(MTUS2-AS. antisense chr13  | 29239379 | 29250554 | - | 0    | 0    |
| ENSG0000(AC019118. lincRNA chr2     | 3131581  | 3145780  | - | 0    | 0    |
| ENSG0000(CTAGE9 protein_co chr6     | 1.32E+08 | 1.32E+08 | - | 0    | 0    |
| ENSG0000(RPL19P16 processed_ chr10  | 1.21E+08 | 1.21E+08 | - | 0    | 0    |
| ENSG0000(TRMT112P processed_ chr9   | 1.01E+08 | 1.01E+08 | - | 0    | 0    |
| ENSG0000(COX7A2P2 processed_ chr4   | 96902801 | 96903050 | + | 0    | 0    |
| ENSG0000(RP11-1029 processed_ chr3  | 48120669 | 48121215 | - | 0    | 0    |
| ENSG0000(RP11-168P lincRNA chr10    | 43901365 | 43912326 | - | 0    | 0    |
| ENSG0000(AC079325. unprocess chr17  | 74549399 | 74552737 | - | 0    | 0    |
| ENSG0000(RP5-1184F. antisense chr20 | 32449755 | 32453607 | + | 0    | 0    |
| ENSG0000(RP11-365C processed_ chr1  | 2.24E+08 | 2.24E+08 | - | 0    | 0    |
| ENSG0000(RP11-551G processed_ chr1  | 2.47E+08 | 2.47E+08 | + | 0    | 0    |
| ENSG0000(RPL21P23 processed_ chr1   | 56538452 | 56538911 | + | 0    | 0    |
| ENSG0000(RP11-108B processed_ chr10 | 22163092 | 22164306 | + | 0    | 0    |
| ENSG0000(INTS6-AS1 antisense chr13  | 51452367 | 51552364 | + | 2.6  | 2.5  |
| ENSG0000(RP11-430C processed_ chr1  | 2.05E+08 | 2.05E+08 | - | 0    | 0    |
| ENSG0000(LINC01829 lincRNA chr2     | 67123357 | 67215319 | - | 0.34 | 0.37 |
| ENSG0000(RP11-96L1. protein_co chr1 | 26169516 | 26171821 | - | 0.1  | 0    |
| ENSG0000(RPS15AP27 processed_ chr9  | 1.08E+08 | 1.08E+08 | - | 0    | 0    |
| ENSG0000(SDR42E1P5 processed_ chr2  | 1.02E+08 | 1.02E+08 | + | 0    | 0    |
| ENSG0000(TSPY15P unprocess chrY     | 9548108  | 9550681  | + | 0    | 0    |
| ENSG0000(LINC00299 lincRNA chr2     | 8007771  | 8383621  | - | 0.12 | 0.04 |
| ENSG0000(OR2AI1P unprocess chr5     | 1.81E+08 | 1.81E+08 | - | 0    | 0    |
| ENSG0000(RP11-142L. processed_ chr1 | 1.92E+08 | 1.92E+08 | + | 0    | 0    |
| ENSG0000(BCRP8 processed_ chr22     | 23179918 | 23180172 | - | 0    | 0    |
| ENSG0000(AC006004. antisense chr7   | 1.47E+08 | 1.47E+08 | - | 0    | 0    |
| ENSG0000(RP11-462B unprocess chr9   | 32836575 | 32869595 | - | 0    | 0    |
| ENSG0000(SPA17P1 transcribec chr10  | 75382393 | 75382844 | - | 0    | 0    |
| ENSG0000(RP11-383C lincRNA chr10    | 1.15E+08 | 1.15E+08 | + | 0    | 0    |

|                 |            |             |       |          |          |   |        |        |
|-----------------|------------|-------------|-------|----------|----------|---|--------|--------|
| ENSG00000100000 | RP11-534L1 | lincRNA     | chr10 | 48664199 | 48672424 | - | 0      | 0      |
| ENSG00000100000 | RPL24P8    | processed   | chr9  | 70217195 | 70217668 | + | 0.16   | 0      |
| ENSG00000100000 | SDAD1P4    | processed   | chr13 | 23267506 | 23269150 | + | 0      | 0      |
| ENSG00000100000 | RPS3AP12   | processed   | chr1  | 1.19E+08 | 1.19E+08 | - | 0      | 0      |
| ENSG00000100000 | RPL7AP15   | processed   | chr1  | 1.47E+08 | 1.47E+08 | + | 0      | 0      |
| ENSG00000100000 | AC092066   | processed   | chr19 | 44765148 | 44765464 | + | 0      | 0      |
| ENSG00000100000 | SNX25P1    | unprocessed | chr1  | 2.11E+08 | 2.11E+08 | + | 0.08   | 0.25   |
| ENSG00000100000 | ELOA-AS1   | antisense   | chr1  | 23760382 | 23778287 | - | 1.82   | 1.23   |
| ENSG00000100000 | GAPDHP2    | processed   | chr20 | 13392677 | 13393674 | + | 0      | 0      |
| ENSG00000100000 | BTF3P8     | processed   | chrX  | 63766875 | 63767400 | + | 0      | 0      |
| ENSG00000100000 | RP11-446E  | processed   | chr8  | 56050038 | 56051207 | - | 0      | 0.19   |
| ENSG00000100000 | ANKRD20A   | unprocessed | chr9  | 42852675 | 42894751 | + | 0      | 0      |
| ENSG00000100000 | RP11-978I1 | antisense   | chr1  | 2.48E+08 | 2.48E+08 | - | 0      | 0      |
| ENSG00000100000 | ARL5AP2    | processed   | chr10 | 99013103 | 99013952 | - | 0      | 0      |
| ENSG00000100000 | LINC01563  | lincRNA     | chr17 | 21075556 | 21090615 | + | 0      | 0      |
| ENSG00000100000 | RP11-137J1 | antisense   | chr6  | 1.42E+08 | 1.42E+08 | + | 0      | 0      |
| ENSG00000100000 | RP1-249F5  | lincRNA     | chr6  | 1.6E+08  | 1.6E+08  | + | 0      | 0      |
| ENSG00000100000 | BCYRN1     | scRNA       | chr2  | 47335315 | 47335514 | + | 175.76 | 186.79 |
| ENSG00000100000 | RAB28P2    | processed   | chr9  | 62606797 | 62607748 | - | 0      | 0      |
| ENSG00000100000 | LINC00529  | lincRNA     | chr8  | 11247626 | 11267865 | - | 0      | 0      |
| ENSG00000100000 | DMD-AS3    | antisense   | chrX  | 32754940 | 32756400 | + | 0      | 0      |
| ENSG00000100000 | Z97634.3   | transcribed | chr16 | 382097   | 392960   | + | 0.56   | 0.93   |
| ENSG00000100000 | CBR3-AS1   | processed   | chr21 | 36131767 | 36175815 | - | 1.89   | 2.51   |
| ENSG00000100000 | YME1L1P1   | unprocessed | chr22 | 15489990 | 15492564 | + | 0      | 0      |
| ENSG00000100000 | AC073465   | processed   | chr2  | 1.73E+08 | 1.73E+08 | - | 0      | 0      |
| ENSG00000100000 | AC024560   | lincRNA     | chr3  | 1.98E+08 | 1.98E+08 | - | 0      | 0.09   |
| ENSG00000100000 | LINC00421  | lincRNA     | chr13 | 19345049 | 19346749 | + | 0      | 0      |
| ENSG00000100000 | PCYT1B-AS  | antisense   | chrX  | 24650073 | 24658237 | + | 0      | 0      |
| ENSG00000100000 | AC139712   | lincRNA     | chr2  | 52494688 | 52500752 | - | 0      | 0      |
| ENSG00000100000 | AC090617   | antisense   | chr17 | 2213697  | 2214414  | + | 0      | 0      |
| ENSG00000100000 | RP11-3P22  | lincRNA     | chr7  | 69187833 | 69189318 | - | 0      | 0      |
| ENSG00000100000 | AC007750   | antisense   | chr2  | 1.62E+08 | 1.62E+08 | + | 0.84   | 1.29   |
| ENSG00000100000 | RP11-399K  | antisense   | chr10 | 75430571 | 75431588 | - | 0      | 0      |
| ENSG00000100000 | AC091633   | processed   | chr3  | 1.96E+08 | 1.96E+08 | + | 0.16   | 0      |
| ENSG00000100000 | RP11-239E  | lincRNA     | chr1  | 2.23E+08 | 2.23E+08 | + | 0      | 0      |
| ENSG00000100000 | AC018892   | unprocessed | chr2  | 97035461 | 97037549 | - | 0      | 0      |
| ENSG00000100000 | RPL23AP95  | processed   | chr7  | 1.03E+08 | 1.03E+08 | - | 0      | 0      |
| ENSG00000100000 | LINC01474  | lincRNA     | chr9  | 72871728 | 72874109 | - | 0      | 0      |
| ENSG00000100000 | RP11-3D23  | processed   | chrX  | 62779250 | 62780326 | + | 0      | 0      |
| ENSG00000100000 | OR2R1P     | unitary_psi | chr7  | 1.43E+08 | 1.43E+08 | - | 0      | 0      |
| ENSG00000100000 | AL121656   | lincRNA     | chr2  | 32927127 | 32928405 | + | 0      | 0      |
| ENSG00000100000 | AC105393   | lincRNA     | chr2  | 388412   | 416885   | + | 0      | 0      |
| ENSG00000100000 | RAP1BP1    | processed   | chr9  | 18717974 | 18718526 | - | 0      | 0      |
| ENSG00000100000 | CTA-992D9  | lincRNA     | chr22 | 27048144 | 27060518 | - | 0.02   | 0      |
| ENSG00000100000 | NIFK-AS1   | antisense   | chr2  | 1.22E+08 | 1.22E+08 | + | 2.42   | 2.56   |

|                                      |          |          |   |      |      |
|--------------------------------------|----------|----------|---|------|------|
| ENSG0000(RPL39P29 processed_ chr13   | 1.02E+08 | 1.02E+08 | - | 0    | 0    |
| ENSG0000(AC006378. antisense chr7    | 93969442 | 94011113 | + | 0    | 0    |
| ENSG0000(RPS20P24 processed_ chr9    | 72655832 | 72656192 | - | 0    | 0    |
| ENSG0000(RPL23AP23 processed_ chr1   | 2.35E+08 | 2.35E+08 | + | 0    | 0    |
| ENSG0000(RP11-44H4 lincRNA chr3      | 1.88E+08 | 1.88E+08 | - | 0    | 0    |
| ENSG0000(AL157902. antisense chr1    | 1.18E+08 | 1.18E+08 | - | 0    | 0    |
| ENSG0000(RP3-522J7. processed_ chr22 | 49817248 | 49817712 | + | 0    | 0    |
| ENSG0000(RP11-944L antisense chr3    | 44557357 | 44685653 | - | 0.34 | 0.19 |
| ENSG0000(RP1-223D1 processed_ chrX   | 83559896 | 83560312 | - | 0    | 0    |
| ENSG0000(LINC00106 lincRNA chrX      | 1396427  | 1399402  | + | 2.34 | 1.38 |
| ENSG0000(LINC00106 lincRNA chrY      | 1396427  | 1399402  | + | 2.34 | 1.38 |
| ENSG0000(RP11-291L processed_ chr1   | 45415020 | 45415344 | + | 0    | 0.34 |
| ENSG0000(RP1-66N13 lincRNA chr20     | 48383323 | 48384895 | - | 0    | 0    |
| ENSG0000(DDX11L5 unprocessε chr9     | 12134    | 13783    | + | 0    | 0    |
| ENSG0000(TMSB4XP1 processed_ chr1    | 42500205 | 42500339 | - | 0    | 0    |
| ENSG0000(SETD6P1 processed_ chr2     | 1.08E+08 | 1.08E+08 | - | 0    | 0    |
| ENSG0000(MTATP6P2 processed_ chr2    | 1.2E+08  | 1.2E+08  | + | 0    | 0    |
| ENSG0000(RP3-384D2 processed_ chrX   | 1.25E+08 | 1.25E+08 | - | 0    | 0    |
| ENSG0000(LINC01554 lincRNA chr5      | 95852232 | 95860133 | + | 0.16 | 0.26 |
| ENSG0000(AP001615. antisense chr21   | 41739373 | 41741308 | + | 0    | 0    |
| ENSG0000(AC018731. lincRNA chr2      | 1.51E+08 | 1.51E+08 | - | 0    | 0    |
| ENSG0000(AC007563. antisense chr2    | 2.17E+08 | 2.17E+08 | + | 0    | 0    |
| ENSG0000(RP11-389C processed_ chr1   | 1.13E+08 | 1.13E+08 | + | 0    | 0    |
| ENSG0000(RPS20P5 processed_ chr1     | 57605847 | 57606206 | - | 0    | 0    |
| ENSG0000(RP11-38J2. lincRNA chr1     | 2.06E+08 | 2.06E+08 | - | 0    | 0    |
| ENSG0000(XXbac-B47 processed_ chr22  | 18081466 | 18081675 | - | 0    | 0    |
| ENSG0000(RP11-482E lincRNA chr10     | 3532094  | 3537031  | - | 0    | 0    |
| ENSG0000(ASS1P7 processed_ chr3      | 1.77E+08 | 1.77E+08 | - | 0    | 0    |
| ENSG0000(RP11-128B transcribec chr10 | 26577676 | 26622338 | - | 0    | 0    |
| ENSG0000(RP11-535C antisense chr9    | 97986551 | 97987656 | - | 0    | 0    |
| ENSG0000(AC113331. lincRNA chr11     | 5106062  | 5107530  | - | 0    | 0    |
| ENSG0000(TIMM9P1 processed_ chr10    | 74344550 | 74344805 | - | 0    | 0    |
| ENSG0000(MIR600HG sense_intrε chr9   | 1.23E+08 | 1.23E+08 | - | 0.05 | 0.04 |
| ENSG0000(RP11-348H processed_ chr1   | 2.13E+08 | 2.13E+08 | + | 0.16 | 0.18 |
| ENSG0000(RP11-548K unprocessε chr7   | 57817601 | 57818012 | - | 0    | 0    |
| ENSG0000(RP5-1063N lincRNA chr12     | 3318718  | 3325343  | + | 0.02 | 0.02 |
| ENSG0000(OR2P1P unprocessε chr6      | 29071824 | 29072599 | - | 0    | 0    |
| ENSG0000(RP11-78B1 antisense chr1    | 2.08E+08 | 2.08E+08 | - | 0    | 0    |
| ENSG0000(AC025750. processed_ chr2   | 42469817 | 42470266 | + | 0    | 0    |
| ENSG0000(LINC01852 lincRNA chr15     | 38069481 | 38072959 | - | 0.76 | 0.49 |
| ENSG0000(RP4-651E1 antisense chr1    | 86571181 | 86693203 | - | 0    | 0    |
| ENSG0000(DNAJA1P2 processed_ chr2    | 1.54E+08 | 1.54E+08 | - | 0    | 0    |
| ENSG0000(RP11-347H unprocessε chr11  | 50246554 | 50247761 | - | 0    | 0    |
| ENSG0000(RP11-111D lincRNA chr6      | 98210020 | 98214683 | - | 0    | 0    |
| ENSG0000(RP11-408N lincRNA chr9      | 22203990 | 22214672 | - | 0    | 0    |

|                                      |          |          |   |      |      |
|--------------------------------------|----------|----------|---|------|------|
| ENSG0000(LINC01378 lincRNA chr4      | 1.17E+08 | 1.18E+08 | + | 0    | 0    |
| ENSG0000(RP11-390F lincRNA chr9      | 6645956  | 6670635  | + | 0    | 0    |
| ENSG0000(RP11-792A processed_chr7    | 66434634 | 66435154 | - | 0    | 0    |
| ENSG0000(RP11-699A processed_chrX    | 15117437 | 15117768 | - | 0    | 0    |
| ENSG0000(RP11-852E processed_chr3    | 45883640 | 45884113 | - | 0.65 | 0    |
| ENSG0000(CEACAMP8 unprocessε chr19   | 43035869 | 43041248 | - | 0    | 0    |
| ENSG0000(AP003774. antisense chr11   | 64325050 | 64329504 | - | 0.1  | 0.11 |
| ENSG0000(RP3-329E2 antisense chr1    | 21266082 | 21267251 | + | 0    | 0    |
| ENSG0000(PTGES3P4 processed_chr10    | 1.03E+08 | 1.03E+08 | + | 0    | 0    |
| ENSG0000(AC003092. lincRNA chr7      | 94071759 | 94077157 | - | 0    | 0    |
| ENSG0000(BAALC-AS2 antisense chr8    | 1.03E+08 | 1.03E+08 | - | 0    | 0    |
| ENSG0000(RP11-98D1 processed_chr1    | 1.52E+08 | 1.52E+08 | + | 0    | 0    |
| ENSG0000(RP11-366N processed_chr4    | 1.65E+08 | 1.65E+08 | + | 0    | 0    |
| ENSG0000(RP11-6B6.3 processed_chr1   | 2.06E+08 | 2.06E+08 | + | 0    | 0    |
| ENSG0000(CCDC58P2 processed_chr10    | 50962993 | 50963358 | - | 0    | 0    |
| ENSG0000(HNRNPA1F processed_chr12    | 68035767 | 68036853 | + | 0    | 0    |
| ENSG0000(RP11-98G7 lincRNA chr1      | 1.56E+08 | 1.56E+08 | - | 0    | 0    |
| ENSG0000(RP11-154H lincRNA chr1      | 5561709  | 5668295  | - | 0    | 0    |
| ENSG0000(LINC01774 lincRNA chr1      | 2.09E+08 | 2.09E+08 | + | 0    | 0    |
| ENSG0000(AC007359. lincRNA chrY      | 22100814 | 22147484 | - | 0    | 0    |
| ENSG0000(ZDHHC20-l sense_intrε chr13 | 21376977 | 21377874 | - | 0    | 0    |
| ENSG0000(NF1P8 unprocessε chr2       | 1.31E+08 | 1.31E+08 | - | 0    | 0    |
| ENSG0000(RP11-451C transcribed chr1  | 1.58E+08 | 1.58E+08 | + | 0    | 0    |
| ENSG0000(RP11-264A sense_intrε chr10 | 54864674 | 54869122 | - | 0    | 0    |
| ENSG0000(SULT1D1P unitary_psε chr4   | 69791872 | 69813888 | - | 0.07 | 0    |
| ENSG0000(RP11-265G processed_chr10   | 19491072 | 19491299 | - | 0    | 0    |
| ENSG0000(RP1-261G2 lincRNA chr6      | 43722786 | 43737834 | - | 0    | 0    |
| ENSG0000(LINC01141 lincRNA chr1      | 20360579 | 20431234 | - | 0    | 0.07 |
| ENSG0000(OR52N3P unitary_psε chr11   | 5800364  | 5801297  | + | 0    | 0    |
| ENSG0000(RP11-216N processed_chr9    | 40131747 | 40132218 | + | 0    | 0    |
| ENSG0000(RP11-298E lincRNA chr10     | 3223816  | 3227407  | + | 0    | 0    |
| ENSG0000(GGT8P unprocessε chr2       | 91775944 | 91781169 | + | 0    | 0    |
| ENSG0000(FABP5P1 processed_chr13     | 73100575 | 73100985 | - | 0    | 0    |
| ENSG0000(GAPDHP51 processed_chr1     | 51707138 | 51708137 | - | 0    | 0    |
| ENSG0000(RP5-1065P lincRNA chr1      | 2.29E+08 | 2.29E+08 | - | 0    | 0    |
| ENSG0000(RP11-165H processed_chr7    | 64141538 | 64142401 | - | 0    | 0    |
| ENSG0000(ANKRD44-l sense_intrε chr2  | 1.97E+08 | 1.97E+08 | - | 0    | 0    |
| ENSG0000(RP11-575N processed_chr7    | 70837738 | 70838013 | + | 0    | 0    |
| ENSG0000(C3orf84 protein_co chr3     | 49177632 | 49191858 | - | 0    | 0    |
| ENSG0000(OR10G9 protein_co chr11     | 1.24E+08 | 1.24E+08 | + | 0    | 0    |
| ENSG0000(BLOC1S2P1 processed_chrX    | 64726748 | 64727048 | - | 0    | 0    |
| ENSG0000(RP5-1195D lincRNA chr20     | 16857962 | 16864148 | - | 0    | 0    |
| ENSG0000(RP11-544A antisense chr9    | 1.31E+08 | 1.31E+08 | - | 0    | 0    |
| ENSG0000(NDUFA5P8 processed_chr11    | 3276045  | 3276390  | + | 0    | 0    |
| ENSG0000(RP11-402K processed_chrX    | 1E+08    | 1E+08    | - | 0    | 0    |

|                                   |       |          |          |   |      |      |
|-----------------------------------|-------|----------|----------|---|------|------|
| ENSG0000( AC142119. lincRNA       | chr2  | 16085222 | 16105841 | - | 0    | 0    |
| ENSG0000( RP11-433J. lincRNA      | chr10 | 4051726  | 4089013  | + | 0    | 0    |
| ENSG0000( EDRF1-AS1 antisense     | chr10 | 1.26E+08 | 1.26E+08 | - | 0    | 0    |
| ENSG0000( RPL12P12 processed_     | chr20 | 19823443 | 19823943 | - | 0    | 0    |
| ENSG0000( GAPDHP21 processed_     | chr10 | 55667341 | 55668350 | - | 0.06 | 0    |
| ENSG0000( YBX1P9 processed_       | chr1  | 2.26E+08 | 2.26E+08 | - | 0    | 0    |
| ENSG0000( MLIP-IT1 sense_intron   | chr6  | 53998890 | 54007152 | + | 0    | 0    |
| ENSG0000( RP11-203L. processed_   | chr9  | 68788307 | 68789670 | - | 0    | 0    |
| ENSG0000( ATP2B2-IT1 sense_intron | chr3  | 10566255 | 10570375 | - | 0    | 0    |
| ENSG0000( PTMAP6 processed_       | chr20 | 56700837 | 56701514 | - | 0    | 0    |
| ENSG0000( WASF3-AS: antisense     | chr13 | 26606544 | 26641364 | - | 0    | 0    |
| ENSG0000( RP11-92J1. lincRNA      | chr10 | 36438616 | 36442392 | + | 0    | 0    |
| ENSG0000( RP4-612C1 processed_    | chr1  | 93190740 | 93191060 | - | 0    | 0    |
| ENSG0000( ZNRF2P1 processed_      | chr7  | 32728569 | 32729011 | + | 0.54 | 1.78 |
| ENSG0000( HIGD1A1. processed_     | chr20 | 10334419 | 10334698 | + | 0    | 0    |
| ENSG0000( KRT18P52 processed_     | chr2  | 31822591 | 31823436 | - | 0    | 0    |
| ENSG0000( LAPTM4BP processed_     | chr1  | 1.53E+08 | 1.53E+08 | - | 0    | 0    |
| ENSG0000( GLIS3-AS1 antisense     | chr9  | 3898642  | 3901248  | + | 0    | 0    |
| ENSG0000( RP11-98G1 lincRNA       | chr1  | 1.94E+08 | 1.94E+08 | - | 0    | 0    |
| ENSG0000( LINC01812 lincRNA       | chr2  | 67796054 | 67825562 | - | 0    | 0    |
| ENSG0000( AC004074. processed_    | chrX  | 73237647 | 73238709 | - | 0    | 0    |
| ENSG0000( CTA-984G1 antisense     | chr22 | 29260889 | 29262037 | + | 0    | 0    |
| ENSG0000( AC013410. processed_    | chr2  | 1.74E+08 | 1.74E+08 | - | 0    | 0    |
| ENSG0000( AC012314. antisense     | chr19 | 54119511 | 54125343 | - | 0.01 | 0.06 |
| ENSG0000( GS1-433O2 lincRNA       | chrX  | 22698457 | 22768966 | + | 0    | 0    |
| ENSG0000( IGH1-20 IG_D_gene       | chr14 | 1.06E+08 | 1.06E+08 | - | 0    | 0    |
| ENSG0000( RP3-486I3. lincRNA      | chr6  | 1.16E+08 | 1.16E+08 | + | 0    | 0.03 |
| ENSG0000( USP9YP3 unprocessed     | chrY  | 21661926 | 21674008 | + | 0    | 0    |
| ENSG0000( RPL21P33 processed_     | chr2  | 60852260 | 60852743 | + | 0    | 0    |
| ENSG0000( RP1-315G1 processed_    | chrX  | 1.24E+08 | 1.24E+08 | - | 0    | 0    |
| ENSG0000( RP11-328P processed_    | chr7  | 65235790 | 65236723 | - | 0    | 0    |
| ENSG0000( RP11-16C1 antisense     | chr6  | 89560875 | 89567044 | - | 0    | 0    |
| ENSG0000( AC008067. antisense     | chr2  | 80572681 | 80618777 | - | 0    | 0    |
| ENSG0000( RPSAP7 processed_       | chr10 | 14723171 | 14724055 | - | 0    | 0    |
| ENSG0000( CASP3P1 processed_      | chr1  | 70660657 | 70661265 | - | 0    | 0    |
| ENSG0000( AC109589. lincRNA       | chr2  | 1.98E+08 | 1.98E+08 | - | 0    | 0    |
| ENSG0000( ZEB1-AS1 antisense      | chr10 | 31206278 | 31320447 | - | 3.94 | 6.15 |
| ENSG0000( NDUFA6-A. processed_    | chr22 | 42090931 | 42137742 | + | 3.64 | 2.99 |
| ENSG0000( USP17L8 protein_coding  | chr8  | 7971661  | 7973253  | - | 0    | 0    |
| ENSG0000( AC018738. processed_    | chr2  | 2.31E+08 | 2.31E+08 | + | 0    | 0    |
| ENSG0000( DPH3P2 processed_       | chrX  | 1.56E+08 | 1.56E+08 | + | 0    | 0    |
| ENSG0000( DPH3P2 processed_       | chrY  | 57062156 | 57062405 | + | 0    | 0    |
| ENSG0000( AC007679. processed_    | chr2  | 2.06E+08 | 2.06E+08 | + | 0    | 0    |
| ENSG0000( MICG unprocessed        | chr6  | 29812565 | 29812696 | - | 0    | 0    |
| ENSG0000( TTTY12 lincRNA          | chrY  | 7804924  | 7810683  | + | 0    | 0    |

|                                           |          |          |   |       |       |
|-------------------------------------------|----------|----------|---|-------|-------|
| ENSG0000(RPL34P1 processed_ chr1          | 1.68E+08 | 1.68E+08 | + | 0     | 0     |
| ENSG0000(FUCA1P1 processed_ chr2          | 1.77E+08 | 1.77E+08 | - | 0     | 0     |
| ENSG0000(PRMT5-AS: antisense chr14        | 22918947 | 22926900 | + | 0     | 0     |
| ENSG0000(MTCO1P48 processed_ chr2         | 94899566 | 94900661 | - | 0     | 0     |
| ENSG0000(LINC02087 lincRNA chr17          | 15806241 | 15817742 | - | 0     | 0.24  |
| ENSG0000(RP13-436F antisense chr1         | 2632568  | 2636620  | + | 0     | 0     |
| ENSG0000(RP11-956J: sense_intron chr8     | 73083787 | 73085879 | - | 0     | 0     |
| ENSG0000(RP11-308N lincRNA chr9           | 1.07E+08 | 1.07E+08 | - | 0     | 0     |
| ENSG0000(RP4-550H1 lincRNA chr20          | 36086252 | 36088192 | - | 0     | 0.12  |
| ENSG0000(EIF3IP1 processed_ chr7          | 1.1E+08  | 1.1E+08  | - | 0     | 0     |
| ENSG0000(NANOGP4 transcribed chr7         | 29212302 | 29213214 | + | 0     | 0     |
| ENSG0000(RPL5P2 processed_ chr20          | 45490818 | 45491671 | - | 0     | 0     |
| ENSG0000(TTTY23B lincRNA chrY             | 6242446  | 6243610  | - | 0     | 0     |
| ENSG0000(AC005550. antisense chr7         | 15667947 | 15681980 | + | 0     | 0     |
| ENSG0000(RP11-232A processed_ chr9        | 81488308 | 81488837 | + | 0     | 0     |
| ENSG0000(RP11-168K antisense chr9         | 1.14E+08 | 1.14E+08 | - | 0     | 0     |
| ENSG0000(RP11-6J21. lincRNA chr1          | 2.07E+08 | 2.07E+08 | + | 0     | 0     |
| ENSG0000(RP5-836J3. lincRNA chr1          | 83790280 | 83801465 | + | 0     | 0     |
| ENSG0000(AC105399. transcribed chr2       | 77788382 | 77793087 | + | 0     | 0     |
| ENSG0000(EHMT2-AS: antisense chr6         | 31883761 | 31884204 | + | 0     | 0     |
| ENSG0000(COX5BP6 processed_ chr13         | 1.01E+08 | 1.01E+08 | - | 0.83  | 0.91  |
| ENSG0000(RP11-132E processed_ chr9        | 17108304 | 17108604 | - | 0     | 0     |
| ENSG0000(AC127391. processed_ chr2        | 91859384 | 91859481 | + | 0     | 0     |
| ENSG0000(AC068134. lincRNA chr2           | 2.32E+08 | 2.32E+08 | - | 0     | 0     |
| ENSG0000(RP11-73E6 processed_ chr9        | 20532552 | 20533339 | + | 0     | 0     |
| ENSG0000(PCNPP4 processed_ chrX           | 75537547 | 75538702 | - | 0     | 0     |
| ENSG0000(RP11-342N processed_ chr1        | 42891094 | 42892430 | - | 0     | 0     |
| ENSG0000(LINC01065 lincRNA chr13          | 53146539 | 53151808 | - | 0     | 0     |
| ENSG0000(RP4-669L1 lincRNA chr1           | 365389   | 501617   | - | 7.01  | 8.07  |
| ENSG0000(GYG1P2 processed_ chr13          | 82823131 | 82824136 | + | 0     | 0     |
| ENSG0000(RP11-365C antisense chr1         | 2.24E+08 | 2.24E+08 | + | 0.04  | 0     |
| ENSG0000(FABP5P15 processed_ chrX         | 77727867 | 77728080 | + | 0     | 0     |
| ENSG0000(RP11-256G processed_ chr6        | 42499710 | 42500022 | + | 0     | 0     |
| ENSG0000(RPL21P111 processed_ chr13       | 78761175 | 78761651 | + | 0     | 0     |
| ENSG0000(TAAR9 protein_coding chr6        | 1.33E+08 | 1.33E+08 | + | 0     | 0     |
| ENSG0000(IGHJ3P IG_J_pseudogene chr14     | 1.06E+08 | 1.06E+08 | - | 0     | 0     |
| ENSG0000(RP1-131F1 processed_ chr6        | 1.32E+08 | 1.32E+08 | - | 0     | 0     |
| ENSG0000(CYP2F2P unitary_pseudogene chr19 | 40818721 | 40826772 | - | 0     | 0     |
| ENSG0000(LINC01056 lincRNA chr20          | 63038011 | 63053863 | + | 0     | 0     |
| ENSG0000(PIEZO1P2 unprocessed chr20       | 58740532 | 58783821 | - | 0     | 0     |
| ENSG0000(FAM90A19 unprocessed chr8        | 7753682  | 7756692  | + | 0     | 0     |
| ENSG0000(MTND2P11 unprocessed chr9        | 1.09E+08 | 1.09E+08 | + | 0     | 0     |
| ENSG0000(HAND2-AS: antisense chr4         | 1.74E+08 | 1.74E+08 | + | 15.33 | 18.16 |
| ENSG0000(AC073254. antisense chr2         | 2.33E+08 | 2.33E+08 | - | 0.22  | 0     |
| ENSG0000(LL22NC03- unprocessed chr22      | 22834865 | 22835117 | + | 0     | 0     |

|                                     |          |          |   |      |       |
|-------------------------------------|----------|----------|---|------|-------|
| ENSG0000(RP11-351M lincRNA chr10    | 28433008 | 28495813 | - | 0    | 0     |
| ENSG0000(MTCYBP34 processed_chr22   | 36175857 | 36176526 | + | 0    | 0     |
| ENSG0000(MRPS6P2 processed_chr1     | 50846468 | 50846837 | + | 0    | 0     |
| ENSG0000(RP1-69E11 processed_chr1   | 1.68E+08 | 1.68E+08 | + | 0    | 0     |
| ENSG0000(AC020594. antisense chr2   | 33555047 | 33563547 | - | 0    | 0     |
| ENSG0000(DDX10P1 processed_chr10    | 30919012 | 30921235 | - | 0.03 | 0.03  |
| ENSG0000(C4orf51 protein_co chr4    | 1.46E+08 | 1.46E+08 | + | 0    | 0     |
| ENSG0000(RP11-408A processed_chr9   | 14531916 | 14532042 | - | 0    | 0     |
| ENSG0000(HUNK-AS1 antisense chr21   | 32020966 | 32021782 | - | 0    | 0     |
| ENSG0000(RPS26P41 processed_chr10   | 73537803 | 73538391 | + | 0    | 0     |
| ENSG0000(HSPE1P16 processed_chr16   | 26062750 | 26063097 | - | 0    | 0     |
| ENSG0000(DNAJC19P. processed_chr10  | 67833763 | 67834081 | + | 0    | 0     |
| ENSG0000(HIGD1AP2 processed_chr13   | 81272891 | 81273170 | + | 0    | 0     |
| ENSG0000(ZNF503-AS antisense chr10  | 75401519 | 75408982 | + | 3.55 | 3.2   |
| ENSG0000(DLEU7-AS1 antisense chr13  | 50807856 | 50849905 | + | 0    | 0     |
| ENSG0000(RP11-132E lincRNA chr9     | 17018708 | 17112815 | + | 0    | 0     |
| ENSG0000(MCFD2P1 processed_chr6     | 27407697 | 27407996 | + | 0    | 0     |
| ENSG0000(RP11-472F processed_chr9   | 6568844  | 6569360  | + | 0    | 0     |
| ENSG0000(CNTFR-AS1 antisense chr9   | 34568015 | 34582829 | + | 0    | 0     |
| ENSG0000(AC004022. processed_chr7   | 95348718 | 95348910 | - | 0    | 0     |
| ENSG0000(RP11-32B5 processed_chr15  | 21293653 | 21295201 | - | 0    | 0     |
| ENSG0000(RP11-443F processed_chr2   | 62939916 | 62940282 | + | 0    | 0     |
| ENSG0000(RP4-771M. processed_chr1   | 62905180 | 62905482 | + | 0    | 0     |
| ENSG0000(SLC25A15P unprocessε chr13 | 19411231 | 19416188 | + | 0    | 0     |
| ENSG0000(LINC01792 lincRNA chr2     | 2.01E+08 | 2.01E+08 | - | 0    | 0     |
| ENSG0000(AC128709. lincRNA chr3     | 1.97E+08 | 1.97E+08 | + | 0    | 0     |
| ENSG0000(RPL12P27 processed_chr10   | 97309138 | 97309958 | - | 0.15 | 0     |
| ENSG0000(RPS7P15 processed_chr4     | 4507078  | 4507777  | + | 0    | 0     |
| ENSG0000(GS1-466O4 unprocessε chrX  | 26223903 | 26224658 | + | 0    | 0     |
| ENSG0000(B3GNT9 protein_co chr16    | 67148105 | 67151214 | - | 20.4 | 20.09 |
| ENSG0000(RP5-866L2. processed_chr1  | 54524824 | 54524931 | + | 0    | 0     |
| ENSG0000(RP11-415D antisense chr6   | 75357214 | 75399300 | + | 0    | 0     |
| ENSG0000(NME1P1 processed_chr13     | 22099163 | 22099544 | - | 0    | 0     |
| ENSG0000(RP11-813P processed_chr12  | 59812102 | 59812576 | + | 0    | 0     |
| ENSG0000(AC019080. processed_chr2   | 1.77E+08 | 1.77E+08 | + | 0    | 0     |
| ENSG0000(LINC01797 lincRNA chr2     | 66697125 | 66703227 | - | 0    | 0     |
| ENSG0000(CYP46A4P processed_chr1    | 48089368 | 48089634 | + | 0    | 0     |
| ENSG0000(AC147651. antisense chr7   | 603185   | 608482   | + | 0    | 0     |
| ENSG0000(RP11-402P processed_chrX   | 71736454 | 71736703 | - | 0    | 0     |
| ENSG0000(KRTAP9-10 unprocessε chr17 | 41280604 | 41280810 | + | 0    | 0     |
| ENSG0000(VN1R66P unprocessε chr16   | 31648307 | 31649222 | + | 0    | 0     |
| ENSG0000(RP11-229A processed_chr3   | 57530345 | 57530967 | - | 0    | 0     |
| ENSG0000(NR2F1-AS1 antisense chr5   | 93409359 | 93585648 | - | 7.11 | 9.85  |
| ENSG0000(RP11-337C antisense chr1   | 1.47E+08 | 1.47E+08 | + | 1.12 | 1.52  |
| ENSG0000(RP11-85G2 lincRNA chr1     | 1.57E+08 | 1.57E+08 | - | 0    | 0     |



|                                      |          |            |      |      |
|--------------------------------------|----------|------------|------|------|
| ENSG0000(CDKN2AIP1 protein_co chr5   | 1.34E+08 | 1.34E+08 - | 7.85 | 8.42 |
| ENSG0000(RP11-275C processed_ chr1   | 2.27E+08 | 2.27E+08 + | 0    | 0    |
| ENSG0000(SNAI1P1 processed_ chr2     | 2.1E+08  | 2.1E+08 +  | 0    | 0    |
| ENSG0000(DLGAP5P1 processed_ chrY    | 6158802  | 6159265 +  | 0    | 0    |
| ENSG0000(IGHD1-7 IG_D_gene chr14     | 1.06E+08 | 1.06E+08 - | 0    | 0    |
| ENSG0000(ZBTB40-IT1 sense_intr chr1  | 22517474 | 22519708 + | 0    | 0.96 |
| ENSG0000(AJ239321.3 processed_ chr21 | 13120244 | 13120807 + | 0    | 0    |
| ENSG0000(RPL7P34 processed_ chr10    | 88618223 | 88618934 - | 0    | 0    |
| ENSG0000(IMPDPH1P4 processed_ chrX   | 43278125 | 43279658 - | 0    | 0    |
| ENSG0000(RBM17P3 processed_ chr9     | 41974362 | 41975768 + | 0    | 0    |
| ENSG0000(RP11-13E5 lincRNA chrX      | 1.26E+08 | 1.26E+08 + | 0    | 0    |
| ENSG0000(RP11-339F processed_ chr7   | 55244247 | 55245681 + | 0    | 0    |
| ENSG0000(SETP4 processed_ chrX       | 84755136 | 84756003 + | 0    | 0    |
| ENSG0000(RP11-569G lincRNA chr9      | 96095211 | 96101912 + | 0    | 0    |
| ENSG0000(RPL23AP22 processed_ chr1   | 1.94E+08 | 1.94E+08 - | 0    | 0    |
| ENSG0000(RP11-12M5 processed_ chr22  | 41064052 | 41064633 + | 0    | 0    |
| ENSG0000(ABC12-470 unprocess chr8    | 12290071 | 12296180 - | 0    | 0    |
| ENSG0000(AC008074. processed_ chr2   | 64450096 | 64450524 + | 0    | 0    |
| ENSG0000(AC104777. lincRNA chr2      | 1.51E+08 | 1.51E+08 + | 0    | 0    |
| ENSG0000(PPEF1-AS1 antisense chrX    | 18688643 | 18691604 - | 0    | 0    |
| ENSG0000(LINC01968 lincRNA chr3      | 1.95E+08 | 1.95E+08 + | 0    | 0    |
| ENSG0000(SULT1C2P1 transcribec chr2  | 1.08E+08 | 1.08E+08 + | 0    | 0    |
| ENSG0000(RP11-109A antisense chr10   | 1.3E+08  | 1.3E+08 -  | 0    | 0    |
| ENSG0000(OR13K1P processed_ chrX     | 1.32E+08 | 1.32E+08 + | 0    | 0    |
| ENSG0000(RPS3AP39 processed_ chr11   | 3549745  | 3550519 -  | 0    | 0    |
| ENSG0000(RP5-1155K processed_ chr1   | 62208136 | 62208442 - | 0    | 0    |
| ENSG0000(KRTAP2-5P unprocess chr17   | 41071946 | 41072341 + | 0    | 0    |
| ENSG0000(ZNF295-AS lincRNA chr21     | 42009194 | 42024924 + | 0    | 0    |
| ENSG0000(TMEM26-A antisense chr10    | 61452639 | 61481956 + | 0.07 | 0    |
| ENSG0000(RP1-142L7. antisense chr6   | 1.12E+08 | 1.12E+08 + | 0.14 | 0    |
| ENSG0000(TRDD2 TR_D_gene chr14       | 22439007 | 22439015 + | 0    | 0    |
| ENSG0000(RP11-548K unprocess chr7    | 57822201 | 57822942 + | 0    | 0    |
| ENSG0000(BMS1P10 unprocess chr9      | 63372803 | 63380011 - | 1.34 | 1.01 |
| ENSG0000(BTF3P15 processed_ chr10    | 1.1E+08  | 1.1E+08 +  | 0    | 0    |
| ENSG0000(AC022173. antisense chr7    | 1.38E+08 | 1.38E+08 + | 0    | 0    |
| ENSG0000(MBD3L5 protein_co chr19     | 7030578  | 7033011 +  | 0    | 0    |
| ENSG0000(LINC00987 lincRNA chr12     | 9240003  | 9243052 +  | 0.62 | 0.85 |
| ENSG0000(RP1-102G2 processed_ chr1   | 1.75E+08 | 1.75E+08 + | 0    | 0    |
| ENSG0000(RP11-193H antisense chr1    | 2.38E+08 | 2.38E+08 + | 0    | 0    |
| ENSG0000(AC072061. unprocess chr7    | 39816549 | 39868140 + | 0    | 0    |
| ENSG0000(RP11-322A processed_ chrX   | 76222637 | 76223097 + | 0    | 0    |
| ENSG0000(TRBV30 TR_V_gene chr7       | 1.43E+08 | 1.43E+08 - | 0    | 0    |
| ENSG0000(PGAM3P processed_ chr20     | 11621051 | 11621477 + | 0    | 0    |
| ENSG0000(MTND2P8 unprocess chr9      | 78741720 | 78742744 - | 0    | 0    |
| ENSG0000(RP4-568F9 antisense chr20   | 18313765 | 18315111 - | 0    | 0    |

|                                       |          |          |   |      |       |
|---------------------------------------|----------|----------|---|------|-------|
| ENSG0000( AC073069. processed_ chr2   | 1.76E+08 | 1.76E+08 | + | 0    | 0     |
| ENSG0000( Metazoa_S misc_RNA chr2     | 14530941 | 14531223 | + | 0    | 0     |
| ENSG0000( AC068492. lincRNA chr2      | 1.36E+08 | 1.36E+08 | + | 0    | 0     |
| ENSG0000( MAPK6PS3 processed_ chr13   | 42068932 | 42071093 | - | 0    | 0     |
| ENSG0000( FTH1P11 processed_ chr8     | 81521682 | 81522232 | - | 3.05 | 1.24  |
| ENSG0000( RP11-402P transcribed chrX  | 71662998 | 71666767 | - | 0    | 0     |
| ENSG0000( LINC01810 lincRNA chr2      | 5810641  | 5812596  | - | 0    | 0     |
| ENSG0000( LINC01519 lincRNA chr10     | 85193421 | 85197958 | - | 0    | 0     |
| ENSG0000( RP13-492C transcribed chr7  | 56421857 | 56448375 | - | 0    | 0     |
| ENSG0000( RBMY2TP unprocessed chrY    | 21430697 | 21437245 | - | 0    | 0     |
| ENSG0000( AC009498. lincRNA chr2      | 2.04E+08 | 2.04E+08 | - | 0    | 0     |
| ENSG0000( OR51R1P unitary_ps chr11    | 4418060  | 4419011  | + | 0    | 0     |
| ENSG0000( RSL24D1P8 processed_ chr19  | 12096424 | 12096915 | + | 0.15 | 0     |
| ENSG0000( GTF3AP1 processed_ chr9     | 6195934  | 6197248  | + | 0    | 0     |
| ENSG0000( RP11-552J processed_ chrX   | 52687363 | 52687633 | - | 0    | 0     |
| ENSG0000( ANO7L1 transcribed chr1     | 16215909 | 16228027 | - | 1.32 | 0.32  |
| ENSG0000( RLIMP2 processed_ chr1      | 1.13E+08 | 1.13E+08 | - | 0    | 0.04  |
| ENSG0000( RP4-631H1 processed_ chr1   | 52943536 | 52943930 | - | 0    | 0     |
| ENSG0000( RP11-96C2 sense_intr chr10  | 87113954 | 87115523 | + | 0    | 0     |
| ENSG0000( CATIP-AS2 antisense chr2    | 2.18E+08 | 2.18E+08 | - | 0    | 0     |
| ENSG0000( LINC00851 antisense chr20   | 18379049 | 18381484 | + | 0    | 0     |
| ENSG0000( RP11-316I lincRNA chr1      | 1.89E+08 | 1.89E+08 | - | 0    | 0     |
| ENSG0000( HNRNPA1P processed_ chr6    | 32325219 | 32326178 | + | 0    | 0     |
| ENSG0000( AC004906. antisense chr7    | 2944035  | 2947091  | + | 0    | 0     |
| ENSG0000( CKMT1B protein_co chr15     | 43593054 | 43604901 | + | 0    | 0     |
| ENSG0000( LINC01343 lincRNA chr1      | 38209034 | 38214767 | - | 0    | 0     |
| ENSG0000( LINC01732 lincRNA chr1      | 1.81E+08 | 1.81E+08 | + | 0    | 0     |
| ENSG0000( AC007099. antisense chr2    | 75474453 | 75482579 | + | 0    | 0     |
| ENSG0000( EIF4BP9 processed_ chrX     | 66074835 | 66076347 | - | 0    | 0     |
| ENSG0000( SMG1P1 transcribed chr16    | 22437008 | 22492220 | + | 8.88 | 11.59 |
| ENSG0000( FAM166AP unprocessed chr10  | 44712    | 46884    | + | 0    | 0     |
| ENSG0000( TTN-AS1 antisense chr2      | 1.79E+08 | 1.79E+08 | + | 6.67 | 6.9   |
| ENSG0000( LA16c-60G unprocessed chr22 | 15541436 | 15578006 | + | 0    | 0     |
| ENSG0000( MTCO1P19 processed_ chrX    | 1.03E+08 | 1.03E+08 | + | 0    | 0     |
| ENSG0000( RP4-680D5 antisense chr1    | 15586136 | 15603626 | - | 0.1  | 0     |
| ENSG0000( OFD1P11Y unprocessed chrY   | 23771232 | 23798150 | + | 0    | 0     |
| ENSG0000( HIGD1AP8 processed_ chr12   | 11481383 | 11481656 | + | 0    | 0     |
| ENSG0000( HSPE1P22 processed_ chr9    | 92027498 | 92027824 | + | 0    | 0     |
| ENSG0000( SRRM1P3 processed_ chrX     | 1.37E+08 | 1.37E+08 | - | 0    | 0     |
| ENSG0000( AC009237. processed_ chr2   | 95496022 | 95496531 | - | 0    | 0     |
| ENSG0000( MTND2P6 unprocessed chr7    | 57186412 | 57187441 | + | 0    | 0     |
| ENSG0000( GS1-124K5 lincRNA chr7      | 66493706 | 66495474 | + | 2.24 | 2.98  |
| ENSG0000( RP6-159A1 antisense chrX    | 65999751 | 66001071 | + | 0    | 0     |
| ENSG0000( RP11-475C lincRNA chr6      | 1.53E+08 | 1.53E+08 | - | 0    | 0     |
| ENSG0000( RPL12P39 processed_ chr18   | 64072158 | 64072653 | + | 0    | 0     |

|                                     |          |          |   |      |      |
|-------------------------------------|----------|----------|---|------|------|
| ENSG0000(RP1-288L1.lincRNA chr22    | 34711908 | 34724919 | - | 0    | 0    |
| ENSG0000(RP4-809F4.processed_chr1   | 1.74E+08 | 1.74E+08 | - | 0    | 0    |
| ENSG0000(RP1-136J1!.processed_chrX  | 1.1E+08  | 1.1E+08  | + | 0    | 0    |
| ENSG0000(AC019064.lincRNA chr2      | 34998273 | 35000160 | - | 0    | 0    |
| ENSG0000(RP11-374A.sense_intrchr6   | 1.24E+08 | 1.24E+08 | + | 0    | 0    |
| ENSG0000(RPL7L1P10.processed_chr2   | 2.29E+08 | 2.29E+08 | + | 0    | 0    |
| ENSG0000(AC009892.unprocesschr19    | 54652085 | 54652230 | + | 0    | 0    |
| ENSG0000(RP11-439H.antisense chr1   | 74341579 | 74378802 | - | 0    | 0    |
| ENSG0000(AP000563.processed_chr21   | 31452466 | 31453223 | + | 0    | 0    |
| ENSG0000(AC113608.lincRNA chr2      | 15801747 | 15810877 | - | 0    | 0    |
| ENSG0000(UPP2-IT1.sense_intrchr2    | 1.58E+08 | 1.58E+08 | + | 0    | 0    |
| ENSG0000(RAI1-AS1.antisense chr17   | 17759154 | 17770821 | - | 0    | 0    |
| ENSG0000(RP11-201C.processed_chr1   | 31036734 | 31037240 | + | 0    | 0    |
| ENSG0000(RNF223.protein_cochr1      | 1070966  | 1074307  | - | 0    | 0    |
| ENSG0000(XIAP-AS1.antisense chrX    | 1.24E+08 | 1.24E+08 | - | 0    | 0    |
| ENSG0000(RP11-230L.antisense chr9   | 1.23E+08 | 1.23E+08 | + | 0    | 0    |
| ENSG0000(RP11-567C.antisense chr1   | 50174306 | 50175868 | - | 0    | 0    |
| ENSG0000(FTCD-AS1.antisense chr21   | 46151614 | 46152647 | + | 0    | 0    |
| ENSG0000(LINC01502.lincRNA chr9     | 1.36E+08 | 1.36E+08 | + | 0.03 | 0    |
| ENSG0000(SYP-AS1.antisense chrX     | 49198966 | 49202454 | + | 0    | 0    |
| ENSG0000(AL132796.lincRNA chr14     | 98844896 | 98845597 | + | 0    | 0    |
| ENSG0000(RP11-763B.lincRNA chr1     | 1.44E+08 | 1.44E+08 | - | 0.65 | 0    |
| ENSG0000(RP11-344N.processed_chrX   | 48279423 | 48281792 | + | 0    | 0    |
| ENSG0000(RP3-448I9.lincRNA chr6     | 14391231 | 14393288 | - | 0    | 0    |
| ENSG0000(AC004461.processed_chr22   | 19055801 | 19056512 | + | 0    | 0    |
| ENSG0000(RP5-1065J!.processed_chr1  | 1.09E+08 | 1.09E+08 | - | 0    | 0    |
| ENSG0000(CDC42P6.processed_chr4     | 22727375 | 22727950 | - | 0    | 0    |
| ENSG0000(CTD-2522E.processed_chrX   | 47156638 | 47158199 | - | 0    | 0    |
| ENSG0000(LINC01358.lincRNA chr1     | 58933643 | 59240555 | + | 1.67 | 1.3  |
| ENSG0000(PATE4.protein_cochr11      | 1.26E+08 | 1.26E+08 | + | 0.03 | 0.06 |
| ENSG0000(OR52S1P.unprocesschr11     | 5076130  | 5077066  | - | 0    | 0    |
| ENSG0000(AL163953!.processed_chr14  | 53169054 | 53687258 | + | 0    | 0.14 |
| ENSG0000(RP11-475I2.lincRNA chr9    | 42566679 | 42569353 | - | 0.65 | 0.31 |
| ENSG0000(AC007064.processed_chr22   | 16876552 | 16876902 | - | 0    | 0    |
| ENSG0000(RP11-509J!.lincRNA chr9    | 3647335  | 3648338  | + | 0    | 0    |
| ENSG0000(CHCHD4P2.processed_chr9    | 1.08E+08 | 1.08E+08 | - | 0    | 0    |
| ENSG0000(TUSC8.lincRNA chr13        | 44400250 | 44405984 | - | 0    | 0    |
| ENSG0000(AP006288.unprocesschr11    | 64531044 | 64532970 | + | 0    | 0    |
| ENSG0000(RP11-334N.antisense chr1   | 7008376  | 7014279  | - | 0    | 0    |
| ENSG0000(AC010907.antisense chr2    | 3603397  | 3604242  | - | 0    | 0    |
| ENSG0000(RP13-152C.antisense chr20  | 64056803 | 64057084 | + | 0    | 0    |
| ENSG0000(UNQ6494.lincRNA chr9       | 89639814 | 89719759 | + | 0    | 0    |
| ENSG0000(BRWD1-IT1.sense_ovei chr21 | 39217093 | 39219805 | - | 0    | 0    |
| ENSG0000(AC005703.lincRNA chr17     | 15276562 | 15279477 | - | 0    | 0    |
| ENSG0000(RP11-473N.lincRNA chr13    | 63746741 | 63751080 | + | 0    | 0    |

|                     |                   |          |          |   |      |      |
|---------------------|-------------------|----------|----------|---|------|------|
| ENSG0000(CBX1P3     | processed_ chr1   | 2.04E+08 | 2.04E+08 | + | 0    | 0    |
| ENSG0000(HOXD-AS2   | antisense_ chr2   | 1.76E+08 | 1.76E+08 | - | 0    | 0    |
| ENSG0000(RP3-455H1  | processed_ chrX   | 93388075 | 93389497 | - | 0    | 0    |
| ENSG0000(RPL21P121  | processed_ chr17  | 18312760 | 18313533 | + | 0    | 0    |
| ENSG0000(CNN2P11    | processed_ chr2   | 94725674 | 94725935 | - | 0    | 0    |
| ENSG0000(RP11-165J  | antisense_ chr9   | 93430342 | 93431299 | - | 0    | 0    |
| ENSG0000(CTA-407F1  | antisense_ chr22  | 25580241 | 25581382 | - | 0    | 0    |
| ENSG0000(OR4A47     | protein_co chr11  | 48488717 | 48489780 | + | 0    | 0    |
| ENSG0000(RP11-402L  | lincRNA_ chr10    | 43630882 | 43631564 | - | 0    | 0    |
| ENSG0000(RP11-1391J | lincRNA_ chr1     | 1.56E+08 | 1.56E+08 | + | 0    | 0    |
| ENSG0000(LINC01384  | lincRNA_ chr20    | 22587522 | 22607517 | - | 0    | 0    |
| ENSG0000(HLA-DPA3   | unprocessε chr6   | 33131216 | 33143325 | - | 0    | 0    |
| ENSG0000(PITRM1-AS  | antisense_ chr10  | 3141632  | 3167972  | + | 0.19 | 0.06 |
| ENSG0000(AC006960.  | antisense_ chr7   | 36463023 | 36504513 | + | 0    | 0    |
| ENSG0000(LINC01304  | lincRNA_ chr2     | 3957655  | 3974070  | - | 0    | 0    |
| ENSG0000(CAMTA1-IT  | sense_intrε chr1  | 7368942  | 7370270  | + | 0    | 0    |
| ENSG0000(NDUFA9P1   | processed_ chr22  | 35897270 | 35898404 | - | 0    | 0    |
| ENSG0000(KB-1183D5  | lincRNA_ chr22    | 21312920 | 21314904 | + | 0    | 0    |
| ENSG0000(ART2BP     | unitary_psε chr11 | 72478221 | 72479237 | + | 0    | 0    |
| ENSG0000(RP11-226L  | processed_ chr1   | 1.6E+08  | 1.6E+08  | + | 0.19 | 0    |
| ENSG0000(AP001092.  | antisense_ chr11  | 64646399 | 64659681 | + | 0    | 0    |
| ENSG0000(PRSS56     | protein_co chr2   | 2.33E+08 | 2.33E+08 | + | 0    | 0    |
| ENSG0000(MGC27382   | processed_ chr1   | 78229599 | 78369464 | + | 0.08 | 0.06 |
| ENSG0000(RP11-321L  | lincRNA_ chr9     | 23894990 | 23898054 | - | 0.23 | 0.2  |
| ENSG0000(NRBF2P3    | processed_ chr1   | 1.11E+08 | 1.11E+08 | - | 0    | 0    |
| ENSG0000(XRCC6P1    | processed_ chr10  | 93206857 | 93209627 | - | 0    | 0    |
| ENSG0000(AC069257.  | processed_ chr3   | 1.96E+08 | 1.96E+08 | - | 0    | 5.27 |
| ENSG0000(RP11-885N  | lincRNA_ chr9     | 1.38E+08 | 1.38E+08 | - | 0    | 0    |
| ENSG0000(RP11-305L  | lincRNA_ chr9     | 91119138 | 91163087 | - | 0    | 0    |
| ENSG0000(LINC01522  | lincRNA_ chr20    | 47980488 | 47988744 | - | 0    | 0    |
| ENSG0000(FOXD2-AS1  | antisense_ chr1   | 47432133 | 47434641 | - | 0.87 | 1.15 |
| ENSG0000(RPSAP2     | processed_ chr6   | 28732017 | 28732904 | + | 0    | 0    |
| ENSG0000(ZIK1P1     | processed_ chrX   | 1.24E+08 | 1.24E+08 | - | 0    | 0    |
| ENSG0000(TOMM22P    | processed_ chrY   | 21130870 | 21131181 | + | 0    | 0    |
| ENSG0000(ASH2LP2    | processed_ chr22  | 22366210 | 22367770 | + | 0    | 0    |
| ENSG0000(RP1-159A1  | antisense_ chr1   | 27525805 | 27530561 | + | 0    | 0    |
| ENSG0000(RPS7P12    | processed_ chrX   | 1.35E+08 | 1.35E+08 | + | 0.12 | 0    |
| ENSG0000(RPSAP11    | processed_ chr3   | 32190747 | 32191627 | + | 0.14 | 0.08 |
| ENSG0000(RP11-15P1  | processed_ chr9   | 20331446 | 20332277 | + | 0    | 0    |
| ENSG0000(RP11-147C  | lincRNA_ chr1     | 95937901 | 96022880 | + | 0    | 0    |
| ENSG0000(RP11-312B  | antisense_ chr1   | 6783892  | 6784843  | - | 0    | 0    |
| ENSG0000(ASS1P12    | processed_ chr9   | 32945996 | 32947222 | + | 0    | 0    |
| ENSG0000(CECR7      | transcribec chr22 | 17036570 | 17060825 | + | 0.77 | 0.88 |
| ENSG0000(RP1-127L4  | transcribec chr22 | 32129689 | 32130612 | + | 0    | 0    |
| ENSG0000(ZNF737     | protein_co chr19  | 20535825 | 20565809 | - | 2.52 | 1.56 |

|                     |             |       |          |          |   |       |       |
|---------------------|-------------|-------|----------|----------|---|-------|-------|
| ENSG0000(RGL2       | protein_co  | chr6  | 33291654 | 33299324 | - | 23.63 | 21.58 |
| ENSG0000(HNRNPA1P   | transcribed | chr2  | 41143780 | 41157555 | + | 0     | 0     |
| ENSG0000(OR13D2P    | unprocessed | chr9  | 1.05E+08 | 1.05E+08 | + | 0     | 0     |
| ENSG0000(AP001342.  | processed_  | chr21 | 25031005 | 25031529 | - | 0     | 0     |
| ENSG0000(CTA-520D8  | lincRNA     | chr1  | 13657311 | 13659910 | - | 0     | 0     |
| ENSG0000(RHEBP3     | processed_  | chr22 | 18019214 | 18020200 | + | 0     | 0     |
| ENSG0000(CDC27P2    | processed_  | chrY  | 10190377 | 10192298 | - | 0     | 0     |
| ENSG0000(TAAR4P     | unitary_ps  | chr6  | 1.33E+08 | 1.33E+08 | - | 0     | 0     |
| ENSG0000(RPL23AP71  | processed_  | chr14 | 34485979 | 34486447 | + | 0     | 0     |
| ENSG0000(CDK2AP2P   | processed_  | chr9  | 62844818 | 62845184 | + | 0     | 0     |
| ENSG0000(BHMG1      | protein_co  | chr19 | 45733251 | 45764534 | + | 0     | 0     |
| ENSG0000(RP11-67L3. | antisense   | chr1  | 54792885 | 54794905 | + | 0     | 0     |
| ENSG0000(RP11-154D  | processed_  | chr3  | 62124204 | 62124608 | - | 0     | 0     |
| ENSG0000(LINC01351  | lincRNA     | chr1  | 1.9E+08  | 1.9E+08  | + | 0     | 0     |
| ENSG0000(TUBB4BP3   | processed_  | chrX  | 1.18E+08 | 1.18E+08 | + | 0     | 0     |
| ENSG0000(LINC01661  | lincRNA     | chr1  | 1.07E+08 | 1.07E+08 | + | 0     | 0     |
| ENSG0000(RP11-554F  | lincRNA     | chr9  | 99585786 | 99819889 | - | 0     | 0     |
| ENSG0000(RP11-280C  | antisense   | chr1  | 1.65E+08 | 1.66E+08 | - | 0.03  | 0.18  |
| ENSG0000(RP3-461P1  | antisense   | chr20 | 45487613 | 45490248 | + | 0     | 0     |
| ENSG0000(MTCO3P41   | unprocessed | chr7  | 67628022 | 67628349 | + | 0     | 0     |
| ENSG0000(USP9YP35   | unprocessed | chrY  | 24077799 | 24079812 | + | 0     | 0     |
| ENSG0000(RP11-715G  | lincRNA     | chr6  | 1.47E+08 | 1.47E+08 | - | 0     | 0     |
| ENSG0000(TUBB8P10   | unprocessed | chr1  | 2.27E+08 | 2.27E+08 | - | 0     | 0     |
| ENSG0000(DCLRE1CP1  | unprocessed | chr10 | 15015370 | 15021863 | - | 0     | 0     |
| ENSG0000(AC073115.  | lincRNA     | chr7  | 45969657 | 45980191 | + | 0     | 0     |
| ENSG0000(AP000361.  | processed_  | chr22 | 22988263 | 22988581 | + | 0     | 0     |
| ENSG0000(RP11-324C  | lincRNA     | chr3  | 1.73E+08 | 1.73E+08 | + | 0     | 0     |
| ENSG0000(RPL7P53    | processed_  | chrX  | 73535503 | 73536241 | + | 0     | 0     |
| ENSG0000(LINC01637  | lincRNA     | chr22 | 20957092 | 20964679 | + | 0.29  | 0.54  |
| ENSG0000(AC093911.  | lincRNA     | chr2  | 1.79E+08 | 1.79E+08 | + | 0     | 0     |
| ENSG0000(RP5-926E3  | processed_  | chr1  | 49691262 | 49691523 | - | 0     | 0     |
| ENSG0000(AC007557.  | antisense   | chr2  | 2.17E+08 | 2.17E+08 | - | 0     | 0     |
| ENSG0000(RP5-947P1  | lincRNA     | chr1  | 1.06E+08 | 1.06E+08 | + | 0     | 0     |
| ENSG0000(RP4-803J1: | antisense   | chr1  | 2.29E+08 | 2.29E+08 | + | 0     | 0     |
| ENSG0000(RPS27AP8   | processed_  | chr3  | 1.72E+08 | 1.72E+08 | - | 0     | 0     |
| ENSG0000(LINC01684  | lincRNA     | chr21 | 24428740 | 24547942 | + | 0.23  | 0.13  |
| ENSG0000(VN1R48P    | processed_  | chr9  | 38504447 | 38505482 | - | 0     | 0     |
| ENSG0000(LINC00959  | protein_co  | chr10 | 1.3E+08  | 1.3E+08  | - | 0.75  | 1.11  |
| ENSG0000(RPS27AP17  | processed_  | chrX  | 6989329  | 6989783  | + | 0     | 0     |
| ENSG0000(RP11-206L  | lincRNA     | chr1  | 778770   | 810060   | + | 2.42  | 2.56  |
| ENSG0000(OR2L9P     | unprocessed | chr1  | 2.48E+08 | 2.48E+08 | + | 0     | 0     |
| ENSG0000(RP11-603J: | processed_  | chr12 | 55980432 | 55981035 | - | 0.15  | 0     |
| ENSG0000(RP11-753B  | lincRNA     | chr6  | 1.42E+08 | 1.42E+08 | - | 0     | 0     |
| ENSG0000(AC010105.  | lincRNA     | chr2  | 82479128 | 82538711 | - | 0     | 0     |
| ENSG0000(RP11-356I: | antisense   | chr6  | 1.38E+08 | 1.38E+08 | - | 0.96  | 0.54  |

|                                    |          |          |   |        |        |
|------------------------------------|----------|----------|---|--------|--------|
| ENSG0000(RP11-526P lincRNA chr10   | 2499721  | 2500570  | + | 0      | 0      |
| ENSG0000(RP11-816B processed_chr3  | 1.73E+08 | 1.73E+08 | - | 0      | 0      |
| ENSG0000(RP5-998N2 processed_chr1  | 1.44E+08 | 1.44E+08 | - | 0      | 0      |
| ENSG0000(PKN2-AS1 antisense chr1   | 88537513 | 88685204 | - | 0.02   | 0      |
| ENSG0000(RPSAP15 processed_chrX    | 87703343 | 87704203 | - | 0      | 0      |
| ENSG0000(GPAT2P1 transcribed chr2  | 95789654 | 95800166 | + | 0      | 0      |
| ENSG0000(UNC5B-AS1 antisense chr10 | 71217224 | 71218228 | - | 1.02   | 1.26   |
| ENSG0000(RP11-325F lincRNA chr7    | 1.05E+08 | 1.05E+08 | + | 0.1    | 0.11   |
| ENSG0000(PTP4A1P7 processed_chr1   | 1.77E+08 | 1.77E+08 | - | 0      | 0      |
| ENSG0000(SHISA9 protein_co chr16   | 12901620 | 13240413 | + | 0.6    | 0.71   |
| ENSG0000(DGCR5 transcribed chr22   | 18970514 | 18994628 | + | 0.03   | 0.01   |
| ENSG0000(RP11-443B lincRNA chr1    | 2.35E+08 | 2.35E+08 | + | 0      | 0      |
| ENSG0000(OR7E24 protein_co chr19   | 9250930  | 9252479  | + | 0      | 0      |
| ENSG0000(NONOP2 processed_chr2     | 60936819 | 60938049 | - | 0.14   | 0.32   |
| ENSG0000(LINC00857 lincRNA chr10   | 80207710 | 80219657 | + | 3.13   | 3.56   |
| ENSG0000(AC114783. protein_co chr2 | 1.27E+08 | 1.27E+08 | + | 0      | 0      |
| ENSG0000(AC012668. lincRNA chr2    | 2.16E+08 | 2.16E+08 | + | 0.03   | 0      |
| ENSG0000(AF241725. lincRNA chr21   | 21655038 | 21686329 | - | 0      | 0      |
| ENSG0000(RP11-234P processed_chrX  | 51923552 | 51923740 | + | 0      | 0      |
| ENSG0000(RP11-439K antisense chr9  | 83276376 | 83279499 | + | 0      | 0      |
| ENSG0000(RP3-449H6 lincRNA chr6    | 44525259 | 44526754 | + | 0      | 0      |
| ENSG0000(RP11-309M lincRNA chrX    | 990221   | 994365   | + | 0      | 0      |
| ENSG0000(RP11-309M lincRNA chrY    | 990221   | 994365   | + | 0      | 0      |
| ENSG0000(AC012451. lincRNA chr2    | 1.29E+08 | 1.29E+08 | - | 0      | 0      |
| ENSG0000(LINC00383 lincRNA chr13   | 69222346 | 69292154 | + | 0      | 0      |
| ENSG0000(GS1-594A7 processed_chrX  | 15646167 | 15646875 | - | 0      | 0      |
| ENSG0000(RPL36AP36 processed_chr10 | 13159477 | 13159777 | - | 0      | 0      |
| ENSG0000(HLA-DQA2 protein_co chr6  | 32741342 | 32747215 | + | 0      | 0      |
| ENSG0000(MTCO3P17 unprocessed chr2 | 2.03E+08 | 2.03E+08 | + | 0      | 0      |
| ENSG0000(XKRYP6 unprocessed chrY   | 25943268 | 25954152 | + | 0      | 0      |
| ENSG0000(IGHJ2P IG_J_pseud chr14   | 1.06E+08 | 1.06E+08 | - | 0      | 0      |
| ENSG0000(TTLL11-IT1 lincRNA chr9   | 1.22E+08 | 1.22E+08 | - | 0      | 0      |
| ENSG0000(AC092570. processed_chr2  | 1.02E+08 | 1.02E+08 | - | 0      | 0      |
| ENSG0000(RPL9P9 transcribed chr15  | 82372196 | 82372912 | - | 851.66 | 897.22 |
| ENSG0000(AC096775. processed_chr7  | 96283357 | 96283804 | + | 0      | 0      |
| ENSG0000(RP11-415A lincRNA chr1    | 76758124 | 76779267 | - | 0      | 0      |
| ENSG0000(RP11-140C processed_chr9  | 5193339  | 5193558  | - | 0      | 0      |
| ENSG0000(RP5-862K6 processed_chr20 | 43388642 | 43389041 | - | 0      | 0      |
| ENSG0000(KCND3-AS1 antisense chr1  | 1.12E+08 | 1.12E+08 | + | 0      | 0      |
| ENSG0000(YWHABP1 processed_chr9    | 38643042 | 38643768 | + | 0      | 0      |
| ENSG0000(CDY7P unprocessed chrY    | 17951589 | 17953500 | + | 0      | 0      |
| ENSG0000(LINC01497 lincRNA chr17   | 69961707 | 69983538 | + | 0      | 0      |
| ENSG0000(TTTY21B lincRNA chrY      | 6443434  | 6447077  | + | 0      | 0      |
| ENSG0000(AC090955. processed_chr3  | 5099627  | 5099861  | + | 0      | 0      |
| ENSG0000(RP3-359N1 lincRNA chr6    | 1.06E+08 | 1.06E+08 | - | 0      | 0      |

|                                    |          |          |   |      |      |
|------------------------------------|----------|----------|---|------|------|
| ENSG0000(RP4-620F2 antisense chr1  | 89260582 | 89269754 | + | 0    | 0    |
| ENSG0000(TUBAP processed_chr21     | 23407658 | 23409128 | - | 0    | 0    |
| ENSG0000(AC073284.lincRNA chr2     | 2.15E+08 | 2.15E+08 | + | 0    | 0    |
| ENSG0000(RP11-373D unprocessε chr7 | 63209219 | 63211822 | + | 0    | 0    |
| ENSG0000(LINC01856 lincRNA chr2    | 1.3E+08  | 1.3E+08  | + | 0    | 0.03 |
| ENSG0000(PYY2 transcribec chr17    | 28226563 | 28228065 | + | 0.28 | 0.12 |
| ENSG0000(LINC01888 antisense chr2  | 68832044 | 68837724 | + | 0    | 0    |
| ENSG0000(LINC01514 lincRNA chr10   | 1.01E+08 | 1.01E+08 | + | 0    | 0    |
| ENSG0000(GCSHP3 processed_chr2     | 2.06E+08 | 2.06E+08 | - | 0.72 | 0    |
| ENSG0000(AC005538.antisense chr2   | 2.34E+08 | 2.34E+08 | - | 0    | 0    |
| ENSG0000(AC093166.processed_chr2   | 1.12E+08 | 1.12E+08 | + | 0    | 0    |
| ENSG0000(RAC1P4 processed_chrX     | 1.37E+08 | 1.37E+08 | - | 0    | 0    |
| ENSG0000(LINC00407 lincRNA chr13   | 44651812 | 44701016 | + | 0.37 | 0    |
| ENSG0000(RP11-383J;processed_chr8  | 1.24E+08 | 1.24E+08 | + | 0    | 0    |
| ENSG0000(RP11-66D1 lincRNA chr1    | 1.57E+08 | 1.57E+08 | - | 0.22 | 0.2  |
| ENSG0000(HMGN1P3;processed_chr19   | 53767971 | 53768553 | - | 0    | 0    |
| ENSG0000(RP11-20J1;lincRNA chr10   | 44259602 | 44261813 | - | 0.08 | 0    |
| ENSG0000(IGKV1OR1(IG_V_pseu chr10  | 42185339 | 42185791 | + | 0    | 0    |
| ENSG0000(RP11-317B processed_chr6  | 1.54E+08 | 1.54E+08 | + | 0    | 0    |
| ENSG0000(AP000251.antisense chr21  | 31559245 | 31560487 | + | 0    | 0    |
| ENSG0000(RP11-112L;lincRNA chr20   | 50162765 | 50166102 | - | 0.74 | 1.18 |
| ENSG0000(RP13-143G antisense chr6  | 1.36E+08 | 1.36E+08 | - | 0.44 | 0.08 |
| ENSG0000(AP000358.processed_chr22  | 24703348 | 24703503 | + | 0    | 0    |
| ENSG0000(HMGB3P1;processed_chr3    | 26216322 | 26216877 | + | 0    | 0    |
| ENSG0000(AP001056.lincRNA chr21    | 44175489 | 44176453 | + | 0    | 0    |
| ENSG0000(RP11-343H antisense chr1  | 2.07E+08 | 2.07E+08 | - | 0    | 0    |
| ENSG0000(RP11-203P processed_chr7  | 1.05E+08 | 1.05E+08 | + | 0    | 0    |
| ENSG0000(AF064858.lincRNA chr21    | 39028536 | 39029128 | - | 0.38 | 0    |
| ENSG0000(OR4C50P unprocessε chr11  | 54591480 | 54592409 | + | 0    | 0    |
| ENSG0000(Metazoa_S misc_RNA chr5   | 7239781  | 7240018  | + | 0.81 | 1.49 |
| ENSG0000(AP002856.lincRNA chr11    | 1.31E+08 | 1.31E+08 | + | 0    | 0    |
| ENSG0000(FAM138A lincRNA chr1      | 34554    | 36081    | - | 0    | 0    |
| ENSG0000(AC073257.lincRNA chr2     | 1.21E+08 | 1.21E+08 | - | 0    | 0    |
| ENSG0000(USP9YP32 unprocessε chrY  | 17995201 | 17997252 | - | 0    | 0    |
| ENSG0000(AC013410.processed_chr2   | 1.74E+08 | 1.74E+08 | - | 0    | 0    |
| ENSG0000(BTBD7P2 processed_chr10   | 1.11E+08 | 1.11E+08 | + | 0    | 0    |
| ENSG0000(OR3B1P unprocessε chrX    | 1.55E+08 | 1.55E+08 | - | 0    | 0    |
| ENSG0000(GCNT1P5 processed_chr7    | 77461458 | 77462139 | + | 0    | 0    |
| ENSG0000(OR9A1P transcribec chr7   | 1.42E+08 | 1.42E+08 | + | 0    | 0    |
| ENSG0000(ELOCP18 processed_chr1    | 68375327 | 68375663 | - | 0    | 0    |
| ENSG0000(RP11-571E processed_chrX  | 47273366 | 47274390 | - | 0    | 0    |
| ENSG0000(OXCT2P1 unprocessε chr1   | 39514956 | 39516490 | + | 0.61 | 0.62 |
| ENSG0000(RP11-406A lincRNA chr9    | 89978282 | 89987486 | + | 0    | 0    |
| ENSG0000(MTCO2P1;processed_chrX    | 1.03E+08 | 1.03E+08 | + | 0    | 0    |
| ENSG0000(UQCRHP2 processed_chr2    | 25994794 | 25995081 | + | 0    | 0    |

|                 |            |             |       |          |          |   |      |       |
|-----------------|------------|-------------|-------|----------|----------|---|------|-------|
| ENSG00000101711 | NIFKP9     | processed   | chr2  | 1.27E+08 | 1.27E+08 | + | 0    | 0     |
| ENSG00000101712 | RP11-72B4  | processed   | chr9  | 95918136 | 95918704 | + | 0    | 0     |
| ENSG00000101713 | S100A11P1  | processed   | chr7  | 1.03E+08 | 1.03E+08 | + | 0    | 0     |
| ENSG00000101714 | AC104623   | antisense   | chr2  | 16523176 | 16529387 | + | 0    | 0     |
| ENSG00000101715 | DUX4L29    | unprocessed | chr10 | 1.34E+08 | 1.34E+08 | + | 0    | 0     |
| ENSG00000101716 | ANKRD26P   | unprocessed | chr13 | 19290593 | 19344825 | - | 0    | 0     |
| ENSG00000101717 | FRY-AS1    | antisense   | chr13 | 32025314 | 32031639 | - | 0    | 0.06  |
| ENSG00000101718 | AC007386   | lincRNA     | chr2  | 64901840 | 64905137 | - | 0    | 0     |
| ENSG00000101719 | RP11-368M  | unprocessed | chr7  | 57650521 | 57650854 | + | 0    | 0     |
| ENSG00000101720 | RP4-604G5  | antisense   | chr7  | 99929392 | 99948620 | + | 0    | 0     |
| ENSG00000101721 | RP11-690I2 | processed   | chr2  | 2.32E+08 | 2.32E+08 | - | 0    | 0     |
| ENSG00000101722 | HMGB3P5    | processed   | chr10 | 1.1E+08  | 1.1E+08  | + | 0    | 0     |
| ENSG00000101723 | RP11-462G  | lincRNA     | chr6  | 70394887 | 70399417 | + | 0    | 0     |
| ENSG00000101724 | RP11-521A  | processed   | chr3  | 1.74E+08 | 1.74E+08 | + | 0    | 0     |
| ENSG00000101725 | H LCS-IT1  | sense_intr  | chr21 | 36803984 | 36806284 | - | 0    | 0     |
| ENSG00000101726 | KIFC1      | protein_co  | chr6  | 33391536 | 33409924 | + | 0.52 | 0.86  |
| ENSG00000101727 | OR11Q1P    | processed   | chrX  | 1.31E+08 | 1.31E+08 | + | 0    | 0     |
| ENSG00000101728 | C2orf74    | protein_co  | chr2  | 61145068 | 61164829 | + | 9.57 | 10.93 |
| ENSG00000101729 | RP11-655G  | processed   | chr3  | 1.92E+08 | 1.92E+08 | - | 0    | 0     |
| ENSG00000101730 | AP003025   | antisense   | chr11 | 1.32E+08 | 1.32E+08 | - | 0    | 0     |
| ENSG00000101731 | AC073834   | antisense   | chr2  | 1.78E+08 | 1.78E+08 | + | 0    | 0     |
| ENSG00000101732 | RNASEH2C   | processed   | chrY  | 2789827  | 2790328  | + | 0    | 0     |
| ENSG00000101733 | RP11-169L  | processed   | chrX  | 40831844 | 40832562 | - | 0    | 0.1   |
| ENSG00000101734 | SOCS2P1    | processed   | chr20 | 33187391 | 33188292 | + | 0    | 0     |
| ENSG00000101735 | DNAJC19P1  | processed   | chr1  | 52252062 | 52252773 | - | 0    | 0     |
| ENSG00000101736 | LINC00316  | lincRNA     | chr21 | 45338590 | 45341990 | - | 0    | 0     |
| ENSG00000101737 | GRM7-AS2   | antisense   | chr3  | 6892632  | 6894022  | - | 0    | 0     |
| ENSG00000101738 | AC108868   | unprocessed | chr2  | 1.06E+08 | 1.06E+08 | - | 0    | 0     |
| ENSG00000101739 | LINC01115  | lincRNA     | chr2  | 779840   | 868426   | - | 0    | 0     |
| ENSG00000101740 | RPS15AP38  | processed   | chr22 | 36421273 | 36421644 | - | 0    | 0     |
| ENSG00000101741 | HCG4P3     | unprocessed | chr6  | 30006121 | 30007116 | - | 0.55 | 0.27  |
| ENSG00000101742 | LINC01866  | lincRNA     | chr2  | 16970034 | 16974497 | + | 0    | 0     |
| ENSG00000101743 | GAGE12C    | protein_co  | chrX  | 49532211 | 49539538 | + | 0    | 0     |
| ENSG00000101744 | KRR1P1     | processed   | chr13 | 20070250 | 20072136 | - | 0    | 0     |
| ENSG00000101745 | GSTA7P     | unprocessed | chr6  | 52739590 | 52744656 | - | 0    | 0     |
| ENSG00000101746 | TEX36-AS1  | antisense   | chr10 | 1.26E+08 | 1.26E+08 | + | 0    | 0     |
| ENSG00000101747 | RPL30P4    | processed   | chr3  | 32635222 | 32635554 | - | 0    | 0     |
| ENSG00000101748 | VDAC1P11   | processed   | chr9  | 94287699 | 94288550 | - | 0    | 0     |
| ENSG00000101749 | RP3-514P1  | processed   | chrX  | 1.02E+08 | 1.02E+08 | - | 0    | 0     |
| ENSG00000101750 | RPSAP35    | processed   | chr4  | 1.17E+08 | 1.17E+08 | + | 0    | 0     |
| ENSG00000101751 | RP11-360C  | antisense   | chr6  | 10511036 | 10514546 | - | 0    | 0     |
| ENSG00000101752 | RP5-1120P  | antisense   | chr6  | 43995723 | 44074652 | - | 0.41 | 0.28  |
| ENSG00000101753 | LINC00686  | lincRNA     | chr20 | 62695024 | 62700480 | - | 0    | 0     |
| ENSG00000101754 | AC007064   | lincRNA     | chr22 | 16869478 | 16871126 | + | 0    | 0     |
| ENSG00000101755 | IFNWP2     | unprocessed | chr9  | 21420234 | 21420813 | + | 0    | 0     |



|                 |               |                        |       |          |          |   |      |      |
|-----------------|---------------|------------------------|-------|----------|----------|---|------|------|
| ENSG00000171800 | IRGM          | protein_coding         | chr5  | 1.51E+08 | 1.51E+08 | + | 0    | 0    |
| ENSG00000171801 | RP11-199F11.1 | lincRNA                | chr13 | 1.14E+08 | 1.14E+08 | + | 0    | 0    |
| ENSG00000171802 | PRAMEF33      | protein_coding         | chr1  | 13303539 | 13308907 | + | 0    | 0    |
| ENSG00000171803 | ATP5JP1       | processed_transcript   | chrY  | 6900753  | 6901372  | + | 0    | 0    |
| ENSG00000171804 | TRBV3-1       | TR_V_gene              | chr7  | 1.42E+08 | 1.42E+08 | + | 0    | 0    |
| ENSG00000171805 | AP004289.1    | processed_transcript   | chr8  | 99340305 | 99341761 | - | 0    | 0    |
| ENSG00000171806 | AC008937.1    | antisense              | chr5  | 56842016 | 56862164 | - | 0    | 0    |
| ENSG00000171807 | TRIM51EP      | unprocessed_transcript | chr11 | 89981441 | 89989559 | - | 0    | 0    |
| ENSG00000171808 | RP5-1018K11.1 | antisense              | chr1  | 1.69E+08 | 1.69E+08 | + | 0    | 0    |
| ENSG00000171809 | RP11-445C11.1 | processed_transcript   | chrX  | 57068914 | 57069685 | - | 0    | 0    |
| ENSG00000171810 | EEF1A1P28     | processed_transcript   | chr7  | 88639014 | 88640416 | + | 0.03 | 0    |
| ENSG00000171811 | MTCO3P11      | unprocessed_transcript | chr9  | 5100236  | 5101009  | + | 0    | 0    |
| ENSG00000171812 | AC006000.1    | lincRNA                | chr7  | 13339201 | 13365049 | - | 0    | 0    |
| ENSG00000171813 | P4HA2-AS1     | antisense              | chr5  | 1.32E+08 | 1.32E+08 | + | 0.08 | 0    |
| ENSG00000171814 | RP3-400B1     | lincRNA                | chr6  | 4186624  | 4188109  | - | 0    | 0    |
| ENSG00000171815 | RP11-402P11.1 | processed_transcript   | chrX  | 71744828 | 71745077 | + | 0    | 0    |
| ENSG00000171816 | AC009095.1    | antisense              | chr16 | 67614381 | 67616146 | - | 0    | 0    |
| ENSG00000171817 | RP1-179N1     | processed_transcript   | chr6  | 36091991 | 36092646 | - | 0    | 0    |
| ENSG00000171818 | AC011995.1    | lincRNA                | chr2  | 2834264  | 2838391  | - | 0    | 0    |
| ENSG00000171819 | AF064858.1    | lincRNA                | chr21 | 39006648 | 39011329 | - | 0    | 0    |
| ENSG00000171820 | MTND1P29      | unprocessed_transcript | chr2  | 1.3E+08  | 1.3E+08  | + | 0    | 0    |
| ENSG00000171821 | RP3-453P2     | antisense              | chr1  | 7382487  | 7389754  | - | 0    | 0    |
| ENSG00000171822 | AC002075.1    | processed_transcript   | chr7  | 93669826 | 93670077 | - | 0    | 0    |
| ENSG00000171823 | RP11-459A11.1 | processed_transcript   | chrX  | 6422092  | 6422701  | - | 0    | 0    |
| ENSG00000171824 | RNGTTP1       | processed_transcript   | chr21 | 25643489 | 25644216 | + | 0    | 0    |
| ENSG00000171825 | AC010980.1    | transcribed_unit       | chr2  | 2.22E+08 | 2.22E+08 | + | 0    | 0.36 |
| ENSG00000171826 | RP11-298E11.1 | antisense              | chr9  | 27391734 | 27397563 | + | 0    | 0    |
| ENSG00000171827 | AP000473.1    | lincRNA                | chr21 | 16754519 | 16815688 | - | 0    | 0    |
| ENSG00000171828 | DCTN1-AS1     | antisense              | chr2  | 74385486 | 74393882 | + | 0.42 | 0.05 |
| ENSG00000171829 | RNF216-IT1    | sense_intronic         | chr7  | 5662432  | 5680461  | - | 0    | 0    |
| ENSG00000171830 | NPAP1P3       | processed_transcript   | chr10 | 87376896 | 87378481 | + | 0    | 0    |
| ENSG00000171831 | AC002368.1    | antisense              | chrX  | 1.48E+08 | 1.49E+08 | - | 0    | 0    |
| ENSG00000171832 | RP11-624M11.1 | antisense              | chr6  | 1.26E+08 | 1.26E+08 | - | 0.14 | 0    |
| ENSG00000171833 | FBP2P1        | transcribed_unit       | chr9  | 87810642 | 87837225 | - | 0    | 0    |
| ENSG00000171834 | AC009963.1    | processed_transcript   | chr2  | 1.08E+08 | 1.08E+08 | + | 0    | 0    |
| ENSG00000171835 | ZNF101P1      | processed_transcript   | chr10 | 28338554 | 28340942 | - | 0    | 0    |
| ENSG00000171836 | RP11-65B2     | processed_transcript   | chr9  | 87741233 | 87741953 | + | 0    | 0    |
| ENSG00000171837 | UQCRBP1       | processed_transcript   | chrX  | 56737242 | 56737577 | - | 0    | 0    |
| ENSG00000171838 | RP3-423B2     | processed_transcript   | chr1  | 37556247 | 37556499 | + | 0    | 0.58 |
| ENSG00000171839 | AC007740.1    | antisense              | chr2  | 1.63E+08 | 1.63E+08 | + | 0    | 0    |
| ENSG00000171840 | LINC01143     | lincRNA                | chr2  | 70887871 | 70889959 | + | 0    | 0    |
| ENSG00000171841 | RP13-75G2     | processed_transcript   | chrX  | 97906644 | 97908090 | + | 0    | 0    |
| ENSG00000171842 | AC079922.1    | lincRNA                | chr2  | 1.13E+08 | 1.13E+08 | - | 1.57 | 1.33 |
| ENSG00000171843 | RP11-521C11.1 | processed_transcript   | chr7  | 68241637 | 68242267 | + | 0.22 | 0    |
| ENSG00000171844 | RP11-77M1     | lincRNA                | chr1  | 1.63E+08 | 1.63E+08 | + | 0    | 0    |

|                                     |          |            |       |       |
|-------------------------------------|----------|------------|-------|-------|
| ENSG0000(EEF1A1P3C processed_ chrX  | 1.2E+08  | 1.2E+08 -  | 0     | 0     |
| ENSG0000(BANF1P3 processed_ chr2    | 2.31E+08 | 2.31E+08 - | 0     | 0     |
| ENSG0000(RP11-278H lincRNA chr1     | 2.44E+08 | 2.44E+08 + | 0     | 0     |
| ENSG0000(AC092657. lincRNA chr7     | 46302120 | 46343621 + | 0     | 0     |
| ENSG0000(RP11-127C lincRNA chr10    | 1.05E+08 | 1.05E+08 + | 0     | 0     |
| ENSG0000(AMY1A protein_co chr1      | 1.04E+08 | 1.04E+08 + | 0     | 0     |
| ENSG0000(RP11-3B12 lincRNA chr7     | 1.25E+08 | 1.25E+08 + | 0     | 0.17  |
| ENSG0000(FAM200B protein_co chr4    | 15681662 | 15705565 + | 21.82 | 26.92 |
| ENSG0000(GGTA2P processed_ chr12    | 67265842 | 67266966 - | 0     | 0     |
| ENSG0000(LINC01370 lincRNA chr20    | 40004477 | 40008529 + | 0     | 0     |
| ENSG0000(RP11-344N antisense chr10  | 73071295 | 73074008 + | 0     | 0     |
| ENSG0000(SPATA31D: unprocessε chr9  | 81966564 | 81972130 + | 0     | 0     |
| ENSG0000(AC092620. lincRNA chr2     | 1.39E+08 | 1.39E+08 + | 0     | 0     |
| ENSG0000(AC003075. antisense chr7   | 17279834 | 17299357 - | 0.54  | 0.44  |
| ENSG0000(RP11-129B processed_ chr12 | 95125760 | 95126389 + | 0     | 0     |
| ENSG0000(DDR1-AS1 antisense chr6    | 30866982 | 30875918 - | 0.07  | 0.03  |
| ENSG0000(RP11-54A4 antisense chr1   | 1.51E+08 | 1.51E+08 - | 0.1   | 0.22  |
| ENSG0000(RP1-192P9 processed_ chrX  | 45381527 | 45381995 - | 0     | 0     |
| ENSG0000(RP11-306I1 processed_ chr1 | 1.66E+08 | 1.66E+08 + | 0     | 0     |
| ENSG0000(AC097713. processed_ chr2  | 2.34E+08 | 2.34E+08 + | 0     | 0     |
| ENSG0000(GFOD1-AS: antisense chr6   | 13486294 | 13486852 + | 0     | 0     |
| ENSG0000(C3orf79 lincRNA chr3       | 1.53E+08 | 1.54E+08 + | 0     | 0     |
| ENSG0000(RP5-1041C processed_ chr20 | 49829125 | 49831085 + | 0     | 0     |
| ENSG0000(LINC01318 lincRNA chr2     | 34067226 | 34069550 + | 0     | 0     |
| ENSG0000(RPL18AP1ε processed_ chrX  | 1.54E+08 | 1.54E+08 + | 0     | 0     |
| ENSG0000(RP11-472N lincRNA chr10    | 31693084 | 31707388 - | 0     | 0     |
| ENSG0000(AC010894. antisense chr2   | 1.75E+08 | 1.75E+08 + | 0     | 0     |
| ENSG0000(CICP11 processed_ chr7     | 55736779 | 55739605 + | 0     | 0     |
| ENSG0000(AMD1P2 processed_ chrX     | 1.56E+08 | 1.56E+08 - | 0     | 0     |
| ENSG0000(AMD1P2 processed_ chrY     | 57015105 | 57016096 - | 0     | 0     |
| ENSG0000(FAM197Y6 transcribed chrY  | 9388122  | 9397438 -  | 0     | 0     |
| ENSG0000(LINC00211 lincRNA chr2     | 37826247 | 37876274 - | 0     | 0     |
| ENSG0000(HNRNPA1F processed_ chr2   | 1.74E+08 | 1.74E+08 - | 0     | 0     |
| ENSG0000(FAUP2 processed_ chr3      | 1.81E+08 | 1.81E+08 - | 0     | 0     |
| ENSG0000(RP11-400K lincRNA chr8     | 53515171 | 53523931 - | 0.69  | 0.43  |
| ENSG0000(CTD-2571E processed_ chr8  | 62143311 | 62144769 - | 0     | 0     |
| ENSG0000(AC002066. antisense chr7   | 1.16E+08 | 1.16E+08 - | 0.09  | 0     |
| ENSG0000(RPL21P109 processed_ chr13 | 71704181 | 71704655 + | 0     | 0     |
| ENSG0000(RPS3AP29 processed_ chr7   | 97898347 | 97899115 - | 0     | 0     |
| ENSG0000(AC002454. antisense chr7   | 92836483 | 92917187 + | 0     | 0.23  |
| ENSG0000(AC083873. processed_ chr7  | 1.33E+08 | 1.33E+08 - | 0     | 0.13  |
| ENSG0000(CDY19P unprocessε chrY     | 25564122 | 25566033 - | 0     | 0     |
| ENSG0000(RPL23AP33 processed_ chr2  | 1.85E+08 | 1.85E+08 - | 0     | 0     |
| ENSG0000(RPS15AP2ε processed_ chr10 | 1.03E+08 | 1.03E+08 - | 0     | 0     |
| ENSG0000(PA2G4P1 processed_ chrX    | 1.21E+08 | 1.21E+08 - | 0     | 0     |

|                                         |          |          |   |      |      |
|-----------------------------------------|----------|----------|---|------|------|
| ENSG0000(RP5-974N1 antisense chr20      | 14933843 | 14935363 | - | 0    | 0    |
| ENSG0000(RP11-432N processed_chrX       | 1.36E+08 | 1.36E+08 | - | 0    | 0    |
| ENSG0000(AC007064. processed_chr22      | 16855804 | 16856162 | + | 0    | 0    |
| ENSG0000(PHKA2-AS1 antisense chrX       | 18890296 | 18894497 | + | 0    | 0    |
| ENSG0000(AC159540. lincRNA chr2         | 97301729 | 97304151 | + | 0    | 0    |
| ENSG0000(AC133680. lincRNA chr3         | 24687919 | 25174305 | + | 0    | 0    |
| ENSG0000(FAM21FP transcribed chr10      | 45706431 | 45727231 | - | 0.78 | 1.29 |
| ENSG0000(KRTAP19-9 unprocessed chr21    | 30510307 | 30510497 | - | 0    | 0    |
| ENSG0000(RP11-110J processed_chr1       | 1.57E+08 | 1.57E+08 | - | 0    | 0    |
| ENSG0000(AC016903. lincRNA chr2         | 2.04E+08 | 2.05E+08 | + | 0    | 0    |
| ENSG0000(AC092684. lincRNA chr2         | 1.64E+08 | 1.64E+08 | - | 0    | 0    |
| ENSG0000(RP5-940F7 lincRNA chr1         | 2.36E+08 | 2.36E+08 | - | 0    | 0    |
| ENSG0000(RP11-216N processed_chr9       | 40105822 | 40106527 | + | 0    | 0.1  |
| ENSG0000(FAM231A protein_coding chr1    | 16673003 | 16673512 | + | 0    | 0    |
| ENSG0000(RP11-739N processed_chr1       | 2.04E+08 | 2.04E+08 | + | 0    | 0    |
| ENSG0000(NFYAP1 processed_chr13         | 63975451 | 63976422 | - | 0.06 | 0    |
| ENSG0000(RP11-483E transcribed chr15    | 28349051 | 28358080 | - | 0    | 0    |
| ENSG0000(RP1-67K17 lincRNA chr6         | 1.43E+08 | 1.43E+08 | + | 0    | 0    |
| ENSG0000(RP4-630A1 sense_intronic chr1  | 65486406 | 65494188 | + | 0    | 0    |
| ENSG0000(NFIA-AS1 processed_chr1        | 61248945 | 61253510 | - | 0    | 0    |
| ENSG0000(LINC00674 transcribed chr17    | 68101908 | 68115518 | + | 3.06 | 3.37 |
| ENSG0000(AC062020. lincRNA chr2         | 1.23E+08 | 1.23E+08 | + | 0    | 0    |
| ENSG0000(EEF1A1P31 unprocessed chrX     | 1.55E+08 | 1.55E+08 | - | 0    | 0    |
| ENSG0000(RP11-232D unprocessed chrX     | 1.17E+08 | 1.17E+08 | + | 0    | 0    |
| ENSG0000(RP11-332L processed_chr1       | 1.97E+08 | 1.97E+08 | + | 0    | 0    |
| ENSG0000(RP1-63G5. sense_intronic chr22 | 37352190 | 37354839 | - | 0    | 0    |
| ENSG0000(RP6-24A23 antisense chrX       | 1.09E+08 | 1.09E+08 | + | 0    | 0    |
| ENSG0000(LINC00322 lincRNA chr21        | 43322417 | 43332039 | - | 0    | 0    |
| ENSG0000(AC097533. processed_chr4       | 1.22E+08 | 1.22E+08 | - | 0    | 0    |
| ENSG0000(AC073130. processed_chr7       | 1.16E+08 | 1.16E+08 | - | 0    | 0.06 |
| ENSG0000(POU5F1P4 processed_chr1        | 1.55E+08 | 1.55E+08 | + | 0    | 0    |
| ENSG0000(RP11-156J processed_chrX       | 93042490 | 93042942 | + | 0    | 0    |
| ENSG0000(RP3-393K1 lincRNA chr6         | 83728055 | 83736525 | + | 0    | 0    |
| ENSG0000(RP5-1174J processed_chrX       | 41790192 | 41790250 | - | 0    | 0    |
| ENSG0000(AKR1B1P4 processed_chr13       | 45687548 | 45688469 | - | 0    | 0    |
| ENSG0000(LINC01473 lincRNA chr2         | 1.86E+08 | 1.86E+08 | - | 0.06 | 0.43 |
| ENSG0000(LINC00398 lincRNA chr13        | 30803206 | 30810645 | + | 0.27 | 0.23 |
| ENSG0000(LINC01885 lincRNA chr2         | 1.07E+08 | 1.08E+08 | - | 0    | 0    |
| ENSG0000(PPIAP13 processed_chr10        | 75089248 | 75089725 | - | 0    | 0    |
| ENSG0000(DGUOK-AS antisense chr2        | 73947642 | 73981441 | - | 0.58 | 0.84 |
| ENSG0000(RP11-208C processed_chr10      | 95031640 | 95032048 | + | 0    | 0    |
| ENSG0000(NALT1 antisense chr9           | 1.37E+08 | 1.37E+08 | + | 1.6  | 1.89 |
| ENSG0000(RPL23AP32 processed_chr2       | 54529343 | 54529801 | + | 0    | 0    |
| ENSG0000(AC087650. processed_chr17      | 43476198 | 43476665 | + | 0    | 0    |
| ENSG0000(RP11-417D processed_chrX       | 1.22E+08 | 1.22E+08 | - | 0    | 0    |

|                                  |       |          |          |   |      |      |
|----------------------------------|-------|----------|----------|---|------|------|
| ENSG0000(KLF7-IT1 sense_intron)  | chr2  | 2.07E+08 | 2.07E+08 | - | 0.31 | 0.57 |
| ENSG0000(AC005008.lincRNA)       | chr7  | 81175508 | 81199115 | + | 0    | 0    |
| ENSG0000(RP11-90H3 processed)    | chr1  | 1.06E+08 | 1.06E+08 | - | 0    | 0    |
| ENSG0000(RP4-739H1 lincRNA)      | chr1  | 40669089 | 40687588 | - | 0    | 0    |
| ENSG0000(AC009161.processed)     | chr16 | 62357371 | 62357746 | + | 0    | 0    |
| ENSG0000(TSPY21P unprocessed)    | chrY  | 22400403 | 22402568 | - | 0    | 0    |
| ENSG0000(RP3-404F1 sense_intron) | chrX  | 1.19E+08 | 1.19E+08 | + | 0    | 0.21 |
| ENSG0000(RP11-460E processed)    | chr9  | 65798726 | 65799124 | + | 0    | 0    |
| ENSG0000(MUPP transcribed)       | chr9  | 1.13E+08 | 1.13E+08 | - | 0    | 0    |
| ENSG0000(MTCO1P18 unprocessed)   | chr2  | 1.31E+08 | 1.31E+08 | - | 0    | 0    |
| ENSG0000(SRP68P3 unprocessed)    | chr17 | 20415792 | 20416697 | - | 0    | 0    |
| ENSG0000(FTLP19 processed)       | chr10 | 16071416 | 16071809 | - | 0    | 0    |
| ENSG0000(SIRPG-AS1 antisense)    | chr20 | 1633508  | 1648472  | + | 0    | 0.02 |
| ENSG0000(RP11-537E processed)    | chr2  | 1.1E+08  | 1.1E+08  | + | 0    | 0    |
| ENSG0000(PARP4P1 unprocessed)    | chrY  | 26594851 | 26634652 | - | 0    | 0    |
| ENSG0000(RP11-181B antisense)    | chr1  | 70013982 | 70031222 | - | 0    | 0    |
| ENSG0000(RP11-350G unprocessed)  | chr1  | 1.54E+08 | 1.54E+08 | - | 0    | 0    |
| ENSG0000(AC004543.lincRNA)       | chr7  | 19813685 | 19818090 | - | 0    | 0    |
| ENSG0000(RP11-478H processed)    | chr1  | 2.36E+08 | 2.36E+08 | - | 0    | 0    |
| ENSG0000(XXbac-BPG lincRNA)      | chr6  | 30839526 | 30848159 | - | 0.16 | 0    |
| ENSG0000(RPL21P112 processed)    | chr13 | 94760553 | 94761015 | - | 0    | 0    |
| ENSG0000(RP13-346H unprocessed)  | chrX  | 51162864 | 51163677 | + | 0    | 0    |
| ENSG0000(RP3-393E1 lincRNA)      | chr6  | 1.6E+08  | 1.6E+08  | - | 0.31 | 0.18 |
| ENSG0000(NFIA-AS2 antisense)     | chr1  | 60940239 | 60970776 | - | 0.08 | 0.1  |
| ENSG0000(RPL31P3 processed)      | chr20 | 31311303 | 31311962 | - | 0    | 0    |
| ENSG0000(AC007563.processed)     | chr2  | 2.17E+08 | 2.17E+08 | - | 0    | 0    |
| ENSG0000(CLIC4P3 processed)      | chrX  | 41076999 | 41077750 | + | 0    | 0    |
| ENSG0000(RP11-467D antisense)    | chr1  | 29223933 | 29224816 | + | 0    | 0    |
| ENSG0000(RP11-224P processed)    | chr10 | 29891032 | 29891467 | - | 0    | 0    |
| ENSG0000(AP000770.lincRNA)       | chr11 | 1.17E+08 | 1.17E+08 | + | 0    | 0    |
| ENSG0000(RP11-288I2 antisense)   | chr1  | 15720312 | 15736896 | - | 0    | 0    |
| ENSG0000(AC097523.processed)     | chr2  | 1.38E+08 | 1.38E+08 | + | 0.1  | 0    |
| ENSG0000(LINC01238 lincRNA)      | chr2  | 2.42E+08 | 2.42E+08 | + | 0.41 | 0.03 |
| ENSG0000(KCNQ1DN antisense)      | chr11 | 2870033  | 2872105  | + | 0    | 0    |
| ENSG0000(PRKCQ-AS1 processed)    | chr10 | 6580419  | 6616452  | + | 0    | 0.27 |
| ENSG0000(LINC00649 antisense)    | chr21 | 33915534 | 33977691 | + | 0.67 | 0.67 |
| ENSG0000(RP11-570K lincRNA)      | chr6  | 40713411 | 40715363 | - | 0    | 0    |
| ENSG0000(MTATP6P2 processed)     | chr22 | 36174261 | 36174822 | + | 0    | 0    |
| ENSG0000(LINC00844 lincRNA)      | chr10 | 58999626 | 59001543 | + | 0    | 0    |
| ENSG0000(RP11-7011 antisense)    | chr1  | 43944370 | 43946551 | - | 0.16 | 0.41 |
| ENSG0000(PPIL1P1 processed)      | chr2  | 26162056 | 26162554 | + | 0    | 0    |
| ENSG0000(RPL7AP73 processed)     | chr13 | 22803296 | 22803648 | + | 0    | 0    |
| ENSG0000(AC013267.processed)     | chr2  | 24968958 | 24969224 | - | 0    | 0    |
| ENSG0000(RP11-1401 lincRNA)      | chr1  | 95356229 | 95381000 | - | 0    | 0    |
| ENSG0000(AC008746.processed)     | chr19 | 54379489 | 54379960 | + | 0    | 0    |

|                 |            |                |       |          |          |   |       |      |
|-----------------|------------|----------------|-------|----------|----------|---|-------|------|
| ENSG00000181100 | TRIAP1P1   | processed      | chr10 | 27378138 | 27378362 | - | 0     | 0    |
| ENSG00000181101 | CT47A5     | protein_coding | chrX  | 1.21E+08 | 1.21E+08 | - | 0     | 0    |
| ENSG00000181102 | RPL36AP1   | processed      | chr1  | 88577880 | 88578201 | + | 0     | 0    |
| ENSG00000181103 | RP11-1281  | processed      | chr4  | 49238032 | 49245419 | - | 0     | 0    |
| ENSG00000181104 | RP11-151G  | processed      | chrX  | 65356890 | 65357547 | - | 0     | 0    |
| ENSG00000181105 | AC068042   | processed      | chr2  | 1.79E+08 | 1.79E+08 | - | 0.05  | 0    |
| ENSG00000181106 | AC007322   | unprocessed    | chrY  | 21940012 | 21941593 | + | 0     | 0    |
| ENSG00000181107 | TMEM161    | processed      | chr10 | 37337415 | 37338871 | + | 0     | 0    |
| ENSG00000181108 | RP11-231N  | processed      | chrX  | 65185018 | 65187265 | - | 0     | 0    |
| ENSG00000181109 | TUBG1P     | processed      | chr7  | 43918697 | 43920054 | + | 0     | 0.05 |
| ENSG00000181110 | MTCO1P12   | unprocessed    | chr1  | 631074   | 632616   | + | 11.91 | 11.8 |
| ENSG00000181111 | AC000111   | processed      | chr7  | 1.17E+08 | 1.17E+08 | + | 0     | 0    |
| ENSG00000181112 | FLG-AS1    | antisense      | chr1  | 1.52E+08 | 1.52E+08 | + | 0.07  | 0.4  |
| ENSG00000181113 | RP11-126K  | antisense      | chr1  | 1.51E+08 | 1.51E+08 | + | 0     | 0.12 |
| ENSG00000181114 | EIF4HP2    | processed      | chr22 | 30902219 | 30902781 | + | 0     | 0.14 |
| ENSG00000181115 | KCNMB2-A   | antisense      | chr3  | 1.79E+08 | 1.79E+08 | - | 0     | 0    |
| ENSG00000181116 | AC007389   | processed      | chr2  | 65500993 | 65502138 | - | 0     | 0    |
| ENSG00000181117 | RP11-338C  | lincRNA        | chr1  | 2.13E+08 | 2.13E+08 | - | 0     | 0    |
| ENSG00000181118 | RP11-815I2 | processed      | chr3  | 38270283 | 38270767 | - | 0     | 0    |
| ENSG00000181119 | PTENP1     | transcribed    | chr9  | 33673504 | 33677499 | - | 0.14  | 0.16 |
| ENSG00000181120 | CELF2-AS2  | antisense      | chr10 | 11071541 | 11105504 | - | 0     | 0    |
| ENSG00000181121 | RP11-503C  | lincRNA        | chr6  | 1.68E+08 | 1.68E+08 | - | 0     | 0    |
| ENSG00000181122 | OR2I1P     | unprocessed    | chr6  | 29553219 | 29554166 | + | 0     | 0    |
| ENSG00000181123 | LINC01679  | lincRNA        | chr21 | 43358147 | 43362349 | - | 0.04  | 0    |
| ENSG00000181124 | CNTN4-AS1  | antisense      | chr3  | 3039033  | 3069242  | - | 0     | 0    |
| ENSG00000181125 | RPL35P1    | processed      | chr1  | 2.37E+08 | 2.37E+08 | + | 0     | 0    |
| ENSG00000181126 | LINC01808  | lincRNA        | chr2  | 19475450 | 19488850 | + | 0     | 0    |
| ENSG00000181127 | RP11-159N  | antisense      | chr1  | 1.16E+08 | 1.16E+08 | - | 0     | 0    |
| ENSG00000181128 | RP1-146A1  | sense_intronic | chrX  | 28942050 | 28942568 | + | 0     | 0    |
| ENSG00000181129 | RCC2P2     | processed      | chrY  | 19986575 | 19987852 | - | 0     | 0    |
| ENSG00000181130 | ACTG1P19   | processed      | chr9  | 1.01E+08 | 1.01E+08 | + | 0     | 0    |
| ENSG00000181131 | RP11-274E  | processed      | chr5  | 98213402 | 98214121 | + | 0     | 0    |
| ENSG00000181132 | SNRPCP1    | processed      | chr9  | 32676063 | 32676520 | - | 0     | 0    |
| ENSG00000181133 | NPAP1P6    | processed      | chr9  | 79863019 | 79866875 | + | 0     | 0    |
| ENSG00000181134 | RPL10P4    | processed      | chr1  | 2.02E+08 | 2.02E+08 | + | 0     | 0    |
| ENSG00000181135 | AC009227   | lincRNA        | chr2  | 1.54E+08 | 1.54E+08 | + | 0     | 0    |
| ENSG00000181136 | RP11-443B  | lincRNA        | chr1  | 2.35E+08 | 2.35E+08 | - | 0.32  | 0.7  |
| ENSG00000181137 | AC024619   | sense_intronic | chr17 | 29012865 | 29016512 | + | 0     | 0    |
| ENSG00000181138 | COX6CP10   | processed      | chr3  | 33554636 | 33554859 | + | 0     | 0    |
| ENSG00000181139 | RP11-34P1  | lincRNA        | chr1  | 89295    | 133723   | - | 1.28  | 1.01 |
| ENSG00000181140 | RP11-123K  | sense_intronic | chr9  | 1.27E+08 | 1.27E+08 | + | 0     | 0    |
| ENSG00000181141 | AC114752   | lincRNA        | chr2  | 64330486 | 64332131 | - | 0     | 0    |
| ENSG00000181142 | RP11-427P  | processed      | chr3  | 46798123 | 46798390 | + | 0     | 0    |
| ENSG00000181143 | RP4-641G1  | processed      | chr1  | 78666272 | 78666695 | + | 0     | 0    |
| ENSG00000181144 | AC093110   | antisense      | chr2  | 54661011 | 54680045 | - | 0     | 0    |

|                                     |          |          |   |      |      |
|-------------------------------------|----------|----------|---|------|------|
| ENSG0000(RP11-732M antisense chr6   | 1.58E+08 | 1.58E+08 | - | 0    | 0    |
| ENSG0000(HTR3E-AS1 antisense chr3   | 1.84E+08 | 1.84E+08 | - | 0    | 0    |
| ENSG0000(ARMC4P1 transcribed chr10  | 27258762 | 27288824 | + | 0    | 0    |
| ENSG0000(RP11-38C1 antisense chr1   | 1.65E+08 | 1.65E+08 | + | 0    | 0    |
| ENSG0000(DDX39BP2 unprocessed chr6  | 29993209 | 29993605 | + | 0    | 0    |
| ENSG0000(ZDHHC4P1 processed_ chr13  | 42933858 | 42934892 | + | 0    | 0    |
| ENSG0000(RP11-78E6 processed_ chr3  | 1.76E+08 | 1.76E+08 | - | 0    | 0    |
| ENSG0000(AC012493. processed_ chr2  | 1E+08    | 1E+08    | + | 0    | 0    |
| ENSG0000(AC090505. lincRNA chr3     | 1.95E+08 | 1.95E+08 | + | 0    | 0    |
| ENSG0000(RP11-38O2 processed_ chrX  | 48177731 | 48178023 | - | 0    | 0    |
| ENSG0000(AC002480. lincRNA chr7     | 22649960 | 22665533 | - | 0    | 0    |
| ENSG0000(RP5-1185K lincRNA chr20    | 21947647 | 21970783 | + | 0    | 0    |
| ENSG0000(AC138035. lincRNA chr5     | 1.81E+08 | 1.81E+08 | + | 3.13 | 2.02 |
| ENSG0000(OOSP1P1 processed_ chr1    | 44155028 | 44155301 | - | 0    | 0    |
| ENSG0000(ATP6V0E1F processed_ chr2  | 33602041 | 33602286 | + | 0    | 0    |
| ENSG0000(AF011889. lincRNA chrX     | 1.5E+08  | 1.5E+08  | - | 0.31 | 0.45 |
| ENSG0000(SALL4P2 processed_ chrX    | 1.3E+08  | 1.3E+08  | + | 0    | 0    |
| ENSG0000(RP11-59K5 processed_ chr11 | 56690465 | 56690723 | + | 0    | 0    |
| ENSG0000(RP11-815M lincRNA chr1     | 2.22E+08 | 2.22E+08 | - | 2.48 | 2.77 |
| ENSG0000(RP11-699L lincRNA chr3     | 1.94E+08 | 1.94E+08 | + | 0    | 0    |
| ENSG0000(AC009133. antisense chr16  | 29808636 | 29821252 | - | 2.68 | 3.68 |
| ENSG0000(MTND5P22 processed_ chr2   | 1.25E+08 | 1.25E+08 | - | 0    | 0    |
| ENSG0000(MTND1P3C processed_ chrX   | 55180377 | 55181277 | - | 0    | 0    |
| ENSG0000(ART2P unprocessed_ chr11   | 72519986 | 72521733 | + | 0    | 0    |
| ENSG0000(LLOXNC01- processed_ chrX  | 1.03E+08 | 1.03E+08 | - | 0    | 0    |
| ENSG0000(ISCUP1 processed_ chr1     | 1.7E+08  | 1.7E+08  | - | 0    | 0    |
| ENSG0000(RP11-316I lincRNA chr1     | 1.89E+08 | 1.89E+08 | - | 0    | 0    |
| ENSG0000(RP1-128O3 processed_ chr6  | 1.08E+08 | 1.08E+08 | + | 0    | 0    |
| ENSG0000(ZEB2-AS1 antisense chr2    | 1.45E+08 | 1.45E+08 | + | 0.93 | 0.05 |
| ENSG0000(RP11-432J antisense chr9   | 1.36E+08 | 1.36E+08 | + | 1    | 0.73 |
| ENSG0000(HSPE1P21 processed_ chr6   | 1.34E+08 | 1.34E+08 | - | 0.34 | 0    |
| ENSG0000(RP4-635A2 processed_ chr1  | 1.85E+08 | 1.85E+08 | + | 0    | 0    |
| ENSG0000(SPATA3-AS lincRNA chr2     | 2.31E+08 | 2.31E+08 | - | 0    | 0    |
| ENSG0000(LINC01685 lincRNA chr1     | 38474875 | 38496034 | + | 0    | 0    |
| ENSG0000(AC010740. processed_ chr2  | 1.41E+08 | 1.41E+08 | + | 0    | 0    |
| ENSG0000(RP3-378P9 processed_ chrX  | 1.17E+08 | 1.17E+08 | + | 0    | 0    |
| ENSG0000(XKRYP1 unprocessed_ chrY   | 18508577 | 18509068 | + | 0    | 0    |
| ENSG0000(RPLPOP7 processed_ chr2    | 1.57E+08 | 1.57E+08 | - | 0    | 0    |
| ENSG0000(RP11-305M processed_ chr7  | 1.29E+08 | 1.29E+08 | - | 1.8  | 0    |
| ENSG0000(RBMY2HP unprocessed_ chrY  | 7671743  | 7676024  | - | 0    | 0.1  |
| ENSG0000(TSPY9P unprocessed_ chrY   | 9487313  | 9489893  | + | 0    | 0    |
| ENSG0000(RPSAP32 processed_ chr3    | 617789   | 618314   | - | 0    | 0    |
| ENSG0000(MRPL48P1 processed_ chr6   | 10459906 | 10460541 | - | 0    | 0    |
| ENSG0000(NMNAT1P: processed_ chr3   | 1.9E+08  | 1.9E+08  | + | 0    | 0    |
| ENSG0000(LINC01352 lincRNA chr1     | 2.21E+08 | 2.21E+08 | + | 0    | 0    |

|                                      |          |          |   |      |      |
|--------------------------------------|----------|----------|---|------|------|
| ENSG0000(RP11-72I2. processed_ chr6  | 1.08E+08 | 1.08E+08 | - | 0    | 0    |
| ENSG0000(RP4-620F2. processed_ chr1  | 89289676 | 89290337 | - | 0    | 0    |
| ENSG0000(AC009948. processed_ chr2   | 1.78E+08 | 1.78E+08 | + | 0.09 | 0.2  |
| ENSG0000(LRRC37A2. protein_co chr17  | 46511511 | 46555650 | + | 1.58 | 1.88 |
| ENSG0000(RP3-469D2. processed_ chr1  | 25398721 | 25399198 | + | 0    | 0    |
| ENSG0000(RP11-435F. processed_ chr1  | 2.41E+08 | 2.41E+08 | - | 0.27 | 0    |
| ENSG0000(PPP1R26P1. processed_ chr13 | 48316863 | 48320475 | - | 0    | 0    |
| ENSG0000(FMO8P. unprocessε chr1      | 1.67E+08 | 1.67E+08 | + | 0    | 0    |
| ENSG0000(OFD1P7Y. unprocessε chrY    | 18848264 | 18867280 | + | 0    | 0    |
| ENSG0000(AC006195. processed_ chr7   | 33379964 | 33380886 | + | 0    | 0    |
| ENSG0000(CEACAMPε. unprocessε chr19  | 42781206 | 42786595 | - | 0    | 0    |
| ENSG0000(AC009892. unprocessε chr19  | 54607870 | 54608376 | + | 0    | 0    |
| ENSG0000(LINC02037. lincRNA chr3     | 1.94E+08 | 1.94E+08 | + | 0    | 0    |
| ENSG0000(ABCA17P. transcribec chr16  | 2339150  | 2426699  | + | 0    | 0    |
| ENSG0000(LINC01625. lincRNA chr6     | 1.39E+08 | 1.39E+08 | - | 0.2  | 0.15 |
| ENSG0000(RP11-19D2. lincRNA chr20    | 7256580  | 7258214  | - | 0    | 0    |
| ENSG0000(RPL9P7. processed_ chrX     | 23836742 | 23837321 | - | 0    | 0    |
| ENSG0000(GOLGA2P5. transcribec chr12 | 1E+08    | 1E+08    | - | 0.33 | 0.39 |
| ENSG0000(RP11-495P. lincRNA chr1     | 1.48E+08 | 1.48E+08 | + | 0    | 0.03 |
| ENSG0000(RP11-463J. processed_ chr1  | 1.91E+08 | 1.91E+08 | + | 0    | 0    |
| ENSG0000(AC004893. processed_ chr7   | 98998538 | 98999930 | - | 0    | 0.05 |
| ENSG0000(RP11-350E. processed_ chr9  | 87944276 | 87945023 | - | 0    | 0    |
| ENSG0000(AC066692. processed_ chr2   | 23900693 | 23901149 | + | 0    | 0    |
| ENSG0000(LINC01410. lincRNA chr9     | 62801461 | 62813486 | + | 0.74 | 0.45 |
| ENSG0000(RP3-347M. processed_ chrX   | 1.01E+08 | 1.01E+08 | + | 0    | 0    |
| ENSG0000(AP004372. antisense chr11   | 1.32E+08 | 1.32E+08 | - | 0    | 0    |
| ENSG0000(SLC25A24P. unprocessε chr1  | 1.08E+08 | 1.08E+08 | - | 0    | 0    |
| ENSG0000(LINC01589. antisense chr22  | 45604432 | 45605621 | - | 0    | 0    |
| ENSG0000(LINC00426. lincRNA chr13    | 30340270 | 30377145 | - | 0.19 | 0.59 |
| ENSG0000(RP11-483I. lincRNA chr1     | 1.08E+08 | 1.08E+08 | - | 0    | 0    |
| ENSG0000(MID1IP1-A. antisense chrX   | 38801568 | 38803883 | - | 0.7  | 0    |
| ENSG0000(RP11-667F. lincRNA chr7     | 65463071 | 65463438 | + | 0    | 0    |
| ENSG0000(SLC9A3P2. processed_ chr22  | 20652730 | 20654750 | + | 0    | 0    |
| ENSG0000(RP3-410C9. lincRNA chr20    | 26188408 | 26196891 | + | 0    | 0    |
| ENSG0000(RP11-806J. lincRNA chr7     | 53926676 | 53947744 | - | 0    | 0    |
| ENSG0000(CASC4P1. processed_ chr13   | 19563589 | 19564900 | - | 0    | 0    |
| ENSG0000(MAP3K20-ι. antisense chr2   | 1.73E+08 | 1.73E+08 | - | 0    | 0    |
| ENSG0000(USP9YP10. unprocessε chrY   | 18826107 | 18829487 | + | 0    | 0    |
| ENSG0000(ARPC3P2. processed_ chr1    | 2.11E+08 | 2.11E+08 | + | 0.14 | 0    |
| ENSG0000(AC027124. processed_ chr3   | 13460294 | 13460398 | - | 0    | 0    |
| ENSG0000(RP11-393N. processed_ chr1  | 67561073 | 67561446 | + | 0    | 0    |
| ENSG0000(RP11-253A. antisense chr1   | 51461721 | 51463416 | + | 0    | 0    |
| ENSG0000(BRWD1-AS. antisense chr21   | 39315707 | 39323218 | + | 0.1  | 0    |
| ENSG0000(RP11-108M. lincRNA chr1     | 16888538 | 16889649 | - | 4.86 | 8.56 |
| ENSG0000(RP11-70K1. processed_ chr9  | 1.01E+08 | 1.01E+08 | - | 0    | 0    |

|                                       |          |          |   |      |      |
|---------------------------------------|----------|----------|---|------|------|
| ENSG0000(RP11-346M) processed_chr1    | 46891639 | 46892830 | + | 0    | 0    |
| ENSG0000(AC104978) processed_chr11    | 28287235 | 28287625 | - | 0    | 0    |
| ENSG0000(AC008753) processed_chr19    | 53775599 | 53775882 | + | 0.8  | 0    |
| ENSG0000(MLLT10P1) processed_chr20    | 30403123 | 30403384 | - | 0    | 0    |
| ENSG0000(OR7E140P) unprocessed_chr12  | 8414780  | 8415805  | - | 0    | 0    |
| ENSG0000(CTA-714B7) processed_chr22   | 35164304 | 35165347 | + | 0    | 0    |
| ENSG0000(USP9YP4) unprocessed_chrY    | 9189629  | 9204611  | - | 0    | 0    |
| ENSG0000(RP11-415D) lincRNA_chr6      | 75454944 | 75458900 | + | 0    | 0    |
| ENSG0000(RP11-420L) sense_overlchr6   | 3831933  | 3855737  | + | 0    | 0    |
| ENSG0000(AC116366) antisense_chr5     | 1.32E+08 | 1.32E+08 | - | 0.08 | 0    |
| ENSG0000(OR7E117P) unprocessed_chr11  | 3599595  | 3600706  | - | 0.05 | 0.06 |
| ENSG0000(AC009237) processed_chr2     | 95485541 | 95485805 | + | 0    | 0    |
| ENSG0000(RP3-395M) antisense_chr1     | 2549920  | 2557031  | - | 0.88 | 0.12 |
| ENSG0000(AC007560) processed_chr2     | 50829442 | 50829678 | - | 0    | 0    |
| ENSG0000(RP11-160C) transcribed_chr15 | 78752107 | 78753373 | + | 0    | 0    |
| ENSG0000(RP11-686G) processed_chr12   | 1.12E+08 | 1.12E+08 | + | 0    | 0    |
| ENSG0000(LINC01053) antisense_chr13   | 25181441 | 25189760 | + | 0    | 0    |
| ENSG0000(AC068196) lincRNA_chr2       | 1.81E+08 | 1.81E+08 | - | 0    | 0    |
| ENSG0000(RPS2P35) processed_chr9      | 1E+08    | 1E+08    | - | 0    | 0    |
| ENSG0000(RPL39P6) processed_chr1      | 11232963 | 11233112 | + | 0    | 0    |
| ENSG0000(RP11-322L) lincRNA_chr10     | 36940109 | 36943932 | + | 0    | 0    |
| ENSG0000(RP11-431J) antisense_chrX    | 16152941 | 16170869 | - | 0    | 0    |
| ENSG0000(AC017079) processed_chr2     | 1.28E+08 | 1.28E+08 | + | 0    | 0    |
| ENSG0000(AHCYP2) processed_chr9       | 1.21E+08 | 1.21E+08 | + | 0    | 0    |
| ENSG0000(RPS27P5) processed_chr1      | 2.27E+08 | 2.27E+08 | + | 0    | 0    |
| ENSG0000(CD81-AS1) antisense_chr11    | 2328749  | 2377992  | - | 0.31 | 0    |
| ENSG0000(RP11-252M) antisense_chr13   | 30973289 | 30977623 | - | 0    | 0    |
| ENSG0000(RP11-656D) antisense_chr1    | 40515754 | 40517174 | - | 0    | 0    |
| ENSG0000(RP5-875H3) processed_chrX    | 1.31E+08 | 1.31E+08 | + | 0    | 0    |
| ENSG0000(ENOX1-AS2) antisense_chr13   | 43458465 | 43459484 | + | 0    | 0    |
| ENSG0000(HMGB1P1) processed_chrX      | 50931114 | 50931548 | - | 0    | 0    |
| ENSG0000(CLUHP1) unprocessed_chrY     | 17621259 | 17625832 | - | 0    | 0    |
| ENSG0000(LL22NC03) lincRNA_chr22      | 48139461 | 48141001 | - | 0    | 0    |
| ENSG0000(RP11-555H) processed_chrX    | 5305714  | 5307128  | - | 0    | 0    |
| ENSG0000(RP4-719C8) antisense_chr20   | 59626464 | 59628289 | - | 0    | 0    |
| ENSG0000(CTA-503F6) lincRNA_chr22     | 27204211 | 27205126 | + | 0    | 0    |
| ENSG0000(PAXB1-AS) antisense_chr21    | 32728115 | 32743122 | + | 0.44 | 0.87 |
| ENSG0000(RP11-31F1) lincRNA_chr1      | 1.13E+08 | 1.13E+08 | - | 0.22 | 0.34 |
| ENSG0000(UBE2V2P3) processed_chr1     | 11278616 | 11279351 | - | 0    | 0    |
| ENSG0000(MGAT2P2) processed_chrX      | 1.36E+08 | 1.36E+08 | + | 0    | 0    |
| ENSG0000(AC114752) lincRNA_chr2       | 64338067 | 64341647 | - | 0    | 0    |
| ENSG0000(AC002465) antisense_chr7     | 1.17E+08 | 1.17E+08 | + | 0    | 0    |
| ENSG0000(MPC1L) protein_co_chrX       | 40623566 | 40624136 | + | 0    | 0    |
| ENSG0000(AC009312) antisense_chr2     | 1.18E+08 | 1.18E+08 | - | 0.12 | 0    |
| ENSG0000(RP13-210D) protein_co_chrX   | 1.35E+08 | 1.35E+08 | + | 0    | 0    |



|                                      |          |          |   |       |       |
|--------------------------------------|----------|----------|---|-------|-------|
| ENSG0000(POLR2LP1 processed_ chr6    | 31140727 | 31140913 | + | 0     | 0     |
| ENSG0000(LINC02096 lincRNA chr17     | 14834638 | 14900554 | + | 0     | 0     |
| ENSG0000(TARDBPP2 processed_ chr13   | 60274776 | 60276006 | + | 0     | 0     |
| ENSG0000(RP11-167P processed_ chr10  | 72643011 | 72644650 | + | 0     | 0     |
| ENSG0000(LINC01877 lincRNA chr2      | 2E+08    | 2E+08    | + | 0     | 0     |
| ENSG0000(AP000275. processed_ chr21  | 32624416 | 32625096 | - | 0     | 0     |
| ENSG0000(RP11-69L1 antisense chr6    | 7276031  | 7298872  | + | 0     | 0     |
| ENSG0000(MKRN4P processed_ chrX      | 40834485 | 40836005 | + | 0     | 0     |
| ENSG0000(RP6-204F4 processed_ chrX   | 1.15E+08 | 1.15E+08 | - | 0     | 0     |
| ENSG0000(RP11-522N antisense chr1    | 2.46E+08 | 2.46E+08 | - | 0     | 0     |
| ENSG0000(CRIP1P2 processed_ chr3     | 25686896 | 25687123 | + | 0     | 0     |
| ENSG0000(C9orf69 protein_co chr9     | 1.36E+08 | 1.36E+08 | - | 18.54 | 17.38 |
| ENSG0000(OR7E7P unprocessε chr7      | 97946987 | 97947998 | - | 0.94  | 1.09  |
| ENSG0000(LINC00391 lincRNA chr13     | 94699694 | 94702862 | - | 0     | 0     |
| ENSG0000(RP11-4601 processed_ chr1   | 27990158 | 27990524 | - | 0     | 0     |
| ENSG0000(RP11-95P1 lincRNA chr1      | 2.2E+08  | 2.2E+08  | + | 0     | 0     |
| ENSG0000(TSPY11P unprocessε chrY     | 6266593  | 6269275  | + | 0     | 0     |
| ENSG0000(MTCYBP14 processed_ chr1    | 2.36E+08 | 2.36E+08 | + | 0     | 0     |
| ENSG0000(CCR12P processed_ chr13     | 99407781 | 99409062 | - | 0     | 0     |
| ENSG0000(RP11-575B lincRNA chr1      | 60114875 | 60149679 | + | 0     | 0     |
| ENSG0000(OR2W3 protein_co chr1       | 2.48E+08 | 2.48E+08 | + | 0.65  | 0.65  |
| ENSG0000(GABARAPL processed_ chr15   | 90348844 | 90349197 | - | 0     | 0     |
| ENSG0000(MYO5BP2 processed_ chr9     | 62857208 | 62858484 | + | 0     | 0     |
| ENSG0000(RP11-575A antisense chr10   | 20070805 | 20091784 | - | 0     | 0     |
| ENSG0000(GS1-309P1 processed_ chrX   | 27517884 | 27519759 | + | 0     | 0     |
| ENSG0000(HMGN2P1 processed_ chr1     | 8893409  | 8894151  | + | 0     | 0.1   |
| ENSG0000(ST6GAL2-IT sense_intrε chr2 | 1.07E+08 | 1.07E+08 | - | 0     | 0     |
| ENSG0000(RP11-172F processed_ chr9   | 96407284 | 96407797 | + | 0     | 0     |
| ENSG0000(CTC-431G1 processed_ chr5   | 79849552 | 79849846 | - | 0     | 0     |
| ENSG0000(MTND5P2C processed_ chr1    | 1.14E+08 | 1.14E+08 | - | 0     | 0     |
| ENSG0000(AP000244. unprocessε chr21  | 30762682 | 30762882 | - | 0     | 0     |
| ENSG0000(RP11-342D antisense chr10   | 33211277 | 33213804 | + | 0.58  | 0.54  |
| ENSG0000(AC067940. processed_ chr2   | 1.68E+08 | 1.68E+08 | - | 0     | 0     |
| ENSG0000(RP11-46F1 antisense chr1    | 3623190  | 3624743  | - | 0.11  | 0.49  |
| ENSG0000(NTM-IT sense_intrε chr11    | 1.32E+08 | 1.32E+08 | + | 0     | 0     |
| ENSG0000(RPL21P88 processed_ chr10   | 43630947 | 43631382 | + | 0     | 0     |
| ENSG0000(LINC00317 lincRNA chr21     | 21723293 | 21737319 | - | 0     | 0     |
| ENSG0000(LINC00707 lincRNA chr10     | 6779598  | 6842906  | + | 0.02  | 0.02  |
| ENSG0000(RP11-241K processed_ chr3   | 39338129 | 39338879 | - | 0     | 0     |
| ENSG0000(PAGE2B protein_co chrX      | 55075063 | 55078909 | + | 0     | 0.34  |
| ENSG0000(RP11-445J lincRNA chr1      | 1.9E+08  | 1.9E+08  | - | 0     | 0     |
| ENSG0000(IFNWP19 unprocessε chr9     | 21455484 | 21456049 | + | 0     | 0     |
| ENSG0000(RP3-436N2 antisense chr1    | 1.74E+08 | 1.74E+08 | + | 0     | 0     |
| ENSG0000(AC012360. antisense chr2    | 1.05E+08 | 1.05E+08 | + | 0.03  | 0     |
| ENSG0000(HOMER2P2 processed_ chr14   | 1.06E+08 | 1.06E+08 | - | 0     | 0     |

|                                      |          |          |   |      |      |
|--------------------------------------|----------|----------|---|------|------|
| ENSG0000(RP11-245J):processed_chr10  | 1.18E+08 | 1.18E+08 | + | 0    | 0    |
| ENSG0000(AC068483):lincRNA_chr2      | 1.29E+08 | 1.29E+08 | - | 0    | 0    |
| ENSG0000(ALG1L6P):unprocessed_chr3   | 75415070 | 75422143 | + | 0    | 0    |
| ENSG0000(BX470102):antisense_chr1    | 1.54E+08 | 1.54E+08 | + | 0    | 1.06 |
| ENSG0000(RP11-436D):antisense_chr10  | 62793562 | 62805887 | - | 0    | 0    |
| ENSG0000(RP5-1164C):lincRNA_chr20    | 4475638  | 4525200  | + | 0    | 0    |
| ENSG0000(TBC1D3P1):transcribed_chr17 | 60008437 | 60017498 | - | 0    | 0    |
| ENSG0000(LINC01448):lincRNA_chr7     | 42661726 | 42706447 | - | 0.06 | 0    |
| ENSG0000(MRPL50P2):processed_chr2    | 2.03E+08 | 2.03E+08 | - | 0    | 0    |
| ENSG0000(SLC35E1P1):processed_chr13  | 20607268 | 20608131 | + | 0.22 | 0.64 |
| ENSG0000(RP11-656D):antisense_chr1   | 40493157 | 40508661 | - | 0.23 | 0.51 |
| ENSG0000(MTND3P2):unprocessed_chr9   | 92110168 | 92110514 | + | 0    | 0    |
| ENSG0000(RP11-431K):lincRNA_chr1     | 8026738  | 8122702  | + | 0.08 | 0.03 |
| ENSG0000(RP11-94M):lincRNA_chr10     | 90462717 | 90467952 | + | 0.08 | 0    |
| ENSG0000(snoU13):snoRNA_chr2         | 1.77E+08 | 1.77E+08 | - | 0    | 0    |
| ENSG0000(U3):snoRNA_chr7             | 1.08E+08 | 1.08E+08 | - | 0    | 0    |
| ENSG0000(SNORD121):snoRNA_chr9       | 33934296 | 33934376 | - | 0    | 0    |
| ENSG0000(RNU7-120F):snRNA_chr12      | 89282223 | 89282285 | - | 0    | 0    |
| ENSG0000(RNU7-50P):snRNA_chr11       | 3781395  | 3781456  | + | 0    | 0    |
| ENSG0000(snoU13):snoRNA_chr15        | 65696833 | 65696936 | - | 0    | 0    |
| ENSG0000(snoU13):snoRNA_chr1         | 26642286 | 26642389 | - | 0    | 0    |
| ENSG0000(SNORD11):snoRNA_chr2        | 2.02E+08 | 2.02E+08 | + | 0    | 0    |
| ENSG0000(RN7SKP19):misc_RNA_chr7     | 1.03E+08 | 1.03E+08 | + | 0    | 0    |
| ENSG0000(snoU13):snoRNA_chr5         | 56000518 | 56000621 | - | 0    | 0    |
| ENSG0000(SNORD126):snoRNA_chr14      | 20326450 | 20326526 | - | 0    | 0    |
| ENSG0000(RNU7-148F):snRNA_chr2       | 1.68E+08 | 1.68E+08 | - | 0    | 0    |
| ENSG0000(RP5-1121E):lincRNA_chr7     | 90119299 | 90122890 | - | 0.24 | 0.13 |
| ENSG0000(SNORA13):snoRNA_chr5        | 1.12E+08 | 1.12E+08 | + | 0    | 0    |
| ENSG0000(RNU7-140F):snRNA_chr19      | 10551033 | 10551092 | - | 0    | 0    |
| ENSG0000(RNU7-57P):snRNA_chr1        | 1.54E+08 | 1.54E+08 | + | 0    | 0    |
| ENSG0000(Y_RNA):misc_RNA_chr10       | 6245731  | 6245831  | - | 0    | 0    |
| ENSG0000(MIR2113):miRNA_chr6         | 98024531 | 98024621 | + | 0    | 0    |
| ENSG0000(RNU7-103F):snRNA_chr12      | 589530   | 589589   | - | 0    | 0    |
| ENSG0000(snoU13):snoRNA_chr2         | 15903669 | 15903772 | + | 0    | 0    |
| ENSG0000(snoU13):snoRNA_chr8         | 1.02E+08 | 1.02E+08 | - | 0    | 0    |
| ENSG0000(RNU7-180F):snRNA_chr5       | 1.46E+08 | 1.46E+08 | - | 0    | 0    |
| ENSG0000(RNA5SP10):rRNA_chr2         | 1.28E+08 | 1.28E+08 | - | 0    | 0    |
| ENSG0000(RNU7-165F):snRNA_chr10      | 1.13E+08 | 1.13E+08 | + | 0    | 0    |
| ENSG0000(RNU6-1211):snRNA_chr1       | 2.33E+08 | 2.33E+08 | + | 0    | 0    |
| ENSG0000(RNU7-48P):snRNA_chr6        | 70513294 | 70513356 | + | 0    | 0    |
| ENSG0000(snoU13):snoRNA_chr11        | 9578028  | 9578131  | + | 0    | 0    |
| ENSG0000(SNORA81):snoRNA_chr21       | 31664306 | 31664482 | + | 0    | 0    |
| ENSG0000(RNA5SP23):rRNA_chr7         | 74487428 | 74487540 | - | 0    | 0    |
| ENSG0000(MIR2053):miRNA_chr8         | 1.13E+08 | 1.13E+08 | + | 0    | 0    |
| ENSG0000(RNA5SP31):rRNA_chr10        | 46807458 | 46807573 | - | 0    | 0    |

|                     |          |       |          |          |   |   |   |
|---------------------|----------|-------|----------|----------|---|---|---|
| ENSG0000(RNU7-171F) | snRNA    | chr9  | 1.29E+08 | 1.29E+08 | + | 0 | 0 |
| ENSG0000(snoU109)   | snoRNA   | chr2  | 75489576 | 75489710 | + | 0 | 0 |
| ENSG0000(RNU7-63P)  | snRNA    | chr16 | 8705456  | 8705517  | - | 0 | 0 |
| ENSG0000(RNU7-186F) | snRNA    | chr17 | 47259358 | 47259420 | - | 0 | 0 |
| ENSG0000(RNU6-437F) | snRNA    | chr6  | 1.08E+08 | 1.08E+08 | + | 0 | 0 |
| ENSG0000(SNORD42B)  | snoRNA   | chr17 | 28720550 | 28720616 | + | 0 | 0 |
| ENSG0000(Y_RNA)     | misc_RNA | chrX  | 41316488 | 41316589 | + | 0 | 0 |
| ENSG0000(RNU7-136F) | snRNA    | chr3  | 1.6E+08  | 1.6E+08  | - | 0 | 0 |
| ENSG0000(RNU7-157F) | snRNA    | chr7  | 57227001 | 57227066 | + | 0 | 0 |
| ENSG0000(snoU13)    | snoRNA   | chr12 | 64355762 | 64355865 | - | 0 | 0 |
| ENSG0000(RNU7-130F) | snRNA    | chr5  | 35632963 | 35633024 | - | 0 | 0 |
| ENSG0000(Y_RNA)     | misc_RNA | chr12 | 1.33E+08 | 1.33E+08 | + | 0 | 0 |
| ENSG0000(RNU6-893F) | snRNA    | chr11 | 1.12E+08 | 1.12E+08 | - | 0 | 0 |
| ENSG0000(RNU7-38P)  | snRNA    | chr10 | 71844735 | 71844794 | - | 0 | 0 |
| ENSG0000(RNU7-134F) | snRNA    | chr17 | 57685529 | 57685592 | - | 0 | 0 |
| ENSG0000(RNU7-144F) | snRNA    | chr20 | 48494234 | 48494309 | - | 0 | 0 |
| ENSG0000(RNU6-1014) | snRNA    | chr15 | 46660658 | 46660760 | + | 0 | 0 |
| ENSG0000(RNU7-169F) | snRNA    | chr12 | 1.09E+08 | 1.09E+08 | + | 0 | 0 |
| ENSG0000(RNU7-14P)  | snRNA    | chr20 | 53668697 | 53668758 | - | 0 | 0 |
| ENSG0000(RNU6-498F) | snRNA    | chr15 | 20738679 | 20738785 | + | 0 | 0 |
| ENSG0000(RNU6-1208) | snRNA    | chr1  | 24777873 | 24777979 | - | 0 | 0 |
| ENSG0000(snoU13)    | snoRNA   | chrX  | 1.4E+08  | 1.4E+08  | - | 0 | 0 |
| ENSG0000(RNU6-749F) | snRNA    | chr15 | 20855251 | 20855357 | - | 0 | 0 |
| ENSG0000(Y_RNA)     | misc_RNA | chr6  | 1.08E+08 | 1.08E+08 | + | 0 | 0 |
| ENSG0000(RNU6-221F) | snRNA    | chr2  | 55456106 | 55456204 | - | 0 | 0 |
| ENSG0000(SNORD13P)  | snoRNA   | chr22 | 42076058 | 42076161 | - | 0 | 0 |
| ENSG0000(RNU7-87P)  | snRNA    | chr13 | 66630715 | 66630776 | - | 0 | 0 |
| ENSG0000(SNORD18)   | snoRNA   | chr2  | 12030303 | 12030372 | - | 0 | 0 |
| ENSG0000(RNU6-104F) | snRNA    | chr8  | 43303376 | 43303482 | + | 0 | 0 |
| ENSG0000(Y_RNA)     | misc_RNA | chr17 | 28834722 | 28834822 | + | 0 | 0 |
| ENSG0000(MIR1270)   | miRNA    | chr19 | 20399272 | 20399354 | - | 0 | 0 |
| ENSG0000(U8)        | snoRNA   | chr15 | 30384959 | 30385091 | - | 0 | 0 |
| ENSG0000(RNU7-107F) | snRNA    | chr10 | 50590652 | 50590712 | - | 0 | 0 |
| ENSG0000(RNU6-599F) | snRNA    | chr9  | 42863200 | 42863306 | + | 0 | 0 |
| ENSG0000(SNORD105)  | snoRNA   | chr19 | 10109757 | 10109835 | + | 0 | 0 |
| ENSG0000(RNU7-93P)  | snRNA    | chr14 | 36405214 | 36405274 | + | 0 | 0 |
| ENSG0000(RNU7-104F) | snRNA    | chr2  | 1.79E+08 | 1.79E+08 | - | 0 | 0 |
| ENSG0000(RNU6-1193) | snRNA    | chr9  | 64380194 | 64380300 | + | 0 | 0 |
| ENSG0000(RNU1-88P)  | snRNA    | chr6  | 36639545 | 36639672 | - | 0 | 0 |
| ENSG0000(RNU7-21P)  | snRNA    | chr9  | 1.33E+08 | 1.33E+08 | + | 0 | 0 |
| ENSG0000(Y_RNA)     | misc_RNA | chr7  | 76523605 | 76523706 | + | 0 | 0 |
| ENSG0000(RNU6ATAC)  | snRNA    | chr14 | 83750384 | 83750501 | + | 0 | 0 |
| ENSG0000(RNU7-159F) | snRNA    | chr11 | 1.03E+08 | 1.03E+08 | - | 0 | 0 |
| ENSG0000(snoU13)    | snoRNA   | chr2  | 1.62E+08 | 1.62E+08 | + | 0 | 0 |
| ENSG0000(snoU109)   | snoRNA   | chr18 | 2555358  | 2555492  | + | 0 | 0 |

|                     |          |       |          |          |   |   |   |
|---------------------|----------|-------|----------|----------|---|---|---|
| ENSG0000(SNORD4A)   | snoRNA   | chr17 | 28722582 | 28722653 | + | 0 | 0 |
| ENSG0000(RNU7-167F) | snRNA    | chr22 | 35249772 | 35249833 | + | 0 | 0 |
| ENSG0000(Y_RNA)     | misc_RNA | chr4  | 55501595 | 55501708 | - | 0 | 0 |
| ENSG0000(RNU7-54P)  | snRNA    | chr7  | 1.28E+08 | 1.28E+08 | - | 0 | 0 |
| ENSG0000(snoU13)    | snoRNA   | chr6  | 1.5E+08  | 1.5E+08  | + | 0 | 0 |
| ENSG0000(SNORD4B)   | snoRNA   | chr17 | 28723682 | 28723753 | + | 0 | 0 |
| ENSG0000(RNU7-7P)   | snRNA    | chrX  | 38608215 | 38608276 | + | 0 | 0 |
| ENSG0000(RNU7-94P)  | snRNA    | chr12 | 1.06E+08 | 1.06E+08 | - | 0 | 0 |
| ENSG0000(RNU7-26P)  | snRNA    | chr6  | 27897504 | 27897566 | - | 0 | 0 |
| ENSG0000(RNU6-300F) | snRNA    | chr6  | 1.51E+08 | 1.51E+08 | + | 0 | 0 |
| ENSG0000(RNU6-775F) | snRNA    | chr2  | 55451004 | 55451099 | - | 0 | 0 |
| ENSG0000(SNORD97)   | snoRNA   | chr11 | 10801467 | 10801608 | - | 0 | 0 |
| ENSG0000(RNA5SP48)  | rRNA     | chr21 | 25202207 | 25202315 | + | 0 | 0 |
| ENSG0000(snoU13)    | snoRNA   | chr6  | 87720915 | 87721018 | + | 0 | 0 |
| ENSG0000(RNU7-126F) | snRNA    | chr4  | 25598564 | 25598625 | - | 0 | 0 |
| ENSG0000(snoU13)    | snoRNA   | chr16 | 53334562 | 53334664 | + | 0 | 0 |
| ENSG0000(SNORD42A)  | snoRNA   | chr17 | 28723429 | 28723492 | + | 0 | 0 |
| ENSG0000(SNORD54)   | snoRNA   | chr8  | 56073835 | 56073901 | - | 0 | 0 |
| ENSG0000(RNU7-62P)  | snRNA    | chr1  | 64384398 | 64384459 | - | 0 | 0 |
| ENSG0000(RNU6-625F) | snRNA    | chr17 | 78066947 | 78067053 | + | 0 | 0 |
| ENSG0000(RNU6-333F) | snRNA    | chr12 | 53138545 | 53138651 | - | 0 | 0 |
| ENSG0000(RNU6-103)  | snRNA    | chr18 | 66946116 | 66946222 | + | 0 | 0 |
| ENSG0000(ACA64)     | snoRNA   | chr16 | 12297197 | 12297323 | - | 0 | 0 |
| ENSG0000(snoU13)    | snoRNA   | chr4  | 34966241 | 34966344 | - | 0 | 0 |
| ENSG0000(RNU6-261F) | snRNA    | chr6  | 76446988 | 76447089 | - | 0 | 0 |
| ENSG0000(RNU7-147F) | snRNA    | chr2  | 1.99E+08 | 1.99E+08 | + | 0 | 0 |
| ENSG0000(RNU7-97P)  | snRNA    | chr17 | 42440198 | 42440259 | - | 0 | 0 |
| ENSG0000(MIR1976)   | miRNA    | chr1  | 26554542 | 26554593 | + | 0 | 0 |
| ENSG0000(SNORD2)    | snoRNA   | chr10 | 56595963 | 56596031 | - | 0 | 0 |
| ENSG0000(RNU7-56P)  | snRNA    | chrX  | 16767844 | 16767905 | + | 0 | 0 |
| ENSG0000(RNY4P25)   | misc_RNA | chr1  | 1.51E+08 | 1.51E+08 | + | 0 | 0 |
| ENSG0000(Y_RNA)     | misc_RNA | chr4  | 1.45E+08 | 1.45E+08 | - | 0 | 0 |
| ENSG0000(RNU7-96P)  | snRNA    | chr2  | 97913054 | 97913117 | - | 0 | 0 |
| ENSG0000(RNU7-194F) | snRNA    | chr4  | 1.5E+08  | 1.5E+08  | + | 0 | 0 |
| ENSG0000(Y_RNA)     | misc_RNA | chr17 | 46215070 | 46215171 | - | 0 | 0 |
| ENSG0000(snoU13)    | snoRNA   | chr11 | 1.15E+08 | 1.15E+08 | + | 0 | 0 |
| ENSG0000(MIR1972-1) | miRNA    | chr16 | 15010321 | 15010397 | - | 0 | 0 |
| ENSG0000(RNU7-164F) | snRNA    | chrX  | 40535502 | 40535563 | - | 0 | 0 |
| ENSG0000(RNU7-90P)  | snRNA    | chr16 | 72673503 | 72673564 | + | 0 | 0 |
| ENSG0000(RNU7-113F) | snRNA    | chr2  | 20246326 | 20246387 | - | 0 | 0 |
| ENSG0000(SCARNA7)   | scaRNA   | chr3  | 1.61E+08 | 1.61E+08 | - | 0 | 0 |
| ENSG0000(snoU13)    | snoRNA   | chr5  | 1.39E+08 | 1.39E+08 | + | 0 | 0 |
| ENSG0000(Y_RNA)     | misc_RNA | chr9  | 61883640 | 61883751 | - | 0 | 0 |
| ENSG0000(RNU7-27P)  | snRNA    | chr7  | 1.28E+08 | 1.28E+08 | + | 0 | 0 |
| ENSG0000(SCARNA18)  | snoRNA   | chr1  | 1.93E+08 | 1.93E+08 | - | 0 | 0 |

|                                    |          |          |   |      |      |
|------------------------------------|----------|----------|---|------|------|
| ENSG0000(LINC02006 processed_ chr3 | 1.53E+08 | 1.54E+08 | - | 0    | 0.09 |
| ENSG0000(RNU7-155F snRNA chr17     | 71298156 | 71298218 | - | 0    | 0    |
| ENSG0000(snoU13 snoRNA chr1        | 1.12E+08 | 1.12E+08 | + | 0    | 0    |
| ENSG0000(snoU13 snoRNA chrX        | 17357930 | 17358033 | + | 0    | 0    |
| ENSG0000(RNA5SP57 rRNA chr1        | 1.48E+08 | 1.48E+08 | + | 0    | 0    |
| ENSG0000(RNU7-141F snRNA chr20     | 59852667 | 59852728 | - | 0    | 0    |
| ENSG0000(RNU7-80P snRNA chr1       | 67772593 | 67772653 | - | 0    | 0    |
| ENSG0000(RNU7-9P snRNA chr2        | 2.3E+08  | 2.3E+08  | + | 0    | 0    |
| ENSG0000(Y_RNA misc_RNA chr15      | 30355436 | 30355540 | + | 0    | 0    |
| ENSG0000(RNU7-92P snRNA chr20      | 47904348 | 47904423 | + | 0    | 0    |
| ENSG0000(RNU7-182F snRNA chr2      | 1.27E+08 | 1.27E+08 | + | 0    | 0    |
| ENSG0000(RNU7-152F snRNA chr6      | 1.56E+08 | 1.56E+08 | - | 0    | 0    |
| ENSG0000(SNORD124 snoRNA chr17     | 40027542 | 40027645 | - | 0    | 0    |
| ENSG0000(SCARNA12 snoRNA chr12     | 6967337  | 6967606  | - | 1.23 | 0    |
| ENSG0000(Y_RNA misc_RNA chr4       | 39441665 | 39441764 | + | 0    | 0    |
| ENSG0000(snoU13 snoRNA chr17       | 48956650 | 48956753 | - | 0    | 0    |
| ENSG0000(RNU7-102F snRNA chr8      | 69110513 | 69110574 | - | 0    | 0    |
| ENSG0000(RNU7-127F snRNA chr2      | 2.36E+08 | 2.36E+08 | + | 0    | 0    |
| ENSG0000(Y_RNA misc_RNA chr2       | 1.66E+08 | 1.66E+08 | - | 0    | 0    |
| ENSG0000(SNORD11 snoRNA chr15      | 46351662 | 46351746 | - | 0    | 0    |
| ENSG0000(RNU1-13P snRNA chr1       | 1.48E+08 | 1.48E+08 | - | 0    | 0    |
| ENSG0000(RNU7-45P snRNA chr2       | 2.01E+08 | 2.01E+08 | + | 0    | 0    |
| ENSG0000(RNU7-46P snRNA chr2       | 98840675 | 98840736 | - | 0    | 0    |
| ENSG0000(snoU109 snoRNA chr7       | 1.08E+08 | 1.08E+08 | + | 0    | 0    |
| ENSG0000(RNU1-131F snRNA chr20     | 17209060 | 17209220 | + | 0    | 0    |
| ENSG0000(SCARNA18 snoRNA chr5      | 83064204 | 83064337 | - | 0    | 0    |
| ENSG0000(LINC02031 lincRNA chr3    | 1.83E+08 | 1.83E+08 | + | 0    | 0    |
| ENSG0000(U8 snoRNA chr10           | 4962436  | 4962568  | - | 0    | 0    |
| ENSG0000(RNU7-106F snRNA chr12     | 80068691 | 80068757 | - | 0    | 0    |
| ENSG0000(Y_RNA misc_RNA chr15      | 44843612 | 44843724 | + | 0    | 0    |
| ENSG0000(SNORD5 snoRNA chr8        | 1.41E+08 | 1.41E+08 | + | 0    | 0    |
| ENSG0000(SNORD19B snoRNA chr3      | 52690744 | 52690827 | + | 0    | 0    |
| ENSG0000(RN7SKP21( misc_RNA chr22  | 39874255 | 39874515 | - | 0    | 0    |
| ENSG0000(RNU7-59P snRNA chr11      | 77566934 | 77566994 | - | 0    | 0    |
| ENSG0000(RNU6-329F snRNA chr9      | 1.02E+08 | 1.02E+08 | + | 0    | 0    |
| ENSG0000(RNU7-85P snRNA chr8       | 79800133 | 79800195 | - | 0    | 0    |
| ENSG0000(SNORD121 snoRNA chr9      | 33952769 | 33952850 | - | 0    | 0    |
| ENSG0000(RNU1-80P snRNA chr17      | 77920098 | 77920258 | + | 0    | 0    |
| ENSG0000(snoU13 snoRNA chr8        | 1.23E+08 | 1.23E+08 | + | 0    | 0    |
| ENSG0000(snoU13 snoRNA chr3        | 1.93E+08 | 1.93E+08 | - | 0    | 0    |
| ENSG0000(RNU7-34P snRNA chr5       | 1.19E+08 | 1.19E+08 | + | 0    | 0    |
| ENSG0000(snoU13 snoRNA chr7        | 29912528 | 29912632 | + | 0    | 0    |
| ENSG0000(RNA5SP48( rRNA chr20      | 40854119 | 40854229 | - | 0    | 0    |
| ENSG0000(Y_RNA misc_RNA chr3       | 27547757 | 27547858 | - | 0    | 0    |
| ENSG0000(RNU7-196F snRNA chr5      | 73828012 | 73828073 | - | 0    | 0    |

|                    |          |       |          |          |   |   |      |
|--------------------|----------|-------|----------|----------|---|---|------|
| ENSG0000(SNORD10   | snoRNA   | chr17 | 7576811  | 7576952  | + | 0 | 4.37 |
| ENSG0000(RNU7-1    | snRNA    | chr12 | 6943816  | 6943878  | + | 0 | 0    |
| ENSG0000(RNU7-82P  | snRNA    | chr3  | 1.63E+08 | 1.63E+08 | - | 0 | 0    |
| ENSG0000(Y_RNA     | misc_RNA | chrX  | 72284945 | 72285045 | - | 0 | 0    |
| ENSG0000(Y_RNA     | misc_RNA | chr9  | 61642383 | 61642494 | + | 0 | 0    |
| ENSG0000(ACA64     | snoRNA   | chr1  | 1.61E+08 | 1.61E+08 | - | 0 | 0    |
| ENSG0000(SNORD65   | snoRNA   | chr8  | 41426655 | 41426727 | + | 0 | 0    |
| ENSG0000(RNU6-953F | snRNA    | chr15 | 45354779 | 45354885 | - | 0 | 0    |
| ENSG0000(SNORD2    | snoRNA   | chr3  | 1.87E+08 | 1.87E+08 | + | 0 | 0    |
| ENSG0000(Y_RNA     | misc_RNA | chr12 | 8592476  | 8592585  | + | 0 | 0    |
| ENSG0000(RNU7-66P  | snRNA    | chr6  | 66728843 | 66728904 | - | 0 | 0    |
| ENSG0000(RNU7-173F | snRNA    | chr20 | 47826969 | 47827044 | - | 0 | 0    |
| ENSG0000(RNU7-19P  | snRNA    | chr3  | 73027808 | 73027873 | + | 0 | 0    |
| ENSG0000(SNORA47   | snoRNA   | chr5  | 77080434 | 77080571 | - | 0 | 4.48 |
| ENSG0000(RNU7-176F | snRNA    | chr2  | 10815485 | 10815546 | - | 0 | 0    |
| ENSG0000(U8        | snoRNA   | chr6  | 1.55E+08 | 1.55E+08 | - | 0 | 0    |
| ENSG0000(RNU7-125F | snRNA    | chr16 | 14643788 | 14643849 | + | 0 | 0    |
| ENSG0000(RNA5SP35: | rRNA     | chr11 | 1.12E+08 | 1.12E+08 | + | 0 | 0    |
| ENSG0000(SNORD112  | snoRNA   | chr8  | 42043504 | 42043575 | - | 0 | 0    |
| ENSG0000(RNU7-133F | snRNA    | chr6  | 14156462 | 14156523 | + | 0 | 0    |
| ENSG0000(RNU7-187F | snRNA    | chr11 | 1.13E+08 | 1.13E+08 | + | 0 | 0    |
| ENSG0000(RNU6-420F | snRNA    | chr4  | 22118983 | 22119089 | + | 0 | 0    |
| ENSG0000(SCARNA10  | snoRNA   | chr12 | 6510222  | 6510551  | + | 0 | 0    |
| ENSG0000(RNU7-88P  | snRNA    | chr13 | 59480070 | 59480132 | + | 0 | 0    |
| ENSG0000(ACA64     | snoRNA   | chr4  | 1.39E+08 | 1.39E+08 | - | 0 | 0    |
| ENSG0000(RNU7-95P  | snRNA    | chr1  | 53688749 | 53688812 | - | 0 | 0    |
| ENSG0000(ACA64     | snoRNA   | chrX  | 80857076 | 80857202 | - | 0 | 0    |
| ENSG0000(RNU7-74P  | snRNA    | chr4  | 40377452 | 40377513 | - | 0 | 0    |
| ENSG0000(SNORD108  | snoRNA   | chr15 | 24986925 | 24986995 | + | 0 | 0    |
| ENSG0000(RNA5SP24: | rRNA     | chr7  | 1.31E+08 | 1.31E+08 | - | 0 | 0    |
| ENSG0000(RNU1-98P  | snRNA    | chr21 | 16718998 | 16719157 | + | 0 | 0    |
| ENSG0000(RNU6-956F | snRNA    | chr7  | 94712409 | 94712511 | + | 0 | 0    |
| ENSG0000(snoU13    | snoRNA   | chr15 | 57278570 | 57278673 | - | 0 | 0    |
| ENSG0000(SNORD13   | snoRNA   | chr8  | 33513475 | 33513578 | + | 0 | 0    |
| ENSG0000(Y_RNA     | misc_RNA | chr4  | 55412636 | 55412738 | + | 0 | 0    |
| ENSG0000(snoU13    | snoRNA   | chr2  | 1.73E+08 | 1.73E+08 | + | 0 | 0    |
| ENSG0000(SNORD127  | snoRNA   | chr14 | 45110883 | 45110968 | + | 0 | 0    |
| ENSG0000(RNU7-138F | snRNA    | chr2  | 10744186 | 10744249 | + | 0 | 0    |
| ENSG0000(MIR500B   | miRNA    | chrX  | 50010672 | 50010750 | + | 0 | 0    |
| ENSG0000(Y_RNA     | misc_RNA | chr7  | 74895816 | 74895917 | + | 0 | 0    |
| ENSG0000(RNU6-274F | snRNA    | chr7  | 89754620 | 89754726 | - | 0 | 0    |
| ENSG0000(RNU7-55P  | snRNA    | chr8  | 9072455  | 9072516  | - | 0 | 0    |
| ENSG0000(snoU13    | snoRNA   | chr11 | 1.23E+08 | 1.23E+08 | - | 0 | 0    |
| ENSG0000(snoU13    | snoRNA   | chrX  | 1.36E+08 | 1.36E+08 | - | 0 | 0    |
| ENSG0000(RNU7-24P  | snRNA    | chr16 | 24400056 | 24400117 | - | 0 | 0    |

|                     |            |       |          |          |   |      |      |
|---------------------|------------|-------|----------|----------|---|------|------|
| ENSG0000(RNU7-170F) | snRNA      | chr12 | 1.22E+08 | 1.22E+08 | + | 0    | 0    |
| ENSG0000(snoU13)    | snoRNA     | chr3  | 1.87E+08 | 1.87E+08 | + | 0    | 0    |
| ENSG0000(snoU13)    | snoRNA     | chr3  | 1.8E+08  | 1.8E+08  | - | 0    | 0    |
| ENSG0000(RNU7-23P)  | snRNA      | chr11 | 66919762 | 66919823 | + | 0    | 0    |
| ENSG0000(RNU7-185F) | snRNA      | chr9  | 8797135  | 8797194  | + | 0    | 0    |
| ENSG0000(RNU7-73P)  | snRNA      | chr3  | 37573151 | 37573213 | - | 0    | 0    |
| ENSG0000(Y_RNA)     | misc_RNA   | chr1  | 24625411 | 24625513 | - | 0    | 0    |
| ENSG0000(RNU6-113Z) | snRNA      | chr2  | 1.32E+08 | 1.32E+08 | - | 0    | 0    |
| ENSG0000(SNORD123)  | snoRNA     | chr5  | 9548836  | 9548905  | + | 0    | 0    |
| ENSG0000(RNU7-67P)  | snRNA      | chr8  | 1.01E+08 | 1.01E+08 | + | 0    | 0    |
| ENSG0000(MIR1972-2) | miRNA      | chr16 | 70030346 | 70030422 | + | 0    | 0    |
| ENSG0000(RNU7-119F) | snRNA      | chr3  | 73593940 | 73594002 | - | 0    | 0    |
| ENSG0000(RNU2-11P)  | snRNA      | chr3  | 1.96E+08 | 1.96E+08 | - | 0    | 0    |
| ENSG0000(SNORD125)  | snoRNA     | chr22 | 29333163 | 29333258 | - | 0    | 0    |
| ENSG0000(SNORD13P)  | snoRNA     | chr3  | 47250523 | 47250626 | - | 0    | 0    |
| ENSG0000(snoU13)    | snoRNA     | chr17 | 29883006 | 29883109 | + | 0    | 0    |
| ENSG0000(snoU13)    | snoRNA     | chr19 | 55167171 | 55167274 | + | 0    | 0    |
| ENSG0000(U8)        | snoRNA     | chr10 | 5093408  | 5093543  | - | 0    | 0    |
| ENSG0000(Y_RNA)     | misc_RNA   | chr2  | 85332895 | 85332996 | - | 0    | 0    |
| ENSG0000(U8)        | snoRNA     | chr10 | 5004710  | 5004842  | + | 0    | 0    |
| ENSG0000(SNORA59A)  | snoRNA     | chr1  | 12507246 | 12507397 | + | 0    | 0    |
| ENSG0000(RNU7-195F) | snRNA      | chr15 | 89120779 | 89120840 | + | 0    | 0    |
| ENSG0000(RNA5SP31)  | rRNA       | chr10 | 45856307 | 45856422 | + | 0    | 0    |
| ENSG0000(snoU13)    | snoRNA     | chr11 | 1.16E+08 | 1.16E+08 | - | 0    | 0    |
| ENSG0000(RNU7-197F) | snRNA      | chr4  | 1.49E+08 | 1.49E+08 | - | 0    | 0    |
| ENSG0000(SNORD109)  | snoRNA     | chr15 | 25278343 | 25278409 | + | 0    | 0    |
| ENSG0000(RNU6-121F) | snRNA      | chr8  | 30043801 | 30043908 | - | 0    | 0    |
| ENSG0000(Y_RNA)     | misc_RNA   | chr9  | 70311607 | 70311701 | - | 0    | 0    |
| ENSG0000(SNORA35)   | snoRNA     | chrX  | 1.19E+08 | 1.19E+08 | + | 0    | 0    |
| ENSG0000(SNORA84)   | snoRNA     | chr9  | 92292461 | 92292593 | - | 0    | 0    |
| ENSG0000(RNA5SP26)  | rRNA       | chr8  | 68695643 | 68695779 | + | 0    | 0    |
| ENSG0000(RNU7-190F) | snRNA      | chr2  | 1.17E+08 | 1.17E+08 | - | 0    | 0    |
| ENSG0000(RNU6-634F) | snRNA      | chr2  | 55499950 | 55500055 | + | 0    | 0    |
| ENSG0000(RNU6-717F) | snRNA      | chr12 | 1.33E+08 | 1.33E+08 | - | 0    | 0    |
| ENSG0000(RNU1-123F) | snRNA      | chr16 | 67390691 | 67390850 | - | 0    | 0    |
| ENSG0000(SNORD5)    | snoRNA     | chr11 | 93733228 | 93733300 | - | 0    | 0    |
| ENSG0000(snoU109)   | snoRNA     | chr15 | 92417547 | 92417689 | + | 0    | 0    |
| ENSG0000(RPL5P22)   | processed_ | chr8  | 28299683 | 28300566 | + | 0    | 0    |
| ENSG0000(RPL21P6)   | processed_ | chr14 | 55413556 | 55414059 | - | 0    | 0    |
| ENSG0000(RP11-536C) | processed_ | chr14 | 18692032 | 18692408 | + | 0.24 | 0    |
| ENSG0000(RPL21P106) | processed_ | chr12 | 92168400 | 92168877 | + | 0    | 0    |
| ENSG0000(RN7SL499F) | misc_RNA   | chr2  | 2.32E+08 | 2.32E+08 | - | 0    | 0    |
| ENSG0000(AC093484)  | processed_ | chr17 | 16427474 | 16428719 | + | 0.34 | 0.19 |
| ENSG0000(LINC02023) | lincRNA    | chr3  | 1.65E+08 | 1.65E+08 | - | 0    | 0    |
| ENSG0000(GAPDHP39)  | processed_ | chr3  | 1.39E+08 | 1.39E+08 | + | 0    | 0    |

|                     |                  |          |          |   |        |        |
|---------------------|------------------|----------|----------|---|--------|--------|
| ENSG0000(RPS26P55)  | processed_chr19  | 34533427 | 34534084 | - | 0      | 0      |
| ENSG0000(RN7SL563F) | misc_RNA_chr8    | 1.01E+08 | 1.01E+08 | - | 0      | 0      |
| ENSG0000(RPL6P7)    | processed_chr3   | 1.56E+08 | 1.56E+08 | + | 0      | 0      |
| ENSG0000(NCK1-AS1)  | antisense_chr3   | 1.37E+08 | 1.37E+08 | - | 0.65   | 0.38   |
| ENSG0000(RPL27P12)  | processed_chr12  | 1.24E+08 | 1.24E+08 | - | 0      | 0      |
| ENSG0000(RP4-712E4) | lincRNA_chr1     | 1.19E+08 | 1.19E+08 | - | 0      | 0      |
| ENSG0000(RPS20P22)  | transcribed_chr8 | 38434347 | 38435664 | - | 0.53   | 0.54   |
| ENSG0000(RP11-379K) | antisense_chr3   | 1.7E+08  | 1.7E+08  | - | 0.01   | 0      |
| ENSG0000(RN7SL442F) | misc_RNA_chr17   | 16191832 | 16192151 | + | 0      | 0      |
| ENSG0000(RPL34P31)  | processed_chr17  | 27274107 | 27274477 | + | 0      | 0      |
| ENSG0000(RN7SL546F) | misc_RNA_chr14   | 1.03E+08 | 1.03E+08 | - | 0      | 0      |
| ENSG0000(TTTY23)    | lincRNA_chrY     | 9910798  | 9911962  | + | 0      | 0      |
| ENSG0000(MRPS17P3)  | processed_chr3   | 78525101 | 78525485 | + | 0      | 0      |
| ENSG0000(RP11-12K1) | processed_chr3   | 1.67E+08 | 1.67E+08 | + | 0      | 0      |
| ENSG0000(RN7SL578F) | misc_RNA_chrX    | 3058220  | 3058502  | - | 0      | 0      |
| ENSG0000(MEMO1P3)   | processed_chr3   | 1.68E+08 | 1.68E+08 | + | 0      | 0      |
| ENSG0000(RP11-464D) | processed_chr17  | 62516321 | 62516767 | - | 0      | 0      |
| ENSG0000(RN7SL589F) | misc_RNA_chr4    | 2316197  | 2316506  | - | 0      | 0      |
| ENSG0000(RN7SL757F) | misc_RNA_chr22   | 28056153 | 28056453 | - | 0      | 0      |
| ENSG0000(RN7SL271F) | misc_RNA_chr3    | 71827177 | 71827471 | + | 0      | 0      |
| ENSG0000(RPS4XP23)  | processed_chr19  | 34021659 | 34021895 | + | 0      | 0      |
| ENSG0000(RP11-365F) | processed_chr7   | 1.39E+08 | 1.39E+08 | - | 0      | 0.04   |
| ENSG0000(RP11-145N) | processed_chr3   | 1.79E+08 | 1.79E+08 | - | 0      | 0      |
| ENSG0000(RPL35AP35) | processed_chr17  | 29340482 | 29340822 | - | 0      | 0      |
| ENSG0000(RPL23AP1)  | transcribed_chr6 | 29726669 | 29727139 | - | 1.5    | 2.14   |
| ENSG0000(RPL31P41)  | processed_chr8   | 65155407 | 65155778 | + | 0      | 0      |
| ENSG0000(RBM43P1)   | processed_chr3   | 69471452 | 69472532 | - | 0      | 0      |
| ENSG0000(TXNDC5)    | protein_co_chr6  | 7881517  | 7910814  | - | 245.46 | 230.81 |
| ENSG0000(CLRN1-AS1) | antisense_chr3   | 1.51E+08 | 1.51E+08 | + | 0      | 0      |
| ENSG0000(RP11-384F) | lincRNA_chr3     | 1.18E+08 | 1.18E+08 | - | 0      | 0      |
| ENSG0000(RPSAP4)    | processed_chr14  | 94726288 | 94727175 | + | 0      | 0      |
| ENSG0000(RPL21P10)  | processed_chr14  | 77683202 | 77683989 | - | 0      | 0.17   |
| ENSG0000(RN7SL184F) | misc_RNA_chr4    | 1.13E+08 | 1.13E+08 | + | 0      | 0      |
| ENSG0000(RP11-271C) | processed_chr3   | 1.14E+08 | 1.14E+08 | - | 0      | 0      |
| ENSG0000(RPS29P2)   | processed_chr8   | 41271431 | 41271566 | + | 0      | 0      |
| ENSG0000(GATS�3)    | protein_co_chr22 | 30285117 | 30289627 | - | 2.96   | 2.41   |
| ENSG0000(RP11-59E1) | processed_chr3   | 1.09E+08 | 1.09E+08 | + | 0      | 0      |
| ENSG0000(RP5-867C2) | processed_chr17  | 47159191 | 47159993 | - | 0      | 0      |
| ENSG0000(OR9P1P)    | unprocessed_chr7 | 1.43E+08 | 1.43E+08 | - | 0      | 0      |
| ENSG0000(RP11-400L) | antisense_chr2   | 9505445  | 9512412  | + | 0      | 0      |
| ENSG0000(DNM1P48)   | processed_chrY   | 25486640 | 25487322 | + | 0      | 0      |
| ENSG0000(RNF103)    | protein_co_chr2  | 86603393 | 86623866 | - | 15.6   | 13.75  |
| ENSG0000(RBM14)     | protein_co_chr11 | 66616582 | 66627347 | + | 12.4   | 11.14  |
| ENSG0000(RP11-615J) | lincRNA_chr3     | 1.11E+08 | 1.11E+08 | - | 0      | 0      |
| ENSG0000(MORC1-AS)  | antisense_chr3   | 1.09E+08 | 1.09E+08 | + | 0      | 0      |



|                                      |          |          |   |       |       |
|--------------------------------------|----------|----------|---|-------|-------|
| ENSG0000(RPL19P13 processed_ chr8    | 11256020 | 11256602 | + | 0     | 0     |
| ENSG0000(RN7SL11P misc_RNA chr6      | 89478141 | 89478433 | + | 0     | 0     |
| ENSG0000(RP11-449H processed_ chr5   | 1.46E+08 | 1.46E+08 | + | 0     | 0     |
| ENSG0000(RN7SL854F misc_RNA chr1     | 65761058 | 65761352 | - | 0     | 0     |
| ENSG0000(RPS29P26 processed_ chr19   | 39597832 | 39598002 | + | 0     | 0     |
| ENSG0000(ATP6V1B1- antisense chr2    | 70941817 | 70948610 | - | 0     | 0     |
| ENSG0000(CTD-2213F processed_ chr14  | 31462795 | 31463371 | - | 0     | 0     |
| ENSG0000(RP11-14J7. processed_ chr14 | 20616644 | 20616991 | - | 0     | 0     |
| ENSG0000(LINC01119 lincRNA chr2      | 46816697 | 46859007 | + | 4.66  | 3.23  |
| ENSG0000(RN7SL658F misc_RNA chrX     | 16539137 | 16539439 | - | 0     | 0     |
| ENSG0000(LLPH-AS1 antisense chr12    | 66130751 | 66134449 | + | 0     | 0     |
| ENSG0000(RP11-771F processed_ chr8   | 1.04E+08 | 1.04E+08 | + | 0     | 0     |
| ENSG0000(HNRNPA1F processed_ chrX    | 1.01E+08 | 1.01E+08 | - | 0     | 0.06  |
| ENSG0000(RP11-398A processed_ chr3   | 72085109 | 72085287 | + | 0     | 0     |
| ENSG0000(NPM1P29 processed_ chr3     | 1.5E+08  | 1.5E+08  | - | 0     | 0     |
| ENSG0000(RPS17P15 processed_ chr11   | 1.11E+08 | 1.11E+08 | - | 0     | 0     |
| ENSG0000(RN7SL309F misc_RNA chr11    | 65695552 | 65695837 | + | 0     | 0     |
| ENSG0000(RPS26P49 processed_ chr14   | 1.05E+08 | 1.05E+08 | - | 0     | 0     |
| ENSG0000(RN7SL477F misc_RNA chr19    | 1570575  | 1570860  | - | 0     | 0     |
| ENSG0000(RP11-407P processed_ chr12  | 1.17E+08 | 1.17E+08 | - | 0     | 0     |
| ENSG0000(RP4-584D1 antisense chr7    | 1.5E+08  | 1.5E+08  | - | 0     | 0     |
| ENSG0000(RP11-4B14 lincRNA chr3      | 1.82E+08 | 1.82E+08 | - | 0     | 0     |
| ENSG0000(ALKBH6 protein_co chr19     | 36009120 | 36014239 | - | 11.83 | 12.72 |
| ENSG0000(RP11-413E processed_ chr3   | 75590298 | 75590649 | - | 0     | 0     |
| ENSG0000(ASB14 protein_co chr3       | 57268347 | 57292682 | - | 0     | 0     |
| ENSG0000(PCDHA13 protein_co chr5     | 1.41E+08 | 1.41E+08 | + | 0     | 0.02  |
| ENSG0000(RN7SL87P misc_RNA chr5      | 1.44E+08 | 1.44E+08 | + | 0     | 0     |
| ENSG0000(RP11-537H processed_ chr9   | 34133157 | 34134696 | - | 0     | 0.04  |
| ENSG0000(CTD-2301A processed_ chr5   | 1.77E+08 | 1.77E+08 | + | 0     | 0     |
| ENSG0000(RP11-634B processed_ chr1   | 2.48E+08 | 2.48E+08 | - | 0     | 0     |
| ENSG0000(RN7SL414F misc_RNA chr2     | 45569199 | 45569492 | - | 0     | 0     |
| ENSG0000(RP11-101K processed_ chr12  | 46004038 | 46004685 | - | 0     | 0     |
| ENSG0000(RN7SL342F misc_RNA chr18    | 59972914 | 59973207 | + | 0     | 0     |
| ENSG0000(CYP4F62P transcribed chr2   | 1.3E+08  | 1.3E+08  | - | 0     | 0     |
| ENSG0000(TMED10P2 processed_ chr3    | 1.29E+08 | 1.29E+08 | + | 0.34  | 0.37  |
| ENSG0000(LLOXNC01- lincRNA chrX      | 1.03E+08 | 1.03E+08 | + | 0.63  | 1.22  |
| ENSG0000(RP11-278L. processed_ chr3  | 1.49E+08 | 1.49E+08 | - | 0     | 0     |
| ENSG0000(RPL21P71 processed_ chr3    | 1.47E+08 | 1.47E+08 | + | 0     | 0.19  |
| ENSG0000(RPS27P23 processed_ chr12   | 1.01E+08 | 1.01E+08 | + | 0     | 0.58  |
| ENSG0000(AP001469. antisense chr21   | 46251549 | 46254133 | - | 0.06  | 0     |
| ENSG0000(RN7SL535F misc_RNA chr7     | 1.43E+08 | 1.43E+08 | + | 0     | 0     |
| ENSG0000(OR8F1P unprocessed chr11    | 1.24E+08 | 1.24E+08 | + | 0     | 0     |
| ENSG0000(GM2AP2 processed_ chr1      | 1.71E+08 | 1.71E+08 | + | 0     | 0     |
| ENSG0000(RP11-45D1 unprocessed chrX  | 1.52E+08 | 1.52E+08 | + | 0     | 0     |
| ENSG0000(GS1-388B5 processed_ chr3   | 1.26E+08 | 1.26E+08 | + | 0     | 0.26  |

|                                     |          |          |   |      |      |
|-------------------------------------|----------|----------|---|------|------|
| ENSG0000(KCNMB3P1 transcribed chr22 | 16575363 | 16582707 | - | 0    | 0    |
| ENSG0000(RN7SL752F misc_RNA chr3    | 1.3E+08  | 1.3E+08  | + | 0    | 0    |
| ENSG0000(RPS26P48 processed_chr14   | 78231281 | 78231619 | - | 0    | 0    |
| ENSG0000(RFKP2 processed_chr3       | 1.12E+08 | 1.12E+08 | - | 0    | 0    |
| ENSG0000(LINC02008 lincRNA chr3     | 81986138 | 82463675 | + | 0    | 0    |
| ENSG0000(PABPC1P1 processed_chr3    | 1.55E+08 | 1.55E+08 | - | 0    | 0    |
| ENSG0000(ST3GAL6-A antisense chr3   | 98714330 | 98732651 | - | 1.37 | 1.07 |
| ENSG0000(RP1-76B20 antisense chr22  | 29711820 | 29719714 | - | 0    | 0    |
| ENSG0000(SIDT1-AS1 antisense chr3   | 1.14E+08 | 1.14E+08 | - | 0    | 0    |
| ENSG0000(LINC02047 lincRNA chr3     | 73999805 | 74005609 | + | 0    | 0    |
| ENSG0000(RP11-561C processed_chr3   | 1.07E+08 | 1.07E+08 | - | 0    | 0    |
| ENSG0000(CTD-2021J antisense chr3   | 98902424 | 99018562 | + | 0    | 0    |
| ENSG0000(RN7SL691F misc_RNA chr4    | 43598544 | 43598844 | - | 0    | 0    |
| ENSG0000(RP11-330L processed_chr15  | 64631109 | 64631914 | - | 0    | 0    |
| ENSG0000(RN7SL552F misc_RNA chr4    | 84687725 | 84688000 | - | 0    | 0    |
| ENSG0000(AC007405 lincRNA chr2      | 1.71E+08 | 1.71E+08 | + | 0.38 | 0.61 |
| ENSG0000(RN7SL569F misc_RNA chr7    | 1.49E+08 | 1.49E+08 | + | 0    | 0    |
| ENSG0000(RP11-16F1 processed_chr11  | 9660438  | 9660920  | + | 0.32 | 0    |
| ENSG0000(RN7SL584F misc_RNA chr15   | 20095733 | 20096029 | - | 0    | 0    |
| ENSG0000(RN7SL221F misc_RNA chr6    | 5918564  | 5918844  | - | 0    | 0    |
| ENSG0000(RPL7P38 processed_chr12    | 80028893 | 80029631 | + | 0    | 0    |
| ENSG0000(KLHL41 protein_co chr2     | 1.7E+08  | 1.7E+08  | + | 0.55 | 0.36 |
| ENSG0000(RP11-514P antisense chr7   | 1.02E+08 | 1.02E+08 | - | 0    | 0    |
| ENSG0000(RPS3AP41 processed_chr11   | 71669520 | 71670297 | + | 0    | 0    |
| ENSG0000(RP11-90K6 lincRNA chr3     | 1.12E+08 | 1.12E+08 | + | 0.1  | 0    |
| ENSG0000(RPS15AP1 processed_chr3    | 1.29E+08 | 1.29E+08 | - | 0    | 0    |
| ENSG0000(RP11-163E unprocessed_chr7 | 1.02E+08 | 1.02E+08 | - | 0    | 0    |
| ENSG0000(RPS4XP18 processed_chr18   | 22586465 | 22587227 | + | 0    | 0    |
| ENSG0000(RN7SL333F misc_RNA chr1    | 1.7E+08  | 1.7E+08  | + | 0    | 0    |
| ENSG0000(AC114765 lincRNA chr2      | 2.2E+08  | 2.2E+08  | + | 0    | 0    |
| ENSG0000(MARK2P8 processed_chr3     | 1.29E+08 | 1.29E+08 | - | 0    | 0    |
| ENSG0000(RN7SL583F misc_RNA chr1    | 88477828 | 88478114 | - | 0    | 0    |
| ENSG0000(PLCH1-AS1 antisense chr3   | 1.55E+08 | 1.55E+08 | + | 0    | 0    |
| ENSG0000(RPL9P5 processed_chr14     | 58564146 | 58564616 | + | 0.16 | 0.18 |
| ENSG0000(POM121L7 processed_chr22   | 21125660 | 21128063 | - | 0.11 | 0.16 |
| ENSG0000(LINC01210 lincRNA chr3     | 1.38E+08 | 1.38E+08 | + | 0    | 0    |
| ENSG0000(FLYWCH1P processed_chr3    | 1.81E+08 | 1.81E+08 | - | 0    | 0    |
| ENSG0000(CTD-2503C processed_chr5   | 74931662 | 74931817 | + | 0    | 0    |
| ENSG0000(CADM2-AS antisense chr3    | 85992183 | 86028007 | - | 0    | 0    |
| ENSG0000(GATS protein_co chr7       | 1E+08    | 1E+08    | - | 7.91 | 8.42 |
| ENSG0000(MYLK-AS1 antisense chr3    | 1.24E+08 | 1.24E+08 | + | 0.82 | 0.8  |
| ENSG0000(RPL32P34 processed_chr19   | 5277734  | 5278133  | + | 0    | 0.23 |
| ENSG0000(RPL30P5 processed_chr4     | 83502699 | 83503034 | + | 0    | 0    |
| ENSG0000(RPS23P7 processed_chr17    | 62397397 | 62398142 | + | 0    | 0    |
| ENSG0000(RPS14P8 processed_chr5     | 1.17E+08 | 1.17E+08 | + | 0    | 0    |

|                                    |          |          |   |      |      |
|------------------------------------|----------|----------|---|------|------|
| ENSG0000(RP11-9D8.:processed_chr4  | 37821361 | 37821838 | + | 0    | 0    |
| ENSG0000(GOLGA2P2.transcribec_chrY | 24209567 | 24215581 | - | 0    | 0    |
| ENSG0000(HMGN1P2(processed_chr10   | 19489101 | 19489400 | + | 0    | 0    |
| ENSG0000(RN7SL399F.misc_RNA_chr17  | 41730127 | 41730405 | - | 0    | 0    |
| ENSG0000(RP11-109N.processed_chr14 | 72963645 | 72964008 | - | 0    | 0    |
| ENSG0000(RN7SL822F.misc_RNA_chr4   | 55215624 | 55215919 | - | 0    | 0    |
| ENSG0000(RN7SL843F.misc_RNA_chr22  | 17352881 | 17353177 | - | 0    | 0    |
| ENSG0000(HOXB-AS2.antisense_chr17  | 48557262 | 48560333 | + | 0    | 0    |
| ENSG0000(RN7SL12P.misc_RNA_chr11   | 66712720 | 66713009 | - | 0    | 0    |
| ENSG0000(RN7SL841F.misc_RNA_chr16  | 55291379 | 55291675 | - | 0    | 0    |
| ENSG0000(AC004951.transcribec_chr7 | 43984994 | 43990207 | - | 0    | 0    |
| ENSG0000(RP11-168J:processed_chr3  | 52373652 | 52374882 | + | 0.1  | 0.11 |
| ENSG0000(RPL37P2.processed_chr11   | 67682772 | 67683058 | - | 0    | 0    |
| ENSG0000(RN7SL479F.misc_RNA_chr1   | 44117098 | 44117397 | - | 0    | 0    |
| ENSG0000(RP11-654C.processed_chr3  | 72583370 | 72583535 | + | 0    | 0    |
| ENSG0000(KMT2E-AS:antisense_chr7   | 1.05E+08 | 1.05E+08 | - | 1.33 | 1.17 |
| ENSG0000(SETP11.processed_chr3     | 1.51E+08 | 1.51E+08 | + | 0    | 0    |
| ENSG0000(IGKV2D-30.IG_V_gene_chr2  | 89936859 | 89937679 | + | 0    | 0    |
| ENSG0000(RP11-451B.lincRNA_chr3    | 87731402 | 87793629 | - | 0    | 0    |
| ENSG0000(COX6CP14.processed_chr3   | 49758483 | 49758656 | + | 0    | 0    |
| ENSG0000(RN7SL388F.misc_RNA_chrX   | 72198712 | 72199050 | + | 0    | 0.31 |
| ENSG0000(RN7SL325F.misc_RNA_chrX   | 1.38E+08 | 1.38E+08 | + | 0    | 0    |
| ENSG0000(RN7SL675F.misc_RNA_chr8   | 69922751 | 69923047 | - | 0    | 0    |
| ENSG0000(MTND1P1(unprocessε_chr3   | 1.07E+08 | 1.07E+08 | + | 0    | 0    |
| ENSG0000(AC018730.antisense_chr2   | 1.05E+08 | 1.05E+08 | - | 0    | 0    |
| ENSG0000(LINC00879.lincRNA_chr3    | 94938172 | 95152509 | + | 0    | 0    |
| ENSG0000(OR1J4.protein_co_chr9     | 1.23E+08 | 1.23E+08 | + | 0.46 | 0.14 |
| ENSG0000(RP11-477J:antisense_chr9  | 1.21E+08 | 1.21E+08 | - | 0.08 | 0.08 |
| ENSG0000(RN7SL79P.misc_RNA_chr17   | 31465543 | 31465832 | + | 0    | 0    |
| ENSG0000(AP000797.processed_chr11  | 1.16E+08 | 1.16E+08 | - | 0    | 0    |
| ENSG0000(RP11-449H.processed_chr5  | 1.46E+08 | 1.46E+08 | + | 0    | 0    |
| ENSG0000(C2orf61.protein_co_chr2   | 47045538 | 47155287 | - | 0    | 0    |
| ENSG0000(RN7SL573F.misc_RNA_chr17  | 75041740 | 75042015 | + | 0    | 0    |
| ENSG0000(RUVBL1-AS.antisense_chr3  | 1.28E+08 | 1.28E+08 | + | 0.12 | 0    |
| ENSG0000(HMGN1P7.processed_chr3    | 93988634 | 93988946 | - | 0    | 0    |
| ENSG0000(CTD-2410N.processed_chr5  | 1.34E+08 | 1.34E+08 | + | 0    | 0    |
| ENSG0000(RP11-302B.processed_chr12 | 48903418 | 48903813 | - | 0    | 1    |
| ENSG0000(RP11-88I21.processed_chr3 | 1.27E+08 | 1.27E+08 | - | 0    | 0    |
| ENSG0000(CTA-242H1.processed_chr7  | 25689580 | 25689959 | - | 0    | 0    |
| ENSG0000(RN7SL241F.misc_RNA_chr10  | 30366064 | 30366299 | - | 0    | 0    |
| ENSG0000(RPSAP41.processed_chr6    | 73290403 | 73291262 | + | 0.85 | 1.13 |
| ENSG0000(RPL12P20.processed_chr4   | 41389115 | 41389593 | + | 0    | 0    |
| ENSG0000(RP11-543D.lincRNA_chr3    | 1.7E+08  | 1.7E+08  | + | 0    | 0    |
| ENSG0000(MTND4LP3.unprocessε_chr3  | 1.07E+08 | 1.07E+08 | - | 0    | 0    |
| ENSG0000(RP4-728D4.antisense_chr1  | 35569813 | 35577729 | - | 0.07 | 0.16 |

|                      |             |       |          |          |   |       |       |
|----------------------|-------------|-------|----------|----------|---|-------|-------|
| ENSG0000(RN7SL62P)   | misc_RNA    | chr1  | 52714399 | 52714695 | + | 0     | 0     |
| ENSG0000(PLS1-AS1)   | antisense   | chr3  | 1.43E+08 | 1.43E+08 | - | 0     | 0     |
| ENSG0000(MEIKIN)     | protein_co  | chr5  | 1.32E+08 | 1.32E+08 | - | 0     | 0     |
| ENSG0000(MTND1P3)    | processed_  | chr7  | 1.42E+08 | 1.42E+08 | - | 0     | 0     |
| ENSG0000(MYADML)     | transcribec | chr2  | 33722721 | 33728207 | - | 0     | 0     |
| ENSG0000(GUSBP4)     | transcribec | chr6  | 57919784 | 57930291 | - | 0     | 0     |
| ENSG0000(PSMD6-AS)   | antisense   | chr3  | 64004022 | 64012148 | + | 0.58  | 0.64  |
| ENSG0000(RPL9P31)    | processed_  | chr18 | 58631259 | 58632120 | + | 0     | 0     |
| ENSG0000(RP11-78O2)  | lincRNA     | chr3  | 1.48E+08 | 1.48E+08 | - | 0     | 0     |
| ENSG0000(RP11-295P)  | processed_  | chr10 | 13631143 | 13668445 | + | 5.59  | 4.87  |
| ENSG0000(RP4-803A2)  | unprocessε  | chr1  | 32986952 | 32988233 | + | 0     | 0     |
| ENSG0000(CTD-3193K)  | processed_  | chr17 | 42714299 | 42714643 | + | 0     | 0     |
| ENSG0000(NME1)       | protein_co  | chr17 | 51153536 | 51162428 | + | 32.26 | 33.96 |
| ENSG0000(RP1-127L4)  | lincRNA     | chr22 | 32141267 | 32143272 | + | 0     | 0     |
| ENSG0000(PDZRN3-AS)  | antisense   | chr3  | 73621713 | 73626796 | + | 0.27  | 0.72  |
| ENSG0000(RN7SL193F)  | misc_RNA    | chr4  | 43863274 | 43863549 | + | 0     | 0     |
| ENSG0000(RP11-322E)  | processed_  | chr18 | 35383354 | 35384025 | - | 0     | 0     |
| ENSG0000(PTGER4P3)   | processed_  | chr9  | 63775892 | 63776143 | - | 0     | 0     |
| ENSG0000(RP11-665C)  | processed_  | chr14 | 55282296 | 55282643 | - | 0     | 0     |
| ENSG0000(RPL17P46)   | processed_  | chr18 | 50823577 | 50824120 | + | 0     | 0     |
| ENSG0000(RN7SL668F)  | misc_RNA    | chr1  | 2.35E+08 | 2.35E+08 | + | 0     | 0     |
| ENSG0000(RPSAP38)    | processed_  | chr5  | 41951313 | 41952193 | - | 0     | 0     |
| ENSG0000(RP11-397J)  | processed_  | chr7  | 7078302  | 7079742  | - | 0     | 0     |
| ENSG0000(TNFSF12)    | protein_co  | chr17 | 7548891  | 7557890  | + | 22.46 | 18.9  |
| ENSG0000(HNRNPA3F)   | processed_  | chr3  | 80216261 | 80217234 | + | 0     | 0     |
| ENSG0000(RP3-461F1)  | processed_  | chr12 | 7032108  | 7032398  | + | 0     | 0     |
| ENSG0000(RN7SL507F)  | misc_RNA    | chr17 | 44290856 | 44291151 | - | 0     | 0     |
| ENSG0000(RN7SL568F)  | misc_RNA    | chr15 | 56029684 | 56029981 | - | 0     | 0     |
| ENSG0000(CDRT4)      | protein_co  | chr17 | 15436015 | 15503608 | - | 2.88  | 1.57  |
| ENSG0000(RP11-65N1)  | antisense   | chr9  | 1.25E+08 | 1.25E+08 | + | 0     | 0.14  |
| ENSG0000(RP11-6F2.3) | processed_  | chr3  | 1.57E+08 | 1.57E+08 | - | 0     | 0     |
| ENSG0000(RN7SL782F)  | misc_RNA    | chr5  | 1.08E+08 | 1.08E+08 | - | 0     | 0     |
| ENSG0000(RN7SL692F)  | misc_RNA    | chr1  | 92974827 | 92975114 | - | 0     | 0     |
| ENSG0000(APOBEC3G)   | protein_co  | chr22 | 39077005 | 39087743 | + | 4.25  | 4.01  |
| ENSG0000(AC093627)   | lincRNA     | chr7  | 174920   | 176013   | + | 0     | 0     |
| ENSG0000(RP11-290K)  | lincRNA     | chr3  | 1.58E+08 | 1.58E+08 | - | 0     | 0     |
| ENSG0000(HLTF-AS1)   | antisense   | chr3  | 1.49E+08 | 1.49E+08 | + | 0     | 0     |
| ENSG0000(RP4-800G7)  | processed_  | chr7  | 1.49E+08 | 1.49E+08 | - | 0     | 0     |
| ENSG0000(IMP3P2)     | processed_  | chr7  | 1.29E+08 | 1.29E+08 | + | 0.16  | 0     |
| ENSG0000(RN7SL688F)  | misc_RNA    | chr11 | 1.19E+08 | 1.19E+08 | + | 0     | 0.47  |
| ENSG0000(RN7SL825F)  | misc_RNA    | chr10 | 31992087 | 31992381 | - | 0     | 0     |
| ENSG0000(TLR9)       | protein_co  | chr3  | 52221080 | 52226163 | - | 0.06  | 0.09  |
| ENSG0000(CEACAMP3)   | transcribec | chr19 | 41599735 | 41605984 | + | 0     | 0     |
| ENSG0000(RP11-373E)  | lincRNA     | chr3  | 1.71E+08 | 1.71E+08 | - | 0     | 0     |
| ENSG0000(RN7SL672F)  | misc_RNA    | chr20 | 50557682 | 50557998 | - | 0     | 0     |

|                     |             |       |          |          |   |       |       |
|---------------------|-------------|-------|----------|----------|---|-------|-------|
| ENSG0000(RN7SL63P)  | misc_RNA    | chr10 | 30555601 | 30555904 | - | 0     | 0     |
| ENSG0000(RN7SL790F) | misc_RNA    | chrX  | 74390692 | 74390989 | + | 0     | 0     |
| ENSG0000(RN7SL795F) | misc_RNA    | chr18 | 70512727 | 70513008 | + | 0     | 0     |
| ENSG0000(AC009120)  | processed   | chr16 | 74312609 | 74313390 | - | 1.3   | 1.25  |
| ENSG0000(RP11-789F) | lincRNA     | chr3  | 86264555 | 86267361 | - | 0     | 0     |
| ENSG0000(RP11-496B) | lincRNA     | chr3  | 1.81E+08 | 1.81E+08 | - | 0.13  | 0.32  |
| ENSG0000(AC017116)  | sense_ov    | chr7  | 44064908 | 44066079 | + | 0     | 0.58  |
| ENSG0000(WBP1)      | protein_co  | chr2  | 74458329 | 74460891 | + | 32.33 | 34.5  |
| ENSG0000(RPLP0P11)  | processed   | chr18 | 50457887 | 50458795 | + | 0     | 0     |
| ENSG0000(RP5-1050K) | processed   | chr20 | 47071865 | 47072236 | + | 0     | 0     |
| ENSG0000(MRPS17)    | protein_co  | chr7  | 55951819 | 55956501 | + | 5.63  | 5.9   |
| ENSG0000(AC002310)  | antisense   | chr16 | 30572250 | 30583860 | + | 0     | 0     |
| ENSG0000(C2orf27AP) | unprocess   | chr9  | 30670964 | 30671966 | - | 0     | 0     |
| ENSG0000(RP11-109G) | processed   | chr4  | 78768499 | 78768750 | + | 0     | 0     |
| ENSG0000(RN7SL653F) | misc_RNA    | chr1  | 91829774 | 91830066 | - | 0     | 0     |
| ENSG0000(RPL21P39)  | processed   | chr3  | 1.46E+08 | 1.46E+08 | - | 0     | 0     |
| ENSG0000(ITIH4-AS1) | antisense   | chr3  | 52823935 | 52825314 | + | 0     | 0     |
| ENSG0000(DENND6A-)  | antisense   | chr3  | 57628810 | 57654918 | + | 0     | 0     |
| ENSG0000(RP11-379B) | processed   | chr3  | 1.26E+08 | 1.26E+08 | - | 0     | 0     |
| ENSG0000(RP11-252C) | processed   | chr3  | 1.82E+08 | 1.82E+08 | - | 0     | 0     |
| ENSG0000(RN7SL255F) | misc_RNA    | chr5  | 1.04E+08 | 1.04E+08 | - | 0     | 0     |
| ENSG0000(RP11-51L5) | processed   | chr17 | 62381668 | 62382015 | + | 0     | 0     |
| ENSG0000(PRAMEF11)  | protein_co  | chr1  | 12824605 | 12831410 | - | 0     | 0     |
| ENSG0000(IGKV1D-8)  | IG_V_gene   | chr2  | 90220727 | 90221384 | + | 0     | 0     |
| ENSG0000(RN7SL213F) | misc_RNA    | chr14 | 67751228 | 67751544 | - | 0     | 0     |
| ENSG0000(RN7SL513F) | misc_RNA    | chr19 | 18333276 | 18333573 | + | 0     | 0     |
| ENSG0000(RN7SL754F) | misc_RNA    | chr10 | 430239   | 430504   | - | 0     | 0     |
| ENSG0000(Y_RNA)     | misc_RNA    | chr17 | 64390158 | 64390263 | - | 0     | 0     |
| ENSG0000(RN7SL549F) | misc_RNA    | chr7  | 1.01E+08 | 1.01E+08 | - | 0     | 0     |
| ENSG0000(SUGT1P3)   | transcribec | chr13 | 40882577 | 40921774 | - | 1.26  | 1.65  |
| ENSG0000(RP11-446H) | lincRNA     | chr3  | 1.07E+08 | 1.07E+08 | - | 0     | 0     |
| ENSG0000(KRT8P25)   | processed   | chr3  | 87323268 | 87324723 | + | 0     | 0     |
| ENSG0000(RPS4XP22)  | processed   | chr19 | 9683294  | 9684073  | - | 0     | 0     |
| ENSG0000(RNF7P1)    | processed   | chr3  | 57519669 | 57520010 | - | 0     | 0     |
| ENSG0000(RP11-767L) | processed   | chr3  | 1.2E+08  | 1.2E+08  | + | 0     | 0     |
| ENSG0000(DEFA3)     | protein_co  | chr8  | 7015869  | 7018301  | - | 0     | 0     |
| ENSG0000(RPL23AP72) | processed   | chr16 | 47150132 | 47150566 | - | 0     | 0     |
| ENSG0000(IGKV1-6)   | IG_V_gene   | chr2  | 88966262 | 88966767 | - | 0     | 0     |
| ENSG0000(RN7SL225F) | misc_RNA    | chr11 | 86324012 | 86324309 | - | 0     | 0     |
| ENSG0000(GET4)      | protein_co  | chr7  | 876552   | 896436   | + | 15.2  | 15.74 |
| ENSG0000(RP11-690D) | processed   | chr11 | 1.03E+08 | 1.03E+08 | + | 0     | 0     |
| ENSG0000(IGKV1-37)  | IG_V_gene   | chr2  | 89297264 | 89297785 | - | 0     | 0     |
| ENSG0000(RN7SL34P)  | misc_RNA    | chr19 | 41286424 | 41286693 | - | 0     | 0     |
| ENSG0000(RP11-83M)  | processed   | chr5  | 67608654 | 67609130 | + | 0     | 0     |
| ENSG0000(RPL35AP19) | processed   | chr8  | 1.21E+08 | 1.21E+08 | - | 0     | 0     |

|                                         |          |            |       |       |
|-----------------------------------------|----------|------------|-------|-------|
| ENSG0000(GAPDHP27 processed_ chr1       | 1.2E+08  | 1.2E+08 -  | 0     | 0     |
| ENSG0000(IGSF11-AS1 antisense chr3      | 1.19E+08 | 1.19E+08 + | 0     | 0     |
| ENSG0000(RP11-420J processed_ chr3      | 1.8E+08  | 1.8E+08 +  | 0.03  | 0     |
| ENSG0000(RPS27P25 transcribed chr12     | 1.2E+08  | 1.2E+08 +  | 0.31  | 0     |
| ENSG0000(PARGP1 transcribed chr10       | 45854093 | 45972154 - | 2.03  | 3.67  |
| ENSG0000(RN7SL608F misc_RNA chr17       | 2680958  | 2681236 +  | 2.3   | 1.58  |
| ENSG0000(KRTAP9-2 protein_co chr17      | 41226648 | 41227652 + | 0     | 0     |
| ENSG0000(C1orf226 protein_co chr1       | 1.62E+08 | 1.62E+08 + | 0.09  | 0.03  |
| ENSG0000(RN7SL792F misc_RNA chr17       | 15408384 | 15408688 + | 0     | 0     |
| ENSG0000(ZNF736P9 processed_ chrY       | 8068896  | 8070723 -  | 0.22  | 0.29  |
| ENSG0000(RN7SL674F misc_RNA chr2        | 11584773 | 11585047 + | 0     | 0     |
| ENSG0000(ADSL protein_co chr22          | 40346500 | 40390463 + | 30.59 | 33.76 |
| ENSG0000(RP11-34P1 antisense chr1       | 139790   | 140339 -   | 0     | 0     |
| ENSG0000(RN7SL75P misc_RNA chr9         | 1E+08    | 1E+08 +    | 0     | 0     |
| ENSG0000(RN7SL530F misc_RNA chr14       | 74174456 | 74174753 + | 0     | 0     |
| ENSG0000(PRKAG2-AS1 antisense chr7      | 1.52E+08 | 1.52E+08 + | 0     | 0     |
| ENSG0000(RPL39P36 processed_ chr19      | 53413190 | 53413345 + | 0     | 0     |
| ENSG0000(RPS10P16 unprocessed chr8      | 1.18E+08 | 1.18E+08 - | 0     | 0     |
| ENSG0000(SNRPGP3 processed_ chr7        | 1.29E+08 | 1.29E+08 + | 0     | 0     |
| ENSG0000(AC015691. antisense chr11      | 5572322  | 5624896 -  | 0.18  | 0.92  |
| ENSG0000(LINC01471 lincRNA chr3         | 1.27E+08 | 1.28E+08 - | 0     | 0     |
| ENSG0000(RP11-71N1 lincRNA chr3         | 1.48E+08 | 1.48E+08 + | 0     | 0     |
| ENSG0000(RN7SL864F misc_RNA chr20       | 14223041 | 14223325 + | 0     | 0     |
| ENSG0000(RPL29P22 processed_ chr11      | 63115880 | 63116338 - | 0     | 0     |
| ENSG0000(PRDX3P4 processed_ chr3        | 64174401 | 64175147 + | 0     | 0     |
| ENSG0000(AP001625. sense_intronic chr21 | 42496539 | 42497443 + | 0     | 0     |
| ENSG0000(RN7SL606F misc_RNA chr17       | 60696313 | 60696605 + | 0.37  | 0     |
| ENSG0000(RPSAP34 processed_ chr4        | 1.08E+08 | 1.08E+08 - | 0     | 0     |
| ENSG0000(RP11-246A lincRNA chr3         | 1.52E+08 | 1.52E+08 - | 0     | 0     |
| ENSG0000(RN7SL394F misc_RNA chr10       | 67825310 | 67825600 - | 0     | 0     |
| ENSG0000(TRBV8-2 TR_V_pseudochrom7      | 1.42E+08 | 1.42E+08 + | 0     | 0     |
| ENSG0000(RP11-34P1 lincRNA chr1         | 89551    | 91105 -    | 0.17  | 0.48  |
| ENSG0000(ZBTB20-AS lincRNA chr3         | 1.15E+08 | 1.15E+08 + | 0     | 0     |
| ENSG0000(RN7SL368F misc_RNA chr19       | 43660500 | 43660776 - | 0.84  | 0     |
| ENSG0000(IGKV3-20 IG_V_gene chr2        | 89142574 | 89143160 - | 0     | 0     |
| ENSG0000(RN7SL273F misc_RNA chr6        | 37361185 | 37361483 + | 0     | 0     |
| ENSG0000(RN7SL51P misc_RNA chr2         | 62262387 | 62262671 - | 0     | 0     |
| ENSG0000(ENPP7P2 unprocessed chr3       | 75446769 | 75491202 - | 0     | 0     |
| ENSG0000(LILRA4 protein_co chr19        | 54333185 | 54339150 - | 0     | 0     |
| ENSG0000(RN7SL748F misc_RNA chr6        | 36522191 | 36522501 + | 0     | 0     |
| ENSG0000(OR2A41P unprocessed chr7       | 1.44E+08 | 1.44E+08 + | 0     | 0     |
| ENSG0000(RP11-163E transcribed chr7     | 1.02E+08 | 1.02E+08 + | 3.18  | 3.5   |
| ENSG0000(IGKV1D-33 IG_V_gene chr2       | 89913982 | 89916052 + | 0     | 0     |
| ENSG0000(OR7E53P unprocessed chr3       | 1.26E+08 | 1.26E+08 + | 0     | 0     |
| ENSG0000(OR2A15P unprocessed chr7       | 1.44E+08 | 1.44E+08 - | 0     | 0     |

|                                      |          |          |   |       |       |
|--------------------------------------|----------|----------|---|-------|-------|
| ENSG0000(RP11-79E3 processed_ chr4   | 33968174 | 33968526 | + | 0     | 0     |
| ENSG0000(RN7SL420F misc_RNA chr1     | 1.16E+08 | 1.16E+08 | + | 0     | 0     |
| ENSG0000(RP11-460N unprocessε chr7   | 65038372 | 65038565 | + | 0     | 0     |
| ENSG0000(RP11-366N processed_ chr9   | 42196333 | 42196662 | - | 0     | 0     |
| ENSG0000(RPL31P60 processed_ chr19   | 32963499 | 32963865 | + | 0     | 0     |
| ENSG0000(AC008132. transcribec chr22 | 18794414 | 18794804 | - | 0     | 0     |
| ENSG0000(RP11-889D lincRNA chr3      | 55166910 | 55175732 | - | 0     | 0     |
| ENSG0000(TRBVA TR_V_pseu chr7        | 1.43E+08 | 1.43E+08 | + | 0     | 0     |
| ENSG0000(RP11-169N antisense chr3    | 1.2E+08  | 1.2E+08  | - | 0     | 0     |
| ENSG0000(TPT1P11 transcribec chr2    | 48632856 | 48633353 | - | 0     | 0     |
| ENSG0000(FCF1P3 processed_ chr3      | 1.07E+08 | 1.07E+08 | + | 0     | 0     |
| ENSG0000(LILRA2 protein_co chr19     | 54572920 | 54590287 | + | 0     | 0     |
| ENSG0000(YBX1P3 processed_ chr3      | 1.15E+08 | 1.15E+08 | + | 0     | 0     |
| ENSG0000(RPL7P24 processed_ chr5     | 80500332 | 80501400 | + | 0     | 0.19  |
| ENSG0000(RP11-293A antisense chr4    | 26859806 | 26860599 | - | 0.37  | 1.22  |
| ENSG0000(LINC02004 lincRNA chr3      | 1.34E+08 | 1.34E+08 | + | 0.37  | 0     |
| ENSG0000(SLC9A9-AS antisense chr3    | 1.43E+08 | 1.43E+08 | + | 0     | 0     |
| ENSG0000(RN7SL254F misc_RNA chr4     | 1.48E+08 | 1.48E+08 | + | 0     | 0     |
| ENSG0000(RP11-90P5 antisense chr8    | 38123274 | 38124651 | + | 0     | 0     |
| ENSG0000(TEX35 protein_co chr1       | 1.79E+08 | 1.79E+08 | + | 0.12  | 0     |
| ENSG0000(RP11-561B processed_ chr14  | 35388121 | 35389069 | - | 0     | 0     |
| ENSG0000(LINC00888 transcribec chr3  | 1.83E+08 | 1.83E+08 | + | 1.47  | 1.43  |
| ENSG0000(RP11-4151J processed_ chr12 | 63760358 | 63760612 | - | 0     | 0     |
| ENSG0000(OR9A3P transcribec chr7     | 1.42E+08 | 1.42E+08 | + | 0     | 0     |
| ENSG0000(LNCSRLR antisense chr3      | 1.46E+08 | 1.46E+08 | - | 0.28  | 0.31  |
| ENSG0000(RP11-12K1 lincRNA chr3      | 1.67E+08 | 1.67E+08 | - | 0     | 0     |
| ENSG0000(MTND6P6 unprocessε chr3     | 1.07E+08 | 1.07E+08 | - | 0     | 0     |
| ENSG0000(RP11-587D processed_ chr11  | 27581680 | 27582055 | + | 0     | 0     |
| ENSG0000(AMY2B protein_co chr1       | 1.04E+08 | 1.04E+08 | + | 3.83  | 4.01  |
| ENSG0000(AC096579. processed_ chr2   | 88811186 | 88861563 | - | 0     | 0     |
| ENSG0000(IGHJ4 IG_J_gene chr14       | 1.06E+08 | 1.06E+08 | - | 0     | 0     |
| ENSG0000(RPS27P26 processed_ chr16   | 70444674 | 70444912 | - | 0     | 0     |
| ENSG0000(RP11-451G protein_co chr3   | 1.55E+08 | 1.55E+08 | - | 0     | 0     |
| ENSG0000(RPS3AP32 processed_ chr8    | 74055882 | 74056647 | + | 0     | 0     |
| ENSG0000(DDX50P2 processed_ chr3     | 1.54E+08 | 1.54E+08 | - | 0.08  | 0     |
| ENSG0000(RP1-93H18 lincRNA chr6      | 1.16E+08 | 1.16E+08 | + | 0     | 0.32  |
| ENSG0000(RPL23AP1C processed_ chr14  | 96456576 | 96457041 | - | 0     | 0     |
| ENSG0000(RP11-289K processed_ chr5   | 53413504 | 53414260 | + | 0.18  | 0     |
| ENSG0000(LY6G5B protein_co chr6      | 31670167 | 31673776 | + | 2.6   | 3.24  |
| ENSG0000(RP11-349J! antisense chr6   | 1.35E+08 | 1.35E+08 | + | 0     | 0     |
| ENSG0000(RP11-572N antisense chr3    | 1.13E+08 | 1.13E+08 | + | 0.54  | 1.08  |
| ENSG0000(ARGFXP1 processed_ chr5     | 1.23E+08 | 1.23E+08 | + | 0     | 0     |
| ENSG0000(RP11-225N antisense chr3    | 1.83E+08 | 1.83E+08 | - | 0     | 0     |
| ENSG0000(PSMB9 protein_co chr6       | 32844136 | 32859585 | + | 14.82 | 16.86 |
| ENSG0000(RPL21P42 processed_ chr3    | 1.54E+08 | 1.54E+08 | + | 0.17  | 0     |

|                     |             |       |          |          |   |       |       |
|---------------------|-------------|-------|----------|----------|---|-------|-------|
| ENSG0000(GPAA1P1    | transcribed | chr2  | 1.1E+08  | 1.1E+08  | + | 0.79  | 1.17  |
| ENSG0000(RPL9P30    | processed   | chr17 | 29855759 | 29856332 | + | 0     | 0     |
| ENSG0000(RPS3AP22   | processed   | chr5  | 88381957 | 88382725 | + | 0.17  | 0     |
| ENSG0000(MTND4LP1   | processed   | chr3  | 1.66E+08 | 1.66E+08 | - | 0     | 0     |
| ENSG0000(RP11-657C  | processed   | chr3  | 1.35E+08 | 1.35E+08 | - | 0     | 0     |
| ENSG0000(RPSAP12    | processed   | chr12 | 68552995 | 68553882 | - | 0     | 0     |
| ENSG0000(BMS1P3     | transcribed | chr10 | 86992253 | 87000435 | + | 0     | 0.27  |
| ENSG0000(AC093627.  | antisense   | chr7  | 182935   | 194180   | - | 0     | 0     |
| ENSG0000(RP11-88H1  | lincRNA     | chr3  | 1.46E+08 | 1.46E+08 | + | 0     | 0     |
| ENSG0000(RP11-85G2  | processed   | chr14 | 93223598 | 93224139 | - | 0     | 0     |
| ENSG0000(RP11-641C  | processed   | chr3  | 60616822 | 60618079 | + | 0     | 0     |
| ENSG0000(RN7SL351F  | misc_RNA    | chr11 | 1.26E+08 | 1.26E+08 | + | 0     | 0     |
| ENSG0000(RP11-240G  | processed   | chr12 | 1.17E+08 | 1.17E+08 | + | 0     | 0     |
| ENSG0000(RP11-846F. | unprocessed | chr17 | 22527324 | 22529570 | + | 0     | 0     |
| ENSG0000(RN7SL146F  | misc_RNA    | chr19 | 16539688 | 16539984 | - | 0     | 0     |
| ENSG0000(RP11-628J. | processed   | chr3  | 1.04E+08 | 1.04E+08 | - | 0     | 0     |
| ENSG0000(NCOR1P1    | transcribed | chr20 | 26103416 | 26114028 | - | 0     | 0     |
| ENSG0000(RN7SL303F  | misc_RNA    | chr8  | 22977877 | 22978127 | + | 0     | 0     |
| ENSG0000(RPS27P20   | processed   | chr11 | 1.3E+08  | 1.3E+08  | + | 0     | 0     |
| ENSG0000(FABP5P11   | processed   | chr22 | 16595089 | 16595485 | - | 0     | 0     |
| ENSG0000(RPL23AP75  | processed   | chr17 | 40439467 | 40439917 | - | 0     | 0     |
| ENSG0000(KRT18P43   | processed   | chr3  | 1.7E+08  | 1.7E+08  | - | 0     | 0     |
| ENSG0000(RP11-124D  | processed   | chr14 | 23229961 | 23230116 | - | 0     | 0     |
| ENSG0000(ETF1P2     | processed   | chr7  | 1.52E+08 | 1.52E+08 | + | 0.04  | 0.04  |
| ENSG0000(PSMD12P    | unprocessed | chr3  | 72876737 | 72878102 | - | 0     | 0     |
| ENSG0000(ERICH6-AS. | antisense   | chr3  | 1.51E+08 | 1.51E+08 | + | 0.78  | 0.85  |
| ENSG0000(EEF1GP4    | processed   | chr3  | 1.61E+08 | 1.61E+08 | - | 0     | 0     |
| ENSG0000(RP4-753P9  | 3prime_ov   | chrX  | 1.3E+08  | 1.3E+08  | + | 0     | 0     |
| ENSG0000(RN7SL826F  | misc_RNA    | chr8  | 1.17E+08 | 1.17E+08 | + | 0     | 0     |
| ENSG0000(RP11-16N2  | lincRNA     | chr4  | 61143656 | 61153962 | + | 0.13  | 0.15  |
| ENSG0000(COX6CP6    | processed   | chr3  | 70751123 | 70751350 | + | 0     | 0     |
| ENSG0000(RP11-162C  | processed   | chr4  | 1.84E+08 | 1.84E+08 | + | 0     | 0     |
| ENSG0000(RN7SL263F  | misc_RNA    | chr22 | 23261782 | 23262071 | - | 0     | 0     |
| ENSG0000(RP11-745A  | processed   | chr15 | 60390371 | 60390682 | + | 0     | 0     |
| ENSG0000(RPS7P7     | processed   | chr4  | 42471810 | 42472380 | + | 0     | 0     |
| ENSG0000(RN7SL771F  | misc_RNA    | chr7  | 1.41E+08 | 1.41E+08 | + | 0     | 0     |
| ENSG0000(RP11-851N  | processed   | chr11 | 84639993 | 84640565 | + | 0     | 0     |
| ENSG0000(MAGI1-AS.  | antisense   | chr3  | 65893816 | 65925297 | + | 0     | 0     |
| ENSG0000(RPL26P3    | processed   | chr14 | 28489910 | 28490362 | + | 0     | 0     |
| ENSG0000(RPL12P28   | processed   | chr10 | 5861805  | 5862594  | - | 0.45  | 0.75  |
| ENSG0000(RN7SL297F  | misc_RNA    | chr2  | 1.12E+08 | 1.12E+08 | + | 0     | 0     |
| ENSG0000(PCDHGC3    | protein_co  | chr5  | 1.41E+08 | 1.42E+08 | + | 49.58 | 51.18 |
| ENSG0000(RN7SL633F  | misc_RNA    | chr22 | 31059989 | 31060285 | + | 0     | 0     |
| ENSG0000(RN7SL621F  | misc_RNA    | chr8  | 33580210 | 33580508 | - | 0     | 0     |
| ENSG0000(CYMP       | transcribed | chr1  | 1.1E+08  | 1.1E+08  | + | 0.11  | 0     |



|                                |       |          |          |   |      |      |
|--------------------------------|-------|----------|----------|---|------|------|
| ENSG0000( AC010518. unprocessε | chr19 | 54294049 | 54294366 | - | 0    | 0    |
| ENSG0000( ARHGEF3-/- antisense | chr3  | 56940040 | 56960854 | + | 0    | 0    |
| ENSG0000( RN7SL520F misc_RNA   | chr16 | 75698531 | 75698816 | - | 0    | 0    |
| ENSG0000( RP11-269C processed_ | chr14 | 30055210 | 30055954 | + | 0    | 0    |
| ENSG0000( RN7SL223F misc_RNA   | chr11 | 93556913 | 93557206 | + | 0    | 0    |
| ENSG0000( RN7SL567F misc_RNA   | chr3  | 42676189 | 42676491 | - | 0    | 0    |
| ENSG0000( SMKR1 protein_co     | chr7  | 1.3E+08  | 1.3E+08  | + | 0.77 | 0.6  |
| ENSG0000( RN7SL865F misc_RNA   | chr12 | 1.16E+08 | 1.16E+08 | + | 0    | 0    |
| ENSG0000( RP11-379F antisense  | chr3  | 1.59E+08 | 1.59E+08 | + | 2.43 | 2.83 |
| ENSG0000( RP11-204K processed_ | chr14 | 68338728 | 68339528 | - | 0    | 0    |
| ENSG0000( RP11-758P antisense  | chr7  | 1E+08    | 1E+08    | + | 0    | 0    |
| ENSG0000( TRBV25OR unprocessε  | chr9  | 33662166 | 33662663 | + | 0    | 0    |
| ENSG0000( CPHL1P transcribec   | chr3  | 1.49E+08 | 1.49E+08 | - | 0    | 0    |
| ENSG0000( RP11-430C lincRNA    | chr1  | 2.05E+08 | 2.05E+08 | + | 0.1  | 0.08 |
| ENSG0000( UGT1A5 protein_co    | chr2  | 2.34E+08 | 2.34E+08 | + | 0    | 0    |
| ENSG0000( ZNF542P transcribec  | chr19 | 56368099 | 56379828 | + | 8.05 | 8.39 |
| ENSG0000( COX19 protein_co     | chr7  | 898778   | 975599   | - | 4.03 | 3.32 |
| ENSG0000( RPS27P29 processed_  | chr19 | 23597341 | 23597592 | + | 0    | 0    |
| ENSG0000( RN7SL587F misc_RNA   | chr14 | 77547566 | 77547846 | - | 0    | 0    |
| ENSG0000( RN7SL794F misc_RNA   | chr9  | 99185587 | 99185866 | - | 0    | 0    |
| ENSG0000( HNRNPA1F processed_  | chr3  | 1.22E+08 | 1.22E+08 | + | 0    | 0    |
| ENSG0000( CTD-2182N processed_ | chr8  | 1.33E+08 | 1.33E+08 | - | 0    | 0    |
| ENSG0000( RP11-112N processed_ | chr15 | 59552615 | 59553093 | - | 0    | 0    |
| ENSG0000( RP11-146D processed_ | chr9  | 40264971 | 40329221 | + | 0.48 | 0    |
| ENSG0000( RP11-314N lincRNA    | chr3  | 78266940 | 78294731 | + | 0    | 0    |
| ENSG0000( GAPDHP33 processed_  | chr1  | 1.2E+08  | 1.2E+08  | - | 0.24 | 0    |
| ENSG0000( RP11-167H processed_ | chr3  | 1.49E+08 | 1.49E+08 | - | 0    | 0    |
| ENSG0000( DEFA1B protein_co    | chr8  | 6996766  | 6999195  | - | 0    | 0    |
| ENSG0000( RN7SL541F misc_RNA   | chr5  | 1.35E+08 | 1.35E+08 | + | 0    | 0    |
| ENSG0000( FAR2P3 transcribec   | chr2  | 1.31E+08 | 1.31E+08 | + | 0    | 0    |
| ENSG0000( B4GALT4-A antisense  | chr3  | 1.19E+08 | 1.19E+08 | + | 0    | 0    |
| ENSG0000( PSMC1P6 processed_   | chr3  | 87630301 | 87631619 | - | 0    | 0    |
| ENSG0000( RP11-62G1 processed_ | chr3  | 69535664 | 69536693 | - | 0    | 0    |
| ENSG0000( MOXD2P transcribec   | chr7  | 1.42E+08 | 1.42E+08 | - | 0    | 0    |
| ENSG0000( RPL12P37 processed_  | chr17 | 80976454 | 80976948 | + | 0    | 0    |
| ENSG0000( RP11-200A processed_ | chr8  | 1.05E+08 | 1.05E+08 | + | 0    | 0    |
| ENSG0000( TCAM1P transcribec   | chr17 | 63849292 | 63864379 | + | 0    | 0.06 |
| ENSG0000( CTD-2062C processed_ | chr5  | 41895068 | 41895599 | + | 0    | 0    |
| ENSG0000( MEAF6P1 processed_   | chr2  | 2.09E+08 | 2.09E+08 | + | 0    | 0    |
| ENSG0000( GHRLOS antisense     | chr3  | 10285754 | 10293449 | + | 0.13 | 0.07 |
| ENSG0000( RP11-499P antisense  | chr10 | 18513115 | 18545651 | - | 0.86 | 0.97 |
| ENSG0000( RN7SKP24: misc_RNA   | chr10 | 24908522 | 24908812 | - | 0    | 0    |
| ENSG0000( AC010492. processed_ | chr19 | 54268005 | 54269045 | + | 0    | 0    |
| ENSG0000( RPL36AP4C processed_ | chr11 | 25588475 | 25588795 | - | 0    | 1.03 |
| ENSG0000( RN7SL187F misc_RNA   | chr9  | 1.21E+08 | 1.21E+08 | + | 0    | 0    |

|                     |             |       |          |          |   |        |        |
|---------------------|-------------|-------|----------|----------|---|--------|--------|
| ENSG0000(RN7SL717F) | misc_RNA    | chr2  | 2E+08    | 2E+08    | - | 0      | 0      |
| ENSG0000(ACAD11)    | protein_co  | chr3  | 1.33E+08 | 1.33E+08 | - | 16.16  | 16.58  |
| ENSG0000(RP11-1072) | processed_  | chr17 | 44719760 | 44720597 | - | 0      | 0      |
| ENSG0000(RN7SL100F) | misc_RNA    | chr9  | 26895678 | 26895970 | + | 0      | 0      |
| ENSG0000(MTCO1P6)   | processed_  | chr3  | 89588714 | 89590097 | - | 0      | 0      |
| ENSG0000(LA16c-306) | processed_  | chr16 | 3496201  | 3496768  | + | 0      | 0      |
| ENSG0000(RN7SL764F) | misc_RNA    | chr2  | 2.19E+08 | 2.19E+08 | + | 0      | 0      |
| ENSG0000(RPS29P27)  | processed_  | chr19 | 39697904 | 39698073 | + | 0      | 0      |
| ENSG0000(RN7SL481F) | misc_RNA    | chr7  | 1.43E+08 | 1.43E+08 | + | 0      | 0      |
| ENSG0000(RN7SL93P)  | misc_RNA    | chrX  | 1.14E+08 | 1.14E+08 | - | 0      | 0      |
| ENSG0000(RP11-841C) | processed_  | chr12 | 19508904 | 19509245 | + | 0      | 0      |
| ENSG0000(RP11-331F) | transcribec | chr16 | 75226074 | 75228197 | + | 0      | 0      |
| ENSG0000(RPS2P5)    | processed_  | chr12 | 1.18E+08 | 1.18E+08 | + | 167.22 | 176.08 |
| ENSG0000(PPIL3)     | protein_co  | chr2  | 2.01E+08 | 2.01E+08 | - | 23.77  | 22.27  |
| ENSG0000(RN7SL35P)  | misc_RNA    | chr7  | 80318253 | 80318544 | + | 0      | 0      |
| ENSG0000(AC017002)  | lincRNA     | chr2  | 1.11E+08 | 1.12E+08 | + | 2.73   | 1.83   |
| ENSG0000(RP11-774I) | lincRNA     | chr3  | 1.62E+08 | 1.62E+08 | - | 0      | 0      |
| ENSG0000(AC004869)  | lincRNA     | chr7  | 46476457 | 46477940 | - | 0      | 0      |
| ENSG0000(RPL23AP7)  | transcribec | chr2  | 1.14E+08 | 1.14E+08 | - | 8.38   | 10.55  |
| ENSG0000(UBL5P3)    | processed_  | chr3  | 63203218 | 63203448 | - | 0      | 0      |
| ENSG0000(OR4G11P)   | unprocessε  | chr1  | 62948    | 63887    | + | 0      | 0      |
| ENSG0000(RPL31P59)  | processed_  | chr18 | 3377916  | 3378247  | - | 0      | 0      |
| ENSG0000(RPL36AP45) | processed_  | chr15 | 75186651 | 75186968 | - | 0      | 0      |
| ENSG0000(RPL13P5)   | transcribec | chr12 | 6873389  | 6884741  | + | 2.83   | 3.05   |
| ENSG0000(RPS4XP13)  | processed_  | chr11 | 57576292 | 57577080 | - | 0.08   | 0      |
| ENSG0000(SEC62-AS1) | antisense   | chr3  | 1.7E+08  | 1.7E+08  | - | 0      | 0      |
| ENSG0000(RN7SL503F) | misc_RNA    | chr1  | 35292196 | 35292498 | - | 0      | 0      |
| ENSG0000(VPS26AP1)  | processed_  | chr3  | 1.14E+08 | 1.14E+08 | + | 0      | 0      |
| ENSG0000(RP11-36C2) | processed_  | chr5  | 33162179 | 33162807 | + | 0.44   | 0      |
| ENSG0000(IGKV1-17)  | IG_V_gene   | chr2  | 89117342 | 89117844 | - | 0      | 0      |
| ENSG0000(RPS29P20)  | processed_  | chr11 | 4018948  | 4019118  | + | 0      | 0      |
| ENSG0000(LCE1F)     | protein_co  | chr1  | 1.53E+08 | 1.53E+08 | + | 0      | 0      |
| ENSG0000(CTD-2061E) | processed_  | chr5  | 91354478 | 91354934 | + | 0      | 0      |
| ENSG0000(RPL9P3)    | processed_  | chr14 | 35262462 | 35263036 | + | 0      | 0      |
| ENSG0000(RP11-768G) | processed_  | chr3  | 1.18E+08 | 1.18E+08 | - | 0      | 0      |
| ENSG0000(RPL5P23)   | processed_  | chr8  | 42341767 | 42342634 | - | 0.14   | 0      |
| ENSG0000(RP1-228P1) | transcribec | chr12 | 48054813 | 48055591 | - | 0.4    | 0.09   |
| ENSG0000(AC012358)  | antisense   | chr2  | 55282350 | 55346049 | + | 0.91   | 0      |
| ENSG0000(KIR3DL2)   | protein_co  | chr19 | 54850443 | 54867207 | + | 0      | 0      |
| ENSG0000(RP11-142L) | processed_  | chr3  | 81612790 | 81613075 | + | 0      | 0      |
| ENSG0000(SAMMSON)   | lincRNA     | chr3  | 69999577 | 70015318 | + | 0.09   | 0.06   |
| ENSG0000(MTATP8P1)  | unprocessε  | chr1  | 633535   | 633741   | + | 0      | 0      |
| ENSG0000(RPL5P16)   | processed_  | chr5  | 82777797 | 82778586 | + | 0      | 0      |
| ENSG0000(RPL5P15)   | processed_  | chr5  | 58822503 | 58823714 | + | 0      | 0      |
| ENSG0000(CYCSP20)   | processed_  | chr7  | 1.29E+08 | 1.29E+08 | - | 0      | 0      |

|                                      |          |          |   |      |      |
|--------------------------------------|----------|----------|---|------|------|
| ENSG0000(CTD-2013N processed_ chr19  | 16412684 | 16413576 | + | 0.07 | 0    |
| ENSG0000(RP11-545E processed_ chr16  | 7126293  | 7126639  | - | 0    | 0    |
| ENSG0000(LINC00636 lincRNA chr3      | 1.08E+08 | 1.08E+08 | + | 0    | 0    |
| ENSG0000(RP11-158N processed_ chr12  | 12568201 | 12568776 | - | 0    | 0    |
| ENSG0000(RP11-356N processed_ chr4   | 76401251 | 76401569 | + | 0    | 0    |
| ENSG0000(RPS26P34 processed_ chr8    | 81627269 | 81627617 | + | 0    | 0    |
| ENSG0000(LRRFIP1P1 processed_ chr3   | 1.79E+08 | 1.79E+08 | - | 0.57 | 0.81 |
| ENSG0000(KRTAP13-3 protein_co chr21  | 30425265 | 30425968 | - | 0    | 0    |
| ENSG0000(RPS12P27 processed_ chr16   | 68209442 | 68209778 | + | 0    | 0    |
| ENSG0000(RP11-9511 processed_ chr5   | 62575951 | 62576271 | - | 0    | 0    |
| ENSG0000(OFD1P5Y unprocessε chrY     | 18582063 | 18629077 | - | 0    | 0    |
| ENSG0000(RN7SL91P misc_RNA chrX      | 25060649 | 25060939 | - | 0    | 0    |
| ENSG0000(AC007879. lincRNA chr2      | 2.07E+08 | 2.07E+08 | - | 0    | 0.28 |
| ENSG0000(RP11-864J: processed_ chr12 | 1.08E+08 | 1.08E+08 | + | 0    | 0    |
| ENSG0000(RPS10P20 transcribed chr12  | 48487946 | 48488408 | + | 0    | 0    |
| ENSG0000(FOXO3B processed_ chr17     | 18670946 | 18672873 | - | 2.49 | 2.6  |
| ENSG0000(RP4-584D1 antisense chr7    | 1.5E+08  | 1.5E+08  | - | 0.49 | 0.4  |
| ENSG0000(CSPG4P1Y lincRNA chrY       | 25482908 | 25486705 | + | 0    | 0    |
| ENSG0000(MTCO1P29 unprocessε chr3    | 1.21E+08 | 1.21E+08 | + | 0    | 0    |
| ENSG0000(RPL39P26 processed_ chr11   | 13685499 | 13685656 | - | 0    | 0    |
| ENSG0000(RN7SL472F misc_RNA chr14    | 1.02E+08 | 1.02E+08 | - | 0    | 0    |
| ENSG0000(RP11-450H processed_ chr3   | 1.67E+08 | 1.67E+08 | + | 0    | 0    |
| ENSG0000(RP11-477G processed_ chr4   | 1.12E+08 | 1.12E+08 | - | 0    | 0    |
| ENSG0000(RPS19P3 processed_ chr14    | 34568689 | 34569129 | - | 0    | 0.4  |
| ENSG0000(RN7SL346F misc_RNA chr15    | 90166233 | 90166526 | + | 0    | 0    |
| ENSG0000(PHBP8 processed_ chr3       | 1.2E+08  | 1.2E+08  | + | 0    | 0    |
| ENSG0000(RN7SL116F misc_RNA chr20    | 38872770 | 38873074 | + | 0    | 0    |
| ENSG0000(LINC00973 lincRNA chr3      | 98981058 | 98983096 | + | 0.32 | 0.28 |
| ENSG0000(RP11-63E1 processed_ chr3   | 1.5E+08  | 1.5E+08  | + | 0    | 0    |
| ENSG0000(RP11-416C lincRNA chr3      | 1.82E+08 | 1.82E+08 | + | 0    | 0    |
| ENSG0000(RPL29P2 transcribed chr17   | 7754320  | 7754976  | + | 0.17 | 0    |
| ENSG0000(RN7SL38P misc_RNA chr12     | 24706788 | 24707083 | + | 0    | 0    |
| ENSG0000(RP11-386N processed_ chr15  | 92719393 | 92719740 | + | 0    | 0    |
| ENSG0000(RPL23AP54 processed_ chr8   | 5476548  | 5476966  | + | 0    | 0    |
| ENSG0000(RP11-553L processed_ chr3   | 1.14E+08 | 1.14E+08 | - | 0    | 0    |
| ENSG0000(SETP14 processed_ chr3      | 1.56E+08 | 1.56E+08 | + | 0    | 0    |
| ENSG0000(RN7SL277F misc_RNA chr1     | 19424384 | 19424671 | + | 0    | 0    |
| ENSG0000(RPS12P28 processed_ chr17   | 28655557 | 28655983 | + | 0    | 0    |
| ENSG0000(RP11-185E lincRNA chr3      | 1.71E+08 | 1.71E+08 | + | 0    | 0    |
| ENSG0000(CDKN2B-A: antisense chr9    | 21994778 | 22121097 | + | 1.46 | 1.1  |
| ENSG0000(RP5-1101C antisense chr7    | 1.22E+08 | 1.22E+08 | + | 0    | 0    |
| ENSG0000(RN7SL837F misc_RNA chr1     | 2.31E+08 | 2.31E+08 | + | 0    | 0    |
| ENSG0000(TNFRSF13E protein_co chr17  | 16929816 | 16972118 | - | 0    | 0    |
| ENSG0000(RPL34P18 processed_ chr8    | 93957338 | 93957691 | - | 0    | 0    |
| ENSG0000(MED28P2 processed_ chr3     | 1.49E+08 | 1.49E+08 | - | 0    | 0    |

|                                      |          |          |   |      |      |
|--------------------------------------|----------|----------|---|------|------|
| ENSG0000(RP11-829H processed_ chr14  | 30819714 | 30819914 | + | 0    | 0    |
| ENSG0000(RP11-515C processed_ chr5   | 1.41E+08 | 1.41E+08 | + | 0    | 0    |
| ENSG0000(RP11-384C processed_ chr8   | 26771790 | 26772140 | + | 0    | 0    |
| ENSG0000(UOX transcribed chr1        | 84363706 | 84397831 | - | 0    | 0.33 |
| ENSG0000(RP11-680B antisense chr3    | 1.49E+08 | 1.49E+08 | - | 0    | 0.09 |
| ENSG0000(RPL7AP10 processed_ chr19   | 21149648 | 21150438 | - | 0    | 0    |
| ENSG0000(RP5-1061H transcribed chr1  | 2.29E+08 | 2.29E+08 | - | 0    | 0    |
| ENSG0000(RP11-429G sense_intr chr10  | 95833508 | 95873758 | + | 0    | 0    |
| ENSG0000(RPL21P123 transcribed chr17 | 29716279 | 29716685 | - | 0    | 0    |
| ENSG0000(RN7SL69P misc_RNA chr12     | 6095699  | 6095970  | - | 0    | 0    |
| ENSG0000(RPL34P17 processed_ chr8    | 52313154 | 52313500 | - | 0    | 0    |
| ENSG0000(CTD-2313F processed_ chr5   | 55021299 | 55042844 | - | 0.79 | 0.76 |
| ENSG0000(RPL3P9 processed_ chr8      | 79571153 | 79572335 | - | 0    | 0    |
| ENSG0000(TM4SF1-AS antisense chr3    | 1.49E+08 | 1.49E+08 | + | 0.09 | 0.38 |
| ENSG0000(KRTAP9-1 protein_co chr17   | 41189887 | 41190639 | + | 0    | 0    |
| ENSG0000(RN7SL492F misc_RNA chr4     | 56794348 | 56794642 | - | 0    | 0    |
| ENSG0000(THOC7-AS1 antisense chr3    | 63860645 | 63861819 | + | 0    | 0    |
| ENSG0000(RP1-184J9. antisense chr1   | 23020147 | 23088058 | - | 0    | 0    |
| ENSG0000(RPL7AP58 processed_ chr11   | 29725764 | 29726565 | + | 0    | 0    |
| ENSG0000(RP11-59J1 lincRNA chr3      | 1.27E+08 | 1.27E+08 | + | 0    | 0    |
| ENSG0000(L1TD1 protein_co chr1       | 62194831 | 62212328 | + | 0.16 | 0.19 |
| ENSG0000(AC010153. processed_ chrY   | 24650808 | 24651534 | + | 0    | 0    |
| ENSG0000(LINC02067 lincRNA chr3      | 1.61E+08 | 1.61E+08 | + | 0    | 0    |
| ENSG0000(RP11-1008 processed_ chr3   | 68192398 | 68192580 | + | 0    | 0    |
| ENSG0000(RP11-775D antisense chr7    | 1.3E+08  | 1.3E+08  | + | 0    | 0    |
| ENSG0000(RP11-121C processed_ chr3   | 99326377 | 99326552 | - | 0    | 0    |
| ENSG0000(RP11-354H lincRNA chr3      | 78087404 | 78092270 | + | 0    | 0    |
| ENSG0000(RN7SL445F misc_RNA chr10    | 5631463  | 5631755  | + | 0    | 0    |
| ENSG0000(TRBV22-1 TR_V_pseu chr7     | 1.43E+08 | 1.43E+08 | + | 0    | 0    |
| ENSG0000(RP11-20L2. processed_ chr7  | 1.28E+08 | 1.28E+08 | - | 0    | 0    |
| ENSG0000(AQP1 protein_co chr7        | 30911694 | 30925516 | + | 0.48 | 1.04 |
| ENSG0000(RN7SL547F misc_RNA chr20    | 7633562  | 7633851  | - | 0    | 0    |
| ENSG0000(RN7SL258F misc_RNA chr17    | 44409059 | 44409358 | - | 0    | 0    |
| ENSG0000(RPSAP48 processed_ chr8     | 1.1E+08  | 1.1E+08  | - | 0    | 0    |
| ENSG0000(RP11-247I1 antisense chr22  | 31454251 | 31464204 | + | 0.15 | 0.12 |
| ENSG0000(KCNAB1-AS antisense chr3    | 1.56E+08 | 1.56E+08 | - | 0    | 0    |
| ENSG0000(RPL9P15 processed_ chr3     | 1.55E+08 | 1.55E+08 | - | 0    | 0    |
| ENSG0000(AADACP1 transcribed chr3    | 1.52E+08 | 1.52E+08 | + | 5.73 | 4.37 |
| ENSG0000(RN7SL564F misc_RNA chr6     | 1.23E+08 | 1.23E+08 | + | 0    | 0    |
| ENSG0000(CTB-49A3.1 processed_ chr5  | 1.33E+08 | 1.33E+08 | - | 0    | 0    |
| ENSG0000(RN7SL98P misc_RNA chr9      | 15525782 | 15526081 | - | 0    | 0    |
| ENSG0000(RPS6P25 processed_ chr19    | 12894133 | 12894880 | + | 0.26 | 0.29 |
| ENSG0000(OR2AO1P unprocess chr7      | 1.44E+08 | 1.44E+08 | + | 0    | 0    |
| ENSG0000(RPL7P15 processed_ chr3     | 1.24E+08 | 1.24E+08 | - | 0.37 | 0    |
| ENSG0000(RP11-45P1 processed_ chr14  | 1.03E+08 | 1.03E+08 | + | 0    | 0    |

|                     |                |       |          |          |   |       |       |
|---------------------|----------------|-------|----------|----------|---|-------|-------|
| ENSG0000(RN7SL403F) | misc_RNA       | chr6  | 43036196 | 43036500 | - | 0     | 0     |
| ENSG0000(RN7SL150F) | misc_RNA       | chr19 | 33927364 | 33927625 | - | 0     | 0     |
| ENSG0000(CTD-2312P) | processed      | chr5  | 51275253 | 51275734 | + | 0     | 0     |
| ENSG0000(RPL30P12)  | processed      | chr12 | 1.07E+08 | 1.07E+08 | + | 0     | 0     |
| ENSG0000(SPATA31D)  | transcribed    | chr9  | 81913437 | 81919926 | + | 0     | 0     |
| ENSG0000(RP11-1348) | processed      | chr16 | 28813980 | 28814673 | - | 0.1   | 0     |
| ENSG0000(RN7SL808F) | misc_RNA       | chr4  | 1.15E+08 | 1.15E+08 | + | 0     | 0     |
| ENSG0000(RN7SL666F) | misc_RNA       | chr20 | 43222206 | 43222509 | + | 0     | 0     |
| ENSG0000(RN7SL580F) | misc_RNA       | chr6  | 51975673 | 51975959 | + | 0     | 0     |
| ENSG0000(RN7SL305F) | misc_RNA       | chr22 | 31981147 | 31981427 | - | 0     | 0     |
| ENSG0000(SEPT7P4)   | unprocessed    | chr7  | 63241590 | 63248321 | - | 0     | 0     |
| ENSG0000(RP11-832N) | processed      | chr11 | 1.08E+08 | 1.08E+08 | + | 0     | 0     |
| ENSG0000(C1QTNF9)   | protein_coding | chr13 | 24307166 | 24322535 | + | 0     | 0.03  |
| ENSG0000(RP11-174C) | transcribed    | chr3  | 1.2E+08  | 1.2E+08  | + | 0     | 0     |
| ENSG0000(RN7SL310F) | misc_RNA       | chr18 | 50206998 | 50207278 | - | 0     | 0     |
| ENSG0000(LSP1P2)    | processed      | chr3  | 75395188 | 75395320 | + | 0     | 0     |
| ENSG0000(MME-AS1)   | antisense      | chr3  | 1.55E+08 | 1.55E+08 | - | 0     | 0     |
| ENSG0000(AL450992)  | unprocessed    | chr1  | 1.52E+08 | 1.52E+08 | + | 0     | 0     |
| ENSG0000(KRT8P36)   | processed      | chr3  | 1.38E+08 | 1.38E+08 | - | 0     | 0     |
| ENSG0000(RP11-555K) | processed      | chr4  | 1.53E+08 | 1.53E+08 | - | 0     | 0     |
| ENSG0000(IGKV1-8)   | IG_V_gene      | chr2  | 88992409 | 88992931 | - | 0     | 0     |
| ENSG0000(AC006539)  | processed      | chr19 | 20079818 | 20080539 | - | 0     | 0     |
| ENSG0000(RP11-366N) | processed      | chr4  | 1.65E+08 | 1.65E+08 | - | 0.97  | 0.18  |
| ENSG0000(MYL6P4)    | processed      | chr7  | 1.42E+08 | 1.42E+08 | + | 0     | 0     |
| ENSG0000(AC016831)  | processed      | chr7  | 1.31E+08 | 1.31E+08 | - | 0     | 0     |
| ENSG0000(ISY1)      | protein_coding | chr3  | 1.29E+08 | 1.29E+08 | - | 11.97 | 12.56 |
| ENSG0000(RP11-521D) | lincRNA        | chr2  | 9638772  | 9649439  | + | 0.15  | 0.17  |
| ENSG0000(RN7SL538F) | misc_RNA       | chr1  | 69879592 | 69879895 | + | 0     | 0     |
| ENSG0000(PNMA2)     | protein_coding | chr8  | 26504686 | 26514092 | - | 10.75 | 10.69 |
| ENSG0000(RP11-102N) | processed      | chr3  | 1.37E+08 | 1.37E+08 | - | 0     | 0     |
| ENSG0000(RPS2P39)   | processed      | chr11 | 1.09E+08 | 1.09E+08 | - | 0     | 0     |
| ENSG0000(KLF7P1)    | processed      | chr3  | 1.71E+08 | 1.71E+08 | - | 0     | 0     |
| ENSG0000(LINC01168) | lincRNA        | chr10 | 1.33E+08 | 1.33E+08 | + | 0     | 0     |
| ENSG0000(LINC02030) | lincRNA        | chr3  | 55296200 | 55300738 | + | 0     | 0     |
| ENSG0000(RP11-430C) | antisense      | chr1  | 2.05E+08 | 2.05E+08 | + | 0     | 0     |
| ENSG0000(RN7SL860F) | misc_RNA       | chr19 | 22601485 | 22601707 | + | 0     | 0     |
| ENSG0000(RN7SL851F) | misc_RNA       | chr7  | 6047721  | 6048023  | - | 0     | 0.38  |
| ENSG0000(LRRD1)     | protein_coding | chr7  | 92112159 | 92179531 | - | 0     | 0.08  |
| ENSG0000(RPS4XP15)  | processed      | chr12 | 87944885 | 87950819 | + | 0     | 0     |
| ENSG0000(RN7SL382F) | misc_RNA       | chr4  | 1.39E+08 | 1.39E+08 | + | 0     | 0     |
| ENSG0000(RPS12P15)  | processed      | chr8  | 1.03E+08 | 1.03E+08 | + | 0     | 0     |
| ENSG0000(CTD-2301A) | processed      | chr5  | 1.77E+08 | 1.77E+08 | + | 0     | 0     |
| ENSG0000(RP5-890O3) | sense_intronic | chr1  | 1317581  | 1318689  | - | 1.12  | 0.49  |
| ENSG0000(RN7SL502F) | misc_RNA       | chr6  | 36450912 | 36451201 | - | 0     | 0     |
| ENSG0000(RP1-273G1) | processed      | chr8  | 33859480 | 33860223 | - | 0     | 0     |

|                                   |       |          |          |   |       |       |
|-----------------------------------|-------|----------|----------|---|-------|-------|
| ENSG0000(RP11-69M: unprocessed)   | chr12 | 7994770  | 7995084  | - | 0     | 0     |
| ENSG0000(KRBOX1 protein_coding)   | chr3  | 42809483 | 42942792 | + | 0     | 0     |
| ENSG0000(RN7SL559F misc_RNA)      | chr1  | 28031884 | 28032180 | - | 0     | 0     |
| ENSG0000(RP11-553D processed)     | chr3  | 1.13E+08 | 1.13E+08 | + | 0     | 0     |
| ENSG0000(RP11-588D processed)     | chr3  | 78758974 | 78759374 | + | 0     | 0     |
| ENSG0000(ERLEC1P1 processed)      | chr21 | 14143581 | 14144158 | + | 0     | 0     |
| ENSG0000(RP11-155G processed)     | chr7  | 1.28E+08 | 1.28E+08 | + | 0.53  | 0.87  |
| ENSG0000(RP11-25115 processed)    | chr12 | 42678873 | 42679124 | - | 0     | 0     |
| ENSG0000(RPL31P56 processed)      | chr16 | 55352721 | 55353088 | - | 0     | 0     |
| ENSG0000(AC098831. processed)     | chr2  | 2.03E+08 | 2.03E+08 | - | 0     | 0     |
| ENSG0000(PCDHGC5 protein_coding)  | chr5  | 1.41E+08 | 1.42E+08 | + | 0.62  | 0.37  |
| ENSG0000(PLCXD2-AS antisense)     | chr3  | 1.12E+08 | 1.12E+08 | - | 0     | 0     |
| ENSG0000(RN7SL288F misc_RNA)      | chr13 | 46169458 | 46169748 | - | 0     | 0     |
| ENSG0000(C21orf91-C lincRNA)      | chr21 | 17763315 | 17792523 | - | 0     | 0     |
| ENSG0000(ARHGFE25 protein_coding) | chr12 | 57610180 | 57619379 | + | 13.08 | 12.63 |
| ENSG0000(RN7SL776F misc_RNA)      | chr4  | 1.67E+08 | 1.67E+08 | - | 0     | 0     |
| ENSG0000(RP11-359H processed)     | chr3  | 1.2E+08  | 1.2E+08  | - | 0     | 0     |
| ENSG0000(RP11-170N processed)     | chr4  | 1.23E+08 | 1.23E+08 | + | 0     | 0     |
| ENSG0000(RP11-435F processed)     | chr3  | 1.14E+08 | 1.14E+08 | - | 0.15  | 0     |
| ENSG0000(RP11-5801 lincRNA)       | chr3  | 55610603 | 55613104 | + | 0     | 0     |
| ENSG0000(RPL36AP21 transcribed)   | chr5  | 18049232 | 18049872 | + | 0     | 0     |
| ENSG0000(RP11-615J4 processed)    | chr3  | 1.12E+08 | 1.12E+08 | - | 0     | 0     |
| ENSG0000(AC073934. antisense)     | chr7  | 1.28E+08 | 1.28E+08 | - | 0     | 0     |
| ENSG0000(MTND4LP7 unprocessed)    | chr9  | 92110575 | 92110868 | + | 0     | 0     |
| ENSG0000(RP11-418B lincRNA)       | chr3  | 1.63E+08 | 1.63E+08 | + | 0     | 0     |
| ENSG0000(UBA52P8 processed)       | chr16 | 48334471 | 48334854 | - | 0     | 0     |
| ENSG0000(MTND2P14 unprocessed)    | chr3  | 1.07E+08 | 1.07E+08 | + | 0     | 0     |
| ENSG0000(ATP8A2P1 transcribed)    | chr10 | 37248118 | 37315801 | + | 0     | 0     |
| ENSG0000(AC132217. 3prime_ov)     | chr11 | 2129121  | 2129964  | - | 1.89  | 3.86  |
| ENSG0000(RN7SL231F misc_RNA)      | chr19 | 14213052 | 14213323 | + | 0     | 0     |
| ENSG0000(NPM1P28 processed)       | chr3  | 1.48E+08 | 1.48E+08 | - | 0     | 0     |
| ENSG0000(CTD-3236F processed)     | chr11 | 17137976 | 17138265 | - | 0     | 0.42  |
| ENSG0000(RP11-550F processed)     | chr3  | 76434018 | 76435428 | + | 0     | 0     |
| ENSG0000(RP11-963H processed)     | chr17 | 10745553 | 10746543 | - | 0     | 0     |
| ENSG0000(RPL9P25 processed)       | chr15 | 66379337 | 66379915 | - | 0.73  | 0     |
| ENSG0000(RN7SL23P misc_RNA)       | chr11 | 61444149 | 61444423 | + | 0     | 0     |
| ENSG0000(MTND3P7 processed)       | chr3  | 1.66E+08 | 1.66E+08 | - | 0     | 0     |
| ENSG0000(RP11-227H processed)     | chr3  | 98620065 | 98620618 | + | 0     | 0     |
| ENSG0000(RPL21P4 processed)       | chr17 | 43079302 | 43079780 | + | 0     | 0     |
| ENSG0000(RN7SL77P misc_RNA)       | chr14 | 70610086 | 70610379 | + | 0     | 0     |
| ENSG0000(RP11-62G1 lincRNA)       | chr3  | 69564106 | 69571122 | - | 0     | 0     |
| ENSG0000(RPS15P9 processed)       | chr19 | 1307401  | 1307719  | - | 0     | 0     |
| ENSG0000(RN7SL497F misc_RNA)      | chr15 | 41191965 | 41192265 | - | 0     | 0     |
| ENSG0000(TMEM189 protein_coding)  | chr20 | 50118254 | 50153734 | - | 17.38 | 15.9  |
| ENSG0000(RN7SL328F misc_RNA)      | chr9  | 1.32E+08 | 1.32E+08 | - | 0     | 0     |

|                                     |          |          |   |       |       |
|-------------------------------------|----------|----------|---|-------|-------|
| ENSG0000(RP11-64K7 processed_ chr3  | 1.32E+08 | 1.32E+08 | + | 0     | 0     |
| ENSG0000(RDH14 protein_co chr2      | 18554723 | 18560680 | - | 14.95 | 15.23 |
| ENSG0000(AC093627. lincRNA chr7     | 149597   | 155465   | + | 1.08  | 0.58  |
| ENSG0000(RP11-572F processed_ chr16 | 74552251 | 74552746 | + | 0     | 0     |
| ENSG0000(RN7SL645F misc_RNA chr16   | 58199568 | 58199836 | - | 0     | 0     |
| ENSG0000(IGKV1-16 IG_V_gene chr2    | 89099859 | 89100361 | - | 0     | 0     |
| ENSG0000(C1QTNF9- antisense chr13   | 24315725 | 24321598 | - | 0     | 0     |
| ENSG0000(RN7SL128F misc_RNA chr6    | 20421583 | 20421887 | - | 0     | 0     |
| ENSG0000(RPL19P14 processed_ chr8   | 98782055 | 98782628 | + | 0     | 0     |
| ENSG0000(KRTAP4-7 protein_co chr17  | 41084150 | 41085141 | + | 0     | 0     |
| ENSG0000(RPS29P22 processed_ chr17  | 28116239 | 28116406 | - | 0     | 0     |
| ENSG0000(CTD-2515H processed_ chr15 | 57555951 | 57556379 | - | 0     | 0     |
| ENSG0000(LINC00886 lincRNA chr3     | 1.57E+08 | 1.57E+08 | - | 1.07  | 1.07  |
| ENSG0000(RN7SL521F misc_RNA chr7    | 1.49E+08 | 1.49E+08 | - | 0.73  | 0     |
| ENSG0000(RP11-713P processed_ chr11 | 23520322 | 23521202 | + | 0     | 0     |
| ENSG0000(RP11-174C processed_ chr3  | 1.2E+08  | 1.2E+08  | + | 0     | 0     |
| ENSG0000(RP13-635I2 sense_intr chr3 | 1.43E+08 | 1.43E+08 | - | 0     | 0     |
| ENSG0000(NDUFB2-A1 antisense chr7   | 1.41E+08 | 1.41E+08 | - | 0.34  | 0.38  |
| ENSG0000(RP11-65E2 processed_ chr3  | 1.32E+08 | 1.32E+08 | + | 0     | 0     |
| ENSG0000(PLCXD2 protein_co chr3     | 1.12E+08 | 1.12E+08 | + | 0.09  | 0.46  |
| ENSG0000(LINC02042 lincRNA chr3     | 1.13E+08 | 1.13E+08 | - | 0     | 0.05  |
| ENSG0000(RP11-119D lincRNA chr3     | 1.11E+08 | 1.11E+08 | - | 0     | 0     |
| ENSG0000(RP11-48B1 processed_ chr17 | 3665220  | 3665702  | + | 0     | 0     |
| ENSG0000(APOOP2 processed_ chr3     | 87594838 | 87595376 | + | 0     | 0     |
| ENSG0000(RN7SL798F misc_RNA chr8    | 55980240 | 55980540 | - | 0     | 0     |
| ENSG0000(RP11-274J processed_ chr3  | 1.14E+08 | 1.14E+08 | - | 0     | 0     |
| ENSG0000(RPL15P2 processed_ chr14   | 94800849 | 94801463 | - | 0     | 0     |
| ENSG0000(RP11-659E antisense chr8   | 63013068 | 63014681 | + | 0     | 0     |
| ENSG0000(RP11-400K processed_ chr8  | 53532908 | 53533704 | + | 0     | 0     |
| ENSG0000(LSAMP-AS1 antisense chr3   | 1.16E+08 | 1.16E+08 | + | 0.13  | 0.14  |
| ENSG0000(RPS20P31 processed_ chr12  | 1.2E+08  | 1.2E+08  | + | 0     | 0     |
| ENSG0000(RN7SL209F misc_RNA chr15   | 1.02E+08 | 1.02E+08 | - | 0     | 0     |
| ENSG0000(HIST2H2BB transcribec chr1 | 1.44E+08 | 1.44E+08 | - | 2.3   | 3.92  |
| ENSG0000(RP11-925D processed_ chr15 | 58200606 | 58201018 | + | 0     | 0     |
| ENSG0000(PLGLA transcribec chr2     | 1.06E+08 | 1.06E+08 | + | 0.4   | 0.47  |
| ENSG0000(RN7SL554F misc_RNA chr6    | 6938606  | 6938897  | - | 0     | 0     |
| ENSG0000(RN7SL591F misc_RNA chr10   | 62350006 | 62350297 | + | 0     | 0     |
| ENSG0000(RP11-372E processed_ chr3  | 1.43E+08 | 1.43E+08 | - | 0     | 0     |
| ENSG0000(MTCO2P6 processed_ chr3    | 89587886 | 89588570 | - | 0     | 0     |
| ENSG0000(RPL4P1 processed_ chr14    | 21750269 | 21751546 | + | 0     | 0     |
| ENSG0000(ST13P14 processed_ chr3    | 50876712 | 50877657 | - | 0     | 0     |
| ENSG0000(RP11-521D processed_ chr2  | 9746704  | 9746869  | + | 0     | 0     |
| ENSG0000(RN7SL415F misc_RNA chr6    | 91739609 | 91739897 | + | 0     | 0     |
| ENSG0000(RP11-518L antisense chr1   | 2.44E+08 | 2.44E+08 | - | 0     | 0     |
| ENSG0000(RN7SL751F misc_RNA chr3    | 78938009 | 78938292 | - | 0     | 0     |

|                                      |          |          |   |        |        |
|--------------------------------------|----------|----------|---|--------|--------|
| ENSG0000(RN7SL681F misc_RNA chr4     | 87386883 | 87387174 | - | 0      | 0      |
| ENSG0000(RPL23AP64 processed_ chr11  | 1.19E+08 | 1.19E+08 | - | 0      | 0      |
| ENSG0000(MIF protein_co chr22        | 23894004 | 23895227 | + | 438.35 | 412.11 |
| ENSG0000(RP11-458K lincRNA chr7      | 1.16E+08 | 1.16E+08 | - | 0      | 0      |
| ENSG0000(RPS27AP1C processed_ chr5   | 1.42E+08 | 1.42E+08 | + | 0      | 0      |
| ENSG0000(RP11-313M processed_ chr11  | 39161453 | 39161967 | + | 0      | 0      |
| ENSG0000(RN7SL283F misc_RNA chr2     | 1.4E+08  | 1.4E+08  | + | 0      | 0      |
| ENSG0000(RP11-79D8 processed_ chr9   | 79726069 | 79726321 | + | 5.87   | 9.61   |
| ENSG0000(RP11-734K lincRNA chr2      | 9143166  | 9146106  | + | 0      | 0      |
| ENSG0000(RP11-742D processed_ chr18  | 46722975 | 46723223 | + | 0      | 0      |
| ENSG0000(HOXA11-A: antisense chr7    | 27184518 | 27189293 | + | 0      | 0      |
| ENSG0000(RPL23AP67 processed_ chr12  | 1.33E+08 | 1.33E+08 | + | 0.16   | 0      |
| ENSG0000(RPS23P4 processed_ chr4     | 1.45E+08 | 1.45E+08 | - | 0      | 0      |
| ENSG0000(RN7SL459F misc_RNA chr12    | 19176288 | 19176589 | - | 0      | 0      |
| ENSG0000(RP11-708H processed_ chr17  | 49148339 | 49149111 | - | 0      | 0      |
| ENSG0000(RP11-80H5 lincRNA chr10     | 89694295 | 89697928 | - | 0      | 0.11   |
| ENSG0000(RN7SL183F misc_RNA chr6     | 87845650 | 87845947 | + | 0      | 0      |
| ENSG0000(RP11-119H processed_ chr4   | 1.13E+08 | 1.13E+08 | + | 0      | 0      |
| ENSG0000(RP11-22C1 processed_ chr8   | 94688228 | 94688610 | + | 0      | 0      |
| ENSG0000(SEPT7P6 processed_ chr7     | 1.52E+08 | 1.52E+08 | + | 0      | 0      |
| ENSG0000(RP11-494M processed_ chr11  | 7783697  | 7784407  | + | 0      | 0      |
| ENSG0000(RP11-713C processed_ chr4   | 1.88E+08 | 1.88E+08 | + | 0      | 0      |
| ENSG0000(RP11-244H processed_ chr1   | 34974356 | 34985313 | - | 2.15   | 1.92   |
| ENSG0000(TPM3P9 transcribed chr19    | 53431984 | 53444670 | + | 2.63   | 1.47   |
| ENSG0000(RCC2P5 processed_ chr3      | 96753185 | 96754671 | + | 0      | 0      |
| ENSG0000(RP11-727A processed_ chr11  | 83213005 | 83213404 | + | 2.88   | 1.72   |
| ENSG0000(NIPA2P2 processed_ chr3     | 75084155 | 75085237 | + | 0      | 0      |
| ENSG0000(CTD-2036J unprocessed chr8  | 22389865 | 22390655 | - | 0      | 0      |
| ENSG0000(RPL29P24 processed_ chr12   | 1.21E+08 | 1.21E+08 | - | 0      | 0      |
| ENSG0000(RN7SL709F misc_RNA chr8     | 37908738 | 37909037 | + | 0      | 0      |
| ENSG0000(RP11-689J: processed_ chr14 | 21398925 | 21399282 | + | 0      | 0      |
| ENSG0000(RN7SL335F misc_RNA chr4     | 1.22E+08 | 1.22E+08 | - | 0      | 0      |
| ENSG0000(RP11-145M lincRNA chr1      | 59054397 | 59056049 | - | 0      | 0      |
| ENSG0000(GVQW1 protein_co chr9       | 32566789 | 32568621 | + | 0.25   | 0.63   |
| ENSG0000(RPL7P43 processed_ chr12    | 76721534 | 76722286 | + | 0      | 0      |
| ENSG0000(RP11-167H lincRNA chr3      | 1.5E+08  | 1.5E+08  | - | 0      | 0      |
| ENSG0000(RPL23AP7C processed_ chr14  | 35144021 | 35144480 | - | 0      | 0      |
| ENSG0000(RP5-1002M antisense chr20   | 20094401 | 20095684 | - | 0      | 0      |
| ENSG0000(AC004985. transcribed chr7  | 43961590 | 43973323 | - | 0      | 0      |
| ENSG0000(NSUN6 protein_co chr10      | 18545561 | 18659285 | - | 4.42   | 2.99   |
| ENSG0000(CTD-2061E antisense chr5    | 91355380 | 91356026 | + | 0      | 0      |
| ENSG0000(RPL5P1 processed_ chr15     | 24908932 | 24909825 | - | 0      | 0      |
| ENSG0000(RN7SL110F misc_RNA chr3     | 15506623 | 15506905 | - | 0      | 0      |
| ENSG0000(RPL17P40 processed_ chr16   | 16094192 | 16095209 | - | 0      | 0      |
| ENSG0000(CTD-3141N transcribed chr19 | 53386233 | 53386388 | + | 1.21   | 0      |



|                                       |          |          |   |      |       |
|---------------------------------------|----------|----------|---|------|-------|
| ENSG0000(RP4-714D9 antisense chr1     | 1E+08    | 1E+08    | - | 0    | 0     |
| ENSG0000(RN7SL813F misc_RNA chr2      | 1.68E+08 | 1.68E+08 | + | 0    | 0     |
| ENSG0000(RP11-488C processed_chr14    | 76886377 | 76886750 | - | 0    | 0.26  |
| ENSG0000(RN7SL259F misc_RNA chr11     | 62935982 | 62936234 | - | 0    | 0     |
| ENSG0000(RP11-344B lincRNA chr9       | 1.29E+08 | 1.29E+08 | + | 0    | 0     |
| ENSG0000(RPL17P44 processed_chr18     | 62415678 | 62416227 | + | 0    | 0     |
| ENSG0000(CYP51A1P1 processed_chr3     | 82806515 | 82808021 | - | 0    | 0     |
| ENSG0000(RP11-864N processed_chr11    | 74738478 | 74738796 | - | 0    | 0     |
| ENSG0000(LINC01994 lincRNA chr3       | 1.82E+08 | 1.82E+08 | - | 0    | 0     |
| ENSG0000(PRICKLE2- antisense chr3     | 64103470 | 64106056 | + | 0    | 0     |
| ENSG0000(RP11-286H processed_chr7     | 1.29E+08 | 1.29E+08 | - | 0    | 0     |
| ENSG0000(RP11-398J processed_chr4     | 94369833 | 94370163 | + | 0    | 0     |
| ENSG0000(CEACAMP1 transcribed chr19   | 43211791 | 43248646 | - | 0.24 | 0.31  |
| ENSG0000(RP11-333A processed_chr8     | 70506251 | 70506818 | - | 0    | 0     |
| ENSG0000(HLA-DOB protein_co chr6      | 32812763 | 32817048 | - | 0.16 | 0.15  |
| ENSG0000(PRICKLE2- antisense chr3     | 64067964 | 64103131 | + | 0.01 | 0     |
| ENSG0000(RPL29P14 processed_chr5      | 1.5E+08  | 1.5E+08  | - | 0.57 | 0     |
| ENSG0000(AC008280 processed_chr2      | 54079974 | 54080280 | - | 0    | 0     |
| ENSG0000(UGT1A9 protein_co chr2       | 2.34E+08 | 2.34E+08 | + | 0    | 0     |
| ENSG0000(HMGN1P8 processed_chr3       | 1.68E+08 | 1.68E+08 | - | 0    | 0     |
| ENSG0000(KRTAP10-5 protein_co chr21   | 44579455 | 44580604 | - | 0    | 0     |
| ENSG0000(YAE1D1 protein_co chr7       | 39566376 | 39610320 | + | 8.77 | 10.69 |
| ENSG0000(OR14A2 protein_co chr1       | 2.48E+08 | 2.48E+08 | - | 0    | 0     |
| ENSG0000(RPL22P19 transcribed chr12   | 1.25E+08 | 1.25E+08 | - | 1.09 | 0.6   |
| ENSG0000(RP11-507J processed_chr15    | 50798670 | 50798951 | + | 0    | 0     |
| ENSG0000(LINC02032 lincRNA chr3       | 1.48E+08 | 1.48E+08 | + | 0    | 0     |
| ENSG0000(BET1P1 processed_chr7        | 1.51E+08 | 1.51E+08 | + | 0    | 0     |
| ENSG0000(LINC00881 lincRNA chr3       | 1.57E+08 | 1.57E+08 | + | 0    | 0.18  |
| ENSG0000(PAICSP6 processed_chr7       | 1.44E+08 | 1.44E+08 | + | 0    | 0     |
| ENSG0000(RPL32P9 transcribed chr3     | 1.5E+08  | 1.5E+08  | + | 0    | 0     |
| ENSG0000(RN7SL728F misc_RNA chr4      | 1.02E+08 | 1.02E+08 | - | 0    | 0     |
| ENSG0000(RPL7P41 processed_chr12      | 52885429 | 52886385 | + | 0    | 0     |
| ENSG0000(RP11-561N protein_co chr7    | 63998874 | 64016130 | + | 0    | 0     |
| ENSG0000(LINC02066 lincRNA chr3       | 1.52E+08 | 1.52E+08 | + | 0.24 | 0     |
| ENSG0000(RN7SL720F misc_RNA chr9      | 17053901 | 17054204 | + | 0    | 0     |
| ENSG0000(ARHGAP31 antisense chr3      | 1.19E+08 | 1.19E+08 | - | 0.11 | 0     |
| ENSG0000(RN7SL582F misc_RNA chr3      | 1.17E+08 | 1.17E+08 | - | 0    | 0     |
| ENSG0000(RP11-3K24 processed_chr17    | 60245288 | 60245647 | - | 0    | 0     |
| ENSG0000(ADAMTS9 antisense chr3       | 64561322 | 64592757 | + | 0    | 0     |
| ENSG0000(RN7SL160F misc_RNA chr2      | 70965584 | 70965867 | + | 0    | 0     |
| ENSG0000(RN7SL617F misc_RNA chr6      | 1.1E+08  | 1.1E+08  | - | 0    | 0     |
| ENSG0000(LINC00877 lincRNA chr3       | 72035300 | 72279503 | - | 0    | 0     |
| ENSG0000(RP11-1002 lincRNA chr3       | 1.63E+08 | 1.63E+08 | + | 0.54 | 0.85  |
| ENSG0000(RP4-752I6 lincRNA chr1       | 27457198 | 27459582 | + | 0    | 0     |
| ENSG0000(RP11-147I3 transcribed chr11 | 74876286 | 74920022 | + | 0    | 0.1   |

|                      |             |       |          |          |   |       |       |
|----------------------|-------------|-------|----------|----------|---|-------|-------|
| ENSG0000(RN7SL70P)   | misc_RNA    | chr19 | 18957957 | 18958258 | - | 0     | 0     |
| ENSG0000(RN7SL570F)  | misc_RNA    | chr9  | 69884363 | 69884654 | - | 0     | 0     |
| ENSG0000(RN7SL494F)  | misc_RNA    | chr15 | 50244628 | 50244931 | - | 0     | 0     |
| ENSG0000(CTB-2L9.1)  | processed   | chr5  | 1.35E+08 | 1.35E+08 | - | 0     | 0     |
| ENSG0000(RP11-5407)  | lincRNA     | chr1  | 914171   | 914971   | + | 0     | 0     |
| ENSG0000(RP11-106J)  | processed   | chr16 | 70079129 | 70079624 | - | 0     | 0     |
| ENSG0000(RPL21P122)  | transcribed | chr17 | 11998353 | 12021508 | - | 0.05  | 0     |
| ENSG0000(TDGF1)      | protein_co  | chr3  | 46574534 | 46582463 | + | 0     | 0     |
| ENSG0000(CTC-209L1)  | processed   | chr5  | 1.55E+08 | 1.55E+08 | + | 0     | 0     |
| ENSG0000(RN7SL165F)  | misc_RNA    | chr1  | 26814822 | 26815112 | + | 0     | 0     |
| ENSG0000(RN7SL191F)  | misc_RNA    | chrX  | 1.31E+08 | 1.31E+08 | - | 0     | 0     |
| ENSG0000(ZNF736P7)   | processed   | chrY  | 7990987  | 7991806  | - | 0     | 0     |
| ENSG0000(ZIC4-AS1)   | antisense   | chr3  | 1.47E+08 | 1.47E+08 | + | 0     | 0     |
| ENSG0000(HMGN2P2)    | processed   | chr3  | 1.68E+08 | 1.68E+08 | + | 0     | 0     |
| ENSG0000(RP11-333A)  | processed   | chr8  | 70424125 | 70424576 | - | 0     | 0     |
| ENSG0000(RP11-344N)  | unprocessed | chrX  | 48276704 | 48277578 | - | 0     | 0     |
| ENSG0000(IQCJ-SCHIP) | antisense   | chr3  | 1.6E+08  | 1.6E+08  | - | 0     | 0     |
| ENSG0000(LINC02024)  | lincRNA     | chr3  | 1.18E+08 | 1.18E+08 | - | 0     | 0     |
| ENSG0000(SNAPC5P1)   | transcribed | chr6  | 6347081  | 6347381  | - | 0     | 0     |
| ENSG0000(RN7SL809F)  | misc_RNA    | chr12 | 56670450 | 56670746 | - | 0     | 0     |
| ENSG0000(RP11-446H)  | processed   | chr3  | 1.07E+08 | 1.07E+08 | - | 0     | 0     |
| ENSG0000(RP11-572M)  | lincRNA     | chr3  | 1.13E+08 | 1.13E+08 | - | 0     | 0     |
| ENSG0000(RP11-292E)  | lincRNA     | chr3  | 1.53E+08 | 1.53E+08 | + | 0     | 0     |
| ENSG0000(MTND4LP1)   | unprocessed | chr2  | 2.03E+08 | 2.03E+08 | + | 0     | 0     |
| ENSG0000(RN7SL39P)   | misc_RNA    | chr18 | 3571215  | 3571511  | - | 0     | 0     |
| ENSG0000(FLJ22763)   | protein_co  | chr3  | 1.09E+08 | 1.09E+08 | + | 0     | 0     |
| ENSG0000(NMTRS-TG)   | unprocessed | chr17 | 22528853 | 22528921 | - | 0     | 0     |
| ENSG0000(RN7SL836F)  | misc_RNA    | chr19 | 45651510 | 45651805 | + | 0     | 0     |
| ENSG0000(RN7SL553F)  | misc_RNA    | chr3  | 5252926  | 5253223  | - | 0     | 0     |
| ENSG0000(RPL12P31)   | processed   | chr11 | 35997226 | 35997675 | - | 0     | 0     |
| ENSG0000(RN7SL443F)  | misc_RNA    | chr20 | 44007248 | 44007537 | + | 0     | 0     |
| ENSG0000(RN7SL801F)  | misc_RNA    | chr5  | 54048007 | 54048308 | - | 0     | 0     |
| ENSG0000(RP11-275H)  | lincRNA     | chr3  | 1.81E+08 | 1.81E+08 | - | 0     | 0     |
| ENSG0000(KRTAP5-8)   | protein_co  | chr11 | 71538025 | 71539207 | + | 0     | 0.28  |
| ENSG0000(KRTAP4-16)  | protein_co  | chr17 | 41101502 | 41102209 | - | 0     | 0     |
| ENSG0000(RN7SL629F)  | misc_RNA    | chr5  | 87294189 | 87294473 | - | 0     | 0     |
| ENSG0000(IGKV1D-16)  | IG_V_gene   | chr2  | 90100236 | 90100738 | + | 0     | 0     |
| ENSG0000(RN7SL302F)  | misc_RNA    | chr9  | 1.25E+08 | 1.25E+08 | + | 0     | 0     |
| ENSG0000(RN7SL727F)  | misc_RNA    | chrX  | 1.4E+08  | 1.4E+08  | + | 0     | 0     |
| ENSG0000(RPL17P20)   | processed   | chr4  | 56710060 | 56710614 | + | 0     | 0     |
| ENSG0000(RP11-73B8)  | processed   | chr12 | 43560784 | 43561297 | - | 0     | 0     |
| ENSG0000(RP1-89D4.)  | processed   | chr11 | 33237008 | 33237409 | + | 0     | 0     |
| ENSG0000(RP11-397K)  | processed   | chr3  | 1.09E+08 | 1.09E+08 | - | 0     | 0     |
| ENSG0000(CRCP)       | protein_co  | chr7  | 66114604 | 66154568 | + | 13.33 | 10.51 |
| ENSG0000(RPL17P19)   | processed   | chr4  | 61211652 | 61212203 | + | 0     | 0     |

|                                  |       |          |          |   |        |        |
|----------------------------------|-------|----------|----------|---|--------|--------|
| ENSG0000( AC093620. antisense    | chr7  | 5419827  | 5420767  | + | 0.85   | 0.4    |
| ENSG0000( ENPP7P4 unprocessε     | chr3  | 1.26E+08 | 1.26E+08 | + | 0      | 0      |
| ENSG0000( RP11-221J lincRNA      | chr3  | 1.02E+08 | 1.02E+08 | + | 0.41   | 0.16   |
| ENSG0000( RP11-364M processed_   | chr4  | 1.47E+08 | 1.47E+08 | - | 0      | 0      |
| ENSG0000( RPL34P33 processed_    | chr19 | 22699352 | 22699685 | + | 0      | 0      |
| ENSG0000( RPL29P25 processed_    | chr12 | 1.11E+08 | 1.11E+08 | - | 0      | 0      |
| ENSG0000( RP11-379B processed_   | chr3  | 1.26E+08 | 1.26E+08 | - | 4.45   | 3.75   |
| ENSG0000( RN7SL791F misc_RNA     | chr5  | 1.47E+08 | 1.47E+08 | - | 0      | 0      |
| ENSG0000( PPATP1 processed_      | chr3  | 87051192 | 87052738 | - | 0      | 0      |
| ENSG0000( IGKV2-24 IG_V_gene     | chr2  | 89176328 | 89177160 | - | 0      | 0      |
| ENSG0000( ZBTB20-AS lincRNA      | chr3  | 1.15E+08 | 1.15E+08 | + | 0      | 0      |
| ENSG0000( ACTG1P13 processed_    | chr3  | 99215224 | 99216266 | - | 0      | 0      |
| ENSG0000( RP11-674E processed_   | chr3  | 1.56E+08 | 1.56E+08 | + | 0      | 0      |
| ENSG0000( WWTR1-AS antisense     | chr3  | 1.5E+08  | 1.5E+08  | + | 0.58   | 0.69   |
| ENSG0000( SUCLG2-AS lincRNA      | chr3  | 67654697 | 67947713 | + | 0.8    | 0.85   |
| ENSG0000( RP11-342M lincRNA      | chr10 | 79504073 | 79506281 | - | 0      | 0      |
| ENSG0000( WDR82P2 processed_     | chr1  | 91534666 | 91535593 | - | 0      | 0      |
| ENSG0000( SETP6 processed_       | chr3  | 81612238 | 81612805 | - | 0      | 0      |
| ENSG0000( CDRT1 protein_co       | chr17 | 15565483 | 15619512 | - | 0.31   | 0.69   |
| ENSG0000( RP5-921G1 lincRNA      | chr7  | 1.24E+08 | 1.24E+08 | - | 0      | 0      |
| ENSG0000( RP11-807G sense_intrε  | chr1  | 9983141  | 9984568  | + | 0      | 0      |
| ENSG0000( LINC02070 lincRNA      | chr3  | 86481943 | 86496996 | + | 0      | 0      |
| ENSG0000( RN7SL385F misc_RNA     | chr22 | 37669464 | 37669739 | - | 0      | 0      |
| ENSG0000( RPL35AP33 processed_   | chr16 | 68477237 | 68477570 | - | 0      | 0      |
| ENSG0000( LINC01487 lincRNA      | chr3  | 1.55E+08 | 1.55E+08 | + | 0      | 0      |
| ENSG0000( RPL36A protein_co      | chrX  | 1.01E+08 | 1.01E+08 | + | 613.21 | 646.42 |
| ENSG0000( RPL21P47 processed_    | chr4  | 62248294 | 62248770 | + | 0      | 0      |
| ENSG0000( RP4-630C2 antisense    | chr7  | 1.24E+08 | 1.24E+08 | + | 0      | 0      |
| ENSG0000( SNRPCP11 processed_    | chr3  | 1.26E+08 | 1.26E+08 | - | 0      | 0      |
| ENSG0000( RN7SL466F misc_RNA     | chr1  | 1.62E+08 | 1.62E+08 | + | 0      | 0      |
| ENSG0000( PMS2P11 transcribec    | chr7  | 77011551 | 77015853 | + | 0      | 0      |
| ENSG0000( IGKV3-11 IG_V_gene     | chr2  | 89027171 | 89027731 | - | 0      | 0      |
| ENSG0000( RP11-392P processed_   | chr12 | 12850982 | 12851740 | + | 0      | 0      |
| ENSG0000( PPP1R2P4 processed_    | chr13 | 46437394 | 46437988 | - | 0      | 0      |
| ENSG0000( RP11-1042 processed_   | chr14 | 60602146 | 60602533 | - | 0      | 0      |
| ENSG0000( OR5G3 polymorph        | chr11 | 56819576 | 56820504 | - | 0      | 0      |
| ENSG0000( RP11-758P antisense    | chr7  | 1E+08    | 1E+08    | + | 0      | 0      |
| ENSG0000( RP11-758I1 transcribec | chr3  | 1.46E+08 | 1.46E+08 | - | 0      | 0      |
| ENSG0000( SYNPR-AS1 antisense    | chr3  | 63423596 | 63550051 | - | 0      | 0      |
| ENSG0000( PDXP protein_co        | chr22 | 37658727 | 37666934 | + | 3.16   | 2.76   |
| ENSG0000( SLC25A24P transcribec  | chr1  | 1.08E+08 | 1.08E+08 | + | 0      | 0      |
| ENSG0000( RPL36AP43 processed_   | chr15 | 89687937 | 89688243 | - | 1.02   | 0.38   |
| ENSG0000( RPL7AP23 processed_    | chr3  | 82319172 | 82320279 | - | 0      | 0      |
| ENSG0000( LINC01192 lincRNA      | chr3  | 1.63E+08 | 1.63E+08 | - | 0      | 0      |
| ENSG0000( RPP21 protein_co       | chr6  | 30345131 | 30346884 | + | 24.04  | 25.6   |

|                                       |          |            |        |        |
|---------------------------------------|----------|------------|--------|--------|
| ENSG0000(LINC01997 lincRNA chr3       | 1.69E+08 | 1.69E+08 + | 0      | 0      |
| ENSG0000(RP11-25D1 processed_chr8     | 1.1E+08  | 1.1E+08 -  | 0      | 0      |
| ENSG0000(HNF1A-AS1 processed_chr12    | 1.21E+08 | 1.21E+08 - | 0.43   | 0.31   |
| ENSG0000(RN7SL234F misc_RNA chr6      | 1.49E+08 | 1.49E+08 + | 0      | 0      |
| ENSG0000(RN7SL205F misc_RNA chr4      | 1.32E+08 | 1.32E+08 - | 0      | 0      |
| ENSG0000(RN7SL344F misc_RNA chr1      | 2.12E+08 | 2.12E+08 - | 0      | 0      |
| ENSG0000(LINC00903 antisense chr3     | 1.17E+08 | 1.17E+08 + | 0      | 0      |
| ENSG0000(CD302 protein_co chr2        | 1.6E+08  | 1.6E+08 -  | 7.25   | 6.98   |
| ENSG0000(RP11-764I5 processed_chr3    | 1.41E+08 | 1.41E+08 + | 0      | 0      |
| ENSG0000(EGFL8 protein_co chr6        | 32164583 | 32168281 + | 2.47   | 3.6    |
| ENSG0000(RN7SL515F misc_RNA chr13     | 41807677 | 41807973 + | 0      | 0      |
| ENSG0000(AC064852.3prime_ov chr2      | 2.33E+08 | 2.33E+08 - | 0      | 0      |
| ENSG0000(RP11-192C processed_chr4     | 1.35E+08 | 1.35E+08 - | 0      | 0      |
| ENSG0000(RN7SL441F misc_RNA chr12     | 1.1E+08  | 1.1E+08 -  | 0      | 0      |
| ENSG0000(KRT8P13 processed_chr3       | 1.7E+08  | 1.7E+08 +  | 0      | 0      |
| ENSG0000(MCRIP2P1 processed_chrX      | 1.32E+08 | 1.32E+08 - | 0      | 0      |
| ENSG0000(RN7SL505F misc_RNA chr7      | 33045798 | 33046090 - | 0      | 0      |
| ENSG0000(RPL21P103 processed_chr12    | 58244378 | 58244865 + | 0      | 0      |
| ENSG0000(EEF1A1P25 processed_chr3     | 1.39E+08 | 1.39E+08 + | 0.28   | 0.29   |
| ENSG0000(RPL37P6 transcribec chr8     | 56588385 | 56588787 + | 0      | 0      |
| ENSG0000(CTD-2224J1 transcribec chr19 | 53495887 | 53496037 + | 0      | 0      |
| ENSG0000(TDGF1P6 processed_chr3       | 1.36E+08 | 1.36E+08 + | 0      | 0      |
| ENSG0000(RP11-666A processed_chr3     | 1.26E+08 | 1.26E+08 + | 0      | 0      |
| ENSG0000(RP11-545G lincRNA chr7       | 1.5E+08  | 1.5E+08 +  | 0      | 0      |
| ENSG0000(RPS27P22 processed_chr12     | 22722229 | 22722469 + | 0      | 0      |
| ENSG0000(RP4-555L1.antisense chr7     | 1.51E+08 | 1.51E+08 + | 0      | 0      |
| ENSG0000(PLSCR5-AS antisense chr3     | 1.47E+08 | 1.47E+08 + | 0      | 0      |
| ENSG0000(RPL7P19 processed_chr5       | 1.38E+08 | 1.38E+08 + | 0      | 0      |
| ENSG0000(RN7SL182F misc_RNA chr3      | 49083233 | 49083532 + | 0      | 0      |
| ENSG0000(RP11-579C processed_chr17    | 58897776 | 58899692 + | 0      | 0      |
| ENSG0000(RPL39P38 processed_chr19     | 18285343 | 18285495 - | 0      | 0      |
| ENSG0000(ATP5J2 protein_co chr7       | 99448475 | 99466331 - | 246.63 | 234.29 |
| ENSG0000(LINC00635 lincRNA chr3       | 1.08E+08 | 1.08E+08 - | 0      | 0      |
| ENSG0000(PTPRG-AS1 processed_chr3     | 62260865 | 62369330 - | 0.94   | 0.6    |
| ENSG0000(RP11-259P processed_chr3     | 1.81E+08 | 1.81E+08 + | 0      | 0      |
| ENSG0000(RP4-781K5 lincRNA chr1       | 2.35E+08 | 2.35E+08 + | 0      | 0      |
| ENSG0000(SSX2 protein_co chrX         | 52696896 | 52707189 - | 0      | 0      |
| ENSG0000(HSPA8P9 processed_chr3       | 1.38E+08 | 1.38E+08 + | 0      | 0.03   |
| ENSG0000(RP11-641D antisense chr3     | 1.69E+08 | 1.69E+08 + | 0      | 0      |
| ENSG0000(ARHGAP8 protein_co chr22     | 44752558 | 44862788 + | 0      | 0.02   |
| ENSG0000(RN7SL586F misc_RNA chr14     | 73040619 | 73040914 - | 0      | 0      |
| ENSG0000(AF011889.1 protein_co chrX   | 1.49E+08 | 1.5E+08 -  | 13.02  | 11.42  |
| ENSG0000(RP11-553L antisense chr3     | 1.14E+08 | 1.14E+08 + | 0.04   | 0.04   |
| ENSG0000(RP11-274B processed_chr7     | 1.29E+08 | 1.29E+08 - | 0      | 0      |
| ENSG0000(RP11-796G processed_chr14    | 1.02E+08 | 1.02E+08 + | 0      | 0      |

|                                     |          |          |   |       |       |
|-------------------------------------|----------|----------|---|-------|-------|
| ENSG0000(RP11-85G2 processed_ chr14 | 93244010 | 93244323 | + | 0     | 0     |
| ENSG0000(RP11-161I1 lincRNA chr1    | 1.9E+08  | 1.9E+08  | + | 0     | 0     |
| ENSG0000(PSMC1P1 processed_ chr3    | 68635705 | 68637024 | + | 0.87  | 0     |
| ENSG0000(RPS15AP24 processed_ chr8  | 30117384 | 30117779 | - | 0     | 0     |
| ENSG0000(AC098820. antisense chr2   | 2.16E+08 | 2.16E+08 | - | 0.06  | 0     |
| ENSG0000(RN7SL632F misc_RNA chr2    | 60831664 | 60831929 | - | 0     | 0     |
| ENSG0000(AC108004. antisense chr17  | 404468   | 414023   | - | 0     | 0     |
| ENSG0000(RP11-144C processed_ chr3  | 1.42E+08 | 1.42E+08 | + | 0     | 0     |
| ENSG0000(CA15P1 unitary_ps chr22    | 19031564 | 19034564 | - | 0     | 0     |
| ENSG0000(RN7SL767F misc_RNA chr3    | 1.14E+08 | 1.14E+08 | + | 0     | 0     |
| ENSG0000(AGGF1P3 processed_ chr3    | 75653561 | 75654773 | - | 0     | 0     |
| ENSG0000(CBX5P1 processed_ chr3     | 88095408 | 88095968 | - | 0     | 0     |
| ENSG0000(RP11-624D processed_ chr3  | 72772539 | 72773471 | + | 0     | 0     |
| ENSG0000(RP11-740N processed_ chr7  | 6924078  | 6924513  | - | 0     | 0     |
| ENSG0000(RN7SL369F misc_RNA chr14   | 67705954 | 67706252 | + | 0     | 0     |
| ENSG0000(LINC02029 lincRNA chr3     | 1.57E+08 | 1.57E+08 | + | 0     | 0     |
| ENSG0000(RP11-767L processed_ chr3  | 1.2E+08  | 1.2E+08  | + | 0     | 0     |
| ENSG0000(ACTG1P20 processed_ chr1   | 27325329 | 27325796 | + | 0.5   | 0.55  |
| ENSG0000(GUSBP2 transcribed chr6    | 26871484 | 26956554 | - | 1.46  | 1.37  |
| ENSG0000(RN7SL41P misc_RNA chr8     | 80204606 | 80204902 | + | 0     | 0     |
| ENSG0000(RN7SL58P misc_RNA chr5     | 18547312 | 18547605 | + | 0     | 0     |
| ENSG0000(ARPC4 protein_co chr3      | 9792495  | 9807726  | + | 50.71 | 49.84 |
| ENSG0000(RP11-490G processed_ chr12 | 95467397 | 95467861 | - | 0.35  | 0     |
| ENSG0000(ZBTB20-AS antisense chr3   | 1.14E+08 | 1.14E+08 | + | 0     | 0     |
| ENSG0000(RPL7P5 processed_ chr15    | 99551382 | 99552117 | - | 0     | 0     |
| ENSG0000(CORT protein_co chr1       | 10449719 | 10451902 | + | 0.16  | 0.08  |
| ENSG0000(IGKV2D-24 IG_V_gene chr2   | 90004797 | 90005629 | + | 0     | 0     |
| ENSG0000(RN7SL338F misc_RNA chr9    | 35049271 | 35049563 | + | 0     | 0     |
| ENSG0000(PAQR9-AS1 antisense chr3   | 1.43E+08 | 1.43E+08 | + | 0.09  | 0.45  |
| ENSG0000(ATP5A1P7 processed_ chr9   | 62686912 | 62688190 | + | 0     | 0.05  |
| ENSG0000(PRICKLE2- antisense chr3   | 64099273 | 64101122 | + | 0.1   | 0     |
| ENSG0000(RP11-286H processed_ chr7  | 1.29E+08 | 1.29E+08 | - | 0     | 0     |
| ENSG0000(RP11-523C sense_ovei chr10 | 48883955 | 48935213 | - | 0     | 0     |
| ENSG0000(RPL23AP8 processed_ chr14  | 34694170 | 34694644 | + | 0     | 0     |
| ENSG0000(RN7SL482F misc_RNA chr3    | 66323855 | 66324152 | + | 0     | 0     |
| ENSG0000(RN7SL484F misc_RNA chr15   | 99791209 | 99791410 | + | 0     | 0     |
| ENSG0000(RPL17P37 processed_ chr12  | 1.19E+08 | 1.19E+08 | - | 0     | 0     |
| ENSG0000(RP11-372E processed_ chr3  | 1.43E+08 | 1.43E+08 | + | 0     | 0     |
| ENSG0000(RP11-520D lincRNA chr3     | 81246579 | 81297345 | - | 0.24  | 0     |
| ENSG0000(KRTAP9-4 protein_co chr17  | 41249687 | 41250653 | + | 0     | 0     |
| ENSG0000(RP11-326J sense_intr chr3  | 1.16E+08 | 1.16E+08 | + | 0     | 0     |
| ENSG0000(CTD-2007H processed_ chr5  | 98954394 | 98954972 | + | 0.12  | 0     |
| ENSG0000(KRTAP5-4 protein_co chr11  | 1620958  | 1622138  | - | 0     | 0     |
| ENSG0000(RP11-34P1 lincRNA chr1     | 160446   | 161525   | + | 0     | 0     |
| ENSG0000(RN7SL340F misc_RNA chr19   | 29233090 | 29233385 | - | 0     | 0     |

|                                 |       |          |          |   |       |       |
|---------------------------------|-------|----------|----------|---|-------|-------|
| ENSG0000(RP11-357K unprocessed) | chrX  | 37441523 | 37442068 | + | 0.16  | 0.15  |
| ENSG0000(RP13-585F processed)   | chr4  | 19813749 | 19814231 | + | 0     | 0     |
| ENSG0000(RN7SL618F misc_RNA)    | chr13 | 53258077 | 53258372 | + | 0     | 0     |
| ENSG0000(GOLGA2P6 unprocessed)  | chr10 | 30364410 | 30374386 | - | 0     | 0     |
| ENSG0000(RARRES2P1 processed)   | chr3  | 75658534 | 75659014 | + | 0     | 0     |
| ENSG0000(RN7SL18P misc_RNA)     | chr2  | 62491178 | 62491468 | + | 0     | 0     |
| ENSG0000(UBQLN4P1 processed)    | chr3  | 1.49E+08 | 1.49E+08 | - | 0     | 0.04  |
| ENSG0000(RN7SL316F misc_RNA)    | chr17 | 30702504 | 30702775 | - | 0     | 0     |
| ENSG0000(RP11-381E processed)   | chr3  | 1.09E+08 | 1.09E+08 | - | 0.15  | 0.16  |
| ENSG0000(UGT1A1 protein_co)     | chr2  | 2.34E+08 | 2.34E+08 | + | 0     | 0     |
| ENSG0000(LINC01323 lincRNA)     | chr3  | 1.65E+08 | 1.65E+08 | - | 0     | 0     |
| ENSG0000(RP11-59H7 processed)   | chr15 | 59049399 | 59050385 | - | 0     | 0     |
| ENSG0000(RPS23P6 processed)     | chr16 | 12081237 | 12081902 | + | 0     | 0     |
| ENSG0000(INMT protein_co)       | chr7  | 30697985 | 30757602 | + | 4.58  | 5.25  |
| ENSG0000(CADM2-AS antisense)    | chr3  | 85799987 | 85828050 | - | 0     | 0     |
| ENSG0000(RP11-214C processed)   | chr4  | 1.28E+08 | 1.28E+08 | - | 0     | 0     |
| ENSG0000(RN7SL253F misc_RNA)    | chr4  | 1.73E+08 | 1.73E+08 | + | 0     | 0     |
| ENSG0000(RPL19P18 processed)    | chr17 | 9589902  | 9590482  | - | 0     | 0     |
| ENSG0000(UBA52P7 processed)     | chr12 | 1.16E+08 | 1.16E+08 | - | 0     | 0     |
| ENSG0000(TRBV11-2 lincRNA)      | chr7  | 1.42E+08 | 1.42E+08 | + | 0     | 0     |
| ENSG0000(PPP1R2P6 processed)    | chr7  | 1.4E+08  | 1.4E+08  | + | 0     | 0     |
| ENSG0000(RN7SL418F misc_RNA)    | chr3  | 69769487 | 69769773 | - | 0     | 0     |
| ENSG0000(RP3-455J7 antisense)   | chr1  | 1.68E+08 | 1.68E+08 | - | 0.07  | 0.02  |
| ENSG0000(RP11-444P lincRNA)     | chr3  | 69591341 | 69593121 | + | 0     | 0     |
| ENSG0000(RPL19P11 processed)    | chr5  | 31053565 | 31054153 | + | 0     | 0     |
| ENSG0000(LINC01327 lincRNA)     | chr3  | 1.67E+08 | 1.67E+08 | + | 0     | 0     |
| ENSG0000(RPL23AP21 processed)   | chr1  | 258568   | 259024   | - | 0     | 0     |
| ENSG0000(RP11-529G processed)   | chr3  | 1.53E+08 | 1.53E+08 | - | 0     | 0     |
| ENSG0000(RPS27P12 processed)    | chr3  | 1.29E+08 | 1.29E+08 | - | 0     | 0     |
| ENSG0000(RP11-732A processed)   | chr11 | 6685891  | 6686369  | - | 0     | 0     |
| ENSG0000(RP11-80H8 processed)   | chr3  | 1.43E+08 | 1.43E+08 | + | 0     | 0     |
| ENSG0000(RPL31P49 processed)    | chr12 | 1.1E+08  | 1.1E+08  | + | 0     | 0     |
| ENSG0000(ADAMTS9- antisense)    | chr3  | 64684909 | 65011468 | + | 1.34  | 1.24  |
| ENSG0000(ARPC1A protein_co)     | chr7  | 99325910 | 99366262 | + | 48.29 | 48.61 |
| ENSG0000(RP5-860F1 protein_co)  | chr20 | 2814968  | 2818066  | + | 0.07  | 0     |
| ENSG0000(RN7SL704F misc_RNA)    | chr22 | 38231720 | 38231993 | + | 0     | 0     |
| ENSG0000(GM2AP1 processed)      | chr3  | 1.46E+08 | 1.46E+08 | + | 0     | 0     |
| ENSG0000(LINC02053 lincRNA)     | chr3  | 1.8E+08  | 1.8E+08  | + | 0     | 0     |
| ENSG0000(TMEFF1 protein_co)     | chr9  | 1E+08    | 1.01E+08 | + | 1.43  | 1.99  |
| ENSG0000(RN7SL265F misc_RNA)    | chr7  | 73732569 | 73732868 | - | 0     | 0     |
| ENSG0000(VWFP1 transcribed)     | chr22 | 16690103 | 16704477 | - | 0     | 0     |
| ENSG0000(RP4-735C1 antisense)   | chr1  | 1.1E+08  | 1.1E+08  | + | 0     | 0     |
| ENSG0000(SUMO1P1 processed)     | chr20 | 53875252 | 53875557 | - | 0     | 0     |
| ENSG0000(RP11-255I1 processed)  | chr4  | 1.12E+08 | 1.12E+08 | + | 0     | 0     |
| ENSG0000(RP11-113A processed)   | chr3  | 1.58E+08 | 1.58E+08 | - | 0     | 0.37  |

|                              |             |          |          |          |   |      |      |
|------------------------------|-------------|----------|----------|----------|---|------|------|
| ENSG000001AP001062. sense_ov | chr21       | 44328944 | 44330221 | -        | 0 | 0    |      |
| ENSG000001FABP5P3            | transcribed | chr7     | 1.52E+08 | 1.52E+08 | + | 0.41 | 0    |
| ENSG000001FAM90A23           | unprocessed | chr8     | 7579644  | 7582653  | - | 0    | 0    |
| ENSG000001ZNF90P1            | processed   | chr3     | 1.01E+08 | 1.01E+08 | + | 0    | 0.03 |
| ENSG000001CTD-2290C          | processed   | chr5     | 31840492 | 31840971 | - | 0.32 | 0.18 |
| ENSG000001RPL7AP30           | processed   | chr4     | 1.13E+08 | 1.13E+08 | - | 0    | 0    |
| ENSG000001XACT               | lincRNA     | chrX     | 1.14E+08 | 1.14E+08 | - | 0    | 0    |
| ENSG000001RP11-399D          | processed   | chr12    | 1.01E+08 | 1.01E+08 | - | 0    | 0    |
| ENSG000001RN7SL788F          | misc_RNA    | chr1     | 52150104 | 52150419 | + | 0    | 0    |
| ENSG000001RP11-941H          | processed   | chr8     | 80265528 | 80266155 | - | 0    | 0    |
| ENSG000001RPSAP52            | transcribed | chr12    | 65758020 | 65826997 | - | 0.36 | 0.86 |
| ENSG000001RP11-280H          | lincRNA     | chr3     | 1.03E+08 | 1.03E+08 | - | 0    | 0    |
| ENSG000001IGKV1-9            | IG_V_gene   | chr2     | 89009982 | 89010515 | - | 0    | 0    |
| ENSG000001RN7SL83P           | misc_RNA    | chr7     | 38531042 | 38531338 | - | 0    | 0    |
| ENSG000001RN7SL714F          | misc_RNA    | chr14    | 98351367 | 98351664 | - | 0    | 0    |
| ENSG000001AC002467.          | antisense   | chr7     | 1.08E+08 | 1.08E+08 | - | 1.47 | 2.07 |
| ENSG000001RPS26P45           | processed   | chr12    | 69422656 | 69422995 | + | 0    | 0    |
| ENSG000001LINC01324          | lincRNA     | chr3     | 1.65E+08 | 1.65E+08 | - | 0    | 0    |
| ENSG000001LINC00893          | antisense   | chrX     | 1.5E+08  | 1.5E+08  | - | 4.88 | 5.8  |
| ENSG000001RP11-555N          | antisense   | chr3     | 1.57E+08 | 1.57E+08 | + | 0    | 0    |
| ENSG000001AC092620.          | 3prime_ov   | chr2     | 1.39E+08 | 1.39E+08 | + | 0    | 0    |
| ENSG000001RP11-651J.         | processed   | chr3     | 84691681 | 84692591 | - | 0    | 0    |
| ENSG000001RP11-148C          | unprocessed | chr3     | 1.09E+08 | 1.09E+08 | - | 0    | 0    |
| ENSG000001RP11-91P2          | processed   | chr11    | 77868722 | 77869195 | - | 0    | 0    |
| ENSG000001RN7SL390F          | misc_RNA    | chr12    | 54255627 | 54255910 | - | 0    | 0    |
| ENSG000001MTND4P1            | unprocessed | chr3     | 1.07E+08 | 1.07E+08 | - | 0    | 0    |
| ENSG000001COX6B1P2           | processed   | chr17    | 48713730 | 48713959 | + | 0    | 0    |
| ENSG000001RN7SL504F          | misc_RNA    | chr3     | 51872178 | 51872464 | + | 0    | 0    |
| ENSG000001ENO1P4             | processed   | chr2     | 2.02E+08 | 2.02E+08 | - | 0.52 | 0.92 |
| ENSG000001RN7SL817F          | misc_RNA    | chr2     | 46448224 | 46448511 | - | 0    | 0    |
| ENSG000001RP11-501C          | lincRNA     | chr3     | 1.48E+08 | 1.48E+08 | + | 0    | 0    |
| ENSG000001SPRR2A             | protein_co  | chr1     | 1.53E+08 | 1.53E+08 | - | 0    | 0    |
| ENSG000001RP11-719N          | processed   | chr3     | 59535863 | 59536415 | + | 0    | 0    |
| ENSG000001RN7SL319F          | misc_RNA    | chr15    | 75785134 | 75785354 | + | 0    | 0    |
| ENSG000001RPS15AP3           | processed   | chr16    | 63350763 | 63351149 | - | 0    | 0    |
| ENSG000001CTD-2207L          | processed   | chr5     | 52903908 | 52904478 | + | 0    | 0    |
| ENSG000001HMGN2P1.           | processed   | chr3     | 1.53E+08 | 1.53E+08 | + | 0    | 0    |
| ENSG000001RP11-124D          | processed   | chr3     | 96566357 | 96567103 | + | 0    | 0    |
| ENSG000001RP11-1000          | antisense   | chr15    | 32656084 | 32673065 | - | 0    | 0    |
| ENSG000001RN7SL170F          | misc_RNA    | chr20    | 56688401 | 56688695 | + | 0    | 0    |
| ENSG000001RPL7P42            | processed   | chr12    | 68684595 | 68686308 | + | 0    | 0    |
| ENSG000001RP11-277J.         | processed   | chr12    | 7860437  | 7860764  | + | 0    | 0    |
| ENSG000001RPL21P54           | processed   | chr5     | 34883057 | 34883520 | + | 0    | 0    |
| ENSG000001CECR3              | lincRNA     | chr22    | 17256859 | 17266733 | - | 0    | 0    |
| ENSG000001RN7SL149F          | misc_RNA    | chr8     | 41840059 | 41840339 | - | 0    | 0    |

|                     |             |       |          |          |   |       |       |
|---------------------|-------------|-------|----------|----------|---|-------|-------|
| ENSG0000(ATP5O      | protein_co  | chr21 | 33903453 | 33915980 | - | 95.27 | 96.19 |
| ENSG0000(LA16c-3G1  | processed_  | chr22 | 15721486 | 15722608 | + | 0     | 0     |
| ENSG0000(PLEKHO2    | protein_co  | chr15 | 64841883 | 64868007 | + | 20.67 | 21    |
| ENSG0000(RP11-318G  | processed_  | chr12 | 25409293 | 25409445 | - | 0     | 0     |
| ENSG0000(C8orf58    | protein_co  | chr8  | 22599601 | 22604150 | + | 10.75 | 10.73 |
| ENSG0000(RP11-147K  | processed_  | chr4  | 88163579 | 88163967 | + | 0     | 0     |
| ENSG0000(ANOS2P     | transcribec | chrY  | 13751656 | 13915824 | + | 0.03  | 0.11  |
| ENSG0000(RP11-34P1  | processed_  | chr1  | 141474   | 173862   | - | 2.32  | 0.84  |
| ENSG0000(GAPDHP50   | processed_  | chr3  | 89047442 | 89048434 | - | 0     | 0     |
| ENSG0000(RN7SL401F  | misc_RNA    | chr18 | 73744935 | 73745232 | + | 0     | 0     |
| ENSG0000(RN7SL434F  | misc_RNA    | chr3  | 1.96E+08 | 1.96E+08 | - | 0     | 0     |
| ENSG0000(RN7SL363F  | misc_RNA    | chr15 | 90855935 | 90856207 | - | 0     | 0     |
| ENSG0000(CTB-14A14  | processed_  | chr5  | 1.81E+08 | 1.81E+08 | + | 0     | 0     |
| ENSG0000(TOMM22P    | processed_  | chr3  | 1.62E+08 | 1.62E+08 | - | 0     | 0     |
| ENSG0000(RP11-84H6  | processed_  | chr4  | 1.78E+08 | 1.78E+08 | + | 0     | 0     |
| ENSG0000(PISD       | protein_co  | chr22 | 31618491 | 31662432 | - | 16.72 | 20.83 |
| ENSG0000(KLF3P2     | processed_  | chr3  | 1.57E+08 | 1.57E+08 | + | 0     | 0     |
| ENSG0000(U66059.58  | lincRNA     | chr7  | 1.42E+08 | 1.42E+08 | + | 0     | 0     |
| ENSG0000(RP11-637C  | lincRNA     | chr3  | 1.68E+08 | 1.68E+08 | + | 0     | 0     |
| ENSG0000(RP11-85I2I | lincRNA     | chr3  | 67296300 | 67306359 | + | 0     | 0     |
| ENSG0000(RP11-242C  | sense_intr  | chrX  | 30698207 | 30721932 | + | 0.38  | 0     |
| ENSG0000(RPSAP37    | processed_  | chr5  | 1.26E+08 | 1.26E+08 | - | 0     | 0     |
| ENSG0000(RP11-435F  | processed_  | chr3  | 1.14E+08 | 1.14E+08 | + | 0.36  | 0.1   |
| ENSG0000(RPL13P4    | processed_  | chr15 | 75388267 | 75388828 | + | 0     | 0     |
| ENSG0000(RP11-226P  | processed_  | chr14 | 81777016 | 81777613 | - | 0     | 0     |
| ENSG0000(TPT1P3     | processed_  | chr3  | 1.42E+08 | 1.42E+08 | - | 0     | 0     |
| ENSG0000(NDUFS6P1   | processed_  | chr3  | 1.36E+08 | 1.36E+08 | - | 0     | 0     |
| ENSG0000(RPS20P4    | processed_  | chr5  | 1.5E+08  | 1.5E+08  | - | 0     | 0     |
| ENSG0000(TRBVB      | TR_V_pseu   | chr7  | 1.43E+08 | 1.43E+08 | + | 0     | 0     |
| ENSG0000(RP11-292E  | lincRNA     | chr3  | 1.53E+08 | 1.53E+08 | + | 0     | 0     |
| ENSG0000(RPS29P21   | processed_  | chr17 | 59912197 | 59912366 | + | 0     | 0     |
| ENSG0000(RP11-512N  | processed_  | chr12 | 1.02E+08 | 1.02E+08 | + | 0     | 0     |
| ENSG0000(AC000370.  | antisense   | chr7  | 1.26E+08 | 1.26E+08 | + | 0     | 0     |
| ENSG0000(RPL14P3    | processed_  | chr4  | 1.4E+08  | 1.4E+08  | - | 0     | 0     |
| ENSG0000(MTCO1P55   | processed_  | chr7  | 1.42E+08 | 1.42E+08 | - | 0     | 0     |
| ENSG0000(RP11-278L  | processed_  | chr3  | 1.49E+08 | 1.49E+08 | - | 0     | 0     |
| ENSG0000(RP11-14K2  | processed_  | chr16 | 12881170 | 12881493 | + | 0     | 0     |
| ENSG0000(RP11-755B  | lincRNA     | chr3  | 57693205 | 57696596 | + | 0.02  | 0.02  |
| ENSG0000(HOGA1      | protein_co  | chr10 | 97584323 | 97612802 | + | 0.17  | 0.26  |
| ENSG0000(RN7SL517F  | misc_RNA    | chr3  | 43314951 | 43315255 | + | 0     | 0     |
| ENSG0000(RPL32P26   | processed_  | chr12 | 62658823 | 62659225 | + | 0     | 0     |
| ENSG0000(RPS20P20   | processed_  | chr8  | 71895991 | 71896330 | + | 0     | 0     |
| ENSG0000(RN7SL188F  | misc_RNA    | chr11 | 16576851 | 16577135 | + | 0     | 0     |
| ENSG0000(PWP2       | protein_co  | chr21 | 44107290 | 44131181 | + | 3.24  | 4.61  |
| ENSG0000(RP11-496B  | processed_  | chr3  | 1.81E+08 | 1.81E+08 | - | 0     | 0     |



|                                     |          |          |   |       |       |
|-------------------------------------|----------|----------|---|-------|-------|
| ENSG0000(HNRNPA1F processed_ chr3   | 1.5E+08  | 1.5E+08  | + | 0     | 0     |
| ENSG0000(RPL29P23 processed_ chr11  | 33190062 | 33190503 | - | 0     | 0     |
| ENSG0000(RP1-149A1 lincRNA chr22    | 32383786 | 32385631 | + | 0     | 0     |
| ENSG0000(CTC-340A1 antisense chr5   | 1.64E+08 | 1.65E+08 | + | 5.96  | 5.02  |
| ENSG0000(RN7SL76P misc_RNA chr7     | 1.51E+08 | 1.51E+08 | - | 0     | 0     |
| ENSG0000(RP11-7F18 processed_ chr8  | 67406515 | 67407072 | + | 0.13  | 0     |
| ENSG0000(RP11-111H protein_co chr2  | 99141485 | 99322741 | + | 0.05  | 0.11  |
| ENSG0000(RN7SL655F misc_RNA chr5    | 1.54E+08 | 1.54E+08 | + | 0     | 0     |
| ENSG0000(RN7SL135F misc_RNA chr8    | 63234634 | 63234911 | - | 0     | 0     |
| ENSG0000(RPS2P25 processed_ chr5    | 85762559 | 85763138 | + | 0     | 0     |
| ENSG0000(PI4KA protein_co chr22     | 20707691 | 20859417 | - | 15.39 | 16.93 |
| ENSG0000(ELOCP19 processed_ chr1    | 88829102 | 88829419 | + | 5.41  | 3.5   |
| ENSG0000(AKAP2 protein_co chr9      | 1.1E+08  | 1.1E+08  | + | 70.81 | 65.48 |
| ENSG0000(AF224669.. processed_ chr4 | 1.03E+08 | 1.03E+08 | + | 0     | 0     |
| ENSG0000(RN7SL566F misc_RNA chr19   | 39369153 | 39369448 | + | 0.73  | 0.81  |
| ENSG0000(RPL7AP2 processed_ chr14   | 39156742 | 39157852 | + | 0     | 0     |
| ENSG0000(WWTR1-IT sense_intr chr3   | 1.5E+08  | 1.5E+08  | - | 0.18  | 0.19  |
| ENSG0000(PRR34-AS1 antisense chr22  | 46053705 | 46057210 | + | 5.74  | 3.7   |
| ENSG0000(RP11-9511 processed_ chr5  | 62561859 | 62562216 | - | 0     | 0     |
| ENSG0000(RN7SL831F misc_RNA chr1    | 96583209 | 96583527 | + | 0     | 0     |
| ENSG0000(RPL38P1 processed_ chr3    | 1.49E+08 | 1.49E+08 | - | 0     | 0     |
| ENSG0000(RN7SL323F misc_RNA chr8    | 56022019 | 56022313 | - | 0     | 0     |
| ENSG0000(GS1-388B5 processed_ chr3  | 1.26E+08 | 1.26E+08 | + | 0     | 0     |
| ENSG0000(RP11-359D lincRNA chr3     | 81840547 | 81922861 | + | 0     | 0     |
| ENSG0000(RP11-338L lincRNA chr3     | 1.82E+08 | 1.82E+08 | + | 0     | 0     |
| ENSG0000(RN7SL26P misc_RNA chr6     | 33540694 | 33541000 | + | 0     | 0     |
| ENSG0000(ALG1L15P processed_ chr3   | 1.56E+08 | 1.56E+08 | - | 0     | 0     |
| ENSG0000(KIR3DL3 protein_co chr19   | 54724479 | 54736536 | + | 0     | 0     |
| ENSG0000(RN7SL68P misc_RNA chr5     | 1.41E+08 | 1.41E+08 | + | 0     | 0     |
| ENSG0000(RP11-268G lincRNA chrX     | 27042907 | 27176298 | - | 0     | 0     |
| ENSG0000(HYPK protein_co chr15      | 43796142 | 43803043 | + | 1     | 1.05  |
| ENSG0000(RP11-457K lincRNA chr3     | 1.1E+08  | 1.1E+08  | + | 0     | 0     |
| ENSG0000(RP11-1396 processed_ chr4  | 9553614  | 9553985  | - | 0     | 0     |
| ENSG0000(RP11-603B processed_ chr3  | 1.68E+08 | 1.68E+08 | - | 0     | 0     |
| ENSG0000(RP11-70F1 processed_ chr12 | 49863173 | 49863503 | + | 0     | 0     |
| ENSG0000(LINC01743 lincRNA chr1     | 2.47E+08 | 2.47E+08 | - | 0     | 0     |
| ENSG0000(RP13-452N processed_ chr7  | 1.52E+08 | 1.52E+08 | + | 0     | 0     |
| ENSG0000(DNAJB8-AS antisense chr3   | 1.28E+08 | 1.28E+08 | + | 0     | 0     |
| ENSG0000(RPL10P7 processed_ chr3    | 1.2E+08  | 1.2E+08  | - | 0     | 0     |
| ENSG0000(RPS4XP19 processed_ chr18  | 9020029  | 9020764  | + | 0     | 0     |
| ENSG0000(RPS3AP49 processed_ chr18  | 60149576 | 60150365 | + | 0     | 0     |
| ENSG0000(CTD-2555K processed_ chr14 | 22694098 | 22694535 | - | 0     | 0     |
| ENSG0000(MARK2P6 processed_ chr3    | 1.29E+08 | 1.29E+08 | - | 0     | 0     |
| ENSG0000(RN7SL291F misc_RNA chrX    | 44772773 | 44773061 | - | 0     | 0     |
| ENSG0000(RN7SL214F misc_RNA chr15   | 77916718 | 77916982 | - | 0     | 0     |

|                                      |          |          |   |       |       |
|--------------------------------------|----------|----------|---|-------|-------|
| ENSG0000(RPL9P28 processed_ chr17    | 48691116 | 48691694 | - | 0     | 0     |
| ENSG0000(RP11-259P processed_ chr3   | 1.81E+08 | 1.81E+08 | - | 0.1   | 0.17  |
| ENSG0000(NPM1P17 processed_ chr3     | 1.38E+08 | 1.38E+08 | + | 0     | 0     |
| ENSG0000(RPL7AP6 processed_ chr14    | 69885340 | 69886140 | - | 0.11  | 0     |
| ENSG0000(RP11-458K lincRNA chr7      | 1.16E+08 | 1.16E+08 | - | 0     | 0     |
| ENSG0000(AC006014. transcribec chr7  | 75474707 | 75486108 | - | 0     | 1.72  |
| ENSG0000(IGKV1-33 IG_V_gene chr2     | 89266494 | 89268506 | - | 0     | 0     |
| ENSG0000(RP11-738B lincRNA chr7      | 1.3E+08  | 1.3E+08  | - | 0     | 0     |
| ENSG0000(RN7SL318F misc_RNA chr8     | 5142411  | 5142707  | - | 0     | 0     |
| ENSG0000(CTC-550M processed_ chr5    | 1.52E+08 | 1.52E+08 | - | 0     | 0     |
| ENSG0000(RP1-90G24 antisense chr22   | 32205115 | 32269666 | + | 0     | 0     |
| ENSG0000(RPL7AP31 processed_ chr4    | 56356135 | 56356932 | + | 0     | 0     |
| ENSG0000(RPS20P33 processed_ chr14   | 1.05E+08 | 1.05E+08 | + | 0.52  | 1.15  |
| ENSG0000(LINC00969 lincRNA chr3      | 1.96E+08 | 1.96E+08 | + | 15.33 | 17.01 |
| ENSG0000(RPL36AP41 processed_ chr12  | 63871739 | 63872044 | - | 0     | 0     |
| ENSG0000(AC090602. processed_ chr15  | 24910874 | 24911125 | - | 0     | 0     |
| ENSG0000(FOXP1-IT1 sense_intr chr3   | 71570255 | 71574457 | - | 0     | 0.02  |
| ENSG0000(RP11-64D2 processed_ chr3   | 1.52E+08 | 1.52E+08 | - | 0     | 0     |
| ENSG0000(RPL9P32 processed_ chr19    | 29956369 | 29956988 | - | 0     | 0     |
| ENSG0000(RN7SL416F misc_RNA chr7     | 1.01E+08 | 1.01E+08 | - | 0     | 0     |
| ENSG0000(RN7SL152F misc_RNA chr4     | 1.41E+08 | 1.41E+08 | + | 0     | 0     |
| ENSG0000(RP11-10G1 processed_ chr3   | 1.21E+08 | 1.21E+08 | + | 0     | 0     |
| ENSG0000(RP11-340E transcribec chr3  | 1.42E+08 | 1.42E+08 | + | 0     | 0.05  |
| ENSG0000(LINC01100 lincRNA chr3      | 1.6E+08  | 1.6E+08  | + | 0     | 0     |
| ENSG0000(NPM1P23 transcribec chr3    | 24096512 | 24097360 | - | 0     | 0     |
| ENSG0000(AMACR protein_co chr5       | 33986178 | 34008108 | - | 7.04  | 7.7   |
| ENSG0000(TOPORSLP transcribec chr9   | 1.04E+08 | 1.04E+08 | + | 0     | 0.07  |
| ENSG0000(RN7SL124F misc_RNA chr2     | 1.51E+08 | 1.51E+08 | + | 0     | 0.44  |
| ENSG0000(MTFP1 protein_co chr22      | 30425530 | 30429053 | + | 4.84  | 3.94  |
| ENSG0000(RN7SL201F misc_RNA chr2     | 81967079 | 81967374 | + | 0     | 0     |
| ENSG0000(RP11-312P processed_ chr3   | 1.51E+08 | 1.51E+08 | + | 0     | 0     |
| ENSG0000(RP11-231I1 protein_co chr3  | 70196894 | 70312726 | - | 0     | 0     |
| ENSG0000(RN7SL267F misc_RNA chr2     | 1.82E+08 | 1.82E+08 | + | 0     | 0     |
| ENSG0000(RP11-51L5. processed_ chr17 | 62319884 | 62320189 | + | 0     | 0     |
| ENSG0000(SNHG3 sense_intr chr1       | 28505980 | 28510892 | + | 10.17 | 10.77 |
| ENSG0000(RPL5P13 processed_ chr4     | 1.42E+08 | 1.42E+08 | - | 0     | 0     |
| ENSG0000(RPL17P2 processed_ chr14    | 60212462 | 60212912 | - | 0     | 0     |
| ENSG0000(RP11-734K processed_ chr2   | 9103440  | 9105114  | + | 0     | 0     |
| ENSG0000(RPL11P5 processed_ chr12    | 1.21E+08 | 1.21E+08 | - | 0     | 0     |
| ENSG0000(RP11-262M processed_ chr3   | 1.81E+08 | 1.81E+08 | + | 0     | 0     |
| ENSG0000(SERBP1P3 processed_ chr3    | 53064283 | 53065091 | - | 0     | 0     |
| ENSG0000(RP11-520D lincRNA chr3      | 81208193 | 81208914 | - | 0     | 0     |
| ENSG0000(RP13-463N lincRNA chr10     | 5594991  | 5596118  | - | 0     | 0     |
| ENSG0000(RPS10P7 transcribec chr1    | 2.02E+08 | 2.02E+08 | + | 0.18  | 0.41  |
| ENSG0000(DYNLL1P5 processed_ chr3    | 1.55E+08 | 1.55E+08 | + | 0     | 0     |

|                     |                      |          |          |   |       |       |
|---------------------|----------------------|----------|----------|---|-------|-------|
| ENSG0000(RP11-639F) | processed_chr3       | 1.55E+08 | 1.55E+08 | - | 0     | 0     |
| ENSG0000(OFD1P6Y)   | transcribed_chrY     | 18674033 | 18739197 | + | 0     | 0     |
| ENSG0000(RP4-778K6) | antisense_chr7       | 1.05E+08 | 1.05E+08 | + | 0     | 0     |
| ENSG0000(AC000041)  | unprocessed_chr22    | 29419155 | 29423193 | - | 7.48  | 13.24 |
| ENSG0000(RN7SL361F) | misc_RNA_chr2        | 60640705 | 60641002 | + | 0     | 0     |
| ENSG0000(ABCF2P1)   | processed_chr3       | 88317156 | 88319022 | + | 0     | 0.07  |
| ENSG0000(RP11-128A) | processed_chr7       | 1.29E+08 | 1.29E+08 | - | 0     | 0     |
| ENSG0000(RP11-299L) | processed_chr14      | 81332961 | 81333361 | - | 0     | 0     |
| ENSG0000(RN7SL222F) | misc_RNA_chr11       | 1.01E+08 | 1.01E+08 | - | 0     | 0     |
| ENSG0000(RP11-219G) | processed_chr4       | 1.88E+08 | 1.88E+08 | - | 0     | 0     |
| ENSG0000(RN7SL329F) | misc_RNA_chr8        | 1.25E+08 | 1.25E+08 | + | 0     | 0     |
| ENSG0000(ARHGDIG)   | protein_coding_chr16 | 268727   | 283010   | + | 0.6   | 0.73  |
| ENSG0000(RN7SL127F) | misc_RNA_chr4        | 78898855 | 78899154 | + | 0     | 0     |
| ENSG0000(RPL39P31)  | processed_chr16      | 71991151 | 71991305 | - | 0     | 0     |
| ENSG0000(MTND4P17)  | processed_chr3       | 1.66E+08 | 1.66E+08 | - | 0     | 0     |
| ENSG0000(OR51B5)    | protein_coding_chr11 | 5342586  | 5343524  | - | 0     | 0     |
| ENSG0000(RN7SL745F) | misc_RNA_chr18       | 23004564 | 23004862 | + | 0     | 0     |
| ENSG0000(AC002523)  | unprocessed_chrX     | 1.49E+08 | 1.49E+08 | + | 0     | 0     |
| ENSG0000(RP11-142L) | lincRNA_chr3         | 81762706 | 81764756 | - | 0     | 0     |
| ENSG0000(RP11-568K) | transcribed_chr1     | 1.78E+08 | 1.78E+08 | - | 5.26  | 4.73  |
| ENSG0000(SRRM1P2)   | processed_chr3       | 83937045 | 83938236 | + | 0     | 0     |
| ENSG0000(RP11-588L) | processed_chr4       | 40491733 | 40492024 | + | 0     | 0     |
| ENSG0000(CTD-2235C) | processed_chr5       | 75374463 | 75374809 | + | 0     | 0     |
| ENSG0000(RP11-71H1) | processed_chr3       | 1.25E+08 | 1.25E+08 | - | 0     | 0     |
| ENSG0000(RN7SL215F) | misc_RNA_chr3        | 1.94E+08 | 1.94E+08 | + | 0     | 0     |
| ENSG0000(RPS26P35)  | processed_chr8       | 1.19E+08 | 1.19E+08 | - | 0     | 0     |
| ENSG0000(HOXB-AS4)  | antisense_chr17      | 48628675 | 48634932 | + | 0     | 0     |
| ENSG0000(RPL5P29)   | processed_chr11      | 56357328 | 56358221 | + | 0     | 0     |
| ENSG0000(AC006445)  | processed_chr4       | 13647697 | 13648400 | - | 0     | 0     |
| ENSG0000(MTND3P6)   | unprocessed_chr3     | 1.07E+08 | 1.07E+08 | - | 0     | 0     |
| ENSG0000(RN7SL97P)  | misc_RNA_chr18       | 25818234 | 25818532 | - | 0     | 0     |
| ENSG0000(TCP10L)    | protein_coding_chr21 | 32574841 | 32587373 | - | 0.05  | 0.2   |
| ENSG0000(PSG2)      | protein_coding_chr19 | 43064211 | 43083045 | - | 0     | 0     |
| ENSG0000(RP11-237P) | processed_chr3       | 1.36E+08 | 1.36E+08 | + | 0     | 0     |
| ENSG0000(RPS3AP14)  | processed_chr3       | 1.26E+08 | 1.26E+08 | + | 0     | 0     |
| ENSG0000(RN7SL594F) | misc_RNA_chr20       | 25654595 | 25654881 | - | 0     | 0     |
| ENSG0000(RN7SL306F) | misc_RNA_chr7        | 1.29E+08 | 1.29E+08 | + | 0     | 0     |
| ENSG0000(PVRL3-AS1) | antisense_chr3       | 1.11E+08 | 1.11E+08 | - | 0     | 0.27  |
| ENSG0000(ATP5G1P3)  | processed_chr3       | 1.39E+08 | 1.39E+08 | - | 0     | 0     |
| ENSG0000(RP11-331C) | processed_chr6       | 1.54E+08 | 1.54E+08 | + | 0     | 0     |
| ENSG0000(ARFGAP3)   | protein_coding_chr22 | 42796502 | 42858106 | - | 16.35 | 18.09 |
| ENSG0000(RPL7AP57)  | processed_chr11      | 92161106 | 92161889 | + | 0     | 0     |
| ENSG0000(RN7SL20P)  | misc_RNA_chr22       | 31757202 | 31757498 | + | 0     | 0     |
| ENSG0000(BGLAP)     | protein_coding_chr1  | 1.56E+08 | 1.56E+08 | + | 0.08  | 0.18  |
| ENSG0000(RPL39P34)  | transcribed_chr19    | 52564076 | 52564231 | + | 0     | 0     |

|                     |             |       |          |          |   |       |       |
|---------------------|-------------|-------|----------|----------|---|-------|-------|
| ENSG0000(RN7SL57P)  | misc_RNA    | chr9  | 1.12E+08 | 1.12E+08 | - | 0     | 0     |
| ENSG0000(LINC00996) | lincRNA     | chr7  | 1.5E+08  | 1.5E+08  | + | 0     | 0.17  |
| ENSG0000(C22orf39)  | protein_co  | chr22 | 19351368 | 19448232 | - | 13.15 | 15.17 |
| ENSG0000(RP11-62J1) | processed   | chr7  | 1.28E+08 | 1.28E+08 | + | 0     | 0     |
| ENSG0000(RP11-100N) | processed   | chr4  | 47706372 | 47706987 | + | 0     | 0     |
| ENSG0000(PEG10)     | protein_co  | chr7  | 94656325 | 94669695 | + | 16.42 | 20.1  |
| ENSG0000(RN7SL456F) | misc_RNA    | chr7  | 1.48E+08 | 1.48E+08 | + | 0     | 0     |
| ENSG0000(SKINT1L)   | transcribec | chr1  | 48096092 | 48182428 | - | 0.45  | 0     |
| ENSG0000(LINC02082) | lincRNA     | chr3  | 1.69E+08 | 1.69E+08 | + | 0     | 0     |
| ENSG0000(AK2P2)     | processed   | chr2  | 31823413 | 31823817 | - | 0     | 0     |
| ENSG0000(RPL5P3)    | processed   | chr15 | 71063101 | 71063989 | - | 0     | 0     |
| ENSG0000(RP11-382N) | processed   | chr16 | 5270174  | 5270954  | + | 0     | 0     |
| ENSG0000(RP11-659G) | processed   | chr11 | 82957423 | 82958216 | + | 0     | 0     |
| ENSG0000(SLC16A1P1) | processed   | chr7  | 1.44E+08 | 1.44E+08 | + | 0     | 0     |
| ENSG0000(RN7SL159F) | misc_RNA    | chr9  | 1.29E+08 | 1.29E+08 | - | 0     | 0     |
| ENSG0000(AC108488)  | lincRNA     | chr2  | 3531813  | 3536873  | - | 4.89  | 4.4   |
| ENSG0000(RPL6P8)    | processed   | chr3  | 1.61E+08 | 1.61E+08 | + | 0     | 0     |
| ENSG0000(RP11-464F) | processed   | chr10 | 73674295 | 73730466 | - | 0.44  | 0     |
| ENSG0000(ZBTB20-AS) | lincRNA     | chr3  | 1.14E+08 | 1.15E+08 | + | 0     | 0     |
| ENSG0000(RPL36AP51) | processed   | chr19 | 21233335 | 21233652 | + | 0     | 0     |
| ENSG0000(CTD-2282P) | processed   | chr5  | 36588506 | 36588661 | + | 0     | 0     |
| ENSG0000(RPS29P1)   | processed   | chr14 | 69023150 | 69023308 | - | 0     | 0     |
| ENSG0000(STAG3L5P)  | transcribec | chr7  | 1E+08    | 1E+08    | + | 4.28  | 5.72  |
| ENSG0000(RP11-522B) | processed   | chr15 | 96448154 | 96448493 | + | 0     | 0     |
| ENSG0000(DEFB109P1) | unprocessε  | chr8  | 12393209 | 12400366 | - | 0     | 0     |
| ENSG0000(RP11-234A) | processed   | chr3  | 1.02E+08 | 1.02E+08 | - | 0     | 0     |
| ENSG0000(RPS26P52)  | processed   | chr16 | 13922332 | 13922679 | - | 0     | 0     |
| ENSG0000(RP11-572C) | unprocessε  | chr3  | 1.13E+08 | 1.13E+08 | - | 0     | 0     |
| ENSG0000(RPL12P32)  | processed   | chr12 | 31948334 | 31948827 | + | 0     | 0     |
| ENSG0000(RN7SL685F) | misc_RNA    | chr8  | 1.01E+08 | 1.01E+08 | + | 0     | 0     |
| ENSG0000(RP11-875H) | lincRNA     | chr3  | 55493830 | 55505261 | - | 0     | 0     |
| ENSG0000(RP11-810D) | processed   | chr4  | 98409290 | 98409763 | + | 0     | 0     |
| ENSG0000(RPL21P126) | processed   | chr18 | 55635833 | 55636310 | + | 0     | 0     |
| ENSG0000(RPL23AP4C) | processed   | chr3  | 1.39E+08 | 1.39E+08 | + | 0     | 0     |
| ENSG0000(RP4-576H2) | unprocessε  | chr20 | 1516759  | 1557653  | - | 0     | 0     |
| ENSG0000(RPS12P31)  | processed   | chr19 | 32636078 | 32636475 | + | 0     | 0     |
| ENSG0000(RP11-12N1) | processed   | chr3  | 1.66E+08 | 1.66E+08 | - | 0     | 0     |
| ENSG0000(CTD-2184D) | processed   | chr15 | 52095295 | 52095747 | + | 0     | 0     |
| ENSG0000(RP11-59H1) | processed   | chr12 | 12840804 | 12841079 | - | 0     | 0     |
| ENSG0000(RN7SL683F) | misc_RNA    | chr14 | 71448689 | 71448958 | + | 0     | 0     |
| ENSG0000(TFP1)      | transcribec | chr3  | 1.34E+08 | 1.34E+08 | + | 0.24  | 0.3   |
| ENSG0000(BMS1P4)    | transcribec | chr10 | 73715843 | 73730469 | - | 0.32  | 0.08  |
| ENSG0000(LINC02025) | lincRNA     | chr3  | 84884936 | 84893379 | + | 0     | 0     |
| ENSG0000(RN7SL646F) | misc_RNA    | chr5  | 1.78E+08 | 1.78E+08 | + | 0     | 0     |
| ENSG0000(RN7SL561F) | misc_RNA    | chr20 | 1666360  | 1666640  | + | 0     | 0     |

|                                      |          |          |   |       |       |
|--------------------------------------|----------|----------|---|-------|-------|
| ENSG0000(NPPA-AS1 antisense chr1     | 11841017 | 11848079 | + | 0.72  | 1.66  |
| ENSG0000(FAM91A3P transcribed chr1   | 1.44E+08 | 1.44E+08 | + | 0     | 0.05  |
| ENSG0000(RPL12P30 processed_ chr11   | 30368148 | 30368646 | + | 0     | 0     |
| ENSG0000(RPS21P4 processed_ chr4     | 16256308 | 16256555 | - | 0     | 0     |
| ENSG0000(RN7SL272F misc_RNA chr13    | 27989296 | 27989584 | - | 0     | 0     |
| ENSG0000(CT47A2 protein_co chrX      | 1.21E+08 | 1.21E+08 | - | 0     | 0     |
| ENSG0000(RP11-451J processed_ chr3   | 73648399 | 73648807 | - | 0     | 0     |
| ENSG0000(NDUFA5P5 processed_ chr3    | 88601061 | 88601402 | + | 0     | 0     |
| ENSG0000(UGT1A8 protein_co chr2      | 2.34E+08 | 2.34E+08 | + | 0.04  | 0.06  |
| ENSG0000(KCNAB1-AS antisense chr3    | 1.56E+08 | 1.56E+08 | - | 0     | 0     |
| ENSG0000(IGKV1-39 IG_V_gene chr2     | 89319625 | 89320146 | - | 0     | 0     |
| ENSG0000(EIF6 protein_co chr20       | 35278907 | 35284985 | - | 60.48 | 59.64 |
| ENSG0000(RP11-498P lincRNA chr9      | 97195351 | 97197687 | - | 0     | 0     |
| ENSG0000(RN7SL741F misc_RNA chr13    | 25944478 | 25944766 | + | 0     | 0     |
| ENSG0000(LINC00901 antisense chr3    | 1.17E+08 | 1.17E+08 | + | 0     | 0     |
| ENSG0000(HIST1H2AP transcribed chr6  | 25882026 | 25882395 | - | 0     | 0     |
| ENSG0000(RBMY1E protein_co chrY      | 21903618 | 21918067 | - | 0     | 0     |
| ENSG0000(RPL6P9 processed_ chr3      | 1.43E+08 | 1.43E+08 | + | 0     | 0     |
| ENSG0000(RP4-631H1 antisense chr1    | 52881216 | 52881730 | - | 0     | 0     |
| ENSG0000(AC010141. unprocessed chrY  | 21508299 | 21510470 | - | 0     | 0     |
| ENSG0000(RP11-67L3. antisense chr1   | 54886875 | 54888001 | + | 0.12  | 0     |
| ENSG0000(RN7SL800F misc_RNA chr17    | 62005737 | 62006016 | - | 0     | 0     |
| ENSG0000(RPS20P23 processed_ chr8    | 1.01E+08 | 1.01E+08 | - | 0     | 0     |
| ENSG0000(RP11-267J processed_ chr12  | 12155262 | 12155772 | + | 0     | 0     |
| ENSG0000(CTD-2377D lincRNA chr17     | 48733091 | 48733888 | + | 0     | 0     |
| ENSG0000(CTD-2086L processed_ chr19  | 56217168 | 56217777 | - | 0.11  | 0     |
| ENSG0000(DBIL5P2 transcribed chr2    | 63117851 | 63119542 | - | 0     | 0.04  |
| ENSG0000(RP11-286B processed_ chr14  | 48489883 | 48490434 | + | 0     | 0     |
| ENSG0000(PCDHGC4 protein_co chr5     | 1.41E+08 | 1.42E+08 | + | 0.08  | 0.11  |
| ENSG0000(RPL12P36 processed_ chr16   | 58825891 | 58826368 | + | 0     | 0     |
| ENSG0000(C3orf67-AS antisense chr3   | 58824437 | 59019093 | + | 0     | 0     |
| ENSG0000(RN7SL274F misc_RNA chr16    | 14601823 | 14602094 | - | 0     | 3.52  |
| ENSG0000(RP11-731J processed_ chr4   | 47490967 | 47491471 | - | 0     | 0     |
| ENSG0000(UPK3BP1 transcribed chr7    | 77004662 | 77005774 | + | 0     | 0     |
| ENSG0000(RN7SL789F misc_RNA chr19    | 32655016 | 32655308 | - | 0     | 0     |
| ENSG0000(CTD-2349P processed_ chr17  | 30830901 | 30831318 | + | 0     | 0     |
| ENSG0000(LINC02046 lincRNA chr3      | 1.48E+08 | 1.48E+08 | + | 0     | 0     |
| ENSG0000(GTF2A1L protein_co chr2     | 48617798 | 48733148 | + | 0.16  | 0     |
| ENSG0000(RP11-320N transcribed chr12 | 4109661  | 4118132  | - | 0.13  | 0     |
| ENSG0000(RPL7AP11 processed_ chr3    | 1.21E+08 | 1.21E+08 | + | 0     | 0     |
| ENSG0000(MTCO3P38 processed_ chr3    | 1.66E+08 | 1.66E+08 | - | 0     | 0     |
| ENSG0000(RBBP4P2 processed_ chr3     | 94075912 | 94077175 | - | 0     | 0     |
| ENSG0000(RPS15AP32 processed_ chr12  | 1.13E+08 | 1.13E+08 | + | 0     | 0     |
| ENSG0000(IGHJ5 IG_J_gene chr14       | 1.06E+08 | 1.06E+08 | - | 0     | 0     |
| ENSG0000(KIR2DP1 unprocessed chr19   | 54755023 | 54767371 | + | 0     | 0     |

|                                 |       |          |          |   |      |       |
|---------------------------------|-------|----------|----------|---|------|-------|
| ENSG0000( AC093627. lincRNA     | chr7  | 135853   | 149466   | - | 0.35 | 0.94  |
| ENSG0000( CTD-2161E processed_  | chr5  | 86884231 | 86884881 | - | 0    | 0     |
| ENSG0000( RP11-383G processed_  | chr3  | 1.42E+08 | 1.42E+08 | + | 0.06 | 0     |
| ENSG0000( RN7SL392F misc_RNA    | chr1  | 67656831 | 67657129 | - | 0    | 0     |
| ENSG0000( RN7SL293F misc_RNA    | chr8  | 11379395 | 11379675 | + | 0    | 0     |
| ENSG0000( MRPL20 protein_co     | chr1  | 1401908  | 1407313  | - | 43.6 | 41.49 |
| ENSG0000( RP11-270N transcribec | chr14 | 75838157 | 75839114 | - | 0.06 | 0     |
| ENSG0000( RN7SL37P misc_RNA     | chr5  | 37246173 | 37246479 | - | 0    | 0     |
| ENSG0000( ARPIN protein_co      | chr15 | 89895006 | 89912956 | - | 5.97 | 5.69  |
| ENSG0000( RP3-477O4 transcribec | chr20 | 35520852 | 35528255 | - | 0    | 0     |
| ENSG0000( RN7SL156F misc_RNA    | chr20 | 36870099 | 36870402 | + | 0    | 0     |
| ENSG0000( NDUFB4P1 processed_   | chr3  | 67513940 | 67514320 | + | 0    | 0     |
| ENSG0000( LINC01206 lincRNA     | chr3  | 1.82E+08 | 1.82E+08 | + | 0    | 0     |
| ENSG0000( UGT1A10 protein_co    | chr2  | 2.34E+08 | 2.34E+08 | + | 0.08 | 0     |
| ENSG0000( LINC00960 lincRNA     | chr3  | 75672391 | 75679303 | + | 0.04 | 0     |
| ENSG0000( MAGEA5 transcribec    | chrX  | 1.52E+08 | 1.52E+08 | - | 0    | 0     |
| ENSG0000( KLHL6-AS1 antisense   | chr3  | 1.84E+08 | 1.84E+08 | + | 1.3  | 0.36  |
| ENSG0000( OR2U2P unprocessε     | chr6  | 29268462 | 29269421 | - | 0    | 0     |
| ENSG0000( OR7E100P unprocessε   | chr3  | 1.13E+08 | 1.13E+08 | - | 0    | 0     |
| ENSG0000( RP11-159H processed_  | chr11 | 27483850 | 27484128 | + | 0    | 0     |
| ENSG0000( AHCYP8 processed_     | chr1  | 2.49E+08 | 2.49E+08 | - | 0    | 1.75  |
| ENSG0000( RP11-299J: unprocessε | chr3  | 1.22E+08 | 1.22E+08 | - | 0    | 0     |
| ENSG0000( IGKV2D-28 IG_V_gene   | chr2  | 89959979 | 89960754 | + | 0    | 0     |
| ENSG0000( RP11-290K lincRNA     | chr3  | 1.58E+08 | 1.58E+08 | - | 0    | 0     |
| ENSG0000( MRE11P1 processed_    | chr3  | 1.56E+08 | 1.56E+08 | - | 0    | 0     |
| ENSG0000( AC007620. antisense   | chr3  | 1.79E+08 | 1.79E+08 | + | 0.52 | 0.23  |
| ENSG0000( AC010729. 3prime_ov   | chr2  | 5696220  | 5708095  | + | 0    | 0.16  |
| ENSG0000( RP11-719N lincRNA     | chr3  | 59464330 | 59510678 | - | 0    | 0     |
| ENSG0000( RN7SL169F misc_RNA    | chr5  | 64539504 | 64539792 | + | 0    | 0     |
| ENSG0000( SERPINB10 protein_co  | chr18 | 63897174 | 63936111 | + | 0.17 | 0     |
| ENSG0000( POU5F1P6 unprocessε   | chr3  | 1.29E+08 | 1.29E+08 | - | 0    | 0     |
| ENSG0000( MRPL42P4 processed_   | chr7  | 47026128 | 47026570 | - | 0    | 0     |
| ENSG0000( AP001432. lincRNA     | chr21 | 37221419 | 37237744 | + | 0    | 0.16  |
| ENSG0000( RN7SL144F misc_RNA    | chrX  | 41683168 | 41683462 | - | 0    | 0     |
| ENSG0000( RN7SL797F misc_RNA    | chr6  | 96282567 | 96282863 | + | 0    | 0     |
| ENSG0000( ATP5LP5 processed_    | chr3  | 1.53E+08 | 1.53E+08 | - | 0    | 0     |
| ENSG0000( DCAF13P1 processed_   | chr7  | 1.06E+08 | 1.06E+08 | + | 0    | 0     |
| ENSG0000( RN7SL372F misc_RNA    | chr1  | 1.54E+08 | 1.54E+08 | + | 0    | 0     |
| ENSG0000( RP11-875H lincRNA     | chr3  | 55335462 | 55350915 | - | 0    | 0     |
| ENSG0000( RPL21P11 processed_   | chr14 | 90366697 | 90367179 | - | 0.16 | 0     |
| ENSG0000( ACTR3P3 processed_    | chr3  | 1.01E+08 | 1.01E+08 | + | 0    | 0     |
| ENSG0000( HLA-DMB protein_co    | chr6  | 32934629 | 32941070 | - | 1.07 | 0.49  |
| ENSG0000( AC012501. transcribec | chr2  | 1.53E+08 | 1.53E+08 | - | 0    | 0     |
| ENSG0000( RP11-469J: lincRNA    | chr3  | 1.7E+08  | 1.7E+08  | + | 0.1  | 0.11  |
| ENSG0000( IGKV1D-43 IG_V_gene   | chr2  | 90209873 | 90210529 | + | 0    | 0     |

|                                      |          |            |      |       |
|--------------------------------------|----------|------------|------|-------|
| ENSG0000(RP11-379K processed_ chr3   | 1.7E+08  | 1.7E+08 +  | 0    | 0     |
| ENSG0000(RP11-481N unprocessε chr3   | 80442081 | 80442305 + | 0    | 0     |
| ENSG0000(RP11-274B processed_ chr7   | 1.29E+08 | 1.29E+08 + | 4.29 | 4.59  |
| ENSG0000(RP11-5407 sense_intrε chr1  | 1055033  | 1056116 +  | 0    | 0     |
| ENSG0000(RP5-921G1 antisense_ chr7   | 1.24E+08 | 1.24E+08 + | 0    | 0     |
| ENSG0000(RPL26P26 processed_ chr8    | 58113189 | 58113622 - | 0    | 0     |
| ENSG0000(MED28P8 processed_ chr1     | 81557121 | 81557832 - | 0    | 0     |
| ENSG0000(CSAG4 transcribec chrX      | 1.53E+08 | 1.53E+08 + | 0    | 0     |
| ENSG0000(MBL1P transcribec chr10     | 79920178 | 79923119 + | 0.12 | 0.04  |
| ENSG0000(CTD-2339N processed_ chr5   | 72878868 | 72879185 - | 0    | 0     |
| ENSG0000(RPS3AP34 processed_ chr8    | 12570350 | 12571130 - | 0    | 0     |
| ENSG0000(RPS23P5 processed_ chr5     | 13250235 | 13250662 - | 0    | 0     |
| ENSG0000(RP11-398A processed_ chr3   | 72086888 | 72087725 + | 0    | 0     |
| ENSG0000(OR5BH1P processed_ chrX     | 1.31E+08 | 1.31E+08 - | 0    | 0     |
| ENSG0000(AC093627. lincRNA_ chr7     | 77038    | 81178 +    | 0.13 | 0.19  |
| ENSG0000(DECR2 protein_co chr16      | 401826   | 412487 +   | 8.57 | 9.02  |
| ENSG0000(RP11-174C processed_ chr3   | 1.2E+08  | 1.2E+08 +  | 0    | 0     |
| ENSG0000(RN7SL164F misc_ RNA_ chr13  | 96169545 | 96169847 + | 0    | 0     |
| ENSG0000(CTC-359D2 transcribec chr19 | 12141806 | 12143322 - | 0.87 | 0.46  |
| ENSG0000(GNG10 protein_co chr9       | 1.12E+08 | 1.12E+08 + | 17.1 | 15.34 |
| ENSG0000(RP11-433A lincRNA_ chr3     | 72202944 | 72209892 - | 0    | 0     |
| ENSG0000(RP11-18H7 lincRNA_ chr3     | 1.2E+08  | 1.2E+08 +  | 1.32 | 1.05  |
| ENSG0000(AC009228. antisense_ chr2   | 24214381 | 24221516 + | 0.19 | 0.7   |
| ENSG0000(RPS24P16 processed_ chr15   | 67232446 | 67232837 + | 0    | 0     |
| ENSG0000(RPS14P7 processed_ chr4     | 1.61E+08 | 1.61E+08 + | 0    | 0     |
| ENSG0000(RPL21P129 processed_ chr19  | 7750684  | 7751161 +  | 0    | 0     |
| ENSG0000(RN7SL294F misc_ RNA_ chr3   | 75182754 | 75183048 - | 0    | 0     |
| ENSG0000(RPS29P11 processed_ chr4    | 25678850 | 25679020 + | 0    | 0     |
| ENSG0000(LINC00971 lincRNA_ chr3     | 84638406 | 84881679 - | 0    | 0     |
| ENSG0000(RN7SL292F misc_ RNA_ chr7   | 51716657 | 51716922 + | 0    | 0     |
| ENSG0000(RN7SL862F misc_ RNA_ chr18  | 9830330  | 9830627 -  | 0    | 0     |
| ENSG0000(RN7SL132F misc_ RNA_ chr7   | 34753424 | 34753719 + | 0    | 0     |
| ENSG0000(RPL32P14 processed_ chr5    | 19041009 | 19041386 + | 0    | 0     |
| ENSG0000(RN7SL581F misc_ RNA_ chrX   | 70222006 | 70222314 - | 0    | 0.37  |
| ENSG0000(RP11-271C lincRNA_ chr3     | 1.14E+08 | 1.14E+08 - | 0    | 0     |
| ENSG0000(RP11-1094 processed_ chr17  | 35566517 | 35566672 + | 0    | 0     |
| ENSG0000(RPS3AP43 processed_ chr12   | 8359054  | 8359834 -  | 0    | 0     |
| ENSG0000(RP11-745A processed_ chr15  | 60404463 | 60404960 + | 0    | 0     |
| ENSG0000(RN7SL317F misc_ RNA_ chr19  | 53629713 | 53630041 + | 0    | 0     |
| ENSG0000(RPL22P13 processed_ chr4    | 54221126 | 54221472 + | 0    | 0     |
| ENSG0000(LINC02010 lincRNA_ chr3     | 1.47E+08 | 1.47E+08 + | 0    | 0     |
| ENSG0000(RN7SL167F misc_ RNA_ chr11  | 1.31E+08 | 1.31E+08 - | 0    | 0     |
| ENSG0000(RPS16P9 processed_ chr19    | 45332698 | 45333124 - | 0    | 0     |
| ENSG0000(RPL12P21 processed_ chr5    | 1.39E+08 | 1.39E+08 - | 0    | 0     |
| ENSG0000(RP11-1191 antisense_ chr4   | 652850   | 656213 -   | 0    | 0.03  |

|                               |             |          |          |          |      |      |      |
|-------------------------------|-------------|----------|----------|----------|------|------|------|
| ENSG0000( AC004893. antisense | chr7        | 99013165 | 99048240 | +        | 2.02 | 1.58 |      |
| ENSG0000( RN7SL304F           | misc_RNA    | chr1     | 19970969 | 19971269 | +    | 0    | 0    |
| ENSG0000( CNTF                | protein_co  | chr11    | 58622673 | 58625733 | +    | 0.28 | 0.28 |
| ENSG0000( RPS27AP1            | processed_  | chr17    | 10258762 | 10259232 | +    | 0    | 0    |
| ENSG0000( RN7SL40P            | misc_RNA    | chr2     | 2.02E+08 | 2.02E+08 | -    | 0    | 0    |
| ENSG0000( RPL5P12             | processed_  | chr4     | 98025390 | 98026240 | +    | 3.33 | 2.61 |
| ENSG0000( RN7SL516F           | misc_RNA    | chr2     | 29681027 | 29681323 | -    | 0    | 0    |
| ENSG0000( CCT4P1              | processed_  | chr7     | 1.41E+08 | 1.41E+08 | -    | 0    | 0    |
| ENSG0000( ICE2P2              | processed_  | chr3     | 88948142 | 88950928 | +    | 0    | 0    |
| ENSG0000( RPS27AP9            | processed_  | chr5     | 80498534 | 80498971 | -    | 0    | 0    |
| ENSG0000( RN7SL362F           | misc_RNA    | chr18    | 13715102 | 13715368 | -    | 0    | 0    |
| ENSG0000( RPL30P9             | processed_  | chr8     | 20113343 | 20113672 | -    | 0    | 0    |
| ENSG0000( CCDC169             | protein_co  | chr13    | 36222008 | 36297840 | -    | 2.21 | 1.11 |
| ENSG0000( RN7SL806F           | misc_RNA    | chr8     | 42881236 | 42881517 | +    | 0    | 0    |
| ENSG0000( RP11-123J           | processed_  | chr4     | 76891034 | 76891445 | +    | 0    | 0    |
| ENSG0000( UQCRHP4             | processed_  | chr3     | 70140217 | 70140488 | +    | 0    | 0    |
| ENSG0000( RP11-124G           | processed_  | chr11    | 41538434 | 41538986 | +    | 0    | 0    |
| ENSG0000( FAM86LP             | unprocessε  | chr7     | 6931684  | 6939603  | -    | 0    | 0    |
| ENSG0000( RGAG4               | protein_co  | chrX     | 72127110 | 72131901 | -    | 2.23 | 2.22 |
| ENSG0000( RPSAP26             | processed_  | chr2     | 62146413 | 62147153 | +    | 0.2  | 0    |
| ENSG0000( TRBV1               | TR_V_pseu   | chr7     | 1.42E+08 | 1.42E+08 | +    | 0    | 0    |
| ENSG0000( RP11-562A           | processed_  | chr15    | 50466738 | 50467096 | +    | 0    | 0    |
| ENSG0000( LINC02005           | lincRNA     | chr3     | 73808601 | 73902866 | +    | 0.08 | 0    |
| ENSG0000( RP11-30K9           | processed_  | chr15    | 58869659 | 58870134 | +    | 0    | 0.17 |
| ENSG0000( RPL23AP81           | transcribec | chr20    | 41196691 | 41197157 | +    | 0    | 0    |
| ENSG0000( NMTRQ-TT            | unprocessε  | chr17    | 19603274 | 19603345 | -    | 0    | 0    |
| ENSG0000( RP11-716C           | lincRNA     | chr6     | 11487226 | 11515710 | +    | 0    | 0    |
| ENSG0000( RHOT1P3             | processed_  | chr13    | 18837768 | 18838098 | -    | 0    | 0    |
| ENSG0000( CTD-2090I           | processed_  | chr1     | 2.27E+08 | 2.27E+08 | +    | 0    | 0    |
| ENSG0000( LINC00882           | lincRNA     | chr3     | 1.07E+08 | 1.07E+08 | -    | 1.81 | 1.84 |
| ENSG0000( RN7SL824F           | misc_RNA    | chr1     | 92402389 | 92402685 | -    | 0    | 0    |
| ENSG0000( IGKV1D-17           | IG_V_gene   | chr2     | 90082635 | 90083291 | +    | 0    | 0    |
| ENSG0000( ZBTB20-AS           | lincRNA     | chr3     | 1.15E+08 | 1.15E+08 | +    | 0.2  | 0.22 |
| ENSG0000( RP11-556G           | processed_  | chr4     | 21656511 | 21656869 | -    | 0    | 0    |
| ENSG0000( RN7SL432F           | misc_RNA    | chr1     | 1.15E+08 | 1.15E+08 | -    | 0    | 0    |
| ENSG0000( RP11-180K           | processed_  | chr3     | 1.13E+08 | 1.13E+08 | +    | 0.12 | 0    |
| ENSG0000( TRBV5-2             | TR_V_pseu   | chr7     | 1.42E+08 | 1.42E+08 | +    | 0    | 0    |
| ENSG0000( RP11-875H           | lincRNA     | chr3     | 55360443 | 55361829 | -    | 0    | 0    |
| ENSG0000( ZNF702P             | transcribec | chr19    | 52968251 | 53037898 | -    | 0.57 | 0.36 |
| ENSG0000( LINC02050           | lincRNA     | chr3     | 80764897 | 80789354 | +    | 0    | 0    |
| ENSG0000( RP11-451G           | lincRNA     | chr3     | 1.55E+08 | 1.55E+08 | +    | 0    | 0    |
| ENSG0000( RP11-651P           | lincRNA     | chr3     | 1.5E+08  | 1.5E+08  | +    | 0    | 0    |
| ENSG0000( AC135999.           | processed_  | chr15    | 26851132 | 26851610 | -    | 0    | 0    |
| ENSG0000( RN7SL299F           | misc_RNA    | chr1     | 2.32E+08 | 2.32E+08 | +    | 0    | 0    |
| ENSG0000( RP11-3K16           | sense_intrε | chr3     | 1.7E+08  | 1.7E+08  | -    | 0    | 0    |



|                                     |          |          |   |       |       |
|-------------------------------------|----------|----------|---|-------|-------|
| ENSG0000(GLYCTK-AS processed_ chr3  | 52288580 | 52299067 | - | 0     | 0     |
| ENSG0000(RP11-506N antisense chr7   | 1E+08    | 1E+08    | - | 0     | 0     |
| ENSG0000(AP5Z1 protein_co chr7      | 4775622  | 4794312  | + | 17.05 | 19.96 |
| ENSG0000(RPL26P31 processed_ chr11  | 93052395 | 93052827 | - | 0     | 0     |
| ENSG0000(SOX2-OT sense_ovei chr3    | 1.81E+08 | 1.82E+08 | + | 0.16  | 0.14  |
| ENSG0000(MRPL42P6 processed_ chr3   | 1.51E+08 | 1.51E+08 | - | 0     | 0     |
| ENSG0000(RN7SL229F misc_RNA chr3    | 1.81E+08 | 1.81E+08 | - | 0     | 0     |
| ENSG0000(RP11-436H processed_ chr5  | 1.25E+08 | 1.25E+08 | - | 0     | 0     |
| ENSG0000(RP11-768G lincRNA chr3     | 1.18E+08 | 1.18E+08 | + | 0     | 0     |
| ENSG0000(RN7SL846F misc_RNA chr10   | 1.2E+08  | 1.2E+08  | + | 0     | 0     |
| ENSG0000(RP11-47P1 lincRNA chr3     | 80761042 | 80788963 | - | 0.42  | 0     |
| ENSG0000(RPS26P21 processed_ chr3   | 1.19E+08 | 1.19E+08 | + | 0     | 0.3   |
| ENSG0000(RPL7AP56 processed_ chr11  | 37725666 | 37726456 | + | 0     | 0     |
| ENSG0000(MTCO3P35 unprocessε chr3   | 1.07E+08 | 1.07E+08 | - | 0     | 0     |
| ENSG0000(RPL21P13 processed_ chr14  | 1.03E+08 | 1.03E+08 | + | 0     | 0     |
| ENSG0000(KRT8P35 processed_ chr3    | 63096374 | 63097711 | - | 0     | 0     |
| ENSG0000(ALDOAP1 processed_ chr3    | 52193170 | 52194785 | + | 0     | 0     |
| ENSG0000(RPL23AP6ε processed_ chr12 | 87169985 | 87170429 | - | 0     | 0     |
| ENSG0000(ZNF709 protein_co chr19    | 12461184 | 12513854 | - | 0.4   | 0.62  |
| ENSG0000(RN7SL749F misc_RNA chr10   | 1.19E+08 | 1.19E+08 | + | 0.38  | 0.42  |
| ENSG0000(DNM1P24 unprocessε chrY    | 24179316 | 24183505 | - | 0     | 0     |
| ENSG0000(RN7SL496F misc_RNA chr7    | 39888375 | 39888664 | + | 0     | 0     |
| ENSG0000(VN1R105P transcribec chr19 | 54647944 | 54648853 | + | 0     | 0     |
| ENSG0000(CTC-484M; processed_ chr5  | 83746388 | 83746989 | - | 0     | 0     |
| ENSG0000(RN7SL180F misc_RNA chr1    | 62072448 | 62072741 | + | 0     | 0     |
| ENSG0000(RP11-285F antisense chr1   | 2.26E+08 | 2.26E+08 | - | 1.61  | 1.48  |
| ENSG0000(RN7SL677F misc_RNA chr15   | 97353497 | 97353815 | + | 0     | 0     |
| ENSG0000(RN7SL244F misc_RNA chr6    | 53090961 | 53091257 | + | 0.02  | 0     |
| ENSG0000(STRC protein_co chr15      | 43599398 | 43618800 | - | 0     | 0.38  |
| ENSG0000(RBMY1B protein_co chrY     | 21511338 | 21549094 | + | 0     | 0.01  |
| ENSG0000(RN7SL812F misc_RNA chr22   | 20481935 | 20482213 | - | 0     | 0     |
| ENSG0000(AC006335. unprocessε chrY  | 6307710  | 6309587  | + | 0     | 0     |
| ENSG0000(RP11-190P lincRNA chr3     | 1.15E+08 | 1.15E+08 | + | 0     | 0     |
| ENSG0000(RPL5P11 processed_ chr4    | 1.73E+08 | 1.73E+08 | - | 0     | 0     |
| ENSG0000(IGHJ3 IG_J_gene chr14      | 1.06E+08 | 1.06E+08 | - | 0     | 0     |
| ENSG0000(RP11-436N processed_ chr14 | 99974336 | 99975149 | - | 0     | 0     |
| ENSG0000(RN7SL449F misc_RNA chr17   | 57618108 | 57618393 | + | 0     | 0     |
| ENSG0000(RN7SL413F misc_RNA chr13   | 51593919 | 51594215 | - | 0     | 0     |
| ENSG0000(RN7SL634F misc_RNA chr14   | 1.04E+08 | 1.04E+08 | + | 0     | 0     |
| ENSG0000(RPL7P16 processed_ chr3    | 1.32E+08 | 1.32E+08 | - | 0.35  | 0.1   |
| ENSG0000(RP11-309L; antisense chr7  | 1.29E+08 | 1.29E+08 | - | 0     | 0     |
| ENSG0000(AADACL2-/- antisense chr3  | 1.52E+08 | 1.52E+08 | - | 0.19  | 0     |
| ENSG0000(RP11-118N processed_ chr3  | 94935760 | 94936120 | - | 0     | 0     |
| ENSG0000(RN7SL384F misc_RNA chr10   | 1.14E+08 | 1.14E+08 | - | 0     | 0     |
| ENSG0000(SNRPGP7 processed_ chr2    | 28460256 | 28460361 | - | 0     | 0     |

|                                      |          |          |   |      |      |
|--------------------------------------|----------|----------|---|------|------|
| ENSG0000(RPL21P104 processed_ chr12  | 61775923 | 61776400 | + | 0    | 0    |
| ENSG0000( PLCH1-AS2 antisense chr3   | 1.55E+08 | 1.55E+08 | + | 0    | 0    |
| ENSG0000( RN7SL868F misc_RNA chr5    | 1.5E+08  | 1.5E+08  | + | 0    | 0    |
| ENSG0000( RPL7P49 processed_ chr17   | 76430417 | 76431124 | - | 0    | 0    |
| ENSG0000( RPL30P6 processed_ chr4    | 95644952 | 95645293 | - | 0    | 0    |
| ENSG0000( RPL12P7 processed_ chr14   | 68693090 | 68693583 | + | 0    | 0    |
| ENSG0000( NKAIN1P1 processed_ chr1   | 1.43E+08 | 1.43E+08 | + | 0    | 0    |
| ENSG0000( RPL29P32 processed_ chr18  | 53605254 | 53605725 | - | 0    | 0    |
| ENSG0000( EPS15P1 transcribed chr7   | 46781373 | 46783443 | + | 0.03 | 0    |
| ENSG0000( ERVW-1 protein_co chr7     | 92468380 | 92477986 | - | 0.51 | 0.24 |
| ENSG0000( RP11-507E processed_ chr14 | 75595805 | 75596206 | - | 0    | 0    |
| ENSG0000( RPSAP3 transcribed chr14   | 76634775 | 76635661 | - | 0    | 0.08 |
| ENSG0000( RP11-803B processed_ chr3  | 75395404 | 75395536 | - | 0    | 0    |
| ENSG0000( RP11-662B processed_ chr8  | 28810103 | 28810418 | + | 0    | 0    |
| ENSG0000( FTH1P23 processed_ chr3    | 72929044 | 72929593 | + | 3.76 | 2.85 |
| ENSG0000( RP11-143E processed_ chr12 | 1.3E+08  | 1.3E+08  | - | 0    | 0    |
| ENSG0000( RP11-731C processed_ chr3  | 1.37E+08 | 1.37E+08 | - | 0    | 0    |
| ENSG0000( AC068522. processed_ chr8  | 58588420 | 58588764 | - | 0    | 0    |
| ENSG0000( RN7SL233F misc_RNA chr18   | 21793883 | 21794159 | + | 0    | 0    |
| ENSG0000( RP11-446F antisense chr6   | 46670444 | 46688165 | - | 0    | 0    |
| ENSG0000( RN7SL177F misc_RNA chr5    | 1.54E+08 | 1.54E+08 | + | 0    | 0    |
| ENSG0000( RP4-545C2 processed_ chr7  | 1.44E+08 | 1.44E+08 | - | 0    | 0    |
| ENSG0000( RPS15AP18 processed_ chr5  | 1.8E+08  | 1.8E+08  | - | 0    | 0    |
| ENSG0000( CABYRP1 processed_ chr3    | 54047749 | 54048793 | - | 0    | 0    |
| ENSG0000( RN7SL50P misc_RNA chr18    | 8471831  | 8472128  | + | 0    | 0    |
| ENSG0000( RPL21P99 processed_ chr12  | 29658376 | 29658798 | - | 0    | 0    |
| ENSG0000( RN7SL332F misc_RNA chr6    | 15112968 | 15113221 | + | 0    | 0    |
| ENSG0000( RPL13AP23 processed_ chr12 | 57674665 | 57675250 | + | 0    | 0    |
| ENSG0000( RPL7P40 processed_ chr12   | 17121716 | 17122460 | + | 0    | 0    |
| ENSG0000( FTH1P4 processed_ chr3     | 1.29E+08 | 1.29E+08 | - | 0    | 0    |
| ENSG0000( RP11-697H processed_ chr11 | 95963219 | 95963624 | + | 0    | 0    |
| ENSG0000( RP11-1085 processed_ chr14 | 56683421 | 56683741 | - | 0    | 0    |
| ENSG0000( RN7SL379F misc_RNA chrX    | 96023360 | 96023652 | + | 0    | 0    |
| ENSG0000( RN7SL239F misc_RNA chr11   | 74845910 | 74846209 | + | 0.36 | 0    |
| ENSG0000( AC005062. sense_ovei chr7  | 19918981 | 20140453 | - | 0.16 | 0.44 |
| ENSG0000( RN7SL16P misc_RNA chr4     | 24563193 | 24563461 | - | 0    | 0    |
| ENSG0000( RPL12P35 processed_ chr15  | 72379215 | 72379710 | - | 0    | 0    |
| ENSG0000( RP11-556N processed_ chr13 | 24566873 | 24597676 | + | 0    | 0    |
| ENSG0000( RN7SL266F misc_RNA chrX    | 1.13E+08 | 1.13E+08 | + | 0    | 0    |
| ENSG0000( LINC02083 lincRNA chr3     | 1.53E+08 | 1.53E+08 | + | 0    | 0    |
| ENSG0000( PTMAP8 processed_ chr3     | 1.17E+08 | 1.17E+08 | + | 0    | 0.31 |
| ENSG0000( RN7SL737F misc_RNA chr12   | 93509487 | 93509768 | + | 0    | 0    |
| ENSG0000( RP11-305F unprocessε chr3  | 1.27E+08 | 1.27E+08 | - | 0    | 0    |
| ENSG0000( RP5-1070G antisense chr7   | 1.51E+08 | 1.51E+08 | + | 1.55 | 0    |
| ENSG0000( RPL7P39 processed_ chr12   | 64867956 | 64868699 | - | 0    | 0    |

|                 |           |                 |          |          |          |      |      |       |
|-----------------|-----------|-----------------|----------|----------|----------|------|------|-------|
| ENSG00000108220 | MARK3P3   | processed_chr3  | 1.29E+08 | 1.29E+08 | -        | 0    | 0    |       |
| ENSG00000108221 | UBA52P3   | processed_chr14 | 58141279 | 58141660 | +        | 0    | 0    |       |
| ENSG00000108222 | RPS11P6   | transcribed     | chr12    | 64222337 | 64397065 | +    | 0.13 | 0.19  |
| ENSG00000108223 | MTAPP1    | processed_chr3  | 1.59E+08 | 1.59E+08 | -        | 0    | 0    |       |
| ENSG00000108224 | RN7SL354F | misc_RNA        | chr15    | 50688900 | 50689193 | +    | 0    | 0     |
| ENSG00000108225 | RN7SL635F | misc_RNA        | chr2     | 65545401 | 65545696 | -    | 0    | 0     |
| ENSG00000108226 | GAPDHP47  | processed_chr3  | 1.44E+08 | 1.44E+08 | -        | 0    | 0    |       |
| ENSG00000108227 | RN7SL810F | misc_RNA        | chr13    | 77947497 | 77947772 | -    | 0    | 0     |
| ENSG00000108228 | RP11-58E2 | processed_chr14 | 50052857 | 50053569 | +        | 0    | 0.41 |       |
| ENSG00000108229 | RBMX2FP   | transcribed     | chrY     | 22308859 | 22321825 | +    | 0    | 0     |
| ENSG00000108230 | RP13-526J | processed_chr3  | 1.63E+08 | 1.63E+08 | +        | 0    | 0    |       |
| ENSG00000108231 | FTH1P18   | unprocessed     | chrX     | 37043023 | 37043571 | -    | 0    | 0     |
| ENSG00000108232 | RN7SL33P  | misc_RNA        | chr17    | 2557753  | 2558094  | -    | 0    | 0     |
| ENSG00000108233 | RPL30P10  | processed_chr8  | 57392546 | 57392882 | +        | 0    | 0    |       |
| ENSG00000108234 | RN7SL269F | misc_RNA        | chr1     | 1.7E+08  | 1.7E+08  | -    | 0    | 0     |
| ENSG00000108235 | RPL31P58  | processed_chr17 | 28802444 | 28802822 | +        | 0    | 0    |       |
| ENSG00000108236 | GK-AS1    | antisense       | chrX     | 30699998 | 30724174 | -    | 0    | 0     |
| ENSG00000108237 | EIF4EBP3  | protein_coding  | chr5     | 1.41E+08 | 1.41E+08 | +    | 17.1 | 15.87 |
| ENSG00000108238 | RPL39P33  | processed_chr17 | 56573040 | 56573195 | +        | 0    | 0    |       |
| ENSG00000108239 | RN7SL400F | misc_RNA        | chr15    | 21102843 | 21103138 | -    | 0    | 0     |
| ENSG00000108240 | RP11-12M1 | lincRNA         | chr1     | 1.8E+08  | 1.8E+08  | +    | 0    | 0     |
| ENSG00000108241 | IGKV3-7   | IG_V_gene       | chr2     | 88978468 | 88979081 | -    | 0    | 0     |
| ENSG00000108242 | ABCC13    | transcribed     | chr21    | 14236206 | 14362754 | +    | 0    | 0     |
| ENSG00000108243 | RN7SL842F | misc_RNA        | chr19    | 14588357 | 14588656 | +    | 0    | 0     |
| ENSG00000108244 | ARHGEF26  | processed_chr3  | 1.54E+08 | 1.54E+08 | -        | 0.41 | 1.18 |       |
| ENSG00000108245 | RP11-613N | processed_chr12 | 76660405 | 76660884 | +        | 0.17 | 0.19 |       |
| ENSG00000108246 | GS1-388B5 | processed_chr3  | 1.26E+08 | 1.26E+08 | +        | 0    | 0    |       |
| ENSG00000108247 | PRAMEF4   | protein_coding  | chr1     | 12879224 | 12886201 | -    | 0    | 0     |
| ENSG00000108248 | RN7SL519F | misc_RNA        | chr12    | 50841498 | 50841785 | -    | 0    | 0     |
| ENSG00000108249 | RP11-231E | lincRNA         | chr3     | 1.12E+08 | 1.12E+08 | -    | 0.04 | 0.15  |
| ENSG00000108250 | LINC00870 | lincRNA         | chr3     | 72151257 | 72174332 | +    | 0.04 | 0     |
| ENSG00000108251 | RP11-392E | processed_chr9  | 38526831 | 38527032 | +        | 0    | 0    |       |
| ENSG00000108252 | RP11-779P | lincRNA         | chr3     | 99507187 | 99527113 | -    | 0    | 0     |
| ENSG00000108253 | RP11-1084 | processed_chr15 | 34085911 | 34086314 | -        | 0.21 | 0    |       |
| ENSG00000108254 | RPL3P10   | processed_chr8  | 39157538 | 39158701 | -        | 0    | 0    |       |
| ENSG00000108255 | AC020983  | processed_chr7  | 1.39E+08 | 1.39E+08 | +        | 0    | 0    |       |
| ENSG00000108256 | RPS3P7    | processed_chr16 | 78825281 | 78826006 | +        | 0    | 0    |       |
| ENSG00000108257 | RN7SL452F | misc_RNA        | chr14    | 50637691 | 50637981 | -    | 0    | 0.84  |
| ENSG00000108258 | MTND4LP1  | processed_chr2  | 1.2E+08  | 1.2E+08  | +        | 0    | 0    |       |
| ENSG00000108259 | AC000120  | sense_intronic  | chr7     | 92200014 | 92206857 | -    | 0.05 | 0.2   |
| ENSG00000108260 | RN7SL849F | misc_RNA        | chr9     | 12764761 | 12765055 | -    | 0    | 0     |
| ENSG00000108261 | RP11-564C | processed_chr3  | 1.6E+08  | 1.6E+08  | -        | 0    | 0    |       |
| ENSG00000108262 | RP11-25H1 | processed_chr15 | 37490691 | 37491103 | +        | 0    | 0    |       |
| ENSG00000108263 | RN7SL643F | misc_RNA        | chr6     | 86435848 | 86436138 | +    | 0    | 0     |
| ENSG00000108264 | RN7SL807F | misc_RNA        | chr2     | 2.23E+08 | 2.23E+08 | -    | 0    | 0     |

|                     |                  |          |          |   |       |       |
|---------------------|------------------|----------|----------|---|-------|-------|
| ENSG0000(RP11-377D) | processed_chr12  | 13021260 | 13021606 | - | 0     | 0     |
| ENSG0000(PSG11)     | protein_co chr19 | 43007656 | 43026512 | - | 0.08  | 0     |
| ENSG0000(UGT1A3)    | protein_co chr2  | 2.34E+08 | 2.34E+08 | + | 0     | 0     |
| ENSG0000(RN7SL22P)  | misc_RNA chr9    | 35671776 | 35672044 | + | 0     | 0     |
| ENSG0000(PSG4)      | protein_co chr19 | 43192702 | 43207299 | - | 0.22  | 0.32  |
| ENSG0000(RPL23AP6)  | processed_chr12  | 12338776 | 12339254 | + | 0     | 0     |
| ENSG0000(RP11-115N) | lincRNA chr7     | 91311368 | 91515409 | + | 0     | 0     |
| ENSG0000(MRPL33)    | protein_co chr2  | 27771717 | 27988087 | + | 51.73 | 54.62 |
| ENSG0000(LINC02040) | lincRNA chr3     | 65174958 | 65193499 | + | 0     | 0     |
| ENSG0000(RP11-538P) | antisense chr3   | 1.59E+08 | 1.59E+08 | - | 0     | 0     |
| ENSG0000(CTD-2501C) | processed_chr3   | 1.55E+08 | 1.55E+08 | - | 0     | 0     |
| ENSG0000(RP11-46A1) | antisense chr1   | 1.81E+08 | 1.81E+08 | - | 0.4   | 0.2   |
| ENSG0000(MICAL3)    | protein_co chr22 | 17787649 | 18024559 | - | 13.82 | 15.4  |
| ENSG0000(RP11-342F) | processed_chr5   | 79529302 | 79530093 | + | 0     | 0     |
| ENSG0000(RP11-166B) | processed_chr12  | 73648666 | 73649039 | + | 0     | 0     |
| ENSG0000(RP11-79M)  | processed_chr3   | 1.59E+08 | 1.59E+08 | - | 0     | 0     |
| ENSG0000(RPS10P28)  | processed_chr19  | 42670005 | 42670816 | + | 0     | 0     |
| ENSG0000(RP11-273P) | processed_chr8   | 1.05E+08 | 1.05E+08 | - | 0     | 0     |
| ENSG0000(RN7SL861F) | misc_RNA chr1    | 1.63E+08 | 1.63E+08 | + | 0.4   | 0     |
| ENSG0000(RPSAP36)   | transcribed chr4 | 1.43E+08 | 1.43E+08 | + | 0     | 0.2   |
| ENSG0000(RP11-550I) | processed_chr3   | 1.57E+08 | 1.57E+08 | + | 0.41  | 0.35  |
| ENSG0000(AC110769)  | lincRNA chr2     | 1.14E+08 | 1.14E+08 | + | 0     | 0     |
| ENSG0000(RP11-734J) | processed_chr8   | 34874159 | 34874633 | + | 0     | 0     |
| ENSG0000(CCDC39-AS) | antisense chr3   | 1.81E+08 | 1.81E+08 | + | 0     | 0     |
| ENSG0000(HNRNPA1P)  | unprocessed chr3 | 1.08E+08 | 1.08E+08 | - | 0     | 0     |
| ENSG0000(CTA-360L1) | processed_chr7   | 1.07E+08 | 1.07E+08 | - | 0     | 0     |
| ENSG0000(TUBBP11)   | processed_chr3   | 1.04E+08 | 1.04E+08 | + | 0     | 0     |
| ENSG0000(TUSC7)     | antisense chr3   | 1.17E+08 | 1.17E+08 | + | 0     | 0     |
| ENSG0000(RP11-408P) | processed_chr4   | 65573459 | 65574328 | + | 0.76  | 0.28  |
| ENSG0000(PPAN-P2R)  | protein_co chr19 | 10106223 | 10114780 | + | 0     | 0.36  |
| ENSG0000(AC006159)  | antisense chr7   | 1.17E+08 | 1.17E+08 | - | 0     | 0     |
| ENSG0000(RP5-1157M) | antisense chr3   | 52239258 | 52241097 | + | 0.23  | 0.13  |
| ENSG0000(RP11-7F17) | processed_chr14  | 76968683 | 76969145 | + | 0     | 0     |
| ENSG0000(RN7SL55P)  | misc_RNA chr4    | 1.09E+08 | 1.09E+08 | - | 0     | 0     |
| ENSG0000(RP11-286H) | antisense chr7   | 1.29E+08 | 1.29E+08 | - | 0     | 0     |
| ENSG0000(PCDHAC2)   | protein_co chr5  | 1.41E+08 | 1.41E+08 | + | 0.05  | 0.06  |
| ENSG0000(CTD-2583A) | processed_chr19  | 57953158 | 57953759 | - | 0     | 0     |
| ENSG0000(GSTA9P)    | transcribed chr6 | 52939726 | 52957521 | - | 0     | 0     |
| ENSG0000(IGKV2-30)  | IG_V_gene chr2   | 89244781 | 89245596 | - | 0     | 0     |
| ENSG0000(AC073130)  | antisense chr7   | 1.16E+08 | 1.16E+08 | - | 0.08  | 0.4   |
| ENSG0000(STON1)     | protein_co chr2  | 48529383 | 48598513 | + | 5.74  | 5.59  |
| ENSG0000(RPS6P16)   | processed_chr11  | 1.12E+08 | 1.12E+08 | - | 0     | 0     |
| ENSG0000(RN7SL350F) | misc_RNA chr8    | 99613783 | 99614081 | - | 0     | 0     |
| ENSG0000(RPL30P14)  | processed_chr18  | 61404858 | 61405205 | - | 0     | 0     |
| ENSG0000(MTCO2P29)  | unprocessed chr3 | 1.21E+08 | 1.21E+08 | + | 0     | 0     |

|                     |             |       |          |          |   |       |       |
|---------------------|-------------|-------|----------|----------|---|-------|-------|
| ENSG0000(RN7SL558F) | misc_RNA    | chr4  | 39761000 | 39761298 | + | 0     | 0     |
| ENSG0000(IGKV2D-29) | IG_V_gene   | chr2  | 89947512 | 89948279 | + | 0     | 0     |
| ENSG0000(RPL23AP55) | processed   | chr8  | 23206918 | 23207369 | + | 0     | 0     |
| ENSG0000(RN7SL614F) | misc_RNA    | chr1  | 10616836 | 10617115 | + | 0     | 0     |
| ENSG0000(RP11-166N) | antisense   | chr3  | 1.51E+08 | 1.51E+08 | + | 0     | 0     |
| ENSG0000(RN7SL571F) | misc_RNA    | chr13 | 76134931 | 76135225 | + | 0     | 0     |
| ENSG0000(RP11-384F) | lincRNA     | chr3  | 1.18E+08 | 1.19E+08 | - | 0     | 0     |
| ENSG0000(PRAF2)     | protein_co  | chrX  | 49071156 | 49074071 | - | 37.32 | 41.46 |
| ENSG0000(RP11-477G) | processed   | chr4  | 1.12E+08 | 1.12E+08 | + | 0     | 0.36  |
| ENSG0000(VSIG8)     | protein_co  | chr1  | 1.6E+08  | 1.6E+08  | - | 0     | 0.04  |
| ENSG0000(RPS17P14)  | processed   | chr8  | 1.08E+08 | 1.08E+08 | - | 0     | 0     |
| ENSG0000(AGAP13P)   | unprocess   | chr10 | 46816516 | 46832476 | + | 0.41  | 0     |
| ENSG0000(IGKV1-12)  | IG_V_gene   | chr2  | 89040224 | 89040745 | - | 0     | 0     |
| ENSG0000(CTD-2185K) | lincRNA     | chr3  | 59065150 | 59119509 | + | 0     | 0     |
| ENSG0000(RP11-779P) | lincRNA     | chr3  | 99500347 | 99505508 | + | 0     | 0     |
| ENSG0000(RPL31P61)  | processed   | chr19 | 36901742 | 36902117 | + | 0     | 0     |
| ENSG0000(LINC00359) | lincRNA     | chr13 | 96941281 | 96984172 | - | 0     | 0     |
| ENSG0000(RP11-274B) | processed   | chr7  | 1.29E+08 | 1.29E+08 | + | 5.74  | 5.36  |
| ENSG0000(RP11-268I) | processed   | chr18 | 21854640 | 21854987 | - | 0     | 0     |
| ENSG0000(CTC-428G2) | processed   | chr5  | 1.15E+08 | 1.15E+08 | - | 0     | 0     |
| ENSG0000(RP11-362A) | antisense   | chr3  | 1.52E+08 | 1.52E+08 | - | 0     | 0     |
| ENSG0000(POM121L6)  | processed   | chr6  | 26896952 | 26898777 | + | 0     | 0     |
| ENSG0000(RP11-397E) | processed   | chr4  | 86870191 | 86871404 | + | 6.64  | 7.06  |
| ENSG0000(RN7SL285F) | misc_RNA    | chr6  | 37832922 | 37833185 | - | 0     | 0     |
| ENSG0000(RP11-538P) | processed   | chr3  | 1.58E+08 | 1.58E+08 | + | 0     | 0     |
| ENSG0000(GUCY2GP)   | transcribec | chr10 | 1.12E+08 | 1.12E+08 | - | 0     | 0     |
| ENSG0000(C7orf73)   | protein_co  | chr7  | 1.36E+08 | 1.36E+08 | + | 18.38 | 16.67 |
| ENSG0000(FGF14-IT1) | sense_intr  | chr13 | 1.02E+08 | 1.02E+08 | - | 0     | 0     |
| ENSG0000(LINC01998) | lincRNA     | chr3  | 1.5E+08  | 1.5E+08  | - | 0.11  | 0.03  |
| ENSG0000(PTPRVP)    | processed   | chr1  | 2.02E+08 | 2.02E+08 | + | 0.08  | 0     |
| ENSG0000(RP11-520P) | processed   | chr8  | 1.43E+08 | 1.43E+08 | - | 0     | 0     |
| ENSG0000(RN7SL174F) | misc_RNA    | chr5  | 1.19E+08 | 1.19E+08 | - | 0     | 0     |
| ENSG0000(KCTD7)     | protein_co  | chr7  | 66628767 | 66649067 | + | 12.18 | 13.3  |
| ENSG0000(RN7SL307F) | misc_RNA    | chr15 | 49198900 | 49199194 | - | 0     | 0     |
| ENSG0000(RN7SL738F) | misc_RNA    | chr3  | 1.96E+08 | 1.96E+08 | + | 0     | 0     |
| ENSG0000(RP11-458K) | lincRNA     | chr7  | 1.16E+08 | 1.16E+08 | + | 0.08  | 0     |
| ENSG0000(RN7SL601F) | misc_RNA    | chr17 | 11157455 | 11157747 | + | 0     | 0     |
| ENSG0000(LINC02045) | lincRNA     | chr3  | 1.48E+08 | 1.48E+08 | - | 0     | 0     |
| ENSG0000(RP11-445N) | processed   | chr10 | 45147394 | 45171389 | + | 0     | 0     |
| ENSG0000(RN7SL8P)   | misc_RNA    | chr7  | 1.05E+08 | 1.05E+08 | + | 0     | 0     |
| ENSG0000(RPS29P19)  | processed   | chr11 | 1.14E+08 | 1.14E+08 | - | 0     | 0     |
| ENSG0000(RP11-57G2) | processed   | chr18 | 32779039 | 32779286 | + | 0     | 0     |
| ENSG0000(RN7SL815F) | misc_RNA    | chr3  | 1.16E+08 | 1.16E+08 | + | 0     | 0     |
| ENSG0000(EFNA4)     | protein_co  | chr1  | 1.55E+08 | 1.55E+08 | + | 8.1   | 6.05  |
| ENSG0000(RN7SL278F) | misc_RNA    | chr15 | 76976915 | 76977210 | - | 0     | 0     |

|                     |             |       |          |          |   |       |       |
|---------------------|-------------|-------|----------|----------|---|-------|-------|
| ENSG0000(RN7SL60P)  | misc_RNA    | chr13 | 98671980 | 98672278 | + | 0     | 0     |
| ENSG0000(MCCC1-AS)  | antisense   | chr3  | 1.83E+08 | 1.83E+08 | + | 0     | 0     |
| ENSG0000(RN7SL775F) | misc_RNA    | chr17 | 17178414 | 17178749 | + | 0     | 0     |
| ENSG0000(RN7SL173F) | misc_RNA    | chr6  | 1.58E+08 | 1.58E+08 | + | 0     | 0     |
| ENSG0000(RN7SL72P)  | misc_RNA    | chr7  | 1.48E+08 | 1.48E+08 | + | 0     | 0     |
| ENSG0000(RP11-646E) | processed   | chr3  | 1.83E+08 | 1.83E+08 | + | 0     | 0     |
| ENSG0000(RN7SL89P)  | misc_RNA    | chr4  | 1.05E+08 | 1.05E+08 | + | 0     | 0     |
| ENSG0000(RP11-475C) | antisense   | chr3  | 58572744 | 58574319 | + | 0     | 0     |
| ENSG0000(CTD-2110K) | processed   | chr5  | 83201229 | 83202141 | + | 0     | 0     |
| ENSG0000(RPL3P3)    | processed   | chr14 | 56978409 | 56979621 | + | 0.1   | 0     |
| ENSG0000(AC012442)  | 3prime_ov   | chr2  | 1.13E+08 | 1.13E+08 | + | 0     | 0     |
| ENSG0000(RP11-454H) | processed   | chr3  | 1.02E+08 | 1.02E+08 | - | 0     | 0     |
| ENSG0000(RN7SL141F) | misc_RNA    | chr3  | 1.72E+08 | 1.72E+08 | + | 0     | 0     |
| ENSG0000(RP11-473C) | processed   | chr8  | 1.3E+08  | 1.3E+08  | + | 0     | 0     |
| ENSG0000(RP11-330L) | processed   | chr15 | 64592979 | 64593326 | + | 0     | 0     |
| ENSG0000(RPL35AP32) | processed   | chr15 | 66446455 | 66446777 | - | 0     | 0     |
| ENSG0000(MRPS31P5)  | transcribec | chr13 | 52167709 | 52194465 | - | 2.79  | 2.21  |
| ENSG0000(PSMD6-AS)  | antisense   | chr3  | 64011964 | 64016246 | + | 0     | 0.2   |
| ENSG0000(TICAM2)    | protein_co  | chr5  | 1.16E+08 | 1.16E+08 | - | 1.64  | 1.45  |
| ENSG0000(RP11-274H) | antisense   | chr3  | 1.46E+08 | 1.46E+08 | + | 0     | 0     |
| ENSG0000(RP11-555K) | processed   | chr4  | 1.53E+08 | 1.53E+08 | - | 0.08  | 0     |
| ENSG0000(RN7SL734F) | misc_RNA    | chr12 | 75957833 | 75958130 | - | 0     | 0     |
| ENSG0000(RPL23AP49) | transcribec | chr3  | 75624275 | 75670156 | - | 0.17  | 0.81  |
| ENSG0000(RP5-837J1) | processed   | chr17 | 35076737 | 35077007 | + | 0     | 0     |
| ENSG0000(RN7SL107F) | misc_RNA    | chr8  | 80613544 | 80613826 | - | 0     | 0     |
| ENSG0000(RN7SL454F) | misc_RNA    | chr17 | 78532813 | 78533055 | - | 0     | 0     |
| ENSG0000(OR7E29P)   | unprocess   | chr3  | 1.26E+08 | 1.26E+08 | + | 0     | 0     |
| ENSG0000(RPL5P30)   | processed   | chr11 | 1.19E+08 | 1.19E+08 | + | 0     | 0     |
| ENSG0000(RP11-148K) | antisense   | chr7  | 1.51E+08 | 1.51E+08 | - | 0     | 0     |
| ENSG0000(RN7SL370F) | misc_RNA    | chr1  | 77645324 | 77645618 | + | 0     | 0     |
| ENSG0000(LARP1BP2)  | processed   | chr7  | 1.06E+08 | 1.06E+08 | + | 0     | 0     |
| ENSG0000(RN7SL352F) | misc_RNA    | chr6  | 1507322  | 1507598  | + | 0     | 0     |
| ENSG0000(AF165138)  | protein_co  | chr21 | 14591930 | 14658821 | - | 0     | 0     |
| ENSG0000(PALM2)     | protein_co  | chr9  | 1.1E+08  | 1.1E+08  | + | 0.01  | 0     |
| ENSG0000(RP11-715J) | processed   | chr16 | 2332313  | 2332732  | - | 0     | 0     |
| ENSG0000(RN7SL284F) | misc_RNA    | chr10 | 77912271 | 77912545 | - | 0     | 0     |
| ENSG0000(C4orf48)   | protein_co  | chr4  | 2041993  | 2043970  | + | 35.57 | 37.96 |
| ENSG0000(COX7BP1)   | processed   | chr22 | 35194699 | 35194942 | - | 0     | 0     |
| ENSG0000(RPS18P13)  | processed   | chr19 | 18048637 | 18049090 | + | 0     | 0     |
| ENSG0000(IGKV1-5)   | IG_V_gene   | chr2  | 88947301 | 88947957 | - | 0     | 0     |
| ENSG0000(INGX)      | transcribec | chrX  | 71491682 | 71492928 | - | 0.55  | 0.28  |
| ENSG0000(RPL7P51)   | processed   | chr19 | 51648862 | 51649610 | + | 0     | 0     |
| ENSG0000(NAT6)      | protein_co  | chr3  | 50296402 | 50299421 | - | 6.36  | 8.94  |
| ENSG0000(AOX2P)     | transcribec | chr2  | 2.01E+08 | 2.01E+08 | + | 0     | 0     |
| ENSG0000(MNX1-AS1)  | lincRNA     | chr7  | 1.57E+08 | 1.57E+08 | + | 0     | 0     |

|                      |            |       |          |          |   |      |      |
|----------------------|------------|-------|----------|----------|---|------|------|
| ENSG0000( AMY2A      | protein_co | chr1  | 1.04E+08 | 1.04E+08 | + | 0    | 0    |
| ENSG0000( RP11-572N  | processed_ | chr3  | 1.13E+08 | 1.13E+08 | - | 0    | 0    |
| ENSG0000( MIR1302-2  | lincRNA    | chr1  | 29554    | 31109    | + | 0    | 0.04 |
| ENSG0000( RP11-217E  | lincRNA    | chr3  | 1.54E+08 | 1.54E+08 | + | 0    | 0    |
| ENSG0000( RN7SL337F  | misc_RNA   | chr19 | 14584095 | 14584395 | + | 0    | 0    |
| ENSG0000( KRTAP10-1  | protein_co | chr21 | 44646414 | 44647650 | + | 0    | 0    |
| ENSG0000( RP11-521D  | lincRNA    | chr2  | 9757496  | 9770341  | - | 0    | 0    |
| ENSG0000( CTC-550B1  | processed_ | chr19 | 54973817 | 54974417 | + | 0    | 0    |
| ENSG0000( GMFBP1     | processed_ | chr3  | 1.01E+08 | 1.01E+08 | - | 0    | 0    |
| ENSG0000( UBA52P5    | processed_ | chr8  | 1.23E+08 | 1.23E+08 | + | 0    | 0    |
| ENSG0000( RPS6P21    | processed_ | chr12 | 1.32E+08 | 1.32E+08 | + | 0    | 0    |
| ENSG0000( RP11-257K  | protein_co | chr6  | 73209746 | 73263196 | - | 0    | 0    |
| ENSG0000( AC090453.  | processed_ | chr8  | 36987977 | 36988412 | - | 0    | 0    |
| ENSG0000( RPS23P1    | processed_ | chr8  | 97865054 | 97865485 | + | 0    | 0    |
| ENSG0000( RN7SL240F  | misc_RNA   | chr11 | 29721399 | 29721684 | - | 0    | 0    |
| ENSG0000( RP11-476N  | processed_ | chr12 | 3468950  | 3469296  | + | 0    | 0    |
| ENSG0000( RP11-775J; | processed_ | chr3  | 1.25E+08 | 1.25E+08 | - | 0    | 0    |
| ENSG0000( TNFRSF6B   | protein_co | chr20 | 63696668 | 63698684 | + | 0    | 0    |
| ENSG0000( RN7SL111F  | misc_RNA   | chr2  | 1.18E+08 | 1.18E+08 | + | 0    | 0    |
| ENSG0000( RPL32P33   | processed_ | chr17 | 72627231 | 72627624 | + | 0    | 0    |
| ENSG0000( RPL12P40   | processed_ | chr18 | 37672689 | 37673176 | + | 0    | 0    |
| ENSG0000( RP11-627K  | processed_ | chr12 | 31251992 | 31252597 | - | 0    | 0    |
| ENSG0000( RP11-639F  | processed_ | chr3  | 1.55E+08 | 1.55E+08 | - | 0    | 0    |
| ENSG0000( IGLVIVOR2  | IG_V_pseu  | chr22 | 32376682 | 32377135 | + | 0    | 0    |
| ENSG0000( RPL5P33    | processed_ | chr17 | 50847950 | 50849270 | + | 0    | 0    |
| ENSG0000( RP11-740N  | processed_ | chr7  | 6900424  | 6900623  | - | 0    | 0    |
| ENSG0000( RN7SL19P   | misc_RNA   | chr8  | 70654578 | 70654883 | - | 0    | 0    |
| ENSG0000( CTC-458A3  | processed_ | chr8  | 1.33E+08 | 1.33E+08 | + | 0    | 0.23 |
| ENSG0000( RPS26P28   | processed_ | chr5  | 16902294 | 16902641 | - | 0    | 0    |
| ENSG0000( RN7SL649F  | misc_RNA   | chr1  | 12036740 | 12037014 | - | 0    | 0    |
| ENSG0000( RN7SL104F  | misc_RNA   | chr2  | 15950689 | 15950981 | - | 0    | 0    |
| ENSG0000( WFDC6      | protein_co | chr20 | 45534196 | 45539495 | - | 0.11 | 0    |
| ENSG0000( RN7SL172F  | misc_RNA   | chr3  | 1.22E+08 | 1.22E+08 | - | 0.35 | 0    |
| ENSG0000( RN7SL108F  | misc_RNA   | chr14 | 68236243 | 68236539 | - | 0    | 0    |
| ENSG0000( HNRNP KP4  | processed_ | chr3  | 96349554 | 96350939 | + | 0    | 0    |
| ENSG0000( RN7SL101F  | misc_RNA   | chr4  | 28711198 | 28711476 | + | 0    | 0    |
| ENSG0000( RN7SL705F  | misc_RNA   | chr18 | 62650308 | 62650601 | - | 0    | 0    |
| ENSG0000( LINC01214  | lincRNA    | chr3  | 1.5E+08  | 1.5E+08  | - | 0    | 0    |
| ENSG0000( AC004967.  | unprocessε | chr7  | 97969005 | 97972254 | - | 0    | 0.2  |
| ENSG0000( RN7SL364F  | misc_RNA   | chr19 | 46688797 | 46689068 | - | 0    | 0    |
| ENSG0000( RN7SL838F  | misc_RNA   | chr11 | 440399   | 440693   | - | 0    | 0    |
| ENSG0000( UPK3B      | protein_co | chr7  | 76510428 | 76516521 | + | 0    | 0.15 |
| ENSG0000( RP11-2I17. | processed_ | chr15 | 72134641 | 72135436 | + | 0.23 | 0    |
| ENSG0000( LINC02017  | lincRNA    | chr3  | 55178172 | 55189214 | + | 0    | 0    |
| ENSG0000( RP11-264K  | lincRNA    | chr7  | 1.24E+08 | 1.24E+08 | - | 0    | 0    |

|                                     |          |          |   |        |        |
|-------------------------------------|----------|----------|---|--------|--------|
| ENSG0000(RPS29P25 processed_ chr19  | 39590981 | 39591151 | + | 0      | 0      |
| ENSG0000(RP4-669B1 lincRNA chr7     | 1.44E+08 | 1.44E+08 | + | 0      | 0      |
| ENSG0000(RP11-14I2. processed_ chr3 | 1.84E+08 | 1.84E+08 | + | 0      | 0      |
| ENSG0000(RN7SL282F misc_RNA chr18   | 6601540  | 6601836  | + | 0      | 0      |
| ENSG0000(RPL17P22 processed_ chr5   | 56136979 | 56137531 | + | 0      | 0      |
| ENSG0000(LINC02049 lincRNA chr3     | 1.21E+08 | 1.21E+08 | - | 0      | 0      |
| ENSG0000(RP11-758I1 processed_ chr3 | 1.46E+08 | 1.46E+08 | - | 0      | 0      |
| ENSG0000(RPL12P24 processed_ chr8   | 1.06E+08 | 1.06E+08 | - | 0      | 0      |
| ENSG0000(RPL35AP26 processed_ chr11 | 1.26E+08 | 1.26E+08 | - | 0      | 0      |
| ENSG0000(RPS2P44 processed_ chr16   | 48577524 | 48578369 | - | 0      | 0      |
| ENSG0000(RP11-216N antisense chr1   | 1.54E+08 | 1.54E+08 | - | 0      | 0      |
| ENSG0000(RP11-649A antisense chr3   | 1.47E+08 | 1.47E+08 | - | 0      | 0      |
| ENSG0000(AC003989. processed_ chr7  | 1.11E+08 | 1.11E+08 | + | 0      | 0      |
| ENSG0000(AP000322. protein_co chr21 | 34418715 | 34423966 | - | 0.03   | 0      |
| ENSG0000(LINC00880 lincRNA chr3     | 1.57E+08 | 1.57E+08 | - | 0.08   | 0.18   |
| ENSG0000(RN7SL542F misc_RNA chr7    | 21215537 | 21215830 | - | 0      | 0      |
| ENSG0000(RP11-281P processed_ chr3  | 1.05E+08 | 1.05E+08 | + | 0      | 0      |
| ENSG0000(RP11-164C lincRNA chr1     | 2.07E+08 | 2.07E+08 | + | 0      | 0      |
| ENSG0000(OR13C7 polymorph chr9      | 36002909 | 36003867 | - | 0      | 0      |
| ENSG0000(RN7SL526F misc_RNA chr19   | 58069970 | 58070288 | + | 0      | 0      |
| ENSG0000(TSPY20P unprocessε chrY    | 10036195 | 10038375 | + | 0      | 0      |
| ENSG0000(IL10RB protein_co chr21    | 33266358 | 33310187 | + | 22.53  | 20.05  |
| ENSG0000(RP11-215P processed_ chr5  | 1.34E+08 | 1.34E+08 | + | 0      | 0      |
| ENSG0000(CFB protein_co chr6        | 31945650 | 31952084 | + | 513.15 | 470.7  |
| ENSG0000(RN7SL834F misc_RNA chr2    | 2.31E+08 | 2.31E+08 | + | 0.79   | 0      |
| ENSG0000(RP11-846F antisense chr17  | 22524563 | 22525330 | - | 0      | 0      |
| ENSG0000(MTND5P1ε unprocessε chr3   | 1.07E+08 | 1.07E+08 | + | 0      | 0      |
| ENSG0000(RP11-4K3_ processed_ chr1  | 27311240 | 27311838 | + | 0      | 0      |
| ENSG0000(ZNF487 protein_co chr10    | 43436841 | 43483179 | + | 2.32   | 3.68   |
| ENSG0000(WBP1LP1 processed_ chr7    | 1.43E+08 | 1.43E+08 | - | 0      | 0      |
| ENSG0000(RPS4XP14 processed_ chr12  | 1757231  | 1758011  | - | 0      | 0.09   |
| ENSG0000(RPS29P12 processed_ chr5   | 1.81E+08 | 1.81E+08 | + | 0      | 0      |
| ENSG0000(WDR92 protein_co chr2      | 68122936 | 68157560 | - | 2.92   | 3.16   |
| ENSG0000(RPL34P23 processed_ chr11  | 1.23E+08 | 1.23E+08 | + | 0      | 0      |
| ENSG0000(RN7SL761F misc_RNA chr13   | 68693804 | 68694081 | - | 0      | 0      |
| ENSG0000(RPS3AP40 processed_ chr11  | 67925651 | 67926431 | - | 0      | 0      |
| ENSG0000(OR7E66P unprocessε chr3    | 75347833 | 75348787 | - | 0      | 0      |
| ENSG0000(RP11-379F processed_ chr3  | 1.59E+08 | 1.59E+08 | + | 0.62   | 0      |
| ENSG0000(NME2 protein_co chr17      | 51165435 | 51171747 | + | 349.28 | 343.41 |
| ENSG0000(RP11-274B processed_ chr7  | 1.29E+08 | 1.29E+08 | + | 5.08   | 6.01   |
| ENSG0000(RPL37P23 processed_ chr19  | 52143043 | 52143336 | + | 0      | 0      |
| ENSG0000(RPLP1P11 processed_ chr17  | 16044621 | 16044961 | + | 0      | 0      |
| ENSG0000(RP11-432B processed_ chr3  | 1.6E+08  | 1.6E+08  | + | 0      | 0      |
| ENSG0000(LINC02027 lincRNA chr3     | 80993868 | 81095647 | + | 0.12   | 0      |
| ENSG0000(RP11-290L processed_ chr9  | 39173794 | 39174513 | - | 0.07   | 0      |



|                                      |          |          |   |       |       |
|--------------------------------------|----------|----------|---|-------|-------|
| ENSG0000(RP5-966M: protein_co chr3   | 52813282 | 52835729 | - | 0.24  | 0.09  |
| ENSG0000(RP11-463C processed_ chr16  | 86525457 | 86526252 | + | 0     | 0     |
| ENSG0000(RN7SL598F misc_RNA chr14    | 58179771 | 58180064 | + | 0     | 0     |
| ENSG0000(DUBR lincRNA chr3           | 1.07E+08 | 1.07E+08 | + | 2.21  | 3.13  |
| ENSG0000(RN7SL638F misc_RNA chr20    | 18592330 | 18592619 | + | 0     | 0     |
| ENSG0000(RN7SL105F misc_RNA chr17    | 1604374  | 1604672  | - | 0     | 0     |
| ENSG0000(RP11-178L: processed_ chr16 | 87268185 | 87268337 | + | 0     | 0     |
| ENSG0000(PLA2G4B protein_co chr15    | 41837775 | 41848147 | + | 0.63  | 0.86  |
| ENSG0000(LEFTY1 protein_co chr1      | 2.26E+08 | 2.26E+08 | - | 0     | 0.08  |
| ENSG0000(CFAP57 protein_co chr1      | 43172149 | 43254358 | + | 0.48  | 0.5   |
| ENSG0000(RPL21P116 processed_ chr15  | 78863247 | 78863729 | - | 0     | 0     |
| ENSG0000(CACNA2D3 antisense chr3     | 54874605 | 54901255 | - | 0     | 0     |
| ENSG0000(NPIPB5 protein_co chr16     | 22479121 | 22536521 | + | 25.09 | 25.63 |
| ENSG0000(RPL21P127 processed_ chr18  | 3406342  | 3406818  | - | 0     | 0     |
| ENSG0000(RPL23AP63 processed_ chr11  | 43718676 | 43719146 | + | 0     | 0     |
| ENSG0000(RN7SL393F misc_RNA chr2     | 1.58E+08 | 1.58E+08 | - | 0     | 0     |
| ENSG0000(TTC4 protein_co chr1        | 54715822 | 54742657 | + | 6.6   | 6.58  |
| ENSG0000(OR5V1 protein_co chr6       | 29355230 | 29431967 | - | 0     | 0     |
| ENSG0000(RPL29P3 processed_ chr14    | 36577543 | 36578005 | - | 0     | 0     |
| ENSG0000(RP11-80H8 lincRNA chr3      | 1.43E+08 | 1.43E+08 | + | 0     | 0     |
| ENSG0000(RN7SL181F misc_RNA chr9     | 1.21E+08 | 1.21E+08 | + | 0     | 0     |
| ENSG0000(RPLP0P2 transcribed chr11   | 61615036 | 61639449 | + | 2.01  | 2.05  |
| ENSG0000(CTC-232H1 processed_ chr5   | 13637919 | 13638381 | - | 0     | 0     |
| ENSG0000(EEF1A1P1C processed_ chr7   | 1.45E+08 | 1.45E+08 | - | 0     | 0.05  |
| ENSG0000(TMEM35B protein_co chr1     | 34981535 | 34985353 | - | 21.37 | 22.25 |
| ENSG0000(HLA-L transcribed chr6      | 30259584 | 30293014 | + | 6.52  | 5.27  |
| ENSG0000(RPL35AP15 processed_ chr5   | 1.17E+08 | 1.17E+08 | - | 0     | 0     |
| ENSG0000(ST13P15 processed_ chr3     | 1.44E+08 | 1.44E+08 | - | 0     | 0     |
| ENSG0000(RP11-216N processed_ chr8   | 86043102 | 86043507 | + | 0     | 0     |
| ENSG0000(AC006547. antisense chr22   | 20110821 | 20111875 | - | 0.14  | 0     |
| ENSG0000(HOTTIP antisense chr7       | 27198575 | 27207259 | + | 0     | 0     |
| ENSG0000(RN7SL65P misc_RNA chr2      | 1.74E+08 | 1.74E+08 | - | 0     | 0     |
| ENSG0000(CTD-3131K processed_ chr19  | 17589595 | 17590071 | - | 0     | 0     |
| ENSG0000(KIR2DL3 protein_co chr19    | 54738515 | 54753052 | + | 0     | 0     |
| ENSG0000(OSTCP1 transcribed chr6     | 1.59E+08 | 1.59E+08 | - | 0.15  | 0.05  |
| ENSG0000(RP11-864G processed_ chr11  | 1.02E+08 | 1.02E+08 | + | 0     | 0     |
| ENSG0000(RP11-681N processed_ chr18  | 13919603 | 13919923 | - | 0     | 0     |
| ENSG0000(RP11-112N processed_ chr15  | 59525422 | 59525881 | - | 0     | 0     |
| ENSG0000(RP11-193H transcribed chr1  | 2.38E+08 | 2.38E+08 | + | 0     | 0     |
| ENSG0000(RN7SL78P misc_RNA chr10     | 87832818 | 87833098 | - | 0     | 0     |
| ENSG0000(JMJD7 protein_co chr15      | 41828085 | 41837581 | + | 2.76  | 2.39  |
| ENSG0000(OR7E89P transcribed chr2    | 1.59E+08 | 1.59E+08 | + | 0     | 0     |
| ENSG0000(SNRPCP10 processed_ chr3    | 75521803 | 75522012 | + | 0     | 0     |
| ENSG0000(LINC02044 lincRNA chr3      | 1.13E+08 | 1.13E+08 | - | 0     | 0     |
| ENSG0000(CTB-111H1 sense_ovei chr7   | 1.06E+08 | 1.07E+08 | - | 0.09  | 0.09  |

|                                     |          |            |      |      |
|-------------------------------------|----------|------------|------|------|
| ENSG0000(PEX5L-AS1 antisense chr3   | 1.8E+08  | 1.8E+08 +  | 0    | 0    |
| ENSG0000(RN7SL461F misc_RNA chr14   | 56824375 | 56824656 - | 0    | 0    |
| ENSG0000(RP11-390K processed_chr11  | 47191181 | 47191542 - | 0    | 0    |
| ENSG0000(RPL7P18 processed_chr5     | 94825961 | 94826694 - | 0.09 | 0    |
| ENSG0000(RP5-1096J antisense chr20  | 20258407 | 20267809 - | 0    | 0    |
| ENSG0000(APOBEC3D protein_co chr22  | 39021113 | 39033276 + | 1.12 | 1.11 |
| ENSG0000(RP11-678L processed_chr3   | 1.21E+08 | 1.21E+08 + | 0    | 0    |
| ENSG0000(RN7SL189F misc_RNA chr14   | 20963579 | 20963867 + | 0    | 0    |
| ENSG0000(RP11-372E antisense chr3   | 1.43E+08 | 1.43E+08 + | 0    | 0    |
| ENSG0000(RN7SL832F lincRNA chr2     | 10690344 | 10692099 + | 0.03 | 0.11 |
| ENSG0000(RP11-2G17 processed_chr3   | 1.49E+08 | 1.49E+08 - | 0    | 0    |
| ENSG0000(RPL12P6 processed_chr14    | 34740336 | 34740833 - | 0    | 0    |
| ENSG0000(RP11-307F transcribed chr6 | 64728837 | 64733837 - | 0    | 0    |
| ENSG0000(CTB-33G10 processed_chr19  | 49719498 | 49720081 - | 0.12 | 0    |
| ENSG0000(RP11-113C processed_chr12  | 8460618  | 8461232 +  | 0    | 0    |
| ENSG0000(RP1-81D8 unprocessed chr6  | 1.61E+08 | 1.61E+08 - | 0    | 0    |
| ENSG0000(LINC02000 lincRNA chr3     | 1.34E+08 | 1.34E+08 - | 0    | 0    |
| ENSG0000(WDR86-AS processed_chr7    | 1.51E+08 | 1.51E+08 + | 0    | 0    |
| ENSG0000(PSMC1P7 processed_chr3     | 1.61E+08 | 1.61E+08 - | 0    | 0    |
| ENSG0000(RPL17P33 processed_chr8    | 29632091 | 29632644 + | 0    | 0    |
| ENSG0000(RN7SL30P misc_RNA chr9     | 1.26E+08 | 1.26E+08 - | 0    | 0    |
| ENSG0000(RN7SL610F misc_RNA chr2    | 23996795 | 23997085 - | 0    | 0    |
| ENSG0000(CFAP44-AS antisense chr3   | 1.13E+08 | 1.13E+08 + | 0    | 0    |
| ENSG0000(ALDH7A1P processed_chr7    | 1.51E+08 | 1.51E+08 - | 0    | 0    |
| ENSG0000(RN7SL67P misc_RNA chr12    | 19303480 | 19303775 + | 0    | 0    |
| ENSG0000(RPL12P5 processed_chr14    | 30791098 | 30791489 + | 0    | 0    |
| ENSG0000(RN7SL551F misc_RNA chr18   | 74227506 | 74227803 + | 0    | 0    |
| ENSG0000(RPL5P17 processed_chr5     | 85464434 | 85465310 + | 0    | 0    |
| ENSG0000(RP11-656A lincRNA chr3     | 1.55E+08 | 1.55E+08 - | 0    | 0    |
| ENSG0000(RPS3AP50 processed_chr19   | 33340686 | 33341984 + | 0    | 0    |
| ENSG0000(RN7SL236F misc_RNA chr17   | 78370852 | 78371135 - | 0    | 0    |
| ENSG0000(RN7SL487F misc_RNA chr15   | 43391384 | 43391727 - | 0    | 0    |
| ENSG0000(RN7SL464F misc_RNA chr1    | 2.21E+08 | 2.21E+08 - | 0    | 0    |
| ENSG0000(HMGB1P3 processed_chr3     | 70753854 | 70754573 + | 0    | 0    |
| ENSG0000(HMGB1P3 processed_chr3     | 79957566 | 79958142 - | 0    | 0    |
| ENSG0000(RN7SL419F misc_RNA chr4    | 1.53E+08 | 1.53E+08 - | 0    | 0    |
| ENSG0000(RP11-278L lincRNA chr3     | 1.49E+08 | 1.49E+08 - | 0    | 0    |
| ENSG0000(RP11-575C processed_chr3   | 1.38E+08 | 1.38E+08 - | 0    | 0    |
| ENSG0000(RP11-548B 3prime_ov chr9   | 69428248 | 69428721 - | 1.28 | 0    |
| ENSG0000(TRBV8-1 TR_V_pseu chr7     | 1.42E+08 | 1.42E+08 + | 0    | 0    |
| ENSG0000(RP11-489N processed_chr4   | 4076711  | 4077491 -  | 0    | 0    |
| ENSG0000(OR2A7 protein_co chr7      | 1.44E+08 | 1.44E+08 - | 0.21 | 0.53 |
| ENSG0000(RN7SL320F misc_RNA chr13   | 51469753 | 51470047 + | 0.37 | 0    |
| ENSG0000(ELFN2 sense_ovei chr22     | 37339583 | 37427445 - | 0    | 0    |
| ENSG0000(RP11-285B lincRNA chr3     | 59380024 | 59388704 - | 0    | 0    |

|                                     |          |          |   |       |       |
|-------------------------------------|----------|----------|---|-------|-------|
| ENSG0000(RPSAP5 processed_chr14     | 1.03E+08 | 1.03E+08 | - | 0     | 0     |
| ENSG0000(RN7SL679F misc_RNA chr1    | 26593243 | 26593546 | - | 0     | 0     |
| ENSG0000(TUBA4B protein_co chr2     | 2.19E+08 | 2.19E+08 | + | 0     | 0     |
| ENSG0000(RN7SL430F misc_RNA chr9    | 1.12E+08 | 1.12E+08 | - | 0     | 0     |
| ENSG0000(RPL5P14 processed_chr5     | 31847271 | 31848148 | + | 0.21  | 0.08  |
| ENSG0000(THAP12P2 processed_chr3    | 86012561 | 86015120 | + | 0     | 0     |
| ENSG0000(RP11-6K23 processed_chr12  | 15439527 | 15440401 | + | 0     | 0     |
| ENSG0000(EIF4BP8 processed_chr3     | 1.23E+08 | 1.23E+08 | + | 0.03  | 0     |
| ENSG0000(RPS26P24 processed_chr4    | 57352999 | 57353329 | - | 0     | 0     |
| ENSG0000(RPS24P18 processed_chr18   | 26098839 | 26099226 | + | 0     | 0     |
| ENSG0000(TIPARP-AS: antisense chr3  | 1.57E+08 | 1.57E+08 | - | 1.22  | 0.4   |
| ENSG0000(MRPS6 protein_co chr21     | 34073224 | 34143034 | + | 22.11 | 25.42 |
| ENSG0000(RP11-61F5 processed_chr4   | 51978079 | 51978372 | - | 0     | 0     |
| ENSG0000(RPS12P21 processed_chr11   | 1.12E+08 | 1.12E+08 | + | 0     | 0     |
| ENSG0000(RP11-200A processed_chr8   | 1.05E+08 | 1.05E+08 | - | 0     | 0     |
| ENSG0000(ZNF512 protein_co chr2     | 27582969 | 27623215 | + | 9.59  | 9.95  |
| ENSG0000(RP11-167H antisense chr3   | 1.5E+08  | 1.5E+08  | + | 0     | 0     |
| ENSG0000(RP11-696F processed_chr3   | 1.1E+08  | 1.1E+08  | - | 0     | 0     |
| ENSG0000(RN7SL308F misc_RNA chr8    | 80776666 | 80776962 | - | 0     | 0     |
| ENSG0000(RP11-439C lincRNA chr3     | 1.55E+08 | 1.55E+08 | - | 0     | 0     |
| ENSG0000(RN7SL743F misc_RNA chr16   | 8683254  | 8683551  | + | 0     | 0     |
| ENSG0000(GSTA1 protein_co chr6      | 52791664 | 52803910 | - | 0     | 0     |
| ENSG0000(RN7SL647F misc_RNA chr3    | 78115158 | 78115457 | + | 0     | 0     |
| ENSG0000(RN7SL684F misc_RNA chr5    | 1.77E+08 | 1.77E+08 | - | 0     | 0     |
| ENSG0000(RP11-552N sense_ovei chr1  | 1.11E+08 | 1.11E+08 | - | 1.21  | 0.69  |
| ENSG0000(RP5-839B4 lincRNA chr20    | 9986088  | 10007116 | + | 0     | 0     |
| ENSG0000(RPL23AP65 processed_chr11  | 9606142  | 9606609  | + | 0     | 0     |
| ENSG0000(NBPF5P transcribec chr1    | 1.08E+08 | 1.08E+08 | + | 0     | 0     |
| ENSG0000(RN7SL402F misc_RNA chr19   | 35881890 | 35882153 | + | 0     | 0     |
| ENSG0000(RP11-439C lincRNA chr3     | 1.55E+08 | 1.55E+08 | - | 0     | 0     |
| ENSG0000(PPIEL unprocessε chr1      | 39531838 | 39558707 | - | 0.24  | 0.18  |
| ENSG0000(VTI1BP1 processed_chr3     | 1E+08    | 1E+08    | + | 0     | 0     |
| ENSG0000(RN7SL523F misc_RNA chr14   | 1E+08    | 1E+08    | - | 0     | 0     |
| ENSG0000(RP11-473P processed_chr3   | 1.8E+08  | 1.8E+08  | - | 0     | 0     |
| ENSG0000(RGAG1 protein_co chrX      | 1.1E+08  | 1.1E+08  | + | 0.34  | 0.27  |
| ENSG0000(RP11-347C processed_chr8   | 94891239 | 94892107 | + | 0     | 0     |
| ENSG0000(RN7SL702F misc_RNA chrY    | 12273473 | 12273764 | + | 0     | 0     |
| ENSG0000(RP11-368N transcribec chr7 | 57628479 | 57645189 | - | 0     | 0     |
| ENSG0000(ENO1P3 processed_chr3      | 1.25E+08 | 1.25E+08 | - | 0     | 0     |
| ENSG0000(RPS24P17 processed_chr16   | 56906534 | 56906956 | + | 0     | 0.21  |
| ENSG0000(ACY1 protein_co chr3       | 51983278 | 51989202 | + | 16.01 | 12.9  |
| ENSG0000(RN7SL447F misc_RNA chr3    | 1.94E+08 | 1.94E+08 | - | 0     | 0     |
| ENSG0000(RP1-300I2. processed_chr20 | 45230868 | 45233331 | + | 0     | 0     |
| ENSG0000(AC006366. processed_chrY   | 23017063 | 23017821 | + | 0     | 0     |
| ENSG0000(RPSAP39 processed_chr4     | 80161129 | 80162011 | + | 0     | 0     |

|                      |             |       |          |          |   |        |        |
|----------------------|-------------|-------|----------|----------|---|--------|--------|
| ENSG0000(RN7SL143F)  | misc_RNA    | chr16 | 58770524 | 58770820 | + | 0      | 0      |
| ENSG0000(RP11-1396)  | processed   | chr4  | 9563171  | 9563950  | + | 0      | 0      |
| ENSG0000(NFS1)       | protein_co  | chr20 | 35668055 | 35699359 | - | 11.78  | 14.29  |
| ENSG0000(RN7SL799F)  | misc_RNA    | chrX  | 64210691 | 64210988 | + | 0      | 0      |
| ENSG0000(B3GAT3P1)   | processed   | chr3  | 1.6E+08  | 1.6E+08  | + | 0      | 0      |
| ENSG0000(RPL35P6)    | processed   | chr8  | 18774547 | 18774918 | - | 0.24   | 0      |
| ENSG0000(RPS2P24)    | processed   | chr5  | 77545397 | 77546266 | + | 0      | 0      |
| ENSG0000(MT1HL1)     | protein_co  | chr1  | 2.37E+08 | 2.37E+08 | - | 0      | 0      |
| ENSG0000(RP11-50D9)  | processed   | chr4  | 1.28E+08 | 1.28E+08 | - | 0      | 0      |
| ENSG0000(LARP7P4)    | processed   | chr3  | 1.46E+08 | 1.46E+08 | + | 0      | 0      |
| ENSG0000(KRTAP19-3)  | protein_co  | chr21 | 30491464 | 30491985 | - | 0      | 0      |
| ENSG0000(FAM86DP)    | transcribec | chr3  | 75421552 | 75435110 | - | 5.4    | 4.7    |
| ENSG0000(RPS3AP17)   | processed   | chr4  | 29962644 | 29963758 | - | 0      | 0      |
| ENSG0000(RN7SL228F)  | misc_RNA    | chr8  | 1.17E+08 | 1.17E+08 | + | 0      | 0      |
| ENSG0000(RN7SL424F)  | misc_RNA    | chr4  | 55063738 | 55064026 | + | 0      | 0      |
| ENSG0000(RP11-306G)  | antisense   | chr7  | 1.3E+08  | 1.3E+08  | + | 0.08   | 0.13   |
| ENSG0000(DDOST)      | protein_co  | chr1  | 20651767 | 20661544 | - | 233.31 | 237.15 |
| ENSG0000(RP11-379K)  | processed   | chr3  | 1.7E+08  | 1.7E+08  | + | 0      | 0      |
| ENSG0000(IL12A-AS1)  | antisense   | chr3  | 1.6E+08  | 1.6E+08  | - | 0      | 0.18   |
| ENSG0000(LINC01011)  | lincRNA     | chr6  | 2987967  | 2991173  | + | 0.91   | 0.76   |
| ENSG0000(RPS27P27)   | processed   | chr16 | 59088837 | 59089091 | + | 0      | 0      |
| ENSG0000(RN7SL735F)  | misc_RNA    | chr17 | 66364029 | 66364320 | + | 0      | 0      |
| ENSG0000(TMEM199)    | protein_co  | chr17 | 28357581 | 28363683 | + | 13.29  | 12.48  |
| ENSG0000(RPS18P6)    | processed   | chr3  | 95171920 | 95172377 | + | 0      | 0      |
| ENSG0000(RP11-266K)  | transcribec | chr12 | 8199599  | 8218911  | - | 0      | 0      |
| ENSG0000(RPL5P24)    | processed   | chr8  | 1.03E+08 | 1.03E+08 | - | 0      | 0      |
| ENSG0000(RPL13AP2)   | processed   | chr14 | 47200575 | 47201104 | - | 0      | 0      |
| ENSG0000(AC007566)   | antisense   | chr7  | 92457564 | 92491610 | + | 1.96   | 0.72   |
| ENSG0000(RN7SL417F)  | misc_RNA    | chr15 | 84394072 | 84394336 | + | 0      | 0      |
| ENSG0000(LCE3C)      | protein_co  | chr1  | 1.53E+08 | 1.53E+08 | + | 0      | 0      |
| ENSG0000(RPS2P41)    | processed   | chr12 | 1.12E+08 | 1.12E+08 | - | 0      | 0      |
| ENSG0000(RP11-389C)  | processed   | chr5  | 72381794 | 72382393 | + | 0      | 0      |
| ENSG0000(RP11-404G)  | processed   | chr3  | 1.34E+08 | 1.34E+08 | + | 0      | 0      |
| ENSG0000(AC024704)   | lincRNA     | chr2  | 1.14E+08 | 1.14E+08 | - | 0      | 0.44   |
| ENSG0000(MARK2P17)   | processed   | chr3  | 1.29E+08 | 1.29E+08 | - | 0      | 0      |
| ENSG0000(RN7SL148F)  | misc_RNA    | chr1  | 2.44E+08 | 2.44E+08 | + | 0      | 0      |
| ENSG0000(GSTA2)      | protein_co  | chr6  | 52750089 | 52763569 | - | 0      | 0      |
| ENSG0000(RPL9P33)    | processed   | chr19 | 51621136 | 51621701 | + | 0      | 0      |
| ENSG0000(RPS4XP6)    | processed   | chr5  | 37085056 | 37085852 | + | 0      | 0      |
| ENSG0000(CTC-512J14) | processed   | chr5  | 80315671 | 80315826 | + | 0      | 0      |
| ENSG0000(RN7SL833F)  | misc_RNA    | chr19 | 11516047 | 11516330 | - | 0      | 0      |
| ENSG0000(RP11-350D)  | unprocessε  | chr9  | 63025597 | 63025993 | + | 0      | 0      |
| ENSG0000(RP11-170N)  | processed   | chr4  | 1.23E+08 | 1.23E+08 | - | 0      | 0      |
| ENSG0000(RPS20P35)   | processed   | chr17 | 38855314 | 38855670 | + | 0      | 1.72   |
| ENSG0000(RPL23AP44)  | processed   | chr5  | 1.22E+08 | 1.22E+08 | - | 0      | 0      |

|                     |                  |          |          |   |       |       |
|---------------------|------------------|----------|----------|---|-------|-------|
| ENSG0000(HMGB1P3)   | processed_chr3   | 1.49E+08 | 1.49E+08 | - | 0     | 0     |
| ENSG0000(RN7SL483F) | misc_RNA_chr12   | 94515476 | 94515760 | + | 0     | 0     |
| ENSG0000(SPRR2F)    | protein_co_chr1  | 1.53E+08 | 1.53E+08 | - | 0     | 0     |
| ENSG0000(RPS4XP17)  | processed_chr17  | 656794   | 657547   | - | 0     | 0     |
| ENSG0000(RPS23P3)   | processed_chr4   | 66431092 | 66431521 | + | 0     | 0     |
| ENSG0000(HMGN1P1)   | processed_chr3   | 1.37E+08 | 1.37E+08 | + | 0     | 0     |
| ENSG0000(RN7SL659F) | misc_RNA_chr9    | 1.08E+08 | 1.08E+08 | - | 0     | 0     |
| ENSG0000(RN7SL250F) | misc_RNA_chr8    | 54420468 | 54420725 | + | 0     | 0     |
| ENSG0000(RN7SL508F) | misc_RNA_chr12   | 1.19E+08 | 1.19E+08 | + | 0     | 0     |
| ENSG0000(RP11-468H) | processed_chr8   | 17150301 | 17150888 | - | 0     | 0     |
| ENSG0000(DNAJC25-C) | protein_co_chr9  | 1.12E+08 | 1.12E+08 | + | 4.52  | 5.01  |
| ENSG0000(IGKV2-28)  | IG_V_gene_chr2   | 89221698 | 89222461 | - | 0     | 0     |
| ENSG0000(PDCL3P4)   | processed_chr3   | 1.02E+08 | 1.02E+08 | + | 0.1   | 0.11  |
| ENSG0000(UGT1A7)    | protein_co_chr2  | 2.34E+08 | 2.34E+08 | + | 0.17  | 0.19  |
| ENSG0000(ATP1B3-AS) | antisense_chr3   | 1.42E+08 | 1.42E+08 | - | 0     | 0     |
| ENSG0000(AC078882)  | sense_ovei_chr2  | 1.42E+08 | 1.42E+08 | - | 0     | 0     |
| ENSG0000(LINC01322) | lincRNA_chr3     | 1.65E+08 | 1.66E+08 | + | 0     | 0.06  |
| ENSG0000(UBE2Q2P9)  | processed_chr3   | 72006774 | 72006975 | + | 0     | 0     |
| ENSG0000(RPSAP51)   | processed_chr12  | 8742428  | 8743072  | + | 0     | 0     |
| ENSG0000(RPS12P20)  | processed_chr11  | 72708186 | 72708565 | + | 0     | 0     |
| ENSG0000(RP11-99J1) | antisense_chr1   | 2.31E+08 | 2.31E+08 | - | 0     | 0     |
| ENSG0000(RN7SL397F) | misc_RNA_chr3    | 1.2E+08  | 1.2E+08  | + | 0     | 0     |
| ENSG0000(ATP6V0CP)  | processed_chr3   | 1.11E+08 | 1.11E+08 | + | 0     | 0     |
| ENSG0000(RP11-757F) | processed_chr3   | 1.12E+08 | 1.12E+08 | - | 0     | 0     |
| ENSG0000(RP11-366N) | processed_chr4   | 1.65E+08 | 1.65E+08 | - | 0     | 0     |
| ENSG0000(RP11-148K) | antisense_chr7   | 1.51E+08 | 1.51E+08 | - | 0     | 0.16  |
| ENSG0000(WWP1P1)    | processed_chr3   | 98657802 | 98660570 | + | 0     | 0     |
| ENSG0000(CYP4F34P)  | unprocessε_chr13 | 18741730 | 18742718 | - | 0     | 0     |
| ENSG0000(EIF4E2P2)  | processed_chr3   | 1.15E+08 | 1.15E+08 | + | 0     | 0     |
| ENSG0000(RP1-93H18) | antisense_chr6   | 1.16E+08 | 1.16E+08 | - | 0     | 0     |
| ENSG0000(RPS27AP1)  | processed_chr8   | 53887008 | 53887244 | - | 0     | 0     |
| ENSG0000(FLNB-AS1)  | antisense_chr3   | 58162547 | 58170636 | - | 0     | 0     |
| ENSG0000(P2RY11)    | protein_co_chr19 | 10111538 | 10115372 | + | 3.45  | 3.02  |
| ENSG0000(RP4-733B9) | processed_chr7   | 7177952  | 7178324  | + | 0     | 0     |
| ENSG0000(RN7SL120F) | misc_RNA_chr3    | 1065580  | 1065875  | - | 0     | 0     |
| ENSG0000(PBX2P1)    | processed_chr3   | 1.43E+08 | 1.43E+08 | + | 0     | 0     |
| ENSG0000(RP11-810P) | processed_chr11  | 62011751 | 62012602 | - | 0     | 0     |
| ENSG0000(RP11-641C) | processed_chr3   | 60732144 | 60732636 | - | 0     | 0     |
| ENSG0000(RP11-314A) | antisense_chr17  | 4704230  | 4705529  | + | 0     | 0.18  |
| ENSG0000(TMEM141)   | protein_co_chr9  | 1.37E+08 | 1.37E+08 | + | 42.42 | 38.61 |
| ENSG0000(RP11-114H) | processed_chr5   | 1.31E+08 | 1.31E+08 | + | 0     | 0.15  |
| ENSG0000(RP11-379K) | transcribec_chr3 | 1.7E+08  | 1.7E+08  | - | 0     | 0     |
| ENSG0000(RN7SL218F) | misc_RNA_chr4    | 74011578 | 74011876 | + | 0     | 0     |
| ENSG0000(PPIAP15)   | processed_chr3   | 1.09E+08 | 1.09E+08 | - | 0     | 0     |
| ENSG0000(RN7SL766F) | misc_RNA_chr13   | 21790537 | 21790845 | + | 0     | 0     |

|                                    |          |            |       |       |
|------------------------------------|----------|------------|-------|-------|
| ENSG0000(RP4-545C2 antisense chr7  | 1.44E+08 | 1.44E+08 + | 3.51  | 4.63  |
| ENSG0000(EIF4EP3 processed_chr3    | 1.82E+08 | 1.82E+08 - | 0     | 0     |
| ENSG0000(FOXP1-AS1 antisense chr3  | 71289769 | 71305853 + | 0     | 0     |
| ENSG0000(PDZK1P1 unprocessε chr1   | 1.48E+08 | 1.48E+08 - | 0     | 0     |
| ENSG0000(ZFAND6P1 processed_chr9   | 35449748 | 35450352 + | 0     | 0     |
| ENSG0000(LINC02016 lincRNA chr3    | 1.27E+08 | 1.27E+08 - | 0     | 0     |
| ENSG0000(RPS4XP10 processed_chr8   | 94352923 | 94353653 + | 0     | 0     |
| ENSG0000(RN7SL81P misc_RNA chr7    | 1.29E+08 | 1.29E+08 + | 2.4   | 0.53  |
| ENSG0000(GS1-259H1 protein_co chr7 | 99598066 | 99610813 + | 0.79  | 1.06  |
| ENSG0000(OR7E121P unprocessε chr3  | 75598652 | 75599673 - | 0     | 0     |
| ENSG0000(ILF2P1 processed_chr3     | 65687301 | 65688468 + | 0     | 0     |
| ENSG0000(LRRC77P transcribec chr3  | 1.68E+08 | 1.68E+08 + | 0     | 0     |
| ENSG0000(RPL26P35 processed_chr18  | 76834429 | 76834888 - | 0     | 0     |
| ENSG0000(RN7SL151F misc_RNA chr9   | 21699314 | 21699596 + | 0     | 0     |
| ENSG0000(CSPG4P2Y processed_chrY   | 24183434 | 24187231 - | 0     | 0     |
| ENSG0000(RN7SL698F misc_RNA chr3   | 1.29E+08 | 1.29E+08 + | 0     | 0     |
| ENSG0000(GMCL1P1 processed_chr5    | 1.78E+08 | 1.78E+08 - | 0     | 0     |
| ENSG0000(RP11-589C processed_chr8  | 42101318 | 42101836 + | 0     | 0     |
| ENSG0000(RN7SL604F misc_RNA chr2   | 69516751 | 69517046 + | 0     | 0     |
| ENSG0000(RP11-1046 processed_chr14 | 69561019 | 69561470 - | 0     | 0     |
| ENSG0000(AC007009. antisense chr7  | 8262233  | 8262821 +  | 0     | 0     |
| ENSG0000(IFITM10 protein_co chr11  | 1732410  | 1750591 -  | 0.23  | 0.59  |
| ENSG0000(RPS3AP42 processed_chr11  | 92498152 | 92498935 - | 0     | 0     |
| ENSG0000(RP11-120B processed_chr5  | 1.09E+08 | 1.09E+08 + | 0     | 0     |
| ENSG0000(ZNF736P8Y processed_chrY  | 7913422  | 7914090 -  | 0     | 0     |
| ENSG0000(LINC01995 lincRNA chr3    | 1.82E+08 | 1.83E+08 - | 0     | 0     |
| ENSG0000(RP11-441N processed_chr3  | 1.59E+08 | 1.59E+08 - | 0     | 0     |
| ENSG0000(RP11-64K1 processed_chr15 | 40480752 | 40481315 - | 0.13  | 0.28  |
| ENSG0000(RPS29P24 processed_chr19  | 39588955 | 39589125 + | 0     | 0     |
| ENSG0000(XXbac-BPG protein_co chr6 | 31927698 | 31952048 + | 1.49  | 0.68  |
| ENSG0000(RN7SL130F misc_RNA chr1   | 63655743 | 63656047 + | 0     | 0.38  |
| ENSG0000(PKD1P1 unprocessε chr16   | 16310341 | 16334190 + | 12.77 | 13.31 |
| ENSG0000(AP000797. processed_chr11 | 1.16E+08 | 1.16E+08 - | 0     | 0     |
| ENSG0000(RP11-521D lincRNA chr2    | 9674023  | 9708413 +  | 0     | 0     |
| ENSG0000(RN7SL597F misc_RNA chr13  | 41121876 | 41122171 + | 0     | 0     |
| ENSG0000(SIAH2-AS1 antisense chr3  | 1.51E+08 | 1.51E+08 + | 0.18  | 0     |
| ENSG0000(RP11-112N processed_chr12 | 50365652 | 50366086 + | 0     | 0     |
| ENSG0000(RPL34P22 processed_chr11  | 44629357 | 44629674 + | 0     | 0     |
| ENSG0000(RP11-529G antisense chr3  | 1.53E+08 | 1.53E+08 - | 0     | 0     |
| ENSG0000(RPL32P29 processed_chr14  | 49577392 | 49577794 - | 15.65 | 16.52 |
| ENSG0000(PGBD4P1 processed_chr7    | 1.43E+08 | 1.43E+08 + | 0     | 0     |
| ENSG0000(DBNDD2 protein_co chr20   | 45406057 | 45410610 + | 20.3  | 25.82 |
| ENSG0000(AP000235. lincRNA chr21   | 25055535 | 25069906 + | 0     | 0     |
| ENSG0000(ECEL1P2 transcribec chr2  | 2.32E+08 | 2.32E+08 - | 0     | 0     |
| ENSG0000(RP11-564P processed_chr3  | 81366990 | 81368021 - | 0     | 0     |

|                                     |          |          |   |      |      |
|-------------------------------------|----------|----------|---|------|------|
| ENSG0000(RPL23AP73 processed_ chr17 | 6749718  | 6750188  | + | 0    | 0    |
| ENSG0000(ITGB5-AS1 antisense chr3   | 1.25E+08 | 1.25E+08 | + | 0    | 0    |
| ENSG0000(RPS3AP35 processed_ chr8   | 12628476 | 12629256 | - | 0    | 0    |
| ENSG0000(OR9N1P transcribed chr7    | 1.42E+08 | 1.42E+08 | + | 0    | 0    |
| ENSG0000(RN7SL740F misc_RNA chr21   | 33918995 | 33919338 | - | 0.27 | 0.67 |
| ENSG0000(RPS20P21 processed_ chr8   | 73982125 | 73982467 | + | 0    | 0    |
| ENSG0000(RN7SL168F misc_RNA chr22   | 19365766 | 19366044 | + | 0    | 0    |
| ENSG0000(RN7SL465F misc_RNA chr6    | 38744086 | 38744386 | + | 0    | 0    |
| ENSG0000(GATA2-AS1 antisense chr3   | 1.28E+08 | 1.29E+08 | + | 2.17 | 3.45 |
| ENSG0000(AOX3P transcribed chr2     | 2.01E+08 | 2.01E+08 | + | 0.03 | 0    |
| ENSG0000(PEX5L-AS2 antisense chr3   | 1.8E+08  | 1.8E+08  | + | 0    | 0    |
| ENSG0000(DUXAP10 transcribed chr14  | 19284653 | 19337730 | - | 2.11 | 1.06 |
| ENSG0000(RN7SL395F misc_RNA chr8    | 1.45E+08 | 1.45E+08 | + | 0    | 0    |
| ENSG0000(RN7SL762F misc_RNA chr3    | 1.2E+08  | 1.2E+08  | - | 0    | 0    |
| ENSG0000(RP11-734K lincRNA chr2     | 9115197  | 9116884  | + | 0.73 | 0    |
| ENSG0000(RP11-425L processed_ chr11 | 46428653 | 46429150 | - | 0    | 0    |
| ENSG0000(RN7SL36P misc_RNA chr3     | 1.95E+08 | 1.95E+08 | - | 0    | 0    |
| ENSG0000(RN7SL252F misc_RNA chr7    | 96940068 | 96940364 | - | 0    | 0    |
| ENSG0000(LINC01326 lincRNA chr3     | 1.67E+08 | 1.67E+08 | - | 0    | 0    |
| ENSG0000(RN7SL814F misc_RNA chr5    | 74317986 | 74318285 | + | 0    | 0    |
| ENSG0000(RP11-383G sense_ovei chr3  | 1.42E+08 | 1.42E+08 | - | 0    | 0    |
| ENSG0000(RN7SL845F misc_RNA chr7    | 1.53E+08 | 1.53E+08 | + | 0    | 0    |
| ENSG0000(UBA52P9 processed_ chr18   | 27355406 | 27355764 | - | 0    | 0    |
| ENSG0000(CTB-47B8.1 processed_ chr5 | 1.58E+08 | 1.58E+08 | - | 0    | 0    |
| ENSG0000(RP11-119K sense_ovei chr10 | 94577439 | 94611238 | + | 0    | 0    |
| ENSG0000(RN7SL687F misc_RNA chrX    | 1.54E+08 | 1.54E+08 | + | 0    | 0    |
| ENSG0000(AJ239322.3 lincRNA chr2    | 1.32E+08 | 1.32E+08 | + | 0    | 0    |
| ENSG0000(LINC00698 lincRNA chr3     | 62950430 | 63125062 | + | 0    | 0    |
| ENSG0000(RP11-654C lincRNA chr3     | 72504806 | 72550552 | - | 0    | 0    |
| ENSG0000(RP11-531F processed_ chr3  | 1.83E+08 | 1.83E+08 | - | 0    | 0    |
| ENSG0000(HCG16 antisense chr6       | 28986800 | 28988536 | + | 0    | 0    |
| ENSG0000(LY6G6D protein_co chr6     | 31715356 | 31717804 | + | 0    | 0    |
| ENSG0000(RN7SL398F misc_RNA chr10   | 33288304 | 33288601 | - | 0.36 | 0    |
| ENSG0000(RN7SL145F misc_RNA chr3    | 45742675 | 45742970 | + | 0    | 0.81 |
| ENSG0000(RP11-88H1 lincRNA chr3     | 1.46E+08 | 1.46E+08 | + | 0    | 0    |
| ENSG0000(RPL30P7 processed_ chr5    | 10488820 | 10489142 | + | 0    | 0    |
| ENSG0000(KRTAP19-7 protein_co chr21 | 30560875 | 30561314 | - | 0    | 0    |
| ENSG0000(RPL7P23 processed_ chr5    | 77582376 | 77583122 | + | 0    | 0.1  |
| ENSG0000(PFN1P8 processed_ chr1     | 1.47E+08 | 1.47E+08 | - | 0    | 0    |
| ENSG0000(RN7SL423F misc_RNA chr2    | 1.61E+08 | 1.61E+08 | + | 0    | 0    |
| ENSG0000(RN7SL636F misc_RNA chr20   | 50429190 | 50429483 | - | 0    | 0    |
| ENSG0000(RPS2P45 transcribed chr16  | 69033675 | 69036042 | + | 0    | 0.03 |
| ENSG0000(RP11-24C3 antisense chr3   | 48440352 | 48446656 | - | 0.14 | 0.16 |
| ENSG0000(RP11-3K16 processed_ chr3  | 1.7E+08  | 1.7E+08  | + | 0    | 0    |
| ENSG0000(FAM3D-AS antisense chr3    | 58607080 | 58634440 | + | 0    | 0.09 |

|                      |             |       |          |          |   |       |       |
|----------------------|-------------|-------|----------|----------|---|-------|-------|
| ENSG0000(RN7SL359F)  | misc_RNA    | chr2  | 2.33E+08 | 2.33E+08 | + | 0     | 0     |
| ENSG0000(RN7SL242F)  | misc_RNA    | chr1  | 70180144 | 70180440 | - | 0     | 0     |
| ENSG0000(RPS6P22)    | processed   | chr12 | 59020169 | 59020894 | + | 0     | 0     |
| ENSG0000(RN7SL330F)  | misc_RNA    | chr12 | 94361220 | 94361526 | + | 0     | 0     |
| ENSG0000(RN7SL869F)  | misc_RNA    | chr7  | 80245926 | 80246225 | + | 0     | 0     |
| ENSG0000(RBMY1D)     | protein_co  | chrY  | 21880076 | 21894526 | - | 0     | 0.01  |
| ENSG0000(RP11-466H)  | processed   | chr11 | 16974693 | 16975013 | - | 64.08 | 79.83 |
| ENSG0000(RN7SL251F)  | misc_RNA    | chr2  | 85442495 | 85442791 | + | 0.36  | 0     |
| ENSG0000(RPS4XP12)   | processed   | chr11 | 1.21E+08 | 1.21E+08 | - | 0     | 0     |
| ENSG0000(RN7SL314F)  | misc_RNA    | chr10 | 37297398 | 37297689 | + | 0     | 0     |
| ENSG0000(RN7SL216F)  | misc_RNA    | chr3  | 25020166 | 25020463 | - | 0     | 0     |
| ENSG0000(ETV5)       | protein_co  | chr3  | 1.86E+08 | 1.86E+08 | - | 3.09  | 2.87  |
| ENSG0000(KRTAP5-7)   | protein_co  | chr11 | 71527267 | 71528674 | + | 0     | 0     |
| ENSG0000(RPL23AP56)  | processed   | chr8  | 1.35E+08 | 1.35E+08 | - | 0     | 0     |
| ENSG0000(CFHR1)      | protein_co  | chr1  | 1.97E+08 | 1.97E+08 | + | 0.7   | 0.68  |
| ENSG0000(RPL38P3)    | processed   | chr4  | 54976159 | 54976371 | - | 0     | 0     |
| ENSG0000(RN7SL268F)  | misc_RNA    | chr22 | 23879493 | 23879790 | - | 0     | 0     |
| ENSG0000(RP11-52B1)  | processed   | chr8  | 8095946  | 8096726  | + | 0     | 0     |
| ENSG0000(RP11-12N1)  | processed   | chr3  | 1.66E+08 | 1.66E+08 | + | 0     | 0     |
| ENSG0000(RPL39P28)   | processed   | chr12 | 68001394 | 68001548 | - | 0     | 0     |
| ENSG0000(RP11-428G)  | processed   | chr12 | 31897820 | 31898123 | + | 0     | 0     |
| ENSG0000(IGKV3-15)   | IG_V_gene   | chr2  | 89085177 | 89085787 | - | 0     | 0     |
| ENSG0000(RP11-359H)  | processed   | chr3  | 1.21E+08 | 1.21E+08 | + | 0     | 0.31  |
| ENSG0000(RPL34P21)   | processed   | chr11 | 1.3E+08  | 1.3E+08  | - | 0     | 0     |
| ENSG0000(AC090774)   | transcribed | chr17 | 20956682 | 20958404 | + | 0     | 0     |
| ENSG0000(ENO1P1)     | transcribed | chr1  | 2.36E+08 | 2.36E+08 | + | 0     | 0     |
| ENSG0000(RP11-1398)  | lincRNA     | chr4  | 1574062  | 1580253  | - | 2.32  | 2.28  |
| ENSG0000(LINC02077)  | lincRNA     | chr3  | 78038705 | 78046794 | - | 0     | 0     |
| ENSG0000(RBM12)      | protein_co  | chr20 | 35648925 | 35664956 | - | 19.81 | 15.62 |
| ENSG0000(RP11-201E)  | lincRNA     | chr3  | 99598064 | 99623820 | + | 0     | 0     |
| ENSG0000(RP11-206N)  | antisense   | chr3  | 1.49E+08 | 1.49E+08 | + | 0     | 0     |
| ENSG0000(RP11-395N)  | processed   | chr4  | 1.05E+08 | 1.05E+08 | - | 0     | 0     |
| ENSG0000(RP11-78J2)  | lincRNA     | chr13 | 52488993 | 52499305 | + | 0     | 0     |
| ENSG0000(UGT1A4)     | protein_co  | chr2  | 2.34E+08 | 2.34E+08 | + | 0     | 0     |
| ENSG0000(ERVFRD-1)   | protein_co  | chr6  | 11102489 | 11111732 | - | 0     | 0     |
| ENSG0000(OR2A1-AS1)  | antisense   | chr7  | 1.44E+08 | 1.44E+08 | - | 5.22  | 4.09  |
| ENSG0000(AC005154)   | transcribed | chr7  | 30523143 | 30524535 | - | 0.8   | 2.32  |
| ENSG0000(LILRA6)     | protein_co  | chr19 | 54236592 | 54242791 | - | 0     | 0     |
| ENSG0000(RPL18P13)   | processed   | chr16 | 76235055 | 76235623 | - | 0     | 0     |
| ENSG0000(SCARF2)     | protein_co  | chr22 | 20424815 | 20437826 | - | 14.39 | 12.73 |
| ENSG0000(RWDD4P1)    | processed   | chr7  | 1.05E+08 | 1.05E+08 | + | 0     | 0     |
| ENSG0000(RP3-508I15) | antisense   | chr22 | 38734725 | 38738765 | + | 0     | 0     |
| ENSG0000(SLC9A9-AS)  | antisense   | chr3  | 1.43E+08 | 1.43E+08 | + | 0     | 0     |
| ENSG0000(RN7SL623F)  | misc_RNA    | chr5  | 1.71E+08 | 1.71E+08 | + | 0     | 0     |
| ENSG0000(HDAC11-A)   | antisense   | chr3  | 13476982 | 13480053 | - | 0     | 0     |



|                                     |          |          |   |       |       |
|-------------------------------------|----------|----------|---|-------|-------|
| ENSG0000(RP11-278L processed_chr3   | 1.49E+08 | 1.49E+08 | + | 0     | 0     |
| ENSG0000(APOBEC3C protein_co chr22  | 39014083 | 39020352 | + | 38.36 | 39.94 |
| ENSG0000(GS1-124K5 transcribec chr7 | 66480394 | 66490108 | - | 0     | 0     |
| ENSG0000(RN7SL28P misc_RNA chr4     | 1.84E+08 | 1.84E+08 | + | 0     | 0     |
| ENSG0000(CTD-2013N antisense chr3   | 69013941 | 69056622 | + | 0.18  | 0.39  |
| ENSG0000(RN7SL125F misc_RNA chr17   | 48765554 | 48765847 | - | 0     | 0     |
| ENSG0000(KRT18P34 processed_chr3    | 1.57E+08 | 1.57E+08 | - | 0     | 0     |
| ENSG0000(RN7SL700F misc_RNA chr13   | 47458941 | 47459234 | - | 0     | 0     |
| ENSG0000(RP11-254G processed_chr18  | 21119182 | 21119661 | - | 0     | 0     |
| ENSG0000(SEPT14P2 processed_chr2    | 2.42E+08 | 2.42E+08 | + | 0     | 6.04  |
| ENSG0000(RN7SL380F misc_RNA chr12   | 6783854  | 6784161  | - | 0     | 0     |
| ENSG0000(RN7SL211F misc_RNA chr2    | 64906863 | 64907138 | - | 0     | 0     |
| ENSG0000(RP1-181J2 processed_chr11  | 32758268 | 32758614 | + | 0     | 0     |
| ENSG0000(KRTAP4-2 protein_co chr17  | 41177446 | 41178208 | - | 0     | 0     |
| ENSG0000(RP11-10G1 processed_chr4   | 22594196 | 22594450 | + | 0     | 0     |
| ENSG0000(RP11-416A processed_chr12  | 51106817 | 51107144 | + | 0     | 0     |
| ENSG0000(LINC01213 lincRNA chr3     | 1.5E+08  | 1.5E+08  | + | 0     | 0     |
| ENSG0000(RN7SL446F misc_RNA chr4    | 1.52E+08 | 1.52E+08 | - | 0     | 0     |
| ENSG0000(RP11-788A lincRNA chr3     | 1.53E+08 | 1.53E+08 | + | 0     | 0     |
| ENSG0000(RP5-905H7 processed_chr7   | 63233115 | 63241645 | - | 0     | 0     |
| ENSG0000(RPL34P29 processed_chr16   | 49935028 | 49935352 | + | 0     | 0     |
| ENSG0000(ODCP processed_chr7        | 1.29E+08 | 1.29E+08 | + | 0.07  | 0.11  |
| ENSG0000(KCNK15-AS antisense chr20  | 44694892 | 44746021 | - | 1.73  | 1.09  |
| ENSG0000(CTD-2377D processed_chr17  | 48690481 | 48690624 | - | 0     | 0     |
| ENSG0000(RP4-800G7 transcribec chr7 | 1.49E+08 | 1.49E+08 | + | 4.8   | 8.56  |
| ENSG0000(RP11-702L processed_chr3   | 1.09E+08 | 1.09E+08 | + | 0     | 0     |
| ENSG0000(AC006011 processed_chr2    | 1.28E+08 | 1.28E+08 | - | 3.79  | 2.2   |
| ENSG0000(RP11-14D2 lincRNA chr3     | 64445231 | 64454832 | + | 0     | 0     |
| ENSG0000(RP11-222C processed_chr7   | 1.16E+08 | 1.16E+08 | + | 0     | 0     |
| ENSG0000(RN7SL654F misc_RNA chr1    | 1.84E+08 | 1.84E+08 | + | 0     | 0     |
| ENSG0000(RPS6P4 processed_chr3      | 1.63E+08 | 1.63E+08 | + | 0     | 0     |
| ENSG0000(RPL30P11 transcribec chr12 | 14356842 | 14365503 | - | 0     | 0     |
| ENSG0000(IGKV1-27 IG_V_gene chr2    | 89213423 | 89213928 | - | 0     | 0     |
| ENSG0000(LINC01391 lincRNA chr3     | 1.39E+08 | 1.39E+08 | - | 0     | 0     |
| ENSG0000(RPL21P120 processed_chr17  | 21504558 | 21505059 | + | 0     | 0     |
| ENSG0000(RPL12P33 processed_chr12   | 1.21E+08 | 1.21E+08 | + | 0     | 0     |
| ENSG0000(WNT5A-AS antisense chr3    | 55487699 | 55488308 | + | 0     | 0     |
| ENSG0000(RAD21L1 protein_co chr20   | 1226056  | 1296421  | + | 0     | 0     |
| ENSG0000(RP11-685B processed_chr8   | 18383274 | 18383917 | - | 0.11  | 0     |
| ENSG0000(RP11-713H processed_chr17  | 8561230  | 8561576  | + | 0.27  | 0.61  |
| ENSG0000(CCDC13 protein_co chr3     | 42692663 | 42773253 | - | 0.4   | 0.29  |
| ENSG0000(RN7SL756F misc_RNA chr17   | 67457023 | 67457290 | - | 0     | 0     |
| ENSG0000(PSPC1P2 transcribec chr13  | 24566843 | 24570728 | + | 0     | 0     |
| ENSG0000(ASPRV1 protein_co chr2     | 69960089 | 69962265 | - | 0.36  | 0.59  |
| ENSG0000(RN7SL334F misc_RNA chr6    | 25031009 | 25031287 | - | 0     | 0     |

|                                 |       |          |          |   |       |       |
|---------------------------------|-------|----------|----------|---|-------|-------|
| ENSG0000(RP11-3151) antisense   | chr1  | 1.46E+08 | 1.46E+08 | + | 0     | 0     |
| ENSG0000(AL122127) lincRNA      | chr14 | 1.06E+08 | 1.06E+08 | + | 0     | 0     |
| ENSG0000(RPS17P11) processed    | chr5  | 52282567 | 52282859 | + | 0     | 0     |
| ENSG0000(OR2AE1) protein_co     | chr7  | 99875987 | 99877057 | - | 0.06  | 0     |
| ENSG0000(KRTAP20-1) protein_co  | chr21 | 30616425 | 30616699 | + | 0     | 0     |
| ENSG0000(MIATNB) lincRNA        | chr22 | 26672767 | 26780207 | + | 5.53  | 6.28  |
| ENSG0000(RP3-449O1) transcribed | chr22 | 38335762 | 38398929 | - | 3.97  | 4.97  |
| ENSG0000(RP11-241J) processed   | chr5  | 80855507 | 80855843 | - | 0     | 0     |
| ENSG0000(RN7SL863F) misc_RNA    | chr3  | 62796124 | 62796419 | - | 0     | 0     |
| ENSG0000(RP11-436J) processed   | chr3  | 68633706 | 68634356 | - | 0     | 0     |
| ENSG0000(RPS26P43) processed    | chr11 | 1.23E+08 | 1.23E+08 | - | 0     | 0     |
| ENSG0000(RN7SL396F) misc_RNA    | chr8  | 1.2E+08  | 1.2E+08  | + | 0     | 0     |
| ENSG0000(XKRY2) transcribed     | chrY  | 18128610 | 18137029 | + | 0     | 0     |
| ENSG0000(LINC02086) lincRNA     | chr17 | 48646923 | 48707346 | + | 0     | 0     |
| ENSG0000(RP11-501C) lincRNA     | chr3  | 1.48E+08 | 1.48E+08 | + | 0     | 0     |
| ENSG0000(RP11-93B2) processed   | chr3  | 1.06E+08 | 1.06E+08 | - | 0     | 0     |
| ENSG0000(UBFD1P1) processed     | chr3  | 98434034 | 98434847 | + | 0     | 0     |
| ENSG0000(GS1-124K5) transcribed | chr7  | 66485095 | 66486532 | - | 0     | 0     |
| ENSG0000(TRBV12-1) TR_V_pseu    | chr7  | 1.42E+08 | 1.42E+08 | + | 0     | 0     |
| ENSG0000(RP11-6151) processed   | chr12 | 24642687 | 24643166 | + | 0     | 0     |
| ENSG0000(SNRPCP3) processed     | chr3  | 1.51E+08 | 1.51E+08 | - | 0     | 0     |
| ENSG0000(RP11-158C) processed   | chr4  | 64767130 | 64767897 | - | 0     | 0     |
| ENSG0000(RN7SL280F) misc_RNA    | chr22 | 21722895 | 21723182 | - | 0     | 0     |
| ENSG0000(RPS3AP15) processed    | chr3  | 75542149 | 75542929 | - | 0     | 0     |
| ENSG0000(AC108676) sense_ove    | chr3  | 1.94E+08 | 1.95E+08 | - | 0.54  | 0.5   |
| ENSG0000(AL109761) antisense    | chr21 | 17793488 | 17810845 | + | 0     | 0     |
| ENSG0000(RN7SL706F) misc_RNA    | chr14 | 68149617 | 68149908 | - | 0     | 0     |
| ENSG0000(MTHFD2P1) transcribed  | chr3  | 95654423 | 95683193 | - | 0     | 0     |
| ENSG0000(FCGR2C) polymorph      | chr1  | 1.62E+08 | 1.62E+08 | + | 0     | 0.04  |
| ENSG0000(UBE2V1) protein_co     | chr20 | 50081124 | 50115959 | - | 48.97 | 52.27 |
| ENSG0000(RPL10AP1) processed    | chr14 | 1.03E+08 | 1.03E+08 | - | 0     | 0     |
| ENSG0000(RN7SL724F) misc_RNA    | chr3  | 1.4E+08  | 1.4E+08  | - | 0     | 0     |
| ENSG0000(CTAGE8) protein_co     | chr7  | 1.44E+08 | 1.44E+08 | - | 0.05  | 0.09  |
| ENSG0000(PTCHD4) protein_co     | chr6  | 47878028 | 48068689 | - | 3.26  | 3.51  |
| ENSG0000(RP11-803B) unprocess   | chr3  | 75384059 | 75391810 | - | 0     | 0     |
| ENSG0000(RP5-894A1) antisense   | chr7  | 1.42E+08 | 1.42E+08 | - | 0.5   | 1.11  |
| ENSG0000(CD46P1) unprocess      | chr1  | 2.08E+08 | 2.08E+08 | + | 0     | 0     |
| ENSG0000(RP11-133K) processed   | chr15 | 40312352 | 40313289 | - | 0     | 0     |
| ENSG0000(RP11-298C) lincRNA     | chr3  | 1.68E+08 | 1.68E+08 | - | 0     | 0     |
| ENSG0000(RPL23P10) processed    | chr8  | 36581180 | 36581591 | - | 0     | 0     |
| ENSG0000(RN7SL47P) misc_RNA     | chr6  | 1.06E+08 | 1.06E+08 | - | 0     | 0     |
| ENSG0000(RP11-874G) processed   | chr12 | 28564678 | 28565141 | - | 0.17  | 0.18  |
| ENSG0000(RP11-2002) processed   | chr1  | 1.09E+08 | 1.09E+08 | + | 0.18  | 0     |
| ENSG0000(RPS27P14) processed    | chr5  | 69469883 | 69470136 | + | 0     | 0.56  |
| ENSG0000(RP11-402J) processed   | chr3  | 1.12E+08 | 1.12E+08 | + | 0     | 0     |

|                 |            |                |       |          |          |   |       |       |
|-----------------|------------|----------------|-------|----------|----------|---|-------|-------|
| ENSG00000100000 | RPSAP29    | processed      | chr3  | 1.11E+08 | 1.11E+08 | - | 0     | 0     |
| ENSG00000100000 | ASLP1      | unprocessed    | chr22 | 23649213 | 23653334 | - | 0     | 0.12  |
| ENSG00000100000 | RP13-1056  | processed      | chr3  | 49775285 | 49775614 | + | 0     | 0     |
| ENSG00000100000 | C4A        | protein_coding | chr6  | 31982024 | 32002681 | + | 3.71  | 2.56  |
| ENSG00000100000 | RN7SL870F  | misc_RNA       | chr3  | 47560229 | 47560524 | - | 0     | 0     |
| ENSG00000100000 | RP11-506M  | lincRNA        | chr10 | 79660891 | 79677996 | + | 0.32  | 0.63  |
| ENSG00000100000 | HBB        | protein_coding | chr11 | 5225464  | 5229395  | - | 0     | 0     |
| ENSG00000100000 | RP11-373E  | sense_intronic | chr3  | 1.71E+08 | 1.71E+08 | + | 0     | 0     |
| ENSG00000100000 | RP11-463H  | processed      | chr3  | 1.36E+08 | 1.36E+08 | - | 0     | 0     |
| ENSG00000100000 | RP11-8P13  | processed      | chr12 | 32863118 | 32863433 | + | 0     | 0     |
| ENSG00000100000 | RN7SL153F  | misc_RNA       | chr5  | 72314397 | 72314688 | - | 0     | 0     |
| ENSG00000100000 | CRYBB2     | protein_coding | chr22 | 25219522 | 25231869 | + | 0     | 0     |
| ENSG00000100000 | RPL15P21   | processed      | chr17 | 10860535 | 10861462 | - | 0     | 0     |
| ENSG00000100000 | N4BP2L2    | protein_coding | chr13 | 32432417 | 32538885 | - | 31.44 | 32.98 |
| ENSG00000100000 | RP11-1042  | processed      | chr14 | 60572024 | 60572311 | - | 0     | 0     |
| ENSG00000100000 | RP11-45A1  | antisense      | chr9  | 1.16E+08 | 1.16E+08 | - | 0     | 0     |
| ENSG00000100000 | RP11-65D1  | lincRNA        | chr8  | 1.26E+08 | 1.26E+08 | + | 0     | 0     |
| ENSG00000100000 | GABPB1-AS1 | antisense      | chr15 | 50354959 | 50372202 | + | 7.95  | 7.41  |
| ENSG00000100000 | MTCYBP18   | processed      | chr5  | 1.35E+08 | 1.35E+08 | - | 0     | 0     |
| ENSG00000100000 | ALKBH3-AS1 | antisense      | chr11 | 43909292 | 43920944 | - | 0     | 0     |
| ENSG00000100000 | RP11-529F  | unprocessed    | chr3  | 1.29E+08 | 1.29E+08 | + | 0     | 0     |
| ENSG00000100000 | RP11-1379  | antisense      | chr5  | 1.8E+08  | 1.8E+08  | - | 0.03  | 0.06  |
| ENSG00000100000 | RP11-1000  | lincRNA        | chr15 | 32613733 | 32615111 | + | 0.77  | 0.92  |
| ENSG00000100000 | RP11-613D  | lincRNA        | chr11 | 43943787 | 43947206 | - | 0     | 0     |
| ENSG00000100000 | LIFR-AS1   | antisense      | chr5  | 38556786 | 38671216 | + | 0.25  | 0.37  |
| ENSG00000100000 | CTD-3064M  | antisense      | chr8  | 1.41E+08 | 1.41E+08 | - | 0     | 0     |
| ENSG00000100000 | RP11-744N  | antisense      | chr11 | 1.29E+08 | 1.29E+08 | - | 0     | 0     |
| ENSG00000100000 | RP11-181C  | lincRNA        | chr12 | 98485544 | 98503855 | - | 0.03  | 0.04  |
| ENSG00000100000 | RP11-875C  | antisense      | chr8  | 22984596 | 23019335 | - | 1.04  | 0.44  |
| ENSG00000100000 | RP11-303E  | lincRNA        | chr16 | 81077319 | 81078861 | + | 0     | 0.06  |
| ENSG00000100000 | LINC00847  | lincRNA        | chr5  | 1.81E+08 | 1.81E+08 | + | 5.41  | 6.14  |
| ENSG00000100000 | IGFBP7-AS1 | antisense      | chr4  | 57109762 | 57205510 | + | 0.99  | 1.44  |
| ENSG00000100000 | RP11-320N  | antisense      | chr8  | 95066808 | 95073182 | - | 0     | 0     |
| ENSG00000100000 | A2M-AS1    | antisense      | chr12 | 9065177  | 9068060  | + | 0.03  | 0.22  |
| ENSG00000100000 | SMARCA5-   | antisense      | chr4  | 1.44E+08 | 1.44E+08 | - | 0.2   | 0.65  |
| ENSG00000100000 | LINC01024  | antisense      | chr5  | 1.4E+08  | 1.4E+08  | - | 0.68  | 0.57  |
| ENSG00000100000 | ARAP1-AS2  | antisense      | chr11 | 72700474 | 72705607 | + | 0     | 0     |
| ENSG00000100000 | RNF139-AS1 | lincRNA        | chr8  | 1.24E+08 | 1.24E+08 | - | 0.88  | 1.15  |
| ENSG00000100000 | RP11-867G  | lincRNA        | chr11 | 66269832 | 66278525 | - | 0.23  | 0.21  |
| ENSG00000100000 | LINC00861  | lincRNA        | chr8  | 1.26E+08 | 1.26E+08 | - | 0     | 0     |
| ENSG00000100000 | EEF1A1P4   | processed      | chr12 | 19456244 | 19457648 | - | 0.02  | 0     |
| ENSG00000100000 | RP11-10K1  | antisense      | chr4  | 1.73E+08 | 1.73E+08 | - | 0.8   | 0.71  |
| ENSG00000100000 | USP2-AS1   | antisense      | chr11 | 1.19E+08 | 1.2E+08  | + | 0.07  | 0.08  |
| ENSG00000100000 | RP3-330M   | antisense      | chr6  | 43213801 | 43223860 | - | 0     | 0     |
| ENSG00000100000 | SAP30L-AS1 | antisense      | chr5  | 1.54E+08 | 1.54E+08 | - | 1.25  | 0.69  |

|                 |                      |       |          |          |   |        |        |
|-----------------|----------------------|-------|----------|----------|---|--------|--------|
| ENSG00000100000 | CTD-2547L antisense  | chr8  | 18084868 | 18096394 | + | 0      | 0.53   |
| ENSG00000100000 | RP11-286E antisense  | chr4  | 1.08E+08 | 1.08E+08 | - | 0      | 0      |
| ENSG00000100000 | ARNTL2-AS antisense  | chr12 | 27389789 | 27446625 | - | 0      | 0      |
| ENSG00000100000 | CTC-241N9 lincRNA    | chr5  | 1.8E+08  | 1.8E+08  | + | 0.4    | 0.65   |
| ENSG00000100000 | RP11-15B1 antisense  | chr4  | 99950006 | 1E+08    | + | 0.16   | 0      |
| ENSG00000100000 | KB-1471A8 lincRNA    | chr8  | 1.2E+08  | 1.2E+08  | - | 0.18   | 0.13   |
| ENSG00000100000 | CXXC4-AS1 antisense  | chr4  | 1.04E+08 | 1.05E+08 | + | 0      | 0      |
| ENSG00000100000 | RP11-334E antisense  | chr11 | 1.19E+08 | 1.19E+08 | - | 0      | 0      |
| ENSG00000100000 | CTD-2540L lincRNA    | chr14 | 70608798 | 70641298 | - | 0      | 0      |
| ENSG00000100000 | RP11-367J: lincRNA   | chr4  | 7094571  | 7103385  | - | 0.11   | 0.13   |
| ENSG00000100000 | LINC01585 sense_ov   | chr15 | 90660234 | 90664967 | + | 0.05   | 0      |
| ENSG00000100000 | RP11-847H antisense  | chr12 | 34022281 | 34046417 | - | 0      | 0      |
| ENSG00000100000 | RP11-677N antisense  | chr11 | 1.25E+08 | 1.25E+08 | + | 0.33   | 0.41   |
| ENSG00000100000 | RP11-540A lincRNA    | chr11 | 9754770  | 9759533  | - | 0.74   | 0.84   |
| ENSG00000100000 | LINC00461 lincRNA    | chr5  | 88507546 | 88691041 | - | 0      | 0      |
| ENSG00000100000 | NEAT1 lincRNA        | chr11 | 65422774 | 65445540 | + | 448.03 | 462.22 |
| ENSG00000100000 | RORA-AS1 antisense   | chr15 | 60479178 | 60630637 | + | 0      | 0      |
| ENSG00000100000 | RP11-712B antisense  | chr11 | 95150539 | 95234104 | + | 0.62   | 0.65   |
| ENSG00000100000 | SCAMP1-A: lincRNA    | chr5  | 78342365 | 78360507 | - | 2.64   | 2.01   |
| ENSG00000100000 | AP001258: lincRNA    | chr11 | 59130133 | 59143015 | - | 3.93   | 3.15   |
| ENSG00000100000 | BDNF-AS antisense    | chr11 | 27506838 | 27698174 | + | 2.08   | 2.78   |
| ENSG00000100000 | DACT3-AS1 antisense  | chr19 | 46660364 | 46677447 | + | 0.15   | 0.1    |
| ENSG00000100000 | DDX11-AS1 antisense  | chr12 | 31020763 | 31073847 | - | 0.18   | 0.35   |
| ENSG00000100000 | RP11-277P antisense  | chr12 | 10363769 | 10398506 | + | 0      | 0.06   |
| ENSG00000100000 | RP11-620J: lincRNA   | chr12 | 57869835 | 57896482 | - | 0.03   | 0.03   |
| ENSG00000100000 | LINC02211 lincRNA    | chr5  | 25190682 | 25306172 | + | 0      | 0      |
| ENSG00000100000 | RP5-940J5: antisense | chr12 | 6543504  | 6544931  | + | 0      | 0      |
| ENSG00000100000 | ZNF585B protein_co   | chr19 | 37181579 | 37218153 | - | 4.98   | 3.46   |
| ENSG00000100000 | AF146191: lincRNA    | chr4  | 1.9E+08  | 1.9E+08  | - | 0.15   | 0.16   |
| ENSG00000100000 | CTB-26E19 sense_intr | chr5  | 1.78E+08 | 1.78E+08 | - | 0      | 0      |
| ENSG00000100000 | CRNDE lincRNA        | chr16 | 54845189 | 54929189 | - | 7.04   | 8.86   |
| ENSG00000100000 | NADK2-AS: antisense  | chr5  | 36221055 | 36221902 | + | 0      | 0      |
| ENSG00000100000 | RP11-34F1 lincRNA    | chr15 | 67834310 | 67838879 | - | 0      | 0      |
| ENSG00000100000 | RP11-480D lincRNA    | chr5  | 8333481  | 8457558  | - | 0.04   | 0      |
| ENSG00000100000 | RP11-367J: antisense | chr4  | 7030554  | 7046231  | - | 0      | 0.01   |
| ENSG00000100000 | DRAIC lincRNA        | chr15 | 69463026 | 69571440 | + | 0      | 0.26   |
| ENSG00000100000 | RP11-410D lincRNA    | chr16 | 58733912 | 59108974 | + | 0      | 0      |
| ENSG00000100000 | LINC02202 lincRNA    | chr5  | 1.59E+08 | 1.59E+08 | + | 1.04   | 0.76   |
| ENSG00000100000 | MIR4300H: lincRNA    | chr11 | 81879851 | 82718082 | - | 0      | 0      |
| ENSG00000100000 | CEBPA protein_co     | chr19 | 33299934 | 33302564 | - | 0.02   | 0.02   |
| ENSG00000100000 | RAD51-AS1 processed_ | chr15 | 40686724 | 40695107 | - | 5.26   | 3.44   |
| ENSG00000100000 | GS1-24F4.2 lincRNA   | chr8  | 6835554  | 6885276  | + | 0      | 0      |
| ENSG00000100000 | CTC-467M: antisense  | chr5  | 88676218 | 88722831 | + | 0      | 0      |
| ENSG00000100000 | RP11-158I: antisense | chr11 | 1.19E+08 | 1.19E+08 | - | 0      | 0      |
| ENSG00000100000 | LINC00682 lincRNA    | chr4  | 41872747 | 41882955 | - | 0      | 0      |

|                       |                     |       |          |          |   |       |       |
|-----------------------|---------------------|-------|----------|----------|---|-------|-------|
| ENSG000001721408      | antisense           | chr16 | 27268205 | 27290492 | + | 0.02  | 0     |
| ENSG000001796E        | antisense           | chr12 | 92145573 | 92189660 | + | 0.01  | 0.08  |
| ENSG00000154566       | processed_lincRNA   | chr8  | 66921684 | 66926398 | - | 42.55 | 42.22 |
| ENSG000001630D        | antisense           | chr4  | 75980790 | 76005942 | + | 0.08  | 0.11  |
| ENSG00000181184       | lincRNA             | chr5  | 1.28E+08 | 1.28E+08 | - | 7.26  | 10.34 |
| ENSG000001618H2       | lincRNA             | chr4  | 1.52E+08 | 1.52E+08 | + | 0     | 0     |
| ENSG000001633B1       | transcribed_lincRNA | chr4  | 1.19E+08 | 1.2E+08  | + | 8.89  | 8.92  |
| ENSG00000161208A1     | antisense           | chr8  | 98041726 | 98044121 | + | 0.03  | 0     |
| ENSG000001630K9       | lincRNA             | chr15 | 58768072 | 58770974 | - | 0.26  | 0.46  |
| ENSG00000151513       | antisense           | chr5  | 10479371 | 10482309 | + | 0     | 0.17  |
| ENSG000001611L1-A     | antisense           | chr3  | 1.26E+08 | 1.26E+08 | + | 0     | 0     |
| ENSG000001630AS1      | lincRNA             | chr11 | 83072066 | 83106719 | + | 3.24  | 4.95  |
| ENSG000001616P1       | transcribed_lincRNA | chr3  | 1.31E+08 | 1.31E+08 | + | 0     | 0.11  |
| ENSG00000162506J      | lincRNA             | chr14 | 97458816 | 97581601 | + | 0     | 0     |
| ENSG0000016115C       | antisense           | chr8  | 6403551  | 6407142  | - | 3.17  | 2.03  |
| ENSG00000161696N      | antisense           | chr4  | 99088857 | 99301356 | + | 2.58  | 1.68  |
| ENSG00000151096       | lincRNA             | chr4  | 13546075 | 13547801 | - | 0     | 0     |
| ENSG000001510900      | lincRNA             | chr11 | 1.16E+08 | 1.16E+08 | - | 0.02  | 0.55  |
| ENSG000001614H1P      | processed_lincRNA   | chr12 | 8512374  | 8512726  | - | 0     | 0     |
| ENSG00000161875C      | antisense           | chr8  | 23068229 | 23083619 | + | 0.06  | 0.02  |
| ENSG000001618AS1      | lincRNA             | chr8  | 66419589 | 66428977 | - | 0.03  | 0.03  |
| ENSG000001612D21-AS   | antisense           | chr11 | 78139771 | 78175323 | + | 2.18  | 1.59  |
| ENSG0000016129H2      | unprocessed_lincRNA | chr1  | 1.56E+08 | 1.56E+08 | - | 0.89  | 0.63  |
| ENSG00000161632K      | lincRNA             | chr11 | 74311362 | 74324705 | + | 0     | 0     |
| ENSG00000161260E      | antisense           | chr5  | 16615926 | 16629969 | + | 0     | 0     |
| ENSG00000151550       | lincRNA             | chr14 | 97925610 | 97978124 | - | 0.2   | 0.03  |
| ENSG0000016117A1      | antisense           | chr11 | 22829380 | 22945393 | + | 0     | 0     |
| ENSG000001618C8       | antisense           | chr8  | 1.27E+08 | 1.27E+08 | - | 0.08  | 0.29  |
| ENSG00000161613D      | antisense           | chr11 | 43829709 | 43880726 | - | 0     | 0     |
| ENSG000001618R5-AS1   | antisense           | chr8  | 1.02E+08 | 1.02E+08 | + | 0.68  | 0.42  |
| ENSG000001618F2-AS1   | antisense           | chr11 | 9758292  | 9811319  | + | 0.97  | 2.54  |
| ENSG000001612D-2036P  | lincRNA             | chr15 | 42739118 | 42743202 | + | 0.06  | 0.03  |
| ENSG0000016185N       | antisense           | chr11 | 10809297 | 10822931 | + | 0     | 0.26  |
| ENSG00000161892A      | antisense           | chr5  | 1.14E+08 | 1.15E+08 | - | 0     | 0     |
| ENSG00000161825L      | antisense           | chr5  | 1.38E+08 | 1.38E+08 | + | 0     | 0     |
| ENSG0000016177I2      | lincRNA             | chr12 | 30755074 | 30780739 | + | 0.07  | 0.04  |
| ENSG000001618R7-AS1   | antisense           | chr5  | 1.77E+08 | 1.77E+08 | - | 0     | 0     |
| ENSG000001618TL3-AS1  | antisense           | chr8  | 28696198 | 28701464 | - | 0.31  | 1.19  |
| ENSG000001618P5-1186N | antisense           | chr6  | 28587378 | 28591747 | + | 0     | 0     |
| ENSG00000161813A1     | lincRNA             | chr12 | 89010681 | 89019679 | - | 0     | 0.08  |
| ENSG000001618ACTB2-AS | antisense           | chr8  | 70608577 | 70663279 | + | 0.5   | 0.16  |
| ENSG00000161810L7     | lincRNA             | chr4  | 88284942 | 88331421 | + | 0.1   | 0.08  |
| ENSG000001618461C     | lincRNA             | chr16 | 56092987 | 56191094 | - | 0     | 0.02  |
| ENSG000001618386I     | lincRNA             | chr12 | 1.33E+08 | 1.33E+08 | - | 0     | 0     |
| ENSG000001618204I     | antisense           | chr5  | 1.42E+08 | 1.42E+08 | + | 0     | 0     |

|                                |       |          |          |   |       |       |
|--------------------------------|-------|----------|----------|---|-------|-------|
| ENSG0000(LINC00968 lincRNA     | chr8  | 56496246 | 56559823 | - | 1.82  | 1.11  |
| ENSG0000(RP13-578N antisense   | chr4  | 1.44E+08 | 1.44E+08 | + | 0     | 0     |
| ENSG0000(RP11-894P antisense   | chr14 | 1.04E+08 | 1.04E+08 | - | 0     | 0     |
| ENSG0000(RP11-57A1 lincRNA     | chr16 | 28284885 | 28292064 | - | 0.07  | 0.07  |
| ENSG0000(AF131216. antisense   | chr8  | 11315859 | 11325429 | - | 0     | 0     |
| ENSG0000(RP11-736K lincRNA     | chr11 | 86955619 | 87000959 | + | 0.26  | 0.48  |
| ENSG0000(RP11-539L lincRNA     | chr4  | 6687448  | 6690519  | - | 0     | 0.03  |
| ENSG0000(RP11-159H antisense   | chr8  | 69834111 | 69854971 | + | 0     | 0     |
| ENSG0000(RP11-363G lincRNA     | chr4  | 94117792 | 94207556 | - | 0     | 0     |
| ENSG0000(RP11-7F17 lincRNA     | chr14 | 77041064 | 77069503 | + | 0.02  | 0.08  |
| ENSG0000(RP11-10L1 antisense   | chr4  | 1.03E+08 | 1.03E+08 | + | 0.92  | 1.32  |
| ENSG0000(AC093162. unprocessε  | chr2  | 85315041 | 85316529 | + | 0.09  | 0     |
| ENSG0000(RP11-1149 processed_  | chr8  | 23224471 | 23230926 | + | 2.71  | 2.15  |
| ENSG0000(RP11-1277 transcribec | chr5  | 1.78E+08 | 1.78E+08 | - | 2.03  | 1.92  |
| ENSG0000(CACNA1C-/ antisense   | chr12 | 2676001  | 2691200  | - | 0     | 0.03  |
| ENSG0000(RP11-1094 lincRNA     | chr17 | 50050349 | 50055739 | - | 0.02  | 0.02  |
| ENSG0000(LINC00535 antisense   | chr8  | 93213302 | 93700433 | - | 0.2   | 0.19  |
| ENSG0000(RASSF8-AS antisense   | chr12 | 25939329 | 25959765 | - | 10.74 | 10.85 |
| ENSG0000(H2AFJ protein_co      | chr12 | 14774383 | 14778002 | + | 59.94 | 56.07 |
| ENSG0000(MGC16275 antisense    | chr17 | 74209980 | 74213342 | - | 0.13  | 0.27  |
| ENSG0000(PLA2G4E-A antisense   | chr15 | 41972763 | 41999094 | + | 0.02  | 0.05  |
| ENSG0000(RGMB-AS1 antisense    | chr5  | 98769618 | 98773469 | - | 0.19  | 0.99  |
| ENSG0000(AC004051. lincRNA     | chr4  | 1.09E+08 | 1.09E+08 | + | 0     | 0     |
| ENSG0000(RP11-61A1 lincRNA     | chr16 | 66751752 | 66754740 | + | 0.06  | 0.19  |
| ENSG0000(RP11-730K antisense   | chr11 | 1.21E+08 | 1.21E+08 | - | 0     | 0     |
| ENSG0000(RP11-68L1 antisense   | chr8  | 90646441 | 90656598 | + | 0.11  | 0.12  |
| ENSG0000(RP11-379P lincRNA     | chr11 | 8169167  | 8178903  | + | 0     | 0     |
| ENSG0000(RP11-544A antisense   | chr9  | 1.31E+08 | 1.31E+08 | - | 0     | 0     |
| ENSG0000(STARD4-AS antisense   | chr5  | 1.12E+08 | 1.12E+08 | + | 0.11  | 0.05  |
| ENSG0000(RP11-325N lincRNA     | chr15 | 39921042 | 39925880 | + | 0.02  | 0.02  |
| ENSG0000(RP11-519M lincRNA     | chr4  | 1.3E+08  | 1.3E+08  | - | 0     | 0     |
| ENSG0000(DNM1P35 antisense     | chr15 | 75727670 | 75738623 | - | 0.05  | 0.04  |
| ENSG0000(AP000487. antisense   | chr11 | 70372246 | 70398488 | - | 0.26  | 0.07  |
| ENSG0000(LINC00920 lincRNA     | chr16 | 66408524 | 66412135 | + | 0.7   | 0.54  |
| ENSG0000(UBAP1L protein_co     | chr15 | 65092770 | 65115197 | - | 0.66  | 0.55  |
| ENSG0000(RP1-179N1 antisense   | chr6  | 36146698 | 36197205 | - | 0.24  | 0.63  |
| ENSG0000(SOCS2-AS1 processed_  | chr12 | 93542463 | 93571768 | - | 0.74  | 0.41  |
| ENSG0000(RP11-700H lincRNA     | chr17 | 50934989 | 50944713 | - | 0     | 0     |
| ENSG0000(RP11-252E antisense   | chr16 | 75108601 | 75110712 | - | 0     | 0     |
| ENSG0000(CTC-338M antisense    | chr5  | 1.81E+08 | 1.81E+08 | - | 0     | 0     |
| ENSG0000(PGAM5 protein_co      | chr12 | 1.33E+08 | 1.33E+08 | + | 4.25  | 4.52  |
| ENSG0000(BAALC-AS1 antisense   | chr8  | 1.03E+08 | 1.03E+08 | - | 3.36  | 3.87  |
| ENSG0000(SNHG10 antisense      | chr14 | 95532297 | 95534872 | - | 1.4   | 1.47  |
| ENSG0000(MIR210HG lincRNA      | chr11 | 565660   | 568457   | - | 36.3  | 32.64 |
| ENSG0000(CTD-2260A antisense   | chr5  | 96814028 | 96935809 | - | 0.79  | 0.51  |

|                 |                      |       |          |          |   |       |       |
|-----------------|----------------------|-------|----------|----------|---|-------|-------|
| ENSG00000100000 | RP11-366H antisense  | chr4  | 1.88E+08 | 1.88E+08 | - | 0.15  | 0     |
| ENSG00000100000 | RP11-588G antisense  | chr12 | 69713633 | 69738568 | - | 0     | 0     |
| ENSG00000100000 | RP11-11N9 lincRNA    | chr8  | 32996178 | 33044855 | + | 0.65  | 0.1   |
| ENSG00000100000 | RP11-727A processed  | chr11 | 83184491 | 83193794 | - | 0.85  | 1.42  |
| ENSG00000100000 | CSTF3-AS1 antisense  | chr11 | 33161657 | 33191598 | + | 0.11  | 0.1   |
| ENSG00000100000 | LINC01252 lincRNA    | chr12 | 11548030 | 11590369 | + | 0.22  | 0.22  |
| ENSG00000100000 | RP11-431N antisense  | chr4  | 36244116 | 36274220 | + | 0     | 0     |
| ENSG00000100000 | RP11-373N antisense  | chr5  | 1.48E+08 | 1.48E+08 | - | 0.05  | 0.09  |
| ENSG00000100000 | LINC01498 antisense  | chr12 | 1.08E+08 | 1.08E+08 | - | 0     | 0     |
| ENSG00000100000 | RP11-2961 antisense  | chr16 | 70156340 | 70173448 | - | 0     | 0     |
| ENSG00000100000 | UBL7-AS1 antisense   | chr15 | 74461265 | 74481302 | + | 1.49  | 1.46  |
| ENSG00000100000 | ZBED5-AS1 antisense  | chr11 | 10858259 | 10906802 | + | 4.94  | 3.72  |
| ENSG00000100000 | RP11-902B antisense  | chr14 | 61298164 | 61322818 | - | 0     | 0     |
| ENSG00000100000 | CTC-441N1 antisense  | chr5  | 1.22E+08 | 1.22E+08 | - | 0.09  | 0.1   |
| ENSG00000100000 | ZCCHC3 protein_co    | chr20 | 296968   | 300321   | + | 5.31  | 4.65  |
| ENSG00000100000 | RP11-273G lincRNA    | chr8  | 1.43E+08 | 1.43E+08 | - | 1.28  | 0.71  |
| ENSG00000100000 | RP11-510N antisense  | chr16 | 71462278 | 71465941 | + | 0.69  | 0.06  |
| ENSG00000100000 | RP11-266N antisense  | chr5  | 59039761 | 59063503 | + | 0     | 0     |
| ENSG00000100000 | RP11-637A lincRNA    | chr12 | 68674371 | 68687755 | - | 0     | 0     |
| ENSG00000100000 | CTD-2235C antisense  | chr5  | 75320155 | 75336914 | - | 0     | 0     |
| ENSG00000100000 | RP11-486C lincRNA    | chr12 | 1.24E+08 | 1.24E+08 | - | 0.37  | 0.23  |
| ENSG00000100000 | PLUT antisense       | chr13 | 27833444 | 27921404 | - | 0     | 0     |
| ENSG00000100000 | DNAJC3-AS lincRNA    | chr13 | 95648733 | 95676925 | - | 2.28  | 0.98  |
| ENSG00000100000 | CTD-2340E lincRNA    | chr5  | 1.03E+08 | 1.03E+08 | + | 0     | 0     |
| ENSG00000100000 | RP11-629G antisense  | chr11 | 1.13E+08 | 1.13E+08 | - | 0     | 0.03  |
| ENSG00000100000 | CARS-AS1 antisense   | chr11 | 3029009  | 3041260  | + | 0     | 0     |
| ENSG00000100000 | RP11-392P antisense  | chr12 | 12927726 | 12984645 | + | 0.2   | 0.21  |
| ENSG00000100000 | MIR4458H lincRNA     | chr5  | 8450743  | 8463095  | + | 1.03  | 1.4   |
| ENSG00000100000 | OIP5-AS1 processed   | chr15 | 41283990 | 41309737 | + | 15.17 | 12.31 |
| ENSG00000100000 | SDCBPP2 processed    | chr8  | 69942948 | 69944648 | + | 0     | 0     |
| ENSG00000100000 | CKMT2-AS antisense   | chr5  | 81204084 | 81301560 | - | 2.7   | 3.19  |
| ENSG00000100000 | SPTY2D1-A protein_co | chr11 | 18588781 | 18610255 | + | 0.12  | 0.34  |
| ENSG00000100000 | TWF2 protein_co      | chr3  | 52228610 | 52239260 | - | 34.97 | 34.2  |
| ENSG00000100000 | CPEB2-AS1 lincRNA    | chr4  | 14909961 | 15002045 | - | 0     | 0     |
| ENSG00000100000 | MARS2 protein_co     | chr2  | 1.98E+08 | 1.98E+08 | + | 0.83  | 0.65  |
| ENSG00000100000 | MTND4P12 processed   | chr5  | 1.35E+08 | 1.35E+08 | - | 0.04  | 0.09  |
| ENSG00000100000 | LRP4-AS1 antisense   | chr11 | 46846412 | 46874396 | + | 0.18  | 0.13  |
| ENSG00000100000 | RP11-1277 antisense  | chr5  | 1.78E+08 | 1.78E+08 | + | 0.77  | 0.78  |
| ENSG00000100000 | CTB-127C1 antisense  | chr5  | 1.6E+08  | 1.6E+08  | - | 0     | 0     |
| ENSG00000100000 | STX18-AS1 antisense  | chr4  | 4542131  | 4710938  | + | 2.07  | 1.01  |
| ENSG00000100000 | RP11-932C antisense  | chr15 | 30616998 | 30625773 | - | 0.7   | 0.7   |
| ENSG00000100000 | RP11-404K unprocess  | chr5  | 7290823  | 7296345  | + | 0     | 0     |
| ENSG00000100000 | CTD-2574D antisense  | chr16 | 29926836 | 29928933 | + | 0.42  | 0.28  |
| ENSG00000100000 | USP51 protein_co     | chrX  | 55484616 | 55489202 | - | 0.5   | 0.65  |
| ENSG00000100000 | RP11-447H processed  | chr5  | 43231812 | 43233173 | - | 0     | 0     |

|                 |            |                     |       |          |          |   |       |      |
|-----------------|------------|---------------------|-------|----------|----------|---|-------|------|
| ENSG00000100000 | RP11-32B5  | lincRNA             | chr15 | 21298233 | 21325241 | - | 0.03  | 0.03 |
| ENSG00000100000 | PCED1B-AS1 | processed_lincRNA   | chr12 | 47205898 | 47216456 | - | 0     | 0    |
| ENSG00000100000 | SNCA-AS1   | antisense           | chr4  | 89836408 | 89841978 | + | 0     | 0    |
| ENSG00000100000 | CTD-2366F  | antisense           | chr5  | 53109842 | 53115126 | + | 1.43  | 1.45 |
| ENSG00000100000 | NR2F2-AS1  | antisense           | chr15 | 96110040 | 96327361 | - | 2.31  | 3.01 |
| ENSG00000100000 | RP11-103J  | lincRNA             | chr4  | 37078577 | 37125424 | + | 0     | 0    |
| ENSG00000100000 | TMEM161f   | antisense           | chr5  | 88268895 | 88436685 | + | 4.56  | 5.77 |
| ENSG00000100000 | CCAT1      | lincRNA             | chr8  | 1.27E+08 | 1.27E+08 | - | 0     | 0    |
| ENSG00000100000 | RP5-940J5  | antisense           | chr12 | 6578622  | 6584739  | + | 0.15  | 0.25 |
| ENSG00000100000 | CTD-2530H  | antisense           | chr11 | 75758455 | 75768647 | - | 0     | 0    |
| ENSG00000100000 | SPCS2P3    | processed_lincRNA   | chr5  | 816346   | 817001   | + | 0     | 0    |
| ENSG00000100000 | CTD-2001C  | lincRNA             | chr5  | 1E+08    | 1.01E+08 | - | 0.04  | 0    |
| ENSG00000100000 | RP11-421F  | antisense           | chr12 | 26971586 | 26979582 | + | 0.11  | 0.04 |
| ENSG00000100000 | HMG11P1    | processed_lincRNA   | chr5  | 71537652 | 71537846 | - | 0     | 0    |
| ENSG00000100000 | RP3-510L9  | antisense           | chr6  | 11173452 | 11259099 | + | 0     | 0    |
| ENSG00000100000 | RP11-967K  | antisense           | chr12 | 28163298 | 28190738 | - | 1.16  | 1.25 |
| ENSG00000100000 | SEC24B-AS1 | antisense           | chr4  | 1.09E+08 | 1.09E+08 | - | 0.77  | 0.87 |
| ENSG00000100000 | RP11-543C  | lincRNA             | chr14 | 99604556 | 99625740 | + | 0.06  | 0.06 |
| ENSG00000100000 | LINC00926  | lincRNA             | chr15 | 57300365 | 57307769 | + | 1.08  | 1.71 |
| ENSG00000100000 | FOXD1-AS1  | lincRNA             | chr5  | 73446357 | 73446984 | + | 0     | 0    |
| ENSG00000100000 | NRAV       | antisense           | chr12 | 1.2E+08  | 1.2E+08  | - | 3.44  | 3.34 |
| ENSG00000100000 | AC005329   | antisense           | chr19 | 1392170  | 1396467  | - | 0.25  | 0.83 |
| ENSG00000100000 | FAM13A-A   | antisense           | chr4  | 88709789 | 88730103 | + | 0.39  | 0.33 |
| ENSG00000100000 | CTD-2383M  | antisense           | chr11 | 1.01E+08 | 1.01E+08 | - | 0     | 0    |
| ENSG00000100000 | CTD-2313F  | lincRNA             | chr5  | 55063179 | 55066230 | + | 0.13  | 0    |
| ENSG00000100000 | UBA6-AS1   | antisense           | chr4  | 67701280 | 68080952 | + | 4.23  | 3.89 |
| ENSG00000100000 | RP11-422N  | antisense           | chr8  | 1.1E+08  | 1.1E+08  | + | 0     | 0    |
| ENSG00000100000 | DPH6-AS1   | lincRNA             | chr15 | 35546195 | 35859001 | + | 0.12  | 0.25 |
| ENSG00000100000 | NNT-AS1    | antisense           | chr5  | 43571594 | 43603230 | - | 10.07 | 8.89 |
| ENSG00000100000 | BCKDHA     | protein_coding      | chr19 | 41397460 | 41425005 | + | 8.54  | 9.15 |
| ENSG00000100000 | INSL3      | protein_coding      | chr19 | 17816512 | 17821574 | - | 0     | 0    |
| ENSG00000100000 | RP11-709A  | lincRNA             | chr12 | 27547050 | 27552773 | - | 0     | 0    |
| ENSG00000100000 | AC002116   | processed_lincRNA   | chr19 | 36008638 | 36014235 | - | 1.28  | 0.95 |
| ENSG00000100000 | CTC-338M   | lincRNA             | chr5  | 1.81E+08 | 1.81E+08 | + | 0     | 0    |
| ENSG00000100000 | TARS2P1    | processed_lincRNA   | chr4  | 1.36E+08 | 1.36E+08 | - | 0     | 0    |
| ENSG00000100000 | CTD-2218K  | processed_lincRNA   | chr5  | 82824884 | 82825184 | + | 0     | 0    |
| ENSG00000100000 | AC005609   | processed_lincRNA   | chr5  | 1.41E+08 | 1.41E+08 | + | 0     | 0    |
| ENSG00000100000 | LINC02039  | lincRNA             | chr5  | 1.26E+08 | 1.26E+08 | + | 0     | 0    |
| ENSG00000100000 | CTC-295J1  | protein_coding      | chr5  | 1.48E+08 | 1.48E+08 | + | 0     | 0    |
| ENSG00000100000 | RP11-78C3  | lincRNA             | chr5  | 82919376 | 82921119 | - | 0     | 0    |
| ENSG00000100000 | RP11-791G  | processed_lincRNA   | chr4  | 82580117 | 82581384 | - | 0     | 0    |
| ENSG00000100000 | AC114812   | unprocessed_lincRNA | chr2  | 2.34E+08 | 2.34E+08 | + | 0     | 0    |
| ENSG00000100000 | RP11-752D  | antisense           | chr4  | 52945649 | 52958087 | + | 0     | 0    |
| ENSG00000100000 | MINOS1P4   | processed_lincRNA   | chr4  | 78379197 | 78379514 | + | 0     | 0    |
| ENSG00000100000 | LINC01019  | lincRNA             | chr5  | 3417152  | 3536094  | - | 0     | 0    |



|                                      |          |          |   |       |      |
|--------------------------------------|----------|----------|---|-------|------|
| ENSG0000(RP11-301A processed_ chr5   | 40967505 | 40967763 | - | 0     | 0    |
| ENSG0000(SMURF2P1 transcribed chr17  | 30600796 | 30615980 | + | 0.24  | 0.64 |
| ENSG0000(APOOP4 processed_ chr4      | 68304343 | 68304939 | - | 0     | 0    |
| ENSG0000(RRN3P1 transcribed chr16    | 21796106 | 21820410 | - | 2.94  | 3.28 |
| ENSG0000(CTB-73N10 lincRNA chr5      | 1.45E+08 | 1.45E+08 | + | 0     | 0    |
| ENSG0000(CTD-2012J: unprocessed chr5 | 1598127  | 1598247  | + | 21.24 | 0    |
| ENSG0000(CTC-235G5 lincRNA chr5      | 76081946 | 76084186 | - | 0     | 0    |
| ENSG0000(RP11-777B processed_ chr4   | 78003143 | 78003439 | + | 0     | 0    |
| ENSG0000(LINC01194 lincRNA chr5      | 12574857 | 12804363 | + | 0     | 0    |
| ENSG0000(LINC02101 lincRNA chr5      | 58108082 | 58122341 | - | 0     | 0    |
| ENSG0000(MTND4LP2 unprocessed chr4   | 25719755 | 25720030 | - | 0     | 0    |
| ENSG0000(AC079395. unprocessed chr2  | 97018343 | 97018604 | - | 0     | 0    |
| ENSG0000(MTND6P8 unprocessed chr2    | 1.3E+08  | 1.3E+08  | - | 0     | 0    |
| ENSG0000(RP11-468D lincRNA chr5      | 2831021  | 2835139  | - | 0     | 0    |
| ENSG0000(RP11-446J: antisense chr4   | 16400430 | 16512187 | + | 0     | 0    |
| ENSG0000(CUL4AP1 processed_ chr4     | 1.16E+08 | 1.16E+08 | - | 0     | 0    |
| ENSG0000(RP11-324J: lincRNA chr4     | 43457527 | 43492543 | - | 0     | 0    |
| ENSG0000(ADH1C protein_co chr4       | 99336492 | 99353027 | - | 1.24  | 2.18 |
| ENSG0000(CTC-305H1 lincRNA chr5      | 13175846 | 13179572 | + | 0     | 0    |
| ENSG0000(RP11-357F lincRNA chr5      | 45035199 | 45098647 | + | 0     | 0    |
| ENSG0000(LINC02150 lincRNA chr5      | 16373361 | 16440081 | - | 0     | 0    |
| ENSG0000(RP11-650J: antisense chr4   | 1.13E+08 | 1.13E+08 | - | 0     | 0    |
| ENSG0000(WI2-89927 unprocessed chr4  | 2607870  | 2608146  | - | 1.7   | 0    |
| ENSG0000(BTG4P1 processed_ chr5      | 24786842 | 24787024 | - | 0     | 0    |
| ENSG0000(HSPA8P11 processed_ chr8    | 30237382 | 30240997 | + | 0.03  | 0    |
| ENSG0000(RP11-432N processed_ chr5   | 17647712 | 17647944 | - | 0     | 0    |
| ENSG0000(RP11-499E lincRNA chr4      | 1.02E+08 | 1.02E+08 | - | 3.72  | 4.52 |
| ENSG0000(RP11-294C processed_ chr4   | 1.65E+08 | 1.65E+08 | + | 0     | 0    |
| ENSG0000(RP11-44F2 antisense chr4    | 74993877 | 75034824 | - | 0     | 0    |
| ENSG0000(TRIM39-RP protein_co chr6   | 30328907 | 30346854 | + | 0     | 0    |
| ENSG0000(RP11-1072 processed_ chr5   | 85237681 | 85238074 | - | 0     | 0    |
| ENSG0000(RP11-1094 lincRNA chr17     | 49996889 | 50016844 | + | 0     | 0    |
| ENSG0000(RP11-659C lincRNA chr4      | 1.16E+08 | 1.16E+08 | - | 0     | 0    |
| ENSG0000(RP11-148L: lincRNA chr4     | 1.74E+08 | 1.74E+08 | - | 0.78  | 1.55 |
| ENSG0000(RP11-472K lincRNA chr4      | 29118308 | 29202770 | + | 0     | 0    |
| ENSG0000(GAPDHP60 processed_ chr4    | 87207092 | 87208086 | + | 0     | 0.07 |
| ENSG0000(RP11-231C lincRNA chr4      | 54332892 | 54355954 | + | 0     | 0    |
| ENSG0000(CTD-2049C processed_ chr5   | 63301523 | 63302056 | + | 0     | 0    |
| ENSG0000(RP11-184M lincRNA chr4      | 1.29E+08 | 1.29E+08 | - | 0.07  | 0.12 |
| ENSG0000(RP11-442P processed_ chr4   | 15743196 | 15743582 | + | 0     | 0    |
| ENSG0000(PES1P1 processed_ chr4      | 1.34E+08 | 1.34E+08 | + | 0     | 0    |
| ENSG0000(ATG10-AS1 antisense chr5    | 82073055 | 82073702 | - | 0     | 0    |
| ENSG0000(CTC-261N6 lincRNA chr5      | 86335024 | 86335808 | + | 0     | 0    |
| ENSG0000(RP11-476C processed_ chr4   | 87166844 | 87167734 | + | 0     | 0.08 |
| ENSG0000(LINC00290 lincRNA chr4      | 1.81E+08 | 1.81E+08 | - | 0     | 0    |

|                                     |          |          |   |      |      |
|-------------------------------------|----------|----------|---|------|------|
| ENSG0000(CTD-2244C lincRNA chr5     | 61878109 | 61886129 | + | 0    | 0    |
| ENSG0000(RP11-115A processed_chr4   | 1.1E+08  | 1.1E+08  | + | 0    | 0    |
| ENSG0000(RP11-455B lincRNA chr5     | 97881420 | 97922695 | + | 0    | 0.1  |
| ENSG0000(CTC-503K1 antisense chr5   | 1.03E+08 | 1.03E+08 | - | 0    | 0    |
| ENSG0000(RP11-321E processed_chr5   | 17502043 | 17502363 | - | 0    | 0    |
| ENSG0000(RP11-739P sense_intrchr4   | 1.84E+08 | 1.84E+08 | + | 0.11 | 0.12 |
| ENSG0000(WDR45P1 processed_chr4     | 1.54E+08 | 1.54E+08 | + | 0    | 0    |
| ENSG0000(RP11-1801 processed_chr4   | 1.27E+08 | 1.27E+08 | + | 0    | 0    |
| ENSG0000(RP11-24121 lincRNA chr4    | 1.49E+08 | 1.49E+08 | + | 0    | 0    |
| ENSG0000(TRPC7-AS1 antisense chr5   | 1.36E+08 | 1.36E+08 | + | 0    | 0    |
| ENSG0000(CICP16 processed_chr4      | 1.19E+08 | 1.19E+08 | - | 0    | 0    |
| ENSG0000(RP11-722M lincRNA chr4     | 36496537 | 36641900 | - | 0    | 0    |
| ENSG0000(KCTD9P5 processed_chr5     | 37505688 | 37506857 | - | 0    | 0    |
| ENSG0000(STX18-IT1 sense_intrchr4   | 4476121  | 4481700  | - | 0    | 0    |
| ENSG0000(CTB-174D1 antisense chr5   | 1.69E+08 | 1.69E+08 | + | 0    | 0    |
| ENSG0000(CTD-2139B lincRNA chr5     | 17353910 | 17354899 | + | 1.95 | 2.29 |
| ENSG0000(RP11-83C7 lincRNA chr4     | 38366914 | 38385759 | + | 0    | 0    |
| ENSG0000(SLIT2-IT1 sense_intrchr4   | 20392189 | 20394856 | + | 0    | 0    |
| ENSG0000(RP11-366M processed_chr4   | 1.65E+08 | 1.65E+08 | + | 0    | 0    |
| ENSG0000(KRT8P4 processed_chr8      | 89412621 | 89415071 | - | 0    | 0    |
| ENSG0000(CTD-2108C processed_chr5   | 38429892 | 38430160 | - | 0    | 0    |
| ENSG0000(AC037459. protein_co chr8  | 22589274 | 22602084 | + | 2.49 | 0.69 |
| ENSG0000(CTD-2151A processed_chr5   | 99594329 | 99594740 | - | 0    | 0    |
| ENSG0000(RP11-593F processed_chr4   | 60784115 | 60784696 | + | 0    | 0    |
| ENSG0000(RP11-3J1.1 lincRNA chr4    | 19172335 | 19456994 | - | 0    | 0    |
| ENSG0000(RP11-159F antisense chr5   | 43515274 | 43525310 | + | 0    | 0    |
| ENSG0000(RP11-5561 lincRNA chr4     | 1.05E+08 | 1.05E+08 | - | 0    | 0    |
| ENSG0000(LINC02014 lincRNA chr3     | 1.3E+08  | 1.3E+08  | - | 0.18 | 0.51 |
| ENSG0000(CTB-49A3.1 antisense chr5  | 1.33E+08 | 1.33E+08 | + | 0    | 0    |
| ENSG0000(RP11-598C processed_chr4   | 1.76E+08 | 1.76E+08 | + | 0    | 0    |
| ENSG0000(AC092597. antisense chr4   | 47556731 | 47560259 | - | 0    | 0    |
| ENSG0000(OCIAD1-AS antisense chr4   | 48852008 | 48860203 | - | 0    | 0    |
| ENSG0000(PSG10P transcribed chr19   | 42839368 | 42855718 | - | 0    | 0    |
| ENSG0000(MTND4LP3 unprocessed chr4  | 64610616 | 64610909 | - | 0    | 0    |
| ENSG0000(CTD-2333K lincRNA chr5     | 1.02E+08 | 1.02E+08 | + | 0    | 0    |
| ENSG0000(RP11-1J7.1 lincRNA chr4    | 11914667 | 11919688 | + | 0    | 0    |
| ENSG0000(FLJ12825 lincRNA chr12     | 54058254 | 54122234 | + | 0.07 | 0.09 |
| ENSG0000(RP11-402C sense_intrchr4   | 1.82E+08 | 1.82E+08 | + | 0    | 0    |
| ENSG0000(CTC-499J9. antisense chr5  | 1.11E+08 | 1.11E+08 | - | 0    | 0    |
| ENSG0000(PGAM1P1 processed_chr5     | 58161197 | 58161752 | + | 0    | 0    |
| ENSG0000(TRIM52-AS processed_chr5   | 1.81E+08 | 1.81E+08 | + | 7.08 | 9.24 |
| ENSG0000(SUMO2P17 transcribed chr17 | 48874860 | 48908983 | - | 0    | 0    |
| ENSG0000(LINC02120 lincRNA chr5     | 32947443 | 32962467 | + | 0    | 0    |
| ENSG0000(RP11-174E processed_chr4   | 30006951 | 30008316 | - | 0    | 0    |
| ENSG0000(MTCYBP44 processed_chr4    | 81733385 | 81734207 | - | 0    | 0    |

|                                     |          |          |   |       |       |
|-------------------------------------|----------|----------|---|-------|-------|
| ENSG0000(CCNL2P1 processed_ chr4    | 42561457 | 42562425 | - | 0     | 0     |
| ENSG0000(RP11-158J: sense_ovei chr5 | 63957893 | 63981043 | - | 0     | 0     |
| ENSG0000(RP11-811J: processed_ chr5 | 21196720 | 21196860 | + | 0     | 0     |
| ENSG0000(SCGB1D5P processed_ chr4   | 1.66E+08 | 1.66E+08 | - | 0     | 0     |
| ENSG0000(CTD-2194F processed_ chr5  | 65209921 | 65210948 | + | 0     | 0.1   |
| ENSG0000(TNXA unprocessε chr6       | 32008614 | 32012472 | - | 0     | 0     |
| ENSG0000(CTC-281M: unprocessε chr5  | 1.75E+08 | 1.75E+08 | + | 0     | 0     |
| ENSG0000(CTD-2023N lincRNA chr5     | 57574027 | 57614341 | + | 0     | 0     |
| ENSG0000(DDX43P1 processed_ chr5    | 1.16E+08 | 1.16E+08 | - | 0     | 0     |
| ENSG0000(CTD-2308B lincRNA chr5     | 1.24E+08 | 1.25E+08 | - | 0     | 0     |
| ENSG0000(RP11-74M: lincRNA chr4     | 11740948 | 11769468 | - | 0     | 0     |
| ENSG0000(BNIP3P41 transcribec chr4  | 49096    | 50124    | - | 0     | 0     |
| ENSG0000(RP11-310A processed_ chr4  | 1.38E+08 | 1.38E+08 | - | 0     | 0     |
| ENSG0000(LINC00616 lincRNA chr4     | 1.38E+08 | 1.38E+08 | - | 0.45  | 0     |
| ENSG0000(RP11-697E processed_ chr5  | 20830166 | 20830947 | - | 0     | 0     |
| ENSG0000(MEF2C-AS1 antisense chr5   | 88883328 | 89466398 | + | 0.65  | 0.2   |
| ENSG0000(CTD-2161F lincRNA chr5     | 4775476  | 4805769  | - | 0     | 0     |
| ENSG0000(CYP4F27P unprocessε chr2   | 1.3E+08  | 1.3E+08  | - | 0     | 0     |
| ENSG0000(MTND4LP2 unprocessε chr7   | 64105292 | 64105576 | - | 0     | 0     |
| ENSG0000(RP11-463H lincRNA chr4     | 54943630 | 54956818 | + | 0     | 0     |
| ENSG0000(RP11-713N antisense chr8   | 1.21E+08 | 1.21E+08 | + | 0     | 0     |
| ENSG0000(RP11-205N lincRNA chr4     | 1.7E+08  | 1.7E+08  | - | 0.11  | 0.06  |
| ENSG0000(THAP12P9 processed_ chr4   | 45323253 | 45326028 | - | 0     | 0     |
| ENSG0000(RP4-559A3 sense_ovei chr1  | 2.26E+08 | 2.26E+08 | - | 0     | 0     |
| ENSG0000(LUCAT1 lincRNA chr5        | 91303029 | 91314402 | - | 0.07  | 0.27  |
| ENSG0000(NOL8P1 processed_ chr4     | 1.66E+08 | 1.66E+08 | - | 0     | 0     |
| ENSG0000(MTCO3P28 unprocessε chr4   | 64611374 | 64611888 | - | 0     | 0     |
| ENSG0000(APELA protein_co chr4      | 1.65E+08 | 1.65E+08 | + | 0     | 0     |
| ENSG0000(LINC00613 lincRNA chr4     | 1.36E+08 | 1.36E+08 | - | 0     | 0     |
| ENSG0000(TUB-AS1 sense_intrε chr11  | 8060038  | 8069373  | + | 0     | 0     |
| ENSG0000(CDK11B protein_co chr1     | 1635227  | 1659012  | - | 14.04 | 13.99 |
| ENSG0000(WHAMMP: transcribec chr15  | 28737583 | 28759204 | + | 1.16  | 1.09  |
| ENSG0000(RP11-102N antisense chr4   | 1.41E+08 | 1.41E+08 | + | 0     | 0     |
| ENSG0000(HMGN1P1: processed_ chr4   | 62510469 | 62510771 | + | 0     | 0     |
| ENSG0000(RP11-432N processed_ chr5  | 17654373 | 17654643 | - | 0     | 0     |
| ENSG0000(RP11-472K lincRNA chr4     | 29214398 | 29221162 | + | 0     | 0     |
| ENSG0000(RP11-717H lincRNA chr4     | 1.71E+08 | 1.71E+08 | - | 0.01  | 0     |
| ENSG0000(RP11-293A processed_ chr4  | 26873561 | 26874349 | - | 0     | 0     |
| ENSG0000(RP11-556G antisense chr4   | 21697450 | 21719026 | + | 0     | 0     |
| ENSG0000(RP11-292D lincRNA chr4     | 1.47E+08 | 1.47E+08 | + | 0     | 0     |
| ENSG0000(RP11-1134 unprocessε chr8  | 47089572 | 47198861 | - | 0     | 0     |
| ENSG0000(RP11-79C6 processed_ chr5  | 35896188 | 35896290 | - | 0     | 0     |
| ENSG0000(CTC-470E2 processed_ chr5  | 1.12E+08 | 1.12E+08 | - | 0     | 0     |
| ENSG0000(HSPD1P18 processed_ chr5   | 1.36E+08 | 1.36E+08 | - | 0     | 0     |
| ENSG0000(ARL2BPP6 processed_ chr5   | 1.75E+08 | 1.75E+08 | + | 0     | 0     |

|                                    |       |          |          |   |      |      |
|------------------------------------|-------|----------|----------|---|------|------|
| ENSG0000(RP11-557J) antisense      | chr4  | 1.46E+08 | 1.46E+08 | - | 0    | 0    |
| ENSG0000(AE000658) lincRNA         | chr14 | 21714795 | 21716262 | - | 0    | 0    |
| ENSG0000(CTC-537E7) lincRNA        | chr5  | 68531690 | 68533530 | - | 0    | 0    |
| ENSG0000(LINC00504) lincRNA        | chr4  | 14470465 | 14888169 | - | 9.26 | 7.95 |
| ENSG0000(CTC-327F1) antisense      | chr5  | 1.48E+08 | 1.48E+08 | - | 0    | 0    |
| ENSG0000(CTC-261N6) lincRNA        | chr5  | 86353803 | 86368854 | + | 0    | 0    |
| ENSG0000(OR7E86P) unprocessed      | chr4  | 9459255  | 9460244  | + | 0.06 | 0    |
| ENSG0000(POU5F1P7) processed       | chr3  | 98119191 | 98119731 | + | 0    | 0    |
| ENSG0000(TRAJ51) TR_J_pseud        | chr14 | 22487183 | 22487245 | + | 0    | 0    |
| ENSG0000(CTB-129O4) antisense      | chr5  | 1.8E+08  | 1.8E+08  | + | 0.22 | 0.24 |
| ENSG0000(RP11-62N2) lincRNA        | chr4  | 1.32E+08 | 1.32E+08 | - | 0    | 0    |
| ENSG0000(RP11-366H) lincRNA        | chr4  | 1.88E+08 | 1.88E+08 | + | 0    | 0    |
| ENSG0000(LINC02056) lincRNA        | chr5  | 72574120 | 72660669 | - | 0.12 | 0    |
| ENSG0000(RP11-556I1) lincRNA       | chr4  | 1.05E+08 | 1.05E+08 | + | 0    | 0    |
| ENSG0000(RP11-501N) unprocessed    | chr3  | 1.44E+08 | 1.44E+08 | + | 0    | 0    |
| ENSG0000(RP11-177B) processed      | chr4  | 52720081 | 52720831 | - | 0    | 0    |
| ENSG0000(RP11-692E) processed      | chr4  | 1.83E+08 | 1.83E+08 | - | 0    | 0    |
| ENSG0000(HMGN1P9) processed        | chr3  | 1.34E+08 | 1.34E+08 | + | 0    | 0    |
| ENSG0000(RP11-5N11) lincRNA        | chr5  | 31743988 | 31744451 | - | 0    | 0    |
| ENSG0000(PCDHAC1) protein_coding   | chr5  | 1.41E+08 | 1.41E+08 | + | 0    | 0    |
| ENSG0000(TARM1) protein_coding     | chr19 | 54069895 | 54081365 | - | 0    | 0    |
| ENSG0000(RP11-781N) processed      | chr4  | 1.58E+08 | 1.58E+08 | + | 0    | 0    |
| ENSG0000(RP11-313E) antisense      | chr4  | 1.77E+08 | 1.77E+08 | + | 0    | 0    |
| ENSG0000(LINC02064) lincRNA        | chr5  | 29380296 | 29395981 | - | 0    | 0    |
| ENSG0000(CTD-2015A) lincRNA        | chr5  | 82545862 | 82546310 | - | 0    | 0    |
| ENSG0000(FOSL1P1) processed        | chr4  | 1.28E+08 | 1.28E+08 | + | 0    | 0    |
| ENSG0000(TOMM22P) processed        | chr4  | 1.63E+08 | 1.63E+08 | + | 0    | 0    |
| ENSG0000(LINC00498) lincRNA        | chr4  | 1.38E+08 | 1.38E+08 | - | 0    | 0    |
| ENSG0000(RP11-503N) sense_intronic | chr4  | 2463797  | 2464124  | + | 0    | 0    |
| ENSG0000(ST13P12) processed        | chr5  | 82968888 | 82977153 | + | 0    | 0    |
| ENSG0000(RP11-576N) processed      | chr4  | 83247179 | 83248206 | + | 0    | 0    |
| ENSG0000(NACAP6) processed         | chr5  | 16192088 | 16192709 | - | 0    | 0    |
| ENSG0000(PRR5-ARH) protein_coding  | chr22 | 44702233 | 44862706 | + | 0    | 0    |
| ENSG0000(CTD-3105H) transcribed    | chr19 | 12379746 | 12383687 | - | 0    | 0    |
| ENSG0000(RP11-452C) lincRNA        | chr4  | 79663761 | 79696837 | + | 0.4  | 0.77 |
| ENSG0000(KB-1269D1) unprocessed    | chr22 | 23392771 | 23393839 | + | 0    | 0    |
| ENSG0000(GAPDHP61) processed       | chr15 | 64528667 | 64529671 | - | 0.06 | 0.2  |
| ENSG0000(RP11-1191) antisense      | chr4  | 722275   | 724034   | - | 0    | 0    |
| ENSG0000(RP11-802H) lincRNA        | chr4  | 33433510 | 33437877 | + | 0    | 0    |
| ENSG0000(UBL5P1) processed         | chr5  | 29600676 | 29600868 | + | 0    | 0    |
| ENSG0000(RP11-136I1) processed     | chr4  | 10478524 | 10478923 | - | 0    | 0    |
| ENSG0000(MTATP6P9) unprocessed     | chr4  | 1.55E+08 | 1.55E+08 | - | 0    | 0    |
| ENSG0000(RP11-432N) processed      | chr5  | 17598432 | 17598559 | - | 0    | 0    |
| ENSG0000(RP11-235P) processed      | chr8  | 15688914 | 15689562 | - | 0    | 0    |
| ENSG0000(OR51K1P) unitary_pseud    | chr11 | 5430653  | 5431602  | - | 0    | 0    |

|                                 |       |          |          |   |      |       |
|---------------------------------|-------|----------|----------|---|------|-------|
| ENSG0000( AC006296. lincRNA     | chr4  | 14390439 | 14393992 | + | 0    | 0     |
| ENSG0000( CTD-2533K processed_  | chr5  | 26669711 | 26669989 | - | 0    | 0     |
| ENSG0000( CTC-551A1 lincRNA     | chr5  | 1.11E+08 | 1.11E+08 | - | 0    | 0     |
| ENSG0000( RP11-597D antisense   | chr4  | 1.58E+08 | 1.58E+08 | + | 12.5 | 10.63 |
| ENSG0000( HMGB3P1f processed_   | chr5  | 1.12E+08 | 1.12E+08 | - | 0    | 0     |
| ENSG0000( AC005150. lincRNA     | chr4  | 1.63E+08 | 1.63E+08 | + | 0.11 | 0     |
| ENSG0000( RP11-269F lincRNA     | chr4  | 1.12E+08 | 1.12E+08 | - | 0    | 0     |
| ENSG0000( RP11-553P lincRNA     | chr4  | 1.35E+08 | 1.35E+08 | + | 0    | 0     |
| ENSG0000( RPL23AP94 processed_  | chr4  | 1.13E+08 | 1.13E+08 | - | 0    | 0     |
| ENSG0000( RP11-231G lincRNA     | chr5  | 1.09E+08 | 1.09E+08 | + | 0    | 0     |
| ENSG0000( LINC01197 lincRNA     | chr15 | 95209099 | 95327129 | - | 0.28 | 0.28  |
| ENSG0000( OR10J7P unitary_ps    | chr1  | 1.59E+08 | 1.59E+08 | + | 0    | 0     |
| ENSG0000( RP11-284A lincRNA     | chr5  | 1.25E+08 | 1.25E+08 | + | 0.08 | 0     |
| ENSG0000( HNRNPA1F processed_   | chr4  | 24771467 | 24772420 | + | 0    | 0     |
| ENSG0000( SEMA6A-A. antisense   | chr5  | 1.16E+08 | 1.17E+08 | + | 0.25 | 0.35  |
| ENSG0000( RP11-633G processed_  | chr4  | 65034634 | 65036017 | - | 0    | 0     |
| ENSG0000( COX5BP1 processed_    | chr4  | 81919995 | 81920387 | - | 0    | 0     |
| ENSG0000( PCDHGB8P transcribec  | chr5  | 1.41E+08 | 1.41E+08 | + | 0.08 | 0.06  |
| ENSG0000( RP11-324H processed_  | chr4  | 26111865 | 26113839 | + | 0    | 0     |
| ENSG0000( LINC02217 lincRNA     | chr5  | 17404019 | 17441694 | + | 0    | 0     |
| ENSG0000( RP11-553P lincRNA     | chr4  | 1.35E+08 | 1.35E+08 | - | 0    | 0     |
| ENSG0000( LINC02220 lincRNA     | chr5  | 12914068 | 13032886 | - | 0    | 0     |
| ENSG0000( RP4-598P1 antisense   | chr1  | 66665864 | 66677027 | - | 1.33 | 1     |
| ENSG0000( RP11-93K2 processed_  | chr3  | 1.3E+08  | 1.3E+08  | + | 0    | 0     |
| ENSG0000( LINC02119 lincRNA     | chr5  | 38148480 | 38153715 | + | 0    | 0     |
| ENSG0000( NENFP3 processed_     | chr5  | 13553654 | 13553966 | - | 0    | 0     |
| ENSG0000( FGF10-AS1 antisense   | chr5  | 44388732 | 44413989 | + | 0    | 0     |
| ENSG0000( RP11-640B processed_  | chr4  | 36065060 | 36065726 | - | 0    | 0     |
| ENSG0000( CTD-2161F lincRNA     | chr5  | 4831699  | 4849800  | - | 0    | 0     |
| ENSG0000( RP11-517B antisense   | chr3  | 1.32E+08 | 1.32E+08 | + | 0    | 0     |
| ENSG0000( RP11-826N antisense   | chr5  | 1.76E+08 | 1.76E+08 | - | 0    | 0     |
| ENSG0000( RP11-432N processed_  | chr5  | 17642962 | 17643228 | - | 0    | 0     |
| ENSG0000( DDX11L9 transcribec   | chr15 | 1.02E+08 | 1.02E+08 | - | 0.12 | 0     |
| ENSG0000( LINC01962 lincRNA     | chr5  | 1.81E+08 | 1.81E+08 | - | 0    | 0.89  |
| ENSG0000( LINC02122 lincRNA     | chr5  | 74084068 | 74103216 | - | 0    | 0     |
| ENSG0000( RP11-479C antisense   | chr5  | 58741581 | 58817099 | - | 0.32 | 0.35  |
| ENSG0000( BACH1-IT1 sense_intr  | chr21 | 29351634 | 29361894 | + | 0.15 | 0     |
| ENSG0000( RP11-848G transcribec | chr5  | 69607099 | 69624049 | + | 0.14 | 0.06  |
| ENSG0000( RP11-3G20 lincRNA     | chr8  | 1.22E+08 | 1.22E+08 | + | 0    | 0     |
| ENSG0000( RP11-807H lincRNA     | chr4  | 65702202 | 65705553 | + | 2.26 | 3.23  |
| ENSG0000( RP11-313E processed_  | chr4  | 1.77E+08 | 1.77E+08 | - | 0    | 0     |
| ENSG0000( CTC-276P9 lincRNA     | chr5  | 1.35E+08 | 1.35E+08 | - | 0    | 0     |
| ENSG0000( POU5F2 protein_co     | chr5  | 93733220 | 93741637 | - | 0    | 0.02  |
| ENSG0000( RP11-375B lincRNA     | chr5  | 1.77E+08 | 1.77E+08 | - | 0    | 0     |
| ENSG0000( PCP4L1 protein_co     | chr1  | 1.61E+08 | 1.61E+08 | + | 0    | 0     |

|                                     |          |          |   |       |        |
|-------------------------------------|----------|----------|---|-------|--------|
| ENSG0000(LINC02149 lincRNA chr5     | 15192139 | 15266541 | - | 0     | 0      |
| ENSG0000(ABHD14A protein_co chr3    | 51971426 | 51981199 | + | 15.99 | 16.6   |
| ENSG0000(PGAM4P2 processed_ chr4    | 1.16E+08 | 1.16E+08 | - | 0     | 0      |
| ENSG0000(LINC02062 lincRNA chr5     | 98929171 | 98995013 | + | 0     | 0      |
| ENSG0000(CTD-3007L lincRNA chr5     | 27412613 | 27436411 | - | 0     | 0      |
| ENSG0000(RP11-1250 lincRNA chr4     | 1.27E+08 | 1.27E+08 | - | 0     | 0      |
| ENSG0000(ZFAT-AS1 antisense chr8    | 1.35E+08 | 1.35E+08 | + | 0     | 0      |
| ENSG0000(AC005351. processed_ chr5  | 1.46E+08 | 1.46E+08 | + | 0     | 0      |
| ENSG0000(LNX1-AS2 sense_intr chr4   | 53592956 | 53604047 | + | 0     | 0      |
| ENSG0000(ASNSP1 unprocess chr8      | 46579213 | 46614523 | - | 0     | 0      |
| ENSG0000(RP5-1000K transcribec chrX | 77910741 | 77964890 | + | 0.29  | 2.15   |
| ENSG0000(RP11-319E lincRNA chr4     | 57425872 | 57465986 | + | 0     | 0      |
| ENSG0000(RP11-93121 processed_ chr4 | 1.24E+08 | 1.24E+08 | - | 0     | 0      |
| ENSG0000(OR5H4P unprocess chr3      | 98222044 | 98222966 | + | 0     | 0      |
| ENSG0000(SRP14-AS1 lincRNA chr15    | 40039311 | 40067290 | + | 3.02  | 2.59   |
| ENSG0000(RP11-145G lincRNA chr4     | 96310701 | 96818864 | + | 0.25  | 0.11   |
| ENSG0000(RP11-9B6.1 lincRNA chr4    | 92297251 | 92304178 | - | 0     | 0      |
| ENSG0000(CTC-338M: antisense chr5   | 1.81E+08 | 1.81E+08 | - | 0     | 0      |
| ENSG0000(RP11-6080 lincRNA chr4     | 19455436 | 19909692 | + | 0     | 0      |
| ENSG0000(RP11-2650 lincRNA chr4     | 4321962  | 4334182  | + | 0     | 0      |
| ENSG0000(RP11-386B lincRNA chr4     | 1.85E+08 | 1.85E+08 | + | 0     | 0      |
| ENSG0000(RP11-231C lincRNA chr4     | 54376002 | 54376752 | + | 0     | 0      |
| ENSG0000(RP11-174F processed_ chr4  | 1.5E+08  | 1.5E+08  | - | 0     | 0      |
| ENSG0000(SBF1P1 processed_ chr8     | 55449509 | 55455139 | - | 0     | 0      |
| ENSG0000(CTD-2001E sense_ovei chr5  | 9621377  | 9658458  | - | 0     | 0      |
| ENSG0000(MTATP6P1 unprocess chr1    | 633696   | 634376   | + | 478.6 | 480.57 |
| ENSG0000(LINC02058 lincRNA chr5     | 92907180 | 92939591 | - | 0     | 0      |
| ENSG0000(RP11-2017 antisense chr5   | 61658474 | 61698432 | - | 0     | 0      |
| ENSG0000(BCL2L12P1 processed_ chr3  | 1.32E+08 | 1.32E+08 | + | 0     | 0      |
| ENSG0000(NDUFA5P1 unprocess chr8    | 47164870 | 47165524 | + | 0     | 0      |
| ENSG0000(RP11-241F processed_ chr4  | 49523648 | 49523857 | - | 0     | 0      |
| ENSG0000(CTD-2130F lincRNA chr5     | 37953402 | 37966964 | + | 0     | 0      |
| ENSG0000(CTD-2201E antisense chr5   | 9363275  | 9422481  | + | 0     | 0      |
| ENSG0000(RP11-10A1 lincRNA chr8     | 9189011  | 9202854  | + | 0     | 0.14   |
| ENSG0000(LINC02117 lincRNA chr5     | 37899363 | 37920869 | - | 0     | 0      |
| ENSG0000(RP11-247C lincRNA chr15    | 74125915 | 74129278 | - | 0     | 0      |
| ENSG0000(RP11-432N processed_ chr5  | 17649046 | 17649643 | + | 0     | 0      |
| ENSG0000(NPM1P41 processed_ chr4    | 82010665 | 82013095 | - | 0     | 0      |
| ENSG0000(CTB-47B11 antisense chr5   | 1.57E+08 | 1.57E+08 | - | 0.97  | 0.27   |
| ENSG0000(RP11-302F lincRNA chr4     | 25608711 | 25619468 | + | 0     | 0      |
| ENSG0000(ANP32C processed_ chr4     | 1.64E+08 | 1.64E+08 | - | 0     | 0      |
| ENSG0000(RP11-468N processed_ chr4  | 68883885 | 68884440 | - | 0     | 0      |
| ENSG0000(MTND4P8 unprocess chr4     | 1.55E+08 | 1.55E+08 | - | 0     | 0      |
| ENSG0000(OTX2-AS1 lincRNA chr14     | 56813183 | 57152177 | + | 0     | 0      |
| ENSG0000(RP11-287F lincRNA chr4     | 1.75E+08 | 1.75E+08 | - | 0     | 0      |

|                                     |          |          |   |      |      |
|-------------------------------------|----------|----------|---|------|------|
| ENSG0000(RP11-138A processed_ chr4  | 1.59E+08 | 1.59E+08 | - | 0    | 0    |
| ENSG0000(OR52H2P unitary_ps chr11   | 5551662  | 5552563  | - | 0    | 0    |
| ENSG0000(RP11-159F antisense chr5   | 43511058 | 43521811 | + | 0.18 | 0.23 |
| ENSG0000(LINC01339 processed_ chr5  | 90158339 | 90290071 | - | 0    | 0    |
| ENSG0000(RP11-390G processed_ chr3  | 1.27E+08 | 1.27E+08 | + | 0    | 0    |
| ENSG0000(RP11-215P antisense chr5   | 1.34E+08 | 1.34E+08 | + | 0    | 0    |
| ENSG0000(CTB-14A14 processed_ chr5  | 1.81E+08 | 1.81E+08 | + | 0    | 0    |
| ENSG0000(RP11-478C processed_ chr4  | 338097   | 338583   | - | 0    | 0    |
| ENSG0000(TECRP2 processed_ chr4     | 1.24E+08 | 1.24E+08 | - | 0    | 0.22 |
| ENSG0000(RP11-545L lincRNA chr4     | 71821305 | 71823980 | - | 0    | 0    |
| ENSG0000(KRT8P48 processed_ chr5    | 1.47E+08 | 1.47E+08 | - | 0    | 0    |
| ENSG0000(CTC-512J1 processed_ chr5  | 80351021 | 80351956 | - | 0    | 0    |
| ENSG0000(RP11-768B antisense chr4   | 1.53E+08 | 1.53E+08 | + | 0    | 0    |
| ENSG0000(EGFLAM-A antisense chr5    | 38399814 | 38403413 | - | 0    | 0    |
| ENSG0000(PRYP6 transcribed chrY     | 18790709 | 18791051 | - | 0    | 0    |
| ENSG0000(ADAM20P2 processed_ chr4   | 1.76E+08 | 1.76E+08 | + | 0    | 0    |
| ENSG0000(RP11-834C antisense chr12  | 54163139 | 54168595 | + | 0    | 0    |
| ENSG0000(RP11-122C processed_ chr5  | 38763158 | 38764289 | - | 0    | 0.13 |
| ENSG0000(NPM1P21 processed_ chr8    | 56101199 | 56102267 | - | 0    | 0.09 |
| ENSG0000(RP11-241F unprocessed chr4 | 49486926 | 49489554 | - | 0    | 0.44 |
| ENSG0000(RP11-90P5 processed_ chr8  | 38201699 | 38204238 | - | 0    | 0    |
| ENSG0000(CTD-2516K processed_ chr5  | 57317989 | 57320020 | - | 0    | 0    |
| ENSG0000(GDNF-AS1 antisense chr5    | 37811589 | 37953827 | + | 2.36 | 1.12 |
| ENSG0000(CTC-458G6 lincRNA chr5     | 92826255 | 92844004 | + | 0    | 0    |
| ENSG0000(GLDCP1 transcribed chr4    | 56593004 | 56595681 | + | 0    | 0    |
| ENSG0000(CTD-2351A processed_ chr5  | 23456468 | 23456850 | + | 0    | 0    |
| ENSG0000(TMEM110-protein_co chr3    | 52833121 | 52897562 | - | 0.46 | 0.4  |
| ENSG0000(DSTNP2 transcribed chr12   | 6884682  | 6885786  | + | 3.07 | 4.38 |
| ENSG0000(RP11-844P processed_ chr5  | 1.76E+08 | 1.76E+08 | - | 0.04 | 0    |
| ENSG0000(RP11-259C lincRNA chr5     | 1963609  | 1967154  | - | 0    | 0    |
| ENSG0000(FLJ42969 lincRNA chr8      | 1.01E+08 | 1.01E+08 | + | 0.11 | 0    |
| ENSG0000(CTD-2308B lincRNA chr5     | 1.24E+08 | 1.24E+08 | + | 0    | 0    |
| ENSG0000(RP11-310I antisense chr4   | 1.68E+08 | 1.68E+08 | - | 0    | 0    |
| ENSG0000(CTD-2306M lincRNA chr5     | 25404733 | 25445925 | - | 0    | 0    |
| ENSG0000(RP11-158I2 antisense chr3  | 1.26E+08 | 1.26E+08 | + | 0    | 0    |
| ENSG0000(RP11-206P processed_ chr4  | 25504997 | 25506675 | + | 0    | 0    |
| ENSG0000(HSPA8P4 processed_ chr5    | 1.3E+08  | 1.3E+08  | + | 0.06 | 0.03 |
| ENSG0000(RP11-158C processed_ chr4  | 1.55E+08 | 1.55E+08 | + | 0    | 0    |
| ENSG0000(RP11-468N unprocessed chr4 | 68900651 | 68900910 | - | 0    | 0    |
| ENSG0000(CTB-1I21.2 processed_ chr5 | 1.37E+08 | 1.37E+08 | + | 0    | 0    |
| ENSG0000(ENPP7P3 processed_ chr3    | 1.3E+08  | 1.3E+08  | - | 0    | 0    |
| ENSG0000(RP11-5K16 processed_ chr4  | 1.41E+08 | 1.41E+08 | - | 0    | 0    |
| ENSG0000(RP11-5N11 sense_intr chr5  | 31657218 | 31665067 | + | 0    | 0    |
| ENSG0000(RP11-205N processed_ chr4  | 1.7E+08  | 1.7E+08  | + | 0    | 0    |
| ENSG0000(GAPDHP40 processed_ chr5   | 1.6E+08  | 1.6E+08  | - | 0.06 | 0    |

|                                |       |          |          |   |      |      |
|--------------------------------|-------|----------|----------|---|------|------|
| ENSG0000(RP11-428L:antisense)  | chr4  | 92833685 | 92838842 | - | 0    | 0    |
| ENSG0000(RP11-154F:antisense)  | chr4  | 1.57E+08 | 1.57E+08 | + | 0    | 0    |
| ENSG0000(RP11-366N:processed)  | chr4  | 1.65E+08 | 1.65E+08 | - | 0.44 | 0.48 |
| ENSG0000(WRBP1:transcribed)    | chr4  | 1.13E+08 | 1.13E+08 | - | 0    | 0    |
| ENSG0000(CTC-573M:sense_intr)  | chr5  | 1.29E+08 | 1.29E+08 | + | 0.17 | 0    |
| ENSG0000(RP11-1267:unprocess)  | chr4  | 68704600 | 68712498 | - | 0    | 0    |
| ENSG0000(RP11-768F:lincRNA)    | chr12 | 1.19E+08 | 1.2E+08  | - | 0    | 0    |
| ENSG0000(RP11-485C:processed)  | chr4  | 1.72E+08 | 1.72E+08 | - | 0    | 0    |
| ENSG0000(RP11-642E:processed)  | chr4  | 68293127 | 68294364 | + | 0    | 0    |
| ENSG0000(HNRNPA1P:processed)   | chr4  | 77987860 | 77988813 | - | 0    | 0    |
| ENSG0000(HMGA1P2:processed)    | chr4  | 73098822 | 73099145 | + | 0    | 0    |
| ENSG0000(OR10J2P:unprocess)    | chr1  | 1.59E+08 | 1.59E+08 | - | 0    | 0    |
| ENSG0000(RBM14-RB:protein_co)  | chr11 | 66616626 | 66646469 | + | 0.45 | 1.13 |
| ENSG0000(RP11-366N:unprocess)  | chr4  | 1.65E+08 | 1.65E+08 | - | 0    | 0    |
| ENSG0000(RP11-567N:lincRNA)    | chr4  | 75361207 | 75434449 | - | 0    | 0    |
| ENSG0000(RP11-331K:antisense)  | chr5  | 1.49E+08 | 1.49E+08 | - | 0    | 0    |
| ENSG0000(RP11-485N:processed)  | chr5  | 1.33E+08 | 1.33E+08 | + | 0    | 0    |
| ENSG0000(GCSHP1:processed)     | chr5  | 39888576 | 39889059 | - | 0    | 0    |
| ENSG0000(RP11-101B:processed)  | chr5  | 57081745 | 57081951 | - | 0    | 0    |
| ENSG0000(MTCO3P44:unprocess)   | chr4  | 25720516 | 25721056 | - | 0.13 | 0    |
| ENSG0000(RP11-2551:lincRNA)    | chr4  | 1.12E+08 | 1.12E+08 | + | 0    | 0    |
| ENSG0000(RP11-2631:unprocess)  | chr3  | 1.3E+08  | 1.3E+08  | - | 0    | 0    |
| ENSG0000(SRIP1:processed)      | chr4  | 58103147 | 58103434 | + | 0    | 0    |
| ENSG0000(LINC00992:lincRNA)    | chr5  | 1.17E+08 | 1.18E+08 | + | 0.46 | 1.5  |
| ENSG0000(CTC-498J1:antisense)  | chr5  | 69113112 | 69136394 | - | 0    | 0.07 |
| ENSG0000(CTD-2331D:lincRNA)    | chr5  | 85420028 | 85420451 | - | 0    | 0    |
| ENSG0000(OXCT1-AS1:processed)  | chr5  | 41870030 | 41872241 | + | 0.49 | 0.25 |
| ENSG0000(RP11-489N:processed)  | chr4  | 4117925  | 4118284  | - | 0    | 0    |
| ENSG0000(ALG1L9P:processed)    | chr11 | 71794363 | 71818238 | - | 0.06 | 0.23 |
| ENSG0000(LY75-CD30:protein_co) | chr2  | 1.6E+08  | 1.6E+08  | - | 0    | 0.52 |
| ENSG0000(LINC01331:lincRNA)    | chr5  | 74369376 | 74536976 | - | 0    | 0    |
| ENSG0000(RBBP4P6:processed)    | chr5  | 85190629 | 85190830 | - | 0    | 0    |
| ENSG0000(RP11-766F:antisense)  | chr4  | 99594799 | 99625913 | - | 0    | 0    |
| ENSG0000(LINC02102:lincRNA)    | chr5  | 6686325  | 6707711  | - | 0.67 | 0.07 |
| ENSG0000(ARHGAP22:sense_intr)  | chr10 | 48510525 | 48511589 | - | 0    | 0    |
| ENSG0000(BIN2P2:processed)     | chr5  | 75910565 | 75911867 | + | 0    | 0    |
| ENSG0000(RP11-548L:lincRNA)    | chr4  | 34120894 | 34269747 | - | 0    | 0    |
| ENSG0000(RP11-557J:lincRNA)    | chr4  | 1.46E+08 | 1.46E+08 | + | 0    | 0    |
| ENSG0000(RP11-42L1:unprocess)  | chr5  | 29104880 | 29105438 | + | 0    | 0    |
| ENSG0000(HAS2-AS1:antisense)   | chr8  | 1.22E+08 | 1.22E+08 | + | 1.34 | 1.08 |
| ENSG0000(ADGRL3-AS:antisense)  | chr4  | 62071752 | 62165554 | - | 0    | 0    |
| ENSG0000(LINC02100:lincRNA)    | chr5  | 18704433 | 18746173 | - | 0    | 0    |
| ENSG0000(RP11-18D7:antisense)  | chr4  | 1.83E+08 | 1.83E+08 | - | 0    | 0    |
| ENSG0000(AC011406:processed)   | chr5  | 1.5E+08  | 1.5E+08  | - | 0    | 0    |
| ENSG0000(TOX4P1:processed)     | chr4  | 1.12E+08 | 1.12E+08 | + | 0    | 0.03 |



|                                      |          |          |   |      |      |
|--------------------------------------|----------|----------|---|------|------|
| ENSG0000(LINC01085 lincRNA chr4      | 14111968 | 14140052 | + | 0    | 0    |
| ENSG0000(CTD-2313D processed_ chr5   | 15450701 | 15451811 | + | 0    | 0    |
| ENSG0000(CTC-493L2 lincRNA chr5      | 86797685 | 86800280 | + | 0    | 0    |
| ENSG0000(RP11-294J2 processed_ chr17 | 50797366 | 50797651 | - | 0    | 0    |
| ENSG0000(RP11-495K lincRNA chr12     | 1.31E+08 | 1.31E+08 | - | 0    | 0    |
| ENSG0000(MTND4P2 unprocessε chr7     | 64104093 | 64105295 | - | 0    | 0    |
| ENSG0000(AC114812. unprocessε chr2   | 2.34E+08 | 2.34E+08 | + | 0    | 0    |
| ENSG0000(LINC02144 lincRNA chr5      | 87713135 | 87733269 | - | 0    | 0    |
| ENSG0000(CTC-505O3 lincRNA chr5      | 1.16E+08 | 1.16E+08 | + | 0    | 0    |
| ENSG0000(RP11-432B protein_co chr3   | 1.6E+08  | 1.6E+08  | - | 0    | 0.44 |
| ENSG0000(THUMPD31 unprocessε chr7    | 40151613 | 40154151 | + | 0.04 | 0    |
| ENSG0000(CCDC153 protein_co chr11    | 1.19E+08 | 1.19E+08 | - | 0.4  | 0.22 |
| ENSG0000(RP11-766F protein_co chr4   | 99636529 | 99654648 | - | 0    | 0    |
| ENSG0000(RP11-1079 lincRNA chr17     | 49361165 | 49369998 | + | 0.12 | 0.15 |
| ENSG0000(RP11-758B processed_ chr4   | 1.32E+08 | 1.32E+08 | + | 0    | 0    |
| ENSG0000(RP11-362N processed_ chr4   | 1.14E+08 | 1.14E+08 | + | 0    | 0    |
| ENSG0000(RP11-451H lincRNA chr5      | 1.81E+08 | 1.81E+08 | + | 0    | 0    |
| ENSG0000(RP11-377G antisense chr4    | 80183280 | 80190169 | - | 0.13 | 0    |
| ENSG0000(RFPL4AP5 processed_ chr8    | 1.26E+08 | 1.26E+08 | - | 0    | 0    |
| ENSG0000(AK3P4 processed_ chr5       | 1.15E+08 | 1.15E+08 | + | 0    | 0    |
| ENSG0000(NPHP3-AS1 antisense chr3    | 1.33E+08 | 1.33E+08 | + | 0    | 0    |
| ENSG0000(RP11-218C processed_ chr4   | 85246157 | 85246912 | + | 0    | 0.09 |
| ENSG0000(LINC01948 lincRNA chr5      | 56457795 | 56481946 | - | 0.12 | 0    |
| ENSG0000(MTCO1P3C processed_ chr5    | 5395378  | 5395957  | - | 0    | 0    |
| ENSG0000(EGFLAM-A antisense chr5     | 38282264 | 38290986 | - | 0    | 0    |
| ENSG0000(CTD-2176L antisense chr5    | 58846885 | 58863414 | - | 0    | 0    |
| ENSG0000(CTD-2260A antisense chr5    | 96784777 | 96785999 | + | 0.39 | 0.61 |
| ENSG0000(R3HDM2P1 processed_ chr4    | 1.33E+08 | 1.33E+08 | + | 0    | 0    |
| ENSG0000(RP11-3507 lincRNA chr5      | 2965006  | 2967628  | + | 0    | 0    |
| ENSG0000(RP11-87E2 antisense chr8    | 22877972 | 22888022 | + | 0    | 0    |
| ENSG0000(RP11-654F processed_ chr4   | 1.7E+08  | 1.7E+08  | - | 0    | 0    |
| ENSG0000(RP11-328K lincRNA chr4      | 1.03E+08 | 1.03E+08 | + | 0    | 0    |
| ENSG0000(RP11-362I1 lincRNA chr4     | 45009540 | 45051652 | + | 0    | 0    |
| ENSG0000(NMNAT1P2 processed_ chr4    | 1.45E+08 | 1.45E+08 | + | 0    | 0    |
| ENSG0000(ACTN3 protein_co chr11      | 66546395 | 66563329 | + | 0.09 | 0.1  |
| ENSG0000(RP11-586L lincRNA chr4      | 1.41E+08 | 1.41E+08 | - | 0.12 | 0    |
| ENSG0000(MTND5P9 unprocessε chr4     | 1.55E+08 | 1.55E+08 | - | 0    | 0    |
| ENSG0000(RP11-42A4 lincRNA chr4      | 84371393 | 84380189 | - | 0    | 0    |
| ENSG0000(RP11-131K processed_ chr4   | 92884663 | 92885107 | + | 0    | 0    |
| ENSG0000(RP1-130H1 protein_co chr22  | 30285238 | 30299482 | - | 0    | 0.28 |
| ENSG0000(RP11-114J lincRNA chr5      | 1.26E+08 | 1.26E+08 | - | 0    | 0    |
| ENSG0000(CTC-276P9 lincRNA chr5      | 1.35E+08 | 1.35E+08 | + | 0    | 0    |
| ENSG0000(RP11-384D processed_ chr4   | 1.71E+08 | 1.71E+08 | - | 0    | 0    |
| ENSG0000(LINC02115 lincRNA chr5      | 1.04E+08 | 1.04E+08 | - | 0    | 0    |
| ENSG0000(CTD-2215E antisense chr5    | 97188090 | 97201880 | - | 0    | 0    |

|                                     |          |            |      |      |
|-------------------------------------|----------|------------|------|------|
| ENSG0000(CTD-2593A processed_ chr5  | 1.81E+08 | 1.81E+08 + | 0    | 0    |
| ENSG0000(RP11-31K2 lincRNA chr8     | 95986108 | 95993103 - | 0    | 0    |
| ENSG0000(RP13-644N unprocessε chr4  | 69066395 | 69069888 + | 0    | 0    |
| ENSG0000(RP11-292D antisense chr4   | 1.47E+08 | 1.47E+08 + | 0    | 0    |
| ENSG0000(MTCYBP37 processed_ chr5   | 8619178  | 8620310 +  | 0    | 0    |
| ENSG0000(RP11-61K2 processed_ chr5  | 20158662 | 20158956 - | 0    | 0    |
| ENSG0000(WI2-2373I: protein_co chr7 | 290170   | 294422 +   | 0    | 0    |
| ENSG0000(RP11-974F unprocessε chr5  | 69653248 | 69654334 + | 0.06 | 0    |
| ENSG0000(RP11-665C unprocessε chr4  | 1.81E+08 | 1.81E+08 - | 0    | 0    |
| ENSG0000(LINC01207 protein_co chr4  | 1.65E+08 | 1.65E+08 + | 0    | 0    |
| ENSG0000(RP11-639F unprocessε chr3  | 1.55E+08 | 1.55E+08 - | 0    | 0    |
| ENSG0000(RP11-231L sense_intrε chr3 | 1.41E+08 | 1.41E+08 + | 0    | 0    |
| ENSG0000(RP11-798N antisense chr4   | 1.73E+08 | 1.73E+08 - | 0    | 0    |
| ENSG0000(RP11-404K processed_ chr5  | 7287924  | 7288477 -  | 0    | 0    |
| ENSG0000(AC006499. processed_ chr4  | 10199823 | 10200672 - | 0    | 0    |
| ENSG0000(RP11-311D processed_ chr4  | 1.06E+08 | 1.06E+08 - | 0    | 0    |
| ENSG0000(RP11-5301 lincRNA chr5     | 44752949 | 44765744 + | 0    | 0    |
| ENSG0000(ARL4AP2 processed_ chr4    | 40786110 | 40786710 + | 0    | 0    |
| ENSG0000(PSMC1P4 processed_ chr5    | 56275304 | 56276630 - | 0    | 0    |
| ENSG0000(RP11-308B lincRNA chr5     | 12553890 | 12574637 - | 0    | 0    |
| ENSG0000(HIGD1AP1: processed_ chr4  | 1.1E+08  | 1.1E+08 +  | 0    | 0    |
| ENSG0000(RP11-666A lincRNA chr3     | 1.26E+08 | 1.26E+08 - | 0.19 | 0.56 |
| ENSG0000(LINC02118 lincRNA chr5     | 52008031 | 52080987 + | 0    | 0    |
| ENSG0000(RP11-319G antisense chr3   | 1.39E+08 | 1.39E+08 + | 0    | 0    |
| ENSG0000(CTD-2165H processed_ chr5  | 14620020 | 14621313 + | 0    | 0    |
| ENSG0000(LINC00266 unprocessε chrY  | 24278681 | 24291346 + | 0    | 0    |
| ENSG0000(CTD-2248H processed_ chr5  | 81242330 | 81242599 - | 0.45 | 0    |
| ENSG0000(RP11-173E processed_ chr4  | 1.39E+08 | 1.39E+08 + | 0    | 0    |
| ENSG0000(MED15P8 unprocessε chr2    | 1.31E+08 | 1.31E+08 - | 0    | 0    |
| ENSG0000(CTC-548H1 antisense chr5   | 1.28E+08 | 1.28E+08 - | 0    | 0    |
| ENSG0000(C8orf34-AS antisense chr8  | 68303468 | 68331491 - | 0    | 0    |
| ENSG0000(RP11-184M lincRNA chr4     | 1.29E+08 | 1.29E+08 - | 0    | 0    |
| ENSG0000(RP11-287J: processed_ chr5 | 66622868 | 66623177 + | 0    | 0    |
| ENSG0000(KRTAP9-12 unprocessε chr17 | 41212706 | 41213237 + | 0    | 0    |
| ENSG0000(LINC01095 lincRNA chr4     | 1.46E+08 | 1.46E+08 - | 0    | 0    |
| ENSG0000(RP11-362F lincRNA chr4     | 1.41E+08 | 1.41E+08 - | 0.09 | 0.1  |
| ENSG0000(RP11-5N11 lincRNA chr5     | 31741833 | 31742327 - | 0    | 0    |
| ENSG0000(RP11-18D7 antisense chr4   | 1.83E+08 | 1.83E+08 - | 0    | 0    |
| ENSG0000(PMPCAP1 processed_ chr4    | 92182477 | 92184052 - | 0    | 0    |
| ENSG0000(DYNLL1P6 processed_ chr4   | 1E+08    | 1E+08 -    | 0    | 0    |
| ENSG0000(AC009238. unprocessε chr2  | 95413456 | 95414296 - | 0    | 0    |
| ENSG0000(APOBEC3A processed_ chr4   | 1.7E+08  | 1.7E+08 +  | 0    | 0    |
| ENSG0000(RP11-790I1 unprocessε chr4 | 69406931 | 69407655 + | 0    | 0    |
| ENSG0000(PCBP2P3 processed_ chr5    | 91843687 | 91844529 - | 0    | 0    |
| ENSG0000(RP11-252I1 processed_ chr5 | 1.08E+08 | 1.08E+08 + | 0    | 0.17 |

|                                      |          |          |   |      |      |
|--------------------------------------|----------|----------|---|------|------|
| ENSG0000(RP11-673E antisense chr4    | 1.44E+08 | 1.44E+08 | + | 0.08 | 0    |
| ENSG0000(ZNF807 unprocessed chr19    | 34542462 | 34545395 | - | 0    | 0    |
| ENSG0000(CTB-179I1. processed_ chr4  | 77350370 | 77351235 | - | 0    | 0    |
| ENSG0000(MARK2P5 processed_ chr5     | 15384220 | 15384853 | + | 0    | 0    |
| ENSG0000(RP11-412P lincRNA chr4      | 22997551 | 23056862 | + | 0    | 0    |
| ENSG0000(PGAM1P13 processed_ chr8    | 1.08E+08 | 1.08E+08 | + | 0    | 0    |
| ENSG0000(RP11-227H antisense chr3    | 98522570 | 98525334 | + | 0    | 0    |
| ENSG0000(RP11-357G transcribed chr4  | 3312512  | 3313058  | + | 0.57 | 0.34 |
| ENSG0000(CTB-1H10. lincRNA chr5      | 1.46E+08 | 1.46E+08 | + | 0    | 0    |
| ENSG0000(RP11-357G processed_ chr4   | 3323977  | 3324762  | - | 0    | 0    |
| ENSG0000(RP11-626H lincRNA chr11     | 70056230 | 70065371 | - | 0    | 0    |
| ENSG0000(LINC02065 lincRNA chr5      | 66206212 | 66209447 | - | 0    | 0    |
| ENSG0000(RP11-26C1 processed_ chr4   | 62489495 | 62490218 | - | 0    | 0    |
| ENSG0000(PBPP2 transcribed chr4      | 74054038 | 74055399 | - | 0    | 0    |
| ENSG0000(RP11-605F processed_ chr3   | 1.27E+08 | 1.27E+08 | - | 0    | 0    |
| ENSG0000(AC006427. processed_ chr4   | 16307456 | 16308167 | + | 0    | 0    |
| ENSG0000(CTD-2613C processed_ chr5   | 1.21E+08 | 1.21E+08 | + | 0    | 0    |
| ENSG0000(HNRNPH1F processed_ chr5    | 55838801 | 55840025 | - | 0    | 0    |
| ENSG0000(FLJ46284 processed_ chr8    | 92699742 | 92879502 | - | 0.09 | 0.04 |
| ENSG0000(LINC01574 lincRNA chr5      | 1.77E+08 | 1.77E+08 | + | 0    | 0    |
| ENSG0000(RP11-83A2 transcribed chr4  | 1.39E+08 | 1.39E+08 | - | 0    | 0.23 |
| ENSG0000(RP11-348J lincRNA chr5      | 92329230 | 92332584 | + | 0    | 0    |
| ENSG0000(USP46-AS1 lincRNA chr4      | 52659406 | 52661668 | + | 1.04 | 1.33 |
| ENSG0000(CTD-2128F processed_ chr5   | 1.09E+08 | 1.09E+08 | - | 0    | 0    |
| ENSG0000(RP11-138I lincRNA chr4      | 1.37E+08 | 1.37E+08 | - | 1.51 | 2.51 |
| ENSG0000(CTD-2015A lincRNA chr5      | 82586776 | 82587411 | - | 0    | 0    |
| ENSG0000(TNFSF12-T1 protein_co chr17 | 7549099  | 7561601  | + | 0    | 0    |
| ENSG0000(RP11-344G lincRNA chr4      | 1.71E+08 | 1.71E+08 | + | 0    | 0    |
| ENSG0000(SERBP1P6 processed_ chr5    | 42465400 | 42468868 | - | 0    | 0    |
| ENSG0000(C5orf17 lincRNA chr5        | 23951348 | 24178263 | + | 2.08 | 0.77 |
| ENSG0000(RP11-231G lincRNA chr5      | 1.09E+08 | 1.09E+08 | + | 0    | 0    |
| ENSG0000(PGBD4P4 processed_ chr4     | 1.3E+08  | 1.3E+08  | + | 0    | 0    |
| ENSG0000(RP11-5N11 transcribed chr5  | 31725539 | 31725902 | - | 0    | 0    |
| ENSG0000(ICE2P1 processed_ chr4      | 1.88E+08 | 1.88E+08 | - | 0    | 0    |
| ENSG0000(CTC-366B1 antisense chr5    | 75598482 | 75599380 | - | 0    | 0    |
| ENSG0000(B4GALNT2 unprocessed chr17  | 49085511 | 49086702 | + | 0    | 0    |
| ENSG0000(CTC-537E7 lincRNA chr5      | 68430427 | 68434481 | - | 0    | 0    |
| ENSG0000(RP11-950K processed_ chr5   | 1.19E+08 | 1.19E+08 | - | 0    | 0    |
| ENSG0000(UGT2A3P7 unprocessed chr4   | 69517667 | 69518400 | - | 0    | 0    |
| ENSG0000(HHIP-AS1 antisense chr4     | 1.45E+08 | 1.45E+08 | - | 7.89 | 8.37 |
| ENSG0000(CTD-2335C processed_ chr5   | 51427996 | 51428427 | - | 0    | 0    |
| ENSG0000(FAM138E lincRNA chr15       | 1.02E+08 | 1.02E+08 | + | 0    | 0    |
| ENSG0000(RP11-463N processed_ chr17  | 48881122 | 48881316 | + | 0    | 0    |
| ENSG0000(CTD-2135J antisense chr8    | 10729314 | 10771392 | + | 0    | 0    |
| ENSG0000(CTD-2288C antisense chr5    | 52675193 | 52788026 | - | 0    | 0    |

|                                     |          |          |   |      |      |
|-------------------------------------|----------|----------|---|------|------|
| ENSG0000(LINC01846 lincRNA chr5     | 98086260 | 98161193 | - | 0    | 0    |
| ENSG0000(AP000867. processed_chr11  | 71568680 | 71568934 | + | 0    | 0    |
| ENSG0000(FMN1 protein_co chr15      | 32765545 | 33194733 | - | 0.14 | 0.14 |
| ENSG0000(MTND2P3 unprocessε chr4    | 1.55E+08 | 1.55E+08 | - | 0    | 0    |
| ENSG0000(RP11-730N lincRNA chr5     | 24835280 | 24840583 | - | 0    | 0    |
| ENSG0000(HMGB1P2 processed_chr5     | 78644265 | 78644845 | - | 0.36 | 0.27 |
| ENSG0000(RP11-182E processed_chr8   | 52975111 | 52976116 | - | 0    | 0    |
| ENSG0000(RP11-171N lincRNA chr4     | 1.57E+08 | 1.57E+08 | + | 0    | 0    |
| ENSG0000(PHBP14 processed_chr4      | 1.68E+08 | 1.68E+08 | + | 0    | 0    |
| ENSG0000(ACTR6P1 processed_chr4     | 1.07E+08 | 1.07E+08 | - | 0    | 0    |
| ENSG0000(NUP210P3 unprocessε chr3   | 1.29E+08 | 1.29E+08 | - | 0    | 0    |
| ENSG0000(CTD-2089N lincRNA chr5     | 50969660 | 50970187 | + | 0    | 0    |
| ENSG0000(ATP5J2-PT protein_co chr7  | 99419749 | 99466197 | - | 2.88 | 4.21 |
| ENSG0000(USP17L19 protein_co chr4   | 9253378  | 9255329  | + | 0    | 0    |
| ENSG0000(RP11-774G processed_chr4   | 1.8E+08  | 1.8E+08  | + | 0    | 0    |
| ENSG0000(MTND5P11 processed_chr5    | 1.35E+08 | 1.35E+08 | - | 0    | 0    |
| ENSG0000(RP11-481K transcribec chr4 | 1.44E+08 | 1.44E+08 | - | 0    | 0    |
| ENSG0000(CTD-2083E antisense chr5   | 269858   | 271516   | - | 0.42 | 0.31 |
| ENSG0000(RP11-777B processed_chr4   | 77958000 | 77958780 | - | 0.08 | 0    |
| ENSG0000(CTD-2334D lincRNA chr5     | 1.21E+08 | 1.21E+08 | + | 0.32 | 0.3  |
| ENSG0000(CTD-2151A processed_chr5   | 99594880 | 99595297 | + | 0    | 0    |
| ENSG0000(HIGD1AP3 processed_chr5    | 1.75E+08 | 1.75E+08 | + | 0    | 0    |
| ENSG0000(CTC-250P2 processed_chr5   | 73020700 | 73021279 | - | 0    | 0    |
| ENSG0000(MTCYBP40 processed_chr5    | 97677547 | 97678681 | - | 0    | 0    |
| ENSG0000(RP11-319G antisense chr3   | 1.39E+08 | 1.4E+08  | + | 1.13 | 1.44 |
| ENSG0000(USP17L22 protein_co chr4   | 9267619  | 9269570  | + | 0    | 0    |
| ENSG0000(CTD-2254N antisense chr5   | 60021249 | 60033020 | + | 0    | 0    |
| ENSG0000(RP11-36B1 antisense chr4   | 37588087 | 37588875 | - | 0.55 | 0.3  |
| ENSG0000(RP11-395F. lincRNA chr4    | 43133867 | 43234956 | + | 0    | 0    |
| ENSG0000(LINC01335 lincRNA chr5     | 74306410 | 74308325 | - | 0    | 0    |
| ENSG0000(RP11-1026 lincRNA chr5     | 1.78E+08 | 1.78E+08 | - | 0    | 0    |
| ENSG0000(FAM90A6P unprocessε chr8   | 7549053  | 7552062  | - | 0    | 0    |
| ENSG0000(MTND3P22 processed_chr4    | 49246601 | 49246915 | + | 0    | 0    |
| ENSG0000(RP11-661C lincRNA chr5     | 946315   | 956520   | + | 0    | 0    |
| ENSG0000(LDHBP3 processed_chr5      | 92840807 | 92841628 | - | 0    | 0    |
| ENSG0000(MTCO2P32 processed_chr5    | 1370543  | 1370945  | - | 0    | 0    |
| ENSG0000(RP11-304F lincRNA chr17    | 49887598 | 49900893 | + | 0    | 0    |
| ENSG0000(RP11-114H processed_chr5   | 1.31E+08 | 1.31E+08 | + | 0    | 0    |
| ENSG0000(HMGB1P4 processed_chr4     | 77963940 | 77964511 | + | 0    | 0    |
| ENSG0000(ZSWIM5P3 processed_chr4    | 1.29E+08 | 1.29E+08 | - | 0    | 0    |
| ENSG0000(CTD-2287N lincRNA chr5     | 4012708  | 4013649  | - | 0    | 0    |
| ENSG0000(RP11-94H1 lincRNA chr8     | 29815004 | 29854543 | - | 0.06 | 0.2  |
| ENSG0000(CTB-174D1 antisense chr5   | 1.69E+08 | 1.69E+08 | + | 0    | 0    |
| ENSG0000(BCLAF1P1 processed_chr5    | 1.11E+08 | 1.11E+08 | - | 0    | 0    |
| ENSG0000(RP11-241J. processed_chr5  | 80746339 | 80746819 | - | 0    | 0    |

|                    |                       |       |          |          |   |      |      |
|--------------------|-----------------------|-------|----------|----------|---|------|------|
| ENSG0000010248325  | CTD-2256P antisense   | chr5  | 10248325 | 10249915 | + | 0    | 0    |
| ENSG00000135678484 | CTD-2113L antisense   | chr5  | 35678484 | 35827018 | - | 0    | 0    |
| ENSG00000103E+08   | KRT8P46 processed     | chr4  | 1.03E+08 | 1.03E+08 | - | 0.57 | 0.45 |
| ENSG0000014451930  | RP11-445C lincRNA     | chr5  | 4451930  | 4866221  | - | 0    | 0    |
| ENSG00000129952397 | CTD-2251F lincRNA     | chr14 | 29952397 | 30297043 | - | 0    | 0    |
| ENSG00000140142198 | RP11-395I processed   | chr4  | 40142198 | 40142365 | - | 0    | 0    |
| ENSG00000184828573 | RP11-98H4 unprocessed | chr8  | 84828573 | 84829479 | - | 0    | 0    |
| ENSG00000119E+08   | LAMTOR3P processed    | chr5  | 1.19E+08 | 1.19E+08 | - | 0    | 0    |
| ENSG00000176E+08   | RP11-87F1 antisense   | chr4  | 1.76E+08 | 1.76E+08 | - | 0.23 | 0.25 |
| ENSG00000191108023 | AC004054. antisense   | chr4  | 91108023 | 91112790 | - | 0    | 0    |
| ENSG0000018320279  | RP11-774C lincRNA     | chr4  | 8320279  | 8323965  | + | 0.32 | 0.16 |
| ENSG00000144944015 | PRDX4P1 processed     | chr4  | 44944015 | 44944961 | - | 0    | 0    |
| ENSG00000159E+08   | RP11-815N processed   | chr4  | 1.59E+08 | 1.59E+08 | + | 0    | 0    |
| ENSG00000128679183 | RP11-960D lincRNA     | chr11 | 28679183 | 28683469 | + | 0    | 0    |
| ENSG00000152E+08   | RP11-73G1 lincRNA     | chr4  | 1.52E+08 | 1.52E+08 | + | 0    | 0    |
| ENSG00000132937364 | XXbac-BPG protein     | chr6  | 32937364 | 32953122 | - | 0    | 0.25 |
| ENSG0000011933863  | RP11-259C lincRNA     | chr5  | 1933863  | 1959176  | + | 0    | 0    |
| ENSG00000164920845 | RP11-766N lincRNA     | chr12 | 64920845 | 64982524 | - | 0    | 0    |
| ENSG00000177E+08   | RP11-1334 antisense   | chr5  | 1.77E+08 | 1.78E+08 | + | 0    | 0    |
| ENSG00000165142703 | EFTUD1P2 processed    | chr4  | 65142703 | 65145763 | - | 0    | 0    |
| ENSG00000135E+08   | CTD-2012I lincRNA     | chr4  | 1.35E+08 | 1.35E+08 | + | 0    | 0    |
| ENSG00000187568035 | RP11-742B antisense   | chr4  | 87568035 | 87733956 | - | 0    | 0    |
| ENSG00000119E+08   | RP11-358D processed   | chr4  | 1.19E+08 | 1.19E+08 | + | 0    | 0    |
| ENSG0000019E+08    | CLUHP4 unprocessed    | chr4  | 1.9E+08  | 1.9E+08  | - | 0    | 0    |
| ENSG00000147E+08   | PRMT5P1 processed     | chr4  | 1.47E+08 | 1.47E+08 | - | 0    | 0    |
| ENSG0000017272148  | FAM90A4P unprocessed  | chr8  | 7272148  | 7275158  | + | 0    | 0    |
| ENSG0000012088718  | RP11-317B processed   | chr4  | 2088718  | 2090617  | - | 0    | 0    |
| ENSG000001202E+08  | RP11-510N sense       | chr1  | 2.02E+08 | 2.02E+08 | + | 0    | 0    |
| ENSG00000177E+08   | RP11-487E lincRNA     | chr4  | 1.77E+08 | 1.77E+08 | - | 0    | 0    |
| ENSG00000151E+08   | RP11-731D unprocessed | chr4  | 1.51E+08 | 1.51E+08 | + | 0    | 0    |
| ENSG00000156E+08   | FTH1P21 processed     | chr4  | 1.56E+08 | 1.56E+08 | + | 0.58 | 0.32 |
| ENSG00000176242024 | HMG2P4 processed      | chr5  | 76242024 | 76242404 | - | 2.99 | 1.26 |
| ENSG00000154956235 | RP11-45H2 lincRNA     | chr5  | 54956235 | 54957846 | - | 0    | 0    |
| ENSG00000103E+08   | RP11-58B2 antisense   | chr5  | 1.03E+08 | 1.03E+08 | + | 0    | 0    |
| ENSG00000131E+08   | GAPDHP56 processed    | chr4  | 1.31E+08 | 1.31E+08 | - | 0    | 0    |
| ENSG00000139713842 | RP11-539G processed   | chr4  | 39713842 | 39714451 | - | 0    | 0    |
| ENSG00000131E+08   | SNORA58 snoRNA        | chr3  | 1.31E+08 | 1.31E+08 | - | 0    | 0    |
| ENSG00000116E+08   | CTC-505O3 lincRNA     | chr5  | 1.16E+08 | 1.16E+08 | - | 0    | 0    |
| ENSG00000153E+08   | RP11-285C lincRNA     | chr4  | 1.53E+08 | 1.53E+08 | + | 0    | 0    |
| ENSG00000185429702 | CTD-2331D lincRNA     | chr5  | 85429702 | 85430184 | + | 0    | 0    |
| ENSG000001393534   | ZNF519P4 processed    | chr4  | 393534   | 393658   | + | 0    | 0    |
| ENSG00000115E+08   | CTNNA1P1 processed    | chr5  | 1.15E+08 | 1.15E+08 | - | 0    | 0    |
| ENSG0000011380060  | RP5-951N9 antisense   | chr12 | 1380060  | 1391502  | - | 0    | 0    |
| ENSG00000175E+08   | SUMO2P6 processed     | chr5  | 1.75E+08 | 1.75E+08 | + | 0    | 0    |
| ENSG00000152E+08   | CTB-113P1 antisense   | chr5  | 1.52E+08 | 1.52E+08 | + | 0.03 | 0    |

|                                |       |          |          |   |      |      |
|--------------------------------|-------|----------|----------|---|------|------|
| ENSG0000(RP11-62517) lincRNA   | chr4  | 77394491 | 77494286 | - | 0    | 0    |
| ENSG0000(AARSP1) processed     | chr4  | 1.33E+08 | 1.33E+08 | + | 0    | 0    |
| ENSG0000(RP11-21G2) antisense  | chr4  | 1.55E+08 | 1.55E+08 | - | 0    | 0    |
| ENSG0000(CTD-2015H) antisense  | chr5  | 80482293 | 80488063 | - | 1.72 | 2.09 |
| ENSG0000(MTND3P24) unprocess   | chr4  | 64610980 | 64611308 | - | 0    | 0    |
| ENSG0000(COX6B1P5) processed   | chr4  | 2234251  | 2234499  | + | 0    | 0    |
| ENSG0000(TRAV31) TR_V_pseu     | chr14 | 22177273 | 22177864 | + | 0    | 0    |
| ENSG0000(RP11-763F) antisense  | chr4  | 91319034 | 91325306 | - | 0    | 0    |
| ENSG0000(RP11-375N) processed  | chr8  | 9453698  | 9457418  | + | 0    | 0    |
| ENSG0000(RP11-447E) processed  | chr4  | 73777636 | 73778060 | - | 0    | 0    |
| ENSG0000(RP11-354C) lincRNA    | chr4  | 91887886 | 91904335 | + | 0    | 0    |
| ENSG0000(RP11-419C) processed  | chr5  | 12794731 | 12795522 | + | 0    | 0    |
| ENSG0000(FAM138D) lincRNA      | chr12 | 36602    | 38133    | - | 0    | 0    |
| ENSG0000(TBCAP3) transcribec   | chr4  | 98909537 | 98909848 | - | 0    | 0    |
| ENSG0000(RP11-3261) processed  | chr4  | 1.85E+08 | 1.85E+08 | - | 0    | 0    |
| ENSG0000(MAST4-IT1) sense_intr | chr5  | 66662331 | 66662988 | + | 0    | 0    |
| ENSG0000(RP11-72L2) lincRNA    | chr5  | 86967321 | 87137712 | + | 0    | 0    |
| ENSG0000(KRT18P25) processed   | chr4  | 40020240 | 40021517 | + | 0    | 0    |
| ENSG0000(PCNAP1) transcribec   | chr4  | 99160514 | 99161645 | - | 0    | 0    |
| ENSG0000(RP11-593F) lincRNA    | chr4  | 60750586 | 60789999 | + | 0    | 0    |
| ENSG0000(CTC-287O8) processed  | chr5  | 1.1E+08  | 1.1E+08  | - | 0    | 0    |
| ENSG0000(LINC01033) lincRNA    | chr5  | 54320944 | 54415125 | + | 0    | 0    |
| ENSG0000(EGFLAM-A) antisense   | chr5  | 38345347 | 38346551 | - | 0    | 0    |
| ENSG0000(RP11-777B) processed  | chr4  | 78008512 | 78008688 | - | 0    | 0    |
| ENSG0000(WSPAR) lincRNA        | chr5  | 1.34E+08 | 1.34E+08 | + | 0    | 0    |
| ENSG0000(NDUFB2P1) processed   | chr4  | 1.55E+08 | 1.55E+08 | + | 0    | 0    |
| ENSG0000(RP11-478C) processed  | chr4  | 2324467  | 2325082  | + | 0    | 0    |
| ENSG0000(RP11-1281) processed  | chr4  | 49212251 | 49212624 | - | 0    | 0    |
| ENSG0000(OR5M14P) unprocess    | chr4  | 41722538 | 41723512 | - | 0    | 0    |
| ENSG0000(C5orf66-AS) lincRNA   | chr5  | 1.35E+08 | 1.35E+08 | - | 0    | 0    |
| ENSG0000(RP11-376C) antisense  | chr4  | 1.77E+08 | 1.77E+08 | - | 0    | 0    |
| ENSG0000(CTD-2631K) antisense  | chr5  | 72794405 | 72816565 | - | 0    | 0    |
| ENSG0000(AC051649) sense_ovei  | chr11 | 1864177  | 1866667  | + | 0    | 0    |
| ENSG0000(ZNF436-AS) antisense  | chr1  | 23368997 | 23371839 | + | 2.96 | 2.33 |
| ENSG0000(AIG1P1) unprocess     | chr5  | 39022411 | 39022558 | + | 0    | 0    |
| ENSG0000(RP11-733C) lincRNA    | chr4  | 1.38E+08 | 1.38E+08 | - | 0    | 0    |
| ENSG0000(CTD-2325A) processed  | chr5  | 42892319 | 42892817 | - | 0    | 0    |
| ENSG0000(RP1-7G5.6) lincRNA    | chr12 | 1.1E+08  | 1.1E+08  | + | 0    | 0    |
| ENSG0000(RP11-290F) lincRNA    | chr4  | 1.84E+08 | 1.84E+08 | - | 0.18 | 0.39 |
| ENSG0000(RP11-39E3) processed  | chr3  | 1.31E+08 | 1.31E+08 | - | 0    | 0    |
| ENSG0000(RP11-351N) lincRNA    | chr5  | 26382519 | 26399819 | - | 0    | 0    |
| ENSG0000(CTD-2218K) lincRNA    | chr5  | 82765404 | 82766333 | + | 0    | 0    |
| ENSG0000(AC008834) processed   | chr5  | 98025965 | 98026139 | + | 0    | 0    |
| ENSG0000(CTD-2066L) lincRNA    | chr5  | 33008994 | 33025724 | + | 0    | 0    |
| ENSG0000(USP17L17) protein_co  | chr4  | 9243879  | 9245830  | + | 0    | 0    |

|                 |           |             |       |          |          |   |      |      |
|-----------------|-----------|-------------|-------|----------|----------|---|------|------|
| ENSG00000101255 | RP11-25L5 | processed   | chr4  | 58117758 | 58118070 | - | 0    | 0    |
| ENSG00000101256 | RP11-806K | antisense   | chr4  | 1.76E+08 | 1.76E+08 | + | 0    | 0    |
| ENSG00000101257 | RP11-1026 | antisense   | chr5  | 1.78E+08 | 1.78E+08 | + | 0    | 0    |
| ENSG00000101258 | RP11-622J | lincRNA     | chr4  | 59152834 | 59176146 | + | 0    | 0    |
| ENSG00000101259 | RP11-43D2 | antisense   | chr5  | 1.25E+08 | 1.25E+08 | + | 0    | 0    |
| ENSG00000101260 | RP11-5N11 | sense_intr  | chr5  | 31738269 | 31738660 | + | 0    | 0    |
| ENSG00000101261 | HAUS5     | protein_co  | chr19 | 35612744 | 35625349 | + | 3.24 | 4.05 |
| ENSG00000101262 | CTD-2194D | antisense   | chr5  | 1883966  | 1884649  | + | 0    | 0    |
| ENSG00000101263 | MTND6P4   | processed   | chr5  | 1.35E+08 | 1.35E+08 | + | 0    | 0    |
| ENSG00000101264 | RP11-227F | lincRNA     | chr4  | 41750345 | 41757341 | + | 0    | 0    |
| ENSG00000101265 | RP11-381N | lincRNA     | chr4  | 1.23E+08 | 1.24E+08 | + | 0    | 0.23 |
| ENSG00000101266 | MTND3P3   | unprocess   | chr4  | 1.55E+08 | 1.55E+08 | - | 0    | 0    |
| ENSG00000101267 | LINC02215 | lincRNA     | chr5  | 1.19E+08 | 1.19E+08 | + | 0    | 0    |
| ENSG00000101268 | SUDS3P1   | processed   | chr5  | 1.78E+08 | 1.78E+08 | + | 0    | 0    |
| ENSG00000101269 | PSD2-AS1  | lincRNA     | chr5  | 1.4E+08  | 1.4E+08  | - | 0    | 0    |
| ENSG00000101270 | RP11-274E | processed   | chr5  | 98203059 | 98205193 | + | 0    | 0    |
| ENSG00000101271 | SLED1     | transcribec | chr4  | 1.85E+08 | 1.85E+08 | - | 0    | 0    |
| ENSG00000101272 | EPPIN-WF1 | protein_co  | chr20 | 45536986 | 45547426 | - | 0    | 0    |
| ENSG00000101273 | PRDX2P3   | processed   | chr5  | 1.8E+08  | 1.8E+08  | + | 0    | 0    |
| ENSG00000101274 | RP11-514C | protein_co  | chr6  | 1.67E+08 | 1.67E+08 | - | 0    | 0.31 |
| ENSG00000101275 | CTD-2290P | processed   | chr5  | 32522758 | 32523865 | + | 0.06 | 0    |
| ENSG00000101276 | RP11-774C | lincRNA     | chr4  | 8320176  | 8323863  | + | 0    | 0    |
| ENSG00000101277 | AC006445  | processed   | chr4  | 13631820 | 13632599 | - | 0    | 0    |
| ENSG00000101278 | RP11-79P5 | transcribec | chr5  | 73382384 | 73410509 | + | 0    | 0    |
| ENSG00000101279 | CTC-472C2 | lincRNA     | chr5  | 1.17E+08 | 1.17E+08 | - | 0    | 0    |
| ENSG00000101280 | LNCPRESS2 | lincRNA     | chr4  | 92268767 | 92277075 | - | 0    | 0    |
| ENSG00000101281 | CTD-2036A | lincRNA     | chr5  | 85848502 | 85849199 | + | 0    | 0    |
| ENSG00000101282 | RP11-432N | protein_co  | chr5  | 17610496 | 17611583 | + | 0    | 0    |
| ENSG00000101283 | RP11-229C | processed   | chr5  | 75006713 | 75007012 | - | 0    | 0    |
| ENSG00000101284 | PCDHA11   | protein_co  | chr5  | 1.41E+08 | 1.41E+08 | + | 0.07 | 0    |
| ENSG00000101285 | RP11-480D | lincRNA     | chr5  | 8387638  | 8457564  | - | 0    | 0    |
| ENSG00000101286 | LINC02213 | lincRNA     | chr5  | 10504996 | 10522084 | - | 0    | 0    |
| ENSG00000101287 | ADAM20P3  | processed   | chr4  | 1.88E+08 | 1.88E+08 | - | 0    | 0    |
| ENSG00000101288 | CTD-3028N | antisense   | chr14 | 45083045 | 45083977 | - | 0    | 0    |
| ENSG00000101289 | RP11-1C1  | lincRNA     | chr5  | 10493291 | 10494094 | - | 0    | 0    |
| ENSG00000101290 | SEMA6A-A  | lincRNA     | chr5  | 1.17E+08 | 1.17E+08 | + | 0    | 0    |
| ENSG00000101291 | CTC-529L1 | lincRNA     | chr5  | 92654848 | 92679141 | + | 0    | 0    |
| ENSG00000101292 | RP11-1J11 | processed   | chr4  | 71300258 | 71301235 | - | 0    | 0    |
| ENSG00000101293 | RP11-767N | lincRNA     | chr4  | 83668510 | 83731755 | - | 0    | 0    |
| ENSG00000101294 | LINC01093 | lincRNA     | chr4  | 1.85E+08 | 1.85E+08 | - | 0    | 0    |
| ENSG00000101295 | RP11-124N | lincRNA     | chr5  | 18965861 | 19142346 | - | 0    | 0    |
| ENSG00000101296 | CTC-484P3 | antisense   | chr5  | 94788789 | 94793599 | + | 0    | 0    |
| ENSG00000101297 | RP11-304F | processed   | chr17 | 49939122 | 49939819 | + | 0    | 0    |
| ENSG00000101298 | MTND4P25  | unprocess   | chr2  | 2.02E+08 | 2.02E+08 | + | 0    | 0    |
| ENSG00000101299 | CTC-506B8 | antisense   | chr5  | 96741079 | 96742698 | - | 0    | 0    |

|                                     |          |          |   |      |      |
|-------------------------------------|----------|----------|---|------|------|
| ENSG0000(SUMO2P4 processed_ chr5    | 69068925 | 69069200 | - | 0    | 0    |
| ENSG0000(RP11-424M lincRNA chr4     | 1.52E+08 | 1.52E+08 | + | 0    | 0    |
| ENSG0000(RP11-423H antisense chr5   | 1.78E+08 | 1.78E+08 | - | 0    | 0    |
| ENSG0000(ENPP7P1 unprocessε chr8    | 8154308  | 8216916  | + | 0    | 0    |
| ENSG0000(AC010492. unprocessε chr19 | 54246101 | 54247322 | - | 0    | 0    |
| ENSG0000(UBE2V1P1: processed_ chr5  | 18886622 | 18887095 | - | 0    | 0    |
| ENSG0000(MTND3P2ε processed_ chr5   | 1.35E+08 | 1.35E+08 | - | 0    | 0    |
| ENSG0000(HSPD1P5 processed_ chr4    | 1.45E+08 | 1.45E+08 | + | 0.07 | 0    |
| ENSG0000(RP11-669N antisense chr12  | 1.29E+08 | 1.29E+08 | + | 0    | 0    |
| ENSG0000(OR10J9P unprocessε chr1    | 1.59E+08 | 1.59E+08 | - | 0    | 0    |
| ENSG0000(RP11-772C lincRNA chr5     | 57751192 | 57751717 | - | 0    | 0    |
| ENSG0000(CTD-2139B lincRNA chr5     | 17369225 | 17375577 | - | 0    | 0    |
| ENSG0000(RP11-290C processed_ chr4  | 1.54E+08 | 1.54E+08 | + | 0    | 0    |
| ENSG0000(CTD-3080P antisense chr5   | 1173141  | 1178605  | - | 0    | 0    |
| ENSG0000(RP11-473L. lincRNA chr5    | 44495618 | 44510282 | - | 0    | 0    |
| ENSG0000(GCNT1P2 processed_ chr5    | 22580225 | 22580819 | - | 0    | 0    |
| ENSG0000(RP11-360F antisense chr4   | 39112677 | 39126818 | - | 0.13 | 0.07 |
| ENSG0000(AP000304. protein_co chr21 | 33584687 | 33931607 | - | 0    | 0    |
| ENSG0000(GAPDHP38 processed_ chr19  | 46558641 | 46559642 | + | 0    | 0.07 |
| ENSG0000(ATP1B1P1 unprocessε chr4   | 42029209 | 42030123 | + | 0    | 0.07 |
| ENSG0000(RP11-98P2 processed_ chr8  | 26254883 | 26256628 | - | 0    | 0    |
| ENSG0000(NCOA4P4 processed_ chr5    | 1.39E+08 | 1.39E+08 | + | 0    | 0.03 |
| ENSG0000(RP11-227F antisense chr4   | 41688858 | 41692797 | - | 0    | 0    |
| ENSG0000(RP13-560N antisense chr4   | 9922814  | 9924146  | + | 0    | 0    |
| ENSG0000(ATP5L2 protein_co chr22    | 42639803 | 42640601 | - | 0.08 | 0    |
| ENSG0000(RP11-343D antisense chr3   | 98099908 | 98148134 | - | 0    | 0    |
| ENSG0000(SUCLG2P4 processed_ chr5   | 29001760 | 29003357 | + | 0    | 0    |
| ENSG0000(RP11-769N lincRNA chr4     | 29046591 | 29048765 | + | 0.07 | 0.16 |
| ENSG0000(NAMPTP2 processed_ chr5    | 1.45E+08 | 1.45E+08 | - | 0    | 0    |
| ENSG0000(CDH12P2 unprocessε chr5    | 69985204 | 69985501 | - | 0    | 0    |
| ENSG0000(CASC16 lincRNA chr16       | 52552090 | 52652105 | - | 0    | 0    |
| ENSG0000(RP11-452J: antisense chr4  | 16178939 | 16183120 | + | 0    | 0    |
| ENSG0000(RP11-468N unprocessε chr4  | 68861332 | 68861610 | - | 0    | 0    |
| ENSG0000(CTD-2227I: lincRNA chr5    | 56059050 | 56067372 | + | 0    | 0    |
| ENSG0000(RP11-376N transcribed chr1 | 84344678 | 84349939 | + | 0    | 0    |
| ENSG0000(BCL9P1 processed_ chr5     | 67636382 | 67638942 | + | 0    | 0    |
| ENSG0000(RP11-428L: processed_ chr4 | 92821986 | 92822918 | - | 0    | 0    |
| ENSG0000(AC069368. protein_co chr15 | 64841883 | 64930920 | + | 1.61 | 0.58 |
| ENSG0000(AC195454. lincRNA chr4     | 40316485 | 40330419 | + | 0    | 0    |
| ENSG0000(TMEM150( protein_co chr4   | 82483170 | 82562357 | - | 1.54 | 1.66 |
| ENSG0000(RP11-548H unprocessε chr4  | 1.19E+08 | 1.19E+08 | - | 0    | 0    |
| ENSG0000(NCOA4P3 processed_ chr4    | 1.46E+08 | 1.46E+08 | - | 0    | 0    |
| ENSG0000(MTCYBP17 unprocessε chr4   | 1.55E+08 | 1.55E+08 | - | 0    | 0    |
| ENSG0000(AC010226. antisense chr5   | 1.16E+08 | 1.16E+08 | + | 0.67 | 0.58 |
| ENSG0000(RP11-665G antisense chr4   | 15004942 | 15427914 | - | 0    | 0    |



|                                      |          |          |   |      |      |
|--------------------------------------|----------|----------|---|------|------|
| ENSG0000(RP11-77P1 processed_ chr3   | 1.3E+08  | 1.3E+08  | + | 0    | 0    |
| ENSG0000(PGAM1P9 processed_ chr11    | 92366496 | 92367250 | - | 0    | 0    |
| ENSG0000(ATP5LP3 processed_ chr4     | 24658072 | 24658375 | - | 0    | 0    |
| ENSG0000(RP11-75N2 processed_ chr4   | 1.09E+08 | 1.09E+08 | + | 0    | 0    |
| ENSG0000(RP11-468H lincRNA chr8      | 17131181 | 17149789 | + | 0.07 | 0    |
| ENSG0000(RP11-166J transcribed chr4  | 1.16E+08 | 1.16E+08 | - | 0    | 0    |
| ENSG0000(RP11-284A lincRNA chr5      | 1.25E+08 | 1.25E+08 | - | 0    | 0    |
| ENSG0000(RP11-710E processed_ chr4   | 87410644 | 87411388 | + | 0    | 0    |
| ENSG0000(PARP4P3 transcribed chr22   | 16653892 | 16659628 | - | 0    | 0    |
| ENSG0000(EEF1A1P9 processed_ chr4    | 1.05E+08 | 1.05E+08 | + | 0    | 0.09 |
| ENSG0000(AC113167. lincRNA chr5      | 89944910 | 89947573 | + | 0    | 0    |
| ENSG0000(MTHFD2P6 processed_ chr5    | 41967139 | 41968366 | - | 0    | 0    |
| ENSG0000(LINC00939 lincRNA chr12     | 1.26E+08 | 1.26E+08 | - | 0.07 | 0.12 |
| ENSG0000(RP11-756P lincRNA chr4      | 1.89E+08 | 1.89E+08 | + | 0    | 0    |
| ENSG0000(KATNBL1P4 processed_ chr5   | 51930808 | 51932036 | + | 0    | 0    |
| ENSG0000(HNRNPA1F processed_ chr15   | 65816302 | 65817481 | - | 0    | 0    |
| ENSG0000(UNC93B8 unprocessed chr4    | 8959628  | 8963981  | + | 0    | 0    |
| ENSG0000(PDLIM1P4 processed_ chr3    | 98782188 | 98783193 | + | 0.24 | 0.2  |
| ENSG0000(RP11-364P lincRNA chr4      | 1.58E+08 | 1.58E+08 | + | 0    | 0.35 |
| ENSG0000(RP11-8L21. lincRNA chr5     | 43874367 | 43886628 | + | 0    | 0    |
| ENSG0000(RP11-302F processed_ chr4   | 25686202 | 25686458 | - | 0    | 0    |
| ENSG0000(RP11-688H processed_ chr4   | 76509284 | 76509719 | - | 0    | 0    |
| ENSG0000(LINC02057 lincRNA chr5      | 61201309 | 61264929 | - | 0.6  | 1.19 |
| ENSG0000(RP11-432N processed_ chr5   | 17601882 | 17602134 | - | 0    | 0    |
| ENSG0000(ACTR3BP4 processed_ chr4    | 1.03E+08 | 1.03E+08 | + | 0    | 0    |
| ENSG0000(RP11-287F processed_ chr4   | 1.75E+08 | 1.75E+08 | + | 0    | 0    |
| ENSG0000(RP11-81B2 processed_ chr5   | 18908866 | 18909543 | + | 0    | 0    |
| ENSG0000(AMD1P3 processed_ chr5      | 43586918 | 43588223 | - | 0.18 | 0.11 |
| ENSG0000(CTD-2593A processed_ chr5   | 1.81E+08 | 1.81E+08 | - | 0    | 0    |
| ENSG0000(SLC25A15P unprocessed chr22 | 16645695 | 16646581 | - | 0    | 0    |
| ENSG0000(CTD-2272G processed_ chr5   | 23329427 | 23329892 | - | 0    | 0    |
| ENSG0000(RP11-68L1. antisense chr3   | 1.4E+08  | 1.4E+08  | - | 0    | 0    |
| ENSG0000(CTC-57511 antisense chr5    | 73778039 | 73786491 | - | 0    | 0    |
| ENSG0000(RP11-241G antisense chr5    | 69477472 | 69502466 | - | 0    | 0    |
| ENSG0000(LINC02174 lincRNA chr4      | 1.72E+08 | 1.72E+08 | - | 0    | 0    |
| ENSG0000(RP11-524L processed_ chr5   | 75910283 | 75910576 | - | 0    | 0    |
| ENSG0000(FTH1P24 processed_ chr4     | 1.4E+08  | 1.4E+08  | + | 0    | 0    |
| ENSG0000(RP11-26P1 antisense chr4    | 1.14E+08 | 1.14E+08 | + | 0    | 0    |
| ENSG0000(RP11-13L2. processed_ chr3  | 1.41E+08 | 1.41E+08 | - | 0    | 0    |
| ENSG0000(LINC01411 lincRNA chr5      | 1.74E+08 | 1.75E+08 | + | 0.05 | 0.03 |
| ENSG0000(LINC01088 antisense chr4    | 78971748 | 79308798 | + | 0.28 | 0.53 |
| ENSG0000(RP11-153N antisense chr4    | 1.54E+08 | 1.54E+08 | + | 0    | 0    |
| ENSG0000(APOBEC3B antisense chr22    | 38991559 | 38998209 | - | 0    | 0    |
| ENSG0000(TERF1P3 processed_ chr4     | 1.36E+08 | 1.36E+08 | - | 0    | 0    |
| ENSG0000(ARL2BPP4 processed_ chr5    | 1.31E+08 | 1.31E+08 | + | 0    | 0    |

|                 |                           |       |          |          |   |      |      |
|-----------------|---------------------------|-------|----------|----------|---|------|------|
| ENSG00000104933 | CTC-493P1 unprocessed     | chr8  | 11281364 | 11282501 | - | 0    | 0    |
| ENSG00000104934 | CTB-191D1 processed       | chr4  | 1.49E+08 | 1.49E+08 | - | 0    | 0    |
| ENSG00000104935 | AC010468. antisense       | chr5  | 1.11E+08 | 1.11E+08 | - | 0    | 0    |
| ENSG00000104936 | AC068533. protein_coding  | chr7  | 66087761 | 66152277 | + | 0.72 | 2.71 |
| ENSG00000104937 | RP11-206P processed       | chr4  | 25472517 | 25473815 | + | 0    | 0    |
| ENSG00000104938 | OR5H5P unprocessed        | chr3  | 98197211 | 98198138 | + | 0    | 0    |
| ENSG00000104939 | CTD-2194D antisense       | chr5  | 1887332  | 1900493  | + | 0    | 0    |
| ENSG00000104940 | RP11-26J3. lincRNA        | chr8  | 79769372 | 79871759 | - | 0.23 | 0.2  |
| ENSG00000104941 | RP11-436F antisense       | chr4  | 46390255 | 46433188 | + | 0    | 0    |
| ENSG00000104942 | RP1-251I12. lincRNA       | chr5  | 15112377 | 15117007 | - | 0    | 0    |
| ENSG00000104943 | LL22NC03. unprocessed     | chr22 | 22038643 | 22039126 | + | 0    | 0    |
| ENSG00000104944 | RP11-61G1. lincRNA        | chr4  | 10685003 | 10697661 | + | 0    | 0    |
| ENSG00000104945 | CTC-340D7. lincRNA        | chr5  | 68832585 | 68962158 | - | 0    | 0    |
| ENSG00000104946 | SNX18P25 processed        | chr4  | 49588772 | 49589529 | + | 0    | 0    |
| ENSG00000104947 | HMGB1P47 processed        | chr5  | 51409617 | 51410205 | - | 0    | 0    |
| ENSG00000104948 | RP11-317M. sense_intronic | chr4  | 53659208 | 53737156 | + | 0    | 0    |
| ENSG00000104949 | LINC01333. lincRNA        | chr5  | 74322486 | 74328297 | + | 0    | 0    |
| ENSG00000104950 | RP11-575F. lincRNA        | chr12 | 1.27E+08 | 1.27E+08 | - | 0    | 0    |
| ENSG00000104951 | LINC01016. lincRNA        | chr6  | 33867506 | 33896914 | - | 0    | 0.13 |
| ENSG00000104952 | RP11-747H processed       | chr4  | 8990455  | 8990806  | + | 0    | 0    |
| ENSG00000104953 | UGDH-AS1 antisense        | chr4  | 39528019 | 39594707 | + | 7.39 | 8.16 |
| ENSG00000104954 | CTC-384G1. lincRNA        | chr5  | 85112342 | 85112756 | - | 0    | 0    |
| ENSG00000104955 | RP11-498E processed       | chr4  | 65216616 | 65217433 | + | 0    | 0    |
| ENSG00000104956 | LINC02198. lincRNA        | chr5  | 68970692 | 69030165 | - | 0    | 0    |
| ENSG00000104957 | NPM1P27 processed         | chr5  | 93682838 | 93683667 | - | 0    | 0.21 |
| ENSG00000104958 | RP11-374A. lincRNA        | chr5  | 21323873 | 21341375 | - | 0    | 0    |
| ENSG00000104959 | CTD-2233C processed       | chr5  | 33502072 | 33503135 | + | 0    | 0    |
| ENSG00000104960 | CTD-2316B. lincRNA        | chr5  | 87662042 | 87679147 | + | 0    | 0    |
| ENSG00000104961 | CTB-78O21 processed       | chr5  | 1.46E+08 | 1.46E+08 | - | 0.14 | 0    |
| ENSG00000104962 | RP11-434D. lincRNA        | chr5  | 67379378 | 67805238 | + | 0    | 0    |
| ENSG00000104963 | RP11-508M. lincRNA        | chr5  | 1.25E+08 | 1.25E+08 | + | 0    | 0    |
| ENSG00000104964 | FABP5P12 processed        | chr4  | 1.59E+08 | 1.59E+08 | + | 0    | 0    |
| ENSG00000104965 | RP11-782K processed       | chr8  | 15325296 | 15325569 | + | 0    | 0    |
| ENSG00000104966 | ATP6V1G11 processed       | chr5  | 78222184 | 78222517 | + | 0    | 0    |
| ENSG00000104967 | RP11-650J. antisense      | chr4  | 1.13E+08 | 1.13E+08 | - | 0    | 0    |
| ENSG00000104968 | CASC11. lincRNA           | chr8  | 1.28E+08 | 1.28E+08 | - | 0    | 0.16 |
| ENSG00000104969 | LINC01060. lincRNA        | chr4  | 1.88E+08 | 1.89E+08 | + | 0    | 0.25 |
| ENSG00000104970 | RP1-27K12. antisense      | chr6  | 53503185 | 53506919 | + | 0.53 | 0    |
| ENSG00000104971 | RP11-1325 processed       | chr5  | 34373028 | 34373850 | + | 0    | 0    |
| ENSG00000104972 | LINC00500. lincRNA        | chr4  | 1.38E+08 | 1.38E+08 | + | 0.13 | 0    |
| ENSG00000104973 | RP11-340A processed       | chr4  | 58987182 | 58988160 | - | 0    | 0    |
| ENSG00000104974 | LINC02071. lincRNA        | chr17 | 51312609 | 51335165 | - | 0    | 0.07 |
| ENSG00000104975 | MTCO2P9 unprocessed       | chr4  | 1.55E+08 | 1.55E+08 | - | 0    | 0    |
| ENSG00000104976 | KRTAP5-14 processed       | chr11 | 71579728 | 71579848 | - | 0    | 0    |
| ENSG00000104977 | RP11-834C. lincRNA        | chr12 | 54082118 | 54102693 | + | 0    | 0    |

|                 |            |             |       |          |          |   |       |      |
|-----------------|------------|-------------|-------|----------|----------|---|-------|------|
| ENSG00000119251 | RP11-725D  | lincRNA     | chr4  | 59551142 | 59630324 | - | 0     | 0    |
| ENSG00000119252 | CASC9      | lincRNA     | chr8  | 75223404 | 75324741 | - | 0     | 0    |
| ENSG00000119253 | LINC02212  | lincRNA     | chr5  | 10493527 | 10502728 | - | 0     | 0    |
| ENSG00000119254 | HMGB3P1    | processed   | chr5  | 1.23E+08 | 1.23E+08 | - | 0     | 0    |
| ENSG00000119255 | CTC-281M   | lincRNA     | chr5  | 1.75E+08 | 1.75E+08 | + | 0     | 0    |
| ENSG00000119256 | CTD-2234B  | lincRNA     | chr5  | 23013048 | 23014527 | + | 0     | 0    |
| ENSG00000119257 | RP11-317C  | lincRNA     | chr5  | 50858760 | 50860020 | - | 0     | 0    |
| ENSG00000119258 | RP11-893F  | lincRNA     | chr17 | 50208972 | 50214459 | + | 0.3   | 0.17 |
| ENSG00000119259 | IL20RB-AS1 | antisense   | chr3  | 1.37E+08 | 1.37E+08 | - | 0     | 0    |
| ENSG00000119260 | RP11-501E  | lincRNA     | chr4  | 1.21E+08 | 1.21E+08 | + | 0.36  | 0.15 |
| ENSG00000119261 | AK4P2      | processed   | chr5  | 55551885 | 55552554 | - | 0     | 0    |
| ENSG00000119262 | RP11-391J  | processed   | chr4  | 1.75E+08 | 1.75E+08 | + | 0     | 0    |
| ENSG00000119263 | CTC-563A5  | antisense   | chr5  | 1.8E+08  | 1.8E+08  | + | 0     | 0    |
| ENSG00000119264 | RP11-25H1  | lincRNA     | chr4  | 65998846 | 66150012 | + | 0     | 0    |
| ENSG00000119265 | RP11-614F  | processed   | chr4  | 1.32E+08 | 1.32E+08 | + | 0     | 0    |
| ENSG00000119266 | RP11-438D  | antisense   | chr3  | 1.41E+08 | 1.41E+08 | - | 0     | 0    |
| ENSG00000119267 | AC005741   | processed   | chr5  | 1.31E+08 | 1.31E+08 | + | 0     | 0    |
| ENSG00000119268 | RP11-497K  | antisense   | chr4  | 1.62E+08 | 1.62E+08 | + | 0     | 0    |
| ENSG00000119269 | ADAMTS19   | antisense   | chr5  | 1.29E+08 | 1.29E+08 | - | 0     | 0    |
| ENSG00000119270 | RP11-284A  | lincRNA     | chr5  | 1.25E+08 | 1.25E+08 | + | 0     | 0    |
| ENSG00000119271 | RP11-502M  | lincRNA     | chr4  | 1.61E+08 | 1.61E+08 | + | 0     | 0    |
| ENSG00000119272 | CTC-448D2  | lincRNA     | chr5  | 1.19E+08 | 1.19E+08 | - | 0     | 0    |
| ENSG00000119273 | CTD-2050E  | lincRNA     | chr5  | 1.43E+08 | 1.44E+08 | - | 0.18  | 0    |
| ENSG00000119274 | CTB-161J7  | processed   | chr5  | 1.15E+08 | 1.15E+08 | + | 0     | 0    |
| ENSG00000119275 | CTD-2224J  | processed   | chr19 | 53426019 | 53426499 | - | 0     | 0    |
| ENSG00000119276 | CTD-2023N  | lincRNA     | chr5  | 57614389 | 57617431 | + | 0     | 0.09 |
| ENSG00000119277 | NAIP       | protein_co  | chr5  | 70968483 | 71025114 | - | 0.61  | 0.94 |
| ENSG00000119278 | KRT18P45   | processed   | chr5  | 80288449 | 80289781 | + | 0     | 0    |
| ENSG00000119279 | HMGN1P1    | processed   | chr5  | 1.12E+08 | 1.12E+08 | - | 0     | 0    |
| ENSG00000119280 | RP11-94H6  | lincRNA     | chr4  | 19747179 | 19754591 | - | 0     | 0    |
| ENSG00000119281 | RP11-1396  | processed   | chr4  | 9521910  | 9522276  | + | 0     | 0    |
| ENSG00000119282 | RP11-93O1  | transcribed | chr5  | 99489559 | 99499367 | + | 0     | 0    |
| ENSG00000119283 | TRAJ60     | TR_J_pseud  | chr14 | 22476306 | 22476362 | + | 0     | 0    |
| ENSG00000119284 | MTCO1P24   | processed   | chr5  | 98410235 | 98411792 | - | 0     | 0    |
| ENSG00000119285 | MRPL57P6   | processed   | chr5  | 1.63E+08 | 1.63E+08 | + | 0     | 0    |
| ENSG00000119286 | RP11-94C2  | lincRNA     | chr17 | 50503412 | 50508328 | - | 0     | 0    |
| ENSG00000119287 | RP11-638C  | processed   | chr4  | 33238239 | 33238670 | - | 0     | 0    |
| ENSG00000119288 | RP13-497K  | antisense   | chr4  | 23779590 | 23782560 | + | 0     | 0    |
| ENSG00000119289 | GZMAP1     | unprocessed | chr5  | 55073015 | 55096553 | + | 0     | 0    |
| ENSG00000119290 | RP11-298J  | sense_overl | chr10 | 1.25E+08 | 1.25E+08 | + | 11.71 | 9.55 |
| ENSG00000119291 | RP11-624A  | lincRNA     | chr4  | 1.77E+08 | 1.77E+08 | - | 0     | 0    |
| ENSG00000119292 | ZNF286B    | protein_co  | chr17 | 18658429 | 18682262 | - | 2.19  | 0.87 |
| ENSG00000119293 | RP11-665C  | lincRNA     | chr4  | 1.81E+08 | 1.81E+08 | - | 0     | 0    |
| ENSG00000119294 | MLLT10P2   | processed   | chr4  | 1.9E+08  | 1.9E+08  | - | 0.54  | 0    |
| ENSG00000119295 | RP11-1E22  | lincRNA     | chr4  | 1.32E+08 | 1.32E+08 | - | 0     | 0    |

|                                     |          |          |   |      |      |
|-------------------------------------|----------|----------|---|------|------|
| ENSG0000(LINC01091 lincRNA chr4     | 1.24E+08 | 1.24E+08 | + | 0.49 | 0.14 |
| ENSG0000(RBMXP4 processed_chr4      | 1.09E+08 | 1.09E+08 | - | 0.21 | 0.17 |
| ENSG0000(RP11-492C processed_chrX   | 36719918 | 36720221 | + | 0    | 0    |
| ENSG0000(ZNF324B protein_co chr19   | 58451604 | 58457833 | + | 1.5  | 1.77 |
| ENSG0000(RP11-1267 processed_chr4   | 68614419 | 68615013 | + | 0    | 0    |
| ENSG0000(RP11-4914. antisense chr3  | 1.02E+08 | 1.02E+08 | - | 0    | 0    |
| ENSG0000(CTD-2587N lincRNA chr5     | 1.09E+08 | 1.09E+08 | - | 0.06 | 0.09 |
| ENSG0000(CTB-49A3. antisense chr5   | 1.33E+08 | 1.33E+08 | + | 0    | 0    |
| ENSG0000(RP11-171N antisense chr4   | 1.57E+08 | 1.57E+08 | + | 0    | 0    |
| ENSG0000(SPATS1 protein_co chr6     | 44342660 | 44377167 | + | 0    | 0    |
| ENSG0000(USP17L14F unprocessε chr4  | 9229641  | 9231233  | + | 0    | 0    |
| ENSG0000(CTD-2249K lincRNA chr5     | 81851601 | 81852201 | + | 0    | 0    |
| ENSG0000(LINC01470 lincRNA chr5     | 1.53E+08 | 1.53E+08 | - | 0    | 0.02 |
| ENSG0000(RBBP4P1 processed_chr5     | 14797125 | 14798400 | - | 0    | 0    |
| ENSG0000(RP11-2151J unprocessε chr5 | 8157541  | 8157788  | - | 0    | 0    |
| ENSG0000(LINC01586 lincRNA chr15    | 88585566 | 88605110 | - | 0    | 0    |
| ENSG0000(NACAP5 processed_chr4      | 17552117 | 17552752 | - | 0    | 0    |
| ENSG0000(GAPDHP70 processed_chr11   | 88408179 | 88409223 | - | 0    | 0    |
| ENSG0000(LINC02146 lincRNA chr5     | 20612625 | 20614765 | - | 0    | 0    |
| ENSG0000(EGFLAM-A. antisense chr5   | 38425036 | 38427376 | - | 0    | 0    |
| ENSG0000(RP11-159F processed_chr5   | 43483959 | 43509356 | + | 0    | 0    |
| ENSG0000(ANKRD20A unprocessε chr21  | 14064325 | 14069087 | + | 0    | 0    |
| ENSG0000(CTB-161M. antisense chr5   | 1.19E+08 | 1.19E+08 | - | 0    | 0    |
| ENSG0000(RP11-1152 processed_chr5   | 1.02E+08 | 1.02E+08 | + | 0    | 0    |
| ENSG0000(LINC02075 lincRNA chr17    | 49457861 | 49461749 | - | 0    | 0    |
| ENSG0000(LINC01179 lincRNA chr4     | 1.66E+08 | 1.66E+08 | + | 0.09 | 0.14 |
| ENSG0000(USP9YP2 unprocessε chrY    | 18776279 | 18779427 | - | 0    | 0    |
| ENSG0000(AC006160. antisense chr4   | 17587467 | 17614571 | - | 0    | 0.1  |
| ENSG0000(HMGN1P1 processed_chr5     | 1.48E+08 | 1.48E+08 | - | 0    | 0    |
| ENSG0000(PCDHA14 transcribed chr5   | 1.41E+08 | 1.41E+08 | + | 0    | 0    |
| ENSG0000(RP11-434H processed_chr3   | 1.29E+08 | 1.29E+08 | + | 0    | 0    |
| ENSG0000(ZEB2P1 transcribed chr4    | 16360686 | 16397323 | - | 0    | 0    |
| ENSG0000(RP11-402J. antisense chr4  | 1.13E+08 | 1.13E+08 | + | 0    | 0    |
| ENSG0000(KB-1247B1 processed_chr8   | 94201913 | 94203052 | - | 0    | 0    |
| ENSG0000(RP11-404I7 lincRNA chr4    | 1.33E+08 | 1.33E+08 | - | 0    | 0    |
| ENSG0000(TMEM251f processed_chr5    | 91030990 | 91031307 | - | 0    | 0    |
| ENSG0000(LINC02113 lincRNA chr5     | 99549432 | 99577957 | + | 0    | 0    |
| ENSG0000(PRELID3BP processed_chr5   | 42917414 | 42917984 | + | 0    | 0    |
| ENSG0000(CTC-327F1 processed_chr5   | 1.48E+08 | 1.48E+08 | - | 0    | 0    |
| ENSG0000(LINC01438 lincRNA chr4     | 1.11E+08 | 1.11E+08 | + | 0    | 0    |
| ENSG0000(RP11-386B processed_chr4   | 1.85E+08 | 1.85E+08 | + | 0    | 0    |
| ENSG0000(LINC02114 lincRNA chr5     | 4773481  | 4774865  | + | 0    | 0    |
| ENSG0000(RP11-718N processed_chr4   | 3910283  | 3910604  | + | 0    | 0    |
| ENSG0000(RP11-344G processed_chr4   | 1.71E+08 | 1.71E+08 | + | 0    | 0    |
| ENSG0000(CTB-35F21 lincRNA chr5     | 1.4E+08  | 1.4E+08  | + | 0    | 0    |

|                                         |          |          |   |      |      |
|-----------------------------------------|----------|----------|---|------|------|
| ENSG0000(RP11-642E processed_ chr4      | 68300325 | 68302459 | + | 0    | 0    |
| ENSG0000(RP11-148B antisense chr4       | 1.13E+08 | 1.13E+08 | - | 0    | 0    |
| ENSG0000(LINC01258 lincRNA chr4         | 38420662 | 38523180 | - | 0    | 0    |
| ENSG0000(MRPS36P2 processed_ chr4       | 1.87E+08 | 1.87E+08 | + | 0    | 0    |
| ENSG0000(RP11-789L processed_ chr3      | 1.41E+08 | 1.41E+08 | - | 0    | 0    |
| ENSG0000(RP11-692C processed_ chr5      | 2787451  | 2788549  | - | 0    | 0    |
| ENSG0000(EEF1A1P21 processed_ chr4      | 29748757 | 29750100 | + | 0    | 0    |
| ENSG0000(CTC-558O1 antisense chr5       | 94979151 | 94980893 | + | 0    | 0    |
| ENSG0000(RP11-453C lincRNA chr4         | 23234625 | 23285573 | - | 0    | 0    |
| ENSG0000(LINC01234 lincRNA chr12        | 1.14E+08 | 1.14E+08 | - | 0    | 0.12 |
| ENSG0000(LINC02216 lincRNA chr5         | 1.19E+08 | 1.19E+08 | + | 0    | 0    |
| ENSG0000(PPP2R2B-l sense_intron chr5    | 1.47E+08 | 1.47E+08 | - | 0    | 0    |
| ENSG0000(TMEM248l processed_ chr4       | 1.26E+08 | 1.26E+08 | - | 0    | 0    |
| ENSG0000(HSPD1P15 processed_ chr5       | 19233366 | 19234487 | + | 0    | 0    |
| ENSG0000(RCC2P4 processed_ chr3         | 1.27E+08 | 1.27E+08 | - | 0    | 0    |
| ENSG0000(RP11-116C processed_ chr5      | 24578294 | 24578561 | - | 0    | 0    |
| ENSG0000(RP11-751L unprocessed_ chr4    | 9733370  | 9742361  | + | 0    | 0    |
| ENSG0000(RP11-390C processed_ chr4      | 29907659 | 29907791 | - | 0    | 0    |
| ENSG0000(SERBP1P5 processed_ chr4       | 78180866 | 78182046 | - | 0    | 0    |
| ENSG0000(RP11-234C antisense chr4       | 1.61E+08 | 1.61E+08 | + | 0    | 0    |
| ENSG0000(CTD-2203K antisense chr5       | 33424025 | 33440619 | - | 1.08 | 0.15 |
| ENSG0000(AC226118. lincRNA chr7         | 379359   | 382712   | + | 0    | 0    |
| ENSG0000(CTD-2195N processed_ chr5      | 1.27E+08 | 1.27E+08 | + | 0    | 0    |
| ENSG0000(RP11-586E processed_ chr5      | 63022919 | 63023489 | - | 0    | 0    |
| ENSG0000(MTATP6P2 unprocessed_ chr3     | 1.07E+08 | 1.07E+08 | - | 0    | 0    |
| ENSG0000(CLRN2 protein_coding chr4      | 17515165 | 17527104 | + | 0    | 0    |
| ENSG0000(RPL7L1P4 processed_ chr5       | 1.18E+08 | 1.18E+08 | - | 0    | 0    |
| ENSG0000(RP11-478P lincRNA chr5         | 57890327 | 57899162 | - | 0    | 0    |
| ENSG0000(CTC-537E7 lincRNA chr5         | 68523878 | 68530007 | + | 0    | 0    |
| ENSG0000(RP4-539Ml protein_coding chr22 | 30409255 | 30428990 | + | 0.05 | 0.85 |
| ENSG0000(RP11-440L antisense chr4       | 762387   | 781849   | - | 3.13 | 3.58 |
| ENSG0000(CTB-46B19 antisense chr5       | 1.39E+08 | 1.39E+08 | + | 0    | 0    |
| ENSG0000(BMP1B-A lincRNA chr4           | 94743800 | 94757533 | - | 0    | 0    |
| ENSG0000(RP11-510l processed_ chr5      | 1.22E+08 | 1.22E+08 | - | 0    | 0    |
| ENSG0000(LINC01187 lincRNA chr5         | 1.7E+08  | 1.7E+08  | - | 0    | 0    |
| ENSG0000(RP11-98D1 antisense chr1       | 1.52E+08 | 1.52E+08 | - | 0    | 0    |
| ENSG0000(RP11-286E antisense chr4       | 1.08E+08 | 1.08E+08 | - | 0    | 0.02 |
| ENSG0000(CTC-218H9 sense_intron chr5    | 1.44E+08 | 1.44E+08 | + | 0    | 0    |
| ENSG0000(TRAPP2P7 unprocessed_ chrY     | 18655520 | 18656190 | - | 0    | 0    |
| ENSG0000(RP11-197C processed_ chr5      | 23688927 | 23689386 | + | 0    | 0    |
| ENSG0000(RP11-635L antisense chr4       | 1.69E+08 | 1.69E+08 | - | 0    | 0    |
| ENSG0000(CTC-441N1 antisense chr5       | 1.22E+08 | 1.22E+08 | - | 0    | 0    |
| ENSG0000(LINC02173 lincRNA chr4         | 1.06E+08 | 1.06E+08 | + | 0    | 0    |
| ENSG0000(RP11-703G lincRNA chr4         | 1.04E+08 | 1.04E+08 | + | 7.93 | 7.19 |
| ENSG0000(CCNB3P1 processed_ chr5        | 26739753 | 26741183 | - | 0    | 0    |

|                                     |          |            |      |      |
|-------------------------------------|----------|------------|------|------|
| ENSG0000(RP11-366M processed_ chr4  | 1.65E+08 | 1.65E+08 + | 0    | 0    |
| ENSG0000(RP11-422J lincRNA chr4     | 1.3E+08  | 1.3E+08 +  | 0    | 0    |
| ENSG0000(HMGN1P1 processed_ chr5    | 1.12E+08 | 1.12E+08 - | 0    | 0    |
| ENSG0000(RP11-321E processed_ chr5  | 17511833 | 17512238 - | 0    | 0    |
| ENSG0000(CTD-2544H lincRNA chr5     | 1.22E+08 | 1.22E+08 - | 0    | 0    |
| ENSG0000(RP11-610J antisense chr4   | 1.69E+08 | 1.69E+08 - | 0    | 0    |
| ENSG0000(AP000295 protein_co chr21  | 33246774 | 33283212 + | 0.33 | 1.23 |
| ENSG0000(RP11-496H processed_ chr3  | 1.98E+08 | 1.98E+08 + | 0.27 | 0.38 |
| ENSG0000(RP11-312A processed_ chr4  | 1.58E+08 | 1.58E+08 + | 0    | 0    |
| ENSG0000(LINC00942 lincRNA chr12    | 1500525  | 1507318 -  | 0    | 0    |
| ENSG0000(RP11-281P lincRNA chr4     | 11625714 | 11813958 + | 0    | 0    |
| ENSG0000(OR52V1P unprocessε chr11   | 5527277  | 5528174 -  | 0.14 | 0.23 |
| ENSG0000(USP9YP5 unprocessε chrY    | 18490915 | 18494295 - | 0    | 0    |
| ENSG0000(RP11-710F antisense chr4   | 1.06E+08 | 1.06E+08 - | 0    | 0.03 |
| ENSG0000(CTC-329D1 antisense chr5   | 1.4E+08  | 1.4E+08 -  | 0    | 0    |
| ENSG0000(CTD-2296D lincRNA chr5     | 7362979  | 7364531 -  | 0    | 0    |
| ENSG0000(CTB-138E5 antisense chr5   | 1.35E+08 | 1.35E+08 + | 0    | 0    |
| ENSG0000(HOXC13-A antisense chr12   | 53935328 | 53939643 - | 0    | 0    |
| ENSG0000(RP11-565A lincRNA chr4     | 1.88E+08 | 1.88E+08 + | 0    | 0    |
| ENSG0000(RP11-552M lincRNA chr4     | 23105502 | 23123487 + | 0    | 0    |
| ENSG0000(OR7E94P transcribec chr4   | 79587302 | 79588130 - | 0.91 | 0.85 |
| ENSG0000(C5orf66-AS lincRNA chr5    | 1.35E+08 | 1.35E+08 - | 0    | 0    |
| ENSG0000(MRPS33P2 processed_ chr4   | 38006784 | 38007105 - | 0    | 0    |
| ENSG0000(RP11-310P antisense chr5   | 602620   | 612210 -   | 0    | 0    |
| ENSG0000(VN1R104P transcribec chr19 | 54320204 | 54321212 - | 0    | 0    |
| ENSG0000(CTC-325J2 antisense chr5   | 80630313 | 80631590 - | 0.13 | 0    |
| ENSG0000(RP11-1018 lincRNA chr17    | 51335261 | 51336240 + | 0    | 0    |
| ENSG0000(TNRC18P1 processed_ chr4   | 1.41E+08 | 1.41E+08 - | 0.06 | 0.03 |
| ENSG0000(LINC02218 lincRNA chr5     | 17444010 | 17483946 + | 0    | 0    |
| ENSG0000(CTD-2227C lincRNA chr5     | 83012285 | 83013109 - | 0    | 0    |
| ENSG0000(LINC01259 lincRNA chr4     | 38509767 | 38518056 + | 0    | 0    |
| ENSG0000(KRT18P56 processed_ chr5   | 40066651 | 40067200 + | 0    | 0    |
| ENSG0000(CARMN lincRNA chr5         | 1.49E+08 | 1.49E+08 + | 1.97 | 2.22 |
| ENSG0000(NOP14-AS1 antisense chr4   | 2934899  | 2961738 +  | 7.2  | 6.71 |
| ENSG0000(RP11-217C lincRNA chr4     | 1.66E+08 | 1.67E+08 - | 0    | 0    |
| ENSG0000(RP11-619J antisense chr4   | 30776257 | 30793970 - | 0    | 0    |
| ENSG0000(RP11-279C antisense chr4   | 1.85E+08 | 1.85E+08 + | 0.43 | 0.24 |
| ENSG0000(TUBA3GP unprocessε chr22   | 21065462 | 21070097 + | 0    | 0    |
| ENSG0000(KRT19P3 processed_ chr4    | 1.1E+08  | 1.1E+08 -  | 0    | 0    |
| ENSG0000(RP11-423H antisense chr5   | 1.78E+08 | 1.78E+08 + | 0.39 | 0.83 |
| ENSG0000(RP11-360F lincRNA chr4     | 39133913 | 39135608 + | 0.86 | 1.33 |
| ENSG0000(RP11-790I1 unprocessε chr4 | 69450014 | 69451613 + | 0    | 0    |
| ENSG0000(RP11-5N11 sense_intrε chr5 | 31754219 | 31754656 + | 0    | 0    |
| ENSG0000(AC138517 processed_ chr5   | 1.39E+08 | 1.39E+08 + | 0    | 0    |
| ENSG0000(RP11-1336 antisense chr4   | 1.51E+08 | 1.51E+08 + | 0    | 0    |

|                                     |          |          |   |      |      |
|-------------------------------------|----------|----------|---|------|------|
| ENSG0000(RP11-445J):processed_chr3  | 1.35E+08 | 1.35E+08 | - | 0    | 0    |
| ENSG0000(RP11-21G2):processed_chr4  | 1.55E+08 | 1.55E+08 | + | 0    | 0    |
| ENSG0000(TH EGL protein_co)chr4     | 56530609 | 56603507 | + | 0    | 0.14 |
| ENSG0000(RP11-598F):antisense_chr12 | 137411   | 149169   | - | 0    | 0    |
| ENSG0000(RP11-155L):lincRNA_chr5    | 56313905 | 56321397 | - | 0    | 0    |
| ENSG0000(MTCO3P9):unprocessεchr4    | 1.55E+08 | 1.55E+08 | - | 0    | 0    |
| ENSG0000(RP11-415C):lincRNA_chr4    | 27217479 | 27282225 | + | 0.07 | 0.15 |
| ENSG0000(SRD5A3-AS):processed_chr4  | 55363971 | 55395847 | - | 0.44 | 0.59 |
| ENSG0000(RP11-89B1):sense_intrεchr4 | 53899871 | 53916835 | + | 0    | 0    |
| ENSG0000(RP11-503L):lincRNA_chr4    | 1.52E+08 | 1.52E+08 | - | 0    | 0    |
| ENSG0000(ZNF564 protein_co)chr19    | 12525370 | 12551542 | - | 2.26 | 1.52 |
| ENSG0000(RP11-588P):antisense_chr4  | 1E+08    | 1E+08    | + | 0    | 0.15 |
| ENSG0000(CTD-2236F):antisense_chr5  | 76606608 | 76608970 | - | 0    | 0    |
| ENSG0000(FER1L5 protein_co)chr2     | 96642737 | 96704885 | + | 0.16 | 0.06 |
| ENSG0000(RP11-44F2):antisense_chr4  | 74955974 | 74970362 | - | 0    | 0    |
| ENSG0000(RP11-83M):processed_chr5   | 67692812 | 67693200 | - | 0    | 0    |
| ENSG0000(CTC-430J1):lincRNA_chr5    | 1.74E+08 | 1.74E+08 | + | 0    | 0    |
| ENSG0000(RP11-469L):lincRNA_chr3    | 1.33E+08 | 1.33E+08 | - | 0    | 0    |
| ENSG0000(TUBB1P1):unprocessεchrY    | 18386974 | 18389151 | + | 0    | 0    |
| ENSG0000(RP11-273B):lincRNA_chr4    | 54836161 | 54845402 | - | 0    | 0    |
| ENSG0000(RP11-55C6):processed_chr4  | 44840380 | 44841402 | - | 0    | 0    |
| ENSG0000(OR10J4 polymorph)chr1      | 1.59E+08 | 1.59E+08 | + | 0    | 0    |
| ENSG0000(RP11-259C):lincRNA_chr5    | 1968094  | 1969013  | + | 6.27 | 4.84 |
| ENSG0000(RP11-332J):lincRNA_chr5    | 6795880  | 6826728  | + | 0    | 0    |
| ENSG0000(RP11-468N):unprocessεchr4  | 68985009 | 68988533 | - | 0    | 0    |
| ENSG0000(RP11-83M):lincRNA_chr5     | 67632266 | 67646789 | - | 0    | 0    |
| ENSG0000(RP1-167G2):antisense_chr5  | 16428536 | 16432436 | + | 0    | 0    |
| ENSG0000(AC008697):antisense_chr5   | 1.59E+08 | 1.6E+08  | + | 0    | 0    |
| ENSG0000(OSMR-AS1):lincRNA_chr5     | 38710367 | 38845829 | - | 0.42 | 0.47 |
| ENSG0000(RP11-673E):processed_chr4  | 1.44E+08 | 1.44E+08 | - | 2.47 | 2.22 |
| ENSG0000(RP11-217E):lincRNA_chr4    | 1.87E+08 | 1.87E+08 | - | 0    | 0    |
| ENSG0000(RP11-60A8):lincRNA_chr5    | 73213947 | 73294934 | + | 0    | 0    |
| ENSG0000(CTD-2057J):processed_chr5  | 29848684 | 29849218 | - | 0    | 0    |
| ENSG0000(HMGB1P2ε):processed_chr4   | 41842154 | 41843950 | - | 0    | 0    |
| ENSG0000(RP11-254I):lincRNA_chr5    | 96213346 | 96215075 | - | 0    | 0    |
| ENSG0000(RP11-308K):lincRNA_chr4    | 1.87E+08 | 1.87E+08 | + | 0    | 0    |
| ENSG0000(RP11-79C6):antisense_chr5  | 35938822 | 35939993 | + | 0    | 0    |
| ENSG0000(ECSCR protein_co)chr5      | 1.39E+08 | 1.39E+08 | - | 0    | 0    |
| ENSG0000(RP11-563M):lincRNA_chr4    | 1.49E+08 | 1.49E+08 | - | 0    | 0    |
| ENSG0000(RP11-415I):antisense_chr12 | 63623788 | 63795718 | - | 0    | 0    |
| ENSG0000(NDUFB4P9):processed_chr4   | 1.4E+08  | 1.4E+08  | - | 0    | 0    |
| ENSG0000(RP11-466G):processed_chr4  | 88527160 | 88528170 | + | 0.1  | 0    |
| ENSG0000(CTD-2278B):processed_chr5  | 97336858 | 97337040 | - | 0    | 0    |
| ENSG0000(RP11-618I):processed_chr4  | 69242628 | 69250815 | + | 0    | 0    |
| ENSG0000(RP11-1299):processed_chr4  | 98713804 | 98713971 | - | 0    | 0    |

|                                     |          |          |   |      |      |
|-------------------------------------|----------|----------|---|------|------|
| ENSG0000(RP11-802H processed_ chr4  | 33400538 | 33400679 | + | 0    | 0    |
| ENSG0000(ENPP7P10 unprocessε chr4   | 9079023  | 9141608  | + | 0    | 0    |
| ENSG0000(HSPE1P10 processed_ chr5   | 1.27E+08 | 1.27E+08 | - | 0    | 0    |
| ENSG0000(MTND6P17 unprocessε chr4   | 1.55E+08 | 1.55E+08 | + | 0    | 0    |
| ENSG0000(RP11-457P lincRNA chr4     | 41883060 | 41894579 | - | 0    | 0    |
| ENSG0000(CTD-2193P antisense chr5   | 81113385 | 81114852 | - | 0    | 0    |
| ENSG0000(RP11-15K1 protein_co chr7  | 55887277 | 55955239 | + | 0.57 | 0.78 |
| ENSG0000(CTD-2206G processed_ chr5  | 31923367 | 31923532 | + | 0    | 0    |
| ENSG0000(RP11-133F lincRNA chr5     | 92410256 | 92660863 | - | 0    | 0    |
| ENSG0000(SAP18P1 processed_ chr5    | 76075531 | 76075920 | + | 0    | 0    |
| ENSG0000(TRMT112P processed_ chr5   | 80033171 | 80033302 | - | 0    | 0    |
| ENSG0000(RP11-447H processed_ chr5  | 43206709 | 43207811 | + | 0    | 0    |
| ENSG0000(RP11-352E processed_ chr4  | 12640298 | 12640637 | - | 0    | 0    |
| ENSG0000(LINC02112 lincRNA chr5     | 9641305  | 9903826  | - | 0    | 0    |
| ENSG0000(RP11-417J lincRNA chr5     | 8525179  | 8528679  | + | 0    | 0    |
| ENSG0000(SCARNA22 scaRNA chr4       | 1974636  | 1974760  | + | 0    | 0    |
| ENSG0000(LINC02103 lincRNA chr5     | 28286389 | 28287665 | - | 0    | 0    |
| ENSG0000(EAF1-AS1 antisense chr3    | 15436171 | 15455940 | - | 0.32 | 0.71 |
| ENSG0000(RP11-346J lincRNA chr5     | 1E+08    | 1E+08    | + | 0    | 0    |
| ENSG0000(RP11-20D1 lincRNA chr12    | 8788257  | 8795789  | + | 0.25 | 0.34 |
| ENSG0000(CTC-428G2 antisense chr5   | 1.15E+08 | 1.15E+08 | + | 0    | 0    |
| ENSG0000(RP11-1072 lincRNA chr5     | 85212958 | 85213614 | - | 0    | 0    |
| ENSG0000(RP11-18O1 processed_ chr4  | 1.27E+08 | 1.27E+08 | + | 0    | 0    |
| ENSG0000(LINC02147 lincRNA chr5     | 1.18E+08 | 1.18E+08 | + | 0    | 0    |
| ENSG0000(HSD3BP3 unprocessε chr1    | 1.2E+08  | 1.2E+08  | + | 0    | 0    |
| ENSG0000(SNRPCP13 processed_ chr4   | 9583942  | 9584131  | - | 0    | 0    |
| ENSG0000(RP11-114H lincRNA chr5     | 1.36E+08 | 1.37E+08 | + | 0    | 0    |
| ENSG0000(RP11-223C lincRNA chr4     | 1.43E+08 | 1.43E+08 | + | 0    | 0    |
| ENSG0000(CTD-2199C lincRNA chr5     | 10137138 | 10138365 | + | 0.33 | 0.6  |
| ENSG0000(LINC01377 lincRNA chr5     | 3177835  | 3181232  | + | 0    | 0    |
| ENSG0000(USP17L21 protein_co chr4   | 9262872  | 9264823  | + | 0    | 0    |
| ENSG0000(RP11-269F lincRNA chr4     | 1.12E+08 | 1.12E+08 | - | 0    | 0    |
| ENSG0000(LINC00964 lincRNA chr8     | 1.25E+08 | 1.25E+08 | + | 0.1  | 0    |
| ENSG0000(RP11-73G1 lincRNA chr4     | 1.52E+08 | 1.52E+08 | - | 0    | 0    |
| ENSG0000(RP11-392C processed_ chr4  | 1.57E+08 | 1.57E+08 | - | 0    | 0    |
| ENSG0000(RP11-503I2 processed_ chr3 | 1.33E+08 | 1.33E+08 | + | 0    | 0    |
| ENSG0000(CTD-2201I antisense chr5   | 80052374 | 80083654 | - | 0.13 | 0    |
| ENSG0000(RP11-1281 processed_ chr4  | 49203171 | 49203726 | - | 0    | 0    |
| ENSG0000(CTC-422A1 processed_ chr5  | 79191549 | 79191747 | + | 0    | 0    |
| ENSG0000(LINC02162 lincRNA chr5     | 3452816  | 3461660  | + | 0    | 0    |
| ENSG0000(RP11-4O3 lincRNA chr4      | 57720035 | 57724655 | + | 0    | 0    |
| ENSG0000(CCDC37-AS antisense chr3   | 1.26E+08 | 1.26E+08 | - | 0    | 0    |
| ENSG0000(PGBD4P3 processed_ chr5    | 1.48E+08 | 1.48E+08 | + | 0    | 0    |
| ENSG0000(VCAN-AS1 antisense chr5    | 83531352 | 83581320 | - | 0    | 0    |
| ENSG0000(CTD-2325B lincRNA chr4     | 1.24E+08 | 1.24E+08 | - | 0    | 0    |



|                                     |          |          |   |      |       |
|-------------------------------------|----------|----------|---|------|-------|
| ENSG0000(SUMO2P7 processed_ chr17   | 50235845 | 50236129 | + | 0    | 0     |
| ENSG0000(AC011330. unprocessε chr15 | 43663654 | 43684339 | - | 0.96 | 0.26  |
| ENSG0000(GAPDHP76 unprocessε chr19  | 11585246 | 11587135 | + | 0    | 0     |
| ENSG0000(CTD-2331D lincRNA chr5     | 85446974 | 85447758 | + | 0    | 0     |
| ENSG0000(RP11-45H2 processed_ chr5  | 54878238 | 54878588 | + | 0    | 0     |
| ENSG0000(OR7E43P unprocessε chr4    | 4174319  | 4175238  | - | 0    | 0     |
| ENSG0000(LINC02021 lincRNA chr3     | 1.3E+08  | 1.3E+08  | + | 0.99 | 0.72  |
| ENSG0000(RP11-192C lincRNA chr4     | 1.35E+08 | 1.35E+08 | - | 0    | 0     |
| ENSG0000(RP11-212F processed_ chr8  | 10336782 | 10337677 | - | 0    | 0     |
| ENSG0000(RP11-1101 antisense chr5   | 1.78E+08 | 1.78E+08 | + | 0    | 0     |
| ENSG0000(KRT18P31 processed_ chr5   | 36885206 | 36886497 | + | 0.05 | 0     |
| ENSG0000(RPS27AP1ε processed_ chr5  | 1.38E+08 | 1.38E+08 | - | 0    | 0     |
| ENSG0000(AC145676. TEC chr7         | 227554   | 229557   | - | 0    | 0     |
| ENSG0000(HS3ST5 protein_co chr6     | 1.14E+08 | 1.14E+08 | - | 0    | 0     |
| ENSG0000(RP11-420C lincRNA chr5     | 20305565 | 20331456 | + | 0    | 0     |
| ENSG0000(EEF1A1P19 processed_ chr5  | 43495073 | 43496454 | - | 0.42 | 0.22  |
| ENSG0000(CTD-2503C lincRNA chr5     | 74917726 | 75023928 | - | 0    | 0     |
| ENSG0000(CTD-2227C lincRNA chr5     | 82940458 | 82940983 | - | 0    | 0     |
| ENSG0000(SNX5P1 processed_ chr4     | 76344550 | 76345590 | + | 0    | 0     |
| ENSG0000(PVT1 lincRNA chr8          | 1.28E+08 | 1.28E+08 | + | 7.43 | 10.54 |
| ENSG0000(MTRNR2L5 protein_co chr10  | 55599303 | 55600041 | + | 0    | 0     |
| ENSG0000(LGALS16 protein_co chr19   | 39655894 | 39660647 | + | 0    | 0     |
| ENSG0000(RP11-177C processed_ chr4  | 37868292 | 37869978 | + | 0.11 | 0.31  |
| ENSG0000(CTD-2296D antisense chr5   | 7367929  | 7373074  | - | 0    | 0     |
| ENSG0000(OR7E83P unprocessε chr4    | 9512905  | 9513874  | + | 0    | 0     |
| ENSG0000(RP11-115J; lincRNA chr11   | 28702615 | 29063821 | + | 0    | 0     |
| ENSG0000(RP11-63E5 lincRNA chr8     | 311133   | 331026   | - | 0    | 0     |
| ENSG0000(RP11-93K2 processed_ chr3  | 1.3E+08  | 1.3E+08  | - | 0    | 0     |
| ENSG0000(RP11-481C antisense chr17  | 51042524 | 51085471 | + | 0    | 0     |
| ENSG0000(RP11-983C lincRNA chr12    | 1.27E+08 | 1.27E+08 | - | 0    | 0     |
| ENSG0000(RP11-51M; lincRNA chr4     | 1.74E+08 | 1.74E+08 | - | 0    | 0     |
| ENSG0000(CTC-563A5 processed_ chr5  | 1.8E+08  | 1.8E+08  | - | 0.1  | 0     |
| ENSG0000(RP11-706F lincRNA chr4     | 1.89E+08 | 1.89E+08 | - | 0    | 0     |
| ENSG0000(CTD-2244C processed_ chr5  | 61831947 | 61833024 | - | 0    | 0     |
| ENSG0000(CTB-57H20 sense_ovei chr5  | 1.44E+08 | 1.44E+08 | + | 0    | 0     |
| ENSG0000(RP11-665I; lincRNA chr4    | 31506666 | 31558821 | + | 0    | 0     |
| ENSG0000(RP11-460H lincRNA chr4     | 1.81E+08 | 1.81E+08 | - | 0    | 0     |
| ENSG0000(RNF103-Cf protein_co chr2  | 86505668 | 86721122 | - | 1.01 | 0     |
| ENSG0000(ARHGEF38 sense_intrε chr4  | 1.06E+08 | 1.06E+08 | + | 0    | 0     |
| ENSG0000(RP11-457P processed_ chr4  | 41924180 | 41924380 | + | 0    | 0     |
| ENSG0000(RP11-447H processed_ chr5  | 43225506 | 43225813 | - | 0    | 0     |
| ENSG0000(ALG1L11P unprocessε chr8   | 12178697 | 12182719 | + | 0    | 0     |
| ENSG0000(RP11-813N unprocessε chr4  | 69021656 | 69022340 | - | 0    | 0     |
| ENSG0000(KRT19P6 processed_ chr4    | 91885046 | 91885254 | - | 0    | 0     |
| ENSG0000(RP11-525J; lincRNA chr4    | 59767816 | 59792114 | - | 0    | 0     |

|                 |           |             |       |          |          |   |       |       |
|-----------------|-----------|-------------|-------|----------|----------|---|-------|-------|
| ENSG00000161611 | MTND6P16  | unprocessed | chr4  | 64608905 | 64609424 | + | 0     | 0     |
| ENSG00000161612 | RP11-434D | lincRNA     | chr5  | 67800740 | 67890096 | - | 0.13  | 0.28  |
| ENSG00000161613 | RP11-586D | transcribed | chr4  | 6200733  | 6239937  | + | 0.01  | 0     |
| ENSG00000161614 | MCPH1-AS  | antisense   | chr8  | 6618475  | 6708209  | - | 0.93  | 0.62  |
| ENSG00000161615 | CTD-2175A | antisense   | chr5  | 52932419 | 52990278 | - | 0     | 0     |
| ENSG00000161616 | RP11-781M | antisense   | chr4  | 1.58E+08 | 1.59E+08 | - | 0     | 0     |
| ENSG00000161617 | CTC-394G3 | processed   | chr5  | 1.26E+08 | 1.26E+08 | - | 0     | 0     |
| ENSG00000161618 | RP5-1029K | antisense   | chr17 | 49505657 | 49574064 | - | 0     | 0     |
| ENSG00000161619 | BRD9P2    | unprocessed | chr5  | 767382   | 768930   | - | 0     | 0     |
| ENSG00000161620 | CYCTP     | unitary_psi | chr2  | 1.78E+08 | 1.78E+08 | - | 0     | 0     |
| ENSG00000161621 | TRIM51CP  | unprocessed | chr11 | 48945694 | 48951895 | + | 0     | 0     |
| ENSG00000161622 | TRBV26    | TR_V_pseu   | chr7  | 1.43E+08 | 1.43E+08 | + | 0     | 0     |
| ENSG00000161623 | PDCD6     | protein_co  | chr5  | 271621   | 353856   | + | 52.34 | 49.69 |
| ENSG00000161624 | CTD-2280E | antisense   | chr5  | 1.22E+08 | 1.22E+08 | - | 0     | 0     |
| ENSG00000161625 | LINC00536 | lincRNA     | chr8  | 1.16E+08 | 1.16E+08 | - | 0     | 0     |
| ENSG00000161626 | FABP5P6   | processed   | chr5  | 1.2E+08  | 1.2E+08  | - | 0     | 0     |
| ENSG00000161627 | HNRNPA1P  | processed   | chr4  | 73938604 | 73939558 | - | 0     | 0     |
| ENSG00000161628 | CTC-329H1 | processed   | chr5  | 1.09E+08 | 1.09E+08 | + | 0     | 0     |
| ENSG00000161629 | XXbac-B44 | antisense   | chr22 | 20198729 | 20204918 | - | 0     | 0     |
| ENSG00000161630 | RP11-27G1 | lincRNA     | chr4  | 1.55E+08 | 1.55E+08 | - | 0     | 0     |
| ENSG00000161631 | RP11-495K | lincRNA     | chr12 | 1.32E+08 | 1.32E+08 | + | 0     | 0     |
| ENSG00000161632 | CTD-2151L | processed   | chr5  | 18893902 | 18894168 | - | 0     | 0     |
| ENSG00000161633 | UQCRBP3   | processed   | chr5  | 14874400 | 14874711 | - | 0     | 0     |
| ENSG00000161634 | AC007016  | processed   | chr4  | 15492729 | 15492972 | - | 0     | 0     |
| ENSG00000161635 | GOLGA8K   | protein_co  | chr15 | 32392782 | 32403292 | - | 0.14  | 0.32  |
| ENSG00000161636 | NCOA4P2   | processed   | chr4  | 88508591 | 88510403 | - | 0     | 0     |
| ENSG00000161637 | RAC1P2    | processed   | chr4  | 46723830 | 46724408 | - | 1.08  | 0     |
| ENSG00000161638 | RP11-454P | lincRNA     | chr5  | 17684584 | 17955857 | + | 0     | 0     |
| ENSG00000161639 | CTD-2046I | lincRNA     | chr5  | 4866521  | 4874759  | + | 0     | 0     |
| ENSG00000161640 | AC142293  | antisense   | chr4  | 74552584 | 74589481 | - | 0     | 0     |
| ENSG00000161641 | RP11-213L | processed   | chr4  | 1.71E+08 | 1.71E+08 | - | 0     | 0     |
| ENSG00000161642 | CTB-161J7 | processed   | chr5  | 1.15E+08 | 1.15E+08 | + | 0     | 0     |
| ENSG00000161643 | RP11-598D | lincRNA     | chr4  | 1.75E+08 | 1.75E+08 | - | 0     | 0     |
| ENSG00000161644 | XBP1P1    | processed   | chr5  | 1.13E+08 | 1.13E+08 | + | 0     | 0     |
| ENSG00000161645 | GBA3      | polymorph   | chr4  | 22692914 | 22819575 | + | 0     | 0     |
| ENSG00000161646 | CTC-394G3 | processed   | chr5  | 1.26E+08 | 1.26E+08 | - | 0     | 0     |
| ENSG00000161647 | RP11-554D | lincRNA     | chr4  | 94675245 | 94702570 | + | 0     | 0     |
| ENSG00000161648 | RP11-6E9  | antisense   | chr4  | 1.7E+08  | 1.7E+08  | + | 0     | 0     |
| ENSG00000161649 | UGT2B24P  | processed   | chr4  | 69408828 | 69423164 | + | 0     | 0     |
| ENSG00000161650 | CCT7P2    | processed   | chr5  | 92889387 | 92890840 | - | 0     | 0     |
| ENSG00000161651 | RP11-252I | lincRNA     | chr5  | 1.08E+08 | 1.08E+08 | - | 0     | 0     |
| ENSG00000161652 | RP11-791G | processed   | chr4  | 82571137 | 82571814 | + | 0     | 0     |
| ENSG00000161653 | TERB1     | protein_co  | chr16 | 66754976 | 66801620 | - | 0.42  | 0.18  |
| ENSG00000161654 | RP11-80H5 | processed   | chr10 | 89644603 | 89645223 | - | 0.96  | 0.55  |
| ENSG00000161655 | EEF1A1P2C | processed   | chr5  | 99996547 | 99997932 | + | 0     | 0     |

|                                      |          |            |      |      |
|--------------------------------------|----------|------------|------|------|
| ENSG0000(CDC42P4 processed_ chr4     | 1.1E+08  | 1.1E+08 +  | 0    | 0    |
| ENSG0000(CTD-2194D antisense chr5    | 1850950  | 1851497 +  | 0    | 0    |
| ENSG0000(RP11-548K protein_co chr10  | 97584374 | 97673910 + | 0    | 0    |
| ENSG0000(RP11-622A processed_ chr4   | 73543822 | 73544013 + | 0    | 0    |
| ENSG0000(RP11-256P antisense chr5    | 1.38E+08 | 1.38E+08 - | 0    | 0    |
| ENSG0000(CHCHD2P7 processed_ chr4    | 87785920 | 87786371 - | 0    | 0    |
| ENSG0000(OR5H3P unprocessε chr3      | 98207423 | 98208341 + | 0    | 0    |
| ENSG0000(RP11-580P processed_ chr4   | 73337233 | 73337771 - | 0    | 0    |
| ENSG0000(RP11-155G processed_ chr5   | 97449358 | 97449741 - | 0    | 0    |
| ENSG0000(TRGV7 TR_V_pseu chr7        | 38335041 | 38335514 - | 0    | 0.29 |
| ENSG0000(RP11-136K lincRNA chr5      | 71445616 | 71446569 + | 0    | 0    |
| ENSG0000(RP11-1018 lincRNA chr17     | 51332679 | 51334090 + | 0    | 0    |
| ENSG0000(CTC-529L1 lincRNA chr5      | 92675956 | 92688254 - | 0    | 0    |
| ENSG0000(RP11-468N unprocessε chr4   | 68907918 | 68908034 - | 0    | 0    |
| ENSG0000(YWHAQP6 processed_ chr3     | 1.42E+08 | 1.42E+08 - | 0    | 0    |
| ENSG0000(RPS4XP20 processed_ chr19   | 34022656 | 34023427 - | 0    | 0    |
| ENSG0000(RP11-669N lincRNA chr4      | 14164455 | 14242813 + | 0    | 0    |
| ENSG0000(MTCO2P24 processed_ chr5    | 98409675 | 98410100 - | 0    | 0    |
| ENSG0000(TMEM158 protein_co chr3     | 45224466 | 45226278 - | 8.43 | 8.19 |
| ENSG0000(BFSP2-AS1 antisense chr3    | 1.33E+08 | 1.33E+08 - | 0    | 0    |
| ENSG0000(CTD-2383I lincRNA chr5      | 4033713  | 4041764 -  | 0    | 0    |
| ENSG0000(ECM1P2 processed_ chr4      | 12639086 | 12641009 + | 0    | 0    |
| ENSG0000(RP11-359P antisense chr5    | 1.23E+08 | 1.23E+08 + | 0    | 0.42 |
| ENSG0000(MTCO3P7 unprocessε chr2     | 1.3E+08  | 1.3E+08 +  | 0    | 0    |
| ENSG0000(RP11-141E lincRNA chr4      | 16973275 | 17073903 - | 0    | 0    |
| ENSG0000(CTD-2201E sense_intrε chr5  | 9519853  | 9523178 -  | 0    | 0    |
| ENSG0000(LINC02107 lincRNA chr5      | 38025697 | 38183932 + | 0    | 0    |
| ENSG0000(CTB-179I1. processed_ chr4  | 77311397 | 77312111 - | 0    | 0    |
| ENSG0000(RP11-814P antisense chr15   | 34755084 | 34812923 + | 0.02 | 0    |
| ENSG0000(HMGB1P3 processed_ chr2     | 2.31E+08 | 2.31E+08 + | 0.4  | 0    |
| ENSG0000(RP11-124N antisense chr3    | 1.26E+08 | 1.26E+08 + | 0    | 0.33 |
| ENSG0000(RP11-456A processed_ chr5   | 83875166 | 83875821 - | 0    | 0    |
| ENSG0000(CTC-339F2 lincRNA chr5      | 1.16E+08 | 1.16E+08 - | 0    | 0    |
| ENSG0000(SNX18P23 processed_ chr4    | 49233289 | 49233965 - | 0    | 0    |
| ENSG0000(RP11-484L processed_ chr5   | 45574590 | 45576612 + | 0    | 0    |
| ENSG0000(RP11-811I1 processed_ chr5  | 58198    | 58915 +    | 0    | 0    |
| ENSG0000(C15orf38-A protein_co chr15 | 89834308 | 89912882 - | 7.27 | 7.38 |
| ENSG0000(RP11-818C lincRNA chr4      | 1.89E+08 | 1.89E+08 - | 0    | 0    |
| ENSG0000(CTC-359M1 antisense chr5    | 1.46E+08 | 1.46E+08 - | 0    | 0    |
| ENSG0000(TMPRSS11 transcribed chr4   | 68184081 | 68218080 - | 0    | 0    |
| ENSG0000(RP11-563E antisense chr4    | 1.63E+08 | 1.63E+08 + | 0    | 0    |
| ENSG0000(RP11-584P processed_ chr4   | 67446267 | 67446574 + | 0    | 0    |
| ENSG0000(RP11-114N processed_ chr8   | 58424588 | 58426685 - | 0    | 0    |
| ENSG0000(CTD-2194L lincRNA chr5      | 37939365 | 37947955 - | 0    | 0    |
| ENSG0000(SLC7A11-A processed_ chr4   | 1.38E+08 | 1.38E+08 + | 0.01 | 0.03 |

|                 |                          |       |          |          |   |      |      |
|-----------------|--------------------------|-------|----------|----------|---|------|------|
| ENSG00000101793 | RP11-793B lincRNA        | chr4  | 1.38E+08 | 1.38E+08 | + | 0    | 0    |
| ENSG00000101794 | IGKV1D-37 IG_V_gene      | chr2  | 89884740 | 89885216 | + | 0    | 0    |
| ENSG00000101795 | RP11-480D unprocessed    | chr5  | 8455946  | 8456558  | - | 0    | 0    |
| ENSG00000101796 | RP11-180C lincRNA        | chr4  | 28362279 | 28402864 | - | 0    | 0    |
| ENSG00000101797 | RP11-17E2 antisense      | chr4  | 21949015 | 22330330 | + | 0    | 0    |
| ENSG00000101798 | RAF1P1 processed         | chr4  | 10254926 | 10256621 | - | 0    | 0    |
| ENSG00000101799 | CTD-2003C lincRNA        | chr11 | 10884885 | 10899322 | - | 0    | 0.21 |
| ENSG00000101800 | RP11-91J3 lincRNA        | chr4  | 1.87E+08 | 1.87E+08 | + | 0    | 0    |
| ENSG00000101801 | RP11-161D lincRNA        | chr4  | 1.74E+08 | 1.74E+08 | - | 0    | 0    |
| ENSG00000101802 | CBX3P3 processed         | chr5  | 1.13E+08 | 1.13E+08 | - | 0    | 0    |
| ENSG00000101803 | RP11-148B lincRNA        | chr4  | 1.13E+08 | 1.13E+08 | - | 0    | 0    |
| ENSG00000101804 | LINC00603 lincRNA        | chr5  | 39892138 | 40053324 | + | 0    | 0    |
| ENSG00000101805 | RP11-348J lincRNA        | chr5  | 92082597 | 92479426 | + | 0    | 0    |
| ENSG00000101806 | MTND4P9 unprocessed      | chr4  | 25718082 | 25719745 | - | 0    | 0    |
| ENSG00000101807 | RARRES2P2 processed      | chr4  | 1.9E+08  | 1.9E+08  | - | 0    | 0    |
| ENSG00000101808 | LINC01018 lincRNA        | chr5  | 6582136  | 6588499  | + | 0.57 | 0.82 |
| ENSG00000101809 | RP11-576N lincRNA        | chr4  | 83233512 | 83247213 | - | 0    | 0    |
| ENSG00000101810 | RP11-332J lincRNA        | chr5  | 6868559  | 6886787  | + | 0    | 0    |
| ENSG00000101811 | RP11-541P antisense      | chr5  | 1.63E+08 | 1.63E+08 | - | 0    | 0    |
| ENSG00000101812 | RP11-778J antisense      | chr4  | 86117912 | 86219926 | + | 0.25 | 0.09 |
| ENSG00000101813 | RP11-123C lincRNA        | chr4  | 28435449 | 28600275 | + | 0    | 0.31 |
| ENSG00000101814 | RP11-141C lincRNA        | chr5  | 68963246 | 68967845 | + | 0    | 0    |
| ENSG00000101815 | YJEFN3 protein_coding    | chr19 | 19528861 | 19537581 | + | 0.82 | 1.09 |
| ENSG00000101816 | RP11-576C unprocessed    | chr9  | 1.13E+08 | 1.13E+08 | - | 0    | 0    |
| ENSG00000101817 | CTB-131B5 sense_intronic | chr5  | 1.4E+08  | 1.4E+08  | + | 0.17 | 0.17 |
| ENSG00000101818 | CTD-2060C processed      | chr5  | 74798994 | 74800100 | + | 0    | 0    |
| ENSG00000101819 | CTC-529P8 lincRNA        | chr5  | 1.49E+08 | 1.49E+08 | + | 0.09 | 0.04 |
| ENSG00000101820 | RP11-677N antisense      | chr11 | 1.25E+08 | 1.25E+08 | + | 0    | 0    |
| ENSG00000101821 | AC006499 processed       | chr4  | 10267895 | 10268231 | - | 0    | 0    |
| ENSG00000101822 | RP11-584P lincRNA        | chr4  | 67417305 | 67468251 | - | 0    | 0    |
| ENSG00000101823 | RP11-141P processed      | chr4  | 33010948 | 33011746 | - | 0    | 0    |
| ENSG00000101824 | RP11-577G lincRNA        | chr4  | 58562165 | 58565122 | - | 0    | 0    |
| ENSG00000101825 | RP11-560A processed      | chr5  | 28213359 | 28214559 | - | 0    | 0    |
| ENSG00000101826 | CTB-88F18 processed      | chr5  | 1.27E+08 | 1.27E+08 | - | 0    | 0    |
| ENSG00000101827 | CTD-2116N lincRNA        | chr5  | 65486444 | 65487048 | - | 0    | 0    |
| ENSG00000101828 | RP11-796L processed      | chr4  | 1.7E+08  | 1.7E+08  | - | 0    | 0    |
| ENSG00000101829 | RP11-485B unprocessed    | chrX  | 52448587 | 52451138 | - | 0    | 0    |
| ENSG00000101830 | RP11-432N processed      | chr5  | 17587290 | 17587523 | - | 0    | 0    |
| ENSG00000101831 | RP13-401N unprocessed    | chr20 | 25835985 | 25836832 | - | 2.31 | 0.43 |
| ENSG00000101832 | DNAH100S protein_coding  | chr12 | 1.24E+08 | 1.24E+08 | - | 0.86 | 0.82 |
| ENSG00000101833 | RP11-556G antisense      | chr4  | 21582096 | 21613728 | + | 0    | 0    |
| ENSG00000101834 | NREP-AS1 antisense       | chr5  | 1.12E+08 | 1.12E+08 | + | 0    | 0    |
| ENSG00000101835 | RP11-22A3 lincRNA        | chr4  | 12947574 | 12948670 | - | 0    | 0    |
| ENSG00000101836 | RP11-12P1 processed      | chr5  | 24749374 | 24749772 | - | 0    | 0    |
| ENSG00000101837 | RP13-644N unprocessed    | chr4  | 69131351 | 69134814 | + | 0    | 0    |

|                 |                           |       |          |          |   |       |       |
|-----------------|---------------------------|-------|----------|----------|---|-------|-------|
| ENSG00000101252 | lincRNA                   | chr5  | 1.78E+08 | 1.78E+08 | + | 0     | 0     |
| ENSG0000010314N | lincRNA                   | chr4  | 1.31E+08 | 1.32E+08 | + | 0     | 0     |
| ENSG00000101000 | PANCR lincRNA             | chr4  | 1.11E+08 | 1.11E+08 | - | 0     | 0     |
| ENSG00000103074 | CTD-3074C lincRNA         | chr11 | 66558866 | 66560384 | - | 0     | 0     |
| ENSG0000010233B | antisense                 | chr5  | 10627260 | 10628225 | - | 0     | 0     |
| ENSG00000101000 | CACNA1G- antisense        | chr17 | 50556207 | 50562108 | - | 0     | 0     |
| ENSG00000101000 | AC107982. unprocessed     | chr17 | 18835707 | 18842364 | + | 0     | 0     |
| ENSG00000101000 | CTB-95B16 unprocessed     | chr5  | 1.63E+08 | 1.63E+08 | + | 0     | 0     |
| ENSG00000101000 | AK3P2 processed           | chr8  | 1.43E+08 | 1.43E+08 | - | 0.19  | 0     |
| ENSG00000101000 | RP11-417F antisense       | chr2  | 46568256 | 46580238 | - | 0     | 0     |
| ENSG00000101000 | RP11-136H processed       | chr5  | 30365405 | 30365684 | - | 0     | 0     |
| ENSG00000101000 | PCDHA10 protein_coding    | chr5  | 1.41E+08 | 1.41E+08 | + | 0.1   | 0.14  |
| ENSG00000101000 | CTD-2013M lincRNA         | chr5  | 45890216 | 45895970 | + | 0     | 0.14  |
| ENSG00000101000 | CTC-261N6 lincRNA         | chr5  | 86380660 | 86381426 | - | 0     | 0     |
| ENSG00000101000 | RP11-707A lincRNA         | chr4  | 64914281 | 65004500 | - | 0     | 0     |
| ENSG00000101000 | RP13-884E lincRNA         | chr4  | 1.38E+08 | 1.38E+08 | - | 0     | 0.24  |
| ENSG00000101000 | LINC02108 lincRNA         | chr5  | 58541567 | 58558243 | - | 0.4   | 0.58  |
| ENSG00000101000 | RP11-265F antisense       | chr3  | 1.31E+08 | 1.31E+08 | - | 0     | 0     |
| ENSG00000101000 | RP11-616K processed       | chr15 | 44354691 | 44355692 | + | 0     | 0.13  |
| ENSG00000101000 | RP11-130F antisense       | chr4  | 1.77E+08 | 1.78E+08 | + | 0.08  | 0.06  |
| ENSG00000101000 | RP11-359B antisense       | chr12 | 974133   | 991190   | - | 2.26  | 3.24  |
| ENSG00000101000 | HOXC-AS2 processed        | chr12 | 53993810 | 53996785 | - | 0.03  | 0     |
| ENSG00000101000 | RP4-622L5. sense_intronic | chr1  | 32170733 | 32176568 | + | 0     | 0     |
| ENSG00000101000 | RP11-380P antisense       | chr4  | 23560923 | 23768652 | + | 0     | 0     |
| ENSG00000101000 | RP11-848G unprocessed     | chr5  | 69631963 | 69636399 | + | 0.21  | 0.29  |
| ENSG00000101000 | CTD-2517C processed       | chr5  | 34860783 | 34861506 | - | 0     | 0     |
| ENSG00000101000 | RP11-208N lincRNA         | chr4  | 1.42E+08 | 1.42E+08 | - | 0     | 0     |
| ENSG00000101000 | RP11-553P processed       | chr4  | 1.35E+08 | 1.35E+08 | + | 0.17  | 0.04  |
| ENSG00000101000 | CTD-2285C processed       | chr5  | 1.07E+08 | 1.07E+08 | - | 0     | 0     |
| ENSG00000101000 | MORF4L2P processed        | chr4  | 54086926 | 54087783 | + | 0     | 0     |
| ENSG00000101000 | KRT8P31 processed         | chr5  | 60743563 | 60744970 | - | 0     | 0     |
| ENSG00000101000 | RP11-399F lincRNA         | chr4  | 1.26E+08 | 1.26E+08 | + | 0     | 0     |
| ENSG00000101000 | RP11-436A lincRNA         | chr4  | 1.67E+08 | 1.67E+08 | - | 0     | 0     |
| ENSG00000101000 | ARPC4-TTL protein_coding  | chr3  | 9793082  | 9835401  | + | 11.12 | 15.12 |
| ENSG00000101000 | CTD-2353F antisense       | chr5  | 36666214 | 36725195 | - | 0     | 0     |
| ENSG00000101000 | LINC02060 lincRNA         | chr5  | 88408982 | 88439090 | - | 0     | 0     |
| ENSG00000101000 | RP11-254I2 lincRNA        | chr5  | 96247776 | 96278751 | + | 0     | 0     |
| ENSG00000101000 | RP11-381K antisense       | chr5  | 1.38E+08 | 1.38E+08 | - | 0.15  | 0     |
| ENSG00000101000 | TRMT112P processed        | chr3  | 1.4E+08  | 1.4E+08  | - | 0     | 0     |
| ENSG00000101000 | CSNK1A1P: processed       | chr5  | 98833382 | 98833711 | + | 0     | 0     |
| ENSG00000101000 | RP11-5N11 lincRNA         | chr5  | 31747644 | 31748078 | - | 0     | 0     |
| ENSG00000101000 | RP11-268P lincRNA         | chr12 | 22601425 | 22618867 | + | 0.76  | 0     |
| ENSG00000101000 | CTC-321K1 antisense       | chr5  | 1.36E+08 | 1.36E+08 | + | 0     | 0     |
| ENSG00000101000 | MTND5P13 processed        | chr4  | 64609454 | 64610532 | - | 0     | 0     |
| ENSG00000101000 | RASA2-IT1 sense_intronic  | chr3  | 1.42E+08 | 1.42E+08 | + | 0     | 0     |

|                 |                          |       |          |          |   |      |      |
|-----------------|--------------------------|-------|----------|----------|---|------|------|
| ENSG00000101111 | RP11-661C lincRNA        | chr5  | 979365   | 981300   | + | 0    | 0    |
| ENSG00000101112 | MYLK-AS2 antisense       | chr3  | 1.24E+08 | 1.24E+08 | + | 0    | 0    |
| ENSG00000101113 | RP11-138A lincRNA        | chr4  | 1.59E+08 | 1.59E+08 | + | 0    | 0    |
| ENSG00000101114 | EEF1A1P13 processed      | chr5  | 14651941 | 14653329 | - | 0.37 | 0.45 |
| ENSG00000101115 | RP11-96A1 transcribed    | chr4  | 1.2E+08  | 1.2E+08  | + | 0    | 0    |
| ENSG00000101116 | RCC2P8 processed         | chr4  | 1.09E+08 | 1.09E+08 | - | 0    | 0    |
| ENSG00000101117 | RP11-1079 antisense      | chr17 | 49404081 | 49405197 | + | 0    | 0    |
| ENSG00000101118 | RP11-362F processed      | chr4  | 1.41E+08 | 1.41E+08 | + | 0    | 0    |
| ENSG00000101119 | RP11-292B lincRNA        | chr4  | 28996524 | 29014594 | + | 0    | 0    |
| ENSG00000101120 | RP11-285A unprocessed    | chr4  | 1.34E+08 | 1.34E+08 | - | 0    | 0    |
| ENSG00000101121 | RP11-300M lincRNA        | chr4  | 57154577 | 57156452 | + | 0    | 0    |
| ENSG00000101122 | RP11-419L lincRNA        | chr4  | 1.29E+08 | 1.29E+08 | - | 0    | 0    |
| ENSG00000101123 | RP11-257I processed      | chr5  | 1.25E+08 | 1.25E+08 | + | 0    | 0    |
| ENSG00000101124 | RP11-371F antisense      | chr4  | 1.39E+08 | 1.39E+08 | - | 0    | 0    |
| ENSG00000101125 | HMG11P1 processed        | chr5  | 1.15E+08 | 1.15E+08 | - | 0    | 0    |
| ENSG00000101126 | LINC02199 lincRNA        | chr5  | 8839732  | 8881525  | + | 0.02 | 0.02 |
| ENSG00000101127 | RP13-577H processed      | chr4  | 1.75E+08 | 1.75E+08 | - | 0    | 0    |
| ENSG00000101128 | RP11-397E processed      | chr4  | 86876338 | 86876652 | + | 0    | 0    |
| ENSG00000101129 | AC006335. unprocessed    | chrY  | 6243295  | 6245283  | - | 0    | 0    |
| ENSG00000101130 | YWHAEP4 processed        | chr4  | 1.55E+08 | 1.55E+08 | - | 0    | 0    |
| ENSG00000101131 | AC079776. unprocessed    | chr2  | 1.3E+08  | 1.3E+08  | - | 0    | 0    |
| ENSG00000101132 | FZD10-AS1 processed      | chr12 | 1.3E+08  | 1.3E+08  | - | 0    | 0    |
| ENSG00000101133 | SEPT14P9 unprocessed     | chr9  | 1.38E+08 | 1.38E+08 | + | 0    | 0    |
| ENSG00000101134 | RP11-488I processed      | chr4  | 1.31E+08 | 1.31E+08 | + | 0    | 0    |
| ENSG00000101135 | RP13-488H processed      | chr4  | 77864508 | 77864804 | - | 0    | 0    |
| ENSG00000101136 | CIR1P2 processed         | chr4  | 1.15E+08 | 1.15E+08 | - | 0    | 0    |
| ENSG00000101137 | ALDH1L1-A antisense      | chr3  | 1.26E+08 | 1.26E+08 | + | 0    | 0    |
| ENSG00000101138 | LTV1P1 processed         | chr4  | 1.2E+08  | 1.2E+08  | - | 0    | 0    |
| ENSG00000101139 | RP11-692D antisense      | chr4  | 73259209 | 73317953 | + | 0    | 0    |
| ENSG00000101140 | KRT8P32 processed        | chr5  | 98392070 | 98393530 | - | 0    | 0    |
| ENSG00000101141 | CTC-338M: antisense      | chr5  | 1.81E+08 | 1.81E+08 | + | 1.7  | 0.42 |
| ENSG00000101142 | LINC01216 sense_intronic | chr4  | 1.01E+08 | 1.01E+08 | - | 0    | 0    |
| ENSG00000101143 | TRIM60P14 processed      | chr4  | 1.65E+08 | 1.65E+08 | + | 0    | 0    |
| ENSG00000101144 | RP11-397D processed      | chr4  | 1.14E+08 | 1.14E+08 | + | 0    | 0    |
| ENSG00000101145 | RP11-855C lincRNA        | chr11 | 61588494 | 61607550 | + | 0    | 0    |
| ENSG00000101146 | USP17L16F unprocessed    | chr4  | 9239130  | 9240722  | + | 0    | 0    |
| ENSG00000101147 | CTD-2024P antisense      | chr5  | 34656412 | 34657250 | - | 0.41 | 0.23 |
| ENSG00000101148 | CTC-498J1: lincRNA       | chr5  | 69038518 | 69043821 | - | 0    | 0    |
| ENSG00000101149 | Z95704.3 processed       | chr4  | 105959   | 107114   | - | 0    | 0    |
| ENSG00000101150 | CTD-2154I: antisense     | chr5  | 95701249 | 95732295 | - | 0.32 | 0.17 |
| ENSG00000101151 | RP11-9G1: lincRNA        | chr4  | 1.33E+08 | 1.33E+08 | - | 0.12 | 0.18 |
| ENSG00000101152 | RP11-438C lincRNA        | chr5  | 1.15E+08 | 1.15E+08 | - | 0    | 0    |
| ENSG00000101153 | RP11-120A antisense      | chr4  | 21304542 | 21316485 | + | 0    | 0    |
| ENSG00000101154 | CTB-49A3.4 antisense     | chr5  | 1.33E+08 | 1.33E+08 | + | 0    | 0    |
| ENSG00000101155 | SEPHS2P1 processed       | chr5  | 14960232 | 14961393 | + | 0    | 0    |

|                                     |          |          |   |       |       |
|-------------------------------------|----------|----------|---|-------|-------|
| ENSG0000(RP11-30P2 processed_ chr4  | 62291562 | 62292337 | + | 0     | 0     |
| ENSG0000(CTD-2350J antisense chr5   | 15602189 | 15607348 | - | 0     | 0     |
| ENSG0000(PKD1P6 transcribed chr16   | 15125242 | 15154564 | - | 18.36 | 17.63 |
| ENSG0000(RP11-342A lincRNA chr4     | 1.49E+08 | 1.49E+08 | - | 0     | 0     |
| ENSG0000(RP11-1072 processed_ chr5  | 85210060 | 85210903 | - | 0     | 0     |
| ENSG0000(PTTG2 protein_co chr4      | 37960435 | 37961125 | + | 0     | 0     |
| ENSG0000(RP11-267A lincRNA chr5     | 1.75E+08 | 1.75E+08 | + | 0     | 0     |
| ENSG0000(LDHAL6DP unprocessed chr11 | 83814571 | 83815263 | - | 0     | 0     |
| ENSG0000(CTC-431G1 antisense chr5   | 79774348 | 79816190 | - | 0     | 0     |
| ENSG0000(RP11-460I1 lincRNA chr4    | 1027678  | 1028972  | + | 0     | 0     |
| ENSG0000(RP11-325L lincRNA chr5     | 1.38E+08 | 1.38E+08 | + | 0     | 0     |
| ENSG0000(CCDC74BP unprocessed chr22 | 20587496 | 20592218 | - | 0     | 0     |
| ENSG0000(RP11-765K lincRNA chr4     | 1.77E+08 | 1.77E+08 | + | 0     | 0     |
| ENSG0000(XXbac-BPG protein_co chr6  | 32813767 | 32838822 | - | 0     | 0     |
| ENSG0000(LINC01612 lincRNA chr4     | 1.7E+08  | 1.7E+08  | + | 0     | 0     |
| ENSG0000(RP11-122A antisense chr8   | 1.09E+08 | 1.09E+08 | + | 0     | 0     |
| ENSG0000(ALG1L14P unprocessed chr4  | 9166297  | 9170270  | - | 0     | 0     |
| ENSG0000(RP11-64D2 transcribed chr3 | 1.52E+08 | 1.52E+08 | + | 2.27  | 3.17  |
| ENSG0000(TRMT112P processed_ chr4   | 1.16E+08 | 1.16E+08 | + | 0     | 0     |
| ENSG0000(PSMC1P5 processed_ chr5    | 1.07E+08 | 1.07E+08 | + | 0.81  | 23.22 |
| ENSG0000(CTB-114C7 lincRNA chr5     | 1.7E+08  | 1.7E+08  | - | 0     | 0     |
| ENSG0000(RP11-468N processed_ chr4  | 68996935 | 68997709 | - | 0     | 0     |
| ENSG0000(RP11-305C sense_intr chr12 | 65281657 | 65286728 | + | 0.03  | 0     |
| ENSG0000(RP5-875H1 antisense chr17  | 50100704 | 50101920 | - | 0     | 0     |
| ENSG0000(CTB-1I21.1 lincRNA chr5    | 1.37E+08 | 1.37E+08 | + | 0     | 0     |
| ENSG0000(RP11-94C2 processed_ chr17 | 50537294 | 50538754 | - | 0.11  | 0.13  |
| ENSG0000(VWA8P1 processed_ chr5     | 68854910 | 68855085 | - | 0     | 0     |
| ENSG0000(NCAPGP1 processed_ chr8    | 1.21E+08 | 1.21E+08 | - | 0     | 0     |
| ENSG0000(RP11-451F processed_ chr4  | 1.83E+08 | 1.83E+08 | + | 0     | 0     |
| ENSG0000(CRYZP2 processed_ chr4     | 97916353 | 97917401 | - | 0     | 0     |
| ENSG0000(RDH10-AS1 antisense chr8   | 73297711 | 73356461 | - | 0     | 0     |
| ENSG0000(GIMD1 protein_co chr4      | 1.06E+08 | 1.06E+08 | - | 0     | 0     |
| ENSG0000(MRPS31P4 transcribed chr13 | 52600119 | 52637446 | + | 3.23  | 1.61  |
| ENSG0000(RP11-696N unprocessed chr4 | 99469598 | 99498698 | - | 0     | 0     |
| ENSG0000(LINC01618 lincRNA chr4     | 52789994 | 52815464 | + | 0     | 0     |
| ENSG0000(RP11-356J lincRNA chr11    | 1.12E+08 | 1.12E+08 | + | 5.48  | 5.13  |
| ENSG0000(ZBED1P1 processed_ chr4    | 1.1E+08  | 1.1E+08  | + | 0     | 0     |
| ENSG0000(KIAA1456 protein_co chr8   | 12945642 | 13031503 | + | 0.07  | 0.05  |
| ENSG0000(CTC-498M processed_ chr5   | 88382948 | 88383260 | + | 0     | 0     |
| ENSG0000(TUBB8P3 processed_ chr4    | 1.12E+08 | 1.12E+08 | + | 0     | 0     |
| ENSG0000(SALL4P1 processed_ chr5    | 57422464 | 57424391 | + | 0     | 0     |
| ENSG0000(CTC-345K1 antisense chr5   | 1.51E+08 | 1.51E+08 | - | 0     | 0     |
| ENSG0000(RP5-1029K antisense chr17  | 49544847 | 49577962 | - | 0     | 0     |
| ENSG0000(ZNF718 protein_co chr4     | 124480   | 163989   | + | 1.27  | 1.12  |
| ENSG0000(RP11-5P22 lincRNA chr5     | 66507544 | 66511604 | - | 0     | 0     |

|                                      |          |          |   |       |       |
|--------------------------------------|----------|----------|---|-------|-------|
| ENSG0000(RP11-44F2 transcribed chr4  | 75101477 | 75101943 | + | 0     | 0     |
| ENSG0000(RP11-618N unprocessed chr8  | 19237737 | 19241912 | + | 0     | 0     |
| ENSG0000(SMIM20 protein_co chr4      | 25861830 | 25929874 | + | 19.96 | 19.51 |
| ENSG0000(CTA-963H5 unprocessed chr22 | 30653877 | 30654814 | - | 1.83  | 1.62  |
| ENSG0000(CTD-2272G processed_ chr5   | 23262159 | 23263185 | - | 0     | 0     |
| ENSG0000(CTD-2269F antisense chr5    | 84384427 | 84490765 | + | 2.62  | 2.55  |
| ENSG0000(RP11-478C processed_ chr4   | 342821   | 342962   | - | 0     | 0     |
| ENSG0000(CTB-51E13 processed_ chr4   | 1.23E+08 | 1.23E+08 | - | 0     | 0     |
| ENSG0000(MRPL22P1 processed_ chr4    | 56320719 | 56321334 | - | 0     | 0     |
| ENSG0000(IGBP1P4 processed_ chr4     | 82401578 | 82402456 | - | 0     | 0     |
| ENSG0000(RP11-284M antisense chr4    | 1.43E+08 | 1.43E+08 | - | 0.51  | 0.19  |
| ENSG0000(RPSAP70 processed_ chr4     | 1.86E+08 | 1.86E+08 | + | 0.96  | 0.8   |
| ENSG0000(MGC32805 antisense chr5     | 1.22E+08 | 1.22E+08 | - | 0     | 0     |
| ENSG0000(KDELCP1 processed_ chr5     | 1.28E+08 | 1.28E+08 | + | 0     | 0     |
| ENSG0000(CTC-422A1 processed_ chr5   | 79229904 | 79230588 | + | 0     | 0     |
| ENSG0000(LINC01340 lincRNA chr5      | 97504696 | 97671046 | + | 0     | 0     |
| ENSG0000(CTD-2272G processed_ chr5   | 23303565 | 23305143 | - | 0     | 0     |
| ENSG0000(RP11-4O3. lincRNA chr4      | 57605694 | 57658800 | - | 0     | 0     |
| ENSG0000(LINC00989 lincRNA chr4      | 79492416 | 79576460 | + | 0     | 0     |
| ENSG0000(LINC01021 lincRNA chr5      | 27472292 | 27496401 | + | 10.2  | 10.25 |
| ENSG0000(RP11-395I lincRNA chr4      | 40265472 | 40266457 | + | 0     | 0     |
| ENSG0000(CXCL1P1 processed_ chr4     | 73944011 | 73944324 | - | 0     | 0     |
| ENSG0000(RP11-577G lincRNA chr4      | 58524515 | 58536328 | - | 0     | 0     |
| ENSG0000(RP11-785F lincRNA chr4      | 1.37E+08 | 1.37E+08 | + | 0     | 0     |
| ENSG0000(SNRPCP16 processed_ chr4    | 9051842  | 9052051  | - | 0     | 0     |
| ENSG0000(CTC-255N2 antisense chr5    | 1.47E+08 | 1.47E+08 | - | 0     | 0     |
| ENSG0000(RP11-647P lincRNA chr4      | 1.21E+08 | 1.21E+08 | + | 0     | 0     |
| ENSG0000(RP11-780N processed_ chr4   | 1.44E+08 | 1.44E+08 | - | 0     | 0     |
| ENSG0000(EEF1GP2 processed_ chr5     | 1.48E+08 | 1.48E+08 | + | 0     | 0     |
| ENSG0000(AC005740. processed_ chr5   | 1.42E+08 | 1.42E+08 | - | 0     | 0     |
| ENSG0000(RP11-466P antisense chr5    | 76285542 | 76311462 | - | 0     | 0     |
| ENSG0000(RP5-972B1 protein_co chrX   | 37349330 | 38687674 | + | 0     | 0     |
| ENSG0000(RP11-731D unprocessed chr4  | 1.51E+08 | 1.51E+08 | - | 0     | 0     |
| ENSG0000(RP11-432N processed_ chr5   | 17620533 | 17620939 | - | 0     | 0     |
| ENSG0000(RP11-76G1 antisense chr4    | 1.48E+08 | 1.48E+08 | + | 0     | 0     |
| ENSG0000(HSPE1P23 processed_ chr4    | 74917822 | 74918138 | + | 0     | 0     |
| ENSG0000(RP11-503L lincRNA chr4      | 1.49E+08 | 1.49E+08 | + | 0     | 0     |
| ENSG0000(LINC02200 lincRNA chr5      | 1.13E+08 | 1.13E+08 | + | 0     | 0     |
| ENSG0000(PTP4A1P4 processed_ chr5    | 86087526 | 86087847 | + | 0     | 0     |
| ENSG0000(CTD-2089N lincRNA chr5      | 50965687 | 50967008 | - | 0     | 0     |
| ENSG0000(GYPB protein_co chr4        | 1.44E+08 | 1.44E+08 | - | 0.16  | 0     |
| ENSG0000(AC008592. processed_ chr5   | 95861786 | 95874519 | + | 0     | 0     |
| ENSG0000(KRT18P21 processed_ chr4    | 1.16E+08 | 1.16E+08 | + | 0     | 0     |
| ENSG0000(CTD-2213F antisense chr14   | 31420286 | 31452883 | + | 0     | 0.32  |
| ENSG0000(TUNAR protein_co chr14      | 95876392 | 95925571 | + | 0     | 0     |



|                                     |          |          |   |      |      |
|-------------------------------------|----------|----------|---|------|------|
| ENSG0000(RP11-22A3 lincRNA chr4     | 12859101 | 12864961 | - | 0    | 0    |
| ENSG0000(MARK2P4 processed_chr4     | 1.76E+08 | 1.76E+08 | - | 0    | 0    |
| ENSG0000(TRIM75P protein_co chr4    | 1.65E+08 | 1.65E+08 | + | 0    | 0    |
| ENSG0000(RP11-340A lincRNA chr4     | 59047020 | 59075256 | - | 0    | 0    |
| ENSG0000(CTD-2005D unprocessε chr4  | 68784618 | 68787474 | + | 0    | 0    |
| ENSG0000(CTC-467M: lincRNA chr5     | 88692645 | 88693972 | - | 0    | 0    |
| ENSG0000(RP11-119J: protein_co chr5 | 1.36E+08 | 1.36E+08 | + | 0    | 0    |
| ENSG0000(RP11-23P1 antisense chr15  | 41825099 | 41827936 | - | 0    | 0    |
| ENSG0000(UNC93B4 unprocessε chr4    | 4143458  | 4150421  | - | 0    | 0    |
| ENSG0000(CTD-2197I: antisense chr5  | 1.09E+08 | 1.09E+08 | - | 0    | 0    |
| ENSG0000(UBE2CP3 processed_chr4     | 57072683 | 57073132 | + | 0    | 0    |
| ENSG0000(RP11-310P antisense chr5   | 524705   | 526594   | + | 0    | 0    |
| ENSG0000(RP11-432N processed_chr5   | 17625551 | 17625959 | - | 0    | 0    |
| ENSG0000(LINC02197 lincRNA chr5     | 71351855 | 71446342 | - | 0    | 0    |
| ENSG0000(MTND6P2 processed_chr5     | 8618581  | 8619104  | - | 0    | 0    |
| ENSG0000(RP11-338H lincRNA chr11    | 95482406 | 95497553 | + | 0.51 | 1.02 |
| ENSG0000(CTD-2160D processed_chr5   | 99948295 | 99949583 | - | 0    | 0    |
| ENSG0000(RP11-700N lincRNA chr4     | 1.2E+08  | 1.2E+08  | + | 0.11 | 0    |
| ENSG0000(RP11-480G processed_chr4   | 10143367 | 10143655 | - | 0    | 0    |
| ENSG0000(RP11-1391 antisense chr11  | 856880   | 859795   | - | 0.19 | 0.23 |
| ENSG0000(RP11-27G1 processed_chr4   | 1.55E+08 | 1.55E+08 | - | 0    | 0    |
| ENSG0000(LINC00977 lincRNA chr8     | 1.29E+08 | 1.29E+08 | - | 0    | 0    |
| ENSG0000(RP11-395P lincRNA chr5     | 1.25E+08 | 1.25E+08 | - | 0    | 0    |
| ENSG0000(RP11-15B1 processed_chr4   | 99990737 | 99991477 | - | 0    | 0    |
| ENSG0000(RP11-114H processed_chr5   | 1.31E+08 | 1.31E+08 | + | 0    | 0    |
| ENSG0000(RP13-539F lincRNA chr4     | 1.45E+08 | 1.45E+08 | + | 0    | 0    |
| ENSG0000(CTB-99A3.: antisense chr5  | 1.47E+08 | 1.47E+08 | + | 0    | 0    |
| ENSG0000(CTB-3M24. antisense chr5   | 1.33E+08 | 1.33E+08 | + | 0    | 0    |
| ENSG0000(RP11-714G antisense chr4   | 1.85E+08 | 1.85E+08 | + | 0.12 | 0    |
| ENSG0000(RP11-257Iε lincRNA chr5    | 1.25E+08 | 1.25E+08 | + | 0    | 0    |
| ENSG0000(KLHL2P1 unprocessε chr4    | 1.19E+08 | 1.19E+08 | + | 0    | 0.18 |
| ENSG0000(RP11-448G antisense chr4   | 10006482 | 10009725 | + | 0    | 0    |
| ENSG0000(CTC-461F2: lincRNA chr5    | 16617225 | 16621276 | + | 0    | 0    |
| ENSG0000(SEC63P2 processed_chr4     | 35487812 | 35489750 | + | 0    | 0    |
| ENSG0000(LINC02116 lincRNA chr5     | 1855970  | 1856568  | - | 0    | 0    |
| ENSG0000(RP11-503D lincRNA chr5     | 44698431 | 44700808 | - | 0    | 0    |
| ENSG0000(AACSP1 transcribec chr5    | 1.79E+08 | 1.79E+08 | - | 0    | 0    |
| ENSG0000(RP11-83M: lincRNA chr5     | 67699429 | 67902600 | - | 0    | 0    |
| ENSG0000(RP11-484L: processed_chr5  | 45557919 | 45559986 | + | 0    | 0    |
| ENSG0000(KIAA1210 protein_co chrX   | 1.19E+08 | 1.19E+08 | - | 0.01 | 0.01 |
| ENSG0000(RP5-877J2. protein_co chr7 | 30852273 | 30923812 | + | 0    | 0    |
| ENSG0000(OR7E35P unprocessε chr4    | 9754898  | 9755778  | + | 0    | 0    |
| ENSG0000(FTLP10 transcribec chr4    | 68182292 | 68212470 | + | 0    | 0    |
| ENSG0000(LINC02148 lincRNA chr5     | 1.18E+08 | 1.18E+08 | + | 0.05 | 0    |
| ENSG0000(RP11-1082 processed_chr8   | 1.25E+08 | 1.25E+08 | + | 0    | 0    |

|                                      |          |          |   |      |      |
|--------------------------------------|----------|----------|---|------|------|
| ENSG0000(RP11-366M processed_ chr4   | 1.65E+08 | 1.65E+08 | - | 0    | 0    |
| ENSG0000(RP13-577H antisense chr4    | 1.75E+08 | 1.75E+08 | - | 0    | 0    |
| ENSG0000(LINC01598 lincRNA chr12     | 54085132 | 54125992 | - | 0    | 0.02 |
| ENSG0000(CLSTN2-AS antisense chr3    | 1.41E+08 | 1.41E+08 | - | 0    | 0    |
| ENSG0000(RP11-622A lincRNA chr4      | 73508803 | 73534128 | + | 0    | 0    |
| ENSG0000(LINC02161 lincRNA chr5      | 89581209 | 89677701 | + | 0    | 0    |
| ENSG0000(CTD-2308B lincRNA chr5      | 1.24E+08 | 1.24E+08 | + | 0    | 0    |
| ENSG0000(RP11-47F1 processed_ chr5   | 1.09E+08 | 1.09E+08 | - | 0    | 0    |
| ENSG0000(EIF3KP3 processed_ chr4     | 1.16E+08 | 1.16E+08 | - | 0    | 0    |
| ENSG0000(CCT5P1 processed_ chr5      | 1.16E+08 | 1.16E+08 | + | 0    | 0    |
| ENSG0000(LINC01332 lincRNA chr5      | 74327995 | 74334766 | - | 0    | 0    |
| ENSG0000(LINC02105 lincRNA chr5      | 53776644 | 53819686 | - | 0    | 0    |
| ENSG0000(RP11-19O2 antisense chr5    | 16180238 | 16185585 | + | 0    | 0    |
| ENSG0000(HOXC-AS1 antisense chr12    | 53999022 | 54000010 | - | 0.26 | 0    |
| ENSG0000(CTD-2134P lincRNA chr5      | 28782678 | 28809249 | - | 0    | 0    |
| ENSG0000(RP11-648M unprocessε chr5   | 37377049 | 37377971 | + | 0    | 0    |
| ENSG0000(AC006552. lincRNA chr4      | 54603211 | 54607131 | - | 0    | 0    |
| ENSG0000(RP11-107E processed_ chr4   | 1.24E+08 | 1.24E+08 | - | 0    | 0    |
| ENSG0000(RP11-631M processed_ chr5   | 61375112 | 61375855 | + | 0    | 0    |
| ENSG0000(LRRC37BP1 transcribed chr17 | 30629680 | 30637466 | + | 4.52 | 5.13 |
| ENSG0000(LRRC34P2 processed_ chr4    | 55313011 | 55313924 | - | 0    | 0    |
| ENSG0000(RP11-227F antisense chr4    | 41748293 | 41824119 | + | 0    | 0    |
| ENSG0000(AP000351. unprocessε chr22  | 23976904 | 23977585 | - | 0    | 0.3  |
| ENSG0000(GMPSP1 processed_ chr4      | 8174421  | 8174999  | + | 0    | 0    |
| ENSG0000(TRIM36-IT: sense_intrε chr5 | 1.15E+08 | 1.15E+08 | - | 0    | 0    |
| ENSG0000(DUTP7 processed_ chr4       | 51865050 | 51865535 | - | 0    | 0    |
| ENSG0000(WBP1LP2 processed_ chr7     | 1.08E+08 | 1.08E+08 | + | 0.6  | 0.07 |
| ENSG0000(RP11-312A unprocessε chr4   | 1.58E+08 | 1.58E+08 | - | 0    | 0    |
| ENSG0000(ENPP7P9 processed_ chr4     | 3967034  | 3967660  | - | 0    | 0    |
| ENSG0000(CHCHD10 protein_co chr22    | 23765834 | 23768443 | - | 4.75 | 2.99 |
| ENSG0000(RP11-101B processed_ chr5   | 57120796 | 57122624 | + | 0    | 0    |
| ENSG0000(CTD-2247C lincRNA chr5      | 4974690  | 5034267  | - | 0    | 0    |
| ENSG0000(DUX4L51 processed_ chr5     | 31249879 | 31250987 | + | 0.02 | 0.1  |
| ENSG0000(PPM1AP1 processed_ chr8     | 15806149 | 15807283 | - | 0    | 0    |
| ENSG0000(RP11-728C processed_ chr4   | 1.24E+08 | 1.24E+08 | + | 0    | 0    |
| ENSG0000(EXOC7P1 processed_ chr4     | 1.08E+08 | 1.08E+08 | - | 0    | 0    |
| ENSG0000(FAM218A protein_co chr4     | 1.65E+08 | 1.65E+08 | + | 0.23 | 0.28 |
| ENSG0000(RP11-6C14 lincRNA chr4      | 1.6E+08  | 1.6E+08  | - | 0    | 0    |
| ENSG0000(LINC02145 lincRNA chr5      | 6310441  | 6339884  | - | 0    | 0    |
| ENSG0000(INTS6P1 processed_ chr5     | 39718984 | 39721513 | - | 0    | 0    |
| ENSG0000(RP11-640N antisense chr11   | 1.21E+08 | 1.21E+08 | - | 0.02 | 0.01 |
| ENSG0000(RP11-162D processed_ chr8   | 53162339 | 53162987 | + | 0    | 0    |
| ENSG0000(ABT1P1 processed_ chr4      | 99022311 | 99023131 | - | 0    | 0    |
| ENSG0000(AC007126. lincRNA chr4      | 13777377 | 13782157 | - | 0.5  | 0.33 |
| ENSG0000(RP11-119H processed_ chr4   | 1.13E+08 | 1.13E+08 | - | 0    | 0    |

|                                      |          |          |   |      |      |
|--------------------------------------|----------|----------|---|------|------|
| ENSG0000(RP11-98O2 lincRNA chr4      | 1.39E+08 | 1.39E+08 | + | 0.07 | 0.32 |
| ENSG0000(RP11-401I1 lincRNA chr4     | 1.31E+08 | 1.31E+08 | - | 0    | 0    |
| ENSG0000(KRT18P51 processed_chr4     | 1.45E+08 | 1.45E+08 | + | 0    | 0    |
| ENSG0000(AC006499. processed_chr4    | 10284961 | 10285708 | - | 0    | 0    |
| ENSG0000(CDK3 protein_co chr17       | 76000906 | 76005999 | + | 3.22 | 2.94 |
| ENSG0000(AC008984. transcribec chr19 | 54328272 | 54331434 | - | 0    | 0    |
| ENSG0000(RP11-757G lincRNA chr11     | 68870664 | 68874542 | + | 0.13 | 0.2  |
| ENSG0000(CTC-573N1 lincRNA chr5      | 1.8E+08  | 1.8E+08  | + | 0.16 | 0.17 |
| ENSG0000(GPR162 protein_co chr12     | 6821545  | 6829972  | + | 2.18 | 3.25 |
| ENSG0000(RP11-380D antisense chr4    | 1.11E+08 | 1.11E+08 | - | 0    | 0    |
| ENSG0000(LINC02125 lincRNA chr16     | 76634998 | 76658478 | + | 0    | 0    |
| ENSG0000(RP11-515C processed_chr5    | 1.41E+08 | 1.41E+08 | - | 0    | 0    |
| ENSG0000(RP11-380I1 processed_chr8   | 28225929 | 28227562 | + | 0    | 0    |
| ENSG0000(LDHAL6CP transcribec chr12  | 63003553 | 63006902 | + | 0    | 0.04 |
| ENSG0000(RP11-680H lincRNA chr11     | 94238150 | 94279206 | + | 0    | 0    |
| ENSG0000(AC004066. antisense chr4    | 1.06E+08 | 1.06E+08 | - | 0    | 0    |
| ENSG0000(RP11-756P processed_chr4    | 1.89E+08 | 1.89E+08 | + | 0    | 0    |
| ENSG0000(RP11-730N lincRNA chr5      | 24881943 | 24885461 | - | 0    | 0    |
| ENSG0000(CCT6P2 processed_chr5       | 14639426 | 14641018 | - | 0    | 0    |
| ENSG0000(LINC02121 lincRNA chr5      | 5069192  | 5078311  | - | 0    | 0    |
| ENSG0000(RP11-727N antisense chr4    | 74418917 | 74440457 | - | 0    | 0    |
| ENSG0000(STK19B unprocessε chr6      | 32013270 | 32013787 | + | 0    | 0    |
| ENSG0000(ABHD17AP unprocessε chr1    | 2.15E+08 | 2.15E+08 | - | 0    | 0    |
| ENSG0000(RP11-92A5 antisense chr4    | 1.55E+08 | 1.55E+08 | - | 0    | 0    |
| ENSG0000(KRT8P33 processed_chr5      | 1.23E+08 | 1.23E+08 | - | 0.16 | 0.27 |
| ENSG0000(RP11-58H1 processed_chr4    | 1.43E+08 | 1.43E+08 | - | 0    | 0    |
| ENSG0000(RP11-302F antisense chr4    | 25770266 | 25773577 | + | 0    | 0    |
| ENSG0000(RP11-442N lincRNA chr3      | 1.4E+08  | 1.4E+08  | - | 0    | 0    |
| ENSG0000(LINC02059 lincRNA chr5      | 86746818 | 86749772 | + | 0    | 0    |
| ENSG0000(RP11-8L2.1 processed_chr4   | 83796436 | 84293412 | - | 0    | 0    |
| ENSG0000(RP11-719L. processed_chr4   | 1.63E+08 | 1.63E+08 | - | 0    | 0    |
| ENSG0000(RP11-47I22 lincRNA chr14    | 61556313 | 61570653 | - | 0.67 | 0.6  |
| ENSG0000(PBPPP1 transcribec chr4     | 73847866 | 73848829 | + | 0    | 0    |
| ENSG0000(MIR583HG lincRNA chr5       | 96050115 | 96215519 | + | 0    | 0.1  |
| ENSG0000(CTC-467M: antisense chr5    | 88692651 | 88692859 | + | 0    | 0    |
| ENSG0000(CCDC34P1 processed_chr4     | 1.12E+08 | 1.12E+08 | + | 0    | 0    |
| ENSG0000(RP11-598G processed_chr4    | 75194867 | 75195079 | + | 0    | 0    |
| ENSG0000(OR7E59P unprocessε chr7     | 6879627  | 6880626  | - | 0    | 0    |
| ENSG0000(RPL38P4 processed_chr3      | 98525061 | 98525274 | - | 0    | 0    |
| ENSG0000(KNOP1P5 processed_chr8      | 1.26E+08 | 1.26E+08 | + | 0    | 0    |
| ENSG0000(RP11-215P lincRNA chr5      | 1.34E+08 | 1.34E+08 | - | 0    | 0    |
| ENSG0000(ATP6V1E2 protein_co chr2    | 46490750 | 46542557 | - | 2.37 | 4.16 |
| ENSG0000(UGT2B29P unprocessε chr4    | 68509441 | 68517647 | - | 0    | 0    |
| ENSG0000(CTD-2154H lincRNA chr5      | 1.03E+08 | 1.03E+08 | - | 0    | 0    |
| ENSG0000(RP11-333E processed_chr4    | 39973128 | 39973442 | - | 0    | 0    |

|                                             |          |            |       |       |
|---------------------------------------------|----------|------------|-------|-------|
| ENSG00000181100 (NTAN1P2 processed_ chr8    | 86481754 | 86483002 - | 0.33  | 0.51  |
| ENSG00000181101 (GLI4 protein_co chr8       | 1.43E+08 | 1.43E+08 + | 11.29 | 10.11 |
| ENSG00000181102 (RP11-529H lincRNA chr4     | 87261931 | 87266822 - | 0     | 0     |
| ENSG00000181103 (AC006499. processed_ chr4  | 10259445 | 10260138 - | 0     | 0.11  |
| ENSG00000181104 (CTD-2275D processed_ chr5  | 76510440 | 76510766 + | 0     | 0     |
| ENSG00000181105 (RP4-669L1 unprocessε chr1  | 491225   | 493241 -   | 0.87  | 1.09  |
| ENSG00000181106 (CTD-2154B lincRNA chr5     | 10775058 | 10777062 - | 0     | 0     |
| ENSG00000181107 (RP11-577B lincRNA chr4     | 1.39E+08 | 1.39E+08 - | 0     | 0     |
| ENSG00000181108 (CTD-2297D antisense chr5   | 5132780  | 5140054 -  | 0     | 0     |
| ENSG00000181109 (SNRPCP8 processed_ chr3    | 1.3E+08  | 1.3E+08 +  | 0     | 0     |
| ENSG00000181110 (SMAD1-AS antisense chr4    | 1.45E+08 | 1.46E+08 - | 0     | 0     |
| ENSG00000181111 (CTD-2233C lincRNA chr5     | 33519616 | 33522230 - | 0     | 0     |
| ENSG00000181112 (LINC01511 lincRNA chr5     | 1363582  | 1380067 -  | 0     | 0     |
| ENSG00000181113 (LINC00604 lincRNA chr5     | 40240173 | 40267657 + | 0     | 0     |
| ENSG00000181114 (HPRT1P2 processed_ chr5    | 30248350 | 30248893 + | 0     | 0     |
| ENSG00000181115 (RP11-565A lincRNA chr4     | 1.88E+08 | 1.88E+08 - | 0     | 0     |
| ENSG00000181116 (PRSS3P1 unprocessε chr7    | 1.43E+08 | 1.43E+08 + | 0     | 0     |
| ENSG00000181117 (RP11-39E3 antisense chr3   | 1.31E+08 | 1.31E+08 - | 0     | 0     |
| ENSG00000181118 (RP11-433B processed_ chr4  | 1.1E+08  | 1.1E+08 -  | 0     | 0     |
| ENSG00000181119 (RP11-4401 lincRNA chr4     | 1.75E+08 | 1.75E+08 - | 0     | 0     |
| ENSG00000181120 (RP11-725M lincRNA chr4     | 34657606 | 34669432 + | 0     | 0     |
| ENSG00000181121 (AC064853. unprocessε chr2  | 2.28E+08 | 2.28E+08 - | 0     | 0     |
| ENSG00000181122 (ROPN1L-AS antisense chr5   | 10441290 | 10441792 - | 0     | 0     |
| ENSG00000181123 (RP11-5171ε antisense chr5  | 1.26E+08 | 1.26E+08 - | 0     | 0     |
| ENSG00000181124 (CTC-228N2 lincRNA chr5     | 1.28E+08 | 1.28E+08 - | 0     | 0.25  |
| ENSG00000181125 (RP11-597D antisense chr4   | 1.58E+08 | 1.58E+08 - | 0     | 0     |
| ENSG00000181126 (RP11-933H processed_ chr3  | 1.31E+08 | 1.31E+08 - | 0.03  | 0     |
| ENSG00000181127 (RP11-158C processed_ chr4  | 1.55E+08 | 1.55E+08 + | 0     | 0     |
| ENSG00000181128 (RP11-339D processed_ chr4  | 20037560 | 20037972 - | 0     | 0     |
| ENSG00000181129 (RP11-6181 lincRNA chr4     | 69346609 | 69358177 + | 0     | 0     |
| ENSG00000181130 (RP11-1361 lincRNA chr4     | 10410996 | 10411644 + | 0     | 0     |
| ENSG00000181131 (AC007078. antisense chr7   | 76474587 | 76478856 - | 0     | 0     |
| ENSG00000181132 (CTC-564N2 antisense chr5   | 77073881 | 77074520 + | 0     | 0     |
| ENSG00000181133 (RP11-455F antisense chr16  | 30096430 | 30104116 + | 0.58  | 0.42  |
| ENSG00000181134 (RP11-548K unprocessε chr7  | 57817996 | 57818197 + | 0     | 0     |
| ENSG00000181135 (CTD-2215L antisense chr5   | 9001774  | 9045940 +  | 0     | 0     |
| ENSG00000181136 (RP11-91J3. lincRNA chr4    | 1.87E+08 | 1.87E+08 + | 0     | 0     |
| ENSG00000181137 (RP11-612J. processed_ chr4 | 1.57E+08 | 1.57E+08 + | 0     | 0     |
| ENSG00000181138 (RP11-317B antisense chr4   | 2139673  | 2141058 +  | 0     | 0     |
| ENSG00000181139 (MTCYBP43 unprocessε chr4   | 30884443 | 30885182 - | 0     | 0     |
| ENSG00000181140 (RP1-142F1. unprocessε chrX | 1.42E+08 | 1.42E+08 - | 0     | 0     |
| ENSG00000181141 (RP11-756P lincRNA chr4     | 1.89E+08 | 1.89E+08 - | 0     | 0     |
| ENSG00000181142 (TTC39CP1 processed_ chr4   | 1.16E+08 | 1.16E+08 - | 0     | 0     |
| ENSG00000181143 (RP11-122C antisense chr5   | 38783580 | 38792754 + | 0     | 0     |
| ENSG00000181144 (MTCO1P35 unprocessε chr3   | 1.07E+08 | 1.07E+08 - | 0     | 0     |

|                                |       |          |          |   |       |      |
|--------------------------------|-------|----------|----------|---|-------|------|
| ENSG0000(LINC02171 lincRNA     | chr4  | 3673593  | 3677855  | - | 0     | 0    |
| ENSG0000(LINC01182 lincRNA     | chr4  | 13655179 | 13977075 | + | 0     | 0    |
| ENSG0000(CXXC5-AS1 lincRNA     | chr5  | 1.4E+08  | 1.4E+08  | - | 0     | 0    |
| ENSG0000(RP11-335L processed_  | chr4  | 1.83E+08 | 1.83E+08 | - | 0     | 0    |
| ENSG0000(RP11-359P unprocessε  | chr8  | 43442902 | 43452912 | + | 0     | 0    |
| ENSG0000(OR7E41P unprocessε    | chr11 | 14987671 | 14988694 | - | 0     | 0    |
| ENSG0000(XXbac-BPG protein_co  | chr6  | 31706904 | 31717918 | + | 0     | 0    |
| ENSG0000(RP11-642E unprocessε  | chr4  | 68282461 | 68285959 | - | 0     | 0    |
| ENSG0000(RP11-93K2 antisense   | chr3  | 1.3E+08  | 1.3E+08  | - | 0     | 0    |
| ENSG0000(RP11-295K protein_co  | chr11 | 1734821  | 1763954  | - | 10.45 | 9.16 |
| ENSG0000(CTD-2228K processed_  | chr5  | 418703   | 419109   | + | 0.62  | 0.45 |
| ENSG0000(RP11-530I1 antisense  | chr4  | 55053060 | 55092534 | + | 0     | 0    |
| ENSG0000(RP11-492L processed_  | chr5  | 1.17E+08 | 1.17E+08 | - | 0     | 0    |
| ENSG0000(PABPC1P7 processed_   | chr4  | 1.03E+08 | 1.03E+08 | + | 0.04  | 0    |
| ENSG0000(RP11-834C transcribec | chr12 | 54076838 | 54081903 | - | 0     | 0    |
| ENSG0000(RP11-61G2 processed_  | chr4  | 96212279 | 96213100 | + | 0     | 0    |
| ENSG0000(ST3GAL1P1 processed_  | chr4  | 67716375 | 67717388 | - | 0     | 0    |
| ENSG0000(RP11-1E6.1 processed_ | chr4  | 43340875 | 43345600 | + | 0     | 0.19 |
| ENSG0000(RP11-138B lincRNA     | chr4  | 1.87E+08 | 1.87E+08 | - | 0.03  | 0    |
| ENSG0000(RP11-864I4 antisense  | chr11 | 62537312 | 62542018 | + | 0     | 0    |
| ENSG0000(HNRNPKP5 processed_   | chr5  | 14877667 | 14877919 | - | 0     | 0    |
| ENSG0000(RP11-775H lincRNA     | chr4  | 1.36E+08 | 1.36E+08 | + | 0     | 0    |
| ENSG0000(LINC01596 lincRNA     | chr4  | 1.9E+08  | 1.9E+08  | + | 0     | 0    |
| ENSG0000(RP11-321E processed_  | chr5  | 17495658 | 17495826 | - | 0     | 0    |
| ENSG0000(LINC02123 lincRNA     | chr5  | 7346986  | 7347977  | - | 0     | 0    |
| ENSG0000(RP11-83M: processed_  | chr5  | 67690033 | 67690437 | - | 0     | 0    |
| ENSG0000(AC004063. lincRNA     | chr4  | 1.05E+08 | 1.05E+08 | + | 0     | 0    |
| ENSG0000(CTD-2017D processed_  | chr5  | 33090126 | 33090349 | - | 0     | 0    |
| ENSG0000(RP11-6L6.2 protein_co | chr4  | 1.46E+08 | 1.46E+08 | + | 0     | 0    |
| ENSG0000(RP11-798K lincRNA     | chr5  | 1.79E+08 | 1.79E+08 | + | 0     | 0    |
| ENSG0000(RP11-576N processed_  | chr4  | 83237303 | 83237444 | + | 0     | 0    |
| ENSG0000(CTB-161M: processed_  | chr5  | 1.19E+08 | 1.19E+08 | + | 0     | 0    |
| ENSG0000(RP3-368B9 lincRNA     | chr4  | 3633029  | 3633975  | + | 0     | 0    |
| ENSG0000(LINC00491 lincRNA     | chr5  | 1.03E+08 | 1.03E+08 | - | 0     | 0    |
| ENSG0000(ADI1P2 processed_     | chr8  | 1.03E+08 | 1.03E+08 | - | 0     | 0    |
| ENSG0000(RP11-486L antisense   | chr16 | 84192558 | 84197053 | - | 0     | 0    |
| ENSG0000(RP1-240B8 3prime_ov   | chr6  | 61630233 | 61681049 | - | 0     | 0    |
| ENSG0000(RP11-497H transcribec | chr5  | 70462244 | 70479215 | + | 0.14  | 0.06 |
| ENSG0000(TRAJ55 TR_J_pseu      | chr14 | 22481697 | 22481753 | + | 0     | 0    |
| ENSG0000(CTB-35F21 antisense   | chr5  | 1.4E+08  | 1.4E+08  | + | 0     | 0    |
| ENSG0000(RPF2P2 processed_     | chr4  | 1.16E+08 | 1.16E+08 | + | 0     | 0    |
| ENSG0000(CTD-2074D lincRNA     | chr5  | 24352309 | 24353443 | - | 0     | 0    |
| ENSG0000(RP11-704N antisense   | chr4  | 69182100 | 69216766 | + | 0     | 0    |
| ENSG0000(CTD-2066L lincRNA     | chr5  | 32925639 | 33297910 | - | 0.22  | 0    |
| ENSG0000(RP11-392B antisense   | chr4  | 1.4E+08  | 1.4E+08  | + | 0     | 0    |

|                                      |          |          |   |      |      |
|--------------------------------------|----------|----------|---|------|------|
| ENSG0000(AP000892. antisense chr11   | 1.17E+08 | 1.17E+08 | - | 0    | 0    |
| ENSG0000(CTD-2533K processed_ chr5   | 26670334 | 26670481 | - | 0    | 0    |
| ENSG0000(RP11-423J lincRNA chr4      | 1.5E+08  | 1.5E+08  | + | 0    | 0    |
| ENSG0000(CTC-470C1 processed_ chr5   | 88602780 | 88603117 | + | 0    | 0    |
| ENSG0000(RP11-18H2 lincRNA chr4      | 1.52E+08 | 1.52E+08 | - | 0.13 | 0    |
| ENSG0000(RP11-161D lincRNA chr4      | 1.74E+08 | 1.74E+08 | + | 0    | 0.17 |
| ENSG0000(CCDC169-S protein_co chr13  | 36168794 | 36297842 | - | 0.15 | 0.06 |
| ENSG0000(OR7E99P unprocessε chr4     | 4156522  | 4157443  | - | 0    | 0    |
| ENSG0000(PRELID3BP processed_ chr5   | 42972624 | 42973092 | + | 0    | 0    |
| ENSG0000(RP11-366N processed_ chr4   | 1.65E+08 | 1.65E+08 | + | 0    | 0    |
| ENSG0000(RP11-1149 antisense chr8    | 23225233 | 23230915 | - | 0    | 0    |
| ENSG0000(RP11-432N processed_ chr5   | 17670168 | 17670571 | - | 0    | 0    |
| ENSG0000(LINC01017 lincRNA chr5      | 3496229  | 3504004  | - | 0    | 0    |
| ENSG0000(RP11-322N protein_co chr1   | 46175486 | 46176478 | - | 0    | 0    |
| ENSG0000(HMGB1P2 processed_ chr5     | 1.25E+08 | 1.25E+08 | + | 0    | 0    |
| ENSG0000(SELENOP protein_co chr5     | 42799880 | 42887392 | - | 3.65 | 6.03 |
| ENSG0000(RP11-79E3 lincRNA chr4      | 33850591 | 33979936 | + | 0    | 0    |
| ENSG0000(RP11-511B processed_ chr4   | 1.66E+08 | 1.66E+08 | + | 0    | 0    |
| ENSG0000(RP11-616K processed_ chr4   | 1.84E+08 | 1.84E+08 | + | 0    | 0    |
| ENSG0000(RP11-959I processed_ chr8   | 1.24E+08 | 1.24E+08 | + | 0    | 0    |
| ENSG0000(AC010468. processed_ chr5   | 1.11E+08 | 1.11E+08 | - | 0    | 0    |
| ENSG0000(HMGB3P3 processed_ chr5     | 6289857  | 6290624  | + | 0    | 0    |
| ENSG0000(TPM3P6 processed_ chr19     | 53479350 | 53480091 | + | 0    | 0.08 |
| ENSG0000(RPEP1 processed_ chr5       | 65251127 | 65251784 | - | 0    | 0    |
| ENSG0000(C8orf17 TEC chr8            | 1.4E+08  | 1.4E+08  | + | 0    | 0    |
| ENSG0000(RP11-404E antisense chr1    | 1.52E+08 | 1.52E+08 | - | 0.14 | 0    |
| ENSG0000(RP11-567N lincRNA chr4      | 75401195 | 75423023 | + | 0    | 0    |
| ENSG0000(LINC01262 lincRNA chr4      | 1.9E+08  | 1.9E+08  | + | 0    | 0    |
| ENSG0000(RP11-710F antisense chr4    | 1.06E+08 | 1.06E+08 | - | 0    | 0    |
| ENSG0000(NT5C1B-RL protein_co chr2   | 18555545 | 18589564 | - | 0    | 0    |
| ENSG0000(RP11-834C lincRNA chr12     | 54126098 | 54142493 | + | 0    | 0.05 |
| ENSG0000(USP17L20 protein_co chr4    | 9258124  | 9260075  | + | 0    | 0    |
| ENSG0000(RP11-39C1 processed_ chr4   | 1.64E+08 | 1.64E+08 | + | 0    | 0    |
| ENSG0000(RP11-232L processed_ chr5   | 73152416 | 73152938 | - | 0    | 0    |
| ENSG0000(RP11-230G lincRNA chr12     | 65466820 | 65642372 | - | 0.15 | 0.08 |
| ENSG0000(RP11-451H processed_ chr5   | 1.81E+08 | 1.81E+08 | - | 0    | 0    |
| ENSG0000(OR5BM1P unprocessε chr3     | 98053374 | 98053739 | + | 0    | 0    |
| ENSG0000(RP11-613C antisense chr17   | 49708334 | 49720060 | + | 0    | 0    |
| ENSG0000(RPL23AP9ε processed_ chr8   | 6898878  | 6899468  | - | 0    | 0    |
| ENSG0000(RP11-241F processed_ chr4   | 49579833 | 49580189 | + | 0    | 0    |
| ENSG0000(RP11-386B lincRNA chr4      | 1.85E+08 | 1.85E+08 | + | 0    | 0    |
| ENSG0000(RP11-225B unprocessε chr7   | 32788334 | 32788442 | + | 0    | 0    |
| ENSG0000(RP11-440I1 transcribed chr4 | 1.75E+08 | 1.75E+08 | - | 0    | 0    |
| ENSG0000(RP11-711G antisense chr5    | 7707802  | 7749766  | - | 0    | 0    |
| ENSG0000(RP1-313L4. unprocessε chr1  | 1.68E+08 | 1.68E+08 | - | 0    | 0    |

|                                      |          |          |   |      |      |
|--------------------------------------|----------|----------|---|------|------|
| ENSG0000(CTD-2152N antisense chr5    | 32103445 | 32121941 | - | 0.08 | 0    |
| ENSG0000(AC138035. lincRNA chr5      | 1.81E+08 | 1.81E+08 | + | 0    | 0    |
| ENSG0000(RP11-1084 processed_ chr5   | 33997044 | 33997724 | - | 0    | 0    |
| ENSG0000(DPP3P1 processed_ chr4      | 64430909 | 64433215 | + | 0    | 0    |
| ENSG0000(RP11-241F processed_ chr4   | 49507764 | 49508806 | - | 0    | 0    |
| ENSG0000(RP5-1063N transcribed chr12 | 3296202  | 3366122  | - | 0.04 | 0.03 |
| ENSG0000(RP11-153N transcribed chr4  | 1.54E+08 | 1.54E+08 | + | 0.41 | 0.13 |
| ENSG0000(LINC01365 lincRNA chr4      | 1.2E+08  | 1.2E+08  | - | 0    | 0    |
| ENSG0000(RP11-12K2 lincRNA chr4      | 63468701 | 63494278 | - | 0    | 0    |
| ENSG0000(RP13-884E lincRNA chr4      | 1.38E+08 | 1.38E+08 | - | 0    | 0    |
| ENSG0000(AC004980. unprocessed chr7  | 76521611 | 76522074 | + | 0    | 0    |
| ENSG0000(RP11-63A1 antisense chr4    | 42281830 | 42391268 | - | 0    | 0    |
| ENSG0000(RP11-432N protein_co chr5   | 17634460 | 17635053 | + | 0    | 0    |
| ENSG0000(SNHG18 lincRNA chr5         | 9546200  | 9550609  | + | 1.91 | 2    |
| ENSG0000(HMGN1P1 processed_ chr5     | 56381781 | 56382075 | + | 0    | 0    |
| ENSG0000(TUBB8P4 unprocessed chr12   | 34164773 | 34166954 | - | 0    | 0    |
| ENSG0000(RP11-46H1 lincRNA chr12     | 1.33E+08 | 1.33E+08 | + | 0.05 | 0.07 |
| ENSG0000(RP11-55L3. lincRNA chr4     | 1.16E+08 | 1.17E+08 | - | 0    | 0    |
| ENSG0000(ALG1L12P unprocessed chr8   | 12421032 | 12425000 | + | 0    | 0    |
| ENSG0000(RP11-723C processed_ chr3   | 1.29E+08 | 1.29E+08 | + | 0    | 0    |
| ENSG0000(PRODH2 protein_co chr19     | 35799988 | 35813299 | - | 0    | 0    |
| ENSG0000(RP11-91H1 antisense chr5    | 1.76E+08 | 1.76E+08 | + | 0    | 0    |
| ENSG0000(ZBED3-AS1 antisense chr5    | 77086740 | 77166909 | + | 0.68 | 1    |
| ENSG0000(CTC-441N1 protein_co chr5   | 1.22E+08 | 1.22E+08 | + | 0    | 0    |
| ENSG0000(RP11-747H unprocessed chr4  | 8981436  | 8982360  | + | 0    | 0    |
| ENSG0000(CTC-293G1 lincRNA chr5      | 1.01E+08 | 1.01E+08 | - | 0    | 0    |
| ENSG0000(MTCO2P3C processed_ chr5    | 5395972  | 5396335  | - | 0    | 0.27 |
| ENSG0000(RP11-530I1 processed_ chr4  | 55219344 | 55219973 | + | 0    | 0    |
| ENSG0000(SERF1AP1 processed_ chr4    | 1.37E+08 | 1.37E+08 | - | 0    | 0    |
| ENSG0000(RP11-447B lincRNA chr5      | 9854377  | 9889937  | + | 0    | 0    |
| ENSG0000(RP11-89B1 processed_ chr4   | 53927499 | 53928138 | - | 0    | 0    |
| ENSG0000(DCAF13P2 processed_ chr5    | 17202274 | 17203145 | + | 0    | 0    |
| ENSG0000(RP11-576E lincRNA chr4      | 17171757 | 17186059 | - | 0    | 0    |
| ENSG0000(RP11-91H1 sense_ovei chr5   | 1.76E+08 | 1.76E+08 | - | 0    | 0    |
| ENSG0000(RP11-345F protein_co chr4   | 55819819 | 55837487 | + | 0    | 0    |
| ENSG0000(LINC02111 lincRNA chr5      | 17378906 | 17387310 | - | 0    | 0    |
| ENSG0000(PGAM1P12 processed_ chr15   | 96441566 | 96442313 | - | 0    | 0    |
| ENSG0000(HNRNPA3F processed_ chr4    | 82128535 | 82129656 | + | 0    | 0    |
| ENSG0000(MFSD4BP1 processed_ chr5    | 52579555 | 52581106 | - | 0    | 0    |
| ENSG0000(RP11-790I1 unprocessed chr4 | 69437357 | 69441050 | + | 0    | 0    |
| ENSG0000(RP11-11N5 lincRNA chr4      | 1.87E+08 | 1.87E+08 | + | 0.15 | 0    |
| ENSG0000(MRPS35P2 processed_ chr5    | 98402542 | 98402732 | - | 0    | 0    |
| ENSG0000(CTD-2232E lincRNA chr5      | 89466537 | 89470039 | - | 0    | 0    |
| ENSG0000(DNM1P17 unprocessed chr10   | 30353706 | 30357365 | + | 0    | 0    |
| ENSG0000(KRT18P54 processed_ chr4    | 1.35E+08 | 1.35E+08 | - | 0    | 0    |

|                                      |          |          |   |      |      |
|--------------------------------------|----------|----------|---|------|------|
| ENSG0000(LSM3P4 processed_ chr4      | 1.42E+08 | 1.42E+08 | + | 0    | 0    |
| ENSG0000(RP11-501C antisense chr17   | 48995266 | 48997492 | - | 0    | 0    |
| ENSG0000(RP11-296L unprocessε chr4   | 1.79E+08 | 1.79E+08 | + | 0    | 0    |
| ENSG0000(CTC-806A2 lincRNA chr5      | 1.45E+08 | 1.45E+08 | - | 0.14 | 0    |
| ENSG0000(USP17L18 protein_co chr4    | 9248630  | 9250581  | + | 0    | 0    |
| ENSG0000(EPHA5-AS1 lincRNA chr4      | 65669961 | 65698029 | + | 3.09 | 2.6  |
| ENSG0000(CTD-2020P unprocessε chr5   | 1.21E+08 | 1.21E+08 | - | 0    | 0    |
| ENSG0000(CTD-2083E processed_ chr5   | 288833   | 290321   | - | 0    | 0    |
| ENSG0000(RP11-297B antisense chr9    | 37002697 | 37008040 | + | 0    | 0    |
| ENSG0000(RNF138P1 processed_ chr5    | 55530156 | 55530701 | - | 0    | 0    |
| ENSG0000(RP11-269F lincRNA chr4      | 1.12E+08 | 1.12E+08 | + | 0    | 0    |
| ENSG0000(TRIM60P1 processed_ chr8    | 46792065 | 46793064 | + | 0    | 0    |
| ENSG0000(IGBP1P5 processed_ chr4     | 27585145 | 27586144 | + | 0    | 0    |
| ENSG0000(HNRNP KP1 processed_ chr5   | 1.28E+08 | 1.28E+08 | - | 0    | 0.05 |
| ENSG0000(CTD-2265D processed_ chr5   | 42466893 | 42468300 | - | 0    | 0    |
| ENSG0000(HMGB1P2 processed_ chr5     | 1.24E+08 | 1.24E+08 | - | 0    | 0    |
| ENSG0000(RP11-663P lincRNA chr4      | 43980006 | 43981620 | - | 0    | 0    |
| ENSG0000(RP11-780C lincRNA chr4      | 1.36E+08 | 1.36E+08 | - | 0    | 0    |
| ENSG0000(CTD-2297D antisense chr5    | 5142138  | 5176214  | - | 0    | 0    |
| ENSG0000(XKRY transcribec chrY       | 17768980 | 17777400 | - | 0    | 0    |
| ENSG0000(RP11-453N unprocessε chr8   | 67133554 | 67135911 | - | 0    | 0    |
| ENSG0000(CTC-480C2 lincRNA chr5      | 85663232 | 85664684 | + | 0.04 | 0    |
| ENSG0000(RP11-373J antisense chr4    | 72323028 | 72330751 | + | 0    | 0    |
| ENSG0000(METTL21E1 transcribec chr13 | 1.03E+08 | 1.03E+08 | + | 0    | 0.03 |
| ENSG0000(CTC-459M antisense chr5     | 1.12E+08 | 1.12E+08 | + | 0    | 0    |
| ENSG0000(OR7E85P unprocessε chr4     | 9483718  | 9484702  | + | 0    | 0    |
| ENSG0000(LINC02061 lincRNA chr5      | 32646564 | 32651976 | - | 0    | 0    |
| ENSG0000(CTD-2046J processed_ chr5   | 35081223 | 35081992 | + | 0    | 0    |
| ENSG0000(RP11-366M lincRNA chr4      | 1.65E+08 | 1.65E+08 | - | 0    | 0    |
| ENSG0000(LINC01455 antisense chr5    | 79936579 | 79967626 | + | 0    | 0    |
| ENSG0000(LINC01336 lincRNA chr5      | 75047719 | 75052843 | - | 0.46 | 0    |
| ENSG0000(RP5-837O2 unprocessε chr1   | 93926032 | 93926188 | - | 0    | 0    |
| ENSG0000(LINC02208 lincRNA chr5      | 1.18E+08 | 1.19E+08 | - | 0    | 0    |
| ENSG0000(RP11-1365 unprocessε chr4   | 201409   | 205009   | - | 0    | 0    |
| ENSG0000(RP11-588L antisense chr4    | 40426119 | 40427585 | + | 0    | 0    |
| ENSG0000(PRAMEF31 unprocessε chr1    | 13245863 | 13248652 | + | 0    | 0    |
| ENSG0000(CTD-2158P processed_ chr5   | 1.2E+08  | 1.2E+08  | - | 0    | 0    |
| ENSG0000(RNPS1P1 processed_ chr4     | 11371975 | 11372892 | + | 0    | 0    |
| ENSG0000(HMGB3P1 processed_ chr4     | 94195940 | 94196513 | - | 0    | 0    |
| ENSG0000(RP11-253E lincRNA chr12     | 3041437  | 3044950  | + | 1.33 | 1.02 |
| ENSG0000(CTC-338M antisense chr5     | 1.81E+08 | 1.81E+08 | + | 0.24 | 0.41 |
| ENSG0000(SMAD1-AS antisense chr4     | 1.46E+08 | 1.46E+08 | - | 0    | 0    |
| ENSG0000(GMDS-AS1 lincRNA chr6       | 2245748  | 2482022  | + | 4.95 | 4.39 |
| ENSG0000(RP11-707F lincRNA chr4      | 1.5E+08  | 1.5E+08  | + | 0    | 0    |
| ENSG0000(RP11-632F antisense chr4    | 40812779 | 40826151 | + | 0    | 0    |



|                                         |       |          |          |   |      |      |
|-----------------------------------------|-------|----------|----------|---|------|------|
| ENSG00000101703C antisense              | chr4  | 93318623 | 93319786 | - | 0    | 0    |
| ENSG00000101843P antisense              | chr5  | 1.76E+08 | 1.76E+08 | + | 0    | 0    |
| ENSG0000010197467. antisense            | chr4  | 1.55E+08 | 1.55E+08 | + | 0.09 | 0.23 |
| ENSG00000102171L23 protein_co           | chr4  | 9272364  | 9272914  | + | 0    | 0    |
| ENSG00000102184 processed_              | chr5  | 33970863 | 33972628 | + | 0    | 0    |
| ENSG000001021338 lincRNA                | chr4  | 8745397  | 8746033  | - | 0    | 0    |
| ENSG000001024785G1 sense_ove            | chr20 | 34234840 | 34281173 | - | 0    | 0    |
| ENSG0000010252B26P unprocess            | chr4  | 69027831 | 69044578 | + | 0    | 0    |
| ENSG000001025297P lincRNA               | chr4  | 1.04E+08 | 1.04E+08 | - | 0    | 0    |
| ENSG0000010260263 lincRNA               | chr5  | 4135682  | 4143648  | + | 0    | 0    |
| ENSG0000010265EP1 processed_            | chr4  | 1.06E+08 | 1.06E+08 | + | 0    | 0    |
| ENSG00000102548K unprocess              | chr7  | 57773183 | 57773381 | + | 0    | 0    |
| ENSG0000010263MESTP3 processed_         | chr4  | 28823244 | 28824211 | - | 0    | 0.07 |
| ENSG000001026161M: processed_           | chr5  | 1.19E+08 | 1.19E+08 | + | 0    | 0    |
| ENSG00000102601181 antisense            | chr8  | 1.03E+08 | 1.03E+08 | + | 0    | 0    |
| ENSG0000010261AS1 antisense             | chr4  | 53496400 | 53549578 | + | 0    | 0    |
| ENSG000001026DHP66 processed_           | chr18 | 3977649  | 3978615  | - | 0    | 0    |
| ENSG00000102671E1 lincRNA               | chr3  | 1.26E+08 | 1.26E+08 | + | 0    | 0    |
| ENSG00000102679C antisense              | chr4  | 1.2E+08  | 1.2E+08  | + | 0.25 | 0.14 |
| ENSG00000102634198. transcribec         | chr3  | 12850659 | 12850860 | + | 0    | 0    |
| ENSG000001026489N processed_            | chr4  | 4086638  | 4086814  | + | 0    | 0    |
| ENSG0000010265P7P11 processed_          | chr4  | 9677308  | 9677934  | + | 0    | 0    |
| ENSG000001026810P lincRNA               | chr4  | 1.27E+08 | 1.27E+08 | - | 0    | 0    |
| ENSG000001026358N unprocess             | chr11 | 89820082 | 89826922 | + | 0    | 0    |
| ENSG0000010267PC7-AS2 antisense         | chr5  | 1.36E+08 | 1.36E+08 | + | 0    | 0    |
| ENSG0000010261079 antisense             | chr17 | 49375380 | 49380094 | + | 1.67 | 0    |
| ENSG000001026492L: lincRNA              | chr5  | 1.17E+08 | 1.17E+08 | + | 0    | 0    |
| ENSG00000102633B1 lincRNA               | chr4  | 1.19E+08 | 1.19E+08 | + | 0    | 0    |
| ENSG00000102699YP1 unprocess            | chrY  | 18540980 | 18544128 | + | 0    | 0    |
| ENSG00000102679E3 lincRNA               | chr4  | 33776347 | 34039893 | - | 0    | 0    |
| ENSG000001026008592. lincRNA            | chr5  | 95964999 | 95986311 | - | 0    | 0    |
| ENSG00000102688F18 processed_           | chr5  | 1.27E+08 | 1.27E+08 | - | 0    | 0    |
| ENSG000001026248N lincRNA               | chr4  | 1.74E+08 | 1.74E+08 | - | 0    | 0.06 |
| ENSG00000102600492 lincRNA              | chr5  | 1.03E+08 | 1.03E+08 | + | 0    | 0    |
| ENSG000001026730562 GLUD1P3 transcribec | chr10 | 73730562 | 73737311 | + | 1.18 | 1.07 |
| ENSG0000010262023N antisense            | chr5  | 57395060 | 57533424 | + | 0.28 | 0.31 |
| ENSG00000102669113 processed_           | chr8  | 88485110 | 88486094 | + | 0    | 0    |
| ENSG000001026402J processed_            | chr4  | 1.13E+08 | 1.13E+08 | + | 0    | 0    |
| ENSG000001026322J: lincRNA              | chr4  | 1.71E+08 | 1.71E+08 | - | 0    | 0    |
| ENSG000001026364L: lincRNA              | chr4  | 1.43E+08 | 1.43E+08 | + | 0    | 0    |
| ENSG000001026696F lincRNA               | chr4  | 1.87E+08 | 1.87E+08 | + | 0    | 0    |
| ENSG000001026144BP5 processed_          | chr5  | 1.44E+08 | 1.44E+08 | + | 0    | 0    |
| ENSG00000102613-6 unprocess             | chr21 | 30356515 | 30356885 | - | 0    | 0    |
| ENSG00000102602196 lincRNA              | chr5  | 6933670  | 7190812  | + | 0    | 0    |
| ENSG00000102694C2 antisense             | chr17 | 50563203 | 50563783 | - | 0    | 0    |

|                                      |          |          |   |       |       |
|--------------------------------------|----------|----------|---|-------|-------|
| ENSG0000(RP11-173E lincRNA chr4      | 1.39E+08 | 1.39E+08 | - | 0     | 0     |
| ENSG0000(RP11-357D processed_chr5    | 67463809 | 67475592 | - | 0     | 0     |
| ENSG0000(RP11-656G unprocessε chr8   | 72202751 | 72251565 | - | 0     | 0     |
| ENSG0000(RP11-529H processed_chr4    | 1.53E+08 | 1.53E+08 | - | 0     | 0     |
| ENSG0000(RP11-1902 antisense chr5    | 16129178 | 16141602 | + | 0     | 0     |
| ENSG0000(GAPDHP35 processed_chr16    | 28239693 | 28240668 | - | 0.19  | 0     |
| ENSG0000(RP11-91K8 processed_chr3    | 1.34E+08 | 1.34E+08 | - | 0     | 1.15  |
| ENSG0000(CTD-2011G processed_chr5    | 29795938 | 29796268 | + | 0     | 0     |
| ENSG0000(AC141928. lincRNA chr4      | 3758748  | 3763390  | - | 0     | 0     |
| ENSG0000(SNHG21 antisense chr15      | 82750564 | 82757206 | + | 2.14  | 0.95  |
| ENSG0000(RP11-392E processed_chr9    | 38543104 | 38543446 | - | 0.41  | 0     |
| ENSG0000(AC073635. antisense chr7    | 77246340 | 77258123 | - | 0     | 0     |
| ENSG0000(RP11-826N antisense chr5    | 1.76E+08 | 1.76E+08 | + | 0     | 0     |
| ENSG0000(RP11-404J. lincRNA chr4     | 1.79E+08 | 1.79E+08 | - | 0     | 0     |
| ENSG0000(AC005355. lincRNA chr5      | 1.34E+08 | 1.34E+08 | + | 0     | 0     |
| ENSG0000(RP13-128C processed_chrX    | 1.19E+08 | 1.19E+08 | + | 0.34  | 0.37  |
| ENSG0000(RP11-502N processed_chr4    | 1.61E+08 | 1.61E+08 | - | 0     | 0     |
| ENSG0000(RP11-1379 antisense chr5    | 1.8E+08  | 1.8E+08  | + | 0.39  | 0.29  |
| ENSG0000(AC008592. processed_chr5    | 95834424 | 95835046 | - | 0     | 0     |
| ENSG0000(CTD-2193P processed_chr5    | 80997183 | 80998047 | - | 0     | 0     |
| ENSG0000(AE000661. processed_chr14   | 22380680 | 22482959 | - | 0.12  | 0     |
| ENSG0000(ZFPM2-AS1 processed_chr8    | 1.06E+08 | 1.06E+08 | - | 0.18  | 0.12  |
| ENSG0000(RP11-318I processed_chr4    | 1.26E+08 | 1.26E+08 | - | 0     | 0     |
| ENSG0000(ORAOV1P1 processed_chr4     | 1.86E+08 | 1.86E+08 | - | 0     | 0     |
| ENSG0000(RP13-494C lincRNA chr4      | 25864881 | 25869550 | - | 0     | 0     |
| ENSG0000(RP11-6L6.7 antisense chr4   | 1.46E+08 | 1.46E+08 | + | 0     | 0     |
| ENSG0000(TMEM108- antisense chr3     | 1.33E+08 | 1.33E+08 | - | 0     | 0     |
| ENSG0000(RP11-484N protein_co chr3   | 1.19E+08 | 1.19E+08 | + | 0     | 0     |
| ENSG0000(GAPDHP62 processed_chr8     | 1.01E+08 | 1.01E+08 | - | 0.06  | 0.07  |
| ENSG0000(RP11-159K processed_chr5    | 1.13E+08 | 1.13E+08 | + | 0     | 0     |
| ENSG0000(SLC25A30-. lincRNA chr13    | 45418162 | 45420371 | + | 0     | 0.1   |
| ENSG0000(RP11-629B processed_chr4    | 74085995 | 74086672 | - | 0     | 0     |
| ENSG0000(HMMR-AS. antisense chr5     | 1.63E+08 | 1.63E+08 | - | 0     | 0     |
| ENSG0000(HIGD1A1. processed_chr4     | 78648954 | 78649242 | - | 0     | 0     |
| ENSG0000(THAP9-AS1 antisense chr4    | 82893009 | 82900960 | - | 14.76 | 13.49 |
| ENSG0000(RP11-549J. sense_intrε chr5 | 93860669 | 93863825 | - | 0     | 0.06  |
| ENSG0000(RP11-203B lincRNA chr4      | 1.46E+08 | 1.46E+08 | - | 0     | 0     |
| ENSG0000(NDUFB5P1 processed_chr4     | 1.81E+08 | 1.81E+08 | - | 0     | 0     |
| ENSG0000(LINC02163 lincRNA chr5      | 1.04E+08 | 1.04E+08 | + | 0.12  | 0.23  |
| ENSG0000(LINC01950 lincRNA chr5      | 1.07E+08 | 1.07E+08 | - | 0     | 0     |
| ENSG0000(CTC-367F4 lincRNA chr5      | 1.45E+08 | 1.45E+08 | - | 0.15  | 0     |
| ENSG0000(CUL1P1 processed_chr5       | 1.28E+08 | 1.28E+08 | - | 0     | 0     |
| ENSG0000(CTD-2533K lincRNA chr5      | 26711551 | 26749997 | - | 0     | 0     |
| ENSG0000(RP11-582J. antisense chr8   | 22540845 | 22545405 | - | 0.05  | 0.19  |
| ENSG0000(WBP1LP4 processed_chr5      | 1.81E+08 | 1.81E+08 | - | 0     | 0     |

|                                 |       |          |          |   |      |      |
|---------------------------------|-------|----------|----------|---|------|------|
| ENSG0000( AC090958. unprocessε  | chr3  | 11909634 | 11910765 | - | 0    | 0    |
| ENSG0000( IGKV2D-40 IG_V_gene   | chr2  | 89851791 | 89852497 | + | 0    | 0    |
| ENSG0000( RP11-535C lincRNA     | chr4  | 52044805 | 52046954 | + | 0    | 0    |
| ENSG0000( CTD-2275D lincRNA     | chr5  | 74321631 | 74340152 | + | 0    | 0    |
| ENSG0000( CTD-2582N lincRNA     | chr5  | 68374765 | 68375292 | + | 0    | 0    |
| ENSG0000( LINC01959 lincRNA     | chr5  | 1.36E+08 | 1.36E+08 | - | 0    | 0    |
| ENSG0000( ZNF969P processed_    | chr4  | 1.1E+08  | 1.1E+08  | + | 0.05 | 0.05 |
| ENSG0000( RP11-608B lincRNA     | chr4  | 18488062 | 18489508 | - | 0    | 0    |
| ENSG0000( RP11-685F lincRNA     | chr4  | 57595940 | 57605872 | - | 0    | 0    |
| ENSG0000( RP11-168A processed_  | chr5  | 80019609 | 80019920 | + | 0.33 | 0    |
| ENSG0000( ELL2P2 processed_     | chr4  | 1.32E+08 | 1.32E+08 | - | 0    | 0    |
| ENSG0000( CTD-2215E lincRNA     | chr5  | 97223371 | 97227957 | - | 0    | 0    |
| ENSG0000( RP11-257A lincRNA     | chr4  | 63128311 | 63143881 | + | 0    | 0    |
| ENSG0000( ANKRD20A unprocessε   | chr4  | 49502145 | 49506022 | - | 0.07 | 0.05 |
| ENSG0000( RP11-68L1. antisense  | chr3  | 1.4E+08  | 1.4E+08  | - | 0    | 0    |
| ENSG0000( RP11-100N antisense   | chr4  | 81164940 | 81193395 | + | 0    | 0    |
| ENSG0000( RP11-789C lincRNA     | chr4  | 1.7E+08  | 1.7E+08  | + | 0    | 0    |
| ENSG0000( CTD-2218C processed_  | chr5  | 32887990 | 32888145 | - | 0    | 0    |
| ENSG0000( CTC-534B2 processed_  | chr5  | 85549409 | 85549952 | + | 0    | 0    |
| ENSG0000( RP11-434D lincRNA     | chr5  | 1.27E+08 | 1.27E+08 | - | 0    | 0    |
| ENSG0000( NUDT19P5 processed_   | chr4  | 1.58E+08 | 1.58E+08 | + | 0    | 0.41 |
| ENSG0000( RP11-1267 unprocessε  | chr4  | 68626847 | 68628899 | - | 0    | 0    |
| ENSG0000( HTT-AS antisense      | chr4  | 3063471  | 3074514  | - | 0    | 0    |
| ENSG0000( RP11-526F antisense   | chr5  | 1.12E+08 | 1.12E+08 | + | 0    | 0    |
| ENSG0000( SLC25A5P9 processed_  | chr5  | 75752570 | 75753479 | - | 0    | 0    |
| ENSG0000( BMS1P2 transcribed    | chr10 | 47538377 | 47551954 | - | 1.28 | 1.43 |
| ENSG0000( RP11-415C lincRNA     | chr4  | 27133996 | 27140051 | - | 0    | 0    |
| ENSG0000( RP11-713M lincRNA     | chr4  | 1.07E+08 | 1.07E+08 | + | 0    | 0    |
| ENSG0000( LINC01969 lincRNA     | chr17 | 50214694 | 50215420 | + | 0    | 0.95 |
| ENSG0000( ALG1L3P unprocessε    | chr4  | 9703754  | 9710812  | - | 0.08 | 0    |
| ENSG0000( RP11-325B lincRNA     | chr3  | 98233651 | 98457898 | + | 0    | 0    |
| ENSG0000( OR5AC4P unprocessε    | chr3  | 98104754 | 98105672 | + | 0    | 0    |
| ENSG0000( RP11-414H lincRNA     | chr5  | 91226475 | 91227071 | - | 0    | 0    |
| ENSG0000( RP11-115D antisense   | chr4  | 89551356 | 89726752 | + | 0    | 0.06 |
| ENSG0000( CTD-2367A processed_  | chr5  | 1.12E+08 | 1.12E+08 | + | 0    | 0    |
| ENSG0000( RP11-1267 processed_  | chr4  | 68615393 | 68616137 | - | 0    | 0    |
| ENSG0000( CTBP2P4 processed_    | chr5  | 98576341 | 98577260 | + | 0    | 0    |
| ENSG0000( RP11-5711I processed_ | chr4  | 54076625 | 54076848 | + | 0    | 0    |
| ENSG0000( FAM206BP processed_   | chr13 | 46270077 | 46270617 | + | 0    | 0    |
| ENSG0000( PDCD5P2 processed_    | chr5  | 76280956 | 76281267 | + | 0    | 0    |
| ENSG0000( YBX1P5 processed_     | chr5  | 72417489 | 72418335 | + | 0    | 0.16 |
| ENSG0000( FCF1P8 processed_     | chr4  | 55351812 | 55352408 | - | 0    | 0    |
| ENSG0000( RP11-419C processed_  | chr5  | 12794100 | 12794731 | - | 0    | 0    |
| ENSG0000( RP11-68D1 processed_  | chr4  | 29465701 | 29467850 | - | 0    | 0    |
| ENSG0000( CTC-505O3 processed_  | chr5  | 1.16E+08 | 1.16E+08 | + | 0    | 0    |

|                                     |          |          |   |      |      |
|-------------------------------------|----------|----------|---|------|------|
| ENSG0000(NIFKP2 processed_ chr5     | 1.75E+08 | 1.75E+08 | + | 0    | 0    |
| ENSG0000(RP11-580J processed_ chr4  | 1.63E+08 | 1.63E+08 | + | 0    | 0    |
| ENSG0000(CTD-2335C lincRNA chr5     | 51451158 | 51462089 | + | 0    | 0    |
| ENSG0000(RP11-119H antisense chr4   | 1.13E+08 | 1.13E+08 | - | 0    | 0    |
| ENSG0000(RP11-280G lincRNA chr8     | 61759094 | 61765969 | - | 0    | 0    |
| ENSG0000(WWC2-AS1 antisense chr4    | 1.83E+08 | 1.83E+08 | - | 0    | 0    |
| ENSG0000(RP11-734I1 lincRNA chr4    | 31997397 | 32155406 | + | 0    | 0    |
| ENSG0000(CTD-2035E antisense chr5   | 43018429 | 43024247 | + | 0.33 | 0    |
| ENSG0000(RP11-438C lincRNA chr5     | 1.15E+08 | 1.15E+08 | - | 0    | 0    |
| ENSG0000(AC008565. processed_ chr5  | 1.21E+08 | 1.21E+08 | + | 0    | 0    |
| ENSG0000(RP11-37B2 lincRNA chr8     | 89609409 | 89757727 | - | 2.97 | 3.26 |
| ENSG0000(RPL7L1P7 processed_ chr3   | 1.39E+08 | 1.39E+08 | - | 0    | 0    |
| ENSG0000(RP11-81H3 lincRNA chr12    | 74133166 | 74402535 | - | 0.19 | 0    |
| ENSG0000(RP11-701P antisense chr4   | 1.85E+08 | 1.85E+08 | + | 0    | 0    |
| ENSG0000(RP11-5301 antisense chr5   | 44744900 | 44808777 | - | 1.37 | 2.81 |
| ENSG0000(RP11-513C processed_ chr8  | 57240057 | 57240541 | + | 0    | 0    |
| ENSG0000(RP11-849H antisense chr11  | 72014291 | 72020910 | + | 0.1  | 0.12 |
| ENSG0000(CTD-2532K lincRNA chr5     | 1.75E+08 | 1.75E+08 | + | 0    | 0    |
| ENSG0000(RP11-701P processed_ chr4  | 1.85E+08 | 1.85E+08 | - | 0    | 0    |
| ENSG0000(RP11-478C antisense chr4   | 2295584  | 2319089  | + | 0    | 0    |
| ENSG0000(MTND5P5 processed_ chr4    | 1.02E+08 | 1.02E+08 | + | 0    | 0    |
| ENSG0000(HOXC-AS3 processed_ chr12  | 53981509 | 53985519 | - | 0    | 0    |
| ENSG0000(RP11-281P lincRNA chr4     | 11469250 | 11478196 | + | 0.01 | 0    |
| ENSG0000(AC006153. unprocessε chr7  | 90469787 | 90488964 | + | 0.46 | 0    |
| ENSG0000(SEPT14P4 processed_ chr4   | 1.19E+08 | 1.19E+08 | + | 0    | 0    |
| ENSG0000(RP11-98J2: unprocessε chr5 | 69898867 | 69903198 | - | 0.06 | 0    |
| ENSG0000(RP11-500G processed_ chr4  | 44533615 | 44533880 | + | 0    | 0    |
| ENSG0000(RP11-540C lincRNA chr15    | 40906811 | 40910337 | + | 0.14 | 0.16 |
| ENSG0000(RP11-75A5 processed_ chr4  | 1.65E+08 | 1.65E+08 | + | 0    | 0    |
| ENSG0000(PRELID3BP processed_ chr5  | 42897262 | 42897832 | - | 0    | 0    |
| ENSG0000(HULC lincRNA chr6          | 8652137  | 8653846  | + | 0    | 0.14 |
| ENSG0000(F11-AS1 antisense chr4     | 1.86E+08 | 1.87E+08 | - | 0    | 0    |
| ENSG0000(OR7E163P unprocessε chr4   | 3889356  | 3890249  | - | 0    | 0    |
| ENSG0000(CTD-2072I: lincRNA chr5    | 7924292  | 7925398  | + | 0    | 0    |
| ENSG0000(LINC01843 lincRNA chr5     | 1.35E+08 | 1.35E+08 | + | 0    | 0    |
| ENSG0000(RP11-729M lincRNA chr4     | 1.04E+08 | 1.04E+08 | + | 0    | 0    |
| ENSG0000(RP11-327C antisense chr4   | 1.69E+08 | 1.69E+08 | + | 0    | 0    |
| ENSG0000(RP11-529P processed_ chr3  | 97481177 | 97481506 | - | 0    | 0    |
| ENSG0000(UCHL1-AS1 antisense chr4   | 41220074 | 41256727 | - | 0    | 0    |
| ENSG0000(TSEN2P1 processed_ chr4    | 1.75E+08 | 1.75E+08 | + | 0    | 0    |
| ENSG0000(RP11-45L9. antisense chr4  | 1.06E+08 | 1.06E+08 | - | 0    | 0    |
| ENSG0000(RP11-97E7 lincRNA chr4     | 1.72E+08 | 1.72E+08 | - | 0    | 0    |
| ENSG0000(RP11-401E unprocessε chr4  | 69572391 | 69585527 | - | 0    | 0    |
| ENSG0000(OR7E21P unprocessε chr3    | 1.3E+08  | 1.3E+08  | - | 0    | 0    |
| ENSG0000(TMEM92-A antisense chr17   | 50281577 | 50287855 | - | 0.52 | 0.29 |

|                                 |       |          |          |   |      |      |
|---------------------------------|-------|----------|----------|---|------|------|
| ENSG0000(RP11-6171) lincRNA     | chr4  | 31171144 | 31211675 | + | 0    | 0    |
| ENSG0000(LINC01861) lincRNA     | chr5  | 1.54E+08 | 1.54E+08 | - | 0    | 0    |
| ENSG0000(RP11-101E) protein_co  | chr9  | 1.29E+08 | 1.29E+08 | + | 0    | 0    |
| ENSG0000(RP11-542G) lincRNA     | chr4  | 75269068 | 75361182 | - | 0    | 0    |
| ENSG0000(RP11-689P) antisense   | chr4  | 8453410  | 8454942  | - | 0    | 0    |
| ENSG0000(CTC-459M) antisense    | chr5  | 1.12E+08 | 1.12E+08 | + | 0    | 0    |
| ENSG0000(RP11-478C) processed_  | chr4  | 268982   | 269531   | - | 0    | 0    |
| ENSG0000(CTD-2196P) lincRNA     | chr5  | 38682070 | 38685126 | + | 0    | 0    |
| ENSG0000(LINC00589) lincRNA     | chr8  | 29673922 | 29748109 | - | 0.04 | 0    |
| ENSG0000(ZNF674) protein_co     | chrX  | 46497727 | 46545457 | - | 1.51 | 2.13 |
| ENSG0000(RP11-72K1) processed_  | chr5  | 97737894 | 97738913 | + | 0    | 0    |
| ENSG0000(RP1-68D18) sense_intr  | chr11 | 35212550 | 35214007 | + | 0.28 | 0.31 |
| ENSG0000(RP11-378N) processed_  | chr4  | 1.29E+08 | 1.29E+08 | + | 0    | 0    |
| ENSG0000(RP11-54F2) unprocess   | chr5  | 10652211 | 10655925 | - | 0    | 0    |
| ENSG0000(RP11-400D) lincRNA     | chr4  | 1.34E+08 | 1.34E+08 | - | 0    | 0    |
| ENSG0000(RP11-6E9.5) antisense  | chr4  | 1.7E+08  | 1.7E+08  | + | 0    | 0    |
| ENSG0000(TMED7-TIC) protein_co  | chr5  | 1.16E+08 | 1.16E+08 | - | 2.86 | 2.32 |
| ENSG0000(RP11-14I17) processed_ | chr8  | 26433029 | 26434065 | - | 0.1  | 0    |
| ENSG0000(CTC-278L1) processed_  | chr5  | 1.06E+08 | 1.06E+08 | - | 0.03 | 0    |
| ENSG0000(CTD-2050E) lincRNA     | chr5  | 1.44E+08 | 1.44E+08 | + | 0    | 0    |
| ENSG0000(CTD-2187J) lincRNA     | chr5  | 67268022 | 67270182 | + | 0    | 0    |
| ENSG0000(LINC00923) lincRNA     | chr15 | 97572185 | 97874550 | - | 0.89 | 1.12 |
| ENSG0000(RP11-168E) lincRNA     | chr4  | 12223451 | 12251286 | + | 0    | 0    |
| ENSG0000(RP11-889L) processed_  | chr5  | 1.78E+08 | 1.78E+08 | + | 0    | 0    |
| ENSG0000(MTND5P4) processed_    | chr4  | 17061878 | 17062165 | + | 0    | 0    |
| ENSG0000(RP11-248N) lincRNA     | chr4  | 1.74E+08 | 1.74E+08 | - | 0    | 0    |
| ENSG0000(CTD-2308B) lincRNA     | chr5  | 1.24E+08 | 1.24E+08 | - | 0    | 0    |
| ENSG0000(GOLGA5P1) processed_   | chr5  | 39169210 | 39170335 | - | 0    | 0    |
| ENSG0000(RP11-161D) lincRNA     | chr4  | 1.74E+08 | 1.74E+08 | - | 0    | 0.03 |
| ENSG0000(RP11-1057) lincRNA     | chr8  | 1.35E+08 | 1.35E+08 | + | 0    | 0    |
| ENSG0000(LINC01217) sense_intr  | chr4  | 1.01E+08 | 1.01E+08 | - | 0    | 0    |
| ENSG0000(RFPL4AP3) processed_   | chr4  | 23514940 | 23515284 | - | 0    | 0    |
| ENSG0000(LINC01337) lincRNA     | chr5  | 80608623 | 80622524 | - | 0    | 0    |
| ENSG0000(MTCO1P9) unprocess     | chr4  | 1.55E+08 | 1.55E+08 | - | 0    | 0    |
| ENSG0000(CNOT10-A) antisense    | chr3  | 32730635 | 32737454 | - | 0    | 0    |
| ENSG0000(RP11-469N) lincRNA     | chr11 | 1.35E+08 | 1.35E+08 | + | 0    | 0    |
| ENSG0000(RP11-192C) processed_  | chr4  | 1.35E+08 | 1.35E+08 | + | 0    | 0    |
| ENSG0000(RP11-503N) processed_  | chr4  | 2505081  | 2506279  | - | 0    | 0    |
| ENSG0000(MIR3945H) lincRNA      | chr4  | 1.85E+08 | 1.85E+08 | - | 0    | 0    |
| ENSG0000(PSMA2P2) processed_    | chr8  | 93939364 | 93942877 | - | 0    | 0    |
| ENSG0000(SNRPCP2) processed_    | chr5  | 76376675 | 76377149 | + | 0    | 0    |
| ENSG0000(RP11-468N) unprocess   | chr4  | 68813995 | 68814727 | + | 0    | 0    |
| ENSG0000(B3GNTL1P) processed_   | chr5  | 52889666 | 52889954 | + | 0    | 0    |
| ENSG0000(CTB-22K21) antisense   | chr17 | 50627032 | 50631940 | - | 0    | 0    |
| ENSG0000(AC005178) processed_   | chr5  | 1.34E+08 | 1.34E+08 | - | 0    | 0    |

|                                     |          |          |   |      |      |
|-------------------------------------|----------|----------|---|------|------|
| ENSG0000(RP13-487K lincRNA chr4     | 1.56E+08 | 1.56E+08 | + | 0    | 0    |
| ENSG0000(RP11-540D protein_co chr1  | 1.55E+08 | 1.55E+08 | + | 0.29 | 0    |
| ENSG0000(ZNF345 protein_co chr19    | 36850361 | 36913029 | + | 2.19 | 2.8  |
| ENSG0000(RP11-223C lincRNA chr4     | 1.43E+08 | 1.43E+08 | + | 0    | 0    |
| ENSG0000(RP11-73G1 processed_ chr4  | 1.52E+08 | 1.52E+08 | + | 0.03 | 0.08 |
| ENSG0000(RP11-404K lincRNA chr5     | 7326064  | 7326609  | + | 0    | 0    |
| ENSG0000(MTND2P31 processed_ chr4   | 14505865 | 14506480 | - | 0    | 0    |
| ENSG0000(MTHFD2P4 processed_ chr4   | 1.62E+08 | 1.62E+08 | + | 0    | 0    |
| ENSG0000(GTF2F2P1 processed_ chr4   | 1.48E+08 | 1.48E+08 | + | 0    | 0.11 |
| ENSG0000(RP11-273B lincRNA chr4     | 54845568 | 54859241 | + | 0    | 0    |
| ENSG0000(CTD-2263F antisense chr5   | 38460925 | 38468339 | - | 0.86 | 0    |
| ENSG0000(RFPL4B protein_co chr6     | 1.12E+08 | 1.12E+08 | + | 0    | 0    |
| ENSG0000(AC004069. lincRNA chr4     | 1.05E+08 | 1.05E+08 | - | 0.73 | 0.16 |
| ENSG0000(WDFY3-AS antisense chr4    | 84803258 | 84810391 | + | 0    | 0    |
| ENSG0000(OR7H2P unprocessε chr5     | 1.02E+08 | 1.02E+08 | - | 0    | 0    |
| ENSG0000(RP11-545H lincRNA chr4     | 54440502 | 54446723 | - | 0    | 0    |
| ENSG0000(RP11-340A lincRNA chr4     | 58984282 | 59046959 | + | 0    | 0    |
| ENSG0000(RP11-231L antisense chr3   | 1.41E+08 | 1.41E+08 | - | 0    | 0    |
| ENSG0000(ALG1L7P unprocessε chr4    | 3935447  | 3942519  | + | 0    | 0    |
| ENSG0000(RP11-549K lincRNA chr5     | 25126305 | 25190656 | - | 0    | 0    |
| ENSG0000(AC006335. unprocessε chrY  | 6241768  | 6243629  | - | 0    | 0    |
| ENSG0000(MAGI2-AS1 antisense chr7   | 78939850 | 78940895 | + | 0    | 0    |
| ENSG0000(AC006499. processed_ chr4  | 10292195 | 10292708 | - | 0    | 0    |
| ENSG0000(SMIM15-A antisense chr5    | 61162070 | 61232040 | + | 0.08 | 0    |
| ENSG0000(CTD-2066L lincRNA chr5     | 33011322 | 33017607 | - | 0.19 | 0    |
| ENSG0000(RP11-171N lincRNA chr4     | 1.57E+08 | 1.57E+08 | - | 0    | 0    |
| ENSG0000(RP13-644N processed_ chr4  | 69125274 | 69126451 | + | 0    | 0    |
| ENSG0000(RP11-147K processed_ chr4  | 88220569 | 88223837 | - | 0    | 0    |
| ENSG0000(RP11-588F processed_ chr4  | 52440494 | 52441535 | - | 0    | 0    |
| ENSG0000(ALG1L2 protein_co chr3     | 1.3E+08  | 1.3E+08  | + | 0.12 | 0.54 |
| ENSG0000(RP11-10L1. processed_ chr4 | 1.03E+08 | 1.03E+08 | + | 0    | 0    |
| ENSG0000(RP11-400D lincRNA chr4     | 1.34E+08 | 1.34E+08 | + | 0    | 0    |
| ENSG0000(ERVH-1 lincRNA chr4        | 23723262 | 23733579 | - | 0    | 0    |
| ENSG0000(CTC-552D5 lincRNA chr5     | 1.2E+08  | 1.2E+08  | - | 0    | 0    |
| ENSG0000(RP11-116C antisense chr5   | 24554018 | 24613222 | + | 0    | 0    |
| ENSG0000(AC006499. processed_ chr4  | 10167159 | 10167765 | - | 0    | 0    |
| ENSG0000(TUBB7P unprocessε chr4     | 1.9E+08  | 1.9E+08  | - | 0    | 0    |
| ENSG0000(RP11-425A antisense chr4   | 1.48E+08 | 1.48E+08 | - | 0    | 0    |
| ENSG0000(SLC25A15P unprocessε chr13 | 24943575 | 24944498 | + | 0    | 0    |
| ENSG0000(RP11-54P1 processed_ chr4  | 1.43E+08 | 1.43E+08 | + | 0    | 0    |
| ENSG0000(RP11-81H1 lincRNA chr12    | 68332888 | 68451663 | - | 0.45 | 0.58 |
| ENSG0000(CAB39P1 processed_ chr5    | 60630514 | 60630973 | + | 0    | 0    |
| ENSG0000(NDUFB4P2 processed_ chr5   | 59528861 | 59529251 | + | 0    | 0    |
| ENSG0000(RP11-506H antisense chr5   | 55233934 | 55295201 | + | 0    | 0    |
| ENSG0000(MRPS33P3 processed_ chr4   | 1.15E+08 | 1.15E+08 | + | 0    | 0    |

|                                 |       |          |          |   |      |      |
|---------------------------------|-------|----------|----------|---|------|------|
| ENSG0000(RP11-498N antisense)   | chr4  | 1.02E+08 | 1.02E+08 | - | 0    | 0    |
| ENSG0000(RP11-706F lincRNA)     | chr4  | 1.89E+08 | 1.89E+08 | + | 0    | 0    |
| ENSG0000(LINC02214 lincRNA)     | chr5  | 1.17E+08 | 1.17E+08 | - | 0    | 0    |
| ENSG0000(AC004062. processed_)  | chr4  | 1.11E+08 | 1.11E+08 | + | 0    | 0    |
| ENSG0000(RP11-747H processed_)  | chr4  | 9030286  | 9031066  | + | 0    | 0    |
| ENSG0000(CTD-2337A antisense)   | chr5  | 95962001 | 96631085 | + | 0.16 | 0.36 |
| ENSG0000(KLF17P2 transcribec)   | chr4  | 14126339 | 14126664 | + | 0    | 0    |
| ENSG0000(CTC-327F1 antisense)   | chr5  | 1.48E+08 | 1.48E+08 | + | 0    | 0    |
| ENSG0000(PCAT4 lincRNA)         | chr4  | 79827471 | 79877770 | + | 0    | 0    |
| ENSG0000(SHANK3 protein_co)     | chr22 | 50674415 | 50733298 | + | 0.53 | 0.95 |
| ENSG0000(RP11-452H lincRNA)     | chr11 | 78423982 | 78429836 | - | 0    | 0.04 |
| ENSG0000(LINC01386 antisense)   | chr5  | 73454187 | 73472896 | - | 0    | 0    |
| ENSG0000(RP11-415C lincRNA)     | chr4  | 27262506 | 27267254 | - | 0    | 0    |
| ENSG0000(RP11-521E lincRNA)     | chr4  | 1.3E+08  | 1.3E+08  | + | 0    | 0    |
| ENSG0000(RP11-240A lincRNA)     | chr4  | 32351038 | 32353220 | + | 0    | 0    |
| ENSG0000(CTD-2283N antisense)   | chr5  | 1.48E+08 | 1.48E+08 | - | 0    | 0    |
| ENSG0000(RP11-177C processed_)  | chr4  | 37995494 | 37996203 | - | 0    | 0    |
| ENSG0000(RTN3P1 processed_)     | chr4  | 1.45E+08 | 1.45E+08 | + | 0    | 0    |
| ENSG0000(RP11-317G processed_)  | chr4  | 48936582 | 48936880 | + | 0    | 0    |
| ENSG0000(RP11-540E lincRNA)     | chr4  | 1.82E+08 | 1.82E+08 | - | 0    | 0    |
| ENSG0000(AC006499. processed_)  | chr4  | 10294463 | 10295579 | - | 0    | 0    |
| ENSG0000(RP11-506N lincRNA)     | chr4  | 58780626 | 58984152 | - | 0.75 | 0.4  |
| ENSG0000(MTCYBP35 processed_)   | chr5  | 94569540 | 94570676 | + | 0    | 0    |
| ENSG0000(CTC-235G5 processed_)  | chr5  | 76078666 | 76079763 | + | 0    | 0    |
| ENSG0000(RP11-392L. processed_) | chr4  | 1.29E+08 | 1.29E+08 | + | 0    | 0    |
| ENSG0000(IRF5P1 processed_)     | chr8  | 92972575 | 92974738 | + | 0    | 0    |
| ENSG0000(HSPD1P11 processed_)   | chr5  | 95768999 | 95770700 | + | 0.66 | 0.62 |
| ENSG0000(MSANTD3- protein_co)   | chr9  | 1E+08    | 1.01E+08 | + | 2    | 1.05 |
| ENSG0000(LVCAT1 lincRNA)        | chr4  | 44016861 | 44022063 | + | 0    | 0    |
| ENSG0000(RP11-451H processed_)  | chr5  | 1.81E+08 | 1.81E+08 | - | 0    | 0    |
| ENSG0000(MTND3P5 unprocessε)    | chr4  | 25720099 | 25720431 | - | 0    | 0.32 |
| ENSG0000(RP11-697N unprocessε)  | chr8  | 47546804 | 47547926 | - | 0    | 0    |
| ENSG0000(RAB5CP2 processed_)    | chr5  | 91476382 | 91477018 | + | 0    | 0    |
| ENSG0000(AP000350. protein_co)  | chr22 | 23862188 | 23895223 | + | 0    | 0    |
| ENSG0000(WWC2-AS2 lincRNA)      | chr4  | 1.83E+08 | 1.83E+08 | - | 0.33 | 0.42 |
| ENSG0000(KHDC1P1 transcribec)   | chr6  | 73209083 | 73210080 | - | 0    | 0    |
| ENSG0000(CTD-2091N lincRNA)     | chr5  | 93019663 | 93068669 | - | 0    | 0    |
| ENSG0000(RP11-129N lincRNA)     | chr14 | 40954898 | 40975877 | + | 0    | 0    |
| ENSG0000(CTD-2516F antisense)   | chr11 | 7427266  | 7512515  | - | 2.27 | 3.57 |
| ENSG0000(RP11-332J. lincRNA)    | chr5  | 6765891  | 6771953  | + | 0    | 0    |
| ENSG0000(DBIP2 processed_)      | chr5  | 80603383 | 80603644 | - | 0    | 0    |
| ENSG0000(RP11-231G lincRNA)     | chr5  | 1.09E+08 | 1.09E+08 | + | 0    | 0    |
| ENSG0000(RP11-175N processed_)  | chr5  | 55750206 | 55750401 | - | 0    | 0    |
| ENSG0000(ZNF550 protein_co)     | chr19 | 57535257 | 57559863 | - | 2.53 | 2.37 |
| ENSG0000(SEMA5A-A lincRNA)      | chr5  | 9511333  | 9518086  | + | 0    | 0    |

|                                 |       |          |          |   |      |      |
|---------------------------------|-------|----------|----------|---|------|------|
| ENSG0000(CTD-2318H lincRNA      | chr5  | 4640731  | 4648254  | + | 0    | 0    |
| ENSG0000(LINC00499 lincRNA      | chr4  | 1.38E+08 | 1.38E+08 | + | 0    | 0    |
| ENSG0000(RP11-68D1 processed_   | chr4  | 29407100 | 29408012 | + | 0    | 0    |
| ENSG0000(RPS23P5 processed_     | chr5  | 82265157 | 82265259 | - | 0    | 0    |
| ENSG0000(CTD-2313F lincRNA      | chr5  | 55054428 | 55055140 | + | 0    | 0    |
| ENSG0000(RP11-18H2 lincRNA      | chr4  | 1.52E+08 | 1.52E+08 | - | 0    | 0    |
| ENSG0000(AC096582. unprocessε   | chr7  | 45818582 | 45819097 | + | 0.57 | 1.42 |
| ENSG0000(RP11-484C antisense    | chr4  | 15358141 | 15420032 | - | 3.59 | 2.69 |
| ENSG0000(DCANP1 protein_co      | chr5  | 1.35E+08 | 1.35E+08 | - | 0    | 0    |
| ENSG0000(LINC00958 lincRNA      | chr11 | 12961842 | 12989548 | - | 0.29 | 0.04 |
| ENSG0000(RP11-542G lincRNA      | chr4  | 75354076 | 75362566 | + | 0    | 0    |
| ENSG0000(MTCYBP16 processed_    | chr4  | 64607703 | 64608831 | - | 0    | 0    |
| ENSG0000(CTB-35F21 lincRNA      | chr5  | 1.4E+08  | 1.4E+08  | - | 0    | 0    |
| ENSG0000(RP11-427M lincRNA      | chr4  | 1.34E+08 | 1.34E+08 | - | 0    | 0    |
| ENSG0000(YTHDF1P1 processed_    | chr5  | 97368776 | 97370421 | + | 0    | 0    |
| ENSG0000(RP11-305P lincRNA      | chr5  | 66298468 | 66322944 | + | 0    | 0.2  |
| ENSG0000(RP1-240K6 processed_   | chr14 | 73462423 | 73477175 | + | 0.39 | 0.29 |
| ENSG0000(FTH1P9 processed_      | chr5  | 83426676 | 83427030 | + | 0    | 0    |
| ENSG0000(LINC01301 lincRNA      | chr8  | 60384588 | 60516795 | - | 0.13 | 0.71 |
| ENSG0000(LINC01256 lincRNA      | chr4  | 1.33E+08 | 1.33E+08 | + | 0    | 0    |
| ENSG0000(RP11-234K lincRNA      | chr4  | 79596542 | 79597173 | + | 0    | 0    |
| ENSG0000(ALDH7A1P processed_    | chr5  | 77290268 | 77291800 | + | 0    | 0.04 |
| ENSG0000(RP11-11N6 processed_   | chr4  | 90682996 | 90683123 | + | 0    | 0    |
| ENSG0000(FAM90A25 unprocessε    | chr8  | 12415080 | 12418090 | - | 0    | 0    |
| ENSG0000(CTB-109A1 sense_ovei   | chr5  | 1.57E+08 | 1.57E+08 | - | 0    | 0.09 |
| ENSG0000(MTND1P22 unprocessε    | chr4  | 1.55E+08 | 1.55E+08 | - | 0    | 0    |
| ENSG0000(RP11-586D lincRNA      | chr4  | 6202328  | 6206649  | + | 0.01 | 0    |
| ENSG0000(AC008592. lincRNA      | chr5  | 95835943 | 95852721 | - | 0    | 0    |
| ENSG0000(AC007106. lincRNA      | chr4  | 27967723 | 27985063 | - | 0    | 0    |
| ENSG0000(RP11-397E processed_   | chr4  | 86913266 | 86914817 | - | 0    | 0.12 |
| ENSG0000(AC006296. lincRNA      | chr4  | 14383123 | 14409078 | - | 0    | 0    |
| ENSG0000(RP11-534Li sense_intrε | chr10 | 48624004 | 48625093 | - | 0    | 0    |
| ENSG0000(RP11-843P antisense    | chr5  | 1.76E+08 | 1.76E+08 | + | 0    | 0    |
| ENSG0000(RP11-140M lincRNA      | chr4  | 1.78E+08 | 1.78E+08 | - | 0    | 0    |
| ENSG0000(RP11-1348 lincRNA      | chr16 | 28802743 | 28817828 | + | 0.43 | 0.43 |
| ENSG0000(ASS1P8 processed_      | chr4  | 1.49E+08 | 1.49E+08 | - | 0    | 0    |
| ENSG0000(RP11-524Li processed_  | chr5  | 75831255 | 75832764 | - | 0    | 0    |
| ENSG0000(CTC-369A1 lincRNA      | chr5  | 1.24E+08 | 1.24E+08 | + | 0    | 0    |
| ENSG0000(CTB-51A17 antisense    | chr5  | 13860303 | 13900749 | + | 0    | 0    |
| ENSG0000(RP11-468N unprocessε   | chr4  | 68834213 | 68834368 | - | 0    | 0    |
| ENSG0000(CTD-2247C lincRNA      | chr5  | 5046796  | 5049497  | - | 0    | 0    |
| ENSG0000(RP13-644M unprocessε   | chr4  | 69144734 | 69147671 | + | 0    | 0    |
| ENSG0000(RP11-597D transcribec  | chr4  | 1.58E+08 | 1.58E+08 | + | 0.61 | 0.93 |
| ENSG0000(MTCO3P27 unprocessε    | chr4  | 64606418 | 64606613 | + | 0    | 0    |
| ENSG0000(AC008984. unprocessε   | chr19 | 54298105 | 54298814 | - | 0    | 0    |



|                                     |          |          |   |      |      |
|-------------------------------------|----------|----------|---|------|------|
| ENSG0000(RP11-420A lincRNA chr4     | 1.28E+08 | 1.29E+08 | + | 1.13 | 1.78 |
| ENSG0000(CCNHP1 processed_chr4      | 1.82E+08 | 1.82E+08 | - | 0    | 0    |
| ENSG0000(RP11-315A lincRNA chr4     | 31350284 | 31351725 | + | 0    | 0    |
| ENSG0000(C1GALT1P2 processed_chr5   | 56192530 | 56193633 | + | 0.11 | 0.3  |
| ENSG0000(NUP58P1 processed_chr4     | 1.26E+08 | 1.26E+08 | - | 0    | 0    |
| ENSG0000(NDUFS5P4 processed_chr4    | 98976800 | 98977117 | - | 0    | 0    |
| ENSG0000(RP11-431N antisense chr4   | 36311190 | 36392410 | - | 0    | 0    |
| ENSG0000(AC006070.unprocessε chr17  | 41186944 | 41187136 | - | 0    | 0    |
| ENSG0000(STMN1P2 processed_chr4     | 1.37E+08 | 1.37E+08 | - | 0    | 0    |
| ENSG0000(RTEL1P1 processed_chr4     | 1.12E+08 | 1.12E+08 | + | 0.01 | 0    |
| ENSG0000(LINC01094 lincRNA chr4     | 78645903 | 78682699 | + | 1.09 | 1.54 |
| ENSG0000(LINC02160 lincRNA chr5     | 33229735 | 33255553 | + | 0    | 0    |
| ENSG0000(RP11-483A antisense chr4   | 1.69E+08 | 1.69E+08 | + | 0    | 0    |
| ENSG0000(RP11-375B lincRNA chr5     | 1.77E+08 | 1.77E+08 | - | 0    | 0    |
| ENSG0000(RP11-517B unprocessε chr3  | 1.32E+08 | 1.32E+08 | - | 0    | 0    |
| ENSG0000(RP11-71E1 lincRNA chr3     | 1.26E+08 | 1.26E+08 | - | 0    | 0    |
| ENSG0000(MTND1P1ε processed_chr4    | 92702345 | 92702659 | + | 0    | 0    |
| ENSG0000(RASGRF2-A antisense chr5   | 80947697 | 80960907 | - | 0.1  | 0    |
| ENSG0000(GTF2IP9 transcribed chr7   | 66407288 | 66409239 | - | 0    | 0.15 |
| ENSG0000(RP13-539F processed_chr4   | 1.45E+08 | 1.45E+08 | - | 0    | 0    |
| ENSG0000(HAUS1P1 processed_chr5     | 1.41E+08 | 1.41E+08 | + | 0    | 0    |
| ENSG0000(RP11-542G lincRNA chr4     | 75341279 | 75359024 | - | 0    | 0    |
| ENSG0000(RP11-164P antisense chr4   | 1.52E+08 | 1.52E+08 | + | 0    | 0    |
| ENSG0000(RP11-436H sense_intrε chr5 | 1.25E+08 | 1.25E+08 | - | 0    | 0    |
| ENSG0000(RP11-844P lincRNA chr5     | 1.76E+08 | 1.76E+08 | - | 0    | 0    |
| ENSG0000(RP11-319E lincRNA chr4     | 57491390 | 57495233 | + | 0    | 0    |
| ENSG0000(RP11-1258 antisense chr4   | 8066528  | 8067724  | + | 0    | 0    |
| ENSG0000(RP11-501C antisense chr17  | 49004731 | 49013725 | - | 0    | 0    |
| ENSG0000(FKBP4P1 processed_chr4     | 1.18E+08 | 1.18E+08 | - | 0    | 0    |
| ENSG0000(RPL7L1P13 processed_chr4   | 1.1E+08  | 1.1E+08  | - | 0    | 0    |
| ENSG0000(CTC-250P2 processed_chr5   | 72996920 | 72997642 | + | 0    | 0    |
| ENSG0000(RP11-369K unprocessε chr8  | 12958387 | 12962200 | + | 0    | 0    |
| ENSG0000(ASNSP4 unprocessε chr8     | 46697630 | 46698688 | + | 0    | 0    |
| ENSG0000(RP11-166D lincRNA chr3     | 1.4E+08  | 1.4E+08  | + | 0    | 0    |
| ENSG0000(AC004069.processed_chr4    | 1.05E+08 | 1.05E+08 | - | 0    | 0    |
| ENSG0000(RPL32P3 transcribed chr3   | 1.29E+08 | 1.29E+08 | - | 5.39 | 5.15 |
| ENSG0000(MTCO1P31 processed_chr5    | 5396477  | 5396968  | - | 0.15 | 0.34 |
| ENSG0000(RP11-74D3 processed_chr5   | 1.18E+08 | 1.18E+08 | - | 0    | 0    |
| ENSG0000(CTD-2122P processed_chr5   | 41585882 | 41587787 | - | 0    | 0    |
| ENSG0000(AKIRIN2P1 processed_chr4   | 1.5E+08  | 1.5E+08  | + | 0    | 0    |
| ENSG0000(LYPLA1P2 processed_chr4    | 1.11E+08 | 1.11E+08 | - | 0    | 0    |
| ENSG0000(RP5-1065Jε processed_chr1  | 1.09E+08 | 1.09E+08 | - | 0    | 0    |
| ENSG0000(AC068134.processed_chr2    | 2.32E+08 | 2.32E+08 | + | 0.67 | 0.92 |
| ENSG0000(RP11-124N lincRNA chr5     | 19035197 | 19038799 | - | 0    | 0    |
| ENSG0000(RP11-404Iε lincRNA chr4    | 1.33E+08 | 1.33E+08 | - | 0    | 0    |

|                                      |          |          |   |      |      |
|--------------------------------------|----------|----------|---|------|------|
| ENSG0000(RP11-736K processed_ chr4   | 69888877 | 69889406 | + | 0    | 0    |
| ENSG0000(RP11-237D lincRNA chr4      | 1.88E+08 | 1.88E+08 | - | 0    | 0    |
| ENSG0000(OR7E28P transcribed chr2    | 1.59E+08 | 1.59E+08 | + | 0    | 0.07 |
| ENSG0000(RP11-782E processed_ chr4   | 1.36E+08 | 1.36E+08 | - | 0    | 0    |
| ENSG0000(FOXD1 protein_co chr5       | 73444827 | 73448527 | - | 5.96 | 5.41 |
| ENSG0000(PPIAP11 processed_ chr5     | 82009602 | 82010094 | - | 0.31 | 0.17 |
| ENSG0000(RP11-197N lincRNA chr12     | 1.23E+08 | 1.23E+08 | + | 0    | 0    |
| ENSG0000(RP11-468N unprocessed_ chr4 | 68972999 | 68975993 | - | 0    | 0    |
| ENSG0000(RP11-466J processed_ chr4   | 43586328 | 43588097 | + | 0    | 0    |
| ENSG0000(APITD1-CO protein_co chr1   | 10430102 | 10452153 | + | 1.11 | 0.52 |
| ENSG0000(LINC01099 lincRNA chr4      | 1.78E+08 | 1.78E+08 | - | 0.91 | 0.11 |
| ENSG0000(CTD-2247C lincRNA chr5      | 4967764  | 4970425  | - | 0    | 0    |
| ENSG0000(RP5-862P8 unprocessed_ chr1 | 2.33E+08 | 2.33E+08 | - | 0.61 | 0    |
| ENSG0000(AC022486. lincRNA chrY      | 18491740 | 18547698 | + | 0    | 0    |
| ENSG0000(RP11-171N lincRNA chr4      | 1.57E+08 | 1.57E+08 | + | 0    | 0    |
| ENSG0000(LIX1-AS1 lincRNA chr5       | 97089075 | 97437217 | + | 0.13 | 0    |
| ENSG0000(CCDC11P1 processed_ chr5    | 39571478 | 39572639 | - | 0    | 0    |
| ENSG0000(RP11-10G1 unprocessed_ chr4 | 22607501 | 22611063 | + | 0    | 0    |
| ENSG0000(RP11-109E lincRNA chr4      | 42706107 | 42707335 | + | 0    | 0    |
| ENSG0000(LINC02110 lincRNA chr5      | 37948491 | 37951055 | + | 0    | 0    |
| ENSG0000(RP11-46A1 unprocessed_ chr1 | 1.81E+08 | 1.81E+08 | + | 0    | 0    |
| ENSG0000(IMPA1P1 transcribed chr8    | 81605569 | 81631134 | - | 0    | 0    |
| ENSG0000(RP11-724N antisense chr4    | 98496364 | 98509935 | + | 0    | 0    |
| ENSG0000(TCP11X3P transcribed chrX   | 1.02E+08 | 1.02E+08 | + | 0    | 0    |
| ENSG0000(RP11-381N lincRNA chr4      | 1.24E+08 | 1.24E+08 | + | 0    | 0    |
| ENSG0000(RP11-51P8 lincRNA chr4      | 65858761 | 65860204 | + | 0    | 0    |
| ENSG0000(RP11-468N unprocessed_ chr4 | 68877626 | 68880131 | - | 0    | 0    |
| ENSG0000(CTD-2245E lincRNA chr5      | 1544107  | 1551710  | - | 0    | 0    |
| ENSG0000(LINC00605 lincRNA chr14     | 1.03E+08 | 1.03E+08 | - | 0    | 0    |
| ENSG0000(RP11-478C processed_ chr4   | 336258   | 336786   | - | 0    | 0    |
| ENSG0000(RP11-572C lincRNA chr12     | 1.3E+08  | 1.3E+08  | - | 0    | 0.09 |
| ENSG0000(RP11-385D protein_co chr17  | 15571491 | 15651653 | - | 0.03 | 0    |
| ENSG0000(LINC02201 lincRNA chr5      | 1.23E+08 | 1.23E+08 | - | 0    | 0    |
| ENSG0000(SNX18P24 processed_ chr4    | 49561479 | 49562149 | + | 0    | 0    |
| ENSG0000(LINC01957 lincRNA chr5      | 1.15E+08 | 1.15E+08 | + | 0    | 0    |
| ENSG0000(RP11-60A8 lincRNA chr5      | 73337906 | 73338533 | + | 0    | 0    |
| ENSG0000(MTND5P12 processed_ chr5    | 94567461 | 94568909 | + | 0    | 0    |
| ENSG0000(RP11-798K unprocessed_ chr5 | 1.8E+08  | 1.8E+08  | + | 0    | 0    |
| ENSG0000(IGKV1D-39 IG_V_gene chr2    | 89862482 | 89862981 | + | 0    | 0    |
| ENSG0000(RP11-215G processed_ chr5   | 10664495 | 10665113 | - | 0.13 | 0.15 |
| ENSG0000(RP11-480D unprocessed_ chr5 | 8410789  | 8410996  | - | 0    | 0    |
| ENSG0000(RP11-501C processed_ chr17  | 49037122 | 49037429 | + | 0    | 0    |
| ENSG0000(COQ10BP2 processed_ chr5    | 83279921 | 83280644 | - | 0    | 0    |
| ENSG0000(DDX18P4 processed_ chr5     | 98679402 | 98681367 | + | 0    | 0    |
| ENSG0000(RP11-745L lincRNA chr4      | 1.32E+08 | 1.32E+08 | - | 1.21 | 0.76 |

|                 |             |                 |          |          |          |   |       |       |
|-----------------|-------------|-----------------|----------|----------|----------|---|-------|-------|
| ENSG00000118118 | antisense   | chr5            | 1.46E+08 | 1.46E+08 | +        | 0 | 0     |       |
| ENSG00000120762 | transcribed | chr11           | 43120762 | 43269393 | -        | 0 | 0     |       |
| ENSG00000120762 | MALAT1      | lincRNA         | chr11    | 65497762 | 65506516 | + | 66.35 | 71.41 |
| ENSG00000120762 | IARS2P1     | processed       | chr8     | 87598462 | 87601634 | - | 0     | 0     |
| ENSG00000120762 | HMGB1P3     | processed       | chr5     | 77146568 | 77147165 | + | 0     | 0.13  |
| ENSG00000120762 | RP11-775H   | lincRNA         | chr4     | 1.36E+08 | 1.36E+08 | - | 0     | 0     |
| ENSG00000120762 | ALG3P1      | processed       | chr5     | 5375723  | 5376836  | - | 0.05  | 0     |
| ENSG00000120762 | RP11-724C   | protein_coding  | chr2     | 1.69E+08 | 1.7E+08  | + | 0     | 0     |
| ENSG00000120762 | DDX3P3      | processed       | chr4     | 1.04E+08 | 1.04E+08 | + | 0     | 0     |
| ENSG00000120762 | AF213884    | processed       | chr4     | 1.02E+08 | 1.02E+08 | + | 0     | 0     |
| ENSG00000120762 | LINC02106   | lincRNA         | chr5     | 50969217 | 50970167 | - | 0     | 0     |
| ENSG00000120762 | RP11-6N13   | lincRNA         | chr5     | 1.04E+08 | 1.05E+08 | - | 0     | 0     |
| ENSG00000120762 | C5orf64-AS  | lincRNA         | chr5     | 61732774 | 61735669 | - | 0     | 0     |
| ENSG00000120762 | LINC01267   | lincRNA         | chr3     | 14348451 | 14352568 | - | 0     | 0     |
| ENSG00000120762 | RP11-297P   | antisense       | chr4     | 1.04E+08 | 1.04E+08 | + | 0     | 0     |
| ENSG00000120762 | TRBV21-1    | TR_V_pseudogene | chr7     | 1.43E+08 | 1.43E+08 | + | 0     | 0     |
| ENSG00000120762 | RP11-39E3   | processed       | chr3     | 1.31E+08 | 1.31E+08 | - | 0     | 0     |
| ENSG00000120762 | RP11-539L   | lincRNA         | chr4     | 6670725  | 6673830  | - | 0.58  | 1.79  |
| ENSG00000120762 | AC008427    | processed       | chr5     | 1.5E+08  | 1.5E+08  | - | 0.1   | 0     |
| ENSG00000120762 | RP11-4401   | lincRNA         | chr4     | 1.75E+08 | 1.75E+08 | + | 0     | 0     |
| ENSG00000120762 | CTD-2299E   | processed       | chr5     | 86402465 | 86402960 | + | 0     | 0     |
| ENSG00000120762 | TET2-AS1    | antisense       | chr4     | 1.05E+08 | 1.05E+08 | - | 0     | 0     |
| ENSG00000120762 | LDHAP1      | processed       | chr4     | 4894182  | 4895173  | - | 0     | 0     |
| ENSG00000120762 | RP11-698E   | processed       | chr4     | 36506043 | 36508869 | + | 0     | 0     |
| ENSG00000120762 | NIFKP7      | unprocessed     | chr3     | 32063974 | 32066611 | - | 0     | 0     |
| ENSG00000120762 | CTD-2197M   | processed       | chr5     | 36071791 | 36072079 | - | 0     | 0     |
| ENSG00000120762 | MSNP1       | processed       | chr5     | 25909503 | 25911234 | + | 0     | 0     |
| ENSG00000120762 | ABCA11P     | transcribed     | chr4     | 425435   | 474129   | - | 1.46  | 1.28  |
| ENSG00000120762 | HADHAP1     | processed       | chr4     | 1.65E+08 | 1.65E+08 | - | 0     | 0     |
| ENSG00000120762 | RPL37P25    | processed       | chr5     | 54399439 | 54400033 | + | 0     | 0     |
| ENSG00000120762 | RP11-789C   | lincRNA         | chr4     | 1.32E+08 | 1.32E+08 | - | 0     | 0     |
| ENSG00000120762 | RP11-232L   | antisense       | chr5     | 73132008 | 73150592 | - | 0     | 0     |
| ENSG00000120762 | RP11-673E   | lincRNA         | chr4     | 1.44E+08 | 1.44E+08 | + | 0     | 0     |
| ENSG00000120762 | RP11-317C   | lincRNA         | chr5     | 50929484 | 50934521 | - | 0     | 0     |
| ENSG00000120762 | RP11-521B   | antisense       | chr14    | 1.05E+08 | 1.05E+08 | - | 1.56  | 1.14  |
| ENSG00000120762 | RP11-164P   | antisense       | chr4     | 1.52E+08 | 1.52E+08 | + | 0     | 0     |
| ENSG00000120762 | LINC01385   | lincRNA         | chr5     | 73451498 | 73453395 | + | 0     | 0     |
| ENSG00000120762 | CTD-2037K   | processed       | chr5     | 78307503 | 78307914 | + | 0     | 0     |
| ENSG00000120762 | OR12D1      | polymorphic     | chr6     | 29417280 | 29418226 | + | 0     | 0     |
| ENSG00000120762 | SETP12      | processed       | chr4     | 1.21E+08 | 1.21E+08 | - | 0     | 0     |
| ENSG00000120762 | RP11-77P1   | unprocessed     | chr3     | 1.3E+08  | 1.3E+08  | - | 0     | 0     |
| ENSG00000120762 | RP11-610P   | lincRNA         | chr4     | 1.51E+08 | 1.51E+08 | - | 0     | 0     |
| ENSG00000120762 | CTC-347C2   | lincRNA         | chr5     | 72687112 | 72762727 | - | 0     | 0     |
| ENSG00000120762 | HSPA8P19    | processed       | chr3     | 1.33E+08 | 1.33E+08 | + | 0     | 0     |
| ENSG00000120762 | RP11-774C   | lincRNA         | chr4     | 8355090  | 8358338  | - | 1.18  | 1.19  |

|                                      |          |          |   |      |      |
|--------------------------------------|----------|----------|---|------|------|
| ENSG0000(RP11-485M lincRNA chr5      | 1.33E+08 | 1.33E+08 | - | 0    | 0    |
| ENSG0000(AC007322. unprocessε chrY   | 21895394 | 21897559 | + | 0    | 0    |
| ENSG0000(RP11-756P lincRNA chr4      | 1.89E+08 | 1.89E+08 | + | 0    | 0    |
| ENSG0000(STPG2-AS1 antisense chr4    | 97366926 | 97490164 | + | 0    | 0    |
| ENSG0000(AC009487. 3prime_ov chr2    | 1.61E+08 | 1.61E+08 | + | 0    | 0    |
| ENSG0000(RP11-826N lincRNA chr5      | 1.76E+08 | 1.76E+08 | + | 0    | 0    |
| ENSG0000(UNC93B7 unprocessε chr4     | 9493736  | 9498066  | + | 0    | 0    |
| ENSG0000(CTD-2089C processed_ chr5   | 1.11E+08 | 1.11E+08 | - | 0    | 0    |
| ENSG0000(RP11-371M lincRNA chr5      | 1.14E+08 | 1.14E+08 | + | 0    | 0    |
| ENSG0000(RP11-774D lincRNA chr5      | 20611840 | 20937691 | + | 0    | 0    |
| ENSG0000(RP11-241F processed_ chr4   | 49561285 | 49561470 | - | 0    | 0    |
| ENSG0000(LINC02172 lincRNA chr4      | 1.38E+08 | 1.38E+08 | + | 0    | 0    |
| ENSG0000(GYG1P1 unprocessε chr8      | 73905357 | 73915010 | - | 0    | 0    |
| ENSG0000(RP11-1280 unprocessε chr5   | 71102898 | 71128753 | - | 0.4  | 0.5  |
| ENSG0000(RP11-213G lincRNA chr4      | 38564003 | 38570671 | + | 0    | 0    |
| ENSG0000(LINC01218 sense_intrε chr4  | 1.01E+08 | 1.01E+08 | - | 0    | 0    |
| ENSG0000(RP11-119D lincRNA chr11     | 67886477 | 67906350 | + | 0    | 0.16 |
| ENSG0000(AC006390. processed_ chr4   | 24768049 | 24768331 | + | 0    | 0    |
| ENSG0000(RP11-2012C processed_ chr4  | 1100016  | 1101558  | - | 0    | 0    |
| ENSG0000(RP11-600L lincRNA chr4      | 38286994 | 38287491 | + | 0    | 0    |
| ENSG0000(RP11-91J3. processed_ chr4  | 1.87E+08 | 1.87E+08 | - | 0    | 0    |
| ENSG0000(HPRT1P1 processed_ chr4     | 15864938 | 15865940 | - | 0    | 0    |
| ENSG0000(RP11-576N processed_ chr4   | 83377363 | 83378076 | - | 0    | 0    |
| ENSG0000(CTD-2353N processed_ chr5   | 65732973 | 65733654 | + | 0    | 0    |
| ENSG0000(RP11-318I lincRNA chr4      | 1.26E+08 | 1.26E+08 | + | 0    | 0    |
| ENSG0000(RP11-2012C antisense chr4   | 1113639  | 1132977  | + | 0    | 0    |
| ENSG0000(RP11-192H lincRNA chr5      | 25218973 | 25298612 | - | 0    | 0    |
| ENSG0000(PRB1 protein_co chr12       | 11351823 | 11395566 | - | 0.09 | 0    |
| ENSG0000(PRELID3BP processed_ chr5   | 42908208 | 42908667 | - | 0    | 0    |
| ENSG0000(AC007036. sense_ovei chr7   | 30157531 | 30159534 | + | 3.78 | 1.41 |
| ENSG0000(RP11-326C antisense chr11   | 318640   | 325631   | + | 1.15 | 1.78 |
| ENSG0000(SUMO2P5 processed_ chr5     | 75225424 | 75225668 | + | 0    | 0    |
| ENSG0000(PCDHA12 protein_co chr5     | 1.41E+08 | 1.41E+08 | + | 0.04 | 0    |
| ENSG0000(RP11-700H lincRNA chr17     | 50944104 | 50948750 | + | 0    | 0    |
| ENSG0000(ZNF346-IT1 sense_intrε chr5 | 1.77E+08 | 1.77E+08 | + | 0.09 | 0.1  |
| ENSG0000(BRCC3P1 processed_ chr5     | 1.76E+08 | 1.76E+08 | + | 0    | 0    |
| ENSG0000(RP11-466P unprocessε chr5   | 76170930 | 76171106 | + | 0    | 0    |
| ENSG0000(FAM86EP transcribec chr4    | 3941760  | 3955419  | - | 1.63 | 1.82 |
| ENSG0000(CTD-2532K lincRNA chr5      | 1.75E+08 | 1.75E+08 | + | 0    | 0    |
| ENSG0000(CTC-458I2. antisense chr5   | 80128361 | 80143883 | + | 0    | 0    |
| ENSG0000(RP11-614F lincRNA chr4      | 1.32E+08 | 1.32E+08 | + | 0    | 0    |
| ENSG0000(CTD-2296D lincRNA chr5      | 7344579  | 7345921  | + | 0    | 0    |
| ENSG0000(RP11-669N lincRNA chr4      | 14134936 | 14143592 | + | 0    | 0    |
| ENSG0000(CTC-575N7 antisense chr5    | 1.3E+08  | 1.3E+08  | - | 0    | 0    |
| ENSG0000(RP11-631N processed_ chr5   | 61347126 | 61347716 | + | 0    | 0    |

|                 |           |                |       |          |          |   |   |      |
|-----------------|-----------|----------------|-------|----------|----------|---|---|------|
| ENSG00000100000 | UGT2B27P  | unprocessed    | chr4  | 69004862 | 69020414 | - | 0 | 0    |
| ENSG00000100000 | OR10J8P   | unprocessed    | chr1  | 1.59E+08 | 1.59E+08 | + | 0 | 0    |
| ENSG00000100000 | RP11-181K | antisense      | chr4  | 1.46E+08 | 1.46E+08 | + | 0 | 0    |
| ENSG00000100000 | RP11-752L | lincRNA        | chr4  | 1.48E+08 | 1.48E+08 | + | 0 | 0    |
| ENSG00000100000 | RP11-478C | processed      | chr4  | 269866   | 270175   | - | 0 | 0    |
| ENSG00000100000 | RP11-618I | unprocessed    | chr4  | 69306469 | 69307173 | - | 0 | 0    |
| ENSG00000100000 | PTX4      | protein_coding | chr16 | 1485886  | 1488981  | - | 0 | 0    |
| ENSG00000100000 | USP17L9P  | unprocessed    | chr4  | 9358383  | 9359975  | + | 0 | 0    |
| ENSG00000100000 | RN7SKP24  | misc_RNA       | chr9  | 34478622 | 34478905 | + | 0 | 0    |
| ENSG00000100000 | RNA5SP44  | rRNA           | chr17 | 66639269 | 66639383 | + | 0 | 0    |
| ENSG00000100000 | RNU6-857F | snRNA          | chr18 | 30984106 | 30984215 | + | 0 | 0    |
| ENSG00000100000 | RNU6-998F | snRNA          | chr4  | 57002692 | 57002792 | + | 0 | 0    |
| ENSG00000100000 | SNORA40   | snoRNA         | chr2  | 16199203 | 16199295 | + | 0 | 0    |
| ENSG00000100000 | RNA5-8SP6 | rRNA           | chrY  | 10200155 | 10200306 | + | 0 | 0    |
| ENSG00000100000 | RNU7-61P  | snRNA          | chr16 | 30483135 | 30483195 | - | 0 | 0    |
| ENSG00000100000 | RNU7-37P  | snRNA          | chrX  | 1.21E+08 | 1.21E+08 | - | 0 | 0    |
| ENSG00000100000 | RNU6-632F | snRNA          | chr10 | 25819363 | 25819426 | - | 0 | 0    |
| ENSG00000100000 | RNU7-20P  | snRNA          | chr7  | 1.49E+08 | 1.49E+08 | + | 0 | 0    |
| ENSG00000100000 | RN7SKP67  | misc_RNA       | chr4  | 1.83E+08 | 1.83E+08 | - | 0 | 0    |
| ENSG00000100000 | SNORA68   | snoRNA         | chr13 | 72460519 | 72460601 | - | 0 | 0    |
| ENSG00000100000 | RNA5SP41  | rRNA           | chr16 | 35753796 | 35753930 | + | 0 | 0    |
| ENSG00000100000 | RNU2-13P  | snRNA          | chr2  | 11561194 | 11561306 | + | 0 | 0    |
| ENSG00000100000 | RNU6-408F | snRNA          | chr18 | 29048620 | 29048719 | + | 0 | 0    |
| ENSG00000100000 | RNU7-123F | snRNA          | chr1  | 63536711 | 63536770 | - | 0 | 0    |
| ENSG00000100000 | RNU5E-3P  | snRNA          | chr4  | 48574453 | 48574520 | - | 0 | 0    |
| ENSG00000100000 | RNU7-175F | snRNA          | chr5  | 75538598 | 75538658 | - | 0 | 0    |
| ENSG00000100000 | RNU7-41P  | snRNA          | chr14 | 34845300 | 34845360 | - | 0 | 0    |
| ENSG00000100000 | RNU6-488F | snRNA          | chr3  | 93843764 | 93843862 | + | 0 | 0    |
| ENSG00000100000 | Y_RNA     | misc_RNA       | chr7  | 1.4E+08  | 1.4E+08  | - | 0 | 0    |
| ENSG00000100000 | RNA5SP40  | rRNA           | chr15 | 97472126 | 97472252 | - | 0 | 0    |
| ENSG00000100000 | SNORA4    | snoRNA         | chr3  | 1.83E+08 | 1.83E+08 | + | 0 | 0    |
| ENSG00000100000 | RN7SKP12  | misc_RNA       | chr5  | 1.08E+08 | 1.08E+08 | + | 0 | 0    |
| ENSG00000100000 | SCARNA8   | scaRNA         | chr9  | 19063656 | 19063786 | - | 0 | 0    |
| ENSG00000100000 | SNORA25   | snoRNA         | chr14 | 46960423 | 46960546 | + | 0 | 0    |
| ENSG00000100000 | RNU6-105E | snRNA          | chr4  | 1.84E+08 | 1.84E+08 | + | 0 | 0    |
| ENSG00000100000 | RNU4ATAC  | snRNA          | chr5  | 1.13E+08 | 1.13E+08 | + | 0 | 0    |
| ENSG00000100000 | RN7SKP13  | misc_RNA       | chr4  | 1.82E+08 | 1.82E+08 | - | 0 | 0    |
| ENSG00000100000 | SNORA25   | snoRNA         | chr8  | 1.39E+08 | 1.39E+08 | + | 0 | 0    |
| ENSG00000100000 | RNU7-124F | snRNA          | chr9  | 37936707 | 37936768 | - | 0 | 0    |
| ENSG00000100000 | RNA5SP11  | rRNA           | chr2  | 1.77E+08 | 1.77E+08 | + | 0 | 0    |
| ENSG00000100000 | RNU7-60P  | snRNA          | chr12 | 11546479 | 11546540 | + | 0 | 0    |
| ENSG00000100000 | RNU4ATAC  | snRNA          | chr9  | 33868540 | 33868665 | + | 0 | 0    |
| ENSG00000100000 | RNU5F-8P  | snRNA          | chr1  | 2.41E+08 | 2.41E+08 | + | 0 | 0    |
| ENSG00000100000 | RN7SKP46  | misc_RNA       | chr3  | 1.58E+08 | 1.58E+08 | - | 0 | 0    |
| ENSG00000100000 | RNU4-29P  | snRNA          | chr9  | 83275941 | 83276114 | + | 0 | 1.68 |

|                    |          |       |          |          |   |   |   |
|--------------------|----------|-------|----------|----------|---|---|---|
| ENSG0000(RNU6-75P  | snRNA    | chr13 | 90781766 | 90781869 | - | 0 | 0 |
| ENSG0000(RNU6-999F | snRNA    | chr1  | 2.45E+08 | 2.45E+08 | + | 0 | 0 |
| ENSG0000(RNA5SP38  | rRNA     | chr14 | 51692752 | 51692861 | + | 0 | 0 |
| ENSG0000(RNU6-848F | snRNA    | chr2  | 1.31E+08 | 1.31E+08 | + | 0 | 0 |
| ENSG0000(RN7SKP29  | misc_RNA | chr3  | 1.67E+08 | 1.67E+08 | - | 0 | 0 |
| ENSG0000(RNA5SP41  | rRNA     | chr16 | 35752826 | 35752942 | + | 0 | 0 |
| ENSG0000(RNU6-138F | snRNA    | chr3  | 18954943 | 18955049 | - | 0 | 0 |
| ENSG0000(RNU6-470F | snRNA    | chr17 | 43412427 | 43412530 | + | 0 | 0 |
| ENSG0000(RNA5SP44  | rRNA     | chr17 | 66895491 | 66895572 | + | 0 | 0 |
| ENSG0000(RNA5SP51  | rRNA     | chrY  | 10090410 | 10090528 | - | 0 | 0 |
| ENSG0000(RNU7-8P   | snRNA    | chr1  | 77420325 | 77420386 | + | 0 | 0 |
| ENSG0000(RNA5SP21  | rRNA     | chr6  | 1.27E+08 | 1.27E+08 | - | 0 | 0 |
| ENSG0000(RNA5SP48  | rRNA     | chr20 | 47873191 | 47873273 | + | 0 | 0 |
| ENSG0000(RNU6-112  | snRNA    | chr3  | 86235321 | 86235424 | + | 0 | 0 |
| ENSG0000(RNU6-377F | snRNA    | chr3  | 12514706 | 12514807 | + | 0 | 0 |
| ENSG0000(ACA59     | snoRNA   | chr2  | 63883249 | 63883391 | - | 0 | 0 |
| ENSG0000(RN7SKP24  | misc_RNA | chr9  | 83200940 | 83201228 | - | 0 | 0 |
| ENSG0000(SNORA3    | snoRNA   | chr21 | 41882205 | 41882300 | + | 0 | 0 |
| ENSG0000(Y_RNA     | misc_RNA | chr17 | 76319376 | 76319473 | + | 0 | 0 |
| ENSG0000(RNA5SP35  | rRNA     | chr12 | 30306431 | 30306524 | - | 0 | 0 |
| ENSG0000(RNU6-117  | snRNA    | chr10 | 42605158 | 42605263 | + | 0 | 0 |
| ENSG0000(RNA5SP20  | rRNA     | chr1  | 77614869 | 77614952 | + | 0 | 0 |
| ENSG0000(RNU7-47P  | snRNA    | chr3  | 1.43E+08 | 1.43E+08 | + | 0 | 0 |
| ENSG0000(RNU5A-7P  | snRNA    | chr12 | 64228560 | 64228675 | - | 0 | 0 |
| ENSG0000(RNU4-57P  | snRNA    | chr1  | 2.23E+08 | 2.23E+08 | + | 0 | 0 |
| ENSG0000(SCARNA6   | scaRNA   | chr2  | 2.33E+08 | 2.33E+08 | + | 0 | 0 |
| ENSG0000(Y_RNA     | misc_RNA | chr14 | 50086982 | 50087083 | + | 0 | 0 |
| ENSG0000(RNU6-237F | snRNA    | chr16 | 74456541 | 74456611 | + | 0 | 0 |
| ENSG0000(SNORA70   | snoRNA   | chrY  | 26247384 | 26247521 | + | 0 | 0 |
| ENSG0000(RNU6-863F | snRNA    | chr7  | 76087444 | 76087547 | + | 0 | 0 |
| ENSG0000(Y_RNA     | misc_RNA | chr4  | 56818218 | 56818314 | - | 0 | 0 |
| ENSG0000(SNORA31   | snoRNA   | chr7  | 34892417 | 34892549 | + | 0 | 0 |
| ENSG0000(Y_RNA     | misc_RNA | chr10 | 17403508 | 17403620 | + | 0 | 0 |
| ENSG0000(RNU6-129  | snRNA    | chr3  | 1.42E+08 | 1.42E+08 | - | 0 | 0 |
| ENSG0000(SCARNA21  | scaRNA   | chr2  | 24273614 | 24273741 | - | 0 | 0 |
| ENSG0000(RNU6-202F | snRNA    | chrX  | 41919254 | 41919349 | - | 0 | 0 |
| ENSG0000(RN7SKP14  | misc_RNA | chr17 | 54770949 | 54771277 | + | 0 | 0 |
| ENSG0000(RN7SKP13  | misc_RNA | chr10 | 27783846 | 27784053 | - | 0 | 0 |
| ENSG0000(Y_RNA     | misc_RNA | chr3  | 43472477 | 43472596 | + | 0 | 0 |
| ENSG0000(Y_RNA     | misc_RNA | chr17 | 4186326  | 4186424  | + | 0 | 0 |
| ENSG0000(RNU6-983F | snRNA    | chr1  | 1.94E+08 | 1.94E+08 | - | 0 | 0 |
| ENSG0000(RN7SKP18  | misc_RNA | chr6  | 1.17E+08 | 1.17E+08 | + | 0 | 0 |
| ENSG0000(SNORD116  | snoRNA   | chr15 | 25099499 | 25099594 | + | 0 | 0 |
| ENSG0000(RNA5SP15  | rRNA     | chr4  | 19181814 | 19181856 | - | 0 | 0 |
| ENSG0000(SCARNA20  | scaRNA   | chr17 | 28018770 | 28018907 | + | 0 | 0 |

|                     |           |       |          |          |   |      |      |
|---------------------|-----------|-------|----------|----------|---|------|------|
| ENSG0000(RNU6-322F) | snRNA     | chr15 | 1.01E+08 | 1.01E+08 | - | 0    | 0    |
| ENSG0000(RNU6-583F) | snRNA     | chr4  | 1.28E+08 | 1.28E+08 | + | 0    | 0    |
| ENSG0000(SNORA19)   | snoRNA    | chr12 | 60363822 | 60363935 | + | 0    | 0    |
| ENSG0000(RNA5SP16)  | rRNA      | chr1  | 2.29E+08 | 2.29E+08 | - | 0    | 0    |
| ENSG0000(RN7SKP19)  | misc_RNA  | chr1  | 73191604 | 73191855 | - | 0    | 0    |
| ENSG0000(SNORA31)   | snoRNA    | chr5  | 80306235 | 80306368 | - | 0    | 0    |
| ENSG0000(RNA5SP43)  | rRNA      | chr17 | 15782341 | 15782455 | + | 0    | 0    |
| ENSG0000(SNORD46)   | snoRNA    | chr6  | 24166273 | 24166374 | + | 0    | 0    |
| ENSG0000(RNU6-1114) | snRNA     | chr6  | 16205014 | 16205120 | + | 0    | 0    |
| ENSG0000(RNU6-319F) | snRNA     | chr9  | 15431899 | 15432006 | - | 0    | 0    |
| ENSG0000(RNU6ATAC)  | snRNA     | chr8  | 54152807 | 54152882 | - | 0    | 0    |
| ENSG0000(Y_RNA)     | misc_RNA  | chr1  | 93027410 | 93027506 | - | 0    | 0    |
| ENSG0000(SNORA31)   | snoRNA    | chr11 | 37702125 | 37702220 | - | 0    | 0    |
| ENSG0000(RNU7-12P)  | snRNA     | chr10 | 27232255 | 27232316 | - | 0    | 0    |
| ENSG0000(RN7SKP15)  | misc_RNA  | chr8  | 1.24E+08 | 1.24E+08 | + | 0    | 0    |
| ENSG0000(RNU6-1334) | snRNA     | chrY  | 2784749  | 2784853  | + | 0    | 0    |
| ENSG0000(RNU6-732F) | snRNA     | chr5  | 1.49E+08 | 1.49E+08 | - | 0    | 0    |
| ENSG0000(RNU6-803F) | snRNA     | chr19 | 53719064 | 53719165 | - | 0    | 0    |
| ENSG0000(snoMe28S)  | snoRNA    | chr12 | 97552137 | 97552228 | - | 0    | 0    |
| ENSG0000(RNA5SP96)  | rRNA      | chr2  | 69181897 | 69182003 | - | 0    | 0    |
| ENSG0000(RNU6-772F) | snRNA     | chr21 | 20355748 | 20355852 | - | 0    | 0    |
| ENSG0000(Y_RNA)     | misc_RNA  | chr7  | 1.03E+08 | 1.03E+08 | - | 0    | 0    |
| ENSG0000(RNU6-507F) | snRNA     | chr3  | 1.5E+08  | 1.5E+08  | - | 0    | 0    |
| ENSG0000(MIR449C)   | miRNA     | chr5  | 55172262 | 55172353 | - | 0    | 0    |
| ENSG0000(RNA5SP36)  | rRNA      | chr12 | 66066221 | 66066338 | + | 0    | 0    |
| ENSG0000(SNORA31)   | snoRNA    | chr14 | 41594463 | 41594591 | + | 0    | 0    |
| ENSG0000(RNU6-1288) | snRNA     | chr2  | 14274622 | 14274725 | - | 0    | 0    |
| ENSG0000(SCARNA20)  | scaRNA    | chr1  | 2.05E+08 | 2.05E+08 | + | 0    | 0    |
| ENSG0000(MIR1343)   | miRNA     | chr11 | 34941837 | 34941920 | + | 0    | 0    |
| ENSG0000(Y_RNA)     | misc_RNA  | chr6  | 36672838 | 36672944 | + | 0    | 0    |
| ENSG0000(RNU6-518F) | snRNA     | chr17 | 58835899 | 58835994 | + | 0    | 0    |
| ENSG0000(SCARNA21)  | scaRNA    | chr1  | 15542165 | 15542304 | + | 0    | 0    |
| ENSG0000(RP11-48B3) | antisense | chr8  | 80484561 | 80485619 | - | 0.57 | 0.31 |
| ENSG0000(RNU7-71P)  | snRNA     | chr16 | 72821933 | 72821992 | - | 0    | 0    |
| ENSG0000(SCARNA23)  | scaRNA    | chrX  | 24744441 | 24744570 | + | 0    | 0    |
| ENSG0000(RNU2-69P)  | snRNA     | chr18 | 58926197 | 58926296 | - | 0    | 0    |
| ENSG0000(RNA5SP18)  | rRNA      | chr5  | 51886688 | 51886769 | + | 0    | 0    |
| ENSG0000(RNU6-615F) | snRNA     | chr4  | 83003412 | 83003517 | + | 0    | 0    |
| ENSG0000(RNU5F-2P)  | snRNA     | chr1  | 1.8E+08  | 1.8E+08  | + | 0    | 0    |
| ENSG0000(RNU2-45P)  | snRNA     | chr6  | 28410270 | 28410456 | + | 0    | 0    |
| ENSG0000(SNORD79)   | snoRNA    | chr4  | 1.84E+08 | 1.84E+08 | + | 0    | 0    |
| ENSG0000(RNU7-75P)  | snRNA     | chr5  | 37327135 | 37327196 | + | 0    | 0    |
| ENSG0000(RNU6-475F) | snRNA     | chr6  | 1.15E+08 | 1.15E+08 | - | 0    | 0    |
| ENSG0000(RNU6ATAC)  | snRNA     | chr20 | 25611153 | 25611223 | + | 0    | 0    |
| ENSG0000(RNA5SP28)  | rRNA      | chr9  | 95142449 | 95142541 | - | 0    | 0    |

|                              |       |          |          |   |   |   |
|------------------------------|-------|----------|----------|---|---|---|
| ENSG0000(RNU6-120F) snRNA    | chr18 | 21120404 | 21120506 | - | 0 | 0 |
| ENSG0000(RNU6-760F) snRNA    | chr5  | 31832439 | 31832535 | + | 0 | 0 |
| ENSG0000(RN7SKP19) misc_RNA  | chr16 | 82192505 | 82192790 | - | 0 | 0 |
| ENSG0000(RNU4-49P) snRNA     | chr2  | 48340687 | 48340826 | - | 0 | 0 |
| ENSG0000(RNA5SP49) rRNA      | chr22 | 32635102 | 32635198 | - | 0 | 0 |
| ENSG0000(RNU7-79P) snRNA     | chr15 | 85389823 | 85389884 | - | 0 | 0 |
| ENSG0000(RNU7-84P) snRNA     | chr8  | 1.07E+08 | 1.07E+08 | - | 0 | 0 |
| ENSG0000(SNORA70) snoRNA     | chr12 | 75689152 | 75689304 | - | 0 | 0 |
| ENSG0000(RNU6-976F) snRNA    | chr14 | 84739942 | 84740052 | + | 0 | 0 |
| ENSG0000(SNORD116) snoRNA    | chr15 | 25101575 | 25101666 | + | 0 | 0 |
| ENSG0000(RNU6-916F) snRNA    | chr18 | 6936912  | 6937020  | - | 0 | 0 |
| ENSG0000(SCARNA11) scaRNA    | chr12 | 6581474  | 6581609  | - | 0 | 0 |
| ENSG0000(VTRNA2-2F) misc_RNA | chr2  | 65555432 | 65555534 | - | 0 | 0 |
| ENSG0000(RNA5SP27) rRNA      | chr8  | 88396437 | 88396547 | - | 0 | 0 |
| ENSG0000(RNU7-2P) snRNA      | chr2  | 1.46E+08 | 1.46E+08 | + | 0 | 0 |
| ENSG0000(RNU6-351F) snRNA    | chr4  | 1.05E+08 | 1.05E+08 | + | 0 | 0 |
| ENSG0000(RNU6-240F) snRNA    | chr14 | 73659564 | 73659660 | - | 0 | 0 |
| ENSG0000(RNU6-491F) snRNA    | chr12 | 14250232 | 14250341 | - | 0 | 0 |
| ENSG0000(RNU6-513F) snRNA    | chr22 | 42569147 | 42569250 | - | 0 | 0 |
| ENSG0000(RNU7-200F) snRNA    | chr1  | 20841241 | 20841302 | + | 0 | 0 |
| ENSG0000(RNA5SP40) rRNA      | chr16 | 35734393 | 35734504 | + | 0 | 0 |
| ENSG0000(RNU1-61P) snRNA     | chr6  | 32549940 | 32550090 | - | 0 | 0 |
| ENSG0000(RNU1-86P) snRNA     | chrY  | 23946618 | 23946771 | - | 0 | 0 |
| ENSG0000(RNU7-105F) snRNA    | chr11 | 72621766 | 72621827 | + | 0 | 0 |
| ENSG0000(RNA5SP21) rRNA      | chr6  | 1.26E+08 | 1.26E+08 | - | 0 | 0 |
| ENSG0000(SNORA14) snoRNA     | chr10 | 6017054  | 6017194  | - | 0 | 0 |
| ENSG0000(RNU6-276F) snRNA    | chr4  | 55798636 | 55798731 | + | 0 | 0 |
| ENSG0000(RNA5SP40) rRNA      | chr16 | 35735372 | 35735471 | + | 0 | 0 |
| ENSG0000(SNORA70) snoRNA     | chrY  | 23423099 | 23423236 | - | 0 | 0 |
| ENSG0000(RNU6-189F) snRNA    | chr14 | 49901850 | 49901950 | - | 0 | 0 |
| ENSG0000(RNU6-871F) snRNA    | chr12 | 59450673 | 59450772 | - | 0 | 0 |
| ENSG0000(RNU6-114) snRNA     | chr11 | 3714772  | 3714875  | - | 0 | 0 |
| ENSG0000(RN7SKP17) misc_RNA  | chr2  | 1.91E+08 | 1.91E+08 | - | 0 | 0 |
| ENSG0000(RNA5SP24) rRNA      | chr7  | 1.48E+08 | 1.48E+08 | + | 0 | 0 |
| ENSG0000(RNU7-129F) snRNA    | chr18 | 12400412 | 12400473 | + | 0 | 0 |
| ENSG0000(RNU6-127) snRNA     | chr18 | 46121615 | 46121721 | - | 0 | 0 |
| ENSG0000(SNORA15) snoRNA     | chr22 | 19249873 | 19249966 | + | 0 | 0 |
| ENSG0000(RNA5SP11) rRNA      | chr2  | 2.08E+08 | 2.08E+08 | - | 0 | 0 |
| ENSG0000(SCARNA16) scaRNA    | chr2  | 53470447 | 53470629 | - | 0 | 0 |
| ENSG0000(RNU6-693F) snRNA    | chr1  | 1.73E+08 | 1.73E+08 | - | 0 | 0 |
| ENSG0000(RNU6-102) snRNA     | chr6  | 54786387 | 54786492 | + | 0 | 0 |
| ENSG0000(RN7SKP16) misc_RNA  | chr2  | 76595413 | 76595678 | - | 0 | 0 |
| ENSG0000(RN7SKP34) misc_RNA  | chr5  | 87102603 | 87102846 | - | 0 | 0 |
| ENSG0000(RNU6-121) snRNA     | chr22 | 29191697 | 29191808 | - | 0 | 0 |
| ENSG0000(RNA5SP52) rRNA      | chrY  | 18346123 | 18346238 | - | 0 | 0 |



|                             |       |          |          |   |   |      |
|-----------------------------|-------|----------|----------|---|---|------|
| ENSG0000(RNU6-496F) snRNA   | chrX  | 1.11E+08 | 1.11E+08 | - | 0 | 0    |
| ENSG0000(RNU6-27P) snRNA    | chr20 | 17187510 | 17187616 | + | 0 | 0    |
| ENSG0000(RNU6-617F) snRNA   | chr2  | 1.32E+08 | 1.32E+08 | + | 0 | 0    |
| ENSG0000(RNU6-1095) snRNA   | chr10 | 11923181 | 11923288 | + | 0 | 0    |
| ENSG0000(RNU6-1102) snRNA   | chr1  | 78088988 | 78089083 | - | 0 | 0    |
| ENSG0000(RNU6-559F) snRNA   | chr9  | 15143289 | 15143386 | + | 0 | 0    |
| ENSG0000(RNU6ATAC) snRNA    | chr4  | 1.71E+08 | 1.71E+08 | + | 0 | 0    |
| ENSG0000(RNA5SP20) rRNA     | chr6  | 67467231 | 67467308 | - | 0 | 0    |
| ENSG0000(SNORD77) snoRNA    | chr3  | 46650510 | 46650590 | + | 0 | 0    |
| ENSG0000(RNU1-41P) snRNA    | chrY  | 18833729 | 18833890 | - | 0 | 0    |
| ENSG0000(RNU6-1333) snRNA   | chr2  | 2.38E+08 | 2.38E+08 | - | 0 | 0    |
| ENSG0000(RNU6-123F) snRNA   | chr21 | 25943044 | 25943145 | - | 0 | 0    |
| ENSG0000(RNU6-473F) snRNA   | chr2  | 1.3E+08  | 1.3E+08  | - | 0 | 0    |
| ENSG0000(SNORA19) snoRNA    | chr2  | 86364136 | 86364265 | + | 0 | 0    |
| ENSG0000(RNU6-718F) snRNA   | chr5  | 1.2E+08  | 1.2E+08  | - | 0 | 0    |
| ENSG0000(RN7SKP14) misc_RNA | chr2  | 1.36E+08 | 1.36E+08 | + | 0 | 0    |
| ENSG0000(RNU6-991F) snRNA   | chr1  | 8292157  | 8292263  | - | 0 | 0    |
| ENSG0000(RNA5SP23) rRNA     | chr7  | 1.07E+08 | 1.07E+08 | - | 0 | 0    |
| ENSG0000(RNU6-436F) snRNA   | chr2  | 1.58E+08 | 1.58E+08 | + | 0 | 0    |
| ENSG0000(RNU7-52P) snRNA    | chr17 | 62383104 | 62383166 | + | 0 | 0    |
| ENSG0000(RN7SKP43) misc_RNA | chr2  | 2.17E+08 | 2.17E+08 | + | 0 | 0    |
| ENSG0000(RN7SKP15) misc_RNA | chr5  | 62146665 | 62146946 | + | 0 | 0    |
| ENSG0000(RNU6-1161) snRNA   | chr22 | 45624531 | 45624632 | - | 0 | 0    |
| ENSG0000(Y_RNA) misc_RNA    | chr3  | 41868998 | 41869095 | - | 0 | 0    |
| ENSG0000(SNORD63) snoRNA    | chr3  | 53530322 | 53530401 | - | 0 | 0    |
| ENSG0000(RNU4ATAC) snRNA    | chr6  | 1.6E+08  | 1.6E+08  | - | 0 | 0    |
| ENSG0000(RNA5SP18) rRNA     | chr5  | 17156971 | 17157071 | - | 0 | 0    |
| ENSG0000(RNU7-49P) snRNA    | chr11 | 14478892 | 14478953 | + | 0 | 0    |
| ENSG0000(SCARNA17) scaRNA   | chr18 | 49814133 | 49814276 | + | 0 | 0    |
| ENSG0000(RNA5SP22) rRNA     | chr7  | 22298594 | 22298706 | + | 0 | 0    |
| ENSG0000(RNU2-27P) snRNA    | chr18 | 9518119  | 9518260  | - | 0 | 0    |
| ENSG0000(Y_RNA) misc_RNA    | chrY  | 7341531  | 7341642  | + | 0 | 0    |
| ENSG0000(RNA5SP45) rRNA     | chr18 | 50319002 | 50319120 | + | 0 | 0    |
| ENSG0000(RNU6-168F) snRNA   | chr5  | 1.64E+08 | 1.64E+08 | - | 0 | 0    |
| ENSG0000(SNORA31) snoRNA    | chr7  | 32791814 | 32791946 | + | 0 | 0    |
| ENSG0000(RNA5SP30) rRNA     | chr10 | 19633683 | 19633812 | - | 0 | 0    |
| ENSG0000(RNA5SP15) rRNA     | chr4  | 9792751  | 9792861  | - | 0 | 0    |
| ENSG0000(RNU7-154F) snRNA   | chr7  | 1.22E+08 | 1.22E+08 | + | 0 | 0    |
| ENSG0000(RNU4ATAC) snRNA    | chr1  | 73883714 | 73883822 | + | 0 | 0    |
| ENSG0000(RNU6-927F) snRNA   | chr12 | 1.25E+08 | 1.25E+08 | + | 0 | 0    |
| ENSG0000(SCARNA5) scaRNA    | chr2  | 2.33E+08 | 2.33E+08 | + | 0 | 0.47 |
| ENSG0000(SNORA25) snoRNA    | chr1  | 2.47E+08 | 2.47E+08 | - | 0 | 0    |
| ENSG0000(RNA5SP52) rRNA     | chrY  | 17559774 | 17559889 | + | 0 | 0    |
| ENSG0000(RNU4ATAC) snRNA    | chr14 | 75202081 | 75202169 | - | 0 | 0    |
| ENSG0000(SNORA70) snoRNA    | chr4  | 1.32E+08 | 1.32E+08 | + | 0 | 0    |

|                     |          |       |          |          |   |   |   |
|---------------------|----------|-------|----------|----------|---|---|---|
| ENSG0000(RNU6-904F) | snRNA    | chr2  | 1.41E+08 | 1.41E+08 | - | 0 | 0 |
| ENSG0000(ACA64)     | snoRNA   | chrX  | 88148792 | 88148918 | + | 0 | 0 |
| ENSG0000(RNU6-1194) | snRNA    | chr3  | 282689   | 282792   | - | 0 | 0 |
| ENSG0000(RNU2-30P)  | snRNA    | chr1  | 52754322 | 52754462 | + | 0 | 0 |
| ENSG0000(RNU6ATAC)  | snRNA    | chr14 | 54859215 | 54859330 | + | 0 | 0 |
| ENSG0000(SCARNA17)  | scaRNA   | chr22 | 21389796 | 21389938 | - | 0 | 0 |
| ENSG0000(Y_RNA)     | misc_RNA | chr20 | 45004348 | 45004454 | + | 0 | 0 |
| ENSG0000(SNORD33)   | snoRNA   | chr16 | 76469508 | 76469595 | - | 0 | 0 |
| ENSG0000(RNU6-581F) | snRNA    | chr7  | 1.21E+08 | 1.21E+08 | + | 0 | 0 |
| ENSG0000(RNU6-982F) | snRNA    | chr19 | 53745004 | 53745105 | - | 0 | 0 |
| ENSG0000(RNU6-1262) | snRNA    | chr16 | 68284223 | 68284318 | - | 0 | 0 |
| ENSG0000(RNU6ATAC)  | snRNA    | chr2  | 1.77E+08 | 1.77E+08 | + | 0 | 0 |
| ENSG0000(RN7SKP52)  | misc_RNA | chr3  | 1.78E+08 | 1.78E+08 | - | 0 | 0 |
| ENSG0000(RNA5SP25)  | rRNA     | chr8  | 12087396 | 12087445 | - | 0 | 0 |
| ENSG0000(RNU6-119f) | snRNA    | chr4  | 1.53E+08 | 1.53E+08 | - | 0 | 0 |
| ENSG0000(RNU6-561F) | snRNA    | chr2  | 79636862 | 79636963 | - | 0 | 0 |
| ENSG0000(RNU6-1281) | snRNA    | chr1  | 51538625 | 51538729 | - | 0 | 0 |
| ENSG0000(RNU6-311F) | snRNA    | chr11 | 78579255 | 78579356 | - | 0 | 0 |
| ENSG0000(RNY4P37)   | misc_RNA | chr18 | 46077004 | 46077099 | - | 0 | 0 |
| ENSG0000(RNU6-397F) | snRNA    | chr8  | 14487776 | 14487879 | - | 0 | 0 |
| ENSG0000(RN7SKP28)  | misc_RNA | chr10 | 1.11E+08 | 1.11E+08 | + | 0 | 0 |
| ENSG0000(RNU6-162F) | snRNA    | chr7  | 1.44E+08 | 1.44E+08 | + | 0 | 0 |
| ENSG0000(RNU6-287F) | snRNA    | chr17 | 42891338 | 42891435 | - | 0 | 0 |
| ENSG0000(snoU109)   | snoRNA   | chr16 | 68630223 | 68630354 | - | 0 | 0 |
| ENSG0000(RNA5SP22)  | rRNA     | chr7  | 24132705 | 24132837 | + | 0 | 0 |
| ENSG0000(Y_RNA)     | misc_RNA | chr17 | 75145670 | 75145762 | + | 0 | 0 |
| ENSG0000(SNORA33)   | snoRNA   | chr21 | 32538299 | 32538434 | + | 0 | 0 |
| ENSG0000(RNU6-150F) | snRNA    | chr6  | 20993474 | 20993568 | - | 0 | 0 |
| ENSG0000(Y_RNA)     | misc_RNA | chr7  | 1.03E+08 | 1.03E+08 | - | 0 | 0 |
| ENSG0000(SNORA40)   | snoRNA   | chr10 | 23166985 | 23167101 | + | 0 | 0 |
| ENSG0000(SNORA31)   | snoRNA   | chrX  | 38308112 | 38308241 | - | 0 | 0 |
| ENSG0000(RN7SKP27)  | misc_RNA | chr1  | 2.29E+08 | 2.29E+08 | - | 0 | 0 |
| ENSG0000(RNU6-1101) | snRNA    | chr3  | 1.95E+08 | 1.95E+08 | - | 0 | 0 |
| ENSG0000(RNU7-174F) | snRNA    | chr8  | 80560567 | 80560625 | + | 0 | 0 |
| ENSG0000(RNA5SP46)  | rRNA     | chr19 | 11996809 | 11996916 | + | 0 | 0 |
| ENSG0000(RNU6-415F) | snRNA    | chr15 | 78898840 | 78898936 | - | 0 | 0 |
| ENSG0000(RNU6-469F) | snRNA    | chr4  | 84886386 | 84886486 | - | 0 | 0 |
| ENSG0000(RNU6-1041) | snRNA    | chr19 | 53760087 | 53760188 | - | 0 | 0 |
| ENSG0000(Y_RNA)     | misc_RNA | chr20 | 57311854 | 57311958 | + | 0 | 0 |
| ENSG0000(RNU6-864F) | snRNA    | chr14 | 28982303 | 28982410 | - | 0 | 0 |
| ENSG0000(RNU2-53P)  | snRNA    | chr15 | 53651977 | 53652123 | + | 0 | 0 |
| ENSG0000(RNU4-71P)  | snRNA    | chr8  | 23600026 | 23600138 | - | 0 | 0 |
| ENSG0000(RNU6-390F) | snRNA    | chr5  | 1.58E+08 | 1.58E+08 | + | 0 | 0 |
| ENSG0000(Y_RNA)     | misc_RNA | chrX  | 1.1E+08  | 1.1E+08  | - | 0 | 0 |
| ENSG0000(RNA5SP34)  | rRNA     | chr11 | 57450183 | 57450299 | + | 0 | 0 |

|                             |       |          |          |   |   |   |
|-----------------------------|-------|----------|----------|---|---|---|
| ENSG0000(RNA5SP32) rRNA     | chr10 | 73706490 | 73706613 | + | 0 | 0 |
| ENSG0000(RNU6-947) snRNA    | chr1  | 2.45E+08 | 2.45E+08 | + | 0 | 0 |
| ENSG0000(RNU6-416) snRNA    | chr16 | 30675300 | 30675402 | - | 0 | 0 |
| ENSG0000(RN7SKP19) misc_RNA | chr10 | 58869184 | 58869528 | + | 0 | 0 |
| ENSG0000(RNU6-327) snRNA    | chr12 | 1.33E+08 | 1.33E+08 | - | 0 | 0 |
| ENSG0000(RNU7-99) snRNA     | chr16 | 6748908  | 6748969  | + | 0 | 0 |
| ENSG0000(RNU6-277) snRNA    | chr11 | 1.06E+08 | 1.06E+08 | - | 0 | 0 |
| ENSG0000(RNU6-547) snRNA    | chr3  | 1.73E+08 | 1.73E+08 | + | 0 | 0 |
| ENSG0000(SNORA40) snoRNA    | chr5  | 23972188 | 23972294 | - | 0 | 0 |
| ENSG0000(RN7SKP12) misc_RNA | chr1  | 2.42E+08 | 2.42E+08 | - | 0 | 0 |
| ENSG0000(RNA5SP76) rRNA     | chr1  | 2.2E+08  | 2.2E+08  | + | 0 | 0 |
| ENSG0000(RN7SKP24) misc_RNA | chr4  | 90370123 | 90370427 | + | 0 | 0 |
| ENSG0000(RNU4ATAC) snRNA    | chr20 | 54859688 | 54859812 | - | 0 | 0 |
| ENSG0000(RNU6-114) snRNA    | chr20 | 56667430 | 56667531 | + | 0 | 0 |
| ENSG0000(RNA5SP41) rRNA     | chr16 | 35745989 | 35746094 | + | 0 | 0 |
| ENSG0000(SNORA31) snoRNA    | chr20 | 4868984  | 4869118  | + | 0 | 0 |
| ENSG0000(RNU6-346) snRNA    | chr18 | 76800664 | 76800774 | - | 0 | 0 |
| ENSG0000(Y_RNA) misc_RNA    | chr1  | 27255464 | 27255567 | - | 0 | 0 |
| ENSG0000(RNU6-758) snRNA    | chr16 | 75286712 | 75286800 | - | 0 | 0 |
| ENSG0000(RNU6-917) snRNA    | chr20 | 1529056  | 1529159  | - | 0 | 0 |
| ENSG0000(RNU6-191) snRNA    | chr4  | 64397694 | 64397787 | - | 0 | 0 |
| ENSG0000(RNU1-143) snRNA    | chr1  | 1.44E+08 | 1.44E+08 | - | 0 | 0 |
| ENSG0000(RNY3P15) misc_RNA  | chr6  | 34873831 | 34873927 | + | 0 | 0 |
| ENSG0000(RNA5SP22) rRNA     | chr6  | 1.4E+08  | 1.4E+08  | - | 0 | 0 |
| ENSG0000(RNU6-123) snRNA    | chr5  | 68159061 | 68159146 | - | 0 | 0 |
| ENSG0000(SNORD63) snoRNA    | chr17 | 30246757 | 30246820 | - | 0 | 0 |
| ENSG0000(RNU6-523) snRNA    | chr10 | 67858818 | 67858871 | - | 0 | 0 |
| ENSG0000(Y_RNA) misc_RNA    | chr7  | 1.17E+08 | 1.17E+08 | - | 0 | 0 |
| ENSG0000(RNU4ATAC) snRNA    | chr1  | 67267601 | 67267726 | - | 0 | 0 |
| ENSG0000(RNU6-110) snRNA    | chr15 | 44927600 | 44927703 | - | 0 | 0 |
| ENSG0000(RNU6ATAC) snRNA    | chr10 | 12456483 | 12456631 | + | 0 | 0 |
| ENSG0000(ACA64) snoRNA      | chr11 | 1.19E+08 | 1.19E+08 | - | 0 | 0 |
| ENSG0000(RNU6-970) snRNA    | chr1  | 92969604 | 92969710 | - | 0 | 0 |
| ENSG0000(SNORA76) snoRNA    | chr16 | 75409332 | 75409466 | - | 0 | 0 |
| ENSG0000(RNU6-129) snRNA    | chr6  | 1.07E+08 | 1.07E+08 | + | 0 | 0 |
| ENSG0000(RNU6-313) snRNA    | chr7  | 66344303 | 66344414 | + | 0 | 0 |
| ENSG0000(SNORD27) snoRNA    | chr13 | 21139886 | 21139957 | - | 0 | 0 |
| ENSG0000(SNORA74) snoRNA    | chr17 | 15574019 | 15574198 | + | 0 | 0 |
| ENSG0000(RNU6-104) snRNA    | chr2  | 1.91E+08 | 1.91E+08 | + | 0 | 0 |
| ENSG0000(RNU6-795) snRNA    | chr10 | 38043873 | 38043975 | - | 0 | 0 |
| ENSG0000(SNORA70) snoRNA    | chr9  | 62358191 | 62358285 | - | 0 | 0 |
| ENSG0000(RNVU1-2) snRNA     | chr1  | 1.48E+08 | 1.48E+08 | - | 0 | 0 |
| ENSG0000(SNORA31) snoRNA    | chr4  | 1.05E+08 | 1.05E+08 | + | 0 | 0 |
| ENSG0000(RNU6-133) snRNA    | chr6  | 75593055 | 75593145 | + | 0 | 0 |
| ENSG0000(SNORA40) snoRNA    | chr16 | 7726841  | 7726951  | - | 0 | 0 |

|                 |           |          |       |          |          |   |   |   |
|-----------------|-----------|----------|-------|----------|----------|---|---|---|
| ENSG00000180100 | SCARNA18  | scaRNA   | chr18 | 49814361 | 49814443 | + | 0 | 0 |
| ENSG00000180101 | RNU6-65P  | snRNA    | chr13 | 51565412 | 51565509 | + | 0 | 0 |
| ENSG00000180102 | SCARNA17  | scaRNA   | chr22 | 21544897 | 21545039 | + | 0 | 0 |
| ENSG00000180103 | RNU6-122E | snRNA    | chrX  | 68102068 | 68102132 | - | 0 | 0 |
| ENSG00000180104 | RNY3P16   | misc_RNA | chrX  | 1.19E+08 | 1.19E+08 | + | 0 | 0 |
| ENSG00000180105 | RNU6-120E | snRNA    | chr2  | 2.01E+08 | 2.01E+08 | + | 0 | 0 |
| ENSG00000180106 | RNA5SP31  | rRNA     | chr10 | 48040462 | 48040577 | + | 0 | 0 |
| ENSG00000180107 | RNU6-126E | snRNA    | chr1  | 14124233 | 14124335 | - | 0 | 0 |
| ENSG00000180108 | MIR2278   | miRNA    | chr9  | 94809962 | 94810057 | + | 0 | 0 |
| ENSG00000180109 | RNU6-941F | snRNA    | chrY  | 7378672  | 7378779  | + | 0 | 0 |
| ENSG00000180110 | RNU6-155F | snRNA    | chr6  | 75768059 | 75768158 | - | 0 | 0 |
| ENSG00000180111 | RNU6-479F | snRNA    | chr4  | 1.84E+08 | 1.84E+08 | - | 0 | 0 |
| ENSG00000180112 | SNORA72   | snoRNA   | chr8  | 1.31E+08 | 1.31E+08 | - | 0 | 0 |
| ENSG00000180113 | RNA5SP31  | rRNA     | chr10 | 53458197 | 53458288 | + | 0 | 0 |
| ENSG00000180114 | RNU6-830F | snRNA    | chr1  | 55398514 | 55398620 | + | 0 | 0 |
| ENSG00000180115 | RN7SKP31  | misc_RNA | chrX  | 1.38E+08 | 1.38E+08 | + | 0 | 0 |
| ENSG00000180116 | RNA5SP28  | rRNA     | chr9  | 34206134 | 34206241 | - | 0 | 0 |
| ENSG00000180117 | RNU1-95P  | snRNA    | chrY  | 18116848 | 18117007 | + | 0 | 0 |
| ENSG00000180118 | RNA5SP28  | rRNA     | chr9  | 81885496 | 81885598 | + | 0 | 0 |
| ENSG00000180119 | RNA5SP20  | rRNA     | chr5  | 1.73E+08 | 1.73E+08 | - | 0 | 0 |
| ENSG00000180120 | SNORD112  | snoRNA   | chrX  | 1.3E+08  | 1.3E+08  | + | 0 | 0 |
| ENSG00000180121 | Y_RNA     | misc_RNA | chr15 | 45047103 | 45047215 | - | 0 | 0 |
| ENSG00000180122 | RNU6-720F | snRNA    | chr3  | 1.5E+08  | 1.5E+08  | - | 0 | 0 |
| ENSG00000180123 | RNU6-109F | snRNA    | chrY  | 16248935 | 16249041 | + | 0 | 0 |
| ENSG00000180124 | RNU7-18P  | snRNA    | chr3  | 1.96E+08 | 1.96E+08 | + | 0 | 0 |
| ENSG00000180125 | RNU7-69P  | snRNA    | chrX  | 1.24E+08 | 1.24E+08 | - | 0 | 0 |
| ENSG00000180126 | RNA5SP25  | rRNA     | chr8  | 13536029 | 13536135 | + | 0 | 0 |
| ENSG00000180127 | RNA5SP41  | rRNA     | chr16 | 35747032 | 35747140 | + | 0 | 0 |
| ENSG00000180128 | RNU6-948F | snRNA    | chr4  | 1.21E+08 | 1.21E+08 | - | 0 | 0 |
| ENSG00000180129 | RNU2-10P  | snRNA    | chr3  | 62118300 | 62118510 | - | 0 | 0 |
| ENSG00000180130 | RNU6-752F | snRNA    | chr5  | 1.27E+08 | 1.27E+08 | - | 0 | 0 |
| ENSG00000180131 | RNU6-781F | snRNA    | chr12 | 6709452  | 6709552  | + | 0 | 0 |
| ENSG00000180132 | SNORA40   | snoRNA   | chr7  | 1.39E+08 | 1.39E+08 | - | 0 | 0 |
| ENSG00000180133 | SCARNA17  | scaRNA   | chr1  | 26006006 | 26006130 | + | 0 | 0 |
| ENSG00000180134 | RNU6-751F | snRNA    | chr19 | 53749851 | 53749951 | - | 0 | 0 |
| ENSG00000180135 | SNORA9    | snoRNA   | chr12 | 1.22E+08 | 1.22E+08 | - | 0 | 0 |
| ENSG00000180136 | SCARNA15  | scaRNA   | chr20 | 43304555 | 43304679 | + | 0 | 0 |
| ENSG00000180137 | Y_RNA     | misc_RNA | chr14 | 58441844 | 58441992 | + | 0 | 0 |
| ENSG00000180138 | SNORA70   | snoRNA   | chr21 | 9907916  | 9908010  | + | 0 | 0 |
| ENSG00000180139 | snoZ6     | snoRNA   | chr19 | 44725984 | 44726058 | - | 0 | 0 |
| ENSG00000180140 | Y_RNA     | misc_RNA | chr5  | 1.8E+08  | 1.8E+08  | - | 0 | 0 |
| ENSG00000180141 | SNORA25   | snoRNA   | chr12 | 31811088 | 31811190 | + | 0 | 0 |
| ENSG00000180142 | RNU6-764F | snRNA    | chrX  | 1.52E+08 | 1.52E+08 | - | 0 | 0 |
| ENSG00000180143 | RNU7-40P  | snRNA    | chr12 | 56352387 | 56352450 | - | 0 | 0 |
| ENSG00000180144 | RNA5SP36  | rRNA     | chr12 | 89726936 | 89727042 | + | 0 | 0 |

|                     |          |       |          |          |   |   |   |
|---------------------|----------|-------|----------|----------|---|---|---|
| ENSG0000(RNU1-48P)  | snRNA    | chrY  | 18486511 | 18486672 | + | 0 | 0 |
| ENSG0000(Y_RNA)     | misc_RNA | chr8  | 68223318 | 68223402 | - | 0 | 0 |
| ENSG0000(RNA5SP47)  | rRNA     | chr19 | 58363438 | 58363562 | + | 0 | 0 |
| ENSG0000(RNU2-58P)  | snRNA    | chr17 | 59129276 | 59129458 | - | 0 | 0 |
| ENSG0000(SNORA74)   | snoRNA   | chr5  | 1.39E+08 | 1.39E+08 | + | 0 | 0 |
| ENSG0000(RNU6-542F) | snRNA    | chr2  | 74319399 | 74319501 | + | 0 | 0 |
| ENSG0000(Y_RNA)     | misc_RNA | chr15 | 65502741 | 65502836 | + | 0 | 0 |
| ENSG0000(SCARNA15)  | scaRNA   | chr6  | 43544144 | 43544270 | + | 0 | 0 |
| ENSG0000(MIR892C)   | miRNA    | chrX  | 1.46E+08 | 1.46E+08 | - | 0 | 0 |
| ENSG0000(RNU6-977F) | snRNA    | chr12 | 83021890 | 83021992 | + | 0 | 0 |
| ENSG0000(RNU7-13P)  | snRNA    | chr1  | 1.85E+08 | 1.85E+08 | - | 0 | 0 |
| ENSG0000(RNU6-104F) | snRNA    | chr2  | 1.3E+08  | 1.3E+08  | - | 0 | 0 |
| ENSG0000(RNU4ATAC)  | snRNA    | chr9  | 33174170 | 33174295 | + | 0 | 0 |
| ENSG0000(Y_RNA)     | misc_RNA | chr22 | 36440880 | 36440970 | - | 0 | 0 |
| ENSG0000(SNORA48)   | snoRNA   | chr6  | 30132805 | 30132966 | - | 0 | 0 |
| ENSG0000(SNORD111)  | snoRNA   | chr19 | 34637696 | 34637781 | - | 0 | 0 |
| ENSG0000(RNA5SP67)  | rRNA     | chr1  | 1.74E+08 | 1.74E+08 | + | 0 | 0 |
| ENSG0000(RN7SKP25)  | misc_RNA | chr4  | 1.4E+08  | 1.4E+08  | - | 0 | 0 |
| ENSG0000(SNORA26)   | snoRNA   | chr1  | 1.56E+08 | 1.56E+08 | - | 0 | 0 |
| ENSG0000(RNU4-54P)  | snRNA    | chr12 | 28319335 | 28319463 | - | 0 | 0 |
| ENSG0000(SNORA31)   | snoRNA   | chr2  | 4827001  | 4827084  | - | 0 | 0 |
| ENSG0000(RNU7-115F) | snRNA    | chr17 | 64825765 | 64825819 | - | 0 | 0 |
| ENSG0000(RNU6-412F) | snRNA    | chr4  | 46531237 | 46531342 | - | 0 | 0 |
| ENSG0000(RNU7-3P)   | snRNA    | chr6  | 1.5E+08  | 1.5E+08  | + | 0 | 0 |
| ENSG0000(RNA5SP92)  | rRNA     | chr2  | 33332898 | 33333007 | + | 0 | 0 |
| ENSG0000(RNU6-70P)  | snRNA    | chr13 | 27343687 | 27343746 | - | 0 | 0 |
| ENSG0000(SNORA18)   | snoRNA   | chr6  | 93879106 | 93879229 | + | 0 | 0 |
| ENSG0000(Y_RNA)     | misc_RNA | chr2  | 69334600 | 69334692 | + | 0 | 0 |
| ENSG0000(RNU6-687F) | snRNA    | chr10 | 54452423 | 54452511 | - | 0 | 0 |
| ENSG0000(Y_RNA)     | misc_RNA | chr1  | 8328067  | 8328179  | + | 0 | 0 |
| ENSG0000(RNU2-35P)  | snRNA    | chr11 | 1.26E+08 | 1.26E+08 | + | 0 | 0 |
| ENSG0000(RN7SKP26)  | misc_RNA | chr3  | 1.82E+08 | 1.82E+08 | + | 0 | 0 |
| ENSG0000(SNORA70)   | snoRNA   | chr18 | 3025434  | 3025566  | - | 0 | 0 |
| ENSG0000(RNA5SP49)  | rRNA     | chr1  | 63186336 | 63186450 | - | 0 | 0 |
| ENSG0000(RNA5SP46)  | rRNA     | chr18 | 77863464 | 77863567 | - | 0 | 0 |
| ENSG0000(RNA5SP26)  | rRNA     | chr8  | 32192028 | 32192153 | - | 0 | 0 |
| ENSG0000(RNA5SP61)  | rRNA     | chr1  | 1.62E+08 | 1.62E+08 | + | 0 | 0 |
| ENSG0000(RNU6-659F) | snRNA    | chr14 | 70496107 | 70496210 | + | 0 | 0 |
| ENSG0000(RNU7-153F) | snRNA    | chr8  | 14319455 | 14319516 | + | 0 | 0 |
| ENSG0000(Y_RNA)     | misc_RNA | chr4  | 5426885  | 5426984  | - | 0 | 0 |
| ENSG0000(RNA5SP49)  | rRNA     | chr22 | 26390667 | 26390776 | - | 0 | 0 |
| ENSG0000(RNA5SP41)  | rRNA     | chr16 | 35751828 | 35751935 | + | 0 | 0 |
| ENSG0000(RNU4ATAC)  | snRNA    | chr12 | 1.33E+08 | 1.33E+08 | - | 0 | 0 |
| ENSG0000(RNU6-111C) | snRNA    | chr16 | 58384442 | 58384542 | - | 0 | 0 |
| ENSG0000(RNA5SP47)  | rRNA     | chr19 | 29001670 | 29001775 | + | 0 | 0 |

|                             |       |          |          |   |   |      |
|-----------------------------|-------|----------|----------|---|---|------|
| ENSG0000(RNU6-426F) snRNA   | chr21 | 16035413 | 16035509 | - | 0 | 0    |
| ENSG0000(SCARNA24) scaRNA   | chr17 | 72818836 | 72818972 | - | 0 | 4.65 |
| ENSG0000(RNU7-192F) snRNA   | chr4  | 1.89E+08 | 1.89E+08 | - | 0 | 0    |
| ENSG0000(SNORD116) snoRNA   | chr15 | 25108268 | 25108352 | + | 0 | 0    |
| ENSG0000(RNU6-406F) snRNA   | chr17 | 43445507 | 43445613 | + | 0 | 0    |
| ENSG0000(RNU6-108E) snRNA   | chr1  | 2.45E+08 | 2.45E+08 | + | 0 | 0    |
| ENSG0000(Vault) misc_RNA    | chr17 | 28061967 | 28062068 | + | 0 | 0    |
| ENSG0000(SNORA108) snoRNA   | chr18 | 58600631 | 58600698 | + | 0 | 0    |
| ENSG0000(RNA5SP24) rRNA     | chr13 | 19088487 | 19088581 | + | 0 | 0    |
| ENSG0000(RNU6-966F) snRNA   | chr15 | 44973558 | 44973661 | + | 0 | 0    |
| ENSG0000(RNA5SP51) rRNA     | chrY  | 10092875 | 10092993 | - | 0 | 0    |
| ENSG0000(SNORA25) snoRNA    | chr1  | 2.38E+08 | 2.38E+08 | - | 0 | 0    |
| ENSG0000(SNORA31) snoRNA    | chrX  | 6061644  | 6061749  | - | 0 | 0    |
| ENSG0000(RN7SKP23) misc_RNA | chr10 | 85650012 | 85650260 | - | 0 | 0    |
| ENSG0000(RNU6-589F) snRNA   | chrX  | 1.03E+08 | 1.03E+08 | - | 0 | 0    |
| ENSG0000(SNORA25) snoRNA    | chrX  | 1E+08    | 1E+08    | + | 0 | 0    |
| ENSG0000(RNU6-875F) snRNA   | chr8  | 1.23E+08 | 1.23E+08 | + | 0 | 0    |
| ENSG0000(RNA5SP13) rRNA     | chr3  | 63545440 | 63545535 | + | 0 | 0    |
| ENSG0000(RNA5SP14) rRNA     | chr3  | 1.77E+08 | 1.77E+08 | + | 0 | 0    |
| ENSG0000(SNORA74) snoRNA    | chr17 | 14177131 | 14177310 | + | 0 | 0    |
| ENSG0000(RNA5SP15) rRNA     | chr4  | 9411178  | 9411253  | - | 0 | 0    |
| ENSG0000(RNU1-103F) snRNA   | chr16 | 85781775 | 85781899 | - | 0 | 0    |
| ENSG0000(RN7SKP21) misc_RNA | chr14 | 36231555 | 36231774 | - | 0 | 0    |
| ENSG0000(RNA5SP28) rRNA     | chr9  | 32293558 | 32293692 | + | 0 | 0    |
| ENSG0000(RNA5SP52) rRNA     | chrY  | 17557864 | 17557976 | + | 0 | 0    |
| ENSG0000(RNY4) misc_RNA     | chr7  | 1.49E+08 | 1.49E+08 | + | 0 | 0    |
| ENSG0000(Y_RNA) misc_RNA    | chr1  | 2.4E+08  | 2.4E+08  | + | 0 | 0    |
| ENSG0000(Y_RNA) misc_RNA    | chr18 | 8720034  | 8720132  | - | 0 | 0    |
| ENSG0000(RNU6-320F) snRNA   | chrX  | 1.37E+08 | 1.37E+08 | + | 0 | 0    |
| ENSG0000(RN7SKP83) misc_RNA | chr2  | 85820435 | 85820612 | - | 0 | 0    |
| ENSG0000(RN7SKP24) misc_RNA | chr4  | 88583666 | 88583972 | - | 0 | 0    |
| ENSG0000(RNU6-184F) snRNA   | chrY  | 16336283 | 16336389 | - | 0 | 0    |
| ENSG0000(RNU6-103E) snRNA   | chr18 | 21879801 | 21879904 | + | 0 | 0    |
| ENSG0000(SNORD116) snoRNA   | chr15 | 25097663 | 25097754 | + | 0 | 0    |
| ENSG0000(Vault) misc_RNA    | chr17 | 35097560 | 35097657 | - | 0 | 0    |
| ENSG0000(SCARNA16) scaRNA   | chr11 | 12904817 | 12904988 | - | 0 | 0    |
| ENSG0000(RNU6-911F) snRNA   | chr7  | 1.39E+08 | 1.39E+08 | + | 0 | 0    |
| ENSG0000(RNU6-964F) snRNA   | chr2  | 2.3E+08  | 2.3E+08  | - | 0 | 0    |
| ENSG0000(RNU6-1337) snRNA   | chr19 | 58483749 | 58483843 | - | 0 | 0    |
| ENSG0000(RNU6-62P) snRNA    | chr13 | 95019235 | 95019336 | + | 0 | 0    |
| ENSG0000(RNA5SP14) rRNA     | chr3  | 1.78E+08 | 1.78E+08 | - | 0 | 0    |
| ENSG0000(SNORA31) snoRNA    | chr5  | 1.07E+08 | 1.07E+08 | + | 0 | 0    |
| ENSG0000(RNU6-503F) snRNA   | chr1  | 75538015 | 75538119 | - | 0 | 0    |
| ENSG0000(RNU6-1061) snRNA   | chr16 | 71563430 | 71563528 | - | 0 | 0    |
| ENSG0000(Y_RNA) misc_RNA    | chr5  | 10292041 | 10292148 | - | 0 | 0    |

|                 |           |          |       |          |          |   |   |   |
|-----------------|-----------|----------|-------|----------|----------|---|---|---|
| ENSG00000172230 | RNA5SP16  | rRNA     | chr4  | 93820171 | 93820280 | + | 0 | 0 |
| ENSG00000172231 | RNU2-34P  | snRNA    | chr4  | 1.83E+08 | 1.83E+08 | + | 0 | 0 |
| ENSG00000172232 | RNA5SP12  | rRNA     | chr2  | 2.28E+08 | 2.28E+08 | - | 0 | 0 |
| ENSG00000172233 | RNU6-104f | snRNA    | chr14 | 23259460 | 23259566 | - | 0 | 0 |
| ENSG00000172234 | RNU6-125f | snRNA    | chr3  | 1.02E+08 | 1.02E+08 | + | 0 | 0 |
| ENSG00000172235 | SNORA31   | snoRNA   | chr17 | 19662000 | 19662090 | + | 0 | 0 |
| ENSG00000172236 | RPPH1-3P  | ribozyme | chr4  | 1.57E+08 | 1.57E+08 | - | 0 | 0 |
| ENSG00000172237 | RNU6ATAC  | snRNA    | chr11 | 1.31E+08 | 1.31E+08 | + | 0 | 0 |
| ENSG00000172238 | SNORA40   | snoRNA   | chr17 | 69355133 | 69355218 | - | 0 | 0 |
| ENSG00000172239 | RNU7-25P  | snRNA    | chr18 | 3093568  | 3093629  | + | 0 | 0 |
| ENSG00000172240 | RN7SKP28  | misc_RNA | chr11 | 43435132 | 43435397 | - | 0 | 0 |
| ENSG00000172241 | Y_RNA     | misc_RNA | chr1  | 1.74E+08 | 1.74E+08 | + | 0 | 0 |
| ENSG00000172242 | RN7SKP13  | misc_RNA | chr8  | 63609354 | 63609600 | - | 0 | 0 |
| ENSG00000172243 | RNU6-118f | snRNA    | chr11 | 62815966 | 62816067 | - | 0 | 0 |
| ENSG00000172244 | RNU6-506f | snRNA    | chr4  | 1.39E+08 | 1.39E+08 | - | 0 | 0 |
| ENSG00000172245 | RNU7-43P  | snRNA    | chr17 | 8511125  | 8511188  | + | 0 | 0 |
| ENSG00000172246 | RNA5SP36  | rRNA     | chr12 | 41658676 | 41658793 | + | 0 | 0 |
| ENSG00000172247 | RNA5SP36  | rRNA     | chr12 | 1.01E+08 | 1.01E+08 | + | 0 | 0 |
| ENSG00000172248 | Y_RNA     | misc_RNA | chr20 | 5113993  | 5114083  | - | 0 | 0 |
| ENSG00000172249 | RNA5SP43  | rRNA     | chr1  | 37264677 | 37264786 | - | 0 | 0 |
| ENSG00000172250 | RNU7-51P  | snRNA    | chr14 | 83048579 | 83048640 | + | 0 | 0 |
| ENSG00000172251 | RNA5SP43  | rRNA     | chr17 | 34120056 | 34120167 | - | 0 | 0 |
| ENSG00000172252 | RNU6-725f | snRNA    | chr1  | 2.38E+08 | 2.38E+08 | - | 0 | 0 |
| ENSG00000172253 | RNU6-358f | snRNA    | chr5  | 31820564 | 31820638 | - | 0 | 0 |
| ENSG00000172254 | Y_RNA     | misc_RNA | chr7  | 14010669 | 14010763 | - | 0 | 0 |
| ENSG00000172255 | RNA5SP39  | rRNA     | chr15 | 50463381 | 50463498 | + | 0 | 0 |
| ENSG00000172256 | RNU6-504f | snRNA    | chrX  | 51870706 | 51870809 | - | 0 | 0 |
| ENSG00000172257 | RNU6-314f | snRNA    | chr17 | 16098704 | 16098807 | + | 0 | 0 |
| ENSG00000172258 | RNU6-68P  | snRNA    | chr13 | 46410454 | 46410557 | + | 0 | 0 |
| ENSG00000172259 | RNU6-101g | snRNA    | chr20 | 41684986 | 41685091 | - | 0 | 0 |
| ENSG00000172260 | RNU5F-4P  | snRNA    | chr12 | 31594093 | 31594206 | - | 0 | 0 |
| ENSG00000172261 | RNU6-638f | snRNA    | chr17 | 78696694 | 78696797 | - | 0 | 0 |
| ENSG00000172262 | RNU6-100g | snRNA    | chr12 | 1.22E+08 | 1.22E+08 | + | 0 | 0 |
| ENSG00000172263 | RNU6-100i | snRNA    | chr2  | 88414898 | 88415004 | - | 0 | 0 |
| ENSG00000172264 | RN7SKP19  | misc_RNA | chr1  | 2.37E+08 | 2.37E+08 | + | 0 | 0 |
| ENSG00000172265 | RNU5A-4P  | snRNA    | chr13 | 33829539 | 33829649 | - | 0 | 0 |
| ENSG00000172266 | Y_RNA     | misc_RNA | chr3  | 32045873 | 32045979 | + | 0 | 0 |
| ENSG00000172267 | RNU6-129i | snRNA    | chr14 | 51522864 | 51522967 | + | 0 | 0 |
| ENSG00000172268 | RNU4ATAC  | snRNA    | chr10 | 28652630 | 28652755 | + | 0 | 0 |
| ENSG00000172269 | SCARNA16  | scaRNA   | chr1  | 9082696  | 9082879  | + | 0 | 0 |
| ENSG00000172270 | RNU7-183f | snRNA    | chr1  | 1.85E+08 | 1.85E+08 | + | 0 | 0 |
| ENSG00000172271 | SNORD38   | snoRNA   | chr19 | 3521248  | 3521320  | - | 0 | 0 |
| ENSG00000172272 | SCARNA21  | scaRNA   | chr3  | 41687868 | 41688033 | - | 0 | 0 |
| ENSG00000172273 | RNU5B-3P  | snRNA    | chr3  | 45034474 | 45034588 | - | 0 | 0 |
| ENSG00000172274 | RNU6-108g | snRNA    | chrX  | 35594173 | 35594273 | + | 0 | 0 |

|                    |          |       |          |          |   |      |      |
|--------------------|----------|-------|----------|----------|---|------|------|
| ENSG0000(Y_RNA     | misc_RNA | chr22 | 37013225 | 37013319 | + | 0    | 0    |
| ENSG0000(RNU7-121F | snRNA    | chr1  | 39723566 | 39723627 | - | 0    | 0    |
| ENSG0000(RNU6-100F | snRNA    | chr2  | 64578892 | 64578997 | + | 0    | 0    |
| ENSG0000(RNU6-101I | snRNA    | chr12 | 73679188 | 73679296 | - | 0    | 0    |
| ENSG0000(RNU6-885F | snRNA    | chr10 | 42832447 | 42832550 | - | 0    | 0    |
| ENSG0000(RNU7-179F | snRNA    | chr1  | 15608078 | 15608145 | - | 0    | 0    |
| ENSG0000(Y_RNA     | misc_RNA | chr3  | 61739127 | 61739229 | - | 0    | 0    |
| ENSG0000(RNU6-106I | snRNA    | chr12 | 31802958 | 31803090 | - | 0    | 0    |
| ENSG0000(RNA5SP47I | rRNA     | chr20 | 18433842 | 18433944 | + | 0    | 0    |
| ENSG0000(RNU6-229F | snRNA    | chr7  | 69401202 | 69401303 | - | 0    | 0    |
| ENSG0000(RNA5SP38I | rRNA     | chr14 | 49552633 | 49552748 | + | 0    | 0    |
| ENSG0000(SNORA18   | snoRNA   | chr15 | 34597458 | 34597558 | - | 0    | 0    |
| ENSG0000(RNU1-107F | snRNA    | chrY  | 25723342 | 25723495 | + | 0    | 0    |
| ENSG0000(SNORD67   | snoRNA   | chr11 | 46758766 | 46758873 | - | 0    | 0    |
| ENSG0000(RNA5SP28I | rRNA     | chr9  | 72299720 | 72299838 | - | 0    | 0    |
| ENSG0000(RNU7-29P  | snRNA    | chr1  | 26602369 | 26602432 | - | 0    | 0    |
| ENSG0000(RNU6-124I | snRNA    | chr6  | 1.51E+08 | 1.51E+08 | - | 0    | 0    |
| ENSG0000(SNORA31   | snoRNA   | chr1  | 67102645 | 67102779 | - | 0    | 0    |
| ENSG0000(Y_RNA     | misc_RNA | chr2  | 62726636 | 62726740 | - | 0    | 0    |
| ENSG0000(RNA5SP45I | rRNA     | chr18 | 55146546 | 55146645 | - | 0    | 0    |
| ENSG0000(SNORD45   | snoRNA   | chr10 | 12415928 | 12416000 | + | 0    | 0    |
| ENSG0000(SNORA64   | snoRNA   | chrX  | 1.16E+08 | 1.16E+08 | + | 0    | 0    |
| ENSG0000(SNORA62   | snoRNA   | chr16 | 69785994 | 69786113 | - | 0    | 0    |
| ENSG0000(RNU6-344F | snRNA    | chr6  | 1.06E+08 | 1.06E+08 | + | 0    | 0    |
| ENSG0000(RNU6-405F | snRNA    | chr17 | 16691798 | 16691907 | + | 0    | 0    |
| ENSG0000(SNORA63   | snoRNA   | chr1  | 37884237 | 37884317 | + | 0    | 0    |
| ENSG0000(RNU6-139F | snRNA    | chr3  | 62814382 | 62814491 | + | 0    | 0    |
| ENSG0000(Y_RNA     | misc_RNA | chr1  | 32286452 | 32286561 | - | 0    | 0    |
| ENSG0000(RNA5SP16I | rRNA     | chr4  | 1.51E+08 | 1.51E+08 | - | 0    | 0    |
| ENSG0000(RNU6-107F | snRNA    | chr2  | 2.33E+08 | 2.33E+08 | + | 0    | 0    |
| ENSG0000(MIR2114   | miRNA    | chrX  | 1.5E+08  | 1.5E+08  | + | 0    | 0    |
| ENSG0000(RNA5SP43I | rRNA     | chr17 | 4056756  | 4056876  | - | 0    | 0    |
| ENSG0000(RNU7-65P  | snRNA    | chr6  | 49344800 | 49344861 | - | 0    | 0    |
| ENSG0000(SNORA68   | snoRNA   | chr5  | 1.59E+08 | 1.59E+08 | + | 0    | 0    |
| ENSG0000(SNORA27   | snoRNA   | chr12 | 1.15E+08 | 1.15E+08 | + | 0    | 0    |
| ENSG0000(RNU6-635F | snRNA    | chr4  | 1.04E+08 | 1.04E+08 | + | 0    | 0    |
| ENSG0000(SNORA43   | snoRNA   | chr16 | 28881480 | 28881607 | - | 0    | 0    |
| ENSG0000(RNU6-113F | snRNA    | chr21 | 17431547 | 17431647 | + | 0    | 0    |
| ENSG0000(RN7SKP70  | misc_RNA | chr5  | 1.79E+08 | 1.79E+08 | - | 1.28 | 2.23 |
| ENSG0000(MIR2115   | miRNA    | chr3  | 48316360 | 48316459 | - | 0    | 0    |
| ENSG0000(RNU6-347F | snRNA    | chr20 | 51902291 | 51902395 | + | 0    | 0    |
| ENSG0000(RNU2-57P  | snRNA    | chrY  | 5019076  | 5019266  | + | 0    | 0    |
| ENSG0000(RNU7-160F | snRNA    | chr14 | 1.04E+08 | 1.04E+08 | + | 0    | 0    |
| ENSG0000(RNU6-551F | snRNA    | chr4  | 1.07E+08 | 1.07E+08 | + | 0    | 0    |
| ENSG0000(RNU6-521F | snRNA    | chrY  | 7423054  | 7423158  | - | 0    | 0    |



|                    |          |       |          |          |   |      |      |
|--------------------|----------|-------|----------|----------|---|------|------|
| ENSG0000(SNORA67   | snoRNA   | chr2  | 39283657 | 39283791 | - | 0    | 0    |
| ENSG0000(RNU6-539F | snRNA    | chr14 | 49839725 | 49839827 | + | 0    | 0    |
| ENSG0000(RNU6-133Z | snRNA    | chr15 | 44962830 | 44962933 | + | 0    | 0    |
| ENSG0000(RNA5SP30) | rRNA     | chr10 | 31259599 | 31259704 | + | 0    | 0    |
| ENSG0000(RNU6-719F | snRNA    | chr7  | 39768341 | 39768444 | + | 0    | 0    |
| ENSG0000(SCARNA13  | scaRNA   | chr14 | 95533355 | 95533629 | - | 0.86 | 0.47 |
| ENSG0000(RNU7-22P  | snRNA    | chr10 | 32173684 | 32173744 | + | 0    | 0    |
| ENSG0000(RNU6-117E | snRNA    | chr17 | 20894532 | 20894638 | - | 0    | 0    |
| ENSG0000(RN7SKP49  | misc_RNA | chr1  | 2.24E+08 | 2.24E+08 | - | 0    | 0    |
| ENSG0000(Vault     | misc_RNA | chr2  | 2.06E+08 | 2.06E+08 | - | 0    | 0    |
| ENSG0000(Y_RNA     | misc_RNA | chrX  | 27252119 | 27252235 | - | 0    | 0    |
| ENSG0000(RNY4P20   | misc_RNA | chr6  | 1.51E+08 | 1.51E+08 | - | 0    | 0    |
| ENSG0000(RNU6-197F | snRNA    | chr4  | 56288485 | 56288584 | - | 0    | 0    |
| ENSG0000(RN7SKP66  | misc_RNA | chr2  | 43772120 | 43772350 | - | 0    | 0    |
| ENSG0000(RNU1-142F | snRNA    | chrX  | 26790142 | 26790286 | + | 0    | 0    |
| ENSG0000(RNU6-126F | snRNA    | chr11 | 78133420 | 78133522 | - | 0    | 0    |
| ENSG0000(RNA5SP33  | rRNA     | chr13 | 79389534 | 79389631 | - | 0    | 0    |
| ENSG0000(RPPH1-2P  | ribozyme | chr14 | 64909488 | 64909780 | - | 0    | 0    |
| ENSG0000(RNU6-101E | snRNA    | chr6  | 75644084 | 75644177 | + | 0    | 0    |
| ENSG0000(RNU6-63P  | snRNA    | chr13 | 27488138 | 27488232 | + | 0    | 0    |
| ENSG0000(RNU4-77P  | snRNA    | chr1  | 2.33E+08 | 2.33E+08 | - | 0    | 0    |
| ENSG0000(RNU6-531F | snRNA    | chr4  | 1.39E+08 | 1.39E+08 | + | 0    | 0    |
| ENSG0000(SNORA70   | snoRNA   | chr8  | 33540040 | 33540137 | + | 0    | 0    |
| ENSG0000(RNU6-180F | snRNA    | chr1  | 2.29E+08 | 2.29E+08 | + | 0    | 0    |
| ENSG0000(RNU7-81P  | snRNA    | chr2  | 54850289 | 54850352 | + | 0    | 0    |
| ENSG0000(RNU4ATAC  | snRNA    | chr13 | 92059844 | 92059969 | + | 0    | 0    |
| ENSG0000(RNA5SP27) | rRNA     | chr8  | 72357728 | 72357815 | + | 0    | 0    |
| ENSG0000(RNA5SP55  | rRNA     | chr1  | 1.17E+08 | 1.17E+08 | - | 0    | 0    |
| ENSG0000(RNA5SP20) | rRNA     | chr6  | 32078508 | 32078628 | - | 0    | 0    |
| ENSG0000(RNU1-128F | snRNA    | chrY  | 17789003 | 17789162 | - | 0    | 0    |
| ENSG0000(RNU7-53P  | snRNA    | chr5  | 1.3E+08  | 1.3E+08  | - | 0    | 0    |
| ENSG0000(RNU6-117I | snRNA    | chr1  | 1.49E+08 | 1.49E+08 | + | 0    | 0    |
| ENSG0000(RNA5SP82  | rRNA     | chr1  | 2.47E+08 | 2.47E+08 | - | 0    | 0    |
| ENSG0000(SNORD59   | snoRNA   | chr2  | 1.95E+08 | 1.95E+08 | - | 0    | 0    |
| ENSG0000(RNU6-783F | snRNA    | chr11 | 23849778 | 23849882 | + | 0    | 0    |
| ENSG0000(RNU5D-2P  | snRNA    | chr9  | 1.32E+08 | 1.32E+08 | + | 0    | 0    |
| ENSG0000(RNU6-267F | snRNA    | chr7  | 1.44E+08 | 1.44E+08 | - | 0    | 0    |
| ENSG0000(Y_RNA     | misc_RNA | chr4  | 1.57E+08 | 1.57E+08 | + | 0    | 0    |
| ENSG0000(SNORA70   | snoRNA   | chr16 | 50151642 | 50151731 | - | 0    | 0    |
| ENSG0000(RNU6-965F | snRNA    | chr1  | 1.02E+08 | 1.02E+08 | - | 0    | 0    |
| ENSG0000(RNU7-193F | snRNA    | chr10 | 43458065 | 43458129 | + | 0    | 0    |
| ENSG0000(RNU6-572F | snRNA    | chr5  | 1.39E+08 | 1.39E+08 | + | 0    | 0    |
| ENSG0000(Y_RNA     | misc_RNA | chr17 | 60748940 | 60749046 | - | 0    | 0    |
| ENSG0000(RNA5SP25) | rRNA     | chr8  | 12333644 | 12333693 | - | 0    | 0    |
| ENSG0000(SNORA31   | snoRNA   | chr10 | 16005808 | 16005923 | + | 0    | 0    |

|                             |       |          |          |   |      |       |
|-----------------------------|-------|----------|----------|---|------|-------|
| ENSG0000(RNA5SP46) rRNA     | chr19 | 453134   | 453245   | + | 0    | 0     |
| ENSG0000(RNU6-919F) snRNA   | chr20 | 49794811 | 49794914 | + | 0    | 0     |
| ENSG0000(SNORD36C) snoRNA   | chr9  | 1.33E+08 | 1.33E+08 | + | 0    | 0     |
| ENSG0000(RNU6-1282) snRNA   | chr4  | 1.51E+08 | 1.51E+08 | + | 0    | 0     |
| ENSG0000(RNU6-362F) snRNA   | chr17 | 75031097 | 75031186 | + | 0    | 0     |
| ENSG0000(RNA5SP46) rRNA     | chr19 | 12070164 | 12070271 | + | 0    | 0     |
| ENSG0000(RNU7-149F) snRNA   | chr4  | 98966815 | 98966873 | - | 0    | 0     |
| ENSG0000(RNU6-759F) snRNA   | chr20 | 35647328 | 35647430 | - | 0    | 0     |
| ENSG0000(SNORA25) snoRNA    | chr13 | 1.06E+08 | 1.06E+08 | - | 0    | 0     |
| ENSG0000(RNU6-307F) snRNA   | chr1  | 1.75E+08 | 1.75E+08 | + | 0    | 0     |
| ENSG0000(RNA5SP73) rRNA     | chr1  | 1.9E+08  | 1.9E+08  | - | 0    | 0     |
| ENSG0000(RNU6-861F) snRNA   | chr6  | 1.29E+08 | 1.29E+08 | - | 0    | 0     |
| ENSG0000(RNU6-567F) snRNA   | chr18 | 60018625 | 60018731 | + | 0    | 0     |
| ENSG0000(RNU6-256F) snRNA   | chr11 | 1.22E+08 | 1.22E+08 | + | 0    | 0     |
| ENSG0000(RNU6-914F) snRNA   | chr8  | 98192205 | 98192313 | - | 5.97 | 10.05 |
| ENSG0000(RNU4-18P) snRNA    | chr6  | 1.32E+08 | 1.32E+08 | - | 0    | 0     |
| ENSG0000(RNU1-125F) snRNA   | chr16 | 3069523  | 3069651  | + | 0    | 0     |
| ENSG0000(RNU6-922F) snRNA   | chr3  | 23613661 | 23613759 | - | 0    | 0     |
| ENSG0000(RNA5SP45) rRNA     | chr1  | 41466937 | 41467028 | - | 0    | 0     |
| ENSG0000(RNU7-28P) snRNA    | chr11 | 9843815  | 9843876  | - | 0    | 0     |
| ENSG0000(RNU6-1155) snRNA   | chr16 | 53443228 | 53443332 | - | 0    | 0     |
| ENSG0000(RNU5B-6P) snRNA    | chr10 | 1.09E+08 | 1.09E+08 | - | 0    | 0     |
| ENSG0000(SCARNA20) scaRNA   | chr17 | 60231516 | 60231646 | - | 0    | 0     |
| ENSG0000(RNU6-135F) snRNA   | chr1  | 23163953 | 23164053 | + | 0    | 0     |
| ENSG0000(SNORA31) snoRNA    | chr9  | 26796173 | 26796304 | - | 0    | 0     |
| ENSG0000(RNU6-1098) snRNA   | chr3  | 1.5E+08  | 1.5E+08  | + | 0    | 0     |
| ENSG0000(SNORA31) snoRNA    | chr9  | 1.31E+08 | 1.31E+08 | - | 0    | 0     |
| ENSG0000(MIR514B) miRNA     | chrX  | 1.47E+08 | 1.47E+08 | - | 0    | 0     |
| ENSG0000(Y_RNA) misc_RNA    | chr12 | 27752874 | 27752986 | + | 0    | 0     |
| ENSG0000(RNA5SP42) rRNA     | chr16 | 35754923 | 35755033 | + | 0    | 0     |
| ENSG0000(RNU7-143F) snRNA   | chr7  | 23450658 | 23450722 | + | 0    | 0     |
| ENSG0000(RNA5SP46) rRNA     | chr19 | 17972025 | 17972117 | + | 0    | 0     |
| ENSG0000(RNU6-1224) snRNA   | chr8  | 1.03E+08 | 1.03E+08 | - | 0    | 0     |
| ENSG0000(RNU6-656F) snRNA   | chr8  | 46831050 | 46831156 | + | 0    | 0     |
| ENSG0000(RN7SKP82) misc_RNA | chr4  | 42892396 | 42892618 | + | 0    | 0     |
| ENSG0000(RNU7-137F) snRNA   | chr20 | 18095571 | 18095632 | - | 0    | 0     |
| ENSG0000(RNA5SP46) rRNA     | chr18 | 72751952 | 72752051 | + | 0    | 0     |
| ENSG0000(RNU6-566F) snRNA   | chr2  | 44154789 | 44154895 | - | 0    | 0     |
| ENSG0000(SNORA18) snoRNA    | chr5  | 29070496 | 29070610 | + | 0    | 0     |
| ENSG0000(RNU6ATAC) snRNA    | chr22 | 41722043 | 41722131 | - | 0    | 0     |
| ENSG0000(RNU2-44P) snRNA    | chr4  | 1.55E+08 | 1.55E+08 | + | 0    | 0     |
| ENSG0000(RNU6-1150) snRNA   | chr21 | 43996322 | 43996420 | - | 0    | 0     |
| ENSG0000(Y_RNA) misc_RNA    | chr12 | 60341824 | 60341941 | - | 0    | 0     |
| ENSG0000(RNU6-1191) snRNA   | chr16 | 81106533 | 81106639 | - | 0    | 0     |
| ENSG0000(RNU6-1121) snRNA   | chr10 | 1.15E+08 | 1.15E+08 | - | 0    | 0     |

|                    |          |       |          |          |   |   |   |
|--------------------|----------|-------|----------|----------|---|---|---|
| ENSG0000(Y_RNA     | misc_RNA | chr1  | 1.85E+08 | 1.85E+08 | + | 0 | 0 |
| ENSG0000(RNU6-807F | snRNA    | chr15 | 1.02E+08 | 1.02E+08 | - | 0 | 0 |
| ENSG0000(Y_RNA     | misc_RNA | chr6  | 1.51E+08 | 1.51E+08 | - | 0 | 0 |
| ENSG0000(RNA5SP44: | rRNA     | chr17 | 40374089 | 40374176 | + | 0 | 0 |
| ENSG0000(RNU6-114  | snRNA    | chr21 | 42417497 | 42417593 | - | 0 | 0 |
| ENSG0000(RNU6ATAC  | snRNA    | chr3  | 1.96E+08 | 1.96E+08 | - | 0 | 0 |
| ENSG0000(Y_RNA     | misc_RNA | chr10 | 37303000 | 37303109 | - | 0 | 0 |
| ENSG0000(RNU6-881F | snRNA    | chr9  | 1.31E+08 | 1.31E+08 | + | 0 | 0 |
| ENSG0000(RNA5SP48: | rRNA     | chr20 | 32008351 | 32008472 | + | 0 | 0 |
| ENSG0000(RNA5SP40: | rRNA     | chr16 | 35735625 | 35735733 | + | 0 | 0 |
| ENSG0000(RNU1-40P  | snRNA    | chrY  | 25928979 | 25929142 | + | 0 | 0 |
| ENSG0000(RNU6-130  | snRNA    | chr3  | 1.07E+08 | 1.07E+08 | + | 0 | 0 |
| ENSG0000(RNU6-122F | snRNA    | chrX  | 1.24E+08 | 1.24E+08 | + | 0 | 0 |
| ENSG0000(RNU6-453F | snRNA    | chr17 | 44307088 | 44307172 | + | 0 | 0 |
| ENSG0000(RN7SKP28: | misc_RNA | chrY  | 7324297  | 7324595  | - | 0 | 0 |
| ENSG0000(RN7SKP21: | misc_RNA | chr10 | 21785292 | 21785587 | + | 0 | 0 |
| ENSG0000(RNU2-56P  | snRNA    | chr20 | 18265690 | 18265879 | - | 0 | 0 |
| ENSG0000(RNU6-826F | snRNA    | chr17 | 49036352 | 49036455 | + | 0 | 0 |
| ENSG0000(RNA5SP26: | rRNA     | chr8  | 67099302 | 67099425 | + | 0 | 0 |
| ENSG0000(RNU2-24P  | snRNA    | chr10 | 27193358 | 27193500 | - | 0 | 0 |
| ENSG0000(snoU109   | snoRNA   | chr16 | 68630851 | 68630968 | - | 0 | 0 |
| ENSG0000(RNU6-678F | snRNA    | chr3  | 1.34E+08 | 1.34E+08 | + | 0 | 0 |
| ENSG0000(RNA5SP13: | rRNA     | chr3  | 1.25E+08 | 1.25E+08 | - | 0 | 0 |
| ENSG0000(RNU6-113  | snRNA    | chr7  | 1.03E+08 | 1.03E+08 | + | 0 | 0 |
| ENSG0000(RNU7-30P  | snRNA    | chr14 | 91091077 | 91091138 | + | 0 | 0 |
| ENSG0000(RNU7-111F | snRNA    | chr15 | 89897576 | 89897637 | + | 0 | 0 |
| ENSG0000(RNA5SP41: | rRNA     | chr16 | 35751574 | 35751684 | + | 0 | 0 |
| ENSG0000(RNA5SP48: | rRNA     | chr20 | 31356870 | 31356978 | + | 0 | 0 |
| ENSG0000(RNA5SP75  | rRNA     | chr1  | 2.05E+08 | 2.05E+08 | - | 0 | 0 |
| ENSG0000(RNU6-557F | snRNA    | chr3  | 73092148 | 73092257 | - | 0 | 0 |
| ENSG0000(Y_RNA     | misc_RNA | chr11 | 43331261 | 43331356 | + | 0 | 0 |
| ENSG0000(RNA5SP44: | rRNA     | chr17 | 66267743 | 66267848 | + | 0 | 0 |
| ENSG0000(RNU7-6P   | snRNA    | chr20 | 51904969 | 51905030 | + | 0 | 0 |
| ENSG0000(Y_RNA     | misc_RNA | chr14 | 89650793 | 89650903 | - | 0 | 0 |
| ENSG0000(RN7SKP88  | misc_RNA | chr1  | 1.49E+08 | 1.49E+08 | - | 0 | 0 |
| ENSG0000(SNORA70   | snoRNA   | chr17 | 29777619 | 29777744 | + | 0 | 0 |
| ENSG0000(RNU6-786F | snRNA    | chr6  | 1.58E+08 | 1.58E+08 | + | 0 | 0 |
| ENSG0000(RNU6-108  | snRNA    | chr12 | 1.2E+08  | 1.2E+08  | - | 0 | 0 |
| ENSG0000(Y_RNA     | misc_RNA | chr12 | 62935701 | 62935802 | + | 0 | 0 |
| ENSG0000(RNU6-782F | snRNA    | chr19 | 15145215 | 15145318 | + | 0 | 0 |
| ENSG0000(RNA5SP52: | rRNA     | chrY  | 18348035 | 18348147 | - | 0 | 0 |
| ENSG0000(Y_RNA     | misc_RNA | chr5  | 10337277 | 10337386 | + | 0 | 0 |
| ENSG0000(RNA5SP42: | rRNA     | chr16 | 35754555 | 35754688 | + | 0 | 0 |
| ENSG0000(RNA5SP10: | rRNA     | chr2  | 1.25E+08 | 1.25E+08 | + | 0 | 0 |
| ENSG0000(SNORA81   | snoRNA   | chr18 | 21711950 | 21712119 | - | 0 | 0 |

|                                     |       |          |          |   |      |      |
|-------------------------------------|-------|----------|----------|---|------|------|
| ENSG0000(RNA5SP44) rRNA             | chr18 | 9844717  | 9844846  | - | 0    | 0    |
| ENSG0000(RNU1-97P) snRNA            | chrY  | 23740942 | 23741105 | - | 0    | 0    |
| ENSG0000(SNORD59) snoRNA            | chr1  | 1.54E+08 | 1.54E+08 | + | 0    | 0    |
| ENSG0000(RNU6ATAC) snRNA            | chr5  | 76948791 | 76948870 | + | 0    | 0    |
| ENSG0000(RNU6-928F) snRNA           | chr17 | 66638271 | 66638374 | + | 0    | 0    |
| ENSG0000(RNU6-1234) snRNA           | chr14 | 29811916 | 29812018 | + | 0    | 0    |
| ENSG0000(RNU6-579F) snRNA           | chr2  | 1.33E+08 | 1.33E+08 | + | 0    | 0    |
| ENSG0000(SNORA20) snoRNA            | chrY  | 16138248 | 16138379 | - | 0    | 0    |
| ENSG0000(SCARNA15) processed_scaRNA | chr15 | 82752884 | 82757208 | + | 0.46 | 0.43 |
| ENSG0000(SCARNA18) scaRNA           | chr1  | 26006216 | 26006299 | + | 0    | 0    |
| ENSG0000(SNORD60) snoRNA            | chr1  | 2.06E+08 | 2.06E+08 | + | 0    | 0    |
| ENSG0000(SNORA40) snoRNA            | chrX  | 1.24E+08 | 1.24E+08 | + | 0    | 0    |
| ENSG0000(MIR2276) miRNA             | chr13 | 24162416 | 24162504 | + | 0    | 0    |
| ENSG0000(RNA5SP34) rRNA             | chr13 | 90135712 | 90135841 | - | 0    | 0    |
| ENSG0000(RN7SKP20) misc_RNA         | chr6  | 87083233 | 87083536 | + | 0    | 0    |
| ENSG0000(SNORA21) snoRNA            | chr17 | 38851524 | 38851659 | - | 0    | 0    |
| ENSG0000(RNU7-110F) snRNA           | chr3  | 33414150 | 33414211 | + | 0    | 0    |
| ENSG0000(RN7SKP27) misc_RNA         | chr7  | 1.22E+08 | 1.22E+08 | + | 0    | 0    |
| ENSG0000(RNU6-175F) snRNA           | chr2  | 1.32E+08 | 1.32E+08 | - | 0    | 0    |
| ENSG0000(RNU11-2P) snRNA            | chr17 | 12036496 | 12036637 | - | 0    | 0    |
| ENSG0000(RNU6-295F) snRNA           | chr8  | 48307927 | 48308030 | - | 0    | 0    |
| ENSG0000(RN7SKP11) misc_RNA         | chr6  | 47715283 | 47715601 | + | 0    | 0    |
| ENSG0000(SCARNA14) scaRNA           | chr15 | 66347207 | 66347342 | - | 0    | 0    |
| ENSG0000(RNU6-1198) snRNA           | chr7  | 73507208 | 73507274 | + | 0    | 0    |
| ENSG0000(RNA5SP39) rRNA             | chr15 | 40331537 | 40331648 | - | 8.34 | 0    |
| ENSG0000(RN7SKP26) misc_RNA         | chr2  | 2.06E+08 | 2.06E+08 | - | 0    | 0    |
| ENSG0000(RNU6-352F) snRNA           | chr1  | 1.02E+08 | 1.02E+08 | + | 0    | 0    |
| ENSG0000(RNU6-612F) snRNA           | chr2  | 60719640 | 60719741 | + | 0    | 0    |
| ENSG0000(SNORA18) snoRNA            | chrX  | 1.4E+08  | 1.4E+08  | + | 0    | 0    |
| ENSG0000(RNU6-1258) snRNA           | chr14 | 93437400 | 93437510 | - | 0    | 0    |
| ENSG0000(RNU6-798F) snRNA           | chr9  | 97192923 | 97193025 | - | 0    | 0    |
| ENSG0000(SCARNA20) scaRNA           | chr15 | 75121536 | 75121666 | - | 0    | 0    |
| ENSG0000(RNU6-677F) snRNA           | chr9  | 37333857 | 37333957 | - | 0    | 0    |
| ENSG0000(SNORA70) snoRNA            | chr9  | 39892446 | 39892540 | + | 0    | 0    |
| ENSG0000(RNU6-765F) snRNA           | chr9  | 38680006 | 38680104 | + | 0    | 0    |
| ENSG0000(RNA5SP94) rRNA             | chr2  | 59694762 | 59694869 | + | 0    | 0    |
| ENSG0000(SCARNA11) scaRNA           | chr12 | 8597509  | 8597640  | + | 0    | 0    |
| ENSG0000(RNU6-971F) snRNA           | chr17 | 43473585 | 43473690 | + | 0    | 0    |
| ENSG0000(RNU6-980F) snRNA           | chr19 | 53732981 | 53733083 | - | 0    | 0    |
| ENSG0000(RNU6-528F) snRNA           | chr8  | 33338867 | 33338966 | + | 0    | 0    |
| ENSG0000(RNU7-151F) snRNA           | chr4  | 1.03E+08 | 1.03E+08 | - | 0    | 0    |
| ENSG0000(Y_RNA) misc_RNA            | chr2  | 1.28E+08 | 1.28E+08 | - | 0    | 0    |
| ENSG0000(RNU6-850F) snRNA           | chr6  | 31756951 | 31757053 | - | 0    | 0    |
| ENSG0000(Y_RNA) misc_RNA            | chr1  | 1.48E+08 | 1.48E+08 | + | 0    | 0    |
| ENSG0000(RNA5SP14) rRNA             | chr3  | 1.43E+08 | 1.43E+08 | - | 0    | 0    |

|                             |       |          |          |   |   |   |
|-----------------------------|-------|----------|----------|---|---|---|
| ENSG0000(RNU6-273F) snRNA   | chr14 | 37187219 | 37187314 | + | 0 | 0 |
| ENSG0000(RNA5SP36) rRNA     | chr12 | 88051701 | 88051778 | + | 0 | 0 |
| ENSG0000(RNU7-116F) snRNA   | chr14 | 63736444 | 63736505 | + | 0 | 0 |
| ENSG0000(RNU7-70P) snRNA    | chr1  | 1.13E+08 | 1.13E+08 | - | 0 | 0 |
| ENSG0000(RNU6-143F) snRNA   | chr3  | 1.24E+08 | 1.24E+08 | + | 0 | 0 |
| ENSG0000(RNU6-210F) snRNA   | chr1  | 93010257 | 93010351 | + | 0 | 0 |
| ENSG0000(RNU6-703F) snRNA   | chr8  | 98048856 | 98048962 | + | 0 | 0 |
| ENSG0000(RNU6-577F) snRNA   | chr2  | 36867398 | 36867495 | - | 0 | 0 |
| ENSG0000(RN7SKP96) misc_RNA | chr4  | 86336318 | 86336614 | - | 0 | 0 |
| ENSG0000(RNU6-445F) snRNA   | chr9  | 74857675 | 74857781 | + | 0 | 0 |
| ENSG0000(Y_RNA) misc_RNA    | chr2  | 2.01E+08 | 2.01E+08 | - | 0 | 0 |
| ENSG0000(RNA5SP54) rRNA     | chr1  | 1.11E+08 | 1.11E+08 | + | 0 | 0 |
| ENSG0000(Y_RNA) misc_RNA    | chr6  | 30932618 | 30932709 | - | 0 | 0 |
| ENSG0000(SNORA31) snoRNA    | chr4  | 81928313 | 81928439 | + | 0 | 0 |
| ENSG0000(RNU2-31P) snRNA    | chr3  | 1.6E+08  | 1.6E+08  | - | 0 | 0 |
| ENSG0000(RNU6-109I) snRNA   | chr8  | 1.01E+08 | 1.01E+08 | + | 0 | 0 |
| ENSG0000(SCARNA16) scaRNA   | chr1  | 1.01E+08 | 1.01E+08 | + | 0 | 0 |
| ENSG0000(RNU6-255F) snRNA   | chrY  | 19018983 | 19019087 | - | 0 | 0 |
| ENSG0000(RNU6-250F) snRNA   | chr6  | 40407853 | 40407955 | + | 0 | 0 |
| ENSG0000(RNU6-856F) snRNA   | chr3  | 52551846 | 52551943 | - | 0 | 0 |
| ENSG0000(RNU6-943F) snRNA   | chr11 | 7889182  | 7889279  | - | 0 | 0 |
| ENSG0000(RNU7-4P) snRNA     | chr12 | 68911921 | 68911982 | + | 0 | 0 |
| ENSG0000(RNU6-714F) snRNA   | chr9  | 92820977 | 92821079 | + | 0 | 0 |
| ENSG0000(SNORA48) snoRNA    | chr15 | 64342539 | 64342698 | + | 0 | 0 |
| ENSG0000(RNU4ATAC) snRNA    | chr11 | 1.22E+08 | 1.22E+08 | + | 0 | 0 |
| ENSG0000(SCARNA24) scaRNA   | chr1  | 28689665 | 28689794 | + | 0 | 0 |
| ENSG0000(SCARNA20) scaRNA   | chr11 | 8555016  | 8555146  | + | 0 | 0 |
| ENSG0000(RNU6-182F) snRNA   | chr2  | 1.72E+08 | 1.72E+08 | - | 0 | 0 |
| ENSG0000(RNA5SP47) rRNA     | chr19 | 31655356 | 31655461 | - | 0 | 0 |
| ENSG0000(RNU6-341F) snRNA   | chr14 | 58292293 | 58292388 | - | 0 | 0 |
| ENSG0000(RNU6-835F) snRNA   | chr14 | 87996345 | 87996448 | - | 0 | 0 |
| ENSG0000(Y_RNA) misc_RNA    | chr1  | 63338263 | 63338372 | + | 0 | 0 |
| ENSG0000(SNORD19) snoRNA    | chr3  | 52688890 | 52688962 | + | 0 | 0 |
| ENSG0000(RN7SKP60) misc_RNA | chr5  | 1.66E+08 | 1.66E+08 | + | 0 | 0 |
| ENSG0000(RNU6-56P) snRNA    | chr13 | 38779424 | 38779516 | + | 0 | 0 |
| ENSG0000(RNU7-11P) snRNA    | chr4  | 39621012 | 39621073 | + | 0 | 0 |
| ENSG0000(RN7SKP27) misc_RNA | chr1  | 89987713 | 89987944 | - | 0 | 0 |
| ENSG0000(SCARNA6) scaRNA    | chr16 | 21587627 | 21587864 | + | 0 | 0 |
| ENSG0000(SCARNA20) scaRNA   | chr14 | 63479272 | 63479413 | + | 0 | 0 |
| ENSG0000(Y_RNA) misc_RNA    | chr1  | 26593940 | 26594041 | - | 0 | 0 |
| ENSG0000(RNU6-958F) snRNA   | chr2  | 43408307 | 43408412 | + | 0 | 0 |
| ENSG0000(RNA5SP42) rRNA     | chr16 | 35754046 | 35754182 | + | 0 | 0 |
| ENSG0000(RNU6-100I) snRNA   | chr2  | 1.7E+08  | 1.7E+08  | - | 0 | 0 |
| ENSG0000(RNU6-345F) snRNA   | chrX  | 1.02E+08 | 1.02E+08 | + | 0 | 0 |
| ENSG0000(RN7SKP2) misc_RNA  | chr13 | 40407122 | 40407440 | - | 0 | 0 |

|                             |       |          |          |   |      |      |
|-----------------------------|-------|----------|----------|---|------|------|
| ENSG0000(RN7SKP23: misc_RNA | chr16 | 76287630 | 76287739 | + | 0    | 0    |
| ENSG0000(RNU6-410F snRNA    | chr4  | 55031965 | 55032071 | - | 0    | 0    |
| ENSG0000(RNA5SP33: rRNA     | chr11 | 21383801 | 21383909 | - | 0    | 0    |
| ENSG0000(Y_RNA misc_RNA     | chr7  | 1.38E+08 | 1.38E+08 | + | 0    | 0    |
| ENSG0000(RNU6-388F snRNA    | chr7  | 33001950 | 33002054 | - | 0    | 0    |
| ENSG0000(Y_RNA misc_RNA     | chr1  | 2.36E+08 | 2.36E+08 | + | 0    | 0    |
| ENSG0000(RNU6-148F snRNA    | chr12 | 89754059 | 89754152 | + | 0    | 0    |
| ENSG0000(SNORA48 snoRNA     | chr7  | 1.02E+08 | 1.02E+08 | - | 0    | 0    |
| ENSG0000(RNU1-92P snRNA     | chr1  | 1.44E+08 | 1.44E+08 | - | 0    | 0    |
| ENSG0000(RN7SKP11 misc_RNA  | chr12 | 96427200 | 96427486 | - | 0.78 | 1.72 |
| ENSG0000(RNA5SP13: rRNA     | chr3  | 68882967 | 68883091 | + | 0    | 0    |
| ENSG0000(5S_rRNA rRNA       | chr1  | 1.43E+08 | 1.43E+08 | + | 0    | 0    |
| ENSG0000(RNU6-121: snRNA    | chr10 | 19792998 | 19793101 | - | 0    | 0    |
| ENSG0000(RNA5SP18: rRNA     | chr5  | 76091708 | 76091801 | - | 0    | 0    |
| ENSG0000(SCARNA21 scaRNA    | chr17 | 7906122  | 7906260  | + | 0    | 0    |
| ENSG0000(RN7SKP99 misc_RNA  | chr14 | 57837354 | 57837660 | - | 0    | 0    |
| ENSG0000(RNU6-419F snRNA    | chr14 | 73246818 | 73246880 | - | 0    | 0    |
| ENSG0000(SNORA44 snoRNA     | chr1  | 1.52E+08 | 1.52E+08 | - | 0    | 0    |
| ENSG0000(RNA5SP10: rRNA     | chr2  | 96956708 | 96956815 | - | 0    | 0    |
| ENSG0000(RNU2-46P snRNA     | chr9  | 95859904 | 95860016 | + | 0    | 0    |
| ENSG0000(RNA5SP23: rRNA     | chr7  | 44125752 | 44125873 | - | 0    | 0    |
| ENSG0000(RNU1-117F snRNA    | chr12 | 88581639 | 88581796 | + | 0    | 0    |
| ENSG0000(SNORA31 snoRNA     | chr8  | 1.17E+08 | 1.17E+08 | + | 0    | 0    |
| ENSG0000(RN7SKP5 misc_RNA   | chr13 | 46249942 | 46250213 | + | 0    | 0    |
| ENSG0000(RNA5SP50: rRNA     | chrX  | 48206258 | 48206374 | + | 0    | 0    |
| ENSG0000(RNU6-389F snRNA    | chr7  | 55685977 | 55686081 | + | 0    | 0    |
| ENSG0000(RNU6-127: snRNA    | chr12 | 76139567 | 76139671 | + | 0    | 0    |
| ENSG0000(RNU6-375F snRNA    | chr22 | 41168217 | 41168316 | + | 0    | 0    |
| ENSG0000(RNU6-570F snRNA    | chr1  | 2E+08    | 2E+08    | + | 0    | 0    |
| ENSG0000(RNU6-448F snRNA    | chr5  | 84196883 | 84196989 | + | 0    | 0    |
| ENSG0000(RNU6-118: snRNA    | chr12 | 1.02E+08 | 1.02E+08 | - | 0    | 0    |
| ENSG0000(RNA5SP27: rRNA     | chr8  | 1.41E+08 | 1.41E+08 | + | 0    | 0    |
| ENSG0000(RNA5SP24: rRNA     | chr7  | 1.29E+08 | 1.29E+08 | + | 0    | 0    |
| ENSG0000(RNU6-909F snRNA    | chr5  | 28624657 | 28624763 | + | 0    | 0    |
| ENSG0000(snoZ278 snoRNA     | chr15 | 29233868 | 29233979 | + | 0    | 0    |
| ENSG0000(ACA59 snoRNA       | chr11 | 1.15E+08 | 1.15E+08 | - | 0    | 0    |
| ENSG0000(RNU7-188F snRNA    | chr7  | 96377857 | 96377920 | + | 0    | 0    |
| ENSG0000(Y_RNA misc_RNA     | chr11 | 47820200 | 47820289 | - | 0    | 0    |
| ENSG0000(RNA5SP31: rRNA     | chr10 | 47532352 | 47532467 | + | 0    | 0    |
| ENSG0000(RN7SKP98 misc_RNA  | chr1  | 2.12E+08 | 2.12E+08 | - | 0    | 0    |
| ENSG0000(RNU6-334F snRNA    | chr5  | 1.05E+08 | 1.05E+08 | - | 0    | 0    |
| ENSG0000(RNU6-113: snRNA    | chr17 | 43395993 | 43396091 | - | 0    | 0    |
| ENSG0000(RNU6-121: snRNA    | chr8  | 80405516 | 80405609 | + | 0    | 0    |
| ENSG0000(RN7SKP19: misc_RNA | chr12 | 1.2E+08  | 1.2E+08  | - | 0    | 0    |
| ENSG0000(RNU6-430F snRNA    | chr16 | 89443318 | 89443424 | + | 0    | 0    |

|                   |          |       |          |          |   |   |   |
|-------------------|----------|-------|----------|----------|---|---|---|
| ENSG0000(SNORA31  | snoRNA   | chr10 | 76835377 | 76835502 | - | 0 | 0 |
| ENSG0000(RNU6-123 | snRNA    | chr3  | 1.09E+08 | 1.09E+08 | + | 0 | 0 |
| ENSG0000(RNU6-699 | snRNA    | chr4  | 66897262 | 66897371 | + | 0 | 0 |
| ENSG0000(Y_RNA    | misc_RNA | chr6  | 89898283 | 89898392 | - | 0 | 0 |
| ENSG0000(RNU6-548 | snRNA    | chr2  | 64994746 | 64994860 | + | 0 | 0 |
| ENSG0000(Y_RNA    | misc_RNA | chr3  | 1.31E+08 | 1.31E+08 | - | 0 | 0 |
| ENSG0000(RNU6-685 | snRNA    | chr2  | 82268612 | 82268706 | + | 0 | 0 |
| ENSG0000(RNU6-109 | snRNA    | chr4  | 1.73E+08 | 1.73E+08 | - | 0 | 0 |
| ENSG0000(RNU6-303 | snRNA    | chrY  | 4174985  | 4175090  | - | 0 | 0 |
| ENSG0000(RNA5SP34 | rRNA     | chr11 | 71845196 | 71845245 | - | 0 | 0 |
| ENSG0000(RNU6-894 | snRNA    | chrX  | 31348192 | 31348296 | + | 0 | 0 |
| ENSG0000(SNORA76  | snoRNA   | chr5  | 65961183 | 65961319 | - | 0 | 0 |
| ENSG0000(RNA5SP33 | rRNA     | chr11 | 8845263  | 8845358  | + | 0 | 0 |
| ENSG0000(SCARNA3  | scaRNA   | chr1  | 1.76E+08 | 1.76E+08 | - | 0 | 0 |
| ENSG0000(RNU6-100 | snRNA    | chr5  | 17240611 | 17240715 | + | 0 | 0 |
| ENSG0000(RNU6-201 | snRNA    | chr22 | 31837238 | 31837298 | + | 0 | 0 |
| ENSG0000(RNU6-158 | snRNA    | chr4  | 48932755 | 48932854 | - | 0 | 0 |
| ENSG0000(RNU6-789 | snRNA    | chr3  | 1.37E+08 | 1.37E+08 | - | 0 | 0 |
| ENSG0000(Y_RNA    | misc_RNA | chr21 | 39344537 | 39344628 | + | 0 | 0 |
| ENSG0000(RNU6-762 | snRNA    | chr2  | 2.01E+08 | 2.01E+08 | + | 0 | 0 |
| ENSG0000(SNORA74  | snoRNA   | chr12 | 42347061 | 42347214 | - | 0 | 0 |
| ENSG0000(Y_RNA    | misc_RNA | chr14 | 49592236 | 49592337 | - | 0 | 0 |
| ENSG0000(SNORA31  | snoRNA   | chr1  | 1.53E+08 | 1.53E+08 | - | 0 | 0 |
| ENSG0000(RNU6-365 | snRNA    | chr11 | 41122907 | 41123012 | - | 0 | 0 |
| ENSG0000(SCARNA16 | scaRNA   | chr2  | 1.97E+08 | 1.97E+08 | - | 0 | 0 |
| ENSG0000(RNA5SP40 | rRNA     | chr16 | 9600097  | 9600228  | + | 0 | 0 |
| ENSG0000(RNU6-64P | snRNA    | chr13 | 30281765 | 30281869 | + | 0 | 0 |
| ENSG0000(RNU6-218 | snRNA    | chr7  | 6057500  | 6057604  | + | 0 | 0 |
| ENSG0000(RNU6-101 | snRNA    | chrX  | 1.13E+08 | 1.13E+08 | + | 0 | 0 |
| ENSG0000(RNU6-231 | snRNA    | chr15 | 85821855 | 85821957 | + | 0 | 0 |
| ENSG0000(RNU6-122 | snRNA    | chr19 | 1616492  | 1616595  | - | 0 | 0 |
| ENSG0000(RNU7-172 | snRNA    | chr2  | 54166944 | 54167007 | - | 0 | 0 |
| ENSG0000(RNU6-122 | snRNA    | chr8  | 78398515 | 78398622 | - | 0 | 0 |
| ENSG0000(RNA5SP42 | rRNA     | chr16 | 35755177 | 35755285 | + | 0 | 0 |
| ENSG0000(RNU6-127 | snRNA    | chr3  | 73241789 | 73241896 | - | 0 | 0 |
| ENSG0000(RNA5SP34 | rRNA     | chr11 | 47804296 | 47804402 | - | 0 | 0 |
| ENSG0000(RNA5SP29 | rRNA     | chr9  | 99145840 | 99145966 | - | 0 | 0 |
| ENSG0000(RNU6-264 | snRNA    | chr9  | 19073843 | 19073946 | + | 0 | 0 |
| ENSG0000(RNU6-897 | snRNA    | chr6  | 1.05E+08 | 1.05E+08 | + | 0 | 0 |
| ENSG0000(snoU83B  | snoRNA   | chr14 | 50844625 | 50844712 | + | 0 | 0 |
| ENSG0000(SCARNA1  | scaRNA   | chr1  | 27834401 | 27834566 | + | 0 | 0 |
| ENSG0000(RNU6-131 | snRNA    | chrY  | 26360989 | 26361092 | + | 0 | 0 |
| ENSG0000(RNA5SP49 | rRNA     | chr21 | 32563075 | 32563210 | + | 0 | 0 |
| ENSG0000(RNA5SP16 | rRNA     | chr4  | 1.48E+08 | 1.48E+08 | - | 0 | 0 |
| ENSG0000(RNU6-58P | snRNA    | chr13 | 23217432 | 23217534 | - | 0 | 0 |

|                             |       |          |          |   |   |   |
|-----------------------------|-------|----------|----------|---|---|---|
| ENSG0000(RNU6-232F) snRNA   | chr3  | 1.25E+08 | 1.25E+08 | + | 0 | 0 |
| ENSG0000(RNU4ATAC) snRNA    | chr4  | 72965178 | 72965303 | + | 0 | 0 |
| ENSG0000(RNA5SP40) rRNA     | chr1  | 9437669  | 9437778  | - | 0 | 0 |
| ENSG0000(RNA5SP40) rRNA     | chr15 | 1E+08    | 1E+08    | - | 0 | 0 |
| ENSG0000(RNA5SP17) rRNA     | chr4  | 1.66E+08 | 1.66E+08 | - | 0 | 0 |
| ENSG0000(RN7SKP25) misc_RNA | chr9  | 18651147 | 18651450 | + | 0 | 0 |
| ENSG0000(RNU6-993F) snRNA   | chr19 | 2503047  | 2503141  | - | 0 | 0 |
| ENSG0000(RN7SKP14) misc_RNA | chr21 | 20356653 | 20356896 | + | 0 | 0 |
| ENSG0000(RNA5SP40) rRNA     | chr15 | 86138269 | 86138379 | - | 0 | 0 |
| ENSG0000(Y_RNA) misc_RNA    | chr3  | 1.26E+08 | 1.26E+08 | - | 0 | 0 |
| ENSG0000(SNORA70) snoRNA    | chr1  | 12221148 | 12221271 | - | 0 | 0 |
| ENSG0000(RNA5SP15) rRNA     | chr4  | 39936753 | 39936855 | + | 0 | 0 |
| ENSG0000(RNU6-105) snRNA    | chr17 | 20290257 | 20290358 | + | 0 | 0 |
| ENSG0000(RNU6-102) snRNA    | chr19 | 19232855 | 19232947 | + | 0 | 0 |
| ENSG0000(Y_RNA) misc_RNA    | chr4  | 39710085 | 39710176 | - | 0 | 0 |
| ENSG0000(RNA5SP70) rRNA     | chr1  | 1.82E+08 | 1.82E+08 | + | 0 | 0 |
| ENSG0000(RN7SKP18) misc_RNA | chrX  | 20452108 | 20452431 | + | 0 | 0 |
| ENSG0000(RNU6-165) snRNA    | chr19 | 53766534 | 53766632 | - | 0 | 0 |
| ENSG0000(RNU6-367) snRNA    | chr3  | 44071087 | 44071186 | + | 0 | 0 |
| ENSG0000(RN7SKP23) misc_RNA | chr3  | 1.74E+08 | 1.74E+08 | + | 0 | 0 |
| ENSG0000(RNU7-35P) snRNA    | chr7  | 43194421 | 43194482 | + | 0 | 0 |
| ENSG0000(RNU6-844) snRNA    | chr15 | 57405074 | 57405175 | - | 0 | 0 |
| ENSG0000(SNORD116) snoRNA   | chr9  | 1.26E+08 | 1.26E+08 | + | 0 | 0 |
| ENSG0000(RNA5SP66) rRNA     | chr1  | 1.69E+08 | 1.69E+08 | + | 0 | 0 |
| ENSG0000(RNU6-111) snRNA    | chr2  | 73298683 | 73298787 | + | 0 | 0 |
| ENSG0000(SNORA31) snoRNA    | chr3  | 1.01E+08 | 1.01E+08 | + | 0 | 0 |
| ENSG0000(RNU1-54P) snRNA    | chr6  | 39620345 | 39620464 | - | 0 | 0 |
| ENSG0000(RNU6-107) snRNA    | chr9  | 1001858  | 1001963  | - | 0 | 0 |
| ENSG0000(SCARNA11) scaRNA   | chr11 | 1.17E+08 | 1.17E+08 | + | 0 | 0 |
| ENSG0000(SNORA25) snoRNA    | chr10 | 92076242 | 92076365 | + | 0 | 0 |
| ENSG0000(RNU6-123) snRNA    | chr10 | 1.03E+08 | 1.03E+08 | + | 0 | 0 |
| ENSG0000(RNU6-667) snRNA    | chr15 | 79817349 | 79817450 | - | 0 | 0 |
| ENSG0000(RNU6-131) snRNA    | chr12 | 2954240  | 2954338  | - | 0 | 0 |
| ENSG0000(RNU6-889) snRNA    | chr10 | 2098167  | 2098269  | + | 0 | 0 |
| ENSG0000(RNA5SP38) rRNA     | chr14 | 20090130 | 20090227 | + | 0 | 0 |
| ENSG0000(RNU1-45P) snRNA    | chr4  | 1.78E+08 | 1.78E+08 | - | 0 | 0 |
| ENSG0000(RN7SKP10) misc_RNA | chr4  | 1.64E+08 | 1.64E+08 | - | 0 | 0 |
| ENSG0000(RNU6-126) snRNA    | chr14 | 34675891 | 34675994 | + | 0 | 0 |
| ENSG0000(RNU6-176) snRNA    | chr1  | 28142737 | 28142841 | - | 0 | 0 |
| ENSG0000(RN7SKP28) misc_RNA | chr2  | 2.29E+08 | 2.29E+08 | - | 0 | 0 |
| ENSG0000(SNORA76) snoRNA    | chr22 | 33704786 | 33704920 | - | 0 | 0 |
| ENSG0000(MIR2355) miRNA     | chr2  | 2.07E+08 | 2.07E+08 | - | 0 | 0 |
| ENSG0000(RN7SKP25) misc_RNA | chr6  | 53415294 | 53415607 | - | 0 | 0 |
| ENSG0000(SNORA31) snoRNA    | chr4  | 1.86E+08 | 1.86E+08 | + | 0 | 0 |
| ENSG0000(RN7SKP64) misc_RNA | chr5  | 1.39E+08 | 1.39E+08 | - | 0 | 0 |



|                     |          |       |          |          |   |   |   |
|---------------------|----------|-------|----------|----------|---|---|---|
| ENSG0000(Y_RNA      | misc_RNA | chr12 | 38274448 | 38274549 | - | 0 | 0 |
| ENSG0000(RN7SKP35   | misc_RNA | chr4  | 1.52E+08 | 1.52E+08 | + | 0 | 0 |
| ENSG0000(RN7SKP40   | misc_RNA | chr3  | 1.75E+08 | 1.75E+08 | + | 0 | 0 |
| ENSG0000(RNU6-902F  | snRNA    | chr19 | 44085213 | 44085303 | - | 0 | 0 |
| ENSG0000(RNU6-731F  | snRNA    | chr1  | 6540854  | 6540964  | + | 0 | 0 |
| ENSG0000(RNU7-156F  | snRNA    | chr5  | 1.44E+08 | 1.44E+08 | - | 0 | 0 |
| ENSG0000(RNU6-1238  | snRNA    | chr11 | 67395210 | 67395311 | - | 0 | 0 |
| ENSG0000(RNU2-12P   | snRNA    | chr1  | 1.76E+08 | 1.76E+08 | - | 0 | 0 |
| ENSG0000(RNU6-464F  | snRNA    | chr6  | 53153795 | 53153898 | - | 0 | 0 |
| ENSG0000(SNORA70    | snoRNA   | chr19 | 44764950 | 44765100 | + | 0 | 0 |
| ENSG0000(SNORA31    | snoRNA   | chr7  | 52269437 | 52269569 | - | 0 | 0 |
| ENSG0000(MIR2116    | miRNA    | chr15 | 59171183 | 59171262 | - | 0 | 0 |
| ENSG0000(RNA5SP29   | rRNA     | chr9  | 1.04E+08 | 1.04E+08 | - | 0 | 0 |
| ENSG0000(RNU6-299F  | snRNA    | chr5  | 56125671 | 56125770 | + | 0 | 0 |
| ENSG0000(RNU4ATAC   | snRNA    | chr11 | 1.22E+08 | 1.22E+08 | + | 0 | 0 |
| ENSG0000(RNU6-706F  | snRNA    | chr18 | 39034007 | 39034110 | + | 0 | 0 |
| ENSG0000(RNA5SP47   | rRNA     | chr1  | 44932323 | 44932431 | + | 0 | 0 |
| ENSG0000(RNA5SP45   | rRNA     | chr18 | 42270589 | 42270715 | + | 0 | 0 |
| ENSG0000(SNORA31    | snoRNA   | chr9  | 1.01E+08 | 1.01E+08 | + | 0 | 0 |
| ENSG0000(SNORA70    | snoRNA   | chr1  | 2.03E+08 | 2.03E+08 | - | 0 | 0 |
| ENSG0000(RNU7-181F  | snRNA    | chr8  | 1.3E+08  | 1.3E+08  | - | 0 | 0 |
| ENSG0000(SNORA40    | snoRNA   | chr1  | 1.51E+08 | 1.51E+08 | - | 0 | 0 |
| ENSG0000(RNU4-60P   | snRNA    | chr19 | 42472875 | 42473009 | + | 0 | 0 |
| ENSG0000(SNORA43    | snoRNA   | chr3  | 3102913  | 3103015  | + | 0 | 0 |
| ENSG0000(SNORA31    | snoRNA   | chr13 | 45336314 | 45336447 | - | 0 | 0 |
| ENSG0000(RN7SKP28   | misc_RNA | chr12 | 53816185 | 53816479 | + | 0 | 0 |
| ENSG0000(RNU7-77P   | snRNA    | chr10 | 35135443 | 35135502 | + | 0 | 0 |
| ENSG0000(RNA5SP41   | rRNA     | chr16 | 35750061 | 35750175 | + | 0 | 0 |
| ENSG0000(RNU7-128F  | snRNA    | chr3  | 48180328 | 48180389 | + | 0 | 0 |
| ENSG0000(RN7SKP57   | misc_RNA | chr5  | 1.12E+08 | 1.12E+08 | - | 0 | 0 |
| ENSG0000(RNA5SP43   | rRNA     | chr17 | 31963805 | 31963933 | - | 0 | 0 |
| ENSG0000(SNORA31    | snoRNA   | chr14 | 35756327 | 35756463 | + | 0 | 0 |
| ENSG0000(SCARNA20   | scaRNA   | chr1  | 1.72E+08 | 1.72E+08 | + | 0 | 0 |
| ENSG0000(RNU6-494F  | snRNA    | chr12 | 32477382 | 32477471 | - | 0 | 0 |
| ENSG0000(RNU6-711F  | snRNA    | chr17 | 29424762 | 29424867 | - | 0 | 0 |
| ENSG0000(SNORA40    | snoRNA   | chr5  | 1.68E+08 | 1.68E+08 | - | 0 | 0 |
| ENSG0000(RNU6-709F  | snRNA    | chr10 | 1.14E+08 | 1.14E+08 | + | 0 | 0 |
| ENSG0000(snoZ6      | snoRNA   | chr5  | 1.32E+08 | 1.32E+08 | + | 0 | 0 |
| ENSG0000(RNU6-794F  | snRNA    | chr10 | 35231331 | 35231394 | - | 0 | 0 |
| ENSG0000(snoMBII-2C | snoRNA   | chr11 | 15481808 | 15481893 | - | 0 | 0 |
| ENSG0000(RN7SKP29   | misc_RNA | chr5  | 83685866 | 83686018 | + | 0 | 0 |
| ENSG0000(RNU6-586F  | snRNA    | chr1  | 67196140 | 67196243 | + | 0 | 0 |
| ENSG0000(RN7SKP92   | misc_RNA | chr14 | 1E+08    | 1E+08    | + | 0 | 0 |
| ENSG0000(RNA5SP16   | rRNA     | chr4  | 1.52E+08 | 1.52E+08 | - | 0 | 0 |
| ENSG0000(RNU6-111   | snRNA    | chr2  | 37435510 | 37435608 | - | 0 | 0 |

|                 |            |            |       |          |          |   |      |      |
|-----------------|------------|------------|-------|----------|----------|---|------|------|
| ENSG00000100000 | NRON       | misc_RNA   | chr9  | 1.26E+08 | 1.26E+08 | - | 0    | 0    |
| ENSG00000100000 | RNA5SP37   | rRNA       | chr12 | 1.11E+08 | 1.11E+08 | + | 0    | 0    |
| ENSG00000100000 | RNU4ATAC   | snRNA      | chr3  | 8364529  | 8364648  | - | 0    | 0    |
| ENSG00000100000 | RNA5SP10   | rRNA       | chr2  | 1.48E+08 | 1.48E+08 | - | 0    | 0    |
| ENSG00000100000 | RNU6-840F  | snRNA      | chr17 | 35093909 | 35093973 | + | 0    | 0    |
| ENSG00000100000 | SCARNA11   | scaRNA     | chr1  | 13696070 | 13696199 | - | 0    | 0    |
| ENSG00000100000 | RNU6-537F  | snRNA      | chr1  | 11152350 | 11152452 | + | 0    | 0    |
| ENSG00000100000 | RNU6-1174  | snRNA      | chr3  | 1.35E+08 | 1.35E+08 | - | 0    | 0    |
| ENSG00000100000 | Y_RNA      | misc_RNA   | chr7  | 1.52E+08 | 1.52E+08 | + | 0    | 0    |
| ENSG00000100000 | RNU1-104F  | snRNA      | chr12 | 1.27E+08 | 1.27E+08 | + | 0    | 0    |
| ENSG00000100000 | SNORA73    | snoRNA     | chr6  | 1.08E+08 | 1.08E+08 | - | 0    | 0    |
| ENSG00000100000 | SNORA81    | snoRNA     | chr3  | 1.83E+08 | 1.83E+08 | + | 0    | 0    |
| ENSG00000100000 | RNA5SP17   | rRNA       | chr5  | 16853994 | 16854114 | + | 0    | 0    |
| ENSG00000100000 | SNORD36    | snoRNA     | chr13 | 22803145 | 22803224 | + | 0    | 0    |
| ENSG00000100000 | Y_RNA      | misc_RNA   | chr14 | 1.04E+08 | 1.04E+08 | - | 0    | 0    |
| ENSG00000100000 | RNU2-19P   | snRNA      | chr1  | 2.06E+08 | 2.06E+08 | + | 0    | 0    |
| ENSG00000100000 | RNU7-161F  | snRNA      | chr5  | 40911067 | 40911128 | - | 0    | 0    |
| ENSG00000100000 | RNU2-60P   | snRNA      | chr11 | 1.11E+08 | 1.11E+08 | + | 0    | 0    |
| ENSG00000100000 | RP11-219J  | lincRNA    | chr8  | 25685798 | 25687524 | + | 0    | 0    |
| ENSG00000100000 | RP1-117B1  | antisense  | chr17 | 50396438 | 50397888 | + | 0    | 0.3  |
| ENSG00000100000 | LINC01609  | lincRNA    | chr8  | 1.11E+08 | 1.11E+08 | - | 0.96 | 0.18 |
| ENSG00000100000 | RP11-855C  | sense_intr | chr5  | 22139247 | 22141468 | - | 0    | 0    |
| ENSG00000100000 | KB-1448A5  | lincRNA    | chr8  | 96371865 | 96387438 | - | 0    | 0.1  |
| ENSG00000100000 | RP11-158K  | antisense  | chr8  | 1.24E+08 | 1.24E+08 | + | 0.4  | 0.47 |
| ENSG00000100000 | CTD-2544L  | processed  | chr8  | 1.11E+08 | 1.11E+08 | + | 0    | 0    |
| ENSG00000100000 | RP1-84O15  | lincRNA    | chr8  | 34228439 | 34346731 | + | 0    | 0    |
| ENSG00000100000 | RPL12P22   | processed  | chr5  | 1.74E+08 | 1.74E+08 | - | 0    | 0    |
| ENSG00000100000 | CTB-78H18  | lincRNA    | chr5  | 1.72E+08 | 1.72E+08 | + | 0    | 0    |
| ENSG00000100000 | RP11-136C  | lincRNA    | chr8  | 1.25E+08 | 1.26E+08 | + | 0    | 0    |
| ENSG00000100000 | CTD-2373N  | antisense  | chr8  | 30596914 | 30597532 | + | 0    | 0    |
| ENSG00000100000 | RP11-550I  | processed  | chr8  | 54696398 | 54697127 | + | 0    | 0    |
| ENSG00000100000 | RP11-6I2.4 | lincRNA    | chr8  | 74103516 | 74106744 | + | 0    | 0    |
| ENSG00000100000 | RP11-648L  | lincRNA    | chr8  | 58091442 | 58106294 | - | 0    | 0    |
| ENSG00000100000 | OC90       | protein_co | chr8  | 1.32E+08 | 1.32E+08 | - | 0    | 0    |
| ENSG00000100000 | RP11-700E  | processed  | chr8  | 92351912 | 92352148 | - | 0    | 0    |
| ENSG00000100000 | HNRNPA3P   | processed  | chr5  | 1.54E+08 | 1.54E+08 | - | 0.31 | 0    |
| ENSG00000100000 | IGLV2-34   | IG_V_pseu  | chr22 | 22580014 | 22580296 | + | 0    | 0    |
| ENSG00000100000 | RP11-659E  | antisense  | chr8  | 63024372 | 63025294 | + | 0    | 0    |
| ENSG00000100000 | RP11-238I  | lincRNA    | chr8  | 1.11E+08 | 1.11E+08 | + | 0    | 0    |
| ENSG00000100000 | RP11-527N  | processed  | chr8  | 37326575 | 37331984 | - | 0    | 0.02 |
| ENSG00000100000 | TRAPP2P2   | processed  | chr8  | 71448811 | 71449219 | - | 0    | 0    |
| ENSG00000100000 | RP11-459E  | processed  | chr8  | 22690150 | 22798616 | + | 0.38 | 0.04 |
| ENSG00000100000 | IGLVI-56   | IG_V_pseu  | chr22 | 22198560 | 22199011 | + | 0    | 0    |
| ENSG00000100000 | IGKV2D-36  | IG_V_pseu  | chr2  | 89887022 | 89887247 | + | 0    | 0    |
| ENSG00000100000 | CTD-3023L  | lincRNA    | chr8  | 8561391  | 8569688  | + | 0    | 0    |

|                                      |          |          |   |       |       |
|--------------------------------------|----------|----------|---|-------|-------|
| ENSG0000(IGHV7-56 IG_V_pseu chr14    | 1.07E+08 | 1.07E+08 | - | 0     | 0     |
| ENSG0000(IGHV3-62 IG_V_pseu chr14    | 1.07E+08 | 1.07E+08 | - | 0     | 0     |
| ENSG0000(RP11-360L:antisense chr8    | 41534155 | 41578368 | - | 0     | 0     |
| ENSG0000(CTC-436K1 lincRNA chr5      | 1.58E+08 | 1.58E+08 | + | 0     | 0     |
| ENSG0000(RP11-589C processed_ chr8   | 42128774 | 42129249 | - | 0     | 0     |
| ENSG0000(RP11-509P processed_ chr8   | 84678798 | 84679842 | + | 0     | 0     |
| ENSG0000(LINC00967 lincRNA chr8      | 66192093 | 66197315 | + | 0     | 0     |
| ENSG0000(RP11-17A4 lincRNA chr8      | 56536758 | 56540497 | - | 0.13  | 0     |
| ENSG0000(RP11-567J: lincRNA chr8     | 48515852 | 48517089 | - | 0     | 0     |
| ENSG0000(CTB-164N1 lincRNA chr5      | 1.73E+08 | 1.73E+08 | + | 0     | 0     |
| ENSG0000(RP11-87E2 sense_intr chr8   | 22895434 | 22897813 | - | 0     | 0     |
| ENSG0000(RP11-333A lincRNA chr8      | 70471112 | 70480623 | - | 0     | 0     |
| ENSG0000(RP11-281C processed_ chr5   | 1.79E+08 | 1.79E+08 | - | 0     | 0     |
| ENSG0000(CIR1P1 processed_ chr5      | 1.55E+08 | 1.55E+08 | - | 0     | 0     |
| ENSG0000(RP11-369E lincRNA chr8      | 20953127 | 20968904 | + | 0     | 0     |
| ENSG0000(RGS21 protein_co chr1       | 1.92E+08 | 1.92E+08 | + | 0     | 0     |
| ENSG0000(IGHVII-28-: IG_V_pseu chr14 | 1.06E+08 | 1.06E+08 | - | 0     | 0     |
| ENSG0000(IGLV3-17 IG_V_pseu chr22    | 22738944 | 22739187 | + | 0     | 0     |
| ENSG0000(KB-1562D1 processed_ chr8   | 1.02E+08 | 1.02E+08 | - | 0     | 0     |
| ENSG0000(CTA-392E5 lincRNA chr8      | 85839705 | 85951083 | + | 0     | 0     |
| ENSG0000(CTB-47B11 processed_ chr5   | 1.57E+08 | 1.57E+08 | + | 0     | 0     |
| ENSG0000(RP11-58O3 processed_ chr8   | 1.12E+08 | 1.12E+08 | - | 0     | 0     |
| ENSG0000(IGKV3-31 IG_V_pseu chr2     | 89252211 | 89252736 | - | 0     | 0     |
| ENSG0000(PCDHGA12 protein_co chr5    | 1.41E+08 | 1.42E+08 | + | 18.18 | 18.64 |
| ENSG0000(RP11-1113 processed_ chr8   | 39309909 | 39310443 | - | 0     | 0     |
| ENSG0000(LINC01605 lincRNA chr8      | 37421341 | 37554183 | - | 0.78  | 1.2   |
| ENSG0000(RP11-279L: sense_intr chr8  | 3373353  | 3375226  | - | 0     | 0     |
| ENSG0000(RP11-443C lincRNA chr5      | 1.79E+08 | 1.79E+08 | - | 0     | 0     |
| ENSG0000(RP11-563N lincRNA chr8      | 20350210 | 20372769 | + | 0     | 0     |
| ENSG0000(CTD-2309H lincRNA chr8      | 1.34E+08 | 1.34E+08 | - | 0     | 0     |
| ENSG0000(RP11-585F unprocessε chr8   | 202660   | 202897   | - | 0     | 0     |
| ENSG0000(WASHC5-A antisense chr8     | 1.25E+08 | 1.25E+08 | + | 0     | 0     |
| ENSG0000(RP11-326L: antisense chr8   | 17703988 | 17706187 | + | 0     | 0     |
| ENSG0000(IGHVII-65-: IG_V_pseu chr14 | 1.07E+08 | 1.07E+08 | - | 0     | 0     |
| ENSG0000(RP11-431J: lincRNA chr4     | 97120701 | 97135059 | + | 0     | 0     |
| ENSG0000(CTB-118P1 antisense chr8    | 87974165 | 88019113 | + | 0     | 0     |
| ENSG0000(CTC-209H2 antisense chr5    | 1.73E+08 | 1.73E+08 | - | 0     | 0     |
| ENSG0000(RP11-152C processed_ chr8   | 70103798 | 70104179 | - | 0     | 0     |
| ENSG0000(RP11-360L: antisense chr8   | 41540381 | 41545044 | - | 0     | 0     |
| ENSG0000(RP11-267N processed_ chr8   | 94565036 | 94565715 | + | 0     | 0     |
| ENSG0000(RP11-1149 processed_ chr8   | 27838477 | 27840382 | + | 0     | 0     |
| ENSG0000(RP11-100L: lincRNA chr8     | 92668836 | 92679594 | + | 0     | 0     |
| ENSG0000(RP11-404E unprocessε chr8   | 20551201 | 20551405 | + | 0     | 0     |
| ENSG0000(CALCP unprocessε chr11      | 14907518 | 14907986 | + | 0     | 0     |
| ENSG0000(RP11-410L: processed_ chr8  | 99003407 | 99003842 | - | 0.74  | 0.41  |

|                 |                           |       |          |          |   |      |      |
|-----------------|---------------------------|-------|----------|----------|---|------|------|
| ENSG00000100000 | RP11-863K antisense       | chr8  | 37717579 | 37733756 | + | 0    | 0    |
| ENSG00000100000 | RP11-486M lincRNA         | chr8  | 29548171 | 29564341 | + | 0    | 0    |
| ENSG00000100000 | RP4-701O1 processed       | chr7  | 1.4E+08  | 1.4E+08  | + | 0.22 | 0.36 |
| ENSG00000100000 | RP11-13N1 lincRNA         | chr8  | 16604255 | 16664879 | + | 0    | 0    |
| ENSG00000100000 | RP11-726G unprocessed     | chr8  | 43253732 | 43254089 | + | 0    | 0    |
| ENSG00000100000 | HOXA10-A1 antisense       | chr7  | 27168619 | 27171915 | + | 0    | 0    |
| ENSG00000100000 | TRBV6-7 TR_V_gene         | chr7  | 1.42E+08 | 1.42E+08 | + | 0    | 0    |
| ENSG00000100000 | RP11-158A lincRNA         | chr8  | 6036433  | 6036974  | - | 0    | 0    |
| ENSG00000100000 | AC084082. lincRNA         | chr8  | 66112667 | 66115207 | + | 0    | 0    |
| ENSG00000100000 | IGKV1D-32 IG_V_pseudogene | chr2  | 89928422 | 89928867 | + | 0    | 0    |
| ENSG00000100000 | RP11-351A antisense       | chr6  | 1.19E+08 | 1.19E+08 | + | 0    | 0    |
| ENSG00000100000 | RP11-359P unprocessed     | chr8  | 43542076 | 43544057 | + | 0    | 0    |
| ENSG00000100000 | RP11-706C antisense       | chr8  | 1.43E+08 | 1.43E+08 | + | 0    | 0    |
| ENSG00000100000 | CTD-3239E antisense       | chr8  | 92882984 | 92965645 | + | 0    | 0    |
| ENSG00000100000 | RP11-643N processed       | chr8  | 43674270 | 43674591 | - | 0    | 0    |
| ENSG00000100000 | LINC02153 lincRNA         | chr8  | 20973797 | 20995119 | + | 0    | 0    |
| ENSG00000100000 | RP11-582J1 antisense      | chr8  | 22613908 | 22616657 | - | 1.78 | 1.46 |
| ENSG00000100000 | IGKV3-25 IG_V_pseudogene  | chr2  | 89192500 | 89192752 | - | 0    | 0    |
| ENSG00000100000 | GUSBP3 transcribed        | chr5  | 69639459 | 69679259 | - | 1.63 | 0.77 |
| ENSG00000100000 | RP5-1009N processed       | chr8  | 30921060 | 30921335 | + | 0    | 0    |
| ENSG00000100000 | CTD-3046C lincRNA         | chr8  | 63384839 | 63470205 | - | 0    | 0    |
| ENSG00000100000 | RP11-738G lincRNA         | chr8  | 49536386 | 49554414 | - | 0    | 0    |
| ENSG00000100000 | RP11-67H2 lincRNA         | chr8  | 1.14E+08 | 1.14E+08 | + | 0    | 0    |
| ENSG00000100000 | RP11-1G11 processed       | chr8  | 26547669 | 26548463 | + | 0    | 0    |
| ENSG00000100000 | IGHV3-65 IG_V_pseudogene  | chr14 | 1.07E+08 | 1.07E+08 | - | 0    | 0    |
| ENSG00000100000 | RP11-809C antisense       | chr8  | 1.41E+08 | 1.41E+08 | - | 2.53 | 1.22 |
| ENSG00000100000 | RP11-546B processed       | chr5  | 1.71E+08 | 1.71E+08 | + | 0    | 0    |
| ENSG00000100000 | RP11-1149 lincRNA         | chr8  | 81154279 | 81164599 | + | 0    | 0    |
| ENSG00000100000 | RP11-156K antisense       | chr8  | 17882043 | 17882661 | + | 0    | 0    |
| ENSG00000100000 | RP11-744J1 processed      | chr8  | 69446057 | 69446260 | + | 0    | 0    |
| ENSG00000100000 | KB-1991G8 lincRNA         | chr8  | 1E+08    | 1E+08    | + | 0    | 0    |
| ENSG00000100000 | KLF3P1 processed          | chr5  | 1.72E+08 | 1.72E+08 | - | 0    | 0    |
| ENSG00000100000 | KRT18P41 processed        | chr5  | 1.7E+08  | 1.7E+08  | - | 0    | 0    |
| ENSG00000100000 | RP11-103H lincRNA         | chr8  | 1.26E+08 | 1.27E+08 | + | 0    | 0    |
| ENSG00000100000 | RP11-409C processed       | chr8  | 66984135 | 66986187 | - | 0    | 0.03 |
| ENSG00000100000 | PGAM5P1 processed         | chr5  | 1.1E+08  | 1.1E+08  | - | 0    | 0    |
| ENSG00000100000 | RP11-1057 processed       | chr8  | 1.29E+08 | 1.29E+08 | + | 0    | 0    |
| ENSG00000100000 | HAUS1P3 processed         | chr8  | 72618722 | 72619383 | - | 0    | 0    |
| ENSG00000100000 | RP11-383J1 lincRNA        | chr8  | 1.24E+08 | 1.24E+08 | + | 0    | 0    |
| ENSG00000100000 | NRBF2P4 processed         | chr8  | 1.08E+08 | 1.08E+08 | + | 0    | 0    |
| ENSG00000100000 | HIGD1AP6 processed        | chr8  | 75302296 | 75302574 | + | 0    | 0    |
| ENSG00000100000 | LINC00599 lincRNA         | chr8  | 9900064  | 9905366  | - | 0    | 0    |
| ENSG00000100000 | COX6CP8 processed         | chr8  | 64331927 | 64332152 | + | 0    | 0    |
| ENSG00000100000 | RP11-359B processed       | chr8  | 33523154 | 33523291 | + | 0    | 0    |
| ENSG00000100000 | KB-1582A1 processed       | chr8  | 39867436 | 39867812 | - | 0    | 0    |

|                                     |          |          |   |       |       |
|-------------------------------------|----------|----------|---|-------|-------|
| ENSG0000(I GLV2-5 IG_V_pseu chr22   | 22856762 | 22857038 | + | 0     | 0     |
| ENSG0000(RP11-4341I lincRNA chr8    | 73368770 | 73369295 | - | 0     | 0     |
| ENSG0000(LINC02143 lincRNA chr5     | 1.64E+08 | 1.64E+08 | - | 0     | 0     |
| ENSG0000(RP11-775E processed_chr8   | 80351132 | 80351416 | + | 0     | 0     |
| ENSG0000(RP11-941H lincRNA chr8     | 80266154 | 80339840 | + | 0     | 0     |
| ENSG0000(I GLVI-70 IG_V_pseu chr22  | 22026076 | 22026593 | + | 0     | 0     |
| ENSG0000(IGHV3-36 IG_V_pseu chr14   | 1.06E+08 | 1.06E+08 | - | 0     | 0     |
| ENSG0000(IGHV3-50 IG_V_pseu chr14   | 1.07E+08 | 1.07E+08 | - | 0     | 0     |
| ENSG0000(I GLVIV-64 IG_V_pseu chr22 | 22075366 | 22075666 | + | 0     | 0     |
| ENSG0000(RP11-619L antisense chr5   | 1.74E+08 | 1.74E+08 | - | 0     | 0     |
| ENSG0000(MTND1P3E processed_chr11   | 1.03E+08 | 1.03E+08 | - | 0.07  | 0     |
| ENSG0000(IGHV3-76 IG_V_pseu chr14   | 1.07E+08 | 1.07E+08 | - | 0     | 0     |
| ENSG0000(RP11-149P lincRNA chr8     | 1.36E+08 | 1.36E+08 | + | 0     | 0     |
| ENSG0000(C8orf88 protein_co chr8    | 90958637 | 90985257 | - | 3.7   | 4.14  |
| ENSG0000(CTC-534A2 protein_co chr5  | 65624765 | 65630891 | + | 0.78  | 0.55  |
| ENSG0000(RP11-10A1 lincRNA chr8     | 9180251  | 9182519  | - | 0     | 0     |
| ENSG0000(CTB-11I22 antisense chr5   | 1.59E+08 | 1.59E+08 | + | 0     | 0     |
| ENSG0000(MTND4P7 processed_chr8     | 13353401 | 13353530 | - | 0     | 0     |
| ENSG0000(RP11-539E antisense chr8   | 1.23E+08 | 1.23E+08 | - | 0     | 0     |
| ENSG0000(RP11-737F sense_intrchr8   | 1.31E+08 | 1.31E+08 | - | 0     | 0     |
| ENSG0000(RP11-379I lincRNA chr8     | 59561327 | 59593701 | - | 0     | 0     |
| ENSG0000(CTC-280C1 processed_chr5   | 1.55E+08 | 1.55E+08 | + | 0     | 0     |
| ENSG0000(RP11-221H processed_chr8   | 5072645  | 5072869  | - | 0     | 0     |
| ENSG0000(KB-1507C5 lincRNA chr8     | 1.03E+08 | 1.03E+08 | + | 0.27  | 0     |
| ENSG0000(PCAT2 lincRNA chr8         | 1.27E+08 | 1.27E+08 | - | 0     | 0     |
| ENSG0000(IGKV2-14 IG_V_pseu chr2    | 89078010 | 89078784 | - | 0     | 0     |
| ENSG0000(RP11-128L lincRNA chr8     | 1.41E+08 | 1.41E+08 | + | 0     | 0.14  |
| ENSG0000(DLGAP2-AS antisense chr8   | 1565509  | 1622417  | - | 0     | 0     |
| ENSG0000(CTB-37A13 antisense chr5   | 1.7E+08  | 1.7E+08  | - | 0     | 0     |
| ENSG0000(RP11-1105 lincRNA chr8     | 19678572 | 19688934 | + | 0     | 0     |
| ENSG0000(RP11-1059 processed_chr8   | 1.17E+08 | 1.17E+08 | + | 0     | 0     |
| ENSG0000(RP11-99A1 unprocesschr8    | 73831143 | 73831947 | + | 0     | 0     |
| ENSG0000(IGHV1-67 IG_V_pseu chr14   | 1.07E+08 | 1.07E+08 | - | 0     | 0     |
| ENSG0000(RP11-566H lincRNA chr8     | 31497423 | 31498612 | + | 0     | 0     |
| ENSG0000(CCDC71L protein_co chr7    | 1.07E+08 | 1.07E+08 | - | 31.01 | 27.49 |
| ENSG0000(IGKV2-10 IG_V_pseu chr2    | 89019992 | 89020686 | - | 0     | 0     |
| ENSG0000(LINC02209 lincRNA chr8     | 29921513 | 29953724 | + | 0     | 0     |
| ENSG0000(RP11-618M lincRNA chr8     | 19254241 | 19257334 | - | 0     | 0     |
| ENSG0000(RP11-716D processed_chr8   | 58255771 | 58272119 | - | 0     | 0     |
| ENSG0000(KB-1410C5 lincRNA chr8     | 1.01E+08 | 1.01E+08 | + | 0     | 0     |
| ENSG0000(RP11-146E processed_chr8   | 85086615 | 85087186 | + | 0     | 0     |
| ENSG0000(RP11-282K sense_intrchr12  | 19147074 | 19154659 | + | 0     | 0     |
| ENSG0000(CTD-2552K antisense chr8   | 1.24E+08 | 1.24E+08 | + | 0     | 0     |
| ENSG0000(RP11-281N lincRNA chr8     | 71779605 | 71792875 | - | 0     | 0     |
| ENSG0000(RP11-238K lincRNA chr8     | 1.38E+08 | 1.38E+08 | - | 0     | 0     |

|                                      |          |          |   |      |      |
|--------------------------------------|----------|----------|---|------|------|
| ENSG0000(RP11-597M) unprocessed chr8 | 27903229 | 27903495 | - | 0    | 0    |
| ENSG0000(TRBV7-7) TR_V_gene chr7     | 1.43E+08 | 1.43E+08 | + | 0    | 0    |
| ENSG0000(MIOXP1) processed chr8      | 86593755 | 86594589 | - | 0    | 0    |
| ENSG0000(HOXA10) protein_co chr7     | 27170591 | 27180261 | - | 0.07 | 0    |
| ENSG0000(IGHVII-40) IG_V_pseu chr14  | 1.06E+08 | 1.06E+08 | - | 0    | 0    |
| ENSG0000(RP11-779C) antisense chr5   | 1.73E+08 | 1.73E+08 | + | 0    | 0    |
| ENSG0000(CTB-160O2) sense_intr chr5  | 1.49E+08 | 1.49E+08 | - | 0    | 0    |
| ENSG0000(LINC01845) lincRNA chr5     | 1.59E+08 | 1.59E+08 | - | 0    | 0    |
| ENSG0000(RP11-316J) processed chr8   | 1E+08    | 1E+08    | - | 0    | 0    |
| ENSG0000(RP11-108E) lincRNA chr8     | 20655691 | 20700134 | - | 0    | 0    |
| ENSG0000(LINC01606) lincRNA chr8     | 57142689 | 57240298 | + | 0    | 0    |
| ENSG0000(STAU2-AS1) antisense chr8   | 73420004 | 73441526 | + | 0.08 | 0.15 |
| ENSG0000(IGHVIII-82) IG_V_pseu chr14 | 1.07E+08 | 1.07E+08 | - | 0    | 0    |
| ENSG0000(TMEM200) protein_co chr1    | 29119428 | 29123935 | - | 8.48 | 8.14 |
| ENSG0000(PCDHGB6) protein_co chr5    | 1.41E+08 | 1.42E+08 | + | 0.48 | 0.46 |
| ENSG0000(RP11-10J2) antisense chr8   | 1.41E+08 | 1.41E+08 | - | 0    | 0    |
| ENSG0000(RP1-170O1) lincRNA chr7     | 27239243 | 27241228 | - | 0    | 0    |
| ENSG0000(SERPINE3) protein_co chr13  | 51335773 | 51364735 | + | 0    | 0    |
| ENSG0000(IGHVIII-76) IG_V_pseu chr14 | 1.07E+08 | 1.07E+08 | - | 0    | 0    |
| ENSG0000(LINC01847) lincRNA chr5     | 1.6E+08  | 1.6E+08  | - | 0    | 0    |
| ENSG0000(RP11-359P) processed chr8   | 43251711 | 43251858 | + | 0    | 0    |
| ENSG0000(C1orf210) protein_co chr1   | 43281883 | 43285617 | - | 0.04 | 0    |
| ENSG0000(LINC00293) lincRNA chr8     | 46822237 | 46854307 | + | 0    | 0    |
| ENSG0000(LINC01932) lincRNA chr5     | 1.59E+08 | 1.59E+08 | + | 0    | 0    |
| ENSG0000(RP11-142A) lincRNA chr8     | 72196334 | 72202269 | + | 0.08 | 0    |
| ENSG0000(TMCC1P1) processed chr8     | 1.05E+08 | 1.05E+08 | - | 0    | 0    |
| ENSG0000(RP11-359P) processed chr8   | 43511820 | 43512033 | - | 0    | 0    |
| ENSG0000(AZIN1-AS1) antisense chr8   | 1.03E+08 | 1.03E+08 | + | 2.81 | 2.81 |
| ENSG0000(RP11-61G2) lincRNA chr5     | 90353037 | 90356609 | - | 0    | 0    |
| ENSG0000(RP11-388G) lincRNA chr8     | 57594166 | 57805029 | - | 0    | 0    |
| ENSG0000(IGHV7-34) IG_V_pseu chr14   | 1.06E+08 | 1.06E+08 | - | 0    | 0    |
| ENSG0000(RP11-261C) processed chr1   | 2.43E+08 | 2.43E+08 | - | 1.22 | 1.58 |
| ENSG0000(RAD21-AS1) antisense chr8   | 1.17E+08 | 1.17E+08 | + | 0.06 | 0.03 |
| ENSG0000(SUMO2P1) unprocessed chr8   | 1.02E+08 | 1.02E+08 | - | 0    | 0    |
| ENSG0000(IGLV3-30) IG_V_pseu chr22   | 22618572 | 22619163 | + | 0    | 0    |
| ENSG0000(RP11-697N) processed chr8   | 47511034 | 47512141 | - | 0.81 | 0.3  |
| ENSG0000(CTC-207P7) lincRNA chr5     | 1.64E+08 | 1.64E+08 | - | 0    | 0    |
| ENSG0000(KB-1582A1) processed chr8   | 39860219 | 39860525 | + | 0    | 0    |
| ENSG0000(RP11-497H) unprocessed chr5 | 70495100 | 70500903 | - | 0    | 0    |
| ENSG0000(RP13-923C) antisense chr8   | 81791823 | 81815714 | + | 0    | 0.18 |
| ENSG0000(RP11-420B) antisense chr8   | 18989279 | 19000952 | + | 0    | 0    |
| ENSG0000(RP11-468C) processed chr8   | 1.23E+08 | 1.23E+08 | + | 0    | 0.03 |
| ENSG0000(IGLV3-29) IG_V_pseu chr22   | 22661299 | 22661542 | + | 0    | 0    |
| ENSG0000(RP11-434I) lincRNA chr8     | 73358913 | 73362788 | + | 0    | 0    |
| ENSG0000(RP11-139G) processed chr8   | 50859530 | 50860062 | + | 0    | 0    |

|                                      |          |          |   |       |       |
|--------------------------------------|----------|----------|---|-------|-------|
| ENSG0000(RP11-730G processed_ chr8   | 74603244 | 74604244 | - | 0     | 0     |
| ENSG0000(RP11-219J lincRNA chr8      | 25776679 | 25777456 | + | 0     | 0     |
| ENSG0000(CTD-3023L lincRNA chr8      | 8555738  | 8560965  | - | 0     | 0     |
| ENSG0000(RP11-346L antisense chr8    | 37626015 | 37674387 | - | 0     | 0     |
| ENSG0000(IGHVII-22- IG_V_pseu chr14  | 1.06E+08 | 1.06E+08 | - | 0     | 0     |
| ENSG0000(CTD-3107M processed_ chr8   | 30331961 | 30332277 | - | 0     | 0     |
| ENSG0000(CTD-2026D antisense chr17   | 47409322 | 47423526 | - | 0.14  | 0     |
| ENSG0000(CTC-455F1 antisense chr5    | 1.71E+08 | 1.71E+08 | - | 0     | 0.27  |
| ENSG0000(COX6B1P6 processed_ chr8    | 89823548 | 89823802 | - | 0     | 0     |
| ENSG0000(LINC01298 lincRNA chr8      | 95207007 | 95216374 | - | 0     | 0     |
| ENSG0000(TUG1 antisense chr22        | 30970677 | 30979395 | + | 50.28 | 51.58 |
| ENSG0000(CTA-392C1 lincRNA chr8      | 40370028 | 40401848 | + | 0     | 0     |
| ENSG0000(KB-1460A1 processed_ chr8   | 1.01E+08 | 1.01E+08 | + | 0     | 0     |
| ENSG0000(RP11-90P5 antisense chr8    | 38148741 | 38163772 | + | 0     | 0     |
| ENSG0000(CTB-78F1.2 sense_intr chr5  | 1.68E+08 | 1.68E+08 | + | 0     | 0     |
| ENSG0000(GS1-251I9 antisense chr8    | 91016588 | 91018655 | + | 0     | 0     |
| ENSG0000(IGHV3-37 IG_V_pseu chr14    | 1.06E+08 | 1.06E+08 | - | 0     | 0     |
| ENSG0000(RP11-675F lincRNA chr8      | 38543652 | 38552680 | - | 0     | 0     |
| ENSG0000(RP11-120I2 unprocess chr8   | 84163449 | 84164564 | - | 0     | 0     |
| ENSG0000(RP11-962G lincRNA chr8      | 36537391 | 36779164 | - | 0     | 0     |
| ENSG0000(RP11-731F lincRNA chr14     | 1.06E+08 | 1.06E+08 | - | 0     | 0     |
| ENSG0000(IGKV1D-22 IG_V_pseu chr2    | 90010741 | 90011184 | + | 0     | 0     |
| ENSG0000(RP11-589F unprocess chr5    | 70751184 | 70795914 | + | 0     | 0     |
| ENSG0000(IGHVIII-25- IG_V_pseu chr14 | 1.06E+08 | 1.06E+08 | - | 0     | 0     |
| ENSG0000(TRNP1 protein_co chr1       | 26993707 | 27000898 | + | 12.04 | 11.47 |
| ENSG0000(RP11-1081 lincRNA chr8      | 53395211 | 53395946 | - | 0     | 0     |
| ENSG0000(CTB-56J15 unprocess chr5    | 1.56E+08 | 1.56E+08 | - | 0     | 0     |
| ENSG0000(RP11-587H lincRNA chr8      | 92500583 | 92509816 | - | 0     | 0     |
| ENSG0000(RP11-44N1 sense_intr chr8   | 1.23E+08 | 1.23E+08 | + | 0     | 0     |
| ENSG0000(RP11-21C1 lincRNA chr8      | 69175579 | 69178189 | - | 0     | 0     |
| ENSG0000(RP11-257P antisense chr8    | 81521618 | 81533275 | + | 0     | 0     |
| ENSG0000(RP11-44D1 lincRNA chr8      | 57889576 | 57890809 | - | 0     | 0     |
| ENSG0000(RP11-566H lincRNA chr8      | 31275596 | 31384279 | + | 0     | 0     |
| ENSG0000(RP11-1102 lincRNA chr8      | 71403440 | 71592025 | - | 0     | 0     |
| ENSG0000(RP11-738G lincRNA chr8      | 49496763 | 49512180 | - | 0     | 0     |
| ENSG0000(RP11-359E lincRNA chr8      | 40104169 | 40107935 | + | 0     | 0     |
| ENSG0000(POU5F1P2 processed_ chr8    | 1.03E+08 | 1.03E+08 | - | 0     | 0     |
| ENSG0000(RP11-116B processed_ chr8   | 73590574 | 73590883 | + | 0     | 0     |
| ENSG0000(CTD-2547L processed_ chr8   | 18088569 | 18089687 | - | 0     | 0     |
| ENSG0000(KB-1254G8 lincRNA chr8      | 1.03E+08 | 1.03E+08 | + | 0     | 0     |
| ENSG0000(IGHVII-49- IG_V_pseu chr14  | 1.07E+08 | 1.07E+08 | - | 0     | 0     |
| ENSG0000(IGHVIII-5-1 IG_V_pseu chr14 | 1.06E+08 | 1.06E+08 | - | 0     | 0     |
| ENSG0000(RP11-150C lincRNA chr8      | 37480089 | 37480809 | + | 0     | 0     |
| ENSG0000(RP11-930P antisense chr8    | 41660991 | 41665566 | + | 0     | 0     |
| ENSG0000(CTC-756D1 lincRNA chr8      | 23458601 | 23484971 | + | 0.22  | 0     |

|                                       |          |          |   |      |      |
|---------------------------------------|----------|----------|---|------|------|
| ENSG0000(RP11-758H processed_ chr8    | 79520145 | 79520649 | + | 0    | 0    |
| ENSG0000(AC006277. antisense chr19    | 2915146  | 2926807  | - | 0.25 | 0.55 |
| ENSG0000(RANP9 processed_ chr8        | 33039523 | 33039793 | + | 0    | 0    |
| ENSG0000(LINC00534 lincRNA chr8       | 90221488 | 90569318 | + | 0    | 0    |
| ENSG0000(KB-1460A1 lincRNA chr8       | 1.01E+08 | 1.01E+08 | - | 0    | 0    |
| ENSG0000(RP11-15G1 lincRNA chr8       | 41435298 | 41440419 | + | 0    | 0    |
| ENSG0000(RP11-597N antisense chr8     | 27904481 | 27910310 | + | 0    | 0    |
| ENSG0000(RP11-775B antisense chr8     | 1.19E+08 | 1.19E+08 | - | 0    | 0    |
| ENSG0000(AC078852. sense_intron chr4  | 1358479  | 1359461  | + | 0    | 0    |
| ENSG0000(RP11-337A lincRNA chr9       | 26801733 | 26805862 | + | 0    | 0    |
| ENSG0000(VTA1P2 processed_ chr8       | 87575598 | 87576508 | - | 0    | 0    |
| ENSG0000(RP11-348N antisense chr5     | 1.62E+08 | 1.62E+08 | - | 0    | 0    |
| ENSG0000(AC034243. antisense chr5     | 1.39E+08 | 1.39E+08 | - | 0.12 | 0    |
| ENSG0000(EVX1-AS antisense chr7       | 27241429 | 27247229 | - | 0    | 0    |
| ENSG0000(AC012613. antisense chr5     | 1.49E+08 | 1.49E+08 | - | 0    | 0    |
| ENSG0000(RP11-381I1 lincRNA chr8      | 1.31E+08 | 1.31E+08 | - | 0    | 0    |
| ENSG0000(RP11-231D antisense chr8     | 42233675 | 42271197 | - | 0.4  | 0    |
| ENSG0000(TRBV7-4 TR_V_gene chr7       | 1.42E+08 | 1.42E+08 | + | 0    | 0    |
| ENSG0000(RP11-539E transcribed chr8   | 1.23E+08 | 1.23E+08 | + | 0    | 0    |
| ENSG0000(IGHVIII-13- IG_V_pseud chr14 | 1.06E+08 | 1.06E+08 | - | 0    | 0    |
| ENSG0000(RP11-960H processed_ chr8    | 59760047 | 59760263 | + | 0    | 0    |
| ENSG0000(RP11-150C sense_intron chr8  | 37516410 | 37517021 | - | 1.31 | 0.16 |
| ENSG0000(RP11-44N1 processed_ chr8    | 98904603 | 98905671 | - | 0    | 0    |
| ENSG0000(RP11-48D4 lincRNA chr8       | 76904591 | 76913399 | + | 0    | 0    |
| ENSG0000(LINC02159 lincRNA chr5       | 1.61E+08 | 1.61E+08 | - | 0.26 | 0.31 |
| ENSG0000(SNX18P27 processed_ chr8     | 43513643 | 43514421 | + | 0    | 0    |
| ENSG0000(RP11-642D antisense chr8     | 1.06E+08 | 1.06E+08 | - | 0    | 0    |
| ENSG0000(ZNHIT1P1 processed_ chr8     | 1.43E+08 | 1.43E+08 | + | 0    | 0    |
| ENSG0000(CTB-47B8.4 processed_ chr5   | 1.58E+08 | 1.58E+08 | - | 0    | 0    |
| ENSG0000(RP11-813B processed_ chr8    | 83200952 | 83202431 | - | 0    | 0    |
| ENSG0000(CTC-436K1 lincRNA chr5       | 1.58E+08 | 1.58E+08 | + | 1.01 | 1.07 |
| ENSG0000(HSPA8P13 unprocessed chr8    | 46549089 | 46550802 | + | 0    | 0    |
| ENSG0000(RP11-10A1 lincRNA chr8       | 9151742  | 9168136  | + | 0.38 | 0.19 |
| ENSG0000(RP11-103H lincRNA chr8       | 1.26E+08 | 1.26E+08 | + | 0    | 0    |
| ENSG0000(LINC01942 lincRNA chr5       | 1.74E+08 | 1.74E+08 | + | 0    | 0    |
| ENSG0000(KB-1090H4 processed_ chr8    | 94708952 | 94709244 | - | 0    | 0    |
| ENSG0000(RP11-14I17 sense_intron chr8 | 26422593 | 26423929 | + | 0    | 0    |
| ENSG0000(SRPK2P processed_ chr8       | 62863082 | 62864181 | - | 0    | 0    |
| ENSG0000(RP11-324F lincRNA chr8       | 1.39E+08 | 1.39E+08 | - | 0    | 0    |
| ENSG0000(NCRNA002 lincRNA chr8        | 1.35E+08 | 1.35E+08 | + | 0    | 0    |
| ENSG0000(RP11-1101 lincRNA chr8       | 1.11E+08 | 1.12E+08 | + | 0    | 0    |
| ENSG0000(IGKV2-4 IG_V_pseud chr2      | 88931666 | 88932380 | - | 0    | 0    |
| ENSG0000(RNU6-988F snRNA chr8         | 38122374 | 38122480 | + | 0    | 0    |
| ENSG0000(PCAT1 lincRNA chr8           | 1.27E+08 | 1.27E+08 | + | 0    | 0.06 |
| ENSG0000(CDC42P5 processed_ chr5      | 1.73E+08 | 1.73E+08 | - | 0    | 0    |



|                                      |          |          |   |      |      |
|--------------------------------------|----------|----------|---|------|------|
| ENSG0000(IGHV3-33-2 IG_V_pseu chr14  | 1.06E+08 | 1.06E+08 | - | 0    | 0    |
| ENSG0000(IGHV3-25 IG_V_pseu chr14    | 1.06E+08 | 1.06E+08 | - | 0    | 0    |
| ENSG0000(AC133633. lincRNA chr8      | 2493876  | 2512580  | - | 0    | 0    |
| ENSG0000(CTB-79E8.2 antisense chr5   | 1.73E+08 | 1.73E+08 | - | 0    | 0    |
| ENSG0000(RP11-619L antisense chr5    | 1.74E+08 | 1.74E+08 | - | 0    | 0    |
| ENSG0000(IGLV3-6 IG_V_pseu chr22     | 22850375 | 22850624 | + | 0    | 0    |
| ENSG0000(CTC-436K1 lincRNA chr5      | 1.58E+08 | 1.58E+08 | - | 0    | 0    |
| ENSG0000(IGLV2-28 IG_V_pseu chr22    | 22664473 | 22664907 | + | 0    | 0    |
| ENSG0000(RP11-473J lincRNA chr8      | 35862123 | 35970665 | + | 0    | 0    |
| ENSG0000(NDUFA5P2 processed_ chr8    | 1.05E+08 | 1.05E+08 | + | 0    | 0    |
| ENSG0000(RP11-770E lincRNA chr8      | 48620465 | 48623895 | + | 0    | 0    |
| ENSG0000(CTD-2363C antisense chr5    | 1.59E+08 | 1.59E+08 | + | 0    | 0    |
| ENSG0000(SMIM18 protein_co chr8      | 30638600 | 30646064 | + | 0    | 0    |
| ENSG0000(IGHVII-15-1 IG_V_pseu chr14 | 1.06E+08 | 1.06E+08 | - | 0    | 0    |
| ENSG0000(IGKV2OR2 IG_V_pseu chr22    | 16921443 | 16922173 | - | 0    | 0    |
| ENSG0000(IGKV1-35 IG_V_pseu chr2     | 89286689 | 89286973 | - | 0    | 0    |
| ENSG0000(IGHVIII-26- IG_V_pseu chr14 | 1.06E+08 | 1.06E+08 | - | 0    | 0    |
| ENSG0000(HMGB1P1 processed_ chr8     | 1.23E+08 | 1.23E+08 | + | 0.12 | 0    |
| ENSG0000(IGHVIV-44- IG_V_pseu chr14  | 1.06E+08 | 1.06E+08 | - | 0    | 0    |
| ENSG0000(IGHV7-40 IG_V_pseu chr14    | 1.06E+08 | 1.06E+08 | - | 0    | 0    |
| ENSG0000(KB-1517D1 processed_ chr8   | 98412882 | 98413784 | - | 0    | 0    |
| ENSG0000(CTC-264O1 lincRNA chr5      | 1.67E+08 | 1.67E+08 | - | 0    | 0    |
| ENSG0000(RP11-697B lincRNA chr8      | 1.26E+08 | 1.26E+08 | - | 0    | 0    |
| ENSG0000(RP11-175E lincRNA chr8      | 23707141 | 23789487 | + | 0    | 0    |
| ENSG0000(CTB-23I7.2 processed_ chr5  | 1.51E+08 | 1.51E+08 | - | 0    | 0    |
| ENSG0000(RP11-10H3 lincRNA chr8      | 49168539 | 49228925 | + | 0    | 0    |
| ENSG0000(RP11-110G sense_intron chr8 | 51895957 | 51896374 | - | 0    | 0    |
| ENSG0000(RP11-395I1 lincRNA chr8     | 25425521 | 25426580 | - | 0.83 | 0.15 |
| ENSG0000(RP11-1C8.4 antisense chr8   | 1.03E+08 | 1.04E+08 | - | 0    | 0    |
| ENSG0000(LINC01603 lincRNA chr8      | 69425035 | 69448244 | - | 0    | 0    |
| ENSG0000(RP11-39H3 processed_ chr5   | 1.8E+08  | 1.8E+08  | - | 0    | 0    |
| ENSG0000(IGKV1OR2 IG_V_pseu chr22    | 16933521 | 16934003 | - | 0    | 0    |
| ENSG0000(IGHVII-26-2 IG_V_pseu chr14 | 1.06E+08 | 1.06E+08 | - | 0    | 0    |
| ENSG0000(CTC-756D1 processed_ chr8   | 23483016 | 23483534 | - | 0    | 0    |
| ENSG0000(RP11-109P lincRNA chr8      | 49817586 | 49820944 | - | 0    | 0    |
| ENSG0000(PCDHGA5 protein_co chr5     | 1.41E+08 | 1.42E+08 | + | 0.89 | 0.87 |
| ENSG0000(IGKV2-36 IG_V_pseu chr2     | 89295233 | 89295455 | - | 0    | 0    |
| ENSG0000(FAM60DP processed_ chr8     | 23634876 | 23635507 | - | 0    | 0    |
| ENSG0000(RP11-114C lincRNA chr8      | 1.11E+08 | 1.11E+08 | - | 0    | 0    |
| ENSG0000(LINC02099 lincRNA chr8      | 29748309 | 29798492 | + | 0.07 | 0.08 |
| ENSG0000(IGHVII-30-1 IG_V_pseu chr14 | 1.06E+08 | 1.06E+08 | - | 0    | 0    |
| ENSG0000(CDH12P3 unprocessed_ chr5   | 70132679 | 70132973 | + | 0    | 0    |
| ENSG0000(RP11-89A1 processed_ chr8   | 64973488 | 64973848 | - | 0    | 0    |
| ENSG0000(CYCSP23 processed_ chr8     | 1.2E+08  | 1.2E+08  | - | 0    | 0    |
| ENSG0000(RP11-13N1 lincRNA chr8      | 16676905 | 16915044 | - | 0    | 0    |

|                                      |          |          |   |      |      |
|--------------------------------------|----------|----------|---|------|------|
| ENSG000001IGKV1-13 IG_V_pseu chr2    | 89045995 | 89046466 | - | 0    | 0    |
| ENSG000001RP11-393K processed_ chr8  | 1.14E+08 | 1.14E+08 | - | 0    | 0    |
| ENSG000001AF121898. antisense chr8   | 87540835 | 87755718 | - | 0.06 | 0    |
| ENSG000001IGKV3D-34 IG_V_pseu chr2   | 89906757 | 89907246 | + | 0    | 0    |
| ENSG000001ATP6V1G1 processed_ chr8   | 47194002 | 47194347 | - | 0    | 0    |
| ENSG000001RP11-653B lincRNA chr8     | 82514568 | 82677153 | - | 0    | 0    |
| ENSG000001MTCYBP19 unprocessε chr8   | 36277763 | 36278886 | - | 0    | 0    |
| ENSG000001CTA-398F1 lincRNA chr8     | 8414690  | 8424632  | - | 0.15 | 0    |
| ENSG000001NACA2 protein_co chr17     | 61590426 | 61591202 | - | 0    | 0    |
| ENSG000001CTD-2501N lincRNA chr8     | 1.31E+08 | 1.31E+08 | + | 0    | 0    |
| ENSG000001RP11-17001 lincRNA chr7    | 27186573 | 27193448 | - | 0    | 0    |
| ENSG000001CTD-3080F sense_intrε chr8 | 41275115 | 41277003 | - | 0    | 0    |
| ENSG000001RP5-991O2 lincRNA chr8     | 5506068  | 5509126  | - | 0    | 0    |
| ENSG000001CTC-535M: processed_ chr5  | 1.66E+08 | 1.66E+08 | - | 0    | 0    |
| ENSG000001RP11-6D1. antisense chr8   | 1.25E+08 | 1.25E+08 | - | 0    | 0    |
| ENSG000001RP11-417F antisense chr2   | 46499731 | 46501278 | + | 0    | 0    |
| ENSG000001HMGB1P4: processed_ chr8   | 80812142 | 80812581 | - | 0    | 0    |
| ENSG000001XRCC6P4 processed_ chr8    | 62855068 | 62857134 | - | 0    | 0    |
| ENSG000001AC106801. antisense chr5   | 1.58E+08 | 1.58E+08 | + | 0    | 0.03 |
| ENSG000001RP11-798K processed_ chr5  | 1.8E+08  | 1.8E+08  | - | 0    | 0    |
| ENSG000001HPYR1 lincRNA chr8         | 1.33E+08 | 1.33E+08 | - | 0    | 0    |
| ENSG000001MIR3142H lincRNA chr5      | 1.6E+08  | 1.6E+08  | + | 0.29 | 0.21 |
| ENSG000001RP11-1112 lincRNA chr8     | 58031334 | 58032682 | - | 0    | 0    |
| ENSG000001RP11-89M: lincRNA chr8     | 36004316 | 36095046 | - | 0    | 0    |
| ENSG000001CTD-2114J: processed_ chr8 | 91157285 | 91158748 | + | 0.04 | 0    |
| ENSG000001RP11-152P lincRNA chr8     | 1.06E+08 | 1.06E+08 | + | 0    | 0    |
| ENSG000001CTB-105L4. antisense chr5  | 1.67E+08 | 1.67E+08 | - | 0    | 0    |
| ENSG000001RP11-347C processed_ chr8  | 94974573 | 94974853 | - | 0    | 0    |
| ENSG000001RP11-103H lincRNA chr8     | 1.27E+08 | 1.27E+08 | + | 0    | 0    |
| ENSG000001CTD-2340D sense_intrε chr8 | 99119352 | 99120581 | + | 0    | 0    |
| ENSG000001TRBV6-8 TR_V_gene chr7     | 1.43E+08 | 1.43E+08 | + | 0    | 0    |
| ENSG000001RP11-624C antisense chr8   | 24295814 | 24912073 | - | 0    | 0    |
| ENSG000001RP11-1174 processed_ chr5  | 71475761 | 71476316 | - | 0    | 0    |
| ENSG000001PCDHGA7 protein_co chr5    | 1.41E+08 | 1.42E+08 | + | 3.08 | 3.41 |
| ENSG000001CTB-32P11 lincRNA chr5     | 1.64E+08 | 1.64E+08 | + | 0    | 0    |
| ENSG000001RP11-402L: antisense chr8  | 99796615 | 99799187 | - | 0    | 0    |
| ENSG000001FAM86HP transcribec chr3   | 1.3E+08  | 1.3E+08  | - | 1.15 | 0.96 |
| ENSG000001SEPT10P1 processed_ chr8   | 56476826 | 56477987 | - | 0    | 0    |
| ENSG000001SDR16C6P transcribec chr8  | 56373064 | 56395365 | - | 0    | 0    |
| ENSG000001RP11-89K1 processed_ chr8  | 1.27E+08 | 1.27E+08 | - | 0    | 0    |
| ENSG000001C1GALT1P: processed_ chr8  | 61909984 | 61910802 | - | 0    | 0    |
| ENSG000001IGHV3-52 IG_V_pseu chr14   | 1.07E+08 | 1.07E+08 | - | 0    | 0    |
| ENSG000001IGLVVI-22: IG_V_pseu chr22 | 22700760 | 22700970 | + | 0    | 0    |
| ENSG000001RP11-959F processed_ chr11 | 63046785 | 63048126 | + | 0    | 0    |
| ENSG000001PYDC2 protein_co chr3      | 1.91E+08 | 1.91E+08 | + | 0    | 0    |

|                                     |          |          |   |      |      |
|-------------------------------------|----------|----------|---|------|------|
| ENSG0000(CA3-AS1 antisense chr8     | 85441851 | 85464915 | - | 0    | 0    |
| ENSG0000(RP11-115C processed_ chr8  | 6473845  | 6474288  | - | 0    | 0    |
| ENSG0000(RP11-26M1 antisense chr8   | 52194362 | 52199580 | + | 0    | 0    |
| ENSG0000(HOXA-AS2 antisense chr7    | 27107777 | 27134302 | + | 0    | 0    |
| ENSG0000(RP11-586K antisense chr8   | 88326836 | 88737134 | + | 0.76 | 0.42 |
| ENSG0000(RP11-32K4 antisense chr8   | 63687179 | 64368558 | - | 0    | 0    |
| ENSG0000(RP11-16E1 unprocessε chr8  | 63136223 | 63138084 | - | 0    | 0    |
| ENSG0000(MTCO1P4 processed_ chr8    | 1.03E+08 | 1.03E+08 | + | 0    | 0    |
| ENSG0000(RP11-1080 lincRNA chr8     | 19084992 | 19259469 | - | 0    | 0    |
| ENSG0000(CTD-2179L transcribed chr5 | 78041879 | 78044138 | - | 0    | 0    |
| ENSG0000(OSGEPL1-A antisense chr2   | 1.9E+08  | 1.9E+08  | + | 0.42 | 0.28 |
| ENSG0000(RP11-16P2 processed_ chr8  | 27697217 | 27697526 | - | 0    | 0    |
| ENSG0000(CTD-2588J lincRNA chr8     | 1.34E+08 | 1.34E+08 | + | 0    | 0    |
| ENSG0000(CTD-2340D antisense chr8   | 99091738 | 99094060 | - | 0    | 0    |
| ENSG0000(NKX2-1-AS antisense chr14  | 36519278 | 36523016 | + | 0    | 0    |
| ENSG0000(RP11-956J processed_ chr8  | 73215929 | 73216627 | - | 0    | 0    |
| ENSG0000(RP11-181B antisense chr8   | 28447264 | 28455902 | + | 0    | 0    |
| ENSG0000(RP11-386D processed_ chr8  | 86776479 | 86776638 | - | 0    | 0    |
| ENSG0000(VENTXP5 processed_ chr8    | 33722305 | 33723079 | - | 0    | 0    |
| ENSG0000(RNF5P1 processed_ chr8     | 38600661 | 38601200 | - | 0.67 | 0.4  |
| ENSG0000(RP11-728L processed_ chr8  | 5848697  | 5849692  | + | 0    | 0    |
| ENSG0000(RP11-107N lincRNA chr5     | 77942757 | 77946438 | - | 0    | 0    |
| ENSG0000(RP11-351C lincRNA chr8     | 1.27E+08 | 1.27E+08 | - | 0    | 0    |
| ENSG0000(RP11-284H antisense chr8   | 1.4E+08  | 1.4E+08  | + | 0    | 0    |
| ENSG0000(GS1-5L10.1 antisense chr8  | 91975908 | 91977418 | + | 0    | 0    |
| ENSG0000(RP11-100L lincRNA chr8     | 92765702 | 92776451 | + | 0    | 0    |
| ENSG0000(IGKV1-22 IG_V_pseu chr2    | 89170775 | 89171212 | - | 0    | 0    |
| ENSG0000(SUMO2P1ε processed_ chr8   | 31131539 | 31131802 | - | 0    | 0    |
| ENSG0000(TRMT10BP processed_ chr8   | 1.09E+08 | 1.09E+08 | + | 0    | 0    |
| ENSG0000(CTD-2272D processed_ chr8  | 82979411 | 82979886 | + | 0    | 0    |
| ENSG0000(RP11-649G antisense chr8   | 1.07E+08 | 1.07E+08 | - | 0    | 0    |
| ENSG0000(RP11-573J lincRNA chr8     | 63586000 | 63589408 | + | 0    | 0    |
| ENSG0000(CTD-2374C lincRNA chr5     | 1.05E+08 | 1.05E+08 | - | 0    | 0    |
| ENSG0000(KB-1184D1 lincRNA chr8     | 94097764 | 94104322 | - | 0    | 0    |
| ENSG0000(RP11-723D sense_intrε chr8 | 38799643 | 38802296 | + | 0    | 0    |
| ENSG0000(IGHV3-30-ε IG_V_pseu chr14 | 1.06E+08 | 1.06E+08 | - | 0    | 0    |
| ENSG0000(IGLV3-13 IG_V_pseu chr22   | 22762294 | 22762516 | + | 0    | 0    |
| ENSG0000(CTC-265N9 antisense chr5   | 1.71E+08 | 1.71E+08 | - | 0    | 0    |
| ENSG0000(IGKV2-38 IG_V_pseu chr2    | 89309898 | 89310144 | - | 0    | 0    |
| ENSG0000(RP11-157E lincRNA chr8     | 1.34E+08 | 1.34E+08 | + | 1.09 | 0.67 |
| ENSG0000(LINC01300 antisense chr8   | 1.41E+08 | 1.41E+08 | + | 0    | 0    |
| ENSG0000(CTD-2320C antisense chr8   | 74347757 | 74350050 | - | 0    | 0    |
| ENSG0000(SLC10A5 protein_co chr8    | 81693607 | 81696174 | - | 0.15 | 0.09 |
| ENSG0000(CTC-340A1 processed_ chr5  | 1.65E+08 | 1.65E+08 | - | 0    | 0    |
| ENSG0000(RN7SL260F misc_RNA chr8    | 1.42E+08 | 1.42E+08 | - | 0    | 0    |

|                 |                             |       |          |          |   |      |      |
|-----------------|-----------------------------|-------|----------|----------|---|------|------|
| ENSG00000108380 | CTA-397H3 antisense         | chr8  | 56074592 | 56075274 | + | 0    | 0    |
| ENSG00000108381 | RP11-489E lincRNA           | chr8  | 29905735 | 29908956 | + | 0    | 0    |
| ENSG00000108382 | HNRNPA1F processed          | chr8  | 1.41E+08 | 1.41E+08 | + | 0    | 0    |
| ENSG00000108383 | AFG3L2P1 processed          | chr8  | 43270198 | 43271960 | - | 0    | 0    |
| ENSG00000108384 | RP11-557C antisense         | chr8  | 1.23E+08 | 1.23E+08 | + | 0    | 0    |
| ENSG00000108385 | RP11-770E antisense         | chr8  | 48551567 | 48698510 | + | 0    | 0    |
| ENSG00000108386 | RP11-139F processed         | chr8  | 36308245 | 36308364 | + | 0    | 0    |
| ENSG00000108387 | VN1R46P processed           | chr8  | 43219960 | 43220809 | - | 0    | 0    |
| ENSG00000108388 | WBP1LP3 processed           | chr8  | 155274   | 155481   | + | 0    | 0    |
| ENSG00000108389 | CTC-551A1 antisense         | chr5  | 1.11E+08 | 1.11E+08 | - | 0    | 0    |
| ENSG00000108390 | RP11-513C lincRNA           | chr8  | 57261226 | 57266613 | + | 0    | 0    |
| ENSG00000108391 | RP11-597N unprocessed       | chr8  | 27903566 | 27903715 | + | 0    | 0    |
| ENSG00000108392 | RP11-875C antisense         | chr8  | 23071377 | 23074488 | - | 0.81 | 0.56 |
| ENSG00000108393 | RP11-443C processed         | chr5  | 1.79E+08 | 1.79E+08 | - | 0    | 0    |
| ENSG00000108394 | GRPEL2-AS antisense         | chr5  | 1.49E+08 | 1.49E+08 | - | 0    | 0    |
| ENSG00000108395 | RP11-369K lincRNA           | chr8  | 1.21E+08 | 1.21E+08 | + | 0    | 0    |
| ENSG00000108396 | AC144568. processed         | chr8  | 64091    | 64320    | - | 0    | 0    |
| ENSG00000108397 | RPSAP74 processed           | chr8  | 89243401 | 89243793 | - | 0    | 0    |
| ENSG00000108398 | RP11-654G sense_intron      | chr8  | 1.17E+08 | 1.17E+08 | + | 0    | 0    |
| ENSG00000108399 | RP11-346I processed         | chr8  | 66480648 | 66481486 | + | 0.08 | 0.17 |
| ENSG00000108400 | IGKV2-23 IG_V_pseudogene    | chr2  | 89172022 | 89172553 | - | 0    | 0    |
| ENSG00000108401 | EIF5AL1 protein_coding      | chr10 | 79512601 | 79516440 | + | 0.17 | 0.18 |
| ENSG00000108402 | RP11-513H lincRNA           | chr8  | 1.34E+08 | 1.34E+08 | - | 0    | 0    |
| ENSG00000108403 | RP11-536N lincRNA           | chr5  | 1.73E+08 | 1.73E+08 | + | 0    | 0    |
| ENSG00000108404 | KB-1107E3 antisense         | chr8  | 1.02E+08 | 1.02E+08 | + | 0    | 0    |
| ENSG00000108405 | CTC-370J7. unprocessed      | chr5  | 1.58E+08 | 1.58E+08 | - | 0    | 0    |
| ENSG00000108406 | IGLV7-35 IG_V_pseudogene    | chr22 | 22450202 | 22450652 | + | 0    | 0    |
| ENSG00000108407 | RP11-486M lincRNA           | chr8  | 29527312 | 29530323 | + | 0    | 0    |
| ENSG00000108408 | KB-1980E6 lincRNA           | chr8  | 1.03E+08 | 1.03E+08 | + | 0.24 | 0.78 |
| ENSG00000108409 | RP11-587H lincRNA           | chr8  | 92565443 | 92655494 | - | 0    | 0    |
| ENSG00000108410 | IGHVIII-67- IG_V_pseudogene | chr14 | 1.07E+08 | 1.07E+08 | - | 0    | 0    |
| ENSG00000108411 | RP11-531A antisense         | chr8  | 73052178 | 73063061 | + | 0.12 | 0.03 |
| ENSG00000108412 | IGLVV-58 IG_V_pseudogene    | chr22 | 22182582 | 22182885 | + | 0    | 0    |
| ENSG00000108413 | CTC-369M processed          | chr8  | 1.33E+08 | 1.33E+08 | - | 0    | 0    |
| ENSG00000108414 | SUMO2P1 processed           | chr8  | 97858049 | 97858947 | - | 0    | 0    |
| ENSG00000108415 | LINCR-0001 lincRNA          | chr8  | 10474565 | 10481974 | + | 0    | 0    |
| ENSG00000108416 | RP11-317N lincRNA           | chr8  | 33604856 | 34039008 | + | 0    | 0    |
| ENSG00000108417 | RP11-561E antisense         | chr8  | 24490312 | 24514829 | - | 0    | 0    |
| ENSG00000108418 | KB-1930G5 lincRNA           | chr8  | 1.01E+08 | 1.01E+08 | - | 0    | 0    |
| ENSG00000108419 | CTD-2544N antisense         | chr8  | 38970360 | 38973011 | - | 0    | 0    |
| ENSG00000108420 | CTD-2311A processed         | chr5  | 1.55E+08 | 1.55E+08 | - | 0    | 0    |
| ENSG00000108421 | CTD-2270F antisense         | chr5  | 1.7E+08  | 1.7E+08  | + | 0    | 0    |
| ENSG00000108422 | RP11-77B2 lincRNA           | chr8  | 15973315 | 16000324 | + | 0    | 0    |
| ENSG00000108423 | PRSS51 protein_coding       | chr8  | 10482878 | 10547585 | - | 0    | 0    |
| ENSG00000108424 | SMARCE1P processed          | chr8  | 37095150 | 37095390 | + | 0    | 0    |

|                                     |          |          |   |      |      |
|-------------------------------------|----------|----------|---|------|------|
| ENSG0000(SOD1P3 processed_ chr8     | 1.26E+08 | 1.26E+08 | - | 0    | 0    |
| ENSG0000(RP11-798K lincRNA chr5     | 1.8E+08  | 1.8E+08  | - | 0    | 0    |
| ENSG0000(CTC-248O1 antisense chr5   | 1.57E+08 | 1.57E+08 | - | 0    | 0    |
| ENSG0000(CTD-2210A processed_ chr8  | 48294026 | 48294694 | - | 0    | 0    |
| ENSG0000(IGJP1 processed_ chr8      | 84980073 | 84980547 | - | 0    | 0    |
| ENSG0000(KB-1568E2 lincRNA chr8     | 1.31E+08 | 1.31E+08 | - | 0    | 0    |
| ENSG0000(RP11-25P1 processed_ chr8  | 1.09E+08 | 1.09E+08 | + | 0    | 0    |
| ENSG0000(LINC01592 lincRNA chr8     | 68911803 | 69104190 | - | 0    | 0    |
| ENSG0000(RP11-1114 lincRNA chr8     | 79297717 | 79314471 | + | 0    | 0    |
| ENSG0000(CTC-353G1 antisense chr5   | 1.68E+08 | 1.68E+08 | - | 0    | 0    |
| ENSG0000(ZFHX4-AS1 antisense chr8   | 76491200 | 76683278 | - | 0.69 | 1.07 |
| ENSG0000(NPM1P52 processed_ chr8    | 1.03E+08 | 1.03E+08 | + | 0    | 0    |
| ENSG0000(RP11-401H antisense chr8   | 51257688 | 51321118 | + | 0    | 0    |
| ENSG0000(RP11-359E lincRNA chr8     | 40114651 | 40127468 | + | 0    | 0    |
| ENSG0000(KB-1615E4 antisense chr8   | 1E+08    | 1.01E+08 | + | 0    | 0    |
| ENSG0000(RP11-30L1 processed_ chr8  | 53971231 | 53974210 | + | 0    | 0    |
| ENSG0000(RP11-463C processed_ chr8  | 53712697 | 53712896 | + | 0    | 0    |
| ENSG0000(KB-1732A1 lincRNA chr8     | 1.03E+08 | 1.03E+08 | + | 0.28 | 0.41 |
| ENSG0000(RP11-429C processed_ chr8  | 25141394 | 25141968 | - | 0    | 0    |
| ENSG0000(RP11-806C processed_ chr8  | 17808941 | 17820868 | + | 0    | 0    |
| ENSG0000(RP11-536K lincRNA chr8     | 1.16E+08 | 1.16E+08 | - | 0    | 0    |
| ENSG0000(CTC-436K1 lincRNA chr5     | 1.58E+08 | 1.58E+08 | + | 0    | 0    |
| ENSG0000(IGHVII-78-IG_V_pseu chr14  | 1.07E+08 | 1.07E+08 | - | 0    | 0    |
| ENSG0000(CTD-3118D antisense chr8   | 86098965 | 86154225 | - | 0    | 0    |
| ENSG0000(TAGLN2P1 processed_ chr8   | 1.07E+08 | 1.07E+08 | - | 0    | 0.13 |
| ENSG0000(UBE2HP1 processed_ chr8    | 81254870 | 81255229 | + | 0    | 0    |
| ENSG0000(RP11-981G lincRNA chr8     | 10477491 | 10479375 | - | 0    | 0    |
| ENSG0000(KB-1410C5 lincRNA chr8     | 1.01E+08 | 1.01E+08 | - | 0    | 0    |
| ENSG0000(RP11-59O2 processed_ chr8  | 85617344 | 85617512 | - | 0    | 0    |
| ENSG0000(RP11-115I sense_intr chr8  | 76576551 | 76579345 | - | 0    | 0    |
| ENSG0000(RP11-700E lincRNA chr8     | 92403545 | 92413645 | - | 0    | 0    |
| ENSG0000(CTB-79E8.3 processed_ chr5 | 1.73E+08 | 1.73E+08 | - | 0    | 0    |
| ENSG0000(BUD31P1 processed_ chr8    | 33641581 | 33641939 | - | 0    | 0    |
| ENSG0000(MTND5P41 unprocess chr8    | 36279491 | 36279696 | - | 0    | 0    |
| ENSG0000(LINC01484 lincRNA chr5     | 1.74E+08 | 1.74E+08 | - | 0    | 0    |
| ENSG0000(CTC-348L5 antisense chr5   | 1.61E+08 | 1.61E+08 | + | 0    | 0    |
| ENSG0000(RP11-567J lincRNA chr8     | 48551527 | 48556441 | - | 0.33 | 0.12 |
| ENSG0000(RP11-380I antisense chr8   | 28250063 | 28339255 | - | 0    | 0    |
| ENSG0000(IGKV2OR2 IG_V_pseu chr22   | 16914235 | 16914981 | - | 0    | 0    |
| ENSG0000(IGHEP1 IG_C_pseu chr14     | 1.06E+08 | 1.06E+08 | - | 0    | 0    |
| ENSG0000(CTC-535M lincRNA chr5      | 1.65E+08 | 1.66E+08 | + | 0.09 | 0    |
| ENSG0000(RP11-177H antisense chr8   | 10840576 | 10846501 | + | 0    | 0    |
| ENSG0000(KBTBD11-C lincRNA chr8     | 1971397  | 1976478  | + | 0    | 0    |
| ENSG0000(RP11-1081 unprocess chr8   | 9658295  | 9658438  | - | 0    | 0    |
| ENSG0000(RP11-1259 antisense chr5   | 1.78E+08 | 1.78E+08 | + | 0    | 0    |

|                                |       |          |          |   |       |       |
|--------------------------------|-------|----------|----------|---|-------|-------|
| ENSG0000(CTD-3118D antisense   | chr8  | 86180418 | 86212236 | + | 0     | 0     |
| ENSG0000(AL928768.: lincRNA    | chr14 | 1.06E+08 | 1.06E+08 | - | 0     | 0     |
| ENSG0000(RP11-567J: lincRNA    | chr8  | 48597458 | 48621018 | - | 0.26  | 0     |
| ENSG0000(IGHV1-68 IG_V_pseu    | chr14 | 1.07E+08 | 1.07E+08 | - | 0     | 0     |
| ENSG0000(RP11-267M lincRNA     | chr8  | 94553722 | 94569745 | + | 0.19  | 0.07  |
| ENSG0000(RP11-758M antisense   | chr8  | 74798784 | 74866939 | - | 0     | 0     |
| ENSG0000(RP11-726G processed_  | chr8  | 43284626 | 43284806 | - | 0     | 0     |
| ENSG0000(RP11-51J9. antisense  | chr8  | 30176554 | 30180888 | - | 0     | 0     |
| ENSG0000(IGHV1-14 IG_V_pseu    | chr14 | 1.06E+08 | 1.06E+08 | - | 0     | 0     |
| ENSG0000(ALG11 protein_co      | chr13 | 52012398 | 52029664 | + | 4.72  | 4.84  |
| ENSG0000(RP11-787D antisense   | chr8  | 61300164 | 61301069 | - | 0     | 0     |
| ENSG0000(RP11-697M lincRNA     | chr8  | 75167704 | 75176656 | - | 0.88  | 1.23  |
| ENSG0000(CTC-264O1 lincRNA     | chr5  | 1.67E+08 | 1.67E+08 | - | 0     | 0     |
| ENSG0000(IGHVII-53-: IG_V_pseu | chr14 | 1.07E+08 | 1.07E+08 | - | 0     | 0     |
| ENSG0000(RP11-706C antisense   | chr8  | 1.43E+08 | 1.43E+08 | + | 0.49  | 0.69  |
| ENSG0000(MINCR antisense       | chr8  | 1.43E+08 | 1.43E+08 | - | 3.37  | 3.02  |
| ENSG0000(KB-1299A7 lincRNA     | chr8  | 1.11E+08 | 1.11E+08 | + | 0     | 0     |
| ENSG0000(ATXN7L3B protein_co   | chr12 | 74537827 | 74545430 | + | 9.3   | 9.83  |
| ENSG0000(RP11-473C lincRNA     | chr8  | 1.3E+08  | 1.3E+08  | + | 0     | 0     |
| ENSG0000(SUMO2P2( processed_   | chr8  | 69987415 | 69987697 | - | 0     | 0     |
| ENSG0000(RP11-10N2 antisense   | chr8  | 93733216 | 93734022 | + | 0     | 0     |
| ENSG0000(RP11-960H processed_  | chr8  | 59821124 | 59821433 | + | 0     | 0     |
| ENSG0000(RP11-21I4. processed_ | chr5  | 1.79E+08 | 1.79E+08 | + | 0     | 0     |
| ENSG0000(RP11-313C sense_intr  | chr8  | 72732045 | 72751843 | + | 0     | 0     |
| ENSG0000(RP11-706C antisense   | chr8  | 1.43E+08 | 1.43E+08 | - | 0     | 0     |
| ENSG0000(PRKDC protein_co      | chr8  | 47773108 | 47960183 | - | 13.73 | 16.41 |
| ENSG0000(RP11-893F antisense   | chr17 | 50158333 | 50161276 | - | 0.13  | 0     |
| ENSG0000(PCDHGA6 protein_co    | chr5  | 1.41E+08 | 1.42E+08 | + | 1.57  | 1.44  |
| ENSG0000(IGKV2-19 IG_V_pseu    | chr2  | 89134975 | 89135257 | - | 0     | 0     |
| ENSG0000(LZTS1-AS1 lincRNA     | chr8  | 20275773 | 20290458 | + | 0     | 0     |
| ENSG0000(LINC01289 lincRNA     | chr8  | 63769430 | 63785501 | + | 0     | 0     |
| ENSG0000(RP11-115J: lincRNA    | chr8  | 9351238  | 9358441  | - | 0     | 0     |
| ENSG0000(RP11-779C antisense   | chr5  | 1.73E+08 | 1.73E+08 | + | 0     | 0     |
| ENSG0000(KB-1460A1 lincRNA     | chr8  | 1.01E+08 | 1.01E+08 | + | 0     | 0     |
| ENSG0000(OTUD6B-A. antisense   | chr8  | 91059909 | 91070189 | - | 6.54  | 5.56  |
| ENSG0000(RNU6-323F snRNA       | chr8  | 38166012 | 38166118 | - | 0     | 0     |
| ENSG0000(KB-1083B1 antisense   | chr8  | 1.01E+08 | 1.01E+08 | + | 0     | 0     |
| ENSG0000(CTD-2292P antisense   | chr8  | 1.43E+08 | 1.43E+08 | - | 0.03  | 0.03  |
| ENSG0000(IGHV3-60 IG_V_pseu    | chr14 | 1.07E+08 | 1.07E+08 | - | 0     | 0     |
| ENSG0000(MARK2P11 unprocess    | chr5  | 1.58E+08 | 1.58E+08 | - | 0     | 0     |
| ENSG0000(AC025442. antisense   | chr5  | 66144156 | 66144795 | - | 0.48  | 0     |
| ENSG0000(RP11-350F lincRNA     | chr8  | 46922561 | 46928832 | + | 0     | 0     |
| ENSG0000(RP11-527N lincRNA     | chr8  | 37405439 | 37406724 | - | 0     | 0.27  |
| ENSG0000(IGHVII-62-: IG_V_pseu | chr14 | 1.07E+08 | 1.07E+08 | - | 0     | 0     |
| ENSG0000(CYP4F44P unprocess    | chr8  | 43539973 | 43540927 | + | 0     | 0     |

|                 |             |             |       |          |          |   |      |      |
|-----------------|-------------|-------------|-------|----------|----------|---|------|------|
| ENSG00000101100 | RP11-700E   | lincRNA     | chr8  | 92420850 | 92421798 | - | 0    | 0    |
| ENSG00000101101 | RP11-21C4   | processed   | chr8  | 64554236 | 64554475 | - | 0    | 0    |
| ENSG00000101102 | IGLVI-63    | IG_V_pseu   | chr22 | 22079770 | 22080263 | + | 0    | 0    |
| ENSG00000101103 | RP11-35G2   | antisense   | chr8  | 1.08E+08 | 1.08E+08 | + | 0    | 0    |
| ENSG00000101104 | IGHGP       | IG_C_pseu   | chr14 | 1.06E+08 | 1.06E+08 | - | 0    | 0    |
| ENSG00000101105 | CARSP2      | processed   | chr8  | 1.15E+08 | 1.15E+08 | - | 0    | 0    |
| ENSG00000101106 | IGHV3-57    | IG_V_pseu   | chr14 | 1.07E+08 | 1.07E+08 | - | 0    | 0    |
| ENSG00000101107 | RP11-48B3   | processed   | chr8  | 80568050 | 80568506 | - | 0    | 0    |
| ENSG00000101108 | RP11-579E   | lincRNA     | chr8  | 63704756 | 63751677 | + | 0    | 0    |
| ENSG00000101109 | IGHV3-6     | IG_V_pseu   | chr14 | 1.06E+08 | 1.06E+08 | - | 0    | 0    |
| ENSG00000101110 | RP11-439C   | lincRNA     | chr8  | 1972570  | 1974637  | - | 0    | 0    |
| ENSG00000101111 | IGKV2D-19   | IG_V_pseu   | chr2  | 90046796 | 90047057 | + | 0    | 0    |
| ENSG00000101112 | RP11-804N   | antisense   | chr5  | 21616262 | 21779522 | + | 0    | 0    |
| ENSG00000101113 | PCDHGA8     | protein_co  | chr5  | 1.41E+08 | 1.42E+08 | + | 0.13 | 0.23 |
| ENSG00000101114 | CTB-33O18   | lincRNA     | chr5  | 1.74E+08 | 1.74E+08 | + | 0    | 0    |
| ENSG00000101115 | HMGB1P2     | processed   | chr8  | 29218905 | 29219472 | + | 0    | 0    |
| ENSG00000101116 | TPTE2P1     | transcribed | chr13 | 24924677 | 24968487 | - | 0    | 0.09 |
| ENSG00000101117 | RP11-34P1   | processed   | chr5  | 1.6E+08  | 1.6E+08  | + | 0    | 0    |
| ENSG00000101118 | C8orf37-AS  | lincRNA     | chr8  | 95204456 | 95810136 | + | 0.34 | 0    |
| ENSG00000101119 | CTD-3023L   | lincRNA     | chr8  | 8559894  | 8562124  | + | 0    | 0    |
| ENSG00000101120 | AC100802.   | antisense   | chr8  | 20079305 | 20118442 | + | 0    | 0    |
| ENSG00000101121 | RP11-6N13   | lincRNA     | chr5  | 1.05E+08 | 1.05E+08 | + | 0    | 0    |
| ENSG00000101122 | RP11-758N   | processed   | chr8  | 74804287 | 74804811 | - | 0    | 0    |
| ENSG00000101123 | RP11-386D   | lincRNA     | chr8  | 86765935 | 86818558 | + | 0    | 0    |
| ENSG00000101124 | IGLVVI-25-  | IG_V_pseu   | chr22 | 22679097 | 22679345 | + | 0    | 0    |
| ENSG00000101125 | IGHVIII-2-1 | IG_V_pseu   | chr14 | 1.06E+08 | 1.06E+08 | - | 0    | 0    |
| ENSG00000101126 | ZNF317P1    | processed   | chr8  | 93646066 | 93647092 | + | 0    | 0    |
| ENSG00000101127 | RP11-350F   | lincRNA     | chr8  | 46930840 | 46934446 | - | 0    | 0    |
| ENSG00000101128 | CTD-2534J   | lincRNA     | chr8  | 1.39E+08 | 1.39E+08 | - | 0    | 0    |
| ENSG00000101129 | RP11-1145   | lincRNA     | chr8  | 72874859 | 72881740 | - | 0    | 0    |
| ENSG00000101130 | CTC-308K2   | processed   | chr5  | 1.73E+08 | 1.73E+08 | + | 0    | 0    |
| ENSG00000101131 | IGLV3-15    | IG_V_pseu   | chr22 | 22755554 | 22755797 | + | 0    | 0    |
| ENSG00000101132 | LINC02219   | lincRNA     | chr5  | 68189876 | 68198407 | + | 0    | 0    |
| ENSG00000101133 | NARSP2      | transcribed | chr8  | 62110524 | 62119898 | + | 0    | 0    |
| ENSG00000101134 | RP11-44K6   | processed   | chr8  | 39997869 | 39998499 | - | 0    | 0    |
| ENSG00000101135 | CTC-436K1   | lincRNA     | chr5  | 1.58E+08 | 1.58E+08 | - | 0    | 0    |
| ENSG00000101136 | RP11-293D   | processed   | chr8  | 30983459 | 30984321 | - | 0    | 0    |
| ENSG00000101137 | IGLV10-67   | IG_V_pseu   | chr22 | 22043618 | 22043942 | + | 0    | 0    |
| ENSG00000101138 | MTND1P5     | processed   | chr8  | 1.03E+08 | 1.03E+08 | + | 0    | 0    |
| ENSG00000101139 | RP11-1084   | antisense   | chr8  | 1.09E+08 | 1.09E+08 | - | 0    | 0    |
| ENSG00000101140 | UTP14C      | protein_co  | chr13 | 52024691 | 52033600 | + | 5.12 | 5.22 |
| ENSG00000101141 | AC008694.   | transcribed | chr5  | 1.58E+08 | 1.58E+08 | - | 0    | 0    |
| ENSG00000101142 | LINC01030   | lincRNA     | chr8  | 90592804 | 90606065 | - | 0    | 0    |
| ENSG00000101143 | RP11-21C4   | processed   | chr8  | 64570913 | 64571332 | - | 0    | 0    |
| ENSG00000101144 | CTD-2060F   | processed   | chr5  | 68087161 | 68087494 | - | 0    | 0    |

|                 |                       |       |          |          |   |      |      |
|-----------------|-----------------------|-------|----------|----------|---|------|------|
| ENSG00000102440 | CTA-392C1 lincRNA     | chr8  | 40298741 | 40343402 | - | 1.81 | 1.53 |
| ENSG00000102441 | RP11-101E processed   | chr8  | 46870902 | 46872045 | - | 0    | 0    |
| ENSG00000102442 | RP11-1049 lincRNA     | chr8  | 2033508  | 2035587  | + | 0    | 0    |
| ENSG00000102443 | CTD-2292P antisense   | chr8  | 1.43E+08 | 1.43E+08 | - | 0    | 0    |
| ENSG00000102444 | LINC01170 lincRNA     | chr5  | 1.24E+08 | 1.24E+08 | - | 0    | 0    |
| ENSG00000102445 | IGHVII-46-1 IG_V_pseu | chr14 | 1.07E+08 | 1.07E+08 | - | 0    | 0    |
| ENSG00000102446 | RP1-149L1 antisense   | chr6  | 70222758 | 70242156 | + | 0    | 0    |
| ENSG00000102447 | PSAT1P1 processed     | chr8  | 49740216 | 49741321 | - | 0    | 0    |
| ENSG00000102448 | CTD-2363C antisense   | chr5  | 1.59E+08 | 1.59E+08 | + | 0    | 0    |
| ENSG00000102449 | COX6B1P4 processed    | chr8  | 26835817 | 26836300 | - | 0    | 0    |
| ENSG00000102450 | MRPS36P3 processed    | chr8  | 1.22E+08 | 1.22E+08 | + | 0    | 0    |
| ENSG00000102451 | RP11-1415 unprocess   | chr5  | 70219918 | 70258930 | - | 4.23 | 10.3 |
| ENSG00000102452 | RP11-1134 processed   | chr8  | 47198032 | 47198323 | - | 0    | 0    |
| ENSG00000102453 | IGLV1-41 IG_V_pseu    | chr22 | 22404207 | 22404721 | + | 0    | 0    |
| ENSG00000102454 | LINC01151 lincRNA     | chr8  | 1.23E+08 | 1.23E+08 | - | 1.86 | 1.37 |
| ENSG00000102455 | IGHVII-67-1 IG_V_pseu | chr14 | 1.07E+08 | 1.07E+08 | - | 0    | 0    |
| ENSG00000102456 | RP11-246K lincRNA     | chr8  | 57492884 | 57591559 | + | 0    | 0    |
| ENSG00000102457 | IGLV3-24 IG_V_pseu    | chr22 | 22694439 | 22694952 | + | 0    | 0    |
| ENSG00000102458 | IGLV1-62 IG_V_pseu    | chr22 | 22086561 | 22087110 | + | 0    | 0    |
| ENSG00000102459 | KB-173C10 lincRNA     | chr8  | 1E+08    | 1E+08    | - | 0    | 0    |
| ENSG00000102460 | RP11-96A1 lincRNA     | chr4  | 1.2E+08  | 1.2E+08  | - | 0    | 0    |
| ENSG00000102461 | WBP1LP10 processed    | chr11 | 75780    | 76143    | + | 0    | 0    |
| ENSG00000102462 | MTND2P38 unprocess    | chr8  | 46827228 | 46827894 | - | 0    | 0    |
| ENSG00000102463 | RP11-723D antisense   | chr8  | 38844866 | 38846439 | - | 0.22 | 0.49 |
| ENSG00000102464 | ETV3L protein_co      | chr1  | 1.57E+08 | 1.57E+08 | - | 0    | 0    |
| ENSG00000102465 | CTD-2168K lincRNA     | chr8  | 24992002 | 25009777 | + | 0    | 0    |
| ENSG00000102466 | RP11-367E processed   | chr8  | 73984493 | 73984883 | + | 0.22 | 0.25 |
| ENSG00000102467 | RP11-705C lincRNA     | chr8  | 61821481 | 61825252 | - | 0    | 0    |
| ENSG00000102468 | RP11-731N lincRNA     | chr8  | 82862779 | 82958696 | - | 0.08 | 0    |
| ENSG00000102469 | RP11-177H processed   | chr8  | 23336171 | 23366125 | + | 0.1  | 0.25 |
| ENSG00000102470 | RP11-44K6 sense_intr  | chr8  | 39914229 | 39915721 | + | 0    | 0    |
| ENSG00000102471 | RP11-431D lincRNA     | chr8  | 1.36E+08 | 1.37E+08 | + | 0    | 0    |
| ENSG00000102472 | RP11-767C processed   | chr8  | 54247633 | 54247906 | + | 0    | 0    |
| ENSG00000102473 | RP11-622C processed   | chr8  | 1.26E+08 | 1.26E+08 | - | 0    | 0    |
| ENSG00000102474 | KB-173C10 lincRNA     | chr8  | 1E+08    | 1E+08    | - | 0    | 0    |
| ENSG00000102475 | RP11-769N processed   | chr8  | 48193850 | 48194627 | - | 0    | 0    |
| ENSG00000102476 | RP11-546K lincRNA     | chr8  | 51961458 | 52022974 | + | 0    | 0    |
| ENSG00000102477 | RP11-643N processed   | chr8  | 43672823 | 43673075 | + | 0    | 0    |
| ENSG00000102478 | PCDHGA10 protein_co   | chr5  | 1.41E+08 | 1.42E+08 | + | 6.95 | 5.97 |
| ENSG00000102479 | RP11-10N2 antisense   | chr8  | 93741193 | 93744534 | + | 0    | 0.15 |
| ENSG00000102480 | RP11-759A sense_intr  | chr8  | 50381015 | 50382275 | + | 0    | 0    |
| ENSG00000102481 | RP11-318M antisense   | chr8  | 1.03E+08 | 1.03E+08 | - | 0    | 0    |
| ENSG00000102482 | CTB-140J7 antisense   | chr5  | 1.51E+08 | 1.51E+08 | - | 0    | 0    |
| ENSG00000102483 | GS1-57L11 lincRNA     | chr8  | 2727318  | 2822482  | + | 0    | 0    |
| ENSG00000102484 | RP11-10N2 antisense   | chr8  | 93719574 | 93721167 | + | 0.33 | 0.14 |



|                                  |       |          |          |   |       |       |
|----------------------------------|-------|----------|----------|---|-------|-------|
| ENSG0000( AC133633. lincRNA      | chr8  | 2518998  | 2522182  | + | 0     | 0     |
| ENSG0000( RP11-386G lincRNA      | chr8  | 55161483 | 55164727 | + | 0     | 0     |
| ENSG0000( CTB-147C1 antisense    | chr5  | 1.7E+08  | 1.7E+08  | - | 0     | 0     |
| ENSG0000( RP11-157I4 antisense   | chr8  | 81439436 | 81521818 | + | 0     | 0     |
| ENSG0000( IGKV3-34 IG_V_pseu     | chr2  | 89275298 | 89275787 | - | 0     | 0     |
| ENSG0000( SLC2A3P1 processed_    | chr5  | 1.69E+08 | 1.69E+08 | - | 5.88  | 5.7   |
| ENSG0000( IGHVIII-47- IG_V_pseu  | chr14 | 1.07E+08 | 1.07E+08 | - | 0     | 0     |
| ENSG0000( RP11-394C antisense    | chr5  | 1.49E+08 | 1.49E+08 | + | 0     | 0.26  |
| ENSG0000( TMEM97P; processed_    | chr8  | 20934435 | 20934837 | - | 0     | 0     |
| ENSG0000( FER1L6-AS; antisense   | chr8  | 1.24E+08 | 1.24E+08 | - | 0     | 0     |
| ENSG0000( PIGFP1 processed_      | chr5  | 1.79E+08 | 1.79E+08 | + | 0     | 0     |
| ENSG0000( IGKV1-32 IG_V_pseu     | chr2  | 89253571 | 89254015 | - | 0     | 0     |
| ENSG0000( RP11-756K lincRNA      | chr8  | 57343787 | 57364857 | + | 0     | 0     |
| ENSG0000( RP11-90D1 lincRNA      | chr8  | 95505406 | 95527524 | + | 0.18  | 0.06  |
| ENSG0000( PCDHGA11 protein_co    | chr5  | 1.41E+08 | 1.42E+08 | + | 10.89 | 10.95 |
| ENSG0000( IGLVIV-66- IG_V_pseu   | chr22 | 22058433 | 22058892 | + | 0     | 0     |
| ENSG0000( RP11-16P2 antisense    | chr8  | 27733338 | 27756426 | + | 0     | 0     |
| ENSG0000( LINC01608 lincRNA      | chr8  | 1.11E+08 | 1.11E+08 | - | 0     | 0     |
| ENSG0000( RP11-347C sense_intr   | chr8  | 94950037 | 94951396 | + | 1.12  | 1.71  |
| ENSG0000( RP11-379I1 lincRNA     | chr8  | 59601378 | 59613775 | + | 0     | 0     |
| ENSG0000( RP11-124B lincRNA      | chr8  | 6044353  | 6257537  | - | 0     | 0     |
| ENSG0000( RP11-52B1 processed_   | chr8  | 8048919  | 8049267  | + | 0     | 0     |
| ENSG0000( RP11-61L2; transcribec | chr7  | 1.44E+08 | 1.44E+08 | - | 5.21  | 4.26  |
| ENSG0000( IGHV3-19 IG_V_pseu     | chr14 | 1.06E+08 | 1.06E+08 | - | 0     | 0     |
| ENSG0000( RP11-726G processed_   | chr8  | 43246755 | 43246935 | - | 0     | 0     |
| ENSG0000( ARF1P3 processed_      | chr8  | 1.24E+08 | 1.24E+08 | + | 0     | 0     |
| ENSG0000( CTB-158E9 processed_   | chr5  | 1.54E+08 | 1.54E+08 | + | 0     | 0     |
| ENSG0000( RP11-10A1 lincRNA      | chr8  | 9255349  | 9260295  | - | 0     | 0     |
| ENSG0000( RP11-521M antisense    | chr8  | 27184321 | 27210494 | + | 0     | 0     |
| ENSG0000( IGLVI-38 IG_V_pseu     | chr22 | 22425821 | 22426314 | + | 0     | 0     |
| ENSG0000( RP11-203E lincRNA      | chr8  | 24169957 | 24177080 | - | 0     | 0     |
| ENSG0000( RP11-770E lincRNA      | chr8  | 48657260 | 48658894 | - | 0     | 0     |
| ENSG0000( FAM85B antisense       | chr8  | 8167819  | 8226614  | - | 0.21  | 0.54  |
| ENSG0000( RP11-45K1 lincRNA      | chr8  | 63465849 | 63475482 | + | 0     | 0     |
| ENSG0000( IGHVII-44-; IG_V_pseu  | chr14 | 1.06E+08 | 1.06E+08 | - | 0     | 0     |
| ENSG0000( AC144568. lincRNA      | chr8  | 72601    | 79775    | + | 0     | 0     |
| ENSG0000( CTB-23I7.1 unprocess   | chr5  | 1.51E+08 | 1.51E+08 | - | 0     | 0     |
| ENSG0000( LINC01419 lincRNA      | chr8  | 83403758 | 83408900 | + | 0     | 0.04  |
| ENSG0000( RP11-613H processed_   | chr8  | 27063996 | 27065278 | - | 0     | 0     |
| ENSG0000( CDH12P4 unprocess      | chr5  | 71132993 | 71133287 | + | 0     | 0     |
| ENSG0000( RP11-122C lincRNA      | chr8  | 91542924 | 91907619 | - | 0.12  | 0     |
| ENSG0000( RP11-521M lincRNA      | chr8  | 27086076 | 27087783 | + | 0     | 0     |
| ENSG0000( IGKV2D-10 IG_V_pseu    | chr2  | 90179889 | 90180587 | + | 0     | 0     |
| ENSG0000( RP11-380I1 processed_  | chr8  | 28238430 | 28238905 | + | 0     | 0     |
| ENSG0000( RP11-252I1 processed_  | chr5  | 1.8E+08  | 1.8E+08  | + | 0     | 0     |

|                                      |          |            |      |      |
|--------------------------------------|----------|------------|------|------|
| ENSG0000(PCDHGB2 protein_co chr5     | 1.41E+08 | 1.42E+08 + | 1.93 | 1.41 |
| ENSG0000(KB-1205A7 antisense chr8    | 98603253 | 98606340 + | 0    | 0    |
| ENSG0000(RP11-402L processed_ chr8   | 99804159 | 99804341 - | 0    | 0    |
| ENSG0000(IGLV3-26 IG_V_pseu chr22    | 22673152 | 22673602 + | 0    | 0    |
| ENSG0000(MAPRE1P1 processed_ chr8    | 1.36E+08 | 1.36E+08 - | 0    | 0    |
| ENSG0000(MTCO1P49 processed_ chr8    | 1.34E+08 | 1.34E+08 + | 0    | 0    |
| ENSG0000(AC226119. processed_ chr4   | 3915183  | 3955419 -  | 0    | 0    |
| ENSG0000(THAP12P7 processed_ chr8    | 78760142 | 78762431 - | 0.03 | 0.03 |
| ENSG0000(IGLV3-31 IG_V_pseu chr22    | 22604445 | 22605165 + | 0    | 0    |
| ENSG0000(CTB-113P1 antisense chr5    | 1.52E+08 | 1.52E+08 + | 0    | 0    |
| ENSG0000(KB-1980E6 processed_ chr8   | 1.02E+08 | 1.02E+08 + | 0.06 | 0.28 |
| ENSG0000(RP11-1023 lincRNA chr8      | 52294455 | 52301942 + | 0    | 0    |
| ENSG0000(CTB-178M; antisense chr5    | 1.68E+08 | 1.68E+08 - | 0    | 0    |
| ENSG0000(RP11-26E5 lincRNA chr8      | 1.29E+08 | 1.29E+08 + | 0    | 0    |
| ENSG0000(GS1-39E22 lincRNA chr5      | 1.36E+08 | 1.36E+08 - | 0    | 0    |
| ENSG0000(CASC21 lincRNA chr8         | 1.27E+08 | 1.27E+08 + | 0    | 0    |
| ENSG0000(RP11-1149 antisense chr8    | 23189279 | 23190675 + | 0    | 0    |
| ENSG0000(RP11-909N antisense chr8    | 1.43E+08 | 1.43E+08 + | 0    | 0    |
| ENSG0000(RP11-10C8 antisense chr8    | 13338574 | 13342754 + | 0.03 | 0.05 |
| ENSG0000(MRPL49P2 processed_ chr8    | 16374618 | 16375082 + | 0    | 0    |
| ENSG0000(IGLVIV-53 IG_V_pseu chr22   | 22219647 | 22220133 + | 0    | 0    |
| ENSG0000(IGHV3-63 IG_V_pseu chr14    | 1.07E+08 | 1.07E+08 - | 0    | 0    |
| ENSG0000(NATP unprocessε chr8        | 18370607 | 18371484 + | 0    | 0    |
| ENSG0000(RP11-44K6 antisense chr8    | 39903775 | 39995248 - | 0    | 0    |
| ENSG0000(CTD-2127C processed_ chr5   | 31065970 | 31066132 - | 0    | 0    |
| ENSG0000(IGHVII-51-; IG_V_pseu chr14 | 1.07E+08 | 1.07E+08 - | 0    | 0    |
| ENSG0000(KB-1410C5 processed_ chr8   | 1.01E+08 | 1.01E+08 - | 0    | 0    |
| ENSG0000(KRT18P37 processed_ chr8    | 41511240 | 41512521 + | 0    | 0    |
| ENSG0000(RP11-156K antisense chr8    | 17801345 | 17861069 + | 0    | 0    |
| ENSG0000(RP11-328L processed_ chr8   | 95403802 | 95403894 + | 0    | 0    |
| ENSG0000(CTC-425K2 processed_ chr5   | 1.66E+08 | 1.66E+08 + | 0    | 0    |
| ENSG0000(CTB-77H17 antisense chr5    | 1.68E+08 | 1.68E+08 - | 0    | 0    |
| ENSG0000(RP11-410L; lincRNA chr8     | 98996763 | 99013044 - | 2.31 | 3.05 |
| ENSG0000(RP11-790J; lincRNA chr8     | 1.09E+08 | 1.09E+08 + | 0    | 0    |
| ENSG0000(RP11-447G processed_ chr8   | 16275681 | 16276296 + | 0    | 0    |
| ENSG0000(HIGD1AP1; processed_ chr8   | 77013751 | 77014028 - | 0    | 0    |
| ENSG0000(PCDHGB4 protein_co chr5     | 1.41E+08 | 1.42E+08 + | 8.49 | 8.31 |
| ENSG0000(HMGN1P3; processed_ chr15   | 92711808 | 92712110 + | 0    | 0    |
| ENSG0000(CTB-33O18 antisense chr5    | 1.74E+08 | 1.74E+08 + | 0    | 0    |
| ENSG0000(RP11-211F lincRNA chr8      | 1.1E+08  | 1.1E+08 -  | 0    | 0    |
| ENSG0000(IGHV3-22 IG_V_pseu chr14    | 1.06E+08 | 1.06E+08 - | 0    | 0    |
| ENSG0000(CLDN23 protein_co chr8      | 8701938  | 8704106 +  | 1.51 | 1.24 |
| ENSG0000(LINC01863 lincRNA chr5      | 1.74E+08 | 1.74E+08 + | 0    | 0    |
| ENSG0000(RP11-388K lincRNA chr8      | 93215925 | 93234878 - | 0    | 0    |
| ENSG0000(RP11-363L; antisense chr8   | 31167078 | 31177167 - | 0    | 0    |

|                                       |          |          |   |       |       |
|---------------------------------------|----------|----------|---|-------|-------|
| ENSG0000( IGLV3-2 IG_V_pseu chr22     | 22873212 | 22873440 | + | 0     | 0     |
| ENSG0000( RPL31P40 processed_ chr8    | 68293446 | 68293818 | - | 0     | 0     |
| ENSG0000( CTC-329D1 antisense chr5    | 1.4E+08  | 1.4E+08  | - | 0     | 0     |
| ENSG0000( CTC-455F1 processed_ chr5   | 1.71E+08 | 1.71E+08 | + | 0     | 0.05  |
| ENSG0000( RP11-333A lincRNA chr8      | 70471134 | 70485687 | + | 0     | 0.03  |
| ENSG0000( CTB-32H22 lincRNA chr5      | 1.73E+08 | 1.73E+08 | + | 0     | 0     |
| ENSG0000( MTND2P7 processed_ chr8     | 1.34E+08 | 1.34E+08 | + | 0     | 0     |
| ENSG0000( CDC42P3 processed_ chr8     | 1.43E+08 | 1.43E+08 | + | 0     | 0     |
| ENSG0000( MAL2 lincRNA chr8           | 1.19E+08 | 1.19E+08 | - | 0     | 0     |
| ENSG0000( RP11-467K antisense chr11   | 9004162  | 9065154  | + | 0     | 0     |
| ENSG0000( NRG1-IT1 sense_intr chr8    | 32026219 | 32139475 | + | 0     | 0     |
| ENSG0000( RP11-577N processed_ chr8   | 62482198 | 62483811 | - | 0     | 0     |
| ENSG0000( RP11-386G lincRNA chr8      | 55135203 | 55142358 | - | 0     | 0     |
| ENSG0000( MTCO2P4 processed_ chr8     | 1.03E+08 | 1.03E+08 | + | 0     | 0     |
| ENSG0000( CTB-178M antisense chr5     | 1.68E+08 | 1.68E+08 | - | 0     | 0     |
| ENSG0000( RP11-443C lincRNA chr5      | 1.79E+08 | 1.79E+08 | + | 0     | 0     |
| ENSG0000( CTB-4E7.1 antisense chr5    | 1.57E+08 | 1.57E+08 | - | 0     | 0     |
| ENSG0000( ALG1L13P transcribed chr8   | 8236003  | 8244667  | - | 0.42  | 0     |
| ENSG0000( CTD-2336C antisense chr8    | 1761990  | 1764502  | - | 16.79 | 15.34 |
| ENSG0000( RP11-16A9.1 antisense chr8  | 74199396 | 74208441 | + | 0.06  | 0.07  |
| ENSG0000( RP11-136K lincRNA chr5      | 71372676 | 71374898 | - | 0     | 0     |
| ENSG0000( CTC-756D1 lincRNA chr8      | 23493009 | 23494198 | - | 0     | 0     |
| ENSG0000( RP11-489C lincRNA chr8      | 1.38E+08 | 1.38E+08 | + | 0     | 0     |
| ENSG0000( IGHVIII-38- IG_V_pseu chr14 | 1.06E+08 | 1.06E+08 | - | 0     | 0     |
| ENSG0000( KB-1562D1 processed_ chr8   | 1.02E+08 | 1.02E+08 | - | 0     | 0     |
| ENSG0000( RP11-737F antisense chr8    | 1.31E+08 | 1.31E+08 | + | 0     | 0     |
| ENSG0000( RP11-451C processed_ chr8   | 33226848 | 33227147 | - | 0     | 0     |
| ENSG0000( NDUFB9P3 processed_ chr8    | 1.11E+08 | 1.11E+08 | - | 0     | 0     |
| ENSG0000( RPL10P18 processed_ chr8    | 33540185 | 33540493 | + | 0     | 0     |
| ENSG0000( RP11-200A processed_ chr8   | 1.05E+08 | 1.05E+08 | - | 0     | 0     |
| ENSG0000( IGKV2-29 IG_V_pseu chr2     | 89234174 | 89234912 | - | 0     | 0     |
| ENSG0000( IGKV3D-31 IG_V_pseu chr2    | 89929701 | 89930202 | + | 0     | 0     |
| ENSG0000( RP11-245A lincRNA chr8      | 1.24E+08 | 1.24E+08 | - | 0     | 0     |
| ENSG0000( RP11-91P1 lincRNA chr8      | 78148101 | 78153913 | + | 0.13  | 0     |
| ENSG0000( RP11-213G lincRNA chr8      | 23726331 | 23743042 | - | 0     | 0     |
| ENSG0000( CTB-167B5 antisense chr7    | 88216660 | 88219226 | + | 0     | 0     |
| ENSG0000( ZNF260 protein_co chr19     | 36510695 | 36528660 | - | 6.27  | 4.02  |
| ENSG0000( RP11-1D12 lincRNA chr8      | 64801236 | 64817573 | - | 0     | 0     |
| ENSG0000( RP11-281H lincRNA chr8      | 5659679  | 5670077  | - | 0.06  | 0     |
| ENSG0000( LINC00051 antisense chr8    | 1.42E+08 | 1.42E+08 | + | 0     | 0     |
| ENSG0000( IGKV2D-38 IG_V_pseu chr2    | 89872463 | 89872702 | + | 0     | 0     |
| ENSG0000( RP11-103H antisense chr8    | 1.27E+08 | 1.27E+08 | + | 0     | 0     |
| ENSG0000( CTC-229L2 sense_intr chr5   | 1.74E+08 | 1.74E+08 | + | 0     | 0     |
| ENSG0000( RPL10P8 processed_ chr5     | 1.71E+08 | 1.71E+08 | + | 0     | 0     |
| ENSG0000( MAP2K1P1 processed_ chr8    | 30027713 | 30028900 | + | 0     | 0     |

|                                      |          |          |   |      |      |
|--------------------------------------|----------|----------|---|------|------|
| ENSG0000(RP11-363E processed_ chr8   | 81244156 | 81244338 | + | 0    | 0    |
| ENSG0000(MTND4LP2 processed_ chr8    | 18200924 | 18201205 | - | 0    | 0    |
| ENSG0000(ALG1L10P unprocessε chr12   | 8227734  | 8231764  | + | 0    | 0    |
| ENSG0000(IGHEP2 IG_C_pseu chr9       | 5113549  | 5114804  | + | 0    | 0    |
| ENSG0000(RP11-785H lincRNA chr8      | 1.22E+08 | 1.22E+08 | + | 0    | 0    |
| ENSG0000(RP11-10J2: antisense chr8   | 1.41E+08 | 1.41E+08 | + | 0    | 0    |
| ENSG0000(RP11-100L: lincRNA chr8     | 92723024 | 92725111 | - | 0    | 0    |
| ENSG0000(RP11-778D lincRNA chr8      | 1.06E+08 | 1.06E+08 | - | 0    | 0    |
| ENSG0000(PKMP4 processed_ chr8       | 75376709 | 75377014 | + | 0    | 0    |
| ENSG0000(KB-1562D1 antisense chr8    | 1.01E+08 | 1.01E+08 | - | 0    | 0    |
| ENSG0000(BRIX1P1 processed_ chr8     | 51435602 | 51436509 | + | 0    | 0    |
| ENSG0000(RP11-369E lincRNA chr8      | 20954012 | 20968904 | + | 0    | 0    |
| ENSG0000(RP11-363E antisense chr8    | 81279871 | 81281446 | - | 0    | 0    |
| ENSG0000(AC083843: lincRNA chr8      | 1.35E+08 | 1.35E+08 | + | 0    | 0    |
| ENSG0000(IGLC4 IG_C_pseu chr22       | 22910828 | 22911075 | + | 0    | 0    |
| ENSG0000(IGLC5 IG_C_pseu chr22       | 22915635 | 22915927 | + | 0    | 0    |
| ENSG0000(RP11-326E antisense chr8    | 71155457 | 71204223 | + | 0    | 0    |
| ENSG0000(RP11-431M lincRNA chr8      | 34229294 | 34248946 | - | 0    | 0    |
| ENSG0000(RP11-662B antisense chr8    | 28798142 | 28799469 | + | 0    | 0    |
| ENSG0000(RP11-281C antisense chr5    | 1.79E+08 | 1.79E+08 | + | 0    | 0    |
| ENSG0000(IGHVIII-67- IG_V_pseu chr14 | 1.07E+08 | 1.07E+08 | - | 0    | 0    |
| ENSG0000(RP11-775B processed_ chr8   | 1.19E+08 | 1.19E+08 | - | 0    | 0    |
| ENSG0000(RP11-419C lincRNA chr8      | 37067441 | 37069418 | - | 0    | 0    |
| ENSG0000(RP11-304F lincRNA chr17     | 49914403 | 49932918 | + | 0    | 0    |
| ENSG0000(RP11-421P lincRNA chr8      | 21023296 | 21029058 | + | 0    | 0    |
| ENSG0000(RP11-574C antisense chr8    | 1.05E+08 | 1.05E+08 | - | 0    | 0.06 |
| ENSG0000(CTC-558O2 antisense chr5    | 1.69E+08 | 1.69E+08 | + | 0.05 | 0.02 |
| ENSG0000(RP11-3N13 lincRNA chr8      | 74891151 | 74896302 | - | 0    | 0    |
| ENSG0000(RP11-681L: sense_ovei chr4  | 97334635 | 97633823 | - | 0    | 0.22 |
| ENSG0000(IGHVIII-22- IG_V_pseu chr14 | 1.06E+08 | 1.06E+08 | - | 0    | 0    |
| ENSG0000(IGHV1-17 IG_V_pseu chr14    | 1.06E+08 | 1.06E+08 | - | 0    | 0    |
| ENSG0000(CTC-436K1 processed_ chr5   | 1.58E+08 | 1.58E+08 | - | 0    | 0    |
| ENSG0000(RP11-328K sense_intrε chr8  | 58991720 | 58992938 | - | 0    | 0    |
| ENSG0000(NRG1-IT3 sense_intrε chr8   | 32440746 | 32442725 | + | 0    | 0    |
| ENSG0000(RP11-577N antisense chr8    | 62473217 | 62474269 | - | 0    | 0    |
| ENSG0000(RP11-403D processed_ chr8   | 68176768 | 68177221 | + | 0    | 0    |
| ENSG0000(IGHVIII-67- IG_V_pseu chr14 | 1.07E+08 | 1.07E+08 | - | 0    | 0    |
| ENSG0000(IGHVIII-5-2 IG_V_pseu chr14 | 1.06E+08 | 1.06E+08 | - | 0    | 0    |
| ENSG0000(RP11-156K lincRNA chr8      | 17905756 | 17907887 | + | 0    | 0    |
| ENSG0000(RP11-17A4 lincRNA chr8      | 56639901 | 56656465 | - | 0    | 0    |
| ENSG0000(IGHV3-71 IG_V_pseu chr14    | 1.07E+08 | 1.07E+08 | - | 0    | 0    |
| ENSG0000(RP3-388N1 lincRNA chr8      | 93834454 | 93846743 | - | 0.14 | 0.46 |
| ENSG0000(RP11-172E lincRNA chr8      | 81036964 | 81040831 | + | 0    | 0    |
| ENSG0000(RP11-359B processed_ chr8   | 33436268 | 33436700 | - | 0    | 0    |
| ENSG0000(DUXAP2 unprocessε chr8      | 1.01E+08 | 1.01E+08 | - | 0    | 0    |

|                                 |       |          |          |   |       |       |
|---------------------------------|-------|----------|----------|---|-------|-------|
| ENSG0000(CTD-2530) antisense    | chr8  | 22254576 | 22275162 | - | 0     | 0     |
| ENSG0000(RP11-697N) processed   | chr8  | 47592147 | 47592609 | - | 0     | 0     |
| ENSG0000(LINC01938) lincRNA     | chr5  | 1.65E+08 | 1.65E+08 | - | 0     | 0     |
| ENSG0000(RP11-122L) transcribed | chr8  | 39522976 | 39580134 | + | 0     | 0     |
| ENSG0000(RP11-359P) processed   | chr8  | 43493937 | 43494762 | + | 0     | 0     |
| ENSG0000(RP11-790L) processed   | chr8  | 46671839 | 46671926 | + | 0     | 0     |
| ENSG0000(IGLVVII-41) IG_V_pseu  | chr22 | 22398849 | 22398999 | + | 0     | 0     |
| ENSG0000(IGLVV-66) IG_V_pseu    | chr22 | 22061077 | 22061538 | + | 0     | 0     |
| ENSG0000(CTD-3145H) processed   | chr8  | 1.38E+08 | 1.38E+08 | + | 0     | 0     |
| ENSG0000(IGLV3-7) IG_V_pseu     | chr22 | 22838602 | 22838872 | + | 0     | 0     |
| ENSG0000(RP11-31K2) processed   | chr8  | 95947781 | 95948233 | - | 0     | 0     |
| ENSG0000(RP11-730G) antisense   | chr8  | 74609698 | 74633320 | - | 0     | 0     |
| ENSG0000(LINC01299) lincRNA     | chr8  | 65527008 | 65562780 | - | 0     | 0.02  |
| ENSG0000(LINC01591) lincRNA     | chr8  | 1.35E+08 | 1.35E+08 | + | 0     | 0     |
| ENSG0000(KB-1930G5) lincRNA     | chr8  | 1.01E+08 | 1.01E+08 | - | 0     | 0     |
| ENSG0000(RP11-94H1) lincRNA     | chr8  | 29864644 | 29871661 | + | 0     | 0     |
| ENSG0000(LYN) protein_co        | chr8  | 55879813 | 56014168 | + | 4.21  | 4.15  |
| ENSG0000(SLC2A3P4) processed    | chr8  | 86503591 | 86505061 | + | 0     | 0     |
| ENSG0000(RP11-388K) lincRNA     | chr8  | 93259667 | 93297976 | + | 0     | 0     |
| ENSG0000(MTND2P32) processed    | chr8  | 33015261 | 33017043 | + | 0     | 0     |
| ENSG0000(RP11-10A1) processed   | chr8  | 9233013  | 9233449  | + | 0     | 0     |
| ENSG0000(RP11-369E) lincRNA     | chr8  | 20952645 | 20973877 | - | 0     | 0     |
| ENSG0000(PINX1) protein_co      | chr8  | 10764963 | 10839884 | - | 4.55  | 4.01  |
| ENSG0000(AC078852) sense_intr   | chr4  | 1356581  | 1358075  | + | 0     | 0     |
| ENSG0000(RP11-566H) processed   | chr8  | 31339197 | 31346479 | + | 0     | 0     |
| ENSG0000(IGKV3D-25) IG_V_pseu   | chr2  | 89989987 | 89990221 | + | 0     | 0     |
| ENSG0000(IGKV2-26) IG_V_pseu    | chr2  | 89196096 | 89196829 | - | 0     | 0     |
| ENSG0000(AC005740) antisense    | chr5  | 1.42E+08 | 1.42E+08 | - | 0     | 0     |
| ENSG0000(RP11-675F) lincRNA     | chr8  | 38552248 | 38559020 | - | 0     | 0     |
| ENSG0000(LINC02055) lincRNA     | chr8  | 1.37E+08 | 1.37E+08 | + | 0     | 0     |
| ENSG0000(RP11-21C4) antisense   | chr8  | 64574306 | 64581888 | - | 0     | 0     |
| ENSG0000(RP11-114M) processed   | chr8  | 58503588 | 58504068 | + | 0     | 0     |
| ENSG0000(RP11-63E5) processed   | chr8  | 264315   | 264672   | + | 0     | 0     |
| ENSG0000(VENTXP6) processed     | chr8  | 73651289 | 73651602 | + | 0     | 0     |
| ENSG0000(LINC01848) lincRNA     | chr5  | 1.1E+08  | 1.1E+08  | + | 0     | 0     |
| ENSG0000(RBPMS-AS) antisense    | chr8  | 30382119 | 30385401 | - | 2.62  | 1.42  |
| ENSG0000(RP11-150C) lincRNA     | chr8  | 37560366 | 37565377 | + | 0     | 0     |
| ENSG0000(KB-1205A7) processed   | chr8  | 98633547 | 98633865 | + | 0     | 0     |
| ENSG0000(RP11-174I) lincRNA     | chr8  | 1.24E+08 | 1.24E+08 | - | 0     | 0     |
| ENSG0000(HMGN1P2) processed     | chr17 | 60851382 | 60851745 | + | 0     | 0     |
| ENSG0000(RP11-386D) antisense   | chr8  | 86707547 | 86765023 | + | 0     | 0.09  |
| ENSG0000(MTCYBP20) processed    | chr8  | 46837578 | 46838706 | - | 0     | 0     |
| ENSG0000(RP11-705C) lincRNA     | chr8  | 61785047 | 61944180 | + | 0     | 0     |
| ENSG0000(LINC02155) lincRNA     | chr8  | 61889839 | 61894206 | + | 0     | 0     |
| ENSG0000(PCDHGB7) protein_co    | chr5  | 1.41E+08 | 1.42E+08 | + | 14.68 | 13.32 |

|                                         |          |          |   |      |      |
|-----------------------------------------|----------|----------|---|------|------|
| ENSG0000(RP11-99H2) lincRNA chr8        | 82098451 | 82160577 | - | 0    | 0    |
| ENSG0000(EEF1A1P37) processed_chr8      | 1.11E+08 | 1.11E+08 | + | 0    | 0    |
| ENSG0000(CD8BP) transcribed chr2        | 1.06E+08 | 1.07E+08 | + | 0    | 0    |
| ENSG0000(IGLCOR22-IG_C_pseudochr22      | 32199919 | 32200234 | + | 0    | 0    |
| ENSG0000(CTD-2647L) antisense chr8      | 29110573 | 29140729 | + | 0    | 0    |
| ENSG0000(LINC01947) lincRNA chr5        | 1.67E+08 | 1.67E+08 | - | 0    | 0    |
| ENSG0000(RP11-1007) processed_chr8      | 42484600 | 42485019 | + | 0    | 0    |
| ENSG0000(MTND6P3) processed_chr5        | 94568929 | 94569470 | - | 1.6  | 1.03 |
| ENSG0000(IGHVII-74-IG_V_pseudochr14     | 1.07E+08 | 1.07E+08 | - | 0    | 0    |
| ENSG0000(RP11-32D1) lincRNA chr5        | 1.58E+08 | 1.59E+08 | + | 0    | 0    |
| ENSG0000(RP11-546K) lincRNA chr8        | 51996210 | 52008355 | - | 0    | 0    |
| ENSG0000(RP11-152K) antisense chr5      | 31093977 | 31267610 | - | 0    | 0    |
| ENSG0000(CTD-2339F) lincRNA chr8        | 57746149 | 57750199 | + | 0.07 | 0    |
| ENSG0000(RP11-642D) sense_intronic chr8 | 1.06E+08 | 1.06E+08 | + | 0    | 0    |
| ENSG0000(RP11-470M) lincRNA chr8        | 40161458 | 40172612 | + | 0    | 0    |
| ENSG0000(RP11-661A) antisense chr8      | 1.44E+08 | 1.44E+08 | + | 0    | 0    |
| ENSG0000(RP11-359P) processed_chr8      | 43539137 | 43539472 | + | 0    | 0    |
| ENSG0000(HMGB1P4) processed_chr8        | 1.07E+08 | 1.07E+08 | - | 0    | 0    |
| ENSG0000(RP11-3791) processed_chr8      | 59557528 | 59557855 | - | 0    | 0    |
| ENSG0000(NIPA2P4) processed_chr8        | 81617220 | 81618560 | - | 0    | 0    |
| ENSG0000(CTD-3107M) processed_chr8      | 30349866 | 30350347 | - | 0    | 0.35 |
| ENSG0000(CTA-398F1) lincRNA chr8        | 8456909  | 8461337  | - | 0.72 | 0.82 |
| ENSG0000(RP4-798P1) processed_chr1      | 1.78E+08 | 1.78E+08 | - | 0.82 | 1.12 |
| ENSG0000(MTND6P2) transcribed chr8      | 46838788 | 46839205 | + | 0    | 0    |
| ENSG0000(IGKV2-18) IG_V_pseudochr2      | 89128724 | 89129483 | - | 0    | 0    |
| ENSG0000(RP11-281C) processed_chr5      | 1.79E+08 | 1.79E+08 | - | 0    | 0    |
| ENSG0000(CTD-2281E) lincRNA chr8        | 1246789  | 1248760  | - | 0    | 0    |
| ENSG0000(IGLVIV-65) IG_V_pseudochr22    | 22070225 | 22070707 | + | 0    | 0    |
| ENSG0000(RP11-48B3) lincRNA chr8        | 80535006 | 80539135 | - | 0.23 | 0.2  |
| ENSG0000(CTC-340I2) antisense chr5      | 1.57E+08 | 1.57E+08 | - | 0    | 0    |
| ENSG0000(CTB-33O18) lincRNA chr5        | 1.74E+08 | 1.74E+08 | + | 0    | 0    |
| ENSG0000(RP11-503E) antisense chr8      | 42537529 | 42538304 | - | 0.56 | 0.41 |
| ENSG0000(CASC19) lincRNA chr8           | 1.27E+08 | 1.27E+08 | - | 0    | 0    |
| ENSG0000(IGHVIII-51-IG_V_pseudochr14    | 1.07E+08 | 1.07E+08 | - | 0    | 0    |
| ENSG0000(CTD-2073C) processed_chr5      | 78708734 | 78716082 | - | 0.08 | 0.27 |
| ENSG0000(RP11-67M) lincRNA chr5         | 1.66E+08 | 1.66E+08 | + | 0    | 0    |
| ENSG0000(RNU5A-3P) snRNA chr8           | 30643689 | 30643802 | + | 0    | 0    |
| ENSG0000(RP11-96G1) lincRNA chr5        | 1.62E+08 | 1.62E+08 | - | 0    | 0    |
| ENSG0000(IGHV1-12) IG_V_pseudochr14     | 1.06E+08 | 1.06E+08 | - | 0    | 0    |
| ENSG0000(IGLVI-42) IG_V_pseudochr22     | 22397032 | 22397524 | + | 0    | 0    |
| ENSG0000(IGHV3-75) IG_V_pseudochr14     | 1.07E+08 | 1.07E+08 | - | 0    | 0    |
| ENSG0000(RP11-1149) lincRNA chr8        | 81058523 | 81067744 | + | 0    | 0    |
| ENSG0000(RP11-299D) lincRNA chr8        | 25834129 | 25840135 | - | 0    | 0    |
| ENSG0000(AB015752) lincRNA chr8         | 90534611 | 90620070 | - | 0    | 0.13 |
| ENSG0000(SLC25A51P) processed_chr8      | 80594815 | 80595703 | - | 0    | 0    |

|                                      |          |          |   |      |       |
|--------------------------------------|----------|----------|---|------|-------|
| ENSG0000(RP11-68L1:processed_chr8    | 90701082 | 90701876 | + | 0    | 0     |
| ENSG0000(RP11-953B:processed_chr8    | 1.42E+08 | 1.42E+08 | - | 0    | 0     |
| ENSG0000(RP11-419L:processed_chr8    | 1.09E+08 | 1.09E+08 | + | 0    | 0     |
| ENSG0000(RP11-167P:lincRNA_chr5      | 1.63E+08 | 1.63E+08 | - | 0.09 | 0.1   |
| ENSG0000(CTB-78F1.1:antisense_chr5   | 1.68E+08 | 1.68E+08 | - | 0.4  | 0.41  |
| ENSG0000(RP11-296C:processed_chr8    | 83099976 | 83100846 | - | 0    | 0     |
| ENSG0000(RP11-267N:processed_chr8    | 94590115 | 94590259 | + | 0    | 0     |
| ENSG0000(CTC-558O2:antisense_chr5    | 1.69E+08 | 1.69E+08 | + | 0    | 0     |
| ENSG0000(RP11-585F:processed_chr8    | 150584   | 150728   | - | 0    | 13.91 |
| ENSG0000(RP1-273G1:lincRNA_chr8      | 33973701 | 34009595 | - | 0    | 0     |
| ENSG0000(TPM3P3:processed_chr8       | 84162118 | 84162471 | + | 0    | 0     |
| ENSG0000(RP11-10J2:lincRNA_chr8      | 1.41E+08 | 1.41E+08 | + | 0    | 0     |
| ENSG0000(RP11-598P:processed_chr8    | 43125995 | 43126397 | - | 0    | 0     |
| ENSG0000(AC008691:lincRNA_chr5       | 1.6E+08  | 1.6E+08  | - | 0    | 0     |
| ENSG0000(RPL7AP33:processed_chr5     | 1.73E+08 | 1.73E+08 | - | 0    | 0     |
| ENSG0000(RP11-618M:lincRNA_chr8      | 19246350 | 19249240 | + | 0    | 0     |
| ENSG0000(RP11-120I2:lincRNA_chr8     | 83912713 | 84140283 | + | 0.11 | 0     |
| ENSG0000(IGHVII-33-IG_V_pseu_chr14   | 1.06E+08 | 1.06E+08 | - | 0    | 0     |
| ENSG0000(RP11-400K:lincRNA_chr8      | 53515170 | 53515905 | + | 0    | 0     |
| ENSG0000(RP11-92K1:antisense_chr8    | 80122852 | 80127670 | + | 0    | 0     |
| ENSG0000(NPIP11:protein_co_chr16     | 29381354 | 29404029 | - | 0.42 | 0.23  |
| ENSG0000(RP11-43A1:sense_intron_chr8 | 725188   | 725877   | - | 0    | 0     |
| ENSG0000(RP11-219B:antisense_chr8    | 85177522 | 85178150 | - | 0    | 0     |
| ENSG0000(RP11-3G20:lincRNA_chr8      | 1.22E+08 | 1.22E+08 | - | 0    | 0     |
| ENSG0000(LINC01485:lincRNA_chr5      | 1.74E+08 | 1.74E+08 | - | 0    | 0     |
| ENSG0000(RP11-98H4:processed_chr8    | 84864668 | 84864907 | - | 0    | 0     |
| ENSG0000(FAM213AP:processed_chr8     | 73277364 | 73278046 | - | 0.1  | 0     |
| ENSG0000(IGHVIII-11-IG_V_pseu_chr14  | 1.06E+08 | 1.06E+08 | - | 0    | 0     |
| ENSG0000(RP11-140I1:processed_chr8   | 56252960 | 56253372 | - | 0    | 0     |
| ENSG0000(GS1-251I9:processed_chr8    | 91042690 | 91044762 | - | 0    | 0     |
| ENSG0000(IGKV2D-18:IG_V_pseu_chr2    | 90052581 | 90053372 | + | 0    | 0     |
| ENSG0000(PCDHGB1:protein_co_chr5     | 1.41E+08 | 1.42E+08 | + | 2.9  | 2.65  |
| ENSG0000(RP11-787D:antisense_chr8    | 61264624 | 61292039 | - | 0    | 0     |
| ENSG0000(RP11-419K:lincRNA_chr8      | 1.3E+08  | 1.3E+08  | - | 0    | 0     |
| ENSG0000(KB-1043D8:antisense_chr8    | 96235427 | 96238034 | + | 0    | 0     |
| ENSG0000(BTF3P1:processed_chr8       | 51721670 | 51722164 | - | 0    | 0     |
| ENSG0000(LINC01933:lincRNA_chr5      | 1.52E+08 | 1.52E+08 | + | 0    | 0.23  |
| ENSG0000(RP11-622C:lincRNA_chr8      | 1.26E+08 | 1.26E+08 | - | 0    | 0     |
| ENSG0000(IGHV3-42:IG_V_pseu_chr14    | 1.06E+08 | 1.06E+08 | - | 0    | 0     |
| ENSG0000(FAM90A12:unprocessed_chr8   | 8027077  | 8032305  | - | 0    | 0     |
| ENSG0000(RP11-582J:antisense_chr8    | 22565997 | 22567171 | - | 0    | 0     |
| ENSG0000(CTD-2284J:processed_chr8    | 86333274 | 86343314 | - | 0.08 | 0.04  |
| ENSG0000(RP11-242J:lincRNA_chr4      | 1.85E+08 | 1.85E+08 | - | 0    | 0     |
| ENSG0000(RP11-115J:lincRNA_chr8      | 9249417  | 9413714  | + | 0    | 0     |
| ENSG0000(KB-1639H6:antisense_chr8    | 1.03E+08 | 1.03E+08 | - | 0    | 0     |

|                                |       |          |          |   |      |      |
|--------------------------------|-------|----------|----------|---|------|------|
| ENSG0000(RP11-115J) lincRNA    | chr8  | 9371970  | 9436205  | - | 0    | 0    |
| ENSG0000(RP11-300E) antisense  | chr8  | 75026428 | 75029460 | - | 0    | 0    |
| ENSG0000(GS1-39E22) lincRNA    | chr5  | 1.36E+08 | 1.36E+08 | + | 0    | 0    |
| ENSG0000(IGLVI-20) IG_V_pseu   | chr22 | 22715290 | 22715419 | + | 0    | 0    |
| ENSG0000(MTCO1P47) processed   | chr8  | 1.11E+08 | 1.11E+08 | - | 0    | 0    |
| ENSG0000(RP11-1080) lincRNA    | chr8  | 19091733 | 19115024 | + | 0    | 0    |
| ENSG0000(PAICSP4) processed    | chr8  | 4787332  | 4788584  | + | 0    | 0    |
| ENSG0000(PCDHGA3) protein_co   | chr5  | 1.41E+08 | 1.42E+08 | + | 0.8  | 1.2  |
| ENSG0000(CTB-120L2) antisense  | chr5  | 1.57E+08 | 1.57E+08 | + | 0    | 0    |
| ENSG0000(RP11-278I) processed  | chr8  | 1.19E+08 | 1.19E+08 | - | 0    | 0    |
| ENSG0000(RP11-320N) antisense  | chr8  | 95071732 | 95087924 | - | 0    | 0    |
| ENSG0000(RP11-959I1) antisense | chr8  | 1.24E+08 | 1.24E+08 | - | 0    | 0    |
| ENSG0000(RP11-662G) antisense  | chr8  | 90806474 | 90859240 | - | 0    | 0    |
| ENSG0000(RPL7P20) processed    | chr5  | 1.66E+08 | 1.66E+08 | - | 0    | 0    |
| ENSG0000(RP11-343B) processed  | chr8  | 67569416 | 67570078 | + | 0    | 0    |
| ENSG0000(RP11-17A4) antisense  | chr8  | 56445807 | 56552067 | + | 0.04 | 0.18 |
| ENSG0000(CTD-2008C) processed  | chr8  | 1.32E+08 | 1.32E+08 | + | 0    | 0    |
| ENSG0000(RPSAP71) processed    | chr5  | 1.71E+08 | 1.71E+08 | + | 0    | 0    |
| ENSG0000(RP11-398H) lincRNA    | chr8  | 1.39E+08 | 1.39E+08 | - | 0.41 | 0.41 |
| ENSG0000(RP11-369E) lincRNA    | chr8  | 20941428 | 20950175 | + | 0    | 0    |
| ENSG0000(RP11-18A1) lincRNA    | chr9  | 26746953 | 26786874 | + | 0    | 0    |
| ENSG0000(RP11-58O3) lincRNA    | chr8  | 1.12E+08 | 1.12E+08 | + | 0    | 0    |
| ENSG0000(RP11-473C) lincRNA    | chr8  | 1.3E+08  | 1.3E+08  | + | 0    | 0    |
| ENSG0000(IGKV3OR2) IG_V_pseu   | chr22 | 16925952 | 16926444 | - | 0    | 0    |
| ENSG0000(CTD-2336C) processed  | chr8  | 1730206  | 1731452  | + | 0    | 0    |
| ENSG0000(PKIA-AS1) lincRNA     | chr8  | 78426103 | 78558503 | - | 0    | 0    |
| ENSG0000(KB-1458E1) lincRNA    | chr8  | 98371355 | 98388247 | - | 0.37 | 0    |
| ENSG0000(RFPL4AP7) processed   | chr8  | 49352630 | 49352844 | - | 0    | 0    |
| ENSG0000(ERHP1) processed      | chr7  | 1.4E+08  | 1.4E+08  | + | 0    | 0    |
| ENSG0000(RP11-131N) lincRNA    | chr10 | 60734342 | 60741828 | + | 0    | 0    |
| ENSG0000(RP11-382J) processed  | chr8  | 22492631 | 22493044 | + | 0.4  | 0.22 |
| ENSG0000(RP11-181D) processed  | chr8  | 73511276 | 73511654 | - | 0.23 | 0    |
| ENSG0000(TDGF1P5) processed    | chr8  | 54073114 | 54073566 | + | 0    | 0    |
| ENSG0000(LINC00824) processed  | chr8  | 1.28E+08 | 1.29E+08 | - | 0.3  | 0    |
| ENSG0000(RP11-1144) lincRNA    | chr8  | 71675300 | 71702786 | + | 0    | 0    |
| ENSG0000(RP11-278I) antisense  | chr8  | 1.19E+08 | 1.19E+08 | - | 0    | 0    |
| ENSG0000(IGHVII-1-1) IG_V_pseu | chr14 | 1.06E+08 | 1.06E+08 | - | 0    | 0    |
| ENSG0000(KB-1507C5) lincRNA    | chr8  | 1.03E+08 | 1.03E+08 | + | 0    | 0    |
| ENSG0000(RP11-267N) processed  | chr8  | 94594411 | 94594601 | + | 0    | 0    |
| ENSG0000(KRT8P3) processed     | chr8  | 61578220 | 61579668 | + | 0    | 0    |
| ENSG0000(RP11-89K1) antisense  | chr8  | 1.27E+08 | 1.27E+08 | + | 0    | 0    |
| ENSG0000(RP11-44K6) antisense  | chr8  | 39918076 | 39920890 | - | 0    | 0    |
| ENSG0000(RP11-6I2.3) lincRNA   | chr8  | 74052340 | 74099853 | + | 0.88 | 0.88 |
| ENSG0000(IGHV3-32) IG_V_pseu   | chr14 | 1.06E+08 | 1.06E+08 | - | 0    | 0    |
| ENSG0000(RP11-150C) lincRNA    | chr8  | 37597480 | 37599858 | - | 0    | 0.03 |



|                               |       |          |          |   |      |      |
|-------------------------------|-------|----------|----------|---|------|------|
| ENSG0000(RP11-10J2: antisense | chr8  | 1.41E+08 | 1.41E+08 | + | 0    | 0    |
| ENSG0000(IGKV2D-14 IG_V_pseu  | chr2  | 90121786 | 90122564 | + | 0    | 0    |
| ENSG0000(CTB-158E9 lincRNA    | chr5  | 1.54E+08 | 1.54E+08 | - | 0    | 0    |
| ENSG0000(IMPDPH1P6 processed_ | chr8  | 1.23E+08 | 1.23E+08 | + | 0    | 0.04 |
| ENSG0000(CTC-308K2 lincRNA    | chr5  | 1.73E+08 | 1.73E+08 | + | 0    | 0    |
| ENSG0000(CTC-286N1 antisense  | chr5  | 1.67E+08 | 1.67E+08 | - | 0    | 0    |
| ENSG0000(CTB-17P3.4 lincRNA   | chr5  | 1.51E+08 | 1.51E+08 | - | 0.54 | 1.19 |
| ENSG0000(LINC01944 lincRNA    | chr5  | 1.73E+08 | 1.73E+08 | - | 0    | 0    |
| ENSG0000(LINC01111 lincRNA    | chr8  | 76406654 | 76524356 | + | 0.24 | 0.34 |
| ENSG0000(RP11-431M lincRNA    | chr8  | 34174886 | 34184895 | + | 0    | 0    |
| ENSG0000(RP11-398G lincRNA    | chr8  | 1.22E+08 | 1.22E+08 | - | 0.08 | 0.36 |
| ENSG0000(MRPL9P1 transcribed  | chr8  | 76603240 | 76603852 | - | 0    | 0    |
| ENSG0000(RP11-150C lincRNA    | chr8  | 37600537 | 37625873 | - | 0    | 0    |
| ENSG0000(KB-1608C1 antisense  | chr8  | 94791643 | 94793106 | - | 0    | 0    |
| ENSG0000(IGLVIV-59 IG_V_pseu  | chr22 | 22179228 | 22179477 | + | 0    | 0    |
| ENSG0000(RP11-89M: processed_ | chr8  | 36121398 | 36121683 | - | 0    | 0    |
| ENSG0000(CTD-2045N processed_ | chr5  | 78753596 | 78753873 | + | 0    | 0    |
| ENSG0000(SNRPCP17 processed_  | chr8  | 8116745  | 8116949  | - | 0    | 0    |
| ENSG0000(MRPL57P7 processed_  | chr8  | 98906260 | 98906517 | - | 0    | 0    |
| ENSG0000(CTD-2309H processed_ | chr8  | 1.34E+08 | 1.34E+08 | - | 0    | 0    |
| ENSG0000(RP11-26M: antisense  | chr8  | 52150820 | 52154892 | + | 0    | 0    |
| ENSG0000(RP11-267N antisense  | chr8  | 94533628 | 94534391 | + | 0    | 0    |
| ENSG0000(CTD-2345N processed_ | chr8  | 30249502 | 30250092 | - | 0    | 0    |
| ENSG0000(RP11-473C antisense  | chr8  | 1.3E+08  | 1.3E+08  | + | 0    | 0    |
| ENSG0000(RP11-134C lincRNA    | chr8  | 2666079  | 2728451  | - | 0    | 0    |
| ENSG0000(RP11-593P processed_ | chr8  | 36321039 | 36321404 | - | 0    | 0    |
| ENSG0000(RP11-495C lincRNA    | chr8  | 38700626 | 38704855 | - | 0    | 0    |
| ENSG0000(MIR151A miRNA        | chr8  | 1.41E+08 | 1.41E+08 | - | 0    | 0    |
| ENSG0000(RP11-318K sense_intr | chr8  | 55893595 | 55895739 | + | 0    | 0    |
| ENSG0000(IGHV7-27 IG_V_pseu   | chr14 | 1.06E+08 | 1.06E+08 | - | 0    | 0    |
| ENSG0000(CTC-308K2 processed_ | chr5  | 1.73E+08 | 1.73E+08 | + | 0    | 0    |
| ENSG0000(IGHVII-60: IG_V_pseu | chr14 | 1.07E+08 | 1.07E+08 | - | 0    | 0    |
| ENSG0000(RP11-1D12 sense_intr | chr8  | 64703774 | 64734459 | - | 0    | 0    |
| ENSG0000(CKS1BP7 processed_   | chr8  | 80644939 | 80645173 | - | 0    | 0    |
| ENSG0000(GS1-44D20 processed_ | chr8  | 69129598 | 69130345 | + | 0.1  | 0    |
| ENSG0000(NDST1-AS1 lincRNA    | chr5  | 1.5E+08  | 1.5E+08  | - | 0    | 0    |
| ENSG0000(RP11-24P4 lincRNA    | chr8  | 21298206 | 21309449 | + | 0    | 0    |
| ENSG0000(CDH12P1 unprocess    | chr5  | 70860285 | 70860579 | - | 0    | 0    |
| ENSG0000(AC008694. processed_ | chr5  | 1.58E+08 | 1.58E+08 | - | 0    | 0    |
| ENSG0000(RP11-865I: lincRNA   | chr8  | 68848742 | 68852763 | - | 0.54 | 1.32 |
| ENSG0000(MAFA-AS1 antisense   | chr8  | 1.43E+08 | 1.43E+08 | + | 0    | 0    |
| ENSG0000(RP11-267L: lincRNA   | chr8  | 1.14E+08 | 1.14E+08 | + | 0    | 0    |
| ENSG0000(RP11-10A1 antisense  | chr8  | 9141424  | 9145435  | + | 0    | 0    |
| ENSG0000(SNORD87 snoRNA       | chr8  | 66922467 | 66922555 | - | 0    | 0    |
| ENSG0000(RP11-726G processed_ | chr8  | 43372559 | 43372677 | + | 0    | 0    |

|                                     |          |            |      |      |
|-------------------------------------|----------|------------|------|------|
| ENSG0000(RP11-760H lincRNA chr8     | 1.2E+08  | 1.2E+08 +  | 2.87 | 8.13 |
| ENSG0000(LINC01288 lincRNA chr8     | 34784052 | 34864798 + | 0    | 0    |
| ENSG0000(IGKV2D-23 IG_V_pseu chr2   | 90009402 | 90009927 + | 0    | 0    |
| ENSG0000(MTND1P6 processed_chr8     | 33014081 | 33015026 + | 0    | 0    |
| ENSG0000(RP11-351E lincRNA chr8     | 72462311 | 72470972 + | 0    | 0    |
| ENSG0000(RP11-1134 processed_chr8   | 47189305 | 47189560 + | 0    | 0    |
| ENSG0000(MIR2052H lincRNA chr8      | 74599775 | 74823313 + | 0    | 0    |
| ENSG0000(RP11-542A lincRNA chr5     | 1.58E+08 | 1.58E+08 + | 0    | 0    |
| ENSG0000(ARL2BPP5 processed_chr5    | 1.63E+08 | 1.63E+08 + | 0    | 0    |
| ENSG0000(RP11-578C processed_chr8   | 78723796 | 78724136 - | 1.12 | 0    |
| ENSG0000(IGLVI-68 IG_V_pseu chr22   | 22032745 | 22033194 + | 0    | 0    |
| ENSG0000(RP11-628E antisense chr8   | 55517240 | 55520977 - | 0    | 0    |
| ENSG0000(CYCSP22 processed_chr8     | 50762460 | 50762798 - | 0    | 0    |
| ENSG0000(RP11-238K lincRNA chr8     | 1.38E+08 | 1.38E+08 + | 0    | 0    |
| ENSG0000(RP11-141I7 sense_intr chr8 | 26440491 | 26442595 + | 0    | 0    |
| ENSG0000(CTB-131B5 processed_chr5   | 1.4E+08  | 1.4E+08 +  | 0.05 | 0.09 |
| ENSG0000(KB-1615E4 antisense chr8   | 1E+08    | 1E+08 +    | 0    | 0    |
| ENSG0000(CTB-180C1 antisense chr5   | 1.67E+08 | 1.67E+08 - | 0    | 0    |
| ENSG0000(RP11-38H1 lincRNA chr8     | 77399072 | 77537290 + | 0    | 0.61 |
| ENSG0000(RP11-211C lincRNA chr8     | 8723693  | 8782479 -  | 0    | 0    |
| ENSG0000(HOXA-AS3 antisense chr7    | 27129977 | 27155928 + | 0    | 0    |
| ENSG0000(RP11-181B sense_intr chr8  | 28415524 | 28420055 - | 0    | 0    |
| ENSG0000(RP11-343P antisense chr8   | 1.35E+08 | 1.35E+08 - | 0    | 0    |
| ENSG0000(RP11-34P1 processed_chr5   | 1.6E+08  | 1.6E+08 +  | 0    | 0    |
| ENSG0000(SOX5P1 processed_chr8      | 87788562 | 87789688 - | 0    | 0    |
| ENSG0000(MIR124-2F lincRNA chr8     | 64373328 | 64383787 + | 0    | 0    |
| ENSG0000(RP11-317J lincRNA chr8     | 85523899 | 85540511 + | 0    | 0    |
| ENSG0000(TUBB8P5 unprocess chr12    | 38201566 | 38203792 + | 0    | 0    |
| ENSG0000(RP11-465K lincRNA chr8     | 40900016 | 40901854 - | 0    | 0    |
| ENSG0000(MTND6P19 unprocess chr8    | 36278960 | 36279483 + | 0    | 0    |
| ENSG0000(MYL12AP1 processed_chr8    | 93849561 | 93850075 + | 0    | 0    |
| ENSG0000(DUTP2 processed_chr8       | 1.23E+08 | 1.23E+08 + | 0    | 0    |
| ENSG0000(RHPN1-AS1 antisense chr8   | 1.43E+08 | 1.43E+08 - | 0.12 | 0.16 |
| ENSG0000(CTC-529G1 antisense chr5   | 1.61E+08 | 1.61E+08 + | 0    | 0    |
| ENSG0000(RP11-759A processed_chr8   | 50490795 | 50491465 + | 0    | 0    |
| ENSG0000(CTD-2272D lincRNA chr8     | 82912104 | 82961926 + | 0    | 0    |
| ENSG0000(IGHV4-55 IG_V_pseu chr14   | 1.07E+08 | 1.07E+08 - | 0    | 0    |
| ENSG0000(RP11-56F1 lincRNA chr9     | 27102630 | 27104728 + | 0    | 0.14 |
| ENSG0000(CTD-2371C antisense chr11  | 9430356  | 9433486 -  | 0    | 0    |
| ENSG0000(RP11-578F unprocess chr15  | 28679405 | 28682252 - | 0    | 0    |
| ENSG0000(GLYATL1P4 unprocess chr11  | 59042737 | 59050971 + | 0    | 0    |
| ENSG0000(RP11-732A antisense chr11  | 6603642  | 6604420 -  | 0    | 0    |
| ENSG0000(RP11-179A lincRNA chr11    | 11117854 | 11183611 + | 0    | 0    |
| ENSG0000(LRRC24 protein_co chr8     | 1.45E+08 | 1.45E+08 - | 0.9  | 1.13 |
| ENSG0000(OR10Y1P unprocess chr11    | 59728519 | 59729492 + | 0    | 0    |

|                                      |          |          |   |      |      |
|--------------------------------------|----------|----------|---|------|------|
| ENSG0000(RP11-703H antisense chr11   | 62213427 | 62260549 | - | 0    | 0    |
| ENSG0000(RP11-215D processed_chr11   | 1.2E+08  | 1.2E+08  | - | 0    | 0    |
| ENSG0000(PHBP17 processed_chr11      | 1.23E+08 | 1.23E+08 | - | 0    | 0    |
| ENSG0000(OR4A1P unprocessε chr11     | 49898267 | 49899186 | - | 0    | 0    |
| ENSG0000(RP11-613D sense_ovei chr11  | 43921059 | 44001157 | + | 0    | 0    |
| ENSG0000(CTD-3051L processed_chr11   | 56495760 | 56496412 | + | 0    | 0    |
| ENSG0000(RP11-107P processed_chr11   | 49098163 | 49101168 | - | 0    | 0    |
| ENSG0000(CHKB-CPT1 protein_co chr22  | 50568869 | 50582965 | - | 1.58 | 0.47 |
| ENSG0000(SIGLEC14 protein_co chr19   | 51642553 | 51646801 | - | 0    | 0    |
| ENSG0000(RP11-347E lincRNA chr11     | 1.1E+08  | 1.1E+08  | + | 0    | 0    |
| ENSG0000(ANO1-AS2 antisense chr11    | 70072434 | 70075433 | - | 0    | 0    |
| ENSG0000(RP11-21L1 antisense chr11   | 14262846 | 14273691 | - | 1.17 | 0    |
| ENSG0000(RP11-261P sense_intrε chr20 | 58710795 | 58711633 | + | 0.12 | 0    |
| ENSG0000(RP11-452H antisense chr11   | 78324758 | 78444049 | + | 0    | 0    |
| ENSG0000(RP11-864G antisense chr11   | 1.02E+08 | 1.02E+08 | - | 0    | 0    |
| ENSG0000(RP11-351I processed_chr8    | 12374366 | 12375546 | - | 0    | 0    |
| ENSG0000(RP11-810P processed_chr11   | 62072882 | 62073052 | - | 0    | 0    |
| ENSG0000(RP11-480C processed_chr8    | 13909231 | 13909780 | - | 0    | 0    |
| ENSG0000(RP11-430H lincRNA chr11     | 45355371 | 45366121 | + | 0    | 0    |
| ENSG0000(RP11-110I antisense chr11   | 1.19E+08 | 1.19E+08 | - | 0    | 0    |
| ENSG0000(CTD-2562J antisense chr11   | 75260127 | 75261025 | + | 0    | 0    |
| ENSG0000(OR6M3P unprocessε chr11     | 1.24E+08 | 1.24E+08 | - | 0    | 0    |
| ENSG0000(RP11-550A antisense chr8    | 1.25E+08 | 1.25E+08 | - | 0.27 | 0    |
| ENSG0000(RP11-331I antisense chr8    | 60808735 | 60809606 | - | 0    | 0    |
| ENSG0000(RP11-677I antisense chr11   | 1.06E+08 | 1.06E+08 | - | 0    | 0    |
| ENSG0000(CTD-2555I lincRNA chr11     | 80321620 | 80327911 | - | 0    | 0    |
| ENSG0000(AP000648. processed_chr11   | 90098421 | 90098817 | - | 0    | 0    |
| ENSG0000(RP11-170I processed_chr11   | 80957317 | 80957634 | + | 0    | 0    |
| ENSG0000(RP11-231N lincRNA chr11     | 13921450 | 13924863 | - | 0    | 0    |
| ENSG0000(PBOV1 protein_co chr6       | 1.38E+08 | 1.38E+08 | - | 0    | 0    |
| ENSG0000(RP11-718B processed_chr11   | 82835509 | 82837222 | + | 0    | 0    |
| ENSG0000(AP000859. processed_chr11   | 1.34E+08 | 1.34E+08 | - | 0    | 0    |
| ENSG0000(RP11-304C lincRNA chr11     | 6362799  | 6365267  | + | 0    | 0    |
| ENSG0000(RP11-290F sense_ovei chr11  | 6108135  | 6185576  | - | 0    | 0    |
| ENSG0000(HSPB2-C11 protein_co chr11  | 1.12E+08 | 1.12E+08 | + | 4.01 | 3.91 |
| ENSG0000(OR7E11P unprocessε chr11    | 67735608 | 67736559 | - | 0    | 0    |
| ENSG0000(SF3A3P2 processed_chr11     | 1.24E+08 | 1.24E+08 | - | 0    | 0    |
| ENSG0000(ALG9-IT1 sense_intrε chr11  | 1.12E+08 | 1.12E+08 | - | 0    | 0    |
| ENSG0000(RP11-560G antisense chr12   | 75234740 | 75298508 | + | 0    | 0    |
| ENSG0000(RP11-867G antisense chr11   | 66276779 | 66277492 | - | 0.16 | 0    |
| ENSG0000(NAV2-AS2 antisense chr11    | 20043846 | 20049303 | - | 0    | 0    |
| ENSG0000(RCC2P6 processed_chr11      | 62371146 | 62373168 | + | 0    | 0    |
| ENSG0000(HIGD1AP1 processed_chr11    | 65145691 | 65145972 | - | 0    | 0    |
| ENSG0000(RP11-405K lincRNA chr11     | 25734770 | 25781758 | + | 0    | 0    |
| ENSG0000(OR5D2P unprocessε chr11     | 55714799 | 55715709 | + | 0    | 0    |

|                                      |          |          |   |       |       |
|--------------------------------------|----------|----------|---|-------|-------|
| ENSG0000(RP11-867G antisense chr11   | 66312853 | 66319237 | + | 0     | 0.15  |
| ENSG0000(RP11-91P2 antisense chr11   | 77829654 | 77872262 | - | 0     | 0     |
| ENSG0000(RP11-939C sense_intrchr11   | 75506937 | 75508391 | - | 0     | 0     |
| ENSG0000(RP11-755F antisense chr11   | 66259567 | 66261834 | - | 0.13  | 0     |
| ENSG0000(TMX2-CTN protein_cochr11    | 57712605 | 57791586 | + | 0.51  | 0     |
| ENSG0000(RP11-484D processed_chr11   | 43466392 | 43466871 | + | 0     | 0.35  |
| ENSG0000(OR4A3P unprocessεchr11      | 54662580 | 54663450 | + | 0     | 0     |
| ENSG0000(THAP12P4 processed_chr11    | 23478068 | 23480430 | + | 0     | 0     |
| ENSG0000(OR4D10 protein_cochr11      | 59477373 | 59478396 | + | 0     | 0     |
| ENSG0000(RP11-634B lincRNA chr11     | 1.24E+08 | 1.24E+08 | + | 0     | 0     |
| ENSG0000(RP11-304M lincRNA chr11     | 112967   | 125927   | - | 0     | 0     |
| ENSG0000(RP11-849H protein_cochr11   | 71865509 | 71928654 | - | 1.17  | 1.74  |
| ENSG0000(AP5B1 protein_cochr11       | 65775893 | 65780802 | - | 5.26  | 5.62  |
| ENSG0000(RP11-885L processed_chr11   | 79987513 | 79989630 | + | 0     | 0     |
| ENSG0000(OR4A49P unprocessεchr11     | 49915013 | 49915644 | - | 0     | 0     |
| ENSG0000(RP11-522I2 antisense chr9   | 83707594 | 83713378 | + | 2.27  | 2.61  |
| ENSG0000(OR2AT1P unprocessεchr11     | 75131138 | 75131880 | - | 0     | 0     |
| ENSG0000(AP000640. antisense chr11   | 59753015 | 59754975 | - | 0.57  | 0.08  |
| ENSG0000(RP11-158Iε processed_chr11  | 1.19E+08 | 1.19E+08 | + | 0     | 0     |
| ENSG0000(SLC25A1P1 processed_chr11   | 85934737 | 85935663 | + | 0     | 0     |
| ENSG0000(RP11-23F2 lincRNA chr11     | 4187140  | 4202655  | + | 0.68  | 0     |
| ENSG0000(PTP4A2P2 processed_chr11    | 1.34E+08 | 1.34E+08 | - | 0     | 0.16  |
| ENSG0000(RP11-386B processed_chr11   | 1.1E+08  | 1.1E+08  | - | 0     | 0     |
| ENSG0000(RP11-23J9. unprocessεchr9   | 97238645 | 97246184 | + | 0     | 0     |
| ENSG0000(CTA-797E1 sense_intrchr11   | 70319928 | 70321415 | + | 0     | 0.21  |
| ENSG0000(RP11-380C antisense chr3    | 9292588  | 9363303  | - | 0     | 0.66  |
| ENSG0000(RP13-631K lincRNA chr11     | 12030875 | 12061785 | + | 0.15  | 0.02  |
| ENSG0000(RP11-707M unprocessεchr11   | 49817778 | 49825553 | + | 0     | 0     |
| ENSG0000(RP11-65G9 lincRNA chrY      | 21038289 | 21044724 | - | 0     | 0     |
| ENSG0000(RP5-1024C antisense chr11   | 30584130 | 30630508 | + | 0     | 0     |
| ENSG0000(OR5M7P unprocessεchr11      | 56500300 | 56501271 | - | 0     | 0     |
| ENSG0000(RP11-145C processed_chr8    | 13583889 | 13584533 | - | 0     | 0     |
| ENSG0000(KB-1073A2 processed_chr8    | 1.02E+08 | 1.02E+08 | + | 0     | 0     |
| ENSG0000(AP000487. antisense chr11   | 70358198 | 70358677 | - | 0     | 0     |
| ENSG0000(CBX3P8 processed_chr11      | 49406190 | 49406714 | + | 0     | 0     |
| ENSG0000(CTD-2560E antisense chr11   | 45253884 | 45254649 | + | 0     | 0     |
| ENSG0000(CTD-2119L processed_chr11   | 36696317 | 36697867 | + | 0     | 0     |
| ENSG0000(AC002056. antisense chr22   | 50740593 | 50743520 | - | 0     | 0     |
| ENSG0000(RANP3 processed_chr11       | 74652636 | 74652911 | + | 0     | 0     |
| ENSG0000(AP003068. antisense chr11   | 65110714 | 65111695 | - | 0     | 0     |
| ENSG0000(FNTAL1 processed_chr11      | 86195132 | 86196266 | + | 0     | 0     |
| ENSG0000(CTD-2521M processed_chr19   | 17417031 | 17418288 | - | 0     | 0     |
| ENSG0000(CHMP4A protein_cochr14      | 24209583 | 24213869 | - | 31.26 | 24.45 |
| ENSG0000(RP11-748H transcribec chr11 | 1.02E+08 | 1.02E+08 | + | 0     | 0     |
| ENSG0000(RP11-481A transcribec chr8  | 12003400 | 12004082 | - | 0     | 0     |

|                                     |          |          |   |       |      |
|-------------------------------------|----------|----------|---|-------|------|
| ENSG0000(FBXO3-AS1 antisense chr11  | 33774699 | 33775670 | + | 0     | 0    |
| ENSG0000(RP11-677N processed_ chr11 | 1.25E+08 | 1.25E+08 | + | 0     | 0    |
| ENSG0000(RP11-867G processed_ chr11 | 66409158 | 66417137 | + | 0.13  | 0    |
| ENSG0000(RP11-876F lincRNA chr11    | 81970994 | 81987813 | + | 0     | 0    |
| ENSG0000(PHBP2 processed_ chr11     | 43733759 | 43734564 | + | 0     | 0    |
| ENSG0000(RP11-958J lincRNA chr11    | 45582525 | 45583474 | + | 0     | 0    |
| ENSG0000(RP11-775A processed_ chr11 | 1.21E+08 | 1.21E+08 | + | 0     | 0    |
| ENSG0000(RP11-159D lincRNA chr11    | 37938601 | 37954663 | + | 0     | 0    |
| ENSG0000(RP11-56P9 unprocessε chr11 | 48959928 | 48961810 | + | 0     | 0    |
| ENSG0000(RP11-347H lincRNA chr11    | 50298579 | 50304656 | + | 0     | 0    |
| ENSG0000(CTD-2210P processed_ chr11 | 45722308 | 45744254 | + | 0     | 0    |
| ENSG0000(SIGLEC12 protein_co chr19  | 51491357 | 51501789 | - | 0     | 0    |
| ENSG0000(RP11-113K processed_ chr11 | 83040806 | 83041403 | - | 0     | 0    |
| ENSG0000(OR8I4P unprocessε chr11    | 56097244 | 56097384 | - | 0     | 0    |
| ENSG0000(RP11-466I lincRNA chr11    | 29159956 | 29266734 | + | 0     | 0    |
| ENSG0000(ENPP7P12 processed_ chr8   | 12205759 | 12206389 | - | 0     | 0    |
| ENSG0000(RP11-728F antisense chr11  | 1.18E+08 | 1.18E+08 | + | 0     | 0    |
| ENSG0000(RP11-583F unprocessε chr11 | 18863558 | 18864509 | - | 0     | 0    |
| ENSG0000(RP11-460B lincRNA chr11    | 29335878 | 29594295 | - | 0     | 0    |
| ENSG0000(FLJ20021 lincRNA chr4      | 1.01E+08 | 1.01E+08 | + | 10.38 | 9.63 |
| ENSG0000(RP11-624D lincRNA chr11    | 30044058 | 30084343 | - | 0     | 0    |
| ENSG0000(AF186192. lincRNA chr8     | 1.45E+08 | 1.45E+08 | - | 0     | 0    |
| ENSG0000(RP11-748H unprocessε chr11 | 1.02E+08 | 1.02E+08 | - | 0     | 0    |
| ENSG0000(PABPC4L protein_co chr4    | 1.34E+08 | 1.34E+08 | - | 0.16  | 0.14 |
| ENSG0000(RP11-108K protein_co chr10 | 1.33E+08 | 1.33E+08 | + | 0.18  | 0.18 |
| ENSG0000(RP1-130L2 processed_ chr11 | 33403216 | 33403605 | + | 0     | 0    |
| ENSG0000(RP11-463D lincRNA chr8     | 73670441 | 73732897 | + | 0     | 0    |
| ENSG0000(RP4-791M lincRNA chr1      | 1.49E+08 | 1.49E+08 | + | 1.72  | 1.63 |
| ENSG0000(CTD-2140C antisense chr11  | 22361213 | 22362294 | - | 0     | 0    |
| ENSG0000(RP11-583F unprocessε chr11 | 18886933 | 18887920 | - | 0     | 0    |
| ENSG0000(NAV2-AS3 antisense chr11   | 19978699 | 19981337 | - | 0     | 0    |
| ENSG0000(HSPD1P2 processed_ chr8    | 7891003  | 7892555  | - | 0     | 0    |
| ENSG0000(PCNAP4 processed_ chr11    | 19274540 | 19275269 | - | 0     | 0    |
| ENSG0000(RP11-84A1 antisense chr1   | 31789130 | 31791322 | + | 0     | 0    |
| ENSG0000(RP11-113D processed_ chr11 | 18196657 | 18197337 | + | 0     | 0    |
| ENSG0000(RP11-738C unprocessε chr11 | 55867569 | 55874537 | - | 0     | 0    |
| ENSG0000(RP11-429J antisense chr8   | 1.44E+08 | 1.44E+08 | - | 0     | 0    |
| ENSG0000(OMP protein_co chr11       | 77102840 | 77103331 | + | 0     | 0    |
| ENSG0000(RP11-727A antisense chr11  | 83209431 | 83213379 | - | 0.08  | 0.09 |
| ENSG0000(XIRP2-AS1 antisense chr2   | 1.67E+08 | 1.67E+08 | - | 0     | 0    |
| ENSG0000(RP1-2705. protein_co chr1  | 32465057 | 32600792 | + | 0     | 0    |
| ENSG0000(RP11-351I2 antisense chr11 | 10302657 | 10303704 | - | 0     | 0    |
| ENSG0000(RP11-379J processed_ chr11 | 97908253 | 97908537 | - | 0     | 0    |
| ENSG0000(AF131215. sense_intrε chr8 | 11136898 | 11138607 | - | 0.03  | 0    |
| ENSG0000(RP11-102F antisense chr8   | 69713390 | 69719722 | + | 0     | 0    |

|                 |                       |                      |          |          |   |      |      |
|-----------------|-----------------------|----------------------|----------|----------|---|------|------|
| ENSG00000181101 | RP11-81M: unprocessed | chr11                | 89863848 | 89865550 | - | 0    | 0    |
| ENSG00000181102 | RP11-304N             | antisense chr11      | 203623   | 205470   | + | 0    | 0    |
| ENSG00000181103 | BBOX1-AS1             | antisense chr11      | 27047186 | 27220113 | - | 0.78 | 1.64 |
| ENSG00000181104 | RP11-196E             | antisense chr11      | 1.2E+08  | 1.2E+08  | + | 0.06 | 0.04 |
| ENSG00000181105 | LINC01493             | lincRNA chr11        | 38646476 | 38674241 | + | 0    | 0    |
| ENSG00000181106 | RP11-673F             | antisense chr11      | 78749250 | 78756480 | + | 0    | 0    |
| ENSG00000181107 | RP11-787P             | processed chr11      | 23431677 | 23431799 | + | 0    | 0    |
| ENSG00000181108 | MTND2P2               | processed chr11      | 1.03E+08 | 1.03E+08 | - | 0.06 | 0.06 |
| ENSG00000181109 | RP11-514F             | lincRNA chr11        | 36321158 | 36323440 | - | 0    | 0    |
| ENSG00000181110 | UBTFL9                | processed chr11      | 49133653 | 49134800 | - | 0    | 0    |
| ENSG00000181111 | RP11-664I             | antisense chr11      | 1.25E+08 | 1.25E+08 | + | 0    | 0    |
| ENSG00000181112 | RP11-693N             | unprocessed chr11    | 1.05E+08 | 1.05E+08 | + | 0    | 0    |
| ENSG00000181113 | RP11-60I3             | antisense chr9       | 99915077 | 99929896 | - | 0    | 0    |
| ENSG00000181114 | GLULP3                | processed chr11      | 1.23E+08 | 1.23E+08 | - | 0    | 0    |
| ENSG00000181115 | AP004550              | lincRNA chr11        | 1.35E+08 | 1.35E+08 | + | 0    | 0    |
| ENSG00000181116 | RP11-429J             | antisense chr8       | 1.44E+08 | 1.44E+08 | - | 0    | 0    |
| ENSG00000181117 | RP11-3G2I             | antisense chr8       | 14161297 | 14165359 | + | 0    | 0    |
| ENSG00000181118 | OR4C1P                | unprocessed chr11    | 55509741 | 55510671 | + | 0    | 0    |
| ENSG00000181119 | RP11-484D             | sense overl chr11    | 43390283 | 43395495 | + | 0    | 0    |
| ENSG00000181120 | CTD-2517N             | antisense chr8       | 1.44E+08 | 1.44E+08 | + | 0    | 0    |
| ENSG00000181121 | RP11-407P             | processed chr11      | 40445304 | 40447141 | - | 0    | 0    |
| ENSG00000181122 | RP11-677I             | lincRNA chr11        | 1.06E+08 | 1.06E+08 | - | 0    | 0    |
| ENSG00000181123 | RP11-303G             | processed chr8       | 12676035 | 12676389 | - | 0    | 0    |
| ENSG00000181124 | PSMA2P1               | processed chr11      | 87329407 | 87330052 | - | 0    | 0    |
| ENSG00000181125 | RP11-15D1             | processed chr11      | 13478333 | 13479037 | + | 0    | 0    |
| ENSG00000181126 | RP1-17K7.2            | antisense chr11      | 32035981 | 32041318 | - | 0    | 0    |
| ENSG00000181127 | MAGEL2                | protein_coding chr15 | 23643544 | 23647841 | - | 0.01 | 0.1  |
| ENSG00000181128 | RP11-358H             | lincRNA chr11        | 17695022 | 17697471 | + | 0    | 0    |
| ENSG00000181129 | RP11-360K             | lincRNA chr11        | 96590317 | 96713822 | + | 0    | 0    |
| ENSG00000181130 | RP11-1007             | antisense chr11      | 1.29E+08 | 1.29E+08 | + | 0    | 0    |
| ENSG00000181131 | EIF4A2P3              | processed chr11      | 58242043 | 58243097 | - | 0.17 | 0.06 |
| ENSG00000181132 | RP11-334E             | processed chr11      | 1.19E+08 | 1.19E+08 | + | 0    | 0    |
| ENSG00000181133 | RP11-822P             | processed chr11      | 1.28E+08 | 1.28E+08 | + | 0    | 0    |
| ENSG00000181134 | RP5-1173A             | antisense chr11      | 3336721  | 3340630  | + | 0    | 0    |
| ENSG00000181135 | OR7E126P              | unprocessed chr11    | 71903194 | 71904081 | + | 0    | 0    |
| ENSG00000181136 | RP11-2F20             | lincRNA chr11        | 24235477 | 24262218 | - | 0    | 0    |
| ENSG00000181137 | CTD-2010I             | processed chr11      | 6488186  | 6489377  | - | 0    | 0.53 |
| ENSG00000181138 | CTD-3074C             | processed chr11      | 66454234 | 66454581 | + | 0    | 0    |
| ENSG00000181139 | FAM90A10              | unprocessed chr8     | 7768977  | 7771988  | + | 0    | 0    |
| ENSG00000181140 | CSNK2A3               | protein_coding chr11 | 11351942 | 11353357 | - | 0.1  | 0.1  |
| ENSG00000181141 | RP11-115E             | lincRNA chr11        | 98676391 | 98683735 | + | 0    | 0    |
| ENSG00000181142 | CYCSP26               | processed chr11      | 58005386 | 58005705 | + | 0    | 0    |
| ENSG00000181143 | AP000662              | sense overl chr11    | 57638024 | 57652790 | + | 0.23 | 0.68 |
| ENSG00000181144 | OR5M6P                | unprocessed chr11    | 56512235 | 56513171 | - | 0    | 0    |
| ENSG00000181145 | AP000487              | antisense chr11      | 70282367 | 70363368 | - | 0    | 0    |

|                 |                       |       |          |          |   |      |      |
|-----------------|-----------------------|-------|----------|----------|---|------|------|
| ENSG00000100000 | RP11-626H lincRNA     | chr11 | 70014858 | 70021059 | - | 0    | 0    |
| ENSG00000100000 | RP11-22P4 lincRNA     | chr11 | 28516832 | 28519341 | + | 0    | 0    |
| ENSG00000100000 | RP11-115C antisense   | chr11 | 1.27E+08 | 1.27E+08 | + | 0    | 1.17 |
| ENSG00000100000 | RP11-719K unprocessed | chr16 | 14727282 | 14733347 | - | 0    | 0    |
| ENSG00000100000 | RP5-903G2 lincRNA     | chr11 | 67934563 | 67955802 | - | 0    | 0.07 |
| ENSG00000100000 | RP11-676M processed   | chr11 | 1.28E+08 | 1.28E+08 | - | 0    | 0.21 |
| ENSG00000100000 | OR6M2P unprocessed    | chr11 | 1.24E+08 | 1.24E+08 | - | 0    | 0    |
| ENSG00000100000 | AP003068. antisense   | chr11 | 65177606 | 65181834 | - | 1.59 | 1.4  |
| ENSG00000100000 | RP11-395G lincRNA     | chr8  | 1.06E+08 | 1.06E+08 | + | 1.26 | 1.22 |
| ENSG00000100000 | RP11-700F processed   | chr11 | 1.34E+08 | 1.34E+08 | + | 0    | 0    |
| ENSG00000100000 | AP000648. unprocessed | chr11 | 89887366 | 89889991 | + | 0    | 0    |
| ENSG00000100000 | TMED10P1 processed    | chr8  | 1.45E+08 | 1.45E+08 | + | 0    | 0    |
| ENSG00000100000 | RP11-646J lincRNA     | chr11 | 33810145 | 33811178 | + | 0    | 0    |
| ENSG00000100000 | RP5-907D1 lincRNA     | chr20 | 58594417 | 58603973 | + | 0    | 0    |
| ENSG00000100000 | SETP16 processed      | chr11 | 1.19E+08 | 1.19E+08 | - | 0    | 0    |
| ENSG00000100000 | NAV2-AS4 antisense    | chr11 | 19510890 | 19519896 | - | 0    | 0    |
| ENSG00000100000 | DEFB108P4 unprocessed | chr8  | 12341426 | 12345776 | - | 0    | 0    |
| ENSG00000100000 | OR4R3P unprocessed    | chr11 | 49923049 | 49923886 | + | 0    | 0    |
| ENSG00000100000 | GS1-24F4.3 antisense  | chr8  | 6928608  | 6930473  | + | 0    | 0    |
| ENSG00000100000 | RP11-27G2 lincRNA     | chr11 | 1.13E+08 | 1.13E+08 | + | 0    | 0    |
| ENSG00000100000 | RP1-17K7.1 sense_intr | chr11 | 32064912 | 32072173 | + | 0    | 0    |
| ENSG00000100000 | RP11-160H processed   | chr11 | 83789977 | 83791578 | - | 0    | 0.04 |
| ENSG00000100000 | CTD-2530H sense_intr  | chr11 | 75635883 | 75638587 | - | 0    | 0    |
| ENSG00000100000 | RP11-702H antisense   | chr11 | 74397549 | 74485742 | + | 0    | 0    |
| ENSG00000100000 | RP11-21L2. antisense  | chr11 | 76759916 | 76768223 | - | 0    | 0    |
| ENSG00000100000 | RP11-23J9. unitary_ps | chr9  | 97276566 | 97295759 | + | 0    | 0    |
| ENSG00000100000 | SMG1P6 unprocessed    | chr16 | 29425800 | 29447026 | - | 0.2  | 0.18 |
| ENSG00000100000 | WAC-AS1 antisense     | chr10 | 28522652 | 28532743 | - | 8.07 | 6.84 |
| ENSG00000100000 | ARMS2 protein_co      | chr10 | 1.22E+08 | 1.22E+08 | + | 0.16 | 0    |
| ENSG00000100000 | OR4A18P unprocessed   | chr11 | 49917391 | 49918478 | - | 0    | 0    |
| ENSG00000100000 | RP11-356J. antisense  | chr11 | 1.12E+08 | 1.12E+08 | - | 0    | 0    |
| ENSG00000100000 | CTD-2589M lincRNA     | chr11 | 46238382 | 46239267 | + | 0.1  | 0.11 |
| ENSG00000100000 | RP11-732A sense_ove   | chr11 | 6608667  | 6610135  | - | 0    | 0    |
| ENSG00000100000 | COX6CP5 processed     | chr11 | 7977481  | 7977708  | + | 0    | 0    |
| ENSG00000100000 | RP11-5A11 processed   | chr8  | 1.04E+08 | 1.04E+08 | - | 0    | 0    |
| ENSG00000100000 | RP11-396C lincRNA     | chr11 | 15701963 | 15758898 | - | 0    | 0    |
| ENSG00000100000 | OR8B10P unprocessed   | chr11 | 1.25E+08 | 1.25E+08 | - | 0    | 0    |
| ENSG00000100000 | INS protein_co        | chr11 | 2159779  | 2161341  | - | 0    | 0    |
| ENSG00000100000 | RP11-713P lincRNA     | chr11 | 1.34E+08 | 1.34E+08 | - | 0.11 | 0    |
| ENSG00000100000 | RP11-452H antisense   | chr11 | 78388061 | 78392405 | + | 0    | 0    |
| ENSG00000100000 | MTCYBP41 processed    | chr11 | 87815035 | 87816157 | - | 0    | 0    |
| ENSG00000100000 | RP11-430H lincRNA     | chr11 | 45399448 | 45400528 | + | 0    | 0    |
| ENSG00000100000 | RP11-702F lincRNA     | chr11 | 46116578 | 46117318 | + | 0.11 | 0.25 |
| ENSG00000100000 | AC068858. lincRNA     | chr11 | 44973902 | 44978028 | + | 0    | 0    |
| ENSG00000100000 | RP11-529A processed   | chr11 | 89960422 | 89960624 | + | 0    | 0    |

|                      |             |       |          |          |   |      |      |
|----------------------|-------------|-------|----------|----------|---|------|------|
| ENSG0000( RTL1       | protein_co  | chr14 | 1.01E+08 | 1.01E+08 | - | 0    | 0.01 |
| ENSG0000( OR8J2      | polymorph   | chr11 | 56210873 | 56211820 | - | 0    | 0    |
| ENSG0000( RP11-262A  | lincRNA     | chr11 | 1.1E+08  | 1.1E+08  | - | 0    | 0    |
| ENSG0000( CTD-3051L  | processed_  | chr11 | 56509573 | 56510195 | + | 0    | 0    |
| ENSG0000( RP11-222N  | lincRNA     | chr11 | 15910957 | 15927443 | + | 0    | 0    |
| ENSG0000( RP11-872D  | antisense   | chr11 | 57325603 | 57327958 | + | 0.66 | 0    |
| ENSG0000( OR4A11P    | unprocessε  | chr11 | 55318560 | 55319465 | + | 0    | 0    |
| ENSG0000( CTD-2560E  | antisense   | chr11 | 45215815 | 45235292 | - | 0    | 0    |
| ENSG0000( RP11-152H  | antisense   | chr11 | 8693357  | 8696607  | + | 0    | 0    |
| ENSG0000( RP11-375D  | processed_  | chr11 | 41797543 | 41797964 | + | 0    | 0    |
| ENSG0000( RP5-945117 | lincRNA     | chr11 | 35579430 | 35585310 | - | 0    | 0    |
| ENSG0000( CTC-497E2  | lincRNA     | chr11 | 13001090 | 13009159 | - | 0    | 0    |
| ENSG0000( STT3A-AS1  | antisense   | chr11 | 1.26E+08 | 1.26E+08 | - | 0    | 0    |
| ENSG0000( RP5-91601  | processed_  | chr11 | 35967010 | 35968676 | - | 0    | 0    |
| ENSG0000( RP11-598P  | protein_co  | chr8  | 43018424 | 43077334 | + | 0    | 0    |
| ENSG0000( OR4A42P    | unprocessε  | chr11 | 48610063 | 48611000 | + | 0    | 0    |
| ENSG0000( RP11-7115. | antisense   | chr11 | 78022933 | 78023721 | + | 0    | 0    |
| ENSG0000( RP11-727A  | sense_ovei  | chr11 | 83180144 | 83184520 | + | 0.07 | 0.3  |
| ENSG0000( OSBPL9P2   | processed_  | chr11 | 91114724 | 91115951 | - | 0    | 0    |
| ENSG0000( RP11-109L  | processed_  | chr11 | 1.17E+08 | 1.17E+08 | - | 0    | 0    |
| ENSG0000( RP11-265D  | antisense   | chr11 | 12261426 | 12263173 | - | 0    | 0.33 |
| ENSG0000( PKD1P5     | transcribec | chr16 | 18374521 | 18401940 | - | 1.49 | 2.85 |
| ENSG0000( RP11-660L  | antisense   | chr11 | 71448674 | 71452157 | + | 0.79 | 0.43 |
| ENSG0000( SNRPCP6    | processed_  | chr8  | 7143632  | 7143841  | - | 0    | 0    |
| ENSG0000( RP11-88211 | processed_  | chr11 | 85336075 | 85336572 | - | 0    | 0    |
| ENSG0000( FPGT       | protein_co  | chr1  | 74198212 | 74234086 | + | 5.22 | 5.95 |
| ENSG0000( RP1-276E1  | lincRNA     | chr11 | 35656694 | 35661339 | + | 0    | 0    |
| ENSG0000( RP11-162D  | antisense   | chr8  | 53177571 | 53242683 | + | 0    | 0.23 |
| ENSG0000( RP11-47J11 | antisense   | chr11 | 12822435 | 12823667 | - | 0    | 0    |
| ENSG0000( RP11-354A  | lincRNA     | chr8  | 81885377 | 81923193 | + | 0    | 0    |
| ENSG0000( GS1-393G1  | antisense   | chr8  | 1.44E+08 | 1.44E+08 | - | 0    | 0    |
| ENSG0000( RP11-91P2  | antisense   | chr11 | 77850604 | 77851511 | + | 0    | 0    |
| ENSG0000( RP11-468E  | protein_co  | chr14 | 24189157 | 24213473 | - | 0    | 7.2  |
| ENSG0000( RP11-58K2  | antisense   | chr11 | 44604508 | 44605337 | - | 0    | 0    |
| ENSG0000( RP11-50B3  | antisense   | chr11 | 1.26E+08 | 1.26E+08 | - | 0.5  | 0.28 |
| ENSG0000( RP11-396C  | lincRNA     | chr11 | 15643885 | 15705368 | + | 0    | 0    |
| ENSG0000( RP11-72M:  | unprocessε  | chr11 | 55282502 | 55282977 | + | 0    | 0    |
| ENSG0000( COPS8P3    | processed_  | chr11 | 78581675 | 78582156 | + | 0    | 0    |
| ENSG0000( RP11-659G  | sense_ovei  | chr11 | 82963681 | 83039115 | - | 0    | 0    |
| ENSG0000( RP11-12D1  | lincRNA     | chr11 | 86192787 | 86193482 | - | 0    | 0    |
| ENSG0000( RP11-1236  | processed_  | chr8  | 12043506 | 12043670 | - | 0    | 0    |
| ENSG0000( RP11-1415  | unprocessε  | chr5  | 70197255 | 70207745 | - | 3.69 | 1.91 |
| ENSG0000( CTD-2651C  | processed_  | chr11 | 1.08E+08 | 1.08E+08 | - | 0    | 0    |
| ENSG0000( SENCRCR    | antisense   | chr11 | 1.29E+08 | 1.29E+08 | - | 3.02 | 2.82 |
| ENSG0000( RP11-1036  | processed_  | chr11 | 59287339 | 59289486 | - | 0    | 0    |



|                                            |       |          |          |   |      |      |
|--------------------------------------------|-------|----------|----------|---|------|------|
| ENSG0000(RP11-675M) antisense              | chr11 | 92400191 | 92408176 | - | 0    | 0    |
| ENSG0000(RP11-565P) protein_coding         | chr1  | 1.62E+08 | 1.62E+08 | + | 0    | 0    |
| ENSG0000(RP11-35J1) antisense              | chr11 | 7705288  | 7709517  | + | 0.13 | 0    |
| ENSG0000(RP1-145M) processed_transcript    | chr11 | 34335118 | 34336003 | - | 0.07 | 0    |
| ENSG0000(IGLL5) protein_coding             | chr22 | 22887780 | 22896107 | + | 0    | 0    |
| ENSG0000(CTD-2216A) antisense              | chr11 | 1.23E+08 | 1.23E+08 | + | 0    | 0    |
| ENSG0000(RP11-560B) processed_transcript   | chr11 | 6843664  | 6844666  | - | 0    | 0    |
| ENSG0000(HNRNPA1F) processed_transcript    | chr11 | 84545131 | 84546846 | - | 0    | 0    |
| ENSG0000(RP11-163C) unprocessed_transcript | chr11 | 49850629 | 49862528 | + | 0    | 0    |
| ENSG0000(OR7E154P) unprocessed_transcript  | chr8  | 7705182  | 7706113  | - | 0    | 0    |
| ENSG0000(GLYATL1P2) transcribed_unit       | chr11 | 58878302 | 58893460 | + | 0    | 0.16 |
| ENSG0000(CTD-2184C) antisense              | chr14 | 60240121 | 60248765 | - | 0    | 0.19 |
| ENSG0000(RP11-351I) processed_transcript   | chr11 | 10272052 | 10272259 | - | 0    | 0    |
| ENSG0000(RP11-583F) unprocessed_transcript | chr11 | 18971746 | 18972703 | - | 0    | 0    |
| ENSG0000(RP11-805J) antisense              | chr11 | 70206291 | 70207390 | - | 0.25 | 0.1  |
| ENSG0000(FAM8A2P) unprocessed_transcript   | chr11 | 56331347 | 56332488 | - | 0    | 0    |
| ENSG0000(OR4A12P) unprocessed_transcript   | chr11 | 55325756 | 55326673 | + | 0    | 0    |
| ENSG0000(OR7E10P) unprocessed_transcript   | chr8  | 12703066 | 12704056 | - | 0    | 0    |
| ENSG0000(RP11-111A) processed_transcript   | chr11 | 43065686 | 43066076 | - | 0    | 0    |
| ENSG0000(MEX3A) protein_coding             | chr1  | 1.56E+08 | 1.56E+08 | - | 1.24 | 1.27 |
| ENSG0000(PTP4A1P6) transcribed_unit        | chr11 | 86432098 | 86432575 | + | 0    | 0    |
| ENSG0000(RP11-56P9) unprocessed_transcript | chr11 | 48881723 | 48902181 | - | 0    | 0    |
| ENSG0000(RP11-801G) processed_transcript   | chr11 | 1.09E+08 | 1.09E+08 | - | 0    | 0    |
| ENSG0000(CTD-2005H) lincRNA                | chr11 | 86703099 | 86714092 | + | 0    | 0.21 |
| ENSG0000(RP11-691N) protein_coding         | chr11 | 57742163 | 57793243 | + | 0.55 | 0.42 |
| ENSG0000(RP11-317J) antisense              | chr11 | 86431590 | 86622867 | + | 0    | 0    |
| ENSG0000(CTD-3138F) lincRNA                | chr11 | 29713909 | 29881714 | + | 0    | 0    |
| ENSG0000(HMGB1P4) processed_transcript     | chr11 | 1.21E+08 | 1.21E+08 | - | 0    | 0    |
| ENSG0000(BRD9P1) processed_transcript      | chr11 | 66389609 | 66390168 | + | 0    | 0    |
| ENSG0000(OR10G4) protein_coding            | chr11 | 1.24E+08 | 1.24E+08 | + | 0    | 0    |
| ENSG0000(RP11-583F) unprocessed_transcript | chr11 | 18956055 | 18957015 | - | 0    | 0    |
| ENSG0000(RP13-46H2) antisense              | chr11 | 528907   | 529659   | + | 0    | 0    |
| ENSG0000(RP11-334E) antisense              | chr11 | 1.19E+08 | 1.19E+08 | + | 0    | 0    |
| ENSG0000(RP11-661A) antisense              | chr8  | 1.44E+08 | 1.44E+08 | + | 0.33 | 0.16 |
| ENSG0000(OR10V3P) unprocessed_transcript   | chr11 | 59741325 | 59742049 | + | 0    | 0    |
| ENSG0000(CTD-3076C) antisense              | chr15 | 99970215 | 99974010 | + | 0    | 0.14 |
| ENSG0000(RP11-958J) processed_transcript   | chr11 | 45489689 | 45542474 | - | 0    | 0    |
| ENSG0000(MTND4LP1) processed_transcript    | chr11 | 81552226 | 81552516 | + | 0    | 0    |
| ENSG0000(HNRNPCP8) processed_transcript    | chr11 | 87024583 | 87025777 | + | 0    | 0    |
| ENSG0000(OR5BD1P) unprocessed_transcript   | chr11 | 57945598 | 57946414 | - | 0    | 0    |
| ENSG0000(CASP1P2) unprocessed_transcript   | chr11 | 1.05E+08 | 1.05E+08 | - | 0    | 0    |
| ENSG0000(TRIM64DP) transcribed_unit        | chr11 | 89776981 | 89782377 | + | 0    | 0    |
| ENSG0000(OR5M2P) unprocessed_transcript    | chr11 | 56479492 | 56480427 | - | 0    | 0    |
| ENSG0000(RP11-480C) lincRNA                | chr8  | 13844101 | 13849109 | - | 0    | 0    |
| ENSG0000(RP11-20J1) lincRNA                | chr11 | 25924188 | 25926808 | + | 0    | 0    |

|                                      |          |          |   |       |        |
|--------------------------------------|----------|----------|---|-------|--------|
| ENSG0000(RP11-672A processed_ chr11  | 76591023 | 76591211 | + | 0     | 0      |
| ENSG0000(RP11-867G antisense chr11   | 66334494 | 66339875 | + | 0.14  | 0      |
| ENSG0000(RP13-726E lincRNA chr11     | 3469319  | 3531328  | + | 0     | 0      |
| ENSG0000(AP000889. unprocessε chr11  | 1.08E+08 | 1.08E+08 | - | 0     | 0      |
| ENSG0000(NAP1L1P1 processed_ chr11   | 1.26E+08 | 1.26E+08 | + | 0     | 0      |
| ENSG0000(CTD-2616J: antisense chr19  | 51414298 | 51414965 | + | 0     | 0      |
| ENSG0000(RP11-867G antisense chr11   | 66267635 | 66268129 | - | 0     | 0      |
| ENSG0000(TRIM53CP unprocessε chr11   | 48985871 | 48991881 | - | 0     | 0      |
| ENSG0000(RP11-1H15 processed_ chr11  | 9958744  | 9959790  | - | 0     | 0      |
| ENSG0000(OR2AL1P unprocessε chr11    | 1.05E+08 | 1.05E+08 | - | 0     | 0      |
| ENSG0000(CTD-2140C antisense chr11   | 22283730 | 22338245 | - | 0     | 0      |
| ENSG0000(OR4A4P unprocessε chr11     | 54659666 | 54660595 | + | 0     | 0      |
| ENSG0000(OR4D7P unprocessε chr11     | 59531754 | 59532695 | + | 0     | 0      |
| ENSG0000(RP11-50B3 processed_ chr11  | 1.26E+08 | 1.26E+08 | - | 0     | 0      |
| ENSG0000(EEF1G protein_co chr11      | 62559601 | 62574086 | - | 802.5 | 787.59 |
| ENSG0000(RP11-148C antisense chr8    | 11553224 | 11554207 | - | 0     | 0      |
| ENSG0000(RP11-27P7 lincRNA chr8      | 60049587 | 60074715 | + | 0     | 0      |
| ENSG0000(AC084121. unprocessε chr8   | 7793716  | 7795870  | - | 0     | 0      |
| ENSG0000(AC022182. lincRNA chr8      | 60910053 | 60966557 | + | 0     | 0      |
| ENSG0000(EGLN1P1 transcribed chr15   | 84633874 | 84634635 | + | 0.43  | 0.66   |
| ENSG0000(RP11-7931I processed_ chr11 | 47905323 | 47905607 | - | 0     | 0      |
| ENSG0000(GVINP2 processed_ chr11     | 6748131  | 6750324  | + | 0     | 0      |
| ENSG0000(RP11-320L processed_ chr11  | 86283927 | 86284668 | + | 1.05  | 0.97   |
| ENSG0000(LRRC6P1 processed_ chr11    | 38211389 | 38212799 | + | 0     | 0      |
| ENSG0000(RP11-81M: unprocessε chr11  | 89895799 | 89900449 | - | 0     | 0      |
| ENSG0000(RP11-142C unprocessε chr11  | 58995439 | 58999689 | - | 0     | 0      |
| ENSG0000(CTD-2537C antisense chr11   | 84720826 | 84800701 | + | 0     | 0      |
| ENSG0000(CKLF-CMTI protein_co chr16  | 66552587 | 66579135 | + | 1.25  | 1.75   |
| ENSG0000(RP11-531H lincRNA chr11     | 15571819 | 15622403 | - | 0     | 0      |
| ENSG0000(RP11-680F lincRNA chr11     | 1.26E+08 | 1.26E+08 | - | 0.15  | 0.1    |
| ENSG0000(FAR1-IT1 sense_intrε chr11  | 13669327 | 13670149 | + | 0     | 0      |
| ENSG0000(RP11-119D processed_ chr11  | 67840942 | 67841049 | + | 0     | 0      |
| ENSG0000(FDPSP4 processed_ chr15     | 42939310 | 42940358 | - | 0.06  | 0      |
| ENSG0000(RP11-665E processed_ chr11  | 87917948 | 87917999 | - | 0     | 0      |
| ENSG0000(OR5AP1P unprocessε chr11    | 56633164 | 56634103 | - | 0     | 0      |
| ENSG0000(RP11-1118 processed_ chr8   | 7601004  | 7601267  | + | 0     | 0      |
| ENSG0000(TFAMP2 processed_ chr11     | 1.1E+08  | 1.1E+08  | - | 0     | 0      |
| ENSG0000(SLC25A47P processed_ chr11  | 59263389 | 59263802 | - | 0     | 0      |
| ENSG0000(RP11-163C processed_ chr11  | 49882999 | 49884093 | + | 0     | 0      |
| ENSG0000(CTD-2132H processed_ chr11  | 49070752 | 49071000 | - | 0     | 0      |
| ENSG0000(AC022182. lincRNA chr8      | 60965802 | 60967775 | - | 0.57  | 0.17   |
| ENSG0000(RP11-529A processed_ chr11  | 90049945 | 90050266 | + | 0     | 0      |
| ENSG0000(RP11-674C lincRNA chr11     | 55684141 | 55686160 | - | 0     | 0.3    |
| ENSG0000(SNRPCP14 processed_ chr11   | 71690453 | 71690657 | - | 0     | 0      |
| ENSG0000(SYS1-DBNC protein_co chr20  | 45363200 | 45410610 | + | 0.26  | 0.97   |

|                 |            |             |       |          |          |   |      |      |
|-----------------|------------|-------------|-------|----------|----------|---|------|------|
| ENSG00000100000 | OR10AK1P   | unprocessed | chr11 | 55957216 | 55957630 | - | 0    | 0    |
| ENSG00000100000 | RP11-672A  | lincRNA     | chr11 | 76654169 | 76656712 | - | 0.94 | 0.23 |
| ENSG00000100000 | RP11-680E  | transcribed | chr11 | 1.06E+08 | 1.06E+08 | + | 0    | 0.04 |
| ENSG00000100000 | RP11-661A  | antisense   | chr8  | 1.44E+08 | 1.44E+08 | - | 0    | 0    |
| ENSG00000100000 | RP11-252C  | lincRNA     | chr8  | 12765849 | 12811478 | - | 0    | 0    |
| ENSG00000100000 | RP11-535A  | antisense   | chr11 | 75800877 | 75803415 | - | 0    | 0    |
| ENSG00000100000 | RP11-496I  | antisense   | chr11 | 557595   | 560107   | + | 0.03 | 0    |
| ENSG00000100000 | RP11-670N  | processed   | chr11 | 21169748 | 21170137 | + | 0    | 0    |
| ENSG00000100000 | OR7E160P   | unprocessed | chr8  | 12033646 | 12034612 | - | 0    | 0    |
| ENSG00000100000 | RP11-529A  | unprocessed | chr11 | 89944035 | 89949402 | + | 0    | 0    |
| ENSG00000100000 | RP11-430L  | lincRNA     | chr11 | 26285711 | 26288007 | - | 0    | 0    |
| ENSG00000100000 | CTD-2019C  | lincRNA     | chr11 | 22113448 | 22117001 | + | 0    | 0    |
| ENSG00000100000 | RP3-400B1  | antisense   | chr6  | 4135423  | 4146053  | + | 0    | 0    |
| ENSG00000100000 | RP11-375D  | lincRNA     | chr11 | 41876634 | 41877078 | + | 0    | 0    |
| ENSG00000100000 | RP11-109E  | lincRNA     | chr11 | 1.23E+08 | 1.23E+08 | - | 0    | 0    |
| ENSG00000100000 | RP11-370I  | processed   | chr11 | 1.03E+08 | 1.03E+08 | - | 0    | 0    |
| ENSG00000100000 | OR9G2P     | unprocessed | chr11 | 56751023 | 56751902 | - | 0    | 0    |
| ENSG00000100000 | CTD-2530H  | sense_intr  | chr11 | 75775904 | 75776929 | + | 0    | 0    |
| ENSG00000100000 | SLC22A18A  | protein_co  | chr11 | 2887780  | 2903740  | - | 0    | 0.33 |
| ENSG00000100000 | RP11-72M   | unprocessed | chr11 | 55302290 | 55305060 | - | 0    | 0    |
| ENSG00000100000 | RP11-7I15  | antisense   | chr11 | 78015715 | 78016495 | + | 0    | 0    |
| ENSG00000100000 | RP11-99C1  | lincRNA     | chr11 | 98938912 | 98945079 | - | 0    | 0    |
| ENSG00000100000 | KRT18P58   | processed   | chr11 | 5993876  | 5994995  | - | 0    | 0    |
| ENSG00000100000 | OR4A40P    | unprocessed | chr11 | 48512273 | 48513220 | + | 0    | 0    |
| ENSG00000100000 | RP11-50B3  | lincRNA     | chr11 | 1.26E+08 | 1.26E+08 | + | 0    | 0    |
| ENSG00000100000 | OR5M10     | protein_co  | chr11 | 56576774 | 56577721 | - | 0    | 0    |
| ENSG00000100000 | RNF185-AS  | antisense   | chr22 | 31205264 | 31205616 | - | 0    | 0    |
| ENSG00000100000 | RP1-17K7.3 | antisense   | chr11 | 32052843 | 32053260 | - | 0    | 0    |
| ENSG00000100000 | AP001372   | lincRNA     | chr11 | 74493366 | 74498533 | + | 2.04 | 2.27 |
| ENSG00000100000 | GVINP1     | transcribed | chr11 | 6713536  | 6746439  | - | 0.12 | 0.08 |
| ENSG00000100000 | AF131215   | lincRNA     | chr8  | 11062647 | 11067089 | - | 0    | 0    |
| ENSG00000100000 | RP11-574M  | transcribed | chr11 | 50307681 | 50361706 | + | 0    | 0    |
| ENSG00000100000 | OR4V1P     | unprocessed | chr11 | 55673536 | 55674675 | + | 0    | 0    |
| ENSG00000100000 | RP11-890B  | lincRNA     | chr11 | 1.31E+08 | 1.31E+08 | - | 0.03 | 0.03 |
| ENSG00000100000 | XIAPP2     | processed   | chr11 | 87094734 | 87096585 | - | 0    | 0.07 |
| ENSG00000100000 | RP11-728F  | antisense   | chr11 | 1.18E+08 | 1.18E+08 | + | 0    | 0    |
| ENSG00000100000 | RP11-203M  | antisense   | chr14 | 20344233 | 20346888 | - | 0    | 0    |
| ENSG00000100000 | RP11-51B2  | lincRNA     | chr11 | 12538083 | 12540967 | - | 0    | 0    |
| ENSG00000100000 | OR5BN1P    | unprocessed | chr11 | 56132666 | 56133494 | - | 0    | 0    |
| ENSG00000100000 | RP5-901A4  | processed   | chr11 | 67935558 | 67935926 | + | 0    | 0    |
| ENSG00000100000 | RP11-109L  | unprocessed | chr11 | 1.17E+08 | 1.17E+08 | + | 0    | 0    |
| ENSG00000100000 | NPIPA2     | protein_co  | chr16 | 14748066 | 14765413 | + | 0    | 0.95 |
| ENSG00000100000 | RP11-659P  | processed   | chr11 | 58072378 | 58075438 | - | 0    | 0    |
| ENSG00000100000 | CTD-2523D  | antisense   | chr11 | 1.2E+08  | 1.2E+08  | + | 0    | 0    |
| ENSG00000100000 | RP11-867G  | antisense   | chr11 | 66264777 | 66265666 | - | 0.32 | 0.35 |

|                                       |          |          |   |      |      |
|---------------------------------------|----------|----------|---|------|------|
| ENSG0000( NDUFA3P2 processed_ chr11   | 68488609 | 68488840 | - | 0    | 0    |
| ENSG0000( RP11-113D processed_ chr11  | 18153277 | 18154255 | + | 0    | 0    |
| ENSG0000( MPV17L2 protein_co chr19    | 18193182 | 18196948 | + | 6.14 | 5.03 |
| ENSG0000( RP11-661A antisense chr8    | 1.44E+08 | 1.44E+08 | - | 0.91 | 1.66 |
| ENSG0000( TMEM9B-A antisense chr11    | 8964675  | 8977527  | + | 1.15 | 1.88 |
| ENSG0000( RP11-945A lincRNA chr11     | 23761330 | 23804598 | - | 0    | 0    |
| ENSG0000( RP11-159H antisense chr11   | 27471729 | 27482433 | + | 0.15 | 0.05 |
| ENSG0000( RP11-831A lincRNA chr11     | 1.2E+08  | 1.2E+08  | - | 0    | 0    |
| ENSG0000( CTD-2516F antisense chr11   | 7568866  | 7572046  | - | 0    | 0    |
| ENSG0000( RP11-748C antisense chr11   | 10149192 | 10165109 | + | 0    | 0    |
| ENSG0000( DEFB109P3 processed_ chr8   | 12150895 | 12151134 | - | 0    | 0    |
| ENSG0000( RP11-1167 processed_ chr11  | 65983679 | 65984331 | - | 0    | 0    |
| ENSG0000( RP11-91I2( lincRNA chr8     | 60652502 | 60653561 | - | 0    | 0    |
| ENSG0000( ATP6V1G2: protein_co chr6   | 31530219 | 31546608 | - | 1.41 | 0.35 |
| ENSG0000( RP11-702F processed_ chr11  | 46142716 | 46143594 | + | 0    | 0    |
| ENSG0000( RP13-870H lincRNA chr11     | 1049880  | 1055749  | + | 0    | 0    |
| ENSG0000( RP11-770J: antisense chr11  | 1.18E+08 | 1.18E+08 | - | 0    | 0    |
| ENSG0000( RP11-676F lincRNA chr11     | 92965797 | 92966603 | + | 0    | 0    |
| ENSG0000( RP11-23J9. processed_ chr9  | 97238449 | 97297314 | + | 0.32 | 0.58 |
| ENSG0000( RP11-142C processed_ chr11  | 58967596 | 58968291 | - | 0    | 0    |
| ENSG0000( CTD-3096P antisense chr11   | 16023190 | 16031515 | + | 0    | 0    |
| ENSG0000( PTPRJ-AS1 antisense chr11   | 48014406 | 48015855 | - | 0    | 0    |
| ENSG0000( PKNOX2-A: lincRNA chr11     | 1.25E+08 | 1.25E+08 | - | 0    | 0    |
| ENSG0000( RP11-655N processed_ chr11  | 67744322 | 67744645 | + | 0.61 | 0    |
| ENSG0000( PRR13P2 processed_ chr11    | 9311284  | 9311689  | - | 0    | 0    |
| ENSG0000( RP11-802F lincRNA chr11     | 79191558 | 79193160 | + | 0.14 | 0.29 |
| ENSG0000( OR4A10P unprocessε chr11    | 55431957 | 55432367 | + | 0    | 0    |
| ENSG0000( CTC-378H2 processed_ chr19  | 42132555 | 42137099 | + | 0.65 | 0.72 |
| ENSG0000( RP11-716D processed_ chr11  | 90074839 | 90075096 | - | 0    | 0    |
| ENSG0000( AC084121. processed_ chr8   | 7696830  | 7697093  | - | 0    | 0    |
| ENSG0000( RP11-10A7 processed_ chr11  | 1.09E+08 | 1.09E+08 | - | 0    | 0    |
| ENSG0000( OR4A9P unprocessε chr11     | 55388529 | 55389472 | + | 0    | 0    |
| ENSG0000( RP11-334E processed_ chr11  | 1.19E+08 | 1.19E+08 | - | 0    | 0    |
| ENSG0000( AC113404. protein_co chr5   | 76170093 | 76174331 | - | 0    | 0    |
| ENSG0000( NAV2-AS1 antisense chr11    | 20119684 | 20120632 | - | 0    | 0    |
| ENSG0000( MTCO3P15 processed_ chr11   | 1.03E+08 | 1.03E+08 | - | 0.12 | 0    |
| ENSG0000( OPCML-IT1 sense_intr( chr11 | 1.33E+08 | 1.33E+08 | - | 0    | 0    |
| ENSG0000( RP11-482L processed_ chr11  | 85452282 | 85453698 | - | 0    | 0    |
| ENSG0000( RP11-513D antisense chr8    | 38335981 | 38337551 | + | 0    | 0    |
| ENSG0000( RP11-152H antisense chr11   | 8679089  | 8680913  | + | 0    | 0    |
| ENSG0000( BORCS8 protein_co chr19     | 19176903 | 19192591 | - | 9.72 | 7.54 |
| ENSG0000( ANO1-AS1 antisense chr11    | 70187788 | 70188509 | - | 0    | 0    |
| ENSG0000( OR8L1P unprocessε chr11     | 56381635 | 56382589 | + | 0    | 0    |
| ENSG0000( RP11-712L( antisense chr11  | 1.26E+08 | 1.26E+08 | - | 0    | 0.34 |
| ENSG0000( RP11-701I( antisense chr11  | 20670425 | 20671297 | - | 0    | 0    |

|                                      |          |          |   |      |      |
|--------------------------------------|----------|----------|---|------|------|
| ENSG0000(RP11-484D antisense chr11   | 43328748 | 43359296 | - | 0    | 0    |
| ENSG0000(RP11-110I1 processed_ chr11 | 1.19E+08 | 1.19E+08 | - | 0    | 0    |
| ENSG0000(RP11-326C antisense chr11   | 310139   | 311141   | - | 2.19 | 1.07 |
| ENSG0000(SCARNA9 antisense chr11     | 93721513 | 93721865 | + | 0.26 | 0.29 |
| ENSG0000(RP11-632K unprocessε chr15  | 32494003 | 32500346 | - | 0    | 0    |
| ENSG0000(RP4-791M: antisense chr1    | 1.49E+08 | 1.49E+08 | - | 0    | 0    |
| ENSG0000(CTD-2537L processed_ chr11  | 42939775 | 42939998 | + | 0    | 0    |
| ENSG0000(RP11-263C processed_ chr11  | 75942129 | 75942435 | - | 0    | 0    |
| ENSG0000(RP11-529A unprocessε chr11  | 90051837 | 90053736 | - | 0    | 0    |
| ENSG0000(OR7E15P unprocessε chr8     | 12696307 | 12697273 | - | 0    | 0    |
| ENSG0000(RP11-698N antisense chr11   | 35915051 | 35918739 | - | 0    | 0    |
| ENSG0000(RP11-56P9 unprocessε chr11  | 48893256 | 48898703 | + | 0    | 0    |
| ENSG0000(RP11-236J: antisense chr11  | 8035446  | 8039718  | - | 0    | 0    |
| ENSG0000(RP11-1236 processed_ chr8   | 12128107 | 12129298 | - | 0    | 0    |
| ENSG0000(RP11-684B processed_ chr11  | 71506061 | 71506380 | - | 0    | 0    |
| ENSG0000(OR4C9P unprocessε chr11     | 48464053 | 48464977 | - | 0    | 0    |
| ENSG0000(AP000445. unprocessε chr11  | 58748999 | 58761053 | - | 0    | 0    |
| ENSG0000(RP11-98J9. lincRNA chr11    | 13826843 | 13879499 | - | 0    | 0    |
| ENSG0000(RP11-702H antisense chr11   | 74455348 | 74456825 | + | 0    | 0    |
| ENSG0000(RP11-144G processed_ chr10  | 47517816 | 47553514 | - | 1.81 | 1.15 |
| ENSG0000(RP11-98J9. lincRNA chr11    | 13844862 | 13870616 | - | 0    | 0    |
| ENSG0000(MTATP6P1 processed_ chr11   | 1.03E+08 | 1.03E+08 | - | 0    | 0    |
| ENSG0000(RP11-687N antisense chr11   | 1.25E+08 | 1.25E+08 | - | 0    | 0    |
| ENSG0000(RP11-619A antisense chr11   | 76190725 | 76195071 | + | 0    | 0    |
| ENSG0000(LINC00678 lincRNA chr11     | 27617626 | 27634627 | - | 0    | 0    |
| ENSG0000(RP11-266E processed_ chr11  | 1.23E+08 | 1.23E+08 | + | 0    | 0    |
| ENSG0000(AF131215.: sense_intrε chr8 | 11123381 | 11126064 | - | 0    | 0    |
| ENSG0000(RP11-728D unprocessε chr11  | 1.25E+08 | 1.25E+08 | - | 0    | 0    |
| ENSG0000(RP11-688Iε lincRNA chr11    | 1.27E+08 | 1.27E+08 | - | 0    | 0    |
| ENSG0000(CTD-2342Iε processed_ chr11 | 98565074 | 98566827 | - | 0    | 0    |
| ENSG0000(OR4A19P unprocessε chr11    | 49920312 | 49921414 | - | 0    | 0    |
| ENSG0000(RP11-677N processed_ chr11  | 1.25E+08 | 1.25E+08 | - | 0    | 0    |
| ENSG0000(RP5-1160K antisense chr1    | 1.1E+08  | 1.1E+08  | - | 0    | 0    |
| ENSG0000(RP11-664Iε antisense chr11  | 1.25E+08 | 1.25E+08 | + | 0    | 0    |
| ENSG0000(ATP5F1P5 processed_ chr11   | 1.23E+08 | 1.23E+08 | + | 0.17 | 0    |
| ENSG0000(RP11-531H lincRNA chr11     | 15552855 | 15591098 | + | 0.25 | 0.14 |
| ENSG0000(OR8K4P unprocessε chr11     | 56142516 | 56143387 | - | 0    | 0    |
| ENSG0000(OR7E158P unprocessε chr8    | 11919900 | 11920809 | - | 0    | 0    |
| ENSG0000(GNG5P3 processed_ chr11     | 1.12E+08 | 1.12E+08 | + | 0    | 0    |
| ENSG0000(RP11-494N sense_ovei chr11  | 7754393  | 7905955  | - | 0.04 | 0    |
| ENSG0000(AP001257. lincRNA chr11     | 60159687 | 60160822 | - | 0    | 0    |
| ENSG0000(RP11-100N processed_ chr11  | 56736316 | 56736462 | - | 0    | 0    |
| ENSG0000(SLC2A13P1 processed_ chr8   | 60141821 | 60142142 | + | 0    | 0    |
| ENSG0000(RP11-179A processed_ chr11  | 11135482 | 11137658 | + | 0    | 0    |
| ENSG0000(INMT-MINI protein_co chr7   | 30752137 | 30892081 | + | 0    | 0    |

|                                    |       |          |          |   |        |        |
|------------------------------------|-------|----------|----------|---|--------|--------|
| ENSG0000(KIRREL3-AS1 antisense)    | chr11 | 1.27E+08 | 1.27E+08 | + | 0      | 0      |
| ENSG0000(TUBB4BP4 processed)       | chr11 | 91949731 | 91950034 | - | 0      | 0      |
| ENSG0000(OR4A14P unprocessed)      | chr11 | 55477551 | 55478509 | + | 0.07   | 0.8    |
| ENSG0000(CTD-2562J antisense)      | chr11 | 75264289 | 75265170 | + | 0      | 0      |
| ENSG0000(RP11-831H antisense)      | chr11 | 62606161 | 62606405 | + | 0      | 0      |
| ENSG0000(C1DP5 processed)          | chr11 | 83111060 | 83111442 | - | 0      | 0      |
| ENSG0000(RP11-1081 antisense)      | chr11 | 18706537 | 18740568 | + | 0.36   | 0      |
| ENSG0000(RP11-65M: lincRNA)        | chr11 | 1.12E+08 | 1.13E+08 | + | 0      | 0      |
| ENSG0000(RP11-313I: lincRNA)       | chr11 | 89753982 | 89754953 | - | 0      | 0      |
| ENSG0000(RP11-167J: lincRNA)       | chr11 | 71701268 | 71705404 | - | 0      | 0      |
| ENSG0000(RP11-429J: lincRNA)       | chr8  | 1.44E+08 | 1.44E+08 | - | 0.03   | 0      |
| ENSG0000(RP11-702H processed)      | chr11 | 74485580 | 74486051 | - | 0      | 0      |
| ENSG0000(RP11-672A lincRNA)        | chr11 | 76675079 | 76703195 | + | 0      | 0      |
| ENSG0000(OR8B7P unprocessed)       | chr11 | 1.24E+08 | 1.24E+08 | - | 0      | 0      |
| ENSG0000(ALG1L9P transcribed)      | chr11 | 71800541 | 71804640 | - | 0      | 0.14   |
| ENSG0000(RP11-872D protein_coding) | chr11 | 57387365 | 57424059 | - | 0.8    | 1.41   |
| ENSG0000(RP11-794P antisense)      | chr11 | 1.12E+08 | 1.12E+08 | - | 0      | 0      |
| ENSG0000(RP11-350N antisense)      | chr8  | 38400536 | 38401683 | - | 0      | 0      |
| ENSG0000(RP11-573E sense_intronic) | chr11 | 12303533 | 12308216 | + | 0      | 0      |
| ENSG0000(FTLP6 processed)          | chr11 | 66771246 | 66771667 | - | 0      | 0      |
| ENSG0000(RSF1-IT2 sense_intronic)  | chr11 | 77717712 | 77718411 | - | 0      | 0      |
| ENSG0000(DPP3 protein_coding)      | chr11 | 66480013 | 66509657 | + | 15.19  | 15.53  |
| ENSG0000(RP11-563P lincRNA)        | chr11 | 1.04E+08 | 1.04E+08 | - | 0.76   | 0.42   |
| ENSG0000(CTD-2547H antisense)      | chr11 | 76955417 | 76978619 | - | 0      | 0      |
| ENSG0000(RP11-469N lincRNA)        | chr11 | 1.35E+08 | 1.35E+08 | - | 0      | 0      |
| ENSG0000(RP11-108O lincRNA)        | chr11 | 1.12E+08 | 1.12E+08 | - | 0      | 0      |
| ENSG0000(RP13-631K lincRNA)        | chr11 | 12066929 | 12073014 | + | 0      | 0      |
| ENSG0000(RP11-215H processed)      | chr11 | 1.18E+08 | 1.18E+08 | - | 0      | 0      |
| ENSG0000(TRIM77BP unprocessed)     | chr11 | 49117019 | 49124570 | - | 0      | 0      |
| ENSG0000(STX16-NPE protein_coding) | chr20 | 58651434 | 58715410 | + | 1.25   | 0.74   |
| ENSG0000(ANKHD1-El protein_coding) | chr5  | 1.4E+08  | 1.41E+08 | + | 9.88   | 8.36   |
| ENSG0000(KRTAP5-9 protein_coding)  | chr11 | 71548418 | 71549553 | + | 0      | 0      |
| ENSG0000(RP11-94P1 lincRNA)        | chr11 | 1.05E+08 | 1.06E+08 | - | 0      | 0      |
| ENSG0000(BRK1 protein_coding)      | chr3  | 10115592 | 10127190 | + | 112.32 | 104.62 |
| ENSG0000(AC139103. processed)      | chr8  | 1.45E+08 | 1.45E+08 | + | 0      | 0      |
| ENSG0000(RP11-347H processed)      | chr11 | 50290749 | 50290933 | + | 0      | 0      |
| ENSG0000(CTD-2509C lincRNA)        | chr14 | 65212893 | 65222347 | - | 0.08   | 0.05   |
| ENSG0000(CYCSP28 processed)        | chr11 | 83328926 | 83329246 | + | 0      | 0      |
| ENSG0000(RP1-68D18 antisense)      | chr11 | 35281813 | 35286009 | + | 0      | 0      |
| ENSG0000(RP11-90K1 antisense)      | chr11 | 85916502 | 85923682 | - | 0      | 0      |
| ENSG0000(ELOCP22 processed)        | chr11 | 1.21E+08 | 1.21E+08 | - | 0      | 0      |
| ENSG0000(CTD-2589M antisense)      | chr11 | 46256355 | 46274547 | - | 0.26   | 0.29   |
| ENSG0000(AP000442. lincRNA)        | chr11 | 59561146 | 59566074 | - | 0      | 0.09   |
| ENSG0000(UBTFL1 protein_coding)    | chr11 | 90085950 | 90087131 | + | 0      | 0      |
| ENSG0000(RP11-113K processed)      | chr11 | 83106580 | 83106961 | - | 0      | 0      |

|                 |             |                |       |          |          |   |      |      |
|-----------------|-------------|----------------|-------|----------|----------|---|------|------|
| ENSG00000100000 | RP11-529A   | unprocessed    | chr11 | 90071136 | 90073055 | + | 0    | 0    |
| ENSG00000100000 | OR5M1       | protein_coding | chr11 | 56612555 | 56613502 | - | 0    | 0    |
| ENSG00000100000 | ARL6IP1P3   | processed      | chr11 | 80653429 | 80653988 | - | 0    | 0    |
| ENSG00000100000 | RP11-716H   | lincRNA        | chr11 | 1.22E+08 | 1.22E+08 | - | 0    | 0.49 |
| ENSG00000100000 | RP11-481A   | processed      | chr8  | 12025244 | 12025598 | - | 0    | 0    |
| ENSG00000100000 | RP11-413N   | processed      | chr11 | 13152200 | 13152348 | + | 0    | 0    |
| ENSG00000100000 | OR5D15P     | unprocessed    | chr11 | 55786964 | 55787905 | + | 0    | 0    |
| ENSG00000100000 | AF131216.1  | antisense      | chr8  | 11345748 | 11347502 | - | 0    | 0.06 |
| ENSG00000100000 | RP11-536I   | lincRNA        | chr3  | 14272373 | 14303845 | - | 0    | 0    |
| ENSG00000100000 | RP11-665E   | processed      | chr11 | 87816224 | 87816524 | + | 0    | 0    |
| ENSG00000100000 | AF228730.1  | processed      | chr8  | 7238286  | 7238631  | - | 0    | 0    |
| ENSG00000100000 | RP11-326C   | antisense      | chr11 | 287305   | 288987   | + | 0    | 0    |
| ENSG00000100000 | RP11-680F   | antisense      | chr11 | 1.26E+08 | 1.26E+08 | - | 0    | 0    |
| ENSG00000100000 | RP11-708B   | antisense      | chr11 | 1.09E+08 | 1.1E+08  | - | 0    | 0    |
| ENSG00000100000 | CTD-3012A   | lincRNA        | chr11 | 29519076 | 29552639 | + | 0    | 0    |
| ENSG00000100000 | OR8B5P      | unprocessed    | chr11 | 1.24E+08 | 1.24E+08 | - | 0    | 0    |
| ENSG00000100000 | RP11-802E   | antisense      | chr11 | 68050740 | 68053762 | + | 2.26 | 2.68 |
| ENSG00000100000 | RP11-45A1   | lincRNA        | chr11 | 44719392 | 44736692 | - | 0    | 0    |
| ENSG00000100000 | SERPINA15   | processed      | chr8  | 1.11E+08 | 1.11E+08 | + | 0    | 0    |
| ENSG00000100000 | SDHCP4      | processed      | chr11 | 17435672 | 17436181 | - | 0    | 0    |
| ENSG00000100000 | RP11-23J9.1 | processed      | chr9  | 97238497 | 97377287 | + | 0.23 | 0    |
| ENSG00000100000 | RP11-680G   | unprocessed    | chr16 | 14766402 | 14770075 | - | 0    | 0    |
| ENSG00000100000 | RP11-1167   | antisense      | chr11 | 66067277 | 66069619 | - | 0.3  | 0.33 |
| ENSG00000100000 | RP11-882G   | lincRNA        | chr11 | 97222644 | 97259987 | - | 0    | 0    |
| ENSG00000100000 | RP11-677N   | processed      | chr11 | 14673606 | 14674555 | - | 0    | 0    |
| ENSG00000100000 | RP11-430H   | lincRNA        | chr11 | 45387215 | 45513802 | - | 0    | 0    |
| ENSG00000100000 | RP11-347H   | transcribed    | chr11 | 50279828 | 50298452 | - | 0    | 0    |
| ENSG00000100000 | NAV2-AS5    | antisense      | chr11 | 19502672 | 19507229 | - | 0    | 0    |
| ENSG00000100000 | RP11-677M   | antisense      | chr11 | 1.25E+08 | 1.25E+08 | - | 0    | 0    |
| ENSG00000100000 | RP11-297N   | lincRNA        | chr8  | 11797928 | 11802568 | - | 0.32 | 1.17 |
| ENSG00000100000 | HNRNPRP2    | processed      | chr11 | 29668886 | 29669628 | - | 0    | 0    |
| ENSG00000100000 | OR8X1P      | unprocessed    | chr11 | 1.24E+08 | 1.24E+08 | - | 0    | 0    |
| ENSG00000100000 | RP11-661A   | antisense      | chr8  | 1.44E+08 | 1.44E+08 | + | 0    | 0    |
| ENSG00000100000 | BCAS2P1     | processed      | chr11 | 83132056 | 83134737 | + | 0    | 0    |
| ENSG00000100000 | FAM66D      | antisense      | chr8  | 12115782 | 12177550 | + | 0.27 | 0.08 |
| ENSG00000100000 | OR4A44P     | unprocessed    | chr11 | 48627546 | 48628493 | + | 0    | 0    |
| ENSG00000100000 | RP1-317E2   | protein_coding | chr1  | 25811470 | 25823744 | + | 0    | 0    |
| ENSG00000100000 | MTND1P35    | processed      | chr11 | 89908540 | 89909047 | + | 0    | 0    |
| ENSG00000100000 | RP11-567M   | processed      | chr11 | 1.3E+08  | 1.3E+08  | + | 0    | 0    |
| ENSG00000100000 | PDCL2P2     | processed      | chr11 | 65160194 | 65160382 | - | 0    | 0    |
| ENSG00000100000 | AP000620.1  | processed      | chr11 | 1.01E+08 | 1.01E+08 | + | 0    | 0    |
| ENSG00000100000 | RP11-219C   | antisense      | chr11 | 36425447 | 36426122 | - | 0    | 0.18 |
| ENSG00000100000 | RP11-712L   | antisense      | chr11 | 1.26E+08 | 1.26E+08 | - | 0.4  | 0.22 |
| ENSG00000100000 | RP11-718B   | processed      | chr11 | 82805354 | 82806509 | + | 0    | 0    |
| ENSG00000100000 | RP11-680E   | processed      | chr11 | 1.06E+08 | 1.06E+08 | + | 0    | 0    |

|                                            |          |          |   |       |       |
|--------------------------------------------|----------|----------|---|-------|-------|
| ENSG0000(RP11-47J1) sense_intronic chr11   | 12848795 | 12849433 | + | 0     | 0     |
| ENSG0000(OSBPL9P3) processed_chrom chr11   | 91115961 | 91116555 | + | 0     | 0     |
| ENSG0000(SAA2-SAA4) protein_coding chr11   | 18231423 | 18248635 | - | 0     | 0     |
| ENSG0000(PIGY) protein_coding chr4         | 88521573 | 88521789 | - | 6.61  | 14.59 |
| ENSG0000(ZFP91-CNT) protein_coding chr11   | 58579172 | 58624639 | + | 0.5   | 0.15  |
| ENSG0000(RP11-140L) processed_chrom chr11  | 14440787 | 14441677 | + | 0     | 0     |
| ENSG0000(CENPUP1) processed_chrom chr11    | 13756027 | 13757560 | + | 0     | 0     |
| ENSG0000(CTD-2023J) sense_intronic chr8    | 14879057 | 14879819 | - | 0     | 0     |
| ENSG0000(OR4X7P) unprocessed_chrom chr11   | 55411526 | 55411717 | + | 0     | 0     |
| ENSG0000(OR4A6P) unprocessed_chrom chr11   | 54724847 | 54725816 | + | 0     | 0     |
| ENSG0000(RP11-45A1) lincRNA chr11          | 44694863 | 44696301 | - | 0     | 0     |
| ENSG0000(RP11-263C) sense_intronic chr11   | 75914201 | 75915213 | + | 0     | 0     |
| ENSG0000(GRM5-AS1) antisense chr11         | 88504576 | 88524054 | + | 0     | 0     |
| ENSG0000(OR5AK1P) unprocessed_chrom chr11  | 57018100 | 57019021 | + | 0     | 0     |
| ENSG0000(RP11-843A) antisense chr11        | 78533176 | 78558565 | + | 0     | 0     |
| ENSG0000(AF186192) transcribed chr8        | 1.45E+08 | 1.45E+08 | + | 0     | 0     |
| ENSG0000(RP11-336F) processed_chrom chr11  | 26045987 | 26047598 | + | 0     | 0     |
| ENSG0000(RP11-168K) lincRNA chr11          | 1.27E+08 | 1.27E+08 | + | 0     | 0     |
| ENSG0000(RP11-23B7) processed_chrom chr11  | 13758111 | 13758345 | - | 0     | 0     |
| ENSG0000(RP11-326C) antisense chr11        | 321991   | 322426   | + | 1.65  | 3.62  |
| ENSG0000(RP11-495C) antisense chr11        | 45651529 | 45652691 | + | 0     | 0     |
| ENSG0000(RP11-58K2) antisense chr11        | 44606170 | 44608101 | - | 0     | 0     |
| ENSG0000(RP11-794P) transcribed chr11      | 1.11E+08 | 1.11E+08 | + | 0     | 0     |
| ENSG0000(RP11-406D) lincRNA chr11          | 27978669 | 28019575 | - | 0     | 0     |
| ENSG0000(OR1D4) transcribed chr17          | 3240676  | 3241614  | + | 0     | 0     |
| ENSG0000(OR5B10P) unprocessed_chrom chr11  | 58348989 | 58349630 | - | 0     | 0     |
| ENSG0000(RP11-5L12) sense_intronic chr11   | 9242448  | 9245509  | - | 0     | 0     |
| ENSG0000(RP11-25D1) processed_chrom chr8   | 1.1E+08  | 1.1E+08  | + | 0     | 0     |
| ENSG0000(RP11-21L2) antisense chr11        | 76782581 | 76783062 | - | 0     | 0     |
| ENSG0000(RP11-412B) antisense chr8         | 42705583 | 42721946 | - | 0     | 0     |
| ENSG0000(RP11-164N) lincRNA chr11          | 88061774 | 88098147 | - | 0     | 0     |
| ENSG0000(AC005324) protein_coding chr17    | 15699692 | 15744778 | + | 0.02  | 0.15  |
| ENSG0000(RP11-5A11) processed_chrom chr8   | 1.04E+08 | 1.04E+08 | - | 0     | 0     |
| ENSG0000(RP11-58K2) processed_chrom chr11  | 44539778 | 44540693 | - | 0     | 0     |
| ENSG0000(RP11-159H) processed_chrom chr8   | 69859264 | 69860540 | - | 0     | 0     |
| ENSG0000(AP006621) antisense chr11         | 823634   | 832883   | - | 0     | 0     |
| ENSG0000(CTD-2572N) lincRNA chr11          | 42183292 | 42253712 | - | 0     | 0     |
| ENSG0000(RP11-72M) unprocessed_chrom chr11 | 55279949 | 55280289 | + | 0     | 0     |
| ENSG0000(RP11-163C) processed_chrom chr11  | 49892262 | 49893777 | - | 0     | 0     |
| ENSG0000(CHMP1B) protein_coding chr18      | 11851396 | 11854449 | + | 13.37 | 12.78 |
| ENSG0000(OR4A48P) unprocessed_chrom chr11  | 48492026 | 48492416 | + | 0     | 0     |
| ENSG0000(RP11-110I) antisense chr11        | 1.19E+08 | 1.19E+08 | + | 0     | 0     |
| ENSG0000(RP11-91P2) processed_chrom chr11  | 77914990 | 77915275 | - | 0     | 0     |
| ENSG0000(SLC5A4P1) processed_chrom chr11   | 1.24E+08 | 1.24E+08 | + | 0     | 0     |
| ENSG0000(RP5-1027C) lincRNA chr11          | 29594918 | 29630664 | + | 0     | 0     |



|                                      |          |          |   |      |      |
|--------------------------------------|----------|----------|---|------|------|
| ENSG0000(RP11-703H antisense chr11   | 62336911 | 62338090 | - | 0    | 0    |
| ENSG0000(RP11-655N antisense chr11   | 67605521 | 67606642 | + | 0    | 0    |
| ENSG0000(OVOL1-AS1 antisense chr11   | 65789051 | 65790868 | - | 0.16 | 0    |
| ENSG0000(RP11-110I1 lincRNA chr11    | 1.19E+08 | 1.19E+08 | - | 1.04 | 0.98 |
| ENSG0000(RP11-303G processed_chr8    | 12580287 | 12581063 | + | 0    | 0    |
| ENSG0000(MTND5P21 processed_chr11    | 11239759 | 11240280 | + | 0    | 0    |
| ENSG0000(RP11-685N antisense chr11   | 10783313 | 10801625 | + | 0    | 0    |
| ENSG0000(CTD-2531D antisense chr11   | 62391516 | 62393372 | - | 0    | 0    |
| ENSG0000(RP11-676F unprocessε chr11  | 92914603 | 92916591 | + | 0    | 0    |
| ENSG0000(HSPD1P3 processed_chr8      | 7418991  | 7420546  | + | 0    | 0    |
| ENSG0000(RP11-839D antisense chr11   | 1.13E+08 | 1.13E+08 | - | 0    | 0    |
| ENSG0000(RP11-396Jε antisense chr8   | 67732587 | 67735665 | + | 0    | 0    |
| ENSG0000(OR9L1P unprocessε chr11     | 58077348 | 58078603 | - | 0    | 0    |
| ENSG0000(RP11-63C8 lincRNA chr11     | 41394595 | 41426504 | + | 0    | 0    |
| ENSG0000(RP11-646Jε lincRNA chr11    | 33814877 | 33822095 | - | 0    | 0    |
| ENSG0000(OR8K2P unprocessε chr11     | 56335142 | 56336068 | + | 0    | 0    |
| ENSG0000(RP11-111N lincRNA chr11     | 76441338 | 76444656 | - | 2.47 | 4.4  |
| ENSG0000(CTD-2562Jε lincRNA chr11    | 75208054 | 75241173 | - | 0    | 0    |
| ENSG0000(GLTPP1 processed_chr11      | 18189000 | 18189621 | + | 0    | 0    |
| ENSG0000(AP000442. antisense chr11   | 59616429 | 59639861 | + | 0    | 0    |
| ENSG0000(OR5BN2P unprocessε chr11    | 56116639 | 56117256 | - | 0    | 0    |
| ENSG0000(HNRNPA1P processed_chr11    | 3972881  | 3974237  | - | 0    | 0    |
| ENSG0000(AP006621. lincRNA chr11     | 781645   | 782105   | + | 0    | 0.88 |
| ENSG0000(RP11-805Jε sense_ovei chr11 | 70129297 | 70149623 | + | 0    | 0    |
| ENSG0000(RP11-589N unprocessε chr8   | 11895850 | 11896870 | - | 0    | 0    |
| ENSG0000(STX17-AS1 antisense chr9    | 99886322 | 99906601 | - | 0    | 0    |
| ENSG0000(RP11-659P lincRNA chr11     | 58044110 | 58060138 | - | 0    | 0    |
| ENSG0000(RP11-655N unprocessε chr11  | 67749043 | 67756968 | - | 0    | 0    |
| ENSG0000(RP4-791Mε antisense chr1    | 1.49E+08 | 1.49E+08 | - | 0    | 0    |
| ENSG0000(RP11-971I4 processed_chr11  | 1.11E+08 | 1.11E+08 | - | 0    | 0    |
| ENSG0000(EID3 protein_co chr12       | 1.04E+08 | 1.04E+08 | + | 0.35 | 0.22 |
| ENSG0000(GLYATL1P3 protein_co chr11  | 59086307 | 59094786 | + | 0    | 0    |
| ENSG0000(MSH5-SAPI protein_co chr6   | 31740020 | 31764851 | + | 0.39 | 0.6  |
| ENSG0000(TOLLIP-AS1 antisense chr11  | 1309769  | 1310707  | + | 0.39 | 0.51 |
| ENSG0000(RP11-80H1 protein_co chr3   | 58306262 | 58318574 | + | 3.99 | 3.93 |
| ENSG0000(RP11-535N processed_chr11   | 1.31E+08 | 1.31E+08 | - | 0    | 0    |
| ENSG0000(RNY1P9 misc_RNA chr22       | 20475203 | 20475311 | - | 0    | 0    |
| ENSG0000(CTD-2313N transcribec chr11 | 71856277 | 71863658 | + | 0    | 0    |
| ENSG0000(RP11-754B antisense chr11   | 665910   | 678391   | + | 0    | 0    |
| ENSG0000(RP11-318C antisense chr11   | 8768778  | 8810231  | + | 0    | 0    |
| ENSG0000(RP11-428C lincRNA chr11     | 19299883 | 19308358 | + | 0    | 0    |
| ENSG0000(RP11-646Jε processed_chr11  | 33787054 | 33787795 | - | 0    | 0    |
| ENSG0000(RP11-358N unprocessε chr11  | 89785945 | 89787838 | + | 0    | 0    |
| ENSG0000(HSPE1P18 processed_chr11    | 1.18E+08 | 1.18E+08 | - | 0    | 0    |
| ENSG0000(RP5-1047A antisense chr8    | 1.45E+08 | 1.45E+08 | + | 0    | 0    |

|                                                |          |          |   |       |       |
|------------------------------------------------|----------|----------|---|-------|-------|
| ENSG00000100000(CTD-2609K sense_intron) chr11  | 44071462 | 44072403 | + | 0.18  | 0.37  |
| ENSG00000100000(RP11-726G processed) chr8      | 43247191 | 43247410 | + | 0     | 0     |
| ENSG00000100000(RP11-670N antisense) chr11     | 21260061 | 21262570 | - | 0     | 0     |
| ENSG00000100000(RP11-646J) lincRNA chr11       | 33804768 | 33805641 | + | 0     | 0     |
| ENSG00000100000(RP11-313I) processed) chr11    | 89764884 | 89765138 | + | 0     | 0     |
| ENSG00000100000(LINC01499) lincRNA chr11       | 41714568 | 41836442 | + | 0     | 0     |
| ENSG00000100000(OR5AM1P unprocessed) chr11     | 56619779 | 56620810 | - | 0     | 0     |
| ENSG00000100000(AP003068) antisense) chr11     | 65117157 | 65117458 | + | 0     | 0     |
| ENSG00000100000(RP11-481A processed) chr8      | 11999087 | 11999468 | + | 0     | 0     |
| ENSG00000100000(RP11-277K) lincRNA chr11       | 38618264 | 38646356 | - | 0     | 0     |
| ENSG00000100000(AP002954) antisense) chr11     | 1.19E+08 | 1.19E+08 | + | 0.38  | 0.5   |
| ENSG00000100000(RP11-532E antisense) chr11     | 1242261  | 1249676  | - | 0     | 0     |
| ENSG00000100000(RP11-686G) lincRNA chr11       | 80751200 | 80762826 | - | 0     | 0     |
| ENSG00000100000(RP11-324J) lincRNA chr11       | 7222933  | 7230863  | + | 0     | 0     |
| ENSG00000100000(CCDC166) protein_coding) chr8  | 1.44E+08 | 1.44E+08 | - | 0     | 0     |
| ENSG00000100000(CTD-2517N) processed) chr8     | 1.44E+08 | 1.45E+08 | - | 2.19  | 1.75  |
| ENSG00000100000(RP11-720D) lincRNA chr11       | 87718354 | 87719411 | - | 0     | 0     |
| ENSG00000100000(RP11-313I) unprocessed) chr11  | 90017611 | 90024511 | - | 0     | 0     |
| ENSG00000100000(PDXDC2P) transcribed) chr16    | 70010751 | 70065945 | - | 1.49  | 0.46  |
| ENSG00000100000(RP11-514F sense_intron) chr11  | 36386521 | 36388250 | + | 0     | 0     |
| ENSG00000100000(RP11-699F) lincRNA chr11       | 91158083 | 91167294 | + | 0     | 0     |
| ENSG00000100000(RP11-507F processed) chr11     | 1.3E+08  | 1.3E+08  | - | 0     | 0     |
| ENSG00000100000(GLYATL1P1 unprocessed) chr11   | 58978787 | 58994120 | + | 0     | 0     |
| ENSG00000100000(TRIM51DP) processed) chr11     | 49874945 | 49876638 | + | 0     | 0     |
| ENSG00000100000(RP11-626H) lincRNA chr11       | 69985876 | 70015815 | + | 0     | 0     |
| ENSG00000100000(NANOGP8) protein_coding) chr15 | 35084193 | 35085110 | - | 0     | 0.07  |
| ENSG00000100000(RP11-945A) lincRNA chr11       | 23730588 | 23796970 | + | 0     | 0     |
| ENSG00000100000(OR4A17P unprocessed) chr11     | 55444435 | 55445338 | + | 0     | 0     |
| ENSG00000100000(RP11-750H antisense) chr11     | 47383148 | 47409190 | - | 0.96  | 0.42  |
| ENSG00000100000(SNHG9) lincRNA chr16           | 1964959  | 1965509  | + | 19.87 | 16.02 |
| ENSG00000100000(GTF2IP11 unprocessed) chr11    | 50100892 | 50102898 | - | 0     | 0     |
| ENSG00000100000(PGAM1P8) transcribed) chr11    | 65174117 | 65176470 | - | 0.54  | 0.54  |
| ENSG00000100000(RP11-350N antisense) chr8      | 38421889 | 38426096 | + | 0     | 0     |
| ENSG00000100000(RP4-541C2 antisense) chr11     | 33665220 | 33696701 | - | 0     | 0     |
| ENSG00000100000(OR7E2P unprocessed) chr11      | 86857059 | 86857947 | - | 0     | 0     |
| ENSG00000100000(RP11-738C unprocessed) chr11   | 55863932 | 55881243 | + | 0     | 0     |
| ENSG00000100000(MED28P5) processed) chr11      | 97000274 | 97000711 | - | 0     | 0     |
| ENSG00000100000(RP11-403D antisense) chr8      | 68082204 | 68095081 | - | 0     | 0     |
| ENSG00000100000(RP1-305G2) processed) chr11    | 33450646 | 33450943 | + | 0     | 0     |
| ENSG00000100000(RP11-258C) lincRNA chr11       | 79604967 | 79612300 | - | 0     | 0     |
| ENSG00000100000(RP11-344L) processed) chr11    | 1.1E+08  | 1.1E+08  | + | 0     | 0     |
| ENSG00000100000(RP11-1195 unprocessed) chr8    | 7967344  | 7968544  | - | 0     | 0     |
| ENSG00000100000(NPM1P35) processed) chr11      | 62330946 | 62331813 | + | 0     | 0     |
| ENSG00000100000(RP11-163C unprocessed) chr11   | 49871826 | 49874067 | - | 0     | 0     |
| ENSG00000100000(OR4R1P unprocessed) chr11      | 48486363 | 48486825 | - | 0     | 0     |

|                     |                |       |          |          |   |       |       |
|---------------------|----------------|-------|----------|----------|---|-------|-------|
| ENSG000001831A      | lincRNA        | chr11 | 1.2E+08  | 1.2E+08  | - | 0     | 0     |
| ENSG000001857P      | unprocessed    | chr11 | 56165500 | 56165921 | + | 0     | 0     |
| ENSG000001858P      | unprocessed    | chr11 | 58317637 | 58318375 | - | 0     | 0     |
| ENSG000001866H      | antisense      | chr11 | 1.22E+08 | 1.22E+08 | + | 0     | 0     |
| ENSG000001868P5     | processed      | chr11 | 1.3E+08  | 1.3E+08  | + | 0     | 0     |
| ENSG000001871P      | protein_coding | chr11 | 1.05E+08 | 1.05E+08 | - | 0     | 0     |
| ENSG000001872P7     | processed      | chr11 | 86294760 | 86295576 | + | 0     | 0.09  |
| ENSG000001875M11    | protein_coding | chr11 | 56542340 | 56543257 | - | 0     | 0     |
| ENSG000001876J      | antisense      | chr8  | 1.44E+08 | 1.44E+08 | - | 0.93  | 0.77  |
| ENSG000001878P6     | unprocessed    | chr11 | 1.24E+08 | 1.24E+08 | - | 0     | 0     |
| ENSG000001879P      | lincRNA        | chr11 | 45750823 | 45751871 | - | 0     | 0     |
| ENSG000001880B      | lincRNA        | chr11 | 29445487 | 29457393 | + | 0     | 0     |
| ENSG000001881N      | antisense      | chr11 | 129279   | 186136   | + | 0     | 0     |
| ENSG000001882A4     | processed      | chr11 | 67965873 | 67966227 | - | 0     | 0     |
| ENSG000001883P4     | processed      | chr11 | 1.12E+08 | 1.12E+08 | + | 0     | 0     |
| ENSG000001884N      | processed      | chr11 | 3961277  | 3961538  | + | 0     | 0     |
| ENSG000001885E      | lincRNA        | chr11 | 93240133 | 93241168 | + | 0     | 0     |
| ENSG000001886A      | antisense      | chr11 | 83286128 | 83423516 | + | 0.14  | 0.02  |
| ENSG000001887I2     | unprocessed    | chr11 | 89883927 | 89886213 | - | 0     | 0     |
| ENSG000001888K      | antisense      | chr11 | 68122053 | 68130518 | + | 0.15  | 0     |
| ENSG000001889D      | antisense      | chr11 | 462930   | 463899   | - | 0.15  | 0.25  |
| ENSG000001890P1     | processed      | chr19 | 55777553 | 55778900 | + | 0     | 0     |
| ENSG000001891P1     | unprocessed    | chr11 | 1.19E+08 | 1.19E+08 | - | 0     | 0     |
| ENSG000001892C      | antisense      | chr11 | 58933643 | 59058659 | - | 0     | 0     |
| ENSG000001893N      | antisense      | chr11 | 88098591 | 88115835 | + | 0     | 0     |
| ENSG000001894G      | lincRNA        | chr11 | 26189123 | 26208347 | + | 0     | 0     |
| ENSG000001895F      | antisense      | chr11 | 18934985 | 18939721 | + | 0     | 0     |
| ENSG000001896Y6-FXY | protein_coding | chr11 | 1.18E+08 | 1.18E+08 | - | 0     | 0     |
| ENSG000001897A      | lincRNA        | chr11 | 82603743 | 82643419 | - | 0     | 0     |
| ENSG000001898D      | lincRNA        | chr11 | 1.2E+08  | 1.2E+08  | + | 0     | 0     |
| ENSG000001899HG     | processed      | chr11 | 1.22E+08 | 1.23E+08 | - | 32.56 | 31.54 |
| ENSG000001900H      | lincRNA        | chr11 | 86727355 | 86765265 | + | 0     | 0     |
| ENSG000001901D1     | protein_coding | chr8  | 7539628  | 7542450  | + | 0     | 0     |
| ENSG000001902P5     | antisense      | chr11 | 32097143 | 32105091 | - | 1.79  | 0     |
| ENSG000001903G      | processed      | chr8  | 12638428 | 12638602 | + | 0     | 0     |
| ENSG000001904P5     | processed      | chr11 | 18106583 | 18106841 | + | 0     | 0     |
| ENSG000001905P1AP   | processed      | chr11 | 75911204 | 75911628 | - | 0     | 0     |
| ENSG000001906O1     | sense_intronic | chr11 | 35972428 | 35989007 | + | 0     | 0     |
| ENSG00000190716     | lincRNA        | chr11 | 5938751  | 5944984  | + | 0     | 0     |
| ENSG000001908P      | lincRNA        | chr11 | 1.34E+08 | 1.34E+08 | - | 0     | 0     |
| ENSG000001909P      | processed      | chr11 | 1.29E+08 | 1.29E+08 | - | 0     | 0     |
| ENSG000001910I      | lincRNA        | chr11 | 11243188 | 11243715 | - | 0     | 0     |
| ENSG000001911E4P    | unprocessed    | chr11 | 71620020 | 71621032 | + | 0     | 0     |
| ENSG000001912P2     | processed      | chr11 | 1.3E+08  | 1.3E+08  | - | 0     | 0     |
| ENSG000001913P1     | processed      | chr11 | 58796237 | 58796854 | - | 0     | 0     |

|                                      |          |          |   |        |       |
|--------------------------------------|----------|----------|---|--------|-------|
| ENSG0000(RP11-734C processed_ chr11  | 57870322 | 57870571 | - | 0      | 0     |
| ENSG0000(RP11-430H lincRNA chr11     | 45371397 | 45388508 | + | 0      | 0     |
| ENSG0000(RP11-707N unprocessε chr11  | 49824839 | 49826724 | - | 0      | 0     |
| ENSG0000(RP11-702F lincRNA chr11     | 46213824 | 46220438 | - | 0      | 0     |
| ENSG0000(NAV2-IT1 sense_intrε chr11  | 19380484 | 19385014 | + | 0      | 0     |
| ENSG0000(RP4-594L9. lincRNA chr11    | 34533014 | 34557924 | - | 0      | 0     |
| ENSG0000(RP11-646J. antisense chr11  | 33776188 | 33779495 | + | 0      | 0     |
| ENSG0000(AF238378. processed_ chr8   | 7082971  | 7083328  | + | 0      | 0     |
| ENSG0000(TMPRS54-7 protein_co chr11  | 1.18E+08 | 1.18E+08 | - | 0      | 0     |
| ENSG0000(RP13-279N protein_co chr1   | 18849273 | 18921121 | - | 0      | 0     |
| ENSG0000(RRM1-AS1 antisense chr11    | 4137116  | 4138257  | - | 0.31   | 0     |
| ENSG0000(ABCC6P2 transcribec chr16   | 14820792 | 14824702 | - | 0.1    | 0.29  |
| ENSG0000(RP11-375D lincRNA chr11     | 41855920 | 41875997 | + | 0      | 0     |
| ENSG0000(CTD-2530H processed_ chr11  | 75642600 | 75642889 | + | 0      | 0     |
| ENSG0000(RP11-460B processed_ chr11  | 29391525 | 29393844 | + | 0      | 0     |
| ENSG0000(WTAPP1 transcribec chr11    | 1.03E+08 | 1.03E+08 | + | 0      | 0     |
| ENSG0000(RP11-72M. unprocessε chr11  | 55279447 | 55284749 | - | 0      | 0     |
| ENSG0000(AP006621. lincRNA chr11     | 777578   | 784297   | + | 6.91   | 5.67  |
| ENSG0000(RP11-358N processed_ chr11  | 89789412 | 89789733 | - | 0      | 0     |
| ENSG0000(RP11-708L. processed_ chr11 | 1.12E+08 | 1.12E+08 | - | 0      | 0     |
| ENSG0000(SNRPGP16 processed_ chr11   | 92937441 | 92937666 | + | 0      | 0     |
| ENSG0000(RP4-562D2 processed_ chr11  | 30167163 | 30167306 | + | 0      | 0     |
| ENSG0000(RP11-91I2. lincRNA chr8     | 60660820 | 60664530 | + | 0      | 0     |
| ENSG0000(HMGB1P4. processed_ chr11   | 20574186 | 20575042 | + | 0      | 0     |
| ENSG0000(SDHD protein_co chr11       | 1.12E+08 | 1.12E+08 | + | 13.42  | 0.2   |
| ENSG0000(WIZP1 processed_ chr11      | 23403805 | 23406103 | + | 0      | 0     |
| ENSG0000(OR4A50P unprocessε chr11    | 55475943 | 55476428 | + | 0      | 0     |
| ENSG0000(RP11-745I. processed_ chr11 | 89498748 | 89499198 | - | 0      | 0     |
| ENSG0000(RP11-757C processed_ chr11  | 71938671 | 71939544 | - | 0      | 0     |
| ENSG0000(OR4A41P unprocessε chr11    | 48589760 | 48590687 | + | 0      | 0     |
| ENSG0000(OR8G5 protein_co chr11      | 1.24E+08 | 1.24E+08 | + | 0      | 0     |
| ENSG0000(RP11-655C lincRNA chr11     | 58497888 | 58505758 | - | 0.41   | 0.14  |
| ENSG0000(RP11-148I. lincRNA chr11    | 41993385 | 42163851 | - | 0      | 0     |
| ENSG0000(RP11-624G antisense chr11   | 57476493 | 57477534 | - | 0      | 0.11  |
| ENSG0000(EID1 protein_co chr15       | 48877886 | 48880183 | + | 116.64 | 116.9 |
| ENSG0000(OR5BA1P unprocessε chr11    | 57866298 | 57867279 | - | 0      | 0     |
| ENSG0000(OR4A46P unprocessε chr11    | 48496348 | 48497280 | + | 0      | 0     |
| ENSG0000(RP11-529A unprocessε chr11  | 89978540 | 89980661 | + | 0      | 0     |
| ENSG0000(RP5-901A4 antisense chr11   | 68024809 | 68030461 | - | 0.09   | 0     |
| ENSG0000(OR52B2 protein_co chr11     | 6169330  | 6170408  | - | 0      | 0     |
| ENSG0000(RP11-428C antisense chr11   | 19196775 | 19281426 | + | 0      | 0     |
| ENSG0000(RP11-756D processed_ chr11  | 11759101 | 11759433 | - | 0      | 0     |
| ENSG0000(AF131215. sense_intrε chr8  | 11107788 | 11109726 | - | 0.95   | 0.6   |
| ENSG0000(RP11-160H antisense chr11   | 83643602 | 83725390 | + | 0      | 0     |
| ENSG0000(OR4C7P unprocessε chr11     | 54635037 | 54635955 | - | 0      | 0     |

|                    |                    |       |          |          |   |      |      |
|--------------------|--------------------|-------|----------|----------|---|------|------|
| ENSG000001082      | lincRNA            | chr8  | 1.25E+08 | 1.25E+08 | - | 0    | 0    |
| ENSG000001702F     | lincRNA            | chr11 | 46123573 | 46177106 | + | 0    | 0    |
| ENSG00000108A3P    | unprocessed        | chr11 | 1.25E+08 | 1.25E+08 | + | 0    | 0    |
| ENSG000001082P25   | unprocessed        | chr11 | 81555910 | 81556425 | - | 0    | 0    |
| ENSG000001688I5    | antisense          | chr11 | 1.27E+08 | 1.27E+08 | + | 0    | 0    |
| ENSG000001082P8    | transcribed        | chr11 | 71711740 | 71781183 | + | 0    | 0    |
| ENSG000001082F5    | antisense          | chr11 | 66244840 | 66246239 | - | 0    | 0    |
| ENSG000001082I2C   | antisense          | chr8  | 60551957 | 60553036 | - | 0    | 0    |
| ENSG000001082C1495 | lincRNA            | chr11 | 22445688 | 22492019 | - | 0    | 0    |
| ENSG000001082B2    | lincRNA            | chr8  | 1.22E+08 | 1.22E+08 | - | 0    | 0    |
| ENSG000001082H     | antisense          | chr11 | 75583196 | 75594665 | + | 0.21 | 0.11 |
| ENSG000001082G5    | lincRNA            | chr11 | 1.35E+08 | 1.35E+08 | + | 0    | 0    |
| ENSG000001082C6    | lincRNA            | chr11 | 327171   | 330122   | + | 0.31 | 0.33 |
| ENSG000001082AFZP4 | processed          | chr11 | 70278921 | 70279297 | - | 0    | 0    |
| ENSG000001082A3    | protein_coding     | chr6  | 1.27E+08 | 1.28E+08 | - | 0.61 | 0.49 |
| ENSG000001082I1    | processed          | chr11 | 60077350 | 60078401 | + | 0.09 | 0    |
| ENSG000001082I1N   | lincRNA            | chr11 | 91794362 | 91812294 | + | 0    | 0    |
| ENSG000001082A0435 | processed          | chr11 | 58354004 | 58354499 | - | 0    | 0    |
| ENSG000001082L     | sense_intronic     | chr11 | 1.12E+08 | 1.12E+08 | + | 0    | 0    |
| ENSG000001082H8    | antisense          | chr11 | 17695267 | 17696940 | - | 0    | 0    |
| ENSG000001082P1    | unprocessed        | chr11 | 1.05E+08 | 1.05E+08 | - | 0    | 0    |
| ENSG000001082I5C   | antisense          | chr11 | 1.02E+08 | 1.02E+08 | + | 0.1  | 0.11 |
| ENSG000001082P7    | processed          | chr11 | 49110756 | 49111220 | + | 0    | 0    |
| ENSG000001082I1B   | protein_coding     | chr10 | 1.01E+08 | 1.01E+08 | - | 1.62 | 2.35 |
| ENSG000001082D     | antisense          | chr11 | 43378882 | 43385671 | - | 0    | 0    |
| ENSG000001082Q1P   | unprocessed        | chr11 | 1.25E+08 | 1.25E+08 | + | 0    | 0    |
| ENSG000001082B2B   | processed          | chr11 | 1.23E+08 | 1.23E+08 | - | 0    | 0    |
| ENSG000001082N     | 3prime_overlapping | chr8  | 1.44E+08 | 1.44E+08 | - | 0    | 0    |
| ENSG000001082N     | lincRNA            | chr11 | 1.35E+08 | 1.35E+08 | + | 0    | 0    |
| ENSG000001082I7    | lincRNA            | chr11 | 79092848 | 79098003 | + | 0.46 | 0.2  |
| ENSG000001082X5    | protein_coding     | chr15 | 68930525 | 69062743 | + | 0    | 0    |
| ENSG000001082H1    | processed          | chr11 | 40083710 | 40084517 | - | 0    | 0    |
| ENSG000001082F     | antisense          | chr11 | 1.34E+08 | 1.34E+08 | + | 0.58 | 0    |
| ENSG000001082A7P   | unprocessed        | chr11 | 54692450 | 54693359 | + | 0    | 0    |
| ENSG000001082C1P15 | processed          | chr11 | 1.03E+08 | 1.03E+08 | - | 0.08 | 0.25 |
| ENSG000001082I1J   | antisense          | chr11 | 11352426 | 11353307 | + | 0    | 0    |
| ENSG000001082R10P1 | processed          | chr11 | 1.31E+08 | 1.31E+08 | - | 0    | 0    |
| ENSG000001082N     | processed          | chr11 | 1.07E+08 | 1.07E+08 | + | 0.09 | 0    |
| ENSG000001082C     | antisense          | chr8  | 11558466 | 11560020 | - | 0    | 0    |
| ENSG000001082A0640 | processed          | chr11 | 59669312 | 59676041 | + | 0.11 | 0.11 |
| ENSG000001082E     | processed          | chr12 | 7896608  | 7896956  | - | 0    | 0    |
| ENSG000001082N1    | lincRNA            | chr11 | 22492112 | 22502846 | + | 0    | 0    |
| ENSG000001082C     | processed          | chr11 | 1.3E+08  | 1.3E+08  | - | 0    | 0    |
| ENSG000001082C179  | protein_coding     | chr11 | 22846931 | 22860426 | - | 0    | 0    |
| ENSG000001082A     | unprocessed        | chr11 | 89955146 | 89957165 | - | 0    | 0    |

|                                       |          |          |   |      |      |
|---------------------------------------|----------|----------|---|------|------|
| ENSG0000(RP11-412B processed_ chr8    | 42725547 | 42726228 | - | 0    | 0    |
| ENSG0000(RP11-619A lincRNA chr11      | 76210956 | 76216025 | - | 0    | 0    |
| ENSG0000(RP11-672A lincRNA chr11      | 76607853 | 76630427 | - | 0.25 | 0.04 |
| ENSG0000(SMILR lincRNA chr8           | 1.22E+08 | 1.22E+08 | - | 1.17 | 1    |
| ENSG0000(RP11-776K processed_ chr8    | 14690382 | 14690619 | + | 0    | 0    |
| ENSG0000(RP11-1134 lincRNA chr8       | 47190772 | 47193262 | + | 0    | 0.07 |
| ENSG0000(RP13-726E transcribed chr11  | 3429758  | 3581211  | - | 0    | 0    |
| ENSG0000(RP11-54J7. processed_ chr11  | 25140533 | 25141023 | - | 0    | 0    |
| ENSG0000(RP11-740D processed_ chr11   | 1.29E+08 | 1.29E+08 | - | 0    | 0    |
| ENSG0000(CYCSP25 processed_ chr11     | 31280672 | 31280987 | - | 0    | 0    |
| ENSG0000(OPCML-IT2 sense_intron chr11 | 1.33E+08 | 1.33E+08 | - | 0    | 0    |
| ENSG0000(CTD-3064C antisense chr11    | 22261209 | 22262256 | - | 0    | 0    |
| ENSG0000(TAS2R43 protein_coding chr12 | 11091287 | 11092313 | - | 0    | 0.13 |
| ENSG0000(RP1-65P5.5 lincRNA chr11     | 32132699 | 32143579 | + | 0    | 0    |
| ENSG0000(RP11-360K processed_ chr11   | 96642671 | 96643225 | - | 0    | 0    |
| ENSG0000(DUXAP5 processed_ chr11      | 1.19E+08 | 1.19E+08 | - | 0    | 0    |
| ENSG0000(PRR23D2 protein_coding chr8  | 7778591  | 7781413  | - | 0    | 0    |
| ENSG0000(CYCSP29 processed_ chr11     | 1.09E+08 | 1.09E+08 | - | 0    | 0    |
| ENSG0000(RP11-684B processed_ chr11   | 98130239 | 98131198 | - | 0    | 0    |
| ENSG0000(AP001258. processed_ chr11   | 59142121 | 59142610 | - | 0    | 0    |
| ENSG0000(RP11-718B lincRNA chr11      | 82791662 | 82817146 | + | 0    | 0    |
| ENSG0000(RP11-770J. lincRNA chr11     | 1.18E+08 | 1.18E+08 | - | 0.03 | 0    |
| ENSG0000(UBTFL10 processed_ chr11     | 89700764 | 89701325 | + | 0    | 0    |
| ENSG0000(OR5BR1P unprocessed chr11    | 59332757 | 59334086 | - | 0    | 0    |
| ENSG0000(RP11-23F2 processed_ chr11   | 4210354  | 4212091  | - | 0    | 0    |
| ENSG0000(RP11-124G lincRNA chr11      | 41518895 | 41714448 | - | 0    | 0    |
| ENSG0000(C6orf3 antisense chr6        | 1.12E+08 | 1.12E+08 | + | 0.29 | 0.35 |
| ENSG0000(RP11-732A antisense chr11    | 6621451  | 6622322  | + | 0    | 0    |
| ENSG0000(CTD-2028E processed_ chr11   | 87480736 | 87481297 | - | 0    | 0    |
| ENSG0000(RP11-736I1 lincRNA chr11     | 60024908 | 60031077 | + | 0    | 0    |
| ENSG0000(C8orf49 lincRNA chr8         | 11761256 | 11763223 | + | 1.27 | 1.12 |
| ENSG0000(CTD-2562J. antisense chr11   | 75099172 | 75140148 | - | 0.26 | 0.14 |
| ENSG0000(AP000857. processed_ chr11   | 84997226 | 84997768 | - | 0    | 0    |
| ENSG0000(AC022182. processed_ chr8    | 60937705 | 60939871 | - | 0    | 0    |
| ENSG0000(HCAR3 protein_coding chr12   | 1.23E+08 | 1.23E+08 | - | 0.05 | 0    |
| ENSG0000(TBX5-AS1 antisense chr12     | 1.14E+08 | 1.14E+08 | + | 0.46 | 0.53 |
| ENSG0000(RP13-631K lincRNA chr11      | 12086891 | 12089441 | + | 0    | 0    |
| ENSG0000(RP11-15D1 unprocessed chr11  | 13488612 | 13489390 | + | 0    | 0    |
| ENSG0000(RP11-696P antisense chr8     | 1.1E+08  | 1.1E+08  | + | 0    | 0    |
| ENSG0000(AP000641. processed_ chr11   | 1.06E+08 | 1.06E+08 | + | 0    | 0    |
| ENSG0000(RP11-770G antisense chr11    | 65795946 | 65797219 | - | 0    | 0    |
| ENSG0000(RP11-713P lincRNA chr11      | 1.34E+08 | 1.34E+08 | + | 0    | 0    |
| ENSG0000(PCDHA3 protein_coding chr5   | 1.41E+08 | 1.41E+08 | + | 0.13 | 0.17 |
| ENSG0000(RSF1-IT1 sense_intron chr11  | 77738680 | 77739568 | - | 0    | 0    |
| ENSG0000(RP11-732A antisense chr11    | 6630603  | 6635208  | + | 0    | 0    |

|                                      |          |          |   |      |      |
|--------------------------------------|----------|----------|---|------|------|
| ENSG0000(RP11-98J9.lincRNA chr11     | 13785390 | 13848002 | + | 0    | 0    |
| ENSG0000(RP11-436P.processed_chr8    | 13741809 | 13742781 | + | 0    | 0    |
| ENSG0000(RP11-684B.processed_chr11   | 71629045 | 71629421 | + | 0    | 0    |
| ENSG0000(OR10AF1P.unprocessε chr11   | 55948120 | 55948924 | - | 0    | 0    |
| ENSG0000(MTCO2P15.processed_chr11    | 1.03E+08 | 1.03E+08 | - | 0.21 | 0.11 |
| ENSG0000(RP11-266A.lincRNA chr11     | 23164900 | 23203161 | + | 0    | 0.11 |
| ENSG0000(CASC23 antisense chr11      | 8011278  | 8016489  | - | 0    | 0    |
| ENSG0000(CTD-2011F antisense chr11   | 76137315 | 76137731 | - | 0    | 0    |
| ENSG0000(AP002954.antisense chr11    | 1.19E+08 | 1.19E+08 | + | 0    | 0    |
| ENSG0000(EBLN2 protein_co chr3       | 73061659 | 73063337 | + | 1.11 | 0.82 |
| ENSG0000(RP11-589F.unprocessε chr11  | 19029697 | 19030438 | - | 0    | 0    |
| ENSG0000(OR8G3P.unprocessε chr11     | 1.24E+08 | 1.24E+08 | + | 0    | 0    |
| ENSG0000(CTD-2210P.lincRNA chr11     | 45733994 | 45735766 | - | 0    | 0    |
| ENSG0000(RP11-350D.lincRNA chr11     | 34570876 | 34573982 | + | 0    | 0    |
| ENSG0000(RP11-794P.sense_intrε chr11 | 1.11E+08 | 1.11E+08 | - | 0    | 0    |
| ENSG0000(RP11-643G.lincRNA chr11     | 89546637 | 89589611 | - | 0    | 0    |
| ENSG0000(CASP1P1.unprocessε chr11    | 1.05E+08 | 1.05E+08 | - | 0    | 0    |
| ENSG0000(OR5B19P.unprocessε chr11    | 58343737 | 58344664 | - | 0    | 0    |
| ENSG0000(RP11-831H.protein_co chr11  | 62649694 | 62665178 | - | 0.27 | 0.25 |
| ENSG0000(AP000479.lincRNA chr11      | 56848478 | 56878078 | + | 0    | 0    |
| ENSG0000(CTD-2530H.sense_intrε chr11 | 75596144 | 75597270 | - | 0    | 0    |
| ENSG0000(RP11-770J.antisense chr11   | 1.19E+08 | 1.19E+08 | - | 0.35 | 0.27 |
| ENSG0000(RP11-510I2.processed_chr8   | 14022687 | 14023422 | - | 0    | 0    |
| ENSG0000(CTD-2653D.antisense chr20   | 47677901 | 47686297 | + | 0    | 0.02 |
| ENSG0000(RP11-196G.protein_co chr16  | 31083439 | 31094956 | - | 1.87 | 2.54 |
| ENSG0000(RP11-632K.sense_intrε chr11 | 74409060 | 74416379 | + | 0    | 0    |
| ENSG0000(CTD-2616J.antisense chr19   | 51415724 | 51417425 | + | 0    | 0    |
| ENSG0000(RP11-347H.unprocessε chr11  | 50170156 | 50190441 | + | 0    | 0    |
| ENSG0000(RP1-68D18.antisense chr11   | 35210343 | 35214985 | - | 0    | 0.13 |
| ENSG0000(CYCSP27.processed_chr11     | 74482250 | 74482542 | + | 0    | 0    |
| ENSG0000(RP11-573N.processed_chr11   | 93152075 | 93152750 | + | 0    | 0    |
| ENSG0000(CTD-2531D.antisense chr11   | 62421845 | 62426724 | - | 0    | 0    |
| ENSG0000(CTD-2210P.lincRNA chr11     | 45813219 | 45825258 | + | 0    | 0    |
| ENSG0000(RP1-59M1I.processed_chr11   | 18000542 | 18022931 | - | 0    | 0    |
| ENSG0000(RP11-91P2.antisense chr11   | 77866412 | 77870091 | - | 0    | 0.1  |
| ENSG0000(CTD-2063L.processed_chr11   | 29275655 | 29276565 | + | 0    | 0    |
| ENSG0000(RP11-58K2.lincRNA chr11     | 44468464 | 44470429 | + | 0    | 0    |
| ENSG0000(RP11-107P.processed_chr11   | 49092404 | 49092767 | + | 0    | 0    |
| ENSG0000(RP11-46P1.processed_chr11   | 25630720 | 25631041 | + | 0    | 0    |
| ENSG0000(RP11-890B.lincRNA chr11     | 1.31E+08 | 1.31E+08 | - | 1.93 | 1.83 |
| ENSG0000(CTD-2517N.antisense chr8    | 1.45E+08 | 1.45E+08 | + | 0    | 0    |
| ENSG0000(RP11-436P.processed_chr8    | 13695574 | 13705506 | + | 0    | 0    |
| ENSG0000(RP11-539G.lincRNA chr4      | 39639140 | 39666644 | + | 0.56 | 0.42 |
| ENSG0000(RP11-52B1.processed_chr8    | 8086022  | 8086765  | - | 0.26 | 0    |
| ENSG0000(ZDHC20P.processed_chr11     | 75228322 | 75228657 | - | 0    | 0.32 |

|                                 |       |          |          |   |      |      |
|---------------------------------|-------|----------|----------|---|------|------|
| ENSG0000( OR8I1P unprocessε     | chr11 | 56296541 | 56297471 | - | 0    | 0    |
| ENSG0000( RP11-483L antisense   | chr11 | 11570084 | 11573782 | + | 0.24 | 0    |
| ENSG0000( RP11-16F1 processed_  | chr11 | 9631008  | 9631359  | - | 0    | 0    |
| ENSG0000( SEPT14P8 unprocessε   | chr8  | 200385   | 200562   | - | 0    | 0    |
| ENSG0000( RP11-264E lincRNA     | chr11 | 1.29E+08 | 1.29E+08 | - | 0    | 0    |
| ENSG0000( OR5AL2P unprocessε    | chr11 | 56393729 | 56394648 | + | 0    | 0    |
| ENSG0000( RP11-144G antisense   | chr11 | 1.08E+08 | 1.08E+08 | - | 0    | 0    |
| ENSG0000( RP11-867G antisense   | chr11 | 66347950 | 66364804 | + | 1.05 | 1.81 |
| ENSG0000( BOLA3P1 processed_    | chr11 | 1.03E+08 | 1.03E+08 | + | 0    | 0    |
| ENSG0000( RP11-113D lincRNA     | chr11 | 18140186 | 18189495 | - | 0    | 0.06 |
| ENSG0000( RP11-736K antisense   | chr11 | 86892214 | 86925037 | - | 3.59 | 3.11 |
| ENSG0000( RP11-998D antisense   | chr14 | 21032818 | 21033895 | + | 0    | 0    |
| ENSG0000( RP11-234B lincRNA     | chr12 | 4700417  | 4720102  | - | 0    | 0    |
| ENSG0000( RP11-687M lincRNA     | chr11 | 1.25E+08 | 1.25E+08 | - | 0    | 0    |
| ENSG0000( RP11-1H15 antisense   | chr11 | 9839143  | 9929263  | + | 0    | 0    |
| ENSG0000( RP11-63D1 lincRNA     | chr11 | 38498995 | 38500186 | + | 0    | 0    |
| ENSG0000( RP11-867C antisense   | chr11 | 65367438 | 65375299 | + | 0.13 | 0.56 |
| ENSG0000( RP11-672A lincRNA     | chr11 | 76625462 | 76626834 | - | 0    | 0    |
| ENSG0000( RP4-710M: antisense   | chr11 | 30425552 | 30429268 | + | 0    | 0    |
| ENSG0000( OR56A7P unprocessε    | chr11 | 6045807  | 6046747  | - | 0    | 0    |
| ENSG0000( RP11-315C antisense   | chr11 | 1.02E+08 | 1.02E+08 | + | 0    | 0    |
| ENSG0000( AP000889. processed_  | chr11 | 1.08E+08 | 1.08E+08 | - | 0    | 0    |
| ENSG0000( RP11-65M: lincRNA     | chr11 | 1.13E+08 | 1.13E+08 | - | 0    | 0    |
| ENSG0000( OR5G4P unprocessε     | chr11 | 56790206 | 56790965 | - | 0    | 0    |
| ENSG0000( RP11-313I2 unprocessε | chr11 | 89723482 | 89727253 | - | 0    | 0    |
| ENSG0000( RP11-513D antisense   | chr8  | 38275888 | 38276680 | + | 1    | 0    |
| ENSG0000( CTC-830E2 processed_  | chr11 | 24701275 | 24701575 | + | 0    | 0    |
| ENSG0000( EIF4A2P5 processed_   | chr11 | 32085111 | 32085712 | + | 0    | 0    |
| ENSG0000( RP11-1082 lincRNA     | chr8  | 1.25E+08 | 1.25E+08 | - | 0    | 0    |
| ENSG0000( CTD-2381F processed_  | chr11 | 11856490 | 11856859 | - | 0    | 0    |
| ENSG0000( RP11-131J4 unprocessε | chr11 | 55430487 | 55430994 | + | 0    | 0    |
| ENSG0000( LINC00681 lincRNA     | chr8  | 12794243 | 12818291 | + | 0    | 0    |
| ENSG0000( AC145124. antisense   | chr8  | 12194467 | 12196280 | + | 2.52 | 3    |
| ENSG0000( RP11-587D sense_ovei  | chr11 | 27696312 | 27877648 | - | 0    | 0    |
| ENSG0000( RP11-726G processed_  | chr8  | 43313948 | 43314200 | + | 0    | 0    |
| ENSG0000( RP11-618K antisense   | chr11 | 45905941 | 45906461 | - | 0    | 0    |
| ENSG0000( RP11-738C processed_  | chr11 | 55865709 | 55865820 | + | 0    | 0    |
| ENSG0000( RP11-347H processed_  | chr11 | 50268161 | 50269273 | + | 0    | 0    |
| ENSG0000( CARD18 protein_co     | chr11 | 1.05E+08 | 1.05E+08 | - | 0    | 0    |
| ENSG0000( RP11-379J: lincRNA    | chr11 | 97878781 | 97942762 | - | 0    | 0    |
| ENSG0000( RP11-113K lincRNA     | chr11 | 83072402 | 83097196 | - | 0    | 0    |
| ENSG0000( RP11-788M transcribec | chr11 | 1.01E+08 | 1.01E+08 | + | 0    | 0    |
| ENSG0000( RP11-485C processed_  | chr11 | 26427051 | 26427412 | + | 0    | 0    |
| ENSG0000( RP11-203F antisense   | chr11 | 92748732 | 92766867 | - | 0    | 0    |
| ENSG0000( RP11-535A antisense   | chr11 | 75803431 | 75815406 | - | 0    | 0    |



|                    |                      |       |          |          |   |       |       |
|--------------------|----------------------|-------|----------|----------|---|-------|-------|
| ENSG00000186414    | protein_coding       | chr11 | 62559603 | 62591531 | - | 0.99  | 1.69  |
| ENSG0000010822P    | unprocessed_coding   | chr11 | 1.24E+08 | 1.24E+08 | + | 0     | 0     |
| ENSG0000011081     | processed_transcript | chr11 | 18870989 | 18873462 | - | 0     | 0     |
| ENSG000001005135   | lincRNA              | chr11 | 1.35E+08 | 1.35E+08 | - | 0     | 0     |
| ENSG000001005363   | transcribed_unit     | chr16 | 1963745  | 1964095  | - | 0.4   | 0.37  |
| ENSG0000010422P    | unprocessed_coding   | chr11 | 48227429 | 48228310 | + | 0     | 0     |
| ENSG0000010178H    | processed_transcript | chr11 | 93609760 | 93610333 | - | 0     | 0     |
| ENSG0000010164N    | lincRNA              | chr11 | 88050106 | 88062110 | + | 0     | 0     |
| ENSG00000103074C   | antisense            | chr11 | 66473490 | 66480233 | - | 2.44  | 3.15  |
| ENSG0000010148C    | antisense            | chr8  | 11556251 | 11558022 | - | 0     | 0     |
| ENSG00000101958J   | processed_transcript | chr11 | 45514187 | 45514451 | + | 0     | 0     |
| ENSG00000101390K   | antisense            | chr11 | 47123104 | 47130801 | - | 0     | 0     |
| ENSG00000104607I7  | antisense            | chr11 | 35132655 | 35138032 | - | 0.16  | 0.88  |
| ENSG00000101531P5  | processed_transcript | chr11 | 3531420  | 3531608  | + | 0     | 0     |
| ENSG00000101780C   | antisense            | chr11 | 58917015 | 58928689 | - | 0     | 0     |
| ENSG00000101531P8  | protein_coding       | chr16 | 28637654 | 28658682 | + | 0.88  | 0.54  |
| ENSG00000101296L1  | antisense            | chr11 | 31305685 | 31314548 | + | 0     | 0     |
| ENSG00000101531P3  | protein_coding       | chr14 | 24213955 | 24232352 | - | 0     | 0.28  |
| ENSG0000010156P9   | unprocessed_coding   | chr11 | 48907103 | 48908946 | + | 0     | 0     |
| ENSG0000010125I9   | lincRNA              | chr11 | 1.09E+08 | 1.09E+08 | - | 0     | 0     |
| ENSG00000101531P2M | protein_coding       | chr15 | 57706629 | 57782762 | + | 16.04 | 17.18 |
| ENSG00000101531P5  | processed_transcript | chr8  | 1.45E+08 | 1.45E+08 | - | 0     | 0     |
| ENSG00000101531P6  | processed_transcript | chr8  | 67849044 | 67849338 | + | 0     | 0     |
| ENSG00000101531P6C | transcribed_unit     | chr11 | 49305714 | 49379669 | + | 0     | 0     |
| ENSG00000101326C   | processed_transcript | chr11 | 303856   | 304144   | - | 0     | 0     |
| ENSG00000101443P   | unprocessed_coding   | chr11 | 48526064 | 48526971 | + | 0     | 0     |
| ENSG00000101679I1  | processed_transcript | chr11 | 1.3E+08  | 1.3E+08  | + | 0     | 0     |
| ENSG00000101583F   | unprocessed_coding   | chr11 | 18910436 | 18911396 | - | 0     | 0     |
| ENSG00000101000708 | antisense            | chr11 | 1.25E+08 | 1.25E+08 | + | 0     | 0     |
| ENSG00000101010V2P | unprocessed_coding   | chr11 | 59748811 | 59749574 | + | 0     | 0     |
| ENSG00000101797E1  | antisense            | chr11 | 70324871 | 70327209 | - | 0     | 0     |
| ENSG00000101313I2  | processed_transcript | chr11 | 89731017 | 89734782 | + | 0     | 0     |
| ENSG00000101727A   | processed_transcript | chr11 | 83209399 | 83209634 | + | 0     | 0     |
| ENSG00000101683L5  | antisense            | chr11 | 35419057 | 35421002 | + | 0     | 0     |
| ENSG0000010172M    | processed_transcript | chr11 | 55267408 | 55267636 | + | 0     | 0     |
| ENSG00000101531P3  | unprocessed_coding   | chr8  | 12095176 | 12099536 | - | 0     | 0     |
| ENSG00000101627G   | processed_transcript | chr11 | 1.34E+08 | 1.35E+08 | + | 0     | 0     |
| ENSG0000010168K    | lincRNA              | chr11 | 1.27E+08 | 1.27E+08 | + | 0     | 0     |
| ENSG00000101531P3  | processed_transcript | chr11 | 1E+08    | 1E+08    | + | 0     | 0     |
| ENSG00000101617B   | antisense            | chr11 | 1.04E+08 | 1.04E+08 | + | 0     | 0     |
| ENSG00000101531P6  | unprocessed_coding   | chr8  | 12448013 | 12511278 | - | 0     | 0     |
| ENSG00000101163C   | unprocessed_coding   | chr11 | 49854080 | 49859402 | - | 0     | 0     |
| ENSG0000010156P9   | unprocessed_coding   | chr11 | 48880111 | 48885237 | + | 0     | 0     |
| ENSG0000010166G6E  | protein_coding       | chr6  | 31711771 | 31714065 | - | 0     | 0     |
| ENSG00000101810P   | lincRNA              | chr11 | 62077277 | 62082184 | - | 0     | 0.09  |

|                                  |       |          |          |   |      |      |
|----------------------------------|-------|----------|----------|---|------|------|
| ENSG0000( OR7E1P unprocessε      | chr11 | 67974286 | 67975243 | - | 0    | 0    |
| ENSG0000( AP000857. antisense    | chr11 | 84936689 | 84955705 | + | 0    | 0    |
| ENSG0000( RP11-351I2 processed_  | chr8  | 12378679 | 12380265 | - | 0    | 0    |
| ENSG0000( RP11-770G lincRNA      | chr11 | 65745729 | 65771585 | + | 0    | 0    |
| ENSG0000( CTC-497E2 lincRNA      | chr11 | 13054615 | 13134839 | - | 0    | 0    |
| ENSG0000( ZNF252P-A antisense    | chr8  | 1.45E+08 | 1.45E+08 | + | 0.07 | 0.04 |
| ENSG0000( OR4R2P unprocessε      | chr11 | 54657120 | 54657716 | - | 0    | 0    |
| ENSG0000( FDXACB1 protein_co     | chr11 | 1.12E+08 | 1.12E+08 | - | 0.34 | 0.79 |
| ENSG0000( UNC93B6 transcribec    | chr11 | 71603260 | 71608040 | + | 0    | 0    |
| ENSG0000( RP11-124G processed_   | chr11 | 41660030 | 41660221 | + | 0    | 0    |
| ENSG0000( RP11-6B19 lincRNA      | chr12 | 15780068 | 15782120 | + | 0    | 0    |
| ENSG0000( RP11-114F processed_   | chr12 | 64442510 | 64443330 | - | 0    | 0    |
| ENSG0000( BRWD1-AS antisense     | chr21 | 39313935 | 39314962 | + | 0.29 | 0.06 |
| ENSG0000( TRAV1-1 TR_V_gene      | chr14 | 21621838 | 21622567 | + | 0    | 0    |
| ENSG0000( MIR9-3HG lincRNA       | chr15 | 89361579 | 89398487 | + | 0    | 0    |
| ENSG0000( RP11-273B antisense    | chr12 | 7166674  | 7189069  | - | 0    | 0    |
| ENSG0000( RP1-267D1 processed_   | chr12 | 1.2E+08  | 1.2E+08  | + | 0    | 0    |
| ENSG0000( AP000462. lincRNA      | chr11 | 1.15E+08 | 1.15E+08 | + | 0    | 0    |
| ENSG0000( RP11-69M: processed_   | chr12 | 8017201  | 8017860  | - | 0    | 0    |
| ENSG0000( OR10G2 protein_co      | chr14 | 21633836 | 21634940 | - | 0    | 0    |
| ENSG0000( RP11-415I1 transcribec | chr12 | 63682523 | 63724935 | - | 1.95 | 1.95 |
| ENSG0000( RP11-188C transcribec  | chr9  | 1.38E+08 | 1.38E+08 | - | 0    | 0    |
| ENSG0000( RAB44 protein_co       | chr6  | 36697851 | 36733183 | + | 0.08 | 0.03 |
| ENSG0000( RP4-809F1. protein_co  | chr12 | 1.26E+08 | 1.26E+08 | + | 0.08 | 0.14 |
| ENSG0000( AP000997. lincRNA      | chr11 | 1.16E+08 | 1.16E+08 | + | 0    | 0.18 |
| ENSG0000( RP11-644L. lincRNA     | chr11 | 95698086 | 95700623 | + | 0    | 0    |
| ENSG0000( AP000439. lincRNA      | chr11 | 69438365 | 69444743 | - | 0    | 0    |
| ENSG0000( RP3-377H1 sense_intrε  | chr12 | 4838955  | 4842675  | + | 0    | 0    |
| ENSG0000( RP11-357K lincRNA      | chr12 | 1.19E+08 | 1.19E+08 | - | 0    | 0    |
| ENSG0000( RP11-377D lincRNA      | chr12 | 13000451 | 13040679 | + | 0.11 | 0    |
| ENSG0000( PCDHB17P transcribec   | chr5  | 1.41E+08 | 1.41E+08 | + | 0.02 | 0.1  |
| ENSG0000( RP11-564D transcribec  | chr10 | 1.23E+08 | 1.23E+08 | + | 0    | 0    |
| ENSG0000( RP11-547L: processed_  | chr12 | 22008348 | 22008880 | + | 0    | 0    |
| ENSG0000( RP11-313F lincRNA      | chr12 | 34149839 | 34162238 | + | 0    | 0    |
| ENSG0000( RP11-196H antisense    | chr12 | 64146388 | 64147857 | - | 0    | 0.19 |
| ENSG0000( MTRNR2L9 processed_    | chr6  | 61574328 | 61574402 | + | 0    | 0    |
| ENSG0000( RP11-234B protein_co   | chr12 | 4657634  | 4744581  | + | 1.65 | 3.16 |
| ENSG0000( RP11-277P protein_co   | chr12 | 10412312 | 10436001 | - | 0    | 0    |
| ENSG0000( PABPC1P4 processed_    | chr12 | 63822021 | 63823895 | + | 0.3  | 0.49 |
| ENSG0000( RP11-59N2 antisense    | chr12 | 21759980 | 21766705 | + | 0    | 0    |
| ENSG0000( CTD-2373J: processed_  | chr5  | 90410000 | 90410669 | + | 0    | 0    |
| ENSG0000( RP11-361I1 antisense   | chr12 | 18714795 | 18737878 | + | 0    | 0    |
| ENSG0000( RP11-502N antisense    | chr12 | 14530151 | 14533229 | + | 0    | 0    |
| ENSG0000( FAM222A- antisense     | chr12 | 1.1E+08  | 1.1E+08  | - | 0    | 0    |
| ENSG0000( RP11-313F lincRNA      | chr12 | 34191279 | 34218853 | - | 0    | 0    |

|                                     |       |          |          |   |       |       |
|-------------------------------------|-------|----------|----------|---|-------|-------|
| ENSG0000(RP11-60C6 unprocessed)     | chr11 | 95011858 | 95012532 | + | 0     | 0     |
| ENSG0000(RP11-256L antisense)       | chr12 | 1.09E+08 | 1.09E+08 | - | 0     | 0     |
| ENSG0000(RERG-AS1 lincRNA)          | chr12 | 15151923 | 15155283 | + | 0     | 0     |
| ENSG0000(RP11-212D protein_coding)  | chr11 | 1.14E+08 | 1.14E+08 | + | 3.45  | 2.25  |
| ENSG0000(ARL6IP1P1 processed)       | chr14 | 21649728 | 21650337 | - | 0     | 0     |
| ENSG0000(RP11-867G lincRNA)         | chr11 | 94641907 | 94651631 | + | 0.32  | 0     |
| ENSG0000(RP11-885B transcribed)     | chr12 | 2761200  | 2775658  | - | 0     | 0.14  |
| ENSG0000(RP11-253I1 lincRNA)        | chr12 | 12485353 | 12491581 | + | 0     | 0     |
| ENSG0000(RP11-283I3 antisense)      | chr12 | 193036   | 194130   | + | 0     | 0     |
| ENSG0000(RP11-45F1 antisense)       | chr11 | 72354516 | 72363555 | + | 0     | 0     |
| ENSG0000(JRKL-AS1 lincRNA)          | chr11 | 96447132 | 96506826 | - | 0     | 0     |
| ENSG0000(RP11-732A antisense)       | chr11 | 6618790  | 6619764  | + | 0     | 0     |
| ENSG0000(RP11-227B lincRNA)         | chr12 | 1.17E+08 | 1.17E+08 | + | 0     | 0     |
| ENSG0000(RP11-136I1 lincRNA)        | chr11 | 1.16E+08 | 1.16E+08 | + | 0     | 0     |
| ENSG0000(TRIL protein_coding)       | chr7  | 28953358 | 28958292 | - | 0.05  | 0.11  |
| ENSG0000(RP1-127H1 antisense)       | chr12 | 1.2E+08  | 1.2E+08  | + | 0     | 0     |
| ENSG0000(RP11-766N lincRNA)         | chr12 | 64883394 | 64977522 | + | 0     | 0     |
| ENSG0000(APOOP3 processed)          | chr12 | 65134688 | 65135273 | + | 0     | 0     |
| ENSG0000(RP11-46H1 processed)       | chr12 | 1.33E+08 | 1.33E+08 | + | 0     | 0     |
| ENSG0000(RP11-292I1 processed)      | chr12 | 1.32E+08 | 1.32E+08 | - | 0     | 0     |
| ENSG0000(RP11-667N processed)       | chr11 | 1.14E+08 | 1.14E+08 | - | 0.06  | 0.13  |
| ENSG0000(OR4D2 protein_coding)      | chr17 | 58169656 | 58170579 | + | 0     | 0     |
| ENSG0000(RP11-121J1 lincRNA)        | chr12 | 1.19E+08 | 1.19E+08 | - | 0     | 0     |
| ENSG0000(SNHG1 processed)           | chr11 | 62851988 | 62855914 | - | 27.68 | 27.02 |
| ENSG0000(RP11-529H processed)       | chr4  | 87317170 | 87345210 | - | 0     | 0.3   |
| ENSG0000(TDGP1 processed)           | chr12 | 25803298 | 25804526 | + | 0     | 0     |
| ENSG0000(XXbac-BPG unprocessed)     | chr6  | 31222913 | 31223093 | + | 0     | 0     |
| ENSG0000(LINC01489 lincRNA)         | chr12 | 15001833 | 15006683 | + | 0     | 0     |
| ENSG0000(CTC-435M: protein_coding)  | chr19 | 41350853 | 41425001 | + | 6.01  | 3.01  |
| ENSG0000(IFNG-AS1 antisense)        | chr12 | 67989445 | 68234686 | + | 0     | 0     |
| ENSG0000(HNRNPABF processed)        | chr12 | 10111738 | 10112471 | + | 0     | 0     |
| ENSG0000(AGAP2-AS1 antisense)       | chr12 | 57726271 | 57728356 | + | 15.52 | 15.06 |
| ENSG0000(RP11-757G antisense)       | chr11 | 68941503 | 68942852 | - | 0     | 0     |
| ENSG0000(RP11-625L lincRNA)         | chr12 | 24704565 | 24774213 | + | 0     | 0     |
| ENSG0000(RP11-283I3 sense_intronic) | chr12 | 253442   | 257299   | - | 0     | 0     |
| ENSG0000(GNAI2P1 processed)         | chr12 | 14254912 | 14255226 | + | 0     | 0     |
| ENSG0000(RP11-283G antisense)       | chr12 | 26230819 | 26319720 | - | 0.09  | 0     |
| ENSG0000(RP11-22B2 processed)       | chr12 | 9314402  | 9316173  | - | 0     | 0     |
| ENSG0000(RP11-749H processed)       | chr12 | 1.28E+08 | 1.28E+08 | - | 0     | 0     |
| ENSG0000(RP11-428G lincRNA)         | chr12 | 31877079 | 31887203 | - | 0.07  | 0     |
| ENSG0000(MRPS18CP processed)        | chr12 | 14237091 | 14237321 | + | 0     | 0     |
| ENSG0000(RP13-512J1 protein_coding) | chr2  | 3531984  | 3547957  | - | 0     | 0     |
| ENSG0000(GOLGA2P1 transcribed)      | chr15 | 82472993 | 82513950 | - | 4.07  | 3.72  |
| ENSG0000(LINC01479 lincRNA)         | chr12 | 67929235 | 67970017 | + | 0     | 0     |
| ENSG0000(AP000439 lincRNA)          | chr11 | 69477133 | 69479940 | - | 0     | 0     |

|                                     |          |          |   |      |      |
|-------------------------------------|----------|----------|---|------|------|
| ENSG0000(RP3-454B2 lincRNA chr12    | 6155035  | 6160719  | - | 0    | 0.11 |
| ENSG0000(VDAC2P2 processed_chr12    | 9036344  | 9037244  | + | 0    | 0    |
| ENSG0000(RP11-1029 processed_chr12  | 64032412 | 64032665 | + | 0    | 0    |
| ENSG0000(RP11-809N processed_chr11  | 73452020 | 73452344 | + | 0    | 0    |
| ENSG0000(RP11-711K sense_intrchr12  | 11399381 | 11486678 | - | 0    | 0    |
| ENSG0000(RMST processed_chr12       | 97430884 | 97598415 | + | 0    | 0    |
| ENSG0000(RP11-561P lincRNA chr12    | 8548361  | 8567613  | - | 0    | 0    |
| ENSG0000(OR6J1 protein_cochr14      | 22633768 | 22634811 | - | 0    | 0    |
| ENSG0000(PTP4A1P2 processed_chr12   | 1.33E+08 | 1.33E+08 | + | 0    | 0    |
| ENSG0000(RP11-31L2:antisense chr11  | 72643237 | 72659407 | + | 0    | 0    |
| ENSG0000(RP1-34M2:antisense chr1    | 34761426 | 34788097 | - | 0    | 0    |
| ENSG0000(RP11-357K lincRNA chr12    | 1.19E+08 | 1.19E+08 | - | 0    | 0    |
| ENSG0000(KRT8P11 processed_chr9     | 99305176 | 99306611 | + | 0    | 0    |
| ENSG0000(RP11-196H antisense chr12  | 64108763 | 64120489 | - | 0    | 0    |
| ENSG0000(KLRC4-KLRI protein_cochr12 | 10372353 | 10410146 | - | 0    | 0    |
| ENSG0000(MTRNR2L8 protein_cochr11   | 10507887 | 10509189 | - | 0.04 | 0    |
| ENSG0000(RP5-1154L antisense chr12  | 590633   | 591269   | + | 0    | 0    |
| ENSG0000(RP11-20D1 antisense chr12  | 8664011  | 8669011  | + | 0    | 0    |
| ENSG0000(RP11-385N processed_chr12  | 1.15E+08 | 1.15E+08 | + | 0    | 0    |
| ENSG0000(TIFAB protein_cochr5       | 1.35E+08 | 1.35E+08 | - | 0    | 0    |
| ENSG0000(RP4-559A3 protein_cochr1   | 2.26E+08 | 2.26E+08 | - | 0.11 | 0    |
| ENSG0000(RP11-157G processed_chr12  | 7438780  | 7439990  | - | 0.05 | 0    |
| ENSG0000(TAS2R20 protein_cochr12    | 10996495 | 10997875 | - | 0.29 | 0.14 |
| ENSG0000(RP11-753B unprocesschr12   | 1.29E+08 | 1.29E+08 | - | 0    | 0    |
| ENSG0000(RP11-338K lincRNA chr12    | 1.24E+08 | 1.24E+08 | - | 0    | 0    |
| ENSG0000(AP000593. antisense chr11  | 72302139 | 72302965 | + | 0    | 0    |
| ENSG0000(RP11-804A antisense chr11  | 60813932 | 60821739 | - | 0    | 0    |
| ENSG0000(RP11-167N antisense chr11  | 73963657 | 73970287 | - | 0    | 0    |
| ENSG0000(TMEM5-AS antisense chr12   | 63808845 | 63822156 | - | 0    | 0.28 |
| ENSG0000(Metazoa_S misc_RNA chr17   | 49017793 | 49018061 | - | 0.9  | 0    |
| ENSG0000(RP11-407A processed_chr12  | 1.27E+08 | 1.27E+08 | - | 0    | 0    |
| ENSG0000(KDM4F protein_cochr11      | 95049422 | 95051338 | + | 0    | 0    |
| ENSG0000(RP11-87C1 lincRNA chr12    | 1.22E+08 | 1.22E+08 | - | 0.11 | 0.23 |
| ENSG0000(PXN-AS1 antisense chr12    | 1.2E+08  | 1.2E+08  | + | 2.63 | 2.37 |
| ENSG0000(RP11-612B lincRNA chr12    | 26315715 | 26317813 | + | 0    | 0    |
| ENSG0000(RP11-807H unprocesschr11   | 72172455 | 72177954 | + | 0    | 0    |
| ENSG0000(AC073610. protein_cochr12  | 48921963 | 48939663 | - | 0    | 0    |
| ENSG0000(RP11-444D lincRNA chr12    | 24213256 | 24562590 | - | 0    | 0.14 |
| ENSG0000(RP11-221N lincRNA chr12    | 65559591 | 65560889 | + | 0    | 0    |
| ENSG0000(DENND5B- antisense chr12   | 31589923 | 31615666 | + | 0.05 | 0.06 |
| ENSG0000(RP11-667N processed_chr11  | 1.14E+08 | 1.14E+08 | + | 0    | 0    |
| ENSG0000(RP11-69C1 lincRNA chr12    | 16693800 | 16695977 | + | 0    | 0    |
| ENSG0000(RP11-613N protein_cochr9   | 37588413 | 38068687 | - | 0    | 0.05 |
| ENSG0000(LINC00346 lincRNA chr13    | 1.11E+08 | 1.11E+08 | - | 0.63 | 0.63 |
| ENSG0000(CTD-2102P processed_chr19  | 52809824 | 52810708 | + | 0    | 0    |

|                                 |       |          |          |   |      |      |
|---------------------------------|-------|----------|----------|---|------|------|
| ENSG0000(RP11-290C antisense)   | chr12 | 9867027  | 9869808  | + | 0    | 0    |
| ENSG0000(FUNDC2P1 processed)    | chr5  | 73508685 | 73509254 | + | 0    | 0    |
| ENSG0000(RP11-815D processed)   | chr12 | 7870852  | 7871370  | + | 0    | 0    |
| ENSG0000(RP11-196H antisense)   | chr12 | 64038562 | 64097618 | - | 0    | 0    |
| ENSG0000(NDFIP1P1 processed)    | chr12 | 18358443 | 18358967 | - | 0    | 0    |
| ENSG0000(RP11-685N antisense)   | chr11 | 94472908 | 94473570 | - | 2.06 | 1.2  |
| ENSG0000(XXbac-BPG unprocessed) | chr6  | 31224342 | 31225058 | - | 0    | 0    |
| ENSG0000(RP11-407A processed)   | chr12 | 1.27E+08 | 1.27E+08 | - | 0    | 0    |
| ENSG0000(RPL12P46 processed)    | chr11 | 1.16E+08 | 1.16E+08 | + | 0    | 0    |
| ENSG0000(PDCD5P1 processed)     | chr12 | 19413153 | 19413461 | + | 0    | 0    |
| ENSG0000(RP11-405A lincRNA)     | chr12 | 19775451 | 20009937 | + | 0    | 0.1  |
| ENSG0000(RP13-895J antisense)   | chr12 | 1.32E+08 | 1.32E+08 | + | 0    | 0    |
| ENSG0000(AC226150 processed)    | chr12 | 1.33E+08 | 1.33E+08 | - | 0    | 0    |
| ENSG0000(CCND2-AS2 antisense)   | chr12 | 4252735  | 4275065  | - | 0.3  | 0    |
| ENSG0000(RP11-662I1 antisense)  | chr12 | 24949163 | 24960158 | + | 0    | 0    |
| ENSG0000(RP11-983C processed)   | chr12 | 1.27E+08 | 1.27E+08 | + | 0    | 0    |
| ENSG0000(RP11-456I1 antisense)  | chr11 | 73722349 | 73722694 | + | 0    | 0    |
| ENSG0000(RP11-867G antisense)   | chr11 | 94545330 | 94740355 | - | 0    | 0    |
| ENSG0000(RP11-286N lincRNA)     | chr11 | 61496440 | 61500076 | + | 0    | 0    |
| ENSG0000(RP11-495K lincRNA)     | chr12 | 1.32E+08 | 1.32E+08 | - | 0    | 0    |
| ENSG0000(RP11-407A lincRNA)     | chr12 | 1.27E+08 | 1.27E+08 | - | 0    | 0    |
| ENSG0000(RP11-351C lincRNA)     | chr12 | 1.28E+08 | 1.28E+08 | + | 0    | 0    |
| ENSG0000(RP11-173P antisense)   | chr12 | 1.21E+08 | 1.21E+08 | - | 0    | 0    |
| ENSG0000(RP11-855C lincRNA)     | chr11 | 61654665 | 61655702 | - | 0    | 0    |
| ENSG0000(AP003419 antisense)    | chr11 | 67431367 | 67435399 | - | 0    | 0.18 |
| ENSG0000(RP11-967K processed)   | chr12 | 28164958 | 28165662 | + | 0    | 0    |
| ENSG0000(RP11-656E antisense)   | chr12 | 10214161 | 10214761 | - | 0    | 0    |
| ENSG0000(RP11-804A antisense)   | chr11 | 60835996 | 60842965 | - | 0.15 | 0    |
| ENSG0000(RP11-459D processed)   | chr12 | 18424663 | 18425140 | + | 0    | 0    |
| ENSG0000(HSPD1P12 processed)    | chr12 | 8015024  | 8016406  | + | 0    | 0    |
| ENSG0000(RP11-408I1 processed)  | chr12 | 1.24E+08 | 1.24E+08 | + | 0    | 0    |
| ENSG0000(RP5-940J5 antisense)   | chr12 | 6532290  | 6533498  | - | 0.32 | 0    |
| ENSG0000(HADHAP2 processed)     | chr12 | 8634367  | 8637608  | + | 0    | 0    |
| ENSG0000(RP11-513G antisense)   | chr12 | 26318953 | 26421462 | + | 0    | 0    |
| ENSG0000(RP11-43N5 lincRNA)     | chr12 | 67709047 | 67729475 | - | 0    | 0    |
| ENSG0000(RP11-324E processed)   | chr12 | 1.23E+08 | 1.23E+08 | - | 0    | 0    |
| ENSG0000(RP11-592H processed)   | chr12 | 5583797  | 5584085  | + | 0    | 0    |
| ENSG0000(CYP2A6 protein)        | chr19 | 40843538 | 40850447 | - | 0    | 0    |
| ENSG0000(RAB11AP2 processed)    | chr12 | 67131567 | 67132205 | - | 0    | 0    |
| ENSG0000(RP11-444J processed)   | chr12 | 7606834  | 7607331  | + | 0    | 0    |
| ENSG0000(AP000439 lincRNA)      | chr11 | 69425690 | 69429621 | + | 0    | 0    |
| ENSG0000(NXPE2P1 processed)     | chr11 | 1.15E+08 | 1.15E+08 | - | 0    | 0    |
| ENSG0000(RP11-1038 lincRNA)     | chr12 | 5388589  | 5406651  | + | 0    | 0    |
| ENSG0000(MT1JP transcribed)     | chr16 | 56635739 | 56637086 | + | 0.14 | 0.15 |
| ENSG0000(TOMM20P processed)     | chr17 | 35514766 | 35515186 | - | 0    | 0    |

|                                      |          |          |   |       |       |
|--------------------------------------|----------|----------|---|-------|-------|
| ENSG0000(TUBB4BP1 processed_ chr12   | 25440875 | 25441052 | - | 0     | 0     |
| ENSG0000(RP11-242C processed_ chr12  | 39466442 | 39467345 | - | 0     | 0     |
| ENSG0000(RP11-417L lincRNA chr12     | 1.32E+08 | 1.32E+08 | - | 0     | 0.21  |
| ENSG0000(PSMC1P9 processed_ chr12    | 18692762 | 18694096 | + | 0     | 0     |
| ENSG0000(HPRTP4 processed_ chr11     | 93991346 | 93991429 | - | 0     | 0     |
| ENSG0000(RP11-429A processed_ chr12  | 5032388  | 5032941  | - | 0.26  | 0.09  |
| ENSG0000(RP11-407A lincRNA chr12     | 1.27E+08 | 1.27E+08 | + | 0     | 0     |
| ENSG0000(RP11-575F lincRNA chr12     | 1.27E+08 | 1.27E+08 | - | 0     | 0     |
| ENSG0000(RP11-20D1 processed_ chr12  | 8678773  | 8679670  | + | 0     | 0     |
| ENSG0000(AC084117. sense_intr chr11  | 18405609 | 18406731 | + | 0.45  | 0     |
| ENSG0000(ARAP1-AS1 antisense chr11   | 72685075 | 72693808 | + | 0     | 0     |
| ENSG0000(RP11-728G antisense chr12   | 1.21E+08 | 1.21E+08 | - | 0     | 0     |
| ENSG0000(RP11-392P antisense chr12   | 12962300 | 12963539 | + | 0     | 0     |
| ENSG0000(RP11-27M: antisense chr16   | 10529440 | 10532082 | + | 0     | 0     |
| ENSG0000(TAS2R63P processed_ chr12   | 11048332 | 11049256 | - | 0     | 0     |
| ENSG0000(RP5-1154L. sense_intr chr12 | 585865   | 586486   | - | 0     | 0     |
| ENSG0000(ELOCP31 processed_ chr12    | 21447545 | 21448314 | - | 0     | 0     |
| ENSG0000(RP11-526P lincRNA chr12     | 1.28E+08 | 1.28E+08 | - | 0     | 0     |
| ENSG0000(CACNA1C- antisense chr12    | 2220537  | 2223479  | - | 0     | 0     |
| ENSG0000(RP11-197N processed_ chr12  | 1.23E+08 | 1.23E+08 | + | 0.46  | 0.59  |
| ENSG0000(RP11-190A protein_co chr1   | 1.6E+08  | 1.6E+08  | - | 0     | 0     |
| ENSG0000(CBX3P4 transcribec chr12    | 2786931  | 2794295  | - | 0.19  | 0     |
| ENSG0000(RP11-364C sense_intr chr12  | 1.19E+08 | 1.19E+08 | + | 0     | 0     |
| ENSG0000(RP11-707G antisense chr11   | 73760563 | 73761070 | + | 0.57  | 0.84  |
| ENSG0000(AP000619. processed_ chr11  | 1.03E+08 | 1.03E+08 | - | 0     | 0     |
| ENSG0000(MRPL40P1 processed_ chr12   | 67351436 | 67352039 | + | 0     | 0     |
| ENSG0000(RP11-291B lincRNA chr12     | 10553363 | 10558049 | + | 0     | 0     |
| ENSG0000(PAPPA-AS1 antisense chr9    | 1.16E+08 | 1.16E+08 | - | 0.04  | 0.12  |
| ENSG0000(RP11-959F processed_ chr11  | 63032503 | 63033103 | - | 0     | 0     |
| ENSG0000(CTSO protein_co chr4        | 1.56E+08 | 1.56E+08 | - | 12.98 | 13.47 |
| ENSG0000(RP11-324E processed_ chr12  | 1.23E+08 | 1.23E+08 | - | 0     | 0     |
| ENSG0000(MTRNR2L1 protein_co chrX    | 55181391 | 55182920 | - | 0.11  | 0.01  |
| ENSG0000(RP11-982M lincRNA chr14     | 1.05E+08 | 1.05E+08 | + | 0.76  | 0.2   |
| ENSG0000(APOPT1 protein_co chr14     | 1.04E+08 | 1.04E+08 | + | 17.51 | 19.56 |
| ENSG0000(RP11-709A unprocess chr12   | 27592461 | 27594039 | - | 0     | 0     |
| ENSG0000(TRAPPC2B protein_co chr19   | 57363511 | 57365353 | + | 6.01  | 5.57  |
| ENSG0000(DYX1C1 protein_co chr15     | 55410525 | 55508234 | - | 1.67  | 1.11  |
| ENSG0000(RP11-117L lincRNA chr12     | 1.3E+08  | 1.3E+08  | - | 0     | 0     |
| ENSG0000(A2MP1 transcribec chr12     | 9228533  | 9275817  | - | 0     | 0     |
| ENSG0000(RP11-56H1 processed_ chr12  | 33454345 | 33455452 | + | 0     | 0     |
| ENSG0000(RP11-465L antisense chr12   | 1.18E+08 | 1.18E+08 | + | 0     | 0     |
| ENSG0000(RP11-335I1 antisense chr12  | 66251745 | 66257434 | - | 0     | 0     |
| ENSG0000(URB1-AS1 lincRNA chr21      | 32393130 | 32393960 | + | 2.59  | 2.01  |
| ENSG0000(RP11-81H1 processed_ chr12  | 68473741 | 68474902 | + | 0     | 0     |
| ENSG0000(RP11-335C lincRNA chr12     | 67571197 | 67589987 | - | 0     | 0     |

|                                      |          |          |   |      |      |
|--------------------------------------|----------|----------|---|------|------|
| ENSG0000(RP11-318G processed_ chr12  | 25435581 | 25436238 | - | 0    | 0    |
| ENSG0000(AE000658. processed_ chr14  | 21585290 | 21586280 | - | 0    | 0    |
| ENSG0000(RP11-366L. antisense chr12  | 65934777 | 65948479 | - | 0    | 0    |
| ENSG0000(RP11-134N lincRNA chr12     | 14216590 | 14221297 | + | 0.11 | 0    |
| ENSG0000(RP11-337L. lincRNA chr12    | 1.3E+08  | 1.3E+08  | - | 0    | 0    |
| ENSG0000(ZNF432 protein_co chr19     | 52031379 | 52095738 | - | 3.13 | 3.24 |
| ENSG0000(MTRF1LP1 processed_ chr11   | 1.14E+08 | 1.14E+08 | + | 0    | 0    |
| ENSG0000(RP13-942N lincRNA chr12     | 1.23E+08 | 1.23E+08 | + | 0.52 | 0.83 |
| ENSG0000(RP11-158L. processed_ chr12 | 1.25E+08 | 1.25E+08 | - | 0    | 0    |
| ENSG0000(RP11-691F processed_ chr11  | 74142151 | 74142358 | + | 0    | 0    |
| ENSG0000(AP000721. protein_co chr11  | 63974620 | 63988346 | + | 0    | 0    |
| ENSG0000(RP11-90D4 lincRNA chr12     | 8321876  | 8329614  | + | 0    | 0    |
| ENSG0000(ATP5J2P5 processed_ chr12   | 6270168  | 6270425  | - | 0    | 0    |
| ENSG0000(RP13-672B processed_ chr12  | 1.33E+08 | 1.33E+08 | + | 0    | 0    |
| ENSG0000(RP11-319E lincRNA chr12     | 5233997  | 5243151  | - | 0    | 0    |
| ENSG0000(RP11-783K antisense chr11   | 64229214 | 64234352 | - | 0.87 | 4.15 |
| ENSG0000(RP11-778H lincRNA chr12     | 24223271 | 24237965 | + | 0    | 0    |
| ENSG0000(LINC01152 lincRNA chr17     | 72030291 | 72041297 | + | 0.11 | 0.16 |
| ENSG0000(RP5-944M. processed_ chr12  | 1.26E+08 | 1.26E+08 | - | 0    | 0    |
| ENSG0000(LINC00944 lincRNA chr12     | 1.27E+08 | 1.27E+08 | - | 0    | 0    |
| ENSG0000(EGLN3P1 processed_ chr12    | 15971890 | 15972609 | - | 0    | 0    |
| ENSG0000(RP11-113C processed_ chr12  | 8406833  | 8407195  | - | 0    | 0    |
| ENSG0000(RP11-174M lincRNA chr12     | 1.3E+08  | 1.3E+08  | - | 0    | 0    |
| ENSG0000(ZKSCAN7P. processed_ chr12  | 18493051 | 18493723 | + | 0    | 0    |
| ENSG0000(RP11-968C sense_ovei chr12  | 1.09E+08 | 1.09E+08 | + | 0.27 | 0.23 |
| ENSG0000(RP11-319E lincRNA chr12     | 5315961  | 5319347  | + | 0    | 0    |
| ENSG0000(RP11-809N processed_ chr11  | 73510658 | 73510820 | + | 0    | 0    |
| ENSG0000(RP11-357K lincRNA chr12     | 1.19E+08 | 1.19E+08 | - | 0    | 0    |
| ENSG0000(RP11-885B processed_ chr12  | 2695765  | 2812902  | - | 0    | 0    |
| ENSG0000(RP11-76C1 lincRNA chr12     | 1.31E+08 | 1.31E+08 | - | 0    | 0    |
| ENSG0000(RP11-463C lincRNA chr12     | 1.23E+08 | 1.23E+08 | + | 0    | 0.17 |
| ENSG0000(RP11-277P lincRNA chr12     | 10358464 | 10361045 | - | 0    | 0    |
| ENSG0000(RP11-80N2 processed_ chr12  | 20845065 | 20845260 | + | 0    | 0    |
| ENSG0000(RP11-820K processed_ chr12  | 31477506 | 31477987 | + | 0    | 0    |
| ENSG0000(SMLR1 protein_co chr6       | 1.31E+08 | 1.31E+08 | + | 0    | 0    |
| ENSG0000(CCND2-AS1 antisense chr12   | 4248765  | 4276184  | - | 0.26 | 0.28 |
| ENSG0000(XXbac-BPG lincRNA chr6      | 31293908 | 31301642 | - | 0    | 0    |
| ENSG0000(ATF4P4 transcribec chr11    | 1.14E+08 | 1.14E+08 | + | 0.12 | 0.13 |
| ENSG0000(GCSHP4 processed_ chr12     | 8141168  | 8142697  | - | 0    | 0    |
| ENSG0000(RP11-473M lincRNA chr12     | 67440998 | 67442559 | - | 0    | 0    |
| ENSG0000(RP11-627K processed_ chr12  | 31311617 | 31312029 | + | 0    | 0    |
| ENSG0000(AP000438. unprocessε chr11  | 63265836 | 63266256 | - | 0    | 0    |
| ENSG0000(RP11-612B 3prime_ov chr12   | 26335864 | 26336950 | - | 0    | 0    |
| ENSG0000(TAS2R30 protein_co chr12    | 11132958 | 11134644 | - | 0    | 0    |
| ENSG0000(RP11-167N processed_ chr11  | 73991283 | 73992180 | - | 0    | 0    |

|                                          |          |          |   |       |       |
|------------------------------------------|----------|----------|---|-------|-------|
| ENSG0000(RP11-290I2 processed_ chr12     | 64266413 | 64266766 | + | 0     | 0     |
| ENSG0000(LINC00507 lincRNA chr12         | 1.28E+08 | 1.28E+08 | + | 0.22  | 0.42  |
| ENSG0000(RP11-64D2 antisense chr11       | 1.14E+08 | 1.14E+08 | - | 0     | 0     |
| ENSG0000(RP11-881M antisense chr11       | 60918469 | 60925397 | - | 0     | 0     |
| ENSG0000(TSPAN9-IT: sense_intron chr12   | 3149797  | 3151476  | + | 0     | 0     |
| ENSG0000(RP11-439H antisense chr12       | 64507166 | 64533638 | - | 0     | 0     |
| ENSG0000(RP11-243N lincRNA chr12         | 1.31E+08 | 1.31E+08 | + | 0     | 0     |
| ENSG0000(RP11-140L: protein_coding chr11 | 14493783 | 14520344 | - | 0     | 0     |
| ENSG0000(RP11-897M lincRNA chr12         | 1.31E+08 | 1.31E+08 | - | 0     | 0     |
| ENSG0000(AC005255. processed_ chr19      | 14792318 | 14792533 | + | 0     | 0     |
| ENSG0000(RP11-1018 processed_ chr12      | 16989126 | 16989936 | + | 0     | 0     |
| ENSG0000(RP11-1038 lincRNA chr12         | 5366048  | 5367774  | - | 0.23  | 0.14  |
| ENSG0000(CTD-2331C processed_ chr11      | 61227168 | 61248533 | + | 0.08  | 0     |
| ENSG0000(AE000661. processed_ chr14      | 22332922 | 22334685 | - | 0     | 0     |
| ENSG0000(MTRNR2L3 protein_coding chr20   | 57358442 | 57359980 | - | 0.04  | 0.24  |
| ENSG0000(ZNF10 protein_coding chr12      | 1.33E+08 | 1.33E+08 | + | 3.45  | 3.5   |
| ENSG0000(RP11-582E lincRNA chr12         | 27105151 | 27161393 | - | 0     | 0     |
| ENSG0000(ZNF486 protein_coding chr19     | 20167228 | 20200490 | + | 1.1   | 0.94  |
| ENSG0000(RP11-771K lincRNA chr12         | 31363481 | 31369301 | - | 0     | 0     |
| ENSG0000(RP11-283G antisense chr12       | 26211164 | 26335856 | - | 0     | 0     |
| ENSG0000(SMIM3 protein_coding chr5       | 1.51E+08 | 1.51E+08 | + | 12.42 | 11.37 |
| ENSG0000(RP11-434C lincRNA chr12         | 11541395 | 11555838 | - | 0     | 0     |
| ENSG0000(SUPT16HP: processed_ chr12      | 16399274 | 16402406 | - | 0.02  | 0     |
| ENSG0000(RPL7AP3 processed_ chr14        | 35235180 | 35235651 | - | 0     | 0     |
| ENSG0000(RP11-123C lincRNA chr12         | 66891876 | 67069162 | - | 0     | 0     |
| ENSG0000(RP11-324E lincRNA chr12         | 1.23E+08 | 1.23E+08 | + | 0     | 0.04  |
| ENSG0000(RP11-989F lincRNA chr12         | 1.31E+08 | 1.31E+08 | + | 0     | 0     |
| ENSG0000(AP000647. processed_ chr11      | 1.03E+08 | 1.03E+08 | - | 0     | 0     |
| ENSG0000(RP11-443N lincRNA chr12         | 25882955 | 25885855 | - | 0     | 0     |
| ENSG0000(CACNA1C-I sense_intron chr12    | 2048352  | 2049463  | + | 0     | 0     |
| ENSG0000(RP11-495K lincRNA chr12         | 1.32E+08 | 1.32E+08 | - | 0     | 0     |
| ENSG0000(RP11-366L lincRNA chr12         | 66027725 | 66031066 | - | 0     | 0     |
| ENSG0000(USP30-AS1 antisense chr12       | 1.09E+08 | 1.09E+08 | - | 0.21  | 0.11  |
| ENSG0000(DDX11L8 unprocessed_ chr12      | 12310    | 13501    | + | 0     | 0     |
| ENSG0000(RP11-221N lincRNA chr12         | 65602869 | 65612997 | + | 0.24  | 0.38  |
| ENSG0000(HMBS protein_coding chr11       | 1.19E+08 | 1.19E+08 | + | 6.53  | 9.02  |
| ENSG0000(CACNA1C-1 antisense chr12       | 2668500  | 2672220  | - | 0.46  | 0     |
| ENSG0000(RP11-71J4. lincRNA chr12        | 68344664 | 68349959 | + | 0     | 0     |
| ENSG0000(TAS2R64P transcribed chr12      | 11076769 | 11079171 | - | 0.2   | 0.08  |
| ENSG0000(RP5-916L7. lincRNA chr12        | 1.26E+08 | 1.26E+08 | + | 0     | 0     |
| ENSG0000(RP11-182J: antisense chr15      | 84611689 | 84614969 | - | 0     | 0     |
| ENSG0000(RP11-466C processed_ chr11      | 63834667 | 63834943 | - | 0     | 0     |
| ENSG0000(RP11-136I1 lincRNA chr11        | 1.16E+08 | 1.16E+08 | - | 0     | 0     |
| ENSG0000(RP11-504G transcribed chr11     | 18595459 | 18599683 | - | 0     | 0     |
| ENSG0000(METTL8P1 processed_ chr12       | 15255213 | 15255823 | - | 0     | 0     |



|                                      |          |          |   |      |      |
|--------------------------------------|----------|----------|---|------|------|
| ENSG0000(OSBPL9P5 processed_ chr12   | 66563524 | 66563694 | + | 0    | 0    |
| ENSG0000(RP11-983C lincRNA chr12     | 1.27E+08 | 1.27E+08 | + | 0    | 0    |
| ENSG0000(RP11-664H lincRNA chr12     | 20014780 | 20098868 | + | 0    | 0    |
| ENSG0000(RP11-277P lincRNA chr12     | 10332861 | 10338292 | - | 0    | 0    |
| ENSG0000(RP11-955H lincRNA chr12     | 1.27E+08 | 1.27E+08 | - | 0    | 0    |
| ENSG0000(RP11-114F processed_ chr12  | 64338178 | 64338797 | - | 0    | 0    |
| ENSG0000(ZNF225 protein_co chr19     | 44112181 | 44134816 | + | 2.83 | 3.84 |
| ENSG0000(RP11-474D lincRNA chr12     | 1.3E+08  | 1.3E+08  | + | 0    | 0    |
| ENSG0000(RP11-989F lincRNA chr12     | 1.31E+08 | 1.31E+08 | - | 0    | 1.76 |
| ENSG0000(CCDC150P processed_ chr12   | 1.22E+08 | 1.22E+08 | - | 0.02 | 0.03 |
| ENSG0000(RP11-4N23 processed_ chr12  | 13526854 | 13547582 | + | 0    | 0    |
| ENSG0000(NDUFA5P6 processed_ chr12   | 1.27E+08 | 1.27E+08 | + | 0    | 0    |
| ENSG0000(RP11-64B1 antisense chr12   | 1.19E+08 | 1.19E+08 | - | 0    | 0    |
| ENSG0000(RP13-977J lincRNA chr12     | 1.32E+08 | 1.32E+08 | + | 0    | 0    |
| ENSG0000(RP11-338E antisense chr12   | 64654060 | 64655019 | - | 0    | 0    |
| ENSG0000(AP000462 processed_ chr11   | 1.15E+08 | 1.15E+08 | + | 0    | 0    |
| ENSG0000(RP11-153K lincRNA chr12     | 23099368 | 23191587 | + | 0    | 0    |
| ENSG0000(RP11-611C antisense chr12   | 68828118 | 68828553 | + | 0    | 0    |
| ENSG0000(NIFKP3 processed_ chr12     | 7604350  | 7605214  | - | 0    | 0    |
| ENSG0000(RPL41P2 processed_ chr15    | 28315651 | 28316059 | + | 0.42 | 0    |
| ENSG0000(RP11-233G antisense chr12   | 14841092 | 14844708 | + | 0    | 0    |
| ENSG0000(ABCC6P1 transcribed chr16   | 18571162 | 18598328 | + | 0.13 | 0.14 |
| ENSG0000(RP11-21A7 antisense chr11   | 64118272 | 64119210 | - | 0    | 0.14 |
| ENSG0000(RP3-446N1 lincRNA chr12     | 1.26E+08 | 1.26E+08 | + | 0    | 0    |
| ENSG0000(RP11-662N lincRNA chr12     | 1.31E+08 | 1.31E+08 | + | 0    | 0    |
| ENSG0000(RP11-72J9 processed_ chr12  | 14169746 | 14169877 | + | 0    | 0    |
| ENSG0000(OR8R1P unprocessε chr11     | 73248779 | 73249867 | + | 0    | 0    |
| ENSG0000(CTD-3074C protein_co chr11  | 66509079 | 66533613 | + | 0    | 0    |
| ENSG0000(AE000658 unprocessε chr14   | 21698954 | 21699151 | - | 0    | 0    |
| ENSG0000(RP1-7G5.5 processed_ chr12  | 1.1E+08  | 1.1E+08  | - | 0    | 0    |
| ENSG0000(RP11-686N processed_ chr12  | 23108458 | 23108493 | - | 0    | 0    |
| ENSG0000(NTAN1P3 processed_ chr12    | 67424272 | 67424986 | - | 0    | 0    |
| ENSG0000(HSPA8P5 processed_ chr12    | 4097451  | 4099519  | + | 0    | 0    |
| ENSG0000(RP11-349I1 antisense chr14  | 94430633 | 94464730 | + | 0    | 0    |
| ENSG0000(RPL31P57 processed_ chr17   | 64308316 | 64308690 | - | 0    | 0    |
| ENSG0000(RP11-613F processed_ chr11  | 18511043 | 18511475 | - | 0    | 0    |
| ENSG0000(RP11-955H lincRNA chr12     | 1.27E+08 | 1.27E+08 | - | 0    | 0    |
| ENSG0000(RP11-173P antisense chr12   | 1.21E+08 | 1.21E+08 | - | 0    | 0    |
| ENSG0000(LRRC34P1 processed_ chr12   | 22573425 | 22575105 | + | 0    | 0    |
| ENSG0000(RP11-428G processed_ chr12  | 31853021 | 31853407 | - | 0    | 0    |
| ENSG0000(PPIAL4D protein_co chr1     | 1.45E+08 | 1.45E+08 | - | 0    | 0    |
| ENSG0000(RP11-1060 antisense chr12   | 27696388 | 27710770 | - | 0    | 0    |
| ENSG0000(RP11-993B unprocessε chr12  | 27935523 | 27935749 | - | 0    | 0    |
| ENSG0000(TRAV8-5 TR_V_pseu chr14     | 21903077 | 21904598 | + | 0    | 0    |
| ENSG0000(RP11-500N sense_intrε chr12 | 4645496  | 4648027  | + | 0    | 0    |

|                                     |          |          |   |       |      |
|-------------------------------------|----------|----------|---|-------|------|
| ENSG0000(UBE2NP1 processed_ chr14   | 21611924 | 21612381 | - | 0     | 0    |
| ENSG0000(RP11-606D lincRNA chr12    | 17589257 | 17615463 | + | 0     | 0    |
| ENSG0000(RPL41P5 processed_ chr12   | 93083598 | 93083675 | - | 0     | 0    |
| ENSG0000(ASIC5 protein_co chr4      | 1.56E+08 | 1.56E+08 | - | 0     | 0    |
| ENSG0000(RP11-274J processed_ chr12 | 63887379 | 63888598 | - | 0     | 0    |
| ENSG0000(RP11-673D processed_ chr12 | 11097179 | 11097274 | - | 0     | 0    |
| ENSG0000(RP11-7N14 antisense chr11  | 72410716 | 72412079 | + | 0     | 0    |
| ENSG0000(RP11-446E protein_co chr1  | 54132686 | 54200073 | - | 0.06  | 0    |
| ENSG0000(RP11-1038 lincRNA chr12    | 5290480  | 5383653  | + | 0     | 0    |
| ENSG0000(OSBPL9P4 processed_ chr12  | 66563967 | 66569194 | - | 0     | 0    |
| ENSG0000(RP11-886D lincRNA chr11    | 1.04E+08 | 1.05E+08 | - | 0     | 0    |
| ENSG0000(RP11-495K lincRNA chr12    | 1.32E+08 | 1.32E+08 | - | 0     | 0    |
| ENSG0000(RP11-118B lincRNA chr12    | 9246497  | 9257960  | + | 0     | 0    |
| ENSG0000(RP11-102E2 lincRNA chr12   | 6393905  | 6396148  | + | 0.16  | 0.27 |
| ENSG0000(TAS2R31 protein_co chr12   | 11030387 | 11031407 | - | 0.24  | 0.26 |
| ENSG0000(RP11-443N lincRNA chr12    | 25831416 | 25834182 | - | 0     | 0    |
| ENSG0000(RP11-300I processed_ chr11 | 69737298 | 69738017 | - | 0     | 0    |
| ENSG0000(RP11-705C antisense chr12  | 9647014  | 9648009  | - | 0     | 0    |
| ENSG0000(RP11-794G lincRNA chr11    | 61539516 | 61542259 | - | 0     | 0.07 |
| ENSG0000(RP11-809N antisense chr11  | 73405297 | 73410682 | + | 0     | 0    |
| ENSG0000(RP11-424N processed_ chr12 | 16513445 | 16514371 | + | 0     | 0    |
| ENSG0000(RP11-667N antisense chr11  | 1.14E+08 | 1.14E+08 | + | 0     | 0    |
| ENSG0000(DND1 protein_co chr5       | 1.41E+08 | 1.41E+08 | - | 0.25  | 0.12 |
| ENSG0000(RP11-363J antisense chr2   | 2.03E+08 | 2.03E+08 | - | 0     | 0    |
| ENSG0000(RP11-116G antisense chr10  | 5524976  | 5525742  | - | 0     | 0    |
| ENSG0000(SALL3 protein_co chr18     | 78980275 | 79002677 | + | 0     | 0    |
| ENSG0000(YWHABP2 processed_ chr11   | 18490243 | 18490955 | - | 0     | 0    |
| ENSG0000(RP11-428G processed_ chr12 | 31893370 | 31893702 | + | 0     | 0    |
| ENSG0000(RP11-856F antisense chr11  | 94874052 | 94925521 | - | 0     | 0    |
| ENSG0000(RP11-437F antisense chr12  | 23637973 | 23638487 | + | 0     | 0    |
| ENSG0000(TRAV11 TR_V_pseu chr14     | 21829539 | 21830070 | + | 0     | 0    |
| ENSG0000(RP11-185H processed_ chr12 | 7237432  | 7240986  | + | 0     | 0    |
| ENSG0000(RP11-21A7 antisense chr11  | 64081690 | 64087175 | + | 0     | 0    |
| ENSG0000(RP11-625L antisense chr12  | 24830421 | 24836558 | + | 0     | 0    |
| ENSG0000(RP13-507P lincRNA chr12    | 1.31E+08 | 1.31E+08 | + | 0     | 0    |
| ENSG0000(RP5-944M lincRNA chr12     | 1.26E+08 | 1.26E+08 | - | 0     | 0    |
| ENSG0000(RP11-955H unprocessε chr12 | 1.27E+08 | 1.27E+08 | - | 0     | 0    |
| ENSG0000(CTC-465D4 lincRNA chr12    | 20120980 | 20129813 | - | 0     | 0    |
| ENSG0000(RP11-73M protein_co chr14  | 1.04E+08 | 1.04E+08 | + | 5.6   | 5.45 |
| ENSG0000(RP11-955H processed_ chr12 | 1.27E+08 | 1.27E+08 | - | 0     | 0    |
| ENSG0000(RP11-1060 lincRNA chr12    | 27704568 | 27708365 | + | 0     | 0    |
| ENSG0000(MRGPRF-A antisense chr11   | 69012283 | 69018447 | + | 0.56  | 0.36 |
| ENSG0000(RP11-860B antisense chr12  | 27798641 | 27800708 | - | 0     | 0    |
| ENSG0000(RP11-977P lincRNA chr12    | 28821975 | 28825831 | - | 0     | 0    |
| ENSG0000(AP003419 protein_co chr11  | 67351572 | 67373584 | - | 23.34 | 33.2 |

|                 |                          |       |          |          |   |       |       |
|-----------------|--------------------------|-------|----------|----------|---|-------|-------|
| ENSG00000180700 | RP11-807H unprocessed    | chr11 | 72158822 | 72159734 | + | 0     | 0     |
| ENSG00000180700 | POLG2 protein_coding     | chr17 | 64477785 | 64497036 | - | 3.85  | 5.37  |
| ENSG00000180700 | RP11-212D processed      | chr11 | 1.14E+08 | 1.14E+08 | + | 0     | 0.13  |
| ENSG00000180700 | SMIM10L1 protein_coding  | chr12 | 11171222 | 11176016 | + | 4.79  | 4.54  |
| ENSG00000180700 | RP11-847H lincRNA        | chr12 | 34037438 | 34056740 | + | 0.08  | 0     |
| ENSG00000180700 | RP11-598F lincRNA        | chr12 | 166856   | 182399   | - | 0     | 0     |
| ENSG00000180700 | RP13-895J antisense      | chr12 | 1.32E+08 | 1.32E+08 | + | 0     | 0     |
| ENSG00000180700 | AC156455 processed       | chr12 | 1.22E+08 | 1.22E+08 | + | 0.67  | 1.37  |
| ENSG00000180700 | RP13-653N lincRNA        | chr12 | 1.28E+08 | 1.28E+08 | - | 0     | 0     |
| ENSG00000180700 | RP11-113C transcribed    | chr12 | 8320381  | 8369555  | + | 0     | 0     |
| ENSG00000180700 | TRAV1-2 TR_V_gene        | chr14 | 21642889 | 21643578 | + | 0     | 0     |
| ENSG00000180700 | RP11-1060 processed      | chr12 | 27608733 | 27609046 | - | 0     | 0     |
| ENSG00000180700 | LINC01486 lincRNA        | chr12 | 1.09E+08 | 1.09E+08 | - | 0     | 0     |
| ENSG00000180700 | NANOGNB processed        | chr12 | 1.33E+08 | 1.33E+08 | - | 0     | 0     |
| ENSG00000180700 | RP11-424M antisense      | chr12 | 16567411 | 16573940 | + | 0.12  | 0.51  |
| ENSG00000180700 | RP4-734P1 protein_coding | chr20 | 2467212  | 2508907  | - | 0.85  | 0.31  |
| ENSG00000180700 | RP11-800A lincRNA        | chr11 | 73176694 | 73181696 | + | 0     | 0     |
| ENSG00000180700 | RP11-173P antisense      | chr12 | 1.21E+08 | 1.21E+08 | - | 0     | 0     |
| ENSG00000180700 | RP11-274J sense_intronic | chr12 | 63878787 | 63879474 | + | 0     | 0     |
| ENSG00000180700 | OR13A1 protein_coding    | chr10 | 45302654 | 45315608 | - | 0     | 0.11  |
| ENSG00000180700 | RP13-977J lincRNA        | chr12 | 1.32E+08 | 1.32E+08 | - | 0.35  | 0.43  |
| ENSG00000180700 | RP11-283I antisense      | chr12 | 203642   | 205094   | + | 0     | 0     |
| ENSG00000180700 | NLRP9P1 unprocessed      | chr12 | 1.29E+08 | 1.29E+08 | + | 0     | 0     |
| ENSG00000180700 | RP11-75L1 lincRNA        | chr12 | 9704077  | 9709350  | + | 0     | 0     |
| ENSG00000180700 | RP11-613F sense_intronic | chr11 | 18507608 | 18508820 | - | 0     | 0     |
| ENSG00000180700 | ENPP7P5 unprocessed      | chr12 | 8254527  | 8308855  | - | 0     | 0     |
| ENSG00000180700 | TRDV3 TR_V_gene          | chr14 | 22469041 | 22469698 | - | 0     | 0     |
| ENSG00000180700 | RP11-286N protein_coding | chr11 | 61429220 | 61485822 | + | 20.77 | 18.81 |
| ENSG00000180700 | RP11-705C transcribed    | chr12 | 9617284  | 9658412  | + | 2.04  | 1.62  |
| ENSG00000180700 | RP11-522N lincRNA        | chr12 | 1.24E+08 | 1.24E+08 | + | 0.02  | 0     |
| ENSG00000180700 | FLJ37505 lincRNA         | chr12 | 1.28E+08 | 1.28E+08 | + | 0     | 0.03  |
| ENSG00000180700 | RP11-667M antisense      | chr11 | 1.14E+08 | 1.14E+08 | - | 0     | 0     |
| ENSG00000180700 | RP11-64B1 antisense      | chr12 | 1.19E+08 | 1.19E+08 | - | 0     | 0     |
| ENSG00000180700 | CYP2B7P transcribed      | chr19 | 40924219 | 40950660 | + | 0.12  | 0.18  |
| ENSG00000180700 | AK6P1 processed          | chr12 | 34249481 | 34249958 | + | 0     | 0     |
| ENSG00000180700 | RP11-59N2 antisense      | chr12 | 21662313 | 21760032 | + | 0     | 0     |
| ENSG00000180700 | RP11-815J transcribed    | chr18 | 12073232 | 12076654 | - | 0.23  | 0.2   |
| ENSG00000180700 | MTRNR2L1 protein_coding  | chr17 | 22523111 | 22524663 | + | 27.98 | 30.75 |
| ENSG00000180700 | RP11-582E unprocessed    | chr12 | 27121910 | 27147664 | + | 0     | 0.15  |
| ENSG00000180700 | RP11-133L unprocessed    | chr12 | 10040848 | 10045711 | + | 0     | 0     |
| ENSG00000180700 | RP11-6B19 processed      | chr12 | 15803164 | 15804158 | + | 0     | 0     |
| ENSG00000180700 | ZBTB11-AS antisense      | chr3  | 1.02E+08 | 1.02E+08 | + | 0.93  | 1.35  |
| ENSG00000180700 | RP11-428I unprocessed    | chr12 | 1.28E+08 | 1.28E+08 | - | 0     | 0     |
| ENSG00000180700 | RP13-672B protein_coding | chr12 | 1.33E+08 | 1.33E+08 | + | 0     | 0     |
| ENSG00000180700 | RP11-169D antisense      | chr11 | 72584572 | 72587979 | + | 0.1   | 0.11  |

|                                     |          |          |   |       |       |
|-------------------------------------|----------|----------|---|-------|-------|
| ENSG0000(LINC01965 lincRNA chr2     | 1.04E+08 | 1.04E+08 | + | 0.08  | 0     |
| ENSG0000(RP11-666F processed_chr12  | 26800843 | 26801302 | + | 0     | 0     |
| ENSG0000(LINC00273 lincRNA chr16    | 34158585 | 34160036 | - | 0     | 0     |
| ENSG0000(CRAT8 lincRNA chr12        | 1.28E+08 | 1.28E+08 | - | 0     | 0     |
| ENSG0000(RP11-111K protein_co chr7  | 42909273 | 42932174 | - | 12.84 | 8.94  |
| ENSG0000(RERG-IT1 sense_intr chr12  | 15112363 | 15114698 | - | 0     | 0     |
| ENSG0000(RP11-144C processed_chr12  | 10831074 | 10832016 | - | 0.07  | 0.07  |
| ENSG0000(RP11-429A processed_chr12  | 4909867  | 5026012  | + | 0.06  | 0.05  |
| ENSG0000(RP11-144C processed_chr12  | 11196075 | 11196996 | - | 0     | 0     |
| ENSG0000(RP11-180M antisense chr12  | 12723297 | 12724011 | - | 0     | 0     |
| ENSG0000(RP13-653N lincRNA chr12    | 1.28E+08 | 1.28E+08 | + | 0     | 0     |
| ENSG0000(CLEC12B protein_co chr12   | 10010627 | 10018619 | + | 0     | 0     |
| ENSG0000(A2ML1-AS: antisense chr12  | 8776219  | 8830947  | - | 0     | 0     |
| ENSG0000(RP11-424C processed_chr12  | 20551590 | 20553012 | + | 0     | 0     |
| ENSG0000(RP11-611C processed_chr12  | 68841946 | 68842384 | + | 23.75 | 19.04 |
| ENSG0000(KLRA1P transcribed chr12   | 10588063 | 10599669 | - | 1.29  | 1.19  |
| ENSG0000(RP11-338E antisense chr12  | 64599078 | 64609459 | - | 0     | 0     |
| ENSG0000(LIMS4 protein_co chr2      | 1.1E+08  | 1.1E+08  | - | 2.92  | 2.42  |
| ENSG0000(RP11-218M lincRNA chr12    | 674801   | 684127   | - | 0     | 0     |
| ENSG0000(RP11-599J: unprocess chr12 | 9398355  | 9414851  | - | 0     | 0     |
| ENSG0000(RP11-172C processed_chr11  | 1.15E+08 | 1.15E+08 | + | 0     | 0     |
| ENSG0000(RP11-611C processed_chr12  | 68805011 | 68805479 | - | 0     | 0     |
| ENSG0000(CCDC58P5 processed_chr11   | 73850469 | 73851211 | - | 0     | 0     |
| ENSG0000(TAS2R12 transcribed chr12  | 10894943 | 10896952 | - | 0     | 0.07  |
| ENSG0000(ZNF350 protein_co chr19    | 51964343 | 51986856 | - | 3.8   | 5.59  |
| ENSG0000(RP11-49K4 lincRNA chr11    | 96508425 | 96514748 | + | 0     | 0     |
| ENSG0000(RP11-443N lincRNA chr12    | 25782706 | 25814171 | - | 0     | 0     |
| ENSG0000(RP11-727F antisense chr11  | 62832234 | 62834043 | + | 0.51  | 0     |
| ENSG0000(RP11-476M antisense chr12  | 3462718  | 3463586  | - | 0     | 0     |
| ENSG0000(RP11-598F antisense chr12  | 164664   | 166321   | - | 0     | 0     |
| ENSG0000(RP1-166H1 lincRNA chr12    | 1.2E+08  | 1.2E+08  | + | 0     | 0     |
| ENSG0000(RP11-669N lincRNA chr12    | 1.29E+08 | 1.29E+08 | + | 0     | 0     |
| ENSG0000(SDCCAG3P processed_chr18   | 60009994 | 60011143 | - | 0     | 0     |
| ENSG0000(CTD-2017C antisense chr14  | 1.02E+08 | 1.02E+08 | - | 0     | 0     |
| ENSG0000(RP5-1096D antisense chr12  | 1917951  | 1922867  | + | 0     | 0     |
| ENSG0000(RP11-444B processed_chr12  | 68143318 | 68143690 | + | 0     | 0     |
| ENSG0000(RP1-19N1.: processed_chrX  | 1.06E+08 | 1.06E+08 | + | 0     | 0     |
| ENSG0000(RP11-785H sense_intr chr12 | 11166090 | 11171353 | - | 0     | 0     |
| ENSG0000(PGA5 protein_co chr11      | 61241042 | 61251448 | + | 0.59  | 0.14  |
| ENSG0000(RP11-73M: lincRNA chr12    | 22395088 | 22398075 | - | 0     | 0     |
| ENSG0000(AP000797: lincRNA chr11    | 1.16E+08 | 1.16E+08 | + | 0     | 0     |
| ENSG0000(BTG1P1 processed_chr12     | 9135084  | 9135591  | + | 0.29  | 0     |
| ENSG0000(CACNA1C-I sense_intr chr12 | 2269776  | 2288937  | + | 0     | 0     |
| ENSG0000(RP11-167N processed_chr11  | 73994972 | 73996151 | - | 0     | 0     |
| ENSG0000(RP11-662M lincRNA chr12    | 1.31E+08 | 1.31E+08 | - | 0     | 0     |

|                                |       |          |          |   |      |      |
|--------------------------------|-------|----------|----------|---|------|------|
| ENSG0000(RP11-407A lincRNA     | chr12 | 1.27E+08 | 1.27E+08 | - | 0    | 0    |
| ENSG0000(RP11-881N lincRNA     | chr11 | 61055737 | 61067535 | + | 0    | 0    |
| ENSG0000(RP11-613F processed_  | chr11 | 18450112 | 18450868 | - | 0    | 0    |
| ENSG0000(RBBP4P5 processed_    | chr14 | 21563819 | 21565084 | + | 0    | 0    |
| ENSG0000(RP11-45F1 antisense   | chr11 | 72351347 | 72353210 | + | 0    | 0    |
| ENSG0000(RP13-941N lincRNA     | chr12 | 1.22E+08 | 1.22E+08 | + | 0.27 | 0.73 |
| ENSG0000(RP11-680H processed_  | chr11 | 94188449 | 94188997 | - | 0    | 0    |
| ENSG0000(RP11-17G1 antisense   | chr11 | 47270657 | 47272110 | - | 0    | 0    |
| ENSG0000(RP11-860B antisense   | chr12 | 27779821 | 27781067 | - | 0    | 0    |
| ENSG0000(RP11-234B processed_  | chr12 | 4601991  | 4603420  | - | 0    | 0    |
| ENSG0000(RP11-3L23 lincRNA     | chr12 | 1.19E+08 | 1.19E+08 | - | 0    | 0    |
| ENSG0000(PLBD1-AS1 antisense   | chr12 | 14567750 | 14619755 | + | 0    | 0.15 |
| ENSG0000(HPRT1P3 processed_    | chr11 | 93998643 | 93999218 | - | 0    | 0    |
| ENSG0000(TIMM17BP processed_   | chr12 | 17400399 | 17400914 | + | 0    | 0    |
| ENSG0000(RP11-159N antisense   | chr11 | 1.13E+08 | 1.13E+08 | + | 0    | 0    |
| ENSG0000(STH protein_co        | chr17 | 45999250 | 45999694 | + | 0    | 0    |
| ENSG0000(RP1-116K2 lincRNA     | chr12 | 1.26E+08 | 1.26E+08 | + | 0    | 0    |
| ENSG0000(CACNA1C- antisense    | chr12 | 2603350  | 2607440  | - | 0    | 0    |
| ENSG0000(ZNF253 protein_co     | chr19 | 19865886 | 19894674 | + | 0.99 | 0.67 |
| ENSG0000(RP11-268P processed_  | chr12 | 22596228 | 22596551 | + | 0    | 0    |
| ENSG0000(PDCL3P7 processed_    | chr12 | 66275940 | 66276651 | - | 0    | 0    |
| ENSG0000(RP11-60C6 transcribec | chr11 | 95037482 | 95039811 | + | 0.38 | 0.21 |
| ENSG0000(RP11-503G lincRNA     | chr12 | 1.32E+08 | 1.32E+08 | + | 0    | 0    |
| ENSG0000(RP11-697H antisense   | chr11 | 63637677 | 63658962 | + | 0    | 0    |
| ENSG0000(KLRF2 protein_co      | chr12 | 9881489  | 9895833  | + | 0    | 0    |
| ENSG0000(RP11-500N processed_  | chr12 | 4635349  | 4636140  | - | 0    | 0    |
| ENSG0000(RP11-680F antisense   | chr15 | 29674990 | 29680957 | + | 0.65 | 0.99 |
| ENSG0000(RP11-133L antisense   | chr12 | 10015240 | 10030606 | - | 0    | 0    |
| ENSG0000(RP13-977J processed_  | chr12 | 1.32E+08 | 1.32E+08 | - | 0    | 0    |
| ENSG0000(C17orf100 protein_co  | chr17 | 6651718  | 6693202  | + | 1.98 | 1.17 |
| ENSG0000(RP11-76C1 lincRNA     | chr12 | 1.31E+08 | 1.31E+08 | - | 0    | 0    |
| ENSG0000(RP11-7M8 antisense    | chr12 | 1.22E+08 | 1.22E+08 | + | 0    | 0    |
| ENSG0000(CAPNS2 protein_co     | chr16 | 55566672 | 55567687 | + | 0.06 | 0.07 |
| ENSG0000(RP11-804A antisense   | chr11 | 60841806 | 60851081 | - | 0    | 0    |
| ENSG0000(RP11-158L lincRNA     | chr12 | 1.25E+08 | 1.25E+08 | + | 0    | 0    |
| ENSG0000(TPT1P12 processed_    | chr12 | 9155881  | 9156372  | - | 0    | 0    |
| ENSG0000(RP11-21A7 antisense   | chr11 | 64035970 | 64103653 | + | 0    | 0    |
| ENSG0000(CTD-2140B protein_co  | chr12 | 1.33E+08 | 1.33E+08 | + | 0    | 0    |
| ENSG0000(ATP5J2P4 processed_   | chr17 | 64491523 | 64491789 | + | 0    | 0    |
| ENSG0000(RP11-214K processed_  | chr12 | 1.24E+08 | 1.24E+08 | - | 0    | 0    |
| ENSG0000(GS1-410F4 processed_  | chr12 | 67978107 | 67978387 | - | 0    | 0    |
| ENSG0000(CACNA1C-l sense_intr  | chr12 | 2018213  | 2020532  | + | 0    | 0    |
| ENSG0000(RP11-467L processed_  | chr12 | 31748100 | 31748240 | - | 0    | 0    |
| ENSG0000(MEF2BNBP processed_   | chr12 | 19107854 | 19108183 | - | 0    | 0    |
| ENSG0000(CCND2P1 processed_    | chr11 | 63243085 | 63244004 | + | 0    | 0    |

|                                     |          |          |   |      |       |
|-------------------------------------|----------|----------|---|------|-------|
| ENSG0000(RP11-405A processed_ chr12 | 19941521 | 19943018 | + | 0    | 0     |
| ENSG0000(XXbac-BPG unprocessε chr6  | 31515979 | 31516211 | + | 0    | 0     |
| ENSG0000(KNOP1P1 processed_ chr12   | 24583561 | 24584549 | + | 0    | 0     |
| ENSG0000(RP11-512N protein_co chr12 | 1.22E+08 | 1.22E+08 | - | 0.12 | 0.16  |
| ENSG0000(RP11-664D antisense chr12  | 3871734  | 3910338  | + | 0    | 0     |
| ENSG0000(RP11-959F unprocessε chr11 | 63237957 | 63239114 | - | 0    | 0     |
| ENSG0000(SLC5A8 protein_co chr12    | 1.01E+08 | 1.01E+08 | - | 0    | 0     |
| ENSG0000(RP11-503G lincRNA chr12    | 1.32E+08 | 1.32E+08 | + | 0    | 0     |
| ENSG0000(RP11-284H antisense chr12  | 20361732 | 20370262 | - | 0    | 0     |
| ENSG0000(RP11-64B1 antisense chr12  | 1.19E+08 | 1.19E+08 | - | 0    | 0     |
| ENSG0000(RP13-81N3 lincRNA chr12    | 10750234 | 10777444 | + | 0    | 0     |
| ENSG0000(MTRNR2L7 protein_co chr10  | 37601440 | 37602974 | - | 0    | 0     |
| ENSG0000(RP11-283G antisense chr12  | 26125155 | 26126617 | - | 0.63 | 1.68  |
| ENSG0000(PSMC1P8 processed_ chr12   | 17383352 | 17384647 | - | 0    | 0     |
| ENSG0000(RP11-17G1 antisense chr11  | 47220218 | 47221751 | - | 0    | 0     |
| ENSG0000(RP11-707G processed_ chr11 | 73921665 | 73922196 | - | 0    | 0     |
| ENSG0000(IQSEC3P1 processed_ chr12  | 2752597  | 2753132  | - | 0.14 | 0     |
| ENSG0000(A2ML1-AS2 antisense chr12  | 8819816  | 8820713  | - | 0    | 0     |
| ENSG0000(RP11-474D lincRNA chr12    | 1.3E+08  | 1.3E+08  | + | 0    | 0     |
| ENSG0000(RP11-75L1 processed_ chr12 | 9817350  | 9818025  | - | 0    | 0     |
| ENSG0000(RP1-102E2 processed_ chr12 | 6477714  | 6480207  | + | 0    | 0     |
| ENSG0000(RP11-221N lincRNA chr12    | 65644334 | 65663299 | + | 0    | 0     |
| ENSG0000(RP11-817J antisense chr11  | 1.03E+08 | 1.03E+08 | + | 0    | 0     |
| ENSG0000(RP11-81H1 processed_ chr12 | 68487687 | 68487863 | + | 0    | 0     |
| ENSG0000(RP11-749H lincRNA chr12    | 1.28E+08 | 1.28E+08 | - | 0    | 0     |
| ENSG0000(RP11-449P lincRNA chr12    | 22742582 | 22743091 | + | 0    | 0     |
| ENSG0000(ADGRA1-A antisense chr10   | 1.33E+08 | 1.33E+08 | - | 0    | 0     |
| ENSG0000(RP5-944M lincRNA chr12     | 1.26E+08 | 1.26E+08 | + | 0    | 0     |
| ENSG0000(RP11-809N antisense chr11  | 73395559 | 73396436 | - | 0    | 0     |
| ENSG0000(KRT17P8 processed_ chr12   | 9127783  | 9128645  | + | 0    | 0     |
| ENSG0000(RP11-783K antisense chr11  | 64245964 | 64248217 | + | 19   | 20.19 |
| ENSG0000(RP13-895J antisense chr12  | 1.32E+08 | 1.32E+08 | + | 0    | 0     |
| ENSG0000(RP11-881N antisense chr11  | 60913166 | 60914052 | - | 0    | 0     |
| ENSG0000(RP11-64D2 antisense chr11  | 1.14E+08 | 1.14E+08 | - | 0    | 0     |
| ENSG0000(RP11-598F antisense chr12  | 106524   | 111850   | - | 0    | 0     |
| ENSG0000(RP11-87C1 protein_co chr12 | 1.22E+08 | 1.22E+08 | + | 0    | 0.06  |
| ENSG0000(AC055876 transcribec chr15 | 28789199 | 28789486 | + | 0    | 0     |
| ENSG0000(RP11-6B19 lincRNA chr12    | 15813493 | 15828274 | - | 0    | 0     |
| ENSG0000(RP11-417L lincRNA chr12    | 1.32E+08 | 1.32E+08 | + | 0    | 0.09  |
| ENSG0000(RP11-216P processed_ chr12 | 1.21E+08 | 1.21E+08 | + | 0    | 0     |
| ENSG0000(RP11-613N protein_co chr9  | 37512547 | 37592469 | - | 0.2  | 0     |
| ENSG0000(RP11-273B antisense chr12  | 7129079  | 7131198  | - | 0    | 0.19  |
| ENSG0000(SNRPEP2 processed_ chr9    | 6748703  | 6748981  | - | 0    | 0     |
| ENSG0000(RP11-320N lincRNA chr12    | 4020977  | 4026658  | + | 0    | 0     |
| ENSG0000(LINC00508 lincRNA chr12    | 1.28E+08 | 1.28E+08 | - | 0    | 0     |

|                   |                |       |          |          |   |      |      |
|-------------------|----------------|-------|----------|----------|---|------|------|
| ENSG00000140046.2 | lincRNA        | chr11 | 1.15E+08 | 1.15E+08 | + | 0    | 0    |
| ENSG00000140049   | lincRNA        | chr12 | 22460519 | 22463914 | - | 0.44 | 1.07 |
| ENSG00000140050   | processed      | chr12 | 9506347  | 9508440  | - | 0    | 0.06 |
| ENSG00000140051   | protein_coding | chr2  | 1.1E+08  | 1.1E+08  | + | 0.52 | 1.99 |
| ENSG00000140052   | protein_coding | chr6  | 73223544 | 73225770 | - | 0    | 0    |
| ENSG00000140053   | processed      | chr12 | 11158785 | 11159694 | - | 0.07 | 0    |
| ENSG00000140054   | lincRNA        | chr16 | 89046172 | 89052965 | - | 0    | 0    |
| ENSG00000140055   | transcribed    | chr12 | 31012503 | 31015806 | + | 0    | 0    |
| ENSG00000140056   | unprocessed    | chr12 | 34162477 | 34163442 | + | 0    | 0    |
| ENSG00000140057   | processed      | chr12 | 31953889 | 31955268 | + | 0    | 0    |
| ENSG00000140058   | lincRNA        | chr12 | 4806542  | 4808641  | - | 0    | 0    |
| ENSG00000140059   | lincRNA        | chr12 | 17509353 | 17589992 | - | 0    | 0    |
| ENSG00000140060   | lincRNA        | chr12 | 22699859 | 23174125 | + | 0.03 | 0    |
| ENSG00000140061   | antisense      | chr12 | 1.32E+08 | 1.32E+08 | - | 0    | 0    |
| ENSG00000140062   | antisense      | chr11 | 62909546 | 62918361 | + | 0    | 0    |
| ENSG00000140063   | lincRNA        | chr12 | 12668982 | 12685075 | + | 0    | 0    |
| ENSG00000140064   | processed      | chr12 | 63651627 | 63651930 | + | 0    | 0    |
| ENSG00000140065   | protein_coding | chr17 | 74367407 | 74372622 | + | 0    | 0    |
| ENSG00000140066   | sense_intronic | chr12 | 25585994 | 25592928 | - | 0    | 0    |
| ENSG00000140067   | unprocessed    | chr11 | 95040411 | 95041571 | + | 0    | 0    |
| ENSG00000140068   | processed      | chr12 | 10551266 | 10551535 | - | 0    | 0    |
| ENSG00000140069   | protein_coding | chr16 | 72054592 | 72061055 | + | 0.58 | 0.23 |
| ENSG00000140070   | processed      | chr12 | 1.27E+08 | 1.27E+08 | + | 0    | 0    |
| ENSG00000140071   | antisense      | chr12 | 21827210 | 21887957 | + | 0    | 0.16 |
| ENSG00000140072   | antisense      | chr12 | 22609228 | 22625015 | - | 0    | 0    |
| ENSG00000140073   | sense_intronic | chr12 | 1.28E+08 | 1.28E+08 | + | 0    | 0    |
| ENSG00000140074   | sense_intronic | chr12 | 9658567  | 9662085  | + | 0.55 | 0.5  |
| ENSG00000140075   | unprocessed    | chr12 | 1.28E+08 | 1.28E+08 | + | 0    | 0    |
| ENSG00000140076   | processed      | chr12 | 27496937 | 27498589 | + | 0    | 0    |
| ENSG00000140077   | antisense      | chr11 | 73307235 | 73309361 | - | 1.2  | 0.59 |
| ENSG00000140078   | antisense      | chr12 | 27958517 | 27969813 | + | 0    | 0    |
| ENSG00000140079   | processed      | chr11 | 18665050 | 18665548 | + | 0    | 0    |
| ENSG00000140080   | antisense      | chr2  | 1.99E+08 | 1.99E+08 | + | 0    | 0    |
| ENSG00000140081   | protein_coding | chr12 | 20815674 | 21090245 | + | 0    | 0    |
| ENSG00000140082   | lincRNA        | chr12 | 3367833  | 3371346  | + | 0    | 0    |
| ENSG00000140083   | antisense      | chr11 | 60906789 | 60909742 | + | 0.31 | 0.35 |
| ENSG00000140084   | processed      | chr12 | 1.21E+08 | 1.21E+08 | + | 0    | 0    |
| ENSG00000140085   | lincRNA        | chr14 | 28783491 | 28785787 | - | 0    | 0    |
| ENSG00000140086   | protein_coding | chr11 | 94512432 | 94532123 | + | 0    | 0    |
| ENSG00000140087   | antisense      | chr11 | 62545999 | 62547699 | + | 0    | 0.24 |
| ENSG00000140088   | lincRNA        | chr15 | 93312557 | 93569483 | + | 0    | 0    |
| ENSG00000140089   | protein_coding | chr12 | 21047179 | 21176895 | + | 0    | 0    |
| ENSG00000140090   | protein_coding | chr6  | 1.44E+08 | 1.44E+08 | + | 0    | 0    |
| ENSG00000140091   | lincRNA        | chr11 | 1.16E+08 | 1.16E+08 | + | 0    | 0    |
| ENSG00000140092   | processed      | chr11 | 64291722 | 64304769 | + | 0    | 0    |

|                     |             |       |          |          |   |       |       |
|---------------------|-------------|-------|----------|----------|---|-------|-------|
| ENSG0000(RP11-667M) | processed   | chr11 | 1.14E+08 | 1.14E+08 | + | 0     | 0     |
| ENSG0000(RPL29P33)  | processed   | chr19 | 34296277 | 34296592 | - | 0     | 0.73  |
| ENSG0000(RPEP6)     | processed   | chr11 | 72131282 | 72131907 | + | 0     | 0     |
| ENSG0000(RP3-461F1) | processed   | chr12 | 7041156  | 7041641  | - | 0     | 0     |
| ENSG0000(RP11-123C) | lincRNA     | chr12 | 67035508 | 67096406 | - | 0     | 0     |
| ENSG0000(U47924.27) | lincRNA     | chr12 | 6963246  | 6964447  | + | 0     | 0     |
| ENSG0000(RP11-783K) | lincRNA     | chr11 | 64246939 | 64249494 | - | 2.29  | 2.68  |
| ENSG0000(RP11-1361) | processed   | chr11 | 1.16E+08 | 1.16E+08 | - | 0     | 0     |
| ENSG0000(KIAA1147)  | protein_co  | chr7  | 1.42E+08 | 1.42E+08 | - | 3.89  | 3.52  |
| ENSG0000(RP11-5011) | processed   | chr12 | 32007127 | 32007435 | + | 0     | 0     |
| ENSG0000(RP11-364C) | antisense   | chr12 | 1.19E+08 | 1.19E+08 | - | 0     | 0     |
| ENSG0000(AE000658)  | antisense   | chr14 | 21521083 | 21522660 | + | 0     | 0     |
| ENSG0000(CLIP1-AS1) | lincRNA     | chr12 | 1.22E+08 | 1.22E+08 | + | 0     | 0     |
| ENSG0000(LRRC37A1)  | processed   | chr11 | 1.14E+08 | 1.14E+08 | + | 0     | 0     |
| ENSG0000(LSM14A)    | protein_co  | chr19 | 34172504 | 34229515 | + | 50.76 | 52.66 |
| ENSG0000(RP11-259C) | antisense   | chr12 | 8987175  | 8996566  | - | 0     | 0     |
| ENSG0000(NHLRC4)    | protein_co  | chr16 | 566996   | 569495   | + | 2     | 1.91  |
| ENSG0000(OR4F28P)   | unprocess   | chr15 | 1.02E+08 | 1.02E+08 | + | 0     | 0     |
| ENSG0000(RP11-274M) | processed   | chr12 | 74274952 | 74275231 | + | 0     | 0     |
| ENSG0000(RP11-2511) | lincRNA     | chr12 | 42692216 | 42717119 | + | 0     | 0.07  |
| ENSG0000(OR11H12)   | protein_co  | chr14 | 18601045 | 18602129 | + | 0     | 0     |
| ENSG0000(EEF1B2P4)  | processed   | chr12 | 1.07E+08 | 1.07E+08 | - | 0     | 0     |
| ENSG0000(CTD-2503)  | antisense   | chr14 | 29652809 | 29657916 | + | 0     | 0     |
| ENSG0000(RP11-129B) | processed   | chr12 | 95100531 | 95101045 | + | 0     | 0     |
| ENSG0000(RRN3P3)    | transcribec | chr16 | 22418672 | 22437715 | - | 1.41  | 1.72  |
| ENSG0000(RP11-384P) | lincRNA     | chr12 | 83661009 | 83661719 | - | 0     | 0     |
| ENSG0000(KRT127P)   | unprocess   | chr12 | 52751978 | 52753821 | - | 0     | 0     |
| ENSG0000(FOXP1-AS1) | antisense   | chr14 | 28729083 | 28765277 | - | 0     | 0     |
| ENSG0000(LLU1)      | protein_co  | chr12 | 92421531 | 92431002 | + | 0     | 0     |
| ENSG0000(RP11-2A1)  | processed   | chr12 | 41911256 | 41912212 | + | 0     | 0     |
| ENSG0000(RP11-554D) | transcribec | chr12 | 1.08E+08 | 1.08E+08 | - | 0     | 0     |
| ENSG0000(RP11-320M) | lincRNA     | chr2  | 10448694 | 10451327 | + | 0.26  | 0.2   |
| ENSG0000(C12orf80)  | lincRNA     | chr12 | 52205556 | 52213583 | - | 0     | 0     |
| ENSG0000(TAS2R38)   | protein_co  | chr7  | 1.42E+08 | 1.42E+08 | - | 0     | 0     |
| ENSG0000(RP11-320P) | lincRNA     | chr12 | 70180338 | 70202004 | + | 5.26  | 5.11  |
| ENSG0000(RP11-554D) | lincRNA     | chr12 | 1.08E+08 | 1.08E+08 | - | 0     | 0     |
| ENSG0000(RP11-536C) | unprocess   | chr14 | 19700479 | 19700650 | - | 0     | 0     |
| ENSG0000(RP11-813P) | processed   | chr12 | 59719698 | 59719944 | - | 0     | 0     |
| ENSG0000(PGAM1P5)   | transcribec | chr12 | 95551582 | 95673999 | + | 0     | 0     |
| ENSG0000(PWAR6)     | lincRNA     | chr15 | 25031873 | 25036490 | + | 0.39  | 0.59  |
| ENSG0000(CTD-2213F) | antisense   | chr14 | 31558507 | 31561334 | - | 0     | 0     |
| ENSG0000(RP11-13A1) | lincRNA     | chr12 | 89048187 | 89309553 | - | 0     | 0     |
| ENSG0000(RP11-528N) | processed   | chr12 | 97679879 | 97680047 | - | 0     | 0     |
| ENSG0000(RP11-58A1) | processed   | chr12 | 57967058 | 57968399 | + | 0     | 0     |
| ENSG0000(MED15P6)   | transcribec | chr14 | 19485336 | 19489148 | + | 0     | 0     |



|                 |                   |       |          |          |   |      |      |
|-----------------|-------------------|-------|----------|----------|---|------|------|
| ENSG00000125115 | lincRNA           | chr12 | 42646583 | 42686701 | + | 0    | 0    |
| ENSG00000117116 | lincRNA           | chr12 | 78448995 | 78540675 | - | 0    | 0    |
| ENSG00000108126 | antisense         | chr12 | 98512973 | 98516422 | - | 0.2  | 0.12 |
| ENSG00000111771 | processed         | chr12 | 96386818 | 96387194 | - | 0    | 0    |
| ENSG00000117541 | transcribed       | chr14 | 18395626 | 18412264 | - | 0    | 0    |
| ENSG00000104622 | processed         | chr12 | 38078529 | 38078999 | - | 0    | 0    |
| ENSG00000105363 | processed         | chr14 | 18634955 | 18637208 | - | 0    | 0    |
| ENSG00000109967 | antisense         | chr12 | 29280418 | 29317848 | - | 0.23 | 0.28 |
| ENSG00000103578 | sense_intron      | chr17 | 48579630 | 48582259 | - | 0.02 | 0    |
| ENSG00000108266 | processed         | chr14 | 25267064 | 25267336 | - | 0    | 0    |
| ENSG00000105098 | sense_intron      | chr16 | 6056975  | 6092954  | + | 0    | 0    |
| ENSG00000106110 | antisense         | chr12 | 68841288 | 68843237 | - | 0.08 | 0    |
| ENSG00000102744 | lincRNA           | chr12 | 74248637 | 74283669 | - | 0.14 | 0    |
| ENSG00000108010 | HOXA10-Hi protein | chr7  | 27163535 | 27180013 | - | 0    | 0    |
| ENSG00000106267 | lincRNA           | chr14 | 26809417 | 26836458 | + | 0    | 0.14 |
| ENSG00000103909 | antisense         | chr12 | 78960258 | 79045644 | - | 0    | 0    |
| ENSG00000108188 | lincRNA           | chr12 | 1.04E+08 | 1.04E+08 | + | 0    | 0    |
| ENSG00000105670 | lincRNA           | chr12 | 90107739 | 90112779 | + | 0    | 0    |
| ENSG00000108911 | processed         | chr12 | 92883773 | 92884700 | + | 0    | 0    |
| ENSG00000102050 | transcribed       | chr9  | 34832295 | 34838586 | - | 0    | 0    |
| ENSG00000106690 | processed         | chr12 | 76984079 | 76984669 | - | 0    | 0    |
| ENSG00000105129 | antisense         | chr12 | 1.02E+08 | 1.02E+08 | - | 0    | 0    |
| ENSG00000108938 | protein           | chr2  | 1.1E+08  | 1.1E+08  | - | 0.38 | 0.32 |
| ENSG00000108010 | processed         | chr12 | 93124063 | 93124543 | - | 0    | 0.17 |
| ENSG00000102050 | protein           | chr12 | 1.2E+08  | 1.2E+08  | + | 9.4  | 7.29 |
| ENSG00000105499 | lincRNA           | chr12 | 76259839 | 76305131 | + | 1.49 | 0.27 |
| ENSG00000108213 | processed         | chr12 | 78130337 | 78131004 | - | 0    | 0    |
| ENSG00000106890 | antisense         | chr12 | 1.09E+08 | 1.09E+08 | + | 0    | 0    |
| ENSG00000105548 | antisense         | chr12 | 1.02E+08 | 1.02E+08 | + | 0    | 0    |
| ENSG00000105363 | transcribed       | chr14 | 18702281 | 18702463 | - | 0    | 0    |
| ENSG00000103280 | antisense         | chr12 | 42459366 | 42466128 | + | 0    | 0.09 |
| ENSG00000102252 | antisense         | chr2  | 1.44E+08 | 1.44E+08 | - | 0    | 0    |
| ENSG00000104130 | antisense         | chr12 | 41409467 | 41473510 | - | 0    | 0    |
| ENSG00000102720 | lincRNA           | chr12 | 59523278 | 59524184 | - | 0    | 0    |
| ENSG00000108114 | processed         | chr12 | 1.14E+08 | 1.14E+08 | - | 0    | 0    |
| ENSG00000108480 | lincRNA           | chr12 | 63004338 | 63006541 | - | 0.14 | 0    |
| ENSG00000105540 | unprocessed       | chr12 | 39058028 | 39059933 | - | 0    | 0    |
| ENSG00000106300 | lincRNA           | chr12 | 41829898 | 41932592 | - | 0    | 0    |
| ENSG00000106110 | antisense         | chr12 | 69946543 | 69947081 | - | 0    | 0    |
| ENSG00000108010 | processed         | chr12 | 91984976 | 92142914 | - | 0    | 0.03 |
| ENSG00000108330 | processed         | chr12 | 49595148 | 49595688 | + | 0    | 0.15 |
| ENSG00000108911 | processed         | chr12 | 51124628 | 51125381 | - | 0    | 0    |
| ENSG00000104860 | antisense         | chr12 | 93317135 | 93377736 | - | 0.56 | 2.6  |
| ENSG00000107010 | lincRNA           | chr12 | 49861207 | 49865802 | + | 0    | 0    |
| ENSG00000102100 | processed         | chr12 | 1.03E+08 | 1.03E+08 | - | 0    | 0    |

|                 |            |             |       |          |          |   |       |       |
|-----------------|------------|-------------|-------|----------|----------|---|-------|-------|
| ENSG00000180500 | RP3-405J1  | antisense   | chr12 | 50219604 | 50229984 | + | 0     | 0     |
| ENSG00000180500 | RP11-946L  | lincRNA     | chr12 | 29143196 | 29148675 | - | 0     | 0     |
| ENSG00000180500 | RP11-767I  | lincRNA     | chr12 | 58565960 | 58781747 | - | 0     | 0     |
| ENSG00000180500 | RP11-96H1  | lincRNA     | chr12 | 46383679 | 46876159 | + | 3.11  | 0.89  |
| ENSG00000180500 | RP11-776A  | lincRNA     | chr12 | 30200983 | 30217916 | + | 0     | 0     |
| ENSG00000180500 | MIR3179-1  | lincRNA     | chr16 | 14901499 | 14902174 | + | 0.58  | 0.2   |
| ENSG00000180500 | CTD-2021H  | lincRNA     | chr12 | 71007773 | 71032083 | - | 0     | 0     |
| ENSG00000180500 | ZNF271P    | transcribed | chr18 | 35290282 | 35328390 | + | 12.57 | 11.07 |
| ENSG00000180500 | RP1-74B13  | lincRNA     | chr12 | 1.11E+08 | 1.11E+08 | + | 0     | 0     |
| ENSG00000180500 | RP11-521B  | antisense   | chr14 | 1.05E+08 | 1.05E+08 | - | 0     | 0     |
| ENSG00000180500 | KIRREL3-AS | antisense   | chr11 | 1.27E+08 | 1.27E+08 | + | 0     | 0     |
| ENSG00000180500 | RP11-317N  | lincRNA     | chr14 | 35873857 | 35875303 | + | 0     | 0     |
| ENSG00000180500 | RP11-164H  | antisense   | chr14 | 95711747 | 95757656 | + | 0     | 0     |
| ENSG00000180500 | RP11-434H  | antisense   | chr2  | 1.44E+08 | 1.44E+08 | - | 0     | 0     |
| ENSG00000180500 | RP11-231I  | antisense   | chr12 | 1.17E+08 | 1.17E+08 | - | 0.01  | 0.13  |
| ENSG00000180500 | RP11-1K3.1 | processed   | chr12 | 1.08E+08 | 1.08E+08 | - | 0     | 0     |
| ENSG00000180500 | RP11-1060  | antisense   | chr12 | 93894965 | 93943603 | - | 0.13  | 0     |
| ENSG00000180500 | RP11-190J  | antisense   | chr2  | 1.43E+08 | 1.43E+08 | - | 0     | 0     |
| ENSG00000180500 | RP11-298I  | antisense   | chr14 | 22929609 | 22955562 | + | 0.26  | 0.27  |
| ENSG00000180500 | RP11-545P  | antisense   | chr12 | 1.13E+08 | 1.13E+08 | - | 0     | 0     |
| ENSG00000180500 | RP11-98E6  | processed   | chr12 | 72431722 | 72432075 | - | 0     | 0     |
| ENSG00000180500 | RP11-557F  | processed   | chr12 | 59052980 | 59054184 | - | 0     | 0     |
| ENSG00000180500 | RP11-611C  | processed   | chr12 | 68913804 | 68914022 | + | 0     | 0     |
| ENSG00000180500 | FAM166AP   | unprocessed | chr12 | 38205098 | 38206009 | - | 0     | 0     |
| ENSG00000180500 | RP11-316A  | lincRNA     | chr12 | 60092864 | 60096071 | + | 0.2   | 0.34  |
| ENSG00000180500 | RP11-701B  | processed   | chr12 | 84671598 | 84672026 | + | 0     | 0     |
| ENSG00000180500 | RP3-405J1  | sense_intr  | chr12 | 50185580 | 50191363 | - | 0.18  | 0.15  |
| ENSG00000180500 | HAUS8P1    | processed   | chr12 | 1.14E+08 | 1.14E+08 | + | 0     | 0     |
| ENSG00000180500 | FAHD2P1    | processed   | chr12 | 70671918 | 70672856 | + | 0     | 0     |
| ENSG00000180500 | RP11-977G  | antisense   | chr12 | 56300142 | 56314808 | + | 0.64  | 1.6   |
| ENSG00000180500 | RP11-317N  | processed   | chr14 | 35881001 | 35881709 | + | 0     | 0     |
| ENSG00000180500 | RP11-471N  | processed   | chr12 | 61231159 | 61232937 | - | 0     | 0     |
| ENSG00000180500 | RP11-496I  | lincRNA     | chr14 | 19244962 | 19247673 | + | 0     | 0     |
| ENSG00000180500 | ZBED6      | protein_co  | chr1  | 2.04E+08 | 2.04E+08 | + | 6.02  | 5.25  |
| ENSG00000180500 | RP11-267D  | processed   | chr12 | 32985838 | 32987070 | + | 0     | 0     |
| ENSG00000180500 | RP11-478B  | antisense   | chr12 | 45050901 | 45103107 | + | 0     | 0     |
| ENSG00000180500 | RP11-511B  | antisense   | chr12 | 93003415 | 93215679 | - | 0     | 0.2   |
| ENSG00000180500 | RP11-361A  | processed   | chr12 | 74656561 | 74656860 | + | 0     | 0     |
| ENSG00000180500 | RP11-263E  | antisense   | chr12 | 1.01E+08 | 1.01E+08 | - | 0     | 0     |
| ENSG00000180500 | RP11-650K  | lincRNA     | chr12 | 1.04E+08 | 1.04E+08 | + | 0     | 0     |
| ENSG00000180500 | RP11-290L  | lincRNA     | chr12 | 75964440 | 75967062 | + | 0     | 0     |
| ENSG00000180500 | RACGAP1P   | processed   | chr12 | 45063473 | 45065351 | - | 0     | 0     |
| ENSG00000180500 | HNRNPA1P   | processed   | chr12 | 63271404 | 63272336 | + | 0     | 0     |
| ENSG00000180500 | MGAM       | protein_co  | chr7  | 1.42E+08 | 1.42E+08 | + | 0.02  | 0.01  |
| ENSG00000180500 | PRELID2P1  | processed   | chr12 | 68957377 | 68957677 | - | 0     | 0     |

|                                      |          |          |   |       |      |
|--------------------------------------|----------|----------|---|-------|------|
| ENSG0000(RP11-983P antisense chr12   | 53014596 | 53054438 | - | 2.57  | 2.41 |
| ENSG0000(AL928654.1 protein_co chr14 | 1.05E+08 | 1.05E+08 | + | 0.87  | 0.42 |
| ENSG0000(RP11-571N antisense chr12   | 57694132 | 57721510 | - | 0.09  | 0    |
| ENSG0000(RP11-641A unprocessed chr12 | 52746596 | 52748308 | - | 0     | 0    |
| ENSG0000(RP11-511B lincRNA chr12     | 92999218 | 93019820 | + | 0     | 0.1  |
| ENSG0000(RP11-386G antisense chr12   | 49090208 | 49093312 | + | 0     | 0.47 |
| ENSG0000(RP11-616L processed_ chr12  | 55122668 | 55124120 | - | 0     | 0    |
| ENSG0000(RP11-631N lincRNA chr12     | 62602752 | 62622213 | + | 3.22  | 3.05 |
| ENSG0000(CTD-2006C protein_co chr19  | 12017888 | 12052967 | - | 0     | 0    |
| ENSG0000(BNIP3P6 processed_ chr14    | 18418775 | 18419273 | + | 0     | 0    |
| ENSG0000(RP11-780K antisense chr12   | 1.14E+08 | 1.14E+08 | + | 0.25  | 0    |
| ENSG0000(RP11-74K1 processed_ chr12  | 94140077 | 94141337 | + | 0     | 0    |
| ENSG0000(VENTXP3 processed_ chr12    | 74292324 | 74293096 | + | 0     | 0    |
| ENSG0000(FNTB protein_co chr14       | 64986720 | 65062652 | + | 10.55 | 8.4  |
| ENSG0000(MIR3180-2 lincRNA chr16     | 16308542 | 16310000 | - | 0.03  | 0    |
| ENSG0000(RP11-438E processed_ chr12  | 45444766 | 45445438 | + | 0     | 0    |
| ENSG0000(RP11-547C lincRNA chr12     | 42979254 | 42996486 | - | 0.13  | 0.43 |
| ENSG0000(RP11-328C processed_ chr12  | 42431665 | 42433357 | - | 0     | 0    |
| ENSG0000(RP11-469H antisense chr12   | 49954639 | 49956125 | - | 0     | 0    |
| ENSG0000(RP11-793H processed_ chr12  | 53441741 | 53467528 | + | 6.23  | 2.41 |
| ENSG0000(MIR3179-2 miRNA chr16       | 16300159 | 16300242 | + | 0     | 0    |
| ENSG0000(RP11-644F processed_ chr12  | 55732366 | 55732648 | - | 0     | 0    |
| ENSG0000(RP11-56G1 antisense chr12   | 74538145 | 74538633 | - | 0     | 0    |
| ENSG0000(RP11-153F processed_ chr12  | 52837403 | 52837739 | + | 0     | 0    |
| ENSG0000(RP11-762I protein_co chr12  | 55757275 | 55827546 | - | 0     | 0.21 |
| ENSG0000(MIR3180-4 lincRNA chr16     | 15154903 | 15157020 | + | 0.13  | 0    |
| ENSG0000(RP11-554D unprocessed chr12 | 1.08E+08 | 1.08E+08 | + | 0     | 0    |
| ENSG0000(RP11-597A lincRNA chr14     | 19681420 | 19684739 | + | 0     | 0    |
| ENSG0000(RP11-554D lincRNA chr12     | 1.08E+08 | 1.08E+08 | - | 0     | 0.1  |
| ENSG0000(RP11-778J lincRNA chr12     | 94491546 | 94496442 | - | 0     | 0    |
| ENSG0000(KRT126P unprocessed chr12   | 52715567 | 52721655 | - | 0     | 0    |
| ENSG0000(CTD-2547E unprocessed chr16 | 21347139 | 21352138 | + | 0.51  | 0    |
| ENSG0000(RP11-153F processed_ chr12  | 52782650 | 52782839 | + | 0     | 0    |
| ENSG0000(RP11-609L processed_ chr12  | 42636815 | 42637111 | - | 0     | 0    |
| ENSG0000(RP11-1028 lincRNA chr12     | 1.16E+08 | 1.16E+08 | - | 0     | 0    |
| ENSG0000(RP11-645C transcribed chr16 | 21938865 | 21944987 | + | 0     | 0    |
| ENSG0000(RP11-2H8.1 lincRNA chr12    | 71793855 | 71799627 | - | 0     | 0    |
| ENSG0000(RP11-603J protein_co chr12  | 56101331 | 56109289 | + | 1.09  | 5.86 |
| ENSG0000(OR6C73P unprocessed chr12   | 55396340 | 55396697 | + | 0     | 0    |
| ENSG0000(RP11-626I processed_ chr12  | 1.04E+08 | 1.04E+08 | + | 0     | 0    |
| ENSG0000(RP11-554D unprocessed chr12 | 1.08E+08 | 1.08E+08 | + | 0     | 0    |
| ENSG0000(RP11-272K antisense chr12   | 80583683 | 80593701 | - | 0     | 0    |
| ENSG0000(RP11-263K lincRNA chr12     | 82512677 | 82515817 | + | 0     | 0    |
| ENSG0000(RP11-244H processed_ chr14  | 19629006 | 19630340 | + | 0     | 0    |
| ENSG0000(RP1-197B1 antisense chr12   | 47706085 | 47742294 | + | 1.81  | 2.72 |

|                                 |       |          |          |   |      |      |
|---------------------------------|-------|----------|----------|---|------|------|
| ENSG0000(RP11-81K1 antisense)   | chr12 | 75020969 | 75044793 | + | 0    | 0    |
| ENSG0000(RP11-267D lincRNA)     | chr12 | 32988763 | 32993754 | + | 0    | 0    |
| ENSG0000(RP11-114F antisense)   | chr12 | 1.06E+08 | 1.06E+08 | + | 0    | 0    |
| ENSG0000(RP11-150C antisense)   | chr12 | 58920639 | 59064238 | + | 0    | 0    |
| ENSG0000(SETP7 processed_)      | chr12 | 1.07E+08 | 1.07E+08 | + | 0    | 0    |
| ENSG0000(ZNF878 protein_co)     | chr19 | 12043805 | 12052939 | - | 0    | 0    |
| ENSG0000(RP11-603J antisense)   | chr12 | 56029649 | 56041806 | - | 0    | 0    |
| ENSG0000(RP1-71H24 antisense)   | chr12 | 1.13E+08 | 1.13E+08 | - | 0.13 | 0    |
| ENSG0000(RP11-290L antisense)   | chr12 | 76030494 | 76031378 | + | 0.37 | 0.27 |
| ENSG0000(CTD-2021H lincRNA)     | chr12 | 71034122 | 71104526 | - | 0    | 0    |
| ENSG0000(RP11-310I antisense)   | chr12 | 29519731 | 29529974 | + | 0    | 0    |
| ENSG0000(RP11-473C antisense)   | chr12 | 98931682 | 98976656 | + | 0    | 0    |
| ENSG0000(RP11-161H processed_)  | chr12 | 49442424 | 49442652 | - | 0    | 0    |
| ENSG0000(ELOCP32 processed_)    | chr12 | 1.17E+08 | 1.17E+08 | - | 0    | 0    |
| ENSG0000(RP11-121G lincRNA)     | chr12 | 81270675 | 81312422 | + | 0    | 0    |
| ENSG0000(RP11-397H lincRNA)     | chr12 | 97024021 | 97051129 | + | 0    | 0    |
| ENSG0000(RP11-159D lincRNA)     | chr14 | 31925801 | 31930146 | - | 0    | 0    |
| ENSG0000(RP11-359M lincRNA)     | chr12 | 79540203 | 79550535 | + | 0    | 0    |
| ENSG0000(RP11-983P sense_intr)  | chr12 | 53012104 | 53013921 | + | 0.41 | 0.61 |
| ENSG0000(RP11-139B lincRNA)     | chr12 | 1.14E+08 | 1.14E+08 | - | 0    | 0    |
| ENSG0000(LINC01154 lincRNA)     | chr12 | 54428303 | 54429403 | + | 0    | 0    |
| ENSG0000(MRPL2P1 processed_)    | chr12 | 89752913 | 89753831 | + | 0    | 0    |
| ENSG0000(RP5-1057I lincRNA)     | chr12 | 47826854 | 47837898 | + | 0    | 0    |
| ENSG0000(RP11-175P transcribec) | chr12 | 1E+08    | 1E+08    | - | 0.71 | 0.38 |
| ENSG0000(RP11-536C unprocessε)  | chr14 | 19664098 | 19683677 | - | 0    | 0    |
| ENSG0000(RP3-521E1 antisense)   | chr12 | 1.12E+08 | 1.12E+08 | + | 0    | 0    |
| ENSG0000(KRT73-AS1 antisense)   | chr12 | 52601467 | 52615305 | + | 0.01 | 0    |
| ENSG0000(RP11-474P lincRNA)     | chr12 | 46384233 | 46386991 | - | 0    | 0    |
| ENSG0000(RP11-585P antisense)   | chr12 | 75483454 | 75489820 | - | 0.19 | 0.3  |
| ENSG0000(RP11-1020 antisense)   | chr12 | 52407580 | 52428494 | + | 0    | 0    |
| ENSG0000(RP11-1016 transcribec) | chr12 | 97713412 | 97761859 | - | 0    | 0    |
| ENSG0000(CYB5AP5 processed_)    | chr14 | 26208036 | 26208424 | + | 0    | 0    |
| ENSG0000(RP11-536C lincRNA)     | chr14 | 18630318 | 18633634 | - | 0    | 0    |
| ENSG0000(RP11-231C unprocessε)  | chr16 | 29478879 | 29482591 | + | 0    | 0    |
| ENSG0000(RP11-956E lincRNA)     | chr12 | 69449470 | 69460724 | + | 0    | 0    |
| ENSG0000(RP11-762I sense_intr)  | chr12 | 55761550 | 55762628 | - | 0    | 0    |
| ENSG0000(RP11-609L lincRNA)     | chr12 | 42615503 | 42646498 | - | 0    | 0    |
| ENSG0000(RP11-278C processed_)  | chr12 | 32726383 | 32727387 | - | 0.61 | 0.27 |
| ENSG0000(RP11-486A transcribec) | chr12 | 93314809 | 93315941 | + | 0.09 | 0    |
| ENSG0000(NPIPB1P transcribec)   | chr18 | 11619509 | 11639699 | - | 0    | 0    |
| ENSG0000(RP11-755C antisense)   | chr12 | 1.02E+08 | 1.02E+08 | - | 0    | 0    |
| ENSG0000(RP11-498M lincRNA)     | chr12 | 71709171 | 71710374 | - | 0    | 0.13 |
| ENSG0000(RP4-601P9 lincRNA)     | chr12 | 1.15E+08 | 1.15E+08 | + | 0    | 0    |
| ENSG0000(RP11-116D lincRNA)     | chr12 | 1.15E+08 | 1.15E+08 | + | 0    | 0    |
| ENSG0000(SFTA3 processed_)      | chr14 | 36473207 | 36519521 | - | 0    | 0    |

|                                        |          |          |   |      |       |
|----------------------------------------|----------|----------|---|------|-------|
| ENSG0000(RP11-562L) processed_ chr14   | 29264381 | 29381295 | - | 0    | 0     |
| ENSG0000(CTD-2384A) lincRNA chr14      | 28975836 | 28978924 | - | 0    | 0     |
| ENSG0000(RP11-203J) processed_ chr9    | 1.28E+08 | 1.28E+08 | - | 4.51 | 12.46 |
| ENSG0000(RP11-20E2) lincRNA chr12      | 76562294 | 76615567 | + | 0    | 0.25  |
| ENSG0000(MIR3179-3) lincRNA chr16      | 18411309 | 18411851 | - | 1.62 | 1.49  |
| ENSG0000(KRT8P19) processed_ chr12     | 61879318 | 61880772 | + | 0    | 0     |
| ENSG0000(RPL36A-HN) protein_co chrX    | 1.01E+08 | 1.01E+08 | + | 1.43 | 2.3   |
| ENSG0000(RP11-843B) antisense chr12    | 32104117 | 32107528 | - | 0    | 0     |
| ENSG0000(RP3-405J1) transcribed chr12  | 50217662 | 50218343 | - | 0    | 0     |
| ENSG0000(RP11-834C) lincRNA chr12      | 54162065 | 54164452 | - | 0    | 0     |
| ENSG0000(HSPA8P14) processed_ chr12    | 1.11E+08 | 1.11E+08 | + | 0.03 | 0.03  |
| ENSG0000(RP11-58A1) lincRNA chr12      | 58087892 | 58093362 | + | 0    | 0     |
| ENSG0000(OR7E47P) transcribed chr12    | 52079696 | 52108261 | + | 0    | 0     |
| ENSG0000(RP11-321F) lincRNA chr12      | 1.01E+08 | 1.01E+08 | - | 0    | 0     |
| ENSG0000(RP11-144F) antisense chr12    | 1.06E+08 | 1.07E+08 | - | 0    | 0     |
| ENSG0000(RP11-797N) antisense chr12    | 1.07E+08 | 1.07E+08 | + | 0    | 0     |
| ENSG0000(RP11-793H) antisense chr12    | 53513984 | 53517608 | + | 0    | 0     |
| ENSG0000(HLX-AS1) antisense chr1       | 2.21E+08 | 2.21E+08 | - | 0.25 | 0.7   |
| ENSG0000(RP11-603J) antisense chr12    | 56104614 | 56113905 | - | 0.37 | 0     |
| ENSG0000(RP11-44N2) lincRNA chr14      | 1.05E+08 | 1.05E+08 | + | 2.15 | 1.06  |
| ENSG0000(RP11-84G2) antisense chr12    | 79934901 | 79942712 | + | 0.17 | 0.07  |
| ENSG0000(RP11-536C) processed_ chr14   | 18667249 | 18667370 | + | 0    | 0     |
| ENSG0000(MIR3180-3) lincRNA chr16      | 18402146 | 18403604 | + | 0.03 | 0     |
| ENSG0000(RP11-123N) processed_ chr12   | 78793526 | 78794114 | - | 0    | 0     |
| ENSG0000(RP11-863H) antisense chr12    | 62482349 | 62484932 | - | 0    | 0     |
| ENSG0000(GSTP1P1) processed_ chr12     | 55900300 | 55900618 | + | 0    | 0     |
| ENSG0000(RP11-133N) processed_ chr12   | 49709237 | 49709336 | + | 0    | 0     |
| ENSG0000(RP11-478B) processed_ chr12   | 45071769 | 45072843 | + | 0    | 0     |
| ENSG0000(HSPD1P4) processed_ chr12     | 56511002 | 56512703 | + | 0    | 0     |
| ENSG0000(RP11-128P) antisense chr12    | 1.08E+08 | 1.08E+08 | - | 0    | 0     |
| ENSG0000(RP11-718L) processed_ chr12   | 98317741 | 98318349 | + | 0    | 0     |
| ENSG0000(LINC01475) lincRNA chr10      | 99526350 | 99531177 | - | 0    | 0     |
| ENSG0000(LINC00609) lincRNA chr14      | 36070427 | 36165288 | + | 0    | 0     |
| ENSG0000(RP11-554L) unprocessed_ chr12 | 38994803 | 38996882 | - | 0    | 0     |
| ENSG0000(RP11-711C) lincRNA chr12      | 73906940 | 73919337 | + | 0    | 0     |
| ENSG0000(RP11-469H) antisense chr12    | 49951512 | 49962924 | - | 0    | 0     |
| ENSG0000(ZNF625) protein_co chr19      | 12142090 | 12156729 | - | 0.33 | 0.44  |
| ENSG0000(GALNT4) protein_co chr12      | 89519408 | 89524806 | - | 1.89 | 1.81  |
| ENSG0000(RP3-473L9) lincRNA chr12      | 1.11E+08 | 1.11E+08 | + | 0.33 | 0.36  |
| ENSG0000(RP11-968A) antisense chr12    | 54262615 | 54279063 | + | 0    | 0     |
| ENSG0000(OVCH1-AS) antisense chr12     | 29389294 | 29487488 | + | 0.13 | 0.11  |
| ENSG0000(RP11-100F) lincRNA chr12      | 1.14E+08 | 1.14E+08 | + | 0    | 0     |
| ENSG0000(RP11-359N) processed_ chr12   | 79500119 | 79500687 | - | 0    | 0     |
| ENSG0000(RP11-680A) antisense chr12    | 53298655 | 53300314 | - | 1.99 | 3.12  |
| ENSG0000(RP11-449P) antisense chr7     | 1055360  | 1059261  | - | 0.04 | 0.04  |

|                                      |          |          |   |       |       |
|--------------------------------------|----------|----------|---|-------|-------|
| ENSG0000(RP11-275C processed_ chr12  | 81868368 | 81869046 | + | 0     | 0     |
| ENSG0000(RP11-185N processed_ chr12  | 1.06E+08 | 1.06E+08 | + | 0     | 0     |
| ENSG0000(MIR4307H lincRNA chr14      | 26873133 | 26914743 | + | 0     | 0     |
| ENSG0000(LINC01481 lincRNA chr12     | 70219132 | 70221862 | - | 0     | 0     |
| ENSG0000(RP11-116N lincRNA chr14     | 35947556 | 35950044 | - | 0     | 0     |
| ENSG0000(RP11-641A processed_ chr12  | 52730425 | 52732865 | + | 0     | 0     |
| ENSG0000(PSMA3-AS: antisense chr14   | 58265365 | 58298134 | - | 10.51 | 11.74 |
| ENSG0000(RP11-44N2 processed_ chr14  | 1.05E+08 | 1.05E+08 | - | 0.2   | 0     |
| ENSG0000(RP1-128M: processed_ chr12  | 1.12E+08 | 1.12E+08 | - | 0     | 0     |
| ENSG0000(RP11-13A1 processed_ chr12  | 89027757 | 89028522 | + | 0     | 0     |
| ENSG0000(RP11-850F lincRNA chr12     | 54682973 | 54687434 | + | 0     | 0     |
| ENSG0000(RP11-536C transcribed chr14 | 18698639 | 18699978 | - | 0     | 0     |
| ENSG0000(RP11-1103 antisense chr14   | 30437992 | 30573629 | - | 0     | 0     |
| ENSG0000(CTB-31N19 unprocessed chr16 | 21532945 | 21550373 | - | 0.12  | 0     |
| ENSG0000(RP11-570L: antisense chr2   | 1.43E+08 | 1.44E+08 | - | 0     | 0     |
| ENSG0000(KCCAT198 antisense chr12    | 1.05E+08 | 1.05E+08 | - | 0.79  | 0.43  |
| ENSG0000(RP11-278C processed_ chr12  | 32692504 | 32692848 | - | 0     | 0     |
| ENSG0000(RP11-536C unprocessed chr14 | 18631388 | 18650966 | + | 0     | 0     |
| ENSG0000(RP11-804F processed_ chr12  | 38532895 | 38533050 | - | 0     | 0     |
| ENSG0000(RP11-701H lincRNA chr15     | 25027736 | 25032047 | - | 0     | 0     |
| ENSG0000(CYCSP30 processed_ chr12    | 87750142 | 87750313 | + | 0     | 0     |
| ENSG0000(METTL7AP processed_ chr12   | 52229093 | 52229588 | - | 0     | 0     |
| ENSG0000(RP11-579D antisense chr12   | 48766194 | 48767323 | + | 0     | 0     |
| ENSG0000(RP11-497G lincRNA chr12     | 1.17E+08 | 1.17E+08 | + | 0     | 0     |
| ENSG0000(RP11-352N lincRNA chr12     | 45481871 | 45610620 | - | 0     | 0     |
| ENSG0000(RP3-521E1 processed_ chr12  | 1.12E+08 | 1.12E+08 | + | 0     | 0     |
| ENSG0000(RP11-579D lincRNA chr12     | 48789147 | 48790535 | + | 0     | 0     |
| ENSG0000(EIF4A1P12 processed_ chr14  | 28593779 | 28593919 | + | 0     | 0     |
| ENSG0000(RP11-1100 antisense chr12   | 52076841 | 52082084 | - | 0.1   | 0.23  |
| ENSG0000(RSL24D1P5 processed_ chr12  | 63055275 | 63055765 | - | 0     | 0     |
| ENSG0000(CBX3P5 processed_ chr12     | 95286318 | 95286838 | - | 0     | 0     |
| ENSG0000(RP11-58A1 processed_ chr12  | 57983795 | 57984761 | - | 0     | 0     |
| ENSG0000(KRT7-AS antisense chr12     | 52245048 | 52247448 | - | 0     | 0     |
| ENSG0000(RP11-536C processed_ chr14  | 18614388 | 18614561 | + | 0     | 0     |
| ENSG0000(RP11-76E1 processed_ chr12  | 42286911 | 42288560 | + | 0     | 0.04  |
| ENSG0000(BTBD10P1 processed_ chr12   | 52748776 | 52750127 | + | 0     | 0     |
| ENSG0000(RP1-81P11 lincRNA chr12     | 77219603 | 77228693 | - | 0     | 0     |
| ENSG0000(RP11-367C processed_ chr12  | 40728811 | 40729897 | + | 0     | 0     |
| ENSG0000(RP11-341G antisense chr12   | 1.04E+08 | 1.04E+08 | - | 0     | 0     |
| ENSG0000(RP11-314D lincRNA chr12     | 73203815 | 73206835 | - | 0     | 0     |
| ENSG0000(RP11-110L: lincRNA chr12    | 1.16E+08 | 1.16E+08 | - | 0     | 0     |
| ENSG0000(RP11-609L: processed_ chr12 | 42627008 | 42627137 | - | 0     | 0     |
| ENSG0000(RP11-345J: processed_ chr16 | 29475064 | 29475355 | + | 0     | 0     |
| ENSG0000(RP11-175P antisense chr12   | 1E+08    | 1E+08    | + | 0.2   | 0     |
| ENSG0000(RP11-620J: lincRNA chr12    | 57931528 | 57936175 | - | 8.33  | 8.5   |

|                                     |          |          |   |       |       |
|-------------------------------------|----------|----------|---|-------|-------|
| ENSG0000(RP11-641A antisense chr12  | 52692605 | 52696788 | + | 0     | 0     |
| ENSG0000(LBX2-AS1 antisense chr2    | 74502595 | 74504678 | + | 6.23  | 6.69  |
| ENSG0000(RP11-328J lincRNA chr12    | 1.03E+08 | 1.03E+08 | - | 0     | 0     |
| ENSG0000(INAFM1 protein_co chr19    | 47274453 | 47275707 | + | 8.51  | 10.19 |
| ENSG0000(RP11-482D antisense chr12  | 1.07E+08 | 1.07E+08 | - | 0     | 0     |
| ENSG0000(RP11-256L antisense chr12  | 96025323 | 96027971 | + | 0     | 0     |
| ENSG0000(RP11-396F antisense chr12  | 38906451 | 38909592 | + | 0.56  | 0.46  |
| ENSG0000(ILF2P2 processed_ chr14    | 36054197 | 36055313 | - | 0     | 0     |
| ENSG0000(RP11-536C processed_ chr14 | 18560047 | 18560191 | + | 0     | 0     |
| ENSG0000(CHCHD3P2 processed_ chr12  | 72610678 | 72611316 | + | 0     | 0     |
| ENSG0000(RP11-654D lincRNA chr12    | 89947693 | 89949726 | + | 0     | 0     |
| ENSG0000(RP11-116D lincRNA chr12    | 1.15E+08 | 1.15E+08 | + | 0     | 0     |
| ENSG0000(CNPY2 protein_co chr12     | 56309842 | 56316336 | - | 81.73 | 72.45 |
| ENSG0000(RP11-788H lincRNA chr12    | 84271340 | 84294562 | + | 0     | 0     |
| ENSG0000(LSM6P2 processed_ chr12    | 49770960 | 49771136 | + | 0     | 0     |
| ENSG0000(RP11-536C processed_ chr14 | 18645044 | 18646221 | - | 0     | 0     |
| ENSG0000(RP11-818F antisense chr12  | 1.04E+08 | 1.04E+08 | - | 2.74  | 1.77  |
| ENSG0000(RP11-370I antisense chr12  | 48350945 | 48442411 | + | 0.25  | 0     |
| ENSG0000(RP11-341G antisense chr12  | 1.04E+08 | 1.04E+08 | - | 0     | 0     |
| ENSG0000(RP11-139E processed_ chr12 | 45200817 | 45201551 | + | 0     | 0     |
| ENSG0000(RP11-977G antisense chr12  | 56308868 | 56309449 | + | 0     | 0.44  |
| ENSG0000(LINC01490 lincRNA chr12    | 80763154 | 80770717 | + | 0     | 0     |
| ENSG0000(MGAM2 protein_co chr7      | 1.42E+08 | 1.42E+08 | + | 0     | 0     |
| ENSG0000(RP11-202G lincRNA chr12    | 93090522 | 93107600 | + | 0     | 0.09  |
| ENSG0000(RP11-362A lincRNA chr12    | 81953719 | 81993133 | + | 0     | 0     |
| ENSG0000(RP11-966I lincRNA chr14    | 28800084 | 28830204 | - | 0     | 0     |
| ENSG0000(RP11-295G lincRNA chr12    | 73760689 | 73798727 | + | 0     | 0     |
| ENSG0000(RP11-536C processed_ chr14 | 19668542 | 19669056 | - | 0     | 0     |
| ENSG0000(RP11-474L processed_ chr12 | 88057876 | 88058578 | - | 0     | 0.1   |
| ENSG0000(RP11-650K antisense chr12  | 1.04E+08 | 1.04E+08 | + | 0     | 0     |
| ENSG0000(RP11-776A lincRNA chr12    | 30230779 | 30296707 | - | 0     | 0     |
| ENSG0000(OR6C7P unprocessε chr12    | 55342841 | 55343774 | + | 0     | 0     |
| ENSG0000(KRT18P20 processed_ chr12  | 1.05E+08 | 1.05E+08 | - | 0     | 0     |
| ENSG0000(RP11-486C lincRNA chr14    | 70425812 | 70547464 | - | 0     | 0.19  |
| ENSG0000(RP11-186F antisense chr12  | 71582293 | 71583852 | - | 0.42  | 0     |
| ENSG0000(RP11-626I lincRNA chr12    | 1.04E+08 | 1.04E+08 | + | 0     | 0     |
| ENSG0000(OR5BK1P unprocessε chr12   | 48355792 | 48356614 | - | 0     | 0     |
| ENSG0000(RP11-1143 antisense chr12  | 69353493 | 69354225 | - | 0.13  | 0.21  |
| ENSG0000(RP11-341G antisense chr12  | 1.04E+08 | 1.04E+08 | - | 0     | 0     |
| ENSG0000(RP11-162P protein_co chr12 | 1.12E+08 | 1.12E+08 | + | 12.48 | 21.95 |
| ENSG0000(CTB-193M antisense chr16   | 15608474 | 15610563 | + | 0     | 0     |
| ENSG0000(RP11-70F1 lincRNA chr12    | 49911953 | 49930320 | + | 0.56  | 0.68  |
| ENSG0000(ST13P3 processed_ chr12    | 1.06E+08 | 1.06E+08 | + | 0     | 0.06  |
| ENSG0000(RP11-25J3 processed_ chr12 | 75600047 | 75601551 | + | 0     | 0     |
| ENSG0000(RP11-848D processed_ chr12 | 63002469 | 63002795 | + | 0     | 0     |

|                                      |          |          |   |      |      |
|--------------------------------------|----------|----------|---|------|------|
| ENSG0000(GLYCAM1 transcribed chr12   | 54608187 | 54610462 | - | 0    | 0    |
| ENSG0000(RP11-110L lincRNA chr12     | 1.16E+08 | 1.16E+08 | + | 0    | 0    |
| ENSG0000(RP11-630C lincRNA chr12     | 41764189 | 41765581 | + | 0    | 0    |
| ENSG0000(AKIRIN1P1 processed_ chr12  | 80561017 | 80561560 | - | 0    | 0    |
| ENSG0000(RP11-20L1 lincRNA chr12     | 90809276 | 90810680 | + | 0    | 0    |
| ENSG0000(EIF4A1P4 processed_ chr12   | 53153272 | 53154484 | + | 0    | 0.05 |
| ENSG0000(OR5BJ1P unprocessed_ chr12  | 48394510 | 48395392 | - | 0    | 0    |
| ENSG0000(CTD-2382E antisense chr15   | 42006132 | 42010117 | + | 0    | 0    |
| ENSG0000(FNBP1P1 processed_ chr2     | 74120680 | 74123218 | + | 0.39 | 0.37 |
| ENSG0000(RP11-2H8.4 processed_ chr12 | 71849228 | 71850428 | - | 0    | 0    |
| ENSG0000(RP11-575G processed_ chr12  | 1.01E+08 | 1.01E+08 | + | 0    | 0    |
| ENSG0000(RP1-90J4.3 processed_ chr12 | 47484689 | 47485722 | + | 0    | 0    |
| ENSG0000(RP11-1136 lincRNA chr12     | 53159586 | 53161000 | + | 0    | 0    |
| ENSG0000(RP11-603J antisense chr12   | 56150796 | 56158220 | - | 0    | 0    |
| ENSG0000(RP11-73B8 processed_ chr12  | 43569769 | 43572038 | - | 0    | 0    |
| ENSG0000(LINC01481 antisense chr12   | 69904033 | 70243360 | - | 3.08 | 3.1  |
| ENSG0000(RP4-601P9 lincRNA chr12     | 1.15E+08 | 1.15E+08 | + | 0    | 0    |
| ENSG0000(C1GALT1P1 processed_ chr12  | 69284397 | 69285485 | + | 0    | 0.12 |
| ENSG0000(MRPS6P4 processed_ chr12    | 89319364 | 89319649 | + | 0    | 0    |
| ENSG0000(RP11-560G processed_ chr12  | 75305452 | 75306357 | + | 0    | 0    |
| ENSG0000(RP11-1049 antisense chr12   | 54543111 | 54544105 | - | 0    | 0    |
| ENSG0000(RP11-536C transcribed chr14 | 18588274 | 18588315 | - | 0    | 0    |
| ENSG0000(RP11-116N lincRNA chr14     | 36061026 | 36067190 | - | 0    | 0    |
| ENSG0000(RP11-845N antisense chr12   | 52306616 | 52308371 | - | 0    | 0    |
| ENSG0000(RP11-845N antisense chr12   | 52274647 | 52279156 | - | 0    | 0    |
| ENSG0000(RP11-596D antisense chr14   | 31248628 | 31302739 | + | 0.06 | 0.07 |
| ENSG0000(RP1-97G4.1 lincRNA chr12    | 77379820 | 77390864 | + | 0    | 0    |
| ENSG0000(RP11-263K lincRNA chr12     | 82505211 | 82506188 | - | 0    | 0    |
| ENSG0000(RP11-368J transcribed chr16 | 22545698 | 22576865 | + | 0.06 | 0.04 |
| ENSG0000(RP11-290L antisense chr12   | 76032658 | 76033897 | + | 0.08 | 0.09 |
| ENSG0000(NOVA1-AS antisense chr14    | 26598412 | 26806467 | + | 0    | 0    |
| ENSG0000(KRT90P unprocessed_ chr12   | 52413960 | 52421876 | - | 0    | 0    |
| ENSG0000(RP11-626P lincRNA chr14     | 26775495 | 26822107 | - | 0    | 0    |
| ENSG0000(RP11-597A processed_ chr14  | 19668829 | 19670003 | + | 0    | 0    |
| ENSG0000(LSM3P2 processed_ chr12     | 94590821 | 94591093 | + | 0    | 0    |
| ENSG0000(RP11-474C processed_ chr12  | 48171590 | 48173353 | + | 0    | 0    |
| ENSG0000(RP11-547C lincRNA chr12     | 42966122 | 42967353 | + | 0    | 0    |
| ENSG0000(HNRNPA3P processed_ chr12   | 51712469 | 51713606 | - | 0    | 0    |
| ENSG0000(RP11-843B processed_ chr12  | 32072734 | 32072880 | + | 0    | 0    |
| ENSG0000(MED15P1 transcribed chr14   | 18912805 | 18916642 | - | 0    | 0    |
| ENSG0000(RP11-629C processed_ chr12  | 85567878 | 85568239 | + | 0    | 0    |
| ENSG0000(MTND1P2 unprocessed_ chr12  | 41699391 | 41700251 | - | 0    | 0    |
| ENSG0000(CASC18 lincRNA chr12        | 1.06E+08 | 1.06E+08 | + | 0    | 0    |
| ENSG0000(RP11-552I lincRNA chr12     | 1.03E+08 | 1.03E+08 | + | 0    | 0    |
| ENSG0000(RP11-587P lincRNA chr12     | 91901458 | 91906187 | + | 0    | 0    |



|                                      |          |          |   |       |       |
|--------------------------------------|----------|----------|---|-------|-------|
| ENSG0000(RP11-461L processed_ chr12  | 44248432 | 44249004 | - | 0     | 0     |
| ENSG0000(RP11-154D processed_ chr12  | 60418983 | 60419293 | + | 0     | 0     |
| ENSG0000(CTD-2591A lincRNA chr14     | 28318141 | 28418612 | + | 0     | 0     |
| ENSG0000(RP11-616L lincRNA chr12     | 55009746 | 55014247 | + | 0     | 0     |
| ENSG0000(RP11-453D processed_ chr12  | 76137425 | 76138610 | + | 0     | 0     |
| ENSG0000(RP11-263K processed_ chr12  | 82468456 | 82468948 | + | 0     | 0.17  |
| ENSG0000(RP11-256L antisense chr12   | 95996521 | 96011489 | + | 0     | 0     |
| ENSG0000(RP11-90C1 lincRNA chr12     | 78426826 | 78442952 | - | 0     | 0     |
| ENSG0000(RP11-769N sense_intr chr12  | 62139999 | 62145643 | - | 0     | 0     |
| ENSG0000(RP11-497G lincRNA chr12     | 1.17E+08 | 1.17E+08 | + | 0     | 0     |
| ENSG0000(RP11-597A transcribec chr14 | 19677837 | 19680104 | + | 0     | 0     |
| ENSG0000(PHBP18 processed_ chr12     | 48168847 | 48169659 | - | 0     | 0     |
| ENSG0000(RP11-114F lincRNA chr12     | 1.06E+08 | 1.06E+08 | - | 0     | 0     |
| ENSG0000(CTD-2311B lincRNA chr14     | 18920109 | 18934078 | + | 0     | 0     |
| ENSG0000(RP11-587P lincRNA chr12     | 91877391 | 91880655 | + | 0     | 0     |
| ENSG0000(RP1-78O14 lincRNA chr12     | 79341205 | 79503396 | - | 1.75  | 1.81  |
| ENSG0000(RP11-210N transcribec chr12 | 43736628 | 43741067 | + | 0     | 0     |
| ENSG0000(RP11-812D processed_ chr12  | 86015697 | 86016441 | + | 0     | 0     |
| ENSG0000(RP11-454K lincRNA chr14     | 45377268 | 45389286 | + | 3.05  | 2.94  |
| ENSG0000(RP11-269C antisense chr14   | 29940745 | 29980212 | + | 0     | 0     |
| ENSG0000(RP3-4321E processed_ chr12  | 47593208 | 47593440 | + | 0     | 0     |
| ENSG0000(LINC02156 lincRNA chr12     | 47415008 | 47420179 | + | 0     | 0.17  |
| ENSG0000(EEF1A1P17 processed_ chr12  | 43659827 | 43661101 | + | 0     | 0     |
| ENSG0000(RP11-461F antisense chr12   | 76878193 | 76880352 | + | 0     | 0     |
| ENSG0000(RP11-248E lincRNA chr12     | 87795733 | 87802028 | + | 0     | 0     |
| ENSG0000(RP11-386G antisense chr12   | 48998367 | 49019235 | + | 1.05  | 0.6   |
| ENSG0000(GLULP5 processed_ chr12     | 1.14E+08 | 1.14E+08 | + | 0     | 0     |
| ENSG0000(RP11-482D antisense chr12   | 1.07E+08 | 1.07E+08 | - | 0     | 0.09  |
| ENSG0000(RP11-541G lincRNA chr12     | 97272692 | 97276209 | - | 0     | 0     |
| ENSG0000(RP11-571N protein_co chr12  | 57773028 | 57787046 | + | 0.48  | 0     |
| ENSG0000(CUX1 protein_co chr7        | 1.02E+08 | 1.02E+08 | + | 46.32 | 46.93 |
| ENSG0000(RP11-493L lincRNA chr12     | 47353754 | 47369935 | + | 0     | 0     |
| ENSG0000(RP11-493L antisense chr12   | 47237734 | 47279021 | - | 0     | 0     |
| ENSG0000(MRPS36P5 processed_ chr12   | 43054089 | 43054386 | - | 0     | 0     |
| ENSG0000(RP11-155I lincRNA chr12     | 30320834 | 30321617 | + | 0     | 0     |
| ENSG0000(LHX5-AS1 antisense chr12    | 1.13E+08 | 1.13E+08 | + | 0     | 0     |
| ENSG0000(RP11-248E lincRNA chr12     | 87816486 | 87817831 | + | 0     | 0.18  |
| ENSG0000(RP11-290L processed_ chr12  | 76057538 | 76058115 | + | 0.24  | 0.27  |
| ENSG0000(RP11-167N transcribec chr12 | 95311312 | 95442482 | - | 0     | 0     |
| ENSG0000(RP11-461L antisense chr12   | 44244394 | 44263982 | - | 0     | 0     |
| ENSG0000(RP11-123M lincRNA chr12     | 78804348 | 78808499 | + | 0     | 0     |
| ENSG0000(TEN1 protein_co chr17       | 75979220 | 76000586 | + | 11.97 | 13.19 |
| ENSG0000(P2RX5-TAX protein_co chr17  | 3663063  | 3696194  | - | 0.28  | 0.21  |
| ENSG0000(RP11-554D unprocess chr12   | 1.08E+08 | 1.08E+08 | + | 0     | 0     |
| ENSG0000(RP11-620J antisense chr12   | 57837092 | 57842745 | + | 0     | 0     |

|                                      |          |          |   |      |      |
|--------------------------------------|----------|----------|---|------|------|
| ENSG0000(RP11-161H processed_ chr12  | 49389516 | 49390162 | + | 0    | 0    |
| ENSG0000(RP1-228P1 lincRNA chr12     | 48019771 | 48025382 | - | 0    | 0    |
| ENSG0000(NOP56P3 processed_ chr12    | 79558782 | 79559166 | + | 0    | 0    |
| ENSG0000(QRSL1P3 processed_ chr14    | 35765795 | 35767110 | + | 0    | 0    |
| ENSG0000(RP11-25E2 lincRNA chr12     | 1.15E+08 | 1.15E+08 | + | 0    | 0    |
| ENSG0000(RP11-536C antisense chr14   | 18555677 | 18596310 | - | 0    | 0    |
| ENSG0000(RP11-219B antisense chr8    | 85246295 | 85249848 | - | 0    | 0    |
| ENSG0000(RP11-133N antisense chr12   | 49576840 | 49577505 | - | 0.12 | 0    |
| ENSG0000(OLA1P3 processed_ chr12     | 55870048 | 55872602 | - | 0.07 | 0.17 |
| ENSG0000(RP11-388G processed_ chr14  | 25431193 | 25432234 | - | 0    | 0    |
| ENSG0000(SNRPGP18 processed_ chr12   | 1.16E+08 | 1.16E+08 | + | 0    | 0    |
| ENSG0000(RP1-228P1 antisense chr12   | 48011304 | 48025469 | + | 0    | 0    |
| ENSG0000(RP11-314P lincRNA chr14     | 25835858 | 26143305 | - | 0    | 0    |
| ENSG0000(LINC00935 protein_co chr12  | 48727435 | 48765786 | + | 0    | 0    |
| ENSG0000(RP1-288H2 lincRNA chr12     | 52092485 | 52104297 | - | 0    | 0    |
| ENSG0000(RP11-2H8. processed_ chr12  | 71835034 | 71835396 | - | 0    | 0    |
| ENSG0000(RP11-626I2 unprocessε chr12 | 1.04E+08 | 1.04E+08 | - | 0    | 0    |
| ENSG0000(RP11-632B lincRNA chr12     | 90617759 | 90622822 | - | 0    | 0    |
| ENSG0000(RP11-100F lincRNA chr12     | 1.14E+08 | 1.14E+08 | + | 0    | 0    |
| ENSG0000(RP11-361A processed_ chr12  | 74728038 | 74728851 | - | 0    | 0    |
| ENSG0000(RP11-61E1 antisense chr12   | 1.05E+08 | 1.05E+08 | - | 0.11 | 0.12 |
| ENSG0000(RP11-756H lincRNA chr12     | 57431116 | 57433935 | + | 0    | 0    |
| ENSG0000(RP11-350G antisense chr12   | 1.01E+08 | 1.01E+08 | - | 0    | 0    |
| ENSG0000(RP11-210M antisense chr15   | 80433795 | 80445152 | - | 0    | 0    |
| ENSG0000(HMGA1P3 processed_ chr12    | 1.1E+08  | 1.1E+08  | - | 0    | 0    |
| ENSG0000(RP11-603K processed_ chr12  | 92858079 | 92859273 | + | 0    | 0    |
| ENSG0000(RPL3P13 processed_ chr4     | 84544304 | 84544519 | - | 0    | 0    |
| ENSG0000(HIGD1AP1 processed_ chr12   | 53142053 | 53142327 | + | 0    | 0    |
| ENSG0000(RP11-386G antisense chr12   | 49127782 | 49147869 | + | 0.8  | 0.33 |
| ENSG0000(RP11-148B lincRNA chr12     | 1.17E+08 | 1.17E+08 | + | 0    | 0    |
| ENSG0000(RP11-1100 processed_ chr12  | 51900565 | 51901336 | + | 0    | 0    |
| ENSG0000(OR5BT1P unprocessε chr12    | 48385417 | 48386265 | - | 0    | 0    |
| ENSG0000(RP11-543H antisense chr12   | 81094375 | 81125845 | - | 0    | 0    |
| ENSG0000(NF1P4 unprocessε chr14      | 19492281 | 19501740 | + | 0    | 0    |
| ENSG0000(RP11-148E lincRNA chr14     | 28936889 | 29028763 | + | 0    | 0.1  |
| ENSG0000(RP11-350G unprocessε chr12  | 1.01E+08 | 1.01E+08 | + | 0    | 0    |
| ENSG0000(RP11-493P antisense chr12   | 1.16E+08 | 1.16E+08 | + | 0    | 0    |
| ENSG0000(RP11-74K1 antisense chr12   | 94168006 | 94186044 | - | 0    | 0    |
| ENSG0000(KRT125P unprocessε chr12    | 52729517 | 52736142 | - | 0    | 0    |
| ENSG0000(CTD-2384A lincRNA chr14     | 28830244 | 28968400 | + | 0    | 0.09 |
| ENSG0000(RP11-406H antisense chr12   | 99093359 | 99105011 | + | 0    | 0    |
| ENSG0000(RP11-530C antisense chr12   | 79823778 | 79825496 | + | 0    | 0    |
| ENSG0000(Metazoa_S misc_RNA chr12    | 55731264 | 55731531 | - | 0    | 0    |
| ENSG0000(RP11-530C lincRNA chr12     | 79690144 | 79778451 | + | 0    | 0    |
| ENSG0000(RP11-698F lincRNA chr14     | 55196727 | 55199013 | - | 0.13 | 0    |

|                                      |          |          |   |      |      |
|--------------------------------------|----------|----------|---|------|------|
| ENSG0000(RP11-474C processed_ chr12  | 48160245 | 48160878 | - | 0    | 0    |
| ENSG0000(AC025263. protein_co chr12  | 69801669 | 69855363 | + | 0    | 0    |
| ENSG0000(CTD-2021H lincRNA chr12     | 71047402 | 71118247 | - | 0.02 | 0    |
| ENSG0000(RP11-644F antisense chr12   | 55729104 | 55730852 | + | 2.88 | 3.25 |
| ENSG0000(BCDIN3D-A antisense chr12   | 49828542 | 49841143 | + | 0.19 | 1.06 |
| ENSG0000(RP11-293I1 protein_co chr12 | 71674204 | 71698968 | + | 0.33 | 0    |
| ENSG0000(RP11-30H9 processed_ chr14  | 28857384 | 28858701 | - | 0    | 0    |
| ENSG0000(RP11-781A lincRNA chr12     | 77775783 | 77783576 | + | 0    | 0    |
| ENSG0000(RP11-328C sense_intr chr12  | 42485353 | 42490019 | - | 0    | 0    |
| ENSG0000(ARL2BPP2 processed_ chr12   | 52763405 | 52763893 | + | 0    | 0    |
| ENSG0000(RP11-554D processed_ chr12  | 1.08E+08 | 1.08E+08 | - | 0    | 0    |
| ENSG0000(RP11-1079 processed_ chr12  | 84939524 | 84939668 | - | 0    | 0    |
| ENSG0000(VT11BP3 processed_ chr12    | 53131350 | 53131985 | + | 0    | 0    |
| ENSG0000(RP11-536C processed_ chr14  | 18645991 | 18646503 | + | 0    | 0    |
| ENSG0000(RP11-114H lincRNA chr12     | 75563202 | 75984015 | - | 0.09 | 0.2  |
| ENSG0000(ARHGAP42 processed_ chr14   | 19688261 | 19691194 | + | 0    | 0.04 |
| ENSG0000(RP11-384J4 lincRNA chr14    | 26836728 | 27160420 | + | 0.48 | 0.18 |
| ENSG0000(RP11-443B lincRNA chr1      | 2.35E+08 | 2.35E+08 | - | 0.07 | 0    |
| ENSG0000(OR9A4 protein_co chr7       | 1.42E+08 | 1.42E+08 | + | 0    | 0    |
| ENSG0000(RP11-754N lincRNA chr12     | 78352519 | 78483019 | + | 0    | 0    |
| ENSG0000(RP11-753H antisense chr12   | 54353792 | 54466985 | + | 0    | 0    |
| ENSG0000(RP11-114H lincRNA chr12     | 75694010 | 75698816 | - | 0    | 0    |
| ENSG0000(RP11-734E processed_ chr12  | 76757191 | 76757914 | + | 0    | 0    |
| ENSG0000(RP11-290L processed_ chr12  | 75926213 | 75926467 | + | 0    | 0    |
| ENSG0000(RP4-816N1 antisense chr12   | 2797136  | 2803938  | - | 0    | 0    |
| ENSG0000(RP11-474P antisense chr12   | 46371463 | 46373778 | + | 0    | 0    |
| ENSG0000(RP11-89K2 lincRNA chr14     | 25124487 | 25126998 | - | 0    | 0    |
| ENSG0000(ATXN2-AS antisense chr12    | 1.12E+08 | 1.12E+08 | + | 0.16 | 0.52 |
| ENSG0000(RP11-121E lincRNA chr12     | 91362196 | 91368606 | + | 0    | 0.15 |
| ENSG0000(RP11-977B antisense chr12   | 49232790 | 49264756 | - | 0.28 | 0.09 |
| ENSG0000(MAP1LC3B protein_co chr12   | 1.17E+08 | 1.17E+08 | + | 1.04 | 0.86 |
| ENSG0000(HIGD1AP9 processed_ chr12   | 49619334 | 49619612 | + | 0    | 0    |
| ENSG0000(RP11-260G lincRNA chr14     | 29390346 | 29436412 | + | 0    | 0    |
| ENSG0000(RP11-1028 lincRNA chr12     | 1.16E+08 | 1.16E+08 | + | 0    | 0    |
| ENSG0000(RP11-43D4 processed_ chr12  | 1.05E+08 | 1.05E+08 | + | 0    | 0    |
| ENSG0000(CCNG2P1 processed_ chr12    | 75257635 | 75258634 | - | 0    | 0    |
| ENSG0000(CTA-109P1 lincRNA chr10     | 1.17E+08 | 1.17E+08 | + | 0    | 0    |
| ENSG0000(RP11-89M: antisense chr12   | 72046149 | 72057377 | - | 0    | 0    |
| ENSG0000(RP11-493L processed_ chr12  | 47341614 | 47342089 | - | 0    | 0    |
| ENSG0000(RP11-1022 lincRNA chr12     | 63292625 | 63360037 | - | 0    | 0    |
| ENSG0000(RP11-77I2: processed_ chr12 | 30861921 | 30862179 | + | 0    | 0    |
| ENSG0000(RP11-804F lincRNA chr12     | 38544177 | 38589812 | - | 0    | 0    |
| ENSG0000(KRT128P unprocess chr12     | 52632866 | 52634456 | - | 0    | 0    |
| ENSG0000(RP11-722P antisense chr12   | 48483287 | 48500961 | - | 0    | 0    |
| ENSG0000(RP11-61A1 antisense chr16   | 66841433 | 66853448 | - | 0    | 0    |

|                 |           |                        |       |          |          |   |      |      |
|-----------------|-----------|------------------------|-------|----------|----------|---|------|------|
| ENSG00000100000 | RP11-314D | lincRNA                | chr12 | 73159190 | 73208317 | + | 0.7  | 0.27 |
| ENSG00000100000 | RP11-1041 | lincRNA                | chr12 | 91680131 | 91680873 | + | 0    | 0    |
| ENSG00000100000 | MKRN9P    | transcribed            | chr12 | 87782163 | 87784568 | - | 0.05 | 0    |
| ENSG00000100000 | RP11-347C | protein_coding         | chr16 | 30204316 | 30209071 | - | 1.55 | 2.76 |
| ENSG00000100000 | RP11-541G | lincRNA                | chr12 | 96985656 | 97185609 | + | 0    | 0    |
| ENSG00000100000 | RP11-340M | processed_transcript   | chr12 | 58394596 | 58395138 | + | 0    | 0    |
| ENSG00000100000 | RP11-956A | processed_transcript   | chr12 | 32227410 | 32228154 | - | 0    | 0    |
| ENSG00000100000 | RP11-70F1 | lincRNA                | chr12 | 49908882 | 49911863 | - | 0    | 0    |
| ENSG00000100000 | RP11-864J | antisense              | chr12 | 1.08E+08 | 1.08E+08 | + | 0    | 0    |
| ENSG00000100000 | RP11-753H | antisense              | chr12 | 54353661 | 54497688 | + | 0    | 0    |
| ENSG00000100000 | RP11-324P | lincRNA                | chr12 | 69212123 | 69224242 | + | 0    | 0    |
| ENSG00000100000 | RP11-18O1 | processed_transcript   | chr12 | 1.02E+08 | 1.02E+08 | - | 0    | 0.32 |
| ENSG00000100000 | RP11-554L | lincRNA                | chr12 | 39087713 | 39092874 | - | 0    | 0    |
| ENSG00000100000 | AC007115  | processed_transcript   | chr12 | 91193709 | 91193942 | + | 0    | 0    |
| ENSG00000100000 | RP11-345J | protein_coding         | chr16 | 29464967 | 29467833 | - | 2.37 | 2.95 |
| ENSG00000100000 | HSPE1P4   | processed_transcript   | chr12 | 1.02E+08 | 1.02E+08 | - | 0    | 0    |
| ENSG00000100000 | RP11-44N2 | unprocessed_transcript | chr14 | 1.05E+08 | 1.05E+08 | - | 0    | 0    |
| ENSG00000100000 | IMMP1LP2  | processed_transcript   | chr12 | 1.13E+08 | 1.13E+08 | + | 0    | 0    |
| ENSG00000100000 | RP11-315E | antisense              | chr12 | 81378042 | 81472954 | + | 0    | 0    |
| ENSG00000100000 | RP11-115F | antisense              | chr12 | 40395853 | 40443847 | - | 0    | 0    |
| ENSG00000100000 | RP11-588H | antisense              | chr12 | 70468080 | 70543040 | + | 0.13 | 0.01 |
| ENSG00000100000 | LINC00485 | lincRNA                | chr12 | 1.03E+08 | 1.03E+08 | - | 0.03 | 0    |
| ENSG00000100000 | RP11-263K | lincRNA                | chr12 | 82481118 | 82497560 | - | 0.04 | 0    |
| ENSG00000100000 | RP11-511B | lincRNA                | chr12 | 93174366 | 93181832 | + | 0.23 | 0.1  |
| ENSG00000100000 | RP11-1105 | antisense              | chr12 | 94272150 | 94277195 | - | 0    | 0    |
| ENSG00000100000 | RP11-248E | processed_transcript   | chr12 | 87753414 | 87753447 | - | 0    | 0    |
| ENSG00000100000 | RP11-412H | lincRNA                | chr14 | 28592223 | 28613623 | - | 0    | 0    |
| ENSG00000100000 | RP11-394J | antisense              | chr12 | 96222797 | 96223973 | - | 0    | 0    |
| ENSG00000100000 | RP11-18J9 | lincRNA                | chr12 | 85958686 | 85960946 | + | 0    | 0    |
| ENSG00000100000 | RP11-248E | processed_transcript   | chr12 | 87820654 | 87820918 | - | 0    | 0    |
| ENSG00000100000 | RP11-493L | lincRNA                | chr12 | 47248124 | 47257539 | + | 0    | 0    |
| ENSG00000100000 | RP11-753N | lincRNA                | chr12 | 90280894 | 90300340 | + | 0    | 0    |
| ENSG00000100000 | RP11-335N | processed_transcript   | chr12 | 60215994 | 60216384 | + | 0    | 0    |
| ENSG00000100000 | RP11-202H | lincRNA                | chr12 | 86599578 | 86838998 | - | 0    | 0    |
| ENSG00000100000 | SLC7A5P2  | transcribed            | chr16 | 21519830 | 21520365 | - | 0.03 | 0.69 |
| ENSG00000100000 | RP11-362A | processed_transcript   | chr12 | 81998632 | 81998962 | + | 0    | 0    |
| ENSG00000100000 | CTD-2213F | antisense              | chr14 | 31553358 | 31558498 | - | 0    | 0    |
| ENSG00000100000 | NKX2-2-AS | antisense              | chr20 | 21511447 | 21512309 | + | 0    | 0    |
| ENSG00000100000 | RP11-977G | sense_intronic         | chr12 | 56162359 | 56190284 | - | 3.35 | 3.91 |
| ENSG00000100000 | RP11-776A | unprocessed_transcript | chr12 | 30454919 | 30492302 | + | 0    | 0    |
| ENSG00000100000 | RP1-228P1 | lincRNA                | chr12 | 48005277 | 48011227 | - | 0    | 0    |
| ENSG00000100000 | RP11-90E9 | processed_transcript   | chr12 | 98794485 | 98794964 | + | 0    | 0    |
| ENSG00000100000 | RP11-248E | processed_transcript   | chr12 | 87746567 | 87746683 | + | 0    | 0    |
| ENSG00000100000 | RP13-619I | processed_transcript   | chr12 | 85781892 | 85782444 | - | 0    | 0    |
| ENSG00000100000 | RP11-478C | processed_transcript   | chr12 | 1.1E+08  | 1.1E+08  | - | 0.48 | 0.3  |

|                                      |          |          |   |       |       |
|--------------------------------------|----------|----------|---|-------|-------|
| ENSG0000(ZNF75BP processed_ chr12    | 44008620 | 44010143 | - | 0     | 0     |
| ENSG0000(RP11-272B lincRNA chr12     | 59366218 | 59411171 | - | 0     | 0     |
| ENSG0000(RP11-299A processed_ chr12  | 80860955 | 80861508 | - | 0     | 0     |
| ENSG0000(RP11-654D lincRNA chr12     | 89882665 | 89989289 | + | 0     | 0     |
| ENSG0000(RP11-38F2 lincRNA chr12     | 78326680 | 78359746 | - | 0     | 0     |
| ENSG0000(PRSS58 protein_co chr7      | 1.42E+08 | 1.42E+08 | - | 0     | 0     |
| ENSG0000(RP11-587P processed_ chr12  | 91871122 | 91871230 | - | 0     | 0     |
| ENSG0000(RP11-136F antisense chr12   | 78052181 | 78091737 | - | 0     | 0     |
| ENSG0000(CLEC5A protein_co chr7      | 1.42E+08 | 1.42E+08 | - | 0     | 0     |
| ENSG0000(RP11-511H transcribed chr12 | 1.02E+08 | 1.02E+08 | - | 0.29  | 0.83  |
| ENSG0000(RP11-362K lincRNA chr12     | 58544124 | 58813060 | + | 0.19  | 0     |
| ENSG0000(RP11-161H antisense chr12   | 49265156 | 49273306 | - | 0.1   | 0.11  |
| ENSG0000(ARHGAP42 processed_ chr14   | 18623852 | 18626787 | - | 0     | 0     |
| ENSG0000(RP11-370I lincRNA chr12     | 48231098 | 48284210 | - | 0     | 0     |
| ENSG0000(RP11-12K6 lincRNA chr12     | 72727923 | 72728844 | - | 0     | 0     |
| ENSG0000(MTND2P1 unprocessε chr12    | 41698495 | 41699182 | - | 0     | 0     |
| ENSG0000(RP1-46F2.3 lincRNA chr12    | 1.11E+08 | 1.11E+08 | - | 0     | 0     |
| ENSG0000(OSTF1P1 processed_ chr12    | 1.15E+08 | 1.15E+08 | + | 0     | 0     |
| ENSG0000(RPL10P13 processed_ chr12   | 75688794 | 75689096 | - | 0     | 0     |
| ENSG0000(RP11-497G lincRNA chr12     | 1.17E+08 | 1.17E+08 | + | 0     | 0     |
| ENSG0000(YPEL5P3 processed_ chr12    | 96060024 | 96060375 | - | 0     | 0     |
| ENSG0000(RP3-416H2 antisense chr12   | 52380460 | 52402407 | + | 0     | 0     |
| ENSG0000(RP11-162N lincRNA chr12     | 1.15E+08 | 1.15E+08 | + | 0     | 0     |
| ENSG0000(RP11-219B antisense chr8    | 85222446 | 85245717 | - | 0.26  | 0.1   |
| ENSG0000(RP11-977G antisense chr12   | 56267793 | 56270104 | - | 0     | 0     |
| ENSG0000(RP11-693J processed_ chr12  | 92530460 | 92531324 | + | 0     | 0     |
| ENSG0000(CTD-2311B lincRNA chr14     | 18944199 | 18945139 | + | 0     | 0     |
| ENSG0000(RP11-570L antisense chr2    | 1.44E+08 | 1.44E+08 | - | 0     | 0     |
| ENSG0000(RP11-356C processed_ chr12  | 93529560 | 93529989 | - | 0     | 0     |
| ENSG0000(RP11-510I lincRNA chr12     | 96422326 | 96485442 | - | 0     | 0     |
| ENSG0000(RP11-370I unprocessε chr12  | 48333755 | 48333901 | - | 0     | 0     |
| ENSG0000(RP11-887P antisense chr12   | 93707791 | 93737823 | - | 0     | 0     |
| ENSG0000(OR7K1P processed_ chr14     | 25357764 | 25358689 | + | 0     | 0     |
| ENSG0000(CLUHP8 unprocessε chr12     | 38082046 | 38087392 | + | 0     | 0     |
| ENSG0000(LINC00592 lincRNA chr12     | 52164115 | 52223804 | + | 0     | 0     |
| ENSG0000(RP11-1028 lincRNA chr12     | 1.16E+08 | 1.16E+08 | + | 0     | 0     |
| ENSG0000(BTF3P2 processed_ chr14     | 28673241 | 28673727 | - | 0     | 0     |
| ENSG0000(RP11-386G antisense chr12   | 48995150 | 48996334 | + | 0     | 0     |
| ENSG0000(POLR2K1 processed_ chr12    | 49594091 | 49594258 | + | 0     | 0     |
| ENSG0000(TESC-AS1 lincRNA chr12      | 1.17E+08 | 1.17E+08 | + | 0     | 0     |
| ENSG0000(NENFP2 processed_ chr12     | 1.02E+08 | 1.02E+08 | + | 0     | 0     |
| ENSG0000(CHURC1 protein_co chr14     | 64914361 | 64944591 | + | 33.21 | 32.01 |
| ENSG0000(BRWD1P2 processed_ chr12    | 89919437 | 89919776 | - | 0     | 0     |
| ENSG0000(RP11-536G lincRNA chr12     | 95803097 | 95823307 | + | 0     | 0     |
| ENSG0000(RP11-314D processed_ chr12  | 73115957 | 73143858 | - | 0     | 0     |

|                                      |          |          |   |       |      |
|--------------------------------------|----------|----------|---|-------|------|
| ENSG0000(RP11-658F antisense chr11   | 66666036 | 66668374 | + | 2.95  | 3.57 |
| ENSG0000(NUTF2P2 processed_chr14     | 35819837 | 35820220 | + | 0     | 0    |
| ENSG0000(RP11-488C lincRNA chr14     | 76781733 | 76786724 | - | 1.22  | 1.92 |
| ENSG0000(RP11-981P antisense chr12   | 89561129 | 89594878 | + | 0     | 0    |
| ENSG0000(RP11-887P sense_intr chr12  | 93836167 | 93838038 | + | 0     | 0    |
| ENSG0000(RP11-453D processed_chr12   | 76115711 | 76116100 | + | 0     | 0    |
| ENSG0000(RP11-554E lincRNA chr12     | 1.02E+08 | 1.02E+08 | - | 0.12  | 0    |
| ENSG0000(RP11-644F protein_co chr12  | 55716036 | 55724703 | + | 1.57  | 2    |
| ENSG0000(RP11-690J lincRNA chr12     | 98113014 | 98292445 | - | 0     | 0    |
| ENSG0000(RP11-167N lincRNA chr12     | 95387890 | 95388558 | - | 0     | 0    |
| ENSG0000(CTD-2314B lincRNA chr14     | 19024090 | 19055551 | + | 0     | 0    |
| ENSG0000(C17orf49 protein_co chr17   | 7014495  | 7017525  | + | 48.11 | 47.9 |
| ENSG0000(KLF17P1 processed_chr12     | 62234390 | 62235515 | - | 0     | 0    |
| ENSG0000(RP11-603J antisense chr12   | 56120033 | 56129619 | - | 0     | 0.08 |
| ENSG0000(RP11-274M processed_chr12   | 74170445 | 74171830 | + | 0     | 0    |
| ENSG0000(RP1-267L1 antisense chr12   | 1.12E+08 | 1.12E+08 | + | 0     | 0    |
| ENSG0000(RP11-536C processed_chr14   | 19653623 | 19653742 | - | 0     | 0    |
| ENSG0000(RP4-816N1 antisense chr12   | 2796877  | 2812902  | - | 0.59  | 0.87 |
| ENSG0000(RP11-118A lincRNA chr12     | 43155315 | 43163110 | + | 0     | 0    |
| ENSG0000(RP11-711C lincRNA chr12     | 74039086 | 74045828 | + | 0     | 0    |
| ENSG0000(RP11-161H antisense chr12   | 49292631 | 49324576 | - | 0.03  | 0    |
| ENSG0000(DUX4L52 processed_chr12     | 61600067 | 61600843 | - | 0     | 0    |
| ENSG0000(RP11-115H sense_intr chr12  | 1.16E+08 | 1.16E+08 | - | 0     | 0    |
| ENSG0000(RP11-87P1 lincRNA chr12     | 83171590 | 83172740 | + | 0     | 0    |
| ENSG0000(RP11-116N sense_ovei chr14  | 35897982 | 36063743 | + | 0     | 0    |
| ENSG0000(RP11-536G antisense chr12   | 95795345 | 95858839 | - | 0     | 0    |
| ENSG0000(RP11-968A sense_ovei chr12  | 54276631 | 54345083 | + | 0     | 0    |
| ENSG0000(RP11-603J antisense chr12   | 56118968 | 56119939 | - | 0     | 0    |
| ENSG0000(RP11-148B lincRNA chr12     | 1.16E+08 | 1.16E+08 | + | 0     | 0    |
| ENSG0000(SYF2P1 processed_chr14      | 30541776 | 30542188 | - | 0     | 0    |
| ENSG0000(RP11-23J1 transcribec chr12 | 47135498 | 47138370 | - | 0     | 0    |
| ENSG0000(MIR3180-1 lincRNA chr16     | 14909887 | 14911345 | - | 0     | 0.09 |
| ENSG0000(RP11-651L sense_intr chr12  | 1.06E+08 | 1.06E+08 | - | 0.33  | 0    |
| ENSG0000(RP11-778J processed_chr12   | 94521090 | 94521869 | - | 0     | 0    |
| ENSG0000(RP11-228G processed_chr12   | 84448625 | 84449878 | - | 0     | 0    |
| ENSG0000(PCNPP1 processed_chr12      | 1.12E+08 | 1.12E+08 | - | 0     | 0    |
| ENSG0000(NF1P12 unprocessε chr12     | 38206231 | 38207192 | - | 0     | 0    |
| ENSG0000(RP11-536C lincRNA chr14     | 18636043 | 18637421 | + | 0     | 0    |
| ENSG0000(RP11-1105 antisense chr12   | 94277758 | 94282844 | - | 0     | 0    |
| ENSG0000(RTEL1 protein_co chr20      | 63657810 | 63696253 | + | 3.76  | 3.6  |
| ENSG0000(RP11-536C transcribec chr14 | 18562928 | 18568790 | + | 0     | 0    |
| ENSG0000(ZNF970P unprocessε chr12    | 37575587 | 37576384 | + | 0     | 0    |
| ENSG0000(ADI1P3 processed_chr12      | 47463087 | 47463621 | + | 0     | 0    |
| ENSG0000(SLC25A3P2 processed_chr12   | 1.12E+08 | 1.12E+08 | + | 0     | 0    |
| ENSG0000(RP11-617J processed_chr12   | 81545326 | 81546450 | - | 0     | 0.06 |

|                 |                      |       |          |          |   |      |      |
|-----------------|----------------------|-------|----------|----------|---|------|------|
| ENSG00000100000 | RP4-647C1 antisense  | chr14 | 73242651 | 73245979 | - | 0.12 | 0.08 |
| ENSG00000100000 | RP11-649E antisense  | chr14 | 49620815 | 49623480 | - | 0.04 | 0    |
| ENSG00000100000 | RP11-517C antisense  | chr14 | 58398557 | 58427125 | + | 0    | 0.2  |
| ENSG00000100000 | RP11-204N lincRNA    | chr14 | 97786565 | 97789256 | - | 0    | 0    |
| ENSG00000100000 | RP11-33N1 antisense  | chr14 | 89399995 | 89409469 | + | 0    | 0    |
| ENSG00000100000 | RP11-737F processed  | chr14 | 48819360 | 48819593 | + | 0    | 0    |
| ENSG00000100000 | CTD-2200A lincRNA    | chr14 | 99324799 | 99332015 | - | 0    | 0    |
| ENSG00000100000 | AC068831. antisense  | chr15 | 90952239 | 90955225 | - | 0.03 | 0.1  |
| ENSG00000100000 | RP11-629F processed  | chr14 | 41296286 | 41298734 | + | 0    | 0    |
| ENSG00000100000 | RP11-187E lincRNA    | chr14 | 32006902 | 32018685 | + | 0    | 0    |
| ENSG00000100000 | RP11-557C processed  | chr14 | 43592142 | 43592262 | - | 0    | 0    |
| ENSG00000100000 | PPT2-EGFL protein_co | chr6  | 32153845 | 32171978 | + | 2.74 | 0.57 |
| ENSG00000100000 | RP11-1070 lincRNA    | chr14 | 95573562 | 95581956 | + | 0    | 0    |
| ENSG00000100000 | RPA2P1 processed     | chr14 | 46996454 | 46997174 | + | 0    | 0    |
| ENSG00000100000 | RP11-907D lincRNA    | chr14 | 97116355 | 97121501 | + | 0    | 0    |
| ENSG00000100000 | CTD-2307P sense_ove  | chr14 | 42362983 | 42703655 | + | 0    | 0    |
| ENSG00000100000 | BCAR1P1 processed    | chr15 | 20073699 | 20074334 | - | 0    | 0    |
| ENSG00000100000 | MEG8 lincRNA         | chr14 | 1.01E+08 | 1.01E+08 | + | 0.06 | 0.14 |
| ENSG00000100000 | RP11-831F antisense  | chr14 | 49707667 | 49708792 | - | 0    | 0    |
| ENSG00000100000 | RP11-326E processed  | chr14 | 49373966 | 49374383 | + | 0    | 0    |
| ENSG00000100000 | RP11-516J lincRNA    | chr14 | 76280943 | 76310066 | - | 0    | 0    |
| ENSG00000100000 | RP11-1029 lincRNA    | chr14 | 1.02E+08 | 1.02E+08 | - | 0    | 0    |
| ENSG00000100000 | ZNF578 protein_co    | chr19 | 52453576 | 52512154 | + | 0.66 | 0.87 |
| ENSG00000100000 | RP11-88E1 processed  | chr14 | 43274824 | 43275697 | + | 0    | 0    |
| ENSG00000100000 | RP11-300J antisense  | chr14 | 88010787 | 88015611 | - | 0    | 0    |
| ENSG00000100000 | NT5CP2 processed     | chr14 | 73539221 | 73539781 | - | 0    | 0    |
| ENSG00000100000 | RP11-173D lincRNA    | chr15 | 20128745 | 20147953 | - | 0.37 | 1.09 |
| ENSG00000100000 | RP11-804N processed  | chr14 | 63762013 | 63762149 | + | 0    | 0    |
| ENSG00000100000 | RP11-404P sense_intr | chr14 | 96210860 | 96214818 | + | 0.17 | 0    |
| ENSG00000100000 | RP11-665C lincRNA    | chr14 | 55262767 | 55272075 | - | 0    | 0    |
| ENSG00000100000 | RP11-356C lincRNA    | chr14 | 37564047 | 37579125 | + | 0    | 0    |
| ENSG00000100000 | RP11-32B5 processed  | chr15 | 21344548 | 21345085 | - | 0    | 0    |
| ENSG00000100000 | RP11-526N lincRNA    | chr14 | 79893080 | 79974169 | - | 0    | 0    |
| ENSG00000100000 | RP11-240B protein_co | chr8  | 1.32E+08 | 1.32E+08 | - | 0    | 0    |
| ENSG00000100000 | RP11-662J lincRNA    | chr14 | 40386252 | 40386794 | + | 0    | 0    |
| ENSG00000100000 | RP11-588P sense_intr | chr14 | 79199982 | 79201632 | + | 0    | 0    |
| ENSG00000100000 | RP11-403B processed  | chr15 | 20775464 | 20775998 | - | 0    | 0    |
| ENSG00000100000 | FXNP1 processed      | chr14 | 78059942 | 78060278 | - | 0    | 0    |
| ENSG00000100000 | RP11-486C antisense  | chr14 | 70187123 | 70230187 | + | 0.37 | 0.81 |
| ENSG00000100000 | OR7E105P unprocess   | chr14 | 51756996 | 51757988 | + | 0    | 0    |
| ENSG00000100000 | RP11-471B antisense  | chr14 | 90402523 | 90405235 | - | 0    | 0    |
| ENSG00000100000 | CTD-2207P lincRNA    | chr14 | 74552181 | 74560048 | + | 0.14 | 0    |
| ENSG00000100000 | RP11-452D lincRNA    | chr14 | 83018201 | 83039602 | - | 0    | 0    |
| ENSG00000100000 | RBM8B processed      | chr14 | 60397757 | 60398281 | + | 0    | 0    |
| ENSG00000100000 | RP11-1085 antisense  | chr14 | 56633244 | 56648658 | - | 0    | 0    |

|                 |           |             |       |          |          |   |      |      |
|-----------------|-----------|-------------|-------|----------|----------|---|------|------|
| ENSG00000100000 | PDF       | protein_co  | chr16 | 69328621 | 69330595 | - | 3.18 | 3.34 |
| ENSG00000100000 | RP11-982N | antisense   | chr14 | 1.05E+08 | 1.05E+08 | + | 0.1  | 0    |
| ENSG00000100000 | RP1-292L2 | processed   | chr14 | 70858844 | 70859429 | - | 0    | 0    |
| ENSG00000100000 | RP11-255M | lincRNA     | chr15 | 95034384 | 95035737 | - | 0    | 0    |
| ENSG00000100000 | RP11-711D | lincRNA     | chr12 | 1.21E+08 | 1.21E+08 | + | 0    | 0    |
| ENSG00000100000 | RNASE12   | protein_co  | chr14 | 20590193 | 20590823 | - | 0    | 0    |
| ENSG00000100000 | RP11-661G | antisense   | chr14 | 90675118 | 90676294 | + | 0    | 0    |
| ENSG00000100000 | OR11K2P   | unprocessed | chr14 | 19733355 | 19734302 | - | 0    | 0    |
| ENSG00000100000 | RP11-173A | processed   | chr14 | 74658049 | 74658590 | + | 0    | 0    |
| ENSG00000100000 | RP11-1033 | processed   | chr14 | 52155740 | 52156179 | + | 0    | 0    |
| ENSG00000100000 | LINC00641 | processed   | chr14 | 21200079 | 21206900 | - | 1.19 | 1.26 |
| ENSG00000100000 | RP3-414A1 | sense_intr  | chr14 | 73517233 | 73520648 | - | 0    | 0    |
| ENSG00000100000 | CTD-2201G | antisense   | chr14 | 23415339 | 23415686 | + | 0    | 0    |
| ENSG00000100000 | RP11-307P | processed   | chr14 | 60779978 | 60780595 | + | 0    | 0    |
| ENSG00000100000 | RP11-895N | processed   | chr14 | 91419449 | 91419751 | + | 0    | 0    |
| ENSG00000100000 | RP11-109N | processed   | chr14 | 73068108 | 73068618 | - | 0    | 0    |
| ENSG00000100000 | RP11-713N | antisense   | chr12 | 25096868 | 25100980 | - | 0    | 0    |
| ENSG00000100000 | RP11-649E | sense_intr  | chr14 | 49629291 | 49629890 | - | 0    | 0    |
| ENSG00000100000 | RP11-903H | antisense   | chr14 | 20693480 | 20707120 | - | 0    | 0    |
| ENSG00000100000 | RP11-757H | processed   | chr14 | 80822524 | 80822796 | + | 0    | 0    |
| ENSG00000100000 | OR11H2    | protein_co  | chr14 | 19712936 | 19713920 | - | 0    | 0    |
| ENSG00000100000 | RP11-361H | sense_ove   | chr14 | 76235817 | 76263474 | + | 0    | 0    |
| ENSG00000100000 | RP11-665C | antisense   | chr14 | 55325834 | 55339501 | - | 0    | 0    |
| ENSG00000100000 | PTCD2P1   | processed   | chr14 | 20524287 | 20525422 | - | 0    | 0    |
| ENSG00000100000 | RP11-298I | antisense   | chr14 | 22982698 | 22999078 | + | 1.58 | 0.26 |
| ENSG00000100000 | CTD-2555K | processed   | chr14 | 22702611 | 22766562 | - | 0    | 0    |
| ENSG00000100000 | CTD-2292N | antisense   | chr14 | 20305730 | 20306811 | + | 0    | 0    |
| ENSG00000100000 | RP11-168L | lincRNA     | chr14 | 1.01E+08 | 1.01E+08 | - | 0    | 0    |
| ENSG00000100000 | RP11-164J | protein_co  | chr15 | 42348103 | 42412317 | + | 1.25 | 1.88 |
| ENSG00000100000 | RP11-831F | processed   | chr14 | 49681302 | 49681886 | + | 0    | 0    |
| ENSG00000100000 | RP11-173D | processed   | chr15 | 19899334 | 19899559 | + | 0    | 0    |
| ENSG00000100000 | RP11-388E | processed   | chr14 | 23729038 | 23729741 | - | 0    | 0    |
| ENSG00000100000 | RP11-574F | protein_co  | chr1  | 1.6E+08  | 1.6E+08  | - | 2.37 | 0    |
| ENSG00000100000 | RP11-1012 | protein_co  | chr14 | 67659820 | 67690367 | - | 0.69 | 0.21 |
| ENSG00000100000 | PHKBP2    | unprocessed | chr14 | 36533506 | 36534538 | - | 0    | 0    |
| ENSG00000100000 | OR11G1P   | unprocessed | chr14 | 20179189 | 20180156 | + | 0    | 0    |
| ENSG00000100000 | CHMP4BP1  | processed   | chr14 | 55298644 | 55299231 | + | 0    | 0    |
| ENSG00000100000 | RP11-84C1 | antisense   | chr14 | 20995837 | 20999163 | - | 0    | 0    |
| ENSG00000100000 | RP11-192H | protein_co  | chr17 | 28455752 | 28614197 | - | 1.68 | 1.15 |
| ENSG00000100000 | RP11-7F17 | lincRNA     | chr14 | 77048172 | 77086446 | - | 0    | 0    |
| ENSG00000100000 | RP11-187E | lincRNA     | chr14 | 31944853 | 31950382 | + | 0    | 0    |
| ENSG00000100000 | LINC02207 | lincRNA     | chr15 | 93863109 | 93878356 | + | 0    | 0    |
| ENSG00000100000 | PPIAP6    | processed   | chr14 | 68421698 | 68422196 | - | 0    | 0    |
| ENSG00000100000 | RP11-232C | antisense   | chr14 | 78744398 | 78753878 | - | 0    | 0    |
| ENSG00000100000 | LINC00640 | lincRNA     | chr14 | 51333393 | 51365557 | + | 0.67 | 0.24 |



|                                  |       |          |          |   |      |      |
|----------------------------------|-------|----------|----------|---|------|------|
| ENSG0000(RP11-662J):lincRNA      | chr14 | 40387558 | 40389140 | + | 0    | 0    |
| ENSG0000(RP11-472N):lincRNA      | chr14 | 92253493 | 92263656 | - | 0    | 0    |
| ENSG0000( TRAV15 TR_V_pseu)      | chr14 | 21950406 | 21950654 | + | 0    | 0    |
| ENSG0000(AC144835):lincRNA       | chr15 | 98003081 | 98021777 | + | 0    | 0    |
| ENSG0000(SPESP1):protein_co      | chr15 | 68818221 | 68946811 | + | 0    | 0    |
| ENSG0000(SRMP2):processed_ch     | chr14 | 60919240 | 60920155 | - | 0    | 0    |
| ENSG0000(RP11-99L1):lincRNA      | chr14 | 44444747 | 44480618 | - | 0    | 0    |
| ENSG0000(RP11-467L):unprocess    | chr15 | 20516252 | 20520627 | + | 0.18 | 0    |
| ENSG0000(RP11-398J):lincRNA      | chr15 | 95463592 | 95493770 | - | 0    | 0    |
| ENSG0000(RP11-862P):antisense    | chr14 | 66969038 | 66969816 | - | 0    | 0    |
| ENSG0000(ZFP64P1):processed_ch   | chr14 | 50704343 | 50705511 | - | 0    | 0    |
| ENSG0000(RP11-73E1):processed_ch | chr14 | 34920865 | 34921006 | + | 0    | 0    |
| ENSG0000(OR11J5P):processed_ch   | chr15 | 20969282 | 20970215 | - | 0    | 0    |
| ENSG0000(RP11-1141):lincRNA      | chr14 | 87251103 | 87251679 | + | 0    | 0    |
| ENSG0000(CTD-2561F):lincRNA      | chr14 | 1.01E+08 | 1.01E+08 | + | 0    | 0    |
| ENSG0000(DIO3OS):lincRNA         | chr14 | 1.02E+08 | 1.02E+08 | - | 0    | 0    |
| ENSG0000(RP11-862G):lincRNA      | chr14 | 92905697 | 92907482 | - | 0    | 0    |
| ENSG0000(CTD-2062F):transcribec  | chr14 | 1E+08    | 1E+08    | + | 0    | 0    |
| ENSG0000(EIF3LP1):processed_ch   | chr14 | 81916231 | 81917888 | + | 0    | 0    |
| ENSG0000(RP11-783L):lincRNA      | chr14 | 66111581 | 66125847 | + | 0.14 | 0.3  |
| ENSG0000(RP11-368P):processed_ch | chr14 | 53011971 | 53012267 | + | 0    | 0    |
| ENSG0000(RP11-638I):lincRNA      | chr14 | 1E+08    | 1E+08    | + | 0.19 | 0    |
| ENSG0000(RP11-90P1):transcribec  | chr14 | 42608868 | 42609577 | + | 0    | 0    |
| ENSG0000(RP11-688D):processed_ch | chr14 | 84951274 | 84951373 | + | 0    | 0    |
| ENSG0000(RP13-582L):sense_intr   | chr4  | 8858715  | 8860827  | - | 0    | 0    |
| ENSG0000(RP11-857B):processed_ch | chr14 | 44887434 | 44887741 | - | 0    | 0    |
| ENSG0000(RP11-493G):processed_ch | chr14 | 77359423 | 77359916 | + | 0    | 0    |
| ENSG0000(RP11-61O1):lincRNA      | chr14 | 98136074 | 98139242 | + | 0    | 0    |
| ENSG0000(LINC00239):lincRNA      | chr14 | 1.02E+08 | 1.02E+08 | + | 0.11 | 0    |
| ENSG0000(RP5-892G5):transcribec  | chr14 | 74192589 | 74192823 | + | 0    | 0    |
| ENSG0000(RP11-203N):antisense    | chr14 | 20451305 | 20451918 | + | 0    | 0    |
| ENSG0000(RP11-185P):lincRNA      | chr14 | 95855548 | 95866464 | - | 0    | 0    |
| ENSG0000(RP6-91H8):lincRNA       | chr14 | 71212633 | 71218216 | + | 0    | 0    |
| ENSG0000(RP11-349A):processed_ch | chr14 | 58184576 | 58185507 | + | 0    | 0    |
| ENSG0000(RP11-363J):lincRNA      | chr14 | 69239166 | 69260567 | - | 0    | 0    |
| ENSG0000(RP11-638I):antisense    | chr14 | 1E+08    | 1E+08    | + | 0    | 0    |
| ENSG0000(NT5CP1):processed_ch    | chr14 | 73571159 | 73571667 | - | 0    | 0    |
| ENSG0000(RP11-829H):antisense    | chr14 | 30876179 | 30889808 | - | 0    | 0.21 |
| ENSG0000(RP11-111A):lincRNA      | chr14 | 39474840 | 39513780 | + | 0    | 0    |
| ENSG0000(ASB9P1):processed_ch    | chr15 | 92795647 | 92796439 | + | 0    | 0    |
| ENSG0000(RP11-108C):protein_co   | chr11 | 1.12E+08 | 1.12E+08 | - | 0.37 | 0    |
| ENSG0000(BANF1P1):processed_ch   | chr14 | 68936602 | 68936864 | + | 0    | 0    |
| ENSG0000(RP11-353P):lincRNA      | chr14 | 83906872 | 83915050 | - | 0    | 0    |
| ENSG0000(CTD-2134A):lincRNA      | chr14 | 1.04E+08 | 1.04E+08 | - | 0    | 0    |
| ENSG0000(RP11-280K):sense_ove    | chr14 | 51765276 | 51825422 | + | 0.04 | 0.12 |

|                                      |          |          |   |       |      |
|--------------------------------------|----------|----------|---|-------|------|
| ENSG0000(FKBP1BP1 processed_ chr14   | 41742639 | 41742963 | + | 0     | 0    |
| ENSG0000(FRMD6-AS. lincRNA chr14     | 51454512 | 51599952 | - | 0     | 0    |
| ENSG0000(RP11-753D lincRNA chr14     | 88175391 | 88180198 | + | 0     | 0    |
| ENSG0000(RP11-12J1( protein_co chr10 | 1.25E+08 | 1.25E+08 | - | 0.06  | 0.12 |
| ENSG0000(RP11-692C processed_ chr15  | 91676771 | 91677060 | + | 0     | 0    |
| ENSG0000(OR4K4P unprocessε chr14     | 19905917 | 19906600 | + | 0     | 0    |
| ENSG0000(AC068831. transcribed chr15 | 91029888 | 91029996 | + | 17.71 | 0    |
| ENSG0000(GLRXP2 processed_ chr14     | 90107675 | 90107995 | + | 0     | 0    |
| ENSG0000(RHOXF1-A antisense chrX     | 1.2E+08  | 1.2E+08  | + | 0.12  | 0.35 |
| ENSG0000(CENPUP2 processed_ chr12    | 25092715 | 25093900 | - | 0     | 0    |
| ENSG0000(LINC00645 lincRNA chr14     | 27612588 | 27639636 | + | 0     | 0    |
| ENSG0000(RP11-22K1 processed_ chr14  | 83805496 | 83805640 | - | 0     | 0    |
| ENSG0000(OR7E106P unprocessε chr14   | 51763056 | 51764076 | - | 0     | 0    |
| ENSG0000(CRAT37 lincRNA chr15        | 91408708 | 91605211 | + | 0.13  | 0.06 |
| ENSG0000(RP11-463C processed_ chr14  | 77173075 | 77173652 | - | 0     | 0.13 |
| ENSG0000(RP11-16B1 antisense chr14   | 59969116 | 60091783 | - | 0     | 0    |
| ENSG0000(RP11-973D antisense chr12   | 55966838 | 55967474 | - | 0     | 0    |
| ENSG0000(SPECC1L-A protein_co chr22  | 24270898 | 24442356 | + | 0.33  | 0    |
| ENSG0000(CTD-2568P lincRNA chr14     | 60323236 | 60323907 | + | 0     | 0    |
| ENSG0000(AE000659. processed_ chr14  | 21962819 | 21963042 | - | 0     | 0    |
| ENSG0000(RP11-159L antisense chr14   | 30734926 | 30822702 | - | 0     | 0    |
| ENSG0000(AC005519. sense_ovei chr14  | 74289127 | 74294425 | - | 0.79  | 2.51 |
| ENSG0000(CTD-2376I antisense chr14   | 1E+08    | 1E+08    | - | 0     | 0    |
| ENSG0000(RP11-72M lincRNA chr14      | 66212810 | 66509394 | - | 0     | 0.87 |
| ENSG0000(CTD-2313J processed_ chr15  | 92762757 | 92763750 | + | 0     | 0    |
| ENSG0000(PSMA3P processed_ chr14     | 60179382 | 60180016 | + | 0.11  | 0    |
| ENSG0000(OR4N1P unprocessε chr14     | 19796345 | 19797260 | + | 0     | 0    |
| ENSG0000(BLZF2P unprocessε chr14     | 68867857 | 68869951 | - | 0.05  | 0    |
| ENSG0000(RP11-99E1 processed_ chr14  | 76690139 | 76690742 | - | 0     | 0    |
| ENSG0000(DUX4L16 unprocessε chrY     | 11306918 | 11308181 | + | 0     | 0    |
| ENSG0000(RHOQP1 processed_ chr14     | 49599994 | 49600572 | + | 1.01  | 1.03 |
| ENSG0000(RP11-99E1 lincRNA chr14     | 76710658 | 76761388 | - | 0.13  | 0    |
| ENSG0000(RP11-452K processed_ chr15  | 94168349 | 94168751 | + | 0     | 0    |
| ENSG0000(PTTG4P processed_ chr14     | 71085482 | 71085833 | - | 0     | 0    |
| ENSG0000(RP11-1070 lincRNA chr14     | 95516136 | 95517911 | + | 0.12  | 0.2  |
| ENSG0000(RP11-14J7 antisense chr14   | 20587644 | 20607137 | + | 0     | 0    |
| ENSG0000(CTD-2644I sense_ovei chr14  | 1.01E+08 | 1.01E+08 | - | 0     | 0    |
| ENSG0000(SNRPGP1 processed_ chr14    | 50571919 | 50572140 | - | 0     | 0    |
| ENSG0000(RP11-98L1 processed_ chr14  | 76013679 | 76014143 | + | 0     | 0    |
| ENSG0000(RP11-320N antisense chr14   | 32373337 | 32417974 | - | 0.55  | 0    |
| ENSG0000(RP11-638I processed_ chr14  | 1E+08    | 1E+08    | + | 0     | 0    |
| ENSG0000(RP11-44L9 lincRNA chr16     | 73483317 | 73487744 | + | 0     | 0    |
| ENSG0000(LINC01500 lincRNA chr14     | 58828234 | 59017328 | + | 0     | 0.3  |
| ENSG0000(FAM181A antisense chr14     | 93904730 | 93927066 | - | 0     | 0    |
| ENSG0000(ZNF519P3 unprocessε chr15   | 21911559 | 21912590 | - | 0     | 0    |

|                                          |          |          |   |      |      |
|------------------------------------------|----------|----------|---|------|------|
| ENSG0000(RP5-1021I2 lincRNA chr14        | 73822559 | 73830135 | - | 0    | 0    |
| ENSG0000(RP11-316E processed_ chr14      | 74873684 | 74874254 | + | 0    | 0    |
| ENSG0000(TRIM6-TRIM6 protein_co chr11    | 5596725  | 5644398  | + | 0.29 | 0.76 |
| ENSG0000(NBEAP1 transcribed chr15        | 20657638 | 20688408 | - | 0.05 | 0.04 |
| ENSG0000(RP11-545N processed_ chr14      | 39108342 | 39108707 | + | 0    | 0    |
| ENSG0000(RP11-108M lincRNA chr14         | 57066260 | 57112660 | - | 0.32 | 0.83 |
| ENSG0000(CTD-3051D lincRNA chr14         | 1.05E+08 | 1.05E+08 | - | 0    | 0.01 |
| ENSG0000(RP11-30G8 lincRNA chr15         | 27621534 | 27629289 | + | 0    | 0    |
| ENSG0000(RP11-371E processed_ chr14      | 93138066 | 93138465 | + | 0    | 0    |
| ENSG0000(SERPINA2 polymorph chr14        | 94364313 | 94366698 | - | 0    | 0    |
| ENSG0000(RP11-260M lincRNA chr14         | 1.04E+08 | 1.04E+08 | - | 0    | 0    |
| ENSG0000(RP11-84C1 processed_ chr14      | 20983155 | 20985066 | - | 0    | 0    |
| ENSG0000(RP11-452D lincRNA chr14         | 83017106 | 83018144 | - | 0    | 0    |
| ENSG0000(RP11-81F1 antisense chr14       | 36808871 | 36828729 | + | 0    | 0    |
| ENSG0000(LINC01629 lincRNA chr14         | 76959638 | 76965802 | + | 0    | 0    |
| ENSG0000(RP3-414A1 antisense chr14       | 73616700 | 73633941 | - | 0    | 0    |
| ENSG0000(AL161668.1 lincRNA chr14        | 21024172 | 21029271 | + | 0    | 0    |
| ENSG0000(DYNLL1P2 processed_ chr14       | 81412970 | 81413239 | + | 0    | 0    |
| ENSG0000(DNAJC19P1 processed_ chr14      | 45290036 | 45290386 | + | 0    | 0    |
| ENSG0000(LINC-ROR lincRNA chr18          | 57054559 | 57072119 | - | 0.02 | 0    |
| ENSG0000(RP11-488C lincRNA chr14         | 76778952 | 76782249 | + | 0    | 0.27 |
| ENSG0000(RP11-368J2 transcribed chr15    | 93065586 | 93066606 | - | 0    | 0.13 |
| ENSG0000(RPL21P7 processed_ chr14        | 65266638 | 65267690 | - | 0    | 0    |
| ENSG0000(RP11-725G unprocessed_ chr14    | 95199039 | 95199345 | + | 0    | 0    |
| ENSG0000(RP11-369C lincRNA chr14         | 45706250 | 45715952 | - | 0    | 0    |
| ENSG0000(RPL21P9 processed_ chr14        | 67714545 | 67715204 | + | 0    | 0    |
| ENSG0000(RP11-134E processed_ chr14      | 32241524 | 32243093 | - | 0    | 0    |
| ENSG0000(RP11-362L1 sense_intronic chr14 | 1E+08    | 1E+08    | + | 0    | 0    |
| ENSG0000(RP11-90P1 processed_ chr14      | 42657763 | 42657918 | - | 0    | 0    |
| ENSG0000(CTD-2325P antisense chr14       | 68683411 | 68685565 | - | 0    | 0    |
| ENSG0000(SERPINE4P processed_ chr15      | 27340524 | 27340804 | + | 0    | 0    |
| ENSG0000(OR11H5P unprocessed_ chr14      | 20209240 | 20210210 | + | 0    | 0    |
| ENSG0000(COX7A2P1 processed_ chr14       | 67652300 | 67652614 | - | 0    | 0    |
| ENSG0000(RP11-76E1 transcribed chr15     | 93825058 | 93825159 | - | 0    | 0    |
| ENSG0000(RP11-492D unprocessed_ chr15    | 20228620 | 20277503 | - | 0    | 0    |
| ENSG0000(CTD-2014B processed_ chr14      | 65879592 | 65881070 | - | 0    | 0    |
| ENSG0000(RP11-725G lincRNA chr14         | 95329584 | 95335504 | + | 0    | 0    |
| ENSG0000(RP11-739G lincRNA chr15         | 93589867 | 93760799 | + | 0    | 0    |
| ENSG0000(RP11-354B processed_ chr15      | 94273496 | 94274005 | + | 0    | 0    |
| ENSG0000(RP11-857B antisense chr14       | 44876874 | 44897077 | - | 0    | 0    |
| ENSG0000(RP4-773N1 antisense chr1        | 1.1E+08  | 1.1E+08  | + | 2.28 | 2.02 |
| ENSG0000(CTD-2298J1 lincRNA chr14        | 41587861 | 41604856 | - | 0    | 0    |
| ENSG0000(RP11-242P antisense chr14       | 79661666 | 79791263 | - | 0    | 0    |
| ENSG0000(RP11-395B processed_ chr14      | 62514872 | 62515123 | - | 0    | 0    |
| ENSG0000(RP11-10A2 processed_ chr14      | 48045481 | 48046216 | + | 0    | 0    |

|                                      |          |          |   |      |      |
|--------------------------------------|----------|----------|---|------|------|
| ENSG0000(RPL21P5 processed_ chr14    | 31111569 | 31112239 | - | 0    | 0    |
| ENSG0000(OR4T1P unprocessε chr14     | 20093353 | 20094263 | + | 0    | 0    |
| ENSG0000(RP11-219E antisense chr14   | 20874305 | 20875768 | - | 0.08 | 0.28 |
| ENSG0000(BCL2L2-PA protein_co chr14  | 23306835 | 23325369 | + | 3.39 | 7.19 |
| ENSG0000(SYNJ2BP-C protein_co chr14  | 70326064 | 70417074 | - | 3.81 | 2.66 |
| ENSG0000(HSPE1P2 processed_ chr14    | 63601509 | 63601814 | + | 0    | 0    |
| ENSG0000(RP11-950C antisense chr14   | 75004719 | 75008481 | - | 0    | 0.34 |
| ENSG0000(LINC00930 lincRNA chr15     | 92567818 | 92572042 | - | 0    | 0    |
| ENSG0000(UBE2CP1 processed_ chr14    | 30683045 | 30683598 | - | 0    | 0    |
| ENSG0000(CTD-2142D lincRNA chr14     | 38190983 | 38202923 | + | 0    | 0    |
| ENSG0000(HSBP1P1 processed_ chr14    | 58463971 | 58464136 | + | 0    | 0    |
| ENSG0000(RP11-545M lincRNA chr14     | 39103140 | 39103812 | + | 0    | 0    |
| ENSG0000(OR4Q1P transcribec chr15    | 22044496 | 22045399 | + | 0    | 0    |
| ENSG0000(RP5-1021I2 protein_co chr14 | 73851971 | 73932278 | + | 0.02 | 0.28 |
| ENSG0000(RP11-509A lincRNA chr15     | 20344736 | 20359166 | + | 0    | 0    |
| ENSG0000(ARHGAP5- antisense chr14    | 32074946 | 32076793 | - | 1.46 | 0.9  |
| ENSG0000(RP11-193F processed_ chr14  | 60972272 | 60972466 | - | 0    | 2.29 |
| ENSG0000(RP11-104E antisense chr14   | 24595723 | 24657774 | + | 0    | 0    |
| ENSG0000(RP11-517C antisense chr14   | 58370023 | 58395641 | - | 0    | 0    |
| ENSG0000(TRIM34 protein_co chr11     | 5619764  | 5644398  | + | 3.67 | 4.05 |
| ENSG0000(RP4-693M: antisense chr14   | 73698103 | 73700351 | - | 0    | 0    |
| ENSG0000(RP11-964E antisense chr14   | 36647083 | 36658801 | - | 0    | 0    |
| ENSG0000(RP11-588P antisense chr14   | 79246668 | 79249023 | - | 0    | 0    |
| ENSG0000(RP11-123M antisense chr14   | 1.01E+08 | 1.01E+08 | - | 0    | 0    |
| ENSG0000(AC068831. unprocessε chr15  | 91031712 | 91032435 | - | 0    | 0    |
| ENSG0000(RP11-638I2 antisense chr14  | 1E+08    | 1E+08    | + | 0    | 0    |
| ENSG0000(HIF1A-AS2 lincRNA chr14     | 61715558 | 61751097 | - | 0.27 | 0.15 |
| ENSG0000(COX6CP11 processed_ chr14   | 77652827 | 77653055 | - | 0    | 0    |
| ENSG0000(RP11-1042 antisense chr14   | 60515119 | 60554916 | + | 0.07 | 0.08 |
| ENSG0000(RP11-407N processed_ chr14  | 39211781 | 39212255 | + | 0    | 0    |
| ENSG0000(RP11-543C lincRNA chr14     | 99691445 | 99693648 | - | 0    | 0    |
| ENSG0000(LINC01397 antisense chr1    | 1.1E+08  | 1.1E+08  | + | 0    | 0    |
| ENSG0000(CTC-260F2 protein_co chr19  | 19516227 | 19536076 | + | 0    | 1.07 |
| ENSG0000(RP11-299L lincRNA chr14     | 81441987 | 81450157 | - | 0.21 | 0.12 |
| ENSG0000(RP11-386N processed_ chr15  | 92580829 | 92600545 | + | 0    | 0    |
| ENSG0000(RP11-463D protein_co chr8   | 73688691 | 73878854 | - | 4.15 | 2.23 |
| ENSG0000(RP11-1078 lincRNA chr14     | 90452063 | 90455117 | - | 0    | 0    |
| ENSG0000(RP11-74M: transcribec chr12 | 56822985 | 56874268 | + | 0.03 | 0.06 |
| ENSG0000(RP11-506K processed_ chr14  | 38835389 | 38835788 | + | 0    | 0    |
| ENSG0000(RP11-8L8.1 processed_ chr14 | 1.01E+08 | 1.01E+08 | - | 0    | 0    |
| ENSG0000(CTD-2002H sense_ovei chr14  | 58264662 | 58269681 | + | 0.12 | 0    |
| ENSG0000(RP11-11K1 lincRNA chr14     | 82788478 | 82796221 | - | 0    | 0    |
| ENSG0000(BMS1P16 unprocessε chr15    | 21160305 | 21167357 | + | 0.06 | 0    |
| ENSG0000(CTD-2315A processed_ chr14  | 59135488 | 59136421 | - | 0    | 0    |
| ENSG0000(RP11-218E antisense chr14   | 50848122 | 50865659 | + | 0    | 0    |

|                                |       |          |          |   |      |      |
|--------------------------------|-------|----------|----------|---|------|------|
| ENSG0000(LINC01269 lincRNA     | chr14 | 70698698 | 70712153 | + | 0    | 0    |
| ENSG0000(RP11-81F1 antisense   | chr14 | 36788644 | 36807163 | + | 0    | 0    |
| ENSG0000(RP11-404P protein_co  | chr14 | 96204844 | 96263929 | + | 6.22 | 6.35 |
| ENSG0000(SALL4P7 transcribed   | chr14 | 60493766 | 60496885 | - | 0    | 0    |
| ENSG0000(RP11-436M lincRNA     | chr14 | 99977115 | 99978098 | - | 0    | 0    |
| ENSG0000(RP11-1033 lincRNA     | chr14 | 52111122 | 52129625 | - | 0    | 0    |
| ENSG0000(RP3-414A1 antisense   | chr14 | 73522878 | 73530610 | + | 0    | 0    |
| ENSG0000(CTD-2058B antisense   | chr14 | 38003113 | 38004847 | - | 0    | 0    |
| ENSG0000(RP11-589M lincRNA     | chr14 | 52792875 | 52820034 | - | 0    | 0    |
| ENSG0000(RP11-356K antisense   | chr14 | 89355060 | 89356571 | + | 0    | 0    |
| ENSG0000(LINC00871 lincRNA     | chr14 | 45940943 | 46501823 | + | 0    | 0    |
| ENSG0000(LINC00638 lincRNA     | chr14 | 1.05E+08 | 1.05E+08 | + | 0.48 | 0.74 |
| ENSG0000(RP11-433J lincRNA     | chr14 | 96592733 | 96595762 | + | 0.03 | 0.04 |
| ENSG0000(RP11-1085 lincRNA     | chr14 | 56759379 | 56765757 | + | 0    | 0    |
| ENSG0000(SRP54-AS1 transcribed | chr14 | 34920858 | 34982532 | - | 0.85 | 1.24 |
| ENSG0000(AE000660. processed_  | chr14 | 22011910 | 22014964 | + | 0    | 0    |
| ENSG0000(SLC20A1P3 processed_  | chr15 | 19967414 | 19968352 | - | 0    | 0    |
| ENSG0000(RP11-467L. processed_ | chr15 | 20626819 | 20627365 | - | 0    | 0    |
| ENSG0000(SLC25A21-. antisense  | chr14 | 37171888 | 37173811 | + | 0.58 | 0.29 |
| ENSG0000(LINC01193 lincRNA     | chr15 | 20940438 | 20993303 | + | 0    | 0    |
| ENSG0000(RP11-218E lincRNA     | chr14 | 50956259 | 50962002 | - | 0.44 | 0.67 |
| ENSG0000(CXADRP2 processed_    | chr15 | 21372793 | 21373881 | - | 0    | 0    |
| ENSG0000(C20orf141 protein_co  | chr20 | 2814987  | 2815833  | + | 0.58 | 0    |
| ENSG0000(RP11-661G antisense   | chr14 | 90697333 | 90699374 | + | 0    | 0    |
| ENSG0000(RP11-566J lincRNA     | chr14 | 1.01E+08 | 1.01E+08 | - | 0    | 0    |
| ENSG0000(RP11-226P lincRNA     | chr14 | 81727780 | 81743138 | - | 0    | 0    |
| ENSG0000(RP11-232C antisense   | chr14 | 78695321 | 78698122 | - | 0    | 0    |
| ENSG0000(OR11H3P unprocess     | chr15 | 22009548 | 22010529 | - | 0    | 0    |
| ENSG0000(CKAP2P1 processed_    | chr14 | 21110295 | 21113472 | - | 0    | 0    |
| ENSG0000(RP11-332E antisense   | chr14 | 78279572 | 78283376 | - | 0    | 0    |
| ENSG0000(CTD-2135J protein_co  | chr8  | 10725399 | 10839847 | - | 0    | 0.02 |
| ENSG0000(PRC1-AS1 antisense    | chr15 | 90966345 | 90988624 | + | 0.12 | 0.27 |
| ENSG0000(DUXAP6 processed_     | chr15 | 92281484 | 92282084 | + | 0    | 0    |
| ENSG0000(RP11-66N2 antisense   | chr14 | 23561097 | 23568073 | + | 3.04 | 3.86 |
| ENSG0000(RP11-195F protein_co  | chr9  | 34646645 | 34657113 | + | 0.17 | 0.3  |
| ENSG0000(RP11-404P lincRNA     | chr14 | 96275046 | 96276723 | - | 0    | 0    |
| ENSG0000(ITPK1-AS1 antisense   | chr14 | 93067452 | 93072152 | + | 0    | 0    |
| ENSG0000(RP11-547D antisense   | chr14 | 53153354 | 53157528 | + | 0    | 0.06 |
| ENSG0000(RP11-603B unprocess   | chr15 | 22278971 | 22282872 | + | 0    | 0    |
| ENSG0000(CTD-2341M lincRNA     | chr14 | 85934710 | 86129778 | + | 0    | 0    |
| ENSG0000(RP11-112J processed_  | chr14 | 58827679 | 58828176 | - | 0    | 0    |
| ENSG0000(LINC00637 lincRNA     | chr14 | 1.04E+08 | 1.04E+08 | + | 0    | 0.03 |
| ENSG0000(RP11-982M lincRNA     | chr14 | 1.05E+08 | 1.05E+08 | - | 0    | 0    |
| ENSG0000(SUB1P2 processed_     | chr14 | 74305425 | 74306527 | + | 0    | 0    |
| ENSG0000(RP11-73E1 antisense   | chr14 | 34874343 | 34876459 | + | 0.79 | 0.84 |

|                 |           |             |       |          |          |   |      |      |
|-----------------|-----------|-------------|-------|----------|----------|---|------|------|
| ENSG00000108800 | ENO1P2    | transcribed | chr15 | 92420860 | 92422735 | + | 0    | 0    |
| ENSG00000108801 | RP11-293M | lincRNA     | chr14 | 75238616 | 75269283 | - | 0    | 0    |
| ENSG00000108802 | RP11-386M | transcribed | chr15 | 92715710 | 92734195 | - | 0    | 0.63 |
| ENSG00000108803 | RP11-862G | lincRNA     | chr14 | 92886352 | 92893506 | + | 0    | 0    |
| ENSG00000108804 | RP11-406A | lincRNA     | chr14 | 82642620 | 82706825 | + | 0    | 0    |
| ENSG00000108805 | RP11-80A1 | antisense   | chr14 | 24501594 | 24508688 | + | 0.19 | 0.21 |
| ENSG00000108806 | RP11-218E | antisense   | chr14 | 50912226 | 50913358 | + | 0    | 0    |
| ENSG00000108807 | RP11-454K | processed   | chr14 | 45502742 | 45503140 | - | 0    | 0    |
| ENSG00000108808 | RP11-163M | antisense   | chr14 | 44507407 | 44538513 | + | 0    | 0    |
| ENSG00000108809 | CTD-2223C | antisense   | chr14 | 1.04E+08 | 1.04E+08 | - | 0    | 0    |
| ENSG00000108810 | RP11-688G | antisense   | chr14 | 99512501 | 99513576 | + | 0    | 0    |
| ENSG00000108811 | RP11-2G1. | processed   | chr14 | 48398310 | 48399375 | + | 0    | 0    |
| ENSG00000108812 | RP11-2G1. | lincRNA     | chr14 | 48396508 | 48491767 | - | 0    | 0    |
| ENSG00000108813 | RP11-356K | antisense   | chr14 | 89350285 | 89364699 | + | 0    | 0    |
| ENSG00000108814 | RP11-794A | lincRNA     | chr14 | 54470709 | 54471218 | + | 0    | 0    |
| ENSG00000108815 | LINC01579 | lincRNA     | chr15 | 93718542 | 94070820 | - | 0    | 0    |
| ENSG00000108816 | RP11-841C | antisense   | chr14 | 52640839 | 52641566 | + | 0    | 0    |
| ENSG00000108817 | RP11-613G | processed   | chr14 | 57040885 | 57042504 | + | 0    | 0    |
| ENSG00000108818 | RP11-1012 | processed   | chr14 | 67799004 | 67799609 | + | 0    | 0    |
| ENSG00000108819 | CTD-2509C | lincRNA     | chr14 | 65236480 | 65318790 | - | 0    | 0    |
| ENSG00000108820 | RP11-24J1 | antisense   | chr15 | 92162798 | 92172436 | - | 0    | 0    |
| ENSG00000108821 | MTND4P3   | processed   | chr14 | 84172841 | 84173606 | + | 0    | 0    |
| ENSG00000108822 | RP11-110A | antisense   | chr12 | 55434734 | 55585471 | - | 0    | 0    |
| ENSG00000108823 | RP11-1042 | transcribed | chr14 | 60544400 | 60544654 | + | 0    | 0    |
| ENSG00000108824 | RP11-692C | lincRNA     | chr15 | 91643017 | 91649114 | - | 1.81 | 1.85 |
| ENSG00000108825 | DIO2-AS1  | antisense   | chr14 | 80211419 | 80455469 | + | 0    | 0    |
| ENSG00000108826 | RP11-32B5 | processed   | chr15 | 21382383 | 21382842 | + | 0    | 0    |
| ENSG00000108827 | CTD-2292M | lincRNA     | chr14 | 20260480 | 20264308 | - | 0.19 | 0.16 |
| ENSG00000108828 | RAP1AP    | processed   | chr14 | 74482985 | 74483435 | + | 0    | 0    |
| ENSG00000108829 | CTD-2007A | lincRNA     | chr14 | 87634379 | 87655294 | - | 0    | 0    |
| ENSG00000108830 | BCAR1P2   | processed   | chr15 | 21080812 | 21081447 | - | 0    | 0    |
| ENSG00000108831 | RP11-84C1 | lincRNA     | chr14 | 20916766 | 20928580 | - | 0    | 0    |
| ENSG00000108832 | RP11-255M | lincRNA     | chr15 | 95080095 | 95132859 | - | 0    | 0    |
| ENSG00000108833 | NANOGP7   | transcribed | chr14 | 91604402 | 91605319 | - | 0    | 0    |
| ENSG00000108834 | RP11-1085 | lincRNA     | chr14 | 56817570 | 56893710 | - | 0    | 0    |
| ENSG00000108835 | HIF1A-AS1 | lincRNA     | chr14 | 61681041 | 61695823 | - | 0.42 | 0.34 |
| ENSG00000108836 | RP11-804M | processed   | chr14 | 63734697 | 63735923 | + | 0.14 | 0.05 |
| ENSG00000108837 | LINC01568 | lincRNA     | chr16 | 73386805 | 73421393 | + | 0    | 0    |
| ENSG00000108838 | BMS1P15   | unprocessed | chr15 | 20153776 | 20160826 | + | 0    | 0.21 |
| ENSG00000108839 | RP11-496I | unprocessed | chr14 | 19228924 | 19244931 | - | 0    | 0    |
| ENSG00000108840 | RP11-701B | processed   | chr14 | 59479274 | 59525437 | - | 0    | 0    |
| ENSG00000108841 | KRT18P6   | processed   | chr14 | 35511825 | 35513089 | - | 0    | 0    |
| ENSG00000108842 | RP11-813I | lincRNA     | chr14 | 55748208 | 55773203 | + | 0    | 0    |
| ENSG00000108843 | LINC01580 | lincRNA     | chr15 | 93900701 | 93984150 | + | 0    | 0    |
| ENSG00000108844 | RP11-928F | unprocessed | chr15 | 21980321 | 21981209 | - | 0    | 0    |

|                                      |          |          |   |      |       |
|--------------------------------------|----------|----------|---|------|-------|
| ENSG0000(RP11-164C processed_ chr15  | 93430659 | 93431217 | - | 0    | 0     |
| ENSG0000(CKS1BP1 processed_ chr14    | 96223108 | 96223347 | + | 0.59 | 0.65  |
| ENSG0000(RP11-507K antisense chr14   | 88551597 | 88552493 | + | 0.46 | 0.81  |
| ENSG0000(RP11-561B protein_co chr14  | 35122549 | 35317474 | + | 0.75 | 0.31  |
| ENSG0000(LINC00520 lincRNA chr14     | 55781135 | 55796688 | - | 1.51 | 1.43  |
| ENSG0000(RP11-944C lincRNA chr14     | 89628921 | 89642671 | - | 0.79 | 0.22  |
| ENSG0000(RP11-404P antisense chr14   | 96259411 | 96268624 | - | 0    | 0     |
| ENSG0000(DUX4L27 processed_ chr12    | 34208415 | 34209675 | - | 0    | 0     |
| ENSG0000(RP11-1082 lincRNA chr14     | 98497132 | 98514798 | + | 0    | 0     |
| ENSG0000(CTD-2560C processed_ chr14  | 66760532 | 66761018 | + | 0    | 0     |
| ENSG0000(RP11-467L unprocessε chr15  | 20545576 | 20549444 | - | 0    | 0     |
| ENSG0000(RP11-895N lincRNA chr14     | 91418266 | 91421176 | + | 0    | 0     |
| ENSG0000(ZNF519P2 processed_ chr15   | 20901441 | 20901609 | - | 0    | 0     |
| ENSG0000(CTD-2302E lincRNA chr14     | 63598874 | 63599248 | + | 0    | 0     |
| ENSG0000(RP11-589N processed_ chr14  | 52798904 | 52799061 | - | 0    | 0     |
| ENSG0000(RP11-624J: lincRNA chr14    | 56514331 | 56551309 | + | 0    | 0     |
| ENSG0000(LINC01148 lincRNA chr14     | 86905778 | 86922755 | + | 0    | 0     |
| ENSG0000(ADIPOR1P2 processed_ chr14  | 94633705 | 94634524 | + | 0    | 0     |
| ENSG0000(OR11H7 polymorph chr14      | 20229402 | 20230341 | + | 0    | 0     |
| ENSG0000(RP11-1152 lincRNA chr14     | 87710419 | 87872291 | - | 0.15 | 0.43  |
| ENSG0000(RP11-255G lincRNA chr14     | 51392128 | 51397135 | - | 0    | 0     |
| ENSG0000(CTD-2555C lincRNA chr14     | 64358768 | 64379318 | - | 0    | 0.14  |
| ENSG0000(RP11-219E antisense chr14   | 20783888 | 20784293 | + | 0    | 0     |
| ENSG0000(CTD-3051D lincRNA chr14     | 1.05E+08 | 1.05E+08 | + | 0.02 | 0.02  |
| ENSG0000(TRAV33 TR_V_pseu chr14      | 22190158 | 22190713 | + | 0    | 0     |
| ENSG0000(RP11-109N antisense chr14   | 73057925 | 73059415 | - | 0.43 | 0.4   |
| ENSG0000(CTD-2128A lincRNA chr14     | 85387275 | 85388765 | + | 0    | 0     |
| ENSG0000(RP11-408B lincRNA chr12     | 85318060 | 85342912 | + | 0    | 0     |
| ENSG0000(RP11-74M: unprocessε chr12  | 56855694 | 56855886 | + | 0    | 0     |
| ENSG0000(OR4C13 protein_co chr11     | 49952391 | 49953419 | + | 0    | 0     |
| ENSG0000(RNASE4 protein_co chr14     | 20684100 | 20701215 | + | 53.2 | 51.19 |
| ENSG0000(RP11-7F17 lincRNA chr14     | 77069180 | 77076344 | - | 0    | 0     |
| ENSG0000(RP11-293N antisense chr14   | 75259411 | 75271950 | + | 0    | 0     |
| ENSG0000(OR4K16P unprocessε chr14    | 19956600 | 19957568 | + | 0    | 0     |
| ENSG0000(CTD-2555K unprocessε chr14  | 22723476 | 22726572 | - | 0    | 0     |
| ENSG0000(CTD-2555C antisense chr14   | 64422935 | 64448557 | - | 1.31 | 1.44  |
| ENSG0000(RP11-300J: lincRNA chr14    | 88018605 | 88036319 | - | 0    | 0     |
| ENSG0000(RP11-537P sense_intrε chr14 | 37097062 | 37098563 | - | 0    | 0     |
| ENSG0000(KRT8P2 processed_ chr14     | 43540883 | 43541826 | - | 0    | 0     |
| ENSG0000(CTD-2243E antisense chr14   | 79072132 | 79074767 | - | 0    | 0     |
| ENSG0000(RP11-123K protein_co chr12  | 57249609 | 57296484 | - | 0.51 | 0.35  |
| ENSG0000(RP11-76E1 lincRNA chr15     | 93882082 | 93886743 | + | 0    | 0     |
| ENSG0000(DUX4L4 unprocessε chr4      | 1.9E+08  | 1.9E+08  | + | 0    | 0     |
| ENSG0000(TRAV28 TR_V_pseu chr14      | 22155079 | 22155638 | + | 0    | 0     |
| ENSG0000(RP11-349A processed_ chr14  | 58100985 | 58101574 | + | 0    | 0     |

|                                 |       |          |          |   |       |       |
|---------------------------------|-------|----------|----------|---|-------|-------|
| ENSG0000( CTD-2566J: antisense  | chr14 | 68125004 | 68130196 | - | 0     | 0     |
| ENSG0000( MC1R protein_co       | chr16 | 89912119 | 89920977 | + | 3.27  | 3.39  |
| ENSG0000( EEF1A1P2 processed_   | chr14 | 81661428 | 81662874 | + | 0     | 0     |
| ENSG0000( RP11-355I2 lincRNA    | chr14 | 62069518 | 62081154 | - | 0     | 0     |
| ENSG0000( RP11-286C antisense   | chr14 | 50821880 | 50823501 | + | 0     | 0     |
| ENSG0000( RP11-259K lincRNA     | chr14 | 36214607 | 36235608 | + | 0.07  | 0     |
| ENSG0000( RP11-945F lincRNA     | chr14 | 45567995 | 45569069 | + | 0     | 0     |
| ENSG0000( EEF1A1P33 processed_  | chr12 | 96900697 | 96902698 | - | 0     | 0     |
| ENSG0000( CTD-2014B lincRNA     | chr14 | 65957297 | 66004523 | - | 0     | 0     |
| ENSG0000( GRAMD4P( processed_   | chr15 | 21383821 | 21384064 | + | 0     | 0     |
| ENSG0000( OR7E159P unprocessε   | chr14 | 51771789 | 51772086 | - | 0     | 0     |
| ENSG0000( RP11-214N lincRNA     | chr14 | 42412573 | 42528888 | + | 0     | 0     |
| ENSG0000( RP11-894P antisense   | chr14 | 1.04E+08 | 1.04E+08 | + | 0.13  | 0.14  |
| ENSG0000( RP11-30G8 lincRNA     | chr15 | 27684498 | 27685768 | - | 0     | 0     |
| ENSG0000( RP11-463J: antisense  | chr14 | 51982520 | 51987219 | - | 0     | 0     |
| ENSG0000( OR111J2P transcribec  | chr15 | 20960675 | 20961581 | + | 0     | 0     |
| ENSG0000( CTD-2325K transcribec | chr14 | 57629841 | 57631162 | + | 0.04  | 0     |
| ENSG0000( RP11-247L: lincRNA    | chr14 | 50397013 | 50398345 | + | 0     | 0     |
| ENSG0000( RP11-982N antisense   | chr14 | 1.05E+08 | 1.05E+08 | - | 0     | 0     |
| ENSG0000( RP11-594C lincRNA     | chr14 | 87353070 | 87573022 | - | 0     | 0     |
| ENSG0000( RP11-561B lincRNA     | chr14 | 35362232 | 35363628 | - | 0     | 0     |
| ENSG0000( MIR381HG lincRNA      | chr14 | 1.01E+08 | 1.01E+08 | + | 0     | 0     |
| ENSG0000( SETP1 processed_      | chr14 | 20528115 | 20528959 | - | 0     | 0     |
| ENSG0000( CTC-554D6 protein_co  | chr5  | 1.13E+08 | 1.13E+08 | + | 0     | 0     |
| ENSG0000( RP11-991C lincRNA     | chr14 | 95048220 | 95050953 | + | 0     | 0     |
| ENSG0000( LINC01146 lincRNA     | chr14 | 88024550 | 88097619 | + | 0     | 0     |
| ENSG0000( RP11-816J8 lincRNA    | chr14 | 49057713 | 49077505 | - | 0     | 0     |
| ENSG0000( RP11-204N lincRNA     | chr14 | 97749264 | 97763989 | - | 0     | 0     |
| ENSG0000( EIF4EBP1P: processed_ | chr14 | 21419620 | 21419960 | + | 0     | 0     |
| ENSG0000( RP3-514A2 lincRNA     | chr14 | 72552580 | 72595125 | - | 0     | 0     |
| ENSG0000( FDPSP3 transcribec    | chr14 | 54884849 | 54886213 | - | 0     | 0     |
| ENSG0000( DUXA protein_co       | chr19 | 57154021 | 57167443 | - | 0     | 0     |
| ENSG0000( RP11-232C antisense   | chr14 | 78703615 | 78709934 | - | 0     | 0     |
| ENSG0000( CTD-2547L processed_  | chr14 | 91242759 | 91252211 | + | 0.16  | 0.18  |
| ENSG0000( RP11-270N lincRNA     | chr14 | 75970924 | 75971587 | + | 0     | 0     |
| ENSG0000( ATP5A1P4 processed_   | chr14 | 62604113 | 62605717 | - | 0     | 0     |
| ENSG0000( CTD-2509C processed_  | chr14 | 65234515 | 65235101 | - | 0     | 0     |
| ENSG0000( AC007040: protein_co  | chr2  | 70939318 | 70995336 | - | 0     | 0.22  |
| ENSG0000( RP11-32B5 unprocessε  | chr15 | 21250180 | 21260147 | - | 0     | 0     |
| ENSG0000( CTD-3035D lincRNA     | chr14 | 90822365 | 90828128 | - | 0     | 0     |
| ENSG0000( RP11-344B antisense   | chr9  | 36856555 | 36861375 | + | 0     | 0     |
| ENSG0000( HIGD1AP1: processed_  | chr14 | 30964347 | 30964622 | + | 0     | 0     |
| ENSG0000( RP11-388E unprocessε  | chr14 | 23817281 | 23827396 | - | 0     | 0     |
| ENSG0000( RP11-326A lincRNA     | chr15 | 93257198 | 93260475 | + | 0     | 0     |
| ENSG0000( CEP95 protein_co      | chr17 | 64506588 | 64542461 | + | 13.27 | 10.41 |



|                                       |          |          |   |      |      |
|---------------------------------------|----------|----------|---|------|------|
| ENSG0000(RP5-1021I2 antisense chr14   | 73896164 | 73938114 | - | 0.02 | 0    |
| ENSG0000(RP11-193F processed_ chr14   | 60879714 | 60982585 | + | 0    | 0    |
| ENSG0000(SETP2 processed_ chr14       | 51436038 | 51436963 | + | 0    | 0    |
| ENSG0000(RP11-557C processed_ chr14   | 43595136 | 43596683 | + | 0    | 0    |
| ENSG0000(CTD-2643K processed_ chr15   | 94033658 | 94034177 | + | 0    | 0.32 |
| ENSG0000(SCOCP1 processed_ chr14      | 60158976 | 60159324 | + | 0    | 0    |
| ENSG0000(EGLN3-AS1 antisense chr14    | 34040097 | 34059300 | + | 0    | 0    |
| ENSG0000(OR4U1P unprocessε chr14      | 20043916 | 20044827 | + | 0    | 0    |
| ENSG0000(HNRNPCP1 processed_ chr14    | 58521223 | 58521988 | + | 0.68 | 1.21 |
| ENSG0000(CTD-2298J processed_ chr14   | 41555662 | 41556055 | - | 0    | 0    |
| ENSG0000(CTD-2128A lincRNA chr14      | 85362457 | 85516934 | - | 0    | 0    |
| ENSG0000(RP11-355I2 lincRNA chr14     | 62103378 | 62117175 | - | 0    | 0    |
| ENSG0000(RP11-638I2 sense_intrε chr14 | 1E+08    | 1E+08    | + | 0.14 | 0.6  |
| ENSG0000(TRAV32 TR_V_pseu chr14       | 22185562 | 22186057 | + | 0    | 0    |
| ENSG0000(CTD-2552B processed_ chr14   | 21184341 | 21184959 | - | 0    | 0    |
| ENSG0000(RP11-644F processed_ chr12   | 55654558 | 55655168 | - | 0    | 0    |
| ENSG0000(RP11-203M lincRNA chr14      | 20474789 | 20477089 | - | 0    | 0    |
| ENSG0000(RP11-164C lincRNA chr15      | 93416850 | 93422576 | - | 0    | 0    |
| ENSG0000(LINC01956 lincRNA chr2       | 1.19E+08 | 1.19E+08 | - | 0.34 | 0    |
| ENSG0000(RP11-1079 lincRNA chr14      | 86014686 | 86062960 | - | 0    | 0    |
| ENSG0000(RP11-260M lincRNA chr14      | 1.04E+08 | 1.04E+08 | + | 0    | 0    |
| ENSG0000(CTD-2134A lincRNA chr14      | 1.04E+08 | 1.04E+08 | + | 0    | 0    |
| ENSG0000(BHLHB9P1 processed_ chr14    | 80981988 | 80983638 | + | 0    | 0    |
| ENSG0000(SPATA31E2 unprocessε chr15   | 20593494 | 20599195 | - | 0    | 0    |
| ENSG0000(ZMYND19F processed_ chr14    | 77696591 | 77697377 | + | 0    | 0    |
| ENSG0000(RP11-219E lincRNA chr14      | 20897985 | 20936255 | - | 0    | 0    |
| ENSG0000(RP11-1029 lincRNA chr14      | 1.02E+08 | 1.02E+08 | - | 0.13 | 0.15 |
| ENSG0000(FOXN3-AS1 antisense chr14    | 89417354 | 89419793 | + | 0.89 | 0.55 |
| ENSG0000(RP11-644F antisense chr12    | 55638912 | 55659795 | - | 0    | 0    |
| ENSG0000(CTD-2313J sense_intrε chr15  | 92805770 | 92808567 | - | 0    | 0    |
| ENSG0000(MTND5P3E processed_ chr14    | 84173791 | 84175510 | + | 0    | 0    |
| ENSG0000(CTB-96E2.3 processed_ chr17  | 28357647 | 28381697 | + | 1.91 | 0.97 |
| ENSG0000(NPM1P5 processed_ chr15      | 92285841 | 92286678 | + | 0    | 0    |
| ENSG0000(RP11-47I2 antisense chr14    | 61537508 | 61545287 | - | 0    | 0    |
| ENSG0000(RP11-1070 lincRNA chr14      | 95620914 | 95643285 | + | 0    | 0    |
| ENSG0000(RP11-463J antisense chr14    | 51916145 | 51918571 | - | 0    | 0    |
| ENSG0000(RP5-1163L transcribec chr14  | 71031686 | 71031970 | - | 0    | 0    |
| ENSG0000(RP11-1084 lincRNA chr15      | 26050538 | 26052276 | - | 0    | 0    |
| ENSG0000(CTD-3006C transcribec chr14  | 27258717 | 27845286 | - | 0    | 0    |
| ENSG0000(RP11-991C lincRNA chr14      | 94960277 | 94962976 | - | 0    | 0    |
| ENSG0000(RP11-97N1 processed_ chr14   | 42807378 | 42808112 | - | 0    | 0    |
| ENSG0000(RP11-1078 lincRNA chr14      | 90567495 | 90569976 | + | 0    | 0    |
| ENSG0000(RP11-317N antisense chr14    | 35819224 | 35826765 | - | 1.91 | 2.06 |
| ENSG0000(RP11-407N antisense chr14    | 39265703 | 39267061 | - | 0.17 | 0.28 |
| ENSG0000(RP11-407N protein_co chr14   | 39233902 | 39350423 | + | 0.03 | 0    |

|                                     |          |          |   |       |       |
|-------------------------------------|----------|----------|---|-------|-------|
| ENSG0000(RP11-255G lincRNA chr14    | 51344914 | 51385603 | - | 0     | 0     |
| ENSG0000(RP11-696D lincRNA chr14    | 63298126 | 63299547 | - | 0     | 0     |
| ENSG0000(RP4-647C1 antisense chr14  | 73272182 | 73274081 | - | 0.25  | 0     |
| ENSG0000(RP11-497E lincRNA chr14    | 85528599 | 85529386 | + | 0.11  | 0     |
| ENSG0000(TUBB3 protein_co chr16     | 89921392 | 89938761 | + | 34.99 | 32.14 |
| ENSG0000(KRT8P1 processed_chr14     | 38727275 | 38728481 | + | 0     | 0     |
| ENSG0000(RP11-857B antisense chr14  | 44898908 | 44911863 | - | 0     | 0     |
| ENSG0000(KRT18P7 processed_chr14    | 70594552 | 70595770 | + | 0     | 0     |
| ENSG0000(SALRNA1 lincRNA chr14      | 60639216 | 60642589 | + | 0     | 0     |
| ENSG0000(RP11-692C lincRNA chr15    | 91532891 | 91535095 | + | 0     | 0     |
| ENSG0000(LINC00519 lincRNA chr14    | 51304416 | 51328386 | - | 0.1   | 0.32  |
| ENSG0000(COX4I1P1 processed_chr14   | 61831861 | 61832369 | - | 0     | 0     |
| ENSG0000(RP11-363J lincRNA chr14    | 69183020 | 69214092 | - | 0.3   | 0     |
| ENSG0000(RP11-594C lincRNA chr14    | 87323753 | 87332390 | + | 0     | 0     |
| ENSG0000(RP11-1017 antisense chr14  | 1.02E+08 | 1.02E+08 | - | 0     | 0.14  |
| ENSG0000(CTD-2014B processed_chr14  | 65900932 | 65901451 | - | 0     | 0     |
| ENSG0000(RP11-747H processed_chr14  | 91709111 | 91710617 | + | 0     | 0     |
| ENSG0000(EDDM3DP unprocessε chr14   | 20734578 | 20735011 | + | 0     | 0     |
| ENSG0000(RP11-618G processed_chr14  | 61734138 | 61776260 | + | 0     | 2.32  |
| ENSG0000(RP11-446P processed_chr15  | 25928146 | 25928575 | - | 0     | 0     |
| ENSG0000(GTF3AP2 transcribec chr14  | 71044375 | 71044640 | - | 0     | 0     |
| ENSG0000(HMGN1P3 processed_chr14    | 68887785 | 68888084 | - | 1.15  | 0     |
| ENSG0000(RP11-829H processed_chr14  | 31018446 | 31018796 | + | 0     | 0     |
| ENSG0000(RP11-305B lincRNA chr14    | 43995781 | 44384545 | - | 0     | 0     |
| ENSG0000(RP11-100N antisense chr15  | 27418796 | 27420735 | - | 0     | 0     |
| ENSG0000(RP11-326A processed_chr15  | 93301416 | 93301647 | - | 0     | 0     |
| ENSG0000(NDUFB8P1 processed_chr14   | 73631475 | 73632019 | + | 0     | 0     |
| ENSG0000(RP11-934B protein_co chr14 | 24332310 | 24337382 | - | 0     | 0     |
| ENSG0000(RP11-753D lincRNA chr14    | 88136733 | 88159845 | - | 0     | 0     |
| ENSG0000(CTD-2207P lincRNA chr14    | 74614693 | 74616647 | - | 0.1   | 0.13  |
| ENSG0000(LINC01467 lincRNA chr14    | 81605347 | 81623061 | - | 0     | 0     |
| ENSG0000(HIF1AP1 processed_chr14    | 75116426 | 75116600 | - | 0     | 0     |
| ENSG0000(RP11-433J lincRNA chr14    | 96741191 | 96790613 | + | 0     | 0     |
| ENSG0000(EIF1AXP2 processed_chr14   | 65528830 | 65529574 | - | 0     | 0     |
| ENSG0000(COX5AP2 processed_chr14    | 52117602 | 52117995 | + | 0     | 0     |
| ENSG0000(RP11-638I antisense chr14  | 1E+08    | 1E+08    | - | 0     | 0     |
| ENSG0000(RP11-507K antisense chr14  | 88499334 | 88515502 | + | 0     | 0     |
| ENSG0000(UBE2F-SCL protein_co chr2  | 2.38E+08 | 2.38E+08 | + | 0     | 0.3   |
| ENSG0000(RP11-368P antisense chr14  | 53036755 | 53038251 | + | 0     | 0     |
| ENSG0000(TMEM179 protein_co chr14   | 1.04E+08 | 1.05E+08 | - | 0     | 0     |
| ENSG0000(RP11-131H antisense chr14  | 93939555 | 93944129 | + | 0     | 0     |
| ENSG0000(RP11-125H processed_chr14  | 67199062 | 67200327 | + | 0     | 0     |
| ENSG0000(RP11-47I2 protein_co chr14 | 61529128 | 61657964 | + | 0     | 0     |
| ENSG0000(MPPE1P1 processed_chr14    | 89110148 | 89111223 | - | 0     | 0     |
| ENSG0000(DUX4L19 unprocessε chrY    | 11332329 | 11333595 | + | 0     | 0     |

|                     |             |       |          |          |   |      |      |
|---------------------|-------------|-------|----------|----------|---|------|------|
| ENSG0000(TSPY1      | protein_co  | chrY  | 9466955  | 9469748  | + | 0    | 0    |
| ENSG0000(RP11-368P  | processed_  | chr14 | 53023055 | 53023597 | + | 0    | 0    |
| ENSG0000(RP11-26L1  | lincRNA     | chr14 | 86332376 | 86401285 | + | 0    | 0    |
| ENSG0000(PARP1P2    | processed_  | chr14 | 63123007 | 63123201 | + | 0    | 0    |
| ENSG0000(CTD-2315A  | processed_  | chr14 | 59181593 | 59181940 | + | 0    | 0    |
| ENSG0000(NF1P2      | unprocessε  | chr15 | 21927657 | 21946641 | - | 0    | 0    |
| ENSG0000(RP11-398E  | lincRNA     | chr14 | 44763157 | 44782829 | - | 0.73 | 1.17 |
| ENSG0000(RP11-114N  | antisense   | chr14 | 81107033 | 81170414 | - | 0.35 | 0    |
| ENSG0000(DOCK11P1   | processed_  | chr14 | 44860316 | 44866247 | - | 0    | 0    |
| ENSG0000(RPPH1      | antisense   | chr14 | 20343048 | 20343685 | - | 0    | 0.18 |
| ENSG0000(RP11-671J  | lincRNA     | chr14 | 34541740 | 34546329 | - | 0    | 0    |
| ENSG0000(AE000662.  | lincRNA     | chr14 | 22556640 | 22559037 | + | 0    | 0    |
| ENSG0000(RP11-8L8.2 | lincRNA     | chr14 | 1.01E+08 | 1.01E+08 | + | 0    | 0    |
| ENSG0000(RP3-449M   | lincRNA     | chr14 | 74474007 | 74474864 | - | 0.71 | 1.05 |
| ENSG0000(RP11-566K  | antisense   | chr16 | 89919827 | 89922662 | - | 0.37 | 0.14 |
| ENSG0000(RP11-463J  | antisense   | chr14 | 51967003 | 51969800 | - | 0    | 0    |
| ENSG0000(RP11-932A  | lincRNA     | chr14 | 57355446 | 57359410 | + | 0    | 0    |
| ENSG0000(TPRX2P     | unprocessε  | chr19 | 47860113 | 47861512 | + | 0    | 0    |
| ENSG0000(RP11-973N  | processed_  | chr14 | 64600243 | 64601644 | - | 0    | 0    |
| ENSG0000(RP11-2C7.1 | lincRNA     | chr15 | 25865295 | 25877211 | + | 0    | 0    |
| ENSG0000(MTCYBP27   | processed_  | chr14 | 84176419 | 84177088 | + | 0    | 0    |
| ENSG0000(RP11-1017  | processed_  | chr14 | 1.02E+08 | 1.02E+08 | - | 0    | 0    |
| ENSG0000(RP11-109N  | processed_  | chr14 | 72960595 | 72961993 | + | 0    | 0    |
| ENSG0000(CTD-2335L  | processed_  | chr14 | 19908096 | 19908649 | - | 0    | 0    |
| ENSG0000(RP11-561B  | lincRNA     | chr14 | 35447003 | 35447625 | - | 0.3  | 0    |
| ENSG0000(RP11-124D  | antisense   | chr14 | 23356406 | 23357003 | + | 0    | 0    |
| ENSG0000(EIF4BP1    | transcribec | chr14 | 44077534 | 44077884 | - | 0    | 0    |
| ENSG0000(RP11-529H  | processed_  | chr14 | 92026566 | 92026887 | + | 0    | 0    |
| ENSG0000(TPRX1P1    | processed_  | chr10 | 79499666 | 79499984 | - | 0    | 0    |
| ENSG0000(DNAJC8P1   | processed_  | chr14 | 35430260 | 35430631 | + | 0    | 0    |
| ENSG0000(LINC00524  | lincRNA     | chr14 | 1.01E+08 | 1.01E+08 | - | 0    | 0    |
| ENSG0000(TVP23C-CD  | protein_co  | chr17 | 15436021 | 15563561 | - | 5.01 | 3.4  |
| ENSG0000(RP11-810K  | processed_  | chr15 | 21053004 | 21054702 | - | 0    | 0    |
| ENSG0000(RP11-907D  | lincRNA     | chr14 | 97110416 | 97119247 | - | 0    | 0    |
| ENSG0000(RP11-325D  | lincRNA     | chr14 | 87568181 | 87569399 | + | 0    | 0    |
| ENSG0000(DUX4L18    | unprocessε  | chrY  | 11321557 | 11322823 | + | 0    | 0    |
| ENSG0000(FPGT-TNNI  | protein_co  | chr1  | 74198235 | 74543982 | + | 1.18 | 4.95 |
| ENSG0000(CTD-2062F  | lincRNA     | chr14 | 1.01E+08 | 1.01E+08 | + | 0    | 0    |
| ENSG0000(ENSAP2     | processed_  | chr14 | 82692704 | 82693055 | - | 0    | 0    |
| ENSG0000(RP11-718G  | lincRNA     | chr14 | 70275296 | 70291859 | + | 0    | 0    |
| ENSG0000(RP11-666E  | lincRNA     | chr14 | 81741002 | 82030349 | + | 0    | 0    |
| ENSG0000(RP11-404P  | antisense   | chr14 | 96233431 | 96234101 | - | 0    | 0    |
| ENSG0000(RP11-614C  | antisense   | chr14 | 1.05E+08 | 1.05E+08 | - | 0    | 0    |
| ENSG0000(CTD-2325P  | antisense   | chr14 | 68627166 | 68628445 | - | 0    | 0    |
| ENSG0000(RP11-409I  | antisense   | chr14 | 57578632 | 57581320 | + | 0    | 0    |

|                                      |          |          |   |      |      |
|--------------------------------------|----------|----------|---|------|------|
| ENSG0000(BLOC1S5-T protein_co chr6   | 7881522  | 8064364  | - | 0.61 | 0    |
| ENSG0000(RP11-167B lincRNA chr15     | 98282075 | 98285907 | + | 0    | 0    |
| ENSG0000(AE000661. lincRNA chr14     | 22417836 | 22418657 | + | 0    | 0    |
| ENSG0000(BRD7P1 processed_chr14      | 23749236 | 23751150 | + | 0    | 0    |
| ENSG0000(RP11-789A lincRNA chr14     | 85202849 | 85239474 | - | 0    | 0    |
| ENSG0000(MTCO1P2 unprocessε chr14    | 32484098 | 32484800 | - | 0    | 0    |
| ENSG0000(RP11-857B processed_chr14   | 44888556 | 44889041 | - | 0    | 0    |
| ENSG0000(RP11-160I processed_chr14   | 42989201 | 42989483 | + | 0    | 0    |
| ENSG0000(CTD-2058B antisense chr14   | 38034287 | 38194281 | - | 0    | 0.18 |
| ENSG0000(RP11-589N antisense chr14   | 52775237 | 52777740 | + | 0.14 | 0.23 |
| ENSG0000(CHORDC2P processed_chr14    | 89736965 | 89738391 | - | 0    | 0    |
| ENSG0000(HNRNPUP1 processed_chr14    | 43300263 | 43300595 | + | 0    | 0    |
| ENSG0000(AL157871. sense_ovei chr14  | 1E+08    | 1E+08    | - | 0    | 0    |
| ENSG0000(RP11-33N1 processed_chr14   | 89412312 | 89954659 | - | 0    | 0    |
| ENSG0000(AE000662. lincRNA chr14     | 22556311 | 22557062 | - | 0    | 0.25 |
| ENSG0000(RP11-1140 antisense chr14   | 51088957 | 51091288 | + | 0    | 0    |
| ENSG0000(DUXAP1 transcribed chr2     | 84750769 | 84751231 | + | 0    | 0    |
| ENSG0000(CTD-2343P processed_chr15   | 91742841 | 91743955 | - | 0    | 0    |
| ENSG0000(RP11-488C lincRNA chr14     | 76921840 | 76924649 | - | 0    | 0    |
| ENSG0000(PEBP1P1 processed_chr14     | 96423700 | 96424209 | - | 0    | 0    |
| ENSG0000(RP11-14J7. protein_co chr14 | 20582892 | 20609795 | - | 0    | 0    |
| ENSG0000(RP11-736P lincRNA chr14     | 86936640 | 86989125 | + | 0    | 0    |
| ENSG0000(ACTN1-AS1 antisense chr14   | 68979682 | 68987463 | + | 0    | 0    |
| ENSG0000(RP11-386M processed_chr15   | 92627073 | 92627414 | + | 0    | 0    |
| ENSG0000(RP5-1021I2 antisense chr14  | 73787360 | 73803270 | + | 1.57 | 2.08 |
| ENSG0000(RP11-371E protein_co chr14  | 93184973 | 93218586 | + | 0    | 0    |
| ENSG0000(CTD-3051D lincRNA chr14     | 1.05E+08 | 1.05E+08 | + | 0    | 0    |
| ENSG0000(TRAV37 TR_V_pseu chr14      | 22265749 | 22266264 | + | 0    | 0    |
| ENSG0000(RP11-597A lincRNA chr14     | 19677644 | 19679016 | - | 0    | 0    |
| ENSG0000(LINC00639 lincRNA chr14     | 38749339 | 38948273 | - | 0.24 | 0.02 |
| ENSG0000(RP11-247L. lincRNA chr14    | 50326526 | 50327909 | - | 0.18 | 0    |
| ENSG0000(RP11-96D2 lincRNA chr14     | 38290953 | 38311930 | + | 0    | 0    |
| ENSG0000(FOXN3-AS2 antisense chr14   | 89576216 | 89577477 | + | 0    | 0    |
| ENSG0000(PSMB7P1 unitary_psi chr14   | 20149232 | 20149745 | + | 0    | 0    |
| ENSG0000(POC1B-GAI protein_co chr12  | 89519408 | 89526262 | - | 0.22 | 0.15 |
| ENSG0000(RP11-973N antisense chr14   | 64552694 | 64596536 | - | 0    | 0    |
| ENSG0000(RP11-804L. lincRNA chr14    | 87810982 | 87838339 | + | 0    | 0    |
| ENSG0000(PTBP1P1 processed_chr14     | 65279267 | 65281166 | + | 0.21 | 0.31 |
| ENSG0000(RP1-261D1 processed_chr14   | 71330342 | 71330738 | - | 0    | 0    |
| ENSG0000(RP11-158I1 processed_chr2   | 27583046 | 27635174 | + | 0.16 | 0.76 |
| ENSG0000(RP11-488C antisense chr14   | 76774284 | 76781518 | - | 0.09 | 0.62 |
| ENSG0000(RP11-168L. lincRNA chr14    | 1.01E+08 | 1.01E+08 | + | 0    | 0    |
| ENSG0000(RP11-407N antisense chr14   | 39174885 | 39175880 | - | 0    | 0    |
| ENSG0000(RP11-1070 processed_chr14   | 95663256 | 95692630 | + | 0    | 0.05 |
| ENSG0000(RP11-134E processed_chr14   | 32271857 | 32272301 | - | 0    | 0    |

|                                      |          |          |   |      |      |
|--------------------------------------|----------|----------|---|------|------|
| ENSG0000(RP11-356C lincRNA chr14     | 37556158 | 37567095 | - | 0.29 | 0.18 |
| ENSG0000(CTD-2017C antisense chr14   | 1.02E+08 | 1.02E+08 | - | 0.18 | 0    |
| ENSG0000(GRAMD4P1 unprocessed chr15  | 20813299 | 20814958 | + | 0    | 0    |
| ENSG0000(SEPT7P1 processed_chr14     | 35157904 | 35159099 | - | 0    | 0    |
| ENSG0000(LINC00517 antisense chr14   | 37896060 | 37902372 | - | 0    | 0    |
| ENSG0000(TRAV30 TR_V_gene chr14      | 22168429 | 22168988 | + | 0    | 0    |
| ENSG0000(RP11-1112 lincRNA chr14     | 63123033 | 63128214 | - | 0    | 0    |
| ENSG0000(RP11-77A1 antisense chr2    | 1.19E+08 | 1.19E+08 | - | 0    | 0    |
| ENSG0000(GTF2IP22 processed_chr14    | 20173632 | 20173813 | - | 0    | 0    |
| ENSG0000(FAM35CP processed_chr14     | 87952527 | 87955203 | + | 0.02 | 0    |
| ENSG0000(RP11-6101 lincRNA chr14     | 98068240 | 98205143 | - | 0    | 0    |
| ENSG0000(RP11-603B processed_chr15   | 22258138 | 22258848 | + | 2.6  | 4.08 |
| ENSG0000(RP11-348N processed_chr12   | 56380361 | 56382711 | - | 0    | 0    |
| ENSG0000(RP11-1074 processed_chr14   | 39385404 | 39387102 | - | 0    | 0    |
| ENSG0000(SMARCE1P processed_chr14    | 21162513 | 21163743 | + | 0    | 0    |
| ENSG0000(RP11-270N antisense chr14   | 75814502 | 75847698 | - | 0    | 0    |
| ENSG0000(PTCSC3 lincRNA chr14        | 36136108 | 36176468 | - | 0.5  | 0    |
| ENSG0000(RPS3AP4 processed_chr14     | 35468272 | 35469330 | + | 0    | 0    |
| ENSG0000(RP11-242P antisense chr14   | 79611418 | 79633311 | - | 0    | 0    |
| ENSG0000(LINC00911 lincRNA chr14     | 85393879 | 85420074 | + | 0    | 0    |
| ENSG0000(LINC01595 lincRNA chr19     | 47863483 | 47865341 | - | 0    | 0    |
| ENSG0000(RP4-687K1 processed_chr14   | 73189763 | 73190004 | + | 0    | 0    |
| ENSG0000(RP11-359N lincRNA chr14     | 97154857 | 97158736 | + | 0    | 0    |
| ENSG0000(RP11-280K lincRNA chr14     | 51750560 | 51763114 | + | 0.18 | 0    |
| ENSG0000(NDUFC2-K1 protein_co chr11  | 78016971 | 78079865 | - | 0.58 | 0.66 |
| ENSG0000(RP11-406H lincRNA chr14     | 50448807 | 50456742 | + | 0    | 0    |
| ENSG0000(CTD-2540L lincRNA chr14     | 70593314 | 70641204 | - | 0    | 0    |
| ENSG0000(RP11-973N antisense chr14   | 64514154 | 64540368 | - | 0    | 0    |
| ENSG0000(RP11-476J1 processed_chr14  | 47801926 | 47802201 | - | 0    | 0    |
| ENSG0000(RP11-840I1 antisense chr14  | 65082034 | 65094212 | + | 0    | 0    |
| ENSG0000(RP11-1127 lincRNA chr14     | 98925137 | 98927805 | - | 0    | 0    |
| ENSG0000(SMIM6 protein_co chr17      | 75646243 | 75647977 | + | 0    | 0    |
| ENSG0000(RP11-545N processed_chr14   | 39090901 | 39091101 | + | 0    | 0    |
| ENSG0000(TVP23BP1 unprocessed chr15  | 26964917 | 26970385 | + | 0    | 0    |
| ENSG0000(RP11-76E1 lincRNA chr15     | 93837611 | 93852981 | - | 0    | 0    |
| ENSG0000(RP11-187C lincRNA chr14     | 76495363 | 76726712 | - | 0    | 0    |
| ENSG0000(LRP1-AS antisense chr12     | 57144620 | 57147619 | - | 0    | 0.12 |
| ENSG0000(RP11-99L1 lincRNA chr14     | 44392531 | 44393716 | - | 0    | 1.04 |
| ENSG0000(LINC00648 lincRNA chr14     | 47764954 | 47795092 | - | 0    | 0    |
| ENSG0000(RP11-219E lincRNA chr14     | 20870278 | 20873592 | - | 0    | 0    |
| ENSG0000(RP11-298I1 protein_co chr14 | 22946270 | 22982258 | - | 0    | 2.68 |
| ENSG0000(RP11-1085 antisense chr14   | 56648965 | 56730535 | - | 0.1  | 0.3  |
| ENSG0000(LINC00924 lincRNA chr15     | 95433095 | 95507847 | + | 0.18 | 0.16 |
| ENSG0000(RP11-671J1 antisense chr14  | 34556774 | 34561298 | + | 0    | 0    |
| ENSG0000(RP11-108N processed_chr14   | 57044646 | 57044960 | - | 0    | 0    |

|                                      |          |          |   |       |       |
|--------------------------------------|----------|----------|---|-------|-------|
| ENSG0000(RP11-305B processed_ chr14  | 44120210 | 44120761 | - | 0     | 0     |
| ENSG0000(RP11-950C antisense_ chr14  | 75127153 | 75136930 | + | 0     | 0     |
| ENSG0000(RP11-986E processed_ chr14  | 94674877 | 94675829 | - | 0     | 0     |
| ENSG0000(LINC00644 lincRNA_ chr14    | 62134149 | 62139973 | - | 0     | 0     |
| ENSG0000(CTD-2240H sense_ovei chr14  | 95185117 | 95185854 | - | 0     | 0.15  |
| ENSG0000(RANBP20P processed_ chr14   | 20720742 | 20723127 | - | 0     | 0     |
| ENSG0000(RP1-261D1 antisense_ chr14  | 71292729 | 71321814 | - | 1.21  | 0.99  |
| ENSG0000(RP11-322L processed_ chr14  | 44290997 | 44291718 | - | 0     | 0     |
| ENSG0000(RP11-313C lincRNA_ chr14    | 42259731 | 42268586 | - | 0     | 0     |
| ENSG0000(LINC00929 lincRNA_ chr15    | 26115813 | 26133037 | + | 0     | 0     |
| ENSG0000(CAP2P1 transcribed chr14    | 89290205 | 89291594 | - | 0     | 0     |
| ENSG0000(RP11-100N sense_intr( chr15 | 27422381 | 27428338 | + | 0     | 0     |
| ENSG0000(RP6-65G23 lincRNA_ chr14    | 70810205 | 70815403 | + | 0     | 0     |
| ENSG0000(DUX4L17 unprocess( chrY     | 11314921 | 11316187 | + | 0     | 0     |
| ENSG0000(RP11-831F processed_ chr14  | 49677369 | 49677893 | + | 0     | 0     |
| ENSG0000(CHEK2P2 transcribed chr15   | 20282744 | 20291586 | + | 0.1   | 0     |
| ENSG0000(RP11-280K unprocess( chr14  | 51787461 | 51787743 | + | 0     | 0     |
| ENSG0000(ADAM20P1 transcribed chr14  | 70468881 | 70483756 | - | 0.07  | 0.03  |
| ENSG0000(RP11-973N processed_ chr14  | 64535702 | 64535879 | - | 0     | 0     |
| ENSG0000(CTD-2017C processed_ chr14  | 1.02E+08 | 1.02E+08 | - | 0     | 0     |
| ENSG0000(RP11-203N transcribed chr14 | 20437982 | 20441268 | + | 0     | 0     |
| ENSG0000(RP11-1078 antisense_ chr14  | 90642638 | 90648894 | + | 0     | 0     |
| ENSG0000(RP11-463C protein_co chr14  | 77098311 | 77225462 | + | 0     | 0     |
| ENSG0000(DDX18P1 processed_ chr14    | 69083398 | 69085389 | + | 0     | 0     |
| ENSG0000(RP11-1029 lincRNA_ chr14    | 1.01E+08 | 1.01E+08 | + | 0     | 0     |
| ENSG0000(NMNAT1P: processed_ chr14   | 81032529 | 81033404 | + | 0     | 0     |
| ENSG0000(RP11-100N antisense_ chr15  | 27483035 | 27541991 | - | 0     | 0     |
| ENSG0000(GNRHR2P1 unprocess( chr14   | 60398934 | 60400013 | - | 0     | 0     |
| ENSG0000(RP11-763K lincRNA_ chr15    | 92470233 | 92471546 | - | 0     | 0     |
| ENSG0000(RP11-903H protein_co chr14  | 20684587 | 20700576 | + | 24.09 | 24.29 |
| ENSG0000(RP11-299G antisense_ chr15  | 1.01E+08 | 1.01E+08 | + | 0.06  | 0.09  |
| ENSG0000(RP11-30K9 processed_ chr15  | 58755625 | 58756247 | - | 0     | 0     |
| ENSG0000(RP11-379K antisense_ chr15  | 80554609 | 80562944 | - | 0.03  | 0.09  |
| ENSG0000(RP11-154B antisense_ chr15  | 90393490 | 90397881 | - | 0     | 0     |
| ENSG0000(CTD-2184D lincRNA_ chr15    | 52082302 | 52086574 | + | 0     | 0     |
| ENSG0000(UBE2CP4 processed_ chr15    | 31420128 | 31420662 | + | 0     | 0     |
| ENSG0000(RP11-420N antisense_ chr15  | 55680385 | 55681463 | + | 0     | 0     |
| ENSG0000(RP11-463I2 lincRNA_ chr15   | 34993646 | 35003221 | + | 0     | 0     |
| ENSG0000(RP11-424I1 lincRNA_ chr15   | 1.01E+08 | 1.01E+08 | + | 0     | 0     |
| ENSG0000(MED28P6 processed_ chr15    | 88143935 | 88144165 | - | 0     | 0     |
| ENSG0000(RP11-56B1 antisense_ chr15  | 51908902 | 51909642 | - | 0     | 0     |
| ENSG0000(MRPS15P1 processed_ chr15   | 73483196 | 73483943 | - | 0     | 0     |
| ENSG0000(CTD-2008A lincRNA_ chr15    | 44826540 | 44827094 | + | 0     | 0     |
| ENSG0000(CTD-2647E antisense_ chr15  | 49879604 | 49883525 | + | 0     | 0.16  |
| ENSG0000(RP11-253N processed_ chr15  | 69434466 | 69435120 | - | 0     | 0     |

|                                       |          |          |   |      |      |
|---------------------------------------|----------|----------|---|------|------|
| ENSG0000( AC109631. processed_ chr15  | 38458760 | 38459540 | - | 0    | 0    |
| ENSG0000( RP11-108K sense_intr chr15  | 51367377 | 51369110 | + | 0    | 0    |
| ENSG0000( RP11-158N processed_ chr15  | 85770990 | 85771163 | + | 0    | 0    |
| ENSG0000( HMBOX1-1' sense_intr chr8   | 28949676 | 28955955 | + | 0    | 0    |
| ENSG0000( RP11-133K lincRNA chr15     | 40312615 | 40316634 | + | 0.05 | 0.15 |
| ENSG0000( CTD-2544N lincRNA chr15     | 98046667 | 98293177 | - | 0    | 0    |
| ENSG0000( RP11-718C lincRNA chr15     | 45705078 | 45931069 | + | 0    | 0    |
| ENSG0000( RP11-56B1 antisense chr15   | 51887560 | 51901123 | - | 0    | 0    |
| ENSG0000( RP11-342N antisense chr15   | 67142734 | 67146939 | - | 0    | 0    |
| ENSG0000( RP11-209K lincRNA chr15     | 52801614 | 52804942 | - | 0    | 0    |
| ENSG0000( RP11-394B sense_intr chr15  | 51064609 | 51069586 | - | 0    | 0    |
| ENSG0000( PRKXP1 processed_ chr15     | 1.01E+08 | 1.01E+08 | - | 0.11 | 0.29 |
| ENSG0000( ITGB3 protein_co chr17      | 47253846 | 47311816 | + | 3.11 | 2.31 |
| ENSG0000( RP11-621H processed_ chr15  | 79668342 | 79668816 | - | 0    | 0    |
| ENSG0000( RP5-991G2 antisense chr16   | 72805998 | 72809872 | + | 0    | 0    |
| ENSG0000( RP11-64K1 antisense chr15   | 40464193 | 40466726 | - | 0    | 0    |
| ENSG0000( CTD-3065B antisense chr15   | 90595840 | 90596447 | - | 0    | 0    |
| ENSG0000( CTD-2071N antisense chr15   | 77787193 | 77788674 | + | 0    | 0    |
| ENSG0000( RP11-810K processed_ chr15  | 20826454 | 20826640 | - | 0    | 0    |
| ENSG0000( RP11-253N lincRNA chr15     | 69458522 | 69461806 | - | 0    | 0    |
| ENSG0000( RP11-227D processed_ chr15  | 48725338 | 48725827 | + | 0    | 0    |
| ENSG0000( RP11-702N unprocess chr15   | 35774801 | 35774950 | + | 0    | 0    |
| ENSG0000( LINC00928 lincRNA chr15     | 89505277 | 89524034 | - | 0    | 0    |
| ENSG0000( CTD-3076C antisense chr15   | 99976481 | 99980774 | + | 0.02 | 0    |
| ENSG0000( CTD-2050N antisense chr15   | 47359430 | 47396732 | - | 0.05 | 0.12 |
| ENSG0000( RP11-809H lincRNA chr15     | 69080879 | 69099987 | + | 0    | 0    |
| ENSG0000( RP11-82L7. lincRNA chr15    | 60073554 | 60118320 | - | 0    | 0    |
| ENSG0000( SLC35G6 protein_co chr17    | 7481332  | 7483496  | + | 0    | 0    |
| ENSG0000( RP11-1008 lincRNA chr15     | 37984766 | 38062340 | + | 0    | 0    |
| ENSG0000( RP11-64K1 processed_ chr15  | 70602124 | 70602516 | + | 0    | 0    |
| ENSG0000( HNRNPA1F processed_ chr15   | 99284625 | 99285576 | - | 0    | 0    |
| ENSG0000( RP11-38G5 processed_ chr15  | 79758549 | 79758762 | - | 0    | 0    |
| ENSG0000( CTD-2555C lincRNA chr14     | 1.03E+08 | 1.03E+08 | + | 0.14 | 0.27 |
| ENSG0000( CTD-2014N processed_ chr15  | 44919376 | 44920820 | + | 0    | 0    |
| ENSG0000( RP11-349G processed_ chr15  | 65475318 | 65475614 | - | 0.36 | 0.8  |
| ENSG0000( ANKRD34C lincRNA chr15      | 79191707 | 79283945 | - | 0    | 0    |
| ENSG0000( RP11-605F lincRNA chr15     | 48189037 | 48191691 | - | 0    | 0    |
| ENSG0000( GOLGA8VP unprocess chr15    | 1.02E+08 | 1.02E+08 | - | 0    | 0    |
| ENSG0000( RP11-209E lincRNA chr15     | 53116365 | 53129698 | + | 0    | 0    |
| ENSG0000( RP11-361D antisense chr15   | 59688517 | 59689418 | + | 1.47 | 0    |
| ENSG0000( RP11-521C processed_ chr15  | 40133768 | 40135214 | - | 0    | 0    |
| ENSG0000( RP11-108K lincRNA chr15     | 51037488 | 51293912 | + | 0.13 | 0    |
| ENSG0000( RP11-313P lincRNA chr15     | 51693216 | 51695765 | - | 0    | 0    |
| ENSG0000( AC002306. antisense chr19   | 19606350 | 19608660 | + | 0    | 0    |
| ENSG0000( RP11-182J: processed_ chr15 | 84513241 | 84526949 | - | 4.58 | 6.49 |

|                 |                          |       |          |          |   |      |      |
|-----------------|--------------------------|-------|----------|----------|---|------|------|
| ENSG00000184480 | RP11-684B lincRNA        | chr15 | 36046082 | 36049529 | + | 0    | 0    |
| ENSG00000184481 | HMG2P4 processed         | chr15 | 67000814 | 67001085 | - | 0    | 0    |
| ENSG00000184482 | TTY25P unprocessed       | chrY  | 22330452 | 22332500 | + | 0    | 0    |
| ENSG00000184483 | USP3-AS1 antisense       | chr15 | 63544247 | 63601589 | - | 0    | 0.12 |
| ENSG00000184484 | RP11-50C1 antisense      | chr15 | 58587507 | 58591676 | + | 0    | 0    |
| ENSG00000184485 | RP11-643M antisense      | chr15 | 62060503 | 62062434 | + | 0.1  | 0.46 |
| ENSG00000184486 | AC011648. lincRNA        | chr15 | 70195638 | 70198509 | - | 0    | 0    |
| ENSG00000184487 | CTD-2339L sense_intron   | chr15 | 40642933 | 40646857 | + | 0    | 0    |
| ENSG00000184488 | RP11-627D lincRNA        | chr15 | 46693288 | 46804844 | + | 0    | 0    |
| ENSG00000184489 | LINC01895 lincRNA        | chr18 | 3347776  | 3350559  | - | 0    | 0    |
| ENSG00000184490 | RP11-616M processed      | chr15 | 99337857 | 99338481 | + | 0    | 0    |
| ENSG00000184491 | RP11-325L processed      | chr15 | 65105534 | 65105800 | + | 0    | 0    |
| ENSG00000184492 | NPM1P42 processed        | chr15 | 72899399 | 72900260 | - | 0    | 0    |
| ENSG00000184493 | IGHV4OR1 IG_V_gene       | chr15 | 22184967 | 22185402 | - | 0    | 0    |
| ENSG00000184494 | NDUFA3P4 processed       | chr15 | 90385814 | 90386063 | + | 0    | 0    |
| ENSG00000184495 | RP11-809H antisense      | chr15 | 69037549 | 69043565 | - | 0    | 0    |
| ENSG00000184496 | RP11-183E processed      | chr15 | 98118171 | 98118320 | + | 0    | 0    |
| ENSG00000184497 | RP11-432J lincRNA        | chr10 | 70939053 | 70955641 | + | 0    | 0    |
| ENSG00000184498 | AC007950. lincRNA        | chr15 | 63456294 | 63469351 | - | 0    | 0    |
| ENSG00000184499 | RP11-624L lincRNA        | chr15 | 39472703 | 39481206 | + | 0    | 0    |
| ENSG00000184500 | RP11-561C processed      | chr15 | 85178628 | 85178806 | - | 0    | 0    |
| ENSG00000184501 | ANKRD62P transcribed     | chr22 | 16671090 | 16679493 | - | 0    | 0    |
| ENSG00000184502 | RP11-493E processed      | chr15 | 89936492 | 89937005 | + | 0    | 0    |
| ENSG00000184503 | CTD-2501E antisense      | chr15 | 60529973 | 60545159 | + | 0.37 | 0    |
| ENSG00000184504 | RP11-522B lincRNA        | chr15 | 96354237 | 96403803 | + | 0.56 | 0.38 |
| ENSG00000184505 | RP11-815J antisense      | chr15 | 85621264 | 85627689 | - | 0    | 0    |
| ENSG00000184506 | RP13-126C antisense      | chr15 | 28970196 | 28977464 | - | 0    | 0    |
| ENSG00000184507 | RP11-62C7 lincRNA        | chr15 | 39019233 | 39024918 | + | 0    | 0    |
| ENSG00000184508 | CTD-2033D antisense      | chr15 | 39593580 | 39594231 | - | 0    | 0    |
| ENSG00000184509 | RP11-122D processed      | chr15 | 36876379 | 36887035 | - | 0    | 0    |
| ENSG00000184510 | LINGO1-AS antisense      | chr15 | 77660052 | 77668074 | + | 0    | 0    |
| ENSG00000184511 | SPATA8-AS antisense      | chr15 | 96772005 | 96783312 | - | 0    | 0    |
| ENSG00000184512 | RP11-26L2 antisense      | chr16 | 55259969 | 55333588 | - | 0    | 0    |
| ENSG00000184513 | RP11-162I lincRNA        | chr15 | 61729850 | 61731389 | + | 0    | 0    |
| ENSG00000184514 | CTD-2330J antisense      | chr15 | 58065225 | 58071043 | + | 0    | 0    |
| ENSG00000184515 | RP11-696L processed      | chr15 | 68833830 | 68834749 | + | 0    | 0    |
| ENSG00000184516 | RP11-3D4. antisense      | chr15 | 33858602 | 33864825 | - | 0.51 | 0.84 |
| ENSG00000184517 | BUB1B-PAI protein_coding | chr15 | 40217428 | 40276396 | + | 0    | 0    |
| ENSG00000184518 | LINC02206 lincRNA        | chr15 | 66931537 | 66956518 | - | 0    | 0    |
| ENSG00000184519 | RP11-687N sense_intron   | chr11 | 1.25E+08 | 1.25E+08 | + | 0    | 0    |
| ENSG00000184520 | RP11-617F antisense      | chr15 | 90074512 | 90082207 | - | 1    | 1.28 |
| ENSG00000184521 | LIPC-AS1 antisense       | chr15 | 58434890 | 58498735 | - | 0    | 0    |
| ENSG00000184522 | CTA-339C1 antisense      | chr7  | 1.02E+08 | 1.02E+08 | - | 0    | 0    |
| ENSG00000184523 | CSPG4P12 transcribed     | chr15 | 85191438 | 85213905 | + | 1.8  | 2.06 |
| ENSG00000184524 | RP11-313P antisense      | chr15 | 51707995 | 51715220 | - | 0    | 0    |



|                                 |       |          |          |   |      |      |
|---------------------------------|-------|----------|----------|---|------|------|
| ENSG0000(RP11-562A antisense)   | chr15 | 50497195 | 50498744 | - | 0    | 0.22 |
| ENSG0000(RP11-37J1: processed)  | chr15 | 29233673 | 29235137 | - | 0    | 0    |
| ENSG0000(TUBBP8 processed)      | chr15 | 29612570 | 29614274 | + | 0    | 0    |
| ENSG0000(RP11-643A processed)   | chr15 | 53837271 | 53837560 | - | 0    | 0    |
| ENSG0000(RP11-182J: unprocessε) | chr15 | 84505463 | 84505495 | + | 0    | 0    |
| ENSG0000(IGHV2OR1: IG_V_gene)   | chr16 | 32847713 | 32848156 | + | 0    | 0    |
| ENSG0000(CTD-2014N processed)   | chr15 | 44970035 | 44971178 | - | 0    | 0    |
| ENSG0000(ZHX1-C8or: protein_co) | chr8  | 1.23E+08 | 1.23E+08 | - | 0.28 | 0.29 |
| ENSG0000(RP11-108K lincRNA)     | chr15 | 51315841 | 51321996 | + | 0    | 0    |
| ENSG0000(PLCB2-AS1 antisense)   | chr15 | 40300670 | 40301820 | + | 0    | 0    |
| ENSG0000(RP11-382A processed)   | chr15 | 83044368 | 83044771 | + | 0    | 0    |
| ENSG0000(RP11-19J5. lincRNA)    | chr15 | 69820756 | 69822856 | - | 0    | 0    |
| ENSG0000(RP11-522B lincRNA)     | chr15 | 96438570 | 96444266 | + | 0    | 0    |
| ENSG0000(CTD-3065B antisense)   | chr15 | 90604225 | 90614558 | - | 0    | 0    |
| ENSG0000(ACTG1P17 transcribed)  | chr15 | 82725873 | 82738904 | - | 0.25 | 0.26 |
| ENSG0000(CTD-2116N protein_co)  | chr15 | 64181180 | 64381510 | - | 0.28 | 0    |
| ENSG0000(RP11-561C unprocessε)  | chr15 | 85272527 | 85272974 | + | 0    | 0    |
| ENSG0000(RP11-454L: processed)  | chr14 | 55394940 | 55395233 | - | 0.74 | 2.45 |
| ENSG0000(RP11-293N antisense)   | chr14 | 75423683 | 75427741 | - | 0.24 | 0.25 |
| ENSG0000(RP11-183E lincRNA)     | chr15 | 98122563 | 98131607 | - | 0    | 0    |
| ENSG0000(RP11-468E lincRNA)     | chr14 | 24139445 | 24140444 | + | 0.09 | 0.29 |
| ENSG0000(RP11-762H antisense)   | chr15 | 78293286 | 78296049 | + | 0    | 0    |
| ENSG0000(OR11K1P unprocessε)    | chr15 | 22030931 | 22031834 | - | 0    | 0    |
| ENSG0000(RP11-102L antisense)   | chr15 | 38502853 | 38504981 | + | 0.03 | 0.06 |
| ENSG0000(CTD-2184D lincRNA)     | chr15 | 52116574 | 52122131 | + | 0.07 | 0    |
| ENSG0000(INAFM2 protein_co)     | chr15 | 40323664 | 40326715 | + | 4.76 | 4.6  |
| ENSG0000(RP11-57P1 lincRNA)     | chr15 | 94600014 | 94600821 | + | 0    | 0    |
| ENSG0000(ST20-MTHI protein_co)  | chr15 | 79845150 | 79923754 | - | 1.17 | 1.72 |
| ENSG0000(RP11-630H unprocessε)  | chr17 | 63900643 | 63900879 | + | 0    | 0    |
| ENSG0000(LINC00596 lincRNA)     | chr14 | 23922247 | 23934568 | - | 0.04 | 0    |
| ENSG0000(HNRNPMP processed)     | chr15 | 44447577 | 44449344 | - | 0.03 | 0    |
| ENSG0000(RP11-323I: lincRNA)    | chr15 | 35099022 | 35169698 | - | 0    | 0    |
| ENSG0000(IGHV1OR1: IG_V_pseu)   | chr15 | 19972782 | 19973218 | - | 0    | 0    |
| ENSG0000(CTD-2651B processed)   | chr15 | 45215547 | 45215943 | + | 0    | 0    |
| ENSG0000(TGIF1P1 processed)     | chr19 | 46136746 | 46137547 | - | 0    | 0    |
| ENSG0000(CTD-2027C processed)   | chr15 | 96551381 | 96551517 | + | 0    | 0    |
| ENSG0000(RP11-20G1 lincRNA)     | chr15 | 99427009 | 99431028 | - | 0    | 0    |
| ENSG0000(RP11-519G antisense)   | chr15 | 45430652 | 45441808 | - | 0.77 | 2.18 |
| ENSG0000(TMC3-AS1 antisense)    | chr15 | 81324377 | 81362037 | + | 4.09 | 4.76 |
| ENSG0000(RP11-624L. lincRNA)    | chr15 | 38865322 | 39427195 | - | 0.46 | 0.53 |
| ENSG0000(RP11-349G processed)   | chr15 | 65301922 | 65302311 | + | 0    | 0    |
| ENSG0000(RP11-798K antisense)   | chr15 | 66984108 | 67065268 | - | 0    | 0    |
| ENSG0000(RP11-4G2.: lincRNA)    | chr15 | 96028089 | 96046930 | - | 0    | 0    |
| ENSG0000(RP11-15E1 antisense)   | chr17 | 60526293 | 60550798 | + | 0.13 | 0.14 |
| ENSG0000(RP11-63A2 processed)   | chr15 | 88952683 | 88953460 | + | 0    | 0    |

|                                 |       |          |          |   |      |      |
|---------------------------------|-------|----------|----------|---|------|------|
| ENSG0000(RP11-111E antisense)   | chr15 | 63928274 | 63935953 | + | 0    | 0    |
| ENSG0000(RP11-109D antisense)   | chr15 | 45073492 | 45074048 | - | 0    | 0    |
| ENSG0000(RP11-30K9 antisense)   | chr15 | 58856831 | 58865063 | - | 0.35 | 0.77 |
| ENSG0000(RP11-519G antisense)   | chr15 | 45448427 | 45513767 | + | 0.09 | 0    |
| ENSG0000(RP11-90E5 antisense)   | chr15 | 1E+08    | 1E+08    | + | 0    | 0    |
| ENSG0000(RP11-316M antisense)   | chr1  | 1.51E+08 | 1.51E+08 | + | 0    | 0.24 |
| ENSG0000(RP11-456J processed)   | chr15 | 31765743 | 31768201 | - | 0    | 0    |
| ENSG0000(RP11-327J lincRNA)     | chr15 | 96171581 | 96174339 | + | 0    | 0    |
| ENSG0000(RP11-142J antisense)   | chr15 | 47397501 | 47399554 | - | 0    | 0    |
| ENSG0000(LINC00927 lincRNA)     | chr15 | 80263068 | 80341805 | - | 0    | 0    |
| ENSG0000(RP11-307C lincRNA)     | chr15 | 77525540 | 77534110 | + | 0.03 | 0.05 |
| ENSG0000(CTD-2054N lincRNA)     | chr15 | 99807023 | 99877148 | + | 4.48 | 3.13 |
| ENSG0000(RP11-64K1 antisense)   | chr15 | 40453444 | 40454639 | - | 0    | 0    |
| ENSG0000(RP11-424I lincRNA)     | chr15 | 1.01E+08 | 1.01E+08 | + | 0    | 0    |
| ENSG0000(CTD-2647L sense_intr)  | chr8  | 29055935 | 29056685 | + | 2.74 | 2.01 |
| ENSG0000(RP11-815J antisense)   | chr15 | 85619623 | 85670948 | - | 0    | 0    |
| ENSG0000(RP11-64K1 antisense)   | chr15 | 40368925 | 40369640 | - | 0    | 0    |
| ENSG0000(RP11-291H processed)   | chr15 | 55746639 | 55746767 | + | 0    | 0    |
| ENSG0000(RP11-1069 antisense)   | chr15 | 62827675 | 62884034 | - | 0.01 | 0.05 |
| ENSG0000(RP11-468E protein_co)  | chr14 | 24120956 | 24131829 | + | 0    | 0.1  |
| ENSG0000(CTD-2240J lincRNA)     | chr15 | 81410517 | 81419127 | + | 0.59 | 0.42 |
| ENSG0000(NDUFB4P1 transcribec)  | chr14 | 1.03E+08 | 1.03E+08 | + | 0    | 0    |
| ENSG0000(RP11-815J antisense)   | chr15 | 85579046 | 85580178 | - | 0    | 0.07 |
| ENSG0000(RP11-505E antisense)   | chr15 | 1.01E+08 | 1.01E+08 | - | 0    | 0    |
| ENSG0000(CTD-2308G sense_intr)  | chr15 | 51752485 | 51756475 | + | 0    | 0    |
| ENSG0000(DCAF13P3 processed)    | chr15 | 50944663 | 50945996 | + | 0.09 | 0.05 |
| ENSG0000(MTND5P3 processed)     | chr15 | 58152606 | 58154407 | + | 0    | 0    |
| ENSG0000(RP11-346D lincRNA)     | chr15 | 38139595 | 38226887 | - | 4.56 | 3.96 |
| ENSG0000(RP11-192N processed)   | chr15 | 1.01E+08 | 1.01E+08 | - | 0    | 0    |
| ENSG0000(RP11-403B lincRNA)     | chr15 | 20759311 | 20774794 | - | 0    | 0    |
| ENSG0000(GH1 protein_co)        | chr17 | 63917200 | 63918838 | - | 0    | 0    |
| ENSG0000(RP11-605F antisense)   | chr15 | 48192191 | 48201684 | - | 0    | 0    |
| ENSG0000(CTD-2647E processed)   | chr15 | 49794246 | 49796097 | + | 0    | 0    |
| ENSG0000(H3F3AP1 processed)     | chr15 | 39951375 | 39951708 | - | 0    | 0    |
| ENSG0000(RP11-27M lincRNA)      | chr15 | 39512404 | 39519854 | - | 0    | 0    |
| ENSG0000(RP11-758N transcribec) | chr15 | 32836983 | 32837326 | - | 0    | 0    |
| ENSG0000(RP11-313H processed)   | chr15 | 58967046 | 58967808 | - | 0    | 0    |
| ENSG0000(RP11-244F processed)   | chr15 | 62953173 | 62954124 | + | 0    | 0    |
| ENSG0000(RP11-475A lincRNA)     | chr15 | 36341739 | 36344166 | + | 0.02 | 0    |
| ENSG0000(RP11-1609 sense_intr)  | chr15 | 41343080 | 41344225 | + | 0    | 0    |
| ENSG0000(RP11-323I processed)   | chr15 | 35092481 | 35093210 | + | 0    | 0    |
| ENSG0000(RP11-430B sense_intr)  | chr15 | 52033707 | 52035625 | + | 0    | 0    |
| ENSG0000(TGIF2-C20 protein_co)  | chr20 | 36574553 | 36612384 | + | 1.27 | 0    |
| ENSG0000(RP11-30K9 sense_intr)  | chr15 | 58815272 | 58817728 | + | 0    | 0    |
| ENSG0000(RP11-315L lincRNA)     | chr15 | 97272177 | 97319288 | - | 0    | 0    |

|                                         |          |          |   |       |      |
|-----------------------------------------|----------|----------|---|-------|------|
| ENSG0000(EFTUD1P1 transcribed chr15     | 84080168 | 84126604 | + | 0     | 0    |
| ENSG0000(ISCA1P4 processed_ chr15       | 40948736 | 40948869 | - | 0     | 0    |
| ENSG0000(RP11-158M antisense chr15      | 85744109 | 85750281 | - | 0     | 0    |
| ENSG0000(RP11-3D4L antisense chr15      | 33851785 | 33856809 | - | 0.51  | 0.42 |
| ENSG0000(RP11-521C antisense chr15      | 40088832 | 40089386 | + | 0     | 0    |
| ENSG0000(RP11-34F1 processed_ chr15     | 67832725 | 67873866 | + | 0     | 0.3  |
| ENSG0000(HNRNPA1F processed_ chr15      | 35400691 | 35401768 | + | 0     | 0    |
| ENSG0000(RP11-5O23 processed_ chr15     | 78382573 | 78383155 | + | 0     | 0    |
| ENSG0000(HERC2P7 unprocessed_ chr15     | 23289303 | 23293667 | - | 0     | 0    |
| ENSG0000(RP11-7M1 sense_intronic chr15  | 84753122 | 84754502 | + | 0     | 0    |
| ENSG0000(RP11-158M antisense chr15      | 85754941 | 85756237 | - | 0     | 0    |
| ENSG0000(LINC01314 protein_coding chr15 | 80195484 | 80252213 | - | 0     | 0    |
| ENSG0000(RP11-109D antisense chr15      | 45041716 | 45058707 | - | 0     | 0    |
| ENSG0000(HNRNPCP3 processed_ chr15      | 79236332 | 79237206 | + | 0     | 0    |
| ENSG0000(RP11-307C lincRNA chr15        | 77568970 | 77608888 | + | 0.07  | 0.08 |
| ENSG0000(CTA-150C2 unprocessed_ chr22   | 39070414 | 39070671 | + | 0     | 0    |
| ENSG0000(RP11-593F antisense chr15      | 76174891 | 76181486 | - | 0     | 0.03 |
| ENSG0000(RP11-265N lincRNA chr15        | 39167739 | 39180048 | + | 0.1   | 0.1  |
| ENSG0000(RP11-35O1 antisense chr15      | 98646951 | 98647371 | - | 0     | 0    |
| ENSG0000(RP11-566K transcribed chr15    | 22770523 | 22776199 | - | 0     | 0    |
| ENSG0000(RP11-253M antisense chr15      | 69396904 | 69415029 | - | 1.32  | 0.62 |
| ENSG0000(DPPA5P2 transcribed chr15      | 45566776 | 45567074 | + | 0     | 0    |
| ENSG0000(HMGB3P2 processed_ chr14       | 1.03E+08 | 1.03E+08 | - | 0     | 0    |
| ENSG0000(UBE2Q2P2 transcribed chr15     | 82355142 | 82420075 | + | 2.45  | 1.58 |
| ENSG0000(CERS3-AS1 antisense chr15      | 1E+08    | 1E+08    | + | 0     | 0    |
| ENSG0000(THTPA protein_coding chr14     | 23555988 | 23560271 | + | 10.34 | 9.16 |
| ENSG0000(RP11-37C7 sense_intronic chr15 | 39813223 | 39815429 | - | 0     | 0    |
| ENSG0000(CTD-2651B processed_ chr15     | 45330209 | 45332634 | - | 0     | 0    |
| ENSG0000(RP11-720L lincRNA chr15        | 37365027 | 37490808 | - | 0     | 0    |
| ENSG0000(OR4N3P unprocessed_ chr15      | 22125618 | 22126435 | + | 0     | 0    |
| ENSG0000(CTC-378H2 antisense chr19      | 42152569 | 42157523 | + | 0.4   | 0.25 |
| ENSG0000(RP11-798K lincRNA chr15        | 66919811 | 66931755 | + | 0     | 0    |
| ENSG0000(CTD-2650P lincRNA chr15        | 52010999 | 52019095 | - | 0     | 0.08 |
| ENSG0000(LINC01833 lincRNA chr2         | 44921077 | 44939199 | - | 0     | 0    |
| ENSG0000(NPM1P43 processed_ chr15       | 73161779 | 73162928 | - | 0     | 0    |
| ENSG0000(MRPL15P1 processed_ chr15      | 89752296 | 89753493 | + | 0     | 0    |
| ENSG0000(RP11-752G antisense chr15      | 82744223 | 82750289 | + | 0     | 0    |
| ENSG0000(RP11-403B lincRNA chr15        | 20773084 | 20774871 | + | 0     | 0    |
| ENSG0000(RP11-736N sense_intronic chr14 | 1.03E+08 | 1.03E+08 | + | 0     | 0    |
| ENSG0000(RP11-276M lincRNA chr15        | 81953303 | 81995666 | - | 0.69  | 0.31 |
| ENSG0000(RP11-489D antisense chr15      | 33303657 | 33310659 | - | 0     | 0    |
| ENSG0000(RP11-462P lincRNA chr15        | 39300418 | 39310782 | - | 0     | 0    |
| ENSG0000(RP11-16E1 lincRNA chr15        | 31216020 | 31224445 | + | 0.04  | 0.23 |
| ENSG0000(NIFKP8 processed_ chr15        | 85181210 | 85182083 | - | 0     | 0    |
| ENSG0000(RP11-265N lincRNA chr15        | 39188438 | 39194309 | - | 0.03  | 0.03 |

|                                    |          |          |   |      |      |
|------------------------------------|----------|----------|---|------|------|
| ENSG0000(RP11-138H)processed_chr15 | 70791013 | 70791486 | + | 0    | 0    |
| ENSG0000(RP11-815J)sense_intrchr15 | 85701109 | 85702771 | + | 0    | 0    |
| ENSG0000(WBP1LP5)processed_chr15   | 1.02E+08 | 1.02E+08 | - | 0    | 0    |
| ENSG0000(ADNP-AS1)antisense_chr20  | 50930984 | 50945134 | + | 0.83 | 0.54 |
| ENSG0000(RP11-279F)lincRNA_chr15   | 69564724 | 69565790 | - | 0    | 0    |
| ENSG0000(MGC15885)antisense_chr15  | 62637172 | 62645291 | - | 0    | 0    |
| ENSG0000(RP11-321G)lincRNA_chr15   | 63390136 | 63438320 | + | 0.3  | 0.12 |
| ENSG0000(RP11-128A)antisense_chr15 | 37099339 | 37100173 | + | 0.34 | 0.37 |
| ENSG0000(ANP32BP3)processed_chr15  | 81117635 | 81118340 | - | 0    | 0    |
| ENSG0000(CPEB1-AS1)antisense_chr15 | 82647770 | 82692820 | + | 0.31 | 0.46 |
| ENSG0000(RP11-540C)antisense_chr15 | 41011597 | 41013300 | + | 0    | 0    |
| ENSG0000(SNRPCP18)processed_chr15  | 1.02E+08 | 1.02E+08 | + | 0    | 0    |
| ENSG0000(AHCYP7)processed_chr15    | 50417385 | 50418692 | + | 0    | 0    |
| ENSG0000(NPM1P47)processed_chr15   | 62082450 | 62083305 | - | 0    | 0    |
| ENSG0000(NDUFAF4P)processed_chr15  | 49156329 | 49156847 | + | 0    | 0    |
| ENSG0000(RP11-1084)antisense_chr15 | 34255286 | 34257832 | + | 0    | 0    |
| ENSG0000(RP11-227D)lincRNA_chr15   | 48729080 | 48729844 | - | 0    | 0    |
| ENSG0000(KRT8P9)processed_chr15    | 70858714 | 70860162 | + | 0    | 0    |
| ENSG0000(LINC01169)lincRNA_chr15   | 66582190 | 66685794 | + | 0.76 | 0.67 |
| ENSG0000(LINC02205)lincRNA_chr15   | 70503907 | 70505928 | - | 0    | 0    |
| ENSG0000(RP11-650L)antisense_chr15 | 78480057 | 78481820 | - | 0    | 0    |
| ENSG0000(RP11-654A)antisense_chr15 | 98954149 | 99105824 | - | 0    | 0    |
| ENSG0000(RP11-50C1)sense_intrchr15 | 58521311 | 58523371 | + | 0    | 0    |
| ENSG0000(RP11-86K2)processed_chr15 | 57979716 | 57980646 | - | 0    | 0    |
| ENSG0000(RP11-753A)lincRNA_chr15   | 97982509 | 97991142 | - | 0    | 0    |
| ENSG0000(SORD2P)transcribedchr15   | 44825747 | 44884694 | - | 2.02 | 2.5  |
| ENSG0000(RP11-39M)antisense_chr15  | 61181249 | 61195938 | + | 0    | 0    |
| ENSG0000(RORA-AS2)antisense_chr15  | 60681569 | 60686888 | + | 0    | 0    |
| ENSG0000(RP11-930C)lincRNA_chr14   | 56303490 | 56310761 | - | 0    | 0    |
| ENSG0000(CTD-2147F)lincRNA_chr15   | 97295881 | 97432094 | + | 0.28 | 0.83 |
| ENSG0000(RP11-154J)antisense_chr15 | 48312353 | 48331856 | - | 0.39 | 0.28 |
| ENSG0000(KRT18P47)processed_chr15  | 88960070 | 88961046 | + | 0    | 0    |
| ENSG0000(IGHV3OR1)IG_V_genechr15   | 19987656 | 19988117 | - | 0    | 0    |
| ENSG0000(RP11-621H)processed_chr15 | 79559256 | 79560304 | - | 0    | 0    |
| ENSG0000(MRPL46)protein_cochr15    | 88459476 | 88467419 | - | 7.63 | 8.85 |
| ENSG0000(RP11-210M)lincRNA_chr15   | 80344853 | 80403575 | - | 0.02 | 0.03 |
| ENSG0000(RP11-19J5)processed_chr15 | 69803316 | 69804046 | - | 0    | 0    |
| ENSG0000(RP11-244F)antisense_chr15 | 63046034 | 63049387 | - | 0.12 | 0.05 |
| ENSG0000(RP11-616K)lincRNA_chr15   | 44387320 | 44390451 | - | 0    | 0    |
| ENSG0000(KRT8P24)processed_chr15   | 48971803 | 48973361 | + | 0    | 0    |
| ENSG0000(RP11-643G)processed_chr14 | 67610986 | 67613864 | + | 0    | 0    |
| ENSG0000(RP11-543G)lincRNA_chr15   | 70321576 | 70326742 | + | 0    | 0    |
| ENSG0000(RP11-352D)lincRNA_chr15   | 69278675 | 69295322 | + | 0    | 0    |
| ENSG0000(RP11-74D7)processed_chr15 | 33990686 | 33992048 | + | 0    | 0    |
| ENSG0000(RP11-719C)processed_chr15 | 98466840 | 98467412 | + | 0    | 0    |

|                                      |          |          |   |      |      |
|--------------------------------------|----------|----------|---|------|------|
| ENSG0000(RP11-661D lincRNA chr14     | 1.03E+08 | 1.03E+08 | - | 0    | 0    |
| ENSG0000(RP11-627D processed_ch15    | 46827526 | 46827958 | + | 0    | 0    |
| ENSG0000(UBE2Q2L protein_co chr15    | 84172490 | 84182234 | + | 1.41 | 1.28 |
| ENSG0000(HNRNPA1P processed_ch15     | 67627852 | 67629135 | + | 0    | 0.14 |
| ENSG0000(CYCSP38 transcribec chr15   | 60558080 | 60558401 | + | 0    | 0    |
| ENSG0000(RP11-685G antisense chr15   | 76339609 | 76342063 | - | 0    | 0    |
| ENSG0000(RP11-365N antisense chr14   | 1.03E+08 | 1.03E+08 | + | 0    | 0    |
| ENSG0000(ANP32AP1 transcribec chr15  | 35181799 | 35238197 | + | 0    | 0    |
| ENSG0000(LINC02169 lincRNA chr16     | 54245618 | 54270746 | - | 0    | 0    |
| ENSG0000(LINC01583 lincRNA chr15     | 82088594 | 82097694 | + | 0.17 | 0.15 |
| ENSG0000(RP11-519G antisense chr15   | 45170344 | 45199958 | + | 0    | 0.41 |
| ENSG0000(CTD-2651B antisense chr15   | 45251580 | 45279251 | - | 0.27 | 0.1  |
| ENSG0000(RP11-540C antisense chr15   | 41016807 | 41027893 | + | 0    | 0    |
| ENSG0000(RP11-468E protein_co chr14  | 24180395 | 24190416 | - | 0.48 | 0.18 |
| ENSG0000(RP11-680F antisense chr15   | 29822631 | 29824081 | + | 0.49 | 0.47 |
| ENSG0000(GCSHP2 processed_ch14       | 1.03E+08 | 1.03E+08 | + | 0    | 0    |
| ENSG0000(LINC00052 lincRNA chr15     | 87576929 | 87579866 | + | 0    | 0    |
| ENSG0000(RP11-272D antisense chr15   | 73255334 | 73256109 | - | 0    | 0    |
| ENSG0000(RP11-468E protein_co chr14  | 24151218 | 24167402 | + | 0.66 | 0.4  |
| ENSG0000(RP11-259A lincRNA chr15     | 61598514 | 61605241 | + | 0    | 0    |
| ENSG0000(RP11-295H processed_ch15    | 49365124 | 49366685 | - | 0    | 0    |
| ENSG0000(RP11-138H lincRNA chr15     | 70748932 | 70754177 | + | 0    | 0    |
| ENSG0000(RP11-630H unprocessε chr17  | 63885851 | 63886051 | + | 0    | 0    |
| ENSG0000(RP11-522B lincRNA chr15     | 96448842 | 96449749 | + | 0    | 0    |
| ENSG0000(RPL21P12 processed_ch14     | 1.03E+08 | 1.03E+08 | + | 0    | 0    |
| ENSG0000(RP11-111A antisense chr15   | 40488041 | 40558019 | + | 0    | 0    |
| ENSG0000(UBE2Q2P1 transcribec chr15  | 84412773 | 84421837 | - | 0    | 0    |
| ENSG0000(CTD-2651B 3prime_ov chr15   | 45152664 | 45167526 | - | 1.98 | 1.9  |
| ENSG0000(RP11-526I2 antisense chr15  | 1.01E+08 | 1.01E+08 | + | 0    | 0    |
| ENSG0000(RP11-778C antisense chr11   | 1.2E+08  | 1.2E+08  | - | 0    | 0    |
| ENSG0000(RP11-522B lincRNA chr15     | 96393146 | 96405189 | - | 0    | 0    |
| ENSG0000(CTD-2034I4 lincRNA chr15    | 81427448 | 81755217 | + | 0    | 0    |
| ENSG0000(RP11-158N antisense chr15   | 85726115 | 85727227 | - | 0    | 0    |
| ENSG0000(RP11-325E processed_ch15    | 49177610 | 49178741 | - | 0    | 0    |
| ENSG0000(RP11-351N antisense chr15   | 80896190 | 80948867 | - | 0    | 0    |
| ENSG0000(CYCSP2 processed_ch15       | 41108878 | 41109178 | + | 0    | 0    |
| ENSG0000(RP11-38G5 lincRNA chr15     | 79832466 | 79833554 | - | 0    | 0.3  |
| ENSG0000(HNRNPA1P processed_ch15     | 54320731 | 54321565 | - | 0    | 0    |
| ENSG0000(RP11-182J lincRNA chr15     | 84500378 | 84502381 | + | 0.6  | 0.36 |
| ENSG0000(AC140725 lincRNA chr15      | 1.02E+08 | 1.02E+08 | - | 0.46 | 0.04 |
| ENSG0000(RP11-408J sense_intrε chr15 | 47274183 | 47275164 | + | 0    | 0    |
| ENSG0000(RP11-335K antisense chr15   | 78625895 | 78628193 | + | 0.02 | 0.03 |
| ENSG0000(RP11-56B1 unprocessε chr15  | 51919073 | 51930627 | - | 0    | 0    |
| ENSG0000(HMGN1P2 processed_ch15      | 62362029 | 62362331 | - | 0    | 0    |
| ENSG0000(MESTP2 processed_ch15       | 60053204 | 60054092 | - | 0    | 0    |

|                                         |          |          |   |      |      |
|-----------------------------------------|----------|----------|---|------|------|
| ENSG0000(RP11-648K lincRNA chr15        | 87432058 | 87703852 | - | 0    | 0    |
| ENSG0000(RP11-300G sense_intronic chr15 | 89704665 | 89705415 | + | 0    | 0.19 |
| ENSG0000(RP11-762H transcribed chr15    | 78290527 | 78291221 | - | 1.05 | 1.05 |
| ENSG0000(CTD-2329K antisense chr15      | 44516650 | 44517483 | - | 0    | 0.5  |
| ENSG0000(RP11-16B9 antisense chr15      | 61834752 | 61852152 | + | 0    | 0    |
| ENSG0000(KRT8P23 processed_ chr15       | 76979245 | 76980451 | - | 0    | 0    |
| ENSG0000(RP11-97O1 processed_ chr15     | 88568287 | 88568562 | + | 0    | 0    |
| ENSG0000(RP11-671N unprocessed_ chr15   | 84394512 | 84395514 | + | 0.46 | 0    |
| ENSG0000(BLID protein_coding chr11      | 1.22E+08 | 1.22E+08 | - | 0.15 | 0.08 |
| ENSG0000(LINC01491 lincRNA chr15        | 47803384 | 47846236 | - | 0    | 0    |
| ENSG0000(NMNAT1P1 processed_ chr15      | 59964942 | 59966084 | + | 0    | 0    |
| ENSG0000(RP11-39M1 antisense chr15      | 61211913 | 61214231 | + | 0    | 0    |
| ENSG0000(CERNA1 lincRNA chr15           | 52180093 | 52205874 | + | 0.63 | 0.28 |
| ENSG0000(RP11-66B2 lincRNA chr15        | 1.01E+08 | 1.01E+08 | + | 0    | 0    |
| ENSG0000(RP11-37C7 processed_ chr15     | 39770559 | 39801333 | - | 0    | 0    |
| ENSG0000(TYRO3P processed_ chr15        | 76258986 | 76261690 | - | 0.02 | 0    |
| ENSG0000(RP11-461F lincRNA chr15        | 97540597 | 97560702 | - | 0    | 0    |
| ENSG0000(RP11-66B2 antisense chr15      | 1.01E+08 | 1.01E+08 | - | 1.94 | 1.73 |
| ENSG0000(RP11-521C lincRNA chr15        | 40075204 | 40078704 | - | 0    | 0    |
| ENSG0000(RBM17P4 processed_ chr15       | 35298249 | 35299440 | - | 0.06 | 0    |
| ENSG0000(RP11-66B2 processed_ chr15     | 1.01E+08 | 1.01E+08 | - | 0    | 0    |
| ENSG0000(RP11-463I2 lincRNA chr15       | 35008469 | 35011191 | + | 0    | 0    |
| ENSG0000(RP11-552E antisense chr15      | 47603880 | 47606352 | - | 0    | 0    |
| ENSG0000(RP11-317G antisense chr15      | 63675146 | 63713758 | + | 0    | 0    |
| ENSG0000(RP11-20G1 lincRNA chr15        | 99395179 | 99396593 | - | 0    | 0    |
| ENSG0000(RP11-554D antisense chr15      | 60763906 | 60765625 | + | 0    | 0    |
| ENSG0000(PRELID1P4 processed_ chr15     | 35121573 | 35122084 | - | 0.14 | 0    |
| ENSG0000(MTND5P4 processed_ chr15       | 46341354 | 46341599 | + | 0    | 0    |
| ENSG0000(CTD-2034I1 lincRNA chr15       | 81554003 | 81696780 | + | 0    | 0    |
| ENSG0000(RP11-516C antisense chr15      | 44402685 | 44427144 | - | 0    | 0    |
| ENSG0000(RP11-275I4 antisense chr15     | 38524070 | 38534655 | + | 0    | 0    |
| ENSG0000(RP11-925D processed_ chr15     | 58151033 | 58152513 | + | 0    | 0    |
| ENSG0000(RP11-568G processed_ chr15     | 59871511 | 59873495 | - | 0    | 0.06 |
| ENSG0000(RP11-138E antisense chr15      | 48938236 | 48948031 | + | 0    | 0    |
| ENSG0000(CTD-2012N antisense chr5       | 3596211  | 3600188  | - | 0    | 0    |
| ENSG0000(RP11-66B2 lincRNA chr15        | 1.01E+08 | 1.01E+08 | + | 0    | 0    |
| ENSG0000(AC074212. processed_ chr19     | 45764785 | 45769806 | + | 2.4  | 2.6  |
| ENSG0000(CTD-2647L antisense chr8       | 29067279 | 29068454 | + | 0    | 0    |
| ENSG0000(RP11-23A2 processed_ chr15     | 85958717 | 85958971 | - | 0    | 0    |
| ENSG0000(RP11-342A unprocessed_ chr15   | 84053113 | 84080097 | - | 0    | 0    |
| ENSG0000(RP11-499F lincRNA chr15        | 81633887 | 81642190 | - | 0    | 0    |
| ENSG0000(LINC01582 lincRNA chr15        | 98085627 | 98103712 | - | 0    | 0    |
| ENSG0000(EEF1A1P22 processed_ chr15     | 52937139 | 52938518 | - | 1.68 | 2.04 |
| ENSG0000(RP11-522B processed_ chr15     | 96388214 | 96389056 | - | 0    | 0    |
| ENSG0000(RP11-429B antisense chr15      | 89579765 | 89582297 | - | 0    | 0    |

|                                      |          |          |   |      |      |
|--------------------------------------|----------|----------|---|------|------|
| ENSG0000(RP11-507B lincRNA chr15     | 61298791 | 61635449 | - | 0    | 0    |
| ENSG0000(RP11-540C antisense chr15   | 40999274 | 41004865 | + | 0    | 0    |
| ENSG0000(RP11-562A lincRNA chr15     | 50494018 | 50497080 | - | 0    | 0    |
| ENSG0000(RP11-390M processed_ chr15  | 54048588 | 54050876 | - | 0    | 0.03 |
| ENSG0000(RP11-133L antisense chr15   | 86938797 | 86988426 | - | 0    | 0    |
| ENSG0000(RP11-654A antisense chr15   | 98880659 | 98893535 | - | 0    | 0    |
| ENSG0000(RP11-597K processed_ chr15  | 82010212 | 82010607 | - | 0    | 0    |
| ENSG0000(RP11-156E sense_ovei chr17  | 41848518 | 41851447 | - | 1.06 | 1.04 |
| ENSG0000(RP11-138H antisense chr15   | 70768011 | 70778868 | - | 0    | 0    |
| ENSG0000(MTND3P12 processed_ chr15   | 58150635 | 58150962 | + | 0    | 0    |
| ENSG0000(RP11-244F antisense chr15   | 63070025 | 63071911 | - | 0    | 0    |
| ENSG0000(RP11-467H processed_ chr7   | 77043721 | 77198626 | + | 0.14 | 0.25 |
| ENSG0000(CTD-2262B transcribec chr15 | 85415228 | 85415633 | + | 0    | 0    |
| ENSG0000(RP11-557C lincRNA chr8      | 1.23E+08 | 1.23E+08 | - | 0    | 0    |
| ENSG0000(RP11-56B1 processed_ chr15  | 51859185 | 51861293 | - | 0    | 0    |
| ENSG0000(UBE2Q2P8 unprocessε chr15   | 84255913 | 84256014 | + | 0    | 0    |
| ENSG0000(AC100830. antisense chr15   | 64701248 | 64719602 | + | 0    | 0    |
| ENSG0000(RP11-133L sense_intrε chr15 | 86932880 | 86946331 | + | 0    | 0    |
| ENSG0000(DNM1P38 unprocessε chr15    | 82531653 | 82534139 | - | 0    | 0    |
| ENSG0000(RP11-184D lincRNA chr15     | 35939167 | 36252257 | - | 0.09 | 0    |
| ENSG0000(PCAT29 lincRNA chr15        | 69592129 | 69695750 | + | 0    | 0    |
| ENSG0000(ST20-AS1 antisense chr15    | 79922771 | 79926993 | + | 0.89 | 0.92 |
| ENSG0000(RP11-680F sense_intrε chr15 | 29728186 | 29729531 | - | 0.09 | 0.19 |
| ENSG0000(RP11-253M sense_intrε chr15 | 69391192 | 69392149 | + | 0    | 0    |
| ENSG0000(AC140725. unprocessε chr15  | 1.02E+08 | 1.02E+08 | + | 0    | 0    |
| ENSG0000(RP11-143J lincRNA chr15     | 30005443 | 30045848 | - | 0    | 0    |
| ENSG0000(RP11-643G transcribec chr14 | 67614929 | 67616626 | + | 0.23 | 0    |
| ENSG0000(RP11-351N antisense chr15   | 80896191 | 80909777 | - | 0.51 | 0    |
| ENSG0000(RP11-272D antisense chr15   | 73335260 | 73342387 | + | 0    | 0    |
| ENSG0000(MTCO3P23 processed_ chr15   | 58150275 | 58150563 | + | 0    | 0    |
| ENSG0000(RP11-797A lincRNA chr15     | 77043680 | 77045160 | + | 0    | 0    |
| ENSG0000(RP11-245C antisense chr15   | 84685884 | 84686946 | + | 0    | 0    |
| ENSG0000(CTD-2054N unprocessε chr15  | 99791127 | 99792847 | + | 0    | 0    |
| ENSG0000(RP11-325E lincRNA chr15     | 49101791 | 49103264 | + | 0    | 0    |
| ENSG0000(PIGHP1 processed_ chr15     | 59676757 | 59677321 | + | 0    | 0    |
| ENSG0000(RP11-89K1 transcribec chr15 | 1.02E+08 | 1.02E+08 | - | 0.86 | 1.23 |
| ENSG0000(RP11-151N sense_intrε chr15 | 44557829 | 44559188 | + | 0.31 | 0    |
| ENSG0000(DNM1P47 transcribec chr15   | 1.02E+08 | 1.02E+08 | + | 0.2  | 0.25 |
| ENSG0000(AC068831. antisense chr15   | 90920218 | 90921186 | - | 0    | 0    |
| ENSG0000(CTD-2314C antisense chr5    | 51372736 | 51383332 | - | 0    | 0.03 |
| ENSG0000(CTD-2147F lincRNA chr15     | 97370371 | 97521811 | - | 0    | 0    |
| ENSG0000(RP11-323I processed_ chr15  | 35081144 | 35081513 | + | 0    | 0    |
| ENSG0000(LINGO1-AS antisense chr15   | 77641764 | 77652288 | + | 0    | 0    |
| ENSG0000(RP11-707P antisense chr15   | 51457286 | 51460582 | + | 0    | 0    |
| ENSG0000(RP11-643A lincRNA chr15     | 53947624 | 53976908 | - | 0    | 0    |

|                                |       |          |          |   |      |      |
|--------------------------------|-------|----------|----------|---|------|------|
| ENSG0000(RP11-485C antisense)  | chr15 | 48783190 | 48784121 | + | 0    | 0    |
| ENSG0000(MTCYBP23 processed)   | chr15 | 58154960 | 58156061 | + | 0    | 0    |
| ENSG0000(RP11-69G7 lincRNA)    | chr15 | 63098870 | 63110403 | + | 0    | 0    |
| ENSG0000(IQCH-AS1 lincRNA)     | chr15 | 67403619 | 67521844 | - | 0.85 | 0.95 |
| ENSG0000(RP11-356N processed)  | chr15 | 59406963 | 59408154 | - | 0    | 0    |
| ENSG0000(RP11-507B lincRNA)    | chr15 | 61639349 | 61715171 | - | 0    | 0    |
| ENSG0000(RP11-343B lincRNA)    | chr15 | 88797413 | 88798734 | - | 0    | 0    |
| ENSG0000(RP11-493E processed)  | chr15 | 89876540 | 89877285 | + | 0    | 0    |
| ENSG0000(RP11-707P antisense)  | chr15 | 51414097 | 51498833 | + | 0    | 0    |
| ENSG0000(RP11-812E protein_co) | chr16 | 33844784 | 33845229 | - | 0    | 0    |
| ENSG0000(RP11-96O2 lincRNA)    | chr15 | 45558598 | 45562877 | + | 0    | 0    |
| ENSG0000(RP11-702L sense_intr) | chr15 | 64470253 | 64471364 | + | 0    | 0    |
| ENSG0000(RP11-182J: unprocess) | chr15 | 84389729 | 84395903 | + | 0    | 0    |
| ENSG0000(RP11-120K antisense)  | chr15 | 50557601 | 50560500 | + | 0    | 0    |
| ENSG0000(CTD-2315E lincRNA)    | chr15 | 90102649 | 90133445 | + | 0    | 0    |
| ENSG0000(HNRNPA1F processed)   | chr15 | 33012119 | 33013068 | + | 0    | 0    |
| ENSG0000(LINC01220 lincRNA)    | chr14 | 75294404 | 75296638 | + | 0.09 | 0.2  |
| ENSG0000(RP11-139F processed)  | chr15 | 35396221 | 35396444 | + | 0    | 0    |
| ENSG0000(CTD-3118D sense_intr) | chr15 | 29373602 | 29376956 | - | 0    | 0    |
| ENSG0000(FKBP1AP2 processed)   | chr15 | 73143236 | 73143518 | - | 0    | 0    |
| ENSG0000(RP11-499F lincRNA)    | chr15 | 81660482 | 81871125 | - | 0.13 | 0.32 |
| ENSG0000(RP13-262C lincRNA)    | chr15 | 84171178 | 84173194 | - | 0.6  | 0.36 |
| ENSG0000(RP11-14C1 processed)  | chr15 | 1.02E+08 | 1.02E+08 | - | 0    | 0    |
| ENSG0000(RP11-126F processed)  | chr15 | 31453201 | 31454139 | - | 0    | 0    |
| ENSG0000(RP11-299H lincRNA)    | chr15 | 62196145 | 62203318 | - | 0    | 0.1  |
| ENSG0000(FAM30C unprocess)     | chr15 | 21019388 | 21020851 | + | 0    | 0    |
| ENSG0000(HMGB1P8 processed)    | chr15 | 89135547 | 89136495 | - | 0.78 | 0.75 |
| ENSG0000(RP11-485C processed)  | chr15 | 48810701 | 48811909 | + | 0    | 0    |
| ENSG0000(RP11-108K sense_intr) | chr15 | 51278927 | 51280015 | - | 0    | 0    |
| ENSG0000(RP11-236L lincRNA)    | chr15 | 96049275 | 96064426 | - | 0    | 0    |
| ENSG0000(LINC00593 lincRNA)    | chr15 | 69835234 | 69843120 | + | 0    | 0    |
| ENSG0000(CTD-3094K sense_ove)  | chr15 | 90839724 | 90841378 | + | 0    | 0    |
| ENSG0000(RP11-227D lincRNA)    | chr15 | 48645951 | 48652016 | + | 0.37 | 0.35 |
| ENSG0000(HSP90B2P processed)   | chr15 | 99257632 | 99260015 | + | 0.02 | 0    |
| ENSG0000(RP11-752G processed)  | chr15 | 82691723 | 82692358 | - | 0    | 0    |
| ENSG0000(RP11-762H antisense)  | chr15 | 78250502 | 78264156 | - | 0    | 0    |
| ENSG0000(CTD-2184D antisense)  | chr15 | 52124561 | 52140246 | + | 0    | 0    |
| ENSG0000(NUTF2P6 processed)    | chr15 | 35282596 | 35282980 | + | 0    | 0    |
| ENSG0000(CTD-3032H lincRNA)    | chr16 | 54934913 | 54954665 | + | 0    | 0    |
| ENSG0000(CTD-2184D antisense)  | chr15 | 52056675 | 52100523 | - | 0    | 0    |
| ENSG0000(RP11-429B sense_ove)  | chr15 | 89518523 | 89591956 | + | 0    | 0    |
| ENSG0000(CTD-3110H lincRNA)    | chr15 | 50359450 | 50360194 | - | 0    | 0    |
| ENSG0000(LINC00677 lincRNA)    | chr14 | 1.03E+08 | 1.03E+08 | - | 0    | 0    |
| ENSG0000(RP11-930C lincRNA)    | chr14 | 56310880 | 56345001 | + | 0    | 0    |
| ENSG0000(RP11-348B antisense)  | chr15 | 31002013 | 31042302 | + | 0    | 0    |



|                    |                |       |          |          |   |      |      |
|--------------------|----------------|-------|----------|----------|---|------|------|
| ENSG000001758N     | lincRNA        | chr15 | 32717270 | 32719007 | - | 1.44 | 1.45 |
| ENSG00000194P1     | processed      | chr15 | 77204578 | 77205100 | + | 0    | 0    |
| ENSG000001823G1    | antisense      | chr20 | 53453058 | 53504314 | - | 0    | 0.29 |
| ENSG000001581      | lincRNA        | chr15 | 93905405 | 94107938 | - | 0    | 0    |
| ENSG0000013032H    | lincRNA        | chr16 | 54937786 | 54938671 | - | 0    | 0    |
| ENSG000001454P11   | unprocessed    | chr15 | 84186752 | 84197384 | + | 1.33 | 1.43 |
| ENSG0000011069     | lincRNA        | chr15 | 62895812 | 62899543 | + | 0    | 0.05 |
| ENSG0000010933     | transcribed    | chr15 | 84570649 | 84580175 | + | 0.9  | 0.53 |
| ENSG0000012007H    | lincRNA        | chr15 | 47944044 | 47949509 | + | 0    | 0    |
| ENSG000001326N     | lincRNA        | chr15 | 38756552 | 38759413 | - | 0    | 0    |
| ENSG00000159H7     | sense_intronic | chr15 | 59121034 | 59133250 | + | 0    | 0    |
| ENSG000001182L     | antisense      | chr15 | 86630266 | 86631136 | - | 0    | 0    |
| ENSG000001356N     | sense_intronic | chr15 | 59348648 | 59359889 | - | 0    | 0    |
| ENSG0000013033-AS1 | antisense      | chr15 | 90620007 | 90717141 | - | 0.21 | 0.34 |
| ENSG000001475A     | lincRNA        | chr15 | 36438972 | 36471016 | - | 0    | 0    |
| ENSG000001444P1    | processed      | chr15 | 58865006 | 58865303 | + | 0    | 0    |
| ENSG000001142J     | sense_intronic | chr15 | 47525169 | 47527756 | + | 0    | 0    |
| ENSG0000012014N    | unprocessed    | chr15 | 44914802 | 44930622 | - | 0    | 0    |
| ENSG000001315C     | processed      | chr15 | 46099193 | 46100392 | - | 0    | 0    |
| ENSG000001138H     | sense_intronic | chr15 | 70848883 | 70849770 | - | 0    | 0.09 |
| ENSG000001351P3    | processed      | chr15 | 90634725 | 90635033 | + | 0    | 0    |
| ENSG000001275K     | lincRNA        | chr15 | 38671847 | 38689191 | + | 0    | 0    |
| ENSG000001356N     | unprocessed    | chr15 | 30005205 | 30006430 | + | 0    | 0    |
| ENSG000001356N     | processed      | chr15 | 59401221 | 59402004 | - | 0    | 0    |
| ENSG00000183J1     | processed      | chr15 | 34849137 | 34850395 | - | 0.05 | 0    |
| ENSG000001290H     | protein_coding | chr17 | 47253897 | 47344292 | + | 0.28 | 0.49 |
| ENSG000001208K     | lincRNA        | chr15 | 47884310 | 48049112 | + | 0    | 0    |
| ENSG000001505E     | antisense      | chr15 | 1.01E+08 | 1.01E+08 | - | 0.27 | 0    |
| ENSG000001625H     | antisense      | chr15 | 62682916 | 62690448 | - | 0.13 | 0    |
| ENSG000001129J1    | lincRNA        | chr5  | 2736662  | 2737759  | - | 0    | 0    |
| ENSG000001324D     | lincRNA        | chr16 | 54239693 | 54240654 | + | 0    | 0    |
| ENSG00000120G1     | antisense      | chr15 | 99396613 | 99401315 | - | 0    | 0    |
| ENSG000001138H     | lincRNA        | chr15 | 87042054 | 87047161 | + | 0.15 | 0    |
| ENSG000001158N     | antisense      | chr15 | 85750336 | 85752901 | - | 0    | 0    |
| ENSG00000102157    | lincRNA        | chr15 | 96235785 | 96236703 | + | 0    | 0    |
| ENSG0000013033-AS1 | antisense      | chr15 | 1.01E+08 | 1.01E+08 | + | 0.35 | 0.37 |
| ENSG00000190B9     | sense_intronic | chr15 | 83022236 | 83024336 | - | 0    | 0    |
| ENSG000001991G2    | antisense      | chr16 | 72665170 | 72791624 | + | 0.71 | 0.72 |
| ENSG0000011360     | processed      | chr15 | 20046296 | 20047994 | - | 0    | 0    |
| ENSG00000181A1     | processed      | chr15 | 79944498 | 79945578 | + | 0    | 0    |
| ENSG000001429D     | sense_intronic | chr15 | 59266720 | 59271162 | - | 0    | 0    |
| ENSG00000116E1     | lincRNA        | chr15 | 31221999 | 31230838 | - | 0    | 0    |
| ENSG000001507J     | antisense      | chr15 | 50746709 | 50749829 | + | 0    | 0    |
| ENSG000001182J     | lincRNA        | chr15 | 84422618 | 84425882 | + | 1.51 | 1.34 |
| ENSG00000145P1     | antisense      | chr14 | 1.03E+08 | 1.03E+08 | - | 0.19 | 0.63 |

|                      |                          |       |          |          |   |       |       |
|----------------------|--------------------------|-------|----------|----------|---|-------|-------|
| ENSG00000101544      | RP11-544D lincRNA        | chr1  | 2.39E+08 | 2.39E+08 | - | 0.11  | 0.04  |
| ENSG00000101922      | LINC01922 lincRNA        | chr18 | 74409415 | 74413209 | + | 0     | 0     |
| ENSG0000010304L      | RP11-304L lincRNA        | chr16 | 2235689  | 2236913  | - | 0.05  | 0     |
| ENSG000001061P6      | HMGB1P6 processed        | chr15 | 71164770 | 71165415 | - | 50.65 | 50.99 |
| ENSG00000102270L     | CTD-2270L sense_intronic | chr16 | 23446446 | 23447282 | - | 0.16  | 0     |
| ENSG00000101006      | RP11-1006 lincRNA        | chr15 | 72608481 | 72636919 | - | 0     | 0     |
| ENSG00000102023      | RP11-2023 protein_coding | chr16 | 2513965  | 2527955  | + | 1.59  | 0     |
| ENSG00000102109      | LINC02109 lincRNA        | chr5  | 29143503 | 29217115 | + | 0     | 0     |
| ENSG0000010359K      | RP11-359K antisense      | chr1  | 1.63E+08 | 1.63E+08 | - | 0     | 0     |
| ENSG00000101078      | RP11-1078 lincRNA        | chr14 | 90489012 | 90491637 | - | 0     | 0     |
| ENSG000001032BP1     | ANP32BP1 transcribed     | chr15 | 75321397 | 75322693 | - | 0     | 0     |
| ENSG000001014K3      | RP11-14K3 lincRNA        | chr16 | 35640029 | 35640582 | + | 0     | 0     |
| ENSG0000010114H      | RP11-114H antisense      | chr15 | 77993405 | 77995289 | + | 0     | 0     |
| ENSG0000010400N      | RP11-400N antisense      | chr2  | 2.33E+08 | 2.33E+08 | - | 0.02  | 0     |
| ENSG0000010196D1     | RP11-96D1 sense_intronic | chr16 | 68316801 | 68319036 | + | 0     | 0     |
| ENSG0000010123E1     | RP11-23E1 antisense      | chr16 | 71113352 | 71114000 | + | 0     | 0     |
| ENSG000001019N8      | RP11-19N8 processed      | chr16 | 33130235 | 33130442 | + | 0     | 0     |
| ENSG00000102256P     | CTD-2256P antisense      | chr5  | 10352701 | 10353601 | - | 0.28  | 0.46  |
| ENSG000001022A31     | SLC22A31 protein_coding  | chr16 | 89195761 | 89201664 | - | 0     | 0.11  |
| ENSG00000102012K     | CTD-2012K antisense      | chr16 | 67561411 | 67562309 | - | 0.07  | 0     |
| ENSG00000101382A     | RP11-382A antisense      | chr15 | 82925884 | 83103443 | + | 0.16  | 0.09  |
| ENSG00000101426C     | RP11-426C lincRNA        | chr16 | 29217170 | 29220031 | - | 4.86  | 4.86  |
| ENSG0000010202519    | AC002519 sense_intronic  | chr16 | 31788202 | 31790993 | + | 0.04  | 0     |
| ENSG00000101142A     | RP5-1142A antisense      | chr16 | 88696501 | 88698610 | + | 0     | 0     |
| ENSG00000101300A     | RP11-300A lincRNA        | chr15 | 29609676 | 29611212 | - | 0     | 0     |
| ENSG00000101565N     | RP11-565N lincRNA        | chr1  | 2.09E+08 | 2.09E+08 | - | 0     | 0     |
| ENSG0000010153L2     | RP11-53L2 lincRNA        | chr16 | 73812621 | 73816053 | + | 0     | 0     |
| ENSG00000101024G     | RP5-1024G antisense      | chr1  | 53220663 | 53224253 | + | 0     | 0     |
| ENSG00000101568A     | RP11-568A lincRNA        | chr16 | 8369864  | 8376276  | + | 0     | 0     |
| ENSG00000102083843   | AC083843 lincRNA         | chr8  | 1.35E+08 | 1.35E+08 | - | 0.19  | 0.23  |
| ENSG00000101169E     | RP11-169E lincRNA        | chr16 | 47004513 | 47035385 | + | 0     | 0     |
| ENSG000001011292     | RP11-1292 processed      | chr16 | 32278866 | 32279115 | + | 0     | 0     |
| ENSG000001010PD8     | LYPD8 protein_coding     | chr1  | 2.49E+08 | 2.49E+08 | - | 0     | 0.11  |
| ENSG00000101467D     | RP11-467D antisense      | chr7  | 39947522 | 39949755 | - | 0.17  | 0.33  |
| ENSG00000101343H     | RP11-343H processed      | chr16 | 56682470 | 56687807 | + | 0     | 0     |
| ENSG0000010163E9     | RP11-63E9 lincRNA        | chr6  | 1.41E+08 | 1.41E+08 | + | 0     | 0     |
| ENSG0000010200567    | LINC00567 lincRNA        | chr13 | 1.11E+08 | 1.11E+08 | - | 0     | 0     |
| ENSG0000010204A26P   | CYP4A26P unprocessed     | chr1  | 46967679 | 46967874 | - | 0     | 0     |
| ENSG0000010123E1     | RP11-23E1 antisense      | chr16 | 71080866 | 71093667 | + | 0     | 0     |
| ENSG00000101284N     | RP11-284N lincRNA        | chr1  | 1.11E+08 | 1.11E+08 | - | 0     | 0     |
| ENSG0000010201P6     | AGGF1P6 processed        | chr16 | 35489237 | 35490212 | + | 0     | 0     |
| ENSG0000010201904    | LINC01904 lincRNA        | chr18 | 926083   | 927993   | - | 0     | 0     |
| ENSG000001020CP2     | ELOCP2 unprocessed       | chr15 | 41557027 | 41557435 | + | 0     | 0     |
| ENSG00000101491F     | RP11-491F lincRNA        | chr16 | 49336683 | 49337345 | + | 0     | 0     |
| ENSG00000102016c-380 | LA16c-380 lincRNA        | chr16 | 710746   | 711277   | - | 0     | 0     |

|                                |       |          |          |   |      |      |
|--------------------------------|-------|----------|----------|---|------|------|
| ENSG0000(LINC01566 lincRNA     | chr16 | 35363412 | 35390584 | + | 0    | 0    |
| ENSG0000(IGHV3OR1 unprocessε   | chr16 | 33949976 | 33950420 | - | 0    | 0    |
| ENSG0000(RP11-429P antisense   | chr16 | 50046429 | 50066224 | - | 0    | 0.17 |
| ENSG0000(GNPATP processed_     | chr16 | 60654235 | 60656649 | - | 0    | 0    |
| ENSG0000(HERC2P10 unprocessε   | chr15 | 30815271 | 30844153 | + | 0    | 0    |
| ENSG0000(RP11-467L lincRNA     | chr16 | 64364781 | 64600247 | + | 0    | 0    |
| ENSG0000(LINC02126 lincRNA     | chr16 | 65141756 | 65176713 | - | 0.09 | 0.47 |
| ENSG0000(AC097374. transcribec | chr2  | 94867486 | 94947341 | - | 0    | 0    |
| ENSG0000(VENTXP1 lincRNA       | chrX  | 26558337 | 26561052 | + | 0    | 0    |
| ENSG0000(IGHV1OR1 IG_V_pseu    | chr16 | 32978461 | 32978891 | + | 0    | 0    |
| ENSG0000(RP11-211G lincRNA     | chr11 | 69414307 | 69416832 | + | 0    | 0    |
| ENSG0000(RP11-574C lincRNA     | chr2  | 2.17E+08 | 2.17E+08 | + | 0    | 0    |
| ENSG0000(RAB43P1 processed_    | chr16 | 46626404 | 46626992 | - | 1.36 | 2.3  |
| ENSG0000(RP11-439I lincRNA     | chr16 | 64735925 | 64736804 | + | 0    | 0    |
| ENSG0000(CTC-471C1 lincRNA     | chr5  | 6030035  | 6030841  | + | 0    | 0    |
| ENSG0000(RP11-143E lincRNA     | chr12 | 1.3E+08  | 1.3E+08  | + | 0    | 0    |
| ENSG0000(SH3RF3-AS lincRNA     | chr2  | 1.09E+08 | 1.09E+08 | - | 0.04 | 0.04 |
| ENSG0000(RP11-370P processed_  | chr16 | 63703483 | 63703665 | + | 0    | 0    |
| ENSG0000(RP11-488L lincRNA     | chr1  | 2.47E+08 | 2.47E+08 | - | 0.19 | 0.36 |
| ENSG0000(RP11-177N processed_  | chr16 | 47561307 | 47562480 | - | 0    | 0    |
| ENSG0000(RP11-525K antisense   | chr16 | 80155053 | 80563135 | - | 0    | 0    |
| ENSG0000(RP11-1012 processed_  | chr14 | 55896547 | 55962970 | + | 0.07 | 0    |
| ENSG0000(AL022344. lincRNA     | chr10 | 42751178 | 42752145 | - | 0    | 0    |
| ENSG0000(RP11-753A lincRNA     | chr15 | 97876289 | 97878386 | + | 0    | 0    |
| ENSG0000(CTA-363E6 sense_intrε | chr16 | 19315164 | 19316526 | + | 0    | 0    |
| ENSG0000(RP11-481E processed_  | chr16 | 82434828 | 82435381 | + | 0    | 0    |
| ENSG0000(RP11-170L processed_  | chr16 | 31870887 | 31871124 | - | 0    | 0    |
| ENSG0000(CTD-3037G antisense   | chr16 | 12556353 | 12557694 | - | 0    | 0    |
| ENSG0000(RP11-46C2 antisense   | chr16 | 89215211 | 89217653 | - | 1.43 | 0.91 |
| ENSG0000(RP11-1O1C lincRNA     | chr15 | 62230384 | 62231895 | - | 0    | 0    |
| ENSG0000(RP11-830F antisense   | chr16 | 88881038 | 88887136 | + | 0    | 0    |
| ENSG0000(RP11-293B unprocessε  | chr16 | 33577502 | 33622547 | + | 0    | 0    |
| ENSG0000(EHD4-AS1 antisense    | chr15 | 41921417 | 41928883 | + | 0    | 0    |
| ENSG0000(RP11-1100 lincRNA     | chr12 | 52058459 | 52059503 | - | 0    | 0    |
| ENSG0000(RP11-923I lincRNA     | chr12 | 51848223 | 51852729 | + | 0    | 0    |
| ENSG0000(RP11-315F lincRNA     | chr2  | 2.4E+08  | 2.4E+08  | + | 0    | 0    |
| ENSG0000(DNM1P50 unprocessε    | chr15 | 30567822 | 30571089 | - | 0    | 0    |
| ENSG0000(CTA-204B4 antisense   | chr8  | 1.41E+08 | 1.41E+08 | - | 0.82 | 0.49 |
| ENSG0000(RP11-1H8.4 unprocessε | chr15 | 34555870 | 34556820 | + | 0    | 0    |
| ENSG0000(RP11-715J antisense   | chr16 | 2464950  | 2468213  | - | 0.17 | 0.07 |
| ENSG0000(FRG2JP unprocessε     | chr16 | 35245916 | 35247534 | - | 0    | 0    |
| ENSG0000(CYP4F33P processed_   | chr9  | 38542314 | 38542569 | - | 0    | 0    |
| ENSG0000(CTD-3037G antisense   | chr16 | 12560756 | 12611044 | - | 0    | 0    |
| ENSG0000(RP11-343C protein_co  | chr16 | 69335276 | 69351730 | - | 0.11 | 0    |
| ENSG0000(ACTG1P15 processed_   | chr15 | 34373541 | 34374603 | - | 0    | 0    |

|                     |                   |       |          |          |   |      |      |
|---------------------|-------------------|-------|----------|----------|---|------|------|
| ENSG0000(PWRN1      | lincRNA           | chr15 | 24493137 | 24652130 | + | 0    | 0    |
| ENSG0000(RP11-932C  | lincRNA           | chr15 | 30170563 | 30179943 | - | 0    | 0    |
| ENSG0000(RP6-91H8.1 | lincRNA           | chr14 | 71181456 | 71182106 | + | 0    | 0    |
| ENSG0000(RP11-1006  | unprocessed       | chr15 | 72638821 | 72640125 | + | 0    | 0    |
| ENSG0000(RP11-616N  | antisense         | chr16 | 1159548  | 1160176  | - | 0    | 0    |
| ENSG0000(CTC-527H2  | lincRNA           | chr16 | 48620319 | 48622033 | + | 0    | 0    |
| ENSG0000(RP11-298D  | antisense         | chr16 | 83725676 | 83726377 | - | 0    | 0    |
| ENSG0000(RP11-410E  | lincRNA           | chr2  | 1.86E+08 | 1.86E+08 | - | 0.03 | 0    |
| ENSG0000(RP11-407P  | protein_coding    | chr2  | 94588522 | 94604573 | + | 0    | 0    |
| ENSG0000(HNRNPLP2   | unprocessed       | chr15 | 34489002 | 34490571 | - | 0    | 0.04 |
| ENSG0000(NDUFA5P1   | processed         | chr16 | 47598654 | 47598996 | - | 0    | 0    |
| ENSG0000(RP11-2E11  | lincRNA           | chr7  | 1.3E+08  | 1.3E+08  | - | 0    | 0    |
| ENSG0000(AC022819.  | sense_intronic    | chr15 | 99157231 | 99161140 | - | 0.04 | 0.08 |
| ENSG0000(RP11-322D  | processed         | chr16 | 57013071 | 57014100 | - | 0    | 0    |
| ENSG0000(RP11-249C  | processed         | chr16 | 56648881 | 56652636 | + | 0    | 0    |
| ENSG0000(RP11-16E2  | processed         | chr15 | 65771176 | 65772139 | - | 0    | 0    |
| ENSG0000(CTA-363E6  | lincRNA           | chr16 | 19343647 | 19401693 | - | 0    | 0    |
| ENSG0000(RP11-44F1. | sense_intronic    | chr16 | 53448748 | 53449590 | + | 0    | 0    |
| ENSG0000(RP11-218M  | lincRNA           | chr17 | 30564057 | 30565576 | - | 0.04 | 0    |
| ENSG0000(CTA-481E9  | lincRNA           | chr16 | 17933189 | 18151595 | - | 0    | 0    |
| ENSG0000(CTD-2323K  | processed         | chr15 | 75512770 | 75513040 | - | 0    | 0    |
| ENSG0000(CTD-2651B  | sense_intronic    | chr15 | 45198517 | 45199139 | - | 0    | 0    |
| ENSG0000(RP11-304L. | sense_overlapping | chr16 | 2091436  | 2095433  | + | 0    | 0    |
| ENSG0000(RP11-989E  | processed         | chr16 | 32845964 | 32846180 | - | 0    | 0    |
| ENSG0000(RP11-519C  | sense_intronic    | chr15 | 52648634 | 52649866 | - | 0    | 0    |
| ENSG0000(RP11-438D  | sense_intronic    | chr12 | 33404872 | 33405896 | - | 0    | 0    |
| ENSG0000(RP11-77H9  | antisense         | chr16 | 8853312  | 8854347  | + | 0    | 0    |
| ENSG0000(CTD-3203P  | antisense         | chr16 | 27213308 | 27214993 | - | 0.27 | 0.22 |
| ENSG0000(RP11-48G1  | lincRNA           | chr15 | 56394321 | 56396785 | - | 0    | 0.02 |
| ENSG0000(RP1-39G22  | antisense         | chr1  | 40256427 | 40257967 | - | 2.26 | 1.71 |
| ENSG0000(CDRT7      | lincRNA           | chr17 | 15030975 | 15031957 | + | 0    | 0    |
| ENSG0000(CTD-2012K  | antisense         | chr16 | 67542123 | 67542963 | - | 0    | 0    |
| ENSG0000(RP11-490G  | lincRNA           | chr1  | 97967005 | 97968814 | - | 0.16 | 0.03 |
| ENSG0000(LINC02124  | lincRNA           | chr16 | 1889114  | 1890434  | + | 0    | 0    |
| ENSG0000(RP11-326A  | processed         | chr15 | 89201091 | 89201768 | - | 0    | 0    |
| ENSG0000(RP11-170L. | processed         | chr16 | 31894542 | 31894983 | - | 0    | 0    |
| ENSG0000(AC009133.  | antisense         | chr16 | 29806496 | 29807732 | - | 0.13 | 0    |
| ENSG0000(RP11-4O1.1 | sense_overlapping | chr9  | 1.12E+08 | 1.12E+08 | - | 0.42 | 0.14 |
| ENSG0000(IL21R-AS1  | antisense         | chr16 | 27447669 | 27453393 | - | 0    | 0.07 |
| ENSG0000(CTD-2547C  | antisense         | chr16 | 25238318 | 25239287 | + | 0    | 0    |
| ENSG0000(RBM15B     | protein_coding    | chr3  | 51391268 | 51397908 | + | 15.4 | 15.4 |
| ENSG0000(RP11-491F  | lincRNA           | chr16 | 49294886 | 49296736 | + | 0    | 0    |
| ENSG0000(RP11-121C  | lincRNA           | chr4  | 47840122 | 47844339 | - | 0.28 | 0.29 |
| ENSG0000(RP4-597A1  | antisense         | chr1  | 13513220 | 13516270 | + | 0    | 0    |
| ENSG0000(RP11-44F1. | unprocessed       | chr16 | 53362019 | 53363678 | - | 0    | 0    |

|                                  |       |          |          |   |      |      |
|----------------------------------|-------|----------|----------|---|------|------|
| ENSG0000(RP11-185J):processed_ch | 16    | 6721786  | 6721960  | + | 0    | 0    |
| ENSG0000(THSD4-AS1 antisense)    | chr15 | 71147650 | 71189042 | - | 0    | 0    |
| ENSG0000(RP11-652G transcribed)  | chr16 | 32600299 | 32615639 | + | 0    | 0    |
| ENSG0000(RP11-2E17 lincRNA)      | chr15 | 80165923 | 80166980 | + | 0    | 0    |
| ENSG0000(RP11-428C lincRNA)      | chr5  | 73952940 | 73954014 | + | 0    | 0    |
| ENSG0000(RP11-999E sense_ov)     | chr14 | 57993545 | 57994525 | - | 0.37 | 0.27 |
| ENSG0000(AC099668).processed_ch  | 3     | 49684480 | 49684983 | - | 1.05 | 0    |
| ENSG0000(RP11-44L9).lincRNA      | chr16 | 73511176 | 73511654 | + | 0    | 0    |
| ENSG0000(AC009120).processed_ch  | 16    | 74305127 | 74335346 | - | 4.09 | 4.64 |
| ENSG0000(LINC00261 lincRNA)      | chr20 | 22547671 | 22578642 | - | 0    | 0    |
| ENSG0000(RP11-553L)3prime_ov     | chr3  | 1.14E+08 | 1.14E+08 | - | 1.01 | 1.19 |
| ENSG0000(AL121578).lincRNA       | chrX  | 37906147 | 37949405 | + | 0    | 0    |
| ENSG0000(MRPS21P8 processed_ch   | 16    | 49764454 | 49764688 | + | 0    | 0    |
| ENSG0000(VN1R68P processed_ch    | 16    | 35118238 | 35118956 | - | 0    | 0    |
| ENSG0000(AF096876).lincRNA       | chr21 | 30089717 | 30097836 | + | 0    | 0    |
| ENSG0000(CDC37P1 processed_ch    | 16    | 28700294 | 28701540 | - | 0    | 0    |
| ENSG0000(RP11-169E transcribed)  | chr16 | 47013957 | 47014365 | + | 0    | 0    |
| ENSG0000(RP11-335G unprocess     | chr1  | 25336429 | 25337465 | - | 0.33 | 0    |
| ENSG0000(RP11-549B antisense)    | chr18 | 31685655 | 31686823 | + | 0.51 | 0.45 |
| ENSG0000(RP11-382A antisense)    | chr15 | 83179182 | 83439445 | + | 0    | 0    |
| ENSG0000(DUX4L46 processed_ch    | 16    | 34141256 | 34142006 | - | 0    | 0    |
| ENSG0000(CTD-2555A lincRNA)      | chr16 | 88984032 | 88995369 | + | 0    | 0    |
| ENSG0000(RP11-598D unprocess     | chr16 | 34013394 | 34013830 | - | 0    | 0    |
| ENSG0000(RP11-77K1 processed_ch  | 16    | 75541399 | 75608445 | - | 0    | 0    |
| ENSG0000(RP11-261B processed_ch  | 15    | 30223017 | 30225564 | + | 0    | 0    |
| ENSG0000(RP11-305E sense_ov)     | chr10 | 30302826 | 30306066 | - | 0.21 | 0.3  |
| ENSG0000(CTD-2336H lincRNA)      | chr16 | 76736342 | 76928169 | + | 0    | 0.18 |
| ENSG0000(RARRES2P8 processed_ch  | 16    | 35543279 | 35543645 | - | 0    | 0    |
| ENSG0000(IGHV1OR1)IG_V_pseu      | chr16 | 33002333 | 33002621 | + | 0    | 0    |
| ENSG0000(RP11-753D lincRNA)      | chr14 | 88158240 | 88160591 | - | 0    | 0    |
| ENSG0000(RP11-252K sense_intr    | chr16 | 75321890 | 75325048 | - | 0    | 0    |
| ENSG0000(RP3-467N1 antisense)    | chr6  | 1.01E+08 | 1.01E+08 | + | 0.98 | 0.5  |
| ENSG0000(TGFBR3L protein_co      | chr19 | 7916145  | 7919097  | + | 1.22 | 2.78 |
| ENSG0000(RP11-279C lincRNA)      | chr16 | 8276263  | 8295700  | - | 0    | 0    |
| ENSG0000(RP11-351A lincRNA)      | chr16 | 65601101 | 65601698 | - | 0    | 0    |
| ENSG0000(AC027601).antisense     | chr17 | 81228707 | 81233983 | + | 0    | 0    |
| ENSG0000(RP11-315D protein_co    | chr15 | 68184032 | 68229718 | - | 0.5  | 0.82 |
| ENSG0000(RP11-732A lincRNA)      | chr11 | 1.02E+08 | 1.02E+08 | + | 0.03 | 0    |
| ENSG0000(LINC02130 lincRNA)      | chr16 | 14363109 | 14370266 | - | 0    | 0    |
| ENSG0000(ZNF720P1 processed_ch   | 16    | 31601593 | 31603531 | - | 0    | 0    |
| ENSG0000(RP13-20L1).lincRNA      | chr17 | 82381110 | 82382690 | - | 0    | 0    |
| ENSG0000(RP11-329J):processed_ch | 16    | 47262741 | 47263500 | + | 0    | 0    |
| ENSG0000(LSM3P5 processed_ch     | 16    | 78355529 | 78355834 | + | 0    | 0    |
| ENSG0000(RP11-510M sense_intr    | chr16 | 71539834 | 71541825 | - | 0    | 0    |
| ENSG0000(RP11-1035 antisense)    | chr16 | 18803083 | 18812181 | + | 0    | 0    |

|                                 |       |          |          |   |       |       |
|---------------------------------|-------|----------|----------|---|-------|-------|
| ENSG0000(RP11-505K antisense)   | chr16 | 84117051 | 84117571 | + | 0.99  | 0.78  |
| ENSG0000(LINC01992 lincRNA)     | chr17 | 27929548 | 27974223 | - | 0     | 0     |
| ENSG0000(RP11-480I1 antisense)  | chr1  | 2.03E+08 | 2.03E+08 | - | 0     | 0     |
| ENSG0000(LA16c-306 antisense)   | chr16 | 883780   | 885090   | + | 0     | 0     |
| ENSG0000(MRPS21P7 processed)    | chr16 | 49708006 | 49708243 | + | 0     | 0     |
| ENSG0000(RP11-490M lincRNA)     | chr2  | 36354749 | 36355114 | - | 5.41  | 6.77  |
| ENSG0000(LINC02189 lincRNA)     | chr16 | 86720688 | 86721954 | - | 0     | 0     |
| ENSG0000(HOXB7 protein_co)      | chr17 | 48607227 | 48633572 | - | 2.05  | 1.49  |
| ENSG0000(RP11-401P antisense)   | chr16 | 50551824 | 50553940 | - | 0     | 0     |
| ENSG0000(RP11-686F lincRNA)     | chr12 | 53754358 | 53762104 | + | 0     | 0     |
| ENSG0000(RPL10P14 processed)    | chr16 | 50151280 | 50151577 | - | 0     | 0     |
| ENSG0000(NORAD lincRNA)         | chr20 | 36045622 | 36050960 | - | 52.17 | 55.15 |
| ENSG0000(CTC-527H2 processed)   | chr16 | 48600176 | 48600644 | + | 0     | 0     |
| ENSG0000(LCMT1-AS2 antisense)   | chr16 | 25140577 | 25149032 | - | 0     | 0     |
| ENSG0000(CTD-2651B sense_intr)  | chr15 | 45200325 | 45200632 | - | 0     | 0     |
| ENSG0000(RP11-178D processed)   | chr15 | 55442635 | 55443357 | - | 0     | 0     |
| ENSG0000(CTD-2524L antisense)   | chr15 | 71818396 | 71823384 | + | 0     | 0     |
| ENSG0000(RP11-407G sense_intr)  | chr16 | 57247350 | 57248492 | + | 0     | 0     |
| ENSG0000(RP11-355E lincRNA)     | chr16 | 56109537 | 56137000 | + | 0     | 0     |
| ENSG0000(CTD-2034I2 lincRNA)    | chr16 | 50856614 | 50879278 | - | 0     | 0     |
| ENSG0000(RP11-454K lincRNA)     | chr14 | 45369215 | 45370839 | + | 0.03  | 0     |
| ENSG0000(BCAP31P2 unprocess)    | chr16 | 32869985 | 32873128 | + | 0     | 0     |
| ENSG0000(IGHV1OR1 IG_V_pseu)    | chr16 | 32059084 | 32059372 | + | 0     | 0     |
| ENSG0000(LA16c-390I antisense)  | chr16 | 1451760  | 1452653  | + | 0     | 0     |
| ENSG0000(CTC-527H2 lincRNA)     | chr16 | 48637143 | 48638719 | + | 0.13  | 0.15  |
| ENSG0000(ABCB10P4 processed)    | chr15 | 28506625 | 28508808 | - | 0     | 0     |
| ENSG0000(LINC01571 lincRNA)     | chr16 | 51762519 | 51773173 | + | 0     | 0     |
| ENSG0000(RP11-279C lincRNA)     | chr16 | 8309962  | 8357860  | + | 0     | 0     |
| ENSG0000(RP11-231E lincRNA)     | chr2  | 1.39E+08 | 1.39E+08 | - | 0     | 0     |
| ENSG0000(RP11-388N antisense)   | chr16 | 31196131 | 31196963 | + | 0.08  | 0     |
| ENSG0000(GOLGA2P1 transcribec)  | chr15 | 62253730 | 62270680 | - | 0.13  | 0.05  |
| ENSG0000(RP5-968P1 antisense)   | chr1  | 26692132 | 26694131 | - | 0.28  | 0.25  |
| ENSG0000(RP11-18F1 sense_intr)  | chr16 | 80627551 | 80628379 | - | 0     | 0     |
| ENSG0000(CTD-2587M lincRNA)     | chr5  | 1725149  | 1728172  | + | 0     | 0     |
| ENSG0000(MTND4LP2 processed)    | chr16 | 49066567 | 49066729 | - | 0     | 0     |
| ENSG0000(RP11-439I1 processed)  | chr16 | 64738323 | 64738564 | + | 0     | 0     |
| ENSG0000(RP11-182J2 antisense)  | chr7  | 36319775 | 36320479 | + | 0     | 0     |
| ENSG0000(RP11-418I2 lincRNA)    | chr16 | 9466655  | 9517564  | + | 0     | 0     |
| ENSG0000(CTD-2313J1 lincRNA)    | chr16 | 24472798 | 24495177 | - | 0.09  | 0.07  |
| ENSG0000(RP11-488I2 lincRNA)    | chr16 | 35192687 | 35195661 | - | 0     | 0     |
| ENSG0000(NSFP1 unprocess)       | chr17 | 46372855 | 46487141 | + | 3.07  | 4.45  |
| ENSG0000(RP11-254F lincRNA)     | chr2  | 10039092 | 10040663 | - | 5.4   | 4.87  |
| ENSG0000(RP11-44F1 transcribec) | chr16 | 53364982 | 53373083 | - | 0     | 0     |
| ENSG0000(RP11-66N1 antisense)   | chrX  | 1.54E+08 | 1.54E+08 | + | 1.68  | 0.71  |
| ENSG0000(RP11-2C24 processed)   | chr16 | 30821068 | 30822110 | - | 0     | 0     |

|                                 |       |          |          |   |      |      |
|---------------------------------|-------|----------|----------|---|------|------|
| ENSG0000(MIR762HG antisense     | chr16 | 30875222 | 30895220 | + | 1.88 | 0.76 |
| ENSG0000(RP11-615I2 antisense   | chr16 | 68573782 | 68589512 | - | 0    | 0    |
| ENSG0000(RP11-421I1 lincRNA     | chr16 | 48623436 | 48744921 | + | 0.45 | 0.78 |
| ENSG0000(PCMTD1P2 processed_    | chr16 | 34139189 | 34139543 | + | 0    | 0    |
| ENSG0000(RP11-92G1 lincRNA      | chr1  | 2.01E+08 | 2.01E+08 | + | 0.69 | 0.6  |
| ENSG0000(ADAM3B processed_      | chr16 | 49517762 | 49518601 | - | 0    | 0    |
| ENSG0000(RP11-292D lincRNA      | chr4  | 1.47E+08 | 1.47E+08 | + | 0    | 0    |
| ENSG0000(RP11-33B1 lincRNA      | chr4  | 1.19E+08 | 1.19E+08 | + | 0.07 | 0    |
| ENSG0000(RP11-77K1 protein_co   | chr16 | 75528532 | 75545428 | - | 0    | 0    |
| ENSG0000(RP11-1E4.1 antisense   | chr8  | 10050485 | 10054254 | - | 0    | 0.02 |
| ENSG0000(LINC00564 lincRNA      | chr13 | 81225865 | 81226983 | - | 0    | 0    |
| ENSG0000(RP11-715J2 antisense   | chr16 | 2452581  | 2452977  | - | 0.21 | 0.24 |
| ENSG0000(DNM1P33 unprocessε     | chr15 | 74062780 | 74063785 | + | 0    | 0    |
| ENSG0000(SPDYE6 protein_co      | chr7  | 1.02E+08 | 1.02E+08 | - | 0    | 0.13 |
| ENSG0000(RP11-220I1 lincRNA     | chr9  | 37078813 | 37079776 | - | 0    | 0    |
| ENSG0000(RP11-568N lincRNA      | chr2  | 64522187 | 64524093 | - | 0.26 | 0.16 |
| ENSG0000(LINC01070 lincRNA      | chr13 | 1.12E+08 | 1.12E+08 | + | 0    | 0    |
| ENSG0000(RP11-100I1 transcribec | chr15 | 74478070 | 74490286 | - | 0.14 | 0.25 |
| ENSG0000(RP11-817C unprocessε   | chr15 | 75249232 | 75249407 | - | 0    | 0    |
| ENSG0000(AOC4P transcribec      | chr17 | 42865922 | 42874369 | + | 0    | 0    |
| ENSG0000(AC005606. lincRNA      | chr16 | 1997654  | 1998374  | + | 0    | 0    |
| ENSG0000(RP11-140H3 prime_ov    | chr16 | 69463844 | 69466264 | + | 0    | 0    |
| ENSG0000(RP11-883G unprocessε   | chr15 | 67985059 | 67986288 | + | 0    | 0    |
| ENSG0000(RP11-529K antisense    | chr16 | 70379457 | 70399502 | + | 0    | 0    |
| ENSG0000(CTC-543D1 processed_   | chr19 | 9518150  | 9519341  | + | 0    | 0    |
| ENSG0000(RP11-146F processed_   | chr16 | 30626976 | 30627178 | + | 0    | 0    |
| ENSG0000(CTD-2574D sense_intrε  | chr16 | 29919634 | 29921905 | - | 0.61 | 1.09 |
| ENSG0000(CTC-420A1 antisense    | chr16 | 61918321 | 61940697 | + | 0    | 0    |
| ENSG0000(RP6-201G1 lincRNA      | chrX  | 68013470 | 68014901 | - | 0.04 | 0    |
| ENSG0000(RP11-177B lincRNA      | chr4  | 52680609 | 52692649 | + | 0    | 0    |
| ENSG0000(RP5-1142A antisense    | chr16 | 88718615 | 88720459 | + | 0    | 0.03 |
| ENSG0000(RP11-923I1 lincRNA     | chr12 | 51809705 | 51810600 | - | 0    | 0    |
| ENSG0000(RP11-326A lincRNA      | chr15 | 89041223 | 89082819 | + | 0    | 0    |
| ENSG0000(AGBL1-AS1 antisense    | chr15 | 86295649 | 86317173 | - | 0    | 0    |
| ENSG0000(RP11-14N9 lincRNA      | chr16 | 16658227 | 16664135 | + | 0.2  | 0.11 |
| ENSG0000(ULK4P2 transcribec     | chr15 | 30572738 | 30600647 | + | 0.1  | 0.71 |
| ENSG0000(LINC00556 antisense    | chr13 | 20181531 | 20181942 | + | 0    | 0    |
| ENSG0000(LA16c-312I1 antisense  | chr16 | 1408834  | 1412248  | + | 0    | 0    |
| ENSG0000(CA5AP1 unprocessε      | chr16 | 29618785 | 29636328 | - | 0    | 0    |
| ENSG0000(C1QL1P1 processed_     | chr16 | 35574834 | 35575494 | + | 0    | 0    |
| ENSG0000(RP11-212I2 lincRNA     | chr16 | 55426797 | 55462297 | - | 0    | 0    |
| ENSG0000(CTD-2270L lincRNA      | chr16 | 23452758 | 23457606 | + | 2.76 | 3.11 |
| ENSG0000(RP11-258F lincRNA      | chr10 | 37791580 | 37791937 | + | 0    | 0    |
| ENSG0000(CSPG4P13 transcribec   | chr15 | 77894684 | 77904674 | + | 0    | 0    |
| ENSG0000(RP11-19N8 lincRNA      | chr16 | 33043609 | 33095431 | - | 0.62 | 0.17 |

|                 |                        |       |          |          |   |      |      |
|-----------------|------------------------|-------|----------|----------|---|------|------|
| ENSG00000100000 | RP11-764E lincRNA      | chr2  | 1.94E+08 | 1.94E+08 | + | 0    | 0    |
| ENSG00000100000 | RP11-361N unprocessed  | chr15 | 72605183 | 72612326 | + | 0    | 0    |
| ENSG00000100000 | RP11-322D antisense    | chr16 | 57052505 | 57058497 | - | 0    | 0    |
| ENSG00000100000 | CTD-2258A processed    | chr16 | 66450998 | 66451351 | - | 0    | 0    |
| ENSG00000100000 | MTND5P34 processed     | chr16 | 55007982 | 55008306 | + | 0    | 0    |
| ENSG00000100000 | RP11-407G antisense    | chr16 | 57091213 | 57092303 | - | 0    | 0    |
| ENSG00000100000 | RP11-748L lincRNA      | chr10 | 27343436 | 27344917 | + | 0    | 0    |
| ENSG00000100000 | RP11-69H7 processed    | chr15 | 75114261 | 75114868 | + | 0    | 0    |
| ENSG00000100000 | RARRES2P1 processed    | chr16 | 35485766 | 35486225 | - | 0    | 0    |
| ENSG00000100000 | RP11-394B antisense    | chr16 | 70747057 | 70747926 | + | 0    | 0    |
| ENSG00000100000 | CH17-53B9 transcribed  | chr17 | 21614487 | 21641536 | + | 0    | 0    |
| ENSG00000100000 | RP11-67H2 lincRNA      | chr16 | 32809556 | 32824645 | + | 0    | 0    |
| ENSG00000100000 | RP11-483E unprocessed  | chr15 | 28454660 | 28457783 | - | 0    | 0    |
| ENSG00000100000 | CTC-471J1. sense_ove   | chr19 | 52058490 | 52063703 | - | 0.1  | 0.22 |
| ENSG00000100000 | MTCYBP28 processed     | chr16 | 82120638 | 82121769 | - | 0    | 0    |
| ENSG00000100000 | RP11-863P lincRNA      | chr16 | 88177289 | 88178646 | + | 0    | 0    |
| ENSG00000100000 | RP11-521C lincRNA      | chr2  | 1.27E+08 | 1.27E+08 | + | 0.01 | 0    |
| ENSG00000100000 | CTD-2323K unprocessed  | chr15 | 75480661 | 75480836 | + | 0    | 0    |
| ENSG00000100000 | RP11-863P lincRNA      | chr16 | 88087387 | 88087932 | + | 0.8  | 0.89 |
| ENSG00000100000 | RP11-146F antisense    | chr16 | 30585907 | 30608593 | + | 0.32 | 0.17 |
| ENSG00000100000 | RP11-96O2 protein_co   | chr15 | 45587351 | 45676314 | + | 0.33 | 0    |
| ENSG00000100000 | RP11-95H1 lincRNA      | chr2  | 2.07E+08 | 2.07E+08 | - | 0    | 0    |
| ENSG00000100000 | LINC01413 lincRNA      | chr15 | 57319138 | 57323908 | + | 0    | 0    |
| ENSG00000100000 | RP11-2I17. antisense   | chr15 | 72140504 | 72155459 | - | 0    | 0    |
| ENSG00000100000 | CTD-2022H processed    | chr15 | 30044455 | 30045296 | + | 0    | 0    |
| ENSG00000100000 | CTD-3126B lincRNA      | chr16 | 2644084  | 2645214  | - | 0    | 0    |
| ENSG00000100000 | RP4-536B2 lincRNA      | chr16 | 87780134 | 87806476 | - | 0    | 0    |
| ENSG00000100000 | RP5-902P8 lincRNA      | chr1  | 1249777  | 1251334  | - | 0.26 | 0.2  |
| ENSG00000100000 | RP11-616N sense_intr   | chr16 | 1257339  | 1258074  | + | 0    | 0    |
| ENSG00000100000 | RP11-109P antisense    | chr16 | 80547842 | 80552514 | - | 0    | 0    |
| ENSG00000100000 | RP11-421I1 processed   | chr16 | 48849919 | 48850015 | - | 0    | 0    |
| ENSG00000100000 | RP11-432I5 antisense   | chr16 | 71655027 | 71664212 | + | 0    | 0    |
| ENSG00000100000 | LINC02137 lincRNA      | chr16 | 58421326 | 58462470 | + | 0    | 0    |
| ENSG00000100000 | RP11-439I1 transcribed | chr16 | 64736788 | 64737280 | + | 0    | 0    |
| ENSG00000100000 | CTA-331P3 antisense    | chr6  | 1.1E+08  | 1.1E+08  | + | 0    | 0    |
| ENSG00000100000 | RP11-229P sense_ove    | chr9  | 1.37E+08 | 1.37E+08 | - | 0.08 | 0    |
| ENSG00000100000 | RP11-756H lincRNA      | chr5  | 1.25E+08 | 1.26E+08 | + | 0    | 0    |
| ENSG00000100000 | RP11-83N9 lincRNA      | chr9  | 1.36E+08 | 1.36E+08 | - | 0    | 0.09 |
| ENSG00000100000 | RP11-357N antisense    | chr16 | 53998313 | 53999969 | - | 0    | 0    |
| ENSG00000100000 | RP1-239B2 antisense    | chr11 | 17380649 | 17383531 | + | 1.09 | 0.91 |
| ENSG00000100000 | RP11-424G lincRNA      | chrY  | 19691941 | 19694606 | - | 0.06 | 0.14 |
| ENSG00000100000 | RP11-441F sense_intr   | chr16 | 56300616 | 56302904 | + | 0    | 0    |
| ENSG00000100000 | RP11-143N lincRNA      | chr16 | 20580999 | 20586640 | + | 0    | 0    |
| ENSG00000100000 | RP3-333B1 lincRNA      | chr20 | 23481645 | 23519054 | - | 0    | 0    |
| ENSG00000100000 | RP11-108B lincRNA      | chr10 | 22218074 | 22221168 | + | 0    | 0    |



|                                 |       |          |          |   |       |       |
|---------------------------------|-------|----------|----------|---|-------|-------|
| ENSG0000(CTD-2026K antisense    | chr15 | 75636139 | 75639239 | + | 0     | 0     |
| ENSG0000(DUX4L47 processed      | chr16 | 34142456 | 34142849 | + | 0     | 0     |
| ENSG0000(RP11-680F lincRNA      | chr11 | 1.26E+08 | 1.26E+08 | - | 0.08  | 0.17  |
| ENSG0000(RP13-395E processed    | chr15 | 32313126 | 32315654 | - | 0     | 0     |
| ENSG0000(RP11-325C unprocess    | chr6  | 1.28E+08 | 1.28E+08 | + | 0     | 0     |
| ENSG0000(RP11-303E antisense    | chr16 | 81016792 | 81035759 | - | 0.06  | 0     |
| ENSG0000(RP11-809F lincRNA      | chr3  | 1.76E+08 | 1.76E+08 | - | 0     | 0     |
| ENSG0000(RP11-170L processed    | chr16 | 31963803 | 31964079 | + | 0     | 0     |
| ENSG0000(RP11-347C lincRNA      | chr16 | 30355441 | 30357104 | + | 0.43  | 0.61  |
| ENSG0000(CCDC187 protein_co     | chr9  | 1.36E+08 | 1.36E+08 | - | 0.03  | 0.03  |
| ENSG0000(RP11-293N lincRNA      | chr16 | 76107283 | 76147806 | - | 0     | 0     |
| ENSG0000(UBL5P4 processed       | chr16 | 11968508 | 11968743 | - | 0     | 0     |
| ENSG0000(RP11-483P antisense    | chr16 | 83789967 | 83807834 | - | 0     | 0.13  |
| ENSG0000(RP11-391L processed    | chr16 | 81476023 | 81476519 | - | 0     | 0     |
| ENSG0000(FRRS1L protein_co      | chr9  | 1.09E+08 | 1.09E+08 | - | 0     | 0.01  |
| ENSG0000(JHDM1D-A antisense     | chr7  | 1.4E+08  | 1.4E+08  | + | 1.94  | 1.73  |
| ENSG0000(PWRN4 lincRNA          | chr15 | 23975172 | 24003435 | + | 0     | 0     |
| ENSG0000(SSSCA1-AS processed    | chr11 | 65568482 | 65570423 | - | 1.09  | 0.76  |
| ENSG0000(RP11-166N protein_co   | chr3  | 1.51E+08 | 1.51E+08 | - | 0     | 0     |
| ENSG0000(CTD-2026K antisense    | chr15 | 75624793 | 75625690 | + | 0.32  | 1.3   |
| ENSG0000(RP11-708J antisense    | chr3  | 47379089 | 47380999 | - | 0.94  | 0.68  |
| ENSG0000(RP11-148N lincRNA      | chr16 | 80040662 | 80045745 | + | 0     | 0     |
| ENSG0000(PMF1-BGL protein_co    | chr1  | 1.56E+08 | 1.56E+08 | + | 4.18  | 3.7   |
| ENSG0000(RP11-274H lincRNA      | chr6  | 4491807  | 4495769  | + | 0     | 0     |
| ENSG0000(APOOP5 transcribec     | chr16 | 59709993 | 59755026 | - | 0     | 0     |
| ENSG0000(CTA-481E9 lincRNA      | chr16 | 18002806 | 18173063 | - | 0     | 0     |
| ENSG0000(RP11-588K sense_ove    | chr4  | 1.56E+08 | 1.56E+08 | + | 0     | 0     |
| ENSG0000(AC000032. antisense    | chr1  | 1.1E+08  | 1.1E+08  | - | 0.15  | 0.17  |
| ENSG0000(SUB1P4 processed       | chr16 | 23537061 | 23537556 | + | 0     | 0     |
| ENSG0000(RP11-401P antisense    | chr16 | 50666211 | 50671639 | + | 0     | 0     |
| ENSG0000(RP11-46D6 unprocess    | chr16 | 46573763 | 46575094 | + | 0     | 0     |
| ENSG0000(RP11-384N antisense    | chr16 | 72084857 | 72087443 | + | 0     | 0     |
| ENSG0000(RP4-676L2. sense_ove   | chr8  | 29352420 | 29353170 | - | 0     | 0     |
| ENSG0000(AP000997. lincRNA      | chr11 | 1.16E+08 | 1.16E+08 | + | 0     | 0     |
| ENSG0000(RP11-185C processed    | chr16 | 25824710 | 25826330 | - | 0     | 0     |
| ENSG0000(AP001063. lincRNA      | chr21 | 44347767 | 44348295 | - | 0     | 0     |
| ENSG0000(RP5-1085F lincRNA      | chr20 | 32856621 | 32858751 | + | 0.08  | 0.09  |
| ENSG0000(RP11-467J. transcribec | chr16 | 52942139 | 52943464 | + | 0     | 0     |
| ENSG0000(LINC02166 lincRNA      | chr16 | 89682620 | 89686569 | - | 0.09  | 0.4   |
| ENSG0000(SNHG19 lincRNA         | chr16 | 2154797  | 2155358  | - | 24.98 | 29.32 |
| ENSG0000(RP11-480A lincRNA      | chr3  | 1.96E+08 | 1.96E+08 | - | 1.18  | 0.94  |
| ENSG0000(RP11-440L lincRNA      | chr4  | 836512   | 837224   | - | 0     | 0     |
| ENSG0000(LINC2194 lincRNA       | chr16 | 24236104 | 24252863 | + | 0     | 0     |
| ENSG0000(RP11-44F2 lincRNA      | chr4  | 75081702 | 75084717 | - | 0     | 0     |
| ENSG0000(CTD-2311N transcribec  | chr15 | 74350768 | 74364620 | + | 0.28  | 0.14  |

|                 |                       |       |          |          |   |      |      |
|-----------------|-----------------------|-------|----------|----------|---|------|------|
| ENSG00000180100 | RP11-452L1 antisense  | chr16 | 31456711 | 31459736 | - | 1.61 | 1.22 |
| ENSG00000180101 | LINC00919 lincRNA     | chr16 | 52083065 | 52085109 | - | 0    | 0    |
| ENSG00000180102 | CTD-2323K processed   | chr15 | 75527150 | 75601205 | - | 1.24 | 1.18 |
| ENSG00000180103 | RP11-45N11 lincRNA    | chr6  | 90345219 | 90362632 | + | 0    | 0    |
| ENSG00000180104 | RP11-20I23 protein_co | chr16 | 2496032  | 2520218  | + | 0    | 0    |
| ENSG00000180105 | RP11-425D antisense   | chr6  | 1.09E+08 | 1.09E+08 | + | 0.29 | 1.03 |
| ENSG00000180106 | RP11-817C lincRNA     | chr15 | 75368155 | 75369584 | + | 0.77 | 0.49 |
| ENSG00000180107 | RP11-326A processed   | chr15 | 89037977 | 89038286 | - | 0    | 0    |
| ENSG00000180108 | RP11-77H9 antisense   | chr16 | 8848105  | 8860456  | + | 0.39 | 0.57 |
| ENSG00000180109 | RP11-101E antisense   | chr16 | 22083256 | 22092231 | - | 0    | 0    |
| ENSG00000180110 | RP11-109G antisense   | chr4  | 78773654 | 78775973 | - | 0    | 0.03 |
| ENSG00000180111 | AC137932. antisense   | chr16 | 89297508 | 89298317 | + | 0    | 0    |
| ENSG00000180112 | SLX1B-SUL1 processed  | chr16 | 29455105 | 29464963 | + | 1    | 2.83 |
| ENSG00000180113 | ITFG1-AS1 antisense   | chr16 | 47144323 | 47162747 | + | 0    | 0    |
| ENSG00000180114 | EIF4EBP2P1 processed  | chr15 | 42581156 | 42581488 | - | 0    | 0    |
| ENSG00000180115 | TPSP2 unprocessed     | chr16 | 1286351  | 1288837  | - | 0    | 0    |
| ENSG00000180116 | RP11-600F antisense   | chr14 | 1.04E+08 | 1.04E+08 | - | 0.67 | 0.87 |
| ENSG00000180117 | C6orf229 protein_co   | chr6  | 24797321 | 24798889 | - | 0    | 0    |
| ENSG00000180118 | TBC1D3G protein_co    | chr17 | 36323884 | 36334759 | + | 0    | 0    |
| ENSG00000180119 | RP11-24M1 processed   | chr15 | 75737820 | 75763321 | + | 0.11 | 0.08 |
| ENSG00000180120 | CTD-2535I1 lincRNA    | chr16 | 7888489  | 7894395  | - | 0    | 0    |
| ENSG00000180121 | CTD-2033A processed   | chr16 | 69756536 | 69757937 | - | 0    | 0    |
| ENSG00000180122 | FRG2GP unprocessed    | chr16 | 35384144 | 35385086 | - | 0    | 0    |
| ENSG00000180123 | RP11-715J1 sense_intr | chr16 | 2476558  | 2482173  | + | 0.22 | 0.19 |
| ENSG00000180124 | RP11-395I1 sense_ove  | chr4  | 40166675 | 40167831 | + | 0.1  | 0.17 |
| ENSG00000180125 | ACTG1P16 transcribed  | chr16 | 50058150 | 50059231 | - | 0    | 0    |
| ENSG00000180126 | RP11-505K protein_co  | chr16 | 83908132 | 83951445 | + | 0.72 | 2    |
| ENSG00000180127 | RP11-973H lincRNA     | chr18 | 12774651 | 12775923 | - | 0    | 0    |
| ENSG00000180128 | RP11-203B lincRNA     | chr4  | 1.46E+08 | 1.46E+08 | - | 0    | 0    |
| ENSG00000180129 | RP11-388N antisense   | chr16 | 31182511 | 31183285 | - | 0    | 0    |
| ENSG00000180130 | NTRK3-AS1 lincRNA     | chr15 | 88252730 | 88271066 | + | 0    | 0    |
| ENSG00000180131 | RP11-645C lincRNA     | chr16 | 21794095 | 21795759 | - | 0.54 | 0.22 |
| ENSG00000180132 | PABPC1P1 processed    | chr16 | 32439069 | 32441159 | - | 0    | 0    |
| ENSG00000180133 | RP11-104C processed   | chr16 | 33771035 | 33771248 | + | 0.79 | 0.87 |
| ENSG00000180134 | RP11-27M1 sense_intr  | chr16 | 10576499 | 10578183 | - | 0    | 0    |
| ENSG00000180135 | RP11-586K lincRNA     | chr16 | 32663925 | 32666533 | + | 0    | 0    |
| ENSG00000180136 | RP11-812E lincRNA     | chr16 | 33857935 | 33858864 | - | 0    | 0    |
| ENSG00000180137 | MRC1 protein_co       | chr10 | 17809344 | 17911170 | + | 0    | 0    |
| ENSG00000180138 | LA16c-306 sense_intr  | chr16 | 898967   | 905224   | - | 0    | 0.02 |
| ENSG00000180139 | RP11-48B3 lincRNA     | chr8  | 80541300 | 80543104 | + | 0.06 | 0.17 |
| ENSG00000180140 | COX6CP1 processed     | chr16 | 11903923 | 11904137 | - | 0    | 0    |
| ENSG00000180141 | RP11-339A lincRNA     | chr1  | 80114943 | 80116918 | + | 0    | 0    |
| ENSG00000180142 | HSPB9 protein_co      | chr17 | 42121431 | 42123352 | + | 0    | 0.03 |
| ENSG00000180143 | PHBP21 processed      | chr16 | 52934813 | 52935635 | + | 0    | 0    |
| ENSG00000180144 | ACTR3BP3 processed    | chr16 | 32379071 | 32380049 | - | 0    | 0    |

|                     |                   |       |          |          |   |      |      |
|---------------------|-------------------|-------|----------|----------|---|------|------|
| ENSG00000141612     | lincRNA           | chr17 | 17011914 | 17014990 | - | 0    | 0    |
| ENSG000001412D      | antisense         | chr12 | 1.07E+08 | 1.07E+08 | - | 1.06 | 0.6  |
| ENSG000001111J      | lincRNA           | chr2  | 18547386 | 18548204 | - | 0.16 | 0    |
| ENSG0000015002      | processed         | chr16 | 62808222 | 62808706 | - | 0    | 0    |
| ENSG000001345J      | unprocessed       | chr16 | 29449191 | 29449625 | + | 0    | 0    |
| ENSG000001386M      | processed         | chr15 | 92592574 | 92596462 | - | 0    | 0    |
| ENSG000001570       | antisense         | chr16 | 5601169  | 5616196  | - | 0    | 0    |
| ENSG000001HEXA-AS1  | antisense         | chr15 | 72376113 | 72378788 | + | 0.08 | 0.04 |
| ENSG000001576       | lincRNA           | chr16 | 84928353 | 84939603 | + | 0.25 | 0    |
| ENSG000001C2orf69P2 | processed         | chr16 | 35492324 | 35493446 | + | 0    | 0    |
| ENSG0000011035      | protein_coding    | chr16 | 18788063 | 18801519 | - | 0    | 0    |
| ENSG000001576       | lincRNA           | chr13 | 1.12E+08 | 1.12E+08 | + | 0    | 0    |
| ENSG00000156L1      | processed         | chr16 | 32213380 | 32213503 | - | 0    | 0    |
| ENSG000001AC009052  | processed         | chr16 | 57461055 | 57462737 | + | 0    | 0    |
| ENSG000001MOC51P1   | processed         | chr16 | 48496990 | 48498601 | + | 0    | 0    |
| ENSG0000011035      | lincRNA           | chr11 | 69909184 | 69910994 | - | 0    | 0    |
| ENSG0000011035      | antisense         | chr16 | 9105834  | 9107174  | - | 0    | 0    |
| ENSG0000011035      | antisense         | chr16 | 8847650  | 8848724  | - | 0    | 0.21 |
| ENSG0000011035      | antisense         | chr15 | 83022571 | 83090782 | + | 0    | 0    |
| ENSG0000011035      | antisense         | chr16 | 18926863 | 18937043 | + | 0.67 | 0.19 |
| ENSG0000011035      | transcribed       | chr15 | 75299953 | 75302965 | - | 0.07 | 0    |
| ENSG0000011035      | lincRNA           | chr1  | 1.8E+08  | 1.8E+08  | - | 0.39 | 0.26 |
| ENSG0000011035      | sense_intronic    | chr15 | 92779757 | 92781492 | - | 0.07 | 0.18 |
| ENSG0000011035      | lincRNA           | chr16 | 9666885  | 9676843  | - | 0    | 0    |
| ENSG0000011035      | lincRNA           | chr16 | 65233056 | 65432820 | + | 0    | 0.27 |
| ENSG0000011035      | sense_overlapping | chr19 | 48926171 | 48926444 | + | 0    | 0.95 |
| ENSG0000011035      | antisense         | chr16 | 28973962 | 28978824 | - | 0.04 | 0    |
| ENSG0000011035      | sense_overlapping | chr8  | 1.01E+08 | 1.01E+08 | - | 0.1  | 0.06 |
| ENSG0000011035      | lincRNA           | chr17 | 80453735 | 80454729 | - | 0.12 | 0    |
| ENSG0000011035      | lincRNA           | chr10 | 14061    | 16544    | - | 0    | 0    |
| ENSG0000011035      | protein_coding    | chr16 | 69335091 | 69356306 | - | 1.03 | 1.52 |
| ENSG0000011035      | antisense         | chr18 | 26655742 | 27190698 | + | 0.02 | 0    |
| ENSG0000011035      | unprocessed       | chr15 | 62255686 | 62256421 | - | 0    | 0    |
| ENSG0000011035      | lincRNA           | chr3  | 1.83E+08 | 1.83E+08 | - | 0.15 | 0    |
| ENSG0000011035      | antisense         | chr16 | 12745873 | 12757835 | + | 0    | 0    |
| ENSG0000011035      | processed         | chr16 | 8508069  | 8508585  | + | 0    | 0    |
| ENSG0000011035      | antisense         | chr16 | 50100339 | 50121943 | - | 0    | 0    |
| ENSG0000011035      | processed         | chr15 | 30882267 | 30883231 | - | 0    | 0    |
| ENSG0000011035      | lincRNA           | chr13 | 1.12E+08 | 1.12E+08 | + | 0    | 0    |
| ENSG0000011035      | transcribed       | chr1  | 31500085 | 31509648 | + | 0    | 0    |
| ENSG0000011035      | lincRNA           | chr16 | 86636328 | 86637145 | - | 0    | 0    |
| ENSG0000011035      | lincRNA           | chr13 | 47930153 | 47932622 | - | 0.18 | 0.17 |
| ENSG0000011035      | transcribed       | chr18 | 32511663 | 32514634 | + | 0    | 0    |
| ENSG0000011035      | lincRNA           | chr9  | 27829276 | 27844481 | + | 0    | 0    |
| ENSG0000011035      | sense_overlapping | chr3  | 1.25E+08 | 1.25E+08 | + | 0    | 0    |

|                                |       |          |          |   |      |      |
|--------------------------------|-------|----------|----------|---|------|------|
| ENSG000001129 sense_ovei       | chr15 | 56542952 | 56629592 | - | 0    | 0    |
| ENSG000001297L lincRNA         | chr16 | 52607762 | 52608158 | - | 0    | 0    |
| ENSG000001616c-313l antisense  | chr16 | 678504   | 679777   | - | 0    | 0    |
| ENSG0000012649C processed_     | chr16 | 21998310 | 21999656 | + | 0    | 0    |
| ENSG000001594N sense_ovei      | chr8  | 78605952 | 78609705 | + | 0.19 | 0.25 |
| ENSG000001529J: unprocessε     | chr15 | 23337985 | 23341848 | - | 0    | 0    |
| ENSG000001119F sense_ovei      | chr10 | 68698500 | 68700794 | + | 0.24 | 0.26 |
| ENSG000001800A sense_ovei      | chr11 | 73238975 | 73242335 | + | 0    | 0    |
| ENSG00000156L1 lincRNA         | chr16 | 32262827 | 32265514 | - | 0    | 0    |
| ENSG000001616N antisense       | chr16 | 1156976  | 1157974  | - | 0    | 0    |
| ENSG000001384K transcribec     | chr4  | 1.19E+08 | 1.19E+08 | + | 1.75 | 1.91 |
| ENSG0000012576D processed_     | chr16 | 17096202 | 17096421 | - | 0    | 0    |
| ENSG000001402F antisense       | chr15 | 43302096 | 43302772 | + | 0    | 0    |
| ENSG000001403B lincRNA         | chr15 | 20729747 | 20756183 | - | 0    | 0    |
| ENSG000001505K processed_      | chr16 | 84119293 | 84121153 | + | 0    | 0    |
| ENSG000001420N lincRNA         | chr16 | 5239815  | 5600151  | + | 0    | 0    |
| ENSG000001438B sense_ovei      | chr9  | 27937617 | 27944497 | - | 0.02 | 0.02 |
| ENSG000001231C transcribec     | chr16 | 29312350 | 29331277 | + | 0    | 0.14 |
| ENSG0000011437 processed_      | chr16 | 33154352 | 33154475 | - | 0    | 0    |
| ENSG00000195-963E2 lincRNA     | chr20 | 63127495 | 63129459 | - | 0    | 0    |
| ENSG0000012542L lincRNA        | chr16 | 85592266 | 85595720 | + | 0    | 0    |
| ENSG0000013406A7 lincRNA       | chr6  | 1.36E+08 | 1.36E+08 | - | 0    | 0.26 |
| ENSG0000011437 antisense       | chr16 | 33191561 | 33195354 | - | 0    | 0    |
| ENSG000001LINC02182 lincRNA    | chr16 | 88194281 | 88195217 | + | 0    | 0    |
| ENSG000001155D2 lincRNA        | chr6  | 1.64E+08 | 1.64E+08 | - | 0    | 0    |
| ENSG00000113-735L lincRNA      | chr12 | 9367464  | 9397617  | + | 0    | 0    |
| ENSG000001616c-316l antisense  | chr16 | 1358900  | 1361405  | - | 0    | 0    |
| ENSG00000195-9121l3 sense_ovei | chr7  | 1.55E+08 | 1.55E+08 | + | 0    | 0    |
| ENSG000001AGGF1P9 processed_   | chr16 | 35347385 | 35348297 | + | 0    | 0    |
| ENSG000001SCX protein_co       | chr8  | 1.44E+08 | 1.44E+08 | + | 0.18 | 0.2  |
| ENSG000001626G lincRNA         | chr16 | 19086856 | 19098110 | + | 0    | 0    |
| ENSG000001616c-382N processed_ | chr16 | 5207088  | 5207439  | + | 0    | 0    |
| ENSG000001LINC01917 lincRNA    | chr18 | 53579623 | 53581059 | - | 0    | 0    |
| ENSG000001616c-20123 antisense | chr16 | 2571570  | 2572353  | - | 0    | 0.43 |
| ENSG000001616c-405F processed_ | chr16 | 57713782 | 57714957 | + | 0    | 0    |
| ENSG000001LMF1-AS1 antisense   | chr16 | 921033   | 934495   | + | 0.23 | 0.14 |
| ENSG000001LINC01544 lincRNA    | chr18 | 61748176 | 61756646 | + | 0    | 0    |
| ENSG000001616c-96D1 antisense  | chr16 | 68256162 | 68260443 | - | 0    | 0    |
| ENSG000001ATP2A1-AS antisense  | chr16 | 28878957 | 28879920 | - | 0.64 | 0.28 |
| ENSG0000012649C processed_     | chr16 | 87945058 | 87945202 | - | 0    | 0    |
| ENSG000001616c-483E unprocessε | chr15 | 28564986 | 28565152 | - | 0    | 0    |
| ENSG0000012649C unprocessε     | chr7  | 99869841 | 99869894 | + | 0    | 0    |
| ENSG000001616c-304L antisense  | chr16 | 2119207  | 2120248  | + | 0    | 0.37 |
| ENSG000001LCMT1-AS1 lincRNA    | chr16 | 25085592 | 25111555 | - | 0.53 | 0.78 |
| ENSG000001LINC02134 lincRNA    | chr16 | 47965672 | 47971687 | + | 0    | 0    |

|                                     |          |          |   |      |      |
|-------------------------------------|----------|----------|---|------|------|
| ENSG0000(GEMIN8P2 processed_ chr16  | 58776540 | 58777563 | + | 0    | 0    |
| ENSG0000(TPRKBP2 processed_ chr16   | 28111173 | 28111647 | - | 0    | 0    |
| ENSG0000(RP11-367F lincRNA chr9     | 90997054 | 91001871 | + | 0.25 | 0.05 |
| ENSG0000(NBAT1 lincRNA chr6         | 22134957 | 22147193 | - | 0    | 0    |
| ENSG0000(C16orf95 protein_co chr16  | 87083562 | 87317420 | - | 2.02 | 1.91 |
| ENSG0000(RP11-723G lincRNA chr18    | 71837039 | 71870788 | + | 0    | 0    |
| ENSG0000(KCNJ18 protein_co chr17    | 21692523 | 21704612 | + | 0    | 0    |
| ENSG0000(FTLP14 processed_ chr16    | 68822587 | 68823070 | + | 0    | 0    |
| ENSG0000(RP11-284F lincRNA chr1     | 1.57E+08 | 1.57E+08 | + | 0.06 | 0.1  |
| ENSG0000(RP11-541N sense_ovei chr10 | 1.04E+08 | 1.04E+08 | - | 0.71 | 0.81 |
| ENSG0000(RP4-561L2.lincRNA chr1     | 93847174 | 93848939 | + | 0.16 | 0.18 |
| ENSG0000(RP11-63M: antisense chr16  | 66720897 | 66731785 | + | 0    | 0    |
| ENSG0000(RP4-536B2 antisense chr16  | 87836532 | 87837663 | + | 0    | 0    |
| ENSG0000(RP11-405F antisense chr16  | 57681124 | 57701730 | - | 0    | 0    |
| ENSG0000(LINC01290 lincRNA chr16    | 10514842 | 10528202 | - | 0    | 0    |
| ENSG0000(C15orf59-A lincRNA chr15   | 73752317 | 73770613 | + | 0    | 0    |
| ENSG0000(RP11-834C lincRNA chr12    | 54145069 | 54147225 | - | 0.05 | 0    |
| ENSG0000(AC009120. processed_ chr16 | 74220929 | 74221427 | + | 0    | 0    |
| ENSG0000(CTD-2358C processed_ chr16 | 31697397 | 31697607 | - | 0    | 0    |
| ENSG0000(RP11-923I1 lincRNA chr12   | 51815043 | 51842106 | + | 0    | 0.08 |
| ENSG0000(RP11-85A1 lincRNA chr10    | 99621055 | 99621918 | + | 0    | 0.16 |
| ENSG0000(RP11-254F lincRNA chr2     | 10021578 | 10022825 | + | 0    | 0    |
| ENSG0000(LINC01584 antisense chr15  | 86078809 | 86116717 | - | 0    | 0    |
| ENSG0000(RP11-142G lincRNA chr16    | 52238082 | 52269440 | + | 0    | 0    |
| ENSG0000(RP11-556H sense_intr chr16 | 79090050 | 79101754 | + | 0    | 0    |
| ENSG0000(C2orf69P4 processed_ chr16 | 35352482 | 35353022 | + | 0    | 0    |
| ENSG0000(CTD-2196E 3prime_ov chr16  | 23670011 | 23675499 | + | 0    | 0.15 |
| ENSG0000(RP11-151H processed_ chr15 | 75022980 | 75023256 | + | 0    | 0    |
| ENSG0000(RP11-1081 lincRNA chr8     | 53388701 | 53390872 | - | 0    | 0    |
| ENSG0000(RP11-297C antisense chr16  | 30480588 | 30481346 | - | 0    | 0    |
| ENSG0000(RP11-166B antisense chr16  | 11976851 | 11977850 | - | 0.12 | 0.13 |
| ENSG0000(MYL12BP1 processed_ chr15  | 42571927 | 42572433 | + | 0    | 0.16 |
| ENSG0000(CISTR lincRNA chr12        | 53750447 | 53757034 | - | 0    | 0    |
| ENSG0000(RP11-219B antisense chr8   | 85172077 | 85177062 | - | 0    | 0.05 |
| ENSG0000(AC002310. unprocessε chr16 | 30537202 | 30538231 | - | 0.27 | 0.2  |
| ENSG0000(RP11-55K1 antisense chr16  | 81310731 | 81313423 | - | 0.2  | 0.07 |
| ENSG0000(RP11-161M lincRNA chr16    | 991151   | 1000926  | - | 0    | 0    |
| ENSG0000(CTB-55P19 processed_ chr16 | 47760780 | 47760921 | - | 0    | 0    |
| ENSG0000(RP4-536B2 lincRNA chr16    | 87773488 | 87779374 | - | 0.13 | 0.14 |
| ENSG0000(CTD-3193C antisense chr19  | 7918652  | 7919157  | - | 0    | 0    |
| ENSG0000(RP11-558A lincRNA chr16    | 84342464 | 84343407 | - | 0    | 0    |
| ENSG0000(RP11-410C lincRNA chr1     | 2.2E+08  | 2.2E+08  | + | 0    | 0    |
| ENSG0000(RP11-356C lincRNA chr16    | 90105095 | 90106316 | - | 0    | 0    |
| ENSG0000(RP11-271M lincRNA chr13    | 25300124 | 25301438 | - | 0    | 0    |
| ENSG0000(AC004381. antisense chr16  | 20743663 | 20766620 | - | 0    | 0    |

|                 |                              |       |          |          |   |       |      |
|-----------------|------------------------------|-------|----------|----------|---|-------|------|
| ENSG00000100000 | RP11-556H sense_intronic     | chr16 | 79105957 | 79110882 | + | 0     | 0    |
| ENSG00000100000 | RP11-368N processed          | chr16 | 29624517 | 29624825 | + | 0     | 0    |
| ENSG00000100000 | CTD-2199C lincRNA            | chr5  | 10195121 | 10197628 | - | 0     | 0    |
| ENSG00000100000 | RP11-17M: unprocessed        | chr16 | 32356981 | 32363695 | - | 0     | 0    |
| ENSG00000100000 | RP11-426C lincRNA            | chr16 | 29116127 | 29217860 | + | 0.5   | 1.07 |
| ENSG00000100000 | BMS1P8 transcribed           | chr16 | 33687025 | 33698504 | - | 0.35  | 0.49 |
| ENSG00000100000 | RP11-109E antisense          | chr4  | 42657496 | 42657928 | + | 0     | 0    |
| ENSG00000100000 | RP11-510M antisense          | chr16 | 71513863 | 71517849 | + | 0     | 0    |
| ENSG00000100000 | CTD-2576F processed          | chr15 | 94855474 | 94856914 | + | 0.04  | 0    |
| ENSG00000100000 | RP11-352B processed          | chr16 | 35722268 | 35722529 | - | 0     | 0    |
| ENSG00000100000 | CYP3A52P unprocessed         | chr7  | 99872168 | 99872258 | + | 0     | 0    |
| ENSG00000100000 | RP11-812E unprocessed        | chr16 | 33875039 | 33875468 | - | 0     | 0    |
| ENSG00000100000 | RP11-73K9 antisense          | chr4  | 1.12E+08 | 1.12E+08 | - | 0.52  | 0.48 |
| ENSG00000100000 | FAM157C lincRNA              | chr16 | 90102271 | 90178344 | + | 0.89  | 1.06 |
| ENSG00000100000 | RP11-558A antisense          | chr16 | 84295498 | 84296985 | - | 0     | 0    |
| ENSG00000100000 | LA16c-381 lincRNA            | chr16 | 1111627  | 1113399  | + | 0     | 0    |
| ENSG00000100000 | RP11-1006 sense_overlapping  | chr15 | 72589691 | 72591845 | + | 0     | 0    |
| ENSG00000100000 | RP5-1085F antisense          | chr20 | 32843128 | 32854257 | - | 0     | 0    |
| ENSG00000100000 | RP11-529K protein_coding     | chr16 | 70299194 | 70372582 | + | 1.56  | 1.53 |
| ENSG00000100000 | ABHD17AP unprocessed         | chr16 | 32199902 | 32202822 | + | 0     | 0    |
| ENSG00000100000 | LA16c-429 lincRNA            | chr16 | 1841020  | 1843547  | - | 0     | 0    |
| ENSG00000100000 | RP13-379C lincRNA            | chr20 | 62513909 | 62516096 | - | 0     | 0    |
| ENSG00000100000 | CTB-134F1 antisense          | chr16 | 58116885 | 58119353 | + | 0     | 0    |
| ENSG00000100000 | RP6-24A23 protein_coding     | chrX  | 1.09E+08 | 1.09E+08 | - | 0     | 0    |
| ENSG00000100000 | MT1L transcribed             | chr16 | 56617476 | 56618818 | + | 12.16 | 8.47 |
| ENSG00000100000 | RP11-457I1 lincRNA           | chr16 | 18570448 | 18571683 | - | 0     | 0    |
| ENSG00000100000 | PWRN2 lincRNA                | chr15 | 24162754 | 24169948 | - | 0     | 0    |
| ENSG00000100000 | RP11-49I11 antisense         | chr18 | 36179996 | 36187448 | - | 2.96  | 2.75 |
| ENSG00000100000 | RP11-728K lincRNA            | chr7  | 1.5E+08  | 1.5E+08  | + | 0     | 0    |
| ENSG00000100000 | RP11-63M: lincRNA            | chr16 | 66738263 | 66739326 | + | 0     | 0    |
| ENSG00000100000 | RP13-516M lincRNA            | chr17 | 82293716 | 82294910 | + | 1.73  | 2.07 |
| ENSG00000100000 | RP11-403N lincRNA            | chr9  | 79889001 | 79892007 | + | 0     | 0    |
| ENSG00000100000 | ERVK13-1 processed           | chr16 | 2660349  | 2673444  | - | 3.7   | 4.17 |
| ENSG00000100000 | RP11-20G6 3prime_overlapping | chr16 | 23061406 | 23064173 | - | 0     | 0    |
| ENSG00000100000 | CTD-2358C lincRNA            | chr16 | 31699676 | 31700465 | - | 0     | 0    |
| ENSG00000100000 | RP11-669I1 lincRNA           | chr18 | 74211391 | 74240555 | - | 0     | 0    |
| ENSG00000100000 | RP11-24N1 antisense          | chr16 | 28830612 | 28837200 | - | 0     | 0    |
| ENSG00000100000 | BNIP3P5 processed            | chr15 | 42313687 | 42314386 | + | 0     | 0    |
| ENSG00000100000 | RP11-16N1 antisense          | chr3  | 1.61E+08 | 1.61E+08 | - | 0.03  | 0.11 |
| ENSG00000100000 | RP11-21B2 lincRNA            | chr16 | 50407666 | 50522638 | + | 0     | 0    |
| ENSG00000100000 | RP11-801I1 lincRNA           | chr6  | 81969453 | 81969539 | - | 0     | 0    |
| ENSG00000100000 | RP11-56L1: antisense         | chr16 | 32250620 | 32254422 | - | 0     | 0    |
| ENSG00000100000 | EIF5A2P1 processed           | chr15 | 72041194 | 72041653 | - | 0     | 0.19 |
| ENSG00000100000 | RP11-615I2 antisense         | chr16 | 68644248 | 68646168 | - | 0     | 0    |
| ENSG00000100000 | CTD-2541J: lincRNA           | chr18 | 67481791 | 67484966 | - | 0.31  | 0.49 |

|                 |                       |       |          |          |   |      |      |
|-----------------|-----------------------|-------|----------|----------|---|------|------|
| ENSG00000101111 | RP11-382A antisense   | chr15 | 83113617 | 83114566 | - | 0    | 0.78 |
| ENSG00000101112 | RP11-142A lincRNA     | chr16 | 26721874 | 26729126 | + | 0    | 0    |
| ENSG00000101113 | CTB-113P1 antisense   | chr5  | 1.52E+08 | 1.52E+08 | + | 0    | 0    |
| ENSG00000101114 | TPST2P1 processed     | chr15 | 36626674 | 36627775 | - | 0    | 0    |
| ENSG00000101115 | AP000223. antisense   | chr21 | 25582770 | 25583326 | - | 0.13 | 0.14 |
| ENSG00000101116 | RP11-1166 processed   | chr16 | 32116700 | 32116997 | + | 0    | 0    |
| ENSG00000101117 | RP13-192B lincRNA     | chrX  | 1.22E+08 | 1.22E+08 | + | 0    | 0    |
| ENSG00000101118 | RP11-592N sense_intr  | chr15 | 71342324 | 71348471 | + | 0    | 0    |
| ENSG00000101119 | RP11-930P lincRNA     | chr8  | 41828165 | 41829934 | - | 0.27 | 0.29 |
| ENSG00000101120 | STAM-AS1 antisense    | chr10 | 17641284 | 17643878 | - | 0.25 | 0.37 |
| ENSG00000101121 | RP11-244B processed   | chr16 | 35193335 | 35193734 | + | 0    | 0    |
| ENSG00000101122 | CTA-363E6 antisense   | chr16 | 19476916 | 19487899 | - | 0    | 0    |
| ENSG00000101123 | RP11-432I5 antisense  | chr16 | 71623708 | 71626816 | - | 0    | 0.18 |
| ENSG00000101124 | CTD-2055C antisense   | chr16 | 80736360 | 80742305 | + | 0    | 0    |
| ENSG00000101125 | OR4C49P unprocess     | chr11 | 50053410 | 50054309 | - | 0    | 0    |
| ENSG00000101126 | DUX4 protein_co       | chr4  | 1.9E+08  | 1.9E+08  | + | 0    | 0    |
| ENSG00000101127 | AC012531. lincRNA     | chr12 | 54019910 | 54022589 | + | 0    | 0    |
| ENSG00000101128 | FRG2IP unprocess      | chr16 | 35405747 | 35407349 | - | 0    | 0    |
| ENSG00000101129 | CTC-457E2 sense_intr  | chr19 | 22520995 | 22527949 | - | 0    | 0    |
| ENSG00000101130 | RP11-109D sense_intr  | chr16 | 61691756 | 61693750 | - | 0    | 0    |
| ENSG00000101131 | RP11-552C sense_intr  | chr16 | 12545482 | 12546684 | + | 0    | 0    |
| ENSG00000101132 | HMG2P4 processed      | chr15 | 68254549 | 68254939 | + | 0    | 0    |
| ENSG00000101133 | GS1-21A4. sense_intr  | chr16 | 87892938 | 87893685 | - | 0.2  | 0    |
| ENSG00000101134 | RP1-140K8 lincRNA     | chr6  | 3904920  | 3911979  | - | 0.13 | 0.13 |
| ENSG00000101135 | RP11-883G lincRNA     | chr16 | 51035118 | 51038764 | - | 0    | 0    |
| ENSG00000101136 | RP11-382A antisense   | chr15 | 83012661 | 83061845 | + | 0    | 0    |
| ENSG00000101137 | RP11-989E processed   | chr16 | 32931768 | 32932569 | - | 0    | 0    |
| ENSG00000101138 | RP11-352B lincRNA     | chr16 | 35785569 | 35786887 | - | 0    | 0    |
| ENSG00000101139 | RP11-432I5 lincRNA    | chr16 | 71726975 | 71727992 | + | 0    | 0    |
| ENSG00000101140 | RP3-522J7. lincRNA    | chr22 | 49832616 | 49837786 | - | 0    | 0    |
| ENSG00000101141 | RP11-491F antisense   | chr16 | 49287430 | 49290227 | + | 0    | 0    |
| ENSG00000101142 | RPL23AP97 processed   | chr13 | 1.14E+08 | 1.14E+08 | + | 0.16 | 0.7  |
| ENSG00000101143 | RP11-327F antisense   | chr16 | 50783859 | 50803338 | - | 0    | 0    |
| ENSG00000101144 | RP5-1142A antisense   | chr16 | 88741631 | 88742367 | + | 0    | 0    |
| ENSG00000101145 | RP11-23N2 antisense   | chr15 | 52577842 | 52598709 | + | 0    | 0    |
| ENSG00000101146 | RP11-775C lincRNA     | chr15 | 80990804 | 80993258 | - | 0.02 | 0.07 |
| ENSG00000101147 | RP11-883G lincRNA     | chr16 | 51054728 | 51056399 | - | 0    | 0.32 |
| ENSG00000101148 | RP11-413H antisense   | chr16 | 56409320 | 56411683 | + | 0    | 0    |
| ENSG00000101149 | RP11-690I2 processed  | chr2  | 2.32E+08 | 2.32E+08 | - | 0    | 0    |
| ENSG00000101150 | RP11-24D1 antisense   | chr15 | 73870950 | 73873366 | - | 0    | 0    |
| ENSG00000101151 | RP11-452L antisense   | chr16 | 31508471 | 31509256 | + | 0.1  | 0    |
| ENSG00000101152 | RP11-23E1 lincRNA     | chr16 | 33533816 | 33534976 | - | 0    | 0    |
| ENSG00000101153 | RP11-1166 transcribec | chr16 | 31975803 | 32003728 | + | 0.82 | 1.54 |
| ENSG00000101154 | BGLT3 sense_ovei      | chr11 | 5244554  | 5245547  | - | 0    | 0    |
| ENSG00000101155 | SNAI3-AS1 antisense   | chr16 | 88663298 | 88687186 | + | 2.27 | 1.27 |

|                                       |          |          |   |      |      |
|---------------------------------------|----------|----------|---|------|------|
| ENSG0000(RBM22P12 processed_ chr16    | 31680847 | 31682101 | + | 0    | 0    |
| ENSG0000(RP11-375I2 lincRNA chr3      | 1.34E+08 | 1.34E+08 | - | 0.09 | 0.16 |
| ENSG0000(RP11-521C lincRNA chr2       | 1.27E+08 | 1.27E+08 | - | 0    | 0.04 |
| ENSG0000(RP11-21M1 antisense chr16    | 22365121 | 22369047 | + | 0    | 0    |
| ENSG0000(RP11-602N processed_ chr15   | 34394594 | 34394931 | + | 0    | 0    |
| ENSG0000(KB-1000E4 lincRNA chr8       | 97241742 | 97242204 | - | 0    | 0    |
| ENSG0000(RP11-1299 antisense chr4     | 98658904 | 98664550 | + | 0.36 | 0.34 |
| ENSG0000(RP11-717I2 lincRNA chr15     | 32359538 | 32367784 | + | 0    | 0    |
| ENSG0000(RP11-303E protein_co chr16   | 81053587 | 81096296 | - | 1.32 | 2.21 |
| ENSG0000(HERC2P5 transcribed chr16    | 32741314 | 32776196 | + | 0.91 | 0.8  |
| ENSG0000(RP11-250B lincRNA chr6       | 80466958 | 80469080 | + | 0.24 | 0.17 |
| ENSG0000(LA16c-385I lincRNA chr16     | 1512979  | 1514675  | + | 0    | 0    |
| ENSG0000(RP1-178F1 antisense chr17    | 18268080 | 18268828 | + | 0.09 | 0    |
| ENSG0000(RP11-133K sense_intron chr15 | 40232082 | 40236109 | + | 0    | 0    |
| ENSG0000(RP11-56L1 transcribed chr16  | 32189262 | 32189481 | + | 0    | 0    |
| ENSG0000(RP11-403P antisense chr16    | 66579983 | 66580716 | - | 0    | 0    |
| ENSG0000(AF213884.. antisense chr4    | 1.03E+08 | 1.03E+08 | - | 0.16 | 0    |
| ENSG0000(RP11-114G lincRNA chr7       | 57404771 | 57416203 | + | 0    | 0    |
| ENSG0000(RP11-315D lincRNA chr15      | 68267792 | 68277994 | - | 0    | 0    |
| ENSG0000(RP11-368L lincRNA chr16      | 63314264 | 63618046 | - | 0    | 0    |
| ENSG0000(RP11-46C2 antisense chr16    | 89226807 | 89228692 | - | 0    | 0    |
| ENSG0000(RP11-69H7 transcribed chr15  | 75223412 | 75234014 | - | 0    | 0    |
| ENSG0000(RP11-152L antisense chr15    | 92148752 | 92331037 | - | 0    | 0    |
| ENSG0000(RP11-626K processed_ chr16   | 32460266 | 32460362 | - | 0    | 0    |
| ENSG0000(AC004158. lincRNA chr16      | 72425948 | 72533892 | + | 0    | 0    |
| ENSG0000(RP11-744D processed_ chr16   | 64260570 | 64261239 | - | 0    | 0    |
| ENSG0000(AL136419.1 processed_ chr14  | 24209646 | 24215987 | - | 0.49 | 0.34 |
| ENSG0000(RP11-447N lincRNA chr3       | 72321051 | 72324027 | - | 0    | 0    |
| ENSG0000(RP11-278A sense_intron chr16 | 87739771 | 87747706 | - | 0    | 0    |
| ENSG0000(RP11-1006 lincRNA chr15      | 72615810 | 72618250 | + | 0    | 0    |
| ENSG0000(RP4-529N6 lincRNA chr6       | 4599287  | 4602420  | - | 0    | 0    |
| ENSG0000(RP11-591L processed_ chr15   | 79743311 | 79743468 | + | 0    | 0    |
| ENSG0000(CTD-2576D unprocessed chr16  | 17094351 | 17094927 | - | 0    | 0    |
| ENSG0000(LINC01541 lincRNA chr18      | 71519962 | 71578956 | - | 0.1  | 0.06 |
| ENSG0000(RP11-546C lincRNA chr9       | 97743208 | 97744935 | + | 0    | 0    |
| ENSG0000(RP11-146F transcribed chr16  | 30615256 | 30615679 | - | 0    | 0    |
| ENSG0000(RP11-643C lincRNA chr11      | 69921638 | 69926813 | - | 0    | 0    |
| ENSG0000(AGGF1P5 processed_ chr16     | 35420291 | 35421209 | + | 0    | 0    |
| ENSG0000(CTA-363E6 antisense chr16    | 19410729 | 19411662 | - | 0    | 0    |
| ENSG0000(RN7SKP17 misc_RNA chr16      | 81961926 | 81962243 | + | 0    | 0    |
| ENSG0000(CTD-2076N lincRNA chrX       | 1.28E+08 | 1.28E+08 | - | 0    | 0    |
| ENSG0000(RP11-326L processed_ chr15   | 75950464 | 75951144 | - | 0    | 0    |
| ENSG0000(CTB-36H16 sense_over chr5    | 1.23E+08 | 1.23E+08 | + | 0.08 | 0.11 |
| ENSG0000(RP11-44L9 lincRNA chr16      | 73499309 | 73499763 | + | 0    | 0    |
| ENSG0000(RP11-44I1C processed_ chr16  | 48470953 | 48471133 | - | 0    | 0    |



|                                      |          |          |   |      |      |
|--------------------------------------|----------|----------|---|------|------|
| ENSG0000(HNRNPA3P processed_ chr15   | 57246960 | 57247893 | - | 0    | 0    |
| ENSG0000(CYCSP39 processed_ chr16    | 25454339 | 25454647 | - | 0    | 0    |
| ENSG0000(ANKRD20A protein_co chr9    | 67859147 | 67902094 | + | 0.02 | 0.28 |
| ENSG0000(AC026150. lincRNA chr15     | 30540093 | 30545969 | + | 3.67 | 4.35 |
| ENSG0000(RP11-556H antisense chr16   | 79077376 | 79078234 | - | 0    | 0    |
| ENSG0000(RP11-513N lincRNA chr16     | 65861112 | 65863784 | - | 0    | 0    |
| ENSG0000(RP11-439E lincRNA chr1      | 2.47E+08 | 2.47E+08 | + | 0.05 | 0.06 |
| ENSG0000(RP11-449J antisense chr16   | 77433382 | 77444336 | + | 0    | 0    |
| ENSG0000(LA16c-349I unprocessε chr16 | 1103280  | 1105461  | - | 0    | 0    |
| ENSG0000(LINC00543 lincRNA chr13     | 27953526 | 27955370 | + | 0    | 0    |
| ENSG0000(RP11-525K lincRNA chr16     | 80065836 | 80167577 | + | 0    | 0    |
| ENSG0000(CTA-29F11 antisense chr22   | 46761894 | 46762563 | - | 2.61 | 1.87 |
| ENSG0000(RP11-616M lincRNA chr16     | 1294551  | 1299166  | - | 0    | 0    |
| ENSG0000(RP11-747H sense_intrε chr14 | 91752856 | 91759798 | - | 0    | 0    |
| ENSG0000(RP11-266L processed_ chr16  | 25015978 | 25021023 | + | 0.01 | 0.03 |
| ENSG0000(RP11-744D lincRNA chr16     | 64155169 | 64156574 | + | 0    | 0    |
| ENSG0000(AC009133. antisense chr16   | 29745247 | 29748299 | + | 0.07 | 0.04 |
| ENSG0000(LINC01243 lincRNA chr9      | 31371611 | 31381490 | - | 0    | 0    |
| ENSG0000(AF067845. lincRNA chr8      | 1368642  | 1369833  | - | 0    | 0    |
| ENSG0000(VN1R67P unitary_psε chr16   | 31801585 | 31802497 | - | 0    | 0    |
| ENSG0000(RP11-165M sense_intrε chr16 | 12372812 | 12373899 | + | 0.3  | 0    |
| ENSG0000(VN1R69P processed_ chr16    | 35134514 | 35135075 | + | 0    | 0    |
| ENSG0000(AC005307. lincRNA chr19     | 28418483 | 28429490 | - | 0    | 0    |
| ENSG0000(KLF8P1 processed_ chr16     | 48718083 | 48719143 | + | 0    | 0    |
| ENSG0000(SLC7A5P1 unprocessε chr16   | 29613104 | 29613640 | - | 0.56 | 0.31 |
| ENSG0000(RP11-106M protein_co chr15  | 72284727 | 72375981 | - | 0.43 | 0.96 |
| ENSG0000(KRT8P22 processed_ chr16    | 78048483 | 78049897 | - | 0    | 0    |
| ENSG0000(RP11-264L antisense chr16   | 78495926 | 78506568 | - | 0    | 0    |
| ENSG0000(RP11-510M protein_co chr16  | 71430262 | 71433376 | - | 0    | 0    |
| ENSG0000(RP11-72I8. antisense chr16  | 15094411 | 15109197 | + | 0.29 | 0.39 |
| ENSG0000(LINC01227 lincRNA chr16     | 80566794 | 80572808 | - | 0    | 0    |
| ENSG0000(LINC00554 antisense chr13   | 99994899 | 99997909 | - | 0    | 0    |
| ENSG0000(RP11-2F9.4 lincRNA chr15    | 22145939 | 22148226 | - | 0    | 0    |
| ENSG0000(AC026471. antisense chr16   | 31487370 | 31488492 | - | 0    | 0.27 |
| ENSG0000(CTC-39I62 antisense chr16   | 23194878 | 23213104 | - | 0    | 0    |
| ENSG0000(RP11-366L antisense chr2    | 1.82E+08 | 1.82E+08 | - | 0.06 | 0    |
| ENSG0000(RP11-255C lincRNA chr3      | 1.79E+08 | 1.79E+08 | + | 0    | 0.12 |
| ENSG0000(RP11-329J antisense chr16   | 47196311 | 47202429 | + | 0    | 0    |
| ENSG0000(KIF18BP1 unprocessε chr16   | 35636687 | 35645180 | - | 0    | 0    |
| ENSG0000(RP11-421N processed_ chr18  | 68277802 | 68278243 | - | 0    | 0    |
| ENSG0000(RP11-482M lincRNA chr16     | 87492555 | 87515635 | + | 0.18 | 0    |
| ENSG0000(CTD-2196E sense_intrε chr16 | 23568673 | 23569696 | + | 1.48 | 1.17 |
| ENSG0000(RP11-403P lincRNA chr16     | 66509437 | 66510048 | + | 0    | 0    |
| ENSG0000(RP11-609N lincRNA chr16     | 10351440 | 10352752 | - | 0    | 0    |
| ENSG0000(RP11-120K sense_oveε chr16  | 31402565 | 31404699 | + | 0    | 0    |

|                |             |       |          |          |   |      |      |
|----------------|-------------|-------|----------|----------|---|------|------|
| ENSG0000016770 | lincRNA     | chr18 | 11666456 | 11670165 | - | 0    | 0    |
| ENSG0000016770 | lincRNA     | chr15 | 24441127 | 24447967 | + | 0    | 0    |
| ENSG0000016770 | lincRNA     | chr5  | 25319834 | 25321346 | + | 0    | 0    |
| ENSG0000016770 | unprocessed | chr16 | 20586550 | 20607107 | - | 0    | 0    |
| ENSG0000016770 | lincRNA     | chr5  | 4436850  | 4440259  | - | 0    | 0    |
| ENSG0000016770 | processed   | chr16 | 8731416  | 8731559  | - | 0    | 0    |
| ENSG0000016770 | unprocessed | chr16 | 55728115 | 55750111 | + | 0    | 0    |
| ENSG0000016770 | sense       | chr1  | 1.6E+08  | 1.6E+08  | - | 1.4  | 0.91 |
| ENSG0000016770 | lincRNA     | chr16 | 49337167 | 49338993 | + | 0    | 0    |
| ENSG0000016770 | lincRNA     | chr6  | 1.68E+08 | 1.68E+08 | + | 0    | 0    |
| ENSG0000016770 | 3prime      | chr16 | 69703065 | 69704652 | + | 1.94 | 0.67 |
| ENSG0000016770 | antisense   | chr15 | 66314914 | 66331703 | - | 0.15 | 0    |
| ENSG0000016770 | processed   | chr5  | 213898   | 217279   | - | 0.04 | 0.21 |
| ENSG0000016770 | transcribed | chr15 | 77914217 | 77926846 | - | 0.13 | 0    |
| ENSG0000016770 | lincRNA     | chr17 | 28263634 | 28266369 | - | 0.04 | 0.05 |
| ENSG0000016770 | lincRNA     | chr16 | 2268155  | 2273418  | + | 1.5  | 1.2  |
| ENSG0000016770 | antisense   | chr18 | 10661933 | 10666887 | + | 0    | 0    |
| ENSG0000016770 | lincRNA     | chr15 | 24206784 | 24225854 | + | 0    | 0    |
| ENSG0000016770 | transcribed | chr16 | 33907419 | 33937167 | - | 0    | 0    |
| ENSG0000016770 | processed   | chr16 | 46789898 | 46792040 | + | 0    | 0    |
| ENSG0000016770 | unprocessed | chr15 | 30516079 | 30517867 | + | 0.41 | 0.11 |
| ENSG0000016770 | lincRNA     | chr17 | 71097775 | 71202177 | - | 0    | 0    |
| ENSG0000016770 | lincRNA     | chr5  | 42188266 | 42191523 | + | 0    | 0    |
| ENSG0000016770 | antisense   | chr16 | 83721119 | 83772936 | - | 0    | 0    |
| ENSG0000016770 | antisense   | chr16 | 22374859 | 22378180 | + | 0.04 | 0    |
| ENSG0000016770 | lincRNA     | chr14 | 1.05E+08 | 1.05E+08 | - | 0.04 | 0.06 |
| ENSG0000016770 | antisense   | chr17 | 44221401 | 44223710 | + | 0.66 | 1.12 |
| ENSG0000016770 | processed   | chr16 | 86906175 | 86906472 | - | 0    | 0    |
| ENSG0000016770 | antisense   | chr16 | 28820570 | 28822033 | - | 0.4  | 0    |
| ENSG0000016770 | processed   | chr16 | 76878274 | 76878936 | - | 0    | 0    |
| ENSG0000016770 | antisense   | chr16 | 68814330 | 68823526 | - | 0    | 0    |
| ENSG0000016770 | processed   | chr15 | 42800968 | 42802405 | - | 0    | 0    |
| ENSG0000016770 | protein     | chrX  | 1.12E+08 | 1.12E+08 | + | 0.02 | 0.04 |
| ENSG0000016770 | processed   | chr16 | 17514    | 35195    | - | 0    | 0    |
| ENSG0000016770 | lincRNA     | chr2  | 2.16E+08 | 2.16E+08 | + | 1.82 | 1.55 |
| ENSG0000016770 | lincRNA     | chr1  | 2.13E+08 | 2.13E+08 | - | 0.15 | 0.23 |
| ENSG0000016770 | antisense   | chr14 | 96500810 | 96502321 | - | 0.19 | 0.17 |
| ENSG0000016770 | lincRNA     | chr16 | 975761   | 981596   | - | 0.07 | 0.3  |
| ENSG0000016770 | lincRNA     | chr11 | 68612899 | 68616711 | - | 0    | 0    |
| ENSG0000016770 | unprocessed | chr16 | 35090501 | 35104834 | + | 0    | 0    |
| ENSG0000016770 | lincRNA     | chr14 | 91258299 | 91259003 | + | 0    | 0.1  |
| ENSG0000016770 | polymorph   | chr11 | 50032874 | 50033794 | + | 0    | 0    |
| ENSG0000016770 | processed   | chr16 | 35414279 | 35414747 | - | 0    | 0    |
| ENSG0000016770 | lincRNA     | chr15 | 41770756 | 41772732 | - | 0    | 0    |
| ENSG0000016770 | processed   | chr15 | 75746769 | 75747263 | + | 0    | 0    |

|                                        |       |          |          |   |      |      |
|----------------------------------------|-------|----------|----------|---|------|------|
| ENSG0000(RP11-319G sense_intron)       | chr16 | 78895361 | 78899644 | + | 0    | 0    |
| ENSG0000(RP11-382N processed)          | chr16 | 5260686  | 5261043  | - | 0    | 0    |
| ENSG0000(UNGP1 processed)              | chr16 | 51277852 | 51279112 | + | 0.04 | 0    |
| ENSG0000(GS1-358P8 sense_overlapping)  | chrX  | 24545516 | 24550466 | + | 1.9  | 1.74 |
| ENSG0000(RP11-249C lincRNA)            | chr16 | 56609501 | 56611375 | - | 0    | 0    |
| ENSG0000(RP11-1437 lincRNA)            | chr16 | 33203773 | 33206462 | - | 0    | 0    |
| ENSG0000(HMGB3P32 processed)           | chr16 | 57603137 | 57603697 | + | 0    | 0    |
| ENSG0000(RP11-524C antisense)          | chr14 | 21384292 | 21384920 | + | 0.11 | 0.12 |
| ENSG0000(CTD-3253I antisense)          | chr16 | 82953230 | 82990298 | - | 0    | 0    |
| ENSG0000(RP11-256I5 lincRNA)           | chr16 | 65190973 | 65234914 | - | 0.09 | 0    |
| ENSG0000(RP11-468I1 sense_intron)      | chr16 | 6573767  | 6577359  | + | 0    | 0    |
| ENSG0000(RP11-152F protein_coding)     | chr15 | 82540032 | 82555932 | - | 0    | 0    |
| ENSG0000(RP11-531A lincRNA)            | chr8  | 72947150 | 72950445 | + | 0.02 | 0    |
| ENSG0000(LINC01964 lincRNA)            | chr2  | 85064108 | 85067347 | - | 0    | 0    |
| ENSG0000(RP11-578F processed)          | chr15 | 28763440 | 28764151 | - | 0    | 0    |
| ENSG0000(RP11-586K lincRNA)            | chr16 | 32735909 | 32741094 | - | 0    | 0    |
| ENSG0000(FRG2HP unprocessed)           | chr16 | 35335277 | 35336889 | - | 0    | 0    |
| ENSG0000(RP11-17M1 lincRNA)            | chr16 | 32188333 | 32193530 | + | 0    | 0    |
| ENSG0000(CTD-2009A lincRNA)            | chr16 | 73543941 | 73558522 | + | 0    | 0    |
| ENSG0000(RP11-437L lincRNA)            | chr16 | 51354456 | 51356532 | - | 0    | 0    |
| ENSG0000(RP11-403P protein_coding)     | chr16 | 66469812 | 66517312 | - | 0    | 0    |
| ENSG0000(FBXL19-AS antisense)          | chr16 | 30919319 | 30923269 | - | 1.57 | 1.5  |
| ENSG0000(RP11-264B antisense)          | chr16 | 28956687 | 28966883 | - | 0    | 0.15 |
| ENSG0000(LINC02184 lincRNA)            | chr16 | 34978744 | 34979844 | - | 0    | 0    |
| ENSG0000(RP11-439E antisense)          | chr1  | 2.47E+08 | 2.47E+08 | + | 0.23 | 0.19 |
| ENSG0000(RP11-80F2 lincRNA)            | chr16 | 35505093 | 35506462 | - | 0    | 0    |
| ENSG0000(RP11-558A lincRNA)            | chr16 | 84255270 | 84261049 | - | 0    | 0    |
| ENSG0000(RP11-254F sense_intron)       | chr16 | 84828263 | 84829242 | + | 0    | 0    |
| ENSG0000(RP11-615I2 processed)         | chr16 | 68651056 | 68651948 | - | 0    | 0    |
| ENSG0000(RP4-576H2 protein_coding)     | chr20 | 1540144  | 1620009  | - | 0.39 | 0.42 |
| ENSG0000(RP11-22H5 sense_intron)       | chr16 | 82773319 | 82829638 | + | 0.01 | 0.02 |
| ENSG0000(CYP2C60P unprocessed)         | chr10 | 95009674 | 95009812 | + | 0    | 0    |
| ENSG0000(ABHD17AP unprocessed)         | chr16 | 32726615 | 32729537 | - | 0    | 0    |
| ENSG0000(CTA-331F8 transcribed)        | chr16 | 58597589 | 58597945 | - | 0.51 | 0    |
| ENSG0000(RP11-626K unprocessed)        | chr16 | 32388135 | 32436200 | + | 0    | 0    |
| ENSG0000(RP11-459F antisense)          | chr16 | 58197112 | 58217805 | + | 0    | 0    |
| ENSG0000(LINC01960 lincRNA)            | chr2  | 1.74E+08 | 1.74E+08 | + | 0.36 | 0.26 |
| ENSG0000(AC002310 protein_coding)      | chr16 | 30534227 | 30558279 | - | 0    | 0    |
| ENSG0000(NDUFB10P processed)           | chr15 | 57325472 | 57326447 | - | 0    | 0    |
| ENSG0000(CTD-2373J1 sense_overlapping) | chr5  | 90388468 | 90389363 | - | 0.14 | 0    |
| ENSG0000(RP11-715J1 lincRNA)           | chr16 | 2456252  | 2459979  | - | 0    | 0.09 |
| ENSG0000(LINC01229 lincRNA)            | chr16 | 79676108 | 79807922 | + | 0    | 0    |
| ENSG0000(RP11-211G lincRNA)            | chr11 | 69371463 | 69372512 | + | 0    | 0    |
| ENSG0000(RP11-320H sense_overlapping)  | chr4  | 46243548 | 46244215 | - | 0    | 0    |
| ENSG0000(RP11-483I1 antisense)         | chr1  | 1.08E+08 | 1.08E+08 | + | 0.29 | 0.13 |

|                     |             |       |          |          |   |       |       |
|---------------------|-------------|-------|----------|----------|---|-------|-------|
| ENSG0000(HCCAT5     | lincRNA     | chr16 | 73092349 | 73093774 | + | 0     | 0     |
| ENSG0000(RP11-10K1  | processed_  | chr16 | 5078168  | 5078605  | - | 0.18  | 0.4   |
| ENSG0000(VN1R65P    | unitary_ps  | chr16 | 31554105 | 31554912 | + | 0     | 0     |
| ENSG0000(AC009120.  | lincRNA     | chr16 | 74313337 | 74315634 | + | 0     | 0     |
| ENSG0000(TAT-AS1    | antisense   | chr16 | 71565789 | 71578187 | + | 0     | 0     |
| ENSG0000(CASC22     | lincRNA     | chr16 | 52258564 | 52280638 | + | 0     | 0     |
| ENSG0000(CKBP1      | processed_  | chr16 | 46842632 | 46844618 | - | 0     | 0     |
| ENSG0000(RP11-96D1  | antisense   | chr16 | 68212401 | 68221671 | - | 0     | 0     |
| ENSG0000(CTD-2026K  | antisense   | chr15 | 75676227 | 75677162 | + | 0.76  | 0.14  |
| ENSG0000(CTD-2012K  | antisense   | chr16 | 67542304 | 67542572 | - | 0     | 0     |
| ENSG0000(RP11-554A  | lincRNA     | chr11 | 69103493 | 69109094 | + | 0     | 0     |
| ENSG0000(LINC02170  | lincRNA     | chr16 | 80828735 | 80892595 | - | 0.05  | 0.18  |
| ENSG0000(DNM1P30    | unprocess   | chr15 | 30150872 | 30153409 | - | 0     | 0     |
| ENSG0000(ADPGK-AS:  | antisense   | chr15 | 72782835 | 72798199 | + | 0     | 0.07  |
| ENSG0000(RP11-2C24  | processed_  | chr16 | 30740667 | 30751381 | + | 0     | 0     |
| ENSG0000(RP11-19N8  | processed_  | chr16 | 33059936 | 33060098 | + | 0.69  | 0     |
| ENSG0000(LINC02011  | lincRNA     | chr3  | 14799331 | 14811414 | - | 0     | 0     |
| ENSG0000(XKR7       | protein_co  | chr20 | 31968002 | 32003387 | + | 0     | 0     |
| ENSG0000(RP11-105C  | lincRNA     | chr16 | 22612543 | 22613483 | - | 0     | 0     |
| ENSG0000(AC008088.  | lincRNA     | chr17 | 20530042 | 20530881 | - | 0.15  | 0.08  |
| ENSG0000(CTB-134H2  | transcribec | chr16 | 29053732 | 29108108 | - | 0.16  | 0     |
| ENSG0000(RP11-93O1  | unprocess   | chr16 | 46649126 | 46649849 | + | 0     | 0     |
| ENSG0000(LINC00565  | lincRNA     | chr13 | 1.14E+08 | 1.14E+08 | - | 0.26  | 0.34  |
| ENSG0000(RP11-196G  | lincRNA     | chr16 | 31043150 | 31049868 | + | 0.35  | 0.39  |
| ENSG0000(RP11-363E  | sense_ove   | chr9  | 19453209 | 19455173 | + | 1.9   | 1.75  |
| ENSG0000(LINC01254  | lincRNA     | chr18 | 10405133 | 10414515 | - | 0     | 0.02  |
| ENSG0000(RP11-343C  | protein_co  | chr16 | 69299682 | 69322700 | + | 16.88 | 16.04 |
| ENSG0000(CCPG1      | protein_co  | chr15 | 55340032 | 55408510 | - | 49.16 | 51.33 |
| ENSG0000(RP11-57H1  | sense_ove   | chr10 | 1.13E+08 | 1.13E+08 | + | 2.11  | 2.24  |
| ENSG0000(RP11-731J  | sense_ove   | chr4  | 47431960 | 47438959 | + | 0     | 0     |
| ENSG0000(CTD-3154N  | antisense   | chr15 | 74613194 | 74615596 | - | 0     | 0     |
| ENSG0000(RP1-228H1  | sense_ove   | chr1  | 40464319 | 40466767 | + | 0.78  | 0.84  |
| ENSG0000(RP11-989E  | lincRNA     | chr16 | 32995537 | 32996770 | + | 0     | 0     |
| ENSG0000(RP11-538I1 | antisense   | chr16 | 77234877 | 77290934 | + | 0     | 0     |
| ENSG0000(LINC02193  | lincRNA     | chr16 | 90173217 | 90222678 | + | 5.8   | 6.16  |
| ENSG0000(LINC01311  | antisense   | chr22 | 19171395 | 19172839 | + | 0.6   | 0.83  |
| ENSG0000(RP11-380D  | lincRNA     | chr15 | 41609466 | 41612727 | - | 0     | 0     |
| ENSG0000(RP11-459F  | antisense   | chr16 | 58129529 | 58159133 | + | 0     | 0     |
| ENSG0000(SPCS2P1    | processed_  | chr15 | 43131008 | 43131686 | + | 0     | 0     |
| ENSG0000(LINC01416  | lincRNA     | chr18 | 55881688 | 55920199 | - | 0     | 0     |
| ENSG0000(RP11-483P  | antisense   | chr16 | 83929796 | 83931223 | - | 0     | 0     |
| ENSG0000(RP11-164A  | processed_  | chr16 | 18170356 | 18170959 | + | 0     | 0     |
| ENSG0000(CTA-363E6  | antisense   | chr16 | 19501689 | 19502286 | + | 0     | 0     |
| ENSG0000(RP11-548M  | lincRNA     | chr15 | 55056747 | 55092173 | + | 0     | 0     |
| ENSG0000(RP11-467J: | processed_  | chr16 | 53010395 | 53011286 | - | 0     | 0     |

|                 |                      |       |          |          |   |      |      |
|-----------------|----------------------|-------|----------|----------|---|------|------|
| ENSG00000180500 | RP4-575N6 sense_ove  | chr1  | 1.01E+08 | 1.01E+08 | + | 0    | 0    |
| ENSG00000180500 | LINC00622 sense_ove  | chr1  | 1.2E+08  | 1.2E+08  | - | 0.33 | 0.2  |
| ENSG00000180500 | CAPN10-AS1 antisense | chr2  | 2.41E+08 | 2.41E+08 | - | 1.03 | 1.2  |
| ENSG00000180500 | RP11-476D lincRNA    | chr12 | 40140926 | 40142876 | - | 0    | 0    |
| ENSG00000180500 | FOXC2-AS1 antisense  | chr16 | 86565145 | 86567761 | - | 0.95 | 2.09 |
| ENSG00000180500 | RP11-916L lincRNA    | chr16 | 17540331 | 17540985 | - | 0    | 0    |
| ENSG00000180500 | RP11-384P lincRNA    | chr9  | 33697459 | 33700986 | + | 0    | 0.02 |
| ENSG00000180500 | RP11-552N sense_ove  | chr1  | 1.11E+08 | 1.11E+08 | - | 0.17 | 0.48 |
| ENSG00000180500 | KB-1836B5 sense_ove  | chr8  | 38062881 | 38063791 | + | 0.2  | 0.61 |
| ENSG00000180500 | RP5-978I12 lincRNA   | chr7  | 25358240 | 25359908 | - | 0    | 0    |
| ENSG00000180500 | RP11-426C lincRNA    | chr16 | 29262273 | 29264479 | - | 0    | 0.14 |
| ENSG00000180500 | LA16c-425 sense_intr | chr16 | 1579242  | 1580308  | - | 0    | 0    |
| ENSG00000180500 | RP11-30L1 lincRNA    | chr8  | 54042989 | 54045629 | - | 0    | 0.2  |
| ENSG00000180500 | RP11-299H lincRNA    | chr15 | 62284190 | 62285006 | + | 0    | 0    |
| ENSG00000180500 | RP11-488I2 lincRNA   | chr16 | 35207937 | 35284146 | + | 0    | 0.08 |
| ENSG00000180500 | RP11-350A lincRNA    | chr15 | 24238145 | 24240192 | - | 0    | 0    |
| ENSG00000180500 | LINC00557 lincRNA    | chr13 | 94960041 | 94961319 | + | 0    | 0    |
| ENSG00000180500 | RP11-297L lincRNA    | chr16 | 52607349 | 52613908 | + | 0    | 0    |
| ENSG00000180500 | RPL23AP91 processed_ | chr16 | 57321352 | 57322117 | + | 0    | 0    |
| ENSG00000180500 | RP11-690D sense_ove  | chr11 | 1.03E+08 | 1.03E+08 | - | 0.17 | 0.13 |
| ENSG00000180500 | RARRES2P1 processed_ | chr16 | 35221583 | 35222048 | - | 0    | 0    |
| ENSG00000180500 | RP11-190D antisense  | chr16 | 78237362 | 78241218 | - | 0    | 0    |
| ENSG00000180500 | RP11-295D lincRNA    | chr9  | 1.19E+08 | 1.2E+08  | + | 0    | 0    |
| ENSG00000180500 | RP11-504A lincRNA    | chr1  | 56248294 | 56258571 | - | 0    | 0    |
| ENSG00000180500 | RP1-58B11 lincRNA    | chr1  | 5492978  | 5494674  | + | 0    | 0    |
| ENSG00000180500 | RP11-105C lincRNA    | chr16 | 22610531 | 22612196 | - | 0    | 0    |
| ENSG00000180500 | RP11-586K antisense  | chr16 | 32675037 | 32678831 | + | 0    | 0    |
| ENSG00000180500 | RP11-142G lincRNA    | chr16 | 52198012 | 52227956 | - | 0.25 | 0.28 |
| ENSG00000180500 | LINC01633 lincRNA    | chr1  | 1.85E+08 | 1.85E+08 | + | 0    | 0    |
| ENSG00000180500 | RP11-333I1 lincRNA   | chr2  | 46777783 | 46780245 | + | 1.11 | 1.23 |
| ENSG00000180500 | MKRN3-AS antisense   | chr15 | 23567264 | 23569657 | - | 0    | 0    |
| ENSG00000180500 | RP11-77H9 lincRNA    | chr16 | 8962706  | 8966990  | + | 0    | 0    |
| ENSG00000180500 | RP11-315A lincRNA    | chr5  | 8785042  | 8785468  | - | 0    | 0    |
| ENSG00000180500 | RP11-150D lincRNA    | chr16 | 76228385 | 76262365 | - | 0    | 0    |
| ENSG00000180500 | FGFR3P5 unprocess    | chr16 | 35232412 | 35235984 | - | 0    | 0    |
| ENSG00000180500 | RP11-854K lincRNA    | chr15 | 21127698 | 21130095 | - | 0    | 0.16 |
| ENSG00000180500 | RP11-285A lincRNA    | chr15 | 78141243 | 78143173 | + | 0.06 | 0.1  |
| ENSG00000180500 | LA16c-395I antisense | chr16 | 1580527  | 1610328  | + | 0    | 0    |
| ENSG00000180500 | RP3-518E1 antisense  | chr1  | 1.75E+08 | 1.75E+08 | + | 0    | 0    |
| ENSG00000180500 | RP11-616N unprocess  | chr16 | 1280161  | 1280544  | - | 0    | 0    |
| ENSG00000180500 | DOCK9-AS2 antisense  | chr13 | 99087819 | 99088625 | + | 0.4  | 0.61 |
| ENSG00000180500 | AGGF1P7 processed_   | chr16 | 35547917 | 35548829 | + | 0    | 0    |
| ENSG00000180500 | RP11-165H lincRNA    | chr9  | 79135422 | 79145674 | - | 0    | 0    |
| ENSG00000180500 | RP13-122B sense_ove  | chr9  | 1.37E+08 | 1.37E+08 | - | 0    | 0    |
| ENSG00000180500 | RP4-647J2 sense_ove  | chr7  | 44958999 | 44960909 | - | 0    | 0    |

|                 |           |             |       |          |          |   |      |      |
|-----------------|-----------|-------------|-------|----------|----------|---|------|------|
| ENSG00000100000 | RP11-521L | lincRNA     | chr16 | 68927547 | 68948261 | - | 0    | 0    |
| ENSG00000100000 | RP11-534L | lincRNA     | chr1  | 2.07E+08 | 2.07E+08 | + | 0    | 0    |
| ENSG00000100000 | RP11-546B | antisense   | chr15 | 42208413 | 42226990 | + | 0    | 0    |
| ENSG00000100000 | RP1-140C1 | sense_ove   | chr6  | 1.7E+08  | 1.7E+08  | + | 0.04 | 0.04 |
| ENSG00000100000 | RP11-382N | processed_  | chr16 | 5365797  | 5366688  | + | 0.07 | 0.08 |
| ENSG00000100000 | LINC01572 | lincRNA     | chr16 | 72283301 | 72665009 | - | 0.21 | 0.19 |
| ENSG00000100000 | RP11-1437 | lincRNA     | chr16 | 33370473 | 33372915 | - | 0    | 0    |
| ENSG00000100000 | RARRES2P  | processed_  | chr16 | 35255192 | 35255633 | - | 0    | 0    |
| ENSG00000100000 | RP11-96C2 | transcribec | chr10 | 87001636 | 87009905 | + | 0.19 | 0.1  |
| ENSG00000100000 | RP11-116D | lincRNA     | chr2  | 20999313 | 21000917 | - | 0    | 0    |
| ENSG00000100000 | CTD-2050B | lincRNA     | chr16 | 56183726 | 56186306 | - | 0    | 0    |
| ENSG00000100000 | LINC02165 | lincRNA     | chr16 | 63730277 | 63754757 | + | 0    | 0    |
| ENSG00000100000 | RP11-3M1  | processed_  | chr16 | 48059671 | 48059995 | - | 0    | 0    |
| ENSG00000100000 | LL09NC01  | antisense   | chr9  | 1.34E+08 | 1.34E+08 | - | 0    | 0    |
| ENSG00000100000 | RP11-111K | lincRNA     | chr7  | 42901272 | 42902639 | - | 0.08 | 0.05 |
| ENSG00000100000 | RP11-744K | lincRNA     | chr17 | 22420022 | 22424731 | + | 0.01 | 0    |
| ENSG00000100000 | GS1-279B7 | lincRNA     | chr1  | 1.85E+08 | 1.85E+08 | - | 0.64 | 0    |
| ENSG00000100000 | RP11-84D1 | lincRNA     | chr1  | 24968423 | 24970865 | - | 0    | 0    |
| ENSG00000100000 | CTD-3247F | sense_ove   | chr8  | 22679013 | 22684009 | - | 0.01 | 0.05 |
| ENSG00000100000 | AC012322  | lincRNA     | chr16 | 64242608 | 64343909 | - | 0.15 | 0.32 |
| ENSG00000100000 | CTD-2588J | lincRNA     | chr16 | 82170296 | 82175803 | + | 0    | 0    |
| ENSG00000100000 | RP11-791N | lincRNA     | chrX  | 13093660 | 13094573 | + | 0    | 0    |
| ENSG00000100000 | RP11-209D | antisense   | chr17 | 20008051 | 20009234 | - | 0    | 0.17 |
| ENSG00000100000 | RP11-151E | lincRNA     | chr20 | 60812004 | 60814211 | - | 0    | 0    |
| ENSG00000100000 | RP11-574H | lincRNA     | chr5  | 1.2E+08  | 1.2E+08  | - | 0    | 0    |
| ENSG00000100000 | CTC-471C1 | lincRNA     | chr5  | 6019029  | 6022283  | - | 0    | 0    |
| ENSG00000100000 | RP1-149C7 | lincRNA     | chr6  | 92387841 | 92388827 | - | 0    | 0    |
| ENSG00000100000 | RP11-417E | lincRNA     | chr6  | 1.69E+08 | 1.69E+08 | - | 0.27 | 0.58 |
| ENSG00000100000 | WFDC21P   | processed_  | chr17 | 60083566 | 60091885 | - | 3.15 | 2.22 |
| ENSG00000100000 | RP11-536P | unprocess   | chr15 | 28545912 | 28549777 | + | 0    | 0    |
| ENSG00000100000 | RP11-24M  | lincRNA     | chr15 | 75759501 | 75762405 | - | 0    | 0.04 |
| ENSG00000100000 | AP006547  | antisense   | chr8  | 1.43E+08 | 1.43E+08 | + | 0    | 0    |
| ENSG00000100000 | LINC02129 | lincRNA     | chr16 | 27158451 | 27176587 | - | 0    | 0    |
| ENSG00000100000 | C2orf69P1 | processed_  | chr16 | 35552909 | 35554001 | + | 0    | 0    |
| ENSG00000100000 | AC137527  | processed_  | chr16 | 51244054 | 51244123 | + | 0    | 0    |
| ENSG00000100000 | RP11-810K | processed_  | chr15 | 20890206 | 20890606 | - | 0    | 0    |
| ENSG00000100000 | RP11-357N | antisense   | chr16 | 54033997 | 54054583 | - | 0    | 0    |
| ENSG00000100000 | RP11-274H | sense_ove   | chr3  | 1.46E+08 | 1.46E+08 | - | 0.32 | 0.35 |
| ENSG00000100000 | SULT1A3   | protein_co  | chr16 | 30199228 | 30204310 | + | 4.58 | 3.85 |
| ENSG00000100000 | NAMPTP3   | processed_  | chr16 | 35085896 | 35086119 | + | 0    | 0    |
| ENSG00000100000 | RP11-6O2  | antisense   | chr15 | 99128832 | 99131806 | - | 0.04 | 0.07 |
| ENSG00000100000 | RP11-195M | lincRNA     | chr1  | 1.1E+08  | 1.1E+08  | + | 0    | 0    |
| ENSG00000100000 | RP11-454F | transcribec | chr16 | 53298224 | 53299792 | + | 0.44 | 0.08 |
| ENSG00000100000 | LINC00555 | antisense   | chr13 | 1.03E+08 | 1.03E+08 | - | 0    | 0    |
| ENSG00000100000 | RP11-252E | lincRNA     | chr16 | 75119558 | 75144200 | + | 0    | 0    |

|                     |                        |       |          |          |   |      |      |
|---------------------|------------------------|-------|----------|----------|---|------|------|
| ENSG000001545A      | sense_overlappin       | chr1  | 1.8E+08  | 1.8E+08  | + | 0.2  | 0.15 |
| ENSG000001303E      | sense_intronic         | chr16 | 81030770 | 81031485 | + | 0.83 | 0.61 |
| ENSG0000015381      | antisense              | chr16 | 77201474 | 77249957 | - | 0    | 0    |
| ENSG0000011000      | lincRNA                | chr15 | 32536047 | 32587613 | + | 6.69 | 7.35 |
| ENSG00000174C1      | antisense              | chr1  | 2.04E+08 | 2.04E+08 | + | 0    | 0    |
| ENSG000001483K      | lincRNA                | chr16 | 8526549  | 8532013  | - | 0    | 0    |
| ENSG000001264B      | processed_transcript   | chr16 | 28974804 | 28990775 | + | 0.77 | 0.43 |
| ENSG0000017K24      | lincRNA                | chr6  | 42092233 | 42094259 | - | 0.27 | 0.13 |
| ENSG000001701H      | lincRNA                | chr15 | 25087661 | 25088896 | + | 0.58 | 0.06 |
| ENSG000001554A      | lincRNA                | chr11 | 69147228 | 69171564 | - | 0    | 0    |
| ENSG000001223E5     | antisense              | chr6  | 13614111 | 13615155 | - | 0.64 | 0.25 |
| ENSG0000015N19      | processed_transcript   | chr15 | 56192353 | 56193262 | - | 0    | 0    |
| ENSG000001LINC01195 | lincRNA                | chr16 | 9446010  | 9455505  | - | 0    | 0    |
| ENSG000001179B      | lincRNA                | chr10 | 58325614 | 58327030 | - | 0.16 | 0.36 |
| ENSG000001553E      | processed_transcript   | chr15 | 86139838 | 86140240 | - | 0    | 0    |
| ENSG000001481J      | antisense              | chr16 | 58382989 | 58383798 | - | 0    | 0    |
| ENSG000001252A      | lincRNA                | chr16 | 74367462 | 74369826 | + | 0.12 | 0.15 |
| ENSG000001166H4     | lincRNA                | chr6  | 45573346 | 45576770 | - | 0    | 0.04 |
| ENSG0000011H8       | unprocessed_transcript | chr15 | 34409625 | 34410594 | + | 0    | 0    |
| ENSG000001LINC01228 | lincRNA                | chr16 | 79798050 | 79827150 | - | 0    | 0    |
| ENSG0000019312      | lincRNA                | chr4  | 1.24E+08 | 1.25E+08 | - | 0.06 | 0.07 |
| ENSG000001PPP1R1AP2 | processed_transcript   | chr16 | 35912120 | 35912516 | + | 0    | 0    |
| ENSG000001KB-1460A1 | lincRNA                | chr8  | 1.01E+08 | 1.01E+08 | - | 0.35 | 0.51 |
| ENSG000001CDC37P2   | processed_transcript   | chr16 | 28413703 | 28415018 | + | 0    | 0    |
| ENSG00000120G6      | lincRNA                | chr16 | 23020337 | 23023611 | + | 0    | 0    |
| ENSG000001LINC02178 | lincRNA                | chr16 | 50390916 | 50395133 | - | 0    | 0    |
| ENSG000001CTD-3126B | antisense              | chr16 | 2597881  | 2599718  | - | 0.03 | 0    |
| ENSG000001235C      | sense_overlapping      | chr9  | 1.23E+08 | 1.23E+08 | + | 0.78 | 1.1  |
| ENSG000001235C      | lincRNA                | chr16 | 87212122 | 87226430 | + | 0    | 0    |
| ENSG000001235C      | sense_overlapping      | chr2  | 2.32E+08 | 2.32E+08 | + | 0    | 0.1  |
| ENSG000001LINC00563 | lincRNA                | chr13 | 46296445 | 46297844 | - | 0    | 0    |
| ENSG000001235C      | lincRNA                | chr11 | 1.07E+08 | 1.07E+08 | - | 0.1  | 0.13 |
| ENSG000001235C      | sense_overlapping      | chrX  | 1.02E+08 | 1.02E+08 | + | 1.44 | 1.02 |
| ENSG000001235C      | processed_transcript   | chr15 | 66414933 | 66415198 | - | 0    | 0    |
| ENSG000001235C      | antisense              | chr16 | 83710179 | 83717898 | - | 0    | 0    |
| ENSG000001235C      | lincRNA                | chr2  | 9106593  | 9109865  | + | 0    | 0    |
| ENSG000001LMO7-AS1  | antisense              | chr13 | 75604700 | 75635994 | - | 0.66 | 0.37 |
| ENSG000001235C      | processed_transcript   | chr16 | 32739627 | 32740166 | - | 0    | 0    |
| ENSG000001235C      | processed_transcript   | chr16 | 32635673 | 32636045 | - | 0    | 0    |
| ENSG000001235C      | antisense              | chr16 | 22286708 | 22288738 | - | 0    | 0    |
| ENSG000001235C      | sense_intronic         | chr16 | 56941028 | 56941726 | + | 2.09 | 0.9  |
| ENSG000001TMEM178   | protein_coding         | chr7  | 1.41E+08 | 1.41E+08 | + | 0.32 | 0.33 |
| ENSG000001235C      | sense_overlapping      | chr6  | 54943167 | 54945099 | + | 0    | 0    |
| ENSG000001235C      | lincRNA                | chr2  | 12715415 | 12716227 | + | 0    | 0    |
| ENSG000001235C      | antisense              | chr16 | 89492017 | 89504460 | - | 0.07 | 0    |

|                 |                                  |       |          |          |   |      |      |
|-----------------|----------------------------------|-------|----------|----------|---|------|------|
| ENSG00000100000 | RP11-62H2 antisense              | chr14 | 59919423 | 59920339 | - | 0    | 0    |
| ENSG00000100000 | RP11-496D lincRNA                | chr4  | 24659856 | 24671568 | + | 0    | 0.06 |
| ENSG00000100000 | LINC02167 lincRNA                | chr16 | 35743268 | 35756515 | + | 0    | 0    |
| ENSG00000100000 | RP11-304L sense_intronic         | chr16 | 2094830  | 2097026  | - | 0.47 | 0.9  |
| ENSG00000100000 | AC135050. antisense              | chr16 | 31065495 | 31069246 | + | 0    | 0    |
| ENSG00000100000 | RBFADN lincRNA                   | chr18 | 80046900 | 80095482 | + | 0.64 | 0.53 |
| ENSG00000100000 | RP11-17M: transcribed            | chr16 | 32289547 | 32310555 | - | 0    | 0    |
| ENSG00000100000 | RP11-361D lincRNA                | chr4  | 1.45E+08 | 1.45E+08 | + | 0    | 0    |
| ENSG00000100000 | RP11-1021 protein_coding         | chr16 | 15395754 | 15515348 | + | 0    | 0    |
| ENSG00000100000 | RP11-9301 sense_intronic         | chr16 | 46660696 | 46661591 | - | 0.31 | 0    |
| ENSG00000100000 | RP4-798A1 lincRNA                | chr1  | 16514645 | 16515754 | + | 0.27 | 0.59 |
| ENSG00000100000 | RP11-37C7 antisense              | chr15 | 39782571 | 39785617 | + | 0.3  | 0.31 |
| ENSG00000100000 | RP11-20123 antisense             | chr16 | 2569043  | 2571936  | - | 0.51 | 0.56 |
| ENSG00000100000 | RP11-303E antisense              | chr16 | 81055301 | 81056426 | + | 0    | 0    |
| ENSG00000100000 | ADAMTS7F transcribed             | chr15 | 77976042 | 77993057 | + | 0    | 0    |
| ENSG00000100000 | RP11-102D processed_transcript   | chr16 | 59166951 | 59167152 | - | 0    | 0    |
| ENSG00000100000 | RP11-29611 processed_transcript  | chr16 | 70202354 | 70202459 | + | 0    | 0    |
| ENSG00000100000 | RP11-2A4.4 lincRNA               | chr3  | 1.38E+08 | 1.38E+08 | + | 0    | 0    |
| ENSG00000100000 | RP11-697E protein_coding         | chr15 | 90249556 | 90272208 | + | 0.09 | 0.26 |
| ENSG00000100000 | EPPK1 protein_coding             | chr8  | 1.44E+08 | 1.44E+08 | - | 0.03 | 0.03 |
| ENSG00000100000 | RP11-332G processed_transcript   | chr16 | 58092053 | 58092947 | - | 0    | 0    |
| ENSG00000100000 | RP11-104C processed_transcript   | chr16 | 33808778 | 33810767 | + | 0    | 0    |
| ENSG00000100000 | LINC02131 lincRNA                | chr16 | 77590806 | 77610681 | + | 0    | 0    |
| ENSG00000100000 | LINC01989 lincRNA                | chr17 | 34169372 | 34195937 | - | 0    | 0    |
| ENSG00000100000 | CTD-2583P antisense              | chr16 | 12759282 | 12761162 | + | 0    | 0    |
| ENSG00000100000 | RP11-723C lincRNA                | chr3  | 1.29E+08 | 1.29E+08 | - | 0.47 | 0.09 |
| ENSG00000100000 | RP11-58A1 lincRNA                | chr16 | 86646301 | 86668923 | + | 0    | 0    |
| ENSG00000100000 | RP11-775H lincRNA                | chr4  | 1.36E+08 | 1.36E+08 | - | 0    | 0    |
| ENSG00000100000 | RP11-517B sense_overlapping      | chr3  | 1.31E+08 | 1.31E+08 | - | 0.19 | 0.2  |
| ENSG00000100000 | RP11-68118 sense_overlapping     | chr1  | 1.51E+08 | 1.51E+08 | - | 0.07 | 0.16 |
| ENSG00000100000 | RP11-252A antisense              | chr16 | 74422120 | 74435254 | + | 0    | 0    |
| ENSG00000100000 | RP11-356C lincRNA                | chr16 | 90110574 | 90168225 | - | 0    | 0    |
| ENSG00000100000 | RP11-169E antisense              | chr16 | 46973989 | 46978983 | + | 0    | 0.63 |
| ENSG00000100000 | HMGB1P3: processed_transcript    | chr15 | 56323193 | 56323719 | + | 0.14 | 0    |
| ENSG00000100000 | LINC02188 lincRNA                | chr16 | 86722091 | 86741059 | + | 0.01 | 0.02 |
| ENSG00000100000 | RP11-2L4.1 lincRNA               | chr16 | 82554049 | 82575210 | - | 0    | 0    |
| ENSG00000100000 | RP11-80512 lincRNA               | chr16 | 86081409 | 86089526 | - | 0.02 | 0.05 |
| ENSG00000100000 | RP11-90K1 unprocessed_transcript | chr16 | 60925733 | 60928541 | - | 0    | 0    |
| ENSG00000100000 | RP11-467N unprocessed_transcript | chr16 | 16394912 | 16398594 | - | 0    | 0    |
| ENSG00000100000 | RP11-201A lincRNA                | chr1  | 1.88E+08 | 1.88E+08 | + | 0    | 0    |
| ENSG00000100000 | RP11-532F antisense              | chr15 | 40835808 | 40844387 | - | 0    | 0    |
| ENSG00000100000 | RP11-196C sense_overlapping      | chr7  | 36095272 | 36100653 | + | 0    | 0    |
| ENSG00000100000 | LINC01238 antisense              | chr2  | 2.42E+08 | 2.42E+08 | - | 0.16 | 0.06 |
| ENSG00000100000 | RP11-1007 lincRNA                | chr15 | 72465128 | 72466262 | - | 0.37 | 0.35 |
| ENSG00000100000 | CTA-445C9 antisense              | chr22 | 26512537 | 26514568 | + | 0.99 | 0.66 |



|                                      |          |          |   |      |      |
|--------------------------------------|----------|----------|---|------|------|
| ENSG0000(RP3-512B1 antisense chr6    | 7540451  | 7541338  | - | 0.42 | 1.24 |
| ENSG0000(C16orf97 processed_chr16    | 52005487 | 52078474 | - | 0    | 0    |
| ENSG0000(RP11-16L1.antisense chr15   | 36641186 | 36669097 | - | 0    | 0    |
| ENSG0000(RNF126P1 transcribed chr17  | 57045478 | 57046797 | + | 0    | 0    |
| ENSG0000(RP11-863P lincRNA chr16     | 88079161 | 88087383 | - | 0    | 0    |
| ENSG0000(LINC01898 lincRNA chr18     | 75696079 | 75712385 | - | 0    | 0    |
| ENSG0000(CTD-2380F antisense chr16   | 19761172 | 19766099 | - | 0.33 | 0    |
| ENSG0000(CYP4A43P unprocessed chr1   | 46994382 | 46994502 | - | 0    | 0    |
| ENSG0000(RP11-598D processed_chr16   | 34051140 | 34051363 | + | 0    | 0    |
| ENSG0000(RP11-26O3 antisense chr16   | 7614230  | 7614992  | - | 0    | 0    |
| ENSG0000(UBE2FP2 processed_chr16     | 63180610 | 63181071 | - | 0    | 0    |
| ENSG0000(RP11-989E lincRNA chr16     | 33541842 | 33545812 | - | 0.77 | 0.56 |
| ENSG0000(RP3-496C2 antisense chr22   | 40043068 | 40044530 | - | 0    | 0.04 |
| ENSG0000(RP11-347C unprocessed chr16 | 30218220 | 30221930 | + | 0    | 0    |
| ENSG0000(AC004449. lincRNA chr19     | 637105   | 637537   | - | 0    | 0    |
| ENSG0000(NIFKP4 processed_chr15      | 75251743 | 75252934 | - | 0.1  | 0    |
| ENSG0000(LINC00561 lincRNA chr13     | 75932395 | 75935132 | - | 0    | 0    |
| ENSG0000(LA16c-361.antisense chr16   | 1751559  | 1752262  | - | 0    | 0    |
| ENSG0000(RP11-452D processed_chr14   | 52286797 | 52289268 | + | 0.09 | 0    |
| ENSG0000(SULT1C2P2 unprocessed chr2  | 1.08E+08 | 1.08E+08 | + | 0    | 0    |
| ENSG0000(CLEC19A protein_co chr16    | 19285739 | 19322145 | + | 0    | 0    |
| ENSG0000(RP1-80N2. lincRNA chr6      | 6680309  | 6683633  | - | 0.13 | 0.13 |
| ENSG0000(RP3-507I15 lincRNA chrX     | 1.41E+08 | 1.41E+08 | - | 0    | 0.29 |
| ENSG0000(RP11-510C lincRNA chr1      | 75122518 | 75123927 | - | 0    | 0    |
| ENSG0000(RP11-195F processed_chr9    | 34661903 | 34666029 | - | 0.19 | 0.09 |
| ENSG0000(RP11-166B antisense chr16   | 11908208 | 11908916 | + | 0.91 | 0    |
| ENSG0000(BCAP31P1 unprocessed chr16  | 33988406 | 33991551 | - | 0    | 0    |
| ENSG0000(RP11-960L. lincRNA chr16    | 81738248 | 81767868 | + | 0    | 0    |
| ENSG0000(RP11-344A lincRNA chr15     | 57720295 | 57720928 | + | 0    | 0    |
| ENSG0000(RP11-629C lincRNA chr8      | 1.34E+08 | 1.34E+08 | + | 2.66 | 4.33 |
| ENSG0000(ZNF865 protein_co chr19     | 55605405 | 55617269 | + | 4.36 | 4.62 |
| ENSG0000(CTD-2006K lincRNA chr17     | 74599840 | 74607229 | + | 0    | 0    |
| ENSG0000(RP11-830F sense_intr chr16  | 88936779 | 88939651 | - | 0    | 0    |
| ENSG0000(AC140912. lincRNA chr16     | 73232055 | 73233970 | + | 0    | 0    |
| ENSG0000(RP11-38G5 lincRNA chr15     | 79843547 | 79844304 | - | 0.17 | 0    |
| ENSG0000(LINC02133 lincRNA chr16     | 47724568 | 47908431 | + | 0    | 0    |
| ENSG0000(RP11-331H processed_chr15   | 76472099 | 76472365 | + | 0    | 0    |
| ENSG0000(ABCD1P3 unprocessed chr16   | 32475051 | 32478250 | - | 0    | 0    |
| ENSG0000(RP11-356C processed_chr16   | 65938189 | 65938453 | - | 0    | 0    |
| ENSG0000(RP11-510J.antisense chr16   | 82044336 | 82139631 | - | 0    | 0    |
| ENSG0000(BOP1 protein_co chr8        | 1.44E+08 | 1.44E+08 | - | 6.48 | 8.85 |
| ENSG0000(AC009166.antisense chr16    | 51149239 | 51149819 | + | 0    | 0    |
| ENSG0000(ANKRD26P transcribed chr16  | 46469341 | 46569097 | - | 0.01 | 0.01 |
| ENSG0000(RP11-304L.antisense chr16   | 2112335  | 2113342  | + | 0.17 | 0    |
| ENSG0000(LINC02128 lincRNA chr16     | 50884209 | 50901061 | + | 0    | 0    |

|                 |                           |       |          |          |   |      |      |
|-----------------|---------------------------|-------|----------|----------|---|------|------|
| ENSG00000100000 | CTD-2302E antisense       | chr14 | 63543569 | 63544664 | + | 0    | 0.12 |
| ENSG00000100000 | RP11-517C antisense       | chr16 | 84495599 | 84497495 | + | 0    | 0    |
| ENSG00000100000 | RP11-114H lincRNA         | chr15 | 77916522 | 77922019 | + | 0    | 0    |
| ENSG00000100000 | RP11-120K unprocessed     | chr16 | 31361278 | 31361695 | - | 0    | 0    |
| ENSG00000100000 | GOLGA8T protein_coding    | chr15 | 30135149 | 30145567 | + | 0.49 | 0.42 |
| ENSG00000100000 | AC009120. lincRNA         | chr16 | 74282415 | 74287519 | + | 0    | 0    |
| ENSG00000100000 | LINC01751 lincRNA         | chr20 | 7302056  | 7307432  | - | 0    | 0    |
| ENSG00000100000 | RP11-545A antisense       | chr1  | 1.8E+08  | 1.8E+08  | - | 0    | 0    |
| ENSG00000100000 | RP3-388M1 antisense       | chr22 | 43812456 | 43817394 | + | 0.12 | 0.3  |
| ENSG00000100000 | AC137932. antisense       | chr16 | 89321133 | 89325110 | + | 0    | 0    |
| ENSG00000100000 | RP11-673E lincRNA         | chr11 | 1.26E+08 | 1.26E+08 | - | 0    | 0    |
| ENSG00000100000 | RP11-19N8 transcribed     | chr16 | 32951993 | 33028037 | - | 0    | 0    |
| ENSG00000100000 | CTD-2520L lincRNA         | chr16 | 71301583 | 71302869 | + | 0    | 0    |
| ENSG00000100000 | RP11-297L lincRNA         | chr16 | 52622115 | 52631088 | + | 0    | 0    |
| ENSG00000100000 | RP11-586K transcribed     | chr16 | 32650195 | 32650910 | - | 0    | 0    |
| ENSG00000100000 | CTD-2515H lincRNA         | chr15 | 57527187 | 57529009 | - | 0    | 0    |
| ENSG00000100000 | CTD-2196E antisense       | chr16 | 23687049 | 23687689 | - | 0    | 0    |
| ENSG00000100000 | RP11-441I1 antisense      | chr16 | 48559661 | 48587403 | + | 0    | 0    |
| ENSG00000100000 | RP11-308D lincRNA         | chr4  | 1.4E+08  | 1.4E+08  | - | 0    | 0    |
| ENSG00000100000 | RP11-389C sense_intronic  | chr5  | 72439903 | 72442387 | - | 0    | 0    |
| ENSG00000100000 | RP11-325K sense_intronic  | chr16 | 56940278 | 56941342 | + | 0.69 | 1.83 |
| ENSG00000100000 | MUC22 protein_coding      | chr6  | 31010474 | 31035402 | + | 0    | 0    |
| ENSG00000100000 | LA16c-444 lincRNA         | chr16 | 88234785 | 88302511 | + | 0    | 0    |
| ENSG00000100000 | TP53TG3G1 processed       | chr16 | 35207903 | 35208236 | - | 0    | 0    |
| ENSG00000100000 | RP11-760D lincRNA         | chr7  | 56493124 | 56497285 | + | 0    | 0    |
| ENSG00000100000 | RP11-554A antisense       | chr11 | 69004394 | 69005100 | + | 0    | 0    |
| ENSG00000100000 | OR4H6P transcribed        | chr15 | 22056709 | 22057949 | + | 0    | 0    |
| ENSG00000100000 | RP11-430C processed       | chr16 | 60024578 | 60025141 | - | 0    | 0    |
| ENSG00000100000 | ULK4P1 transcribed        | chr15 | 32406597 | 32434992 | - | 0    | 0.17 |
| ENSG00000100000 | RP11-361N transcribed     | chr15 | 72682266 | 72682904 | - | 0    | 0    |
| ENSG00000100000 | SOD1P2 processed          | chr16 | 51107571 | 51108021 | + | 0    | 0    |
| ENSG00000100000 | RBM22P13 processed        | chr16 | 31863633 | 31864876 | + | 0    | 0    |
| ENSG00000100000 | RP11-481E lincRNA         | chr16 | 82495993 | 82510919 | - | 0    | 0    |
| ENSG00000100000 | RP11-517C antisense       | chr16 | 84459259 | 84467361 | - | 0.07 | 0.12 |
| ENSG00000100000 | RP11-20I23 sense_intronic | chr16 | 2554975  | 2556105  | + | 0    | 0    |
| ENSG00000100000 | RP11-170L processed       | chr16 | 31952160 | 31952473 | + | 0    | 0    |
| ENSG00000100000 | CYP4A44P unprocessed      | chr1  | 47002995 | 47003148 | - | 0    | 0    |
| ENSG00000100000 | RP11-295N sense_intronic  | chr16 | 53168522 | 53169450 | + | 0    | 0    |
| ENSG00000100000 | RP11-389G lincRNA         | chr3  | 97759523 | 97761532 | + | 0    | 0    |
| ENSG00000100000 | RP11-276H antisense       | chr16 | 12093627 | 12095307 | - | 0    | 0    |
| ENSG00000100000 | RP11-616N antisense       | chr16 | 1206560  | 1207124  | - | 0    | 0    |
| ENSG00000100000 | RP11-299H lincRNA         | chr15 | 62274163 | 62278365 | + | 0    | 0.02 |
| ENSG00000100000 | RP11-309N lincRNA         | chr2  | 2.34E+08 | 2.34E+08 | + | 0    | 0    |
| ENSG00000100000 | C2orf69P3 processed       | chr16 | 35425364 | 35426483 | + | 0    | 0    |
| ENSG00000100000 | RP11-343H antisense       | chr16 | 56708772 | 56729968 | - | 0.09 | 0    |

|                 |                       |       |          |          |   |      |      |
|-----------------|-----------------------|-------|----------|----------|---|------|------|
| ENSG00000100000 | RP11-160C transcribed | chr15 | 78660644 | 78735495 | + | 0    | 0    |
| ENSG00000100000 | CTD-2125J lincRNA     | chr15 | 34651135 | 34655764 | - | 0    | 0    |
| ENSG00000100000 | RP4-584D1 sense       | chr7  | 1.5E+08  | 1.5E+08  | + | 0.23 | 0    |
| ENSG00000100000 | RP11-157P lincRNA     | chr18 | 47501172 | 47558383 | + | 0    | 0    |
| ENSG00000100000 | FIGNL2 protein        | chr12 | 51817840 | 51848766 | - | 0.06 | 0.07 |
| ENSG00000100000 | RP11-354I1 lincRNA    | chr16 | 60486819 | 60523250 | - | 0    | 0    |
| ENSG00000100000 | AC002550 antisense    | chr16 | 19706351 | 19715383 | + | 0    | 0    |
| ENSG00000100000 | RP11-2C15 lincRNA     | chr16 | 75838630 | 75860867 | - | 0    | 0    |
| ENSG00000100000 | RP11-359E sense       | chr1  | 2.12E+08 | 2.12E+08 | - | 0    | 0    |
| ENSG00000100000 | LARP4P transcribed    | chr15 | 36617089 | 36619265 | + | 0    | 0    |
| ENSG00000100000 | LINC01834 lincRNA     | chr19 | 30907199 | 30909155 | + | 0    | 0    |
| ENSG00000100000 | RP11-566K antisense   | chr16 | 89969791 | 89972544 | + | 0.15 | 0.09 |
| ENSG00000100000 | RP11-653J antisense   | chr15 | 66278498 | 66293357 | - | 0    | 0    |
| ENSG00000100000 | LINC02152 lincRNA     | chr16 | 8298492  | 8299772  | + | 0    | 0    |
| ENSG00000100000 | RP11-297D lincRNA     | chr16 | 67430667 | 67431464 | - | 0    | 0    |
| ENSG00000100000 | RP11-174G sense       | chr12 | 14762504 | 14767931 | - | 0.36 | 0.18 |
| ENSG00000100000 | LINC02192 lincRNA     | chr16 | 47849314 | 47887130 | - | 0    | 0    |
| ENSG00000100000 | LINC01355 lincRNA     | chr1  | 23281309 | 23286752 | - | 0.6  | 0.6  |
| ENSG00000100000 | RP11-863P lincRNA     | chr16 | 88177298 | 88178941 | - | 2.3  | 2.33 |
| ENSG00000100000 | CTD-2049C antisense   | chr16 | 27678940 | 27718806 | - | 0    | 0    |
| ENSG00000100000 | RP11-281J processed   | chr16 | 77892422 | 77892915 | + | 0    | 0    |
| ENSG00000100000 | RP11-297C antisense   | chr16 | 30498766 | 30499554 | - | 0    | 0    |
| ENSG00000100000 | CD24P2 processed      | chr15 | 56071421 | 56071639 | + | 0    | 0    |
| ENSG00000100000 | RP11-65J3 lincRNA     | chr9  | 1.29E+08 | 1.29E+08 | - | 0.09 | 0.03 |
| ENSG00000100000 | RP11-318A antisense   | chr17 | 76671942 | 76673658 | + | 0    | 0.04 |
| ENSG00000100000 | EIF4BP5 processed     | chr16 | 47565090 | 47566884 | - | 0.03 | 0    |
| ENSG00000100000 | RP11-378A sense       | chr2  | 2.18E+08 | 2.18E+08 | + | 0.61 | 0.7  |
| ENSG00000100000 | LINC01616 lincRNA     | chr11 | 29980113 | 29982392 | - | 0    | 0    |
| ENSG00000100000 | CTD-2568A protein     | chr19 | 50776141 | 50793142 | - | 0    | 0    |
| ENSG00000100000 | AC006538 sense        | chr19 | 2727743  | 2729327  | - | 0.29 | 0.16 |
| ENSG00000100000 | RP11-297C antisense   | chr16 | 30477180 | 30489353 | - | 0    | 0    |
| ENSG00000100000 | AP000439 lincRNA      | chr11 | 69467598 | 69469705 | + | 0    | 0    |
| ENSG00000100000 | LINC02136 lincRNA     | chr16 | 71410440 | 71426464 | - | 0    | 0    |
| ENSG00000100000 | RP3-465N2 unprocessed | chr1  | 25266102 | 25267136 | - | 0    | 0.65 |
| ENSG00000100000 | RP11-80F2 lincRNA     | chr16 | 35491174 | 35492395 | - | 0    | 0    |
| ENSG00000100000 | CTD-3185P antisense   | chr15 | 66488658 | 66492109 | - | 0.07 | 0.1  |
| ENSG00000100000 | CTA-14H9 lincRNA      | chr6  | 26527063 | 26527404 | + | 1.39 | 2.44 |
| ENSG00000100000 | RP11-46D6 processed   | chr16 | 46571537 | 46572136 | + | 0    | 0    |
| ENSG00000100000 | RP11-626G lincRNA     | chr16 | 19065991 | 19066694 | + | 0    | 0    |
| ENSG00000100000 | PYCARD-AS antisense   | chr16 | 31201885 | 31203452 | + | 0.33 | 0.12 |
| ENSG00000100000 | CTD-2165H antisense   | chr5  | 14661808 | 14664604 | - | 0.18 | 0.24 |
| ENSG00000100000 | RP11-467N processed   | chr16 | 16541217 | 16541847 | - | 0    | 0    |
| ENSG00000100000 | RP11-134D lincRNA     | chr16 | 87066705 | 87069752 | + | 0    | 0    |
| ENSG00000100000 | RP11-59E1 lincRNA     | chr3  | 1.09E+08 | 1.09E+08 | - | 0    | 0.07 |
| ENSG00000100000 | RP11-483E unprocessed | chr15 | 28473322 | 28473448 | - | 0    | 0    |

|                                 |       |          |          |   |      |      |
|---------------------------------|-------|----------|----------|---|------|------|
| ENSG0000(MANEA-AS antisense)    | chr6  | 95575183 | 95577450 | - | 0.15 | 0.13 |
| ENSG0000(RP11-455F antisense)   | chr16 | 30107675 | 30110541 | + | 0.31 | 0.32 |
| ENSG0000(RP11-96B5 lincRNA)     | chr10 | 50964270 | 50965220 | + | 0    | 0    |
| ENSG0000(RP11-474B antisense)   | chr16 | 47299447 | 47317814 | + | 0    | 0    |
| ENSG0000(PECAM1 protein_co)     | chr17 | 64319415 | 64413776 | - | 0.42 | 0.54 |
| ENSG0000(VPS9D1-AS antisense)   | chr16 | 89711856 | 89718165 | + | 0.93 | 0.57 |
| ENSG0000(RP11-632K unprocessε)  | chr15 | 32489267 | 32491586 | - | 0    | 0    |
| ENSG0000(RP11-525K lincRNA)     | chr16 | 80179129 | 80180682 | + | 0    | 0    |
| ENSG0000(PDCD6IPP2 transcribec) | chr15 | 28789664 | 28859007 | + | 0.92 | 1.17 |
| ENSG0000(RP11-395N sense_intrε) | chr2  | 2.27E+08 | 2.27E+08 | + | 0.06 | 0.07 |
| ENSG0000(RP11-461L lincRNA)     | chr5  | 1.54E+08 | 1.54E+08 | + | 0    | 0    |
| ENSG0000(RP11-60L3 sense_intrε) | chr15 | 74303005 | 74304343 | + | 0    | 0    |
| ENSG0000(RP11-388N antisense)   | chr16 | 31131433 | 31131877 | + | 0    | 0    |
| ENSG0000(CTD-2012K lincRNA)     | chr16 | 67549214 | 67563958 | - | 0.45 | 0.16 |
| ENSG0000(MAFTRR lincRNA)        | chr16 | 79715232 | 79770563 | - | 0.03 | 0    |
| ENSG0000(RP11-586K processed_)  | chr16 | 32715931 | 32716056 | + | 0    | 0    |
| ENSG0000(RP11-473I1 lincRNA)    | chr16 | 9068554  | 9072412  | + | 0    | 0.09 |
| ENSG0000(RP11-21B2 antisense)   | chr16 | 50368580 | 50371480 | + | 0    | 0    |
| ENSG0000(RP11-165N antisense)   | chr16 | 12366982 | 12372582 | - | 0    | 0    |
| ENSG0000(HSPE1P5 transcribec)   | chr16 | 68686399 | 68686670 | + | 0    | 0    |
| ENSG0000(CTD-2012K antisense)   | chr16 | 67538557 | 67540106 | - | 0    | 0    |
| ENSG0000(LINC01177 lincRNA)     | chr16 | 9441294  | 9444985  | - | 0    | 0    |
| ENSG0000(RP11-244B lincRNA)     | chr16 | 35195779 | 35197544 | + | 0    | 0    |
| ENSG0000(LA16c-329I antisense)  | chr16 | 1713527  | 1714208  | - | 0    | 0    |
| ENSG0000(AC011525 lincRNA)      | chr19 | 31588040 | 31595720 | - | 0    | 0    |
| ENSG0000(RP11-578F unprocessε)  | chr15 | 28332237 | 28336609 | + | 0    | 0.1  |
| ENSG0000(RP11-378Iε lincRNA)    | chr9  | 19926094 | 19929937 | + | 0    | 0    |
| ENSG0000(RP11-114H lincRNA)     | chr15 | 77954075 | 77963654 | - | 0    | 0    |
| ENSG0000(AC009120 lincRNA)      | chr16 | 74054151 | 74296762 | - | 0    | 0.22 |
| ENSG0000(RP11-23E1 transcribec) | chr16 | 33562649 | 33570935 | - | 0    | 0.29 |
| ENSG0000(RP11-326A antisense)   | chr15 | 89087078 | 89088267 | - | 0    | 0    |
| ENSG0000(TEN1-CDK3 protein_co)  | chr17 | 75979231 | 76005999 | + | 0.44 | 0.38 |
| ENSG0000(RP6-24A23 sense_ovei)  | chrX  | 1.09E+08 | 1.09E+08 | - | 0    | 0    |
| ENSG0000(RP11-543N antisense)   | chr16 | 83383007 | 83398170 | - | 0    | 0    |
| ENSG0000(RP11-268G lincRNA)     | chr20 | 11685144 | 11687323 | - | 0    | 0    |
| ENSG0000(RP11-455F antisense)   | chr16 | 30183505 | 30184957 | - | 0    | 0    |
| ENSG0000(RP11-529J unprocessε)  | chr15 | 23430839 | 23435212 | + | 0    | 0    |
| ENSG0000(RP11-57A1 unprocessε)  | chr16 | 28659696 | 28740781 | - | 0    | 0    |
| ENSG0000(RP1-168L1 antisense)   | chr6  | 1.66E+08 | 1.66E+08 | + | 0.03 | 0    |
| ENSG0000(RP11-22D3 lincRNA)     | chr16 | 49159508 | 49162023 | + | 0    | 0    |
| ENSG0000(RP11-1007 lincRNA)     | chr15 | 72407778 | 72475168 | - | 0.45 | 0.5  |
| ENSG0000(ATP5F1P7 processed_)   | chr16 | 75709056 | 75709815 | - | 0    | 0    |
| ENSG0000(AC144833 sense_intrε)  | chr15 | 27362310 | 27366398 | + | 0    | 0    |
| ENSG0000(CTD-2349B protein_co)  | chr16 | 19114002 | 19173578 | + | 0    | 0    |
| ENSG0000(RP11-16P6 antisense)   | chr2  | 2.23E+08 | 2.23E+08 | - | 0.16 | 0.13 |

|                                      |          |          |   |      |      |
|--------------------------------------|----------|----------|---|------|------|
| ENSG0000(DPPA2P4 processed_ chr16    | 56686851 | 56688052 | + | 0    | 0    |
| ENSG0000(LA16c-390l sense_intr chr16 | 1467673  | 1472684  | - | 0    | 0    |
| ENSG0000(RP4-616B8 antisense chr20   | 38961925 | 38962111 | - | 2.39 | 0    |
| ENSG0000(LINC01613 lincRNA chr9      | 1.2E+08  | 1.2E+08  | + | 0    | 0    |
| ENSG0000(CTC-297N7 lincRNA chr17     | 10658542 | 10659082 | - | 0    | 0    |
| ENSG0000(CTD-2083E sense_ovei chr5   | 195778   | 196341   | + | 0    | 0    |
| ENSG0000(RP13-126P lincRNA chrX      | 39837536 | 39848358 | - | 0    | 0    |
| ENSG0000(RP11-3541l lincRNA chr16    | 60359842 | 60442245 | + | 0    | 0    |
| ENSG0000(RP11-22C1 antisense chr8    | 94637285 | 94639467 | - | 0    | 0    |
| ENSG0000(RP11-399C sense_ovei chr10  | 89015836 | 89017059 | + | 0.87 | 1.22 |
| ENSG0000(DKFZP434f antisense chr16   | 56192614 | 56194518 | - | 0    | 0    |
| ENSG0000(DUX4L45 processed_ chr16    | 34135736 | 34136792 | - | 0    | 0    |
| ENSG0000(RP11-217B antisense chr15   | 89335053 | 89336161 | + | 0.35 | 0    |
| ENSG0000(RP11-709D antisense chr16   | 4634329  | 4640623  | - | 0    | 0    |
| ENSG0000(RP11-347C unprocessε chr16  | 30214409 | 30214699 | + | 0    | 0    |
| ENSG0000(RP11-80F2 lincRNA chr16     | 35493754 | 35496457 | - | 0    | 0    |
| ENSG0000(LINC00559 lincRNA chr13     | 90060247 | 90119719 | - | 0    | 0    |
| ENSG0000(RP11-109D lincRNA chr9      | 69672749 | 69673713 | + | 0    | 0    |
| ENSG0000(CTD-2576D antisense chr16   | 17134504 | 17138736 | + | 0    | 0    |
| ENSG0000(RP11-589C antisense chr8    | 42151772 | 42152763 | - | 0    | 0    |
| ENSG0000(RP11-981G sense_ovei chr8   | 10433672 | 10438312 | + | 0.01 | 0.01 |
| ENSG0000(LINC01735 lincRNA chr1      | 2.09E+08 | 2.09E+08 | - | 0    | 0    |
| ENSG0000(LINC01003 lincRNA chr7      | 1.52E+08 | 1.52E+08 | + | 2.68 | 3.02 |
| ENSG0000(TUBB8 protein_co chr10      | 46892    | 74163    | - | 0    | 0    |
| ENSG0000(AC002519. transcribed chr16 | 31802947 | 31807973 | + | 0    | 0    |
| ENSG0000(RP11-787D unprocessε chr16  | 74842587 | 74843883 | + | 0    | 0    |
| ENSG0000(AC002310. protein_co chr16  | 30525923 | 30534852 | - | 0    | 0    |
| ENSG0000(RP11-106N antisense chr15   | 72278867 | 72351794 | + | 0    | 0.02 |
| ENSG0000(UBE2MP1 processed_ chr16    | 35169692 | 35170241 | - | 0    | 0    |
| ENSG0000(CTA-2540f lincRNA chr7      | 87109539 | 87111282 | + | 0    | 0    |
| ENSG0000(RP11-626G antisense chr16   | 19062499 | 19067691 | - | 0    | 0    |
| ENSG0000(RP11-23E1 lincRNA chr16     | 33548297 | 33554408 | - | 0.72 | 0.67 |
| ENSG0000(RP11-731K lincRNA chr7      | 73985992 | 73988767 | + | 0.06 | 0.09 |
| ENSG0000(RP11-1024 sense_ovei chr3   | 30697661 | 30699576 | + | 0.61 | 0.48 |
| ENSG0000(RP11-96D1 sense_intr chr16  | 68236845 | 68237667 | - | 0    | 0    |
| ENSG0000(RP11-152C antisense chr16   | 52078622 | 52080489 | + | 0    | 0    |
| ENSG0000(RP11-61F1 antisense chr16   | 84594393 | 84596826 | + | 0    | 0    |
| ENSG0000(RP11-467l lincRNA chr16     | 79505603 | 79516293 | + | 0    | 0    |
| ENSG0000(RP11-452L lincRNA chr16     | 31449535 | 31453493 | - | 0.53 | 1.16 |
| ENSG0000(LINC02190 lincRNA chr16     | 31549143 | 31553567 | - | 0    | 0    |
| ENSG0000(RP11-77K1 sense_intr chr16  | 75458252 | 75460017 | - | 0.07 | 0    |
| ENSG0000(RP11-429B lincRNA chr15     | 89508961 | 89510416 | + | 0    | 0    |
| ENSG0000(GOLGA8M lincRNA chr15       | 28719377 | 28738431 | - | 0.39 | 0.42 |
| ENSG0000(RP11-77H9 antisense chr16   | 8869251  | 8870032  | + | 0    | 0    |
| ENSG0000(RP11-673P antisense chr16   | 27066928 | 27067858 | - | 0    | 0    |

|                                      |          |          |   |      |      |
|--------------------------------------|----------|----------|---|------|------|
| ENSG0000(PAN3-AS1 antisense chr13    | 28136843 | 28138193 | - | 0.77 | 1.51 |
| ENSG0000(RARRES2P processed_chr16    | 35344091 | 35344559 | - | 0    | 0    |
| ENSG0000(AC135048. processed_chr16   | 30948386 | 30956511 | + | 7.37 | 7.35 |
| ENSG0000(RP11-757F antisense chr3    | 1.12E+08 | 1.12E+08 | + | 0.84 | 0.73 |
| ENSG0000(CTD-2515H lincRNA chr15     | 57477484 | 57478329 | - | 0    | 0    |
| ENSG0000(RP11-448G sense_ovei chr4   | 10068089 | 10073019 | - | 0.52 | 0.59 |
| ENSG0000(DNM1P31 unprocessε chr15    | 32384937 | 32387484 | + | 0    | 0    |
| ENSG0000(RP11-483E unprocessε chr15  | 28362796 | 28365731 | - | 0    | 0    |
| ENSG0000(LINC00566 lincRNA chr13     | 24331450 | 24337121 | + | 0    | 0    |
| ENSG0000(CH17-260C unprocessε chr17  | 36274191 | 36320547 | + | 0.42 | 0.53 |
| ENSG0000(RP11-63B1 lincRNA chr4      | 1.22E+08 | 1.22E+08 | + | 0.03 | 0.13 |
| ENSG0000(RP11-96H1 processed_chr16   | 63056786 | 63129654 | - | 0    | 0    |
| ENSG0000(LINC01686 lincRNA chr1      | 1.83E+08 | 1.83E+08 | + | 0    | 0.05 |
| ENSG0000(LA16c-358I antisense chr16  | 1317891  | 1322845  | - | 0    | 0    |
| ENSG0000(RP11-1437 lincRNA chr16     | 33206431 | 33330342 | - | 0    | 0    |
| ENSG0000(TP53TG3B protein_co chr16   | 33360274 | 33363478 | + | 0    | 0.21 |
| ENSG0000(CYP3A137F unprocessε chr7   | 99820018 | 99820086 | + | 0    | 0    |
| ENSG0000(RP11-46D6 lincRNA chr16     | 46622861 | 46624451 | - | 4.06 | 4.08 |
| ENSG0000(RP11-432Iε antisense chr16  | 71723180 | 71724230 | + | 0.17 | 0.18 |
| ENSG0000(LINC01976 lincRNA chr17     | 43938363 | 43938959 | + | 0    | 0    |
| ENSG0000(VN1R70P processed_chr16     | 35836886 | 35837732 | + | 0    | 0    |
| ENSG0000(LINC00558 lincRNA chr13     | 53815419 | 53876119 | + | 0    | 0    |
| ENSG0000(RP11-403P lincRNA chr16     | 66549280 | 66551189 | + | 0    | 0    |
| ENSG0000(DLGAP1-AS antisense chr18   | 4264602  | 4295405  | + | 0    | 0    |
| ENSG0000(RP11-407P transcribed chr2  | 94575976 | 94587183 | - | 0    | 0    |
| ENSG0000(RP11-82O1 antisense chr16   | 14695567 | 14707055 | - | 0    | 0.01 |
| ENSG0000(ABCB10P3 processed_chr15    | 28402868 | 28405033 | + | 0    | 0    |
| ENSG0000(CTB-31O2C lincRNA chr19     | 1874871  | 1876169  | - | 1.75 | 2.23 |
| ENSG0000(RP11-343C processed_chr16   | 69443240 | 69444290 | - | 0    | 0    |
| ENSG0000(AC002400. processed_chr16   | 23500905 | 23501630 | + | 0    | 0    |
| ENSG0000(RP13-487P sense_intrε chr15 | 25345633 | 25347235 | - | 0    | 0    |
| ENSG0000(RP11-304L lincRNA chr16     | 2211997  | 2212863  | + | 0    | 0    |
| ENSG0000(RP11-244C sense_ovei chr9   | 1.22E+08 | 1.22E+08 | - | 0.52 | 0.47 |
| ENSG0000(CTA-305I2. antisense chr7   | 1.02E+08 | 1.02E+08 | - | 0    | 0    |
| ENSG0000(ABHD17AP unprocessε chr16   | 33140850 | 33143797 | + | 0    | 0    |
| ENSG0000(RP11-319G sense_intrε chr16 | 78994345 | 79004730 | + | 0    | 0    |
| ENSG0000(RP11-3M1. sense_ovei chr16  | 48164952 | 48167238 | - | 0    | 0    |
| ENSG0000(RP11-281Jε antisense chr16  | 78014683 | 78059454 | - | 0    | 0    |
| ENSG0000(RP11-626K lincRNA chr16     | 32454612 | 32458758 | - | 0.05 | 0.11 |
| ENSG0000(RP11-16E1 lincRNA chr8      | 63215981 | 63218034 | + | 0.03 | 0.03 |
| ENSG0000(RP11-665Jε antisense chr15  | 74152800 | 74179226 | - | 0    | 0    |
| ENSG0000(RP11-16E2 sense_intrε chr15 | 65766460 | 65767398 | - | 0    | 0    |
| ENSG0000(CTD-2555A antisense chr16   | 89113175 | 89115279 | - | 0    | 0    |
| ENSG0000(HLA-P unprocessε chr6       | 29800415 | 29802425 | + | 0    | 0    |
| ENSG0000(RP11-320A processed_chr15   | 88989519 | 88990245 | - | 0    | 0    |

|                                            |          |          |   |      |      |
|--------------------------------------------|----------|----------|---|------|------|
| ENSG0000(RP11-264B antisense chr16         | 28989140 | 28990778 | - | 0    | 0    |
| ENSG0000(RP11-29G8 processed_ chr13        | 75549773 | 75807120 | + | 0.15 | 0.18 |
| ENSG0000(RP11-810K processed_ chr15        | 20893383 | 20893980 | - | 0    | 0    |
| ENSG0000(CTD-3229J lincRNA chr16           | 17825252 | 17826906 | + | 0    | 0    |
| ENSG0000(SMG1P7 transcribed chr16          | 70219574 | 70246610 | - | 5.79 | 5.15 |
| ENSG0000(EEF1A1P38 processed_ chr16        | 27133483 | 27135179 | - | 0.04 | 0.28 |
| ENSG0000(LINC01859 lincRNA chr19           | 23015075 | 23023697 | - | 0    | 0    |
| ENSG0000(FSCN1P1 processed_ chr15          | 34494420 | 34495900 | + | 0    | 0    |
| ENSG0000(RP11-166B sense_intron chr16      | 11881075 | 11882569 | - | 0.12 | 0.13 |
| ENSG0000(RP11-536P unprocessed chr15       | 28346490 | 28346647 | + | 0    | 0    |
| ENSG0000(RP11-616M unprocessed chr16       | 1273751  | 1276522  | - | 0    | 0    |
| ENSG0000(CTD-2144E lincRNA chr16           | 35022851 | 35024250 | - | 0    | 0    |
| ENSG0000(RP11-524C lincRNA chr6            | 22220781 | 22222395 | + | 0.18 | 0.15 |
| ENSG0000(RP11-586K lincRNA chr16           | 32649193 | 32663956 | + | 0    | 0    |
| ENSG0000(RP11-744I antisense chr7          | 1.42E+08 | 1.42E+08 | - | 0    | 0    |
| ENSG0000(RP11-384L sense_intron chr3       | 32236688 | 32238578 | - | 0    | 0.03 |
| ENSG0000(RP11-553K antisense chr1          | 1.99E+08 | 1.99E+08 | - | 0    | 0    |
| ENSG0000(RP1-168P1 sense_intron chr16      | 89392375 | 89412564 | - | 0    | 0    |
| ENSG0000(RP11-259G transcribed chr17       | 46267037 | 46268694 | + | 0    | 0.52 |
| ENSG0000(RP11-21L2 sense_overlapping chr11 | 76800364 | 76804555 | + | 0.17 | 0.1  |
| ENSG0000(ENPP7P13 processed_ chr16         | 33769421 | 33769679 | + | 0    | 0    |
| ENSG0000(HERC2P11 unprocessed chr15        | 28575019 | 28579400 | - | 0    | 0    |
| ENSG0000(RP4-614O4 protein_coding chr20    | 35267885 | 35280043 | - | 0    | 0    |
| ENSG0000(CTD-2385L antisense chr16         | 23711990 | 23712793 | + | 0    | 0    |
| ENSG0000(RP11-457M lincRNA chr6            | 26686241 | 26687964 | + | 0.31 | 0.25 |
| ENSG0000(RP11-923I lincRNA chr12           | 51817899 | 51820150 | + | 0    | 0    |
| ENSG0000(TMEM249 protein_coding chr8       | 1.44E+08 | 1.44E+08 | - | 0.09 | 0.04 |
| ENSG0000(AC002310 processed_ chr16         | 30587662 | 30587920 | - | 2.45 | 1.08 |
| ENSG0000(RP11-457D processed_ chr16        | 60357214 | 60357474 | + | 0    | 0    |
| ENSG0000(RP11-178L antisense chr16         | 87396704 | 87400295 | - | 0    | 0.05 |
| ENSG0000(CYP4A27P unprocessed chr1         | 47000898 | 47001087 | - | 0    | 0    |
| ENSG0000(TPBGL protein_coding chr11        | 75240905 | 75243697 | + | 0.06 | 0.04 |
| ENSG0000(RP11-426L antisense chr1          | 1.13E+08 | 1.13E+08 | + | 0    | 0.03 |
| ENSG0000(CTB-31N19 sense_intron chr16      | 21626742 | 21627569 | + | 0.08 | 0.17 |
| ENSG0000(RP11-107D lincRNA chr15           | 24299749 | 24300638 | + | 0    | 0    |
| ENSG0000(HERC2P8 transcribed chr16         | 33094204 | 33129090 | - | 1.02 | 1.05 |
| ENSG0000(RP11-575H lincRNA chr2            | 91580336 | 91580863 | + | 0    | 0.46 |
| ENSG0000(CTD-2033A antisense chr16         | 69709874 | 69710583 | + | 0    | 0    |
| ENSG0000(PRSS46 protein_coding chr3        | 46719583 | 46736429 | - | 0    | 0    |
| ENSG0000(CTD-2636A antisense chr5          | 43287601 | 43290839 | + | 0    | 0    |
| ENSG0000(RP11-414J processed_ chr15        | 74816223 | 74831795 | + | 0    | 0    |
| ENSG0000(RP11-812E unprocessed chr16       | 33948278 | 33948548 | - | 0    | 0    |
| ENSG0000(SLC25A1P4 processed_ chr16        | 35173316 | 35174093 | + | 0    | 0    |
| ENSG0000(GAN protein_coding chr16          | 81314952 | 81390884 | + | 0.58 | 0.64 |
| ENSG0000(AP000265 lincRNA chr21            | 32259804 | 32261585 | - | 0.03 | 0    |

|                                 |       |          |          |   |      |      |
|---------------------------------|-------|----------|----------|---|------|------|
| ENSG0000( AC010547. protein_co  | chr16 | 71447600 | 71489311 | - | 0.33 | 0.26 |
| ENSG0000( SUB1P3 processed_     | chr16 | 4562814  | 4563128  | - | 0    | 0    |
| ENSG0000( RP11-20I2 antisense   | chr16 | 2554060  | 2556060  | - | 2.98 | 2.7  |
| ENSG0000( CSDAP1 processed_     | chr16 | 31568386 | 31569475 | - | 0    | 0    |
| ENSG0000( LINC01858 lincRNA     | chr19 | 23046958 | 23061752 | - | 0    | 0    |
| ENSG0000( RP11-6O2 antisense    | chr15 | 99139317 | 99145370 | + | 0    | 0    |
| ENSG0000( LINC02177 lincRNA     | chr16 | 9355588  | 9408093  | + | 0    | 0    |
| ENSG0000( RP11-79H2 lincRNA     | chr8  | 78837529 | 78840522 | + | 0.11 | 0.16 |
| ENSG0000( HMGN2P4 processed_    | chr16 | 35802869 | 35803280 | - | 0    | 0    |
| ENSG0000( RP11-580I lincRNA     | chr15 | 24235078 | 24276829 | + | 0    | 0    |
| ENSG0000( RP11-484P lincRNA     | chr15 | 23912409 | 23941716 | + | 0    | 0    |
| ENSG0000( LINC02179 lincRNA     | chr16 | 49466106 | 49469875 | + | 0    | 0    |
| ENSG0000( NDUFB10P processed_   | chr7  | 1.41E+08 | 1.41E+08 | + | 0    | 0    |
| ENSG0000( RP11-554A sense_ove   | chr11 | 69000765 | 69002048 | - | 1.41 | 1.91 |
| ENSG0000( RP11-91I8. lincRNA    | chr18 | 6641971  | 6642478  | - | 0    | 0    |
| ENSG0000( RP11-540B unprocess   | chr15 | 30899480 | 30900327 | + | 0    | 0    |
| ENSG0000( RP5-842K1 antisense   | chr7  | 1.41E+08 | 1.41E+08 | - | 0    | 0    |
| ENSG0000( RP11-357N antisense   | chr16 | 53981229 | 53981912 | - | 0.13 | 0    |
| ENSG0000( RP11-390D antisense   | chr15 | 71972206 | 72040265 | + | 0    | 0    |
| ENSG0000( RP11-405F antisense   | chr16 | 57622034 | 57631647 | - | 0    | 0    |
| ENSG0000( RP11-352D antisense   | chr15 | 69278328 | 69298763 | - | 0    | 0    |
| ENSG0000( RP11-618N processed_  | chr15 | 36613474 | 36614198 | + | 0    | 0    |
| ENSG0000( LINC02191 lincRNA     | chr16 | 25419814 | 25424169 | - | 0    | 0    |
| ENSG0000( LINC02127 lincRNA     | chr16 | 51017758 | 51035777 | + | 0    | 0    |
| ENSG0000( RP11-700H lincRNA     | chr16 | 58847807 | 58880213 | - | 0    | 0    |
| ENSG0000( LA16c-390I antisense  | chr16 | 1445343  | 1446519  | + | 0.05 | 0    |
| ENSG0000( RP11-309H lincRNA     | chr1  | 1.91E+08 | 1.91E+08 | + | 0    | 0.04 |
| ENSG0000( RP11-529E sense_ove   | chr4  | 3503597  | 3504457  | - | 0.36 | 0.48 |
| ENSG0000( RP11-327F antisense   | chr16 | 50727417 | 50742815 | - | 0.12 | 0.23 |
| ENSG0000( DISC1FP1 processed_   | chr11 | 90251232 | 90915052 | + | 0    | 0    |
| ENSG0000( RP11-489G lincRNA     | chr4  | 1.73E+08 | 1.73E+08 | - | 0    | 0.06 |
| ENSG0000( IMPDH1P1 processed_   | chr16 | 10111382 | 10112885 | + | 0    | 0    |
| ENSG0000( CTD-2014E lincRNA     | chr16 | 31546698 | 31547237 | - | 0    | 0    |
| ENSG0000( GOLGA6L7 protein_co   | chr15 | 28841833 | 28848675 | - | 0    | 0    |
| ENSG0000( RP11-474D lincRNA     | chr12 | 1.3E+08  | 1.3E+08  | - | 0    | 0    |
| ENSG0000( RP11-899L antisense   | chr16 | 87215915 | 87216452 | + | 0    | 0    |
| ENSG0000( C15orf65 protein_co   | chr15 | 55408548 | 55418764 | + | 1.8  | 3.42 |
| ENSG0000( RP11-21L1. lincRNA    | chr16 | 63935778 | 63936906 | + | 0.16 | 0.31 |
| ENSG0000( RP11-96K1 sense_ove   | chr1  | 1.11E+08 | 1.11E+08 | - | 0.04 | 0.06 |
| ENSG0000( CTD-3064N sense_ove   | chr8  | 1.41E+08 | 1.41E+08 | - | 0    | 0    |
| ENSG0000( BEAN1-AS1 antisense   | chr16 | 66469796 | 66481230 | - | 0.16 | 0    |
| ENSG0000( LA16c-313I processed_ | chr16 | 689001   | 692554   | + | 0.65 | 0.7  |
| ENSG0000( RP5-1042I sense_ove   | chr1  | 1.2E+08  | 1.2E+08  | - | 0.77 | 0.56 |
| ENSG0000( RP11-304L antisense   | chr16 | 2240487  | 2241818  | + | 0    | 0    |
| ENSG0000( TTC39A-AS antisense   | chr1  | 51329654 | 51335324 | + | 0    | 0    |



|                     |             |       |          |          |   |      |      |
|---------------------|-------------|-------|----------|----------|---|------|------|
| ENSG0000(TUBAP4     | transcribed | chr15 | 83739784 | 83740199 | + | 0    | 0    |
| ENSG0000(LINC00560  | lincRNA     | chr13 | 88626853 | 88630397 | + | 0    | 0    |
| ENSG0000(LY6L       | protein_co  | chr8  | 1.43E+08 | 1.43E+08 | + | 0    | 0    |
| ENSG0000(RP11-50D9  | antisense   | chr4  | 1.28E+08 | 1.28E+08 | - | 0    | 0    |
| ENSG0000(CTD-2515A  | antisense   | chr16 | 24803451 | 24819739 | - | 0    | 0    |
| ENSG0000(RP11-1C8.5 | lincRNA     | chr8  | 1.03E+08 | 1.03E+08 | + | 0.11 | 0.04 |
| ENSG0000(RP11-573G  | lincRNA     | chr10 | 22257786 | 22258548 | + | 0.17 | 0.19 |
| ENSG0000(RP11-475B  | lincRNA     | chr4  | 1.74E+08 | 1.74E+08 | + | 0.21 | 0.16 |
| ENSG0000(RP11-328J  | lincRNA     | chr16 | 72224565 | 72225144 | - | 0.22 | 0    |
| ENSG0000(RP5-1119A  | sense_ove   | chr22 | 36560870 | 36562915 | - | 0    | 0    |
| ENSG0000(SCRT1      | protein_co  | chr8  | 1.44E+08 | 1.44E+08 | - | 0    | 0    |
| ENSG0000(ATP5HP1    | processed_  | chr15 | 43267904 | 43268388 | - | 0    | 0    |
| ENSG0000(RP11-146F  | processed_  | chr16 | 30624285 | 30624714 | - | 0    | 0    |
| ENSG0000(RP11-19N8  | lincRNA     | chr16 | 33129316 | 33134499 | + | 0    | 0    |
| ENSG0000(LINC00838  | lincRNA     | chr10 | 33759713 | 33772658 | - | 0    | 0    |
| ENSG0000(RP11-265N  | antisense   | chr15 | 42531867 | 42532840 | - | 0    | 0    |
| ENSG0000(RP11-473C  | antisense   | chr15 | 43184079 | 43185141 | - | 0    | 0    |
| ENSG0000(AGGF1P4    | processed_  | chr16 | 35389203 | 35390003 | - | 0    | 0    |
| ENSG0000(LA16c-366l | antisense   | chr16 | 547185   | 553847   | - | 0    | 0    |
| ENSG0000(RP1-168P1  | sense_intr  | chr16 | 89420075 | 89422226 | - | 0    | 0.22 |
| ENSG0000(RP13-467H  | antisense   | chr8  | 1.42E+08 | 1.42E+08 | + | 0    | 0.04 |
| ENSG0000(RP11-719K  | antisense   | chr16 | 14734685 | 14746177 | - | 0    | 0.01 |
| ENSG0000(RP11-354P  | lincRNA     | chr9  | 21394888 | 21396346 | - | 0    | 0    |
| ENSG0000(RP11-178L  | sense_intr  | chr16 | 87262759 | 87292438 | - | 0    | 0.04 |
| ENSG0000(HPR        | protein_co  | chr16 | 72063224 | 72077246 | + | 0    | 0    |
| ENSG0000(RP11-282N  | processed_  | chr15 | 67974391 | 67974625 | - | 0    | 0    |
| ENSG0000(LINC02168  | lincRNA     | chr16 | 50806668 | 50807629 | + | 0    | 0    |
| ENSG0000(IGHV10R1   | IG_V_pseu   | chr16 | 32034853 | 32035326 | + | 0    | 0    |
| ENSG0000(LINC00165  | lincRNA     | chr21 | 44994362 | 44995185 | - | 0    | 0    |
| ENSG0000(RP11-264N  | antisense   | chr16 | 77741468 | 77743000 | - | 0    | 0    |
| ENSG0000(DNM1P32    | unprocess   | chr15 | 32436503 | 32439767 | + | 0    | 0    |
| ENSG0000(SNORA11    | snoRNA      | chr15 | 45214906 | 45215033 | - | 0    | 0    |
| ENSG0000(RP11-953B  | lincRNA     | chr8  | 1.42E+08 | 1.42E+08 | + | 0    | 0    |
| ENSG0000(FRG2DP     | transcribed | chr16 | 35477414 | 35480481 | - | 0    | 0    |
| ENSG0000(SSTR5-AS1  | processed_  | chr16 | 1064093  | 1078731  | - | 0    | 0    |
| ENSG0000(CTD-2562G  | processed_  | chr15 | 75415249 | 75416020 | + | 0    | 0    |
| ENSG0000(LINC01477  | lincRNA     | chr18 | 40066286 | 40099233 | + | 0    | 0    |
| ENSG0000(RP11-196G  | sense_ove   | chr1  | 1.5E+08  | 1.5E+08  | - | 1.09 | 1.02 |
| ENSG0000(RP11-77K1  | protein_co  | chr16 | 75412684 | 75464706 | - | 0    | 0    |
| ENSG0000(RP11-67H2  | processed_  | chr16 | 32811029 | 32811251 | - | 0    | 0    |
| ENSG0000(RP11-161N  | lincRNA     | chr16 | 1065240  | 1066502  | + | 0    | 0    |
| ENSG0000(RP11-679B  | lincRNA     | chr16 | 79212711 | 79229453 | - | 0    | 0    |
| ENSG0000(CTD-2196E  | antisense   | chr16 | 23605841 | 23624107 | + | 0    | 0    |
| ENSG0000(RP11-480G  | processed_  | chr16 | 46850999 | 46851254 | + | 0    | 0    |
| ENSG0000(RP11-1166  | transcribed | chr16 | 32008438 | 32084785 | - | 0    | 0    |

|                 |                            |       |          |          |   |       |      |
|-----------------|----------------------------|-------|----------|----------|---|-------|------|
| ENSG00000103070 | RP11-307C lincRNA          | chr13 | 34925834 | 34928076 | - | 0     | 0    |
| ENSG00000103071 | GS1-204I1.2 lincRNA        | chr1  | 1.86E+08 | 1.86E+08 | + | 0     | 0    |
| ENSG00000103072 | RP4-668J2.4 antisense      | chr6  | 1383790  | 1385066  | - | 0.05  | 0    |
| ENSG00000103073 | CTD-2358C antisense        | chr16 | 31709113 | 31711984 | - | 0     | 0    |
| ENSG00000103074 | LA16c-431I protein_coding  | chr16 | 1632259  | 1686715  | + | 0.3   | 0.24 |
| ENSG00000103075 | RP11-669C lincRNA          | chr3  | 20388249 | 20390562 | + | 0     | 0    |
| ENSG00000103076 | AC002551.1 sense_intronic  | chr16 | 27643199 | 27644663 | + | 0     | 0.08 |
| ENSG00000103077 | RP4-612B1 antisense        | chr1  | 86703502 | 86704462 | - | 1.34  | 1.9  |
| ENSG00000103078 | MIR3976H1 lincRNA          | chr18 | 5748819  | 5876328  | + | 0     | 0    |
| ENSG00000103079 | GOLGA8S protein_coding     | chr15 | 23354748 | 23367231 | + | 0.13  | 0.2  |
| ENSG00000103080 | RP11-345J.4 protein_coding | chr16 | 29443230 | 29454651 | - | 11.94 | 9.38 |
| ENSG00000103081 | FRG2KP transcribed         | chr16 | 31563082 | 31567716 | - | 0     | 0    |
| ENSG00000103082 | LINC00922 lincRNA          | chr16 | 65284499 | 65576300 | - | 0.15  | 0.13 |
| ENSG00000103083 | RP11-2K6.2 lincRNA         | chr16 | 63368844 | 63369456 | + | 0     | 0    |
| ENSG00000103084 | RP11-21B2 antisense        | chr16 | 88512960 | 88531053 | - | 0     | 0    |
| ENSG00000103085 | RP11-506E sense_intronic   | chr6  | 53125644 | 53126146 | - | 0     | 0    |
| ENSG00000103086 | RP11-932C unprocessed      | chr15 | 30153933 | 30154110 | - | 0     | 0    |
| ENSG00000103087 | RP11-419L processed        | chr16 | 16952502 | 16953468 | - | 0     | 0    |
| ENSG00000103088 | LINC02180 lincRNA          | chr16 | 52085280 | 52099067 | + | 0     | 0    |
| ENSG00000103089 | RP11-305A lincRNA          | chr16 | 49920730 | 49924154 | - | 0     | 0    |
| ENSG00000103090 | AGGF1P8 processed          | chr16 | 35258630 | 35259629 | + | 0     | 0    |
| ENSG00000103091 | CTC-523E2 lincRNA          | chr19 | 34811589 | 34814345 | - | 0     | 0    |
| ENSG00000103092 | AC005592.1 lincRNA         | chr5  | 1.43E+08 | 1.43E+08 | + | 0     | 0    |
| ENSG00000103093 | RP11-102M antisense        | chr3  | 1.37E+08 | 1.37E+08 | + | 0.05  | 0.02 |
| ENSG00000103094 | RP11-626G antisense        | chr16 | 19119976 | 19121629 | - | 0     | 0    |
| ENSG00000103095 | RP11-1223 transcribed      | chr2  | 1.1E+08  | 1.1E+08  | + | 1.13  | 0.71 |
| ENSG00000103096 | RP11-103J processed        | chr4  | 37001816 | 37020708 | + | 0     | 0    |
| ENSG00000103097 | RP11-650L antisense        | chr15 | 78589123 | 78591276 | - | 0     | 0    |
| ENSG00000103098 | RP11-442N lincRNA          | chr3  | 1.4E+08  | 1.4E+08  | - | 0     | 0    |
| ENSG00000103099 | KRT18P18 transcribed       | chr16 | 72728616 | 72729894 | + | 0     | 0    |
| ENSG00000103100 | RP11-498D sense_intronic   | chr16 | 71881553 | 71882273 | - | 0.38  | 0    |
| ENSG00000103101 | RP11-22P6 antisense        | chr16 | 28862166 | 28863340 | - | 0.4   | 0.15 |
| ENSG00000103102 | CTC-459F4 lincRNA          | chr19 | 27757184 | 27760849 | - | 0.19  | 0.06 |
| ENSG00000103103 | DYX1C1-CC processed        | chr15 | 55355248 | 55498360 | - | 0     | 0.35 |
| ENSG00000103104 | WI2-89031 sense_intronic   | chrX  | 1.55E+08 | 1.55E+08 | - | 0     | 0    |
| ENSG00000103105 | RP11-328J processed        | chr16 | 72278268 | 72278568 | + | 0     | 0    |
| ENSG00000103106 | RP11-100I lincRNA          | chr15 | 74489602 | 74516959 | + | 0     | 0.83 |
| ENSG00000103107 | RP11-358L processed        | chr16 | 78055824 | 78056927 | - | 0     | 0    |
| ENSG00000103108 | RP11-529K processed        | chr16 | 70315640 | 70346747 | - | 0.08  | 0.32 |
| ENSG00000103109 | RP5-1173P processed        | chr7  | 1.41E+08 | 1.41E+08 | - | 0     | 0    |
| ENSG00000103110 | RP11-69H7 antisense        | chr15 | 75211301 | 75212167 | - | 0     | 0    |
| ENSG00000103111 | CTD-2354A processed        | chr18 | 73324941 | 73349878 | + | 0     | 0.09 |
| ENSG00000103112 | LINC01654 lincRNA          | chr1  | 18065657 | 18074412 | + | 0     | 0    |
| ENSG00000103113 | RP11-43P5 processed        | chr16 | 35879036 | 35879498 | - | 0     | 0    |
| ENSG00000103114 | RP11-252K sense_intronic   | chr16 | 75379818 | 75381260 | - | 1.9   | 1.04 |

|                 |            |                        |       |          |          |   |      |      |
|-----------------|------------|------------------------|-------|----------|----------|---|------|------|
| ENSG00000101084 | RP4-555D2  | lincRNA                | chr3  | 44117299 | 44122365 | + | 0.04 | 0.09 |
| ENSG00000101085 | TCF24      | protein_coding         | chr8  | 66946501 | 66962590 | - | 0    | 0    |
| ENSG00000101086 | RP11-709D  | antisense              | chr16 | 4560001  | 4561662  | - | 0    | 0.07 |
| ENSG00000101087 | AC005606   | lincRNA                | chr16 | 1984877  | 1990357  | - | 0.27 | 0    |
| ENSG00000101088 | DNM1P28    | unprocessed_transcript | chr15 | 30098826 | 30102093 | - | 0    | 0    |
| ENSG00000101089 | RP11-350C  | protein_coding         | chr9  | 1.37E+08 | 1.37E+08 | - | 0    | 0    |
| ENSG00000101090 | GOLGA8H    | protein_coding         | chr15 | 30604126 | 30614561 | + | 0.06 | 0.18 |
| ENSG00000101091 | RP11-90P1  | lincRNA                | chr7  | 161765   | 164972   | - | 0    | 0    |
| ENSG00000101092 | ISY1-RAB4  | protein_coding         | chr3  | 1.29E+08 | 1.29E+08 | - | 8.31 | 5.96 |
| ENSG00000101093 | RP11-744I2 | lincRNA                | chr7  | 1.42E+08 | 1.42E+08 | - | 0    | 0    |
| ENSG00000101094 | RP1-118J2  | antisense              | chr1  | 39788976 | 39790171 | + | 0    | 0    |
| ENSG00000101095 | RP11-283I3 | sense_intronic         | chr12 | 273954   | 277123   | - | 1.67 | 1.54 |
| ENSG00000101096 | RP11-244B  | lincRNA                | chr16 | 35143722 | 35144881 | + | 0    | 0    |
| ENSG00000101097 | LOXL1-AS1  | antisense              | chr15 | 73908071 | 73928248 | - | 4.98 | 7.1  |
| ENSG00000101098 | RP11-44I1C | sense_intronic         | chr16 | 48447904 | 48448398 | - | 0    | 0    |
| ENSG00000101099 | LINC02140  | lincRNA                | chr16 | 54366007 | 54370699 | - | 0    | 0    |
| ENSG00000101100 | RP11-44F1  | lincRNA                | chr16 | 53373493 | 53384745 | + | 0.22 | 0.64 |
| ENSG00000101101 | LINC02141  | lincRNA                | chr16 | 59855353 | 60053973 | + | 0    | 0.02 |
| ENSG00000101102 | CYP3A54P   | processed_transcript   | chr7  | 4511959  | 4512033  | - | 0    | 0    |
| ENSG00000101103 | RP11-895K  | antisense              | chr16 | 10033684 | 10037297 | + | 0    | 0    |
| ENSG00000101104 | LINC02164  | lincRNA                | chr16 | 5215394  | 5220594  | - | 0    | 0    |
| ENSG00000101105 | TUBB8P7    | transcribed_unit       | chr16 | 90093154 | 90096354 | + | 0    | 0    |
| ENSG00000101106 | RP11-151H  | processed_transcript   | chr15 | 74976240 | 74976573 | - | 0    | 0    |
| ENSG00000101107 | RP11-22D3  | lincRNA                | chr16 | 49170552 | 49171786 | + | 0    | 0    |
| ENSG00000101108 | RP11-863P  | lincRNA                | chr16 | 88191486 | 88193667 | - | 0    | 0    |
| ENSG00000101109 | RP11-502H  | lincRNA                | chr1  | 1.8E+08  | 1.8E+08  | - | 0    | 0    |
| ENSG00000101110 | RP11-351A  | lincRNA                | chr16 | 65580668 | 65646947 | + | 0    | 0    |
| ENSG00000101111 | RP11-680G  | processed_transcript   | chr16 | 14988259 | 14990160 | - | 0.19 | 0.18 |
| ENSG00000101112 | DNM1P49    | unprocessed_transcript | chr15 | 75791470 | 75792683 | - | 0    | 0    |
| ENSG00000101113 | CTD-2311N  | antisense              | chr15 | 74365435 | 74371211 | + | 0.14 | 0.11 |
| ENSG00000101114 | RP11-265N  | antisense              | chr15 | 42567031 | 42569994 | - | 0    | 0.28 |
| ENSG00000101115 | RP11-48G1  | lincRNA                | chr15 | 56408483 | 56410186 | - | 0    | 0    |
| ENSG00000101116 | LINC00662  | lincRNA                | chr19 | 27684580 | 27793940 | - | 8.72 | 6.85 |
| ENSG00000101117 | RP11-691G  | lincRNA                | chr3  | 1.41E+08 | 1.41E+08 | - | 0    | 0    |
| ENSG00000101118 | RP11-223I1 | sense_intronic         | chr2  | 2.31E+08 | 2.31E+08 | + | 0.12 | 0    |
| ENSG00000101119 | RP11-533E  | lincRNA                | chr1  | 1.8E+08  | 1.8E+08  | - | 0    | 0    |
| ENSG00000101120 | RP11-435I1 | protein_coding         | chr16 | 28456371 | 28492098 | - | 0.87 | 1.56 |
| ENSG00000101121 | RP11-58C2  | protein_coding         | chr16 | 76553417 | 76819624 | + | 0    | 0    |
| ENSG00000101122 | IGHV3OR1   | IG_V_pseudogene        | chr16 | 32903442 | 32903894 | + | 0    | 0    |
| ENSG00000101123 | RP11-429P  | unprocessed_transcript | chr16 | 50046496 | 50047798 | + | 0    | 0    |
| ENSG00000101124 | RP11-264L  | sense_intronic         | chr16 | 78534374 | 78535648 | + | 0    | 0    |
| ENSG00000101125 | RP11-303E  | antisense              | chr16 | 81069854 | 81076598 | + | 0.21 | 0    |
| ENSG00000101126 | RP1-265C2  | lincRNA                | chr6  | 28136849 | 28139678 | + | 0.12 | 0.02 |
| ENSG00000101127 | RP11-146F  | antisense              | chr16 | 30697707 | 30699058 | - | 0.57 | 0.36 |
| ENSG00000101128 | RP11-143I2 | lincRNA                | chr7  | 1.49E+08 | 1.49E+08 | + | 0    | 0    |

|                 |                      |       |          |          |   |       |       |
|-----------------|----------------------|-------|----------|----------|---|-------|-------|
| ENSG00000101313 | RP13-638C antisense  | chr17 | 82602989 | 82604178 | - | 0     | 0     |
| ENSG00000101314 | CTD-2309C lincRNA    | chr17 | 3134969  | 3177031  | - | 0     | 0     |
| ENSG00000101315 | LINC02186 lincRNA    | chr16 | 14018880 | 14021077 | - | 0     | 0     |
| ENSG00000101316 | MIA protein_co       | chr19 | 40771648 | 40777490 | + | 0     | 0     |
| ENSG00000101317 | LINC01996 lincRNA    | chr17 | 4610449  | 4617650  | + | 0     | 0     |
| ENSG00000101318 | RP11-67A1 processed  | chr16 | 68077340 | 68122271 | + | 0     | 0     |
| ENSG00000101319 | AC092566. processed  | chr19 | 8676844  | 8677584  | + | 0     | 0     |
| ENSG00000101320 | MFSD1P1 processed    | chr17 | 4301372  | 4302698  | + | 0     | 0     |
| ENSG00000101321 | RP5-867C2 antisense  | chr17 | 47169826 | 47171049 | + | 0     | 0     |
| ENSG00000101322 | RP11-515E protein_co | chr17 | 55448433 | 55511444 | - | 0     | 0.04  |
| ENSG00000101323 | RP11-333E antisense  | chr17 | 5192084  | 5248069  | + | 0.8   | 0.9   |
| ENSG00000101324 | RP11-502F processed  | chr17 | 56368063 | 56368215 | + | 0     | 0     |
| ENSG00000101325 | CTC-479C5 protein_co | chr16 | 67929614 | 67936017 | - | 1.83  | 0.49  |
| ENSG00000101326 | RP11-63A1 lincRNA    | chr17 | 46916770 | 46923034 | - | 0.22  | 0     |
| ENSG00000101327 | AC144831. lincRNA    | chr17 | 83104255 | 83106910 | + | 10.56 | 10.06 |
| ENSG00000101328 | RP11-473M lincRNA    | chr16 | 3156736  | 3157483  | - | 0.44  | 0.65  |
| ENSG00000101329 | RP11-314A antisense  | chr17 | 4731756  | 4732371  | - | 0     | 0     |
| ENSG00000101330 | MTND5P33 unprocess   | chr16 | 10720015 | 10721464 | - | 0.04  | 0     |
| ENSG00000101331 | RPL23AP84 processed  | chr4  | 1.9E+08  | 1.9E+08  | + | 0     | 0     |
| ENSG00000101332 | RP11-542C protein_co | chr17 | 7312661  | 7319174  | - | 0     | 0     |
| ENSG00000101333 | RP11-235E sense_intr | chr17 | 3601761  | 3602272  | - | 0.14  | 0     |
| ENSG00000101334 | CTD-2561B antisense  | chr17 | 80966239 | 80971213 | - | 0     | 0     |
| ENSG00000101335 | PCDHGA9 protein_co   | chr5  | 1.41E+08 | 1.42E+08 | + | 0.62  | 1.15  |
| ENSG00000101336 | RP11-461A lincRNA    | chr16 | 3581181  | 3583266  | + | 0     | 0     |
| ENSG00000101337 | LARP7P2 processed    | chr16 | 19819504 | 19819628 | - | 0     | 0     |
| ENSG00000101338 | GFY protein_co       | chr19 | 49423749 | 49428818 | + | 0     | 0     |
| ENSG00000101339 | RP11-893F antisense  | chr17 | 50163523 | 50165316 | - | 0     | 0     |
| ENSG00000101340 | CCDC92B unitary_ps   | chr17 | 2724411  | 2749504  | - | 0     | 0     |
| ENSG00000101341 | ISCA1P3 processed    | chr17 | 54477796 | 54478168 | + | 0     | 0     |
| ENSG00000101342 | RP11-342L processed  | chr6  | 79552794 | 79553160 | + | 0     | 0.27  |
| ENSG00000101343 | MMP25-AS antisense   | chr16 | 3051096  | 3059370  | - | 4.31  | 5.56  |
| ENSG00000101344 | RP11-506D antisense  | chr17 | 50840057 | 50841626 | - | 0     | 0     |
| ENSG00000101345 | CTD-2529C antisense  | chr17 | 80023894 | 80026107 | + | 0     | 0     |
| ENSG00000101346 | KYNUP1 unprocess     | chr17 | 19166896 | 19169668 | - | 0     | 0     |
| ENSG00000101347 | CTC-281F2. lincRNA   | chr17 | 6653464  | 6655009  | - | 0     | 0     |
| ENSG00000101348 | RP11-212L lincRNA    | chr16 | 55538200 | 55542027 | + | 0.06  | 0.08  |
| ENSG00000101349 | CTD-2526A processed  | chr17 | 80515215 | 80515389 | + | 0     | 0     |
| ENSG00000101350 | DLGAP1-AS antisense  | chr18 | 3603000  | 3608336  | + | 2.28  | 2.31  |
| ENSG00000101351 | RP11-676J antisense  | chr17 | 909632   | 911212   | + | 0     | 0     |
| ENSG00000101352 | RP11-700H lincRNA    | chr17 | 50909637 | 50910232 | - | 0     | 0     |
| ENSG00000101353 | RP11-510N unprocess  | chr16 | 71443055 | 71443856 | - | 0     | 0     |
| ENSG00000101354 | AC003009. antisense  | chr16 | 13331368 | 13332583 | - | 0     | 0     |
| ENSG00000101355 | RP11-66H6 antisense  | chr16 | 11066496 | 11071102 | - | 0     | 0     |
| ENSG00000101356 | LINC01974 lincRNA    | chr17 | 46909742 | 46911512 | - | 0     | 0     |
| ENSG00000101357 | RP11-177N sense_intr | chr16 | 47529190 | 47529916 | + | 0     | 0     |

|                 |                          |       |          |          |   |      |      |
|-----------------|--------------------------|-------|----------|----------|---|------|------|
| ENSG00000181122 | RP11-81K2 antisense      | chr17 | 49370740 | 49476988 | + | 0    | 0    |
| ENSG00000181123 | RP1-232L2 processed      | chr6  | 79406240 | 79406774 | - | 0    | 0    |
| ENSG00000181124 | RP13-1032 antisense      | chr17 | 81701324 | 81703300 | - | 1.78 | 1.3  |
| ENSG00000181125 | RP11-74E2 antisense      | chr17 | 2712309  | 2712833  | + | 0    | 0.2  |
| ENSG00000181126 | RP11-763E lincRNA        | chr17 | 55842677 | 55872939 | - | 0    | 0    |
| ENSG00000181127 | RP11-1260 processed      | chr17 | 331205   | 333488   | + | 0    | 0    |
| ENSG00000181128 | CTD-2545G processed      | chr17 | 7058934  | 7059204  | + | 0    | 0    |
| ENSG00000181129 | SNORD3B-1 snoRNA         | chr17 | 19063346 | 19064136 | - | 0    | 0    |
| ENSG00000181130 | DKFZP434F11.2 lincRNA    | chr9  | 1.36E+08 | 1.36E+08 | - | 0.06 | 0.02 |
| ENSG00000181131 | RP11-515C lincRNA        | chr17 | 55325757 | 55327791 | - | 0    | 0    |
| ENSG00000181132 | IL9RP4 unprocessed       | chr18 | 80140    | 88570    | - | 0    | 0    |
| ENSG00000181133 | OR1P1 unprocessed        | chr17 | 3153889  | 3154882  | - | 0    | 0    |
| ENSG00000181134 | RP11-589P lincRNA        | chr17 | 6994642  | 6995189  | - | 3.31 | 2.43 |
| ENSG00000181135 | RP11-23E1 processed      | chr16 | 33495943 | 33496093 | - | 0    | 0    |
| ENSG00000181136 | AC139099.1 lincRNA       | chr17 | 83220527 | 83227721 | - | 0    | 0    |
| ENSG00000181137 | MTATP6P2 processed       | chr6  | 91726810 | 91727070 | + | 0    | 0    |
| ENSG00000181138 | PCDHB19P transcribed     | chr5  | 1.41E+08 | 1.41E+08 | + | 0.09 | 0.06 |
| ENSG00000181139 | LINC02185 lincRNA        | chr16 | 14009280 | 14016016 | - | 0    | 0    |
| ENSG00000181140 | CTD-2561B lincRNA        | chr17 | 81023545 | 81025503 | - | 0    | 0    |
| ENSG00000181141 | CTC-524C5 lincRNA        | chr17 | 5469092  | 5470360  | + | 0    | 0    |
| ENSG00000181142 | OR1D3P unprocessed       | chr17 | 3265611  | 3266541  | + | 0    | 0    |
| ENSG00000181143 | MTND6P33 unprocessed     | chr16 | 10719833 | 10720015 | + | 0    | 0    |
| ENSG00000181144 | RP11-670E antisense      | chr17 | 56888880 | 56891841 | + | 0    | 0    |
| ENSG00000181145 | RP11-455C antisense      | chr17 | 81197393 | 81200288 | + | 0    | 0    |
| ENSG00000181146 | AC009134.1 antisense     | chr16 | 13197606 | 13204907 | - | 0    | 0    |
| ENSG00000181147 | BCAR4 lincRNA            | chr16 | 11819829 | 11828845 | - | 0    | 0    |
| ENSG00000181148 | MTCO1P28 processed       | chr16 | 3367719  | 3369246  | - | 0    | 0    |
| ENSG00000181149 | RP11-483C sense_intronic | chr14 | 26592747 | 26594517 | - | 0.03 | 0    |
| ENSG00000181150 | RP11-510M unprocessed    | chr16 | 71420483 | 71421518 | + | 0    | 0    |
| ENSG00000181151 | RP11-676J.1 antisense    | chr17 | 877902   | 880093   | + | 0    | 0    |
| ENSG00000181152 | GARSP1 processed         | chr17 | 55550931 | 55551649 | - | 0    | 0    |
| ENSG00000181153 | CTD-2033A antisense      | chr16 | 69727013 | 69742563 | + | 0.24 | 0.13 |
| ENSG00000181154 | RP11-417N unprocessed    | chr16 | 71833787 | 71835932 | + | 0    | 0.08 |
| ENSG00000181155 | CTC-479C5 processed      | chr16 | 67855955 | 67856111 | - | 0    | 0    |
| ENSG00000181156 | RP13-638C antisense      | chr17 | 82587313 | 82588411 | - | 0    | 0    |
| ENSG00000181157 | RP11-876N antisense      | chr16 | 10864914 | 10888752 | - | 0    | 0    |
| ENSG00000181158 | LINC00514 processed      | chr16 | 2988961  | 2994509  | + | 0    | 0    |
| ENSG00000181159 | EIF1P4 processed         | chr16 | 2822659  | 2822993  | - | 0    | 0    |
| ENSG00000181160 | LINC02175 lincRNA        | chr16 | 25066937 | 25068943 | + | 0.45 | 0.59 |
| ENSG00000181161 | MTCO3P24 unprocessed     | chr16 | 10723836 | 10724617 | - | 0    | 0    |
| ENSG00000181162 | RP11-96D1 antisense      | chr16 | 68225969 | 68229145 | - | 0    | 0.06 |
| ENSG00000181163 | RP11-81A2 protein_coding | chr17 | 4801159  | 4807013  | - | 1.17 | 0.25 |
| ENSG00000181164 | CTA-972D3 antisense      | chr16 | 15885029 | 15886158 | + | 0    | 0    |
| ENSG00000181165 | CTD-2529C sense_intronic | chr17 | 79991944 | 79992841 | - | 0    | 0    |
| ENSG00000181166 | RP1-302G2 protein_coding | chr6  | 44216939 | 44218236 | + | 0.1  | 0.11 |

|                     |             |       |          |          |   |       |      |
|---------------------|-------------|-------|----------|----------|---|-------|------|
| ENSG0000(OCLM       | protein_co  | chr1  | 1.86E+08 | 1.86E+08 | + | 0.07  | 0.16 |
| ENSG0000(FAM166AP   | unprocessε  | chr18 | 45034    | 46047    | + | 0     | 0    |
| ENSG0000(RP11-462G  | sense_ovei  | chr16 | 3947609  | 3950444  | - | 1.28  | 1.52 |
| ENSG0000(RP11-652G  | unprocessε  | chr16 | 32618733 | 32618852 | + | 0     | 0    |
| ENSG0000(LINC01978  | lincRNA     | chr17 | 79919357 | 79925462 | + | 0.15  | 0.21 |
| ENSG0000(RP11-124N  | lincRNA     | chr13 | 22918591 | 22924602 | + | 0     | 0    |
| ENSG0000(RP11-160E  | lincRNA     | chr17 | 19112000 | 19112636 | - | 0.11  | 0    |
| ENSG0000(PCDHGB3    | protein_co  | chr5  | 1.41E+08 | 1.42E+08 | + | 1.98  | 1.93 |
| ENSG0000(CTD-2031P  | antisense   | chr5  | 55936143 | 55941727 | + | 0     | 0.27 |
| ENSG0000(AC144836.  | lincRNA     | chr17 | 1241939  | 1254000  | - | 0     | 0    |
| ENSG0000(RP11-876N  | antisense   | chr16 | 10940719 | 10943021 | + | 0     | 0.11 |
| ENSG0000(RP11-1055  | lincRNA     | chr17 | 81376001 | 81385360 | - | 0     | 0    |
| ENSG0000(RP5-1050D  | antisense   | chr17 | 4987706  | 4988446  | + | 1.31  | 1.01 |
| ENSG0000(RP11-676J. | lincRNA     | chr17 | 763565   | 765319   | - | 0.18  | 0.09 |
| ENSG0000(RP11-960B  | processed_  | chr17 | 6189361  | 6190541  | - | 0     | 0    |
| ENSG0000(TMF1P1     | processed_  | chr16 | 13458326 | 13458698 | + | 0     | 0    |
| ENSG0000(CORO7      | protein_co  | chr16 | 4354542  | 4425705  | - | 10.87 | 6.14 |
| ENSG0000(RP11-235E  | processed_  | chr17 | 3619256  | 3619913  | - | 0     | 0    |
| ENSG0000(RP11-199F  | sense_intrε | chr17 | 7685260  | 7686371  | - | 0.48  | 0.12 |
| ENSG0000(MTND4LP2   | unprocessε  | chr16 | 10723065 | 10723355 | - | 0     | 0    |
| ENSG0000(RP11-815Iε | transcribec | chr17 | 18638019 | 18638370 | - | 0     | 0    |
| ENSG0000(RP5-867C2  | sense_intrε | chr17 | 47161075 | 47162064 | - | 0     | 0    |
| ENSG0000(U95743.1   | lincRNA     | chr16 | 13730137 | 13779760 | - | 0     | 0    |
| ENSG0000(CTD-2535P  | processed_  | chr17 | 53434131 | 53435829 | + | 0     | 0    |
| ENSG0000(RP11-160E  | lincRNA     | chr17 | 19160789 | 19162274 | + | 0     | 0    |
| ENSG0000(RP11-1260  | antisense   | chr17 | 352638   | 357581   | + | 0     | 0    |
| ENSG0000(RP11-55L4. | antisense   | chr17 | 9647020  | 9647660  | - | 0     | 0    |
| ENSG0000(RP5-1107A  | antisense   | chr17 | 56939932 | 56941275 | + | 0     | 0    |
| ENSG0000(RP1-4G17.! | protein_co  | chr17 | 7246829  | 7262089  | - | 0     | 0    |
| ENSG0000(RP11-235E  | protein_co  | chr17 | 3585149  | 3636249  | - | 0     | 0.35 |
| ENSG0000(LA16c-390I | antisense   | chr16 | 3542739  | 3545785  | + | 0.06  | 0.08 |
| ENSG0000(CTD-2561B  | antisense   | chr17 | 80940418 | 80942033 | - | 0     | 0    |
| ENSG0000(RP11-433P  | processed_  | chr16 | 3323192  | 3323925  | - | 0     | 0    |
| ENSG0000(CTC-457L1ε | antisense   | chr17 | 19141017 | 19143689 | - | 0     | 0    |
| ENSG0000(MTND4P3ε   | unprocessε  | chr16 | 10721698 | 10723068 | - | 0     | 0    |
| ENSG0000(RP11-517A  | antisense   | chr16 | 16223027 | 16224261 | + | 0     | 0    |
| ENSG0000(HNRNPA1P   | processed_  | chr17 | 2306761  | 2307715  | + | 0.25  | 0.59 |
| ENSG0000(RP11-1197  | antisense   | chr17 | 82978525 | 82981738 | + | 0     | 0    |
| ENSG0000(RP11-353N  | lincRNA     | chr17 | 79848058 | 79850110 | - | 0     | 0    |
| ENSG0000(AP005530.  | lincRNA     | chr18 | 11103    | 15928    | + | 0.07  | 0    |
| ENSG0000(CTD-3195Iε | antisense   | chr17 | 3729361  | 3730493  | + | 0     | 0    |
| ENSG0000(LA16c-380I | sense_ovei  | chr16 | 3003431  | 3005101  | - | 0     | 0    |
| ENSG0000(NDUFA3P6   | processed_  | chr16 | 31174573 | 31174822 | + | 0     | 0    |
| ENSG0000(RP11-473M  | lincRNA     | chr16 | 3076911  | 3087100  | - | 0.25  | 0.14 |
| ENSG0000(RP11-669E  | antisense   | chr17 | 46035313 | 46035770 | + | 0     | 0    |

|                                                |          |          |   |      |      |
|------------------------------------------------|----------|----------|---|------|------|
| ENSG00000102400(CTB-193M:sense_intronic)chr16  | 15683290 | 15684570 | + | 0    | 0    |
| ENSG00000102401(MTATP6P2:unprocessed)chr16     | 10724620 | 10725296 | - | 0    | 0    |
| ENSG00000102402(RP11-312B:processed)chr17      | 53681630 | 53682111 | - | 0    | 0    |
| ENSG00000102403(RP11-191A:processed)chr6       | 25152547 | 25152883 | + | 0    | 0    |
| ENSG00000102404(RP11-667K:processed)chr17      | 2127430  | 2127904  | - | 0    | 0    |
| ENSG00000102405(MMP12:protein_coding)chr11     | 1.03E+08 | 1.03E+08 | - | 0    | 0    |
| ENSG00000102406(RP11-670E:processed)chr17      | 56884639 | 56884819 | - | 0    | 0    |
| ENSG00000102407(RP11-388C:sense_intronic)chr17 | 82745068 | 82745709 | + | 1.4  | 2.33 |
| ENSG00000102408(RP11-85G1:lincRNA)chr10        | 27243130 | 27250804 | + | 0    | 0.27 |
| ENSG00000102409(RP11-498C:antisense)chr17      | 81867721 | 81868552 | + | 0    | 0.88 |
| ENSG00000102410(RP11-490C:antisense)chr16      | 11741910 | 11744506 | + | 0.06 | 0.09 |
| ENSG00000102411(RP5-1050D:antisense)chr17      | 4967995  | 4968822  | + | 0    | 0.18 |
| ENSG00000102412(RP11-676J:antisense)chr17      | 789744   | 790525   | - | 0    | 0    |
| ENSG00000102413(CTD-2545H:antisense)chr17      | 1995614  | 2003671  | + | 0    | 0    |
| ENSG00000102414(MIR193BH:lincRNA)chr16         | 14301389 | 14326744 | + | 1.74 | 1.85 |
| ENSG00000102415(RP1-59D14:antisense)chr17      | 2384847  | 2386664  | + | 0    | 0    |
| ENSG00000102416(SPDYE9P:transcribed)chr7       | 73076165 | 73086038 | - | 0    | 0    |
| ENSG00000102417(LINC01569:lincRNA)chr16        | 4245825  | 4253789  | - | 1.06 | 0.38 |
| ENSG00000102418(TVP23CP2:processed)chr16       | 14200357 | 14200979 | + | 0    | 0    |
| ENSG00000102419(RP11-95P2:processed)chr16      | 4130555  | 4130820  | + | 0    | 0    |
| ENSG00000102420(AC021224.lincRNA)chr18         | 32412182 | 32413236 | + | 0.66 | 0.73 |
| ENSG00000102421(SAMD11P1:processed)chr17       | 2613284  | 2613944  | - | 0    | 0    |
| ENSG00000102422(TMEM256:protein_coding)chr17   | 7389734  | 7404097  | - | 1.22 | 0.45 |
| ENSG00000102423(LA16c-321l:antisense)chr16     | 2939714  | 2954276  | - | 0    | 0    |
| ENSG00000102424(CCER2:protein_coding)chr19     | 38908980 | 38912158 | - | 0.06 | 0.28 |
| ENSG00000102425(RP11-876N:processed)chr16      | 10840384 | 10841544 | - | 0    | 0    |
| ENSG00000102426(RP11-1099:processed)chr17      | 7954868  | 7955622  | + | 0    | 0    |
| ENSG00000102427(RP11-4618:processed)chr17      | 5060356  | 5062123  | + | 0    | 0    |
| ENSG00000102428(FAM187B2:unprocessed)chr19     | 35232291 | 35233003 | - | 0    | 0    |
| ENSG00000102429(MAPK8IP1:processed)chr17       | 46243606 | 46245044 | + | 0    | 0    |
| ENSG00000102430(RP11-530N:processed)chr17      | 6927472  | 6928191  | - | 0    | 0    |
| ENSG00000102431(RP11-96D1:sense_intronic)chr16 | 68199795 | 68200981 | + | 0    | 0    |
| ENSG00000102432(RP11-95J1:processed)chr16      | 3840528  | 3841010  | + | 0    | 0    |
| ENSG00000102433(CTD-2535P:processed)chr17      | 53438556 | 53439721 | + | 0    | 0    |
| ENSG00000102434(TXNP4:processed)chr17          | 4572206  | 4572515  | + | 0    | 0    |
| ENSG00000102435(AJ003147.lincRNA)chr16         | 3181233  | 3184018  | - | 0    | 0    |
| ENSG00000102436(CTD-2545G:protein_coding)chr17 | 7240427  | 7244635  | - | 0    | 7.11 |
| ENSG00000102437(LA16c-349l:antisense)chr16     | 654611   | 656194   | - | 0.04 | 0.09 |
| ENSG00000102438(CTA-276F8:antisense)chr16      | 14191820 | 14200277 | - | 0    | 0    |
| ENSG00000102439(RP11-667K:antisense)chr17      | 2042900  | 2043425  | - | 0    | 0    |
| ENSG00000102440(RP11-259G:processed)chr17      | 46259551 | 46260606 | - | 0    | 0    |
| ENSG00000102441(RP3-422G2:protein_coding)chr6  | 1.38E+08 | 1.38E+08 | + | 0    | 0    |
| ENSG00000102442(LA16c-360l:transcribed)chr16   | 3308609  | 3308816  | + | 0    | 1.39 |
| ENSG00000102443(RP11-1260:antisense)chr17      | 354737   | 356882   | + | 0    | 0    |
| ENSG00000102444(RP11-296A:protein_coding)chr15 | 43772617 | 43799133 | - | 0    | 0    |

|                                      |          |          |   |       |       |
|--------------------------------------|----------|----------|---|-------|-------|
| ENSG0000(CTD-2522B processed_ chr16  | 34120470 | 34120677 | + | 0     | 0     |
| ENSG0000(RP11-448N processed_ chr6   | 62611153 | 62611327 | - | 0     | 0     |
| ENSG0000(PCDHGA4 protein_co chr5     | 1.41E+08 | 1.42E+08 | + | 12.81 | 12.74 |
| ENSG0000(RP11-334C antisense chr17   | 80200673 | 80205949 | - | 2.02  | 1.37  |
| ENSG0000(RP11-77K1 transcribed chr16 | 75499788 | 75516280 | - | 0     | 0     |
| ENSG0000(LINC01979 lincRNA chr17     | 79915252 | 79926725 | - | 0     | 0.03  |
| ENSG0000(RP11-266L transcribed chr16 | 25031744 | 25058109 | + | 0.58  | 0.58  |
| ENSG0000(BTF3P14 processed_ chr17    | 6322413  | 6323228  | - | 0     | 0     |
| ENSG0000(LINC00621 lincRNA chr13     | 22894656 | 22916369 | - | 0     | 0     |
| ENSG0000(LA16c-306 protein_co chr16  | 3365099  | 3479550  | + | 0.44  | 0.24  |
| ENSG0000(RP5-1107A processed_ chr17  | 56951664 | 56952404 | + | 0     | 0     |
| ENSG0000(RP11-104H antisense chr17   | 7436557  | 7437523  | - | 0.3   | 0     |
| ENSG0000(OR1D5 protein_co chr17      | 3062669  | 3063607  | - | 0     | 0     |
| ENSG0000(RP11-156P protein_co chr17  | 46923133 | 47049932 | + | 5.09  | 1.97  |
| ENSG0000(CTD-3088G processed_ chr16  | 11380859 | 11381118 | - | 0     | 0     |
| ENSG0000(PHBP15 processed_ chr7      | 74741457 | 74742121 | - | 0     | 0     |
| ENSG0000(RP11-164N processed_ chr6   | 63612761 | 63612903 | - | 0     | 0     |
| ENSG0000(RP13-638C sense_intr chr17  | 82578023 | 82578616 | + | 0     | 0.13  |
| ENSG0000(SPON1 protein_co chr11      | 13962689 | 14267884 | + | 0.19  | 0.28  |
| ENSG0000(RP13-1032 protein_co chr17  | 81703371 | 81720539 | + | 0     | 0     |
| ENSG0000(CTD-2561B antisense chr17   | 80960766 | 80961713 | - | 0     | 0     |
| ENSG0000(RP11-497H lincRNA chr17     | 82918282 | 82918785 | + | 0.15  | 0.16  |
| ENSG0000(OVCA2 protein_co chr17      | 2041936  | 2043430  | + | 10.81 | 10.19 |
| ENSG0000(AJ003147.5 antisense chr16  | 3188212  | 3224779  | + | 0     | 0     |
| ENSG0000(RP11-64J4. sense_ovei chr17 | 3278775  | 3386339  | - | 0     | 0     |
| ENSG0000(RP5-1050D antisense chr17   | 4986466  | 4987324  | + | 0.13  | 0     |
| ENSG0000(RP11-311F lincRNA chr17     | 19719059 | 19722428 | + | 0     | 0     |
| ENSG0000(GLIS2-AS1 lincRNA chr16     | 4324667  | 4328340  | - | 0     | 0     |
| ENSG0000(CTC-277H1 processed_ chr16  | 67261108 | 67263784 | + | 0.06  | 0.05  |
| ENSG0000(CTD-3195I antisense chr17   | 3721628  | 3722488  | + | 0     | 0     |
| ENSG0000(RP11-46I8. antisense chr17  | 5075678  | 5078113  | - | 0     | 0     |
| ENSG0000(RP11-266L processed_ chr16  | 25093387 | 25095255 | + | 0     | 0     |
| ENSG0000(RP11-485G antisense chr16   | 11348143 | 11349321 | - | 0     | 0     |
| ENSG0000(RP11-411G processed_ chr17  | 616002   | 616595   | + | 0     | 0     |
| ENSG0000(RP11-295D sense_intr chr16  | 4335870  | 4337818  | - | 0.29  | 0.22  |
| ENSG0000(RP11-44F1. lincRNA chr16    | 53386944 | 53389085 | + | 0     | 0     |
| ENSG0000(AC106782. sense_ovei chr16  | 30875766 | 30895216 | - | 0     | 0     |
| ENSG0000(RP11-1000 antisense chr15   | 32586105 | 32615158 | - | 0.19  | 0.56  |
| ENSG0000(RP11-1099 protein_co chr17  | 7925931  | 7930622  | - | 0     | 0     |
| ENSG0000(CTD-2135D antisense chr16   | 13930677 | 13935635 | - | 0.12  | 0.1   |
| ENSG0000(MRPS21P9 processed_ chr17   | 50450179 | 50450725 | - | 0     | 0     |
| ENSG0000(RP11-196G sense_intr chr16  | 31118078 | 31118747 | + | 0.27  | 1.03  |
| ENSG0000(RP11-353N antisense chr17   | 79800598 | 79802529 | + | 0     | 0     |
| ENSG0000(RP11-1113 antisense chr17   | 19560111 | 19597922 | - | 0     | 0     |
| ENSG0000(LINC01977 lincRNA chr17     | 79823452 | 79827704 | + | 0     | 0     |



|                                |       |          |          |   |       |       |
|--------------------------------|-------|----------|----------|---|-------|-------|
| ENSG0000(RP11-818C antisense)  | chr17 | 1424473  | 1426484  | + | 0     | 0     |
| ENSG0000(RP11-214C lincRNA)    | chr17 | 14295512 | 14297600 | - | 0     | 0     |
| ENSG0000(RP11-961A antisense)  | chr17 | 1725748  | 1738585  | - | 0     | 0     |
| ENSG0000(U91319.1 lincRNA)     | chr16 | 13246316 | 13562918 | + | 0     | 0     |
| ENSG0000(RP11-160A processed)  | chr6  | 70693839 | 70694619 | + | 0     | 0     |
| ENSG0000(RP11-667K antisense)  | chr17 | 2089681  | 2101560  | + | 0     | 0     |
| ENSG0000(MRPL12 protein_co)    | chr17 | 81703357 | 81707526 | + | 20.53 | 22.58 |
| ENSG0000(RP11-565F antisense)  | chr17 | 9464742  | 9467422  | + | 0.44  | 0.41  |
| ENSG0000(RP11-636N processed)  | chr17 | 6417685  | 6418264  | + | 0     | 0     |
| ENSG0000(RP13-580F antisense)  | chr17 | 4481966  | 4486353  | - | 0.09  | 0.32  |
| ENSG0000(RP11-498C antisense)  | chr17 | 81843165 | 81843958 | + | 0.28  | 0.91  |
| ENSG0000(RP11-28G8 antisense)  | chr17 | 80801640 | 80805632 | - | 0.02  | 0.02  |
| ENSG0000(RP11-304F lincRNA)    | chr17 | 49834239 | 49836454 | + | 0     | 0     |
| ENSG0000(RP11-517A antisense)  | chr16 | 16290135 | 16292242 | - | 0     | 0     |
| ENSG0000(RP11-46I8. processed) | chr17 | 5126740  | 5127010  | - | 0     | 0     |
| ENSG0000(CTD-2545H sense_intr) | chr17 | 2019952  | 2023664  | - | 0     | 0     |
| ENSG0000(CYCSP40 processed)    | chr17 | 77198950 | 77199543 | - | 0     | 0     |
| ENSG0000(CTD-2561B lincRNA)    | chr17 | 81017969 | 81020011 | - | 0     | 0.08  |
| ENSG0000(C19orf84 protein_co)  | chr19 | 51388289 | 51390574 | - | 0     | 0     |
| ENSG0000(RP11-1055 lincRNA)    | chr17 | 81388126 | 81390256 | - | 0.94  | 0.44  |
| ENSG0000(RP11-156P processed)  | chr17 | 46984045 | 47100323 | - | 7.91  | 12.28 |
| ENSG0000(RP11-104H processed)  | chr17 | 7420103  | 7444081  | + | 0.7   | 0.17  |
| ENSG0000(RP11-669E antisense)  | chr17 | 45907670 | 45910779 | - | 0     | 0     |
| ENSG0000(CTD-3060P antisense)  | chr17 | 2962248  | 2965895  | - | 0     | 0     |
| ENSG0000(CTD-2144E processed)  | chr16 | 35023339 | 35023765 | + | 0     | 0     |
| ENSG0000(RP11-462G sense_ove)  | chr16 | 3931217  | 3946305  | - | 0.42  | 0.19  |
| ENSG0000(RP11-424M lincRNA)    | chr16 | 70802083 | 70802840 | - | 0     | 0     |
| ENSG0000(AC139099. lincRNA)    | chr17 | 83144131 | 83177607 | + | 0     | 0.12  |
| ENSG0000(LA16c-360I antisense) | chr16 | 3307573  | 3308393  | - | 0     | 0     |
| ENSG0000(MTCO1P4C processed)   | chr17 | 53105734 | 53106358 | + | 0     | 0     |
| ENSG0000(RP11-235E antisense)  | chr17 | 3655621  | 3658092  | - | 1.94  | 0.55  |
| ENSG0000(TMPOP2 processed)     | chr16 | 74667506 | 74668706 | + | 0     | 0     |
| ENSG0000(RP5-1029F antisense)  | chr17 | 552566   | 553417   | + | 0     | 0     |
| ENSG0000(FAM58A protein_co)    | chrX  | 1.54E+08 | 1.54E+08 | - | 10.35 | 9.51  |
| ENSG0000(RP11-1260 antisense)  | chr17 | 321392   | 322453   | + | 0     | 0     |
| ENSG0000(RP11-141J. lincRNA)   | chr17 | 4565752  | 4571760  | + | 0     | 0     |
| ENSG0000(ALOX12P2 transcribec) | chr17 | 6853861  | 6954107  | + | 0.1   | 0.05  |
| ENSG0000(RP11-189E lincRNA)    | chr16 | 49442910 | 49454078 | - | 0     | 0     |
| ENSG0000(AC139099. lincRNA)    | chr17 | 83211996 | 83221190 | + | 0     | 0     |
| ENSG0000(EIF4A1P9 processed)   | chr17 | 2586330  | 2587866  | - | 0     | 0     |
| ENSG0000(RPL23AP8E processed)  | chr16 | 2922662  | 2923202  | - | 0     | 0     |
| ENSG0000(CTB-162E1 processed)  | chr17 | 5730289  | 5731085  | + | 0     | 0     |
| ENSG0000(KARSP3 unprocess)     | chr16 | 68002432 | 68004952 | - | 0     | 0     |
| ENSG0000(RP11-85B7 antisense)  | chr17 | 9171068  | 9179118  | - | 0     | 0     |
| ENSG0000(RP11-294J. antisense) | chr17 | 50693448 | 50695449 | + | 0     | 0     |

|                                     |          |          |   |       |       |
|-------------------------------------|----------|----------|---|-------|-------|
| ENSG0000(RP11-4571)processed_chr16  | 18533418 | 18533817 | + | 0     | 0     |
| ENSG0000(CTD-2047)H_sense_intrchr17 | 80315651 | 80316633 | + | 0     | 0.11  |
| ENSG0000(OR52L2P_unprocesschr11     | 6057316  | 6058275  | - | 0     | 0     |
| ENSG0000(AF001550)antisense_chr16   | 21194847 | 21205977 | + | 0     | 0     |
| ENSG0000(CTC-281F2)processed_chr17  | 6749685  | 6749978  | - | 0     | 0     |
| ENSG0000(CTD-2194A)antisense_chr16  | 20440266 | 20447000 | - | 0     | 0     |
| ENSG0000(CTD-3088G)antisense_chr16  | 11465260 | 11473174 | + | 0     | 0.07  |
| ENSG0000(GTF2I_protein_cochr7       | 74657667 | 74760692 | + | 54.96 | 52.56 |
| ENSG0000(ZNF234_protein_cochr19     | 44141557 | 44160309 | + | 4.44  | 3.91  |
| ENSG0000(RP11-166P)lincRNA_chr17    | 57078298 | 57085024 | - | 0.67  | 1.36  |
| ENSG0000(ROCK1P1)transcribecchr18   | 109065   | 122219   | + | 0     | 0.18  |
| ENSG0000(RP11-473N)sense_ovechr16   | 3106764  | 3109576  | + | 0     | 0     |
| ENSG0000(RP11-876N)sense_intrchr16  | 10938886 | 10940044 | - | 0.46  | 0.28  |
| ENSG0000(RP5-1029F)antisense_chr17  | 503171   | 511347   | + | 0     | 0     |
| ENSG0000(RP11-3561)processed_chr17  | 959034   | 959366   | + | 0     | 0     |
| ENSG0000(XXbac-BPG)protein_cochr6   | 31666102 | 31673546 | + | 1.49  | 1.85  |
| ENSG0000(RP11-517A)processed_chr16  | 16260866 | 16261235 | - | 0     | 0     |
| ENSG0000(RP11-396B)lincRNA_chr16    | 11196177 | 11224969 | + | 0     | 0     |
| ENSG0000(RP11-355F)lincRNA_chr10    | 1.18E+08 | 1.18E+08 | - | 0     | 0     |
| ENSG0000(RP11-28B2)processed_chr17  | 18986148 | 18986334 | - | 0     | 0     |
| ENSG0000(RP11-667K)lincRNA_chr17    | 2043475  | 2044968  | - | 0     | 0.4   |
| ENSG0000(RP11-565F)antisense_chr17  | 9547298  | 9548541  | + | 0     | 0     |
| ENSG0000(RP11-388C)lincRNA_chr17    | 82713908 | 82716255 | - | 0     | 0.31  |
| ENSG0000(AF001548)antisense_chr16   | 15741151 | 15741791 | + | 0     | 0     |
| ENSG0000(CTD-2047)H_antisense_chr17 | 80351828 | 80415168 | - | 0.11  | 0.4   |
| ENSG0000(RP11-382B)transcribecchr15 | 30380353 | 30386987 | - | 0     | 0     |
| ENSG0000(ZNF213-AS)antisense_chr16  | 3110460  | 3134882  | - | 4.99  | 4.29  |
| ENSG0000(RP11-485G)antisense_chr16  | 11341809 | 11345211 | - | 0     | 0.1   |
| ENSG0000(AC004878)antisense_chr7    | 75232928 | 75233924 | + | 0     | 0     |
| ENSG0000(LINC02187)lincRNA_chr16    | 50880209 | 50884101 | + | 0     | 0     |
| ENSG0000(RP11-166P)antisense_chr17  | 57092145 | 57096425 | - | 0.01  | 0     |
| ENSG0000(RP11-515C)antisense_chr17  | 55271504 | 55273653 | - | 0     | 0.04  |
| ENSG0000(RP11-567C)antisense_chr17  | 82795486 | 82796095 | - | 0     | 0     |
| ENSG0000(RP11-95P2)lincRNA_chr16    | 4180117  | 4183515  | - | 0     | 0.7   |
| ENSG0000(RP11-1113)processed_chr17  | 19582116 | 19582275 | - | 0     | 0     |
| ENSG0000(RP11-189E)lincRNA_chr16    | 49454229 | 49457269 | + | 0     | 0     |
| ENSG0000(RP5-1107A)sense_intrchr17  | 56982749 | 56985104 | + | 0.11  | 0.27  |
| ENSG0000(ARL2BPP8)processed_chr17   | 54754165 | 54754649 | - | 0     | 0     |
| ENSG0000(CTC-479C5)lincRNA_chr16    | 67882461 | 67886367 | + | 0.16  | 0.15  |
| ENSG0000(LRRC37A1)transcribecchr17  | 46978481 | 47054569 | + | 0.2   | 0.14  |
| ENSG0000(LINC01896)lincRNA_chr18    | 78976555 | 78979074 | - | 0     | 0     |
| ENSG0000(RP11-1055)lincRNA_chr17    | 81362272 | 81374214 | + | 0     | 0     |
| ENSG0000(MYZAP_protein_cochr15      | 57591941 | 57685364 | + | 0.03  | 0     |
| ENSG0000(RP11-462G)antisense_chr16  | 4032012  | 4032936  | + | 0     | 0     |
| ENSG0000(RP11-333E)lincRNA_chr17    | 5240508  | 5241543  | - | 0     | 0     |

|                 |                          |       |          |          |   |      |      |
|-----------------|--------------------------|-------|----------|----------|---|------|------|
| ENSG00000181101 | RP11-810M antisense      | chr17 | 4163910  | 4164713  | + | 0    | 0    |
| ENSG00000181102 | RP11-149I antisense      | chr17 | 81135771 | 81136256 | + | 0    | 0    |
| ENSG00000181103 | RP11-542C antisense      | chr17 | 7352687  | 7354944  | - | 0    | 0    |
| ENSG00000181104 | RP11-893F lincRNA        | chr17 | 50212933 | 50215357 | - | 0.24 | 0.13 |
| ENSG00000181105 | MTND1P8 processed        | chr16 | 3369957  | 3370906  | - | 0    | 0    |
| ENSG00000181106 | HNRNPCP4 processed       | chr16 | 11242653 | 11243552 | + | 0    | 0    |
| ENSG00000181107 | RP11-618P processed      | chr17 | 53952936 | 53955324 | + | 0    | 0    |
| ENSG00000181108 | MTND3P13 unprocessed     | chr16 | 10723424 | 10723766 | - | 0    | 0    |
| ENSG00000181109 | RP11-372K processed      | chr17 | 54702936 | 54703430 | + | 0    | 0    |
| ENSG00000181110 | CTC-479C5 protein_coding | chr16 | 68013436 | 68015911 | - | 0    | 0    |
| ENSG00000181111 | KYNUP3 transcribed       | chr17 | 19208584 | 19211359 | + | 0    | 0    |
| ENSG00000181112 | RP11-26L2 lincRNA        | chr16 | 55332355 | 55332967 | + | 0    | 0    |
| ENSG00000181113 | LA16c-306I processed     | chr16 | 3458071  | 3515564  | + | 0    | 0    |
| ENSG00000181114 | CTD-2561B antisense      | chr17 | 80999509 | 81000130 | - | 0    | 0    |
| ENSG00000181115 | RYKP1 processed          | chr17 | 4222091  | 4223828  | + | 0    | 0    |
| ENSG00000181116 | RP11-420A antisense      | chr17 | 5364315  | 5371626  | - | 0    | 0    |
| ENSG00000181117 | ATP5A1P3 processed       | chr16 | 72005037 | 72006543 | - | 0    | 0    |
| ENSG00000181118 | CTD-2135D lincRNA        | chr16 | 13953155 | 13954825 | + | 0.24 | 0.71 |
| ENSG00000181119 | RP11-461A sense_overlap  | chr16 | 3650636  | 3651703  | - | 0.28 | 0    |
| ENSG00000181120 | RP11-429K antisense      | chr16 | 20385957 | 20391164 | + | 0    | 0    |
| ENSG00000181121 | MTCYBP33 unprocessed     | chr16 | 10718633 | 10719762 | - | 0    | 0    |
| ENSG00000181122 | RP11-473I13prime_overlap | chr16 | 9104848  | 9113181  | + | 0    | 0    |
| ENSG00000181123 | RP11-146P processed      | chr17 | 53353427 | 53354134 | - | 0    | 0    |
| ENSG00000181124 | RP11-204E lincRNA        | chr16 | 20208925 | 20209525 | + | 0    | 0    |
| ENSG00000181125 | RP11-65J2 lincRNA        | chr16 | 14408039 | 14418872 | - | 0    | 0    |
| ENSG00000181126 | CTB-133G6 protein_coding | chr19 | 7348943  | 7383385  | + | 0.11 | 0.04 |
| ENSG00000181127 | RPS7P1 processed         | chr17 | 28467822 | 28468406 | + | 0    | 0.21 |
| ENSG00000181128 | RP11-1055 antisense      | chr17 | 81461013 | 81461937 | - | 0    | 0    |
| ENSG00000181129 | CTC-524C5 antisense      | chr17 | 5425139  | 5432876  | - | 0.12 | 0.13 |
| ENSG00000181130 | RP11-96D1 sense_overlap  | chr16 | 68224713 | 68227734 | + | 0.31 | 0.07 |
| ENSG00000181131 | CH17-351M sense_intronic | chr17 | 79598032 | 79603921 | - | 0    | 0    |
| ENSG00000181132 | RP11-109M antisense      | chr16 | 10691273 | 10692973 | + | 0    | 0    |
| ENSG00000181133 | LA16c-325I lincRNA       | chr16 | 2866348  | 2867618  | - | 0    | 0.33 |
| ENSG00000181134 | THCAT158 antisense       | chr17 | 47303460 | 47323613 | - | 0.16 | 0    |
| ENSG00000181135 | RP5-1029F antisense      | chr17 | 523140   | 540576   | + | 0    | 0    |
| ENSG00000181136 | RP11-104H antisense      | chr17 | 7439159  | 7443327  | - | 0    | 0    |
| ENSG00000181137 | AP005530 lincRNA         | chr18 | 14195    | 16898    | - | 0    | 0    |
| ENSG00000181138 | RP11-166B antisense      | chr16 | 11851649 | 11895611 | + | 0.13 | 0.14 |
| ENSG00000181139 | RP11-498D unprocessed    | chr16 | 72004239 | 72004803 | - | 0    | 0    |
| ENSG00000181140 | LINC01975 lincRNA        | chr17 | 3977103  | 3981899  | + | 0    | 0    |
| ENSG00000181141 | RP11-530N antisense      | chr17 | 6954098  | 6978960  | - | 0    | 0    |
| ENSG00000181142 | LINC01982 lincRNA        | chr17 | 52390515 | 52535701 | + | 0    | 0    |
| ENSG00000181143 | RP11-388C lincRNA        | chr17 | 82729164 | 82734143 | - | 0    | 0    |
| ENSG00000181144 | LA16c-325I antisense     | chr16 | 2857898  | 2859726  | + | 0    | 0    |
| ENSG00000181145 | RP11-266L unprocessed    | chr16 | 25071490 | 25072727 | - | 0    | 0    |

|                                      |          |          |   |      |      |
|--------------------------------------|----------|----------|---|------|------|
| ENSG0000(TAPT1-AS1 antisense chr4    | 16226685 | 16320140 | + | 0.69 | 0.67 |
| ENSG0000(CTC-508F8 antisense chr16   | 21120758 | 21130108 | + | 0    | 0    |
| ENSG0000(AF001548. antisense chr16   | 15726674 | 15732993 | + | 2.27 | 2.17 |
| ENSG0000(RP11-235E sense_intr chr17  | 3577955  | 3578853  | - | 0.26 | 0    |
| ENSG0000(RP1-4G17. antisense chr17   | 7282947  | 7284071  | - | 0    | 0    |
| ENSG0000(RP11-388M processed_ chr16  | 31165648 | 31165927 | + | 0    | 0    |
| ENSG0000(RP1-59D14 antisense chr17   | 2375061  | 2379306  | - | 6.1  | 3.73 |
| ENSG0000(PPIAL4A protein_co chr1     | 1.21E+08 | 1.21E+08 | + | 0    | 0    |
| ENSG0000(MIR5011 miRNA chr18         | 67081584 | 67081686 | + | 0    | 0    |
| ENSG0000(AKR1B10P processed_ chr18   | 68455951 | 68456877 | + | 0    | 0    |
| ENSG0000(RN7SL134F misc_RNA chr16    | 82844455 | 82844757 | + | 0    | 0    |
| ENSG0000(MIR378H miRNA chr5          | 1.55E+08 | 1.55E+08 | + | 0    | 0    |
| ENSG0000(MIR5702 miRNA chr2          | 2.27E+08 | 2.27E+08 | - | 0    | 0    |
| ENSG0000(ABHD17AP processed_ chr22   | 22114844 | 22118005 | - | 0    | 0    |
| ENSG0000(RP11-720N processed_ chr17  | 27526386 | 27527223 | - | 0    | 0    |
| ENSG0000(RP11-640N transcribed chr17 | 32106330 | 32114125 | - | 0    | 0    |
| ENSG0000(RP11-68I3. antisense chr17  | 29639627 | 29640825 | + | 0    | 0    |
| ENSG0000(MIR548AO miRNA chr8         | 41271048 | 41271143 | - | 0    | 0    |
| ENSG0000(RP11-822E processed_ chr17  | 21592794 | 21594180 | + | 0    | 0    |
| ENSG0000(MIR5584 miRNA chr1          | 44545493 | 44545552 | + | 0    | 0    |
| ENSG0000(RP11-552C lincRNA chr18     | 26822813 | 26823979 | - | 0    | 0    |
| ENSG0000(CTC-297N7 antisense chr17   | 10680734 | 10683988 | + | 0    | 0    |
| ENSG0000(MIR3973 miRNA chr11         | 36010098 | 36010204 | + | 0    | 0    |
| ENSG0000(hsa-mir-31 miRNA chr1       | 1.7E+08  | 1.7E+08  | + | 0    | 0    |
| ENSG0000(RP11-53I6. antisense chr18  | 32122400 | 32124478 | - | 0    | 0    |
| ENSG0000(RP11-160E lincRNA chr17     | 19091069 | 19091825 | - | 0    | 0    |
| ENSG0000(RP11-288C processed_ chr18  | 1357651  | 1357942  | + | 0    | 0    |
| ENSG0000(MIR3170 miRNA chr13         | 98208524 | 98208600 | + | 0    | 0    |
| ENSG0000(TMEM220- antisense chr17    | 10729777 | 10815164 | + | 0.92 | 1.44 |
| ENSG0000(MIR4673 miRNA chr9          | 1.37E+08 | 1.37E+08 | - | 0    | 0    |
| ENSG0000(PA2G4P3 processed_ chr18    | 27452514 | 27453657 | - | 0    | 0    |
| ENSG0000(MIR4660 miRNA chr8          | 9048445  | 9048518  | + | 0    | 0    |
| ENSG0000(MIR4747 miRNA chr19         | 4932687  | 4932740  | + | 0    | 0    |
| ENSG0000(RN7SL460F misc_RNA chrX     | 77885377 | 77885634 | + | 0    | 0    |
| ENSG0000(RP5-890E1 processed_ chr17  | 48045141 | 48048073 | - | 0.68 | 0.37 |
| ENSG0000(MIR4538 miRNA chr14         | 1.06E+08 | 1.06E+08 | - | 0    | 0    |
| ENSG0000(MIR3187 miRNA chr19         | 813584   | 813653   | + | 0    | 0    |
| ENSG0000(GTSCR1 lincRNA chr18        | 70630534 | 70650744 | - | 0    | 0    |
| ENSG0000(CTD-2541J antisense chr18   | 67506589 | 67514030 | + | 0    | 0.02 |
| ENSG0000(RN7SL471F misc_RNA chr6     | 28977475 | 28977773 | + | 0    | 0    |
| ENSG0000(RP11-599B lincRNA chr17     | 8056225  | 8057621  | - | 0    | 0    |
| ENSG0000(LINC00675 protein_co chr17  | 10794913 | 10804099 | - | 0    | 0    |
| ENSG0000(RN7SL689F misc_RNA chr5     | 1.23E+08 | 1.23E+08 | - | 1.46 | 0.8  |
| ENSG0000(RP11-260A processed_ chr17  | 26981694 | 26982090 | + | 0    | 0    |
| ENSG0000(RP11-17M antisense chr17    | 33976531 | 33980851 | + | 0    | 0    |

|                   |                       |       |          |          |   |      |       |
|-------------------|-----------------------|-------|----------|----------|---|------|-------|
| ENSG00000102E+08  | MIR3158-1 miRNA       | chr10 | 1.02E+08 | 1.02E+08 | + | 0    | 0     |
| ENSG0000053568447 | LINC01919 lincRNA     | chr18 | 53597851 | 53597851 | + | 0    | 0     |
| ENSG000002.35E+08 | MIR4753 miRNA         | chr1  | 2.35E+08 | 2.35E+08 | - | 0    | 0     |
| ENSG000001.23E+08 | RP11-973F lincRNA     | chr8  | 1.23E+08 | 1.23E+08 | - | 1.94 | 1.15  |
| ENSG0000076573568 | MIR4450 miRNA         | chr4  | 76573632 | 76573632 | + | 0    | 0     |
| ENSG0000032954075 | RP11-680N antisense   | chr18 | 32957998 | 32957998 | + | 0    | 0     |
| ENSG0000057895394 | MIR4532 miRNA         | chr20 | 57895444 | 57895444 | + | 0    | 0     |
| ENSG0000088468918 | MIR5189 miRNA         | chr16 | 88469031 | 88469031 | + | 0    | 0     |
| ENSG000001.85E+08 | MIR4455 miRNA         | chr4  | 1.85E+08 | 1.85E+08 | - | 0    | 0     |
| ENSG000003415145  | BOD1P1 transcribed    | chr18 | 3415580  | 3415580  | + | 0    | 0     |
| ENSG000001.5E+08  | PPIAL4C protein_co    | chr1  | 1.5E+08  | 1.5E+08  | + | 0    | 0     |
| ENSG0000095067197 | SRSF8 protein_co      | chr11 | 95071224 | 95071224 | + | 9.66 | 13.61 |
| ENSG0000038903704 | RP1-56K13 antisense   | chr17 | 38904600 | 38904600 | - | 0    | 0     |
| ENSG000002.07E+08 | hsa-mir-31 miRNA      | chr2  | 2.07E+08 | 2.07E+08 | + | 0    | 0     |
| ENSG0000045164014 | MIR3156-1 miRNA       | chr10 | 45164088 | 45164088 | + | 0    | 0     |
| ENSG0000029863402 | RP11-338L antisense   | chr17 | 29866092 | 29866092 | + | 0    | 0     |
| ENSG0000096914699 | RN7SL509F misc_RNA    | chr6  | 96914995 | 96914995 | - | 0    | 0     |
| ENSG0000046233885 | ANTXRLP1 unprocessed  | chr10 | 46273557 | 46273557 | - | 0    | 0     |
| ENSG0000022529934 | MTATP6P3 unprocessed  | chr17 | 22530609 | 22530609 | + | 0    | 0     |
| ENSG0000034080882 | CTC-304I17 sense_intr | chr17 | 34082224 | 34082224 | - | 0    | 0     |
| ENSG0000063972920 | CTC-264K1 lincRNA     | chr17 | 63989422 | 63989422 | - | 0    | 0     |
| ENSG0000018631646 | RN7SL155F misc_RNA    | chr19 | 18631908 | 18631908 | - | 0    | 0     |
| ENSG0000020185082 | AC004702. lincRNA     | chr17 | 20322973 | 20322973 | + | 0    | 0     |
| ENSG0000057600856 | RP11-118E antisense   | chr17 | 57608412 | 57608412 | - | 0    | 0     |
| ENSG0000063305262 | RP11-269G antisense   | chr17 | 63313521 | 63313521 | - | 0    | 0     |
| ENSG0000045600869 | MAPK8IP1 processed    | chr17 | 45602340 | 45602340 | - | 0    | 0     |
| ENSG000001159198  | RP11-78F1 processed   | chr18 | 1160404  | 1160404  | - | 0    | 0     |
| ENSG0000010849541 | RP11-963H lincRNA     | chr17 | 10880895 | 10880895 | + | 0.18 | 0     |
| ENSG000001.1E+08  | MIR4497 miRNA         | chr12 | 1.1E+08  | 1.1E+08  | + | 0    | 0     |
| ENSG00000641689   | MIR5699 miRNA         | chr10 | 641778   | 641778   | - | 0    | 0     |
| ENSG0000066040233 | MIR4311 miRNA         | chr15 | 66040332 | 66040332 | + | 0    | 0     |
| ENSG000001.44E+08 | FAM72C protein_co     | chr1  | 1.44E+08 | 1.44E+08 | - | 1.12 | 0.6   |
| ENSG000001.4E+08  | MIR3668 miRNA         | chr6  | 1.4E+08  | 1.4E+08  | + | 0    | 0     |
| ENSG000001.07E+08 | MIR548AN miRNA        | chrX  | 1.07E+08 | 1.07E+08 | + | 0    | 0     |
| ENSG0000065457541 | CRAT40 lincRNA        | chr17 | 65458408 | 65458408 | + | 0    | 0     |
| ENSG0000094745860 | MIR378G miRNA         | chr1  | 94745900 | 94745900 | - | 0    | 0     |
| ENSG0000013611114 | MIR4526 miRNA         | chr18 | 13611200 | 13611200 | + | 0    | 0     |
| ENSG000002.06E+08 | IKBKE protein_co      | chr1  | 2.06E+08 | 2.06E+08 | + | 9    | 8.82  |
| ENSG0000032457835 | RN7SL122F misc_RNA    | chr1  | 32458135 | 32458135 | + | 0    | 0     |
| ENSG0000030863921 | RP13-753N antisense   | chr17 | 30864940 | 30864940 | - | 0.35 | 0.4   |
| ENSG0000075428407 | MIR4463 miRNA         | chr6  | 75428473 | 75428473 | + | 0    | 0     |
| ENSG0000031345519 | AK4P1 processed       | chr17 | 31346190 | 31346190 | + | 4.89 | 7.52  |
| ENSG000001.11E+08 | RN7SL387F misc_RNA    | chr12 | 1.11E+08 | 1.11E+08 | - | 0    | 0     |
| ENSG0000046753125 | MIR5582 miRNA         | chr11 | 46753192 | 46753192 | - | 0    | 0     |
| ENSG0000076122998 | RP11-102. processed   | chr18 | 76145255 | 76145255 | + | 0    | 0     |

|                 |            |             |       |          |          |   |      |      |
|-----------------|------------|-------------|-------|----------|----------|---|------|------|
| ENSG00000101781 | RP11-78F1  | lincRNA     | chr18 | 976589   | 1174823  | + | 0.51 | 0.25 |
| ENSG00000101782 | RP11-449D  | lincRNA     | chr18 | 24673163 | 24674348 | + | 0    | 0    |
| ENSG00000101783 | RN7SL383F  | misc_RNA    | chr5  | 44716193 | 44716486 | + | 0    | 0    |
| ENSG00000101784 | RN7SL716F  | misc_RNA    | chr17 | 59059226 | 59059493 | + | 0    | 0    |
| ENSG00000101785 | MIR4704    | miRNA       | chr13 | 66218250 | 66218324 | + | 0    | 0    |
| ENSG00000101786 | UBBP4      | transcribed | chr17 | 22202995 | 22205154 | + | 1.06 | 1.01 |
| ENSG00000101787 | RP11-805L  | lincRNA     | chr17 | 31762440 | 31769048 | + | 0    | 0    |
| ENSG00000101788 | CTC-304I17 | lincRNA     | chr17 | 34155566 | 34165679 | + | 0    | 0    |
| ENSG00000101789 | MIR7853    | miRNA       | chr6  | 6169304  | 6169435  | - | 0    | 0    |
| ENSG00000101790 | MIR4270    | miRNA       | chr3  | 15496239 | 15496308 | - | 0    | 0    |
| ENSG00000101791 | CTD-2532D  | lincRNA     | chr17 | 73737854 | 73756557 | + | 0    | 0    |
| ENSG00000101792 | MIR4665    | miRNA       | chr9  | 6007826  | 6007904  | + | 0    | 0    |
| ENSG00000101793 | MIR548X2   | miRNA       | chr13 | 65966330 | 65966429 | - | 0    | 0    |
| ENSG00000101794 | MIR4522    | miRNA       | chr17 | 27293910 | 27293996 | - | 0    | 0    |
| ENSG00000101795 | MIR4480    | miRNA       | chr10 | 12578753 | 12578823 | + | 0    | 0    |
| ENSG00000101796 | RP11-498C  | antisense   | chr17 | 81932398 | 81933058 | + | 0.18 | 0.19 |
| ENSG00000101797 | HID1-AS1   | antisense   | chr17 | 74970704 | 74975728 | + | 0    | 0    |
| ENSG00000101798 | RP11-595B  | lincRNA     | chr18 | 22088060 | 22098780 | + | 0    | 0    |
| ENSG00000101799 | RP11-403I1 | lincRNA     | chr1  | 1.44E+08 | 1.44E+08 | + | 0    | 0.03 |
| ENSG00000101800 | MIR4804    | miRNA       | chr5  | 72878591 | 72878663 | + | 0    | 0    |
| ENSG00000101801 | RP11-2803  | lincRNA     | chr18 | 67672221 | 67676078 | - | 0    | 0    |
| ENSG00000101802 | RN7SL823F  | misc_RNA    | chr19 | 16910490 | 16910784 | - | 0    | 0    |
| ENSG00000101803 | MIR3936    | miRNA       | chr5  | 1.32E+08 | 1.32E+08 | - | 0    | 0    |
| ENSG00000101804 | MIR3915    | miRNA       | chrX  | 32583656 | 32583752 | - | 0    | 0    |
| ENSG00000101805 | MIR3185    | miRNA       | chr17 | 48724408 | 48724475 | - | 0    | 0    |
| ENSG00000101806 | CTD-2349P  | lincRNA     | chr17 | 30729469 | 30731202 | + | 0    | 0    |
| ENSG00000101807 | RP11-19P2  | processed   | chr17 | 27683946 | 27684144 | - | 0    | 0    |
| ENSG00000101808 | RP11-737C  | transcribed | chr18 | 2945550  | 2946890  | - | 0.19 | 0    |
| ENSG00000101809 | RN7SL353F  | misc_RNA    | chr6  | 30751038 | 30751289 | + | 0    | 0.47 |
| ENSG00000101810 | LINC02002  | lincRNA     | chr17 | 22234328 | 22266362 | - | 0    | 0    |
| ENSG00000101811 | RP11-612A  | lincRNA     | chr18 | 27397952 | 27401904 | + | 0    | 0    |
| ENSG00000101812 | AF186192.  | lincRNA     | chr8  | 1.45E+08 | 1.45E+08 | + | 0    | 0    |
| ENSG00000101813 | RP11-321A  | antisense   | chr17 | 29009799 | 29011009 | - | 0    | 0    |
| ENSG00000101814 | MIR4306    | miRNA       | chr13 | 99643059 | 99643149 | + | 0    | 0    |
| ENSG00000101815 | RN7SL178F  | misc_RNA    | chr8  | 8582352  | 8582655  | - | 0    | 0    |
| ENSG00000101816 | RP11-527H  | lincRNA     | chr18 | 14903580 | 14915628 | + | 0    | 0    |
| ENSG00000101817 | RP11-599B  | protein_co  | chr17 | 8150816  | 8162975  | - | 4.86 | 0    |
| ENSG00000101818 | RP11-389J  | lincRNA     | chr18 | 65917782 | 65920942 | - | 0    | 0    |
| ENSG00000101819 | RP11-45M   | antisense   | chr17 | 17167946 | 17185554 | - | 0    | 0    |
| ENSG00000101820 | PPP4R1-AS  | lincRNA     | chr18 | 9615264  | 9619363  | + | 0.7  | 0    |
| ENSG00000101821 | MIR3155A   | miRNA       | chr10 | 6152196  | 6152277  | + | 0    | 0    |
| ENSG00000101822 | MIR5586    | miRNA       | chr14 | 59646962 | 59647020 | - | 0    | 0    |
| ENSG00000101823 | MIR378D1   | miRNA       | chr4  | 5923275  | 5923328  | - | 0    | 0    |
| ENSG00000101824 | MIR3919    | miRNA       | chr3  | 1.59E+08 | 1.59E+08 | + | 0    | 0    |
| ENSG00000101825 | RP11-805F  | lincRNA     | chr18 | 15075445 | 15122767 | + | 0    | 0    |

|                 |                          |       |          |          |   |      |      |
|-----------------|--------------------------|-------|----------|----------|---|------|------|
| ENSG00000180100 | RP11-106E antisense      | chr18 | 68753179 | 68754583 | - | 0    | 0    |
| ENSG00000180100 | MSMB protein_coding      | chr10 | 46033307 | 46046269 | - | 0    | 0    |
| ENSG00000180100 | MIR4777 miRNA            | chr2  | 2.31E+08 | 2.31E+08 | + | 0    | 0    |
| ENSG00000180100 | MIR4802 miRNA            | chr4  | 40502040 | 40502119 | - | 0    | 0    |
| ENSG00000180100 | MIR4515 miRNA            | chr15 | 83067335 | 83067415 | + | 0    | 0    |
| ENSG00000180100 | RP11-269G antisense      | chr17 | 63391191 | 63431089 | - | 0    | 0    |
| ENSG00000180100 | BPTFP1 unprocessed       | chr17 | 64761912 | 64762710 | - | 4.86 | 6.37 |
| ENSG00000180100 | RP11-471L processed      | chr17 | 12115547 | 12115885 | + | 0.28 | 0    |
| ENSG00000180100 | MIR3135B miRNA           | chr6  | 32749912 | 32749979 | - | 0    | 0    |
| ENSG00000180100 | MIR548AX miRNA           | chrX  | 11318614 | 11318686 | - | 0    | 0    |
| ENSG00000180100 | RP11-25L3 lincRNA        | chr18 | 73914405 | 74034161 | - | 0    | 0    |
| ENSG00000180100 | RP11-82O1 antisense      | chr17 | 29761103 | 29787836 | + | 0    | 0    |
| ENSG00000180100 | SNORA70D snoRNA          | chr16 | 71698567 | 71698701 | - | 0    | 0    |
| ENSG00000180100 | RP3-416J7 lincRNA        | chr6  | 181466   | 205484   | - | 0    | 0    |
| ENSG00000180100 | RN7SL470F misc_RNA       | chr2  | 70075014 | 70075272 | - | 0    | 0    |
| ENSG00000180100 | MIR4457 miRNA            | chr5  | 1309310  | 1309377  | - | 0    | 0    |
| ENSG00000180100 | RN7SL750F misc_RNA       | chr7  | 1.01E+08 | 1.01E+08 | - | 0    | 0    |
| ENSG00000180100 | RP11-443G antisense      | chr17 | 32280387 | 32280953 | - | 0    | 0    |
| ENSG00000180100 | MIR5581 miRNA            | chr1  | 37500935 | 37500994 | - | 0    | 0    |
| ENSG00000180100 | MIR4632 miRNA            | chr1  | 12191713 | 12191773 | + | 0    | 0    |
| ENSG00000180100 | RP11-17A1 lincRNA        | chr18 | 26688111 | 26689668 | + | 0    | 0    |
| ENSG00000180100 | RP11-57A1 lincRNA        | chr17 | 72425939 | 72428852 | + | 0    | 0    |
| ENSG00000180100 | MIR3197 miRNA            | chr21 | 41167557 | 41167629 | + | 0    | 0    |
| ENSG00000180100 | RP11-93H1 unprocessed    | chr18 | 11326270 | 11328832 | + | 0    | 0    |
| ENSG00000180100 | RP4-777O2 lincRNA        | chr7  | 30550217 | 30551569 | + | 0    | 0    |
| ENSG00000180100 | RP11-628C antisense      | chr17 | 11874932 | 11875828 | - | 0    | 0    |
| ENSG00000180100 | RP11-386P lincRNA        | chr18 | 32581528 | 32582828 | + | 0    | 0    |
| ENSG00000180100 | hsa-mir-54 miRNA         | chr17 | 67471489 | 67471585 | - | 0    | 0    |
| ENSG00000180100 | MIR3161 miRNA            | chr11 | 48096782 | 48096858 | + | 0    | 0    |
| ENSG00000180100 | MIR3621 miRNA            | chr9  | 1.37E+08 | 1.37E+08 | - | 0    | 0    |
| ENSG00000180100 | RP11-408H antisense      | chr18 | 31131456 | 31132494 | + | 0    | 0    |
| ENSG00000180100 | MIR5689 miRNA            | chr6  | 10439717 | 10439794 | + | 0    | 0    |
| ENSG00000180100 | RP11-597N antisense      | chr17 | 12990149 | 12990610 | - | 0    | 0    |
| ENSG00000180100 | RP11-85B7 antisense      | chr17 | 9283174  | 9305651  | + | 0    | 0    |
| ENSG00000180100 | RP11-321A antisense      | chr17 | 29140483 | 29155489 | + | 0    | 0    |
| ENSG00000180100 | RP11-169F processed      | chr18 | 73151241 | 73264480 | - | 0    | 0    |
| ENSG00000180100 | MIR4639 miRNA            | chr6  | 16141556 | 16141624 | + | 0    | 0    |
| ENSG00000180100 | LINC02210 protein_coding | chr17 | 45620344 | 45835826 | + | 0    | 0    |
| ENSG00000180100 | SLC25A51P processed      | chr18 | 7134931  | 7135819  | + | 0    | 0    |
| ENSG00000180100 | RP11-466A sense_intronic | chr17 | 32512869 | 32519350 | - | 0    | 0    |
| ENSG00000180100 | RP11-285E lincRNA        | chr17 | 77257737 | 77281897 | - | 0    | 0    |
| ENSG00000180100 | RP11-389J sense_intronic | chr18 | 65865262 | 65866397 | + | 0    | 0    |
| ENSG00000180100 | SNORD39 snoRNA           | chr2  | 2.38E+08 | 2.38E+08 | + | 0    | 0    |
| ENSG00000180100 | DLGAP1-AS1 antisense     | chr18 | 3878180  | 3897069  | + | 0    | 0    |
| ENSG00000180100 | FTLP13 processed         | chr17 | 22221221 | 22221605 | + | 0    | 0    |

|                     |            |       |          |          |   |       |       |
|---------------------|------------|-------|----------|----------|---|-------|-------|
| ENSG000001806L      | sense_intr | chr18 | 653985   | 657259   | - | 0     | 0     |
| ENSG000001746N      | processed  | chr17 | 20983902 | 20984046 | + | 0     | 0     |
| ENSG0000013937      | miRNA      | chrX  | 39661216 | 39661321 | + | 0     | 0     |
| ENSG000001498C      | lincRNA    | chr17 | 81878425 | 81881106 | - | 0.06  | 0.11  |
| ENSG00000147G4      | processed  | chr18 | 71225704 | 71226721 | + | 0     | 0     |
| ENSG0000014643      | miRNA      | chr6  | 91521660 | 91521737 | + | 0     | 0     |
| ENSG0000014662B     | miRNA      | chr8  | 1.25E+08 | 1.25E+08 | - | 0     | 0     |
| ENSG00000175L4P     | misc_RNA   | chr3  | 15738515 | 15738809 | + | 0     | 0     |
| ENSG000001548AS     | miRNA      | chr13 | 92490163 | 92490220 | + | 0     | 0     |
| ENSG0000013165      | miRNA      | chr11 | 72072228 | 72072302 | - | 0     | 0     |
| ENSG0000013664      | miRNA      | chr11 | 70872270 | 70872368 | - | 0     | 0     |
| ENSG000001161I      | lincRNA    | chr18 | 1883524  | 2489426  | - | 0.4   | 0.15  |
| ENSG0000014277      | miRNA      | chr5  | 1708785  | 1708868  | - | 0     | 0     |
| ENSG0000014XOGP1    | processed  | chr18 | 21182503 | 21183499 | - | 0     | 0     |
| ENSG0000014OSP1P2   | processed  | chr17 | 32343774 | 32344124 | - | 0     | 0     |
| ENSG000001548AV     | miRNA      | chr18 | 72853321 | 72853382 | - | 0     | 0     |
| ENSG0000013133      | miRNA      | chr2  | 2.41E+08 | 2.41E+08 | + | 0     | 0     |
| ENSG00000100667     | lincRNA    | chr18 | 5237826  | 5246508  | + | 13.69 | 14.84 |
| ENSG00000175L498F   | misc_RNA   | chr20 | 6001733  | 6002030  | + | 0     | 0     |
| ENSG000001XXbac-BPG | antisense  | chr6  | 32972065 | 32972853 | - | 0     | 0     |
| ENSG0000014GDF2     | protein_co | chr10 | 47322490 | 47326270 | + | 0     | 0     |
| ENSG0000014286      | miRNA      | chr8  | 10666978 | 10667070 | + | 0     | 0     |
| ENSG0000013686      | miRNA      | chr8  | 1.29E+08 | 1.29E+08 | - | 0     | 0     |
| ENSG00000143NORD43  | snoRNA     | chr22 | 39319050 | 39319113 | - | 0     | 0     |
| ENSG000001746B      | antisense  | chr18 | 32833454 | 32938316 | + | 0     | 0     |
| ENSG000001580I      | antisense  | chr17 | 47603860 | 47649420 | - | 0.72  | 0.1   |
| ENSG000001549B      | processed  | chr18 | 31726043 | 31726397 | - | 0     | 0     |
| ENSG00000143NORA4   | snoRNA     | chr3  | 1.87E+08 | 1.87E+08 | + | 0     | 0     |
| ENSG000001321A      | processed  | chr17 | 29021325 | 29021640 | - | 0     | 0     |
| ENSG0000015590      | miRNA      | chr2  | 1.35E+08 | 1.35E+08 | + | 0     | 0     |
| ENSG0000013182      | miRNA      | chr16 | 83508346 | 83508408 | + | 0     | 0     |
| ENSG000001649A      | sense_intr | chr17 | 75145261 | 75146546 | - | 0     | 0.4   |
| ENSG000001456D      | antisense  | chr17 | 48185938 | 48204529 | + | 0.1   | 0.56  |
| ENSG00000142D-2008P | processed  | chr17 | 28256375 | 28256669 | - | 0     | 0     |
| ENSG0000014473      | miRNA      | chr9  | 20411148 | 20411238 | - | 0     | 0     |
| ENSG0000013115      | miRNA      | chr1  | 23044305 | 23044372 | + | 0     | 0     |
| ENSG00000175L457F   | misc_RNA   | chr8  | 33715784 | 33716070 | + | 0     | 0     |
| ENSG0000015100      | miRNA      | chr10 | 42997563 | 42997681 | + | 0     | 0     |
| ENSG000001746G      | antisense  | chr18 | 6873399  | 6875024  | - | 0     | 0     |
| ENSG0000016N17      | processed  | chr17 | 47945424 | 47974438 | + | 0     | 0     |
| ENSG0000015684      | miRNA      | chr19 | 12787128 | 12787192 | + | 0     | 0     |
| ENSG000001746F      | protein_co | chr17 | 8368638  | 8383187  | - | 0.1   | 0.08  |
| ENSG0000013675      | miRNA      | chr1  | 16858949 | 16859021 | - | 0     | 0     |
| ENSG00000100908     | lincRNA    | chr18 | 76528655 | 76610968 | + | 1.24  | 2.14  |
| ENSG0000013679      | miRNA      | chr2  | 1.34E+08 | 1.34E+08 | + | 0     | 0     |



|                     |                |       |          |          |   |      |      |
|---------------------|----------------|-------|----------|----------|---|------|------|
| ENSG0000(RN7SL426F) | misc_RNA       | chr17 | 21229334 | 21229628 | - | 0    | 0    |
| ENSG0000(MIR548AV)  | miRNA          | chr9  | 1.33E+08 | 1.33E+08 | + | 0    | 0    |
| ENSG0000(CTD-2206N) | transcribed    | chr17 | 39057019 | 39113190 | + | 0    | 0    |
| ENSG0000(RP11-527H) | lincRNA        | chr18 | 14978739 | 14979839 | + | 0    | 0    |
| ENSG0000(RP11-326K) | antisense      | chr18 | 31942575 | 31944156 | + | 1.08 | 0.99 |
| ENSG0000(RP11-573D) | antisense      | chr3  | 1.87E+08 | 1.87E+08 | - | 0.11 | 0.15 |
| ENSG0000(MIR4439)   | miRNA          | chr2  | 2.25E+08 | 2.25E+08 | - | 0    | 0    |
| ENSG0000(FAM60BP)   | processed      | chr18 | 26255698 | 26256355 | - | 0    | 0    |
| ENSG0000(MIR378E)   | miRNA          | chr5  | 1.7E+08  | 1.7E+08  | + | 0    | 0    |
| ENSG0000(MIR4635)   | miRNA          | chr5  | 1062896  | 1062974  | - | 0    | 0    |
| ENSG0000(MIR4698)   | miRNA          | chr12 | 47187812 | 47187891 | + | 0    | 0    |
| ENSG0000(RN7SL44P)  | misc_RNA       | chr1  | 1.54E+08 | 1.54E+08 | - | 0    | 0    |
| ENSG0000(RP11-649A) | antisense      | chr17 | 75271369 | 75273895 | + | 0.41 | 0.24 |
| ENSG0000(CIAPIN1P)  | processed      | chr18 | 26599408 | 26600338 | + | 0    | 0    |
| ENSG0000(RP11-143J) | antisense      | chr18 | 9112404  | 9115877  | - | 0.14 | 0    |
| ENSG0000(MIR4744)   | miRNA          | chr18 | 49049687 | 49049768 | - | 0    | 0    |
| ENSG0000(MIR4729)   | miRNA          | chr17 | 59366083 | 59366154 | + | 0    | 0    |
| ENSG0000(MIR4769)   | miRNA          | chrX  | 47587429 | 47587505 | + | 0    | 0    |
| ENSG0000(RP11-498C) | lincRNA        | chr17 | 81878667 | 81879557 | + | 0    | 0    |
| ENSG0000(RP11-218N) | lincRNA        | chr17 | 30550493 | 30551189 | - | 0    | 0    |
| ENSG0000(MIR3927)   | miRNA          | chr9  | 1.1E+08  | 1.1E+08  | - | 0    | 0    |
| ENSG0000(LINC01543) | lincRNA        | chr18 | 26422995 | 26426101 | + | 0    | 0    |
| ENSG0000(AC007948)  | lincRNA        | chr18 | 65105873 | 65125710 | - | 0    | 0    |
| ENSG0000(CTD-2350C) | unprocessed    | chr17 | 28444063 | 28445563 | - | 0    | 0    |
| ENSG0000(MIR4528)   | miRNA          | chr18 | 53237101 | 53237190 | + | 0    | 0    |
| ENSG0000(RP11-334E) | sense_intronic | chr11 | 1.19E+08 | 1.19E+08 | + | 0.11 | 0    |
| ENSG0000(LINC00672) | protein_coding | chr17 | 38925168 | 38929384 | + | 0.32 | 0.29 |
| ENSG0000(DLGAP1-AS) | antisense      | chr18 | 3962353  | 4013943  | + | 0    | 0    |
| ENSG0000(MIR4436B)  | miRNA          | chr2  | 1.1E+08  | 1.1E+08  | + | 0    | 0    |
| ENSG0000(RN7SL774F) | misc_RNA       | chr17 | 4364164  | 4364453  | - | 0    | 0    |
| ENSG0000(EEF1DP7)   | transcribed    | chr17 | 63636601 | 63637113 | + | 0    | 0    |
| ENSG0000(RP11-705C) | lincRNA        | chr18 | 268148   | 270278   | + | 0.03 | 0.03 |
| ENSG0000(MIR3920)   | miRNA          | chr11 | 1.02E+08 | 1.02E+08 | - | 0    | 0    |
| ENSG0000(RP11-51L5) | transcribed    | chr17 | 62282387 | 62297026 | - | 0    | 0.21 |
| ENSG0000(MIR4303)   | miRNA          | chr12 | 97995383 | 97995448 | - | 0    | 0    |
| ENSG0000(MIR4667)   | miRNA          | chr9  | 35608094 | 35608159 | + | 0    | 0    |
| ENSG0000(CTD-3010D) | lincRNA        | chr17 | 72642731 | 72644490 | + | 0    | 0    |
| ENSG0000(MIR3925)   | miRNA          | chr6  | 36622436 | 36622512 | - | 0    | 0    |
| ENSG0000(RP11-110H) | sense_intronic | chr18 | 49431744 | 49447420 | - | 0    | 0    |
| ENSG0000(MIR4669)   | miRNA          | chr9  | 1.34E+08 | 1.34E+08 | + | 0    | 0    |
| ENSG0000(RP11-344B) | sense_intronic | chr18 | 32245946 | 32249032 | - | 0    | 0.18 |
| ENSG0000(RN7SL555F) | misc_RNA       | chr20 | 3094171  | 3094509  | + | 0    | 0    |
| ENSG0000(MIR3116-1) | miRNA          | chr1  | 62078786 | 62078859 | + | 0    | 0    |
| ENSG0000(MIR5000)   | miRNA          | chr2  | 75090812 | 75090914 | + | 0    | 0    |
| ENSG0000(MTND2P13)  | unprocessed    | chr17 | 22525899 | 22526937 | + | 0    | 0    |

|                                   |       |          |          |   |      |       |
|-----------------------------------|-------|----------|----------|---|------|-------|
| ENSG0000(RP11-110H sense_intron)  | chr18 | 49484536 | 49486149 | - | 0    | 0     |
| ENSG0000(RP11-5316 processed)     | chr18 | 32018829 | 32111779 | + | 0.02 | 0     |
| ENSG0000(MIR3670-1 miRNA)         | chr16 | 14907717 | 14907781 | + | 0    | 0     |
| ENSG0000(RP11-571L antisense)     | chr4  | 98928897 | 98994994 | + | 0    | 0     |
| ENSG0000(RP11-210K antisense)     | chr18 | 31844388 | 31845178 | + | 0    | 0     |
| ENSG0000(MIR4462 miRNA)           | chr6  | 37555365 | 37555422 | - | 0    | 0     |
| ENSG0000(MIR4448 miRNA)           | chr3  | 1.84E+08 | 1.84E+08 | + | 0    | 0     |
| ENSG0000(SNORD3A snoRNA)          | chr17 | 19188016 | 19188714 | + | 6.07 | 10.93 |
| ENSG0000(TOMM20P processed)       | chr18 | 8688022  | 8688410  | - | 0    | 0     |
| ENSG0000(RP11-579C sense_intron)  | chr17 | 58965952 | 58966727 | + | 0    | 0     |
| ENSG0000(RN7SL275F misc_RNA)      | chr4  | 1.1E+08  | 1.1E+08  | + | 0.29 | 0     |
| ENSG0000(RN7SL32P misc_RNA)       | chr2  | 2.33E+08 | 2.33E+08 | + | 0.14 | 0     |
| ENSG0000(RN7SL435F misc_RNA)      | chr11 | 59291052 | 59291333 | - | 0    | 0     |
| ENSG0000(MIR548Y miRNA)           | chr14 | 47760995 | 47761104 | - | 0    | 0     |
| ENSG0000(RP11-434D transcribed)   | chr17 | 20554971 | 20559410 | - | 0    | 0     |
| ENSG0000(RP11-513M antisense)     | chr18 | 10893617 | 10908783 | + | 0    | 0     |
| ENSG0000(RN7SL850F misc_RNA)      | chr16 | 4633591  | 4633881  | - | 0    | 0     |
| ENSG0000(NBPF11 protein_coding)   | chr1  | 1.48E+08 | 1.48E+08 | - | 5.5  | 5.69  |
| ENSG0000(RP11-676J lincRNA)       | chr18 | 72868388 | 72881399 | + | 0    | 0     |
| ENSG0000(C1orf186 protein_coding) | chr1  | 2.06E+08 | 2.06E+08 | + | 0.11 | 0.06  |
| ENSG0000(MIR4461 miRNA)           | chr5  | 1.35E+08 | 1.35E+08 | + | 0    | 0     |
| ENSG0000(MIR4509-3 miRNA)         | chr15 | 28490752 | 28490845 | - | 0    | 0     |
| ENSG0000(MIR4290 miRNA)           | chr9  | 90023441 | 90023535 | - | 0    | 0     |
| ENSG0000(RN7SL381F misc_RNA)      | chr16 | 85659378 | 85659675 | + | 0.72 | 0     |
| ENSG0000(RN7SL678F misc_RNA)      | chr21 | 37215605 | 37215903 | + | 0    | 0     |
| ENSG0000(RP11-789C antisense)     | chr18 | 8406761  | 8406953  | - | 0    | 0     |
| ENSG0000(MIR1587 miRNA)           | chrX  | 39837561 | 39837613 | + | 0    | 0     |
| ENSG0000(MIR4760 miRNA)           | chr21 | 40212352 | 40212431 | - | 0    | 0     |
| ENSG0000(RN7SL121F misc_RNA)      | chr19 | 2595019  | 2595291  | - | 3.9  | 5.51  |
| ENSG0000(YWHAEP3 processed)       | chr17 | 20491323 | 20491443 | - | 0    | 0     |
| ENSG0000(MIR4499 miRNA)           | chr13 | 20433778 | 20433846 | - | 0    | 0     |
| ENSG0000(MIR4672 miRNA)           | chr9  | 1.28E+08 | 1.28E+08 | - | 0    | 0     |
| ENSG0000(MIR5705 miRNA)           | chr4  | 87300495 | 87300583 | - | 0    | 0     |
| ENSG0000(RP11-504I1 antisense)    | chr18 | 76372717 | 76378275 | + | 0    | 0     |
| ENSG0000(RP11-746N antisense)     | chr17 | 20999747 | 21000323 | + | 0    | 0     |
| ENSG0000(MIR5698 miRNA)           | chr1  | 1.54E+08 | 1.54E+08 | - | 0    | 0     |
| ENSG0000(RN7SL147F misc_RNA)      | chr3  | 11952788 | 11953085 | - | 0    | 0     |
| ENSG0000(RN7SL615F misc_RNA)      | chr20 | 41290280 | 41290577 | - | 0    | 0     |
| ENSG0000(CTC-542B2 lincRNA)       | chr17 | 31873926 | 31886666 | + | 0    | 0.17  |
| ENSG0000(RN7SL786F misc_RNA)      | chr11 | 75742129 | 75742426 | + | 0    | 0     |
| ENSG0000(RN7SL42P misc_RNA)       | chr11 | 59214406 | 59214699 | - | 0    | 0     |
| ENSG0000(RP11-286N antisense)     | chr18 | 5567130  | 5570942  | + | 0    | 0     |
| ENSG0000(RN7SL52P misc_RNA)       | chr21 | 9902344  | 9902627  | - | 0    | 0     |
| ENSG0000(MIR4717 miRNA)           | chr16 | 2274620  | 2274691  | + | 0    | 0     |
| ENSG0000(MIR4314 miRNA)           | chr17 | 8088056  | 8088147  | + | 0    | 0     |

|                 |           |                |       |          |          |   |      |      |
|-----------------|-----------|----------------|-------|----------|----------|---|------|------|
| ENSG00000101811 | AKR1C8P   | transcribed    | chr10 | 5154143  | 5185187  | - | 0    | 0.07 |
| ENSG00000101812 | RP11-68I3 | sense_intronic | chr17 | 29621617 | 29622254 | - | 0.11 | 0.24 |
| ENSG00000101813 | MIR4429   | miRNA          | chr2  | 11540605 | 11540677 | - | 0    | 0    |
| ENSG00000101814 | RP11-627G | antisense      | chr18 | 22175465 | 22176662 | - | 0    | 0    |
| ENSG00000101815 | MIR3938   | miRNA          | chr3  | 55852492 | 55852594 | - | 0    | 0    |
| ENSG00000101816 | MIR4253   | miRNA          | chr1  | 22863159 | 22863226 | - | 0    | 0    |
| ENSG00000101817 | RP11-176N | lincRNA        | chr18 | 77421619 | 77560763 | + | 0    | 0.04 |
| ENSG00000101818 | CTC-297N7 | lincRNA        | chr17 | 10741267 | 10769016 | - | 0    | 0    |
| ENSG00000101819 | RN7SL336F | misc_RNA       | chr6  | 89090946 | 89091242 | + | 0    | 0.4  |
| ENSG00000101820 | RP11-6N17 | antisense      | chr17 | 47946802 | 47948275 | - | 0    | 0    |
| ENSG00000101821 | RP11-728E | lincRNA        | chr17 | 21457434 | 21458989 | + | 0    | 0    |
| ENSG00000101822 | MIR4507   | miRNA          | chr14 | 1.06E+08 | 1.06E+08 | - | 0    | 0    |
| ENSG00000101823 | LINC02003 | lincRNA        | chr17 | 72342940 | 72355136 | + | 0    | 0    |
| ENSG00000101824 | RN7SL744F | misc_RNA       | chr12 | 54344610 | 54344876 | + | 1.53 | 3.53 |
| ENSG00000101825 | CTD-2008P | unprocessed    | chr17 | 28274657 | 28275716 | - | 0    | 0    |
| ENSG00000101826 | RN7SL66P  | misc_RNA       | chr2  | 10280628 | 10280891 | + | 0    | 0    |
| ENSG00000101827 | ABHD15-A1 | antisense      | chr17 | 29560547 | 29707090 | + | 0    | 0    |
| ENSG00000101828 | MIR4491   | miRNA          | chr11 | 1.11E+08 | 1.11E+08 | + | 0    | 0    |
| ENSG00000101829 | RN7SL198F | misc_RNA       | chr10 | 12328132 | 12328389 | - | 0    | 0.54 |
| ENSG00000101830 | MIR4472-2 | miRNA          | chr12 | 1.16E+08 | 1.16E+08 | - | 0    | 0    |
| ENSG00000101831 | RP11-29O1 | processed      | chr18 | 67602692 | 67603022 | - | 0    | 0    |
| ENSG00000101832 | RN7SL670F | misc_RNA       | chr2  | 2.03E+08 | 2.03E+08 | + | 3.5  | 1.83 |
| ENSG00000101833 | RP11-192H | antisense      | chr17 | 28633206 | 28635950 | + | 0    | 0    |
| ENSG00000101834 | RN7SL455F | misc_RNA       | chr2  | 43904412 | 43904693 | + | 0.41 | 3.28 |
| ENSG00000101835 | MIR4737   | miRNA          | chr17 | 60043025 | 60043105 | - | 0    | 0    |
| ENSG00000101836 | RP11-22N1 | processed      | chr17 | 29197071 | 29197785 | - | 0    | 0    |
| ENSG00000101837 | RPL31P9   | processed      | chr18 | 67137611 | 67137751 | - | 0    | 0    |
| ENSG00000101838 | MIR5685   | miRNA          | chr6  | 53276993 | 53277071 | + | 0    | 0    |
| ENSG00000101839 | RP11-583F | transcribed    | chr17 | 64927634 | 64934203 | + | 3.92 | 2.47 |
| ENSG00000101840 | RP5-1028K | protein_coding | chr17 | 40628797 | 40665141 | - | 0    | 0.04 |
| ENSG00000101841 | MIR4316   | miRNA          | chr17 | 77396984 | 77397054 | - | 0    | 0    |
| ENSG00000101842 | FGF7P1    | unprocessed    | chr18 | 14888709 | 14890086 | - | 0.39 | 0    |
| ENSG00000101843 | MIR3687-2 | miRNA          | chr21 | 8987370  | 8987430  | + | 0    | 0    |
| ENSG00000101844 | RP11-20B2 | lincRNA        | chr17 | 28861072 | 28861966 | - | 0    | 0    |
| ENSG00000101845 | RP11-401C | antisense      | chr17 | 10320392 | 10341458 | + | 0.42 | 0.94 |
| ENSG00000101846 | MIR3943   | miRNA          | chr7  | 43150895 | 43150994 | + | 0    | 0    |
| ENSG00000101847 | DND1P1    | processed      | chr17 | 45585871 | 45586929 | + | 0.46 | 0.44 |
| ENSG00000101848 | RN7SL531F | misc_RNA       | chr2  | 43492032 | 43492313 | + | 0.66 | 2.21 |
| ENSG00000101849 | RP11-856M | lincRNA        | chr18 | 10627646 | 10628846 | - | 0    | 0    |
| ENSG00000101850 | MIR3199-1 | miRNA          | chr22 | 27920525 | 27920612 | - | 0    | 0    |
| ENSG00000101851 | MIR4783   | miRNA          | chr2  | 1.27E+08 | 1.27E+08 | - | 0    | 0    |
| ENSG00000101852 | RP11-73M1 | antisense      | chr1  | 31644694 | 31649371 | + | 0    | 0    |
| ENSG00000101853 | CTD-2015H | lincRNA        | chr18 | 1780329  | 1782064  | + | 0    | 0    |
| ENSG00000101854 | RP11-227G | lincRNA        | chr17 | 32430967 | 32432841 | + | 0.66 | 0    |
| ENSG00000101855 | MIR5688   | miRNA          | chr3  | 85385710 | 85385792 | + | 0    | 0    |

|                     |             |       |          |          |   |      |      |
|---------------------|-------------|-------|----------|----------|---|------|------|
| ENSG0000(MIR3681)   | miRNA       | chr2  | 12199130 | 12199201 | + | 0    | 0    |
| ENSG0000(MIR4666B)  | miRNA       | chrX  | 29574278 | 29574358 | + | 0    | 0    |
| ENSG0000(RN7SL474F) | misc_RNA    | chr8  | 16863196 | 16863496 | - | 0    | 0.39 |
| ENSG0000(RP11-401F) | processed   | chr17 | 67276118 | 67276351 | - | 0    | 0    |
| ENSG0000(MIR4803)   | miRNA       | chr5  | 72169467 | 72169540 | + | 0    | 0    |
| ENSG0000(MIR4689)   | miRNA       | chr1  | 5862672  | 5862741  | - | 0    | 0    |
| ENSG0000(MIR4688)   | miRNA       | chr11 | 46376402 | 46376484 | + | 0    | 0    |
| ENSG0000(RP11-638L) | processed   | chr18 | 67788268 | 67791035 | - | 0    | 0    |
| ENSG0000(MIR3688-1) | miRNA       | chr4  | 1.59E+08 | 1.59E+08 | - | 0    | 0    |
| ENSG0000(RP11-848P) | antisense   | chr17 | 31090787 | 31095450 | - | 0.46 | 0.34 |
| ENSG0000(RP11-357H) | lincRNA     | chr18 | 76008118 | 76015861 | - | 0    | 0    |
| ENSG0000(MIR4300)   | miRNA       | chr11 | 81890741 | 81890836 | - | 0    | 0    |
| ENSG0000(RP11-159D) | lincRNA     | chr17 | 57989039 | 57994850 | - | 1.64 | 1.91 |
| ENSG0000(RN7SL784F) | misc_RNA    | chr17 | 4882975  | 4883316  | + | 0    | 0.31 |
| ENSG0000(MIR3180-4) | miRNA       | chr16 | 15154850 | 15155002 | - | 0    | 0    |
| ENSG0000(RP11-321M) | antisense   | chr18 | 75407012 | 75419040 | + | 0    | 0    |
| ENSG0000(MIR4795)   | miRNA       | chr3  | 87226189 | 87226277 | - | 0    | 0    |
| ENSG0000(RP11-354P) | antisense   | chr17 | 30204318 | 30206468 | + | 0.05 | 0    |
| ENSG0000(SCML2P1)   | processed   | chr18 | 6926944  | 6928210  | + | 0    | 0    |
| ENSG0000(RN7SL713F) | misc_RNA    | chr1  | 58565631 | 58565932 | - | 0    | 0    |
| ENSG0000(AC007631)  | lincRNA     | chr18 | 65186159 | 65187018 | + | 0    | 0    |
| ENSG0000(MIR3689D)  | miRNA       | chr9  | 1.35E+08 | 1.35E+08 | - | 0    | 0    |
| ENSG0000(RP11-20B2) | unprocess   | chr17 | 28848860 | 28849592 | + | 0    | 0    |
| ENSG0000(MIR3667)   | miRNA       | chr22 | 49543393 | 49543466 | - | 0    | 0    |
| ENSG0000(MIR3928)   | miRNA       | chr22 | 31160062 | 31160119 | - | 0    | 0    |
| ENSG0000(CH17-13I2) | processed   | chr1  | 1.43E+08 | 1.43E+08 | - | 0    | 0    |
| ENSG0000(RP11-848P) | processed   | chr17 | 31008154 | 31008319 | - | 1.82 | 0    |
| ENSG0000(RP11-268I) | lincRNA     | chr18 | 21871446 | 21893996 | - | 0    | 0    |
| ENSG0000(RP11-715F) | processed   | chr18 | 2568392  | 2569122  | + | 0    | 0    |
| ENSG0000(RP11-739N) | lincRNA     | chr18 | 27336379 | 27595164 | - | 0    | 0    |
| ENSG0000(MIR3127)   | miRNA       | chr2  | 96798278 | 96798353 | + | 0    | 0    |
| ENSG0000(MIR4670)   | miRNA       | chr9  | 92527984 | 92528058 | - | 0    | 0    |
| ENSG0000(MIR4762)   | miRNA       | chr22 | 45760524 | 45760598 | + | 0    | 0    |
| ENSG0000(MIR3689B)  | miRNA       | chr9  | 1.35E+08 | 1.35E+08 | - | 0    | 0    |
| ENSG0000(RP11-640N) | transcribec | chr17 | 32083179 | 32097065 | + | 0    | 0    |
| ENSG0000(RP1-253P7) | sense_intr  | chr17 | 17777781 | 17779094 | + | 0    | 0    |
| ENSG0000(MTND1P15)  | transcribec | chr17 | 22524738 | 22525686 | + | 0    | 0    |
| ENSG0000(RN7SL665F) | misc_RNA    | chr9  | 1.3E+08  | 1.3E+08  | + | 0    | 0    |
| ENSG0000(MIR4305)   | miRNA       | chr13 | 39664034 | 39664135 | - | 0    | 0    |
| ENSG0000(PDLIM1P3)  | processed   | chr17 | 27002661 | 27003259 | - | 0    | 0    |
| ENSG0000(RP11-212E) | lincRNA     | chr17 | 34725509 | 34726170 | - | 0    | 0    |
| ENSG0000(MIR3189)   | miRNA       | chr19 | 18386562 | 18386634 | + | 0    | 0    |
| ENSG0000(MAGOH2P)   | transcribec | chr17 | 10716002 | 10716511 | - | 0.94 | 0.21 |
| ENSG0000(RP1-37N7)  | antisense   | chr17 | 18379855 | 18388984 | - | 0    | 0.01 |
| ENSG0000(RP11-672L) | processed   | chr18 | 856526   | 857045   | + | 0    | 0    |

|                                     |          |          |   |      |      |
|-------------------------------------|----------|----------|---|------|------|
| ENSG0000(SNRPCP4 processed_ chr18   | 2990652  | 2991078  | + | 0    | 0    |
| ENSG0000(RP11-45M; protein_co chr17 | 17202649 | 17237185 | - | 1.44 | 2.51 |
| ENSG0000(RP11-13N1 sense_intr chr18 | 21661787 | 21662395 | - | 0    | 0    |
| ENSG0000(CTD-2533G processed_ chr18 | 1927727  | 1929094  | - | 0    | 0    |
| ENSG0000(RN7SL117F misc_RNA chr2    | 21922993 | 21923288 | + | 0    | 0    |
| ENSG0000(RP11-737G processed_ chr18 | 25953216 | 25953468 | - | 0    | 0    |
| ENSG0000(RP11-171G antisense chr17  | 72839039 | 72839718 | + | 0    | 0    |
| ENSG0000(MIR4693 miRNA chr11        | 1.04E+08 | 1.04E+08 | + | 0    | 0    |
| ENSG0000(MIR4701 miRNA chr12        | 48771975 | 48772037 | - | 0    | 0    |
| ENSG0000(AGAP7P unprocess chr10     | 46109621 | 46131358 | + | 0.47 | 0.31 |
| ENSG0000(RP11-196G antisense chr1   | 1.5E+08  | 1.5E+08  | + | 0.67 | 0.94 |
| ENSG0000(MIR4716 miRNA chr15        | 49169070 | 49169153 | - | 0    | 0    |
| ENSG0000(MIR4492 miRNA chr11        | 1.19E+08 | 1.19E+08 | + | 0    | 0    |
| ENSG0000(RP11-94B1 lincRNA chr18    | 76256891 | 76258337 | + | 0    | 0    |
| ENSG0000(RP11-283C lincRNA chr17    | 20788071 | 20789584 | + | 0    | 0    |
| ENSG0000(NOS2P1 transcribec chr17   | 27651334 | 27665712 | - | 0    | 0    |
| ENSG0000(RPL35AP25 processed_ chr10 | 45940522 | 45940851 | + | 0    | 0    |
| ENSG0000(MIR3168 miRNA chr13        | 41101019 | 41101100 | - | 0    | 0    |
| ENSG0000(RNU4ATAC snRNA chr2        | 1.22E+08 | 1.22E+08 | + | 0    | 0    |
| ENSG0000(ANXA8L1 protein_co chr10   | 46375627 | 46537864 | + | 3.86 | 3.36 |
| ENSG0000(LINC01916 lincRNA chr18    | 65424013 | 65447512 | + | 0    | 0    |
| ENSG0000(MIR4456 miRNA chr5         | 535840   | 535882   | - | 0    | 0    |
| ENSG0000(RP13-270P antisense chr18  | 3255436  | 3261850  | - | 0    | 0    |
| ENSG0000(RP11-861L processed_ chr18 | 68992718 | 68993375 | - | 0    | 0    |
| ENSG0000(RP11-19P2 processed_ chr17 | 27677805 | 27678087 | - | 0    | 0    |
| ENSG0000(RP11-271K unprocess chr17  | 30553697 | 30558962 | + | 0    | 0    |
| ENSG0000(RP11-6N17 lincRNA chr17    | 47863342 | 47865190 | + | 0    | 0    |
| ENSG0000(RP11-822E processed_ chr17 | 21573770 | 21574073 | + | 0    | 0    |
| ENSG0000(RP11-138C processed_ chr18 | 4430945  | 4431152  | + | 0    | 0    |
| ENSG0000(LINC00909 lincRNA chr18    | 74591774 | 74598508 | - | 5.32 | 4.99 |
| ENSG0000(MIR3912 miRNA chr5         | 1.71E+08 | 1.71E+08 | - | 0    | 0    |
| ENSG0000(RN7SL835F misc_RNA chr19   | 16907462 | 16907723 | + | 0    | 0    |
| ENSG0000(RN7SL819F misc_RNA chr17   | 44718861 | 44719130 | - | 0    | 0    |
| ENSG0000(CTD-3096M lincRNA chr18    | 5310396  | 5317664  | + | 0    | 0    |
| ENSG0000(KIR3DP1 transcribec chr19  | 54786355 | 54790318 | + | 0    | 0    |
| ENSG0000(LINC01893 lincRNA chr18    | 76209510 | 76215702 | + | 0    | 0    |
| ENSG0000(RP11-285M lincRNA chr17    | 22676695 | 22692618 | - | 0    | 0    |
| ENSG0000(RP11-671P antisense chr18  | 53480835 | 53568283 | - | 0    | 0    |
| ENSG0000(LINC01925 lincRNA chr18    | 508568   | 515294   | - | 0.6  | 0.99 |
| ENSG0000(MIR4322 miRNA chr19        | 10230413 | 10230485 | + | 0    | 0    |
| ENSG0000(MIR4767 miRNA chrX         | 7147860  | 7147937  | + | 0    | 0    |
| ENSG0000(RP11-15F1 antisense chr18  | 49023703 | 49048474 | + | 0    | 0    |
| ENSG0000(RP11-474I1 antisense chr17 | 75683543 | 75684799 | - | 0    | 0    |
| ENSG0000(RN7SL488F misc_RNA chr1    | 63529613 | 63529898 | - | 0    | 0.39 |
| ENSG0000(CTD-2514K antisense chr17  | 74256896 | 74262020 | - | 0    | 0    |

|                 |                     |                      |          |          |   |       |       |
|-----------------|---------------------|----------------------|----------|----------|---|-------|-------|
| ENSG00000100000 | CTD-2145A antisense | chr17                | 18859354 | 18861466 | - | 0     | 0     |
| ENSG00000100000 | MIR4799             | miRNA chr4           | 1.48E+08 | 1.48E+08 | + | 0     | 0     |
| ENSG00000100000 | RN7SL753F           | misc_RNA chr2        | 2.02E+08 | 2.02E+08 | + | 0     | 0     |
| ENSG00000100000 | RP11-162A           | lincRNA chr18        | 76794732 | 76822295 | - | 0.41  | 0.45  |
| ENSG00000100000 | MIR4786             | miRNA chr2           | 2.4E+08  | 2.4E+08  | - | 0     | 0     |
| ENSG00000100000 | CTD-2031P           | processed_chr5       | 55944656 | 55944733 | + | 0     | 0     |
| ENSG00000100000 | RP11-2681P          | processed_chr18      | 21914369 | 21914660 | - | 0     | 0     |
| ENSG00000100000 | RP11-6813           | sense_intronic chr17 | 29569580 | 29570519 | + | 0.5   | 0.55  |
| ENSG00000100000 | MIR2467             | miRNA chr2           | 2.39E+08 | 2.39E+08 | - | 0     | 0     |
| ENSG00000100000 | RN7SL657F           | misc_RNA chr1        | 1405460  | 1405752  | - | 0.66  | 0.32  |
| ENSG00000100000 | SNORD55             | snoRNA chr1          | 44775864 | 44775943 | + | 0     | 0     |
| ENSG00000100000 | MIR3922             | miRNA chr12          | 1.05E+08 | 1.05E+08 | + | 0     | 0     |
| ENSG00000100000 | RP11-116K           | processed_chr18      | 54142133 | 54142577 | + | 0     | 0     |
| ENSG00000100000 | MIR4433B            | miRNA chr2           | 64340747 | 64340848 | - | 0     | 0     |
| ENSG00000100000 | RP11-640N           | transcribed chr17    | 32003110 | 32006688 | - | 0     | 0     |
| ENSG00000100000 | LINC01444           | lincRNA chr18        | 14969001 | 14970468 | - | 0     | 0     |
| ENSG00000100000 | RP11-20B2           | antisense chr17      | 28892469 | 28893342 | + | 0     | 0     |
| ENSG00000100000 | MIR4694             | miRNA chr11          | 19760004 | 19760083 | - | 0     | 0     |
| ENSG00000100000 | CCDC58P1            | processed_chr18      | 10623876 | 10624305 | - | 0     | 0     |
| ENSG00000100000 | RN7SL644F           | misc_RNA chr10       | 92659044 | 92659302 | + | 0.52  | 0.65  |
| ENSG00000100000 | MIR548AT            | miRNA chr17          | 42494773 | 42494830 | + | 0     | 0     |
| ENSG00000100000 | HNRNPA1P            | processed_chr18      | 72618267 | 72619222 | + | 0     | 0     |
| ENSG00000100000 | MTCO3P13            | unprocessed chr17    | 22530612 | 22531392 | + | 0     | 0     |
| ENSG00000100000 | RN7SL154F           | misc_RNA chr19       | 34421988 | 34422311 | - | 0     | 0     |
| ENSG00000100000 | MIR4801             | miRNA chr4           | 37241910 | 37241991 | - | 0     | 0     |
| ENSG00000100000 | RN7SL448F           | misc_RNA chr17       | 60899891 | 60900185 | + | 0     | 0     |
| ENSG00000100000 | RP11-287D           | protein_coding chr2  | 74211604 | 74363377 | - | 0     | 0.06  |
| ENSG00000100000 | MIR5186             | miRNA chr3           | 1.52E+08 | 1.52E+08 | - | 0     | 0     |
| ENSG00000100000 | RP11-671C           | lincRNA chr18        | 77983020 | 77986610 | - | 0     | 0     |
| ENSG00000100000 | RP11-769C           | antisense chr18      | 738058   | 739444   | + | 0     | 0     |
| ENSG00000100000 | RP11-231E           | antisense chr18      | 74561381 | 74562100 | - | 0     | 0     |
| ENSG00000100000 | MIR4417             | miRNA chr1           | 5564071  | 5564143  | + | 0     | 0     |
| ENSG00000100000 | MIR3660             | miRNA chr5           | 90016621 | 90016720 | - | 0     | 0     |
| ENSG00000100000 | NOTCH2NL            | protein_coding chr1  | 1.46E+08 | 1.46E+08 | - | 12.15 | 11.95 |
| ENSG00000100000 | LINC01894           | lincRNA chr18        | 24933487 | 24987682 | - | 0     | 0     |
| ENSG00000100000 | SNORA77             | snoRNA chr22         | 20126402 | 20126526 | + | 0     | 0     |
| ENSG00000100000 | MIR4258             | miRNA chr1           | 1.55E+08 | 1.55E+08 | + | 0     | 0     |
| ENSG00000100000 | SNRPGP2             | processed_chr18      | 54406889 | 54407114 | - | 0     | 0     |
| ENSG00000100000 | RN7SL602F           | misc_RNA chr2        | 34809233 | 34809556 | - | 1.48  | 1.56  |
| ENSG00000100000 | MIR3134             | miRNA chr3           | 15697298 | 15697371 | - | 0     | 0     |
| ENSG00000100000 | MIR4648             | miRNA chr7           | 2527074  | 2527145  | + | 0     | 0     |
| ENSG00000100000 | MIR3122             | miRNA chr1           | 2.12E+08 | 2.12E+08 | + | 0     | 0     |
| ENSG00000100000 | NEK4P2              | processed_chr17      | 16666107 | 16667118 | - | 0     | 0     |
| ENSG00000100000 | DYNLL2              | protein_coding chr17 | 58083415 | 58095536 | + | 10.79 | 11.48 |
| ENSG00000100000 | RP11-621L           | antisense chr18      | 24364787 | 24367984 | + | 0     | 0     |

|                     |             |       |          |          |   |      |      |
|---------------------|-------------|-------|----------|----------|---|------|------|
| ENSG0000(MIR3125)   | miRNA       | chr2  | 12737367 | 12737444 | + | 0    | 0    |
| ENSG0000(MIR4425)   | miRNA       | chr1  | 25023503 | 25023586 | + | 0    | 0    |
| ENSG0000(RP11-227G) | processed   | chr17 | 32434939 | 32435028 | - | 0    | 0    |
| ENSG0000(MIR4671)   | miRNA       | chr1  | 2.34E+08 | 2.34E+08 | + | 0    | 0    |
| ENSG0000(SNORD39)   | snoRNA      | chr9  | 21524307 | 21524382 | - | 0    | 0    |
| ENSG0000(RN7SL431F) | misc_RNA    | chr1  | 1.54E+08 | 1.54E+08 | - | 0.35 | 0    |
| ENSG0000(MIR4513)   | miRNA       | chr15 | 74788672 | 74788757 | - | 0    | 0    |
| ENSG0000(MIR5007)   | miRNA       | chr13 | 55174454 | 55174548 | + | 0    | 0    |
| ENSG0000(RP11-752P) | processed   | chr18 | 71588537 | 71588884 | + | 0    | 0    |
| ENSG0000(MIR4465)   | miRNA       | chr6  | 1.41E+08 | 1.41E+08 | + | 0    | 0    |
| ENSG0000(RN7SL208F) | misc_RNA    | chr5  | 76836900 | 76837195 | - | 0    | 0    |
| ENSG0000(MIR3193)   | miRNA       | chr20 | 31607186 | 31607240 | + | 0    | 0    |
| ENSG0000(MIR3180-5) | miRNA       | chr16 | 2135977  | 2136129  | - | 0    | 0    |
| ENSG0000(MIR4736)   | miRNA       | chr17 | 58335976 | 58336022 | - | 0    | 0    |
| ENSG0000(RN7SL491F) | misc_RNA    | chr19 | 35414881 | 35415149 | - | 0    | 0    |
| ENSG0000(MIR548AL)  | miRNA       | chr11 | 74399237 | 74399333 | + | 0    | 0    |
| ENSG0000(RP11-342C) | lincRNA     | chr10 | 47588681 | 47599830 | - | 0    | 0    |
| ENSG0000(MIR3913-1) | miRNA       | chr12 | 69584722 | 69584823 | - | 0    | 0    |
| ENSG0000(MIR548AP)  | miRNA       | chr15 | 85825635 | 85825730 | + | 0    | 0    |
| ENSG0000(MIR4470)   | miRNA       | chr8  | 61714788 | 61714859 | + | 0    | 0    |
| ENSG0000(MIR548AC)  | miRNA       | chr1  | 1.17E+08 | 1.17E+08 | - | 0    | 0    |
| ENSG0000(RP11-401F) | antisense   | chr17 | 67224303 | 67225541 | + | 0    | 0    |
| ENSG0000(RP11-434D) | lincRNA     | chr17 | 20576667 | 20578748 | - | 0    | 0    |
| ENSG0000(RN7SL718F) | misc_RNA    | chr19 | 41190927 | 41191229 | - | 0    | 0    |
| ENSG0000(MYH4)      | protein_co  | chr17 | 10443290 | 10469559 | - | 0    | 0    |
| ENSG0000(MIR4653)   | miRNA       | chr7  | 1.01E+08 | 1.01E+08 | + | 0    | 0    |
| ENSG0000(MIR4283-1) | miRNA       | chr7  | 56955785 | 56955864 | - | 0    | 0    |
| ENSG0000(MIR3183)   | miRNA       | chr17 | 1022476  | 1022559  | - | 0    | 0    |
| ENSG0000(RP11-285N) | processed   | chr17 | 22693325 | 22694831 | - | 0    | 0    |
| ENSG0000(CTD-2006C) | antisense   | chr18 | 25302126 | 25302960 | + | 0    | 0    |
| ENSG0000(RP11-338L) | transcribed | chr17 | 29972514 | 29973027 | + | 0    | 0    |
| ENSG0000(RN7SL560F) | misc_RNA    | chr9  | 1.29E+08 | 1.29E+08 | + | 0    | 0.52 |
| ENSG0000(RP4-594I1) | lincRNA     | chr1  | 24538802 | 24556024 | - | 0    | 0    |
| ENSG0000(SDHCP1)    | processed   | chr18 | 68866517 | 68867028 | + | 0    | 0    |
| ENSG0000(RP3-388N1) | lincRNA     | chr8  | 93915734 | 93916682 | - | 0.19 | 0.29 |
| ENSG0000(RP11-945C) | antisense   | chr18 | 5887487  | 5909122  | + | 0    | 0    |
| ENSG0000(RP11-433M) | lincRNA     | chr17 | 48460370 | 48466040 | + | 0    | 0    |
| ENSG0000(snoZ6)     | snoRNA      | chr21 | 44439035 | 44439110 | + | 0    | 0    |
| ENSG0000(RP11-848P) | sense_intr  | chr17 | 30971652 | 30973312 | + | 0.11 | 0.19 |
| ENSG0000(RP11-220C) | antisense   | chr17 | 32627739 | 32686484 | + | 0    | 0    |
| ENSG0000(MIR3648-2) | miRNA       | chr21 | 8986999  | 8987178  | + | 0    | 0    |
| ENSG0000(RP11-110H) | lincRNA     | chr18 | 49499390 | 49501860 | + | 0    | 0.03 |
| ENSG0000(MIR4520-1) | miRNA       | chr17 | 6655440  | 6655509  | - | 0    | 0    |
| ENSG0000(MIR4794)   | miRNA       | chr1  | 64579847 | 64579923 | + | 0    | 0    |
| ENSG0000(RP11-861L) | antisense   | chr18 | 68899781 | 68902255 | - | 0    | 0    |

|                 |           |                      |       |          |          |   |      |      |
|-----------------|-----------|----------------------|-------|----------|----------|---|------|------|
| ENSG00000108465 | MIR4656   | miRNA                | chr7  | 4788565  | 4788639  | - | 0    | 0    |
| ENSG00000108466 | RP11-76K1 | antisense            | chr18 | 7076817  | 7080123  | + | 0    | 0    |
| ENSG00000108467 | MIR5682   | miRNA                | chr3  | 1.21E+08 | 1.21E+08 | + | 0    | 0    |
| ENSG00000108468 | MIR4714   | miRNA                | chr15 | 98784426 | 98784502 | + | 0    | 0    |
| ENSG00000108469 | MIR4705   | miRNA                | chr13 | 1.02E+08 | 1.02E+08 | - | 0    | 0    |
| ENSG00000108470 | MIR5008   | miRNA                | chr1  | 2.28E+08 | 2.28E+08 | - | 0    | 0    |
| ENSG00000108471 | RN7SL697F | misc_RNA             | chrX  | 1.54E+08 | 1.54E+08 | - | 0    | 0    |
| ENSG00000108472 | CTD-2008P | lincRNA              | chr17 | 28256438 | 28265551 | + | 0    | 0    |
| ENSG00000108473 | RP11-605F | lincRNA              | chr17 | 40803744 | 40809296 | + | 0    | 0    |
| ENSG00000108474 | WI2-87327 | lincRNA              | chr20 | 62575590 | 62577507 | + | 0    | 0    |
| ENSG00000108475 | RP11-349A | antisense            | chr17 | 67019934 | 67021743 | - | 0    | 0    |
| ENSG00000108476 | MIR4298   | miRNA                | chr11 | 1859464  | 1859536  | - | 0    | 0    |
| ENSG00000108477 | MIR4650-2 | miRNA                | chr7  | 72697903 | 72697978 | + | 0    | 0    |
| ENSG00000108478 | RP11-640N | processed_transcript | chr17 | 32024469 | 32024583 | - | 0    | 0    |
| ENSG00000108479 | MIR3124   | miRNA                | chr1  | 2.49E+08 | 2.49E+08 | + | 0    | 0    |
| ENSG00000108480 | RN7SL731F | misc_RNA             | chr1  | 10306465 | 10306757 | + | 3.51 | 3.92 |
| ENSG00000108481 | RP11-856N | processed_transcript | chr18 | 10622123 | 10622267 | - | 0    | 0    |
| ENSG00000108482 | MIR3678   | miRNA                | chr17 | 75406069 | 75406162 | + | 0    | 0    |
| ENSG00000108483 | MIR5692A  | miRNA                | chr8  | 12719132 | 12719190 | + | 0    | 0    |
| ENSG00000108484 | RP11-556C | antisense            | chr17 | 63117019 | 63130947 | - | 0    | 0    |
| ENSG00000108485 | RP11-720L | lincRNA              | chr18 | 316737   | 319165   | + | 0    | 0    |
| ENSG00000108486 | CTC-525D6 | processed_transcript | chr19 | 29287011 | 29525752 | - | 0.02 | 0    |
| ENSG00000108487 | RN7SL596F | misc_RNA             | chr11 | 63797784 | 63798071 | - | 0    | 0    |
| ENSG00000108488 | RP4-777O2 | lincRNA              | chr7  | 30525731 | 30533613 | + | 0    | 0    |
| ENSG00000108489 | OTUD7B    | protein_coding       | chr1  | 1.5E+08  | 1.5E+08  | - | 6.63 | 6.65 |
| ENSG00000108490 | MIR4778   | miRNA                | chr2  | 66358249 | 66358328 | - | 0    | 0    |
| ENSG00000108491 | RP11-556C | transcribed_unit     | chr17 | 63182166 | 63182817 | + | 0    | 0    |
| ENSG00000108492 | RN7SL25P  | misc_RNA             | chr9  | 6542094  | 6542353  | + | 0    | 0    |
| ENSG00000108493 | MIR378B   | miRNA                | chr3  | 10330229 | 10330285 | + | 0    | 0    |
| ENSG00000108494 | MIR5706   | miRNA                | chr5  | 1.19E+08 | 1.19E+08 | + | 0    | 0    |
| ENSG00000108495 | SUZ12P1   | transcribed_unit     | chr17 | 30709299 | 30790908 | + | 5.62 | 3.93 |
| ENSG00000108496 | MIR548AR  | miRNA                | chr13 | 1.14E+08 | 1.14E+08 | + | 0    | 0    |
| ENSG00000108497 | RN7SL405F | misc_RNA             | chr17 | 44883986 | 44884274 | + | 0.42 | 0    |
| ENSG00000108498 | RP11-145E | protein_coding       | chr9  | 21802636 | 22032986 | + | 0.53 | 0    |
| ENSG00000108499 | RP11-464D | sense_intronic       | chr17 | 62549726 | 62552121 | + | 0    | 0    |
| ENSG00000108500 | RP13-516N | antisense            | chr17 | 82214227 | 82217352 | + | 0.13 | 0.26 |
| ENSG00000108501 | SNORD95   | snoRNA               | chr5  | 1.81E+08 | 1.81E+08 | - | 0    | 0    |
| ENSG00000108502 | MIR4257   | miRNA                | chr1  | 1.51E+08 | 1.51E+08 | + | 0    | 0    |
| ENSG00000108503 | RN7SL793F | misc_RNA             | chr12 | 1.02E+08 | 1.02E+08 | - | 0    | 0    |
| ENSG00000108504 | RP11-138C | antisense            | chr17 | 47682417 | 47682683 | - | 0.46 | 0    |
| ENSG00000108505 | MIR3162   | miRNA                | chr11 | 59595077 | 59595158 | - | 0    | 0    |
| ENSG00000108506 | RP11-1109 | processed_transcript | chr17 | 22305671 | 22306013 | - | 0    | 0    |
| ENSG00000108507 | MIR4633   | miRNA                | chr5  | 1.29E+08 | 1.29E+08 | + | 0    | 0    |
| ENSG00000108508 | RP11-61D1 | processed_transcript | chr18 | 54525434 | 54525563 | + | 0    | 0    |
| ENSG00000108509 | MIR23C    | miRNA                | chrX  | 20017088 | 20017187 | - | 0    | 0    |



|                     |            |       |          |          |   |      |      |
|---------------------|------------|-------|----------|----------|---|------|------|
| ENSG0000(RP13-650J) | antisense  | chr17 | 82037905 | 82039380 | + | 0    | 0    |
| ENSG0000(SNX19P3)   | processed  | chr18 | 14629832 | 14632806 | - | 0    | 0    |
| ENSG0000(MIR4529)   | miRNA      | chr18 | 55479221 | 55479298 | + | 0    | 0    |
| ENSG0000(MIR4296)   | miRNA      | chr10 | 1.25E+08 | 1.25E+08 | - | 0    | 0    |
| ENSG0000(RN7SL15P)  | misc_RNA   | chrX  | 41345576 | 41345876 | - | 0    | 0.78 |
| ENSG0000(MIR1254-2) | miRNA      | chr10 | 23393405 | 23393467 | + | 0    | 0    |
| ENSG0000(LINC00526) | lincRNA    | chr18 | 5236724  | 5238598  | - | 0.9  | 0.66 |
| ENSG0000(AC010761)  | antisense  | chr17 | 28721487 | 28722877 | - | 0    | 0    |
| ENSG0000(RP11-360L) | antisense  | chr8  | 41609692 | 41621502 | - | 0    | 0    |
| ENSG0000(MIR5692B)  | miRNA      | chr21 | 42950928 | 42951014 | - | 0    | 0    |
| ENSG0000(RN7SL326F) | misc_RNA   | chr1  | 40804846 | 40805141 | + | 0    | 0    |
| ENSG0000(MIR4487)   | miRNA      | chr11 | 47400970 | 47401042 | + | 0    | 0    |
| ENSG0000(MIR4449)   | miRNA      | chr4  | 52712682 | 52712747 | + | 0    | 0    |
| ENSG0000(RP11-784B) | lincRNA    | chr18 | 29518259 | 29548241 | + | 0    | 0    |
| ENSG0000(MAPT-AS1)  | antisense  | chr17 | 45799390 | 45895630 | - | 0    | 0.03 |
| ENSG0000(RN7SL131F) | misc_RNA   | chr1  | 36191915 | 36192170 | + | 0    | 0    |
| ENSG0000(RP11-94B1) | lincRNA    | chr18 | 76227990 | 76233387 | - | 0    | 0    |
| ENSG0000(RP11-678G) | sense_intr | chr18 | 7814118  | 7815730  | + | 0    | 0    |
| ENSG0000(RP1-29G21) | sense_intr | chr17 | 33052107 | 33052867 | - | 0    | 0    |
| ENSG0000(MIR3159)   | miRNA      | chr11 | 18387787 | 18387860 | + | 0    | 0    |
| ENSG0000(MIR3173)   | miRNA      | chr14 | 95137919 | 95137986 | - | 0    | 0    |
| ENSG0000(RP11-192H) | sense_intr | chr17 | 28601827 | 28602284 | - | 0    | 0    |
| ENSG0000(MIR4685)   | miRNA      | chr10 | 98431292 | 98431360 | - | 0    | 0    |
| ENSG0000(RN7SL290F) | misc_RNA   | chr1  | 51995740 | 51996039 | + | 0    | 0    |
| ENSG0000(MIR5588)   | miRNA      | chr3  | 1.85E+08 | 1.85E+08 | - | 0    | 0    |
| ENSG0000(RN7SL592F) | misc_RNA   | chr9  | 2228961  | 2229241  | - | 0    | 0    |
| ENSG0000(MIR4755)   | miRNA      | chr20 | 34049119 | 34049190 | + | 0    | 0    |
| ENSG0000(AC144838)  | unprocess  | chr17 | 21655843 | 21657633 | - | 0    | 0    |
| ENSG0000(RN7SL732F) | misc_RNA   | chrX  | 39786524 | 39786823 | - | 0    | 0    |
| ENSG0000(MIR5591)   | miRNA      | chr4  | 39411910 | 39411974 | + | 0    | 0    |
| ENSG0000(RP11-642M) | lincRNA    | chr17 | 34837871 | 34859046 | - | 0    | 0    |
| ENSG0000(MIR4796)   | miRNA      | chr3  | 1.15E+08 | 1.15E+08 | - | 0    | 0    |
| ENSG0000(PRKCA-AS1) | antisense  | chr17 | 66398069 | 66416854 | - | 0    | 0    |
| ENSG0000(MIR4271)   | miRNA      | chr3  | 49274120 | 49274186 | + | 0    | 0    |
| ENSG0000(RP11-659F) | lincRNA    | chr18 | 67940949 | 67956426 | + | 0    | 0    |
| ENSG0000(RP11-769C) | sense_intr | chr18 | 738058   | 739662   | - | 0.44 | 0.22 |
| ENSG0000(MIR3152)   | miRNA      | chr9  | 18573306 | 18573379 | + | 0    | 0    |
| ENSG0000(RP11-118G) | lincRNA    | chr17 | 33680577 | 33680883 | + | 0    | 0    |
| ENSG0000(KRT18P8)   | processed  | chr18 | 9678248  | 9679493  | - | 0    | 0    |
| ENSG0000(RP11-68I3) | antisense  | chr17 | 29591703 | 29592241 | - | 0    | 0    |
| ENSG0000(MIR5194)   | miRNA      | chr8  | 1.3E+08  | 1.3E+08  | - | 0    | 0    |
| ENSG0000(CTD-2267D) | processed  | chr17 | 40367952 | 40368438 | + | 0    | 0    |
| ENSG0000(MIR3171)   | miRNA      | chr14 | 27633205 | 27633278 | - | 0    | 0    |
| ENSG0000(MIR4798)   | miRNA      | chr4  | 7310450  | 7310524  | + | 0    | 0    |
| ENSG0000(CTD-2006K) | antisense  | chr17 | 74672712 | 74677600 | - | 0    | 0    |

|                                 |       |          |          |   |      |      |
|---------------------------------|-------|----------|----------|---|------|------|
| ENSG0000(RP11-381P antisense)   | chr17 | 20963722 | 20980238 | + | 0    | 0    |
| ENSG0000(MIR3200 miRNA)         | chr22 | 30731557 | 30731641 | + | 0    | 0    |
| ENSG0000(RP11-283C processed)   | chr17 | 20789217 | 20789595 | - | 0    | 0    |
| ENSG0000(KRT8P34 processed)     | chr17 | 39835037 | 39836080 | - | 0    | 0    |
| ENSG0000(RP11-524F antisense)   | chr17 | 17591428 | 17610485 | + | 0.38 | 0.21 |
| ENSG0000(RP13-582C protein_co)  | chr8  | 1.43E+08 | 1.43E+08 | + | 0.13 | 0.67 |
| ENSG0000(SEPT4-AS1 antisense)   | chr17 | 58519837 | 58556977 | + | 0.45 | 0.34 |
| ENSG0000(RP11-92B1 antisense)   | chr17 | 16788248 | 16789234 | - | 0    | 0    |
| ENSG0000(MIR4285 miRNA)         | chr7  | 1.02E+08 | 1.02E+08 | + | 0    | 0    |
| ENSG0000(RN7SL204F misc_RNA)    | chr2  | 2.36E+08 | 2.36E+08 | + | 0    | 0    |
| ENSG0000(MIR3140 miRNA)         | chr4  | 1.52E+08 | 1.52E+08 | - | 0    | 0    |
| ENSG0000(hsa-mir-47 miRNA)      | chr2  | 1.51E+08 | 1.51E+08 | + | 0    | 0    |
| ENSG0000(PRPF19P1 processed)    | chr18 | 66068750 | 66069647 | - | 0    | 0    |
| ENSG0000(RP11-19P2 processed)   | chr17 | 27682476 | 27682737 | + | 0    | 0    |
| ENSG0000(RP11-63N3 lincRNA)     | chr18 | 77622552 | 77624515 | + | 0    | 0    |
| ENSG0000(RP11-178F lincRNA)     | chr18 | 24489375 | 24491080 | + | 0    | 0    |
| ENSG0000(RP11-585K processed)   | chr18 | 68527970 | 68528123 | + | 0    | 0    |
| ENSG0000(MIR4255 miRNA)         | chr1  | 37161563 | 37161634 | + | 0    | 0    |
| ENSG0000(LINC01912 lincRNA)     | chr18 | 68258339 | 68264827 | - | 0    | 0    |
| ENSG0000(RP11-6N17 antisense)   | chr17 | 47980398 | 47996196 | - | 0    | 0    |
| ENSG0000(MIR4752 miRNA)         | chr19 | 54282109 | 54282180 | + | 0    | 0    |
| ENSG0000(RP11-674P lincRNA)     | chr18 | 69212277 | 69214350 | + | 0.05 | 0.06 |
| ENSG0000(RN7SL217F misc_RNA)    | chr3  | 49863375 | 49863660 | - | 0    | 0    |
| ENSG0000(L3MBTL4-A lincRNA)     | chr18 | 6256747  | 6260934  | + | 0    | 0    |
| ENSG0000(MIR4504 miRNA)         | chr14 | 50299855 | 50299946 | - | 0    | 0    |
| ENSG0000(RP11-21G1 transcribed) | chr18 | 10724619 | 10728539 | + | 0    | 0    |
| ENSG0000(CH17-360C protein_co)  | chr10 | 47918739 | 47923524 | + | 0.45 | 0.55 |
| ENSG0000(MIR3117 miRNA)         | chr1  | 66628440 | 66628517 | + | 0    | 0    |
| ENSG0000(MIR3670-2 miRNA)       | chr16 | 16306370 | 16306434 | + | 0    | 0    |
| ENSG0000(MIR3129 miRNA)         | chr2  | 1.89E+08 | 1.89E+08 | - | 0    | 0    |
| ENSG0000(RP11-680C lincRNA)     | chr17 | 11288205 | 11290811 | + | 0    | 0.02 |
| ENSG0000(RP11-219A lincRNA)     | chr17 | 16804627 | 16805707 | + | 0    | 0    |
| ENSG0000(MIR4638 miRNA)         | chr5  | 1.81E+08 | 1.81E+08 | - | 0    | 0    |
| ENSG0000(MIR4718 miRNA)         | chr16 | 12720321 | 12720371 | + | 0    | 0    |
| ENSG0000(RP11-260A lincRNA)     | chr17 | 26989189 | 26999941 | - | 0    | 0    |
| ENSG0000(RP11-498C lincRNA)     | chr17 | 81965632 | 81966589 | - | 0    | 0    |
| ENSG0000(BDP1P processed)       | chr18 | 77435253 | 77437242 | - | 0    | 0    |
| ENSG0000(MIR4511 miRNA)         | chr15 | 65719246 | 65719332 | - | 0    | 0    |
| ENSG0000(RP11-1381J antisense)  | chr17 | 16414524 | 16416689 | - | 0.03 | 0.03 |
| ENSG0000(MIR4505 miRNA)         | chr14 | 73758747 | 73758819 | + | 0    | 0    |
| ENSG0000(DPRXP4 processed)      | chr17 | 30975387 | 30975954 | + | 0    | 0    |
| ENSG0000(MIR3689C miRNA)        | chr9  | 1.35E+08 | 1.35E+08 | - | 0    | 0    |
| ENSG0000(TTC39C-AS antisense)   | chr18 | 23994213 | 24015339 | - | 0.08 | 0    |
| ENSG0000(MIR3924 miRNA)         | chr10 | 57304479 | 57304559 | - | 0    | 0    |
| ENSG0000(RP11-277J antisense)   | chr17 | 73641026 | 73643106 | + | 0    | 0    |

|                 |            |                      |       |          |          |   |      |      |
|-----------------|------------|----------------------|-------|----------|----------|---|------|------|
| ENSG00000100000 | CTD-2653B  | sense_intron         | chr17 | 67524481 | 67525422 | + | 0    | 0    |
| ENSG00000100000 | MIR3131    | miRNA                | chr2  | 2.19E+08 | 2.19E+08 | - | 0    | 0    |
| ENSG00000100000 | MIR3198-1  | miRNA                | chr22 | 17764180 | 17764259 | - | 0    | 0    |
| ENSG00000100000 | MIR3141    | miRNA                | chr5  | 1.55E+08 | 1.55E+08 | - | 0    | 0    |
| ENSG00000100000 | MIR4295    | miRNA                | chr10 | 1.13E+08 | 1.13E+08 | + | 0    | 0    |
| ENSG00000100000 | MIR4772    | miRNA                | chr2  | 1.02E+08 | 1.02E+08 | + | 0    | 0    |
| ENSG00000100000 | RP11-92B1  | lincRNA              | chr17 | 16653904 | 16654787 | + | 0    | 0    |
| ENSG00000100000 | RN7SL237F  | misc_RNA             | chr20 | 38098414 | 38098700 | - | 0    | 0    |
| ENSG00000100000 | RP11-498C  | antisense            | chr17 | 81922899 | 81924511 | + | 0    | 0    |
| ENSG00000100000 | RP11-186B  | processed_transcript | chr17 | 7572826  | 7582024  | + | 1.36 | 1.05 |
| ENSG00000100000 | MIR4420    | miRNA                | chr1  | 30739156 | 30739232 | - | 0    | 0    |
| ENSG00000100000 | PPIAP14    | processed_transcript | chr18 | 5002759  | 5003254  | - | 0    | 0    |
| ENSG00000100000 | MIR4537    | miRNA                | chr14 | 1.06E+08 | 1.06E+08 | - | 0    | 0    |
| ENSG00000100000 | RP11-311F  | antisense            | chr17 | 19737682 | 19738542 | + | 0    | 0    |
| ENSG00000100000 | MIR3148    | miRNA                | chr8  | 29957272 | 29957348 | - | 0    | 0    |
| ENSG00000100000 | RP11-26N1  | lincRNA              | chr18 | 27343252 | 27346110 | + | 0.01 | 0    |
| ENSG00000100000 | CTC-304I17 | antisense            | chr17 | 34142947 | 34147047 | + | 0    | 0    |
| ENSG00000100000 | MIR4637    | miRNA                | chr5  | 14825929 | 14826012 | - | 0    | 0    |
| ENSG00000100000 | MIR4771-1  | miRNA                | chr2  | 87194786 | 87194859 | + | 0    | 0    |
| ENSG00000100000 | MIR5009    | miRNA                | chr15 | 89883931 | 89884030 | - | 0    | 0    |
| ENSG00000100000 | MIR4294    | miRNA                | chr10 | 48985512 | 48985587 | - | 0    | 0    |
| ENSG00000100000 | ERVFRD-3   | transcribed_element  | chr9  | 21929457 | 21931073 | + | 0.07 | 0.17 |
| ENSG00000100000 | MIR5191    | miRNA                | chr1  | 2.02E+08 | 2.02E+08 | + | 0    | 0    |
| ENSG00000100000 | MIR378C    | miRNA                | chr10 | 1.31E+08 | 1.31E+08 | - | 0    | 0    |
| ENSG00000100000 | RP11-802D  | antisense            | chr17 | 29369717 | 29390777 | - | 0.34 | 0.19 |
| ENSG00000100000 | Metazoa_S  | misc_RNA             | chr1  | 1.78E+08 | 1.78E+08 | + | 0    | 0    |
| ENSG00000100000 | MIR4441    | miRNA                | chr2  | 2.39E+08 | 2.39E+08 | - | 0    | 0    |
| ENSG00000100000 | RP11-1109  | processed_transcript | chr17 | 22299134 | 22299467 | - | 0    | 0    |
| ENSG00000100000 | RP13-20L1  | sense_intron         | chr17 | 82400703 | 82401382 | - | 0.26 | 0.3  |
| ENSG00000100000 | CTD-2501B  | protein_coding       | chr17 | 63484823 | 63521848 | + | 0.02 | 0    |
| ENSG00000100000 | MIR1273C   | miRNA                | chr6  | 1.55E+08 | 1.55E+08 | + | 0    | 0    |
| ENSG00000100000 | MIR3154    | miRNA                | chr9  | 1.28E+08 | 1.28E+08 | - | 0    | 0    |
| ENSG00000100000 | MIR5571    | miRNA                | chr22 | 22886267 | 22886379 | + | 0    | 0    |
| ENSG00000100000 | RP11-627G  | lincRNA              | chr18 | 22213778 | 22228029 | + | 0    | 0    |
| ENSG00000100000 | RP11-474I1 | antisense            | chr17 | 75679474 | 75679967 | - | 0    | 0    |
| ENSG00000100000 | RN7SL468F  | misc_RNA             | chr2  | 1.19E+08 | 1.19E+08 | + | 0    | 0    |
| ENSG00000100000 | MIR1273F   | miRNA                | chr1  | 52928674 | 52928772 | + | 0    | 0    |
| ENSG00000100000 | VN1R71P    | processed_transcript | chr17 | 27057399 | 27058221 | + | 0    | 0    |
| ENSG00000100000 | RN7SL404F  | misc_RNA             | chr17 | 64871504 | 64871784 | - | 0    | 0    |
| ENSG00000100000 | RP11-856N  | antisense            | chr18 | 10704297 | 10709599 | + | 0    | 0    |
| ENSG00000100000 | RP11-465I4 | transcribed_element  | chr18 | 69469517 | 69471736 | + | 0    | 0    |
| ENSG00000100000 | MIR4310    | miRNA                | chr15 | 41866495 | 41866551 | - | 0    | 0    |
| ENSG00000100000 | RP11-16C1  | sense_intron         | chr17 | 75370947 | 75373736 | - | 0    | 0    |
| ENSG00000100000 | MIR5696    | miRNA                | chr2  | 1.01E+08 | 1.01E+08 | + | 0    | 0    |
| ENSG00000100000 | DSG2-AS1   | antisense            | chr18 | 31542146 | 31556911 | - | 0    | 0    |

|                                     |          |          |   |      |      |
|-------------------------------------|----------|----------|---|------|------|
| ENSG0000(RP11-143K processed_ chr17 | 73164977 | 73196593 | + | 0    | 0    |
| ENSG0000(RN7SL45P misc_RNA chr17    | 31518432 | 31518729 | + | 0    | 0    |
| ENSG0000(MIR3613 miRNA chr13        | 49996415 | 49996501 | - | 0    | 0    |
| ENSG0000(RP11-526H lincRNA chr18    | 68102116 | 68114377 | + | 0    | 0    |
| ENSG0000(AC087499. processed_ chr17 | 20710425 | 20710533 | - | 0    | 0    |
| ENSG0000(RP11-138E lincRNA chr18    | 10323132 | 10372380 | - | 0    | 0    |
| ENSG0000(RN7SL690F misc_RNA chr20   | 20316755 | 20316994 | + | 0    | 0    |
| ENSG0000(RP11-805F lincRNA chr18    | 15159724 | 15164467 | - | 0    | 0    |
| ENSG0000(MIR1273D miRNA chr1        | 10227718 | 10227803 | + | 0    | 0    |
| ENSG0000(RP11-815I sense_intr chr17 | 18667629 | 18669461 | - | 0.71 | 1.2  |
| ENSG0000(NOS2P4 processed_ chr17    | 16812447 | 16812651 | + | 0    | 0    |
| ENSG0000(RP11-421E sense_intr chr17 | 51249579 | 51251748 | - | 0    | 0    |
| ENSG0000(MIR3921 miRNA chr3         | 99964314 | 99964398 | - | 0    | 0    |
| ENSG0000(MIR3616 miRNA chr20        | 47166967 | 47167058 | + | 0    | 0    |
| ENSG0000(MIR5701-3 miRNA chr15      | 21951242 | 21951323 | + | 0    | 0    |
| ENSG0000(MIR4494 miRNA chr12        | 47364186 | 47364269 | - | 0    | 0    |
| ENSG0000(PRELID3BP processed_ chr17 | 62841101 | 62841645 | + | 0    | 0    |
| ENSG0000(RN7SL525F misc_RNA chr19   | 58543299 | 58543578 | - | 0    | 0.53 |
| ENSG0000(RP11-107K processed_ chr18 | 26348347 | 26349004 | + | 0    | 0    |
| ENSG0000(RP11-343K antisense chr17  | 57912333 | 57922581 | + | 0    | 0    |
| ENSG0000(RN7SL230F misc_RNA chr1    | 1.8E+08  | 1.8E+08  | + | 0    | 0    |
| ENSG0000(RP11-6N17 processed_ chr17 | 47891255 | 47895812 | - | 4.92 | 6.32 |
| ENSG0000(MIR4540 miRNA chr9         | 36864254 | 36864308 | - | 0    | 0    |
| ENSG0000(RP11-799B antisense chr18  | 24113637 | 24121003 | - | 0    | 0    |
| ENSG0000(MIR378F miRNA chr1         | 23929070 | 23929147 | + | 0    | 0    |
| ENSG0000(RP11-846F processed_ chr17 | 22606388 | 22606703 | + | 0    | 0    |
| ENSG0000(MIR3138 miRNA chr4         | 10078611 | 10078692 | - | 0    | 0    |
| ENSG0000(CTD-2104P antisense chr17  | 19649373 | 19649935 | - | 0    | 0    |
| ENSG0000(RN7SL190F misc_RNA chrX    | 1.24E+08 | 1.24E+08 | - | 0    | 0    |
| ENSG0000(MIR4265 miRNA chr2         | 1.09E+08 | 1.09E+08 | - | 0    | 0    |
| ENSG0000(AC100830. antisense chr15  | 64696622 | 64696861 | + | 0    | 0    |
| ENSG0000(SNORD3C snoRNA chr17       | 19189665 | 19190245 | - | 0    | 0    |
| ENSG0000(MIR4474 miRNA chr9         | 20502265 | 20502342 | - | 0    | 0    |
| ENSG0000(SH3GL1P2 processed_ chr17  | 30624413 | 30625494 | + | 0.19 | 0.06 |
| ENSG0000(MIR3181 miRNA chr16        | 50742305 | 50742377 | + | 0    | 0    |
| ENSG0000(PRR29-AS1 lincRNA chr17    | 63996071 | 63999899 | - | 0.05 | 0.15 |
| ENSG0000(RP11-1109 lincRNA chr17    | 22266425 | 22288133 | + | 0    | 0    |
| ENSG0000(ALOX12P1 unprocess chr17   | 30529688 | 30542416 | + | 0    | 0    |
| ENSG0000(MIR4730 miRNA chr17        | 80419418 | 80419493 | + | 0    | 0    |
| ENSG0000(RN7SL440F misc_RNA chr1    | 94150738 | 94151080 | + | 0    | 0.33 |
| ENSG0000(RP11-888D lincRNA chr18    | 9315194  | 9334441  | - | 1.33 | 2.2  |
| ENSG0000(MIR5094 miRNA chr15        | 89850637 | 89850721 | - | 0    | 0    |
| ENSG0000(RP11-387H lincRNA chr17    | 39927742 | 39939601 | + | 0    | 0    |
| ENSG0000(RP11-846F processed_ chr17 | 22704415 | 22705685 | + | 0    | 0    |
| ENSG0000(PRR13P4 processed_ chr18   | 49469803 | 49470223 | + | 0    | 0    |

|                      |           |                |       |          |          |   |      |      |
|----------------------|-----------|----------------|-------|----------|----------|---|------|------|
| ENSG000001034789     | MIR4789   | miRNA          | chr3  | 1.75E+08 | 1.75E+08 | + | 0    | 0    |
| ENSG000001034431     | MIR4431   | miRNA          | chr2  | 52702522 | 52702615 | - | 0    | 0    |
| ENSG000001034630     | RN7SL630F | misc_RNA       | chr12 | 93831076 | 93831372 | + | 0    | 0    |
| ENSG000001034368     | MIR4436B  | miRNA          | chr2  | 1.1E+08  | 1.1E+08  | - | 0    | 0    |
| ENSG000001034434     | RP11-434D | unprocessed    | chr17 | 20542974 | 20544123 | - | 0    | 0    |
| ENSG000001034434     | RP11-344B | antisense      | chr18 | 32287437 | 32290340 | + | 0    | 0    |
| ENSG000001034691     | MIR5691   | miRNA          | chr11 | 9090312  | 9090379  | - | 0    | 0    |
| ENSG000001034491     | RP11-449L | antisense      | chr17 | 73513612 | 73521407 | + | 0    | 0    |
| ENSG000001034592     | MIR5092   | miRNA          | chr3  | 1.25E+08 | 1.25E+08 | - | 0    | 0    |
| ENSG00000103415E     | RP11-215E | lincRNA        | chr17 | 34176538 | 34178166 | + | 0    | 0    |
| ENSG00000103492      | SNORD92   | snoRNA         | chr2  | 28913664 | 28913748 | + | 0    | 0    |
| ENSG00000103439      | SNORD39   | snoRNA         | chr11 | 1.09E+08 | 1.09E+08 | - | 0    | 0    |
| ENSG0000010345089    | MIR5089   | miRNA          | chr17 | 46973017 | 46973100 | + | 0    | 0    |
| ENSG00000103453A     | RP11-453A | lincRNA        | chr17 | 62808500 | 62836371 | + | 0    | 0    |
| ENSG000001034780     | MIR4780   | miRNA          | chr2  | 88082519 | 88082599 | - | 0    | 0    |
| ENSG000001034548W    | MIR548W   | miRNA          | chr16 | 26025237 | 26025310 | + | 0    | 0    |
| ENSG000001034327     | MIR4327   | miRNA          | chr21 | 30375294 | 30375378 | - | 0    | 0    |
| ENSG0000010345316    | RP11-5316 | antisense      | chr18 | 32091295 | 32092119 | - | 0    | 0    |
| ENSG000001034661C    | RP11-661C | sense_intronic | chr17 | 73243093 | 73244706 | + | 0    | 0    |
| ENSG0000010343160-1  | MIR3160-1 | miRNA          | chr11 | 46451805 | 46451889 | - | 0    | 0    |
| ENSG00000103454P     | RP11-454P | transcribed    | chr18 | 15196999 | 15197775 | - | 0.2  | 0    |
| ENSG00000103412P     | AGAP12P   | transcribed    | chr10 | 48009873 | 48031640 | - | 0.44 | 0.97 |
| ENSG0000010341P2     | NCOR1P2   | unprocessed    | chr17 | 22061961 | 22070538 | - | 0    | 0    |
| ENSG000001034792     | MIR4792   | miRNA          | chr3  | 24521362 | 24521435 | - | 0    | 0    |
| ENSG0000010341273E   | MIR1273E  | miRNA          | chr17 | 64425069 | 64425170 | - | 0    | 0    |
| ENSG00000103475L262F | RN7SL262F | misc_RNA       | chrX  | 49152651 | 49152944 | + | 0    | 0    |
| ENSG0000010342P1     | PMM2P1    | processed      | chr18 | 10636670 | 10637399 | + | 0    | 0    |
| ENSG000001034119P2   | RP11-19P2 | unprocessed    | chr17 | 27666749 | 27672803 | - | 0    | 0    |
| ENSG000001034728E    | RP11-728E | lincRNA        | chr17 | 21456513 | 21460215 | - | 0.02 | 0    |
| ENSG000001034542B2   | CTC-542B2 | lincRNA        | chr17 | 31830731 | 31831750 | + | 0    | 0    |
| ENSG00000103475L622F | RN7SL622F | misc_RNA       | chr17 | 67977698 | 67977972 | + | 0    | 0    |
| ENSG000001034145343  | AC145343  | lincRNA        | chr17 | 68096046 | 68101474 | - | 0.22 | 0    |
| ENSG000001034548S    | MIR548S   | miRNA          | chr2  | 11767444 | 11767525 | + | 0    | 0    |
| ENSG000001034765     | MIR4765   | miRNA          | chr2  | 32635255 | 32635331 | + | 0    | 0    |
| ENSG0000010342P      | PPY2P     | transcribed    | chr17 | 28247444 | 28248289 | + | 0    | 0    |
| ENSG000001034419B    | MIR4419B  | miRNA          | chr12 | 1.28E+08 | 1.28E+08 | + | 0    | 0    |
| ENSG000001034692     | MIR4692   | miRNA          | chr11 | 72783530 | 72783592 | + | 0    | 0    |
| ENSG000001034781P    | RP11-781P | antisense      | chr18 | 6954677  | 6957419  | + | 0    | 0    |
| ENSG000001034010761  | AC010761  | antisense      | chr17 | 28732963 | 28743102 | - | 0.79 | 0.12 |
| ENSG0000010343622B   | MIR3622B  | miRNA          | chr8  | 27701673 | 27701767 | - | 0    | 0    |
| ENSG00000103475L664F | RN7SL664F | misc_RNA       | chr3  | 48094801 | 48095105 | - | 0    | 0    |
| ENSG0000010343691    | MIR3691   | miRNA          | chr6  | 5148233  | 5148322  | - | 0    | 0    |
| ENSG000001034655     | MIR4655   | miRNA          | chr7  | 1844180  | 1844253  | - | 0    | 0    |
| ENSG000001034835E    | RP11-835E | lincRNA        | chr18 | 5232876  | 5238526  | - | 0    | 0    |
| ENSG000001034484     | MIR4484   | miRNA          | chr10 | 1.26E+08 | 1.26E+08 | + | 0    | 0    |

|                     |             |       |          |          |   |      |      |
|---------------------|-------------|-------|----------|----------|---|------|------|
| ENSG0000(RN7SL246F) | misc_RNA    | chr12 | 45874035 | 45874330 | + | 0    | 0    |
| ENSG0000(RP11-178F) | sense_intr  | chr18 | 24435364 | 24439638 | + | 0    | 0    |
| ENSG0000(FTLP12)    | processed_  | chr17 | 16391434 | 16391882 | + | 0    | 0    |
| ENSG0000(C1QTNF1-)  | antisense   | chr17 | 79019209 | 79027655 | - | 0.07 | 0    |
| ENSG0000(RBM22P1)   | processed_  | chr18 | 27418884 | 27420435 | - | 0    | 0    |
| ENSG0000(MIR4510)   | miRNA       | chr15 | 35926856 | 35926923 | + | 0    | 0    |
| ENSG0000(RP11-344E) | processed_  | chr17 | 20938023 | 20938344 | - | 0    | 0    |
| ENSG0000(RP11-147L) | antisense   | chr17 | 68246629 | 68247938 | - | 0    | 0    |
| ENSG0000(CTD-2382H) | lincRNA     | chr18 | 78925064 | 78927441 | - | 0    | 0    |
| ENSG0000(MIR3942)   | miRNA       | chr15 | 35372256 | 35372364 | - | 0    | 0    |
| ENSG0000(GJA5)      | protein_co  | chr1  | 1.48E+08 | 1.48E+08 | - | 0.05 | 0.11 |
| ENSG0000(MIR4731)   | miRNA       | chr17 | 15251627 | 15251696 | - | 0    | 0    |
| ENSG0000(MIR3153)   | miRNA       | chr9  | 89312225 | 89312306 | + | 0    | 0    |
| ENSG0000(RP11-7005) | sense_intr  | chr16 | 69240549 | 69241929 | + | 0    | 0    |
| ENSG0000(RP11-285M) | lincRNA     | chr17 | 22692834 | 22693613 | + | 0    | 0    |
| ENSG0000(RP11-3112) | antisense   | chr17 | 33627027 | 33635057 | + | 0    | 0    |
| ENSG0000(CTD-2370N) | protein_co  | chr17 | 31305213 | 31318831 | - | 3.39 | 2.84 |
| ENSG0000(RP11-285E) | lincRNA     | chr17 | 77264180 | 77264776 | - | 0    | 0    |
| ENSG0000(RN7SL200F) | misc_RNA    | chr6  | 34685355 | 34685642 | - | 0    | 0    |
| ENSG0000(RP11-3112) | antisense   | chr17 | 33565764 | 33624122 | + | 0    | 0    |
| ENSG0000(CTB-187M)  | antisense   | chr17 | 19411786 | 19413118 | - | 0    | 0    |
| ENSG0000(RP11-15F1) | antisense   | chr18 | 49116301 | 49126479 | + | 0    | 0    |
| ENSG0000(MIR3190)   | miRNA       | chr19 | 47226942 | 47227021 | + | 0    | 0    |
| ENSG0000(MIR5687)   | miRNA       | chr5  | 55508850 | 55508926 | - | 0    | 0    |
| ENSG0000(RP13-638C) | processed_  | chr17 | 82576616 | 82577391 | - | 0    | 0    |
| ENSG0000(MIR3192)   | miRNA       | chr20 | 18470615 | 18470691 | + | 0    | 0    |
| ENSG0000(RP11-227G) | lincRNA     | chr17 | 32328441 | 32329395 | + | 0    | 0    |
| ENSG0000(MIR4301)   | miRNA       | chr11 | 1.13E+08 | 1.13E+08 | - | 0    | 0    |
| ENSG0000(RN7SL451F) | misc_RNA    | chr1  | 8979576  | 8979874  | - | 0    | 0    |
| ENSG0000(MIR133A1)  | antisense   | chr18 | 21825487 | 21831410 | - | 0    | 0    |
| ENSG0000(MIR548AM)  | miRNA       | chrX  | 16627012 | 16627085 | - | 0    | 0    |
| ENSG0000(SNORD53)   | snoRNA      | chr2  | 28927067 | 28927144 | + | 0    | 0    |
| ENSG0000(TSPOAP1-)  | antisense   | chr17 | 58325450 | 58415766 | + | 0.22 | 0.29 |
| ENSG0000(MIR151B)   | miRNA       | chr14 | 1E+08    | 1E+08    | - | 0    | 0    |
| ENSG0000(LRRC37A7F) | transcribec | chr18 | 31724198 | 31726956 | + | 0.06 | 0.09 |
| ENSG0000(MIR5003)   | miRNA       | chr5  | 1.73E+08 | 1.73E+08 | + | 0    | 0    |
| ENSG0000(CDRT8)     | lincRNA     | chr17 | 15105237 | 15106187 | - | 0    | 0    |
| ENSG0000(MIR2681)   | miRNA       | chr13 | 1.02E+08 | 1.02E+08 | - | 0    | 0    |
| ENSG0000(MIR4307)   | miRNA       | chr14 | 26908642 | 26908725 | + | 0    | 0    |
| ENSG0000(RP11-192H) | antisense   | chr17 | 28573117 | 28574243 | + | 0    | 0    |
| ENSG0000(RN7SL667F) | misc_RNA    | chrX  | 1.53E+08 | 1.53E+08 | - | 0    | 0    |
| ENSG0000(MIR4262)   | miRNA       | chr2  | 11836933 | 11836986 | - | 0    | 0    |
| ENSG0000(CTD-2124B) | sense_intr  | chr18 | 6557822  | 6558654  | + | 0    | 0    |
| ENSG0000(MIR3202-1) | miRNA       | chrX  | 1.54E+08 | 1.54E+08 | + | 0    | 0    |
| ENSG0000(MIR4728)   | miRNA       | chr17 | 39726495 | 39726561 | + | 0    | 0    |

|                     |                    |          |          |   |       |       |
|---------------------|--------------------|----------|----------|---|-------|-------|
| ENSG0000(RP11-672L) | processed_chr18    | 902766   | 906667   | - | 0     | 0     |
| ENSG0000(MIR4790)   | miRNA chr3         | 5250177  | 5250255  | - | 0     | 0     |
| ENSG0000(MIR4674)   | miRNA chr9         | 1.37E+08 | 1.37E+08 | - | 0     | 0     |
| ENSG0000(SRP72P1)   | processed_chr18    | 49495147 | 49496896 | - | 0     | 0     |
| ENSG0000(SNORD3B)   | snoRNA chr17       | 19061912 | 19062669 | + | 0     | 0     |
| ENSG0000(RP11-835E) | processed_chr18    | 5240255  | 5241167  | - | 0     | 0     |
| ENSG0000(ANXA8)     | protein_co chr10   | 47460162 | 47484158 | - | 0.68  | 1.49  |
| ENSG0000(MIR3923)   | miRNA chr3         | 79507887 | 79507969 | + | 0     | 0     |
| ENSG0000(RP11-70L8) | antisense chr9     | 21858910 | 21861926 | - | 0     | 0     |
| ENSG0000(MIR4312)   | miRNA chr15        | 68801850 | 68801925 | - | 0     | 0     |
| ENSG0000(MIR4677)   | miRNA chr1         | 2.43E+08 | 2.43E+08 | + | 0     | 0     |
| ENSG0000(RBP3)      | protein_co chr10   | 47348371 | 47357875 | + | 0     | 0     |
| ENSG0000(RP11-403A) | antisense chr18    | 24076794 | 24099320 | - | 0     | 0     |
| ENSG0000(AC010761)  | antisense chr17    | 28670054 | 28672804 | - | 0     | 0     |
| ENSG0000(RP5-11711) | antisense chr17    | 58330884 | 58332508 | - | 0     | 0     |
| ENSG0000(MIR4486)   | miRNA chr11        | 19575310 | 19575372 | + | 0     | 0     |
| ENSG0000(MIR3684)   | miRNA chr4         | 98997387 | 98997460 | + | 0     | 0     |
| ENSG0000(MIR4283-2) | miRNA chr7         | 63621090 | 63621169 | + | 0     | 0     |
| ENSG0000(MIR4269)   | miRNA chr2         | 2.39E+08 | 2.39E+08 | + | 0     | 0     |
| ENSG0000(RP11-775G) | lincRNA chr18      | 65606090 | 65652053 | + | 0     | 0     |
| ENSG0000(RP11-927P) | antisense chr17    | 64892729 | 64910180 | + | 0     | 0.23  |
| ENSG0000(RP11-466A) | sense_intron chr17 | 32509954 | 32523424 | - | 0     | 0.07  |
| ENSG0000(MIR548A)   | miRNA chr6         | 99124609 | 99124696 | + | 0     | 0     |
| ENSG0000(MIR4699)   | miRNA chr12        | 81158388 | 81158461 | + | 0     | 0     |
| ENSG0000(AC144838)  | processed_chr17    | 22056587 | 22056755 | - | 0     | 0     |
| ENSG0000(SNORD84)   | snoRNA chr6        | 31541101 | 31541178 | - | 0     | 0     |
| ENSG0000(MIR3142)   | miRNA chr5         | 1.6E+08  | 1.6E+08  | + | 0     | 0     |
| ENSG0000(RP11-638L) | processed_chr18    | 67830671 | 67831967 | - | 0     | 0     |
| ENSG0000(RBM8A)     | protein_co chr1    | 1.46E+08 | 1.46E+08 | - | 42.67 | 40.41 |
| ENSG0000(IGLJCOR18) | IG_C_pseudochr18   | 3394889  | 3395312  | + | 0     | 0     |
| ENSG0000(RP11-663N) | lincRNA chr17      | 27237859 | 27241661 | - | 0     | 0     |
| ENSG0000(MIR4472-1) | miRNA chr8         | 1.42E+08 | 1.42E+08 | + | 0     | 0     |
| ENSG0000(MIR4288)   | miRNA chr8         | 28505116 | 28505182 | - | 0     | 0     |
| ENSG0000(MIR3132)   | miRNA chr2         | 2.2E+08  | 2.2E+08  | - | 0     | 0     |
| ENSG0000(MIR4446)   | miRNA chr3         | 1.14E+08 | 1.14E+08 | + | 0     | 0     |
| ENSG0000(CTD-2350C) | antisense chr17    | 28405240 | 28406796 | + | 0.15  | 0     |
| ENSG0000(RP11-21J1) | processed_chr18    | 9102736  | 9254346  | + | 0     | 0     |
| ENSG0000(MIR4686)   | miRNA chr11        | 2173063  | 2173138  | + | 0     | 0     |
| ENSG0000(RN7SL74P)  | misc_RNA chrX      | 97341046 | 97341344 | + | 0     | 0     |
| ENSG0000(RP11-162A) | processed_chr18    | 76884935 | 76888724 | - | 0     | 0     |
| ENSG0000(TRMT112P)  | transcribed chr17  | 62950831 | 62951188 | - | 0     | 0     |
| ENSG0000(RP11-135L) | antisense chr17    | 19334308 | 19336127 | - | 0.68  | 0.38  |
| ENSG0000(RP11-822E) | lincRNA chr17      | 21519514 | 21521269 | + | 0     | 0     |
| ENSG0000(RN7SL693F) | misc_RNA chr19     | 58490797 | 58491075 | + | 0     | 0.46  |
| ENSG0000(PGDP1)     | processed_chr18    | 31962178 | 31963618 | + | 0     | 0     |

|                 |           |             |       |          |          |   |      |       |
|-----------------|-----------|-------------|-------|----------|----------|---|------|-------|
| ENSG00000100000 | CLUHP6    | processed   | chr18 | 32196026 | 32196966 | - | 0    | 0     |
| ENSG00000100000 | MIR3935   | miRNA       | chr16 | 56245520 | 56245623 | + | 0    | 0     |
| ENSG00000100000 | RP11-269G | lincRNA     | chr17 | 63430468 | 63432211 | - | 0.13 | 0.72  |
| ENSG00000100000 | MIR4770   | miRNA       | chrX  | 6383906  | 6383963  | - | 0    | 0     |
| ENSG00000100000 | RP11-192H | antisense   | chr17 | 28607963 | 28609730 | + | 0    | 0     |
| ENSG00000100000 | AC104984  | antisense   | chr17 | 30059339 | 30065677 | - | 0    | 0     |
| ENSG00000100000 | MIR4710   | miRNA       | chr14 | 1.05E+08 | 1.05E+08 | - | 0    | 0     |
| ENSG00000100000 | ARGFXP2   | processed   | chr17 | 32150433 | 32151504 | - | 0    | 0     |
| ENSG00000100000 | FEM1AP2   | processed   | chr18 | 14391913 | 14393909 | - | 0    | 0     |
| ENSG00000100000 | RP13-104F | unprocessε  | chr17 | 64750420 | 64751311 | + | 0    | 0     |
| ENSG00000100000 | MIR548AD  | miRNA       | chr2  | 35471405 | 35471486 | + | 0    | 0     |
| ENSG00000100000 | CTD-2510F | protein_co  | chr17 | 59197566 | 59215226 | + | 0    | 0     |
| ENSG00000100000 | MIR3650   | miRNA       | chr5  | 38557502 | 38557561 | - | 0    | 0     |
| ENSG00000100000 | MIR3195   | miRNA       | chr20 | 62064802 | 62064885 | + | 0    | 0     |
| ENSG00000100000 | LINC01476 | lincRNA     | chr17 | 59430869 | 59526946 | - | 0    | 0     |
| ENSG00000100000 | RN7SL199F | misc_RNA    | chr17 | 46537534 | 46537814 | + | 0    | 0     |
| ENSG00000100000 | RP11-286N | antisense   | chr18 | 5463627  | 5480975  | + | 0    | 0     |
| ENSG00000100000 | RN7SL847F | misc_RNA    | chr10 | 33034655 | 33034924 | - | 0    | 0     |
| ENSG00000100000 | MIR4263   | miRNA       | chr2  | 27996367 | 27996449 | + | 0    | 0     |
| ENSG00000100000 | MIR3118-2 | miRNA       | chr15 | 20832795 | 20832869 | + | 0    | 0     |
| ENSG00000100000 | RN7SL411F | misc_RNA    | chr3  | 40209005 | 40209304 | + | 0    | 0     |
| ENSG00000100000 | MIR548AB  | miRNA       | chr3  | 1.04E+08 | 1.04E+08 | - | 0    | 0     |
| ENSG00000100000 | MIR4524B  | miRNA       | chr17 | 69099542 | 69099656 | + | 0    | 0     |
| ENSG00000100000 | MIR3137   | miRNA       | chr3  | 1.95E+08 | 1.95E+08 | - | 0    | 0     |
| ENSG00000100000 | CTD-2349P | antisense   | chr17 | 30834325 | 30863028 | - | 0    | 0     |
| ENSG00000100000 | RP11-466A | sense_intrε | chr17 | 32529008 | 32530049 | - | 0    | 0     |
| ENSG00000100000 | OR4K7P    | unprocessε  | chr18 | 14570844 | 14571788 | + | 0    | 0     |
| ENSG00000100000 | RP11-16C1 | antisense   | chr17 | 75394123 | 75394963 | + | 0    | 0     |
| ENSG00000100000 | MIR5188   | miRNA       | chr12 | 1.25E+08 | 1.25E+08 | + | 0    | 0     |
| ENSG00000100000 | MIR4291   | miRNA       | chr9  | 93819357 | 93819421 | + | 0    | 0     |
| ENSG00000100000 | RP11-55L4 | antisense   | chr17 | 9638768  | 9645325  | - | 0    | 0     |
| ENSG00000100000 | LINC01899 | lincRNA     | chr18 | 71732615 | 71788128 | - | 0    | 0     |
| ENSG00000100000 | TIMM23    | protein_co  | chr10 | 45972449 | 46003734 | + | 26.2 | 25.88 |
| ENSG00000100000 | MIR3136   | miRNA       | chr3  | 69048958 | 69049035 | - | 0    | 0     |
| ENSG00000100000 | RP11-17M  | processed   | chr17 | 33935437 | 34156000 | - | 0    | 0     |
| ENSG00000100000 | MIR4493   | miRNA       | chr11 | 1.23E+08 | 1.23E+08 | - | 0    | 0     |
| ENSG00000100000 | RP5-1110E | antisense   | chr17 | 40850800 | 40863282 | + | 0    | 0     |
| ENSG00000100000 | GLUD1P2   | transcribec | chr10 | 46759019 | 46786770 | - | 0.79 | 0     |
| ENSG00000100000 | MIR4476   | miRNA       | chr9  | 36893462 | 36893531 | - | 0    | 0     |
| ENSG00000100000 | PCAT18    | lincRNA     | chr18 | 26687621 | 26703638 | - | 0    | 0.05  |
| ENSG00000100000 | MIR4682   | miRNA       | chr10 | 1.2E+08  | 1.2E+08  | + | 0    | 0     |
| ENSG00000100000 | MIR4675   | miRNA       | chr10 | 20551970 | 20552046 | + | 0    | 0     |
| ENSG00000100000 | MIR3180-2 | miRNA       | chr16 | 16309879 | 16309966 | + | 0    | 0     |
| ENSG00000100000 | LINC01908 | lincRNA     | chr18 | 27225742 | 27247188 | + | 0    | 0     |
| ENSG00000100000 | MIR4679-2 | miRNA       | chr10 | 89063335 | 89063411 | - | 0    | 0     |



|                 |             |             |       |          |          |   |      |      |
|-----------------|-------------|-------------|-------|----------|----------|---|------|------|
| ENSG00000100000 | MIR466      | miRNA       | chr3  | 31161704 | 31161787 | - | 0    | 0    |
| ENSG00000100000 | RP11-1231I2 | lincRNA     | chr18 | 78505165 | 78506410 | + | 0    | 0    |
| ENSG00000100000 | RP11-126K   | lincRNA     | chr18 | 73711329 | 73715490 | - | 0    | 0    |
| ENSG00000100000 | RN7SL219F   | misc_RNA    | chr16 | 2013181  | 2013476  | + | 0    | 0    |
| ENSG00000100000 | RN7SL391F   | misc_RNA    | chr12 | 6344554  | 6344837  | + | 1.23 | 1.2  |
| ENSG00000100000 | MIR4999     | miRNA       | chr19 | 8389290  | 8389380  | - | 0    | 0    |
| ENSG00000100000 | MIR4252     | miRNA       | chr1  | 6429834  | 6429896  | - | 0    | 0    |
| ENSG00000100000 | CTD-2517M   | antisense   | chr8  | 1.45E+08 | 1.45E+08 | + | 0    | 0    |
| ENSG00000100000 | RP11-1148   | antisense   | chr17 | 30090366 | 30117497 | - | 0    | 0    |
| ENSG00000100000 | MIR3944     | miRNA       | chr10 | 1.33E+08 | 1.33E+08 | - | 0    | 0    |
| ENSG00000100000 | MIR3128     | miRNA       | chr2  | 1.77E+08 | 1.77E+08 | - | 0    | 0    |
| ENSG00000100000 | RP13-270P   | antisense   | chr18 | 3190397  | 3247277  | + | 0    | 0    |
| ENSG00000100000 | RP11-471L   | lincRNA     | chr17 | 12201600 | 12215267 | + | 0    | 0    |
| ENSG00000100000 | RP11-1381I1 | antisense   | chr17 | 16382152 | 16382669 | - | 0.85 | 0.93 |
| ENSG00000100000 | RSL24D1P9   | processed_  | chr18 | 51612639 | 51613110 | - | 0    | 0    |
| ENSG00000100000 | MIR4324     | miRNA       | chr19 | 49308797 | 49308868 | - | 0    | 0    |
| ENSG00000100000 | RP11-361L   | processed_  | chr16 | 66942712 | 66963256 | + | 0    | 0    |
| ENSG00000100000 | RN7SL656F   | misc_RNA    | chr17 | 46319679 | 46319959 | + | 0    | 0    |
| ENSG00000100000 | RP11-789C   | sense_intr  | chr18 | 8402847  | 8405161  | + | 0.02 | 0.08 |
| ENSG00000100000 | CTD-2510F   | antisense   | chr17 | 59202677 | 59203829 | - | 0    | 0    |
| ENSG00000100000 | RP11-288C   | processed_  | chr18 | 1362445  | 1363873  | - | 0    | 0    |
| ENSG00000100000 | MIR4261     | miRNA       | chr2  | 10192614 | 10192671 | - | 0    | 0    |
| ENSG00000100000 | MIR4779     | miRNA       | chr2  | 86193026 | 86193108 | - | 0    | 0    |
| ENSG00000100000 | MIR4459     | miRNA       | chr5  | 54075518 | 54075583 | - | 0    | 0    |
| ENSG00000100000 | MIR4684     | miRNA       | chr1  | 22719517 | 22719598 | + | 0    | 0    |
| ENSG00000100000 | MIR4652     | miRNA       | chr7  | 93716928 | 93717005 | + | 0    | 0    |
| ENSG00000100000 | RP11-128D   | lincRNA     | chr18 | 68427030 | 68436918 | + | 0    | 0    |
| ENSG00000100000 | RP1-56K13   | processed_  | chr17 | 38996323 | 38996624 | - | 0    | 0    |
| ENSG00000100000 | MIR4782     | miRNA       | chr2  | 1.14E+08 | 1.14E+08 | - | 0    | 0    |
| ENSG00000100000 | MIR4308     | miRNA       | chr14 | 54878113 | 54878193 | - | 0    | 0    |
| ENSG00000100000 | MIR4447     | miRNA       | chr3  | 1.17E+08 | 1.17E+08 | - | 0    | 0    |
| ENSG00000100000 | MIR3121     | miRNA       | chr1  | 1.8E+08  | 1.8E+08  | - | 0    | 0    |
| ENSG00000100000 | RP11-757C   | processed_  | chr18 | 14361434 | 14361943 | - | 0    | 0    |
| ENSG00000100000 | RN7SL811F   | misc_RNA    | chr6  | 44209766 | 44210063 | + | 2.15 | 2.46 |
| ENSG00000100000 | MIR3941     | miRNA       | chr10 | 1.22E+08 | 1.22E+08 | + | 0    | 0    |
| ENSG00000100000 | CTD-2349P   | lincRNA     | chr17 | 30726305 | 30727564 | - | 0.34 | 0    |
| ENSG00000100000 | MIR4733     | miRNA       | chr17 | 31094350 | 31094425 | - | 0    | 0    |
| ENSG00000100000 | RP11-849N   | antisense   | chr17 | 15261015 | 15265707 | + | 0    | 0    |
| ENSG00000100000 | MIR4502     | miRNA       | chr13 | 1.14E+08 | 1.14E+08 | + | 0    | 0    |
| ENSG00000100000 | RP11-204L   | antisense   | chr2  | 1.22E+08 | 1.22E+08 | + | 0.2  | 0.22 |
| ENSG00000100000 | MIR3682     | miRNA       | chr2  | 53849122 | 53849205 | - | 0    | 0    |
| ENSG00000100000 | RP11-173M   | processed_  | chr17 | 27281094 | 27281415 | + | 0    | 0    |
| ENSG00000100000 | MIR3672     | miRNA       | chrX  | 1.21E+08 | 1.21E+08 | + | 0    | 0    |
| ENSG00000100000 | RP13-20L1   | antisense   | chr17 | 82454273 | 82458521 | - | 1.61 | 0.57 |
| ENSG00000100000 | RP11-690G   | transcribec | chr17 | 39238466 | 39250818 | + | 0    | 0    |

|                 |           |                |       |          |          |   |      |      |
|-----------------|-----------|----------------|-------|----------|----------|---|------|------|
| ENSG00000103620 | MIR3680-1 | miRNA          | chr16 | 21506049 | 21506135 | - | 0    | 0    |
| ENSG00000103621 | MIR4768   | miRNA          | chrX  | 17425881 | 17425954 | + | 0    | 0    |
| ENSG00000103622 | POLR3KP2  | processed      | chr17 | 73163035 | 73163359 | - | 0    | 0    |
| ENSG00000103623 | MIR548AQ  | miRNA          | chr3  | 1.86E+08 | 1.86E+08 | - | 0    | 0    |
| ENSG00000103624 | RP11-2803 | processed      | chr18 | 67707929 | 67708246 | - | 0    | 0    |
| ENSG00000103625 | AC010761  | antisense      | chr17 | 28745569 | 28747652 | - | 0    | 0    |
| ENSG00000103626 | RP11-720L | sense_intronic | chr18 | 423744   | 424416   | - | 0    | 0    |
| ENSG00000103627 | CTD-2145A | lincRNA        | chr17 | 18809956 | 18810940 | + | 0.68 | 0.61 |
| ENSG00000103628 | DTX2P1-UF | processed      | chr7  | 76959835 | 77043775 | + | 3.66 | 3.77 |
| ENSG00000103629 | KRT18P55  | transcribed    | chr17 | 28275986 | 28317783 | - | 0    | 0.11 |
| ENSG00000103630 | MIR4443   | miRNA          | chr3  | 48196564 | 48196616 | + | 0    | 0    |
| ENSG00000103631 | RP11-47G4 | lincRNA        | chr18 | 71216704 | 71237102 | - | 0    | 0    |
| ENSG00000103632 | LINC01915 | lincRNA        | chr18 | 24628182 | 24662198 | + | 0.12 | 0.03 |
| ENSG00000103633 | RN7SL518F | misc_RNA       | chr10 | 76242022 | 76242301 | - | 0    | 0    |
| ENSG00000103634 | RP11-793A | antisense      | chr18 | 5956101  | 5960785  | + | 0    | 0    |
| ENSG00000103635 | RP11-1090 | antisense      | chr17 | 12760140 | 12790242 | - | 0.02 | 0.13 |
| ENSG00000103636 | RP11-806L | antisense      | chr18 | 706523   | 707648   | + | 0    | 0    |
| ENSG00000103637 | RNF115    | protein_coding | chr1  | 1.46E+08 | 1.46E+08 | - | 4.43 | 5.38 |
| ENSG00000103638 | RP11-131K | lincRNA        | chr17 | 13909231 | 13911212 | + | 0.29 | 0.35 |
| ENSG00000103639 | MIR1539   | antisense      | chr18 | 49487339 | 49491878 | + | 0    | 0    |
| ENSG00000103640 | MIR3156-2 | miRNA          | chr18 | 14830166 | 14830242 | + | 0    | 0    |
| ENSG00000103641 | MIR1269B  | miRNA          | chr17 | 12917268 | 12917342 | - | 0    | 0    |
| ENSG00000103642 | MIR4435-1 | miRNA          | chr2  | 87629755 | 87629834 | + | 0    | 0    |
| ENSG00000103643 | MIR4436A  | miRNA          | chr2  | 88812370 | 88812454 | + | 0    | 0    |
| ENSG00000103644 | RP11-524F | antisense      | chr17 | 17507351 | 17508308 | + | 0    | 0    |
| ENSG00000103645 | LINC01892 | lincRNA        | chr18 | 5081182  | 5095815  | + | 0    | 0    |
| ENSG00000103646 | CTD-3157E | lincRNA        | chr17 | 15787787 | 15788205 | - | 0    | 0    |
| ENSG00000103647 | MIR548V   | miRNA          | chr8  | 17681578 | 17681657 | - | 0    | 0    |
| ENSG00000103648 | MIR5697   | miRNA          | chr1  | 9967381  | 9967458  | + | 0    | 0    |
| ENSG00000103649 | MIR4304   | miRNA          | chr12 | 1.23E+08 | 1.23E+08 | - | 0    | 0    |
| ENSG00000103650 | MIR5690   | miRNA          | chr6  | 35664717 | 35664789 | - | 0    | 0    |
| ENSG00000103651 | FCGR1CP   | unprocessed    | chr1  | 1.44E+08 | 1.44E+08 | + | 0    | 0    |
| ENSG00000103652 | RP11-638L | lincRNA        | chr18 | 67516546 | 67899619 | + | 0.05 | 0    |
| ENSG00000103653 | RN7SL475F | misc_RNA       | chr1  | 59974757 | 59975054 | - | 0    | 0    |
| ENSG00000103654 | MIR3180-1 | miRNA          | chr16 | 14911220 | 14911313 | + | 0    | 0    |
| ENSG00000103655 | MIR4421   | miRNA          | chr1  | 51059837 | 51059905 | + | 0    | 0    |
| ENSG00000103656 | MIR3164   | miRNA          | chr11 | 69083176 | 69083258 | + | 0    | 0    |
| ENSG00000103657 | H3F3BP2   | unprocessed    | chr17 | 28416922 | 28417492 | + | 0    | 0    |
| ENSG00000103658 | RP11-60A2 | lincRNA        | chr17 | 57771946 | 57834749 | - | 0    | 0    |
| ENSG00000103659 | AA06      | sense_intronic | chr17 | 33529787 | 33533760 | - | 0    | 0    |
| ENSG00000103660 | RP11-183C | processed      | chr18 | 4459230  | 4459458  | + | 0    | 0    |
| ENSG00000103661 | RP11-293E | lincRNA        | chr17 | 45731703 | 45732977 | - | 0    | 0    |
| ENSG00000103662 | RP11-958F | lincRNA        | chr18 | 25055600 | 25056760 | + | 0    | 0    |
| ENSG00000103663 | RP11-419J | lincRNA        | chr18 | 10125340 | 10144406 | + | 0    | 0    |
| ENSG00000103664 | LINC01903 | lincRNA        | chr18 | 67808505 | 67814822 | - | 0    | 0    |

|                     |            |       |          |          |   |      |      |
|---------------------|------------|-------|----------|----------|---|------|------|
| ENSG0000(LINC01984  | lincRNA    | chr17 | 20433206 | 20434285 | + | 0    | 0    |
| ENSG0000(MIR3918    | miRNA      | chr6  | 1.59E+08 | 1.59E+08 | - | 0    | 0    |
| ENSG0000(RN7SL652F  | misc_RNA   | chr11 | 47557534 | 47557833 | - | 0.36 | 0    |
| ENSG0000(MIR1268B   | miRNA      | chr17 | 80098828 | 80098877 | + | 0    | 0    |
| ENSG0000(PIGPP4     | processed_ | chr18 | 9880580  | 9880886  | - | 0    | 0    |
| ENSG0000(MIR3143    | miRNA      | chr6  | 27147626 | 27147688 | + | 0    | 0    |
| ENSG0000(RN7SL605F  | misc_RNA   | chr11 | 57528085 | 57528365 | - | 3.68 | 8.02 |
| ENSG0000(RP11-1109  | processed_ | chr17 | 22301333 | 22301657 | - | 0    | 0    |
| ENSG0000(WDR45BP1   | processed_ | chr17 | 32111562 | 32112590 | - | 0.06 | 0    |
| ENSG0000(RP11-713C  | sense_intr | chr18 | 72743756 | 72745961 | - | 0    | 0    |
| ENSG0000(MIR3978    | miRNA      | chrX  | 1.1E+08  | 1.1E+08  | + | 0    | 0    |
| ENSG0000(MIR5708    | miRNA      | chr8  | 80241389 | 80241473 | + | 0    | 0    |
| ENSG0000(AP000275.  | protein_co | chr21 | 32578822 | 32612281 | - | 1.03 | 0    |
| ENSG0000(NPM1P45    | processed_ | chr17 | 9852748  | 9853306  | - | 0    | 0    |
| ENSG0000(MIR4756    | miRNA      | chr20 | 54068408 | 54068485 | - | 0    | 0    |
| ENSG0000(MIR3659    | miRNA      | chr1  | 38089231 | 38089329 | + | 0    | 0    |
| ENSG0000(MIR5707    | miRNA      | chr7  | 1.59E+08 | 1.59E+08 | + | 0    | 0    |
| ENSG0000(MIR4471    | miRNA      | chr8  | 1E+08    | 1E+08    | + | 0    | 0    |
| ENSG0000(MIR4695    | miRNA      | chr1  | 18883202 | 18883275 | - | 0    | 0    |
| ENSG0000(MIR4539    | miRNA      | chr14 | 1.06E+08 | 1.06E+08 | - | 0    | 0    |
| ENSG0000(RP11-521P  | processed_ | chr17 | 34331862 | 34332228 | - | 0    | 0    |
| ENSG0000(MIR548AG   | miRNA      | chr20 | 60564562 | 60564625 | + | 0    | 0    |
| ENSG0000(CTB-96E2.7 | antisense  | chr17 | 28361601 | 28362859 | - | 0    | 0    |
| ENSG0000(MIR3139    | miRNA      | chr4  | 1.43E+08 | 1.43E+08 | + | 0    | 0    |
| ENSG0000(RP11-68I3. | sense_intr | chr17 | 29644796 | 29645847 | - | 0.06 | 0.06 |
| ENSG0000(AC139085.  | processed_ | chr18 | 76759685 | 76759866 | - | 0    | 0    |
| ENSG0000(GLUD1P8    | unprocess  | chr10 | 47563604 | 47569697 | + | 0    | 0    |
| ENSG0000(BNIP3P3    | processed_ | chr18 | 15247429 | 15247997 | - | 0    | 0    |
| ENSG0000(MIR3612    | miRNA      | chr12 | 1.28E+08 | 1.28E+08 | + | 0    | 0    |
| ENSG0000(RP11-529J. | processed_ | chr18 | 71028770 | 71033056 | + | 0    | 0    |
| ENSG0000(MIR3929    | miRNA      | chr18 | 35934088 | 35934142 | - | 0    | 0    |
| ENSG0000(RP11-465I4 | antisense  | chr18 | 69483627 | 69618694 | - | 0    | 0    |
| ENSG0000(RP11-451L  | lincRNA    | chr18 | 78480549 | 78484867 | + | 0    | 0    |
| ENSG0000(TUFMP1     | processed_ | chr17 | 27082690 | 27084036 | - | 0    | 0    |
| ENSG0000(RN7SL279F  | misc_RNA   | chr16 | 70276069 | 70276352 | + | 0    | 0    |
| ENSG0000(MIR548AK   | miRNA      | chr10 | 12130760 | 12130816 | - | 0    | 0    |
| ENSG0000(RP11-13N1  | antisense  | chr18 | 21673628 | 21682561 | + | 0    | 0    |
| ENSG0000(MIR3151    | miRNA      | chr8  | 1.03E+08 | 1.03E+08 | + | 0    | 0    |
| ENSG0000(MIR3690    | miRNA      | chrX  | 1293918  | 1293992  | + | 0    | 0    |
| ENSG0000(MIR3690    | miRNA      | chrY  | 1293918  | 1293992  | + | 0    | 0    |
| ENSG0000(MIR4664    | miRNA      | chr8  | 1.44E+08 | 1.44E+08 | - | 0    | 0    |
| ENSG0000(RP11-74H8  | antisense  | chr17 | 67032409 | 67033290 | - | 0    | 0    |
| ENSG0000(RARA-AS1   | antisense  | chr17 | 40340867 | 40343136 | - | 1.7  | 1.45 |
| ENSG0000(MIR548AJ1  | miRNA      | chr6  | 1.32E+08 | 1.32E+08 | - | 0    | 0    |
| ENSG0000(RP11-25I11 | lincRNA    | chr18 | 30954820 | 30980917 | - | 0    | 0    |

|                 |           |             |       |          |          |   |         |         |
|-----------------|-----------|-------------|-------|----------|----------|---|---------|---------|
| ENSG00000100000 | RP11-672L | antisense   | chr18 | 894435   | 907680   | - | 0       | 0       |
| ENSG00000100000 | MIR4508   | miRNA       | chr15 | 23562062 | 23562131 | - | 0       | 0       |
| ENSG00000100000 | RN7SL708F | misc_RNA    | chr19 | 49081332 | 49081630 | + | 0       | 0       |
| ENSG00000100000 | RP11-1376 | antisense   | chr17 | 82153430 | 82154815 | + | 0       | 0       |
| ENSG00000100000 | RPL17     | protein_co  | chr18 | 49488453 | 49492523 | - | 1018.42 | 1011.96 |
| ENSG00000100000 | MIR4267   | miRNA       | chr2  | 1.1E+08  | 1.1E+08  | - | 0       | 0       |
| ENSG00000100000 | RP11-173N | processed   | chr17 | 27351858 | 27352584 | - | 0.18    | 0.2     |
| ENSG00000100000 | RN7SL378F | misc_RNA    | chr5  | 82078427 | 82078724 | + | 0       | 0       |
| ENSG00000100000 | MAFG-AS1  | antisense   | chr17 | 81927829 | 81930753 | + | 1.3     | 1.03    |
| ENSG00000100000 | RP11-118G | lincRNA     | chr17 | 33688803 | 33689174 | + | 0       | 0       |
| ENSG00000100000 | RP11-5A19 | protein_co  | chr16 | 67163385 | 67165815 | + | 1.69    | 1.33    |
| ENSG00000100000 | MIR4460   | miRNA       | chr5  | 1.29E+08 | 1.29E+08 | - | 0       | 0       |
| ENSG00000100000 | LINC01970 | lincRNA     | chr17 | 82290046 | 82292814 | - | 0.14    | 0.21    |
| ENSG00000100000 | RP11-815I | transcribed | chr17 | 18704640 | 18704769 | + | 9.92    | 0       |
| ENSG00000100000 | MIR4774   | miRNA       | chr2  | 1.69E+08 | 1.69E+08 | + | 0       | 0       |
| ENSG00000100000 | RP11-31I2 | antisense   | chr17 | 33534110 | 33541339 | + | 0       | 0       |
| ENSG00000100000 | LARP7P3   | processed   | chr18 | 70412055 | 70412391 | + | 0       | 0       |
| ENSG00000100000 | MIR548AE  | miRNA       | chr5  | 58530043 | 58530109 | - | 0       | 0       |
| ENSG00000100000 | RP11-156L | antisense   | chr17 | 62699244 | 62737922 | + | 0       | 0       |
| ENSG00000100000 | SNORD53   | snoRNA      | chr2  | 28927983 | 28928060 | + | 0       | 0       |
| ENSG00000100000 | RP11-440L | processed   | chr18 | 51687525 | 51688209 | - | 0       | 0       |
| ENSG00000100000 | RP11-82O1 | transcribed | chr17 | 29775747 | 29776701 | - | 0       | 0       |
| ENSG00000100000 | RP11-94B1 | lincRNA     | chr18 | 76254292 | 76255214 | - | 0       | 0       |
| ENSG00000100000 | MIR4681   | miRNA       | chr10 | 1.19E+08 | 1.19E+08 | + | 0       | 0       |
| ENSG00000100000 | MIR4284   | miRNA       | chr7  | 73711317 | 73711397 | + | 0       | 0       |
| ENSG00000100000 | MIR3144   | miRNA       | chr6  | 1.2E+08  | 1.2E+08  | + | 0       | 0       |
| ENSG00000100000 | RN7SL648F | misc_RNA    | chrX  | 74242608 | 74242908 | - | 0       | 0       |
| ENSG00000100000 | RP11-883A | lincRNA     | chr18 | 10594590 | 10604798 | + | 0.15    | 0.24    |
| ENSG00000100000 | SNORA74   | snoRNA      | chr10 | 45984610 | 45984810 | + | 0       | 0       |
| ENSG00000100000 | MIR4438   | miRNA       | chr2  | 2.14E+08 | 2.14E+08 | + | 0       | 0       |
| ENSG00000100000 | RN7SL5P   | misc_RNA    | chr9  | 9442060  | 9442380  | + | 0       | 0       |
| ENSG00000100000 | RP11-1157 | antisense   | chr18 | 14816151 | 14825249 | - | 0       | 0       |
| ENSG00000100000 | RP11-354P | antisense   | chr17 | 30122429 | 30126118 | - | 0       | 0       |
| ENSG00000100000 | RN7SL339F | misc_RNA    | chr5  | 1.71E+08 | 1.71E+08 | + | 0       | 0       |
| ENSG00000100000 | RP11-848P | lincRNA     | chr17 | 30964935 | 30965500 | - | 0       | 0       |
| ENSG00000100000 | MIR4427   | miRNA       | chr1  | 2.34E+08 | 2.34E+08 | + | 0       | 0       |
| ENSG00000100000 | RN7SL375F | misc_RNA    | chr13 | 60034465 | 60034762 | - | 0       | 0       |
| ENSG00000100000 | KYNUP2    | processed   | chr17 | 19082437 | 19084834 | + | 0       | 0       |
| ENSG00000100000 | RP11-849F | antisense   | chr17 | 8365563  | 8381328  | + | 0       | 0       |
| ENSG00000100000 | RP11-799B | lincRNA     | chr18 | 24159509 | 24162211 | - | 0.19    | 0       |
| ENSG00000100000 | RP11-296E | antisense   | chr18 | 21380286 | 21451017 | - | 0       | 0       |
| ENSG00000100000 | RP11-403A | lincRNA     | chr18 | 23957754 | 23982556 | - | 0       | 0.13    |
| ENSG00000100000 | RN7SL444F | misc_RNA    | chr1  | 1.51E+08 | 1.51E+08 | - | 0       | 0       |
| ENSG00000100000 | LINC01900 | lincRNA     | chr18 | 21981121 | 22051159 | + | 0       | 0       |
| ENSG00000100000 | ZNF488    | protein_co  | chr10 | 47365496 | 47384273 | - | 0.16    | 0.16    |

|                     |             |       |          |          |   |       |       |
|---------------------|-------------|-------|----------|----------|---|-------|-------|
| ENSG0000(CXADRP3    | transcribed | chr18 | 14477955 | 14499278 | - | 0     | 0     |
| ENSG0000(MIR4506    | miRNA       | chr14 | 93948226 | 93948302 | - | 0     | 0     |
| ENSG0000(CTC-304I17 | sense_intr  | chr17 | 34118347 | 34118882 | - | 0     | 0     |
| ENSG0000(MIR3670-3  | miRNA       | chr16 | 18405698 | 18405762 | - | 0     | 0     |
| ENSG0000(RN7SL624F  | misc_RNA    | chr17 | 2199762  | 2200039  | + | 0     | 0     |
| ENSG0000(RP11-17M:  | antisense   | chr18 | 76491652 | 76493918 | + | 0.1   | 0.22  |
| ENSG0000(RP11-384E  | lincRNA     | chr18 | 71000477 | 71011490 | - | 0     | 0     |
| ENSG0000(RP1-56K13  | antisense   | chr17 | 38918801 | 38921769 | - | 0     | 0.19  |
| ENSG0000(LINC01906  | lincRNA     | chr18 | 14877611 | 14884052 | + | 0     | 0     |
| ENSG0000(CYP4F35P   | transcribed | chr18 | 14337423 | 14342524 | + | 0     | 0     |
| ENSG0000(RP11-19P2  | lincRNA     | chr17 | 27661549 | 27663658 | - | 0     | 0     |
| ENSG0000(MIR4330    | miRNA       | chrX  | 1.51E+08 | 1.51E+08 | + | 0     | 0     |
| ENSG0000(RNASEH1P   | processed_  | chr17 | 20901939 | 20902680 | - | 0     | 0     |
| ENSG0000(CTD-2349P  | sense_intr  | chr17 | 30781493 | 30782221 | - | 0     | 0     |
| ENSG0000(MIR3118-4  | miRNA       | chr15 | 21843750 | 21843824 | + | 0     | 0     |
| ENSG0000(RP11-227G  | processed_  | chr17 | 32324431 | 32360700 | + | 0     | 0     |
| ENSG0000(RP11-271K  | transcribed | chr17 | 31038575 | 31059121 | - | 0     | 0     |
| ENSG0000(RP11-387H  | lincRNA     | chr17 | 40012226 | 40014705 | - | 0.33  | 0.27  |
| ENSG0000(RP11-649A  | sense_intr  | chr17 | 75138416 | 75141350 | - | 0     | 0     |
| ENSG0000(RP11-720N  | sense_intr  | chr17 | 27465112 | 27465541 | + | 0     | 0     |
| ENSG0000(RN7SL49P   | misc_RNA    | chr13 | 45002150 | 45002447 | + | 0     | 0.4   |
| ENSG0000(MIR4292    | miRNA       | chr9  | 1.37E+08 | 1.37E+08 | + | 0     | 0     |
| ENSG0000(SEC22B     | protein_co  | chr1  | 1.2E+08  | 1.2E+08  | - | 20.88 | 20.26 |
| ENSG0000(MIR3907    | miRNA       | chr7  | 1.51E+08 | 1.51E+08 | - | 0     | 0     |
| ENSG0000(RN7SL300F  | misc_RNA    | chr3  | 1.53E+08 | 1.53E+08 | - | 0     | 0     |
| ENSG0000(RN7SL376F  | misc_RNA    | chr15 | 40615665 | 40615928 | - | 0     | 0     |
| ENSG0000(MIR1273G   | miRNA       | chr1  | 52940314 | 52940413 | + | 0     | 0     |
| ENSG0000(FSBP       | protein_co  | chr8  | 94372170 | 94436952 | - | 3.2   | 2.13  |
| ENSG0000(EEF1E1-BL  | protein_co  | chr6  | 8015726  | 8102530  | - | 0     | 0     |
| ENSG0000(MIR3177    | miRNA       | chr16 | 1734985  | 1735066  | + | 0     | 0     |
| ENSG0000(MIR4422    | miRNA       | chr1  | 55225641 | 55225723 | + | 0     | 0     |
| ENSG0000(MIR3939    | miRNA       | chr6  | 1.67E+08 | 1.67E+08 | - | 0     | 0     |
| ENSG0000(MIR548AG   | miRNA       | chr4  | 60922619 | 60922684 | + | 0     | 0     |
| ENSG0000(MIR3123    | miRNA       | chr1  | 2.41E+08 | 2.41E+08 | + | 0     | 0     |
| ENSG0000(RP1-66C13  | processed_  | chr17 | 27707178 | 27707250 | + | 0     | 0     |
| ENSG0000(CCND3P2    | processed_  | chr18 | 76751305 | 76751841 | + | 0     | 0     |
| ENSG0000(AC010761.  | antisense   | chr17 | 28749731 | 28750079 | - | 0     | 0     |
| ENSG0000(MIR548X    | miRNA       | chr21 | 18686090 | 18686164 | - | 0     | 0     |
| ENSG0000(LINC01029  | lincRNA     | chr18 | 77971294 | 77993722 | - | 0     | 0     |
| ENSG0000(RP11-751H  | lincRNA     | chr18 | 77180106 | 77235430 | + | 0     | 0     |
| ENSG0000(RP11-20B2  | antisense   | chr17 | 28926275 | 28944749 | + | 0     | 0     |
| ENSG0000(MIR4276    | miRNA       | chr4  | 1.74E+08 | 1.74E+08 | + | 0     | 0     |
| ENSG0000(MIR4287    | miRNA       | chr8  | 27886039 | 27886116 | - | 0     | 0     |
| ENSG0000(MIR3689D:  | miRNA       | chr9  | 1.35E+08 | 1.35E+08 | - | 0     | 0     |
| ENSG0000(MIR4797    | miRNA       | chr3  | 1.97E+08 | 1.97E+08 | - | 0     | 0     |

|                     |            |       |          |          |   |      |      |
|---------------------|------------|-------|----------|----------|---|------|------|
| ENSG0000(RP1-48J14) | processed  | chr17 | 16893198 | 16893429 | - | 0    | 0    |
| ENSG0000(MIR4514)   | miRNA      | chr15 | 80997417 | 80997473 | - | 0    | 0    |
| ENSG0000(MIR5704)   | miRNA      | chr3  | 1.32E+08 | 1.32E+08 | - | 0    | 0    |
| ENSG0000(MIR4495)   | miRNA      | chr12 | 97939056 | 97939121 | - | 0    | 0    |
| ENSG0000(RP11-805L) | processed  | chr17 | 31759795 | 31761385 | + | 0    | 0    |
| ENSG0000(MIR4516)   | miRNA      | chr16 | 2133119  | 2133204  | + | 0    | 0    |
| ENSG0000(MIR3174)   | miRNA      | chr15 | 90006755 | 90006841 | + | 0    | 0    |
| ENSG0000(MIR3689A)  | miRNA      | chr9  | 1.35E+08 | 1.35E+08 | - | 0    | 0    |
| ENSG0000(MIR4289)   | miRNA      | chr9  | 88745836 | 88745905 | - | 0    | 0    |
| ENSG0000(MIR4489)   | miRNA      | chr11 | 65649192 | 65649253 | + | 0    | 0    |
| ENSG0000(MIR3914-1) | miRNA      | chr7  | 71307672 | 71307770 | - | 0    | 0    |
| ENSG0000(MIR4748)   | miRNA      | chr19 | 10780254 | 10780335 | + | 0    | 0    |
| ENSG0000(PDLIM1P2)  | processed  | chr17 | 21444833 | 21445439 | - | 0    | 0    |
| ENSG0000(RN7SL73P)  | misc_RNA   | chr3  | 1.96E+08 | 1.96E+08 | + | 0.52 | 1.15 |
| ENSG0000(RP11-169I) | processed  | chr17 | 65185319 | 65185482 | - | 0    | 0    |
| ENSG0000(RN7SL783F) | misc_RNA   | chr13 | 1.1E+08  | 1.1E+08  | - | 0    | 0    |
| ENSG0000(DSCAS)     | antisense  | chr18 | 31101588 | 31162789 | + | 0    | 0    |
| ENSG0000(Y_RNA)     | misc_RNA   | chr17 | 36285312 | 36285413 | + | 0    | 0    |
| ENSG0000(RN7SL311F) | misc_RNA   | chr4  | 1.39E+08 | 1.39E+08 | + | 0    | 0    |
| ENSG0000(RN7SL357F) | misc_RNA   | chr4  | 56805834 | 56806131 | + | 0    | 0    |
| ENSG0000(AC018696)  | processed  | chr2  | 90359809 | 90360032 | - | 0.7  | 0    |
| ENSG0000(MIR4696)   | miRNA      | chr11 | 74720268 | 74720337 | - | 0    | 0    |
| ENSG0000(RN7SL96P)  | misc_RNA   | chr2  | 38936876 | 38937158 | - | 1.47 | 0    |
| ENSG0000(RP11-737C) | antisense  | chr18 | 2948238  | 2960756  | + | 0.12 | 0    |
| ENSG0000(RP11-20B2) | antisense  | chr17 | 28944796 | 28945394 | + | 0    | 0    |
| ENSG0000(RP11-583F) | lincRNA    | chr17 | 64943262 | 64951054 | + | 0.02 | 0.01 |
| ENSG0000(RP11-434D) | processed  | chr17 | 20532248 | 20532881 | - | 0.11 | 0    |
| ENSG0000(MIR3685)   | miRNA      | chr12 | 95309923 | 95309984 | + | 0    | 0    |
| ENSG0000(RN7SL543F) | misc_RNA   | chr16 | 67019519 | 67019817 | + | 0    | 0    |
| ENSG0000(MIR4280)   | miRNA      | chr5  | 87114879 | 87114954 | - | 0    | 0    |
| ENSG0000(MIR5692C)  | miRNA      | chr5  | 1.36E+08 | 1.36E+08 | - | 0    | 0    |
| ENSG0000(CTD-2532D) | lincRNA    | chr17 | 73831572 | 73836019 | - | 0    | 0    |
| ENSG0000(MIR5195)   | miRNA      | chr14 | 1.07E+08 | 1.07E+08 | - | 0    | 0    |
| ENSG0000(MIR3146)   | miRNA      | chr7  | 19705358 | 19705436 | - | 0    | 0    |
| ENSG0000(LINC00668) | lincRNA    | chr18 | 6919496  | 6929966  | - | 0    | 0    |
| ENSG0000(ARL2BPP1)  | processed  | chr18 | 76703444 | 76704254 | - | 0    | 0    |
| ENSG0000(RP11-277J) | lincRNA    | chr17 | 73662568 | 73663848 | - | 0    | 0    |
| ENSG0000(RP11-563H) | processed  | chr18 | 67375133 | 67375305 | + | 0    | 0    |
| ENSG0000(UBE2CP2)   | processed  | chr18 | 22900486 | 22900995 | - | 0.44 | 0.32 |
| ENSG0000(RN7SL577F) | misc_RNA   | chr15 | 49042341 | 49042643 | - | 0    | 0    |
| ENSG0000(RP11-739L) | antisense  | chr18 | 22699481 | 22933764 | - | 0.12 | 0.14 |
| ENSG0000(LINC01387) | lincRNA    | chr18 | 6511416  | 6590653  | + | 0    | 0    |
| ENSG0000(RP11-752P) | processed  | chr18 | 71665148 | 71665525 | + | 0    | 0    |
| ENSG0000(RP11-296E) | sense_intr | chr18 | 21316878 | 21317795 | + | 0.5  | 0    |
| ENSG0000(MIR4749)   | miRNA      | chr19 | 49854591 | 49854651 | + | 0    | 0    |

|                 |            |                      |       |          |          |   |        |        |
|-----------------|------------|----------------------|-------|----------|----------|---|--------|--------|
| ENSG00000108445 | MIR4445    | miRNA                | chr3  | 1.1E+08  | 1.1E+08  | + | 0      | 0      |
| ENSG00000108439 | MIR4319    | miRNA                | chr18 | 44970082 | 44970166 | - | 0      | 0      |
| ENSG00000108440 | Y_RNA      | misc_RNA             | chr1  | 31503631 | 31503744 | - | 0      | 0      |
| ENSG00000108442 | GACAT2     | antisense            | chr18 | 8695856  | 8707621  | - | 0      | 0.34   |
| ENSG00000108443 | RP11-293E  | lincRNA              | chr17 | 45733353 | 45734669 | - | 0      | 0      |
| ENSG00000108444 | MIR4266    | miRNA                | chr2  | 1.09E+08 | 1.09E+08 | - | 0      | 0      |
| ENSG00000108445 | AC100830   | antisense            | chr15 | 64695041 | 64695594 | + | 0.13   | 0.57   |
| ENSG00000108446 | RP11-269G  | lincRNA              | chr17 | 63454993 | 63455817 | + | 0      | 0      |
| ENSG00000108447 | TXNIP      | protein_coding       | chr1  | 1.46E+08 | 1.46E+08 | - | 120.79 | 115.81 |
| ENSG00000108448 | RP11-163C  | unprocessed_lincRNA  | chr11 | 49843488 | 49846533 | - | 0      | 0      |
| ENSG00000108449 | CTB-4116.2 | lincRNA              | chr17 | 8967523  | 8976995  | + | 0      | 0      |
| ENSG00000108450 | MIR4725    | miRNA                | chr17 | 31575269 | 31575358 | + | 0      | 0      |
| ENSG00000108451 | CTD-2515C  | lincRNA              | chr18 | 29278509 | 29361963 | - | 0      | 0      |
| ENSG00000108452 | MIR544B    | miRNA                | chr3  | 1.25E+08 | 1.25E+08 | + | 0      | 0      |
| ENSG00000108453 | RP11-927P  | unprocessed_lincRNA  | chr17 | 64778842 | 64778937 | - | 0      | 0      |
| ENSG00000108454 | RP11-699A  | lincRNA              | chr18 | 21240675 | 21241371 | - | 0      | 0      |
| ENSG00000108455 | MIR4735    | miRNA                | chr1  | 1.97E+08 | 1.97E+08 | - | 0      | 0      |
| ENSG00000108456 | RP11-16C1  | antisense            | chr17 | 75344405 | 75373662 | + | 0      | 0      |
| ENSG00000108457 | MIR4519    | miRNA                | chr16 | 30875266 | 30875323 | - | 0      | 0      |
| ENSG00000108458 | ESRG       | sense_intronic       | chr3  | 54632122 | 54639857 | - | 0.33   | 0.3    |
| ENSG00000108459 | MIR5694    | miRNA                | chr14 | 67441855 | 67441930 | - | 0      | 0      |
| ENSG00000108460 | RP11-510D  | lincRNA              | chr18 | 28785068 | 28789260 | + | 0      | 0      |
| ENSG00000108461 | RP11-736G  | lincRNA              | chr18 | 71890409 | 71944577 | - | 0      | 0      |
| ENSG00000108462 | MIR3671    | miRNA                | chr1  | 65057755 | 65057842 | - | 0      | 0      |
| ENSG00000108463 | RP11-567L  | antisense            | chr17 | 59400488 | 59403303 | - | 0      | 0      |
| ENSG00000108464 | RP11-267C  | processed_transcript | chr18 | 51433437 | 51434783 | + | 0      | 0      |
| ENSG00000108465 | MIR4488    | miRNA                | chr11 | 61508596 | 61508657 | + | 0      | 0      |
| ENSG00000108466 | RP11-746N  | transcribed_unit     | chr17 | 20981489 | 20981654 | + | 0      | 0      |
| ENSG00000108467 | GATA6-AS1  | lincRNA              | chr18 | 22166898 | 22168968 | - | 6.85   | 8.49   |
| ENSG00000108468 | MIR4764    | miRNA                | chr22 | 33436582 | 33436669 | - | 0      | 0      |
| ENSG00000108469 | LINC02079  | lincRNA              | chr17 | 39026715 | 39027110 | - | 0      | 0      |
| ENSG00000108470 | RP11-94B1  | lincRNA              | chr18 | 76247725 | 76251388 | + | 0      | 0      |
| ENSG00000108471 | MIR4309    | miRNA                | chr14 | 1.03E+08 | 1.03E+08 | + | 0      | 0      |
| ENSG00000108472 | MIR548Z    | miRNA                | chr12 | 64622509 | 64622605 | - | 0      | 0      |
| ENSG00000108473 | MIR4477B   | miRNA                | chr9  | 63819574 | 63819654 | + | 0      | 0      |
| ENSG00000108474 | MIR3609    | miRNA                | chr7  | 98881650 | 98881729 | + | 0      | 0      |
| ENSG00000108475 | SRGAP2     | protein_coding       | chr1  | 2.06E+08 | 2.06E+08 | + | 32.08  | 29.42  |
| ENSG00000108476 | RP11-452I  | antisense            | chr17 | 74747319 | 74748912 | - | 0      | 0.14   |
| ENSG00000108477 | MIR4659A   | miRNA                | chr8  | 6745164  | 6745244  | + | 0      | 0      |
| ENSG00000108478 | MIR4509-2  | miRNA                | chr15 | 28426491 | 28426584 | + | 0      | 0      |
| ENSG00000108479 | MIR4690    | miRNA                | chr11 | 65636310 | 65636369 | + | 0      | 0      |
| ENSG00000108480 | AC015818   | processed_transcript | chr17 | 20526102 | 20526210 | + | 0      | 0      |
| ENSG00000108481 | MIR3649    | miRNA                | chr12 | 1660315  | 1660380  | - | 0      | 0      |
| ENSG00000108482 | CTD-2206N  | processed_transcript | chr17 | 39033926 | 39034042 | - | 0      | 0      |
| ENSG00000108483 | RP11-703N  | antisense            | chr18 | 2688564  | 2833065  | - | 0      | 0      |

|                 |                |       |          |          |   |      |      |
|-----------------|----------------|-------|----------|----------|---|------|------|
| ENSG000001822E  | transcribed    | chr17 | 21566569 | 21574517 | - | 0    | 0    |
| ENSG00000184500 | miRNA          | chr13 | 87618665 | 87618740 | - | 0    | 0    |
| ENSG00000184500 | antisense      | chr18 | 9121265  | 9136645  | - | 1.82 | 2.29 |
| ENSG00000184500 | misc_RNA       | chr2  | 20175346 | 20175639 | + | 0    | 0    |
| ENSG00000184500 | miRNA          | chr2  | 1.12E+08 | 1.12E+08 | - | 0    | 0    |
| ENSG00000184500 | lincRNA        | chr18 | 6493420  | 6495668  | + | 0    | 0    |
| ENSG00000184500 | processed      | chr17 | 62136972 | 62140639 | - | 0.15 | 0.09 |
| ENSG00000184500 | miRNA          | chr20 | 45705102 | 45705180 | - | 0    | 0    |
| ENSG00000184500 | miRNA          | chr13 | 51348567 | 51348639 | - | 0    | 0    |
| ENSG00000184500 | protein_coding | chr17 | 81395475 | 81466332 | + | 6.02 | 6.41 |
| ENSG00000184500 | misc_RNA       | chr1  | 3782815  | 3783111  | + | 0    | 0    |
| ENSG00000184500 | protein_coding | chr17 | 65538102 | 65641033 | - | 0    | 0    |
| ENSG00000184500 | miRNA          | chr2  | 60387362 | 60387445 | - | 0    | 0    |
| ENSG00000184500 | snoRNA         | chr17 | 19557211 | 19557911 | + | 0.38 | 0.1  |
| ENSG00000184500 | protein_coding | chr17 | 57989038 | 58005253 | - | 1.34 | 0.6  |
| ENSG00000184500 | lincRNA        | chr17 | 40517026 | 40527002 | + | 0    | 0    |
| ENSG00000184500 | protein_coding | chr1  | 2.07E+08 | 2.07E+08 | + | 4.38 | 5.48 |
| ENSG00000184500 | miRNA          | chr2  | 62205826 | 62205917 | + | 0    | 0    |
| ENSG00000184500 | miRNA          | chr12 | 94561789 | 94561859 | + | 0    | 0    |
| ENSG00000184500 | antisense      | chr17 | 57522248 | 57523597 | - | 0    | 0    |
| ENSG00000184500 | antisense      | chr17 | 39173290 | 39177503 | + | 0    | 0    |
| ENSG00000184500 | lincRNA        | chr18 | 10375103 | 10378114 | + | 0    | 0    |
| ENSG00000184500 | miRNA          | chr20 | 63286808 | 63286866 | + | 0    | 0    |
| ENSG00000184500 | processed      | chr18 | 31966960 | 31967545 | + | 0    | 0    |
| ENSG00000184500 | antisense      | chr17 | 74307210 | 74309790 | - | 0    | 0    |
| ENSG00000184500 | miRNA          | chr17 | 82668233 | 82668307 | - | 0    | 0    |
| ENSG00000184500 | miRNA          | chr2  | 2.39E+08 | 2.39E+08 | - | 0    | 0    |
| ENSG00000184500 | miRNA          | chr1  | 85133794 | 85133873 | + | 0    | 0    |
| ENSG00000184500 | lincRNA        | chr17 | 29352069 | 29404105 | + | 0    | 0    |
| ENSG00000184500 | lincRNA        | chr17 | 10792059 | 10794985 | + | 0    | 0    |
| ENSG00000184500 | processed      | chr17 | 68095068 | 68095757 | + | 0    | 0    |
| ENSG00000184500 | antisense      | chr17 | 30238741 | 30252237 | + | 0    | 0    |
| ENSG00000184500 | miRNA          | chr16 | 535316   | 535368   | + | 0    | 0    |
| ENSG00000184500 | sense_intronic | chr17 | 19929372 | 19929737 | - | 0    | 0    |
| ENSG00000184500 | processed      | chr18 | 9785108  | 9787805  | + | 0    | 0    |
| ENSG00000184500 | misc_RNA       | chr6  | 1.64E+08 | 1.64E+08 | + | 0    | 0    |
| ENSG00000184500 | processed      | chr17 | 16787235 | 16788141 | - | 0    | 0    |
| ENSG00000184500 | miRNA          | chr21 | 26953961 | 26954043 | + | 0    | 0    |
| ENSG00000184500 | miRNA          | chr2  | 1.11E+08 | 1.11E+08 | - | 0    | 0    |
| ENSG00000184500 | miRNA          | chr20 | 60478111 | 60478181 | + | 0    | 0    |
| ENSG00000184500 | miRNA          | chr1  | 1.62E+08 | 1.62E+08 | + | 0    | 0    |
| ENSG00000184500 | processed      | chr18 | 14222008 | 14222331 | + | 0    | 0    |
| ENSG00000184500 | miRNA          | chr18 | 13459947 | 13460026 | + | 0    | 0    |
| ENSG00000184500 | miRNA          | chr18 | 39676721 | 39676779 | + | 0    | 0    |
| ENSG00000184500 | antisense      | chr18 | 8360820  | 8367034  | - | 0    | 0    |



|                     |             |       |          |          |   |       |       |
|---------------------|-------------|-------|----------|----------|---|-------|-------|
| ENSG0000(MIR4711)   | miRNA       | chr1  | 59733227 | 59733296 | - | 0     | 0     |
| ENSG0000(MIR3646)   | miRNA       | chr20 | 44408120 | 44408203 | + | 0     | 0     |
| ENSG0000(RP11-1901) | lincRNA     | chr18 | 5159332  | 5171026  | + | 0     | 0     |
| ENSG0000(RP11-927P) | unprocessε  | chr17 | 64936485 | 64940229 | - | 0     | 0     |
| ENSG0000(RN7SL785F) | misc_RNA    | chrX  | 47280811 | 47281063 | - | 0.52  | 0     |
| ENSG0000(RN7SL612F) | misc_RNA    | chr1  | 1.57E+08 | 1.57E+08 | - | 0     | 0     |
| ENSG0000(YWHAEP2)   | processed_  | chr17 | 18418195 | 18418306 | - | 0     | 0     |
| ENSG0000(RN7SL557F) | misc_RNA    | chr16 | 25185253 | 25185538 | - | 0     | 0     |
| ENSG0000(MIR3147)   | miRNA       | chr7  | 57405025 | 57405090 | + | 0     | 0     |
| ENSG0000(RP11-769C) | antisense   | chr18 | 735746   | 737459   | + | 0     | 0     |
| ENSG0000(STRADA)    | protein_co  | chr17 | 63682336 | 63741986 | - | 12.91 | 15.29 |
| ENSG0000(MIR4666A)  | miRNA       | chr1  | 2.28E+08 | 2.28E+08 | + | 0     | 0     |
| ENSG0000(RP11-1113) | processed_  | chr17 | 19600860 | 19601345 | + | 0     | 0     |
| ENSG0000(MIR4282)   | miRNA       | chr6  | 72967687 | 72967753 | - | 0     | 0     |
| ENSG0000(EIF4A3P1)  | processed_  | chr18 | 24522273 | 24522919 | - | 0     | 0     |
| ENSG0000(RP11-552C) | processed_  | chr18 | 26831520 | 26832432 | - | 0     | 0     |
| ENSG0000(RN7SL804F) | misc_RNA    | chr12 | 69400903 | 69401200 | + | 0     | 0     |
| ENSG0000(RN7SL480F) | misc_RNA    | chr1  | 1.5E+08  | 1.5E+08  | + | 0     | 0     |
| ENSG0000(MIR5095)   | miRNA       | chr1  | 52934930 | 52935017 | + | 0     | 0     |
| ENSG0000(MIR3186)   | miRNA       | chr17 | 81451104 | 81451188 | - | 0     | 0     |
| ENSG0000(RP11-218F) | unprocessε  | chr17 | 28021668 | 28022265 | - | 0     | 0     |
| ENSG0000(MIR1260B)  | miRNA       | chr11 | 96341438 | 96341526 | + | 0     | 0     |
| ENSG0000(MIR4661)   | miRNA       | chr8  | 91205485 | 91205559 | + | 0     | 0     |
| ENSG0000(RN7SL163F) | misc_RNA    | chr21 | 17506453 | 17506728 | + | 0     | 0     |
| ENSG0000(RP11-675P) | lincRNA     | chr18 | 30713275 | 30714286 | + | 0     | 0     |
| ENSG0000(PNLIPRP2)  | polymorph   | chr10 | 1.17E+08 | 1.17E+08 | + | 0     | 0     |
| ENSG0000(SS18L2P2)  | processed_  | chr18 | 51421063 | 51421674 | - | 0     | 0     |
| ENSG0000(RP1-66C13) | protein_co  | chr17 | 27798806 | 27893365 | - | 0     | 0     |
| ENSG0000(MIR5585)   | miRNA       | chr1  | 32086949 | 32087007 | + | 0     | 0     |
| ENSG0000(MIR5589)   | miRNA       | chr19 | 10038354 | 10038413 | + | 0     | 0     |
| ENSG0000(MIR3926-1) | miRNA       | chr8  | 12727232 | 12727304 | - | 0     | 0     |
| ENSG0000(CTD-2267D) | antisense   | chr17 | 40360655 | 40364693 | + | 3.58  | 4.37  |
| ENSG0000(RN7SL371F) | misc_RNA    | chr1  | 30918469 | 30918735 | - | 0     | 0     |
| ENSG0000(MIR3156-3) | miRNA       | chr21 | 13406384 | 13406460 | - | 0     | 0     |
| ENSG0000(RP11-100K) | lincRNA     | chr18 | 78137223 | 78140887 | + | 0     | 0     |
| ENSG0000(MIR3167)   | miRNA       | chr11 | 1.27E+08 | 1.27E+08 | - | 0     | 0     |
| ENSG0000(CTSLP2)    | unprocessε  | chr10 | 47581211 | 47582321 | - | 0     | 0     |
| ENSG0000(RP11-433N) | sense_intrε | chr17 | 48377262 | 48380370 | - | 0     | 0     |
| ENSG0000(MIR4323)   | miRNA       | chr19 | 42133445 | 42133513 | - | 0     | 0     |
| ENSG0000(NPM1P2)    | processed_  | chr18 | 26204869 | 26205904 | + | 0     | 0     |
| ENSG0000(MIR3611)   | miRNA       | chr10 | 35079598 | 35079680 | - | 0     | 0     |
| ENSG0000(MIR3178)   | miRNA       | chr16 | 2531922  | 2532005  | - | 0     | 0     |
| ENSG0000(MIR3176)   | miRNA       | chr16 | 543277   | 543366   | + | 0     | 0     |
| ENSG0000(NARF-IT1)  | sense_intrε | chr17 | 82482098 | 82483388 | + | 0.08  | 0.28  |
| ENSG0000(RP11-25D3) | sense_intrε | chr18 | 26266009 | 26267409 | + | 0.08  | 0     |

|                 |            |            |       |          |          |   |      |      |
|-----------------|------------|------------|-------|----------|----------|---|------|------|
| ENSG00000100000 | MIR5091    | miRNA      | chr4  | 13627865 | 13627957 | + | 0    | 0    |
| ENSG00000100000 | GRAMD4P1   | processed  | chr18 | 14485806 | 14487501 | + | 0    | 0    |
| ENSG00000100000 | MIR4279    | miRNA      | chr5  | 31936102 | 31936159 | - | 0    | 0    |
| ENSG00000100000 | MIR4644    | miRNA      | chr6  | 1.7E+08  | 1.7E+08  | + | 0    | 0    |
| ENSG00000100000 | CTC-525D6  | antisense  | chr19 | 29489775 | 29526948 | - | 0    | 0    |
| ENSG00000100000 | COX6CP3    | processed  | chr18 | 1176790  | 1177012  | - | 0    | 0    |
| ENSG00000100000 | MIR4475    | miRNA      | chr9  | 36823539 | 36823599 | - | 0    | 0    |
| ENSG00000100000 | LINC00683  | lincRNA    | chr18 | 76615212 | 76625940 | + | 0.12 | 0.06 |
| ENSG00000100000 | LINC01909  | lincRNA    | chr18 | 70335439 | 70352459 | + | 0.27 | 0.09 |
| ENSG00000100000 | RP11-64011 | antisense  | chr17 | 15651590 | 15654489 | + | 0    | 0    |
| ENSG00000100000 | MIR4428    | miRNA      | chr1  | 2.37E+08 | 2.37E+08 | + | 0    | 0    |
| ENSG00000100000 | KLF14      | protein_co | chr7  | 1.31E+08 | 1.31E+08 | - | 0    | 0    |
| ENSG00000100000 | RP11-172F  | lincRNA    | chr18 | 4775054  | 5004537  | - | 0    | 0    |
| ENSG00000100000 | MIR5096    | miRNA      | chr4  | 78820752 | 78820821 | + | 0    | 0    |
| ENSG00000100000 | RP11-715C  | lincRNA    | chr18 | 78795612 | 78796672 | - | 0    | 0    |
| ENSG00000100000 | RN7SL138F  | misc_RNA   | chr17 | 30959564 | 30959850 | + | 0.78 | 0    |
| ENSG00000100000 | MIR4743    | miRNA      | chr18 | 48670600 | 48670668 | + | 0    | 0    |
| ENSG00000100000 | LINC01910  | lincRNA    | chr18 | 70380140 | 70384591 | - | 0    | 0.02 |
| ENSG00000100000 | RP11-849F  | lincRNA    | chr17 | 8337697  | 8338758  | + | 0    | 0    |
| ENSG00000100000 | UBL5P2     | processed  | chr17 | 32227890 | 32228108 | - | 0    | 0    |
| ENSG00000100000 | RP11-627G  | antisense  | chr18 | 22200619 | 22205229 | - | 0    | 0    |
| ENSG00000100000 | MIR3683    | miRNA      | chr7  | 7066964  | 7067045  | - | 0    | 0    |
| ENSG00000100000 | CTD-3096N  | lincRNA    | chr18 | 5381641  | 5385330  | - | 0    | 0    |
| ENSG00000100000 | RP11-1C8.1 | lincRNA    | chr8  | 1.03E+08 | 1.03E+08 | - | 0    | 0.18 |
| ENSG00000100000 | RP11-159D  | lincRNA    | chr17 | 58076891 | 58083204 | - | 0.02 | 0.01 |
| ENSG00000100000 | MIR3180-3  | miRNA      | chr16 | 18402178 | 18402271 | - | 0    | 0    |
| ENSG00000100000 | ARIH2P1    | processed  | chr18 | 28651732 | 28653208 | + | 0    | 0    |
| ENSG00000100000 | MIR744     | miRNA      | chr17 | 12081899 | 12081996 | + | 0    | 0    |
| ENSG00000100000 | MIR3118-1  | miRNA      | chr21 | 13644775 | 13644850 | - | 0    | 0    |
| ENSG00000100000 | RP11-219A  | protein_co | chr17 | 16690261 | 16804453 | + | 0.09 | 0.1  |
| ENSG00000100000 | RP11-484N  | lincRNA    | chr18 | 70335929 | 70337310 | - | 0    | 0    |
| ENSG00000100000 | MIR4518    | miRNA      | chr16 | 30503919 | 30504001 | + | 0    | 0    |
| ENSG00000100000 | CTD-2008P  | unprocess  | chr17 | 28269203 | 28272365 | - | 0    | 0    |
| ENSG00000100000 | MIR5093    | miRNA      | chr16 | 85306226 | 85306325 | - | 0    | 0    |
| ENSG00000100000 | RN7SL510F  | misc_RNA   | chr15 | 75895040 | 75895302 | + | 0.3  | 0    |
| ENSG00000100000 | AC007952.1 | lincRNA    | chr17 | 19164209 | 19174436 | - | 0    | 0    |
| ENSG00000100000 | LINC01927  | lincRNA    | chr18 | 76623006 | 76639011 | - | 0    | 0    |
| ENSG00000100000 | RP11-173M  | lincRNA    | chr17 | 27333256 | 27348491 | + | 0    | 0    |
| ENSG00000100000 | MIR4668    | miRNA      | chr9  | 1.12E+08 | 1.12E+08 | + | 0    | 0    |
| ENSG00000100000 | RN7SL703F  | misc_RNA   | chr3  | 1.82E+08 | 1.82E+08 | + | 0    | 0    |
| ENSG00000100000 | MIR5692A   | miRNA      | chr7  | 97963658 | 97963726 | + | 0    | 0    |
| ENSG00000100000 | MIR3909    | miRNA      | chr22 | 35335640 | 35335758 | + | 0    | 0    |
| ENSG00000100000 | MIR4293    | miRNA      | chr10 | 14383200 | 14383277 | - | 0    | 0    |
| ENSG00000100000 | MIR4663    | miRNA      | chr8  | 1.23E+08 | 1.23E+08 | - | 0    | 0    |
| ENSG00000100000 | MIR3665    | miRNA      | chr13 | 77698012 | 77698116 | - | 0    | 0    |

|                 |            |                |       |          |          |   |       |       |
|-----------------|------------|----------------|-------|----------|----------|---|-------|-------|
| ENSG00000103921 | MIR4503    | miRNA          | chr14 | 36952309 | 36952391 | - | 0     | 0     |
| ENSG00000103922 | MIR4536-2  | miRNA          | chrX  | 55451495 | 55451582 | + | 0     | 0     |
| ENSG00000103923 | MIR4281    | miRNA          | chr5  | 1.77E+08 | 1.77E+08 | - | 0     | 0     |
| ENSG00000103924 | RP11-2503  | lincRNA        | chr18 | 52336361 | 52339025 | - | 0     | 0     |
| ENSG00000103925 | NBPF15     | protein_coding | chr1  | 1.44E+08 | 1.44E+08 | - | 22    | 23.58 |
| ENSG00000103926 | RP11-848P  | antisense      | chr17 | 30978610 | 30980250 | - | 13.13 | 15.22 |
| ENSG00000103927 | RP5-890E1  | antisense      | chr17 | 48060383 | 48060669 | - | 0     | 0     |
| ENSG00000103928 | MIR4776-2  | miRNA          | chr2  | 2.13E+08 | 2.13E+08 | + | 0     | 0     |
| ENSG00000103929 | RP11-578C  | unprocessed    | chr17 | 27411438 | 27412806 | - | 0     | 0     |
| ENSG00000103930 | LINC02074  | lincRNA        | chr17 | 74043452 | 74154212 | - | 0     | 0     |
| ENSG00000103931 | RP11-218E  | transcribed    | chr17 | 20633034 | 20633259 | - | 0     | 0     |
| ENSG00000103932 | RP11-51L5  | unprocessed    | chr17 | 62231470 | 62247153 | - | 0     | 0     |
| ENSG00000103933 | RP11-1096  | antisense      | chr17 | 11953889 | 11977594 | - | 0.17  | 0.37  |
| ENSG00000103934 | RP11-344E  | antisense      | chr17 | 20855946 | 20857317 | + | 0     | 0     |
| ENSG00000103935 | MIR3657    | miRNA          | chr12 | 1.12E+08 | 1.12E+08 | - | 0     | 0     |
| ENSG00000103936 | RP11-142C  | sense_intronic | chr17 | 31133182 | 31138518 | + | 0     | 0     |
| ENSG00000103937 | RP11-710N  | processed      | chr18 | 3580169  | 3580754  | + | 0     | 0     |
| ENSG00000103938 | RP11-214C  | lincRNA        | chr17 | 14327335 | 14329474 | + | 0     | 0     |
| ENSG00000103939 | RP11-640N  | transcribed    | chr17 | 32088160 | 32094933 | - | 0     | 0     |
| ENSG00000103940 | MIR5002    | miRNA          | chr3  | 1.24E+08 | 1.24E+08 | + | 0     | 0     |
| ENSG00000103941 | RP11-227G  | lincRNA        | chr17 | 32411217 | 32412420 | + | 0.13  | 0     |
| ENSG00000103942 | CTB-41I6.1 | lincRNA        | chr17 | 8965896  | 8967070  | + | 0     | 0     |
| ENSG00000103943 | MIR4740    | miRNA          | chr17 | 81400716 | 81400778 | - | 0     | 0     |
| ENSG00000103944 | MIR4273    | miRNA          | chr3  | 75738280 | 75738363 | + | 0     | 0     |
| ENSG00000103945 | RP11-737C  | antisense      | chr18 | 2967018  | 2985410  | + | 0     | 0     |
| ENSG00000103946 | RP11-874J  | antisense      | chr18 | 3653410  | 3656282  | + | 0     | 0     |
| ENSG00000103947 | SNHG25     | lincRNA        | chr17 | 64145970 | 64146476 | + | 18.59 | 5.52  |
| ENSG00000103948 | CBX3P2     | transcribed    | chr18 | 2652170  | 2655395  | - | 0.67  | 0.74  |
| ENSG00000103949 | MIR3157    | miRNA          | chr10 | 96064315 | 96064399 | - | 0     | 0     |
| ENSG00000103950 | RP11-180P  | lincRNA        | chr17 | 62966817 | 62968549 | - | 0     | 0.07  |
| ENSG00000103951 | NCOA4      | protein_coding | chr10 | 46005088 | 46030714 | - | 71.86 | 69    |
| ENSG00000103952 | MIR4636    | miRNA          | chr5  | 9053816  | 9053895  | - | 0     | 0     |
| ENSG00000103953 | RP1-66C13  | processed      | chr17 | 27708111 | 27708138 | + | 0     | 0     |
| ENSG00000103954 | MIR4424    | miRNA          | chr1  | 1.79E+08 | 1.79E+08 | + | 0     | 0     |
| ENSG00000103955 | RN7SL118F  | misc_RNA       | chrX  | 1.19E+08 | 1.19E+08 | + | 0     | 0     |
| ENSG00000103956 | MIR4451    | miRNA          | chr4  | 85722468 | 85722533 | + | 0     | 0     |
| ENSG00000103957 | MIR3163    | miRNA          | chr11 | 66934434 | 66934506 | - | 0     | 0     |
| ENSG00000103958 | MIR4719    | miRNA          | chr16 | 76868936 | 76869019 | + | 0     | 0     |
| ENSG00000103959 | MIR5580    | miRNA          | chr14 | 53948427 | 53948484 | - | 0     | 0     |
| ENSG00000103960 | TBC1D3P5   | transcribed    | chr17 | 27417690 | 27431623 | + | 0.08  | 0.06  |
| ENSG00000103961 | MIR4264    | miRNA          | chr2  | 79649294 | 79649359 | - | 0     | 0     |
| ENSG00000103962 | MIR4746    | miRNA          | chr19 | 4445978  | 4446048  | + | 0     | 0     |
| ENSG00000103963 | RN7SL493F  | misc_RNA       | chr16 | 10221775 | 10222073 | - | 0     | 0     |
| ENSG00000103964 | RP11-91I8  | antisense      | chr18 | 6728821  | 6729862  | - | 0.15  | 0     |
| ENSG00000103965 | RP13-991F  | antisense      | chr17 | 82476597 | 82477924 | - | 0     | 0.09  |

|                    |                |       |          |          |   |       |       |
|--------------------|----------------|-------|----------|----------|---|-------|-------|
| ENSG0000014912     | sense_intronic | chr9  | 21995482 | 21996013 | + | 0.19  | 0     |
| ENSG000001805L     | processed      | chr17 | 31709568 | 31709859 | + | 0     | 0     |
| ENSG0000013713     | miRNA          | chr15 | 76586647 | 76586691 | + | 0     | 0     |
| ENSG0000012015H    | lincRNA        | chr18 | 1655177  | 1779955  | + | 0     | 0     |
| ENSG0000013179-3   | miRNA          | chr16 | 18411894 | 18411977 | - | 0     | 0     |
| ENSG000001806L     | antisense      | chr18 | 650229   | 652843   | + | 0     | 0     |
| ENSG0000014259     | miRNA          | chr1  | 1.6E+08  | 1.6E+08  | - | 0     | 0     |
| ENSG000001173L     | lincRNA        | chr18 | 75844925 | 75868252 | - | 0     | 0     |
| ENSG0000012392     | miRNA          | chr14 | 1.01E+08 | 1.01E+08 | + | 0     | 0     |
| ENSG0000013196     | miRNA          | chr20 | 63238779 | 63238842 | + | 0     | 0     |
| ENSG000001822E     | antisense      | chr17 | 21532974 | 21542786 | + | 0     | 0     |
| ENSG00000175L220F  | misc_RNA       | chr10 | 68007718 | 68008017 | - | 0     | 0     |
| ENSG000001131K1    | antisense      | chr17 | 39401793 | 39406233 | + | 1.54  | 0.64  |
| ENSG000001856M     | unprocessed    | chr18 | 10632238 | 10632396 | + | 0     | 0     |
| ENSG000001MRPS21   | protein_coding | chr1  | 1.5E+08  | 1.5E+08  | + | 29.67 | 27.34 |
| ENSG0000018401F    | antisense      | chr17 | 67244837 | 67245806 | + | 0.19  | 0.32  |
| ENSG00000175L616F  | misc_RNA       | chr5  | 69478997 | 69479265 | - | 0     | 0     |
| ENSG0000015197     | miRNA          | chr5  | 1.44E+08 | 1.44E+08 | + | 0     | 0     |
| ENSG0000012515C    | processed      | chr18 | 29256817 | 29257060 | - | 0     | 0     |
| ENSG000001FAM106CP | processed      | chr17 | 16788901 | 16789407 | + | 0     | 0.42  |
| ENSG0000018178F    | lincRNA        | chr18 | 24516883 | 24518006 | - | 0     | 0     |
| ENSG0000012349P    | lincRNA        | chr17 | 30792372 | 30792833 | + | 0.34  | 0.56  |
| ENSG0000014641     | miRNA          | chr6  | 41598723 | 41598788 | + | 0     | 0     |
| ENSG0000018171J    | antisense      | chr18 | 23257164 | 23260354 | - | 0     | 0.73  |
| ENSG0000018995C    | unprocessed    | chr17 | 46503946 | 46509339 | + | 0     | 0     |
| ENSG000001845M     | lincRNA        | chr17 | 17235433 | 17236118 | - | 0     | 0.11  |
| ENSG0000018766H    | processed      | chr17 | 73067870 | 73068288 | - | 0     | 0     |
| ENSG0000015681A    | miRNA          | chr8  | 74548543 | 74548617 | + | 0     | 0     |
| ENSG00000175L162F  | misc_RNA       | chr22 | 28642979 | 28643270 | - | 0     | 0     |
| ENSG0000018798G    | transcribed    | chr17 | 45553710 | 45559070 | - | 0     | 0     |
| ENSG0000018629E    | lincRNA        | chr13 | 30022021 | 30023800 | - | 0     | 0     |
| ENSG0000014479     | miRNA          | chr9  | 1.37E+08 | 1.37E+08 | + | 0     | 0     |
| ENSG0000013201     | miRNA          | chr22 | 48274364 | 48274415 | + | 0     | 0     |
| ENSG0000013934     | miRNA          | chr6  | 33698128 | 33698234 | + | 0     | 0     |
| ENSG000001874J     | sense_intronic | chr18 | 3770017  | 3771430  | - | 0     | 0     |
| ENSG0000013689F    | miRNA          | chr9  | 1.35E+08 | 1.35E+08 | - | 0     | 0     |
| ENSG0000014452     | miRNA          | chr4  | 86542482 | 86542552 | - | 0     | 0     |
| ENSG0000014715     | miRNA          | chr15 | 25848747 | 25848825 | - | 0     | 0     |
| ENSG0000014268     | miRNA          | chr2  | 2.2E+08  | 2.2E+08  | - | 0     | 0     |
| ENSG000001RAC1P1   | processed      | chr18 | 24685772 | 24686351 | - | 0     | 0     |
| ENSG0000018650P    | lincRNA        | chr18 | 31496645 | 31497195 | - | 0.19  | 0     |
| ENSG000001805F     | unprocessed    | chr18 | 15003975 | 15006352 | - | 0     | 0     |
| ENSG000001GDF10    | protein_coding | chr10 | 47300386 | 47313547 | + | 0.09  | 0.25  |
| ENSG0000014650-1   | miRNA          | chr7  | 67114322 | 67114397 | - | 0     | 0     |
| ENSG0000018138P    | antisense      | chr17 | 27874645 | 27881237 | + | 0     | 0     |

|                                |       |          |          |   |      |      |
|--------------------------------|-------|----------|----------|---|------|------|
| ENSG0000(MTCYBP13 unprocessed) | chr17 | 22519617 | 22520709 | + | 0    | 0    |
| ENSG0000(MIR4318 miRNA)        | chr18 | 37657135 | 37657215 | + | 0    | 0    |
| ENSG0000(MIR4706 miRNA)        | chr14 | 65044688 | 65044769 | + | 0    | 0    |
| ENSG0000(MIR3619 miRNA)        | chr22 | 46091044 | 46091126 | + | 0    | 0    |
| ENSG0000(RP11-40A1 antisense)  | chr17 | 33111858 | 33131743 | + | 0    | 0    |
| ENSG0000(SPDYE22P unprocessed) | chr17 | 59174983 | 59181787 | - | 0    | 0    |
| ENSG0000(RP11-385D lincRNA)    | chr17 | 15530773 | 15531089 | - | 0.32 | 0.35 |
| ENSG0000(RP11-881L antisense)  | chr18 | 9587386  | 9590182  | + | 0    | 0    |
| ENSG0000(MIR5701-1 miRNA)      | chr15 | 20940252 | 20940333 | + | 0    | 0    |
| ENSG0000(RP11-526I processed)  | chr18 | 26952201 | 26952558 | - | 0    | 0    |
| ENSG0000(RN7SL356F misc_RNA)   | chr14 | 76967518 | 76967765 | - | 0    | 0    |
| ENSG0000(LINC01443 lincRNA)    | chr18 | 14946267 | 14973770 | + | 0    | 0.11 |
| ENSG0000(MIR3145 miRNA)        | chr6  | 1.38E+08 | 1.38E+08 | - | 0    | 0    |
| ENSG0000(MIR4530 miRNA)        | chr19 | 39409623 | 39409678 | - | 0    | 0    |
| ENSG0000(RP11-1007 processed)  | chrX  | 1.52E+08 | 1.52E+08 | - | 0    | 0    |
| ENSG0000(CTD-2200P processed)  | chr17 | 58675286 | 58675462 | + | 0    | 0    |
| ENSG0000(EIF1P5 unprocessed)   | chr17 | 21259968 | 21260501 | - | 0    | 0    |
| ENSG0000(MIR4418 miRNA)        | chr1  | 22266239 | 22266300 | + | 0    | 0    |
| ENSG0000(RN7SL377F misc_RNA)   | chr7  | 72822894 | 72823171 | - | 0    | 0.46 |
| ENSG0000(MIR5579 miRNA)        | chr11 | 79422169 | 79422226 | - | 0    | 0    |
| ENSG0000(RP11-449D lincRNA)    | chr18 | 24725781 | 24929076 | + | 0    | 0    |
| ENSG0000(BOLA2P1 processed)    | chr18 | 832238   | 832469   | + | 0    | 0    |
| ENSG0000(RP11-838N lincRNA)    | chr18 | 3284145  | 3327292  | + | 0    | 0    |
| ENSG0000(RP1-71H19 lincRNA)    | chr6  | 57493855 | 57497691 | + | 0    | 0    |
| ENSG0000(MIR4254 miRNA)        | chr1  | 31758660 | 31758735 | - | 0    | 0    |
| ENSG0000(MIR3166 miRNA)        | chr11 | 88176502 | 88176593 | + | 0    | 0    |
| ENSG0000(MIR4527 miRNA)        | chr18 | 47380496 | 47380565 | + | 0    | 0    |
| ENSG0000(MIR4478 miRNA)        | chr9  | 1.22E+08 | 1.22E+08 | - | 0    | 0    |
| ENSG0000(CTD-2382H lincRNA)    | chr18 | 78908629 | 78918993 | - | 0    | 0    |
| ENSG0000(RP1-56K13 lincRNA)    | chr17 | 39003248 | 39013032 | - | 0    | 0    |
| ENSG0000(MIR4512 miRNA)        | chr15 | 66496958 | 66497034 | - | 0    | 0    |
| ENSG0000(MIR4713 miRNA)        | chr15 | 51242190 | 51242264 | + | 0    | 0    |
| ENSG0000(MIR4766 miRNA)        | chr22 | 40813883 | 40813958 | - | 0    | 0    |
| ENSG0000(RP11-583F antisense)  | chr17 | 65051909 | 65053308 | + | 0    | 0    |
| ENSG0000(RP11-466A antisense)  | chr17 | 32518953 | 32531492 | + | 0    | 0    |
| ENSG0000(RP11-6N17 antisense)  | chr17 | 47929682 | 47933106 | - | 0    | 0    |
| ENSG0000(RP11-476K lincRNA)    | chr18 | 1509183  | 1647097  | + | 0    | 0    |
| ENSG0000(LINC01887 lincRNA)    | chr18 | 10612304 | 10626353 | - | 0    | 0    |
| ENSG0000(LONRF2P1 processed)   | chr18 | 14450216 | 14450883 | - | 0    | 0    |
| ENSG0000(RN7SL176F misc_RNA)   | chr12 | 1E+08    | 1E+08    | - | 0    | 0    |
| ENSG0000(MIR4703 miRNA)        | chr13 | 51552589 | 51552667 | + | 0    | 0    |
| ENSG0000(RFWD2P1 processed)    | chr18 | 8412129  | 8414304  | + | 0    | 0    |
| ENSG0000(RP11-94B1 lincRNA)    | chr18 | 76259166 | 76260114 | + | 0    | 0    |
| ENSG0000(MIR3692 miRNA)        | chr6  | 1.58E+08 | 1.58E+08 | + | 0    | 0    |
| ENSG0000(MIR4742 miRNA)        | chr1  | 2.24E+08 | 2.24E+08 | - | 0    | 0    |

|                 |            |             |       |          |          |   |      |      |
|-----------------|------------|-------------|-------|----------|----------|---|------|------|
| ENSG00000108462 | MIR4642    | miRNA       | chr6  | 44435641 | 44435722 | + | 0    | 0    |
| ENSG00000108462 | RN7SL202F  | misc_RNA    | chr19 | 3920245  | 3920506  | - | 0    | 0.45 |
| ENSG00000108462 | MIR3972    | miRNA       | chr1  | 17277889 | 17277975 | + | 0    | 0    |
| ENSG00000108462 | MIR4754    | miRNA       | chr19 | 58386770 | 58386858 | - | 0    | 0    |
| ENSG00000108462 | RP11-20B2  | antisense   | chr17 | 28897738 | 28899402 | + | 0    | 0    |
| ENSG00000108462 | MIR3677    | miRNA       | chr16 | 2270713  | 2270772  | + | 0    | 0    |
| ENSG00000108462 | RP11-927P  | antisense   | chr17 | 64899766 | 64900716 | + | 0.77 | 0.58 |
| ENSG00000108462 | MIR4299    | miRNA       | chr11 | 11656651 | 11656722 | - | 0    | 0    |
| ENSG00000108462 | RP11-51L5  | unprocessed | chr17 | 62260634 | 62261936 | + | 0    | 0    |
| ENSG00000108462 | SETP3      | processed   | chr17 | 58476138 | 58476950 | - | 0.24 | 0.6  |
| ENSG00000108462 | MIR3126    | miRNA       | chr2  | 69103682 | 69103755 | + | 0    | 0    |
| ENSG00000108462 | RP11-138I1 | lincRNA     | chr17 | 16440479 | 16440952 | - | 0    | 0    |
| ENSG00000108462 | RP11-1376  | antisense   | chr17 | 82160056 | 82160452 | + | 0    | 0    |
| ENSG00000108462 | MIR3908    | miRNA       | chr12 | 1.24E+08 | 1.24E+08 | + | 0    | 0    |
| ENSG00000108462 | MIR3169    | miRNA       | chr13 | 61199798 | 61199880 | - | 0    | 0    |
| ENSG00000108462 | RP11-160E  | sense_intr  | chr17 | 19150279 | 19151286 | + | 0    | 0    |
| ENSG00000108462 | MIR4739    | miRNA       | chr17 | 79707176 | 79707249 | - | 0    | 0    |
| ENSG00000108462 | MIR4325    | miRNA       | chr20 | 57321502 | 57321591 | - | 0    | 0    |
| ENSG00000108462 | RP11-849N  | lincRNA     | chr17 | 15379864 | 15417878 | - | 0    | 0    |
| ENSG00000108462 | MIR5692C   | miRNA       | chr7  | 97964405 | 97964481 | - | 0    | 0    |
| ENSG00000108462 | RP11-822E  | processed   | chr17 | 21552509 | 21552711 | + | 0    | 0    |
| ENSG00000108462 | MIR4297    | miRNA       | chr10 | 1.3E+08  | 1.3E+08  | - | 0    | 0    |
| ENSG00000108462 | RP11-258F  | antisense   | chr17 | 18172625 | 18184753 | - | 0.3  | 0.42 |
| ENSG00000108462 | RP5-1148A  | antisense   | chr6  | 63571005 | 63572408 | - | 2.27 | 2.67 |
| ENSG00000108462 | MIR4274    | miRNA       | chr4  | 7460028  | 7460118  | + | 0    | 0    |
| ENSG00000108462 | RP11-1109  | processed   | chr17 | 22277867 | 22279289 | - | 0    | 0    |
| ENSG00000108462 | snoZ6      | snoRNA      | chr21 | 44437121 | 44437175 | + | 0    | 0    |
| ENSG00000108462 | OR4K8P     | unprocessed | chr18 | 14613137 | 14614184 | + | 0    | 0    |
| ENSG00000108462 | RP11-30L3  | antisense   | chr18 | 49205912 | 49208781 | + | 0    | 0    |
| ENSG00000108462 | MIR3945    | miRNA       | chr4  | 1.85E+08 | 1.85E+08 | - | 0    | 0    |
| ENSG00000108462 | MIR4490    | miRNA       | chr11 | 90555774 | 90555857 | - | 0    | 0    |
| ENSG00000108462 | MIR4498    | miRNA       | chr12 | 1.2E+08  | 1.2E+08  | - | 0    | 0    |
| ENSG00000108462 | MIR4437    | miRNA       | chr2  | 1.81E+08 | 1.81E+08 | - | 0    | 0    |
| ENSG00000108462 | PSMD7P1    | processed   | chr17 | 66197693 | 66198238 | + | 0    | 0    |
| ENSG00000108462 | RP11-661C  | antisense   | chr18 | 8635179  | 8636347  | - | 0    | 0    |
| ENSG00000108462 | RP11-214C  | lincRNA     | chr17 | 14303854 | 14305505 | + | 0    | 0    |
| ENSG00000108462 | RN7SL48P   | misc_RNA    | chrX  | 18915243 | 18915535 | - | 0.37 | 0    |
| ENSG00000108462 | RP11-398J  | antisense   | chr17 | 79132722 | 79136402 | + | 0    | 0    |
| ENSG00000108462 | MIR3149    | miRNA       | chr8  | 76966768 | 76966850 | - | 0    | 0    |
| ENSG00000108462 | MYO15B     | protein_co  | chr17 | 75588058 | 75626501 | + | 1.03 | 2.37 |
| ENSG00000108462 | RP11-855A  | antisense   | chr17 | 67950885 | 67951746 | - | 0    | 0    |
| ENSG00000108462 | RP11-466A  | antisense   | chr17 | 32495536 | 32499333 | + | 0    | 0    |
| ENSG00000108462 | MIR4676    | miRNA       | chr10 | 72721029 | 72721100 | + | 0    | 0    |
| ENSG00000108462 | RN7SL14P   | misc_RNA    | chr20 | 18258554 | 18258851 | - | 0    | 0    |
| ENSG00000108462 | MIR5695    | miRNA       | chr19 | 12920320 | 12920404 | + | 0    | 0    |

|                                 |       |          |          |   |      |      |
|---------------------------------|-------|----------|----------|---|------|------|
| ENSG0000( AC015688. protein_co  | chr17 | 27623364 | 27640777 | + | 0    | 0    |
| ENSG0000( DSG1-AS1 antisense    | chr18 | 31343368 | 31426988 | - | 0    | 0    |
| ENSG0000( TBC1D29 protein_co    | chr17 | 30557112 | 30563493 | + | 0.21 | 0.08 |
| ENSG0000( GTF2IP6 unprocessε    | chr17 | 27019527 | 27047934 | - | 0    | 0    |
| ENSG0000( MIR4757 miRNA         | chr2  | 19348429 | 19348505 | + | 0    | 0    |
| ENSG0000( MIR4708 miRNA         | chr14 | 65335117 | 65335183 | - | 0    | 0    |
| ENSG0000( RP11-94B1 lincRNA     | chr18 | 76173304 | 76177738 | - | 0    | 0    |
| ENSG0000( RP11-131K lincRNA     | chr17 | 13957748 | 13966952 | - | 0    | 0    |
| ENSG0000( MIR3135A miRNA        | chr3  | 20137565 | 20137641 | + | 0    | 0    |
| ENSG0000( RP11-1109 processed_  | chr17 | 22411893 | 22412229 | - | 0    | 0    |
| ENSG0000( MIR4645 miRNA         | chr6  | 2854031  | 2854107  | - | 0    | 0    |
| ENSG0000( MIR3661 miRNA         | chr5  | 1.34E+08 | 1.34E+08 | + | 0    | 0    |
| ENSG0000( RN7SL524F misc_RNA    | chr10 | 1.04E+08 | 1.04E+08 | - | 1.36 | 3.42 |
| ENSG0000( MIR5680 miRNA         | chr8  | 1.02E+08 | 1.02E+08 | + | 0    | 0    |
| ENSG0000( MIR3680-2 miRNA       | chr16 | 29599179 | 29599265 | - | 0    | 0    |
| ENSG0000( MIR4464 miRNA         | chr6  | 90312742 | 90312833 | + | 0    | 0    |
| ENSG0000( MIR3194 miRNA         | chr20 | 51452905 | 51452977 | - | 0    | 0    |
| ENSG0000( CTD-2582D lincRNA     | chr17 | 73894749 | 73911878 | - | 0    | 0    |
| ENSG0000( RP11-678G antisense   | chr18 | 7741310  | 7754831  | - | 0    | 0    |
| ENSG0000( RN7SL619F misc_RNA    | chr19 | 13815062 | 13815319 | - | 0.88 | 0    |
| ENSG0000( RP11-19P2 processed_  | chr17 | 27675894 | 27675997 | - | 0    | 0    |
| ENSG0000( RP11-321N lincRNA     | chr18 | 75432703 | 75436957 | - | 0    | 0    |
| ENSG0000( RP11-218N antisense   | chr17 | 30557732 | 30558502 | - | 0    | 0    |
| ENSG0000( MIR4646 miRNA         | chr6  | 31701029 | 31701091 | - | 0    | 0    |
| ENSG0000( SH3GL1P1 transcribec  | chr17 | 32039974 | 32042828 | + | 0.77 | 0.98 |
| ENSG0000( MIR4444-2 miRNA       | chr3  | 75214476 | 75214549 | + | 0    | 0    |
| ENSG0000( MIR3663 miRNA         | chr10 | 1.17E+08 | 1.17E+08 | - | 0    | 0    |
| ENSG0000( RP11-715F sense_intrε | chr18 | 2561172  | 2562220  | - | 0.17 | 0.06 |
| ENSG0000( LGALS9DP unprocessε   | chr17 | 27746132 | 27754954 | + | 0    | 0    |
| ENSG0000( RN7SL7P misc_RNA      | chr7  | 92971002 | 92971299 | - | 0    | 0    |
| ENSG0000( RP11-521L sense_intrε | chr16 | 68933820 | 68937725 | + | 0    | 0.12 |
| ENSG0000( MIR4419A miRNA        | chr1  | 23057858 | 23057934 | - | 0    | 0    |
| ENSG0000( RP1-77H15 sense_intrε | chr17 | 16557985 | 16559269 | - | 0.1  | 0.32 |
| ENSG0000( RP11-61L1 sense_intrε | chr18 | 9506242  | 9509726  | + | 0.02 | 0.02 |
| ENSG0000( RP11-744K unprocessε  | chr17 | 22331597 | 22332410 | + | 0    | 0    |
| ENSG0000( MIR548H5 miRNA        | chr6  | 1.32E+08 | 1.32E+08 | + | 0    | 0    |
| ENSG0000( MIR548AE miRNA        | chr2  | 1.84E+08 | 1.84E+08 | + | 0    | 0    |
| ENSG0000( RP11-449D processed_  | chr18 | 24689914 | 24690161 | - | 0    | 0    |
| ENSG0000( RP11-454P unprocessε  | chr18 | 15254418 | 15271744 | + | 0    | 0    |
| ENSG0000( KPNA2P3 transcribec   | chr17 | 64749918 | 64758603 | - | 2.85 | 2.71 |
| ENSG0000( RP11-6N17 lincRNA     | chr17 | 47879472 | 47882398 | - | 0.08 | 0.12 |
| ENSG0000( RP11-599B lincRNA     | chr17 | 8176812  | 8182812  | + | 0    | 0    |
| ENSG0000( CTD-2200P protein_co  | chr17 | 58660424 | 58692018 | - | 0    | 0    |
| ENSG0000( MIR3689E miRNA        | chr9  | 1.35E+08 | 1.35E+08 | - | 0    | 0    |
| ENSG0000( RN7SL712F misc_RNA    | chrX  | 1.16E+08 | 1.16E+08 | - | 0    | 0    |

|                 |           |                        |       |          |          |   |      |      |
|-----------------|-----------|------------------------|-------|----------|----------|---|------|------|
| ENSG00000102088 | CTD-2008P | lincRNA                | chr17 | 28246454 | 28248006 | - | 0    | 0    |
| ENSG00000102089 | GAPLINC   | lincRNA                | chr18 | 3466250  | 3478978  | + | 3.63 | 2.45 |
| ENSG00000102090 | RP11-121A | sense_intronic         | chr17 | 20323058 | 20323337 | + | 0    | 0    |
| ENSG00000102091 | RP11-543H | antisense              | chr18 | 69704978 | 69724975 | - | 0    | 0    |
| ENSG00000102092 | RP11-862L | antisense              | chr18 | 76974690 | 76984162 | + | 0    | 1    |
| ENSG00000102093 | RP11-793A | antisense              | chr18 | 6025091  | 6082455  | + | 0    | 0    |
| ENSG00000102094 | RP11-370A | antisense              | chr18 | 22723491 | 22907721 | - | 0    | 0.22 |
| ENSG00000102095 | MIR4482   | miRNA                  | chr10 | 1.04E+08 | 1.04E+08 | - | 0    | 0    |
| ENSG00000102096 | ITM2BP1   | processed_transcript   | chr17 | 27612588 | 27613251 | - | 0    | 0    |
| ENSG00000102097 | MIR3910-1 | miRNA                  | chr9  | 91636251 | 91636361 | + | 0    | 0    |
| ENSG00000102098 | RPSAP67   | unprocessed_transcript | chr17 | 67774591 | 67777324 | - | 0    | 0    |
| ENSG00000102099 | RN7SL123F | misc_RNA               | chr9  | 6661651  | 6661942  | + | 0    | 0.28 |
| ENSG00000102100 | RP11-848P | transcribed            | chr17 | 31008497 | 31093127 | + | 1.99 | 4.74 |
| ENSG00000102101 | RP6-114E2 | lincRNA                | chr14 | 71848606 | 71908430 | + | 0.21 | 0    |
| ENSG00000102102 | RP11-19P2 | antisense              | chr17 | 27625484 | 27626438 | - | 0    | 0    |
| ENSG00000102103 | RN7SL408F | misc_RNA               | chr6  | 1.34E+08 | 1.34E+08 | + | 0    | 0    |
| ENSG00000102104 | RP11-1148 | transcribed            | chr17 | 30068632 | 30069631 | + | 0.12 | 0.13 |
| ENSG00000102105 | RP1-41C23 | lincRNA                | chr17 | 31583162 | 31637543 | + | 0.25 | 0.28 |
| ENSG00000102106 | RP11-744K | transcribed            | chr17 | 22435390 | 22439033 | + | 0    | 0    |
| ENSG00000102107 | MIR4535   | miRNA                  | chr22 | 48780295 | 48780353 | + | 0    | 0    |
| ENSG00000102108 | MIR4634   | miRNA                  | chr5  | 1.75E+08 | 1.75E+08 | + | 0    | 0    |
| ENSG00000102109 | RP11-692N | processed_transcript   | chr18 | 9734882  | 9735602  | - | 0    | 0    |
| ENSG00000102110 | AC005616  | lincRNA                | chr19 | 28491864 | 28632728 | - | 0    | 0    |
| ENSG00000102111 | RP1-266L2 | sense_intronic         | chr6  | 1.7E+08  | 1.7E+08  | + | 0.53 | 0.29 |
| ENSG00000102112 | AC005546  | lincRNA                | chr19 | 13131571 | 13132410 | + | 0.44 | 0    |
| ENSG00000102113 | AKR1B1P7  | processed_transcript   | chr19 | 33360497 | 33361448 | - | 0.06 | 0    |
| ENSG00000102114 | RP11-173A | sense_intronic         | chr18 | 62245810 | 62247412 | + | 0    | 0    |
| ENSG00000102115 | RP11-567N | antisense              | chr18 | 79702721 | 79703651 | - | 0    | 0    |
| ENSG00000102116 | CTB-171A8 | antisense              | chr19 | 44632199 | 44718759 | - | 0.26 | 0.08 |
| ENSG00000102117 | LINC00663 | lincRNA                | chr19 | 19757366 | 19776423 | - | 1.74 | 1.21 |
| ENSG00000102118 | RP11-1058 | lincRNA                | chr18 | 48962951 | 48963941 | - | 0    | 0    |
| ENSG00000102119 | AC005357  | processed_transcript   | chr19 | 27983032 | 27983332 | - | 0    | 0    |
| ENSG00000102120 | AC006116  | processed_transcript   | chr19 | 56319790 | 56322310 | - | 0    | 0    |
| ENSG00000102121 | RP5-1022P | lincRNA                | chr20 | 5499116  | 5502881  | + | 0    | 0    |
| ENSG00000102122 | SLC25A6P4 | processed_transcript   | chr18 | 80077707 | 80078259 | + | 0    | 0    |
| ENSG00000102123 | CTC-448F2 | processed_transcript   | chr19 | 30037423 | 30038156 | + | 0    | 0    |
| ENSG00000102124 | LINC01841 | lincRNA                | chr19 | 14305458 | 14370196 | - | 0    | 0.14 |
| ENSG00000102125 | MRPS5P4   | processed_transcript   | chr18 | 60519841 | 60520165 | + | 0    | 0    |
| ENSG00000102126 | ZNF793-AS | antisense              | chr19 | 37497159 | 37507046 | - | 0.44 | 0.19 |
| ENSG00000102127 | RP11-798G | TEC                    | chr17 | 45531577 | 45533838 | + | 0.76 | 0.38 |
| ENSG00000102128 | MIR3184   | sense_intronic         | chr17 | 30117079 | 30117172 | - | 0    | 0    |
| ENSG00000102129 | ACTBP9    | processed_transcript   | chr18 | 62442028 | 62443126 | + | 0    | 0    |
| ENSG00000102130 | RP11-15A1 | antisense              | chr19 | 43996896 | 44002836 | - | 0.35 | 0.15 |
| ENSG00000102131 | CTC-499B1 | sense_intronic         | chr19 | 11725961 | 11730783 | - | 0    | 0    |
| ENSG00000102132 | RP11-693J | antisense              | chr12 | 92421531 | 92483680 | + | 0    | 0    |



|                 |                          |       |          |          |   |       |       |
|-----------------|--------------------------|-------|----------|----------|---|-------|-------|
| ENSG00000101544 | RP11-154H lincRNA        | chr18 | 79787121 | 79791432 | + | 0     | 0     |
| ENSG00000101545 | RP11-434D lincRNA        | chr17 | 20507413 | 20508931 | - | 0     | 0     |
| ENSG00000101546 | CTB-70G10 lincRNA        | chr19 | 28294093 | 28313500 | - | 0     | 0     |
| ENSG00000101547 | RP11-400F processed      | chr17 | 42536510 | 42562062 | + | 0.21  | 0     |
| ENSG00000101548 | RP11-1252 unprocessed    | chr2  | 87055658 | 87055800 | - | 0     | 0.83  |
| ENSG00000101549 | AC006116. transcribed    | chr19 | 56342432 | 56343419 | - | 0     | 0     |
| ENSG00000101550 | AC005775. antisense      | chr19 | 490046   | 507833   | - | 0.68  | 0.49  |
| ENSG00000101551 | RP11-332H sense_intronic | chr17 | 61382785 | 61384680 | + | 0.6   | 0.2   |
| ENSG00000101552 | CTC-21504 antisense      | chr19 | 11010917 | 11016011 | - | 0     | 0     |
| ENSG00000101553 | AC119403. processed      | chr19 | 2896625  | 2897222  | - | 0     | 0     |
| ENSG00000101554 | AC104532. antisense      | chr19 | 5899895  | 5901511  | + | 0     | 0     |
| ENSG00000101555 | RPSAP66 processed        | chr17 | 60564740 | 60565671 | - | 0     | 0     |
| ENSG00000101556 | AC005262. processed      | chr19 | 3130717  | 3131398  | + | 0     | 0     |
| ENSG00000101557 | MRPL37P1 processed       | chr18 | 58690356 | 58692153 | + | 0     | 0     |
| ENSG00000101558 | RP11-799D antisense      | chr17 | 35231450 | 35242963 | - | 0.29  | 0.41  |
| ENSG00000101559 | CTD-2623M lincRNA        | chr19 | 9793621  | 9802301  | + | 0     | 0     |
| ENSG00000101560 | AD000091. lincRNA        | chr19 | 15613247 | 15614553 | - | 0     | 0.13  |
| ENSG00000101561 | LINC01538 lincRNA        | chr18 | 64213082 | 64260055 | - | 0     | 0     |
| ENSG00000101562 | RP11-618P protein_coding | chr19 | 34396315 | 34409364 | + | 0.61  | 0     |
| ENSG00000101563 | RP11-701H antisense      | chr18 | 13644815 | 13645685 | - | 0     | 0     |
| ENSG00000101564 | RP11-820I1 antisense     | chr18 | 11993988 | 11994938 | - | 0     | 0     |
| ENSG00000101565 | RP11-49K2 antisense      | chr18 | 47077361 | 47091280 | - | 0     | 0     |
| ENSG00000101566 | AC006126. antisense      | chr19 | 45187388 | 45216933 | + | 0     | 0     |
| ENSG00000101567 | AC005786. processed      | chr19 | 3568120  | 3568273  | - | 0     | 0     |
| ENSG00000101568 | FAM106DP unprocessed     | chr17 | 60173322 | 60173822 | + | 0     | 0     |
| ENSG00000101569 | RP11-973H lincRNA        | chr18 | 12738965 | 12750068 | - | 0     | 0     |
| ENSG00000101570 | RP11-400F antisense      | chr17 | 42552436 | 42554748 | - | 6.88  | 7.86  |
| ENSG00000101571 | AC005625. antisense      | chr19 | 38361795 | 38362484 | - | 0     | 0     |
| ENSG00000101572 | FXD1 protein_coding      | chr19 | 35138808 | 35143109 | + | 4.46  | 4.5   |
| ENSG00000101573 | RP11-712P sense_intronic | chr18 | 35595901 | 35597599 | + | 0     | 0     |
| ENSG00000101574 | AARSD1 protein_coding    | chr17 | 42950526 | 42964498 | - | 13.63 | 15.39 |
| ENSG00000101575 | RP11-116C sense_intronic | chr18 | 45646153 | 45647937 | + | 0     | 0     |
| ENSG00000101576 | RP11-773H antisense      | chr18 | 12984694 | 12991173 | - | 0     | 0     |
| ENSG00000101577 | RP11-806H lincRNA        | chr17 | 78360453 | 78373911 | + | 0.08  | 0.35  |
| ENSG00000101578 | OR4F8P unprocessed       | chr19 | 156279   | 157215   | - | 0     | 0     |
| ENSG00000101579 | CTD-3162L antisense      | chr19 | 36378028 | 36378832 | + | 0     | 0     |
| ENSG00000101580 | FARSA-AS1 antisense      | chr19 | 12930522 | 12933296 | + | 0     | 0     |
| ENSG00000101581 | AC079466. lincRNA        | chr19 | 28606688 | 28615229 | + | 0.05  | 0.08  |
| ENSG00000101582 | CTC-459F4 lincRNA        | chr19 | 27849730 | 27889222 | - | 0     | 0     |
| ENSG00000101583 | CTD-2369P antisense      | chr19 | 10252268 | 10285108 | - | 0     | 0.07  |
| ENSG00000101584 | LINC01180 lincRNA        | chr17 | 44646364 | 44650349 | - | 0     | 0     |
| ENSG00000101585 | RP11-552F antisense      | chr17 | 75818815 | 75820055 | - | 0     | 0     |
| ENSG00000101586 | RP11-799D processed      | chr17 | 35188522 | 35191343 | + | 0     | 0     |
| ENSG00000101587 | CTC-232P5 antisense      | chr19 | 5978403  | 6020363  | + | 0.11  | 0.12  |
| ENSG00000101588 | POLR3GP2 processed       | chr18 | 48478561 | 48479228 | + | 0     | 0     |

|                                |       |          |          |   |      |      |
|--------------------------------|-------|----------|----------|---|------|------|
| ENSG0000(CTD-2329C lincRNA     | chr19 | 33555568 | 33557470 | + | 0    | 0    |
| ENSG0000(RP11-354P antisense   | chr17 | 30144062 | 30144790 | - | 0    | 0    |
| ENSG0000(RP11-749H sense_intr  | chr18 | 45483345 | 45529855 | + | 0    | 0    |
| ENSG0000(FTLP5 processed_      | chr19 | 3870991  | 3872107  | + | 0    | 0    |
| ENSG0000(LLNLR-284I antisense  | chr19 | 999796   | 1002757  | - | 0.84 | 0.26 |
| ENSG0000(DHX40P1 transcribec   | chr17 | 59976009 | 60002384 | - | 1.28 | 0.45 |
| ENSG0000(RP4-657D1 antisense   | chr1  | 51793934 | 51799154 | + | 0.21 | 0.75 |
| ENSG0000(RP11-127I2 processed_ | chr16 | 4730115  | 4752565  | - | 0    | 0    |
| ENSG0000(RP11-703I1 processed_ | chr18 | 12040101 | 12040300 | - | 0    | 1.06 |
| ENSG0000(RP11-886H protein_co  | chr18 | 49795793 | 49837623 | - | 0    | 0    |
| ENSG0000(RP11-936I5 antisense  | chr17 | 77373818 | 77377236 | - | 0.02 | 0    |
| ENSG0000(RP11-27G2 antisense   | chr18 | 59459072 | 59465682 | + | 0    | 0    |
| ENSG0000(AC006538. protein_co  | chr19 | 2717769  | 2740048  | - | 0    | 0    |
| ENSG0000(RP11-242D lincRNA     | chr17 | 43148368 | 43171037 | - | 4.21 | 3.65 |
| ENSG0000(CTD-2659N lincRNA     | chr19 | 12725517 | 12725886 | - | 0    | 0    |
| ENSG0000(AC002984. processed_  | chr19 | 36173406 | 36173853 | - | 0    | 0    |
| ENSG0000(CTC-448F2 lincRNA     | chr19 | 30028741 | 30029916 | - | 0    | 0    |
| ENSG0000(CTB-31O2C antisense   | chr19 | 1815249  | 1815873  | + | 0    | 0    |
| ENSG0000(RP11-120M processed_  | chr17 | 68413623 | 68524949 | + | 0.26 | 0.02 |
| ENSG0000(CTB-50L17. lincRNA    | chr19 | 4457962  | 4471493  | - | 0    | 0.39 |
| ENSG0000(CTC-360P9 lincRNA     | chr19 | 31886704 | 31908284 | - | 0    | 0    |
| ENSG0000(LINC01929 lincRNA     | chr18 | 55105904 | 55124306 | - | 0.05 | 0    |
| ENSG0000(LINC01532 lincRNA     | chr19 | 29002555 | 29013955 | + | 0    | 0    |
| ENSG0000(RP11-800A antisense   | chr18 | 79340258 | 79343972 | - | 0    | 0    |
| ENSG0000(RP11-75C1 antisense   | chr17 | 77469162 | 77472770 | - | 0    | 0.12 |
| ENSG0000(NTF6A unprocessε      | chr19 | 49025461 | 49026020 | - | 0    | 0    |
| ENSG0000(AC084219. protein_co  | chr19 | 44025354 | 44087318 | + | 0.44 | 0.72 |
| ENSG0000(LRRC37A1ε transcribec | chr17 | 68125777 | 68152468 | - | 0.03 | 0    |
| ENSG0000(CTD-2588C antisense   | chr19 | 34426112 | 34428273 | - | 0.18 | 0.6  |
| ENSG0000(RP11-92C4 antisense   | chr9  | 98847172 | 98872415 | - | 0    | 0    |
| ENSG0000(AC011524. lincRNA     | chr19 | 28949437 | 28950200 | - | 0    | 0    |
| ENSG0000(TCF4-AS1 antisense    | chr18 | 55452533 | 55482940 | + | 0    | 0    |
| ENSG0000(CTB-50L17. antisense  | chr19 | 4447304  | 4448217  | + | 0.27 | 0.44 |
| ENSG0000(RP11-807E processed_  | chr18 | 13151637 | 13152689 | - | 0    | 0    |
| ENSG0000(CTD-2562J. antisense  | chr19 | 16186276 | 16189458 | - | 0    | 0.13 |
| ENSG0000(RP11-384C lincRNA     | chr2  | 2.22E+08 | 2.22E+08 | - | 0.04 | 0    |
| ENSG0000(RP11-1094 lincRNA     | chr17 | 35540039 | 35540797 | - | 0    | 0    |
| ENSG0000(AC005559. processed_  | chr19 | 590430   | 591300   | - | 0    | 0    |
| ENSG0000(RP11-1096 lincRNA     | chr18 | 61681653 | 61682695 | + | 0    | 0    |
| ENSG0000(RP11-58G1 antisense   | chr18 | 36901946 | 36923814 | - | 0    | 0    |
| ENSG0000(RP11-35G9 antisense   | chr18 | 57630302 | 57669296 | + | 0.85 | 1.62 |
| ENSG0000(ZNF850 protein_co     | chr19 | 36714383 | 36772825 | - | 0.53 | 0.5  |
| ENSG0000(CTD-3193K antisense   | chr17 | 42679963 | 42682020 | + | 0    | 0    |
| ENSG0000(AC005757. antisense   | chr19 | 45135993 | 45136977 | - | 0    | 0    |
| ENSG0000(E2F3P1 processed_     | chr17 | 35490009 | 35491238 | + | 0    | 0    |

|                                    |       |          |          |   |       |       |
|------------------------------------|-------|----------|----------|---|-------|-------|
| ENSG0000(RP11-589P antisense)      | chr17 | 6985494  | 7019414  | - | 0.14  | 0.09  |
| ENSG0000(RP11-566K processed)      | chr16 | 89906157 | 89918233 | + | 0     | 0     |
| ENSG0000(AC002398. antisense)      | chr19 | 35769144 | 35771028 | - | 0.19  | 0     |
| ENSG0000(RP11-128P lincRNA)        | chr18 | 11366913 | 11378409 | - | 0     | 0     |
| ENSG0000(CTB-30L5.1 lincRNA)       | chr7  | 1.07E+08 | 1.07E+08 | - | 0     | 0.14  |
| ENSG0000(CTD-3162L lincRNA)        | chr19 | 36304580 | 36312668 | + | 0     | 0.17  |
| ENSG0000(CTD-2540B sense_intron)   | chr19 | 33178056 | 33178651 | + | 0     | 0     |
| ENSG0000(RP11-486P lincRNA)        | chr7  | 20096137 | 20130475 | + | 0     | 0     |
| ENSG0000(AC005336. processed)      | chr19 | 15910582 | 15911824 | - | 0     | 0     |
| ENSG0000(LINC01905 lincRNA)        | chr18 | 56042135 | 56096319 | + | 0     | 0     |
| ENSG0000(RP11-15A1 lincRNA)        | chr19 | 43891804 | 43901805 | - | 3.52  | 4.88  |
| ENSG0000(AC005943. protein_coding) | chr19 | 1578339  | 1605445  | - | 13.53 | 11.74 |
| ENSG0000(PTGES3L protein_coding)   | chr17 | 42968088 | 42980433 | - | 0.21  | 0.16  |
| ENSG0000(RP11-760L antisense)      | chr18 | 59563709 | 59568615 | + | 0     | 0     |
| ENSG0000(CTD-2659N antisense)      | chr19 | 12796823 | 12801849 | + | 0.37  | 0     |
| ENSG0000(AC006130. antisense)      | chr19 | 2847227  | 2858716  | - | 0     | 0     |
| ENSG0000(UXT-AS1 antisense)        | chrX  | 47658833 | 47660377 | + | 0.36  | 0.41  |
| ENSG0000(LINC02080 lincRNA)        | chr17 | 76799044 | 76807102 | + | 0.08  | 0.04  |
| ENSG0000(RP11-866E processed)      | chr18 | 59929226 | 59930330 | + | 0     | 0     |
| ENSG0000(RP11-64C1 lincRNA)        | chr18 | 12288308 | 12291488 | + | 0     | 0     |
| ENSG0000(RP11-10K1 lincRNA)        | chr16 | 5098739  | 5142595  | + | 0     | 0     |
| ENSG0000(NAGPA-AS. lincRNA)        | chr16 | 5010909  | 5043999  | + | 0     | 0     |
| ENSG0000(AC005256. lincRNA)        | chr19 | 1748056  | 1748745  | + | 0     | 1.54  |
| ENSG0000(RP11-1094 sense_intron)   | chr17 | 35499690 | 35510270 | - | 0     | 0     |
| ENSG0000(RP11-434D lincRNA)        | chr17 | 20545371 | 20549952 | + | 0     | 0     |
| ENSG0000(CCDC58P3 processed)       | chr18 | 12211378 | 12211807 | + | 0     | 0     |
| ENSG0000(RP11-127I2 antisense)     | chr16 | 4795265  | 4796532  | - | 0     | 0     |
| ENSG0000(RP11-666A antisense)      | chr17 | 76569792 | 76571240 | + | 0     | 0     |
| ENSG0000(RP11-820I1 lincRNA)       | chr18 | 11910634 | 11914344 | - | 0     | 0     |
| ENSG0000(ASB16-AS1 antisense)      | chr17 | 44175973 | 44186717 | - | 4.89  | 6.91  |
| ENSG0000(CTC-400I9. lincRNA)       | chr19 | 30850975 | 30872507 | + | 0     | 0     |
| ENSG0000(CTC-510F1. antisense)     | chr19 | 11203628 | 11216168 | + | 0.12  | 0.27  |
| ENSG0000(KRT18P61 processed)       | chr17 | 60810165 | 60811462 | + | 0     | 0     |
| ENSG0000(RP11-666A processed)      | chr17 | 76595584 | 76595772 | - | 0     | 0     |
| ENSG0000(RP11-15J1( processed)     | chr9  | 65222522 | 65222777 | - | 0     | 0     |
| ENSG0000(RP11-115N processed)      | chr18 | 42089312 | 42089752 | + | 0     | 0     |
| ENSG0000(CTC-499B1 lincRNA)        | chr19 | 11841241 | 11842439 | - | 0     | 0     |
| ENSG0000(AC005789. antisense)      | chr19 | 38385522 | 38386759 | + | 0     | 0.4   |
| ENSG0000(CTBP2P7 processed)        | chr19 | 36496916 | 36498159 | - | 0.05  | 0     |
| ENSG0000(CTB-25B13 antisense)      | chr19 | 1508375  | 1508963  | + | 0.17  | 0     |
| ENSG0000(CTD-2319I( lincRNA)       | chr17 | 60135762 | 60140081 | - | 0     | 0.15  |
| ENSG0000(CTD-2537I( sense_intron)  | chr19 | 55670632 | 55672069 | + | 0.08  | 0.26  |
| ENSG0000(SLC14A2-A antisense)      | chr18 | 45423764 | 45483218 | - | 0     | 0     |
| ENSG0000(RP11-325K lincRNA)        | chr18 | 60630167 | 60902726 | - | 0     | 0     |
| ENSG0000(NTF6G unprocessed)        | chr19 | 49029726 | 49030341 | + | 0     | 0     |

|                                       |          |          |   |      |      |
|---------------------------------------|----------|----------|---|------|------|
| ENSG0000( ILF3-AS1 lincRNA chr19      | 10651862 | 10653844 | - | 3.18 | 3.65 |
| ENSG0000( RP11-846C antisense chr18   | 45130565 | 45181347 | - | 0    | 0    |
| ENSG0000( RP11-686D transcribed chr17 | 35409602 | 35410228 | - | 3.8  | 2.05 |
| ENSG0000( TBC1D3P1- processed_ chr17  | 59962363 | 60018975 | - | 0.05 | 0.05 |
| ENSG0000( CTD-2369P antisense chr19   | 10259109 | 10260045 | - | 0    | 0    |
| ENSG0000( ZNF561-AS processed_ chr19  | 9621291  | 9645896  | + | 7.36 | 6.82 |
| ENSG0000( PCAT19 lincRNA chr19        | 41454169 | 41500649 | - | 0    | 0.02 |
| ENSG0000( RP11-861E lincRNA chr18     | 12432897 | 12437635 | + | 0    | 0    |
| ENSG0000( CTD-2378E lincRNA chr17     | 70312831 | 70368916 | - | 0    | 0    |
| ENSG0000( CTD-2587H protein_co chr19  | 55154757 | 55160671 | - | 0    | 0    |
| ENSG0000( RP11-839G antisense chr18   | 54885866 | 54898083 | - | 0    | 0    |
| ENSG0000( AF038458. processed_ chr19  | 35957121 | 35957382 | - | 0    | 0    |
| ENSG0000( CTB-129P6 lincRNA chr19     | 44950044 | 44954007 | - | 0    | 0    |
| ENSG0000( CTD-3064H lincRNA chr19     | 37503906 | 37504465 | - | 0    | 0    |
| ENSG0000( RP11-64C1 processed_ chr18  | 12192203 | 12192934 | - | 0    | 0    |
| ENSG0000( AC010525. antisense chr19   | 55694118 | 55694558 | - | 0    | 0    |
| ENSG0000( RPL10P15 processed_ chr19   | 9820141  | 9820455  | + | 0    | 0    |
| ENSG0000( AD000671. protein_co chr19  | 35739252 | 35745432 | - | 0.11 | 0.31 |
| ENSG0000( CTD-2020K antisense chr17   | 45190931 | 45222222 | - | 5.36 | 4.59 |
| ENSG0000( AC004490. antisense chr19   | 2212029  | 2215565  | - | 0    | 0    |
| ENSG0000( LINC02081 lincRNA chr17     | 78617389 | 78632057 | - | 0    | 0    |
| ENSG0000( CTD-3113P antisense chr19   | 305573   | 306467   | + | 0    | 0    |
| ENSG0000( CTB-31O2C antisense chr19   | 1852382  | 1853622  | + | 0    | 0    |
| ENSG0000( RP11-795F protein_co chr18  | 80034346 | 80097088 | + | 0.26 | 0.06 |
| ENSG0000( RNF157-AS antisense chr17   | 76140556 | 76154650 | + | 0    | 0    |
| ENSG0000( OR1AC1P unprocessε chr17    | 3377527  | 3377602  | - | 0    | 0    |
| ENSG0000( CTD-2540B lincRNA chr19     | 33305036 | 33309387 | + | 0    | 0    |
| ENSG0000( RP11-332H antisense chr17   | 61361668 | 61400243 | - | 0    | 0    |
| ENSG0000( HMGB3P2. processed_ chr17   | 42648178 | 42648738 | + | 0    | 0    |
| ENSG0000( AC011518. lincRNA chr19     | 32103583 | 32106537 | + | 0    | 0    |
| ENSG0000( LINC01924 lincRNA chr18     | 64104091 | 64423601 | + | 0    | 0    |
| ENSG0000( AD000091. processed_ chr19  | 15611623 | 15611909 | - | 2.34 | 2.58 |
| ENSG0000( RP11-53B2 antisense chr18   | 13514520 | 13522888 | - | 0    | 0    |
| ENSG0000( RP11-15K2 antisense chr17   | 61460224 | 61463384 | - | 0    | 0    |
| ENSG0000( AC005954. sense_intrε chr19 | 3754620  | 3756659  | - | 0    | 0.31 |
| ENSG0000( AC005262. antisense chr19   | 3118665  | 3119304  | - | 0.17 | 0    |
| ENSG0000( RP11-322E protein_co chr18  | 35443871 | 35497940 | - | 0    | 0    |
| ENSG0000( CTB-31O2C antisense chr19   | 1860250  | 1862019  | + | 0    | 0    |
| ENSG0000( CTD-3162L processed_ chr19  | 36421536 | 36422534 | + | 0    | 0.13 |
| ENSG0000( RP11-677C lincRNA chr18     | 11620717 | 11621158 | - | 0    | 0.22 |
| ENSG0000( AC067968. lincRNA chr19     | 44023604 | 44025262 | - | 0    | 0    |
| ENSG0000( AC006116. processed_ chr19  | 56338288 | 56338648 | - | 0    | 0    |
| ENSG0000( RP11-383D antisense chr18   | 56872668 | 56873970 | - | 0    | 0    |
| ENSG0000( LINC01842 lincRNA chr19     | 14333743 | 14343916 | + | 0    | 0.09 |
| ENSG0000( AC005777. unprocessε chr19  | 3775996  | 3776182  | - | 0    | 0    |

|                 |                       |       |          |          |   |      |      |
|-----------------|-----------------------|-------|----------|----------|---|------|------|
| ENSG00000100000 | CTC-550B1 processed   | chr19 | 55027593 | 55053928 | - | 0    | 0    |
| ENSG00000100000 | RP11-411B antisense   | chr18 | 14089935 | 14091019 | + | 0    | 0    |
| ENSG00000100000 | MIR2117H1 lincRNA     | chr17 | 43444707 | 43451200 | + | 0    | 0    |
| ENSG00000100000 | CTD-2528L lincRNA     | chr19 | 37728586 | 37730643 | - | 0    | 0.33 |
| ENSG00000100000 | CTBP2P3 processed     | chr18 | 60663115 | 60664369 | + | 0    | 0    |
| ENSG00000100000 | OR1M4P unprocessed    | chr19 | 9083112  | 9083398  | - | 0    | 0    |
| ENSG00000100000 | TPMTP1 processed      | chr18 | 47630112 | 47630848 | + | 0    | 0    |
| ENSG00000100000 | CTB-5409.1 protein    | chr19 | 5784005  | 5785619  | - | 0.13 | 0    |
| ENSG00000100000 | AC005391. antisense   | chr19 | 928259   | 928817   | - | 0.3  | 0    |
| ENSG00000100000 | RP11-1072 antisense   | chr17 | 44673689 | 44676257 | - | 0.06 | 0    |
| ENSG00000100000 | SDHDP1 processed      | chr18 | 12101997 | 12102470 | - | 0    | 0    |
| ENSG00000100000 | CHMP1B-A antisense    | chr18 | 11851414 | 11852751 | - | 0    | 0    |
| ENSG00000100000 | RP11-527L unprocessed | chr17 | 43922775 | 43927388 | - | 0    | 0    |
| ENSG00000100000 | RP11-318A protein     | chr17 | 76732978 | 76738522 | + | 0    | 0    |
| ENSG00000100000 | CTB-5506.1 antisense  | chr19 | 14137179 | 14171267 | + | 2.13 | 1.93 |
| ENSG00000100000 | CALM2P1 processed     | chr17 | 70241324 | 70241761 | + | 0    | 0    |
| ENSG00000100000 | RP11-397A lincRNA     | chr18 | 55817167 | 55819759 | + | 0    | 0    |
| ENSG00000100000 | CTC-512J1.1 protein   | chr19 | 44329695 | 44401608 | - | 0    | 0    |
| ENSG00000100000 | CTC-510F1.3 prime     | chr19 | 11300777 | 11324441 | - | 0    | 0    |
| ENSG00000100000 | RP11-879F lincRNA     | chr18 | 61592375 | 61748832 | - | 0    | 0    |
| ENSG00000100000 | RP11-756J.1 antisense | chr18 | 13234945 | 13236470 | - | 5.43 | 0    |
| ENSG00000100000 | PHF5CP processed      | chr19 | 19588091 | 19588415 | - | 0    | 0    |
| ENSG00000100000 | CTD-2006C protein     | chr19 | 11925075 | 11979290 | + | 0    | 0    |
| ENSG00000100000 | AC007136. transcribed | chr19 | 2030853  | 2031051  | - | 0    | 0    |
| ENSG00000100000 | SNRPCP20 processed    | chr16 | 5289200  | 5289409  | - | 0    | 0    |
| ENSG00000100000 | RP1-200G1 processed   | chr17 | 69707193 | 69707373 | - | 0    | 0    |
| ENSG00000100000 | PTP4A2P1 processed    | chr17 | 42533532 | 42534009 | + | 0    | 0    |
| ENSG00000100000 | RP11-767C processed   | chr18 | 47703175 | 47703745 | + | 0    | 0    |
| ENSG00000100000 | CTC-512J1.1 processed | chr19 | 44392439 | 44448452 | - | 0    | 0    |
| ENSG00000100000 | ATP5LP7 processed     | chr17 | 42647834 | 42648143 | + | 0    | 0    |
| ENSG00000100000 | TYMSP2 processed      | chr19 | 35683778 | 35684201 | - | 0    | 0    |
| ENSG00000100000 | RP11-15A1 antisense   | chr19 | 43902001 | 43926545 | + | 0.14 | 0    |
| ENSG00000100000 | AC006116. antisense   | chr19 | 56387412 | 56388424 | + | 0    | 0    |
| ENSG00000100000 | RP11-116C antisense   | chr18 | 45669367 | 45747215 | - | 0.33 | 0.36 |
| ENSG00000100000 | RP1-193H1 lincRNA     | chr17 | 69551358 | 69553861 | + | 0.11 | 0.17 |
| ENSG00000100000 | MIR212 miRNA          | chr17 | 2050271  | 2050380  | - | 0    | 0    |
| ENSG00000100000 | RP11-813F sense       | chr18 | 49969721 | 49970957 | - | 0    | 0    |
| ENSG00000100000 | CTC-429L1.1 sense     | chr19 | 10490339 | 10491000 | - | 1.8  | 0.57 |
| ENSG00000100000 | RP11-798G lincRNA     | chr17 | 45545804 | 45563230 | + | 0.6  | 0.65 |
| ENSG00000100000 | RP11-861E antisense   | chr18 | 12438890 | 12448205 | + | 2.42 | 2.18 |
| ENSG00000100000 | MIR132 miRNA          | chr17 | 2049908  | 2050008  | - | 0    | 0    |
| ENSG00000100000 | LINC01775 lincRNA     | chr19 | 2458935  | 2462185  | - | 0.72 | 0.26 |
| ENSG00000100000 | RP11-797E antisense   | chr18 | 37273706 | 37276572 | + | 0    | 0    |
| ENSG00000100000 | SNRPGP4 processed     | chr17 | 69318733 | 69318961 | + | 0    | 0    |
| ENSG00000100000 | LINC01782 lincRNA     | chr19 | 32102088 | 32105916 | - | 0    | 0    |

|                                 |       |          |          |   |       |      |
|---------------------------------|-------|----------|----------|---|-------|------|
| ENSG0000( AC005954. antisense   | chr19 | 3753840  | 3756517  | + | 0.28  | 0.91 |
| ENSG0000( LCN6 protein_co       | chr9  | 1.37E+08 | 1.37E+08 | - | 0     | 0    |
| ENSG0000( RP11-264B antisense   | chr17 | 61034636 | 61070122 | - | 0     | 0    |
| ENSG0000( LINC01897 lincRNA     | chr18 | 57961231 | 57964434 | - | 0     | 0    |
| ENSG0000( RP5-1067N lincRNA     | chr17 | 44328613 | 44331462 | + | 0     | 0    |
| ENSG0000( CTD-2659N lincRNA     | chr19 | 12784539 | 12785101 | - | 0     | 0    |
| ENSG0000( AC007773. antisense   | chr19 | 32390050 | 32405560 | - | 1.07  | 0    |
| ENSG0000( CTC-265F1. antisense  | chr19 | 2631954  | 2632849  | + | 0     | 0    |
| ENSG0000( RP11-685A lincRNA     | chr18 | 59081924 | 59084981 | + | 0     | 0    |
| ENSG0000( AC010642. protein_co  | chr19 | 58278966 | 58315197 | + | 0.31  | 0.15 |
| ENSG0000( AC005336. processed_  | chr19 | 15902300 | 15903238 | - | 0     | 0    |
| ENSG0000( AC010504. antisense   | chr19 | 34348356 | 34359412 | - | 0.24  | 0.13 |
| ENSG0000( CTC-260E6 transcribec | chr19 | 20131894 | 20151908 | - | 0     | 0    |
| ENSG0000( CTD-2132N protein_co  | chr17 | 42038232 | 42050614 | - | 0.6   | 0.43 |
| ENSG0000( RP11-194N sense_intr  | chr17 | 42495867 | 42496550 | + | 0     | 0    |
| ENSG0000( AC005597. antisense   | chr19 | 30219666 | 30228715 | - | 0     | 0    |
| ENSG0000( AC005498. lincRNA     | chr19 | 56535299 | 56535763 | + | 0     | 0.18 |
| ENSG0000( WDR7-OT1 sense_ovei   | chr18 | 57027832 | 57038845 | + | 0     | 0    |
| ENSG0000( RP11-126C antisense   | chr18 | 58670009 | 58671877 | - | 0.1   | 0    |
| ENSG0000( RP11-640I1 processed_ | chr17 | 15748703 | 15749315 | - | 0     | 0    |
| ENSG0000( RP11-49K2 protein_co  | chr18 | 47108188 | 47176345 | - | 14.38 | 16.1 |
| ENSG0000( AC005786. lincRNA     | chr19 | 3558015  | 3558486  | + | 0     | 0    |
| ENSG0000( CTB-31O2C lincRNA     | chr19 | 1875016  | 1875992  | + | 0     | 0    |
| ENSG0000( HNRNPA3F processed_   | chr18 | 50814392 | 50815730 | + | 0     | 0    |
| ENSG0000( CTB-184G2 antisense   | chr19 | 19401979 | 19402603 | - | 0.47  | 0    |
| ENSG0000( ZNF861P unprocess     | chr19 | 15821796 | 15823797 | - | 0     | 0    |
| ENSG0000( AC093074. lincRNA     | chr19 | 28394851 | 28396428 | - | 0     | 0    |
| ENSG0000( RP11-794N antisense   | chr18 | 13203774 | 13216367 | - | 0     | 0    |
| ENSG0000( AC011524. lincRNA     | chr19 | 28960506 | 28964943 | - | 0     | 0    |
| ENSG0000( CYP4F10P unprocess    | chr19 | 15664106 | 15669826 | + | 0     | 0    |
| ENSG0000( AC005307. lincRNA     | chr19 | 28437060 | 28535277 | - | 0     | 0    |
| ENSG0000( CTB-31O2C processed_  | chr19 | 1822089  | 1824542  | + | 0.02  | 0    |
| ENSG0000( CTD-2085J. processed_ | chr19 | 32824142 | 32824505 | - | 0     | 0    |
| ENSG0000( RP11-798G processed_  | chr17 | 45549781 | 45558738 | - | 0     | 0    |
| ENSG0000( RP11-64C1 lincRNA     | chr18 | 12230411 | 12231573 | - | 0     | 0    |
| ENSG0000( CTD-2319I. processed_ | chr17 | 60126535 | 60135644 | - | 0.56  | 0.93 |
| ENSG0000( RP11-973H sense_intr  | chr18 | 12670426 | 12671145 | - | 0.18  | 0.21 |
| ENSG0000( RP11-118B lincRNA     | chr17 | 68793549 | 68797822 | - | 0     | 0    |
| ENSG0000( AC139100. antisense   | chr18 | 80183680 | 80202992 | + | 0.05  | 0    |
| ENSG0000( LINC01255 lincRNA     | chr18 | 11488570 | 11506983 | + | 0     | 0    |
| ENSG0000( RP11-209N processed_  | chr17 | 43718314 | 43720436 | - | 0.06  | 0.07 |
| ENSG0000( ZNF790-AS antisense   | chr19 | 36797518 | 36828115 | + | 1.43  | 1.61 |
| ENSG0000( CTB-50L17. antisense  | chr19 | 4429689  | 4430934  | - | 0     | 0    |
| ENSG0000( RP11-1151 antisense   | chr18 | 58535415 | 58538552 | + | 0     | 0    |
| ENSG0000( CTC-448F2 processed_  | chr19 | 29921182 | 29921653 | + | 0     | 0    |

|                 |                       |       |          |          |   |      |      |
|-----------------|-----------------------|-------|----------|----------|---|------|------|
| ENSG00000100000 | CTD-2008P lincRNA     | chr17 | 28232590 | 28235281 | - | 0.08 | 0.03 |
| ENSG00000100000 | CTD-2162K lincRNA     | chr19 | 36773153 | 36777078 | + | 0.11 | 0.03 |
| ENSG00000100000 | CTD-2132N protein_co  | chr17 | 42119674 | 42154916 | - | 0.36 | 0    |
| ENSG00000100000 | CTC-232P5 antisense   | chr19 | 6067953  | 6077119  | + | 0    | 0    |
| ENSG00000100000 | RP11-75C1 sense_intr  | chr17 | 77469068 | 77471045 | + | 0.08 | 0.46 |
| ENSG00000100000 | CTC-459F4 processed_  | chr19 | 27803538 | 27804060 | + | 0    | 0.46 |
| ENSG00000100000 | CTC-550B1 antisense   | chr19 | 55006193 | 55048086 | + | 0.13 | 0.09 |
| ENSG00000100000 | AC007204. lincRNA     | chr19 | 19900968 | 19963464 | + | 0    | 0    |
| ENSG00000100000 | RP11-2N1. antisense   | chr18 | 59685820 | 59688400 | + | 0    | 0    |
| ENSG00000100000 | PARD6G-A antisense    | chr18 | 80147924 | 80178432 | + | 1.4  | 1.45 |
| ENSG00000100000 | RP11-686D processed_  | chr17 | 35344231 | 35344564 | + | 0    | 0    |
| ENSG00000100000 | LINC01140 lincRNA     | chr1  | 87129765 | 87169198 | + | 2.12 | 1.38 |
| ENSG00000100000 | CTC-543D1 lincRNA     | chr19 | 9498678  | 9510079  | + | 0    | 0    |
| ENSG00000100000 | CTD-2006C sense_ove   | chr19 | 11939959 | 11953381 | + | 0    | 0    |
| ENSG00000100000 | CTD-2562J antisense   | chr19 | 16283359 | 16324514 | - | 0    | 0    |
| ENSG00000100000 | CTD-2342J antisense   | chr19 | 11368123 | 11374935 | - | 0    | 0.43 |
| ENSG00000100000 | MAP3K14 antisense     | chr17 | 45247925 | 45268630 | + | 0.48 | 0.33 |
| ENSG00000100000 | RP11-879F lincRNA     | chr18 | 61585746 | 61606916 | - | 0.89 | 0.68 |
| ENSG00000100000 | TBX2-AS1 antisense    | chr17 | 61393456 | 61411555 | - | 0.85 | 1.21 |
| ENSG00000100000 | RP11-793H protein_co  | chr12 | 53506688 | 53625979 | - | 2.61 | 1.46 |
| ENSG00000100000 | CTB-129P6 antisense   | chr19 | 44882027 | 44890876 | - | 0    | 0    |
| ENSG00000100000 | AC005306. processed_  | chr19 | 1989401  | 1990370  | + | 0.47 | 0.18 |
| ENSG00000100000 | RP11-397A lincRNA     | chr18 | 55721063 | 55788761 | + | 1.41 | 0.82 |
| ENSG00000100000 | RP5-951N9 sense_intr  | chr12 | 1385833  | 1386987  | + | 0    | 0    |
| ENSG00000100000 | RP11-794M lincRNA     | chr18 | 13183402 | 13185617 | - | 0    | 0    |
| ENSG00000100000 | RP11-567N processed_  | chr18 | 79576460 | 79589010 | + | 0    | 0.03 |
| ENSG00000100000 | RP13-890H antisense   | chr17 | 45168800 | 45171584 | - | 0.22 | 0.27 |
| ENSG00000100000 | CTD-2623N lincRNA     | chr19 | 9834079  | 9835013  | - | 0    | 0    |
| ENSG00000100000 | CTB-186G2 antisense   | chr19 | 38596346 | 38601694 | + | 0    | 0    |
| ENSG00000100000 | RP11-703I1 processed_ | chr18 | 12050309 | 12050672 | - | 0    | 0    |
| ENSG00000100000 | RP11-8H2. processed_  | chr18 | 46028306 | 46029829 | + | 0    | 0.04 |
| ENSG00000100000 | CTD-2319I unprocess   | chr17 | 60113793 | 60120687 | - | 0    | 0    |
| ENSG00000100000 | CEBPA-AS1 antisense   | chr19 | 33302857 | 33305054 | + | 0.03 | 0.06 |
| ENSG00000100000 | AC006116. sense_intr  | chr19 | 56311928 | 56312486 | - | 0.13 | 0    |
| ENSG00000100000 | CTB-66B24 antisense   | chr19 | 6109322  | 6125797  | + | 0    | 0    |
| ENSG00000100000 | RPL23AP77 processed_  | chr18 | 23709825 | 23710287 | - | 0.17 | 0.19 |
| ENSG00000100000 | RP11-178C lincRNA     | chr17 | 59964832 | 59996972 | + | 0.1  | 0.11 |
| ENSG00000100000 | CTD-2369P protein_co  | chr19 | 10315471 | 10320678 | - | 0    | 0    |
| ENSG00000100000 | AC004637. antisense   | chr19 | 3672582  | 3674295  | + | 0    | 0    |
| ENSG00000100000 | RP11-378J unprocess   | chr1  | 2.23E+08 | 2.23E+08 | - | 0    | 0    |
| ENSG00000100000 | LINC01764 lincRNA     | chr19 | 15827045 | 15835853 | - | 0    | 0    |
| ENSG00000100000 | CTD-2630F antisense   | chr19 | 36489649 | 36491040 | + | 0.94 | 1.06 |
| ENSG00000100000 | OR4G1P unprocess      | chr19 | 104535   | 105471   | + | 0    | 0    |
| ENSG00000100000 | RP11-99A1 lincRNA     | chr18 | 54879457 | 54880809 | + | 0    | 0    |
| ENSG00000100000 | RP11-1094 processed_  | chr17 | 35459481 | 35460550 | - | 0    | 0.06 |

|                     |             |       |          |          |   |       |      |
|---------------------|-------------|-------|----------|----------|---|-------|------|
| ENSG0000(KC6        | lincRNA     | chr18 | 41465783 | 41632185 | - | 0     | 0    |
| ENSG0000(AC104532.  | protein_co  | chr19 | 5904841  | 5914707  | + | 0.46  | 0    |
| ENSG0000(RP11-686D  | processed_  | chr17 | 35377416 | 35377678 | - | 0     | 0    |
| ENSG0000(RP11-879F  | lincRNA     | chr18 | 61571342 | 61579456 | - | 0     | 0    |
| ENSG0000(CTB-25B13  | antisense   | chr19 | 1457670  | 1458580  | - | 7.84  | 8.02 |
| ENSG0000(RP11-178C  | protein_co  | chr17 | 59940908 | 59973101 | + | 0     | 0    |
| ENSG0000(CTD-2528L  | processed_  | chr19 | 37693280 | 37693564 | - | 0     | 0.44 |
| ENSG0000(AC005780.  | lincRNA     | chr19 | 28316705 | 28386204 | - | 0     | 0    |
| ENSG0000(LINC02001  | lincRNA     | chr17 | 35568109 | 35574843 | + | 1.63  | 2.15 |
| ENSG0000(SNHG22     | antisense   | chr18 | 49814023 | 49851059 | + | 0.6   | 1.1  |
| ENSG0000(SLC25A1P5  | processed_  | chr19 | 27805423 | 27806205 | - | 0     | 0    |
| ENSG0000(RP11-411B  | processed_  | chr18 | 14143596 | 14151139 | - | 0     | 0    |
| ENSG0000(LINC01415  | lincRNA     | chr18 | 55776727 | 55781721 | - | 0     | 0    |
| ENSG0000(CTD-2008L  | lincRNA     | chr18 | 55893038 | 56023522 | + | 0     | 0    |
| ENSG0000(AC002398.  | antisense   | chr19 | 35754566 | 35755490 | + | 0.1   | 0.11 |
| ENSG0000(BOLA3P2    | processed_  | chr19 | 9019344  | 9019984  | + | 0     | 0    |
| ENSG0000(ASNSP6     | processed_  | chr18 | 11745626 | 11747581 | + | 0     | 0    |
| ENSG0000(CTD-2534I  | lincRNA     | chr17 | 44947912 | 44948939 | + | 0     | 0    |
| ENSG0000(CTB-60B18  | protein_co  | chr19 | 49022953 | 49036895 | - | 0     | 0    |
| ENSG0000(EIF4A2P1   | processed_  | chr18 | 12912844 | 12913906 | + | 0     | 0    |
| ENSG0000(LINC01478  | lincRNA     | chr18 | 44323436 | 44531697 | - | 0     | 0    |
| ENSG0000(KB-7G2.9   | lincRNA     | chr22 | 16616170 | 16617114 | + | 0     | 0    |
| ENSG0000(LINC00906  | lincRNA     | chr19 | 28965131 | 28970874 | + | 0.02  | 0.05 |
| ENSG0000(RP11-242D  | processed_  | chr17 | 43169880 | 43170077 | - | 0     | 1.1  |
| ENSG0000(RP11-640A  | antisense   | chr18 | 62372894 | 62378130 | - | 0     | 0    |
| ENSG0000(RP11-552F  | antisense   | chr17 | 75897060 | 75900148 | + | 0.08  | 0    |
| ENSG0000(ZNF833P    | transcribec | chr19 | 11680944 | 11686259 | + | 0     | 0.08 |
| ENSG0000(CTB-39G8.  | antisense   | chr17 | 45396932 | 45397477 | + | 0     | 0    |
| ENSG0000(CTD-2293H  | antisense   | chr19 | 37075113 | 37078605 | - | 0     | 0    |
| ENSG0000(EIF5AP3    | processed_  | chr19 | 45128569 | 45129030 | + | 0     | 0    |
| ENSG0000(CTB-179K2  | antisense   | chr19 | 45076510 | 45090391 | - | 0     | 0.45 |
| ENSG0000(RP11-686D  | antisense   | chr17 | 35477994 | 35478444 | + | 0     | 0    |
| ENSG0000(SH3GL1P3   | processed_  | chr17 | 68134675 | 68135604 | - | 0.13  | 0    |
| ENSG0000(CTD-2162K  | lincRNA     | chr19 | 36773712 | 36775908 | - | 0.06  | 0.06 |
| ENSG0000(RP11-749H  | sense_intr  | chr18 | 45507202 | 45550183 | + | 0     | 0    |
| ENSG0000(RPL9P29    | processed_  | chr17 | 78845953 | 78846868 | - | 0     | 0    |
| ENSG0000(RP11-411B  | antisense   | chr18 | 14104542 | 14105226 | + | 0     | 0    |
| ENSG0000(RP11-1094  | antisense   | chr17 | 35553205 | 35554767 | + | 0     | 0    |
| ENSG0000(CTC-454I2I | protein_co  | chr19 | 37093019 | 37210512 | - | 0.72  | 0    |
| ENSG0000(LOC10042I  | processed_  | chr17 | 69094289 | 69095499 | - | 1.27  | 0.64 |
| ENSG0000(CTD-3162L  | lincRNA     | chr19 | 36379351 | 36380912 | - | 0     | 0    |
| ENSG0000(RP11-47L3. | lincRNA     | chr17 | 35313502 | 35324900 | + | 0     | 0.7  |
| ENSG0000(KCNJ2-AS1  | antisense   | chr17 | 70166961 | 70169402 | - | 0     | 0    |
| ENSG0000(RP11-53B2  | antisense   | chr18 | 13500641 | 13501289 | - | 0     | 0    |
| ENSG0000(UPK3BL     | protein_co  | chr7  | 1.03E+08 | 1.03E+08 | - | 11.42 | 12.2 |



|                                       |          |          |   |      |      |
|---------------------------------------|----------|----------|---|------|------|
| ENSG0000(RP11-1094 processed_ chr17   | 35498218 | 35499175 | + | 0    | 0    |
| ENSG0000(CTD-2623N unprocessε chr19   | 9756152  | 9756863  | - | 0.93 | 1.02 |
| ENSG0000(RP11-712C processed_ chr18   | 11552366 | 11552847 | + | 0    | 0    |
| ENSG0000(AC005330. lincRNA chr19      | 1321225  | 1322846  | + | 0    | 0    |
| ENSG0000(CTD-2231E lincRNA chr19      | 16103761 | 16104254 | - | 0    | 0    |
| ENSG0000(RP11-244M lincRNA chr18      | 39206924 | 39800318 | - | 0.02 | 0    |
| ENSG0000(CTB-186G2 antisense chr19    | 38683873 | 38693606 | - | 0    | 0    |
| ENSG0000(ATP5LP6 processed_ chr17     | 76202644 | 76202796 | - | 0    | 0    |
| ENSG0000(CTC-400I9. lincRNA chr19     | 30946582 | 30957192 | + | 0    | 0    |
| ENSG0000(CTC-548K1 antisense chr19    | 14402717 | 14408723 | - | 0    | 0    |
| ENSG0000(RP11-325K transcribec chr18  | 60611773 | 60654623 | + | 0    | 0    |
| ENSG0000(CTC-260E6 antisense chr19    | 20125377 | 20321305 | - | 1.64 | 1.04 |
| ENSG0000(SMCO4P1 processed_ chr17     | 44645411 | 44645587 | + | 0    | 0    |
| ENSG0000(CTB-50L17. protein_co chr19  | 4528427  | 4540067  | - | 0    | 0.17 |
| ENSG0000(CTD-2240E antisense chr19    | 10089032 | 10090377 | - | 0    | 0    |
| ENSG0000(AF038458. lincRNA chr19      | 35960512 | 35964063 | + | 0    | 0    |
| ENSG0000(CTC-459F4 unprocessε chr19   | 27892495 | 27898927 | - | 0    | 0    |
| ENSG0000(RP11-635N antisense chr18    | 63367328 | 63381629 | + | 2.29 | 1.89 |
| ENSG0000(RP11-1151 lincRNA chr18      | 58446275 | 58453766 | + | 0.02 | 0    |
| ENSG0000(CYP4F9P unprocessε chr19     | 15979835 | 15999020 | - | 0    | 0    |
| ENSG0000(RP11-691H antisense chr18    | 13362203 | 13366243 | - | 0    | 0    |
| ENSG0000(CTB-175E5 antisense chr17    | 44198882 | 44216565 | + | 0    | 0    |
| ENSG0000(AC074212. antisense chr19    | 45767796 | 45772504 | + | 0.86 | 1.71 |
| ENSG0000(RP11-845C antisense chr18    | 58398663 | 58400082 | - | 0    | 0    |
| ENSG0000(RP11-873E lincRNA chr18      | 35716370 | 35717978 | + | 0    | 0    |
| ENSG0000(AC006130. processed_ chr19   | 2874950  | 2875592  | - | 0    | 0    |
| ENSG0000(RP11-456C lincRNA chr18      | 56061109 | 56063078 | - | 0    | 0    |
| ENSG0000(RP11-325K processed_ chr18   | 60495868 | 60496336 | - | 0    | 0    |
| ENSG0000(RP11-396N lincRNA chr18      | 60294151 | 60301118 | + | 0    | 0    |
| ENSG0000(TCF4-AS2 antisense chr18     | 55492175 | 55496392 | + | 0    | 0    |
| ENSG0000(RP11-49I11 processed_ chr18  | 36273574 | 36274599 | + | 0    | 0    |
| ENSG0000(CTC-296K1 lincRNA chr17      | 44794747 | 44797783 | - | 0.24 | 0    |
| ENSG0000(CTD-2189E lincRNA chr19      | 14267807 | 14269377 | - | 0    | 0    |
| ENSG0000(CTD-2050I. lincRNA chr19     | 31542039 | 31554797 | + | 0    | 0    |
| ENSG0000(CTB-50L17. unprocessε chr19  | 4621194  | 4622307  | + | 0    | 0    |
| ENSG0000(RP11-567M lincRNA chr18      | 79610747 | 79612303 | + | 0    | 0    |
| ENSG0000(CTC-265F1. sense_intrε chr19 | 2610155  | 2611862  | - | 0    | 0    |
| ENSG0000(LINC01901 lincRNA chr18      | 39841174 | 39924840 | - | 0    | 0    |
| ENSG0000(RP11-456K lincRNA chr18      | 44676927 | 44679717 | - | 0.08 | 0.15 |
| ENSG0000(CTC-503J8. transcribec chr19 | 6176256  | 6176442  | - | 0    | 0    |
| ENSG0000(CTD-2319I. lincRNA chr17     | 60079309 | 60088695 | + | 0.09 | 0.21 |
| ENSG0000(CTC-239J1ε antisense chr19   | 13013662 | 13014511 | - | 0.14 | 0    |
| ENSG0000(ELOCP29 processed_ chr19     | 9182369  | 9183048  | - | 0    | 0    |
| ENSG0000(CTC-559E9 transcribec chr19  | 19776602 | 19836073 | + | 0.56 | 1.05 |
| ENSG0000(RP11-527L. lincRNA chr17     | 43927563 | 43932622 | + | 0    | 0    |

|                                        |          |          |   |      |      |
|----------------------------------------|----------|----------|---|------|------|
| ENSG0000( AC005498. lincRNA chr19      | 56536156 | 56538575 | - | 0    | 0.72 |
| ENSG0000( CTD-2554C transcribec chr19  | 37779686 | 37792865 | + | 0    | 0    |
| ENSG0000( AC005616. lincRNA chr19      | 28509238 | 28518728 | + | 0    | 0.42 |
| ENSG0000( CTD-2265C antisense chr19    | 12825711 | 12832983 | + | 0    | 0    |
| ENSG0000( LINC01928 lincRNA chr18      | 11454478 | 11465996 | + | 0    | 0    |
| ENSG0000( RP11-552F protein_co chr17   | 75898645 | 75930129 | - | 0    | 0.39 |
| ENSG0000( RP11-289E processed_ chr18   | 54566997 | 54567303 | + | 0    | 0    |
| ENSG0000( AC006116. sense_intr chr19   | 56347081 | 56348183 | - | 0.06 | 0.18 |
| ENSG0000( RP11-635N processed_ chr18   | 63415317 | 63416469 | - | 0.05 | 0    |
| ENSG0000( DNAH17-A processed_ chr17    | 78484882 | 78503056 | + | 0.07 | 0.03 |
| ENSG0000( CTD-2057D unprocess chr19    | 29901696 | 29901869 | - | 0    | 0    |
| ENSG0000( AC005786. antisense chr19    | 3544199  | 3557569  | + | 0.25 | 0    |
| ENSG0000( CTC-454I21 antisense chr19   | 37128679 | 37141640 | - | 0    | 0    |
| ENSG0000( AC002398. antisense chr19    | 35747057 | 35753415 | - | 0    | 0    |
| ENSG0000( CTC-501O1 lincRNA chr17      | 43680273 | 43705884 | + | 0.13 | 0    |
| ENSG0000( RP1-37N7.1 processed_ chr17  | 18388871 | 18389459 | + | 0    | 0    |
| ENSG0000( AC010641. lincRNA chr19      | 397589   | 399173   | + | 0    | 0    |
| ENSG0000( SMUG1P1 processed_ chr18     | 49650350 | 49651160 | + | 0    | 0    |
| ENSG0000( CTB-39G8.1 lincRNA chr17     | 45371402 | 45372057 | - | 0    | 0    |
| ENSG0000( AC010649. antisense chr19    | 3296765  | 3303003  | - | 0    | 0    |
| ENSG0000( RP11-264B antisense chr17    | 61069856 | 61070356 | - | 0    | 0    |
| ENSG0000( OR1AB1P processed_ chr19     | 16051929 | 16052689 | + | 0    | 0    |
| ENSG0000( LINC02073 lincRNA chr17      | 51435427 | 51445802 | + | 0    | 0.06 |
| ENSG0000( LINC01835 transcribec chr19  | 15851993 | 15864904 | - | 0    | 0    |
| ENSG0000( ZNF582-AS lincRNA chr19      | 56393656 | 56399172 | + | 0.85 | 0.5  |
| ENSG0000( RP11-78A1 antisense chr18    | 11810406 | 11811484 | - | 0    | 0    |
| ENSG0000( RP11-49I11 processed_ chr18  | 36278735 | 36279119 | - | 0    | 0    |
| ENSG0000( RP5-837J1. lincRNA chr17     | 35073831 | 35074374 | - | 0    | 0.15 |
| ENSG0000( CTC-425F1 antisense chr19    | 12944118 | 12944487 | - | 0.45 | 0    |
| ENSG0000( AC006116. transcribec chr19  | 56377037 | 56377792 | - | 0.17 | 0.09 |
| ENSG0000( RP11-120M lincRNA chr17      | 68557516 | 68582577 | + | 0    | 0    |
| ENSG0000( RP11-866E lincRNA chr18      | 60010281 | 60014258 | + | 0.02 | 0.04 |
| ENSG0000( UBE2V2P2 processed_ chr17    | 78066258 | 78066761 | - | 0    | 0    |
| ENSG0000( AC011525. lincRNA chr19      | 31588196 | 31593781 | + | 0    | 0    |
| ENSG0000( RP11-13K1 lincRNA chr17      | 77563368 | 77568695 | - | 0    | 0    |
| ENSG0000( APOC4 protein_co chr19       | 44942238 | 44945496 | + | 0    | 0    |
| ENSG0000( AC005944. antisense chr19    | 3052910  | 3053724  | + | 0.25 | 0.14 |
| ENSG0000( ZNF571-AS antisense chr19    | 37548914 | 37587348 | + | 0.23 | 0.34 |
| ENSG0000( RP11-1058 processed_ chr17   | 70628917 | 70629265 | - | 0    | 0    |
| ENSG0000( LOC440461 processed_ chr17   | 68198921 | 68199596 | + | 0    | 0    |
| ENSG0000( CTC-548K1 sense_intr chr19   | 14458401 | 14459366 | + | 0.28 | 0.31 |
| ENSG0000( CTD-2538C lincRNA chr19      | 32687089 | 32691750 | - | 1.38 | 1.79 |
| ENSG0000( RP11-126C antisense chr18    | 58672613 | 58752730 | - | 0    | 0    |
| ENSG0000( CTC-398G3 protein_co chr19   | 11466240 | 11505698 | - | 0    | 0    |
| ENSG0000( RP11-815J.4 processed_ chr18 | 12091674 | 12093141 | - | 0    | 0    |

|                      |             |       |          |          |   |      |      |
|----------------------|-------------|-------|----------|----------|---|------|------|
| ENSG0000(RP11-7031)  | antisense   | chr18 | 12031178 | 12032181 | - | 0    | 0    |
| ENSG0000(CTC-559E9)  | sense_intr  | chr19 | 19788755 | 19790531 | - | 0.27 | 0.15 |
| ENSG0000(RNY4P13)    | unprocess   | chr17 | 30059054 | 30059147 | - | 0    | 0    |
| ENSG0000(CTC-518P1)  | antisense   | chr19 | 4838332  | 4838907  | + | 0.29 | 0    |
| ENSG0000(GLUD1P4)    | processed_  | chr18 | 59778572 | 59778989 | + | 0    | 0    |
| ENSG0000(RP11-640A)  | processed_  | chr18 | 62418318 | 62418576 | + | 0    | 0    |
| ENSG0000(LINC01837)  | lincRNA     | chr19 | 31859103 | 32072082 | - | 0    | 0    |
| ENSG0000(CTD-3116E)  | unprocess   | chr19 | 9724008  | 9725086  | - | 0    | 0    |
| ENSG0000(CTD-2373H)  | antisense   | chr17 | 78903263 | 78905024 | + | 0    | 0    |
| ENSG0000(RP1-37N7.)  | processed_  | chr17 | 18453574 | 18453739 | - | 0    | 0    |
| ENSG0000(CIRBP-AS1)  | antisense   | chr19 | 1267814  | 1270241  | - | 0.68 | 0.61 |
| ENSG0000(FAM215A)    | lincRNA     | chr17 | 43917194 | 43917985 | + | 0.09 | 0.19 |
| ENSG0000(NFE2L3P1)   | processed_  | chr18 | 59969438 | 59971396 | + | 0    | 0    |
| ENSG0000(CTB-32O4.)  | lincRNA     | chr19 | 29213235 | 29215815 | + | 0.28 | 0.1  |
| ENSG0000(ZNF887P)    | transcribec | chr19 | 11648364 | 11652877 | + | 0.07 | 0.14 |
| ENSG0000(RP11-108P)  | lincRNA     | chr18 | 58754859 | 58757842 | - | 0    | 0    |
| ENSG0000(RP11-53B2)  | antisense   | chr18 | 13561399 | 13565035 | - | 0    | 0    |
| ENSG0000(RP11-845C)  | sense_intr  | chr18 | 58371566 | 58372666 | + | 0    | 0    |
| ENSG0000(CTC-296K1)  | lincRNA     | chr17 | 44793199 | 44794474 | + | 0    | 0    |
| ENSG0000(RP11-13K1)  | lincRNA     | chr17 | 77546940 | 77563243 | + | 0    | 0    |
| ENSG0000(CTD-2587H)  | processed_  | chr19 | 55119250 | 55120383 | - | 0    | 0    |
| ENSG0000(ZNF285)     | protein_co  | chr19 | 44382298 | 44401608 | - | 3.01 | 1.98 |
| ENSG0000(CTD-2043I)  | lincRNA     | chr19 | 28065267 | 28125430 | + | 0    | 0    |
| ENSG0000(CTC-325H2)  | antisense   | chr19 | 9291515  | 9294482  | + | 0.22 | 0    |
| ENSG0000(ADAD1P2)    | processed_  | chr18 | 50063795 | 50064440 | + | 0    | 0    |
| ENSG0000(CTC-250I14) | antisense   | chr19 | 13139617 | 13141147 | - | 0    | 0    |
| ENSG0000(HMGN1P3)    | processed_  | chr18 | 60794613 | 60794916 | - | 0    | 0    |
| ENSG0000(RP11-861E)  | processed_  | chr18 | 12450447 | 12451042 | + | 0.23 | 0.13 |
| ENSG0000(LINC01855)  | lincRNA     | chr19 | 16065737 | 16066312 | + | 0    | 0    |
| ENSG0000(RP11-794C)  | processed_  | chr17 | 76345761 | 76346081 | + | 0    | 0    |
| ENSG0000(CTD-3252C)  | lincRNA     | chr19 | 13834516 | 13836289 | - | 7.57 | 5.8  |
| ENSG0000(RP11-373L)  | 3prime_ov   | chr2  | 60925909 | 60931610 | + | 2.41 | 2.72 |
| ENSG0000(RP11-87G2)  | lincRNA     | chr17 | 76957023 | 76958222 | - | 0    | 0    |
| ENSG0000(LINC01864)  | lincRNA     | chr19 | 56066684 | 56078801 | + | 0    | 0    |
| ENSG0000(CTD-2537I)  | antisense   | chr19 | 55661901 | 55674715 | - | 0    | 0    |
| ENSG0000(RPSAP57)    | processed_  | chr18 | 54744750 | 54745581 | + | 0    | 0    |
| ENSG0000(RP11-178C)  | processed_  | chr17 | 60063004 | 60064782 | - | 0    | 0    |
| ENSG0000(AC011524)   | lincRNA     | chr19 | 28883430 | 28953245 | + | 0.27 | 0    |
| ENSG0000(RP11-53B2)  | processed_  | chr18 | 13471012 | 13472709 | - | 0    | 0    |
| ENSG0000(LINC01836)  | lincRNA     | chr19 | 782755   | 785080   | + | 0.19 | 0.53 |
| ENSG0000(MIR497HG)   | antisense   | chr17 | 7015818  | 7019659  | - | 0.18 | 0.41 |
| ENSG0000(RP11-815J4) | processed_  | chr18 | 12067173 | 12068417 | - | 0    | 0    |
| ENSG0000(S1PR2)      | protein_co  | chr19 | 10221435 | 10231272 | - | 5.32 | 5.28 |
| ENSG0000(LINC00868)  | lincRNA     | chr17 | 76850176 | 76861836 | + | 0    | 0    |
| ENSG0000(AC005394)   | lincRNA     | chr19 | 28602379 | 28648303 | - | 0    | 0    |

|                                      |          |          |   |      |      |
|--------------------------------------|----------|----------|---|------|------|
| ENSG0000(MTCO2P2 processed_ chr18    | 47853233 | 47853457 | - | 0    | 0    |
| ENSG0000(RP11-666A sense_intr chr17  | 76549951 | 76550826 | + | 0.43 | 1.23 |
| ENSG0000(AC007229. processed_ chr19  | 10841839 | 10842250 | + | 0    | 0    |
| ENSG0000(AC005779. protein_co chr19  | 45179822 | 45202444 | + | 0.13 | 0    |
| ENSG0000(RP11-666A antisense chr17   | 76545668 | 76557683 | - | 1.76 | 0.47 |
| ENSG0000(RP11-686D lincRNA chr17     | 35403837 | 35404373 | - | 0.95 | 1.04 |
| ENSG0000(AC006116. antisense chr19   | 56314703 | 56341287 | + | 0    | 0.08 |
| ENSG0000(CTC-482H1 antisense chr19   | 5178119  | 5178464  | + | 0    | 0    |
| ENSG0000(AC005264. antisense chr19   | 3141576  | 3155175  | - | 0    | 0    |
| ENSG0000(CTD-2528L protein_co chr19  | 37689865 | 37719188 | - | 0    | 0    |
| ENSG0000(RP11-686D processed_ chr17  | 35470069 | 35470628 | - | 0    | 0    |
| ENSG0000(CTD-2085J. antisense chr19  | 32831295 | 32833168 | + | 0    | 0    |
| ENSG0000(CTC-379B2 antisense chr19   | 32666298 | 32673210 | + | 0    | 0    |
| ENSG0000(RP11-618K processed_ chr18  | 45788530 | 45788670 | + | 0    | 0    |
| ENSG0000(RP11-383M lincRNA chr9      | 81930226 | 81977089 | - | 0.07 | 0    |
| ENSG0000(RP11-173A antisense chr18   | 62300036 | 62300998 | - | 0    | 0    |
| ENSG0000(RP5-1052I5 protein_co chr1  | 86993009 | 87169204 | + | 0.31 | 0.95 |
| ENSG0000(CTC-503J8. antisense chr19  | 6259157  | 6259799  | + | 0    | 0    |
| ENSG0000(RP11-128P lincRNA chr18     | 11447756 | 11489369 | - | 0    | 0    |
| ENSG0000(CTC-559E9 antisense chr19   | 19892433 | 19895847 | - | 0.21 | 0    |
| ENSG0000(CTD-2538C lincRNA chr19     | 32718298 | 32719595 | - | 0    | 0    |
| ENSG0000(RP11-87G2 processed_ chr17  | 76950317 | 76969156 | - | 0    | 0    |
| ENSG0000(STK25P1 processed_ chr18    | 12911186 | 12912023 | + | 0    | 0    |
| ENSG0000(AC104532. antisense chr19   | 5911578  | 5913899  | - | 0    | 0.13 |
| ENSG0000(KRT8P5 processed_ chr18     | 44320800 | 44322257 | - | 0    | 0    |
| ENSG0000(CTC-525D6 lincRNA chr19     | 29448038 | 29448380 | + | 0    | 0    |
| ENSG0000(CTC-459F4 lincRNA chr19     | 27793463 | 27918863 | + | 3.47 | 2.82 |
| ENSG0000(CTC-510F1. sense_intr chr19 | 11322156 | 11324195 | + | 0    | 0    |
| ENSG0000(CTD-2587H antisense chr19   | 55158939 | 55177540 | + | 0.24 | 0.11 |
| ENSG0000(RP11-126C antisense chr18   | 58557070 | 58566677 | + | 0    | 0    |
| ENSG0000(CTD-2540B antisense chr19   | 33299934 | 33301168 | + | 0    | 0    |
| ENSG0000(CTC-559E9 lincRNA chr19     | 19761038 | 19821716 | - | 0.18 | 0    |
| ENSG0000(CTD-3252C antisense chr19   | 13796574 | 13796933 | - | 0    | 0    |
| ENSG0000(RP11-322E lincRNA chr18     | 35443869 | 35467088 | - | 0    | 0    |
| ENSG0000(RP11-115P processed_ chr18  | 34573987 | 34574523 | - | 0    | 0    |
| ENSG0000(LINC00907 lincRNA chr18     | 42159283 | 42691422 | + | 0    | 0.04 |
| ENSG0000(RP11-687F processed_ chr18  | 46852632 | 46853882 | - | 0    | 0    |
| ENSG0000(CTC-232P5 processed_ chr19  | 6072823  | 6073527  | + | 0    | 0    |
| ENSG0000(NDUFA3P1 processed_ chr19   | 44297104 | 44297355 | + | 0    | 0    |
| ENSG0000(RP11-689E processed_ chr18  | 50098742 | 50099162 | + | 0    | 0    |
| ENSG0000(CTC-507E2 processed_ chr17  | 35596904 | 35597128 | - | 0    | 0    |
| ENSG0000(LINC01926 lincRNA chr18     | 58813880 | 58834364 | + | 0    | 0    |
| ENSG0000(CYP4F24P unprocessε chr19   | 15760241 | 15779909 | - | 0    | 0    |
| ENSG0000(RP11-242D unprocessε chr17  | 43168170 | 43168249 | - | 0    | 0    |
| ENSG0000(RPIAP1 processed_ chr18     | 61957273 | 61958014 | - | 0    | 0    |

|                                  |       |          |          |   |       |       |
|----------------------------------|-------|----------|----------|---|-------|-------|
| ENSG0000( CTC-250I14 antisense   | chr19 | 13153071 | 13154193 | - | 0     | 0     |
| ENSG0000( CTD-2050I1 lincRNA     | chr19 | 31465653 | 31466431 | + | 0     | 0     |
| ENSG0000( RP11-323N antisense    | chr17 | 78855478 | 78855844 | + | 0.24  | 1.35  |
| ENSG0000( LINC01028 lincRNA      | chr17 | 70051277 | 70068095 | + | 0     | 0     |
| ENSG0000( RP5-905N1 antisense    | chr17 | 43782804 | 43784682 | - | 0     | 0     |
| ENSG0000( CTD-3220F lincRNA      | chr19 | 37265939 | 37271518 | - | 0     | 0.12  |
| ENSG0000( AC006116. lincRNA      | chr19 | 56354493 | 56368053 | - | 0     | 0     |
| ENSG0000( CTD-2369P antisense    | chr19 | 10285801 | 10289019 | - | 0     | 0     |
| ENSG0000( SNX33P1 processed_     | chr19 | 16034776 | 16036537 | - | 0     | 0     |
| ENSG0000( AC007787. antisense    | chr19 | 13069792 | 13071374 | - | 0     | 0     |
| ENSG0000( CTC-461H2 processed_   | chr19 | 33051515 | 33051701 | + | 0     | 0     |
| ENSG0000( CTD-3116E lincRNA      | chr19 | 9730853  | 9731943  | + | 0     | 0     |
| ENSG0000( AC138472. lincRNA      | chr19 | 44536263 | 44536613 | - | 0     | 0     |
| ENSG0000( RP11-552F antisense    | chr17 | 75943832 | 75945142 | + | 0     | 0     |
| ENSG0000( AC007795. lincRNA      | chr19 | 28869796 | 28879170 | + | 0     | 0     |
| ENSG0000( RAD51L3-R protein_co   | chr17 | 35011349 | 35121493 | - | 0.1   | 0     |
| ENSG0000( RP11-795H processed_   | chr18 | 60196555 | 60198172 | + | 0     | 0     |
| ENSG0000( AC022153. transcribec  | chr19 | 27902595 | 27984743 | + | 0     | 0     |
| ENSG0000( RP11-219G processed_   | chr17 | 78211618 | 78211908 | - | 0     | 0     |
| ENSG0000( RP11-1094 lincRNA      | chr17 | 35561539 | 35562077 | - | 0     | 0     |
| ENSG0000( AC002115. lincRNA      | chr19 | 35608285 | 35612666 | - | 0     | 0     |
| ENSG0000( RP11-905K lincRNA      | chr18 | 35951803 | 35966118 | - | 0     | 0     |
| ENSG0000( RP11-1136 antisense    | chr18 | 79253577 | 79254856 | - | 0     | 0     |
| ENSG0000( AC138430. processed_   | chr19 | 19254748 | 19273369 | - | 0.47  | 0.44  |
| ENSG0000( AC005758. transcribec  | chr19 | 27918943 | 27929370 | + | 0     | 0     |
| ENSG0000( CGB1 protein_co        | chr19 | 49035610 | 49036895 | - | 0     | 0     |
| ENSG0000( RP11-400F sense_intr   | chr17 | 42509784 | 42511519 | + | 0.46  | 0.32  |
| ENSG0000( CTB-5E10.3 antisense   | chr19 | 13772118 | 13774118 | - | 0     | 0     |
| ENSG0000( RPL7L1P5 processed_    | chr17 | 44365014 | 44365751 | - | 0     | 0     |
| ENSG0000( AC008992. lincRNA      | chr19 | 31421997 | 31427302 | + | 0     | 0     |
| ENSG0000( RP11-619I12 sense_intr | chr17 | 59784813 | 59785035 | + | 0     | 0     |
| ENSG0000( RP11-546M antisense    | chr17 | 44115912 | 44120595 | + | 0     | 0     |
| ENSG0000( CTD-2554C transcribec  | chr19 | 37817359 | 37832160 | + | 0.13  | 0.13  |
| ENSG0000( BNIP3P16 processed_    | chr19 | 20175013 | 20177063 | - | 0     | 0     |
| ENSG0000( RP11-258B lincRNA      | chr18 | 33552123 | 33578187 | - | 0     | 0     |
| ENSG0000( RP11-64C1 lincRNA      | chr18 | 12200779 | 12201979 | + | 0     | 0     |
| ENSG0000( CTD-2008P lincRNA      | chr17 | 28219285 | 28220005 | + | 0     | 0     |
| ENSG0000( POLR2J2 protein_co     | chr7  | 1.03E+08 | 1.03E+08 | - | 19.99 | 22.26 |
| ENSG0000( CTC-499B1 antisense    | chr19 | 11796084 | 11798598 | - | 0     | 0     |
| ENSG0000( MAP1LC3P processed_    | chr18 | 54954403 | 54954732 | + | 0     | 0     |
| ENSG0000( RP11-686D transcribec  | chr17 | 35406948 | 35407818 | - | 0.59  | 1.11  |
| ENSG0000( CTD-2587H lincRNA      | chr19 | 55216660 | 55221616 | + | 0     | 0     |
| ENSG0000( CTD-2553C antisense    | chr19 | 9995997  | 9997163  | + | 0     | 0     |
| ENSG0000( RP11-95O2 lincRNA      | chr18 | 37234119 | 37236242 | - | 0     | 0     |
| ENSG0000( RP11-188I12 processed_ | chr18 | 41789162 | 41789395 | - | 0     | 0     |

|                                          |          |          |   |       |       |
|------------------------------------------|----------|----------|---|-------|-------|
| ENSG0000(RP1-193H1 lincRNA chr17         | 69477139 | 69501755 | - | 0     | 0     |
| ENSG0000(LINC01882 lincRNA chr18         | 12739490 | 12749421 | - | 0     | 0     |
| ENSG0000(CTD-2286N sense_intronic chr18  | 79117207 | 79117920 | + | 0.28  | 0.2   |
| ENSG0000(RP11-807E processed_ chr18      | 13139780 | 13140489 | - | 0     | 0     |
| ENSG0000(RP11-358B lincRNA chr17         | 42154600 | 42155972 | + | 0     | 0     |
| ENSG0000(LINC01482 lincRNA chr17         | 68591796 | 68763882 | + | 0     | 0.02  |
| ENSG0000(RP11-820I1 processed_ chr18     | 11928838 | 11929476 | + | 0     | 0     |
| ENSG0000(AC007796. antisense chr19       | 31348881 | 31417794 | + | 0.13  | 0     |
| ENSG0000(RP11-64C1 processed_ chr18      | 12246589 | 12247055 | + | 0     | 0     |
| ENSG0000(RPL17P45 processed_ chr18       | 40143926 | 40144504 | - | 0     | 0     |
| ENSG0000(RP11-13K1 lincRNA chr17         | 77526998 | 77536592 | + | 0     | 0.08  |
| ENSG0000(AC004156. lincRNA chr19         | 663482   | 669500   | + | 0.04  | 0.11  |
| ENSG0000(RP11-136H antisense chr17       | 61130704 | 61135964 | - | 0     | 0     |
| ENSG0000(RP11-824M transcribed chr18     | 59821040 | 59825261 | + | 0.45  | 0.35  |
| ENSG0000(CTB-55O6. antisense chr19       | 14030855 | 14031557 | - | 0     | 0     |
| ENSG0000(CTD-2293H sense_intronic chr19  | 37091341 | 37092564 | + | 0.04  | 0     |
| ENSG0000(FDX2 protein_coding chr19       | 10310045 | 10316015 | - | 14.19 | 17.16 |
| ENSG0000(RP11-813F lincRNA chr18         | 49739823 | 49742063 | - | 0     | 0     |
| ENSG0000(RP11-1151 lincRNA chr18         | 58416765 | 58417628 | + | 0     | 0     |
| ENSG0000(THA1P unitary_pseudogene chr17  | 78248493 | 78254416 | - | 0     | 0     |
| ENSG0000(RP11-27G2 lincRNA chr18         | 59360700 | 59386749 | + | 0     | 0     |
| ENSG0000(RP11-15E1 processed_ chr17      | 60562010 | 60562161 | - | 0     | 0     |
| ENSG0000(EIF5AP2 processed_ chr17        | 78157403 | 78159135 | + | 0.06  | 0.06  |
| ENSG0000(ZNF224 protein_coding chr19     | 44094339 | 44109886 | + | 10.03 | 8.37  |
| ENSG0000(CTD-3199J. transcribed chr17    | 43144956 | 43145255 | + | 1.94  | 2.93  |
| ENSG0000(CTD-3220F sense_intronic chr19  | 37337236 | 37337743 | + | 0.24  | 1.56  |
| ENSG0000(AC008991. lincRNA chr19         | 28892931 | 28895949 | + | 0.16  | 0     |
| ENSG0000(NTF6B unprocessed chr19         | 49038479 | 49039038 | - | 0     | 0     |
| ENSG0000(RP11-795H lincRNA chr18         | 60125033 | 60161195 | + | 0     | 0     |
| ENSG0000(RP11-325K processed_ chr18      | 60525616 | 60526156 | - | 0     | 0     |
| ENSG0000(AC005262. antisense chr19       | 3121116  | 3122128  | - | 0     | 0     |
| ENSG0000(AC010525. processed_ chr19      | 55705978 | 55706172 | - | 0     | 0     |
| ENSG0000(LDLRAD4-A antisense chr18       | 13419421 | 13427480 | - | 0     | 0     |
| ENSG0000(SHC1P2 processed_ chr17         | 44228760 | 44230228 | - | 0     | 0     |
| ENSG0000(TAF9P3 processed_ chr19         | 30037285 | 30037411 | + | 0     | 0     |
| ENSG0000(CTC-559E9 processed_ chr19      | 19768731 | 19768989 | + | 0     | 0     |
| ENSG0000(RP11-691H antisense chr18       | 13461020 | 13470823 | - | 0     | 0     |
| ENSG0000(RP11-1030 lincRNA chr18         | 50302190 | 50313595 | + | 0     | 0     |
| ENSG0000(ERVK-28 lincRNA chr19           | 27638483 | 27646483 | - | 0     | 1.02  |
| ENSG0000(LUZP6 protein_coding chr7       | 1.36E+08 | 1.36E+08 | - | 20.37 | 19.34 |
| ENSG0000(AC002116. antisense chr19       | 36014508 | 36045972 | + | 0     | 0     |
| ENSG0000(RP11-729L. protein_coding chr18 | 50968019 | 51058144 | + | 0.17  | 0     |
| ENSG0000(RP11-53B2 sense_intronic chr18  | 13486462 | 13490676 | + | 0.03  | 0.01  |
| ENSG0000(CTD-2013N antisense chr19       | 16440946 | 16443584 | + | 0     | 0     |
| ENSG0000(FRG2LP processed_ chr18         | 14137710 | 14139272 | + | 0     | 0     |

|                                       |          |          |   |      |      |
|---------------------------------------|----------|----------|---|------|------|
| ENSG0000(RP11-108P lincRNA chr18      | 58752179 | 58753898 | - | 0    | 0    |
| ENSG0000(CTD-2105E protein_co chr19   | 55352301 | 55359516 | - | 0    | 0    |
| ENSG0000(RP11-95O2 antisense chr18    | 37243776 | 37247506 | + | 0.28 | 0    |
| ENSG0000(RP11-147L unprocessε chr17   | 68152776 | 68159043 | - | 0    | 0    |
| ENSG0000(AC024592. antisense chr19    | 5847467  | 5858239  | + | 0    | 0.05 |
| ENSG0000(AC006116. protein_co chr19   | 56272769 | 56310450 | + | 0    | 0    |
| ENSG0000(RP11-686D lincRNA chr17      | 35400878 | 35403006 | - | 0.22 | 0.48 |
| ENSG0000(LINC01539 lincRNA chr18      | 56083356 | 56137536 | - | 0    | 0    |
| ENSG0000(RP11-10I6. transcribec chr18 | 50669510 | 50670215 | + | 0    | 0    |
| ENSG0000(CTD-2540B antisense chr19    | 33217817 | 33221170 | + | 0    | 0    |
| ENSG0000(AC083760. processed_ chr18   | 44039471 | 44040140 | + | 0    | 0    |
| ENSG0000(SRSF10P1 processed_ chr18    | 51158282 | 51159383 | - | 0    | 0    |
| ENSG0000(LINC02078 lincRNA chr17      | 79707266 | 79712317 | + | 0.06 | 0.01 |
| ENSG0000(RP11-815J4 lincRNA chr18     | 12081540 | 12085267 | + | 0    | 0    |
| ENSG0000(CTD-2189E lincRNA chr19      | 14254189 | 14293205 | - | 0.33 | 0.12 |
| ENSG0000(RP11-49K2 antisense chr18    | 47105946 | 47108062 | + | 0    | 0    |
| ENSG0000(CTC-461H2 processed_ chr19   | 33067175 | 33067433 | + | 0    | 0    |
| ENSG0000(CTD-2526N lincRNA chr18      | 57169615 | 57171194 | - | 0    | 0    |
| ENSG0000(CTD-2540B antisense chr19    | 33301279 | 33301940 | + | 0.32 | 0.7  |
| ENSG0000(AC010761. antisense chr17    | 28727258 | 28727739 | + | 0    | 0    |
| ENSG0000(RP11-147L. lincRNA chr17     | 68189884 | 68192802 | + | 0.07 | 0.01 |
| ENSG0000(RP11-456C lincRNA chr18      | 56138612 | 56143221 | + | 0    | 0    |
| ENSG0000(RP11-64C1 transcribec chr18  | 12201982 | 12223539 | + | 0    | 0    |
| ENSG0000(RP4-604K5 antisense chr1     | 86932199 | 86934891 | - | 0    | 0    |
| ENSG0000(CTD-2265C antisense chr19    | 12880969 | 12884088 | + | 0    | 0    |
| ENSG0000(HMGB2P1 transcribec chr19    | 1203209  | 1203842  | + | 0.11 | 0.12 |
| ENSG0000(AC061992. lincRNA chr17      | 78315729 | 78347798 | + | 0.53 | 0.44 |
| ENSG0000(AC024592. protein_co chr19   | 5866171  | 5903787  | - | 2.61 | 1.53 |
| ENSG0000(UBE2L4 processed_ chr19      | 9774497  | 9774960  | + | 0    | 0    |
| ENSG0000(FAM60CP processed_ chr18     | 60016778 | 60017441 | - | 0    | 0    |
| ENSG0000(RP11-718I1 antisense chr18   | 58189834 | 58195696 | - | 0    | 0    |
| ENSG0000(RP11-799D transcribec chr17  | 35190961 | 35191702 | + | 0    | 0    |
| ENSG0000(RP11-686D processed_ chr17   | 35406684 | 35409768 | - | 1.37 | 1.77 |
| ENSG0000(RP11-379L. antisense chr18   | 34222965 | 34224761 | + | 0    | 0    |
| ENSG0000(RP11-392C antisense chr17    | 43544785 | 43610338 | + | 0    | 0    |
| ENSG0000(CTB-102L5. protein_co chr19  | 38289151 | 38304910 | + | 0.18 | 0    |
| ENSG0000(CTC-265F1. sense_intrε chr19 | 2641838  | 2643853  | - | 0    | 0    |
| ENSG0000(RUNDC3A- antisense chr17     | 44299574 | 44315315 | - | 0.48 | 0.49 |
| ENSG0000(AC009005. antisense chr19    | 567210   | 572228   | - | 0.47 | 1.27 |
| ENSG0000(RPS10P27 processed_ chr18    | 23672253 | 23672748 | - | 0    | 0    |
| ENSG0000(AC004623. antisense chr19    | 1376773  | 1377520  | - | 0    | 0    |
| ENSG0000(RP11-411B unprocessε chr18   | 14074912 | 14075741 | - | 0.06 | 0    |
| ENSG0000(EML2-AS1 processed_ chr19    | 45641494 | 45642840 | + | 3.12 | 2.27 |
| ENSG0000(RP11-358B antisense chr17    | 42268587 | 42269807 | + | 0    | 0    |
| ENSG0000(CTC-565M4. lincRNA chr19     | 30665274 | 30668647 | - | 0    | 0    |

|                 |                                  |       |          |          |   |      |      |
|-----------------|----------------------------------|-------|----------|----------|---|------|------|
| ENSG00000100000 | CTD-2130C lincRNA                | chr18 | 47285725 | 47594550 | + | 0    | 0    |
| ENSG00000100000 | RP11-426J1. antisense            | chr18 | 48673575 | 48688419 | - | 0    | 0    |
| ENSG00000100000 | RP11-484L1. antisense            | chr18 | 48826051 | 48834770 | - | 0    | 0    |
| ENSG00000100000 | CTD-3193K antisense              | chr17 | 42683187 | 42699466 | - | 0    | 0    |
| ENSG00000100000 | RP11-299P sense_intronic         | chr18 | 63151114 | 63151320 | - | 0    | 0    |
| ENSG00000100000 | LINC01801 lincRNA                | chr19 | 34788582 | 34832869 | - | 0    | 0    |
| ENSG00000100000 | CTC-459F4 processed_transcript   | chr19 | 27908356 | 27908554 | - | 0    | 0    |
| ENSG00000100000 | CTB-50L17. antisense             | chr19 | 4454014  | 4455286  | + | 0    | 0    |
| ENSG00000100000 | RP11-559N processed_transcript   | chr17 | 78522247 | 78522828 | + | 0    | 0    |
| ENSG00000100000 | CTC-260E6 unprocessed_transcript | chr19 | 20206844 | 20206954 | - | 0    | 0    |
| ENSG00000100000 | LINC01999 lincRNA                | chr17 | 60564547 | 60586623 | + | 0    | 0    |
| ENSG00000100000 | RP11-677C unprocessed_transcript | chr18 | 11644336 | 11644824 | + | 0    | 0    |
| ENSG00000100000 | RP11-2N11.1. antisense           | chr18 | 59696459 | 59698111 | + | 0.61 | 0.86 |
| ENSG00000100000 | OR7E16P unprocessed_transcript   | chr19 | 9191286  | 9192170  | + | 0    | 0    |
| ENSG00000100000 | AC006116. sense_intronic         | chr19 | 56376704 | 56377284 | - | 0    | 0    |
| ENSG00000100000 | LINC01791 lincRNA                | chr19 | 31167516 | 31207663 | + | 0    | 0    |
| ENSG00000100000 | AC004221. lincRNA                | chr19 | 1238179  | 1239522  | + | 0.15 | 0    |
| ENSG00000100000 | LINC01533 lincRNA                | chr19 | 32025862 | 32056865 | + | 0    | 0    |
| ENSG00000100000 | RP11-154H lincRNA                | chr18 | 79792726 | 79816529 | + | 0    | 0    |
| ENSG00000100000 | SLC25A36P processed_transcript   | chr19 | 56386226 | 56386690 | + | 0    | 0    |
| ENSG00000100000 | RP11-799D antisense              | chr17 | 35164243 | 35167012 | - | 0    | 0    |
| ENSG00000100000 | CTB-55O6. antisense              | chr19 | 14119106 | 14119537 | + | 0    | 0    |
| ENSG00000100000 | RP11-171I2 antisense             | chr2  | 1.79E+08 | 1.79E+08 | + | 0    | 0    |
| ENSG00000100000 | AF038458. lincRNA                | chr19 | 35947115 | 35959192 | + | 0    | 0    |
| ENSG00000100000 | RP11-35G9 antisense              | chr18 | 57639455 | 57738044 | + | 0.27 | 0.24 |
| ENSG00000100000 | CTD-2534I1. lincRNA              | chr17 | 44982514 | 44982772 | + | 0    | 0    |
| ENSG00000100000 | CTD-2526N lincRNA                | chr18 | 57136322 | 57146998 | - | 0    | 0    |
| ENSG00000100000 | LINC01987 lincRNA                | chr17 | 77722872 | 77728559 | - | 0    | 0    |
| ENSG00000100000 | CTD-2659N antisense              | chr19 | 12688922 | 12689238 | + | 0    | 0    |
| ENSG00000100000 | WBP1LP11 processed_transcript    | chr19 | 145485   | 145812   | + | 0    | 0    |
| ENSG00000100000 | RP11-576C transcribed_unit       | chrY  | 19598188 | 19598757 | + | 0.37 | 0.55 |
| ENSG00000100000 | RP11-677C processed_transcript   | chr18 | 11618208 | 11618315 | + | 0    | 0    |
| ENSG00000100000 | SMIM22 protein_coding            | chr16 | 4788397  | 4796491  | + | 0    | 0    |
| ENSG00000100000 | LIN37 protein_coding             | chr19 | 35748361 | 35754519 | + | 6.24 | 4.36 |
| ENSG00000100000 | NRBF2P1 processed_transcript     | chr18 | 35841759 | 35842617 | + | 0    | 0    |
| ENSG00000100000 | MAN1A2P1 processed_transcript    | chr19 | 28790812 | 28792871 | - | 0    | 0    |
| ENSG00000100000 | RP11-49K2 processed_transcript   | chr18 | 47137018 | 47137290 | + | 0    | 0    |
| ENSG00000100000 | RP11-552F antisense              | chr17 | 75876372 | 75879546 | + | 0.02 | 0    |
| ENSG00000100000 | AC018755. lincRNA                | chr19 | 51599289 | 51600470 | + | 0.1  | 0.06 |
| ENSG00000100000 | NDUFV2P1 processed_transcript    | chr19 | 53223973 | 53224879 | - | 1.47 | 2.2  |
| ENSG00000100000 | RP11-727F antisense              | chr11 | 62771120 | 62771606 | - | 0.31 | 0.86 |
| ENSG00000100000 | CTB-191K2 antisense              | chr19 | 50310022 | 50310539 | - | 0    | 0    |
| ENSG00000100000 | CTC-471J1. processed_transcript  | chr19 | 52130548 | 52171533 | - | 0.46 | 0.31 |
| ENSG00000100000 | Y_RNA misc_RNA                   | chr7  | 75297990 | 75298091 | - | 0    | 0    |
| ENSG00000100000 | RP11-167N lincRNA                | chr9  | 1.29E+08 | 1.29E+08 | - | 5.31 | 6.22 |



|                                 |       |          |          |   |       |       |
|---------------------------------|-------|----------|----------|---|-------|-------|
| ENSG0000( AC008746. lincRNA     | chr19 | 54438665 | 54439544 | - | 0.21  | 0.7   |
| ENSG0000( CTB-133G6 antisense   | chr19 | 7390522  | 7395039  | - | 0.25  | 0.55  |
| ENSG0000( NDUFA7 protein_co     | chr19 | 8308768  | 8321396  | - | 32.33 | 39.08 |
| ENSG0000( RP5-1023B lincRNA     | chr21 | 45100487 | 45101094 | - | 0     | 0     |
| ENSG0000( MZF1-AS1 antisense    | chr19 | 58559129 | 58574797 | + | 2.32  | 1.07  |
| ENSG0000( RP11-120K lincRNA     | chr13 | 1.13E+08 | 1.13E+08 | - | 0     | 0     |
| ENSG0000( CTC-444N2 antisense   | chr19 | 57267220 | 57280334 | - | 0.37  | 0.47  |
| ENSG0000( RP11-157B lincRNA     | chr19 | 22243254 | 22245347 | - | 0     | 0     |
| ENSG0000( CTB-147C2 antisense   | chr19 | 50968210 | 51012129 | + | 0     | 0     |
| ENSG0000( AC011513. protein_co  | chr19 | 41708612 | 41761282 | + | 0     | 0     |
| ENSG0000( RP4-569M: antisense   | chr20 | 47318502 | 47320754 | + | 0     | 0.03  |
| ENSG0000( CTD-2291D lincRNA     | chr19 | 23075201 | 23100361 | + | 0     | 0     |
| ENSG0000( CTD-2126E lincRNA     | chr19 | 50075123 | 50075902 | + | 0     | 0.85  |
| ENSG0000( CTD-2540F antisense   | chr19 | 38738284 | 38739863 | + | 0.04  | 0.14  |
| ENSG0000( SIGLEC19P transcribed | chr19 | 51143826 | 51144196 | + | 0     | 0     |
| ENSG0000( CTD-2639E lincRNA     | chr19 | 48963975 | 48965158 | + | 0     | 0     |
| ENSG0000( CTC-429P9 sense_intr  | chr19 | 16639967 | 16640668 | - | 1.59  | 0.58  |
| ENSG0000( CTD-2616J: antisense  | chr19 | 51340695 | 51344117 | + | 0     | 0     |
| ENSG0000( ZSCAN5DP unprocess    | chr19 | 56244043 | 56247482 | + | 0     | 0     |
| ENSG0000( CCDC177 protein_co    | chr14 | 69569816 | 69574837 | - | 0.03  | 0.03  |
| ENSG0000( RP11-256I: lincRNA    | chr2  | 2.2E+08  | 2.2E+08  | + | 0     | 0     |
| ENSG0000( SNX6P1 processed_ch   | chr19 | 23126569 | 23127792 | - | 0     | 0     |
| ENSG0000( AC007193. lincRNA     | chr19 | 46101122 | 46196218 | + | 0     | 0     |
| ENSG0000( RP11-255H lincRNA     | chr19 | 23817599 | 23874701 | - | 0     | 0     |
| ENSG0000( CTD-2525I: antisense  | chr19 | 52171158 | 52177002 | + | 0     | 0     |
| ENSG0000( CTB-176F2 antisense   | chr19 | 23323968 | 23329101 | + | 0     | 0     |
| ENSG0000( EIF1P6 unprocess      | chr19 | 4347780  | 4349061  | - | 0     | 0     |
| ENSG0000( CTD-2325N lincRNA     | chr19 | 8008729  | 8016025  | + | 2.47  | 4.84  |
| ENSG0000( RP11-290F lincRNA     | chr11 | 6201901  | 6203253  | - | 0.21  | 0.24  |
| ENSG0000( CTD-2620I: lincRNA    | chr19 | 53007512 | 53013180 | + | 0     | 0     |
| ENSG0000( CTD-2207C protein_co  | chr19 | 7507052  | 7519622  | + | 0     | 1.23  |
| ENSG0000( MIR3188 miRNA         | chr19 | 18282077 | 18282161 | + | 0     | 0     |
| ENSG0000( OR10B1P unprocess     | chr19 | 15141132 | 15142038 | - | 0     | 0     |
| ENSG0000( AC011523. antisense   | chr19 | 50830530 | 50851089 | + | 0     | 0     |
| ENSG0000( MAGEA9B protein_co    | chrX  | 1.5E+08  | 1.5E+08  | - | 0     | 0     |
| ENSG0000( AC007292. antisense   | chr19 | 4363789  | 4364640  | + | 0.09  | 0.29  |
| ENSG0000( CTD-2616J: antisense  | chr19 | 51345169 | 51353293 | + | 0     | 0.82  |
| ENSG0000( AC130469. antisense   | chr19 | 8581160  | 8582715  | + | 0     | 0     |
| ENSG0000( CTD-3187F unprocess   | chr19 | 51137970 | 51138634 | + | 0     | 0     |
| ENSG0000( CTB-189B5 antisense   | chr19 | 39030436 | 39031323 | + | 0     | 0     |
| ENSG0000( CARD8-AS1 antisense   | chr19 | 48255675 | 48258199 | + | 0.43  | 0.22  |
| ENSG0000( PTOV1-AS1 antisense   | chr19 | 49838639 | 49851676 | - | 0.39  | 0.5   |
| ENSG0000( SSX4 protein_co       | chrX  | 48383516 | 48393347 | + | 0     | 0     |
| ENSG0000( CTD-2525I: antisense  | chr19 | 52222225 | 52231294 | - | 0     | 0     |
| ENSG0000( OR4G4P unprocess      | chr1  | 52473    | 53312    | + | 0     | 0     |

|                                |       |          |          |   |      |      |
|--------------------------------|-------|----------|----------|---|------|------|
| ENSG0000(AC006129. lincRNA     | chr19 | 41545192 | 41555462 | + | 0    | 0    |
| ENSG0000(AC005253. antisense   | chr19 | 18557775 | 18561560 | - | 0    | 0.17 |
| ENSG0000(AC005795. processed_  | chr19 | 41506152 | 41506898 | + | 0    | 0    |
| ENSG0000(AC007228. transcribed | chr19 | 56613810 | 56613951 | + | 0    | 0    |
| ENSG0000(LINC01785 lincRNA     | chr19 | 22615557 | 22623971 | - | 0    | 0    |
| ENSG0000(CTD-2575K protein_co  | chr19 | 41907705 | 41928516 | - | 0.03 | 0.06 |
| ENSG0000(NBPF12 protein_co     | chr1  | 1.47E+08 | 1.47E+08 | + | 5.33 | 6.52 |
| ENSG0000(AC018766. antisense   | chr19 | 49852887 | 49854967 | - | 0    | 0    |
| ENSG0000(CTD-2619J. antisense  | chr19 | 58357999 | 58359603 | + | 1.03 | 0.91 |
| ENSG0000(RP11-247A antisense   | chr9  | 1.29E+08 | 1.29E+08 | + | 0    | 0    |
| ENSG0000(CTC-244M: sense_intr  | chr19 | 37963853 | 37964790 | + | 0.63 | 0.99 |
| ENSG0000(CTC-344H1 processed_  | chr19 | 46111079 | 46113863 | - | 0    | 0    |
| ENSG0000(AC067969. antisense   | chr19 | 38535517 | 38537128 | - | 0    | 0    |
| ENSG0000(CTD-3032J. antisense  | chr19 | 17152588 | 17168051 | - | 0    | 0    |
| ENSG0000(BNIP3P40 processed_   | chr19 | 24098425 | 24098980 | - | 0    | 0    |
| ENSG0000(NAPA-AS1 antisense    | chr19 | 47484282 | 47501597 | + | 0.68 | 0.14 |
| ENSG0000(TOP1P1 processed_     | chr1  | 1.71E+08 | 1.71E+08 | - | 0    | 0    |
| ENSG0000(FMR1-AS1 processed_   | chrX  | 1.48E+08 | 1.48E+08 | - | 0.02 | 0.04 |
| ENSG0000(OR5AH1P transcribed   | chr19 | 56760933 | 56761215 | + | 0    | 0    |
| ENSG0000(RP5-1057I2 antisense  | chr12 | 47784923 | 47786002 | + | 0.11 | 0    |
| ENSG0000(AC006539. processed_  | chr19 | 20033444 | 20034332 | + | 0    | 0    |
| ENSG0000(RPL22P5 processed_    | chr1  | 1.44E+08 | 1.44E+08 | - | 0    | 0    |
| ENSG0000(RP11-805I2 lincRNA    | chr16 | 86158206 | 86158798 | - | 0    | 0    |
| ENSG0000(BNIP3P30 processed_   | chr19 | 22203128 | 22204003 | + | 0    | 0    |
| ENSG0000(RP11-388K processed_  | chr8  | 93229659 | 93229916 | + | 0    | 0    |
| ENSG0000(RP11-678G antisense   | chr19 | 21554640 | 21569237 | - | 0    | 0    |
| ENSG0000(AC104534. protein_co  | chr19 | 38817471 | 38840178 | - | 0    | 0    |
| ENSG0000(CTC-429P9 lincRNA     | chr19 | 16610411 | 16636531 | + | 0    | 0    |
| ENSG0000(AC093063. transcribed | chr19 | 39693925 | 39696258 | + | 0    | 0    |
| ENSG0000(GABRQ protein_co      | chrX  | 1.53E+08 | 1.53E+08 | + | 0    | 0    |
| ENSG0000(AC022154. antisense   | chr19 | 48619272 | 48624132 | - | 0    | 0    |
| ENSG0000(ZNF649-AS antisense   | chr19 | 51888025 | 51900463 | + | 0.12 | 0    |
| ENSG0000(ZNF725P unprocess     | chr19 | 23492428 | 23512656 | - | 0    | 0    |
| ENSG0000(CYP2G2P unprocess     | chr19 | 41050449 | 41062444 | - | 0    | 0    |
| ENSG0000(SLC6A14 protein_co    | chrX  | 1.16E+08 | 1.16E+08 | + | 0    | 0    |
| ENSG0000(RP11-369G processed_  | chr19 | 23125665 | 23128543 | + | 1.38 | 0.92 |
| ENSG0000(AC003005. protein_co  | chr19 | 57487718 | 57505381 | + | 0    | 0    |
| ENSG0000(CTB-60B18 antisense   | chr19 | 49060613 | 49061132 | + | 0.14 | 0.94 |
| ENSG0000(CTD-3149D antisense   | chr19 | 17727840 | 17734513 | - | 0    | 0.84 |
| ENSG0000(RP11-157B processed_  | chr19 | 22130325 | 22130489 | + | 0    | 0    |
| ENSG0000(VN1R84P unprocess     | chr19 | 21719801 | 21720035 | - | 0    | 0    |
| ENSG0000(CTD-2561J. processed_ | chr19 | 21444241 | 21463908 | - | 0    | 0.08 |
| ENSG0000(CTD-3193C lincRNA     | chr19 | 7870561  | 7871296  | + | 0    | 0    |
| ENSG0000(RP11-91G2 lincRNA     | chr3  | 1.43E+08 | 1.43E+08 | - | 0.25 | 0.56 |
| ENSG0000(AC003002. protein_co  | chr19 | 57363566 | 57398584 | + | 0.43 | 0    |

|                    |                   |          |          |   |      |      |
|--------------------|-------------------|----------|----------|---|------|------|
| ENSG0000(PCGF7P    | processed_ chr19  | 22137931 | 22138981 | + | 0    | 0    |
| ENSG0000(NIFKP6    | processed_ chr19  | 51396755 | 51403526 | - | 0    | 0    |
| ENSG0000(VN1R91P   | unprocessε chr19  | 23290849 | 23291017 | + | 0    | 0    |
| ENSG0000(CTD-3193C | antisense_ chr19  | 7912648  | 7913518  | - | 0    | 0    |
| ENSG0000(AC005176. | transcribec chr19 | 39638685 | 39642401 | + | 0.06 | 0.03 |
| ENSG0000(Metazoa_S | misc_RNA_ chr1    | 1.55E+08 | 1.55E+08 | - | 0    | 0.44 |
| ENSG0000(AC010524. | antisense_ chr19  | 49356152 | 49357769 | + | 0    | 0    |
| ENSG0000(AC004076. | protein_co chr19  | 57437970 | 57477536 | - | 1.25 | 0    |
| ENSG0000(RP11-5561 | antisense_ chr7   | 1.43E+08 | 1.43E+08 | - | 0.03 | 0    |
| ENSG0000(AC007192. | protein_co chr19  | 18153158 | 18178117 | + | 0    | 0    |
| ENSG0000(BNIP3P22  | processed_ chr19  | 20416514 | 20417069 | + | 0    | 0    |
| ENSG0000(RP11-73B2 | processed_ chr7   | 63396341 | 63399250 | - | 0    | 0    |
| ENSG0000(SMIM17    | protein_co chr19  | 56643145 | 56655766 | + | 0    | 0.06 |
| ENSG0000(RP11-420K | lincRNA_ chr19    | 21768772 | 21793860 | - | 0    | 0    |
| ENSG0000(CTC-241F2 | lincRNA_ chr19    | 48262900 | 48271283 | - | 0    | 0    |
| ENSG0000(AC005785. | processed_ chr19  | 15379076 | 15381194 | + | 0.7  | 0.07 |
| ENSG0000(CTD-2396E | antisense_ chr19  | 6494320  | 6495025  | + | 0    | 0    |
| ENSG0000(AC002985. | protein_co chr19  | 18907013 | 18934397 | - | 0.36 | 0.25 |
| ENSG0000(CTD-3137H | antisense_ chr19  | 18441419 | 18443597 | + | 0    | 0    |
| ENSG0000(CTD-3138B | sense_intrε chr19 | 58266635 | 58267685 | + | 0    | 0    |
| ENSG0000(CTD-2396E | antisense_ chr19  | 6494320  | 6494805  | + | 0    | 0    |
| ENSG0000(CTD-3214H | antisense_ chr19  | 7633766  | 7636990  | - | 0    | 0    |
| ENSG0000(CTC-444N2 | lincRNA_ chr19    | 57304305 | 57308562 | + | 0.66 | 0.69 |
| ENSG0000(RP11-6181 | unprocessε chr4   | 69387580 | 69388307 | + | 0    | 0    |
| ENSG0000(AC137932. | antisense_ chr16  | 89268104 | 89273044 | + | 0.06 | 0.05 |
| ENSG0000(RP11-379K | antisense_ chr3   | 1.7E+08  | 1.7E+08  | + | 0    | 0    |
| ENSG0000(OPN1MW    | protein_co chrX   | 1.54E+08 | 1.54E+08 | + | 0    | 0    |
| ENSG0000(EEF1A1P7  | processed_ chr19  | 35382172 | 35384052 | + | 0.08 | 0    |
| ENSG0000(ARL14EPL  | protein_co chr5   | 1.16E+08 | 1.16E+08 | + | 0    | 0    |
| ENSG0000(CTD-2331H | unprocessε chr19  | 52861807 | 52864151 | - | 0.3  | 0.11 |
| ENSG0000(CTD-2619J | processed_ chr19  | 58346854 | 58362751 | - | 0    | 0    |
| ENSG0000(CTD-2560K | sense_intrε chr19 | 50555370 | 50557969 | - | 0    | 0    |
| ENSG0000(FKBP4P6   | processed_ chr9   | 42384805 | 42386136 | + | 0    | 0    |
| ENSG0000(TCP11X1   | transcribec chrX  | 1.02E+08 | 1.02E+08 | + | 0    | 0    |
| ENSG0000(IGFL1P2   | unprocessε chr19  | 46260420 | 46260858 | - | 0    | 0    |
| ENSG0000(RP11-678G | lincRNA_ chr19    | 21587432 | 21594628 | - | 0    | 0    |
| ENSG0000(RPS29P30  | processed_ chr19  | 39644502 | 39644612 | + | 0    | 0    |
| ENSG0000(AIRN      | antisense_ chr6   | 1.6E+08  | 1.6E+08  | - | 0    | 0    |
| ENSG0000(CTC-246B1 | sense_ovei chr19  | 39314651 | 39320858 | - | 0    | 0.08 |
| ENSG0000(AC003005. | lincRNA_ chr19    | 57477649 | 57482996 | + | 0    | 0.16 |
| ENSG0000(SIGLEC29P | unprocessε chr19  | 51563797 | 51564910 | - | 0    | 0    |
| ENSG0000(VN1R78P   | unprocessε chr19  | 20583084 | 20583647 | - | 0    | 0    |
| ENSG0000(RP11-420K | unprocessε chr19  | 21637974 | 21656300 | + | 0    | 0    |
| ENSG0000(RP11-434D | protein_co chr3   | 14135217 | 14148252 | + | 0    | 0.2  |
| ENSG0000(CTD-2620  | processed_ chr19  | 53004040 | 53005150 | + | 0    | 0    |

|                                 |       |          |          |   |       |       |
|---------------------------------|-------|----------|----------|---|-------|-------|
| ENSG0000( CTB-60B18 lincRNA     | chr19 | 49064259 | 49064856 | + | 0.12  | 0     |
| ENSG0000( RP11-98D1 antisense   | chr1  | 1.52E+08 | 1.52E+08 | - | 0.14  | 0     |
| ENSG0000( CTD-2528A antisense   | chr19 | 17051994 | 17055087 | + | 0     | 0     |
| ENSG0000( AC006547. antisense   | chr22 | 20064552 | 20065705 | - | 0     | 0     |
| ENSG0000( CTD-2623H processed_  | chr19 | 58136713 | 58137054 | + | 0     | 0     |
| ENSG0000( POLR3GP1 transcribed  | chr14 | 91603173 | 91603433 | - | 0     | 0     |
| ENSG0000( CTD-2579N lincRNA     | chr19 | 22907086 | 22914289 | - | 0     | 0     |
| ENSG0000( CLEC4GP1 unprocessed  | chr19 | 7787549  | 7790621  | + | 0     | 0     |
| ENSG0000( CTD-2619J. lincRNA    | chr19 | 58400221 | 58400679 | + | 0     | 0     |
| ENSG0000( CTD-3222D antisense   | chr19 | 16551773 | 16552328 | + | 0     | 0     |
| ENSG0000( AC006272. lincRNA     | chr19 | 51839771 | 51840945 | - | 0     | 0     |
| ENSG0000( LINC01872 lincRNA     | chr19 | 51271266 | 51281234 | + | 0     | 0     |
| ENSG0000( SCGB1C2 protein_co    | chr17 | 137526   | 139067   | + | 0     | 0     |
| ENSG0000( BNIP3P25 processed_   | chr19 | 21318161 | 21318719 | + | 0     | 0     |
| ENSG0000( LRRC2-AS1 antisense   | chr3  | 46557398 | 46559694 | + | 0     | 0     |
| ENSG0000( CTD-2542C lincRNA     | chr19 | 20972262 | 20983210 | + | 0     | 0     |
| ENSG0000( RP4-806M. lincRNA     | chr20 | 58833809 | 58836529 | - | 0     | 0.17  |
| ENSG0000( BNIP3P23 processed_   | chr19 | 20443215 | 20443725 | - | 0     | 0     |
| ENSG0000( SIGLEC20P unprocessed | chr19 | 51184905 | 51190809 | + | 0     | 0     |
| ENSG0000( FAM156A protein_co    | chrX  | 52926402 | 52995472 | - | 12.55 | 11.64 |
| ENSG0000( AC007228. lincRNA     | chr19 | 56672268 | 56684653 | + | 0     | 0     |
| ENSG0000( AC006129. lincRNA     | chr19 | 41531206 | 41532174 | + | 0     | 0     |
| ENSG0000( VN1R81P unprocessed   | chr19 | 21123817 | 21124188 | + | 0.48  | 1.05  |
| ENSG0000( L34079.2 protein_co   | chr19 | 43554692 | 43593036 | - | 0     | 0     |
| ENSG0000( CTD-2017D lincRNA     | chr19 | 24033445 | 24066909 | + | 0.76  | 0.92  |
| ENSG0000( SMC5-AS1 antisense    | chr9  | 70193997 | 70258866 | - | 0.34  | 0.17  |
| ENSG0000( CTC-492K1 antisense   | chr19 | 40443436 | 40444087 | + | 0     | 0     |
| ENSG0000( CTD-2568A antisense   | chr19 | 50792685 | 50793584 | - | 0     | 0     |
| ENSG0000( CTC-360J1. processed_ | chr19 | 57175233 | 57177921 | + | 0.03  | 0.03  |
| ENSG0000( FENDRR lincRNA        | chr16 | 86474529 | 86509099 | - | 0.13  | 0.14  |
| ENSG0000( CTC-518B2 lincRNA     | chr19 | 51043806 | 51052077 | + | 0     | 0     |
| ENSG0000( MTCO3P42 processed_   | chr4  | 49548918 | 49549435 | - | 0     | 0     |
| ENSG0000( AC003682. lincRNA     | chr19 | 57625032 | 57626950 | + | 0     | 0     |
| ENSG0000( CTD-3214H protein_co  | chr19 | 7629796  | 7643048  | + | 0.77  | 0     |
| ENSG0000( CTC-344H1 lincRNA     | chr19 | 46027654 | 46030161 | + | 0.29  | 0     |
| ENSG0000( CTD-2371C antisense   | chr11 | 9459556  | 9460702  | - | 1.71  | 1.48  |
| ENSG0000( AC006115. processed_  | chr19 | 56793048 | 56793249 | - | 0     | 0     |
| ENSG0000( TRMT112P processed_   | chr2  | 26028208 | 26028612 | - | 0     | 0     |
| ENSG0000( CTD-2626C lincRNA     | chr19 | 20746923 | 20755250 | - | 0.08  | 0.01  |
| ENSG0000( AC011551. sense_intr  | chr19 | 46547056 | 46600861 | - | 0.15  | 0     |
| ENSG0000( MTDHP3 processed_     | chr19 | 21677550 | 21678221 | - | 0     | 0     |
| ENSG0000( AC011530. protein_co  | chr19 | 45779437 | 45785973 | - | 0     | 0     |
| ENSG0000( BNIP3P27 processed_   | chr19 | 21826513 | 21827279 | + | 0     | 0     |
| ENSG0000( EMG1 protein_co       | chr12 | 6970921  | 6997428  | + | 6.69  | 7.6   |
| ENSG0000( CTD-2027I. processed_ | chr19 | 24162370 | 24163425 | - | 0     | 0     |

|                     |             |       |          |          |   |      |      |
|---------------------|-------------|-------|----------|----------|---|------|------|
| ENSG0000(SSX2B      | protein_co  | chrX  | 52751132 | 52790305 | + | 0.04 | 0.05 |
| ENSG0000(RP11-359H  | unprocessε  | chr19 | 23596122 | 23598159 | + | 0    | 0    |
| ENSG0000(CTC-471J1. | lincRNA     | chr19 | 52142626 | 52144156 | + | 0    | 0    |
| ENSG0000(AC006262.  | processed_  | chr19 | 46203426 | 46214837 | + | 0.02 | 0    |
| ENSG0000(CTC-575C1  | unprocessε  | chr19 | 20389658 | 20390689 | + | 0    | 0    |
| ENSG0000(CTC-273B1  | protein_co  | chr19 | 48465837 | 48472431 | + | 0    | 0    |
| ENSG0000(BNIP3P38   | processed_  | chr19 | 23236308 | 23236851 | + | 0    | 0    |
| ENSG0000(DKFZP434I  | lincRNA     | chr4  | 1.53E+08 | 1.53E+08 | + | 0.65 | 1.15 |
| ENSG0000(RP11-356J  | antisense   | chr11 | 1.12E+08 | 1.12E+08 | + | 0    | 0    |
| ENSG0000(RP11-158I  | processed_  | chr16 | 86434830 | 86435884 | - | 0    | 0    |
| ENSG0000(CTC-435M   | antisense   | chr19 | 41425359 | 41426237 | + | 0    | 0    |
| ENSG0000(LINC01862  | lincRNA     | chr19 | 8630671  | 8638649  | + | 0    | 0    |
| ENSG0000(RPL7AP69   | processed_  | chr19 | 57065334 | 57066139 | + | 0    | 0    |
| ENSG0000(ABC7-4241  | transcribec | chr13 | 18408806 | 18431605 | + | 0    | 0    |
| ENSG0000(CTD-2587H  | sense_intrε | chr19 | 54434183 | 54434665 | + | 0    | 0    |
| ENSG0000(CTB-102L5  | sense_intrε | chr19 | 38199836 | 38200934 | + | 0    | 0    |
| ENSG0000(AC018755.  | protein_co  | chr19 | 51612091 | 51646889 | - | 0    | 0    |
| ENSG0000(RP11-805I  | lincRNA     | chr16 | 86192793 | 86198913 | - | 0    | 0    |
| ENSG0000(RP11-572B  | antisense   | chr3  | 5187172  | 5188298  | - | 0.05 | 0.06 |
| ENSG0000(IFNL3P1    | unprocessε  | chr19 | 39236433 | 39237293 | - | 0    | 0    |
| ENSG0000(CTD-3138B  | antisense   | chr19 | 58257270 | 58278808 | - | 1.31 | 1.62 |
| ENSG0000(CTD-2545N  | lincRNA     | chr19 | 50486810 | 50487638 | - | 0    | 0    |
| ENSG0000(CTD-2616J  | sense_intrε | chr19 | 51361712 | 51365544 | - | 0    | 0    |
| ENSG0000(VN1R83P    | unprocessε  | chr19 | 21289554 | 21289998 | - | 1.97 | 0    |
| ENSG0000(CYP2T3P    | unprocessε  | chr19 | 41134722 | 41137308 | + | 0    | 0    |
| ENSG0000(CTC-273B1  | antisense   | chr19 | 48465593 | 48469693 | - | 0.06 | 0    |
| ENSG0000(RP11-32B5  | lincRNA     | chr15 | 21368459 | 21370621 | + | 0    | 0.06 |
| ENSG0000(LINC02135  | lincRNA     | chr16 | 86286427 | 86293389 | + | 0    | 0    |
| ENSG0000(AC004076.  | protein_co  | chr19 | 57394183 | 57438457 | + | 0    | 0    |
| ENSG0000(MTDHP4     | processed_  | chr19 | 21709522 | 21710191 | + | 0    | 0    |
| ENSG0000(AC005523.  | lincRNA     | chr19 | 4785120  | 4791207  | - | 0    | 0    |
| ENSG0000(VN1R88P    | unprocessε  | chr19 | 22861303 | 22861594 | + | 0    | 0    |
| ENSG0000(CTD-2619J  | TEC         | chr19 | 58418560 | 58419310 | + | 0.15 | 0.67 |
| ENSG0000(VN1R107P   | unprocessε  | chr19 | 57459912 | 57460120 | + | 0    | 0    |
| ENSG0000(RP11-678G  | lincRNA     | chr19 | 21570822 | 21587322 | - | 0    | 0    |
| ENSG0000(CTD-2332E  | lincRNA     | chr19 | 20611559 | 20615389 | + | 0    | 0    |
| ENSG0000(AC003956.  | antisense   | chr19 | 15124160 | 15126174 | + | 0    | 0    |
| ENSG0000(AC005339.  | antisense   | chr19 | 4654964  | 4655524  | - | 0    | 0    |
| ENSG0000(RP11-687D  | lincRNA     | chr18 | 38655209 | 38687998 | - | 0    | 0    |
| ENSG0000(AC007228.  | lincRNA     | chr19 | 56672574 | 56673901 | - | 0    | 0    |
| ENSG0000(RP11-158H  | lincRNA     | chr18 | 35280867 | 35290201 | - | 0.29 | 0.37 |
| ENSG0000(RP1-283E3  | processed_  | chr1  | 1702736  | 1737688  | - | 1.18 | 1.08 |
| ENSG0000(LINC01966  | lincRNA     | chr2  | 1.45E+08 | 1.45E+08 | - | 0    | 0    |
| ENSG0000(SIGLEC18P  | unprocessε  | chr19 | 51119987 | 51122965 | + | 0    | 0.08 |
| ENSG0000(AC005794.  | processed_  | chr19 | 41652676 | 41652963 | + | 0    | 0    |

|                                         |          |          |   |      |      |
|-----------------------------------------|----------|----------|---|------|------|
| ENSG0000( CTC-453G2 antisense chr19     | 48204083 | 48213154 | + | 0.13 | 0    |
| ENSG0000( RP11-464F antisense chr10     | 73625996 | 73626790 | + | 0    | 0.18 |
| ENSG0000( CTC-457E2 unprocessed chr19   | 22620483 | 22620724 | + | 0    | 0    |
| ENSG0000( RAET1E-AS antisense chr6      | 1.5E+08  | 1.5E+08  | + | 0.2  | 0.49 |
| ENSG0000( CTD-2611C processed_ chr19    | 55707550 | 55707855 | + | 0    | 0    |
| ENSG0000( CTD-3187F antisense chr19     | 51251231 | 51271179 | - | 0    | 0    |
| ENSG0000( RP11-157B lincRNA chr19       | 22259693 | 22261335 | + | 0    | 0    |
| ENSG0000( VN1R80P unprocessed chr19     | 21063924 | 21064261 | + | 0    | 0    |
| ENSG0000( AC115522. lincRNA chr19       | 43794309 | 43795658 | - | 0    | 0    |
| ENSG0000( RP11-316C antisense chr2      | 2.19E+08 | 2.19E+08 | - | 0.32 | 0.59 |
| ENSG0000( CTB-50E14 sense_intr chr19    | 42424384 | 42425071 | - | 0    | 0    |
| ENSG0000( MAGEA2 protein_co chrX        | 1.53E+08 | 1.53E+08 | - | 0    | 0    |
| ENSG0000( CTD-2207C protein_co chr19    | 7533595  | 7540059  | + | 0    | 0    |
| ENSG0000( RP11-65J3. lincRNA chr9       | 1.29E+08 | 1.29E+08 | + | 0    | 0    |
| ENSG0000( AC092316. antisense chr19     | 8549506  | 8550139  | + | 0    | 0    |
| ENSG0000( AC078899. unprocessed chr19   | 20249052 | 20250295 | + | 0    | 0    |
| ENSG0000( IGFL2-AS1 lincRNA chr19       | 46189166 | 46203083 | - | 0    | 0.06 |
| ENSG0000( CTB-52I2.3 processed_ chr19   | 18040355 | 18041083 | + | 0    | 0    |
| ENSG0000( RP1-122P2 lincRNA chr20       | 19756390 | 19758037 | - | 0.07 | 0    |
| ENSG0000( TEX13A protein_co chrX        | 1.05E+08 | 1.05E+08 | - | 0    | 0    |
| ENSG0000( RP11-739B antisense chr11     | 77473371 | 77477030 | + | 0.03 | 0.03 |
| ENSG0000( CTB-33G10 antisense chr19     | 49625994 | 49626439 | - | 0    | 0    |
| ENSG0000( AC006486. protein_co chr19    | 42234583 | 42255132 | - | 0    | 0    |
| ENSG0000( RP4-806M. lincRNA chr20       | 58817132 | 58817725 | - | 0.47 | 0.39 |
| ENSG0000( AC068499. antisense chr19     | 18204730 | 18220480 | + | 0.95 | 0.08 |
| ENSG0000( CTAG1A protein_co chrX        | 1.55E+08 | 1.55E+08 | + | 0    | 0    |
| ENSG0000( CTD-3187F processed_ chr19    | 51194118 | 51195540 | - | 0    | 0    |
| ENSG0000( MIMT1 lincRNA chr19           | 56840902 | 56848556 | + | 0    | 0    |
| ENSG0000( CTB-60B18 protein_co chr19    | 49017496 | 49020523 | - | 0    | 0.09 |
| ENSG0000( LINC00664 lincRNA chr19       | 21483374 | 21503238 | + | 0.05 | 0.04 |
| ENSG0000( RP11-310J. sense_intr chr10   | 75642476 | 75643106 | + | 0    | 0    |
| ENSG0000( LETM1P2 processed_ chr19      | 58044592 | 58046769 | + | 0    | 0    |
| ENSG0000( WBP1LP6 processed_ chr1       | 674842   | 675265   | + | 0    | 0    |
| ENSG0000( CTB-60B18 unprocessed chr19   | 49042174 | 49042731 | + | 0    | 0    |
| ENSG0000( CTD-2622I. sense_intr chr19   | 4061615  | 4062749  | - | 0.59 | 0.75 |
| ENSG0000( LLNLR-249I lincRNA chr19      | 15760375 | 15770828 | + | 0    | 0    |
| ENSG0000( FAM231D protein_co KI270713.1 | 35407    | 35916    | + | 0    | 0    |
| ENSG0000( CTB-33G10 antisense chr19     | 49688853 | 49690573 | - | 0    | 0    |
| ENSG0000( CTC-444N2 antisense chr19     | 57350848 | 57352012 | - | 0.29 | 0.06 |
| ENSG0000( COX6CP7 processed_ chr19      | 49502432 | 49502639 | - | 0    | 0    |
| ENSG0000( CTD-2553L sense_intr chr19    | 34638122 | 34640689 | - | 0    | 0    |
| ENSG0000( CTB-31C7.3 processed_ chr19   | 22362589 | 22362825 | + | 0    | 0    |
| ENSG0000( AC010524. antisense chr19     | 49368705 | 49388081 | - | 0.05 | 0.05 |
| ENSG0000( ZNF723P unprocessed chr19     | 22832201 | 22859422 | + | 0    | 0    |
| ENSG0000( BNIP3P26 processed_ chr19     | 21521343 | 21521896 | - | 0    | 0    |

|                                      |          |          |   |      |      |
|--------------------------------------|----------|----------|---|------|------|
| ENSG0000(RP11-247A lincRNA chr9      | 1.29E+08 | 1.29E+08 | + | 0.15 | 0.32 |
| ENSG0000(CTD-2616J unprocessed chr19 | 51426347 | 51426668 | - | 0    | 0    |
| ENSG0000(CTC-444N2 lincRNA chr19     | 57261354 | 57262738 | + | 0.54 | 0.37 |
| ENSG0000(ARL14EPL protein_co chr5    | 1.16E+08 | 1.16E+08 | + | 0    | 0    |
| ENSG0000(BNIP3P33 processed_ chr19   | 22457329 | 22458212 | - | 0    | 0    |
| ENSG0000(CTC-444N2 processed_ chr19  | 57317208 | 57317562 | - | 0    | 0    |
| ENSG0000(CTD-2105E antisense chr19   | 55312029 | 55312495 | - | 0    | 0    |
| ENSG0000(CTD-2561J processed_ chr19  | 21381220 | 21381921 | - | 0    | 0    |
| ENSG0000(CTB-61M7 lincRNA chr19      | 54890673 | 54891420 | + | 0    | 0    |
| ENSG0000(MTCO3P39 processed_ chr4    | 49246021 | 49246538 | + | 0.14 | 0.31 |
| ENSG0000(HSFX2 protein_co chrX       | 1.5E+08  | 1.5E+08  | - | 0    | 0.66 |
| ENSG0000(CTC-518B2 antisense chr19   | 51014374 | 51014734 | + | 0    | 0    |
| ENSG0000(CTD-2396E processed_ chr19  | 6552358  | 6554494  | - | 0    | 0    |
| ENSG0000(CTD-2538C sense_intr chr19  | 16844025 | 16846473 | + | 0.24 | 0    |
| ENSG0000(CTD-3105H protein_co chr19  | 12379189 | 12401274 | - | 0.07 | 0.14 |
| ENSG0000(RP11-298J antisense chr6    | 41791410 | 41791477 | + | 0    | 0    |
| ENSG0000(CTD-2571L lincRNA chr19     | 47607524 | 47733098 | + | 0    | 0    |
| ENSG0000(CTD-3030D processed_ chr19  | 21276023 | 21276332 | - | 0    | 0.37 |
| ENSG0000(CTD-2583A protein_co chr19  | 57819719 | 57858941 | + | 2.03 | 1.84 |
| ENSG0000(SCGB1B2P lincRNA chr19      | 34576733 | 34577701 | - | 0.11 | 0.12 |
| ENSG0000(LINC01081 lincRNA chr16     | 86225580 | 86275745 | - | 0    | 0    |
| ENSG0000(AC104534 antisense chr19    | 38820166 | 38823223 | + | 0    | 0    |
| ENSG0000(ADGRE4P transcribed chr19   | 6952500  | 6997872  | - | 0    | 0    |
| ENSG0000(CTC-450M antisense chr19    | 38108500 | 38109533 | - | 0    | 0    |
| ENSG0000(CTD-3073N antisense chr19   | 51519731 | 51520260 | + | 0    | 0    |
| ENSG0000(MGC2752 transcribed chr19   | 58582024 | 58582609 | + | 0    | 0    |
| ENSG0000(RPL7P50 processed_ chr19    | 6593329  | 6594055  | + | 0    | 0    |
| ENSG0000(VN1R87P unprocessed chr19   | 22742924 | 22743410 | - | 0    | 0    |
| ENSG0000(CTC-429P9 protein_co chr19  | 16577642 | 16660115 | - | 1.12 | 1.33 |
| ENSG0000(VN1R90P unprocessed chr19   | 23288620 | 23289345 | + | 0    | 0    |
| ENSG0000(CTC-490E2 protein_co chr19  | 40801297 | 40898282 | + | 0.25 | 0    |
| ENSG0000(CTB-25B13 lincRNA chr19     | 1440839  | 1441938  | + | 0    | 0.42 |
| ENSG0000(RP11-321E processed_ chr5   | 17491361 | 17491769 | - | 0    | 0    |
| ENSG0000(RP11-704M unprocessed chr4  | 69215908 | 69216635 | - | 0    | 0    |
| ENSG0000(LINC02132 lincRNA chr16     | 85935281 | 85936223 | - | 0    | 0    |
| ENSG0000(AC007193 antisense chr19    | 46382492 | 46383169 | - | 0    | 0    |
| ENSG0000(RP1-102K2 antisense chr22   | 30246205 | 30246998 | + | 0.08 | 0.27 |
| ENSG0000(CITF22-62I sense_intr chr22 | 35626988 | 35635134 | - | 0    | 0.01 |
| ENSG0000(CTC-457E2 processed_ chr19  | 22603269 | 22608501 | + | 0    | 0    |
| ENSG0000(BNIP3P32 processed_ chr19   | 22447934 | 22448777 | - | 0    | 0    |
| ENSG0000(AC011513 antisense chr19    | 41757898 | 41786893 | - | 0    | 0    |
| ENSG0000(OR7A1P unprocessed chr19    | 14891895 | 14892804 | - | 0    | 0    |
| ENSG0000(LA16c-OS1 lincRNA chr16     | 185748   | 186294   | - | 0.13 | 0.29 |
| ENSG0000(CTD-3073N unprocessed chr19 | 51505059 | 51505362 | - | 0    | 0    |
| ENSG0000(CTD-2245F antisense chr19   | 53162428 | 53163563 | + | 0    | 0    |

|                                               |          |          |   |      |      |
|-----------------------------------------------|----------|----------|---|------|------|
| ENSG0000(RP11-1137 antisense chr19            | 6953211  | 6954904  | + | 0    | 0    |
| ENSG0000(SIGLEC31P unprocessed chr19          | 56589495 | 56590281 | - | 0    | 0    |
| ENSG0000(SIGLEC22P transcribed chr19          | 51211080 | 51212088 | + | 0    | 0    |
| ENSG0000(CTD-2545M antisense chr19            | 50480119 | 50483351 | - | 0    | 0    |
| ENSG0000(RP4-591C2 antisense chr20            | 63861212 | 63864293 | - | 3.4  | 2.65 |
| ENSG0000(CTD-2207C protein_coding chr19       | 7382834  | 7472477  | + | 0    | 0    |
| ENSG0000(CTB-167G5 transcribed chr19          | 53599628 | 53608451 | - | 0    | 0.17 |
| ENSG0000(AC020915. processed_transcript chr19 | 58224506 | 58225469 | + | 0    | 0    |
| ENSG0000(ESPNP transcribed chr1               | 16687339 | 16720157 | - | 0.14 | 0    |
| ENSG0000(CTD-3105H protein_coding chr19       | 12391949 | 12441082 | - | 0    | 0.1  |
| ENSG0000(RP11-138H antisense chr18            | 34737795 | 34767663 | - | 0    | 0    |
| ENSG0000(IGFL1P1 unprocessed chr19            | 46196238 | 46197323 | + | 0    | 0    |
| ENSG0000(PNMA6B unprocessed chrX              | 1.53E+08 | 1.53E+08 | - | 0.05 | 0    |
| ENSG0000(CTD-2550C processed_transcript chr19 | 8346517  | 8347687  | + | 0    | 0    |
| ENSG0000(CTD-3099C antisense chr19            | 52575883 | 52585561 | - | 0    | 0    |
| ENSG0000(CTD-2616J: lincRNA chr19             | 51394488 | 51403650 | + | 0.26 | 0    |
| ENSG0000(CTD-3233P unprocessed chr19          | 21221645 | 21222746 | - | 0    | 0    |
| ENSG0000(PLCE1-AS1 antisense chr10            | 94279277 | 94287478 | - | 0.04 | 0.23 |
| ENSG0000(A1BG-AS1 antisense chr19             | 58347751 | 58355183 | + | 4.22 | 5.53 |
| ENSG0000(RP11-256I2 antisense chr2            | 2.2E+08  | 2.2E+08  | - | 0    | 0    |
| ENSG0000(CSAG2 protein_coding chrX            | 1.53E+08 | 1.53E+08 | - | 0    | 0    |
| ENSG0000(RP11-34P1 processed_transcript chr1  | 135141   | 135895   | - | 0.28 | 0.65 |
| ENSG0000(CTC-518B2 antisense chr19            | 51030076 | 51034335 | + | 0    | 0    |
| ENSG0000(VN1R92P unprocessed chr19            | 23444262 | 23445189 | + | 0    | 0    |
| ENSG0000(CTD-2619J: lincRNA chr19             | 58428632 | 58431148 | - | 0.65 | 0.62 |
| ENSG0000(CSAG3 protein_coding chrX            | 1.53E+08 | 1.53E+08 | + | 0    | 0    |
| ENSG0000(CTD-2557P processed_transcript chr19 | 8778665  | 8778861  | - | 0    | 0    |
| ENSG0000(RP11-180I4 lincRNA chr9              | 95772323 | 95774734 | + | 0    | 0    |
| ENSG0000(RP11-886P antisense chr19            | 8423355  | 8427827  | - | 0.05 | 0.08 |
| ENSG0000(AC005387. antisense chr19            | 18531613 | 18532632 | + | 0    | 0    |
| ENSG0000(CT45A1 protein_coding chrX           | 1.36E+08 | 1.36E+08 | + | 0    | 0    |
| ENSG0000(LINC01711 lincRNA chr20              | 58634772 | 58635738 | + | 0    | 0.07 |
| ENSG0000(CKS1BP3 processed_transcript chr5    | 62512246 | 62512482 | - | 0    | 0    |
| ENSG0000(CTD-2192J: lincRNA chr19             | 12682693 | 12687279 | - | 0.11 | 0.12 |
| ENSG0000(AD000684. sense_intronic chr19       | 35262846 | 35264804 | + | 0    | 0    |
| ENSG0000(MRPS17P1 processed_transcript chr1   | 44988705 | 44991834 | - | 0.06 | 0.06 |
| ENSG0000(RP11-149F processed_transcript chr9  | 63719864 | 63720441 | + | 0.49 | 0.4  |
| ENSG0000(RP11-556C lincRNA chr8               | 8188535  | 8189195  | - | 0    | 0    |
| ENSG0000(SIGLEC26P unprocessed chr19          | 51468360 | 51468636 | - | 0    | 0    |
| ENSG0000(ERVV-2 protein_coding chr19          | 53044738 | 53051076 | + | 0    | 0    |
| ENSG0000(RP11-1281 processed_transcript chr4  | 49548564 | 49548855 | - | 0    | 0    |
| ENSG0000(CTD-3099C sense_intronic chr19       | 52597699 | 52598887 | - | 0    | 0    |
| ENSG0000(MIA-RAB4E protein_coding chr19       | 40771648 | 40786685 | + | 0    | 0    |
| ENSG0000(CTC-457E2 antisense chr19            | 22665552 | 22716991 | - | 0    | 0    |
| ENSG0000(AC005253. antisense chr19            | 18568506 | 18569375 | - | 0    | 0    |



|                                     |          |          |   |      |      |
|-------------------------------------|----------|----------|---|------|------|
| ENSG0000(CTD-2528A antisense chr19  | 17009189 | 17013460 | + | 0    | 0    |
| ENSG0000(CTC-435M: sense_intrchr19  | 41399372 | 41400365 | + | 0    | 0    |
| ENSG0000(SPANXN2 protein_cochrX     | 1.44E+08 | 1.44E+08 | - | 0    | 0    |
| ENSG0000(FAM231B protein_cochr1     | 16539066 | 16539575 | + | 0    | 0    |
| ENSG0000(CDC42EP3: processed_chr19  | 23384530 | 23385293 | + | 0    | 0    |
| ENSG0000(RP11-439A processed_chr1   | 1.21E+08 | 1.21E+08 | - | 0    | 0    |
| ENSG0000(FAM236B protein_cochrX     | 72781865 | 72782660 | - | 0    | 0    |
| ENSG0000(VN1R82P unprocesschr19     | 21188598 | 21188953 | + | 0.59 | 0.83 |
| ENSG0000(MAN1B1-A antisense chr9    | 1.37E+08 | 1.37E+08 | - | 1.1  | 0.69 |
| ENSG0000(DNAJC19P: processed_chr19  | 41638569 | 41638899 | - | 0    | 0    |
| ENSG0000(CTD-2245F transcribedchr19 | 53197111 | 53214522 | + | 1.88 | 4.28 |
| ENSG0000(SLC6A21P processed_chr19   | 49255472 | 49256102 | - | 0    | 0    |
| ENSG0000(KRT18P40 unprocesschr19    | 20961057 | 20965140 | + | 0    | 0.04 |
| ENSG0000(CTB-147N1 processed_chr19  | 46826895 | 46828440 | - | 0    | 0    |
| ENSG0000(AC005932. antisense chr19  | 18940322 | 18946831 | + | 0.51 | 0.42 |
| ENSG0000(CTD-3187F transcribedchr19 | 51280862 | 51283022 | + | 0    | 0    |
| ENSG0000(CTC-457E2 transcribedchr19 | 22605739 | 22608211 | + | 0    | 0    |
| ENSG0000(AC003006. protein_cochr19  | 57682045 | 57753575 | + | 0.78 | 1.47 |
| ENSG0000(MTRNR2L1 protein_cochr3    | 96617188 | 96618236 | - | 0    | 0    |
| ENSG0000(AC016629. transcribedchr19 | 58586158 | 58586356 | + | 3.69 | 1.14 |
| ENSG0000(CTD-2521N protein_cochr19  | 17436611 | 17460804 | - | 0    | 0.04 |
| ENSG0000(LINC01838 lincRNA chr19    | 34905315 | 34908188 | + | 0    | 0    |
| ENSG0000(AP001462. lincRNA chr11    | 64778954 | 64779405 | + | 0.17 | 0    |
| ENSG0000(BNIP3P24 processed_chr19   | 20784596 | 20785152 | - | 0    | 0    |
| ENSG0000(CTC-513N1 lincRNA chr19    | 20432552 | 20528615 | + | 0    | 0    |
| ENSG0000(CTC-429P9 sense_intrchr19  | 16633797 | 16635269 | - | 2.73 | 2.19 |
| ENSG0000(CTC-360G5 antisense chr19  | 38870159 | 38873763 | + | 0    | 0    |
| ENSG0000(CTD-2521N antisense chr19  | 17419305 | 17419774 | - | 0    | 0    |
| ENSG0000(CTD-2619J: antisense chr19 | 58362585 | 58366591 | + | 0.24 | 0.09 |
| ENSG0000(BNIP3P18 processed_chr19   | 20267817 | 20268391 | + | 0    | 0    |
| ENSG0000(CALR3 protein_cochr19      | 16479057 | 16496192 | - | 0    | 0    |
| ENSG0000(CTD-2528A antisense chr19  | 17095418 | 17099307 | - | 0    | 0    |
| ENSG0000(ZNF728 protein_cochr19     | 22975468 | 23003176 | - | 0.03 | 0    |
| ENSG0000(RP11-256I: antisense chr2  | 2.2E+08  | 2.2E+08  | + | 0.27 | 0.44 |
| ENSG0000(CTC-471F3 processed_chr19  | 40023384 | 40025502 | - | 0.9  | 0.45 |
| ENSG0000(CTD-3187F antisense chr19  | 51152923 | 51181966 | - | 0    | 0    |
| ENSG0000(CTD-2620I: processed_chr19 | 52956041 | 52981654 | - | 0    | 0    |
| ENSG0000(CTD-3222D antisense chr19  | 16565551 | 16566330 | + | 0    | 0    |
| ENSG0000(CTC-523E2 lincRNA chr19    | 34837889 | 34855304 | + | 0.08 | 0.06 |
| ENSG0000(CTD-2126E antisense chr19  | 50043196 | 50051062 | - | 0.13 | 0    |
| ENSG0000(AC010646. protein_cochr19  | 17235940 | 17255448 | - | 0.17 | 0    |
| ENSG0000(CT45A3 protein_cochrX      | 1.36E+08 | 1.36E+08 | - | 0    | 0    |
| ENSG0000(TPRG1LP1 processed_chr19   | 57664280 | 57665039 | + | 0.09 | 0    |
| ENSG0000(LSP1P1 processed_chr13     | 25017404 | 25017536 | + | 0    | 0    |
| ENSG0000(CTD-2525I: antisense chr19 | 52284780 | 52297920 | - | 0    | 0    |

|                                         |          |          |   |       |       |
|-----------------------------------------|----------|----------|---|-------|-------|
| ENSG0000(Metazoa_S misc_RNA chr20       | 49932795 | 49933078 | + | 0.94  | 0     |
| ENSG0000(CTD-2619J: antisense chr19     | 58475355 | 58475763 | - | 0.2   | 0.22  |
| ENSG0000(RP11-15H2 lincRNA chr19        | 23257255 | 23274232 | - | 0     | 0.44  |
| ENSG0000(CTC-513N1 lincRNA chr19        | 20553792 | 20661583 | - | 1.56  | 0     |
| ENSG0000(TRABD2B protein_co chr1        | 47760528 | 47996895 | - | 0.01  | 0.12  |
| ENSG0000(FAM90A28 transcribed chr19     | 53299051 | 53308644 | - | 0     | 0     |
| ENSG0000(HNRNPA1F processed_ chr19      | 41829692 | 41830938 | + | 0     | 0.07  |
| ENSG0000(AC007193. antisense chr19      | 46320197 | 46340004 | - | 0     | 0     |
| ENSG0000(RP11-98F1. antisense chr13     | 1.13E+08 | 1.13E+08 | - | 0     | 0     |
| ENSG0000(SIGLEC28P unprocessed_ chr19   | 51560122 | 51560590 | - | 0     | 0     |
| ENSG0000(BRI3BPP1 processed_ chr19      | 21800480 | 21801266 | + | 0     | 0     |
| ENSG0000(ZNF209P unprocessed_ chr19     | 22463922 | 22473036 | + | 0     | 0     |
| ENSG0000(CTD-3193C processed_ chr19     | 7926001  | 7926810  | + | 0     | 0.35  |
| ENSG0000(AC007192. antisense chr19      | 18144522 | 18151691 | - | 0     | 0     |
| ENSG0000(AC092301. antisense chr19      | 45830164 | 45831108 | + | 0     | 0     |
| ENSG0000(AC007193. antisense chr19      | 46390515 | 46390852 | - | 0     | 0     |
| ENSG0000(LYPLA2P2 processed_ chr19      | 7879445  | 7880120  | - | 0     | 0     |
| ENSG0000(BNIP3P13 processed_ chr19      | 20062755 | 20063320 | + | 0     | 0     |
| ENSG0000(RP3-431P2 lincRNA chr6         | 1.68E+08 | 1.68E+08 | + | 0     | 0     |
| ENSG0000(CTD-3131K antisense chr19      | 17518330 | 17520565 | - | 0     | 0     |
| ENSG0000(CTC-218B8 antisense chr19      | 39134882 | 39136463 | - | 0     | 0     |
| ENSG0000(RP11-727F antisense chr11      | 62786023 | 62786785 | - | 1.44  | 1.21  |
| ENSG0000(L34079.3 antisense chr19       | 43553445 | 43555494 | + | 0     | 0     |
| ENSG0000(CTC-326K1 protein_co chr19     | 49909501 | 49958391 | - | 0     | 0     |
| ENSG0000(CTD-3073N processed_ chr19     | 51442379 | 51442650 | + | 0     | 0     |
| ENSG0000(LINC01082 lincRNA chr16        | 86196181 | 86199720 | + | 0     | 0     |
| ENSG0000(CTB-60E11 unprocessed_ chr19   | 39584042 | 39586489 | + | 0     | 0     |
| ENSG0000(RP11-573N sense_intronic chr13 | 98233650 | 98234700 | + | 0     | 0     |
| ENSG0000(FBXO17 protein_co chr19        | 38941401 | 38975910 | - | 13.54 | 16.52 |
| ENSG0000(AC005387. antisense chr19      | 18532908 | 18536188 | + | 0     | 0     |
| ENSG0000(AC006942. antisense chr19      | 49808933 | 49809738 | + | 0.14  | 0.78  |
| ENSG0000(AC003973. lincRNA chr19        | 22043500 | 22050005 | - | 0     | 0     |
| ENSG0000(RP11-173C antisense chr2       | 38959287 | 38960342 | - | 0.46  | 0.38  |
| ENSG0000(LINC00528 lincRNA chr22        | 17777322 | 17779481 | + | 0     | 0     |
| ENSG0000(RP11-722G protein_co chrX      | 1.04E+08 | 1.04E+08 | - | 1.2   | 2.55  |
| ENSG0000(RPS27AP15 processed_ chr19     | 7665717  | 7666476  | + | 0     | 0     |
| ENSG0000(ZNF350-AS antisense chr19      | 51949134 | 51981367 | + | 0.12  | 0     |
| ENSG0000(CTD-2619J: processed_ chr19    | 58166166 | 58167145 | + | 0     | 0     |
| ENSG0000(CTD-2561J: protein_co chr19    | 21405159 | 21491266 | + | 0     | 0     |
| ENSG0000(CTD-2192J: protein_co chr19    | 12643831 | 12648397 | - | 2.21  | 1.09  |
| ENSG0000(CTD-2231E antisense chr19      | 16123661 | 16139892 | - | 0     | 0     |
| ENSG0000(RPL23AP78 processed_ chr19     | 8728735  | 8729204  | - | 0     | 0     |
| ENSG0000(CTC-246B1 lincRNA chr19        | 39341773 | 39341945 | - | 0     | 6.87  |
| ENSG0000(SIGLEC21P unprocessed_ chr19   | 51198855 | 51201449 | + | 0     | 0     |
| ENSG0000(RP11-325D antisense chr10      | 76558350 | 76560994 | - | 0     | 0     |

|                                      |          |          |   |        |        |
|--------------------------------------|----------|----------|---|--------|--------|
| ENSG0000(DNAJC19P:processed_ chr19   | 41605341 | 41605671 | - | 0      | 0      |
| ENSG0000(CTB-83J4.2 lincRNA chr19    | 54589441 | 54590287 | + | 0      | 0      |
| ENSG0000(AC078899.unprocessε chr19   | 20295089 | 20303794 | + | 0      | 0      |
| ENSG0000(CTD-2105E antisense chr19   | 55377579 | 55378125 | - | 0      | 0      |
| ENSG0000(RP11-564H processed_ chrX   | 52770809 | 52771080 | + | 0      | 0      |
| ENSG0000(CTD-2245F antisense chr19   | 53240675 | 53241913 | + | 0      | 0      |
| ENSG0000(CTB-92J24.antisense chr19   | 23919081 | 23957930 | - | 0      | 0      |
| ENSG0000(CTB-12A17 antisense chr19   | 46609277 | 46610779 | - | 0.37   | 0      |
| ENSG0000(ZSCAN16-A antisense chr6    | 28121795 | 28137293 | - | 2.03   | 2.31   |
| ENSG0000(AC005614.antisense chr19    | 40090754 | 40094406 | + | 0.16   | 0.06   |
| ENSG0000(CTD-2529P antisense chr19   | 8821501  | 8824110  | + | 0      | 0      |
| ENSG0000(CTD-2527I:antisense chr19   | 34998233 | 35000170 | - | 0      | 0      |
| ENSG0000(FKBP1AP1 processed_ chr19   | 57826461 | 57826778 | - | 0      | 0      |
| ENSG0000(CTD-2278I:protein_co chr19  | 17267418 | 17282966 | + | 0      | 0.28   |
| ENSG0000(MAGIX protein_co chrX       | 49162564 | 49168483 | + | 0.48   | 0.24   |
| ENSG0000(CTC-457E2 processed_ chr19  | 22609606 | 22610601 | + | 0      | 0      |
| ENSG0000(AC007292.antisense chr19    | 4356637  | 4358448  | - | 0      | 0.03   |
| ENSG0000(VN1R93P unprocessε chr19    | 23602567 | 23603106 | + | 0      | 0      |
| ENSG0000(CTC-453G2 antisense chr19   | 48145908 | 48147413 | + | 0      | 0      |
| ENSG0000(GOLGA2P9 transcribec chr19  | 22596257 | 22603550 | + | 0      | 0      |
| ENSG0000(IKBKG protein_co chrX       | 1.55E+08 | 1.55E+08 | + | 10.7   | 12.64  |
| ENSG0000(ZNF587B protein_co chr19    | 57819741 | 57846238 | + | 2.18   | 2.34   |
| ENSG0000(VN1R85P unprocessε chr19    | 22174766 | 22175191 | - | 0      | 0      |
| ENSG0000(CTD-3099C antisense chr19   | 52511282 | 52512342 | - | 0      | 0      |
| ENSG0000(CTD-2278I:antisense chr19   | 17360932 | 17362753 | + | 0      | 0      |
| ENSG0000(PTOV1-AS2 antisense chr19   | 49856970 | 49859289 | - | 1.91   | 1.92   |
| ENSG0000(AC092071.sense_intrε chr19  | 40946347 | 40947450 | + | 0      | 0      |
| ENSG0000(AC005626.processed_ chr19   | 41639659 | 41640602 | - | 0      | 0      |
| ENSG0000(RP11-120K sense_intrε chr13 | 1.13E+08 | 1.13E+08 | + | 0      | 0      |
| ENSG0000(LINC01233 lincRNA chr19     | 22532626 | 22533494 | + | 0      | 0      |
| ENSG0000(RP11-380N antisense chr18   | 47878295 | 47882444 | + | 0      | 0      |
| ENSG0000(CTD-2207C antisense chr19   | 7519916  | 7520460  | - | 0      | 0      |
| ENSG0000(CTD-2542C unprocessε chr19  | 20838515 | 20847417 | - | 0      | 0      |
| ENSG0000(CTB-50E14 processed_ chr19  | 42485076 | 42485714 | - | 2.11   | 2.95   |
| ENSG0000(RP11-120K sense_intrε chr13 | 1.13E+08 | 1.13E+08 | + | 0      | 0      |
| ENSG0000(ITGB1P1 processed_ chr19    | 14621634 | 14622242 | - | 110.67 | 108.56 |
| ENSG0000(RP11-292K processed_ chr2   | 1E+08    | 1E+08    | - | 0      | 0      |
| ENSG0000(CTC-312O1 unprocessε chr19  | 6898299  | 6898686  | + | 0      | 0      |
| ENSG0000(RAB11B-AS antisense chr19   | 8374373  | 8390685  | - | 4.89   | 6.15   |
| ENSG0000(RP11-298J:lincRNA chr6      | 41764292 | 41764460 | - | 0      | 0      |
| ENSG0000(AC018755.transcribec chr19  | 51594561 | 51606150 | + | 0.71   | 1.56   |
| ENSG0000(RP11-194G lincRNA chr3      | 16530771 | 16531802 | + | 0      | 0      |
| ENSG0000(CTB-191K2 antisense chr19   | 50365880 | 50369331 | - | 0.69   | 0      |
| ENSG0000(CTB-92J24.sense_intrε chr19 | 23927788 | 23929287 | + | 0      | 0.08   |
| ENSG0000(CTD-3222D lincRNA chr19     | 16542746 | 16544814 | + | 0.69   | 0.53   |

|                                                              |          |          |   |      |      |
|--------------------------------------------------------------|----------|----------|---|------|------|
| ENSG0000(CTD-2529P sense_intron) chr19                       | 8833065  | 8833541  | + | 0    | 0    |
| ENSG0000(CTD-2616J) protein_coding chr19                     | 51350373 | 51368099 | - | 0    | 1.44 |
| ENSG0000(SPIB) protein_coding chr19                          | 50418938 | 50431313 | + | 0.03 | 0    |
| ENSG0000(NXF2) protein_coding chrX                           | 1.02E+08 | 1.02E+08 | + | 0    | 0    |
| ENSG0000(LINC01224) lincRNA chr19                            | 23399233 | 23416075 | - | 0    | 0.03 |
| ENSG0000(CTD-2538C) processed_transcript chr19               | 16712317 | 16712434 | + | 0    | 0    |
| ENSG0000(PLA2G4C-A) antisense chr19                          | 48061371 | 48064945 | + | 0    | 0    |
| ENSG0000(ZNF92P3) unprocessed_transcript chr19               | 23935220 | 23936173 | + | 0    | 0    |
| ENSG0000(AC007292) antisense chr19                           | 4339577  | 4343491  | + | 0.41 | 0.46 |
| ENSG0000(CTC-429P9) antisense chr19                          | 16630743 | 16643942 | + | 0    | 0    |
| ENSG0000(BNIP3P8) processed_transcript chr19                 | 23380317 | 23380876 | + | 0    | 0    |
| ENSG0000(OPN1MW3) protein_coding chrX                        | 1.54E+08 | 1.54E+08 | + | 0    | 0    |
| ENSG0000(NXF2B) protein_coding chrX                          | 1.02E+08 | 1.02E+08 | - | 0    | 0    |
| ENSG0000(CTD-3131K) lincRNA chr19                            | 17488990 | 17511889 | - | 2.24 | 1.92 |
| ENSG0000(CTB-180A7) sense_intronic chr19                     | 6386762  | 6390400  | - | 0    | 0.4  |
| ENSG0000(AC067969) antisense chr19                           | 38526954 | 38528555 | - | 0    | 0    |
| ENSG0000(RP4-639J1) lincRNA chr7                             | 1.57E+08 | 1.57E+08 | + | 0    | 0.24 |
| ENSG0000(CTD-2579N) unprocessed_transcript chr19             | 22925377 | 22925547 | + | 0    | 0    |
| ENSG0000(AC093063) lincRNA chr19                             | 39685244 | 39694577 | + | 0    | 0    |
| ENSG0000(RP11-727F) sense_intronic chr11                     | 62807682 | 62808063 | - | 0    | 0    |
| ENSG0000(RP11-432N) processed_transcript chr5                | 17655129 | 17655538 | - | 0    | 0    |
| ENSG0000(CTD-3148I) protein_coding chr19                     | 49462752 | 49486231 | + | 0    | 0    |
| ENSG0000(RP11-15H2) processed_transcript chr19               | 23204010 | 23204556 | + | 0    | 0    |
| ENSG0000(CTD-2619J) lincRNA chr19                            | 58440448 | 58445849 | + | 0.13 | 0.18 |
| ENSG0000(CH17-38B1) unprocessed_transcript chrX              | 1.53E+08 | 1.53E+08 | + | 0    | 0    |
| ENSG0000(CTD-2583A) protein_coding chr19                     | 57876765 | 57916591 | - | 0    | 0    |
| ENSG0000(CTD-3032J) antisense chr19                          | 17207138 | 17208010 | - | 0.66 | 0.73 |
| ENSG0000(CTD-2521N) antisense chr19                          | 17414257 | 17422324 | - | 0    | 0    |
| ENSG0000(Z69720.2) antisense chr16                           | 90631    | 91102    | + | 0.89 | 0    |
| ENSG0000(LLNLF-191) transcribed_unprocessed_transcript chr19 | 51842878 | 51843315 | - | 0    | 0    |
| ENSG0000(CTC-360G5) lincRNA chr19                            | 38935297 | 38938632 | - | 0.56 | 0.8  |
| ENSG0000(CTB-174O2) antisense chr19                          | 46728603 | 46732700 | + | 0    | 0    |
| ENSG0000(RP11-98D1) lincRNA chr1                             | 1.52E+08 | 1.52E+08 | + | 0    | 0    |
| ENSG0000(CTB-147C2) antisense chr19                          | 50950185 | 50963649 | + | 0    | 0    |
| ENSG0000(DMRTC1) protein_coding chrX                         | 72872025 | 72943814 | - | 0    | 0    |
| ENSG0000(AC003973) lincRNA chr19                             | 22017959 | 22036315 | - | 0    | 0    |
| ENSG0000(ZNF92P2) processed_transcript chr19                 | 22128627 | 22130318 | - | 0    | 0    |
| ENSG0000(RP11-571I) antisense chr4                           | 54059597 | 54061210 | + | 0    | 0    |
| ENSG0000(BNIP3P34) processed_transcript chr19                | 22773853 | 22774424 | + | 0    | 0    |
| ENSG0000(RP11-370I) lincRNA chr12                            | 48198387 | 48202031 | + | 0.04 | 0.06 |
| ENSG0000(CYP4F23P) transcribed_unprocessed_transcript chr19  | 15564074 | 15584709 | + | 0    | 0    |
| ENSG0000(AC005176) processed_transcript chr19                | 39631300 | 39631446 | - | 0    | 0    |
| ENSG0000(CTB-83J4.1) lincRNA chr19                           | 54224523 | 54224881 | + | 0    | 0    |
| ENSG0000(ERVV-1) protein_coding chr19                        | 53013921 | 53016122 | + | 0    | 0.08 |
| ENSG0000(AC003002) protein_coding chr19                      | 57389884 | 57419994 | + | 0.96 | 0.22 |

|                                       |          |          |   |       |       |
|---------------------------------------|----------|----------|---|-------|-------|
| ENSG0000( CTC-453G2 antisense chr19   | 48118432 | 48127706 | + | 0     | 0     |
| ENSG0000( CTD-2525I antisense chr19   | 52300693 | 52345229 | - | 0.03  | 0.06  |
| ENSG0000( CTD-2126E processed_ chr19  | 50058882 | 50060232 | - | 0     | 0     |
| ENSG0000( CTD-2291D lincRNA chr19     | 23068473 | 23071476 | - | 0     | 0     |
| ENSG0000( CLIC4P2 processed_ chr19    | 6562123  | 6563848  | - | 0     | 0     |
| ENSG0000( CTC-360G5 protein_co chr19  | 38915404 | 38949855 | - | 0     | 0     |
| ENSG0000( OR7A8P unprocessε chr19     | 14852032 | 14852944 | - | 0     | 0     |
| ENSG0000( U62631.5 sense_intrε chr19  | 35330843 | 35331920 | + | 0     | 0     |
| ENSG0000( TMEM185/ protein_co chrX    | 1.5E+08  | 1.5E+08  | - | 13.26 | 15.71 |
| ENSG0000( RP11-629B antisense chr4    | 74156511 | 74158373 | - | 0.09  | 0.03  |
| ENSG0000( CTD-2192J sense_intrε chr19 | 12529768 | 12532973 | - | 0     | 0     |
| ENSG0000( AC008753. lincRNA chr19     | 53788782 | 53789168 | + | 0     | 0     |
| ENSG0000( GPR32P1 unprocessε chr19    | 50758382 | 50759192 | + | 0     | 0     |
| ENSG0000( CMB9-55A antisense chr11    | 58611119 | 58612642 | - | 0.11  | 0     |
| ENSG0000( MTDHP5 processed_ chr19     | 22140532 | 22141117 | + | 0     | 0     |
| ENSG0000( HNRNPMP. processed_ chr19   | 46809585 | 46810183 | + | 0     | 0     |
| ENSG0000( CTD-3222D sense_intrε chr19 | 16586905 | 16587985 | - | 0.06  | 0.06  |
| ENSG0000( SIGLEC27P unprocessε chr19  | 51508573 | 51509311 | + | 0     | 0     |
| ENSG0000( L34079.4 antisense chr19    | 43574638 | 43575618 | + | 0     | 0     |
| ENSG0000( TDGF1P7 processed_ chr19    | 39534463 | 39535021 | + | 0     | 0     |
| ENSG0000( CT45A10 protein_co chrX     | 1.36E+08 | 1.36E+08 | - | 0     | 0     |
| ENSG0000( CTB-60E11 unprocessε chr19  | 39553034 | 39555356 | + | 0     | 0     |
| ENSG0000( CTD-2192J protein_co chr19  | 12664828 | 12669397 | - | 0     | 0     |
| ENSG0000( RP11-261P antisense chr13   | 98329655 | 98333236 | - | 0     | 0     |
| ENSG0000( AC016629. antisense chr19   | 58593896 | 58599355 | - | 0     | 0.08  |
| ENSG0000( AC005523. antisense chr19   | 4791745  | 4795559  | - | 0     | 0     |
| ENSG0000( CTB-167G5 processed_ chr19  | 53616802 | 53617254 | + | 1.22  | 0.38  |
| ENSG0000( RPARP-AS1 processed_ chr10  | 1.02E+08 | 1.02E+08 | + | 4.37  | 3.25  |
| ENSG0000( MTDHP2 processed_ chr19     | 21940820 | 21941533 | + | 0     | 0     |
| ENSG0000( RP11-98D1 antisense chr1    | 1.52E+08 | 1.52E+08 | + | 0     | 0     |
| ENSG0000( TP53TG3HI transcribed chr16 | 35506592 | 35507170 | - | 0     | 0     |
| ENSG0000( AC004257. lincRNA chr19     | 15221015 | 15222297 | - | 0     | 0     |
| ENSG0000( RPL12P41 processed_ chr19   | 46219423 | 46219920 | + | 0     | 0     |
| ENSG0000( CTD-2331H lincRNA chr19     | 52923382 | 52924075 | + | 0     | 0.17  |
| ENSG0000( CTD-3020H unprocessε chr19  | 8173272  | 8175567  | + | 0     | 0     |
| ENSG0000( CTD-2195B antisense chr19   | 41221426 | 41222051 | - | 0     | 0     |
| ENSG0000( CTB-102L5 sense_intrε chr19 | 38184376 | 38186265 | + | 0.03  | 0     |
| ENSG0000( GLTSCR2-A antisense chr19   | 47757036 | 47768840 | - | 0     | 0     |
| ENSG0000( BNIP3P39 processed_ chr19   | 23798924 | 23799477 | - | 0     | 0     |
| ENSG0000( RP11-542M lincRNA chr16     | 85981750 | 85984723 | + | 0     | 0     |
| ENSG0000( OR7A18P unprocessε chr19    | 14886839 | 14887115 | - | 0     | 0     |
| ENSG0000( CTD-3128G antisense chr19   | 6748293  | 6751467  | - | 0     | 0     |
| ENSG0000( CTD-3187F processed_ chr19  | 51155288 | 51155624 | - | 0     | 0     |
| ENSG0000( AC008982. sense_intrε chr19 | 38844729 | 38845499 | - | 0     | 0.34  |
| ENSG0000( FKBP4P2 processed_ chr9     | 39631046 | 39632416 | + | 0     | 0     |

|                                       |          |            |      |       |
|---------------------------------------|----------|------------|------|-------|
| ENSG0000(CTD-2192J) protein_co chr19  | 12525720 | 12580975 - | 0.55 | 0.75  |
| ENSG0000(AC005197) antisense chr19    | 18881680 | 18883376 + | 0    | 0.11  |
| ENSG0000(AC007228) antisense chr19    | 56545566 | 56567411 - | 0.35 | 0.12  |
| ENSG0000(ZIM2) protein_co chr19       | 56774552 | 56840729 - | 0    | 0     |
| ENSG0000(CTB-60B18) unprocessε chr19  | 49050217 | 49050846 - | 0    | 0     |
| ENSG0000(RP11-13J1) sense_ovei chr2   | 1.05E+08 | 1.05E+08 + | 0    | 0     |
| ENSG0000(CTD-3214H) protein_co chr19  | 7678501  | 7682854 +  | 0    | 0     |
| ENSG0000(NBPF9) protein_co chr1       | 1.49E+08 | 1.49E+08 - | 11.8 | 11.84 |
| ENSG0000(CTD-2521M) protein_co chr19  | 17390509 | 17394158 - | 0    | 0     |
| ENSG0000(RPL23AP51) transcribed chr7  | 7742091  | 7742535 -  | 0    | 0     |
| ENSG0000(AC006262) lincRNA chr19      | 46163893 | 46180647 - | 0    | 0     |
| ENSG0000(WBP1LP7) processed_ chr1     | 439870   | 440232 +   | 0    | 0     |
| ENSG0000(CTD-2521M) lincRNA chr19     | 17452211 | 17452969 - | 0.09 | 0     |
| ENSG0000(RP11-345P) transcribed chr1  | 1671990  | 1674397 +  | 0    | 0     |
| ENSG0000(CTC-518B2) protein_co chr19  | 50996018 | 51009581 - | 0    | 0     |
| ENSG0000(BNIP3P29) processed_ chr19   | 22065828 | 22066398 - | 0    | 0     |
| ENSG0000(SLC25A53) protein_co chrX    | 1.04E+08 | 1.04E+08 - | 3.82 | 3.93  |
| ENSG0000(AC006262) antisense chr19    | 46228964 | 46230388 - | 0    | 0     |
| ENSG0000(AC005614) processed_ chr19   | 40048757 | 40090925 - | 0    | 0     |
| ENSG0000(CTD-3149D) antisense chr19   | 17613722 | 17614430 + | 0    | 0.43  |
| ENSG0000(CTD-3105H) protein_co chr19  | 12433103 | 12484816 - | 0.09 | 0.25  |
| ENSG0000(CTD-2245F) lincRNA chr19     | 53267870 | 53270932 - | 1.42 | 0     |
| ENSG0000(RP11-1137) processed_ chr19  | 7005012  | 7006074 -  | 0    | 0     |
| ENSG0000(EXOSC3P2) processed_ chr19   | 7813615  | 7814425 -  | 0    | 0     |
| ENSG0000(CTB-187L3) unprocessε chr19  | 15515342 | 15516836 - | 0    | 0     |
| ENSG0000(DPPA5P1) processed_ chr19    | 52425863 | 52426202 - | 0    | 0     |
| ENSG0000(CTD-2542C) unprocessε chr19  | 20691336 | 20697615 + | 0.02 | 0     |
| ENSG0000(MIR1470) miRNA chr19         | 15449548 | 15449608 + | 0    | 0     |
| ENSG0000(CTC-258N2) processed_ chr19  | 56922018 | 56922213 + | 0    | 0     |
| ENSG0000(OR7A3P) unprocessε chr19     | 14903232 | 14904138 - | 0    | 0     |
| ENSG0000(SSX4B) protein_co chrX       | 48402078 | 48411910 - | 0    | 0     |
| ENSG0000(CTB-60E11) antisense chr19   | 39532412 | 39534422 + | 0    | 0     |
| ENSG0000(ZIM2-AS1) antisense chr19    | 56690686 | 56799646 + | 0    | 0     |
| ENSG0000(AC010642) processed_ chr19   | 58319277 | 58320489 + | 0    | 0     |
| ENSG0000(AC011516) lincRNA chr19      | 22422513 | 22426045 + | 0    | 0     |
| ENSG0000(CTD-2538G) sense_intrε chr19 | 16801426 | 16801714 + | 0    | 0     |
| ENSG0000(PLEKHA3P1) processed_ chr19  | 41521043 | 41521989 - | 0    | 0     |
| ENSG0000(CTB-180A7) antisense chr19   | 6343761  | 6362149 -  | 0    | 0     |
| ENSG0000(GLTSCR1-A) antisense chr19   | 47615699 | 47626395 - | 0    | 0     |
| ENSG0000(AC007292) antisense chr19    | 4347244  | 4354057 -  | 0    | 0     |
| ENSG0000(SCGB2B3P) processed_ chr19   | 34645662 | 34646070 + | 0    | 0     |
| ENSG0000(CTD-3193C) antisense chr19   | 7959123  | 7960012 +  | 0    | 0     |
| ENSG0000(CTC-273B1) lincRNA chr19     | 48513207 | 48513660 - | 0    | 0     |
| ENSG0000(CTD-2278I) sense_intrε chr19 | 17296196 | 17296695 - | 0.15 | 0.17  |
| ENSG0000(KCNQ1OT1) antisense chr11    | 2608328  | 2699994 -  | 0.38 | 0.4   |

|                                  |       |          |          |   |       |       |
|----------------------------------|-------|----------|----------|---|-------|-------|
| ENSG0000(CTD-3099C sense_intron) | chr19 | 52650437 | 52653284 | - | 0.72  | 0.82  |
| ENSG0000(RP11-158I3 lincRNA)     | chr16 | 86347387 | 86349611 | + | 0     | 0     |
| ENSG0000(RP11-11A5 processed)    | chrX  | 1.35E+08 | 1.35E+08 | + | 0     | 0     |
| ENSG0000(ZNF528-AS processed)    | chr19 | 52388842 | 52397766 | - | 3.13  | 2.34  |
| ENSG0000(CTD-3032J antisense)    | chr19 | 17177511 | 17178476 | - | 0     | 0     |
| ENSG0000(IPO5P1 transcribed)     | chr19 | 23255053 | 23257939 | - | 0.66  | 1.16  |
| ENSG0000(CTD-3233P unprocessed)  | chr19 | 21225098 | 21245241 | - | 0     | 0     |
| ENSG0000(CTC-339O9 lincRNA)      | chr19 | 53761961 | 53764199 | + | 0.16  | 0.23  |
| ENSG0000(CTC-490E2 lincRNA)      | chr19 | 40831221 | 40837210 | - | 0     | 0     |
| ENSG0000(RP11-420K transcribed)  | chr19 | 21750747 | 21753438 | + | 0     | 0     |
| ENSG0000(RP4-621N1 antisense)    | chr20 | 37095785 | 37097178 | + | 0     | 0     |
| ENSG0000(RP11-1281 processed)    | chr4  | 49524030 | 49524185 | - | 0     | 0     |
| ENSG0000(RNF225 protein)         | chr19 | 58396090 | 58397079 | + | 0     | 0     |
| ENSG0000(EGLN2 protein)          | chr19 | 40798996 | 40808433 | + | 46.65 | 41.95 |
| ENSG0000(CTD-2537I antisense)    | chr19 | 55475983 | 55476482 | - | 0     | 0     |
| ENSG0000(CTD-2583A sense_intron) | chr19 | 57867038 | 57868172 | - | 0     | 0     |
| ENSG0000(CTD-2587H lincRNA)      | chr19 | 54438010 | 54438346 | - | 0     | 0     |
| ENSG0000(CTD-3022G lincRNA)      | chr19 | 53787597 | 53788169 | - | 0     | 0     |
| ENSG0000(AC004754 protein)       | chr16 | 249547   | 269943   | + | 0.08  | 0.25  |
| ENSG0000(RP11-463C antisense)    | chr14 | 77140683 | 77142996 | + | 0     | 0     |
| ENSG0000(VN1R79P unprocessed)    | chr19 | 20758440 | 20758952 | + | 0     | 0     |
| ENSG0000(RP11-266J antisense)    | chr3  | 9812762  | 9813097  | - | 0.86  | 0     |
| ENSG0000(RP11-477H sense_intron) | chr1  | 1.65E+08 | 1.65E+08 | + | 0.18  | 0     |
| ENSG0000(RP11-3P17 lincRNA)      | chr3  | 1.61E+08 | 1.61E+08 | + | 2.17  | 1.19  |
| ENSG0000(RP11-816J antisense)    | chr3  | 1.7E+08  | 1.7E+08  | + | 0.07  | 0     |
| ENSG0000(RP5-1139B antisense)    | chr1  | 2.28E+08 | 2.28E+08 | - | 0.97  | 0.54  |
| ENSG0000(ARHGAP19 protein)       | chr10 | 97153045 | 97292637 | - | 0     | 0     |
| ENSG0000(RP4-761J1 lincRNA)      | chr12 | 6742985  | 6743641  | + | 0.41  | 0.79  |
| ENSG0000(SNHG8 lincRNA)          | chr4  | 1.18E+08 | 1.18E+08 | + | 62.42 | 71.34 |
| ENSG0000(RP11-1020 sense_intron) | chr3  | 9935706  | 9936258  | + | 0.52  | 0.29  |
| ENSG0000(AP000654 lincRNA)       | chr11 | 86833068 | 86837615 | + | 0.05  | 0.16  |
| ENSG0000(RP4-740C4 transcribed)  | chr1  | 2350414  | 2352820  | - | 1.34  | 0.55  |
| ENSG0000(COMMD3 protein)         | chr10 | 22316388 | 22329542 | + | 25.29 | 27.95 |
| ENSG0000(RP11-568J antisense)    | chr16 | 85743287 | 85744225 | + | 0     | 0     |
| ENSG0000(RP11-589N sense_intron) | chr8  | 11846154 | 11846391 | - | 1.2   | 0     |
| ENSG0000(RMRP lincRNA)           | chr9  | 35657751 | 35658018 | - | 0     | 0     |
| ENSG0000(RP11-178L antisense)    | chr16 | 87362536 | 87367476 | + | 0     | 0     |
| ENSG0000(RP6-99M1 lincRNA)       | chrX  | 45764772 | 45765299 | - | 0     | 0     |
| ENSG0000(RP11-571M lincRNA)      | chr12 | 57814494 | 57814926 | + | 0     | 0     |
| ENSG0000(MAP2K4P1 transcribed)   | chrX  | 73524275 | 73563085 | - | 0.06  | 0.06  |
| ENSG0000(RP11-248J sense_intron) | chr14 | 50662511 | 50663178 | - | 0.4   | 1     |
| ENSG0000(RP11-330M processed)    | chr9  | 96910076 | 96910405 | + | 0     | 0     |
| ENSG0000(RP11-73M antisense)     | chr14 | 1.04E+08 | 1.04E+08 | - | 0     | 0.15  |
| ENSG0000(FAM226B sense_intron)   | chrX  | 72777608 | 72779097 | + | 0     | 0     |
| ENSG0000(AP006621 antisense)     | chr11 | 708564   | 727047   | - | 0     | 0     |

|                       |            |                |       |          |          |   |       |       |
|-----------------------|------------|----------------|-------|----------|----------|---|-------|-------|
| ENSG00000193133       | RP11-193M  | lincRNA        | chr12 | 85263544 | 85264457 | + | 0     | 0     |
| ENSG00000113215       | AF131215   | sense_intronic | chr8  | 11104691 | 11106704 | - | 0.59  | 0.35  |
| ENSG000001134E1       | RP1-134E1  | sense_intronic | chr6  | 1.06E+08 | 1.06E+08 | + | 0     | 0     |
| ENSG00000116461       | RP11-6461  | lincRNA        | chr4  | 56387625 | 56388153 | + | 0.41  | 0     |
| ENSG0000011697N       | RP11-697N  | sense_intronic | chr8  | 47527397 | 47528148 | + | 0     | 0     |
| ENSG000001167L1       | RP3-467L1  | sense_intronic | chr1  | 7776383  | 7776775  | + | 0.65  | 0.24  |
| ENSG0000011442H       | RP11-442H  | antisense      | chr10 | 72274915 | 72275980 | - | 0.22  | 0     |
| ENSG0000011691H8      | RP6-91H8   | lincRNA        | chr14 | 71141125 | 71143253 | - | 0.05  | 0.11  |
| ENSG00000112B6        | RP11-2B6   | lincRNA        | chr9  | 94176458 | 94177892 | + | 1     | 1.06  |
| ENSG0000011932C       | RP11-932C  | lincRNA        | chr15 | 30616958 | 30617749 | + | 0.92  | 1.48  |
| ENSG0000011069C       | RP5-1069C  | lincRNA        | chr20 | 12934877 | 12935783 | - | 0     | 0     |
| ENSG0000011333A1      | RP3-333A1  | sense_intronic | chr1  | 71005854 | 71006502 | - | 0     | 0     |
| ENSG0000011139B       | RP5-1139B  | antisense      | chr1  | 2.28E+08 | 2.28E+08 | - | 1.28  | 1.02  |
| ENSG00000111482N      | RP11-482N  | antisense      | chr16 | 87600526 | 87602190 | - | 0     | 0     |
| ENSG000001120I2       | RP11-20I2  | antisense      | chr16 | 2561471  | 2565096  | - | 1.98  | 2.05  |
| ENSG0000011214K       | RP11-214K  | sense_intronic | chr12 | 1.24E+08 | 1.24E+08 | - | 0.26  | 0.14  |
| ENSG00000111AS1       | PCF11-AS1  | lincRNA        | chr11 | 83185521 | 83187036 | - | 0.57  | 0.5   |
| ENSG0000011173M       | RP11-73M   | sense_intronic | chr14 | 1.04E+08 | 1.04E+08 | + | 5.89  | 8.23  |
| ENSG00000111770J      | RP11-770J  | sense_intronic | chr11 | 1.18E+08 | 1.18E+08 | + | 0     | 0     |
| ENSG0000011691H8      | RP6-91H8   | lincRNA        | chr14 | 71219100 | 71222724 | + | 0.12  | 0.39  |
| ENSG00000112B6        | RP11-2B6   | lincRNA        | chr9  | 94166289 | 94200627 | + | 0     | 0     |
| ENSG00000111849F      | RP11-849F  | lincRNA        | chr17 | 8277763  | 8278436  | + | 0.6   | 0.33  |
| ENSG00000111738E      | RP11-738E  | lincRNA        | chr4  | 56960927 | 56961373 | - | 0     | 0     |
| ENSG0000011000962     | AP000962   | lincRNA        | chr21 | 16574718 | 16582637 | - | 0     | 0     |
| ENSG00000111797A      | RP11-797A  | sense_intronic | chr15 | 77067654 | 77068325 | - | 0.7   | 0.77  |
| ENSG00000111324I2     | RP11-324I2 | sense_intronic | chr10 | 35210416 | 35210750 | + | 0     | 0     |
| ENSG0000011148C       | RP11-148C  | lincRNA        | chr8  | 11552488 | 11552991 | - | 0.15  | 0     |
| ENSG000001139E55      | C7orf55-LL | protein_coding | chr7  | 1.39E+08 | 1.39E+08 | + | 13.01 | 12.69 |
| ENSG00000111MKNK1-AS  | MKNK1-AS   | antisense      | chr1  | 46538696 | 46570255 | + | 0     | 0     |
| ENSG0000011120A2      | RP11-20A2  | lincRNA        | chr9  | 24545952 | 24591993 | + | 0     | 0     |
| ENSG0000011173M       | RP11-73M   | sense_intronic | chr14 | 1.04E+08 | 1.04E+08 | + | 4.56  | 5.45  |
| ENSG00000111SPACA6P-A | SPACA6P-A  | lincRNA        | chr19 | 51685363 | 51693456 | - | 0.07  | 0.19  |
| ENSG00000111CTD-2033C | CTD-2033C  | lincRNA        | chr5  | 65924629 | 65925135 | - | 0.29  | 0.81  |
| ENSG00000111MEI4      | MEI4       | protein_coding | chr6  | 77690658 | 77926974 | + | 0     | 0     |
| ENSG00000111331H2     | RP3-331H2  | lincRNA        | chr6  | 71295173 | 71417436 | - | 0.14  | 0     |
| ENSG0000011184A1      | RP11-84A1  | lincRNA        | chr1  | 31851913 | 31921841 | - | 0     | 0     |
| ENSG0000011195940J5   | RP5-940J5  | antisense      | chr12 | 6537794  | 6538370  | - | 9.32  | 10.68 |
| ENSG00000111498E      | RP11-498E  | sense_intronic | chr9  | 1.22E+08 | 1.22E+08 | + | 2.18  | 3.2   |
| ENSG00000111426I6     | RP3-426I6  | sense_intronic | chr1  | 27773858 | 27774041 | + | 0     | 0     |
| ENSG00000111430N8     | RP3-430N8  | lincRNA        | chr22 | 30977516 | 30977858 | - | 0     | 0     |
| ENSG0000011195D1      | RP11-95D1  | lincRNA        | chr2  | 9936360  | 9939590  | + | 0.83  | 0.62  |
| ENSG00000111932C      | RP11-932C  | lincRNA        | chr15 | 30648797 | 30649529 | + | 0.18  | 0     |
| ENSG00000111130L      | RP11-130L  | lincRNA        | chr2  | 20586248 | 20586686 | - | 0     | 0.2   |
| ENSG00000111338N      | RP11-338N  | lincRNA        | chr1  | 7700704  | 7700970  | - | 0     | 0     |
| ENSG00000111282C      | RP11-282C  | antisense      | chr12 | 1.23E+08 | 1.23E+08 | + | 0     | 0     |



|                 |                       |       |          |          |   |      |      |
|-----------------|-----------------------|-------|----------|----------|---|------|------|
| ENSG00000100000 | RP11-34P1 processed   | chr1  | 137682   | 137965   | - | 0    | 0.45 |
| ENSG00000100000 | RP11-1020 antisense   | chr3  | 9958717  | 9962539  | + | 0.19 | 0.27 |
| ENSG00000100000 | RP11-497H lincRNA     | chr5  | 70449636 | 70450353 | + | 1.72 | 1.13 |
| ENSG00000100000 | RP11-362K antisense   | chr3  | 1.7E+08  | 1.7E+08  | - | 0.03 | 0    |
| ENSG00000100000 | RP1-232P2 antisense   | chr6  | 5451683  | 5458075  | - | 0    | 0    |
| ENSG00000100000 | RP11-96H1 sense_intr  | chr16 | 63066526 | 63066990 | - | 0    | 0    |
| ENSG00000100000 | RP3-430N8 lincRNA     | chr22 | 30976515 | 30978848 | - | 0    | 0    |
| ENSG00000100000 | RP11-635N sense_intr  | chr18 | 63485601 | 63486018 | + | 0    | 0    |
| ENSG00000100000 | AF003625. lincRNA     | chrX  | 1.51E+08 | 1.51E+08 | + | 0    | 0    |
| ENSG00000100000 | RP11-276H lincRNA     | chr9  | 87008455 | 87042126 | - | 0.03 | 0    |
| ENSG00000100000 | RP11-214K sense_intr  | chr12 | 1.24E+08 | 1.24E+08 | - | 0.91 | 0.14 |
| ENSG00000100000 | LINC01930 lincRNA     | chr1  | 97933474 | 97941746 | - | 0.5  | 0.08 |
| ENSG00000100000 | RP3-449M lincRNA      | chr14 | 74471930 | 74472360 | - | 0    | 0.21 |
| ENSG00000100000 | RP11-218C lincRNA     | chr20 | 23631826 | 23632316 | - | 0.92 | 0.17 |
| ENSG00000100000 | RP11-93H1 antisense   | chr10 | 85644073 | 85648066 | + | 0    | 0    |
| ENSG00000100000 | RP11-178L antisense   | chr16 | 87317509 | 87318043 | + | 0.21 | 0    |
| ENSG00000100000 | RP11-298P processed   | chr13 | 32425358 | 32432954 | - | 0.02 | 0.37 |
| ENSG00000100000 | ZNF559-ZN protein_co  | chr19 | 9324174  | 9382617  | + | 0    | 0.72 |
| ENSG00000100000 | LLOXNC01- lincRNA     | chrX  | 49273054 | 49275768 | + | 0.46 | 0.51 |
| ENSG00000100000 | RP11-540B sense_intr  | chr15 | 30926514 | 30928407 | + | 2.96 | 2.21 |
| ENSG00000100000 | RP11-932C antisense   | chr15 | 30607695 | 30608193 | - | 0.45 | 0.33 |
| ENSG00000100000 | CTD-2576F lincRNA     | chr15 | 94855586 | 94857011 | - | 0    | 0    |
| ENSG00000100000 | RP11-141B lincRNA     | chr2  | 1.14E+08 | 1.14E+08 | - | 0.11 | 0.08 |
| ENSG00000100000 | RP11-463C lincRNA     | chr16 | 86520383 | 86523897 | - | 0.02 | 0    |
| ENSG00000100000 | CTC-203F4 antisense   | chr5  | 1.35E+08 | 1.35E+08 | + | 0.36 | 0.27 |
| ENSG00000100000 | RNU12 lincRNA         | chr22 | 42615244 | 42615907 | + | 0    | 0    |
| ENSG00000100000 | C8orf44-SC protein_co | chr8  | 66667596 | 66860472 | + | 0.01 | 0.16 |
| ENSG00000100000 | BMS1P7 transcribed    | chr10 | 48050282 | 48060016 | - | 0    | 0    |
| ENSG00000100000 | RP11-380L antisense   | chr12 | 1.24E+08 | 1.24E+08 | - | 1.1  | 1.7  |
| ENSG00000100000 | RP11-326C lincRNA     | chr11 | 325703   | 326294   | - | 0    | 0.13 |
| ENSG00000100000 | RP3-426I6. sense_intr | chr1  | 27819983 | 27820341 | + | 0    | 0.28 |
| ENSG00000100000 | RP11-51L5. protein_co | chr17 | 62272487 | 62282915 | - | 0    | 0    |
| ENSG00000100000 | RP11-338N lincRNA     | chr1  | 7698303  | 7698872  | - | 0    | 0    |
| ENSG00000100000 | RP11-685G lincRNA     | chr15 | 76343642 | 76344365 | + | 0    | 0    |
| ENSG00000100000 | RP11-1070 lincRNA     | chr14 | 95644508 | 95645232 | + | 0    | 0    |
| ENSG00000100000 | RP11-571M lincRNA     | chr12 | 57803838 | 57804415 | + | 0.86 | 0.4  |
| ENSG00000100000 | RP11-416A sense_intr  | chr1  | 39206512 | 39206957 | + | 0    | 0.2  |
| ENSG00000100000 | RP11-214K sense_intr  | chr12 | 1.24E+08 | 1.24E+08 | - | 0    | 0.52 |
| ENSG00000100000 | RP11-297D antisense   | chr16 | 67481314 | 67505063 | + | 0.41 | 1.24 |
| ENSG00000100000 | RP4-769N1 antisense   | chrX  | 1.03E+08 | 1.03E+08 | - | 0    | 0    |
| ENSG00000100000 | WI2-80269 lincRNA     | chrX  | 1.51E+08 | 1.51E+08 | + | 0    | 0    |
| ENSG00000100000 | CTD-3092A sense_intr  | chr15 | 30487963 | 30490313 | + | 6.04 | 6.33 |
| ENSG00000100000 | RP11-514D lincRNA     | chr16 | 86221423 | 86222729 | - | 0    | 0    |
| ENSG00000100000 | RP11-88H1 sense_intr  | chr3  | 65359268 | 65359717 | - | 0    | 0    |
| ENSG00000100000 | RP11-390K sense_intr  | chr11 | 47168281 | 47169563 | - | 0.99 | 0.54 |

|                                     |       |          |          |   |      |      |
|-------------------------------------|-------|----------|----------|---|------|------|
| ENSG0000(RP11-214K sense_intron)    | chr12 | 1.24E+08 | 1.24E+08 | - | 0.78 | 0.86 |
| ENSG0000(RP11-248J sense_intron)    | chr14 | 50723777 | 50724272 | - | 0.46 | 0.17 |
| ENSG0000(SCARNA2 lincRNA)           | chr1  | 1.09E+08 | 1.09E+08 | + | 0    | 0    |
| ENSG0000(CTC-487M antisense)        | chr5  | 1.13E+08 | 1.13E+08 | + | 0.2  | 0.33 |
| ENSG0000(RP4-761J1 antisense)       | chr12 | 6723233  | 6723687  | + | 0    | 0    |
| ENSG0000(MIR222HG lincRNA)          | chrX  | 45745211 | 45770274 | - | 1.51 | 2.03 |
| ENSG0000(AP001172 lincRNA)          | chr21 | 16291791 | 16308133 | - | 0    | 0    |
| ENSG0000(RP11-750H sense_intron)    | chr11 | 47513605 | 47514889 | - | 0    | 0.38 |
| ENSG0000(TSPY6P unprocessed)        | chrY  | 9507596  | 9510175  | + | 0    | 0    |
| ENSG0000(RP11-351I2 lincRNA)        | chr8  | 12412827 | 12414373 | + | 2.18 | 1.58 |
| ENSG0000(RP11-127L antisense)       | chr10 | 1.04E+08 | 1.04E+08 | + | 0    | 0    |
| ENSG0000(AF131215 lincRNA)          | chr8  | 11202965 | 11203671 | + | 0.37 | 0.21 |
| ENSG0000(KB-1958F4 sense_intron)    | chr8  | 97144170 | 97144723 | + | 0    | 0    |
| ENSG0000(RP11-178L antisense)       | chr16 | 87326987 | 87327584 | + | 0    | 0    |
| ENSG0000(RP1-257I2 sense_intron)    | chr22 | 42089630 | 42090028 | - | 0.43 | 0.23 |
| ENSG0000(GAS5-AS1 antisense)        | chr1  | 1.74E+08 | 1.74E+08 | + | 0.19 | 0.11 |
| ENSG0000(RP11-399K lincRNA)         | chr10 | 75279726 | 75401246 | - | 0    | 0    |
| ENSG0000(RP11-529E lincRNA)         | chr4  | 3544555  | 3548796  | + | 0    | 0.12 |
| ENSG0000(RP11-7807 lincRNA)         | chr17 | 19896590 | 19897287 | - | 0.39 | 0.86 |
| ENSG0000(AP000473 lincRNA)          | chr21 | 16643529 | 16645065 | + | 0    | 0    |
| ENSG0000(RP11-245P antisense)       | chr1  | 2.28E+08 | 2.28E+08 | + | 0    | 0    |
| ENSG0000(RP11-214K sense_intron)    | chr12 | 1.24E+08 | 1.24E+08 | - | 1.97 | 0    |
| ENSG0000(RP11-362K antisense)       | chr3  | 1.7E+08  | 1.7E+08  | + | 0    | 0.1  |
| ENSG0000(LDHAL6EP processed)        | chr4  | 71434405 | 71437924 | - | 0    | 0    |
| ENSG0000(RP11-248J protein_coding)  | chr10 | 95860548 | 95924844 | + | 0    | 0    |
| ENSG0000(RP11-130L lincRNA)         | chr2  | 20678254 | 20678932 | - | 0.1  | 0.11 |
| ENSG0000(RNU11 lincRNA)             | chr1  | 28648600 | 28648730 | + | 0    | 5.91 |
| ENSG0000(RP11-245P lincRNA)         | chr1  | 2.28E+08 | 2.28E+08 | - | 0    | 0    |
| ENSG0000(RP11-326C lincRNA)         | chr11 | 322186   | 322727   | - | 0    | 0    |
| ENSG0000(TSNAX-DIS1 protein_coding) | chr1  | 2.32E+08 | 2.32E+08 | + | 0.1  | 0.13 |
| ENSG0000(RP11-73M sense_intron)     | chr14 | 1.04E+08 | 1.04E+08 | + | 1.56 | 1.29 |
| ENSG0000(RP5-1139B antisense)       | chr1  | 2.28E+08 | 2.28E+08 | - | 0    | 0    |
| ENSG0000(RP11-271F lincRNA)         | chr10 | 10418739 | 10462349 | - | 0    | 0    |
| ENSG0000(RP11-742D processed)       | chr18 | 46756487 | 46764408 | + | 0    | 0    |
| ENSG0000(RP5-1048B antisense)       | chr7  | 1.54E+08 | 1.54E+08 | - | 0    | 0    |
| ENSG0000(RP11-415J lincRNA)         | chr1  | 33261212 | 33261680 | + | 0    | 0.18 |
| ENSG0000(AP001429 sense_intron)     | chr21 | 37100814 | 37101343 | + | 0.97 | 0.91 |
| ENSG0000(AP000769 lincRNA)          | chr11 | 65498010 | 65498405 | - | 0    | 0    |
| ENSG0000(RP11-57A1 lincRNA)         | chr16 | 28454141 | 28454511 | - | 0    | 0    |
| ENSG0000(RP11-327F sense_intron)    | chr16 | 50712844 | 50713589 | + | 0.09 | 0    |
| ENSG0000(VTRNA2-1 vaultRNA)         | chr5  | 1.36E+08 | 1.36E+08 | - | 6.44 | 0    |
| ENSG0000(RP11-118F lincRNA)         | chr16 | 85580009 | 85583571 | - | 0    | 0.13 |
| ENSG0000(RP11-526I2 lincRNA)        | chr15 | 1.01E+08 | 1.01E+08 | - | 0.26 | 0.29 |
| ENSG0000(RP11-214K sense_intron)    | chr12 | 1.24E+08 | 1.24E+08 | - | 1.39 | 0.46 |
| ENSG0000(KB-1043D8 lincRNA)         | chr8  | 96140572 | 96140944 | - | 0    | 0    |

|                                          |          |          |   |       |       |
|------------------------------------------|----------|----------|---|-------|-------|
| ENSG0000(WISP1-OT1sense_intron)chr8      | 1.33E+08 | 1.33E+08 | + | 0     | 0.08  |
| ENSG0000(CTC-303L1.sense_intron)chr5     | 94611906 | 94618122 | - | 0.2   | 0     |
| ENSG0000(RP11-362Kantisense)chr3         | 1.7E+08  | 1.7E+08  | + | 0.16  | 0     |
| ENSG0000(MINOS1-N)protein_coding)chr1    | 19596979 | 19658056 | + | 0     | 0     |
| ENSG0000(CTC-137K3sense_intron)chr8      | 1.33E+08 | 1.33E+08 | + | 0     | 0     |
| ENSG0000(AP001172.lincRNA)chr21          | 16417139 | 16419080 | - | 0     | 0     |
| ENSG0000(RP5-1021I2sense_intron)chr14    | 73905267 | 73905636 | + | 0     | 0     |
| ENSG0000(TERC)lincRNA)chr3               | 1.7E+08  | 1.7E+08  | - | 0     | 0     |
| ENSG0000(RP11-646I6)lincRNA)chr4         | 56396312 | 56396871 | + | 0.38  | 0.14  |
| ENSG0000(RP11-544N)protein_coding)chr1   | 1.61E+08 | 1.61E+08 | - | 2.14  | 2.61  |
| ENSG0000(RP11-419I1)lincRNA)chr8         | 12476462 | 12477122 | + | 0.2   | 0     |
| ENSG0000(RP5-894A1sense_intron)chr7      | 1.42E+08 | 1.42E+08 | - | 1.67  | 1.55  |
| ENSG0000(RP11-568J2)antisense)chr16      | 85792415 | 85792933 | + | 0     | 0     |
| ENSG0000(RP11-264E)lincRNA)chr11         | 1.29E+08 | 1.29E+08 | - | 0     | 0     |
| ENSG0000(LINC01480)lincRNA)chr19         | 41535183 | 41536904 | + | 0.07  | 0.04  |
| ENSG0000(RP11-167P)sense_intron)chr16    | 67738588 | 67739922 | - | 0.25  | 0.14  |
| ENSG0000(RP11-158D)processed)chr9        | 84078584 | 84078857 | + | 0     | 0     |
| ENSG0000(LA16c-380I)protein_coding)chr16 | 2988256  | 3002016  | + | 0     | 0     |
| ENSG0000(NCBP2-AS2)protein_coding)chr3   | 1.97E+08 | 1.97E+08 | + | 13.84 | 12.48 |
| ENSG0000(RP11-338N)lincRNA)chr1          | 7693124  | 7694844  | - | 0     | 0     |
| ENSG0000(RP1-256G2)antisense)chr6        | 5664985  | 5695272  | - | 0     | 0     |
| ENSG0000(RP11-793H)antisense)chr12       | 53500162 | 53500936 | - | 0.67  | 0.82  |
| ENSG0000(CTD-2410N)lincRNA)chr5          | 1.34E+08 | 1.34E+08 | + | 0.08  | 0.4   |
| ENSG0000(RP11-494H)lincRNA)chr3          | 1.8E+08  | 1.8E+08  | + | 0     | 0     |
| ENSG0000(RP11-159N)sense_intron)chr11    | 1.13E+08 | 1.13E+08 | + | 0.43  | 1.29  |
| ENSG0000(BIVM-ERCC)protein_coding)chr13  | 1.03E+08 | 1.03E+08 | + | 14.74 | 13.54 |
| ENSG0000(RP1-170O1)sense_intron)chr7     | 27158344 | 27158976 | + | 0     | 0     |
| ENSG0000(RP11-568J2)antisense)chr16      | 85784382 | 85787617 | + | 0     | 0     |
| ENSG0000(IGHD1OR1)IG_D_gene)chr15        | 21017800 | 21017816 | - | 0     | 0     |
| ENSG0000(IGKV1OR2-IG_V_pseudogene)chr2   | 97386082 | 97386368 | + | 0     | 0     |
| ENSG0000(MTRNR2L1)protein_coding)chr1    | 2.38E+08 | 2.38E+08 | - | 0     | 0     |
| ENSG0000(RP11-803D)lincRNA)chr2          | 1.11E+08 | 1.11E+08 | - | 0     | 0.13  |
| ENSG0000(BNIP3P31)processed)chr19        | 22298977 | 22299868 | - | 0     | 0     |
| ENSG0000(MRPS35P3)processed)chr10        | 57982285 | 57982993 | + | 0     | 0     |
| ENSG0000(RP11-440D)processed)chr2        | 95616492 | 95617233 | + | 0     | 0     |
| ENSG0000(RP11-259K)antisense)chr3        | 37241789 | 37244177 | - | 1.91  | 1.87  |
| ENSG0000(RP11-572C)lincRNA)chr4          | 1712821  | 1713622  | + | 0.96  | 1.49  |
| ENSG0000(RP11-550A)processed)chr7        | 29551521 | 29552151 | + | 0     | 0     |
| ENSG0000(RP5-1136G)processed)chr7        | 1.49E+08 | 1.49E+08 | + | 0     | 0     |
| ENSG0000(RP11-89C3)processed)chr11       | 1.11E+08 | 1.11E+08 | - | 0     | 0     |
| ENSG0000(RP11-172C)processed)chr11       | 1.15E+08 | 1.15E+08 | + | 0     | 0     |
| ENSG0000(RP11-157E)antisense)chr3        | 7606890  | 7607897  | - | 0     | 0     |
| ENSG0000(RP4-592A1)processed)chr1        | 58552913 | 58553333 | - | 0     | 0     |
| ENSG0000(RP11-373D)lincRNA)chr2          | 28425945 | 28426719 | + | 0.08  | 0     |
| ENSG0000(CTD-2540B)lincRNA)chr19         | 33283978 | 33285739 | - | 0     | 0     |

|                                      |          |          |   |      |      |
|--------------------------------------|----------|----------|---|------|------|
| ENSG0000(RP11-325L: processed_ chr15 | 65026088 | 65026676 | + | 0    | 0    |
| ENSG0000(DUXAP11 processed_ chr16    | 59655602 | 59656336 | + | 0    | 0    |
| ENSG0000(MTCO2P22 processed_ chr5    | 1E+08    | 1E+08    | - | 0    | 0    |
| ENSG0000(AC006548. processed_ chr22  | 17012404 | 17012932 | + | 0    | 0    |
| ENSG0000(RP11-453E processed_ chr4   | 67718996 | 67724262 | - | 0    | 0    |
| ENSG0000(MTND6P22 processed_ chr5    | 1E+08    | 1E+08    | + | 0    | 0    |
| ENSG0000(NBPF8 unprocessε chr1       | 1.2E+08  | 1.2E+08  | + | 8.65 | 9.96 |
| ENSG0000(MTCYBP22 processed_ chr5    | 1E+08    | 1E+08    | - | 0    | 0    |
| ENSG0000(RP11-575N processed_ chr10  | 8724010  | 8724288  | + | 0    | 0    |
| ENSG0000(RP11-265B processed_ chr9   | 69107926 | 69108217 | - | 0    | 0    |
| ENSG0000(AC015849. antisense chr17   | 35868967 | 35885863 | + | 0.1  | 0.39 |
| ENSG0000(RP4-657M: processed_ chr1   | 34276859 | 34277292 | - | 0    | 0    |
| ENSG0000(ACTR3BP1 processed_ chrY    | 11395699 | 11397076 | + | 0    | 0    |
| ENSG0000(RP11-779C processed_ chr5   | 1.73E+08 | 1.73E+08 | - | 0    | 0    |
| ENSG0000(RP11-123J: processed_ chr4  | 76886029 | 76886370 | - | 0    | 0    |
| ENSG0000(CTC-471J1. processed_ chr19 | 52110318 | 52110726 | - | 0.82 | 0    |
| ENSG0000(RP11-514P protein_co chr7   | 1.03E+08 | 1.03E+08 | - | 0.54 | 0.2  |
| ENSG0000(RP6-166C1 processed_ chrX   | 1.21E+08 | 1.21E+08 | + | 0    | 0    |
| ENSG0000(IGKV3OR2- IG_V_pseu chr2    | 97348899 | 97349179 | + | 0    | 0    |
| ENSG0000(RP11-420B processed_ chr8   | 19001627 | 19001950 | + | 0    | 0    |
| ENSG0000(RP11-17P1 processed_ chr4   | 67638177 | 67638359 | + | 0    | 0    |
| ENSG0000(DUXAP4 processed_ chr10     | 45055656 | 45056268 | + | 0    | 0    |
| ENSG0000(RP13-122B processed_ chr9   | 1.37E+08 | 1.37E+08 | + | 0    | 0    |
| ENSG0000(NDUFB8P2 processed_ chr17   | 59885015 | 59885552 | + | 0    | 0    |
| ENSG0000(RP11-731D lincRNA chr4      | 1.51E+08 | 1.51E+08 | - | 0    | 0    |
| ENSG0000(RP1-164L1: processed_ chrX  | 79369364 | 79370165 | - | 0    | 0    |
| ENSG0000(IMMP1LP1 processed_ chr11   | 63632233 | 63632720 | + | 0    | 0    |
| ENSG0000(BNIP3P10 processed_ chr19   | 19870723 | 19871299 | - | 0.12 | 0    |
| ENSG0000(RP11-242C processed_ chr12  | 39539581 | 39539851 | - | 0    | 0    |
| ENSG0000(TRMT112P processed_ chr8    | 54479597 | 54479963 | - | 0    | 0    |
| ENSG0000(HIST2H4B protein_co chr1    | 1.5E+08  | 1.5E+08  | - | 1.77 | 2.28 |
| ENSG0000(RP11-65L3. antisense chr2   | 1.79E+08 | 1.79E+08 | + | 0.19 | 0.07 |
| ENSG0000(RP4-806M: lincRNA chr20     | 58754351 | 58756838 | + | 0    | 0    |
| ENSG0000(RP11-265D processed_ chrX   | 43000174 | 43000396 | + | 0    | 0    |
| ENSG0000(CTC-523E2 processed_ chr19  | 34779412 | 34780021 | - | 0    | 0    |
| ENSG0000(RP5-1115A processed_ chr1   | 8512653  | 8513021  | + | 0    | 0    |
| ENSG0000(RP11-1029 processed_ chr3   | 48039267 | 48039490 | + | 0    | 0    |
| ENSG0000(RP11-118H processed_ chr1   | 2.26E+08 | 2.26E+08 | - | 0    | 0    |
| ENSG0000(RP11-512G processed_ chr2   | 1.8E+08  | 1.8E+08  | - | 0    | 0    |
| ENSG0000(RP11-453E processed_ chr4   | 67725183 | 67726395 | - | 0    | 0    |
| ENSG0000(CTC-360J1: processed_ chr19 | 57150513 | 57150978 | + | 0    | 0    |
| ENSG0000(XIAPP1 processed_ chr10     | 1.1E+08  | 1.1E+08  | + | 0    | 0    |
| ENSG0000(STX8P1 processed_ chr12     | 12771351 | 12771705 | - | 0    | 0    |
| ENSG0000(RP5-850E9 protein_co chr20  | 646626   | 675800   | - | 0    | 0    |
| ENSG0000(PHACTR2P: transcribed chr10 | 1.2E+08  | 1.2E+08  | - | 0.08 | 0    |

|                                     |          |          |   |      |      |
|-------------------------------------|----------|----------|---|------|------|
| ENSG0000(WI2-2334D processed_ chr15 | 28857882 | 28858398 | - | 0    | 0    |
| ENSG0000(RP11-461L lincRNA chr4     | 1.52E+08 | 1.52E+08 | - | 0    | 0    |
| ENSG0000(RP11-597G processed_ chr15 | 37253879 | 37254952 | + | 0    | 0    |
| ENSG0000(RP3-437C1 processed_ chr6  | 51385282 | 51385849 | - | 0    | 0    |
| ENSG0000(MTATP6P2 processed_ chr5   | 1E+08    | 1E+08    | - | 0    | 0    |
| ENSG0000(RP3-3770E processed_ chrX  | 99656997 | 99657381 | + | 0    | 0    |
| ENSG0000(COX6CP16 processed_ chr16  | 85278820 | 85279035 | - | 0    | 0    |
| ENSG0000(GS1-165B1 processed_ chr7  | 7735743  | 7736851  | - | 0    | 0    |
| ENSG0000(BORCS7-AS protein_co chr10 | 1.03E+08 | 1.03E+08 | + | 0    | 0    |
| ENSG0000(AC004004. processed_ chr19 | 22501699 | 22501948 | - | 0    | 0    |
| ENSG0000(IGHV3OR1 IG_V_pseu chr16   | 33858896 | 33859352 | - | 0    | 0    |
| ENSG0000(RP11-2L8.2 lincRNA chr3    | 1.78E+08 | 1.78E+08 | - | 0    | 0    |
| ENSG0000(RP11-697E unprocessε chr15 | 90281848 | 90282031 | - | 0    | 0    |
| ENSG0000(AP000860. processed_ chr11 | 73640479 | 73641037 | + | 0    | 0    |
| ENSG0000(RP11-180P processed_ chr17 | 62978494 | 62978841 | - | 0    | 0    |
| ENSG0000(BNIP3P9 processed_ chr19   | 19856975 | 19857527 | + | 0    | 0    |
| ENSG0000(RP5-874C2 processed_ chr6  | 28319660 | 28319852 | - | 0    | 0    |
| ENSG0000(RP11-33E1 processed_ chr8  | 56776283 | 56776874 | + | 0    | 0    |
| ENSG0000(RP5-892F1. processed_ chr1 | 7942372  | 7942726  | + | 0    | 0    |
| ENSG0000(SMC2-AS1 lincRNA chr9      | 1.04E+08 | 1.04E+08 | - | 0.61 | 0.45 |
| ENSG0000(RP11-566F processed_ chr10 | 1.1E+08  | 1.1E+08  | + | 0    | 0    |
| ENSG0000(RP11-642D processed_ chr2  | 62348948 | 62350739 | - | 0    | 0    |
| ENSG0000(RP11-521F processed_ chr4  | 1.68E+08 | 1.68E+08 | - | 0    | 0    |
| ENSG0000(CH17-385C protein_co chr1  | 1.46E+08 | 1.46E+08 | - | 0    | 0    |
| ENSG0000(RP11-478L. processed_ chr1 | 1.07E+08 | 1.07E+08 | - | 0    | 0    |
| ENSG0000(UNGP3 processed_ chr14     | 81259565 | 81260239 | - | 0    | 0    |
| ENSG0000(POC1B-AS1 antisense chr12  | 89525654 | 89548005 | + | 0.21 | 0.24 |
| ENSG0000(CTC-33909 unprocessε chr19 | 53657400 | 53658462 | - | 0    | 0    |
| ENSG0000(MTND4LP5 processed_ chr5   | 1E+08    | 1E+08    | - | 0    | 0    |
| ENSG0000(RP11-111N processed_ chr10 | 63658074 | 63658521 | + | 0    | 0    |
| ENSG0000(RP11-547N processed_ chr2  | 64208498 | 64208716 | - | 0    | 0    |
| ENSG0000(IGHV1OR1 IG_V_pseu chr15   | 22194885 | 22195317 | - | 0    | 0    |
| ENSG0000(RP11-2G1. processed_ chr14 | 48319068 | 48319394 | - | 0    | 0    |
| ENSG0000(RP11-307C lincRNA chr1     | 1.55E+08 | 1.55E+08 | + | 0    | 0    |
| ENSG0000(HMGN3-AS antisense chr6    | 79233718 | 79236797 | + | 0.26 | 0.32 |
| ENSG0000(RP11-331G processed_ chr3  | 39285985 | 39287920 | + | 0.62 | 0.81 |
| ENSG0000(RP11-144G processed_ chr10 | 47484457 | 47484754 | - | 0    | 0    |
| ENSG0000(RP11-417P processed_ chr14 | 1.06E+08 | 1.06E+08 | - | 0    | 0    |
| ENSG0000(RP11-109M lincRNA chr9     | 10948372 | 10948481 | - | 0    | 0    |
| ENSG0000(RP11-384L. processed_ chr3 | 32243847 | 32244018 | - | 0    | 0    |
| ENSG0000(RP11-108K processed_ chr15 | 51351100 | 51351192 | - | 0    | 0    |
| ENSG0000(HEATR9 protein_co chr17    | 35854946 | 35868891 | - | 0    | 0    |
| ENSG0000(RP11-470L. antisense chr1  | 1.1E+08  | 1.1E+08  | - | 0    | 0    |
| ENSG0000(RP11-290D processed_ chr13 | 45263690 | 45263915 | + | 0    | 0    |
| ENSG0000(RP1-152L7. processed_ chr6 | 52657373 | 52657651 | + | 0    | 0    |

|                     |             |       |          |          |   |      |      |
|---------------------|-------------|-------|----------|----------|---|------|------|
| ENSG0000(U1         | snRNA       | chr1  | 1.45E+08 | 1.45E+08 | - | 0    | 0    |
| ENSG0000(GS1-21A4.  | processed   | chr16 | 87892955 | 87893735 | + | 0    | 0    |
| ENSG0000(RP11-315D  | processed   | chr4  | 1.48E+08 | 1.48E+08 | - | 0    | 0    |
| ENSG0000(MTCO3P22   | processed   | chr5  | 1E+08    | 1E+08    | - | 0    | 0    |
| ENSG0000(RP11-470B  | processed   | chr2  | 1.43E+08 | 1.43E+08 | - | 0    | 0    |
| ENSG0000(PFN1P2     | transcribed | chr1  | 1.2E+08  | 1.2E+08  | - | 0.88 | 0.69 |
| ENSG0000(AC000095.  | processed   | chr22 | 19018043 | 19018916 | - | 0.07 | 0.08 |
| ENSG0000(MTRNR2L1   | protein_co  | chr4  | 1.16E+08 | 1.16E+08 | + | 0    | 0    |
| ENSG0000(MREGP1     | processed   | chr12 | 31254361 | 31254445 | - | 0    | 0    |
| ENSG0000(RP6-166C1  | processed   | chrX  | 1.21E+08 | 1.21E+08 | + | 0    | 0    |
| ENSG0000(RP11-464I  | processed   | chr13 | 83145540 | 83145903 | + | 0    | 0    |
| ENSG0000(RP11-812E  | unprocess   | chr16 | 33965655 | 33966091 | - | 0    | 0    |
| ENSG0000(CTC-412M:  | processed   | chr19 | 19708965 | 19710465 | + | 0    | 0    |
| ENSG0000(RP11-35P1  | lincRNA     | chr11 | 1.18E+08 | 1.18E+08 | + | 0    | 0    |
| ENSG0000(RP11-208G  | processed   | chr7  | 1.52E+08 | 1.52E+08 | + | 0    | 0    |
| ENSG0000(RP11-44D5  | transcribed | chr3  | 15732252 | 15733470 | + | 0    | 0    |
| ENSG0000(RP13-379L  | processed   | chr20 | 58097267 | 58097591 | + | 0    | 0    |
| ENSG0000(RP11-92C4  | antisense   | chr9  | 98943337 | 98943775 | - | 0    | 0.2  |
| ENSG0000(RP11-810C  | processed   | chrX  | 1.15E+08 | 1.15E+08 | - | 0    | 0    |
| ENSG0000(DPPA3P3    | processed   | chr13 | 81114866 | 81115295 | - | 0    | 0    |
| ENSG0000(REXO1L4P   | processed   | chr8  | 85802574 | 85806435 | - | 0    | 0    |
| ENSG0000(CAHM       | lincRNA     | chr6  | 1.63E+08 | 1.63E+08 | - | 0.49 | 0.77 |
| ENSG0000(RP11-351C  | processed   | chr10 | 63358745 | 63359104 | + | 0    | 0    |
| ENSG0000(AL133247.  | processed   | chr2  | 31651381 | 31651862 | + | 0    | 0    |
| ENSG0000(RP11-361A  | processed   | chr11 | 1.1E+08  | 1.1E+08  | - | 0    | 0    |
| ENSG0000(RP11-1348  | processed   | chr16 | 28749959 | 28750595 | - | 0    | 0    |
| ENSG0000(CTA-369K2  | processed   | chr7  | 1.09E+08 | 1.09E+08 | - | 0    | 0    |
| ENSG0000(RP11-326I  | sense_intr  | chr4  | 1.84E+08 | 1.84E+08 | - | 0.39 | 0    |
| ENSG0000(NRBF2P5    | processed   | chr10 | 5776071  | 5776858  | + | 0    | 0    |
| ENSG0000(KNOP1P2    | processed   | chr12 | 45880950 | 45882266 | - | 0    | 0    |
| ENSG0000(RP11-42L1: | processed   | chr5  | 29105568 | 29106861 | - | 0    | 0    |
| ENSG0000(RP1-241P1  | processed   | chrX  | 1.16E+08 | 1.16E+08 | + | 0    | 0    |
| ENSG0000(OR7E108P   | unprocess   | chr9  | 90751240 | 90752230 | - | 0    | 0    |
| ENSG0000(RP11-124D  | transcribed | chr14 | 23293852 | 23295798 | + | 0.12 | 0.1  |
| ENSG0000(RP11-175I  | processed   | chr10 | 45812648 | 45812944 | - | 0    | 0    |
| ENSG0000(RP11-304C  | processed   | chr11 | 6297189  | 6298606  | - | 0    | 0    |
| ENSG0000(RP11-511I  | processed   | chr2  | 63083008 | 63087322 | + | 0    | 0    |
| ENSG0000(RP11-19H6  | processed   | chr16 | 5838131  | 5838661  | - | 0    | 0    |
| ENSG0000(RP11-694I  | unprocess   | chr3  | 49140086 | 49160851 | - | 0.03 | 0.03 |
| ENSG0000(CTB-95D12  | processed   | chr5  | 1.55E+08 | 1.55E+08 | + | 0    | 0    |
| ENSG0000(RP1-223H1  | processed   | chr1  | 1.82E+08 | 1.82E+08 | - | 0    | 0    |
| ENSG0000(AZU1P1     | processed   | chr13 | 39856710 | 39857094 | - | 0    | 0    |
| ENSG0000(RP11-972P  | processed   | chr12 | 1.23E+08 | 1.23E+08 | - | 0    | 0    |
| ENSG0000(RP6-43L17. | processed   | chrX  | 87806433 | 87806769 | - | 0    | 0    |
| ENSG0000(RP11-569H  | processed   | chr2  | 59514890 | 59515124 | + | 0    | 0    |

|                                     |          |          |   |      |      |
|-------------------------------------|----------|----------|---|------|------|
| ENSG0000(RP11-681H)processed_chr11  | 1.05E+08 | 1.05E+08 | - | 0    | 0    |
| ENSG0000(IGKV2OR2-IG_V_pseu)chr2    | 97372532 | 97372835 | + | 0    | 0    |
| ENSG0000(IGHD4OR1.IG_D_gene)chr15   | 21011451 | 21011469 | - | 0    | 0    |
| ENSG0000(CTB-10G5.:processed)chr7   | 92442077 | 92442489 | + | 0    | 0    |
| ENSG0000(PABPC1P5)processed_chrY    | 11335627 | 11337693 | + | 0    | 0    |
| ENSG0000(RP6-166C1)processed_chrX   | 1.21E+08 | 1.21E+08 | + | 0    | 0    |
| ENSG0000(RP11-467C)lincRNA_chr1     | 59289303 | 59289640 | - | 0    | 0    |
| ENSG0000(RP11-644F)processed_chr12  | 55662337 | 55662501 | - | 0    | 0    |
| ENSG0000(RP11-796E)lincRNA_chr2     | 1.74E+08 | 1.74E+08 | + | 0    | 0    |
| ENSG0000(RP11-342K)antisense_chr2   | 75697583 | 75697996 | + | 0    | 0    |
| ENSG0000(IGHV3OR1.IG_V_gene)chr16   | 33802764 | 33803217 | + | 0    | 0    |
| ENSG0000(RP11-411B)processed_chr18  | 14053951 | 14054761 | + | 0    | 0    |
| ENSG0000(RP11-601H)processed_chr2   | 78437850 | 78438921 | + | 0    | 0    |
| ENSG0000(IGHV3OR1.IG_V_gene)chr16   | 32066065 | 32066358 | + | 0    | 0    |
| ENSG0000(IGHV3-29)IG_V_pseu)chr14   | 1.06E+08 | 1.06E+08 | - | 0    | 0    |
| ENSG0000(CTC-451A6)processed_chr19  | 22708834 | 22709314 | - | 0    | 0    |
| ENSG0000(RP1-72E17)processed_chr6   | 3693923  | 3694075  | - | 0    | 0    |
| ENSG0000(BNIP3P37)processed_chr19   | 23123188 | 23124088 | - | 0    | 0    |
| ENSG0000(RP11-57B2)processed_chr4   | 82691737 | 82692468 | + | 0    | 0    |
| ENSG0000(RP11-131L)lincRNA_chr12    | 1.18E+08 | 1.18E+08 | - | 0.11 | 0    |
| ENSG0000(RP3-399J4)processed_chr6   | 94442030 | 94443809 | - | 0    | 0    |
| ENSG0000(RP11-230C)antisense_chr6   | 1.57E+08 | 1.57E+08 | - | 0    | 0    |
| ENSG0000(RP11-245G)processed_chr2   | 10874291 | 10874567 | - | 0    | 0    |
| ENSG0000(RP11-622C)processed_chr15  | 66808404 | 66810560 | + | 0.15 | 0.14 |
| ENSG0000(RP4-743O1)processed_chr11  | 34742906 | 34743199 | + | 0    | 0    |
| ENSG0000(RP13-685P)processed_chr3   | 1.29E+08 | 1.29E+08 | + | 0.16 | 0    |
| ENSG0000(RP6-166C1)processed_chrX   | 1.21E+08 | 1.21E+08 | + | 0    | 0    |
| ENSG0000(RP11-119F)processed_chr10  | 68717311 | 68717795 | - | 0    | 0    |
| ENSG0000(CTD-2134P)processed_chr5   | 28808538 | 28809255 | + | 0    | 0    |
| ENSG0000(BNIP3P7)processed_chr13    | 18491904 | 18492419 | + | 0    | 0    |
| ENSG0000(RP1-290F1)processed_chrX   | 53065053 | 53065548 | - | 0    | 0    |
| ENSG0000(MKI67P1)processed_chrX     | 46560928 | 46562749 | - | 0    | 0    |
| ENSG0000(COX6CP4)processed_chr15    | 36571985 | 36572212 | + | 0    | 0    |
| ENSG0000(YTHDF2P1)processed_chr14   | 39215065 | 39216335 | + | 0    | 0    |
| ENSG0000(RP11-420L)antisense_chr6   | 3751111  | 3753871  | + | 4.16 | 4.86 |
| ENSG0000(IGHV1OR1.IG_V_gene)chr15   | 22160431 | 22160868 | - | 0    | 0    |
| ENSG0000(RP11-511B)processed_chr12  | 93035261 | 93035744 | + | 0    | 0    |
| ENSG0000(CTA-21C21)processed_chr1   | 88313153 | 88313302 | + | 0    | 0    |
| ENSG0000(RP11-301G)processed_chr6   | 67933485 | 67934682 | + | 0    | 0    |
| ENSG0000(RP11-777F)processed_chr11  | 87323709 | 87324359 | - | 0    | 0    |
| ENSG0000(RP5-1136G)processed_chr7   | 1.4E+08  | 1.4E+08  | + | 0    | 0    |
| ENSG0000(RP11-116B)processed_chr5   | 42729138 | 42729519 | + | 0    | 0    |
| ENSG0000(RP11-500N)processed_chr7   | 1.19E+08 | 1.19E+08 | - | 0    | 0    |
| ENSG0000(CTB-159G1)unprocess€)chr19 | 22770937 | 22771191 | + | 1.7  | 0    |
| ENSG0000(RP11-24C1)processed_chr6   | 66710242 | 66710827 | - | 0    | 0    |

|                                         |          |          |   |       |       |
|-----------------------------------------|----------|----------|---|-------|-------|
| ENSG0000(RP11-168P lincRNA chr13        | 43787591 | 43787852 | + | 0.48  | 0     |
| ENSG0000(RP11-145P sense_intronic chr15 | 25130978 | 25131337 | + | 0     | 0     |
| ENSG0000(QTRT1P1 processed_chrx         | 1.14E+08 | 1.14E+08 | + | 0     | 0     |
| ENSG0000(SNRPGP19 processed_chr11       | 65514403 | 65514923 | - | 0     | 0     |
| ENSG0000(RP11-6741J processed_chr2      | 28015777 | 28016482 | - | 0     | 0     |
| ENSG0000(RP11-169K processed_chr3       | 11529488 | 11529755 | - | 0     | 0     |
| ENSG0000(PEBP1P2 processed_chr2         | 85341281 | 85341838 | - | 0.13  | 0     |
| ENSG0000(bp-21201H transcribed chr21    | 9975017  | 10119309 | - | 0.04  | 0.43  |
| ENSG0000(ELOCP34 processed_chry         | 25662900 | 25663226 | + | 0     | 0     |
| ENSG0000(RP11-3B7.7 processed_chr3      | 49252129 | 49252264 | - | 0     | 0     |
| ENSG0000(RP11-785G antisense chr2       | 2.36E+08 | 2.36E+08 | + | 0     | 0     |
| ENSG0000(RP11-478B processed_chr10      | 55746551 | 55746908 | + | 0     | 0     |
| ENSG0000(RP11-311H processed_chr9       | 33449755 | 33449941 | + | 0     | 0     |
| ENSG0000(CTC-523E2 lincRNA chr19        | 34902202 | 34904195 | - | 0     | 0     |
| ENSG0000(LINC01235 lincRNA chr9         | 13406380 | 13433053 | - | 0.07  | 0.26  |
| ENSG0000(RP11-293K processed_chr1       | 62530636 | 62530873 | + | 0     | 0     |
| ENSG0000(IGHV3-30 IG_V_gene chr14       | 1.06E+08 | 1.06E+08 | - | 0     | 0     |
| ENSG0000(DUXAP3 unprocessed chr10       | 42747544 | 42748687 | - | 0     | 0     |
| ENSG0000(RP11-15E1 processed_chr17      | 60513190 | 60513550 | + | 0     | 0     |
| ENSG0000(RP11-225N processed_chr3       | 1.83E+08 | 1.83E+08 | - | 0     | 0     |
| ENSG0000(RP11-1394 processed_chr7       | 72768798 | 72769191 | + | 0     | 0     |
| ENSG0000(RP11-546J: lincRNA chr2        | 1.58E+08 | 1.58E+08 | + | 0     | 0.08  |
| ENSG0000(CTD-2124B processed_chr5       | 37286449 | 37286977 | - | 0.55  | 0     |
| ENSG0000(APOOP1 processed_chr5          | 1.57E+08 | 1.57E+08 | + | 0     | 0     |
| ENSG0000(RP11-154H lincRNA chr3         | 71584943 | 71587409 | + | 0.22  | 0     |
| ENSG0000(RP11-127H processed_chr2       | 57429548 | 57430693 | - | 0     | 0     |
| ENSG0000(RP1-85D24 processed_chry       | 11107719 | 11107887 | - | 0     | 0     |
| ENSG0000(RP11-355F antisense chr2       | 75154366 | 75189949 | + | 0     | 0.05  |
| ENSG0000(RP11-171I: antisense chr2      | 1.79E+08 | 1.79E+08 | + | 0.52  | 0.23  |
| ENSG0000(RP11-21M: processed_chr1       | 1.78E+08 | 1.78E+08 | - | 0     | 0     |
| ENSG0000(RP5-1021I: processed_chr14     | 73840520 | 73840609 | - | 0     | 0     |
| ENSG0000(RP5-1147A processed_chr7       | 40115685 | 40115943 | + | 0     | 0     |
| ENSG0000(RP11-712B processed_chr11      | 95145437 | 95146004 | + | 0     | 0     |
| ENSG0000(PKD1P6-NF processed_chr16      | 15104723 | 15131601 | - | 13.07 | 10.66 |
| ENSG0000(RP11-471G processed_chrx       | 95720243 | 95721144 | + | 0     | 0     |
| ENSG0000(RP11-362B processed_chr7       | 1.56E+08 | 1.56E+08 | + | 0     | 0     |
| ENSG0000(RP11-568G processed_chr1       | 2.2E+08  | 2.2E+08  | + | 0     | 0     |
| ENSG0000(RP11-51F1 processed_chr17      | 63610772 | 63611184 | - | 0     | 0     |
| ENSG0000(RP11-810F processed_chr11      | 39873782 | 39874388 | + | 0     | 0     |
| ENSG0000(RP11-348N antisense chr10      | 1.11E+08 | 1.11E+08 | + | 0.1   | 0.19  |
| ENSG0000(RP11-73M: transcribed chr14    | 1.04E+08 | 1.04E+08 | + | 0     | 0     |
| ENSG0000(RP11-455J: processed_chr7      | 16849957 | 16850725 | - | 0     | 0     |
| ENSG0000(RP11-396C processed_chr1       | 2.26E+08 | 2.26E+08 | + | 0     | 0     |
| ENSG0000(PRAMEF5 protein_coding chr1    | 13254212 | 13263314 | + | 0     | 0     |
| ENSG0000(HCG17 lincRNA chr6             | 30234039 | 30326134 | - | 0.18  | 0.11  |



|                                |       |          |          |   |       |       |
|--------------------------------|-------|----------|----------|---|-------|-------|
| ENSG0000(RP5-1092A antisense)  | chr1  | 28239509 | 28241453 | - | 0.22  | 0.16  |
| ENSG0000(RP11-713H processed)  | chr17 | 8560471  | 8560962  | + | 0     | 0     |
| ENSG0000(RP11-359E lincRNA)    | chr11 | 19710934 | 19712619 | - | 1.48  | 1.18  |
| ENSG0000(RP11-486C processed)  | chr14 | 70234495 | 70235095 | + | 0     | 0     |
| ENSG0000(GS1-69O6. processed)  | chr7  | 9850924  | 9851386  | + | 0     | 0     |
| ENSG0000(RP11-34P1 processed)  | chr5  | 1.6E+08  | 1.6E+08  | + | 0     | 0     |
| ENSG0000(CTC-325H2 processed)  | chr19 | 9348106  | 9348703  | - | 0     | 0     |
| ENSG0000(SGO1P1 processed)     | chr1  | 69606855 | 69608301 | - | 0     | 0     |
| ENSG0000(URGCP-MR protein_co)  | chr7  | 43866558 | 43906589 | - | 0     | 0     |
| ENSG0000(RP11-388E unprocessε) | chr14 | 23767662 | 23768998 | + | 0     | 0     |
| ENSG0000(RP11-197B processed)  | chrX  | 1.18E+08 | 1.18E+08 | + | 0     | 0     |
| ENSG0000(RP1-134O1 unprocessε) | chr1  | 15917698 | 15917908 | - | 0     | 0     |
| ENSG0000(SPCS2P2 processed)    | chr10 | 1E+08    | 1E+08    | - | 0     | 0     |
| ENSG0000(LOC401913 processed)  | chr19 | 34866352 | 34866919 | + | 0     | 0     |
| ENSG0000(RP4-555N2 processed)  | chrX  | 1.19E+08 | 1.19E+08 | - | 0     | 0     |
| ENSG0000(RP11-216F processed)  | chr9  | 78589158 | 78589539 | + | 0     | 0     |
| ENSG0000(NBPF14 protein_co)    | chr1  | 1.49E+08 | 1.49E+08 | - | 22.89 | 22.12 |
| ENSG0000(RP11-710N processed)  | chr1  | 1.16E+08 | 1.16E+08 | - | 0     | 0     |
| ENSG0000(RP11-340C processed)  | chr13 | 1E+08    | 1E+08    | - | 0     | 0     |
| ENSG0000(RP4-777G9 processed)  | chr7  | 1.48E+08 | 1.48E+08 | - | 0     | 0     |
| ENSG0000(RP3-466P1 lincRNA)    | chr6  | 1.46E+08 | 1.46E+08 | + | 0.1   | 0.04  |
| ENSG0000(ECM1P1 processed)     | chr9  | 4768617  | 4769895  | - | 0     | 0     |
| ENSG0000(RP11-373D sense_intr) | chr2  | 28396815 | 28397110 | + | 0     | 0     |
| ENSG0000(TSIX lincRNA)         | chrX  | 73792205 | 73829231 | + | 0.07  | 0.08  |
| ENSG0000(RP6-166C1 processed)  | chrX  | 1.21E+08 | 1.21E+08 | + | 0     | 0     |
| ENSG0000(TAF15 protein_co)     | chr17 | 35713791 | 35864615 | + | 55.45 | 54.7  |
| ENSG0000(CYP2C61P processed)   | chr10 | 64762883 | 64763172 | - | 0     | 0     |
| ENSG0000(DPRXP5 processed)     | chr21 | 36943267 | 36944125 | + | 0     | 0     |
| ENSG0000(NUTF2P8 processed)    | chr2  | 21362292 | 21364025 | - | 0     | 0     |
| ENSG0000(RP1-20N2. processed)  | chr6  | 1.43E+08 | 1.43E+08 | + | 0     | 0     |
| ENSG0000(RP11-105N lincRNA)    | chr2  | 2.13E+08 | 2.13E+08 | + | 0.1   | 0     |
| ENSG0000(RP1-142L7. lincRNA)   | chr6  | 1.12E+08 | 1.12E+08 | - | 0.03  | 0     |
| ENSG0000(RP11-544H processed)  | chr2  | 2.03E+08 | 2.03E+08 | + | 0     | 0.92  |
| ENSG0000(HNRNPA1F processed)   | chr4  | 72807267 | 72808192 | + | 0     | 0     |
| ENSG0000(XXbac-BPG processed)  | chr6  | 27515039 | 27515274 | - | 0     | 0     |
| ENSG0000(CTB-179I1. processed) | chr4  | 77216416 | 77216878 | - | 0     | 0     |
| ENSG0000(MARK2P16 processed)   | chr10 | 89837612 | 89839334 | - | 0     | 0     |
| ENSG0000(MTRNR2L6 protein_co)  | chr7  | 1.43E+08 | 1.43E+08 | + | 0     | 0     |
| ENSG0000(YTHDF3-AS lincRNA)    | chr8  | 63167725 | 63168442 | - | 0.37  | 0.81  |
| ENSG0000(RP11-294L. processed) | chr2  | 36656322 | 36656941 | - | 0     | 0     |
| ENSG0000(RP6-166C1 processed)  | chrX  | 1.21E+08 | 1.21E+08 | + | 0     | 0     |
| ENSG0000(CTC-512J1. processed) | chr19 | 44290081 | 44290911 | + | 0     | 0     |
| ENSG0000(RP11-351N processed)  | chr13 | 29339566 | 29339869 | - | 0     | 0     |
| ENSG0000(RP11-372K antisense)  | chr4  | 1.51E+08 | 1.51E+08 | + | 0     | 0.12  |
| ENSG0000(KB-1907C4 processed)  | chr8  | 97788210 | 97788357 | - | 0     | 0     |

|                                      |          |          |   |      |      |
|--------------------------------------|----------|----------|---|------|------|
| ENSG0000(FAM71BP1 processed_ chr9    | 25937912 | 25938434 | + | 0    | 0    |
| ENSG0000(IGHV1OR1:IG_V_pseu chr15    | 20639464 | 20639890 | - | 0    | 0    |
| ENSG0000(RP11-507D processed_ chr9   | 86228815 | 86228983 | + | 0    | 0    |
| ENSG0000(BUD13P1 processed_ chr11    | 95143637 | 95145125 | + | 0.15 | 0    |
| ENSG0000(RP11-349G processed_ chr15  | 65458574 | 65459534 | + | 0    | 0    |
| ENSG0000(RP11-403N processed_ chr9   | 79850871 | 79851498 | + | 0    | 0    |
| ENSG0000(RP11-535E processed_ chr7   | 72722885 | 72723089 | + | 0    | 0    |
| ENSG0000(RP1-21P18 processed_ chr6   | 4529722  | 4530008  | + | 0    | 0    |
| ENSG0000(RP11-342K antisense chr2    | 75660462 | 75662208 | + | 2.97 | 2.59 |
| ENSG0000(RP11-381K lincRNA chr5      | 1.38E+08 | 1.38E+08 | + | 0    | 0    |
| ENSG0000(RP11-568J: processed_ chr16 | 85814425 | 85815062 | - | 0    | 0    |
| ENSG0000(RP11-292K processed_ chr2   | 1E+08    | 1E+08    | + | 0    | 0    |
| ENSG0000(RP11-876F processed_ chr11  | 81842435 | 81842669 | - | 0    | 0    |
| ENSG0000(RP11-107F processed_ chr15  | 41718370 | 41718672 | - | 0    | 0    |
| ENSG0000(RP11-701H sense_intr chr15  | 24984864 | 24985173 | + | 0    | 0    |
| ENSG0000(RP11-736N processed_ chr14  | 1.03E+08 | 1.03E+08 | + | 0    | 0    |
| ENSG0000(PRMT1P1 processed_ chr5     | 1.77E+08 | 1.77E+08 | - | 0    | 0    |
| ENSG0000(RP11-568G processed_ chr1   | 2.2E+08  | 2.2E+08  | + | 0    | 0    |
| ENSG0000(GS1-115M: processed_ chrX   | 1.46E+08 | 1.46E+08 | + | 0    | 0    |
| ENSG0000(RP11-293G processed_ chr1   | 2.36E+08 | 2.36E+08 | + | 0    | 0    |
| ENSG0000(RP11-46A1 processed_ chr1   | 1.81E+08 | 1.81E+08 | + | 0    | 0    |
| ENSG0000(RP11-378I: processed_ chr9  | 19957394 | 19958147 | - | 0    | 0    |
| ENSG0000(RP11-506K processed_ chr14  | 38973399 | 38974085 | - | 0    | 0    |
| ENSG0000(MINOS1P2 processed_ chr17   | 64747264 | 64747492 | - | 0    | 0    |
| ENSG0000(BNIP3P15 processed_ chr19   | 20136933 | 20137233 | + | 0    | 0    |
| ENSG0000(RP11-421H processed_ chr12  | 39170646 | 39170880 | + | 0    | 0    |
| ENSG0000(RP11-134N processed_ chr1   | 1.18E+08 | 1.18E+08 | - | 0    | 0    |
| ENSG0000(RP11-84C1 lincRNA chr4      | 89119284 | 89119871 | + | 0.24 | 0    |
| ENSG0000(U1 snRNA chr1               | 1.45E+08 | 1.45E+08 | - | 0    | 0    |
| ENSG0000(RPL23AP92 processed_ chr2   | 69873565 | 69873819 | - | 0    | 0    |
| ENSG0000(RP11-383H lincRNA chr13     | 97939356 | 97953539 | + | 0    | 0    |
| ENSG0000(AJ271736.1 processed_ chrX  | 1.56E+08 | 1.56E+08 | + | 0    | 0    |
| ENSG0000(AJ271736.1 processed_ chrY  | 57190738 | 57208756 | + | 0    | 0    |
| ENSG0000(RP11-51E2 processed_ chr10  | 20547171 | 20547422 | + | 0    | 0    |
| ENSG0000(RP4-657E1 processed_ chr1   | 19297080 | 19297903 | + | 0    | 0    |
| ENSG0000(RP4-669B1 processed_ chr7   | 1.44E+08 | 1.44E+08 | - | 0    | 0    |
| ENSG0000(RP11-231P processed_ chr1   | 26263041 | 26263398 | - | 0    | 0    |
| ENSG0000(RP11-719K processed_ chr16  | 14862380 | 14862749 | - | 0    | 0    |
| ENSG0000(RP6-166C1 processed_ chrX   | 1.21E+08 | 1.21E+08 | + | 0    | 0    |
| ENSG0000(RP11-608C processed_ chr3   | 16275060 | 16276632 | - | 0    | 0    |
| ENSG0000(PRELID3BP processed_ chr5   | 1.21E+08 | 1.21E+08 | - | 0    | 0    |
| ENSG0000(RP4-802A1 sense_intr chr1   | 61124733 | 61125202 | + | 0    | 0    |
| ENSG0000(RP13-324D processed_ chrX   | 88982215 | 88982353 | - | 0    | 0    |
| ENSG0000(RP11-344N processed_ chrX   | 48336899 | 48337169 | - | 0    | 0    |
| ENSG0000(IGKV2OR2-IG_V_pseu chr2     | 97046588 | 97046891 | + | 0    | 0    |

|                                       |          |          |   |       |      |
|---------------------------------------|----------|----------|---|-------|------|
| ENSG0000(RP11-368M) processed_chr7    | 57629285 | 57630151 | + | 0     | 0    |
| ENSG0000(RP11-461L) lincRNA_chr4      | 1.52E+08 | 1.52E+08 | - | 0     | 0    |
| ENSG0000(FBXW7-AS) antisense_chr4     | 1.52E+08 | 1.52E+08 | + | 0     | 0    |
| ENSG0000(RP11-693I) processed_chr11   | 97086160 | 97086682 | - | 0     | 0    |
| ENSG0000(NEK4P3) processed_chr10      | 65054460 | 65055003 | + | 0     | 0    |
| ENSG0000(RP11-138E) lincRNA_chr9      | 1.3E+08  | 1.3E+08  | + | 0     | 0    |
| ENSG0000(HSPE1-MO) protein_co_chr2    | 1.98E+08 | 1.98E+08 | + | 13.38 | 9.8  |
| ENSG0000(CTD-2324A) processed_chrX    | 39791580 | 39791904 | - | 0     | 0    |
| ENSG0000(AD001527) antisense_chr19    | 36144081 | 36148348 | - | 0     | 0    |
| ENSG0000(RP11-385F) lincRNA_chr6      | 47477243 | 47477572 | - | 0     | 0.33 |
| ENSG0000(FXYD6P1) processed_chr10     | 42555440 | 42555724 | + | 0     | 0    |
| ENSG0000(DDX43P2) processed_chr7      | 49258493 | 49259846 | - | 0     | 0    |
| ENSG0000(CTB-152G1) processed_chr7    | 1.05E+08 | 1.05E+08 | + | 0     | 0    |
| ENSG0000(GAS2L2) protein_co_chr17     | 35744511 | 35752878 | - | 0.29  | 0.27 |
| ENSG0000(RP11-627K) processed_chr12   | 31244440 | 31244685 | + | 0     | 0    |
| ENSG0000(RP11-733D) processed_chr10   | 44488335 | 44488445 | - | 0     | 0    |
| ENSG0000(RP6-166C1) processed_chrX    | 1.21E+08 | 1.21E+08 | + | 0     | 0    |
| ENSG0000(PDHA1P1) processed_chr3      | 57800056 | 57801448 | - | 0     | 0    |
| ENSG0000(RP13-685P) processed_chr3    | 1.29E+08 | 1.29E+08 | + | 0     | 0    |
| ENSG0000(AP000436) processed_chr11    | 65025390 | 65026515 | - | 0.08  | 0    |
| ENSG0000(RP11-17G1) processed_chr2    | 1.53E+08 | 1.53E+08 | - | 0     | 0    |
| ENSG0000(RP11-103J) lincRNA_chr20     | 11001304 | 11001763 | + | 0     | 0.19 |
| ENSG0000(BUB1P1) processed_chr10      | 1.28E+08 | 1.28E+08 | + | 0     | 0    |
| ENSG0000(CTD-2026D) processed_chr5    | 1.11E+08 | 1.11E+08 | + | 0     | 0    |
| ENSG0000(RP4-590F2) processed_chr1    | 1.14E+08 | 1.14E+08 | - | 0     | 0    |
| ENSG0000(RP11-501C) processed_chr17   | 48899131 | 48899748 | + | 0     | 0    |
| ENSG0000(RP11-500K) processed_chr3    | 1.21E+08 | 1.21E+08 | - | 0     | 0    |
| ENSG0000(PDLIM1P1) processed_chr14    | 50050368 | 50051336 | + | 0     | 0    |
| ENSG0000(RP11-632K) processed_chr15   | 32461666 | 32461809 | - | 0     | 0    |
| ENSG0000(CTC-360J1) processed_chr19   | 57151587 | 57151860 | - | 0     | 0    |
| ENSG0000(DPRXP6) processed_chrX       | 40758483 | 40759050 | + | 0     | 0    |
| ENSG0000(RP11-103J) antisense_chr20   | 10672928 | 10994924 | + | 0.31  | 0.51 |
| ENSG0000(LLPHP1) processed_chr20      | 20721187 | 20721879 | + | 0     | 0    |
| ENSG0000(GS1-383H3) processed_chrX    | 30209423 | 30210209 | + | 0     | 0    |
| ENSG0000(RP5-1173I) processed_chr7    | 39788967 | 39789304 | - | 0     | 0    |
| ENSG0000(RP11-416H) processed_chr2    | 1.22E+08 | 1.22E+08 | - | 0     | 0    |
| ENSG0000(RP11-451F) processed_chr2    | 1.74E+08 | 1.74E+08 | + | 0     | 0    |
| ENSG0000(RPS10-NU1) protein_co_chr6   | 34284887 | 34426071 | - | 4.38  | 2.45 |
| ENSG0000(AC005776) processed_chr19    | 15338948 | 15339237 | + | 0     | 0    |
| ENSG0000(CTD-2583A) transcribed_chr19 | 57867885 | 57868834 | + | 2.16  | 4.51 |
| ENSG0000(C17orf50) protein_co_chr17   | 35760897 | 35765079 | + | 0     | 0    |
| ENSG0000(RP13-359K) processed_chr12   | 33717853 | 33718217 | + | 0     | 0    |
| ENSG0000(RP11-574K) processed_chr10   | 73740538 | 73740823 | - | 0     | 0    |
| ENSG0000(CHCHD2P1) processed_chr13    | 42181465 | 42181921 | - | 0     | 0    |
| ENSG0000(RP11-393K) processed_chr10   | 7154120  | 7154236  | + | 0     | 0    |

|                                       |          |          |   |       |       |
|---------------------------------------|----------|----------|---|-------|-------|
| ENSG0000(CTA-326K9 processed_ chr7    | 88455309 | 88456191 | + | 0     | 0     |
| ENSG0000(NANOGNB processed_ chrX      | 1.01E+08 | 1.01E+08 | - | 0     | 0     |
| ENSG0000(TMEM261I processed_ chr15    | 25169337 | 25169676 | - | 0     | 0     |
| ENSG0000(RP11-56O1 processed_ chr2    | 1.25E+08 | 1.25E+08 | - | 0     | 0     |
| ENSG0000(LINC00221 lincRNA_ chr14     | 1.06E+08 | 1.07E+08 | + | 0     | 0     |
| ENSG0000(RP11-498M processed_ chr1    | 2.43E+08 | 2.43E+08 | - | 0     | 0     |
| ENSG0000(RP11-355B antisense_ chr2    | 61471188 | 61484130 | + | 2.66  | 3.17  |
| ENSG0000(RP11-730B processed_ chr7    | 5009164  | 5009328  | - | 0     | 0     |
| ENSG0000(RP11-2E11 antisense_ chr7    | 1.3E+08  | 1.3E+08  | - | 0.07  | 0     |
| ENSG0000(IGHD5OR1.IG_D_gene_ chr15    | 21010494 | 21010516 | - | 0     | 0     |
| ENSG0000(RP1-60G11 processed_ chrX    | 93776911 | 93777384 | - | 0     | 0     |
| ENSG0000(RP3-466P1 lincRNA_ chr6      | 1.46E+08 | 1.46E+08 | - | 0     | 0     |
| ENSG0000(AC015849. lincRNA_ chr17     | 35808489 | 35808897 | - | 0     | 0     |
| ENSG0000(RP11-317C processed_ chr5    | 50903608 | 50903743 | + | 0     | 0     |
| ENSG0000(NF1P1 unprocessε_ chr15      | 20916686 | 20935658 | - | 0     | 0     |
| ENSG0000(RP1-168P1 processed_ chr16   | 89458870 | 89459437 | + | 0     | 0     |
| ENSG0000(AP001425. transcribed_ chr21 | 38204141 | 38206080 | - | 0     | 0     |
| ENSG0000(HNRNPDLF processed_ chr19    | 58049046 | 58049346 | - | 0     | 0     |
| ENSG0000(RP5-1004Iε processed_ chr20  | 22343693 | 22343930 | - | 0     | 0     |
| ENSG0000(CTC-571O2 processed_ chr5    | 1.75E+08 | 1.75E+08 | - | 0     | 0     |
| ENSG0000(RP11-57B2 processed_ chr4    | 82775461 | 82776101 | + | 0     | 0     |
| ENSG0000(RP11-674I1 processed_ chr2   | 27896116 | 27897195 | - | 0     | 0     |
| ENSG0000(CHCHD2P3 processed_ chr19    | 34126973 | 34127423 | + | 0     | 0     |
| ENSG0000(RP11-395N processed_ chr1    | 32421979 | 32422319 | + | 0     | 0     |
| ENSG0000(RP11-355I2 unprocessε_ chr14 | 62150656 | 62152258 | - | 0     | 0     |
| ENSG0000(RP11-863N processed_ chr18   | 22418829 | 22419294 | - | 0     | 0     |
| ENSG0000(RP11-429G processed_ chr13   | 61927090 | 61927272 | - | 0     | 0     |
| ENSG0000(RP11-757G processed_ chr12   | 12248991 | 12249427 | + | 0.18  | 0     |
| ENSG0000(VDAC1P5 processed_ chr12     | 54802746 | 54803589 | - | 0     | 0     |
| ENSG0000(RP11-435Iε processed_ chr1   | 2.43E+08 | 2.43E+08 | + | 0     | 0     |
| ENSG0000(KB-1589B1 processed_ chr8    | 97853021 | 97853253 | - | 0     | 0     |
| ENSG0000(DDX55P1 processed_ chr12     | 11512723 | 11514136 | + | 0     | 0     |
| ENSG0000(IGHV3OR1.IG_V_pseu_ chr16    | 32915074 | 32915536 | + | 0     | 0     |
| ENSG0000(RPL12P48 processed_ chr8     | 37983070 | 37983373 | + | 0     | 0     |
| ENSG0000(RP11-706J. lincRNA_ chr8     | 76403998 | 76405091 | + | 0     | 0     |
| ENSG0000(RP11-864G processed_ chr11   | 1.02E+08 | 1.02E+08 | + | 0     | 0     |
| ENSG0000(GS1-531I17 processed_ chr17  | 65654914 | 65655395 | + | 0     | 0     |
| ENSG0000(AC015849. antisense_ chr17   | 35816717 | 35830293 | - | 0     | 0     |
| ENSG0000(SRGAP2D unprocessε_ chr1     | 1.44E+08 | 1.44E+08 | + | 12.21 | 10.95 |
| ENSG0000(RPAP2P1 processed_ chr10     | 86854696 | 86856236 | - | 0     | 0     |
| ENSG0000(ZNF30-AS1 lincRNA_ chr19     | 34923299 | 34926812 | - | 0     | 0     |
| ENSG0000(CTD-2302E processed_ chr14   | 63594031 | 63595291 | - | 0.09  | 0     |
| ENSG0000(RP11-255E processed_ chr3    | 1.14E+08 | 1.14E+08 | + | 0     | 0     |
| ENSG0000(HIST2H4A protein_co_ chr1    | 1.5E+08  | 1.5E+08  | + | 7.99  | 5.8   |
| ENSG0000(RP11-461L. lincRNA_ chr4     | 1.52E+08 | 1.52E+08 | - | 0     | 0     |

|                                     |          |          |   |      |      |
|-------------------------------------|----------|----------|---|------|------|
| ENSG0000(RASL10B protein_co chr17   | 35731649 | 35743521 | + | 2.68 | 3.05 |
| ENSG0000(RP11-609L processed_ chr7  | 35971147 | 35971567 | - | 0    | 0    |
| ENSG0000(RP3-468K1 processed_ chr6  | 1.44E+08 | 1.44E+08 | - | 0    | 0    |
| ENSG0000(RP11-499P processed_ chr2  | 2.31E+08 | 2.31E+08 | + | 0    | 0    |
| ENSG0000(AC006077. processed_ chr5  | 1.35E+08 | 1.35E+08 | - | 0    | 0    |
| ENSG0000(RP11-311B processed_ chr2  | 1.59E+08 | 1.59E+08 | + | 0    | 0    |
| ENSG0000(AC015849. sense_ovei chr17 | 35818399 | 35823713 | + | 0    | 0    |
| ENSG0000(XXbac-BPG processed_ chr6  | 29763258 | 29763392 | - | 0    | 0    |
| ENSG0000(RP11-179A processed_ chr11 | 11182107 | 11182413 | - | 0    | 0    |
| ENSG0000(GPR75-ASE protein_co chr2  | 53670293 | 53860160 | - | 0.57 | 0    |
| ENSG0000(NUDT19P4 processed_ chr6   | 44898711 | 44899295 | + | 0    | 0    |
| ENSG0000(RP11-338C processed_ chr10 | 1.23E+08 | 1.23E+08 | - | 0    | 0    |
| ENSG0000(HNRNPA3P processed_ chr11  | 32591793 | 32592771 | - | 0    | 0    |
| ENSG0000(CTC-224D3 processed_ chr5  | 1.51E+08 | 1.51E+08 | + | 0    | 0    |
| ENSG0000(MTND4P35 processed_ chr5   | 1E+08    | 1E+08    | - | 0    | 0    |
| ENSG0000(RP11-24B1 processed_ chr9  | 41979352 | 41983753 | + | 0    | 0    |
| ENSG0000(RP11-272L processed_ chr1  | 97855575 | 97856825 | + | 0    | 0    |
| ENSG0000(RPS28P1 processed_ chr14   | 63808546 | 63808732 | + | 0    | 0    |
| ENSG0000(RP5-1077B processed_ chr1  | 12017216 | 12017308 | - | 0    | 0    |
| ENSG0000(RP11-27M processed_ chr2   | 2.03E+08 | 2.03E+08 | - | 0    | 0    |
| ENSG0000(RPL12P50 processed_ chrX   | 1.51E+08 | 1.51E+08 | - | 0    | 0    |
| ENSG0000(RP11-27I1. processed_ chr9 | 1.21E+08 | 1.21E+08 | - | 0.48 | 0    |
| ENSG0000(RP11-379K antisense chr15  | 80580029 | 80580566 | - | 0    | 0    |
| ENSG0000(MCRIP2P2 processed_ chr1   | 1.85E+08 | 1.85E+08 | + | 0    | 0    |
| ENSG0000(CICP23 processed_ chr11    | 123312   | 126123   | + | 0    | 0    |
| ENSG0000(TAS2R6P processed_ chr7    | 1.42E+08 | 1.42E+08 | + | 0.08 | 0.08 |
| ENSG0000(RP11-812E unprocessε chr16 | 33848476 | 33848644 | - | 0    | 0    |
| ENSG0000(RP11-551L unprocessε chr12 | 31105105 | 31106830 | - | 0    | 0    |
| ENSG0000(RP11-179G processed_ chr1  | 29904865 | 29905357 | - | 0    | 0    |
| ENSG0000(SRD5A3P1 processed_ chr11  | 59898185 | 59899133 | + | 0    | 0    |
| ENSG0000(GRAMD4P processed_ chr2    | 1.32E+08 | 1.32E+08 | - | 0    | 0    |
| ENSG0000(CTD-2227E lincRNA chr7     | 25948657 | 25949403 | - | 0.09 | 0    |
| ENSG0000(RP11-346C processed_ chr6  | 1.11E+08 | 1.11E+08 | + | 0    | 0    |
| ENSG0000(XXbac-BPG processed_ chr6  | 27268113 | 27269229 | + | 0    | 0    |
| ENSG0000(RP5-879K2 processed_ chr1  | 2.1E+08  | 2.1E+08  | - | 0    | 0    |
| ENSG0000(RP5-856G1 lincRNA chr6     | 1026494  | 1027225  | - | 0    | 0    |
| ENSG0000(RAP2CP1 transcribec chr14  | 1.03E+08 | 1.03E+08 | + | 0.48 | 0    |
| ENSG0000(RP5-966M processed_ chr3   | 52734735 | 52735013 | + | 0    | 0    |
| ENSG0000(HSPE1P7 processed_ chr16   | 74612596 | 74613221 | - | 0    | 0    |
| ENSG0000(CT45A9 protein_co chrX     | 1.36E+08 | 1.36E+08 | - | 0    | 0    |
| ENSG0000(AC025811. lincRNA chr19    | 22455988 | 22456459 | + | 0    | 0    |
| ENSG0000(MTDHP1 processed_ chr7     | 64942143 | 64942926 | - | 0    | 0    |
| ENSG0000(RP1-309F2 antisense chr20  | 58876592 | 58876981 | - | 0    | 0.73 |
| ENSG0000(RP11-2E11 antisense chr7   | 1.31E+08 | 1.31E+08 | + | 0.33 | 0.12 |
| ENSG0000(RPSAP75 processed_ chr9    | 74804473 | 74804773 | + | 0    | 0    |

|                                     |          |          |   |      |      |
|-------------------------------------|----------|----------|---|------|------|
| ENSG0000(RP11-261B processed_ chr15 | 30282533 | 30288389 | + | 0    | 0    |
| ENSG0000(RP11-65L3 antisense chr2   | 1.79E+08 | 1.79E+08 | + | 0.69 | 0.44 |
| ENSG0000(RP11-1324 processed_ chr7  | 57485166 | 57485895 | + | 0    | 0    |
| ENSG0000(LPP-AS2 antisense chr3     | 1.88E+08 | 1.88E+08 | - | 1.26 | 1.13 |
| ENSG0000(RP11-366N processed_ chr4  | 1.65E+08 | 1.65E+08 | - | 0    | 0    |
| ENSG0000(IGHD5OR1. IG_D_gene chr15  | 20003840 | 20003862 | - | 0    | 0    |
| ENSG0000(RP11-403I1 processed_ chr1 | 1.44E+08 | 1.44E+08 | + | 0.54 | 0    |
| ENSG0000(RP11-502I4 lincRNA chr15   | 67541072 | 67542604 | - | 0.34 | 0.37 |
| ENSG0000(NTAN1P1 processed_ chr10   | 1.16E+08 | 1.16E+08 | - | 0    | 0    |
| ENSG0000(RP11-62H7 processed_ chr8  | 8933721  | 8934006  | - | 0    | 0    |
| ENSG0000(CTD-235J1 processed_ chr11 | 1.08E+08 | 1.08E+08 | - | 0    | 0    |
| ENSG0000(REXO1L8P processed_ chr8   | 85642777 | 85646325 | - | 0    | 0    |
| ENSG0000(RP11-326C lincRNA chr11    | 333192   | 333688   | + | 0    | 0    |
| ENSG0000(SMARCE1P processed_ chr10  | 1.01E+08 | 1.01E+08 | - | 0    | 0    |
| ENSG0000(MAGO3P unprocessε chr14    | 68861762 | 68862525 | + | 0    | 0    |
| ENSG0000(RP11-110F processed_ chr1  | 1.07E+08 | 1.07E+08 | + | 0    | 0    |
| ENSG0000(AC015849. lincRNA chr17    | 35893707 | 35911023 | - | 0.01 | 0    |
| ENSG0000(RP11-54C4 processed_ chr5  | 1.52E+08 | 1.52E+08 | + | 0    | 0    |
| ENSG0000(RP11-626A processed_ chr8  | 54191582 | 54192035 | - | 0    | 0    |
| ENSG0000(RP11-550I2 processed_ chr3 | 1.57E+08 | 1.57E+08 | - | 0    | 0    |
| ENSG0000(RP11-490D processed_ chr9  | 1.01E+08 | 1.01E+08 | + | 0    | 0    |
| ENSG0000(RP11-137J1 processed_ chr6 | 1.42E+08 | 1.42E+08 | + | 0    | 0    |
| ENSG0000(HMGB1P51 processed_ chr15  | 58672296 | 58672933 | + | 0    | 0    |
| ENSG0000(RP3-467N1 processed_ chr6  | 1.01E+08 | 1.01E+08 | + | 0    | 0.1  |
| ENSG0000(RP11-439C lincRNA chr8     | 1974818  | 1975314  | + | 0    | 0    |
| ENSG0000(RP11-844P processed_ chr5  | 1.76E+08 | 1.76E+08 | - | 0    | 0    |
| ENSG0000(RP11-632K processed_ chr7  | 1.51E+08 | 1.51E+08 | - | 0    | 0    |
| ENSG0000(RP11-190G processed_ chr7  | 1.3E+08  | 1.3E+08  | + | 0    | 0    |
| ENSG0000(RP11-1112 processed_ chr17 | 75060491 | 75060620 | - | 0    | 0    |
| ENSG0000(RP11-293B processed_ chr1  | 1.84E+08 | 1.84E+08 | - | 0    | 0    |
| ENSG0000(RP11-29B1 processed_ chr9  | 1E+08    | 1E+08    | - | 0    | 0    |
| ENSG0000(RP11-342K lincRNA chr2     | 75719120 | 75720018 | + | 0.14 | 0.3  |
| ENSG0000(RP11-703P processed_ chr7  | 1.13E+08 | 1.13E+08 | + | 0    | 0    |
| ENSG0000(IGKV1OR2- IG_V_pseu chr2   | 90315366 | 90315836 | - | 0    | 0    |
| ENSG0000(RP11-599B processed_ chr17 | 8199123  | 8199437  | - | 0    | 0    |
| ENSG0000(RP11-440D unprocessε chr2  | 95607073 | 95616592 | + | 0    | 0    |
| ENSG0000(CTHRC1P1 processed_ chrX   | 79177200 | 79177668 | - | 0    | 0    |
| ENSG0000(RP11-346C lincRNA chr16    | 73060470 | 73062316 | + | 0.06 | 0.2  |
| ENSG0000(CTC-539A1 processed_ chr19 | 10598001 | 10598965 | - | 0.12 | 0    |
| ENSG0000(RP11-171I2 antisense chr2  | 1.79E+08 | 1.79E+08 | + | 0.28 | 0.16 |
| ENSG0000(LRRC37A9F processed_ chr17 | 35912635 | 35918010 | - | 0    | 0.01 |
| ENSG0000(RP11-717A processed_ chr2  | 85360798 | 85360925 | - | 0    | 0    |
| ENSG0000(IGKV2OR2- IG_V_pseu chr2   | 97335671 | 97335974 | - | 0    | 0    |
| ENSG0000(RP11-60E8 processed_ chr12 | 50756892 | 50757433 | + | 0    | 0    |
| ENSG0000(RP11-10C2 lincRNA chr3     | 33797149 | 33797681 | - | 1.37 | 1.35 |

|                                      |          |          |   |      |      |
|--------------------------------------|----------|----------|---|------|------|
| ENSG0000(RP5-878I1) processed_chrX   | 1.15E+08 | 1.15E+08 | - | 0.51 | 0.74 |
| ENSG0000(RP11-142I2) processed_chr11 | 1.21E+08 | 1.21E+08 | - | 0    | 0    |
| ENSG0000(HSPE1P19) processed_chr3    | 90261414 | 90261708 | - | 0    | 0.41 |
| ENSG0000(RP11-708L) processed_chr11  | 1.12E+08 | 1.12E+08 | - | 0    | 0    |
| ENSG0000(KATNBL1P) processed_chr13   | 28067587 | 28068334 | + | 0    | 0    |
| ENSG0000(RP11-463M) processed_chr7   | 31330711 | 31330896 | + | 0    | 0    |
| ENSG0000(RP11-111A) processed_chr11  | 43063637 | 43065932 | - | 0    | 0    |
| ENSG0000(RP11-849F) processed_chr17  | 8296505  | 8297216  | - | 0    | 0    |
| ENSG0000(CTD-2527I) antisense_chr19  | 35014961 | 35025335 | - | 0    | 0    |
| ENSG0000(RP11-963H) processed_chr3   | 70125070 | 70126609 | - | 0    | 0    |
| ENSG0000(CTD-2269E) processed_chr5   | 28897785 | 28898274 | - | 0    | 0    |
| ENSG0000(CLPTM1LP) processed_chr1    | 1.89E+08 | 1.89E+08 | - | 0    | 0    |
| ENSG0000(RP5-933K2) lincRNA_chr6     | 1.57E+08 | 1.57E+08 | + | 0.29 | 0.16 |
| ENSG0000(RP6-166C1) processed_chrX   | 1.21E+08 | 1.21E+08 | + | 0    | 0    |
| ENSG0000(RP3-364H1) processed_chr6   | 99082449 | 99082761 | + | 0    | 0    |
| ENSG0000(MTRNR2L2) processed_chr5    | 80650000 | 80650086 | - | 0    | 0    |
| ENSG0000(RP11-255N) processed_chr15  | 84940504 | 84941133 | - | 0    | 0    |
| ENSG0000(NDUFB9P1) processed_chr5    | 69349936 | 69350445 | + | 0    | 0    |
| ENSG0000(RP11-138I) lincRNA_chr10    | 11679675 | 11680514 | + | 0.3  | 0.14 |
| ENSG0000(RP11-760D) processed_chr7   | 56603410 | 56603553 | + | 0    | 0    |
| ENSG0000(CTD-2342N) processed_chr8   | 1.35E+08 | 1.35E+08 | + | 0    | 0    |
| ENSG0000(CTD-2553L) processed_chr19  | 34634844 | 34635717 | + | 0    | 0    |
| ENSG0000(RP11-479I) processed_chr3   | 1.61E+08 | 1.61E+08 | - | 0    | 0    |
| ENSG0000(RP11-97F8) processed_chr4   | 1.17E+08 | 1.17E+08 | + | 0    | 0    |
| ENSG0000(RP6-43L17) processed_chrX   | 87807549 | 87809883 | - | 0    | 0    |
| ENSG0000(RP11-747H) processed_chr4   | 9020857  | 9021161  | - | 0    | 0    |
| ENSG0000(SNRPGP17) processed_chr17   | 59281130 | 59281343 | + | 0    | 0    |
| ENSG0000(RP11-792A) processed_chr7   | 66748838 | 66749077 | - | 0    | 0    |
| ENSG0000(RP11-607P) antisense_chr12  | 51421956 | 51424611 | - | 0    | 0    |
| ENSG0000(GMCL1P2) processed_chr2     | 1.08E+08 | 1.08E+08 | + | 0    | 0    |
| ENSG0000(RP11-457N) processed_chr6   | 26611903 | 26613109 | - | 0    | 0    |
| ENSG0000(PHBP20) processed_chr15     | 72450657 | 72451474 | + | 0    | 0    |
| ENSG0000(RP11-212J) processed_chr2   | 2.11E+08 | 2.11E+08 | + | 0    | 0    |
| ENSG0000(RP11-589M) processed_chr14  | 52871458 | 52872217 | + | 0    | 0    |
| ENSG0000(AC096553) processed_chr7    | 9634270  | 9635703  | + | 0    | 0    |
| ENSG0000(RP13-395E) processed_chr15  | 32250302 | 32256125 | - | 0    | 0    |
| ENSG0000(CTAGE15) protein_co_chr7    | 1.44E+08 | 1.44E+08 | + | 0.03 | 0.06 |
| ENSG0000(RP11-465K) processed_chr8   | 30754236 | 30754539 | - | 0    | 0    |
| ENSG0000(NAMA) lincRNA_chr9          | 99355337 | 99377240 | - | 0    | 0    |
| ENSG0000(RP11-497J) processed_chrX   | 35741600 | 35744582 | + | 0    | 0    |
| ENSG0000(TMEM56-R) protein_co_chr1   | 95117923 | 95247225 | + | 0.7  | 0.33 |
| ENSG0000(IGLCOR22-IG_C_pseu) chr22   | 32356676 | 32356988 | - | 0    | 0    |
| ENSG0000(RP3-380C1) processed_chrX   | 95453369 | 95453581 | + | 0    | 0    |
| ENSG0000(BNIP3P28) processed_chr19   | 21997648 | 21998840 | + | 0    | 0.06 |
| ENSG0000(SUMO2P14) processed_chr7    | 24589115 | 24589407 | - | 0    | 0    |

|                                     |          |          |   |       |       |
|-------------------------------------|----------|----------|---|-------|-------|
| ENSG0000(RP11-223J) processed_chr2  | 87301658 | 87302251 | + | 0     | 0     |
| ENSG0000(IMMP1LP3) processed_chr7   | 2287915  | 2288428  | + | 0     | 0     |
| ENSG0000(RP11-809N) processed_chr6  | 1.05E+08 | 1.05E+08 | + | 0.04  | 0     |
| ENSG0000(RP11-697H) processed_chr11 | 63698596 | 63698764 | - | 0     | 0     |
| ENSG0000(RP11-1003) processed_chr17 | 71011997 | 71013587 | + | 0     | 0     |
| ENSG0000(SCML2P2) processed_chr16   | 25069570 | 25070109 | + | 0.4   | 0     |
| ENSG0000(KATNBL1P) processed_chr6   | 25248263 | 25248779 | + | 0     | 0     |
| ENSG0000(CTC-523E2) lincRNA_chr19   | 34849278 | 34860576 | - | 0     | 0     |
| ENSG0000(RP11-409K) processed_chr6  | 67456346 | 67457250 | - | 0     | 0     |
| ENSG0000(RP11-159H) processed_chr8  | 69794062 | 69794734 | + | 0     | 0     |
| ENSG0000(RP11-453D) processed_chr6  | 87891424 | 87891869 | + | 0     | 0     |
| ENSG0000(RP11-443I) processed_chr2  | 57048350 | 57049336 | - | 0     | 0     |
| ENSG0000(RP11-377H) processed_chr7  | 36146842 | 36148024 | + | 0     | 0     |
| ENSG0000(RP11-175E) processed_chr8  | 23805933 | 23806154 | - | 0     | 0     |
| ENSG0000(CTD-2012J) lincRNA_chr5    | 1594626  | 1611467  | + | 0.01  | 0     |
| ENSG0000(NUDT4P2) processed_chr1    | 1.46E+08 | 1.46E+08 | + | 44.58 | 45.44 |
| ENSG0000(RP11-379H) antisense_chr7  | 35695214 | 35699413 | + | 3.25  | 2.99  |
| ENSG0000(ELOCP5) processed_chrY     | 21631683 | 21632015 | - | 0     | 0     |
| ENSG0000(LL22NC03) sense_intrchr22  | 15796959 | 15798346 | + | 0     | 0.27  |
| ENSG0000(CTB-113I2) processed_chr5  | 1.34E+08 | 1.34E+08 | - | 0     | 0     |
| ENSG0000(RP11-123C) processed_chr16 | 69025860 | 69026643 | - | 0     | 0     |
| ENSG0000(IGHV3OR1) IG_V_gene_chr16  | 33009175 | 33009620 | + | 0     | 0     |
| ENSG0000(RP11-33A1) processed_chr3  | 1.78E+08 | 1.78E+08 | - | 0.16  | 0.35  |
| ENSG0000(CTA-293F1) antisense_chr7  | 20328299 | 20331747 | - | 0.44  | 0.39  |
| ENSG0000(RP11-416L) processed_chr2  | 60682873 | 60683244 | - | 0     | 0     |
| ENSG0000(RP11-320J) processed_chrX  | 34516920 | 34517358 | + | 0     | 0     |
| ENSG0000(RP5-966M) processed_chr3   | 52753526 | 52754690 | + | 0     | 0     |
| ENSG0000(IGLVIVOR2) IG_V_pseu_chr22 | 25437306 | 25437823 | - | 0     | 0     |
| ENSG0000(PRR20FP) unprocesschr13    | 57173453 | 57173632 | + | 0     | 0     |
| ENSG0000(RP11-171I2) lincRNA_chr2   | 1.79E+08 | 1.79E+08 | + | 0.27  | 0.15  |
| ENSG0000(YWHAQP7) processed_chr12   | 76619386 | 76620043 | + | 0     | 0.11  |
| ENSG0000(RP11-12L8) processed_chr1  | 1.16E+08 | 1.16E+08 | + | 0     | 0     |
| ENSG0000(RP11-479F) processed_chr2  | 61249780 | 61250621 | + | 0     | 0     |
| ENSG0000(ARMCX5-G) processed_chrX   | 1.03E+08 | 1.03E+08 | + | 3.47  | 4.01  |
| ENSG0000(RP11-401N) lincRNA_chr8    | 49906863 | 49907446 | - | 0     | 0     |
| ENSG0000(CTC-457E2) unprocesschr19  | 22595479 | 22596163 | - | 0     | 0     |
| ENSG0000(CTD-2571L) processed_chr19 | 47794650 | 47794920 | + | 0     | 0     |
| ENSG0000(RP11-394I1) lincRNA_chr2   | 1.74E+08 | 1.74E+08 | + | 0.06  | 0.25  |
| ENSG0000(RPL23AP8) processed_chr2   | 2.42E+08 | 2.42E+08 | + | 1.18  | 1.36  |
| ENSG0000(RP6-166C1) processed_chrX  | 1.21E+08 | 1.21E+08 | + | 0     | 0     |
| ENSG0000(RP11-435C) antisense_chr9  | 95506235 | 95507636 | + | 0.45  | 0.45  |
| ENSG0000(RP11-642C) lincRNA_chr8    | 88808318 | 88808908 | - | 0     | 0.26  |
| ENSG0000(RP1-249C1) processed_chrX  | 88827554 | 88829858 | - | 0     | 0     |
| ENSG0000(RP11-265D) processed_chrX  | 1.35E+08 | 1.35E+08 | - | 0     | 0     |
| ENSG0000(HINT1P2) processed_chr7    | 95018163 | 95018397 | - | 0     | 0     |



|                                      |          |          |   |      |      |
|--------------------------------------|----------|----------|---|------|------|
| ENSG0000(BOLA2P2 transcribed chr3    | 47499841 | 47500407 | + | 0    | 0    |
| ENSG0000(RP1-57E3.1 processed_ chr6  | 48952070 | 48952781 | - | 0    | 0    |
| ENSG0000(RP4-607J2. processed_ chr7  | 2393847  | 2394131  | - | 0    | 0    |
| ENSG0000(RP4-789D1 processed_ chr1   | 35873270 | 35873752 | - | 0    | 0    |
| ENSG0000(RP11-409C processed_ chr9   | 71804283 | 71804826 | + | 0    | 0    |
| ENSG0000(LINC01109 lincRNA chr8      | 76404058 | 76407138 | + | 0    | 0.02 |
| ENSG0000(CTC-523E2 lincRNA chr19     | 34904392 | 34905057 | - | 0    | 0    |
| ENSG0000(RP11-660N lincRNA chr4      | 25220403 | 25220913 | + | 0    | 0    |
| ENSG0000(RP11-272J. processed_ chr10 | 43728217 | 43728728 | + | 0    | 0    |
| ENSG0000(RP11-814N processed_ chr3   | 66622760 | 66623102 | - | 0    | 0    |
| ENSG0000(RP11-434J. processed_ chrX  | 1.48E+08 | 1.48E+08 | - | 0    | 0    |
| ENSG0000(RP11-575G processed_ chr12  | 1.01E+08 | 1.01E+08 | - | 0    | 0    |
| ENSG0000(IGHV3OR1 IG_V_gene chr16    | 33827214 | 33827661 | + | 0    | 0    |
| ENSG0000(RP11-629P processed_ chr2   | 1.32E+08 | 1.32E+08 | - | 0    | 0    |
| ENSG0000(RP11-665C processed_ chr14  | 55240622 | 55241080 | - | 0    | 0    |
| ENSG0000(CTA-221G9 processed_ chr22  | 25179309 | 25179554 | - | 0    | 0    |
| ENSG0000(RP11-678G processed_ chr19  | 21634833 | 21635175 | - | 0    | 0    |
| ENSG0000(RP4-800O1 processed_ chr12  | 1.26E+08 | 1.26E+08 | - | 0    | 0    |
| ENSG0000(RP5-855F1 lincRNA chr7      | 10940423 | 10940735 | + | 0    | 0    |
| ENSG0000(RP11-309H processed_ chr1   | 1.91E+08 | 1.91E+08 | - | 0    | 0    |
| ENSG0000(RPP40P2 processed_ chr13    | 59262680 | 59263391 | + | 0    | 0    |
| ENSG0000(RP4-555D2 lincRNA chr3      | 43996896 | 43997443 | + | 0    | 0    |
| ENSG0000(RNF138P2 processed_ chr7    | 53316149 | 53316740 | + | 0    | 0    |
| ENSG0000(RP11-162I. processed_ chr15 | 61674767 | 61675212 | + | 0    | 0    |
| ENSG0000(RP11-461C processed_ chr5   | 1.38E+08 | 1.38E+08 | - | 0    | 0    |
| ENSG0000(VDAC3P1 processed_ chr14    | 99964529 | 99965378 | + | 0    | 0.08 |
| ENSG0000(RP13-216E sense_ovei chrX   | 73958059 | 73969485 | - | 0.27 | 0    |
| ENSG0000(RP11-430G lincRNA chr1      | 61741998 | 61742424 | - | 0.19 | 0    |
| ENSG0000(ABO19440. lincRNA chr14     | 1.06E+08 | 1.06E+08 | + | 0    | 0    |
| ENSG0000(PRR13P7 processed_ chr8     | 91909738 | 91910167 | - | 0.19 | 0    |
| ENSG0000(RP11-138A lincRNA chr7      | 1.31E+08 | 1.31E+08 | - | 0    | 0    |
| ENSG0000(RP1-138A5 processed_ chrX   | 87723089 | 87723238 | - | 0    | 0    |
| ENSG0000(MTCO1P22 processed_ chr5    | 1E+08    | 1E+08    | - | 0    | 0    |
| ENSG0000(RP1-142L7. lincRNA chr6     | 1.12E+08 | 1.12E+08 | - | 0    | 0    |
| ENSG0000(BRDTP1 processed_ chrX      | 96337236 | 96337912 | - | 0    | 0    |
| ENSG0000(RP6-166C1 processed_ chrX   | 1.21E+08 | 1.21E+08 | + | 0    | 0    |
| ENSG0000(RP11-9M1. processed_ chr9   | 1.14E+08 | 1.14E+08 | + | 0    | 0    |
| ENSG0000(RPL21P136 processed_ chr12  | 12614359 | 12615907 | - | 0    | 0    |
| ENSG0000(LINC01050 lincRNA chr13     | 42810366 | 42812562 | - | 0.94 | 1.88 |
| ENSG0000(RP3-523E1 antisense chr6    | 53918974 | 53920788 | - | 0    | 0    |
| ENSG0000(RP11-369K processed_ chr8   | 1.21E+08 | 1.21E+08 | - | 0    | 0    |
| ENSG0000(RP11-478H transcribed chr10 | 28806121 | 28813458 | + | 0    | 0    |
| ENSG0000(RP11-1072 processed_ chr17  | 44596346 | 44597344 | + | 0    | 0    |
| ENSG0000(BNIP3P4 processed_ chr9     | 64810865 | 64811429 | - | 0    | 0    |
| ENSG0000(RP1-152L7. processed_ chr6  | 52688661 | 52688998 | + | 0    | 0    |

|                                           |          |          |   |       |      |
|-------------------------------------------|----------|----------|---|-------|------|
| ENSG0000( CTC-336P1 antisense chr2        | 32013061 | 32013368 | + | 0.34  | 0    |
| ENSG0000( CTD-2195N processed_ chr5       | 6532891  | 6533200  | - | 0     | 0    |
| ENSG0000( KRT18P9 processed_ chr6         | 34189780 | 34191079 | + | 0     | 0    |
| ENSG0000( CARSP1 processed_ chr15         | 68749501 | 68750691 | + | 0     | 0    |
| ENSG0000( RP5-894D1 lincRNA chr6          | 1.7E+08  | 1.7E+08  | - | 0     | 0    |
| ENSG0000( RP11-1037 processed_ chr3       | 22811390 | 22812047 | - | 0     | 0    |
| ENSG0000( SUMO2P15 processed_ chr15       | 40760597 | 40760874 | + | 0     | 0    |
| ENSG0000( HMGB1P5( processed_ chr10       | 49551308 | 49552652 | + | 0     | 0    |
| ENSG0000( RP11-510D processed_ chr18      | 28824652 | 28824826 | - | 0     | 0    |
| ENSG0000( RP11-238F lincRNA chr17         | 70778604 | 70779230 | - | 0     | 0    |
| ENSG0000( RP11-157E processed_ chr8       | 1.34E+08 | 1.34E+08 | - | 0     | 0    |
| ENSG0000( PRELID3BP processed_ chr13      | 51195881 | 51196081 | + | 0     | 0    |
| ENSG0000( RP11-355B processed_ chr2       | 61575774 | 61576394 | + | 0     | 0    |
| ENSG0000( RP4-761I2. processed_ chr6      | 11154929 | 11155150 | - | 0     | 0    |
| ENSG0000( RP11-745K processed_ chr8       | 5455218  | 5455665  | - | 0     | 0    |
| ENSG0000( DIMT1P1 processed_ chr3         | 1.1E+08  | 1.1E+08  | - | 0     | 0    |
| ENSG0000( RP11-101P processed_ chr13      | 21216555 | 21216660 | + | 0     | 0    |
| ENSG0000( RP11-543F processed_ chr10      | 8472719  | 8472952  | + | 0     | 0    |
| ENSG0000( RP11-286B lincRNA chr1          | 95743096 | 95759470 | + | 0     | 0    |
| ENSG0000( CTD-2320J processed_ chr7       | 12685637 | 12686033 | + | 0     | 0    |
| ENSG0000( AC240274. protein_co KI270711.1 | 4612     | 29626    | - | 10.76 | 9.32 |
| ENSG0000( CTD-2117L processed_ chr5       | 58503295 | 58503700 | + | 0     | 0    |
| ENSG0000( RP11-1109 lincRNA chr12         | 89371820 | 89372359 | + | 0.4   | 0.3  |
| ENSG0000( MZT1P1 processed_ chr1          | 9780822  | 9781240  | + | 0     | 0    |
| ENSG0000( RP11-230C lincRNA chr6          | 1.57E+08 | 1.57E+08 | - | 0     | 0.2  |
| ENSG0000( LAPTM4BP processed_ chr3        | 72884234 | 72884679 | + | 0     | 0    |
| ENSG0000( RP11-29H2 processed_ chr1       | 1.56E+08 | 1.56E+08 | - | 0     | 0    |
| ENSG0000( AC015849. processed_ chr17      | 35861093 | 35861566 | - | 0     | 0    |
| ENSG0000( RP11-317P processed_ chr1       | 1.83E+08 | 1.83E+08 | + | 0     | 0    |
| ENSG0000( TMCC1-AS antisense chr3         | 1.3E+08  | 1.3E+08  | + | 2.12  | 1.81 |
| ENSG0000( UGT2A2 protein_co chr4          | 69589309 | 69639642 | - | 0.03  | 0    |
| ENSG0000( RP11-510P processed_ chr12      | 42929848 | 42930579 | - | 0     | 0    |
| ENSG0000( AC007326. processed_ chr22      | 18997138 | 18997595 | - | 0     | 0    |
| ENSG0000( RP11-82O2 processed_ chr1       | 1.02E+08 | 1.02E+08 | + | 0     | 0    |
| ENSG0000( ELOCP33 processed_ chr4         | 39932454 | 39933561 | + | 0.1   | 0.12 |
| ENSG0000( CTC-412M processed_ chr19       | 19699203 | 19699409 | - | 0     | 0    |
| ENSG0000( SMIM12P1 processed_ chr2        | 1.08E+08 | 1.08E+08 | + | 0     | 0    |
| ENSG0000( LLOXNC01- processed_ chrX       | 21939461 | 21940160 | + | 0     | 0    |
| ENSG0000( BCRP9 processed_ chr13          | 67790407 | 67790794 | + | 0     | 0    |
| ENSG0000( IGHV1OR1 IG_V_pseu chr15        | 22178107 | 22178542 | - | 0     | 0    |
| ENSG0000( RP11-345E processed_ chrX       | 86798598 | 86799226 | - | 0     | 0    |
| ENSG0000( RP11-289I1 processed_ chr1      | 1.45E+08 | 1.45E+08 | - | 0     | 0    |
| ENSG0000( RP11-432N processed_ chr5       | 17614781 | 17615111 | - | 0     | 0    |
| ENSG0000( RP5-1012F processed_ chr20      | 11838355 | 11838574 | + | 0     | 0    |
| ENSG0000( CTD-2356P processed_ chr19      | 41073804 | 41074107 | - | 0     | 0    |

|                                      |          |            |       |       |
|--------------------------------------|----------|------------|-------|-------|
| ENSG0000(RP11-647P processed_ chr4   | 1.21E+08 | 1.21E+08 + | 0     | 0     |
| ENSG0000(SRXN1 protein_co chr20      | 646615   | 653370 -   | 24.81 | 24.21 |
| ENSG0000(DPRXP2 processed_ chr6      | 35989515 | 35990436 - | 0     | 0     |
| ENSG0000(RAC1P9 processed_ chr7      | 53779783 | 53780263 + | 0     | 0     |
| ENSG0000(AF146191. processed_ chr4   | 1.9E+08  | 1.9E+08 +  | 0     | 0     |
| ENSG0000(RP1-85D24 processed_ chrY   | 11107389 | 11107596 - | 0     | 0     |
| ENSG0000(RP11-736G processed_ chr18  | 71932493 | 71932796 + | 0     | 0     |
| ENSG0000(RP11-435C antisense chr9    | 95494924 | 95495379 + | 0     | 0     |
| ENSG0000(WI2-2221J. processed_ chr2  | 16149251 | 16149394 + | 0     | 0     |
| ENSG0000(IGHD4OR1. IG_D_gene chr15   | 20004797 | 20004815 - | 0     | 0     |
| ENSG0000(AP000654. processed_ chr11  | 86821143 | 86821728 - | 0     | 0     |
| ENSG0000(RP11-1152 lincRNA chr2      | 1.58E+08 | 1.58E+08 + | 0     | 0     |
| ENSG0000(CTAGE6 protein_co chr7      | 1.44E+08 | 1.44E+08 - | 0.07  | 0     |
| ENSG0000(RP11-390F processed_ chrX   | 98348451 | 98348748 - | 0     | 0     |
| ENSG0000(RP11-10C2 lincRNA chr3      | 33793644 | 33794145 - | 0     | 0.33  |
| ENSG0000(RP11-1109 lincRNA chr12     | 89367807 | 89369301 + | 0.38  | 0.42  |
| ENSG0000(B3GNTL1P. processed_ chr6   | 47368943 | 47369230 + | 0     | 0     |
| ENSG0000(RP5-891H2 processed_ chr1   | 44187943 | 44189049 - | 0     | 0     |
| ENSG0000(CTA-298G8 processed_ chr7   | 24674309 | 24674612 - | 0     | 0     |
| ENSG0000(RP11-797J. processed_ chr11 | 28144907 | 28145204 - | 0     | 0     |
| ENSG0000(RP11-382B unprocessε chr15  | 30420283 | 30420429 - | 0     | 0     |
| ENSG0000(LINC02104 lincRNA chr5      | 39520431 | 39524708 + | 0.13  | 0     |
| ENSG0000(RP11-324I2 antisense chr10  | 35314552 | 35336401 - | 1.35  | 0.85  |
| ENSG0000(IGHD1OR1. IG_D_gene chr15   | 20011153 | 20011169 - | 0     | 0     |
| ENSG0000(NDE1P2 processed_ chr13     | 36804198 | 36805302 - | 0     | 0     |
| ENSG0000(RP11-96J1. processed_ chr6  | 53381519 | 53382203 + | 0     | 0     |
| ENSG0000(RP11-1114 processed_ chrX   | 1.37E+08 | 1.37E+08 + | 0     | 0     |
| ENSG0000(CTD-2526A processed_ chr17  | 80515657 | 80515812 + | 0     | 0     |
| ENSG0000(RP11-435C processed_ chr10  | 1.19E+08 | 1.19E+08 + | 0     | 0     |
| ENSG0000(RP11-274B lincRNA chr7      | 1.29E+08 | 1.29E+08 + | 0.14  | 0.1   |
| ENSG0000(RP1-321E8 processed_ chrX   | 1.21E+08 | 1.21E+08 + | 0     | 0     |
| ENSG0000(RP11-701H sense_intrε chr15 | 24991486 | 24991753 + | 0     | 0     |
| ENSG0000(RP11-44N1 processed_ chr8   | 96126967 | 96127801 - | 0     | 0     |
| ENSG0000(CTD-2384B processed_ chr11  | 47041027 | 47041945 - | 0     | 0     |
| ENSG0000(IGKV1OR2- IG_V_pseu chr2    | 97322137 | 97322423 - | 0     | 0     |
| ENSG0000(RP11-179H processed_ chr10  | 1.2E+08  | 1.2E+08 -  | 0     | 0     |
| ENSG0000(RP4-666O2 processed_ chr1   | 47483698 | 47484162 - | 0     | 0     |
| ENSG0000(RP11-335E processed_ chr2   | 76260755 | 76261661 - | 0     | 0     |
| ENSG0000(RP11-843B processed_ chr12  | 32100485 | 32100735 - | 0     | 0     |
| ENSG0000(RP11-241N processed_ chr14  | 96019484 | 96019765 + | 0     | 0     |
| ENSG0000(RP11-138I1 antisense chr10  | 11611305 | 11612227 + | 0     | 0     |
| ENSG0000(HTATSF1P2 processed_ chr6   | 3023142  | 3023772 -  | 1.74  | 1.91  |
| ENSG0000(RP3-468B3 processed_ chr6   | 33883170 | 33883411 + | 0     | 0     |
| ENSG0000(RP11-81A1 processed_ chr15  | 79984151 | 79985724 + | 0     | 0     |
| ENSG0000(RP1-85D24 processed_ chrY   | 11107065 | 11107263 - | 0     | 0     |

|                                       |          |            |       |       |
|---------------------------------------|----------|------------|-------|-------|
| ENSG0000( AC002128. antisense chr19   | 35251440 | 35253639 - | 0     | 0     |
| ENSG0000( RP3-483K1 lincRNA chr6      | 53350158 | 53350705 + | 0.66  | 0.43  |
| ENSG0000( RP11-10E6 processed_ chr7   | 1.1E+08  | 1.1E+08 +  | 0     | 0     |
| ENSG0000( RP11-350D processed_ chr11  | 34709600 | 34710161 + | 0     | 0     |
| ENSG0000( RP11-253I1 processed_ chr12 | 12452103 | 12452481 - | 0     | 0.25  |
| ENSG0000( NANOGP3 processed_ chr6     | 53418452 | 53418737 - | 0     | 0     |
| ENSG0000( RP11-295P processed_ chrY   | 11473727 | 11474237 - | 0     | 0     |
| ENSG0000( RP11-33I11 processed_ chr8  | 60906059 | 60906452 + | 0     | 0     |
| ENSG0000( C8orf59P2 processed_ chr5   | 37130430 | 37130700 + | 0     | 0     |
| ENSG0000( RP11-440G processed_ chr12  | 42069935 | 42070625 - | 0     | 0     |
| ENSG0000( RP11-307C antisense chr1    | 1.55E+08 | 1.55E+08 + | 0.48  | 0.7   |
| ENSG0000( REXO1L9P processed_ chr8    | 85762909 | 85766931 - | 0     | 0     |
| ENSG0000( RP11-1060 lincRNA chr12     | 93945041 | 93947813 + | 0     | 0     |
| ENSG0000( NBPF19 protein_co chr1      | 1.49E+08 | 1.5E+08 +  | 13.26 | 12.51 |
| ENSG0000( RP11-435C lincRNA chr9      | 95406990 | 95407662 - | 0     | 0     |
| ENSG0000( RP11-108M processed_ chr10  | 91464578 | 91464708 - | 0     | 0     |
| ENSG0000( SRGNP1 processed_ chr13     | 78285838 | 78286288 + | 0     | 0     |
| ENSG0000( RP11-382D lincRNA chr1      | 1.84E+08 | 1.84E+08 - | 0.13  | 0.64  |
| ENSG0000( OSBPL9P1 processed_ chr3    | 80163327 | 80164795 + | 0     | 0     |
| ENSG0000( RP11-89C3 lincRNA chr11     | 1.11E+08 | 1.11E+08 - | 0     | 0     |
| ENSG0000( RP1-161P9 sense_intr chr17  | 35757199 | 35758325 - | 0     | 0     |
| ENSG0000( 7SK misc_RNA chr17          | 35889558 | 35889804 + | 0     | 0     |
| ENSG0000( RP11-75N6 lincRNA chr13     | 89551233 | 89552389 + | 0     | 0     |
| ENSG0000( RP11-697E processed_ chr15  | 90284376 | 90285580 - | 0     | 0     |
| ENSG0000( RP5-1128N processed_ chr20  | 11608436 | 11609048 - | 0     | 0     |
| ENSG0000( RP5-1092A lincRNA chr1      | 28247144 | 28247568 + | 0     | 0     |
| ENSG0000( RP4-799G3 processed_ chr1   | 2.29E+08 | 2.29E+08 + | 0     | 0     |
| ENSG0000( RP13-266I1 processed_ chrX  | 1.12E+08 | 1.12E+08 + | 0     | 0     |
| ENSG0000( RP11-171I2 lincRNA chr2     | 1.79E+08 | 1.79E+08 + | 0     | 0     |
| ENSG0000( IGKV2OR2- IG_V_pseu chr2    | 97050729 | 97051028 + | 0     | 0     |
| ENSG0000( MZT1P2 processed_ chr7      | 1.39E+08 | 1.39E+08 + | 0     | 0     |
| ENSG0000( NAPGP1 processed_ chr10     | 88699683 | 88700401 + | 0     | 0     |
| ENSG0000( RP11-432J1 lincRNA chr10    | 70929925 | 70932057 + | 0     | 0     |
| ENSG0000( RP11-506H processed_ chr5   | 55356308 | 55357523 - | 0     | 0     |
| ENSG0000( PRR13P3 processed_ chr11    | 1.17E+08 | 1.17E+08 - | 0     | 0     |
| ENSG0000( RP11-809F processed_ chr3   | 1.76E+08 | 1.76E+08 + | 0     | 0     |
| ENSG0000( RP11-751K processed_ chr7   | 1.36E+08 | 1.36E+08 + | 0     | 0     |
| ENSG0000( RPL23AP9C processed_ chr1   | 1E+08    | 1E+08 +    | 0     | 0     |
| ENSG0000( RP11-582E processed_ chr12  | 27093923 | 27094223 - | 0     | 0     |
| ENSG0000( RP4-591B8 processed_ chr1   | 1.14E+08 | 1.14E+08 + | 0     | 0     |
| ENSG0000( RP5-1057J1 lincRNA chr1     | 23378380 | 23379029 - | 0     | 0.11  |
| ENSG0000( RP1-269O5 processed_ chrX   | 1.12E+08 | 1.12E+08 + | 0     | 0     |
| ENSG0000( CYCSP1 processed_ chr14     | 76633714 | 76634028 + | 0     | 0     |
| ENSG0000( RP11-647C processed_ chr14  | 39370279 | 39370756 - | 0     | 0     |
| ENSG0000( NBPF10 protein_co chr1      | 1.46E+08 | 1.46E+08 - | 5.22  | 6.17  |

|                                      |          |          |   |      |      |
|--------------------------------------|----------|----------|---|------|------|
| ENSG0000(RP4-718P1 processed_ chr20  | 13073667 | 13074312 | - | 0    | 0    |
| ENSG0000(RP11-188D lincRNA chr1      | 1.17E+08 | 1.17E+08 | - | 0.98 | 0.41 |
| ENSG0000(RP1-224A6 processed_ chr1   | 22068340 | 22068827 | - | 0    | 0    |
| ENSG0000(RPL17P51 processed_ chr13   | 40224625 | 40224862 | - | 0    | 0    |
| ENSG0000(PPATP2 processed_ chrX      | 78699384 | 78699891 | - | 0    | 0    |
| ENSG0000(RP13-238F processed_ chr10  | 1.24E+08 | 1.24E+08 | + | 0    | 0    |
| ENSG0000(RP11-803A processed_ chr2   | 1.3E+08  | 1.3E+08  | - | 0    | 0    |
| ENSG0000(RP11-295B processed_ chr13  | 98553243 | 98553780 | + | 0    | 0    |
| ENSG0000(RP11-666A processed_ chr1   | 1.44E+08 | 1.44E+08 | - | 0    | 0    |
| ENSG0000(RP11-373N processed_ chr6   | 28633381 | 28633594 | - | 0    | 0    |
| ENSG0000(RP11-541E transcribed chr2  | 38535258 | 38536249 | - | 0    | 0    |
| ENSG0000(MMP28 protein_co chr17      | 35756249 | 35795707 | - | 0.57 | 0.28 |
| ENSG0000(CT45A2 protein_co chrX      | 1.36E+08 | 1.36E+08 | - | 0    | 0    |
| ENSG0000(RP11-342K sense_intr chr2   | 75669989 | 75670454 | + | 1    | 0.73 |
| ENSG0000(RP11-290L processed_ chr9   | 39159071 | 39160319 | + | 0    | 0    |
| ENSG0000(RP11-269M processed_ chr5   | 50603229 | 50603511 | + | 0    | 0    |
| ENSG0000(CTC-661116 processed_ chr16 | 57332379 | 57332599 | - | 0    | 0    |
| ENSG0000(RP11-192B processed_ chrX   | 87143854 | 87144748 | - | 0    | 0    |
| ENSG0000(RP4-560B9 processed_ chr1   | 1.72E+08 | 1.72E+08 | - | 0    | 0    |
| ENSG0000(RP4-673D2 processed_ chr20  | 1756756  | 1758940  | - | 0.03 | 0    |
| ENSG0000(RP11-841C processed_ chr12  | 19418927 | 19419161 | - | 0    | 0    |
| ENSG0000(DPRXP7 processed_ chrX      | 1.12E+08 | 1.12E+08 | - | 0    | 0    |
| ENSG0000(SQSTM1P1 processed_ chr13   | 62406058 | 62406916 | - | 0    | 0    |
| ENSG0000(CICP24 processed_ chr7      | 63768257 | 63771047 | - | 0    | 0    |
| ENSG0000(RP11-14N4 processed_ chr14  | 38605255 | 38606098 | + | 0    | 0    |
| ENSG0000(RP11-710C antisense chr4    | 95549129 | 95552457 | + | 0    | 0    |
| ENSG0000(RP4-799G3 processed_ chr1   | 2.29E+08 | 2.29E+08 | + | 0    | 0    |
| ENSG0000(CTC-447K7 processed_ chr5   | 1.55E+08 | 1.55E+08 | + | 0    | 0    |
| ENSG0000(MTND3P15 processed_ chr5    | 1E+08    | 1E+08    | - | 0    | 0    |
| ENSG0000(CTB-152G1 processed_ chr7   | 1.05E+08 | 1.05E+08 | + | 0    | 0    |
| ENSG0000(RP11-384A processed_ chr3   | 1.94E+08 | 1.94E+08 | + | 0    | 0    |
| ENSG0000(ABI1P1 unprocessed chr14    | 55546674 | 55548123 | + | 0    | 0    |
| ENSG0000(AP000403. processed_ chr21  | 19620695 | 19621545 | + | 0    | 0    |
| ENSG0000(RBM11P1 processed_ chr6     | 1.33E+08 | 1.33E+08 | + | 0    | 0    |
| ENSG0000(RP11-60E8 processed_ chr12  | 50806335 | 50806437 | - | 0    | 0    |
| ENSG0000(RP11-787P processed_ chr11  | 23370116 | 23377644 | - | 0    | 0    |
| ENSG0000(MEMO1P5 processed_ chr13    | 95394049 | 95394454 | + | 0    | 0    |
| ENSG0000(CTB-23I7.3 processed_ chr5  | 1.51E+08 | 1.51E+08 | + | 0    | 0    |
| ENSG0000(RP11-666C processed_ chr16  | 28548331 | 28548658 | - | 0    | 0    |
| ENSG0000(SNRPGP20 processed_ chr12   | 79989014 | 79989218 | - | 0    | 0    |
| ENSG0000(RP11-505K processed_ chr6   | 1.13E+08 | 1.13E+08 | + | 0    | 0    |
| ENSG0000(CTC-559E9 processed_ chr19  | 19750618 | 19752544 | + | 0    | 0    |
| ENSG0000(RP11-288K processed_ chr12  | 1695830  | 1698044  | - | 0    | 0    |
| ENSG0000(RP6-166C1 processed_ chrX   | 1.21E+08 | 1.21E+08 | + | 0    | 0    |
| ENSG0000(CCL5 protein_co chr17       | 35871491 | 35880793 | - | 2.92 | 3.57 |

|                                 |       |          |          |   |      |      |
|---------------------------------|-------|----------|----------|---|------|------|
| ENSG0000(RP11-603B unprocessed) | chr15 | 22202392 | 22202734 | - | 0    | 0    |
| ENSG0000(RP11-73B8 processed)   | chr12 | 43633093 | 43633281 | + | 0    | 0    |
| ENSG0000(RP11-382A processed)   | chr8  | 1.27E+08 | 1.27E+08 | + | 0    | 0    |
| ENSG0000(RP11-712C processed)   | chr14 | 64361392 | 64361637 | + | 0    | 0    |
| ENSG0000(RP11-307A processed)   | chrX  | 35864858 | 35869631 | + | 0.34 | 0.35 |
| ENSG0000(RP11-36B6 lincRNA)     | chr7  | 1.31E+08 | 1.31E+08 | + | 0    | 0.12 |
| ENSG0000(RP4-576H2 processed)   | chr20 | 1591392  | 1591848  | + | 0    | 0    |
| ENSG0000(BNIP3P17 processed)    | chr19 | 20221869 | 20222463 | + | 0    | 0    |
| ENSG0000(ARF4P1 processed)      | chr9  | 1.34E+08 | 1.34E+08 | + | 0    | 0    |
| ENSG0000(RP4-668E1 processed)   | chr7  | 9084022  | 9084175  | + | 0    | 0    |
| ENSG0000(RP11-7G12 processed)   | chr1  | 1.66E+08 | 1.66E+08 | - | 0    | 0    |
| ENSG0000(WBP1LP12 processed)    | chr6  | 95124    | 95454    | + | 0    | 0    |
| ENSG0000(BBIP1P1 processed)     | chr2  | 1.01E+08 | 1.01E+08 | + | 0    | 0    |
| ENSG0000(RP3-368A4 sense_intr)  | chrX  | 74209976 | 74213660 | - | 0.84 | 0.96 |
| ENSG0000(RP11-51I5 processed)   | chr2  | 73877566 | 73878862 | + | 0    | 0    |
| ENSG0000(RP11-365F processed)   | chr7  | 1.39E+08 | 1.39E+08 | - | 0    | 0    |
| ENSG0000(RP11-326I1 lincRNA)    | chr4  | 1.85E+08 | 1.85E+08 | - | 0.06 | 0.19 |
| ENSG0000(RP11-692N processed)   | chr11 | 47796169 | 47796379 | + | 0    | 0    |
| ENSG0000(AC006499 processed)    | chr4  | 10238213 | 10238235 | - | 0    | 0    |
| ENSG0000(RP4-725K1 processed)   | chr1  | 1.49E+08 | 1.49E+08 | + | 0    | 0    |
| ENSG0000(RP11-579D processed)   | chr12 | 48800576 | 48801086 | - | 0.58 | 0.64 |
| ENSG0000(BNIP3P11 processed)    | chr7  | 64678954 | 64687393 | - | 0    | 0    |
| ENSG0000(RP11-230C antisense)   | chr6  | 1.57E+08 | 1.57E+08 | - | 0.28 | 0.31 |
| ENSG0000(RP11-274B lincRNA)     | chr7  | 1.29E+08 | 1.29E+08 | + | 0.05 | 0.18 |
| ENSG0000(RP4-665N4 antisense)   | chr1  | 35992109 | 36013630 | - | 0    | 0    |
| ENSG0000(CTD-3214K sense_intr)  | chr8  | 52722903 | 52723141 | + | 0    | 0    |
| ENSG0000(YPEL5P2 processed)     | chr11 | 47841324 | 47841682 | + | 0    | 0    |
| ENSG0000(RP11-445P processed)   | chr1  | 1.88E+08 | 1.88E+08 | - | 0    | 0    |
| ENSG0000(RP11-380N processed)   | chr13 | 26229332 | 26229644 | - | 0    | 0    |
| ENSG0000(KB-1410C5 processed)   | chr8  | 1.01E+08 | 1.01E+08 | + | 0    | 0    |
| ENSG0000(HIRAP1 processed)      | chr10 | 25691537 | 25692323 | + | 0    | 0    |
| ENSG0000(RP13-444H lincRNA)     | chr13 | 52334295 | 52341896 | + | 0.07 | 0.08 |
| ENSG0000(RP4-775C1 processed)   | chr20 | 6219199  | 6219443  | + | 0    | 0    |
| ENSG0000(PPIAL4E protein_co)    | chr1  | 1.44E+08 | 1.44E+08 | - | 0    | 0    |
| ENSG0000(RP11-632K processed)   | chr7  | 1.51E+08 | 1.51E+08 | - | 0    | 0    |
| ENSG0000(IGKV1OR2-IG_V_pseu)    | chr2  | 97355059 | 97355335 | + | 0    | 0    |
| ENSG0000(RP11-96C2 processed)   | chr10 | 87027184 | 87027477 | + | 0    | 0    |
| ENSG0000(RP11-486G lincRNA)     | chr1  | 84076331 | 84077931 | - | 0.78 | 0.67 |
| ENSG0000(RP5-1033H processed)   | chr1  | 1.01E+08 | 1.01E+08 | + | 0    | 0    |
| ENSG0000(RP11-116D lincRNA)     | chr12 | 1.15E+08 | 1.15E+08 | - | 0.16 | 0    |
| ENSG0000(RP11-536L processed)   | chr1  | 2.05E+08 | 2.05E+08 | + | 0    | 0    |
| ENSG0000(XXbac-BPG unprocessed) | chr6  | 31356647 | 31357637 | + | 0.31 | 0.88 |
| ENSG0000(RP11-511P processed)   | chr7  | 1.5E+08  | 1.5E+08  | - | 0    | 0    |
| ENSG0000(RP11-638D processed)   | chr2  | 1.47E+08 | 1.47E+08 | - | 0    | 0    |
| ENSG0000(RP11-89C3 lincRNA)     | chr11 | 1.11E+08 | 1.11E+08 | - | 0.44 | 1.29 |

|                                       |          |            |       |       |
|---------------------------------------|----------|------------|-------|-------|
| ENSG0000( CTB-88F18 processed_ chr5   | 1.27E+08 | 1.27E+08 - | 0     | 0     |
| ENSG0000( RP11-52M: processed_ chr7   | 44601032 | 44601487 + | 0     | 0     |
| ENSG0000( GS1-531I1: processed_ chr17 | 65644308 | 65644617 + | 0     | 0     |
| ENSG0000( LARP7P1 processed_ chr1     | 2.03E+08 | 2.03E+08 - | 0     | 0     |
| ENSG0000( RP11-130N processed_ chrX   | 74769639 | 74769798 + | 0     | 0     |
| ENSG0000( RP11-181E lincRNA chr2      | 1.11E+08 | 1.11E+08 - | 0.39  | 0.55  |
| ENSG0000( ELOCP35 processed_ chrY     | 17464879 | 17465214 - | 0     | 0     |
| ENSG0000( RP11-407N processed_ chr12  | 50949117 | 50949384 - | 0     | 0     |
| ENSG0000( RP11-85D1 processed_ chr2   | 69251818 | 69252364 - | 0     | 0     |
| ENSG0000( CTD-2542C processed_ chr19  | 21025915 | 21026041 - | 0     | 0     |
| ENSG0000( RP11-864G processed_ chr11  | 1.02E+08 | 1.02E+08 - | 0     | 0     |
| ENSG0000( LIX1L protein_co chr1       | 1.46E+08 | 1.46E+08 - | 11.61 | 12.56 |
| ENSG0000( KRT8P49 processed_ chr11    | 4722740  | 4724171 -  | 0     | 0     |
| ENSG0000( MILR1 protein_co chr17      | 64449037 | 64468643 + | 8.41  | 8.4   |
| ENSG0000( RP11-27G1 unprocessε chr4   | 1.55E+08 | 1.55E+08 + | 0     | 0     |
| ENSG0000( RP3-418A9 processed_ chr6   | 1.11E+08 | 1.11E+08 + | 0     | 0     |
| ENSG0000( RP11-697G processed_ chr6   | 1.09E+08 | 1.09E+08 - | 0     | 0     |
| ENSG0000( CTB-31N19 processed_ chr16  | 21538487 | 21538794 + | 0     | 0     |
| ENSG0000( RP4-813F1 processed_ chr7   | 1.41E+08 | 1.41E+08 + | 0     | 0     |
| ENSG0000( HSPE1P14 processed_ chr8    | 1.02E+08 | 1.02E+08 + | 0     | 0     |
| ENSG0000( ATP2B1-AS lincRNA chr12     | 89708959 | 89712590 + | 0.46  | 0.49  |
| ENSG0000( ACTG1P22 transcribed chr2   | 57755428 | 57766052 + | 0     | 0     |
| ENSG0000( RP11-578F processed_ chr15  | 28830619 | 28831182 - | 0     | 0     |
| ENSG0000( RP11-175G processed_ chr1   | 71738173 | 71738354 + | 0     | 0     |
| ENSG0000( IGHV3OR1 IG_V_pseu chr16    | 33938337 | 33938799 - | 0     | 0     |
| ENSG0000( RP11-60E8 processed_ chr12  | 50847925 | 50848312 - | 0     | 0     |
| ENSG0000( RP11-435I1 processed_ chr16 | 28364700 | 28365333 + | 0     | 0     |
| ENSG0000( RP11-651K processed_ chr11  | 1.32E+08 | 1.32E+08 - | 0     | 0     |
| ENSG0000( PSMA6P4 processed_ chr13    | 97475742 | 97476459 + | 0     | 0     |
| ENSG0000( RP11-3K24 processed_ chr17  | 60315834 | 60316215 + | 0     | 0     |
| ENSG0000( RP11-165D processed_ chr2   | 91723023 | 91723605 + | 0     | 0     |
| ENSG0000( RP11-79J2: processed_ chr2  | 21198518 | 21198896 - | 0     | 0     |
| ENSG0000( RP11-408C antisense chr9    | 1.13E+08 | 1.13E+08 + | 0.11  | 0     |
| ENSG0000( RP11-496I2 processed_ chr14 | 19199763 | 19200279 - | 0     | 0     |
| ENSG0000( RP11-68E1 processed_ chr2   | 1.12E+08 | 1.12E+08 - | 0     | 0     |
| ENSG0000( BNIP3P19 processed_ chr19   | 20323992 | 20324568 - | 0     | 0     |
| ENSG0000( RP11-289A processed_ chr2   | 2.34E+08 | 2.34E+08 + | 0     | 0     |
| ENSG0000( MARK3P1 processed_ chr12    | 46682071 | 46682713 - | 0     | 0     |
| ENSG0000( RP11-10C2 lincRNA chr3      | 33795688 | 33796950 - | 1.53  | 1.58  |
| ENSG0000( RP3-365I1: processed_ chr1  | 1.45E+08 | 1.45E+08 + | 0     | 0     |
| ENSG0000( RP11-326I1 lincRNA chr4     | 1.84E+08 | 1.84E+08 + | 0.68  | 0.81  |
| ENSG0000( KRT8P47 processed_ chr1     | 44103306 | 44104703 - | 0     | 0     |
| ENSG0000( LINC00904 lincRNA chr19     | 34892029 | 34898943 - | 0     | 0     |
| ENSG0000( AL031601. processed_ chr10  | 42209990 | 42210383 + | 0     | 0     |
| ENSG0000( RP11-168P processed_ chr13  | 54116476 | 54116851 + | 0     | 0     |

|                 |                            |       |          |          |   |      |      |
|-----------------|----------------------------|-------|----------|----------|---|------|------|
| ENSG00000101259 | RP11-259K lincRNA          | chr3  | 37216779 | 37217988 | + | 0    | 0    |
| ENSG00000101259 | RP11-685B processed        | chr8  | 18387108 | 18387777 | - | 0    | 0    |
| ENSG00000101259 | BNIP3P35 processed         | chr19 | 22840432 | 22840921 | - | 0    | 0    |
| ENSG00000101259 | RP11-114N processed        | chr14 | 81003325 | 81003645 | - | 0    | 0    |
| ENSG00000101259 | RP11-270B processed        | chr2  | 62168862 | 62171163 | + | 0    | 0    |
| ENSG00000101259 | RP11-435C antisense        | chr9  | 95514045 | 95514520 | + | 0    | 0.18 |
| ENSG00000101259 | RP1-73A14 processed        | chrX  | 1.47E+08 | 1.47E+08 | - | 0    | 0    |
| ENSG00000101259 | BNIP3P36 processed         | chr19 | 22994968 | 22995847 | + | 0    | 0    |
| ENSG00000101259 | RP11-141C processed        | chr3  | 1.96E+08 | 1.96E+08 | - | 0    | 0    |
| ENSG00000101259 | RP4-800G7 unprocessed      | chr7  | 1.49E+08 | 1.49E+08 | - | 0    | 0    |
| ENSG00000101259 | CTC-523E2 processed        | chr19 | 34825414 | 34825996 | + | 0    | 0    |
| ENSG00000101259 | RP11-338I2 processed       | chr2  | 1.17E+08 | 1.17E+08 | - | 0    | 0    |
| ENSG00000101259 | RP11-951I6 antisense       | chr10 | 1.21E+08 | 1.21E+08 | - | 0    | 0    |
| ENSG00000101259 | RP11-598F processed        | chr3  | 96244732 | 96245335 | - | 0    | 0    |
| ENSG00000101259 | DUXAP8 transcribed         | chr22 | 15826566 | 15827187 | + | 0    | 0    |
| ENSG00000101259 | RP11-1E1.2 processed       | chr4  | 77112495 | 77113458 | - | 0    | 0    |
| ENSG00000101259 | RP1-274L7 unprocessed      | chrX  | 1.31E+08 | 1.31E+08 | + | 0    | 0    |
| ENSG00000101259 | LSM1P2 processed           | chr5  | 1.64E+08 | 1.64E+08 | - | 0    | 0    |
| ENSG00000101259 | RP11-564A processed        | chr1  | 2.07E+08 | 2.07E+08 | + | 0    | 0    |
| ENSG00000101259 | RP11-1259 processed        | chr5  | 1.78E+08 | 1.78E+08 | + | 0    | 0    |
| ENSG00000101259 | RP11-393B processed        | chr3  | 1.83E+08 | 1.83E+08 | - | 0    | 0    |
| ENSG00000101259 | CTD-2230N processed        | chrX  | 1.14E+08 | 1.14E+08 | + | 0    | 0    |
| ENSG00000101259 | MTND5P1C processed         | chr5  | 1E+08    | 1E+08    | - | 0    | 0    |
| ENSG00000101259 | RP11-812E unprocessed      | chr16 | 33851785 | 33852069 | - | 0    | 0    |
| ENSG00000101259 | CTD-2194N processed        | chrX  | 88369343 | 88369459 | + | 0    | 0    |
| ENSG00000101259 | RP11-548K processed        | chr7  | 57835309 | 57836251 | - | 0    | 0    |
| ENSG00000101259 | RP11-1012 processed        | chr14 | 67735195 | 67735350 | + | 0    | 0    |
| ENSG00000101259 | GS1-393G1 protein_coding   | chr8  | 1.44E+08 | 1.44E+08 | - | 0.18 | 0.08 |
| ENSG00000101259 | SNX29P2 transcribed        | chr16 | 29350746 | 29370272 | + | 0.54 | 0.25 |
| ENSG00000101259 | RP11-438F processed        | chr1  | 2.49E+08 | 2.49E+08 | + | 0    | 0    |
| ENSG00000101259 | RP11-63N3 processed        | chr18 | 77632928 | 77633360 | - | 0    | 0    |
| ENSG00000101259 | BNIP3P20 processed         | chr19 | 20351502 | 20352079 | + | 0    | 0    |
| ENSG00000101259 | RPL17P3 unprocessed        | chr14 | 81001166 | 81001786 | - | 0    | 0    |
| ENSG00000101259 | ATP1B3P1 processed         | chr2  | 60734895 | 60735715 | - | 0    | 0    |
| ENSG00000101259 | RP11-297J lincRNA          | chr2  | 1.21E+08 | 1.21E+08 | - | 0.19 | 0.1  |
| ENSG00000101259 | NDUFA8P1 processed         | chr10 | 74641410 | 74641776 | - | 0    | 0    |
| ENSG00000101259 | RP11-392C processed        | chr3  | 1.51E+08 | 1.51E+08 | - | 0    | 0    |
| ENSG00000101259 | RP11-688D processed        | chr14 | 84998278 | 84999296 | - | 0    | 0    |
| ENSG00000101259 | CTD-2377C antisense        | chr5  | 74865893 | 74867854 | + | 0    | 0    |
| ENSG00000101259 | CTD-2256P lincRNA          | chr5  | 10269489 | 10269918 | - | 0    | 0.41 |
| ENSG00000101259 | RP11-169K antisense        | chr3  | 11607184 | 11610748 | + | 0    | 0    |
| ENSG00000101259 | CTD-3020H antisense        | chr19 | 8222153  | 8239648  | - | 0    | 0    |
| ENSG00000101259 | MROH7-TT protein_coding    | chr1  | 54641786 | 54742308 | + | 0.01 | 0    |
| ENSG00000101259 | CTC-359M6 sense_intronic   | chr5  | 1.46E+08 | 1.46E+08 | - | 0    | 0    |
| ENSG00000101259 | RP11-761I4 3prime_overhang | chr15 | 81303215 | 81309391 | - | 0.65 | 0.53 |



|                 |            |             |       |          |          |   |      |      |
|-----------------|------------|-------------|-------|----------|----------|---|------|------|
| ENSG00000100000 | RP11-532F  | lincRNA     | chr6  | 711533   | 750729   | + | 0.19 | 0.21 |
| ENSG00000100000 | RP11-787I2 | antisense   | chr6  | 1.09E+08 | 1.09E+08 | + | 0    | 0    |
| ENSG00000100000 | RP5-1182A  | lincRNA     | chr1  | 16617391 | 16617729 | + | 0.28 | 0    |
| ENSG00000100000 | RP1-111B2  | lincRNA     | chr6  | 1.08E+08 | 1.08E+08 | - | 0.49 | 0    |
| ENSG00000100000 | RP11-85G2  | lincRNA     | chr1  | 1.57E+08 | 1.57E+08 | + | 0    | 0    |
| ENSG00000100000 | CTB-113I2C | lincRNA     | chr5  | 1.34E+08 | 1.34E+08 | + | 0.79 | 0.87 |
| ENSG00000100000 | RNU1-29P   | snRNA       | chr7  | 1.2E+08  | 1.2E+08  | - | 0    | 0    |
| ENSG00000100000 | RP11-244H  | protein_co  | chr1  | 34981533 | 35031741 | - | 2.79 | 3.1  |
| ENSG00000100000 | RP4-680D5  | lincRNA     | chr1  | 15682873 | 15683128 | - | 0    | 0    |
| ENSG00000100000 | CTD-254I1N | lincRNA     | chr8  | 6615604  | 6617198  | - | 0.21 | 0.16 |
| ENSG00000100000 | RP1-202O8  | antisense   | chr1  | 6393555  | 6394391  | + | 0.23 | 0.08 |
| ENSG00000100000 | RP11-269G  | unprocessε  | chr17 | 63393355 | 63393586 | + | 0.64 | 0    |
| ENSG00000100000 | RP11-110I1 | lincRNA     | chr11 | 1.19E+08 | 1.19E+08 | - | 0    | 0.22 |
| ENSG00000100000 | RP11-269M  | lincRNA     | chr5  | 50662859 | 50663266 | - | 0    | 0    |
| ENSG00000100000 | RP3-337H4  | antisense   | chr6  | 43519180 | 43519724 | - | 0.27 | 0    |
| ENSG00000100000 | RP1-153G1  | lincRNA     | chr6  | 27404010 | 27406964 | - | 0.22 | 0.05 |
| ENSG00000100000 | RP11-111N  | lincRNA     | chr11 | 76392196 | 76392905 | + | 0.28 | 0.1  |
| ENSG00000100000 | RP11-35J1C | lincRNA     | chr11 | 7704628  | 7882947  | - | 0    | 0    |
| ENSG00000100000 | XXbac-BPG  | lincRNA     | chr6  | 57902609 | 57903148 | - | 0    | 0    |
| ENSG00000100000 | RP11-213H  | lincRNA     | chr5  | 91313057 | 91314402 | - | 0.31 | 0.43 |
| ENSG00000100000 | RP11-386N  | antisense   | chr15 | 92602910 | 92620015 | + | 0    | 0    |
| ENSG00000100000 | RN7SKP29C  | misc_RNA    | chr6  | 1.37E+08 | 1.37E+08 | + | 0    | 0    |
| ENSG00000100000 | CTD-2195N  | lincRNA     | chr5  | 1.27E+08 | 1.27E+08 | + | 0    | 0    |
| ENSG00000100000 | RP11-1250  | lincRNA     | chr5  | 34158121 | 34158767 | + | 0.12 | 0.35 |
| ENSG00000100000 | RP4-678D1  | antisense   | chr20 | 53255979 | 53487274 | - | 0    | 0    |
| ENSG00000100000 | RP11-52L5  | antisense   | chr13 | 78596129 | 78599619 | + | 0    | 0    |
| ENSG00000100000 | RP11-379F  | sense_intrō | chr3  | 1.59E+08 | 1.59E+08 | + | 0.37 | 0    |
| ENSG00000100000 | RP11-87N3  | processed_  | chr17 | 64572829 | 64573081 | + | 0    | 0    |
| ENSG00000100000 | RP11-1017  | lincRNA     | chr14 | 1.02E+08 | 1.02E+08 | + | 2.67 | 2.45 |
| ENSG00000100000 | CTD-2589H  | antisense   | chr5  | 675826   | 676616   | + | 0    | 0.09 |
| ENSG00000100000 | RP1-28H20  | lincRNA     | chr20 | 46689659 | 46690289 | + | 0.11 | 0.6  |
| ENSG00000100000 | RP11-254F  | antisense   | chr2  | 10054421 | 10054866 | - | 0    | 0    |
| ENSG00000100000 | CTD-2201E  | lincRNA     | chr5  | 43006733 | 43007543 | - | 0.16 | 0.26 |
| ENSG00000100000 | RP5-1112D  | lincRNA     | chr6  | 1.11E+08 | 1.11E+08 | + | 0.08 | 0    |
| ENSG00000100000 | CTB-35F21  | lincRNA     | chr5  | 1.4E+08  | 1.4E+08  | + | 0    | 0    |
| ENSG00000100000 | RP11-321N  | protein_co  | chr6  | 85557978 | 85615234 | - | 1.37 | 1.45 |
| ENSG00000100000 | CTC-251D1  | antisense   | chr5  | 1.52E+08 | 1.52E+08 | + | 0.05 | 0.16 |
| ENSG00000100000 | CTC-428G2  | antisense   | chr5  | 1.15E+08 | 1.15E+08 | + | 0.33 | 0.36 |
| ENSG00000100000 | SNORA51    | snoRNA      | chr20 | 2655067  | 2655198  | + | 0    | 0    |
| ENSG00000100000 | RP1-63M2   | antisense   | chr20 | 33674517 | 33675380 | + | 0    | 0    |
| ENSG00000100000 | RP5-892K4  | antisense   | chr1  | 2141084  | 2145279  | - | 0.01 | 0    |
| ENSG00000100000 | RP11-426L  | protein_co  | chr1  | 1.13E+08 | 1.13E+08 | - | 0    | 0    |
| ENSG00000100000 | RP1-79C4.4 | lincRNA     | chr1  | 1.71E+08 | 1.71E+08 | + | 0.05 | 0.21 |
| ENSG00000100000 | RN7SKP29C  | misc_RNA    | chrX  | 12614003 | 12614197 | - | 0    | 0    |
| ENSG00000100000 | CTD-2235C  | lincRNA     | chr5  | 75363760 | 75364242 | + | 0    | 0    |

|                     |            |       |          |          |   |      |      |
|---------------------|------------|-------|----------|----------|---|------|------|
| ENSG0000(BMS1P4     | processed_ | chr10 | 73699151 | 73730487 | - | 1.74 | 2.2  |
| ENSG0000(U3         | snoRNA     | chr4  | 1.59E+08 | 1.59E+08 | + | 0    | 0    |
| ENSG0000(RN7SKP4    | misc_RNA   | chr13 | 45123093 | 45123414 | + | 0    | 0    |
| ENSG0000(RNU6-94P   | snRNA      | chr15 | 50347423 | 50347529 | - | 0    | 0    |
| ENSG0000(RP5-894D1  | lincRNA    | chr6  | 1.7E+08  | 1.7E+08  | - | 0    | 0    |
| ENSG0000(XXbac-BPG  | lincRNA    | chr6  | 31200165 | 31201918 | - | 0    | 0    |
| ENSG0000(AC009014.  | protein_co | chr5  | 1.36E+08 | 1.36E+08 | - | 0    | 0.04 |
| ENSG0000(RP11-337N  | antisense  | chr2  | 1.77E+08 | 1.77E+08 | + | 0    | 0    |
| ENSG0000(PLS3-AS1   | antisense  | chrX  | 1.16E+08 | 1.16E+08 | - | 0.1  | 0.21 |
| ENSG0000(CTD-2310F  | antisense  | chr5  | 56927874 | 56929573 | + | 0    | 0.07 |
| ENSG0000(RP11-1C8.7 | lincRNA    | chr8  | 1.03E+08 | 1.03E+08 | - | 0    | 0    |
| ENSG0000(RP11-356B  | sense_intr | chr9  | 1.27E+08 | 1.27E+08 | + | 0    | 0    |
| ENSG0000(RP1-224A6  | lincRNA    | chr1  | 22100613 | 22101360 | + | 0    | 0    |
| ENSG0000(RNU7-10P   | snRNA      | chr3  | 17664963 | 17665025 | + | 0    | 0    |
| ENSG0000(RP11-245J  | lincRNA    | chr3  | 64008082 | 64008692 | - | 0.11 | 0    |
| ENSG0000(RP11-464F  | antisense  | chr10 | 73654039 | 73674719 | + | 0    | 0    |
| ENSG0000(CTC-332L2. | lincRNA    | chr5  | 1.1E+08  | 1.1E+08  | - | 0    | 0.15 |
| ENSG0000(RP11-16D2  | lincRNA    | chr13 | 34348043 | 34614170 | + | 0    | 0    |
| ENSG0000(RP11-565F  | sense_intr | chr17 | 9553323  | 9555696  | - | 0.23 | 0.13 |
| ENSG0000(SNORD11B   | snoRNA     | chr2  | 2.02E+08 | 2.02E+08 | + | 0    | 0    |
| ENSG0000(RP1-178F1  | processed_ | chr1  | 1.54E+08 | 1.54E+08 | - | 3.21 | 4.55 |
| ENSG0000(RP11-214N  | lincRNA    | chr2  | 9555899  | 9556775  | + | 0.21 | 0.31 |
| ENSG0000(LINC01215  | lincRNA    | chr3  | 1.08E+08 | 1.08E+08 | + | 0    | 0    |
| ENSG0000(RP1-244F2. | antisense  | chr6  | 45421079 | 45422005 | - | 0.87 | 0.81 |
| ENSG0000(CYB561D2   | antisense  | chr3  | 50365334 | 50368197 | + | 0.59 | 0.15 |
| ENSG0000(RP11-436D  | lincRNA    | chr6  | 97283303 | 98399872 | + | 0    | 0    |
| ENSG0000(RP11-343L  | lincRNA    | chr5  | 83049376 | 83050964 | - | 0.22 | 0.28 |
| ENSG0000(RP11-1293  | lincRNA    | chr2  | 3496956  | 3497428  | + | 0    | 0    |
| ENSG0000(RP11-51J9. | lincRNA    | chr8  | 30155830 | 30156232 | - | 1.26 | 0.92 |
| ENSG0000(RP11-97C1  | antisense  | chr3  | 3152942  | 3153435  | + | 0.92 | 2.18 |
| ENSG0000(AC005740.  | antisense  | chr5  | 1.42E+08 | 1.42E+08 | + | 0.19 | 0.14 |
| ENSG0000(CTD-2024P  | lincRNA    | chr5  | 34651457 | 34651888 | - | 0    | 0.41 |
| ENSG0000(AGAP11     | processed_ | chr10 | 86970741 | 87010126 | + | 0.23 | 0.22 |
| ENSG0000(KB-1410C5  | lincRNA    | chr8  | 1.01E+08 | 1.01E+08 | + | 0.81 | 2.23 |
| ENSG0000(MIR98      | miRNA      | chrX  | 53556223 | 53556341 | - | 0    | 0    |
| ENSG0000(RP11-560J. | lincRNA    | chr6  | 15243923 | 15245000 | - | 0.33 | 0.06 |
| ENSG0000(RP11-493E  | lincRNA    | chr2  | 61151433 | 61162105 | - | 0    | 0    |
| ENSG0000(OR10AE1P   | unprocess  | chr1  | 1.6E+08  | 1.6E+08  | - | 0    | 0    |
| ENSG0000(CTD-2228A  | lincRNA    | chr5  | 17107360 | 17107789 | - | 0    | 0    |
| ENSG0000(RP11-762E  | lincRNA    | chr2  | 1.95E+08 | 1.96E+08 | - | 0    | 0    |
| ENSG0000(RP11-482H  | processed_ | chr2  | 56147630 | 56386171 | + | 0    | 0.03 |
| ENSG0000(RP4-635E1  | antisense  | chr1  | 11029659 | 11030528 | + | 2.64 | 2.54 |
| ENSG0000(RP11-679B  | lincRNA    | chr6  | 11607552 | 11607981 | + | 0    | 0    |
| ENSG0000(MIR4791    | miRNA      | chr3  | 19314848 | 19314931 | - | 0    | 0    |
| ENSG0000(MIR4466    | miRNA      | chr6  | 1.57E+08 | 1.57E+08 | - | 0    | 0    |

|                                        |          |          |   |      |      |
|----------------------------------------|----------|----------|---|------|------|
| ENSG0000(RP11-1113 processed_ chr17    | 19601840 | 19602256 | + | 0    | 0    |
| ENSG0000(RP11-266E lincRNA chr13       | 34545929 | 34671182 | - | 0    | 0    |
| ENSG0000(CTC-498M: lincRNA chr5        | 88433892 | 88498697 | - | 0    | 0    |
| ENSG0000(SNORA35 snoRNA chrX           | 1.15E+08 | 1.15E+08 | - | 0    | 0    |
| ENSG0000(RP11-532F lincRNA chr6        | 761675   | 780648   | + | 0.08 | 0    |
| ENSG0000(RP1-111C2 antisense chr6      | 1.59E+08 | 1.59E+08 | + | 0.29 | 0.38 |
| ENSG0000(RP4-789D1 lincRNA chr1        | 35929720 | 35930115 | - | 0.86 | 0    |
| ENSG0000(RP11-884K antisense chr3      | 53797764 | 53798019 | - | 0    | 0    |
| ENSG0000(RP11-506C sense_intron chr1   | 1.65E+08 | 1.65E+08 | + | 0.08 | 0    |
| ENSG0000(CTD-2287C antisense chr5      | 1.16E+08 | 1.16E+08 | - | 1.06 | 0.35 |
| ENSG0000(RP11-269G transcribed chr17   | 63331984 | 63332539 | - | 0    | 0    |
| ENSG0000(snoU13 snoRNA chr3            | 1.54E+08 | 1.54E+08 | + | 0    | 0    |
| ENSG0000(RNU6-86P snRNA chr9           | 87998229 | 87998335 | - | 0    | 0    |
| ENSG0000(RNA5SP10: rRNA chr2           | 1.61E+08 | 1.61E+08 | + | 0    | 0    |
| ENSG0000(CTD-2376L lincRNA chr5        | 72953635 | 72954274 | - | 0.21 | 0.12 |
| ENSG0000(RP11-44N1 lincRNA chr8        | 98943595 | 98944098 | + | 0    | 0    |
| ENSG0000(RP11-63L7 antisense chr6      | 89080164 | 89080667 | - | 0    | 0    |
| ENSG0000(RNU6-85P snRNA chr7           | 1.41E+08 | 1.41E+08 | + | 0    | 0    |
| ENSG0000(RP11-338I2 antisense chr10    | 84138420 | 84140582 | - | 0    | 0    |
| ENSG0000(OR2AS2P unprocessed chr1      | 2.48E+08 | 2.48E+08 | + | 0    | 0    |
| ENSG0000(RP11-443B antisense chr2      | 24825610 | 24826717 | + | 0.27 | 0.18 |
| ENSG0000(RP11-424N antisense chr3      | 44337941 | 44338552 | - | 0    | 0    |
| ENSG0000(RP11-589C lincRNA chr8        | 42139461 | 42139752 | - | 0    | 0    |
| ENSG0000(RP11-188P antisense chr3      | 43346923 | 43347643 | - | 0.27 | 0.2  |
| ENSG0000(RP11-222K lincRNA chr3        | 27638315 | 27638776 | + | 0    | 0    |
| ENSG0000(RP11-354K lincRNA chr6        | 76774983 | 76775860 | + | 0    | 0    |
| ENSG0000(RP11-439M lincRNA chr2        | 6905724  | 6906301  | - | 0    | 0    |
| ENSG0000(RP11-302N protein_coding chr1 | 89633140 | 89933250 | + | 0    | 0.55 |
| ENSG0000(LINC01954 lincRNA chr2        | 10878269 | 10885118 | + | 0    | 0    |
| ENSG0000(RP11-444A lincRNA chr2        | 59218680 | 60100200 | - | 0    | 0    |
| ENSG0000(RP11-617D lincRNA chr4        | 38618265 | 38619437 | - | 0    | 0    |
| ENSG0000(CTD-3064N antisense chr8      | 1.41E+08 | 1.41E+08 | + | 0    | 0    |
| ENSG0000(CTD-2140B antisense chr12     | 1.33E+08 | 1.33E+08 | + | 0    | 0    |
| ENSG0000(RP11-415F antisense chr3      | 16314439 | 16314987 | + | 0    | 0.14 |
| ENSG0000(RP11-7F18 lincRNA chr8        | 67343975 | 67345087 | + | 0.21 | 0.41 |
| ENSG0000(RP11-134K lincRNA chr6        | 70596438 | 70596980 | + | 0.13 | 0    |
| ENSG0000(ADAM6 transcribed chr14       | 1.06E+08 | 1.06E+08 | - | 0    | 0    |
| ENSG0000(U47924.29 antisense chr12     | 6964949  | 6965382  | + | 0    | 0    |
| ENSG0000(RP3-337H4 antisense chr6      | 43561872 | 43562419 | + | 0    | 0.14 |
| ENSG0000(CTD-2006H antisense chr8      | 93715378 | 93716113 | - | 0.89 | 0.88 |
| ENSG0000(RP11-572C lincRNA chr3        | 48672455 | 48672733 | + | 0    | 0    |
| ENSG0000(RP11-927P transcribed chr17   | 64905883 | 64906018 | - | 0    | 0    |
| ENSG0000(RP11-884K antisense chr3      | 53858994 | 53861576 | - | 1.02 | 0.84 |
| ENSG0000(AC226119. transcribed chr4    | 3915187  | 3924274  | - | 0    | 0    |
| ENSG0000(RP11-428J: lincRNA chr6       | 5031756  | 5054423  | - | 0.08 | 0.02 |

|                    |                      |       |          |          |   |      |      |
|--------------------|----------------------|-------|----------|----------|---|------|------|
| ENSG0000010264597  | CTD-2256P antisense  | chr5  | 10264597 | 10267146 | - | 0    | 0.02 |
| ENSG00000122332587 | RP11-573G lincRNA    | chr10 | 22332587 | 22332981 | - | 0    | 0    |
| ENSG00000149491664 | SNORD58B snoRNA      | chr18 | 49491664 | 49491729 | - | 0    | 0    |
| ENSG00000180693216 | RP11-28H5 lincRNA    | chr15 | 80693216 | 80693707 | - | 0.46 | 0    |
| ENSG00000145892694 | RP3-337O1 antisense  | chr20 | 45892694 | 45893419 | - | 0    | 0.55 |
| ENSG00000179526508 | RP11-589B processed  | chr10 | 79526508 | 79526631 | - | 0    | 0    |
| ENSG00000173487590 | RN7SL827F misc_RNA   | chr6  | 73487590 | 73487877 | - | 0    | 0    |
| ENSG00000110429881 | RP4-736L2 antisense  | chr1  | 10429881 | 10430677 | - | 0    | 0    |
| ENSG00000119902025 | RP11-79O8 lincRNA    | chr2  | 19902025 | 19902569 | + | 0    | 0.15 |
| ENSG00000170445071 | RP11-42O1 lincRNA    | chr1  | 70445071 | 70445536 | + | 0.17 | 0    |
| ENSG00000137182107 | RP11-285J antisense  | chr3  | 37182107 | 37182734 | + | 0.44 | 0.6  |
| ENSG000001177E+08  | RP11-337N antisense  | chr2  | 1.77E+08 | 1.77E+08 | + | 0    | 0    |
| ENSG00000110195187 | CTD-2199C lincRNA    | chr5  | 10195187 | 10197622 | - | 0.02 | 0.02 |
| ENSG0000017260871  | RP11-557L lincRNA    | chr2  | 7260871  | 7261504  | + | 0    | 0    |
| ENSG0000011659325  | RP11-345P antisense  | chr1  | 1659325  | 1662602  | + | 0    | 0    |
| ENSG00000164951498 | RP11-583F processed  | chr17 | 64951498 | 64951609 | - | 0    | 0    |
| ENSG00000187151159 | RP11-393I2 antisense | chr6  | 87151159 | 87155285 | - | 0.03 | 0.03 |
| ENSG00000128078792 | RP1-313I6 antisense  | chr6  | 28078792 | 28081130 | - | 0.49 | 0.64 |
| ENSG00000165591850 | CTD-3025N lincRNA    | chr8  | 65591850 | 65592472 | - | 0.11 | 0    |
| ENSG00000138894785 | SNORA62 snoRNA       | chr21 | 38894785 | 38894867 | + | 0    | 0    |
| ENSG00000199568097 | RP1-199J3 antisense  | chr6  | 99568097 | 99569096 | + | 0.06 | 0.2  |
| ENSG000001126E+08  | RNU1-30P snRNA       | chr3  | 1.26E+08 | 1.26E+08 | - | 0    | 0    |
| ENSG00000195849309 | AC008592 lincRNA     | chr5  | 95849309 | 95849855 | + | 0    | 0    |
| ENSG000001133E+08  | CTC-350I8 lincRNA    | chr5  | 1.33E+08 | 1.33E+08 | + | 0    | 0    |
| ENSG00000151950284 | RP11-546K lincRNA    | chr8  | 51950284 | 51950690 | + | 0.41 | 0.23 |
| ENSG00000165158662 | SNORA74 snoRNA       | chr2  | 65158662 | 65158860 | + | 0    | 0    |
| ENSG00000134692290 | RP11-529E lincRNA    | chr2  | 34692290 | 34703606 | - | 0    | 0.41 |
| ENSG00000151014134 | RNU6-87P snRNA       | chr12 | 51014134 | 51014241 | - | 0    | 0    |
| ENSG000001154E+08  | RP1-178F1 antisense  | chr1  | 1.54E+08 | 1.54E+08 | - | 1.55 | 1.61 |
| ENSG000001146E+08  | ANKRD34A protein_co  | chr1  | 1.46E+08 | 1.46E+08 | - | 0.71 | 0.42 |
| ENSG000001167E+08  | RP11-52A2 sense_intr | chr1  | 1.67E+08 | 1.67E+08 | + | 0    | 0.07 |
| ENSG00000117074654 | SNORD14A snoRNA      | chr11 | 17074654 | 17074744 | - | 0    | 0    |
| ENSG00000172615063 | MIR139 miRNA         | chr11 | 72615063 | 72615130 | - | 0    | 0    |
| ENSG000001102E+08  | KB-431C1.5 antisense | chr8  | 1.02E+08 | 1.02E+08 | + | 0.04 | 0.04 |
| ENSG00000175608817 | CTC-366B1 lincRNA    | chr5  | 75608817 | 75609983 | + | 0.31 | 0.28 |
| ENSG000001123E+08  | RP11-44N1 lincRNA    | chr8  | 1.23E+08 | 1.23E+08 | + | 0    | 0    |
| ENSG00000187807634 | RP11-471M lincRNA    | chr13 | 87807634 | 87811232 | - | 0    | 0    |
| ENSG000001158E+08  | GTF2H5 protein_co    | chr6  | 1.58E+08 | 1.58E+08 | + | 3.55 | 3.8  |
| ENSG0000018444949  | RP11-480D lincRNA    | chr5  | 8444949  | 8445535  | - | 0    | 0.13 |
| ENSG00000162477870 | RP13-379C lincRNA    | chr20 | 62477870 | 62478594 | + | 0    | 0    |
| ENSG00000155484871 | Y_RNA misc_RNA       | chr1  | 55484871 | 55484972 | - | 0    | 0    |
| ENSG00000125014952 | RP11-367G lincRNA    | chr6  | 25014952 | 25042170 | - | 0    | 0    |
| ENSG00000137208875 | RP11-423P sense_intr | chr2  | 37208875 | 37212677 | + | 0.23 | 0.14 |
| ENSG00000113217269 | RNU6-6P snRNA        | chr10 | 13217269 | 13217375 | + | 0    | 1.24 |
| ENSG00000127053618 | RP11-503P antisense  | chr2  | 27053618 | 27054276 | - | 0.2  | 0.11 |

|                                 |       |          |          |   |      |      |
|---------------------------------|-------|----------|----------|---|------|------|
| ENSG0000( CTB-40H15 lincRNA     | chr5  | 14872332 | 14872713 | + | 0    | 0.25 |
| ENSG0000( RP11-284F lincRNA     | chr1  | 1.57E+08 | 1.57E+08 | - | 0.1  | 0.06 |
| ENSG0000( AC005618. lincRNA     | chr5  | 1.41E+08 | 1.41E+08 | + | 0.77 | 0.53 |
| ENSG0000( RP11-332J lincRNA     | chr5  | 6779458  | 6779998  | + | 0    | 0    |
| ENSG0000( CTA-363E1 antisense   | chr7  | 1.07E+08 | 1.07E+08 | - | 0    | 0.19 |
| ENSG0000( RN7SL828F misc_RNA    | chr11 | 1.18E+08 | 1.18E+08 | + | 0    | 0    |
| ENSG0000( RP11-11C2 lincRNA     | chr8  | 51810110 | 51810681 | - | 0    | 0    |
| ENSG0000( RP11-348P lincRNA     | chr3  | 44667412 | 44669364 | + | 0.31 | 0.13 |
| ENSG0000( RP4-734G2 antisense   | chr1  | 10639241 | 10654333 | + | 0.01 | 0    |
| ENSG0000( LA16c-380I lincRNA    | chr16 | 3006120  | 3007388  | + | 0    | 0    |
| ENSG0000( MIR502 miRNA          | chrX  | 50014598 | 50014683 | + | 0    | 0    |
| ENSG0000( CTD-2376I lincRNA     | chr5  | 72955206 | 72955699 | - | 0    | 0.34 |
| ENSG0000( RP5-1126H 3prime_ov   | chr1  | 19072110 | 19075511 | - | 0.25 | 0.26 |
| ENSG0000( RP11-542A lincRNA     | chr5  | 1.58E+08 | 1.58E+08 | + | 0    | 0    |
| ENSG0000( CTD-2186N lincRNA     | chr5  | 32174471 | 32175272 | + | 2.07 | 2.19 |
| ENSG0000( RP11-379F lincRNA     | chr3  | 1.59E+08 | 1.59E+08 | - | 0.42 | 0.11 |
| ENSG0000( RP11-168F lincRNA     | chr1  | 3487246  | 3487627  | + | 0    | 0    |
| ENSG0000( RP11-350N lincRNA     | chr8  | 38382364 | 38383461 | + | 0.38 | 0.48 |
| ENSG0000( RP4-665J2 lincRNA     | chr1  | 90860550 | 90862920 | - | 0.39 | 0.22 |
| ENSG0000( RN7SL715F misc_RNA    | chr3  | 1.55E+08 | 1.55E+08 | - | 0    | 0    |
| ENSG0000( RP11-421M lincRNA     | chr6  | 10743324 | 10747663 | - | 0.05 | 0.53 |
| ENSG0000( RP11-155C antisense   | chr1  | 52353487 | 52353877 | + | 0    | 0.24 |
| ENSG0000( RP3-355L5 lincRNA     | chr6  | 1.05E+08 | 1.05E+08 | - | 0.13 | 0    |
| ENSG0000( CTD-2653M lincRNA     | chr5  | 36861736 | 36862217 | - | 0    | 0    |
| ENSG0000( XXcos-LUC protein_co  | chr3  | 50350892 | 50367923 | + | 0    | 0    |
| ENSG0000( RP11-345P antisense   | chr1  | 1613758  | 1615795  | - | 3.19 | 4.26 |
| ENSG0000( AC005754. lincRNA     | chr5  | 1.41E+08 | 1.41E+08 | + | 0.03 | 0.03 |
| ENSG0000( CTD-2260A antisense   | chr5  | 96804353 | 96806105 | + | 0.18 | 0    |
| ENSG0000( CTB-113P1 lincRNA     | chr5  | 1.52E+08 | 1.52E+08 | - | 0    | 0.15 |
| ENSG0000( Y_RNA misc_RNA        | chr9  | 32820261 | 32820350 | + | 0    | 0    |
| ENSG0000( RP1-261G2 antisense   | chr6  | 43770429 | 43770616 | - | 3.52 | 2.58 |
| ENSG0000( GS1-393G1 antisense   | chr8  | 1.44E+08 | 1.44E+08 | + | 0.16 | 0    |
| ENSG0000( RP4-555D2 lincRNA     | chr3  | 43998081 | 43999149 | - | 0    | 0    |
| ENSG0000( CTD-2366F antisense   | chr5  | 53089016 | 53089468 | - | 0    | 0    |
| ENSG0000( KB-1836B5 lincRNA     | chr8  | 38099471 | 38099931 | + | 0    | 0    |
| ENSG0000( RP11-250B lincRNA     | chr6  | 80355424 | 80356859 | + | 0.16 | 0.22 |
| ENSG0000( RP11-360I2 lincRNA    | chr5  | 21569755 | 21570045 | + | 0    | 0    |
| ENSG0000( RP11-927P processed_  | chr17 | 64881091 | 64881181 | + | 0    | 0    |
| ENSG0000( RP11-107C transcribec | chr10 | 1.23E+08 | 1.23E+08 | + | 0    | 0    |
| ENSG0000( RP11-177G lincRNA     | chr6  | 79561132 | 79561602 | + | 0    | 0    |
| ENSG0000( LINC01607 lincRNA     | chr8  | 79768142 | 79802842 | + | 0.16 | 0.12 |
| ENSG0000( CTD-2544H antisense   | chr5  | 1.22E+08 | 1.22E+08 | - | 0    | 0    |
| ENSG0000( RP11-574K lincRNA     | chr10 | 73703735 | 73713581 | - | 1.63 | 1.73 |
| ENSG0000( RP11-465B lincRNA     | chr1  | 1169357  | 1170343  | + | 0    | 0    |
| ENSG0000( RP11-428J lincRNA     | chr6  | 5029972  | 5043449  | + | 1.45 | 1.36 |

|                 |                      |       |          |          |   |       |      |
|-----------------|----------------------|-------|----------|----------|---|-------|------|
| ENSG00000100000 | FGF14-AS2 lincRNA    | chr13 | 1.02E+08 | 1.02E+08 | + | 0.62  | 0.12 |
| ENSG00000100000 | CTD-2035E lincRNA    | chr5  | 43061395 | 43062441 | + | 0.12  | 0.19 |
| ENSG00000100000 | NFYC-AS1 antisense   | chr1  | 40690380 | 40692066 | - | 1.14  | 0.74 |
| ENSG00000100000 | ARF4-AS1 antisense   | chr3  | 57597715 | 57600927 | + | 0.3   | 0    |
| ENSG00000100000 | RP11-195B antisense  | chr2  | 27062428 | 27062907 | - | 0.16  | 0.18 |
| ENSG00000100000 | RP11-627J antisense  | chr3  | 33144104 | 33147721 | - | 0     | 0.38 |
| ENSG00000100000 | NBPF25P transcribed  | chr1  | 1.46E+08 | 1.46E+08 | - | 0.85  | 0.84 |
| ENSG00000100000 | RP1-286D6 antisense  | chr1  | 3785008  | 3785538  | + | 0.14  | 0.15 |
| ENSG00000100000 | AC005754 antisense   | chr5  | 1.41E+08 | 1.41E+08 | - | 0     | 0    |
| ENSG00000100000 | RP11-707N antisense  | chr8  | 65714334 | 65714778 | - | 0.18  | 0    |
| ENSG00000100000 | RP11-477N lincRNA    | chr2  | 54082554 | 54085066 | + | 0     | 0.49 |
| ENSG00000100000 | CTD-2168K antisense  | chr8  | 24956621 | 24957110 | + | 0     | 0    |
| ENSG00000100000 | RP11-840I1 antisense | chr14 | 65003325 | 65003767 | - | 0.18  | 0.4  |
| ENSG00000100000 | RP11-350N antisense  | chr8  | 38408048 | 38408742 | - | 0.38  | 0.21 |
| ENSG00000100000 | RNU4-5P snRNA        | chr10 | 1.1E+08  | 1.1E+08  | + | 0     | 0    |
| ENSG00000100000 | RP4-713A8 sense_intr | chr1  | 2326201  | 2326693  | - | 0     | 0    |
| ENSG00000100000 | RP11-637C protein_co | chr6  | 10747794 | 10930423 | + | 0     | 0    |
| ENSG00000100000 | GS1-72M2 antisense   | chr8  | 24912165 | 24914717 | - | 0     | 0    |
| ENSG00000100000 | RP11-180P processed  | chr17 | 63004672 | 63005152 | - | 0     | 0    |
| ENSG00000100000 | SNORD5 snoRNA        | chr3  | 25555543 | 25555606 | - | 0     | 0    |
| ENSG00000100000 | PROX1-AS1 antisense  | chr1  | 2.14E+08 | 2.14E+08 | - | 0     | 0    |
| ENSG00000100000 | CASC15 lincRNA       | chr6  | 21664772 | 22368328 | + | 2.55  | 2.45 |
| ENSG00000100000 | RP11-387N antisense  | chr6  | 43074331 | 43074739 | - | 0.2   | 0    |
| ENSG00000100000 | RP13-582C antisense  | chr8  | 1.43E+08 | 1.43E+08 | - | 0     | 0    |
| ENSG00000100000 | U47924.31 antisense  | chr12 | 6943508  | 6944604  | - | 0.49  | 0.54 |
| ENSG00000100000 | RP4-657D1 antisense  | chr1  | 51801028 | 51801307 | + | 0     | 0    |
| ENSG00000100000 | RP11-481J lincRNA    | chr2  | 55952158 | 56181652 | + | 0     | 0    |
| ENSG00000100000 | RP11-245J antisense  | chr3  | 64019508 | 64019925 | + | 0     | 0    |
| ENSG00000100000 | RP11-802C antisense  | chr3  | 58428255 | 58428815 | + | 0.25  | 1.4  |
| ENSG00000100000 | RP11-523H antisense  | chr2  | 74501717 | 74502365 | + | 0     | 0    |
| ENSG00000100000 | RP11-110I1 antisense | chr11 | 1.19E+08 | 1.19E+08 | - | 0.61  | 0.34 |
| ENSG00000100000 | RP3-325F2 antisense  | chr6  | 1.37E+08 | 1.37E+08 | + | 0     | 0.03 |
| ENSG00000100000 | CTD-2532N lincRNA    | chr8  | 65842752 | 65843331 | + | 0.36  | 0.27 |
| ENSG00000100000 | RP11-156E antisense  | chr1  | 2.45E+08 | 2.45E+08 | - | 0.19  | 0.07 |
| ENSG00000100000 | HIST2H2AA protein_co | chr1  | 1.5E+08  | 1.5E+08  | + | 16.24 | 3.51 |
| ENSG00000100000 | RN7SL803F misc_RNA   | chr5  | 1.55E+08 | 1.55E+08 | - | 0     | 0    |
| ENSG00000100000 | RP11-157F antisense  | chr3  | 57078943 | 57080101 | + | 0.05  | 0.06 |
| ENSG00000100000 | AC004775 lincRNA     | chr5  | 1.33E+08 | 1.33E+08 | - | 0     | 0    |
| ENSG00000100000 | RP11-277B lincRNA    | chr1  | 1.67E+08 | 1.67E+08 | - | 0.2   | 0    |
| ENSG00000100000 | RP3-500L1 lincRNA    | chr6  | 13825432 | 13826574 | + | 0.05  | 0    |
| ENSG00000100000 | RP11-347P antisense  | chr2  | 1.96E+08 | 1.96E+08 | + | 0     | 0.12 |
| ENSG00000100000 | U7 snRNA             | chr12 | 1.12E+08 | 1.12E+08 | - | 0     | 0    |
| ENSG00000100000 | XXbac-BPG lincRNA    | chr6  | 33246075 | 33246856 | - | 0.59  | 0.39 |
| ENSG00000100000 | RP11-11N5 lincRNA    | chr4  | 1.87E+08 | 1.87E+08 | + | 0     | 0    |
| ENSG00000100000 | CTB-181H1 sense_intr | chr7  | 1.02E+08 | 1.02E+08 | + | 0     | 0    |

|                 |            |                      |       |          |          |   |      |      |
|-----------------|------------|----------------------|-------|----------|----------|---|------|------|
| ENSG00000181100 | RP11-927P  | transcribed          | chr17 | 64892728 | 64892845 | + | 0    | 0    |
| ENSG00000181101 | XXbac-BPG  | lincRNA              | chr6  | 31394289 | 31395495 | - | 1.42 | 1.61 |
| ENSG00000181102 | RP1-20C7.1 | antisense            | chr6  | 43033897 | 43034405 | - | 0.44 | 0    |
| ENSG00000181103 | RP11-63G1  | lincRNA              | chr1  | 58812808 | 58813342 | - | 0    | 0    |
| ENSG00000181104 | MIR3666    | miRNA                | chr7  | 1.15E+08 | 1.15E+08 | + | 0    | 0    |
| ENSG00000181105 | RN7SL726F  | misc_RNA             | chr9  | 70579163 | 70579461 | - | 0.36 | 0.4  |
| ENSG00000181106 | CTD-2325A  | antisense            | chr5  | 42806394 | 42806997 | + | 0.12 | 0    |
| ENSG00000181107 | RP11-22L1  | lincRNA              | chr1  | 3306636  | 3310096  | - | 0.06 | 0.02 |
| ENSG00000181108 | XXbac-BPG  | lincRNA              | chr6  | 29751965 | 29752207 | - | 0    | 0    |
| ENSG00000181109 | SNORA25    | snoRNA               | chr2  | 2.28E+08 | 2.28E+08 | + | 0    | 0    |
| ENSG00000181110 | CTB-10806  | antisense            | chr5  | 1.47E+08 | 1.47E+08 | + | 0    | 0    |
| ENSG00000181111 | RP5-855D2  | antisense            | chr8  | 234347   | 234887   | - | 0.67 | 1.03 |
| ENSG00000181112 | RP11-554D  | lincRNA              | chr6  | 74530248 | 74734279 | - | 0.12 | 0    |
| ENSG00000181113 | RP11-379F  | antisense            | chr3  | 1.59E+08 | 1.59E+08 | - | 0    | 0.11 |
| ENSG00000181114 | RP3-406P2  | lincRNA              | chr6  | 4018713  | 4019202  | + | 0.31 | 0.34 |
| ENSG00000181115 | KB-1958F4  | antisense            | chr8  | 97132835 | 97133379 | - | 0    | 0    |
| ENSG00000181116 | RP11-346C  | lincRNA              | chr16 | 73060245 | 73060759 | + | 0.43 | 0.49 |
| ENSG00000181117 | RNA5SP38   | rRNA                 | chr14 | 67657105 | 67657211 | - | 0    | 0    |
| ENSG00000181118 | RP11-531A  | antisense            | chr8  | 73042910 | 73043346 | - | 0    | 0    |
| ENSG00000181119 | CTD-3224K  | lincRNA              | chr5  | 1.4E+08  | 1.4E+08  | - | 0    | 0    |
| ENSG00000181120 | RP11-489E  | antisense            | chr8  | 30082758 | 30083467 | + | 0    | 0    |
| ENSG00000181121 | LINC01749  | lincRNA              | chr20 | 63009383 | 63085071 | + | 0    | 0    |
| ENSG00000181122 | RNU6-89P   | snRNA                | chr1  | 2.02E+08 | 2.02E+08 | - | 0    | 0    |
| ENSG00000181123 | RP11-767C  | antisense            | chr3  | 12832219 | 12832728 | - | 0    | 0    |
| ENSG00000181124 | RP11-92K1  | lincRNA              | chr8  | 80032724 | 80033300 | - | 0    | 0    |
| ENSG00000181125 | CTD-2287C  | lincRNA              | chr5  | 1.16E+08 | 1.16E+08 | - | 0    | 0    |
| ENSG00000181126 | RP11-375N  | antisense            | chr8  | 9555144  | 9556520  | - | 0.21 | 0.05 |
| ENSG00000181127 | RP11-500C  | antisense            | chr6  | 17706257 | 17707344 | + | 0.94 | 1.34 |
| ENSG00000181128 | XXbac-BPG  | antisense            | chr6  | 30742929 | 30743592 | + | 0.28 | 0    |
| ENSG00000181129 | LINC00551  | lincRNA              | chr13 | 1.07E+08 | 1.07E+08 | + | 0.03 | 0    |
| ENSG00000181130 | RP11-791G  | lincRNA              | chr2  | 10767875 | 10770058 | - | 0.22 | 0.96 |
| ENSG00000181131 | RP1-40E16  | antisense            | chr6  | 3068045  | 3068894  | - | 0.59 | 0.9  |
| ENSG00000181132 | RP11-157J  | lincRNA              | chr6  | 1528364  | 1528911  | - | 0    | 0    |
| ENSG00000181133 | TPTE2P2    | transcribed          | chr13 | 52219344 | 52334277 | - | 0    | 0.02 |
| ENSG00000181134 | LINC02084  | lincRNA              | chr3  | 27712910 | 27714005 | + | 0.66 | 0.72 |
| ENSG00000181135 | RP11-140K  | antisense            | chr6  | 34696317 | 34697470 | + | 4.16 | 4.63 |
| ENSG00000181136 | RP11-91J1  | antisense            | chr8  | 450714   | 451343   | - | 0    | 0    |
| ENSG00000181137 | SNORD96A   | snoRNA               | chr5  | 1.81E+08 | 1.81E+08 | - | 0    | 0    |
| ENSG00000181138 | RP11-215A  | protein_coding       | chr4  | 1.86E+08 | 1.87E+08 | - | 0    | 0    |
| ENSG00000181139 | RP11-386N  | processed_transcript | chr15 | 92699040 | 92724277 | - | 0    | 0    |
| ENSG00000181140 | RP11-394A  | lincRNA              | chr13 | 63837295 | 63838031 | - | 0    | 0    |
| ENSG00000181141 | RP11-111M  | lincRNA              | chr11 | 76389648 | 76390128 | + | 0    | 0.35 |
| ENSG00000181142 | RP11-19C2  | lincRNA              | chr4  | 66003281 | 66016792 | + | 0    | 0    |
| ENSG00000181143 | RP11-894J  | protein_coding       | chr3  | 52969119 | 53099453 | - | 0    | 0    |
| ENSG00000181144 | RP11-231G  | lincRNA              | chr5  | 60866457 | 60866935 | - | 0    | 0    |

|                 |             |                |       |          |          |   |      |      |
|-----------------|-------------|----------------|-------|----------|----------|---|------|------|
| ENSG00000108140 | IFNL4P1     | unprocessed    | chr19 | 39264382 | 39265817 | + | 0    | 0    |
| ENSG00000108141 | RP11-239L1  | lincRNA        | chr6  | 27001208 | 27001648 | - | 0    | 0    |
| ENSG00000108142 | XXbac-BPG   | lincRNA        | chr6  | 57908560 | 57913911 | - | 1.03 | 0.92 |
| ENSG00000108143 | AL022345.1  | unprocessed    | chr10 | 42579724 | 42579858 | + | 0    | 0    |
| ENSG00000108144 | RP11-506K   | antisense      | chr6  | 3311662  | 3313650  | + | 0.06 | 0.03 |
| ENSG00000108145 | KB-1517D1   | antisense      | chr8  | 98436669 | 98439290 | + | 0.06 | 0.14 |
| ENSG00000108146 | CTD-2517C   | antisense      | chr5  | 34837549 | 34839278 | - | 0.44 | 0.44 |
| ENSG00000108147 | CTD-2154B   | antisense      | chr5  | 10761065 | 10770294 | + | 0    | 0    |
| ENSG00000108148 | NUDT3       | protein_coding | chr6  | 34279679 | 34392674 | - | 5.28 | 5.63 |
| ENSG00000108149 | RP4-594A5   | lincRNA        | chr7  | 8303741  | 8341343  | + | 0    | 0.14 |
| ENSG00000108150 | RP11-65L1.1 | lincRNA        | chr13 | 96948018 | 96949584 | + | 0    | 0    |
| ENSG00000108151 | AC002044.1  | sense_intronic | chr16 | 73014319 | 73014476 | - | 0    | 0    |
| ENSG00000108152 | KMT2B       | protein_coding | chr19 | 35718019 | 35738878 | + | 5.76 | 6    |
| ENSG00000108153 | RP11-129K   | lincRNA        | chr3  | 36973117 | 36973672 | - | 0.13 | 0    |
| ENSG00000108154 | RP11-53O1   | lincRNA        | chr5  | 44826076 | 44828592 | + | 1.07 | 1.12 |
| ENSG00000108155 | RNU6-90P    | snRNA          | chr15 | 51907200 | 51907305 | + | 0    | 0    |
| ENSG00000108156 | RP11-722E   | lincRNA        | chr8  | 33360839 | 33361415 | - | 0.61 | 0.4  |
| ENSG00000108157 | RP1-151F1   | lincRNA        | chr6  | 16764346 | 16766883 | + | 1.06 | 0.76 |
| ENSG00000108158 | LINC01115   | lincRNA        | chr2  | 739588   | 740164   | - | 0    | 0    |
| ENSG00000108159 | RP11-140I1  | lincRNA        | chr8  | 56222688 | 56223173 | + | 0.31 | 0    |
| ENSG00000108160 | SNORD114    | snoRNA         | chr14 | 1.01E+08 | 1.01E+08 | + | 0    | 0    |
| ENSG00000108161 | RP1-30M3    | antisense      | chr6  | 24700907 | 24701793 | - | 0.42 | 0.85 |
| ENSG00000108162 | RP11-927P   | transcribed    | chr17 | 64940606 | 64940717 | + | 0    | 0    |
| ENSG00000108163 | RP11-43F1   | lincRNA        | chr5  | 1005039  | 1006623  | + | 0    | 0.12 |
| ENSG00000108164 | RNA5SP50    | rRNA           | chrX  | 69672479 | 69672597 | + | 0    | 0    |
| ENSG00000108165 | RP11-307L   | lincRNA        | chr5  | 65020614 | 65020989 | + | 0    | 0    |
| ENSG00000108166 | RP5-1112D   | antisense      | chr6  | 1.11E+08 | 1.11E+08 | + | 0.11 | 0.14 |
| ENSG00000108167 | RNU4-89P    | snRNA          | chr3  | 1.97E+08 | 1.97E+08 | - | 0    | 0    |
| ENSG00000108168 | RP11-359I1  | lincRNA        | chr3  | 58490830 | 58491291 | - | 0.17 | 0    |
| ENSG00000108169 | GS1-166A2   | lincRNA        | chr7  | 16593626 | 16594224 | - | 0    | 0    |
| ENSG00000108170 | RP4-781K5   | lincRNA        | chr1  | 2.35E+08 | 2.35E+08 | + | 0    | 0    |
| ENSG00000108171 | RP11-573G   | lincRNA        | chr10 | 22340377 | 22340615 | - | 0    | 0    |
| ENSG00000108172 | CTC-428H1   | antisense      | chr5  | 87376256 | 87377180 | - | 0.27 | 0.07 |
| ENSG00000108173 | RP4-605O3   | antisense      | chr12 | 50112197 | 50165618 | + | 0.44 | 0.22 |
| ENSG00000108174 | RP11-446N   | lincRNA        | chr12 | 46537502 | 46652550 | + | 0    | 0.39 |
| ENSG00000108175 | RP11-307L   | lincRNA        | chr5  | 65020038 | 65020551 | + | 0    | 0    |
| ENSG00000108176 | RP11-25O1   | lincRNA        | chr1  | 52554818 | 52555273 | + | 0    | 0    |
| ENSG00000108177 | RP11-441F   | antisense      | chr16 | 56351886 | 56353524 | - | 0.03 | 0    |
| ENSG00000108178 | RP3-329A5   | lincRNA        | chr6  | 35220370 | 35224630 | - | 0.49 | 0.26 |
| ENSG00000108179 | RP11-51J9   | lincRNA        | chr8  | 30197404 | 30198048 | + | 0.21 | 0.12 |
| ENSG00000108180 | RP1-257A7   | lincRNA        | chr6  | 13290018 | 13290490 | - | 0.33 | 0.54 |
| ENSG00000108181 | MIR3976     | miRNA          | chr18 | 5840695  | 5840833  | + | 0    | 0    |
| ENSG00000108182 | RP11-192P   | lincRNA        | chr10 | 31187883 | 31261910 | + | 0.03 | 0.12 |
| ENSG00000108183 | CTD-2035E   | lincRNA        | chr5  | 43033716 | 43034635 | + | 0.13 | 0.07 |
| ENSG00000108184 | RP11-556C   | processed      | chr17 | 63088162 | 63089197 | - | 0    | 0    |



|                 |           |                |       |          |          |   |       |       |
|-----------------|-----------|----------------|-------|----------|----------|---|-------|-------|
| ENSG00000100000 | RP11-44N1 | lincRNA        | chr8  | 1.23E+08 | 1.23E+08 | - | 3.51  | 2.9   |
| ENSG00000100000 | RP11-666A | sense_intronic | chr17 | 76551352 | 76551750 | + | 0     | 0.7   |
| ENSG00000100000 | AL022345  | unprocessed    | chr10 | 42583241 | 42583375 | + | 0     | 0     |
| ENSG00000100000 | CTC-487M  | antisense      | chr5  | 1.13E+08 | 1.13E+08 | + | 0     | 0     |
| ENSG00000100000 | POM121C   | protein_coding | chr7  | 75416787 | 75486271 | - | 12.53 | 13.44 |
| ENSG00000100000 | RNU6-92P  | snRNA          | chr7  | 1.33E+08 | 1.33E+08 | + | 0     | 0     |
| ENSG00000100000 | IFNL4     | polymorphic    | chr19 | 39246314 | 39248856 | - | 0     | 0     |
| ENSG00000100000 | CTC-490G2 | antisense      | chr19 | 43360685 | 43368970 | - | 0     | 0     |
| ENSG00000100000 | RP11-497D | lincRNA        | chr6  | 1.47E+08 | 1.47E+08 | - | 0     | 0     |
| ENSG00000100000 | CD24      | protein_coding | chr6  | 1.07E+08 | 1.07E+08 | - | 14.97 | 21.41 |
| ENSG00000100000 | RP11-927P | unprocessed    | chr17 | 64847386 | 64847728 | + | 0     | 0     |
| ENSG00000100000 | RP1-30M3  | antisense      | chr6  | 24706747 | 24707151 | + | 0     | 0     |
| ENSG00000100000 | RP11-284F | antisense      | chr1  | 1.57E+08 | 1.57E+08 | - | 0.69  | 0.61  |
| ENSG00000100000 | RP11-185E | lincRNA        | chr5  | 93741640 | 93743500 | + | 0     | 0     |
| ENSG00000100000 | RP3-511B2 | transcribed    | chr20 | 41196647 | 41196938 | - | 0.75  | 0.41  |
| ENSG00000100000 | RP11-438J | protein_coding | chr3  | 10249372 | 10285796 | + | 1.68  | 2.33  |
| ENSG00000100000 | RP11-44B1 | antisense      | chr5  | 1.49E+08 | 1.49E+08 | + | 0     | 0     |
| ENSG00000100000 | RN7SL778F | misc_RNA       | chr11 | 1.3E+08  | 1.3E+08  | + | 0     | 0     |
| ENSG00000100000 | FAM47E-S1 | protein_coding | chr4  | 76251721 | 76311129 | + | 3.69  | 2.46  |
| ENSG00000100000 | CTD-2081C | lincRNA        | chr5  | 53880293 | 53881051 | - | 0     | 0     |
| ENSG00000100000 | CTD-2199C | lincRNA        | chr5  | 10203600 | 10204040 | - | 0     | 0     |
| ENSG00000100000 | RP11-762H | sense_intronic | chr15 | 78280950 | 78282190 | - | 0     | 0     |
| ENSG00000100000 | RP11-403I | transcribed    | chr1  | 1.45E+08 | 1.45E+08 | - | 12.73 | 8.34  |
| ENSG00000100000 | RP4-740C4 | sense_intronic | chr1  | 2363061  | 2363628  | - | 0     | 0.28  |
| ENSG00000100000 | RP11-363E | lincRNA        | chr8  | 81275399 | 81277570 | - | 0     | 0.03  |
| ENSG00000100000 | RP11-108M | lincRNA        | chr1  | 16904339 | 16904776 | - | 0     | 0     |
| ENSG00000100000 | RP11-704J | lincRNA        | chr6  | 1.34E+08 | 1.34E+08 | + | 0     | 0     |
| ENSG00000100000 | RP11-38L1 | lincRNA        | chr10 | 46632387 | 46635472 | + | 0     | 0.14  |
| ENSG00000100000 | RP11-281C | lincRNA        | chr5  | 1.79E+08 | 1.79E+08 | - | 0     | 0     |
| ENSG00000100000 | RP3-465N2 | lincRNA        | chr1  | 25247837 | 25248321 | + | 0     | 0     |
| ENSG00000100000 | RP13-131K | antisense      | chr3  | 49029316 | 49029706 | + | 0.44  | 1.45  |
| ENSG00000100000 | RNA5SP35  | rRNA           | chr12 | 34205699 | 34205817 | + | 0     | 0     |
| ENSG00000100000 | CUX2P1    | processed      | chr10 | 10257169 | 10257466 | - | 0     | 0     |
| ENSG00000100000 | RP11-5407 | lincRNA        | chr1  | 904834   | 915976   | + | 0.26  | 0     |
| ENSG00000100000 | RNU6-91P  | snRNA          | chr14 | 99444306 | 99444412 | + | 0     | 0     |
| ENSG00000100000 | RP11-379F | lincRNA        | chr3  | 1.59E+08 | 1.59E+08 | + | 0     | 0     |
| ENSG00000100000 | RP11-444E | protein_coding | chr6  | 44273194 | 44378957 | + | 0     | 0     |
| ENSG00000100000 | OR13Z2P   | unprocessed    | chr1  | 1.47E+08 | 1.47E+08 | + | 0     | 0     |
| ENSG00000100000 | RP11-1017 | lincRNA        | chr14 | 1.02E+08 | 1.02E+08 | + | 0.31  | 0.46  |
| ENSG00000100000 | RNU6-84P  | snRNA          | chr6  | 76557653 | 76557754 | - | 0     | 0     |
| ENSG00000100000 | RP1-225E1 | processed      | chr6  | 1.39E+08 | 1.39E+08 | - | 0.29  | 0     |
| ENSG00000100000 | RP11-182L | lincRNA        | chr10 | 79825902 | 79827602 | + | 4.12  | 3.28  |
| ENSG00000100000 | RP3-395M  | lincRNA        | chr1  | 2546465  | 2547460  | + | 0.12  | 0.13  |
| ENSG00000100000 | RP4-758J1 | lincRNA        | chr1  | 1409096  | 1410618  | + | 2.72  | 3.39  |
| ENSG00000100000 | CTD-2342N | lincRNA        | chr8  | 1.35E+08 | 1.35E+08 | + | 0     | 0     |

|                       |                |       |          |          |   |      |      |
|-----------------------|----------------|-------|----------|----------|---|------|------|
| ENSG000001070         | antisense      | chr8  | 53876150 | 53876649 | - | 0    | 0.33 |
| ENSG0000010432        | miRNA          | chr14 | 1.01E+08 | 1.01E+08 | + | 0    | 0    |
| ENSG0000011277        | lincRNA        | chr5  | 1.78E+08 | 1.78E+08 | + | 3.48 | 1.62 |
| ENSG0000010115        | snoRNA         | chr15 | 25243614 | 25243695 | + | 0    | 0    |
| ENSG0000010689C       | lincRNA        | chr18 | 962592   | 976883   | - | 0    | 0    |
| ENSG000001091328.19   | lincRNA        | chr6  | 25992662 | 26001775 | + | 1.31 | 1.67 |
| ENSG0000010532F       | lincRNA        | chr6  | 708592   | 711405   | - | 0.1  | 0.09 |
| ENSG0000010136B1      | lincRNA        | chr6  | 2437549  | 2438249  | + | 0.28 | 0.42 |
| ENSG0000010186C11     | lincRNA        | chr6  | 27122657 | 27123221 | - | 0    | 0.28 |
| ENSG000001075L760F    | misc_RNA       | chr8  | 73833773 | 73834042 | - | 0    | 0    |
| ENSG000001095G1       | sense_intronic | chr6  | 1.23E+08 | 1.23E+08 | + | 0    | 0    |
| ENSG000001006273.     | lincRNA        | chr19 | 781002   | 781862   | - | 0.22 | 0.17 |
| ENSG0000010113        | snoRNA         | chr14 | 1.01E+08 | 1.01E+08 | + | 0    | 0    |
| ENSG0000010191J1      | antisense      | chr6  | 1.08E+08 | 1.08E+08 | + | 0.74 | 0.66 |
| ENSG0000010158G       | sense_intronic | chr3  | 18408680 | 18409635 | - | 0    | 0    |
| ENSG00000101317E2     | antisense      | chr1  | 25831913 | 25832134 | - | 0    | 0    |
| ENSG00000101301G      | lincRNA        | chr8  | 40519565 | 40520158 | - | 0.12 | 0    |
| ENSG000001013Z3P      | unprocessed    | chr1  | 1.47E+08 | 1.47E+08 | + | 0    | 0    |
| ENSG00000101474C      | lincRNA        | chr1  | 12618900 | 12619244 | - | 4.1  | 6.61 |
| ENSG0000010169K       | antisense      | chr3  | 11611602 | 11612197 | + | 0    | 0    |
| ENSG00000101284J      | lincRNA        | chr6  | 774747   | 780214   | - | 0    | 0    |
| ENSG00000101532N      | antisense      | chr8  | 1.25E+08 | 1.25E+08 | + | 0    | 0.07 |
| ENSG00000101182L      | sense_intronic | chr10 | 79663192 | 79664786 | + | 1.14 | 0.68 |
| ENSG0000010151024N    | antisense      | chr1  | 48227888 | 48229561 | - | 0.2  | 0.19 |
| ENSG000001011X1P      | unprocessed    | chr5  | 1.76E+08 | 1.76E+08 | + | 0    | 0    |
| ENSG00000101415F      | antisense      | chr3  | 16339308 | 16339871 | + | 0    | 0.28 |
| ENSG00000101XXbac-BPG | antisense      | chr6  | 31195200 | 31198037 | - | 1.39 | 1.73 |
| ENSG00000101713N      | antisense      | chr8  | 1.21E+08 | 1.21E+08 | + | 0    | 0.11 |
| ENSG00000101981G      | lincRNA        | chr8  | 10486807 | 10489666 | + | 0.13 | 0.04 |
| ENSG000001014535B2    | lincRNA        | chr1  | 65003470 | 65004087 | - | 0    | 0    |
| ENSG00000101RNU6-88P  | snRNA          | chr10 | 12116280 | 12116379 | - | 0    | 0    |
| ENSG0000010196C2      | processed      | chr10 | 86993432 | 87024732 | + | 0    | 0    |
| ENSG00000101347C      | antisense      | chr8  | 94884609 | 94885070 | + | 0.17 | 0    |
| ENSG000001014680D5    | antisense      | chr1  | 15565611 | 15565956 | - | 0    | 0    |
| ENSG000001015407      | lincRNA        | chr1  | 995966   | 998051   | - | 0.03 | 0    |
| ENSG00000101CFAP206   | protein_coding | chr6  | 87407983 | 87464465 | + | 0.18 | 0.13 |
| ENSG0000010129P2      | lincRNA        | chr13 | 87607907 | 87609234 | - | 0    | 0    |
| ENSG00000101573G      | lincRNA        | chr10 | 22332404 | 22332987 | + | 0    | 0    |
| ENSG0000010126J3.     | sense_intronic | chr8  | 79956465 | 79957381 | - | 0.81 | 0.15 |
| ENSG00000101105N      | lincRNA        | chr2  | 2.13E+08 | 2.13E+08 | - | 0    | 0    |
| ENSG00000101LINC01023 | lincRNA        | chr5  | 1.09E+08 | 1.09E+08 | - | 1.84 | 0.41 |
| ENSG00000101254F      | lincRNA        | chr2  | 10120734 | 10121065 | + | 0    | 0    |
| ENSG0000010179P5      | lincRNA        | chr5  | 73497550 | 73498293 | - | 0.26 | 0.48 |
| ENSG00000101415F      | antisense      | chr3  | 16345126 | 16346440 | + | 0    | 0    |
| ENSG00000101SNORA28   | snoRNA         | chr14 | 1.03E+08 | 1.03E+08 | + | 0    | 0    |

|                     |                |       |          |          |   |      |      |
|---------------------|----------------|-------|----------|----------|---|------|------|
| ENSG0000(RN7SL840F) | misc_RNA       | chr10 | 72582803 | 72583086 | + | 0    | 0    |
| ENSG0000(GS1-166A2) | lincRNA        | chr7  | 16471184 | 16471373 | + | 0    | 0    |
| ENSG0000(XXbac-BPG) | antisense      | chr6  | 30723105 | 30723877 | - | 0    | 0    |
| ENSG0000(XXbac-BPG) | lincRNA        | chr6  | 57855891 | 57856468 | - | 0.2  | 0    |
| ENSG0000(RP11-255P) | lincRNA        | chr13 | 1.03E+08 | 1.03E+08 | + | 0    | 0.07 |
| ENSG0000(MIR4787)   | miRNA          | chr3  | 50675080 | 50675163 | + | 0    | 0    |
| ENSG0000(CTC-527H2) | lincRNA        | chr16 | 48640473 | 48641052 | + | 0    | 0    |
| ENSG0000(OR3A5P)    | transcribed    | chr17 | 3311193  | 3311892  | + | 0    | 0    |
| ENSG0000(RP11-351J) | lincRNA        | chr6  | 1.68E+08 | 1.68E+08 | - | 0    | 0    |
| ENSG0000(RP11-324L) | lincRNA        | chr2  | 1.77E+08 | 1.77E+08 | - | 0    | 0    |
| ENSG0000(RP11-317L) | lincRNA        | chr3  | 24496272 | 24499580 | - | 0    | 0    |
| ENSG0000(RP11-459I) | lincRNA        | chr2  | 2.19E+08 | 2.19E+08 | + | 0.17 | 0.38 |
| ENSG0000(GTF2IP13)  | transcribed    | chr7  | 45769105 | 45815263 | + | 0.67 | 0.71 |
| ENSG0000(U91328.21) | antisense      | chr6  | 25983812 | 25999167 | - | 0    | 0    |
| ENSG0000(OR51F3P)   | unprocessed    | chr11 | 4736178  | 4737078  | - | 0    | 0    |
| ENSG0000(RP11-396C) | antisense      | chr1  | 2.26E+08 | 2.26E+08 | - | 0    | 0.17 |
| ENSG0000(RP11-480C) | lincRNA        | chr2  | 1.13E+08 | 1.13E+08 | + | 0.1  | 0.02 |
| ENSG0000(RP11-548P) | lincRNA        | chr2  | 85904279 | 85904727 | + | 0.53 | 0    |
| ENSG0000(RP11-462G) | lincRNA        | chr4  | 1.9E+08  | 1.9E+08  | - | 0    | 0    |
| ENSG0000(RP11-73K9) | lincRNA        | chr4  | 1.12E+08 | 1.12E+08 | - | 0    | 0    |
| ENSG0000(CTB-113D1) | antisense      | chr7  | 28979967 | 29013367 | + | 0    | 0    |
| ENSG0000(OR5BL1P)   | unprocessed    | chr11 | 58171098 | 58171721 | + | 0    | 0    |
| ENSG0000(RP11-179B) | antisense      | chr10 | 1.01E+08 | 1.01E+08 | - | 0.17 | 0.19 |
| ENSG0000(MUSTN1)    | protein_coding | chr3  | 52833114 | 52835219 | - | 0.01 | 0    |
| ENSG0000(RP11-359K) | sense_intronic | chr1  | 1.63E+08 | 1.63E+08 | + | 0.44 | 0    |
| ENSG0000(LINC02098) | lincRNA        | chr11 | 1.28E+08 | 1.28E+08 | + | 0    | 0    |
| ENSG0000(RP11-365H) | lincRNA        | chr4  | 51918772 | 51919381 | + | 0    | 0.12 |
| ENSG0000(AP000347)  | transcribed    | chr22 | 23658094 | 23717356 | - | 2.08 | 1.79 |
| ENSG0000(RP11-101E) | antisense      | chr1  | 1.93E+08 | 1.93E+08 | - | 0.1  | 0.11 |
| ENSG0000(RP5-1039K) | antisense      | chr22 | 37950965 | 37951778 | + | 0.06 | 0.07 |
| ENSG0000(RP11-344P) | lincRNA        | chr1  | 1.22E+08 | 1.22E+08 | - | 0    | 0    |
| ENSG0000(RP11-440L) | antisense      | chr4  | 757022   | 757740   | - | 0    | 0.1  |
| ENSG0000(ZSWIM8-A)  | antisense      | chr10 | 73796514 | 73801399 | - | 0    | 0.08 |
| ENSG0000(RP11-63A2) | antisense      | chr10 | 61684892 | 61685388 | - | 0    | 0    |
| ENSG0000(RP11-339B) | lincRNA        | chr9  | 1.28E+08 | 1.28E+08 | + | 0    | 0    |
| ENSG0000(OR10AH1P)  | unprocessed    | chr7  | 5117169  | 5118087  | + | 0    | 0    |
| ENSG0000(RP11-446H) | lincRNA        | chr3  | 1.07E+08 | 1.07E+08 | + | 0    | 0    |
| ENSG0000(RP11-152N) | antisense      | chr10 | 73124573 | 73125532 | - | 0    | 0.12 |
| ENSG0000(AC007308)  | antisense      | chr22 | 20889206 | 20891214 | - | 0    | 0    |
| ENSG0000(RP11-155G) | transcribed    | chr7  | 1.28E+08 | 1.28E+08 | + | 2.1  | 3.74 |
| ENSG0000(ZNF595)    | protein_coding | chr4  | 53285    | 88211    | + | 2.1  | 1.49 |
| ENSG0000(RP11-251G) | antisense      | chr7  | 1.06E+08 | 1.06E+08 | + | 0.28 | 0.14 |
| ENSG0000(RP11-554J) | antisense      | chr2  | 55617909 | 55618373 | + | 0.17 | 1.1  |
| ENSG0000(RP11-461N) | antisense      | chr3  | 1.38E+08 | 1.38E+08 | - | 0    | 0    |
| ENSG0000(MAGI1-IT1) | sense_intronic | chr3  | 65872815 | 65954558 | - | 0    | 0.02 |

|                 |            |                        |       |          |          |   |      |      |
|-----------------|------------|------------------------|-------|----------|----------|---|------|------|
| ENSG00000108080 | COG8       | protein_coding         | chr16 | 69326913 | 69339667 | - | 8.24 | 6.56 |
| ENSG00000108081 | RP11-563K  | lincRNA                | chr7  | 1.43E+08 | 1.43E+08 | + | 0    | 0    |
| ENSG00000108082 | AFAP1-AS1  | antisense              | chr4  | 7754090  | 7778928  | + | 0    | 0    |
| ENSG00000108083 | RP11-395N  | lincRNA                | chr2  | 2.27E+08 | 2.27E+08 | + | 0    | 0    |
| ENSG00000108084 | RP11-737C  | antisense              | chr18 | 2920966  | 2921685  | + | 0    | 0    |
| ENSG00000108085 | RP11-468N  | lincRNA                | chr4  | 68901008 | 68906983 | - | 0    | 0    |
| ENSG00000108086 | RP11-354E  | sense_intronic         | chr10 | 72766560 | 72767052 | + | 0    | 0.17 |
| ENSG00000108087 | RP11-344N  | lincRNA                | chr10 | 73098044 | 73101297 | - | 0.39 | 0.14 |
| ENSG00000108088 | RP11-359E  | antisense              | chr10 | 86749754 | 86756298 | - | 0.58 | 0.37 |
| ENSG00000108089 | RP11-362F  | lincRNA                | chr4  | 1.41E+08 | 1.41E+08 | + | 0    | 0    |
| ENSG00000108090 | OR51F5P    | unprocessed_transcript | chr11 | 4709569  | 4710510  | + | 0    | 0    |
| ENSG00000108091 | LLNLF-65H1 | processed_transcript   | chr19 | 27793488 | 27984984 | + | 0    | 0    |
| ENSG00000108092 | DOC2B      | protein_coding         | chr17 | 142789   | 181636   | - | 0.01 | 0.02 |
| ENSG00000108093 | GS1-114I9  | antisense              | chr7  | 30424672 | 30425412 | + | 0    | 0.29 |
| ENSG00000108094 | RP11-66B2  | processed_transcript   | chr15 | 1.01E+08 | 1.01E+08 | + | 0    | 0    |
| ENSG00000108095 | CTD-2234N  | lincRNA                | chr11 | 1.27E+08 | 1.27E+08 | + | 0    | 0    |
| ENSG00000108096 | RP11-3304  | lincRNA                | chr2  | 2.19E+08 | 2.19E+08 | - | 0.52 | 0.76 |
| ENSG00000108097 | GTF2IP20   | transcribed_unit       | chr1  | 2.24E+08 | 2.24E+08 | - | 3.28 | 3.5  |
| ENSG00000108098 | RP11-188P  | lincRNA                | chr4  | 1.83E+08 | 1.83E+08 | - | 0    | 0    |
| ENSG00000108099 | GS1-259H1  | protein_coding         | chr7  | 99558695 | 99607810 | + | 0    | 0.24 |
| ENSG00000108100 | RP11-571I1 | lincRNA                | chr4  | 53997415 | 53997712 | - | 0    | 0    |
| ENSG00000108101 | RP11-422P  | lincRNA                | chr1  | 1.54E+08 | 1.54E+08 | + | 0.12 | 0.22 |
| ENSG00000108102 | POLR2J4    | transcribed_unit       | chr7  | 44013562 | 44019170 | - | 5.03 | 2.52 |
| ENSG00000108103 | RP11-219D  | antisense              | chr3  | 1.39E+08 | 1.39E+08 | - | 0    | 0    |
| ENSG00000108104 | AP000320   | processed_transcript   | chr21 | 34073592 | 34360033 | + | 0    | 0    |
| ENSG00000108105 | RP11-145N  | antisense              | chr3  | 1.8E+08  | 1.8E+08  | - | 0    | 0    |
| ENSG00000108106 | RP4-548D1  | antisense              | chr7  | 1.51E+08 | 1.51E+08 | + | 2.1  | 0.41 |
| ENSG00000108107 | RP11-190C  | lincRNA                | chr3  | 1.19E+08 | 1.19E+08 | - | 0.15 | 0    |
| ENSG00000108108 | RP11-191L  | lincRNA                | chr2  | 48440043 | 48440597 | - | 0    | 0.14 |
| ENSG00000108109 | OR51C4P    | unprocessed_transcript | chr11 | 4718612  | 4719559  | + | 0    | 0    |
| ENSG00000108110 | CTA-384D8  | lincRNA                | chr22 | 50542305 | 50542906 | - | 0.12 | 0    |
| ENSG00000108111 | RP11-395A  | lincRNA                | chr2  | 1.28E+08 | 1.28E+08 | + | 3.27 | 4.84 |
| ENSG00000108112 | RP11-190A  | antisense              | chr1  | 1.6E+08  | 1.6E+08  | + | 1.61 | 1.38 |
| ENSG00000108113 | RP3-508I15 | antisense              | chr22 | 38742625 | 38743115 | + | 0.77 | 0.68 |
| ENSG00000108114 | RP11-302M  | lincRNA                | chr1  | 89939601 | 89940147 | + | 0    | 0    |
| ENSG00000108115 | PCDHB16    | protein_coding         | chr5  | 1.41E+08 | 1.41E+08 | + | 1.34 | 1.6  |
| ENSG00000108116 | OR5A01P    | unprocessed_transcript | chr11 | 57045091 | 57045390 | + | 0    | 0    |
| ENSG00000108117 | RP11-127B  | antisense              | chr4  | 82374301 | 82384027 | + | 0.67 | 1.49 |
| ENSG00000108118 | RP11-797D  | antisense              | chr3  | 1.23E+08 | 1.23E+08 | + | 0    | 0.24 |
| ENSG00000108119 | RP11-216L  | processed_transcript   | chr9  | 1.37E+08 | 1.37E+08 | + | 0    | 0    |
| ENSG00000108120 | FAM223B    | lincRNA                | chrX  | 1.55E+08 | 1.55E+08 | - | 0.14 | 0    |
| ENSG00000108121 | AC004471   | lincRNA                | chr22 | 19124309 | 19128449 | - | 0    | 0    |
| ENSG00000108122 | OR9I3P     | unprocessed_transcript | chr11 | 58108720 | 58109661 | - | 0    | 0    |
| ENSG00000108123 | RP11-390E  | antisense              | chr7  | 1.24E+08 | 1.24E+08 | + | 1.06 | 1.34 |
| ENSG00000108124 | RP13-270P  | lincRNA                | chr18 | 3246401  | 3247086  | - | 2.62 | 2.67 |

|                 |            |                      |       |          |          |   |      |      |
|-----------------|------------|----------------------|-------|----------|----------|---|------|------|
| ENSG00000180500 | RP4-539M1  | sense_intronic       | chr22 | 30421206 | 30421536 | - | 0    | 0    |
| ENSG00000180501 | LINC02018  | lincRNA              | chr3  | 75435348 | 75457486 | + | 0.11 | 0.86 |
| ENSG00000180502 | RP11-290M1 | lincRNA              | chr1  | 85578500 | 85578742 | - | 0    | 0    |
| ENSG00000180503 | RP11-399K1 | lincRNA              | chr10 | 75409157 | 75411842 | + | 0.18 | 0.33 |
| ENSG00000180504 | RP11-479C1 | lincRNA              | chr7  | 65647010 | 65770810 | - | 0.14 | 0.06 |
| ENSG00000180505 | RP1-63G5.1 | antisense            | chr22 | 37371684 | 37372858 | + | 0    | 0    |
| ENSG00000180506 | GAS6-AS2   | lincRNA              | chr13 | 1.14E+08 | 1.14E+08 | + | 1.03 | 1.67 |
| ENSG00000180507 | RP11-339B1 | antisense            | chr9  | 1.28E+08 | 1.28E+08 | + | 0.74 | 0.27 |
| ENSG00000180508 | RP11-145M1 | antisense            | chr3  | 1.79E+08 | 1.79E+08 | + | 0    | 0    |
| ENSG00000180509 | MESTIT1    | antisense            | chr7  | 1.3E+08  | 1.3E+08  | - | 0    | 0.04 |
| ENSG00000180510 | RP11-44N2  | processed_transcript | chr2  | 73113018 | 73115907 | + | 1.63 | 1.15 |
| ENSG00000180511 | RP11-78A1  | antisense            | chr18 | 11857155 | 11857554 | - | 0    | 0    |
| ENSG00000180512 | RP11-534C1 | lincRNA              | chr3  | 1.95E+08 | 1.95E+08 | - | 0    | 0    |
| ENSG00000180513 | CTD-2026C  | lincRNA              | chr3  | 75540049 | 75579999 | - | 0    | 0    |
| ENSG00000180514 | RP11-259N1 | lincRNA              | chr2  | 74832655 | 74833987 | - | 0.79 | 1.83 |
| ENSG00000180515 | RP1-276J1  | transcribed_unit     | chr6  | 1.21E+08 | 1.21E+08 | + | 0    | 0    |
| ENSG00000180516 | RP4-753F5  | lincRNA              | chr1  | 1.17E+08 | 1.17E+08 | - | 0    | 0    |
| ENSG00000180517 | RP11-563N1 | lincRNA              | chr2  | 32165046 | 32165757 | - | 0.38 | 0.41 |
| ENSG00000180518 | RP11-342I1 | antisense            | chr4  | 1.4E+08  | 1.4E+08  | + | 0.22 | 0.08 |
| ENSG00000180519 | CTB-161C1  | antisense            | chr7  | 5556731  | 5557245  | + | 0.14 | 0.32 |
| ENSG00000180520 | CTA-228A9  | lincRNA              | chr22 | 38090127 | 38091559 | + | 1.27 | 0.52 |
| ENSG00000180521 | RP11-778D1 | antisense            | chr3  | 1.84E+08 | 1.84E+08 | - | 0    | 0    |
| ENSG00000180522 | OR7E47P    | sense_intronic       | chr12 | 52084744 | 52092285 | + | 0    | 0    |
| ENSG00000180523 | RP11-142A1 | lincRNA              | chr4  | 1.45E+08 | 1.45E+08 | - | 0    | 0    |
| ENSG00000180524 | RP11-387A1 | antisense            | chr2  | 1.76E+08 | 1.76E+08 | - | 0    | 0    |
| ENSG00000180525 | RP5-1159C1 | lincRNA              | chr7  | 7550104  | 7552440  | - | 0    | 0.04 |
| ENSG00000180526 | KB-208E9.1 | lincRNA              | chr22 | 23580880 | 23583859 | - | 0.22 | 0    |
| ENSG00000180527 | ADIRF-AS1  | processed_transcript | chr10 | 86965345 | 86971311 | - | 7.1  | 6.52 |
| ENSG00000180528 | RP11-467P1 | lincRNA              | chr2  | 71067519 | 71068125 | - | 0    | 0.13 |
| ENSG00000180529 | RP11-799N1 | antisense            | chr17 | 10383132 | 10537862 | + | 0.12 | 0.13 |
| ENSG00000180530 | RP11-447L1 | protein_coding       | chr3  | 1.96E+08 | 1.96E+08 | - | 0    | 0    |
| ENSG00000180531 | CTB-43P18  | antisense            | chr5  | 1.39E+08 | 1.39E+08 | - | 0    | 0    |
| ENSG00000180532 | RP11-367N1 | lincRNA              | chr4  | 1.84E+08 | 1.84E+08 | + | 0    | 0    |
| ENSG00000180533 | RP5-1007H1 | lincRNA              | chr7  | 7619872  | 7620543  | + | 0    | 0    |
| ENSG00000180534 | RP11-53B2  | sense_intronic       | chr18 | 13526078 | 13526688 | + | 0    | 0    |
| ENSG00000180535 | RP11-222G1 | lincRNA              | chr10 | 74821610 | 74822130 | - | 0    | 0.16 |
| ENSG00000180536 | RP11-378J1 | antisense            | chr1  | 2.23E+08 | 2.23E+08 | - | 0.04 | 0.05 |
| ENSG00000180537 | STAG3L5P-  | processed_transcript | chr7  | 1E+08    | 1E+08    | + | 3.15 | 2.57 |
| ENSG00000180538 | AL133245.1 | lincRNA              | chr2  | 32321638 | 32323002 | + | 0    | 0    |
| ENSG00000180539 | RP11-326G1 | lincRNA              | chr1  | 1.49E+08 | 1.49E+08 | + | 1.39 | 0.55 |
| ENSG00000180540 | RP11-299J1 | antisense            | chr3  | 1.22E+08 | 1.22E+08 | + | 2.63 | 2.59 |
| ENSG00000180541 | RP11-5C23  | antisense            | chr7  | 1.55E+08 | 1.55E+08 | + | 0.51 | 0.49 |
| ENSG00000180542 | RP11-155D1 | processed_transcript | chr3  | 51961212 | 51974031 | - | 0    | 0    |
| ENSG00000180543 | RP11-357H1 | lincRNA              | chr17 | 48635923 | 48647023 | - | 0    | 0    |
| ENSG00000180544 | RP11-318E1 | lincRNA              | chr10 | 5813985  | 5814441  | + | 0    | 0.93 |

|                                |       |          |          |   |      |      |
|--------------------------------|-------|----------|----------|---|------|------|
| ENSG0000(JMJD1C-AS antisense   | chr10 | 63465229 | 63466563 | + | 0.44 | 0.38 |
| ENSG0000(RP4-673M: antisense   | chr7  | 44884953 | 44886393 | + | 1.28 | 1.63 |
| ENSG0000(RP11-725P lincRNA     | chr2  | 1.32E+08 | 1.32E+08 | - | 0.1  | 0.04 |
| ENSG0000(RP11-74E2 antisense   | chr17 | 2683305  | 2685088  | - | 0    | 0    |
| ENSG0000(CTD-2410N protein_co  | chr5  | 1.34E+08 | 1.34E+08 | - | 0.41 | 0.39 |
| ENSG0000(RP11-433A lincRNA     | chr3  | 72178279 | 72178810 | + | 0    | 0    |
| ENSG0000(RP11-571L lincRNA     | chr4  | 99067256 | 99068125 | - | 0.22 | 0.16 |
| ENSG0000(LL22NC03- unprocessε  | chr22 | 22303224 | 22310401 | + | 6.88 | 7.27 |
| ENSG0000(RP11-822E processed_  | chr17 | 21532477 | 21574517 | - | 1.77 | 2.15 |
| ENSG0000(RP13-1016 lincRNA     | chr4  | 1550284  | 1550572  | + | 0    | 0    |
| ENSG0000(RP11-335L lincRNA     | chr4  | 1.83E+08 | 1.83E+08 | - | 0.11 | 0    |
| ENSG0000(KB-226F1.2 lincRNA    | chr22 | 23969211 | 23969873 | + | 0.1  | 0.45 |
| ENSG0000(RP11-674N sense_intrε | chr18 | 8801656  | 8802305  | + | 0.31 | 0    |
| ENSG0000(RP11-286H antisense   | chr2  | 1.28E+08 | 1.28E+08 | - | 0    | 0.1  |
| ENSG0000(RP11-464F lincRNA     | chr10 | 73630556 | 73631490 | + | 0.13 | 0.29 |
| ENSG0000(RP11-602N lincRNA     | chr4  | 1.1E+08  | 1.1E+08  | - | 0.25 | 0.27 |
| ENSG0000(RP11-368I2 lincRNA    | chr3  | 1.69E+08 | 1.69E+08 | + | 0    | 0    |
| ENSG0000(CTA-390C1 lincRNA     | chr22 | 25436312 | 25436915 | + | 0    | 0    |
| ENSG0000(RP11-474N lincRNA     | chr18 | 9912316  | 9912849  | - | 0.14 | 0.15 |
| ENSG0000(RP11-438L lincRNA     | chr2  | 1.83E+08 | 1.83E+08 | + | 0.11 | 0    |
| ENSG0000(RP1-17001 processed_  | chr7  | 27147366 | 27152598 | - | 0    | 0    |
| ENSG0000(KRTAP10-7 protein_co  | chr21 | 44600597 | 44602174 | + | 0    | 0    |
| ENSG0000(RP11-260N antisense   | chr2  | 2.1E+08  | 2.1E+08  | + | 0.09 | 0.58 |
| ENSG0000(RP11-66B2 processed_  | chr15 | 1.01E+08 | 1.01E+08 | + | 0.09 | 0.18 |
| ENSG0000(U91328.22 lincRNA     | chr6  | 26013241 | 26013757 | + | 0.14 | 0    |
| ENSG0000(RP5-855D2 sense_intrε | chr8  | 233119   | 233692   | + | 1.61 | 0.85 |
| ENSG0000(RP11-1512C antisense  | chr2  | 46956615 | 46956888 | - | 0    | 0    |
| ENSG0000(RP11-219A processed_  | chr17 | 16788057 | 16816540 | + | 0    | 0    |
| ENSG0000(RP11-402D antisense   | chr10 | 91908131 | 91909348 | + | 0    | 0    |
| ENSG0000(CTA-384D8 antisense   | chr22 | 50523926 | 50524780 | + | 1.03 | 1.13 |
| ENSG0000(RP11-302B protein_co  | chr12 | 48903503 | 48957365 | - | 1.74 | 1.59 |
| ENSG0000(RP11-295M lincRNA     | chr1  | 2.21E+08 | 2.21E+08 | - | 0.27 | 0.45 |
| ENSG0000(RP6-74O6.l lincRNA    | chr1  | 1.48E+08 | 1.48E+08 | - | 0.36 | 0.79 |
| ENSG0000(LL21NC02- antisense   | chr21 | 44936303 | 44936954 | + | 0.1  | 0.11 |
| ENSG0000(RP11-445P lincRNA     | chr1  | 1.87E+08 | 1.87E+08 | + | 0    | 0    |
| ENSG0000(XXbac-B13 lincRNA     | chr22 | 20981361 | 20981755 | - | 0    | 0.24 |
| ENSG0000(RP11-792A antisense   | chr7  | 66739829 | 66740385 | - | 4.12 | 4.39 |
| ENSG0000(RP11-91K8 lincRNA     | chr3  | 1.34E+08 | 1.34E+08 | - | 0    | 0    |
| ENSG0000(RP5-1042K antisense   | chr22 | 40415003 | 40415445 | + | 0    | 0    |
| ENSG0000(RP3-402G1 antisense   | chr22 | 50205585 | 50206062 | - | 0.48 | 0.18 |
| ENSG0000(OR10AE3P unprocessε   | chr12 | 55646195 | 55646663 | - | 0    | 0    |
| ENSG0000(RP11-452C antisense   | chr7  | 1.58E+08 | 1.58E+08 | + | 0    | 0    |
| ENSG0000(RP11-379B lincRNA     | chr3  | 1.26E+08 | 1.26E+08 | + | 0    | 0    |
| ENSG0000(RP3-428L1 antisense   | chr6  | 1.61E+08 | 1.61E+08 | - | 1.13 | 1.72 |
| ENSG0000(RP11-513N antisense   | chr9  | 19371386 | 19371945 | - | 0    | 0    |

|                 |                           |       |          |          |   |      |       |
|-----------------|---------------------------|-------|----------|----------|---|------|-------|
| ENSG00000100000 | RP11-313P antisense       | chr7  | 72924418 | 72925125 | - | 0.28 | 0     |
| ENSG00000100000 | RP11-484K antisense       | chr3  | 1.13E+08 | 1.13E+08 | - | 0    | 0.1   |
| ENSG00000100000 | RP1-137D1 lincRNA         | chr6  | 1.69E+08 | 1.69E+08 | - | 0.1  | 0.11  |
| ENSG00000100000 | RP11-347I1 lincRNA        | chr12 | 1.22E+08 | 1.22E+08 | + | 0    | 0     |
| ENSG00000100000 | RP11-801F antisense       | chr2  | 2.08E+08 | 2.08E+08 | - | 0    | 0     |
| ENSG00000100000 | RP11-398C lincRNA         | chr10 | 14877688 | 14878686 | - | 0.98 | 0.6   |
| ENSG00000100000 | RP4-593H1 antisense       | chr7  | 1.08E+08 | 1.08E+08 | - | 0.15 | 0     |
| ENSG00000100000 | RP5-1102E lincRNA         | chr1  | 76636877 | 76637339 | + | 0    | 0     |
| ENSG00000100000 | RP11-710E lincRNA         | chr4  | 87460807 | 87462280 | - | 0    | 0     |
| ENSG00000100000 | CTA-292E1 sense_intronic  | chr22 | 28814914 | 28815662 | + | 0.17 | 0     |
| ENSG00000100000 | RP11-332H lincRNA         | chr2  | 1.05E+08 | 1.05E+08 | - | 0.22 | 0.48  |
| ENSG00000100000 | RP11-814H lincRNA         | chr4  | 41988741 | 41989237 | - | 0.3  | 0     |
| ENSG00000100000 | RP11-17E1 lincRNA         | chr1  | 74698769 | 74699333 | - | 0.13 | 0     |
| ENSG00000100000 | RP11-561I1 antisense      | chr1  | 2.42E+08 | 2.42E+08 | + | 0    | 0     |
| ENSG00000100000 | RP11-12D2 lincRNA         | chr9  | 5351796  | 5352410  | - | 0    | 0     |
| ENSG00000100000 | CTC-487M1 protein_coding  | chr5  | 1.13E+08 | 1.13E+08 | + | 2.06 | 3.69  |
| ENSG00000100000 | RP11-798N antisense       | chr4  | 1.73E+08 | 1.73E+08 | - | 9.09 | 6.17  |
| ENSG00000100000 | RP11-408A lincRNA         | chr9  | 14588797 | 14590065 | - | 0.23 | 0.1   |
| ENSG00000100000 | LL22NC03- sense_intronic  | chr22 | 15823197 | 15823890 | + | 0.19 | 0.53  |
| ENSG00000100000 | RP5-1103G lincRNA         | chr20 | 267186   | 268857   | + | 0.03 | 0     |
| ENSG00000100000 | RP11-33M1 lincRNA         | chr1  | 1.82E+08 | 1.82E+08 | + | 0    | 0     |
| ENSG00000100000 | OR2BH1P unprocessed       | chr11 | 28986635 | 28987498 | + | 0    | 0     |
| ENSG00000100000 | RP11-104H processed       | chr17 | 7439506  | 7445966  | + | 0.05 | 0.11  |
| ENSG00000100000 | RP11-2H3.1 lincRNA        | chr4  | 416118   | 416537   | - | 0.39 | 0     |
| ENSG00000100000 | DCP1A protein_coding      | chr3  | 53283428 | 53347610 | - | 5.14 | 6.58  |
| ENSG00000100000 | CSPG4P5 transcribed       | chr15 | 84401807 | 84408005 | - | 0.51 | 0.31  |
| ENSG00000100000 | LINC01578 processed       | chr15 | 92882707 | 92899701 | + | 45.7 | 48.45 |
| ENSG00000100000 | RP11-57G1 lincRNA         | chr10 | 67849525 | 67850746 | + | 0.15 | 0.11  |
| ENSG00000100000 | RP5-1159C lincRNA         | chr7  | 7552462  | 7566996  | - | 0.43 | 0.56  |
| ENSG00000100000 | RP11-98C1 antisense       | chr2  | 1.18E+08 | 1.18E+08 | + | 0    | 0     |
| ENSG00000100000 | RP11-216L protein_coding  | chr9  | 1.37E+08 | 1.37E+08 | + | 0.63 | 0.25  |
| ENSG00000100000 | RP1-309K2 protein_coding  | chr20 | 35632340 | 35674544 | - | 0    | 0     |
| ENSG00000100000 | RP11-309L1 protein_coding | chr7  | 1.29E+08 | 1.29E+08 | + | 0.19 | 0.2   |
| ENSG00000100000 | OR10Q2P unprocessed       | chr11 | 58291826 | 58292765 | - | 0    | 0     |
| ENSG00000100000 | TBC1D8-AS lincRNA         | chr2  | 1.01E+08 | 1.01E+08 | + | 0.53 | 0.27  |
| ENSG00000100000 | RP11-392E processed       | chr9  | 38542479 | 38568422 | - | 0    | 0     |
| ENSG00000100000 | RP11-265E lincRNA         | chr7  | 32845394 | 32846061 | + | 0.1  | 0     |
| ENSG00000100000 | RP11-533E lincRNA         | chr1  | 1.8E+08  | 1.8E+08  | - | 0.25 | 0.88  |
| ENSG00000100000 | RP11-121A lincRNA         | chr7  | 38326070 | 38329643 | - | 0.03 | 0.03  |
| ENSG00000100000 | CTD-2555C antisense       | chr14 | 64440369 | 64442238 | - | 1.11 | 1.01  |
| ENSG00000100000 | RP11-15L1 antisense       | chr3  | 1.8E+08  | 1.8E+08  | - | 0    | 0     |
| ENSG00000100000 | RP11-74E2 lincRNA         | chr17 | 2688473  | 2688960  | + | 0    | 0     |
| ENSG00000100000 | RP11-724N lincRNA         | chr10 | 1.03E+08 | 1.03E+08 | + | 0.08 | 0     |
| ENSG00000100000 | RP11-440D lincRNA         | chr2  | 95525109 | 95526702 | - | 3.32 | 3.07  |
| ENSG00000100000 | RP11-330C sense_intronic  | chr10 | 30831828 | 30833387 | - | 0.04 | 0.04  |

|                 |                                |       |          |          |   |      |      |
|-----------------|--------------------------------|-------|----------|----------|---|------|------|
| ENSG00000162111 | RP11-62J1. lincRNA             | chr7  | 1.28E+08 | 1.28E+08 | - | 0    | 0    |
| ENSG00000162112 | RP11-574K protein_coding       | chr10 | 73796514 | 73811651 | - | 0.31 | 0.23 |
| ENSG00000162113 | RP11-705C processed_transcript | chr12 | 9642872  | 9657070  | + | 0    | 0.42 |
| ENSG00000162114 | CTB-152G1 antisense            | chr7  | 1.05E+08 | 1.05E+08 | - | 0.08 | 0.25 |
| ENSG00000162115 | hsa-mir-12 lincRNA             | chr17 | 2748078  | 2748182  | + | 0    | 0    |
| ENSG00000162116 | RP11-500M protein_coding       | chr12 | 4604944  | 4662643  | + | 3.88 | 0    |
| ENSG00000162117 | RP11-329B lincRNA              | chr3  | 1.85E+08 | 1.85E+08 | + | 0    | 0    |
| ENSG00000162118 | RP11-391L lincRNA              | chr16 | 81385463 | 81387560 | + | 0    | 0.67 |
| ENSG00000162119 | RP11-1191 antisense            | chr4  | 661209   | 661945   | - | 0    | 0    |
| ENSG00000162120 | RP5-943J3. lincRNA             | chr1  | 89820174 | 89820868 | - | 0.19 | 0.11 |
| ENSG00000162121 | RP11-47A8 lincRNA              | chr10 | 1.03E+08 | 1.03E+08 | - | 0.13 | 0.05 |
| ENSG00000162122 | RP11-392E processed_transcript | chr9  | 38542389 | 38543215 | - | 0.31 | 0    |
| ENSG00000162123 | RP11-700J antisense            | chr4  | 44704405 | 44704965 | + | 0    | 0.14 |
| ENSG00000162124 | OR6U2P unprocessed_transcript  | chr12 | 55611623 | 55612554 | + | 0    | 0    |
| ENSG00000162125 | CTA-384D8 lincRNA              | chr22 | 50597152 | 50597599 | + | 0    | 0    |
| ENSG00000162126 | RP11-134L antisense            | chr7  | 1.35E+08 | 1.35E+08 | + | 0.52 | 0.8  |
| ENSG00000162127 | CTA-246H3 lincRNA              | chr22 | 25434324 | 25435070 | - | 0    | 0.1  |
| ENSG00000162128 | CTD-2308L antisense            | chr2  | 2.22E+08 | 2.22E+08 | + | 0.11 | 0.25 |
| ENSG00000162129 | CTD-3216D sense_intronic       | chr20 | 34281632 | 34286466 | - | 0.12 | 0.13 |
| ENSG00000162130 | AP001412. antisense            | chr21 | 37267784 | 37268497 | + | 0.37 | 0.3  |
| ENSG00000162131 | RP11-514P processed_transcript | chr7  | 1.02E+08 | 1.03E+08 | - | 0    | 1.03 |
| ENSG00000162132 | RP11-307C antisense            | chr7  | 98322853 | 98323430 | + | 0.37 | 0.13 |
| ENSG00000162133 | RP11-1275 lincRNA              | chr7  | 5425770  | 5426401  | + | 0.22 | 1.43 |
| ENSG00000162134 | KB-1440D3 sense_intronic       | chr22 | 21661934 | 21662363 | + | 0    | 0    |
| ENSG00000162135 | CMP21-97 lincRNA               | chr21 | 34425508 | 34426017 | + | 0    | 0    |
| ENSG00000162136 | OR7A19P unprocessed_transcript | chr12 | 46592573 | 46593305 | + | 0    | 0    |
| ENSG00000162137 | RP11-686C lincRNA              | chr2  | 2.02E+08 | 2.02E+08 | + | 0.34 | 0    |
| ENSG00000162138 | RP11-190C antisense            | chr3  | 1.2E+08  | 1.2E+08  | - | 0    | 0    |
| ENSG00000162139 | RBAK-RBAK protein_coding       | chr7  | 4983718  | 5073221  | + | 0    | 0    |
| ENSG00000162140 | RP11-528I antisense            | chr4  | 55547112 | 55547889 | + | 0    | 0    |
| ENSG00000162141 | RP11-329B lincRNA              | chr3  | 1.85E+08 | 1.85E+08 | + | 0.57 | 0    |
| ENSG00000162142 | RP11-284F lincRNA              | chr1  | 1.57E+08 | 1.57E+08 | - | 0    | 0    |
| ENSG00000162143 | KB-1125A3 antisense            | chr22 | 23856427 | 23857039 | - | 0.45 | 0.5  |
| ENSG00000162144 | MYHAS antisense                | chr17 | 10383144 | 10623886 | + | 0    | 0.03 |
| ENSG00000162145 | CTA-390C1 sense_intronic       | chr22 | 25476218 | 25479971 | + | 0.27 | 0.17 |
| ENSG00000162146 | RP11-647K antisense            | chr2  | 1.9E+08  | 1.9E+08  | - | 0    | 0.41 |
| ENSG00000162147 | RP11-517H processed_transcript | chr6  | 1.67E+08 | 1.67E+08 | + | 0.07 | 0.09 |
| ENSG00000162148 | CTD-2234N lincRNA              | chr11 | 1.27E+08 | 1.27E+08 | + | 0    | 0    |
| ENSG00000162149 | RP5-1180E antisense            | chr1  | 1.11E+08 | 1.11E+08 | - | 0    | 0    |
| ENSG00000162150 | RP11-508N lincRNA              | chr10 | 38137337 | 38144399 | + | 0.14 | 0.22 |
| ENSG00000162151 | RP11-85E1 lincRNA              | chr7  | 36734004 | 36734535 | - | 0    | 0    |
| ENSG00000162152 | RP11-46J2 antisense            | chr4  | 70703747 | 70704491 | - | 0.09 | 0.1  |
| ENSG00000162153 | OR5A11 polymorph               | chr11 | 56412696 | 56413680 | + | 0    | 0    |
| ENSG00000162154 | RP11-150D lincRNA              | chr10 | 72053294 | 72054037 | - | 0    | 0    |
| ENSG00000162155 | LINC02012 lincRNA              | chr3  | 1.98E+08 | 1.98E+08 | - | 0.14 | 0    |



|                                  |       |          |          |   |      |      |
|----------------------------------|-------|----------|----------|---|------|------|
| ENSG0000(RP11-305K antisense)    | chr3  | 1.57E+08 | 1.57E+08 | - | 0.44 | 0.32 |
| ENSG0000(AF129408. antisense)    | chr21 | 39184469 | 39184899 | + | 0    | 0    |
| ENSG0000(RP11-196G lincRNA)      | chr1  | 1.5E+08  | 1.5E+08  | + | 2    | 1.43 |
| ENSG0000(RP11-332H lincRNA)      | chr2  | 1.05E+08 | 1.05E+08 | - | 0.51 | 0.41 |
| ENSG0000(RP11-362J. antisense)   | chr4  | 20766808 | 20767372 | + | 0.13 | 0    |
| ENSG0000(KB-1572G7 processed_)   | chr22 | 23652860 | 23717347 | - | 0.47 | 1.81 |
| ENSG0000(RP11-118K lincRNA)      | chr10 | 3065424  | 3066001  | - | 0.61 | 0.81 |
| ENSG0000(RP11-336K antisense)    | chr1  | 1.56E+08 | 1.56E+08 | + | 0.15 | 0.14 |
| ENSG0000(ARL2-SNX1 protein_co)   | chr11 | 65014182 | 65040570 | + | 0    | 0    |
| ENSG0000(GS1-279B7 lincRNA)      | chr1  | 1.85E+08 | 1.85E+08 | + | 0.69 | 0    |
| ENSG0000(RP11-314C lincRNA)      | chr2  | 38193348 | 38193629 | + | 0.41 | 0    |
| ENSG0000(RP11-170N antisense)    | chr4  | 1.23E+08 | 1.23E+08 | - | 0.07 | 0.04 |
| ENSG0000(RP11-351D lincRNA)      | chr10 | 43136824 | 43138334 | - | 0.49 | 0.29 |
| ENSG0000(RP11-352G lincRNA)      | chr3  | 1.96E+08 | 1.96E+08 | - | 0.11 | 0.13 |
| ENSG0000(RP11-96K1 antisense)    | chr1  | 1.11E+08 | 1.11E+08 | + | 0.09 | 0.14 |
| ENSG0000(RP11-728K lincRNA)      | chr7  | 1.5E+08  | 1.5E+08  | + | 0    | 0    |
| ENSG0000(RP11-90B2 lincRNA)      | chr10 | 33341655 | 33341905 | + | 0    | 0    |
| ENSG0000(CTD-2002J. antisense)   | chr3  | 1.96E+08 | 1.96E+08 | + | 0    | 0    |
| ENSG0000(RP11-225B lincRNA)      | chr7  | 32758882 | 32759353 | + | 0.65 | 0    |
| ENSG0000(RP11-352N lincRNA)      | chr12 | 45718046 | 45727775 | - | 0.92 | 0.73 |
| ENSG0000(AP000240. sense_intron) | chr21 | 29359002 | 29359453 | + | 0    | 0    |
| ENSG0000(CTD-2303H processed_)   | chr17 | 18511221 | 18551705 | - | 8.88 | 9.77 |
| ENSG0000(INTS4P2 transcribed)    | chr7  | 65647864 | 65715661 | + | 0    | 0    |
| ENSG0000(RP11-106M protein_co)   | chr15 | 72266746 | 72319946 | - | 0    | 0    |
| ENSG0000(RP11-422P antisense)    | chr1  | 1.54E+08 | 1.54E+08 | + | 1.4  | 0.88 |
| ENSG0000(LL21NC02- sense_intron) | chr21 | 44929653 | 44930112 | - | 0.68 | 0.56 |
| ENSG0000(RP11-285F lincRNA)      | chr10 | 1E+08    | 1E+08    | + | 0    | 0    |
| ENSG0000(DGCR9 lincRNA)          | chr22 | 19017834 | 19020248 | + | 0    | 0.03 |
| ENSG0000(LINC02035 lincRNA)      | chr3  | 1.23E+08 | 1.23E+08 | + | 2.63 | 3    |
| ENSG0000(RP11-449G sense_intron) | chr2  | 39323328 | 39323804 | - | 0.8  | 0    |
| ENSG0000(FAM95C lincRNA)         | chr9  | 38540567 | 38545372 | - | 0.86 | 0.44 |
| ENSG0000(RP11-479G lincRNA)      | chr10 | 32887255 | 32889311 | - | 6.08 | 6.3  |
| ENSG0000(ATF4P2 processed_)      | chrX  | 1.55E+08 | 1.55E+08 | + | 0    | 0    |
| ENSG0000(RP4-569D1 lincRNA)      | chr22 | 35526932 | 35527415 | + | 0    | 0    |
| ENSG0000(C2orf15 protein_co)     | chr2  | 99141485 | 99151487 | + | 0.07 | 0.21 |
| ENSG0000(RP11-834C processed_)   | chr12 | 54017110 | 54035361 | + | 0    | 0    |
| ENSG0000(RP4-583P1 protein_co)   | chr20 | 63738270 | 63740398 | + | 0    | 3.32 |
| ENSG0000(RP11-834C protein_co)   | chr12 | 53985845 | 54034888 | + | 0    | 0.09 |
| ENSG0000(OR51F4P unprocessed)    | chr11 | 4752046  | 4752944  | - | 0    | 0    |
| ENSG0000(CTB-13F3.1 antisense)   | chr7  | 1.08E+08 | 1.08E+08 | + | 0.22 | 0.24 |
| ENSG0000(RP11-77E1 lincRNA)      | chr9  | 7786105  | 7786688  | - | 0    | 0.13 |
| ENSG0000(RP11-385F antisense)    | chr1  | 2.37E+08 | 2.37E+08 | - | 1.47 | 0.44 |
| ENSG0000(XXyac-YX1! lincRNA)     | chr1  | 1.48E+08 | 1.48E+08 | + | 0    | 0    |
| ENSG0000(CDC37L1-A lincRNA)      | chr9  | 4676600  | 4679502  | - | 0.62 | 1.55 |
| ENSG0000(RP11-428K antisense)    | chr1  | 1.79E+08 | 1.79E+08 | - | 0.37 | 0.62 |

|                                 |       |          |          |   |       |       |
|---------------------------------|-------|----------|----------|---|-------|-------|
| ENSG0000(RP11-334G antisense)   | chr2  | 58241349 | 58241686 | + | 0     | 0     |
| ENSG0000(RP11-474G antisense)   | chr2  | 68252870 | 68253848 | + | 0.19  | 0.34  |
| ENSG0000(RP11-216L processed)   | chr9  | 1.37E+08 | 1.37E+08 | + | 0.18  | 0.37  |
| ENSG0000(CTA-714B7 lincRNA)     | chr22 | 35122661 | 35127419 | + | 0     | 0     |
| ENSG0000(RP5-1186P lincRNA)     | chr7  | 74606913 | 74607299 | + | 0     | 0     |
| ENSG0000(RP11-337C processed)   | chr1  | 1.47E+08 | 1.47E+08 | + | 1.49  | 1.53  |
| ENSG0000(RP11-109E lincRNA)     | chr2  | 1.31E+08 | 1.31E+08 | - | 0     | 0.27  |
| ENSG0000(RP3-508I15 antisense)  | chr22 | 38743495 | 38743910 | + | 0     | 0     |
| ENSG0000(RP11-130C lincRNA)     | chr4  | 1.29E+08 | 1.29E+08 | - | 0     | 0     |
| ENSG0000(GRIN2B protein_co)     | chr12 | 13437942 | 13981957 | - | 0     | 0     |
| ENSG0000(RP11-301C antisense)   | chr2  | 86195590 | 86196049 | + | 0.85  | 1.31  |
| ENSG0000(LL22NC03- antisense)   | chr22 | 33922422 | 33922766 | + | 0     | 0     |
| ENSG0000(RP11-1275 lincRNA)     | chr7  | 5428731  | 5429672  | + | 1.7   | 1.44  |
| ENSG0000(OR52E1 polymorph)      | chr11 | 5069572  | 5070497  | + | 0     | 0     |
| ENSG0000(RP11-201K protein_co)  | chr1  | 1.55E+08 | 1.55E+08 | - | 0     | 0     |
| ENSG0000(RP11-781I4 antisense)  | chr2  | 36513255 | 36513732 | - | 0     | 0     |
| ENSG0000(AP000255. lincRNA)     | chr21 | 31735732 | 31736407 | + | 0.2   | 0     |
| ENSG0000(RP11-532L lincRNA)     | chr1  | 2E+08    | 2E+08    | - | 0     | 0     |
| ENSG0000(RP3-508I15 sense_intr) | chr22 | 38736610 | 38736792 | - | 0     | 0     |
| ENSG0000(RP11-488L lincRNA)     | chr17 | 13095908 | 13100928 | + | 0     | 0     |
| ENSG0000(RP11-302L lincRNA)     | chr6  | 1.7E+08  | 1.7E+08  | + | 0     | 0     |
| ENSG0000(AP000569. lincRNA)     | chr21 | 33967101 | 33968573 | - | 0     | 0.13  |
| ENSG0000(CMP21-97 lincRNA)      | chr21 | 34412200 | 34412587 | + | 0     | 0     |
| ENSG0000(RP11-559M antisense)   | chr2  | 44167625 | 44168859 | - | 0     | 0     |
| ENSG0000(RP11-165A lincRNA)     | chr10 | 24953241 | 24953513 | + | 0     | 0.48  |
| ENSG0000(RP11-416N antisense)   | chr10 | 1.04E+08 | 1.04E+08 | + | 0     | 0     |
| ENSG0000(RP11-350G antisense)   | chr1  | 1.54E+08 | 1.54E+08 | + | 0     | 0     |
| ENSG0000(LYPD4 protein_co)      | chr19 | 41837074 | 41844697 | - | 0     | 0     |
| ENSG0000(RP11-25K2 processed)   | chr1  | 1.62E+08 | 1.62E+08 | + | 0     | 0     |
| ENSG0000(RP11-367H lincRNA)     | chr2  | 2.42E+08 | 2.42E+08 | + | 0.08  | 0.09  |
| ENSG0000(KB-1466C5 lincRNA)     | chr21 | 26459903 | 26460214 | - | 0     | 0     |
| ENSG0000(AC144652. lincRNA)     | chr7  | 1.55E+08 | 1.55E+08 | - | 1.89  | 1.31  |
| ENSG0000(AC079610. sense_ove)   | chr2  | 2.13E+08 | 2.13E+08 | - | 0     | 0     |
| ENSG0000(RP11-128P lincRNA)     | chr18 | 11390033 | 11390729 | - | 0     | 0     |
| ENSG0000(RP11-9N2C antisense)   | chr3  | 1.24E+08 | 1.24E+08 | + | 0     | 0.14  |
| ENSG0000(RP11-236B lincRNA)     | chr10 | 90997480 | 90997713 | - | 0     | 0     |
| ENSG0000(LINC01990 lincRNA)     | chr3  | 1.07E+08 | 1.07E+08 | + | 0     | 0     |
| ENSG0000(PACERR lincRNA)        | chr1  | 1.87E+08 | 1.87E+08 | + | 1.08  | 0.42  |
| ENSG0000(RP11-350J antisense)   | chr6  | 1.5E+08  | 1.5E+08  | + | 0     | 0     |
| ENSG0000(RP11-799M antisense)   | chr4  | 15563698 | 15564253 | - | 0.26  | 0     |
| ENSG0000(NBPF26 protein_co)     | chr1  | 1.21E+08 | 1.21E+08 | + | 14.61 | 14.36 |
| ENSG0000(RP3-402G1 antisense)   | chr22 | 50208461 | 50209542 | - | 0.11  | 0.23  |
| ENSG0000(GS1-293C5 antisense)   | chr7  | 95416108 | 95416462 | + | 0     | 0     |
| ENSG0000(XXbac-B44. lincRNA)    | chr22 | 20320739 | 20321203 | + | 0     | 0.37  |
| ENSG0000(RP11-820I1 antisense)  | chr18 | 11908712 | 11909223 | + | 0     | 0.16  |

|                 |            |                      |       |          |          |   |       |      |
|-----------------|------------|----------------------|-------|----------|----------|---|-------|------|
| ENSG00000100000 | RP11-458F  | lincRNA              | chr7  | 66902857 | 66906297 | + | 1.36  | 1.24 |
| ENSG00000100000 | RP11-525A  | lincRNA              | chr10 | 1.1E+08  | 1.1E+08  | - | 0     | 0    |
| ENSG00000100000 | CITF22-92A | lincRNA              | chr22 | 46013606 | 46015498 | + | 0.85  | 0.8  |
| ENSG00000100000 | RP5-1068E  | lincRNA              | chr20 | 18794529 | 18796067 | + | 1.45  | 0.53 |
| ENSG00000100000 | RP11-290D  | antisense            | chr13 | 45340039 | 45341183 | + | 13.01 | 8.27 |
| ENSG00000100000 | RP11-449P  | antisense            | chr7  | 879790   | 886547   | - | 0.04  | 0.01 |
| ENSG00000100000 | RP11-406H  | lincRNA              | chr10 | 17137336 | 17137585 | - | 0     | 0    |
| ENSG00000100000 | RP4-583P1  | protein_coding       | chr20 | 63708864 | 63739103 | + | 0.9   | 1.42 |
| ENSG00000100000 | RP11-38C1  | protein_coding       | chr2  | 99154998 | 99195298 | + | 0.54  | 0    |
| ENSG00000100000 | RP11-127B  | lincRNA              | chr4  | 82344876 | 82345540 | - | 0     | 0    |
| ENSG00000100000 | RP11-104L  | lincRNA              | chr1  | 1.67E+08 | 1.67E+08 | - | 0     | 0    |
| ENSG00000100000 | RP11-108L  | lincRNA              | chr10 | 1.01E+08 | 1.01E+08 | - | 0.13  | 0.28 |
| ENSG00000100000 | DGCR10     | sense_intronic       | chr22 | 19023056 | 19023550 | + | 0     | 0    |
| ENSG00000100000 | RP11-1057  | lincRNA              | chr2  | 31852976 | 31853423 | - | 0     | 0    |
| ENSG00000100000 | RP11-307N  | protein_coding       | chr13 | 23979700 | 24321031 | + | 0.52  | 0.08 |
| ENSG00000100000 | CTB-96E2.2 | protein_coding       | chr17 | 28364288 | 28368012 | - | 0     | 0    |
| ENSG00000100000 | LINC02091  | lincRNA              | chr17 | 183824   | 191587   | - | 0     | 0    |
| ENSG00000100000 | SNURF      | protein_coding       | chr15 | 24954986 | 24977850 | + | 4.46  | 8.71 |
| ENSG00000100000 | RP11-434H  | antisense            | chr3  | 1.29E+08 | 1.29E+08 | + | 0.38  | 0.83 |
| ENSG00000100000 | RP11-11N7  | lincRNA              | chr1  | 2.45E+08 | 2.45E+08 | + | 0.27  | 0.45 |
| ENSG00000100000 | RP3-510H1  | antisense            | chr22 | 35298838 | 35299541 | - | 0     | 0    |
| ENSG00000100000 | RP11-368I2 | lincRNA              | chr3  | 1.69E+08 | 1.69E+08 | + | 0     | 0    |
| ENSG00000100000 | RP11-20I2  | antisense            | chr4  | 1167778  | 1168174  | + | 0     | 0.24 |
| ENSG00000100000 | RP11-335L  | lincRNA              | chr4  | 1.83E+08 | 1.83E+08 | - | 0     | 0    |
| ENSG00000100000 | RP11-778D  | lincRNA              | chr3  | 1.84E+08 | 1.84E+08 | - | 0     | 0    |
| ENSG00000100000 | RP11-5C23  | antisense            | chr7  | 1.55E+08 | 1.55E+08 | + | 0.49  | 0.33 |
| ENSG00000100000 | RP11-212P  | processed_transcript | chr7  | 1.28E+08 | 1.28E+08 | + | 2.49  | 1.52 |
| ENSG00000100000 | RP11-339B  | sense_intronic       | chr9  | 1.28E+08 | 1.28E+08 | + | 2.86  | 8.31 |
| ENSG00000100000 | RP3-402G1  | antisense            | chr22 | 50191724 | 50192402 | - | 0.1   | 0.11 |
| ENSG00000100000 | CTD-3148I  | processed_transcript | chr19 | 49474586 | 49487637 | + | 0     | 0.08 |
| ENSG00000100000 | CITF22-1A6 | lincRNA              | chr22 | 49902228 | 49904576 | + | 0.07  | 0.08 |
| ENSG00000100000 | RP11-717A  | antisense            | chr2  | 85387074 | 85387146 | - | 0     | 0    |
| ENSG00000100000 | GS1-304P7  | lincRNA              | chr1  | 1.87E+08 | 1.87E+08 | + | 0     | 0    |
| ENSG00000100000 | AP000692   | antisense            | chr21 | 36319792 | 36320670 | - | 0.5   | 0.23 |
| ENSG00000100000 | AC006946   | lincRNA              | chr22 | 17067821 | 17070675 | + | 0     | 0    |
| ENSG00000100000 | RP4-549L2  | antisense            | chr1  | 1.01E+08 | 1.01E+08 | + | 0.19  | 0.62 |
| ENSG00000100000 | RP11-107N  | lincRNA              | chr2  | 2.02E+08 | 2.02E+08 | - | 0.34  | 0.56 |
| ENSG00000100000 | AP001437   | antisense            | chr21 | 37365477 | 37365932 | - | 0.52  | 0.38 |
| ENSG00000100000 | RP13-131K  | lincRNA              | chr3  | 48985485 | 48985963 | - | 0.16  | 1.06 |
| ENSG00000100000 | AC000068   | antisense            | chr22 | 19456503 | 19456962 | + | 0.17  | 0    |
| ENSG00000100000 | RP5-998N2  | processed_transcript | chr1  | 1.44E+08 | 1.44E+08 | - | 2.71  | 1.76 |
| ENSG00000100000 | RP5-1039K  | lincRNA              | chr22 | 38043230 | 38043920 | + | 0     | 0    |
| ENSG00000100000 | AC002059   | sense_intronic       | chr22 | 29316744 | 29317220 | - | 0.16  | 0    |
| ENSG00000100000 | CTC-432M   | protein_coding       | chr5  | 1.31E+08 | 1.32E+08 | - | 0     | 0    |
| ENSG00000100000 | LLNLR-246  | lincRNA              | chr19 | 15346068 | 15348417 | - | 0     | 0    |

|                 |            |                |       |          |          |   |      |      |
|-----------------|------------|----------------|-------|----------|----------|---|------|------|
| ENSG00000100000 | RP11-644N  | antisense      | chr7  | 1.36E+08 | 1.36E+08 | + | 0    | 1.52 |
| ENSG00000100000 | RP5-1180E  | antisense      | chr1  | 1.11E+08 | 1.11E+08 | - | 0    | 0    |
| ENSG00000100000 | FAM25BP    | transcribed    | chr10 | 46369113 | 46373563 | + | 0.33 | 0    |
| ENSG00000100000 | RP11-513M  | antisense      | chr9  | 19375451 | 19375996 | + | 0.26 | 1.16 |
| ENSG00000100000 | OR5BQ1P    | unprocessed    | chr11 | 57029408 | 57029722 | + | 0    | 0    |
| ENSG00000100000 | RP11-1246  | lincRNA        | chr7  | 1464497  | 1467522  | - | 0.82 | 1.3  |
| ENSG00000100000 | RP11-370A  | sense_intronic | chr18 | 22882825 | 22883357 | - | 0    | 0    |
| ENSG00000100000 | RP11-713D  | lincRNA        | chr2  | 28810281 | 28810706 | - | 0    | 0    |
| ENSG00000100000 | OR2A13P    | unprocessed    | chr7  | 1.44E+08 | 1.44E+08 | + | 0    | 0    |
| ENSG00000100000 | CTB-119C2  | antisense      | chr7  | 26173533 | 26174945 | - | 0.04 | 0.04 |
| ENSG00000100000 | RP11-1263  | lincRNA        | chr4  | 573880   | 574412   | - | 0    | 0    |
| ENSG00000100000 | RP11-455J  | antisense      | chr2  | 1.9E+08  | 1.9E+08  | - | 0    | 0.13 |
| ENSG00000100000 | CTA-217C2  | lincRNA        | chr22 | 45155539 | 45156011 | - | 0    | 0.54 |
| ENSG00000100000 | KB-7G2.8   | processed      | chr22 | 16676016 | 16694648 | - | 0    | 0    |
| ENSG00000100000 | RP11-434P  | lincRNA        | chr2  | 73750256 | 73750786 | - | 0.14 | 0    |
| ENSG00000100000 | RP11-83A2  | antisense      | chr4  | 1.39E+08 | 1.39E+08 | - | 0.63 | 0.65 |
| ENSG00000100000 | RP11-399K  | lincRNA        | chr10 | 75408973 | 75409326 | - | 0.26 | 1.15 |
| ENSG00000100000 | LL09NC01-  | antisense      | chr9  | 1.34E+08 | 1.34E+08 | - | 0.23 | 0.09 |
| ENSG00000100000 | OR7E39P    | unprocessed    | chr7  | 6835420  | 6835794  | - | 0    | 0    |
| ENSG00000100000 | RP3-402G1  | antisense      | chr22 | 50199090 | 50200837 | - | 1.1  | 1.27 |
| ENSG00000100000 | RP1-100J1  | antisense      | chr21 | 29024255 | 29024890 | - | 0    | 0.12 |
| ENSG00000100000 | OR5BP1P    | unprocessed    | chr11 | 57055587 | 57056132 | + | 0    | 0    |
| ENSG00000100000 | RP11-177J  | lincRNA        | chr4  | 55387949 | 55388271 | + | 0    | 0    |
| ENSG00000100000 | RP11-394I  | lincRNA        | chr2  | 1.74E+08 | 1.74E+08 | - | 0    | 0    |
| ENSG00000100000 | RP11-986E  | protein_coding | chr14 | 94592058 | 94624646 | + | 0.42 | 0.15 |
| ENSG00000100000 | RP11-531F  | antisense      | chr3  | 1.83E+08 | 1.83E+08 | - | 0    | 0    |
| ENSG00000100000 | RP11-181I  | antisense      | chr10 | 1.02E+08 | 1.02E+08 | + | 0.28 | 0    |
| ENSG00000100000 | RP11-131L  | lincRNA        | chr1  | 85467295 | 85467660 | + | 0    | 0    |
| ENSG00000100000 | RP11-353K  | lincRNA        | chr2  | 96812239 | 96813657 | - | 0.4  | 0.22 |
| ENSG00000100000 | RP11-338K  | antisense      | chr4  | 8022665  | 8023126  | + | 0    | 0    |
| ENSG00000100000 | C2orf61    | protein_coding | chr2  | 47065941 | 47176511 | - | 0    | 0    |
| ENSG00000100000 | RP11-212P  | lincRNA        | chr7  | 1.29E+08 | 1.29E+08 | - | 2.04 | 1.98 |
| ENSG00000100000 | AP000254.  | antisense      | chr21 | 31666728 | 31667247 | - | 0.28 | 0.16 |
| ENSG00000100000 | CTA-384D8  | lincRNA        | chr22 | 50542650 | 50543011 | + | 0    | 0    |
| ENSG00000100000 | ZBTB8B     | protein_coding | chr1  | 32465069 | 32496686 | + | 0.09 | 0.08 |
| ENSG00000100000 | RP11-474G  | antisense      | chr2  | 68179833 | 68180532 | + | 0.09 | 0.21 |
| ENSG00000100000 | RP11-888D  | sense_intronic | chr18 | 9259388  | 9260390  | + | 0.55 | 0.2  |
| ENSG00000100000 | CTA-268H5  | lincRNA        | chr22 | 45262273 | 45263585 | - | 0.13 | 0    |
| ENSG00000100000 | RP6-109B7  | antisense      | chr22 | 46053093 | 46053560 | + | 0    | 0.36 |
| ENSG00000100000 | RP11-136C  | protein_coding | chr3  | 42809446 | 43055871 | + | 0.13 | 0    |
| ENSG00000100000 | RP11-445N  | lincRNA        | chr7  | 1.5E+08  | 1.5E+08  | - | 0    | 0    |
| ENSG00000100000 | C1QTNF3-7  | protein_coding | chr5  | 33987174 | 34124528 | - | 0    | 0    |
| ENSG00000100000 | AP000350.  | lincRNA        | chr22 | 23901432 | 23907068 | - | 0.34 | 0.31 |
| ENSG00000100000 | RP11-38M   | lincRNA        | chr7  | 1.34E+08 | 1.34E+08 | - | 2.65 | 3.93 |
| ENSG00000100000 | CTB-13L3.1 | processed      | chr7  | 90403434 | 90513391 | + | 0    | 0    |

|                                 |       |          |          |   |      |      |
|---------------------------------|-------|----------|----------|---|------|------|
| ENSG0000( AC000068. antisense   | chr22 | 19454179 | 19454605 | + | 0.19 | 0    |
| ENSG0000( RP11-314B lincRNA     | chr2  | 2.26E+08 | 2.26E+08 | + | 0    | 0    |
| ENSG0000( RP11-493E sense_intr  | chr2  | 61199979 | 61200769 | + | 0    | 0.09 |
| ENSG0000( RP11-440D lincRNA     | chr2  | 95537969 | 95538469 | + | 0.3  | 0.82 |
| ENSG0000( RP11-527J antisense   | chr2  | 99405218 | 99405843 | + | 0.22 | 0.72 |
| ENSG0000( RP11-496H lincRNA     | chr3  | 1.98E+08 | 1.98E+08 | + | 0    | 0.29 |
| ENSG0000( DGCR11 sense_intr     | chr22 | 19046162 | 19048375 | - | 1.42 | 1.02 |
| ENSG0000( RP11-425A antisense   | chr10 | 35604485 | 35608153 | - | 0.2  | 0.39 |
| ENSG0000( RBAKDN lincRNA        | chr7  | 5072125  | 5073223  | + | 0    | 0.32 |
| ENSG0000( RP5-1136G antisense   | chr7  | 1.49E+08 | 1.49E+08 | - | 1.06 | 0.75 |
| ENSG0000( RP11-138A lincRNA     | chr7  | 1.31E+08 | 1.31E+08 | + | 0    | 0    |
| ENSG0000( RP11-22N1 antisense   | chr7  | 1.06E+08 | 1.06E+08 | + | 0.07 | 0.33 |
| ENSG0000( RP11-621L lincRNA     | chr18 | 24402153 | 24402714 | + | 0.13 | 0.14 |
| ENSG0000( RP1-90G24 lincRNA     | chr22 | 32284683 | 32285131 | + | 0    | 0    |
| ENSG0000( OR6L2P unprocess      | chr10 | 1.33E+08 | 1.33E+08 | - | 0    | 0    |
| ENSG0000( RP11-141N processed_  | chr3  | 42809414 | 42908105 | + | 0.01 | 0.03 |
| ENSG0000( RP11-448A lincRNA     | chr7  | 1.3E+08  | 1.3E+08  | - | 0.48 | 0.36 |
| ENSG0000( CYP4F36P unprocess    | chr19 | 15871667 | 15871852 | - | 0    | 0    |
| ENSG0000( TM4SF19-T protein_co  | chr3  | 1.96E+08 | 1.96E+08 | - | 0    | 0    |
| ENSG0000( XXbac-BPG 3prime_ov   | chr6  | 32184733 | 32185882 | - | 0    | 0    |
| ENSG0000( RP11-61L1 lincRNA     | chr18 | 9473421  | 9474006  | - | 0.12 | 0    |
| ENSG0000( OR7M1P unprocess      | chr10 | 1.33E+08 | 1.33E+08 | + | 0.82 | 0    |
| ENSG0000( RP11-386I antisense   | chr1  | 78004346 | 78004554 | - | 0    | 0    |
| ENSG0000( MICE transcribec      | chr6  | 29741731 | 29748969 | - | 0.71 | 0.53 |
| ENSG0000( RP5-899E9 lincRNA     | chr7  | 77416673 | 77425443 | + | 0    | 0    |
| ENSG0000( KB-1440D3 lincRNA     | chr22 | 21640844 | 21641284 | + | 0    | 0    |
| ENSG0000( XXbac-B44. sense_intr | chr22 | 20318119 | 20318749 | - | 0.22 | 0.84 |
| ENSG0000( PAXIP1-AS lincRNA     | chr7  | 1.55E+08 | 1.55E+08 | + | 1.3  | 1.68 |
| ENSG0000( CTD-2410N processed_  | chr5  | 1.34E+08 | 1.34E+08 | - | 0.23 | 0.07 |
| ENSG0000( RP11-535A lincRNA     | chr18 | 22347846 | 22348252 | - | 0.21 | 0    |
| ENSG0000( RP4-539M sense_intr   | chr22 | 30420512 | 30420912 | + | 0.21 | 0    |
| ENSG0000( CTA-268H5 sense_intr  | chr22 | 45178990 | 45179310 | + | 0    | 0    |
| ENSG0000( RP11-672L lincRNA     | chr18 | 813274   | 813756   | + | 0.47 | 0.17 |
| ENSG0000( LINC02019 lincRNA     | chr3  | 50669989 | 50672048 | + | 1.45 | 1.17 |
| ENSG0000( RP11-210G antisense   | chr10 | 66079243 | 66118326 | + | 0    | 0    |
| ENSG0000( RP11-378A antisense   | chr2  | 2.18E+08 | 2.18E+08 | - | 0    | 0.53 |
| ENSG0000( KB-67B5.1 lincRNA     | chr22 | 16521059 | 16527237 | + | 0    | 0    |
| ENSG0000( RP11-285G sense_intr  | chr10 | 44958917 | 44959458 | - | 0.4  | 0.88 |
| ENSG0000( RP11-466F lincRNA     | chr1  | 1.66E+08 | 1.66E+08 | - | 0    | 0    |
| ENSG0000( CTA-989H1 lincRNA     | chr22 | 42278188 | 42278846 | + | 0.1  | 0.23 |
| ENSG0000( RP5-827C2 antisense   | chr1  | 2.34E+08 | 2.34E+08 | + | 0    | 0    |
| ENSG0000( RP11-376P sense_intr  | chr18 | 8154558  | 8155070  | + | 0    | 0    |
| ENSG0000( RP11-700J antisense   | chr4  | 44693946 | 44694386 | - | 0.36 | 0    |
| ENSG0000( RP11-268E lincRNA     | chr3  | 1.91E+08 | 1.91E+08 | + | 0    | 0    |
| ENSG0000( SFTPD-AS1 antisense   | chr10 | 79968213 | 79973213 | + | 0.08 | 0.11 |

|                |                      |       |          |          |   |      |      |
|----------------|----------------------|-------|----------|----------|---|------|------|
| ENSG000001074L | antisense            | chr1  | 1.1E+08  | 1.1E+08  | + | 0.38 | 0.5  |
| ENSG000001383I | lincRNA              | chr3  | 99802699 | 99806058 | - | 0.03 | 0.02 |
| ENSG000001803P | lincRNA              | chr3  | 1.98E+08 | 1.98E+08 | + | 0    | 0    |
| ENSG000001020Q | unprocessed          | chr7  | 1.44E+08 | 1.44E+08 | + | 0    | 0    |
| ENSG000001305L | lincRNA              | chr9  | 91206175 | 91210299 | - | 0.08 | 0.06 |
| ENSG000001065J | antisense            | chr1  | 1.09E+08 | 1.09E+08 | - | 0.61 | 0.55 |
| ENSG000001098D | lincRNA              | chr1  | 1.79E+08 | 1.79E+08 | + | 0.24 | 0.27 |
| ENSG000001412A | antisense            | chr22 | 31082156 | 31083565 | - | 0.08 | 0    |
| ENSG000001401C | antisense            | chr17 | 10291820 | 10317926 | + | 1.41 | 0.31 |
| ENSG000001351E | antisense            | chr4  | 86000327 | 86000766 | - | 0    | 0    |
| ENSG000001634H | antisense            | chr7  | 1.39E+08 | 1.39E+08 | - | 0.27 | 0.6  |
| ENSG000001255E | antisense            | chr3  | 1.14E+08 | 1.14E+08 | - | 0    | 0    |
| ENSG0000010396 | lincRNA              | chr4  | 4844437  | 4850827  | + | 0    | 0    |
| ENSG000001474G | protein_coding       | chr2  | 68131238 | 68261230 | - | 0.63 | 0    |
| ENSG000001408A | lincRNA              | chr9  | 14586766 | 14587326 | - | 0    | 0.14 |
| ENSG000001855D | antisense            | chr8  | 237045   | 237669   | + | 0.22 | 0    |
| ENSG000001329B | lincRNA              | chr3  | 1.85E+08 | 1.85E+08 | + | 0    | 0.61 |
| ENSG000001114C | lincRNA              | chr1  | 1.2E+08  | 1.2E+08  | + | 0.32 | 0    |
| ENSG000001757A | antisense            | chr7  | 99766543 | 99766892 | + | 0    | 0    |
| ENSG000001058B | unprocessed          | chr11 | 58387583 | 58388486 | - | 0    | 0    |
| ENSG000001480C | lincRNA              | chr11 | 1.27E+08 | 1.27E+08 | + | 0    | 0    |
| ENSG000001962C | antisense            | chr10 | 86970237 | 86970826 | - | 0    | 0    |
| ENSG000001702B | lincRNA              | chr11 | 1.28E+08 | 1.28E+08 | + | 0    | 0.14 |
| ENSG000001459N | lincRNA              | chr1  | 2.35E+08 | 2.35E+08 | - | 0    | 0.41 |
| ENSG000001451H | antisense            | chr7  | 1.5E+08  | 1.5E+08  | - | 0.07 | 0    |
| ENSG0000012540 | 3prime_uts           | chr19 | 33207129 | 33207639 | + | 5    | 6.77 |
| ENSG000001031P | unprocessed          | chr9  | 1.05E+08 | 1.05E+08 | + | 0    | 0    |
| ENSG000001223H | lincRNA              | chr22 | 41430934 | 41431375 | + | 0.18 | 0    |
| ENSG000001453M | lincRNA              | chr22 | 30435544 | 30436247 | + | 0    | 0    |
| ENSG0000011165 | processed_transcript | chr7  | 43951910 | 44019151 | - | 0.39 | 0.63 |
| ENSG0000011700 | processed_transcript | chr7  | 27128969 | 27152561 | - | 0    | 0    |
| ENSG0000010852 | unprocessed          | chr12 | 48417150 | 48417337 | - | 0    | 0    |
| ENSG000001434H | lincRNA              | chr3  | 1.29E+08 | 1.29E+08 | - | 0.29 | 0.32 |
| ENSG0000010069 | lincRNA              | chr22 | 17080701 | 17081456 | + | 0.09 | 0    |
| ENSG0000011540 | lincRNA              | chr1  | 1062208  | 1063288  | - | 0    | 0    |
| ENSG0000011147 | unprocessed          | chr7  | 40107288 | 40107454 | + | 0    | 0    |
| ENSG0000011399 | antisense            | chr2  | 87477495 | 87478034 | - | 0.27 | 0.3  |
| ENSG0000010040 | antisense            | chr4  | 1.1E+08  | 1.1E+08  | + | 0.09 | 0    |
| ENSG000001166C | lincRNA              | chr7  | 67333047 | 67334383 | + | 1.22 | 1.65 |
| ENSG0000011218 | lincRNA              | chr4  | 1.64E+08 | 1.64E+08 | + | 0.27 | 0.29 |
| ENSG000001176P | antisense            | chr10 | 94314907 | 94315327 | - | 0    | 0    |
| ENSG000001456M | sense_intronic       | chr20 | 47348137 | 47349142 | - | 0.06 | 0.07 |
| ENSG000001179D | lincRNA              | chr3  | 1.23E+08 | 1.23E+08 | + | 0.26 | 0.29 |
| ENSG0000011305 | antisense            | chr3  | 1.36E+08 | 1.36E+08 | - | 0.18 | 0    |
| ENSG0000011686 | lincRNA              | chr2  | 2.02E+08 | 2.02E+08 | - | 0.8  | 0.22 |

|                 |           |                |       |          |          |   |      |      |
|-----------------|-----------|----------------|-------|----------|----------|---|------|------|
| ENSG00000100000 | RP11-398A | lincRNA        | chr3  | 72061061 | 72069933 | + | 0    | 0    |
| ENSG00000100000 | RP11-313P | antisense      | chr21 | 29657406 | 29657831 | + | 0.38 | 0.21 |
| ENSG00000100000 | RP11-548H | antisense      | chr2  | 2.19E+08 | 2.19E+08 | - | 0.77 | 0.28 |
| ENSG00000100000 | RP13-1039 | processed      | chr2  | 1.1E+08  | 1.1E+08  | - | 0.29 | 0.95 |
| ENSG00000100000 | RP11-102N | lincRNA        | chr4  | 1.41E+08 | 1.41E+08 | + | 0.25 | 0.32 |
| ENSG00000100000 | LL09NC01- | lincRNA        | chr9  | 1.34E+08 | 1.34E+08 | + | 0.12 | 0    |
| ENSG00000100000 | RP11-295P | antisense      | chr10 | 13675646 | 13675990 | + | 0    | 0    |
| ENSG00000100000 | RP11-108L | lincRNA        | chr10 | 1.01E+08 | 1.01E+08 | + | 0    | 0    |
| ENSG00000100000 | RP11-465N | antisense      | chr1  | 2.02E+08 | 2.02E+08 | - | 0    | 0    |
| ENSG00000100000 | RP11-126K | lincRNA        | chr1  | 1.51E+08 | 1.51E+08 | + | 0    | 0    |
| ENSG00000100000 | RP4-671G1 | antisense      | chr1  | 1.13E+08 | 1.13E+08 | - | 0    | 0    |
| ENSG00000100000 | OR6R2P    | unprocessed    | chr8  | 21797460 | 21797759 | + | 0    | 0    |
| ENSG00000100000 | RP11-225H | antisense      | chr10 | 1.03E+08 | 1.03E+08 | + | 0.1  | 0    |
| ENSG00000100000 | RP11-731C | antisense      | chr3  | 1.37E+08 | 1.37E+08 | - | 0.07 | 0.07 |
| ENSG00000100000 | RP4-621B1 | lincRNA        | chr1  | 92189237 | 92190707 | + | 0.05 | 0.05 |
| ENSG00000100000 | RP11-180C | antisense      | chr7  | 1.31E+08 | 1.31E+08 | - | 0    | 0    |
| ENSG00000100000 | AP000230. | lincRNA        | chr21 | 26170871 | 26217381 | + | 0.06 | 0.06 |
| ENSG00000100000 | RP11-80H1 | lincRNA        | chr3  | 58329965 | 58330118 | + | 0    | 0    |
| ENSG00000100000 | AC011841. | protein_coding | chr10 | 99351    | 104855   | - | 0.01 | 0    |
| ENSG00000100000 | RP11-402D | unprocessed    | chr10 | 91896704 | 91896897 | + | 0    | 0    |
| ENSG00000100000 | SNORA40   | snoRNA         | chr12 | 1.09E+08 | 1.09E+08 | - | 0    | 0    |
| ENSG00000100000 | MIR6129   | miRNA          | chr17 | 49288346 | 49288454 | - | 0    | 0    |
| ENSG00000100000 | RP11-50D1 | lincRNA        | chr13 | 39053072 | 39221927 | + | 0    | 0.35 |
| ENSG00000100000 | CNTNAP3P  | unprocessed    | chr9  | 62924911 | 62934964 | + | 0    | 0    |
| ENSG00000100000 | RP11-160C | unprocessed    | chr15 | 78749833 | 78750107 | - | 0    | 0    |
| ENSG00000100000 | TBC1D3K   | protein_coding | chr17 | 37924415 | 37935365 | + | 0    | 0    |
| ENSG00000100000 | FOXD4L6   | protein_coding | chr9  | 41126430 | 41128463 | - | 0    | 0    |
| ENSG00000100000 | DAOA-AS1  | misc_RNA       | chr2  | 1.04E+08 | 1.04E+08 | - | 0    | 0    |
| ENSG00000100000 | U1        | snRNA          | chr1  | 1.21E+08 | 1.21E+08 | - | 0    | 0    |
| ENSG00000100000 | SPDYE8P   | transcribed    | chr7  | 73020338 | 73029766 | - | 0    | 0    |
| ENSG00000100000 | RP11-45A1 | antisense      | chr10 | 1.32E+08 | 1.32E+08 | + | 0    | 0    |
| ENSG00000100000 | RP11-248G | antisense      | chr13 | 52128891 | 52132723 | + | 0    | 0    |
| ENSG00000100000 | Metazoa_S | misc_RNA       | chr18 | 24179038 | 24179295 | - | 0    | 0    |
| ENSG00000100000 | H19_1     | misc_RNA       | chr12 | 51722    | 51792    | + | 0    | 0    |
| ENSG00000100000 | RP11-74M: | processed      | chr12 | 56840973 | 56841273 | - | 0    | 0    |
| ENSG00000100000 | ZEB2_AS1  | misc_RNA       | chr2  | 1.45E+08 | 1.45E+08 | + | 0    | 0    |
| ENSG00000100000 | AGBL1     | protein_coding | chr15 | 86079973 | 87029052 | + | 0    | 0    |
| ENSG00000100000 | DLEU1_2   | misc_RNA       | chr13 | 50104833 | 50105174 | + | 0    | 0.88 |
| ENSG00000100000 | HIST1H4K  | protein_coding | chr6  | 27831216 | 27831527 | - | 0    | 3.28 |
| ENSG00000100000 | SNORA44   | snoRNA         | chr1  | 28580381 | 28580512 | - | 0    | 0    |
| ENSG00000100000 | OR4F16    | protein_coding | chr1  | 685716   | 686654   | - | 0    | 0    |
| ENSG00000100000 | Metazoa_S | misc_RNA       | chr5  | 1.8E+08  | 1.8E+08  | + | 0.48 | 0    |
| ENSG00000100000 | RP11-527N | lincRNA        | chr13 | 63034992 | 63097797 | + | 0    | 0    |
| ENSG00000100000 | RP11-616M | lincRNA        | chr16 | 1148224  | 1148754  | - | 0    | 0    |
| ENSG00000100000 | RP11-87C7 | lincRNA        | chr13 | 27667540 | 27680566 | - | 0    | 0    |

|                                            |            |          |          |   |       |       |
|--------------------------------------------|------------|----------|----------|---|-------|-------|
| ENSG0000(CTD-2049C sense_intron)           | chr16      | 27687182 | 27687522 | + | 0     | 0     |
| ENSG0000(AC136616.protein_coding)          | KI270728.1 | 1139577  | 1147868  | - | 0     | 0     |
| ENSG0000(MIR6812 miRNA)                    | chr20      | 45425510 | 45425573 | + | 0     | 0     |
| ENSG0000(CTD-2024I sense_intron)           | chr5       | 1.41E+08 | 1.41E+08 | + | 0.29  | 0     |
| ENSG0000(RP11-244H lincRNA)                | chr14      | 19637225 | 19641306 | + | 0     | 0     |
| ENSG0000(CWC25 protein_coding)             | chr17      | 38800434 | 38825481 | - | 9.18  | 7.18  |
| ENSG0000(CTD-3075F lincRNA)                | chr14      | 75176929 | 75177418 | + | 0     | 0     |
| ENSG0000(Metazoa_S misc_RNA)               | chr10      | 21455236 | 21455515 | - | 0     | 0     |
| ENSG0000(REXO1L3P processed_transcript)    | chr8       | 85654684 | 85658514 | - | 0     | 0     |
| ENSG0000(RP11-417L sense_intron)           | chr12      | 1.32E+08 | 1.32E+08 | + | 1.17  | 1.29  |
| ENSG0000(CTC-320C6 processed_transcript)   | chr5       | 1.64E+08 | 1.64E+08 | - | 0     | 0     |
| ENSG0000(RMST_5 misc_RNA)                  | chr12      | 97495932 | 97496057 | + | 0     | 0     |
| ENSG0000(ST7-OT4_2 misc_RNA)               | chr7       | 1.17E+08 | 1.17E+08 | + | 0     | 0     |
| ENSG0000(Metazoa_S misc_RNA)               | chr1       | 1.82E+08 | 1.82E+08 | + | 0     | 0     |
| ENSG0000(RP11-390P lincRNA)                | chr17      | 39566915 | 39567559 | + | 3.27  | 3.71  |
| ENSG0000(RP11-609L unprocessed_transcript) | chr7       | 35933888 | 35934569 | + | 0     | 0     |
| ENSG0000(RP11-426C lincRNA)                | chr16      | 29225594 | 29226348 | - | 0     | 0     |
| ENSG0000(RP11-861L sense_intron)           | chr18      | 68908048 | 68908599 | + | 0     | 0     |
| ENSG0000(RP11-14C1 lincRNA)                | chr15      | 1.02E+08 | 1.02E+08 | - | 0     | 0     |
| ENSG0000(OR10G1P unprocessed_transcript)   | chr14      | 21601899 | 21602825 | - | 0     | 0     |
| ENSG0000(SNORA78 snoRNA)                   | chr16      | 1965184  | 1965310  | + | 0     | 0     |
| ENSG0000(RP11-433A unprocessed_transcript) | chr2       | 1.32E+08 | 1.32E+08 | + | 0     | 0     |
| ENSG0000(RP11-427G unprocessed_transcript) | chrY       | 22646031 | 22646327 | - | 0     | 0     |
| ENSG0000(SMIM11B protein_coding)           | chr21      | 7744962  | 7777853  | + | 6.64  | 9.88  |
| ENSG0000(7SK misc_RNA)                     | chr1       | 1.49E+08 | 1.49E+08 | + | 0     | 0     |
| ENSG0000(MIR7160 miRNA)                    | chr8       | 2076589  | 2076640  | + | 0     | 0     |
| ENSG0000(RP11-707E processed_transcript)   | chr2       | 1.06E+08 | 1.06E+08 | + | 0     | 0     |
| ENSG0000(ST7-OT4_1 misc_RNA)               | chr7       | 1.17E+08 | 1.17E+08 | + | 0     | 0     |
| ENSG0000(RP11-392A processed_transcript)   | chr9       | 35001342 | 35002994 | - | 0     | 0     |
| ENSG0000(PMS2P6 unprocessed_transcript)    | chr7       | 75316048 | 75327765 | - | 0     | 0     |
| ENSG0000(RP11-59C5 antisense)              | chr10      | 1.25E+08 | 1.25E+08 | + | 0.05  | 0.05  |
| ENSG0000(CTD-2564P processed_transcript)   | chr11      | 95756959 | 95757442 | - | 0     | 0     |
| ENSG0000(EPOP protein_coding)              | chr17      | 38671703 | 38675421 | - | 0.99  | 1.03  |
| ENSG0000(MIR6776 miRNA)                    | chr17      | 2692861  | 2692919  | - | 0     | 0     |
| ENSG0000(RP11-271K unprocessed_transcript) | chr17      | 30617680 | 30617790 | - | 0     | 0     |
| ENSG0000(RN7SL386F misc_RNA)               | chr1       | 21987481 | 21987777 | + | 0     | 0     |
| ENSG0000(ZNHIT3 protein_coding)            | chr17      | 36486629 | 36499310 | + | 21.87 | 22.68 |
| ENSG0000(DLEU2_4 misc_RNA)                 | chr13      | 50068107 | 50068164 | + | 0     | 0     |
| ENSG0000(MIR6511A miRNA)                   | chr16      | 18344013 | 18344079 | - | 0     | 0     |
| ENSG0000(SNORA11 snoRNA)                   | chr21      | 7826098  | 7826225  | - | 0     | 0     |
| ENSG0000(RP11-66N2 antisense)              | chr14      | 23530682 | 23532367 | + | 0.07  | 0     |
| ENSG0000(RP5-908M antisense)               | chr20      | 62386303 | 62386970 | - | 1.61  | 0.66  |
| ENSG0000(uc_338 misc_RNA)                  | chr4       | 1.45E+08 | 1.45E+08 | - | 0     | 0     |
| ENSG0000(TP53TG1_1 misc_RNA)               | chr7       | 87345082 | 87345233 | + | 0     | 0     |
| ENSG0000(MIR4726 miRNA)                    | chr17      | 38719691 | 38719748 | + | 0     | 0     |



|                 |                          |                |          |          |          |      |      |   |
|-----------------|--------------------------|----------------|----------|----------|----------|------|------|---|
| ENSG00000100000 | RP11-756A unprocessed    | chr13          | 24933006 | 24936796 | +        | 0    | 0    |   |
| ENSG00000100000 | U7                       | snRNA          | chr1     | 1.76E+08 | 1.76E+08 | +    | 0    | 0 |
| ENSG00000100000 | RP11-219H processed      | chr2           | 97008368 | 97009104 | -        | 0    | 0    |   |
| ENSG00000100000 | RP5-864K1 processed      | chr1           | 38839333 | 38874494 | -        | 0    | 0    |   |
| ENSG00000100000 | RP11-597A processed      | chr14          | 19499737 | 19677926 | +        | 0    | 0    |   |
| ENSG00000100000 | WBP1LP8 processed        | chr6           | 1.71E+08 | 1.71E+08 | -        | 0    | 0    |   |
| ENSG00000100000 | PPP1R26P2 processed      | chr22          | 18650023 | 18653617 | -        | 0    | 0    |   |
| ENSG00000100000 | ABC7-4817 processed      | chr7           | 37032    | 37477    | +        | 0    | 0    |   |
| ENSG00000100000 | MIR8065                  | miRNA          | chr16    | 5632467  | 5632566  | +    | 0    | 0 |
| ENSG00000100000 | CTD-3193K lincRNA        | chr17          | 42751289 | 42751717 | -        | 0.19 | 0    |   |
| ENSG00000100000 | CTB-52I2.4 transcribed   | chr19          | 18022403 | 18032099 | +        | 0    | 0    |   |
| ENSG00000100000 | MIR6792                  | miRNA          | chr19    | 7617439  | 7617505  | +    | 0    | 0 |
| ENSG00000100000 | uc_338                   | misc_RNA       | chr12    | 53464720 | 53464901 | +    | 0    | 0 |
| ENSG00000100000 | RP11-58C2 lincRNA        | chr16          | 76582556 | 76583098 | +        | 0.09 | 0.44 |   |
| ENSG00000100000 | RP11-2N1.1 lincRNA       | chr18          | 59700523 | 59700946 | +        | 0    | 0.21 |   |
| ENSG00000100000 | RP11-15E1 transcribed    | chr9           | 66017643 | 66017868 | -        | 0.68 | 0    |   |
| ENSG00000100000 | RP11-405M lincRNA        | chr18          | 75073543 | 75074205 | +        | 0    | 0    |   |
| ENSG00000100000 | CTD-2378E lincRNA        | chr15          | 50839875 | 50908599 | -        | 0.06 | 0.33 |   |
| ENSG00000100000 | RP11-406H processed      | chr14          | 50471769 | 50472592 | +        | 0    | 0    |   |
| ENSG00000100000 | RP11-144A transcribed    | chr9           | 60929927 | 60930407 | +        | 0    | 0    |   |
| ENSG00000100000 | WT1-AS_2                 | misc_RNA       | chr11    | 32436311 | 32436447 | +    | 0    | 0 |
| ENSG00000100000 | RP11-566K processed      | chr15          | 22371736 | 22373570 | +        | 0    | 0    |   |
| ENSG00000100000 | RP11-996F antisense      | chr12          | 29332733 | 29333383 | -        | 0.73 | 0.92 |   |
| ENSG00000100000 | RP11-427P processed      | chr3           | 46918807 | 46918935 | -        | 0    | 0    |   |
| ENSG00000100000 | RP5-837J1. antisense     | chr17          | 35018660 | 35018991 | +        | 0    | 0    |   |
| ENSG00000100000 | RP11-617F sense_intronic | chr15          | 90024955 | 90026003 | +        | 0    | 0.06 |   |
| ENSG00000100000 | AL050303.1 processed     | chr21          | 13704853 | 13705518 | +        | 0    | 0    |   |
| ENSG00000100000 | C2orf27AP processed      | chrY           | 11085476 | 11086061 | -        | 0    | 0    |   |
| ENSG00000100000 | U2                       | snRNA          | chr1     | 1.21E+08 | 1.21E+08 | +    | 0    | 0 |
| ENSG00000100000 | CT45A7                   | protein_coding | chrX     | 1.36E+08 | 1.36E+08 | -    | 0    | 0 |
| ENSG00000100000 | MRPL57P1 processed       | chr1           | 1.14E+08 | 1.14E+08 | -        | 0    | 0    |   |
| ENSG00000100000 | MIR6760                  | miRNA          | chr12    | 1.11E+08 | 1.11E+08 | +    | 0    | 0 |
| ENSG00000100000 | PART1_1                  | misc_RNA       | chr5     | 60487713 | 60487929 | +    | 0    | 0 |
| ENSG00000100000 | RP11-758H lincRNA        | chr17          | 59618553 | 59619714 | -        | 0.72 | 0.39 |   |
| ENSG00000100000 | HIST1H2BN                | protein_coding | chr6     | 27815044 | 27815424 | +    | 0    | 0 |
| ENSG00000100000 | RP11-573C unprocessed    | chrX           | 34768327 | 34768688 | -        | 0    | 0    |   |
| ENSG00000100000 | LHX1                     | protein_coding | chr17    | 36936785 | 36944612 | +    | 0.02 | 0 |
| ENSG00000100000 | U2                       | snRNA          | chr17    | 43241180 | 43241370 | -    | 0.28 | 0 |
| ENSG00000100000 | Metazoa_S                | misc_RNA       | chr8     | 28915579 | 28915864 | -    | 0    | 0 |
| ENSG00000100000 | RP5-1021I2 antisense     | chr14          | 73885392 | 73885555 | -        | 0    | 0    |   |
| ENSG00000100000 | RP5-874C2 processed      | chr6           | 28315613 | 28315883 | -        | 0    | 0.49 |   |
| ENSG00000100000 | RP11-586D processed      | chr4           | 1.18E+08 | 1.18E+08 | -        | 0    | 0    |   |
| ENSG00000100000 | RN7SL343F                | misc_RNA       | chr9     | 42011350 | 42011610 | +    | 0    | 0 |
| ENSG00000100000 | RP11-715G processed      | chr6           | 1.47E+08 | 1.47E+08 | -        | 0    | 0    |   |
| ENSG00000100000 | RP11-613E processed      | chr7           | 55743073 | 55743457 | +        | 0    | 0    |   |

|                 |            |             |            |          |          |   |       |       |
|-----------------|------------|-------------|------------|----------|----------|---|-------|-------|
| ENSG00000100000 | RP11-745A  | unprocessed | chr15      | 60409234 | 60409420 | - | 0     | 0     |
| ENSG00000100000 | RP11-93H2  | lincRNA     | chr13      | 52651305 | 52652279 | - | 0.88  | 0.35  |
| ENSG00000100000 | RP11-347C  | unprocessed | chr16      | 30336400 | 30343336 | + | 0     | 0     |
| ENSG00000100000 | Metazoa_S  | misc_RNA    | chr11      | 9279532  | 9279816  | - | 0     | 0     |
| ENSG00000100000 | U1         | snRNA       | chr1       | 1.2E+08  | 1.2E+08  | + | 0     | 0     |
| ENSG00000100000 | RP11-7F17  | antisense   | chr14      | 77028086 | 77031572 | + | 0.43  | 0.36  |
| ENSG00000100000 | RNA5-8S5   | rRNA        | GL000220.  | 155997   | 156149   | + | 13.92 | 37.54 |
| ENSG00000100000 | RP11-373F  | processed   | chrY       | 8931069  | 8931454  | - | 0     | 0     |
| ENSG00000100000 | VN1R74P    | unprocessed | chr18      | 14680604 | 14681106 | - | 0     | 0     |
| ENSG00000100000 | CTC-510F1  | antisense   | chr19      | 11221083 | 11221573 | + | 0.15  | 0.34  |
| ENSG00000100000 | Llfos-48D6 | protein_co  | chr19      | 2269525  | 2341172  | + | 0     | 0     |
| ENSG00000100000 | CTB-186H2  | transcribed | chr17      | 35963488 | 35965472 | - | 0     | 0     |
| ENSG00000100000 | pRNA       | misc_RNA    | KI270733.1 | 122136   | 122225   | + | 0     | 0     |
| ENSG00000100000 | MIR6075    | miRNA       | chr5       | 1510762  | 1510856  | - | 0     | 0     |
| ENSG00000100000 | U4         | snRNA       | chr6       | 1.06E+08 | 1.06E+08 | + | 0     | 0     |
| ENSG00000100000 | MIR6870    | miRNA       | chr20      | 10649636 | 10649695 | - | 0     | 0     |
| ENSG00000100000 | GHc-1077F  | unprocessed | chrX       | 1.02E+08 | 1.02E+08 | + | 0     | 0     |
| ENSG00000100000 | RP11-90B9  | antisense   | chr15      | 83020115 | 83020802 | + | 0     | 0.21  |
| ENSG00000100000 | AL592183.  | protein_co  | GL000219.  | 54224    | 83311    | - | 11.47 | 8.59  |
| ENSG00000100000 | CYFIP1     | protein_co  | chr15      | 22867052 | 22981063 | - | 27.14 | 24.42 |
| ENSG00000100000 | HOXB13-A   | misc_RNA    | chr17      | 48723188 | 48723314 | + | 0     | 0     |
| ENSG00000100000 | RP11-566K  | transcribed | chr15      | 23326256 | 23334127 | - | 0     | 0     |
| ENSG00000100000 | MIR6790    | miRNA       | chr19      | 6392921  | 6392983  | - | 0     | 0     |
| ENSG00000100000 | RP4-563E1  | lincRNA     | chr20      | 62928621 | 62929297 | - | 0.79  | 0.44  |
| ENSG00000100000 | CH17-360D  | lincRNA     | chr10      | 47970043 | 47973496 | - | 0.85  | 1.27  |
| ENSG00000100000 | VN1R76P    | unprocessed | chr18      | 52419189 | 52419644 | - | 0     | 0     |
| ENSG00000100000 | RP11-420C  | processed   | chr2       | 65203571 | 65203813 | - | 0     | 0.63  |
| ENSG00000100000 | RP11-370I  | lincRNA     | chr12      | 48360920 | 48361377 | + | 0     | 0     |
| ENSG00000100000 | ZNRD1-AS1  | misc_RNA    | chr10      | 1.22E+08 | 1.22E+08 | - | 0     | 0     |
| ENSG00000100000 | U1         | snRNA       | chr1       | 1.46E+08 | 1.46E+08 | + | 1.72  | 1.68  |
| ENSG00000100000 | LCA10      | processed   | chrX       | 1.54E+08 | 1.54E+08 | + | 0     | 0     |
| ENSG00000100000 | RP11-236L  | lincRNA     | chr15      | 96080713 | 96084584 | - | 0.02  | 0     |
| ENSG00000100000 | RP5-865E1  | unprocessed | chrX       | 1.55E+08 | 1.55E+08 | + | 0     | 0     |
| ENSG00000100000 | MIR6126    | miRNA       | chr16      | 3485381  | 3485469  | - | 0     | 0     |
| ENSG00000100000 | CEACAM2C   | protein_co  | chr19      | 44501677 | 44529788 | - | 0     | 0     |
| ENSG00000100000 | MIR6765    | miRNA       | chr14      | 1.05E+08 | 1.05E+08 | - | 0     | 0     |
| ENSG00000100000 | UCA1       | misc_RNA    | chr19      | 15834730 | 15834804 | + | 0     | 0     |
| ENSG00000100000 | CTD-2506P  | antisense   | chr14      | 81221218 | 81222460 | + | 0.05  | 0.12  |
| ENSG00000100000 | RP11-78J2  | processed   | chr13      | 52600042 | 52642542 | + | 3.79  | 5.29  |
| ENSG00000100000 | RP11-133K  | sense_intr  | chr15      | 40226386 | 40227069 | + | 0     | 0     |
| ENSG00000100000 | U3         | snoRNA      | chrX       | 72726122 | 72726337 | - | 0     | 0     |
| ENSG00000100000 | CTC-559E9  | unprocessed | chr19      | 19908268 | 19909146 | - | 0     | 0     |
| ENSG00000100000 | RP11-554D  | sense_intr  | chr15      | 60847757 | 60849068 | - | 0.04  | 0.05  |
| ENSG00000100000 | LL21NC02-  | lincRNA     | chr21      | 45403809 | 45404369 | - | 0.89  | 2.24  |
| ENSG00000100000 | RP11-1046  | sense_intr  | chr14      | 69617122 | 69617648 | + | 0     | 0     |

|                               |       |          |          |   |       |       |
|-------------------------------|-------|----------|----------|---|-------|-------|
| ENSG00000101114.1 unprocessed | chrX  | 12583415 | 12583526 | - | 0     | 0     |
| ENSG00000101114.1 unprocessed | chr6  | 26215159 | 26216692 | - | 0.11  | 0.12  |
| ENSG00000101114.1 unprocessed | chr16 | 14953012 | 14953120 | - | 0     | 0     |
| ENSG00000101114.1 unprocessed | chr12 | 57894232 | 57896846 | + | 0.4   | 0.39  |
| ENSG00000101114.1 unprocessed | chr9  | 83201957 | 83202065 | + | 0     | 0     |
| ENSG00000101114.1 unprocessed | chr20 | 62596732 | 62603115 | - | 0     | 0     |
| ENSG00000101114.1 unprocessed | chr11 | 3335125  | 3335407  | - | 0     | 0     |
| ENSG00000101114.1 unprocessed | chr17 | 9244666  | 9244897  | - | 0     | 0     |
| ENSG00000101114.1 unprocessed | chr15 | 30091662 | 30091898 | + | 0     | 0     |
| ENSG00000101114.1 unprocessed | chr11 | 67812557 | 67873367 | - | 0     | 0     |
| ENSG00000101114.1 unprocessed | chrX  | 49879948 | 49882565 | + | 1.79  | 1.65  |
| ENSG00000101114.1 unprocessed | chr20 | 63218041 | 63218502 | + | 0.17  | 0.74  |
| ENSG00000101114.1 unprocessed | chr12 | 68426331 | 68427737 | - | 0.04  | 0     |
| ENSG00000101114.1 unprocessed | chr1  | 1.45E+08 | 1.45E+08 | - | 0     | 0     |
| ENSG00000101114.1 unprocessed | chr20 | 46364551 | 46390885 | + | 0     | 0     |
| ENSG00000101114.1 unprocessed | chr16 | 50054143 | 50054430 | + | 0     | 0     |
| ENSG00000101114.1 unprocessed | chr14 | 72516820 | 72516898 | + | 0     | 0     |
| ENSG00000101114.1 unprocessed | chr15 | 25193321 | 25193402 | + | 0     | 0     |
| ENSG00000101114.1 unprocessed | chr8  | 27433370 | 27433434 | + | 0     | 0     |
| ENSG00000101114.1 unprocessed | chr19 | 51639478 | 51639931 | - | 0     | 0     |
| ENSG00000101114.1 unprocessed | chr20 | 23458529 | 23459459 | + | 0     | 0     |
| ENSG00000101114.1 unprocessed | chr21 | 10482738 | 10605716 | + | 0     | 0     |
| ENSG00000101114.1 unprocessed | chr5  | 69364743 | 69370013 | - | 27.64 | 27.53 |
| ENSG00000101114.1 unprocessed | chr1  | 137798   | 139135   | + | 0     | 0     |
| ENSG00000101114.1 unprocessed | chr1  | 1.97E+08 | 1.97E+08 | + | 0     | 0     |
| ENSG00000101114.1 unprocessed | chr22 | 21379382 | 21379701 | - | 0     | 0     |
| ENSG00000101114.1 unprocessed | chr9  | 66724584 | 66725064 | + | 0     | 0     |
| ENSG00000101114.1 unprocessed | chr15 | 69022230 | 69024176 | + | 0     | 0     |
| ENSG00000101114.1 unprocessed | chr12 | 33432311 | 33432853 | - | 0     | 0     |
| ENSG00000101114.1 unprocessed | chr15 | 40285468 | 40285909 | - | 0     | 0     |
| ENSG00000101114.1 unprocessed | chrY  | 11042722 | 11042943 | - | 0     | 0     |
| ENSG00000101114.1 unprocessed | chr5  | 67855735 | 67855986 | + | 0     | 0     |
| ENSG00000101114.1 unprocessed | chrY  | 7905536  | 7907303  | - | 0     | 0     |
| ENSG00000101114.1 unprocessed | chr22 | 37578669 | 37578922 | + | 0     | 0     |
| ENSG00000101114.1 unprocessed | chr6  | 35070871 | 35071049 | - | 0     | 0     |
| ENSG00000101114.1 unprocessed | chr21 | 10612455 | 10613379 | - | 0     | 0     |
| ENSG00000101114.1 unprocessed | chr1  | 187891   | 187958   | - | 0     | 0     |
| ENSG00000101114.1 unprocessed | chr8  | 5127919  | 5128233  | - | 0     | 0     |
| ENSG00000101114.1 unprocessed | chrX  | 1.53E+08 | 1.53E+08 | + | 0     | 0     |
| ENSG00000101114.1 unprocessed | chr4  | 1.01E+08 | 1.01E+08 | - | 0     | 0     |
| ENSG00000101114.1 unprocessed | chr11 | 93721797 | 93721866 | + | 0     | 0     |
| ENSG00000101114.1 unprocessed | chr13 | 34910545 | 34910815 | - | 0     | 0     |
| ENSG00000101114.1 unprocessed | chr14 | 51649516 | 51651744 | - | 1.11  | 0.85  |
| ENSG00000101114.1 unprocessed | chr12 | 56010091 | 56010574 | - | 0     | 0     |
| ENSG00000101114.1 unprocessed | chr10 | 1.22E+08 | 1.22E+08 | + | 0     | 0.03  |

|                                   |          |          |          |   |      |      |
|-----------------------------------|----------|----------|----------|---|------|------|
| ENSG0000(RP1-101A2 sense_intron)  | chr20    | 46681676 | 46682375 | - | 0.19 | 0.73 |
| ENSG0000(SLC20A1P2 processed)     | chr14    | 1.06E+08 | 1.06E+08 | - | 0    | 0    |
| ENSG0000(CH17-264B unprocessed)   | chr7     | 73037371 | 73049246 | + | 0    | 0    |
| ENSG0000(MIR6798 miRNA)           | chr19    | 49009906 | 49009972 | + | 0    | 0    |
| ENSG0000(NOL12 protein_coding)    | chr22    | 37681673 | 37693478 | + | 9.04 | 7.8  |
| ENSG0000(RP11-459C processed)     | chr9     | 42921443 | 42921670 | - | 0    | 0    |
| ENSG0000(CTD-2619J antisense)     | chr19    | 58500505 | 58501137 | + | 0.22 | 0.24 |
| ENSG0000(Hammerhead ribozyme)     | chr10    | 1.14E+08 | 1.14E+08 | - | 0    | 0    |
| ENSG0000(RP11-115H sense_intron)  | chrY     | 6918682  | 6920791  | + | 0    | 0    |
| ENSG0000(CA15P2 unprocessed)      | chr22    | 18636445 | 18638405 | - | 0    | 0    |
| ENSG0000(WT1-AS_7 misc_RNA)       | chr11    | 32439716 | 32440009 | + | 0.51 | 0.71 |
| ENSG0000(MIR8068 miRNA)           | chr11    | 28477481 | 28477548 | - | 0    | 0    |
| ENSG0000(Metazoa_S misc_RNA)      | chr2     | 42511570 | 42511851 | + | 0    | 0.57 |
| ENSG0000(RP11-384G lincRNA)       | chr13    | 53345211 | 53410880 | + | 0    | 0    |
| ENSG0000(RP11-761K antisense)     | chr15    | 81335577 | 81336119 | + | 0.13 | 0.29 |
| ENSG0000(CTD-2536I lincRNA)       | chr15    | 95225326 | 95225864 | - | 0    | 0    |
| ENSG0000(RP11-227D lincRNA)       | chr15    | 48662531 | 48663056 | - | 0    | 0    |
| ENSG0000(Y_RNA misc_RNA)          | chr7     | 73039085 | 73039186 | + | 0    | 0    |
| ENSG0000(MIR6877 miRNA)           | chr9     | 1.33E+08 | 1.33E+08 | + | 0    | 0    |
| ENSG0000(RP11-48O2 unprocessed)   | chr1     | 1.6E+08  | 1.6E+08  | - | 0    | 0    |
| ENSG0000(pRNA misc_RNA)           | GL000220 | 149259   | 149348   | + | 0    | 0    |
| ENSG0000(RN7SL722F misc_RNA)      | chr9     | 61789143 | 61789426 | + | 0    | 0    |
| ENSG0000(RMST_2 misc_RNA)         | chr12    | 97492462 | 97492597 | + | 0    | 0    |
| ENSG0000(MIR6853 miRNA)           | chr9     | 35732922 | 35732995 | + | 0    | 0    |
| ENSG0000(RN7SL733F misc_RNA)      | chr10    | 87154041 | 87154369 | - | 0    | 0    |
| ENSG0000(SMCR2_1 misc_RNA)        | chr17    | 17675366 | 17675522 | + | 0    | 0    |
| ENSG0000(Metazoa_S misc_RNA)      | chr2     | 1.28E+08 | 1.28E+08 | + | 0    | 0    |
| ENSG0000(RP4-620E1 sense_intron)  | chr20    | 41485571 | 41486225 | - | 0.21 | 0    |
| ENSG0000(CTB-31N19 lincRNA)       | chr16    | 21526824 | 21531141 | - | 0    | 0    |
| ENSG0000(RP11-346J unprocessed)   | chr5     | 1E+08    | 1E+08    | + | 0    | 0    |
| ENSG0000(RP11-219B lincRNA)       | chr15    | 60593027 | 60593460 | + | 0    | 0    |
| ENSG0000(HOXA11-A1 misc_RNA)      | chr7     | 27185433 | 27185530 | + | 0    | 0    |
| ENSG0000(IGKV2-40 IG_V_gene)      | chr2     | 89330110 | 89330429 | - | 0    | 0    |
| ENSG0000(ENPP7P14 unprocessed)    | chr16    | 5110793  | 5148685  | - | 0    | 0    |
| ENSG0000(Y_RNA misc_RNA)          | chr13    | 28629794 | 28629883 | + | 0    | 0    |
| ENSG0000(RP11-378E antisense)     | chr17    | 37407936 | 37408594 | - | 0    | 0    |
| ENSG0000(pRNA misc_RNA)           | chrY     | 17568962 | 17569051 | - | 0    | 0    |
| ENSG0000(RP11-77K1 lincRNA)       | chr16    | 75497948 | 75498289 | - | 0.28 | 0    |
| ENSG0000(CTD-2306A lincRNA)       | chr15    | 45702640 | 45703183 | + | 0.13 | 0    |
| ENSG0000(RP11-973D sense_intron)  | chr12    | 55929170 | 55929729 | + | 0    | 0    |
| ENSG0000(FTX_2 misc_RNA)          | chrX     | 74280402 | 74280495 | + | 0    | 0    |
| ENSG0000(Metazoa_S misc_RNA)      | chr2     | 2.01E+08 | 2.01E+08 | + | 0    | 0    |
| ENSG0000(GOLGA6L1 protein_coding) | chr15    | 23128268 | 23136822 | - | 0.02 | 0.08 |
| ENSG0000(CTB-118P1 unprocessed)   | chr8     | 87867601 | 87868607 | + | 0    | 0    |
| ENSG0000(Metazoa_S misc_RNA)      | chr22    | 40917111 | 40917381 | + | 0    | 0    |

|                 |            |             |       |          |          |   |       |       |
|-----------------|------------|-------------|-------|----------|----------|---|-------|-------|
| ENSG00000151151 | RP13-491L5 | lincRNA     | chr10 | 1.33E+08 | 1.33E+08 | - | 0     | 0     |
| ENSG00000151152 | RN7SL106F  | misc_RNA    | chr15 | 23165897 | 23166186 | + | 0     | 0     |
| ENSG00000151153 | RP11-332H  | antisense   | chr17 | 61354763 | 61355155 | - | 0     | 0     |
| ENSG00000151154 | HIST1H3G   | protein_co  | chr6  | 26269405 | 26271815 | - | 0.02  | 0     |
| ENSG00000151155 | Metazoa_S  | misc_RNA    | chr20 | 36561237 | 36561530 | - | 0     | 0     |
| ENSG00000151156 | RP11-585P  | sense_intr  | chr12 | 75333798 | 75334486 | - | 0.77  | 0.32  |
| ENSG00000151157 | RP11-265D  | unprocess   | chrX  | 1.35E+08 | 1.35E+08 | - | 0     | 0     |
| ENSG00000151158 | RP11-425D  | sense_intr  | chr12 | 28236227 | 28236828 | + | 0     | 0     |
| ENSG00000151159 | SDR42E1P1  | processed   | chr9  | 39651901 | 39652377 | - | 0     | 0     |
| ENSG00000151160 | RP11-361F  | processed   | chr6  | 1.47E+08 | 1.47E+08 | + | 1.49  | 0     |
| ENSG00000151161 | RP4-777L9  | lincRNA     | chr20 | 16576068 | 16579615 | + | 0     | 0     |
| ENSG00000151162 | RBM17P2    | processed   | chr9  | 67211663 | 67213067 | - | 0     | 0     |
| ENSG00000151163 | RP11-5G9   | sense_intr  | chr13 | 43877715 | 43878163 | - | 0.35  | 0.58  |
| ENSG00000151164 | RP11-66N2  | lincRNA     | chr14 | 23619201 | 23620012 | + | 0     | 0     |
| ENSG00000151165 | H19_3      | misc_RNA    | chr11 | 83386988 | 83387102 | + | 0     | 0     |
| ENSG00000151166 | DLG2-AS1   | misc_RNA    | chr11 | 84887207 | 84887419 | + | 0     | 0     |
| ENSG00000151167 | Metazoa_S  | misc_RNA    | chr10 | 69098496 | 69098794 | + | 0     | 0     |
| ENSG00000151168 | RP5-935K1  | processed   | chr2  | 1.28E+08 | 1.28E+08 | - | 0     | 0     |
| ENSG00000151169 | Metazoa_S  | misc_RNA    | chr9  | 98115885 | 98116135 | + | 0     | 0     |
| ENSG00000151170 | RN7SL2     | misc_RNA    | chr14 | 49862550 | 49862849 | - | 87.34 | 84.02 |
| ENSG00000151171 | CTD-2302E  | lincRNA     | chr14 | 63642143 | 63642696 | + | 0.13  | 0     |
| ENSG00000151172 | Metazoa_S  | misc_RNA    | chr12 | 49196784 | 49197062 | + | 0     | 0     |
| ENSG00000151173 | CH17-78J1  | unprocess   | chr1  | 1.49E+08 | 1.49E+08 | - | 0     | 0     |
| ENSG00000151174 | LINC01138  | processed   | chr1  | 1.48E+08 | 1.49E+08 | - | 4.48  | 4.32  |
| ENSG00000151175 | RP11-823E  | lincRNA     | chr12 | 89351015 | 89353271 | + | 0.22  | 0.56  |
| ENSG00000151176 | RP13-362E  | processed   | chrX  | 90208895 | 90209418 | - | 0     | 0     |
| ENSG00000151177 | RP11-732N  | sense_ove   | chr6  | 1.58E+08 | 1.58E+08 | + | 0.13  | 0.12  |
| ENSG00000151178 | RP13-210D  | processed   | chrX  | 1.35E+08 | 1.35E+08 | + | 0     | 0     |
| ENSG00000151179 | MIR3670-4  | miRNA       | chr16 | 18488301 | 18488365 | - | 0     | 0     |
| ENSG00000151180 | FAM27E3    | transcribec | chr9  | 67717411 | 67719178 | - | 0.93  | 2.54  |
| ENSG00000151181 | RP11-440D  | unprocess   | chr2  | 95588149 | 95589253 | + | 0     | 0     |
| ENSG00000151182 | RP11-340F  | lincRNA     | chr12 | 1.21E+08 | 1.21E+08 | + | 0.21  | 0     |
| ENSG00000151183 | RP11-413H  | antisense   | chr16 | 56465642 | 56466162 | - | 0.42  | 0.47  |
| ENSG00000151184 | AC006539   | unprocess   | chr19 | 20056466 | 20056594 | - | 0     | 0     |
| ENSG00000151185 | MIR6813    | miRNA       | chr20 | 64076955 | 64077010 | - | 0     | 0     |
| ENSG00000151186 | RP11-66H6  | sense_intr  | chr16 | 11056556 | 11057034 | + | 0     | 0     |
| ENSG00000151187 | LINC01660  | lincRNA     | chr22 | 18361823 | 18391105 | - | 0     | 0     |
| ENSG00000151188 | Y_RNA      | misc_RNA    | chr21 | 7092616  | 7092716  | + | 0     | 0     |
| ENSG00000151189 | INO80B-WI  | protein_co  | chr2  | 74455088 | 74460884 | + | 4.92  | 7.46  |
| ENSG00000151190 | uc_338     | misc_RNA    | chr17 | 76721216 | 76721396 | - | 0     | 0     |
| ENSG00000151191 | OR7E156P   | unprocess   | chr13 | 63742341 | 63742804 | + | 0     | 0     |
| ENSG00000151192 | MIR4727    | miRNA       | chr17 | 38825838 | 38825892 | + | 0     | 0     |
| ENSG00000151193 | CDKN2B-A   | misc_RNA    | chr9  | 22046758 | 22046901 | + | 2.67  | 0     |
| ENSG00000151194 | MIR6507    | miRNA       | chr10 | 98924499 | 98924568 | - | 0     | 0     |
| ENSG00000151195 | 5S_rRNA    | rRNA        | chr1  | 2.08E+08 | 2.08E+08 | - | 0     | 0     |

|                                 |       |          |          |   |      |      |
|---------------------------------|-------|----------|----------|---|------|------|
| ENSG0000(MIR6724-2 miRNA        | chr21 | 8249505  | 8249596  | + | 0    | 0    |
| ENSG0000(U2 snRNA               | chr17 | 43284139 | 43284329 | - | 0.28 | 0    |
| ENSG0000(RP11-570L processed_   | chr8  | 1.4E+08  | 1.4E+08  | + | 0    | 0.05 |
| ENSG0000(MIR6514 miRNA          | chr11 | 62792702 | 62792771 | - | 0    | 0    |
| ENSG0000(ABC12-479 unprocessε   | chr9  | 40481559 | 40497591 | - | 0    | 0    |
| ENSG0000(RP11-475E protein_co   | chr1  | 1.09E+08 | 1.09E+08 | - | 0.41 | 0    |
| ENSG0000(GATSL2 protein_co      | chr7  | 74964818 | 75024798 | + | 1.23 | 1.22 |
| ENSG0000(mascRNA-r sRNA         | chr11 | 65506117 | 65506173 | + | 0    | 0    |
| ENSG0000(uc_338 misc_RNA        | chr12 | 27824207 | 27824382 | - | 0    | 0    |
| ENSG0000(RN7SL539F misc_RNA     | chr15 | 32446674 | 32446964 | - | 0    | 0.14 |
| ENSG0000(Metazoa_S misc_RNA     | chr15 | 96496180 | 96496462 | - | 0    | 0    |
| ENSG0000(CTA-315H1 sense_intrε  | chr7  | 73609262 | 73611502 | - | 0    | 0.03 |
| ENSG0000(FMR1-AS1 misc_RNA      | chrX  | 1.48E+08 | 1.48E+08 | + | 0    | 0    |
| ENSG0000(RP11-415G lincRNA      | chr13 | 55535697 | 55583524 | - | 0    | 0    |
| ENSG0000(SNORD1C snoRNA         | chr17 | 76558791 | 76558868 | + | 0    | 0    |
| ENSG0000(CTD-3203P antisense    | chr16 | 27313387 | 27314101 | - | 0    | 0    |
| ENSG0000(RP11-140H sense_intrε  | chr16 | 69632141 | 69632571 | + | 0    | 0    |
| ENSG0000(5S_rRNA rRNA           | chr11 | 1.02E+08 | 1.02E+08 | + | 0    | 0    |
| ENSG0000(RN7SL787F misc_RNA     | chr9  | 67791499 | 67791782 | - | 0    | 0    |
| ENSG0000(ABCB10P1 processed_    | chr15 | 23179869 | 23182049 | + | 0    | 0    |
| ENSG0000(RP11-12A2 unprocessε   | chr9  | 67721884 | 67722094 | - | 0    | 0    |
| ENSG0000(OR4M2 protein_co       | chr15 | 22080527 | 22081659 | + | 0    | 0    |
| ENSG0000(CTD-2553L lincRNA      | chr19 | 34733298 | 34733837 | - | 1.34 | 0.89 |
| ENSG0000(RP11-278C sense_intrε  | chr12 | 32728169 | 32729024 | - | 0.07 | 0.3  |
| ENSG0000(MIR6777 miRNA          | chr17 | 17813480 | 17813545 | - | 0    | 0    |
| ENSG0000(CTC-281F2.transcribec  | chr17 | 6657034  | 6693577  | + | 0.42 | 0.31 |
| ENSG0000(MIR6081 miRNA          | chr9  | 95065350 | 95065446 | + | 0    | 0    |
| ENSG0000(RP11-813B processed_   | chr8  | 83293925 | 83294271 | - | 0    | 0    |
| ENSG0000(Y_RNA misc_RNA         | chr7  | 1.46E+08 | 1.46E+08 | + | 0    | 0    |
| ENSG0000(DISC2 misc_RNA         | chr1  | 2.32E+08 | 2.32E+08 | + | 0    | 0    |
| ENSG0000(RP11-474C antisense    | chr12 | 48152817 | 48153128 | + | 0    | 0.36 |
| ENSG0000(uc_338 misc_RNA        | chr7  | 1.46E+08 | 1.46E+08 | - | 0    | 0    |
| ENSG0000(RP11-342A sense_intrε  | chr15 | 83962176 | 83962583 | + | 0    | 0    |
| ENSG0000(RP11-163I1 processed_  | chr7  | 1.48E+08 | 1.48E+08 | + | 0    | 0    |
| ENSG0000(MIR6774 miRNA          | chr16 | 85918347 | 85918416 | + | 0    | 0    |
| ENSG0000(Metazoa_S misc_RNA     | chr7  | 66915063 | 66915334 | - | 0    | 0.18 |
| ENSG0000(RP11-14C1 sense_intrε  | chr15 | 1.01E+08 | 1.01E+08 | - | 0    | 0    |
| ENSG0000(RP11-450H processed_   | chr3  | 1.67E+08 | 1.67E+08 | + | 0    | 0    |
| ENSG0000(FADS2P1 unprocessε     | chr11 | 56890613 | 56927885 | + | 0    | 0    |
| ENSG0000(RP11-576N processed_   | chr4  | 83369416 | 83369523 | - | 0    | 0    |
| ENSG0000(RP11-407N lincRNA      | chr12 | 50934942 | 50935464 | - | 0.14 | 0    |
| ENSG0000(RP11-341A processed_   | chr9  | 40358454 | 40358682 | + | 0    | 0    |
| ENSG0000(AL133243.: sense_intrε | chr2  | 32548675 | 32549040 | + | 0    | 0    |
| ENSG0000(SNX18P1Y processed_    | chrY  | 11178306 | 11178816 | + | 0    | 0.2  |
| ENSG0000(RNA5SP43: rRNA         | chr17 | 36491199 | 36491322 | - | 0    | 0    |

|                      |                |            |          |          |   |       |       |
|----------------------|----------------|------------|----------|----------|---|-------|-------|
| ENSG000001AL031601.1 | transcribed    | chr10      | 42242721 | 42276842 | + | 0     | 0     |
| ENSG000001RN7SL585F  | misc_RNA       | chr13      | 94699223 | 94699502 | - | 0     | 0     |
| ENSG000001RFPL3-AS1  | misc_RNA       | chr22      | 32368497 | 32368567 | + | 0     | 0     |
| ENSG000001MIR8071-1  | miRNA          | chr14      | 1.06E+08 | 1.06E+08 | + | 0     | 0     |
| ENSG000001RP4-568C1  | lincRNA        | chr20      | 24931840 | 24932983 | + | 0     | 0.17  |
| ENSG000001AC133551   | protein_coding | KI270728.1 | 17234    | 19833    | + | 0     | 0     |
| ENSG000001LLNLR-284  | antisense      | chr19      | 1010221  | 1010907  | + | 0     | 0     |
| ENSG000001PRAMEF28   | unprocessed    | chr1       | 13029339 | 13032130 | + | 0     | 0     |
| ENSG000001NATD1      | protein_coding | chr17      | 21238870 | 21253410 | - | 13.66 | 13.31 |
| ENSG000001RBPJP2     | processed      | chr9       | 66635754 | 66637197 | + | 0     | 0     |
| ENSG000001H2AFB1     | protein_coding | chrX       | 1.55E+08 | 1.55E+08 | + | 0     | 0     |
| ENSG000001RP11-158H  | lincRNA        | chr18      | 35268218 | 35270238 | + | 0.03  | 0.03  |
| ENSG000001RN7SL248F  | misc_RNA       | chr10      | 46648948 | 46649276 | + | 0     | 0     |
| ENSG000001RP11-324E  | lincRNA        | chr12      | 1.23E+08 | 1.23E+08 | + | 0.13  | 0.15  |
| ENSG000001FAM197Y4   | transcribed    | chrY       | 9479053  | 9486239  | - | 0     | 0     |
| ENSG000001U4         | snRNA          | chr11      | 1.3E+08  | 1.3E+08  | - | 0     | 0     |
| ENSG000001RP11-579A  | lincRNA        | chr17      | 58747055 | 58747340 | + | 0     | 0     |
| ENSG000001DLEU2_1    | misc_RNA       | chr1       | 63549489 | 63549608 | - | 0     | 0     |
| ENSG000001U2         | snRNA          | GL000216.1 | 93197    | 93309    | - | 0     | 0     |
| ENSG000001RP11-272L  | sense_intronic | chr13      | 1.07E+08 | 1.07E+08 | - | 0     | 0     |
| ENSG000001Metazoa_S  | misc_RNA       | chr2       | 96938923 | 96939203 | + | 0     | 0     |
| ENSG000001ANTXRL     | protein_coding | chr10      | 46286345 | 46330207 | + | 0     | 0.03  |
| ENSG000001U1         | snRNA          | chr1       | 1.49E+08 | 1.49E+08 | + | 0     | 0     |
| ENSG000001SOCS7      | protein_coding | chr17      | 38352228 | 38405593 | + | 4.51  | 4.51  |
| ENSG000001RP11-401E  | processed      | chr6       | 16041381 | 16041614 | - | 0     | 0     |
| ENSG000001RP11-670E  | lincRNA        | chr17      | 56914186 | 56914533 | + | 2.69  | 3.26  |
| ENSG000001RP11-757C  | processed      | chr18      | 14253548 | 14254075 | + | 0     | 0     |
| ENSG000001CTD-2313J  | lincRNA        | chr15      | 92808451 | 92809057 | + | 0     | 0     |
| ENSG000001Metazoa_S  | misc_RNA       | chr15      | 37216617 | 37216898 | + | 0     | 0     |
| ENSG000001CTC-360J1  | unprocessed    | chr19      | 57111120 | 57112027 | - | 0     | 0     |
| ENSG000001RP11-77K1  | lincRNA        | chr16      | 75433836 | 75436392 | + | 0.37  | 0.45  |
| ENSG000001KB-68A7.1  | lincRNA        | chr21      | 44477850 | 44478493 | + | 0.11  | 0     |
| ENSG000001TBC1D3H    | protein_coding | chr17      | 36377531 | 36388423 | - | 0     | 0     |
| ENSG000001RP1-267L1  | antisense      | chr12      | 1.12E+08 | 1.12E+08 | - | 0.33  | 0.24  |
| ENSG000001RNA5SP41   | rRNA           | chr16      | 35748520 | 35748655 | + | 0     | 0     |
| ENSG000001RMST_3     | misc_RNA       | chr12      | 97493178 | 97493286 | + | 0     | 0     |
| ENSG000001RP11-131M  | processed      | chrY       | 11144250 | 11144492 | + | 0     | 0     |
| ENSG000001RN7SL818F  | misc_RNA       | chrY       | 24210958 | 24211216 | - | 0     | 0     |
| ENSG000001CTC-311G1  | unprocessed    | chr5       | 1.51E+08 | 1.51E+08 | - | 0     | 0     |
| ENSG000001RP11-115D  | antisense      | chr4       | 89743792 | 89744305 | + | 0     | 0     |
| ENSG000001RP11-20I6  | unprocessed    | chr10      | 25244061 | 25244854 | - | 0     | 0     |
| ENSG000001RP11-697E  | lincRNA        | chr17      | 37649133 | 37650894 | + | 0     | 0     |
| ENSG000001RP11-357P  | lincRNA        | chr1       | 2.07E+08 | 2.07E+08 | + | 0     | 0.32  |
| ENSG000001AJ011932.1 | lincRNA        | chr21      | 45974489 | 45974953 | + | 0.33  | 0.55  |
| ENSG000001CTC-1337H  | lincRNA        | chr11      | 67353629 | 67354348 | + | 0     | 0     |

|                 |            |                        |       |          |          |   |      |       |
|-----------------|------------|------------------------|-------|----------|----------|---|------|-------|
| ENSG00000108110 | GGTLC3     | protein_coding         | chr22 | 18516344 | 18518161 | - | 0    | 0     |
| ENSG00000108111 | RP11-566K  | sense_intronic         | chr15 | 22757857 | 22778741 | + | 0    | 0.21  |
| ENSG00000108112 | RP1-229K2  | processed_transcript   | chr6  | 41250851 | 41251097 | + | 0    | 0     |
| ENSG00000108113 | MIR6728    | miRNA                  | chr1  | 8866502  | 8866590  | - | 0    | 0     |
| ENSG00000108114 | XXbac-BPG  | antisense              | chr6  | 33437363 | 33454453 | - | 0    | 0     |
| ENSG00000108115 | RP1-66N13  | lincRNA                | chr20 | 48407367 | 48410716 | + | 0    | 0     |
| ENSG00000108116 | MIR7702    | miRNA                  | chr9  | 1.11E+08 | 1.11E+08 | - | 0    | 0     |
| ENSG00000108117 | CH17-189F  | lincRNA                | chr1  | 1.49E+08 | 1.49E+08 | + | 3.21 | 4.94  |
| ENSG00000108118 | SNORA73A   | snoRNA                 | chr1  | 28507366 | 28507571 | + | 0    | 1.02  |
| ENSG00000108119 | HIST1H3B   | protein_coding         | chr6  | 26031650 | 26032060 | - | 0    | 0     |
| ENSG00000108120 | RP4-545L1  | processed_transcript   | chr20 | 1186092  | 1207036  | + | 0    | 0     |
| ENSG00000108121 | RP11-34F2  | sense_intronic         | chr13 | 50125816 | 50128463 | + | 0.14 | 0.11  |
| ENSG00000108122 | RP11-44M1  | processed_transcript   | chr7  | 1.01E+08 | 1.01E+08 | - | 0.57 | 0.71  |
| ENSG00000108123 | GAGE13     | protein_coding         | chrX  | 49331616 | 49338952 | + | 0    | 0     |
| ENSG00000108124 | RP11-326K  | sense_intronic         | chr18 | 32031035 | 32031359 | + | 0    | 0     |
| ENSG00000108125 | CBSL       | protein_coding         | chr21 | 6444869  | 6468040  | - | 19.6 | 19.65 |
| ENSG00000108126 | SPATA31E3  | unprocessed_transcript | chr15 | 22401208 | 22406944 | + | 0    | 0     |
| ENSG00000108127 | MIR6069    | miRNA                  | chr22 | 35336721 | 35336799 | - | 0    | 0     |
| ENSG00000108128 | RP11-326N  | lincRNA                | chr15 | 38851306 | 38853432 | - | 2.04 | 2.78  |
| ENSG00000108129 | RP11-118E  | processed_transcript   | chrY  | 19253960 | 19260875 | - | 0    | 0     |
| ENSG00000108130 | Y_RNA      | misc_RNA               | chr17 | 38231043 | 38231144 | - | 0    | 0     |
| ENSG00000108131 | ADRA2B     | protein_coding         | chr2  | 96112875 | 96116245 | - | 0    | 0     |
| ENSG00000108132 | HIST1H2BE  | protein_coding         | chr6  | 26172059 | 26184655 | + | 0.15 | 0.05  |
| ENSG00000108133 | RP11-347I1 | lincRNA                | chr12 | 1.22E+08 | 1.22E+08 | + | 0.02 | 0.02  |
| ENSG00000108134 | pRNA       | misc_RNA               | chr12 | 38150050 | 38150138 | + | 0    | 0     |
| ENSG00000108135 | RP11-20G1  | lincRNA                | chr15 | 99416584 | 99417204 | + | 0    | 0.37  |
| ENSG00000108136 | RP11-1081  | processed_transcript   | chr8  | 53394215 | 53394795 | + | 0    | 0     |
| ENSG00000108137 | RP11-138H  | sense_intronic         | chr15 | 70758269 | 70758856 | - | 0    | 0     |
| ENSG00000108138 | RP11-114G  | unprocessed_transcript | chr7  | 57270839 | 57275197 | + | 0    | 0     |
| ENSG00000108139 | MIR6864    | miRNA                  | chr17 | 4969702  | 4969771  | - | 0    | 0     |
| ENSG00000108140 | 7SK        | misc_RNA               | chr11 | 1.2E+08  | 1.2E+08  | + | 0    | 0     |
| ENSG00000108141 | MIR5088    | miRNA                  | chr19 | 49682117 | 49682195 | + | 0    | 0     |
| ENSG00000108142 | RP11-345J1 | sense_intronic         | chr15 | 25708470 | 25710869 | - | 0.05 | 0.03  |
| ENSG00000108143 | RP11-19G2  | processed_transcript   | chr17 | 37140611 | 37141424 | - | 0    | 0     |
| ENSG00000108144 | SNORA71E   | snoRNA                 | chr20 | 38448084 | 38448215 | + | 0    | 0     |
| ENSG00000108145 | RP11-53M1  | unprocessed_transcript | chr8  | 54467208 | 54470609 | + | 0    | 0.12  |
| ENSG00000108146 | RP11-167B  | lincRNA                | chr15 | 98319687 | 98320237 | - | 0    | 0     |
| ENSG00000108147 | MIR6749    | miRNA                  | chr11 | 64902387 | 64902455 | - | 0    | 0     |
| ENSG00000108148 | RP11-996F  | antisense              | chr12 | 29331434 | 29331936 | - | 0.59 | 0.49  |
| ENSG00000108149 | ZNF646P1   | unprocessed_transcript | chr13 | 53408882 | 53409876 | - | 0    | 0     |
| ENSG00000108150 | RP11-93G5  | lincRNA                | chr13 | 37934565 | 38048169 | + | 0    | 0     |
| ENSG00000108151 | RPSAP73    | processed_transcript   | chr7  | 6365441  | 6365770  | + | 0    | 0     |
| ENSG00000108152 | uc_338     | misc_RNA               | chr1  | 88520000 | 88520170 | + | 0    | 0     |
| ENSG00000108153 | RP11-314N  | protein_coding         | chr20 | 1317571  | 1393096  | - | 0    | 0.12  |
| ENSG00000108154 | AL359314.1 | misc_RNA               | chr9  | 76779657 | 76779917 | + | 0    | 0     |



|                                      |          |          |   |       |       |
|--------------------------------------|----------|----------|---|-------|-------|
| ENSG0000(RP11-239C processed_ chr7   | 35847038 | 35847426 | - | 0     | 0     |
| ENSG0000(RP11-486C unprocessε chr14  | 70230224 | 70232426 | + | 0     | 0     |
| ENSG0000(RP11-403A lincRNA chr13     | 1.1E+08  | 1.1E+08  | - | 0     | 0     |
| ENSG0000(RP11-717F lincRNA chr21     | 5553637  | 5614880  | + | 6.2   | 5.08  |
| ENSG0000(RP11-435J lincRNA chr15     | 62387327 | 62388875 | - | 0.15  | 0.08  |
| ENSG0000(RP11-227G lincRNA chr17     | 32408013 | 32408309 | + | 0     | 0     |
| ENSG0000(TTC28-AS1 misc_RNA chr22    | 27994474 | 27994654 | + | 0     | 1.01  |
| ENSG0000(REXO1L7P processed_ chr8    | 85790382 | 85794399 | - | 0     | 0     |
| ENSG0000(ST7-AS2_1 misc_RNA chr7     | 1.17E+08 | 1.17E+08 | + | 0     | 0     |
| ENSG0000(RP11-40B2 unprocessε chr2   | 2.38E+08 | 2.38E+08 | + | 0     | 0     |
| ENSG0000(RP11-1360 unprocessε chr15  | 19955300 | 19955602 | - | 0     | 0     |
| ENSG0000(ZNF658 protein_co chr9      | 66856426 | 66932141 | + | 1.9   | 1.99  |
| ENSG0000(RN7SL853F misc_RNA chr15    | 72664577 | 72664799 | + | 0     | 0     |
| ENSG0000(RP11-2031 unprocessε chr13  | 49232874 | 49234399 | + | 0     | 0     |
| ENSG0000(RP11-788A unprocessε chr2   | 1.32E+08 | 1.32E+08 | - | 0     | 0     |
| ENSG0000(RP11-1151 sense_intrε chr18 | 58511598 | 58512310 | - | 0.18  | 0.1   |
| ENSG0000(FAM74A3 transcribec chr9    | 66976520 | 66976991 | - | 0     | 0     |
| ENSG0000(RP11-216L unprocessε chr9   | 1.37E+08 | 1.37E+08 | - | 0     | 0     |
| ENSG0000(Metazoa_S misc_RNA chr13    | 45732082 | 45732356 | - | 0     | 0     |
| ENSG0000(RP11-104C lincRNA chr17     | 4267691  | 4268430  | + | 0     | 0     |
| ENSG0000(RP3-324O1 sense_intrε chr20 | 31535263 | 31535626 | + | 0     | 0     |
| ENSG0000(RP11-507A processed_ chrY   | 6789153  | 6789344  | + | 0     | 0     |
| ENSG0000(LA16c-380I lincRNA chr16    | 2981175  | 2981591  | - | 0     | 0     |
| ENSG0000(GRAMD4P4 processed_ chr14   | 19026521 | 19028189 | - | 0     | 0     |
| ENSG0000(AC144831. lincRNA chr17     | 83098377 | 83098987 | + | 12.23 | 11.09 |
| ENSG0000(RP11-94I2. lincRNA chr1     | 1.48E+08 | 1.48E+08 | + | 0     | 0     |
| ENSG0000(RP13-714J lincRNA chr12     | 1.32E+08 | 1.32E+08 | - | 0     | 0     |
| ENSG0000(RP5-878I13 processed_ chrX  | 1.15E+08 | 1.15E+08 | - | 0     | 0     |
| ENSG0000(ADAMTS7F transcribec chr15  | 82298553 | 82334609 | + | 0     | 0     |
| ENSG0000(RP11-178C unprocessε chr17  | 60025859 | 60030746 | + | 0     | 0.22  |
| ENSG0000(RP11-179A lincRNA chr14     | 94918253 | 94918734 | - | 0     | 0     |
| ENSG0000(MIR6801 miRNA chr19         | 52222020 | 52222098 | + | 0     | 0     |
| ENSG0000(LL22NC03- unprocessε chr22  | 22803076 | 22803360 | + | 0     | 0     |
| ENSG0000(CTD-2017F antisense chr15   | 64950916 | 64951435 | - | 3.69  | 4.52  |
| ENSG0000(U6 snRNA chr20              | 30713240 | 30713346 | - | 0     | 0     |
| ENSG0000(TMEM269 protein_co chr1     | 42785007 | 42816619 | + | 0.14  | 0.09  |
| ENSG0000(RP11-154H antisense chr3    | 71567863 | 71571112 | + | 0     | 0     |
| ENSG0000(MIR6885 miRNA chr19         | 6389638  | 6389703  | - | 0     | 0     |
| ENSG0000(TPTE protein_co chr21       | 10521553 | 10606140 | + | 0     | 0     |
| ENSG0000(RP11-554D lincRNA chr12     | 1.08E+08 | 1.08E+08 | - | 0     | 0     |
| ENSG0000(HOTAIRM1 misc_RNA chr7      | 27099856 | 27099957 | + | 0     | 0     |
| ENSG0000(CTD-2540L unprocessε chr14  | 70556206 | 70557478 | + | 0     | 0     |
| ENSG0000(RP11-322A processed_ chrX   | 76250183 | 76251796 | - | 0     | 0     |
| ENSG0000(RP11-294N lincRNA chr18     | 35144942 | 35145417 | + | 0     | 0     |
| ENSG0000(CTD-2036P antisense chr15   | 42726583 | 42727211 | + | 0     | 0.12  |

|                    |            |       |          |          |   |      |      |
|--------------------|------------|-------|----------|----------|---|------|------|
| ENSG0000(5S_rRNA   | rRNA       | chr1  | 1.47E+08 | 1.47E+08 | - | 0    | 0    |
| ENSG0000(DLX6-AS1_ | misc_RNA   | chr7  | 96965302 | 96965481 | + | 0    | 0    |
| ENSG0000(RP5-965G2 | lincRNA    | chr20 | 25239007 | 25245229 | - | 0.17 | 0.4  |
| ENSG0000(RP11-433J | antisense  | chr1  | 1.48E+08 | 1.48E+08 | + | 0    | 0    |
| ENSG0000(MIR6515   | miRNA      | chr19 | 12940484 | 12940540 | + | 0    | 0    |
| ENSG0000(TBC1D3D   | protein_co | chr17 | 38003976 | 38014902 | + | 1.56 | 1.34 |
| ENSG0000(uc_338    | misc_RNA   | chr3  | 47818005 | 47818128 | + | 0    | 0    |
| ENSG0000(RP11-386J | sense_intr | chr9  | 70310875 | 70312120 | + | 0    | 0    |
| ENSG0000(LL22NC03- | lincRNA    | chr22 | 22283928 | 22287220 | - | 0.16 | 0.23 |
| ENSG0000(RP11-544C | unprocess  | chr1  | 1.49E+08 | 1.49E+08 | + | 0.29 | 0.49 |
| ENSG0000(RN7SL196F | misc_RNA   | chr15 | 30405307 | 30405597 | - | 0    | 0.14 |
| ENSG0000(AC114271. | antisense  | chr19 | 10333436 | 10336248 | + | 0.41 | 0.79 |
| ENSG0000(RP11-972P | sense_intr | chr12 | 1.24E+08 | 1.24E+08 | - | 0    | 0    |
| ENSG0000(U1        | snRNA      | chr1  | 1.46E+08 | 1.46E+08 | + | 0    | 0    |
| ENSG0000(JPX_1     | misc_RNA   | chrX  | 73944332 | 73944466 | + | 9.8  | 18.3 |
| ENSG0000(U2        | snRNA      | chr17 | 43245674 | 43245864 | - | 0.28 | 0    |
| ENSG0000(CTD-2282P | antisense  | chr5  | 36636019 | 36649347 | - | 0    | 0    |
| ENSG0000(C8orf89   | protein_co | chr8  | 73241329 | 73259502 | - | 0.21 | 0.32 |
| ENSG0000(RP11-128A | lincRNA    | chr15 | 37109587 | 37109984 | + | 0.21 | 0.23 |
| ENSG0000(RP11-373F | processed_ | chrY  | 9868462  | 9868702  | - | 0    | 0    |
| ENSG0000(RP11-683L | processed_ | chr18 | 94202    | 94330    | - | 0    | 0    |
| ENSG0000(LLNLR-304 | antisense  | chr19 | 5294247  | 5294696  | + | 0.18 | 0    |
| ENSG0000(U6atac    | snRNA      | chr1  | 1.47E+08 | 1.47E+08 | - | 0    | 0    |
| ENSG0000(RP1-66H9. | unprocess  | chr6  | 1.55E+08 | 1.55E+08 | - | 0    | 0    |
| ENSG0000(U2        | snRNA      | chr17 | 43290291 | 43290481 | - | 0.28 | 0    |
| ENSG0000(CTD-2012B | unprocess  | chr5  | 1E+08    | 1E+08    | - | 0    | 0    |
| ENSG0000(AC000041. | unprocess  | chr22 | 29437583 | 29437733 | + | 0    | 0    |
| ENSG0000(SNORA40   | snoRNA     | chr10 | 36438661 | 36438788 | + | 0    | 0    |
| ENSG0000(Metazoa_S | misc_RNA   | chr12 | 68575858 | 68576136 | - | 0    | 0    |
| ENSG0000(CTD-2649C | processed_ | chr16 | 21950218 | 21951708 | - | 0.62 | 0.8  |
| ENSG0000(RP11-323P | processed_ | chr10 | 1.21E+08 | 1.21E+08 | + | 0    | 0    |
| ENSG0000(MIR1273H  | miRNA      | chr16 | 24203116 | 24203231 | + | 0    | 0    |
| ENSG0000(RNA5SP25  | rRNA       | chr8  | 20290174 | 20290289 | + | 0    | 0    |
| ENSG0000(RP4-663N1 | unprocess  | chr1  | 1.15E+08 | 1.15E+08 | + | 0    | 0    |
| ENSG0000(LINC01746 | lincRNA    | chr20 | 37571103 | 37583935 | + | 0    | 0    |
| ENSG0000(RP11-228N | unprocess  | chr15 | 23309607 | 23313276 | + | 1.2  | 1.56 |
| ENSG0000(Y_RNA     | misc_RNA   | chr5  | 1.55E+08 | 1.55E+08 | + | 0    | 0    |
| ENSG0000(RN7SL650F | misc_RNA   | chr14 | 21429508 | 21429806 | - | 0.36 | 0    |
| ENSG0000(RP11-58A1 | lincRNA    | chr16 | 86698118 | 86698841 | + | 0    | 0    |
| ENSG0000(RP11-345P | processed_ | chr1  | 1583510  | 1583909  | - | 0    | 0    |
| ENSG0000(Y_RNA     | misc_RNA   | chr21 | 7474394  | 7474494  | + | 0    | 0    |
| ENSG0000(RP11-60C6 | unprocess  | chr11 | 95030549 | 95031245 | + | 0    | 0    |
| ENSG0000(CH17-431C | unprocess  | chr17 | 38195740 | 38257152 | - | 7.15 | 7.21 |
| ENSG0000(RP11-962G | processed_ | chr8  | 36795255 | 36795862 | - | 0    | 0    |
| ENSG0000(GNAS-AS1_ | misc_RNA   | chr20 | 58850530 | 58850641 | + | 0    | 0    |

|                 |            |                |       |          |          |   |       |       |
|-----------------|------------|----------------|-------|----------|----------|---|-------|-------|
| ENSG00000100000 | RP11-976B  | lincRNA        | chr14 | 88819608 | 88822151 | - | 0.21  | 0.02  |
| ENSG00000100000 | MRPS17P5   | processed      | chr6  | 1.28E+08 | 1.28E+08 | + | 0     | 0     |
| ENSG00000100000 | MIR6832    | miRNA          | chr6  | 31633787 | 31633858 | + | 0     | 0     |
| ENSG00000100000 | RP11-403B  | transcribed    | chr15 | 20803505 | 20826173 | - | 0     | 0     |
| ENSG00000100000 | MESTIT1_3  | misc_RNA       | chr7  | 1.3E+08  | 1.3E+08  | + | 0     | 0     |
| ENSG00000100000 | RP4-583P1  | antisense      | chr20 | 63730072 | 63730377 | - | 0     | 0     |
| ENSG00000100000 | ANKRD20A   | processed      | chrY  | 11173618 | 11173821 | + | 0     | 0     |
| ENSG00000100000 | RP11-678G  | unprocessed    | chr19 | 21592727 | 21593041 | + | 0     | 0     |
| ENSG00000100000 | Metazoa_S  | misc_RNA       | chr16 | 11753666 | 11753948 | - | 0     | 0     |
| ENSG00000100000 | RP5-965G2  | antisense      | chr20 | 25251008 | 25251304 | - | 0     | 0     |
| ENSG00000100000 | RP11-212L  | lincRNA        | chr16 | 55425574 | 55426130 | - | 0     | 0     |
| ENSG00000100000 | Metazoa_S  | misc_RNA       | chr9  | 1.25E+08 | 1.25E+08 | + | 0     | 0     |
| ENSG00000100000 | TBC1D3L    | protein_coding | chr17 | 37977972 | 37989048 | - | 12.23 | 11.56 |
| ENSG00000100000 | Metazoa_S  | misc_RNA       | chr3  | 12576961 | 12577237 | - | 0     | 0     |
| ENSG00000100000 | CTD-2026K  | antisense      | chr15 | 75645020 | 75645442 | + | 0     | 0     |
| ENSG00000100000 | FAM74A6    | lincRNA        | chr9  | 60929774 | 60936746 | + | 0.01  | 0.18  |
| ENSG00000100000 | Six3os1_1  | misc_RNA       | chr2  | 44932320 | 44932406 | + | 0     | 0     |
| ENSG00000100000 | RCC1L      | protein_coding | chr7  | 75027122 | 75074228 | - | 15.1  | 16.68 |
| ENSG00000100000 | CTC-338M   | unprocessed    | chr5  | 1.81E+08 | 1.81E+08 | + | 0     | 0     |
| ENSG00000100000 | CTD-2650P  | sense_intronic | chr15 | 52017167 | 52018032 | - | 0.15  | 0.65  |
| ENSG00000100000 | SEBOX      | protein_coding | chr17 | 28364268 | 28365244 | - | 0     | 0     |
| ENSG00000100000 | RP11-483E  | unprocessed    | chr15 | 28422172 | 28422373 | + | 0     | 0     |
| ENSG00000100000 | SNORD39    | snoRNA         | chr4  | 1.59E+08 | 1.59E+08 | - | 0     | 0     |
| ENSG00000100000 | RP6-159A1  | antisense      | chrX  | 66015461 | 66020422 | + | 0     | 0     |
| ENSG00000100000 | RP1-62D2.4 | processed      | chr6  | 11015586 | 11015888 | + | 0     | 0     |
| ENSG00000100000 | SNORD28    | snoRNA         | chr11 | 62854621 | 62854695 | - | 0     | 0     |
| ENSG00000100000 | Six3os1_6  | misc_RNA       | chr2  | 44938833 | 44939028 | + | 0     | 0     |
| ENSG00000100000 | RP11-676B  | unprocessed    | chr13 | 37139176 | 37139585 | - | 0     | 0     |
| ENSG00000100000 | RP11-434C  | unprocessed    | chr12 | 11516425 | 11521686 | - | 0     | 0     |
| ENSG00000100000 | MIR6889    | miRNA          | chr22 | 41252992 | 41253050 | - | 0     | 0     |
| ENSG00000100000 | AC138035   | processed      | chr5  | 1.81E+08 | 1.81E+08 | - | 0     | 0     |
| ENSG00000100000 | RP11-240G  | antisense      | chr12 | 1.17E+08 | 1.17E+08 | - | 0     | 0     |
| ENSG00000100000 | CH507-42P  | protein_coding | chr21 | 5972924  | 5973383  | - | 2.43  | 1.68  |
| ENSG00000100000 | RP11-285E  | lincRNA        | chr12 | 1.02E+08 | 1.02E+08 | - | 0     | 0     |
| ENSG00000100000 | RP11-147L  | lincRNA        | chr17 | 68131462 | 68131907 | + | 2.32  | 2.55  |
| ENSG00000100000 | RP11-404F  | unprocessed    | chr1  | 1.61E+08 | 1.61E+08 | - | 0     | 0     |
| ENSG00000100000 | CTD-3035K  | antisense      | chr17 | 62626437 | 62627590 | - | 3.76  | 4.42  |
| ENSG00000100000 | RN7SL545F  | misc_RNA       | chr15 | 22429200 | 22429489 | - | 0     | 0     |
| ENSG00000100000 | RP11-121C  | processed      | chr12 | 56413647 | 56414045 | - | 0     | 0     |
| ENSG00000100000 | SPDYE10P   | transcribed    | chr7  | 73104201 | 73111140 | - | 0     | 0     |
| ENSG00000100000 | ZYXP1      | unprocessed    | chr8  | 1.37E+08 | 1.37E+08 | - | 0     | 0     |
| ENSG00000100000 | IGHV2-70   | IG_V_gene      | chr14 | 1.07E+08 | 1.07E+08 | - | 0     | 0     |
| ENSG00000100000 | RP11-430E  | sense_intronic | chr18 | 28146233 | 28146703 | - | 0     | 0.18  |
| ENSG00000100000 | RP5-824H1  | processed      | chrX  | 1.47E+08 | 1.47E+08 | + | 0     | 0     |
| ENSG00000100000 | SNORA16A   | snoRNA         | chr1  | 28580920 | 28581056 | - | 0     | 0     |

|                    |             |       |          |          |   |       |       |
|--------------------|-------------|-------|----------|----------|---|-------|-------|
| ENSG0000(FAM74A4   | transcribed | chr9  | 61205258 | 61212373 | + | 0     | 0     |
| ENSG0000(RP11-819N | unprocessed | chr11 | 1.07E+08 | 1.07E+08 | + | 0.53  | 0     |
| ENSG0000(RNU2-1    | snRNA       | chr17 | 43233787 | 43233977 | - | 0.28  | 0     |
| ENSG0000(DGKK      | protein_co  | chrX  | 50365409 | 50470738 | - | 0     | 0     |
| ENSG0000(Metazoa_S | misc_RNA    | chr11 | 18538885 | 18539189 | + | 0     | 0     |
| ENSG0000(RP11-474P | sense_intr  | chr12 | 46239106 | 46239473 | - | 0     | 0     |
| ENSG0000(RP11-43P8 | processed   | chr6  | 1.38E+08 | 1.38E+08 | + | 0     | 0     |
| ENSG0000(RP11-423G | sense_intr  | chr12 | 1.09E+08 | 1.09E+08 | - | 0.3   | 0     |
| ENSG0000(DUX4L24   | unprocessed | chr10 | 1.34E+08 | 1.34E+08 | + | 0     | 0     |
| ENSG0000(RIMBP3B   | protein_co  | chr22 | 21383374 | 21389478 | + | 0.14  | 0.19  |
| ENSG0000(WI2-88277 | unprocessed | chrX  | 1.36E+08 | 1.36E+08 | - | 0     | 0     |
| ENSG0000(PI4KAP1   | transcribed | chr22 | 18533646 | 18577968 | - | 11.15 | 13.27 |
| ENSG0000(Y_RNA     | misc_RNA    | chr6  | 99526097 | 99526205 | + | 0     | 0     |
| ENSG0000(RP11-12G1 | lincRNA     | chr13 | 1E+08    | 1E+08    | - | 2.65  | 2.69  |
| ENSG0000(ST7-OT4_4 | misc_RNA    | chr7  | 1.17E+08 | 1.17E+08 | + | 0     | 0     |
| ENSG0000(RNU6-866F | snRNA       | chr17 | 38755279 | 38755400 | - | 0     | 0     |
| ENSG0000(TBC1D3    | protein_co  | chr17 | 38181659 | 38192541 | - | 0     | 0     |
| ENSG0000(CTC-260E6 | processed   | chr19 | 20087013 | 20087576 | - | 0     | 0     |
| ENSG0000(RP11-17E4 | unprocessed | chr13 | 1.11E+08 | 1.11E+08 | - | 0     | 0     |
| ENSG0000(CH17-258A | unprocessed | chr17 | 38078262 | 38124770 | + | 0     | 0     |
| ENSG0000(RFPL3-AS1 | misc_RNA    | chr22 | 32362972 | 32363059 | + | 0     | 0     |
| ENSG0000(HIST1H4F  | protein_co  | chr6  | 26240426 | 26240737 | + | 0     | 0     |
| ENSG0000(MIR378J   | miRNA       | chr17 | 37614931 | 37615039 | - | 0     | 0     |
| ENSG0000(MIR6867   | miRNA       | chr17 | 40193597 | 40193663 | + | 0     | 0     |
| ENSG0000(RP11-49G2 | sense_intr  | chr12 | 22104491 | 22105320 | - | 0     | 0     |
| ENSG0000(SCARNA17  | scaRNA      | chr22 | 18605355 | 18605497 | + | 0     | 0     |
| ENSG0000(RP11-104N | sense_intr  | chr16 | 89516797 | 89522217 | + | 0.94  | 0.78  |
| ENSG0000(RP11-399F | processed   | chr9  | 66047084 | 66055006 | - | 0.08  | 0.22  |
| ENSG0000(RP11-92F2 | antisense   | chr2  | 2.24E+08 | 2.24E+08 | + | 0     | 0     |
| ENSG0000(RP11-229E | antisense   | chr17 | 41867581 | 41867736 | + | 0     | 0     |
| ENSG0000(RP11-368E | processed   | chrX  | 1.28E+08 | 1.28E+08 | - | 0     | 0     |
| ENSG0000(RN7SL719F | misc_RNA    | chr15 | 28703554 | 28703790 | - | 0     | 0     |
| ENSG0000(RP11-279C | unprocessed | chr7  | 1.55E+08 | 1.55E+08 | - | 0     | 0     |
| ENSG0000(SNORD109  | snoRNA      | chr15 | 25041974 | 25042040 | + | 0     | 0     |
| ENSG0000(HIST1H2BC | protein_co  | chr6  | 27893463 | 27893843 | + | 0     | 0     |
| ENSG0000(CH17-472C | unprocessed | chr1  | 1.2E+08  | 1.2E+08  | + | 0.29  | 0.29  |
| ENSG0000(DLEU2_6   | misc_RNA    | chr12 | 91632912 | 91633023 | - | 0     | 0     |
| ENSG0000(CTD-2311B | processed   | chr14 | 19511244 | 19511712 | + | 0     | 0     |
| ENSG0000(RP11-457D | lincRNA     | chr13 | 51180178 | 51180967 | + | 0     | 0     |
| ENSG0000(RP11-347C | antisense   | chr16 | 30359825 | 30360336 | + | 0.14  | 0.16  |
| ENSG0000(CTD-3247H | sense_intr  | chr15 | 48528980 | 48529728 | - | 0.78  | 0.57  |
| ENSG0000(XIST_intr | misc_RNA    | chrX  | 73821657 | 73821724 | - | 0     | 0     |
| ENSG0000(RN7SL625F | misc_RNA    | chr7  | 72841437 | 72841727 | - | 0     | 0     |
| ENSG0000(TBC1D3J   | unprocessed | chr17 | 36450146 | 36457535 | - | 0     | 0     |
| ENSG0000(RP11-986G | lincRNA     | chr12 | 2740093  | 2742855  | + | 0     | 0     |

|                                       |          |          |   |      |      |
|---------------------------------------|----------|----------|---|------|------|
| ENSG0000(Metazoa_S misc_RNA chr10     | 1.01E+08 | 1.01E+08 | - | 0    | 0    |
| ENSG0000(RN7SKP23( misc_RNA chr21     | 25101132 | 25101415 | + | 0    | 0    |
| ENSG0000(5S_rRNA rRNA chr17           | 38144201 | 38144287 | - | 0    | 0    |
| ENSG0000(RP11-169D processed_chr11    | 72562044 | 72562554 | + | 0    | 0    |
| ENSG0000(CTD-2566J: unprocessε chr14  | 68113706 | 68114144 | - | 0    | 0    |
| ENSG0000(RP11-31H5 sense_intrε chr15  | 56729932 | 56730611 | - | 0.1  | 0.11 |
| ENSG0000(RP13-820C lincRNA chr12      | 1.32E+08 | 1.32E+08 | - | 0    | 0    |
| ENSG0000(RP11-505K sense_intrε chr16  | 84085979 | 84086590 | - | 0.11 | 0.25 |
| ENSG0000(RP11-2C24 lincRNA chr16      | 30821338 | 30821884 | + | 0    | 0    |
| ENSG0000(MYO5BP1 processed_chr9       | 41292887 | 41294125 | + | 0    | 0    |
| ENSG0000(RP11-385G sense_intrε chr12  | 40978744 | 40979244 | + | 0    | 0    |
| ENSG0000(RP11-122K lincRNA chr10      | 1.33E+08 | 1.33E+08 | - | 0    | 0    |
| ENSG0000(Metazoa_S misc_RNA chr10     | 77966173 | 77966440 | + | 0    | 0    |
| ENSG0000(RP11-34H1 processed_chr9     | 41700480 | 41700696 | - | 0    | 0    |
| ENSG0000(RP11-310E unprocessε chr10   | 95173085 | 95173187 | - | 0    | 0    |
| ENSG0000(HTT-AS1_2 misc_RNA chr4      | 3069977  | 3070151  | + | 0    | 0    |
| ENSG0000(RP11-21K1 lincRNA chr12      | 1.29E+08 | 1.29E+08 | + | 0.09 | 0    |
| ENSG0000(MIR6761 miRNA chr12          | 1.12E+08 | 1.12E+08 | + | 0    | 0    |
| ENSG0000(RP11-71L1: lincRNA chr16     | 68450283 | 68452318 | + | 0    | 0    |
| ENSG0000(Metazoa_S misc_RNA chr8      | 94655911 | 94656208 | + | 0    | 0    |
| ENSG0000(RP11-393N processed_chr1     | 1.88E+08 | 1.88E+08 | + | 0    | 0    |
| ENSG0000(Metazoa_S misc_RNA chr14     | 49913493 | 49913760 | - | 0    | 0    |
| ENSG0000(MIR486-1 miRNA chr8          | 41660441 | 41660508 | - | 0    | 0    |
| ENSG0000(Evf-2_5p misc_RNA chr7       | 97013925 | 97014066 | - | 0    | 0    |
| ENSG0000(Metazoa_S misc_RNA chr2      | 1.31E+08 | 1.31E+08 | - | 0.23 | 0.52 |
| ENSG0000(RP11-147L: lincRNA chr17     | 68205489 | 68207493 | + | 1.5  | 0.98 |
| ENSG0000(MIR7974 miRNA chr19          | 11495544 | 11495622 | - | 0    | 0    |
| ENSG0000(U4 snRNA chr5                | 1.79E+08 | 1.79E+08 | - | 0    | 0    |
| ENSG0000(RP1-47A17 processed_chr22    | 42791814 | 42794313 | - | 0    | 0    |
| ENSG0000(RP11-346C lincRNA chr13      | 1.08E+08 | 1.08E+08 | + | 0    | 0    |
| ENSG0000(RP11-86K2 sense_intrε chr15  | 57990217 | 57990636 | - | 0    | 0    |
| ENSG0000(SPRY4-IT1_ misc_RNA chr5     | 1.42E+08 | 1.42E+08 | + | 0    | 0    |
| ENSG0000(RP11-618L: lincRNA chr12     | 46970504 | 46972155 | + | 0    | 0    |
| ENSG0000(RP11-476L1 processed_chr20   | 64327418 | 64327972 | - | 0    | 0    |
| ENSG0000(RP11-143N unprocessε chr16   | 20618205 | 20620758 | - | 0    | 0    |
| ENSG0000(LINC00901 misc_RNA chr3      | 1.17E+08 | 1.17E+08 | + | 0    | 0    |
| ENSG0000(CCL23 protein_co chr17       | 36013056 | 36017968 | - | 0    | 0    |
| ENSG0000(RP5-1057I2 sense_intrε chr12 | 47817451 | 47817966 | - | 0.43 | 0.16 |
| ENSG0000(AC013791: misc_RNA chr11     | 2871437  | 2871498  | + | 0    | 0    |
| ENSG0000(Metazoa_S misc_RNA chr10     | 1.02E+08 | 1.02E+08 | - | 0    | 0    |
| ENSG0000(ELOA3D protein_co chr18      | 46962768 | 46964408 | - | 0    | 0    |
| ENSG0000(RN7SL627F misc_RNA chr17     | 18840618 | 18840920 | + | 0    | 0    |
| ENSG0000(CH17-53B9 unprocessε chr17   | 21678086 | 21678418 | + | 0    | 0    |
| ENSG0000(KRTAP7-1 protein_co chr21    | 30829039 | 30829759 | - | 0    | 0    |
| ENSG0000(HIST1H3E protein_co chr6     | 26224199 | 26227473 | + | 0.71 | 0.76 |

|                                          |          |          |   |      |      |
|------------------------------------------|----------|----------|---|------|------|
| ENSG0000(LA16c-358l antisense chr16      | 1305547  | 1309413  | - | 0.22 | 0.1  |
| ENSG0000(TRBV12-3 TR_V_gene chr7         | 1.43E+08 | 1.43E+08 | + | 0    | 0    |
| ENSG0000(U2 snRNA chr9                   | 1.16E+08 | 1.16E+08 | + | 0    | 0    |
| ENSG0000(CTB-75G16 processed_ chr17      | 36574462 | 36575325 | - | 0    | 0    |
| ENSG0000(RP1-59D14 antisense chr17       | 2366589  | 2366791  | - | 0    | 0    |
| ENSG0000(5S_rRNA rRNA chr4               | 67439992 | 67440118 | + | 0    | 0    |
| ENSG0000(ZNFX1-AS1 misc_RNA chr20        | 49279116 | 49279208 | + | 0    | 0    |
| ENSG0000(RP11-966l antisense chr14       | 28818741 | 28819258 | + | 0    | 0    |
| ENSG0000(PRAMEF27 protein_co chr1        | 13049476 | 13056491 | - | 0    | 0    |
| ENSG0000(RP11-139H sense_intr chr15      | 55343141 | 55343575 | - | 0.37 | 0    |
| ENSG0000(LINC00453 lincRNA chr13         | 1.14E+08 | 1.14E+08 | + | 0    | 0    |
| ENSG0000(AC131056. antisense chr17       | 36183235 | 36196471 | + | 0.28 | 1.18 |
| ENSG0000(RP11-493E processed_ chr2       | 61115787 | 61164825 | + | 0    | 0    |
| ENSG0000(MIR6128 miRNA chr11             | 56743873 | 56743981 | + | 0    | 0    |
| ENSG0000(Metazoa_S misc_RNA chr8         | 1.45E+08 | 1.45E+08 | + | 0    | 0    |
| ENSG0000(RP1-274L7. transcribed chrX     | 1.3E+08  | 1.31E+08 | - | 0    | 0    |
| ENSG0000(RP11-687F lincRNA chr18         | 46786699 | 46789297 | - | 0.11 | 0    |
| ENSG0000(AC004792. misc_RNA chr19        | 56848068 | 56848204 | + | 0    | 0    |
| ENSG0000(Y_RNA misc_RNA chr21            | 6223480  | 6223580  | - | 0    | 0    |
| ENSG0000(F8A2 protein_co chrX            | 1.55E+08 | 1.55E+08 | + | 0    | 0    |
| ENSG0000(AC171558. protein_co KI270727.1 | 386278   | 387620   | + | 0    | 0    |
| ENSG0000(RP11-407N antisense chr12       | 50953924 | 50954356 | - | 0.56 | 0    |
| ENSG0000(CTD-2129N lincRNA chr15         | 40874433 | 40874595 | + | 0    | 0    |
| ENSG0000(Metazoa_S misc_RNA chr5         | 1.48E+08 | 1.48E+08 | + | 0    | 0    |
| ENSG0000(AC007204. unprocess chr19       | 19978190 | 19979610 | - | 0    | 0    |
| ENSG0000(MIR6768 miRNA chr16             | 2463967  | 2464038  | + | 0    | 0    |
| ENSG0000(TBC1D3B protein_co chr17        | 36165681 | 36176636 | - | 5.18 | 5.97 |
| ENSG0000(MIR6078 miRNA chr10             | 3991160  | 3991259  | + | 0    | 0    |
| ENSG0000(NPHP3-AC protein_co chr3        | 1.33E+08 | 1.33E+08 | - | 1.37 | 0.82 |
| ENSG0000(RP11-21l4. unprocess chr5       | 1.79E+08 | 1.79E+08 | + | 0    | 0    |
| ENSG0000(RP11-536P unprocess chr15       | 28494975 | 28495182 | - | 0    | 0    |
| ENSG0000(MIR6772 miRNA chr16             | 57772289 | 57772352 | - | 0    | 0    |
| ENSG0000(AC012531. misc_RNA chr12        | 53968002 | 53968178 | + | 0    | 0    |
| ENSG0000(RP1-292L2l lincRNA chr14        | 70906657 | 70907111 | - | 3.45 | 1.71 |
| ENSG0000(RMST_7 misc_RNA chr12           | 97532691 | 97532958 | + | 0    | 0    |
| ENSG0000(RP11-395E unprocess chr9        | 66979460 | 66979862 | + | 0    | 0    |
| ENSG0000(MIR6762 miRNA chr12             | 1.13E+08 | 1.13E+08 | + | 0    | 0    |
| ENSG0000(RP11-348N processed_ chr12      | 56376818 | 56377331 | - | 0    | 0    |
| ENSG0000(MIR7152 miRNA chr10             | 71790747 | 71790800 | + | 0    | 0    |
| ENSG0000(RP4-616B8 lincRNA chr20         | 38955910 | 38956547 | + | 0.11 | 0    |
| ENSG0000(LINC01297 lincRNA chr14         | 19344578 | 19384587 | - | 0.01 | 0.01 |
| ENSG0000(RP11-567N lincRNA chr18         | 79677287 | 79679358 | - | 1.66 | 1.92 |
| ENSG0000(RP11-432N processed_ chr5       | 17669283 | 17669518 | - | 0    | 0    |
| ENSG0000(RP11-1055 lincRNA chr17         | 81387415 | 81387766 | + | 0    | 0.29 |
| ENSG0000(CTD-3037C lincRNA chr16         | 12614451 | 12614852 | + | 0    | 0    |

|                                 |           |          |          |   |       |       |
|---------------------------------|-----------|----------|----------|---|-------|-------|
| ENSG0000(RP11-566K unprocessed) | chr15     | 22360639 | 22360918 | + | 0     | 0     |
| ENSG0000(SMCR2_2 misc_RNA)      | chr17     | 17676211 | 17676371 | + | 0     | 0     |
| ENSG0000(RP11-356K processed)   | chrY      | 19932130 | 19932500 | - | 0     | 0     |
| ENSG0000(MIR6788 miRNA)         | chr18     | 10759584 | 10759649 | - | 0     | 0     |
| ENSG0000(RP11-320G lincRNA)     | chr3      | 18013226 | 18041603 | + | 0     | 0     |
| ENSG0000(Metazoa_S misc_RNA)    | chr9      | 1.38E+08 | 1.38E+08 | - | 0     | 0     |
| ENSG0000(RP11-325N processed)   | chr6      | 60826185 | 60826533 | - | 0     | 0     |
| ENSG0000(uc_338 misc_RNA)       | chr2      | 1.92E+08 | 1.92E+08 | + | 0     | 0     |
| ENSG0000(AC145212. protein_co)  | GL000194. | 53594    | 115055   | - | 2.94  | 3.33  |
| ENSG0000(Metazoa_S misc_RNA)    | chr16     | 30816030 | 30816302 | + | 0     | 0     |
| ENSG0000(RP11-4911sense_intr)   | chr18     | 36189824 | 36190272 | + | 0.88  | 0.97  |
| ENSG0000(RN7SL422F misc_RNA)    | chr9      | 67175775 | 67176035 | - | 0     | 0     |
| ENSG0000(RP1-90J20. processed)  | chr6      | 3033183  | 3033288  | + | 0     | 0     |
| ENSG0000(RP11-136L. antisense)  | chr12     | 1.18E+08 | 1.18E+08 | + | 0     | 0     |
| ENSG0000(Metazoa_S misc_RNA)    | chr17     | 6521131  | 6521412  | + | 1.64  | 1.45  |
| ENSG0000(U2 snRNA)              | chr17     | 43277978 | 43278168 | - | 0.28  | 0     |
| ENSG0000(RP11-97N1 lincRNA)     | chr20     | 19000709 | 19056796 | - | 0     | 0     |
| ENSG0000(HOTAIRM1 misc_RNA)     | chr7      | 27099778 | 27099836 | + | 0     | 0     |
| ENSG0000(H19_2 misc_RNA)        | chr11     | 1997484  | 1997552  | + | 0     | 0     |
| ENSG0000(RP4-724P1 processed)   | chr6      | 49115537 | 49116115 | + | 0     | 0     |
| ENSG0000(pRNA misc_RNA)         | chr21     | 8388898  | 8388987  | + | 0     | 0     |
| ENSG0000(RP11-214K protein_co)  | chr12     | 1.24E+08 | 1.24E+08 | + | 0     | 0.92  |
| ENSG0000(DLEU2_3 misc_RNA)      | chr13     | 50049591 | 50049663 | + | 0     | 0     |
| ENSG0000(RP11-411G processed)   | chr12     | 1.15E+08 | 1.15E+08 | - | 0     | 0     |
| ENSG0000(Metazoa_S misc_RNA)    | chr17     | 45931806 | 45932083 | + | 0     | 0     |
| ENSG0000(AL117190. misc_RNA)    | chr14     | 1.01E+08 | 1.01E+08 | + | 0     | 0     |
| ENSG0000(RP11-268P sense_intr)  | chr12     | 22638464 | 22638943 | + | 0     | 0     |
| ENSG0000(SEPT14P17 unprocessed) | chr1      | 2.28E+08 | 2.28E+08 | + | 0     | 0     |
| ENSG0000(CTB-167G5 unprocessed) | chr19     | 53512092 | 53512616 | - | 0     | 0     |
| ENSG0000(RP11-15E1 lincRNA)     | chr9      | 66014525 | 66020816 | - | 0     | 0     |
| ENSG0000(RP11-478J. antisense)  | chr1      | 2.14E+08 | 2.14E+08 | - | 0     | 0     |
| ENSG0000(PANO1 protein_co)      | chr11     | 797511   | 799190   | + | 0.54  | 0.33  |
| ENSG0000(AC001226. lincRNA)     | chr13     | 77027944 | 77028482 | + | 0     | 0.15  |
| ENSG0000(RP11-566H processed)   | chrY      | 25174520 | 25175237 | + | 0     | 0     |
| ENSG0000(LLOXNC01- processed)   | chrX      | 1.27E+08 | 1.27E+08 | - | 0     | 0     |
| ENSG0000(RP1-197B1 lincRNA)     | chr12     | 47731908 | 47732351 | + | 0.36  | 0     |
| ENSG0000(RP1-81D8. unprocessed) | chr6      | 1.61E+08 | 1.61E+08 | + | 0     | 0     |
| ENSG0000(CTD-2515C antisense)   | chr16     | 30064306 | 30064825 | - | 0     | 0     |
| ENSG0000(RP11-12A2 unprocessed) | chr9      | 67725890 | 67726544 | + | 1.34  | 0.8   |
| ENSG0000(HAR1A misc_RNA)        | chr20     | 63102142 | 63102259 | + | 0     | 0     |
| ENSG0000(RP11-144A transcribed) | chr9      | 60927098 | 60927491 | - | 0     | 0     |
| ENSG0000(RNA5-8S5 rRNA)         | GL000220. | 112025   | 112177   | + | 13.92 | 37.54 |
| ENSG0000(RP11-54G1 lincRNA)     | chr18     | 35317396 | 35317848 | + | 0.52  | 0.77  |
| ENSG0000(RP11-428F processed)   | chr9      | 1.15E+08 | 1.15E+08 | - | 0     | 0     |
| ENSG0000(RP11-88E1 lincRNA)     | chr13     | 1.13E+08 | 1.13E+08 | - | 0.3   | 0.33  |

|                 |            |             |       |          |          |   |      |      |
|-----------------|------------|-------------|-------|----------|----------|---|------|------|
| ENSG00000105111 | GS1-214D1  | unprocessed | chrX  | 7896514  | 7896722  | - | 0    | 0    |
| ENSG00000105112 | CTD-2547C  | lincRNA     | chr16 | 25257952 | 25261066 | + | 0.71 | 0.69 |
| ENSG00000105113 | CH17-1312  | unprocessed | chr1  | 1.43E+08 | 1.43E+08 | - | 0    | 0    |
| ENSG00000105114 | KRT89P     | transcribed | chr12 | 52341197 | 52354036 | + | 0    | 0    |
| ENSG00000105115 | RP11-165D  | sense_intr  | chr13 | 48532013 | 48532599 | - | 0    | 0    |
| ENSG00000105116 | RP11-1030  | processed   | chr18 | 50318420 | 50319024 | + | 0    | 0    |
| ENSG00000105117 | MIR7150    | miRNA       | chr9  | 1.23E+08 | 1.23E+08 | - | 0    | 0    |
| ENSG00000105118 | TBC1D3I    | protein_co  | chr17 | 36253456 | 36264553 | - | 0    | 0.21 |
| ENSG00000105119 | SMAD5-AS   | misc_RNA    | chr5  | 1.36E+08 | 1.36E+08 | + | 0    | 0    |
| ENSG00000105120 | CTD-2311N  | lincRNA     | chr15 | 74374678 | 74375511 | + | 0    | 0    |
| ENSG00000105121 | MIR8083    | miRNA       | chr1  | 1.54E+08 | 1.54E+08 | - | 0    | 0    |
| ENSG00000105122 | RP11-351C  | sense_intr  | chr12 | 42361267 | 42361703 | + | 0    | 0.2  |
| ENSG00000105123 | RP5-864K1  | protein_co  | chr1  | 38864501 | 38881617 | - | 0.24 | 0    |
| ENSG00000105124 | RP5-1009E  | processed   | chr20 | 3811384  | 3823882  | + | 0.47 | 0    |
| ENSG00000105125 | RP11-56B1  | sense_intr  | chr15 | 51833134 | 51833426 | + | 0    | 0    |
| ENSG00000105126 | UG0898H0   | lincRNA     | chr8  | 62977861 | 62984900 | + | 0.11 | 0.03 |
| ENSG00000105127 | SPDYE13P   | unprocessed | chr7  | 75281267 | 75287118 | + | 0    | 0    |
| ENSG00000105128 | TEX28P1    | unprocessed | chrX  | 1.54E+08 | 1.54E+08 | - | 0    | 0    |
| ENSG00000105129 | RN7SL600F  | misc_RNA    | chr1  | 1.51E+08 | 1.51E+08 | - | 0    | 0    |
| ENSG00000105130 | RP11-817I4 | sense_intr  | chr12 | 32339368 | 32340724 | + | 0.56 | 0.52 |
| ENSG00000105131 | RP11-382B  | unprocessed | chr15 | 30395146 | 30396368 | + | 0    | 0    |
| ENSG00000105132 | Y_RNA      | misc_RNA    | chr3  | 53290640 | 53290751 | + | 0    | 0    |
| ENSG00000105133 | MIR6771    | miRNA       | chr16 | 50292616 | 50292675 | + | 0    | 0    |
| ENSG00000105134 | RP11-472F  | processed   | chr7  | 12439419 | 12440404 | - | 0    | 0    |
| ENSG00000105135 | BSNDP2     | processed   | chr20 | 25845497 | 25845862 | + | 0    | 0    |
| ENSG00000105136 | MIR6735    | miRNA       | chr1  | 43448539 | 43448611 | + | 0    | 0    |
| ENSG00000105137 | RP11-8P13  | sense_intr  | chr12 | 32820142 | 32820567 | - | 0.19 | 0    |
| ENSG00000105138 | RP11-118N  | processed   | chr2  | 2.41E+08 | 2.41E+08 | - | 0    | 0    |
| ENSG00000105139 | RNU11      | snRNA       | chr1  | 28648600 | 28648733 | + | 0    | 0    |
| ENSG00000105140 | RP11-1143  | lincRNA     | chr12 | 69326574 | 69331882 | - | 0.02 | 0.01 |
| ENSG00000105141 | Y_RNA      | misc_RNA    | chr7  | 73067231 | 73067332 | + | 0    | 0    |
| ENSG00000105142 | PTCHD3P1   | unprocessed | chr10 | 29421476 | 29422012 | - | 0    | 0    |
| ENSG00000105143 | MIR6750    | miRNA       | chr11 | 64898363 | 64898437 | - | 0    | 0    |
| ENSG00000105144 | RP11-295I5 | antisense   | chr12 | 25210652 | 25211233 | + | 0.24 | 0.13 |
| ENSG00000105145 | MIR6876    | miRNA       | chr8  | 25345402 | 25345474 | + | 0    | 0    |
| ENSG00000105146 | RP11-395B  | antisense   | chr7  | 1.01E+08 | 1.01E+08 | - | 0    | 0    |
| ENSG00000105147 | MIR8056    | miRNA       | chr5  | 1.73E+08 | 1.73E+08 | + | 0    | 0    |
| ENSG00000105148 | RP11-321F  | sense_intr  | chr15 | 66740445 | 66741151 | + | 0    | 0.1  |
| ENSG00000105149 | CTB-58E17  | antisense   | chr17 | 38601049 | 38602701 | + | 0    | 0    |
| ENSG00000105150 | HIST1H2AF  | protein_co  | chr6  | 27147129 | 27147515 | + | 0    | 0    |
| ENSG00000105151 | SNORA17A   | snoRNA      | chr9  | 1.37E+08 | 1.37E+08 | - | 0    | 0    |
| ENSG00000105152 | MIR8052    | miRNA       | chr11 | 1.31E+08 | 1.31E+08 | + | 0    | 0    |
| ENSG00000105153 | uc_338     | misc_RNA    | chr10 | 16767235 | 16767416 | + | 0    | 0    |
| ENSG00000105154 | RP11-187E  | transcribed | chr14 | 31964550 | 31965095 | + | 0    | 0    |
| ENSG00000105155 | ZNF280B    | protein_co  | chr22 | 22484421 | 22509154 | - | 0.48 | 0.35 |



|                                          |          |          |   |       |       |
|------------------------------------------|----------|----------|---|-------|-------|
| ENSG0000(RP11-234G antisense chr10       | 1.3E+08  | 1.3E+08  | + | 0     | 0     |
| ENSG0000(Y_RNA misc_RNA chr17            | 38089399 | 38089500 | + | 0     | 0     |
| ENSG0000(RP11-599B unprocessed chr17     | 8063936  | 8072533  | + | 0     | 0     |
| ENSG0000(CTC-550B1 processed_chr19       | 54948864 | 54948993 | + | 0     | 0     |
| ENSG0000(RN7SL166F misc_RNA chr13        | 19736975 | 19737254 | - | 0     | 0     |
| ENSG0000(RP11-129G unprocessed chr10     | 88259129 | 88259372 | - | 0     | 0     |
| ENSG0000(RP11-6101 lincRNA chr15         | 95638346 | 95825451 | + | 0     | 0     |
| ENSG0000(RP11-317B processed_chr9        | 88391362 | 88391832 | - | 0     | 0     |
| ENSG0000(MIR6753 miRNA chr11             | 68044794 | 68044957 | + | 0     | 0     |
| ENSG0000(MLLT6 protein_co chr17          | 38705542 | 38729803 | + | 19.35 | 19.49 |
| ENSG0000(CTB-1144G antisense chr10       | 1.14E+08 | 1.14E+08 | - | 0     | 0     |
| ENSG0000(RP5-875H1 antisense chr17       | 50098460 | 50098899 | - | 0     | 0     |
| ENSG0000(GXYLT1P4 transcribed chr9       | 66022661 | 66027719 | - | 0     | 0     |
| ENSG0000(HMGB1P2 transcribed chr17       | 37143607 | 37144463 | - | 0     | 0     |
| ENSG0000(RNU6-538F snRNA chr9            | 66142221 | 66142327 | - | 0     | 0     |
| ENSG0000(TCL6_2 misc_RNA chr14           | 95662480 | 95662598 | + | 0     | 0     |
| ENSG0000(TP53TG3E protein_co chr16       | 33303739 | 33306935 | + | 0     | 0     |
| ENSG0000(MIR8086 miRNA chr10             | 28289258 | 28289350 | - | 0     | 0     |
| ENSG0000(RP11-546B protein_co chr5       | 1.71E+08 | 1.71E+08 | - | 0     | 0     |
| ENSG0000(RP11-70D2 lincRNA chr16         | 79619469 | 79620110 | + | 0     | 0     |
| ENSG0000(Metazoa_S misc_RNA chr8         | 1.01E+08 | 1.01E+08 | - | 0     | 0     |
| ENSG0000(SNORD25 snoRNA chr11            | 62855564 | 62855632 | - | 0     | 0     |
| ENSG0000(RP11-136G processed_chr6        | 58386799 | 58386961 | + | 0     | 0     |
| ENSG0000(BSNP1 processed_chr20           | 25783553 | 25783919 | + | 0     | 0     |
| ENSG0000(PPP4R3B protein_co chr2         | 55547292 | 55618880 | - | 14.5  | 15.15 |
| ENSG0000(ST7-OT3_1 misc_RNA chr7         | 1.17E+08 | 1.17E+08 | + | 0     | 0     |
| ENSG0000(CTC-471J1. antisense chr19      | 52049007 | 52049754 | + | 0.26  | 0.29  |
| ENSG0000(RP11-127I2 sense_intronic chr16 | 4839244  | 4840334  | - | 0.06  | 0     |
| ENSG0000(PPP1R26P3 unprocessed chr22     | 18400407 | 18404206 | - | 0     | 0     |
| ENSG0000(RP11-220H unprocessed chr7      | 57067950 | 57074664 | - | 0     | 0     |
| ENSG0000(AC233755. protein_co KI270726.1 | 41444    | 41876    | + | 0     | 0     |
| ENSG0000(CH17-262C unprocessed chr1      | 1.46E+08 | 1.46E+08 | + | 0     | 0     |
| ENSG0000(SYNRG protein_co chr17          | 37514797 | 37609496 | - | 11.35 | 10.69 |
| ENSG0000(MIR6825 miRNA chr3              | 1.28E+08 | 1.28E+08 | - | 0     | 0     |
| ENSG0000(U6 snRNA chr9                   | 64082429 | 64082534 | + | 0     | 0     |
| ENSG0000(GNAS-AS1 misc_RNA chr20         | 58850783 | 58850903 | + | 0     | 0     |
| ENSG0000(Metazoa_S misc_RNA chrX         | 1.3E+08  | 1.3E+08  | - | 0     | 0.41  |
| ENSG0000(uc_338 misc_RNA chr13           | 55128285 | 55128444 | + | 0     | 0     |
| ENSG0000(SNORD50B snoRNA chr6            | 85677589 | 85677658 | - | 0     | 0     |
| ENSG0000(NUDT18 protein_co chr8          | 22106872 | 22109419 | - | 9.73  | 8.85  |
| ENSG0000(CH17-248F processed_chr1        | 1.44E+08 | 1.44E+08 | + | 0     | 0     |
| ENSG0000(RP11-656A unprocessed chr8      | 1.4E+08  | 1.4E+08  | - | 0     | 0     |
| ENSG0000(SNORD91B snoRNA chr17           | 2329016  | 2329237  | - | 0     | 0     |
| ENSG0000(RP11-442C lincRNA chr16         | 85142696 | 85146001 | - | 0.02  | 0     |
| ENSG0000(RN7SL296F misc_RNA chr3         | 33103008 | 33103306 | + | 0     | 0     |

|                 |           |             |       |          |          |   |       |       |
|-----------------|-----------|-------------|-------|----------|----------|---|-------|-------|
| ENSG00000100000 | CTB-5506  | antisense   | chr19 | 14006422 | 14006773 | + | 0     | 0     |
| ENSG00000100000 | LA16c-329 | sense_intr  | chr16 | 1707252  | 1707973  | + | 0     | 0     |
| ENSG00000100000 | RP11-219H | unprocess   | chr2  | 97000436 | 97001593 | - | 0     | 0     |
| ENSG00000100000 | RP11-627K | 3prime_ov   | chr12 | 31280422 | 31280895 | - | 0.22  | 0     |
| ENSG00000100000 | MIR6766   | miRNA       | chr15 | 89326739 | 89326810 | - | 0     | 0     |
| ENSG00000100000 | SCb-64M4  | unprocess   | chr8  | 89826593 | 89833564 | + | 0     | 0     |
| ENSG00000100000 | RP11-309L | TEC         | chr7  | 1.29E+08 | 1.29E+08 | - | 0     | 0     |
| ENSG00000100000 | MIR6782   | miRNA       | chr17 | 44207771 | 44207839 | - | 0     | 0     |
| ENSG00000100000 | U7        | snRNA       | chr3  | 98987387 | 98987449 | + | 0     | 0     |
| ENSG00000100000 | MIR6504   | miRNA       | chr16 | 81611348 | 81611408 | + | 0     | 0     |
| ENSG00000100000 | MIR6087   | miRNA       | chrX  | 1.09E+08 | 1.09E+08 | + | 0     | 0     |
| ENSG00000100000 | ZNF2      | protein_co  | chr2  | 95165432 | 95184317 | + | 2.07  | 2.12  |
| ENSG00000100000 | GAGE2E    | protein_co  | chrX  | 49341192 | 49345922 | + | 0     | 0     |
| ENSG00000100000 | RP11-613H | unprocess   | chr8  | 27010486 | 27010746 | + | 0     | 0     |
| ENSG00000100000 | RP11-711K | lincRNA     | chr12 | 11212219 | 11251389 | + | 0     | 0     |
| ENSG00000100000 | RP11-182J | antisense   | chr15 | 84597809 | 84633987 | - | 0.32  | 0.35  |
| ENSG00000100000 | CH17-232I | processed   | chr7  | 75237293 | 75237405 | - | 33.65 | 94.01 |
| ENSG00000100000 | HIST1H4L  | protein_co  | chr6  | 27873199 | 27873510 | - | 0     | 0     |
| ENSG00000100000 | SNORD116  | snoRNA      | chr15 | 25089923 | 25090014 | + | 0     | 0     |
| ENSG00000100000 | RN7SL203F | misc_RNA    | chr8  | 70480192 | 70480487 | - | 0     | 0     |
| ENSG00000100000 | CH17-219N | processed   | chr1  | 1.21E+08 | 1.21E+08 | - | 0     | 0     |
| ENSG00000100000 | RP11-32D4 | unprocess   | chr9  | 11618496 | 11618621 | - | 0     | 0     |
| ENSG00000100000 | CH17-472C | transcribec | chr1  | 1.2E+08  | 1.21E+08 | - | 4.39  | 5.24  |
| ENSG00000100000 | RN7SL663F | misc_RNA    | chr19 | 38200234 | 38200532 | + | 0     | 0     |
| ENSG00000100000 | MEG8_2    | misc_RNA    | chr14 | 1.01E+08 | 1.01E+08 | + | 0     | 0     |
| ENSG00000100000 | RP11-432L | processed   | chr6  | 1.41E+08 | 1.41E+08 | - | 0     | 0     |
| ENSG00000100000 | RP1-101D8 | antisense   | chr21 | 45759804 | 45763758 | - | 0     | 0     |
| ENSG00000100000 | CH17-478C | unprocess   | chr1  | 1.49E+08 | 1.49E+08 | - | 0     | 0     |
| ENSG00000100000 | MIR6888   | miRNA       | chr2  | 1.59E+08 | 1.59E+08 | + | 0     | 0     |
| ENSG00000100000 | RP5-999L4 | lincRNA     | chr20 | 19871891 | 19872284 | + | 0     | 0     |
| ENSG00000100000 | SCARNA16  | scaRNA      | chr17 | 77089307 | 77089493 | + | 0.45  | 0     |
| ENSG00000100000 | SNX18P5   | unprocess   | chr9  | 42923277 | 42924144 | + | 0     | 0     |
| ENSG00000100000 | snoU2_19  | snoRNA      | chr11 | 93721542 | 93721621 | + | 0     | 0     |
| ENSG00000100000 | CCL16     | protein_co  | chr17 | 35976493 | 35981496 | - | 0     | 0     |
| ENSG00000100000 | U3        | snoRNA      | chr14 | 91714915 | 91715130 | - | 0     | 0     |
| ENSG00000100000 | CTD-2595P | sense_intr  | chr16 | 49847018 | 49847632 | - | 0.22  | 0.25  |
| ENSG00000100000 | RP11-762N | unprocess   | chr2  | 2.32E+08 | 2.32E+08 | + | 0     | 0     |
| ENSG00000100000 | TRBV12-5  | TR_V_gene   | chr7  | 1.43E+08 | 1.43E+08 | + | 0     | 0     |
| ENSG00000100000 | RP11-187C | processed   | chr9  | 41479960 | 41480548 | + | 1.63  | 2.2   |
| ENSG00000100000 | Mico1     | misc_RNA    | chr14 | 1.01E+08 | 1.01E+08 | + | 0     | 0     |
| ENSG00000100000 | LLNLR-260 | sense_intr  | chr19 | 956485   | 958149   | + | 0     | 0     |
| ENSG00000100000 | RP11-385J | protein_co  | chr3  | 1.78E+08 | 1.79E+08 | + | 0     | 0     |
| ENSG00000100000 | MIR6814   | miRNA       | chr21 | 41746772 | 41746841 | - | 0     | 0     |
| ENSG00000100000 | MIR6815   | miRNA       | chr21 | 45478266 | 45478326 | + | 0     | 0     |
| ENSG00000100000 | FRG2MP    | processed   | chr21 | 14019060 | 14020725 | - | 0     | 0     |

|                                 |            |          |          |   |       |       |
|---------------------------------|------------|----------|----------|---|-------|-------|
| ENSG0000( AC091199. lincRNA     | chr17      | 37798894 | 37802788 | - | 0     | 0     |
| ENSG0000( U6 snRNA              | chr15      | 21428879 | 21428985 | - | 0     | 0     |
| ENSG0000( CTD-2313J. lincRNA    | chr15      | 92819598 | 92819992 | + | 0     | 0     |
| ENSG0000( RP11-4B16 antisense   | chr18      | 77093086 | 77093446 | + | 0.5   | 1.66  |
| ENSG0000( RP4-737E2 lincRNA     | chr20      | 23180176 | 23187544 | + | 0     | 0     |
| ENSG0000( RP11-631N lincRNA     | chr12      | 62603909 | 62604399 | + | 13.71 | 12.54 |
| ENSG0000( LENG9 protein_co      | chr19      | 54461796 | 54463711 | - | 3.01  | 2.73  |
| ENSG0000( RP13-753N antisense   | chr17      | 30899110 | 30899651 | + | 0     | 0     |
| ENSG0000( RP11-196B antisense   | chr18      | 79470120 | 79470940 | - | 0.13  | 0     |
| ENSG0000( RP11-36I17 sense_intr | chr16      | 53628256 | 53628816 | - | 0.13  | 0     |
| ENSG0000( RP1-27C22 unprocess   | chrX       | 11221348 | 11225731 | + | 0     | 0     |
| ENSG0000( RP11-295I5 antisense  | chr12      | 25225103 | 25225665 | + | 0     | 0     |
| ENSG0000( RP11-471B lincRNA     | chr14      | 90383365 | 90387973 | + | 0.12  | 0.04  |
| ENSG0000( LLNLF-18A: unprocess  | chr19      | 23479762 | 23480468 | - | 0     | 0     |
| ENSG0000( RP11-156K antisense   | chr13      | 48974967 | 48976867 | - | 0.71  | 0.42  |
| ENSG0000( RP1-37N7. unprocess   | chr17      | 18390153 | 18390323 | - | 0     | 0     |
| ENSG0000( MIR6740 miRNA         | chr1       | 2.02E+08 | 2.02E+08 | + | 0     | 0     |
| ENSG0000( MIR6745 miRNA         | chr11      | 47179611 | 47179737 | - | 0     | 0     |
| ENSG0000( AC008984. processed_  | chr19      | 54308915 | 54337168 | - | 0.03  | 0.11  |
| ENSG0000( RP3-446N1 lincRNA     | chr12      | 1.26E+08 | 1.26E+08 | + | 0     | 0     |
| ENSG0000( Metazoa_S misc_RNA    | chr1       | 2.06E+08 | 2.06E+08 | + | 0     | 0     |
| ENSG0000( RNA5-8S5 rRNA         | chr21      | 8395607  | 8395759  | + | 13.92 | 37.54 |
| ENSG0000( RP11-54H7 lincRNA     | chr13      | 1.09E+08 | 1.09E+08 | + | 0.08  | 0.15  |
| ENSG0000( U2 snRNA              | chr17      | 43296425 | 43296615 | - | 0.28  | 0     |
| ENSG0000( HIST1H2AK protein_co  | chr6       | 27837947 | 27838339 | - | 0.22  | 0     |
| ENSG0000( Metazoa_S misc_RNA    | chr20      | 8998849  | 8999100  | + | 0     | 0     |
| ENSG0000( RP1-63M2. lincRNA     | chr20      | 33655701 | 33656423 | - | 0.27  | 0     |
| ENSG0000( LINC00547 lincRNA     | chr13      | 37534940 | 37551536 | + | 0     | 0.05  |
| ENSG0000( uc_338 misc_RNA       | chr3       | 25618132 | 25618312 | - | 0     | 0     |
| ENSG0000( RP11-370I1 lincRNA    | chr12      | 48327942 | 48328472 | - | 0     | 0     |
| ENSG0000( RNU1-68P snRNA        | chr1       | 1.5E+08  | 1.5E+08  | - | 0     | 0     |
| ENSG0000( RN7SL544F misc_RNA    | chr9       | 62363581 | 62363864 | + | 0     | 0     |
| ENSG0000( RMST_4 misc_RNA       | chr12      | 97493897 | 97494003 | + | 0     | 0     |
| ENSG0000( RP11-897M lincRNA     | chr12      | 1.31E+08 | 1.31E+08 | - | 0     | 0     |
| ENSG0000( CTD-2396E antisense   | chr19      | 6469465  | 6470152  | + | 0.1   | 0     |
| ENSG0000( AC009120. lincRNA     | chr16      | 74289593 | 74291052 | - | 0.04  | 0     |
| ENSG0000( MIR4734 miRNA         | chr17      | 38702262 | 38702331 | - | 0     | 0     |
| ENSG0000( RP11-157L. lincRNA    | chr9       | 41657708 | 41699072 | - | 0     | 0     |
| ENSG0000( TRBV16 TR_V_gene      | chr7       | 1.43E+08 | 1.43E+08 | + | 0     | 0     |
| ENSG0000( RP11-40E6 lincRNA     | chr13      | 1.1E+08  | 1.1E+08  | + | 0     | 0     |
| ENSG0000( AC171558. protein_co  | KI270727.1 | 372322   | 373405   | + | 0     | 0     |
| ENSG0000( RP11-768G processed_  | chr4       | 34714270 | 34714598 | + | 0     | 0     |
| ENSG0000( FTX_3 misc_RNA        | chrX       | 74280936 | 74281082 | + | 0     | 0     |
| ENSG0000( MRPS31P1 processed_   | chr3       | 41189041 | 41189236 | + | 0     | 0     |
| ENSG0000( MIR6511A: miRNA       | chr16      | 14925937 | 14926003 | + | 0     | 0     |

|                          |             |       |          |          |   |      |      |
|--------------------------|-------------|-------|----------|----------|---|------|------|
| ENSG000001072            | lincRNA     | chr16 | 30956872 | 30957199 | - | 0    | 0.33 |
| ENSG000001152            | lincRNA     | chr12 | 1.23E+08 | 1.23E+08 | + | 0    | 0    |
| ENSG000001191            | misc_RNA    | chr11 | 1996540  | 1996610  | + | 0    | 0    |
| ENSG000001007            | snRNA       | chrX  | 1.4E+08  | 1.4E+08  | + | 0    | 0    |
| ENSG0000016780A          | miRNA       | chr17 | 42708084 | 42708151 | - | 0    | 0    |
| ENSG000001946L           | antisense   | chr12 | 29156448 | 29156991 | - | 0    | 0    |
| ENSG000001105L           | processed   | chrY  | 7656968  | 7657352  | + | 0    | 0    |
| ENSG0000014564F2         | lincRNA     | chr20 | 38378825 | 38383179 | + | 0    | 0    |
| ENSG000001499A           | lincRNA     | chr12 | 44498616 | 44499158 | - | 0    | 0    |
| ENSG000001Metazoa_S      | misc_RNA    | chrX  | 388100   | 388389   | - | 0    | 0    |
| ENSG000001Metazoa_S      | misc_RNA    | chrY  | 388100   | 388389   | - | 0    | 0    |
| ENSG000001001            | snRNA       | chr1  | 1.45E+08 | 1.45E+08 | - | 0    | 0    |
| ENSG000001Metazoa_S      | misc_RNA    | chr22 | 21555138 | 21555457 | + | 0    | 0    |
| ENSG000001428C           | lincRNA     | chr13 | 27178263 | 27251288 | - | 0.25 | 0.14 |
| ENSG000001111G           | processed   | chr7  | 45303620 | 45304362 | + | 0    | 0    |
| ENSG0000011718C          | processed   | chr1  | 1.21E+08 | 1.21E+08 | - | 0    | 0    |
| ENSG0000011292F          | processed   | chr9  | 41760088 | 41764175 | + | 0.21 | 0.28 |
| ENSG000001004            | protein_co  | chr17 | 36103590 | 36105621 | + | 0    | 0    |
| ENSG00000105_rRNA        | rRNA        | chr20 | 30816156 | 30816274 | - | 0    | 0    |
| ENSG000001001_4          | misc_RNA    | chr22 | 30973417 | 30973597 | + | 0    | 0    |
| ENSG00000111-441G        | processed   | chrY  | 9325799  | 9326047  | + | 0    | 0    |
| ENSG00000111-432I1       | unprocessε  | chr10 | 45180400 | 45180616 | + | 0    | 0    |
| ENSG00000111-32A1        | unprocessε  | chrX  | 36794500 | 36795460 | - | 0    | 0    |
| ENSG00000111-143N        | unprocessε  | chr16 | 20616409 | 20616532 | - | 0    | 0    |
| ENSG00000111-526D        | unprocessε  | chr9  | 92840955 | 92841688 | - | 0.09 | 0.29 |
| ENSG000001Metazoa_S      | misc_RNA    | chr22 | 18524620 | 18524935 | + | 0    | 0.35 |
| ENSG000001003-347M1      | processed   | chrX  | 1.01E+08 | 1.01E+08 | - | 0    | 0    |
| ENSG00000111-262A        | lincRNA     | chr15 | 96342953 | 96345651 | + | 0.16 | 0.12 |
| ENSG000001003D61PP1      | transcribec | chr15 | 22727104 | 22744918 | + | 0.16 | 0.2  |
| ENSG00000111-234G        | antisense   | chr10 | 1.3E+08  | 1.3E+08  | + | 0    | 0    |
| ENSG000001003DYE19P      | unprocessε  | chr7  | 5031608  | 5037831  | - | 0    | 0    |
| ENSG00000111-83N9        | lincRNA     | chr9  | 1.36E+08 | 1.36E+08 | + | 0.03 | 0.07 |
| ENSG000001003D-2017F     | antisense   | chr15 | 64943240 | 64943672 | - | 0    | 0    |
| ENSG000001003D MIR5787   | miRNA       | chr3  | 50227436 | 50227490 | + | 0    | 0    |
| ENSG000001003D MIR8088   | miRNA       | chrX  | 52336557 | 52336642 | - | 0    | 0    |
| ENSG000001003D RN7SL680F | misc_RNA    | chr20 | 39349094 | 39349392 | - | 0    | 0    |
| ENSG000001003D RP3-425C1 | processed   | chr6  | 1.22E+08 | 1.22E+08 | + | 0    | 0    |
| ENSG000001003D FGD5P1    | transcribec | chr3  | 13933056 | 13937477 | + | 0.04 | 0.09 |
| ENSG000001003D PRAG1     | protein_co  | chr8  | 8317736  | 8386498  | - | 6.87 | 7.2  |
| ENSG00000111-323F        | sense_intrε | chr15 | 56908312 | 56908635 | - | 0    | 0    |
| ENSG000001003D MIR6503   | miRNA       | chr11 | 60209071 | 60209156 | - | 0    | 0    |
| ENSG00000111-697E        | lincRNA     | chr15 | 90281858 | 90282270 | + | 0.2  | 0    |
| ENSG00000111-592P        | processed   | chr3  | 1.22E+08 | 1.22E+08 | + | 0    | 0    |
| ENSG00000111-329N        | processed   | chr1  | 38383838 | 38384422 | - | 0    | 0    |
| ENSG00000111-492C        | unprocessε  | chrY  | 6273579  | 6274065  | - | 0    | 0    |

|                 |                              |          |          |   |      |      |
|-----------------|------------------------------|----------|----------|---|------|------|
| ENSG00000108410 | (Metazoa_S misc_RNA chr18    | 76840838 | 76841102 | - | 2.33 | 1.71 |
| ENSG00000108411 | (C7orf77 protein_co chr7     | 1.25E+08 | 1.25E+08 | - | 0    | 0    |
| ENSG00000108412 | (RP5-1025A lincRNA chr20     | 25062962 | 25063591 | - | 0    | 0    |
| ENSG00000108413 | (ST7-AS1_1 misc_RNA chr7     | 1.17E+08 | 1.17E+08 | + | 0    | 0    |
| ENSG00000108414 | (MIR6868 miRNA chr17         | 76098019 | 76098076 | - | 0    | 0    |
| ENSG00000108415 | (LL22NC03-unprocessed chr22  | 22087924 | 22088085 | + | 0    | 0    |
| ENSG00000108416 | (Metazoa_S misc_RNA chr22    | 18615581 | 18615900 | + | 0    | 0    |
| ENSG00000108417 | (RP11-566K unprocessed chr15 | 22451209 | 22455154 | + | 0    | 0.18 |
| ENSG00000108418 | (RP11-266K lincRNA chr12     | 8217758  | 8221115  | + | 2.75 | 2.6  |
| ENSG00000108419 | (RP11-455F antisense chr16   | 30110895 | 30111955 | + | 0.42 | 0.5  |
| ENSG00000108420 | (ZEB2_AS1_misc_RNA chr2      | 1.45E+08 | 1.45E+08 | + | 0    | 0    |
| ENSG00000108421 | (MIR6124 miRNA chr11         | 12163683 | 12163767 | + | 0    | 0    |
| ENSG00000108422 | (RP11-346J-unprocessed chr5  | 1E+08    | 1E+08    | - | 0.09 | 0    |
| ENSG00000108423 | (MIR1299 miRNA chr9          | 40929010 | 40929092 | - | 0    | 0    |
| ENSG00000108424 | (HIST1H3I protein_co chr6    | 27871905 | 27872315 | - | 0    | 0    |
| ENSG00000108425 | (RP11-401N processed_chr2    | 69844509 | 69844933 | - | 0    | 0    |
| ENSG00000108426 | (RP11-615I2 lincRNA chr16    | 68591382 | 68594424 | + | 0.15 | 0.2  |
| ENSG00000108427 | (CCL18 protein_co chr17      | 36064280 | 36072032 | + | 0    | 0    |
| ENSG00000108428 | (CTC-788C1 unprocessed chr8  | 93974671 | 93974776 | - | 0    | 0    |
| ENSG00000108429 | (RP6-14C6.3 unprocessed chrX | 54842014 | 54842134 | + | 0    | 0    |
| ENSG00000108430 | (RP11-214K lincRNA chr12     | 1.24E+08 | 1.24E+08 | + | 0.17 | 0.13 |
| ENSG00000108431 | (RP11-318K lincRNA chr9      | 40767870 | 40806344 | + | 0    | 0    |
| ENSG00000108432 | (MIR6770-3 miRNA chr16       | 18379351 | 18379410 | - | 0    | 0    |
| ENSG00000108433 | (RP11-164C antisense chr1    | 2.07E+08 | 2.07E+08 | - | 0    | 0    |
| ENSG00000108434 | (RP11-568J sense_intr chr16  | 85697335 | 85697868 | - | 0.82 | 0.45 |
| ENSG00000108435 | (FCGBP protein_co chr19      | 39863323 | 39934626 | - | 0.07 | 0.02 |
| ENSG00000108436 | (RP4-756H1 processed_chr7    | 66553805 | 66554199 | - | 3.82 | 2.79 |
| ENSG00000108437 | (RP4-564F2 lincRNA chr20     | 38418483 | 38419202 | - | 0    | 0.1  |
| ENSG00000108438 | (U1 snRNA KI270713.1         | 21861    | 22024    | - | 1.72 | 1.68 |
| ENSG00000108439 | (RP11-125A unprocessed chr1  | 2.26E+08 | 2.26E+08 | - | 0    | 0    |
| ENSG00000108440 | (RP11-131L lincRNA chr12     | 1.18E+08 | 1.18E+08 | + | 0    | 0.14 |
| ENSG00000108441 | (HNF1B protein_co chr17      | 37686432 | 37745247 | - | 0    | 0    |
| ENSG00000108442 | (MIR6882 miRNA chr15         | 74840642 | 74840707 | - | 0    | 0    |
| ENSG00000108443 | (CTC-529I1 antisense chr17   | 16023323 | 16023653 | - | 0    | 0.65 |
| ENSG00000108444 | (uc_338 misc_RNA chr2        | 1.71E+08 | 1.71E+08 | + | 0    | 0    |
| ENSG00000108445 | (RP11-844G sense_intr chr15  | 56248787 | 56249127 | + | 0    | 0    |
| ENSG00000108446 | (RP11-126C lincRNA chr18     | 58659858 | 58660524 | + | 0    | 0    |
| ENSG00000108447 | (RP11-486N processed_chr6    | 1.55E+08 | 1.55E+08 | + | 1.15 | 0    |
| ENSG00000108448 | (RP11-429P processed_chr2    | 47989625 | 47990526 | + | 0    | 0    |
| ENSG00000108449 | (CH17-262A sense_intr chr4   | 149738   | 150317   | + | 0    | 0    |
| ENSG00000108450 | (CTD-2281E lincRNA chr8      | 1296034  | 1302607  | - | 0    | 0    |
| ENSG00000108451 | (MIR6862-1 miRNA chr16       | 28390982 | 28391051 | - | 0    | 0    |
| ENSG00000108452 | (CTB-186H2 antisense chr17   | 35983656 | 35990270 | + | 0    | 0.02 |
| ENSG00000108453 | (CTD-3093B processed_chr19   | 14628599 | 14628801 | + | 0    | 0    |
| ENSG00000108454 | (RP5-908M sense_intr chr20   | 62402236 | 62405935 | - | 0.16 | 0.13 |

|                                 |       |          |          |   |      |      |
|---------------------------------|-------|----------|----------|---|------|------|
| ENSG0000(LA16c-360) lincRNA     | chr16 | 848525   | 849065   | - | 0    | 0    |
| ENSG0000(RP11-666C antisense)   | chr16 | 28553709 | 28554140 | - | 0.37 | 0.21 |
| ENSG0000(RP11-759A) lincRNA     | chr15 | 95990582 | 96300990 | + | 0    | 0    |
| ENSG0000(CTD-2649C antisense)   | chr16 | 22007480 | 22008062 | - | 0.12 | 0.27 |
| ENSG0000(RP11-762J) processed_  | chr18 | 64677796 | 64677993 | - | 0    | 0    |
| ENSG0000(MIR6859-3) miRNA       | chr15 | 1.02E+08 | 1.02E+08 | + | 0    | 0    |
| ENSG0000(PTGER4P2) lincRNA      | chr9  | 41276280 | 41282846 | + | 0.09 | 0.12 |
| ENSG0000(MIR6085) miRNA         | chr15 | 62343029 | 62343138 | + | 0    | 0    |
| ENSG0000(MIR54802) miRNA        | chr20 | 38516563 | 38516632 | + | 0    | 0    |
| ENSG0000(CTD-2026K antisense)   | chr15 | 75639760 | 75640976 | + | 0.1  | 0.32 |
| ENSG0000(MIR7852) miRNA         | chr1  | 1.08E+08 | 1.08E+08 | + | 0    | 0    |
| ENSG0000(RP1-198K1) antisense   | chr20 | 21302731 | 21303704 | - | 2.01 | 2.28 |
| ENSG0000(MIR6809) miRNA         | chr2  | 2.18E+08 | 2.18E+08 | - | 0    | 0    |
| ENSG0000(Metazoa_S_misc_RNA)    | chr15 | 80057425 | 80057684 | - | 0    | 0    |
| ENSG0000(RP11-281H) unprocessε  | chr8  | 5716584  | 5716804  | + | 0    | 0    |
| ENSG0000(CH507-9B2) protein_co  | chr21 | 5130871  | 5154734  | - | 3.3  | 2.49 |
| ENSG0000(RP11-569G) lincRNA     | chr9  | 96106661 | 96116411 | - | 0    | 0    |
| ENSG0000(RP11-240G) lincRNA     | chr12 | 1.17E+08 | 1.17E+08 | + | 0    | 0    |
| ENSG0000(LLNLR-304) processed_  | chr19 | 2013728  | 2014656  | - | 0    | 0    |
| ENSG0000(MIR6130) miRNA         | chr21 | 23079284 | 23079392 | + | 0    | 0    |
| ENSG0000(IGHV3-54) IG_V_pseu    | chr14 | 1.07E+08 | 1.07E+08 | - | 0    | 0    |
| ENSG0000(RP11-996F) antisense   | chr12 | 29277397 | 29277882 | - | 0    | 0    |
| ENSG0000(RP11-334C) lincRNA     | chr17 | 80149627 | 80149798 | + | 0    | 0    |
| ENSG0000(RP11-846F) unprocessε  | chr17 | 22567423 | 22568713 | - | 0    | 0    |
| ENSG0000(RP11-474P) lincRNA     | chr12 | 46388856 | 46392126 | + | 0.1  | 0.09 |
| ENSG0000(CTC-1337H) lincRNA     | chr11 | 67374416 | 67374932 | + | 0    | 0    |
| ENSG0000(RP11-261P) sense_intrε | chr13 | 20768876 | 20769375 | - | 0.15 | 0    |
| ENSG0000(RP11-793H) processed_  | chr12 | 53574632 | 53576103 | + | 0    | 0    |
| ENSG0000(C17orf98) protein_co   | chr17 | 38835088 | 38841455 | - | 0    | 0    |
| ENSG0000(CH17-132F) unprocessε  | chr2  | 90309230 | 90309333 | + | 0    | 0    |
| ENSG0000(LINC01730) lincRNA     | chr20 | 3808357  | 3812434  | + | 0.07 | 0.16 |
| ENSG0000(FAM27D1) processed_    | chr9  | 41644430 | 41644770 | - | 0    | 0    |
| ENSG0000(RP11-266L) sense_intrε | chr16 | 25106569 | 25107102 | - | 0.41 | 1.65 |
| ENSG0000(CH507-24F) lincRNA     | chr21 | 6228966  | 6267317  | - | 1.59 | 1.8  |
| ENSG0000(RP11-440D) unprocessε  | chr2  | 95633850 | 95636106 | + | 0    | 0    |
| ENSG0000(DAOA-AS1) misc_RNA     | chr13 | 1.05E+08 | 1.05E+08 | + | 0    | 0    |
| ENSG0000(RP11-5P18) processed_  | chr1  | 15989140 | 15989375 | - | 0    | 0    |
| ENSG0000(U7) snRNA              | chr16 | 68926894 | 68926957 | - | 0    | 0    |
| ENSG0000(CTD-2062A) processed_  | chr5  | 1.4E+08  | 1.4E+08  | - | 0    | 0    |
| ENSG0000(GS1-54N1C) processed_  | chrX  | 1.42E+08 | 1.42E+08 | + | 0    | 0    |
| ENSG0000(RP11-322E) lincRNA     | chr18 | 35403996 | 35406528 | - | 3.21 | 3.37 |
| ENSG0000(RP11-295D) processed_  | chr16 | 4433202  | 4433387  | - | 0    | 0    |
| ENSG0000(RP11-353N) antisense   | chr17 | 79952663 | 79952992 | + | 0    | 0    |
| ENSG0000(MIR6718) miRNA         | chr18 | 3885353  | 3885432  | + | 0    | 0    |
| ENSG0000(MIR6804) miRNA         | chr19 | 55230885 | 55230952 | - | 0    | 0    |

|                     |             |       |          |          |   |      |      |
|---------------------|-------------|-------|----------|----------|---|------|------|
| ENSG0000(FAM236A    | protein_co  | chrX  | 72938163 | 72938958 | + | 0    | 0    |
| ENSG0000(MIR6508    | miRNA       | chr21 | 39447010 | 39447069 | + | 0    | 0    |
| ENSG0000(SNORD115   | snoRNA      | chr15 | 25218617 | 25218698 | + | 0    | 0    |
| ENSG0000(CTD-3154N  | lincRNA     | chr15 | 74598919 | 74599397 | - | 0.32 | 0    |
| ENSG0000(SNORD116   | snoRNA      | chr15 | 25059538 | 25059633 | + | 0    | 0    |
| ENSG0000(CTB-58E17  | antisense   | chr17 | 38703480 | 38706261 | - | 0.63 | 0.34 |
| ENSG0000(RNVU1-19   | snRNA       | chr1  | 1.21E+08 | 1.21E+08 | - | 0    | 0    |
| ENSG0000(CTC-559E9  | unprocessε  | chr19 | 19740884 | 19750127 | + | 0    | 0    |
| ENSG0000(RP11-455C  | lincRNA     | chr17 | 81339183 | 81339691 | - | 0.58 | 0.16 |
| ENSG0000(CTD-2293H  | unprocessε  | chr19 | 37024886 | 37025254 | - | 0    | 0    |
| ENSG0000(STPG3-AS1  | antisense   | chr9  | 1.37E+08 | 1.37E+08 | - | 0.33 | 0.37 |
| ENSG0000(RP4-744I24 | processed_  | chr6  | 37295584 | 37295742 | - | 0    | 0    |
| ENSG0000(CH17-302N  | antisense   | chr14 | 22595808 | 22598946 | - | 0    | 0.04 |
| ENSG0000(ELOA3C     | protein_co  | chr18 | 46968695 | 46969912 | - | 0    | 0    |
| ENSG0000(RP11-353N  | lincRNA     | chr1  | 1.5E+08  | 1.5E+08  | + | 0    | 0.22 |
| ENSG0000(RN7SKP17!  | misc_RNA    | chr8  | 1.44E+08 | 1.44E+08 | + | 0.77 | 0    |
| ENSG0000(DLEU2_6    | misc_RNA    | chr13 | 50081843 | 50081978 | + | 0    | 0    |
| ENSG0000(RP11-180N  | sense_intrε | chr12 | 12718973 | 12719521 | + | 0.79 | 1.88 |
| ENSG0000(RP11-3K24  | unprocessε  | chr17 | 60256720 | 60258411 | + | 0    | 0    |
| ENSG0000(CTD-2311B  | antisense   | chr14 | 18977180 | 18980742 | - | 0    | 0    |
| ENSG0000(RP11-729I1 | sense_intrε | chr12 | 21828360 | 21828564 | - | 0    | 0    |
| ENSG0000(RP11-930C  | antisense   | chr14 | 56305838 | 56306394 | + | 0.13 | 0.14 |
| ENSG0000(GRIFIN     | protein_co  | chr7  | 2474844  | 2476894  | - | 0    | 0    |
| ENSG0000(RP5-836N1  | sense_intrε | chr20 | 32116171 | 32116629 | + | 0    | 0    |
| ENSG0000(RP11-357E  | unprocessε  | chrY  | 17705968 | 17708185 | - | 0    | 0    |
| ENSG0000(RP11-295H  | lincRNA     | chr15 | 49343608 | 49344254 | + | 0.31 | 0    |
| ENSG0000(RP4-681N2  | antisense   | chr20 | 3921279  | 3923400  | - | 0    | 0    |
| ENSG0000(CH17-118C  | transcribec | chr1  | 1.21E+08 | 1.21E+08 | - | 0    | 0    |
| ENSG0000(Metazoa_S  | misc_RNA    | chr7  | 1.49E+08 | 1.49E+08 | + | 0.82 | 0.96 |
| ENSG0000(RN7SL341F  | misc_RNA    | chr2  | 64817378 | 64817675 | + | 0    | 0    |
| ENSG0000(HOTAIR_2   | misc_RNA    | chr12 | 53963629 | 53963697 | + | 0    | 0    |
| ENSG0000(XKR5       | protein_co  | chr8  | 6808517  | 6835644  | - | 0    | 0    |
| ENSG0000(VN1R7P     | processed_  | chr21 | 10357400 | 10358620 | + | 0    | 0    |
| ENSG0000(RP11-1378  | unprocessε  | chr2  | 87980714 | 87992858 | - | 0    | 0    |
| ENSG0000(CMB9-14B:  | processed_  | chr11 | 63469376 | 63470944 | + | 0    | 0    |
| ENSG0000(AC011330.  | sense_intrε | chr15 | 43642389 | 43643023 | - | 0.32 | 1.18 |
| ENSG0000(RP11-802C  | processed_  | chr3  | 58379217 | 58379525 | - | 0    | 0    |
| ENSG0000(KB-1572G7  | processed_  | chr22 | 23610329 | 23610538 | + | 0    | 0    |
| ENSG0000(DUX4L21    | unprocessε  | chr10 | 1.34E+08 | 1.34E+08 | + | 0    | 0    |
| ENSG0000(RP11-291I6 | sense_intrε | chr13 | 1.1E+08  | 1.1E+08  | + | 0    | 0    |
| ENSG0000(RP11-35J1( | sense_intrε | chr11 | 7698951  | 7699393  | - | 0    | 0    |
| ENSG0000(CTD-3194C  | lincRNA     | chr17 | 36722583 | 36726340 | + | 0    | 0    |
| ENSG0000(RP11-12A2  | unprocessε  | chr9  | 67714723 | 67714914 | + | 0    | 0    |
| ENSG0000(U2         | snRNA       | chr17 | 43239921 | 43240111 | - | 0.28 | 0    |
| ENSG0000(FLJ16779   | antisense   | chr20 | 63253978 | 63261615 | + | 0    | 0.02 |

|                 |            |             |            |          |          |   |      |      |
|-----------------|------------|-------------|------------|----------|----------|---|------|------|
| ENSG00000100000 | FTX_4      | misc_RNA    | chrX       | 74281703 | 74281849 | + | 0    | 0    |
| ENSG00000100000 | RP11-144A  | lincRNA     | chr9       | 60918581 | 60927822 | - | 0    | 0    |
| ENSG00000100000 | RP6-65G23  | lincRNA     | chr14      | 70822004 | 70823984 | + | 0    | 0    |
| ENSG00000100000 | U1         | snRNA       | chr21      | 9646825  | 9647000  | + | 0    | 0    |
| ENSG00000100000 | RP5-967N2  | lincRNA     | chr20      | 6000418  | 6000941  | + | 0.14 | 0.15 |
| ENSG00000100000 | PART1_2    | misc_RNA    | chr5       | 60488078 | 60488327 | + | 0    | 0    |
| ENSG00000100000 | U7         | snRNA       | chr22      | 23137805 | 23137864 | - | 0    | 0    |
| ENSG00000100000 | RP11-521C  | lincRNA     | chr15      | 40078892 | 40079347 | + | 0    | 0    |
| ENSG00000100000 | RP11-16E2  | antisense   | chr15      | 65655620 | 65656085 | - | 0.17 | 0.18 |
| ENSG00000100000 | MIR6793    | miRNA       | chr19      | 10828973 | 10829035 | + | 0    | 0    |
| ENSG00000100000 | Metazoa_S  | misc_RNA    | chr19      | 1724115  | 1724395  | + | 0    | 0    |
| ENSG00000100000 | RBM22P6    | processed   | chrX       | 52485046 | 52485912 | - | 0    | 0    |
| ENSG00000100000 | RP11-817C  | antisense   | chr15      | 75346744 | 75347161 | - | 0.2  | 0.22 |
| ENSG00000100000 | SMAD5-AS   | misc_RNA    | chr5       | 1.36E+08 | 1.36E+08 | + | 0    | 0    |
| ENSG00000100000 | RP11-209D  | processed   | chr4       | 1.29E+08 | 1.29E+08 | + | 0    | 0    |
| ENSG00000100000 | RP11-286C  | lincRNA     | chr9       | 42231811 | 42354454 | + | 0    | 0    |
| ENSG00000100000 | MIR6851    | miRNA       | chr9       | 33467869 | 33467935 | - | 0    | 0    |
| ENSG00000100000 | MIR6796    | miRNA       | chr19      | 40369846 | 40369907 | + | 0    | 0    |
| ENSG00000100000 | RP11-435I1 | unprocess   | chr16      | 28451644 | 28455356 | + | 0    | 0    |
| ENSG00000100000 | RN7SL313F  | misc_RNA    | chr2       | 97100587 | 97100874 | + | 0    | 0    |
| ENSG00000100000 | RFPL3-AS1  | misc_RNA    | chr22      | 32188400 | 32188487 | - | 0    | 0    |
| ENSG00000100000 | H19_3      | misc_RNA    | KI270721.1 | 52895    | 53010    | + | 0    | 0    |
| ENSG00000100000 | SNORD112   | snoRNA      | chr14      | 1.01E+08 | 1.01E+08 | + | 0    | 0    |
| ENSG00000100000 | HIST1H4G   | protein_co  | chr6       | 26246681 | 26246977 | - | 0    | 0    |
| ENSG00000100000 | pRNA       | misc_RNA    | chr21      | 8205851  | 8205940  | + | 0    | 0    |
| ENSG00000100000 | CTB-58E17  | antisense   | chr17      | 38715328 | 38720272 | - | 0    | 0.14 |
| ENSG00000100000 | KCNQ1OT1   | misc_RNA    | chr11      | 2652099  | 2652562  | + | 0    | 0    |
| ENSG00000100000 | MIR6839    | miRNA       | chr7       | 64679064 | 64679176 | + | 0    | 0    |
| ENSG00000100000 | MIR6744    | miRNA       | chr11      | 1256605  | 1256670  | + | 0    | 0    |
| ENSG00000100000 | MIR8076    | miRNA       | chr3       | 1.13E+08 | 1.13E+08 | - | 0    | 0    |
| ENSG00000100000 | GATM-AS1   | antisense   | chr15      | 45378700 | 45380123 | + | 0.61 | 0.78 |
| ENSG00000100000 | RP11-876N  | sense_intr  | chr16      | 10934258 | 10934887 | - | 0.54 | 0.12 |
| ENSG00000100000 | RP11-697E  | protein_co  | chr15      | 90266317 | 90314499 | + | 0    | 0    |
| ENSG00000100000 | RP11-1021  | unprocess   | chr10      | 38068449 | 38068694 | - | 0    | 0    |
| ENSG00000100000 | RP11-101E  | lincRNA     | chr9       | 61229913 | 61231863 | - | 0    | 0    |
| ENSG00000100000 | RP4-547N1  | sense_intr  | chr1       | 67121605 | 67123956 | - | 0.05 | 0.05 |
| ENSG00000100000 | Metazoa_S  | misc_RNA    | chr17      | 58951185 | 58951513 | + | 0    | 0    |
| ENSG00000100000 | LLOXNC01-  | unprocess   | chrX       | 21841794 | 21841961 | - | 0    | 0    |
| ENSG00000100000 | CCL15-CCL  | protein_co  | chr17      | 35983656 | 36001621 | - | 0    | 0    |
| ENSG00000100000 | FAS-AS1    | misc_RNA    | chr13      | 21126271 | 21126396 | - | 0    | 0    |
| ENSG00000100000 | RP11-249C  | protein_co  | chr16      | 56676132 | 56677763 | + | 0    | 0    |
| ENSG00000100000 | MIR6724-4  | miRNA       | chr21      | 8432530  | 8432621  | + | 0    | 0    |
| ENSG00000100000 | FAS-AS1    | misc_RNA    | chr10      | 88992370 | 88992539 | + | 0    | 1.83 |
| ENSG00000100000 | UBE2Q2P6   | transcribec | chr15      | 82445719 | 82454837 | + | 0.76 | 0.66 |
| ENSG00000100000 | Metazoa_S  | misc_RNA    | chr3       | 1.87E+08 | 1.87E+08 | - | 0    | 0    |



|                     |              |            |          |          |   |       |       |
|---------------------|--------------|------------|----------|----------|---|-------|-------|
| ENSG0000(AATF       | protein_co   | chr17      | 36948875 | 37056871 | + | 17.58 | 14.27 |
| ENSG0000(U47924.32  | lincRNA      | chr12      | 6899752  | 6900212  | + | 0.34  | 0     |
| ENSG0000(MIR3648-1  | miRNA        | chr21      | 8208473  | 8208652  | + | 0     | 0     |
| ENSG0000(RP11-96O2  | lincRNA      | chr15      | 45585757 | 45586304 | - | 0     | 0.29  |
| ENSG0000(RP11-257C  | antisense    | chr17      | 54964474 | 54964679 | + | 0     | 0     |
| ENSG0000(MIR6795    | miRNA        | chr19      | 15179283 | 15179350 | - | 0     | 0     |
| ENSG0000(HIST1H2B   | protein_co   | chr6       | 26251651 | 26253710 | + | 0.08  | 0.06  |
| ENSG0000(HIST1H3A   | protein_co   | chr6       | 26020490 | 26020900 | + | 0.2   | 0     |
| ENSG0000(RP3-344J2  | processed_ch | 6          | 1E+08    | 1E+08    | - | 0     | 0     |
| ENSG0000(CCL15      | protein_co   | chr17      | 35996440 | 36002038 | - | 0     | 0     |
| ENSG0000(CTB-147N1  | antisense    | chr19      | 46787815 | 46789043 | + | 1.49  | 1.16  |
| ENSG0000(CTB-75G16  | lincRNA      | chr17      | 36634069 | 36634698 | + | 0.11  | 0.12  |
| ENSG0000(LYZL6      | protein_co   | chr17      | 35934518 | 35943699 | - | 0     | 0     |
| ENSG0000(RP11-244C  | processed_ch | 11         | 44656771 | 44656920 | + | 0     | 0     |
| ENSG0000(MIR6088    | miRNA        | chr19      | 45436654 | 45436704 | + | 0     | 0     |
| ENSG0000(RP4-777L9. | lincRNA      | chr20      | 16580258 | 16580622 | + | 0     | 0     |
| ENSG0000(RP11-24P2  | processed_ch | 5          | 2261859  | 2262023  | + | 0     | 0     |
| ENSG0000(RP11-368I7 | antisense    | chr16      | 89684642 | 89685304 | + | 0.2   | 0.11  |
| ENSG0000(RP11-449H  | protein_co   | chr5       | 1.46E+08 | 1.46E+08 | + | 1.76  | 1.59  |
| ENSG0000(RP11-40E6  | antisense    | chr13      | 1.1E+08  | 1.1E+08  | + | 0     | 0     |
| ENSG0000(TRBV14     | TR_V_gene    | chr7       | 1.43E+08 | 1.43E+08 | + | 0     | 0     |
| ENSG0000(Y_RNA      | misc_RNA     | chr16      | 66550457 | 66550567 | + | 0     | 0     |
| ENSG0000(IGHV3-79   | IG_V_pseu    | chr14      | 1.07E+08 | 1.07E+08 | - | 0     | 0     |
| ENSG0000(RP11-100G  | processed_ch | 9          | 92104425 | 92105451 | + | 0     | 0     |
| ENSG0000(RNA5-8S5   | rRNA         | KI270733.1 | 173956   | 174108   | + | 13.92 | 37.54 |
| ENSG0000(RP11-131L  | lincRNA      | chr12      | 1.18E+08 | 1.18E+08 | + | 0.12  | 0.39  |
| ENSG0000(C18orf65   | lincRNA      | chr18      | 76495521 | 76498088 | + | 0.05  | 0.09  |
| ENSG0000(RP11-582E  | lincRNA      | chr12      | 27037100 | 27038960 | + | 2.08  | 1.58  |
| ENSG0000(RP11-54C4  | lincRNA      | chr5       | 1.52E+08 | 1.52E+08 | - | 1.45  | 1.59  |
| ENSG0000(CH17-248F  | unprocessε   | chr1       | 1.44E+08 | 1.44E+08 | + | 0     | 0     |
| ENSG0000(SLC2AXP1   | unprocessε   | chr2       | 95196449 | 95197357 | - | 0     | 0     |
| ENSG0000(RP11-771K  | sense_intr   | chr12      | 31443792 | 31444208 | - | 0     | 0     |
| ENSG0000(MIR6505    | miRNA        | chr12      | 48132797 | 48132867 | + | 0     | 0     |
| ENSG0000(AC140725.  | processed_ch | 15         | 1.02E+08 | 1.02E+08 | - | 0     | 0     |
| ENSG0000(LL22NC03-  | processed_ch | 22         | 22785643 | 22787268 | - | 0     | 0     |
| ENSG0000(RP11-343D  | lincRNA      | chr6       | 60723148 | 60723898 | + | 0     | 0     |
| ENSG0000(HNRNPCL2   | protein_co   | chr1       | 13115496 | 13116854 | - | 0     | 0     |
| ENSG0000(RN7SL185F  | misc_RNA     | chr15      | 32394365 | 32394613 | - | 0     | 0     |
| ENSG0000(PRH1-PRR4  | protein_co   | chr12      | 10845849 | 11171598 | - | 0.31  | 0.29  |
| ENSG0000(RP5-1125A  | lincRNA      | chr20      | 33989480 | 33991818 | - | 0.37  | 0.13  |
| ENSG0000(RP11-111E  | unprocessε   | chr15      | 63890030 | 63890317 | + | 0     | 0     |
| ENSG0000(OR7G15P    | unprocessε   | chr19      | 9122160  | 9122492  | - | 0     | 0     |
| ENSG0000(Metazoa_S  | misc_RNA     | chr13      | 30684029 | 30684278 | - | 0     | 0.56  |
| ENSG0000(MIR8064    | miRNA        | chr3       | 52846463 | 52846552 | - | 0     | 0     |
| ENSG0000(TRBV10-3   | TR_V_gene    | chr7       | 1.43E+08 | 1.43E+08 | + | 0     | 0     |

|                    |             |            |          |          |   |       |       |
|--------------------|-------------|------------|----------|----------|---|-------|-------|
| ENSG0000(RIMBP3    | protein_co  | chr22      | 18605815 | 18611919 | - | 0.46  | 0.58  |
| ENSG0000(AP001059. | lincRNA     | chr21      | 44244545 | 44244993 | + | 0     | 0     |
| ENSG0000(EIF5P2    | unprocessε  | chrX       | 19496378 | 19497721 | - | 0     | 0     |
| ENSG0000(RP11-404F | unprocessε  | chr1       | 1.61E+08 | 1.61E+08 | - | 0     | 0     |
| ENSG0000(RN7SL736F | misc_RNA    | chr15      | 90293939 | 90294207 | + | 0     | 0     |
| ENSG0000(RP11-349H | sense_intrc | chr18      | 26565723 | 26575626 | - | 0     | 0     |
| ENSG0000(RP11-1348 | antisense   | chr16      | 28822431 | 28823969 | - | 0.74  | 0.41  |
| ENSG0000(Metazoa_S | misc_RNA    | chr16      | 59004213 | 59004494 | + | 0     | 0     |
| ENSG0000(MIR8082   | miRNA       | chr4       | 1.13E+08 | 1.13E+08 | + | 0     | 0     |
| ENSG0000(HTR1DP1   | processed_  | chr12      | 1151810  | 1153059  | - | 0     | 0     |
| ENSG0000(RP4-697K1 | antisense   | chr20      | 63543411 | 63543738 | + | 0     | 0     |
| ENSG0000(MIR6500   | miRNA       | chr1       | 51060018 | 51060103 | + | 0     | 0     |
| ENSG0000(MIR6818   | miRNA       | chr22      | 30007049 | 30007113 | + | 0     | 0     |
| ENSG0000(DLEU2_3   | misc_RNA    | chr1       | 63549294 | 63549366 | - | 0     | 0     |
| ENSG0000(RP11-756P | processed_  | chr4       | 1.89E+08 | 1.89E+08 | + | 0     | 0     |
| ENSG0000(RP11-1O2. | processed_  | chr18      | 75927836 | 75928004 | + | 0     | 0     |
| ENSG0000(RP11-295P | unprocessε  | chrY       | 11412548 | 11418716 | + | 0     | 0     |
| ENSG0000(RP11-403A | lincRNA     | chr13      | 1.1E+08  | 1.1E+08  | - | 0     | 0     |
| ENSG0000(ARHGAP23  | protein_co  | chr17      | 38419280 | 38512392 | + | 21.39 | 21.71 |
| ENSG0000(RP11-479C | unprocessε  | chr7       | 65764535 | 65768306 | + | 0     | 0     |
| ENSG0000(RP11-440E | processed_  | chr7       | 96306810 | 96306874 | + | 0     | 0     |
| ENSG0000(TUBGCP5   | protein_co  | chr15      | 22983192 | 23039673 | - | 8.07  | 5.39  |
| ENSG0000(MIR6068   | miRNA       | chr1       | 63326925 | 63326984 | - | 0     | 0     |
| ENSG0000(CTC-421K2 | processed_  | chr17      | 37454171 | 37454931 | + | 0     | 0     |
| ENSG0000(Metazoa_S | misc_RNA    | chr22      | 21396273 | 21396590 | - | 0.95  | 0     |
| ENSG0000(MIR941-5  | miRNA       | chr20      | 63919868 | 63919939 | + | 0     | 0     |
| ENSG0000(RP11-457M | lincRNA     | chr6       | 26602733 | 26606661 | + | 0.02  | 0     |
| ENSG0000(RP11-543P | sense_intrc | chr12      | 3171657  | 3174056  | + | 0     | 0     |
| ENSG0000(LINC01742 | lincRNA     | chr20      | 58003904 | 58004648 | + | 0     | 0     |
| ENSG0000(Metazoa_S | misc_RNA    | chr7       | 55731100 | 55731403 | + | 0     | 0     |
| ENSG0000(RP11-278C | sense_intrc | chr12      | 32736930 | 32737660 | - | 0.18  | 0.59  |
| ENSG0000(ZNRD1-AS1 | misc_RNA    | chr6       | 30058115 | 30058190 | + | 0     | 0     |
| ENSG0000(AC009133. | antisense   | chr16      | 29804430 | 29804990 | - | 0     | 0     |
| ENSG0000(MIR6720   | miRNA       | chr6       | 1390314  | 1390411  | - | 0     | 0     |
| ENSG0000(RP11-178C | unprocessε  | chr17      | 60021072 | 60022436 | + | 0     | 0     |
| ENSG0000(CTB-147N1 | processed_  | chr19      | 46809583 | 46810182 | + | 0     | 0     |
| ENSG0000(MIR7975   | miRNA       | chr19      | 55123225 | 55123292 | - | 0     | 0     |
| ENSG0000(RP11-17E1 | processed_  | chrY       | 8517364  | 8517748  | - | 0     | 0     |
| ENSG0000(MIR8054   | miRNA       | chr11      | 23419105 | 23419190 | - | 0     | 0     |
| ENSG0000(AC136612. | protein_co  | KI270728.1 | 933862   | 936467   | - | 0     | 0     |
| ENSG0000(RP11-394C | lincRNA     | chr5       | 1.49E+08 | 1.49E+08 | - | 0     | 0     |
| ENSG0000(PIC SAR   | lincRNA     | chr21      | 44999208 | 45004727 | - | 0     | 0     |
| ENSG0000(RP11-613E | processed_  | chr7       | 55741525 | 55741869 | + | 0     | 0     |
| ENSG0000(5_8S_rRNA | rRNA        | chr20      | 30484925 | 30485076 | - | 0     | 0     |
| ENSG0000(RN7SL43P  | misc_RNA    | chr7       | 66980120 | 66980410 | + | 0     | 0     |

|                                |       |          |          |   |       |       |
|--------------------------------|-------|----------|----------|---|-------|-------|
| ENSG0000(RP11-90L1. antisense  | chr13 | 1.11E+08 | 1.11E+08 | - | 0.36  | 0.47  |
| ENSG0000(Metazoa_S misc_RNA    | chr12 | 62393607 | 62393880 | - | 0     | 0     |
| ENSG0000(IKBKGP1 unprocessε    | chrX  | 1.55E+08 | 1.55E+08 | - | 3.12  | 0     |
| ENSG0000(RP13-516M antisense   | chr17 | 82244770 | 82245591 | + | 0.22  | 0.24  |
| ENSG0000(RP3-453C1 sense_intrε | chr20 | 45345115 | 45345823 | - | 0.19  | 0.1   |
| ENSG0000(U2AF1L5 protein_co    | chr21 | 6484623  | 6499261  | - | 26.12 | 29.19 |
| ENSG0000(PRSS2 protein_co      | chr7  | 1.43E+08 | 1.43E+08 | + | 0     | 0     |
| ENSG0000(RP11-94C2 lincRNA     | chr17 | 50475819 | 50478391 | + | 0.02  | 0.02  |
| ENSG0000(RP11-497G lincRNA     | chr12 | 1.17E+08 | 1.17E+08 | + | 0     | 0.02  |
| ENSG0000(U3 snoRNA             | chr18 | 26689316 | 26689529 | - | 0     | 0     |
| ENSG0000(Metazoa_S misc_RNA    | chr19 | 16187313 | 16187566 | + | 0     | 0     |
| ENSG0000(RP13-1032 antisense   | chr17 | 81697025 | 81697714 | - | 0.58  | 0.53  |
| ENSG0000(Y_RNA misc_RNA        | chr9  | 67697076 | 67697187 | + | 0     | 0     |
| ENSG0000(KB-1433G4 unprocessε  | chr8  | 1.07E+08 | 1.07E+08 | - | 0     | 0     |
| ENSG0000(XXbac-BPG processed_  | chr6  | 30961403 | 30962396 | - | 0     | 0     |
| ENSG0000(U4atac snRNA          | chr16 | 20823443 | 20823537 | + | 0     | 0     |
| ENSG0000(Metazoa_S misc_RNA    | chr16 | 48432927 | 48433208 | - | 0     | 0     |
| ENSG0000(RP11-680G antisense   | chr16 | 15015828 | 15016390 | - | 0.25  | 0.7   |
| ENSG0000(NPPA-AS1 misc_RNA     | chr1  | 11847442 | 11847549 | + | 0     | 0     |
| ENSG0000(RP11-155N processed_  | chr13 | 98871742 | 98872005 | + | 0     | 0     |
| ENSG0000(RP5-837G1 lincRNA     | chr20 | 55504906 | 55505215 | - | 0     | 0     |
| ENSG0000(MIR6807 miRNA         | chr19 | 58550285 | 58550376 | + | 0     | 0     |
| ENSG0000(RP11-567P sense_intrε | chr16 | 17445825 | 17446380 | - | 0     | 0     |
| ENSG0000(REXO1L11F processed_  | chr8  | 85733419 | 85737278 | + | 0     | 0     |
| ENSG0000(AC068831. unprocessε  | chr15 | 91031246 | 91031691 | - | 0     | 0     |
| ENSG0000(Y_RNA misc_RNA        | chr7  | 75381638 | 75381739 | + | 0     | 0     |
| ENSG0000(7SK misc_RNA          | chr1  | 1.21E+08 | 1.21E+08 | + | 0     | 0     |
| ENSG0000(RP1-278C1 antisense   | chr12 | 1.2E+08  | 1.2E+08  | + | 0     | 0.11  |
| ENSG0000(uc_338 misc_RNA       | chr5  | 1.31E+08 | 1.31E+08 | - | 0     | 0     |
| ENSG0000(MRPL57P3 processed_   | chr3  | 47028855 | 47029030 | + | 0     | 0     |
| ENSG0000(MIAT_exor misc_RNA    | chr22 | 26672164 | 26672248 | + | 0     | 0     |
| ENSG0000(RP11-104J antisense   | chr17 | 36001419 | 36011618 | + | 0     | 0     |
| ENSG0000(EIF3FP1 processed_    | chr21 | 10330732 | 10331537 | + | 0     | 0     |
| ENSG0000(mascRNA-r sRNA        | chr11 | 65445541 | 65445598 | + | 0     | 0     |
| ENSG0000(MIR6724-1 miRNA       | chr21 | 8205315  | 8205406  | + | 0     | 0     |
| ENSG0000(RP11-753G processed_  | chr6  | 1.27E+08 | 1.27E+08 | - | 0     | 0     |
| ENSG0000(TBC1D3F protein_co    | chr17 | 36428618 | 36439566 | - | 0     | 0     |
| ENSG0000(RP5-966M processed_   | chr3  | 52732547 | 52733867 | + | 0     | 0     |
| ENSG0000(uc_338 misc_RNA       | chr20 | 52482801 | 52482991 | - | 0     | 0     |
| ENSG0000(RP11-362I1 processed_ | chr4  | 44994426 | 44996022 | + | 0     | 0     |
| ENSG0000(RN7SL210F misc_RNA    | chr2  | 96004563 | 96004850 | - | 0     | 0     |
| ENSG0000(RP11-180M lincRNA     | chr12 | 12648939 | 12649713 | + | 0     | 0     |
| ENSG0000(RP11-61K9 lincRNA     | chr13 | 19863858 | 19865048 | + | 1.89  | 2.57  |
| ENSG0000(RP11-386M antisense   | chr15 | 92634305 | 92634665 | + | 0     | 0     |
| ENSG0000(RP11-1055 lincRNA     | chr17 | 81345476 | 81345966 | - | 0.46  | 1.36  |

|                     |             |            |          |          |   |       |      |
|---------------------|-------------|------------|----------|----------|---|-------|------|
| ENSG0000(MIR6880    | miRNA       | chr12      | 1.24E+08 | 1.24E+08 | - | 0     | 0    |
| ENSG0000(DAOA-AS1   | misc_RNA    | chr13      | 1.05E+08 | 1.05E+08 | + | 0     | 0    |
| ENSG0000(SPATA31A:  | protein_co  | chr9       | 66986304 | 66992583 | - | 0     | 0    |
| ENSG0000(RMST_6     | misc_RNA    | chr12      | 97530656 | 97530858 | + | 0     | 0    |
| ENSG0000(Metazoa_S  | misc_RNA    | chrX       | 71368666 | 71368968 | + | 0     | 0    |
| ENSG0000(SPDYE11    | transcribec | chr7       | 73048055 | 73057911 | - | 0     | 0    |
| ENSG0000(Metazoa_S  | misc_RNA    | chr14      | 34659564 | 34659878 | - | 0.83  | 0.36 |
| ENSG0000(RP11-113D  | processed_  | chr9       | 21135598 | 21136350 | - | 0     | 0    |
| ENSG0000(AC018816.  | misc_RNA    | chr3       | 4750333  | 4750685  | + | 0     | 0    |
| ENSG0000(Y_RNA      | misc_RNA    | chr17      | 19649494 | 19649587 | - | 0     | 0    |
| ENSG0000(U1         | snRNA       | KI270713.1 | 30437    | 30580    | - | 0     | 0    |
| ENSG0000(RP11-365P  | unprocessε  | chr13      | 1.11E+08 | 1.11E+08 | - | 0     | 0    |
| ENSG0000(RN7SL327F  | misc_RNA    | chr15      | 75292706 | 75292928 | + | 0     | 0    |
| ENSG0000(CH507-42P  | protein_co  | chr21      | 6111134  | 6123739  | + | 1.97  | 2.45 |
| ENSG0000(SNORA24    | snoRNA      | chr4       | 1.18E+08 | 1.18E+08 | + | 4.95  | 4.26 |
| ENSG0000(CTD-2240J: | lincRNA     | chr15      | 81403026 | 81403570 | + | 0.13  | 0    |
| ENSG0000(SNORD27    | snoRNA      | chr11      | 62855012 | 62855083 | - | 0     | 0    |
| ENSG0000(RP11-216P  | processed_  | chr17      | 1155966  | 1156175  | + | 0     | 0    |
| ENSG0000(Metazoa_S  | misc_RNA    | chr19      | 50258443 | 50258722 | + | 0     | 0    |
| ENSG0000(FAM13A-A   | misc_RNA    | chr4       | 88723209 | 88723316 | + | 0     | 0    |
| ENSG0000(REXO1L12F  | processed_  | chr8       | 85714922 | 85715833 | + | 0     | 0    |
| ENSG0000(RP11-358L: | sense_intrε | chr16      | 78123243 | 78124332 | + | 0.11  | 0    |
| ENSG0000(RP11-397C  | antisense   | chr13      | 1.02E+08 | 1.02E+08 | + | 0.95  | 0.21 |
| ENSG0000(RN7SL301F  | misc_RNA    | chr17      | 36110150 | 36110447 | + | 0     | 0    |
| ENSG0000(KCNQ10T1   | misc_RNA    | chr11      | 2697851  | 2698076  | + | 0     | 0    |
| ENSG0000(AC007325.  | protein_co  | KI270734.1 | 72411    | 74814    | + | 0     | 0.06 |
| ENSG0000(HULC       | misc_RNA    | chr6       | 8653558  | 8653797  | + | 0     | 0    |
| ENSG0000(DUSP14     | protein_co  | chr17      | 37489831 | 37513501 | + | 18.49 | 15.6 |
| ENSG0000(RP4-545L1: | antisense   | chr20      | 1117847  | 1118450  | - | 0     | 0    |
| ENSG0000(RNU12      | snRNA       | chr22      | 42615244 | 42615393 | + | 0     | 0    |
| ENSG0000(MIR4477A   | miRNA       | chr9       | 41233755 | 41233835 | + | 0     | 0    |
| ENSG0000(CTD-2027I: | lincRNA     | chr19      | 24146701 | 24147081 | + | 0     | 0    |
| ENSG0000(RN7SL197F  | misc_RNA    | chr20      | 49721949 | 49722247 | + | 0     | 0    |
| ENSG0000(RP11-12A2  | unprocessε  | chr9       | 67723736 | 67724105 | + | 0     | 0    |
| ENSG0000(RNA5SP44:  | rRNA        | chr17      | 38731802 | 38731920 | - | 0     | 0    |
| ENSG0000(RP11-395E  | processed_  | chr9       | 66962271 | 66962348 | + | 0     | 0    |
| ENSG0000(SPATA31A:  | protein_co  | chr9       | 61190003 | 61196280 | + | 0     | 0    |
| ENSG0000(UHRF1      | protein_co  | chr19      | 4903080  | 4962154  | + | 0.73  | 0.47 |
| ENSG0000(ORAI1      | protein_co  | chr12      | 1.22E+08 | 1.22E+08 | + | 4.62  | 4.65 |
| ENSG0000(DUX4L13    | unprocessε  | chr10      | 1.34E+08 | 1.34E+08 | + | 0     | 0    |
| ENSG0000(RN7SL711F  | misc_RNA    | chr5       | 1.23E+08 | 1.23E+08 | + | 0     | 0    |
| ENSG0000(Six3os1_5  | misc_RNA    | chr2       | 44937426 | 44937696 | + | 0     | 0    |
| ENSG0000(IGKV2OR2-  | IG_V_pseu   | chr2       | 97331533 | 97331843 | - | 0     | 0    |
| ENSG0000(RP11-378E  | sense_intrε | chr17      | 37386886 | 37387926 | + | 0.3   | 0.3  |
| ENSG0000(CLRN1-AS1  | misc_RNA    | chr3       | 1.51E+08 | 1.51E+08 | + | 0     | 0    |

|                    |              |       |          |          |   |       |       |
|--------------------|--------------|-------|----------|----------|---|-------|-------|
| ENSG0000(TUG1_2    | misc_RNA     | chr22 | 30971296 | 30971382 | + | 0     | 0     |
| ENSG0000(STMN1P1   | processed_ch | chr12 | 31715342 | 31715781 | - | 0     | 0     |
| ENSG0000(RP11-817G | lincRNA      | chr14 | 69154311 | 69154804 | + | 0     | 0     |
| ENSG0000(RP11-274E | processed_ch | chr6  | 77343557 | 77343654 | + | 0     | 0     |
| ENSG0000(RP11-260N | transcribed  | chr7  | 1.35E+08 | 1.35E+08 | - | 0.16  | 0.06  |
| ENSG0000(CCL4L2    | protein_co   | chr17 | 36210924 | 36212878 | + | 0     | 0     |
| ENSG0000(CTD-3234P | lincRNA      | chr19 | 36668102 | 36669404 | + | 0.04  | 0.15  |
| ENSG0000(RP5-1125A | lincRNA      | chr20 | 33985617 | 33988989 | - | 0.08  | 0.23  |
| ENSG0000(SOX2OT_e  | misc_RNA     | chr3  | 1.82E+08 | 1.82E+08 | + | 0     | 0     |
| ENSG0000(CTD-2012K | antisense    | chr16 | 67517862 | 67528675 | - | 1.69  | 1.55  |
| ENSG0000(CH507-152 | protein_co   | chr21 | 6560714  | 6564489  | + | 0     | 0     |
| ENSG0000(CH507-254 | lincRNA      | chr21 | 7430659  | 7469007  | + | 2.69  | 2.94  |
| ENSG0000(MIR7156   | miRNA        | chr1  | 77060143 | 77060202 | + | 0     | 0     |
| ENSG0000(MIR7976   | miRNA        | chr3  | 1.28E+08 | 1.28E+08 | - | 0     | 0     |
| ENSG0000(CCL3L3    | protein_co   | chr17 | 36194869 | 36196758 | - | 0     | 0.09  |
| ENSG0000(RP11-507M | protein_co   | chr2  | 24124366 | 24190436 | + | 0     | 0     |
| ENSG0000(RN7SL620F | misc_RNA     | chr17 | 16710059 | 16710361 | + | 0     | 0     |
| ENSG0000(DLEU1_1   | misc_RNA     | chr13 | 50082295 | 50082484 | + | 4.92  | 4.25  |
| ENSG0000(RP11-734B | sense_intr   | chr18 | 68721082 | 68721560 | + | 0     | 0     |
| ENSG0000(RP5-1017F | lincRNA      | chr20 | 60083360 | 60083872 | - | 0     | 0     |
| ENSG0000(SNORA70   | snoRNA       | chr9  | 41573512 | 41573606 | - | 0     | 0     |
| ENSG0000(LINC01663 | lincRNA      | chr22 | 18873543 | 18894407 | - | 0     | 0     |
| ENSG0000(Metazoa_S | misc_RNA     | chr16 | 4756338  | 4756633  | + | 0     | 0     |
| ENSG0000(AC006538. | sense_intr   | chr19 | 2700689  | 2701266  | - | 0     | 0     |
| ENSG0000(CTD-2345H | processed_ch | chr5  | 29516005 | 29516504 | + | 0     | 0     |
| ENSG0000(ST7-OT4_3 | misc_RNA     | chr7  | 1.17E+08 | 1.17E+08 | + | 0     | 0     |
| ENSG0000(RP11-455C | antisense    | chr17 | 81251194 | 81251803 | + | 0.45  | 0.75  |
| ENSG0000(MIR6747   | miRNA        | chr11 | 62567011 | 62567071 | - | 0     | 0     |
| ENSG0000(U4        | snRNA        | chr1  | 1.51E+08 | 1.51E+08 | - | 0     | 0     |
| ENSG0000(KCNQ10T1  | misc_RNA     | chr11 | 2674097  | 2674292  | + | 0     | 0     |
| ENSG0000(CTD-2033D | sense_intr   | chr15 | 39586561 | 39587293 | + | 6.78  | 4.52  |
| ENSG0000(RP11-169D | processed_ch | chr11 | 72551049 | 72551919 | - | 0     | 0     |
| ENSG0000(RP4-790G1 | antisense    | chr1  | 1.5E+08  | 1.5E+08  | - | 0     | 0     |
| ENSG0000(RP11-817L | sense_intr   | chr12 | 32352349 | 32354144 | + | 0.13  | 0.21  |
| ENSG0000(FUT8-AS1  | antisense    | chr14 | 65411170 | 65412690 | - | 18.52 | 21.08 |
| ENSG0000(CH17-333N | unprocess    | chr1  | 1.43E+08 | 1.43E+08 | + | 0     | 0     |
| ENSG0000(OR13C2    | protein_co   | chr9  | 1.05E+08 | 1.05E+08 | - | 0     | 0     |
| ENSG0000(CTD-2008A | lincRNA      | chr15 | 44778196 | 44778721 | - | 0     | 0     |
| ENSG0000(RP11-143E | lincRNA      | chr12 | 1.3E+08  | 1.3E+08  | + | 0     | 0     |
| ENSG0000(Metazoa_S | misc_RNA     | chr2  | 1.95E+08 | 1.95E+08 | - | 0     | 0     |
| ENSG0000(MIR6855   | miRNA        | chr9  | 1.3E+08  | 1.3E+08  | + | 0     | 0     |
| ENSG0000(RP11-154D | processed_ch | chr6  | 71251758 | 71252988 | + | 0     | 0     |
| ENSG0000(RP11-459C | lincRNA      | chr9  | 42981772 | 42988167 | + | 0.02  | 0     |
| ENSG0000(RP11-481J | antisense    | chr16 | 58392153 | 58392807 | - | 0     | 0     |
| ENSG0000(FAM27E2   | processed_ch | chr9  | 41648023 | 41648425 | + | 1.27  | 0     |

|                 |            |                |          |          |          |   |       |       |
|-----------------|------------|----------------|----------|----------|----------|---|-------|-------|
| ENSG00000195119 | RP11-50119 | lincRNA        | chr12    | 32000375 | 32001222 | + | 0.22  | 0.78  |
| ENSG00000195120 | MIR6133    | miRNA          | chr7     | 1.33E+08 | 1.33E+08 | + | 0     | 0     |
| ENSG00000195121 | U6         | snRNA          | chr22    | 15273855 | 15273961 | + | 0     | 0     |
| ENSG00000195122 | ZFAT-AS1   | misc_RNA       | chr8     | 1.35E+08 | 1.35E+08 | + | 0     | 0     |
| ENSG00000195123 | WHAMMP     | transcribed    | chr15    | 22664359 | 22686213 | + | 3.34  | 3.36  |
| ENSG00000195124 | ABC12-492  | lincRNA        | chr12    | 7115736  | 7116486  | - | 0.09  | 0     |
| ENSG00000195125 | MIR548AY   | miRNA          | chr3     | 32506283 | 32506389 | - | 0     | 0     |
| ENSG00000195126 | RP11-278C  | antisense      | chr12    | 32725248 | 32725660 | - | 0.2   | 1.33  |
| ENSG00000195127 | RP11-101E  | transcribed    | chr9     | 61202718 | 61203087 | - | 0     | 0     |
| ENSG00000195128 | TTC28-AS1  | misc_RNA       | chr22    | 27922022 | 27922178 | + | 1.18  | 0     |
| ENSG00000195129 | RP11-491H  | unprocessed    | chr6     | 45097496 | 45097976 | + | 0     | 0     |
| ENSG00000195130 | MIR1264    | miRNA          | chrX     | 1.15E+08 | 1.15E+08 | + | 0     | 0     |
| ENSG00000195131 | GGTLC5P    | unprocessed    | chr22    | 18340145 | 18345899 | + | 0     | 0     |
| ENSG00000195132 | SNORA17B   | snoRNA         | chr9     | 1.37E+08 | 1.37E+08 | - | 0     | 0     |
| ENSG00000195133 | MIR5739    | miRNA          | chr22    | 28459869 | 28459948 | + | 0     | 0     |
| ENSG00000195134 | DUX4L20    | unprocessed    | chr10    | 1.34E+08 | 1.34E+08 | + | 0     | 0     |
| ENSG00000195135 | CTD-2600C  | antisense      | chr16    | 57759358 | 57760024 | + | 0     | 0     |
| ENSG00000195136 | RN7SL1     | misc_RNA       | chr14    | 49586580 | 49586878 | + | 57.11 | 76.28 |
| ENSG00000195137 | MIR6871    | miRNA          | chr20    | 41169023 | 41169078 | + | 0     | 0     |
| ENSG00000195138 | AC124789   | processed      | chr17    | 38450394 | 38452444 | - | 1.41  | 1.01  |
| ENSG00000195139 | ELMO2P1    | transcribed    | chr15    | 23083094 | 23121324 | + | 0     | 0     |
| ENSG00000195140 | RP11-687E  | sense_intronic | chr18    | 42052705 | 42053030 | + | 0     | 0     |
| ENSG00000195141 | MIR6090    | miRNA          | chr11    | 1.29E+08 | 1.29E+08 | + | 0     | 0     |
| ENSG00000195142 | Y_RNA      | misc_RNA       | chr7     | 72983360 | 72983461 | - | 0     | 0     |
| ENSG00000195143 | DLG2-AS1   | misc_RNA       | chr11    | 84890744 | 84890961 | + | 0     | 0     |
| ENSG00000195144 | HIST1H4I   | protein_coding | chr6     | 27138588 | 27139881 | + | 0     | 0.05  |
| ENSG00000195145 | MIR6794    | miRNA          | chr19    | 12852260 | 12852327 | + | 0     | 0     |
| ENSG00000195146 | RP11-872J  | sense_intronic | chr14    | 96537170 | 96537904 | + | 0.36  | 0.59  |
| ENSG00000195147 | U6         | snRNA          | chr13    | 18418526 | 18418632 | + | 0     | 0     |
| ENSG00000195148 | TP53TG1_2  | misc_RNA       | chr7     | 87345305 | 87345486 | + | 0     | 0     |
| ENSG00000195149 | RP11-173P  | lincRNA        | chr12    | 1.21E+08 | 1.21E+08 | + | 0     | 0     |
| ENSG00000195150 | TP73-AS1   | misc_RNA       | chr1     | 3736943  | 3737103  | + | 0     | 0     |
| ENSG00000195151 | Metazoa_S  | misc_RNA       | chr8     | 1.34E+08 | 1.34E+08 | - | 0     | 0     |
| ENSG00000195152 | pRNA       | misc_RNA       | GL000220 | 105287   | 105376   | + | 0     | 0     |
| ENSG00000195153 | RN7SL820F  | misc_RNA       | chr2     | 1.96E+08 | 1.96E+08 | + | 0     | 0     |
| ENSG00000195154 | Metazoa_S  | misc_RNA       | chr17    | 77014880 | 77015138 | + | 0     | 0.42  |
| ENSG00000195155 | ANKRD20A   | protein_coding | chr9     | 66106815 | 66153135 | - | 0     | 0.02  |
| ENSG00000195156 | RP11-203I  | processed      | chr9     | 67328207 | 67329404 | - | 0     | 0     |
| ENSG00000195157 | RP11-529C  | unprocessed    | chrX     | 1.31E+08 | 1.31E+08 | - | 0     | 0     |
| ENSG00000195158 | CTD-3093N  | unprocessed    | chr19    | 54031412 | 54031504 | + | 0     | 0     |
| ENSG00000195159 | RP11-168J  | unprocessed    | chr13    | 58377513 | 58377774 | + | 0     | 0     |
| ENSG00000195160 | LINC00226  | lincRNA        | chr14    | 1.06E+08 | 1.06E+08 | + | 0     | 0     |
| ENSG00000195161 | Metazoa_S  | misc_RNA       | chr7     | 1.52E+08 | 1.52E+08 | - | 0     | 0     |
| ENSG00000195162 | CTD-2146C  | processed      | chr5     | 59314110 | 59314800 | + | 0     | 0     |
| ENSG00000195163 | CH17-373J  | lincRNA        | chr1     | 1.45E+08 | 1.45E+08 | + | 0     | 0.89  |

|                 |            |             |            |          |          |   |       |       |
|-----------------|------------|-------------|------------|----------|----------|---|-------|-------|
| ENSG00000168057 | MIR8057    | miRNA       | chr18      | 26591467 | 26591535 | - | 0     | 0     |
| ENSG00000168101 | RP4-781B1  | sense_intr  | chr20      | 44746642 | 44747201 | + | 1.4   | 0.84  |
| ENSG00000168102 | MEG8_1     | misc_RNA    | chr14      | 1.01E+08 | 1.01E+08 | + | 0     | 0     |
| ENSG00000168103 | Six3os1_3  | misc_RNA    | chr2       | 44935294 | 44935368 | + | 0     | 0     |
| ENSG00000168104 | PIK3R6     | protein_co  | chr17      | 8802723  | 8867677  | - | 0     | 0     |
| ENSG00000168105 | SCARNA10   | sense_intr  | chr12      | 6510275  | 6510522  | + | 0     | 0     |
| ENSG00000168106 | PART1_3    | misc_RNA    | chr5       | 60546219 | 60546349 | + | 0     | 0     |
| ENSG00000168107 | TADA2A     | protein_co  | chr17      | 37406874 | 37479730 | + | 4.6   | 4.61  |
| ENSG00000168108 | OR4E1      | processed_  | chr14      | 21669990 | 21670935 | - | 0     | 0     |
| ENSG00000168109 | CTB-91J4.1 | antisense   | chr17      | 36116177 | 36177510 | + | 0     | 0     |
| ENSG00000168110 | RP11-230F  | sense_intr  | chr13      | 1.14E+08 | 1.14E+08 | + | 0.76  | 0.7   |
| ENSG00000168111 | CTD-2349P  | antisense   | chr17      | 30803654 | 30804077 | + | 0     | 0.21  |
| ENSG00000168112 | CTB-3204.1 | lincRNA     | chr19      | 29220864 | 29221666 | + | 0     | 0     |
| ENSG00000168113 | RP5-881P1  | lincRNA     | chr1       | 2.28E+08 | 2.28E+08 | - | 0.06  | 0.02  |
| ENSG00000168114 | AC011043.1 | protein_co  | GL000195   | 42939    | 49164    | - | 0.42  | 0.52  |
| ENSG00000168115 | RP11-327I2 | processed_  | chr9       | 66084804 | 66085031 | + | 0     | 0     |
| ENSG00000168116 | RP11-481J1 | antisense   | chr16      | 58522970 | 58523842 | + | 0.64  | 0.42  |
| ENSG00000168117 | RP11-1060  | antisense   | chr12      | 27700066 | 27700574 | + | 0.73  | 0.32  |
| ENSG00000168118 | CH17-80A1  | lincRNA     | chr9       | 40611252 | 40622155 | - | 0.07  | 0     |
| ENSG00000168119 | RP11-403A  | lincRNA     | chr13      | 1.1E+08  | 1.1E+08  | - | 0     | 0     |
| ENSG00000168120 | MIR6799    | miRNA       | chr19      | 49791866 | 49791934 | + | 0     | 0     |
| ENSG00000168121 | RP11-121C  | lincRNA     | chr12      | 56411944 | 56413190 | - | 0     | 0.05  |
| ENSG00000168122 | RP11-366N  | processed_  | chr9       | 42213841 | 42213918 | - | 0     | 0     |
| ENSG00000168123 | RP11-182J1 | antisense   | chr15      | 84622015 | 84623237 | - | 0.45  | 0.97  |
| ENSG00000168124 | RN7SL126F  | misc_RNA    | chr2       | 85567662 | 85567960 | - | 0     | 0     |
| ENSG00000168125 | RP11-210K  | sense_intr  | chr18      | 31895745 | 31896410 | - | 0.71  | 0     |
| ENSG00000168126 | KCNE1B     | protein_co  | chr21      | 7816675  | 7829926  | - | 0     | 0.04  |
| ENSG00000168127 | RBBP4P3    | processed_  | chr6       | 60873360 | 60874642 | - | 0     | 0     |
| ENSG00000168128 | FRG1HP     | transcribed | chr9       | 40992249 | 41218410 | + | 22.3  | 22.09 |
| ENSG00000168129 | RP11-33N1  | antisense   | chr12      | 1.18E+08 | 1.18E+08 | + | 0     | 0     |
| ENSG00000168130 | PIP4K2B    | protein_co  | chr17      | 38765689 | 38800126 | - | 17.53 | 16.74 |
| ENSG00000168131 | CTC-575C1  | unprocess   | chr19      | 20330121 | 20331517 | + | 0     | 0     |
| ENSG00000168132 | LLOXNC01   | unprocess   | chrX       | 1.04E+08 | 1.04E+08 | + | 0     | 0     |
| ENSG00000168133 | RP5-874C2  | protein_co  | chr6       | 28267121 | 28281580 | + | 0.18  | 0.22  |
| ENSG00000168134 | PISRT1     | misc_RNA    | chr3       | 1.39E+08 | 1.39E+08 | + | 0     | 0     |
| ENSG00000168135 | RP11-116D  | lincRNA     | chr12      | 1.15E+08 | 1.15E+08 | - | 0.27  | 0.36  |
| ENSG00000168136 | RN7SKP25   | misc_RNA    | chr5       | 68970439 | 68970752 | - | 0     | 0     |
| ENSG00000168137 | MIR6511A   | miRNA       | chr16      | 16368876 | 16368942 | + | 0     | 0     |
| ENSG00000168138 | pRNA       | misc_RNA    | KI270733.1 | 167218   | 167307   | + | 0     | 0     |
| ENSG00000168139 | SNORD107   | snoRNA      | chr15      | 24981994 | 24982068 | + | 0     | 0     |
| ENSG00000168140 | OR8G7P     | unprocess   | chr11      | 1.24E+08 | 1.24E+08 | + | 0     | 0     |
| ENSG00000168141 | RP11-93B1  | antisense   | chr20      | 62651272 | 62652186 | - | 0.23  | 0.5   |
| ENSG00000168142 | GTF2IP8    | unprocess   | chr18      | 14695422 | 14706597 | + | 0     | 0     |
| ENSG00000168143 | MIR8079    | miRNA       | chr13      | 44196129 | 44196200 | - | 0     | 0     |
| ENSG00000168144 | MIR2909    | miRNA       | chr17      | 37033745 | 37033813 | + | 0     | 0     |

|                                          |          |          |   |      |      |
|------------------------------------------|----------|----------|---|------|------|
| ENSG0000(CTD-2007F processed_ chr5       | 38197432 | 38198148 | + | 0    | 0    |
| ENSG0000(AL133243.: sense_intr chr2      | 32521927 | 32523547 | + | 0.32 | 0.42 |
| ENSG0000(RP11-106D sense_intr chr16      | 87470370 | 87474370 | - | 0.02 | 0    |
| ENSG0000(AC004556. protein_co KI270721.1 | 2585     | 11802    | + | 0.26 | 0    |
| ENSG0000(RP11-395E lincRNA chr9          | 66979132 | 66988373 | + | 0    | 0    |
| ENSG0000(MIR6858 miRNA chrX              | 1.54E+08 | 1.54E+08 | + | 0    | 0    |
| ENSG0000(H19_2 misc_RNA KI270721.1       | 52666    | 52734    | + | 0    | 0    |
| ENSG0000(MIR668 miRNA chr14              | 1.01E+08 | 1.01E+08 | + | 0    | 0    |
| ENSG0000(Metazoa_S misc_RNA chr8         | 54130582 | 54130860 | + | 0    | 0    |
| ENSG0000(Metazoa_S misc_RNA chr1         | 1.65E+08 | 1.65E+08 | - | 0    | 0    |
| ENSG0000(RP11-241N unprocessε chr2       | 84850711 | 84851148 | + | 0    | 0    |
| ENSG0000(MIR145 miRNA chr5               | 1.49E+08 | 1.49E+08 | + | 0    | 0    |
| ENSG0000(U3 snoRNA chr2                  | 2.4E+08  | 2.4E+08  | + | 0    | 0    |
| ENSG0000(HIST1H2AJ protein_co chr6       | 27814354 | 27814740 | - | 0    | 0    |
| ENSG0000(RP11-339B unprocessε chr10      | 1.3E+08  | 1.3E+08  | - | 0.09 | 0.19 |
| ENSG0000(U7 snRNA chr15                  | 90076424 | 90076486 | + | 0    | 0    |
| ENSG0000(UBE2NL polymorph chrX           | 1.44E+08 | 1.44E+08 | + | 0    | 0    |
| ENSG0000(RP11-186B antisense chr17       | 7557820  | 7558245  | - | 0    | 0.84 |
| ENSG0000(RP5-859I17 processed_ chr20     | 8934984  | 8935481  | - | 0    | 0    |
| ENSG0000(CNTNAP3P unprocessε chr9        | 67059560 | 67293468 | + | 0.93 | 0.68 |
| ENSG0000(RP11-424E unprocessε chr9       | 1.38E+08 | 1.38E+08 | + | 0    | 0    |
| ENSG0000(RP1-197B1 sense_intr chr12      | 47699401 | 47699917 | - | 0    | 0.16 |
| ENSG0000(RP5-928E2 processed_ chrX       | 85207187 | 85210649 | + | 0    | 0    |
| ENSG0000(RP11-106D unprocessε chr16      | 87467138 | 87467654 | + | 0    | 0    |
| ENSG0000(Metazoa_S misc_RNA chr4         | 1.39E+08 | 1.39E+08 | + | 0    | 0    |
| ENSG0000(LINC01879 lincRNA chr18         | 76690029 | 76693636 | + | 0    | 0    |
| ENSG0000(RMST_9 misc_RNA chr12           | 97560856 | 97561048 | + | 0    | 0    |
| ENSG0000(FLJ36000 lincRNA chr17          | 22406019 | 22413744 | + | 0    | 0    |
| ENSG0000(VN1R9P processed_ chr22         | 17021398 | 17022570 | - | 0    | 0    |
| ENSG0000(RP11-1151 lincRNA chr18         | 58476191 | 58477484 | + | 0    | 0    |
| ENSG0000(MIR6835 miRNA chr6              | 34240673 | 34240736 | + | 0    | 0    |
| ENSG0000(TRBV13 TR_V_gene chr7           | 1.43E+08 | 1.43E+08 | + | 0    | 0    |
| ENSG0000(RP11-78O7 lincRNA chr17         | 19868568 | 19868689 | + | 0    | 0    |
| ENSG0000(RP11-407B lincRNA chr3          | 1.94E+08 | 1.94E+08 | + | 0    | 0    |
| ENSG0000(RP11-490B lincRNA chr16         | 75556392 | 75557059 | + | 0.2  | 0    |
| ENSG0000(CCL14 protein_co chr17          | 35983291 | 35987004 | - | 0    | 0    |
| ENSG0000(HIST1H2BB protein_co chr6       | 26043277 | 26043657 | - | 0    | 0    |
| ENSG0000(RP11-494G lincRNA chr2          | 11673964 | 11676925 | - | 0    | 0    |
| ENSG0000(RP11-157L: processed_ chr9      | 41651935 | 41652172 | - | 0    | 0    |
| ENSG0000(RP3-393E1 processed_ chr6       | 1.6E+08  | 1.6E+08  | + | 0    | 0    |
| ENSG0000(RP11-266K lincRNA chr12         | 8205984  | 8207397  | + | 0.16 | 0.18 |
| ENSG0000(RP11-26J3. protein_co chr8      | 79918860 | 80080775 | - | 0    | 0    |
| ENSG0000(RP11-144A lincRNA chr9          | 60943311 | 60964185 | - | 0    | 0    |
| ENSG0000(uc_338 misc_RNA chr5            | 91844022 | 91844116 | - | 0    | 0    |
| ENSG0000(IGLL4P unprocessε chr22         | 20632619 | 20632751 | + | 0    | 0    |



|                                       |          |          |   |      |      |
|---------------------------------------|----------|----------|---|------|------|
| ENSG0000(AE000660. processed_ chr14   | 22066016 | 22066373 | + | 0    | 0    |
| ENSG0000(FAM25C protein_co chr10      | 47995355 | 47999791 | - | 0    | 0    |
| ENSG0000(RP11-776A processed_ chr12   | 30169881 | 30170091 | - | 0    | 0    |
| ENSG0000(RP11-391H sense_intron chr13 | 1.13E+08 | 1.13E+08 | - | 0    | 0    |
| ENSG0000(RP11-195L antisense chr13    | 49792886 | 49793307 | + | 0.19 | 0.43 |
| ENSG0000(5S_rRNA rRNA chr1            | 1.44E+08 | 1.44E+08 | + | 0    | 0    |
| ENSG0000(PVT1_1 misc_RNA chr8         | 1.28E+08 | 1.28E+08 | + | 1.76 | 3.5  |
| ENSG0000(LLNLR-268I lincRNA chr19     | 39812972 | 39813555 | - | 0    | 0.8  |
| ENSG0000(AC004076. antisense chr19    | 57449689 | 57453011 | + | 0.05 | 0    |
| ENSG0000(RP11-493L lincRNA chr12      | 47265665 | 47266108 | + | 0    | 0    |
| ENSG0000(FKBP4P8 processed_ chr9      | 66744561 | 66745929 | - | 0    | 0    |
| ENSG0000(RP11-109E unprocessed chr2   | 1.31E+08 | 1.31E+08 | - | 0    | 0    |
| ENSG0000(BX255923. lincRNA chr9       | 41100794 | 41106229 | - | 0.04 | 0    |
| ENSG0000(RP1-272E8 unprocessed chrX   | 17897711 | 17900333 | - | 0    | 0    |
| ENSG0000(NPPA-AS1_misc_RNA chr1       | 11843812 | 11843984 | + | 0    | 0    |
| ENSG0000(RP11-398A lincRNA chr3       | 72080564 | 72084641 | - | 0    | 0    |
| ENSG0000(CTD-2026J lincRNA chr15      | 61239906 | 61240331 | + | 0    | 0    |
| ENSG0000(RP11-363G processed_ chrX    | 52326166 | 52326762 | + | 0    | 0    |
| ENSG0000(RP11-561N processed_ chr7    | 64590599 | 64591133 | - | 0    | 0    |
| ENSG0000(LINC00540 lincRNA chr13      | 22040975 | 22276524 | + | 0    | 0    |
| ENSG0000(RP11-65B2 unprocessed chr9   | 87799501 | 87821803 | - | 0    | 0    |
| ENSG0000(MIR548AZ miRNA chr8          | 1.19E+08 | 1.19E+08 | + | 0    | 0    |
| ENSG0000(RP11-1212 unprocessed chr16  | 18313294 | 18316984 | + | 0    | 0    |
| ENSG0000(RP11-210K processed_ chr18   | 31883288 | 31883728 | + | 0    | 0    |
| ENSG0000(RP11-417C lincRNA chr12      | 1.28E+08 | 1.28E+08 | - | 0    | 0    |
| ENSG0000(CTD-2537I antisense chr19    | 55612490 | 55613097 | - | 0.11 | 0    |
| ENSG0000(MIR6829 miRNA chr3           | 1.96E+08 | 1.96E+08 | - | 0    | 0    |
| ENSG0000(RP11-400G protein_co chr10   | 94688154 | 94853073 | + | 0    | 0    |
| ENSG0000(Metazoa_S misc_RNA chr1      | 32087523 | 32087813 | - | 0.38 | 0    |
| ENSG0000(KCNQ10T1 misc_RNA chr11      | 2674625  | 2674740  | + | 0    | 0    |
| ENSG0000(HOXA11-A misc_RNA chr7       | 27186166 | 27186263 | + | 0    | 0    |
| ENSG0000(BMS1P14 lincRNA chr9         | 40505399 | 40566281 | - | 0    | 0    |
| ENSG0000(RP11-187C lincRNA chr9       | 41310816 | 41332962 | - | 0    | 0    |
| ENSG0000(CMB9-94B sense_intron chr11  | 1.17E+08 | 1.17E+08 | - | 0.31 | 0    |
| ENSG0000(RP11-769N processed_ chr4    | 29010619 | 29011021 | - | 0    | 0    |
| ENSG0000(CTD-3194G lincRNA chr17      | 36684754 | 36685129 | + | 0    | 0    |
| ENSG0000(CH17-353B lincRNA chr1       | 1.46E+08 | 1.46E+08 | + | 0.17 | 0.06 |
| ENSG0000(uc_338 misc_RNA chr5         | 94877599 | 94877777 | - | 0    | 0    |
| ENSG0000(AL133243. sense_intron chr2  | 32526504 | 32529507 | + | 0.12 | 0.22 |
| ENSG0000(RP11-510J lincRNA chr16      | 81987948 | 81989016 | + | 0    | 0    |
| ENSG0000(WI2-2118C processed_ chr1    | 2.49E+08 | 2.49E+08 | + | 0    | 0    |
| ENSG0000(RP11-690D unprocessed chr11  | 1.03E+08 | 1.03E+08 | - | 0    | 0    |
| ENSG0000(RN7SL462F misc_RNA chr9      | 61427617 | 61427877 | - | 0    | 0    |
| ENSG0000(RP11-490B antisense chr16    | 75572185 | 75572685 | - | 0    | 0    |
| ENSG0000(RP11-323F lincRNA chr15      | 56887107 | 56888219 | + | 0    | 0.52 |

|                   |                                 |          |          |   |       |       |
|-------------------|---------------------------------|----------|----------|---|-------|-------|
| ENSG000001002591  | (Metazoa_S misc_RNA chr20       | 10025917 | 10026168 | + | 0     | 0     |
| ENSG00000144684   | (RP11-442J2 lincRNA chr13       | 44684487 | 44715393 | - | 0     | 0     |
| ENSG00000127096   | (HOTAIRM1 misc_RNA chr7         | 27096124 | 27096248 | + | 0     | 0     |
| ENSG00000144978   | (AP001505. lincRNA chr21        | 44978832 | 44979274 | + | 0.36  | 0.79  |
| ENSG00000132439   | (WT1-AS_6 misc_RNA chr11        | 32439086 | 32439206 | + | 0     | 0     |
| ENSG00000172483   | (RP11-205A unprocessed chr10    | 72483245 | 72483812 | + | 0     | 0     |
| ENSG00000186050   | (Metazoa_S misc_RNA chr17       | 18605054 | 18605356 | - | 0     | 0     |
| ENSG00000155288   | (RP11-139H sense_intronic chr15 | 55288849 | 55289346 | - | 0     | 0.17  |
| ENSG00000188144   | (RP11-345K processed_chr9       | 88144851 | 88145850 | - | 0     | 0     |
| ENSG00000115E+08  | (RP11-545G unprocessed chr7     | 1.5E+08  | 1.5E+08  | - | 0     | 0     |
| ENSG00000185744   | (REXO1L10F processed_chr8       | 85744543 | 85748373 | - | 0     | 0     |
| ENSG00000189748   | (RP11-115D antisense chr4       | 89748283 | 89749154 | + | 0     | 0     |
| ENSG00000147692   | (RN7SL453F misc_RNA chr10       | 47692399 | 47692727 | - | 0     | 0     |
| ENSG000001141E+08 | (PCDHGB9P unprocessed chr5      | 1.41E+08 | 1.41E+08 | + | 0.24  | 0.24  |
| ENSG00000176639   | (Y_RNA misc_RNA chr21           | 7663911  | 7664011  | - | 0     | 0     |
| ENSG000001141E+08 | (PCDHGB5 protein_coding chr5    | 1.41E+08 | 1.42E+08 | + | 3.94  | 3.79  |
| ENSG00000121401   | (CTD-2547E unprocessed chr16    | 21401089 | 21401198 | + | 0     | 0     |
| ENSG00000122495   | (HERC2P2 transcribed chr15      | 22495570 | 22590815 | + | 10.75 | 10.05 |
| ENSG00000110640   | (AF254982. unprocessed chr21    | 10640028 | 10640338 | - | 0     | 0     |
| ENSG000001143E+08 | (TRBV18 TR_V_gene chr7          | 1.43E+08 | 1.43E+08 | + | 0     | 0     |
| ENSG00000141578   | (RN7SL565F misc_RNA chr9        | 41578903 | 41579186 | + | 0     | 0     |
| ENSG000001178E+08 | (RP11-568K processed_chr1       | 1.78E+08 | 1.78E+08 | + | 0     | 0     |
| ENSG00000114150   | (CTA-276F8 lincRNA chr16        | 14150833 | 14153235 | + | 0     | 0.03  |
| ENSG00000190154   | (IGKV1D-13 IG_V_gene chr2       | 90154073 | 90154574 | + | 0     | 0     |
| ENSG00000169283   | (Metazoa_S misc_RNA chr19       | 6928345  | 6928629  | + | 0     | 0     |
| ENSG00000143179   | (RP11-460G processed_chr13      | 43179501 | 43181193 | - | 0.03  | 0     |
| ENSG00000155227   | (CTD-2587H processed_chr19      | 55227219 | 55230279 | - | 0.46  | 0.58  |
| ENSG00000119694   | (AC002550. antisense chr16      | 19694035 | 19694428 | - | 0     | 0     |
| ENSG00000197435   | (RP11-128N sense_intronic chr13 | 97435946 | 97436168 | + | 2.13  | 0     |
| ENSG00000153195   | (MIR6895 miRNA chrX             | 53195411 | 53195488 | - | 0     | 0     |
| ENSG00000157029   | (MRPL30P1 processed_chr6        | 57029521 | 57029988 | + | 0     | 0     |
| ENSG00000120323   | (RNU6-467F snRNA chr17          | 20323001 | 20323110 | + | 0     | 0     |
| ENSG00000156485   | (LLNLR-285I unprocessed chr19   | 56485923 | 56494280 | - | 0     | 0     |
| ENSG00000166221   | (MIR8055 miRNA chr8             | 6622124  | 6622220  | - | 0     | 0     |
| ENSG00000160914   | (SPATA31A1 protein_coding chr9  | 60914374 | 60920650 | + | 0     | 0     |
| ENSG000001154E+08 | (MIR6737 miRNA chr1             | 1.54E+08 | 1.54E+08 | - | 0     | 0     |
| ENSG00000162397   | (RP11-490P unprocessed chr13    | 62397645 | 62397916 | + | 0     | 0     |
| ENSG00000147581   | (RN7SL322F misc_RNA chr19       | 47581023 | 47581321 | + | 0     | 0     |
| ENSG00000142974   | (GXylt1P5 transcribed chr9      | 42974855 | 42978320 | + | 0     | 0     |
| ENSG00000175203   | (PHBP6 processed_chr7           | 75203926 | 75204711 | + | 0     | 0     |
| ENSG00000149353   | (RP11-295H sense_intronic chr15 | 49353485 | 49354034 | + | 0.26  | 0     |
| ENSG00000143266   | (U2 snRNA chr17                 | 43266633 | 43266823 | - | 0.28  | 0     |
| ENSG000001143E+08 | (TRBV11-3 TR_V_gene chr7        | 1.43E+08 | 1.43E+08 | + | 0     | 0     |
| ENSG000001144E+08 | (MIR6893 miRNA chr8             | 1.44E+08 | 1.44E+08 | - | 0     | 0     |
| ENSG00000135746   | (RNA5P41: rRNA chr16            | 35746523 | 35746636 | + | 0     | 0     |

|                     |            |       |          |          |   |       |       |
|---------------------|------------|-------|----------|----------|---|-------|-------|
| ENSG0000(RAB7B      | protein_co | chr1  | 2.06E+08 | 2.06E+08 | - | 8.79  | 10.49 |
| ENSG0000(Metazoa_S  | misc_RNA   | chr17 | 58785323 | 58785608 | - | 0     | 0     |
| ENSG0000(RP11-425N  | sense_intr | chr20 | 37526642 | 37527060 | - | 0.2   | 1.51  |
| ENSG0000(RP11-793H  | processed_ | chr8  | 54354168 | 54355118 | + | 0     | 0     |
| ENSG0000(HOTTIP_1   | misc_RNA   | chr7  | 27200465 | 27200521 | + | 0     | 0     |
| ENSG0000(SNORD64    | snoRNA     | chr15 | 24985100 | 24985166 | + | 0     | 0     |
| ENSG0000(CH507-9B2  | protein_co | chr21 | 5116343  | 5133805  | - | 0.41  | 0     |
| ENSG0000(RP11-300D  | processed_ | chr6  | 1.07E+08 | 1.07E+08 | + | 0     | 0     |
| ENSG0000(MIR6499    | miRNA      | chr5  | 1.52E+08 | 1.52E+08 | - | 0     | 0     |
| ENSG0000(RP11-366N  | processed_ | chr4  | 1.65E+08 | 1.65E+08 | + | 0     | 0     |
| ENSG0000(7SK        | misc_RNA   | chr3  | 1.25E+08 | 1.25E+08 | - | 0     | 0     |
| ENSG0000(RP5-1016A  | lincRNA    | chr20 | 60761874 | 60767279 | + | 0     | 0     |
| ENSG0000(CTB-3204.  | lincRNA    | chr19 | 29222542 | 29223137 | + | 0     | 0     |
| ENSG0000(RP11-419N  | processed_ | chr1  | 1.6E+08  | 1.6E+08  | + | 0     | 0     |
| ENSG0000(AJ011931.1 | sense_intr | chr21 | 45870854 | 45873345 | + | 0     | 0     |
| ENSG0000(CTD-2132H  | unprocess  | chr11 | 49067610 | 49069301 | + | 0     | 0     |
| ENSG0000(RP3-333B1  | lincRNA    | chr20 | 23489416 | 23489973 | - | 0     | 0     |
| ENSG0000(MIR7154    | miRNA      | chr11 | 45691704 | 45691776 | - | 0     | 0     |
| ENSG0000(MIR6769A   | miRNA      | chr16 | 4671318  | 4671390  | + | 0     | 0     |
| ENSG0000(U6atac     | snRNA      | chr1  | 2.21E+08 | 2.21E+08 | + | 0     | 0     |
| ENSG0000(SNORD45    | snoRNA     | chr6  | 1.66E+08 | 1.66E+08 | + | 0     | 0     |
| ENSG0000(DACH1      | protein_co | chr13 | 71437966 | 71867192 | - | 0     | 0     |
| ENSG0000(Metazoa_S  | misc_RNA   | chr1  | 33029232 | 33029576 | - | 0     | 0     |
| ENSG0000(RP1-225L1  | processed_ | chr21 | 44686358 | 44686629 | + | 0     | 0     |
| ENSG0000(RP5-858L1  | antisense  | chr20 | 1888128  | 1894374  | - | 1.18  | 1.3   |
| ENSG0000(RP11-321E  | unprocess  | chr7  | 64425623 | 64426334 | - | 0     | 0     |
| ENSG0000(AC007950.  | lincRNA    | chr15 | 63500737 | 63503083 | - | 0.05  | 0.08  |
| ENSG0000(RN7SL856F  | misc_RNA   | chr2  | 25058032 | 25058329 | + | 0     | 0     |
| ENSG0000(MIR6083    | miRNA      | chr3  | 1.24E+08 | 1.24E+08 | + | 0     | 0     |
| ENSG0000(RP11-631N  | unprocess  | chr10 | 147820   | 148751   | - | 0     | 0     |
| ENSG0000(RP11-407G  | antisense  | chr16 | 57245832 | 57246396 | - | 0     | 0     |
| ENSG0000(TUG1_1     | misc_RNA   | chr22 | 30971005 | 30971149 | + | 28.21 | 32.46 |
| ENSG0000(RP11-471J  | unprocess  | chr9  | 19895800 | 19895973 | - | 0     | 0     |
| ENSG0000(RP11-35J1  | sense_intr | chr11 | 7699562  | 7699988  | - | 0     | 0.21  |
| ENSG0000(Metazoa_S  | misc_RNA   | chr11 | 86216596 | 86216878 | + | 0     | 0     |
| ENSG0000(Six3os1_7  | misc_RNA   | chr2  | 44940045 | 44940245 | + | 0     | 0     |
| ENSG0000(RP11-142E  | sense_intr | chr13 | 33846190 | 33850825 | + | 0.07  | 0.14  |
| ENSG0000(uc_338     | misc_RNA   | chr8  | 76733302 | 76733476 | - | 0     | 0     |
| ENSG0000(IGKV1OR1-  | IG_V_pseu  | chr1  | 1.44E+08 | 1.44E+08 | + | 0     | 0     |
| ENSG0000(TTC28-AS1  | misc_RNA   | chr22 | 28002484 | 28002595 | + | 0     | 0     |
| ENSG0000(GHRLOS     | misc_RNA   | chr3  | 10287413 | 10287482 | + | 0     | 0     |
| ENSG0000(HYMAI      | misc_RNA   | chr6  | 1.44E+08 | 1.44E+08 | + | 0     | 0     |
| ENSG0000(pRNA       | misc_RNA   | chr8  | 46028804 | 46028892 | - | 0     | 0     |
| ENSG0000(RP5-1077H  | lincRNA    | chr6  | 905445   | 909006   | - | 0     | 0     |
| ENSG0000(RP5-828H9  | lincRNA    | chr20 | 5407564  | 5407876  | + | 0     | 0     |

|                                              |          |          |   |       |       |
|----------------------------------------------|----------|----------|---|-------|-------|
| ENSG0000(RP11-314A processed_ chrX           | 65786763 | 65787169 | + | 0     | 0     |
| ENSG0000(SOX2OT_e: misc_RNA chr3             | 1.82E+08 | 1.82E+08 | + | 0     | 0     |
| ENSG0000(RP5-1057I2 antisense chr12          | 47788426 | 47788971 | + | 0     | 0     |
| ENSG0000(RP11-104G processed_ chr9           | 39873931 | 39874390 | - | 0     | 0     |
| ENSG0000(RP13-977J: lincRNA chr12            | 1.32E+08 | 1.32E+08 | + | 0     | 0     |
| ENSG0000(Y_RNA misc_RNA chr15                | 56634038 | 56634167 | - | 0     | 0     |
| ENSG0000(RP11-468E lincRNA chr14             | 24198433 | 24199090 | + | 0.31  | 0.79  |
| ENSG0000(TRAJ36 TR_J_gene chr14              | 22505110 | 22505167 | + | 0     | 0     |
| ENSG0000(RNA5-8S5 rRNA KI270733.1            | 128877   | 129029   | + | 13.92 | 37.54 |
| ENSG0000(RP11-3D4.4 antisense chr15          | 33850538 | 33851178 | - | 0     | 0     |
| ENSG0000(RPS29P32 processed_ chr6            | 1.34E+08 | 1.34E+08 | + | 0     | 0     |
| ENSG0000(RP11-128N sense_intron chr13        | 97437268 | 97437630 | + | 0     | 0     |
| ENSG0000(VIS1 misc_RNA chr2                  | 1.45E+08 | 1.45E+08 | + | 0     | 0     |
| ENSG0000(RP11-445F antisense chr17           | 36940049 | 36943456 | - | 0     | 0     |
| ENSG0000(CSPG4P10 transcribed chr15          | 82459472 | 82477258 | + | 1.05  | 0.92  |
| ENSG0000(U2 snRNA GL000225.                  | 183252   | 183364   | + | 0     | 0     |
| ENSG0000(MIR7111 miRNA chr6                  | 35470508 | 35470579 | + | 0     | 0     |
| ENSG0000(Metazoa_S misc_RNA chr15            | 62244330 | 62244595 | - | 0     | 0     |
| ENSG0000(YWHAEP7 transcribed chr17           | 37828305 | 37884743 | - | 0     | 0     |
| ENSG0000(RP11-62C3 unprocessed chr9          | 92177235 | 92188652 | - | 0     | 0     |
| ENSG0000(RP1-102E2 antisense chr12           | 6466537  | 6467135  | + | 0.23  | 0.79  |
| ENSG0000(RP11-645C unprocessed chr16         | 21833516 | 21833621 | + | 0     | 0     |
| ENSG0000(GNAS-AS1_ misc_RNA chr20            | 58842433 | 58842546 | + | 0     | 0     |
| ENSG0000(Y_RNA misc_RNA chr9                 | 65573384 | 65573495 | + | 0     | 0     |
| ENSG0000(RP11-1000 sense_intron chr15        | 32583612 | 32584312 | + | 6.24  | 4.05  |
| ENSG0000(RP11-123K antisense chr12           | 57229498 | 57230198 | - | 0     | 0.21  |
| ENSG0000(AC142472. lincRNA chr17             | 45146730 | 45148470 | - | 0.23  | 0.5   |
| ENSG0000(Metazoa_S misc_RNA chr19            | 50019019 | 50019320 | + | 0     | 0     |
| ENSG0000(Hammerhead misc_RNA chr9            | 36072686 | 36072762 | + | 0     | 0     |
| ENSG0000(MIR7158 miRNA chr2                  | 5974662  | 5974732  | + | 0     | 0     |
| ENSG0000(Metazoa_S misc_RNA chr1             | 1.93E+08 | 1.93E+08 | - | 0     | 0     |
| ENSG0000(AP001506. processed_ chr21          | 20597953 | 20598163 | + | 0     | 0     |
| ENSG0000(RP11-381C sense_intron chr13        | 1.07E+08 | 1.07E+08 | - | 0     | 0     |
| ENSG0000(RP11-500G antisense chr10           | 1.22E+08 | 1.22E+08 | + | 0     | 0     |
| ENSG0000(CTD-2562C sense_intron chr15        | 75452964 | 75453947 | - | 0.31  | 0.48  |
| ENSG0000(Metazoa_S misc_RNA chr6             | 33562880 | 33563130 | - | 0     | 0     |
| ENSG0000(PADI6 protein_coding chr1           | 17372196 | 17401699 | + | 0     | 0     |
| ENSG0000(MIR6821 miRNA chr22                 | 49962866 | 49962939 | + | 0     | 0     |
| ENSG0000(RP11-461A antisense chr16           | 3686998  | 3687380  | + | 0     | 0     |
| ENSG0000(RP11-893G unprocessed chr17         | 36234447 | 36234554 | - | 0     | 0     |
| ENSG0000(CH17-125A transcribed chr1          | 1.44E+08 | 1.44E+08 | - | 0     | 0     |
| ENSG0000(RN7SL192F misc_RNA chr19            | 11011708 | 11012006 | + | 0     | 0     |
| ENSG0000(AC010518. unprocessed chr19         | 54296194 | 54296252 | - | 0     | 0     |
| ENSG0000(RP11-80I3. lincRNA chr9             | 26066675 | 26118408 | + | 0     | 0     |
| ENSG0000(AC136352. protein_coding KI270727.1 | 136160   | 167571   | - | 0     | 0     |

|                                         |          |          |   |      |      |
|-----------------------------------------|----------|----------|---|------|------|
| ENSG0000(RP11-381E processed_ chr3      | 1.09E+08 | 1.09E+08 | + | 0    | 0    |
| ENSG0000(Metazoa_S misc_RNA chr5        | 18958147 | 18958413 | - | 0    | 0    |
| ENSG0000(MIR8073 miRNA chr13            | 1.1E+08  | 1.1E+08  | + | 0    | 0    |
| ENSG0000(RP5-1116H lincRNA chr20        | 5049857  | 5050321  | - | 0    | 0.37 |
| ENSG0000(MIR6752 miRNA chr11            | 67490245 | 67490315 | + | 0    | 0    |
| ENSG0000(MIR6780B miRNA chr6            | 43434542 | 43434620 | + | 0    | 0    |
| ENSG0000(HOTAIRM1 misc_RNA chr7         | 27098900 | 27099114 | + | 0    | 0    |
| ENSG0000(CTD-2515H lincRNA chr15        | 57553955 | 57555680 | + | 0.03 | 0.25 |
| ENSG0000(IGHV4-4 IG_V_gene chr14        | 1.06E+08 | 1.06E+08 | - | 0    | 0    |
| ENSG0000(RP11-524N lincRNA chr5         | 1.58E+08 | 1.58E+08 | - | 0    | 0    |
| ENSG0000(Metazoa_S misc_RNA chr14       | 82429872 | 82430156 | + | 0    | 0    |
| ENSG0000(JPX_2 misc_RNA chrX            | 73944595 | 73944663 | + | 0    | 0    |
| ENSG0000(WI2-8325B lincRNA chr20        | 61369879 | 61370855 | + | 0    | 0    |
| ENSG0000(SNORD26 snoRNA chr11           | 62855292 | 62855366 | - | 0    | 0    |
| ENSG0000(RP11-1081 processed_ chr11     | 18836304 | 18837081 | + | 0    | 0    |
| ENSG0000(RP11-290H antisense chr17      | 47279526 | 47280047 | - | 0    | 0.31 |
| ENSG0000(CTD-2270P lincRNA chr16        | 2777319  | 2780568  | + | 0.22 | 0.18 |
| ENSG0000(RP11-374N processed_ chr9      | 61912704 | 61913115 | + | 0    | 0    |
| ENSG0000(Metazoa_S misc_RNA chr22       | 21463963 | 21464279 | + | 0    | 0    |
| ENSG0000(RP11-291L transcribed chr10    | 38403189 | 38452153 | + | 0.89 | 0.92 |
| ENSG0000(RP11-8P11 lincRNA chr15        | 73730048 | 73731711 | - | 0    | 0    |
| ENSG0000(RP11-10E1 sense_intronic chr13 | 95744726 | 95745765 | + | 0    | 0.06 |
| ENSG0000(RP11-19G2 processed_ chr17     | 37162616 | 37163139 | + | 0    | 0    |
| ENSG0000(RP1-228P1 lincRNA chr12        | 48039784 | 48040761 | - | 0    | 0.07 |
| ENSG0000(TRBV15 TR_V_gene chr7          | 1.43E+08 | 1.43E+08 | + | 0    | 0    |
| ENSG0000(RP11-252A unprocessed chr16    | 74393076 | 74393183 | - | 0    | 0    |
| ENSG0000(Metazoa_S misc_RNA chrX        | 48524480 | 48524806 | + | 0    | 0    |
| ENSG0000(MIR7159 miRNA chr6             | 33899135 | 33899200 | + | 0    | 0    |
| ENSG0000(RP11-88L2 unprocessed chr2     | 1.9E+08  | 1.9E+08  | - | 0    | 0    |
| ENSG0000(RP11-473E unprocessed chrY     | 22861112 | 22861834 | - | 0    | 0    |
| ENSG0000(MIR6730 miRNA chr1             | 12578957 | 12579023 | - | 0    | 0    |
| ENSG0000(CTD-2105E lincRNA chr19        | 55338945 | 55339283 | - | 0    | 0    |
| ENSG0000(RP11-187C unprocessed chr9     | 41341000 | 41342041 | - | 0.12 | 0    |
| ENSG0000(MIR6127 miRNA chr1             | 22633258 | 22633366 | - | 0    | 0    |
| ENSG0000(Metazoa_S misc_RNA chr1        | 1.83E+08 | 1.83E+08 | - | 0    | 0.13 |
| ENSG0000(PMS2P10 unprocessed chr7       | 75288120 | 75299795 | - | 0.91 | 0.79 |
| ENSG0000(RP11-475F unprocessed chr13    | 70564267 | 70564437 | - | 0    | 0    |
| ENSG0000(RP11-713N antisense chr12      | 25103124 | 25103869 | - | 0    | 0    |
| ENSG0000(SNORD115 snoRNA chr15          | 25266591 | 25266661 | + | 0    | 0    |
| ENSG0000(RP11-374N unprocessed chr9     | 61944232 | 61945136 | - | 0    | 0    |
| ENSG0000(CTD-3220F antisense chr19      | 37314868 | 37315620 | - | 0.43 | 0.28 |
| ENSG0000(CH17-360E lincRNA chr10        | 47908064 | 47991850 | - | 3.75 | 2.55 |
| ENSG0000(RP5-875H1 lincRNA chr17        | 50094065 | 50094647 | + | 0    | 0    |
| ENSG0000(RP11-305C sense_intronic chr12 | 65171262 | 65171917 | + | 0    | 0    |
| ENSG0000(RP11-478K lincRNA chr13        | 44196006 | 44197298 | + | 0    | 0    |

|                 |            |            |            |          |          |   |      |      |
|-----------------|------------|------------|------------|----------|----------|---|------|------|
| ENSG00000100000 | CTD-3157E  | lincRNA    | chr17      | 15789016 | 15789705 | + | 3.29 | 3.2  |
| ENSG00000100000 | MIR6715A   | miRNA      | chr10      | 1.12E+08 | 1.12E+08 | + | 0    | 0    |
| ENSG00000100000 | GNAS-AS1   | misc_RNA   | chr20      | 58842030 | 58842132 | + | 0    | 0    |
| ENSG00000100000 | 5S_rRNA    | rRNA       | chr2       | 89600571 | 89600680 | + | 0    | 0    |
| ENSG00000100000 | CTD-2047H  | antisense  | chr17      | 80333841 | 80334366 | - | 0    | 0    |
| ENSG00000100000 | MIR7151    | miRNA      | chr10      | 67403351 | 67403410 | - | 0    | 0    |
| ENSG00000100000 | CTD-2358C  | lincRNA    | chr16      | 31704728 | 31705260 | + | 0    | 0    |
| ENSG00000100000 | RP11-318K  | processed  | chr9       | 40883634 | 40883763 | + | 0    | 0    |
| ENSG00000100000 | MIR6729    | miRNA      | chr1       | 12029158 | 12029222 | + | 0    | 0    |
| ENSG00000100000 | 5_8S_rRNA  | rRNA       | chr22      | 11249809 | 11249959 | - | 0    | 0    |
| ENSG00000100000 | AC171558.  | pseudogen  | KI270727.1 | 417283   | 418206   | + | 0    | 0    |
| ENSG00000100000 | uc_338     | misc_RNA   | chr21      | 39171462 | 39171560 | - | 0    | 0    |
| ENSG00000100000 | AC011718.  | lincRNA    | chr22      | 18374106 | 18375689 | + | 0    | 0    |
| ENSG00000100000 | MIR6074    | miRNA      | chr12      | 66023620 | 66023726 | - | 0    | 0    |
| ENSG00000100000 | DLEU2_6    | misc_RNA   | chr1       | 63548977 | 63549112 | - | 0    | 0    |
| ENSG00000100000 | RP11-244H  | antisense  | chr14      | 19420975 | 19425017 | + | 0    | 0    |
| ENSG00000100000 | Metazoa_S  | misc_RNA   | chr3       | 72926955 | 72927237 | - | 0    | 0    |
| ENSG00000100000 | RN7SL238F  | misc_RNA   | chr15      | 28387196 | 28387485 | + | 0    | 0    |
| ENSG00000100000 | RP1-93L7.4 | processed  | chrX       | 85851575 | 85851682 | - | 0    | 0    |
| ENSG00000100000 | RAB28P4    | processed  | chr9       | 66641314 | 66642277 | - | 0    | 0    |
| ENSG00000100000 | RP11-651H  | unprocess  | chrX       | 52409772 | 52410432 | - | 0    | 0    |
| ENSG00000100000 | RP11-118H  | lincRNA    | chr9       | 67512034 | 67515393 | - | 0    | 0.09 |
| ENSG00000100000 | RP11-467L  | antisense  | chr12      | 31729117 | 31731204 | + | 0.43 | 0.41 |
| ENSG00000100000 | Y_RNA      | misc_RNA   | chr21      | 6365955  | 6366055  | + | 0    | 0    |
| ENSG00000100000 | HIST1H2AL  | protein_co | chr6       | 27865355 | 27865747 | + | 0    | 0    |
| ENSG00000100000 | DUX4L14    | unprocess  | chr10      | 1.34E+08 | 1.34E+08 | + | 0    | 0    |
| ENSG00000100000 | MIR7106    | miRNA      | chr12      | 1.13E+08 | 1.13E+08 | - | 0    | 0    |
| ENSG00000100000 | RP4-608O1  | protein_co | chr1       | 1.97E+08 | 1.97E+08 | + | 0    | 0    |
| ENSG00000100000 | RP4-775C1  | processed  | chr20      | 6220330  | 6220759  | + | 0    | 0    |
| ENSG00000100000 | RP11-230F  | sense_intr | chr13      | 1.14E+08 | 1.14E+08 | + | 0.39 | 0.65 |
| ENSG00000100000 | MIR8080    | miRNA      | chr2       | 79866495 | 79866583 | - | 0    | 0    |
| ENSG00000100000 | Metazoa_S  | misc_RNA   | chr11      | 66374138 | 66374435 | - | 0    | 0    |
| ENSG00000100000 | MEG3_2     | misc_RNA   | chr14      | 1.01E+08 | 1.01E+08 | + | 1.68 | 0    |
| ENSG00000100000 | RP11-321P  | lincRNA    | chr20      | 48073869 | 48074188 | + | 0.31 | 0    |
| ENSG00000100000 | RP11-708J  | processed  | chr3       | 47469777 | 47469987 | + | 0    | 0    |
| ENSG00000100000 | MIR6797    | miRNA      | chr19      | 41869627 | 41869698 | + | 0    | 0    |
| ENSG00000100000 | RP11-483E  | unprocess  | chr15      | 28416449 | 28416674 | + | 0    | 0    |
| ENSG00000100000 | RP11-266I  | unprocess  | chrX       | 55137930 | 55142433 | + | 0    | 0    |
| ENSG00000100000 | RP11-161M  | sense_intr | chr16      | 968375   | 969012   | - | 0.43 | 0.47 |
| ENSG00000100000 | Y_RNA      | misc_RNA   | GL000205.  | 93050    | 93150    | - | 0    | 0    |
| ENSG00000100000 | RP11-231E  | sense_intr | chr18      | 74504766 | 74505248 | + | 0    | 0    |
| ENSG00000100000 | PLCE1P1    | unprocess  | chrX       | 30290047 | 30290351 | - | 0    | 0    |
| ENSG00000100000 | MIR4509-1  | miRNA      | chr15      | 23197827 | 23197920 | + | 0    | 0    |
| ENSG00000100000 | CTC-436P1  | unprocess  | chr5       | 61145846 | 61146376 | - | 0.14 | 0.15 |
| ENSG00000100000 | RP11-118N  | processed  | chr2       | 2.41E+08 | 2.41E+08 | + | 0    | 0    |

|                     |             |       |          |          |   |      |      |
|---------------------|-------------|-------|----------|----------|---|------|------|
| ENSG0000(GSTTP1     | protein_co  | chr22 | 23998401 | 24005453 | - | 0.03 | 0    |
| ENSG0000(RP11-11A9  | processed_  | chr11 | 3289311  | 3289642  | - | 0    | 0    |
| ENSG0000(RP5-965G2  | antisense   | chr20 | 25284915 | 25285588 | - | 0    | 0.11 |
| ENSG0000(TRBV12-4   | TR_V_gene   | chr7  | 1.43E+08 | 1.43E+08 | + | 0.21 | 0    |
| ENSG0000(Metazoa_S  | misc_RNA    | chr15 | 28524151 | 28524440 | - | 0    | 0    |
| ENSG0000(RN7SL769F  | misc_RNA    | chr12 | 1.1E+08  | 1.1E+08  | - | 0    | 0    |
| ENSG0000(RP11-29B2  | lincRNA     | chr13 | 1.03E+08 | 1.03E+08 | - | 0.27 | 0    |
| ENSG0000(RP11-458I4 | unprocessε  | chr13 | 25017766 | 25017903 | - | 0    | 0    |
| ENSG0000(RP1-81D8.! | unprocessε  | chr6  | 1.61E+08 | 1.61E+08 | - | 0    | 0    |
| ENSG0000(MIR7848    | miRNA       | chr8  | 1.33E+08 | 1.33E+08 | - | 0    | 0    |
| ENSG0000(RP11-318K  | unprocessε  | chr9  | 40755407 | 40767875 | - | 0    | 0    |
| ENSG0000(DUX4L23    | unprocessε  | chr10 | 1.34E+08 | 1.34E+08 | + | 0    | 0    |
| ENSG0000(TUG1_3     | misc_RNA    | chr22 | 30972857 | 30973093 | + | 0    | 0    |
| ENSG0000(HIST1H4E   | protein_co  | chr6  | 26204552 | 26206038 | + | 0.04 | 0.04 |
| ENSG0000(RP11-90M   | antisense   | chr13 | 48041751 | 48042184 | - | 0.19 | 0    |
| ENSG0000(RP11-116D  | lincRNA     | chr12 | 1.15E+08 | 1.15E+08 | - | 0    | 0    |
| ENSG0000(HYDIN2     | transcribec | chr1  | 1.47E+08 | 1.47E+08 | + | 0.07 | 0.07 |
| ENSG0000(CTD-3128C  | sense_intrc | chr19 | 6716386  | 6717742  | - | 0.51 | 0.66 |
| ENSG0000(LA16c-359I | lincRNA     | chr16 | 424243   | 424543   | - | 0    | 0    |
| ENSG0000(Metazoa_S  | misc_RNA    | chr7  | 1.28E+08 | 1.28E+08 | - | 0.52 | 0.57 |
| ENSG0000(MIAT_exor  | misc_RNA    | chr22 | 26673254 | 26673630 | + | 0.2  | 0.38 |
| ENSG0000(RP11-556I1 | processed_  | chr4  | 1.05E+08 | 1.05E+08 | - | 0    | 0    |
| ENSG0000(RP11-321M  | lincRNA     | chr18 | 75387056 | 75387596 | + | 0    | 0    |
| ENSG0000(RP11-378J  | lincRNA     | chr1  | 2.22E+08 | 2.23E+08 | - | 3.39 | 4.89 |
| ENSG0000(REXO1L2P   | processed_  | chr8  | 85775106 | 85779090 | - | 0    | 0    |
| ENSG0000(DUSP12P1   | unprocessε  | chr3  | 1E+08    | 1E+08    | - | 0    | 0    |
| ENSG0000(Metazoa_S  | misc_RNA    | chr5  | 91314716 | 91314997 | - | 0    | 0    |
| ENSG0000(RP11-419C  | unprocessε  | chr16 | 69975238 | 69975344 | + | 0    | 0    |
| ENSG0000(RNA5SP41   | rRNA        | chr16 | 35746772 | 35746894 | + | 0    | 0    |
| ENSG0000(RP11-392C  | lincRNA     | chr1  | 2.19E+08 | 2.19E+08 | + | 0.04 | 0.16 |
| ENSG0000(TEX28P2    | unprocessε  | chrX  | 1.54E+08 | 1.54E+08 | - | 0    | 0    |
| ENSG0000(CH17-128C  | unprocessε  | chrX  | 1.54E+08 | 1.54E+08 | - | 0    | 0    |
| ENSG0000(RP11-616N  | antisense   | chr16 | 1223639  | 1224143  | + | 0    | 0    |
| ENSG0000(RP13-895J  | lincRNA     | chr12 | 1.32E+08 | 1.32E+08 | + | 0    | 0    |
| ENSG0000(CTC-526N1  | lincRNA     | chr19 | 33906352 | 33908391 | + | 0    | 0    |
| ENSG0000(MIR3179-4  | miRNA       | chr16 | 18494493 | 18494576 | - | 0    | 0    |
| ENSG0000(XXbac-B33  | lincRNA     | chr22 | 18486999 | 18491247 | - | 0    | 0    |
| ENSG0000(RP11-476H  | antisense   | chr13 | 20564708 | 20567045 | - | 0.15 | 0.13 |
| ENSG0000(RP3-453C1  | lincRNA     | chr20 | 45435272 | 45448325 | - | 0    | 0    |
| ENSG0000(RP11-347J  | transcribec | chr9  | 39359890 | 39369105 | - | 0    | 0    |
| ENSG0000(RMRP       | ribozyme    | chr9  | 35657754 | 35658017 | - | 0.94 | 3.61 |
| ENSG0000(RNU6-119   | snRNA       | chr17 | 36404826 | 36404932 | - | 0    | 0    |
| ENSG0000(MIR8071-2  | miRNA       | chr14 | 1.06E+08 | 1.06E+08 | + | 0    | 0    |
| ENSG0000(RN7SL796F  | misc_RNA    | chr15 | 30560644 | 30560934 | + | 0    | 0    |
| ENSG0000(SNORA71    | snoRNA      | chr20 | 38421647 | 38421774 | - | 0    | 6.32 |

|                |           |                |       |          |          |   |      |       |
|----------------|-----------|----------------|-------|----------|----------|---|------|-------|
| ENSG0000010338 | uc_338    | misc_RNA       | chr2  | 28134408 | 28134585 | - | 0    | 0     |
| ENSG0000010339 | Metazoa_S | misc_RNA       | chr5  | 1.55E+08 | 1.55E+08 | + | 0    | 0     |
| ENSG0000010340 | RP11-307N | processed      | chr13 | 24323021 | 24323457 | + | 0    | 0     |
| ENSG0000010341 | RP11-368J | unprocessed    | chr16 | 22537478 | 22537584 | - | 0    | 0     |
| ENSG0000010342 | EEF1A1P42 | processed      | chr6  | 49358185 | 49360420 | - | 0    | 0     |
| ENSG0000010343 | RP11-108H | lincRNA        | chr13 | 54940843 | 54986719 | + | 0    | 0     |
| ENSG0000010344 | 5S_rRNA   | rRNA           | chr9  | 41237440 | 41237557 | - | 0    | 0     |
| ENSG0000010345 | RP11-102G | antisense      | chr14 | 51637348 | 51637947 | - | 0.35 | 0.51  |
| ENSG0000010346 | Metazoa_S | misc_RNA       | chr20 | 45847630 | 45847940 | - | 0    | 0     |
| ENSG0000010347 | MIR6763   | miRNA          | chr12 | 1.33E+08 | 1.33E+08 | + | 0    | 0     |
| ENSG0000010348 | GTF2IP1   | transcribed    | chr7  | 75185385 | 75237696 | - | 25.4 | 22.82 |
| ENSG0000010349 | RP11-65E1 | unprocessed    | chr10 | 66837457 | 66837704 | + | 0    | 0     |
| ENSG0000010350 | MIR6779   | miRNA          | chr17 | 38914979 | 38915042 | + | 0    | 0     |
| ENSG0000010351 | HNRNPCL3  | protein_coding | chr1  | 13060869 | 13062229 | + | 0    | 0     |
| ENSG0000010352 | RN7SL88P  | misc_RNA       | chr12 | 96101951 | 96102249 | - | 0    | 0     |
| ENSG0000010353 | MIR8084   | miRNA          | chr8  | 93029751 | 93029839 | + | 0    | 0     |
| ENSG0000010354 | DLEU2_2   | misc_RNA       | chr13 | 50045143 | 50045232 | + | 0    | 0     |
| ENSG0000010355 | CH507-254 | lincRNA        | chr21 | 7048891  | 7087229  | + | 0    | 1.36  |
| ENSG0000010356 | STAG3L2   | transcribed    | chr7  | 74882163 | 74890610 | - | 4.81 | 4.54  |
| ENSG0000010357 | MIR6131   | miRNA          | chr5  | 10478037 | 10478145 | + | 0    | 0     |
| ENSG0000010358 | HIST1H2AE | protein_coding | chr6  | 26216975 | 26217483 | + | 0.15 | 0.16  |
| ENSG0000010359 | RP11-101P | unprocessed    | chr13 | 21287634 | 21287828 | - | 1.04 | 0     |
| ENSG0000010360 | RMST_10   | misc_RNA       | chr12 | 97564174 | 97564327 | + | 0    | 0     |
| ENSG0000010361 | PRSS3P3   | transcribed    | chr7  | 1.42E+08 | 1.42E+08 | - | 0    | 0     |
| ENSG0000010362 | RNU2-4P   | snRNA          | chr17 | 43387226 | 43387417 | - | 0    | 0     |
| ENSG0000010363 | RP5-1116H | lincRNA        | chr20 | 5045761  | 5046276  | - | 0    | 0     |
| ENSG0000010364 | AC069363  | antisense      | chr17 | 36072866 | 36090134 | + | 0    | 0     |
| ENSG0000010365 | CH17-333N | unprocessed    | chr1  | 1.43E+08 | 1.43E+08 | + | 0    | 0     |
| ENSG0000010366 | RP11-324J | processed      | chr4  | 43388157 | 43388437 | + | 0    | 0     |
| ENSG0000010367 | FAM166AP  | unprocessed    | chr1  | 2.42E+08 | 2.42E+08 | - | 0    | 0     |
| ENSG0000010368 | RP11-520B | processed      | chr9  | 97151894 | 97152694 | - | 0.08 | 0.17  |
| ENSG0000010369 | SNORD49B  | snoRNA         | chr17 | 16439505 | 16439576 | + | 0    | 0     |
| ENSG0000010370 | RP11-160N | unprocessed    | chr9  | 61581813 | 61582675 | + | 0    | 0     |
| ENSG0000010371 | ANKRD20A  | transcribed    | chr20 | 30656033 | 30723932 | - | 0    | 0     |
| ENSG0000010372 | CH507-9B2 | protein_coding | chr21 | 5022493  | 5040666  | + | 0.03 | 0.19  |
| ENSG0000010373 | Metazoa_S | misc_RNA       | chr3  | 1.86E+08 | 1.86E+08 | - | 0    | 0     |
| ENSG0000010374 | WT1-AS_8  | misc_RNA       | chr11 | 32440109 | 32440383 | + | 0    | 0.02  |
| ENSG0000010375 | MIR6089   | miRNA          | chrX  | 2609191  | 2609254  | + | 0    | 0     |
| ENSG0000010376 | MIR6089   | miRNA          | chrY  | 2609191  | 2609254  | + | 0    | 0     |
| ENSG0000010377 | DLX6-AS1  | misc_RNA       | chr7  | 96965489 | 96965695 | + | 0    | 0     |
| ENSG0000010378 | CH17-264B | unprocessed    | chr7  | 73065529 | 73077353 | + | 1.78 | 1.66  |
| ENSG0000010379 | Metazoa_S | misc_RNA       | chr7  | 75057877 | 75058188 | + | 0    | 0     |
| ENSG0000010380 | RP11-146E | lincRNA        | chr14 | 19127736 | 19175530 | - | 0    | 0     |
| ENSG0000010381 | AC012531  | misc_RNA       | chr12 | 53968351 | 53968501 | + | 0    | 0     |
| ENSG0000010382 | RP11-530C | sense_intronic | chr12 | 79818784 | 79819465 | - | 0    | 0.11  |



|                                          |          |          |   |       |       |
|------------------------------------------|----------|----------|---|-------|-------|
| ENSG0000(RP11-453N processed_ chr10      | 38617255 | 38617344 | + | 0     | 0     |
| ENSG0000(RP11-327J lincRNA chr15         | 96139472 | 96140452 | - | 0.19  | 0     |
| ENSG0000(Metazoa_S misc_RNA chr19        | 41442102 | 41442392 | - | 0     | 0     |
| ENSG0000(MIR6509 miRNA chr7              | 1.35E+08 | 1.35E+08 | - | 0     | 0     |
| ENSG0000(Metazoa_S misc_RNA chr1         | 1.17E+08 | 1.17E+08 | - | 0     | 0     |
| ENSG0000(LINC00235 lincRNA chr16         | 525155   | 527407   | - | 0.49  | 0.46  |
| ENSG0000(RP11-113A processed_ chr3       | 1.58E+08 | 1.58E+08 | - | 0     | 0     |
| ENSG0000(RP11-59H7 lincRNA chr15         | 59115547 | 59116089 | - | 0     | 0     |
| ENSG0000(RP11-557B processed_ chrY       | 26453982 | 26454092 | + | 0     | 0     |
| ENSG0000(LINC00869 lincRNA chr1          | 1.5E+08  | 1.5E+08  | + | 3.23  | 2.42  |
| ENSG0000(TYW1B protein_co chr7           | 72558744 | 72828198 | - | 0.24  | 0.15  |
| ENSG0000(F8A3 protein_co chrX            | 1.55E+08 | 1.55E+08 | - | 0     | 0.16  |
| ENSG0000(RP11-380B lincRNA chr13         | 32782874 | 32788178 | + | 0     | 0     |
| ENSG0000(RP11-622C lincRNA chr15         | 66860303 | 66867023 | + | 0.06  | 0.04  |
| ENSG0000(RP11-496I2 processed_ chr14     | 19267115 | 19268164 | + | 0     | 0     |
| ENSG0000(HIST1H4D protein_co chr6        | 26188765 | 26189076 | - | 0.66  | 0     |
| ENSG0000(RP11-88E1 lincRNA chr13         | 1.13E+08 | 1.13E+08 | - | 0.25  | 0.29  |
| ENSG0000(PIGW protein_co chr17           | 36535020 | 36539310 | + | 3.32  | 3.37  |
| ENSG0000(DUX4L30 unprocessε chr4         | 1.9E+08  | 1.9E+08  | + | 0     | 0     |
| ENSG0000(Metazoa_S misc_RNA chr1         | 37953508 | 37953780 | + | 0     | 0     |
| ENSG0000(RP11-295D sense_intrε chr16     | 4426902  | 4427380  | + | 0     | 0.18  |
| ENSG0000(RP11-191H unprocessε chr2       | 79547151 | 79548128 | - | 0     | 0     |
| ENSG0000(GAPDHP41 processed_ chr6        | 60719222 | 60720196 | - | 0     | 0     |
| ENSG0000(CTD-2024F sense_intrε chr12     | 47768529 | 47769648 | + | 0     | 0     |
| ENSG0000(RP11-10F1 unprocessε chr7       | 56685036 | 56687366 | - | 0     | 0     |
| ENSG0000(CTB-58E17 antisense chr17       | 38749360 | 38751457 | + | 0.77  | 0.38  |
| ENSG0000(SNORA9 snoRNA chr7              | 44985378 | 44985510 | - | 0     | 0     |
| ENSG0000(RP13-554M lincRNA chr12         | 1.33E+08 | 1.33E+08 | - | 0     | 0     |
| ENSG0000(NCRUPAR_ misc_RNA chr5          | 76712195 | 76712327 | + | 0     | 0     |
| ENSG0000(RP11-57A1 unprocessε chr16      | 28341437 | 28341543 | + | 0     | 0     |
| ENSG0000(SNORD22 snoRNA chr11            | 62852910 | 62853035 | - | 0     | 0     |
| ENSG0000(AC007325. protein_co KI270734.1 | 138082   | 161852   | - | 0.06  | 0     |
| ENSG0000(RN7SL270F misc_RNA chr17        | 47041825 | 47042105 | + | 0     | 0     |
| ENSG0000(LINC01632 lincRNA chr1          | 1.45E+08 | 1.45E+08 | - | 0.14  | 0     |
| ENSG0000(RP11-74E2 lincRNA chr17         | 2720801  | 2723947  | - | 0.22  | 0.26  |
| ENSG0000(MIR8063 miRNA chr15             | 36972821 | 36972901 | - | 0     | 0     |
| ENSG0000(F8A1 protein_co chrX            | 1.55E+08 | 1.55E+08 | + | 14.69 | 14.86 |
| ENSG0000(RP11-797H unprocessε chr7       | 64768156 | 64769101 | + | 0     | 0     |
| ENSG0000(RP11-12A2 unprocessε chr9       | 67713910 | 67713967 | + | 0     | 0     |
| ENSG0000(RPPH1 ribozyme chr14            | 20343075 | 20343407 | - | 1.75  | 0.79  |
| ENSG0000(RP11-14C1 lincRNA chr15         | 1.02E+08 | 1.02E+08 | - | 0     | 0     |
| ENSG0000(RP11-204E processed_ chr16      | 20155648 | 20158391 | + | 0     | 0     |
| ENSG0000(SDR42E1P2 processed_ chr9       | 42408526 | 42409006 | - | 0     | 0     |
| ENSG0000(RP11-70D2 lincRNA chr16         | 79603572 | 79604177 | + | 0     | 0     |
| ENSG0000(SPANXA2-C lincRNA chrX          | 1.42E+08 | 1.42E+08 | + | 0.1   | 0     |

|                 |                    |                        |       |          |          |   |       |       |
|-----------------|--------------------|------------------------|-------|----------|----------|---|-------|-------|
| ENSG00000103380 | uc_338             | misc_RNA               | chr12 | 1.29E+08 | 1.29E+08 | - | 0     | 0     |
| ENSG00000103381 | RP11-500G          | sense_intronic         | chr10 | 1.3E+08  | 1.3E+08  | - | 0.75  | 0     |
| ENSG00000103382 | RP11-578B          | sense_intronic         | chr12 | 71448405 | 71448850 | + | 0     | 0     |
| ENSG00000103383 | HIST1H2BF          | protein_coding         | chr6  | 26199520 | 26200715 | + | 0.2   | 0     |
| ENSG00000103384 | RP11-161P          | unprocessed_transcript | chr13 | 28778224 | 28778448 | - | 0     | 0     |
| ENSG00000103385 | RP11-189B          | lincRNA                | chr13 | 46474246 | 46493268 | + | 0     | 0     |
| ENSG00000103386 | RP11-355N          | sense_intronic         | chr15 | 58454327 | 58454982 | + | 0     | 0     |
| ENSG00000103387 | GTSE1-AS1          | lincRNA                | chr22 | 46295143 | 46296660 | - | 0.74  | 0.12  |
| ENSG00000103388 | Metazoa_S          | misc_RNA               | chr13 | 48429269 | 48429554 | + | 0     | 0     |
| ENSG00000103389 | RNU1-5P            | snRNA                  | chr1  | 16873708 | 16873851 | + | 0     | 0     |
| ENSG00000103390 | RP4-550H1          | lincRNA                | chr20 | 36064243 | 36064563 | - | 0     | 0     |
| ENSG00000103391 | RP11-114N          | processed_transcript   | chr3  | 1.78E+08 | 1.78E+08 | - | 0     | 0     |
| ENSG00000103392 | MIR3118-3          | miRNA                  | chr15 | 21406385 | 21406459 | + | 0     | 0     |
| ENSG00000103393 | RP11-48G1          | antisense              | chr15 | 56447120 | 56447697 | + | 0     | 0.13  |
| ENSG00000103394 | RP11-153L2         | sense_intronic         | chr13 | 1.08E+08 | 1.08E+08 | + | 0     | 0     |
| ENSG00000103395 | RP11-785D          | antisense              | chr12 | 70570969 | 70571440 | + | 0     | 0     |
| ENSG00000103396 | U2                 | snRNA                  | chr22 | 10736171 | 10736283 | - | 0     | 0     |
| ENSG00000103397 | MIR6784            | miRNA                  | chr17 | 45114367 | 45114433 | - | 0     | 0     |
| ENSG00000103398 | Metazoa_S          | misc_RNA               | chr3  | 1.29E+08 | 1.29E+08 | - | 0     | 0.54  |
| ENSG00000103399 | RP11-496L2         | unprocessed_transcript | chr14 | 19220796 | 19220912 | - | 0     | 0     |
| ENSG00000103400 | RP13-580B          | processed_transcript   | chr7  | 56805336 | 56808148 | + | 0     | 0     |
| ENSG00000103401 | MIR7854            | miRNA                  | chr16 | 81533902 | 81533966 | + | 0     | 0     |
| ENSG00000103402 | PCGF2              | protein_coding         | chr17 | 38733897 | 38749817 | - | 23.96 | 23.45 |
| ENSG00000103403 | FAM74A7            | lincRNA                | chr9  | 42199000 | 42204988 | + | 0     | 0     |
| ENSG00000103404 | MIR6833            | miRNA                  | chr6  | 32179816 | 32179876 | + | 0     | 0     |
| ENSG00000103405 | RN7SL556F          | misc_RNA               | chr7  | 5871753  | 5872050  | - | 0     | 0     |
| ENSG00000103406 | RP11-445F          | antisense              | chr17 | 36861674 | 36936661 | - | 0     | 0     |
| ENSG00000103407 | MESTIT1_1          | misc_RNA               | chr7  | 1.3E+08  | 1.3E+08  | + | 0     | 0     |
| ENSG00000103408 | RP5-827E2          | lincRNA                | chr20 | 61434625 | 61437547 | - | 0     | 0     |
| ENSG00000103409 | DUX4L22            | unprocessed_transcript | chr10 | 1.34E+08 | 1.34E+08 | + | 0     | 0     |
| ENSG00000103410 | CH507-396          | protein_coding         | chr21 | 7768884  | 7770591  | - | 0     | 0     |
| ENSG00000103411 | IGHV1OR2:IG_V_gene |                        | chr21 | 10649400 | 10649835 | - | 0     | 0     |
| ENSG00000103412 | RP1-267D1          | antisense              | chr12 | 1.2E+08  | 1.2E+08  | + | 1.01  | 1.34  |
| ENSG00000103413 | RP4-794I6          | lincRNA                | chr20 | 3239705  | 3245382  | + | 0.21  | 0.31  |
| ENSG00000103414 | C10orf142          | protein_coding         | chr10 | 44292569 | 44294649 | + | 0     | 0     |
| ENSG00000103415 | RP11-485B          | processed_transcript   | chrX  | 52531709 | 52532051 | - | 0     | 0     |
| ENSG00000103416 | RP11-326C          | processed_transcript   | chr11 | 243099   | 243483   | - | 0     | 0     |
| ENSG00000103417 | RN7SL489F          | misc_RNA               | chr15 | 75268430 | 75268652 | + | 0     | 0     |
| ENSG00000103418 | ATP5A1P1           | processed_transcript   | chr9  | 66721158 | 66722760 | + | 0.07  | 0     |
| ENSG00000103419 | RP11-837J          | antisense              | chr12 | 1.1E+08  | 1.1E+08  | + | 0     | 0     |
| ENSG00000103420 | RP5-1184F          | antisense              | chr20 | 32509959 | 32520285 | + | 0.03  | 0     |
| ENSG00000103421 | RP11-989E          | unprocessed_transcript | chr16 | 32916974 | 32946392 | + | 0.85  | 0.95  |
| ENSG00000103422 | uc_338             | misc_RNA               | chr2  | 1.4E+08  | 1.4E+08  | - | 0     | 0     |
| ENSG00000103423 | Metazoa_S          | misc_RNA               | chr10 | 97297290 | 97297557 | + | 0     | 0     |
| ENSG00000103424 | RP11-699C          | sense_intronic         | chr18 | 50256036 | 50256461 | - | 0.19  | 0     |

|                                         |          |          |   |      |      |
|-----------------------------------------|----------|----------|---|------|------|
| ENSG0000(Six3os1_2 misc_RNA chr2        | 44934055 | 44934271 | + | 0    | 0    |
| ENSG0000(7SK misc_RNA chr1              | 1.2E+08  | 1.2E+08  | - | 0    | 0    |
| ENSG0000(RP1-209B9 processed_ chr20     | 7867327  | 7867614  | + | 0    | 0    |
| ENSG0000(RP11-326L unprocessε chr13     | 31483414 | 31483699 | - | 0    | 0    |
| ENSG0000(PCA3_2 misc_RNA chr9           | 76785782 | 76786190 | + | 0    | 0    |
| ENSG0000(GOLGA6L6 protein_co chr15      | 20531856 | 20541800 | - | 0    | 0    |
| ENSG0000(RP11-850A antisense chr18      | 54268346 | 54270028 | - | 0.1  | 0.19 |
| ENSG0000(SPDYE20P unprocessε chr7       | 6715630  | 6720982  | - | 0    | 0    |
| ENSG0000(AC145123. antisense chr8       | 1.43E+08 | 1.43E+08 | + | 0    | 0    |
| ENSG0000(RP11-157L processed_ chr9      | 41573156 | 41573453 | - | 0    | 0    |
| ENSG0000(RNU6-489F snRNA chr17          | 37907957 | 37908063 | + | 0    | 0    |
| ENSG0000(RP11-843B sense_intrε chr12    | 32109076 | 32109602 | + | 0.14 | 0    |
| ENSG0000(RNU1-6P snRNA chr1             | 16534081 | 16534224 | - | 0    | 0    |
| ENSG0000(RP11-356C unprocessε chr16     | 90174062 | 90175865 | - | 0    | 0    |
| ENSG0000(RP11-395E lincRNA chr9         | 66942703 | 66952344 | + | 0    | 0    |
| ENSG0000(RP11-325L antisense chr15      | 65049188 | 65049802 | - | 0    | 0    |
| ENSG0000(KB-68A7.2 lincRNA chr21        | 44494874 | 44495519 | + | 0    | 0    |
| ENSG0000(NPAP1P7 processed_ chr9        | 87825146 | 87825968 | + | 0    | 0    |
| ENSG0000(RP11-321C unprocessε chr13     | 45124015 | 45124143 | - | 0    | 0    |
| ENSG0000(SRCIN1 protein_co chr17        | 38530016 | 38605930 | - | 0.09 | 0.08 |
| ENSG0000(RP11-536C processed_ chr14     | 18889084 | 18890424 | - | 0    | 0    |
| ENSG0000(RP11-380N antisense chr13      | 26222191 | 26222654 | + | 0.84 | 0    |
| ENSG0000(RP11-486I lincRNA chr16        | 11797468 | 11798275 | + | 0.39 | 0.09 |
| ENSG0000(SNORD49A snoRNA chr17          | 16440036 | 16440106 | + | 0    | 0    |
| ENSG0000(Metazoa_S misc_RNA chr10       | 1.26E+08 | 1.26E+08 | + | 0    | 0    |
| ENSG0000(RP11-462D sense_intrε chr20    | 17565501 | 17565851 | - | 0    | 0    |
| ENSG0000(U1 snRNA KI270750.1            | 148668   | 148843   | + | 0    | 0    |
| ENSG0000(MIR6724-3 miRNA chr21          | 8388362  | 8388453  | + | 0    | 0    |
| ENSG0000(RP11-318A antisense chr17      | 76709760 | 76710045 | + | 0.79 | 0.43 |
| ENSG0000(CTD-3001H antisense chr19      | 47607873 | 47608454 | - | 0.36 | 1.46 |
| ENSG0000(Metazoa_S misc_RNA chr22       | 38281028 | 38281289 | - | 0    | 0    |
| ENSG0000(RP11-141N sense_intrε chr13    | 33336216 | 33336716 | - | 0    | 0    |
| ENSG0000(MIR8058 miRNA chr16            | 82688931 | 82689019 | + | 0    | 0    |
| ENSG0000(MIR8053 miRNA chr4             | 47652669 | 47652743 | + | 0    | 0    |
| ENSG0000(MIR6881 miRNA chr15            | 74411357 | 74411432 | - | 0    | 0    |
| ENSG0000(Metazoa_S misc_RNA chr2        | 47383160 | 47383421 | + | 0.61 | 0    |
| ENSG0000(RP5-1024G unprocessε chr1      | 53180921 | 53186900 | + | 0    | 0    |
| ENSG0000(GPR179 protein_co chr17        | 38325530 | 38343847 | - | 0.01 | 0.01 |
| ENSG0000(AC145212. protein_co GL000194. | 53590    | 115018   | - | 4.17 | 4.04 |
| ENSG0000(MIR6891 miRNA chr6             | 31355224 | 31355316 | - | 0    | 0    |
| ENSG0000(CH17-385C unprocessε chr1      | 1.46E+08 | 1.46E+08 | - | 0.2  | 0.48 |
| ENSG0000(RP3-425C1 processed_ chr6      | 1.23E+08 | 1.23E+08 | - | 0    | 0    |
| ENSG0000(RP1-139G2 processed_ chr6      | 25885419 | 25885751 | + | 0    | 0    |
| ENSG0000(5S_rRNA rRNA chr6              | 15522195 | 15522300 | - | 0    | 0    |
| ENSG0000(RP11-101E antisense chr9       | 61194211 | 61203446 | - | 0    | 0    |

|                 |            |             |            |          |          |   |       |       |
|-----------------|------------|-------------|------------|----------|----------|---|-------|-------|
| ENSG00000103338 | uc_338     | misc_RNA    | chr15      | 60677109 | 60677272 | - | 0     | 0     |
| ENSG00000103339 | 5S_rRNA    | rRNA        | chr8       | 48316669 | 48316770 | + | 0     | 0     |
| ENSG00000103340 | CH17-408M  | lincRNA     | chr1       | 1.47E+08 | 1.47E+08 | + | 0     | 0.18  |
| ENSG00000103341 | REXO1L6P   | transcribed | chr8       | 85826865 | 85828467 | - | 0     | 0     |
| ENSG00000103342 | RP11-173P  | lincRNA     | chr12      | 1.21E+08 | 1.21E+08 | + | 0.4   | 0.44  |
| ENSG00000103343 | RP5-1116H  | lincRNA     | chr20      | 5066082  | 5068154  | - | 0.11  | 0.13  |
| ENSG00000103344 | CTD-2206N  | unprocessed | chr17      | 39023394 | 39026742 | + | 0     | 0     |
| ENSG00000103345 | XXbac-BPG  | antisense   | chr6       | 32255284 | 32350039 | + | 0     | 0     |
| ENSG00000103346 | Y_RNA      | misc_RNA    | GL000195.  | 37434    | 37534    | - | 0     | 0     |
| ENSG00000103347 | RP11-1180  | processed   | chr15      | 22690454 | 22691158 | - | 0     | 0     |
| ENSG00000103348 | REXO1L5P   | processed   | chr8       | 85814767 | 85818783 | - | 0     | 0     |
| ENSG00000103349 | MIR3687-1  | miRNA       | chr21      | 8208844  | 8208904  | + | 0     | 0     |
| ENSG00000103350 | KDM5DP1    | processed   | chrY       | 20570222 | 20570519 | - | 0     | 0     |
| ENSG00000103351 | RP11-295D  | sense_intr  | chr16      | 4430522  | 4431103  | + | 0     | 0.27  |
| ENSG00000103352 | MARCKS     | protein_co  | chr6       | 1.14E+08 | 1.14E+08 | + | 28.97 | 30.62 |
| ENSG00000103353 | ZEB2_AS1   | misc_RNA    | chr2       | 1.45E+08 | 1.45E+08 | + | 0     | 0     |
| ENSG00000103354 | Metazoa_S  | misc_RNA    | chr2       | 10691538 | 10691831 | + | 0.35  | 0     |
| ENSG00000103355 | RP11-193E  | processed   | chr18      | 3025069  | 3025387  | - | 0     | 0     |
| ENSG00000103356 | RP11-538C  | lincRNA     | chr13      | 58165827 | 58209483 | + | 0     | 0     |
| ENSG00000103357 | CEBPB-AS1  | antisense   | chr20      | 50184598 | 50191498 | - | 0.06  | 0.09  |
| ENSG00000103358 | CTB-96E2.1 | sense_intr  | chr17      | 28373256 | 28373562 | + | 0     | 0.37  |
| ENSG00000103359 | RN7SL473F  | misc_RNA    | chr1       | 1.51E+08 | 1.51E+08 | - | 0     | 0     |
| ENSG00000103360 | CTC-492K1  | lincRNA     | chr19      | 40426115 | 40426702 | + | 0     | 0     |
| ENSG00000103361 | Metazoa_S  | misc_RNA    | chr5       | 24449351 | 24449615 | - | 0.46  | 0     |
| ENSG00000103362 | RP11-166B  | unprocessed | chr16      | 11926199 | 11926307 | + | 0     | 0     |
| ENSG00000103363 | RP11-732A  | lincRNA     | chr11      | 1.02E+08 | 1.02E+08 | - | 0.98  | 0.72  |
| ENSG00000103364 | TTC28-AS1  | misc_RNA    | chr22      | 27919384 | 27919545 | + | 0     | 2.2   |
| ENSG00000103365 | ZNF670     | protein_co  | chr1       | 2.47E+08 | 2.47E+08 | - | 0.95  | 0.76  |
| ENSG00000103366 | CTD-3035K  | lincRNA     | chr17      | 62626031 | 62626453 | + | 0     | 0     |
| ENSG00000103367 | RN7SL286F  | misc_RNA    | chr15      | 32602121 | 32602411 | + | 0     | 0.14  |
| ENSG00000103368 | AL137067.  | misc_RNA    | chr9       | 99368447 | 99368566 | + | 0     | 0     |
| ENSG00000103369 | RP11-349F  | unprocessed | chr8       | 17596312 | 17596378 | - | 0     | 0     |
| ENSG00000103370 | RN7SL628F  | misc_RNA    | chr15      | 30612724 | 30612960 | + | 0     | 0     |
| ENSG00000103371 | TCL6_3     | misc_RNA    | chr14      | 95670441 | 95670577 | + | 0     | 0     |
| ENSG00000103372 | HOTTIP_3   | misc_RNA    | chr7       | 27202302 | 27202638 | + | 0     | 0     |
| ENSG00000103373 | Metazoa_S  | misc_RNA    | chr6       | 11644067 | 11644343 | + | 0     | 0     |
| ENSG00000103374 | MIR6894    | miRNA       | chrX       | 53198889 | 53198945 | - | 0     | 0     |
| ENSG00000103375 | AC213203.  | protein_co  | KI270713.1 | 31698    | 32528    | - | 0     | 0     |
| ENSG00000103376 | RP11-147L  | lincRNA     | chr17      | 68133201 | 68135935 | + | 1.12  | 1.01  |
| ENSG00000103377 | MIR6165    | miRNA       | chr17      | 49510817 | 49510900 | + | 0     | 0     |
| ENSG00000103378 | AL022345.  | unprocessed | chr10      | 42578500 | 42578727 | + | 0     | 0     |
| ENSG00000103379 | PKD1L3     | protein_co  | chr16      | 71929538 | 71999978 | - | 0.01  | 0     |
| ENSG00000103380 | RP11-762H  | antisense   | chr15      | 78299701 | 78299924 | + | 0     | 0     |
| ENSG00000103381 | RN7SL321F  | misc_RNA    | chr3       | 48379834 | 48380132 | + | 0     | 0     |
| ENSG00000103382 | SAGE3P     | unprocessed | chrX       | 1.36E+08 | 1.36E+08 | - | 0     | 0     |

|                     |             |       |          |          |   |      |      |
|---------------------|-------------|-------|----------|----------|---|------|------|
| ENSG0000055_rRNA    | rRNA        | chr17 | 37940704 | 37940790 | - | 0    | 0    |
| ENSG00000RP11-1082  | processed   | chr9  | 66879454 | 66879940 | - | 0    | 0    |
| ENSG00000RP11-676J  | lincRNA     | chr17 | 795306   | 795794   | + | 0    | 0    |
| ENSG00000ACEA_U3    | snoRNA      | chrX  | 70846079 | 70846295 | - | 0    | 0    |
| ENSG00000RP11-255H  | unprocessε  | chr19 | 23842549 | 23843230 | + | 0    | 0    |
| ENSG00000GPIHBP1    | protein_co  | chr8  | 1.43E+08 | 1.43E+08 | + | 0    | 0    |
| ENSG00000RP11-93B1  | antisense   | chr20 | 62648961 | 62650767 | - | 0.25 | 0.48 |
| ENSG00000RP11-681L  | unprocessε  | chr2  | 61858137 | 61860298 | + | 0    | 0    |
| ENSG00000RP11-144M  | processed   | chrX  | 63087071 | 63088664 | + | 0    | 0    |
| ENSG00000RP11-456J  | unprocessε  | chr15 | 31787494 | 31787734 | + | 0    | 0    |
| ENSG00000RP11-697E  | antisense   | chr17 | 37642947 | 37684252 | + | 0    | 0    |
| ENSG00000uc_338     | misc_RNA    | chr2  | 2.06E+08 | 2.06E+08 | + | 0.15 | 0    |
| ENSG00000RP11-278A  | antisense   | chr16 | 87683945 | 87684477 | - | 0    | 0    |
| ENSG00000RP11-467N  | unprocessε  | chr15 | 23140563 | 23144422 | - | 0    | 0    |
| ENSG00000RN7SL802F  | misc_RNA    | chr5  | 1.02E+08 | 1.02E+08 | + | 0    | 0    |
| ENSG00000BSNDP3     | processed   | chr20 | 26071988 | 26072351 | - | 0    | 0    |
| ENSG00000RP11-944L  | processed   | chr3  | 44528955 | 44529391 | - | 0    | 0    |
| ENSG00000Metazoa_S  | misc_RNA    | chr19 | 40450225 | 40450480 | + | 0    | 0.54 |
| ENSG00000CTD-2095E  | lincRNA     | chr17 | 32127595 | 32128454 | + | 0.44 | 0.48 |
| ENSG00000SNORD65    | snoRNA      | chr17 | 16441226 | 16441298 | + | 0    | 0    |
| ENSG00000RP3-393B1  | processed   | chr1  | 43104086 | 43104497 | + | 0    | 0    |
| ENSG00000OR52Q1P    | unprocessε  | chr11 | 5903767  | 5904448  | + | 0    | 0    |
| ENSG00000RN7SL495F  | misc_RNA    | chr15 | 22609141 | 22609377 | - | 0    | 0    |
| ENSG00000RP11-541G  | unprocessε  | chrX  | 55520382 | 55520714 | - | 0    | 0    |
| ENSG00000OFD1P16Y   | unprocessε  | chrY  | 21817579 | 21818218 | - | 0    | 0    |
| ENSG00000MIR8078    | miRNA       | chr18 | 112256   | 112339   | - | 0    | 0    |
| ENSG00000SMAD5-AS   | misc_RNA    | chr5  | 1.36E+08 | 1.36E+08 | + | 0    | 0    |
| ENSG00000RP11-378A  | lincRNA     | chr8  | 2589985  | 2623382  | - | 0    | 0    |
| ENSG00000LINC01796  | lincRNA     | chr2  | 1.03E+08 | 1.03E+08 | - | 0    | 0    |
| ENSG00000NF1P10     | transcribec | chr14 | 18709478 | 18712643 | - | 0    | 0    |
| ENSG00000LLNLF-187I | protein_co  | chr19 | 46424697 | 46428951 | - | 0.01 | 0.01 |
| ENSG00000CTD-2319I  | unprocessε  | chr17 | 60124110 | 60125474 | - | 0    | 0    |
| ENSG00000MIR8077    | miRNA       | chr19 | 42351131 | 42351205 | + | 0    | 0    |
| ENSG00000RP11-9E17  | sense_intrc | chr18 | 26542971 | 26545791 | - | 0.13 | 0.17 |
| ENSG00000RP13-347D  | protein_co  | chrX  | 1.19E+08 | 1.19E+08 | + | 0    | 0    |
| ENSG00000RP11-298C  | sense_intrc | chr3  | 71276087 | 71289616 | - | 0    | 0    |
| ENSG00000ZNF630-AS  | antisense   | chrX  | 48056310 | 48066583 | + | 0    | 0    |
| ENSG00000HOXB13-A   | misc_RNA    | chr17 | 48723692 | 48723772 | + | 0    | 0    |
| ENSG00000RP11-452L  | antisense   | chr16 | 31428180 | 31428646 | + | 0    | 0    |
| ENSG00000RP11-746P  | unprocessε  | chr7  | 65290429 | 65292776 | + | 0    | 0    |
| ENSG00000RP11-73M   | sense_intrc | chr13 | 1.13E+08 | 1.13E+08 | + | 0.12 | 0    |
| ENSG00000RP11-139H  | sense_intrc | chr15 | 55346347 | 55346752 | - | 0.21 | 0.45 |
| ENSG00000RP11-359P  | unprocessε  | chr13 | 60322591 | 60322766 | + | 0    | 0    |
| ENSG00000RP5-1057B  | lincRNA     | chr20 | 38103524 | 38104961 | - | 0.08 | 0.09 |
| ENSG00000HOTTIP_4   | misc_RNA    | chr7  | 27206139 | 27206303 | + | 0    | 0    |

|                     |             |           |          |          |   |      |      |
|---------------------|-------------|-----------|----------|----------|---|------|------|
| ENSG0000(OR13C5     | protein_co  | chr9      | 1.05E+08 | 1.05E+08 | - | 0    | 0    |
| ENSG0000(RP3-468O1  | sense_intr  | chr20     | 34476205 | 34476787 | + | 0    | 0.27 |
| ENSG0000(RP11-434E  | lincRNA     | chr16     | 54290965 | 54292422 | + | 0.24 | 0.13 |
| ENSG0000(GOLGA8IP   | transcribec | chr15     | 22607540 | 22617854 | - | 0.39 | 0.34 |
| ENSG0000(CTD-2525I  | processed_  | chr19     | 52241765 | 52242440 | - | 0    | 0    |
| ENSG0000(AC063961.  | misc_RNA    | chr10     | 24255246 | 24255333 | + | 0    | 0    |
| ENSG0000(DLEU2_4    | misc_RNA    | chr1      | 63549227 | 63549284 | - | 0    | 0    |
| ENSG0000(RP11-545P  | sense_intr  | chr12     | 1.13E+08 | 1.13E+08 | + | 0.24 | 0    |
| ENSG0000(uc_338     | misc_RNA    | chr5      | 1.47E+08 | 1.47E+08 | + | 0    | 0    |
| ENSG0000(MIR6134    | miRNA       | chrX      | 28495555 | 28495663 | - | 0    | 0    |
| ENSG0000(pRNA       | misc_RNA    | chr21     | 14075950 | 14076038 | - | 0    | 0    |
| ENSG0000(RP11-292B  | processed_  | chr9      | 67203635 | 67208072 | - | 0    | 0    |
| ENSG0000(RP11-157E  | unprocess   | chr8      | 1.34E+08 | 1.34E+08 | + | 0    | 0    |
| ENSG0000(Xist_exon4 | misc_RNA    | chrX      | 73831145 | 73831270 | - | 0    | 0    |
| ENSG0000(Metazoa_S  | misc_RNA    | chr15     | 84642487 | 84642763 | - | 1.94 | 0    |
| ENSG0000(CTC-268N1  | sense_intr  | chr17     | 37034668 | 37043252 | + | 0    | 0    |
| ENSG0000(RP4-616B8  | sense_intr  | chr20     | 38962472 | 38962993 | + | 0    | 0    |
| ENSG0000(RN7SL428F  | misc_RNA    | chr15     | 85210053 | 85210299 | - | 0    | 0    |
| ENSG0000(ST7-AS1_2  | misc_RNA    | chr7      | 1.17E+08 | 1.17E+08 | + | 0    | 0    |
| ENSG0000(NEFL       | protein_co  | chr8      | 24950955 | 24957110 | - | 0    | 0    |
| ENSG0000(CTD-3116E  | lincRNA     | chr19     | 9721903  | 9722410  | + | 0    | 0    |
| ENSG0000(MIR6806    | miRNA       | chr19     | 58334688 | 58334751 | + | 0    | 0    |
| ENSG0000(RP11-333J  | sense_intr  | chr17     | 36998598 | 37000034 | + | 0    | 0    |
| ENSG0000(MIR7845    | miRNA       | chr2      | 2.07E+08 | 2.07E+08 | + | 0    | 0    |
| ENSG0000(RN7SL575F  | misc_RNA    | chr2      | 95003545 | 95003843 | - | 0    | 0    |
| ENSG0000(Metazoa_S  | misc_RNA    | chr3      | 59584169 | 59584445 | + | 0    | 0    |
| ENSG0000(RP11-946P  | sense_intr  | chr12     | 1.1E+08  | 1.1E+08  | + | 0.13 | 0.42 |
| ENSG0000(RP11-961A  | antisense   | chr17     | 1684726  | 1685151  | + | 0.96 | 0.63 |
| ENSG0000(RP11-49E1  | processed_  | chr9      | 60546920 | 60547154 | - | 0    | 0    |
| ENSG0000(NEAT1_3    | misc_RNA    | chr11     | 65423960 | 65424118 | + | 0    | 0    |
| ENSG0000(AC005363.  | lincRNA     | chr16     | 1971655  | 1971896  | - | 0    | 0    |
| ENSG0000(Y_RNA      | misc_RNA    | chr8      | 80484589 | 80484683 | - | 0    | 0    |
| ENSG0000(Metazoa_S  | misc_RNA    | chrX      | 47476822 | 47477152 | - | 0    | 0.33 |
| ENSG0000(RP11-321L  | unprocess   | chr9      | 23955760 | 23956444 | + | 0    | 0    |
| ENSG0000(RNVU1-4    | snRNA       | chr1      | 1.21E+08 | 1.21E+08 | + | 0    | 0    |
| ENSG0000(RP1-138B7  | protein_co  | chr20     | 43540171 | 43569498 | + | 0    | 0    |
| ENSG0000(U6         | snRNA       | chr17     | 90796    | 90899    | - | 0    | 0    |
| ENSG0000(Metazoa_S  | misc_RNA    | chr1      | 32269338 | 32269597 | - | 0    | 0    |
| ENSG0000(RP11-12A2  | processed_  | chr9      | 67797221 | 67797500 | + | 0    | 0.45 |
| ENSG0000(CTC-276P9  | antisense   | chr5      | 1.35E+08 | 1.35E+08 | + | 0    | 0    |
| ENSG0000(RP11-597N  | antisense   | chr17     | 12982613 | 12983002 | - | 0    | 0    |
| ENSG0000(RP11-374N  | processed_  | chr9      | 61858710 | 61858908 | + | 0    | 0    |
| ENSG0000(Metazoa_S  | misc_RNA    | chr2      | 1.09E+08 | 1.09E+08 | - | 0    | 0    |
| ENSG0000(BX072566.  | protein_co  | GL000213. | 108007   | 139659   | - | 0    | 0    |
| ENSG0000(PGM5P3-A   | lincRNA     | chr9      | 72674    | 88826    | + | 0.24 | 0.2  |

|                     |             |            |          |          |   |      |      |
|---------------------|-------------|------------|----------|----------|---|------|------|
| ENSG0000(CCL3       | protein_co  | chr17      | 36088256 | 36090169 | - | 0    | 0    |
| ENSG0000(Y_RNA      | misc_RNA    | chr14      | 49839401 | 49839493 | - | 0    | 0    |
| ENSG0000(Metazoa_S  | misc_RNA    | chr3       | 1.09E+08 | 1.09E+08 | + | 0    | 0    |
| ENSG0000(MIR8061    | miRNA       | chr19      | 54645309 | 54645383 | + | 0    | 0    |
| ENSG0000(RN7SL469F  | misc_RNA    | chr15      | 30143733 | 30143969 | + | 0    | 0    |
| ENSG0000(RP11-467J: | protein_co  | chr16      | 53035690 | 53052873 | - | 2.65 | 3.54 |
| ENSG0000(RP11-471N  | processed_  | chr13      | 87765752 | 87765881 | - | 0    | 0    |
| ENSG0000(RP11-275A  | processed_  | chr9       | 29317833 | 29318952 | + | 0    | 0    |
| ENSG0000(RP11-1212  | unprocessε  | chr16      | 18357026 | 18357136 | + | 0    | 0    |
| ENSG0000(CTD-2014B  | sense_intrε | chr14      | 65986967 | 65987447 | - | 0    | 0    |
| ENSG0000(CDKN2B-A:  | misc_RNA    | chr9       | 22117665 | 22117814 | + | 0    | 0    |
| ENSG0000(RP11-255N  | lincRNA     | chr15      | 94841059 | 95169864 | + | 0    | 0    |
| ENSG0000(RP11-640N  | unprocessε  | chr1       | 1.46E+08 | 1.46E+08 | + | 0    | 0    |
| ENSG0000(XXbac-BPG  | antisense   | chr6       | 29036021 | 29076524 | + | 0    | 0    |
| ENSG0000(RP11-74J1: | sense_intrε | chr13      | 41229180 | 41229676 | - | 0.15 | 0.5  |
| ENSG0000(AC136352.  | protein_co  | KI270727.1 | 100123   | 101141   | - | 0    | 0    |
| ENSG0000(Metazoa_S  | misc_RNA    | chr2       | 1.31E+08 | 1.31E+08 | + | 0.23 | 0    |
| ENSG0000(AC009133.  | protein_co  | chr16      | 29663279 | 29695144 | + | 1.92 | 2.55 |
| ENSG0000(RP11-339A  | unprocessε  | chr1       | 80124004 | 80124361 | + | 0    | 0    |
| ENSG0000(pRNA       | misc_RNA    | chr21      | 8250060  | 8250149  | + | 0    | 0    |
| ENSG0000(RP11-386G  | processed_  | chr12      | 49075039 | 49075802 | + | 0    | 0    |
| ENSG0000(RP13-483F  | unprocessε  | chrX       | 1.07E+08 | 1.07E+08 | + | 0    | 0    |
| ENSG0000(AC004878.  | antisense   | chr7       | 75225433 | 75234310 | + | 0    | 0    |
| ENSG0000(Metazoa_S  | misc_RNA    | chr15      | 51858070 | 51858352 | - | 0    | 0    |
| ENSG0000(U1         | snRNA       | chr1       | 1.45E+08 | 1.45E+08 | + | 0    | 0    |
| ENSG0000(MIR6739    | miRNA       | chr1       | 2.02E+08 | 2.02E+08 | + | 0    | 0    |
| ENSG0000(RP11-305D  | antisense   | chr13      | 48340797 | 48341330 | - | 0    | 0    |
| ENSG0000(RP11-427L: | sense_intrε | chr10      | 1.19E+08 | 1.19E+08 | - | 0.3  | 0.78 |
| ENSG0000(RP11-697E  | antisense   | chr17      | 37609739 | 37613841 | + | 0    | 0    |
| ENSG0000(DLEU2_2    | misc_RNA    | chr1       | 63549374 | 63549463 | - | 0    | 0    |
| ENSG0000(XXbac-B33  | processed_  | chr22      | 18527157 | 18527626 | + | 0    | 0    |
| ENSG0000(RP11-358N  | lincRNA     | chr20      | 32355053 | 32355734 | + | 0.1  | 0.11 |
| ENSG0000(AP003900.  | lincRNA     | chr21      | 10328411 | 10342737 | - | 0    | 0    |
| ENSG0000(HOTAIRM1   | misc_RNA    | chr7       | 27099967 | 27100111 | + | 0    | 0    |
| ENSG0000(RP11-115D  | antisense   | chr4       | 89747802 | 89755853 | + | 0    | 0    |
| ENSG0000(RP11-459C  | lincRNA     | chr9       | 42978851 | 42979918 | + | 0    | 0    |
| ENSG0000(MIR6770-2  | miRNA       | chr16      | 16329305 | 16329364 | + | 0    | 0    |
| ENSG0000(RP11-734K  | lincRNA     | chr2       | 97281904 | 97291780 | + | 6.98 | 9.88 |
| ENSG0000(CH17-13I2: | unprocessε  | chr1       | 1.43E+08 | 1.43E+08 | - | 1.13 | 7.18 |
| ENSG0000(RP11-498N  | processed_  | chr1       | 2.43E+08 | 2.43E+08 | + | 0    | 0    |
| ENSG0000(RP11-434C  | processed_  | chr12      | 11507162 | 11507408 | - | 0    | 0    |
| ENSG0000(PGBD4P2    | unprocessε  | chr20      | 44841925 | 44842539 | - | 0    | 0    |
| ENSG0000(CTD-2314B  | processed_  | chr14      | 19154134 | 19155089 | + | 0    | 0    |
| ENSG0000(RP11-378I: | processed_  | chr9       | 19967239 | 19967994 | - | 0    | 0    |
| ENSG0000(MIR6856    | miRNA       | chr9       | 1.31E+08 | 1.31E+08 | + | 0    | 0    |

|                  |           |                |            |          |          |   |       |       |
|------------------|-----------|----------------|------------|----------|----------|---|-------|-------|
| ENSG000001000000 | RP11-651L | antisense      | chr12      | 1.06E+08 | 1.06E+08 | + | 0.38  | 0.54  |
| ENSG000001000000 | U6        | snRNA          | chrX       | 86481028 | 86481130 | + | 0     | 0     |
| ENSG000001000000 | CTD-2311M | lincRNA        | chr15      | 74379083 | 74390535 | + | 0     | 0     |
| ENSG000001000000 | RP1-34B20 | unprocessed    | chr6       | 26219045 | 26219240 | + | 0     | 0     |
| ENSG000001000000 | Metazoa_S | misc_RNA       | chrX       | 46553522 | 46553775 | - | 0     | 0     |
| ENSG000001000000 | MIR6827   | miRNA          | chr3       | 1.34E+08 | 1.34E+08 | - | 0     | 0     |
| ENSG000001000000 | RP4-635E1 | protein_coding | chr1       | 11012662 | 11030528 | + | 0.15  | 0.21  |
| ENSG000001000000 | RP11-143K | antisense      | chr17      | 73202968 | 73203431 | - | 0.67  | 0.55  |
| ENSG000001000000 | ZFAT-AS1  | _misc_RNA      | chr8       | 1.35E+08 | 1.35E+08 | + | 0     | 0     |
| ENSG000001000000 | TRAC      | TR_C_gene      | chr14      | 22547506 | 22552154 | + | 0.13  | 0.21  |
| ENSG000001000000 | CH17-469C | unprocessed    | chr9       | 43109866 | 43125905 | - | 0     | 0     |
| ENSG000001000000 | RP11-693J | lincRNA        | chr12      | 91634887 | 91635644 | + | 0     | 0     |
| ENSG000001000000 | RNA5-8S5  | rRNA           | chr21      | 8256781  | 8256933  | + | 13.92 | 37.54 |
| ENSG000001000000 | Metazoa_S | misc_RNA       | chr8       | 69851148 | 69851436 | - | 0     | 0     |
| ENSG000001000000 | GOLGA6L1  | transcribed    | chr15      | 82519590 | 82526412 | + | 0.1   | 0.15  |
| ENSG000001000000 | RP11-757C | processed      | chr18      | 14346214 | 14346923 | - | 0     | 0     |
| ENSG000001000000 | CTC-435M  | sense_intronic | chr19      | 41373971 | 41374419 | + | 0.88  | 2.13  |
| ENSG000001000000 | H2AFB3    | protein_coding | chrX       | 1.55E+08 | 1.55E+08 | - | 0     | 0     |
| ENSG000001000000 | RP11-43A1 | processed      | chr3       | 86816740 | 86817036 | + | 0     | 0     |
| ENSG000001000000 | RP11-404J | unprocessed    | chr2       | 95460144 | 95460336 | - | 0     | 0     |
| ENSG000001000000 | AC006262  | unprocessed    | chr19      | 46249394 | 46250163 | - | 0     | 0     |
| ENSG000001000000 | RP11-60L3 | antisense      | chr15      | 74311516 | 74319688 | - | 0     | 0     |
| ENSG000001000000 | DLEU2_5   | misc_RNA       | chr13      | 50075570 | 50075653 | + | 0     | 0     |
| ENSG000001000000 | U3        | snoRNA         | chr14      | 1.01E+08 | 1.01E+08 | - | 0     | 0     |
| ENSG000001000000 | RP11-26F2 | processed      | chr15      | 22756172 | 22756729 | - | 0     | 0     |
| ENSG000001000000 | RP11-285G | processed      | chr10      | 45016080 | 45147221 | - | 0     | 0     |
| ENSG000001000000 | ABC7-4240 | protein_coding | chr10      | 47750864 | 47763592 | - | 0.77  | 1.01  |
| ENSG000001000000 | MIR6719   | miRNA          | chr19      | 39829716 | 39829802 | - | 0     | 0     |
| ENSG000001000000 | AC136616  | protein_coding | KI270728.1 | 1167457  | 1257196  | + | 0     | 0     |
| ENSG000001000000 | RN7SL261F | misc_RNA       | chr1       | 1.48E+08 | 1.48E+08 | + | 0     | 0     |
| ENSG000001000000 | CTD-2588E | lincRNA        | chr14      | 56117316 | 56117990 | - | 0.2   | 0.22  |
| ENSG000001000000 | Vax2os1_3 | misc_RNA       | chr2       | 70900155 | 70900351 | + | 0     | 0     |
| ENSG000001000000 | LLNLF-136 | unprocessed    | chr19      | 16037009 | 16038455 | - | 0     | 0     |
| ENSG000001000000 | RP11-365P | lincRNA        | chr13      | 1.11E+08 | 1.11E+08 | + | 0.28  | 0.17  |
| ENSG000001000000 | RBM22P4   | processed      | chr6       | 45098021 | 45099260 | + | 0     | 0     |
| ENSG000001000000 | RP11-72I8 | unprocessed    | chr16      | 15358978 | 15362674 | + | 0     | 0     |
| ENSG000001000000 | Metazoa_S | misc_RNA       | chr22      | 49846456 | 49846720 | + | 0     | 0     |
| ENSG000001000000 | RN7SL763F | misc_RNA       | chr9       | 39886861 | 39887144 | - | 0     | 0     |
| ENSG000001000000 | HIST1H3F  | protein_coding | chr6       | 26250195 | 26250605 | - | 0     | 0     |
| ENSG000001000000 | Y_RNA     | misc_RNA       | chr21      | 5597390  | 5597490  | + | 0     | 0     |
| ENSG000001000000 | PGM5P2    | transcribed    | chr9       | 41006999 | 41074617 | - | 0.45  | 0.26  |
| ENSG000001000000 | RP11-775C | lincRNA        | chr15      | 80999593 | 80999981 | - | 3.55  | 1.71  |
| ENSG000001000000 | MIR6786   | miRNA          | chr17      | 81693757 | 81693869 | + | 0     | 0     |
| ENSG000001000000 | SNORD116  | snoRNA         | chr15      | 25088804 | 25088895 | + | 0     | 0     |
| ENSG000001000000 | RP11-355N | sense_intronic | chr15      | 58456188 | 58456348 | + | 0     | 0     |



|                     |            |            |          |          |   |       |       |
|---------------------|------------|------------|----------|----------|---|-------|-------|
| ENSG0000( PSMB3     | protein_co | chr17      | 38752736 | 38764231 | + | 58.89 | 66.84 |
| ENSG0000( Metazoa_S | misc_RNA   | chr13      | 40730981 | 40731253 | + | 0     | 0     |
| ENSG0000( AC005752. | processed_ | chr5       | 1.41E+08 | 1.41E+08 | + | 0     | 0     |
| ENSG0000( RP11-244G | lincRNA    | chr6       | 81551686 | 81554092 | + | 0     | 0     |
| ENSG0000( RP11-681H | lincRNA    | chr14      | 89156743 | 89157574 | + | 0     | 0     |
| ENSG0000( RP11-747E | processed_ | chr11      | 23886135 | 23893557 | + | 0     | 0     |
| ENSG0000( RP11-15A1 | sense_intr | chr19      | 43976815 | 43977448 | + | 0.54  | 0     |
| ENSG0000( Six3os1_4 | misc_RNA   | chr2       | 44935585 | 44935908 | + | 0     | 0     |
| ENSG0000( MIR6738   | miRNA      | chr1       | 1.56E+08 | 1.56E+08 | - | 0     | 0     |
| ENSG0000( Y_RNA     | misc_RNA   | chr5       | 79562745 | 79562846 | - | 0     | 0     |
| ENSG0000( CTD-2013M | lincRNA    | chr19      | 16352462 | 16353182 | - | 0     | 0     |
| ENSG0000( uc_338    | misc_RNA   | chr14      | 93637179 | 93637338 | + | 0     | 0     |
| ENSG0000( AL137067. | misc_RNA   | chr9       | 99357827 | 99357957 | + | 0     | 0     |
| ENSG0000( RP5-1054A | sense_intr | chr20      | 38233251 | 38233799 | - | 0.13  | 0.29  |
| ENSG0000( ZNFX1-AS1 | misc_RNA   | chr20      | 49278427 | 49278624 | + | 0     | 0     |
| ENSG0000( RP11-269C | lincRNA    | chr13      | 44369365 | 44369877 | - | 0.14  | 0     |
| ENSG0000( AC141272. | protein_co | KI270728.1 | 1270984  | 1271271  | + | 0     | 0     |
| ENSG0000( RP11-714M | lincRNA    | chr18      | 57427133 | 57432112 | + | 0     | 0     |
| ENSG0000( RP11-103B | sense_intr | chr12      | 1.17E+08 | 1.17E+08 | + | 0     | 0.11  |
| ENSG0000( MIR5701-2 | miRNA      | chr15      | 21513959 | 21514040 | + | 0     | 0     |
| ENSG0000( MIR6811   | miRNA      | chr2       | 2.38E+08 | 2.38E+08 | + | 0     | 0     |
| ENSG0000( SNORD30   | snoRNA     | chr11      | 62853663 | 62853732 | - | 0     | 0     |
| ENSG0000( RP11-756G | lincRNA    | chr12      | 92247756 | 92363832 | - | 0     | 0     |
| ENSG0000( RP11-421K | unprocess  | chr2       | 89203509 | 89203906 | - | 0     | 0     |
| ENSG0000( RP11-154H | antisense  | chr3       | 71581721 | 71628558 | + | 0.08  | 0.34  |
| ENSG0000( AC233755. | protein_co | KI270726.1 | 26241    | 26534    | + | 0     | 0     |
| ENSG0000( H2AFB2    | protein_co | chrX       | 1.55E+08 | 1.55E+08 | + | 0.54  | 0     |
| ENSG0000( SMAD5-AS  | misc_RNA   | chr5       | 1.36E+08 | 1.36E+08 | + | 0     | 0     |
| ENSG0000( PRAMEF34  | unprocess  | chr1       | 13095179 | 13097971 | - | 0     | 0     |
| ENSG0000( RP11-282A | lincRNA    | chr13      | 1.07E+08 | 1.07E+08 | - | 0     | 0     |
| ENSG0000( SCARNA15  | scaRNA     | chr15      | 82755945 | 82756071 | + | 0     | 0     |
| ENSG0000( GOLGA6L2  | protein_co | chr15      | 22458903 | 22469230 | + | 0     | 0     |
| ENSG0000( CTC-311G1 | unprocess  | chr5       | 1.51E+08 | 1.51E+08 | + | 0     | 0     |
| ENSG0000( AC138649. | processed_ | chr15      | 22714939 | 22715225 | + | 0     | 0     |
| ENSG0000( RP11-250H | processed_ | chr9       | 64498517 | 64498745 | + | 0     | 0     |
| ENSG0000( FAM230A   | protein_co | chr22      | 18422244 | 18500594 | + | 0     | 0.02  |
| ENSG0000( MIR6817   | miRNA      | chr22      | 25455646 | 25455711 | + | 0     | 0     |
| ENSG0000( RP11-33N1 | antisense  | chr12      | 1.18E+08 | 1.18E+08 | - | 0     | 0.1   |
| ENSG0000( RP11-467P | unprocess  | chrX       | 30821815 | 30823407 | - | 0     | 0     |
| ENSG0000( CTD-2269E | processed_ | chr5       | 28927298 | 28927459 | - | 0     | 0     |
| ENSG0000( RP11-129N | antisense  | chr10      | 1.17E+08 | 1.17E+08 | - | 0.52  | 0.4   |
| ENSG0000( TRBV17    | TR_V_gene  | chr7       | 1.43E+08 | 1.43E+08 | + | 0     | 0     |
| ENSG0000( XXbac-BPG | processed_ | chr6       | 29450210 | 29450558 | + | 0     | 0     |
| ENSG0000( RP11-122G | processed_ | chr1       | 1.61E+08 | 1.61E+08 | - | 0     | 0     |
| ENSG0000( NLRP3P1   | unprocess  | chrX       | 1.08E+08 | 1.08E+08 | + | 0.13  | 0.07  |

|                 |            |            |            |          |          |   |      |      |
|-----------------|------------|------------|------------|----------|----------|---|------|------|
| ENSG00000108450 | SNORA50C   | snoRNA     | chr17      | 64146339 | 64146471 | + | 0    | 0    |
| ENSG00000108451 | MIR6846    | miRNA      | chr8       | 1.44E+08 | 1.44E+08 | - | 0    | 0    |
| ENSG00000108452 | MIR8081    | miRNA      | chr9       | 1.07E+08 | 1.07E+08 | + | 0    | 0    |
| ENSG00000108453 | U6         | snRNA      | KI270727.1 | 34890    | 34996    | + | 0    | 0    |
| ENSG00000108454 | MIR6746    | miRNA      | chr11      | 61878216 | 61878278 | - | 0    | 0    |
| ENSG00000108455 | SRD5A2     | protein_co | chr2       | 31522480 | 31581067 | - | 0    | 0    |
| ENSG00000108456 | RP11-114F  | antisense  | chr12      | 64451591 | 64452901 | - | 0.04 | 0    |
| ENSG00000108457 | MLECP1     | processed_ | chr18      | 44522366 | 44523074 | + | 0    | 0    |
| ENSG00000108458 | Metazoa_S  | misc_RNA   | chrX       | 97081674 | 97081956 | + | 0    | 0.89 |
| ENSG00000108459 | RP5-851M   | lincRNA    | chr20      | 23320958 | 23325352 | - | 0    | 0    |
| ENSG00000108460 | U2         | snRNA      | chr17      | 43271369 | 43271559 | - | 0.28 | 0    |
| ENSG00000108461 | MIR7850    | miRNA      | chr19      | 2630715  | 2630793  | + | 0    | 0    |
| ENSG00000108462 | RP11-23B5  | processed_ | chr18      | 48478282 | 48478491 | - | 0    | 0    |
| ENSG00000108463 | RP11-333J  | sense_intr | chr17      | 36980167 | 36980422 | + | 0    | 0    |
| ENSG00000108464 | MIR8089    | miRNA      | chr5       | 1.81E+08 | 1.81E+08 | - | 0    | 0    |
| ENSG00000108465 | DLEU2_1    | misc_RNA   | chr13      | 50044649 | 50044768 | + | 0    | 0    |
| ENSG00000108466 | DDX6P2     | processed_ | chr13      | 86275493 | 86277262 | + | 0    | 0    |
| ENSG00000108467 | uc_338     | misc_RNA   | chr1       | 29171285 | 29171453 | - | 0.63 | 0    |
| ENSG00000108468 | U1         | snRNA      | chr1       | 1.45E+08 | 1.45E+08 | - | 0    | 0    |
| ENSG00000108469 | MIR8067    | miRNA      | chr15      | 62304658 | 62304734 | - | 0    | 0    |
| ENSG00000108470 | RP11-958N  | unprocess  | chr16      | 16351545 | 16351653 | - | 0    | 0    |
| ENSG00000108471 | FTX_5      | misc_RNA   | chrX       | 74293357 | 74293574 | + | 0    | 0    |
| ENSG00000108472 | Telomeras  | misc_RNA   | chr3       | 1.7E+08  | 1.7E+08  | - | 0    | 0.4  |
| ENSG00000108473 | U6         | snRNA      | KI270727.1 | 156089   | 156195   | - | 0    | 0    |
| ENSG00000108474 | RP11-122L  | lincRNA    | chrY       | 4993858  | 4999650  | - | 0    | 0    |
| ENSG00000108475 | OR52E5     | protein_co | chr11      | 5900777  | 5902090  | + | 0    | 0    |
| ENSG00000108476 | RP11-4N23  | lincRNA    | chr12      | 13540231 | 13544540 | + | 0    | 0    |
| ENSG00000108477 | RP5-965G2  | lincRNA    | chr20      | 25229150 | 25231933 | + | 0.18 | 0.31 |
| ENSG00000108478 | MIAT_exor  | misc_RNA   | chr22      | 26671402 | 26671550 | + | 0    | 8.5  |
| ENSG00000108479 | MIR8075    | miRNA      | chr13      | 1.13E+08 | 1.13E+08 | + | 0    | 0    |
| ENSG00000108480 | RP11-677N  | sense_intr | chr12      | 65830750 | 65831050 | + | 0    | 0    |
| ENSG00000108481 | RN7SL478F  | misc_RNA   | chr7       | 97998325 | 97998622 | + | 0    | 0    |
| ENSG00000108482 | SNORD3D    | snoRNA     | chr17      | 19112419 | 19112636 | - | 0    | 0    |
| ENSG00000108483 | uc_338     | misc_RNA   | chr2       | 1.75E+08 | 1.75E+08 | - | 1.19 | 0    |
| ENSG00000108484 | Metazoa_S  | misc_RNA   | chr22      | 20070716 | 20070965 | + | 0    | 0    |
| ENSG00000108485 | RP11-90D4  | processed_ | chr12      | 8340182  | 8340397  | + | 0.79 | 0    |
| ENSG00000108486 | RP11-679B  | antisense  | chr16      | 79202624 | 79206739 | - | 0    | 0    |
| ENSG00000108487 | SENP3-EIF4 | protein_co | chr17      | 7563287  | 7578715  | + | 0    | 0.15 |
| ENSG00000108488 | Metazoa_S  | misc_RNA   | chr1       | 29041199 | 29041480 | + | 0    | 0    |
| ENSG00000108489 | RP11-45A1  | antisense  | chr10      | 1.32E+08 | 1.32E+08 | + | 0.29 | 0.97 |
| ENSG00000108490 | Metazoa_S  | misc_RNA   | chr20      | 38711821 | 38712103 | - | 0    | 0    |
| ENSG00000108491 | HOXA11-A   | misc_RNA   | chr7       | 27186892 | 27187124 | + | 0    | 0    |
| ENSG00000108492 | ZNFX1-AS1  | misc_RNA   | chr20      | 49280485 | 49280571 | + | 0    | 0    |
| ENSG00000108493 | SPRY4-IT1  | misc_RNA   | chr5       | 1.42E+08 | 1.42E+08 | + | 0    | 0    |
| ENSG00000108494 | CTB-58E17  | lincRNA    | chr17      | 38702452 | 38704747 | + | 0.77 | 1.06 |

|                                      |          |          |   |      |       |
|--------------------------------------|----------|----------|---|------|-------|
| ENSG0000(XXbac-B56: protein_co chr22 | 20429241 | 20446620 | - | 0    | 0     |
| ENSG0000(CISD3 protein_co chr17      | 38730235 | 38735044 | + | 10.1 | 10.47 |
| ENSG0000(RP11-472E processed_ chr6   | 1.36E+08 | 1.36E+08 | + | 0    | 0     |
| ENSG0000(CSTP2 unprocessε chr20      | 23772785 | 23776169 | - | 0    | 0     |
| ENSG0000(CTD-3018C unprocessε chr19  | 52392659 | 52392755 | + | 0    | 0     |
| ENSG0000(RP11-403P antisense chr16   | 66565620 | 66566001 | - | 0    | 0     |
| ENSG0000(RP11-157L: processed_ chr9  | 41652895 | 41652973 | - | 0    | 0     |
| ENSG0000(RP11-428P unprocessε chr10  | 77738246 | 77739015 | + | 0    | 0     |
| ENSG0000(RP11-735A unprocessε chr11  | 95057282 | 95057984 | + | 0    | 0     |
| ENSG0000(SNORA67 snoRNA chr17        | 7577955  | 7578091  | + | 0    | 0     |
| ENSG0000(U4 snRNA chr2               | 2.32E+08 | 2.32E+08 | + | 0    | 0     |
| ENSG0000(RP11-167B lincRNA chr15     | 98324273 | 98327494 | - | 0    | 0     |
| ENSG0000(FAM30B unprocessε chr15     | 20012741 | 20014208 | + | 0    | 0     |
| ENSG0000(CH507-338 lincRNA chr21     | 7669397  | 7681742  | - | 0.58 | 2.26  |
| ENSG0000(HOTAIR_3 misc_RNA chr12     | 53965965 | 53966061 | + | 0    | 0     |
| ENSG0000(RP11-356M lincRNA chr2      | 307683   | 309424   | + | 0    | 0     |
| ENSG0000(RP11-452N unprocessε chr2   | 1.65E+08 | 1.65E+08 | + | 0    | 0.1   |
| ENSG0000(RP11-426C lincRNA chr16     | 29272220 | 29272772 | + | 0.26 | 0.86  |
| ENSG0000(AC139100. sense_intrε chr18 | 80161752 | 80162413 | + | 0    | 0.34  |
| ENSG0000(RP11-157L: processed_ chr9  | 41700682 | 41701096 | + | 0    | 0     |
| ENSG0000(RP11-596C lincRNA chr14     | 49863072 | 49864379 | + | 0    | 0.1   |
| ENSG0000(Pinc misc_RNA chr2          | 2.17E+08 | 2.17E+08 | + | 0    | 0     |
| ENSG0000(Metazoa_5 misc_RNA chr19    | 4127492  | 4127732  | + | 0    | 0     |
| ENSG0000(PPP1R26P4 processed_ chr22  | 18715815 | 18719341 | + | 0    | 0     |
| ENSG0000(RP11-649E unprocessε chr14  | 49601011 | 49601124 | - | 0    | 0     |
| ENSG0000(SNORA70 snoRNA chr9         | 67797087 | 67797181 | + | 0    | 0     |
| ENSG0000(RP11-900F lincRNA chr12     | 88601862 | 88602195 | + | 0    | 0     |
| ENSG0000(RP1-310O1 sense_intrε chr20 | 31970181 | 31970831 | + | 0    | 0     |
| ENSG0000(RP11-379H lincRNA chr15     | 82540870 | 82562374 | + | 0    | 0     |
| ENSG0000(RP11-120K antisense chr18   | 62525919 | 62526325 | - | 0    | 0     |
| ENSG0000(HOXA11-A: misc_RNA chr7     | 27188816 | 27188994 | + | 0    | 0     |
| ENSG0000(RP11-350I sense_intrε chr15 | 98660210 | 98660668 | + | 0.17 | 0     |
| ENSG0000(RDM1 protein_co chr17       | 35918066 | 35930773 | - | 0.08 | 0.16  |
| ENSG0000(SOX2OT_e: misc_RNA chr3     | 1.82E+08 | 1.82E+08 | + | 0    | 0     |
| ENSG0000(Y_RNA misc_RNA chr9         | 41672295 | 41672406 | - | 0    | 0     |
| ENSG0000(CTD-2240J: lincRNA chr15    | 81392759 | 81393384 | + | 0.66 | 1.21  |
| ENSG0000(TRBV7-9 TR_V_gene chr7      | 1.43E+08 | 1.43E+08 | + | 0    | 0     |
| ENSG0000(MIR6731 miRNA chr1          | 24919345 | 24919416 | - | 0    | 0     |
| ENSG0000(RP11-234K lincRNA chr20     | 36233851 | 36234297 | + | 0.35 | 0.2   |
| ENSG0000(MIR6076 miRNA chr14         | 49966399 | 49966511 | + | 0    | 0     |
| ENSG0000(Xist_exon1 misc_RNA chrX    | 73850487 | 73850571 | + | 0    | 0     |
| ENSG0000(uc_338 misc_RNA chr9        | 75016681 | 75016848 | - | 0    | 0     |
| ENSG0000(RP5-984P4 lincRNA chr20     | 21499261 | 21502934 | - | 0.01 | 0.02  |
| ENSG0000(XXbac-B33 lincRNA chr22     | 18501794 | 18512187 | - | 0    | 0     |
| ENSG0000(WT1-AS_3 misc_RNA chr11     | 32436797 | 32437030 | + | 0    | 2.75  |

|                    |             |            |          |          |   |        |      |
|--------------------|-------------|------------|----------|----------|---|--------|------|
| ENSG0000(U2        | snRNA       | chr17      | 43251829 | 43252019 | - | 0.28   | 0    |
| ENSG0000(NEAT1_2   | misc_RNA    | chr11      | 65423638 | 65423742 | + | 173.57 | 0    |
| ENSG0000(RP11-379L | lincRNA     | chr18      | 34225930 | 34226429 | + | 0      | 0    |
| ENSG0000(DDX52     | protein_co  | chr17      | 37609739 | 37643464 | - | 6.06   | 6.08 |
| ENSG0000(RP11-34H1 | processed_  | chr9       | 41647825 | 41648035 | - | 0      | 0    |
| ENSG0000(MESTIT1_2 | misc_RNA    | chr7       | 1.3E+08  | 1.3E+08  | + | 0      | 0    |
| ENSG0000(TEX28     | protein_co  | chrX       | 1.54E+08 | 1.54E+08 | - | 0      | 0    |
| ENSG0000(RP11-70D2 | lincRNA     | chr16      | 79605802 | 79606605 | + | 0      | 0    |
| ENSG0000(RP11-466M | antisense   | chr2       | 72932974 | 72934355 | - | 0      | 0    |
| ENSG0000(AC023491. | pseudogen   | KI270731.1 | 26533    | 27138    | - | 0      | 0    |
| ENSG0000(RP11-15E1 | processed_  | chr9       | 66029264 | 66030169 | + | 0      | 0    |
| ENSG0000(MIR6072   | miRNA       | chr10      | 2076019  | 2076089  | - | 0      | 0    |
| ENSG0000(RP11-736N | lincRNA     | chr14      | 1.03E+08 | 1.03E+08 | + | 1.46   | 0.91 |
| ENSG0000(TUSC7     | misc_RNA    | chr3       | 1.17E+08 | 1.17E+08 | + | 0      | 0    |
| ENSG0000(MIR6726   | miRNA       | chr1       | 1296110  | 1296170  | - | 0      | 0    |
| ENSG0000(RP11-248M | lincRNA     | chr18      | 79900555 | 79900903 | - | 0      | 0    |
| ENSG0000(RP11-157L | processed_  | chr9       | 41644771 | 41644981 | + | 0      | 0    |
| ENSG0000(RP11-231C | unprocessε  | chr16      | 29380242 | 29380345 | + | 0      | 0    |
| ENSG0000(SPDYE15P  | unprocessε  | chr7       | 75337162 | 75343013 | + | 0      | 0    |
| ENSG0000(RP11-525G | processed_  | chr2       | 2.23E+08 | 2.23E+08 | - | 0      | 0    |
| ENSG0000(RP11-87C1 | lincRNA     | chr12      | 1.22E+08 | 1.22E+08 | + | 0      | 0    |
| ENSG0000(CT45A8    | protein_co  | chrX       | 1.36E+08 | 1.36E+08 | - | 0      | 0    |
| ENSG0000(SNORD115  | snoRNA      | chr15      | 25182385 | 25182466 | + | 0      | 0    |
| ENSG0000(RP11-602. | lincRNA     | chr15      | 99028538 | 99031053 | + | 0      | 0    |
| ENSG0000(RP11-283G | antisense   | chr12      | 26273329 | 26273900 | - | 0      | 0    |
| ENSG0000(AC131056. | lincRNA     | chr17      | 36225246 | 36226807 | - | 0      | 0    |
| ENSG0000(MIR7973-1 | miRNA       | chr15      | 51314034 | 51314109 | + | 0      | 0    |
| ENSG0000(U1        | snRNA       | chr1       | 1.45E+08 | 1.45E+08 | - | 0      | 0    |
| ENSG0000(Metazoa_S | misc_RNA    | chr10      | 14391875 | 14392196 | + | 0      | 0    |
| ENSG0000(RP11-14J1 | processed_  | chr6       | 18304854 | 18305045 | - | 0      | 0    |
| ENSG0000(MIR8060   | miRNA       | chr3       | 96359964 | 96360039 | + | 0      | 0    |
| ENSG0000(ZNRD1-AS1 | misc_RNA    | chr6       | 30035916 | 30035983 | + | 0      | 0    |
| ENSG0000(RP11-589N | unprocessε  | chr21      | 10397644 | 10397778 | + | 0      | 0    |
| ENSG0000(RP11-162A | lincRNA     | chr18      | 76805151 | 76805736 | - | 0.24   | 0.13 |
| ENSG0000(MIR6757   | miRNA       | chr12      | 53056944 | 53057012 | + | 0      | 0    |
| ENSG0000(Metazoa_S | misc_RNA    | chr17      | 43607436 | 43607723 | - | 0      | 0.26 |
| ENSG0000(SUSD2P2   | unprocessε  | chr22      | 18623339 | 18625289 | - | 0      | 0    |
| ENSG0000(RP11-972P | sense_intrε | chr12      | 1.24E+08 | 1.24E+08 | - | 0.33   | 0    |
| ENSG0000(uc_338    | misc_RNA    | chr13      | 72567213 | 72567380 | + | 0      | 0    |
| ENSG0000(AQP7P5    | unprocessε  | chr9       | 40481558 | 40497592 | - | 0      | 0    |
| ENSG0000(SNORD116  | snoRNA      | chr15      | 25104642 | 25104732 | + | 0      | 0    |
| ENSG0000(RN7SL186F | misc_RNA    | chr1       | 22010650 | 22010946 | + | 0      | 0    |
| ENSG0000(RP11-454E | sense_intrε | chr12      | 51201684 | 51202581 | - | 0.4    | 0.46 |
| ENSG0000(RP11-440J | processed_  | chr6       | 23854444 | 23855457 | + | 0      | 0    |
| ENSG0000(ZNF8      | protein_co  | chr19      | 58278951 | 58302805 | + | 0.85   | 1.06 |

|                                 |           |          |          |   |       |        |
|---------------------------------|-----------|----------|----------|---|-------|--------|
| ENSG0000(RP11-424E unprocessed) | chr9      | 1.38E+08 | 1.38E+08 | - | 0     | 0      |
| ENSG0000(AC116050. unprocessed) | chr2      | 91589494 | 91621421 | + | 0     | 0      |
| ENSG0000(RP11-196G sense_intr)  | chr16     | 31122235 | 31124064 | + | 8.13  | 5.47   |
| ENSG0000(RP11-12A2 unprocessed) | chr9      | 67722083 | 67722683 | + | 0     | 0      |
| ENSG0000(U2 snRNA)              | chr4      | 25250545 | 25250639 | + | 0     | 0      |
| ENSG0000(CLUHP11 unprocessed)   | chr16     | 35068211 | 35085060 | + | 0     | 0      |
| ENSG0000(RP4-533D7 protein_co)  | chr1      | 46043661 | 46176488 | - | 0.03  | 0      |
| ENSG0000(NF1P7 unprocessed)     | chr14     | 18899942 | 18909673 | - | 0     | 0      |
| ENSG0000(NEAT1_1 misc_RNA)      | chr11     | 65423273 | 65423392 | + | 6.6   | 151.61 |
| ENSG0000(RP11-327J lincRNA)     | chr15     | 96230897 | 96231145 | + | 0     | 0      |
| ENSG0000(CTD-3028 lincRNA)      | chr14     | 45079849 | 45080189 | + | 0     | 0      |
| ENSG0000(FAM13A-A misc_RNA)     | chr4      | 88710147 | 88710265 | + | 0     | 10.34  |
| ENSG0000(RP4-5851 lincRNA)      | chr20     | 13368291 | 13368703 | - | 0.4   | 0      |
| ENSG0000(TSC22D1-A antisense)   | chr13     | 44575893 | 44580432 | + | 0.83  | 1.54   |
| ENSG0000(AP001059. lincRNA)     | chr21     | 44241847 | 44242081 | + | 0     | 0      |
| ENSG0000(MIR8062 miRNA)         | chr20     | 7371608  | 7371692  | + | 0     | 0      |
| ENSG0000(RP11-485B unprocessed) | chrX      | 52481515 | 52483950 | + | 0     | 0      |
| ENSG0000(RP11-4761 processed)   | chr20     | 64278306 | 64278561 | + | 0     | 0      |
| ENSG0000(Metazoa_S misc_RNA)    | chr13     | 29864372 | 29864629 | - | 0     | 0      |
| ENSG0000(GLIDR lincRNA)         | chr9      | 39748514 | 39810097 | - | 1.85  | 1.45   |
| ENSG0000(RP11-632L antisense)   | chr13     | 93226612 | 93227317 | - | 4.12  | 3.91   |
| ENSG0000(FAM166AP unprocessed)  | chr1      | 2.27E+08 | 2.27E+08 | + | 0     | 0      |
| ENSG0000(AP000457. processed)   | chr21     | 17296219 | 17296596 | + | 0     | 0      |
| ENSG0000(CH17-262C unprocessed) | chr1      | 1.46E+08 | 1.46E+08 | + | 0     | 0      |
| ENSG0000(NF1P11 unprocessed)    | chr14     | 19612191 | 19619490 | + | 0     | 0      |
| ENSG0000(U6 snRNA)              | chr22     | 16141767 | 16141872 | + | 0     | 0      |
| ENSG0000(RNA5-8S5 rRNA)         | chr21     | 8439823  | 8439975  | + | 13.92 | 37.54  |
| ENSG0000(RP5-1056H lincRNA)     | chr20     | 6065966  | 6067897  | - | 0.2   | 0.06   |
| ENSG0000(RP11-313C unprocessed) | chr8      | 72660584 | 72661470 | - | 0     | 0      |
| ENSG0000(SSTR3 protein_co)      | chr22     | 37204238 | 37212322 | - | 0.03  | 0      |
| ENSG0000(IGLV2-8 IG_V_gene)     | chr22     | 22822658 | 22823289 | + | 0     | 0      |
| ENSG0000(RP11-539D unprocessed) | chrY      | 25009700 | 25010769 | - | 0     | 0      |
| ENSG0000(AC011043. protein_co)  | GL000195. | 173872   | 179372   | + | 0.01  | 0      |
| ENSG0000(LINC01971 lincRNA)     | chr17     | 81480523 | 81481570 | - | 0     | 0      |
| ENSG0000(RP11-152F processed)   | chr15     | 82418651 | 82434235 | + | 0     | 0      |
| ENSG0000(MIR6857 miRNA)         | chrX      | 53405673 | 53405765 | - | 0     | 0      |
| ENSG0000(RP11-760D unprocessed) | chr7      | 56462536 | 56467771 | + | 0     | 0      |
| ENSG0000(RP1-20N2. processed)   | chr6      | 1.43E+08 | 1.44E+08 | + | 0     | 0      |
| ENSG0000(MAFIP unprocessed)     | chrY      | 11153858 | 11159013 | - | 0     | 0.11   |
| ENSG0000(CNTNAP3P unprocessed)  | chr9      | 62559839 | 62569907 | + | 0.07  | 0.15   |
| ENSG0000(LINC02139 lincRNA)     | chr16     | 85137150 | 85149443 | + | 0     | 0      |
| ENSG0000(RP11-712L processed)   | chr11     | 1.26E+08 | 1.26E+08 | - | 0     | 0      |
| ENSG0000(MALAT1 misc_RNA)       | chr11     | 65502914 | 65503008 | + | 0     | 0      |
| ENSG0000(uc_338 misc_RNA)       | chrX      | 11148584 | 11148769 | - | 0     | 0      |
| ENSG0000(MIR6511A miRNA)        | chr16     | 16324588 | 16324654 | + | 0     | 0      |

|                     |            |            |          |          |   |       |       |
|---------------------|------------|------------|----------|----------|---|-------|-------|
| ENSG0000(RN7SL536F) | misc_RNA   | chr15      | 23363272 | 23363561 | + | 0     | 0     |
| ENSG0000(MIR6783)   | miRNA      | chr17      | 44934618 | 44934681 | - | 0     | 0     |
| ENSG0000(PRICKLE4)  | protein_co | chr6       | 41780762 | 41787372 | + | 1.23  | 1.5   |
| ENSG0000(Metazoa_S) | misc_RNA   | chr4       | 56810422 | 56810681 | + | 0     | 0     |
| ENSG0000(RP5-906C1) | lincRNA    | chr20      | 48821688 | 48849458 | - | 0     | 0     |
| ENSG0000(RNA5-8S5)  | rRNA       | chr21      | 8212572  | 8212724  | + | 13.92 | 37.54 |
| ENSG0000(U2)        | snRNA      | chr3       | 1.5E+08  | 1.5E+08  | + | 0     | 0     |
| ENSG0000(uc_338)    | misc_RNA   | chr7       | 87184849 | 87185020 | + | 0     | 0     |
| ENSG0000(NCRUPAR_)  | misc_RNA   | chr5       | 76712763 | 76712861 | + | 0     | 0     |
| ENSG0000(RP11-245D) | lincRNA    | chr13      | 52454775 | 52455331 | - | 0.26  | 0.14  |
| ENSG0000(AC020956)  | lincRNA    | chr19      | 41833686 | 41835950 | - | 0     | 0     |
| ENSG0000(RN7SL725F) | misc_RNA   | chrY       | 25458926 | 25459184 | + | 0     | 0     |
| ENSG0000(SCARNA2)   | scaRNA     | chr1       | 1.09E+08 | 1.09E+08 | + | 0.2   | 0     |
| ENSG0000(Metazoa_S) | misc_RNA   | chr12      | 1.2E+08  | 1.2E+08  | + | 0.34  | 0     |
| ENSG0000(RP4-668E1) | lincRNA    | chr7       | 9082557  | 9189857  | - | 0     | 0.03  |
| ENSG0000(RP1-5308)  | antisense  | chr12      | 2217462  | 2217920  | - | 0     | 0     |
| ENSG0000(RP11-29A2) | unprocessε | chr8       | 5363371  | 5363650  | + | 0     | 0     |
| ENSG0000(MYO19)     | protein_co | chr17      | 36495633 | 36543435 | - | 10.42 | 12.66 |
| ENSG0000(SNORD1A)   | snoRNA     | chr17      | 76561634 | 76561705 | + | 0     | 0     |
| ENSG0000(RP11-294C) | IG_V_gene  | chr15      | 21742364 | 21742799 | - | 0     | 0     |
| ENSG0000(MIR6803)   | miRNA      | chr19      | 55245186 | 55245250 | - | 0     | 0     |
| ENSG0000(MIR6770-1) | miRNA      | chr16      | 14930820 | 14930879 | + | 0     | 0     |
| ENSG0000(RP11-575F) | lincRNA    | chr12      | 1.27E+08 | 1.27E+08 | + | 0.3   | 0.18  |
| ENSG0000(MIR6859-1) | miRNA      | chr1       | 17369    | 17436    | - | 0     | 0     |
| ENSG0000(HIST1H3C)  | protein_co | chr6       | 26045411 | 26045821 | + | 0     | 0     |
| ENSG0000(RP11-763B) | unprocessε | chr1       | 1.45E+08 | 1.45E+08 | + | 0     | 0     |
| ENSG0000(SNORA61)   | snoRNA     | chr1       | 28579764 | 28579893 | - | 4.46  | 0     |
| ENSG0000(RP11-55J1) | processed_ | chr8       | 1.28E+08 | 1.28E+08 | - | 0     | 0     |
| ENSG0000(RP3-324O1) | lincRNA    | chr20      | 31580890 | 31581214 | + | 0     | 0     |
| ENSG0000(MIR6816)   | miRNA      | chr22      | 20114686 | 20114751 | - | 0     | 0     |
| ENSG0000(MIR7856)   | miRNA      | chr1       | 86357632 | 86357687 | - | 0     | 0     |
| ENSG0000(RP5-884M)  | unprocessε | chrX       | 55044749 | 55045121 | - | 0     | 0     |
| ENSG0000(DLEU2_5)   | misc_RNA   | chr1       | 63549133 | 63549216 | - | 0     | 0     |
| ENSG0000(CT45A6)    | protein_co | chrX       | 1.36E+08 | 1.36E+08 | - | 0     | 0     |
| ENSG0000(RP11-172H) | antisense  | chr13      | 20699307 | 20703718 | - | 0.53  | 0.64  |
| ENSG0000(RFPL4AP6)  | unprocessε | chr22      | 29432944 | 29435005 | + | 0     | 0     |
| ENSG0000(5_8S_rRNA) | rRNA       | KI270442.1 | 217250   | 217401   | - | 0     | 0     |
| ENSG0000(TBC1D3C)   | protein_co | chr17      | 38057693 | 38068592 | - | 0     | 0     |
| ENSG0000(GRAMD4P)   | processed_ | chr14      | 19371822 | 19373490 | + | 0.08  | 0.09  |
| ENSG0000(RP11-326L) | lincRNA    | chr13      | 31419989 | 31437999 | + | 0     | 0     |
| ENSG0000(GGNBP2)    | protein_co | chr17      | 36544888 | 36589848 | + | 31.8  | 32.69 |
| ENSG0000(RP11-1006) | unprocessε | chr15      | 72604399 | 72605008 | - | 0     | 0     |
| ENSG0000(RP4-655L2) | processed_ | chrX       | 1.21E+08 | 1.21E+08 | - | 0     | 0     |
| ENSG0000(ZNF229)    | protein_co | chr19      | 44417519 | 44448578 | - | 2.35  | 2.67  |
| ENSG0000(RP11-266I) | unprocessε | chrX       | 55101637 | 55102026 | - | 0     | 0     |

|                     |             |           |          |          |   |      |      |
|---------------------|-------------|-----------|----------|----------|---|------|------|
| ENSG0000(PVT1_3     | misc_RNA    | chr8      | 1.28E+08 | 1.28E+08 | + | 0    | 0    |
| ENSG0000(MIR6802    | miRNA       | chr19     | 55239912 | 55239976 | - | 0    | 0    |
| ENSG0000(RP11-4B16  | antisense   | chr18     | 77112602 | 77115726 | + | 0.04 | 0    |
| ENSG0000(RNU6-156F  | snRNA       | chr9      | 40759600 | 40759706 | - | 0    | 0    |
| ENSG0000(XXbac-BPG  | processed_  | chr6      | 27510501 | 27510694 | + | 0    | 0    |
| ENSG0000(uc_338     | misc_RNA    | chr10     | 85613017 | 85613186 | - | 0    | 0    |
| ENSG0000(HOXA11-A!  | misc_RNA    | chr7      | 27185832 | 27186018 | + | 0    | 0    |
| ENSG0000(RP11-408E  | unprocessε  | chr13     | 19172773 | 19172925 | + | 0    | 0    |
| ENSG0000(VWA8-AS1   | antisense   | chr13     | 41955808 | 41981565 | + | 0.08 | 0    |
| ENSG0000(MIR6862-2  | miRNA       | chr16     | 28724252 | 28724321 | + | 0    | 0    |
| ENSG0000(RP5-1142A  | antisense   | chr16     | 88708956 | 88710437 | - | 0.31 | 0.21 |
| ENSG0000(RP11-248B  | unprocessε  | chr14     | 91554410 | 91554503 | + | 0    | 0    |
| ENSG0000(RP5-1077H  | lincRNA     | chr6      | 958324   | 962272   | - | 0    | 0    |
| ENSG0000(RP11-18C2  | lincRNA     | chr12     | 1.21E+08 | 1.21E+08 | - | 0.77 | 0.28 |
| ENSG0000(CTD-2267D  | processed_  | chr17     | 40380666 | 40381838 | - | 0    | 0    |
| ENSG0000(Metazoa_S  | misc_RNA    | chr15     | 74162340 | 74162620 | - | 0.41 | 0    |
| ENSG0000(MIR6754    | miRNA       | chr11     | 71473503 | 71473568 | + | 0    | 0    |
| ENSG0000(RP11-139E  | sense_intrε | chr12     | 45256473 | 45256726 | + | 0    | 0    |
| ENSG0000(RP11-372B  | sense_intrε | chr12     | 2885819  | 2886329  | + | 0    | 0.38 |
| ENSG0000(RP11-485B  | processed_  | chrX      | 52480836 | 52481131 | + | 0    | 0    |
| ENSG0000(MIR7155    | miRNA       | chr11     | 64341849 | 64341904 | - | 0    | 0    |
| ENSG0000(RP11-42O4  | antisense   | chr20     | 35174355 | 35174919 | - | 0    | 0    |
| ENSG0000(RP11-387D  | lincRNA     | chr15     | 90650631 | 90651103 | + | 0    | 0    |
| ENSG0000(U4         | snRNA       | chr8      | 1.23E+08 | 1.23E+08 | - | 0    | 0    |
| ENSG0000(RP11-158I! | lincRNA     | chr11     | 1.19E+08 | 1.19E+08 | + | 0.33 | 0.36 |
| ENSG0000(OR7E104P   | unprocessε  | chr13     | 63836994 | 63837456 | - | 0    | 0    |
| ENSG0000(AL050303.  | processed_  | chr21     | 13654073 | 13654356 | + | 0    | 0    |
| ENSG0000(RP11-406A  | processed_  | chr9      | 90108244 | 90108518 | + | 0    | 0    |
| ENSG0000(RP4-694B1  | antisense   | chr20     | 25680781 | 25681246 | + | 1.33 | 0.18 |
| ENSG0000(AL354822.  | protein_co  | GL000218. | 51867    | 54893    | - | 0.79 | 0.77 |
| ENSG0000(RP11-89H1  | lincRNA     | chr12     | 47905122 | 47906865 | + | 0    | 0    |
| ENSG0000(GS1-345D1  | unprocessε  | chr7      | 93914987 | 93915108 | + | 0    | 0    |
| ENSG0000(RP11-626G  | lincRNA     | chr16     | 19111035 | 19111484 | - | 0.18 | 0    |
| ENSG0000(RP11-74J1: | antisense   | chr13     | 41132939 | 41236686 | + | 0.99 | 0.45 |
| ENSG0000(pRNA       | misc_RNA    | chrY      | 18336960 | 18337049 | + | 0    | 0    |
| ENSG0000(AC131056.  | unprocessε  | chr17     | 36241701 | 36241806 | + | 0    | 0    |
| ENSG0000(RP11-120E  | sense_intrε | chr14     | 93334528 | 93335057 | + | 0.41 | 0    |
| ENSG0000(RP11-74M!  | unprocessε  | chr12     | 56981211 | 56985960 | - | 0    | 0    |
| ENSG0000(RP11-474N  | processed_  | chr12     | 56941174 | 56941482 | - | 0    | 0    |
| ENSG0000(MIAT_exor  | misc_RNA    | chr22     | 26657521 | 26657655 | + | 0    | 8.72 |
| ENSG0000(PCGEM1     | misc_RNA    | chr2      | 1.93E+08 | 1.93E+08 | + | 0    | 0    |
| ENSG0000(RP11-1123  | antisense   | chr15     | 71547280 | 71549832 | - | 0    | 0    |
| ENSG0000(AL121590.  | misc_RNA    | chr20     | 21614978 | 21615435 | + | 0    | 0    |
| ENSG0000(MIR6854    | miRNA       | chr9      | 98229149 | 98229217 | - | 0    | 0    |
| ENSG0000(uc_338     | misc_RNA    | chr13     | 26359529 | 26359702 | - | 0    | 0    |

|                     |             |            |          |          |   |      |      |
|---------------------|-------------|------------|----------|----------|---|------|------|
| ENSG0000(PMS2P2     | unprocessε  | chr7       | 75344015 | 75359550 | - | 0    | 0.09 |
| ENSG0000(MIR6512    | miRNA       | chr2       | 1.77E+08 | 1.77E+08 | - | 0    | 0    |
| ENSG0000(RP11-298E  | antisense   | chr10      | 3134566  | 3145166  | + | 0    | 0    |
| ENSG0000(MIR6819    | miRNA       | chr22      | 36286847 | 36286907 | - | 0    | 0    |
| ENSG0000(FTX_1      | misc_RNA    | chrX       | 74274341 | 74274411 | + | 0    | 0    |
| ENSG0000(RN7SL331F  | misc_RNA    | chr15      | 84205454 | 84205700 | - | 0    | 0    |
| ENSG0000(RP11-745H  | unprocessε  | chr7       | 1.1E+08  | 1.1E+08  | + | 0    | 0    |
| ENSG0000(RP11-88H1  | unprocessε  | chr8       | 59893856 | 59893942 | - | 0    | 0    |
| ENSG0000(CH17-270A  | antisense   | chr1       | 1.46E+08 | 1.46E+08 | + | 0    | 0    |
| ENSG0000(MIR6070    | miRNA       | chr21      | 43609887 | 43609989 | - | 0    | 0    |
| ENSG0000(RP11-709D  | sense_intrε | chr16      | 4532216  | 4533670  | - | 0.2  | 0    |
| ENSG0000(MIR7849    | miRNA       | chr4       | 1.46E+08 | 1.46E+08 | + | 0    | 0    |
| ENSG0000(RP11-21I4. | processed_  | chr5       | 1.79E+08 | 1.79E+08 | - | 0    | 0    |
| ENSG0000(RP11-255P  | lincRNA     | chr13      | 1.03E+08 | 1.03E+08 | + | 0    | 0.11 |
| ENSG0000(RP4-668E1  | processed_  | chr7       | 9170948  | 9171273  | - | 0    | 0    |
| ENSG0000(MIR6781    | miRNA       | chr17      | 42823880 | 42823943 | - | 0    | 0    |
| ENSG0000(CTD-2240J. | lincRNA     | chr15      | 81393625 | 81394082 | + | 0.17 | 0.75 |
| ENSG0000(MIR6892    | miRNA       | chr7       | 1.43E+08 | 1.43E+08 | + | 0    | 0    |
| ENSG0000(ZFAT-AS1_  | misc_RNA    | chr8       | 1.35E+08 | 1.35E+08 | + | 0    | 0    |
| ENSG0000(RP11-261C  | processed_  | chr1       | 2.43E+08 | 2.43E+08 | + | 0    | 0    |
| ENSG0000(RP11-66B2  | antisense   | chr15      | 1.01E+08 | 1.01E+08 | - | 0    | 0.12 |
| ENSG0000(5S_rRNA    | rRNA        | KI270442.1 | 380608   | 380726   | + | 0    | 0    |
| ENSG0000(Metazoa_S  | misc_RNA    | chr12      | 7856169  | 7856471  | + | 0    | 0    |
| ENSG0000(RP11-165D  | sense_intrε | chr13      | 46717423 | 46717688 | + | 0    | 0    |
| ENSG0000(HIST1H2AB  | protein_co  | chr6       | 26033176 | 26033568 | - | 0    | 0    |
| ENSG0000(RP11-96A1  | lincRNA     | chr18      | 34892013 | 34902885 | - | 0    | 0    |
| ENSG0000(MIR6769B   | miRNA       | chr1       | 2.06E+08 | 2.06E+08 | + | 0    | 0    |
| ENSG0000(RP11-504P  | lincRNA     | chr1       | 2.24E+08 | 2.24E+08 | + | 0.62 | 1.63 |
| ENSG0000(Metazoa_S  | misc_RNA    | chr12      | 3124777  | 3125063  | + | 0    | 0.43 |
| ENSG0000(RP11-74D7  | sense_intrε | chr15      | 33972059 | 33972515 | - | 0    | 0.57 |
| ENSG0000(IGHV3-41   | IG_V_pseu   | chr14      | 1.06E+08 | 1.06E+08 | - | 0    | 0    |
| ENSG0000(RP11-19E1  | sense_intrε | chr12      | 45789189 | 45789657 | + | 0    | 0    |
| ENSG0000(RP11-282N  | unprocessε  | chr13      | 34262863 | 34263090 | + | 0    | 0    |
| ENSG0000(RP11-160K  | processed_  | chrY       | 10070131 | 10070409 | + | 0    | 0    |
| ENSG0000(RP5-903E1  | processed_  | chr1       | 15226373 | 15227549 | + | 0    | 0    |
| ENSG0000(ST7-OT3_3  | misc_RNA    | chr7       | 1.17E+08 | 1.17E+08 | + | 0    | 0    |
| ENSG0000(MIR8087    | miRNA       | chr11      | 27514970 | 27515047 | - | 0    | 0    |
| ENSG0000(RP11-95I1f | lincRNA     | chr10      | 1.21E+08 | 1.21E+08 | - | 0    | 0    |
| ENSG0000(RP11-144A  | processed_  | chr9       | 60944555 | 60944636 | - | 0    | 0    |
| ENSG0000(YRDCP1     | processed_  | chr9       | 94432631 | 94433273 | - | 0    | 0    |
| ENSG0000(RP11-447H  | processed_  | chr5       | 43143362 | 43143514 | - | 0    | 0    |
| ENSG0000(RP11-15A1  | sense_intrε | chr19      | 43978376 | 43978663 | + | 0    | 0    |
| ENSG0000(CTD-2382E  | sense_intrε | chr15      | 41908204 | 41908714 | - | 0.15 | 0    |
| ENSG0000(RP11-144H  | unprocessε  | chr13      | 27077218 | 27077962 | + | 0    | 0    |
| ENSG0000(RN7SL759F  | misc_RNA    | chr15      | 20570886 | 20571175 | + | 0    | 0    |



|                       |           |                        |       |          |          |   |       |       |
|-----------------------|-----------|------------------------|-------|----------|----------|---|-------|-------|
| ENSG0000010338        | uc_338    | misc_RNA               | chr10 | 1.03E+08 | 1.03E+08 | + | 0     | 0     |
| ENSG0000010358        | RP11-457D | protein_coding         | chr16 | 60358455 | 60359480 | - | 0     | 0     |
| ENSG0000010336        | AC009336  | protein_coding         | chr2  | 1.76E+08 | 1.76E+08 | + | 0     | 0     |
| ENSG0000010382        | MIR6082   | miRNA                  | chr4  | 1.71E+08 | 1.71E+08 | + | 0     | 0     |
| ENSG0000010378        | C17orf78  | protein_coding         | chr17 | 37375986 | 37392708 | + | 0     | 0     |
| ENSG0000010398        | AC007908  | processed_transcript   | chr15 | 1109945  | 1110235  | + | 0     | 0     |
| ENSG0000010323        | RP11-123C | unprocessed_transcript | chr15 | 58732188 | 58733149 | + | 0     | 0     |
| ENSG0000010383        | AC068831  | lincRNA                | chr15 | 91022766 | 91023200 | + | 0     | 0     |
| ENSG0000010365        | MIR6865   | miRNA                  | chr17 | 4970086  | 4970150  | - | 0     | 0     |
| ENSG000001038K        | RP11-108K | antisense              | chr10 | 1.34E+08 | 1.34E+08 | - | 0.05  | 0.15  |
| ENSG0000010351        | MIR7851   | miRNA                  | chr12 | 42323700 | 42323859 | - | 0     | 0     |
| ENSG00000103E3        | POTEB3    | protein_coding         | chr15 | 21408243 | 21440451 | - | 0     | 0     |
| ENSG00000103NA        | Y_RNA     | misc_RNA               | chr2  | 61928634 | 61928704 | - | 0     | 0     |
| ENSG0000010310        | MIR6810   | miRNA                  | chr2  | 2.18E+08 | 2.18E+08 | + | 0     | 0     |
| ENSG0000010367        | RN7SL607F | misc_RNA               | chr20 | 20738433 | 20738731 | - | 0     | 0     |
| ENSG00000103T3        | ST7-OT3_2 | misc_RNA               | chr7  | 1.17E+08 | 1.17E+08 | + | 0     | 0     |
| ENSG00000103D2        | SNORD22   | snoRNA                 | chr11 | 62854161 | 62854285 | - | 0     | 14.86 |
| ENSG0000010348        | RP11-1348 | unprocessed_transcript | chr16 | 28773824 | 28777534 | - | 0     | 0     |
| ENSG0000010370        | MIR8070   | miRNA                  | chr11 | 11783135 | 11783222 | - | 0     | 0     |
| ENSG00000103B2        | CHMP1B2F  | transcribed            | chrX  | 80228489 | 80335364 | - | 0.24  | 0.23  |
| ENSG0000010321        | RP11-4321 | unprocessed_transcript | chr10 | 45187292 | 45198323 | - | 0     | 0     |
| ENSG00000103E3        | RP11-17E3 | lincRNA                | chr18 | 69398726 | 69399249 | - | 0     | 0     |
| ENSG00000103S1        | DHRS11    | protein_coding         | chr17 | 36591798 | 36600806 | + | 1.35  | 1.49  |
| ENSG00000103V2        | IGKV2OR2- | IG_V_pseudogene        | chr2  | 97376674 | 97376973 | + | 0     | 0     |
| ENSG00000103CA        | ACACA     | protein_coding         | chr17 | 37084988 | 37406818 | - | 11.99 | 15    |
| ENSG0000010367N       | RP11-467N | processed_transcript   | chr15 | 23193491 | 23193696 | + | 0     | 0     |
| ENSG0000010318C       | CTD-3018C | unprocessed_transcript | chr19 | 52473336 | 52475239 | - | 0     | 0     |
| ENSG00000103C23       | RP1-41C23 | lincRNA                | chr17 | 31560132 | 31560573 | + | 1.08  | 0.4   |
| ENSG000001036736      | MIR6736   | miRNA                  | chr1  | 1.46E+08 | 1.46E+08 | - | 0     | 0     |
| ENSG0000010368F       | RNU6-368F | snRNA                  | chr9  | 67869947 | 67870053 | + | 0     | 0     |
| ENSG0000010367N       | RP11-467N | unprocessed_transcript | chr15 | 23225876 | 23226391 | - | 0     | 0     |
| ENSG00000103Metazoa   | Metazoa_S | misc_RNA               | chr3  | 73959642 | 73959927 | - | 0     | 0     |
| ENSG00000103MEM191    | TMEM191f  | protein_coding         | chr22 | 18527802 | 18530573 | + | 6.01  | 5.57  |
| ENSG00000103PTPN20    | PTPN20CP  | unprocessed_transcript | chr10 | 48064308 | 48119455 | - | 0     | 0     |
| ENSG00000103OR4F29    | OR4F29    | protein_coding         | chr1  | 450740   | 451678   | - | 0     | 0     |
| ENSG00000103Metazoa   | Metazoa_S | misc_RNA               | chr7  | 17205652 | 17205928 | + | 0     | 0     |
| ENSG00000103NR2E3     | NR2E3     | protein_coding         | chr15 | 71792638 | 71818259 | + | 0.06  | 0     |
| ENSG00000103MIR7161   | MIR7161   | miRNA                  | chr6  | 1.59E+08 | 1.59E+08 | + | 0     | 0     |
| ENSG00000103RP11-231P | RP11-231P | unprocessed_transcript | chr1  | 26218581 | 26220476 | - | 0     | 0     |
| ENSG00000103AC007325  | AC007325  | pseudogene             | chr15 | 59711    | 60316    | + | 0     | 0     |
| ENSG00000103RP11-507K | RP11-507K | sense_intronic         | chr14 | 88589231 | 88592408 | + | 0.04  | 0.04  |
| ENSG00000103RP11-340I | RP11-340I | unprocessed_transcript | chr7  | 63993904 | 63994006 | + | 0     | 0     |
| ENSG00000103RP11-272N | RP11-272N | unprocessed_transcript | chr13 | 85837126 | 85837532 | - | 0     | 0     |
| ENSG00000103MIR6080   | MIR6080   | miRNA                  | chr17 | 64780759 | 64780824 | + | 0     | 0     |
| ENSG00000103RP11-1H8  | RP11-1H8  | unprocessed_transcript | chr15 | 34520608 | 34521791 | + | 0     | 0     |

|                                           |          |          |   |       |       |
|-------------------------------------------|----------|----------|---|-------|-------|
| ENSG0000(SNX3P1Y processed_ chrY          | 5634480  | 5634655  | - | 0     | 0     |
| ENSG0000(CTA-313A1 processed_ chr7        | 1.02E+08 | 1.02E+08 | - | 0     | 0     |
| ENSG0000(uc_338 misc_RNA chr14            | 30519161 | 30519318 | + | 0     | 0     |
| ENSG0000(HIST1H2BI protein_co chr6        | 26272976 | 26273356 | + | 0     | 0     |
| ENSG0000(ZACNP1 unprocessε chr4           | 1.08E+08 | 1.08E+08 | + | 0     | 0     |
| ENSG0000(RN7SL113F misc_RNA chr2          | 85368282 | 85368580 | + | 0.36  | 0     |
| ENSG0000(U2 snRNA chr17                   | 43300041 | 43300231 | - | 0.28  | 0     |
| ENSG0000(HOXA11-A misc_RNA chr7           | 27187819 | 27188021 | + | 0     | 0     |
| ENSG0000(RP13-977E unprocessε chr2        | 2.35E+08 | 2.35E+08 | - | 0     | 0     |
| ENSG0000(RP11-146E processed_ chr14       | 19131842 | 19132890 | - | 0     | 0     |
| ENSG0000(RP5-1068H lincRNA chr20          | 4761300  | 4761696  | + | 0     | 0     |
| ENSG0000(MIR6077 miRNA chr1               | 1.48E+08 | 1.48E+08 | + | 0     | 0     |
| ENSG0000(MIR6775 miRNA chr16              | 87834592 | 87834660 | - | 0     | 0     |
| ENSG0000(TBC1D3E protein_co chr17         | 38127951 | 38138862 | + | 0     | 0     |
| ENSG0000(RP11-81A1 sense_intrε chr15      | 79920195 | 79922455 | - | 1.55  | 1.81  |
| ENSG0000(RP11-348N antisense chr10        | 1.11E+08 | 1.11E+08 | + | 0     | 0.31  |
| ENSG0000(RP11-539D unprocessε chrY        | 24977176 | 24978317 | - | 0     | 0     |
| ENSG0000(RP13-608F unprocessε chr15       | 82472203 | 82472426 | + | 0     | 0     |
| ENSG0000(RN7SL429F misc_RNA chr15         | 74072454 | 74072676 | - | 0     | 0     |
| ENSG0000(RP11-405N lincRNA chr18          | 75070197 | 75071091 | - | 0     | 0     |
| ENSG0000(RP11-455P lincRNA chr1           | 2.23E+08 | 2.23E+08 | + | 0.28  | 0     |
| ENSG0000(CTC-543D1 lincRNA chr19          | 9538733  | 9539734  | + | 1.02  | 0.89  |
| ENSG0000(C11orf98 protein_co chr11        | 62662816 | 62665217 | - | 19.18 | 22.96 |
| ENSG0000(BEND3P3 processed_ chr10         | 79682997 | 79685436 | + | 0     | 0     |
| ENSG0000(MIR8074 miRNA chr19              | 51206929 | 51207009 | - | 0     | 0     |
| ENSG0000(MIR8069-2 miRNA chr21            | 13724189 | 13724274 | + | 0     | 0     |
| ENSG0000(MRM1 protein_co chr17            | 36601572 | 36608971 | + | 1.6   | 1.5   |
| ENSG0000(CTD-2033D antisense chr15        | 39588357 | 39588882 | - | 0.14  | 0     |
| ENSG0000(U6 snRNA KI270744.1              | 51009    | 51114    | - | 0     | 0     |
| ENSG0000(RP11-467L lincRNA chr15          | 20642799 | 20643448 | - | 0     | 0     |
| ENSG0000(RP11-506H antisense chr17        | 58202352 | 58203003 | - | 0.42  | 0.46  |
| ENSG0000(RP11-78L1 lincRNA chr13          | 55062945 | 55161490 | + | 0     | 0     |
| ENSG0000(RP11-71B7 processed_ chr2        | 94861362 | 94862667 | + | 0     | 0     |
| ENSG0000(AC023491.1 protein_co KI270731.1 | 10598    | 13001    | - | 0     | 0.05  |
| ENSG0000(CTD-2318C unprocessε chr12       | 9415641  | 9416718  | + | 0     | 0     |
| ENSG0000(Metazoa_S misc_RNA chr1          | 70430896 | 70431178 | + | 0     | 0     |
| ENSG0000(HIST1H4A protein_co chr6         | 26021679 | 26021990 | + | 0     | 0     |
| ENSG0000(CTC-268N1 antisense chr17        | 37045462 | 37052775 | - | 0     | 0     |
| ENSG0000(Metazoa_S misc_RNA chr11         | 1.05E+08 | 1.05E+08 | - | 0     | 0     |
| ENSG0000(DUX4L15 unprocessε chr10         | 1.34E+08 | 1.34E+08 | + | 0     | 0     |
| ENSG0000(RP11-159D lincRNA chr17          | 57955965 | 57956143 | + | 0     | 0     |
| ENSG0000(uc_338 misc_RNA chr19            | 11033727 | 11033912 | + | 0     | 0     |
| ENSG0000(RP1-321E8 protein_co chrX        | 1.21E+08 | 1.21E+08 | - | 0     | 0     |
| ENSG0000(CDK2AP2P transcribec chr9        | 41280460 | 41280787 | + | 0     | 0     |
| ENSG0000(RP11-275N unprocessε chr10       | 21452197 | 21452412 | + | 0     | 0     |

|                 |                                |          |          |   |       |       |
|-----------------|--------------------------------|----------|----------|---|-------|-------|
| ENSG00000101400 | RP11-434C processed_ chr12     | 11500499 | 11501022 | + | 0     | 0     |
| ENSG00000101401 | KB-1572G7 unprocessε chr22     | 23607041 | 23608407 | + | 0     | 0     |
| ENSG00000101402 | LL22NC03- lincRNA chr22        | 22036344 | 22040065 | + | 0     | 0     |
| ENSG00000101403 | MIR6826 miRNA chr3             | 1.29E+08 | 1.29E+08 | + | 0     | 0     |
| ENSG00000101404 | TRAJ37 TR_J_gene chr14         | 22503750 | 22503814 | + | 0     | 0     |
| ENSG00000101405 | GOLGA6L1 protein_co chr15      | 82339998 | 82349475 | - | 1.35  | 1.42  |
| ENSG00000101406 | DUX4L10 unprocessε chr10       | 1.34E+08 | 1.34E+08 | + | 0     | 0     |
| ENSG00000101407 | RP11-666C unprocessε chr16     | 28599241 | 28601881 | - | 0     | 0     |
| ENSG00000101408 | LL22NC03- processed_ chr22     | 22730725 | 22731090 | - | 0     | 0     |
| ENSG00000101409 | RP11-227G lincRNA chr17        | 32410159 | 32410746 | + | 0.48  | 0     |
| ENSG00000101410 | MIR8059 miRNA chr17            | 50768650 | 50768730 | + | 0     | 0     |
| ENSG00000101411 | AC136352. pseudogen KI270727.1 | 20741    | 22392    | - | 0.07  | 0     |
| ENSG00000101412 | ELOA3B protein_co chr18        | 47022287 | 47023927 | - | 0     | 0     |
| ENSG00000101413 | HIST1H2AM protein_co chr6      | 27892757 | 27893149 | - | 0     | 0     |
| ENSG00000101414 | CYCSP41 processed_ chr21       | 10576292 | 10576587 | + | 0     | 0     |
| ENSG00000101415 | RP11-80F2 unprocessε chr16     | 35435303 | 35436341 | - | 0     | 0     |
| ENSG00000101416 | RP11-132A unprocessε chr7      | 1.01E+08 | 1.01E+08 | + | 0     | 0     |
| ENSG00000101417 | RP5-1051D unprocessε chr1      | 2.09E+08 | 2.09E+08 | + | 0     | 0     |
| ENSG00000101418 | IQCA1L protein_co chr7         | 1.51E+08 | 1.51E+08 | - | 0     | 0     |
| ENSG00000101419 | RP11-31A2 processed_ chr12     | 28978584 | 28978685 | + | 0     | 0     |
| ENSG00000101420 | RP11-104J lincRNA chr17        | 36012504 | 36012891 | + | 0     | 0     |
| ENSG00000101421 | RP11-137P unprocessε chr1      | 1.54E+08 | 1.54E+08 | + | 0     | 0     |
| ENSG00000101422 | RN7SL82P misc_RNA chr15        | 30800160 | 30800396 | + | 0     | 0     |
| ENSG00000101423 | RP11-282A lincRNA chr13        | 1.07E+08 | 1.07E+08 | - | 0     | 0     |
| ENSG00000101424 | Metazoa_S misc_RNA chr16       | 4658851  | 4659151  | + | 0     | 0     |
| ENSG00000101425 | Metazoa_S misc_RNA chr17       | 20340743 | 20341045 | + | 0     | 0     |
| ENSG00000101426 | Metazoa_S misc_RNA chr1        | 35399997 | 35400319 | + | 0.27  | 0.35  |
| ENSG00000101427 | RP11-706P lincRNA chr18        | 57588611 | 57589091 | - | 0     | 0     |
| ENSG00000101428 | BX004987. protein_co GL000009. | 56140    | 58376    | - | 0.1   | 0.14  |
| ENSG00000101429 | HIST1H4B protein_co chr6       | 26026815 | 26027252 | - | 0     | 0     |
| ENSG00000101430 | HOTTIP_2 misc_RNA chr7         | 27201844 | 27202219 | + | 0     | 0     |
| ENSG00000101431 | NKILA antisense chr20          | 57710183 | 57712780 | + | 0.59  | 0.65  |
| ENSG00000101432 | CTD-2574D antisense chr16      | 29862760 | 29863417 | + | 0     | 0.11  |
| ENSG00000101433 | SNORD116 snoRNA chr15          | 25087662 | 25087753 | + | 0     | 0     |
| ENSG00000101434 | LA16c-352I lincRNA chr16       | 85489813 | 85490831 | + | 0     | 0     |
| ENSG00000101435 | MCM8-AS1 antisense chr20       | 5990943  | 6005821  | - | 0     | 0     |
| ENSG00000101436 | RP11-399F processed_ chr9      | 66042646 | 66043342 | + | 0     | 0     |
| ENSG00000101437 | RP11-95F2 antisense chr13      | 57632759 | 57633575 | - | 0     | 0     |
| ENSG00000101438 | Metazoa_S misc_RNA chrX        | 1.51E+08 | 1.51E+08 | + | 0     | 0     |
| ENSG00000101439 | RP11-666C unprocessε chr16     | 28602340 | 28604519 | + | 0     | 0     |
| ENSG00000101440 | AC000403. lincRNA chr13        | 76887551 | 76891135 | + | 0.42  | 0.26  |
| ENSG00000101441 | RP11-147L lincRNA chr17        | 68126666 | 68129586 | + | 17.05 | 18.53 |
| ENSG00000101442 | Metazoa_S misc_RNA chr13       | 31975167 | 31975448 | + | 0     | 0     |
| ENSG00000101443 | RP11-425D antisense chr12      | 28185625 | 28186190 | - | 0.25  | 0     |
| ENSG00000101444 | CTD-2054H processed_ chr5      | 51101172 | 51101643 | - | 0     | 0     |

|                 |                           |            |          |          |   |      |      |
|-----------------|---------------------------|------------|----------|----------|---|------|------|
| ENSG00000100000 | RP11-12A2 unprocessed     | chr9       | 67718821 | 67719022 | + | 0    | 0    |
| ENSG00000100000 | RP1-281E1 processed       | chr6       | 48701491 | 48701872 | - | 0    | 0    |
| ENSG00000100000 | RP11-325L lincRNA         | chr15      | 65083042 | 65083663 | - | 0    | 0    |
| ENSG00000100000 | MIR6859-4 miRNA           | chr16      | 17052    | 17119    | - | 0    | 0    |
| ENSG00000100000 | RP11-147L lincRNA         | chr17      | 68188547 | 68189165 | + | 0    | 0    |
| ENSG00000100000 | RP11-707G lincRNA         | chr12      | 25385670 | 25386241 | - | 0.62 | 0.41 |
| ENSG00000100000 | CTA-444M processed        | chr6       | 1.34E+08 | 1.34E+08 | + | 0    | 0    |
| ENSG00000100000 | RP1-229K2 processed       | chr6       | 41252696 | 41252858 | + | 0    | 0    |
| ENSG00000100000 | RN7SL660F misc_RNA        | chr14      | 32442341 | 32442639 | + | 0    | 0    |
| ENSG00000100000 | AL355301.1 misc_RNA       | chr10      | 98076361 | 98076421 | - | 0    | 0    |
| ENSG00000100000 | RP11-518K processed       | chr9       | 15524576 | 15524707 | - | 0    | 0    |
| ENSG00000100000 | MIR6722 miRNA             | chr9       | 1.37E+08 | 1.37E+08 | - | 0    | 0    |
| ENSG00000100000 | U6 snRNA                  | chr1       | 516376   | 516479   | - | 0    | 0    |
| ENSG00000100000 | DUX4L11 unprocessed       | chr10      | 1.34E+08 | 1.34E+08 | + | 0    | 0    |
| ENSG00000100000 | FAM27B processed          | chr9       | 67725690 | 67725902 | - | 0    | 0    |
| ENSG00000100000 | Metazoa_S misc_RNA        | chr2       | 46266690 | 46266971 | + | 0    | 0    |
| ENSG00000100000 | RP5-890E1 lincRNA         | chr17      | 48066704 | 48067293 | - | 0    | 0    |
| ENSG00000100000 | AC159540.1 lincRNA        | chr2       | 97421075 | 97434847 | + | 0    | 0    |
| ENSG00000100000 | BACE1-AS antisense        | chr11      | 1.17E+08 | 1.17E+08 | + | 1.92 | 0.82 |
| ENSG00000100000 | CTD-2036P antisense       | chr15      | 42724102 | 42724922 | + | 0.08 | 0    |
| ENSG00000100000 | Metazoa_S misc_RNA        | chr17      | 45526466 | 45526746 | - | 0    | 0    |
| ENSG00000100000 | RN7SL3 misc_RNA           | chr14      | 49853616 | 49853914 | - | 0.36 | 0    |
| ENSG00000100000 | ZNRD1-AS1 misc_RNA        | chr6       | 30061080 | 30061183 | + | 0    | 0    |
| ENSG00000100000 | U2 snRNA                  | chr17      | 43273101 | 43273292 | - | 0    | 0    |
| ENSG00000100000 | pRNA misc_RNA             | chr21      | 8433085  | 8433174  | + | 0    | 0    |
| ENSG00000100000 | HTT-AS1_1 misc_RNA        | chr4       | 3063472  | 3063701  | + | 0    | 0    |
| ENSG00000100000 | AC136616.1 protein_coding | KI270728.1 | 1157687  | 1240349  | + | 0    | 0    |
| ENSG00000100000 | MIR6071 miRNA             | chr2       | 85783600 | 85783677 | - | 0    | 0    |
| ENSG00000100000 | RP11-468E sense_intronic  | chr14      | 24201612 | 24202811 | - | 1.33 | 1.89 |
| ENSG00000100000 | Metazoa_S misc_RNA        | chr15      | 84467901 | 84468147 | + | 0    | 0    |
| ENSG00000100000 | DUX4L12 unprocessed       | chr10      | 1.34E+08 | 1.34E+08 | + | 0    | 0    |
| ENSG00000100000 | MIR6723 miRNA             | chr1       | 632325   | 632413   | - | 0    | 0    |
| ENSG00000100000 | U6 snRNA                  | GL000213.1 | 127840   | 127946   | - | 0    | 0    |
| ENSG00000100000 | Metazoa_S misc_RNA        | chr17      | 1101007  | 1101273  | - | 0    | 0    |
| ENSG00000100000 | LLNLR-2761 unprocessed    | chr19      | 46533669 | 46534351 | + | 0    | 0    |
| ENSG00000100000 | MIR6823 miRNA             | chr3       | 48549961 | 48550021 | - | 0    | 0    |
| ENSG00000100000 | RMST_8 misc_RNA           | chr12      | 97560557 | 97560721 | + | 0    | 0    |
| ENSG00000100000 | RP11-635C unprocessed     | chrX       | 1.53E+08 | 1.53E+08 | + | 0    | 0    |
| ENSG00000100000 | SPDYE14P unprocessed      | chr7       | 75309144 | 75315046 | + | 0    | 0    |
| ENSG00000100000 | LINC00624 antisense       | chr1       | 1.47E+08 | 1.48E+08 | - | 0    | 0.04 |
| ENSG00000100000 | AC006133.1 unprocessed    | chr19      | 39726030 | 39726775 | - | 0    | 0    |
| ENSG00000100000 | Vault misc_RNA            | chr5       | 1.36E+08 | 1.36E+08 | - | 0    | 0    |
| ENSG00000100000 | RP5-1116H lincRNA         | chr20      | 5061037  | 5061340  | - | 0    | 0    |
| ENSG00000100000 | AC007325.1 protein_coding | KI270734.1 | 131494   | 137392   | + | 0    | 0.2  |
| ENSG00000100000 | Metazoa_S misc_RNA        | chr14      | 55285227 | 55285558 | + | 0    | 0    |

|                                    |       |          |          |   |       |       |
|------------------------------------|-------|----------|----------|---|-------|-------|
| ENSG0000(RP5-1099C unprocessed)    | chr7  | 92540268 | 92557877 | - | 0     | 0     |
| ENSG0000(WT1-AS_1 misc_RNA)        | chr11 | 32435738 | 32435846 | + | 16.92 | 0     |
| ENSG0000(RP11-1315 processed)      | chr5  | 71754378 | 71756301 | - | 0     | 0     |
| ENSG0000(RN7SL640F misc_RNA)       | chr9  | 39191100 | 39191360 | + | 0     | 0     |
| ENSG0000(HIST1H3H protein_coding)  | chr6  | 27810064 | 27811300 | + | 0.05  | 0.31  |
| ENSG0000(RP11-358B sense_intronic) | chr17 | 42272069 | 42275571 | - | 0     | 0     |
| ENSG0000(RP11-748L unprocessed)    | chr10 | 27313723 | 27316587 | + | 0     | 0     |
| ENSG0000(RP11-12J1 antisense)      | chr10 | 1.25E+08 | 1.25E+08 | + | 0     | 0     |
| ENSG0000(RP11-458J antisense)      | chr17 | 40648300 | 40649718 | + | 2.46  | 2.35  |
| ENSG0000(RP11-529A processed)      | chr11 | 89954593 | 89954908 | - | 0     | 0     |
| ENSG0000(Metazoa_S misc_RNA)       | chrX  | 46073651 | 46073935 | - | 0     | 0     |
| ENSG0000(RP11-345N sense_intronic) | chr15 | 26557598 | 26557937 | - | 0     | 0     |
| ENSG0000(RP3-405J1 processed)      | chr12 | 50286244 | 50289231 | + | 0     | 0     |
| ENSG0000(MRPL45 protein_coding)    | chr17 | 38297023 | 38323218 | + | 17.68 | 17.39 |
| ENSG0000(RP11-414C lincRNA)        | chrY  | 2934406  | 2934771  | - | 0     | 0.27  |
| ENSG0000(TP53TG3F protein_coding)  | chr16 | 33459045 | 33462249 | + | 0     | 0     |
| ENSG0000(RP11-327I2 lincRNA)       | chr9  | 66159954 | 66179430 | - | 0     | 0     |
| ENSG0000(MIR6879 miRNA)            | chr11 | 65018505 | 65018570 | + | 0     | 0     |
| ENSG0000(NPPA-AS1 misc_RNA)        | chr1  | 11845549 | 11845697 | + | 2.55  | 0     |
| ENSG0000(RP11-109F processed)      | chrY  | 7845485  | 7846454  | - | 0     | 0     |
| ENSG0000(IGKV1D-12 IG_V_gene)      | chr2  | 90159840 | 90160335 | + | 0     | 0     |
| ENSG0000(RP11-806N TEC)            | chr11 | 91992833 | 91993255 | + | 0     | 0     |
| ENSG0000(RP11-28A2 TEC)            | chr17 | 34614409 | 34614809 | + | 0     | 0     |
| ENSG0000(RP11-338K TEC)            | chr12 | 1.24E+08 | 1.24E+08 | + | 0.12  | 0     |
| ENSG0000(RP11-571C TEC)            | chr16 | 77657174 | 77660570 | + | 0.02  | 0.02  |
| ENSG0000(RP11-567L TEC)            | chr17 | 59362665 | 59363278 | + | 0     | 0     |
| ENSG0000(RP11-45M TEC)             | chr17 | 17181504 | 17183257 | + | 0.8   | 0.88  |
| ENSG0000(CTD-2154B TEC)            | chr5  | 10676096 | 10676423 | - | 0     | 0     |
| ENSG0000(RP11-407A TEC)            | chr12 | 1.27E+08 | 1.27E+08 | - | 0     | 0     |
| ENSG0000(RP11-640N TEC)            | chr17 | 32051030 | 32053208 | + | 0.46  | 0.04  |
| ENSG0000(CITF22-49E lincRNA)       | chr22 | 49933198 | 49934074 | - | 0     | 0     |
| ENSG0000(OR51G1 polymorph)         | chr11 | 4923374  | 4924339  | - | 0     | 0     |
| ENSG0000(RP13-895J TEC)            | chr12 | 1.32E+08 | 1.32E+08 | - | 0     | 0.04  |
| ENSG0000(PRO1804 TEC)              | chr17 | 69232963 | 69235012 | - | 0     | 0     |
| ENSG0000(RP11-191F TEC)            | chr5  | 10070531 | 10070841 | + | 0     | 0     |
| ENSG0000(CTC-43909 TEC)            | chr19 | 31364297 | 31366098 | + | 0.91  | 0.65  |
| ENSG0000(RP11-498C TEC)            | chr17 | 81862778 | 81863102 | + | 1.83  | 2.01  |
| ENSG0000(RP11-315A TEC)            | chr5  | 8754869  | 8755159  | + | 0     | 0     |
| ENSG0000(CH507-145 lincRNA)        | chr21 | 6667304  | 6670667  | - | 0.54  | 0.64  |
| ENSG0000(AP000560 TEC)             | chr11 | 74830574 | 74832510 | - | 0.14  | 0.06  |
| ENSG0000(RP11-612J TEC)            | chr4  | 1.57E+08 | 1.57E+08 | + | 0     | 0     |
| ENSG0000(RP3-477J1 TEC)            | chr22 | 47115838 | 47117217 | - | 0     | 0     |
| ENSG0000(CH507-236 lincRNA)        | chr21 | 7020599  | 7025166  | + | 0     | 0     |
| ENSG0000(CTD-2014E TEC)            | chr16 | 31566360 | 31567000 | - | 0     | 0     |
| ENSG0000(RP11-108A TEC)            | chr8  | 18864681 | 18865247 | - | 0     | 0     |

|                 |           |                        |       |          |          |   |      |      |
|-----------------|-----------|------------------------|-------|----------|----------|---|------|------|
| ENSG00000101347 | RP11-347C | TEC                    | chr16 | 30206510 | 30206927 | + | 0.3  | 0.87 |
| ENSG00000101352 | OR2S2     | protein_coding         | chr9  | 35957108 | 35958154 | - | 0    | 0.06 |
| ENSG00000101353 | LL22NC03  | lincRNA                | chr22 | 48052646 | 48058275 | + | 0    | 0    |
| ENSG00000101354 | RP11-246E | TEC                    | chr18 | 48147634 | 48150864 | - | 0    | 0    |
| ENSG00000101355 | RP11-183A | TEC                    | chr11 | 93071529 | 93072031 | + | 0    | 0    |
| ENSG00000101356 | RP11-229C | TEC                    | chr16 | 64981123 | 64983227 | - | 0.11 | 0.06 |
| ENSG00000101357 | RP11-786A | TEC                    | chr7  | 1.13E+08 | 1.13E+08 | + | 0    | 0    |
| ENSG00000101358 | CTC-448F2 | TEC                    | chr19 | 29915862 | 29917830 | + | 0.35 | 0.72 |
| ENSG00000101359 | RP11-474P | TEC                    | chr12 | 46404644 | 46407166 | + | 0.02 | 0    |
| ENSG00000101360 | AC020951  | TEC                    | chr19 | 11856032 | 11858302 | + | 0.22 | 0.08 |
| ENSG00000101361 | CTD-2342N | TEC                    | chr8  | 1.35E+08 | 1.35E+08 | + | 0    | 0    |
| ENSG00000101362 | RP11-350J | antisense              | chr6  | 1.5E+08  | 1.5E+08  | + | 0.05 | 0.1  |
| ENSG00000101363 | RP11-1250 | TEC                    | chr5  | 34105750 | 34106336 | - | 0    | 0    |
| ENSG00000101364 | AC005609  | antisense              | chr5  | 1.41E+08 | 1.41E+08 | - | 0    | 0    |
| ENSG00000101365 | RP11-25L3 | TEC                    | chr18 | 73921939 | 73922631 | - | 0    | 0    |
| ENSG00000101366 | CH507-145 | lincRNA                | chr21 | 6318434  | 6360415  | + | 1.58 | 0.56 |
| ENSG00000101367 | RP11-65F1 | TEC                    | chr5  | 93600357 | 93603598 | + | 0    | 0    |
| ENSG00000101368 | AC005609  | antisense              | chr5  | 1.41E+08 | 1.41E+08 | - | 0    | 0    |
| ENSG00000101369 | RP11-523J | TEC                    | chr2  | 30677762 | 30679895 | + | 0    | 0    |
| ENSG00000101370 | RP11-401P | TEC                    | chr16 | 50555355 | 50558719 | + | 0    | 0    |
| ENSG00000101371 | BANCR     | lincRNA                | chr9  | 69296682 | 69306977 | - | 0    | 0    |
| ENSG00000101372 | RP11-405M | TEC                    | chr18 | 75103587 | 75106260 | - | 0    | 0    |
| ENSG00000101373 | CTD-2196E | TEC                    | chr16 | 23696665 | 23697314 | - | 0    | 0    |
| ENSG00000101374 | CTD-2299N | TEC                    | chr5  | 6134303  | 6137171  | + | 0    | 0    |
| ENSG00000101375 | KB-1517D1 | TEC                    | chr8  | 98391401 | 98391514 | - | 0    | 0    |
| ENSG00000101376 | AC005609  | antisense              | chr5  | 1.41E+08 | 1.41E+08 | - | 0.12 | 0    |
| ENSG00000101377 | CEP83-AS1 | lincRNA                | chr12 | 94460003 | 94462484 | + | 0.07 | 0.05 |
| ENSG00000101378 | RP11-15A1 | TEC                    | chr19 | 43891233 | 43895411 | + | 0.13 | 0.11 |
| ENSG00000101379 | CTD-2267D | TEC                    | chr17 | 40348049 | 40350539 | - | 0    | 0    |
| ENSG00000101380 | RP3-412A9 | sense_intronic         | chr22 | 31051630 | 31068327 | + | 0.03 | 0.03 |
| ENSG00000101381 | EPB41L4A  | lincRNA                | chr5  | 1.12E+08 | 1.12E+08 | + | 0    | 0    |
| ENSG00000101382 | AC002310  | TEC                    | chr16 | 30526918 | 30528294 | + | 0.04 | 0.05 |
| ENSG00000101383 | RP11-805F | lincRNA                | chr18 | 15056845 | 15066598 | - | 0    | 0    |
| ENSG00000101384 | RP11-227L | TEC                    | chr2  | 1.72E+08 | 1.72E+08 | - | 0    | 0    |
| ENSG00000101385 | AC005753  | lincRNA                | chr5  | 1.42E+08 | 1.42E+08 | - | 0    | 0    |
| ENSG00000101386 | RP11-264N | TEC                    | chr16 | 77800023 | 77801714 | + | 0    | 0.04 |
| ENSG00000101387 | CH507-152 | lincRNA                | chr21 | 6550749  | 6553955  | - | 0    | 0    |
| ENSG00000101388 | RP11-481F | TEC                    | chr16 | 55704119 | 55706422 | + | 0    | 0    |
| ENSG00000101389 | RP11-137C | TEC                    | chr11 | 87565994 | 87566421 | + | 0    | 0    |
| ENSG00000101390 | bP-2189O9 | unprocessed_transcript | chr21 | 8857260  | 8880976  | + | 0.14 | 0    |
| ENSG00000101391 | bP-21264C | lincRNA                | chr21 | 9325013  | 9368775  | + | 1.44 | 0.35 |
| ENSG00000101392 | RP11-789C | TEC                    | chr18 | 43499173 | 43499836 | + | 0    | 0    |
| ENSG00000101393 | CTD-2006N | TEC                    | chr3  | 73624410 | 73627626 | + | 0.81 | 0.79 |
| ENSG00000101394 | RP11-173D | TEC                    | chr15 | 20141794 | 20146430 | + | 0    | 0    |
| ENSG00000101395 | CH17-140K | antisense              | chr5  | 1.41E+08 | 1.41E+08 | - | 0    | 0    |

|                 |                      |       |          |          |   |       |       |
|-----------------|----------------------|-------|----------|----------|---|-------|-------|
| ENSG00000139913 | RP11-139H TEC        | chr13 | 46117864 | 46122699 | + | 0.01  | 0     |
| ENSG00000139914 | SMG6-IT1 TEC         | chr17 | 2235713  | 2236086  | - | 0     | 0     |
| ENSG00000139915 | LA16c-390I TEC       | chr16 | 3533429  | 3534258  | - | 0     | 0     |
| ENSG00000139916 | RP11-142A TEC        | chr4  | 1.45E+08 | 1.45E+08 | + | 0     | 0.13  |
| ENSG00000139917 | RP11-477N processed_ | chr17 | 9791227  | 9808855  | - | 0     | 0     |
| ENSG00000139918 | AP000770. TEC        | chr11 | 1.17E+08 | 1.17E+08 | - | 0     | 0     |
| ENSG00000139919 | AC005609. antisense  | chr5  | 1.41E+08 | 1.41E+08 | - | 0     | 0     |
| ENSG00000139920 | RP5-1039K TEC        | chr22 | 37943050 | 37944898 | + | 7.11  | 5.71  |
| ENSG00000139921 | RP11-46H1 TEC        | chr12 | 1.33E+08 | 1.33E+08 | - | 0.26  | 0.23  |
| ENSG00000139922 | RP11-67H2 TEC        | chr16 | 32781883 | 32784138 | + | 0.12  | 0.16  |
| ENSG00000139923 | RP11-399J. TEC       | chr11 | 65118310 | 65119111 | + | 0     | 0     |
| ENSG00000139924 | RP11-178H TEC        | chr11 | 93592187 | 93592669 | + | 0.32  | 0     |
| ENSG00000139925 | RP13-415G TEC        | chr17 | 41665566 | 41668031 | + | 0     | 0.02  |
| ENSG00000139926 | CH507-210 lincRNA    | chr21 | 6858539  | 6897263  | + | 0     | 0     |
| ENSG00000139927 | RP11-89K2 TEC        | chr2  | 44927914 | 44928396 | - | 0     | 0     |
| ENSG00000139928 | RP11-313L. TEC       | chr5  | 1.04E+08 | 1.04E+08 | + | 0     | 0     |
| ENSG00000139929 | RP11-455I. TEC       | chr7  | 93954044 | 93956519 | - | 0.15  | 0.05  |
| ENSG00000139930 | CTA-407F1 antisense  | chr22 | 25756318 | 25756669 | - | 0     | 0     |
| ENSG00000139931 | CH507-396 protein_co | chr21 | 7788703  | 7793954  | - | 0.03  | 0     |
| ENSG00000139932 | RP11-399B TEC        | chr2  | 1.12E+08 | 1.12E+08 | + | 2.52  | 2.72  |
| ENSG00000139933 | RP11-294J. TEC       | chr17 | 50722074 | 50724224 | + | 0.03  | 0     |
| ENSG00000139934 | RP13-20L1. TEC       | chr17 | 82362349 | 82363196 | - | 0     | 0     |
| ENSG00000139935 | RP11-39H3 TEC        | chr5  | 1.8E+08  | 1.8E+08  | - | 0.05  | 0.05  |
| ENSG00000139936 | RP5-1174N TEC        | chr1  | 32973553 | 32974463 | + | 0.65  | 0.24  |
| ENSG00000139937 | RP5-849H1 TEC        | chr1  | 62607766 | 62609584 | + | 0     | 0     |
| ENSG00000139938 | RP11-662I. TEC       | chr12 | 24902309 | 24904681 | + | 0     | 0     |
| ENSG00000139939 | HEIH TEC             | chr5  | 1.81E+08 | 1.81E+08 | - | 14.98 | 13.53 |
| ENSG00000139940 | RP11-644A TEC        | chr18 | 70489630 | 70491205 | + | 0     | 0     |
| ENSG00000139941 | CTD-3022L TEC        | chr17 | 69433084 | 69435533 | + | 0.02  | 0     |
| ENSG00000139942 | RP11-83B2 TEC        | chr12 | 1.25E+08 | 1.25E+08 | - | 0     | 0     |
| ENSG00000139943 | RP11-756P TEC        | chr4  | 1.89E+08 | 1.89E+08 | - | 0.5   | 0.4   |
| ENSG00000139944 | RP11-185J. TEC       | chr16 | 6703883  | 6705558  | + | 0     | 0     |
| ENSG00000139945 | RP1-41C23 TEC        | chr17 | 31533171 | 31533938 | - | 0     | 0     |
| ENSG00000139946 | RP11-164P TEC        | chr4  | 1.52E+08 | 1.52E+08 | + | 0     | 0     |
| ENSG00000139947 | RP11-165N TEC        | chr16 | 12374355 | 12376032 | + | 0     | 0     |
| ENSG00000139948 | RP11-739P TEC        | chr11 | 91208838 | 91209590 | - | 0     | 0     |
| ENSG00000139949 | RP11-9N12 antisense  | chr4  | 1.54E+08 | 1.54E+08 | + | 0     | 0     |
| ENSG00000139950 | RP5-1031D TEC        | chr10 | 7411599  | 7413467  | + | 0     | 0     |
| ENSG00000139951 | RP11-426J. TEC       | chr18 | 48564795 | 48568342 | + | 0.02  | 0     |
| ENSG00000139952 | RP11-303E TEC        | chr16 | 80982319 | 80984094 | - | 0.02  | 0.07  |
| ENSG00000139953 | RP11-723J. TEC       | chr18 | 35972151 | 35973916 | + | 0.2   | 0.18  |
| ENSG00000139954 | LA16c-431I TEC       | chr16 | 1688355  | 1690536  | + | 0.08  | 0.14  |
| ENSG00000139955 | RP11-333B TEC        | chr9  | 82543718 | 82544196 | + | 0     | 0     |
| ENSG00000139956 | RP11-762L. TEC       | chr11 | 86434924 | 86437282 | - | 0.4   | 0.38  |
| ENSG00000139957 | RP11-1127 TEC        | chr14 | 98916902 | 98917801 | - | 0     | 0     |

|                               |       |          |          |   |      |      |
|-------------------------------|-------|----------|----------|---|------|------|
| ENSG0000(RP11-797A) TEC       | chr15 | 77063397 | 77064910 | - | 0.49 | 0.17 |
| ENSG0000(RP11-43N2) TEC       | chr10 | 76270206 | 76270800 | + | 0    | 0    |
| ENSG0000(RP3-424M) TEC        | chr12 | 1.11E+08 | 1.11E+08 | + | 0.03 | 0.24 |
| ENSG0000(CTD-2036A) TEC       | chr16 | 18201501 | 18201956 | + | 0    | 0    |
| ENSG0000(Z69720.3) TEC        | chr16 | 74683    | 74961    | + | 0    | 0    |
| ENSG0000(CH507-513) lincRNA   | chr21 | 8197620  | 8227646  | + | 0.73 | 0.57 |
| ENSG0000(RP11-131N) TEC       | chr1  | 33141871 | 33143230 | - | 0.04 | 0.42 |
| ENSG0000(RP11-1430) TEC       | chr7  | 1.55E+08 | 1.55E+08 | + | 0    | 0    |
| ENSG0000(AC008985) TEC        | chr19 | 47661657 | 47663895 | - | 0.45 | 0.68 |
| ENSG0000(OR10A6 polymorph)    | chr11 | 7927633  | 7928662  | - | 0    | 0    |
| ENSG0000(RP11-216P) TEC       | chr12 | 1.21E+08 | 1.21E+08 | - | 0    | 0    |
| ENSG0000(RP11-417J) TEC       | chr5  | 8659764  | 8660059  | - | 0    | 0    |
| ENSG0000(RP11-159D) TEC       | chr11 | 38013510 | 38014141 | - | 0    | 0    |
| ENSG0000(RP5-1186P) TEC       | chr7  | 74633510 | 74633884 | - | 0    | 0    |
| ENSG0000(CTA-243E7 antisense) | chr22 | 25048967 | 25051966 | - | 0    | 0    |
| ENSG0000(AC005943) TEC        | chr19 | 1576939  | 1577086  | + | 0    | 0    |
| ENSG0000(RP5-1039K sense_ove) | chr22 | 37948352 | 38002889 | + | 0.1  | 0.1  |
| ENSG0000(RP11-191F) TEC       | chr5  | 10057502 | 10057807 | + | 0    | 0    |
| ENSG0000(OR51B2 polymorph)    | chr11 | 5323359  | 5324297  | - | 0    | 0    |
| ENSG0000(RP11-254A) TEC       | chr4  | 91603275 | 91605292 | + | 0    | 0    |
| ENSG0000(CTD-2651B) TEC       | chr15 | 45214448 | 45215044 | - | 0    | 0    |
| ENSG0000(RP11-314B) TEC       | chr2  | 2.26E+08 | 2.26E+08 | + | 0    | 0    |
| ENSG0000(RP11-360A) TEC       | chr4  | 1.49E+08 | 1.49E+08 | - | 0    | 0    |
| ENSG0000(RP11-697K) TEC       | chr3  | 45749627 | 45750651 | + | 0    | 0.07 |
| ENSG0000(RP11-407G) TEC       | chr16 | 57140896 | 57144586 | - | 0.01 | 0.02 |
| ENSG0000(C18orf15) TEC        | chr18 | 13239543 | 13242076 | + | 0    | 0    |
| ENSG0000(RP11-391L) TEC       | chr16 | 81463892 | 81464859 | - | 0    | 0    |
| ENSG0000(RP11-250B) TEC       | chr6  | 80440730 | 80441172 | + | 0.18 | 0.2  |
| ENSG0000(RP13-895J) TEC       | chr12 | 1.32E+08 | 1.32E+08 | + | 0    | 0    |
| ENSG0000(RP11-1193) TEC       | chr2  | 1.36E+08 | 1.36E+08 | + | 0    | 0    |
| ENSG0000(RP11-131P) TEC       | chr13 | 38372856 | 38373935 | + | 0    | 0    |
| ENSG0000(RP3-414A1) TEC       | chr14 | 73580694 | 73582918 | + | 0.25 | 0.3  |
| ENSG0000(CTC-270D5 antisense) | chr5  | 1.41E+08 | 1.41E+08 | - | 0    | 0    |
| ENSG0000(RP11-144I) TEC       | chr10 | 24481180 | 24483034 | - | 0    | 0    |
| ENSG0000(RP11-212I) TEC       | chr16 | 55486618 | 55488777 | + | 0.23 | 0.11 |
| ENSG0000(LA16c-360I) TEC      | chr16 | 3292879  | 3293403  | + | 0    | 0    |
| ENSG0000(RP11-306B) TEC       | chr14 | 30370108 | 30373115 | + | 0    | 0    |
| ENSG0000(RP11-500C) TEC       | chr15 | 77484275 | 77485606 | - | 0    | 0    |
| ENSG0000(RP11-5A1) TEC        | chr18 | 40062903 | 40066471 | - | 0    | 0    |
| ENSG0000(RP11-649A) TEC       | chr17 | 75130883 | 75133043 | + | 0.03 | 0.08 |
| ENSG0000(RP11-81K2) TEC       | chr17 | 49494223 | 49497800 | - | 0    | 0    |
| ENSG0000(CTC-260E6) TEC       | chr19 | 20207192 | 20209789 | - | 0.02 | 0    |
| ENSG0000(RP11-667K) TEC       | chr17 | 2101542  | 2101667  | + | 0    | 0    |
| ENSG0000(CTD-2373N) TEC       | chr8  | 30552345 | 30553766 | + | 2.68 | 3.44 |
| ENSG0000(RP11-805F) TEC       | chr18 | 14990707 | 14993235 | - | 0    | 0    |



|                 |           |            |       |          |          |   |      |      |
|-----------------|-----------|------------|-------|----------|----------|---|------|------|
| ENSG00000102220 | CTB-22K14 | TEC        | chr7  | 1.09E+08 | 1.09E+08 | - | 0    | 0    |
| ENSG00000102221 | AC007787  | TEC        | chr19 | 13081966 | 13082564 | + | 0.12 | 0.13 |
| ENSG00000102222 | RP11-643G | TEC        | chr11 | 89548130 | 89548795 | - | 0    | 0    |
| ENSG00000102223 | RP11-555G | TEC        | chr11 | 1.35E+08 | 1.35E+08 | + | 0    | 0    |
| ENSG00000102224 | CTC-270D5 | antisense  | chr5  | 1.41E+08 | 1.41E+08 | - | 0    | 0    |
| ENSG00000102225 | RP11-511H | TEC        | chr7  | 17940503 | 17942922 | + | 0.39 | 0.3  |
| ENSG00000102226 | AL353898  | pseudogen  | chr1  | 54099968 | 54100224 | - | 0    | 0    |
| ENSG00000102227 | PWAR1     | TEC        | chr15 | 25135642 | 25138055 | + | 0    | 0.03 |
| ENSG00000102228 | OR6Q1     | protein_co | chr11 | 58030930 | 58031931 | + | 0    | 0    |
| ENSG00000102229 | RP11-643G | TEC        | chr11 | 89556860 | 89557205 | + | 0    | 0    |
| ENSG00000102230 | CTD-3126B | TEC        | chr16 | 2620222  | 2621794  | - | 0    | 0    |
| ENSG00000102231 | AGAP14    | unprocessε | chr10 | 46337224 | 46358714 | + | 0    | 0    |
| ENSG00000102232 | RP11-2570 | TEC        | chr17 | 54956760 | 54958426 | - | 1.22 | 1.35 |
| ENSG00000102233 | RP3-33201 | TEC        | chr1  | 1.73E+08 | 1.73E+08 | + | 0    | 0.31 |
| ENSG00000102234 | CH507-216 | unprocessε | chr21 | 10136419 | 10137004 | + | 0    | 0    |
| ENSG00000102235 | CTD-2537I | TEC        | chr19 | 55467438 | 55467934 | - | 0    | 0    |
| ENSG00000102236 | CH507-39C | lincRNA    | chr21 | 5707004  | 5709456  | - | 0.86 | 0.57 |
| ENSG00000102237 | RP11-264J | TEC        | chr13 | 20194412 | 20196005 | + | 0    | 0    |
| ENSG00000102238 | HEXDC-IT1 | sense_intr | chr17 | 82425498 | 82427310 | + | 0.19 | 0.03 |
| ENSG00000102239 | GS1-25M2  | TEC        | chr7  | 96118647 | 96119995 | + | 0    | 0    |
| ENSG00000102240 | CH17-140K | protein_co | chr5  | 1.41E+08 | 1.41E+08 | + | 0    | 0.55 |
| ENSG00000102241 | RP11-159D | TEC        | chr17 | 58006674 | 58008187 | + | 0.61 | 0.92 |
| ENSG00000102242 | RP11-287D | lincRNA    | chr2  | 74196698 | 74198560 | - | 0.03 | 0    |
| ENSG00000102243 | RP11-83B2 | TEC        | chr12 | 1.25E+08 | 1.25E+08 | + | 0    | 0    |
| ENSG00000102244 | RP13-580B | lincRNA    | chr7  | 56809214 | 56848800 | - | 0.02 | 0.03 |
| ENSG00000102245 | RP11-229P | protein_co | chr9  | 1.37E+08 | 1.37E+08 | - | 0    | 0    |
| ENSG00000102246 | RP11-322E | TEC        | chr18 | 35483431 | 35483667 | - | 0    | 1.33 |
| ENSG00000102247 | RP11-480D | TEC        | chr5  | 8458842  | 8459183  | + | 0    | 0    |
| ENSG00000102248 | RP3-449H6 | TEC        | chr6  | 44551577 | 44553281 | + | 0    | 0    |
| ENSG00000102249 | RP11-800A | TEC        | chr18 | 79352458 | 79354567 | + | 0    | 0    |
| ENSG00000102250 | SND1-IT1  | lincRNA    | chr7  | 1.28E+08 | 1.28E+08 | + | 0    | 0    |
| ENSG00000102251 | CTA-228A9 | antisense  | chr22 | 38130216 | 38150612 | + | 0.15 | 0.13 |
| ENSG00000102252 | RP11-341D | processed_ | chr13 | 18206570 | 18207466 | - | 0    | 0    |
| ENSG00000102253 | LINC01727 | lincRNA    | chr20 | 21569976 | 21619674 | + | 0    | 0    |
| ENSG00000102254 | RP11-395N | TEC        | chr9  | 35360540 | 35362054 | - | 0    | 0    |
| ENSG00000102255 | CTA-243E7 | antisense  | chr22 | 25009685 | 25015072 | - | 0.01 | 0.01 |
| ENSG00000102256 | RP11-667F | TEC        | chr7  | 1.16E+08 | 1.16E+08 | - | 0.31 | 0.19 |
| ENSG00000102257 | RP11-83B2 | TEC        | chr12 | 1.25E+08 | 1.25E+08 | - | 0    | 0    |
| ENSG00000102258 | RP11-574K | TEC        | chr10 | 73742995 | 73744230 | - | 6.47 | 6.65 |
| ENSG00000102259 | RP11-481C | TEC        | chr17 | 51183191 | 51186403 | - | 0.07 | 0.18 |
| ENSG00000102260 | RP11-684N | TEC        | chr11 | 1.32E+08 | 1.32E+08 | - | 0    | 0    |
| ENSG00000102261 | RP11-461F | TEC        | chr15 | 97533738 | 97541476 | - | 0.04 | 0.07 |
| ENSG00000102262 | RP11-1H8  | TEC        | chr15 | 34415450 | 34420273 | - | 0.1  | 0.04 |
| ENSG00000102263 | RP11-856B | TEC        | chr11 | 65561484 | 65561607 | + | 0    | 0    |
| ENSG00000102264 | LINC01670 | lincRNA    | chr21 | 5499151  | 5502542  | - | 0.54 | 0.64 |

|                                |       |          |          |   |      |      |
|--------------------------------|-------|----------|----------|---|------|------|
| ENSG0000( AC092066. TEC        | chr19 | 44664131 | 44666158 | + | 3.38 | 3.62 |
| ENSG0000( RP5-1024N TEC        | chr1  | 48102068 | 48104736 | + | 0    | 0    |
| ENSG0000( RP11-417J TEC        | chr5  | 8572047  | 8572206  | + | 0    | 0    |
| ENSG0000( RP11-15B1 TEC        | chr4  | 99942081 | 99942522 | - | 0    | 0    |
| ENSG0000( RP11-595C TEC        | chr8  | 35254344 | 35256605 | + | 0    | 0    |
| ENSG0000( AC009120. TEC        | chr16 | 74150520 | 74151299 | + | 0    | 0    |
| ENSG0000( CTC-204F2. TEC       | chr19 | 44246478 | 44248374 | - | 0.03 | 0.03 |
| ENSG0000( RP11-138B TEC        | chr7  | 49760897 | 49762764 | - | 0    | 0    |
| ENSG0000( RP11-426C TEC        | chr16 | 29204633 | 29205855 | + | 0    | 0.11 |
| ENSG0000( RP11-823P TEC        | chr5  | 21493436 | 21494596 | + | 0    | 0.06 |
| ENSG0000( CTC-490E2 TEC        | chr19 | 40840159 | 40842039 | + | 0.51 | 0.56 |
| ENSG0000( CTA-243E7 antisense  | chr22 | 25052122 | 25065241 | - | 0    | 0.03 |
| ENSG0000( OR10X1 polymorph     | chr1  | 1.59E+08 | 1.59E+08 | - | 0    | 0    |
| ENSG0000( RP13-895J TEC        | chr12 | 1.32E+08 | 1.32E+08 | + | 0    | 0    |
| ENSG0000( RP3-425C1 TEC        | chr6  | 1.22E+08 | 1.22E+08 | + | 0.05 | 0.02 |
| ENSG0000( RP11-566H processed_ | chrY  | 25307729 | 25307803 | + | 0    | 0    |
| ENSG0000( OR8D2 polymorph      | chr11 | 1.24E+08 | 1.24E+08 | - | 0    | 0    |
| ENSG0000( CTD-2562J TEC        | chr11 | 75260129 | 75262466 | - | 2.73 | 4.04 |
| ENSG0000( RP11-517I TEC        | chr5  | 1.26E+08 | 1.26E+08 | + | 1    | 1.18 |
| ENSG0000( CTB-58E17 TEC        | chr17 | 38727833 | 38728198 | - | 0    | 0    |
| ENSG0000( RP11-140I TEC        | chr16 | 73293866 | 73294296 | - | 0    | 0    |
| ENSG0000( RP11-83B2 TEC        | chr12 | 1.25E+08 | 1.25E+08 | + | 0    | 0    |
| ENSG0000( RP11-394B TEC        | chr16 | 70768967 | 70770221 | - | 0.1  | 0    |
| ENSG0000( RP11-424N TEC        | chr16 | 70778433 | 70779145 | + | 0    | 0    |
| ENSG0000( RP11-341D unprocessε | chr13 | 18279320 | 18309934 | - | 0    | 0    |
| ENSG0000( RP11-417J TEC        | chr5  | 8685581  | 8685816  | - | 0    | 0    |
| ENSG0000( RP3-442L6. TEC       | chr6  | 49721931 | 49724007 | + | 0.06 | 0.03 |
| ENSG0000( RP11-76C1 TEC        | chr12 | 1.31E+08 | 1.31E+08 | - | 0    | 0    |
| ENSG0000( RP11-264L TEC        | chr16 | 78550739 | 78553296 | - | 0.04 | 0.11 |
| ENSG0000( RP11-278J TEC        | chr5  | 1.43E+08 | 1.43E+08 | + | 0    | 0    |
| ENSG0000( FAM231C protein_co   | chr1  | 16733952 | 16734461 | - | 0    | 0    |
| ENSG0000( RP11-342K TEC        | chr17 | 62003700 | 62007518 | - | 0.01 | 0.02 |
| ENSG0000( RP11-489P TEC        | chr12 | 58094914 | 58098013 | - | 0    | 0    |
| ENSG0000( RP11-261P TEC        | chr13 | 20712431 | 20714146 | + | 0    | 0    |
| ENSG0000( LA16c-335I TEC       | chr16 | 769119   | 769443   | - | 0    | 0    |
| ENSG0000( RP11-205K TEC        | chr9  | 1.27E+08 | 1.27E+08 | + | 0    | 0    |
| ENSG0000( KB-1742H1 TEC        | chr8  | 1.04E+08 | 1.04E+08 | - | 0.12 | 0.08 |
| ENSG0000( RP11-597D TEC        | chr4  | 1.58E+08 | 1.58E+08 | - | 0    | 0    |
| ENSG0000( RP11-477I TEC        | chr14 | 1.05E+08 | 1.05E+08 | - | 0.35 | 0.76 |
| ENSG0000( LINC01451 lincRNA    | chr9  | 1.37E+08 | 1.37E+08 | - | 0    | 0    |
| ENSG0000( RP11-463C TEC        | chr16 | 86595189 | 86597639 | + | 0    | 0.05 |
| ENSG0000( AC139099. TEC        | chr17 | 83132647 | 83136150 | - | 0    | 0    |
| ENSG0000( RP11-894J TEC        | chr3  | 52848085 | 52848553 | - | 0    | 0.18 |
| ENSG0000( RP11-547D TEC        | chr15 | 55171972 | 55178175 | - | 0.03 | 0.04 |
| ENSG0000( RP11-117L TEC        | chr12 | 1.3E+08  | 1.3E+08  | - | 0    | 0    |

|                 |                      |       |          |          |   |      |      |
|-----------------|----------------------|-------|----------|----------|---|------|------|
| ENSG00000100000 | RP11-271K TEC        | chr3  | 1.42E+08 | 1.42E+08 | - | 0.05 | 0.15 |
| ENSG00000100000 | RP11-135F TEC        | chr12 | 1E+08    | 1E+08    | - | 0.5  | 0.55 |
| ENSG00000100000 | RP11-374F TEC        | chr13 | 30344672 | 30347167 | + | 0.13 | 0.02 |
| ENSG00000100000 | RP1-163M1 lincRNA    | chr1  | 16701546 | 16705594 | + | 0    | 0    |
| ENSG00000100000 | RP11-599B TEC        | chr17 | 8188933  | 8189688  | + | 0    | 0.09 |
| ENSG00000100000 | RP11-495K TEC        | chr12 | 1.32E+08 | 1.32E+08 | + | 0    | 0    |
| ENSG00000100000 | RP11-345K TEC        | chr9  | 88177695 | 88178578 | + | 0    | 0.08 |
| ENSG00000100000 | LLOXNC01- TEC        | chrX  | 48939992 | 48940808 | + | 0    | 0    |
| ENSG00000100000 | RP4-646P1 TEC        | chr21 | 18917213 | 18917429 | + | 0    | 0    |
| ENSG00000100000 | RP11-282A TEC        | chr13 | 1.07E+08 | 1.07E+08 | - | 0    | 0    |
| ENSG00000100000 | RP3-394A1 antisense  | chr22 | 29978950 | 30028236 | - | 0.01 | 0.01 |
| ENSG00000100000 | RP11-387A TEC        | chr2  | 1.76E+08 | 1.76E+08 | - | 0    | 0    |
| ENSG00000100000 | CTB-12A17 TEC        | chr19 | 46636810 | 46639161 | - | 0.14 | 0.13 |
| ENSG00000100000 | CTD-3126B TEC        | chr16 | 2592514  | 2594563  | + | 0.03 | 0.03 |
| ENSG00000100000 | RP11-313I2 TEC       | chr11 | 89704164 | 89704658 | + | 0    | 0    |
| ENSG00000100000 | RP4-737E2 TEC        | chr20 | 23148086 | 23149939 | + | 0    | 0    |
| ENSG00000100000 | CTD-2144E TEC        | chr16 | 34941977 | 34943880 | + | 0.03 | 0.1  |
| ENSG00000100000 | RP11-107E TEC        | chr2  | 1.44E+08 | 1.44E+08 | - | 0    | 0    |
| ENSG00000100000 | bP-2168N6 processed  | chr21 | 8701461  | 8701562  | + | 0    | 0    |
| ENSG00000100000 | RP11-514P sense_ove  | chr7  | 1.03E+08 | 1.03E+08 | - | 0.41 | 0    |
| ENSG00000100000 | PRAMEF13 protein_co  | chr1  | 13196330 | 13201409 | - | 0    | 0    |
| ENSG00000100000 | RP1-199J3. TEC       | chr6  | 99587611 | 99589898 | + | 0.19 | 0.37 |
| ENSG00000100000 | RP11-407A TEC        | chr12 | 1.27E+08 | 1.27E+08 | + | 0    | 0    |
| ENSG00000100000 | CTB-52I2.7 TEC       | chr19 | 18009440 | 18009881 | - | 0    | 0    |
| ENSG00000100000 | RP11-318G TEC        | chr12 | 25423600 | 25424942 | + | 0    | 0    |
| ENSG00000100000 | RP11-1099 TEC        | chr17 | 8013327  | 8016378  | - | 0    | 0.02 |
| ENSG00000100000 | CTA-414D7 sense_intr | chr22 | 44102779 | 44116232 | + | 0.05 | 0.1  |
| ENSG00000100000 | RP11-43D4 TEC        | chr12 | 1.05E+08 | 1.05E+08 | + | 0.13 | 0.05 |
| ENSG00000100000 | CH507-338 processed  | chr21 | 7626344  | 7627528  | - | 0.42 | 0.33 |
| ENSG00000100000 | RP11-131N TEC        | chr1  | 33162851 | 33166298 | + | 0.03 | 0.08 |
| ENSG00000100000 | RP11-417C TEC        | chr12 | 1.28E+08 | 1.28E+08 | + | 0    | 0.47 |
| ENSG00000100000 | RP11-711N TEC        | chr2  | 73998337 | 73998548 | - | 0    | 0    |
| ENSG00000100000 | XX-C00717 antisense  | chr22 | 50316035 | 50317025 | + | 0    | 0    |
| ENSG00000100000 | RP3-323A1 antisense  | chr22 | 35160947 | 35215025 | + | 0.19 | 0.17 |
| ENSG00000100000 | CH507-39C TEC        | chr21 | 5703182  | 5705637  | - | 0.03 | 0.03 |
| ENSG00000100000 | RP11-455C TEC        | chr17 | 81262920 | 81265401 | + | 0.09 | 0    |
| ENSG00000100000 | RP11-861E TEC        | chr11 | 1.33E+08 | 1.33E+08 | - | 0    | 0    |
| ENSG00000100000 | RP11-534P TEC        | chr12 | 97150081 | 97154627 | - | 0    | 0.03 |
| ENSG00000100000 | RP11-803D TEC        | chr2  | 1.11E+08 | 1.11E+08 | - | 0.25 | 0.09 |
| ENSG00000100000 | PWAR5 TEC            | chr15 | 24985053 | 24988232 | + | 0.37 | 0.47 |
| ENSG00000100000 | RP11-143E TEC        | chr12 | 1.3E+08  | 1.3E+08  | - | 0    | 0    |
| ENSG00000100000 | RP11-1072 TEC        | chr16 | 30984630 | 30988270 | - | 0.04 | 0.02 |
| ENSG00000100000 | CTB-3M24. TEC        | chr5  | 1.34E+08 | 1.34E+08 | - | 0    | 0    |
| ENSG00000100000 | CTD-2231E TEC        | chr19 | 16074293 | 16077395 | - | 0.56 | 0.5  |
| ENSG00000100000 | RP11-749I1 TEC       | chr17 | 40113215 | 40115442 | - | 0.05 | 0.19 |

|                 |             |       |          |          |   |      |      |
|-----------------|-------------|-------|----------|----------|---|------|------|
| ENSG00000101524 | TEC         | chr17 | 17616043 | 17617745 | + | 0.1  | 0    |
| ENSG00000101287 | TEC         | chr2  | 74191388 | 74192245 | + | 0    | 0    |
| ENSG0000010113A | TEC         | chr16 | 24098239 | 24099971 | + | 0.03 | 0.18 |
| ENSG00000101005 | TEC         | chr19 | 15383202 | 15383832 | - | 0.11 | 0    |
| ENSG00000101175 | TEC         | chr5  | 1.59E+08 | 1.59E+08 | + | 0.18 | 0.22 |
| ENSG00000101632 | TEC         | chr2  | 1.77E+08 | 1.77E+08 | + | 0    | 0.04 |
| ENSG00000101991 | lincRNA     | chr16 | 72772673 | 72773272 | + | 0    | 0    |
| ENSG00000101159 | TEC         | chr17 | 58095672 | 58101479 | + | 0.76 | 0.74 |
| ENSG00000101212 | unprocessed | chr21 | 9369285  | 9376645  | - | 0.17 | 0.19 |
| ENSG00000101678 | TEC         | chr11 | 91013787 | 91015299 | + | 0.19 | 0    |
| ENSG00000101570 | processed   | chr21 | 9580024  | 9580415  | - | 0    | 0    |
| ENSG00000101316 | TEC         | chr10 | 26695091 | 26697625 | - | 0    | 0.02 |
| ENSG00000101818 | processed   | chr21 | 8801362  | 8801880  | - | 0.14 | 0.12 |
| ENSG00000101024 | TEC         | chr1  | 48262230 | 48263179 | - | 0    | 0    |
| ENSG00000101212 | lincRNA     | chr22 | 36071000 | 36085573 | + | 0.09 | 0.05 |
| ENSG00000101263 | TEC         | chr2  | 2.34E+08 | 2.34E+08 | + | 0    | 0    |
| ENSG00000101018 | processed   | chr2  | 2.06E+08 | 2.06E+08 | + | 0.05 | 0.06 |
| ENSG00000101543 | TEC         | chr18 | 69659837 | 69663413 | + | 0.03 | 0    |
| ENSG00000101219 | TEC         | chr5  | 1858409  | 1859890  | - | 0    | 0    |
| ENSG00000101556 | TEC         | chr7  | 1.43E+08 | 1.43E+08 | - | 0    | 0    |
| ENSG00000101261 | TEC         | chr16 | 63397707 | 63397946 | + | 0    | 0    |
| ENSG00000101507 | TEC         | chr21 | 6520344  | 6520670  | - | 0    | 0    |
| ENSG00000101093 | TEC         | chr2  | 1.18E+08 | 1.18E+08 | + | 0.69 | 0.67 |
| ENSG00000101345 | TEC         | chr16 | 29467161 | 29467578 | + | 0.3  | 0.87 |
| ENSG00000101341 | unprocessed | chr13 | 18331933 | 18348596 | + | 0    | 0    |
| ENSG00000101463 | antisense   | chr5  | 98792861 | 98795766 | - | 0.02 | 0.08 |
| ENSG00000101158 | TEC         | chr12 | 1.25E+08 | 1.25E+08 | + | 0.29 | 0.33 |
| ENSG00000101166 | TEC         | chr15 | 78906127 | 78906809 | + | 0.1  | 0.43 |
| ENSG00000101120 | TEC         | chr18 | 62551203 | 62552505 | + | 0.18 | 0.15 |
| ENSG00000101212 | TEC         | chr13 | 1.1E+08  | 1.1E+08  | - | 0    | 0    |
| ENSG00000101178 | transcribed | chr10 | 42470082 | 42470268 | - | 0    | 0    |
| ENSG00000101063 | lincRNA     | chr5  | 1.36E+08 | 1.36E+08 | - | 0    | 0    |
| ENSG00000101022 | lincRNA     | chr11 | 65487241 | 65488136 | - | 0    | 0    |
| ENSG00000101223 | lincRNA     | chrX  | 1.55E+08 | 1.55E+08 | + | 0.14 | 0    |
| ENSG00000101286 | TEC         | chr11 | 61352244 | 61354477 | + | 0.16 | 0    |
| ENSG00000101643 | TEC         | chr11 | 89533645 | 89534043 | - | 0    | 0    |
| ENSG00000101491 | TEC         | chr16 | 49341663 | 49350554 | + | 0    | 0    |
| ENSG00000101461 | TEC         | chr18 | 48755693 | 48756318 | + | 0.66 | 0.12 |
| ENSG00000101780 | TEC         | chr17 | 19855747 | 19856164 | + | 0    | 0    |
| ENSG00000101614 | TEC         | chr20 | 35262727 | 35264187 | - | 1.61 | 2.38 |
| ENSG00000101536 | TEC         | chr2  | 46668870 | 46670778 | + | 0.35 | 0.45 |
| ENSG0000010116c | TEC         | chr16 | 707650   | 709067   | + | 0.73 | 0.81 |
| ENSG00000101515 | TEC         | chr9  | 26642697 | 26644595 | - | 0    | 0    |
| ENSG00000101334 | TEC         | chr17 | 80147250 | 80148596 | + | 0.3  | 0.38 |
| ENSG00000101400 | lincRNA     | chr1  | 2.35E+08 | 2.35E+08 | - | 0    | 0.01 |

|                                |       |          |          |   |      |      |
|--------------------------------|-------|----------|----------|---|------|------|
| ENSG0000(CTD-3137H) TEC        | chr19 | 18448275 | 18448802 | + | 0    | 0    |
| ENSG0000(OR2L8) polymorph      | chr1  | 2.48E+08 | 2.48E+08 | + | 0    | 0    |
| ENSG0000(RP11-417J) TEC        | chr5  | 8614356  | 8614696  | + | 0    | 0    |
| ENSG0000(AC000123) TEC         | chr7  | 1.27E+08 | 1.27E+08 | - | 1.02 | 1.3  |
| ENSG0000(RP11-371I) TEC        | chr11 | 20131730 | 20135465 | + | 0.04 | 0.06 |
| ENSG0000(RP11-395L) TEC        | chr2  | 1.14E+08 | 1.14E+08 | - | 1.96 | 2.95 |
| ENSG0000(RP11-628M) TEC        | chr15 | 65226472 | 65226697 | - | 0    | 0    |
| ENSG0000(RP11-573N) TEC        | chr11 | 93206990 | 93207583 | - | 0    | 0    |
| ENSG0000(OR52R1) polymorph     | chr11 | 4803433  | 4804380  | - | 0    | 0    |
| ENSG0000(RP11-349F) TEC        | chr8  | 17498647 | 17499238 | - | 0    | 0    |
| ENSG0000(CTD-2526A) TEC        | chr17 | 80463451 | 80465593 | - | 0    | 0    |
| ENSG0000(RP11-533E) processed_ | chrY  | 24362335 | 24362409 | - | 0    | 0    |
| ENSG0000(RP11-756J) TEC        | chr18 | 13279415 | 13280110 | - | 0    | 0    |
| ENSG0000(CTA-345G4) TEC        | chr16 | 23962951 | 23963351 | + | 0    | 0    |
| ENSG0000(RP11-861A) TEC        | chr3  | 1.08E+08 | 1.08E+08 | - | 0.03 | 0.11 |
| ENSG0000(CH17-264L) lincRNA    | chr22 | 22264601 | 22273020 | + | 0.13 | 0.14 |
| ENSG0000(RP11-226N) TEC        | chr17 | 57448218 | 57450291 | + | 0    | 0.03 |
| ENSG0000(RP11-417L) TEC        | chr12 | 1.32E+08 | 1.32E+08 | + | 0.49 | 0.39 |
| ENSG0000(RP1-149M) TEC         | chr6  | 41381392 | 41381832 | - | 0    | 0    |
| ENSG0000(RP11-64C1) TEC        | chr18 | 12199345 | 12200089 | + | 0    | 0    |
| ENSG0000(RP11-248B) TEC        | chr14 | 91572444 | 91575271 | - | 0.02 | 0    |
| ENSG0000(RP11-736E) TEC        | chr7  | 1.13E+08 | 1.13E+08 | - | 0    | 0    |
| ENSG0000(RP3-331H2) TEC        | chr6  | 71386852 | 71390829 | - | 0.2  | 0.12 |
| ENSG0000(RP11-274A) TEC        | chr16 | 81618505 | 81620563 | + | 0    | 0    |
| ENSG0000(RP11-683C) TEC        | chr11 | 79966805 | 79968708 | + | 0    | 0    |
| ENSG0000(PRAL) TEC             | chr17 | 6772831  | 6776116  | - | 0.07 | 0.02 |
| ENSG0000(RP11-796A) TEC        | chr11 | 89297717 | 89298199 | + | 0    | 0    |
| ENSG0000(CTA-221G9) lincRNA    | chr22 | 25251523 | 25252602 | - | 0.03 | 0    |
| ENSG0000(AP000648) TEC         | chr11 | 90125658 | 90126061 | + | 0    | 0    |
| ENSG0000(CTD-3149D) TEC        | chr19 | 17622447 | 17623338 | + | 0    | 0    |
| ENSG0000(OR2T11) polymorph     | chr1  | 2.49E+08 | 2.49E+08 | - | 0    | 0    |
| ENSG0000(RP11-16P2) TEC        | chr8  | 27701194 | 27703789 | + | 0.17 | 0.09 |
| ENSG0000(CH507-236) TEC        | chr21 | 7135334  | 7137789  | - | 0.03 | 0.03 |
| ENSG0000(RP11-573N) TEC        | chr11 | 93133855 | 93134164 | + | 0    | 0    |
| ENSG0000(RP11-316N) TEC        | chr3  | 1.54E+08 | 1.54E+08 | - | 0    | 0    |
| ENSG0000(RP5-915N1) TEC        | chr1  | 2.28E+08 | 2.28E+08 | - | 0.4  | 0.15 |
| ENSG0000(RP11-130L) processed_ | chr2  | 20529467 | 20529976 | - | 0    | 0    |
| ENSG0000(RP11-123C) TEC        | chr12 | 67065018 | 67065278 | - | 0    | 0    |
| ENSG0000(RP11-170K) TEC        | chr3  | 1.59E+08 | 1.59E+08 | + | 0.21 | 0.42 |
| ENSG0000(RP3-331H2) TEC        | chr6  | 71373253 | 71375387 | - | 0.52 | 0.14 |
| ENSG0000(CH507-145) lincRNA    | chr21 | 6994374  | 6997737  | - | 0    | 0    |
| ENSG0000(RP1-257C2) TEC        | chr13 | 31960325 | 31961946 | - | 0    | 0    |
| ENSG0000(RP11-57H1) TEC        | chr10 | 1.13E+08 | 1.13E+08 | + | 0    | 0    |
| ENSG0000(AC006994) bidirection | chr2  | 2.1E+08  | 2.1E+08  | + | 0    | 0    |
| ENSG0000(RP11-693N) TEC        | chr18 | 44986109 | 44989203 | + | 0    | 0    |

|                 |                      |       |          |          |   |       |       |
|-----------------|----------------------|-------|----------|----------|---|-------|-------|
| ENSG00000103290 | RP11-329N TEC        | chr3  | 1.47E+08 | 1.47E+08 | - | 0.06  | 0.18  |
| ENSG00000103291 | RP11-555K lincRNA    | chr21 | 9913117  | 9914846  | + | 0     | 0     |
| ENSG00000103292 | RP4-738P1 TEC        | chr20 | 25226448 | 25226735 | - | 0     | 0     |
| ENSG00000103293 | RP11-93G2 TEC        | chr1  | 49994318 | 49996218 | + | 0     | 0     |
| ENSG00000103294 | RP11-24H2 lincRNA    | chr13 | 53193667 | 53198540 | + | 0     | 0     |
| ENSG00000103295 | RP5-1136A TEC        | chr7  | 80972516 | 80974724 | - | 0     | 0     |
| ENSG00000103296 | RP11-203H TEC        | chr3  | 1.26E+08 | 1.26E+08 | - | 0     | 0     |
| ENSG00000103297 | CTD-2553L TEC        | chr19 | 34675717 | 34677581 | - | 0.78  | 1.09  |
| ENSG00000103298 | AJ003147.1 TEC       | chr16 | 3273609  | 3275807  | + | 0.08  | 0.12  |
| ENSG00000103299 | RBM12B-A TEC         | chr8  | 93740121 | 93740773 | + | 0     | 0     |
| ENSG00000103300 | RP11-799B TEC        | chr18 | 24135468 | 24135829 | - | 0     | 0     |
| ENSG00000103301 | RP11-75I2. TEC       | chr1  | 2.11E+08 | 2.11E+08 | + | 0     | 0.03  |
| ENSG00000103302 | RP11-83B2 TEC        | chr12 | 1.25E+08 | 1.25E+08 | + | 0     | 0     |
| ENSG00000103303 | AL353662. pseudogen  | chr9  | 34201273 | 34201515 | - | 0     | 0     |
| ENSG00000103304 | CTD-2349P TEC        | chr17 | 30724982 | 30725181 | - | 10.96 | 10.54 |
| ENSG00000103305 | CTD-2373H TEC        | chr17 | 78897264 | 78900152 | + | 0.09  | 0.04  |
| ENSG00000103306 | RP11-667K TEC        | chr17 | 2122342  | 2122508  | - | 0     | 0     |
| ENSG00000103307 | RP11-720D TEC        | chr11 | 87718667 | 87721233 | - | 0     | 0     |
| ENSG00000103308 | RP11-677N sense_intr | chr11 | 1.25E+08 | 1.25E+08 | - | 0.17  | 0.42  |
| ENSG00000103309 | RP11-200K TEC        | chr12 | 1.3E+08  | 1.3E+08  | - | 0     | 0     |
| ENSG00000103310 | RP11-44F1. TEC       | chr16 | 53478957 | 53481550 | - | 0.11  | 0.03  |
| ENSG00000103311 | RP3-522J7. antisense | chr22 | 49805452 | 49807208 | + | 0     | 0.04  |
| ENSG00000103312 | RP11-85I17 TEC       | chr8  | 1.2E+08  | 1.2E+08  | - | 0.21  | 0.04  |
| ENSG00000103313 | RP11-566E TEC        | chr2  | 2.16E+08 | 2.16E+08 | + | 1.13  | 1.15  |
| ENSG00000103314 | RP11-147G TEC        | chr3  | 1.13E+08 | 1.13E+08 | - | 0.04  | 0.02  |
| ENSG00000103315 | RP11-411B TEC        | chr18 | 14010054 | 14010917 | + | 7.99  | 5.66  |
| ENSG00000103316 | RP11-864N TEC        | chr11 | 74698231 | 74699658 | - | 0.12  | 0.09  |
| ENSG00000103317 | RP11-776B TEC        | chr18 | 46915021 | 46915623 | - | 0     | 0     |
| ENSG00000103318 | AGPAT4-IT TEC        | chr6  | 1.61E+08 | 1.61E+08 | - | 0.54  | 0.3   |
| ENSG00000103319 | RP11-429P TEC        | chr16 | 50072862 | 50074986 | + | 0.03  | 0.12  |
| ENSG00000103320 | RP11-475D TEC        | chr16 | 8666762  | 8667271  | + | 0.15  | 0.64  |
| ENSG00000103321 | RP11-688I TEC        | chr11 | 1.27E+08 | 1.27E+08 | - | 0     | 0     |
| ENSG00000103322 | RP11-36D1 TEC        | chr10 | 80249710 | 80254121 | + | 0     | 0     |
| ENSG00000103323 | RP11-946P TEC        | chr12 | 1.1E+08  | 1.1E+08  | - | 0     | 0     |
| ENSG00000103324 | RP11-360N TEC        | chr17 | 67637774 | 67638973 | + | 0     | 0     |
| ENSG00000103325 | RP11-463I2 TEC       | chr15 | 34978351 | 34980084 | + | 0     | 0     |
| ENSG00000103326 | KB-176G8. TEC        | chr21 | 36485867 | 36487760 | + | 0.18  | 0.16  |
| ENSG00000103327 | RP11-380N TEC        | chr18 | 47912207 | 47912504 | - | 0     | 0     |
| ENSG00000103328 | RP11-157P TEC        | chr18 | 47501172 | 47503106 | + | 0     | 0     |
| ENSG00000103329 | RP1-80N2. TEC        | chr6  | 6685148  | 6686984  | + | 0     | 0     |
| ENSG00000103330 | RP11-51F1 TEC        | chr17 | 63700847 | 63702670 | + | 0.74  | 0.41  |
| ENSG00000103331 | RP1-247F3 TEC        | chr5  | 1.31E+08 | 1.31E+08 | - | 0     | 0     |
| ENSG00000103332 | RP11-1182 TEC        | chr17 | 82035403 | 82035800 | - | 0     | 0     |
| ENSG00000103333 | RP11-650L TEC        | chr15 | 78537681 | 78538946 | + | 0     | 0     |
| ENSG00000103334 | CH17-140K antisense  | chr5  | 1.41E+08 | 1.41E+08 | - | 0     | 0     |

|                                |       |          |          |   |       |       |
|--------------------------------|-------|----------|----------|---|-------|-------|
| ENSG0000(RP11-292D) TEC        | chr4  | 1.47E+08 | 1.47E+08 | + | 0     | 0     |
| ENSG0000(AC003973) TEC         | chr19 | 21965708 | 21968529 | - | 0     | 0     |
| ENSG0000(RP11-70D2) TEC        | chr16 | 79675685 | 79677715 | - | 0     | 0     |
| ENSG0000(RP11-84N1) TEC        | chr4  | 19257951 | 19258337 | - | 0     | 0     |
| ENSG0000(bp-2171C2) processed_ | chr21 | 9088188  | 9088391  | + | 0     | 0     |
| ENSG0000(RP11-449J) TEC        | chr17 | 76090308 | 76091669 | + | 0     | 0     |
| ENSG0000(RP11-635L) TEC        | chr4  | 1.69E+08 | 1.69E+08 | + | 0     | 0     |
| ENSG0000(RP11-177C) TEC        | chr4  | 37866561 | 37867091 | - | 0     | 0     |
| ENSG0000(CTC-525D6) TEC        | chr19 | 29506966 | 29509041 | - | 0     | 0     |
| ENSG0000(RP11-897N) TEC        | chr12 | 1.31E+08 | 1.31E+08 | - | 0     | 0     |
| ENSG0000(AF127577) TEC         | chr21 | 15050189 | 15052379 | + | 0     | 0     |
| ENSG0000(RP11-236J) TEC        | chr11 | 8075573  | 8077781  | - | 0     | 0     |
| ENSG0000(RP11-665C) processed_ | chr14 | 55229217 | 55229681 | + | 0     | 0     |
| ENSG0000(RP11-95G6) TEC        | chr13 | 28495633 | 28497267 | + | 0     | 0     |
| ENSG0000(RP11-81A1) TEC        | chr15 | 79875920 | 79878179 | - | 0.19  | 0.19  |
| ENSG0000(OR5L1 polymorph)      | chr11 | 55811367 | 55812476 | + | 0     | 0     |
| ENSG0000(AC130469) TEC         | chr19 | 8575079  | 8576170  | - | 0     | 0     |
| ENSG0000(RP11-196B) TEC        | chr18 | 79515798 | 79516057 | - | 0     | 0     |
| ENSG0000(RP3-429G5) TEC        | chr6  | 1.08E+08 | 1.08E+08 | + | 0     | 0     |
| ENSG0000(RP11-369J) TEC        | chr10 | 80091411 | 80091867 | - | 0     | 0     |
| ENSG0000(CTD-2353F) TEC        | chr5  | 36667717 | 36669958 | + | 0.02  | 0     |
| ENSG0000(GS1-204I1) TEC        | chr1  | 1.86E+08 | 1.86E+08 | + | 0     | 0     |
| ENSG0000(RP3-399J4) TEC        | chr6  | 94397664 | 94398829 | + | 0     | 0     |
| ENSG0000(CTD-2542C) TEC        | chr19 | 20926777 | 20928714 | - | 0.09  | 0.24  |
| ENSG0000(AC098795) TEC         | chr19 | 56480397 | 56483977 | - | 0     | 0     |
| ENSG0000(RP11-327E) TEC        | chr10 | 71364243 | 71366374 | + | 0.08  | 0.2   |
| ENSG0000(AC007191) TEC         | chr19 | 45714387 | 45717381 | - | 0.69  | 0.6   |
| ENSG0000(RP11-294C) protein_co | chr15 | 21651844 | 21653039 | + | 0     | 0     |
| ENSG0000(RP11-133K) TEC        | chr15 | 40258501 | 40260370 | + | 0     | 0.07  |
| ENSG0000(RP11-1102) TEC        | chr16 | 17192863 | 17194232 | - | 0     | 0     |
| ENSG0000(RP11-489P) TEC        | chr12 | 58103907 | 58105935 | + | 0     | 0     |
| ENSG0000(RP11-394B) TEC        | chr16 | 70713987 | 70716890 | + | 0     | 0     |
| ENSG0000(AC112497) pseudogen   | chrX  | 15702602 | 15703243 | - | 0     | 0     |
| ENSG0000(bp-2171C2) processed_ | chr21 | 9026821  | 9027329  | - | 0     | 0     |
| ENSG0000(RP11-1102) TEC        | chr16 | 17227023 | 17228000 | - | 0.31  | 0.28  |
| ENSG0000(RP11-849I) TEC        | chr18 | 79085134 | 79086435 | + | 0     | 0     |
| ENSG0000(RP11-382B) TEC        | chr15 | 30344307 | 30348236 | - | 2.85  | 2.61  |
| ENSG0000(LINC00244) lincRNA    | chr7  | 1.57E+08 | 1.57E+08 | + | 0     | 0     |
| ENSG0000(RP5-907C1) TEC        | chr7  | 1.25E+08 | 1.25E+08 | - | 0     | 0     |
| ENSG0000(RP11-42H1) TEC        | chr16 | 74053365 | 74053965 | + | 0     | 0     |
| ENSG0000(RP11-335K) TEC        | chr15 | 78599892 | 78600013 | - | 0     | 0     |
| ENSG0000(RP11-641J) TEC        | chrX  | 49165576 | 49165972 | - | 0     | 0     |
| ENSG0000(RP11-671J) TEC        | chr14 | 34541044 | 34541714 | + | 11.12 | 12.12 |
| ENSG0000(CTD-2017D) TEC        | chr19 | 24078481 | 24080669 | + | 0.13  | 0.11  |
| ENSG0000(AC093230) TEC         | chr19 | 8695721  | 8696321  | - | 0     | 0     |

|                      |            |                |       |          |          |   |      |      |
|----------------------|------------|----------------|-------|----------|----------|---|------|------|
| ENSG00000101322      | RP11-132F  | TEC            | chr16 | 52436772 | 52437474 | - | 0    | 0    |
| ENSG00000101258      | RP11-258F  | TEC            | chr17 | 18107334 | 18110463 | - | 0    | 0    |
| ENSG00000100409      | AC004009   | TEC            | chr7  | 27412164 | 27412891 | + | 0    | 0    |
| ENSG0000010190A      | RP11-190A  | TEC            | chr1  | 1.6E+08  | 1.6E+08  | - | 0    | 0    |
| ENSG0000010218N      | RP11-218N  | TEC            | chr17 | 30551193 | 30551802 | + | 0    | 0    |
| ENSG0000010135N      | RP11-135N  | TEC            | chr17 | 2639297  | 2642418  | + | 0.15 | 0.14 |
| ENSG00000104B16      | RP11-4B16  | TEC            | chr18 | 77108284 | 77110537 | - | 0.02 | 0.08 |
| ENSG0000010185K1     | RP11-85K1  | TEC            | chr14 | 35086035 | 35088059 | + | 0.13 | 0.14 |
| ENSG0000010326L1     | RP3-326L1  | TEC            | chrX  | 83506023 | 83509214 | - | 0    | 0    |
| ENSG00000101678K     | RP11-678K  | TEC            | chr11 | 91093875 | 91094260 | - | 0    | 0    |
| ENSG00000102576N     | CTD-2576N  | TEC            | chr18 | 25200976 | 25202837 | - | 0    | 0    |
| ENSG0000010992D9     | CTA-992D9  | lincRNA        | chr22 | 27019369 | 27024550 | + | 0    | 0    |
| ENSG0000010A16c-313I | LA16c-313I | TEC            | chr16 | 678645   | 679061   | + | 0    | 0    |
| ENSG0000010A16c-60D  | LA16c-60D  | lincRNA        | chr22 | 15298378 | 15304556 | - | 0.41 | 0.32 |
| ENSG00000104669K1    | RP4-669K1  | TEC            | chr1  | 28544460 | 28546542 | + | 0.19 | 0.12 |
| ENSG000001011715H    | RP11-715H  | TEC            | chr12 | 63151065 | 63154006 | + | 0    | 0    |
| ENSG00000101983G     | RP11-983G  | unprocessed    | chr15 | 21683038 | 21683962 | + | 0    | 0    |
| ENSG0000010A005915   | AC005915   | TEC            | chr5  | 1.27E+08 | 1.27E+08 | + | 0    | 0    |
| ENSG00000104737E2    | RP4-737E2  | TEC            | chr20 | 23071547 | 23072722 | - | 0    | 0    |
| ENSG00000101154F2    | RP11-54F2  | TEC            | chr5  | 10556582 | 10556815 | + | 0    | 0    |
| ENSG0000010A006277   | AC006277   | TEC            | chr19 | 2949035  | 2950644  | + | 0    | 0    |
| ENSG00000103425C1    | RP3-425C1  | TEC            | chr6  | 1.22E+08 | 1.22E+08 | - | 0.92 | 0.5  |
| ENSG00000101178H     | RP11-178H  | TEC            | chr11 | 93587703 | 93588559 | + | 0    | 0    |
| ENSG00000101495K     | RP11-495K  | TEC            | chr12 | 1.32E+08 | 1.32E+08 | - | 0    | 0    |
| ENSG0000010187H9     | RP11-87H9  | TEC            | chr9  | 41061290 | 41062917 | + | 0.73 | 0.5  |
| ENSG00000101134P1    | RP11-34P1  | unprocessed    | chr1  | 185217   | 195411   | - | 5.82 | 5.28 |
| ENSG0000010CH17-335B | CH17-335B  | processed      | chr10 | 46370759 | 46382626 | + | 0    | 0    |
| ENSG000001011826F    | RP11-826F  | TEC            | chr11 | 70603304 | 70604859 | + | 0    | 0    |
| ENSG000001011517N    | RP11-517N  | TEC            | chr4  | 1.85E+08 | 1.85E+08 | - | 0    | 0    |
| ENSG00000104592G7    | RP4-592G7  | processed      | chr14 | 74003396 | 74003470 | + | 0    | 0    |
| ENSG000001011604N    | RP11-604N  | TEC            | chr12 | 1.25E+08 | 1.25E+08 | + | 0.1  | 0.12 |
| ENSG00000101157H     | RP11-157H  | sense_intronic | chr13 | 73844683 | 73845130 | - | 0    | 0    |
| ENSG0000010117P1     | RP11-17P1  | TEC            | chr4  | 67607856 | 67610313 | - | 0.1  | 0.18 |
| ENSG00000101144D5    | RP11-44D5  | TEC            | chr3  | 15731877 | 15732536 | + | 0    | 0    |
| ENSG000001011386I8   | RP11-386I8 | TEC            | chr12 | 1.33E+08 | 1.33E+08 | - | 0    | 0    |
| ENSG0000010KB-1125A3 | KB-1125A3  | antisense      | chr22 | 23865248 | 23873277 | - | 0.03 | 0.06 |
| ENSG000001011215P    | RP11-215P  | TEC            | chr5  | 1.34E+08 | 1.34E+08 | - | 0    | 0    |
| ENSG00000101182I2    | RP11-182I2 | TEC            | chr5  | 51963992 | 51964445 | + | 0    | 0    |
| ENSG0000010CH17-140K | CH17-140K  | processed      | chr5  | 1.41E+08 | 1.41E+08 | + | 0    | 0    |
| ENSG000001022286N    | CTD-2286N  | TEC            | chr18 | 79144752 | 79146918 | + | 0    | 0    |
| ENSG000001011749H    | RP11-749H  | TEC            | chr12 | 1.28E+08 | 1.28E+08 | - | 0    | 0    |
| ENSG000001011391L    | RP11-391L  | TEC            | chr16 | 81517824 | 81520617 | + | 0    | 0    |
| ENSG0000010CH507-236 | CH507-236  | unprocessed    | chr21 | 7003248  | 7007022  | - | 0    | 0    |
| ENSG000001011200K    | RP11-200K  | TEC            | chr12 | 1.3E+08  | 1.3E+08  | + | 0    | 0    |
| ENSG00000101191I8    | RP11-91I8  | TEC            | chr18 | 6727053  | 6728981  | + | 0    | 0    |



|                                    |       |          |          |   |      |      |
|------------------------------------|-------|----------|----------|---|------|------|
| ENSG0000(RP13-977J):TEC            | chr12 | 1.32E+08 | 1.32E+08 | + | 0    | 0    |
| ENSG0000(RP11-181K):TEC            | chr4  | 1.46E+08 | 1.46E+08 | - | 0.16 | 0.1  |
| ENSG0000(RP11-401L):TEC            | chr7  | 1.03E+08 | 1.03E+08 | - | 0    | 0    |
| ENSG0000(RP11-84E1):processed_chr7 | chr7  | 1.38E+08 | 1.38E+08 | + | 0    | 0    |
| ENSG0000(KLHL30-AS):TEC            | chr2  | 2.38E+08 | 2.38E+08 | - | 0.24 | 0.15 |
| ENSG0000(RP11-391A):TEC            | chr2  | 63517892 | 63519268 | - | 0    | 0.14 |
| ENSG0000(OR2AG1):protein_co        | chr11 | 6785017  | 6786014  | + | 0    | 0    |
| ENSG0000(AC004623):TEC             | chr19 | 1372238  | 1374364  | - | 0.16 | 0    |
| ENSG0000(RP11-392A):TEC            | chr9  | 35001913 | 35003663 | + | 0    | 0    |
| ENSG0000(CTD-2576D):TEC            | chr16 | 17082295 | 17085049 | - | 0.02 | 0.04 |
| ENSG0000(RP11-810P):TEC            | chr11 | 61967794 | 61969490 | + | 0.03 | 0    |
| ENSG0000(CH507-9B2):protein_co     | chr21 | 5011799  | 5017145  | + | 0    | 0    |
| ENSG0000(RP11-494C):lincRNA        | chr22 | 49851425 | 49853364 | + | 0    | 0    |
| ENSG0000(RP11-521B):TEC            | chr14 | 1.05E+08 | 1.05E+08 | + | 0.44 | 0.43 |
| ENSG0000(RP11-654C):TEC            | chr11 | 1.33E+08 | 1.33E+08 | - | 0    | 0    |
| ENSG0000(RP11-7212):TEC            | chr6  | 1.08E+08 | 1.08E+08 | - | 0    | 0    |
| ENSG0000(RP11-490N):TEC            | chr13 | 30196443 | 30196881 | - | 0    | 0    |
| ENSG0000(RP11-21K1):TEC            | chr12 | 1.29E+08 | 1.29E+08 | - | 0.62 | 0.92 |
| ENSG0000(bp-2171C2):lincRNA        | chr21 | 8996496  | 9018670  | - | 0    | 0    |
| ENSG0000(RP11-354E):TEC            | chr10 | 72756398 | 72757016 | + | 0    | 0    |
| ENSG0000(RP11-30P1):TEC            | chr9  | 90158028 | 90158646 | + | 0    | 0    |
| ENSG0000(AD001527):TEC             | chr19 | 36114362 | 36115146 | + | 0.53 | 0.18 |
| ENSG0000(RP11-43N5):TEC            | chr12 | 67753701 | 67753817 | + | 0    | 0    |
| ENSG0000(RP11-723C):TEC            | chr3  | 1.29E+08 | 1.29E+08 | - | 0    | 0    |
| ENSG0000(RP11-329J):TEC            | chr16 | 47218026 | 47218768 | + | 0    | 0    |
| ENSG0000(RP11-676B):TEC            | chr13 | 37142967 | 37146718 | - | 0    | 0    |
| ENSG0000(RP11-575N):TEC            | chr2  | 1.33E+08 | 1.33E+08 | + | 0    | 0    |
| ENSG0000(RP4-675C2):TEC            | chr1  | 1.17E+08 | 1.17E+08 | + | 0.24 | 0.07 |
| ENSG0000(OR4C16):polymorph         | chr11 | 55572128 | 55573060 | + | 0    | 0    |
| ENSG0000(FAM230C):processed_chr13  | chr13 | 18195297 | 18232024 | + | 0    | 0    |
| ENSG0000(RP11-64J4):TEC            | chr17 | 3309986  | 3311446  | + | 0    | 0    |
| ENSG0000(AC083843):TEC             | chr8  | 1.35E+08 | 1.35E+08 | - | 0.08 | 0.11 |
| ENSG0000(RP11-288C):TEC            | chr2  | 36839922 | 36842539 | - | 0.75 | 0.87 |
| ENSG0000(RP11-2012):TEC            | chr16 | 2516658  | 2517999  | + | 0.56 | 0.81 |
| ENSG0000(RP11-314P):TEC            | chr14 | 25820366 | 25822741 | + | 0    | 0    |
| ENSG0000(CTC-487M):TEC             | chr5  | 1.13E+08 | 1.13E+08 | + | 0.14 | 0.19 |
| ENSG0000(RP11-461C):TEC            | chr16 | 56108980 | 56109970 | + | 0    | 0    |
| ENSG0000(GS1-306C1):TEC            | chr7  | 95542145 | 95544542 | + | 0.05 | 0.12 |
| ENSG0000(AC011239):TEC             | chr2  | 23616499 | 23617987 | - | 0    | 0.04 |
| ENSG0000(RP11-83B2):TEC            | chr12 | 1.25E+08 | 1.25E+08 | - | 0    | 0    |
| ENSG0000(RP11-1148):TEC            | chrX  | 48580741 | 48581165 | + | 6.34 | 4.44 |
| ENSG0000(CTD-3222D):antisense      | chr19 | 16572624 | 16575340 | + | 0.56 | 0.4  |
| ENSG0000(RP11-398J):TEC            | chr12 | 70321542 | 70324274 | - | 0    | 0    |
| ENSG0000(RP11-184E):TEC            | chr5  | 25425412 | 25425599 | - | 0    | 0    |
| ENSG0000(CTB-96E2):TEC             | chr17 | 28373673 | 28374301 | - | 0    | 0    |

|                               |       |          |          |   |      |      |
|-------------------------------|-------|----------|----------|---|------|------|
| ENSG000001AP001340. TEC       | chr21 | 25371827 | 25372043 | + | 0    | 0    |
| ENSG000001AC113188. TEC       | chr8  | 1.18E+08 | 1.18E+08 | - | 0    | 0.13 |
| ENSG000001RP11-445N TEC       | chr7  | 1.5E+08  | 1.5E+08  | + | 0.11 | 0    |
| ENSG000001RP11-133K TEC       | chr15 | 40244925 | 40247366 | + | 0    | 0    |
| ENSG000001AC006486. TEC       | chr19 | 42242775 | 42244973 | + | 0.05 | 0.08 |
| ENSG000001CTC-444N2 TEC       | chr19 | 57293083 | 57294469 | - | 0    | 0    |
| ENSG000001RP11-963H TEC       | chr17 | 10821901 | 10822243 | - | 0    | 0    |
| ENSG000001RP11-1147 TEC       | chr18 | 37473330 | 37473977 | - | 0    | 0    |
| ENSG000001AL133243. TEC       | chr2  | 32563328 | 32566436 | + | 0.01 | 0.02 |
| ENSG000001CTA-243E7 antisense | chr22 | 25022594 | 25024652 | - | 0    | 0    |
| ENSG000001AP000437. TEC       | chr11 | 61143380 | 61145464 | - | 0.08 | 0.03 |
| ENSG000001RP11-165I9 TEC      | chr13 | 25190063 | 25190317 | - | 0    | 0    |
| ENSG000001RP11-588G TEC       | chr12 | 69660034 | 69661429 | - | 0    | 0    |
| ENSG000001CTA-113A6 TEC       | chr16 | 24208105 | 24208478 | + | 0    | 0    |
| ENSG000001RP11-426D TEC       | chr17 | 57277920 | 57280017 | + | 0.11 | 0    |
| ENSG000001CTD-2210P TEC       | chr5  | 43586367 | 43587543 | - | 0.15 | 0.08 |
| ENSG000001CH17-140K lincRNA   | chr5  | 1.41E+08 | 1.41E+08 | + | 0    | 0    |
| ENSG000001RP11-739A TEC       | chr2  | 1.81E+08 | 1.81E+08 | + | 0    | 0    |
| ENSG000001RP11-4L24. TEC      | chr9  | 41269916 | 41273997 | - | 0.05 | 0.02 |
| ENSG000001RP11-667K TEC       | chr17 | 2117626  | 2117772  | + | 0    | 0    |
| ENSG000001RP4-57001 TEC       | chr6  | 88172261 | 88175762 | + | 0    | 0    |
| ENSG000001RP11-849N TEC       | chr17 | 15365323 | 15365877 | + | 0    | 0    |
| ENSG000001RP11-20123 TEC      | chr16 | 2575628  | 2577373  | - | 0.19 | 0.07 |
| ENSG000001RP11-394B TEC       | chr16 | 70661667 | 70665836 | + | 0.04 | 0.2  |
| ENSG000001CTD-2357A TEC       | chr17 | 78691266 | 78691979 | - | 0    | 0    |
| ENSG000001RP11-56D1 lincRNA   | chr9  | 1.28E+08 | 1.28E+08 | - | 0.35 | 0.19 |
| ENSG000001RP11-13K1 TEC       | chr17 | 77571418 | 77572516 | + | 0    | 0    |
| ENSG000001RP11-855A TEC       | chr17 | 67955314 | 67957291 | + | 2.43 | 2.9  |
| ENSG000001RP11-271F TEC       | chr10 | 10394670 | 10395737 | + | 0    | 0    |
| ENSG000001RP4-815D2 TEC       | chr7  | 48847766 | 48851625 | + | 0    | 0    |
| ENSG000001LINC01666 lincRNA   | chr21 | 8759077  | 8761335  | + | 0.4  | 0.49 |
| ENSG000001RP11-243N TEC       | chr12 | 1.31E+08 | 1.31E+08 | - | 0    | 0    |
| ENSG000001RP11-368N TEC       | chr16 | 29595130 | 29596137 | - | 0.06 | 0.09 |
| ENSG000001AC005593. TEC       | chr5  | 1.32E+08 | 1.32E+08 | + | 0    | 0    |
| ENSG000001GS1-115M. TEC       | chrX  | 1.46E+08 | 1.46E+08 | + | 0    | 0    |
| ENSG000001AP000711. TEC       | chr11 | 1.18E+08 | 1.18E+08 | - | 0    | 0    |
| ENSG000001RP1-278D1 TEC       | chrX  | 1.18E+08 | 1.18E+08 | - | 0    | 0    |
| ENSG000001RP11-76I7. TEC      | chr15 | 1.01E+08 | 1.01E+08 | - | 0.03 | 0.02 |
| ENSG000001RP11-454F TEC       | chr16 | 53310797 | 53311989 | + | 0    | 0.11 |
| ENSG000001AC005786. TEC       | chr19 | 3567278  | 3567959  | - | 0    | 0    |
| ENSG000001AC002044. TEC       | chr16 | 73015047 | 73016016 | - | 0    | 0    |
| ENSG000001RP11-417N TEC       | chr16 | 71859680 | 71860676 | + | 0.06 | 0.07 |
| ENSG000001RP11-131H TEC       | chr14 | 93895762 | 93897759 | + | 0.05 | 0    |
| ENSG000001RP11-950C TEC       | chr14 | 75011269 | 75012851 | - | 0.04 | 0.08 |
| ENSG000001RP11-854K TEC       | chr15 | 21148334 | 21152970 | + | 0    | 0    |

|                 |                      |       |          |          |   |      |      |
|-----------------|----------------------|-------|----------|----------|---|------|------|
| ENSG00000104100 | RP4-566L2 lincRNA    | chr22 | 49534062 | 49534926 | + | 0    | 0    |
| ENSG00000104101 | RP11-65L3 TEC        | chr2  | 1.79E+08 | 1.79E+08 | + | 0.02 | 0    |
| ENSG00000104102 | AC005514 TEC         | chr19 | 3371395  | 3371602  | + | 0    | 0    |
| ENSG00000104103 | RP11-637C TEC        | chr17 | 78008421 | 78008855 | + | 0    | 0    |
| ENSG00000104104 | CTA-38K21 TEC        | chrX  | 1.2E+08  | 1.2E+08  | + | 0.02 | 0.02 |
| ENSG00000104105 | CTD-3014M TEC        | chr17 | 43360041 | 43361361 | - | 0.18 | 0.05 |
| ENSG00000104106 | RP11-796A TEC        | chr11 | 89300709 | 89301477 | - | 0    | 0    |
| ENSG00000104107 | RP11-542N TEC        | chr16 | 86035627 | 86036419 | + | 0    | 0    |
| ENSG00000104108 | RP11-661A TEC        | chr8  | 1.44E+08 | 1.44E+08 | + | 0.03 | 0.04 |
| ENSG00000104109 | RP11-502F TEC        | chr17 | 56471142 | 56473647 | + | 0    | 0    |
| ENSG00000104110 | RP11-348J lincRNA    | chr10 | 93071972 | 93073466 | + | 0    | 0    |
| ENSG00000104111 | RP11-182N TEC        | chr9  | 35038625 | 35044326 | - | 0.01 | 0.08 |
| ENSG00000104112 | RP11-235C TEC        | chr9  | 1.06E+08 | 1.06E+08 | + | 0    | 0    |
| ENSG00000104113 | C20orf181 TEC        | chr20 | 63843436 | 63843915 | - | 0    | 0    |
| ENSG00000104114 | CTD-2619J TEC        | chr19 | 58350795 | 58351720 | + | 0.47 | 1.03 |
| ENSG00000104115 | RP13-638C TEC        | chr17 | 82648849 | 82650657 | + | 0.03 | 0.07 |
| ENSG00000104116 | bP-2168N6 processed  | chr21 | 8680538  | 8680934  | - | 0    | 0    |
| ENSG00000104117 | RP11-102H1 TEC       | chr6  | 87356831 | 87358605 | + | 0.1  | 0.07 |
| ENSG00000104118 | AC005796 TEC         | chr19 | 17871273 | 17871705 | - | 0    | 0    |
| ENSG00000104119 | CTD-2527I TEC        | chr19 | 35137645 | 35139580 | - | 0.12 | 0.16 |
| ENSG00000104120 | RP11-1102 TEC        | chr16 | 17249674 | 17251395 | - | 0    | 0    |
| ENSG00000104121 | RP11-67A1 TEC        | chr16 | 68199841 | 68200981 | - | 0    | 0    |
| ENSG00000104122 | RP11-254F TEC        | chr16 | 84917377 | 84919923 | - | 0    | 0    |
| ENSG00000104123 | RP11-399C sense_intr | chr10 | 21865335 | 21865921 | - | 0    | 0    |
| ENSG00000104124 | RP11-415K TEC        | chr1  | 22364630 | 22366482 | - | 0    | 0    |
| ENSG00000104125 | DUX4L28 unprocess    | chr10 | 1.34E+08 | 1.34E+08 | + | 0    | 0    |
| ENSG00000104126 | RP11-467L TEC        | chr15 | 20658900 | 20664970 | + | 0    | 0    |
| ENSG00000104127 | RP11-426J TEC        | chr18 | 48661840 | 48662635 | - | 0    | 0    |
| ENSG00000104128 | AC190387 TEC         | chr12 | 1.09E+08 | 1.09E+08 | - | 0    | 0    |
| ENSG00000104129 | RP11-573G TEC        | chr10 | 22252072 | 22254589 | + | 0.63 | 0.53 |
| ENSG00000104130 | RP11-286N TEC        | chr11 | 61426448 | 61427325 | - | 0.15 | 0.15 |
| ENSG00000104131 | RP11-442G TEC        | chr14 | 61801713 | 61803634 | + | 0    | 0    |
| ENSG00000104132 | RP11-143A TEC        | chr5  | 8980404  | 8980659  | - | 0    | 0    |
| ENSG00000104133 | LINC00216 lincRNA    | chr14 | 58288033 | 58289158 | + | 0    | 0    |
| ENSG00000104134 | RP11-196B TEC        | chr18 | 79420836 | 79422780 | + | 0    | 0.03 |
| ENSG00000104135 | CTD-2081C TEC        | chr5  | 54286194 | 54286331 | - | 0    | 0    |
| ENSG00000104136 | RP11-294C unprocess  | chr15 | 21574225 | 21575207 | - | 0    | 0    |
| ENSG00000104137 | RP13-977J TEC        | chr12 | 1.32E+08 | 1.32E+08 | - | 0    | 0    |
| ENSG00000104138 | CTD-2545C TEC        | chr17 | 7242200  | 7243814  | + | 0.18 | 0.08 |
| ENSG00000104139 | RP5-1033E TEC        | chr22 | 44486295 | 44486914 | - | 0    | 0    |
| ENSG00000104140 | RP11-759A TEC        | chr15 | 96285068 | 96289265 | - | 0    | 0    |
| ENSG00000104141 | CH507-254 unprocess  | chr21 | 7385058  | 7388799  | - | 0    | 0    |
| ENSG00000104142 | AP000432 TEC         | chr21 | 17705408 | 17707455 | + | 0.14 | 0.15 |
| ENSG00000104143 | RP11-96D1 TEC        | chr16 | 68290087 | 68292790 | - | 0.1  | 0.07 |
| ENSG00000104144 | RP11-989F TEC        | chr12 | 1.31E+08 | 1.31E+08 | - | 0    | 0    |

|                                         |       |          |          |   |      |      |
|-----------------------------------------|-------|----------|----------|---|------|------|
| ENSG00000178B3.1 lincRNA                | chr22 | 35992321 | 36000469 | + | 0.01 | 0    |
| ENSG0000012225.1 TEC                    | chr19 | 2002580  | 2003581  | - | 0.25 | 0.07 |
| ENSG0000012225.1 TEC                    | chr7  | 27380562 | 27381206 | + | 0    | 0    |
| ENSG0000012225.1 TEC                    | chr14 | 23023083 | 23024217 | - | 0.11 | 0    |
| ENSG0000012225.1 TEC                    | chr13 | 60730176 | 60733600 | + | 0    | 0    |
| ENSG0000012225.1 antisense              | chr3  | 97836986 | 97874691 | - | 0    | 0    |
| ENSG0000012225.1 TEC                    | chr6  | 79573877 | 79575530 | + | 0.27 | 0.19 |
| ENSG0000012225.1 TEC                    | chr17 | 15260513 | 15261841 | + | 0.04 | 0.1  |
| ENSG0000012225.1 TEC                    | chr16 | 10445309 | 10449747 | - | 0.27 | 0.29 |
| ENSG0000012225.1 TEC                    | chr2  | 16541690 | 16545695 | - | 0    | 0    |
| ENSG0000012225.1 TEC                    | chr15 | 50742702 | 50743276 | - | 0    | 0    |
| ENSG0000012225.1 TEC                    | chr16 | 35903117 | 35904916 | + | 0    | 0    |
| ENSG0000012225.1 TEC                    | chr1  | 40473055 | 40474059 | + | 0    | 0.2  |
| ENSG0000012225.1 lincRNA                | chr17 | 33827728 | 34079100 | - | 0.31 | 0.08 |
| ENSG0000012225.1 lincRNA                | chr21 | 5232668  | 5243833  | - | 0    | 0    |
| ENSG0000012225.1 TEC                    | chr9  | 21892188 | 21893857 | + | 0    | 0.11 |
| ENSG0000012225.1 TEC                    | chr5  | 25349841 | 25350073 | + | 0    | 0    |
| ENSG0000012225.1 TEC                    | chr11 | 779617   | 780755   | + | 2.35 | 2.07 |
| ENSG0000012225.1 TEC                    | chr3  | 1.71E+08 | 1.71E+08 | + | 0.62 | 0.42 |
| ENSG0000012225.1 TEC                    | chr17 | 34000789 | 34006772 | - | 0    | 0    |
| ENSG0000012225.1 TEC                    | chr11 | 40107244 | 40112599 | - | 0    | 0    |
| ENSG0000012225.1 TEC                    | chr19 | 50962197 | 50962781 | - | 0    | 0    |
| ENSG0000012225.1 TEC                    | chr13 | 51921251 | 51921587 | + | 0    | 0    |
| ENSG0000012225.1 TEC                    | chr18 | 37305295 | 37306333 | - | 0    | 0    |
| ENSG0000012225.1 TEC                    | chr5  | 1.43E+08 | 1.43E+08 | - | 0    | 0    |
| ENSG0000012225.1 TEC                    | chr16 | 81617038 | 81617543 | - | 0    | 0    |
| ENSG0000012225.1 TEC                    | chrX  | 7489659  | 7491199  | + | 0    | 0    |
| ENSG0000012225.1 TEC                    | chr15 | 56795382 | 56795522 | + | 0    | 0    |
| ENSG0000012225.1 TEC                    | chr11 | 93286629 | 93288903 | - | 0    | 0    |
| ENSG0000012225.1 sense_intronic         | chr17 | 45895783 | 45898798 | + | 0    | 0    |
| ENSG0000012225.1 protein_coding         | chr5  | 1.39E+08 | 1.39E+08 | - | 0.3  | 0.13 |
| ENSG0000012225.1 antisense              | chr21 | 5073458  | 5087867  | + | 0    | 0    |
| ENSG0000012225.1 unprocessed_transcript | chr9  | 65878766 | 65894790 | + | 0    | 0    |
| ENSG0000012225.1 TEC                    | chr10 | 73769264 | 73772862 | - | 0.43 | 0.25 |
| ENSG0000012225.1 TEC                    | chr21 | 32790673 | 32791504 | - | 0    | 0    |
| ENSG0000012225.1 TEC                    | chr5  | 1.33E+08 | 1.33E+08 | + | 0    | 0    |
| ENSG0000012225.1 TEC                    | chr17 | 81395609 | 81397144 | - | 0.07 | 0.33 |
| ENSG0000012225.1 TEC                    | chr16 | 68367325 | 68370262 | - | 0    | 0.1  |
| ENSG0000012225.1 TEC                    | chr15 | 78339208 | 78341757 | - | 0    | 0    |
| ENSG0000012225.1 TEC                    | chr13 | 25141536 | 25141809 | + | 0    | 0    |
| ENSG0000012225.1 TEC                    | chr11 | 93726654 | 93729805 | - | 0.22 | 0.41 |
| ENSG0000012225.1 TEC                    | chr11 | 89545128 | 89545744 | + | 0    | 0    |
| ENSG0000012225.1 TEC                    | chr5  | 9498401  | 9498775  | - | 0    | 0    |
| ENSG0000012225.1 TEC                    | chr22 | 30275215 | 30276951 | - | 0.02 | 0.21 |
| ENSG0000012225.1 TEC                    | chr12 | 1.33E+08 | 1.33E+08 | + | 0.3  | 0.33 |

|                                |       |          |          |   |      |      |
|--------------------------------|-------|----------|----------|---|------|------|
| ENSG0000( CTD-2028E TEC        | chr11 | 87490144 | 87491110 | + | 0    | 0    |
| ENSG0000( RP11-347N TEC        | chr13 | 1.02E+08 | 1.02E+08 | - | 0    | 0    |
| ENSG0000( RP11-364P TEC        | chr4  | 1.58E+08 | 1.58E+08 | - | 0    | 0    |
| ENSG0000( RP13-895J TEC        | chr12 | 1.32E+08 | 1.32E+08 | + | 0    | 0    |
| ENSG0000( RP11-758N TEC        | chr15 | 80014157 | 80015707 | + | 0    | 0    |
| ENSG0000( RP11-561C TEC        | chr9  | 68250469 | 68251656 | - | 0    | 0    |
| ENSG0000( RP11-380N TEC        | chr18 | 47866839 | 47867367 | + | 0    | 0    |
| ENSG0000( CTD-2335A TEC        | chr15 | 89358841 | 89360377 | + | 0    | 0    |
| ENSG0000( CH507-254 unprocessε | chr21 | 6309161  | 6312948  | + | 0    | 0    |
| ENSG0000( AP004782. TEC        | chr11 | 1.33E+08 | 1.33E+08 | + | 0.02 | 0    |
| ENSG0000( CTA-280A3 lincRNA    | chr22 | 47916728 | 47926264 | + | 0.1  | 0.1  |
| ENSG0000( CTD-3035K TEC        | chr17 | 62679403 | 62681354 | - | 0    | 0    |
| ENSG0000( CTA-212A2 lincRNA    | chr22 | 36091148 | 36093352 | + | 0.07 | 0.15 |
| ENSG0000( RP11-403N TEC        | chr9  | 79913269 | 79915736 | + | 0    | 0    |
| ENSG0000( AC006128. TEC        | chr19 | 15398696 | 15400356 | + | 0.03 | 0.15 |
| ENSG0000( LLNLF-158I TEC       | chr19 | 15904556 | 15907234 | + | 0    | 0    |
| ENSG0000( SNX18P12 processed_  | chr21 | 9364467  | 9365225  | - | 0.85 | 0.56 |
| ENSG0000( RP11-81A1 TEC        | chr15 | 79989905 | 79990606 | + | 0    | 0    |
| ENSG0000( bP-2171C2 processed_ | chr21 | 9082601  | 9083101  | - | 0.3  | 0    |
| ENSG0000( RP11-416H TEC        | chr2  | 1.22E+08 | 1.22E+08 | + | 0.08 | 0.09 |
| ENSG0000( RP11-44F1. TEC       | chr16 | 53487607 | 53489943 | - | 0.16 | 0.14 |
| ENSG0000( AC005086. pseudogen  | chr7  | 1.02E+08 | 1.02E+08 | - | 0    | 0    |
| ENSG0000( RP11-288A TEC        | chr10 | 1.28E+08 | 1.28E+08 | - | 0    | 0    |
| ENSG0000( AC005609. antisense  | chr5  | 1.41E+08 | 1.41E+08 | - | 0    | 0    |
| ENSG0000( LINC02033 lincRNA    | chr3  | 36819276 | 36822498 | - | 0.25 | 0    |
| ENSG0000( CH507-236 unprocessε | chr21 | 6712596  | 6716361  | + | 0    | 0    |
| ENSG0000( RP11-14N9 TEC        | chr16 | 16760905 | 16762465 | + | 0    | 0    |
| ENSG0000( SETD8P1 processed_   | chr13 | 18297554 | 18298733 | + | 0    | 0    |
| ENSG0000( RP11-319G TEC        | chr16 | 78981722 | 78981843 | - | 0    | 0    |
| ENSG0000( RP11-685B TEC        | chr11 | 88165575 | 88167691 | - | 0    | 0    |
| ENSG0000( RP11-675P TEC        | chr18 | 30780006 | 30780424 | + | 1.11 | 0    |
| ENSG0000( RP11-701H TEC        | chr15 | 25091960 | 25092377 | - | 0    | 0    |
| ENSG0000( RP11-79C6 TEC        | chr5  | 35895689 | 35896020 | - | 0    | 0    |
| ENSG0000( RP5-1014D sense_ovei | chr22 | 37876148 | 37895563 | + | 0.12 | 0.16 |
| ENSG0000( CTB-105N1 TEC        | chr5  | 1.68E+08 | 1.68E+08 | + | 0    | 0    |
| ENSG0000( RP11-44F1. TEC       | chr16 | 53389886 | 53390563 | + | 0    | 0    |
| ENSG0000( RP11-700A TEC        | chr11 | 85852557 | 85854943 | - | 0.36 | 0.35 |
| ENSG0000( CTB-43I4.1 TEC       | chr17 | 51761260 | 51763397 | - | 0    | 0    |
| ENSG0000( RP13-20L1. TEC       | chr17 | 82462601 | 82464255 | + | 0.82 | 0.41 |
| ENSG0000( RP11-495K TEC        | chr12 | 1.31E+08 | 1.31E+08 | + | 0    | 0    |
| ENSG0000( CTA-363E6 TEC        | chr16 | 19503861 | 19504625 | + | 0    | 0    |
| ENSG0000( CTD-3222D TEC        | chr19 | 16586905 | 16589409 | + | 0.2  | 0.17 |
| ENSG0000( RP11-625B TEC        | chr4  | 1.37E+08 | 1.37E+08 | + | 0    | 0    |
| ENSG0000( RP11-33H1 lincRNA    | chrX  | 52053176 | 52055684 | + | 0    | 0    |
| ENSG0000( CH507-210 lincRNA    | chr21 | 6904884  | 6906692  | + | 0    | 0    |

|                                 |       |          |          |   |      |      |
|---------------------------------|-------|----------|----------|---|------|------|
| ENSG0000( CTB-174D1 TEC         | chr5  | 1.69E+08 | 1.69E+08 | - | 0    | 0    |
| ENSG0000( AC011558. TEC         | chr19 | 1038727  | 1039064  | - | 0.28 | 0.62 |
| ENSG0000( RP11-309J. TEC        | chr13 | 73399031 | 73399205 | + | 0    | 0    |
| ENSG0000( RP11-191F TEC         | chr5  | 10064243 | 10064476 | - | 0    | 0    |
| ENSG0000( CTD-2385L TEC         | chr16 | 23753689 | 23755939 | - | 0    | 0    |
| ENSG0000( CTD-2326C TEC         | chr16 | 72973374 | 72973832 | - | 0    | 0    |
| ENSG0000( RP11-752G TEC         | chr15 | 82738386 | 82739122 | + | 0    | 0    |
| ENSG0000( CTC-425O2 TEC         | chr19 | 40355842 | 40360606 | + | 1.33 | 1.44 |
| ENSG0000( OR5D13 polymorph      | chr11 | 55773438 | 55774382 | + | 0    | 0    |
| ENSG0000( RP11-227G antisense   | chr17 | 32423971 | 32446038 | - | 0    | 0    |
| ENSG0000( RP11-441F TEC         | chr16 | 56306845 | 56308335 | + | 0    | 0    |
| ENSG0000( RP11-437B protein_co  | chr15 | 92883413 | 92949230 | + | 0.4  | 1.42 |
| ENSG0000( RP11-642A TEC         | chr8  | 1.41E+08 | 1.41E+08 | - | 0.1  | 0    |
| ENSG0000( AL513523.: protein_co | chr1  | 1.54E+08 | 1.54E+08 | - | 0.05 | 0    |
| ENSG0000( CH507-42P TEC         | chr21 | 6034690  | 6036093  | + | 0.04 | 0.05 |
| ENSG0000( LINC00552 TEC         | chr13 | 1.14E+08 | 1.14E+08 | - | 0    | 0.02 |
| ENSG0000( AP000997. TEC         | chr11 | 1.16E+08 | 1.16E+08 | + | 0    | 0    |
| ENSG0000( CTD-2169H TEC         | chr5  | 1.24E+08 | 1.24E+08 | - | 0    | 0    |
| ENSG0000( AL050303.: TEC        | chr21 | 13679300 | 13681138 | - | 0.03 | 0    |
| ENSG0000( RP11-278H TEC         | chr1  | 2.44E+08 | 2.44E+08 | + | 0    | 0    |
| ENSG0000( RP5-1028K TEC         | chr17 | 40597113 | 40598585 | - | 0    | 0    |
| ENSG0000( RP11-60A1 TEC         | chr1  | 87805286 | 87808372 | - | 0.11 | 0.12 |
| ENSG0000( RP11-152O TEC         | chr16 | 52081568 | 52082096 | - | 0    | 0    |
| ENSG0000( RP11-586K TEC         | chr16 | 32786394 | 32787379 | + | 0.12 | 0.14 |
| ENSG0000( RP11-466A TEC         | chr17 | 32518322 | 32518934 | - | 0    | 0    |
| ENSG0000( PPIAL4F protein_co    | chr1  | 1.45E+08 | 1.45E+08 | + | 0    | 0    |
| ENSG0000( RP11-555K processed_  | chr21 | 9810501  | 9810848  | + | 0    | 0    |
| ENSG0000( CH507-39C lincRNA     | chr21 | 5705345  | 5707160  | + | 0    | 0    |
| ENSG0000( GS1-124K5 TEC         | chr7  | 66474556 | 66475749 | + | 0    | 0    |
| ENSG0000( CTD-2014D TEC         | chr8  | 1.41E+08 | 1.41E+08 | - | 0    | 0    |
| ENSG0000( CH507-154 unprocess   | chr21 | 6676178  | 6679962  | - | 0    | 0    |
| ENSG0000( CTD-2574D TEC         | chr16 | 29913144 | 29915337 | - | 0.9  | 0.92 |
| ENSG0000( RP11-374N TEC         | chr6  | 73971346 | 73973115 | + | 0.23 | 0.07 |
| ENSG0000( RP11-499E TEC         | chr2  | 97094935 | 97097433 | + | 0.07 | 0    |
| ENSG0000( RP11-893F TEC         | chr17 | 50362967 | 50365232 | - | 0    | 0.03 |
| ENSG0000( RP11-665E TEC         | chr11 | 87816999 | 87817567 | + | 0    | 0    |
| ENSG0000( CTD-2621I. TEC        | chr19 | 56149817 | 56150490 | + | 0.4  | 0.98 |
| ENSG0000( RP11-586K TEC         | chr16 | 32787962 | 32788944 | + | 0.06 | 0    |
| ENSG0000( RP11-317F TEC         | chr10 | 1.14E+08 | 1.14E+08 | - | 0    | 0    |
| ENSG0000( RP11-432J. lincRNA    | chr13 | 61424689 | 61427946 | - | 0    | 0    |
| ENSG0000( RP11-528N TEC         | chr12 | 97563257 | 97563971 | - | 0    | 0    |
| ENSG0000( AC006077. TEC         | chr5  | 1.35E+08 | 1.35E+08 | + | 0.34 | 0.38 |
| ENSG0000( BCLAF1P2 processed_   | chr16 | 34266041 | 34268649 | - | 0    | 0    |
| ENSG0000( RP11-75C1 TEC         | chr17 | 77444704 | 77447167 | + | 0.2  | 0.36 |
| ENSG0000( RP11-407G TEC         | chr16 | 57142652 | 57144936 | + | 0.12 | 0.16 |

|                 |                         |                 |          |          |   |      |      |
|-----------------|-------------------------|-----------------|----------|----------|---|------|------|
| ENSG00000180100 | PRAMEF18 protein_coding | chr1            | 13222705 | 13226106 | - | 0    | 0    |
| ENSG00000180101 | CTA-212A2               | TEC chr22       | 36137430 | 36139350 | - | 0.06 | 0.19 |
| ENSG00000180102 | RP11-5809               | TEC chr17       | 40473554 | 40475289 | - | 0    | 0    |
| ENSG00000180103 | CTC-510F1               | TEC chr19       | 11208195 | 11208702 | + | 0.3  | 0    |
| ENSG00000180104 | AC005538                | TEC chr2        | 2.34E+08 | 2.34E+08 | - | 0.14 | 1.64 |
| ENSG00000180105 | RP3-495K2               | TEC chr6        | 1.69E+08 | 1.69E+08 | + | 0    | 0    |
| ENSG00000180106 | RP11-862L               | TEC chr18       | 77002849 | 77006846 | - | 0    | 0.01 |
| ENSG00000180107 | CTD-2545G               | TEC chr17       | 7192295  | 7192448  | - | 0    | 0    |
| ENSG00000180108 | WI2-1959D               | TEC chr9        | 1.36E+08 | 1.36E+08 | + | 0    | 0    |
| ENSG00000180109 | RP11-399K               | TEC chr10       | 75450081 | 75451725 | + | 0    | 0    |
| ENSG00000180110 | RP11-394B               | TEC chr16       | 70768356 | 70768785 | + | 0    | 0    |
| ENSG00000180111 | RP11-386I               | TEC chr12       | 1.33E+08 | 1.33E+08 | - | 0    | 0    |
| ENSG00000180112 | CTC-774J1               | TEC chr11       | 1.16E+08 | 1.16E+08 | - | 0    | 0    |
| ENSG00000180113 | RP11-142L               | TEC chr10       | 22693953 | 22694639 | - | 0    | 0    |
| ENSG00000180114 | RP11-1334               | TEC chr5        | 1.77E+08 | 1.77E+08 | - | 0.53 | 0.71 |
| ENSG00000180115 | RP11-541M               | TEC chr10       | 48443836 | 48445820 | - | 0.14 | 0.06 |
| ENSG00000180116 | CTC-457L1               | TEC chr17       | 19030857 | 19033529 | + | 0    | 0    |
| ENSG00000180117 | RP11-886P               | TEC chr19       | 8444570  | 8445597  | - | 0.24 | 0.06 |
| ENSG00000180118 | RP11-63I8               | TEC chr18       | 46385707 | 46387083 | + | 0    | 0    |
| ENSG00000180119 | RP4-742C1               | antisense chr22 | 39133090 | 39136760 | + | 0.02 | 0    |
| ENSG00000180120 | RP11-775C               | TEC chr15       | 81060953 | 81063488 | + | 0    | 0    |
| ENSG00000180121 | RP4-811M                | TEC chr20       | 51098138 | 51098845 | + | 0    | 0    |
| ENSG00000180122 | RP11-648C               | TEC chr11       | 87121058 | 87121596 | + | 0    | 0    |
| ENSG00000180123 | RP11-504G               | TEC chr11       | 18601882 | 18602649 | + | 0.17 | 0.46 |
| ENSG00000180124 | RP4-635A2               | TEC chr1        | 1.85E+08 | 1.85E+08 | - | 0    | 0.03 |
| ENSG00000180125 | RP11-193J               | TEC chr1        | 3205988  | 3208664  | + | 0    | 0    |
| ENSG00000180126 | RP1-228P1               | TEC chr12       | 47960497 | 47963469 | - | 0.05 | 0    |
| ENSG00000180127 | RP11-274A               | TEC chr16       | 81630193 | 81632038 | + | 0    | 0    |
| ENSG00000180128 | RP11-305A               | TEC chr16       | 49900019 | 49900524 | + | 0    | 0    |
| ENSG00000180129 | RP11-20F1               | TEC chr2        | 1.61E+08 | 1.61E+08 | - | 0    | 0    |
| ENSG00000180130 | RP11-6L6.4              | TEC chr4        | 1.46E+08 | 1.46E+08 | + | 0    | 0    |
| ENSG00000180131 | RP11-20G1               | TEC chr15       | 99497812 | 99498375 | - | 0    | 0    |
| ENSG00000180132 | C8orf87                 | lincRNA chr8    | 93134095 | 93166850 | - | 0    | 0    |
| ENSG00000180133 | CTA-992D9               | lincRNA chr22   | 27044001 | 27045315 | + | 0    | 0    |
| ENSG00000180134 | CH507-216               | lincRNA chr21   | 10122273 | 10129029 | + | 0.03 | 0.16 |
| ENSG00000180135 | RP11-91J1               | TEC chr8        | 486117   | 488512   | - | 0    | 0    |
| ENSG00000180136 | RP5-844F9               | TEC chr7        | 44367140 | 44369292 | - | 0    | 0.03 |
| ENSG00000180137 | AC005618                | antisense chr5  | 1.41E+08 | 1.41E+08 | - | 0.34 | 0    |
| ENSG00000180138 | CTD-2300H               | TEC chr16       | 77104260 | 77105297 | + | 0    | 0    |
| ENSG00000180139 | RP11-618M               | TEC chr8        | 19375128 | 19375622 | - | 0    | 0    |
| ENSG00000180140 | RP11-539L               | TEC chr4        | 6691995  | 6692970  | - | 0.21 | 0    |
| ENSG00000180141 | CTC-546K2               | TEC chr5        | 1.21E+08 | 1.21E+08 | + | 0    | 0    |
| ENSG00000180142 | RP11-43N1               | TEC chr19       | 47487638 | 47489519 | - | 0.76 | 0.94 |
| ENSG00000180143 | RP11-423E               | TEC chr3        | 1.72E+08 | 1.72E+08 | - | 0    | 0    |
| ENSG00000180144 | RP11-521C               | TEC chr10       | 50334538 | 50336123 | + | 0    | 0    |

|                 |                       |       |          |          |   |       |       |
|-----------------|-----------------------|-------|----------|----------|---|-------|-------|
| ENSG00000100000 | RP11-570J processed   | chr21 | 9558970  | 9559155  | + | 0     | 0     |
| ENSG00000100000 | RP11-69M TEC          | chr12 | 8080381  | 8082163  | - | 0.13  | 0     |
| ENSG00000100000 | CTD-2026A TEC         | chr5  | 25716271 | 25716715 | + | 0     | 0     |
| ENSG00000100000 | RP11-59D14 TEC        | chr17 | 2424179  | 2424412  | - | 1.05  | 4.34  |
| ENSG00000100000 | LINC01126 lincRNA     | chr2  | 43227210 | 43228855 | + | 0.24  | 0.38  |
| ENSG00000100000 | RP11-329A TEC         | chr2  | 1.24E+08 | 1.24E+08 | - | 0     | 0     |
| ENSG00000100000 | RP11-474C TEC         | chr12 | 48189349 | 48191207 | + | 0     | 0     |
| ENSG00000100000 | RP11-24J1 TEC         | chr2  | 1.46E+08 | 1.46E+08 | - | 0     | 0     |
| ENSG00000100000 | RP11-420N processed   | chr16 | 5239802  | 6776014  | + | 0.08  | 0     |
| ENSG00000100000 | RP11-286N TEC         | chr11 | 61525708 | 61526602 | - | 0.21  | 0     |
| ENSG00000100000 | RP11-1072 TEC         | chr17 | 44689858 | 44693340 | + | 0.06  | 0     |
| ENSG00000100000 | RP11-855A TEC         | chr17 | 67973934 | 67976072 | + | 0     | 0.03  |
| ENSG00000100000 | RP11-513C TEC         | chr8  | 48428143 | 48431041 | - | 0.45  | 0.31  |
| ENSG00000100000 | CTB-151G2 TEC         | chr19 | 27639300 | 27639665 | - | 13.53 | 13.54 |
| ENSG00000100000 | CTD-2315N TEC         | chr5  | 55484403 | 55485086 | + | 0     | 0     |
| ENSG00000100000 | RP11-483E TEC         | chr2  | 1.75E+08 | 1.75E+08 | - | 0     | 0     |
| ENSG00000100000 | RP11-637N TEC         | chr18 | 6394847  | 6398020  | - | 0     | 0     |
| ENSG00000100000 | RP11-219G TEC         | chr17 | 78250346 | 78250932 | - | 0     | 0     |
| ENSG00000100000 | RP11-264L TEC         | chr16 | 78525189 | 78526535 | - | 0     | 0     |
| ENSG00000100000 | RP11-451N TEC         | chr16 | 58705799 | 58706297 | - | 0     | 0     |
| ENSG00000100000 | FLJ42393 TEC          | chr3  | 1.88E+08 | 1.88E+08 | + | 0     | 0     |
| ENSG00000100000 | GHc-857Gc TEC         | chrX  | 1.04E+08 | 1.04E+08 | + | 0.02  | 0.13  |
| ENSG00000100000 | CH507-254 unprocessed | chr21 | 7421442  | 7425839  | - | 0     | 0     |
| ENSG00000100000 | BIRC6-AS2 antisense   | chr2  | 32557520 | 32574818 | - | 0     | 0     |
| ENSG00000100000 | RP11-113K TEC         | chr11 | 83083687 | 83084138 | + | 0     | 0.19  |
| ENSG00000100000 | CTD-2270P TEC         | chr16 | 2683106  | 2684764  | + | 0.07  | 0     |
| ENSG00000100000 | RP11-349F TEC         | chr8  | 17500012 | 17500605 | + | 0.24  | 0     |
| ENSG00000100000 | CTD-2015C TEC         | chr2  | 1.05E+08 | 1.05E+08 | + | 0     | 0     |
| ENSG00000100000 | RP11-117L TEC         | chr12 | 1.3E+08  | 1.3E+08  | + | 0.04  | 0     |
| ENSG00000100000 | RP11-568J TEC         | chr16 | 85859521 | 85862012 | + | 0     | 0     |
| ENSG00000100000 | RP11-325I TEC         | chr5  | 1383159  | 1386409  | - | 0     | 0.02  |
| ENSG00000100000 | RP11-113E TEC         | chr10 | 85526880 | 85531115 | - | 0     | 0     |
| ENSG00000100000 | RP11-624A TEC         | chr15 | 32182551 | 32186475 | + | 3.35  | 3.43  |
| ENSG00000100000 | AP001962 TEC          | chr4  | 99844138 | 99844696 | + | 0     | 0     |
| ENSG00000100000 | CTA-992D9 lincRNA     | chr22 | 27040197 | 27041494 | + | 0.05  | 0     |
| ENSG00000100000 | RP11-360N TEC         | chr17 | 67611277 | 67613822 | + | 0.02  | 0.02  |
| ENSG00000100000 | AC006840 TEC          | chr4  | 19098199 | 19098740 | + | 0     | 0     |
| ENSG00000100000 | RP11-618N TEC         | chr8  | 19277284 | 19277573 | + | 0     | 0     |
| ENSG00000100000 | LINC01651 lincRNA     | chr22 | 21354563 | 21355763 | + | 0     | 0     |
| ENSG00000100000 | CTD-2008E TEC         | chr5  | 31558573 | 31559875 | + | 0.22  | 0.05  |
| ENSG00000100000 | RP11-341D unprocessed | chr13 | 18174010 | 18178465 | - | 0     | 0     |
| ENSG00000100000 | RP11-481J TEC         | chr12 | 1.11E+08 | 1.11E+08 | + | 0     | 0     |
| ENSG00000100000 | RP3-406P2 TEC         | chr6  | 3982673  | 3984130  | + | 0     | 0     |
| ENSG00000100000 | CTA-212A2 lincRNA     | chr22 | 36066533 | 36070110 | + | 0     | 0     |
| ENSG00000100000 | ABC7-4304 unprocessed | chr1  | 182696   | 184174   | + | 0     | 0     |



|                |                |       |          |          |   |      |      |
|----------------|----------------|-------|----------|----------|---|------|------|
| ENSG000001145E | TEC            | chr9  | 1.34E+08 | 1.34E+08 | + | 0    | 0    |
| ENSG0000014631 | TEC            | chr16 | 1437154  | 1439315  | + | 0    | 0    |
| ENSG0000011311 | TEC            | chr12 | 1.25E+08 | 1.25E+08 | + | 0    | 0    |
| ENSG0000011349 | sense_intronic | chr8  | 17510613 | 17511300 | + | 0.1  | 0    |
| ENSG0000016710 | TEC            | chr22 | 44183031 | 44187739 | - | 0    | 0.01 |
| ENSG0000011447 | TEC            | chr9  | 1.35E+08 | 1.35E+08 | + | 0    | 0    |
| ENSG0000012086 | TEC            | chr19 | 37401404 | 37403846 | - | 0    | 0    |
| ENSG0000011734 | TEC            | chr12 | 89544203 | 89544488 | - | 0    | 0    |
| ENSG0000011243 | TEC            | chr12 | 1.31E+08 | 1.31E+08 | - | 0    | 0    |
| ENSG000001153P | TEC            | chr6  | 37567716 | 37571460 | + | 0    | 0    |
| ENSG0000013857 | TEC            | chr4  | 1.86E+08 | 1.86E+08 | - | 0.13 | 0    |
| ENSG0000011970 | TEC            | chr15 | 88477871 | 88478387 | - | 0    | 0    |
| ENSG000001176K | TEC            | chr1  | 2.07E+08 | 2.07E+08 | + | 0    | 0.04 |
| ENSG0000012233 | TEC            | chr19 | 46946535 | 46949156 | + | 0.1  | 0.07 |
| ENSG00000110A1 | lincRNA        | chr8  | 9158063  | 9158621  | + | 0    | 0    |
| ENSG0000011264 | TEC            | chr13 | 20092632 | 20094144 | + | 0    | 0    |
| ENSG0000011483 | TEC            | chr12 | 1.27E+08 | 1.27E+08 | + | 0    | 0    |
| ENSG0000011338 | TEC            | chr12 | 1.24E+08 | 1.24E+08 | + | 0.08 | 0.04 |
| ENSG0000011285 | antisense      | chr22 | 45875932 | 45879247 | + | 0    | 0.02 |
| ENSG0000011221 | transcribed    | chr9  | 65865190 | 65877274 | - | 0    | 0    |
| ENSG0000011310 | protein_coding | chr2  | 48632291 | 48755724 | - | 0.03 | 0.09 |
| ENSG000001141B | TEC            | chr2  | 1.14E+08 | 1.14E+08 | + | 0    | 0    |
| ENSG0000011201 | TEC            | chr15 | 33105758 | 33106236 | - | 0    | 0    |
| ENSG0000012621 | TEC            | chr19 | 56127236 | 56127466 | - | 0    | 0    |
| ENSG000001181K | TEC            | chr6  | 1.33E+08 | 1.33E+08 | + | 0.06 | 0    |
| ENSG00000105R1 | polymorphic    | chr11 | 56417258 | 56418232 | - | 0    | 0    |
| ENSG0000011720 | TEC            | chr18 | 13710249 | 13710484 | - | 0    | 0    |
| ENSG000001169J | TEC            | chr2  | 2.3E+08  | 2.3E+08  | - | 0    | 0    |
| ENSG0000011472 | TEC            | chr13 | 1.1E+08  | 1.1E+08  | + | 0    | 0    |
| ENSG000001159G | unprocessed    | chr19 | 22770375 | 22770622 | + | 0    | 0    |
| ENSG0000011507 | TEC            | chr21 | 8101251  | 8103706  | - | 0.03 | 0.03 |
| ENSG00000115Q2 | protein_coding | chr6  | 1.39E+08 | 1.39E+08 | - | 0.02 | 0.48 |
| ENSG0000011299 | TEC            | chr15 | 1.01E+08 | 1.01E+08 | - | 0.24 | 0.18 |
| ENSG0000012553 | TEC            | chr19 | 34645380 | 34646838 | + | 0    | 0    |
| ENSG0000011354 | TEC            | chr14 | 41514972 | 41515350 | - | 0    | 0    |
| ENSG00000122CB | lincRNA        | chr22 | 11066418 | 11068174 | + | 0    | 0    |
| ENSG0000011243 | TEC            | chr12 | 1.31E+08 | 1.31E+08 | + | 0    | 0    |
| ENSG000001222D | TEC            | chr19 | 16610374 | 16612203 | - | 0.03 | 0.04 |
| ENSG0000012154 | TEC            | chr5  | 10675317 | 10675575 | - | 0    | 0    |
| ENSG00000115A1 | TEC            | chr15 | 90347587 | 90349437 | + | 0.06 | 0    |
| ENSG000001196B | TEC            | chr18 | 79496058 | 79498348 | + | 0    | 0.03 |
| ENSG000001145A | TEC            | chr10 | 1.32E+08 | 1.32E+08 | + | 0.05 | 0.06 |
| ENSG0000011740 | protein_coding | chr5  | 1.41E+08 | 1.41E+08 | + | 0    | 0    |
| ENSG000001143P | TEC            | chr5  | 61114432 | 61116753 | - | 0    | 0    |
| ENSG0000010081 | sense_intronic | chr22 | 18883502 | 18884682 | - | 0    | 0    |

|                 |                      |       |          |          |   |      |      |
|-----------------|----------------------|-------|----------|----------|---|------|------|
| ENSG00000101551 | RP11-158H TEC        | chr18 | 35257040 | 35257512 | + | 0.65 | 0    |
| ENSG00000101552 | RPSAP68 processed    | chr21 | 8603547  | 8603984  | + | 0    | 0    |
| ENSG00000101553 | RP11-190D TEC        | chr16 | 78166717 | 78168514 | - | 0    | 0    |
| ENSG00000101554 | RP11-76C1 TEC        | chr12 | 1.31E+08 | 1.31E+08 | - | 0    | 0    |
| ENSG00000101555 | RP11-312A TEC        | chr4  | 1.58E+08 | 1.58E+08 | - | 0    | 0.08 |
| ENSG00000101556 | RP11-1250 TEC        | chr5  | 34124162 | 34124385 | - | 0    | 0    |
| ENSG00000101557 | CTB-139P1 TEC        | chr7  | 75625089 | 75626970 | - | 0    | 0.07 |
| ENSG00000101558 | RP11-56L1 TEC        | chr16 | 32185624 | 32186311 | + | 0    | 0    |
| ENSG00000101559 | CH507-210 lincRNA    | chr21 | 6789592  | 6812297  | + | 0    | 0    |
| ENSG00000101560 | AL353997 processed   | chr17 | 18424321 | 18425097 | + | 0    | 0    |
| ENSG00000101561 | RP11-509E TEC        | chr16 | 6037210  | 6038977  | + | 0.03 | 0    |
| ENSG00000101562 | RP11-76C1 TEC        | chr12 | 1.31E+08 | 1.31E+08 | - | 0    | 0    |
| ENSG00000101563 | RP11-330H TEC        | chr3  | 52217016 | 52219012 | - | 0    | 0    |
| ENSG00000101564 | AC005086 pseudogen   | chr7  | 1.02E+08 | 1.02E+08 | - | 0    | 0    |
| ENSG00000101565 | RP11-9N12 antisense  | chr4  | 1.54E+08 | 1.54E+08 | + | 0    | 0    |
| ENSG00000101566 | AC008079 antisense   | chr22 | 18110759 | 18131154 | - | 0.11 | 0.09 |
| ENSG00000101567 | CTD-2123J TEC        | chr5  | 86305233 | 86306149 | - | 0    | 0    |
| ENSG00000101568 | AP001350 TEC         | chr11 | 58627435 | 58628528 | + | 0.11 | 0.18 |
| ENSG00000101569 | RP4-671O1 antisense  | chr22 | 44210442 | 44229512 | - | 0    | 0    |
| ENSG00000101570 | RPL23AP61 processed  | chr10 | 46063250 | 46063715 | + | 0    | 0    |
| ENSG00000101571 | CH507-42P processed  | chr21 | 6008604  | 6008810  | + | 2.44 | 0    |
| ENSG00000101572 | AC006129 TEC         | chr19 | 41551568 | 41552274 | - | 0    | 0    |
| ENSG00000101573 | RP11-83C7 TEC        | chr4  | 38390754 | 38391675 | + | 0    | 0    |
| ENSG00000101574 | RP11-191F TEC        | chr5  | 10082571 | 10082772 | + | 0    | 0    |
| ENSG00000101575 | RP11-54F2 TEC        | chr5  | 10541454 | 10543192 | + | 0    | 0    |
| ENSG00000101576 | CH507-154 lincRNA    | chr21 | 6986450  | 6997765  | - | 0.58 | 0.96 |
| ENSG00000101577 | CH507-145 unprocess  | chr21 | 6272135  | 6276532  | - | 0    | 0    |
| ENSG00000101578 | CTD-2095E TEC        | chr17 | 32178946 | 32180074 | - | 0.15 | 0.12 |
| ENSG00000101579 | OR51F1 polymorph     | chr11 | 4768979  | 4769938  | - | 0    | 0    |
| ENSG00000101580 | RP11-707O TEC        | chr17 | 45592621 | 45593369 | + | 0.52 | 0.59 |
| ENSG00000101581 | LLNLR-276I TEC       | chr19 | 36070239 | 36071070 | + | 0    | 0    |
| ENSG00000101582 | RP11-367G TEC        | chr12 | 1.27E+08 | 1.27E+08 | + | 0    | 0    |
| ENSG00000101583 | CTA-992D9 lincRNA    | chr22 | 27102766 | 27107019 | + | 0    | 0    |
| ENSG00000101584 | AC005618 antisense   | chr5  | 1.41E+08 | 1.41E+08 | - | 0    | 0    |
| ENSG00000101585 | RP11-44F1 TEC        | chr16 | 53391089 | 53392473 | + | 0    | 0    |
| ENSG00000101586 | RP11-118E TEC        | chr17 | 57531769 | 57532355 | + | 0    | 0    |
| ENSG00000101587 | CH17-140K antisense  | chr5  | 1.41E+08 | 1.41E+08 | - | 0    | 0    |
| ENSG00000101588 | RP11-832A TEC        | chr11 | 1.18E+08 | 1.18E+08 | + | 0    | 0    |
| ENSG00000101589 | CTD-2095E TEC        | chr17 | 32159311 | 32160371 | + | 0    | 0    |
| ENSG00000101590 | RP11-10J2 TEC        | chr8  | 1.41E+08 | 1.41E+08 | - | 0.02 | 0.02 |
| ENSG00000101591 | RP11-540C sense_intr | chr15 | 41016990 | 41018843 | - | 0    | 0    |
| ENSG00000101592 | RP11-434P TEC        | chr2  | 73761269 | 73761781 | - | 0    | 0.16 |
| ENSG00000101593 | DNM1P41 TEC          | chr15 | 84166547 | 84169896 | - | 0.68 | 0.62 |
| ENSG00000101594 | RN7SKP23 TEC         | chr16 | 23412380 | 23416680 | + | 0.04 | 0.04 |
| ENSG00000101595 | RP11-296E TEC        | chr1  | 98660388 | 98661059 | - | 0    | 0    |

|                                |       |          |          |   |       |       |
|--------------------------------|-------|----------|----------|---|-------|-------|
| ENSG0000(RP11-71H1) TEC        | chr3  | 1.25E+08 | 1.25E+08 | - | 0.06  | 0     |
| ENSG0000(RP11-1281) TEC        | chr4  | 49229573 | 49231284 | + | 0.13  | 0.07  |
| ENSG0000(RP11-22H5) TEC        | chr16 | 82727474 | 82727694 | + | 0     | 0     |
| ENSG0000(RP11-1099) TEC        | chr17 | 7858943  | 7866083  | + | 0.19  | 0.36  |
| ENSG0000(CTC-463A1) TEC        | chr5  | 1.42E+08 | 1.42E+08 | + | 0.44  | 0.57  |
| ENSG0000(RP11-327J) TEC        | chr15 | 96112628 | 96116051 | - | 0.02  | 0     |
| ENSG0000(RP11-324H) TEC        | chr12 | 87041916 | 87042423 | + | 0     | 0     |
| ENSG0000(RP11-206B) TEC        | chr12 | 1.29E+08 | 1.29E+08 | + | 0     | 0     |
| ENSG0000(RP11-61K1) TEC        | chr3  | 1.27E+08 | 1.27E+08 | + | 0     | 0     |
| ENSG0000(RP1-197B1) TEC        | chr12 | 47728151 | 47730598 | - | 0.02  | 0     |
| ENSG0000(TMEM75) TEC           | chr8  | 1.28E+08 | 1.28E+08 | - | 0     | 0     |
| ENSG0000(RP11-562F) TEC        | chr4  | 92260367 | 92260751 | - | 0     | 0     |
| ENSG0000(RP1-168L1) TEC        | chr6  | 1.66E+08 | 1.66E+08 | + | 0     | 0     |
| ENSG0000(RP1-131F1) TEC        | chr6  | 1.32E+08 | 1.32E+08 | + | 0     | 0     |
| ENSG0000(RP11-401I1) TEC       | chr4  | 1.31E+08 | 1.31E+08 | + | 0     | 0     |
| ENSG0000(RP11-5G9) TEC         | chr13 | 43894725 | 43895182 | - | 0     | 0     |
| ENSG0000(CTD-2001J) TEC        | chr19 | 30553956 | 30558058 | + | 0     | 0     |
| ENSG0000(LA16c-380) TEC        | chr16 | 1530715  | 1533301  | + | 0     | 0     |
| ENSG0000(RP11-295D) TEC        | chr16 | 4346694  | 4348648  | - | 0.43  | 0.69  |
| ENSG0000(RP11-205N) TEC        | chr8  | 37858949 | 37861333 | + | 0     | 0     |
| ENSG0000(CTD-2600H) TEC        | chr16 | 48343755 | 48346058 | - | 0.05  | 0.03  |
| ENSG0000(RP11-91H1) TEC        | chr5  | 1.76E+08 | 1.76E+08 | - | 0     | 0     |
| ENSG0000(CTD-2349P) TEC        | chr17 | 30738182 | 30740275 | + | 0.11  | 0.2   |
| ENSG0000(RP11-907D) TEC        | chr14 | 96992864 | 96996601 | + | 0     | 0     |
| ENSG0000(CH507-9B2) protein_co | chr21 | 5079294  | 5128425  | - | 16.09 | 15.62 |
| ENSG0000(CTD-2525P) TEC        | chr14 | 69357010 | 69359308 | + | 0.12  | 0.05  |
| ENSG0000(RP11-555K) processed_ | chr21 | 9810381  | 9810503  | - | 0     | 0     |
| ENSG0000(RP11-326A) TEC        | chr15 | 93206066 | 93208048 | + | 0     | 0     |
| ENSG0000(RP11-87H9) TEC        | chr9  | 41012231 | 41014133 | + | 1.18  | 1.29  |
| ENSG0000(RP11-361H) TEC        | chr14 | 76279173 | 76283103 | + | 0.01  | 0.03  |
| ENSG0000(CTC-260E6) TEC        | chr19 | 20220597 | 20222186 | - | 0     | 0.04  |
| ENSG0000(TBC1D22A) antisense   | chr22 | 46914092 | 46916042 | - | 0.03  | 0     |
| ENSG0000(LINC01667) lincRNA    | chr21 | 9781918  | 9814009  | - | 0     | 0     |
| ENSG0000(AF246928) TEC         | chr21 | 15346652 | 15346738 | + | 0     | 0     |
| ENSG0000(RP11-317J) TEC        | chr2  | 1.91E+08 | 1.91E+08 | - | 0.06  | 0     |
| ENSG0000(RP11-678K) TEC        | chr11 | 90972316 | 90972521 | - | 0     | 0     |
| ENSG0000(RP11-544P) TEC        | chr10 | 11395808 | 11398792 | + | 0     | 0     |
| ENSG0000(CTB-129P6) TEC        | chr19 | 44909375 | 44914968 | + | 0.02  | 0.03  |
| ENSG0000(RP11-135F) TEC        | chr12 | 1E+08    | 1E+08    | - | 1.58  | 1.97  |
| ENSG0000(CMB9-52H) TEC         | chr11 | 70705605 | 70706068 | - | 0     | 0     |
| ENSG0000(OR8B4) protein_co     | chr11 | 1.24E+08 | 1.24E+08 | - | 0     | 0     |
| ENSG0000(CTC-312O1) TEC        | chr19 | 6894994  | 6896832  | - | 0     | 0     |
| ENSG0000(AC002044) TEC         | chr16 | 73005601 | 73006141 | - | 0.27  | 0.29  |
| ENSG0000(RP11-843F) TEC        | chr11 | 91382909 | 91383289 | + | 0     | 0     |
| ENSG0000(OR1B1) polymorph      | chr9  | 1.23E+08 | 1.23E+08 | - | 0     | 0     |

|                 |                          |       |          |          |   |      |      |
|-----------------|--------------------------|-------|----------|----------|---|------|------|
| ENSG00000140507 | CH507-42P lincRNA        | chr21 | 6081193  | 6082585  | + | 0    | 0    |
| ENSG00000140508 | RP11-294N TEC            | chr18 | 35082009 | 35082242 | + | 1.05 | 4.34 |
| ENSG00000140509 | RP11-83B2 TEC            | chr12 | 1.25E+08 | 1.25E+08 | - | 0    | 0    |
| ENSG00000140510 | RP11-7K9.2 TEC           | chr18 | 52409042 | 52409257 | + | 0    | 0    |
| ENSG00000140511 | RP11-33E1 TEC            | chr1  | 85152487 | 85154203 | - | 0.03 | 0.04 |
| ENSG00000140512 | AC007792. TEC            | chr19 | 3355554  | 3355955  | - | 0    | 0    |
| ENSG00000140513 | CTB-3M24. TEC            | chr5  | 1.33E+08 | 1.33E+08 | + | 0    | 0    |
| ENSG00000140514 | RP11-334E TEC            | chr2  | 1.61E+08 | 1.61E+08 | + | 0    | 0    |
| ENSG00000140515 | CTC-523E2 TEC            | chr19 | 34949038 | 34951205 | - | 0    | 0.03 |
| ENSG00000140516 | AL022393.1 TEC           | chr6  | 28170845 | 28172521 | + | 0.27 | 0.15 |
| ENSG00000140517 | RP1-127M.1 lincRNA       | chr21 | 13305152 | 13314944 | + | 0    | 0    |
| ENSG00000140518 | PLAC4 TEC                | chr21 | 41175231 | 41185239 | - | 0    | 0    |
| ENSG00000140519 | RP11-423G TEC            | chr12 | 1.09E+08 | 1.09E+08 | + | 0    | 0    |
| ENSG00000140520 | RP11-84A1 TEC            | chr1  | 9826289  | 9828271  | - | 0.03 | 0    |
| ENSG00000140521 | RP5-875O1 unprocessed    | chr1  | 16681097 | 16688749 | - | 0    | 0    |
| ENSG00000140522 | RP11-133M TEC            | chr16 | 78872739 | 78873505 | + | 0    | 0    |
| ENSG00000140523 | RP11-641J.1 unprocessed  | chrX  | 49155242 | 49157351 | - | 0    | 0    |
| ENSG00000140524 | RP11-158L TEC            | chr12 | 1.25E+08 | 1.25E+08 | + | 0.09 | 0    |
| ENSG00000140525 | RP11-385H TEC            | chr15 | 24848357 | 24852253 | + | 0.03 | 0.02 |
| ENSG00000140526 | AC093642. TEC            | chr2  | 2.42E+08 | 2.42E+08 | + | 0    | 0    |
| ENSG00000140527 | RP11-546D TEC            | chr12 | 1.23E+08 | 1.23E+08 | - | 1.12 | 0.32 |
| ENSG00000140528 | CTD-3137H TEC            | chr19 | 18448275 | 18448805 | - | 0.14 | 0    |
| ENSG00000140529 | RP11-87G2 TEC            | chr17 | 76966285 | 76969530 | - | 0.03 | 0    |
| ENSG00000140530 | RP11-267M TEC            | chr8  | 94427712 | 94429888 | - | 0.33 | 0.42 |
| ENSG00000140531 | RP11-739P TEC            | chr11 | 91184934 | 91185543 | - | 0    | 0    |
| ENSG00000140532 | RP4-800O1 TEC            | chr12 | 1.26E+08 | 1.26E+08 | + | 0    | 0    |
| ENSG00000140533 | AC069542. pseudogen      | chr10 | 17602910 | 17603127 | + | 0    | 0    |
| ENSG00000140534 | XXbac-BPG TEC            | chr6  | 30282349 | 30286054 | - | 1.48 | 1.43 |
| ENSG00000140535 | RP11-298I.1 TEC          | chr14 | 23005499 | 23007123 | - | 0.14 | 0    |
| ENSG00000140536 | CTD-2595P TEC            | chr16 | 49711273 | 49711914 | + | 0    | 0    |
| ENSG00000140537 | RP11-452L1 TEC           | chr16 | 31470204 | 31472108 | - | 0.53 | 0.32 |
| ENSG00000140538 | RP11-113E TEC            | chr10 | 85555484 | 85557436 | - | 0    | 0    |
| ENSG00000140539 | RP1-47M2.1 TEC           | chr6  | 1.08E+08 | 1.08E+08 | - | 0    | 0    |
| ENSG00000140540 | RP11-1228 lincRNA        | chr17 | 88641    | 118578   | - | 0    | 0    |
| ENSG00000140541 | RP11-297C TEC            | chr16 | 30379763 | 30380110 | - | 0    | 0    |
| ENSG00000140542 | RP11-463O TEC            | chr12 | 1.23E+08 | 1.23E+08 | - | 0.29 | 0.24 |
| ENSG00000140543 | CTB-162J7. TEC           | chr5  | 1.76E+08 | 1.76E+08 | + | 0    | 0    |
| ENSG00000140544 | RP11-597D TEC            | chr4  | 1.58E+08 | 1.58E+08 | - | 0.12 | 0.27 |
| ENSG00000140545 | RP13-16D1 TEC            | chrX  | 1.22E+08 | 1.22E+08 | + | 0    | 0    |
| ENSG00000140546 | AP000892. TEC            | chr11 | 1.17E+08 | 1.17E+08 | + | 7.8  | 8.9  |
| ENSG00000140547 | RP11-13M.1 TEC           | chr7  | 1.46E+08 | 1.46E+08 | + | 0    | 0    |
| ENSG00000140548 | CH507-154 lincRNA        | chr21 | 6630182  | 6670695  | - | 3.26 | 2.86 |
| ENSG00000140549 | RP11-486N TEC            | chr8  | 29587001 | 29588426 | + | 0    | 0    |
| ENSG00000140550 | RP3-468K1 protein_coding | chr6  | 1.44E+08 | 1.44E+08 | + | 0    | 0    |
| ENSG00000140551 | RP4-751H1 TEC            | chr7  | 1.5E+08  | 1.5E+08  | + | 0.35 | 0.77 |

|                 |                        |       |          |          |   |      |      |
|-----------------|------------------------|-------|----------|----------|---|------|------|
| ENSG00000189514 | TEC                    | chr12 | 1.32E+08 | 1.32E+08 | + | 0    | 0    |
| ENSG00000183116 | TEC                    | chr16 | 75245994 | 75250077 | - | 0.26 | 0.42 |
| ENSG00000187626 | TEC                    | chr16 | 10933903 | 10936280 | + | 0    | 0    |
| ENSG00000182000 | TEC                    | chr2  | 30408170 | 30408346 | + | 0    | 0    |
| ENSG00000183202 | TEC                    | chr6  | 1.32E+08 | 1.32E+08 | - | 0    | 0    |
| ENSG00000180648 | sense_intronic         | chr22 | 16950086 | 17034417 | - | 0.25 | 0.25 |
| ENSG00000182000 | TEC                    | chr1  | 2.28E+08 | 2.28E+08 | + | 0.15 | 0.16 |
| ENSG00000182510 | TEC                    | chr5  | 54643557 | 54645987 | + | 0.02 | 0.1  |
| ENSG00000182600 | TEC                    | chr16 | 31093727 | 31095944 | + | 0.03 | 0.05 |
| ENSG00000182000 | TEC                    | chr5  | 1.81E+08 | 1.81E+08 | + | 0.62 | 0.48 |
| ENSG00000182000 | TEC                    | chr20 | 1320710  | 1324367  | + | 0    | 0    |
| ENSG00000182000 | TEC                    | chr16 | 67205175 | 67206849 | - | 0.04 | 0.3  |
| ENSG00000182000 | lincRNA                | chr21 | 6721812  | 6725209  | + | 0.74 | 0.28 |
| ENSG00000182000 | protein_coding         | chr13 | 61409685 | 61415522 | - | 0    | 0    |
| ENSG00000182000 | TEC                    | chr10 | 72730557 | 72731175 | + | 0    | 0    |
| ENSG00000182000 | TEC                    | chr11 | 94559018 | 94559374 | + | 0    | 0    |
| ENSG00000182000 | TEC                    | chr17 | 12973033 | 12973834 | - | 0    | 0    |
| ENSG00000182000 | antisense              | chr13 | 1.01E+08 | 1.01E+08 | + | 0    | 0    |
| ENSG00000182000 | unprocessed_transcript | chr19 | 20674923 | 20696533 | + | 0    | 0    |
| ENSG00000182000 | processed_transcript   | chr21 | 6897291  | 6899280  | + | 0    | 0    |
| ENSG00000182000 | TEC                    | chr3  | 47346950 | 47349073 | + | 0.7  | 0.55 |
| ENSG00000182000 | TEC                    | chr2  | 1.97E+08 | 1.97E+08 | - | 0.77 | 0    |
| ENSG00000182000 | TEC                    | chr17 | 39165073 | 39167849 | + | 0    | 0    |
| ENSG00000182000 | lincRNA                | chr21 | 6084364  | 6091407  | - | 0    | 0    |
| ENSG00000182000 | TEC                    | chr16 | 35148636 | 35154366 | + | 0.22 | 0.29 |
| ENSG00000182000 | TEC                    | chr12 | 64709458 | 64710513 | + | 0.06 | 0    |
| ENSG00000182000 | TEC                    | chr16 | 81261924 | 81264091 | - | 0.07 | 0.18 |
| ENSG00000182000 | TEC                    | chr17 | 42598643 | 42599177 | + | 0    | 0    |
| ENSG00000182000 | TEC                    | chr6  | 1.46E+08 | 1.46E+08 | - | 0.54 | 0.53 |
| ENSG00000182000 | TEC                    | chr5  | 8793875  | 8794197  | + | 0    | 0    |
| ENSG00000182000 | TEC                    | chr1  | 1.08E+08 | 1.08E+08 | + | 0    | 0.09 |
| ENSG00000182000 | TEC                    | chr5  | 69186359 | 69189452 | - | 0.86 | 0.74 |
| ENSG00000182000 | TEC                    | chr16 | 49297143 | 49299762 | + | 0.09 | 0.07 |
| ENSG00000182000 | TEC                    | chr16 | 78890231 | 78892302 | + | 0    | 0    |
| ENSG00000182000 | lincRNA                | chr21 | 6060340  | 6076305  | + | 0.15 | 0    |
| ENSG00000182000 | TEC                    | chr8  | 81696368 | 81698694 | + | 0    | 0    |
| ENSG00000182000 | TEC                    | chr19 | 35901561 | 35903855 | - | 0.02 | 0    |
| ENSG00000182000 | antisense              | chrX  | 1.54E+08 | 1.54E+08 | - | 0.58 | 0.63 |
| ENSG00000182000 | TEC                    | chr12 | 1.3E+08  | 1.3E+08  | - | 0    | 0    |
| ENSG00000182000 | TEC                    | chr18 | 48252301 | 48252837 | + | 0    | 0    |
| ENSG00000182000 | TEC                    | chr17 | 18026072 | 18026771 | - | 0.09 | 0.1  |
| ENSG00000182000 | lincRNA                | chr22 | 49264201 | 49266080 | + | 0    | 0    |
| ENSG00000182000 | TEC                    | chr12 | 1.31E+08 | 1.31E+08 | + | 0    | 0.09 |
| ENSG00000182000 | TEC                    | chr11 | 89576913 | 89577652 | + | 0    | 0    |
| ENSG00000182000 | TEC                    | chr12 | 3610307  | 3612003  | - | 1.22 | 0.81 |

|                                |           |          |          |   |      |      |
|--------------------------------|-----------|----------|----------|---|------|------|
| ENSG0000( OR1S1 polymorph      | chr11     | 58214745 | 58215723 | + | 0    | 0    |
| ENSG0000( RP11-504I1           | TEC chr18 | 76385642 | 76389406 | - | 0.01 | 0.02 |
| ENSG0000( CTB-193M: lincRNA    | chr16     | 15701237 | 15702118 | + | 0.99 | 1.33 |
| ENSG0000( RP11-423H lincRNA    | chr5      | 1.78E+08 | 1.78E+08 | + | 0    | 0    |
| ENSG0000( GGT4P unprocessε     | chr13     | 18253526 | 18270822 | - | 0    | 0.07 |
| ENSG0000( RP11-2C24            | TEC chr16 | 30773532 | 30776033 | - | 0.02 | 0.02 |
| ENSG0000( RP11-49K2            | TEC chr18 | 47076117 | 47076594 | + | 0    | 0    |
| ENSG0000( UCKL1-AS1 antisense  | chr20     | 63953384 | 63956985 | + | 0.08 | 0.14 |
| ENSG0000( CTD-2012K            | TEC chr16 | 67550815 | 67552935 | - | 0.3  | 0.16 |
| ENSG0000( RP11-279N            | TEC chr8  | 21129990 | 21130100 | - | 0    | 0    |
| ENSG0000( RP3-333H2            | TEC chr22 | 39379610 | 39380015 | + | 0.41 | 0.23 |
| ENSG0000( RP11-638F            | TEC chr12 | 1.31E+08 | 1.31E+08 | + | 0    | 0    |
| ENSG0000( RP11-752L            | TEC chr4  | 1.47E+08 | 1.47E+08 | + | 0.08 | 0.05 |
| ENSG0000( RP11-560A            | TEC chr20 | 57161822 | 57163775 | + | 0    | 0    |
| ENSG0000( RP11-174G            | TEC chr1  | 18109389 | 18115861 | + | 0    | 0    |
| ENSG0000( RP1-138O1            | TEC chrX  | 1.26E+08 | 1.26E+08 | - | 0    | 0    |
| ENSG0000( CTA-722E9 lincRNA    | chr22     | 49500568 | 49501585 | + | 0    | 0    |
| ENSG0000( RP11-114G            | TEC chr7  | 57402181 | 57404717 | - | 0    | 0    |
| ENSG0000( RP11-454F            | TEC chr16 | 53227146 | 53227694 | + | 0    | 0    |
| ENSG0000( RP11-67L1            | TEC chr2  | 1.13E+08 | 1.13E+08 | + | 0    | 0    |
| ENSG0000( RP11-470C            | TEC chr20 | 20363691 | 20365657 | + | 0    | 0    |
| ENSG0000( LA16c-380I           | TEC chr16 | 1553655  | 1554130  | - | 0.65 | 0.35 |
| ENSG0000( RP11-321N            | TEC chr6  | 85498441 | 85499058 | - | 0    | 0.25 |
| ENSG0000( RP11-159D            | TEC chr17 | 57988180 | 57988760 | + | 0    | 0    |
| ENSG0000( RP11-145P            | TEC chr15 | 25255579 | 25257027 | + | 0.64 | 0.8  |
| ENSG0000( OR12D2 polymorph     | chr6      | 29396555 | 29397623 | + | 0    | 0    |
| ENSG0000( MIR4697H             | TEC chr11 | 1.34E+08 | 1.34E+08 | - | 0.6  | 0.68 |
| ENSG0000( RP11-574K            | TEC chr10 | 73791218 | 73791490 | + | 0    | 0.51 |
| ENSG0000( CTB-50L17            | TEC chr19 | 4448810  | 4450836  | + | 0.18 | 0.22 |
| ENSG0000( RP11-290C antisense  | chr4      | 1.54E+08 | 1.54E+08 | + | 0    | 0    |
| ENSG0000( RP5-1037N            | TEC chr17 | 2255719  | 2256157  | + | 0    | 0    |
| ENSG0000( MTCO1P1 processed_   | chr21     | 8845566  | 8846646  | + | 0    | 0    |
| ENSG0000( RP11-44N2            | TEC chr14 | 1.05E+08 | 1.05E+08 | - | 0.52 | 0.92 |
| ENSG0000( RP11-466A            | TEC chr17 | 32504567 | 32505644 | - | 0    | 0    |
| ENSG0000( AC005578             | TEC chr19 | 4246339  | 4247358  | - | 0    | 0    |
| ENSG0000( CTD-2047H            | TEC chr17 | 80339898 | 80342058 | + | 0.3  | 0.48 |
| ENSG0000( AL691477.: pseudogen | chrX      | 1.35E+08 | 1.35E+08 | - | 4.19 | 4.47 |
| ENSG0000( RP11-6L6.ε           | TEC chr4  | 1.46E+08 | 1.46E+08 | + | 0    | 0    |
| ENSG0000( RP11-215I1           | TEC chr5  | 8143618  | 8143784  | + | 0    | 0    |
| ENSG0000( RP11-81A2            | TEC chr17 | 4787057  | 4789162  | + | 0.03 | 0    |
| ENSG0000( RP5-1007F            | TEC chr7  | 26538378 | 26541048 | + | 0    | 0    |
| ENSG0000( RP11-340F            | TEC chr2  | 65790039 | 65793533 | + | 0    | 0    |
| ENSG0000( RP11-479C            | TEC chr10 | 79970963 | 79973213 | - | 0.45 | 0.19 |
| ENSG0000( RP11-75D3            | TEC chr16 | 62342420 | 62342557 | + | 0    | 0    |
| ENSG0000( RP11-542P            | TEC chr4  | 1.4E+08  | 1.41E+08 | + | 0    | 0.02 |

|                                |       |          |          |   |      |      |
|--------------------------------|-------|----------|----------|---|------|------|
| ENSG0000( ACTR3BP2 processed_  | chr22 | 16486985 | 16488322 | + | 0    | 0    |
| ENSG0000( CTA-363E6 TEC        | chr16 | 19392213 | 19393468 | - | 0    | 0    |
| ENSG0000( RP11-331D TEC        | chr7  | 1.58E+08 | 1.58E+08 | + | 0    | 0    |
| ENSG0000( PRAMEF26 protein_co  | chr1  | 13148905 | 13155961 | - | 0    | 0    |
| ENSG0000( RP11-147K TEC        | chr17 | 3439923  | 3441844  | - | 0    | 0    |
| ENSG0000( AP000577. TEC        | chr11 | 74204869 | 74205746 | + | 0.14 | 0.08 |
| ENSG0000( RP11-560F TEC        | chr3  | 1.87E+08 | 1.87E+08 | + | 0    | 0    |
| ENSG0000( RP3-446N1 TEC        | chr12 | 1.26E+08 | 1.26E+08 | + | 0    | 0    |
| ENSG0000( AF131216. antisense  | chr8  | 11283481 | 11285068 | - | 0.18 | 0.16 |
| ENSG0000( RP11-556H TEC        | chr16 | 79016136 | 79017429 | + | 0    | 0    |
| ENSG0000( RP3-428A1 TEC        | chrX  | 1.27E+08 | 1.27E+08 | + | 0    | 0    |
| ENSG0000( RP11-314C TEC        | chr2  | 38121935 | 38123881 | - | 0    | 0    |
| ENSG0000( RP1-72A23 TEC        | chr6  | 88964527 | 88966587 | + | 0    | 0    |
| ENSG0000( FLJ30679 TEC         | chr16 | 86555320 | 86557299 | + | 0.08 | 0    |
| ENSG0000( RP11-1228 lincRNA    | chr17 | 64099    | 76866    | - | 0.56 | 0.35 |
| ENSG0000( RP1-59D14 TEC        | chr17 | 2460183  | 2460294  | - | 0    | 0    |
| ENSG0000( RP11-340L TEC        | chr14 | 32879246 | 32882830 | + | 0    | 0    |
| ENSG0000( LLNLR-259I TEC       | chr19 | 19255638 | 19256141 | + | 0    | 0    |
| ENSG0000( CTA-481E9 TEC        | chr16 | 17961597 | 17962370 | + | 0    | 0    |
| ENSG0000( RP11-154F TEC        | chr4  | 1.57E+08 | 1.57E+08 | + | 0    | 0    |
| ENSG0000( RP11-630A TEC        | chr4  | 56662469 | 56665694 | - | 0.03 | 0    |
| ENSG0000( FRG1KP unprocessε    | chr9  | 65646982 | 65652679 | - | 0    | 0    |
| ENSG0000( RP13-554N TEC        | chr12 | 1.33E+08 | 1.33E+08 | + | 0.39 | 0.5  |
| ENSG0000( RP11-756D TEC        | chr11 | 11725332 | 11726702 | - | 0    | 0    |
| ENSG0000( RP11-759A TEC        | chr15 | 96294935 | 96298023 | - | 0.02 | 0.02 |
| ENSG0000( RP11-177H TEC        | chr8  | 10856085 | 10859436 | - | 0    | 0.02 |
| ENSG0000( RP11-358B TEC        | chr17 | 42233832 | 42235469 | + | 0    | 0    |
| ENSG0000( RP11-78J2 TEC        | chr13 | 52497097 | 52500195 | - | 0    | 0    |
| ENSG0000( RP11-583F processed_ | chr17 | 64940602 | 64954177 | + | 0    | 0    |
| ENSG0000( RP11-338K TEC        | chr12 | 1.24E+08 | 1.24E+08 | - | 0    | 0    |
| ENSG0000( RP11-64C1 TEC        | chr18 | 12279427 | 12282739 | + | 0.06 | 0.05 |
| ENSG0000( ERICD lincRNA        | chr8  | 1.41E+08 | 1.41E+08 | + | 0.31 | 0.34 |
| ENSG0000( CTD-2536I TEC        | chr15 | 95280753 | 95284249 | - | 0.08 | 0.07 |
| ENSG0000( CTD-2351A TEC        | chr5  | 29979669 | 29983114 | + | 0    | 0    |
| ENSG0000( CTD-3076N TEC        | chr16 | 20487702 | 20489659 | + | 0    | 0    |
| ENSG0000( RP11-665E TEC        | chr11 | 87879473 | 87880095 | - | 0    | 0    |
| ENSG0000( RP11-60L3 TEC        | chr15 | 74299503 | 74304527 | + | 0    | 0    |
| ENSG0000( RP11-326I1 TEC       | chr4  | 4820405  | 4821452  | + | 0.06 | 0.06 |
| ENSG0000( RP13-554N TEC        | chr12 | 1.33E+08 | 1.33E+08 | - | 0    | 0    |
| ENSG0000( RP1-111J2 TEC        | chr22 | 47259366 | 47261007 | + | 0    | 0    |
| ENSG0000( OR8K3 polymorph      | chr11 | 56318307 | 56319245 | + | 0    | 0    |
| ENSG0000( RP11-25L1 TEC        | chr1  | 72979014 | 72979314 | - | 0    | 0    |
| ENSG0000( CTB-79E8.4 TEC       | chr5  | 1.73E+08 | 1.73E+08 | - | 0    | 0    |
| ENSG0000( RP11-897N TEC        | chr12 | 1.31E+08 | 1.31E+08 | + | 0    | 0    |
| ENSG0000( RP11-629N TEC        | chr12 | 64696191 | 64696550 | - | 0    | 0    |

|                                |       |          |          |   |       |       |
|--------------------------------|-------|----------|----------|---|-------|-------|
| ENSG0000(RP11-1110) TEC        | chr11 | 36196248 | 36197901 | + | 0     | 0     |
| ENSG0000(RP6-24A23) TEC        | chrX  | 1.09E+08 | 1.09E+08 | - | 0     | 0     |
| ENSG0000(AC053503) TEC         | chr2  | 2.19E+08 | 2.19E+08 | + | 0     | 0     |
| ENSG0000(AC074183) TEC         | chr7  | 84939335 | 84940256 | - | 18.82 | 18.02 |
| ENSG0000(RP11-642A) TEC        | chr8  | 1.41E+08 | 1.41E+08 | + | 0.04  | 0     |
| ENSG0000(LA16c-3131) TEC       | chr16 | 1576716  | 1578371  | - | 0.35  | 0.23  |
| ENSG0000(CH507-236) processed_ | chr21 | 7129103  | 7130287  | + | 0.42  | 0.33  |
| ENSG0000(RP11-545D) TEC        | chr11 | 36510361 | 36510537 | + | 0     | 0     |
| ENSG0000(CTD-2013N) TEC        | chr19 | 16356329 | 16358327 | - | 0.62  | 0.68  |
| ENSG0000(RP11-667K) TEC        | chr17 | 2072823  | 2072956  | + | 0     | 0     |
| ENSG0000(RP11-361L) TEC        | chr16 | 67006672 | 67009481 | - | 0.02  | 0     |
| ENSG0000(RP11-15F1) TEC        | chr18 | 49013106 | 49013819 | + | 0     | 0     |
| ENSG0000(CH17-140K) lincRNA    | chr5  | 1.41E+08 | 1.41E+08 | + | 0.1   | 0     |
| ENSG0000(DUX4L25) unprocess    | chr10 | 1.34E+08 | 1.34E+08 | + | 0     | 0     |
| ENSG0000(RP11-334G) TEC        | chr5  | 8080186  | 8080761  | - | 0     | 0     |
| ENSG0000(RP11-736K) TEC        | chr11 | 86908990 | 86912238 | - | 0.68  | 0.6   |
| ENSG0000(RP11-511H) TEC        | chr7  | 18000290 | 18000879 | - | 0     | 0     |
| ENSG0000(LA16c-60D) lincRNA    | chr22 | 15282557 | 15288670 | - | 0.15  | 0.23  |
| ENSG0000(AC009166) TEC         | chr16 | 51176066 | 51178898 | + | 0.02  | 0.08  |
| ENSG0000(RP11-438L) TEC        | chr12 | 8631545  | 8632259  | - | 0.79  | 0.29  |
| ENSG0000(CH507-152) processed_ | chr21 | 6507017  | 6507389  | - | 0     | 0     |
| ENSG0000(AC000123) TEC         | chr7  | 1.27E+08 | 1.27E+08 | - | 0.67  | 0.7   |
| ENSG0000(RP11-552M) TEC        | chr13 | 73800074 | 73802203 | + | 0     | 0     |
| ENSG0000(RP11-40A1) TEC        | chr17 | 33099969 | 33100319 | - | 0     | 0     |
| ENSG0000(LINC01726) lincRNA    | chr20 | 21610787 | 21703585 | - | 0     | 0     |
| ENSG0000(CTD-2561B) TEC        | chr17 | 81003335 | 81005132 | + | 0.44  | 0.21  |
| ENSG0000(RP13-884E) TEC        | chr4  | 1.38E+08 | 1.38E+08 | - | 0     | 0.15  |
| ENSG0000(CTC-453G2) TEC        | chr19 | 48198107 | 48199720 | - | 0     | 0     |
| ENSG0000(RP11-83B2) TEC        | chr12 | 1.25E+08 | 1.25E+08 | + | 0     | 0     |
| ENSG0000(RP11-119F) TEC        | chr10 | 79681973 | 79684094 | - | 1.31  | 0.78  |
| ENSG0000(RP1-101G1) lincRNA    | chr22 | 34641179 | 34651862 | + | 0     | 0     |
| ENSG0000(RP11-269C) TEC        | chr13 | 44432144 | 44432678 | + | 0     | 0     |
| ENSG0000(CTD-2071N) TEC        | chr15 | 77784610 | 77785070 | - | 0     | 0     |
| ENSG0000(RP11-455F) TEC        | chr2  | 687799   | 688348   | + | 0     | 0     |
| ENSG0000(RP11-643A) TEC        | chr15 | 53910769 | 53914712 | + | 0     | 0     |
| ENSG0000(RP3-446N1) TEC        | chr12 | 1.26E+08 | 1.26E+08 | - | 0     | 0     |
| ENSG0000(RP11-9H20) TEC        | chr18 | 44732575 | 44733315 | + | 0     | 0     |
| ENSG0000(RP11-327L) lincRNA    | chr9  | 79975023 | 79990064 | + | 0     | 0     |
| ENSG0000(RP11-121L) TEC        | chr11 | 90223153 | 90226538 | + | 0.02  | 0.07  |
| ENSG0000(CTD-2199C) TEC        | chr5  | 10171030 | 10171214 | - | 0     | 0     |
| ENSG0000(CTD-2256P) TEC        | chr5  | 10342813 | 10343131 | + | 0     | 0     |
| ENSG0000(RP1-149M) TEC         | chr6  | 41405819 | 41406561 | + | 0     | 0     |
| ENSG0000(bP-21201H) TEC        | chr21 | 10028361 | 10029855 | - | 0     | 0     |
| ENSG0000(RP11-417J) TEC        | chr5  | 8669018  | 8669250  | - | 0     | 0     |
| ENSG0000(RP11-337N) sense_intr | chr2  | 1.77E+08 | 1.77E+08 | - | 0.6   | 0.85  |



|                 |            |            |       |          |          |   |      |      |
|-----------------|------------|------------|-------|----------|----------|---|------|------|
| ENSG00000101314 | RP13-204A  | TEC        | chrX  | 74122134 | 74122725 | - | 0    | 0    |
| ENSG00000101315 | RP11-9301  | TEC        | chr16 | 46673443 | 46673927 | - | 0    | 0    |
| ENSG00000101316 | RP11-493E  | TEC        | chr15 | 89950760 | 89951345 | + | 0    | 0.21 |
| ENSG00000101317 | RP4-758J2  | TEC        | chr1  | 54033126 | 54034880 | - | 0.13 | 0.18 |
| ENSG00000101318 | RP11-573M  | TEC        | chr11 | 93171134 | 93171906 | + | 0    | 0    |
| ENSG00000101319 | RP11-326K  | TEC        | chr18 | 31982899 | 31986087 | + | 0    | 0    |
| ENSG00000101320 | RP11-197N  | TEC        | chr12 | 1.23E+08 | 1.23E+08 | - | 0    | 0    |
| ENSG00000101321 | RP11-804H  | lincRNA    | chr3  | 50599879 | 50601148 | - | 0    | 0    |
| ENSG00000101322 | CTA-941F9  | sense_intr | chr22 | 45657019 | 45680130 | + | 0.03 | 0.06 |
| ENSG00000101323 | RP4-695O2  | sense_intr | chr22 | 46163303 | 46165347 | + | 0.1  | 0    |
| ENSG00000101324 | AP000648   | TEC        | chr11 | 90193614 | 90198120 | + | 0    | 0    |
| ENSG00000101325 | RP5-1153D  | TEC        | chr20 | 56522252 | 56523499 | + | 0.19 | 0    |
| ENSG00000101326 | RP11-229D  | TEC        | chr7  | 76043977 | 76045963 | - | 0.11 | 0.12 |
| ENSG00000101327 | RP11-512M  | TEC        | chr12 | 1.22E+08 | 1.22E+08 | - | 0    | 0    |
| ENSG00000101328 | AC010872   | TEC        | chr2  | 21023496 | 21024170 | + | 0    | 0    |
| ENSG00000101329 | RP11-357N  | TEC        | chr16 | 53991012 | 53994454 | + | 0    | 0    |
| ENSG00000101330 | RP11-449M  | TEC        | chr8  | 69938168 | 69938400 | + | 0    | 0    |
| ENSG00000101331 | CTC-503J8  | TEC        | chr19 | 6263068  | 6263469  | - | 0    | 0    |
| ENSG00000101332 | RP5-898I4  | sense_intr | chr22 | 50092745 | 50096437 | + | 0.02 | 0.07 |
| ENSG00000101333 | RP11-463I2 | TEC        | chr15 | 34999902 | 35000270 | + | 0    | 0    |
| ENSG00000101334 | RP11-42F1  | TEC        | chr3  | 1.44E+08 | 1.44E+08 | - | 0    | 0.02 |
| ENSG00000101335 | RP3-446N1  | TEC        | chr12 | 1.26E+08 | 1.26E+08 | - | 0    | 0    |
| ENSG00000101336 | RP11-80P2  | TEC        | chr3  | 1.38E+08 | 1.38E+08 | + | 0.11 | 0.16 |
| ENSG00000101337 | RP11-20G6  | TEC        | chr16 | 23061767 | 23062232 | + | 0    | 0    |
| ENSG00000101338 | RP11-104F  | TEC        | chr10 | 70434829 | 70436556 | + | 0.07 | 0.11 |
| ENSG00000101339 | RP11-20I2  | TEC        | chr16 | 2578395  | 2579963  | + | 0.69 | 0.48 |
| ENSG00000101340 | AC005086   | pseudogen  | chr7  | 1.02E+08 | 1.02E+08 | - | 0    | 0    |
| ENSG00000101341 | RP11-143E  | TEC        | chr12 | 1.3E+08  | 1.3E+08  | + | 0    | 0    |
| ENSG00000101342 | RP11-379L  | TEC        | chr18 | 34221007 | 34221603 | - | 0    | 0    |
| ENSG00000101343 | RP13-516M  | TEC        | chr17 | 82249067 | 82251844 | + | 0.39 | 0.3  |
| ENSG00000101344 | RP11-818C  | TEC        | chr17 | 1352070  | 1352255  | + | 0    | 0    |
| ENSG00000101345 | LINC01101  | TEC        | chr2  | 1.2E+08  | 1.2E+08  | - | 0    | 0    |
| ENSG00000101346 | IGHV1-69D  | IG_V_gene  | chr14 | 1.07E+08 | 1.07E+08 | - | 0    | 0    |
| ENSG00000101347 | AC114273   | TEC        | chr19 | 16019719 | 16020290 | + | 0    | 0    |
| ENSG00000101348 | RP11-572N  | TEC        | chr2  | 1.74E+08 | 1.74E+08 | - | 0    | 0    |
| ENSG00000101349 | RP4-800O1  | TEC        | chr12 | 1.26E+08 | 1.26E+08 | + | 0    | 0    |
| ENSG00000101350 | RP11-361L  | TEC        | chr16 | 66944660 | 66945096 | - | 0    | 0    |
| ENSG00000101351 | RP11-5O17  | TEC        | chr3  | 53046166 | 53048122 | + | 0    | 0.03 |
| ENSG00000101352 | AC007326   | lincRNA    | chr22 | 18951934 | 18959512 | - | 0    | 0    |
| ENSG00000101353 | RP11-178L  | TEC        | chr16 | 87296949 | 87297633 | + | 0    | 0    |
| ENSG00000101354 | AC005355   | TEC        | chr5  | 1.35E+08 | 1.35E+08 | - | 0.16 | 0    |
| ENSG00000101355 | RP11-155D  | TEC        | chr3  | 51951849 | 51953902 | - | 0.05 | 0.1  |
| ENSG00000101356 | RP11-299J  | TEC        | chr6  | 2561947  | 2564143  | + | 0    | 0    |
| ENSG00000101357 | CITF22-92A | TEC        | chr22 | 46006616 | 46010777 | + | 0.01 | 0.1  |
| ENSG00000101358 | RP11-446E  | antisense  | chr1  | 54137746 | 54142980 | + | 0    | 0    |

|                     |             |       |          |          |   |      |      |
|---------------------|-------------|-------|----------|----------|---|------|------|
| ENSG000001837J      | TEC         | chr12 | 1.1E+08  | 1.1E+08  | - | 0.03 | 0.07 |
| ENSG000001548       | TEC         | chr16 | 15790975 | 15792717 | - | 0.03 | 0    |
| ENSG000001660       | TEC         | chr11 | 90731110 | 90731723 | + | 0    | 0    |
| ENSG000001218I      | TEC         | chr13 | 34079411 | 34080134 | + | 0    | 0    |
| ENSG00000100962     | TEC         | chr21 | 16525919 | 16527019 | + | 0    | 0.06 |
| ENSG0000015079B2    | protein_co  | chr21 | 5155499  | 5165472  | - | 1.18 | 1.28 |
| ENSG0000016710I1    | sense_ovei  | chr22 | 44139365 | 44153626 | + | 0.12 | 0.16 |
| ENSG000001555D2     | TEC         | chr3  | 44115818 | 44117487 | - | 0    | 0    |
| ENSG0000012171C2    | unprocessε  | chr21 | 9053122  | 9059060  | + | 0    | 0    |
| ENSG000001315A      | TEC         | chr5  | 8717684  | 8717883  | - | 0    | 0    |
| ENSG000001568B1     | TEC         | chr7  | 1.06E+08 | 1.06E+08 | + | 0    | 0    |
| ENSG000001002064    | TEC         | chr7  | 90345873 | 90346218 | - | 0    | 0    |
| ENSG000001507528    | lincRNA     | chr21 | 8380665  | 8410645  | + | 0.73 | 0.57 |
| ENSG000001551N1     | TEC         | chr6  | 21822536 | 21822737 | + | 0    | 0    |
| ENSG00000183B2      | TEC         | chr12 | 1.25E+08 | 1.25E+08 | + | 0    | 0    |
| ENSG000001205F1     | lincRNA     | chr22 | 27414462 | 27419713 | - | 0    | 0.1  |
| ENSG000001XX-FYM63  | TEC         | chr10 | 1.32E+08 | 1.32E+08 | - | 0    | 0    |
| ENSG000001CTD-2199C | TEC         | chr5  | 10168783 | 10169006 | + | 0    | 0    |
| ENSG000001XXyac-YR2 | TEC         | chr10 | 5346651  | 5347277  | + | 0    | 0    |
| ENSG000001834I5     | TEC         | chr6  | 93811825 | 93813036 | + | 0    | 0    |
| ENSG0000018349F     | TEC         | chr8  | 17498737 | 17499157 | + | 0    | 0    |
| ENSG000001007347    | pseudogen   | chr16 | 54114697 | 54114878 | - | 0    | 0    |
| ENSG0000018325M     | lincRNA     | chr13 | 1.06E+08 | 1.06E+08 | + | 0    | 0    |
| ENSG000001DUX4L2    | unprocessε  | chr4  | 1.9E+08  | 1.9E+08  | + | 0    | 0    |
| ENSG000001SCARNA4   | scaRNA      | chr1  | 1.56E+08 | 1.56E+08 | - | 0    | 0    |
| ENSG00000183216B    | sense_intrε | chr9  | 1.29E+08 | 1.29E+08 | + | 0.88 | 2.34 |
| ENSG00000183437J    | antisense   | chr10 | 93772681 | 93788605 | - | 0    | 0    |
| ENSG000001LLNLR-307 | antisense   | chr19 | 1386804  | 1389651  | - | 0    | 0    |
| ENSG000001MIR7641-2 | miRNA       | chr14 | 75604209 | 75604261 | + | 0    | 0    |
| ENSG000001SNORA17B  | snoRNA      | chr9  | 1.37E+08 | 1.37E+08 | - | 0    | 0    |
| ENSG000001SNORA16A  | snoRNA      | chr1  | 28580920 | 28581054 | - | 0    | 0    |
| ENSG000001Metazoa_S | misc_RNA    | chr11 | 1.19E+08 | 1.19E+08 | + | 0    | 0    |
| ENSG0000018335J1    | lincRNA     | chr6  | 76561328 | 76562590 | + | 0.29 | 0.12 |
| ENSG000001SALRNA2   | lincRNA     | chr15 | 70635249 | 70637314 | + | 0    | 0    |
| ENSG000001833304    | protein_co  | chr2  | 2.19E+08 | 2.19E+08 | - | 0.19 | 0.31 |
| ENSG000001ASAP1-IT2 | sense_intrε | chr8  | 1.3E+08  | 1.3E+08  | - | 0.19 | 0    |
| ENSG00000183358D    | TEC         | chr4  | 1.19E+08 | 1.19E+08 | + | 0.06 | 0    |
| ENSG000001snoU18    | snoRNA      | chr15 | 66502019 | 66502089 | - | 0    | 0    |
| ENSG000001LINC01374 | lincRNA     | chr10 | 89853906 | 89914948 | + | 0    | 0    |
| ENSG00000183383C    | antisense   | chr10 | 1.26E+08 | 1.26E+08 | - | 0.79 | 0    |
| ENSG000001834613B2  | protein_co  | chr3  | 42757177 | 42804518 | - | 1.33 | 0    |
| ENSG00000183411G    | lincRNA     | chr13 | 68878380 | 68893573 | + | 0    | 0    |
| ENSG000001LINC01348 | lincRNA     | chr1  | 2.35E+08 | 2.35E+08 | - | 0.02 | 0.02 |
| ENSG000001AP000432  | processed_  | chr21 | 17611744 | 17633199 | + | 0.15 | 0.08 |
| ENSG000001PCBP3-OT1 | sense_ovei  | chr21 | 45914296 | 45919483 | + | 0.01 | 0.02 |

|                                        |          |          |   |       |       |
|----------------------------------------|----------|----------|---|-------|-------|
| ENSG0000( AC009133. processed_ chr16   | 29808679 | 29812227 | + | 0     | 0     |
| ENSG0000( CH507-513 lincRNA chr21      | 8393419  | 8394341  | - | 0.07  | 0.04  |
| ENSG0000( SCAANT1 antisense chr3       | 63911518 | 63911772 | - | 0     | 0     |
| ENSG0000( PCAT14 lincRNA chr22         | 23536881 | 23547797 | + | 0.77  | 1.12  |
| ENSG0000( THRIL antisense chr12        | 1.25E+08 | 1.25E+08 | - | 0.14  | 0.03  |
| ENSG0000( SNORA43 snoRNA chr2          | 1.8E+08  | 1.8E+08  | - | 0     | 0     |
| ENSG0000( LINC02204 lincRNA chr15      | 70570958 | 70586606 | - | 0     | 0.02  |
| ENSG0000( RNA5SP19( rRNA chr5          | 1.47E+08 | 1.47E+08 | - | 0     | 0     |
| ENSG0000( CH17-172B TEC chr1           | 1.48E+08 | 1.48E+08 | + | 2.38  | 1.74  |
| ENSG0000( KCNIP4-IT1 lincRNA chr4      | 21843341 | 21853188 | - | 0     | 0     |
| ENSG0000( RP11-361C IG_V_pseu chr15    | 21752278 | 21752710 | - | 0     | 0     |
| ENSG0000( RP11-437J( sense_intr( chr10 | 93762453 | 93771991 | + | 0     | 0     |
| ENSG0000( RP11-35J6. TEC chr6          | 1.69E+08 | 1.69E+08 | + | 4.6   | 4.76  |
| ENSG0000( CCDC163 protein_co chr1      | 45493866 | 45500079 | - | 1.78  | 2.72  |
| ENSG0000( LINC01242 lincRNA chr9       | 30388935 | 30575012 | - | 0     | 0     |
| ENSG0000( SH3PXD2A. antisense chr10    | 1.04E+08 | 1.04E+08 | + | 0     | 0     |
| ENSG0000( RP11-275E lincRNA chr15      | 21342171 | 21343958 | + | 0     | 0     |
| ENSG0000( U3 snoRNA chrX               | 70846080 | 70846295 | - | 0     | 0     |
| ENSG0000( RP11-568A lincRNA chr6       | 1.67E+08 | 1.67E+08 | + | 0     | 0     |
| ENSG0000( LINC02203 lincRNA chr15      | 21552795 | 21653276 | + | 0     | 0     |
| ENSG0000( RP11-214F lincRNA chr13      | 99498524 | 99501315 | + | 0.13  | 0.28  |
| ENSG0000( JADRR lincRNA chr4           | 1.29E+08 | 1.29E+08 | + | 0.03  | 0.04  |
| ENSG0000( PCAT5 lincRNA chr10          | 35778302 | 35800920 | + | 0     | 0     |
| ENSG0000( LINC01943 lincRNA chr2       | 87439523 | 87459044 | - | 13.84 | 12.13 |
| ENSG0000( RP11-11H9 lincRNA chr15      | 21514144 | 21567053 | + | 0     | 0     |
| ENSG0000( LINC00251 lincRNA chr8       | 65161145 | 65180341 | - | 0     | 0     |
| ENSG0000( LINC01232 processed_ chr13   | 99486962 | 99499306 | - | 1.39  | 2.11  |
| ENSG0000( EIF1B-AS1 processed_ chr3    | 40173145 | 40309698 | - | 0.74  | 0.4   |
| ENSG0000( LINC01173 lincRNA chr2       | 2.35E+08 | 2.35E+08 | + | 0.29  | 0     |
| ENSG0000( LINC00850 lincRNA chrX       | 1.5E+08  | 1.5E+08  | + | 0     | 0     |
| ENSG0000( DUX4L1 unprocess( chr4       | 1.9E+08  | 1.9E+08  | + | 0     | 0     |
| ENSG0000( RP11-216B antisense chr9     | 1.29E+08 | 1.29E+08 | - | 0     | 0.41  |
| ENSG0000( RP13-465B lincRNA chrX       | 419157   | 421980   | + | 0     | 0     |
| ENSG0000( RP13-465B lincRNA chrY       | 419157   | 421980   | + | 0     | 0     |
| ENSG0000( MIR7641-1 miRNA chr11        | 1.04E+08 | 1.04E+08 | + | 0     | 0     |
| ENSG0000( LINC01202 lincRNA chr5       | 1.62E+08 | 1.62E+08 | - | 0     | 0     |
| ENSG0000( CH17-270A protein_co chr1    | 1.46E+08 | 1.46E+08 | + | 0     | 0     |
| ENSG0000( JAKMIP2-A antisense chr5     | 1.48E+08 | 1.48E+08 | + | 0     | 0     |
| ENSG0000( PAGR1 protein_co chr16       | 29815952 | 29820117 | + | 7.57  | 9.31  |
| ENSG0000( LINC00294 lincRNA chr11      | 33076149 | 33079454 | + | 4.23  | 4.43  |
| ENSG0000( DUX4L5 unprocess( chr4       | 1.9E+08  | 1.9E+08  | + | 0     | 0     |
| ENSG0000( CH507-513 lincRNA chr21      | 8210384  | 8211306  | - | 0.07  | 0.04  |
| ENSG0000( LINC00836 lincRNA chr10      | 25651712 | 25732935 | + | 0     | 0     |
| ENSG0000( RP11-274B unprocess( chr7    | 1.29E+08 | 1.29E+08 | + | 1.32  | 1.29  |
| ENSG0000( ST3GAL4-A antisense chr11    | 1.26E+08 | 1.26E+08 | - | 2.3   | 2.69  |

|                                  |       |          |          |   |      |      |
|----------------------------------|-------|----------|----------|---|------|------|
| ENSG0000( AL355480.: pseudogen   | chr1  | 45581219 | 45581321 | - | 0    | 0    |
| ENSG0000( CPS1-IT1 sense_intr    | chr2  | 2.11E+08 | 2.11E+08 | + | 0    | 0    |
| ENSG0000( RP4-655C5 lincRNA      | chr6  | 1.66E+08 | 1.66E+08 | - | 0    | 0    |
| ENSG0000( CTD-2319I: transcribec | chr17 | 60101759 | 60102919 | - | 0    | 0    |
| ENSG0000( MIR325HG lincRNA       | chrX  | 76657798 | 77014532 | - | 0    | 0    |
| ENSG0000( RP11-68E1 lincRNA      | chr2  | 1.11E+08 | 1.12E+08 | + | 0    | 0    |
| ENSG0000( RP11-275E lincRNA      | chr15 | 21328380 | 21343881 | - | 0    | 0    |
| ENSG0000( ELDR lincRNA           | chr7  | 55235965 | 55255635 | - | 0    | 0    |
| ENSG0000( AC009133. protein_co   | chr16 | 29812261 | 29820092 | + | 0    | 0    |
| ENSG0000( SNORA76 snoRNA         | chr5  | 69160808 | 69160939 | + | 0    | 0    |
| ENSG0000( SNORD19B snoRNA        | chr3  | 52688882 | 52688961 | + | 0    | 0    |
| ENSG0000( CTSLP2 transcribec     | chr10 | 46753605 | 46759740 | + | 0    | 0    |
| ENSG0000( FOXCUT lincRNA         | chr6  | 1605531  | 1606079  | + | 0    | 0    |
| ENSG0000( HPVC1 lincRNA          | chr7  | 54201224 | 54202421 | + | 0    | 0    |
| ENSG0000( LINC00628 lincRNA      | chr1  | 2.04E+08 | 2.04E+08 | - | 0    | 0    |
| ENSG0000( CTBP1-AS antisense     | chr4  | 1210120  | 1218591  | + | 0    | 0.03 |
| ENSG0000( RP11-358D antisense    | chr20 | 63422269 | 63424555 | + | 0    | 0    |
| ENSG0000( LINC01163 lincRNA      | chr10 | 1.28E+08 | 1.28E+08 | + | 0    | 0    |
| ENSG0000( RP4-587D1 TEC          | chr7  | 78170195 | 78170915 | + | 0    | 0    |
| ENSG0000( TTTY3B lincRNA         | chrY  | 23936727 | 23941622 | - | 0    | 0    |
| ENSG0000( MIR3653 miRNA          | chr22 | 29333158 | 29333267 | - | 0    | 0    |
| ENSG0000( RPS4Y2 protein_co      | chrY  | 20756164 | 20781032 | + | 0    | 0    |
| ENSG0000( MATR3 protein_co       | chr5  | 1.39E+08 | 1.39E+08 | + | 6.78 | 9.59 |
| ENSG0000( LINC00581 lincRNA      | chr6  | 21486061 | 21511895 | - | 0    | 0    |
| ENSG0000( RP4-655C5 unprocessε   | chr6  | 1.66E+08 | 1.66E+08 | + | 0    | 0    |
| ENSG0000( CCAT2 lincRNA          | chr8  | 1.27E+08 | 1.27E+08 | + | 0    | 0    |
| ENSG0000( SNORD3D snoRNA         | chr17 | 19112420 | 19112636 | - | 0    | 0    |
| ENSG0000( LINC00921 lincRNA      | chr16 | 3263743  | 3267567  | + | 0.8  | 0.9  |
| ENSG0000( RP4-587D1 TEC          | chr7  | 78134079 | 78134851 | + | 0    | 0    |
| ENSG0000( snoR1 snoRNA           | chr16 | 2155025  | 2155104  | - | 0    | 0    |
| ENSG0000( RP11-2H3.: antisense   | chr4  | 386174   | 454070   | + | 0    | 0    |
| ENSG0000( RP1-12G14 antisense    | chr6  | 1.5E+08  | 1.5E+08  | - | 0    | 0    |
| ENSG0000( N4BP2L2-IT1 sense_intr | chr13 | 32504506 | 32509395 | - | 0.14 | 0.23 |
| ENSG0000( RP11-717K protein_co   | chr4  | 25160663 | 25277306 | + | 3.09 | 3.67 |
| ENSG0000( RP4-777O2 protein_co   | chr7  | 30497077 | 30550761 | - | 1.39 | 0.78 |
| ENSG0000( DUX4L6 unprocessε      | chr4  | 1.9E+08  | 1.9E+08  | + | 0    | 0    |
| ENSG0000( AC073476. pseudogen    | chr2  | 2.32E+08 | 2.32E+08 | + | 0    | 0    |
| ENSG0000( RP11-983G processed_   | chr15 | 21709649 | 21710270 | - | 0    | 0    |
| ENSG0000( RP13-349C lincRNA      | chrX  | 1.03E+08 | 1.03E+08 | + | 0.68 | 0.56 |
| ENSG0000( LINC01395 lincRNA      | chr11 | 1.3E+08  | 1.3E+08  | - | 0    | 0    |
| ENSG0000( RP11-640L: TEC         | chr3  | 36823151 | 36825158 | - | 0.31 | 0.4  |
| ENSG0000( TRG-AS1 antisense      | chr7  | 38341577 | 38378804 | + | 0.03 | 0.03 |
| ENSG0000( LINC00282 protein_co   | chr13 | 51813347 | 51845175 | - | 0    | 0    |
| ENSG0000( AL355480.: pseudogen   | chr1  | 45592722 | 45592814 | - | 0    | 0    |
| ENSG0000( RP11-294C lincRNA      | chr15 | 21703428 | 21705627 | - | 0    | 0    |

|                      |             |       |          |          |   |      |      |
|----------------------|-------------|-------|----------|----------|---|------|------|
| ENSG000001093G       | antisense   | chr7  | 79139829 | 79177210 | + | 0    | 0    |
| ENSG000001PTENP1-AS  | antisense   | chr9  | 33677268 | 33688011 | + | 0    | 0.08 |
| ENSG000001SCHLAP1    | lincRNA     | chr2  | 1.81E+08 | 1.81E+08 | + | 0.08 | 0    |
| ENSG000001AL355480.1 | pseudogen   | chr1  | 45580892 | 45580996 | - | 0    | 0    |
| ENSG000001MIR3651    | miRNA       | chr9  | 92292458 | 92292547 | - | 0    | 0    |
| ENSG000001SCARNA15   | scaRNA      | chr2  | 1.31E+08 | 1.31E+08 | - | 0    | 0    |
| ENSG000001RP11-333B  | antisense   | chr3  | 42264989 | 42266390 | + | 0    | 0    |
| ENSG000001LINC01127  | lincRNA     | chr2  | 1.02E+08 | 1.02E+08 | + | 0.04 | 0.02 |
| ENSG000001RP11-285E  | lincRNA     | chr13 | 74434538 | 74555515 | + | 0    | 0    |
| ENSG000001RP11-294C  | IG_V_gene   | chr15 | 21717808 | 21718245 | - | 0    | 0    |
| ENSG000001CH507-513  | lincRNA     | chr21 | 8437629  | 8438551  | - | 0.07 | 0.04 |
| ENSG000001NPTN-IT1   | sense_intr  | chr15 | 73567012 | 73569294 | - | 1.11 | 1.25 |
| ENSG000001LINC00706  | lincRNA     | chr10 | 6774307  | 6779180  | - | 0    | 0    |
| ENSG000001GHET1      | lincRNA     | chr7  | 1.49E+08 | 1.49E+08 | + | 0.41 | 0.74 |
| ENSG000001ZNF638-IT1 | processed_  | chr2  | 71373938 | 71376320 | + | 0.28 | 0.15 |
| ENSG000001LINC00934  | lincRNA     | chr12 | 1.19E+08 | 1.19E+08 | - | 0    | 0    |
| ENSG000001LINC01097  | lincRNA     | chr4  | 13526319 | 13534335 | - | 0    | 0    |
| ENSG000001LINC00950  | lincRNA     | chr9  | 35858738 | 35865518 | + | 0.4  | 0.24 |
| ENSG000001SLFNL1-AS  | antisense   | chr1  | 41014590 | 41043890 | + | 0.08 | 0.05 |
| ENSG000001LINC00254  | lincRNA     | chr16 | 1878285  | 1884233  | - | 0    | 0    |
| ENSG000001AL132640.1 | pseudogen   | chr14 | 67616903 | 67617084 | + | 0    | 0    |
| ENSG000001RP11-325C  | lincRNA     | chr6  | 1.28E+08 | 1.28E+08 | + | 0    | 0    |
| ENSG000001SALRNA3    | lincRNA     | chr15 | 70615547 | 70616567 | + | 0    | 0    |
| ENSG000001AC068724.1 | pseudogen   | chr15 | 43109928 | 43110018 | + | 0    | 0    |
| ENSG000001SNORA50    | snoRNA      | chr22 | 33704786 | 33704922 | - | 0    | 0    |
| ENSG000001SNORA50    | snoRNA      | chr17 | 64146337 | 64146471 | + | 0    | 0    |
| ENSG000001LINC01338  | lincRNA     | chr5  | 82850864 | 82859836 | - | 0    | 0    |
| ENSG000001LINC00997  | lincRNA     | chr7  | 32760279 | 32762924 | + | 0.78 | 1    |
| ENSG000001RP11-900F  | antisense   | chr12 | 88580531 | 88598218 | + | 0.15 | 0.67 |
| ENSG000001HELLPAR    | macro_Incl  | chr12 | 1.02E+08 | 1.02E+08 | + | 0.24 | 0.28 |
| ENSG000001NF1P9      | transcribec | chr15 | 21490364 | 21509404 | - | 0    | 0    |
| ENSG000001CTD-2574D  | protein_co  | chr16 | 29817239 | 29830627 | + | 2.03 | 1.12 |
| ENSG000001ARRDC3-AS  | lincRNA     | chr5  | 91380349 | 91439085 | + | 0.53 | 0.28 |
| ENSG000001RASSF1-AS  | antisense   | chr3  | 50337511 | 50338300 | + | 0    | 0    |
| ENSG000001RP5-991B1  | lincRNA     | chr20 | 48471308 | 48472414 | + | 0    | 0    |
| ENSG000001AC093826.1 | pseudogen   | chr4  | 1.29E+08 | 1.29E+08 | + | 0    | 0    |
| ENSG000001INE2       | antisense   | chrX  | 15785716 | 15787589 | - | 0.03 | 0    |
| ENSG000001ABALON     | antisense   | chr20 | 31721507 | 31723409 | + | 0.06 | 0.06 |
| ENSG000001SEPT14P19  | transcribec | chr19 | 186373   | 195696   | - | 3.54 | 0.98 |
| ENSG000001CH507-513  | lincRNA     | chr21 | 8254592  | 8255514  | - | 0    | 0.04 |
| ENSG000001RP11-237N  | lincRNA     | chr11 | 1.3E+08  | 1.3E+08  | + | 0    | 0    |
| ENSG000001LINC00506  | lincRNA     | chr3  | 87089129 | 87157069 | + | 2.98 | 3.06 |
| ENSG000001SCARNA4    | scaRNA      | chr1  | 1.56E+08 | 1.56E+08 | - | 0    | 0    |
| ENSG000001SNHG4      | processed_  | chr5  | 1.39E+08 | 1.39E+08 | + | 3.29 | 3.61 |
| ENSG000001LINC01176  | lincRNA     | chr7  | 30390885 | 30412375 | + | 0.28 | 0.61 |

|                 |           |            |       |          |          |   |       |       |
|-----------------|-----------|------------|-------|----------|----------|---|-------|-------|
| ENSG00000100000 | BLACAT1   | lincRNA    | chr1  | 2.05E+08 | 2.05E+08 | - | 0     | 0     |
| ENSG00000100000 | AP001052  | pseudogen  | chr21 | 43748365 | 43748468 | - | 0     | 0     |
| ENSG00000100000 | MIR548BB  | miRNA      | chr3  | 60617805 | 60617870 | - | 0     | 0     |
| ENSG00000100000 | PANDAR    | lincRNA    | chr6  | 36673621 | 36675126 | - | 0.08  | 0     |
| ENSG00000100000 | TGFB2-OT1 | 3prime_ov  | chr1  | 2.18E+08 | 2.18E+08 | + | 0     | 0     |
| ENSG00000100000 | RP5-991B1 | lincRNA    | chr20 | 48476999 | 48477553 | + | 0     | 0     |
| ENSG00000100000 | CTC-459F4 | sense_intr | chr19 | 27802838 | 27803472 | + | 0.11  | 0.95  |
| ENSG00000100000 | RP11-567F | TEC        | chr2  | 1.48E+08 | 1.48E+08 | + | 0     | 0     |
| ENSG00000100000 | PISRT1    | lincRNA    | chr3  | 1.39E+08 | 1.39E+08 | + | 0     | 0     |
| ENSG00000100000 | LINC01955 | lincRNA    | chr2  | 87249095 | 87253750 | - | 0     | 0     |
| ENSG00000100000 | CICP14    | processed_ | chr7  | 1.29E+08 | 1.29E+08 | - | 0     | 0     |
| ENSG00000100000 | DNAJB5-AS | lincRNA    | chr9  | 34985410 | 34989379 | - | 0     | 0     |
| ENSG00000100000 | SEPSECS-A | antisense  | chr4  | 25160641 | 25201440 | + | 1.28  | 0.71  |
| ENSG00000100000 | CDR1-AS   | antisense  | chrX  | 1.41E+08 | 1.41E+08 | + | 0.35  | 0.51  |
| ENSG00000100000 | SCARNA4   | scaRNA     | chr2  | 1.31E+08 | 1.31E+08 | - | 0     | 0     |
| ENSG00000100000 | DGCR12    | sense_intr | chr22 | 19061041 | 19061843 | - | 0     | 0.26  |
| ENSG00000100000 | RP4-669P1 | lincRNA    | chr22 | 42138060 | 42139726 | + | 0.65  | 0.84  |
| ENSG00000100000 | LINC00895 | lincRNA    | chr22 | 19565203 | 19566839 | - | 0.24  | 0     |
| ENSG00000100000 | RP11-294C | IG_V_pseu  | chr15 | 21735506 | 21735945 | - | 0     | 0     |
| ENSG00000100000 | LSINCT5   | lincRNA    | chr5  | 2712591  | 2715237  | + | 0.17  | 0.22  |
| ENSG00000100000 | RP11-485F | lincRNA    | chrX  | 98573859 | 98864984 | + | 0     | 0     |
| ENSG00000100000 | CH17-195P | TEC        | chr1  | 1.45E+08 | 1.45E+08 | + | 3.74  | 3.61  |
| ENSG00000100000 | DBET      | lincRNA    | chr4  | 1.9E+08  | 1.9E+08  | + | 0     | 0     |
| ENSG00000100000 | GS1-114I9 | protein_co | chr7  | 30362400 | 30412502 | + | 0     | 0.69  |
| ENSG00000100000 | RP11-395P | lincRNA    | chr5  | 1.25E+08 | 1.25E+08 | + | 0     | 0     |
| ENSG00000100000 | RP11-506B | protein_co | chr6  | 1.12E+08 | 1.12E+08 | + | 0     | 0     |
| ENSG00000100000 | DUX4L3    | unprocess  | chr4  | 1.9E+08  | 1.9E+08  | + | 0     | 0     |
| ENSG00000100000 | SAMD12-A  | lincRNA    | chr8  | 1.19E+08 | 1.19E+08 | + | 0     | 0     |
| ENSG00000100000 | EBLN3P    | lincRNA    | chr9  | 37079857 | 37090507 | + | 18.17 | 15.69 |
| ENSG00000100000 | DUX4L7    | unprocess  | chr4  | 1.9E+08  | 1.9E+08  | + | 0     | 0     |
| ENSG00000100000 | RP11-817J | lincRNA    | chr11 | 1.03E+08 | 1.03E+08 | + | 0     | 0     |
| ENSG00000100000 | LINC00976 | lincRNA    | chr8  | 1.29E+08 | 1.29E+08 | - | 3.4   | 3.48  |
| ENSG00000100000 | LINC00538 | lincRNA    | chr1  | 2.14E+08 | 2.14E+08 | - | 0     | 0     |
| ENSG00000100000 | RBM5-AS1  | antisense  | chr3  | 50099603 | 50100988 | - | 0.04  | 0     |
| ENSG00000100000 | PACRG-AS1 | antisense  | chr6  | 1.63E+08 | 1.63E+08 | - | 0     | 0     |
| ENSG00000100000 | MIR664A   | miRNA      | chr1  | 2.2E+08  | 2.2E+08  | - | 0     | 0     |
| ENSG00000100000 | LINC01012 | lincRNA    | chr6  | 27694035 | 27710222 | + | 0.01  | 0.05  |
| ENSG00000100000 | ERC2-IT1  | sense_intr | chr3  | 55657206 | 55659382 | - | 0     | 0     |
| ENSG00000100000 | U3        | snoRNA     | chr3  | 30304321 | 30304536 | - | 0     | 0     |
| ENSG00000100000 | DUX4L8    | unprocess  | chr4  | 1.9E+08  | 1.9E+08  | + | 0     | 0     |
| ENSG00000100000 | LINC01080 | lincRNA    | chr13 | 80011077 | 80028283 | + | 0     | 0     |
| ENSG00000100000 | RP11-384K | lincRNA    | chr4  | 1.19E+08 | 1.19E+08 | - | 0     | 0.04  |
| ENSG00000100000 | CTA-299D3 | processed_ | chr22 | 48538900 | 48547387 | - | 0     | 0     |
| ENSG00000100000 | CH17-118C | TEC        | chr1  | 1.21E+08 | 1.21E+08 | - | 0     | 0     |
| ENSG00000100000 | C2-AS1    | antisense  | chr6  | 31934474 | 31941724 | - | 0     | 0     |

|                     |             |       |          |          |   |      |      |
|---------------------|-------------|-------|----------|----------|---|------|------|
| ENSG0000(LINC01230  | lincRNA     | chr9  | 1045625  | 1048641  | + | 0    | 0    |
| ENSG0000(RP11-567F  | TEC         | chr2  | 1.48E+08 | 1.48E+08 | + | 0    | 0    |
| ENSG0000(LINC00550  | lincRNA     | chr13 | 68861284 | 68885325 | - | 0    | 0    |
| ENSG0000(snoZ196    | snoRNA      | chr2  | 2.06E+08 | 2.06E+08 | + | 0    | 0    |
| ENSG0000(SNORA17    | snoRNA      | chr9  | 1.37E+08 | 1.37E+08 | - | 0    | 0    |
| ENSG0000(LINC01394  | lincRNA     | chr6  | 1321698  | 1324022  | - | 0    | 0    |
| ENSG0000(AL355480.  | pseudogen   | chr1  | 45605657 | 45605730 | - | 0    | 0    |
| ENSG0000(HCP5B      | lincRNA     | chr6  | 29871895 | 29873783 | - | 0.03 | 0    |
| ENSG0000(LINC00602  | lincRNA     | chr6  | 1.66E+08 | 1.66E+08 | + | 0    | 0    |
| ENSG0000(MIR1291    | miRNA       | chr12 | 48654444 | 48654530 | - | 0    | 0    |
| ENSG0000(RP13-465B  | antisense   | chrX  | 386980   | 405579   | + | 0.16 | 0    |
| ENSG0000(RP13-465B  | antisense   | chrY  | 386980   | 405579   | + | 0.16 | 0    |
| ENSG0000(LINC00891  | lincRNA     | chrX  | 71697196 | 71706455 | + | 0.13 | 0.01 |
| ENSG0000(RP11-744A  | lincRNA     | chr17 | 19219143 | 19222527 | + | 0.03 | 0.56 |
| ENSG0000(SNORD38B   | snoRNA      | chr1  | 44778390 | 44778458 | + | 0    | 0    |
| ENSG0000(SNORA43    | snoRNA      | chr3  | 8931495  | 8931632  | + | 0    | 0    |
| ENSG0000(PAUPAR     | lincRNA     | chr11 | 31826347 | 31829311 | + | 0    | 0    |
| ENSG0000(SPRY4-IT1  | lincRNA     | chr5  | 1.42E+08 | 1.42E+08 | - | 0    | 0.21 |
| ENSG0000(RP11-65B7  | protein_co  | chr13 | 43883800 | 44028526 | + | 0.46 | 0.1  |
| ENSG0000(GIMAP1-GI  | protein_co  | chr7  | 1.51E+08 | 1.51E+08 | + | 0    | 0    |
| ENSG0000(RP11-274B  | transcribed | chr7  | 1.29E+08 | 1.29E+08 | + | 0    | 0    |
| ENSG0000(AL359736.  | protein_co  | chr13 | 24321126 | 24321428 | - | 0    | 0    |
| ENSG0000(AF127936.  | lincRNA     | chr21 | 14819699 | 14918552 | - | 1.49 | 0.59 |
| ENSG0000(CH17-132F  | lincRNA     | chr2  | 90365737 | 90367699 | + | 0.03 | 0.09 |
| ENSG0000(RP11-439N  | unprocessed | chr15 | 22480439 | 22484840 | - | 0    | 0    |
| ENSG0000(SNORA50A   | snoRNA      | chr16 | 58559796 | 58559931 | - | 0    | 0    |
| ENSG0000(LINC01144  | lincRNA     | chr1  | 45303910 | 45305619 | + | 0.13 | 0.36 |
| ENSG0000(RP11-418H  | lincRNA     | chr2  | 65623272 | 65628424 | + | 0.18 | 0.1  |
| ENSG0000(RP3-510D1  | lincRNA     | chr1  | 9197143  | 9198906  | - | 0    | 0.04 |
| ENSG0000(CTB-127M:  | protein_co  | chr5  | 1.32E+08 | 1.32E+08 | - | 0    | 0    |
| ENSG0000(RP11-126C  | processed_  | chrX  | 9412772  | 9413522  | + | 0    | 0    |
| ENSG0000(RP11-126C  | processed_  | chrX  | 9411701  | 9412478  | + | 0    | 0    |
| ENSG0000(TRBJ1-4    | TR_J_gene   | chr7  | 1.43E+08 | 1.43E+08 | + | 0    | 0    |
| ENSG0000(AF067845.  | lincRNA     | chr8  | 1377867  | 1380307  | + | 0    | 0    |
| ENSG0000(XXyac-YR3: | TEC         | chr6  | 39818751 | 39823227 | + | 0    | 0    |
| ENSG0000(RP11-411A  | TEC         | chr10 | 86948677 | 86949875 | + | 0.05 | 0.05 |
| ENSG0000(IGHV1-69-: | IG_V_gene   | chr14 | 1.07E+08 | 1.07E+08 | - | 0    | 0    |
| ENSG0000(TMEM265    | protein_co  | chr16 | 30740381 | 30744281 | + | 1.5  | 0    |
| ENSG0000(LL22NC03-  | lincRNA     | chr22 | 24691122 | 24696003 | - | 0    | 0    |
| ENSG0000(CTD-2336C  | lincRNA     | chr8  | 1758208  | 1760447  | - | 0.05 | 0.05 |
| ENSG0000(RP11-259C  | antisense   | chr12 | 8858143  | 8915276  | - | 0    | 0.19 |
| ENSG0000(RP3-467D1  | antisense   | chr6  | 16259101 | 16264553 | - | 0.05 | 0    |
| ENSG0000(RP11-506F  | lincRNA     | chr2  | 1.1E+08  | 1.1E+08  | - | 0    | 0    |
| ENSG0000(RP11-2C24  | protein_co  | chr16 | 30704067 | 30745169 | + | 1.51 | 2.22 |
| ENSG0000(CTA-286B1  | lincRNA     | chr22 | 35376422 | 35377261 | + | 0.13 | 0.25 |

|                                  |       |          |          |   |      |      |
|----------------------------------|-------|----------|----------|---|------|------|
| ENSG0000(RP4-590F2_sense_intr)   | chr1  | 1.14E+08 | 1.14E+08 | + | 0    | 0    |
| ENSG0000(LLNLF-173_transcribec)  | chr19 | 197961   | 200775   | + | 0    | 0    |
| ENSG0000(RP4-621F1_lincRNA)      | chr1  | 85482281 | 85578250 | - | 1.61 | 1.68 |
| ENSG0000(CICP19_processed)       | chr19 | 193239   | 195595   | + | 0    | 0    |
| ENSG0000(RP11-69M_lincRNA)       | chr12 | 8014093  | 8019007  | - | 0    | 0    |
| ENSG0000(IGHD3OR1_IG_D_gene)     | chr15 | 21012559 | 21012589 | - | 0    | 0    |
| ENSG0000(RP4-781K5_lincRNA)      | chr1  | 2.35E+08 | 2.35E+08 | + | 0    | 0    |
| ENSG0000(HSP90AB4_processed)     | chr15 | 58691106 | 58693125 | - | 0    | 0    |
| ENSG0000(RP5-1065P_lincRNA)      | chr1  | 2.29E+08 | 2.29E+08 | - | 0    | 0    |
| ENSG0000(RP11-388P_antisense)    | chr10 | 60139912 | 60140877 | + | 0    | 0    |
| ENSG0000(IGHV7-4-1_IG_V_gene)    | chr14 | 1.06E+08 | 1.06E+08 | - | 0    | 0    |
| ENSG0000(TRBJ1-3_TR_J_gene)      | chr7  | 1.43E+08 | 1.43E+08 | + | 0    | 0    |
| ENSG0000(OR4G3P_unprocessε)      | chr19 | 94062    | 94974    | + | 0    | 0    |
| ENSG0000(CH17-174L_lincRNA)      | chr8  | 2517898  | 2529710  | - | 0    | 0    |
| ENSG0000(RP1-163M_lincRNA)       | chr1  | 16656879 | 16667524 | + | 0    | 0.09 |
| ENSG0000(AF067845_lincRNA)       | chr8  | 1373685  | 1381394  | + | 0    | 0    |
| ENSG0000(PEG13_sense_intr)       | chr8  | 1.4E+08  | 1.4E+08  | - | 0.13 | 0.19 |
| ENSG0000(TRBJ1-5_TR_J_gene)      | chr7  | 1.43E+08 | 1.43E+08 | + | 0    | 0    |
| ENSG0000(RP11-527L_processed)    | chr17 | 43914433 | 43923001 | - | 0    | 0    |
| ENSG0000(RP11-141C_unprocessε)   | chr3  | 1.96E+08 | 1.96E+08 | + | 0    | 0    |
| ENSG0000(RP1-179P9_protein_co)   | chr6  | 1.17E+08 | 1.18E+08 | - | 0    | 0    |
| ENSG0000(RP11-27G1_antisense)    | chr1  | 2.01E+08 | 2.01E+08 | + | 0    | 0    |
| ENSG0000(RP11-126C_processed)    | chrX  | 9410789  | 9411545  | + | 0    | 0    |
| ENSG0000(RP11-295P_protein_co)   | chr10 | 13610047 | 13655929 | + | 0    | 0    |
| ENSG0000(RP11-199H_lincRNA)      | chr1  | 2.15E+08 | 2.15E+08 | - | 0    | 0    |
| ENSG0000(IGHD2OR1_IG_D_gene)     | chr15 | 21015048 | 21015078 | - | 0    | 0    |
| ENSG0000(CYP3A51P_unprocessε)    | chr7  | 99685145 | 99700034 | - | 0    | 0    |
| ENSG0000(RP11-231C_protein_co)   | chr4  | 53377839 | 54295272 | + | 9.56 | 8.08 |
| ENSG0000(RP11-126C_processed)    | chrX  | 9408818  | 9409571  | + | 0    | 0    |
| ENSG0000(RP11-126C_processed)    | chrX  | 9413816  | 9414569  | + | 0    | 0    |
| ENSG0000(CYP3A7-CY_protein_co)   | chr7  | 99684957 | 99735102 | - | 0.25 | 0    |
| ENSG0000(RP11-1223_processed)    | chr2  | 1.1E+08  | 1.1E+08  | + | 0    | 0.42 |
| ENSG0000(RP11-126C_processed)    | chrX  | 9404954  | 9405731  | + | 0    | 0    |
| ENSG0000(DPRXP3_processed)       | chr14 | 35222174 | 35222746 | + | 0    | 0    |
| ENSG0000(RP11-173A_lincRNA)      | chr1  | 2.45E+08 | 2.45E+08 | + | 0.13 | 0    |
| ENSG0000(TRBJ1-1_TR_J_gene)      | chr7  | 1.43E+08 | 1.43E+08 | + | 0    | 0    |
| ENSG0000(MTND1P7_unprocessε)     | chr8  | 46828117 | 46828413 | - | 0    | 0    |
| ENSG0000(RP11-657G_processed)    | chr3  | 1.8E+08  | 1.8E+08  | + | 0    | 0    |
| ENSG0000(LLNLF-176f_transcribec) | chr19 | 200499   | 201174   | - | 2.76 | 1.52 |
| ENSG0000(RP11-126C_processed)    | chrX  | 9406952  | 9407708  | + | 0    | 0    |
| ENSG0000(RP11-43A1_lincRNA)      | chr8  | 738548   | 740374   | + | 0    | 0    |
| ENSG0000(RP11-328P_lincRNA)      | chr7  | 65269374 | 65306238 | + | 0    | 0    |
| ENSG0000(RP11-422P_antisense)    | chr1  | 1.54E+08 | 1.54E+08 | + | 0.47 | 0.61 |
| ENSG0000(RP11-29A1_sense_intr)   | chr10 | 1290018  | 1293002  | - | 0    | 0    |
| ENSG0000(CTD-3113P_lincRNA)      | chr19 | 248551   | 251571   | - | 4.45 | 4.71 |



|                                 |       |          |          |   |       |       |
|---------------------------------|-------|----------|----------|---|-------|-------|
| ENSG0000(RP3-335E1 antisense)   | chr6  | 1.06E+08 | 1.06E+08 | - | 0     | 0     |
| ENSG0000(RP11-359E processed)   | chr10 | 1.2E+08  | 1.2E+08  | + | 0.22  | 0     |
| ENSG0000(LLNLF-173 processed)   | chr19 | 197310   | 198066   | - | 0     | 0     |
| ENSG0000(RP11-496N lincRNA)     | chr1  | 2.25E+08 | 2.25E+08 | + | 0     | 0     |
| ENSG0000(TEX13D protein_co)     | chrX  | 1.24E+08 | 1.24E+08 | + | 0     | 0     |
| ENSG0000(TRBJ1-2 TR_J_gene)     | chr7  | 1.43E+08 | 1.43E+08 | + | 0     | 0     |
| ENSG0000(TRBD1 TR_D_gene)       | chr7  | 1.43E+08 | 1.43E+08 | + | 0     | 0     |
| ENSG0000(RP11-369J transcribed) | chr10 | 80053428 | 80053548 | - | 0     | 0     |
| ENSG0000(RP11-605B lincRNA)     | chr2  | 1.56E+08 | 1.56E+08 | - | 0     | 0     |
| ENSG0000(WASH5P transcribed)    | chr19 | 60951    | 71626    | - | 25.66 | 29.12 |
| ENSG0000(RP5-1128N lincRNA)     | chr20 | 11536406 | 11541647 | - | 0     | 0     |
| ENSG0000(TRBV25-1 TR_V_gene)    | chr7  | 1.43E+08 | 1.43E+08 | + | 0     | 0     |
| ENSG0000(RP11-126C processed)   | chrX  | 9406025  | 9406778  | + | 0     | 0     |
| ENSG0000(FKBP1AP4 processed)    | chr3  | 1.49E+08 | 1.49E+08 | - | 0     | 0     |
| ENSG0000(LINC01002 processed)   | chr19 | 198264   | 239440   | - | 12.21 | 12.22 |
| ENSG0000(CLUHP10 unprocessed)   | chr3  | 75629993 | 75634057 | + | 0     | 0     |
| ENSG0000(IGHD3OR1.IG_D_gene)    | chr15 | 20005905 | 20005935 | - | 0     | 0     |
| ENSG0000(RP11-389G antisense)   | chr3  | 97800733 | 97821884 | - | 0     | 0.19  |
| ENSG0000(AC092192. lincRNA)     | chr19 | 176896   | 177913   | + | 0     | 0     |
| ENSG0000(AC008993. TEC)         | chr19 | 68403    | 69178    | + | 0     | 0.18  |
| ENSG0000(RP11-304C lincRNA)     | chr11 | 6323554  | 6324023  | + | 0.9   | 1.98  |
| ENSG0000(RP4-553F1 lincRNA)     | chr1  | 2.3E+08  | 2.3E+08  | + | 0     | 0     |
| ENSG0000(RP11-482G processed)   | chr7  | 19018    | 35489    | - | 0     | 0     |
| ENSG0000(FAM138F lincRNA)       | chr19 | 76163    | 77686    | - | 0     | 0     |
| ENSG0000(IGHD2OR1.IG_D_gene)    | chr15 | 20008402 | 20008432 | - | 0     | 0     |
| ENSG0000(IGHV3-69.IG_V_pseu)    | chr14 | 1.07E+08 | 1.07E+08 | - | 0     | 0     |
| ENSG0000(CTA-286B1 lincRNA)     | chr22 | 35372174 | 35372621 | + | 0     | 0     |
| ENSG0000(ADORA3 protein_co)     | chr1  | 1.11E+08 | 1.12E+08 | - | 0.03  | 0.19  |
| ENSG0000(MRPL57P8 processed)    | chr14 | 35219023 | 35219283 | - | 0     | 0     |
| ENSG0000(IGHV3-64D IG_V_gene)   | chr14 | 1.06E+08 | 1.06E+08 | - | 0     | 0     |
| ENSG0000(IGHV5-10.IG_V_gene)    | chr14 | 1.06E+08 | 1.06E+08 | - | 0     | 0     |
| ENSG0000(RP11-126C processed)   | chrX  | 9407861  | 9408638  | + | 0     | 0     |
| ENSG0000(CH17-31A6 lincRNA)     | chr8  | 2495522  | 2499428  | + | 0     | 0     |
| ENSG0000(CTD-3212A lincRNA)     | chr8  | 1018757  | 1019704  | + | 0     | 0     |
| ENSG0000(RP11-126C processed)   | chrX  | 9409748  | 9410501  | + | 0     | 0     |
| ENSG0000(RP11-348H lincRNA)     | chr1  | 2.13E+08 | 2.13E+08 | + | 0     | 0     |
| ENSG0000(PGR-AS1 processed)     | chr11 | 1.01E+08 | 1.01E+08 | + | 0     | 0     |
| ENSG0000(RP11-157B unprocessed) | chr19 | 22215634 | 22215661 | - | 0     | 0     |
| ENSG0000(RP11-428C unprocessed) | chr17 | 36161607 | 36162926 | + | 0     | 0     |
| ENSG0000(RP5-1182A lincRNA)     | chr1  | 16739938 | 16750589 | - | 0     | 0     |
| ENSG0000(RP11-539L. TEC)        | chr4  | 6697861  | 6698809  | - | 0.13  | 0.33  |
| ENSG0000(DUXB protein_co)       | chr16 | 75693929 | 75701459 | - | 0     | 0     |
| ENSG0000(RP11-555E lincRNA)     | chr8  | 891251   | 893112   | - | 0     | 0     |
| ENSG0000(RP11-753C antisense)   | chr10 | 1.03E+08 | 1.03E+08 | - | 0.62  | 0.28  |
| ENSG0000(TRBJ1-6 TR_J_gene)     | chr7  | 1.43E+08 | 1.43E+08 | + | 0     | 0     |

|                                       |          |            |       |       |
|---------------------------------------|----------|------------|-------|-------|
| ENSG0000(RP11-1223 transcribed chr2   | 1.1E+08  | 1.1E+08 +  | 0     | 0     |
| ENSG0000(RP11-151A lincRNA chr10      | 1.25E+08 | 1.25E+08 + | 0     | 0.26  |
| ENSG0000(RP11-14C1 lincRNA chr15      | 1.02E+08 | 1.02E+08 - | 0     | 0     |
| ENSG0000(LLNLR-222) TEC chr19         | 69167    | 69972 +    | 0.08  | 0     |
| ENSG0000(RP3-369A1 protein_co chr6    | 24797373 | 24809798 - | 0     | 0     |
| ENSG0000(AC008993) lincRNA chr19      | 71778    | 72718 +    | 0     | 0     |
| ENSG0000(TEX13C protein_co chrX       | 1.25E+08 | 1.25E+08 + | 0     | 0     |
| ENSG0000(AC000035) antisense chr22    | 29480220 | 29481113 - | 0     | 0     |
| ENSG0000(FRG1CP unprocessed chr20     | 28580709 | 28602664 - | 16.09 | 15.85 |
| ENSG0000(RP13-794C protein_co chr3    | 48446846 | 48467645 + | 1.64  | 1.8   |
| ENSG0000(RP11-443F) lincRNA chr2      | 49563398 | 49595122 + | 0     | 0     |
| ENSG0000(SEPT14P21 transcribed chr1   | 2.43E+08 | 2.43E+08 - | 0     | 0     |
| ENSG0000(RP11-712B processed_ chr11   | 95203727 | 95204033 + | 0     | 0     |
| ENSG0000(RP11-369J) antisense chr2    | 1.97E+08 | 1.97E+08 - | 0     | 0     |
| ENSG0000(GS1-590J6) lincRNA chrX      | 11668401 | 11757718 - | 0     | 0     |
| ENSG0000(FRG2EP unprocessed chr20     | 29415264 | 29416911 - | 0     | 0     |
| ENSG0000(RP11-380J) lincRNA chr1      | 17193232 | 17201733 - | 0     | 0     |
| ENSG0000(RP11-121P) lincRNA chr1      | 2E+08    | 2E+08 -    | 0.32  | 0     |
| ENSG0000(RHOXF1P2 unprocessed chrX    | 1.2E+08  | 1.2E+08 -  | 0     | 0     |
| ENSG0000(BISPR lincRNA chr19          | 17405694 | 17418904 + | 0.95  | 1.15  |
| ENSG0000(RP5-1003J) processed_ chr1   | 1.1E+08  | 1.1E+08 +  | 0     | 0     |
| ENSG0000(RP11-50D9) processed_ chr4   | 1.28E+08 | 1.28E+08 + | 0.68  | 0     |
| ENSG0000(CTA-250D1) sense_intron chr7 | 1.15E+08 | 1.15E+08 + | 0     | 0     |
| ENSG0000(RP11-153F) lincRNA chr3      | 1.28E+08 | 1.28E+08 - | 0.57  | 0.13  |
| ENSG0000(RP11-90J7) lincRNA chr10     | 78179174 | 78675109 + | 0     | 0     |
| ENSG0000(RP11-487A) TEC chr13         | 91485793 | 91486870 + | 0     | 0     |
| ENSG0000(RP11-306C) TEC chr13         | 92239835 | 92241951 - | 0     | 0.06  |
| ENSG0000(FRG1DP unprocessed chr20     | 29080390 | 29102761 + | 0.26  | 0.28  |
| ENSG0000(RP11-96L1) protein_co chr1   | 26164161 | 26168581 - | 0     | 0     |
| ENSG0000(XXyac-YRM) processed_ chr10  | 1.34E+08 | 1.34E+08 - | 0     | 0     |
| ENSG0000(RP1-138B7) lincRNA chr20     | 43590009 | 43590596 - | 0     | 0     |
| ENSG0000(RP11-10F1) processed_ chr7   | 56736396 | 56736590 - | 0     | 0     |
| ENSG0000(RP11-49P4) protein_co chr1   | 46532166 | 46533614 - | 0     | 0     |
| ENSG0000(RP11-477N) lincRNA chr17     | 9764188  | 9805073 +  | 0     | 0     |
| ENSG0000(RP11-596C) lincRNA chr14     | 49861176 | 49864326 - | 0.07  | 0.22  |
| ENSG0000(RP11-307E) processed_ chr9   | 94347234 | 94347563 - | 0     | 0     |
| ENSG0000(RP11-470L) lincRNA chr1      | 1.1E+08  | 1.1E+08 +  | 0     | 0     |
| ENSG0000(RP11-460M) lincRNA chr2      | 48809340 | 49419013 + | 0     | 0     |
| ENSG0000(DUX4L33 unprocessed chr20    | 29324092 | 29325049 + | 0     | 0     |
| ENSG0000(RP11-168K) TEC chr9          | 1.14E+08 | 1.14E+08 - | 0     | 0     |
| ENSG0000(RP4-726F1) lincRNA chr1      | 79323769 | 79324852 - | 0     | 0     |
| ENSG0000(RP11-731J) bidirection chr4  | 47463784 | 47470477 + | 0     | 0     |
| ENSG0000(RP11-252C) lincRNA chr10     | 65123667 | 65141185 + | 0     | 0     |
| ENSG0000(LA16c-407) processed_ chr16  | 568837   | 576257 +   | 0.1   | 0.27  |
| ENSG0000(RP11-157F) transcribed chrY  | 18389297 | 18391510 - | 0     | 0     |

|                                    |       |          |          |   |      |      |
|------------------------------------|-------|----------|----------|---|------|------|
| ENSG0000(DUX4L35 unprocessed)      | chr20 | 29448517 | 29449306 | - | 0    | 0.09 |
| ENSG0000(RP11-413E processed)      | chr3  | 75624899 | 75625188 | + | 0    | 0    |
| ENSG0000(RP1-138A5 lincRNA)        | chrX  | 87707579 | 87750883 | - | 0    | 0    |
| ENSG0000(RP11-205A sense_intr)     | chr10 | 72467749 | 72473304 | - | 0    | 0    |
| ENSG0000(RP11-676F lincRNA)        | chr11 | 92914272 | 92915604 | - | 0    | 0    |
| ENSG0000(RP11-121C antisense)      | chr4  | 47831385 | 47896709 | + | 0    | 0    |
| ENSG0000(CFTRP2 processed)         | chr20 | 29641778 | 29641976 | + | 0    | 0    |
| ENSG0000(RP11-104C unprocessed)    | chr16 | 33723356 | 33763773 | - | 0    | 0    |
| ENSG0000(CTD-2195M lincRNA)        | chr5  | 1.28E+08 | 1.28E+08 | - | 0    | 0    |
| ENSG0000(RP11-23E1 processed)      | chr16 | 33484887 | 33485131 | + | 0    | 0    |
| ENSG0000(RHOXF1P3 transcribed)     | chrX  | 1.2E+08  | 1.2E+08  | + | 0    | 0    |
| ENSG0000(DUX4L34 unprocessed)      | chr20 | 29410348 | 29411600 | - | 0    | 0    |
| ENSG0000(CTC-281F2 protein_coding) | chr17 | 6636780  | 6640316  | - | 0.68 | 0.82 |
| ENSG0000(TRBV7-2 TR_V_gene)        | chr7  | 1.42E+08 | 1.42E+08 | + | 0    | 0    |
| ENSG0000(RP11-676F lincRNA)        | chr11 | 92915884 | 92931322 | + | 0    | 0    |
| ENSG0000(CTC-490G2 antisense)      | chr19 | 42977463 | 43171515 | + | 0    | 0    |
| ENSG0000(RP11-1216 processed)      | chr2  | 1.31E+08 | 1.31E+08 | + | 0    | 0    |
| ENSG0000(RP11-80F2 processed)      | chr16 | 35528367 | 35529318 | - | 0    | 0    |
| ENSG0000(PCMTD1P7 unprocessed)     | chr20 | 29321310 | 29321666 | - | 0    | 0    |
| ENSG0000(RP11-174C lincRNA)        | chr3  | 1.2E+08  | 1.2E+08  | - | 0    | 0    |
| ENSG0000(CTC-490E2 antisense)      | chr19 | 40779780 | 40796943 | - | 0    | 0.06 |
| ENSG0000(RP11-17G2 lincRNA)        | chr10 | 78538391 | 78551719 | - | 0    | 0    |
| ENSG0000(PRNCR1 lincRNA)           | chr8  | 1.27E+08 | 1.27E+08 | + | 0.01 | 0.02 |
| ENSG0000(RP11-438H sense_intr)     | chr12 | 1.03E+08 | 1.03E+08 | - | 0    | 0    |
| ENSG0000(RP11-683L lincRNA)        | chr18 | 49815    | 73545    | - | 0    | 0    |
| ENSG0000(AGGF1P10 processed)       | chr20 | 29430723 | 29432913 | + | 0    | 0    |
| ENSG0000(RP11-1277 processed)      | chr16 | 33345182 | 33345396 | + | 0    | 0    |
| ENSG0000(LINC02034 lincRNA)        | chr3  | 1.28E+08 | 1.28E+08 | + | 0    | 0    |
| ENSG0000(PCBP2-OT1 non_coding)     | chr12 | 53464468 | 53465057 | + | 0.36 | 0.26 |
| ENSG0000(RP11-144C processed)      | chr3  | 1.01E+08 | 1.01E+08 | - | 0    | 0    |
| ENSG0000(RP11-807C processed)      | chr17 | 5512040  | 5512537  | - | 0.75 | 0.66 |
| ENSG0000(RP11-901H lincRNA)        | chr3  | 21006730 | 21226305 | - | 0    | 0    |
| ENSG0000(HIST1H3D protein_coding)  | chr6  | 26195595 | 26199293 | - | 0.34 | 0.08 |
| ENSG0000(KB-1396H2 processed)      | chr8  | 1.02E+08 | 1.02E+08 | - | 0    | 0    |
| ENSG0000(RP11-118A TEC)            | chr13 | 92658994 | 92659227 | - | 1.05 | 4.34 |
| ENSG0000(ABC7-4239 processed)      | chr4  | 1.9E+08  | 1.9E+08  | - | 0    | 0    |
| ENSG0000(FRG1EP unprocessed)       | chr20 | 29480147 | 29497179 | - | 0.4  | 0.68 |
| ENSG0000(RP11-351M lincRNA)        | chr10 | 28303300 | 28307658 | + | 0    | 0    |
| ENSG0000(RP11-95C1 sense_intr)     | chr13 | 91994518 | 91996523 | + | 0.04 | 0.15 |
| ENSG0000(RP11-152D lincRNA)        | chr2  | 49202126 | 49451896 | - | 0    | 0    |
| ENSG0000(RP11-297A lincRNA)        | chr10 | 34969909 | 34975578 | + | 0.05 | 0.05 |
| ENSG0000(RP11-317C antisense)      | chr9  | 1.05E+08 | 1.05E+08 | + | 0.11 | 0.04 |
| ENSG0000(RP11-418I2 lincRNA)       | chr16 | 9542045  | 9614894  | + | 0    | 0    |
| ENSG0000(CDC27P3 processed)        | chr20 | 29746181 | 29748090 | + | 0    | 0    |
| ENSG0000(RP1-273N1 lincRNA)        | chr6  | 98829967 | 98832508 | - | 0    | 0    |

|                                      |          |          |   |      |      |
|--------------------------------------|----------|----------|---|------|------|
| ENSG0000(RP11-176H processed_ chr14  | 31320224 | 31320634 | - | 0    | 0    |
| ENSG0000(DUX4L37 unprocessε chr20    | 29878636 | 29879363 | - | 0    | 0    |
| ENSG0000(FRG1GP unprocessε chr22     | 12602466 | 12626642 | + | 0.4  | 0.12 |
| ENSG0000(RP11-477N antisense chr17   | 9805443  | 9811047  | + | 0    | 0    |
| ENSG0000(RN7SL1 non_codinι chr14     | 49586579 | 49586878 | + | 0    | 0    |
| ENSG0000(RP11-557N lincRNA chr2      | 23667208 | 23685453 | - | 0    | 0.02 |
| ENSG0000(RP11-219A lincRNA chr17     | 16861146 | 16864223 | + | 0    | 0    |
| ENSG0000(LINC01988 lincRNA chr3      | 44424134 | 44429529 | + | 0    | 0    |
| ENSG0000(KLF18 protein_co chr1       | 44137821 | 44141631 | - | 0    | 0    |
| ENSG0000(FAM166AP transcribec chr1   | 874529   | 877234   | - | 0    | 0    |
| ENSG0000(RP11-371A processed_ chr7   | 1.33E+08 | 1.33E+08 | - | 0.2  | 0.47 |
| ENSG0000(RP11-284H processed_ chr4   | 60038269 | 60038586 | + | 0    | 0    |
| ENSG0000(RP11-357P lincRNA chr1      | 2.07E+08 | 2.07E+08 | - | 0    | 0    |
| ENSG0000(RP11-764D sense_intrι chr17 | 44486153 | 44486815 | - | 0    | 0    |
| ENSG0000(FRG1FP unprocessε chr22     | 10939388 | 10961338 | - | 0.17 | 0.28 |
| ENSG0000(GTF2IP12 transcribec chr4   | 1.19E+08 | 1.19E+08 | - | 0.64 | 0.73 |
| ENSG0000(LINC01668 lincRNA chr21     | 42777819 | 42779994 | - | 0    | 0    |
| ENSG0000(RP11-210L lincRNA chr12     | 1.02E+08 | 1.02E+08 | + | 0    | 0    |
| ENSG0000(RP11-30G1 lincRNA chr10     | 90622143 | 90623611 | - | 0    | 0    |
| ENSG0000(RP11-417N processed_ chr16  | 71777603 | 71777834 | - | 0    | 0.7  |
| ENSG0000(RP11-358H antisense chr2    | 50620963 | 50632993 | + | 0    | 0    |
| ENSG0000(ABC7-4817 lincRNA chr7      | 12704    | 27234    | + | 0    | 0    |
| ENSG0000(TRBV6-2 TR_V_gene chr7      | 1.42E+08 | 1.42E+08 | + | 0    | 0    |
| ENSG0000(RP1-221C1 antisense chr6    | 26160765 | 26172802 | - | 0.11 | 0.12 |
| ENSG0000(RP11-598D processed_ chr16  | 34015260 | 34015477 | + | 0    | 0    |
| ENSG0000(DUX4L32 unprocessε chr20    | 29318824 | 29319579 | + | 0    | 0    |
| ENSG0000(RP11-736N protein_co chr14  | 1.03E+08 | 1.03E+08 | + | 0.09 | 0    |
| ENSG0000(RP11-359G lincRNA chr20     | 22685391 | 22746107 | + | 0    | 0    |
| ENSG0000(RP11-834C lincRNA chr12     | 54142591 | 54147485 | + | 0    | 0    |
| ENSG0000(RP11-124N lincRNA chr13     | 22931537 | 22931999 | + | 0    | 0    |
| ENSG0000(RP11-529I transcribec chrY  | 17514502 | 17516715 | + | 0    | 0    |
| ENSG0000(RP11-11M lincRNA chr20      | 62066830 | 62068437 | + | 0.25 | 0.12 |
| ENSG0000(RP11-61G1 lincRNA chr4      | 10737572 | 10749586 | + | 0    | 0    |
| ENSG0000(RP11-639E processed_ chr18  | 23485000 | 23485197 | + | 0    | 0    |
| ENSG0000(CTD-2331H protein_co chr19  | 52880663 | 52962768 | - | 1.33 | 0.7  |
| ENSG0000(CENPVL2 protein_co chrX     | 51681212 | 51682831 | - | 0    | 0    |
| ENSG0000(ABC11-493 lincRNA chr10     | 1.32E+08 | 1.32E+08 | + | 0    | 0    |
| ENSG0000(RP11-157J lincRNA chr10     | 78176928 | 78178186 | + | 0    | 0    |
| ENSG0000(RP11-165N TEC chr13         | 92446470 | 92449056 | + | 0    | 0    |
| ENSG0000(RP11-964E bidirection chr14 | 36320753 | 36656163 | + | 0    | 0    |
| ENSG0000(BMS1P21 transcribec chr10   | 79906605 | 79907856 | + | 0.74 | 0    |
| ENSG0000(LLNLR-245I antisense chr19  | 58310449 | 58326933 | - | 1.59 | 1.69 |
| ENSG0000(CTC-325H2 processed_ chr19  | 9383581  | 9407055  | - | 0.36 | 0.53 |
| ENSG0000(RP11-1437 processed_ chr16  | 33386105 | 33386349 | + | 0    | 0    |
| ENSG0000(CTD-2060L lincRNA chr7      | 10449820 | 10779944 | - | 0.02 | 0    |

|                 |                             |       |          |          |   |       |       |
|-----------------|-----------------------------|-------|----------|----------|---|-------|-------|
| ENSG00000180100 | RP11-107E antisense         | chr2  | 1.44E+08 | 1.44E+08 | + | 0     | 0     |
| ENSG00000180101 | HYMA1 non_coding            | chr6  | 1.44E+08 | 1.44E+08 | - | 0.02  | 0.07  |
| ENSG00000180102 | RARRES2P1 processed         | chr20 | 29427400 | 29427883 | - | 0     | 0     |
| ENSG00000180103 | RP11-299P antisense         | chr18 | 63207622 | 63208168 | + | 0     | 0     |
| ENSG00000180104 | MIR1297 miRNA               | chr13 | 54311972 | 54312048 | - | 0     | 0     |
| ENSG00000180105 | RP5-912113 processed        | chr7  | 1.55E+08 | 1.56E+08 | - | 0     | 0.02  |
| ENSG00000180106 | RP11-360A processed         | chr13 | 88571654 | 88572312 | + | 0     | 0     |
| ENSG00000180107 | MTND2P41 unprocessed        | chr4  | 68049706 | 68050478 | - | 0     | 0     |
| ENSG00000180108 | RP4-614C1 unprocessed       | chr2  | 89622213 | 89640635 | - | 0     | 0     |
| ENSG00000180109 | RP11-12911 processed        | chr15 | 41157175 | 41157342 | - | 0     | 0     |
| ENSG00000180110 | U6 snRNA                    | chr1  | 43023549 | 43023637 | - | 0     | 0     |
| ENSG00000180111 | RP11-294C unprocessed       | chr15 | 21543038 | 21543920 | - | 0     | 0     |
| ENSG00000180112 | RP3-488M1 antisense         | chr12 | 3752518  | 3757842  | + | 0.13  | 0     |
| ENSG00000180113 | RP11-109A lincRNA           | chr10 | 1.3E+08  | 1.3E+08  | + | 0     | 0     |
| ENSG00000180114 | RP1-172H2 transcribed       | chr20 | 45137706 | 45138976 | - | 0     | 0     |
| ENSG00000180115 | KB-1592A4 unprocessed       | chr22 | 21228760 | 21229138 | - | 0     | 0     |
| ENSG00000180116 | MIR548AU miRNA              | chr9  | 93594841 | 93594894 | + | 0     | 0     |
| ENSG00000180117 | RP11-456N lincRNA           | chr3  | 58174478 | 58178374 | - | 0     | 0     |
| ENSG00000180118 | RP11-134F protein_coding    | chr3  | 1.87E+08 | 1.87E+08 | + | 2.53  | 0     |
| ENSG00000180119 | MIR3120 miRNA               | chr1  | 1.72E+08 | 1.72E+08 | + | 0     | 0     |
| ENSG00000180120 | IQCJ-SCHIP protein_coding   | chr3  | 1.59E+08 | 1.6E+08  | + | 5.76  | 4.6   |
| ENSG00000180121 | AC011380. processed         | chr5  | 1.41E+08 | 1.41E+08 | - | 0     | 0     |
| ENSG00000180122 | RP11-64616 transcribed      | chr4  | 56410516 | 56431548 | + | 0.05  | 0.11  |
| ENSG00000180123 | RP11-85M1 antisense         | chr8  | 1.05E+08 | 1.05E+08 | - | 0     | 0     |
| ENSG00000180124 | MIR665 miRNA                | chr14 | 1.01E+08 | 1.01E+08 | + | 0     | 0     |
| ENSG00000180125 | MIR4521 miRNA               | chr17 | 8186945  | 8187004  | + | 0     | 0     |
| ENSG00000180126 | RP11-403F transcribed       | chr9  | 38433696 | 38543880 | + | 0     | 0     |
| ENSG00000180127 | RP11-499P antisense         | chr2  | 2.31E+08 | 2.31E+08 | + | 0     | 0     |
| ENSG00000180128 | MIR203B miRNA               | chr14 | 1.04E+08 | 1.04E+08 | - | 0     | 0     |
| ENSG00000180129 | RP11-193H processed         | chr1  | 2.38E+08 | 2.38E+08 | - | 0     | 0     |
| ENSG00000180130 | RP11-1223 unprocessed       | chr2  | 1.1E+08  | 1.1E+08  | + | 0     | 0     |
| ENSG00000180131 | MIR382 miRNA                | chr14 | 1.01E+08 | 1.01E+08 | + | 0     | 0     |
| ENSG00000180132 | hsa-mir-54 miRNA            | chr8  | 1.23E+08 | 1.23E+08 | - | 0     | 0     |
| ENSG00000180133 | RP11-193H processed         | chr1  | 2.38E+08 | 2.38E+08 | - | 0     | 0     |
| ENSG00000180134 | RP11-208N antisense         | chr3  | 1.87E+08 | 1.87E+08 | + | 0.68  | 1.35  |
| ENSG00000180135 | RP11-629C processed         | chr8  | 1.34E+08 | 1.34E+08 | + | 0     | 0     |
| ENSG00000180136 | AL590763.1 unprocessed      | chrX  | 71869763 | 71873295 | - | 0.07  | 0.08  |
| ENSG00000180137 | MIR6767 miRNA               | chr16 | 2445392  | 2445457  | + | 0     | 0     |
| ENSG00000180138 | RP11-1263 lincRNA           | chr4  | 577168   | 584866   | + | 0     | 0     |
| ENSG00000180139 | MIR2052 miRNA               | chr8  | 74705693 | 74705747 | + | 0     | 0     |
| ENSG00000180140 | RP11-949J1 protein_coding   | chr3  | 49416777 | 49429314 | - | 1.3   | 1.26  |
| ENSG00000180141 | MIR1243 miRNA               | chr4  | 1.13E+08 | 1.13E+08 | + | 0     | 0     |
| ENSG00000180142 | IGHVII-43-1 IG_V_pseudogene | chr14 | 1.06E+08 | 1.06E+08 | - | 0     | 0     |
| ENSG00000180143 | RP4-614C1 lincRNA           | chr2  | 89542842 | 89585652 | - | 54.59 | 53.79 |
| ENSG00000180144 | RP11-629C processed         | chr8  | 1.34E+08 | 1.34E+08 | + | 0     | 0     |

|                 |            |                          |       |          |          |   |      |      |
|-----------------|------------|--------------------------|-------|----------|----------|---|------|------|
| ENSG00000181141 | RP11-481L  | unprocessed              | chr10 | 1.23E+08 | 1.23E+08 | + | 0    | 0    |
| ENSG00000181142 | ABC13-474  | protein_coding           | chr13 | 1.14E+08 | 1.14E+08 | - | 0.13 | 0.4  |
| ENSG00000181143 | MIR1206    | miRNA                    | chr8  | 1.28E+08 | 1.28E+08 | + | 0    | 0    |
| ENSG00000181144 | RP11-15H2  | protein_coding           | chr19 | 23222755 | 23274221 | - | 0    | 0.05 |
| ENSG00000181145 | RP11-395A  | unitary_prime_transcript | chr2  | 2.31E+08 | 2.31E+08 | - | 0    | 0    |
| ENSG00000181146 | MIR1246    | miRNA                    | chr2  | 1.77E+08 | 1.77E+08 | - | 0    | 0    |
| ENSG00000181147 | MIR4434    | miRNA                    | chr2  | 64525513 | 64525565 | + | 0    | 0    |
| ENSG00000181148 | RP11-350E  | protein_coding           | chr9  | 87956214 | 87956883 | + | 0    | 0    |
| ENSG00000181149 | MIR941-1   | miRNA                    | chr20 | 63919449 | 63919520 | + | 0    | 0    |
| ENSG00000181150 | MIR1255B   | miRNA                    | chr4  | 36426366 | 36426428 | - | 0    | 0    |
| ENSG00000181151 | RP11-226E  | protein_coding           | chr13 | 76992078 | 77129589 | + | 0.2  | 0.03 |
| ENSG00000181152 | RP11-347L  | sense_intronic           | chr17 | 56803841 | 56804269 | - | 0    | 0    |
| ENSG00000181153 | MIR1322    | miRNA                    | chr8  | 10825373 | 10825443 | - | 0    | 0    |
| ENSG00000181154 | RP11-216M  | unprocessed              | chr9  | 40167392 | 40171329 | + | 0    | 0    |
| ENSG00000181155 | MIR642B    | miRNA                    | chr19 | 45674932 | 45675008 | - | 0    | 0    |
| ENSG00000181156 | CTC-591M   | lincRNA                  | chr16 | 22806289 | 22813680 | - | 0    | 0    |
| ENSG00000181157 | RP4-614C1  | unprocessed              | chr2  | 89662601 | 89662977 | + | 0    | 0    |
| ENSG00000181158 | RP11-344J  | lincRNA                  | chr6  | 43844878 | 43852317 | - | 0    | 0    |
| ENSG00000181159 | RP11-472I  | lincRNA                  | chr11 | 43556436 | 43673393 | + | 0    | 0    |
| ENSG00000181160 | MIR302F    | miRNA                    | chr18 | 30298910 | 30298960 | + | 0    | 0    |
| ENSG00000181161 | AC006160   | unprocessed              | chr4  | 17557892 | 17558045 | - | 0    | 0    |
| ENSG00000181162 | RP11-297N  | antisense                | chr16 | 9794637  | 9805571  | + | 0    | 0    |
| ENSG00000181163 | MIR4433A   | miRNA                    | chr2  | 64340759 | 64340839 | + | 0    | 0    |
| ENSG00000181164 | MIR3199-2  | miRNA                    | chr22 | 27920526 | 27920611 | + | 0    | 0    |
| ENSG00000181165 | RP1-20N18  | protein_coding           | chr1  | 1.53E+08 | 1.53E+08 | + | 0    | 0    |
| ENSG00000181166 | CTD-2021K  | protein_coding           | chr2  | 1.52E+08 | 1.52E+08 | - | 1.04 | 0.94 |
| ENSG00000181167 | RP11-1217  | unprocessed              | chr7  | 57168725 | 57169074 | + | 0    | 0    |
| ENSG00000181168 | Cyp2c44    | unitary_prime_transcript | chr10 | 1E+08    | 1E+08    | - | 0    | 0    |
| ENSG00000181169 | RP11-26H1  | transcribed              | chr1  | 21950679 | 21956871 | - | 0    | 0    |
| ENSG00000181170 | RP11-844P  | processed                | chr5  | 1.76E+08 | 1.76E+08 | - | 0.13 | 0    |
| ENSG00000181171 | AC074141   | transcribed              | chr19 | 51860242 | 51863236 | - | 0.19 | 0.39 |
| ENSG00000181172 | hsa-mir-55 | miRNA                    | chr7  | 30289794 | 30289890 | - | 0    | 0    |
| ENSG00000181173 | MIR1245B   | miRNA                    | chr2  | 1.89E+08 | 1.89E+08 | - | 0    | 0    |
| ENSG00000181174 | KBTBD11-C  | protein_coding           | chr8  | 1763888  | 1958627  | + | 0.25 | 0.64 |
| ENSG00000181175 | RP11-239A  | lincRNA                  | chr12 | 16661766 | 16788375 | + | 0.11 | 0.06 |
| ENSG00000181176 | MIR384     | miRNA                    | chrX  | 76919273 | 76919360 | - | 0    | 0    |
| ENSG00000181177 | MEP1AP1    | unprocessed              | chr9  | 40187792 | 40193921 | - | 0    | 0    |
| ENSG00000181178 | RP11-638I  | protein_coding           | chr7  | 45860008 | 45873082 | - | 0    | 0    |
| ENSG00000181179 | U6         | snRNA                    | chr15 | 65843484 | 65843558 | + | 0    | 0    |
| ENSG00000181180 | CTB-60B18  | transcribed              | chr19 | 49056088 | 49058761 | - | 0.07 | 0.36 |
| ENSG00000181181 | RP5-968D2  | lincRNA                  | chr1  | 1.68E+08 | 1.68E+08 | - | 0    | 0    |
| ENSG00000181182 | U6         | snRNA                    | chr12 | 31366288 | 31366366 | + | 0    | 0    |
| ENSG00000181183 | RP11-715F  | unprocessed              | chr11 | 67538899 | 67540584 | + | 0    | 0    |
| ENSG00000181184 | AC007491   | lincRNA                  | chr16 | 54628963 | 54657662 | - | 0    | 0    |
| ENSG00000181185 | ABC14-118  | antisense                | chr1  | 2773603  | 2776473  | + | 0    | 0    |

|                 |            |                |       |          |          |   |      |      |
|-----------------|------------|----------------|-------|----------|----------|---|------|------|
| ENSG00000100000 | U6         | snRNA          | chr2  | 88367793 | 88367862 | - | 0    | 0    |
| ENSG00000100000 | RP11-95M1  | lincRNA        | chr6  | 1.38E+08 | 1.38E+08 | + | 0.05 | 0    |
| ENSG00000100000 | CTB-16J4.1 | protein_coding | chr7  | 90316503 | 90321308 | - | 0    | 0    |
| ENSG00000100000 | RP11-727F  | protein_coding | chr11 | 62832319 | 62832803 | - | 0    | 0    |
| ENSG00000100000 | AC005307   | transcribed    | chr19 | 28683071 | 28727777 | - | 0    | 0    |
| ENSG00000100000 | AC096579   | transcribed    | chr2  | 88811186 | 88825207 | - | 0    | 0    |
| ENSG00000100000 | U6         | snRNA          | chr4  | 13051342 | 13051411 | + | 0    | 0    |
| ENSG00000100000 | RP11-1180  | unprocessed    | chr15 | 22714342 | 22717727 | + | 0    | 0    |
| ENSG00000100000 | 5_8S       | rRNA           | chr14 | 16057472 | 16057622 | + | 0    | 0    |
| ENSG00000100000 | MIR4275    | miRNA          | chr4  | 28819582 | 28819668 | + | 0    | 0    |
| ENSG00000100000 | MIR3914-2  | miRNA          | chr7  | 71307674 | 71307768 | + | 0    | 0    |
| ENSG00000100000 | MIR376C    | miRNA          | chr14 | 1.01E+08 | 1.01E+08 | + | 0    | 0    |
| ENSG00000100000 | MIR7978    | miRNA          | chr4  | 21464700 | 21464758 | - | 0    | 0    |
| ENSG00000100000 | RP11-1223  | unprocessed    | chr2  | 1.1E+08  | 1.1E+08  | - | 0    | 0    |
| ENSG00000100000 | CTC-429C1  | unprocessed    | chr19 | 51914675 | 51917703 | - | 0    | 0    |
| ENSG00000100000 | RP11-386E  | lincRNA        | chr5  | 40415137 | 40431491 | + | 0    | 0    |
| ENSG00000100000 | AC138517   | protein_coding | chr5  | 1.39E+08 | 1.39E+08 | + | 0    | 0    |
| ENSG00000100000 | MIR524     | miRNA          | chr19 | 53711002 | 53711088 | + | 0    | 0    |
| ENSG00000100000 | U6         | snRNA          | chr14 | 24352057 | 24352157 | - | 0    | 0    |
| ENSG00000100000 | 5_8S       | rRNA           | chr20 | 29741510 | 29741661 | - | 0    | 0    |
| ENSG00000100000 | RN7SK      | snRNA          | chr6  | 52995621 | 52995948 | + | 2.7  | 3.63 |
| ENSG00000100000 | RP11-681B  | processed      | chr18 | 14225224 | 14342505 | + | 0.02 | 0.01 |
| ENSG00000100000 | MIR4256    | miRNA          | chr1  | 1.12E+08 | 1.12E+08 | - | 0    | 0    |
| ENSG00000100000 | RP4-816N1  | protein_coding | chr12 | 2849039  | 2857083  | - | 0    | 0    |
| ENSG00000100000 | MIR4272    | miRNA          | chr3  | 67225464 | 67225527 | + | 0    | 0    |
| ENSG00000100000 | U6         | snRNA          | chr21 | 28743208 | 28743291 | + | 0    | 0    |
| ENSG00000100000 | MIR4520-2  | miRNA          | chr17 | 6655449  | 6655502  | + | 0    | 0    |
| ENSG00000100000 | RP11-109E  | antisense      | chr2  | 1.31E+08 | 1.31E+08 | + | 0    | 0    |
| ENSG00000100000 | LINC02183  | lincRNA        | chr16 | 54542808 | 54559100 | - | 0    | 0    |
| ENSG00000100000 | OR5AK4P    | unprocessed    | chr11 | 57037534 | 57038436 | + | 0    | 0    |
| ENSG00000100000 | RP11-1217  | unprocessed    | chr7  | 57172772 | 57173283 | - | 0    | 0    |
| ENSG00000100000 | RP11-562I5 | processed      | chr2  | 2.31E+08 | 2.31E+08 | - | 0    | 0.08 |
| ENSG00000100000 | U6         | snRNA          | chr4  | 70848136 | 70848218 | - | 0    | 0    |
| ENSG00000100000 | RP11-263J1 | lincRNA        | chr4  | 26070754 | 26104258 | + | 0    | 0    |
| ENSG00000100000 | RP11-122G  | lincRNA        | chr1  | 1.61E+08 | 1.61E+08 | - | 0.12 | 0.27 |
| ENSG00000100000 | MIR103B2   | miRNA          | chr20 | 3917502  | 3917563  | - | 0    | 0    |
| ENSG00000100000 | RP11-507K  | protein_coding | chr7  | 17299295 | 17467234 | + | 0.26 | 0    |
| ENSG00000100000 | RP11-235D  | protein_coding | chr1  | 1.51E+08 | 1.51E+08 | + | 0    | 0    |
| ENSG00000100000 | MIR6860    | miRNA          | chr11 | 67045643 | 67045708 | + | 0    | 0    |
| ENSG00000100000 | MIR6841    | miRNA          | chr8  | 24953796 | 24953867 | - | 0    | 0    |
| ENSG00000100000 | RP11-481L  | unprocessed    | chr10 | 1.23E+08 | 1.23E+08 | + | 0    | 0    |
| ENSG00000100000 | RP13-198D  | protein_coding | chr9  | 38694263 | 38720428 | - | 0    | 0    |
| ENSG00000100000 | MIR518D    | miRNA          | chr19 | 53734877 | 53734963 | + | 0    | 0    |
| ENSG00000100000 | RP11-1223  | lincRNA        | chr2  | 1.1E+08  | 1.1E+08  | - | 0    | 0    |
| ENSG00000100000 | MIR7977    | miRNA          | chr3  | 1.77E+08 | 1.77E+08 | + | 0    | 0    |

|                 |               |                |       |          |          |   |      |      |
|-----------------|---------------|----------------|-------|----------|----------|---|------|------|
| ENSG00000103921 | hsa-mir-45    | miRNA          | chrX  | 55451495 | 55451582 | - | 0    | 0    |
| ENSG00000103922 | MIR219B       | miRNA          | chr9  | 1.28E+08 | 1.28E+08 | + | 0    | 0    |
| ENSG00000103923 | RP11-294C     | unprocessed    | chr15 | 21609104 | 21610016 | + | 0    | 0    |
| ENSG00000103924 | U6            | snRNA          | chr10 | 1.03E+08 | 1.03E+08 | + | 0    | 0    |
| ENSG00000103925 | RP11-125F     | unprocessed    | chr11 | 47323983 | 47324181 | + | 0    | 0    |
| ENSG00000103926 | RP11-5C23     | unprocessed    | chr7  | 1.55E+08 | 1.55E+08 | + | 0    | 0    |
| ENSG00000103927 | MIR3119-2     | miRNA          | chr1  | 1.7E+08  | 1.7E+08  | - | 0    | 0    |
| ENSG00000103928 | RP11-4721     | processed      | chr11 | 43578889 | 43840030 | + | 0.7  | 0.43 |
| ENSG00000103929 | NBPF13P       | unprocessed    | chr1  | 1.47E+08 | 1.47E+08 | - | 0    | 0    |
| ENSG00000103930 | MIR4320       | miRNA          | chr18 | 50126499 | 50126563 | - | 0    | 0    |
| ENSG00000103931 | CTD-3092A     | unprocessed    | chr15 | 30507377 | 30513698 | + | 0.15 | 0.32 |
| ENSG00000103932 | MIR6511B      | miRNA          | chr16 | 15134075 | 15134145 | - | 0    | 0    |
| ENSG00000103933 | RP11-569D     | antisense      | chr13 | 1.14E+08 | 1.14E+08 | - | 0    | 0    |
| ENSG00000103934 | RP4-710L4     | transcribed    | chrX  | 64405473 | 64406136 | + | 0    | 0    |
| ENSG00000103935 | MIR3910-2     | miRNA          | chr9  | 91636264 | 91636345 | - | 0    | 0    |
| ENSG00000103936 | XXbac-BPG     | lincRNA        | chr6  | 57919912 | 57961382 | - | 1.71 | 1.3  |
| ENSG00000103937 | RP5-964H1     | unprocessed    | chr1  | 1.08E+08 | 1.09E+08 | - | 0    | 0    |
| ENSG00000103938 | RP11-739P     | TEC            | chr4  | 1.84E+08 | 1.84E+08 | + | 0    | 0    |
| ENSG00000103939 | RP3-491M      | unprocessed    | chr1  | 5554747  | 5554881  | + | 0    | 0    |
| ENSG00000103940 | MIR3977       | miRNA          | chr5  | 82840155 | 82840224 | + | 0    | 0    |
| ENSG00000103941 | RP11-122G     | lincRNA        | chr1  | 1.61E+08 | 1.61E+08 | - | 0    | 0    |
| ENSG00000103942 | RP11-569D     | protein_coding | chr13 | 1.14E+08 | 1.14E+08 | + | 0    | 0    |
| ENSG00000103943 | MIR451B       | miRNA          | chr17 | 28861371 | 28861438 | + | 0    | 0    |
| ENSG00000103944 | RP11-305A     | unitary_prime  | chr16 | 49954985 | 49968730 | - | 0    | 0    |
| ENSG00000103945 | AC000095      | transcribed    | chr22 | 18998274 | 19014786 | + | 0    | 0    |
| ENSG00000103946 | Clostridiales | sRNA           | chr3  | 91356755 | 91356914 | + | 0    | 0    |
| ENSG00000103947 | U6            | snRNA          | chr1  | 2.48E+08 | 2.48E+08 | - | 0    | 0    |
| ENSG00000103948 | ABC8-4301     | unprocessed    | chr13 | 86266842 | 86266926 | - | 0    | 0    |
| ENSG00000103949 | U6            | snRNA          | chr15 | 98026042 | 98026139 | + | 0    | 0    |
| ENSG00000103950 | TXNRD3NB      | protein_coding | chr3  | 1.27E+08 | 1.27E+08 | - | 0    | 0    |
| ENSG00000103951 | RP11-613D     | antisense      | chr11 | 43855913 | 43856404 | - | 0    | 0    |
| ENSG00000103952 | RP11-118B     | unitary_prime  | chr17 | 68691809 | 68716064 | - | 0    | 0    |
| ENSG00000103953 | RP11-193H     | processed      | chr1  | 2.38E+08 | 2.38E+08 | - | 0    | 0    |
| ENSG00000103954 | CH17-296N     | protein_coding | chr9  | 61330717 | 61453030 | + | 5.31 | 3.99 |
| ENSG00000103955 | MIR3688-2     | miRNA          | chr4  | 1.59E+08 | 1.59E+08 | + | 0    | 0    |
| ENSG00000103956 | RP11-274G     | processed      | chrX  | 20769718 | 21374265 | - | 0    | 0.03 |
| ENSG00000103957 | RP11-118G     | unprocessed    | chr17 | 33692229 | 33692484 | + | 0    | 0    |
| ENSG00000103958 | RP11-499F     | lincRNA        | chr4  | 1.84E+08 | 1.84E+08 | - | 0    | 0    |
| ENSG00000103959 | RP11-1531     | protein_coding | chr13 | 1.08E+08 | 1.08E+08 | + | 0.46 | 0.38 |
| ENSG00000103960 | MIR4524A      | miRNA          | chr17 | 69099564 | 69099632 | - | 0    | 0    |
| ENSG00000103961 | MIR4659B      | miRNA          | chr8  | 6745168  | 6745240  | - | 0    | 0    |
| ENSG00000103962 | Metazoa_S     | misc_RNA       | chr12 | 1.22E+08 | 1.22E+08 | - | 0    | 0    |
| ENSG00000103963 | RP11-134F     | processed      | chr3  | 1.87E+08 | 1.87E+08 | + | 0    | 0    |
| ENSG00000103964 | RP11-588H     | lincRNA        | chr3  | 14602035 | 14641443 | + | 0    | 0    |
| ENSG00000103965 | RP11-4721     | processed      | chr11 | 43718676 | 43719143 | + | 0    | 0    |



|                 |           |                           |       |          |          |   |      |      |
|-----------------|-----------|---------------------------|-------|----------|----------|---|------|------|
| ENSG00000103921 | MIR7515   | miRNA                     | chr2  | 6650373  | 6650439  | + | 0    | 0    |
| ENSG00000103922 | CTD-2192D | processed_lincRNA         | chr7  | 76960571 | 76978658 | + | 0    | 0    |
| ENSG00000103923 | AC004381  | unprocessed_lincRNA       | chr16 | 20711473 | 20732990 | + | 0    | 0    |
| ENSG00000103924 | RP11-203E | lincRNA                   | chrX  | 20443326 | 20492349 | + | 0    | 0    |
| ENSG00000103925 | RP11-294C | unprocessed_lincRNA       | chr15 | 21614118 | 21615038 | + | 0    | 0    |
| ENSG00000103926 | RP11-108A | unprocessed_lincRNA       | chr8  | 18849258 | 18849707 | + | 0    | 0    |
| ENSG00000103927 | AC005307  | processed_lincRNA         | chr19 | 28435388 | 28727680 | - | 0    | 0.04 |
| ENSG00000103928 | RP5-872K7 | lincRNA                   | chr20 | 21089696 | 21090509 | + | 0    | 0    |
| ENSG00000103929 | DGCR5     | processed_lincRNA         | chr22 | 18970525 | 19031242 | + | 0    | 0    |
| ENSG00000103930 | RP1-242N1 | lincRNA                   | chr6  | 18522739 | 18674001 | + | 0    | 0    |
| ENSG00000103931 | MIR3662   | miRNA                     | chr6  | 1.35E+08 | 1.35E+08 | - | 0    | 0    |
| ENSG00000103932 | RP11-48C7 | processed_lincRNA         | chr9  | 1.38E+08 | 1.38E+08 | + | 0    | 0    |
| ENSG00000103933 | U6        | snRNA                     | chr11 | 87648489 | 87648549 | - | 0    | 0    |
| ENSG00000103934 | CTB-76P12 | lincRNA                   | chr5  | 1.59E+08 | 1.6E+08  | - | 0    | 0    |
| ENSG00000103935 | U6        | snRNA                     | chr1  | 43716467 | 43716556 | + | 0    | 0    |
| ENSG00000103936 | RP11-413N | lincRNA                   | chr11 | 6821942  | 6926877  | - | 0.08 | 0    |
| ENSG00000103937 | MIR1910   | miRNA                     | chr16 | 85741621 | 85741700 | - | 0    | 0    |
| ENSG00000103938 | RP11-118G | lincRNA                   | chr17 | 33791838 | 33816761 | - | 0    | 0    |
| ENSG00000103939 | U6        | snRNA                     | chr3  | 1.39E+08 | 1.39E+08 | + | 0    | 0    |
| ENSG00000103940 | MIR6874   | miRNA                     | chr7  | 5711840  | 5711910  | - | 0    | 0    |
| ENSG00000103941 | MIR4278   | miRNA                     | chr5  | 6827853  | 6827921  | - | 0    | 0    |
| ENSG00000103942 | AF001550  | unitary_processed_lincRNA | chr16 | 21299903 | 21300506 | + | 0    | 0    |
| ENSG00000103943 | RP11-256L | lincRNA                   | chr12 | 96160692 | 96172126 | - | 0.04 | 0    |
| ENSG00000103944 | RP11-26L2 | lincRNA                   | chr16 | 55321575 | 55322686 | - | 0    | 0    |
| ENSG00000103945 | RP11-141C | unitary_processed_lincRNA | chr3  | 1.96E+08 | 1.96E+08 | + | 0    | 0    |
| ENSG00000103946 | RP4-614C1 | unprocessed_lincRNA       | chr2  | 89533185 | 89547106 | + | 0    | 0    |
| ENSG00000103947 | RP11-811C | protein_coding            | chr2  | 2.25E+08 | 2.25E+08 | - | 0    | 0    |
| ENSG00000103948 | MIR1244-3 | miRNA                     | chr12 | 9239467  | 9239551  | - | 0    | 0    |
| ENSG00000103949 | RP11-1217 | unprocessed_lincRNA       | chr7  | 57163168 | 57166024 | - | 0    | 0    |
| ENSG00000103950 | U6        | snRNA                     | chr4  | 1.35E+08 | 1.35E+08 | - | 0    | 0    |
| ENSG00000103951 | 5S_rRNA   | rRNA                      | chr20 | 29874059 | 29874177 | + | 0    | 0    |
| ENSG00000103952 | RP11-249L | protein_coding            | chr3  | 88338413 | 88467562 | + | 0    | 0    |
| ENSG00000103953 | MIR1321   | miRNA                     | chrX  | 85835780 | 85835858 | + | 0    | 0    |
| ENSG00000103954 | LINC01958 | lincRNA                   | chr2  | 1.57E+08 | 1.57E+08 | + | 0    | 0    |
| ENSG00000103955 | Metazoa_S | misc_RNA                  | chr22 | 23132730 | 23133005 | - | 0    | 0    |
| ENSG00000103956 | RP11-104H | protein_coding            | chr17 | 7428903  | 7432762  | + | 0    | 0    |
| ENSG00000103957 | RP11-445H | lincRNA                   | chr20 | 44656451 | 44663498 | - | 0.11 | 0    |
| ENSG00000103958 | MIR499B   | miRNA                     | chr20 | 34990400 | 34990472 | - | 0    | 0    |
| ENSG00000103959 | U4        | snRNA                     | chr1  | 1.56E+08 | 1.56E+08 | + | 0    | 0    |
| ENSG00000103960 | RP11-462H | unprocessed_lincRNA       | chr20 | 30545601 | 30551470 | + | 0    | 0    |
| ENSG00000103961 | RP11-605P | unitary_processed_lincRNA | chr7  | 37796058 | 37796888 | + | 0    | 0    |
| ENSG00000103962 | RP11-63G1 | lincRNA                   | chr1  | 58715609 | 58771295 | + | 0.5  | 0.36 |
| ENSG00000103963 | RP3-388N1 | unprocessed_lincRNA       | chrX  | 85143427 | 85156444 | + | 0    | 0    |
| ENSG00000103964 | MIR486-2  | miRNA                     | chr8  | 41660444 | 41660507 | + | 0    | 0    |
| ENSG00000103965 | RP11-98F1 | unprocessed_lincRNA       | chr2  | 2.3E+08  | 2.3E+08  | + | 0    | 0    |

|                 |                            |             |          |          |   |      |      |
|-----------------|----------------------------|-------------|----------|----------|---|------|------|
| ENSG00000108160 | Clostridiale sRNA          | chr18       | 75086368 | 75086514 | + | 0    | 0    |
| ENSG00000108161 | RP3-401D2 unprocessed      | chr6        | 60281444 | 60544955 | + | 0    | 0    |
| ENSG00000108162 | MIR523                     | miRNA chr19 | 53698385 | 53698471 | + | 0    | 0    |
| ENSG00000108163 | MTND1P37 processed         | chr10       | 19747172 | 19747435 | - | 0    | 0    |
| ENSG00000108164 | RP11-53L2 lincRNA          | chr16       | 73794079 | 73809733 | + | 0    | 0    |
| ENSG00000108165 | RP11-1I2.1 lincRNA         | chr18       | 39314240 | 39328008 | + | 0    | 0    |
| ENSG00000108166 | RP11-411G lincRNA          | chr12       | 1.15E+08 | 1.15E+08 | - | 0    | 0    |
| ENSG00000108167 | hsa-mir-55                 | miRNA chr7  | 32732981 | 32733077 | - | 0    | 0    |
| ENSG00000108168 | CTC-445B2 processed        | chr5        | 1.04E+08 | 1.04E+08 | - | 0.01 | 0.03 |
| ENSG00000108169 | XX-FW810 protein_coding    | chrX        | 1.5E+08  | 1.5E+08  | + | 0    | 0    |
| ENSG00000108170 | CH17-268I1 IG_V_pseudogene | chr14       | 1.06E+08 | 1.06E+08 | - | 0    | 0    |
| ENSG00000108171 | MIR4454                    | miRNA chr4  | 1.63E+08 | 1.63E+08 | - | 0    | 0    |
| ENSG00000108172 | MIR3130-1                  | miRNA chr2  | 2.07E+08 | 2.07E+08 | - | 0    | 0    |
| ENSG00000108173 | MIR6863                    | miRNA chr16 | 56904264 | 56904353 | + | 0    | 0    |
| ENSG00000108174 | RP11-509I2 protein_coding  | chr3        | 46612435 | 46626543 | + | 0    | 0    |
| ENSG00000108175 | MIR6828                    | miRNA chr3  | 1.7E+08  | 1.7E+08  | + | 0    | 0    |
| ENSG00000108176 | MIR1244-4                  | miRNA chr12 | 12111952 | 12112036 | + | 0    | 0    |
| ENSG00000108177 | MIR1279                    | miRNA chr12 | 69273157 | 69273218 | - | 0    | 0    |
| ENSG00000108178 | MIR6079                    | miRNA chr1  | 43838622 | 43838683 | + | 0    | 0    |
| ENSG00000108179 | LLpac-136A transcribed     | chr19       | 35407770 | 35408493 | + | 0    | 0    |
| ENSG00000108180 | RP11-204E antisense        | chr6        | 21528739 | 21595593 | - | 0    | 0    |
| ENSG00000108181 | MTND4LP3 unprocessed       | chr7        | 57169143 | 57169412 | + | 0    | 0    |
| ENSG00000108182 | RP11-472I2 processed       | chr11       | 43733761 | 43734564 | + | 0    | 0    |
| ENSG00000108183 | MIR3529                    | miRNA chr15 | 88611847 | 88611924 | - | 0    | 0    |
| ENSG00000108184 | RP11-392E protein_coding   | chr9        | 38540569 | 38577207 | - | 0.03 | 0.12 |
| ENSG00000108185 | MIR4501                    | miRNA chr13 | 96427229 | 96427292 | + | 0    | 0    |
| ENSG00000108186 | U6                         | snRNA chr11 | 1.33E+08 | 1.33E+08 | + | 0    | 0    |
| ENSG00000108187 | MIR518C                    | miRNA chr19 | 53708735 | 53708835 | + | 0    | 0    |
| ENSG00000108188 | RP11-562I5 unprocessed     | chr2        | 2.31E+08 | 2.32E+08 | - | 0    | 0    |
| ENSG00000108189 | MIR7153                    | miRNA chr18 | 11654885 | 11654941 | - | 0    | 0    |
| ENSG00000108190 | MIR6086                    | miRNA chrX  | 13590292 | 13590346 | + | 0    | 0    |
| ENSG00000108191 | ZNF511-PR protein_coding   | chr10       | 1.33E+08 | 1.33E+08 | + | 0    | 0    |
| ENSG00000108192 | MIR3160-2                  | miRNA chr11 | 46451807 | 46451887 | + | 0    | 0    |
| ENSG00000108193 | MIR1244-2                  | miRNA chr5  | 1.19E+08 | 1.19E+08 | + | 0    | 0    |
| ENSG00000108194 | U6                         | snRNA chr4  | 48109353 | 48109410 | - | 0    | 0    |
| ENSG00000108195 | U6                         | snRNA chr2  | 47781379 | 47781465 | + | 0    | 0    |
| ENSG00000108196 | LINC01902 lincRNA          | chr18       | 39841809 | 39896298 | + | 0.02 | 0.02 |
| ENSG00000108197 | RP5-958B1 lincRNA          | chr7        | 1.48E+08 | 1.49E+08 | - | 0    | 0    |
| ENSG00000108198 | MIR5681B                   | miRNA chr8  | 74548550 | 74548609 | - | 0    | 0    |
| ENSG00000108199 | MIR7157                    | miRNA chr2  | 1.41E+08 | 1.41E+08 | - | 0    | 0    |
| ENSG00000108200 | MIR1302-1                  | miRNA chr12 | 1.13E+08 | 1.13E+08 | - | 0    | 0    |
| ENSG00000108201 | U6                         | snRNA chr3  | 1.3E+08  | 1.3E+08  | + | 0    | 0    |
| ENSG00000108202 | RP11-456N transcribed      | chr3        | 58180009 | 58187495 | + | 0    | 0.12 |
| ENSG00000108203 | CTD-2547E unprocessed      | chr16       | 21315911 | 21339037 | + | 0    | 0    |
| ENSG00000108204 | MIR941-3                   | miRNA chr20 | 63919561 | 63919632 | + | 0    | 0    |

|                                      |          |          |   |      |      |
|--------------------------------------|----------|----------|---|------|------|
| ENSG0000(MIR3975 miRNA chr18         | 35591737 | 35591806 | + | 0    | 0    |
| ENSG0000(CTD-3138B protein_co chr19  | 58228914 | 58315183 | + | 1.21 | 1.55 |
| ENSG0000(RP11-77H9 protein_co chr16  | 8881634  | 8885351  | + | 0.05 | 0    |
| ENSG0000(RP11-465C lincRNA chr17     | 71829870 | 71871750 | - | 0    | 0    |
| ENSG0000(RP11-53A1 lincRNA chr1      | 2.14E+08 | 2.14E+08 | - | 0    | 0    |
| ENSG0000(U2 snRNA chr14              | 75270700 | 75270780 | - | 0    | 0    |
| ENSG0000(MIR3150A miRNA chr8         | 95072914 | 95072993 | + | 0    | 0    |
| ENSG0000(MIR3926-2 miRNA chr8        | 12727237 | 12727299 | + | 0    | 0    |
| ENSG0000(RP11-69H1 unprocessε chr15  | 21971728 | 21972643 | + | 0    | 0    |
| ENSG0000(LLNLR-271 transcribec chr19 | 43690002 | 43700508 | + | 0    | 0.12 |
| ENSG0000(RP11-40A7 protein_co chr9   | 1.32E+08 | 1.32E+08 | + | 0    | 0    |
| ENSG0000(U6 snRNA chr20              | 35769785 | 35769867 | - | 0    | 0    |
| ENSG0000(RP11-298A protein_co chr7   | 1.44E+08 | 1.44E+08 | - | 0    | 0    |
| ENSG0000(RP4-791K1 transcribec chr20 | 49318337 | 49441654 | + | 0    | 0    |
| ENSG0000(MIR4317 miRNA chr18         | 6374361  | 6374425  | - | 0    | 0    |
| ENSG0000(MIR374C miRNA chrX          | 74218549 | 74218618 | + | 0    | 0    |
| ENSG0000(AC007064. unprocessε chr22  | 16844399 | 16846357 | + | 0    | 0    |
| ENSG0000(RP11-624J protein_co chr12  | 53241889 | 53245134 | + | 0    | 0.22 |
| ENSG0000(RP11-298A unprocessε chr7   | 1.44E+08 | 1.44E+08 | - | 0    | 0    |
| ENSG0000(RP11-180P lincRNA chr17     | 62910690 | 62968549 | - | 0.05 | 0    |
| ENSG0000(MIR520F miRNA chr19         | 53682159 | 53682245 | + | 0    | 0    |
| ENSG0000(RP11-101E unprocessε chr9   | 61063752 | 61113954 | - | 0    | 0    |
| ENSG0000(RP11-216P unitary_ps chr12  | 1.21E+08 | 1.21E+08 | - | 0    | 0    |
| ENSG0000(ABBA0100 unprocessε chr3    | 91374236 | 91513775 | - | 0    | 0    |
| ENSG0000(U6 snRNA chr12              | 45554590 | 45554659 | - | 0    | 0    |
| ENSG0000(RP11-52E2 lincRNA chrX      | 21131496 | 21163726 | + | 0    | 0    |
| ENSG0000(RP11-1217 unprocessε chr7   | 57167200 | 57167880 | + | 0    | 0    |
| ENSG0000(RP11-505D processed_ chr7   | 7640752  | 8004053  | + | 0    | 0.33 |
| ENSG0000(MIR2054 miRNA chr4          | 1.26E+08 | 1.26E+08 | + | 0    | 0    |
| ENSG0000(SNORD98 snoRNA chr10        | 68755172 | 68755238 | + | 0    | 0    |
| ENSG0000(RP11-413N lincRNA chr13     | 42339188 | 42485956 | + | 0    | 0    |
| ENSG0000(U2 snRNA chr8               | 1.1E+08  | 1.1E+08  | - | 0    | 0    |
| ENSG0000(MIR376B miRNA chr14         | 1.01E+08 | 1.01E+08 | + | 0    | 0    |
| ENSG0000(hsa-mir-31 miRNA chr10      | 1.02E+08 | 1.02E+08 | - | 0    | 0    |
| ENSG0000(RP11-844P transcribec chr5  | 1.76E+08 | 1.76E+08 | - | 0    | 0    |
| ENSG0000(MIR376A2 miRNA chr14        | 1.01E+08 | 1.01E+08 | + | 0    | 0    |
| ENSG0000(IGHVIII-44 IG_V_pseu chr14  | 1.06E+08 | 1.06E+08 | - | 0    | 0    |
| ENSG0000(RP11-9J18. protein_co chr3  | 28349178 | 29767537 | + | 0    | 0.05 |
| ENSG0000(U6 snRNA chr16              | 72376704 | 72376760 | + | 0    | 0    |
| ENSG0000(ABC13-476 unprocessε chr17  | 21773754 | 21783465 | - | 0    | 0    |
| ENSG0000(CTD-2537I protein_co chr19  | 55463002 | 55464707 | - | 0    | 0    |
| ENSG0000(5_8S_rRNA rRNA chr20        | 29297095 | 29297246 | - | 0    | 0    |
| ENSG0000(MIR4773-2 miRNA chr2        | 1.51E+08 | 1.51E+08 | - | 0    | 0    |
| ENSG0000(CH17-212P IG_pseudo chr14   | 1.07E+08 | 1.07E+08 | - | 0    | 0    |
| ENSG0000(MIR4251 miRNA chr1          | 3127975  | 3128035  | + | 0    | 0    |

|                                        |       |          |          |   |      |      |
|----------------------------------------|-------|----------|----------|---|------|------|
| ENSG0000(RP11-344J) lincRNA            | chr6  | 43803193 | 43842625 | + | 0    | 0    |
| ENSG0000(RP11-206L) transcribed        | chr1  | 720024   | 720206   | - | 0    | 0    |
| ENSG0000(U6) snRNA                     | chr1  | 1.81E+08 | 1.81E+08 | + | 0    | 0    |
| ENSG0000(CTD-2336C) processed          | chr8  | 1726273  | 1726557  | + | 0    | 0    |
| ENSG0000(MTND5P42) processed           | chr10 | 89786610 | 89787107 | + | 0    | 0    |
| ENSG0000(RP11-545M) lincRNA            | chr13 | 26965967 | 26991996 | - | 0    | 0    |
| ENSG0000(RP5-994D1) protein_coding     | chr1  | 42767292 | 42794493 | + | 0.78 | 0.56 |
| ENSG0000(RP11-49G2) unitary_pseudogene | chr12 | 22116629 | 22134851 | - | 0    | 0    |
| ENSG0000(AC007326) unprocessed         | chr22 | 18980695 | 18981325 | - | 0    | 0    |
| ENSG0000(snoMe28S) snoRNA              | chr16 | 7431217  | 7431296  | + | 0    | 0    |
| ENSG0000(CTB-133P2) lincRNA            | chr7  | 1.07E+08 | 1.07E+08 | + | 0    | 0    |
| ENSG0000(GKN3P) polymorphic            | chr2  | 68921248 | 68926834 | + | 0    | 0    |
| ENSG0000(RP11-986G) processed          | chr12 | 2726400  | 2727050  | - | 0    | 0    |
| ENSG0000(MIR376A1) miRNA               | chr14 | 1.01E+08 | 1.01E+08 | + | 0    | 0    |
| ENSG0000(MIR4430) miRNA                | chr2  | 33418516 | 33418564 | + | 0    | 0    |
| ENSG0000(Y_RNA) misc_RNA               | chr20 | 29575060 | 29575171 | + | 0    | 0    |
| ENSG0000(FAM236C) protein_coding       | chrX  | 72912615 | 72913401 | + | 0    | 0    |
| ENSG0000(FAM169B) protein_coding       | chr15 | 98437162 | 98547728 | - | 0    | 0    |
| ENSG0000(MIR1295B) miRNA               | chr1  | 1.71E+08 | 1.71E+08 | + | 0    | 0    |
| ENSG0000(RP11-402P) protein_coding     | chrX  | 71667542 | 71671524 | + | 0    | 0    |
| ENSG0000(RP11-448N) unprocessed        | chr11 | 60577856 | 60608418 | + | 0    | 0    |
| ENSG0000(AC011380) transcribed         | chr5  | 1.41E+08 | 1.41E+08 | - | 0    | 0    |
| ENSG0000(MIR4302) miRNA                | chr12 | 25874020 | 25874079 | - | 0    | 0    |
| ENSG0000(MIR338) miRNA                 | chr17 | 81125883 | 81125949 | - | 0    | 0    |
| ENSG0000(OR4C48P) unprocessed          | chr11 | 50018798 | 50019695 | + | 0    | 0    |
| ENSG0000(IGHVII-31) IG_V_pseudogene    | chr14 | 1.06E+08 | 1.06E+08 | - | 0    | 0    |
| ENSG0000(RP1-111D6) lincRNA            | chr6  | 1.49E+08 | 1.49E+08 | + | 0    | 0    |
| ENSG0000(MIR4662A) miRNA               | chr8  | 1.25E+08 | 1.25E+08 | + | 0    | 0    |
| ENSG0000(RP11-84A1) unitary_pseudogene | chr1  | 9951231  | 9960832  | - | 0    | 0    |
| ENSG0000(MIR103B1) miRNA               | chr5  | 1.69E+08 | 1.69E+08 | + | 0    | 0    |
| ENSG0000(RP11-61D1) unitary_pseudogene | chr18 | 54412763 | 54424632 | + | 0    | 0    |
| ENSG0000(MIR7973-2) miRNA              | chr15 | 51314032 | 51314107 | - | 0    | 0    |
| ENSG0000(MIR924) miRNA                 | chr18 | 39622123 | 39622175 | - | 0    | 0    |
| ENSG0000(MIR5683) miRNA                | chr6  | 6169334  | 6169409  | + | 0    | 0    |
| ENSG0000(Clostridiales) sRNA           | chr7  | 30115845 | 30115994 | - | 0    | 0    |
| ENSG0000(MIR6759) miRNA                | chr12 | 57748618 | 57748682 | - | 0    | 0    |
| ENSG0000(MIR4328) miRNA                | chrX  | 78901194 | 78901249 | - | 0    | 0    |
| ENSG0000(RP11-433C) unprocessed        | chr3  | 1.84E+08 | 1.85E+08 | - | 0    | 0    |
| ENSG0000(RP11-1217) unprocessed        | chr7  | 57190461 | 57191138 | + | 0    | 0    |
| ENSG0000(RP11-151G) lincRNA            | chr14 | 89013386 | 89025807 | + | 0    | 0    |
| ENSG0000(RP11-361H) antisense          | chr14 | 76131707 | 76152627 | - | 0    | 0    |
| ENSG0000(RP11-1037) lincRNA            | chrX  | 20311838 | 20317783 | - | 0    | 0    |
| ENSG0000(EXOC3L2) protein_coding       | chr19 | 45212621 | 45245431 | - | 0.05 | 0    |
| ENSG0000(AC005301) lincRNA             | chr22 | 16601911 | 16615111 | + | 1    | 0.61 |
| ENSG0000(MIR3155B) miRNA               | chr10 | 6152207  | 6152262  | - | 0    | 0    |

|                                |       |          |          |   |      |      |
|--------------------------------|-------|----------|----------|---|------|------|
| ENSG0000(RP11-5O24 antisense)  | chr2  | 2.38E+08 | 2.38E+08 | + | 0    | 0    |
| ENSG0000(Metazoa_S misc_RNA)   | chr2  | 63168600 | 63168847 | + | 0    | 0    |
| ENSG0000(hsa-mir-47 miRNA)     | chr2  | 2.13E+08 | 2.13E+08 | - | 0    | 0    |
| ENSG0000(AC002407. processed_) | chrX  | 1.34E+08 | 1.34E+08 | - | 0    | 0    |
| ENSG0000(MIR9500 miRNA)        | chr2  | 2.19E+08 | 2.19E+08 | + | 0    | 0    |
| ENSG0000(RP13-210D protein_co) | chrX  | 1.35E+08 | 1.35E+08 | + | 0    | 0    |
| ENSG0000(MIR5583-2 miRNA)      | chr18 | 39676719 | 39676777 | - | 0    | 0    |
| ENSG0000(LINC02009 lincRNA)    | chr3  | 46416524 | 46423591 | - | 0    | 0.04 |
| ENSG0000(RP11-265B antisense)  | chr9  | 14790635 | 14791158 | + | 0    | 0    |
| ENSG0000(RP5-958B1 lincRNA)    | chr7  | 1.49E+08 | 1.49E+08 | - | 0    | 0    |
| ENSG0000(RP11-373N unitary_ps) | chr5  | 1.48E+08 | 1.48E+08 | + | 0    | 0    |
| ENSG0000(RP11-244E protein_co) | chr14 | 23099065 | 23104992 | - | 0.08 | 0.07 |
| ENSG0000(MIR4483 miRNA)        | chr10 | 1.14E+08 | 1.14E+08 | - | 0    | 0    |
| ENSG0000(RP11-646I unprocessε) | chr2  | 1.66E+08 | 1.66E+08 | + | 0    | 0    |
| ENSG0000(RP4-614C1 unprocessε) | chr2  | 89666033 | 89683204 | + | 0    | 0    |
| ENSG0000(RP11-57A1 lincRNA)    | chr16 | 28258686 | 28292173 | + | 0.53 | 0.43 |
| ENSG0000(CTB-60B18 protein_co) | chr19 | 49055793 | 49065076 | - | 0    | 0.04 |
| ENSG0000(MIR4679-1 miRNA)      | chr10 | 89063336 | 89063410 | + | 0    | 0    |
| ENSG0000(MIR3974 miRNA)        | chr12 | 17673299 | 17673394 | + | 0    | 0    |
| ENSG0000(U6 snRNA)             | chr4  | 29510635 | 29510737 | + | 0    | 0    |
| ENSG0000(RP11-793J antisense)  | chr18 | 63966406 | 63970181 | - | 0.04 | 0    |
| ENSG0000(RP11-231E unitary_ps) | chr3  | 1.12E+08 | 1.12E+08 | + | 0    | 0    |
| ENSG0000(MIR4678 miRNA)        | chr10 | 87503881 | 87503954 | + | 0    | 0    |
| ENSG0000(MIR4531 miRNA)        | chr19 | 44653686 | 44653732 | - | 0    | 0    |
| ENSG0000(RP11-419I lincRNA)    | chr8  | 12537079 | 12665588 | - | 0.22 | 0.15 |
| ENSG0000(snoMe28S. snoRNA)     | chr17 | 19420279 | 19420342 | + | 0    | 0    |
| ENSG0000(MIR5087 miRNA)        | chr1  | 1.48E+08 | 1.48E+08 | - | 0    | 0    |
| ENSG0000(MIR3913-2 miRNA)      | chr12 | 69584723 | 69584822 | + | 0    | 0    |
| ENSG0000(MIR6830 miRNA)        | chr5  | 1.32E+08 | 1.32E+08 | - | 0    | 0    |
| ENSG0000(RP11-1137 processed_) | chr19 | 7011884  | 7012679  | + | 0    | 0    |
| ENSG0000(RP11-294C unprocessε) | chr15 | 21595580 | 21596510 | - | 0    | 0    |
| ENSG0000(MIR548AH miRNA)       | chr4  | 76575551 | 76575626 | + | 0    | 0    |
| ENSG0000(RP3-454G6 protein_co) | chr1  | 1.72E+08 | 1.72E+08 | + | 0.29 | 0.62 |
| ENSG0000(AC013271. processed_) | chr2  | 1.1E+08  | 1.1E+08  | + | 0.08 | 0.13 |
| ENSG0000(MIR522 miRNA)         | chr19 | 53751211 | 53751297 | + | 0    | 0    |
| ENSG0000(RP11-706C unprocessε) | chr8  | 1.43E+08 | 1.43E+08 | - | 0    | 0    |
| ENSG0000(MIR6715B miRNA)       | chr10 | 1.12E+08 | 1.12E+08 | - | 0    | 0    |
| ENSG0000(RP11-434E antisense)  | chr16 | 54285604 | 54289568 | + | 0.17 | 0.56 |
| ENSG0000(MIR3116-2 miRNA)      | chr1  | 62078789 | 62078856 | - | 0    | 0    |
| ENSG0000(Y_RNA misc_RNA)       | chr11 | 1.19E+08 | 1.19E+08 | + | 0    | 0    |
| ENSG0000(RP11-158N lincRNA)    | chrX  | 1.38E+08 | 1.38E+08 | + | 0    | 0    |
| ENSG0000(MIR3202-2 miRNA)      | chrX  | 1.54E+08 | 1.54E+08 | - | 0    | 0    |
| ENSG0000(CTD-2331H unprocessε) | chr19 | 52865369 | 52865429 | - | 0    | 0    |
| ENSG0000(RP11-122G lincRNA)    | chr1  | 1.61E+08 | 1.61E+08 | + | 0.31 | 0.34 |
| ENSG0000(RP5-937E2 protein_co) | chrX  | 1.5E+08  | 1.5E+08  | - | 0    | 0    |

|                 |            |                        |       |          |          |   |       |       |
|-----------------|------------|------------------------|-------|----------|----------|---|-------|-------|
| ENSG00000181200 | RP11-606N  | transcribed            | chr2  | 1.12E+08 | 1.12E+08 | - | 0.07  | 0     |
| ENSG00000181201 | MIR4481    | miRNA                  | chr10 | 12653138 | 12653197 | - | 0     | 0     |
| ENSG00000181202 | MIR555     | miRNA                  | chr1  | 1.55E+08 | 1.55E+08 | - | 0     | 0     |
| ENSG00000181203 | RP11-680F  | protein_coding         | chr11 | 1.26E+08 | 1.26E+08 | + | 0     | 0     |
| ENSG00000181204 | MIR3656    | miRNA                  | chr11 | 1.19E+08 | 1.19E+08 | + | 0     | 0     |
| ENSG00000181205 | MIR92A1    | miRNA                  | chr13 | 91351314 | 91351391 | + | 0     | 0     |
| ENSG00000181206 | PRSS50     | protein_coding         | chr3  | 46712115 | 46717907 | - | 0     | 0     |
| ENSG00000181207 | LINC00202  | transcribed            | chr10 | 26931206 | 26944418 | - | 0.17  | 0.24  |
| ENSG00000181208 | MIR1204    | miRNA                  | chr8  | 1.28E+08 | 1.28E+08 | + | 0     | 0     |
| ENSG00000181209 | MIR6727    | miRNA                  | chr1  | 1312502  | 1312566  | - | 0     | 0     |
| ENSG00000181210 | MIR6831    | miRNA                  | chr5  | 1.41E+08 | 1.41E+08 | - | 0     | 0     |
| ENSG00000181211 | MIR6884    | miRNA                  | chr17 | 40026332 | 40026409 | - | 0     | 0     |
| ENSG00000181212 | MIR6732    | miRNA                  | chr1  | 37480230 | 37480289 | + | 0     | 0     |
| ENSG00000181213 | MIR5193    | miRNA                  | chr3  | 49806137 | 49806245 | - | 0     | 0     |
| ENSG00000181214 | MIR7108    | miRNA                  | chr19 | 2434914  | 2435000  | - | 0     | 0     |
| ENSG00000181215 | MIR146A    | miRNA                  | chr5  | 1.6E+08  | 1.6E+08  | + | 0     | 0     |
| ENSG00000181216 | MIR4785    | miRNA                  | chr2  | 1.6E+08  | 1.6E+08  | - | 0     | 0     |
| ENSG00000181217 | MIR484     | miRNA                  | chr16 | 15643294 | 15643372 | + | 0     | 0     |
| ENSG00000181218 | RP5-1044C  | TEC                    | chrX  | 42285130 | 42285925 | + | 15.66 | 15.32 |
| ENSG00000181219 | RP11-432N  | protein_coding         | chr5  | 17604177 | 17605377 | + | 0     | 0     |
| ENSG00000181220 | RP1-230G1  | processed_transcript   | chrX  | 47605233 | 47623509 | - | 0     | 0     |
| ENSG00000181221 | MIR6755    | miRNA                  | chr11 | 86278333 | 86278398 | + | 0     | 0     |
| ENSG00000181222 | MIR196B    | miRNA                  | chr7  | 27169480 | 27169563 | - | 0     | 0     |
| ENSG00000181223 | MIR4781    | miRNA                  | chr1  | 54054079 | 54054154 | + | 0     | 0     |
| ENSG00000181224 | MIR452     | miRNA                  | chrX  | 1.52E+08 | 1.52E+08 | - | 0     | 0     |
| ENSG00000181225 | CH17-195P  | unprocessed_transcript | chr1  | 1.45E+08 | 1.45E+08 | + | 0     | 0     |
| ENSG00000181226 | CPHXL      | protein_coding         | chr16 | 75714224 | 75726442 | - | 0     | 0     |
| ENSG00000181227 | RP5-981L2  | processed_transcript   | chr20 | 46455033 | 46496731 | - | 0.03  | 0     |
| ENSG00000181228 | LLNLR-275I | protein_coding         | chr19 | 35586260 | 35587296 | + | 0     | 0     |
| ENSG00000181229 | MIR614     | miRNA                  | chr12 | 12915829 | 12915918 | + | 0     | 0     |
| ENSG00000181230 | RP4-714D9  | protein_coding         | chr1  | 99970011 | 1E+08    | + | 6.09  | 5.37  |
| ENSG00000181231 | MIR20A     | miRNA                  | chr13 | 91351065 | 91351135 | + | 0     | 0     |
| ENSG00000181232 | MIR6850    | miRNA                  | chr8  | 1.45E+08 | 1.45E+08 | - | 0     | 0     |
| ENSG00000181233 | RP11-449K  | protein_coding         | chr3  | 1.84E+08 | 1.84E+08 | - | 0     | 0     |
| ENSG00000181234 | AC141930   | lincRNA                | chr2  | 1552445  | 1554701  | + | 0     | 0     |
| ENSG00000181235 | MIR1178    | miRNA                  | chr12 | 1.2E+08  | 1.2E+08  | - | 0     | 0     |
| ENSG00000181236 | WI2-1959D  | antisense              | chr9  | 1.36E+08 | 1.36E+08 | + | 0     | 0     |
| ENSG00000181237 | MIR6849    | miRNA                  | chr8  | 1.44E+08 | 1.44E+08 | - | 0     | 0     |
| ENSG00000181238 | MIR6778    | miRNA                  | chr17 | 18340814 | 18340886 | - | 0     | 0     |
| ENSG00000181239 | RP5-1182A  | transcribed            | chr1  | 16642767 | 16643109 | - | 0.81  | 5.46  |
| ENSG00000181240 | MIR632     | miRNA                  | chr17 | 32350109 | 32350202 | + | 0     | 0     |
| ENSG00000181241 | MIR4329    | miRNA                  | chrX  | 1.13E+08 | 1.13E+08 | - | 0     | 0     |
| ENSG00000181242 | RP11-432N  | protein_coding         | chr5  | 17632088 | 17632684 | + | 0     | 0     |
| ENSG00000181243 | AC116366   | protein_coding         | chr5  | 1.32E+08 | 1.33E+08 | + | 0.63  | 0.54  |
| ENSG00000181244 | MIR622     | miRNA                  | chr13 | 90231182 | 90231277 | + | 0     | 0     |

|                     |            |       |          |          |   |      |       |
|---------------------|------------|-------|----------|----------|---|------|-------|
| ENSG0000(MIR15A     | miRNA      | chr13 | 50049119 | 50049201 | - | 0    | 0     |
| ENSG0000(PRR33      | protein_co | chr11 | 1888577  | 1891895  | - | 0    | 0     |
| ENSG0000(MIR936     | miRNA      | chr10 | 1.04E+08 | 1.04E+08 | - | 0    | 0     |
| ENSG0000(MIR7846    | miRNA      | chr1  | 12166943 | 12167038 | + | 0    | 0     |
| ENSG0000(MIR612     | miRNA      | chr11 | 65444458 | 65444557 | + | 0    | 0     |
| ENSG0000(MIR4453    | miRNA      | chr4  | 1.53E+08 | 1.53E+08 | + | 0    | 0     |
| ENSG0000(MIR6861    | miRNA      | chr12 | 1.12E+08 | 1.12E+08 | - | 0    | 0     |
| ENSG0000(MIR4426    | miRNA      | chr1  | 1.93E+08 | 1.93E+08 | + | 0    | 0     |
| ENSG0000(MIR6510    | miRNA      | chr17 | 41517164 | 41517217 | - | 0    | 0     |
| ENSG0000(MIR29B1    | miRNA      | chr7  | 1.31E+08 | 1.31E+08 | - | 0    | 0     |
| ENSG0000(MIR630     | miRNA      | chr15 | 72587217 | 72587313 | + | 0    | 0     |
| ENSG0000(MIR1182    | miRNA      | chr1  | 2.31E+08 | 2.31E+08 | - | 0    | 45.3  |
| ENSG0000(MIR1302-1  | miRNA      | chr19 | 71973    | 72110    | + | 0    | 0     |
| ENSG0000(MIR3198-2  | miRNA      | chr12 | 54231397 | 54231476 | - | 0    | 0     |
| ENSG0000(MIR636     | miRNA      | chr17 | 76736450 | 76736548 | - | 0    | 0     |
| ENSG0000(AC007326.  | protein_co | chr22 | 18906238 | 18947732 | + | 0    | 0     |
| ENSG0000(MIR4485    | miRNA      | chr11 | 10508270 | 10508326 | - | 0    | 0     |
| ENSG0000(MIR18A     | miRNA      | chr13 | 91350751 | 91350821 | + | 0    | 0     |
| ENSG0000(MIR7844    | miRNA      | chr12 | 94571231 | 94571352 | - | 0    | 0     |
| ENSG0000(MIR144     | miRNA      | chr17 | 28861533 | 28861618 | - | 0    | 0     |
| ENSG0000(MIR6875    | miRNA      | chr7  | 1.01E+08 | 1.01E+08 | + | 0    | 0     |
| ENSG0000(MIR639     | miRNA      | chr19 | 14529543 | 14529640 | + | 0    | 0     |
| ENSG0000(MIR22      | miRNA      | chr17 | 1713903  | 1713987  | - | 0    | 0     |
| ENSG0000(RP11-98F1. | antisense  | chr13 | 1.13E+08 | 1.13E+08 | - | 0.49 | 0.38  |
| ENSG0000(MIR378I    | miRNA      | chr22 | 41923222 | 41923297 | - | 0    | 0     |
| ENSG0000(MIR6734    | miRNA      | chr1  | 43364648 | 43364715 | - | 0    | 0     |
| ENSG0000(RP11-363K  | antisense  | chr2  | 1.85E+08 | 1.85E+08 | - | 0    | 0.02  |
| ENSG0000(MIR6764    | miRNA      | chr14 | 1E+08    | 1E+08    | + | 0    | 0     |
| ENSG0000(MIR4751    | miRNA      | chr19 | 49933064 | 49933137 | + | 0    | 0     |
| ENSG0000(MIR214     | miRNA      | chr1  | 1.72E+08 | 1.72E+08 | - | 0    | 16.31 |
| ENSG0000(MIR4721    | miRNA      | chr16 | 28843919 | 28844007 | - | 0    | 0     |
| ENSG0000(MIR6872    | miRNA      | chr3  | 50273236 | 50273297 | + | 0    | 0     |
| ENSG0000(RP11-331G  | antisense  | chr3  | 39152906 | 39154723 | + | 0    | 0     |
| ENSG0000(MIR4738    | miRNA      | chr17 | 75784521 | 75784607 | - | 0    | 0     |
| ENSG0000(MIR7703    | miRNA      | chr14 | 24143489 | 24143565 | - | 0    | 0     |
| ENSG0000(MIR1247    | miRNA      | chr14 | 1.02E+08 | 1.02E+08 | - | 0    | 0     |
| ENSG0000(MIR3674    | miRNA      | chr8  | 1801125  | 1801192  | + | 0    | 0     |
| ENSG0000(MIR3960    | miRNA      | chr9  | 1.28E+08 | 1.28E+08 | + | 0    | 0     |
| ENSG0000(RP11-109E  | unprocessε | chr2  | 1.31E+08 | 1.31E+08 | - | 0    | 0     |
| ENSG0000(RP11-680F  | antisense  | chr11 | 1.26E+08 | 1.26E+08 | + | 0    | 0     |
| ENSG0000(MIR1307    | miRNA      | chr10 | 1.03E+08 | 1.03E+08 | - | 0    | 0     |
| ENSG0000(MIR130B    | miRNA      | chr22 | 21653304 | 21653385 | + | 0    | 0     |
| ENSG0000(SSU72P4    | protein_co | chr11 | 4287499  | 4288083  | - | 0    | 0     |
| ENSG0000(MIR3911    | miRNA      | chr9  | 1.28E+08 | 1.28E+08 | - | 0    | 0     |
| ENSG0000(MIR4260    | miRNA      | chr1  | 2.1E+08  | 2.1E+08  | - | 0    | 0     |

|                                 |       |          |          |   |       |       |
|---------------------------------|-------|----------|----------|---|-------|-------|
| ENSG0000( AC104304. protein_co  | chr3  | 46581150 | 46617226 | + | 0     | 0     |
| ENSG0000( RP13-929K unprocessε  | chr17 | 22519195 | 22519504 | - | 0     | 0     |
| ENSG0000( MIR7704 miRNA         | chr2  | 1.76E+08 | 1.76E+08 | + | 0     | 0     |
| ENSG0000( MIR3916 miRNA         | chr1  | 2.47E+08 | 2.47E+08 | - | 0     | 0     |
| ENSG0000( MIR3714 miRNA         | chr3  | 16933196 | 16933260 | + | 0     | 0     |
| ENSG0000( RP11-204M processed_  | chr9  | 39816599 | 39874562 | - | 0     | 0     |
| ENSG0000( MIR1469 miRNA         | chr15 | 96333261 | 96333307 | + | 0     | 0     |
| ENSG0000( MIR628 miRNA          | chr15 | 55372940 | 55373034 | - | 0     | 0     |
| ENSG0000( MIR1324 miRNA         | chr3  | 75630763 | 75630858 | + | 0     | 0     |
| ENSG0000( CTB-88F18 lincRNA     | chr5  | 1.27E+08 | 1.27E+08 | - | 0.04  | 0.17  |
| ENSG0000( MIR761 miRNA          | chr1  | 51836344 | 51836402 | - | 0     | 0     |
| ENSG0000( RP1-5O6.7 protein_co  | chr22 | 38291918 | 38398522 | - | 0.77  | 1.01  |
| ENSG0000( MIR155 miRNA          | chr21 | 25573980 | 25574044 | + | 0     | 0     |
| ENSG0000( IGHV4-80 IG_V_pseu    | chr14 | 1.07E+08 | 1.07E+08 | - | 0     | 0     |
| ENSG0000( LLNLF-96A: antisense  | chr19 | 35557956 | 35581954 | + | 64.44 | 72.24 |
| ENSG0000( RP11-479C processed_  | chr10 | 79904898 | 79951029 | + | 0     | 0.03  |
| ENSG0000( RP11-219G lincRNA     | chr17 | 78248193 | 78251440 | + | 0     | 0     |
| ENSG0000( MIR6743 miRNA         | chr11 | 209336   | 209406   | + | 0     | 0     |
| ENSG0000( MIR1302-9 miRNA       | chr9  | 30144    | 30281    | + | 0     | 0     |
| ENSG0000( MIR6132 miRNA         | chr7  | 1.17E+08 | 1.17E+08 | + | 0     | 0     |
| ENSG0000( MIR192 miRNA          | chr11 | 64891137 | 64891246 | - | 0     | 0     |
| ENSG0000( MIR133A1 miRNA        | chr18 | 21825698 | 21825785 | - | 0     | 0     |
| ENSG0000( MIR637 miRNA          | chr19 | 3961414  | 3961512  | - | 0     | 0     |
| ENSG0000( MIR5010 miRNA         | chr17 | 42514188 | 42514307 | + | 0     | 0     |
| ENSG0000( RP11-508N protein_co  | chr10 | 38094368 | 38360098 | + | 0.56  | 0.43  |
| ENSG0000( MIR18B miRNA          | chrX  | 1.34E+08 | 1.34E+08 | - | 0     | 0     |
| ENSG0000( RP4-788L2: protein_co | chr20 | 22560553 | 22584261 | - | 0     | 0     |
| ENSG0000( MIR6878 miRNA         | chr1  | 1.5E+08  | 1.5E+08  | + | 0     | 0     |
| ENSG0000( MIR423 miRNA          | chr17 | 30117079 | 30117172 | + | 0     | 0     |
| ENSG0000( MIR3658 miRNA         | chr1  | 1.66E+08 | 1.66E+08 | + | 0     | 0     |
| ENSG0000( MIR3917 miRNA         | chr1  | 25906362 | 25906454 | - | 0     | 0     |
| ENSG0000( RP11-803A unprocessε  | chr2  | 1.3E+08  | 1.3E+08  | + | 0     | 0     |
| ENSG0000( MIR600 miRNA          | chr9  | 1.23E+08 | 1.23E+08 | - | 0     | 0     |
| ENSG0000( MIR4709 miRNA         | chr14 | 74480133 | 74480204 | - | 0     | 0     |
| ENSG0000( LINC00032 transcribec | chr9  | 27245680 | 27284869 | - | 0     | 0     |
| ENSG0000( IGHVIII-16- IG_V_pseu | chr14 | 1.06E+08 | 1.06E+08 | - | 0     | 0     |
| ENSG0000( MIR6791 miRNA         | chr19 | 6736712  | 6736778  | - | 0     | 0     |
| ENSG0000( RP11-543B protein_co  | chr1  | 2.11E+08 | 2.11E+08 | - | 0     | 0     |
| ENSG0000( MIR3610 miRNA         | chr8  | 1.17E+08 | 1.17E+08 | - | 0     | 0     |
| ENSG0000( MIR1248 miRNA         | chr3  | 1.87E+08 | 1.87E+08 | + | 0     | 0     |
| ENSG0000( KB-1042C1 bidirection | chr8  | 1.03E+08 | 1.03E+08 | + | 0.08  | 0.2   |
| ENSG0000( RP11-432M protein_co  | chr5  | 17590364 | 17590960 | - | 0     | 0     |
| ENSG0000( MIR6838 miRNA         | chr7  | 44073378 | 44073433 | - | 0     | 0     |
| ENSG0000( MIR4442 miRNA         | chr3  | 25664873 | 25664939 | - | 0     | 0     |
| ENSG0000( KB-1592A4 transcribec | chr22 | 21193360 | 21203755 | - | 0     | 0     |



|                  |                        |       |          |          |   |      |      |
|------------------|------------------------|-------|----------|----------|---|------|------|
| ENSG000001848E1  | lincRNA                | chr1  | 42959065 | 42961864 | - | 0    | 0    |
| ENSG00000120101  | protein_coding         | chr11 | 6481485  | 6508978  | + | 0    | 0.95 |
| ENSG000001365B   | miRNA                  | chr17 | 31575411 | 31575521 | + | 0    | 0    |
| ENSG00000126591  | protein_coding         | chr19 | 12687998 | 12688422 | + | 0    | 0    |
| ENSG00000114951  | lincRNA                | chr9  | 23500691 | 23672387 | - | 0    | 0    |
| ENSG000001432M   | protein_coding         | chr5  | 17593798 | 17594394 | - | 0    | 0    |
| ENSG000001777A3  | miRNA                  | chr22 | 46112749 | 46112822 | + | 0    | 0    |
| ENSG00000142B7   | antisense              | chr7  | 4130181  | 4134837  | - | 0    | 0    |
| ENSG00000119X1   | protein_coding         | chr8  | 1.43E+08 | 1.43E+08 | - | 0    | 0    |
| ENSG000001079584 | sense_intronic         | chr2  | 1.44E+08 | 1.44E+08 | + | 0    | 0    |
| ENSG000001492    | miRNA                  | chr12 | 94834398 | 94834513 | + | 0    | 0    |
| ENSG000001470L   | processed_transcript   | chr1  | 1.1E+08  | 1.1E+08  | + | 0    | 0    |
| ENSG0000014458   | miRNA                  | chr5  | 8460925  | 8460999  | + | 0    | 0    |
| ENSG000001109E   | unprocessed_transcript | chr2  | 1.31E+08 | 1.31E+08 | - | 0    | 0    |
| ENSG0000016084   | miRNA                  | chr1  | 20633679 | 20633788 | + | 0    | 0    |
| ENSG0000016511B  | miRNA                  | chr16 | 2106669  | 2106753  | - | 0    | 0    |
| ENSG000001675    | miRNA                  | chr11 | 1996759  | 1996831  | - | 0    | 0    |
| ENSG0000016502   | miRNA                  | chr12 | 66251082 | 66251157 | + | 0    | 0    |
| ENSG0000016840   | miRNA                  | chr7  | 1E+08    | 1E+08    | + | 0    | 0    |
| ENSG0000011281   | miRNA                  | chr22 | 41092513 | 41092566 | + | 0    | 0    |
| ENSG00000172P5   | protein_coding         | chr11 | 4233288  | 4233872  | + | 0    | 0    |
| ENSG0000014697   | miRNA                  | chr11 | 1.34E+08 | 1.34E+08 | - | 0    | 0    |
| ENSG000001398C   | protein_coding         | chr10 | 14838166 | 14844727 | + | 2.77 | 2.07 |
| ENSG000001497    | miRNA                  | chr17 | 7017911  | 7018022  | - | 0    | 0    |
| ENSG0000014468   | miRNA                  | chr7  | 1.38E+08 | 1.38E+08 | + | 0    | 0    |
| ENSG0000016805   | miRNA                  | chr19 | 55388181 | 55388242 | + | 0    | 0    |
| ENSG0000014761   | miRNA                  | chr22 | 19963753 | 19963834 | + | 0    | 0    |
| ENSG00000129A    | miRNA                  | chr7  | 1.31E+08 | 1.31E+08 | - | 0    | 0    |
| ENSG0000015196   | miRNA                  | chr19 | 35345513 | 35345627 | + | 0    | 0    |
| ENSG0000015187   | miRNA                  | chr1  | 1.61E+08 | 1.61E+08 | + | 0    | 0    |
| ENSG00000110A    | miRNA                  | chr17 | 48579838 | 48579947 | - | 0    | 0    |
| ENSG000001296    | miRNA                  | chr20 | 58817615 | 58817694 | - | 0    | 0    |
| ENSG000001511P   | protein_coding         | chr7  | 1.5E+08  | 1.5E+08  | + | 0.27 | 0.45 |
| ENSG000001321E   | protein_coding         | chr5  | 17528669 | 17529265 | + | 0    | 0    |
| ENSG00000120B    | miRNA                  | chrX  | 1.34E+08 | 1.34E+08 | - | 0    | 0    |
| ENSG0000016836   | miRNA                  | chr7  | 2257515  | 2257577  | - | 0    | 0    |
| ENSG000001511P   | processed_transcript   | chr7  | 1.5E+08  | 1.5E+08  | + | 5.92 | 5.04 |
| ENSG000001650    | miRNA                  | chr22 | 22822776 | 22822871 | + | 0    | 0    |
| ENSG0000011284E  | bidirectional_promoter | chr2  | 1.91E+08 | 1.91E+08 | - | 0.33 | 0.15 |
| ENSG0000017112   | miRNA                  | chr8  | 1.44E+08 | 1.44E+08 | - | 0    | 0    |
| ENSG0000014315-1 | miRNA                  | chr17 | 45475363 | 45475435 | - | 0    | 0    |
| ENSG000001606E   | protein_coding         | chr11 | 93741664 | 93812378 | + | 0.29 | 0.33 |
| ENSG0000015572   | miRNA                  | chr15 | 80581103 | 80581239 | + | 0    | 0    |
| ENSG000001002472 | transcribed_unit       | chr22 | 21002895 | 21009453 | - | 0.01 | 0.22 |
| ENSG0000014469   | miRNA                  | chr8  | 42896197 | 42896275 | - | 0    | 0    |

|                 |            |             |       |          |          |   |      |      |
|-----------------|------------|-------------|-------|----------|----------|---|------|------|
| ENSG00000108080 | MIR6834    | miRNA       | chr6  | 33290245 | 33290325 | + | 0    | 0    |
| ENSG00000108081 | MIR6887    | miRNA       | chr19 | 35122700 | 35122764 | + | 0    | 0    |
| ENSG00000108082 | MIR6837    | miRNA       | chr7  | 44051766 | 44051829 | + | 0    | 0    |
| ENSG00000108083 | KB-1995A5  | antisense   | chr22 | 24645171 | 24651657 | - | 0.05 | 0    |
| ENSG00000108084 | RP11-533E  | unprocessed | chrY  | 24196518 | 24206132 | - | 0    | 0    |
| ENSG00000108085 | MIR4758    | miRNA       | chr20 | 62332487 | 62332557 | - | 0    | 0    |
| ENSG00000108086 | hsa-mir-36 | miRNA       | chr5  | 86620497 | 86620575 | + | 0    | 0    |
| ENSG00000108087 | MIR4775    | miRNA       | chr2  | 2.08E+08 | 2.08E+08 | + | 0    | 0    |
| ENSG00000108088 | MIR1199    | miRNA       | chr19 | 14073361 | 14073479 | + | 0    | 0    |
| ENSG00000108089 | MIR7109    | miRNA       | chr22 | 31621467 | 31621531 | - | 0    | 0    |
| ENSG00000108090 | AOX3P-AO   | processed   | chr2  | 2.01E+08 | 2.01E+08 | + | 0    | 0    |
| ENSG00000108091 | MIR4732    | miRNA       | chr17 | 28861655 | 28861730 | - | 0    | 0    |
| ENSG00000108092 | MIR6844    | miRNA       | chr8  | 1.25E+08 | 1.25E+08 | - | 0    | 0    |
| ENSG00000108093 | MIR5703    | miRNA       | chr2  | 2.27E+08 | 2.27E+08 | + | 0    | 0    |
| ENSG00000108094 | MIR6073    | miRNA       | chr11 | 15969533 | 15969621 | - | 0    | 0    |
| ENSG00000108095 | RP11-39E3  | TEC         | chr3  | 1.31E+08 | 1.31E+08 | - | 0.67 | 0.93 |
| ENSG00000108096 | RP11-1217  | unprocessed | chr7  | 57190300 | 57190460 | + | 0    | 0    |
| ENSG00000108097 | MIR19B2    | miRNA       | chrX  | 1.34E+08 | 1.34E+08 | - | 0    | 0    |
| ENSG00000108098 | MIR611     | miRNA       | chr11 | 61792495 | 61792561 | - | 0    | 0    |
| ENSG00000108099 | MIR195     | miRNA       | chr17 | 7017615  | 7017701  | - | 0    | 0    |
| ENSG00000108100 | MIR6800    | miRNA       | chr19 | 49832018 | 49832099 | + | 0    | 0    |
| ENSG00000108101 | RP11-204M  | processed   | chr9  | 39983793 | 40106611 | - | 3.2  | 2.56 |
| ENSG00000108102 | MIR6883    | miRNA       | chr17 | 8144994  | 8145071  | - | 0    | 0    |
| ENSG00000108103 | MIR4707    | miRNA       | chr14 | 22956950 | 22957029 | - | 0    | 0    |
| ENSG00000108104 | MIR198     | miRNA       | chr3  | 1.2E+08  | 1.2E+08  | - | 0    | 0    |
| ENSG00000108105 | MIR6717    | miRNA       | chr14 | 21023314 | 21023386 | - | 0    | 0    |
| ENSG00000108106 | MIR1825    | miRNA       | chr20 | 32237795 | 32237847 | + | 0    | 0    |
| ENSG00000108107 | BCRP3      | transcribed | chr22 | 24644791 | 24653356 | + | 0.35 | 0.28 |
| ENSG00000108108 | MIR6789    | miRNA       | chr19 | 2235829  | 2235926  | - | 0    | 0    |
| ENSG00000108109 | AC002472   | transcribed | chr22 | 21011384 | 21014217 | - | 0    | 0.12 |
| ENSG00000108110 | MIR568     | miRNA       | chr3  | 1.14E+08 | 1.14E+08 | - | 0    | 0    |
| ENSG00000108111 | MIR3654    | miRNA       | chr7  | 1.33E+08 | 1.33E+08 | - | 0    | 0    |
| ENSG00000108112 | RP5-848E1  | processed   | chr1  | 42952202 | 42952641 | - | 0    | 0    |
| ENSG00000108113 | MIR1234    | miRNA       | chr8  | 1.44E+08 | 1.44E+08 | - | 0    | 0    |
| ENSG00000108114 | MIR3618    | miRNA       | chr22 | 20085746 | 20085833 | + | 0    | 0    |
| ENSG00000108115 | MIR6845    | miRNA       | chr8  | 1.44E+08 | 1.44E+08 | - | 0    | 0    |
| ENSG00000108116 | MIR4700    | miRNA       | chr12 | 1.21E+08 | 1.21E+08 | + | 0    | 0    |
| ENSG00000108117 | MIR6866    | miRNA       | chr17 | 40161933 | 40162001 | + | 0    | 0    |
| ENSG00000108118 | MIR922     | miRNA       | chr3  | 1.98E+08 | 1.98E+08 | - | 0    | 0    |
| ENSG00000108119 | MIR3150B   | miRNA       | chr8  | 95072911 | 95072996 | - | 0    | 0    |
| ENSG00000108120 | MIR6756    | miRNA       | chr11 | 1.19E+08 | 1.19E+08 | - | 0    | 0    |
| ENSG00000108121 | MIR4784    | miRNA       | chr2  | 1.31E+08 | 1.31E+08 | - | 0    | 0    |
| ENSG00000108122 | MIR6758    | miRNA       | chr12 | 57512688 | 57512750 | + | 0    | 0    |
| ENSG00000108123 | MIR3605    | miRNA       | chr1  | 33332393 | 33332492 | - | 0    | 0    |
| ENSG00000108124 | MIR194-2   | miRNA       | chr11 | 64891355 | 64891439 | - | 0    | 0    |

|                 |              |                        |       |          |          |   |       |      |
|-----------------|--------------|------------------------|-------|----------|----------|---|-------|------|
| ENSG00000106610 | MIR106A      | miRNA                  | chrX  | 1.34E+08 | 1.34E+08 | - | 0     | 0    |
| ENSG00000106611 | MIR6822      | miRNA                  | chr3  | 39138206 | 39138266 | + | 0     | 0    |
| ENSG00000106612 | MIR3940      | miRNA                  | chr19 | 6416410  | 6416511  | - | 0     | 0    |
| ENSG00000106613 | MIR7706      | miRNA                  | chr15 | 85380596 | 85380662 | + | 0     | 0    |
| ENSG00000106614 | MIR4523      | miRNA                  | chr17 | 29390662 | 29390730 | + | 0     | 0    |
| ENSG00000106615 | MIR3620      | miRNA                  | chr1  | 2.28E+08 | 2.28E+08 | + | 0     | 0    |
| ENSG00000106616 | RP11-190J2.1 | processed_transcript   | chr2  | 1.43E+08 | 1.43E+08 | - | 0     | 0    |
| ENSG00000106617 | RP11-803A1.1 | unprocessed_transcript | chr2  | 1.3E+08  | 1.3E+08  | + | 0     | 0    |
| ENSG00000106618 | MIR4315-2    | miRNA                  | chr17 | 64822030 | 64822102 | - | 0     | 0    |
| ENSG00000106619 | MIR6513      | miRNA                  | chr2  | 2.18E+08 | 2.18E+08 | - | 0     | 0    |
| ENSG00000106620 | MIR4763      | miRNA                  | chr22 | 46113566 | 46113657 | + | 0     | 0    |
| ENSG00000106621 | MIR5090      | miRNA                  | chr7  | 1.02E+08 | 1.02E+08 | + | 0     | 0    |
| ENSG00000106622 | MIR7-1       | miRNA                  | chr9  | 83969748 | 83969857 | - | 0     | 0    |
| ENSG00000106623 | MIR3606      | miRNA                  | chr2  | 1.89E+08 | 1.89E+08 | + | 0     | 0    |
| ENSG00000106624 | MIR143       | miRNA                  | chr5  | 1.49E+08 | 1.49E+08 | + | 0     | 0    |
| ENSG00000106625 | MIR6506      | miRNA                  | chr16 | 15611030 | 15611095 | - | 0     | 0    |
| ENSG00000106626 | MIR219A2     | miRNA                  | chr9  | 1.28E+08 | 1.28E+08 | - | 0     | 0    |
| ENSG00000106627 | MIR3615      | miRNA                  | chr17 | 74748613 | 74748699 | + | 0     | 0    |
| ENSG00000106628 | RP11-173A1.1 | protein_coding         | chr1  | 2.45E+08 | 2.45E+08 | - | 0     | 0    |
| ENSG00000106629 | MIR21        | miRNA                  | chr17 | 59841266 | 59841337 | + | 0     | 0    |
| ENSG00000106630 | MIR671       | miRNA                  | chr7  | 1.51E+08 | 1.51E+08 | + | 0     | 0    |
| ENSG00000106631 | MIR1257      | miRNA                  | chr20 | 61953546 | 61953662 | - | 0     | 0    |
| ENSG00000106632 | SCO2         | protein_coding         | chr22 | 50523568 | 50526439 | - | 1.59  | 1.57 |
| ENSG00000106633 | MIR6852      | miRNA                  | chr9  | 35710676 | 35710741 | - | 0     | 0    |
| ENSG00000106634 | RP11-470N1.1 | processed_transcript   | chr13 | 80041725 | 80074557 | - | 0.17  | 0.1  |
| ENSG00000106635 | MIR658       | miRNA                  | chr22 | 37844272 | 37844371 | - | 51.76 | 0    |
| ENSG00000106636 | MIR6847      | miRNA                  | chr8  | 1.44E+08 | 1.44E+08 | + | 0     | 0    |
| ENSG00000106637 | MIR137       | miRNA                  | chr1  | 98046070 | 98046171 | - | 0     | 0    |
| ENSG00000106638 | MIR29B2      | miRNA                  | chr1  | 2.08E+08 | 2.08E+08 | - | 0     | 0    |
| ENSG00000106639 | MIR19A       | miRNA                  | chr13 | 91350891 | 91350972 | + | 0     | 0    |
| ENSG00000106640 | CH17-342C1.1 | unprocessed_transcript | chr16 | 34353616 | 34371659 | - | 0     | 0    |
| ENSG00000106641 | MIR29C       | miRNA                  | chr1  | 2.08E+08 | 2.08E+08 | - | 0     | 0    |
| ENSG00000106642 | MIR1909      | miRNA                  | chr19 | 1816159  | 1816238  | - | 0     | 0    |
| ENSG00000106643 | MIR202       | miRNA                  | chr10 | 1.33E+08 | 1.33E+08 | - | 0     | 0    |
| ENSG00000106644 | RP11-1217.1  | unprocessed_transcript | chr7  | 57192405 | 57192698 | + | 0     | 0    |
| ENSG00000106645 | MIR937       | miRNA                  | chr8  | 1.44E+08 | 1.44E+08 | - | 0     | 0    |
| ENSG00000106646 | MIR6848      | miRNA                  | chr8  | 1.44E+08 | 1.44E+08 | - | 0     | 0    |
| ENSG00000106647 | MIR424       | miRNA                  | chrX  | 1.35E+08 | 1.35E+08 | - | 0     | 0    |
| ENSG00000106648 | KB-1995A5    | transcribed_unit       | chr22 | 24633272 | 24633443 | + | 0     | 0    |
| ENSG00000106649 | RP11-321E1.1 | protein_coding         | chr5  | 17525235 | 17525831 | + | 0     | 0    |
| ENSG00000106650 | RP11-328D1.1 | lincRNA                | chr1  | 2.08E+08 | 2.08E+08 | + | 0.11  | 0.09 |
| ENSG00000106651 | MIR1539      | miRNA                  | chr18 | 49487373 | 49487422 | + | 0     | 0    |
| ENSG00000106652 | RP5-1043L1.1 | lincRNA                | chr1  | 87212669 | 87264741 | + | 0.05  | 0    |
| ENSG00000106653 | RP11-4F22.1  | unprocessed_transcript | chr17 | 66278059 | 66278664 | + | 0     | 0    |
| ENSG00000106654 | MIR6716      | miRNA                  | chr11 | 1.19E+08 | 1.19E+08 | + | 0     | 0    |

|                     |             |       |          |          |   |       |       |
|---------------------|-------------|-------|----------|----------|---|-------|-------|
| ENSG0000(MIR2682)   | miRNA       | chr1  | 98045242 | 98045351 | - | 0     | 0     |
| ENSG0000(MIR6516)   | miRNA       | chr17 | 77089417 | 77089497 | + | 0     | 0     |
| ENSG0000(MIR711)    | miRNA       | chr3  | 48578902 | 48578977 | - | 0     | 0     |
| ENSG0000(MIR4444-1) | miRNA       | chr2  | 1.77E+08 | 1.77E+08 | + | 0     | 0     |
| ENSG0000(MIR1973)   | miRNA       | chr4  | 1.16E+08 | 1.16E+08 | + | 0     | 0     |
| ENSG0000(MIR5004)   | miRNA       | chr6  | 33438331 | 33438437 | + | 0     | 0     |
| ENSG0000(MIR8085)   | miRNA       | chr19 | 44758657 | 44758721 | + | 0     | 0     |
| ENSG0000(MIR6773)   | miRNA       | chr16 | 68233426 | 68233499 | - | 0     | 0     |
| ENSG0000(MIR4657)   | miRNA       | chr7  | 44881748 | 44881800 | - | 0     | 0     |
| ENSG0000(RP13-929K) | unprocessε  | chr17 | 22532166 | 22532522 | + | 0     | 0     |
| ENSG0000(MIR4683)   | miRNA       | chr10 | 35641172 | 35641252 | - | 0     | 0     |
| ENSG0000(MIR4534)   | miRNA       | chr22 | 37988794 | 37988853 | + | 0     | 0     |
| ENSG0000(MIR1181)   | miRNA       | chr19 | 10403458 | 10403538 | - | 0     | 0     |
| ENSG0000(MIR7855)   | miRNA       | chr14 | 64785626 | 64785686 | - | 0     | 0     |
| ENSG0000(MIR4321)   | miRNA       | chr19 | 2250639  | 2250718  | + | 0     | 0     |
| ENSG0000(MIR4800)   | miRNA       | chr4  | 2250077  | 2250156  | - | 0     | 0     |
| ENSG0000(MIR7162)   | miRNA       | chr10 | 30368597 | 30368665 | - | 0     | 0     |
| ENSG0000(MIR6843)   | miRNA       | chr8  | 27610601 | 27610751 | - | 0     | 0     |
| ENSG0000(RP11-321E) | protein_co  | chr5  | 17521801 | 17522397 | + | 0     | 0     |
| ENSG0000(MIR4712)   | miRNA       | chr15 | 50360329 | 50360410 | + | 0     | 0     |
| ENSG0000(MIR718)    | miRNA       | chrX  | 1.54E+08 | 1.54E+08 | - | 0     | 0     |
| ENSG0000(MIR378D2)  | miRNA       | chr8  | 93916022 | 93916119 | - | 0     | 0     |
| ENSG0000(MIR6820)   | miRNA       | chr22 | 37967563 | 37967624 | + | 0     | 0     |
| ENSG0000(RP11-1217) | unprocessε  | chr7  | 57189578 | 57190226 | + | 0     | 0     |
| ENSG0000(RP5-900K1) | protein_co  | chr7  | 99325879 | 99394653 | + | 0.88  | 2.03  |
| ENSG0000(MIR7113)   | miRNA       | chr11 | 68032864 | 68032922 | + | 0     | 0     |
| ENSG0000(AC007326)  | processed_  | chr22 | 18936411 | 18947741 | + | 11.51 | 11.75 |
| ENSG0000(RP11-434N) | protein_co  | chr1  | 2.11E+08 | 2.11E+08 | - | 0     | 0     |
| ENSG0000(RP13-929K) | unprocessε  | chr17 | 22531463 | 22531797 | + | 0     | 0     |
| ENSG0000(MIR3179-1) | miRNA       | chr16 | 14901508 | 14901591 | + | 0     | 0     |
| ENSG0000(SSU72P2)   | protein_co  | chr11 | 4242056  | 4242640  | - | 0     | 0     |
| ENSG0000(C2orf81)   | protein_co  | chr2  | 74414176 | 74421591 | - | 3.55  | 1.95  |
| ENSG0000(RP11-96L1) | bidirection | chr1  | 26046665 | 26049099 | + | 0     | 0     |
| ENSG0000(MIR939)    | miRNA       | chr8  | 1.44E+08 | 1.44E+08 | - | 0     | 0     |
| ENSG0000(MIR6742)   | miRNA       | chr1  | 2.28E+08 | 2.28E+08 | - | 0     | 0     |
| ENSG0000(MIR7114)   | miRNA       | chr9  | 1.37E+08 | 1.37E+08 | - | 0     | 0     |
| ENSG0000(MIR124-1)  | miRNA       | chr8  | 9903388  | 9903472  | - | 0     | 0     |
| ENSG0000(MIR3175)   | miRNA       | chr15 | 92904399 | 92904475 | + | 0     | 0     |
| ENSG0000(MIR3655)   | miRNA       | chr5  | 1.41E+08 | 1.41E+08 | + | 0     | 0     |
| ENSG0000(RP11-444J) | processed_  | chr12 | 7619872  | 7620260  | - | 0     | 0     |
| ENSG0000(RP13-929K) | unprocessε  | chr17 | 22531876 | 22532172 | + | 0     | 0     |
| ENSG0000(MIR9-3)    | miRNA       | chr15 | 89368017 | 89368106 | + | 0     | 0     |
| ENSG0000(MIR4741)   | miRNA       | chr18 | 22933349 | 22933438 | + | 0     | 0     |
| ENSG0000(MIR1302-2) | miRNA       | chr1  | 30366    | 30503    | + | 0     | 0     |
| ENSG0000(MIR4651)   | miRNA       | chr7  | 75915197 | 75915269 | + | 0     | 0     |

|                 |            |                        |       |          |          |   |       |       |
|-----------------|------------|------------------------|-------|----------|----------|---|-------|-------|
| ENSG00000102277 | MIR2277    | miRNA                  | chr5  | 93620696 | 93620788 | - | 0     | 0     |
| ENSG00000102271 | AC013271   | protein_coding         | chr2  | 1.1E+08  | 1.1E+08  | + | 0.37  | 0.22  |
| ENSG00000102299 | RP11-229P  | protein_coding         | chr9  | 1.37E+08 | 1.37E+08 | + | 0     | 0     |
| ENSG00000102631 | MIR631     | miRNA                  | chr15 | 75353611 | 75353685 | - | 0     | 0     |
| ENSG00000102117 | MIR2117    | miRNA                  | chr17 | 43444806 | 43444885 | + | 0     | 0     |
| ENSG00000102940 | MIR940     | miRNA                  | chr16 | 2271747  | 2271840  | + | 0     | 0     |
| ENSG00000103622 | MIR3622A   | miRNA                  | chr8  | 27701677 | 27701759 | + | 0     | 0     |
| ENSG00000102142 | MIR142     | miRNA                  | chr17 | 58331232 | 58331318 | - | 0     | 0     |
| ENSG00000102432 | RP11-432M  | protein_coding         | chr5  | 17597232 | 17597828 | - | 0     | 0     |
| ENSG00000102344 | MIR34A     | miRNA                  | chr1  | 9151668  | 9151777  | - | 0     | 0     |
| ENSG00000102625 | MIR6125    | miRNA                  | chr12 | 62260359 | 62260454 | + | 0     | 0     |
| ENSG00000102475 | MIR4745    | miRNA                  | chr19 | 804940   | 805001   | + | 0     | 0     |
| ENSG00000102192 | MIR519A2   | miRNA                  | chr19 | 53762344 | 53762430 | + | 0     | 0     |
| ENSG00000102224 | MIR224     | miRNA                  | chrX  | 1.52E+08 | 1.52E+08 | - | 0     | 0     |
| ENSG00000102682 | MIR6824    | miRNA                  | chr3  | 48633636 | 48633698 | - | 0     | 0     |
| ENSG00000102507 | MIR5047    | miRNA                  | chr17 | 64501214 | 64501313 | - | 30.25 | 36.49 |
| ENSG00000102464 | MIR4640    | miRNA                  | chr6  | 30890883 | 30890972 | + | 0     | 0     |
| ENSG00000102688 | MIR6808    | miRNA                  | chr1  | 1339650  | 1339708  | - | 0     | 0     |
| ENSG00000102321 | RP11-321E  | protein_coding         | chr5  | 17498231 | 17498827 | + | 0     | 0     |
| ENSG00000102191 | MIR19B1    | miRNA                  | chr13 | 91351192 | 91351278 | + | 0     | 0     |
| ENSG00000102543 | RP11-543B  | sense_intronic         | chr1  | 2.11E+08 | 2.11E+08 | - | 0     | 0     |
| ENSG00000102266 | RP11-226B  | lincRNA                | chrX  | 1.47E+08 | 1.47E+08 | + | 0     | 0     |
| ENSG00000102441 | MIR1244-1  | miRNA                  | chr2  | 2.32E+08 | 2.32E+08 | + | 0     | 0     |
| ENSG00000102102 | RP11-102C  | unprocessed_transcript | chrY  | 25464006 | 25473621 | + | 0     | 0     |
| ENSG00000102433 | MIR4313    | miRNA                  | chr15 | 75762215 | 75762315 | - | 0     | 0     |
| ENSG00000102177 | MIR147B    | miRNA                  | chr15 | 45433050 | 45433129 | + | 0     | 0     |
| ENSG00000102242 | MIR24-2    | miRNA                  | chr19 | 13836287 | 13836359 | - | 0     | 0     |
| ENSG00000102496 | MIR4496    | miRNA                  | chr12 | 1.09E+08 | 1.09E+08 | + | 0     | 0     |
| ENSG00000102528 | RP11-528B  | antisense              | chrX  | 70427450 | 70435350 | - | 0     | 0     |
| ENSG00000102266 | RP11-266K  | protein_coding         | chr12 | 8138140  | 8175320  | + | 0     | 0     |
| ENSG00000102475 | MIR4750    | miRNA                  | chr19 | 49888175 | 49888230 | + | 0     | 0     |
| ENSG0000010216c | LA16c-312l | protein_coding         | chr16 | 1431035  | 1433397  | + | 0     | 0     |
| ENSG00000102318 | MIR3184    | miRNA                  | chr17 | 30117086 | 30117160 | - | 0     | 0     |
| ENSG00000102710 | MIR7107    | miRNA                  | chr12 | 1.21E+08 | 1.21E+08 | - | 0     | 0     |
| ENSG00000102500 | MIR5001    | miRNA                  | chr2  | 2.33E+08 | 2.33E+08 | - | 0     | 0     |
| ENSG00000102673 | MIR6733    | miRNA                  | chr1  | 43171652 | 43171712 | - | 0     | 0     |
| ENSG00000102319 | MIR3191    | miRNA                  | chr19 | 47226944 | 47227019 | - | 0     | 0     |
| ENSG00000102469 | MIR4649    | miRNA                  | chr7  | 44110849 | 44110912 | + | 0     | 0     |
| ENSG00000102803 | BTBD8      | protein_coding         | chr1  | 92080305 | 92147840 | + | 0.18  | 0.6   |
| ENSG00000102128 | MIR1287    | miRNA                  | chr10 | 98395218 | 98395307 | - | 0     | 0     |
| ENSG00000102198 | MIR1908    | miRNA                  | chr11 | 61815161 | 61815240 | - | 0     | 0     |
| ENSG00000102370 | RP11-370B  | lincRNA                | chr9  | 22703516 | 23438700 | - | 0     | 0     |
| ENSG00000102663 | MIR663A    | miRNA                  | chr20 | 26208186 | 26208278 | - | 0     | 0     |
| ENSG00000102711 | MIR7110    | miRNA                  | chr3  | 1.23E+08 | 1.23E+08 | + | 0     | 0     |
| ENSG00000102472 | MIR4724    | miRNA                  | chr17 | 31534883 | 31534971 | + | 0     | 0     |

|                 |            |                        |       |          |          |   |      |      |
|-----------------|------------|------------------------|-------|----------|----------|---|------|------|
| ENSG00000168522 | MIR8072    | miRNA                  | chr12 | 1.23E+08 | 1.23E+08 | - | 0    | 0    |
| ENSG00000168523 | MIR4647    | miRNA                  | chr6  | 44254206 | 44254285 | - | 0    | 0    |
| ENSG00000168524 | RP11-15H2  | processed_transcript   | chr19 | 23259906 | 23274251 | - | 2.16 | 2.59 |
| ENSG00000168525 | LLNLR-2631 | lincRNA                | chr19 | 31100304 | 31147981 | + | 0.05 | 0.03 |
| ENSG00000168526 | RP5-1042K  | protein_coding         | chr22 | 40346529 | 40410054 | + | 0.4  | 0    |
| ENSG00000168527 | MIR1914    | miRNA                  | chr20 | 63941465 | 63941544 | - | 0    | 0    |
| ENSG00000168528 | MIR4691    | miRNA                  | chr11 | 68033897 | 68033981 | + | 0    | 0    |
| ENSG00000168529 | MIR6869    | miRNA                  | chr20 | 1392900  | 1392961  | - | 0    | 0    |
| ENSG00000168530 | SSU72P7    | protein_coding         | chr11 | 4338660  | 4339244  | - | 0    | 0    |
| ENSG00000168531 | RP11-321E  | protein_coding         | chr5  | 17518367 | 17518963 | + | 0    | 0    |
| ENSG00000168532 | MIR122     | miRNA                  | chr18 | 58451074 | 58451158 | + | 0    | 0    |
| ENSG00000168533 | MIR2110    | miRNA                  | chr10 | 1.14E+08 | 1.14E+08 | - | 0    | 0    |
| ENSG00000168534 | MIR197     | miRNA                  | chr1  | 1.1E+08  | 1.1E+08  | + | 0    | 0    |
| ENSG00000168535 | MIR1236    | miRNA                  | chr6  | 31956839 | 31956940 | - | 0    | 0    |
| ENSG00000168536 | MIR9-2     | miRNA                  | chr5  | 88666853 | 88666939 | - | 0    | 0    |
| ENSG00000168537 | MIR6501    | miRNA                  | chr21 | 33550662 | 33550728 | + | 0    | 0    |
| ENSG00000168538 | MIR664B    | miRNA                  | chrX  | 1.55E+08 | 1.55E+08 | + | 0    | 0    |
| ENSG00000168539 | RP11-625N  | lincRNA                | chr2  | 495731   | 496633   | + | 0    | 0    |
| ENSG00000168540 | MIR1-2     | miRNA                  | chr18 | 21829004 | 21829088 | - | 0    | 0    |
| ENSG00000168541 | MIR1304    | miRNA                  | chr11 | 93733674 | 93733764 | - | 0    | 0    |
| ENSG00000168542 | MIR24-1    | miRNA                  | chr9  | 95086021 | 95086088 | + | 0    | 0    |
| ENSG00000168543 | RABGEF1    | protein_coding         | chr7  | 66628958 | 66811459 | + | 0.12 | 0.74 |
| ENSG00000168544 | MIR302B    | miRNA                  | chr4  | 1.13E+08 | 1.13E+08 | - | 0    | 0    |
| ENSG00000168545 | MIR1306    | miRNA                  | chr22 | 20086058 | 20086142 | + | 0    | 0    |
| ENSG00000168546 | RP11-432N  | protein_coding         | chr5  | 17585162 | 17585758 | - | 0    | 0    |
| ENSG00000168547 | MIR6721    | miRNA                  | chr6  | 32170030 | 32170116 | - | 0    | 0    |
| ENSG00000168548 | RP11-449H  | TEC                    | chr9  | 61982796 | 61986934 | + | 0.04 | 0.03 |
| ENSG00000168549 | MIR4720    | miRNA                  | chr16 | 81385018 | 81385093 | + | 0    | 0    |
| ENSG00000168550 | RP11-1217  | unprocessed_transcript | chr7  | 57167039 | 57167245 | + | 0    | 0    |
| ENSG00000168551 | AC009477   | protein_coding         | chr2  | 1.31E+08 | 1.31E+08 | + | 0    | 0    |
| ENSG00000168552 | MIR1292    | miRNA                  | chr20 | 2652777  | 2652842  | + | 0    | 0    |
| ENSG00000168553 | MIR4680    | miRNA                  | chr10 | 1.11E+08 | 1.11E+08 | + | 0    | 0    |
| ENSG00000168554 | RP11-490B  | protein_coding         | chr16 | 75660227 | 75677009 | - | 0    | 0    |
| ENSG00000168555 | MIR205     | miRNA                  | chr1  | 2.09E+08 | 2.09E+08 | + | 0    | 0    |
| ENSG00000168556 | RP11-262N  | processed_transcript   | chr1  | 2.07E+08 | 2.07E+08 | - | 0.04 | 0.27 |
| ENSG00000168557 | MIR6890    | miRNA                  | chr3  | 49099854 | 49099914 | - | 0    | 0    |
| ENSG00000168558 | MIR6751    | miRNA                  | chr11 | 65129916 | 65129978 | - | 0    | 0    |
| ENSG00000168559 | CTC-503J8  | unprocessed_transcript | chr19 | 6199405  | 6205121  | + | 0    | 0    |
| ENSG00000168560 | CTD-2265C  | protein_coding         | chr19 | 12802072 | 12804303 | + | 0    | 0    |
| ENSG00000168561 | MIR564     | miRNA                  | chr3  | 44861888 | 44861981 | + | 0    | 0    |
| ENSG00000168562 | MIR363     | miRNA                  | chrX  | 1.34E+08 | 1.34E+08 | - | 0    | 0    |
| ENSG00000168563 | RP11-69H1  | sense_intronic         | chr15 | 21990061 | 22125546 | + | 0    | 0    |
| ENSG00000168564 | MIR3652    | miRNA                  | chr12 | 1.04E+08 | 1.04E+08 | + | 0    | 0    |
| ENSG00000168565 | LYNX1      | protein_coding         | chr8  | 1.43E+08 | 1.43E+08 | - | 0.8  | 0.72 |
| ENSG00000168566 | MIR133A2   | miRNA                  | chr20 | 62564912 | 62565013 | + | 0    | 0    |

|                 |           |             |       |          |          |   |      |      |
|-----------------|-----------|-------------|-------|----------|----------|---|------|------|
| ENSG00000180100 | RP11-303E | protein_co  | chr16 | 81022316 | 81096284 | - | 0.02 | 0    |
| ENSG00000180101 | RP3-377H1 | lincRNA     | chr12 | 4960113  | 4963450  | + | 0    | 0    |
| ENSG00000180102 | RP11-429B | transcribed | chr4  | 82284971 | 82340013 | + | 0    | 0    |
| ENSG00000180103 | MIR6873   | miRNA       | chr6  | 33287227 | 33287289 | - | 0    | 0    |
| ENSG00000180104 | MIR4658   | miRNA       | chr7  | 1E+08    | 1E+08    | - | 0    | 0    |
| ENSG00000180105 | MIR6741   | miRNA       | chr1  | 2.26E+08 | 2.26E+08 | - | 0    | 0    |
| ENSG00000180106 | MIRLET7B  | miRNA       | chr22 | 46113686 | 46113768 | + | 0    | 0    |
| ENSG00000180107 | RP11-444J | processed   | chr12 | 7626103  | 7626486  | + | 0    | 0    |
| ENSG00000180108 | RP13-968A | antisense   | chr7  | 99252452 | 99325826 | - | 0.03 | 0.08 |
| ENSG00000180109 | MIR4687   | miRNA       | chr11 | 3856062  | 3856141  | + | 0    | 0    |
| ENSG00000180110 | RP11-666A | protein_co  | chr17 | 76563710 | 76570544 | - | 0.04 | 0.07 |
| ENSG00000180111 | MIR4723   | miRNA       | chr17 | 28360654 | 28360734 | + | 0    | 0    |
| ENSG00000180112 | RP11-340I | processed   | chr7  | 63959844 | 63981477 | - | 0    | 0    |
| ENSG00000180113 | MIR6748   | miRNA       | chr11 | 62789815 | 62789885 | + | 0    | 0    |
| ENSG00000180114 | MIR17     | miRNA       | chr13 | 91350605 | 91350688 | + | 0    | 0    |
| ENSG00000180115 | MIR92A2   | miRNA       | chrX  | 1.34E+08 | 1.34E+08 | - | 0    | 0    |
| ENSG00000180116 | RP11-90J1 | TEC         | chr15 | 47133495 | 47134122 | - | 4.66 | 4.92 |
| ENSG00000180117 | MIR4517   | miRNA       | chr16 | 28958583 | 28958661 | + | 0    | 0    |
| ENSG00000180118 | MIR3614   | miRNA       | chr17 | 56891270 | 56891355 | - | 0    | 0    |
| ENSG00000180119 | LINC01226 | processed   | chr1  | 31506226 | 31583306 | + | 0.09 | 0.33 |
| ENSG00000180120 | MIR330    | miRNA       | chr19 | 45638994 | 45639087 | - | 0    | 0    |
| ENSG00000180121 | SSU72P3   | protein_co  | chr11 | 4329865  | 4330449  | + | 0    | 0    |
| ENSG00000180122 | MIR2861   | miRNA       | chr9  | 1.28E+08 | 1.28E+08 | + | 0    | 0    |
| ENSG00000180123 | MIR8069-1 | miRNA       | chr21 | 6859171  | 6859256  | + | 0    | 0    |
| ENSG00000180124 | RP11-321E | protein_co  | chr5  | 17486231 | 17486829 | + | 0    | 0    |
| ENSG00000180125 | MIR6886   | miRNA       | chr19 | 11113474 | 11113534 | + | 0    | 0    |
| ENSG00000180126 | CTA-150C2 | protein_co  | chr22 | 39014363 | 39033276 | + | 0.05 | 0    |
| ENSG00000180127 | MIR1302-1 | miRNA       | chr15 | 1.02E+08 | 1.02E+08 | - | 0    | 0    |
| ENSG00000180128 | RP11-1217 | unprocessed | chr7  | 57191997 | 57192337 | + | 0    | 0    |
| ENSG00000180129 | MIR4788   | miRNA       | chr3  | 1.34E+08 | 1.34E+08 | + | 0    | 0    |
| ENSG00000180130 | MIR3064   | miRNA       | chr17 | 64500774 | 64500839 | - | 0    | 0    |
| ENSG00000180131 | MIR451A   | miRNA       | chr17 | 28861369 | 28861440 | - | 0    | 0    |
| ENSG00000180132 | MIR223    | miRNA       | chrX  | 66018870 | 66018979 | + | 0    | 0    |
| ENSG00000180133 | MIR371B   | miRNA       | chr19 | 53787677 | 53787742 | - | 0    | 0    |
| ENSG00000180134 | MIR7705   | miRNA       | chr8  | 1.01E+08 | 1.01E+08 | - | 0    | 0    |
| ENSG00000180135 | RP11-1217 | processed   | chr7  | 57196056 | 57196564 | - | 0    | 0    |
| ENSG00000180136 | MIR6787   | miRNA       | chr17 | 82236668 | 82236728 | + | 0    | 0    |
| ENSG00000180137 | MIR4793   | miRNA       | chr3  | 48644194 | 48644280 | - | 0    | 0    |
| ENSG00000180138 | MIR935    | miRNA       | chr19 | 53982307 | 53982397 | + | 0    | 0    |
| ENSG00000180139 | MIR5006   | miRNA       | chr13 | 41568286 | 41568395 | - | 0    | 0    |
| ENSG00000180140 | MIR4722   | miRNA       | chr16 | 88716278 | 88716337 | - | 0    | 0    |
| ENSG00000180141 | MIR92B    | miRNA       | chr1  | 1.55E+08 | 1.55E+08 | + | 0    | 0    |
| ENSG00000180142 | MIR943    | miRNA       | chr4  | 1986384  | 1986477  | - | 0    | 0    |
| ENSG00000180143 | RP11-444J | processed   | chr12 | 7620542  | 7621450  | + | 0    | 0    |
| ENSG00000180144 | RP11-71G1 | unprocessed | chr1  | 1.57E+08 | 1.57E+08 | - | 0    | 0    |

|                 |           |           |       |          |          |   |   |   |
|-----------------|-----------|-----------|-------|----------|----------|---|---|---|
| ENSG00000108047 | MIR7847   | miRNA     | chr11 | 1880045  | 1880147  | + | 0 | 0 |
| ENSG00000108048 | MIR6785   | miRNA     | chr17 | 75498548 | 75498628 | + | 0 | 0 |
| ENSG00000108049 | MIR4467   | miRNA     | chr7  | 1.02E+08 | 1.02E+08 | + | 0 | 0 |
| ENSG00000108050 | RP11-755H | antisense | chr2  | 1795525  | 1811526  | + | 0 | 0 |



GapCTR\_B; GapCTR\_CI GapCTR\_CI GapCTR\_CI LogFC\_Gap padj\_GapCTR\_Cholesterol\_vs\_GapCTRBasal.C

|        |        |        |        |          |          |
|--------|--------|--------|--------|----------|----------|
| 13.31  | 12.49  | 12.84  | 11.57  | -0.14675 | 0.309002 |
| 0      | 0      | 0      | 0      | NA       | NA       |
| 20.55  | 21.63  | 22.65  | 22.31  | 0.164451 | 0.304156 |
| 3.58   | 3.82   | 3.79   | 3.81   | 0.143889 | 0.485549 |
| 1.11   | 2.18   | 1.54   | 1.84   | 0.344236 | 0.322363 |
| 0      | 0.18   | 0.15   | 0.07   | NA       | NA       |
| 150.01 | 72.44  | 110.14 | 95.47  | -0.70867 | 8.98E-09 |
| 53.25  | 70.22  | 64.85  | 65.16  | 0.244697 | 0.005101 |
| 7.85   | 10.41  | 11.53  | 10.55  | 0.348267 | 0.034542 |
| 5.7    | 14.3   | 11.47  | 10.67  | 0.848207 | 1.49E-10 |
| 2.97   | 1.58   | 2.36   | 2.18   | -0.74047 | 0.000596 |
| 17.06  | 7.31   | 11.47  | 11.47  | -0.75147 | 1.55E-07 |
| 9.25   | 9.65   | 10.48  | 11.51  | 0.125958 | 0.435326 |
| 0.01   | 0.01   | 0      | 0.01   | NA       | NA       |
| 7.76   | 19.56  | 12.08  | 15.88  | 1.094604 | 2.30E-13 |
| 0.02   | 0      | 0      | 0      | NA       | NA       |
| 24.74  | 21.64  | 18.88  | 21.73  | -0.15062 | 0.141625 |
| 29.02  | 20.11  | 20.32  | 21.21  | -0.38365 | 0.000559 |
| 12     | 16.01  | 13.57  | 14.08  | -0.04918 | 0.782915 |
| 9.08   | 4.1    | 4.57   | 6.36   | -0.18072 | 0.47546  |
| 0      | 0      | 0      | 0.03   | NA       | NA       |
| 61.66  | 51.84  | 52.78  | 48.32  | -0.30946 | 0.008337 |
| 34.93  | 29.8   | 32.49  | 29.48  | -0.17892 | 0.106722 |
| 275.87 | 236.42 | 262.42 | 236.65 | -0.20735 | 0.014506 |
| 275.87 | 236.42 | 262.42 | 236.65 | -0.20735 | 0.014506 |
| 0.01   | 0.03   | 0.12   | 0.07   | 1.185104 | 0.056179 |
| 0      | 0      | 0      | 0      | NA       | NA       |
| 0      | 0      | 0      | 0      | NA       | NA       |
| 0      | 0      | 0      | 0      | NA       | NA       |
| 5.99   | 6.71   | 6.89   | 8.38   | -0.07606 | 0.727719 |
| 77.45  | 57.16  | 63.17  | 61.25  | -0.44666 | 2.74E-09 |
| 7.31   | 6.9    | 7.3    | 8.03   | -0.08854 | 0.716221 |
| 0      | 0      | 0      | 0      | NA       | NA       |
| 84.43  | 78.5   | 86.93  | 82.33  | 0.09636  | 0.363774 |
| 0.62   | 0.43   | 0.76   | 0.44   | -0.03219 | 0.96286  |
| 0.51   | 0.58   | 0.78   | 0.33   | -0.37104 | 0.478944 |
| 0      | 0      | 0      | 0      | NA       | NA       |
| 5.32   | 4.25   | 4.53   | 3.49   | -0.51233 | 0.007765 |
| 10.75  | 9.05   | 9.08   | 7.83   | -0.34054 | 0.002689 |
| 3.49   | 1.68   | 2.83   | 3      | -0.49437 | 0.015347 |
| 20.59  | 36.51  | 28.79  | 34.38  | 0.761225 | 2.22E-18 |
| 44.73  | 76.03  | 68.02  | 74.64  | 0.825563 | 9.76E-20 |
| 11.55  | 10.94  | 10.36  | 11.1   | -0.07645 | 0.747108 |
| 66.96  | 56.61  | 58     | 63.37  | -0.33868 | 1.81E-05 |

|       |       |       |       |          |          |
|-------|-------|-------|-------|----------|----------|
| 0.15  | 0.48  | 0.41  | 0.55  | 0.459185 | 0.491275 |
| 20.64 | 61.83 | 48.18 | 61.13 | 1.495816 | 4.04E-39 |
| 84.61 | 72.1  | 79.67 | 66.92 | -0.31813 | 0.001348 |
| 9.16  | 7.34  | 8.31  | 7.72  | 0.134172 | 0.379343 |
| 34.66 | 30.94 | 32.04 | 31.79 | -0.15069 | 0.157661 |
| 41    | 34.61 | 32.99 | 34.32 | -0.41917 | 1.59E-06 |
| 57.01 | 60.7  | 69.27 | 71.44 | 0.153781 | 0.187456 |
| 0.26  | 0.49  | 0.2   | 1.46  | 0.765526 | 0.130673 |
| 14.35 | 13.31 | 14.48 | 13.39 | 0.167401 | 0.183194 |
| 22.72 | 21.74 | 23.52 | 20.68 | -0.11616 | 0.323311 |
| 23.48 | 28.07 | 24.84 | 26.65 | 0.197701 | 0.064708 |
| 5.34  | 14.61 | 13.1  | 14.54 | 1.398404 | 2.87E-36 |
| 12.46 | 22.35 | 16.45 | 20.58 | 0.722774 | 1.95E-09 |
| 7.24  | 6.71  | 5.87  | 6.08  | -0.37069 | 0.007427 |
| 43.77 | 7.01  | 11.88 | 9.32  | -2.30296 | 3.67E-45 |
| 2.15  | 0.98  | 1.63  | 2.39  | -1.07355 | 3.91E-05 |
| 23.55 | 40.43 | 30.06 | 30.99 | 0.447932 | 0.007648 |
| 1.33  | 0.18  | 0.05  | 0.12  | -2.86242 | 1.07E-14 |
| 0.03  | 0     | 0.07  | 0     | NA       | NA       |
| 0.88  | 0.43  | 0.63  | 1.09  | -0.65738 | 0.217282 |
| 0.11  | 0     | 0.02  | 0.02  | NA       | NA       |
| 0     | 0     | 0     | 0     | NA       | NA       |
| 5.82  | 6.8   | 7.63  | 10.35 | 0.464269 | 0.001388 |
| 12.64 | 13.7  | 11.03 | 13.75 | 0.064338 | 0.727122 |
| 28.47 | 29.06 | 30.39 | 29.04 | 0.189046 | 0.102471 |
| 0.09  | 0.03  | 0.03  | 0.02  | NA       | NA       |
| 0     | 0     | 0     | 0     | NA       | NA       |
| 13.17 | 18.34 | 15.51 | 16.03 | 0.296511 | 0.062797 |
| 31.3  | 22.56 | 27.14 | 26.4  | -0.26905 | 0.026266 |
| 0     | 0     | 0.12  | 0.07  | NA       | NA       |
| 17.66 | 15.64 | 16.98 | 15.88 | -0.17961 | 0.060694 |
| 4.77  | 2.48  | 3.07  | 4.05  | -0.49018 | 0.008134 |
| 98.22 | 97.58 | 90.28 | 91.86 | -0.04703 | 0.71014  |
| 13.18 | 11.73 | 14.45 | 9.87  | -0.13944 | 0.469074 |
| 0     | 0     | 0.02  | 0     | NA       | NA       |
| 35.16 | 36.28 | 31.99 | 32.88 | 0.006628 | 0.975618 |
| 5.07  | 5.53  | 5.35  | 5.02  | 0.042706 | 0.827737 |
| 0.21  | 0.21  | 0.24  | 0.23  | -0.95519 | 0.09607  |
| 0.14  | 0.03  | 0.28  | 0.67  | -0.35568 | 0.590993 |
| 3.43  | 5.77  | 3.91  | 4.34  | 0.217395 | 0.189669 |
| 7.17  | 9.63  | 8.36  | 8.87  | 0.23235  | 0.16154  |
| 0.46  | 0.25  | 0.93  | 0.26  | -1.17598 | 0.029299 |
| 1.35  | 0.33  | 0.85  | 0.66  | -1.18487 | 0.002531 |
| 13.43 | 19.36 | 12.99 | 15.61 | 0.170586 | 0.318404 |
| 16.49 | 15.44 | 15.82 | 16.91 | -0.21268 | 0.123941 |

|        |        |        |        |          |          |
|--------|--------|--------|--------|----------|----------|
| 17.54  | 39.11  | 29.33  | 36.21  | 0.904757 | 6.12E-16 |
| 56.06  | 30.25  | 34     | 32.06  | -0.95719 | 1.09E-15 |
| 0.54   | 0.64   | 0.35   | 0.81   | 0.919001 | 0.061979 |
| 10.98  | 16.47  | 13.69  | 14.48  | 0.251296 | 0.071915 |
| 14.31  | 13.57  | 13.45  | 15.65  | -0.18031 | 0.062147 |
| 0.08   | 0.14   | 0.39   | 0.46   | -0.3926  | 0.568922 |
| 0.02   | 0      | 0.12   | 0.03   | NA       | NA       |
| 0      | 0      | 0      | 0      | NA       | NA       |
| 4.25   | 5.04   | 5.21   | 6.09   | -0.14893 | 0.549293 |
| 20.34  | 28.3   | 26.45  | 25.9   | 0.365895 | 0.004791 |
| 13.19  | 4.18   | 7.72   | 4.17   | -1.26051 | 2.10E-16 |
| 0      | 0      | 0      | 0      | NA       | NA       |
| 20.31  | 36.93  | 29.65  | 34.39  | 0.812754 | 8.15E-16 |
| 33.95  | 53.67  | 45.98  | 49.33  | 0.440647 | 2.68E-05 |
| 0.03   | 0.26   | 0.26   | 0.2    | 1.571555 | 0.004392 |
| 11.44  | 16.85  | 13.36  | 15.18  | 0.363783 | 0.001488 |
| 3.15   | 4.21   | 3.99   | 5.19   | 0.127193 | 0.663866 |
| 16.43  | 12.61  | 13.77  | 15.67  | -0.03649 | 0.78157  |
| 16.58  | 15.11  | 16.18  | 16.11  | 0.030604 | 0.854636 |
| 0.12   | 0      | 0      | 0.13   | NA       | NA       |
| 32.23  | 22.86  | 25.31  | 22.03  | -0.48682 | 5.35E-06 |
| 16.09  | 25.39  | 16.78  | 19.54  | 0.288358 | 0.014494 |
| 6.29   | 5.32   | 5.28   | 5.8    | 0.000907 | 0.996711 |
| 157.6  | 152.04 | 166.02 | 161.05 | -0.05537 | 0.584842 |
| 0.6    | 0.03   | 0.09   | 0.43   | -0.75278 | 0.250629 |
| 0      | 0      | 0      | 0.01   | NA       | NA       |
| 30.06  | 35.83  | 31.51  | 34.49  | 0.066268 | 0.626496 |
| 29.3   | 29.79  | 32.71  | 32.52  | 0.078068 | 0.660487 |
| 123.32 | 318.92 | 243.37 | 286.54 | 0.957808 | 5.35E-23 |
| 5.55   | 2      | 3.61   | 2.55   | -0.61492 | 0.001968 |
| 39.16  | 34.19  | 44.46  | 37.15  | -0.1455  | 0.302482 |
| 0.01   | 0      | 0      | 0.03   | NA       | NA       |
| 0      | 0      | 0      | 0      | NA       | NA       |
| 4.34   | 1.64   | 2.13   | 2.39   | -1.23343 | 5.67E-14 |
| 0      | 0      | 0      | 0      | NA       | NA       |
| 0      | 0      | 0      | 0      | NA       | NA       |
| 74.1   | 496.5  | 318.12 | 428.37 | 2.308246 | 1.65E-79 |
| 50.62  | 46.53  | 49.88  | 50.82  | -0.05368 | 0.617615 |
| 0      | 0.27   | 0.2    | 0.11   | NA       | NA       |
| 13.8   | 13.57  | 14.45  | 15.33  | -0.01314 | 0.948225 |
| 0.15   | 0.28   | 0.07   | 0.06   | 0.245806 | 0.767431 |
| 39.13  | 29.2   | 29.36  | 29.41  | -0.46332 | 4.04E-08 |
| 0.13   | 0.17   | 0.15   | 0.14   | 0.629699 | 0.357738 |
| 57.85  | 165.71 | 125.06 | 146.03 | 1.220418 | 6.95E-32 |
| 0      | 0      | 0.02   | 0      | NA       | NA       |

|       |       |       |       |          |          |
|-------|-------|-------|-------|----------|----------|
| 0.06  | 0.14  | 0.1   | 0.06  | 0.651382 | 0.283859 |
| 46.87 | 68.39 | 86.17 | 82.94 | 0.736516 | 1.50E-16 |
| 0.61  | 0.38  | 0.43  | 0.47  | -0.33729 | 0.456632 |
| 2.98  | 6.1   | 4.84  | 5.76  | 1.128924 | 1.82E-14 |
| 3.2   | 26.11 | 17.3  | 20.18 | 2.5538   | 6.07E-67 |
| 6.81  | 6.65  | 5.9   | 5.85  | -0.23998 | 0.217376 |
| 15.38 | 10.08 | 12.98 | 12.14 | -0.48366 | 4.40E-05 |
| 0     | 0     | 0.09  | 0.01  | NA       | NA       |
| 8.99  | 5.96  | 6     | 5.53  | -0.42899 | 0.001965 |
| 6.52  | 8.28  | 9.22  | 8.81  | 0.408297 | 0.228759 |
| 7.73  | 6.88  | 7.88  | 9.58  | -0.17857 | 0.183866 |
| 0     | 0     | 0     | 0     | NA       | NA       |
| 12.36 | 11.18 | 12.35 | 10.78 | -0.2171  | 0.27362  |
| 2.22  | 3.68  | 2.38  | 3.65  | 0.483527 | 0.102921 |
| 3.14  | 2.01  | 3.42  | 2.81  | -0.40989 | 0.101604 |
| 23.24 | 26.28 | 26.37 | 25.86 | 0.102855 | 0.412114 |
| 0     | 0     | 0     | 0     | NA       | NA       |
| 3.61  | 3.51  | 3.47  | 3.87  | -0.06549 | 0.811617 |
| 5.45  | 5.33  | 6.5   | 6.07  | -0.01789 | 0.945692 |
| 25.55 | 24.48 | 26.45 | 25.5  | -0.01774 | 0.918727 |
| 36.71 | 25.46 | 29.46 | 27.09 | -0.41018 | 7.66E-06 |
| 0.12  | 0.17  | 0.18  | 0.33  | 0.368029 | 0.629548 |
| 13.04 | 14.37 | 13.7  | 13.37 | -0.13029 | 0.35328  |
| 0.03  | 0.02  | 0.02  | 0.02  | -0.45055 | 0.550981 |
| 8.73  | 7.78  | 9.94  | 11.43 | 0.075074 | 0.665046 |
| 6.36  | 6.38  | 6.2   | 5.99  | -0.27916 | 0.203888 |
| 0     | 0     | 0     | 0     | NA       | NA       |
| 22.84 | 20.05 | 20.46 | 20.02 | -0.16229 | 0.126817 |
| 2.09  | 1.88  | 2.22  | 2.13  | 0.04908  | 0.932476 |
| 0     | 0     | 0     | 0     | NA       | NA       |
| 0     | 0     | 0     | 0     | NA       | NA       |
| 19.34 | 14.74 | 13.57 | 16.13 | -0.01437 | 0.931016 |
| 0     | 0     | 0     | 0     | NA       | NA       |
| 38.31 | 34.75 | 37.03 | 33.16 | -0.04943 | 0.790064 |
| 0     | 0     | 0     | 0     | NA       | NA       |
| 51.59 | 49.92 | 50.46 | 52.39 | 0.208545 | 0.012372 |
| 0     | 0     | 0     | 0     | NA       | NA       |
| 0.03  | 0.02  | 0.05  | 0     | NA       | NA       |
| 39.25 | 42.06 | 40.24 | 41.92 | 0.180137 | 0.021469 |
| 0     | 0.02  | 0     | 0     | NA       | NA       |
| 0.98  | 1.09  | 1.33  | 1.44  | 0.676932 | 0.022942 |
| 11.53 | 5.2   | 7.95  | 7.85  | -0.95673 | 6.97E-05 |
| 0     | 0.42  | 0     | 0.03  | NA       | NA       |
| 0     | 0     | 0     | 0     | NA       | NA       |
| 0     | 0     | 0     | 0     | NA       | NA       |

|        |        |        |        |          |          |
|--------|--------|--------|--------|----------|----------|
| 0.02   | 0      | 0.01   | 0      | NA       | NA       |
| 4.14   | 6.6    | 5.38   | 5.98   | 0.062682 | 0.826744 |
| 0      | 0      | 0      | 0.02   | NA       | NA       |
| 0.12   | 0.09   | 0.55   | 0.07   | NA       | NA       |
| 10.78  | 11.39  | 11.47  | 11.87  | 0.105078 | 0.554091 |
| 23.32  | 58.73  | 45.02  | 53.17  | 1.01411  | 3.29E-24 |
| 16.86  | 21.84  | 20.52  | 20.87  | 0.130735 | 0.343264 |
| 0      | 0.04   | 0.03   | 0.02   | NA       | NA       |
| 0.29   | 0.54   | 0.31   | 0.36   | 0.598282 | 0.38828  |
| 26.14  | 25.99  | 27.87  | 26.16  | 0.004034 | 0.985048 |
| 14.14  | 24.77  | 21.34  | 24.66  | 0.534868 | 2.71E-07 |
| 5.22   | 5.61   | 5.81   | 6.7    | 0.123425 | 0.406684 |
| 21.7   | 19.91  | 17.72  | 20.73  | -0.26626 | 0.019178 |
| 0      | 0.19   | 0.03   | 0.11   | 1.149115 | 0.046534 |
| 15.09  | 14.5   | 14.16  | 17.35  | -0.08468 | 0.561445 |
| 0.66   | 0.07   | 0.04   | 0.02   | -2.51397 | 6.60E-07 |
| 2.76   | 12.24  | 14.17  | 14.66  | 1.943764 | 2.07E-37 |
| 0.11   | 0      | 0      | 0.09   | NA       | NA       |
| 0.01   | 0      | 0.01   | 0      | NA       | NA       |
| 97.05  | 111.71 | 106.06 | 101.46 | 0.108198 | 0.334924 |
| 0.64   | 2.07   | 1.36   | 2.23   | 1.926723 | 3.44E-09 |
| 3.92   | 9.8    | 6.24   | 7.41   | 0.891346 | 4.71E-09 |
| 2.17   | 1.68   | 1.71   | 1.95   | -0.16992 | 0.385664 |
| 0.11   | 0.21   | 0.09   | 0.42   | -0.17529 | 0.837638 |
| 13.42  | 18.67  | 15.61  | 15.1   | 0.062597 | 0.762686 |
| 24.72  | 21.57  | 22.65  | 21.74  | 0.011863 | 0.941535 |
| 0      | 0      | 0      | 0      | NA       | NA       |
| 0.23   | 0.42   | 0.26   | 0.33   | 0.690127 | 0.296011 |
| 0.12   | 0.04   | 0.09   | 0.35   | -0.20211 | 0.812274 |
| 14.46  | 6.98   | 9.53   | 8.01   | -0.80419 | 3.42E-12 |
| 0.34   | 0.2    | 0.35   | 0.13   | 0.432249 | 0.541965 |
| 34.25  | 43.71  | 42.35  | 40.09  | 0.222737 | 0.026814 |
| 19.4   | 46.81  | 33.43  | 38.03  | 0.820656 | 1.44E-10 |
| 26.74  | 45.88  | 35.5   | 39.23  | 0.540244 | 4.74E-09 |
| 0.33   | 0.79   | 0.58   | 0.8    | 1.535504 | 1.69E-08 |
| 6.95   | 4.08   | 4.58   | 4.29   | -0.70197 | 4.28E-07 |
| 0      | 0.03   | 0.03   | 0      | NA       | NA       |
| 7.8    | 10.34  | 9.09   | 8.48   | 0.058474 | 0.869186 |
| 6.68   | 4.79   | 6.66   | 6.71   | -0.40974 | 0.048648 |
| 314.37 | 206.56 | 247.07 | 218.87 | -0.39879 | 3.57E-06 |
| 5.1    | 4.36   | 6.12   | 5.66   | -0.13566 | 0.516817 |
| 0      | 0      | 0      | 0      | NA       | NA       |
| 100.17 | 59.1   | 68.49  | 67     | -0.63226 | 1.57E-11 |
| 63.62  | 115.69 | 86.79  | 104.08 | 0.588246 | 1.35E-08 |
| 0.07   | 0.09   | 0.05   | 0.14   | 0.433481 | 0.570209 |

|        |        |        |        |          |          |
|--------|--------|--------|--------|----------|----------|
| 35.08  | 85.56  | 70.73  | 78.61  | 0.99724  | 2.02E-17 |
| 68.66  | 58.42  | 56.68  | 56.06  | -0.16329 | 0.060277 |
| 0.24   | 0.12   | 0.16   | 0.12   | -1.19148 | 0.012939 |
| 15.24  | 18.09  | 16.17  | 19.12  | -0.08647 | 0.544467 |
| 4.83   | 4.05   | 4.28   | 3.79   | -0.31065 | 0.026001 |
| 6.25   | 5.55   | 6.25   | 5.36   | -0.07407 | 0.624592 |
| 52.08  | 68.55  | 64.8   | 66.85  | 0.371803 | 3.55E-05 |
| 872.71 | 774.48 | 831.06 | 746.24 | -0.17336 | 0.048067 |
| 162.44 | 134.57 | 154.79 | 148.41 | -0.0385  | 0.712726 |
| 19.51  | 19.94  | 19.53  | 19.79  | 0.173995 | 0.089707 |
| 21.93  | 12.47  | 13.59  | 15.57  | -0.96985 | 6.92E-29 |
| 0      | 0      | 0      | 0      | NA       | NA       |
| 0      | 0      | 0      | 0      | NA       | NA       |
| 0      | 0.02   | 0      | 0      | NA       | NA       |
| 0.06   | 0.06   | 0.1    | 0.01   | NA       | NA       |
| 6.14   | 4.83   | 4.97   | 4.75   | -0.14916 | 0.528582 |
| 0      | 0.55   | 0      | 0.46   | 0.960119 | 0.108243 |
| 5.62   | 12.85  | 11.92  | 13.86  | 0.42443  | 0.003307 |
| 21.07  | 18.12  | 17.76  | 18.87  | -0.18181 | 0.13616  |
| 0.27   | 0.33   | 0.43   | 0.38   | 0.125321 | 0.875208 |
| 23.09  | 25.48  | 26.5   | 27.24  | 0.201228 | 0.01844  |
| 26.33  | 27.05  | 23.28  | 23.6   | -0.02365 | 0.878589 |
| 1.16   | 0.6    | 1.04   | 0.82   | -0.80227 | 0.049096 |
| 4.59   | 6.11   | 3.57   | 3.94   | 0.271634 | 0.288686 |
| 8.76   | 9.97   | 9.99   | 11.07  | 0.081377 | 0.623698 |
| 12.6   | 10.84  | 13.38  | 13.05  | -0.16642 | 0.554943 |
| 50.11  | 47.84  | 48.76  | 47.57  | -0.03953 | 0.741293 |
| 69.98  | 97.16  | 90.95  | 96.25  | 0.357585 | 0.000368 |
| 20.21  | 23.4   | 21.66  | 21.56  | 0.135303 | 0.402757 |
| 202.26 | 255.11 | 214.42 | 213.21 | 0.132253 | 0.254603 |
| 0      | 0      | 0      | 0      | NA       | NA       |
| 15.61  | 15.34  | 14.16  | 15.76  | 0.000733 | 0.996497 |
| 19.15  | 14.43  | 14.23  | 14.83  | -0.488   | 4.50E-05 |
| 0.65   | 0.16   | 0.43   | 0.15   | -1.14034 | 0.012786 |
| 3.38   | 3.84   | 3.1    | 3.39   | -0.18938 | 0.582085 |
| 0.01   | 0.04   | 0.06   | 0.01   | -0.78788 | 0.242246 |
| 38.84  | 24.69  | 31.91  | 32.5   | -0.56528 | 7.00E-08 |
| 0      | 0      | 0.19   | 0.02   | NA       | NA       |
| 9.47   | 9.82   | 9.91   | 11.75  | 0.007187 | 0.978994 |
| 0.16   | 0      | 0.04   | 0      | NA       | NA       |
| 27.75  | 43.86  | 37.53  | 39.14  | 0.799829 | 6.99E-19 |
| 18.44  | 59.74  | 42.24  | 46.39  | 1.290621 | 4.28E-18 |
| 3.1    | 3.18   | 3.26   | 2.85   | -0.00385 | 0.992502 |
| 0.51   | 0.1    | 0.14   | 0.57   | -1.25885 | 0.011352 |
| 6.21   | 7.55   | 7.07   | 7.07   | 0.180471 | 0.47363  |

|         |         |        |         |          |          |
|---------|---------|--------|---------|----------|----------|
| 0       | 0.02    | 0.09   | 0 NA    | NA       |          |
| 13.77   | 7.22    | 11.76  | 10.09   | -0.55216 | 0.000301 |
| 16.92   | 12.27   | 17.46  | 13.03   | -0.35672 | 0.012478 |
| 58.79   | 101.37  | 92.27  | 103.43  | 0.8035   | 7.85E-17 |
| 8.94    | 18.41   | 16.05  | 21.46   | 1.083507 | 1.76E-27 |
| 0.07    | 0.25    | 0.11   | 0 NA    | NA       |          |
| 15      | 19.37   | 16.18  | 17.78   | 0.286484 | 0.008194 |
| 19.64   | 23.01   | 22.14  | 21.88   | 0.083989 | 0.580733 |
| 9.18    | 7.15    | 8.35   | 8.16    | -0.2999  | 0.011287 |
| 241.28  | 296.94  | 313.45 | 314.95  | 0.207215 | 0.004837 |
| 18.73   | 12.56   | 11.8   | 11.49   | -0.32489 | 0.1305   |
| 0       | 0.01    | 0      | 0 NA    | NA       |          |
| 19.03   | 9.42    | 11.97  | 11.04   | -0.71787 | 4.89E-13 |
| 9.71    | 7.85    | 8.82   | 9.23    | -0.17186 | 0.114007 |
| 8.9     | 15.13   | 11.9   | 16.46   | 0.419709 | 0.006822 |
| 5.01    | 4.04    | 3.9    | 4.99    | -0.42565 | 0.06265  |
| 24.65   | 14.82   | 14.42  | 13.54   | -0.70228 | 1.04E-09 |
| 0.11    | 0.15    | 0.01   | 0.02    | -1.01736 | 0.112357 |
| 23.69   | 24.85   | 22.36  | 27.76   | 0.111139 | 0.421103 |
| 4.2     | 3       | 4.35   | 4.03    | -0.15586 | 0.400517 |
| 13.76   | 16.43   | 13.51  | 13.82   | 0.190919 | 0.247738 |
| 13.74   | 12.78   | 12.56  | 12.56   | -0.19034 | 0.058894 |
| 13.07   | 16.83   | 14.63  | 15.25   | 0.215002 | 0.075193 |
| 67.31   | 67.94   | 70.04  | 66.03   | -0.07929 | 0.42039  |
| 0.23    | 0.24    | 0.08   | 0.06 NA | NA       |          |
| 1.55    | 3.23    | 1.97   | 2.47    | 0.491256 | 0.038465 |
| 4.94    | 3.93    | 3.81   | 4.24    | -0.16537 | 0.334547 |
| 15.68   | 17.7    | 17.53  | 17.26   | 0.012105 | 0.935254 |
| 35.25   | 203.53  | 115.28 | 152.35  | 2.030143 | 1.03E-16 |
| 1.37    | 1.39    | 0.69   | 0.64    | -0.35443 | 0.395163 |
| 21.68   | 19.53   | 20.56  | 19.28   | -0.1249  | 0.226087 |
| 16.5    | 12.29   | 14.39  | 13.11   | -0.34578 | 0.000212 |
| 3560.52 | 3570.37 | 3884.2 | 3845.75 | 0.034668 | 0.726825 |
| 5.58    | 17.6    | 11.28  | 14.3    | 1.08071  | 4.40E-11 |
| 23.67   | 27.6    | 25.45  | 25.41   | 0.24395  | 0.021586 |
| 3.59    | 3.11    | 4.03   | 4.13    | -0.38917 | 0.012731 |
| 10.85   | 18.97   | 19.32  | 18.9    | 0.806053 | 2.62E-17 |
| 0       | 0       | 0      | 0 NA    | NA       |          |
| 0       | 0       | 0      | 0 NA    | NA       |          |
| 30.17   | 12.75   | 16.05  | 11.05   | -1.09998 | 1.24E-15 |
| 0       | 0       | 0      | 0 NA    | NA       |          |
| 2.61    | 1.23    | 1.19   | 0.63    | -0.35979 | 0.224776 |
| 37.64   | 37.8    | 32.64  | 37.51   | -0.05621 | 0.718403 |
| 0.12    | 0.11    | 0      | 0.24 NA | NA       |          |
| 15.12   | 8.95    | 8.72   | 7.85    | -0.87713 | 1.78E-13 |

|       |        |        |        |          |          |
|-------|--------|--------|--------|----------|----------|
| 7.45  | 11.08  | 9.36   | 9.64   | 0.322934 | 0.009759 |
| 4.66  | 5.29   | 4.95   | 4.91   | 0.264367 | 0.247997 |
| 2.96  | 0.13   | 0.06   | 0.19   | -4.2646  | 2.70E-33 |
| 9.77  | 11.83  | 10.66  | 11.27  | 0.172369 | 0.142343 |
| 0     | 0      | 0      | 0      | NA       | NA       |
| 41.13 | 48.23  | 50.78  | 44.69  | 0.223063 | 0.017859 |
| 0     | 0      | 0      | 0      | NA       | NA       |
| 14.82 | 8.53   | 9.76   | 10.15  | -0.50211 | 2.16E-05 |
| 96.05 | 65.42  | 71.2   | 71.97  | -0.49853 | 4.77E-10 |
| 7.91  | 7.76   | 6.78   | 6.1    | 0.125526 | 0.527967 |
| 11.37 | 14.13  | 10.64  | 13.1   | 0.363862 | 0.00232  |
| 5.67  | 6.19   | 5.6    | 6.32   | -0.0342  | 0.857382 |
| 30.45 | 45.38  | 37.19  | 41.78  | 0.396202 | 0.00041  |
| 23.57 | 24.35  | 26.76  | 25.73  | -0.04277 | 0.736669 |
| 0.11  | 0.05   | 0.03   | 0.32   | -1.1809  | 0.017716 |
| 67.63 | 4.77   | 16.67  | 10.39  | -2.23122 | 8.67E-08 |
| 32.57 | 46.52  | 39.75  | 43.86  | 0.251956 | 0.027346 |
| 126.8 | 112.83 | 113.05 | 110.37 | -0.23642 | 0.001679 |
| 25.72 | 48.57  | 41.24  | 46.23  | 0.626033 | 7.37E-10 |
| 33.1  | 34.22  | 35.14  | 37.91  | 0.393427 | 1.48E-05 |
| 4.72  | 6.84   | 6.32   | 5.74   | 0.41841  | 0.003284 |
| 31.87 | 39.15  | 37.66  | 39.94  | 0.307574 | 0.001249 |
| 2.71  | 2.85   | 2.85   | 3.22   | -0.08735 | 0.725022 |
| 5.21  | 4.41   | 4.79   | 5.69   | -0.2184  | 0.16434  |
| 30.11 | 28.23  | 28.35  | 30.14  | 0.0336   | 0.831142 |
| 17.6  | 15.35  | 15.32  | 15.54  | -0.27213 | 0.024302 |
| 3.94  | 3.97   | 4.52   | 3.43   | -0.16816 | 0.483643 |
| 63.84 | 41.34  | 42.93  | 39.4   | -0.62734 | 4.85E-11 |
| 44.82 | 33.62  | 39.15  | 40.15  | -0.42155 | 2.54E-05 |
| 1.86  | 2.66   | 1.82   | 2.92   | 0.326345 | 0.18588  |
| 0     | 0.13   | 0      | 0      | NA       | NA       |
| 1.29  | 1.79   | 1.26   | 1.62   | 0.103612 | 0.817106 |
| 7.18  | 8.26   | 7.43   | 7.53   | 0.04387  | 0.805614 |
| 4.02  | 5.44   | 2.42   | 3.23   | 0.054271 | 0.865144 |
| 6.12  | 4.85   | 4.89   | 5.63   | -0.30298 | 0.046795 |
| 50.89 | 55.65  | 47.13  | 52.2   | -0.00454 | 0.975981 |
| 0     | 0.31   | 0.45   | 0.12   | 0.276244 | 0.734129 |
| 64.15 | 66.93  | 63.58  | 63.75  | -0.02251 | 0.87691  |
| 21.1  | 23.48  | 23.49  | 25.15  | 0.318086 | 0.001397 |
| 10.64 | 26.9   | 22.28  | 22.11  | 0.65049  | 6.77E-08 |
| 11.2  | 7.94   | 8.71   | 8.89   | -0.46973 | 0.000457 |
| 0.31  | 1.24   | 0.46   | 0.34   | 0.090192 | 0.872934 |
| 5.43  | 7.79   | 9.4    | 9.68   | 0.305173 | 0.196026 |
| 25.1  | 31     | 33.13  | 35.02  | 0.330111 | 0.000187 |
| 0.34  | 0      | 0.11   | 0.11   | NA       | NA       |



|       |        |       |       |          |          |
|-------|--------|-------|-------|----------|----------|
| 0.04  | 0      | 0.12  | 0     | NA       | NA       |
| 17.46 | 29.4   | 24.96 | 25.28 | 0.664649 | 8.47E-08 |
| 80.1  | 88.57  | 85.82 | 81.9  | 0.074795 | 0.494864 |
| 0     | 0      | 0     | 0     | NA       | NA       |
| 14.7  | 20.86  | 18.66 | 20.03 | 0.303472 | 0.003712 |
| 1.55  | 2.31   | 1.55  | 3.37  | 0.724082 | 0.289467 |
| 0     | 0      | 0     | 0     | NA       | NA       |
| 33    | 30.18  | 35.12 | 33    | -0.03216 | 0.820647 |
| 0     | 0      | 0     | 0     | NA       | NA       |
| 0.07  | 0.12   | 0.08  | 0.09  | -0.47856 | 0.425463 |
| 0.02  | 0      | 0     | 0     | NA       | NA       |
| 0     | 0      | 0     | 0     | NA       | NA       |
| 0     | 0.04   | 0     | 0     | NA       | NA       |
| 42.63 | 52.2   | 47.27 | 49.63 | 0.172088 | 0.110301 |
| 44.86 | 65.68  | 71.4  | 74.39 | 0.655811 | 7.90E-16 |
| 5.42  | 12.9   | 12.72 | 12.66 | 1.358808 | 4.75E-27 |
| 3.63  | 3.91   | 7.24  | 6.24  | 0.640395 | 0.029727 |
| 22.46 | 18.63  | 17.29 | 19.21 | -0.33343 | 0.000323 |
| 20.41 | 19.85  | 18.97 | 15.88 | -0.30248 | 0.007206 |
| 0     | 0.03   | 0.01  | 0     | NA       | NA       |
| 0.07  | 0.12   | 0.05  | 0.08  | 0.093497 | 0.919715 |
| 40.33 | 106.59 | 95.25 | 99.87 | 1.197461 | 1.37E-44 |
| 22.34 | 11.35  | 13.08 | 13.07 | -0.55367 | 8.92E-08 |
| 0     | 0      | 0     | 0     | NA       | NA       |
| 8.69  | 7.68   | 8.25  | 8.45  | -0.04999 | 0.834706 |
| 0.13  | 0.01   | 0.01  | 0     | NA       | NA       |
| 5.07  | 2.68   | 3.85  | 3.57  | -0.64375 | 0.000456 |
| 0.79  | 0.92   | 1.27  | 1.86  | 0.470679 | 0.282991 |
| 0.12  | 0      | 0.08  | 0.09  | NA       | NA       |
| 34.17 | 52.74  | 46.48 | 54.24 | 0.445715 | 5.95E-06 |
| 0.07  | 0.11   | 0.02  | 0     | NA       | NA       |
| 0     | 0.39   | 0.12  | 0.27  | 1.093973 | 0.083084 |
| 1.74  | 1.54   | 1.88  | 2.71  | 0.006033 | 0.986413 |
| 0     | 0      | 0     | 0     | NA       | NA       |
| 35.74 | 11.76  | 16.49 | 13.45 | -1.35305 | 1.98E-29 |
| 1.87  | 1.56   | 1.76  | 1.95  | -0.31082 | 0.43554  |
| 30.99 | 73.56  | 75.52 | 75.13 | 1.241753 | 1.92E-49 |
| 8.91  | 9.01   | 9.47  | 9.97  | 0.044711 | 0.757141 |
| 14.15 | 15.44  | 15.77 | 16.26 | 0.074311 | 0.593584 |
| 51.39 | 21.25  | 31.62 | 27.21 | -1.0075  | 1.46E-17 |
| 0.04  | 0      | 0.05  | 0     | NA       | NA       |
| 5.78  | 7.35   | 6.9   | 9.42  | 0.178203 | 0.313063 |
| 10.96 | 12.23  | 11.43 | 12.36 | -0.00743 | 0.980456 |
| 4.46  | 12.57  | 9.84  | 10.3  | 1.293845 | 6.43E-29 |
| 0     | 0      | 0.01  | 0     | NA       | NA       |

|        |        |        |        |          |          |
|--------|--------|--------|--------|----------|----------|
| 5.97   | 4.5    | 4.85   | 5.27   | -0.18698 | 0.283353 |
| 0.39   | 0.15   | 0.11   | 0.21   | -1.43833 | 0.008674 |
| 10.65  | 8.83   | 11.15  | 10.27  | 0.003005 | 0.990895 |
| 0      | 0      | 0.15   | 0.03   | NA       | NA       |
| 0.09   | 0.03   | 0.11   | 0.08   | NA       | NA       |
| 6.16   | 6.4    | 4.76   | 5.24   | -0.03097 | 0.896737 |
| 1.03   | 0.86   | 0.39   | 0.71   | -0.35217 | 0.415861 |
| 14.32  | 12.93  | 14.15  | 16.32  | -0.04258 | 0.813781 |
| 6.68   | 6.87   | 9.59   | 7.97   | 0.143385 | 0.297549 |
| 3.37   | 1.81   | 2.45   | 2.45   | -0.99232 | 1.07E-09 |
| 0      | 0.19   | 0.15   | 0.25   | 1.655998 | 0.004209 |
| 18.87  | 10.34  | 12.01  | 13.26  | -1.13683 | 1.34E-18 |
| 46.79  | 36.96  | 41.37  | 39.71  | -0.37193 | 3.90E-05 |
| 0      | 0.17   | 0      | 0.04   | NA       | NA       |
| 0.14   | 0.1    | 0      | 0.12   | NA       | NA       |
| 3.17   | 3.87   | 3.3    | 3.01   | 0.118936 | 0.598375 |
| 54.36  | 54.25  | 54.8   | 49.92  | 0.006254 | 0.966405 |
| 2.86   | 3.62   | 3.44   | 3.46   | 0.366363 | 0.120531 |
| 16.58  | 17.9   | 17.53  | 18.85  | 0.236412 | 0.057465 |
| 0.79   | 2.13   | 1.64   | 1.76   | 1.026137 | 1.10E-05 |
| 187.01 | 138.81 | 155.46 | 147.13 | -0.45908 | 7.02E-09 |
| 22.22  | 22     | 21.42  | 22.78  | 0.328376 | 0.000499 |
| 21.45  | 24.38  | 20.15  | 21.37  | 0.089976 | 0.429301 |
| 14.39  | 16.11  | 14.58  | 15.02  | 0.027422 | 0.85058  |
| 23.24  | 30.77  | 27.79  | 29.84  | 0.366045 | 0.000269 |
| 0.4    | 12.45  | 4.98   | 9.24   | 3.472914 | 3.62E-20 |
| 7.56   | 10.79  | 10.77  | 11.17  | 0.461844 | 1.86E-08 |
| 8.54   | 15.28  | 10.64  | 11.44  | 0.69914  | 0.005595 |
| 5.13   | 8.96   | 8.55   | 9.1    | 0.759906 | 1.15E-07 |
| 15.04  | 16.49  | 15.44  | 14.11  | -0.21587 | 0.216148 |
| 39.03  | 54     | 46.13  | 46.51  | 0.316447 | 0.002674 |
| 0.16   | 0.35   | 0.34   | 0.4    | 0.919326 | 0.026323 |
| 0.74   | 0.67   | 0.33   | 0.26   | -0.93313 | 0.043336 |
| 31.19  | 46.91  | 43.35  | 44.45  | 0.533016 | 3.57E-08 |
| 31.04  | 20.13  | 21.16  | 19.69  | -0.3347  | 0.005595 |
| 7.85   | 7.84   | 7.71   | 7.55   | -0.07395 | 0.547629 |
| 138.76 | 77.82  | 89.31  | 87.32  | -0.75738 | 3.09E-23 |
| 0.15   | 0.03   | 0.06   | 0      | NA       | NA       |
| 8.33   | 8.1    | 8.41   | 11.01  | 0.012982 | 0.968599 |
| 0.08   | 0.36   | 0.5    | 0.37   | 0.973864 | 0.060763 |
| 7.91   | 7.88   | 8.19   | 8.29   | -0.05476 | 0.822429 |
| 17.07  | 13.12  | 14.19  | 13.6   | -0.02624 | 0.868219 |
| 4.12   | 0.2    | 0.36   | 0.1    | -3.56289 | 5.72E-23 |
| 10.39  | 28.96  | 32.54  | 28.25  | 1.577643 | 4.99E-37 |
| 4.52   | 12.55  | 11.93  | 13.83  | 1.395182 | 8.37E-20 |

|         |         |         |        |          |          |
|---------|---------|---------|--------|----------|----------|
| 10.95   | 9.25    | 8.67    | 8.75   | -0.17633 | 0.325969 |
| 17.49   | 15.38   | 14.16   | 13.57  | -0.33409 | 0.006248 |
| 45.09   | 36.79   | 33.74   | 38.38  | -0.09468 | 0.421641 |
| 12.62   | 12.33   | 12.29   | 12.02  | 0.042029 | 0.751907 |
| 2094.96 | 1651.57 | 2027.21 | 1820.9 | -0.23472 | 0.014166 |
| 2.08    | 3.73    | 2.68    | 2.44   | 0.429029 | 0.031864 |
| 28.21   | 37.5    | 35.95   | 36.17  | 0.407954 | 0.00013  |
| 21.58   | 12.7    | 14.86   | 18.28  | -0.64442 | 1.58E-06 |
| 316.17  | 734.21  | 695.2   | 737.81 | 1.307181 | 3.68E-63 |
| 1.91    | 6.57    | 3.03    | 5.1    | 1.021498 | 0.000178 |
| 2.87    | 2.95    | 3.57    | 2.63   | -0.04933 | 0.818414 |
| 0       | 0.08    | 0       | 0.04   | NA       | NA       |
| 7.42    | 10.44   | 7.74    | 10.96  | 0.146831 | 0.453463 |
| 5.15    | 5.64    | 5.56    | 4.7    | -0.10219 | 0.667336 |
| 1.3     | 1.96    | 1.08    | 1.55   | 0.385929 | 0.309099 |
| 0       | 0       | 0.01    | 0      | NA       | NA       |
| 23.34   | 34.51   | 31.74   | 33.11  | 0.509535 | 3.52E-07 |
| 14.45   | 21.13   | 18.19   | 18.5   | 0.37926  | 0.00313  |
| 0.04    | 0       | 0.07    | 0.03   | NA       | NA       |
| 8.02    | 12.97   | 10.84   | 11.61  | 0.459842 | 0.003297 |
| 6.75    | 10.93   | 9.45    | 9.63   | 0.531274 | 2.53E-05 |
| 29.76   | 17.51   | 19.72   | 19.51  | -0.49199 | 6.43E-07 |
| 4.81    | 22.61   | 9.42    | 20.01  | 1.998644 | 1.72E-33 |
| 12.23   | 11.25   | 11.81   | 12.08  | -0.1663  | 0.218389 |
| 51.47   | 41.83   | 46.8    | 43.29  | -0.27226 | 0.002436 |
| 17.8    | 20.06   | 19.28   | 17.26  | -0.06213 | 0.787231 |
| 4.11    | 8.89    | 5.96    | 10.23  | 0.991612 | 2.46E-10 |
| 46.8    | 44.73   | 42.99   | 47.75  | 0.054628 | 0.646639 |
| 20.04   | 24.95   | 23.1    | 23.64  | 0.110797 | 0.329012 |
| 2.3     | 0.82    | 0.86    | 0.73   | -1.3814  | 2.76E-11 |
| 0       | 0       | 0       | 0      | NA       | NA       |
| 5.61    | 7.78    | 6.58    | 6.11   | 0.423315 | 0.088865 |
| 20.47   | 17.08   | 20.01   | 18.68  | -0.16855 | 0.114228 |
| 6.11    | 12.46   | 10.49   | 8.71   | 0.473493 | 0.015136 |
| 10.04   | 8.51    | 8.19    | 8.33   | -0.19394 | 0.117766 |
| 6.77    | 8.2     | 7.29    | 8.11   | 0.020835 | 0.933708 |
| 0.15    | 0.08    | 0.2     | 0.17   | -0.27792 | 0.725125 |
| 0.87    | 0.34    | 0.35    | 0.29   | -1.10405 | 0.000761 |
| 631.91  | 618     | 652.73  | 673.66 | -0.05584 | 0.575962 |
| 10.88   | 7.95    | 10.18   | 8.13   | -0.35726 | 0.002721 |
| 5.09    | 3.71    | 4.11    | 4.13   | -0.28747 | 0.012214 |
| 2.87    | 1.91    | 1.88    | 1.74   | -0.36775 | 0.26475  |
| 108.25  | 80.45   | 89.09   | 84.16  | -0.44279 | 2.34E-08 |
| 26.5    | 22.68   | 24.94   | 28.1   | -0.13372 | 0.251642 |
| 7.13    | 5.21    | 5.47    | 5.77   | -0.07737 | 0.67447  |

|         |         |         |         |          |          |
|---------|---------|---------|---------|----------|----------|
| 5.81    | 5.91    | 8.41    | 7.69    | 0.230228 | 0.287997 |
| 18      | 25.3    | 19.74   | 23.86   | 0.143636 | 0.234414 |
| 6.79    | 6.68    | 6.39    | 6.85    | -0.05219 | 0.81945  |
| 13.6    | 17.08   | 15.38   | 15.91   | 0.072171 | 0.669626 |
| 7.39    | 6.8     | 7.03    | 7.41    | 0.029026 | 0.896069 |
| 18.87   | 21.79   | 20.81   | 22.13   | 0.055374 | 0.694306 |
| 28.23   | 46.61   | 41.07   | 43.45   | 0.519044 | 2.20E-09 |
| 0       | 0       | 0.02    | 0       | NA       | NA       |
| 149.18  | 72.24   | 96.3    | 80.8    | -0.81472 | 1.71E-17 |
| 18.52   | 18.23   | 19.17   | 21.49   | 0.213298 | 0.082266 |
| 10.56   | 28.6    | 24.24   | 28.43   | 1.214978 | 1.05E-41 |
| 14.65   | 22.93   | 19.01   | 18.94   | 0.486271 | 7.97E-07 |
| 12.84   | 11.2    | 9.64    | 9.43    | -0.17686 | 0.151067 |
| 17.98   | 14.46   | 14.01   | 17.75   | -0.26643 | 0.020957 |
| 6.67    | 5.8     | 6.88    | 6.63    | 0.151971 | 0.413097 |
| 20.27   | 36.71   | 27.21   | 31.42   | 0.592924 | 1.65E-05 |
| 0.15    | 0.02    | 0.1     | 0       | NA       | NA       |
| 2876.59 | 2873.49 | 2940.84 | 2819.55 | -0.04256 | 0.710655 |
| 2.98    | 2.5     | 3.57    | 2.8     | -0.39027 | 0.097071 |
| 13.16   | 16.43   | 14.71   | 16.64   | 0.06225  | 0.66667  |
| 7.41    | 8       | 8.53    | 7.33    | -0.1895  | 0.423986 |
| 63.29   | 88.15   | 84.68   | 86.48   | 0.370179 | 3.47E-05 |
| 0.96    | 0       | 0.34    | 0.1     | -1.92285 | 0.000113 |
| 17.94   | 13.1    | 14.41   | 14.48   | -0.28908 | 0.060766 |
| 12.76   | 11.7    | 14.96   | 13.32   | 0.011967 | 0.959017 |
| 89.2    | 46.89   | 62.48   | 56.32   | -0.65803 | 2.40E-11 |
| 0.09    | 0.02    | 0.16    | 0.07    | -0.8078  | 0.230333 |
| 0.83    | 0.92    | 0.24    | 0.78    | -0.00152 | 0.998212 |
| 18.23   | 19.27   | 18.7    | 20.44   | -0.0798  | 0.53965  |
| 16.79   | 28.74   | 20.24   | 23.98   | 0.544086 | 4.80E-05 |
| 0       | 0       | 0       | 0       | NA       | NA       |
| 480.97  | 412.32  | 423.88  | 410.76  | -0.24178 | 0.001177 |
| 20.69   | 16.95   | 15.63   | 15.74   | -0.30913 | 0.003126 |
| 17.39   | 19.07   | 18.17   | 17.89   | 0.067752 | 0.640044 |
| 24.84   | 25.5    | 22.32   | 25.07   | 0.031367 | 0.843711 |
| 0.46    | 0.5     | 0.81    | 0.51    | -0.25305 | 0.747413 |
| 0       | 0       | 0       | 0       | NA       | NA       |
| 0.46    | 0.12    | 0.15    | 0.11    | -1.30599 | 0.001076 |
| 14.2    | 12.76   | 13.15   | 12.91   | -0.15035 | 0.224964 |
| 0       | 0       | 0       | 0       | NA       | NA       |
| 0.15    | 0       | 0.05    | 0.11    | -0.80743 | 0.230308 |
| 0.38    | 0.22    | 0.33    | 0.26    | -0.39797 | 0.265261 |
| 13.82   | 11      | 11.96   | 11.95   | -0.30021 | 0.036687 |
| 16.46   | 21.55   | 21.19   | 22.54   | 0.300308 | 0.107181 |
| 0.04    | 0       | 0       | 0.01    | NA       | NA       |

|        |       |        |       |          |          |
|--------|-------|--------|-------|----------|----------|
| 13.75  | 17.31 | 16.35  | 17.19 | 0.303484 | 0.007663 |
| 10.42  | 9.52  | 10.35  | 11.81 | 0.069143 | 0.70138  |
| 12.85  | 17.74 | 15.81  | 15.12 | 0.178264 | 0.241357 |
| 14.86  | 12.6  | 13.72  | 14.1  | -0.24524 | 0.090288 |
| 7.86   | 11.28 | 11.12  | 10.84 | 0.570463 | 0.004649 |
| 0      | 0     | 0      | 0     | NA       | NA       |
| 21.01  | 16    | 18.37  | 17.77 | -0.30871 | 0.025609 |
| 3.09   | 3.83  | 3.64   | 3.15  | 0.255041 | 0.304944 |
| 11.97  | 15.67 | 15.1   | 16.11 | 0.389528 | 2.55E-05 |
| 22.64  | 29.46 | 26.38  | 27.55 | 0.206056 | 0.071885 |
| 0.73   | 0.24  | 0.23   | 0.15  | -1.80397 | 1.10E-08 |
| 13.57  | 10.76 | 10.94  | 13.27 | -0.07232 | 0.62178  |
| 31.78  | 74.96 | 46.26  | 61.21 | 0.485292 | 1.51E-07 |
| 139.71 | 358.7 | 325.08 | 349   | 1.279056 | 3.27E-56 |
| 6.13   | 4.72  | 4.62   | 5.04  | -0.25808 | 0.037465 |
| 0.5    | 0.75  | 0.51   | 0.24  | -0.5857  | 0.354068 |
| 0      | 0.05  | 0.05   | 0.11  | NA       | NA       |
| 21.62  | 20.35 | 23.11  | 21.75 | -0.02071 | 0.907131 |
| 0.31   | 0.14  | 0.14   | 0.27  | -0.01053 | 0.990588 |
| 7.77   | 12.59 | 10.69  | 17.75 | 0.723739 | 1.08E-08 |
| 21.09  | 30.83 | 28.36  | 31.03 | 0.303331 | 0.003002 |
| 0.19   | 0     | 0      | 0     | -1.33767 | 0.019319 |
| 28.81  | 46.63 | 37.94  | 46.59 | 0.644169 | 3.04E-11 |
| 0.12   | 0     | 0.05   | 0.06  | NA       | NA       |
| 18.27  | 17.63 | 18.42  | 18.61 | 0.136292 | 0.404409 |
| 0      | 0     | 0      | 0     | NA       | NA       |
| 3.18   | 3.25  | 3.18   | 3.43  | 0.056644 | 0.762344 |
| 13.16  | 24.24 | 26.08  | 30.33 | 0.928382 | 1.03E-17 |
| 17.26  | 16.83 | 12.25  | 13.18 | -0.24459 | 0.074133 |
| 11.88  | 18.42 | 15.79  | 16.8  | 0.407942 | 0.002178 |
| 16.01  | 16.25 | 16.06  | 15.43 | -0.09065 | 0.56012  |
| 0.22   | 0.21  | 0.23   | 0.11  | -0.22939 | 0.776968 |
| 37.62  | 42.37 | 40.06  | 40.31 | 0.204511 | 0.060021 |
| 0.62   | 0.2   | 0.18   | 0.15  | -1.63038 | 0.000104 |
| 7.73   | 4.83  | 5.15   | 6     | -0.39799 | 0.001973 |
| 2.32   | 58.07 | 27.6   | 50.86 | 3.52007  | 5.14E-34 |
| 70.43  | 85.73 | 75.67  | 75.2  | 0.216458 | 0.040779 |
| 0.02   | 0.01  | 0      | 0.02  | NA       | NA       |
| 12.9   | 16.07 | 15.64  | 16.35 | 0.396055 | 0.000909 |
| 14.3   | 18.37 | 16.42  | 18.65 | 0.038089 | 0.862624 |
| 4.93   | 54.39 | 20.72  | 41.93 | 1.882708 | 1.00E-05 |
| 7.34   | 10.74 | 9.4    | 9.14  | 0.061298 | 0.826554 |
| 4.61   | 2.4   | 2.06   | 2.15  | -1.13176 | 1.05E-10 |
| 5.74   | 5.56  | 6.29   | 4.91  | 0.205433 | 0.347013 |
| 12.4   | 13.01 | 12     | 11.97 | 0.053682 | 0.747413 |

|        |        |        |        |          |          |
|--------|--------|--------|--------|----------|----------|
| 0.04   | 0      | 0.1    | 0      | NA       | NA       |
| 5.6    | 4.92   | 5.29   | 3.61   | -0.08336 | 0.772062 |
| 8.57   | 11.23  | 10.37  | 10.58  | 0.419032 | 0.011435 |
| 27.72  | 23.23  | 25.32  | 25.69  | -0.20028 | 0.043501 |
| 29.72  | 20.1   | 23.91  | 20.77  | -0.38276 | 0.006654 |
| 103.98 | 91.02  | 95.78  | 90.54  | -0.23655 | 0.014233 |
| 0      | 0      | 0      | 0      | NA       | NA       |
| 0      | 0.09   | 0      | 0      | NA       | NA       |
| 0.01   | 0.28   | 0.34   | 0.52   | 0.528501 | 0.467815 |
| 1.66   | 1.58   | 2.24   | 1.68   | 0.408053 | 0.24031  |
| 0.15   | 0.04   | 0.06   | 0      | NA       | NA       |
| 10.51  | 14.19  | 14.07  | 11.54  | 0.280541 | 0.088025 |
| 13.2   | 19.06  | 16.72  | 22.01  | 0.512734 | 2.83E-07 |
| 0      | 0      | 0      | 0.05   | NA       | NA       |
| 0      | 0.19   | 0      | 0      | NA       | NA       |
| 6.59   | 7.32   | 8.53   | 9.23   | -0.01958 | 0.944376 |
| 0      | 0      | 0      | 0      | NA       | NA       |
| 0      | 0      | 0      | 0      | NA       | NA       |
| 13.7   | 16.51  | 14.38  | 15.79  | 0.051699 | 0.701112 |
| 104.74 | 129.64 | 126.62 | 126.06 | 0.176475 | 0.032189 |
| 7.42   | 6.21   | 6.52   | 8.03   | -0.15764 | 0.318521 |
| 2.88   | 1.83   | 2.68   | 2.27   | -0.45248 | 0.007681 |
| 0      | 0      | 0.01   | 0      | NA       | NA       |
| 164.14 | 388.15 | 260.16 | 286.47 | 0.812391 | 9.49E-11 |
| 31.83  | 8.62   | 15.87  | 13.07  | -1.26745 | 2.71E-07 |
| 12.56  | 9.85   | 9.74   | 9.26   | -0.25982 | 0.214747 |
| 4.57   | 4.14   | 4.69   | 4.9    | -0.07848 | 0.737344 |
| 0      | 0.25   | 0.14   | 0.11   | 1.07641  | 0.084206 |
| 0.03   | 0      | 0      | 0.03   | NA       | NA       |
| 0.01   | 0      | 0.01   | 0      | NA       | NA       |
| 6.61   | 7.78   | 6.88   | 7      | 0.240941 | 0.119749 |
| 4.49   | 6.86   | 7.15   | 6.85   | 0.420686 | 0.000294 |
| 3.3    | 2.69   | 3.14   | 2.86   | -0.21904 | 0.286215 |
| 28.36  | 26.22  | 28.44  | 27.1   | -0.08935 | 0.479777 |
| 40.04  | 40.33  | 42.16  | 38.68  | 0.048577 | 0.675953 |
| 14.31  | 11.23  | 11.55  | 12.15  | -0.13306 | 0.362291 |
| 0      | 0      | 0      | 0.02   | NA       | NA       |
| 28.32  | 30.29  | 30.46  | 29.1   | 0.331351 | 2.12E-05 |
| 6.11   | 4.39   | 6.04   | 7.63   | 0.119352 | 0.628706 |
| 7.93   | 8.67   | 9.08   | 7.46   | -0.18833 | 0.148018 |
| 13.43  | 5.72   | 7.1    | 6.9    | -0.74768 | 5.34E-06 |
| 0      | 0      | 0.01   | 0      | NA       | NA       |
| 0      | 0.01   | 0      | 0      | NA       | NA       |
| 8.22   | 5.27   | 4.96   | 4.13   | -0.52423 | 0.0003   |
| 4.7    | 3.6    | 3.05   | 3.13   | -0.6378  | 0.000249 |

|       |        |        |        |          |          |
|-------|--------|--------|--------|----------|----------|
| 3.92  | 7.5    | 5.68   | 7.73   | 0.715552 | 2.42E-07 |
| 4.62  | 5.96   | 6.55   | 5.88   | 0.524977 | 9.40E-05 |
| 0.03  | 0      | 0.01   | 0      | NA       | NA       |
| 88.22 | 71.17  | 73.05  | 76.22  | -0.31225 | 1.94E-05 |
| 11.35 | 12.74  | 12.74  | 12.93  | 0.115089 | 0.318781 |
| 0.07  | 0.19   | 0.27   | 0.34   | 1.68346  | 0.000336 |
| 14    | 14.97  | 11.14  | 16.84  | 0.237966 | 0.082591 |
| 3.89  | 3.04   | 2.75   | 3.07   | -0.52702 | 0.007225 |
| 21.74 | 22.52  | 21.38  | 22.94  | -0.04812 | 0.736669 |
| 8.54  | 12.48  | 9.95   | 9.17   | 0.178434 | 0.469557 |
| 9.12  | 10.68  | 10.43  | 10.3   | 0.021862 | 0.904801 |
| 18.84 | 21.09  | 17.67  | 20.13  | 0.130809 | 0.277873 |
| 7.47  | 10.89  | 9.7    | 8      | 0.313471 | 0.049672 |
| 0     | 0      | 0      | 0      | NA       | NA       |
| 6.63  | 6.61   | 5.8    | 4.89   | -0.18024 | 0.187845 |
| 1.27  | 0.06   | 0.19   | 0.13   | -2.13869 | 3.62E-06 |
| 13.95 | 14.22  | 14.07  | 12.27  | -0.05711 | 0.760747 |
| 0.04  | 0      | 0.03   | 0      | NA       | NA       |
| 17.26 | 17.29  | 17.26  | 17.57  | 0.164135 | 0.12603  |
| 7.01  | 6.04   | 6.24   | 6.77   | -0.11287 | 0.306849 |
| 21.47 | 12.51  | 11.48  | 12.77  | -0.79552 | 9.76E-20 |
| 38.2  | 34.2   | 34.07  | 35.3   | -0.12052 | 0.192859 |
| 8.77  | 8.52   | 8.83   | 10.31  | -0.11186 | 0.472312 |
| 0.36  | 0.7    | 0.3    | 0.35   | 0.265078 | 0.692251 |
| 36.35 | 12.41  | 23.7   | 17     | -0.89254 | 0.002325 |
| 3.09  | 3.15   | 3.28   | 3      | -0.43029 | 0.07678  |
| 5.45  | 12     | 5.14   | 8.52   | 0.604085 | 0.111556 |
| 18.28 | 15.33  | 15.78  | 16.4   | -0.27746 | 0.000562 |
| 63.72 | 66.82  | 68.09  | 63.93  | -0.01007 | 0.944131 |
| 12.51 | 4.01   | 7.92   | 7.16   | -0.98475 | 0.00149  |
| 0.08  | 0      | 0      | 0      | NA       | NA       |
| 0.48  | 2.52   | 2.78   | 3.26   | 2.091868 | 1.28E-12 |
| 0     | 0      | 0      | 0      | NA       | NA       |
| 53.48 | 168.46 | 116.7  | 142.71 | 1.190092 | 1.13E-25 |
| 124.1 | 165.67 | 149.2  | 155.54 | 0.317443 | 0.000152 |
| 27.78 | 33.37  | 33.09  | 39.33  | 0.291624 | 0.011499 |
| 5.24  | 5.97   | 5.92   | 5.31   | 0.042962 | 0.886584 |
| 14.19 | 17.31  | 16.79  | 24.68  | 0.306394 | 0.002245 |
| 50.9  | 66.61  | 56.82  | 56.65  | 0.259309 | 0.009746 |
| 1.38  | 2.77   | 4.29   | 3.67   | 1.238306 | 3.53E-10 |
| 0.03  | 0.08   | 0      | 0.07   | NA       | NA       |
| 2.51  | 3.81   | 4.72   | 3.31   | 0.621521 | 0.004499 |
| 182.6 | 134.31 | 159.87 | 143.5  | -0.36944 | 5.19E-06 |
| 4.1   | 3.13   | 3.95   | 2.75   | -0.08895 | 0.694326 |
| 0.01  | 0.01   | 0.02   | 0      | NA       | NA       |

|        |        |        |        |          |          |
|--------|--------|--------|--------|----------|----------|
| 42.19  | 45.66  | 42.54  | 43.75  | 0.129779 | 0.294087 |
| 192.13 | 316.94 | 321.09 | 354.89 | 0.659345 | 3.95E-16 |
| 1.85   | 1.18   | 1.21   | 1.17   | -0.70764 | 0.005403 |
| 0.26   | 1.59   | 1.6    | 1.06   | 1.669978 | 3.91E-05 |
| 6.44   | 12.34  | 10.08  | 9.78   | 0.605308 | 2.89E-06 |
| 114    | 59.89  | 85.37  | 71.98  | -0.51422 | 7.96E-06 |
| 24.43  | 24.3   | 23.48  | 23     | -0.24224 | 0.048536 |
| 0.52   | 0.27   | 0.54   | 0.46   | -0.21745 | 0.648374 |
| 0.02   | 0      | 0      | 0.02   | NA       | NA       |
| 0      | 0.01   | 0      | 0.01   | NA       | NA       |
| 0.22   | 1.62   | 0.98   | 0.92   | 3.09519  | 1.11E-10 |
| 15.74  | 17.9   | 18.08  | 19.78  | 0.108027 | 0.482338 |
| 0      | 0      | 0.04   | 0      | NA       | NA       |
| 21.67  | 25.94  | 25.28  | 24.27  | 0.208909 | 0.046128 |
| 15.25  | 12.85  | 13.61  | 15.47  | -0.14448 | 0.310228 |
| 101.41 | 142.84 | 105.19 | 121.45 | 0.159086 | 0.15409  |
| 44.89  | 82.18  | 70.34  | 73.19  | 0.664403 | 7.10E-12 |
| 0.74   | 0.44   | 0.78   | 1.6    | 0.065924 | 0.93072  |
| 0.06   | 0.01   | 0.05   | 0.02   | -0.73458 | 0.268868 |
| 9.47   | 12.93  | 9.93   | 10.62  | 0.446229 | 0.001912 |
| 115.02 | 134.56 | 119.72 | 116.05 | 0.069151 | 0.599474 |
| 13.02  | 13.33  | 11.71  | 12.47  | 0.000499 | 0.998212 |
| 26.64  | 27.2   | 29.02  | 26.81  | 0.220512 | 0.040242 |
| 4.57   | 5.91   | 5.89   | 6.89   | -0.17058 | 0.417838 |
| 18.14  | 11.82  | 17.57  | 17.07  | -0.25935 | 0.068669 |
| 0      | 0.04   | 0.07   | 0      | NA       | NA       |
| 14.33  | 13.12  | 13.13  | 13.52  | -0.07277 | 0.675176 |
| 6.76   | 8.22   | 8.04   | 7.59   | 0.345538 | 0.014867 |
| 5.89   | 3.5    | 4.84   | 4.74   | -0.24886 | 0.129169 |
| 36.63  | 14.25  | 14.64  | 14.87  | -1.15718 | 1.27E-27 |
| 28.31  | 25.23  | 26.42  | 28.18  | 0.109612 | 0.368831 |
| 0      | 0      | 0      | 0.02   | NA       | NA       |
| 0      | 0      | 0      | 0.14   | NA       | NA       |
| 14.29  | 12.84  | 12.84  | 13.98  | -0.22506 | 0.029113 |
| 0      | 0      | 0      | 0      | NA       | NA       |
| 35.1   | 37.8   | 34.87  | 33.13  | -0.0822  | 0.55868  |
| 7.89   | 11.27  | 11.44  | 11.79  | 0.219658 | 0.146974 |
| 0      | 0      | 0.04   | 0.13   | NA       | NA       |
| 20.81  | 17.19  | 19.74  | 15.73  | -0.1975  | 0.313913 |
| 0.11   | 0.18   | 0.13   | 0.43   | 0.092723 | 0.909236 |
| 0.03   | 0      | 0      | 0.04   | NA       | NA       |
| 3.01   | 1.48   | 1.7    | 1.49   | -0.40248 | 0.027241 |
| 12.04  | 10.8   | 12.09  | 12.11  | 0.152323 | 0.292424 |
| 8.8    | 9.08   | 7.15   | 7.53   | -0.24009 | 0.129201 |
| 0      | 0      | 0      | 0      | NA       | NA       |



|       |       |       |       |          |          |
|-------|-------|-------|-------|----------|----------|
| 37.69 | 53.66 | 49.87 | 49.48 | 0.268926 | 0.009917 |
| 30.58 | 30.17 | 35.17 | 31.53 | -0.02903 | 0.816626 |
| 77.88 | 65.41 | 69.89 | 69.39 | -0.40454 | 0.000242 |
| 0.17  | 0     | 0.06  | 0     | NA       | NA       |
| 0.83  | 0.28  | 0.52  | 0.18  | -0.2666  | 0.612213 |
| 9.56  | 16.05 | 13.19 | 13.77 | 0.433383 | 8.55E-05 |
| 3.72  | 4.05  | 3.8   | 4.52  | 0.068403 | 0.820599 |
| 15    | 13.99 | 15.14 | 11.74 | -0.2168  | 0.129884 |
| 3.35  | 35.75 | 15.98 | 26.11 | 3.15286  | 1.62E-12 |
| 3.45  | 2.27  | 3.01  | 2.57  | -0.61759 | 0.00154  |
| 9.69  | 14.26 | 11.5  | 13.28 | 0.387442 | 0.000231 |
| 1.23  | 3.28  | 2.19  | 2.7   | 1.092084 | 2.72E-07 |
| 10.37 | 11.46 | 10.88 | 12.71 | 0.08238  | 0.609765 |
| 3.17  | 1.69  | 2.41  | 1.64  | -1.65622 | 2.26E-34 |
| 0.37  | 0.46  | 0.47  | 0.65  | -0.04197 | 0.948254 |
| 7.87  | 4.85  | 4.77  | 4.67  | -0.7632  | 3.21E-16 |
| 0     | 0     | 0     | 0     | NA       | NA       |
| 0     | 0     | 0     | 0     | NA       | NA       |
| 5.12  | 1.93  | 2.01  | 2.17  | -1.48281 | 1.95E-12 |
| 20.43 | 15.2  | 19.19 | 18.56 | -0.29629 | 0.003991 |
| 0.83  | 4.64  | 3.21  | 4.11  | 1.800943 | 1.19E-16 |
| 16.64 | 18.95 | 19.49 | 19.49 | 0.445455 | 1.44E-05 |
| 11.85 | 16.55 | 14.27 | 14.69 | 0.172915 | 0.262374 |
| 45.77 | 51.09 | 51.03 | 45.39 | -0.01546 | 0.916037 |
| 0     | 0     | 0     | 0.02  | NA       | NA       |
| 18.88 | 25.66 | 23.57 | 23.3  | 0.354715 | 0.000374 |
| 13.69 | 12.47 | 12.08 | 10.03 | -0.1126  | 0.596078 |
| 5.28  | 7.41  | 6.34  | 6.51  | 0.342961 | 0.011474 |
| 19.42 | 21.78 | 19.89 | 20.3  | 0.133832 | 0.263458 |
| 48.91 | 60.63 | 54.62 | 54.64 | 0.273717 | 0.005818 |
| 10.33 | 9.49  | 7.74  | 10.51 | -0.01793 | 0.90895  |
| 11.27 | 17.92 | 15.35 | 14.97 | 0.31232  | 0.002695 |
| 11.46 | 8.84  | 8     | 10.71 | -0.18229 | 0.058316 |
| 2.78  | 0.39  | 0.67  | 0.54  | -2.13913 | 2.14E-16 |
| 0.09  | 0     | 0.02  | 0.05  | -0.63807 | 0.361968 |
| 19.32 | 22.24 | 20.16 | 20.68 | 0.187383 | 0.067202 |
| 38.6  | 43.86 | 44.66 | 44.86 | 0.222854 | 0.069231 |
| 0.73  | 1.01  | 1.66  | 0.85  | -0.05565 | 0.946646 |
| 0     | 0     | 0     | 0     | NA       | NA       |
| 10.26 | 10.77 | 10.44 | 9.21  | 0.001715 | 0.995746 |
| 30.37 | 38.64 | 31.72 | 33.17 | 0.330299 | 0.000337 |
| 1.09  | 1     | 0.77  | 0.77  | -0.26737 | 0.416383 |
| 0.06  | 0     | 0     | 0     | NA       | NA       |
| 0     | 0     | 0     | 0     | NA       | NA       |
| 1.22  | 2.88  | 1.05  | 1.75  | 0.647659 | 0.026109 |

|        |        |        |         |          |          |
|--------|--------|--------|---------|----------|----------|
| 11.02  | 14.8   | 13.27  | 15.05   | 0.355241 | 0.000201 |
| 0.02   | 0      | 0.05   | 0 NA    | NA       |          |
| 16.45  | 33.39  | 26.79  | 30.25   | 0.751424 | 1.85E-09 |
| 3.77   | 1.8    | 1.98   | 2.12    | -1.11147 | 8.66E-10 |
| 33.99  | 152.14 | 105.8  | 136.47  | 1.941617 | 6.81E-61 |
| 0      | 0      | 0      | 0 NA    | NA       |          |
| 19.32  | 17.42  | 16.31  | 18.47   | -0.31971 | 0.001089 |
| 1.79   | 0.09   | 0.72   | 0.22    | -1.8933  | 0.000425 |
| 0.02   | 0.01   | 0      | 0.03 NA | NA       |          |
| 0      | 0      | 0.02   | 0.12 NA | NA       |          |
| 75.84  | 92.17  | 87.78  | 90.09   | 0.222056 | 0.006454 |
| 0.42   | 0.95   | 0.51   | 0.64    | 0.617883 | 0.148389 |
| 9.71   | 11.96  | 12.23  | 10.78   | 0.027967 | 0.889589 |
| 0.8    | 0.7    | 0.62   | 0.88    | -0.25721 | 0.442695 |
| 16.09  | 14.59  | 16.25  | 14.57   | -0.08946 | 0.610062 |
| 14.74  | 10.69  | 13.67  | 10.87   | -0.38871 | 0.002736 |
| 3.09   | 3.65   | 2.54   | 3.41    | 0.287874 | 0.127141 |
| 18.25  | 18.63  | 16.99  | 21.2    | 0.164823 | 0.176246 |
| 1.82   | 2.73   | 2.2    | 2.82    | 0.333418 | 0.091468 |
| 11.97  | 25.54  | 29.68  | 24.24   | 0.886932 | 1.72E-27 |
| 134.18 | 173.2  | 152.75 | 160.39  | 0.183817 | 0.039044 |
| 19.52  | 16.04  | 15.02  | 13.75   | -0.30982 | 0.001684 |
| 0.04   | 0.02   | 0      | 0.02 NA | NA       |          |
| 0.13   | 0.35   | 0.06   | 0.22    | 0.277252 | 0.734587 |
| 13.03  | 7.47   | 8.62   | 9.73    | -0.33272 | 0.009062 |
| 11.06  | 10.71  | 13.37  | 14.69   | 0.364484 | 0.005159 |
| 76.49  | 32.87  | 39.57  | 34.9    | -1.13574 | 1.22E-49 |
| 30.99  | 33.25  | 31.82  | 33.36   | 0.08426  | 0.502985 |
| 11.92  | 9.63   | 10.36  | 12.73   | 0.135654 | 0.486386 |
| 13.63  | 13.85  | 13.03  | 11.39   | -0.0105  | 0.966075 |
| 2.26   | 2.59   | 2.74   | 2.77    | 0.055829 | 0.833394 |
| 0.1    | 1.26   | 0.7    | 1.16    | 1.612134 | 0.001039 |
| 21.26  | 23.02  | 20.13  | 23.74   | -0.165   | 0.158225 |
| 10.01  | 9.2    | 10.18  | 13.11   | 0.186447 | 0.216741 |
| 0.74   | 0.54   | 0.74   | 0.4     | -0.40343 | 0.564461 |
| 5.43   | 7.12   | 6.19   | 7.81    | 0.230658 | 0.291301 |
| 18.78  | 29.97  | 28.44  | 31.02   | 0.278998 | 0.004534 |
| 6.8    | 5.85   | 4.54   | 6.66    | -0.18115 | 0.285664 |
| 7.9    | 9.02   | 7.15   | 9.43    | -0.1731  | 0.353814 |
| 4.4    | 5.19   | 4.55   | 6.89    | 0.549184 | 5.14E-05 |
| 10.09  | 16.54  | 11.92  | 20.79   | 0.433467 | 0.003624 |
| 5.49   | 7.19   | 7.78   | 6.81    | 0.371966 | 0.054267 |
| 36.99  | 40.95  | 54.4   | 53.58   | 0.340393 | 0.001661 |
| 0.56   | 0.78   | 1.17   | 1.38    | 0.394348 | 0.440749 |
| 7.26   | 9.32   | 8.32   | 10.55   | 0.341684 | 0.013063 |

|        |        |        |        |          |          |
|--------|--------|--------|--------|----------|----------|
| 154.7  | 114.54 | 124.55 | 130.25 | -0.38014 | 4.72E-05 |
| 0.17   | 0.12   | 0.09   | 0.08   | -0.35096 | 0.654968 |
| 36.44  | 39.1   | 38.07  | 40.39  | -0.00972 | 0.943527 |
| 0      | 0      | 0      | 0      | NA       | NA       |
| 31.67  | 36.56  | 37.65  | 36.84  | 0.266856 | 0.005878 |
| 17.45  | 22.91  | 20.71  | 24.03  | 0.286924 | 0.014386 |
| 0      | 0.62   | 0.21   | 0.52   | 2.382735 | 1.63E-05 |
| 0      | 0.04   | 0      | 0      | NA       | NA       |
| 9.49   | 12.43  | 9.59   | 11.19  | 0.426312 | 0.006769 |
| 3.72   | 8.09   | 5.81   | 7.12   | 0.846545 | 1.46E-12 |
| 13.05  | 16.01  | 15.36  | 15.97  | 0.124101 | 0.493647 |
| 0      | 0      | 0      | 0      | NA       | NA       |
| 0.99   | 0.09   | 0.18   | 0.2    | -1.47018 | 0.000203 |
| 7.58   | 6.86   | 7.67   | 6.87   | 0.029745 | 0.854324 |
| 11.6   | 9.63   | 10.63  | 9.51   | -0.30078 | 0.162132 |
| 24.29  | 24.13  | 25.47  | 25.01  | -0.06269 | 0.674182 |
| 30.33  | 35.06  | 36.45  | 47.59  | 0.419802 | 6.87E-07 |
| 43.35  | 31.5   | 33.66  | 33.81  | -0.31346 | 0.000469 |
| 0.29   | 0.11   | 0.12   | 0.12   | -1.09512 | 0.012691 |
| 0.19   | 0.06   | 0.15   | 0.26   | -0.11133 | 0.893216 |
| 0      | 0      | 0      | 0      | NA       | NA       |
| 11.42  | 12.86  | 16.93  | 21.44  | 0.358094 | 0.085322 |
| 54.76  | 53.09  | 54.75  | 53.46  | -0.02783 | 0.807332 |
| 14.31  | 15.51  | 15.82  | 16.45  | 0.18424  | 0.191102 |
| 0.27   | 0.03   | 0.01   | 0.04   | NA       | NA       |
| 12.99  | 10.76  | 10.98  | 11.78  | -0.17886 | 0.154618 |
| 8.82   | 10.71  | 10.52  | 11.47  | 0.094106 | 0.554834 |
| 11.96  | 11.14  | 11.24  | 11.67  | -0.01213 | 0.938797 |
| 0.16   | 0.76   | 0.16   | 0.46   | -0.56089 | 0.42505  |
| 0      | 0      | 0      | 0      | NA       | NA       |
| 20.26  | 19.96  | 22.04  | 21.17  | 0.043641 | 0.763461 |
| 2.82   | 3.43   | 2.81   | 2.44   | 0.274278 | 0.329012 |
| 4.02   | 2.59   | 2.64   | 2.65   | -0.14248 | 0.566181 |
| 41.85  | 39.49  | 37.26  | 41.05  | -0.19779 | 0.028232 |
| 0      | 0.25   | 0      | 0.05   | NA       | NA       |
| 52.83  | 45.71  | 57.07  | 48.29  | -0.11788 | 0.488156 |
| 13.64  | 17.92  | 13.35  | 13.73  | 0.026094 | 0.876915 |
| 9.41   | 9.57   | 12.32  | 10.15  | 0.097909 | 0.434032 |
| 83.38  | 100.14 | 102.94 | 89.56  | 0.216342 | 0.026537 |
| 14.24  | 8.28   | 11.66  | 10.79  | -0.45854 | 2.97E-05 |
| 4.41   | 4.24   | 4.26   | 5.56   | -0.0056  | 0.986154 |
| 0      | 0      | 0      | 0      | NA       | NA       |
| 232.55 | 201.22 | 229.24 | 200.1  | -0.18003 | NA       |
| 0.13   | 0.02   | 0.07   | 0.27   | -0.64028 | 0.363774 |
| 6.02   | 3.46   | 3.86   | 4.11   | -0.12191 | 0.536395 |

|        |        |        |        |          |          |
|--------|--------|--------|--------|----------|----------|
| 6.17   | 6.56   | 6.87   | 5.44   | 0.119014 | 0.601015 |
| 839.93 | 764.63 | 788.73 | 725.83 | -0.2084  | 0.012362 |
| 10.09  | 4.08   | 7.74   | 11.09  | -1.08284 | 5.71E-07 |
| 30.05  | 35.48  | 29.02  | 31.84  | 0.079871 | 0.650585 |
| 49.98  | 56.64  | 53.51  | 57.24  | -0.08635 | 0.470028 |
| 62.48  | 58.7   | 59.85  | 59.58  | -0.1042  | 0.287915 |
| 17.13  | 16.26  | 14.61  | 14.46  | -0.1921  | 0.095414 |
| 4.98   | 9.48   | 6.93   | 7.74   | 0.568292 | 0.000253 |
| 0      | 0      | 0      | 0      | NA       | NA       |
| 4.08   | 5.19   | 4.48   | 4.97   | 0.230008 | 0.08887  |
| 9.06   | 7.34   | 7.05   | 6.37   | -0.48537 | 9.19E-05 |
| 50.33  | 44.41  | 47.62  | 47.72  | -0.22326 | 0.014338 |
| 3.79   | 4.14   | 3.26   | 3.62   | 0.076905 | 0.819046 |
| 28.7   | 53.56  | 46.86  | 53.65  | 0.710579 | 8.27E-09 |
| 19.35  | 26.46  | 23.18  | 25.97  | 0.223145 | 0.043233 |
| 6.78   | 5.2    | 5.85   | 5.47   | -0.28307 | 0.201629 |
| 0.62   | 1.01   | 0.67   | 1.5    | 0.19613  | 0.616434 |
| 6.85   | 8.03   | 7.27   | 10.16  | -0.07724 | 0.699358 |
| 31.97  | 27.81  | 42.34  | 33.08  | -0.18574 | 0.178484 |
| 0      | 0.02   | 0      | 0      | NA       | NA       |
| 4.93   | 6.28   | 5.38   | 4.88   | 0.19992  | 0.50607  |
| 0.16   | 0.07   | 0      | 0.18   | NA       | NA       |
| 47.49  | 3.94   | 13.5   | 8.71   | -2.06991 | 2.41E-06 |
| 0      | 0      | 0      | 0      | NA       | NA       |
| 4.66   | 11.26  | 8.39   | 8.97   | 0.637264 | 0.000131 |
| 0      | 0      | 0      | 0      | NA       | NA       |
| 0.04   | 0.08   | 0.05   | 0.17   | 0.211649 | 0.802725 |
| 4.52   | 1.17   | 1.29   | 1.51   | -1.75623 | 7.03E-25 |
| 6.54   | 9.35   | 9.7    | 10.13  | 0.126578 | 0.36769  |
| 5.42   | 5.5    | 4.64   | 5.65   | -0.18276 | 0.109495 |
| 16.34  | 17.05  | 16.97  | 17.21  | -0.04247 | 0.750753 |
| 2.69   | 3.95   | 3.83   | 3.74   | -0.07365 | 0.850579 |
| 28.12  | 24.64  | 26.81  | 22.02  | -0.19045 | 0.237068 |
| 10.72  | 10.84  | 11.57  | 11.03  | -0.04414 | 0.843441 |
| 0.89   | 1.27   | 0.94   | 0.63   | -0.16043 | 0.801875 |
| 495.93 | 377.79 | 406.51 | 403.57 | -0.37475 | 5.11E-08 |
| 14.81  | 18.88  | 17.57  | 18.74  | 0.13668  | 0.199223 |
| 10.57  | 16.54  | 15.47  | 15.38  | 0.533652 | 1.64E-07 |
| 13.51  | 10.04  | 9.37   | 11.46  | -0.1365  | 0.52693  |
| 1.24   | 0.09   | 0.22   | 0.06   | -2.58572 | 5.47E-10 |
| 150.9  | 33.03  | 50.25  | 42.79  | -1.93518 | 1.27E-54 |
| 4.92   | 2.51   | 2.35   | 2.65   | -0.80986 | 6.17E-07 |
| 0.19   | 0.21   | 0.25   | 0.09   | 0.766207 | 0.261184 |
| 5.01   | 3.34   | 3.63   | 3.78   | -0.31569 | 0.072712 |
| 19.88  | 22.48  | 22.94  | 24.74  | 0.138651 | 0.208141 |

|        |        |        |        |          |          |
|--------|--------|--------|--------|----------|----------|
| 3.19   | 2.92   | 3.39   | 3.25   | -0.11161 | 0.719538 |
| 0.05   | 1.49   | 0.46   | 1.86   | 2.614056 | 4.18E-09 |
| 0      | 0      | 0      | 0      | NA       | NA       |
| 85.68  | 19.59  | 34.64  | 30.13  | -1.60316 | 2.23E-27 |
| 24.81  | 27.51  | 31.25  | 31.54  | 0.158439 | 0.201629 |
| 4.43   | 3.74   | 3.67   | 3.04   | -0.22692 | 0.347535 |
| 36.79  | 37.1   | 37.97  | 39.79  | -0.01106 | 0.947552 |
| 10.29  | 3.14   | 5.42   | 3.57   | -0.88011 | 4.73E-06 |
| 9.35   | 10.37  | 8.86   | 11.64  | 0.170014 | 0.410017 |
| 4.6    | 4.95   | 4.45   | 5.33   | 0.123199 | 0.452761 |
| 30.64  | 33.99  | 33.51  | 33.88  | 0.045986 | 0.687835 |
| 12.93  | 13.31  | 13.56  | 13.63  | -0.03749 | 0.84665  |
| 13.88  | 16.37  | 15.51  | 17.81  | -0.05222 | 0.814797 |
| 7.38   | 7.03   | 6.65   | 6.95   | -0.03861 | 0.913642 |
| 4      | 3.26   | 3.44   | 3.75   | -0.19424 | 0.129598 |
| 2.92   | 2.93   | 3.1    | 2.93   | -0.01131 | 0.940209 |
| 42.64  | 43.37  | 39.14  | 40.35  | -0.01306 | 0.924604 |
| 55.98  | 56.95  | 57.27  | 55.39  | -0.03939 | 0.756943 |
| 9.68   | 7.64   | 9.24   | 11.17  | 0.01799  | 0.929201 |
| 10.57  | 10.52  | 10.94  | 11.27  | -0.10904 | 0.390993 |
| 18.38  | 22.45  | 22.93  | 23.94  | 0.055901 | 0.760637 |
| 106.29 | 50.55  | 75.72  | 62.51  | -0.78853 | 1.40E-11 |
| 0.08   | 0.28   | 0.07   | 0.13   | 0.748185 | 0.216435 |
| 0      | 0      | 0      | 0      | NA       | NA       |
| 0.13   | 0      | 0.26   | 0.14   | NA       | NA       |
| 26.2   | 21.92  | 27.38  | 27.57  | -0.27705 | 0.015804 |
| 0.93   | 0.47   | 0.77   | 0.45   | -0.53477 | 0.322965 |
| 0      | 0      | 0      | 0      | NA       | NA       |
| 1.76   | 2.51   | 3.89   | 1.49   | -0.52538 | 0.023923 |
| 41.83  | 44.33  | 43.52  | 41.09  | -0.04153 | 0.754778 |
| 12.65  | 16.5   | 12.95  | 15.62  | 0.221152 | 0.263307 |
| 52.08  | 39.34  | 46.06  | 41.01  | -0.31518 | 0.001933 |
| 7.24   | 6.34   | 6.59   | 7.26   | -0.17542 | 0.241346 |
| 87.31  | 115.46 | 108.82 | 103.14 | 0.337923 | 0.00109  |
| 8.55   | 12.88  | 11.2   | 13.55  | 0.473174 | 3.86E-06 |
| 7.53   | 3.48   | 2.1    | 4.31   | -2.03002 | 2.56E-65 |
| 22.53  | 21.56  | 24.79  | 20.53  | 0.217398 | 0.106822 |
| 10.48  | 10.73  | 11.23  | 11.56  | 0.223009 | 0.138752 |
| 4.17   | 7.71   | 6.32   | 8.18   | 0.797103 | 0.000105 |
| 0      | 0      | 0.06   | 0.01   | NA       | NA       |
| 10.42  | 12.47  | 11.17  | 14.43  | 0.463088 | 4.15E-06 |
| 12.32  | 12.24  | 12.67  | 10.28  | -0.01576 | 0.94393  |
| 1.32   | 0.95   | 1.56   | 1.76   | 1.187917 | 8.60E-05 |
| 0.23   | 1.89   | 1.11   | 1.34   | 1.859133 | 2.44E-07 |
| 3.24   | 4.87   | 3.46   | 4.34   | 0.226208 | 0.400736 |

|        |        |        |        |          |          |
|--------|--------|--------|--------|----------|----------|
| 0      | 0      | 0      | 0      | NA       | NA       |
| 3.72   | 1.17   | 1.67   | 2.18   | -1.06505 | 2.07E-06 |
| 13.53  | 25.18  | 15.43  | 22.55  | 0.88547  | 1.05E-12 |
| 2.49   | 7.48   | 4.46   | 6.62   | 1.063574 | 2.34E-06 |
| 5.89   | 2.54   | 3.19   | 2.82   | -1.01013 | 3.44E-11 |
| 12.96  | 9.56   | 8.6    | 8.14   | -0.22635 | 0.190231 |
| 10.82  | 11.29  | 12.08  | 11.9   | 0.072076 | 0.56012  |
| 56.34  | 43.5   | 54.97  | 53.39  | -0.31547 | 0.002238 |
| 6.76   | 4.89   | 6.1    | 4.86   | -0.15214 | 0.250886 |
| 8.69   | 10.2   | 9.34   | 10.29  | 0.121657 | 0.343747 |
| 312.67 | 235.12 | 286.33 | 251.38 | -0.29028 | 0.00208  |
| 9.57   | 8.95   | 8.84   | 9.21   | -0.0539  | 0.729065 |
| 7.04   | 7.48   | 6.89   | 6.59   | -0.08111 | 0.666171 |
| 0      | 0.11   | 0      | 0      | NA       | NA       |
| 19.95  | 21.98  | 22.28  | 21.5   | 0.036236 | 0.838159 |
| 0.77   | 2.48   | 1.06   | 0.82   | 0.61406  | 0.142343 |
| 10.02  | 10.75  | 10.23  | 10.49  | 0.045459 | 0.735697 |
| 22.07  | 28.21  | 26.56  | 26.13  | 0.079464 | 0.572314 |
| 13.53  | 12.11  | 12.76  | 11.49  | -0.16264 | 0.152735 |
| 14.76  | 12.43  | 14.31  | 14.61  | -0.10935 | 0.540465 |
| 0.37   | 0.74   | 0.28   | 0.76   | 0.082052 | 0.92335  |
| 0      | 0      | 0      | 0      | NA       | NA       |
| 2.3    | 7.62   | 9.64   | 8.27   | 1.766521 | 9.10E-28 |
| 0.47   | 0.06   | 0.05   | 0.03   | -2.53777 | 8.93E-11 |
| 0.01   | 0      | 0.01   | 0.04   | NA       | NA       |
| 51.71  | 56.01  | 53.34  | 54.74  | -0.00219 | 0.989838 |
| 0      | 0.08   | 0.04   | 0      | NA       | NA       |
| 10.29  | 10.48  | 10.16  | 10.86  | -0.006   | 0.986402 |
| 0.02   | 0.02   | 0.02   | 0.02   | NA       | NA       |
| 0      | 0      | 0.04   | 0      | NA       | NA       |
| 4.18   | 4.67   | 5.14   | 4.2    | 0.302484 | 0.056421 |
| 9.89   | 9.9    | 10.04  | 12.02  | 0.018778 | 0.934775 |
| 19.48  | 28.25  | 25.44  | 25.49  | 0.338503 | 0.00052  |
| 0.05   | 0      | 0.27   | 0.14   | -0.40752 | 0.590736 |
| 3.11   | 3.46   | 3.46   | 2.76   | -0.02335 | 0.941535 |
| 5.88   | 12.96  | 10.54  | 9.89   | 0.872894 | 1.18E-08 |
| 19.33  | 14.37  | 11.11  | 12.65  | -0.7334  | 1.56E-11 |
| 6.69   | 6.74   | 7.18   | 7.09   | -0.00021 | 0.999448 |
| 10.42  | 12.35  | 10.97  | 10.81  | 0.109444 | 0.46657  |
| 22.53  | 33.9   | 32.22  | 35.14  | 0.519479 | 7.59E-07 |
| 0      | 0      | 0      | 0      | NA       | NA       |
| 10.02  | 10.13  | 8.72   | 11.86  | 0.080514 | 0.534029 |
| 9.85   | 9.93   | 8.98   | 10.9   | 0.012627 | 0.941019 |
| 0      | 0      | 0      | 0      | NA       | NA       |
| 2.47   | 2.19   | 2.33   | 2.49   | 0.128711 | 0.608074 |

|        |         |         |         |          |          |
|--------|---------|---------|---------|----------|----------|
| 6.54   | 9.49    | 8.95    | 8.84    | 0.301636 | 0.111448 |
| 0.49   | 1.22    | 0.58    | 0.96    | 0.136399 | 0.791573 |
| 18.67  | 13.78   | 12.59   | 12.57   | -0.35564 | 0.005185 |
| 7.33   | 6.6     | 6.94    | 7.61    | -0.08536 | 0.515662 |
| 26.19  | 30.99   | 32.61   | 41.58   | 0.310356 | 0.000636 |
| 76.34  | 113.67  | 124.45  | 126.83  | 0.623189 | 1.23E-11 |
| 17.78  | 17.08   | 17.06   | 15.15   | -0.04316 | 0.819106 |
| 48.91  | 52.36   | 53.59   | 55.72   | 0.222052 | 0.022825 |
| 12.13  | 12.48   | 14.48   | 13.16   | 0.130283 | 0.35328  |
| 54.96  | 95.75   | 81.87   | 85.88   | 0.683148 | 4.01E-10 |
| 9.57   | 17.44   | 18.09   | 17.09   | 0.998502 | 2.02E-26 |
| 117.92 | 113.96  | 104.24  | 109.29  | -0.14159 | 0.176687 |
| 2.59   | 4.29    | 4.66    | 4.49    | 0.858405 | 2.36E-10 |
| 134.19 | 118.82  | 117.72  | 119.94  | -0.31927 | 0.000131 |
| 3.73   | 2.85    | 2.4     | 2.54    | -0.21321 | 0.373137 |
| 12.1   | 12.06   | 14.66   | 12.05   | 0.051958 | 0.744187 |
| 7.79   | 6.15    | 6.13    | 5.76    | -0.26099 | 0.182357 |
| 889.2  | 1101.89 | 1203.12 | 1153.04 | 0.285829 | 0.001515 |
| 8.83   | 10.73   | 9.37    | 9.7     | 0.111544 | 0.430415 |
| 12.56  | 16.13   | 15.57   | 15.81   | 0.352803 | 0.002559 |
| 9.31   | 14.33   | 10.65   | 11.71   | -0.15019 | 0.470108 |
| 25.22  | 30.31   | 25.89   | 26.94   | 0.142535 | 0.117171 |
| 9.49   | 7.57    | 6.39    | 7.29    | -0.2664  | 0.082878 |
| 4.2    | 4.45    | 4.48    | 4.05    | 0.16368  | 0.539415 |
| 232.63 | 175.27  | 210.23  | 194     | -0.32896 | 2.05E-05 |
| 14.23  | 19.12   | 13.04   | 15      | 0.23184  | 0.055161 |
| 2.64   | 1.84    | 1.92    | 2.63    | -0.25882 | 0.699246 |
| 1.23   | 1.41    | 0.96    | 0.65    | 0.172066 | 0.752233 |
| 6.07   | 5.83    | 6.25    | 7.43    | 0.364826 | 0.021341 |
| 33.13  | 33.74   | 37.21   | 35.49   | 0.038895 | 0.752675 |
| 3.82   | 1.55    | 2.5     | 1.94    | -1.02693 | 6.80E-09 |
| 7.74   | 13.01   | 12.41   | 12.77   | 0.78231  | 2.69E-15 |
| 24.55  | 26.25   | 28.81   | 27.91   | 0.088977 | 0.571879 |
| 15.61  | 5.9     | 7.09    | 6.33    | -1.2896  | 4.42E-20 |
| 0.36   | 0.11    | 0.27    | 0.22    | -0.07638 | 0.923329 |
| 0.02   | 0.01    | 0.01    | 0 NA    | NA       |          |
| 12.91  | 12.07   | 12.86   | 12.21   | -0.12404 | 0.22911  |
| 14.69  | 25.65   | 24.03   | 24.71   | 0.712102 | 3.80E-10 |
| 4.12   | 3.68    | 3.31    | 3.84    | -0.07299 | 0.817247 |
| 20.3   | 31.77   | 31      | 30.69   | 0.588147 | 4.43E-10 |
| 5.89   | 3.81    | 3.7     | 5.29    | -0.05282 | 0.767346 |
| 22.83  | 21.44   | 22.57   | 22.55   | -0.13116 | 0.308023 |
| 0.18   | 0.95    | 0.37    | 0.57    | 1.634063 | 0.000459 |
| 17.71  | 13.61   | 13.06   | 14      | -0.44348 | 0.001622 |
| 6.42   | 7.43    | 6.89    | 6.04    | 0.213469 | 0.183442 |

|        |        |        |        |          |          |
|--------|--------|--------|--------|----------|----------|
| 20.69  | 18.97  | 17.12  | 20.69  | 0.083554 | 0.565562 |
| 11.85  | 7.61   | 9.39   | 8.18   | -0.23124 | 0.093281 |
| 20.98  | 15.34  | 17.72  | 17.85  | -0.27227 | 0.003757 |
| 26.39  | 29.71  | 30.32  | 28.17  | 0.086362 | 0.478049 |
| 29.41  | 29.95  | 30.44  | 30.66  | 0.0435   | 0.724081 |
| 8.57   | 6.99   | 6.65   | 10.02  | -0.11946 | 0.504623 |
| 27.88  | 142.07 | 95.04  | 118.8  | 2.015636 | 3.41E-20 |
| 6.29   | 7.59   | 7.1    | 7.89   | 0.110315 | 0.543203 |
| 9.4    | 9.86   | 9.91   | 10.37  | 0.162562 | 0.373798 |
| 11.3   | 18.64  | 15.15  | 16.84  | 0.421387 | 0.000956 |
| 15.11  | 26.64  | 24.22  | 26.34  | 0.629776 | 1.28E-06 |
| 0.68   | 1.17   | 1.33   | 1.25   | 0.287613 | 0.521775 |
| 0      | 0.05   | 0.04   | 0.06   | NA       | NA       |
| 18.9   | 8.54   | 10.4   | 9.83   | -0.49697 | 1.50E-07 |
| 5.94   | 6.25   | 6.41   | 5.33   | -0.12165 | 0.279617 |
| 253.51 | 215.35 | 230.84 | 220.51 | -0.24208 | 0.001085 |
| 18.77  | 14.14  | 15.61  | 15.07  | -0.28698 | 0.005729 |
| 44.36  | 55.17  | 54.93  | 58.35  | 0.217295 | 0.034735 |
| 0.25   | 0.3    | 0.2    | 0.33   | -0.95851 | 0.032553 |
| 2.6    | 3.09   | 3.42   | 3.16   | 0.040912 | 0.87997  |
| 8.85   | 10.96  | 10.28  | 10.2   | 0.116769 | 0.456633 |
| 0.5    | 0      | 0.15   | 0.05   | -0.91157 | 0.164486 |
| 10.51  | 13.52  | 11.18  | 12.99  | 0.169505 | 0.181048 |
| 23.95  | 15.1   | 15.53  | 15.24  | -0.3604  | 0.000849 |
| 43.91  | 25.09  | 33.14  | 31.62  | -0.63003 | 1.18E-09 |
| 26.92  | 72.52  | 44.43  | 55.41  | 1.019832 | 4.99E-13 |
| 7.7    | 14.69  | 13.01  | 12.26  | 0.584296 | 2.95E-05 |
| 1.41   | 0.25   | 0.6    | 0.53   | -1.58079 | 1.94E-06 |
| 0      | 0      | 0      | 0      | NA       | NA       |
| 0      | 0.09   | 0.09   | 0      | NA       | NA       |
| 0      | 0      | 0      | 0      | NA       | NA       |
| 7.41   | 10.45  | 10.15  | 11.15  | 0.385212 | 0.000644 |
| 0.04   | 0.01   | 0.01   | 0.12   | NA       | NA       |
| 0.01   | 0.01   | 0.36   | 0.02   | 0.744131 | 0.266084 |
| 0      | 0      | 0      | 0      | NA       | NA       |
| 9.27   | 11.55  | 9.41   | 10.02  | -0.1074  | 0.413241 |
| 55.33  | 36.43  | 36.03  | 35.27  | -0.23461 | 0.008021 |
| 35.96  | 32.07  | 34.4   | 35.31  | -0.15647 | 0.101523 |
| 21.02  | 21.33  | 23.96  | 22.8   | 0.036309 | 0.816402 |
| 38.14  | 32.02  | 37.97  | 31.86  | -0.12214 | 0.326189 |
| 5.01   | 5.95   | 4.63   | 5.56   | 0.22741  | 0.192444 |
| 5.19   | 0.9    | 1.45   | 1.02   | -1.73716 | 2.05E-32 |
| 0      | 0.07   | 0.12   | 0      | NA       | NA       |
| 2.11   | 1.4    | 1.72   | 1.42   | -0.37102 | 0.237586 |
| 5.51   | 7.64   | 8.84   | 7.57   | 0.371058 | 0.101151 |



|        |        |        |        |          |          |
|--------|--------|--------|--------|----------|----------|
| 0.02   | 0      | 0      | 0.02   | NA       | NA       |
| 2.9    | 4.9    | 5.27   | 5.7    | 1.085273 | 1.55E-15 |
| 0      | 0.11   | 0.39   | 0.3    | NA       | NA       |
| 15.5   | 14.11  | 14.23  | 14.98  | 0.311698 | 0.001073 |
| 0.33   | 0.23   | 0.29   | 0.29   | -0.88957 | 0.02876  |
| 0.07   | 0.05   | 0      | 0      | NA       | NA       |
| 0.16   | 0.31   | 0.41   | 0.46   | -0.103   | 0.896485 |
| 79.78  | 140.72 | 113    | 125.41 | 0.686012 | 7.28E-13 |
| 30.99  | 28.64  | 33.4   | 27.56  | -0.16565 | 0.177792 |
| 5.88   | 4.76   | 5.06   | 4.41   | -0.55449 | 0.002216 |
| 14     | 26.14  | 19.84  | 22.87  | 0.578082 | 5.26E-09 |
| 11.36  | 14.61  | 12.66  | 13.15  | 0.235694 | 0.081123 |
| 12.47  | 14.66  | 13.54  | 14.78  | 0.104962 | 0.557574 |
| 21.34  | 18.12  | 23.11  | 22.3   | -0.06019 | 0.748936 |
| 29.33  | 41.43  | 36.36  | 34.34  | 0.369504 | 0.003347 |
| 11.61  | 13.85  | 12.53  | 13     | 0.10374  | 0.424805 |
| 0      | 0      | 0      | 0      | NA       | NA       |
| 0      | 0.21   | 0      | 0      | NA       | NA       |
| 10.26  | 12.09  | 11.68  | 12.7   | 0.235745 | 0.02158  |
| 7.54   | 8.14   | 7.93   | 7.49   | -0.0503  | 0.761385 |
| 110.85 | 135.75 | 122.44 | 139.1  | 0.280759 | 0.004292 |
| 92.81  | 55.18  | 58.7   | 51.36  | -0.72799 | 3.15E-15 |
| 0.47   | 0.65   | 0.67   | 0.63   | 0.251573 | 0.44868  |
| 0.19   | 0.14   | 0.34   | 0.32   | -0.10563 | 0.877298 |
| 0.15   | 0      | 0.09   | 0.03   | -0.02792 | 0.974854 |
| 0      | 0.04   | 0      | 0.07   | NA       | NA       |
| 23.24  | 53.65  | 51.01  | 53.52  | 1.029601 | 5.93E-39 |
| 5.62   | 4.35   | 5.41   | 4.64   | -0.19    | 0.301759 |
| 40.74  | 29.02  | 38.97  | 37.58  | -0.33603 | 0.000845 |
| 22.79  | 20.22  | 19.24  | 21.87  | 0.207373 | 0.050185 |
| 3.07   | 2.01   | 3.54   | 2.96   | -0.21972 | 0.367698 |
| 0.5    | 0.51   | 0.31   | 0.37   | 0.267771 | 0.731121 |
| 28.94  | 23.69  | 29.4   | 29.26  | -0.08574 | 0.565616 |
| 23.08  | 21.59  | 20.44  | 21.83  | -0.23985 | 0.009167 |
| 13.6   | 14.86  | 14.64  | 16.34  | 0.287498 | 0.064116 |
| 12.08  | 16.41  | 18.93  | 18.06  | 0.35843  | 0.000239 |
| 6.39   | 8.51   | 6.81   | 8.16   | 0.245569 | 0.145356 |
| 8.91   | 15.87  | 13.27  | 15.14  | 0.793739 | 2.44E-08 |
| 8.34   | 12.28  | 9.33   | 10.75  | 0.36924  | 0.08671  |
| 0.26   | 0.26   | 0.13   | 0.52   | 0.152166 | 0.863981 |
| 96.64  | 145.8  | 114.43 | 134.87 | 0.461354 | 1.88E-06 |
| 2.28   | 3.6    | 2.29   | 3.73   | -0.06111 | 0.933531 |
| 12.09  | 14.89  | 14.69  | 14.98  | 0.364267 | 0.005679 |
| 48.16  | 38.12  | 41.75  | 46.65  | -0.21734 | 0.008494 |
| 32.61  | 18.99  | 23.48  | 25     | -0.69887 | 8.04E-12 |

|         |         |         |        |          |          |
|---------|---------|---------|--------|----------|----------|
| 10.29   | 8.6     | 7.49    | 8.16   | -0.39397 | 0.004395 |
| 0       | 0.01    | 0       | 0.21   | NA       | NA       |
| 1.45    | 1.81    | 2.86    | 1.86   | 0.682293 | 0.054139 |
| 0       | 0       | 0       | 0      | NA       | NA       |
| 690.71  | 520.68  | 584.48  | 602.87 | -0.33887 | 9.25E-07 |
| 2.04    | 1.69    | 1.64    | 1.97   | -0.37744 | 0.116319 |
| 14.3    | 15.72   | 14.68   | 15.54  | -0.03765 | 0.862624 |
| 22.94   | 25.94   | 24.55   | 26.09  | -0.00352 | 0.983057 |
| 8.11    | 5.69    | 7.67    | 7.45   | -0.26692 | 0.031121 |
| 8.24    | 7.23    | 7.71    | 7.16   | -0.18341 | 0.353286 |
| 0.19    | 0.01    | 0.11    | 0.01   | -1.54345 | 0.009051 |
| 7.35    | 6.94    | 8.33    | 7.72   | -0.06061 | 0.730191 |
| 73.52   | 75.78   | 83.64   | 75.5   | -0.07237 | 0.480886 |
| 14.16   | 6.78    | 9.83    | 8.54   | -0.51272 | 1.12E-05 |
| 0       | 0       | 0       | 0      | NA       | NA       |
| 0       | 0       | 0       | 0      | NA       | NA       |
| 3.03    | 2       | 3.02    | 3.48   | -0.20568 | 0.358088 |
| 13.08   | 39.09   | 25.68   | 31.9   | 1.099127 | 4.18E-22 |
| 0       | 0       | 0       | 0      | NA       | NA       |
| 9.28    | 13.13   | 11.21   | 11.1   | -0.06324 | 0.741372 |
| 137.02  | 135.61  | 135.47  | 137    | -0.05156 | 0.580841 |
| 0.04    | 0.08    | 0.15    | 0.16   | 0.267612 | 0.719768 |
| 1149.46 | 1047.69 | 1157.85 | 983.84 | -0.22303 | 0.019775 |
| 174.47  | 158.75  | 173.5   | 167.01 | -0.22027 | 0.002673 |
| 20.63   | 15.73   | 17.38   | 15.38  | -0.00573 | 0.973164 |
| 0       | 0       | 0       | 0      | NA       | NA       |
| 9.26    | 6.85    | 6.92    | 7.19   | -0.51503 | 2.12E-05 |
| 45.77   | 17.54   | 27.68   | 24.47  | -0.99106 | 8.25E-15 |
| 5.7     | 4.73    | 5.49    | 4.99   | -0.04231 | 0.891048 |
| 7.46    | 9.36    | 9.62    | 9.67   | 0.214112 | 0.05871  |
| 18.67   | 6.14    | 13.78   | 12.33  | -0.78918 | 0.043799 |
| 30.34   | 31.65   | 31.78   | 30.21  | -0.01832 | 0.922287 |
| 61.92   | 72.36   | 59.32   | 70.8   | 0.341934 | 0.000139 |
| 1.56    | 0.22    | 0.52    | 0.33   | -0.73225 | 0.123782 |
| 70.6    | 101.87  | 92.49   | 93.43  | 0.380029 | 4.10E-06 |
| 36.39   | 34.45   | 41.82   | 37.56  | -0.015   | 0.921651 |
| 11      | 10.43   | 13.13   | 12.63  | 0.334836 | 0.005521 |
| 26.73   | 23.16   | 25.21   | 26.16  | 0.034249 | 0.832104 |
| 27.98   | 31.77   | 28.73   | 30.28  | 0.049064 | 0.720746 |
| 0       | 0       | 0       | 0      | NA       | NA       |
| 10.31   | 11.98   | 10.71   | 12.75  | 0.130219 | 0.325155 |
| 47.05   | 56.38   | 54.36   | 52.33  | 0.115609 | 0.329829 |
| 29.38   | 21.14   | 25.82   | 24.18  | -0.3688  | 0.001309 |
| 18.74   | 18.15   | 15.93   | 19.66  | 0.001087 | 0.995704 |
| 0.02    | 0       | 0.03    | 0.02   | NA       | NA       |

|        |        |        |        |          |           |
|--------|--------|--------|--------|----------|-----------|
| 195.06 | 79.88  | 96.35  | 88.51  | -1.12539 | 7.33E-33  |
| 0.1    | 1.22   | 1.02   | 1.07   | 1.922704 | 6.79E-06  |
| 23.38  | 27.09  | 25.76  | 25.61  | 0.305678 | 0.013432  |
| 2.29   | 2.09   | 2.38   | 1.96   | 0.536056 | 0.039273  |
| 31.02  | 53.44  | 45.02  | 55.29  | 0.75433  | 1.34E-16  |
| 41.52  | 37.88  | 37.04  | 38.95  | -0.18529 | 0.056076  |
| 5.05   | 6.5    | 6.56   | 6.17   | 0.029813 | 0.876951  |
| 1.32   | 1.03   | 0.42   | 2.11   | 0.190694 | 0.826158  |
| 108.55 | 85.64  | 86.8   | 89.37  | -0.36248 | 6.09E-07  |
| 7.37   | 5.55   | 6.4    | 6.86   | -0.35446 | 0.000429  |
| 1.34   | 1.72   | 1.33   | 1.01   | 0.47128  | 0.114969  |
| 18.13  | 15.5   | 11.7   | 12.83  | -0.11305 | 0.400004  |
| 11.99  | 13.47  | 14.65  | 14.73  | 0.190577 | 0.197245  |
| 15.13  | 2.73   | 4.79   | 3.26   | -1.90168 | 5.40E-27  |
| 0      | 0      | 0.04   | 0      | NA       | NA        |
| 21.43  | 6.27   | 9.01   | 5.64   | -2.02647 | 2.72E-41  |
| 1.42   | 0.36   | 0.86   | 0.78   | -0.84765 | 0.021019  |
| 19.36  | 14.12  | 14.12  | 12.35  | -0.6002  | 8.31E-09  |
| 65.06  | 92.15  | 92.7   | 94.35  | 0.368028 | 1.45E-07  |
| 34.92  | 136.21 | 152.42 | 156    | 1.764362 | 7.52E-109 |
| 0      | 0      | 0      | 0      | NA       | NA        |
| 21.53  | 26.27  | 25.64  | 27.44  | 0.270405 | 0.000632  |
| 6.32   | 9.46   | 8.28   | 8.31   | 0.095422 | 0.629904  |
| 6.66   | 4.64   | 5.31   | 4.49   | -0.46793 | 0.000231  |
| 7.48   | 4.43   | 5.76   | 4.19   | -0.8283  | 3.49E-09  |
| 11.71  | 10.92  | 13.53  | 12.99  | 0.260482 | 0.018879  |
| 34.86  | 38.55  | 35.83  | 33.86  | -0.06543 | 0.703123  |
| 7.47   | 9.21   | 8.03   | 9.09   | 0.114494 | 0.482947  |
| 0.09   | 0.14   | 0.09   | 0.22   | 0.124871 | 0.889947  |
| 12.82  | 11.41  | 12.43  | 14.75  | -0.14423 | 0.318116  |
| 0.97   | 0.49   | 0.43   | 0.43   | -1.18879 | 0.000242  |
| 211.11 | 175.35 | 200.7  | 198.13 | -0.21452 | 0.021913  |
| 0      | 0      | 0      | 0      | NA       | NA        |
| 6.95   | 6.85   | 7.53   | 8.39   | 0.130773 | 0.343547  |
| 6.52   | 8.05   | 5.68   | 6.56   | 0.237009 | 0.321112  |
| 163.67 | 166.02 | 147.85 | 152.87 | -0.19666 | 0.031562  |
| 5.92   | 9.26   | 8.55   | 8.53   | 0.370079 | 0.003411  |
| 24.29  | 25.8   | 26.34  | 25.06  | 0.199856 | 0.056421  |
| 0.97   | 4.48   | 3.52   | 2.74   | 0.40401  | 0.505452  |
| 0.04   | 0.02   | 0      | 0.1    | NA       | NA        |
| 24.51  | 30.69  | 23.5   | 27.58  | 0.016248 | 0.921986  |
| 32.65  | 42.34  | 39.24  | 33.23  | 0.092039 | 0.583184  |
| 0      | 0      | 0.01   | 0      | NA       | NA        |
| 8.91   | 9.98   | 9.01   | 8.04   | 0.010085 | 0.968986  |
| 2.25   | 0      | 0.04   | 0      | -5.52313 | 4.02E-47  |

|       |        |       |        |          |          |
|-------|--------|-------|--------|----------|----------|
| 4.76  | 2.79   | 3     | 3.76   | 0.230162 | 0.396261 |
| 30.93 | 27.02  | 32.15 | 29.28  | -0.13426 | 0.248874 |
| 17.88 | 18.26  | 17.18 | 17.58  | -0.05752 | 0.696368 |
| 10.94 | 11.79  | 12.51 | 14     | -0.05454 | 0.769317 |
| 11.75 | 17.28  | 17.33 | 20.12  | 0.429446 | 0.000292 |
| 0.03  | 0      | 0     | 0      | NA       | NA       |
| 4.85  | 3.11   | 3.45  | 3.21   | -0.68086 | 7.79E-06 |
| 2.38  | 0.91   | 1.02  | 0.93   | -1.66106 | 9.79E-09 |
| 2.54  | 3.26   | 2.94  | 3.39   | 0.356874 | 0.092111 |
| 8.85  | 10.55  | 10.19 | 9.36   | 0.0654   | 0.748853 |
| 0     | 0      | 0.15  | 0.02   | NA       | NA       |
| 8.03  | 2.69   | 4.27  | 3.92   | -1.1022  | 4.60E-12 |
| 0.35  | 0.71   | 1.25  | 0.81   | 1.304418 | 0.006363 |
| 9.45  | 17.02  | 14.58 | 15.82  | 0.652712 | 4.71E-08 |
| 0.77  | 2.19   | 1.98  | 1.81   | 1.015486 | 3.42E-07 |
| 7.12  | 3.74   | 4.95  | 5.4    | -0.5765  | 0.002066 |
| 45.9  | 44.44  | 45.53 | 44.57  | -0.03285 | 0.80335  |
| 73.23 | 67.14  | 66.69 | 67.36  | -0.13407 | 0.176064 |
| 0.05  | 0      | 0     | 0      | NA       | NA       |
| 2.53  | 1.69   | 1.94  | 2.38   | -0.22682 | 0.467135 |
| 14.16 | 11.92  | 16.28 | 16.65  | 0.052392 | 0.684379 |
| 0.24  | 0.18   | 0.16  | 0.14   | -1.08436 | 0.038465 |
| 5.21  | 4.94   | 5.58  | 5.89   | -0.07292 | 0.660676 |
| 54.66 | 33.97  | 40.72 | 39.27  | -0.4714  | 3.66E-07 |
| 0     | 0      | 0     | 0      | NA       | NA       |
| 0     | 0.49   | 0.69  | 0.57   | 1.801291 | 0.001289 |
| 0     | 0      | 0     | 0      | NA       | NA       |
| 4.8   | 403.16 | 93.09 | 222.81 | 4.04972  | 7.46E-19 |
| 27.55 | 19.96  | 18.18 | 20.69  | -0.36971 | 9.89E-05 |
| 5.5   | 6.76   | 6.79  | 5.78   | 0.066843 | 0.809404 |
| 3.64  | 4.71   | 4.91  | 5.29   | 0.477061 | 0.001088 |
| 0     | 0      | 0     | 0      | NA       | NA       |
| 0     | 0.07   | 0     | 0      | NA       | NA       |
| 2.88  | 0.61   | 0.64  | 1.03   | -2.13529 | 1.95E-44 |
| 77.05 | 91.23  | 94.95 | 87.79  | 0.194913 | 0.019786 |
| 16.42 | 15.05  | 14.58 | 13.89  | -0.21389 | 0.033618 |
| 5.66  | 7.38   | 7.73  | 7.48   | 0.29188  | 0.025102 |
| 12.6  | 14.55  | 14.97 | 14.78  | 0.214441 | 0.05133  |
| 38.43 | 36.95  | 39.17 | 36.63  | 0.081848 | 0.610746 |
| 16.25 | 33.52  | 30.16 | 30.23  | 0.792971 | 2.08E-22 |
| 55.48 | 46.91  | 55.59 | 46.04  | -0.26032 | 0.044387 |
| 0     | 0      | 0.11  | 0      | NA       | NA       |
| 18.33 | 20.67  | 21.71 | 20.58  | 0.069964 | 0.636669 |
| 7.26  | 6.99   | 6.44  | 6.3    | -0.0771  | 0.743262 |
| 0.02  | 0.02   | 0.01  | 0.01   | NA       | NA       |

|        |        |        |        |          |          |
|--------|--------|--------|--------|----------|----------|
| 0.43   | 0.08   | 0.3    | 0.22   | -0.58892 | 0.400538 |
| 39.45  | 60.26  | 57.37  | 57.3   | 0.289154 | 0.006282 |
| 16.25  | 11.58  | 12.8   | 13.26  | 0.155208 | 0.176848 |
| 0.52   | 0.98   | 0.77   | 1      | 1.135401 | 0.000349 |
| 118.89 | 125.54 | 162.07 | 154.38 | 0.241381 | 0.074393 |
| 8.75   | 29.54  | 16.46  | 24.17  | 1.522678 | 5.90E-09 |
| 21.97  | 41.18  | 39.71  | 38.37  | 0.812312 | 7.18E-21 |
| 13.13  | 12     | 11.24  | 11.74  | -0.29604 | 0.142212 |
| 8.29   | 6.09   | 5.99   | 7.03   | -0.07189 | 0.626917 |
| 11.31  | 13.33  | 9.97   | 12.05  | 0.297482 | 0.015187 |
| 4.62   | 4.82   | 4.83   | 4.38   | 0.02771  | 0.916101 |
| 30.55  | 25.79  | 27.97  | 25.39  | -0.18313 | 0.07457  |
| 0.41   | 0.51   | 0.55   | 0.87   | 0.306251 | 0.538624 |
| 35.23  | 57.6   | 48.56  | 52.13  | 0.620511 | 6.80E-10 |
| 24.89  | 22.72  | 21.6   | 24.8   | -0.19939 | 0.040164 |
| 0.01   | 0      | 0.04   | 0      | NA       | NA       |
| 9.88   | 8.87   | 8.89   | 10.22  | -0.13982 | 0.173794 |
| 0      | 0      | 0      | 0      | NA       | NA       |
| 882.17 | 785.26 | 997.68 | 943.01 | -0.07146 | 0.627366 |
| 0      | 0      | 0      | 0      | NA       | NA       |
| 113.71 | 190.48 | 164.44 | 175.24 | 0.524953 | 8.74E-09 |
| 2.49   | 5.83   | 3.85   | 4.55   | 0.762413 | 4.97E-05 |
| 10.17  | 10.77  | 9.8    | 10.43  | 0.015141 | 0.953105 |
| 8.1    | 11.95  | 9.24   | 11.73  | 0.477198 | 8.57E-05 |
| 0      | 0      | 0.12   | 0.06   | NA       | NA       |
| 0      | 0      | 0      | 0      | NA       | NA       |
| 0      | 0      | 0      | 0      | NA       | NA       |
| 0.08   | 0      | 0.05   | 0.09   | NA       | NA       |
| 6.59   | 7.61   | 8.2    | 6.45   | 0.134857 | 0.577772 |
| 1.99   | 1.64   | 1.76   | 1.36   | -0.33953 | 0.427643 |
| 62.52  | 54.31  | 54.72  | 51.47  | -0.27561 | 0.013722 |
| 30.24  | 32.41  | 29.28  | 32.92  | 0.018165 | 0.894407 |
| 14.04  | 12.56  | 12.56  | 13.33  | -0.35794 | 0.057898 |
| 1.41   | 3.89   | 5.42   | 4.27   | 1.555667 | 8.53E-21 |
| 0.18   | 0.24   | 0.25   | 0.17   | 0.547013 | 0.40629  |
| 149.69 | 152.82 | 168.88 | 183.69 | 0.239513 | 0.007346 |
| 6.5    | 7.12   | 9.93   | 7.88   | -0.06868 | 0.744989 |
| 27.09  | 21.59  | 21.86  | 18.67  | -0.33676 | 0.004264 |
| 5.93   | 10.61  | 10.3   | 10.63  | 0.688396 | 6.05E-09 |
| 0.55   | 1.34   | 1.4    | 1.17   | 0.98539  | 6.81E-07 |
| 0      | 0      | 0      | 0      | NA       | NA       |
| 19.68  | 26.27  | 23.18  | 28.67  | 0.350688 | 0.000202 |
| 5.78   | 7.13   | 5.47   | 4.42   | -0.10122 | 0.708328 |
| 16.99  | 14.13  | 20.11  | 20.95  | 0.110649 | 0.621469 |
| 0.38   | 0      | 0.1    | 0.21   | -1.6185  | 0.003994 |

|         |        |         |        |          |          |
|---------|--------|---------|--------|----------|----------|
| 0       | 0      | 0       | 0      | NA       | NA       |
| 10.42   | 5.98   | 8.24    | 7.04   | -0.69062 | 3.20E-09 |
| 11.1    | 10.9   | 10.83   | 9.73   | -0.14891 | 0.324944 |
| 6.01    | 4.93   | 5.35    | 5.13   | -0.19647 | 0.117752 |
| 30.69   | 36.45  | 33.03   | 35.59  | 0.119448 | 0.283694 |
| 321.2   | 214.31 | 255.33  | 229.49 | -0.46809 | 1.37E-08 |
| 50.87   | 113.87 | 101.33  | 115.01 | 1.077382 | 1.96E-45 |
| 21.36   | 35.03  | 33.01   | 37.6   | 0.768042 | 9.48E-22 |
| 0       | 0      | 0       | 0      | NA       | NA       |
| 0       | 0.01   | 0       | 0      | NA       | NA       |
| 11.25   | 13.46  | 15.5    | 15.44  | 0.325846 | 0.000373 |
| 13.2    | 16.31  | 14.97   | 14.47  | 0.065882 | 0.564687 |
| 49.69   | 52.05  | 56.78   | 53.09  | 0.101958 | 0.329405 |
| 1722.79 | 816.24 | 1062.08 | 920.12 | -1.00354 | 3.77E-26 |
| 1.27    | 1.36   | 1.12    | 0.97   | -0.28919 | 0.228419 |
| 9.62    | 19.04  | 15.65   | 21.86  | 1.269635 | 5.73E-29 |
| 0       | 0      | 0       | 0      | NA       | NA       |
| 0.49    | 0.54   | 0.49    | 0.6    | -0.29873 | 0.579413 |
| 25.08   | 21.25  | 20.76   | 21.38  | -0.11635 | 0.324048 |
| 140.49  | 175.97 | 171.36  | 167.77 | 0.138768 | 0.106367 |
| 24.17   | 35.32  | 22.68   | 30.1   | 0.454916 | 0.002504 |
| 4.36    | 4.71   | 5.54    | 4.99   | 0.022833 | 0.921731 |
| 12.94   | 15.47  | 13.32   | 14.53  | 0.114177 | 0.403801 |
| 0.09    | 0      | 0       | 0      | NA       | NA       |
| 0       | 0      | 0       | 0      | NA       | NA       |
| 0       | 0      | 0       | 0      | NA       | NA       |
| 18.93   | 14.67  | 18.32   | 16.91  | -0.12249 | 0.551069 |
| 11.38   | 8.25   | 8.6     | 8.74   | -0.48557 | 1.78E-05 |
| 14.19   | 12.61  | 15.38   | 13.15  | -0.1591  | 0.255177 |
| 6.64    | 3.35   | 4.32    | 3.7    | -0.77372 | 1.06E-08 |
| 108.12  | 79.1   | 85.46   | 79.61  | -0.48303 | 2.12E-08 |
| 26.99   | 21.7   | 24.13   | 26.99  | -0.05364 | 0.764511 |
| 20.71   | 9.29   | 10.78   | 10.5   | -0.47555 | 2.70E-07 |
| 20.43   | 24.16  | 20.52   | 22.79  | 0.191284 | 0.065458 |
| 14.4    | 14.43  | 14.09   | 15     | -0.04875 | 0.722504 |
| 13.04   | 9.44   | 11.59   | 9.71   | -0.00351 | 0.988237 |
| 9.56    | 6.37   | 7.04    | 6.42   | -0.45586 | 0.002764 |
| 1.29    | 0.76   | 0.82    | 0.97   | -0.95332 | 0.003588 |
| 8.61    | 8.23   | 9.05    | 9.54   | -0.01971 | 0.930024 |
| 2.47    | 0.68   | 1.81    | 0.86   | -1.60007 | 4.37E-11 |
| 1.69    | 1.37   | 1.63    | 1.76   | -0.37577 | 0.075989 |
| 6.41    | 12.19  | 11.01   | 11.27  | 0.846782 | 6.49E-19 |
| 1.16    | 1.21   | 0.63    | 1.32   | -0.08358 | 0.866409 |
| 54.75   | 16.07  | 23.17   | 19.21  | -1.46651 | 8.74E-39 |
| 0.55    | 1      | 0.98    | 0.68   | 0.645491 | 0.285493 |

|        |        |       |        |          |          |
|--------|--------|-------|--------|----------|----------|
| 2.85   | 1.63   | 1.43  | 1.36   | -0.86579 | 8.91E-07 |
| 16.37  | 18.63  | 21.17 | 20.05  | 0.057538 | 0.738925 |
| 0.41   | 0.69   | 2.49  | 0.54   | 0.417202 | 0.171615 |
| 1.98   | 1.6    | 1.83  | 2.77   | -0.22333 | 0.399821 |
| 4.57   | 6.67   | 5.78  | 8.43   | 0.463826 | 0.048909 |
| 38.77  | 21.53  | 24.62 | 21.91  | -0.70908 | 4.09E-14 |
| 0.66   | 0.37   | 0.17  | 0.45   | -0.14388 | 0.843986 |
| 0      | 0      | 0     | 0      | NA       | NA       |
| 1.07   | 0.3    | 0.21  | 0.2    | -1.04874 | 0.000983 |
| 0      | 0.01   | 0.01  | 0      | NA       | NA       |
| 0.49   | 2.11   | 1.66  | 2.08   | 1.647245 | 3.59E-09 |
| 12.56  | 12.97  | 12.51 | 13.21  | -0.03117 | 0.859273 |
| 20.98  | 22.85  | 22.95 | 23.34  | 0.128109 | 0.303435 |
| 14.96  | 22.63  | 20.58 | 23.56  | 0.500728 | 3.27E-05 |
| 10.84  | 12.93  | 12.93 | 12.57  | 0.177837 | 0.151723 |
| 0      | 0      | 0     | 0      | NA       | NA       |
| 5.45   | 7.54   | 5.54  | 9.58   | 0.210473 | 0.122345 |
| 0.2    | 0.02   | 0.11  | 0.03   | 0.019515 | 0.984835 |
| 0      | 0      | 0.05  | 0      | NA       | NA       |
| 5.24   | 2.75   | 2.37  | 2.36   | -0.65874 | 0.001089 |
| 23.55  | 27.25  | 26.14 | 22.55  | -0.07203 | 0.515404 |
| 40.59  | 53.43  | 49.17 | 45.69  | 0.304573 | 0.000311 |
| 14.9   | 64.01  | 42.77 | 56.63  | 1.90563  | 5.94E-48 |
| 2.56   | 2.12   | 1.93  | 2.06   | -0.28403 | 0.540395 |
| 14.8   | 3.67   | 6.05  | 6.93   | -1.40867 | 3.17E-18 |
| 71.9   | 116.29 | 96.15 | 97.76  | 0.550172 | 1.35E-08 |
| 18.23  | 26.82  | 27.4  | 23.37  | 0.257797 | 0.004239 |
| 41.21  | 99.54  | 87.39 | 99.41  | 1.149879 | 3.29E-35 |
| 28.08  | 20.15  | 25.33 | 22.27  | -0.34502 | 0.000258 |
| 0.09   | 0.23   | 0.36  | 0.34   | 0.802408 | 0.132181 |
| 0      | 0      | 0     | 0      | NA       | NA       |
| 0      | 0      | 0     | 0.01   | NA       | NA       |
| 13.44  | 12.89  | 14.98 | 14.02  | -0.15491 | 0.364486 |
| 0      | 0      | 0     | 0      | NA       | NA       |
| 6.87   | 7.72   | 7.87  | 9.71   | 0.079434 | 0.792039 |
| 59.1   | 46.3   | 53.84 | 50.56  | -0.27991 | 0.001735 |
| 0.41   | 1.32   | 1.1   | 1.37   | 0.882107 | 0.009215 |
| 11.06  | 11.78  | 10.69 | 12.4   | -0.08624 | 0.632286 |
| 9.79   | 9.83   | 9.84  | 10.58  | 0.139782 | 0.542757 |
| 9.12   | 14.89  | 12.04 | 13.34  | 0.46552  | 0.005568 |
| 0      | 0      | 0     | 0      | NA       | NA       |
| 7.45   | 6.87   | 5.84  | 6.87   | -0.38006 | 0.005086 |
| 0.04   | 0.02   | 0.01  | 0.16   | NA       | NA       |
| 218.27 | 260.75 | 239.6 | 240.14 | 0.131507 | 0.171219 |
| 12.45  | 18.73  | 16.28 | 20.24  | 0.558251 | 1.66E-05 |

|        |        |        |        |          |          |
|--------|--------|--------|--------|----------|----------|
| 0.28   | 0.1    | 0.04   | 0.02   | -1.41138 | 0.014336 |
| 6.55   | 5.18   | 5.54   | 5.68   | -0.27761 | 0.023323 |
| 12.63  | 10.51  | 9.64   | 9.82   | -0.4395  | 0.000197 |
| 30.67  | 38.56  | 35.61  | 37.33  | 0.203808 | 0.059813 |
| 88.49  | 73.43  | 87.71  | 92.32  | -0.08575 | 0.366897 |
| 0      | 0      | 0      | 0      | NA       | NA       |
| 0      | 0      | 0      | 0      | NA       | NA       |
| 673.24 | 111.25 | 178.23 | 144.82 | -2.20317 | 4.55E-67 |
| 0      | 0      | 0.01   | 0      | NA       | NA       |
| 0      | 0      | 0      | 0      | NA       | NA       |
| 1.24   | 0.81   | 1.51   | 1.11   | -0.613   | 0.034606 |
| 8.31   | 6.22   | 5.83   | 7.44   | -0.20478 | 0.217189 |
| 0.93   | 0.16   | 0.34   | 0.12   | -1.25147 | 0.006402 |
| 22.44  | 34     | 28.27  | 29.89  | 0.168039 | 0.207379 |
| 8.66   | 5.53   | 6.55   | 7.33   | -0.36579 | 0.031317 |
| 0.65   | 0.72   | 0.83   | 0.51   | -0.06457 | 0.91804  |
| 237.61 | 250.28 | 253.59 | 238.59 | 0.068523 | 0.501186 |
| 0.23   | 0.56   | 0.26   | 0.16   | 0.519074 | 0.326999 |
| 4.07   | 4.57   | 4.91   | 3.65   | -0.0663  | 0.754901 |
| 24.76  | 38.01  | 33.93  | 36.43  | 0.295762 | 0.007067 |
| 20.2   | 23.97  | 22.82  | 28.32  | 0.402629 | 5.84E-05 |
| 0.99   | 1.77   | 1.03   | 1.8    | 0.277175 | 0.251257 |
| 8.91   | 5.74   | 8.9    | 8.61   | -0.1365  | 0.514027 |
| 15.48  | 16.41  | 15.05  | 15.18  | -0.05248 | 0.73195  |
| 11.41  | 41.19  | 31.76  | 35.49  | 1.577133 | 2.52E-54 |
| 0.02   | 0.11   | 0.05   | 0.04   | 0.30864  | 0.703755 |
| 39.49  | 37.36  | 38.11  | 37.16  | -0.00176 | 0.992041 |
| 4.12   | 3.37   | 4.02   | 4.51   | 0.067247 | 0.865219 |
| 0      | 0      | 0      | 0      | NA       | NA       |
| 131.41 | 177.15 | 171.48 | 176.18 | 0.291386 | 0.0001   |
| 0      | 0      | 0      | 0      | NA       | NA       |
| 5.91   | 0.46   | 1.4    | 1.16   | -2.44503 | 3.34E-21 |
| 11.33  | 9.97   | 12.18  | 10.23  | -0.26023 | 0.049891 |
| 2.62   | 1.71   | 1.99   | 1.84   | -0.35364 | 0.289947 |
| 0      | 0      | 0      | 0      | NA       | NA       |
| 0      | 0      | 0      | 0      | NA       | NA       |
| 0      | 0      | 0      | 0      | NA       | NA       |
| 0.83   | 0.34   | 0.61   | 0.39   | -0.25006 | 0.737655 |
| 44.59  | 41.22  | 42.43  | 41.83  | -0.06249 | 0.572396 |
| 42.68  | 38.96  | 40.42  | 37.6   | -0.22965 | 0.033295 |
| 22.88  | 19.9   | 23.71  | 23.82  | -0.07901 | 0.465679 |
| 4.38   | 2.98   | 2.68   | 3.86   | -0.1553  | 0.376931 |
| 6.65   | 5.65   | 5.89   | 6.83   | -0.04218 | 0.807248 |
| 0.04   | 0.13   | 0.26   | 0.2    | 1.142559 | 0.06051  |
| 13.37  | 14.18  | 15.82  | 16.17  | 0.161409 | 0.138439 |



|        |        |        |        |          |          |
|--------|--------|--------|--------|----------|----------|
| 0.62   | 0.53   | 0.87   | 0.71   | -0.19436 | 0.801079 |
| 12.6   | 20.77  | 17.7   | 18.77  | 0.738009 | 7.38E-13 |
| 183.26 | 227.84 | 227.26 | 233.01 | 0.169599 | 0.027322 |
| 0.38   | 0.36   | 0.35   | 0.8    | -0.52185 | 0.372435 |
| 0      | 0      | 0      | 0.03   | NA       | NA       |
| 0      | 0      | 0      | 0      | NA       | NA       |
| 27.18  | 24.48  | 24.52  | 25.54  | -0.04918 | 0.709206 |
| 7.6    | 5.39   | 5.03   | 4.61   | -0.63116 | 0.000311 |
| 0      | 0      | 0      | 0      | NA       | NA       |
| 1.88   | 0.22   | 0.17   | 0.18   | -3.61889 | 5.46E-36 |
| 0.02   | 0      | 0      | 0      | NA       | NA       |
| 12.12  | 9.76   | 10.9   | 9.9    | -0.11783 | 0.565161 |
| 30.95  | 27.36  | 31.49  | 29.98  | -0.11614 | 0.476361 |
| 5.45   | 3.82   | 4.74   | 4.45   | -0.15715 | 0.363059 |
| 0.72   | 0.96   | 0.55   | 1.06   | 1.891085 | 7.10E-06 |
| 65.59  | 72.43  | 73.15  | 72.35  | 0.085587 | 0.370274 |
| 75.26  | 9.29   | 17.48  | 13.6   | -2.46762 | 2.56E-55 |
| 0.33   | 0.46   | 0.33   | 0.17   | -0.25264 | 0.762437 |
| 17.43  | 11.98  | 12.39  | 11.2   | -0.54687 | 7.93E-06 |
| 43.52  | 112.17 | 85.2   | 111.12 | 1.11134  | 6.61E-31 |
| 4.88   | 6.7    | 8.55   | 7.71   | 0.308932 | 0.022792 |
| 71.72  | 56.21  | 63.16  | 67.57  | -0.088   | 0.405764 |
| 0.43   | 1.97   | 1.02   | 1.73   | 1.184654 | 0.000335 |
| 0.7    | 0.88   | 1.04   | 0.69   | -0.55809 | 0.110986 |
| 0.41   | 0.37   | 0.35   | 0.32   | -0.19294 | 0.791918 |
| 4.16   | 5.01   | 4.09   | 6      | 0.062941 | 0.761728 |
| 0      | 0      | 0      | 0      | NA       | NA       |
| 29.48  | 23.39  | 24.45  | 29.26  | -0.20008 | 0.027299 |
| 1.5    | 2.18   | 2.04   | 1.3    | -0.16088 | 0.742403 |
| 66.14  | 46.4   | 42.09  | 44.51  | -0.50538 | 4.37E-08 |
| 12.54  | 9      | 9.9    | 9.12   | -0.54793 | 0.008794 |
| 2.6    | 2.58   | 2.28   | 3.91   | 0.01215  | 0.959922 |
| 0      | 0      | 0      | 0      | NA       | NA       |
| 10.78  | 10.19  | 10.19  | 10.47  | 0.064486 | 0.81891  |
| 0      | 0      | 0      | 0      | NA       | NA       |
| 8.88   | 6.79   | 8.37   | 8.15   | -0.29193 | 0.014759 |
| 32.6   | 37.01  | 39.25  | 37.68  | 0.207814 | 0.030556 |
| 34.01  | 29.82  | 31.41  | 30.34  | -0.06135 | 0.622344 |
| 39.18  | 44.95  | 42.1   | 45.8   | 0.124289 | 0.255153 |
| 116    | 34.49  | 49.33  | 42.76  | -1.27358 | 3.41E-20 |
| 0.02   | 0      | 0      | 0      | NA       | NA       |
| 20.44  | 5.99   | 10.69  | 6.81   | -1.60856 | 1.99E-35 |
| 31.96  | 25.76  | 24.19  | 24.94  | -0.21004 | 0.068536 |
| 12.64  | 12.6   | 14.17  | 13.46  | -0.06057 | 0.737889 |
| 25.27  | 36.32  | 38.65  | 32.5   | 0.263693 | 0.005253 |

|        |        |        |                 |          |
|--------|--------|--------|-----------------|----------|
| 0.03   | 0.02   | 0.05   | 0 NA            | NA       |
| 2.12   | 1.28   | 0.68   | 1.36 -0.59116   | 0.03899  |
| 0.02   | 0.08   | 0      | 0 NA            | NA       |
| 22.22  | 26.02  | 21.1   | 21.65 0.11092   | 0.448395 |
| 5.04   | 3.92   | 5.99   | 4.7 -0.06535    | 0.650209 |
| 0      | 0      | 0      | 0 NA            | NA       |
| 0      | 0      | 0.13   | 0 NA            | NA       |
| 1.55   | 1.53   | 1.16   | 0.73 -0.41933   | 0.055013 |
| 5.17   | 6.09   | 6.28   | 6.32 0.343478   | 0.000767 |
| 20.52  | 33.48  | 27.07  | 27.93 0.534616  | 3.41E-06 |
| 3.1    | 0.97   | 1.3    | 1.15 -1.59308   | 6.49E-24 |
| 41.83  | 27.37  | 30.99  | 29.83 -0.6882   | 7.79E-18 |
| 0      | 0.06   | 0      | 0.09 NA         | NA       |
| 14.41  | 9.28   | 11.1   | 10.6 -0.51396   | 4.36E-05 |
| 4.3    | 4.43   | 3.91   | 4.44 -0.40131   | 0.038905 |
| 0.04   | 0      | 0      | 0.03 NA         | NA       |
| 2.58   | 3.83   | 3.44   | 3.87 0.177249   | 0.376582 |
| 18.6   | 21.66  | 22.23  | 22.12 0.072669  | 0.488156 |
| 15.54  | 10.08  | 11.01  | 9.57 -0.43215   | 0.001256 |
| 0      | 0      | 0      | 0 NA            | NA       |
| 0.15   | 0.11   | 0      | 0.05 NA         | NA       |
| 0      | 0.12   | 0      | 0.08 NA         | NA       |
| 8.42   | 9.81   | 8.54   | 8.36 0.018994   | 0.928303 |
| 22.23  | 29.22  | 25.88  | 27.24 0.215727  | 0.031643 |
| 13.04  | 19.55  | 20.67  | 24.42 0.776512  | 1.46E-13 |
| 32.12  | 58.56  | 58.81  | 67.06 0.77218   | 3.99E-14 |
| 8.76   | 5.8    | 5.51   | 4.4 -0.63266    | 0.000335 |
| 136.77 | 144.12 | 142.06 | 141.36 0.056873 | 0.55316  |
| 1.11   | 1      | 1.03   | 1.19 -0.21977   | 0.451545 |
| 34.08  | 50.72  | 41.66  | 49.82 0.444943  | 1.85E-05 |
| 1.23   | 3.68   | 2.67   | 4.48 1.133521   | 7.55E-06 |
| 0      | 0      | 0      | 0 NA            | NA       |
| 5.83   | 3.92   | 6.72   | 4.26 -0.43921   | 0.071885 |
| 0.42   | 0.59   | 0.29   | 0.21 -0.81593   | 0.111054 |
| 4.64   | 4.22   | 4.13   | 4.84 0.025328   | 0.902801 |
| 5.82   | 4.75   | 4.39   | 4.6 0.272276    | 0.163163 |
| 2.87   | 2.04   | 2.22   | 2.05 -0.30414   | 0.083783 |
| 10.44  | 228.49 | 89.11  | 142.2 3.427274  | 2.68E-20 |
| 0.64   | 0.38   | 0.57   | 0.65 0.203704   | 0.812564 |
| 25.48  | 8.67   | 11.1   | 10.86 -1.35711  | 5.22E-46 |
| 1.27   | 11.6   | 6.05   | 6.52 2.435094   | 1.55E-24 |
| 37.88  | 52.46  | 47.04  | 52.85 0.57607   | 4.90E-06 |
| 0      | 0.01   | 0.04   | 0.01 NA         | NA       |
| 0.03   | 0.07   | 0.04   | 0.06 0.76463    | 0.248001 |
| 50.21  | 50.52  | 49.12  | 52.34 0.00257   | 0.988102 |

|        |        |        |        |          |          |
|--------|--------|--------|--------|----------|----------|
| 7.86   | 6.57   | 8.64   | 6.52   | -0.19951 | 0.171146 |
| 3.18   | 2.67   | 1.57   | 1.03   | -0.52848 | 0.111448 |
| 3.09   | 1.4    | 1.39   | 1.56   | -0.29674 | 0.332469 |
| 0      | 0      | 0      | 0      | NA       | NA       |
| 0      | 0      | 0      | 0      | NA       | NA       |
| 0.01   | 0.02   | 0.02   | 0      | NA       | NA       |
| 13.99  | 21.35  | 20.02  | 19.61  | 0.324793 | 0.007684 |
| 6.31   | 2.74   | 3.42   | 2.57   | -1.23338 | 7.73E-16 |
| 9.36   | 4.22   | 6.04   | 5.47   | -0.87612 | 5.77E-13 |
| 3.33   | 2.51   | 4.3    | 2.21   | -0.03783 | 0.888663 |
| 0      | 0      | 0      | 0      | NA       | NA       |
| 2.55   | 2.21   | 2.8    | 1.75   | 0.0624   | 0.880476 |
| 5.63   | 6.41   | 6.53   | 5.87   | -0.15003 | 0.475722 |
| 11.11  | 14.42  | 11.96  | 14.46  | 0.267751 | 0.177179 |
| 9.04   | 8.33   | 9.77   | 9.97   | -0.13695 | 0.340693 |
| 32.8   | 38.54  | 32.84  | 37.14  | -0.03079 | 0.850235 |
| 0      | 0.01   | 0.01   | 0.04   | NA       | NA       |
| 1.31   | 2      | 1.27   | 1.7    | 0.647044 | 0.026867 |
| 0.1    | 0.27   | 0.25   | 0.13   | 0.326752 | 0.661482 |
| 0.33   | 0.13   | 0.3    | 0.11   | -1.0537  | 0.038353 |
| 1.98   | 1.86   | 2.31   | 1.78   | -0.20711 | 0.378774 |
| 20.42  | 20.61  | 20.98  | 17.36  | 0.133576 | 0.550537 |
| 2.01   | 2.61   | 2.38   | 2.35   | -0.1672  | 0.435245 |
| 3.25   | 1.61   | 3.59   | 2.6    | -0.64322 | 0.001076 |
| 0      | 0      | 0      | 0      | NA       | NA       |
| 14.69  | 8.32   | 11.97  | 10.48  | -0.7222  | 3.42E-06 |
| 12.18  | 11.86  | 9.52   | 11.82  | -0.1945  | 0.234874 |
| 0.4    | 0.16   | 0.27   | 0.34   | -0.22381 | 0.737009 |
| 1.06   | 0.33   | 0.43   | 0.37   | -0.35729 | 0.567686 |
| 22.83  | 18.2   | 13.8   | 15.22  | -0.76759 | 2.54E-14 |
| 130.23 | 191.42 | 156.82 | 170.42 | 0.426192 | 2.40E-06 |
| 0      | 0.02   | 0.02   | 0.01   | NA       | NA       |
| 0.95   | 0.87   | 0.7    | 1.61   | 0.018879 | 0.980125 |
| 9.33   | 13.43  | 10.93  | 12.63  | 0.251945 | 0.082793 |
| 6.47   | 4.45   | 5.13   | 4.71   | 0.004709 | 0.986644 |
| 7.91   | 6.56   | 7.1    | 8.45   | 0.085187 | 0.631181 |
| 2.7    | 2.82   | 2.77   | 2.52   | 0.179471 | 0.422205 |
| 0      | 0.01   | 0.01   | 0      | NA       | NA       |
| 5.03   | 6.64   | 4.05   | 5.84   | 0.154265 | 0.534445 |
| 2.6    | 5.28   | 2.4    | 4.03   | 0.508593 | 0.018856 |
| 3.91   | 4.15   | 4.45   | 5.69   | 0.138406 | 0.480681 |
| 1.12   | 0.42   | 0.96   | 0.82   | -0.45468 | 0.322715 |
| 2.57   | 3.28   | 4.31   | 3.57   | -0.02652 | 0.941496 |
| 7.82   | 2.74   | 4.27   | 3.2    | -1.07962 | 3.94E-12 |
| 16.68  | 20.16  | 17.55  | 16.23  | 0.021379 | 0.94163  |

|        |        |        |        |          |          |
|--------|--------|--------|--------|----------|----------|
| 3.16   | 3.51   | 3.63   | 3.37   | 0.037579 | 0.85878  |
| 0      | 0      | 0      | 0      | NA       | NA       |
| 214.36 | 286.65 | 261.85 | 303.06 | 0.420532 | 2.80E-07 |
| 0.29   | 0.01   | 0      | 0.03   | -1.31332 | 0.029691 |
| 22.86  | 17.1   | 17.53  | 19.76  | -0.23529 | 0.015742 |
| 254.71 | 362.19 | 388.32 | 385.17 | 0.540396 | 1.31E-13 |
| 9.06   | 9.45   | 8.95   | 9.49   | 0.007477 | 0.961482 |
| 34.9   | 33.92  | 32.97  | 31.12  | -0.17967 | 0.047298 |
| 0      | 0      | 0      | 0      | NA       | NA       |
| 29.06  | 37.34  | 32.6   | 33.96  | 0.387964 | 0.00065  |
| 2.05   | 0.25   | 0.71   | 0.45   | -2.10084 | 1.06E-18 |
| 3.39   | 3.46   | 3.38   | 3.31   | 0.122644 | 0.58687  |
| 7.62   | 4.64   | 5.97   | 5.45   | -0.77808 | 3.74E-10 |
| 13.8   | 14.94  | 17.01  | 15.95  | 0.07993  | 0.602483 |
| 10.02  | 4.66   | 6.05   | 4.45   | -0.84978 | 4.96E-07 |
| 6.39   | 7.53   | 7.38   | 8.33   | 0.188679 | 0.086435 |
| 6.6    | 15.06  | 10.26  | 12.21  | 0.692341 | 2.36E-09 |
| 11.51  | 6.48   | 6.49   | 8.52   | -0.68456 | 1.03E-09 |
| 0.12   | 0      | 0      | 0      | NA       | NA       |
| 51.03  | 50.54  | 52.03  | 53.38  | 0.06332  | 0.538388 |
| 343.99 | 383.49 | 407.69 | 418    | 0.136324 | 0.140343 |
| 2.07   | 1.2    | 1.12   | 0.62   | -0.93718 | 0.010496 |
| 13.89  | 14.43  | 13.53  | 11.37  | -0.21348 | 0.38904  |
| 9.14   | 11.55  | 11.44  | 10.34  | 0.349554 | 0.002034 |
| 6.07   | 4.57   | 4.88   | 5.3    | -0.18525 | 0.435587 |
| 5.55   | 6.43   | 5.73   | 5.35   | 0.08222  | 0.712611 |
| 0      | 0      | 0      | 0      | NA       | NA       |
| 1.5    | 1.44   | 1.4    | 1.92   | 0.188454 | 0.561469 |
| 8.55   | 9.27   | 9.25   | 8.09   | 0.239729 | 0.062061 |
| 11     | 13     | 13.21  | 9.67   | -0.10659 | 0.527967 |
| 10.34  | 7.91   | 11.73  | 6.69   | -0.33589 | 0.04651  |
| 0      | 0      | 0      | 0      | NA       | NA       |
| 11.64  | 27.31  | 18.73  | 24.38  | 0.907284 | 2.08E-14 |
| 2.17   | 1.63   | 2.12   | 1.92   | -0.38217 | 0.355144 |
| 4.82   | 4.23   | 4.06   | 3.64   | -0.09019 | 0.703062 |
| 2.31   | 1.63   | 2.01   | 2.15   | -0.21833 | 0.568207 |
| 2.58   | 2.2    | 1.95   | 2.32   | -0.20789 | 0.456966 |
| 1.46   | 2.53   | 2.43   | 2.74   | -0.11466 | 0.791573 |
| 6.15   | 6.74   | 6.2    | 7.33   | 0.020366 | 0.93583  |
| 3.85   | 4.02   | 3.25   | 4.52   | 0.137635 | 0.427292 |
| 581.05 | 509.38 | 511.1  | 481.66 | -0.2881  | 0.000181 |
| 27.96  | 45.16  | 43.7   | 50.05  | 0.802466 | 7.49E-26 |
| 20.81  | 23.22  | 22.59  | 25.26  | 0.081356 | 0.54214  |
| 19.25  | 19.59  | 19.21  | 16.32  | 0.113321 | 0.52693  |
| 8.56   | 9.25   | 8.6    | 7.94   | 0.070607 | 0.717052 |

|        |        |        |        |          |          |
|--------|--------|--------|--------|----------|----------|
| 20.15  | 21.36  | 21.26  | 21.31  | -0.02001 | 0.921012 |
| 15.65  | 17.88  | 15.67  | 15.49  | 0.051141 | 0.747737 |
| 20.46  | 22.59  | 24.65  | 21.98  | 0.093401 | 0.441553 |
| 7.93   | 9.23   | 9.59   | 9.56   | 0.12814  | 0.37306  |
| 7.55   | 8.24   | 8.2    | 9.36   | 0.563601 | 5.24E-08 |
| 0.11   | 0.09   | 0.02   | 0.01   | NA       | NA       |
| 16.1   | 19.78  | 18.19  | 22.08  | 0.467518 | 3.06E-07 |
| 216.11 | 230.7  | 230.96 | 220.15 | -0.05013 | 0.668551 |
| 332.15 | 484.5  | 440.4  | 461.79 | 0.455904 | 2.83E-10 |
| 3.03   | 2.56   | 2.72   | 2.82   | -0.20057 | 0.336998 |
| 0      | 0      | 0.04   | 0      | NA       | NA       |
| 16.14  | 19.21  | 20.31  | 20.67  | 0.351737 | 0.000281 |
| 86.36  | 113.14 | 103.14 | 101.4  | 0.179521 | 0.072044 |
| 0.07   | 0.21   | 0.14   | 0.22   | 1.204902 | 0.052038 |
| 133.3  | 279.73 | 244.7  | 283.1  | 0.889191 | 4.62E-26 |
| 24.43  | 23.22  | 23.22  | 24.11  | -0.09109 | 0.36572  |
| 0      | 0.01   | 0      | 0.03   | NA       | NA       |
| 8.51   | 5.17   | 5.74   | 5.76   | -0.48939 | 1.11E-05 |
| 14.09  | 9.32   | 9.89   | 9.97   | -0.50514 | 2.15E-05 |
| 0.26   | 1.53   | 0.78   | 1.3    | 2.002793 | 2.02E-13 |
| 8      | 12.92  | 11.37  | 11.13  | 0.370259 | 0.000985 |
| 75.93  | 66.15  | 84.9   | 71.15  | 0.171017 | 0.069776 |
| 0.29   | 2.47   | 1.22   | 2.08   | 1.938623 | 2.17E-05 |
| 55.54  | 41.72  | 42.86  | 40.15  | -0.50292 | 6.88E-11 |
| 17.5   | 15.28  | 14.86  | 16.33  | -0.15403 | 0.286173 |
| 8.8    | 7.27   | 7.03   | 6.9    | 0.063022 | 0.693099 |
| 557.58 | 770.23 | 872.69 | 783.73 | 0.625094 | 3.85E-15 |
| 10.28  | 80.5   | 40.96  | 69.74  | 1.982496 | 2.38E-10 |
| 5.79   | 5.9    | 6.28   | 6.4    | 0.09892  | 0.554892 |
| 21.1   | 20.6   | 22.22  | 19.08  | 0.035613 | 0.779226 |
| 24.25  | 22.01  | 26.27  | 22.13  | 0.155016 | 0.502232 |
| 0      | 0      | 0.01   | 0      | NA       | NA       |
| 5.06   | 5.85   | 6.35   | 6.13   | 0.129848 | 0.53784  |
| 10.55  | 10.23  | 12.62  | 12.12  | 0.097002 | 0.504322 |
| 19.64  | 23.23  | 23.59  | 21.56  | 0.326424 | 0.007597 |
| 9.58   | 13.32  | 13.62  | 14.37  | 0.423831 | 0.000289 |
| 4.1    | 3.79   | 4.2    | 4.63   | 0.05597  | 0.806634 |
| 10.79  | 11.41  | 14.54  | 12.55  | 0.272349 | 0.066184 |
| 6.46   | 6.91   | 6.06   | 6.17   | 0.106808 | 0.555333 |
| 22.01  | 21.21  | 20.8   | 24.07  | 0.093421 | 0.433783 |
| 0.46   | 0.93   | 0.92   | 0.53   | 0.466379 | 0.373008 |
| 9.56   | 9.47   | 8.92   | 8.68   | -0.05572 | 0.747622 |
| 7.23   | 12.83  | 8.71   | 9.44   | 0.269507 | 0.041647 |
| 1.61   | 5.83   | 1.79   | 4.02   | 1.307348 | 0.000751 |
| 0.25   | 0.05   | 0.15   | 0.02   | -1.00446 | 0.090438 |

|        |        |        |        |          |          |
|--------|--------|--------|--------|----------|----------|
| 0.04   | 0      | 0.13   | 0.06   | NA       | NA       |
| 6.3    | 6.85   | 6.08   | 6.55   | 0.164027 | 0.350063 |
| 108.55 | 236.85 | 203.28 | 230.22 | 0.980362 | 2.03E-30 |
| 18.18  | 23.72  | 24.23  | 20.54  | 0.013105 | 0.93072  |
| 7.51   | 10.53  | 9.66   | 10.01  | 0.287528 | 0.036988 |
| 150.51 | 146.22 | 158.97 | 159.91 | 0.026281 | 0.811617 |
| 0.1    | 0.05   | 0.2    | 0.05   | NA       | NA       |
| 9.65   | 11.03  | 11.85  | 12.02  | 0.172958 | 0.243814 |
| 28.28  | 19.42  | 21.69  | 25.01  | -0.40093 | 0.000203 |
| 0      | 0.41   | 0.01   | 0.02   | NA       | NA       |
| 25.45  | 13.25  | 21.6   | 15.95  | -0.47177 | 3.09E-05 |
| 0.19   | 0.45   | 0.17   | 0.53   | 0.836804 | 0.13066  |
| 30.25  | 22.69  | 24.34  | 21.79  | -0.35173 | 0.026021 |
| 9.52   | 8.94   | 9.89   | 9.24   | -0.089   | 0.555761 |
| 7.22   | 11.56  | 8.94   | 11.12  | 0.284052 | 0.030966 |
| 11.28  | 9.94   | 13.7   | 12.47  | -0.02156 | 0.88999  |
| 15.45  | 38.42  | 27.14  | 31.71  | 0.982673 | 4.66E-15 |
| 0.33   | 0.23   | 0.46   | 0.18   | -0.13791 | 0.876113 |
| 13.53  | 13.32  | 11.97  | 13.73  | -0.06727 | 0.631181 |
| 46.45  | 73.46  | 62.85  | 68.47  | 0.582424 | 1.09E-10 |
| 133.51 | 166.12 | 162.11 | 167.13 | 0.246204 | 0.001408 |
| 32.65  | 48.48  | 44.55  | 44.88  | 0.380562 | 0.000261 |
| 13.42  | 11.31  | 11.97  | 12.33  | -0.16166 | 0.173353 |
| 0.24   | 0.22   | 0.16   | 0.04   | -0.55225 | 0.431252 |
| 11.73  | 11.09  | 10.28  | 11.68  | 0.004547 | 0.986749 |
| 5.32   | 6.23   | 3.88   | 5.42   | 0.048384 | 0.840815 |
| 0      | 0      | 0      | 0      | NA       | NA       |
| 29.94  | 34.68  | 32.85  | 34.82  | 0.153167 | 0.135417 |
| 0      | 0      | 0      | 0      | NA       | NA       |
| 33.93  | 18.14  | 20.4   | 18.42  | -0.67703 | 1.08E-12 |
| 0      | 0      | 0.02   | 0      | NA       | NA       |
| 19.01  | 13.69  | 17.82  | 14.61  | -0.14143 | 0.364486 |
| 32.49  | 31.72  | 30.89  | 28.22  | -0.01864 | 0.926196 |
| 0      | 0      | 0      | 0      | NA       | NA       |
| 9.16   | 7.03   | 8.19   | 7.53   | -0.3984  | 0.001309 |
| 0      | 0      | 0      | 0      | NA       | NA       |
| 0.06   | 0.02   | 0.03   | 0.01   | -1.17158 | 0.044331 |
| 17.78  | 15.67  | 19.51  | 18.7   | -0.04242 | 0.800053 |
| 91.95  | 119.11 | 98.52  | 104.83 | 0.21347  | 0.089084 |
| 0.91   | 4.74   | 1.72   | 3.6    | 1.390763 | 4.56E-08 |
| 37.42  | 39.66  | 34.59  | 38.31  | 0.100372 | 0.49698  |
| 0.01   | 0.03   | 0.12   | 0.01   | NA       | NA       |
| 4.88   | 6.26   | 5.14   | 6.16   | 0.335154 | 0.027519 |
| 0      | 0.3    | 0.16   | 0.18   | NA       | NA       |
| 0.1    | 0.31   | 0.3    | 0.22   | 0.094083 | 0.919583 |

|         |         |         |         |          |          |
|---------|---------|---------|---------|----------|----------|
| 36.32   | 35.14   | 33.57   | 41.59   | 0.038218 | 0.745101 |
| 5.81    | 6.29    | 5.62    | 5.17    | 0.098363 | 0.644516 |
| 11.72   | 11.1    | 13.01   | 12.71   | 0.024953 | 0.907773 |
| 0       | 0       | 0       | 0       | NA       | NA       |
| 3.47    | 4.25    | 3.65    | 4.62    | 0.19906  | 0.463611 |
| 10.58   | 5.19    | 5.86    | 6.01    | -0.41162 | 0.008101 |
| 14.57   | 16.36   | 15.85   | 16.49   | -0.00557 | 0.975146 |
| 42.7    | 71.03   | 56.13   | 62.88   | 0.516764 | 4.89E-07 |
| 15.09   | 5.16    | 7.28    | 4.66    | -1.48991 | 7.90E-16 |
| 55.52   | 28.21   | 35.23   | 31.16   | -0.80655 | 4.96E-13 |
| 0       | 0.1     | 0.09    | 0.09    | NA       | NA       |
| 5021.83 | 3024.61 | 3739.11 | 3217.06 | -0.63451 | 1.35E-12 |
| 25.27   | 24.43   | 25.53   | 24.82   | 0.040122 | 0.775927 |
| 118.23  | 112.02  | 109.45  | 112.6   | -0.07065 | 0.584036 |
| 3.2     | 4.32    | 3.4     | 3.85    | 0.292056 | 0.147669 |
| 45.53   | 32.83   | 36.55   | 34.94   | -0.63416 | 3.99E-10 |
| 39.17   | 24.27   | 28.76   | 29.17   | -0.77229 | 2.04E-16 |
| 0       | 0       | 0       | 0       | NA       | NA       |
| 19.47   | 24.09   | 25.41   | 24.8    | 0.265065 | 0.005164 |
| 13.22   | 14.73   | 12.74   | 13.4    | -0.03083 | 0.879254 |
| 57.85   | 65.11   | 61.04   | 64.68   | 0.260486 | 0.01389  |
| 13.58   | 14.27   | 13.76   | 11.79   | -0.15892 | 0.310278 |
| 0.44    | 1.19    | 0.89    | 0.85    | 0.701002 | 0.149198 |
| 3859.86 | 4839.48 | 5074.85 | 5111.56 | 0.244824 | 0.000184 |
| 0.6     | 1.01    | 1.81    | 1.82    | 0.694461 | 0.297933 |
| 16.53   | 20.23   | 23.19   | 18.55   | 0.524455 | 5.36E-06 |
| 0.02    | 0.13    | 0.03    | 0.06    | NA       | NA       |
| 10.53   | 15.97   | 14.81   | 14.89   | 0.326216 | 0.020336 |
| 13.63   | 12.78   | 14.2    | 16.59   | -0.16896 | 0.171754 |
| 10.04   | 10.54   | 11.16   | 11.38   | 0.06593  | 0.665462 |
| 64.3    | 56.68   | 63.99   | 63.3    | -0.22089 | 0.008409 |
| 1.52    | 0.98    | 1.56    | 0.88    | -0.42553 | 0.072419 |
| 5.7     | 2.09    | 3.03    | 3.56    | -1.23958 | 5.49E-18 |
| 60.78   | 87.09   | 71.63   | 62.96   | 0.235415 | 0.060722 |
| 105.44  | 35.35   | 42.18   | 42.06   | -1.49512 | 1.56E-69 |
| 3.56    | 4.75    | 4.37    | 6.88    | 0.387485 | 0.011865 |
| 55.6    | 65.58   | 67.59   | 64.94   | 0.127277 | 0.164258 |
| 6.46    | 8.24    | 7.45    | 7.33    | 0.413744 | 0.001544 |
| 455.55  | 384.15  | 444.46  | 400.95  | -0.30938 | 7.02E-06 |
| 16.77   | 21.4    | 19.34   | 21.57   | 0.356924 | 0.000689 |
| 0.97    | 67.41   | 22.38   | 43.96   | 3.774493 | 1.70E-17 |
| 0       | 0       | 0       | 0       | NA       | NA       |
| 27.01   | 33.59   | 31.71   | 30.1    | 0.231392 | 0.118279 |
| 0       | 0       | 0       | 0       | NA       | NA       |
| 0.69    | 1.1     | 0.97    | 0.85    | 0.649576 | 0.144756 |

|        |        |        |         |          |          |
|--------|--------|--------|---------|----------|----------|
| 0.28   | 0.1    | 0.29   | 0.14    | -1.09897 | 0.032633 |
| 9.91   | 8.29   | 9.42   | 8.51    | -0.22774 | 0.280278 |
| 55.3   | 28.72  | 43.05  | 28.16   | -0.59874 | 0.002474 |
| 4.76   | 2.56   | 2.76   | 3.33    | -0.77638 | 2.11E-05 |
| 4.7    | 5.49   | 4.97   | 5.48    | -0.01063 | 0.972078 |
| 0.11   | 0.08   | 0.04   | 0 NA    | NA       |          |
| 3.73   | 3.44   | 3.34   | 2.8     | -0.2012  | 0.461301 |
| 12.34  | 16.55  | 15.32  | 16.85   | 0.162204 | 0.252381 |
| 0      | 0      | 0      | 0.02 NA | NA       |          |
| 9.79   | 7.09   | 4.23   | 6.49    | -0.12696 | 0.524726 |
| 16.33  | 18.36  | 23.77  | 23.42   | 0.31837  | 0.001761 |
| 75.79  | 81.36  | 77.54  | 80.51   | -0.08569 | 0.430701 |
| 22.86  | 22.04  | 22.35  | 23.44   | -0.07223 | 0.528371 |
| 33.57  | 14.66  | 19     | 18.54   | -0.9431  | 1.21E-19 |
| 21.55  | 34.56  | 31.17  | 32.41   | 0.572208 | 8.75E-09 |
| 0.37   | 0.4    | 0.4    | 0.42    | -0.27303 | 0.569536 |
| 0.08   | 0.14   | 0.03   | 0.06    | -0.43951 | 0.561886 |
| 2.21   | 1.16   | 1.73   | 1.25    | -0.75081 | 0.001102 |
| 14.88  | 4.1    | 7.45   | 7.13    | -1.12649 | 0.002551 |
| 6.28   | 5.17   | 5.67   | 5.14    | -0.17564 | 0.44099  |
| 32.04  | 24.1   | 25.48  | 23.9    | -0.3976  | 3.48E-05 |
| 0.06   | 0.01   | 0.06   | 0.06 NA | NA       |          |
| 13.62  | 11.42  | 12.52  | 10.43   | -0.56997 | 1.85E-06 |
| 72.27  | 53.69  | 55.52  | 61.68   | -0.06969 | 0.595137 |
| 3.34   | 4.42   | 3.66   | 4.41    | 0.293172 | 0.24026  |
| 0.87   | 0.33   | 0.53   | 0.51    | -0.82176 | 0.000706 |
| 11.6   | 11.45  | 11.81  | 13.14   | 0.007728 | 0.972956 |
| 18.23  | 20.79  | 21.76  | 21.15   | 0.16367  | 0.239387 |
| 0      | 0      | 0      | 0 NA    | NA       |          |
| 2.58   | 3.04   | 2.73   | 2.35    | -0.09755 | 0.868021 |
| 0.33   | 0.11   | 0.16   | 0.22    | -0.72504 | 0.199168 |
| 14.06  | 23.16  | 20.27  | 21.85   | 0.514423 | 3.98E-05 |
| 0      | 0      | 0      | 0 NA    | NA       |          |
| 5.07   | 3.01   | 3.29   | 4.07    | -0.41737 | 0.030845 |
| 33.5   | 42.33  | 43.26  | 42.89   | 0.398154 | 9.97E-08 |
| 11.37  | 71.03  | 40.29  | 52.12   | 2.061525 | 9.27E-17 |
| 0      | 0      | 0      | 0 NA    | NA       |          |
| 205.84 | 228.18 | 220.68 | 206.24  | 0.022515 | 0.852782 |
| 26.48  | 44.95  | 38.78  | 44.91   | 0.483595 | 5.33E-07 |
| 1.61   | 2.22   | 1.61   | 2.1     | 0.448247 | 0.102826 |
| 6.09   | 4.47   | 4.71   | 4.68    | -0.35393 | 0.002411 |
| 4.81   | 4.34   | 4.37   | 4.36    | -0.16248 | 0.387812 |
| 0.09   | 0.7    | 0.32   | 0.58    | 0.662202 | 0.28991  |
| 1.56   | 0.18   | 0.66   | 0.48    | -1.69551 | 2.36E-06 |
| 13.65  | 14.83  | 14.97  | 14.72   | 0.092472 | 0.325276 |



|         |         |         |         |          |          |
|---------|---------|---------|---------|----------|----------|
| 2.36    | 4.75    | 3.48    | 4.36    | 0.737382 | 7.66E-06 |
| 0       | 0       | 0       | 0.12    | NA       | NA       |
| 33.83   | 39.89   | 39.68   | 38.71   | 0.120467 | 0.217023 |
| 8.89    | 7.43    | 6.01    | 6.95    | -0.34848 | 0.025159 |
| 193.6   | 227.44  | 227.34  | 222     | 0.163883 | 0.067325 |
| 0       | 0       | 0       | 0       | NA       | NA       |
| 36.46   | 29.31   | 28.42   | 26.54   | -0.36242 | 0.00041  |
| 756.06  | 656.55  | 704.05  | 612.43  | -0.22137 | 0.010117 |
| 0.11    | 0       | 0.07    | 0       | NA       | NA       |
| 11.55   | 15.66   | 16.08   | 14.97   | 0.31567  | 0.028045 |
| 0.48    | 0.24    | 0.19    | 0.26    | -0.7613  | 0.107889 |
| 5.88    | 7.06    | 6.94    | 6.34    | 0.138177 | 0.469079 |
| 6.47    | 8.4     | 8.58    | 7.95    | 0.255507 | 0.072419 |
| 35.46   | 40.94   | 41.36   | 39.43   | 0.04014  | 0.76132  |
| 6.38    | 7.48    | 6.42    | 6.48    | 0.212508 | 0.080962 |
| 13.15   | 7.27    | 9.08    | 8.52    | -0.74089 | 2.73E-09 |
| 56.01   | 58.01   | 52.02   | 50.87   | -0.03054 | 0.841253 |
| 0.83    | 1.26    | 0.92    | 1.06    | 0.025269 | 0.959338 |
| 5.8     | 7.87    | 8.78    | 8.68    | 0.338687 | 0.01323  |
| 0       | 0.04    | 0.11    | 0.12    | NA       | NA       |
| 0       | 0.02    | 0       | 0       | NA       | NA       |
| 2.62    | 1.43    | 2.44    | 2.74    | -0.22786 | 0.515404 |
| 2.99    | 5.28    | 5.24    | 8.26    | 0.628116 | 0.022707 |
| 14.51   | 17.17   | 15.19   | 19.53   | 0.116269 | 0.277346 |
| 1694.24 | 1443.72 | 1521.29 | 1403.24 | -0.30074 | 3.74E-05 |
| 69.65   | 47.98   | 46.91   | 50.2    | -0.56105 | 7.56E-13 |
| 0.91    | 1.68    | 0.74    | 1.01    | 0.028788 | 0.968828 |
| 0       | 0       | 0       | 0.02    | NA       | NA       |
| 2.86    | 1.61    | 2.37    | 1.47    | -0.79787 | 1.67E-06 |
| 3       | 4.81    | 4.32    | 5.12    | 0.624368 | 0.000827 |
| 0.43    | 1.09    | 0.95    | 1.07    | 1.124308 | 0.002112 |
| 105.18  | 102.15  | 96.16   | 93.87   | -0.06539 | 0.54329  |
| 2.7     | 1.42    | 1.45    | 1.24    | -0.74029 | 0.000949 |
| 6.79    | 7.73    | 8.01    | 7.15    | 0.090636 | 0.598375 |
| 93.17   | 78.28   | 84.52   | 79.78   | -0.24373 | 0.006008 |
| 0       | 0.01    | 0       | 0       | NA       | NA       |
| 45.79   | 58.95   | 56.43   | 57.45   | 0.070592 | 0.515825 |
| 37.39   | 37.73   | 39.84   | 35.59   | 0.002248 | 0.990306 |
| 93.26   | 184.01  | 143.87  | 164.79  | 0.676243 | 1.01E-10 |
| 14.93   | 10.73   | 10.36   | 12.46   | -0.14926 | 0.332137 |
| 33.18   | 65.42   | 47.21   | 61.12   | 0.595758 | 1.82E-08 |
| 0.32    | 0.11    | 0       | 0.12    | NA       | NA       |
| 45.56   | 26.61   | 36.25   | 32.25   | -0.50325 | 2.69E-07 |
| 11.36   | 10.79   | 11.02   | 11.87   | -0.2555  | 0.089877 |
| 1.09    | 0.91    | 1.46    | 1.83    | -0.31456 | 0.592303 |

|        |        |        |        |          |          |
|--------|--------|--------|--------|----------|----------|
| 0      | 0      | 0      | 0      | NA       | NA       |
| 235.29 | 299.38 | 304.93 | 299.59 | 0.282533 | 7.08E-05 |
| 4.25   | 4.06   | 4.58   | 4.72   | -0.03544 | 0.907869 |
| 4.75   | 5.48   | 5.94   | 5.5    | 0.085624 | 0.725984 |
| 0.37   | 0.23   | 0.73   | 0.52   | -0.34744 | 0.615027 |
| 0.05   | 0.02   | 0.03   | 0.09   | NA       | NA       |
| 90.1   | 100.1  | 95.78  | 98.5   | 0.000447 | 0.997502 |
| 0.93   | 0.31   | 0.49   | 0.52   | -0.87564 | 0.008518 |
| 75.11  | 76.6   | 78.49  | 84.71  | 0.12005  | 0.197962 |
| 4.59   | 4.34   | 4.35   | 4.12   | 4.12E-05 | 0.999852 |
| 12.48  | 19.27  | 17.52  | 20.74  | 0.184363 | 0.197255 |
| 0.51   | 0.38   | 0.34   | 1.08   | -0.05554 | 0.94485  |
| 0.36   | 0.2    | 0.14   | 0.34   | -0.968   | 0.053626 |
| 13.39  | 20.87  | 18.23  | 18.05  | 0.410168 | 0.000177 |
| 5.31   | 6.49   | 6.36   | 6.75   | 0.199994 | 0.111671 |
| 7.65   | 9.39   | 8.51   | 8.77   | 0.283046 | 0.006406 |
| 93.66  | 91.69  | 92.47  | 91.89  | -0.33874 | 1.41E-05 |
| 72.11  | 32.06  | 45.69  | 36.79  | -1.02543 | 9.14E-15 |
| 13.23  | 18.92  | 18.05  | 20.01  | 0.353147 | 0.000276 |
| 33.41  | 30.57  | 31.49  | 34.12  | 0.082487 | 0.524974 |
| 38.48  | 41.85  | 40.7   | 45.96  | 0.210212 | 0.029893 |
| 14.6   | 17.17  | 15.36  | 16.05  | 0.073603 | 0.627484 |
| 23.06  | 17.64  | 19.42  | 20.63  | -0.3437  | 0.002927 |
| 0      | 0      | 0      | 0      | NA       | NA       |
| 91.1   | 77.55  | 85.09  | 88.23  | -0.1347  | 0.248971 |
| 28.51  | 31.38  | 30.44  | 29.97  | 0.154739 | 0.373395 |
| 79.5   | 89.92  | 90.16  | 81.05  | 0.015098 | 0.941496 |
| 32.24  | 40.73  | 39.18  | 40.01  | 0.2643   | 0.006259 |
| 33.13  | 30.35  | 30.58  | 27.95  | -0.08458 | 0.50955  |
| 39.18  | 110.63 | 86.99  | 101.76 | 1.294803 | 1.07E-42 |
| 25.26  | 29.44  | 28.1   | 31.47  | 0.044958 | 0.762739 |
| 6.61   | 11.36  | 9.81   | 13.02  | 0.769724 | 1.24E-16 |
| 0.45   | 0.53   | 0.57   | 0.55   | 0.23542  | 0.732003 |
| 0      | 0      | 0      | 0      | NA       | NA       |
| 13.04  | 19.58  | 16     | 17.25  | 0.294801 | 0.025445 |
| 3.54   | 2.6    | 4.02   | 3.08   | -0.06633 | 0.842073 |
| 10.17  | 8.27   | 9.39   | 9.01   | -0.0068  | 0.975618 |
| 52.68  | 49.92  | 53.88  | 46.91  | -0.12495 | 0.26919  |
| 0      | 0      | 0      | 0.03   | NA       | NA       |
| 30.7   | 45.59  | 33.67  | 36.06  | 0.25379  | 0.064696 |
| 7.67   | 6.61   | 5.84   | 5.54   | -0.48271 | 0.000263 |
| 0.09   | 0.04   | 0.13   | 0.07   | NA       | NA       |
| 0.83   | 0.59   | 0.77   | 0.88   | -0.14807 | 0.760637 |
| 10.53  | 12.8   | 8.79   | 8.81   | -0.03012 | 0.930842 |
| 20.53  | 20.23  | 18.97  | 17.73  | -0.12966 | 0.264645 |

|        |        |        |        |          |          |
|--------|--------|--------|--------|----------|----------|
| 67.32  | 67.41  | 67.1   | 70.97  | -0.08018 | 0.494193 |
| 4.84   | 5.01   | 3.56   | 4.23   | -0.12944 | 0.482074 |
| 10.11  | 18.69  | 18.54  | 20.47  | 0.518598 | 5.98E-09 |
| 70.21  | 62.42  | 64.92  | 61.87  | -0.20758 | 0.013284 |
| 0      | 0      | 0      | 0.02   | NA       | NA       |
| 3.56   | 1.76   | 2.64   | 1.75   | -0.30456 | 0.426486 |
| 28.27  | 20.48  | 20.69  | 21.73  | -0.32731 | 0.002696 |
| 20.04  | 20.25  | 19.61  | 19.6   | -0.19798 | 0.05674  |
| 19.86  | 14.94  | 15.64  | 15.23  | -0.48699 | 3.69E-06 |
| 10     | 11.23  | 11.79  | 12.05  | 0.072786 | 0.534258 |
| 67.74  | 49.16  | 52.99  | 51.28  | -0.435   | 1.75E-09 |
| 95.04  | 129.14 | 132.56 | 139.26 | 0.441385 | 2.81E-10 |
| 0.1    | 0.22   | 0.11   | 0.1    | -0.26356 | 0.712726 |
| 19.54  | 16.5   | 18.24  | 14.72  | -0.37151 | 2.03E-05 |
| 15.88  | 9.18   | 10.42  | 9.35   | -0.67315 | 2.93E-09 |
| 0.13   | 0.16   | 0.29   | 0.24   | -0.1421  | 0.862624 |
| 10.92  | 27.79  | 14.8   | 21.45  | 0.704584 | 5.81E-05 |
| 4.65   | 3.34   | 3.14   | 3.49   | -0.60507 | 9.62E-07 |
| 17.84  | 17.5   | 16.83  | 14.44  | -0.25441 | 0.020367 |
| 3.52   | 2.75   | 2.9    | 3.08   | 0.247674 | 0.135575 |
| 0      | 0.04   | 0.08   | 0      | NA       | NA       |
| 114.21 | 37.47  | 62.72  | 55.16  | -1.02746 | 1.32E-17 |
| 4.79   | 8.07   | 6.49   | 7.85   | 0.34893  | 0.078205 |
| 0.02   | 0.01   | 0.01   | 0      | NA       | NA       |
| 3.15   | 5.28   | 4.6    | 5.39   | 0.493325 | 0.003199 |
| 0.26   | 0.91   | 0.45   | 0.87   | 1.310141 | 0.009612 |
| 15.57  | 23.08  | 15.71  | 19.13  | 0.261689 | 0.02735  |
| 327.52 | 199.93 | 265.69 | 230.8  | -0.48707 | 1.23E-06 |
| 0.06   | 0.19   | 0.37   | 0.14   | 0.766303 | 0.200836 |
| 0      | 0      | 0      | 0      | NA       | NA       |
| 23.75  | 26.65  | 23.56  | 29.73  | 0.105367 | 0.446537 |
| 6.04   | 4.21   | 3.93   | 4.03   | -0.01362 | 0.947179 |
| 38.5   | 38.86  | 37.25  | 36.92  | -0.01041 | 0.951277 |
| 0      | 0.07   | 0      | 0      | NA       | NA       |
| 0.04   | 0      | 0      | 0      | NA       | NA       |
| 22.15  | 29.6   | 26.63  | 25.84  | 0.382804 | 6.68E-05 |
| 5.19   | 10.99  | 9.98   | 9.38   | 1.285633 | 3.62E-34 |
| 1.97   | 0.64   | 1.28   | 2.39   | -0.59455 | 0.07594  |
| 15.76  | 11.25  | 10.97  | 11.82  | -0.51692 | 2.70E-09 |
| 0      | 0      | 0      | 0      | NA       | NA       |
| 21.08  | 21.22  | 20.57  | 19.5   | -0.14082 | 0.314122 |
| 64.26  | 85.72  | 105.06 | 96.68  | 0.462071 | 3.39E-07 |
| 0.37   | 0.25   | 0.11   | 0.1    | -0.54698 | 0.432449 |
| 63.87  | 67.58  | 65.63  | 65.11  | 0.012524 | 0.928606 |
| 1.58   | 1.05   | 1.35   | 1.61   | -0.22577 | 0.589208 |

|         |        |        |        |          |          |
|---------|--------|--------|--------|----------|----------|
| 31.56   | 41.13  | 40.03  | 42.24  | 0.280454 | 0.003141 |
| 0       | 0      | 0      | 0      | NA       | NA       |
| 22.49   | 22.37  | 24.27  | 22.55  | -0.05773 | 0.649335 |
| 0.3     | 1.01   | 0.51   | 0.65   | 0.84216  | 0.010716 |
| 36.38   | 52.05  | 46.63  | 46.43  | 0.222949 | 0.078754 |
| 3.29    | 3.49   | 3.14   | 4.76   | 0.026704 | 0.945943 |
| 6.2     | 3.91   | 4.66   | 5.23   | -0.50432 | 4.72E-06 |
| 0       | 0      | 0      | 0      | NA       | NA       |
| 0.57    | 0      | 0      | 0      | -1.51662 | 0.008221 |
| 7.75    | 5.79   | 7.09   | 7.25   | -0.32043 | 0.066673 |
| 1.05    | 0.74   | 0.62   | 0.48   | -0.30219 | 0.341072 |
| 2.89    | 5.69   | 5.93   | 5.91   | 1.225583 | 2.33E-14 |
| 0.9     | 0.52   | 0.92   | 0.57   | -0.52196 | 0.226861 |
| 12.18   | 17.54  | 16.5   | 15.32  | 0.340774 | 0.016385 |
| 44.15   | 150    | 137.51 | 146.29 | 1.636822 | 2.47E-73 |
| 2148.07 | 313.68 | 675.17 | 486.48 | -2.07249 | 6.35E-13 |
| 0       | 0      | 0      | 0      | NA       | NA       |
| 80.39   | 99.94  | 89.14  | 97.42  | 0.207982 | 0.035795 |
| 10.57   | 12.35  | 11.5   | 11.33  | 0.12206  | 0.535111 |
| 11.45   | 7.96   | 9.63   | 8.12   | -0.38081 | 0.020386 |
| 0       | 0      | 0.01   | 0      | NA       | NA       |
| 0       | 0      | 0      | 0      | NA       | NA       |
| 0       | 0      | 0      | 0      | NA       | NA       |
| 3.03    | 0.85   | 0.82   | 0.6    | -1.83532 | 3.52E-13 |
| 12.65   | 13.76  | 12.48  | 11.16  | -0.11266 | 0.557135 |
| 3.52    | 4.54   | 4.76   | 5.27   | 0.247383 | 0.267265 |
| 12.15   | 19.27  | 15.75  | 13.33  | 0.238984 | 0.061286 |
| 22.75   | 24.73  | 24.34  | 25.44  | -0.03866 | 0.807537 |
| 4.68    | 3.95   | 4.06   | 4.88   | -0.01766 | 0.953687 |
| 46.64   | 45.86  | 44.32  | 54.37  | 0.075935 | 0.456167 |
| 118.34  | 149.99 | 159.42 | 146.79 | 0.268428 | 0.001088 |
| 0       | 0      | 0      | 0      | NA       | NA       |
| 23.6    | 22.93  | 23.55  | 23.68  | 0.02174  | 0.872237 |
| 36.97   | 33.36  | 31.67  | 35.77  | -0.13881 | 0.232634 |
| 3.44    | 3.28   | 3.22   | 3.98   | -0.01964 | 0.968491 |
| 0.68    | 0.09   | 0.75   | 0.62   | -0.51518 | 0.422808 |
| 21.19   | 31.66  | 29.71  | 29.2   | 0.241219 | 0.041647 |
| 0       | 0      | 0      | 0      | NA       | NA       |
| 0       | 0      | 0      | 0      | NA       | NA       |
| 0.9     | 1.55   | 1.06   | 2.32   | 0.414845 | 0.114489 |
| 20.66   | 11.5   | 14.94  | 12.84  | -0.38486 | 9.46E-05 |
| 3.73    | 2.71   | 2.88   | 3      | -0.72946 | 0.000123 |
| 1.25    | 1.2    | 1.1    | 0.95   | -0.1166  | 0.783496 |
| 3.04    | 2.69   | 1.98   | 3.4    | -0.10744 | 0.813172 |
| 47.16   | 38.64  | 41.73  | 38.88  | -0.27392 | 0.011856 |

|         |        |        |        |          |          |
|---------|--------|--------|--------|----------|----------|
| 1.56    | 1.73   | 1.51   | 1.47   | -0.03814 | 0.917434 |
| 104.65  | 54.4   | 66.78  | 62.17  | -0.92398 | 1.35E-21 |
| 1.13    | 0.26   | 0.32   | 0.29   | -1.43059 | 0.000802 |
| 20.61   | 15.45  | 20.76  | 16.77  | -0.26507 | 0.04416  |
| 1463.17 | 779.17 | 937.74 | 813.89 | -0.7778  | 3.49E-20 |
| 6       | 5.4    | 5.24   | 5.93   | -0.09403 | 0.490305 |
| 0.04    | 0.03   | 0.24   | 0.03   | -0.1174  | 0.895299 |
| 0.03    | 0.15   | 0.08   | 0.11   | 0.142334 | 0.872872 |
| 5.1     | 6.59   | 8.25   | 5.24   | 0.155219 | 0.357527 |
| 1.88    | 0.81   | 0.74   | 1.19   | -0.17444 | 0.725564 |
| 14.18   | 17.37  | 14.12  | 15.46  | 0.09437  | 0.585114 |
| 67.44   | 65.48  | 65.48  | 72.22  | 0.010915 | 0.932158 |
| 29.76   | 33.16  | 46.65  | 38.92  | 0.75856  | 4.83E-10 |
| 3.35    | 2.05   | 3.13   | 3.38   | 0.168516 | 0.479777 |
| 9.07    | 9.4    | 9.76   | 9.47   | -0.06233 | 0.698705 |
| 0.17    | 0.53   | 0.32   | 0.47   | 0.104506 | 0.904541 |
| 114.89  | 104.44 | 113.94 | 102.94 | -0.29945 | 0.001162 |
| 0.73    | 0.44   | 0.69   | 0.32   | -0.795   | 0.04685  |
| 1.4     | 0.73   | 1.33   | 0.84   | -0.62003 | 0.024347 |
| 0.04    | 0.19   | 0.21   | 0.16   | 0.844497 | 0.187834 |
| 34.31   | 30.26  | 31.95  | 29.71  | -0.07916 | 0.581336 |
| 23.46   | 19.49  | 17.66  | 19.67  | -0.19746 | 0.108655 |
| 26.24   | 28.02  | 24.84  | 24.91  | -0.04341 | 0.762686 |
| 2.79    | 1.43   | 1.99   | 2.53   | 0.096155 | 0.789916 |
| 15.93   | 23.21  | 19.95  | 20.67  | 0.19726  | 0.117752 |
| 0       | 0      | 0      | 0      | NA       | NA       |
| 1.26    | 0.74   | 0.84   | 1.3    | -0.0836  | 0.922915 |
| 0       | 0      | 0      | 0      | NA       | NA       |
| 0.3     | 1.07   | 1.51   | 0.86   | 1.069554 | 0.002532 |
| 4.31    | 5.34   | 4.81   | 5.49   | 0.316049 | 0.145067 |
| 9.33    | 7.11   | 8.88   | 8.82   | -0.38543 | 0.003717 |
| 24.49   | 23.89  | 23.67  | 24.64  | -0.17146 | 0.157444 |
| 11.67   | 8.81   | 8.87   | 9.31   | -0.25392 | 0.00528  |
| 5.8     | 0.09   | 0.23   | 0      | -1.68088 | NA       |
| 6.7     | 12.58  | 9.75   | 11.96  | 0.685234 | 2.26E-08 |
| 5.65    | 2.96   | 3.92   | 3.38   | -0.55533 | 0.000654 |
| 1.3     | 1.71   | 1.64   | 1.53   | 0.426142 | 0.030167 |
| 27.11   | 35.18  | 34.73  | 35.46  | 0.291038 | 0.011987 |
| 12.64   | 12.68  | 13     | 12.92  | -0.23624 | 0.137197 |
| 0       | 0      | 0      | 0      | NA       | NA       |
| 58.08   | 79.49  | 74.08  | 81.05  | 0.417069 | 7.00E-08 |
| 0.08    | 0      | 0      | 0.01   | -1.54204 | 0.008581 |
| 5.93    | 5.98   | 5.18   | 6.55   | 0.737031 | 0.000324 |
| 15.17   | 16.02  | 13.26  | 15.8   | 0.047898 | 0.787206 |
| 182.97  | 289.33 | 421.75 | 371.2  | 0.938196 | 9.90E-16 |

|        |        |        |        |          |          |
|--------|--------|--------|--------|----------|----------|
| 11.22  | 16.17  | 16.86  | 15.75  | 0.521084 | 3.43E-09 |
| 29.29  | 29.72  | 29.34  | 30.61  | -0.09989 | 0.37916  |
| 0.02   | 0.22   | 0.09   | 0.15   | 0.191575 | 0.821404 |
| 19.02  | 28.85  | 21.86  | 21.88  | 0.273299 | 0.09804  |
| 11.07  | 4.04   | 5.21   | 4.86   | -1.0974  | 1.91E-15 |
| 4.25   | 5.52   | 4.4    | 4.91   | 0.123805 | 0.596012 |
| 0      | 0      | 0      | 0      | NA       | NA       |
| 4.9    | 4.32   | 5.8    | 5.96   | -0.11137 | 0.652879 |
| 3.51   | 0.97   | 1.7    | 1.54   | -1.0429  | 9.57E-05 |
| 15.22  | 14.26  | 15.48  | 15.74  | 0.075111 | 0.559778 |
| 3.62   | 5.14   | 3.62   | 3.92   | 0.293648 | 0.113184 |
| 0.12   | 0      | 0.03   | 0.04   | NA       | NA       |
| 0.22   | 0.3    | 0.17   | 0.21   | 0.463558 | 0.526221 |
| 0.23   | 0.04   | 0.12   | 0.22   | NA       | NA       |
| 0      | 0      | 0      | 0      | NA       | NA       |
| 0.15   | 0.22   | 0.19   | 0.25   | 0.888115 | 0.103755 |
| 0.03   | 0      | 0.02   | 0      | NA       | NA       |
| 19.63  | 29.26  | 27.56  | 27.36  | 0.521016 | 1.20E-06 |
| 2.56   | 231.62 | 21.84  | 90.7   | 2.96876  | 4.29E-08 |
| 0      | 0      | 0      | 0      | NA       | NA       |
| 42.55  | 49.34  | 45.67  | 46.11  | 0.204093 | 0.019118 |
| 10.59  | 20.97  | 18.8   | 16.81  | 0.600663 | 0.000428 |
| 20.09  | 20.08  | 20.4   | 23.47  | 0.088595 | 0.598375 |
| 0      | 0      | 0      | 0      | NA       | NA       |
| 0      | 0.08   | 0      | 0      | NA       | NA       |
| 6.82   | 10.96  | 9.44   | 12.34  | 0.674616 | 7.59E-11 |
| 0.75   | 0.06   | 0.09   | 0.07   | -1.72357 | 0.002801 |
| 0      | 0      | 0      | 0      | NA       | NA       |
| 0      | 0      | 0      | 0      | NA       | NA       |
| 2.12   | 0.8    | 1.25   | 1.24   | -1.09307 | 8.02E-07 |
| 8.01   | 16.47  | 11.31  | 13.61  | 0.652756 | 1.25E-07 |
| 10.66  | 13.22  | 10.71  | 12.13  | 0.146464 | 0.218325 |
| 18.19  | 21.22  | 20.94  | 20.42  | 0.024251 | 0.919698 |
| 0      | 0      | 0      | 0      | NA       | NA       |
| 14.25  | 10.37  | 13.29  | 11.9   | -0.37432 | 0.047206 |
| 25.54  | 20.04  | 24.22  | 28.06  | -0.38334 | 0.000134 |
| 0      | 0      | 0      | 0      | NA       | NA       |
| 252.82 | 254.07 | 263.78 | 249.92 | 0.00117  | 0.99316  |
| 0      | 0      | 0      | 0      | NA       | NA       |
| 5.28   | 7.42   | 6.59   | 7.2    | 0.385592 | 0.000456 |
| 21.82  | 58.24  | 47.77  | 57.68  | 1.280394 | 1.68E-46 |
| 2.54   | 2.44   | 2.41   | 2.1    | -0.03351 | 0.923329 |
| 7.27   | 7.72   | 8.07   | 8.11   | 0.049331 | 0.699298 |
| 5.13   | 7.25   | 6.35   | 6.32   | 0.245682 | 0.090285 |
| 46.45  | 51.8   | 53.45  | 48.72  | 0.062201 | 0.640682 |

|        |        |        |        |          |          |
|--------|--------|--------|--------|----------|----------|
| 6.05   | 5.27   | 4.9    | 5.18   | -0.18016 | 0.387041 |
| 3.86   | 5.05   | 6.51   | 5.11   | 0.605278 | 6.16E-06 |
| 0.19   | 0.1    | 0.14   | 0.13   | -0.32822 | 0.681184 |
| 42.99  | 95.09  | 78.39  | 95.27  | 1.036929 | NA       |
| 15.88  | 13.21  | 12.89  | 11.59  | -0.24792 | 0.132476 |
| 72.12  | 48.66  | 54.15  | 48.01  | -0.49596 | 1.81E-08 |
| 1.98   | 0.93   | 0.92   | 1.07   | -0.96652 | 9.57E-05 |
| 0.44   | 0.07   | 0.02   | 0.06   | -1.78551 | 0.000688 |
| 4.97   | 10.17  | 9.24   | 9.95   | 0.9717   | 1.26E-17 |
| 148.12 | 307.76 | 432.1  | 405.02 | 1.394837 | 3.88E-37 |
| 17.38  | 28.93  | 28.13  | 29.15  | 0.611164 | 2.78E-07 |
| 3.47   | 1.47   | 1.68   | 1.65   | -0.73952 | 4.64E-05 |
| 6.08   | 4.39   | 4.55   | 3.81   | -0.66791 | 4.03E-08 |
| 45.94  | 55.45  | 51.03  | 49.7   | 0.277768 | 0.016789 |
| 113.18 | 371.16 | 243.34 | 317.54 | 1.430724 | 1.56E-10 |
| 0.81   | 0.59   | 0.42   | 0.59   | -0.68284 | 0.189072 |
| 7.18   | 11.59  | 12.02  | 10.48  | 0.560232 | 0.000397 |
| 1.64   | 2.64   | 1.36   | 2.1    | 0.655243 | 0.049084 |
| 0.12   | 0      | 0.03   | 0.06   | NA       | NA       |
| 5.75   | 5.44   | 5.26   | 4.46   | -0.31132 | 0.114402 |
| 26.43  | 19.35  | 21.17  | 20.96  | -0.45677 | 5.52E-08 |
| 2.84   | 2.33   | 2.47   | 2.21   | -0.29123 | 0.077297 |
| 8.75   | 11.46  | 10.84  | 11.65  | 0.307738 | 0.012477 |
| 15.13  | 19.69  | 17.5   | 17.7   | 0.251084 | 0.171822 |
| 19.6   | 31.47  | 26.92  | 30.3   | 0.520168 | 2.45E-09 |
| 9.3    | 8.8    | 10.52  | 9.6    | -0.00899 | 0.958771 |
| 0.37   | 0.15   | 0.54   | 0.12   | -0.13839 | 0.876492 |
| 106.33 | 139.03 | 112.1  | 119.47 | 0.140313 | 0.210544 |
| 6.98   | 10.82  | 10.47  | 9.13   | 0.380289 | 0.002726 |
| 0.74   | 0.64   | 0.33   | 0.6    | -0.65098 | 0.072764 |
| 15.33  | 31.29  | 23.79  | 26.81  | 0.792004 | 1.27E-09 |
| 4.77   | 6.66   | 6.4    | 6.68   | 0.281979 | 0.017823 |
| 15.1   | 13.28  | 13.4   | 12.27  | -0.25689 | 0.085207 |
| 0      | 0      | 0      | 0      | NA       | NA       |
| 0      | 0.06   | 0.1    | 0      | NA       | NA       |
| 164.29 | 156.58 | 143.85 | 141.55 | -0.29488 | 0.000117 |
| 57.18  | 57.78  | 59.84  | 55.28  | -0.1213  | 0.378466 |
| 1.19   | 2.48   | 3.07   | 3.92   | 0.85631  | 0.00083  |
| 0.03   | 0.13   | 0.08   | 0.07   | -0.13657 | 0.873897 |
| 0      | 0      | 0      | 0      | NA       | NA       |
| 10     | 2.7    | 4.27   | 4.2    | -1.38708 | 7.54E-20 |
| 0      | 0      | 0.04   | 0      | NA       | NA       |
| 42.73  | 46.81  | 52.15  | 50.17  | 0.179151 | 0.065777 |
| 20.61  | 22.84  | 19.48  | 20.36  | -0.18311 | 0.24807  |
| 91.04  | 96.74  | 95.26  | 91     | -0.02478 | 0.888664 |

|        |       |       |       |          |          |
|--------|-------|-------|-------|----------|----------|
| 50.7   | 55.81 | 47.55 | 47.9  | -0.17026 | 0.198344 |
| 47.9   | 48.07 | 47.41 | 42.37 | -0.13746 | 0.292242 |
| 19.81  | 24.47 | 21.6  | 25.45 | 0.03166  | 0.88368  |
| 10.71  | 13.17 | 14.38 | 11.91 | 0.358438 | 0.002017 |
| 0.09   | 0.1   | 0     | 0.03  | NA       | NA       |
| 10.68  | 12.53 | 10.66 | 11.54 | 0.137845 | 0.240462 |
| 124.14 | 99.78 | 95.19 | 99.28 | -0.2642  | 0.001584 |
| 9.34   | 11.04 | 9.56  | 10.39 | 0.125551 | 0.44719  |
| 0.31   | 0.6   | 0.8   | 0.59  | 0.602768 | 0.146363 |
| 0      | 0     | 0     | 0     | NA       | NA       |
| 2.18   | 0.69  | 0.87  | 1.45  | -0.55806 | 0.236703 |
| 7.8    | 6.98  | 7.01  | 6.97  | 0.119217 | 0.6621   |
| 15.68  | 8.35  | 12.01 | 10.98 | -0.55605 | 0.000935 |
| 14.63  | 3.48  | 7.23  | 7.89  | -1.418   | 1.82E-14 |
| 0.24   | 0.19  | 0.37  | 0.45  | -0.28796 | 0.690157 |
| 0.47   | 0.47  | 0.39  | 0.37  | -0.56402 | 0.284634 |
| 43.99  | 30.15 | 32.61 | 31.45 | -0.56179 | 6.11E-12 |
| 5.22   | 4.64  | 3.93  | 4.24  | -0.02236 | 0.942504 |
| 17.45  | 14.46 | 16.61 | 20.81 | -0.19443 | 0.189903 |
| 28.71  | 35.63 | 36.31 | 35.36 | 0.202357 | 0.202132 |
| 24.45  | 27.71 | 26.98 | 31.04 | 0.102732 | 0.423213 |
| 14.72  | 13.13 | 13.72 | 14.04 | -0.13282 | 0.375128 |
| 27.41  | 24.04 | 24.49 | 25.53 | -0.16761 | 0.11533  |
| 0.3    | 10.5  | 3.66  | 7.82  | 3.774927 | 1.34E-18 |
| 15.16  | 15.35 | 18.99 | 15.13 | -0.11898 | 0.377971 |
| 13.15  | 15.55 | 15.4  | 15.9  | 0.118134 | 0.286172 |
| 12.94  | 14.7  | 13.89 | 16.82 | -0.05004 | 0.747468 |
| 5.56   | 2.69  | 5.47  | 3.49  | -0.57501 | 0.009522 |
| 0.01   | 0     | 0.02  | 0     | NA       | NA       |
| 23.01  | 28.97 | 23.73 | 23.55 | -0.0218  | 0.905823 |
| 3.39   | 1     | 1.75  | 1.02  | -1.50911 | 2.40E-09 |
| 0.29   | 0.67  | 0.44  | 0.36  | 1.107905 | 0.075253 |
| 2.02   | 0.1   | 0.11  | 0.04  | -3.82066 | 1.43E-23 |
| 29.31  | 19.64 | 21.94 | 22.4  | -0.42878 | 2.78E-06 |
| 0.4    | 0.29  | 0.28  | 0.36  | -0.2889  | 0.693614 |
| 65.59  | 59.86 | 67.93 | 61.33 | -0.02262 | 0.9065   |
| 1.04   | 0.25  | 1.25  | 0.73  | -0.27866 | 0.688044 |
| 0      | 0     | 0     | 0     | NA       | NA       |
| 11.69  | 9.06  | 10.79 | 10.44 | -0.12128 | 0.334383 |
| 7.51   | 15.36 | 12.32 | 13.45 | 0.497696 | 0.001025 |
| 2.22   | 0.74  | 0.66  | 0.7   | -1.58224 | 8.11E-12 |
| 19.78  | 40.08 | 36.21 | 39.31 | 0.299304 | 0.002414 |
| 20.87  | 15.76 | 16.5  | 18.75 | -0.19587 | 0.189547 |
| 11.91  | 19.63 | 16.4  | 17.84 | 0.615919 | 2.61E-06 |
| 22.12  | 28.6  | 33.52 | 33.42 | 0.75997  | 1.23E-15 |



|         |         |         |        |          |          |
|---------|---------|---------|--------|----------|----------|
| 0       | 0       | 0       | 0      | NA       | NA       |
| 11.72   | 11.19   | 10.22   | 11.49  | -0.14483 | 0.182049 |
| 15.84   | 14.39   | 12.95   | 13.21  | -0.2494  | 0.029189 |
| 0.08    | 0.04    | 0.04    | 0.05   | NA       | NA       |
| 1.86    | 3.51    | 2.78    | 2.67   | 1.098363 | 1.49E-08 |
| 52.23   | 44.78   | 50.77   | 47.69  | -0.05726 | 0.712991 |
| 31.06   | 32.52   | 36.57   | 35.93  | 0.151925 | 0.176246 |
| 43.99   | 57.03   | 48.28   | 54.77  | 0.282928 | 0.001212 |
| 2.57    | 5.33    | 3.55    | 6.44   | 0.311834 | 0.278147 |
| 0.14    | 0.02    | 0.01    | 0      | NA       | NA       |
| 12.98   | 13.24   | 13.52   | 14.86  | -0.09346 | 0.421352 |
| 2.2     | 7.75    | 5.33    | 6.53   | 1.356747 | 3.41E-13 |
| 7.41    | 8.52    | 8.61    | 9.92   | 0.113298 | 0.551381 |
| 0       | 0       | 0       | 0      | NA       | NA       |
| 0.02    | 0.14    | 0.09    | 0.23   | 0.522267 | 0.476938 |
| 7.68    | 8.71    | 6.96    | 7.99   | -0.05383 | 0.812564 |
| 24.82   | 22.24   | 24.94   | 23.47  | -0.18275 | 0.327054 |
| 0.03    | 0       | 0       | 0.02   | NA       | NA       |
| 2.37    | 2.3     | 2.23    | 2.25   | -0.17289 | 0.464212 |
| 1.49    | 1.19    | 1.27    | 1.5    | -0.01464 | 0.978992 |
| 37.76   | 33.06   | 36.28   | 33.41  | -0.19879 | 0.077332 |
| 0.07    | 0.06    | 0.06    | 0.19   | -0.07628 | 0.923514 |
| 0       | 0       | 0       | 0      | NA       | NA       |
| 0       | 0       | 0       | 0      | NA       | NA       |
| 15.26   | 20.74   | 18.55   | 21.94  | 0.310224 | 0.010348 |
| 9.68    | 10.56   | 10.04   | 10.86  | 0.011053 | 0.951428 |
| 4.85    | 7.1     | 9.37    | 8.8    | 0.793884 | 5.30E-07 |
| 0       | 0       | 0       | 0      | NA       | NA       |
| 2040.77 | 1809.21 | 1948.17 | 1775.3 | -0.20112 | 0.021648 |
| 15.72   | 14.44   | 15.99   | 15.32  | -0.07329 | 0.597345 |
| 34.89   | 17.16   | 19.32   | 18.31  | -0.93586 | 1.97E-22 |
| 0       | 0       | 0       | 0      | NA       | NA       |
| 6.95    | 8.32    | 8.36    | 9.19   | -0.0675  | 0.773507 |
| 6.23    | 4.69    | 4.88    | 5.17   | -0.18485 | 0.324325 |
| 61.67   | 46.73   | 47.11   | 47.37  | -0.35596 | 3.50E-06 |
| 12.79   | 17.31   | 16.02   | 15.47  | 0.252169 | 0.044471 |
| 10.07   | 5.5     | 7.38    | 7.07   | -0.67238 | 0.000188 |
| 0       | 0       | 0       | 0      | NA       | NA       |
| 0       | 0       | 0       | 0      | NA       | NA       |
| 8.55    | 10.14   | 10.71   | 8.82   | 0.072751 | 0.734742 |
| 198.74  | 203.36  | 220.35  | 176.46 | -0.13845 | 0.179623 |
| 58.45   | 86.91   | 75.23   | 75.44  | 0.383125 | 9.80E-05 |
| 13.9    | 18.21   | 17.39   | 21.95  | 0.31775  | 0.001899 |
| 47.49   | 45.94   | 49.55   | 46.11  | 0.050217 | 0.797495 |
| 0       | 0       | 0       | 0      | NA       | NA       |

|        |       |        |        |          |          |
|--------|-------|--------|--------|----------|----------|
| 2.53   | 1.72  | 1.95   | 1.84   | -0.17819 | 0.693099 |
| 5.9    | 5.55  | 5.48   | 4.93   | 0.118074 | 0.597089 |
| 5.95   | 6.07  | 6.4    | 5.94   | -0.09181 | 0.717625 |
| 14.69  | 8.33  | 8.86   | 8.58   | -0.59874 | 6.21E-12 |
| 0.11   | 0.42  | 0.15   | 0.18   | NA       | NA       |
| 1.89   | 0.46  | 0.55   | 0.62   | -0.82618 | 0.136236 |
| 0.25   | 0.07  | 0.15   | 0.1    | -1.13007 | 0.037252 |
| 0      | 0     | 0      | 0      | NA       | NA       |
| 2.2    | 1.5   | 1.11   | 0.93   | -0.3141  | 0.378414 |
| 0      | 0.05  | 0      | 0      | NA       | NA       |
| 35.94  | 47.44 | 40.7   | 41.63  | 0.139517 | 0.288176 |
| 0.25   | 0.13  | 0.07   | 0.13   | -0.64123 | 0.35328  |
| 109.67 | 107.8 | 114.14 | 115.97 | -0.00468 | 0.969266 |
| 0.1    | 0.24  | 0.34   | 0.19   | 0.55349  | 0.429497 |
| 6.56   | 7.71  | 7.24   | 8.03   | 0.254877 | 0.026755 |
| 10.04  | 11.63 | 10.73  | 9.65   | 0.228561 | 0.353037 |
| 24.58  | 16.28 | 19.47  | 16.07  | -0.54171 | 7.33E-05 |
| 22.57  | 25.86 | 24.92  | 24.57  | 0.01595  | 0.932631 |
| 0      | 0.08  | 0.34   | 0.13   | NA       | NA       |
| 43.78  | 97.82 | 76.65  | 88.73  | 0.944713 | 1.28E-20 |
| 32.7   | 35.25 | 34.02  | 33.3   | 0.001573 | 0.99316  |
| 25.89  | 31.64 | 27.95  | 29.15  | 0.078125 | 0.516747 |
| 43.76  | 48.94 | 44.35  | 46.46  | 0.090437 | 0.460995 |
| 12.37  | 14.67 | 14.61  | 16.18  | 0.170933 | 0.175193 |
| 25     | 31.15 | 29.13  | 30.86  | 0.162269 | 0.118384 |
| 2.45   | 3.23  | 2.8    | 3.3    | 0.157033 | 0.49274  |
| 68.32  | 67.3  | 83.06  | 74.47  | 0.02982  | 0.837757 |
| 21.02  | 21.32 | 20.25  | 21.65  | -0.02059 | 0.896404 |
| 18.96  | 21.94 | 18.19  | 20.64  | 0.183742 | 0.062712 |
| 50.31  | 62.64 | 62.69  | 62.45  | 0.377022 | 2.49E-07 |
| 221.72 | 228.1 | 207.96 | 217.59 | -0.07954 | 0.419658 |
| 11.46  | 12.33 | 11.38  | 10.6   | 0.054661 | 0.816626 |
| 0      | 0     | 0.05   | 0      | NA       | NA       |
| 0.1    | 0.15  | 0.23   | 0.14   | -0.50461 | 0.486227 |
| 38     | 36.95 | 35.59  | 37.41  | -0.08223 | 0.477636 |
| 17.81  | 21.54 | 19.46  | 22.1   | -0.0102  | 0.962663 |
| 16.73  | 19.21 | 20.98  | 18.76  | 0.225435 | 0.048722 |
| 7.45   | 4.21  | 5.1    | 5.08   | -0.48583 | 0.016343 |
| 0      | 0.1   | 0.06   | 0.03   | NA       | NA       |
| 14.89  | 15.29 | 13.58  | 15.89  | -0.07941 | 0.585688 |
| 9.6    | 13.01 | 10.74  | 11.45  | 0.308072 | 0.013445 |
| 19.33  | 24.67 | 22.03  | 19.98  | 0.095427 | 0.513722 |
| 0.08   | 0.08  | 0.09   | 0.12   | 0.06487  | 0.94485  |
| 25.76  | 24.67 | 25.37  | 24.99  | -0.04833 | 0.773744 |
| 0      | 0.05  | 0      | 0      | NA       | NA       |

|         |        |         |        |          |          |
|---------|--------|---------|--------|----------|----------|
| 60.18   | 41.48  | 52.6    | 41.98  | -0.434   | 5.18E-05 |
| 8.01    | 7.36   | 7.59    | 6.64   | -0.03908 | 0.899265 |
| 24.15   | 23.54  | 23.04   | 21.96  | 0.008563 | 0.96236  |
| 4.56    | 3.26   | 3.27    | 3.89   | -0.36076 | 0.099522 |
| 0       | 0      | 0       | 0.1    | NA       | NA       |
| 45.34   | 47.62  | 47.26   | 48.67  | -0.06917 | 0.573858 |
| 154.64  | 116.86 | 130.97  | 120.14 | -0.40574 | 3.72E-06 |
| 0.04    | 0.27   | 0.22    | 0.23   | 1.591068 | 0.004162 |
| 9.85    | 14.64  | 14.28   | 13.31  | 0.311022 | 0.005644 |
| 8.79    | 9.68   | 6.81    | 8.68   | -0.02608 | 0.903665 |
| 0.06    | 0.14   | 0.05    | 0.17   | 1.07705  | 0.086942 |
| 0       | 0.03   | 0       | 0      | NA       | NA       |
| 0       | 0      | 0       | 0      | NA       | NA       |
| 1260.71 | 941.3  | 1094.53 | 964.9  | -0.39807 | 5.59E-07 |
| 17.42   | 13.58  | 13.69   | 13.53  | -0.40305 | 0.030652 |
| 72.47   | 46.6   | 51.84   | 51.24  | -0.58348 | 7.05E-14 |
| 12.3    | 6.42   | 9.53    | 8.41   | -0.63942 | 6.51E-06 |
| 8.99    | 8.41   | 8.99    | 9.95   | -0.18498 | 0.182766 |
| 17.23   | 21.67  | 16.41   | 19.36  | 0.067362 | 0.663037 |
| 11.31   | 15.4   | 17.34   | 16.31  | 0.153527 | 0.160086 |
| 13.8    | 15.6   | 12.11   | 12.36  | 0.19438  | 0.100481 |
| 2.79    | 1.5    | 2.09    | 1.15   | -0.85511 | 0.002185 |
| 0       | 0      | 0       | 0      | NA       | NA       |
| 22.99   | 25.74  | 29.55   | 34.54  | 0.321619 | 0.008553 |
| 0.12    | 0.27   | 0.07    | 0.02   | -0.76953 | 0.255954 |
| 211.99  | 109.79 | 110.73  | 115.32 | -0.97325 | 3.67E-45 |
| 0       | 0      | 0       | 0      | NA       | NA       |
| 20.3    | 19.01  | 19.53   | 17.33  | -0.13436 | 0.358726 |
| 42.81   | 35.59  | 37.98   | 37.62  | -0.33644 | 0.001491 |
| 12.16   | 7.11   | 9       | 6.6    | -0.56429 | 1.24E-06 |
| 0       | 0.31   | 0.15    | 0      | NA       | NA       |
| 84.96   | 87.64  | 89.63   | 86.61  | -0.03993 | 0.740757 |
| 3.94    | 5.86   | 5.34    | 5.51   | 0.165519 | 0.219931 |
| 20.92   | 22.37  | 23.3    | 20.4   | 0.024568 | 0.893369 |
| 15.54   | 19.19  | 17.45   | 19.19  | -0.22327 | 0.081113 |
| 0.71    | 0.11   | 0.46    | 0.15   | NA       | NA       |
| 17.1    | 21.04  | 20.85   | 19.43  | 0.207293 | 0.045993 |
| 0.16    | 0.18   | 0.17    | 0.53   | -0.06327 | 0.946275 |
| 4.07    | 2.92   | 4.84    | 4.91   | 0.110112 | 0.698064 |
| 10.59   | 11.97  | 10.98   | 12.4   | 0.123963 | 0.512384 |
| 0       | 0      | 0       | 0      | NA       | NA       |
| 12.57   | 10.52  | 10.12   | 12.76  | -0.4719  | 0.001195 |
| 20.31   | 29.91  | 33.19   | 31.77  | 0.462387 | 0.000172 |
| 183.65  | 149.83 | 169.19  | 156.33 | -0.22073 | 0.015921 |
| 0.3     | 0.03   | 0.19    | 0.11   | -1.1041  | 0.074719 |

|       |        |        |        |          |          |
|-------|--------|--------|--------|----------|----------|
| 26.14 | 29.05  | 28.71  | 27.23  | 0.025791 | 0.88961  |
| 19.34 | 18.49  | 16.25  | 18.7   | 0.266478 | 0.004431 |
| 6.29  | 7.29   | 6.83   | 8.08   | 0.26209  | 0.072419 |
| 0.41  | 0.44   | 0.35   | 0.23   | -0.53125 | 0.387486 |
| 15.79 | 27.18  | 21.59  | 24.36  | 0.567359 | 1.94E-07 |
| 27.29 | 24.09  | 27.1   | 26.74  | -0.1642  | 0.084422 |
| 13.5  | 16.88  | 15.74  | 20.56  | 0.170349 | 0.412164 |
| 27.01 | 30.28  | 28.93  | 29.67  | 0.137809 | 0.223032 |
| 19.66 | 18.34  | 17.31  | 17.45  | -0.08138 | 0.543006 |
| 13.01 | 15.93  | 14.58  | 15.3   | 0.23661  | 0.096523 |
| 29.15 | 27.08  | 25.6   | 23.67  | -0.29748 | 0.016508 |
| 11.45 | 13.78  | 12.86  | 13.67  | 0.162306 | 0.196666 |
| 10.97 | 19.82  | 15.13  | 16.38  | 0.599685 | 1.45E-08 |
| 10.14 | 9.64   | 9.8    | 11.5   | 0.146793 | 0.285976 |
| 2.74  | 3      | 2.76   | 3.21   | 0.080304 | 0.670013 |
| 0     | 0      | 0      | 0      | NA       | NA       |
| 14.88 | 10.54  | 10.73  | 11.65  | -0.39582 | 0.005567 |
| 0     | 0      | 0      | 0      | NA       | NA       |
| 38.88 | 21.11  | 24.79  | 26.31  | -0.77529 | 4.39E-17 |
| 26.41 | 31.13  | 29.16  | 30.48  | 0.147035 | 0.125892 |
| 24.55 | 27.06  | 27.16  | 24.02  | 0.111726 | 0.482563 |
| 25.77 | 27.46  | 23.27  | 21.26  | 0.118797 | 0.4498   |
| 0     | 0      | 0      | 0      | NA       | NA       |
| 0     | 0      | 0      | 0      | NA       | NA       |
| 0     | 0      | 0.1    | 0      | NA       | NA       |
| 25.66 | 27.9   | 28.18  | 27.65  | 0.053395 | 0.704634 |
| 36.75 | 25.42  | 27.51  | 30.54  | 0.137505 | 0.256269 |
| 0.07  | 0.36   | 0.02   | 0.18   | -0.17514 | 0.841691 |
| 3.46  | 2.93   | 2.37   | 2.67   | -0.28919 | 0.257584 |
| 0.6   | 0.67   | 0.87   | 0.47   | -0.44893 | 0.425217 |
| 2.88  | 3.26   | 2.92   | 2.2    | 0.101436 | 0.795244 |
| 6.85  | 9.86   | 9.06   | 8.7    | 0.392681 | 0.000382 |
| 0.99  | 0.21   | 0.23   | 0.48   | -0.51772 | 0.475596 |
| 12.51 | 15.72  | 14.91  | 14.59  | 0.433067 | 2.43E-06 |
| 33.48 | 11.85  | 20.86  | 16.82  | -1.09298 | 3.10E-18 |
| 0     | 0.21   | 0.15   | 0.07   | 0.46223  | 0.533673 |
| 32.22 | 43.14  | 37.38  | 39.67  | 0.2216   | 0.060145 |
| 9.72  | 10.6   | 9.71   | 12.38  | 0.464337 | 0.000237 |
| 2.94  | 3.12   | 3.03   | 3.22   | 0.149839 | 0.345217 |
| 2.14  | 1.22   | 1.53   | 1.05   | -0.32036 | 0.605852 |
| 96.7  | 135.37 | 119.07 | 128.37 | 0.48259  | 1.68E-06 |
| 8.68  | 12.03  | 10.42  | 9.08   | 0.247221 | 0.298563 |
| 42.59 | 49.84  | 49.96  | 47.05  | 0.180087 | 0.117872 |
| 0     | 0.03   | 0.02   | 0      | NA       | NA       |
| 4.84  | 11.64  | 7.67   | 8.62   | 0.654075 | 0.002348 |

|        |        |        |        |          |          |
|--------|--------|--------|--------|----------|----------|
| 11.39  | 8.41   | 11.61  | 11.57  | -0.05325 | 0.848795 |
| 0      | 0      | 0      | 0      | NA       | NA       |
| 41.38  | 54.81  | 46.41  | 51.14  | 0.25532  | 0.042305 |
| 60.5   | 56.04  | 65.1   | 57.4   | 0.030306 | 0.817702 |
| 23     | 18.33  | 19.02  | 21.7   | -0.17892 | 0.363774 |
| 20.05  | 20.99  | 21.55  | 17.7   | 0.067325 | 0.764316 |
| 3.64   | 2.46   | 2.28   | 3.19   | -0.24376 | 0.214004 |
| 3.19   | 3.52   | 3.67   | 3.83   | 0.229401 | 0.089571 |
| 0.55   | 0.81   | 0.77   | 0.64   | -0.00344 | 0.99586  |
| 47.55  | 72.23  | 70.15  | 60.8   | 0.263744 | 0.00988  |
| 31.06  | 12.2   | 23.37  | 13.54  | -0.93757 | 1.92E-09 |
| 0.57   | 0.29   | 0.64   | 0.68   | -0.03211 | 0.964603 |
| 7.11   | 8.52   | 7.97   | 8.25   | 0.597726 | 2.24E-09 |
| 6.58   | 4.69   | 4.21   | 4.66   | -0.52687 | 4.78E-05 |
| 49.75  | 46.5   | 42.7   | 45.52  | -0.14109 | 0.179051 |
| 3.48   | 3.85   | 4.31   | 4.61   | -0.07995 | 0.783713 |
| 25.22  | 26.51  | 24.85  | 24.31  | 0.010452 | 0.952639 |
| 0.14   | 0.07   | 0      | 0      | NA       | NA       |
| 14.68  | 14.62  | 13.62  | 13.31  | 0.106918 | 0.523528 |
| 27.15  | 24.8   | 26.43  | 25.13  | -0.0732  | 0.649587 |
| 22.49  | 25.64  | 22.27  | 24.74  | 0.110419 | 0.392714 |
| 2.78   | 2.94   | 2.59   | 2.68   | 0.043805 | 0.866475 |
| 2.98   | 0.35   | 0.7    | 1.13   | -1.74849 | 1.21E-11 |
| 0      | 0      | 0      | 0      | NA       | NA       |
| 0.49   | 0.34   | 0.59   | 0.6    | -0.57417 | 0.213426 |
| 60.56  | 74.72  | 72.07  | 64.97  | 0.147173 | 0.205905 |
| 190.42 | 277.14 | 265.33 | 291.56 | 0.55638  | 5.59E-15 |
| 11.57  | 27.32  | 17.05  | 22.45  | 0.896414 | 9.41E-11 |
| 186.07 | 188.82 | 184.76 | 188.24 | -0.02098 | 0.857688 |
| 0.03   | 0      | 0      | 0      | NA       | NA       |
| 156.08 | 166.51 | 164.09 | 166.31 | 0.055075 | 0.610298 |
| 0      | 0      | 0      | 0      | NA       | NA       |
| 0      | 0.02   | 0      | 0.02   | NA       | NA       |
| 9.21   | 8.42   | 7.99   | 9.41   | -0.10229 | 0.388284 |
| 27.38  | 19.76  | 20.73  | 20.36  | -0.47324 | 1.57E-05 |
| 14.58  | 12.26  | 15.78  | 11.88  | -0.23411 | 0.062063 |
| 0      | 0      | 0      | 0      | NA       | NA       |
| 19.66  | 22.03  | 20.85  | 21.38  | 0.082453 | 0.546434 |
| 6.86   | 7.78   | 8.38   | 7.38   | 0.180942 | 0.273879 |
| 15.45  | 12.54  | 14.27  | 18.47  | -0.16443 | 0.07186  |
| 25.8   | 135.55 | 87.67  | 111.11 | 1.94111  | 8.37E-49 |
| 8.22   | 9.2    | 10.01  | 7.95   | 0.360261 | 0.041659 |
| 1      | 2.49   | 2.19   | 1.93   | 0.396999 | 0.345805 |
| 63.11  | 80.42  | 70.72  | 74.72  | 0.092061 | 0.475549 |
| 2.36   | 2.96   | 1.91   | 2.86   | -0.32798 | 0.201347 |

|        |        |        |        |          |          |
|--------|--------|--------|--------|----------|----------|
| 1.52   | 1.54   | 1.76   | 2.23   | 0.071842 | 0.818684 |
| 23.87  | 24.63  | 25.25  | 23.48  | 0.130454 | 0.31061  |
| 3.39   | 2.63   | 3.66   | 3.06   | -0.35642 | 0.233316 |
| 84.02  | 98.78  | 90.84  | 87.25  | 0.13581  | 0.213794 |
| 23.2   | 21.89  | 23.08  | 20.39  | 0.123067 | 0.235917 |
| 99.12  | 90.53  | 92.31  | 98.24  | -0.09682 | 0.294358 |
| 12.84  | 14.87  | 12.75  | 10.71  | -0.21183 | 0.279959 |
| 11.38  | 12.04  | 12.89  | 14.59  | 0.269979 | 0.012608 |
| 88.86  | 82.05  | 84.76  | 75.83  | -0.11339 | 0.285557 |
| 59.19  | 61.64  | 64     | 63.53  | 0.059109 | 0.606618 |
| 0.02   | 0.07   | 0.07   | 0.05   | NA       | NA       |
| 17.75  | 19.73  | 15.93  | 18.11  | 0.17886  | 0.139182 |
| 15.16  | 15.85  | 14.81  | 16.6   | -0.21856 | 0.169958 |
| 0.14   | 0      | 0.11   | 0      | NA       | NA       |
| 23.04  | 32.64  | 28.64  | 30.45  | 0.419472 | 6.00E-05 |
| 0      | 0      | 0      | 0      | NA       | NA       |
| 14.58  | 16.53  | 15.29  | 18.29  | 0.057811 | 0.633188 |
| 28     | 17.31  | 19.25  | 20.88  | -0.65326 | 1.32E-09 |
| 9.43   | 11.72  | 11.35  | 10.54  | 0.208364 | 0.199269 |
| 26.89  | 27.91  | 27.02  | 27.65  | -0.02884 | 0.847976 |
| 64.86  | 99.51  | 81.83  | 93.45  | 0.469863 | 3.17E-06 |
| 39.36  | 169.58 | 121.46 | 145.38 | 1.812489 | 1.67E-53 |
| 8.84   | 10.14  | 9.84   | 9.25   | 0.361648 | 0.14945  |
| 43.54  | 82.83  | 57.77  | 72.41  | 0.53556  | 5.14E-05 |
| 3.16   | 3.2    | 3.1    | 2.46   | -0.11788 | 0.713701 |
| 1.34   | 1.92   | 2.87   | 2.26   | 0.330365 | 0.500647 |
| 45.77  | 51.36  | 45.28  | 51.1   | 0.243241 | 0.083788 |
| 56.14  | 67.28  | 60.34  | 61.97  | 0.203309 | 0.041417 |
| 30.84  | 33.19  | 34.88  | 30.32  | -0.0312  | 0.857688 |
| 21.38  | 21.69  | 22.01  | 21.25  | 0.015394 | 0.917965 |
| 10.13  | 17     | 13.5   | 14.16  | 0.388255 | 0.008291 |
| 72.49  | 78.4   | 86.39  | 85.68  | 0.08305  | 0.404931 |
| 190.49 | 185.49 | 166.2  | 175.86 | -0.23021 | 0.014448 |
| 12.14  | 11.53  | 11.38  | 13.48  | 0.108857 | 0.49821  |
| 16.32  | 17.06  | 16.81  | 16.25  | -0.07159 | 0.662948 |
| 0.03   | 0.7    | 0.08   | 0.36   | 1.54999  | 0.008025 |
| 0      | 0      | 0      | 0      | NA       | NA       |
| 37.12  | 41.41  | 36.36  | 40.26  | 0.053771 | 0.670266 |
| 37.57  | 32.04  | 29.58  | 31.79  | -0.28488 | 0.002385 |
| 21.59  | 22.34  | 21.46  | 20.75  | -0.01845 | 0.914375 |
| 43.52  | 101.36 | 96.83  | 94.11  | 1.02671  | 1.05E-28 |
| 0.41   | 0.35   | 0.31   | 0.3    | 0.073189 | 0.920557 |
| 3.18   | 3.13   | 3.17   | 2.79   | -0.21407 | 0.290517 |
| 2.95   | 3.4    | 3.46   | 2.57   | -0.00637 | 0.988237 |
| 19.13  | 13.35  | 14.27  | 15.49  | -0.12193 | 0.414461 |

|       |        |        |        |          |          |
|-------|--------|--------|--------|----------|----------|
| 6.42  | 10.89  | 10.12  | 10.81  | 0.554704 | 8.91E-07 |
| 0.07  | 0.04   | 0.13   | 0.22   | -0.74849 | 0.274883 |
| 22.25 | 16.74  | 18.39  | 17.56  | -0.41654 | 0.000568 |
| 0.07  | 0.02   | 0.03   | 0.04   | NA       | NA       |
| 0     | 0      | 0      | 0      | NA       | NA       |
| 0     | 0      | 0      | 0.01   | NA       | NA       |
| 13.57 | 9.45   | 11.64  | 10.63  | -0.42432 | 0.000277 |
| 0     | 0      | 0.02   | 0      | NA       | NA       |
| 35.17 | 47.4   | 48.25  | 44.26  | 0.33643  | 0.002059 |
| 0.02  | 0.78   | 0.11   | 0.46   | 2.65697  | 4.06E-08 |
| 0.02  | 0      | 0      | 0      | NA       | NA       |
| 12.17 | 8.91   | 9.87   | 10.59  | -0.43418 | 0.007835 |
| 10.88 | 6.5    | 7.29   | 7.36   | -0.53465 | 2.30E-07 |
| 0     | 0.02   | 0      | 0      | NA       | NA       |
| 13.98 | 14.72  | 15.72  | 15.76  | 0.075916 | 0.515056 |
| 34.62 | 33.5   | 34.02  | 33.59  | 0.054004 | 0.80335  |
| 11.75 | 5.79   | 7.99   | 7.01   | -0.61791 | 0.000412 |
| 12.78 | 12.34  | 14.03  | 13.79  | 0.12521  | 0.465103 |
| 0.22  | 0.22   | 0.15   | 0.14   | -0.50096 | 0.381428 |
| 15.93 | 17.27  | 13.68  | 14.58  | -0.15089 | 0.355581 |
| 69.23 | 67.3   | 64.43  | 64.21  | -0.05396 | 0.623489 |
| 16.03 | 17.71  | 17.43  | 17.17  | 0.026403 | 0.845158 |
| 21.78 | 21.97  | 23.5   | 23.39  | -0.02383 | 0.889599 |
| 96.99 | 72.61  | 89.18  | 84.05  | -0.23558 | 0.025734 |
| 22.52 | 25.58  | 25.4   | 23.68  | 0.036911 | 0.796573 |
| 0     | 0      | 0      | 0.01   | NA       | NA       |
| 13.71 | 21.35  | 16.71  | 20.42  | 0.269297 | 0.040932 |
| 0     | 0      | 0      | 0      | NA       | NA       |
| 12.92 | 13.53  | 10.39  | 11.75  | -0.09255 | 0.624621 |
| 89.33 | 126.56 | 117.44 | 115.51 | 0.293614 | 0.002815 |
| 0     | 1.62   | 0.61   | 0.99   | 3.489067 | 2.92E-13 |
| 0.02  | 0.11   | 0.06   | 0.04   | 1.08451  | 0.074387 |
| 6.42  | 7.94   | 7.01   | 7.41   | 0.135283 | 0.451091 |
| 5.26  | 5.27   | 4.71   | 4.81   | -0.12136 | 0.596473 |
| 14.5  | 11.45  | 11.9   | 11.96  | -0.16318 | 0.105745 |
| 9.93  | 11.22  | 10.16  | 9.33   | -0.05074 | 0.741372 |
| 0.05  | 0.59   | 0.28   | 0.87   | 1.487281 | 0.005101 |
| 0     | 0      | 0.11   | 0.1    | NA       | NA       |
| 0.09  | 0      | 0      | 0.04   | NA       | NA       |
| 31.33 | 45.55  | 41.45  | 40.4   | 0.226125 | 0.017766 |
| 0     | 0      | 0      | 0      | NA       | NA       |
| 0     | 0      | 0.01   | 0      | NA       | NA       |
| 0     | 0      | 0      | 0      | NA       | NA       |
| 0.03  | 0.07   | 0      | 0.1    | NA       | NA       |
| 0.12  | 0.05   | 0.02   | 0.02   | NA       | NA       |

|        |        |        |        |          |          |
|--------|--------|--------|--------|----------|----------|
| 4.48   | 5.15   | 4.47   | 4.97   | 0.064724 | 0.742037 |
| 16.31  | 11.25  | 12.85  | 10.15  | -0.5829  | 7.02E-05 |
| 0.08   | 0.15   | 0.14   | 0      | 0.192508 | 0.81543  |
| 45.7   | 34.4   | 33.48  | 33.44  | -0.40236 | 2.98E-06 |
| 0      | 0.21   | 0.08   | 0.13   | 0.983646 | 0.12686  |
| 16.98  | 28.56  | 28.83  | 29.69  | 0.757065 | 1.64E-21 |
| 17.05  | 21.66  | 20.61  | 18.34  | 0.186376 | 0.176614 |
| 4.18   | 9.17   | 7      | 5.78   | 0.315628 | 0.314691 |
| 0      | 0      | 0      | 0      | NA       | NA       |
| 32.86  | 23.64  | 23.63  | 27.22  | -0.49215 | 8.68E-07 |
| 0.72   | 0.37   | 0.47   | 0.68   | -0.7105  | 0.033239 |
| 44.51  | 45.58  | 43     | 46.32  | 0.111781 | 0.244388 |
| 0      | 0      | 0.02   | 0      | NA       | NA       |
| 0      | 0      | 0      | 0      | NA       | NA       |
| 0      | 0      | 0      | 0      | NA       | NA       |
| 0      | 0      | 0.03   | 0      | NA       | NA       |
| 14.99  | 13.1   | 12.94  | 13.52  | -0.21215 | 0.028887 |
| 0      | 0      | 0      | 0      | NA       | NA       |
| 97.51  | 133.89 | 106.62 | 114.38 | 0.166877 | 0.179507 |
| 3.1    | 4.25   | 3.38   | 3.77   | 0.14429  | 0.449862 |
| 0      | 0      | 0.08   | 0      | NA       | NA       |
| 3.08   | 8.6    | 5.84   | 6.84   | 0.649208 | 0.043116 |
| 9.56   | 24.68  | 20.29  | 19.86  | 1.105685 | 3.52E-18 |
| 2.76   | 6.01   | 3.85   | 4.19   | 0.626129 | 0.003539 |
| 0      | 0      | 0      | 0      | NA       | NA       |
| 0      | 0      | 0      | 0.04   | NA       | NA       |
| 0      | 0      | 0      | 0      | NA       | NA       |
| 0.05   | 0.07   | 0.38   | 0.02   | -0.51667 | 0.467533 |
| 222.24 | 38.18  | 61.78  | 44.16  | -2.27316 | 2.68E-66 |
| 0      | 0      | 0      | 0      | NA       | NA       |
| 28.84  | 27.71  | 29.05  | 28.57  | -0.07511 | 0.4894   |
| 0      | 0      | 0      | 0      | NA       | NA       |
| 7.18   | 9.23   | 7.97   | 8.71   | 0.126959 | 0.449914 |
| 17     | 22.64  | 21.79  | 21.46  | 0.218596 | 0.018955 |
| 10.08  | 4.63   | 5.64   | 5.81   | -1.02733 | 4.14E-18 |
| 0      | 0      | 0      | 0      | NA       | NA       |
| 11.33  | 15.47  | 14.03  | 15.23  | 0.413637 | 8.69E-06 |
| 1.57   | 1.39   | 1.67   | 0.98   | -0.09499 | 0.861365 |
| 34.22  | 33.11  | 41.46  | 34.55  | 0.051293 | 0.729146 |
| 36.79  | 36.42  | 38.98  | 34.56  | 0.0439   | 0.787143 |
| 22.69  | 27.24  | 29.04  | 24.8   | 0.103988 | 0.513722 |
| 21.57  | 24.71  | 23.67  | 23.28  | 0.092936 | 0.452939 |
| 10.66  | 13.44  | 11.07  | 13.2   | 0.37192  | 0.001963 |
| 8.33   | 7.09   | 8.26   | 8.92   | 0.045639 | 0.862624 |
| 12.62  | 9.7    | 12.24  | 10.64  | -0.42704 | 0.002282 |



|        |        |        |        |          |          |
|--------|--------|--------|--------|----------|----------|
| 0.17   | 0.25   | 0.23   | 0      | NA       | NA       |
| 4.67   | 5.58   | 6.78   | 5.73   | 0.177865 | 0.271491 |
| 0.46   | 1.63   | 0.82   | 1.03   | 1.167021 | 0.002336 |
| 7.35   | 8.84   | 6.66   | 7.52   | 0.105508 | 0.543908 |
| 4.39   | 3.51   | 2.53   | 3.12   | -0.56897 | 0.000317 |
| 70.8   | 87.53  | 82.64  | 81.55  | 0.176927 | 0.053968 |
| 0.55   | 0.63   | 2.04   | 1.18   | -0.01022 | 0.992113 |
| 0      | 0      | 0      | 0      | NA       | NA       |
| 0      | 0      | 0      | 0      | NA       | NA       |
| 454.66 | 469.94 | 549.57 | 511.34 | 0.145449 | 0.138384 |
| 1.15   | 0.1    | 0.47   | 0.54   | -0.66388 | 0.341924 |
| 0      | 0.16   | 0      | 0      | NA       | NA       |
| 1.62   | 2.07   | 1.85   | 1.95   | -0.17764 | 0.586781 |
| 0.36   | 0.91   | 1.16   | 2.01   | 1.283038 | 0.033208 |
| 38.53  | 25.82  | 30.67  | 27.99  | -0.47676 | 3.82E-06 |
| 0      | 0      | 0      | 0      | NA       | NA       |
| 0      | 0      | 0      | 0      | NA       | NA       |
| 0.33   | 0.24   | 0.11   | 0.15   | -0.11163 | 0.898733 |
| 0.12   | 0.77   | 0.79   | 0.6    | 1.13428  | 0.019257 |
| 3.58   | 2.79   | 2.54   | 2.69   | -0.41731 | 0.024912 |
| 19.19  | 19.5   | 18.43  | 19.12  | -0.05288 | 0.779226 |
| 27.62  | 30.4   | 26.11  | 25.74  | -0.01565 | 0.948175 |
| 0      | 0      | 0      | 0      | NA       | NA       |
| 9.31   | 8.31   | 8.52   | 7.98   | -0.20652 | 0.27752  |
| 0.39   | 1.34   | 0.85   | 1.12   | 0.192527 | 0.798939 |
| 12.04  | 12.75  | 11.48  | 11.36  | -0.20659 | 0.286    |
| 76.7   | 62.27  | 65.56  | 61.72  | -0.32783 | 1.82E-05 |
| 0      | 0      | 0      | 0      | NA       | NA       |
| 6.23   | 4.68   | 6.17   | 5.44   | -0.18391 | 0.220045 |
| 0.02   | 0.02   | 0.03   | 0      | NA       | NA       |
| 6.04   | 6.05   | 5.74   | 6.45   | 0.041035 | 0.829528 |
| 13.1   | 7.19   | 9.36   | 9.04   | -0.5495  | 0.001234 |
| 19.06  | 23.64  | 18.76  | 20.76  | 0.192119 | 0.112514 |
| 143.69 | 141.86 | 160.47 | 153.15 | 0.064234 | 0.575502 |
| 4.07   | 2.95   | 2.89   | 2.94   | -0.05547 | 0.858181 |
| 9.01   | 12.45  | 10.21  | 12.37  | 0.188504 | 0.095296 |
| 8.18   | 10.58  | 10.13  | 10.41  | 0.252307 | 0.022918 |
| 0.89   | 0.8    | 0.46   | 0.65   | 0.013647 | 0.980125 |
| 237.35 | 200.67 | 216.16 | 192.31 | -0.26094 | 0.003577 |
| 2.78   | 3.43   | 3.46   | 3.26   | 0.311674 | 0.268868 |
| 0.19   | 0.22   | 0.03   | 0.22   | -0.13216 | 0.882965 |
| 3.24   | 3.25   | 3.01   | 3.19   | -0.20428 | 0.192267 |
| 11.45  | 13.44  | 13.99  | 14.5   | 0.317442 | 0.000694 |
| 7.19   | 22.84  | 19.31  | 20.32  | 1.626817 | 1.44E-35 |
| 5.91   | 40.22  | 24.06  | 32.95  | 2.404839 | 3.70E-53 |

|       |       |        |        |          |          |
|-------|-------|--------|--------|----------|----------|
| 5.33  | 4.95  | 4.61   | 5.32   | -0.15866 | 0.260251 |
| 0.09  | 0.16  | 0.16   | 0.12   | 0.145685 | 0.852311 |
| 10.18 | 12.05 | 13.21  | 13.78  | 0.308864 | 0.002763 |
| 0     | 0     | 0      | 0      | NA       | NA       |
| 11.78 | 7.98  | 9.44   | 7.93   | -0.29397 | 0.045667 |
| 8.11  | 10.63 | 9.15   | 10.82  | 0.366846 | 0.001194 |
| 6.44  | 15.58 | 9.05   | 11.99  | 0.882928 | 1.38E-09 |
| 25.81 | 24.6  | 30.2   | 24.59  | -0.01216 | 0.942709 |
| 6     | 6.15  | 6.22   | 6.97   | 0.288358 | 0.170626 |
| 0.28  | 0.23  | 0.41   | 0.57   | -0.05538 | 0.947499 |
| 0.56  | 2.25  | 2.47   | 2.8    | 1.640209 | 9.11E-23 |
| 0.32  | 0.49  | 0.61   | 0.77   | 0.135191 | 0.841253 |
| 24.18 | 25.83 | 26.27  | 26.11  | 0.157667 | 0.252009 |
| 4.96  | 6.68  | 5.22   | 5.72   | 0.151606 | 0.501478 |
| 6.65  | 5.46  | 6.19   | 5.86   | -0.2614  | 0.032292 |
| 5.5   | 7.79  | 6.39   | 6.69   | 0.101843 | 0.546747 |
| 0     | 0     | 0      | 0      | NA       | NA       |
| 55.16 | 42.44 | 45.34  | 42.04  | -0.28879 | 0.006015 |
| 1.62  | 1.46  | 1.55   | 1.2    | -0.27466 | 0.221096 |
| 10.82 | 7.95  | 6.83   | 8.16   | -0.65745 | 6.98E-09 |
| 4.51  | 5.84  | 5.43   | 5.19   | 0.231794 | 0.142386 |
| 0     | 0     | 0      | 0      | NA       | NA       |
| 2.62  | 4.3   | 3.74   | 3.61   | 0.727474 | 0.001318 |
| 0     | 0.5   | 0.29   | 0.42   | 2.785597 | 4.73E-08 |
| 0.06  | 0     | 0.03   | 0      | NA       | NA       |
| 2.13  | 1.35  | 1.33   | 2.27   | -0.14421 | 0.850235 |
| 17.83 | 21.98 | 15.16  | 18.36  | 0.146127 | 0.44053  |
| 25.8  | 7.19  | 8.32   | 7.5    | -1.63129 | 1.71E-39 |
| 0     | 0     | 0      | 0      | NA       | NA       |
| 16    | 10.87 | 10.86  | 11.2   | -0.41147 | 0.004171 |
| 3.37  | 4.02  | 3.39   | 3.06   | -0.03415 | 0.881728 |
| 0     | 0.06  | 0.03   | 0      | NA       | NA       |
| 40.08 | 42.5  | 35.81  | 37.81  | 0.006505 | 0.970061 |
| 1.77  | 1.62  | 1.85   | 1.71   | 0.124961 | 0.719111 |
| 0     | 0     | 0      | 0      | NA       | NA       |
| 275.2 | 111.7 | 152.47 | 140.69 | -1.04566 | 8.58E-23 |
| 0     | 0     | 0      | 0      | NA       | NA       |
| 12.83 | 15.29 | 12.57  | 13.07  | 0.680483 | 2.53E-09 |
| 26.7  | 27.65 | 24.56  | 26.67  | 0.205426 | 0.024524 |
| 15.64 | 9.3   | 10.58  | 12.07  | -0.32006 | 0.00348  |
| 0     | 0.02  | 0.09   | 0.08   | NA       | NA       |
| 0     | 0     | 0      | 0      | NA       | NA       |
| 5.45  | 12.12 | 13.35  | 12.87  | 1.086231 | 9.25E-23 |
| 5.99  | 7.2   | 6.51   | 6.2    | 0.262422 | 0.20048  |
| 0     | 0.02  | 0      | 0      | NA       | NA       |

|        |        |       |        |          |          |
|--------|--------|-------|--------|----------|----------|
| 0.14   | 0.32   | 0.32  | 0.32   | 0.142861 | 0.85721  |
| 86.64  | 111.02 | 97.85 | 102.83 | 0.19757  | 0.052592 |
| 0      | 0.06   | 0.07  | 0.04   | NA       | NA       |
| 0      | 0      | 0     | 0      | NA       | NA       |
| 205.92 | 69.68  | 97.13 | 62.72  | -1.52325 | 8.24E-11 |
| 39.14  | 48     | 49.14 | 44.18  | 0.292926 | 0.016935 |
| 1.36   | 0.64   | 1.1   | 0.69   | -0.31074 | 0.593207 |
| 8.24   | 9.4    | 7.99  | 9.3    | 0.099726 | 0.521167 |
| 28.72  | 19.27  | 20.26 | 20.24  | -0.47489 | 3.52E-08 |
| 0      | 0.12   | 0     | 0      | NA       | NA       |
| 0.18   | 0.18   | 0.17  | 0.06   | NA       | NA       |
| 0.06   | 0.1    | 0.26  | 0.05   | 0.422349 | 0.559778 |
| 44.12  | 60.56  | 51.62 | 56.09  | 0.276921 | 0.00518  |
| 0      | 0      | 0     | 0      | NA       | NA       |
| 1.4    | 0.86   | 1.09  | 0.88   | -0.7629  | 0.000833 |
| 0      | 0      | 0     | 0      | NA       | NA       |
| 9.06   | 7.54   | 7.5   | 6.12   | 0.040068 | 0.903519 |
| 12.53  | 13.11  | 11.95 | 13.15  | 0.07155  | 0.666871 |
| 2.37   | 5.88   | 4.59  | 5.49   | 1.157762 | 1.15E-08 |
| 0.26   | 0.15   | 0.1   | 0.28   | -0.64846 | 0.292714 |
| 12.39  | 16.41  | 14.73 | 14.32  | 0.231168 | 0.133281 |
| 28.32  | 26.75  | 30.28 | 31.43  | -0.07015 | 0.689895 |
| 0      | 0      | 0     | 0      | NA       | NA       |
| 0.81   | 0.98   | 1.1   | 0.78   | 0.390736 | 0.529657 |
| 38.29  | 36.3   | 35.64 | 34.26  | -0.23304 | 0.071257 |
| 10.11  | 15.71  | 12.01 | 13.21  | 0.040885 | 0.85662  |
| 0      | 0.1    | 0.2   | 0      | NA       | NA       |
| 585.16 | 547.48 | 722.5 | 661.31 | 0.126028 | 0.358037 |
| 0      | 0      | 0     | 0      | NA       | NA       |
| 24.86  | 38.28  | 33.07 | 32.02  | 0.456655 | 1.56E-05 |
| 35.27  | 57.73  | 52.9  | 53.68  | 0.623621 | 2.96E-12 |
| 0.23   | 0.21   | 0.25  | 0.17   | -0.26516 | 0.625415 |
| 18.08  | 18.66  | 18.93 | 18.02  | 0.067365 | 0.673396 |
| 44.45  | 36.96  | 40.5  | 38.91  | -0.24048 | 0.0043   |
| 26.78  | 11.5   | 17.9  | 12.51  | -0.6716  | 1.49E-06 |
| 0      | 0      | 0     | 0      | NA       | NA       |
| 3.39   | 3.75   | 3.25  | 3.06   | 0.053112 | 0.846238 |
| 5.22   | 2      | 2.89  | 2.45   | -0.57551 | 0.001115 |
| 43.67  | 45.74  | 49.88 | 47.58  | 0.03561  | 0.779226 |
| 16.91  | 19.55  | 17.96 | 18.98  | 0.163893 | 0.212763 |
| 0.19   | 0.13   | 0.1   | 0.08   | 0.222628 | 0.784205 |
| 0      | 0      | 0     | 0      | NA       | NA       |
| 12.17  | 16.73  | 15.58 | 16.47  | 0.420697 | 0.000236 |
| 0      | 0      | 0     | 0      | NA       | NA       |
| 0      | 0      | 0     | 0      | NA       | NA       |

|         |          |         |          |          |          |
|---------|----------|---------|----------|----------|----------|
| 3356.24 | 14160.94 | 9159.35 | 10726.49 | 1.561724 | 1.09E-35 |
| 5.76    | 2.26     | 5.14    | 3.85     | -0.6481  | 0.006816 |
| 19.16   | 19.68    | 20.8    | 21.6     | -0.11814 | 0.367739 |
| 0.02    | 0.04     | 0.04    | 0.02     | NA       | NA       |
| 6.61    | 5.76     | 5.88    | 6.45     | -0.04523 | 0.832636 |
| 11.28   | 17.89    | 17.14   | 16.69    | 0.268248 | 0.137936 |
| 10.66   | 12.14    | 12.3    | 15.76    | 0.410623 | 0.006246 |
| 0       | 0        | 0       | 0        | NA       | NA       |
| 99.77   | 94.71    | 95.29   | 93.95    | -0.14508 | 0.097548 |
| 164.5   | 101.76   | 112.94  | 94.87    | -0.72263 | 4.59E-17 |
| 0.96    | 0.51     | 0.6     | 0.84     | -0.44731 | 0.27138  |
| 26.55   | 42.95    | 38.45   | 42.4     | 0.853495 | 2.08E-14 |
| 4.82    | 3.19     | 2.73    | 3.17     | 0.172642 | 0.506865 |
| 0       | 0        | 0.01    | 0.06     | NA       | NA       |
| 0.39    | 0.14     | 0.15    | 0.21     | -1.06338 | 0.036873 |
| 2.24    | 4.13     | 3.19    | 3.52     | 0.796181 | 6.35E-07 |
| 0.08    | 0.07     | 0.08    | 0.22     | 0.091206 | 0.92335  |
| 19.33   | 20.87    | 21.53   | 22.43    | 0.148875 | 0.348779 |
| 13.81   | 24.2     | 19.74   | 21.78    | 0.669096 | 5.61E-06 |
| 34.61   | 40.2     | 36.24   | 39.26    | 0.121008 | 0.319061 |
| 1.66    | 3.02     | 2.11    | 2.18     | 0.61081  | 0.094336 |
| 0       | 0.02     | 0.02    | 0        | NA       | NA       |
| 0.21    | 0.03     | 0.1     | 0.04     | -0.74731 | 0.256799 |
| 0.01    | 0        | 0       | 0        | NA       | NA       |
| 2.75    | 0.96     | 2.53    | 1.36     | -0.50833 | 0.061355 |
| 16.27   | 19.73    | 15.07   | 17.29    | 0.296498 | 0.032916 |
| 4.62    | 1.83     | 2.34    | 3.37     | -0.67955 | 0.049277 |
| 13.11   | 18       | 14.29   | 15.21    | 0.288861 | 0.020538 |
| 0       | 0        | 0       | 0        | NA       | NA       |
| 7.22    | 4.58     | 3.51    | 2.57     | -0.12356 | 0.667271 |
| 3.38    | 4.38     | 3.57    | 3.76     | 0.395259 | 0.059749 |
| 5.84    | 6.88     | 5.67    | 7.16     | 0.49048  | 0.007974 |
| 27.24   | 31.95    | 31.66   | 30.42    | 0.368812 | 0.000711 |
| 0.84    | 0.07     | 0.81    | 0.39     | -0.28552 | 0.726751 |
| 12.69   | 25.6     | 17.54   | 18.95    | 0.685082 | 3.44E-07 |
| 14.98   | 31.76    | 27.5    | 29.01    | 0.758948 | 2.57E-16 |
| 15.87   | 13.52    | 14.13   | 17.9     | -0.03029 | 0.849515 |
| 0       | 0        | 0       | 0        | NA       | NA       |
| 0.16    | 0.18     | 0.28    | 0.47     | 0.416731 | 0.570905 |
| 43.59   | 31.32    | 33.78   | 33.2     | -0.44212 | 3.10E-09 |
| 17.26   | 14.75    | 17.81   | 19.97    | -0.05903 | 0.722942 |
| 6.28    | 4.91     | 4.65    | 5.62     | -0.1263  | 0.666647 |
| 2.52    | 3.56     | 2.9     | 2.9      | 0.114974 | 0.763558 |
| 9.32    | 11.21    | 10.43   | 11.22    | 0.181067 | 0.125608 |
| 1.02    | 3.35     | 2.32    | 2.05     | 1.803348 | 7.99E-16 |

|        |        |        |        |          |          |
|--------|--------|--------|--------|----------|----------|
| 0      | 0.16   | 0.05   | 0.23   | NA       | NA       |
| 4.85   | 3.76   | 3.5    | 4.09   | -0.07165 | 0.681006 |
| 1.89   | 2.06   | 1.79   | 1.89   | -0.15272 | 0.314182 |
| 6.16   | 5.17   | 4.75   | 6.39   | -0.10997 | 0.53524  |
| 7.71   | 10.12  | 9.94   | 13.55  | 0.362007 | 0.002695 |
| 0      | 0      | 0      | 0      | NA       | NA       |
| 7.55   | 4.54   | 4.41   | 5.65   | -0.43887 | 0.087247 |
| 103.1  | 219.58 | 119.98 | 152.79 | 0.635744 | 0.031006 |
| 42.59  | 340.23 | 175.22 | 262.19 | 1.963047 | 7.85E-15 |
| 21.48  | 19.97  | 20.71  | 18.01  | -0.09201 | 0.512103 |
| 0      | 0      | 0      | 0      | NA       | NA       |
| 0.16   | 0.05   | 0      | 0      | -1.40792 | 0.018476 |
| 21.51  | 21.07  | 21.68  | 23.92  | 0.039202 | 0.771988 |
| 5.95   | 5.9    | 6.24   | 6.33   | 0.002356 | 0.991594 |
| 14.66  | 14.09  | 14.46  | 14.8   | -0.12438 | 0.426714 |
| 18.34  | 9.85   | 12.9   | 9.94   | -1.06912 | 4.20E-11 |
| 0.18   | 0.19   | 0.06   | 0.13   | -0.88687 | 0.178726 |
| 102.82 | 73.93  | 71.07  | 71.08  | -0.41109 | 6.03E-07 |
| 2.31   | 0.89   | 2.77   | 1.78   | -0.29449 | 0.542248 |
| 0.37   | 0.25   | 0.37   | 0.42   | -0.17166 | 0.806634 |
| 0      | 0      | 0      | 0      | NA       | NA       |
| 16.38  | 9.85   | 10.5   | 10.81  | -0.61483 | 8.94E-10 |
| 12.77  | 8.86   | 11.53  | 8.89   | -0.39651 | 0.025835 |
| 54.2   | 36.98  | 44.24  | 40.06  | -0.45539 | 1.13E-05 |
| 10.46  | 14.61  | 10.57  | 11.76  | -0.10914 | 0.507777 |
| 15.49  | 10.56  | 13.25  | 12.16  | -0.52579 | 1.27E-05 |
| 1.12   | 1.1    | 0.86   | 1.14   | -0.10164 | 0.85135  |
| 11.62  | 9.09   | 9.75   | 13.39  | 0.11653  | 0.324944 |
| 22.67  | 16.65  | 17.53  | 18.32  | -0.3065  | 0.001079 |
| 11.33  | 11.08  | 11.32  | 8.74   | 0.17629  | 0.132256 |
| 0      | 0      | 0      | 0      | NA       | NA       |
| 28.19  | 27.66  | 25.01  | 26.17  | -0.15941 | 0.204156 |
| 0.03   | 0.4    | 0.18   | 0.37   | 0.766799 | 0.244847 |
| 0.79   | 1.15   | 1.29   | 0.92   | 0.255214 | 0.444261 |
| 0      | 0.03   | 0.02   | 0.02   | NA       | NA       |
| 1.27   | 1.03   | 1.6    | 1.38   | -0.29326 | 0.419647 |
| 0      | 0      | 0      | 0      | NA       | NA       |
| 8.12   | 11.79  | 10.62  | 11.52  | 0.405213 | 0.000285 |
| 10.4   | 11.15  | 9.8    | 10.52  | 0.007913 | 0.975981 |
| 21.37  | 28.01  | 25.12  | 25.39  | 0.062387 | 0.666379 |
| 0.66   | 1.07   | 0.56   | 0.49   | -0.10453 | 0.889416 |
| 4.48   | 4.69   | 4.82   | 4.56   | 0.106008 | 0.729146 |
| 2.61   | 5.84   | 5.2    | 5.41   | 0.882243 | 7.22E-10 |
| 13.95  | 21.62  | 18.71  | 21.3   | 0.419005 | 0.000243 |
| 40.04  | 44.62  | 37.2   | 40.87  | 0.062494 | 0.666949 |

|        |       |       |         |          |           |
|--------|-------|-------|---------|----------|-----------|
| 1.06   | 0.6   | 1.13  | 0.81    | -0.15918 | 0.693783  |
| 0      | 0     | 0     | 0 NA    | NA       |           |
| 19.9   | 21.76 | 22.28 | 18.48   | -0.01633 | 0.946597  |
| 13.42  | 37.41 | 35.09 | 36.7    | 1.283662 | 1.05E-45  |
| 42.02  | 53.95 | 51.12 | 50.6    | 0.323663 | 0.001116  |
| 7.55   | 8.58  | 8.23  | 9.96    | 0.443237 | 0.011431  |
| 18.72  | 15.78 | 17.57 | 17.89   | -0.18275 | 0.076603  |
| 28.27  | 25.59 | 26.41 | 26.88   | -0.05474 | 0.675253  |
| 0.68   | 16.66 | 20.2  | 21.76   | 4.257997 | 8.17E-150 |
| 1.82   | 1.9   | 1.8   | 1.95    | -0.26683 | 0.226001  |
| 24.46  | 20.01 | 22.99 | 20.81   | -0.1503  | 0.171219  |
| 0.14   | 0.04  | 0     | 0.01 NA | NA       |           |
| 5.88   | 5.41  | 6.5   | 4.9     | -0.23601 | 0.159249  |
| 8.75   | 12.8  | 7.47  | 10.41   | -0.04637 | 0.784421  |
| 15.11  | 12.46 | 13.36 | 12.92   | -0.30595 | 0.009624  |
| 0      | 0.02  | 0.01  | 0 NA    | NA       |           |
| 0      | 0     | 0     | 0 NA    | NA       |           |
| 22.21  | 17.64 | 21.08 | 19.27   | -0.14504 | 0.286161  |
| 17.41  | 20.57 | 17.28 | 17      | 0.280753 | 0.012131  |
| 18.81  | 27.36 | 20.4  | 20.75   | 0.270117 | 0.264491  |
| 9.53   | 9.24  | 9.92  | 9.96    | 0.003383 | 0.986589  |
| 106.31 | 66.44 | 87.07 | 81.23   | -0.51289 | 1.18E-05  |
| 15.42  | 12.75 | 13.35 | 17.19   | -0.016   | 0.934965  |
| 1.17   | 1.38  | 1.47  | 1.41    | -0.23096 | 0.257483  |
| 43.28  | 90.79 | 68.11 | 77.91   | 0.789761 | 9.43E-13  |
| 0.77   | 1.01  | 0.5   | 0.72    | 0.03025  | 0.971554  |
| 6.72   | 7.6   | 7.37  | 9.43    | 0.084909 | 0.611815  |
| 8.89   | 9.71  | 9.59  | 9.1     | -0.10245 | 0.520711  |
| 14.83  | 13.43 | 16.38 | 15.1    | -0.12987 | 0.384138  |
| 0.05   | 0.07  | 0.03  | 0.04 NA | NA       |           |
| 0.6    | 0.03  | 0.1   | 0.02    | -2.50034 | 1.41E-09  |
| 43.11  | 82.12 | 57.5  | 67.73   | 0.593988 | 1.13E-06  |
| 17.33  | 18.08 | 16.23 | 17.76   | 0.034599 | 0.829375  |
| 1.45   | 1.94  | 1.7   | 2.14    | 0.792164 | 0.002178  |
| 20.19  | 21.55 | 19.06 | 22.02   | -0.11026 | 0.326999  |
| 6.83   | 7.06  | 5.36  | 5.91    | -0.1124  | 0.59616   |
| 0      | 0     | 0     | 0 NA    | NA       |           |
| 71.99  | 53.59 | 58.68 | 60.15   | -0.46132 | 4.31E-06  |
| 20.3   | 39.58 | 33.76 | 38.8    | 0.753053 | 1.02E-20  |
| 28.95  | 52.33 | 39.04 | 45.93   | 0.551109 | 3.72E-08  |
| 9.97   | 7.5   | 7.87  | 6.8     | -0.34954 | 0.029416  |
| 0.82   | 2.69  | 1.34  | 2.34    | 1.439153 | 3.92E-07  |
| 8.89   | 8.83  | 10.75 | 9.43    | -0.21531 | 0.177052  |
| 7.68   | 6.82  | 7.97  | 9.18    | -0.25463 | 0.174526  |
| 53.37  | 53.77 | 49.34 | 54.79   | -0.05082 | 0.680958  |

|        |        |        |        |          |          |
|--------|--------|--------|--------|----------|----------|
| 5.49   | 4.37   | 6.12   | 5      | -0.22153 | 0.441246 |
| 8.34   | 11.33  | 11.81  | 10.28  | 0.092977 | 0.743262 |
| 27.65  | 83.93  | 49.43  | 71.99  | 1.152355 | 2.04E-16 |
| 24.33  | 19.58  | 21.42  | 17.17  | -0.24214 | 0.112825 |
| 16.05  | 12.02  | 11.92  | 13.71  | -0.4176  | 0.000184 |
| 45     | 56.7   | 52.59  | 47.85  | -0.04106 | 0.785709 |
| 0.92   | 1.44   | 1.11   | 1.33   | 0.067125 | 0.90897  |
| 9.01   | 13.6   | 10.48  | 13.85  | 0.427103 | 0.021693 |
| 49.26  | 53.36  | 56.66  | 54.27  | 0.025112 | 0.852782 |
| 0      | 0      | 0      | 0      | NA       | NA       |
| 0.14   | 0.04   | 0.1    | 0.08   | -0.49886 | 0.500626 |
| 1.15   | 1.24   | 1.08   | 1.11   | 0.180738 | 0.797375 |
| 9.59   | 5.93   | 7.15   | 7.34   | -0.4948  | 5.67E-06 |
| 8.33   | 11.78  | 11     | 13.31  | 0.394951 | 0.00076  |
| 47.46  | 43.96  | 45.6   | 52.1   | 0.059185 | 0.580733 |
| 26.84  | 30.95  | 29.36  | 29.9   | 0.067984 | 0.589862 |
| 6.29   | 4.14   | 5.21   | 4.71   | -0.25922 | 0.252381 |
| 12.1   | 13.32  | 14.02  | 12.08  | -0.2028  | 0.239744 |
| 20.27  | 22.2   | 23.92  | 22.99  | 0.118649 | 0.26888  |
| 0      | 0      | 0      | 0      | NA       | NA       |
| 5.22   | 8.97   | 6.73   | 7.09   | 0.23144  | 0.153319 |
| 153.37 | 158.54 | 165.85 | 158.25 | -0.04434 | 0.741817 |
| 27.64  | 18.25  | 20.5   | 21.27  | -0.24292 | 0.00979  |
| 0      | 0      | 0      | 0      | NA       | NA       |
| 0.62   | 0.17   | 0.6    | 0.23   | -0.65857 | 0.129165 |
| 1.8    | 2.25   | 1.71   | 2.21   | 0.425069 | 0.016375 |
| 21.56  | 22.6   | 23.76  | 21.81  | 0.067494 | 0.707293 |
| 15.19  | 14.07  | 14.5   | 13.92  | -0.06696 | 0.669626 |
| 0      | 0.17   | 0.19   | 0.29   | 2.269312 | 5.36E-05 |
| 37.05  | 34.63  | 34.07  | 33.74  | -0.21509 | 0.031562 |
| 0.77   | 3.26   | 1.14   | 1.8    | 1.202372 | 0.000113 |
| 0      | 0      | 0      | 0      | NA       | NA       |
| 1.01   | 0.86   | 0.58   | 1.17   | 0.140822 | 0.813447 |
| 16.82  | 17.66  | 17.98  | 18.71  | 0.113689 | 0.352836 |
| 5.59   | 0.24   | 0.27   | 0.18   | -4.26934 | 2.15E-47 |
| 2.86   | 20.93  | 10.81  | 16.46  | 2.306155 | 1.96E-18 |
| 19.38  | 13.36  | 18.02  | 13.39  | -0.45407 | 0.014071 |
| 2.69   | 3.55   | 3.23   | 3.19   | 0.119597 | 0.594667 |
| 69.5   | 79.7   | 85.48  | 85.76  | 0.052154 | 0.658288 |
| 34.35  | 49.2   | 46.79  | 46.64  | 0.367643 | 0.000191 |
| 81.18  | 81.29  | 73.85  | 73.79  | -0.17546 | 0.066328 |
| 29.86  | 24.75  | 29.41  | 28.52  | -0.18609 | 0.136595 |
| 18.84  | 19.49  | 18.28  | 19.85  | 0.114795 | 0.472312 |
| 57.5   | 90.11  | 85.65  | 99.14  | 0.486423 | 1.14E-08 |
| 0.91   | 4.15   | 2.82   | 4.39   | 2.162431 | 2.04E-22 |

|        |        |        |        |          |          |
|--------|--------|--------|--------|----------|----------|
| 0.01   | 0.05   | 0.11   | 0.08   | -0.16429 | 0.852157 |
| 0      | 0.01   | 0.01   | 0      | NA       | NA       |
| 3.3    | 3.25   | 3.57   | 2.94   | -0.06757 | 0.762739 |
| 21.36  | 20.42  | 21.51  | 22.01  | -0.16229 | 0.138844 |
| 0      | 0      | 0      | 0      | NA       | NA       |
| 25.92  | 34.68  | 30.07  | 31.38  | 0.104573 | 0.370542 |
| 8.31   | 9.37   | 13.07  | 12.52  | 0.154935 | 0.405764 |
| 0      | 0      | 0      | 0      | NA       | NA       |
| 15.89  | 18.55  | 17.24  | 16.55  | 0.064917 | 0.68047  |
| 0.8    | 1.28   | 0.61   | 0.52   | 0.466164 | 0.376582 |
| 15.79  | 25.29  | 25.83  | 22.8   | 0.334438 | 0.004292 |
| 15.3   | 25.6   | 22.99  | 24.08  | 0.610687 | 3.17E-11 |
| 15.26  | 14.92  | 16.2   | 15.27  | 0.039766 | 0.831213 |
| 13.27  | 10.48  | 10.37  | 11.08  | -0.24819 | 0.012362 |
| 6.73   | 7.46   | 8.25   | 7.94   | -0.03572 | 0.890238 |
| 5.96   | 8.42   | 8.85   | 6.56   | 0.328271 | 0.087349 |
| 0.27   | 0.26   | 0.41   | 0.3    | 0.219315 | 0.756358 |
| 0.74   | 1.12   | 1.3    | 1.43   | -0.09128 | 0.876943 |
| 0.01   | 0.01   | 0.1    | 0.01   | NA       | NA       |
| 0.3    | 0.31   | 0.24   | 0.57   | -0.37902 | 0.402014 |
| 111.89 | 125.37 | 120.24 | 111.24 | 0.212262 | 0.04072  |
| 103.51 | 59.85  | 68.75  | 65.88  | -0.75814 | 1.72E-14 |
| 0      | 0      | 0      | 0      | NA       | NA       |
| 11.71  | 6.36   | 7.18   | 8.22   | -0.50675 | 0.000215 |
| 59.63  | 147.86 | 116.26 | 129.98 | 1.04151  | 1.30E-30 |
| 11.31  | 21.93  | 14.72  | 18.36  | 0.210592 | 0.28351  |
| 607.74 | 580.99 | 225.04 | 317.25 | -0.60824 | 0.171489 |
| 4.5    | 5.41   | 5.19   | 4.79   | 0.039467 | 0.846993 |
| 0.82   | 0.37   | 0.57   | 0.66   | -0.55035 | 0.284754 |
| 2.21   | 1.2    | 1.81   | 1.62   | -0.59616 | 0.001303 |
| 10.31  | 18.94  | 13.27  | 16.41  | 0.430409 | 0.004711 |
| 22.98  | 16.32  | 17.62  | 16.12  | -0.62272 | 3.74E-14 |
| 2.51   | 3.14   | 1.86   | 2.9    | 0.361509 | 0.078754 |
| 2.26   | 0.96   | 1.34   | 1.23   | -1.23209 | 2.29E-08 |
| 0      | 0      | 0      | 0      | NA       | NA       |
| 28.3   | 38.76  | 32.61  | 34.61  | 0.368774 | 0.001186 |
| 0.25   | 0      | 0      | 0      | NA       | NA       |
| 0.45   | 0.18   | 0.2    | 0.08   | -1.49364 | 0.000837 |
| 8.55   | 10.95  | 10.52  | 9.89   | 0.511824 | 3.76E-05 |
| 19.66  | 21.77  | 20.12  | 21.58  | -0.16863 | 0.062973 |
| 3.5    | 4.68   | 3.75   | 4.6    | 0.007379 | 0.978003 |
| 6.11   | 4.83   | 4.6    | 5.09   | -0.04892 | 0.793261 |
| 0.02   | 0      | 0      | 0      | NA       | NA       |
| 12.53  | 9.9    | 9.88   | 14.58  | -0.07642 | 0.799563 |
| 25.19  | 27.54  | 28.93  | 24.06  | -0.02032 | 0.914213 |



|        |        |        |        |          |          |
|--------|--------|--------|--------|----------|----------|
| 15.1   | 15     | 14.67  | 14.46  | 0.045963 | 0.731121 |
| 0.19   | 0      | 0.05   | 0.06   | NA       | NA       |
| 12.6   | 12.91  | 13.15  | 12.91  | 0.022588 | 0.885955 |
| 0.4    | 0.12   | 0.08   | 0.26   | -0.39394 | 0.611421 |
| 2.94   | 2.56   | 2.28   | 3.19   | -0.0883  | 0.675253 |
| 30.94  | 35.34  | 35.25  | 38.35  | 0.273566 | 0.007972 |
| 2.07   | 3.28   | 2.4    | 2.77   | 0.364    | 0.217778 |
| 2.67   | 1.44   | 1.5    | 1.12   | -0.16231 | 0.630121 |
| 13.04  | 3.57   | 4.22   | 4.36   | -1.7864  | 6.07E-34 |
| 3.04   | 3.05   | 2.12   | 2.36   | -0.34323 | 0.105706 |
| 16.73  | 17.74  | 16.42  | 23.27  | 0.074663 | 0.638048 |
| 4.44   | 5.11   | 4.6    | 4.65   | 0.083014 | 0.748601 |
| 9.9    | 10.56  | 8.45   | 11     | 0.080687 | 0.608206 |
| 13.14  | 12.05  | 13.16  | 12.18  | -0.04467 | 0.855415 |
| 0.21   | 1.08   | 1.29   | 0.11   | 1.378041 | 0.022298 |
| 0      | 0      | 0      | 0      | NA       | NA       |
| 0.14   | 0.96   | 0.29   | 1.55   | 0.160558 | 0.825113 |
| 5.73   | 5.6    | 5.93   | 5.61   | -0.17642 | 0.379777 |
| 9.82   | 30.47  | 18.29  | 24.41  | 1.278687 | 8.02E-15 |
| 0.08   | 0      | 0.11   | 0.35   | NA       | NA       |
| 8.08   | 11.1   | 8.12   | 8.89   | 0.160657 | 0.332768 |
| 1.79   | 1.65   | 3.83   | 3.94   | 0.854344 | 0.000573 |
| 34.6   | 23.07  | 23.63  | 21.08  | -0.69747 | 3.58E-12 |
| 52.95  | 43.45  | 42.62  | 40.6   | -0.35942 | 0.000511 |
| 0.46   | 0      | 0      | 0.15   | NA       | NA       |
| 19.39  | 32.75  | 33.71  | 34.63  | 0.732808 | 2.24E-17 |
| 61.22  | 91.1   | 91.87  | 90.43  | 0.516652 | 3.13E-14 |
| 30.88  | 23.51  | 26.31  | 23.87  | -0.45768 | 2.69E-06 |
| 7.16   | 7.07   | 7.05   | 8.3    | 0.201211 | 0.200957 |
| 2.01   | 2.75   | 1.99   | 1.89   | 0.243409 | 0.352496 |
| 11.75  | 6.71   | 7.27   | 6.84   | -0.93449 | 4.64E-14 |
| 13.93  | 24.55  | 17.87  | 22.4   | 0.540543 | 3.26E-06 |
| 33.43  | 223.58 | 129.13 | 153.18 | 2.115018 | 3.11E-13 |
| 0.04   | 0.17   | 0.36   | 0.19   | 1.758754 | 0.001628 |
| 0      | 0      | 0      | 0      | NA       | NA       |
| 7.4    | 5.92   | 6.01   | 4.54   | -0.56456 | 0.00023  |
| 2.64   | 0.63   | 1.12   | 1.09   | -0.77486 | 0.008581 |
| 69.58  | 91.66  | 82.91  | 83.25  | 0.330224 | 0.000384 |
| 136.62 | 127.13 | 129.4  | 120.99 | -0.18861 | 0.025454 |
| 25.95  | 25.89  | 24.04  | 23.05  | -0.06544 | 0.712504 |
| 0      | 0      | 0      | 0      | NA       | NA       |
| 0.41   | 0.24   | 0.32   | 0.2    | -0.66523 | 0.160595 |
| 197.25 | 204.37 | 244.88 | 258.53 | 0.100382 | 0.444119 |
| 8.8    | 5.62   | 7.31   | 6.55   | -0.34285 | 0.096093 |
| 1.51   | 1.68   | 1.12   | 1.29   | -0.08091 | 0.873568 |

|        |        |        |        |          |          |
|--------|--------|--------|--------|----------|----------|
| 0      | 0      | 0.09   | 0      | NA       | NA       |
| 8.8    | 8.34   | 9.8    | 9.67   | 0.138687 | 0.383483 |
| 9.36   | 14.03  | 12.49  | 13.06  | 0.680983 | 5.71E-13 |
| 1.01   | 1.33   | 1.92   | 1.32   | 1.181407 | 8.60E-05 |
| 9.98   | 12.9   | 10.3   | 9.47   | 0.09881  | 0.639146 |
| 0.31   | 0.49   | 0      | 0.24   | -0.1426  | 0.867696 |
| 6.83   | 5.39   | 5.83   | 6.47   | -0.29016 | 0.138377 |
| 0      | 0      | 0      | 0      | NA       | NA       |
| 18.1   | 19.72  | 18.83  | 17.36  | -0.16973 | 0.055689 |
| 19.07  | 19.38  | 16.69  | 19.1   | -0.26259 | 0.026593 |
| 29.65  | 24.55  | 23.76  | 24.85  | -0.27771 | 0.021812 |
| 2.99   | 4.89   | 3.32   | 3.55   | 0.174078 | 0.540321 |
| 257.79 | 293.46 | 297.07 | 287.37 | 0.003136 | 0.981096 |
| 0      | 0      | 0.02   | 0.06   | NA       | NA       |
| 25.81  | 26.68  | 23.97  | 25.99  | 0.02249  | 0.890238 |
| 16.26  | 12.73  | 16.85  | 15.09  | -0.31584 | 0.014902 |
| 18.09  | 16.26  | 19.15  | 13.76  | -0.10357 | 0.479412 |
| 4.3    | 3.81   | 3.32   | 3.76   | -0.22279 | 0.242748 |
| 58.74  | 193.87 | 155.2  | 184.21 | 1.57317  | 6.31E-63 |
| 3.13   | 4.29   | 4.17   | 3.92   | 0.366591 | 0.015739 |
| 30.7   | 34.55  | 28.82  | 30.55  | 0.221792 | 0.129165 |
| 20.27  | 25.96  | 24.27  | 23.56  | 0.17084  | 0.280336 |
| 10.51  | 10.59  | 12.32  | 9.64   | -0.2115  | 0.248876 |
| 33.11  | 19.76  | 24.03  | 19.99  | -0.44989 | 2.23E-05 |
| 1.87   | 3.09   | 3.76   | 3.65   | 0.400779 | 0.1529   |
| 5.36   | 7.12   | 6.8    | 4.41   | -0.0759  | 0.813831 |
| 41.55  | 46.64  | 44.1   | 44.76  | 0.071613 | 0.574924 |
| 8.98   | 9.45   | 8.45   | 10.55  | -0.02932 | 0.908519 |
| 0.03   | 0.4    | 0.14   | 0.24   | 1.586579 | 0.00662  |
| 83.07  | 97.01  | 102.15 | 94.74  | 0.211312 | 0.018737 |
| 20.54  | 13.34  | 12.86  | 13.99  | -0.59571 | 1.21E-10 |
| 5.15   | 6.39   | 6.3    | 7.99   | -0.02739 | 0.919748 |
| 12.85  | 9.35   | 9.1    | 10.67  | 0.188158 | 0.215835 |
| 0      | 0      | 0      | 0      | NA       | NA       |
| 15.5   | 18.63  | 17.88  | 18.05  | 0.36968  | 0.000843 |
| 0      | 0      | 0      | 0      | NA       | NA       |
| 118.05 | 62.11  | 78.15  | 68.79  | -0.7139  | 7.54E-14 |
| 178.03 | 150.55 | 179.78 | 170.32 | -0.15298 | 0.117656 |
| 58.9   | 62.61  | 59.72  | 60.36  | 0.034858 | 0.761233 |
| 2.11   | 8.51   | 9.82   | 8.81   | 1.866313 | 3.37E-27 |
| 0      | 0      | 0.06   | 0      | NA       | NA       |
| 322.84 | 283.33 | 281.89 | 296.25 | -0.1209  | 0.155466 |
| 0.13   | 0.05   | 0.13   | 0.08   | NA       | NA       |
| 38.33  | 35.73  | 49.23  | 52.07  | 0.10977  | 0.550981 |
| 0.35   | 0.22   | 0.68   | 1.15   | 0.233398 | 0.778245 |

|        |        |        |        |          |          |
|--------|--------|--------|--------|----------|----------|
| 0      | 0      | 0      | 0      | NA       | NA       |
| 45.11  | 29.29  | 32.16  | 31.24  | -0.74529 | 6.31E-13 |
| 88.87  | 86.6   | 95.85  | 93.09  | -0.03356 | 0.793361 |
| 12.28  | 21.73  | 16.75  | 17.23  | 0.564406 | 0.0001   |
| 0      | 0      | 0.11   | 0.13   | NA       | NA       |
| 0      | 0      | 0      | 0      | NA       | NA       |
| 0.03   | 0      | 0      | 0      | NA       | NA       |
| 4.17   | 6.89   | 5.81   | 6.72   | 0.136797 | 0.591444 |
| 0.04   | 0.11   | 0.14   | 0.03   | 0.270806 | 0.740036 |
| 88.79  | 85.88  | 83.88  | 88.95  | -0.04921 | 0.647297 |
| 45.06  | 56.68  | 52.6   | 53     | 0.181624 | 0.057465 |
| 6.44   | 30.04  | 22.27  | 28.01  | 1.96197  | 1.06E-50 |
| 15.14  | 13.95  | 15.56  | 13.64  | -0.09243 | 0.624654 |
| 5.94   | 5.69   | 6.58   | 6.41   | 0.745552 | 0.01765  |
| 13.28  | 12.35  | 12.57  | 13.48  | -0.09015 | 0.512103 |
| 134.08 | 108.67 | 119.55 | 119.29 | -0.2513  | 0.00154  |
| 31.28  | 40.24  | 37.55  | 38.87  | 0.252172 | 0.034321 |
| 0      | 0      | 0      | 0      | NA       | NA       |
| 9.09   | 9.37   | 8.1    | 8.31   | -0.05173 | 0.756231 |
| 7.28   | 5.89   | 9.88   | 8.06   | 0.037791 | 0.913582 |
| 2.06   | 2.14   | 2.13   | 2.34   | -0.24751 | 0.587566 |
| 11.72  | 7.57   | 11.69  | 10.25  | -0.45338 | 0.000654 |
| 4.02   | 6.05   | 5.88   | 6.08   | 0.397396 | 0.000889 |
| 18.9   | 17.77  | 15.68  | 15.95  | -0.23708 | 0.127027 |
| 0.16   | 0.5    | 0.35   | 0.35   | 0.389759 | 0.532341 |
| 3.7    | 3.29   | 3.42   | 3.09   | -0.57131 | 0.048686 |
| 0.14   | 0.13   | 0      | 0.12   | NA       | NA       |
| 0      | 0      | 0      | 0.02   | NA       | NA       |
| 20.98  | 20.78  | 19.5   | 18.77  | -0.10324 | 0.480728 |
| 0.62   | 0.14   | 0.28   | 0.37   | -0.38666 | 0.609164 |
| 0.17   | 0      | 0.07   | 0      | NA       | NA       |
| 0.41   | 0.52   | 0.61   | 1.11   | 1.009848 | 0.076798 |
| 667.12 | 690.89 | 626.25 | 630.81 | -0.08088 | 0.405998 |
| 11.55  | 12.44  | 10.36  | 11.72  | 0.309333 | 0.035824 |
| 37.4   | 36.16  | 40.47  | 36.38  | -0.01217 | 0.948254 |
| 0      | 0      | 0      | 0      | NA       | NA       |
| 0      | 0      | 0      | 0      | NA       | NA       |
| 21.69  | 11.45  | 12.78  | 12.88  | -0.733   | 3.09E-13 |
| 0.02   | 0      | 0.06   | 0      | NA       | NA       |
| 0      | 0      | 0      | 0      | NA       | NA       |
| 30.33  | 41.26  | 35.58  | 38.14  | 0.170554 | 0.160188 |
| 0.73   | 1.22   | 0.62   | 0.82   | 1.559764 | 0.001507 |
| 0.79   | 0.62   | 0.36   | 0.48   | -0.08329 | 0.926237 |
| 14.11  | 16.59  | 15.9   | 17.57  | 0.280899 | 0.061205 |
| 49.92  | 56.82  | 55.91  | 55.8   | 0.083714 | 0.493654 |

|         |        |        |        |          |          |
|---------|--------|--------|--------|----------|----------|
| 176.63  | 201.8  | 208.14 | 192.08 | 0.109783 | 0.241035 |
| 2.71    | 3.28   | 3.07   | 3.58   | 0.269119 | 0.06026  |
| 18.74   | 19.02  | 18     | 17.42  | -0.06085 | 0.683775 |
| 0.11    | 0.04   | 0.09   | 0.19   | 0.233006 | 0.779226 |
| 0       | 0      | 0      | 0      | NA       | NA       |
| 23.38   | 20.15  | 16.31  | 18     | -0.43679 | 7.96E-05 |
| 0       | 0      | 0      | 0      | NA       | NA       |
| 18.41   | 23.67  | 20.15  | 23.25  | 0.0897   | 0.627882 |
| 60.41   | 78.21  | 75.04  | 75.15  | 0.205097 | 0.085106 |
| 18.28   | 15.93  | 17.64  | 14.21  | -0.33965 | 0.011624 |
| 2.47    | 3.62   | 3.14   | 4.1    | 0.257124 | 0.447153 |
| 0.66    | 0.84   | 1.44   | 0.93   | 0.39313  | 0.323739 |
| 0.29    | 0.41   | 0.32   | 0.29   | 1.145077 | 0.061346 |
| 1.41    | 1.14   | 3.18   | 2.45   | 0.145092 | 0.811816 |
| 13.45   | 14.06  | 12.31  | 13.85  | -0.09434 | 0.598232 |
| 49.22   | 53.3   | 52.95  | 50.15  | 0.02031  | 0.891946 |
| 22.66   | 30.74  | 24.53  | 27.54  | 0.235791 | 0.020032 |
| 3.43    | 3.21   | 3.9    | 3.3    | -0.27529 | 0.151958 |
| 2.86    | 3.32   | 3.39   | 3.17   | 0.185815 | 0.41138  |
| 0       | 0.2    | 0.27   | 0.18   | 0.944149 | 0.143358 |
| 0.06    | 0.04   | 0.11   | 0.15   | NA       | NA       |
| 8.35    | 7.86   | 9.4    | 9.78   | 0.042983 | 0.821703 |
| 0       | 0.05   | 0      | 0      | NA       | NA       |
| 27.94   | 18.47  | 20.68  | 19.04  | -0.49859 | 1.64E-06 |
| 5.89    | 6.38   | 5.96   | 7.07   | -0.09593 | 0.670138 |
| 16.31   | 17.67  | 20.37  | 19.15  | 0.041706 | 0.778344 |
| 0       | 0      | 0      | 0      | NA       | NA       |
| 0       | 0.03   | 0.01   | 0      | NA       | NA       |
| 0.34    | 0.4    | 0.98   | 0.52   | 0.431431 | 0.558527 |
| 25.56   | 31.52  | 29.53  | 30.59  | 0.257235 | 0.116002 |
| 1.99    | 3.22   | 2.89   | 2.24   | -0.05494 | 0.896663 |
| 20.37   | 18.77  | 19.42  | 18.83  | 0.017456 | 0.92421  |
| 93.18   | 127.43 | 133.57 | 127.17 | 0.42989  | 4.38E-06 |
| 8.43    | 7.87   | 7.52   | 7.99   | -0.16296 | 0.221807 |
| 1026.01 | 987.48 | 969.44 | 920.63 | -0.19742 | 0.020567 |
| 19.08   | 24.04  | 24.4   | 21.1   | 0.203536 | 0.165715 |
| 0       | 0      | 0      | 0      | NA       | NA       |
| 52.09   | 49.53  | 60.31  | 52.9   | -0.09595 | 0.50294  |
| 11.39   | 12.27  | 11.92  | 13.89  | 0.065239 | 0.712235 |
| 0       | 0      | 0      | 0      | NA       | NA       |
| 0.15    | 0.5    | 0.41   | 0.56   | 0.733491 | 0.24613  |
| 207.26  | 186.86 | 246.55 | 226.98 | 0.036649 | 0.828382 |
| 56.56   | 56.51  | 53.15  | 59.97  | -0.12902 | 0.193622 |
| 235.28  | 203.57 | 213.34 | 205.75 | -0.32592 | 1.05E-05 |
| 2.85    | 1.97   | 1.91   | 1.93   | -0.45801 | 0.005828 |

|         |         |        |         |          |          |
|---------|---------|--------|---------|----------|----------|
| 7.8     | 10.21   | 8.38   | 8.09    | 0.096386 | 0.625297 |
| 30.97   | 19.3    | 22.65  | 20.77   | -0.58611 | 1.41E-09 |
| 0       | 0.61    | 0.28   | 0.45    | 0.832459 | 0.212676 |
| 6.77    | 7.1     | 7.91   | 9.14    | 0.153184 | 0.514027 |
| 0       | 0       | 0      | 0       | NA       | NA       |
| 73.54   | 61.71   | 71.56  | 71.79   | -0.15629 | 0.215669 |
| 1.52    | 0.77    | 0.93   | 1.42    | -0.73384 | 0.059672 |
| 34.75   | 34.95   | 30.5   | 29.61   | 0.039841 | 0.867232 |
| 0       | 0       | 0      | 0       | NA       | NA       |
| 29.98   | 19.08   | 23.59  | 21.18   | -0.59134 | 6.03E-10 |
| 0       | 0       | 0      | 0       | NA       | NA       |
| 116.52  | 62.61   | 74.75  | 73.18   | -0.83855 | 8.94E-28 |
| 9.53    | 10.28   | 11.61  | 10.88   | 0.16396  | 0.243427 |
| 0       | 0       | 0.03   | 0       | NA       | NA       |
| 16.34   | 19.02   | 17.24  | 19.64   | 0.120396 | 0.422944 |
| 7.43    | 6.8     | 7.04   | 6.42    | -0.08818 | 0.617378 |
| 9.23    | 13.45   | 11.62  | 12.32   | 0.310813 | 0.059008 |
| 76.33   | 84.4    | 82.94  | 87.77   | 0.069805 | 0.463995 |
| 15.4    | 16.65   | 18.73  | 18.94   | 0.077774 | 0.577804 |
| 21.78   | 14.18   | 16.65  | 16.89   | -0.58333 | 2.45E-06 |
| 52.34   | 87.34   | 76.43  | 83.91   | 0.527383 | 2.59E-09 |
| 3.03    | 2.62    | 2.22   | 2.29    | -0.35606 | 0.077303 |
| 20.85   | 23.64   | 23.75  | 22.56   | 0.168708 | 0.233743 |
| 0       | 0       | 0      | 0       | NA       | NA       |
| 70.02   | 50.53   | 57.48  | 54.92   | -0.37181 | 5.25E-05 |
| 0       | 0       | 0      | 0.01    | NA       | NA       |
| 20.27   | 21.89   | 20.63  | 20.54   | -0.00694 | 0.974476 |
| 0       | 0       | 0      | 0.02    | NA       | NA       |
| 0.15    | 0.12    | 0.26   | 0.25    | 0.214492 | 0.802725 |
| 0       | 0       | 0      | 0       | NA       | NA       |
| 0.81    | 0.55    | 0.96   | 1.07    | -0.10523 | 0.880968 |
| 2004.26 | 1558.06 | 1609.6 | 1498.18 | -0.45076 | 1.56E-09 |
| 108.14  | 118.41  | 118.88 | 113.27  | 0.115802 | 0.236588 |
| 0       | 0       | 0      | 0       | NA       | NA       |
| 1.88    | 7.36    | 6.35   | 5.55    | 1.632303 | 7.86E-20 |
| 54.76   | 42.64   | 42.59  | 40.18   | -0.50328 | 2.38E-06 |
| 0       | 0       | 0.15   | 0.19    | NA       | NA       |
| 0.04    | 0       | 0      | 0       | NA       | NA       |
| 0.45    | 0.31    | 0.53   | 0.4     | -0.17929 | 0.734587 |
| 35.79   | 40.13   | 33.12  | 34.35   | 0.045365 | 0.781175 |
| 20.16   | 28.86   | 23.23  | 28.29   | 0.027208 | 0.859711 |
| 0       | 0       | 0      | 0       | NA       | NA       |
| 82.64   | 83.17   | 89.21  | 80.63   | -0.03119 | 0.816626 |
| 75.74   | 66.41   | 63.52  | 60.14   | -0.33529 | 5.69E-05 |
| 136.51  | 174.91  | 158.61 | 157     | 0.12437  | 0.277137 |

|        |        |        |       |          |          |
|--------|--------|--------|-------|----------|----------|
| 0.37   | 0.15   | 0.41   | 0.4   | -0.29108 | 0.718661 |
| 21.33  | 18.74  | 22.96  | 21.14 | -0.16317 | 0.294299 |
| 21.9   | 23.85  | 25.53  | 25.6  | 0.083024 | 0.461725 |
| 0.67   | 0.24   | 0.23   | 0.63  | NA       | NA       |
| 0      | 0      | 0      | 0     | NA       | NA       |
| 19.63  | 20     | 21.22  | 21.9  | -0.04172 | 0.696467 |
| 124.06 | 133.41 | 127.3  | 124.2 | -0.01597 | 0.904625 |
| 28.69  | 52.18  | 43.46  | 49.8  | 0.611739 | 1.37E-09 |
| 9.51   | 11.45  | 10.09  | 9.88  | 0.009068 | 0.966405 |
| 1.02   | 1.08   | 1.29   | 1.33  | 0.300724 | 0.257554 |
| 0      | 0      | 0      | 0     | NA       | NA       |
| 80.15  | 68.49  | 76.23  | 71.34 | -0.19921 | 0.043639 |
| 0.12   | 0.13   | 0.24   | 0.11  | 0.049768 | 0.956533 |
| 10.1   | 4.98   | 6.12   | 6.6   | -0.64201 | 3.86E-05 |
| 6.5    | 5.75   | 5.65   | 4.42  | -0.36354 | 0.029416 |
| 0      | 0      | 0      | 0     | NA       | NA       |
| 4.47   | 14.31  | 8.81   | 13.12 | 0.889185 | 1.89E-07 |
| 2.02   | 9.95   | 7.13   | 8.83  | 1.69846  | 1.12E-12 |
| 0      | 0      | 0      | 0     | NA       | NA       |
| 0      | 0      | 0      | 0     | NA       | NA       |
| 0.06   | 5.6    | 1.18   | 2.56  | 4.22445  | 1.96E-20 |
| 4.32   | 2.93   | 3.35   | 3.24  | -0.34227 | 0.039302 |
| 22.23  | 8.29   | 18.36  | 12.55 | -0.82315 | 5.36E-05 |
| 33.72  | 53.66  | 45.3   | 50.15 | 0.441883 | 0.000402 |
| 4.26   | 4.71   | 5.34   | 4.89  | 0.072775 | 0.766003 |
| 20.14  | 28.5   | 21.78  | 26.42 | 0.275465 | 0.020165 |
| 0      | 0      | 0      | 0     | NA       | NA       |
| 4.47   | 13.9   | 9.05   | 11.43 | 0.9966   | 1.00E-09 |
| 0      | 0      | 0      | 0     | NA       | NA       |
| 0      | 0      | 0      | 0     | NA       | NA       |
| 21.46  | 7.79   | 10.95  | 9.98  | -1.18281 | 2.61E-14 |
| 8.52   | 16.25  | 12.98  | 15.94 | 0.798612 | 4.12E-07 |
| 28.32  | 17.8   | 22.96  | 21.89 | -0.59826 | 1.40E-08 |
| 97.13  | 69.48  | 78.67  | 73.36 | -0.41851 | 1.13E-07 |
| 23.26  | 23.81  | 25.01  | 27.19 | -0.06521 | 0.570732 |
| 100.87 | 100.01 | 100.95 | 99.46 | -0.00415 | 0.980011 |
| 13.12  | 17.68  | 17.14  | 17.07 | 0.334027 | 0.002858 |
| 6.95   | 8      | 5.57   | 5.59  | -0.05298 | 0.844671 |
| 0.05   | 0.1    | 0.05   | 0.03  | -0.31898 | 0.693269 |
| 0      | 0.03   | 0.11   | 0.03  | NA       | NA       |
| 72.57  | 80.25  | 86.93  | 81.4  | 0.080458 | 0.476585 |
| 0.33   | 0.44   | 0.15   | 0.31  | 0.267772 | 0.740459 |
| 3.49   | 4.18   | 3.02   | 3.59  | 0.026598 | 0.94726  |
| 22.39  | 25.59  | 25.58  | 23.2  | 0.051023 | 0.747308 |
| 8.63   | 9.19   | 10.83  | 9.83  | 0.127478 | 0.623051 |

|        |        |        |        |          |          |
|--------|--------|--------|--------|----------|----------|
| 0.47   | 0.43   | 0.7    | 0.8    | -0.27981 | 0.505777 |
| 981.1  | 900.91 | 898.11 | 864.6  | -0.23964 | 0.00206  |
| 0.03   | 0.04   | 0.01   | 0.08   | NA       | NA       |
| 0.07   | 0.03   | 0.01   | 0.06   | NA       | NA       |
| 4.43   | 21.77  | 14.33  | 17.09  | 1.839307 | 9.26E-31 |
| 20.39  | 14.61  | 15.82  | 14.58  | -0.42382 | 7.63E-05 |
| 1.37   | 3.17   | 2.76   | 2.64   | 0.581725 | 0.100555 |
| 1.08   | 0.6    | 1.09   | 0.95   | 0.511358 | 0.209827 |
| 13.37  | 3.14   | 6.09   | 4      | -1.75217 | 3.94E-27 |
| 5.34   | 5.81   | 6.13   | 7.05   | -0.01426 | 0.949887 |
| 7.88   | 9.93   | 7.86   | 10.25  | 0.307958 | 0.030825 |
| 0.21   | 0.66   | 0.16   | 0.37   | 0.221092 | 0.759879 |
| 0.23   | 0.08   | 0.19   | 0.44   | 0.626608 | 0.362863 |
| 76.67  | 97.48  | 90.2   | 87.52  | 0.21976  | 0.029618 |
| 18.04  | 22.52  | 18.68  | 17.12  | -0.18351 | 0.246536 |
| 1.07   | 1.23   | 0.9    | 1.35   | -0.12336 | 0.864443 |
| 0      | 0      | 0      | 0      | NA       | NA       |
| 8.14   | 7.66   | 7.76   | 8.04   | -0.2496  | 0.120323 |
| 81.42  | 89.25  | 88.25  | 80.75  | -0.02418 | 0.882822 |
| 0      | 0.03   | 0      | 0      | NA       | NA       |
| 0      | 0      | 0      | 0      | NA       | NA       |
| 0      | 0      | 0      | 0      | NA       | NA       |
| 10.75  | 18.28  | 17.95  | 17.19  | 0.462776 | 0.000813 |
| 0.02   | 0      | 0.04   | 0.04   | NA       | NA       |
| 43.78  | 59.18  | 57.9   | 57.7   | 0.329482 | 0.000736 |
| 0.71   | 0.66   | 0.94   | 0.9    | 0.504744 | 0.343974 |
| 49.33  | 53.67  | 45.65  | 47.34  | -0.08581 | 0.506692 |
| 151.59 | 108.54 | 119.87 | 124.44 | -0.41821 | 2.04E-07 |
| 19.78  | 15.79  | 19.07  | 12.6   | -0.02329 | 0.912249 |
| 0.17   | 0.04   | 0.04   | 0.11   | -0.83648 | 0.21047  |
| 1.64   | 1.28   | 1.05   | 1.23   | -0.43667 | 0.125261 |
| 6.42   | 16.79  | 14.5   | 14.46  | 0.993537 | 7.38E-13 |
| 0      | 0.07   | 0      | 0      | NA       | NA       |
| 30.94  | 30.99  | 33.2   | 36.84  | 0.207041 | 0.045065 |
| 20.26  | 36.88  | 30.8   | 32.42  | 0.444453 | 2.52E-05 |
| 16.98  | 20.02  | 19.08  | 20.02  | 0.186876 | 0.098821 |
| 5.43   | 5.9    | 5.4    | 6.15   | 0.132268 | 0.483782 |
| 0      | 0.02   | 0      | 0.07   | NA       | NA       |
| 2.73   | 8.43   | 6.61   | 6.69   | 0.756991 | 5.39E-07 |
| 2.91   | 2.33   | 2.4    | 2.18   | -0.33864 | 0.419419 |
| 67.89  | 64.74  | 67.31  | 66.48  | -0.13984 | 0.218325 |
| 1.82   | 2.9    | 2.26   | 2.41   | 0.323862 | 0.265988 |
| 26.18  | 26.98  | 24.59  | 26.38  | -0.06217 | 0.683537 |
| 15.16  | 14.45  | 11.44  | 14.28  | 0.236622 | 0.040963 |
| 0.3    | 0.1    | 0.03   | 0.01   | NA       | NA       |

|        |         |         |         |          |          |
|--------|---------|---------|---------|----------|----------|
| 3.52   | 3.97    | 3.18    | 3.04    | -0.32268 | 0.178503 |
| 6.29   | 4.43    | 7.46    | 6.86    | -0.04892 | 0.850433 |
| 8.81   | 20.87   | 13.35   | 18.93   | 0.851243 | 1.52E-08 |
| 5.24   | 3.74    | 4.09    | 4.26    | 0.204926 | 0.145311 |
| 28.18  | 28.43   | 30.26   | 29.88   | 0.075041 | 0.584213 |
| 9.48   | 12.38   | 9.76    | 11.51   | 0.226136 | 0.161801 |
| 284.65 | 2803.95 | 1325.66 | 1874.27 | 2.581797 | 2.45E-16 |
| 12.9   | 22.52   | 16.23   | 16.94   | 0.512208 | 0.000364 |
| 278.42 | 1202.18 | 1053.33 | 1267.69 | 2.126468 | 2.46E-92 |
| 6.19   | 3.77    | 4.16    | 2.73    | -0.19908 | 0.323961 |
| 0      | 0       | 0       | 0       | NA       | NA       |
| 0.03   | 0       | 0.05    | 0.14    | NA       | NA       |
| 53.03  | 36.31   | 37.58   | 36.8    | -0.51636 | 3.89E-08 |
| 3.6    | 4.46    | 3.18    | 3.47    | 0.349001 | 0.059672 |
| 59.67  | 74.22   | 83.59   | 91.54   | 0.335502 | 2.31E-05 |
| 2.01   | 3.34    | 2.87    | 2.26    | 0.493035 | 0.116184 |
| 0.9    | 2.14    | 1.05    | 2.18    | 0.443275 | 0.068494 |
| 4.42   | 4.91    | 5.94    | 5.37    | -0.14462 | 0.455983 |
| 0.56   | 0.51    | 0.21    | 0.48    | 0.094747 | 0.90337  |
| 7.91   | 9.05    | 9.1     | 8.73    | 0.093934 | 0.624221 |
| 0      | 0       | 0       | 0       | NA       | NA       |
| 60.71  | 72.55   | 69.25   | 72.43   | 0.180571 | 0.039133 |
| 0.1    | 0.38    | 0.22    | 0.3     | 0.403433 | 0.601015 |
| 3.98   | 1.64    | 1.92    | 1.91    | -1.16314 | 7.34E-07 |
| 4.59   | 4.76    | 5.04    | 4.65    | 0.294896 | 0.136506 |
| 26.05  | 32.07   | 28.29   | 29.87   | 0.249016 | 0.029791 |
| 0.5    | 0       | 0.04    | 0       | -1.01476 | 0.099076 |
| 9.09   | 9.32    | 8.65    | 9.17    | -0.04174 | 0.791918 |
| 3.3    | 2.75    | 2.47    | 2.35    | -0.2453  | 0.350063 |
| 19.04  | 26.15   | 21.63   | 23.66   | 0.27773  | 0.013097 |
| 0      | 0       | 0       | 0       | NA       | NA       |
| 1.24   | 2.4     | 1.6     | 2.4     | 0.38653  | 0.250398 |
| 0.05   | 0.02    | 0.01    | 0.09    | NA       | NA       |
| 47.68  | 54.28   | 50.73   | 49.88   | 0.418661 | 4.87E-05 |
| 34.78  | 20.57   | 25.2    | 22.01   | -0.38667 | 0.001893 |
| 173.96 | 81.24   | 129.78  | 96.81   | -0.89141 | 2.53E-12 |
| 6.86   | 19.05   | 12.39   | 14.89   | 1.550964 | 5.11E-27 |
| 0.29   | 0.4     | 0.6     | 0.39    | 0.047174 | 0.959017 |
| 12.95  | 18.16   | 16.33   | 15.27   | 0.168673 | 0.170894 |
| 0      | 0       | 0       | 0       | NA       | NA       |
| 1.85   | 10.21   | 9.14    | 9.58    | 2.139422 | 4.21E-32 |
| 0      | 0       | 0       | 0       | NA       | NA       |
| 48.08  | 52.55   | 49.73   | 51.08   | 0.057686 | 0.667271 |
| 0      | 0       | 0       | 0       | NA       | NA       |
| 0      | 0       | 0       | 0       | NA       | NA       |



|        |        |        |        |          |          |
|--------|--------|--------|--------|----------|----------|
| 0.2    | 0.58   | 0.36   | 0.74   | 0.478887 | 0.416706 |
| 0      | 0      | 0      | 0      | NA       | NA       |
| 0      | 0      | 0      | 0      | NA       | NA       |
| 10.93  | 11.35  | 10.15  | 11.44  | -0.01364 | 0.944571 |
| 7.92   | 5.7    | 6.07   | 5.38   | 0.065671 | 0.695687 |
| 0.1    | 0      | 0      | 0.08   | NA       | NA       |
| 0.05   | 0.01   | 0      | 0.01   | NA       | NA       |
| 0.16   | 0.11   | 0.2    | 0.54   | 0.6854   | 0.326281 |
| 61.55  | 57.28  | 71.34  | 61.79  | 0.036059 | 0.854324 |
| 0      | 0      | 0      | 0      | NA       | NA       |
| 6.96   | 7.29   | 5.72   | 7.54   | 0.133832 | 0.508353 |
| 0      | 0      | 0      | 0      | NA       | NA       |
| 38.92  | 24.06  | 26.46  | 24.84  | -0.54709 | 4.61E-08 |
| 58.16  | 59.36  | 60.66  | 60.45  | 0.05341  | 0.626626 |
| 0.32   | 0      | 0      | 0      | NA       | NA       |
| 0.3    | 0.14   | 0.29   | 0.24   | -0.94134 | 0.145193 |
| 23.52  | 48.62  | 35.33  | 42.06  | 0.902279 | 2.36E-13 |
| 6.06   | 8.33   | 6.37   | 6.32   | 0.259316 | 0.310717 |
| 0      | 0.05   | 0.04   | 0.15   | NA       | NA       |
| 6.56   | 9.17   | 7.4    | 7.86   | 0.106134 | 0.509256 |
| 3.61   | 4.3    | 4.26   | 4.07   | 0.170322 | 0.268462 |
| 4.29   | 24.82  | 12.67  | 18.79  | 1.790043 | 7.66E-18 |
| 2.33   | 1.84   | 3.31   | 2.62   | -0.12195 | 0.670013 |
| 101.91 | 95.32  | 101.22 | 100.1  | -0.21889 | 0.003777 |
| 0      | 0      | 0      | 0      | NA       | NA       |
| 18.3   | 1.1    | 2.32   | 1.94   | -3.20648 | 9.46E-28 |
| 2.3    | 1.49   | 1.35   | 1.57   | -0.73005 | 0.00147  |
| 0      | 0      | 0      | 0      | NA       | NA       |
| 5.19   | 4.15   | 3.7    | 3.77   | -0.26056 | 0.335697 |
| 5.36   | 4.7    | 5.12   | 5.08   | -0.0791  | 0.673627 |
| 181.39 | 190.55 | 159.59 | 169.03 | -0.12547 | 0.262273 |
| 0      | 0      | 0      | 0      | NA       | NA       |
| 323.24 | 162    | 194.96 | 171.96 | -0.90479 | 2.01E-25 |
| 1.68   | 12.02  | 10.37  | 10.48  | 2.039886 | 3.41E-27 |
| 62.12  | 72.27  | 66.37  | 65.99  | 0.110066 | 0.338487 |
| 56.25  | 46.95  | 54.56  | 50.63  | -0.04511 | 0.778362 |
| 2.39   | 2.15   | 1.51   | 1.34   | 0.06647  | 0.829981 |
| 0.73   | 0.32   | 0.53   | 0.49   | -0.69157 | 0.115967 |
| 15.09  | 15.24  | 14.61  | 15.55  | -0.00019 | 0.998927 |
| 55.11  | 56.7   | 58.11  | 55.79  | -0.0003  | 0.998212 |
| 20.15  | 17.03  | 16.72  | 13.54  | -0.21337 | 0.050517 |
| 6.89   | 6.22   | 7.11   | 6.44   | -0.26046 | 0.42098  |
| 0.01   | 0.01   | 0.02   | 0.01   | NA       | NA       |
| 26.68  | 24.52  | 21.3   | 23.49  | -0.11199 | 0.397273 |
| 10.64  | 12.15  | 11.13  | 11.36  | 0.049527 | 0.740468 |

|        |        |        |        |          |           |
|--------|--------|--------|--------|----------|-----------|
| 0      | 0      | 0      | 0      | NA       | NA        |
| 0      | 0      | 0      | 0      | NA       | NA        |
| 12.35  | 13.79  | 14.83  | 12.82  | -0.05057 | 0.829486  |
| 0.25   | 0.34   | 1.2    | 1.11   | 0.556876 | 0.333214  |
| 0.93   | 0.1    | 0.41   | 0.1    | -1.00804 | 0.11511   |
| 16.33  | 14.42  | 15.7   | 12.82  | -0.20343 | 0.249197  |
| 0      | 0      | 0      | 0      | NA       | NA        |
| 319.7  | 183.51 | 225.83 | 206.89 | -0.73833 | 7.99E-16  |
| 0.08   | 0.58   | 0.28   | 0.06   | 0.374754 | 0.630121  |
| 0      | 0      | 0      | 0      | NA       | NA        |
| 9.18   | 8.52   | 10.3   | 9.57   | 0.136214 | 0.427918  |
| 2.24   | 3.48   | 3.13   | 3.5    | 0.394867 | 0.02098   |
| 26.51  | 20.54  | 22.48  | 21.59  | -0.33959 | 0.001055  |
| 10.5   | 6.46   | 5.92   | 5.16   | -0.73719 | 5.62E-06  |
| 10.46  | 15.84  | 9.19   | 12.29  | 0.295401 | 0.261904  |
| 150.85 | 644.43 | 517.74 | 627.04 | 1.840016 | 2.31E-17  |
| 42.18  | 36.82  | 42.9   | 37.15  | -0.19561 | 0.133395  |
| 0.1    | 0      | 0.1    | 0.05   | NA       | NA        |
| 21.55  | 30.81  | 27.88  | 28.1   | 0.573419 | 3.48E-07  |
| 56.72  | 74.29  | 72.55  | 76.51  | 0.281239 | 0.000735  |
| 12.5   | 7.23   | 6.52   | 6.81   | -0.27853 | 0.374469  |
| 42.19  | 49.61  | 38.59  | 43     | -0.08147 | 0.612623  |
| 3.86   | 2.8    | 3.92   | 3.38   | -0.07186 | 0.835052  |
| 0      | 0      | 0      | 0      | NA       | NA        |
| 0.47   | 0.64   | 0.64   | 0.85   | 0.032459 | 0.958008  |
| 0      | 0      | 0      | 0      | NA       | NA        |
| 9.01   | 8.01   | 9.36   | 7.73   | -0.12599 | 0.43754   |
| 3.62   | 5.21   | 4.75   | 4.67   | 0.12502  | 0.582334  |
| 18.94  | 16.94  | 19.51  | 19.76  | -0.07827 | 0.598827  |
| 2.17   | 1.83   | 1.54   | 1.79   | -0.23976 | 0.446465  |
| 5.69   | 4.97   | 4.21   | 4.89   | -0.34178 | 0.099824  |
| 12     | 7.92   | 10.5   | 7.73   | -0.41021 | 0.000212  |
| 205.35 | 20.05  | 28.52  | 21.74  | -3.05985 | 1.79E-124 |
| 33.54  | 0.89   | 1.42   | 1.28   | -4.74712 | 1.07E-48  |
| 0      | 0.02   | 0      | 0.06   | NA       | NA        |
| 7.81   | 6.41   | 7.8    | 8.49   | -0.27604 | 0.08817   |
| 0.37   | 0.25   | 0.16   | 0.84   | -0.24162 | 0.734012  |
| 0.04   | 0      | 0      | 0      | NA       | NA        |
| 2.4    | 4.44   | 2.34   | 3.32   | 0.288336 | 0.363343  |
| 488.55 | 191.56 | 298    | 280.07 | -1.05343 | 4.85E-15  |
| 0      | 0.68   | 0.18   | 0.14   | NA       | NA        |
| 0      | 0      | 0      | 0      | NA       | NA        |
| 45.56  | 75.57  | 60.1   | 72.22  | 0.470255 | 7.59E-09  |
| 24.94  | 26.27  | 23.96  | 26.34  | 0.028624 | 0.876436  |
| 0.68   | 0.25   | 0.36   | 0.51   | -0.68652 | 0.298448  |

|        |        |        |        |          |          |
|--------|--------|--------|--------|----------|----------|
| 0      | 0      | 0      | 0      | NA       | NA       |
| 6.13   | 3.85   | 3.64   | 3.95   | -0.31226 | 0.01058  |
| 61.58  | 72.35  | 80.01  | 70.58  | 0.26844  | 0.008581 |
| 19.99  | 24.66  | 25.16  | 26.6   | 0.256526 | 0.062063 |
| 17.51  | 19.8   | 18.38  | 15.59  | -0.08433 | 0.654414 |
| 21.49  | 25.52  | 20.78  | 21.88  | -0.05755 | 0.782973 |
| 10.44  | 9.91   | 10.07  | 9.81   | -0.07402 | 0.668483 |
| 37.68  | 45.21  | 48.02  | 49.86  | 0.338423 | 4.80E-05 |
| 5.25   | 4.46   | 4.41   | 3.96   | 0.063193 | 0.862825 |
| 57.59  | 75.88  | 73.47  | 74.26  | 0.246411 | 0.01047  |
| 7.77   | 5.99   | 5.86   | 7.19   | -0.26683 | 0.191296 |
| 193.88 | 107.31 | 131.13 | 126.46 | -0.70462 | 2.53E-16 |
| 42.65  | 32.11  | 34.98  | 33.12  | -0.27289 | 0.008587 |
| 0      | 0      | 0      | 0      | NA       | NA       |
| 0.05   | 0      | 0.07   | 0      | NA       | NA       |
| 20.95  | 25.04  | 23.94  | 27.7   | 0.233837 | 0.064723 |
| 45.47  | 62.21  | 53.7   | 57.86  | 0.184683 | 0.072419 |
| 17.34  | 26.83  | 22.46  | 23.83  | 0.455678 | 4.30E-05 |
| 0      | 0      | 0      | 0      | NA       | NA       |
| 13.71  | 24.82  | 20.29  | 23.51  | 0.634041 | 1.06E-10 |
| 137.91 | 117.59 | 132.9  | 124.35 | -0.23276 | 0.006731 |
| 15.46  | 34.75  | 24.27  | 31.86  | 0.795855 | 5.23E-10 |
| 0.63   | 0.48   | 0.71   | 0.29   | -0.65162 | 0.22547  |
| 14.39  | 24.1   | 13.61  | 18.17  | 0.364395 | 0.033269 |
| 0      | 0.16   | 0      | 0      | NA       | NA       |
| 6.78   | 5.17   | 5.1    | 4.18   | -0.36213 | 0.004811 |
| 1.95   | 2.02   | 1.52   | 1.81   | -0.07283 | 0.848408 |
| 8.67   | 6.43   | 10.97  | 10.07  | 0.017978 | 0.944533 |
| 26.58  | 29.29  | 30.08  | 27.64  | 0.174972 | 0.072688 |
| 10.27  | 7.1    | 7.73   | 7.75   | -0.43295 | 0.015918 |
| 15.76  | 15.5   | 14.59  | 15.15  | -0.01109 | 0.94312  |
| 5.54   | 3.16   | 4.06   | 3.7    | -0.87707 | 1.32E-09 |
| 8.81   | 4.23   | 4.77   | 4.49   | -1.008   | 3.17E-24 |
| 0.95   | 0.45   | 0.75   | 0.59   | -0.82583 | 0.007132 |
| 0.35   | 0.34   | 0.41   | 0.32   | 0.106119 | 0.84141  |
| 11.6   | 20.11  | 16.07  | 17.42  | 0.403035 | 2.50E-05 |
| 102.77 | 131.34 | 109.04 | 107.6  | 0.218616 | 0.094126 |
| 1.44   | 0.69   | 0.9    | 0.85   | -0.7832  | 0.001386 |
| 3.4    | 0.13   | 0.05   | 0.21   | -4.38399 | 2.08E-30 |
| 7.47   | 0.09   | 0.09   | 0.11   | -5.52745 | 8.39E-63 |
| 14.4   | 1.04   | 2.93   | 2.45   | -2.28779 | 5.95E-10 |
| 15.52  | 19.88  | 18.31  | 20.54  | 0.396631 | 0.000126 |
| 0      | 0      | 0.16   | 0.18   | NA       | NA       |
| 70.09  | 48.62  | 66.33  | 58.38  | -0.30917 | 0.020509 |
| 8.02   | 7.66   | 7.46   | 8.18   | -0.06325 | 0.735697 |

|        |        |        |        |          |          |
|--------|--------|--------|--------|----------|----------|
| 0.38   | 0.14   | 0.19   | 0.05   | -0.40072 | 0.604705 |
| 6.98   | 3.43   | 5.16   | 3.59   | -1.12359 | 3.13E-19 |
| 0      | 0      | 0      | 0      | NA       | NA       |
| 6.55   | 8.06   | 8.49   | 9.44   | 0.1701   | 0.382448 |
| 74.18  | 127.94 | 121.56 | 122.45 | 0.654403 | 3.53E-17 |
| 44.68  | 56.81  | 46.97  | 47.43  | 0.025762 | 0.89455  |
| 9.58   | 7.15   | 8.38   | 6.81   | -0.13754 | 0.497796 |
| 0      | 0      | 0      | 0      | NA       | NA       |
| 0      | 0      | 0      | 0      | NA       | NA       |
| 10.05  | 8.12   | 4.71   | 6.8    | -0.398   | 0.162315 |
| 11.67  | 10.63  | 10.65  | 9.8    | -0.25512 | 0.031887 |
| 17.89  | 11.76  | 13.63  | 13.17  | -0.41122 | 2.55E-06 |
| 8.74   | 10.09  | 8.66   | 10.97  | 0.119227 | 0.438529 |
| 0.05   | 0.12   | 0.17   | 0.01   | NA       | NA       |
| 5.23   | 3.91   | 3.99   | 4.6    | -0.4604  | 0.000224 |
| 0.02   | 0      | 0.04   | 0.01   | NA       | NA       |
| 17.69  | 26.08  | 22.94  | 21.99  | 0.475848 | 7.90E-07 |
| 18.78  | 23.93  | 20.74  | 22.17  | 0.291057 | 0.024457 |
| 0      | 0      | 0      | 0      | NA       | NA       |
| 0.8    | 0.33   | 1.11   | 0.67   | 0.027309 | 0.97459  |
| 15.85  | 21.53  | 21.93  | 22.15  | 0.207768 | 0.062619 |
| 0.85   | 0.18   | 0.48   | 0.35   | -0.93911 | 0.123601 |
| 25.47  | 37.47  | 31.2   | 32.35  | 0.309193 | 0.008807 |
| 11.84  | 12.2   | 12.17  | 12.79  | 0.056109 | 0.643555 |
| 14.9   | 12.34  | 15.07  | 15.17  | -0.22873 | 0.039338 |
| 0      | 0      | 0      | 0      | NA       | NA       |
| 3.18   | 4.96   | 4.43   | 5.66   | 0.554325 | 0.000206 |
| 239.19 | 278.82 | 274.31 | 280.35 | 0.221401 | 0.00775  |
| 0      | 0.03   | 0.13   | 0.02   | NA       | NA       |
| 14.51  | 23.46  | 16.81  | 21.86  | 0.543709 | 1.63E-05 |
| 29.77  | 51.44  | 44.31  | 45.55  | 0.838134 | 1.85E-12 |
| 11.8   | 17.32  | 13.36  | 17.17  | 0.277593 | 0.033273 |
| 61.15  | 62.98  | 60.88  | 60.99  | 0.060113 | 0.623018 |
| 0.94   | 0.77   | 1.47   | 0.56   | -0.4429  | 0.120437 |
| 9.46   | 13.7   | 12.85  | 13.24  | 0.324536 | 0.000265 |
| 0      | 0      | 0      | 0.02   | NA       | NA       |
| 66.77  | 5.48   | 9.52   | 7.38   | -3.19644 | 4.73E-94 |
| 17.45  | 16.44  | 19.24  | 19.74  | 0.044904 | 0.729856 |
| 13.08  | 16.97  | 20.63  | 21.23  | 0.547716 | 2.83E-06 |
| 16.34  | 15.22  | 14.95  | 15.39  | -0.14481 | 0.178292 |
| 3.98   | 5.94   | 5.4    | 5.02   | 0.561188 | 0.004081 |
| 14.09  | 14.86  | 14.85  | 18.68  | 0.107286 | 0.677027 |
| 111.53 | 74.79  | 75.41  | 82.79  | -0.36542 | 3.09E-06 |
| 20.26  | 36.89  | 31.15  | 33.23  | 0.638341 | 1.68E-09 |
| 70.04  | 40.34  | 69.93  | 53.77  | -0.3984  | 0.01317  |

|        |       |       |       |          |           |
|--------|-------|-------|-------|----------|-----------|
| 1.72   | 2.68  | 2.4   | 2.21  | 0.328673 | 0.156217  |
| 0      | 0     | 0     | 0     | NA       | NA        |
| 1.67   | 1.56  | 0.93  | 1.66  | -0.47871 | 0.164486  |
| 0.04   | 0     | 0.05  | 0.12  | NA       | NA        |
| 43.42  | 34.07 | 38.37 | 34.83 | -0.41214 | 9.69E-06  |
| 19.77  | 18.7  | 19.05 | 16    | -0.12884 | 0.42696   |
| 41.18  | 10.81 | 20.92 | 17.45 | -1.19813 | 8.49E-20  |
| 8.31   | 14.63 | 13.12 | 13.56 | 0.758325 | 4.91E-17  |
| 5.89   | 5.97  | 7.21  | 6.94  | -0.01181 | 0.956754  |
| 93.74  | 23.68 | 56.58 | 35.37 | -1.24857 | 0.000599  |
| 26.75  | 26.35 | 24.5  | 26.56 | 0.04269  | 0.751876  |
| 70.24  | 80.17 | 79.84 | 79.19 | 0.176352 | 0.021849  |
| 0      | 0.17  | 0.17  | 0.03  | NA       | NA        |
| 0.19   | 0.37  | 0.29  | 0.26  | 0.229674 | 0.57309   |
| 1.72   | 2.05  | 1.4   | 1.99  | 0.027908 | 0.949887  |
| 17.06  | 15.76 | 17.87 | 16.62 | -0.02261 | 0.900706  |
| 17.87  | 22.36 | 24.01 | 23.25 | 0.342602 | 0.006117  |
| 17.71  | 23.58 | 27.66 | 25.52 | 0.441832 | 5.92E-05  |
| 5.63   | 8.68  | 5.57  | 7.5   | 0.25166  | 0.12559   |
| 9.15   | 9.7   | 8.39  | 9.03  | 0.046849 | 0.861405  |
| 10.55  | 13.42 | 11.45 | 11.56 | 0.393958 | 0.004721  |
| 0      | 0     | 0.01  | 0     | NA       | NA        |
| 12.89  | 26.48 | 21.76 | 26.74 | 0.708301 | 1.05E-10  |
| 0.13   | 0.17  | 0.13  | 0.15  | -0.10285 | 0.890364  |
| 57.46  | 24.47 | 23.31 | 23.65 | -1.3753  | 7.42E-60  |
| 0.19   | 0.13  | 0.19  | 0.28  | 1.120468 | 0.046111  |
| 41.25  | 25.13 | 30.34 | 27.66 | -0.64772 | 6.11E-12  |
| 19.08  | 21.9  | 21.28 | 19.76 | -0.05774 | 0.687066  |
| 23.71  | 17.54 | 15.22 | 15.91 | -0.22219 | 0.037235  |
| 13.29  | 13.19 | 12.49 | 13.42 | 0.010521 | 0.952655  |
| 10.19  | 28.12 | 19.71 | 22.18 | 1.090019 | 1.48E-16  |
| 414.74 | 48.66 | 61.26 | 56.84 | -3.08679 | 7.26E-136 |
| 31.64  | 12.99 | 18.04 | 17.35 | -0.93428 | 7.15E-17  |
| 0      | 0.03  | 0     | 0     | NA       | NA        |
| 3.79   | 3.49  | 3.91  | 3.61  | 0.364068 | 0.071645  |
| 45.9   | 44.95 | 49.9  | 51.05 | -0.06015 | 0.621689  |
| 41.52  | 63.92 | 60    | 67.45 | 0.377092 | 3.12E-06  |
| 9.34   | 24.58 | 19.89 | 22.72 | 1.144085 | 1.87E-15  |
| 13.85  | 16.16 | 16.62 | 16.89 | 0.105243 | 0.492779  |
| 0      | 0     | 0     | 0     | NA       | NA        |
| 12.55  | 14.26 | 14.3  | 13.21 | -0.14493 | 0.558304  |
| 14.49  | 15.59 | 15.14 | 14.46 | 0.003095 | 0.984462  |
| 0.34   | 0.14  | 0.2   | 0.34  | -0.415   | 0.575232  |
| 18.59  | 20.17 | 18.09 | 19.95 | -0.02918 | 0.827737  |
| 65.49  | 37.79 | 46.12 | 38.22 | -0.82229 | 5.91E-25  |

|         |         |         |         |          |          |
|---------|---------|---------|---------|----------|----------|
| 0.67    | 0.29    | 0.36    | 0.4     | -0.7417  | 0.018191 |
| 6.69    | 6.37    | 6.81    | 7.15    | 0.060669 | 0.829492 |
| 39.36   | 38.82   | 33.52   | 35.43   | -0.10324 | 0.505147 |
| 8.6     | 7.5     | 7.92    | 7.64    | -0.12148 | 0.40454  |
| 1.82    | 1.94    | 2.24    | 2.32    | 0.100598 | 0.637183 |
| 9.92    | 11.95   | 12.07   | 11.8    | 0.259825 | 0.032422 |
| 8.33    | 6.73    | 6.72    | 6.42    | -0.26209 | 0.186876 |
| 11.94   | 12.9    | 12.75   | 13.84   | 0.1438   | 0.218346 |
| 12.56   | 19.51   | 19.07   | 17.83   | 0.522751 | 7.33E-07 |
| 5.44    | 6.35    | 4.37    | 4.8     | -0.12038 | 0.521446 |
| 13.63   | 13.72   | 14.52   | 13.74   | -0.09098 | 0.62424  |
| 2.89    | 3.39    | 3.42    | 3.73    | -0.02787 | 0.921986 |
| 0.04    | 0       | 0.01    | 0.01    | NA       | NA       |
| 21.56   | 24.3    | 21.85   | 25.17   | 0.079292 | 0.516817 |
| 21.34   | 36.87   | 27.55   | 33.15   | 0.617362 | 2.32E-07 |
| 10.35   | 10.31   | 10.02   | 9.76    | -0.12571 | 0.547437 |
| 19.5    | 13.63   | 13.09   | 14.52   | -0.51166 | 2.22E-05 |
| 147.86  | 65.48   | 118.93  | 96.93   | -0.4374  | 0.005082 |
| 11.29   | 13.9    | 12.52   | 13.03   | 0.042258 | 0.810283 |
| 27.75   | 42.07   | 40.61   | 40.82   | 0.402373 | 0.000248 |
| 0       | 0       | 0       | 0       | NA       | NA       |
| 15.5    | 18.09   | 14.7    | 18.09   | 0.286522 | 0.006587 |
| 29.29   | 28.5    | 33.51   | 34.65   | -0.11096 | 0.346125 |
| 13.94   | 14.67   | 14.56   | 15.05   | 0.10418  | 0.400635 |
| 20.12   | 25.33   | 23.31   | 22.49   | 0.082779 | 0.521446 |
| 6.31    | 7.07    | 8.11    | 5.16    | 0.369431 | 0.031362 |
| 10.49   | 7.21    | 8.39    | 7.82    | -0.42756 | 3.01E-05 |
| 14.14   | 18.1    | 16.3    | 15.55   | 0.090823 | 0.556392 |
| 53.14   | 34.78   | 42.84   | 45.52   | -0.33375 | 9.16E-05 |
| 9.49    | 24.15   | 19.3    | 23.6    | 0.685612 | 1.40E-06 |
| 929.98  | 933.43  | 865.32  | 877.86  | -0.11643 | 0.185088 |
| 29.23   | 46.33   | 42.91   | 49.54   | 0.607732 | 1.60E-14 |
| 1.16    | 1.96    | 1.64    | 1.16    | 0.067732 | 0.919582 |
| 20.13   | 16.77   | 15.79   | 16.45   | -0.35307 | 0.002283 |
| 5.49    | 2.93    | 4.22    | 3.35    | -0.58419 | 0.003934 |
| 30.99   | 38.59   | 32.97   | 36.24   | 0.260782 | 0.012476 |
| 0.48    | 0.08    | 0       | 0       | -1.18117 | 0.055388 |
| 2.67    | 2.8     | 2.73    | 2.49    | -0.07952 | 0.718036 |
| 0       | 0       | 0       | 0       | NA       | NA       |
| 0       | 0.14    | 0.08    | 0       | NA       | NA       |
| 0       | 0       | 0       | 0       | NA       | NA       |
| 20.28   | 15.74   | 19.72   | 19.51   | 0.091573 | 0.400034 |
| 13.3    | 15.78   | 14.15   | 16.21   | 0.009497 | 0.955079 |
| 1293.34 | 1136.41 | 1196.28 | 1101.95 | -0.22645 | 0.003405 |
| 5.16    | 6.64    | 6.51    | 6.12    | 0.291513 | 0.019789 |

|        |        |        |        |          |          |
|--------|--------|--------|--------|----------|----------|
| 0.14   | 0.97   | 0.28   | 0.49   | 0.94258  | 0.092102 |
| 24.15  | 28.38  | 26.78  | 26.86  | 0.076816 | 0.503565 |
| 0.91   | 407.14 | 74.4   | 212.96 | 4.984555 | 1.80E-24 |
| 40.08  | 47.84  | 43.16  | 42.83  | 0.157881 | 0.136236 |
| 22.43  | 25.15  | 23.76  | 26.03  | 0.115356 | 0.277603 |
| 1.85   | 2.03   | 2.41   | 2.12   | -0.04126 | 0.912249 |
| 1.96   | 0.27   | 0.58   | 0.1    | -2.06581 | 1.55E-07 |
| 0.23   | 0.51   | 0.23   | 0.18   | 0.095692 | 0.893545 |
| 1      | 1.04   | 0.72   | 0.89   | -0.18822 | 0.649726 |
| 1.35   | 0.11   | 0.22   | 0.2    | -2.37375 | 4.96E-09 |
| 13.92  | 10.38  | 10.13  | 8.59   | -0.44763 | 0.01553  |
| 4.59   | 0.48   | 1.95   | 1.13   | -1.35557 | 0.000132 |
| 10.6   | 10.05  | 11.35  | 9.65   | -0.1215  | 0.363946 |
| 12.08  | 12.95  | 13.42  | 13.53  | 0.088149 | 0.495779 |
| 0.17   | 0.72   | 0.36   | 0.77   | 1.845211 | 0.000306 |
| 24.14  | 27.07  | 26.61  | 26.63  | 0.074263 | 0.57335  |
| 0      | 0      | 0      | 0      | NA       | NA       |
| 2.14   | 3.65   | 3      | 4.03   | 0.575207 | 0.065198 |
| 91.01  | 72.53  | 89.07  | 66.12  | -0.32047 | 0.000408 |
| 19.86  | 30.26  | 26.02  | 25.9   | 0.356485 | 0.000569 |
| 9.06   | 9.34   | 8.88   | 8.02   | -0.0133  | 0.953663 |
| 0      | 0      | 0      | 0      | NA       | NA       |
| 14.71  | 16.8   | 13.72  | 15.76  | 0.079192 | 0.604506 |
| 4.29   | 4.67   | 6.74   | 4.01   | -0.18313 | 0.560333 |
| 0      | 0      | 0      | 0      | NA       | NA       |
| 38.8   | 44.07  | 41.71  | 37.68  | -0.04082 | 0.790851 |
| 42.26  | 27.63  | 32.89  | 29.59  | -0.40793 | 0.000227 |
| 11.01  | 9.26   | 7.09   | 6.58   | -0.1857  | 0.294481 |
| 22.25  | 21.76  | 16.83  | 21.93  | -0.20463 | 0.31311  |
| 15.44  | 12.1   | 13.7   | 13.86  | -0.07923 | 0.732325 |
| 1.76   | 2.49   | 2.34   | 2.3    | 0.312271 | 0.099359 |
| 28.26  | 60.82  | 42.02  | 49.75  | 0.292558 | 0.021812 |
| 10.86  | 12.58  | 12.39  | 12.3   | 0.229019 | 0.01771  |
| 0.16   | 0.52   | 0.38   | 0.43   | 0.231981 | 0.763311 |
| 1.93   | 4.64   | 3.26   | 4.14   | 0.53753  | 0.146855 |
| 0      | 0      | 0      | 0      | NA       | NA       |
| 537.19 | 410.74 | 520.45 | 455.55 | -0.28653 | 0.001599 |
| 46.65  | 55.26  | 48.29  | 50.72  | 0.233781 | 0.024364 |
| 26.82  | 31.03  | 27.86  | 28.04  | 0.115894 | 0.387704 |
| 14.88  | 26.02  | 23.33  | 22.87  | 0.574129 | 8.41E-07 |
| 0.07   | 0.1    | 0.05   | 0.14   | -0.13797 | 0.877298 |
| 8.82   | 9.19   | 9.24   | 9.61   | 0.204052 | 0.059382 |
| 13.02  | 21.62  | 12.96  | 16.62  | 0.302006 | 0.032618 |
| 43.49  | 40.92  | 41.4   | 39.34  | 0.044859 | 0.790851 |
| 0.57   | 0.08   | 0.05   | 0.04   | -2.56126 | 3.82E-11 |

|         |         |         |         |          |          |
|---------|---------|---------|---------|----------|----------|
| 18.7    | 13.8    | 13.95   | 13.88   | -0.36016 | 0.002843 |
| 125.09  | 108.91  | 139.02  | 136.63  | 0.003791 | 0.981982 |
| 10.96   | 14      | 14.36   | 16.27   | 0.236553 | 0.067777 |
| 33.27   | 39.79   | 39.12   | 41.37   | 0.32421  | 0.000162 |
| 6.58    | 10.61   | 6.36    | 9.77    | 0.44016  | 0.132042 |
| 12.21   | 11.05   | 12.44   | 12.65   | -0.08671 | 0.662206 |
| 16.84   | 23.67   | 22.09   | 23.77   | 0.315112 | 0.0015   |
| 10.36   | 12.09   | 13.38   | 11.71   | 0.076152 | 0.62424  |
| 0.38    | 0.07    | 0.21    | 0.04    | -1.60805 | 0.005364 |
| 27.76   | 26.84   | 25.46   | 25.56   | -0.07665 | 0.557719 |
| 1.45    | 1.96    | 2.23    | 3.13    | 0.458924 | 0.257881 |
| 5.59    | 9.26    | 8.37    | 8.16    | 0.402304 | 0.041591 |
| 15.5    | 13.27   | 12.88   | 12.1    | -0.1714  | 0.421309 |
| 16.16   | 18.15   | 15.54   | 15.03   | 0.115091 | 0.468064 |
| 251.92  | 381.41  | 347.17  | 359.67  | 0.547259 | 3.21E-15 |
| 6.71    | 5.96    | 7.39    | 5.5     | 0.035312 | 0.899733 |
| 5.66    | 6.87    | 6.39    | 6.69    | 0.156039 | 0.339284 |
| 21.67   | 31.24   | 25.66   | 27.51   | 0.293563 | 0.019851 |
| 355.74  | 303.41  | 316.51  | 374.19  | -0.19891 | 0.068319 |
| 0       | 0.14    | 0.05    | 0.2     | 1.473381 | 0.012907 |
| 5.78    | 247.88  | 136.03  | 213.4   | 4.5455   | 1.49E-64 |
| 247.11  | 3163.25 | 1843.24 | 2473.25 | 3.107943 | 7.03E-47 |
| 0.71    | 2.53    | 1.26    | 1.85    | 1.55195  | 0.000473 |
| 0       | 0.41    | 0.09    | 0.11    | NA       | NA       |
| 3.5     | 4.35    | 3.99    | 4.07    | -0.02604 | 0.931947 |
| 0       | 0       | 0       | 0       | NA       | NA       |
| 5.39    | 4.23    | 4.68    | 5.23    | -0.56598 | 0.002444 |
| 13.02   | 13.32   | 12.91   | 12.65   | 0.044059 | 0.792338 |
| 98.96   | 87.51   | 92.69   | 87.86   | -0.16812 | 0.056558 |
| 59.04   | 65.78   | 64.21   | 66.7    | 0.149678 | 0.09381  |
| 0.08    | 0       | 0       | 0       | NA       | NA       |
| 0.89    | 0.53    | 0.73    | 0.83    | -0.61933 | 0.164698 |
| 18.31   | 17.97   | 17.54   | 17.87   | 0.015751 | 0.931254 |
| 48.91   | 40.96   | 50.63   | 46.8    | -0.15046 | 0.163857 |
| 0       | 0.07    | 0.04    | 0.06    | NA       | NA       |
| 14.29   | 13.45   | 14.96   | 13.41   | -0.27803 | 0.009976 |
| 0.4     | 0.19    | 0.26    | 0.45    | -0.68883 | 0.292004 |
| 18.41   | 23.65   | 22.77   | 23.42   | 0.236393 | 0.01097  |
| 2744.15 | 723     | 1235.62 | 1123.69 | -1.53383 | 2.34E-11 |
| 0.13    | 0.45    | 0       | 0.46    | NA       | NA       |
| 0.54    | 0.34    | 0       | 0.71    | -1.12882 | 0.056971 |
| 29.16   | 36.86   | 33.57   | 34.1    | 0.145089 | 0.405016 |
| 374.05  | 224.5   | 274.05  | 250.22  | -0.62666 | 2.75E-13 |
| 25.69   | 44.97   | 38.09   | 39.68   | 0.567422 | 3.22E-09 |
| 1.31    | 1.07    | 1.19    | 1.09    | -0.26366 | 0.380678 |



|        |        |        |        |          |          |
|--------|--------|--------|--------|----------|----------|
| 0      | 0      | 0      | 0      | NA       | NA       |
| 23.11  | 28.06  | 23.54  | 25.03  | -0.06786 | 0.623956 |
| 3.92   | 10.21  | 10.83  | 10.93  | 1.086235 | 5.83E-16 |
| 55.63  | 47.14  | 52.9   | 46.69  | -0.09149 | 0.412337 |
| 0      | 0      | 0      | 0      | NA       | NA       |
| 3.08   | 3.58   | 4.09   | 4.61   | 0.398435 | 0.021491 |
| 18.22  | 15.92  | 15.75  | 17.49  | -0.02172 | 0.898146 |
| 23.91  | 29.9   | 29.31  | 30.77  | 0.227507 | 0.011865 |
| 0      | 0      | 0      | 0      | NA       | NA       |
| 25.7   | 22.99  | 23.53  | 21.55  | 0.061754 | 0.650646 |
| 0      | 0.02   | 0.01   | 0      | NA       | NA       |
| 0.04   | 0.32   | 0.03   | 0.05   | NA       | NA       |
| 150.87 | 219.11 | 188.92 | 200.6  | 0.450159 | 2.17E-07 |
| 16.32  | 9.76   | 12.39  | 10.52  | -0.66647 | 4.33E-09 |
| 31.97  | 19.25  | 22.81  | 18.41  | -0.87404 | 1.35E-17 |
| 203.37 | 208.68 | 206.95 | 207.62 | -0.04751 | 0.637572 |
| 0      | 0      | 0      | 0      | NA       | NA       |
| 2.8    | 11.02  | 7.44   | 8.38   | 1.681463 | 1.79E-24 |
| 16.93  | 14.49  | 14.54  | 17.2   | -0.19883 | 0.264326 |
| 18.22  | 16.16  | 17.43  | 18.16  | -0.3304  | 0.009801 |
| 0.57   | 0.25   | 0.17   | 0.09   | -1.50383 | 0.003002 |
| 8.8    | 9.47   | 9.84   | 8.68   | -0.05302 | 0.842024 |
| 171.11 | 86.47  | 111.23 | 110.5  | -0.78365 | 2.00E-14 |
| 0      | 0      | 0      | 0      | NA       | NA       |
| 0      | 0      | 0      | 0      | NA       | NA       |
| 6.88   | 8.46   | 9.01   | 8.57   | 0.252607 | 0.200966 |
| 0.83   | 0.25   | 0.83   | 0.91   | 0.469309 | 0.456741 |
| 21.73  | 20.23  | 23.02  | 21.1   | 0.061448 | 0.738866 |
| 4.7    | 6.95   | 5.43   | 7.12   | 0.388174 | 0.008625 |
| 39.46  | 8.44   | 17.56  | 14.18  | -1.32053 | 8.38E-06 |
| 19.45  | 21.29  | 19.52  | 20.94  | 0.092785 | 0.440153 |
| 30.06  | 36.98  | 29.61  | 31.2   | 0.086023 | 0.627882 |
| 9.06   | 2.13   | 2.17   | 2.11   | -1.98571 | 9.93E-27 |
| 6.33   | 9.98   | 9.08   | 9.96   | 0.539677 | 4.06E-06 |
| 48.15  | 48.38  | 48.51  | 45.46  | -0.0577  | 0.633185 |
| 0      | 0      | 0      | 0      | NA       | NA       |
| 19.4   | 20.24  | 20.32  | 23.47  | 0.025743 | 0.884731 |
| 41.36  | 17.73  | 32.84  | 25.76  | -0.74603 | 0.008908 |
| 26.68  | 29.86  | 30.15  | 33.02  | 0.10044  | 0.324831 |
| 91.53  | 90.2   | 95.9   | 97.04  | -0.11485 | 0.251371 |
| 11.57  | 14.94  | 12.87  | 14.18  | 0.302941 | 0.016889 |
| 0      | 0      | 0      | 0      | NA       | NA       |
| 11.21  | 14.71  | 11.87  | 13.09  | 0.403105 | 0.006339 |
| 0      | 0      | 0      | 0      | NA       | NA       |
| 0      | 0      | 0      | 0      | NA       | NA       |

|        |        |        |        |          |          |
|--------|--------|--------|--------|----------|----------|
| 24.96  | 34.99  | 26.18  | 26.59  | 0.141571 | 0.252682 |
| 64.29  | 86.22  | 80.71  | 82     | 0.334498 | 0.000256 |
| 0      | 0      | 0      | 0      | NA       | NA       |
| 0      | 0      | 0      | 0      | NA       | NA       |
| 21.68  | 12.52  | 20.79  | 16.25  | -0.27576 | 0.043171 |
| 5.64   | 7.78   | 5.97   | 5.42   | 0.055338 | 0.787231 |
| 2.5    | 0.17   | 0.2    | 0.06   | -2.97593 | 1.38E-11 |
| 0      | 0      | 0      | 0      | NA       | NA       |
| 0      | 0      | 0      | 0      | NA       | NA       |
| 24.94  | 30.29  | 25.08  | 25.47  | 0.25377  | 0.086738 |
| 1.3    | 0.15   | 0.62   | 0.19   | -1.02625 | 0.101304 |
| 9.09   | 3.69   | 4.98   | 4.01   | -0.78532 | 4.69E-09 |
| 23.2   | 20.01  | 23.27  | 22.9   | -0.07974 | 0.608626 |
| 1.18   | 2.18   | 3.76   | 4.96   | 1.217194 | 0.013578 |
| 14.22  | 29.28  | 26.48  | 30.77  | 1.024013 | 7.70E-26 |
| 0.15   | 5.76   | 2.54   | 3.86   | 1.767146 | 0.001728 |
| 25.73  | 23.6   | 27.92  | 26.64  | -0.02028 | 0.897882 |
| 127.91 | 131.6  | 125.69 | 137.43 | 0.131522 | 0.158983 |
| 5.9    | 1.55   | 1.98   | 2.19   | -1.43955 | 3.01E-12 |
| 15.47  | 14.12  | 15.53  | 13.62  | -0.04645 | 0.789892 |
| 44.48  | 34.46  | 39.35  | 30.66  | -0.33478 | 0.028379 |
| 0      | 0      | 0      | 0      | NA       | NA       |
| 17.56  | 16.11  | 15.17  | 15.89  | -0.083   | 0.465481 |
| 19.6   | 14.61  | 17.19  | 14.22  | -0.29787 | 0.026579 |
| 0.69   | 1.29   | 0.93   | 1.21   | 0.799595 | 0.003238 |
| 5.2    | 5.12   | 4.73   | 5.99   | -0.21391 | 0.172931 |
| 10.06  | 18.02  | 13.78  | 15.28  | 0.466851 | 0.001043 |
| 0      | 0      | 0      | 0      | NA       | NA       |
| 28.79  | 19.78  | 25.59  | 24.79  | -0.33588 | 0.004431 |
| 871.08 | 753.62 | 814.75 | 724.13 | -0.20274 | 0.025597 |
| 12.1   | 11.04  | 7.93   | 8.78   | -0.22088 | 0.191296 |
| 9.59   | 66.03  | 49.26  | 54.84  | 2.380208 | 8.47E-68 |
| 11.28  | 20.25  | 19.28  | 20.39  | 0.567945 | 9.84E-05 |
| 8.83   | 9.62   | 10.44  | 7.97   | 0.217007 | 0.369321 |
| 26.81  | 28.11  | 27.49  | 27.68  | 0.20981  | 0.193482 |
| 25.58  | 30.73  | 34.16  | 33.81  | 0.357934 | 1.40E-05 |
| 2.11   | 2.38   | 2.58   | 3.49   | 0.123533 | 0.706157 |
| 19.54  | 28.48  | 24.17  | 24.4   | 0.345378 | 0.000549 |
| 37.64  | 43.78  | 44.4   | 44.44  | 0.24989  | 0.004172 |
| 47.15  | 11.04  | 16.35  | 12.17  | -1.88777 | 1.40E-47 |
| 2.2    | 2.32   | 2.76   | 3.08   | 0.074456 | 0.771534 |
| 6.21   | 6      | 5.46   | 5.47   | -0.27155 | 0.154923 |
| 14.67  | 10.97  | 12.95  | 12.2   | -0.28718 | 0.004388 |
| 4.12   | 1.38   | 2.11   | 2.75   | -0.93941 | 0.000418 |
| 8.88   | 6.72   | 9.73   | 9.58   | -0.13345 | 0.413631 |

|        |        |        |        |          |          |
|--------|--------|--------|--------|----------|----------|
| 0.33   | 0.09   | 0.07   | 0.03   | -1.44746 | 0.012629 |
| 5.78   | 4.25   | 3.76   | 3.44   | -0.12266 | 0.654603 |
| 0      | 0.02   | 0.01   | 0      | NA       | NA       |
| 8.11   | 8.47   | 9.76   | 9.14   | 0.18508  | 0.133131 |
| 66.03  | 22.47  | 26.9   | 23.91  | -1.22082 | 1.61E-49 |
| 8.88   | 15.61  | 10.11  | 12.02  | 0.211081 | 0.230403 |
| 0.05   | 0.03   | 0.12   | 0.02   | NA       | NA       |
| 39.52  | 34.81  | 36.36  | 37.03  | -0.15914 | 0.141627 |
| 2.11   | 2.25   | 3.12   | 2.22   | -0.18437 | 0.596633 |
| 33.31  | 6.71   | 11.96  | 9.67   | -1.56185 | 2.07E-22 |
| 11.71  | 25.16  | 19.65  | 20.01  | 0.405872 | 6.00E-05 |
| 0      | 0.08   | 0.14   | 0.05   | NA       | NA       |
| 5.82   | 8.7    | 8.03   | 8.69   | 0.496482 | 0.000145 |
| 0.37   | 0.1    | 0.13   | 0.1    | 0.26132  | 0.744464 |
| 15.03  | 14.41  | 13.45  | 13.88  | -0.07933 | 0.658941 |
| 12.39  | 16.41  | 15.09  | 15.57  | 0.378236 | 0.000119 |
| 79.21  | 54.7   | 58.68  | 58.69  | -0.44072 | 6.14E-08 |
| 1.87   | 0.89   | 1.42   | 1.09   | -1.27041 | 2.76E-05 |
| 0.11   | 0.12   | 0.27   | 0.05   | -0.58282 | 0.399481 |
| 31.26  | 40.69  | 33.81  | 37.51  | 0.216146 | 0.054291 |
| 0.08   | 0.32   | 0.18   | 0.25   | 1.55374  | 0.005098 |
| 0      | 0      | 0.02   | 0.01   | NA       | NA       |
| 32.55  | 11.01  | 12.28  | 12.52  | -1.67866 | 5.17E-32 |
| 0      | 0      | 0      | 0      | NA       | NA       |
| 27.54  | 32.72  | 30.19  | 27.54  | 0.144031 | 0.365954 |
| 45.26  | 162.37 | 89.33  | 112    | 1.323199 | 2.30E-07 |
| 2.84   | 2.41   | 3.57   | 2.65   | 0.188247 | 0.568717 |
| 0      | 0.02   | 0.02   | 0      | NA       | NA       |
| 5.51   | 3.58   | 3.39   | 3.33   | -0.62718 | 0.002474 |
| 14.98  | 24.9   | 26.33  | 25.45  | 0.622865 | 8.42E-09 |
| 68.3   | 55.74  | 70.61  | 61.38  | -0.10619 | 0.40892  |
| 33.86  | 32.86  | 33.36  | 36.61  | 0.096491 | 0.40718  |
| 0.3    | 0.27   | 0.32   | 0.63   | 0.190059 | 0.703505 |
| 19.1   | 11.67  | 11.91  | 11.29  | -0.7384  | 4.26E-11 |
| 0      | 0      | 0      | 0.05   | NA       | NA       |
| 1.18   | 0.38   | 0.64   | 0.51   | -0.94415 | 0.00858  |
| 0      | 0.01   | 0.01   | 0.01   | NA       | NA       |
| 589.45 | 565.03 | 597.52 | 567.01 | -0.04785 | 0.638027 |
| 0      | 0      | 0      | 0      | NA       | NA       |
| 12     | 8.73   | 7.8    | 7.12   | -0.65374 | 1.76E-07 |
| 22.01  | 25.3   | 18.96  | 22.72  | 0.094503 | 0.612623 |
| 19.3   | 14.63  | 14.93  | 15.41  | -0.37081 | 0.000245 |
| 7.75   | 8.18   | 7.35   | 8.29   | 0.002511 | 0.99316  |
| 9.25   | 44.72  | 21.67  | 33.43  | 1.871047 | 5.06E-10 |
| 1.61   | 0.61   | 0.27   | 0.44   | -1.53063 | 1.23E-08 |

|        |        |        |        |          |          |
|--------|--------|--------|--------|----------|----------|
| 5.59   | 8.69   | 7.72   | 7.79   | 0.313288 | 0.014429 |
| 18.09  | 33.39  | 25.27  | 25.34  | 0.465841 | 6.02E-05 |
| 16.76  | 19.86  | 19.09  | 19.2   | 0.280276 | 0.003219 |
| 12.55  | 10.4   | 12.14  | 12.91  | 0.008811 | 0.968592 |
| 5.6    | 6.14   | 7.87   | 6.88   | -0.09119 | 0.760718 |
| 6.49   | 7.54   | 6.72   | 6.3    | -0.03362 | 0.908355 |
| 10.62  | 10.66  | 9.94   | 11.76  | 0.042801 | 0.807531 |
| 10.38  | 8.21   | 7.08   | 7.61   | -0.23261 | 0.25627  |
| 21.01  | 22.07  | 22.83  | 22.25  | 0.135952 | 0.216188 |
| 0.54   | 0.72   | 0.54   | 0.7    | -0.10164 | 0.891946 |
| 0      | 0      | 0      | 0.02   | NA       | NA       |
| 0      | 0      | 0      | 0      | NA       | NA       |
| 22.1   | 41.02  | 31.93  | 32.05  | 0.536169 | 7.21E-06 |
| 19.43  | 13.09  | 10.98  | 13.18  | -0.64915 | 1.71E-11 |
| 18.91  | 137.12 | 69.52  | 110.76 | 2.274114 | 3.30E-17 |
| 8.79   | 10.5   | 9.76   | 9.73   | 0.078838 | 0.690157 |
| 31.45  | 37.27  | 33.96  | 32.34  | 0.1591   | 0.156964 |
| 40.55  | 42.74  | 39.74  | 41.29  | -0.06563 | 0.592747 |
| 0      | 0      | 0      | 0      | NA       | NA       |
| 0.87   | 0.27   | 0.4    | 1.05   | -0.81046 | 0.150435 |
| 12.9   | 15.3   | 14.3   | 15.28  | 0.003637 | 0.9867   |
| 10.33  | 9.95   | 8.72   | 10     | -0.0008  | 0.997475 |
| 0      | 0      | 0      | 0      | NA       | NA       |
| 14.48  | 17.8   | 18.55  | 16.31  | 0.041304 | 0.874956 |
| 0.39   | 3.02   | 1.64   | 2.3    | 1.646756 | 0.000534 |
| 12.51  | 27.73  | 25.09  | 25.89  | 1.001486 | 4.70E-19 |
| 19.23  | 9.62   | 13.83  | 10.91  | -0.82417 | 2.09E-14 |
| 0      | 0      | 0      | 0      | NA       | NA       |
| 0      | 0      | 0      | 0      | NA       | NA       |
| 0      | 0      | 0      | 0      | NA       | NA       |
| 14.42  | 10.77  | 9      | 10.77  | -0.27026 | 0.014746 |
| 12.57  | 10.52  | 12.05  | 9.18   | -0.49433 | 6.91E-05 |
| 2.13   | 2.24   | 1.68   | 2.29   | -0.12037 | 0.62424  |
| 234.19 | 268.84 | 265.64 | 266.28 | 0.12919  | 0.09814  |
| 0      | 0      | 0      | 0.02   | NA       | NA       |
| 0.23   | 1.44   | 1.37   | 1.13   | 2.29084  | 7.31E-10 |
| 23.39  | 31.77  | 27.36  | 28.9   | 0.464428 | 0.000242 |
| 10.89  | 10.25  | 9.51   | 10.52  | 0.00551  | 0.97502  |
| 27.52  | 28.86  | 29.39  | 27.82  | 0.050901 | 0.64449  |
| 0.32   | 0.12   | 0.16   | 0.35   | -0.32277 | 0.688803 |
| 3.31   | 4.49   | 4.02   | 5.01   | 0.434052 | 0.000206 |
| 2.74   | 5.09   | 3.51   | 4.29   | 0.576896 | 0.002191 |
| 21.52  | 18.51  | 17.77  | 19.24  | -0.15269 | 0.108943 |
| 0.87   | 2.45   | 2.63   | 2.68   | 1.502444 | 1.43E-24 |
| 19.82  | 12.46  | 16.83  | 17.85  | -0.24636 | 0.069966 |

|        |        |        |        |          |          |
|--------|--------|--------|--------|----------|----------|
| 7.87   | 12.66  | 10.13  | 17.97  | 0.422086 | 0.006717 |
| 0.59   | 0.99   | 1.2    | 1      | 0.282854 | 0.237748 |
| 46.92  | 35.31  | 42.28  | 37.3   | -0.36968 | 0.001893 |
| 10.33  | 11.1   | 10.09  | 12.62  | -0.21615 | 0.257278 |
| 0      | 0      | 0      | 0      | NA       | NA       |
| 10.26  | 4.44   | 7      | 7.06   | -0.6146  | 0.001273 |
| 0      | 0      | 0      | 0      | NA       | NA       |
| 145.59 | 96.3   | 109.25 | 113.26 | -0.54564 | 1.04E-08 |
| 7.45   | 9.28   | 8.16   | 6.92   | -0.14688 | 0.259514 |
| 7.17   | 23.31  | 18.11  | 21.35  | 1.172003 | 5.69E-26 |
| 27.95  | 34.31  | 33.25  | 33.68  | 0.293527 | 0.028383 |
| 10.38  | 9.24   | 9.65   | 8.11   | -0.23269 | 0.077006 |
| 47.79  | 45.47  | 45.46  | 51.04  | -0.13553 | 0.154853 |
| 9.24   | 10.26  | 9.34   | 8.8    | -0.21333 | 0.257974 |
| 532.13 | 306.08 | 378.53 | 350.28 | -0.7096  | 5.07E-17 |
| 1.58   | 5.19   | 4.4    | 4.44   | 1.518731 | 2.67E-14 |
| 0      | 0      | 0.03   | 0      | NA       | NA       |
| 0.85   | 1.81   | 1.62   | 1.99   | 1.454564 | 6.15E-06 |
| 0.88   | 1.08   | 0.99   | 1.41   | 1.018779 | 0.087089 |
| 0.16   | 0.21   | 0.11   | 0.11   | 1.458818 | 0.011398 |
| 84.03  | 106.41 | 100.25 | 107.77 | 0.227219 | 0.011831 |
| 8.84   | 20.07  | 13.28  | 16.96  | 0.731067 | 1.06E-06 |
| 453.05 | 439.38 | 469.46 | 403.17 | -0.07982 | 0.48467  |
| 31.35  | 37.49  | 38.15  | 34.55  | 0.129181 | 0.350175 |
| 16.98  | 19.12  | 15.82  | 16.98  | -0.01258 | 0.930085 |
| 39.34  | 50.63  | 46.97  | 46.78  | 0.250085 | 0.068527 |
| 22.52  | 33.29  | 30.21  | 33.42  | 0.27691  | 0.011862 |
| 6.15   | 6.91   | 7.07   | 6.59   | 0.115126 | 0.602234 |
| 0.12   | 0.06   | 0.09   | 0.09   | -0.29683 | 0.627366 |
| 6.72   | 5.4    | 6.25   | 4.84   | -0.50989 | 3.28E-05 |
| 30.12  | 24.24  | 26.57  | 22.45  | -0.33112 | 0.001741 |
| 0.09   | 0.13   | 0.12   | 0.11   | 0.225862 | 0.784751 |
| 0.11   | 0.35   | 0.26   | 0.45   | 1.574793 | 0.003358 |
| 0.3    | 0.09   | 0.1    | 0.3    | -0.70907 | 0.106397 |
| 40.58  | 47.8   | 41.7   | 44.8   | 0.073797 | 0.626953 |
| 52.5   | 42.35  | 46.99  | 48.75  | -0.29216 | 0.002857 |
| 30.38  | 64.19  | 53.26  | 62     | 0.87966  | 3.27E-21 |
| 8.73   | 4.52   | 6.28   | 5.41   | -0.48701 | 0.001083 |
| 0      | 0      | 0      | 0      | NA       | NA       |
| 10.53  | 11.46  | 12.55  | 13.66  | 0.203962 | 0.084213 |
| 7      | 8.3    | 7.78   | 8.2    | 0.200892 | 0.325155 |
| 12.54  | 13     | 11.61  | 12.15  | -0.15516 | 0.364752 |
| 2.93   | 1.67   | 1.59   | 1.48   | -0.88768 | 0.000123 |
| 77.66  | 57.85  | 67.64  | 69.05  | -0.28076 | 0.000336 |
| 6.21   | 2.15   | 3.81   | 3.07   | -0.98439 | 3.05E-07 |

|        |        |        |         |          |          |
|--------|--------|--------|---------|----------|----------|
| 0      | 0      | 0      | 0 NA    | NA       |          |
| 20.76  | 35.6   | 28.51  | 34.08   | 0.644674 | 1.17E-11 |
| 0.3    | 0.18   | 0.15   | 0.17    | -0.82624 | 0.131398 |
| 33.81  | 19.61  | 23.79  | 19.31   | -0.57333 | 2.08E-11 |
| 20.63  | 52.84  | 41.43  | 47.61   | 1.12811  | 1.52E-26 |
| 27     | 45.57  | 37.3   | 41.24   | 0.459436 | 1.25E-07 |
| 8.81   | 3.52   | 5.31   | 4.95    | -0.9846  | 3.71E-09 |
| 8.14   | 13.6   | 11.83  | 13.84   | 0.597502 | 2.51E-08 |
| 11.92  | 9.54   | 10.68  | 12.28   | -0.12825 | 0.339087 |
| 0      | 0      | 0      | 0 NA    | NA       |          |
| 0.07   | 1.13   | 0.28   | 1.17    | 2.04206  | 0.000331 |
| 190.08 | 205.67 | 198.98 | 194.29  | 0.050755 | 0.620055 |
| 58.38  | 75.2   | 75.73  | 72.22   | 0.327989 | 7.84E-05 |
| 0      | 0      | 0      | 0 NA    | NA       |          |
| 2.31   | 2.49   | 2.43   | 2.13    | 0.045354 | 0.886918 |
| 24.2   | 31.89  | 34.46  | 35.08   | 0.293959 | 0.004976 |
| 0.18   | 0.58   | 0.54   | 0.43    | 1.288864 | 0.010291 |
| 0      | 0      | 0      | 0 NA    | NA       |          |
| 0      | 0      | 0      | 0 NA    | NA       |          |
| 0      | 0.01   | 0      | 0 NA    | NA       |          |
| 85.33  | 12.82  | 19.27  | 14.85   | -2.4203  | 7.35E-88 |
| 0.16   | 0.02   | 0.19   | 0.15    | -1.22663 | 0.043278 |
| 47.47  | 23.92  | 27.19  | 28.51   | -0.91106 | 9.77E-30 |
| 1.34   | 3.43   | 3.62   | 2.52    | 1.365872 | 8.41E-07 |
| 0.29   | 0.52   | 0.21   | 0.22    | -0.22997 | 0.655139 |
| 39.41  | 33.49  | 40.06  | 37.18   | -0.12186 | 0.321112 |
| 35.99  | 27.41  | 30.89  | 27.43   | -0.34167 | 0.000532 |
| 14.58  | 19.82  | 18.09  | 16.29   | 0.42581  | 0.000387 |
| 0      | 0.36   | 0.31   | 0.24    | 1.202644 | 0.052635 |
| 0.83   | 0.32   | 0.16   | 0.45    | -0.54675 | 0.367991 |
| 4.74   | 9.98   | 10.33  | 9.71    | 0.281515 | 0.289276 |
| 2.28   | 5.02   | 3.38   | 3.34    | 0.61718  | 0.003602 |
| 15.79  | 12.36  | 15.23  | 12.96   | 0.100795 | 0.615027 |
| 1.91   | 0.61   | 1.54   | 0.73    | -0.93561 | 0.000787 |
| 4.15   | 2.87   | 4.17   | 3.64    | 0.098541 | 0.850501 |
| 0      | 0.01   | 0.05   | 0.02 NA | NA       |          |
| 4.08   | 2.93   | 3.18   | 2.44    | -0.07815 | 0.783179 |
| 117.03 | 140.06 | 125.25 | 116.32  | 0.117029 | 0.339087 |
| 9.05   | 10.23  | 8.35   | 8.64    | -0.03177 | 0.925002 |
| 45.7   | 39.45  | 41.02  | 36.19   | -0.1345  | 0.410735 |
| 0      | 0      | 0      | 0 NA    | NA       |          |
| 0      | 0      | 0      | 0.07 NA | NA       |          |
| 0.93   | 0.6    | 0.23   | 0.66    | -0.09969 | 0.90252  |
| 0      | 0      | 0      | 0 NA    | NA       |          |
| 6.8    | 23.16  | 13.39  | 19.76   | 1.294975 | 2.96E-17 |

|        |        |        |        |          |          |
|--------|--------|--------|--------|----------|----------|
| 0.32   | 0.43   | 0.1    | 0.34   | 0.061104 | 0.948254 |
| 12.17  | 8.69   | 10.15  | 8.93   | -0.21218 | 0.171754 |
| 0      | 0.01   | 0.01   | 0.01   | NA       | NA       |
| 3.28   | 9.73   | 5.13   | 8.5    | 1.168803 | 4.91E-13 |
| 16.16  | 16.07  | 14.19  | 14.53  | -0.13246 | 0.297505 |
| 6.81   | 5.08   | 5.81   | 6.29   | -0.28771 | 0.079477 |
| 39.66  | 81.41  | 63.12  | 72.16  | 0.76817  | 4.88E-12 |
| 13.86  | 13.86  | 13.26  | 12.83  | -0.16542 | 0.199892 |
| 0      | 0      | 0      | 0      | NA       | NA       |
| 4.53   | 4.83   | 4.5    | 5.34   | 0.270668 | 0.063962 |
| 0.66   | 0.17   | 0.09   | 0.15   | -1.38159 | 0.009382 |
| 0.08   | 0.59   | 0.32   | 0.51   | -0.38716 | 0.614068 |
| 81.7   | 72.22  | 72.06  | 73.92  | -0.20702 | 0.011206 |
| 11.51  | 8.36   | 8.11   | 9.18   | -0.13448 | 0.52917  |
| 104.2  | 129.4  | 134.77 | 121.8  | 0.224217 | 0.016935 |
| 3.81   | 3.12   | 2.82   | 4.38   | 0.099892 | 0.704099 |
| 5.8    | 5.59   | 6.55   | 9.03   | -0.01179 | 0.969911 |
| 0.92   | 0.93   | 0.79   | 1.41   | 1.084319 | 0.003893 |
| 629.98 | 523.49 | 849.27 | 650.66 | -0.0814  | 0.826744 |
| 0      | 0      | 0      | 0      | NA       | NA       |
| 18.24  | 10.4   | 19.55  | 15.98  | -0.40151 | 0.059795 |
| 7.98   | 10.38  | 9.83   | 8.74   | 0.228898 | 0.151876 |
| 16.72  | 15.6   | 17.5   | 15.55  | -0.18494 | 0.171037 |
| 7.87   | 9.41   | 8.87   | 6.67   | 0.140496 | 0.489603 |
| 23.64  | 23.67  | 24.01  | 27.46  | 0.010522 | 0.941277 |
| 0      | 0      | 0      | 0      | NA       | NA       |
| 0.04   | 0.09   | 0.02   | 0.02   | NA       | NA       |
| 9.34   | 12.97  | 12.98  | 10.28  | 0.183467 | 0.135461 |
| 8.54   | 8.74   | 8.33   | 10.72  | 0.222629 | 0.099083 |
| 0      | 0.08   | 0      | 0.01   | NA       | NA       |
| 3.12   | 2.61   | 4.32   | 3.78   | -0.10805 | 0.766489 |
| 14.08  | 16.21  | 17.08  | 16.85  | 0.148671 | 0.223214 |
| 3.16   | 0.49   | 0.89   | 1.8    | -1.98846 | 2.91E-22 |
| 69.19  | 67.78  | 64.88  | 63.73  | -0.02613 | 0.844576 |
| 0.17   | 0.41   | 0.48   | 0.12   | -0.93982 | 0.128121 |
| 48.86  | 39.15  | 50     | 42.28  | -0.25811 | 0.002244 |
| 0.13   | 0      | 0      | 0      | NA       | NA       |
| 0      | 0      | 0      | 0      | NA       | NA       |
| 59.62  | 56.38  | 55.69  | 57.16  | -0.10231 | 0.268286 |
| 5.77   | 3.53   | 5.19   | 3.78   | -0.47467 | 0.035436 |
| 11.56  | 11.69  | 11.28  | 9.03   | -0.01643 | 0.946967 |
| 28.9   | 28.93  | 33.01  | 32.31  | -0.03631 | 0.813043 |
| 2.45   | 3.21   | 2.98   | 2.99   | 0.184977 | 0.390114 |
| 20.27  | 18.8   | 19.87  | 19.29  | -0.07856 | 0.561504 |
| 16.27  | 24.63  | 25.18  | 22.61  | 0.609365 | 3.67E-07 |

|         |         |         |         |          |          |
|---------|---------|---------|---------|----------|----------|
| 82.07   | 70.18   | 70.09   | 66.79   | -0.08443 | 0.547588 |
| 4027.23 | 3388.41 | 4256.9  | 3793.63 | -0.18058 | 0.10983  |
| 6.83    | 9.71    | 9.78    | 10.53   | 0.272102 | 0.091909 |
| 58.1    | 65.67   | 66.74   | 65.68   | 0.145305 | 0.068311 |
| 0.32    | 0       | 0       | 0.07    | NA       | NA       |
| 9.06    | 13.82   | 10.63   | 13.74   | 0.652771 | 3.02E-08 |
| 51.06   | 50.25   | 50.1    | 44.08   | -0.1819  | 0.096535 |
| 28.72   | 26.44   | 26.62   | 27.42   | -0.05198 | 0.763231 |
| 1.87    | 1.72    | 1.41    | 1.85    | -0.11378 | 0.811556 |
| 0.89    | 1.11    | 1.01    | 1.11    | 0.085884 | 0.887423 |
| 11.39   | 22.96   | 19.55   | 19.56   | 0.704336 | 4.88E-08 |
| 23.48   | 25.88   | 23.29   | 26.04   | 0.110646 | 0.339279 |
| 817.46  | 836.71  | 1102.58 | 996.59  | 0.1527   | 0.259053 |
| 69.48   | 50.71   | 64.14   | 60.79   | -0.18697 | 0.095223 |
| 4.72    | 6.37    | 4.5     | 4.84    | 0.039044 | 0.92019  |
| 62.31   | 115.44  | 127.19  | 135.2   | 0.88651  | 4.10E-17 |
| 45.86   | 35.52   | 34.62   | 36.24   | -0.4089  | 1.40E-07 |
| 87.77   | 188.48  | 148.23  | 160.18  | 0.714296 | 4.63E-09 |
| 0       | 0.09    | 0.24    | 0.09    | NA       | NA       |
| 15.44   | 28.87   | 31.89   | 28.31   | 0.89766  | 1.41E-17 |
| 0.63    | 0.63    | 0.76    | 0.68    | 0.025999 | 0.949526 |
| 0       | 0       | 0       | 0       | NA       | NA       |
| 0       | 0       | 0       | 0       | NA       | NA       |
| 0       | 0       | 0.03    | 0       | NA       | NA       |
| 8.31    | 10.23   | 9.05    | 10.39   | 0.168351 | 0.195795 |
| 24.72   | 44.45   | 37.12   | 38.25   | 0.917379 | NA       |
| 0.02    | 0       | 0.01    | 0.02    | NA       | NA       |
| 181.25  | 128.18  | 148.49  | 124.26  | -0.42539 | 8.92E-06 |
| 8.41    | 9.88    | 12.64   | 9.27    | 0.075637 | 0.675253 |
| 14.66   | 16.72   | 13.9    | 16.78   | 0.15839  | 0.339413 |
| 9.42    | 4.62    | 6.31    | 5.56    | -0.66304 | 1.44E-06 |
| 0.01    | 0.1     | 0.08    | 0.22    | 0.026387 | 0.978168 |
| 0.35    | 0.41    | 0.42    | 0.29    | -0.15793 | 0.849773 |
| 12.4    | 6.5     | 6.86    | 5.52    | -0.86691 | 1.20E-13 |
| 0.07    | 0.02    | 0.09    | 0       | -0.90324 | 0.166341 |
| 14.53   | 18.63   | 17.99   | 18.3    | 0.088436 | 0.517818 |
| 14.14   | 11.19   | 11.54   | 12.14   | -0.37548 | 0.001464 |
| 285.62  | 285.08  | 277.71  | 256.42  | -0.12823 | 0.220582 |
| 2.32    | 0       | 0.58    | 0.89    | -0.67039 | 0.339087 |
| 0       | 0       | 0       | 0       | NA       | NA       |
| 4.19    | 4.51    | 4.26    | 5.6     | 0.122609 | 0.56904  |
| 61.1    | 65.47   | 69.5    | 67.37   | 0.132355 | 0.219226 |
| 0.68    | 0.26    | 0.65    | 0.34    | -0.26406 | 0.649563 |
| 18.24   | 16.83   | 16.72   | 17.14   | 0.019081 | 0.930324 |
| 0       | 0       | 0       | 0       | NA       | NA       |



|        |         |         |         |          |          |
|--------|---------|---------|---------|----------|----------|
| 102.28 | 95.12   | 128.27  | 120.05  | 0.148637 | 0.221633 |
| 13.67  | 19.78   | 17.37   | 21.55   | 0.44883  | 0.000395 |
| 11.94  | 18.14   | 16.69   | 15.71   | 0.304353 | 0.031454 |
| 0.67   | 0.33    | 0.51    | 0.48    | -0.64114 | 0.003748 |
| 30.01  | 33.85   | 41.78   | 39.53   | 0.302093 | 0.00225  |
| 20.04  | 17.14   | 20.05   | 17.95   | -0.26126 | 0.035994 |
| 0.14   | 0.21    | 0.05    | 0       | NA       | NA       |
| 0      | 0.01    | 0.03    | 0       | NA       | NA       |
| 88.58  | 71.38   | 80.77   | 75.51   | -0.24304 | 0.01323  |
| 6.5    | 6.86    | 6.98    | 7.29    | 0.008548 | 0.975388 |
| 0.48   | 0.17    | 0.1     | 0.06    | NA       | NA       |
| 3.4    | 1.31    | 1.31    | 1.66    | -0.28277 | 0.487408 |
| 0.65   | 8.73    | 4.73    | 7.59    | 2.56068  | 2.23E-13 |
| 2.38   | 1.34    | 1.81    | 1.55    | -0.23676 | 0.275663 |
| 1.32   | 5.32    | 2.9     | 4.34    | 1.348007 | 5.26E-06 |
| 6.3    | 6       | 5.54    | 4.83    | 0.060174 | 0.829499 |
| 3.51   | 3.36    | 3.04    | 3       | 0.017532 | 0.953105 |
| 0.32   | 0.07    | 0.04    | 0.11    | -0.78887 | 0.224728 |
| 1.78   | 4.25    | 3.11    | 3.33    | 0.72134  | 0.000134 |
| 29.56  | 29.84   | 31.53   | 29.62   | 0.085873 | 0.460995 |
| 0.08   | 0.26    | 0       | 0.15    | 0.184261 | 0.826991 |
| 86.82  | 107.66  | 101.49  | 104.09  | 0.230406 | 0.002815 |
| 30.8   | 31.5    | 31.82   | 30.09   | -0.07134 | 0.695627 |
| 5.93   | 0.21    | 0.96    | 0.51    | -3.14124 | 2.12E-23 |
| 6.13   | 9.27    | 8.26    | 8.18    | 0.489503 | 0.000171 |
| 33.82  | 43.49   | 45.73   | 48.16   | 0.549042 | 3.51E-12 |
| 0.1    | 0.05    | 0.06    | 0.07    | NA       | NA       |
| 14.77  | 11.86   | 10.81   | 11.8    | -0.2028  | 0.046711 |
| 9.08   | 10.49   | 9.91    | 9.56    | 0.214639 | 0.141625 |
| 0.95   | 0.86    | 1.01    | 1.04    | -0.07235 | 0.869818 |
| 2.26   | 2.29    | 2.26    | 1.84    | -0.19073 | 0.549989 |
| 6.14   | 10.9    | 9.91    | 9.74    | 0.553168 | 3.30E-06 |
| 12.53  | 32.92   | 22.42   | 27.75   | 0.962329 | 2.16E-13 |
| 0.03   | 0       | 0       | 0       | NA       | NA       |
| 2.31   | 2.81    | 2.28    | 2.23    | -0.16791 | 0.565783 |
| 0      | 0       | 0.02    | 0       | NA       | NA       |
| 0.1    | 0.03    | 0.17    | 0.29    | 0.277873 | 0.736131 |
| 15.36  | 21.64   | 17.39   | 20.45   | 0.271599 | 0.019666 |
| 0      | 0       | 0       | 0       | NA       | NA       |
| 15.61  | 11.8    | 11.66   | 11.39   | -0.38994 | 3.05E-05 |
| 24.68  | 14.1    | 15.22   | 14.78   | -0.73665 | 3.53E-17 |
| 65.63  | 78.33   | 74.5    | 75.91   | 0.15378  | 0.125285 |
| 819.46 | 1557.56 | 1527.89 | 1592.55 | 0.816502 | 3.32E-21 |
| 29.46  | 30.23   | 30.43   | 35.78   | 0.012998 | 0.950693 |
| 0      | 0       | 0       | 0       | NA       | NA       |

|         |        |         |        |          |          |
|---------|--------|---------|--------|----------|----------|
| 0       | 0      | 0       | 0      | NA       | NA       |
| 7.05    | 7.02   | 7.6     | 7.47   | -0.05978 | 0.753132 |
| 11.39   | 13.05  | 14.01   | 13.6   | 0.262241 | 0.058615 |
| 0.14    | 0.62   | 0.43    | 0.73   | 0.345841 | 0.562579 |
| 7.31    | 10.49  | 10.19   | 11.52  | 0.959227 | 9.28E-22 |
| 3.13    | 3.17   | 2.76    | 2.77   | -0.16515 | 0.33109  |
| 43.68   | 48     | 42.61   | 34.76  | -0.0206  | 0.904253 |
| 0.34    | 0.69   | 0.31    | 0.41   | 0.528146 | 0.365559 |
| 3.41    | 3.66   | 4.69    | 4      | 0.119913 | 0.283983 |
| 0       | 0      | 0       | 0      | NA       | NA       |
| 6.74    | 6.17   | 5.93    | 6.82   | -0.10749 | 0.641333 |
| 0       | 0.01   | 0       | 0      | NA       | NA       |
| 0.26    | 0.53   | 0.4     | 0.21   | 1.887821 | 1.49E-05 |
| 0.85    | 1.05   | 0.69    | 0.85   | -0.0072  | 0.992801 |
| 12.03   | 8.28   | 10.11   | 10.3   | -0.35394 | 0.038657 |
| 0       | 0      | 0.01    | 0      | NA       | NA       |
| 7.96    | 8.49   | 8.83    | 12.24  | 0.238305 | 0.064618 |
| 2.77    | 4.14   | 3.04    | 3.65   | 0.394246 | 0.030806 |
| 6.59    | 17.75  | 11.93   | 14.98  | 0.953645 | 2.35E-09 |
| 0       | 0      | 0       | 0      | NA       | NA       |
| 0       | 0      | 0       | 0      | NA       | NA       |
| 0.01    | 0.03   | 0.08    | 0.02   | NA       | NA       |
| 0       | 0      | 0       | 0      | NA       | NA       |
| 5.08    | 5.97   | 5.14    | 6.07   | 0.149078 | 0.334623 |
| 21.86   | 13.37  | 15.16   | 14.86  | -0.43076 | 0.001734 |
| 0       | 0      | 0       | 0      | NA       | NA       |
| 4.45    | 5.6    | 5.65    | 5.85   | 0.312905 | 0.042374 |
| 60.43   | 98.98  | 134.39  | 99.61  | 0.637765 | 1.76E-14 |
| 0       | 0      | 0       | 0      | NA       | NA       |
| 13.38   | 9.77   | 10.53   | 10.45  | -0.24908 | 0.023394 |
| 0       | 0      | 0       | 0      | NA       | NA       |
| 1.63    | 1.96   | 1.67    | 1.7    | 0.186013 | 0.418653 |
| 0       | 0      | 0       | 0      | NA       | NA       |
| 9.5     | 7.69   | 7.87    | 7.47   | -0.1689  | 0.219207 |
| 11.11   | 8.84   | 10.28   | 8.87   | -0.25547 | 0.073517 |
| 0.07    | 0.04   | 0.02    | 0.07   | NA       | NA       |
| 0.37    | 0.16   | 0.15    | 0.29   | -0.81181 | 0.102589 |
| 0.37    | 0.24   | 0.27    | 0.52   | -0.46873 | 0.1846   |
| 0.04    | 0.63   | 0.21    | 0.33   | 1.688318 | 0.001802 |
| 0       | 0.11   | 0.04    | 0.05   | NA       | NA       |
| 11.79   | 6.83   | 10.39   | 6.17   | -0.57533 | 0.000668 |
| 11.58   | 12.84  | 12.03   | 12.13  | -0.00109 | 0.99586  |
| 1131.49 | 925.28 | 1090.94 | 919.57 | -0.26713 | NA       |
| 44.24   | 63.89  | 54.23   | 59.3   | 0.400835 | 1.16E-06 |
| 0       | 0      | 0       | 0.02   | NA       | NA       |

|        |        |        |        |          |          |
|--------|--------|--------|--------|----------|----------|
| 5.21   | 3.36   | 3.89   | 2.96   | -0.42786 | 0.131654 |
| 0      | 0.04   | 0.02   | 0.02   | NA       | NA       |
| 1.51   | 2.15   | 1.86   | 1.92   | 0.181985 | 0.440749 |
| 0      | 0      | 0      | 0      | NA       | NA       |
| 115.59 | 89.61  | 106.29 | 93.75  | -0.31047 | 0.000877 |
| 0      | 0      | 0      | 0      | NA       | NA       |
| 27.6   | 27.92  | 29.11  | 23.97  | -0.16615 | 0.193252 |
| 6.26   | 4.11   | 4.4    | 4.54   | -0.54409 | 1.51E-08 |
| 3.72   | 3.23   | 2.97   | 3.19   | -0.12547 | 0.727847 |
| 2.26   | 2.28   | 2.59   | 2.24   | 0.103016 | 0.64334  |
| 9.55   | 7.42   | 8.36   | 7.49   | -0.36414 | 0.005496 |
| 14.66  | 14.56  | 15.26  | 13.46  | -0.04318 | 0.771116 |
| 0.12   | 0.18   | 0.34   | 0.29   | 0.900402 | 0.010946 |
| 0.01   | 0.01   | 0.02   | 0      | NA       | NA       |
| 4.37   | 7.09   | 6.22   | 6.22   | 0.446    | 0.000464 |
| 4.16   | 1.19   | 1.91   | 1.24   | -1.27152 | 3.52E-15 |
| 14.1   | 11.92  | 13.04  | 13.59  | -0.34604 | 0.000241 |
| 2.81   | 2.18   | 2.86   | 3.16   | -0.0397  | 0.912329 |
| 0      | 0      | 0      | 0      | NA       | NA       |
| 81.78  | 128.55 | 112.47 | 116.82 | 0.489371 | 1.92E-08 |
| 0      | 0      | 0      | 0.03   | NA       | NA       |
| 0      | 0      | 0      | 0      | NA       | NA       |
| 0.21   | 0.41   | 0.38   | 0.41   | 0.803556 | 0.233327 |
| 26.7   | 50.59  | 37.67  | 43.09  | 0.559551 | 7.36E-07 |
| 119.55 | 142.64 | 129.23 | 126.93 | 0.0616   | 0.633306 |
| 0.22   | 0      | 0.19   | 0.48   | NA       | NA       |
| 61.75  | 52.38  | 54.68  | 54.26  | -0.06423 | 0.583993 |
| 0      | 0.03   | 0.07   | 0.06   | NA       | NA       |
| 4.28   | 5.03   | 5.14   | 6.18   | 0.291983 | 0.026551 |
| 0.54   | 0.24   | 0.59   | 0      | -0.28413 | 0.72824  |
| 4.09   | 1.39   | 1.68   | 1.9    | -0.40606 | 0.175193 |
| 0      | 0      | 0      | 0      | NA       | NA       |
| 13.51  | 16.5   | 15.94  | 16.73  | 0.366856 | 0.004518 |
| 6.54   | 6.7    | 6.15   | 6.52   | 0.128224 | 0.579435 |
| 10.64  | 10.65  | 11.72  | 10.83  | 0.000927 | 0.996111 |
| 7.78   | 7.26   | 7.37   | 9.08   | 0.023081 | 0.935649 |
| 0.95   | 0.69   | 0.21   | 0.19   | -0.2342  | 0.778245 |
| 0.04   | 0.06   | 0.04   | 0.16   | 0.187369 | 0.829375 |
| 4.69   | 5.31   | 4.9    | 5.22   | 0.152345 | 0.280554 |
| 22.72  | 19.34  | 20.38  | 19.73  | -0.29663 | 0.001704 |
| 17.3   | 28.46  | 23     | 25.74  | 0.372546 | 0.019488 |
| 70.94  | 46.54  | 55.68  | 50.66  | -0.60417 | 7.65E-11 |
| 13.91  | 12.07  | 13.21  | 13.7   | -0.18364 | 0.102377 |
| 8.29   | 8.51   | 9.54   | 9.6    | -0.02586 | 0.884521 |
| 32.68  | 28.83  | 33.33  | 32.6   | -0.12483 | 0.50611  |

|        |        |        |        |          |          |
|--------|--------|--------|--------|----------|----------|
| 12.46  | 9.83   | 11.24  | 8.75   | -0.4121  | 0.000961 |
| 9.28   | 10.16  | 9.09   | 9.11   | 0.113108 | 0.440549 |
| 73.48  | 135.04 | 105.88 | 118.82 | 0.290199 | 0.03411  |
| 62.11  | 62.49  | 72.71  | 63.37  | 0.220237 | 0.008396 |
| 6.42   | 5.95   | 6.39   | 6.18   | -0.1658  | 0.493505 |
| 23.4   | 20.1   | 18.95  | 20.36  | -0.16872 | 0.121475 |
| 0      | 0      | 0      | 0      | NA       | NA       |
| 166.25 | 495.6  | 461.36 | 524.28 | 1.403955 | 1.80E-57 |
| 16.27  | 17.4   | 17.69  | 18.09  | 0.241322 | 0.014622 |
| 0.5    | 0.22   | 0.41   | 0.33   | -0.47916 | 0.513751 |
| 8.52   | 4.44   | 4.45   | 4.4    | -1.03223 | 1.00E-12 |
| 0      | 0      | 0      | 0.04   | NA       | NA       |
| 10.86  | 22.57  | 19.44  | 27.87  | 0.846762 | 2.29E-12 |
| 316.36 | 123.52 | 197.58 | 171.89 | -0.95513 | 1.19E-14 |
| 15.53  | 10.04  | 15.31  | 13.71  | -0.39999 | 0.002594 |
| 0      | 0      | 0      | 0      | NA       | NA       |
| 9.21   | 12.77  | 10.47  | 13.89  | 0.163008 | 0.267053 |
| 0      | 0      | 0      | 0      | NA       | NA       |
| 0      | 0      | 0      | 0      | NA       | NA       |
| 0      | 0.11   | 0.11   | 0.08   | NA       | NA       |
| 0      | 0      | 0      | 0      | NA       | NA       |
| 36.24  | 14.01  | 21.46  | 15.95  | -1.19836 | 8.09E-20 |
| 13.74  | 17.61  | 14.29  | 13.46  | -0.05164 | 0.68041  |
| 1.05   | 2.57   | 1.85   | 1.94   | 0.436007 | 0.127039 |
| 11.95  | 13.25  | 14.55  | 12.4   | 0.089926 | 0.582145 |
| 4.93   | 4.5    | 3.95   | 3.35   | -0.2346  | 0.281377 |
| 0.85   | 0.47   | 0.29   | 0.51   | -0.93604 | 0.031473 |
| 18.83  | 20.86  | 19.84  | 22.25  | 0.107839 | 0.350163 |
| 0.97   | 0.31   | 0.49   | 0.44   | -1.01917 | 1.07E-06 |
| 2.54   | 0.74   | 0.38   | 1.32   | -2.64148 | 4.21E-19 |
| 7.24   | 10.72  | 10.65  | 12.76  | 0.487332 | 3.42E-05 |
| 0.36   | 0.08   | 0.18   | 0.13   | -1.13688 | 0.014529 |
| 21.34  | 11.1   | 12.67  | 12.4   | -0.77064 | 5.22E-12 |
| 41.39  | 54.25  | 48.85  | 50.22  | 0.182261 | 0.073034 |
| 0.44   | 0.37   | 1.1    | 0.62   | 0.173935 | 0.828322 |
| 28.4   | 21.14  | 19.45  | 24.47  | -0.09042 | 0.493654 |
| 0.02   | 0.15   | 0.1    | 0.07   | NA       | NA       |
| 25.37  | 14.87  | 17.7   | 14.52  | -0.60646 | 6.67E-11 |
| 12.36  | 10.87  | 10.74  | 11.66  | 0.179364 | 0.288161 |
| 70.61  | 89.51  | 82.36  | 85.37  | 0.204558 | 0.019933 |
| 19.34  | 17.2   | 17.64  | 17.15  | -0.27238 | 0.008337 |
| 32.51  | 35.34  | 36.06  | 32.52  | 0.049778 | 0.755288 |
| 0.35   | 19.74  | 6.54   | 11.35  | 3.064243 | 8.65E-11 |
| 0      | 0      | 0      | 0      | NA       | NA       |
| 126.71 | 97.28  | 146.16 | 140.32 | 0.085643 | 0.639996 |

|         |         |         |         |          |          |
|---------|---------|---------|---------|----------|----------|
| 0       | 0       | 0       | 0       | NA       | NA       |
| 0       | 0       | 0       | 0       | NA       | NA       |
| 10.09   | 14.41   | 16.12   | 18.11   | 0.394439 | 0.026993 |
| 4.72    | 3.76    | 5.01    | 5.04    | 0.31618  | 0.261111 |
| 3770.48 | 1087.45 | 1536.45 | 1354.47 | -1.54787 | 1.53E-52 |
| 41.39   | 44.3    | 45.07   | 44.2    | 0.220779 | 0.043501 |
| 19.3    | 16.21   | 13.98   | 18.6    | 0.010841 | 0.957269 |
| 22.83   | 25.12   | 27.43   | 26.58   | 0.218497 | 0.029341 |
| 14.78   | 18.05   | 17.12   | 17.68   | 0.176388 | 0.096985 |
| 0       | 0       | 0       | 0.06    | NA       | NA       |
| 0.06    | 1.12    | 0.24    | 0.21    | 0.431395 | 0.53739  |
| 0.43    | 0.36    | 0.64    | 0.31    | -0.49052 | 0.313298 |
| 0.65    | 0.87    | 0.82    | 0.59    | 0.20804  | 0.653345 |
| 1.43    | 1.01    | 0.96    | 1.08    | -0.24068 | 0.467815 |
| 0       | 0       | 0       | 0       | NA       | NA       |
| 9.16    | 11.6    | 10.41   | 12.75   | 0.225919 | 0.124472 |
| 0.66    | 0.42    | 0.55    | 0.88    | -0.22677 | 0.649967 |
| 0       | 0       | 0       | 0       | NA       | NA       |
| 0.01    | 0.01    | 0.02    | 0.02    | NA       | NA       |
| 0.01    | 0.01    | 0.04    | 0.02    | -0.09146 | 0.920206 |
| 32.54   | 27.79   | 31.2    | 29.91   | -0.09218 | 0.521446 |
| 4.8     | 7.12    | 8.81    | 8.01    | 0.211786 | 0.278143 |
| 21.7    | 19.81   | 20.73   | 22.09   | -0.04855 | 0.719768 |
| 32.15   | 40.19   | 35.52   | 38.93   | 0.307511 | 0.000914 |
| 0.54    | 0.25    | 0.18    | 0.47    | -0.00503 | 0.99586  |
| 5.69    | 8.37    | 9.29    | 8.1     | 0.63937  | 2.79E-08 |
| 0       | 0       | 0.05    | 0.02    | NA       | NA       |
| 0.32    | 0       | 0       | 0.09    | NA       | NA       |
| 24.12   | 22.52   | 21.72   | 21.16   | -0.10926 | 0.465892 |
| 3.7     | 4.63    | 3.61    | 3.69    | 0.133494 | 0.549053 |
| 1.06    | 1.67    | 1.48    | 1.57    | 0.670473 | 0.0011   |
| 2.8     | 2.74    | 3.52    | 3.51    | -0.00623 | 0.98906  |
| 141.83  | 60.82   | 95.79   | 95.16   | -0.6635  | 2.59E-09 |
| 0.96    | 0.67    | 0.62    | 0.89    | -0.49155 | 0.310129 |
| 10      | 11.77   | 10.55   | 10.07   | -0.17923 | 0.151884 |
| 12.04   | 5.64    | 9.28    | 4.98    | -0.74523 | 1.43E-06 |
| 1.39    | 2.74    | 2.58    | 2.85    | 0.858048 | 0.000691 |
| 25.9    | 55.09   | 58.65   | 55.67   | 0.977637 | 4.84E-31 |
| 28.17   | 36.93   | 33.08   | 35.05   | 0.304789 | 0.001269 |
| 92.48   | 105.44  | 96.41   | 93.05   | 0.130509 | 0.292536 |
| 11.09   | 35.29   | 36.34   | 40.79   | 1.769079 | 8.08E-92 |
| 9.14    | 7.47    | 7.61    | 6.68    | -0.11877 | 0.521446 |
| 0.09    | 0       | 0       | 0       | NA       | NA       |
| 56.47   | 67.37   | 67.55   | 61.98   | 0.25758  | 0.003844 |
| 0       | 0       | 0       | 0       | NA       | NA       |

|        |        |        |        |          |          |
|--------|--------|--------|--------|----------|----------|
| 6.15   | 6.57   | 6.52   | 6      | 0.097627 | 0.395445 |
| 1.05   | 7.68   | 4.2    | 6.56   | 2.807832 | 1.60E-37 |
| 9.72   | 10.67  | 8.36   | 9.37   | -0.11391 | 0.556729 |
| 7.8    | 12.39  | 10.36  | 9.1    | 0.139859 | 0.509257 |
| 0.04   | 0      | 0      | 0.03   | NA       | NA       |
| 0      | 0.06   | 0      | 0.14   | NA       | NA       |
| 9.89   | 7.94   | 8.63   | 9.25   | -0.13613 | 0.320148 |
| 0      | 0      | 0      | 0      | NA       | NA       |
| 11.82  | 14.2   | 12.33  | 13.1   | 0.031063 | 0.85513  |
| 0      | 0      | 0      | 0      | NA       | NA       |
| 0.31   | 0.64   | 1.03   | 0.45   | 0.32784  | 0.392401 |
| 47.26  | 22.73  | 32.25  | 32.01  | -0.79051 | 2.76E-14 |
| 0.02   | 1.22   | 0.66   | 0.54   | 3.257678 | 5.20E-15 |
| 339.74 | 315.44 | 320.34 | 300.06 | -0.05892 | 0.580733 |
| 3.51   | 3.51   | 3.17   | 3.07   | -0.08541 | 0.651615 |
| 55.59  | 62.89  | 70.82  | 73.18  | 0.273895 | 0.004416 |
| 1.36   | 0.12   | 0.29   | 0.12   | -2.02377 | 9.16E-06 |
| 25.27  | 46.3   | 43.13  | 51.95  | 0.835706 | 1.69E-23 |
| 38.12  | 64.58  | 57.08  | 62.11  | 0.581524 | 1.40E-08 |
| 11.81  | 11.32  | 11.02  | 11.32  | -0.18285 | 0.242246 |
| 4.59   | 3.31   | 4.43   | 4.17   | -0.29197 | 0.034258 |
| 4.7    | 5.64   | 5.77   | 5.41   | 0.268086 | 0.113219 |
| 8.02   | 8.02   | 7.69   | 8.99   | 0.149877 | 0.51883  |
| 0.14   | 0.11   | 0.08   | 0.35   | NA       | NA       |
| 6.5    | 13.97  | 10.36  | 12.77  | 0.780722 | 1.64E-11 |
| 36.05  | 68.49  | 67.77  | 60.82  | 0.699988 | 1.25E-13 |
| 6.81   | 6.22   | 6.05   | 6.42   | 0.069526 | 0.823075 |
| 27.63  | 33.26  | 31.36  | 30.23  | 0.273507 | 0.009178 |
| 0.8    | 2.03   | 1.87   | 1.71   | 1.962922 | 5.58E-14 |
| 48.34  | 52.97  | 52.31  | 52.76  | -0.01995 | 0.87997  |
| 12.25  | 11.41  | 11.45  | 11.22  | 0.085741 | 0.582824 |
| 178.67 | 98.93  | 124.71 | 111.93 | -0.694   | 1.59E-13 |
| 27.12  | 21.74  | 22.42  | 20.75  | -0.05898 | 0.653927 |
| 100.57 | 81.17  | 93.11  | 93.78  | -0.17169 | 0.037023 |
| 14.07  | 15.71  | 14.9   | 17.5   | 0.146142 | 0.23469  |
| 64.01  | 97.93  | 71.26  | 84.97  | 0.406447 | 0.000364 |
| 51.07  | 21.25  | 24.06  | 24.94  | -1.18513 | 1.19E-39 |
| 0.25   | 0.18   | 0.07   | 0.27   | -0.29454 | 0.71864  |
| 231.22 | 247.16 | 265.18 | 234.38 | -0.05281 | 0.621469 |
| 5.99   | 4.69   | 4.03   | 5.79   | -0.1415  | 0.678186 |
| 72.56  | 79.47  | 114.55 | 92.32  | 0.374046 | 0.000127 |
| 9.43   | 15.14  | 13.68  | 16.58  | 0.724459 | 3.10E-10 |
| 0.02   | 0      | 0      | 0      | NA       | NA       |
| 85.21  | 141.85 | 122.6  | 136.03 | 0.457953 | 1.59E-07 |
| 8.06   | 6.26   | 6.29   | 5.59   | -0.56386 | 0.000159 |

|        |        |       |        |          |          |
|--------|--------|-------|--------|----------|----------|
| 0      | 0      | 0     | 0.01   | NA       | NA       |
| 1.62   | 1.4    | 1.06  | 0.77   | -0.77058 | 0.002145 |
| 6.05   | 2.53   | 3.34  | 2.76   | -0.43834 | 0.01072  |
| 10.06  | 7.23   | 8.61  | 8.48   | -0.14666 | 0.419945 |
| 17.62  | 33.36  | 25.86 | 29.13  | 0.823197 | 1.56E-07 |
| 13.25  | 13.01  | 14.76 | 16.66  | 0.244403 | 0.085606 |
| 4.13   | 3.46   | 3.91  | 3.92   | -0.1092  | 0.669626 |
| 36.13  | 46.74  | 41.54 | 46.91  | 0.179739 | 0.149977 |
| 21.41  | 16.35  | 16.59 | 21.97  | 0.030239 | 0.875035 |
| 0      | 0      | 0     | 0      | NA       | NA       |
| 0      | 0      | 0.01  | 0      | NA       | NA       |
| 40.6   | 29.41  | 37.75 | 34.3   | -0.27659 | 0.008618 |
| 1.19   | 0.3    | 0.67  | 0.72   | -0.64415 | 0.279279 |
| 0.06   | 0.01   | 0.23  | 0.35   | 0.407512 | 0.587229 |
| 2.16   | 3.16   | 3.66  | 2.97   | 0.397323 | 0.142816 |
| 9.39   | 9.51   | 8.62  | 10     | 0.03412  | 0.850433 |
| 0      | 0      | 0     | 0.02   | NA       | NA       |
| 63.87  | 17.22  | 24.86 | 21.24  | -1.60536 | 1.71E-39 |
| 34.74  | 34.05  | 31.4  | 32.31  | -0.01506 | 0.933829 |
| 101.59 | 60.27  | 93.8  | 79.77  | -0.34202 | 0.032613 |
| 8.94   | 8.65   | 7.61  | 7.86   | -0.3507  | 0.020029 |
| 24.21  | 26.02  | 20.1  | 22.99  | 0.177712 | 0.164258 |
| 16.59  | 10.33  | 11.36 | 10.38  | -0.68899 | 3.12E-09 |
| 26.18  | 26.93  | 21.94 | 26.15  | 0.200751 | 0.058122 |
| 10.01  | 9.99   | 9.16  | 8.35   | -0.07876 | 0.644849 |
| 5.16   | 3.96   | 3.64  | 4.13   | -0.51193 | 0.009808 |
| 0      | 0      | 0     | 0      | NA       | NA       |
| 42.67  | 15.39  | 26.33 | 20.12  | -1.12773 | 3.30E-09 |
| 25.64  | 30.71  | 34.63 | 34.75  | 0.389799 | 0.000149 |
| 0      | 0.01   | 0     | 0      | NA       | NA       |
| 49.38  | 54.69  | 58.84 | 48.86  | 0.156949 | 0.214248 |
| 10.9   | 9.15   | 9.54  | 8.11   | -0.22573 | 0.052499 |
| 6.37   | 7.5    | 8.7   | 8.21   | 0.210137 | 0.056076 |
| 8.94   | 3.89   | 6.36  | 4.97   | -0.58883 | 6.34E-05 |
| 0      | 0      | 0     | 0      | NA       | NA       |
| 0      | 0      | 0     | 0      | NA       | NA       |
| 20.99  | 28.44  | 28.08 | 27.06  | 0.401836 | 0.003113 |
| 0      | 0      | 0     | 0      | NA       | NA       |
| 0.32   | 2.23   | 1.25  | 1.64   | 1.874472 | 1.03E-11 |
| 6.98   | 16.92  | 15.67 | 20.61  | 0.963871 | 1.28E-11 |
| 6.57   | 113.23 | 63.22 | 105.19 | 3.439194 | 1.72E-37 |
| 0      | 0.26   | 0.1   | 0.12   | NA       | NA       |
| 12.64  | 11.38  | 9.14  | 11.14  | -0.2052  | 0.090796 |
| 0.08   | 4.82   | 2.17  | 2.96   | 3.607603 | 1.39E-18 |
| 19.14  | 16.51  | 17.74 | 17.6   | -0.12564 | 0.335602 |

|        |        |        |        |          |          |
|--------|--------|--------|--------|----------|----------|
| 17.96  | 16.04  | 17.15  | 17.74  | -0.05814 | 0.654615 |
| 8.63   | 8.07   | 4.41   | 8.02   | 0.34143  | 0.067777 |
| 0      | 0      | 0      | 0      | NA       | NA       |
| 173.57 | 163.37 | 164.85 | 160.43 | -0.18579 | 0.01452  |
| 47.28  | 62.22  | 54.99  | 55.98  | 0.252541 | 0.009816 |
| 4.5    | 4.62   | 5.53   | 5.11   | -0.19617 | 0.160064 |
| 2.19   | 2.03   | 1.92   | 2.65   | 0.010859 | 0.979528 |
| 12.5   | 16.46  | 13.32  | 14.59  | 0.127684 | 0.487872 |
| 10.01  | 9.27   | 9.62   | 7.52   | -0.13138 | 0.546314 |
| 527.85 | 469.78 | 471.77 | 415.89 | -0.24493 | 0.010076 |
| 10.99  | 13.14  | 13.22  | 13.8   | 0.401332 | 0.02098  |
| 7.65   | 8.33   | 6.85   | 6.8    | 0.263953 | 0.397657 |
| 65.76  | 59.34  | 62.46  | 57.28  | -0.16855 | 0.071645 |
| 16.77  | 18.06  | 18.95  | 20.37  | 0.179192 | 0.16485  |
| 16.91  | 16.38  | 15.49  | 16.78  | 0.054122 | 0.659502 |
| 26.25  | 26.83  | 24.6   | 23.55  | -0.29325 | 0.011898 |
| 7.27   | 6.59   | 5.47   | 6.3    | -0.21808 | 0.094598 |
| 0.08   | 0      | 0      | 0.05   | NA       | NA       |
| 4.12   | 3.74   | 3.84   | 4.93   | 0.071475 | 0.825615 |
| 96.77  | 98.56  | 101.24 | 102.01 | 0.026675 | 0.831405 |
| 0      | 0      | 0.03   | 0      | NA       | NA       |
| 11.94  | 8      | 8.4    | 5      | -0.10325 | 0.62178  |
| 31.32  | 33.28  | 32.6   | 30.9   | -0.0046  | 0.978168 |
| 12.68  | 12.11  | 13.26  | 13.09  | 0.024134 | 0.917968 |
| 2.69   | 2.37   | 2.3    | 2.01   | -0.16226 | 0.585529 |
| 0.35   | 0.57   | 0.42   | 0.28   | -0.56296 | 0.207391 |
| 23.22  | 15.71  | 18.4   | 16.14  | -0.38349 | 0.000404 |
| 0      | 0      | 0      | 0      | NA       | NA       |
| 23.15  | 25.97  | 23.89  | 26.35  | 0.055463 | 0.606148 |
| 37.55  | 39.52  | 33.6   | 39.85  | 0.103221 | 0.365448 |
| 19.58  | 29.78  | 18.25  | 24.84  | 0.259128 | 0.113462 |
| 2.61   | 3.34   | 2.96   | 2.54   | 0.234406 | 0.410828 |
| 0      | 0.28   | 0.39   | 0.29   | 0.59314  | 0.397367 |
| 0.06   | 0.09   | 0.17   | 0.12   | 0.605658 | 0.397612 |
| 6.07   | 5.15   | 5.94   | 6.07   | 0.049128 | 0.810283 |
| 19.58  | 23.77  | 20.27  | 21.61  | 0.091224 | 0.437644 |
| 0      | 0      | 0.02   | 0      | NA       | NA       |
| 0.07   | 0.04   | 0.18   | 0.07   | -0.01582 | 0.986644 |
| 3.85   | 2.11   | 2.76   | 2.55   | -0.6645  | 0.001741 |
| 23.93  | 28.39  | 24.66  | 25.78  | 0.02732  | 0.876113 |
| 65.38  | 17.44  | 27.07  | 21.67  | -1.59786 | 5.03E-33 |
| 6.93   | 7.33   | 5.38   | 5.6    | -0.23891 | 0.112467 |
| 2.27   | 1.48   | 1.98   | 1.12   | -0.57669 | 0.05654  |
| 15.81  | 16.73  | 15.1   | 12.85  | -0.12874 | 0.405883 |
| 0.5    | 0.96   | 0.71   | 0.8    | 0.498974 | 0.029691 |



|        |        |        |        |          |          |
|--------|--------|--------|--------|----------|----------|
| 15.98  | 14.67  | 13.74  | 15.2   | 0.106273 | 0.420489 |
| 11.89  | 10.68  | 9.92   | 9.41   | -0.12403 | 0.518846 |
| 19.84  | 22.59  | 20.46  | 21.98  | -0.05873 | 0.701731 |
| 1.04   | 0.13   | 0.22   | 0.24   | -1.51106 | 9.90E-05 |
| 8.2    | 12.23  | 8.85   | 10.94  | 0.286937 | 0.133808 |
| 14.36  | 9.79   | 11.41  | 11.42  | -0.53584 | 2.61E-08 |
| 9.86   | 10.96  | 14.08  | 11.64  | 0.008397 | 0.979404 |
| 26.58  | 28.7   | 28.6   | 29.33  | 0.006321 | 0.972634 |
| 30.99  | 74.49  | 45.07  | 55.74  | 1.046043 | 9.74E-11 |
| 1.08   | 0.97   | 1.19   | 6.42   | 0.224985 | 0.719768 |
| 1.62   | 0.67   | 0.65   | 0.85   | -0.81237 | 0.002525 |
| 13.61  | 21.43  | 17.97  | 21.25  | 0.4098   | 1.44E-05 |
| 0      | 0.01   | 0      | 0      | NA       | NA       |
| 2.46   | 2.09   | 1.45   | 1.11   | -0.59939 | 0.025352 |
| 2.68   | 1.95   | 1.01   | 2.35   | -0.36158 | 0.051241 |
| 64.44  | 106.93 | 79.68  | 83.73  | 0.434535 | 0.000146 |
| 13.98  | 10.91  | 11.46  | 12.46  | -0.26773 | 0.013949 |
| 0.65   | 0.25   | 0.43   | 0.26   | -1.04975 | 0.099241 |
| 16.39  | 15.68  | 15.81  | 16.69  | -0.07    | 0.563208 |
| 2.18   | 2.3    | 2.18   | 2.96   | -0.05604 | 0.868344 |
| 23.16  | 20.34  | 23.6   | 25.06  | -0.07666 | 0.571644 |
| 83.07  | 86.71  | 81.73  | 88.01  | 0.055675 | 0.581813 |
| 72.4   | 88.37  | 92.8   | 78.91  | 0.205923 | 0.073245 |
| 5.28   | 5.79   | 5.44   | 4.81   | 0.063695 | 0.788283 |
| 6.11   | 1.36   | 1.93   | 2.19   | -1.62892 | 1.69E-23 |
| 1.04   | 1.25   | 1.2    | 1.5    | 0.324338 | 0.046332 |
| 250.36 | 276.36 | 267.3  | 251.62 | 0.052597 | 0.64242  |
| 7.31   | 8.45   | 8.8    | 9.42   | 0.098337 | 0.547963 |
| 37.93  | 41.04  | 37.36  | 38.3   | 0.075424 | 0.673897 |
| 26.97  | 23.98  | 24.65  | 23.89  | -0.10043 | 0.355283 |
| 18.52  | 17.46  | 19.49  | 18.45  | -0.10267 | 0.345379 |
| 11.22  | 10.29  | 10.25  | 9.35   | -0.16508 | 0.274629 |
| 7.29   | 10.34  | 9.61   | 11.3   | 0.272925 | 0.114007 |
| 18.01  | 23.36  | 21.43  | 21.98  | 0.297412 | 0.00296  |
| 1.07   | 26.96  | 14.87  | 20.88  | 4.15425  | 3.40E-83 |
| 0      | 10.46  | 6.03   | 8.19   | 4.323855 | 5.26E-25 |
| 7.22   | 9.24   | 7.77   | 8.97   | 0.369548 | 0.000232 |
| 0.71   | 1.09   | 0.64   | 1.07   | -0.24463 | 0.575715 |
| 11.04  | 11.16  | 11.6   | 11.01  | -0.05415 | 0.808612 |
| 192.27 | 204.9  | 221.55 | 202.81 | 0.067974 | 0.522846 |
| 24.53  | 32.06  | 28.5   | 29.55  | 0.134639 | 0.30558  |
| 18.04  | 18.94  | 21.22  | 18     | 0.120853 | 0.401041 |
| 0.06   | 0.11   | 0.07   | 0.1    | NA       | NA       |
| 92.89  | 83.48  | 84.41  | 85.78  | -0.05997 | 0.596012 |
| 9.4    | 10.63  | 8.04   | 8.91   | -0.02945 | 0.896069 |

|        |        |        |         |          |          |
|--------|--------|--------|---------|----------|----------|
| 3.62   | 3.58   | 4.8    | 3.19    | -0.15391 | 0.363237 |
| 0      | 0      | 0      | 0 NA    | NA       |          |
| 55.92  | 51.7   | 52.63  | 52.87   | -0.06619 | 0.667112 |
| 34.75  | 12.69  | 18.64  | 15.7    | -1.22699 | 1.16E-15 |
| 2.04   | 1.99   | 1.6    | 1.73    | 0.116732 | 0.732109 |
| 0.76   | 0.49   | 1.16   | 0.83    | 0.77053  | 0.216547 |
| 10.62  | 12.69  | 9.33   | 11.38   | 0.325267 | 0.012636 |
| 0      | 0      | 0.01   | 0 NA    | NA       |          |
| 5.7    | 7.28   | 5.77   | 6.25    | 0.147015 | 0.365337 |
| 0.79   | 0      | 0.23   | 0.17    | -0.86195 | 0.192499 |
| 0      | 0.15   | 0      | 0 NA    | NA       |          |
| 37.12  | 41.03  | 37.88  | 39.48   | 0.048308 | 0.700753 |
| 7.19   | 4.61   | 6.41   | 5.75    | -0.36019 | 0.007116 |
| 0      | 0      | 0      | 0 NA    | NA       |          |
| 81.27  | 61.47  | 70.25  | 64.08   | -0.34032 | 0.000875 |
| 14.93  | 18.44  | 16.87  | 17.3    | 0.064424 | 0.697219 |
| 18.22  | 19.61  | 18.83  | 19.55   | 0.161241 | 0.251686 |
| 60.41  | 66.23  | 61.78  | 66.46   | 0.072706 | 0.504114 |
| 0.37   | 0.03   | 0.03   | 0.14 NA | NA       |          |
| 11.79  | 13.7   | 13.7   | 13.73   | 0.201366 | 0.213468 |
| 1.92   | 1.29   | 1.18   | 1.01    | -0.82064 | 0.000353 |
| 18.6   | 27.98  | 22.52  | 25.71   | 0.461686 | 0.000107 |
| 56.59  | 49.72  | 44.26  | 49.41   | -0.27319 | 0.002227 |
| 7.71   | 8.03   | 7.61   | 8.78    | 0.143459 | 0.491917 |
| 28.26  | 33.22  | 32.4   | 32.95   | 0.149031 | 0.151632 |
| 1.45   | 0.47   | 0.58   | 0.35    | -2.05469 | 1.50E-10 |
| 2.73   | 1.61   | 2.17   | 1.79    | -0.8896  | 0.000598 |
| 1.2    | 1.47   | 1.24   | 0.96    | -0.20387 | 0.656892 |
| 0      | 0      | 0      | 0 NA    | NA       |          |
| 0.05   | 0.03   | 0.02   | 0.05    | -0.50353 | 0.457182 |
| 2.26   | 2.11   | 2.36   | 2.77    | -0.15677 | 0.553779 |
| 634.68 | 507.91 | 544.34 | 504.62  | -0.29439 | 0.000343 |
| 0.84   | 0.78   | 0.53   | 0.11    | -0.18351 | 0.827737 |
| 12.2   | 15.78  | 12.93  | 12.85   | 0.234577 | 0.221688 |
| 22.5   | 36.76  | 28.36  | 31.98   | 0.579569 | 1.50E-08 |
| 9.02   | 7.95   | 8.8    | 9.25    | -0.26253 | 0.058942 |
| 40.52  | 28.53  | 35.75  | 35.43   | -0.31512 | 0.018255 |
| 10.55  | 11.07  | 13.71  | 11.45   | 0.310779 | 0.150904 |
| 1.68   | 22.66  | 11.04  | 17.39   | 3.776438 | 1.65E-62 |
| 29.6   | 20.85  | 23.49  | 24.57   | -0.41545 | 7.40E-06 |
| 0      | 0      | 0.02   | 0.08 NA | NA       |          |
| 89.85  | 111    | 104.96 | 114.03  | 0.318167 | 1.42E-05 |
| 44.83  | 63.63  | 53.3   | 58.14   | 0.344696 | 0.001103 |
| 265.54 | 200.55 | 214.12 | 210.07  | -0.37236 | 3.11E-07 |
| 14.52  | 18.45  | 16.57  | 13.98   | 0.256923 | 0.112641 |

|         |         |         |         |          |          |
|---------|---------|---------|---------|----------|----------|
| 40.78   | 19.85   | 39.72   | 29.29   | -0.52369 | 0.167523 |
| 11.3    | 14.18   | 14.54   | 13.56   | 0.147951 | 0.355247 |
| 0.42    | 0.05    | 0.12    | 0.11    | -0.90418 | 0.159298 |
| 65.92   | 30.2    | 31.79   | 27.61   | -1.08587 | 2.90E-17 |
| 0.01    | 0.02    | 0.01    | 0       | NA       | NA       |
| 6.76    | 6.19    | 7.57    | 7.73    | -0.08464 | 0.554834 |
| 0.03    | 0       | 0       | 0       | NA       | NA       |
| 8.41    | 3.87    | 6.11    | 4.66    | -0.54327 | 0.035128 |
| 14.27   | 14.72   | 14.88   | 11.18   | 0.083538 | 0.661423 |
| 19.37   | 17.12   | 16.56   | 15.29   | -0.29803 | 0.006545 |
| 14.57   | 10.85   | 11.22   | 10.08   | -0.19039 | 0.151723 |
| 1795.26 | 403.92  | 866.21  | 619.93  | -1.41499 | 4.93E-06 |
| 0       | 0       | 0       | 0       | NA       | NA       |
| 4.64    | 3.85    | 5.53    | 4.48    | -0.02344 | 0.94787  |
| 4959.4  | 2082.33 | 2954.04 | 2573.08 | -1.04958 | 3.09E-24 |
| 78.65   | 44.16   | 49.52   | 52.11   | -0.74264 | 2.26E-20 |
| 113.85  | 26.39   | 42.21   | 42.64   | -1.49989 | 1.49E-30 |
| 4.72    | 4.1     | 4.79    | 3.45    | 0.246776 | 0.205905 |
| 0.12    | 0       | 0.04    | 0       | -2.23775 | 3.37E-05 |
| 9.89    | 6.92    | 6.84    | 6.4     | -0.66608 | 0.00035  |
| 23.32   | 30.15   | 28.36   | 30.08   | 0.303069 | 0.014308 |
| 0.07    | 0.07    | 0.31    | 0.08    | -0.04429 | 0.96236  |
| 9.11    | 8.79    | 9.44    | 9.34    | 0.011277 | 0.962663 |
| 4.04    | 0.96    | 1.57    | 1.34    | -0.92458 | 9.52E-07 |
| 18.4    | 27.49   | 22.48   | 26.2    | 0.337413 | 3.65E-05 |
| 0.06    | 0.18    | 0.06    | 0.05    | -0.22725 | 0.785803 |
| 0       | 0       | 0       | 0       | NA       | NA       |
| 42.35   | 39.75   | 39.72   | 39.55   | -0.15211 | 0.116184 |
| 26.1    | 18.51   | 21.19   | 21.06   | -0.51691 | 2.18E-07 |
| 0       | 0       | 0       | 0       | NA       | NA       |
| 19.77   | 11.41   | 9.81    | 13.12   | -0.675   | 3.05E-10 |
| 0       | 0       | 0       | 0.05    | NA       | NA       |
| 16.67   | 24.15   | 16      | 19.9    | 0.357665 | 0.04143  |
| 11.68   | 28.96   | 21.36   | 21.47   | 0.961953 | 2.89E-13 |
| 0       | 0       | 0       | 0       | NA       | NA       |
| 119.94  | 102.49  | 111.81  | 109.04  | -0.01334 | 0.912249 |
| 23.56   | 20.84   | 18.92   | 18.28   | -0.30521 | 0.012289 |
| 4.1     | 8.11    | 5.73    | 5.16    | 0.377469 | 0.040242 |
| 5.68    | 8.78    | 6.61    | 7.64    | 0.287052 | 0.217474 |
| 7.07    | 8.43    | 9.84    | 7       | 0.53167  | 0.000588 |
| 46.64   | 56.5    | 66.09   | 61.88   | 0.161577 | 0.229697 |
| 19.81   | 27.14   | 28.65   | 30.32   | 0.527791 | 4.38E-10 |
| 2.59    | 1.42    | 1.5     | 0.97    | -0.88263 | 0.000148 |
| 89.12   | 66.13   | 83.21   | 74.28   | -0.29837 | 0.002227 |
| 6.54    | 6.28    | 5.46    | 7.45    | 0.158653 | 0.327465 |

|        |        |        |         |          |          |
|--------|--------|--------|---------|----------|----------|
| 2.8    | 0.74   | 0.82   | 0.56    | -0.94305 | 0.095947 |
| 0.22   | 0      | 0.02   | 0       | -1.6928  | 0.003591 |
| 0      | 0      | 0      | 0 NA    | NA       |          |
| 176.22 | 126.71 | 154.2  | 140.36  | -0.32918 | 0.0002   |
| 0      | 0      | 0      | 0 NA    | NA       |          |
| 0.51   | 1      | 0.82   | 1.05    | 0.69165  | 0.106506 |
| 0.08   | 0.25   | 0.29   | 0.37    | 0.415518 | 0.56903  |
| 4.63   | 1.85   | 1.55   | 1.55    | -0.78194 | 0.000589 |
| 0      | 0      | 0      | 0 NA    | NA       |          |
| 0      | 0.01   | 0.01   | 0 NA    | NA       |          |
| 55.26  | 86.78  | 71.32  | 77.64   | 0.438249 | 1.38E-05 |
| 1.89   | 2.79   | 2.29   | 3.38    | 0.317029 | 0.417177 |
| 28.85  | 30.42  | 32.67  | 30.65   | 0.033392 | 0.823747 |
| 13.02  | 42.6   | 31.74  | 37.97   | 1.515459 | 7.69E-37 |
| 15.22  | 13.75  | 22.47  | 21.04   | 0.190575 | 0.294303 |
| 17.01  | 21.07  | 21.03  | 18.72   | 0.181883 | 0.242329 |
| 0      | 0      | 0      | 0 NA    | NA       |          |
| 254.63 | 267.46 | 264.27 | 265.81  | -0.03568 | 0.727852 |
| 44.89  | 59.71  | 61.18  | 58.1    | 0.343905 | 0.000336 |
| 3.4    | 10.93  | 8.21   | 11.53   | 1.420106 | 1.48E-27 |
| 65.94  | 66.91  | 64.03  | 56.83   | -0.22506 | 0.03398  |
| 0      | 0      | 0      | 0 NA    | NA       |          |
| 0.04   | 0      | 0      | 0.19 NA | NA       |          |
| 87.65  | 377.33 | 315.37 | 336.13  | 1.931284 | 1.03E-83 |
| 5.37   | 5.64   | 5.65   | 5.19    | -0.04708 | 0.859697 |
| 7.14   | 10.77  | 8.3    | 8.94    | 0.208272 | 0.271336 |
| 16.97  | 49.04  | 26.49  | 36.93   | 1.119238 | 3.98E-05 |
| 12.42  | 12.61  | 14.75  | 15.03   | 0.147115 | 0.14166  |
| 6.22   | 7.36   | 6.94   | 7.35    | 0.004191 | 0.986548 |
| 21.63  | 33.05  | 26.52  | 29.37   | 0.500727 | 2.63E-06 |
| 47.01  | 56.35  | 50.03  | 56.08   | 0.221176 | 0.022961 |
| 7.97   | 6.47   | 6.55   | 7.3     | -0.21997 | 0.059883 |
| 7.74   | 12.15  | 11.52  | 9.91    | 0.237514 | 0.069893 |
| 14.91  | 21.06  | 15.44  | 19.43   | 0.384857 | 0.000742 |
| 5.85   | 4.55   | 4.45   | 4.2     | -0.21398 | 0.245244 |
| 4.84   | 28.54  | 12.44  | 22.22   | 1.997554 | 6.03E-22 |
| 26.65  | 19.42  | 19.39  | 19.66   | -0.46656 | 1.17E-08 |
| 11.93  | 11.64  | 12.21  | 11.52   | -0.04147 | 0.81312  |
| 5.37   | 8.88   | 6.93   | 7.05    | 0.40924  | 0.04685  |
| 0.66   | 4.18   | 1.78   | 2.36    | 1.948124 | 2.52E-09 |
| 0      | 0      | 0      | 0 NA    | NA       |          |
| 36.17  | 41.79  | 52.05  | 49.75   | 0.198737 | 0.060018 |
| 24.22  | 27.42  | 30.86  | 30.31   | 0.091491 | 0.536567 |
| 3.48   | 4.85   | 4.48   | 3.37    | -0.24026 | 0.341727 |
| 16.54  | 1.42   | 4.26   | 2.59    | -2.19561 | 5.77E-09 |

|        |        |        |        |          |          |
|--------|--------|--------|--------|----------|----------|
| 5.4    | 7.56   | 5.31   | 7.17   | 0.291525 | 0.082754 |
| 15.58  | 12.54  | 9.44   | 13.32  | -0.12332 | 0.323959 |
| 0.54   | 5.61   | 2.61   | 3.79   | 1.526075 | 6.07E-10 |
| 0      | 0      | 0      | 0      | NA       | NA       |
| 16.59  | 16.38  | 15.93  | 15.05  | -0.06279 | 0.690438 |
| 4.05   | 8.18   | 8.4    | 9.08   | 0.319717 | 0.035752 |
| 69.8   | 64.5   | 63.59  | 61.64  | -0.12223 | 0.286111 |
| 3.91   | 6.84   | 5.47   | 5.72   | 0.666133 | 0.000385 |
| 9.67   | 10.18  | 10.12  | 8.57   | 0.145106 | 0.355068 |
| 0      | 0      | 0      | 0.02   | NA       | NA       |
| 62.54  | 141.26 | 103.85 | 136.38 | 1.126054 | 5.08E-33 |
| 19.22  | 16.49  | 15.54  | 16.94  | -0.00957 | 0.955966 |
| 5.24   | 5.35   | 5.28   | 6.71   | 0.086889 | 0.597637 |
| 12.84  | 10.85  | 10.66  | 12.19  | -0.07913 | 0.581349 |
| 20.19  | 15.16  | 15.39  | 17.23  | -0.44978 | 1.64E-08 |
| 6.02   | 6.69   | 6.61   | 7.64   | -0.0086  | 0.976227 |
| 47.18  | 36.77  | 44.88  | 43.45  | -0.0133  | 0.93851  |
| 77.34  | 54.34  | 66.27  | 58.22  | -0.29966 | 0.001021 |
| 0.08   | 0      | 0.1    | 0.09   | NA       | NA       |
| 148.66 | 69.09  | 84.36  | 80.4   | -1.05728 | 3.02E-34 |
| 5.71   | 6.04   | 7.91   | 6.52   | 0.403187 | 0.002084 |
| 50.7   | 51.4   | 56.53  | 50.22  | 0.013381 | 0.932664 |
| 0      | 0      | 0      | 0      | NA       | NA       |
| 0.48   | 0.93   | 0.25   | 0.18   | -1.32684 | 0.001111 |
| 1.35   | 0.97   | 0.75   | 0.94   | -0.81461 | 0.062134 |
| 1.61   | 1.14   | 0.88   | 1.56   | -0.13678 | 0.823482 |
| 88.5   | 85.08  | 107.76 | 108.84 | 0.053338 | 0.626953 |
| 19.98  | 18.52  | 18.36  | 17.93  | -0.1343  | 0.284265 |
| 9.2    | 17.92  | 13.6   | 14.58  | 0.663277 | 4.46E-05 |
| 15.56  | 13.76  | 14.34  | 14.09  | -0.22908 | 0.123769 |
| 1.67   | 4.54   | 3.5    | 4.24   | 1.648897 | 7.09E-23 |
| 2.15   | 0.46   | 0.64   | 0.85   | -1.61593 | 5.61E-19 |
| 5.07   | 3.85   | 3.89   | 4.06   | -0.36221 | 0.030022 |
| 2.51   | 3.66   | 2.94   | 3.41   | 0.019209 | 0.926096 |
| 7.23   | 9.4    | 6.91   | 7.47   | 0.354418 | 0.022274 |
| 91.62  | 92.39  | 93.32  | 94.87  | 0.002248 | 0.986749 |
| 56.34  | 16.82  | 23.25  | 22.69  | -1.39643 | 4.95E-37 |
| 6.45   | 14.21  | 7.24   | 8.41   | 0.531784 | 3.12E-06 |
| 0      | 0.03   | 0      | 0      | NA       | NA       |
| 0      | 0      | 0      | 0      | NA       | NA       |
| 2.35   | 2.48   | 2.28   | 2.55   | -0.02507 | 0.948247 |
| 6.89   | 9.11   | 7.39   | 8      | 0.160644 | 0.521762 |
| 56.14  | 39.12  | 42.09  | 36.08  | 0.038836 | 0.831619 |
| 119.94 | 66.87  | 73.41  | 65.35  | -0.86403 | 3.15E-23 |
| 0      | 0      | 0      | 0      | NA       | NA       |

|        |        |        |        |          |          |
|--------|--------|--------|--------|----------|----------|
| 0.8    | 1.76   | 1.57   | 1.42   | 0.838714 | 6.07E-06 |
| 15.11  | 12.87  | 11.79  | 12.75  | -0.35081 | 0.005864 |
| 6.14   | 2.11   | 2.56   | 3.29   | -1.17828 | 8.27E-09 |
| 15.12  | 11.81  | 9.95   | 14.23  | 0.311813 | 0.028887 |
| 12.52  | 12.01  | 12.17  | 11.98  | 0.036107 | 0.816402 |
| 3.64   | 1.54   | 1.84   | 1.48   | -0.16864 | 0.338009 |
| 306.32 | 341.95 | 377.73 | 370.62 | 0.239533 | 0.002243 |
| 22.23  | 17.23  | 20.95  | 18.15  | -0.20608 | 0.138851 |
| 7.03   | 7.96   | 7.41   | 9.49   | 0.171948 | 0.398876 |
| 0      | 0      | 0      | 0      | NA       | NA       |
| 34.78  | 32.15  | 34.14  | 30.18  | -0.18039 | 0.155209 |
| 20.34  | 25.51  | 22.49  | 23.67  | 0.211986 | 0.042652 |
| 295.61 | 226.13 | 275.55 | 231.88 | -0.27266 | 0.003005 |
| 0.02   | 0.01   | 0.02   | 0.11   | NA       | NA       |
| 484.37 | 465.95 | 460.09 | 489.59 | -0.12586 | 0.114062 |
| 14.17  | 18.46  | 17.53  | 20.8   | 0.274985 | 0.039606 |
| 10.39  | 9.25   | 10.12  | 10.26  | -0.08815 | 0.544525 |
| 32.62  | 24.52  | 26.45  | 25.32  | -0.44618 | 2.41E-07 |
| 139.01 | 139.4  | 148.02 | 141.96 | -0.05129 | 0.688104 |
| 0.86   | 0.91   | 0.68   | 0.78   | 0.041158 | 0.936841 |
| 0.01   | 0      | 0.01   | 0.02   | NA       | NA       |
| 30.09  | 43.64  | 36.23  | 40.29  | 0.522614 | 6.42E-08 |
| 26.88  | 31     | 35.04  | 31.56  | 0.192089 | 0.060035 |
| 14.56  | 10.09  | 10.98  | 11.81  | -0.31946 | 0.0661   |
| 3.38   | 12.77  | 10.19  | 11.49  | 1.572214 | 4.60E-32 |
| 10.62  | 19.28  | 14.42  | 20.61  | 0.864693 | 5.60E-13 |
| 11.84  | 9.48   | 10.47  | 9.7    | -0.3506  | 0.032887 |
| 107.44 | 83.31  | 87.68  | 82.84  | -0.39532 | 1.17E-05 |
| 26.98  | 28     | 28.67  | 28.9   | 0.001269 | 0.995428 |
| 30.67  | 29.81  | 29.85  | 33.65  | -0.04982 | 0.729146 |
| 47.75  | 42.26  | 44.74  | 52.82  | -0.00732 | 0.961381 |
| 18.27  | 14.45  | 13.55  | 11.5   | -0.13171 | 0.363774 |
| 9.28   | 13.35  | 11.2   | 13.51  | 0.504431 | 0.000204 |
| 46.83  | 61.34  | 55.2   | 56.47  | 0.228065 | 0.027263 |
| 3.11   | 4.41   | 3.58   | 3.93   | 0.319406 | 0.086549 |
| 10.32  | 10.85  | 11.06  | 11.37  | -0.0013  | 0.993768 |
| 0.04   | 0      | 0      | 0.03   | NA       | NA       |
| 79.03  | 67.86  | 71.81  | 71.31  | -0.17125 | 0.060016 |
| 1.37   | 0.59   | 0.93   | 1.01   | -0.73936 | 0.004854 |
| 9.79   | 10.71  | 11.11  | 11.04  | 0.070915 | 0.580014 |
| 49.64  | 54.64  | 56.04  | 60.12  | -0.04367 | 0.728701 |
| 37.34  | 42.66  | 43.66  | 40.24  | 0.132336 | 0.428362 |
| 15.05  | 21.9   | 19.34  | 24.31  | 0.597355 | 3.81E-08 |
| 47.74  | 21.12  | 28.62  | 20.83  | 0.232799 | 0.011074 |
| 36.3   | 46.14  | 39.46  | 44.87  | 0.173274 | 0.161521 |

|        |        |        |        |          |          |
|--------|--------|--------|--------|----------|----------|
| 1.62   | 1.59   | 1.87   | 1.77   | 0.154687 | 0.601075 |
| 1.08   | 0.65   | 0.85   | 0.83   | -0.40861 | 0.401776 |
| 2.05   | 1.57   | 2.05   | 1.37   | -0.42346 | 0.266084 |
| 14.12  | 13.06  | 8.64   | 11.53  | -0.08362 | 0.636575 |
| 3.46   | 2.44   | 2.08   | 1.91   | -0.0011  | 0.997661 |
| 18.27  | 14.99  | 15.29  | 12.91  | -0.22418 | 0.216483 |
| 0.54   | 0.14   | 0.43   | 0.22   | -0.90948 | 0.027852 |
| 9.43   | 4.1    | 4.26   | 4.04   | -1.14323 | 3.52E-22 |
| 9.33   | 13.64  | 14.13  | 14.1   | 0.461345 | 1.63E-05 |
| 36.14  | 44.26  | 47.87  | 48.17  | 0.328167 | 0.000174 |
| 24.13  | 26.95  | 25.34  | 27.59  | 0.118431 | 0.232634 |
| 60.24  | 149.33 | 111.54 | 124.82 | 0.965652 | 1.60E-22 |
| 11.01  | 7.73   | 8.34   | 8.78   | -0.4852  | 0.001707 |
| 13.96  | 15.49  | 14.86  | 15.59  | 0.25458  | 0.015085 |
| 0.15   | 0.13   | 0.22   | 0.11   | -0.51379 | 0.461248 |
| 0.12   | 0.2    | 0.16   | 0.21   | 0.651739 | 0.339945 |
| 2.69   | 3.15   | 2.9    | 2.88   | 0.164432 | 0.345488 |
| 5.33   | 26.6   | 10.56  | 15.61  | 1.449583 | 0.000125 |
| 37.29  | 12.24  | 20.07  | 16.66  | -1.16506 | 1.23E-13 |
| 0      | 0      | 0      | 0      | NA       | NA       |
| 0      | 0      | 0      | 0      | NA       | NA       |
| 81.03  | 85.78  | 74.89  | 82.15  | -0.01801 | 0.900928 |
| 7.2    | 6.7    | 5.38   | 5.95   | -0.32733 | 0.003983 |
| 4.67   | 18.87  | 13.12  | 16.09  | 1.644557 | 1.14E-20 |
| 0      | 0      | 0      | 0      | NA       | NA       |
| 8.4    | 11.5   | 9.38   | 11.16  | 0.334063 | 0.016889 |
| 0      | 0      | 0      | 0      | NA       | NA       |
| 8.51   | 10.18  | 9.04   | 11.19  | -0.03134 | 0.901274 |
| 13.66  | 14.66  | 14.2   | 13.74  | 0.005952 | 0.981096 |
| 92.69  | 94.57  | 103.6  | 95.01  | 0.03607  | 0.774948 |
| 3.07   | 3.08   | 2.92   | 2.39   | -0.26101 | 0.369276 |
| 0.12   | 0.2    | 0.11   | 0.12   | 0.580295 | 0.421641 |
| 141.24 | 29.21  | 64.3   | 48     | -1.55291 | 4.40E-07 |
| 0.18   | 0.02   | 0      | 0.12   | NA       | NA       |
| 0      | 0      | 0.02   | 0      | NA       | NA       |
| 37.61  | 39.47  | 36.26  | 39.41  | -0.02036 | 0.86804  |
| 15.15  | 14.04  | 14.39  | 15.02  | -0.2194  | 0.153064 |
| 12.91  | 19.15  | 18.29  | 17.3   | 0.342201 | 0.00934  |
| 11.36  | 16.37  | 13.34  | 14.07  | 0.384306 | 0.006169 |
| 13.46  | 27.72  | 22.85  | 23.9   | 0.841671 | 1.22E-09 |
| 0.27   | 0.28   | 0.28   | 0.25   | -0.09016 | 0.91001  |
| 0      | 0      | 0      | 0      | NA       | NA       |
| 5.62   | 3.13   | 3.66   | 2.39   | -0.48522 | 0.010703 |
| 0      | 0.03   | 0      | 0      | NA       | NA       |
| 0.01   | 0.02   | 0.02   | 0      | NA       | NA       |

|        |        |       |        |          |          |
|--------|--------|-------|--------|----------|----------|
| 34.84  | 33.04  | 35.09 | 38.01  | -0.04165 | 0.791619 |
| 16.05  | 18.87  | 20.12 | 18.74  | 0.084841 | 0.617956 |
| 50.9   | 58.95  | 58.55 | 63.14  | 0.220946 | 0.010343 |
| 6.73   | 5.04   | 4.74  | 4.69   | -0.70714 | 3.34E-06 |
| 0      | 0      | 0     | 0      | NA       | NA       |
| 3.01   | 2.56   | 3.7   | 3.41   | -0.18568 | 0.553779 |
| 5.42   | 5.7    | 6.31  | 5.2    | 0.09867  | 0.737889 |
| 34.62  | 35.68  | 29.04 | 31.6   | -0.07271 | 0.680958 |
| 3.17   | 4.57   | 3.87  | 4.16   | 0.386762 | 0.008581 |
| 15.86  | 12.68  | 12.84 | 12.96  | -0.19535 | 0.122148 |
| 13.64  | 20.42  | 19.54 | 21.77  | 0.475739 | 0.000138 |
| 14.57  | 10.53  | 13.71 | 10.24  | -0.07236 | 0.760637 |
| 28.99  | 20.77  | 21.01 | 20.46  | -0.50627 | 5.93E-09 |
| 7.49   | 5.63   | 6.5   | 5.56   | -0.31422 | 0.084789 |
| 118.76 | 79.25  | 91.92 | 91.68  | -0.5122  | 1.84E-10 |
| 23.69  | 35.94  | 32.04 | 35.67  | 0.417595 | 4.15E-06 |
| 0      | 0      | 0     | 0      | NA       | NA       |
| 0      | 0      | 0     | 0.01   | NA       | NA       |
| 7.94   | 8.95   | 10.4  | 10.04  | 0.185185 | 0.122507 |
| 0      | 0.01   | 0     | 0.03   | NA       | NA       |
| 0.17   | 0.22   | 0.32  | 0.61   | 0.341671 | 0.592028 |
| 9.69   | 1.64   | 3.34  | 2.21   | -1.76759 | 7.27E-27 |
| 0      | 0      | 0     | 0      | NA       | NA       |
| 4.41   | 4.97   | 5.04  | 5.61   | 0.164139 | 0.249921 |
| 0      | 0.05   | 0.09  | 0      | NA       | NA       |
| 1.13   | 0.93   | 1.49  | 0.76   | -0.21391 | 0.713929 |
| 0.05   | 0.03   | 0.12  | 0.07   | 0.250465 | 0.76239  |
| 0.88   | 0.07   | 0.08  | 0.07   | -2.82831 | 3.95E-16 |
| 20.62  | 20.82  | 17.27 | 19.6   | 0.049581 | 0.714277 |
| 4.55   | 6.54   | 5.62  | 6.2    | 0.413294 | 0.00127  |
| 18.94  | 14.7   | 14.71 | 15.19  | -0.07119 | 0.729146 |
| 0      | 0      | 0     | 0      | NA       | NA       |
| 0      | 0      | 0     | 0      | NA       | NA       |
| 0      | 0      | 0     | 0      | NA       | NA       |
| 14.82  | 41.48  | 39.43 | 44.44  | 1.393537 | 4.65E-70 |
| 0.03   | 0      | 0     | 0      | NA       | NA       |
| 41.65  | 40.08  | 45.3  | 46.14  | 0.105745 | 0.437878 |
| 98.44  | 138.71 | 150.7 | 142.08 | 0.3684   | 0.000214 |
| 12.7   | 16.12  | 15.29 | 15.27  | 0.247828 | 0.107755 |
| 23.11  | 23.8   | 24.41 | 25.63  | 0.009294 | 0.948247 |
| 26.69  | 40.9   | 35.43 | 39.86  | 0.413832 | 3.97E-05 |
| 0      | 0.06   | 0.05  | 0.03   | NA       | NA       |
| 11.4   | 14.47  | 14.53 | 14.5   | 0.331544 | 0.013432 |
| 22.03  | 11.45  | 14.24 | 16.44  | -0.87385 | 6.17E-12 |
| 11.1   | 8.22   | 9.59  | 7.91   | -0.26599 | 0.039889 |



|        |        |        |        |          |          |
|--------|--------|--------|--------|----------|----------|
| 0      | 0      | 0      | 0      | NA       | NA       |
| 8.48   | 5.53   | 6.4    | 5.05   | -0.63566 | 4.38E-06 |
| 5.92   | 5.47   | 6.18   | 6.24   | 0.140385 | 0.460808 |
| 0.02   | 0      | 0.03   | 0.02   | NA       | NA       |
| 4.63   | 5.18   | 4.93   | 4.45   | 0.074721 | 0.698813 |
| 14.22  | 18.67  | 12.83  | 17.16  | 0.52356  | 0.000134 |
| 9.13   | 4.23   | 7.12   | 7.72   | -0.8639  | 2.31E-07 |
| 4.93   | 6.53   | 6.54   | 6.01   | 0.335076 | 0.009063 |
| 0.24   | 0.06   | 0.04   | 0.03   | -1.4011  | 0.017716 |
| 6.5    | 5.58   | 7.13   | 5.9    | -0.16438 | 0.447745 |
| 1.26   | 0.05   | 0.22   | 0.6    | -2.15725 | 1.06E-06 |
| 18.84  | 17.31  | 16.96  | 16.94  | -0.29966 | 0.008096 |
| 0      | 0      | 0      | 0      | NA       | NA       |
| 68.68  | 110.36 | 92.21  | 107.36 | 0.659822 | 9.68E-13 |
| 25.46  | 18.11  | 20.35  | 19.7   | -0.42999 | 0.000181 |
| 2.8    | 6.2    | 4.86   | 5.15   | 0.667686 | 0.004756 |
| 13.8   | 97.18  | 67.98  | 83.48  | 2.421257 | 3.39E-67 |
| 0      | 0      | 0      | 0      | NA       | NA       |
| 97.8   | 81.1   | 87.14  | 84.26  | -0.20102 | 0.029355 |
| 12.91  | 13.29  | 14.45  | 14.11  | 0.134078 | 0.369321 |
| 62.83  | 50.84  | 57.43  | 52.05  | -0.3062  | 0.001501 |
| 58.92  | 77.78  | 75.87  | 79.26  | 0.330315 | 4.46E-05 |
| 35.45  | 70.67  | 91.74  | 91.86  | 1.205421 | NA       |
| 28.49  | 31.69  | 28.73  | 30.83  | 0.134327 | 0.350175 |
| 0.24   | 0.3    | 0.34   | 0.37   | 0.480805 | 0.495023 |
| 0.03   | 0      | 0      | 0      | NA       | NA       |
| 0      | 0.04   | 0.09   | 0.13   | NA       | NA       |
| 11.01  | 12.2   | 11.04  | 11.63  | 0.005656 | 0.975618 |
| 42.38  | 87.69  | 68.94  | 72.34  | 0.639566 | 1.46E-08 |
| 27.3   | 29.04  | 28.86  | 28.18  | -0.0215  | 0.88999  |
| 21.72  | 23.85  | 21.62  | 20.54  | -0.06485 | 0.696366 |
| 0.8    | 0.09   | 0.14   | 0.18   | -2.27166 | 4.26E-10 |
| 68.64  | 72.33  | 70.36  | 70.54  | -0.0304  | 0.827592 |
| 230.81 | 241.77 | 235.75 | 215.14 | 0.031346 | 0.813172 |
| 1.55   | 3.74   | 1.47   | 2.32   | 0.823336 | 0.004224 |
| 0.29   | 0.91   | 0.37   | 0.71   | 0.821695 | 0.212294 |
| 8.39   | 9.6    | 9.02   | 9.41   | 0.188712 | 0.246536 |
| 0      | 0      | 0      | 0.02   | NA       | NA       |
| 2.15   | 6.1    | 4.19   | 4.62   | 1.272602 | 2.74E-10 |
| 0.17   | 0.28   | 0.18   | 0.51   | 0.621715 | 0.377312 |
| 6.36   | 9.8    | 9.12   | 9.29   | 0.242501 | 0.119262 |
| 32.09  | 42.88  | 37.79  | 31.68  | 0.370086 | 0.003621 |
| 0.03   | 0.08   | 0.04   | 0.13   | NA       | NA       |
| 15.86  | 14.15  | 15.52  | 16.06  | 0.07732  | 0.590713 |
| 0.15   | 0      | 0      | 0      | NA       | NA       |

|        |        |        |        |          |          |
|--------|--------|--------|--------|----------|----------|
| 98.54  | 89.17  | 100.57 | 89.86  | -0.22808 | 0.014995 |
| 28.29  | 38.26  | 35.45  | 39.62  | 0.348535 | 1.58E-05 |
| 3.05   | 2.65   | 5.16   | 4.34   | 0.136852 | 0.68232  |
| 11.41  | 12.26  | 12.51  | 12.15  | 0.109038 | 0.437263 |
| 5.3    | 5.88   | 4.74   | 5.59   | 0.15539  | 0.501657 |
| 16.75  | 15.02  | 13.58  | 12     | -0.20197 | 0.263933 |
| 0      | 0      | 0      | 0      | NA       | NA       |
| 4.81   | 3      | 2.95   | 4.26   | 0.159956 | 0.53786  |
| 0.36   | 0.44   | 0.51   | 0.6    | 0.544712 | 0.244814 |
| 100.34 | 98.18  | 98.96  | 101.08 | -0.03277 | 0.784567 |
| 4.23   | 5.29   | 4.26   | 4.99   | 0.16348  | 0.41991  |
| 84.11  | 298.32 | 222.97 | 282.14 | 1.588844 | 2.17E-46 |
| 0.2    | 0.05   | 0.44   | 0.22   | -0.56115 | 0.360955 |
| 3.66   | 7.25   | 6.33   | 6.15   | 0.832719 | 1.72E-12 |
| 0      | 0      | 0      | 0      | NA       | NA       |
| 0      | 0.04   | 0      | 0      | NA       | NA       |
| 0      | 0      | 0.05   | 0.09   | NA       | NA       |
| 2.08   | 1.16   | 1.64   | 1.7    | -0.41261 | 0.080471 |
| 38.14  | 45.07  | 45.09  | 43.55  | 0.245911 | 0.023956 |
| 43.61  | 38.1   | 46.46  | 44.19  | 0.056171 | 0.66378  |
| 4.56   | 6.67   | 5.42   | 6.15   | 0.41028  | 0.005167 |
| 16.58  | 11.35  | 12.95  | 12.86  | -0.35669 | 0.003982 |
| 19.38  | 21.14  | 27.47  | 21.6   | -0.03315 | 0.888827 |
| 33.22  | 26.1   | 32.27  | 26.68  | -0.30487 | 0.005533 |
| 8.95   | 0.26   | 0.83   | 1.07   | -3.07375 | 2.34E-13 |
| 0.11   | 0.04   | 0.15   | 0.03   | NA       | NA       |
| 1.44   | 2.34   | 2.03   | 1.45   | 0.24964  | 0.452916 |
| 17.4   | 18.58  | 15.82  | 15.57  | -0.16192 | 0.233413 |
| 52.87  | 40.4   | 50.53  | 47.36  | -0.28635 | 0.027164 |
| 11.97  | 12.4   | 10.48  | 9.66   | -0.17828 | 0.378021 |
| 0.32   | 0.3    | 0.4    | 0.3    | 1.488929 | 0.001067 |
| 10.29  | 12.79  | 11.65  | 14.31  | 0.180748 | 0.085419 |
| 0.3    | 0.52   | 0.34   | 0.85   | -0.47555 | 0.218478 |
| 11.75  | 11     | 11.16  | 11.95  | 0.081792 | 0.711605 |
| 23.12  | 24.18  | 26.02  | 24.13  | 0.230486 | 0.05669  |
| 17.37  | 14.9   | 18.03  | 16.05  | -0.21359 | 0.073034 |
| 7.23   | 4.28   | 4.87   | 4.14   | -0.61235 | 0.013521 |
| 0      | 0      | 0      | 0.13   | NA       | NA       |
| 44.01  | 21.25  | 30.93  | 27.1   | -0.58376 | 5.37E-07 |
| 31.22  | 27.75  | 29     | 31.38  | -0.20124 | 0.070113 |
| 46.31  | 58.02  | 56.08  | 58.03  | 0.412742 | 5.10E-08 |
| 2.98   | 3.58   | 3.97   | 4.13   | 0.328369 | 0.147909 |
| 15.53  | 22.23  | 20.45  | 20.9   | 0.338892 | 0.000334 |
| 23.8   | 36.33  | 34.62  | 32.31  | 0.496694 | 3.09E-07 |
| 0      | 0      | 0.04   | 0      | NA       | NA       |

|        |        |        |         |          |          |
|--------|--------|--------|---------|----------|----------|
| 0      | 0      | 0      | 0 NA    | NA       |          |
| 499.97 | 618.02 | 602.65 | 621.29  | 0.17035  | 0.020095 |
| 0.07   | 0.12   | 0.08   | 0.19 NA | NA       |          |
| 11.97  | 11.85  | 11.67  | 11.46   | -0.05521 | 0.681932 |
| 0      | 0      | 0      | 0 NA    | NA       |          |
| 21.94  | 22.93  | 22.01  | 21.68   | -0.04861 | 0.734024 |
| 10.43  | 11.78  | 10.08  | 12.22   | 0.112342 | 0.280934 |
| 0      | 0.07   | 0.02   | 0.02 NA | NA       |          |
| 9.03   | 11.61  | 10.92  | 11.57   | 0.1717   | 0.335485 |
| 0.06   | 0.12   | 0.15   | 0.03    | -0.0076  | 0.994915 |
| 37.13  | 24.22  | 24.63  | 27.04   | -0.51103 | 2.20E-05 |
| 0.05   | 0.04   | 0      | 0 NA    | NA       |          |
| 0      | 0      | 0.02   | 0.03 NA | NA       |          |
| 4.1    | 3.16   | 2.77   | 2.32    | -0.46477 | 0.100388 |
| 430.16 | 403.86 | 429.9  | 365.51  | -0.13657 | 0.186393 |
| 0.04   | 0.43   | 0.2    | 0.31    | 2.209505 | 8.69E-07 |
| 0      | 0      | 0      | 0 NA    | NA       |          |
| 4.45   | 10.26  | 8.32   | 10.04   | 0.562597 | 0.000751 |
| 15.18  | 20.2   | 18.33  | 21.01   | 0.333975 | 0.001078 |
| 8.31   | 8.91   | 8.42   | 8.74    | 0.032644 | 0.81989  |
| 0      | 0      | 0      | 0 NA    | NA       |          |
| 1.62   | 0.88   | 0.71   | 0.78    | -0.79393 | 0.032727 |
| 0      | 0      | 0      | 0 NA    | NA       |          |
| 7.91   | 9.88   | 7.26   | 8.58    | 0.100037 | 0.611421 |
| 12.65  | 64.01  | 24.72  | 44.8    | 1.484902 | 0.000346 |
| 17     | 16.73  | 18.69  | 23.18   | -0.11857 | 0.374093 |
| 12.86  | 9.81   | 14.75  | 12.99   | -0.18611 | 0.156772 |
| 0      | 0      | 0      | 0 NA    | NA       |          |
| 3.63   | 5.81   | 5.02   | 5.28    | 0.626439 | 0.000737 |
| 27.66  | 20.31  | 22.98  | 17.48   | -0.52425 | 0.006214 |
| 0.14   | 0.03   | 0.07   | 0.11    | -1.00324 | 0.118279 |
| 0.04   | 0.06   | 0.2    | 0.19    | -0.3085  | 0.702634 |
| 0.29   | 0.11   | 0      | 0.05 NA | NA       |          |
| 0.05   | 0.04   | 0.09   | 0.06    | 0.511915 | 0.477749 |
| 71.2   | 114.29 | 95.15  | 95.15   | 0.217251 | 0.082487 |
| 7.2    | 10.9   | 11.3   | 12.3    | 0.464524 | 0.000106 |
| 3.02   | 3.4    | 2.95   | 3.27    | 0.203187 | 0.384251 |
| 0.15   | 0.07   | 0.06   | 0.11    | -0.49663 | 0.456284 |
| 3.11   | 2.42   | 3.38   | 3.24    | 0.064194 | 0.784802 |
| 28.52  | 26.36  | 28.09  | 24.53   | -0.13118 | 0.446465 |
| 1.44   | 1.05   | 1.3    | 1.02    | -0.77196 | 0.025824 |
| 0      | 0      | 0      | 0.01 NA | NA       |          |
| 0      | 0      | 0      | 0 NA    | NA       |          |
| 7.52   | 7.17   | 6.48   | 6.73    | 0.051776 | 0.799823 |
| 0.56   | 1.47   | 0.93   | 2.75    | 1.071588 | 0.00556  |

|        |        |        |        |          |          |
|--------|--------|--------|--------|----------|----------|
| 16.13  | 15.58  | 16.63  | 16.48  | 0.068931 | 0.541089 |
| 0.08   | 0      | 0      | 0      | NA       | NA       |
| 0.01   | 0      | 0      | 0      | NA       | NA       |
| 33.49  | 22.07  | 29.63  | 27.38  | -0.59563 | 5.30E-09 |
| 2.87   | 3.02   | 2.88   | 2.46   | -0.03636 | 0.861141 |
| 15.38  | 80.15  | 51.72  | 77.09  | 2.222858 | 4.81E-88 |
| 4.27   | 1.65   | 3.24   | 2.11   | -0.8181  | 0.001877 |
| 49.5   | 46.19  | 62.21  | 56.4   | 0.07667  | 0.654968 |
| 0.05   | 0.51   | 0.28   | 0.47   | 1.932919 | 0.000511 |
| 0.76   | 0.56   | 0.39   | 0.35   | -0.10671 | 0.893556 |
| 268.8  | 89.96  | 143.8  | 119.24 | -1.1755  | 2.32E-22 |
| 23.16  | 22     | 24.42  | 23.8   | 0.025994 | 0.884597 |
| 0      | 0      | 0      | 0      | NA       | NA       |
| 43.87  | 36.04  | 58.19  | 48.39  | 0.06228  | 0.768326 |
| 12.3   | 12.27  | 11.07  | 12.73  | -0.12735 | 0.38666  |
| 0.14   | 0      | 0.05   | 0.01   | NA       | NA       |
| 25.95  | 24.3   | 26.45  | 26.2   | 0.110781 | 0.350063 |
| 18.53  | 15.48  | 16.86  | 16.8   | -0.26273 | 0.018529 |
| 4.7    | 4.27   | 3.07   | 4.81   | 0.006072 | 0.978992 |
| 8.22   | 9.94   | 8.11   | 8.43   | 0.238237 | 0.199168 |
| 2.94   | 2.86   | 2.16   | 4.07   | 0.208719 | 0.496739 |
| 3.85   | 3.56   | 3.24   | 2.84   | -0.09505 | 0.85716  |
| 1.51   | 2.34   | 1.75   | 1.48   | -0.05332 | 0.889321 |
| 252.55 | 198.83 | 231.25 | 203.4  | -0.29179 | 0.001345 |
| 16.82  | 19.65  | 17.26  | 20.63  | 0.214678 | 0.034252 |
| 2.18   | 1.11   | 0.65   | 1.89   | -0.03943 | 0.944131 |
| 0      | 0      | 0      | 0      | NA       | NA       |
| 230.74 | 341.48 | 316.45 | 327.42 | 0.448782 | 4.35E-10 |
| 3.97   | 1.45   | 2.83   | 1.53   | -1.24997 | 4.03E-08 |
| 0      | 0      | 0      | 0      | NA       | NA       |
| 0      | 0      | 0      | 0      | NA       | NA       |
| 24.98  | 33.02  | 27.18  | 29.59  | 0.061991 | 0.6611   |
| 0.1    | 0.53   | 0.32   | 0.23   | 0.643094 | 0.282991 |
| 0.8    | 0.42   | 0.2    | 0.15   | -0.79664 | 0.232634 |
| 1.89   | 0.83   | 1.67   | 0.89   | -0.48493 | 0.157196 |
| 99.38  | 102.66 | 109.24 | 125.96 | 0.003096 | 0.981181 |
| 75.3   | 14.25  | 20.48  | 10.31  | -2.38463 | 2.32E-19 |
| 64.41  | 53.12  | 52.81  | 44.89  | -0.39431 | 8.13E-05 |
| 12.48  | 8.76   | 8.72   | 10.6   | -0.0358  | 0.815345 |
| 5.35   | 4.81   | 4.78   | 4.28   | -0.21809 | 0.372266 |
| 10.7   | 0.95   | 3.22   | 2.19   | -2.05631 | 6.67E-07 |
| 24.24  | 17.74  | 19.4   | 17.53  | -0.40917 | 4.55E-07 |
| 0      | 0      | 0      | 0      | NA       | NA       |
| 5.77   | 5.4    | 4.71   | 4.97   | 0.00217  | 0.991592 |
| 17.69  | 16.29  | 14.95  | 14.06  | -0.11415 | 0.625415 |

|       |       |        |       |          |           |
|-------|-------|--------|-------|----------|-----------|
| 0.01  | 0.04  | 0.14   | 0.03  | 0.706918 | 0.290722  |
| 18.63 | 15.12 | 15.42  | 13.37 | -0.50723 | 3.94E-06  |
| 6.44  | 6.4   | 8.16   | 5.88  | -0.18248 | 0.287557  |
| 4.06  | 4.97  | 4.01   | 4.63  | 0.307849 | 0.02867   |
| 0.67  | 0.22  | 0.36   | 0.29  | -1.13722 | 8.35E-05  |
| 0     | 0     | 0      | 0     | NA       | NA        |
| 0     | 0     | 0      | 0     | NA       | NA        |
| 10.46 | 10.42 | 9.31   | 8     | -0.35935 | 0.000497  |
| 0     | 0     | 0      | 0     | NA       | NA        |
| 1.62  | 0.21  | 0.2    | 0.38  | -1.04373 | 0.000972  |
| 5.73  | 6.64  | 6.86   | 4.78  | -0.01384 | 0.966586  |
| 37.12 | 37.76 | 39.12  | 38.51 | 0.071388 | 0.719609  |
| 14.98 | 14.05 | 11.71  | 12.03 | 0.091597 | 0.55268   |
| 2.5   | 2.92  | 2.58   | 2.85  | 0.385316 | 0.036219  |
| 46.04 | 71.28 | 70.51  | 68.68 | 0.395251 | 0.000457  |
| 0.02  | 0.11  | 0.03   | 0.03  | -0.51886 | 0.469767  |
| 0.17  | 0.05  | 0.03   | 0.03  | NA       | NA        |
| 11.27 | 13.94 | 11.62  | 12.22 | 0.133383 | 0.324944  |
| 22.49 | 9.21  | 6.92   | 7.12  | -1.49457 | 9.74E-38  |
| 0     | 0     | 0      | 0     | NA       | NA        |
| 62.95 | 61.75 | 54.56  | 60.98 | 0.067514 | 0.624621  |
| 14.6  | 13.97 | 11.4   | 14.08 | 0.259364 | 0.072747  |
| 7.34  | 4.1   | 4.04   | 4.24  | -0.82543 | 7.46E-08  |
| 5.94  | 9.41  | 6.62   | 9.28  | 0.470165 | 0.000127  |
| 27.21 | 21.33 | 22.3   | 20.85 | -0.32959 | 0.002253  |
| 39.66 | 6.18  | 8.63   | 8.77  | -2.33916 | 2.81E-106 |
| 0     | 0     | 0      | 0     | NA       | NA        |
| 7.89  | 6.11  | 6.16   | 6.78  | -0.08484 | 0.543203  |
| 8.64  | 7.99  | 7.11   | 9.36  | 0.128794 | 0.298406  |
| 60.72 | 43.53 | 42.67  | 42.99 | -0.67033 | 4.95E-18  |
| 14.54 | 12.9  | 14.15  | 14.62 | -0.08536 | 0.501478  |
| 24.21 | 10.96 | 14     | 11.92 | -0.94579 | 5.85E-17  |
| 8.46  | 5.89  | 7.08   | 7.14  | -0.27335 | 0.116527  |
| 14.93 | 12.33 | 14.89  | 15.4  | -0.14415 | 0.410345  |
| 85.3  | 94.39 | 104.48 | 87.36 | 0.198343 | 0.037382  |
| 63.06 | 69.27 | 62.07  | 62.4  | -0.13106 | 0.2439    |
| 9.86  | 12.07 | 11.3   | 11.03 | 0.171936 | 0.187999  |
| 18.55 | 20.57 | 19.69  | 20.5  | 0.074295 | 0.566849  |
| 2.64  | 1.15  | 1.23   | 1.88  | -0.72823 | 5.41E-05  |
| 9.19  | 8.04  | 9.37   | 8.98  | -0.05358 | 0.760637  |
| 25.14 | 24.44 | 21.77  | 22.56 | 0.03209  | 0.813799  |
| 9.79  | 11.59 | 10.44  | 10.82 | -0.09223 | 0.619953  |
| 33.8  | 16.54 | 22.32  | 19.18 | -0.81071 | 2.48E-10  |
| 0     | 0     | 0      | 0     | NA       | NA        |
| 14.63 | 12.16 | 14.65  | 14.65 | -0.13152 | 0.303505  |

|        |        |       |        |          |          |
|--------|--------|-------|--------|----------|----------|
| 32.87  | 35.79  | 31.23 | 32.71  | 0.049093 | 0.800572 |
| 8.09   | 5.8    | 5.51  | 5.67   | -0.44765 | 0.017618 |
| 0      | 0      | 0     | 0      | NA       | NA       |
| 7.83   | 9.92   | 10.81 | 9.61   | 0.302718 | 0.03267  |
| 0      | 0.05   | 0     | 0.02   | NA       | NA       |
| 12.69  | 5.54   | 6.27  | 6.04   | -0.84508 | 2.84E-12 |
| 32.9   | 37.69  | 40.89 | 37.74  | 0.131309 | 0.193252 |
| 0.17   | 3.25   | 1.35  | 2.01   | 3.282467 | 2.11E-22 |
| 6.1    | 5.71   | 4.83  | 5.51   | -0.12117 | 0.50294  |
| 5.9    | 16.67  | 12.59 | 15.04  | 1.096124 | 4.15E-17 |
| 6.48   | 15.85  | 13.18 | 13.85  | 0.931203 | 3.82E-13 |
| 17.2   | 26.96  | 23.59 | 23.66  | 0.55059  | 8.61E-07 |
| 0.3    | 0      | 0.05  | 0      | NA       | NA       |
| 44.49  | 66.35  | 57.45 | 57.34  | 0.423748 | 1.89E-05 |
| 16.95  | 17.23  | 18.39 | 15.89  | -0.00355 | 0.986452 |
| 0      | 0      | 0     | 0.01   | NA       | NA       |
| 17.51  | 20.23  | 19.83 | 18.89  | 0.028616 | 0.882965 |
| 5.81   | 6.53   | 6.25  | 5.17   | 0.008589 | 0.97575  |
| 16.96  | 14.39  | 16.04 | 17.15  | 0.020379 | 0.885986 |
| 5.46   | 5.75   | 5.93  | 4.59   | -0.45363 | 0.031089 |
| 0      | 0      | 0     | 0      | NA       | NA       |
| 0      | 0      | 0     | 0      | NA       | NA       |
| 21.86  | 22.79  | 27.37 | 23.9   | 0.12327  | 0.42351  |
| 0.73   | 3.8    | 1.77  | 2.71   | 1.110833 | 0.000564 |
| 98.83  | 78.68  | 92.02 | 80.73  | -0.38188 | 0.003139 |
| 5.82   | 4.7    | 4.59  | 4.5    | -0.34878 | 0.108499 |
| 31.36  | 26.47  | 29.46 | 25.96  | -0.30285 | 0.000253 |
| 4      | 7.4    | 5.35  | 8.63   | 0.635156 | 0.058646 |
| 18.98  | 24.82  | 21.71 | 23.29  | 0.261651 | 0.11359  |
| 422.48 | 253.08 | 341.6 | 277.84 | -0.5741  | 1.02E-08 |
| 0      | 0      | 0     | 0      | NA       | NA       |
| 6.33   | 4.66   | 4.98  | 6.39   | 0.251531 | 0.181048 |
| 15.44  | 20.34  | 15.68 | 18.81  | 0.226919 | 0.078314 |
| 17.62  | 13.71  | 16.43 | 16.33  | -0.0944  | 0.599132 |
| 100.24 | 72.8   | 86.6  | 85.83  | -0.38098 | 4.78E-05 |
| 13.69  | 16.39  | 14.61 | 16.27  | 0.465814 | 1.39E-06 |
| 8.09   | 7.49   | 9.61  | 8.23   | 0.117816 | 0.487167 |
| 8.53   | 7.89   | 7.16  | 7.4    | -0.07895 | 0.664803 |
| 0.58   | 2.51   | 1.82  | 2.87   | 1.68379  | 1.60E-07 |
| 21.31  | 22.89  | 21.42 | 23.83  | -0.00595 | 0.975981 |
| 49.57  | 54.01  | 52.97 | 53.61  | 0.073175 | 0.495334 |
| 2.03   | 2.13   | 1.16  | 1.52   | -0.66874 | 0.004314 |
| 7.97   | 8.88   | 5.36  | 6.66   | -0.3036  | 0.183415 |
| 1.08   | 1.02   | 0.91  | 1.24   | 0.044162 | 0.950846 |
| 65.72  | 59.31  | 61.43 | 55.96  | -0.10615 | 0.596023 |

|       |       |       |       |          |          |
|-------|-------|-------|-------|----------|----------|
| 27    | 27    | 25.41 | 23.65 | -0.11141 | 0.29573  |
| 9.06  | 5.14  | 4.24  | 5.35  | -0.58093 | 1.43E-05 |
| 1.76  | 21.98 | 13.09 | 19.57 | 3.230287 | 2.80E-73 |
| 0.1   | 0.09  | 0.06  | 0.16  | NA       | NA       |
| 13.9  | 19.2  | 21.16 | 19.95 | 0.421336 | 0.006191 |
| 4.13  | 5.18  | 5.52  | 4.35  | 0.21399  | 0.157871 |
| 9.77  | 10.55 | 12.66 | 12.02 | 0.144741 | 0.468812 |
| 22.13 | 22    | 18.04 | 19.77 | -0.0855  | 0.547359 |
| 69.78 | 80.52 | 77.12 | 75.2  | 0.033782 | 0.789916 |
| 0.18  | 0.24  | 0.08  | 0.31  | 0.256245 | 0.748769 |
| 13.19 | 15.47 | 15.41 | 15.22 | 0.170705 | 0.157436 |
| 1.56  | 2.41  | 2.05  | 2.18  | 0.463913 | 0.013899 |
| 6.42  | 3.72  | 3.68  | 3.7   | -0.20038 | 0.175868 |
| 38.35 | 50.52 | 41.87 | 45.46 | 0.341642 | 0.00118  |
| 2.13  | 3.54  | 2.85  | 2.24  | 0.206806 | 0.3249   |
| 8.42  | 12.63 | 14.12 | 11.68 | 0.567254 | 0.002826 |
| 11.12 | 12.92 | 10.56 | 11.98 | 0.109711 | 0.53469  |
| 53.12 | 52.05 | 56.92 | 57.83 | -0.01906 | 0.890132 |
| 16.07 | 20.32 | 23.46 | 26.8  | 0.249474 | 0.051234 |
| 23.69 | 27.86 | 25.18 | 26.65 | 0.340805 | 0.000562 |
| 8.01  | 13.25 | 9.63  | 10.2  | 0.519926 | 8.77E-05 |
| 2.05  | 2.27  | 3.18  | 1.97  | 0.030986 | 0.941447 |
| 14.46 | 19.92 | 18.61 | 19.23 | 0.305498 | 0.015783 |
| 0     | 0     | 0     | 0     | NA       | NA       |
| 6.34  | 7.77  | 7.41  | 6.38  | 0.031395 | 0.904541 |
| 0     | 0     | 0     | 0     | NA       | NA       |
| 11.05 | 18.88 | 17.79 | 17.24 | 0.66904  | 2.99E-11 |
| 5.56  | 4.63  | 5.03  | 5.09  | -0.22632 | 0.046856 |
| 8.12  | 6.57  | 7.35  | 6.77  | -0.16311 | 0.210008 |
| 9.32  | 14.49 | 12.76 | 14.68 | 0.23859  | 0.071462 |
| 0     | 0     | 0     | 0     | NA       | NA       |
| 2.04  | 1.4   | 1.45  | 1.15  | -0.19165 | 0.714341 |
| 9.75  | 11.65 | 11.81 | 15.3  | 0.149489 | 0.427658 |
| 0     | 0     | 0     | 0     | NA       | NA       |
| 3.28  | 2.2   | 2.86  | 3.32  | -0.3372  | 0.139827 |
| 3.37  | 2.57  | 2.96  | 2.87  | 0.096677 | 0.620775 |
| 9.98  | 7.53  | 10.03 | 7.5   | -0.1438  | 0.606148 |
| 28.37 | 14.37 | 16.15 | 18.61 | -0.73705 | 6.18E-11 |
| 5.9   | 2.4   | 4.35  | 3.76  | -1.04091 | 1.27E-07 |
| 0.01  | 0.01  | 0.01  | 0.02  | NA       | NA       |
| 43.48 | 44.61 | 49.07 | 48.75 | 0.118837 | 0.276193 |
| 14.4  | 13.27 | 14.19 | 14.09 | 0.175172 | 0.313875 |
| 4.85  | 3.85  | 3.08  | 3.38  | 0.195718 | 0.487872 |
| 1.19  | 0.5   | 0.81  | 0.73  | -0.29811 | 0.571377 |
| 0.02  | 0.01  | 0.01  | 0     | NA       | NA       |

|       |       |       |       |          |          |
|-------|-------|-------|-------|----------|----------|
| 18.57 | 21.82 | 22.63 | 21.94 | 0.20312  | 0.07562  |
| 44.67 | 31.48 | 35.09 | 32.65 | -0.32701 | 0.001352 |
| 42.8  | 38.94 | 45.45 | 43.85 | -0.08256 | 0.554943 |
| 23.51 | 24.62 | 19.56 | 23.57 | 0.096811 | 0.391892 |
| 7.32  | 7.3   | 6.85  | 7.74  | -0.10577 | 0.480941 |
| 0.47  | 0.49  | 0.74  | 0.75  | 0.02365  | 0.975388 |
| 0.46  | 2.42  | 1.38  | 1.22  | 1.700357 | 5.42E-08 |
| 14.37 | 12.97 | 15.54 | 14.43 | -0.17927 | 0.236588 |
| 0     | 0     | 0     | 0     | NA       | NA       |
| 0.05  | 0.03  | 0.06  | 0.04  | NA       | NA       |
| 0     | 0     | 0     | 0     | NA       | NA       |
| 10.11 | 10.84 | 9.01  | 9.99  | 0.051846 | 0.747622 |
| 0     | 0     | 0     | 0.08  | NA       | NA       |
| 14.18 | 9.85  | 10.26 | 10.86 | -0.30999 | 0.002396 |
| 0.13  | 0.02  | 0.02  | 0     | NA       | NA       |
| 0     | 0     | 0     | 0.04  | NA       | NA       |
| 0.82  | 0.88  | 0.65  | 0.63  | -0.20146 | 0.737972 |
| 0     | 0     | 0     | 0     | NA       | NA       |
| 4.95  | 70.22 | 21.16 | 38.39 | 2.393336 | 1.49E-08 |
| 9.33  | 9.79  | 8.81  | 9.39  | 0.146883 | 0.179686 |
| 1.06  | 3.44  | 2.18  | 4.1   | 1.283309 | 2.54E-05 |
| 18.7  | 22.68 | 27.6  | 25.89 | 0.490702 | 1.23E-06 |
| 3     | 4.6   | 4.2   | 4.71  | 0.445758 | 0.039292 |
| 6.75  | 8.74  | 9.93  | 10.17 | 0.384105 | 0.06167  |
| 0     | 0     | 0     | 0     | NA       | NA       |
| 0.11  | 0.29  | 0.15  | 0.16  | 1.718404 | 0.001227 |
| 0.2   | 0.47  | 0.14  | 0     | NA       | NA       |
| 0     | 0     | 0     | 0     | NA       | NA       |
| 0.03  | 0.08  | 0.04  | 0.12  | -0.34972 | 0.658987 |
| 1.84  | 0.67  | 0.4   | 0.53  | -1.64754 | 4.69E-09 |
| 0     | 0     | 0     | 0     | NA       | NA       |
| 0     | 0     | 0     | 0     | NA       | NA       |
| 0     | 0     | 0     | 0     | NA       | NA       |
| 6.45  | 6.82  | 6.4   | 5.84  | -0.06473 | 0.752189 |
| 23.76 | 36.39 | 37.43 | 39.09 | 0.635141 | 1.15E-12 |
| 13.44 | 12.96 | 12.58 | 16.58 | 0.091011 | 0.550073 |
| 1.36  | 0.9   | 0.41  | 0.56  | -0.32367 | 0.440162 |
| 28.26 | 30.8  | 29.23 | 29.56 | 0.080984 | 0.570765 |
| 1.13  | 1.84  | 0.99  | 0.7   | -0.35736 | 0.213937 |
| 8.5   | 4.04  | 5.84  | 5.02  | -0.61984 | 0.0002   |
| 0     | 0     | 0     | 0     | NA       | NA       |
| 0     | 0     | 0     | 0     | NA       | NA       |
| 32.68 | 46.33 | 35.48 | 41.51 | 0.11889  | 0.427768 |
| 7.35  | 8.75  | 8.71  | 9.47  | 0.165571 | 0.225539 |
| 7.46  | 11.52 | 10.4  | 11.28 | 0.528032 | 6.26E-07 |



|       |       |       |       |          |          |
|-------|-------|-------|-------|----------|----------|
| 0.48  | 0.39  | 0.5   | 0.62  | 0.104214 | 0.869436 |
| 0.8   | 0.94  | 0.68  | 1     | -0.09407 | 0.840343 |
| 1.32  | 1.22  | 1.61  | 1.43  | -0.2129  | 0.484343 |
| 0.52  | 0.44  | 0.53  | 0.39  | -0.16216 | 0.789781 |
| 0.05  | 0     | 0     | 0     | NA       | NA       |
| 0     | 0     | 0     | 0.02  | NA       | NA       |
| 9.36  | 9.94  | 8.75  | 8.55  | -0.11832 | 0.575545 |
| 2.86  | 2.01  | 2.52  | 1.78  | -0.08278 | 0.836229 |
| 0     | 0.28  | 0.13  | 0.13  | 1.492435 | 0.010081 |
| 1.29  | 1.21  | 0.87  | 0.39  | -1.3178  | 3.81E-06 |
| 7.4   | 12.61 | 9.12  | 11.95 | 0.409098 | 0.005968 |
| 0     | 0     | 0     | 0     | NA       | NA       |
| 17.53 | 6.46  | 7.72  | 5.64  | -1.20296 | 4.80E-15 |
| 86.9  | 76.59 | 80.27 | 72.82 | -0.11237 | 0.310843 |
| 0     | 0     | 0     | 0     | NA       | NA       |
| 25.66 | 35.51 | 25.73 | 30.54 | 0.127585 | 0.251371 |
| 0.02  | 0.02  | 0.03  | 0     | NA       | NA       |
| 3.03  | 3.89  | 3.94  | 4.64  | 0.125492 | 0.619736 |
| 0     | 0.03  | 0.03  | 0     | NA       | NA       |
| 0     | 0.06  | 0     | 0     | NA       | NA       |
| 0     | 0     | 0     | 0     | NA       | NA       |
| 23.25 | 19.53 | 17.99 | 19.07 | -0.30229 | 0.0454   |
| 3.11  | 3.76  | 3.07  | 2.45  | 0.314016 | 0.279838 |
| 3.59  | 4.67  | 4.71  | 5.3   | 0.227222 | 0.297505 |
| 42.57 | 47.78 | 43.13 | 37.03 | 0.087825 | 0.645197 |
| 3.27  | 4.45  | 4.06  | 3.94  | 0.427246 | 0.017372 |
| 0.43  | 0.33  | 0.91  | 0.74  | -0.23678 | 0.55452  |
| 0.31  | 0     | 0.28  | 0.08  | NA       | NA       |
| 0     | 0     | 0     | 0     | NA       | NA       |
| 2.55  | 1.85  | 3.15  | 2.52  | -0.18138 | 0.501497 |
| 10.5  | 8.95  | 10.41 | 8.49  | 0.049167 | 0.800959 |
| 0.25  | 0.15  | 0.13  | 0.14  | 0.858989 | 0.144943 |
| 4.62  | 4.97  | 4.14  | 4.64  | 0.576572 | 0.00778  |
| 15.58 | 15.59 | 15.51 | 14.04 | -0.11146 | 0.547427 |
| 12.75 | 4.2   | 6.38  | 4.34  | -1.38492 | 8.22E-18 |
| 0     | 0.11  | 0.12  | 0.14  | NA       | NA       |
| 5.55  | 3.01  | 3.76  | 3.46  | -0.37529 | 0.122483 |
| 2.01  | 0.89  | 1.53  | 1.27  | -0.97722 | 0.054994 |
| 0.06  | 0     | 0.06  | 0     | NA       | NA       |
| 11.53 | 11.15 | 10.94 | 10.18 | 0.195954 | 0.149186 |
| 6.12  | 6.15  | 7.05  | 7.7   | -0.07108 | 0.653519 |
| 21.07 | 29.97 | 26.41 | 26.7  | 0.432549 | 7.31E-06 |
| 5.51  | 6.9   | 5.79  | 6.94  | 0.215386 | 0.23118  |
| 22.12 | 27.63 | 27.16 | 27.29 | 0.192355 | 0.102463 |
| 2.67  | 2.66  | 2.41  | 2.89  | -0.09495 | 0.651342 |

|         |         |         |         |          |          |
|---------|---------|---------|---------|----------|----------|
| 14.91   | 30.54   | 23.05   | 27.05   | 0.824242 | 3.25E-14 |
| 1.78    | 1.56    | 1.3     | 1.31    | -0.31349 | 0.179344 |
| 22.63   | 35.39   | 27.46   | 31.12   | 0.455918 | 0.000711 |
| 11.66   | 10.34   | 11.4    | 9.57    | -0.1368  | 0.553779 |
| 38.78   | 42.71   | 39.6    | 40.44   | 0.221212 | 0.022918 |
| 1773.48 | 1544.56 | 2368.01 | 2019.97 | 0.061396 | 0.743045 |
| 15.52   | 14.29   | 14.84   | 13.81   | -0.26857 | 0.005716 |
| 43.07   | 49.69   | 58.27   | 56.58   | -0.05206 | 0.693665 |
| 39.1    | 39.3    | 38.88   | 38.57   | 0.107803 | 0.435331 |
| 0       | 0       | 0       | 0       | NA       | NA       |
| 14.53   | 14.75   | 13.76   | 15.34   | -0.05926 | 0.638027 |
| 8.01    | 22.82   | 21.88   | 24.3    | 1.378428 | 3.25E-32 |
| 45.22   | 58.49   | 55.61   | 52.07   | 0.267611 | 0.008221 |
| 0.09    | 0.1     | 0.16    | 0.21    | -0.62689 | 0.35461  |
| 2.12    | 3.28    | 3.41    | 2.83    | 0.115642 | 0.6696   |
| 13.22   | 12.16   | 10.99   | 9.08    | -0.08103 | 0.700418 |
| 2.43    | 3.03    | 3.13    | 3.13    | 0.254245 | 0.067405 |
| 12.25   | 10.71   | 11.18   | 11.79   | 0.001648 | 0.995428 |
| 32.65   | 67.54   | 58.55   | 64.05   | 0.760806 | 7.25E-12 |
| 42.26   | 4.71    | 16.03   | 11.3    | -1.90124 | 1.68E-07 |
| 4.56    | 1.78    | 1.82    | 2.94    | -0.8675  | 1.71E-05 |
| 3.49    | 1.67    | 1.41    | 1.34    | -1.02798 | 6.94E-05 |
| 47.22   | 14.36   | 23.11   | 19.61   | -1.07772 | 6.02E-15 |
| 47.76   | 38.94   | 42.43   | 42.7    | -0.39495 | 0.000766 |
| 3.25    | 5.19    | 3.53    | 4.76    | 0.201103 | 0.172666 |
| 3.5     | 16.22   | 14.74   | 15.93   | 1.972005 | 4.94E-79 |
| 452.49  | 131.08  | 197.02  | 143.72  | -1.56584 | 7.15E-41 |
| 78.25   | 143.55  | 136.88  | 152.67  | 0.821216 | 9.68E-30 |
| 84.83   | 62.33   | 71.66   | 67.51   | -0.21076 | 0.030101 |
| 22.91   | 1.96    | 5.11    | 4.02    | -2.49135 | 3.24E-11 |
| 0       | 0       | 0       | 0       | NA       | NA       |
| 0.03    | 0.06    | 0.05    | 0.09    | NA       | NA       |
| 9.24    | 20.87   | 15.58   | 18.05   | 0.772799 | 4.10E-07 |
| 126.29  | 65.85   | 91.17   | 78.32   | -0.8708  | 1.35E-12 |
| 1.56    | 0.67    | 0.47    | 0.68    | -1.32438 | 0.001394 |
| 14.41   | 10.38   | 12.27   | 9.75    | 0.099272 | 0.553412 |
| 3.98    | 0       | 1.21    | 0.52    | -1.97998 | 3.66E-05 |
| 4.69    | 6.5     | 5.19    | 5.85    | 0.379415 | 0.017646 |
| 64.96   | 65.84   | 67.56   | 63.16   | 0.017362 | 0.899382 |
| 3.04    | 1.03    | 1.96    | 1.55    | -1.13342 | 1.75E-06 |
| 0       | 0       | 0       | 0       | NA       | NA       |
| 36.77   | 43.95   | 46.22   | 47.49   | 0.136515 | 0.36079  |
| 23.25   | 29.87   | 24.03   | 24.59   | 0.190999 | 0.280891 |
| 0.2     | 0.1     | 0.04    | 0.12    | -1.33985 | 0.02352  |
| 24.32   | 25.2    | 25.45   | 25.2    | -0.05445 | 0.717625 |

|       |       |       |       |          |          |
|-------|-------|-------|-------|----------|----------|
| 29.75 | 46.48 | 39.91 | 40.75 | 0.582056 | 1.98E-06 |
| 0     | 0     | 0     | 0     | NA       | NA       |
| 8.31  | 7.96  | 8.74  | 7.66  | -0.161   | 0.270473 |
| 5.29  | 4.11  | 5.12  | 4.75  | -0.09228 | 0.708562 |
| 34.2  | 18.83 | 22.55 | 24.36 | -0.5088  | 4.83E-07 |
| 88.64 | 59.97 | 68.97 | 61.94 | -0.57173 | 4.32E-10 |
| 20.35 | 17.75 | 17.68 | 17.2  | 0.013695 | 0.944571 |
| 2.11  | 4.93  | 2.68  | 4.21  | 0.826555 | 0.003093 |
| 21.3  | 38.61 | 30.95 | 34.27 | 0.4821   | 0.001113 |
| 0     | 0.02  | 0     | 0.02  | NA       | NA       |
| 0.14  | 0.01  | 0     | 0     | NA       | NA       |
| 0     | 0     | 0     | 0.01  | NA       | NA       |
| 5.87  | 6.16  | 6.24  | 7.21  | 0.142649 | 0.471929 |
| 0.13  | 0.13  | 0.03  | 0     | NA       | NA       |
| 0.03  | 0.02  | 0.03  | 0.11  | NA       | NA       |
| 3.41  | 2.87  | 2.36  | 2.31  | -0.81619 | 4.48E-08 |
| 0.18  | 0.27  | 0.12  | 0.29  | NA       | NA       |
| 3.05  | 0.92  | 1.03  | 0.97  | -1.24355 | 0.000151 |
| 0.07  | 0     | 0.01  | 0.23  | NA       | NA       |
| 4.42  | 3.89  | 3.67  | 4.66  | 0.028084 | 0.908712 |
| 10.27 | 8.4   | 12.47 | 10.77 | -0.47286 | 9.28E-05 |
| 7.67  | 7.15  | 8.12  | 8.32  | -0.10773 | 0.494795 |
| 9.26  | 12.8  | 11.23 | 11.83 | 0.322434 | 0.001504 |
| 45.09 | 17.7  | 28.02 | 22.9  | -0.80999 | 5.73E-10 |
| 0     | 0     | 0     | 0     | NA       | NA       |
| 1.11  | 0.77  | 0.91  | 0.92  | -0.7308  | 0.088594 |
| 0.14  | 0     | 0.14  | 0.21  | NA       | NA       |
| 0     | 0     | 0     | 0     | NA       | NA       |
| 5.27  | 8.31  | 6.13  | 5.69  | 0.330123 | 0.066059 |
| 0     | 0.15  | 0.02  | 0     | NA       | NA       |
| 3.96  | 1.67  | 1.79  | 2.33  | -1.18429 | 1.29E-09 |
| 0     | 0     | 0     | 0     | NA       | NA       |
| 0.13  | 0     | 0.07  | 0     | NA       | NA       |
| 0     | 0     | 0     | 0     | NA       | NA       |
| 0     | 0     | 0     | 0     | NA       | NA       |
| 12.16 | 15.3  | 12.46 | 13.06 | 0.116744 | 0.501155 |
| 1.9   | 1.82  | 2.12  | 1.87  | -0.14496 | 0.565783 |
| 15.85 | 18.74 | 17.04 | 17.54 | -0.01372 | 0.970247 |
| 4.47  | 2.56  | 3.09  | 2.33  | -0.4264  | 0.072758 |
| 6.4   | 5.07  | 6.15  | 6.4   | -0.06064 | 0.819338 |
| 11.01 | 15.65 | 8.02  | 10.17 | -0.10378 | 0.675953 |
| 0     | 0     | 0.02  | 0     | NA       | NA       |
| 0     | 0.08  | 0.01  | 0.02  | NA       | NA       |
| 8.09  | 10.58 | 11.25 | 11.58 | 0.133081 | 0.487038 |
| 8.01  | 7.39  | 7.59  | 7.61  | 0.21417  | 0.18279  |

|       |       |       |       |          |          |
|-------|-------|-------|-------|----------|----------|
| 14    | 11.36 | 10.42 | 12.45 | -0.39713 | 0.009917 |
| 2.67  | 1.63  | 2.2   | 2.81  | -0.22332 | 0.675953 |
| 0.07  | 0.12  | 0.14  | 0.2   | 0.311555 | 0.692251 |
| 0.61  | 0.33  | 0.32  | 1.95  | -0.19084 | 0.800053 |
| 15.91 | 14.11 | 17.3  | 14.46 | -0.11086 | 0.464526 |
| 46.89 | 64.41 | 50.83 | 51.97 | 0.294094 | 0.00873  |
| 0.05  | 0     | 0     | 0     | NA       | NA       |
| 0.18  | 0.23  | 0.16  | 0.2   | -0.25084 | 0.716647 |
| 0     | 0     | 0     | 0     | NA       | NA       |
| 9.92  | 13.57 | 12.75 | 13.15 | 0.315666 | 0.006817 |
| 5.57  | 6.88  | 5.19  | 6.05  | 0.3621   | 0.048925 |
| 10.38 | 8.96  | 10.09 | 10.27 | -0.22001 | 0.06849  |
| 11.65 | 10.47 | 9.99  | 11.03 | -0.01386 | 0.957971 |
| 3.13  | 1.89  | 2.12  | 1.57  | -0.77824 | 0.004887 |
| 29.71 | 18.58 | 19.68 | 19.15 | -0.66389 | 1.58E-12 |
| 4.71  | 5.63  | 4.18  | 7.68  | -0.05045 | 0.883618 |
| 18.05 | 20.73 | 18.67 | 18.89 | -0.05216 | 0.684807 |
| 0     | 0     | 0     | 0     | NA       | NA       |
| 1.03  | 0.56  | 0.64  | 0.76  | -0.83187 | 0.000913 |
| 25.91 | 27.97 | 28.86 | 29.89 | 0.218655 | 0.06243  |
| 8.75  | 9.91  | 9.92  | 9.61  | 0.200367 | 0.086535 |
| 0     | 0.43  | 0.07  | 0.24  | 1.433156 | 0.013422 |
| 21.04 | 33.14 | 31.87 | 33.83 | 0.56407  | 1.62E-07 |
| 7.13  | 1.7   | 2.7   | 2.47  | -1.28616 | 9.74E-05 |
| 38.67 | 32.81 | 37.25 | 37.2  | -0.11437 | 0.32261  |
| 8.04  | 8.85  | 8.67  | 10.95 | 0.091815 | 0.683401 |
| 0     | 0.11  | 0.07  | 0.08  | NA       | NA       |
| 0     | 0     | 0     | 0     | NA       | NA       |
| 18.81 | 11.61 | 12.48 | 11.46 | -0.63253 | 1.16E-05 |
| 0     | 0     | 0     | 0     | NA       | NA       |
| 5.91  | 1.51  | 3.74  | 4.25  | -0.9092  | 0.000734 |
| 9.62  | 12.91 | 11.36 | 13.17 | 0.133992 | 0.4469   |
| 0     | 0     | 0.02  | 0     | NA       | NA       |
| 8.03  | 11.54 | 10.39 | 9.37  | 0.106157 | 0.502338 |
| 12    | 12.29 | 12.46 | 15.36 | 0.105248 | 0.333953 |
| 0.2   | 0.86  | 0.65  | 0.89  | 1.323791 | 0.008581 |
| 5.51  | 5.4   | 6.14  | 5.21  | -0.146   | 0.594664 |
| 36.73 | 40.56 | 40.03 | 39.74 | 0.133359 | 0.172889 |
| 23.56 | 29.8  | 27.01 | 30.01 | 0.192383 | 0.211277 |
| 2.06  | 2.14  | 2.15  | 2.33  | -0.04939 | 0.872359 |
| 1.43  | 1.72  | 1.64  | 1.5   | 0.342214 | 0.072947 |
| 0.16  | 0.12  | 0.03  | 0.04  | NA       | NA       |
| 4.69  | 6.69  | 6.3   | 6.15  | 0.252531 | 0.133281 |
| 0     | 0.22  | 0.05  | 0.11  | NA       | NA       |
| 17.96 | 15.7  | 13.97 | 13.8  | -0.17676 | 0.169106 |

|        |        |        |        |          |          |
|--------|--------|--------|--------|----------|----------|
| 3.39   | 1.71   | 1.86   | 2.81   | -0.57568 | 0.007925 |
| 5.25   | 3.29   | 2.95   | 3.98   | -0.47519 | 0.010227 |
| 0.09   | 35.28  | 5.69   | 15.8   | 3.711253 | 2.11E-12 |
| 1.38   | 1.42   | 1.67   | 1.33   | -0.51335 | 0.077363 |
| 9.35   | 4.32   | 5.54   | 4.77   | -0.74518 | 1.40E-07 |
| 8.98   | 7.31   | 6.4    | 7.31   | -0.21235 | 0.155519 |
| 0.01   | 0.01   | 0      | 0      | NA       | NA       |
| 0      | 0      | 0      | 0      | NA       | NA       |
| 400.14 | 326.15 | 352.67 | 325.85 | -0.21762 | 0.015262 |
| 30.74  | 25.5   | 27.23  | 28.51  | -0.1667  | 0.332903 |
| 35.1   | 40.47  | 42.41  | 40.04  | 0.128922 | 0.303152 |
| 1.11   | 3.12   | 3.53   | 2.4    | 0.579931 | 0.139731 |
| 8.6    | 11.46  | 9.75   | 10.43  | 0.262044 | 0.028781 |
| 0      | 0      | 0      | 0      | NA       | NA       |
| 25.85  | 17.68  | 21.5   | 20.47  | -0.12065 | 0.31492  |
| 13.77  | 14.69  | 15.83  | 15.11  | -0.13044 | 0.452509 |
| 10.03  | 1.59   | 3.06   | 2.66   | -2.01552 | 4.64E-30 |
| 0      | 0      | 0      | 0      | NA       | NA       |
| 11.2   | 11.11  | 11.63  | 12.05  | 0.011325 | 0.944642 |
| 0      | 0      | 0.1    | 0      | NA       | NA       |
| 0      | 0      | 0      | 0      | NA       | NA       |
| 19.55  | 20.18  | 22.07  | 21.84  | 0.024421 | 0.895538 |
| 0      | 0      | 0      | 0.1    | NA       | NA       |
| 36.28  | 10.88  | 15.15  | 13.96  | -1.54983 | 1.93E-49 |
| 0      | 0      | 0      | 0      | NA       | NA       |
| 0      | 0      | 0      | 0      | NA       | NA       |
| 0.61   | 0.13   | 0.4    | 0.25   | -0.08108 | 0.931439 |
| 46.86  | 56.43  | 58.86  | 66.1   | 0.204755 | 0.024016 |
| 62.84  | 80.01  | 71.15  | 72.6   | 0.121943 | 0.199631 |
| 0.5    | 0      | 0      | 0      | -2.79357 | 2.90E-07 |
| 0      | 0      | 0      | 0      | NA       | NA       |
| 0      | 0.08   | 0.1    | 0.07   | NA       | NA       |
| 16.67  | 14.94  | 18.88  | 18.67  | -0.08181 | 0.546299 |
| 17.9   | 17.09  | 13.77  | 15.28  | -0.23626 | 0.030372 |
| 0      | 0      | 0      | 0      | NA       | NA       |
| 21.28  | 2.67   | 5.83   | 3.51   | -2.15894 | 4.09E-14 |
| 101.1  | 51.74  | 56.21  | 53.76  | -1.01613 | 7.03E-47 |
| 0.11   | 0.08   | 0.02   | 0.02   | -0.37849 | 0.626965 |
| 0      | 0      | 0      | 0      | NA       | NA       |
| 7.55   | 10.5   | 9.83   | 10.13  | 0.459298 | 8.58E-05 |
| 0.26   | 0.32   | 0.31   | 0.34   | 0.348442 | 0.616695 |
| 6.37   | 6.28   | 5.7    | 6.51   | -0.0828  | 0.726122 |
| 27.95  | 21.21  | 25.48  | 29.59  | -0.20194 | 0.085592 |
| 602.07 | 497.59 | 551.51 | 493.56 | -0.26863 | 0.001041 |
| 17.71  | 9.94   | 13.33  | 14.46  | -0.50066 | 0.000244 |

|        |        |        |        |          |          |
|--------|--------|--------|--------|----------|----------|
| 14.82  | 24.31  | 22.12  | 24.13  | 0.605052 | 8.48E-11 |
| 1.06   | 0.02   | 1.06   | 0.31   | -0.34192 | 0.664961 |
| 4.03   | 3.14   | 4.03   | 3.69   | -0.17486 | 0.525078 |
| 0.1    | 0.14   | 0.1    | 0.41   | 0.544095 | 0.457237 |
| 7.84   | 6.04   | 7.64   | 5.33   | -0.09867 | 0.771371 |
| 7.88   | 8.33   | 9.33   | 9.8    | 0.159005 | 0.243689 |
| 2.04   | 1.87   | 2.05   | 2.61   | 0.100148 | 0.801875 |
| 6.98   | 6.87   | 4.85   | 6.45   | 0.026577 | 0.877741 |
| 13.61  | 13.35  | 11.72  | 13.08  | -0.10237 | 0.522358 |
| 7.84   | 4.63   | 4.54   | 4.01   | -0.72669 | 3.77E-08 |
| 7.05   | 4.91   | 5.91   | 5.65   | -0.35763 | 0.021019 |
| 21.59  | 29.57  | 27.39  | 31.02  | 0.340665 | 0.000201 |
| 0      | 0.09   | 0      | 0      | NA       | NA       |
| 127.89 | 92.82  | 95.09  | 91.04  | -0.37914 | 2.65E-06 |
| 1.01   | 0.38   | 1.53   | 0.63   | -0.85432 | 0.093224 |
| 0      | 0      | 0.01   | 0.05   | NA       | NA       |
| 12.62  | 13.27  | 15.58  | 13.69  | 0.108506 | 0.493915 |
| 13.68  | 10.7   | 8.87   | 12.58  | -0.21018 | 0.139094 |
| 65.3   | 70.9   | 72.72  | 72.64  | 0.105157 | 0.294481 |
| 150.07 | 201.48 | 200.58 | 196.22 | 0.326856 | 2.94E-05 |
| 0      | 0      | 0      | 0      | NA       | NA       |
| 0      | 0      | 0      | 0      | NA       | NA       |
| 0      | 0      | 0      | 0      | NA       | NA       |
| 15.8   | 24.63  | 19.56  | 23.55  | 0.538171 | 9.46E-07 |
| 0      | 0      | 0      | 0      | NA       | NA       |
| 27.93  | 185.53 | 68.09  | 120.15 | 1.915574 | 5.38E-07 |
| 277.2  | 246.23 | 304.75 | 283.44 | -0.11348 | 0.268349 |
| 9.68   | 7.4    | 6.54   | 6.08   | -0.20731 | 0.37944  |
| 4.55   | 7.37   | 5.76   | 6.22   | 0.735447 | 0.001423 |
| 21.82  | 27.07  | 20.97  | 25.98  | 0.208513 | 0.141665 |
| 7.69   | 5.91   | 5.38   | 6.41   | -0.40616 | 0.01076  |
| 0      | 0      | 0      | 0      | NA       | NA       |
| 8.7    | 9.05   | 10.71  | 7.68   | -0.05034 | 0.822035 |
| 23.11  | 24.25  | 23.88  | 19.29  | 0.02202  | 0.924712 |
| 6.49   | 6.59   | 7.19   | 6.63   | 0.033753 | 0.840624 |
| 20.39  | 8.44   | 14.11  | 11.69  | -0.82103 | 1.24E-07 |
| 6.45   | 6.26   | 7.72   | 7.62   | 0.034153 | 0.907131 |
| 165.01 | 140.95 | 148.38 | 131.14 | -0.19205 | 0.052499 |
| 31.94  | 10.37  | 16.92  | 13.25  | -1.14946 | 3.31E-18 |
| 0.26   | 0.73   | 0.33   | 1.03   | NA       | NA       |
| 0      | 0.04   | 0      | 0.01   | NA       | NA       |
| 51.23  | 49.92  | 49.88  | 51.28  | -0.00376 | 0.977207 |
| 0.01   | 0      | 0.03   | 0      | NA       | NA       |
| 0      | 0      | 0.06   | 0.02   | NA       | NA       |
| 10.43  | 10.85  | 9.02   | 9.74   | 0.005856 | 0.975618 |

|        |        |        |        |          |          |
|--------|--------|--------|--------|----------|----------|
| 0.1    | 0      | 0.07   | 0      | NA       | NA       |
| 2.13   | 4.25   | 3.3    | 4.03   | 0.914439 | 7.69E-11 |
| 5.36   | 4.68   | 4.63   | 5.37   | -0.14562 | 0.368657 |
| 16.53  | 23.62  | 19.67  | 22.45  | 0.408693 | 0.001382 |
| 195.65 | 97.03  | 125.41 | 112.2  | -0.75173 | 1.47E-15 |
| 0      | 0      | 0      | 0      | NA       | NA       |
| 0.34   | 0.33   | 0.44   | 0.28   | 0.20951  | 0.783544 |
| 0      | 0      | 0      | 0      | NA       | NA       |
| 0      | 0      | 0      | 0      | NA       | NA       |
| 5.54   | 5.08   | 3.23   | 3.43   | -0.58629 | 0.004116 |
| 190.3  | 218.31 | 193.3  | 202.19 | 0.055227 | 0.656491 |
| 7.17   | 11.43  | 8.62   | 9.85   | 0.528846 | 1.93E-05 |
| 43.69  | 33.57  | 39.92  | 35.02  | -0.2786  | 0.00177  |
| 0      | 0      | 0      | 0      | NA       | NA       |
| 25.95  | 18.99  | 19.34  | 19.71  | -0.612   | 2.11E-05 |
| 5.09   | 16.53  | 19.22  | 19.19  | 1.404601 | 3.17E-28 |
| 12.14  | 10.38  | 11.73  | 10.68  | -0.10552 | 0.555637 |
| 130.43 | 140.13 | 165.99 | 157.44 | 0.183326 | 0.068527 |
| 7.84   | 4.88   | 5      | 7.88   | -0.12343 | 0.547427 |
| 1.74   | 0.99   | 1.35   | 1.1    | -0.2376  | 0.626883 |
| 28.64  | 28.3   | 27.08  | 29.82  | -0.07918 | 0.543584 |
| 7.02   | 7.54   | 6.45   | 8.04   | -0.01092 | 0.961232 |
| 1.63   | 1.99   | 0.85   | 0.94   | 0.230331 | 0.46082  |
| 3.65   | 6.52   | 3.94   | 5.12   | 0.213229 | 0.334588 |
| 6.87   | 4.2    | 4.72   | 4.9    | -0.70096 | 3.87E-05 |
| 2.48   | 2.08   | 1.94   | 2.41   | -0.09904 | 0.826911 |
| 0      | 0      | 0      | 0      | NA       | NA       |
| 22.65  | 23.45  | 21.71  | 25.08  | 0.033717 | 0.840033 |
| 11.58  | 8.33   | 10.17  | 9.43   | -0.33976 | 9.17E-05 |
| 7.42   | 3.42   | 3.71   | 2.85   | -0.94513 | 2.80E-06 |
| 57.55  | 65.85  | 65.1   | 56.29  | 0.093564 | 0.477739 |
| 30.95  | 103.81 | 62.92  | 81.74  | 1.595464 | 1.93E-29 |
| 12.91  | 34.43  | 32.34  | 42.12  | 1.389247 | 3.97E-37 |
| 9.05   | 6.76   | 9.21   | 10.59  | -0.02074 | 0.935474 |
| 7.49   | 6.26   | 5.59   | 5.69   | -0.43848 | 5.36E-06 |
| 17.95  | 15.53  | 16.69  | 13.75  | 0.367886 | 0.055267 |
| 0      | 0      | 0      | 0      | NA       | NA       |
| 11.24  | 13.95  | 12.21  | 12.83  | 0.109003 | 0.475612 |
| 18.02  | 20.11  | 19.91  | 18.96  | 0.156584 | 0.234526 |
| 158.68 | 193.14 | 187.76 | 193.71 | 0.192604 | 0.021636 |
| 17.09  | 21.28  | 21.12  | 20.85  | 0.359721 | 0.005944 |
| 50.11  | 47.94  | 45.04  | 48.87  | -0.13192 | 0.150252 |
| 114.96 | 127.38 | 128.69 | 122.26 | 0.148781 | 0.131901 |
| 18.25  | 29.8   | 22.81  | 27.66  | 0.474467 | 0.000224 |
| 5.05   | 4.82   | 5.52   | 6.07   | 0.048528 | 0.887602 |

|        |        |        |        |          |          |
|--------|--------|--------|--------|----------|----------|
| 45.03  | 35.42  | 37.44  | 38.37  | -0.41871 | 1.01E-05 |
| 0      | 0      | 0      | 0      | NA       | NA       |
| 0      | 0      | 0      | 0      | NA       | NA       |
| 2.06   | 2.93   | 3.18   | 3.38   | 0.501651 | 0.019334 |
| 22.78  | 10.41  | 14.19  | 13.36  | -0.84783 | 2.20E-06 |
| 1.35   | 0.77   | 0.81   | 1.21   | -0.62471 | 0.014723 |
| 11.25  | 11.89  | 12.46  | 12.04  | 0.104476 | 0.340129 |
| 0      | 0.05   | 0.06   | 0.06   | NA       | NA       |
| 5.19   | 6.48   | 9.29   | 6.52   | 0.266349 | 0.086862 |
| 0.42   | 0.6    | 0.93   | 1.3    | 0.150721 | 0.845257 |
| 93.85  | 75.6   | 85.14  | 83.82  | -0.31008 | 0.000526 |
| 0.23   | 0.16   | 0.23   | 0.22   | -0.20371 | 0.787973 |
| 24.21  | 25.55  | 23.2   | 23.65  | 0.071296 | 0.741906 |
| 19.52  | 20.22  | 20.58  | 20.61  | 0.007161 | 0.975638 |
| 0      | 0      | 0      | 0      | NA       | NA       |
| 0.31   | 0.13   | 0.03   | 0.06   | NA       | NA       |
| 0      | 0      | 0.15   | 0.01   | NA       | NA       |
| 16.68  | 16.4   | 16.89  | 16.96  | -0.02815 | 0.867634 |
| 407.23 | 375.67 | 380.73 | 354.38 | -0.16925 | 0.059382 |
| 24.76  | 15.38  | 23.02  | 19.19  | -0.19048 | 0.231668 |
| 19.94  | 21.56  | 19.61  | 19.22  | 0.128214 | 0.527312 |
| 1.82   | 26     | 11.58  | 16.97  | 2.535085 | 5.88E-11 |
| 0      | 0      | 0      | 0.09   | NA       | NA       |
| 0      | 0      | 0      | 0      | NA       | NA       |
| 12.8   | 10.38  | 12.24  | 10.63  | -0.127   | 0.498179 |
| 351.86 | 287.25 | 326    | 335.57 | -0.24826 | 0.002935 |
| 0      | 0      | 0      | 0      | NA       | NA       |
| 20.11  | 36.74  | 32.37  | 36.52  | 0.656677 | 8.65E-09 |
| 3.72   | 0.96   | 1.62   | 1.1    | -1.70542 | 4.82E-11 |
| 0      | 0      | 0      | 0      | NA       | NA       |
| 3.35   | 4.04   | 3.84   | 5.03   | 0.249644 | 0.141973 |
| 11.08  | 15.46  | 14.93  | 12.09  | 0.140149 | 0.475699 |
| 156.18 | 147.43 | 150.1  | 152.1  | -0.15641 | 0.062773 |
| 4.42   | 4.4    | 6.56   | 4.81   | -0.04329 | 0.880476 |
| 9.36   | 8.41   | 8.63   | 6.72   | -0.0442  | 0.848892 |
| 0      | 0      | 0      | 0      | NA       | NA       |
| 1      | 0.43   | 0.57   | 0.59   | -0.94727 | 0.004558 |
| 0      | 0      | 0      | 0      | NA       | NA       |
| 19.08  | 14.78  | 17.78  | 16.51  | -0.24838 | 0.061877 |
| 0.75   | 0.53   | 0.6    | 0.6    | -0.0018  | 0.997475 |
| 0.58   | 1.03   | 1.65   | 0.39   | 0.365183 | 0.528371 |
| 0.4    | 1.58   | 0.76   | 1.07   | 1.361213 | 0.011945 |
| 0.12   | 0.08   | 0.04   | 0.16   | -0.88167 | 0.175193 |
| 13.53  | 19.83  | 15.35  | 15.29  | 0.37789  | 0.001928 |
| 6.8    | 7.22   | 8.35   | 4.88   | 0.224796 | 0.468055 |



|        |        |        |        |          |           |
|--------|--------|--------|--------|----------|-----------|
| 3.3    | 3.46   | 2.97   | 3.13   | -0.20676 | 0.373088  |
| 0.45   | 0.02   | 0.1    | 0      | -1.93676 | 0.000715  |
| 0      | 0      | 0      | 0      | NA       | NA        |
| 181.37 | 199.23 | 171.84 | 182.15 | 0.080841 | 0.45229   |
| 0      | 0      | 0      | 0      | NA       | NA        |
| 0.84   | 0.99   | 0.7    | 0.56   | 0.123994 | 0.801875  |
| 0      | 0      | 0      | 0      | NA       | NA        |
| 2.92   | 4.76   | 4.46   | 4.73   | 0.518024 | 1.39E-05  |
| 0      | 0      | 0      | 0      | NA       | NA        |
| 0      | 0      | 0      | 0      | NA       | NA        |
| 0      | 0      | 0      | 0      | NA       | NA        |
| 18.95  | 21.74  | 21.14  | 20.88  | 0.088887 | 0.602721  |
| 7.54   | 6.52   | 6.62   | 6.3    | -0.13566 | 0.502229  |
| 3.32   | 2.94   | 3.12   | 3.1    | -0.03194 | 0.898268  |
| 8.33   | 8.36   | 7.05   | 7.57   | -0.20934 | 0.287509  |
| 39.06  | 270.49 | 200.6  | 254.52 | 2.54019  | 8.28E-136 |
| 0.16   | 0.01   | 0.03   | 0.04   | NA       | NA        |
| 14.87  | 21.78  | 15.65  | 20.4   | 0.331523 | 0.005939  |
| 5.22   | 4.23   | 4.73   | 4.89   | -0.34597 | 0.006223  |
| 6.03   | 7.72   | 7.5    | 7.33   | 0.260123 | 0.020548  |
| 0.3    | 0.56   | 0.19   | 0.83   | 0.239709 | 0.768148  |
| 154.27 | 116.97 | 188.44 | 165.59 | 0.07629  | 0.849012  |
| 0.04   | 0.51   | 0.15   | 0.24   | 2.410867 | 3.96E-06  |
| 4.22   | 9.52   | 9.46   | 11.73  | 0.605233 | 2.13E-05  |
| 9.71   | 8.75   | 10.27  | 9.49   | -0.15084 | 0.426714  |
| 19.1   | 14.1   | 13.7   | 12.36  | -0.59637 | 8.13E-06  |
| 4.88   | 7.37   | 6.5    | 6.45   | 0.471565 | 0.068365  |
| 11.46  | 13.77  | 15.27  | 14.18  | 0.06996  | 0.732891  |
| 1.47   | 0.74   | 1.1    | 1.19   | -0.21681 | 0.504968  |
| 0      | 0      | 0      | 0.02   | NA       | NA        |
| 0.03   | 0      | 0.04   | 0.1    | NA       | NA        |
| 3.62   | 1.64   | 1.01   | 1.45   | -0.14101 | 0.804462  |
| 0.23   | 2.12   | 0.75   | 1.88   | 1.929144 | 2.21E-05  |
| 0.03   | 0.05   | 0.02   | 0.03   | NA       | NA        |
| 4.6    | 5.41   | 4.72   | 5.12   | 0.334392 | 0.006402  |
| 38.78  | 32.02  | 30.71  | 32.33  | -0.39461 | 6.58E-07  |
| 1.26   | 0.31   | 1.39   | 1.18   | -0.09523 | 0.91777   |
| 13.46  | 8.8    | 8.83   | 7.53   | -0.39884 | 0.170856  |
| 4.47   | 12.24  | 9.64   | 11.83  | 1.173725 | 8.67E-14  |
| 28.58  | 45.92  | 42.71  | 52.48  | 0.751689 | 1.86E-21  |
| 47.02  | 87.45  | 63.4   | 73.8   | 0.579656 | 7.38E-07  |
| 35.93  | 36.14  | 36.84  | 41.9   | 0.056197 | 0.700319  |
| 1.66   | 1.03   | 1      | 1.17   | -0.28783 | 0.55675   |
| 0      | 0      | 0      | 0      | NA       | NA        |
| 33.82  | 21.91  | 24.72  | 23.16  | -0.59996 | 5.36E-09  |

|        |        |        |                 |          |
|--------|--------|--------|-----------------|----------|
| 0      | 0      | 0.02   | 0 NA            | NA       |
| 30.22  | 24.57  | 28.86  | 28.59 -0.21017  | 0.033021 |
| 10.08  | 11.74  | 12.52  | 13.12 -0.01433  | 0.955141 |
| 0      | 0      | 0      | 0 NA            | NA       |
| 0      | 0      | 0      | 0 NA            | NA       |
| 0      | 0      | 0      | 0 NA            | NA       |
| 0      | 0.09   | 0.09   | 0 NA            | NA       |
| 34.89  | 35.12  | 33.92  | 32.63 -0.03706  | 0.779226 |
| 1.61   | 13.04  | 4.06   | 7.74 2.236233   | 5.13E-08 |
| 0      | 0.12   | 0.11   | 0.12 NA         | NA       |
| 40.38  | 35.91  | 33.83  | 37.12 -0.22984  | 0.01752  |
| 3.22   | 0.5    | 1.02   | 1.27 -2.15679   | 3.23E-07 |
| 11.6   | 14.93  | 12.03  | 13.08 0.027589  | 0.946543 |
| 5.76   | 4.49   | 4.42   | 5.03 -0.42932   | 0.00114  |
| 1.96   | 9.7    | 3.65   | 6.45 1.3006     | 0.001239 |
| 0.45   | 0.04   | 0.11   | 0.05 -2.74109   | 5.73E-11 |
| 0.75   | 0.27   | 0.35   | 0.43 -0.8054    | 0.194005 |
| 0      | 0      | 0.05   | 0 NA            | NA       |
| 70.93  | 74.59  | 72.5   | 79.88 0.051046  | 0.646408 |
| 16.4   | 15.53  | 14.44  | 14.48 -0.0596   | 0.646408 |
| 195.82 | 235.05 | 220.69 | 239.9 0.146714  | 0.094033 |
| 0      | 0      | 0      | 0 NA            | NA       |
| 0.16   | 0.09   | 0.02   | 0 NA            | NA       |
| 9.52   | 10.43  | 10.16  | 11 0.073376     | 0.684097 |
| 17.73  | 13.31  | 17.06  | 16.92 -0.17247  | 0.130354 |
| 0.11   | 0.12   | 0.09   | 0.07 -0.29771   | 0.681801 |
| 47.76  | 41.05  | 58.17  | 45.27 -0.16884  | 0.087697 |
| 8.53   | 13.33  | 10.53  | 12.4 0.148275   | 0.159661 |
| 28     | 30.33  | 27.14  | 28.39 -0.1259   | 0.233642 |
| 7.76   | 4.08   | 5.11   | 5.72 -0.71839   | 0.000148 |
| 52.7   | 45.02  | 49.08  | 47.66 -0.0773   | 0.471929 |
| 0      | 0.06   | 0      | 0 NA            | NA       |
| 0      | 0      | 0      | 0 NA            | NA       |
| 10.07  | 11.96  | 10.57  | 11.83 0.155984  | 0.147092 |
| 14.75  | 22.47  | 17.73  | 21.92 0.421555  | 8.89E-05 |
| 0      | 0      | 0      | 0 NA            | NA       |
| 0      | 0      | 0      | 0 NA            | NA       |
| 11.24  | 11.9   | 11.51  | 12.1 -0.0177    | 0.91832  |
| 4.32   | 5.75   | 1.07   | 2.75 -0.13923   | 0.864897 |
| 6.12   | 7.53   | 7.01   | 7.89 0.375181   | 0.000428 |
| 424.96 | 306.46 | 328.3  | 320.87 -0.48369 | 5.30E-14 |
| 33.32  | 33.76  | 33.99  | 33.95 -0.02538  | 0.845525 |
| 0      | 0.97   | 0.13   | 0.11 0.062872   | 0.94726  |
| 2.92   | 7.86   | 7.61   | 8.86 1.427969   | 5.02E-15 |
| 1.75   | 2.27   | 2.28   | 2.37 0.245804   | 0.210423 |

|       |       |       |       |          |          |
|-------|-------|-------|-------|----------|----------|
| 25.9  | 25.74 | 27.33 | 28.95 | -0.00228 | 0.988237 |
| 4.34  | 5.16  | 4.21  | 4.44  | 0.010133 | 0.972956 |
| 7.2   | 32.18 | 25.38 | 30.81 | 2.027395 | 3.24E-60 |
| 24.47 | 32.47 | 27.29 | 29.57 | 0.443337 | 9.44E-05 |
| 0     | 0     | 0     | 0     | NA       | NA       |
| 15.42 | 15.36 | 15.67 | 15.87 | 0.050494 | 0.748475 |
| 0     | 0     | 0     | 0     | NA       | NA       |
| 0     | 0     | 0     | 0     | NA       | NA       |
| 0     | 0     | 0     | 0     | NA       | NA       |
| 4.29  | 6.26  | 9.12  | 8.62  | 0.33439  | 0.089133 |
| 5.82  | 1.16  | 2.09  | 1.54  | -1.91726 | 3.44E-22 |
| 0.16  | 0.14  | 0.17  | 0     | NA       | NA       |
| 0     | 0     | 0     | 0     | NA       | NA       |
| 0     | 0     | 0     | 0     | NA       | NA       |
| 2.75  | 2.58  | 2.68  | 2.69  | -0.11331 | 0.784872 |
| 0     | 0     | 0.04  | 0.06  | NA       | NA       |
| 23.53 | 20.47 | 20.93 | 17.72 | 0.110735 | 0.492577 |
| 4.46  | 4.68  | 3.22  | 5.76  | -0.10068 | 0.758944 |
| 58.13 | 40.14 | 43.69 | 40.23 | -0.4737  | 9.47E-08 |
| 0     | 0.1   | 0.05  | 0     | NA       | NA       |
| 7.93  | 10.82 | 9.33  | 10.04 | 0.311176 | 0.015935 |
| 8.74  | 7.59  | 6.71  | 6.55  | -0.22052 | 0.195631 |
| 8.74  | 7.59  | 6.71  | 6.55  | -0.22052 | 0.195631 |
| 0.03  | 0     | 0     | 0.01  | NA       | NA       |
| 0.03  | 0     | 0     | 0.01  | NA       | NA       |
| 6.45  | 4.84  | 5.3   | 6.1   | -0.148   | 0.552317 |
| 16.94 | 15.74 | 17.65 | 18.87 | 0.125222 | 0.382844 |
| 61.25 | 69.66 | 70.38 | 65.68 | 0.004341 | 0.978168 |
| 8.59  | 11.57 | 8.8   | 7.54  | 0.203294 | 0.519824 |
| 0.27  | 0.06  | 0.05  | 0.04  | -1.97117 | 7.83E-06 |
| 19.9  | 22.33 | 25.52 | 23.65 | 0.275459 | 0.08626  |
| 9.48  | 12.52 | 11.26 | 11.51 | 0.405545 | 0.002178 |
| 0     | 0.25  | 0.18  | 0.31  | 0.848292 | 0.186252 |
| 0     | 0     | 0     | 0     | NA       | NA       |
| 1.1   | 0.58  | 1.34  | 1.04  | -0.20061 | 0.501186 |
| 50.84 | 55.79 | 53.84 | 57.47 | 0.061389 | 0.526672 |
| 0     | 0     | 0     | 0     | NA       | NA       |
| 1.46  | 3.93  | 2.52  | 5.75  | 0.780945 | 0.000674 |
| 7.08  | 8.38  | 7.79  | 7.28  | 0.365921 | 0.068722 |
| 0     | 0     | 0     | 0     | NA       | NA       |
| 4.22  | 4.04  | 4.29  | 5.47  | -0.09239 | 0.698813 |
| 1.08  | 3.17  | 2.78  | 3.57  | 1.720081 | 2.04E-09 |
| 0     | 0.05  | 0     | 0     | NA       | NA       |
| 0.06  | 0.04  | 0.11  | 0.03  | NA       | NA       |
| 0     | 0.05  | 0.07  | 0.11  | NA       | NA       |

|        |        |        |         |          |          |
|--------|--------|--------|---------|----------|----------|
| 20.55  | 20.49  | 18.95  | 22.11   | -0.08723 | 0.378021 |
| 0      | 0      | 0      | 0 NA    | NA       |          |
| 0      | 0      | 0      | 0 NA    | NA       |          |
| 0      | 0      | 0      | 0 NA    | NA       |          |
| 3.99   | 2.79   | 2.67   | 2.7     | -0.7278  | 1.70E-09 |
| 0.01   | 0      | 0.04   | 0.06    | -0.37196 | 0.628896 |
| 9.02   | 14.61  | 12.01  | 13.23   | 0.52361  | 0.000287 |
| 5.15   | 3.83   | 4.13   | 4.29    | -0.20391 | 0.273443 |
| 6.1    | 5.31   | 5.56   | 6.23    | -0.01855 | 0.945762 |
| 15.14  | 21.81  | 20.76  | 21.51   | 0.198953 | 0.113811 |
| 20.68  | 29.7   | 26.96  | 27.29   | 0.465582 | 0.0002   |
| 3.04   | 4.25   | 3.66   | 4.3     | 0.150983 | 0.555224 |
| 0      | 0      | 0      | 0 NA    | NA       |          |
| 45.98  | 50.76  | 50.6   | 48.65   | 0.024772 | 0.888394 |
| 0.06   | 0      | 0      | 0 NA    | NA       |          |
| 0      | 0      | 0      | 0 NA    | NA       |          |
| 54.45  | 52.78  | 51.55  | 50.78   | -0.14655 | 0.151718 |
| 6.49   | 9.78   | 9.22   | 11.34   | 0.38715  | 0.000328 |
| 14.88  | 12     | 13.95  | 14.53   | -0.24716 | 0.052389 |
| 0      | 0      | 0.08   | 0 NA    | NA       |          |
| 6.37   | 5.45   | 5.46   | 5.5     | -0.29487 | 0.043978 |
| 34.2   | 49.35  | 39.39  | 42.41   | 0.360361 | 0.003791 |
| 4.74   | 2.91   | 3.65   | 3.33    | -0.56866 | 0.000766 |
| 13.57  | 18.7   | 16.81  | 18.4    | 0.281257 | 0.101148 |
| 0      | 0.13   | 0.14   | 0.33    | 0.704221 | 0.310228 |
| 4.01   | 2.7    | 3.04   | 2.9     | -0.49368 | 0.001758 |
| 0      | 0      | 0      | 0 NA    | NA       |          |
| 0.94   | 0.4    | 0.49   | 0.44    | -0.7433  | 0.023897 |
| 717.83 | 646.99 | 704.29 | 630.35  | -0.19746 | 0.029373 |
| 5.92   | 4.46   | 4.9    | 4.86    | -0.37046 | 0.015186 |
| 1.09   | 1.66   | 1.52   | 2.3     | 1.165941 | 0.034903 |
| 8.56   | 8.41   | 9.52   | 6.95    | -0.31017 | 0.067277 |
| 0.08   | 0      | 0      | 0 NA    | NA       |          |
| 13.94  | 11.94  | 12.39  | 13.52   | 0.003511 | 0.989838 |
| 0      | 0      | 0      | 0.03 NA | NA       |          |
| 0.09   | 0      | 0.11   | 0.15    | -0.51161 | 0.482257 |
| 11.79  | 13.99  | 13.36  | 12.86   | 0.161099 | 0.389913 |
| 0      | 0      | 0      | 0 NA    | NA       |          |
| 31.82  | 26.19  | 29.78  | 28.88   | -0.2432  | 0.023758 |
| 0.33   | 0.38   | 0.18   | 0.15    | -0.23659 | 0.778541 |
| 0      | 0      | 0.01   | 0 NA    | NA       |          |
| 1.12   | 33.68  | 13.73  | 22.51   | 3.025296 | 6.34E-12 |
| 50.27  | 57.41  | 58.25  | 59.57   | 0.170552 | 0.116184 |
| 0      | 0.02   | 0      | 0 NA    | NA       |          |
| 0.14   | 0.04   | 0      | 0.07    | -0.72767 | 0.285624 |

|        |         |        |        |          |          |
|--------|---------|--------|--------|----------|----------|
| 486.03 | 283.47  | 334.36 | 306.99 | -0.70141 | 1.79E-18 |
| 16.09  | 29.24   | 26.35  | 27.29  | 0.703944 | 2.93E-15 |
| 36.58  | 29.61   | 28.75  | 26.22  | -0.32279 | 0.002871 |
| 0.39   | 0       | 0.02   | 0.11   | -1.1779  | 0.058686 |
| 0      | 0       | 0      | 0      | NA       | NA       |
| 4.9    | 4.17    | 4.13   | 4.76   | -0.14701 | 0.2682   |
| 61.07  | 98.91   | 85.35  | 83.46  | 0.563972 | NA       |
| 5.45   | 5.09    | 4.26   | 4.68   | -0.03272 | 0.901652 |
| 0      | 0.07    | 0      | 0      | NA       | NA       |
| 11.01  | 11.42   | 10.8   | 10.81  | 0.057908 | 0.761451 |
| 3.54   | 2.59    | 2.9    | 2.98   | 0.138765 | 0.779498 |
| 9.52   | 17.15   | 14.63  | 14.95  | 0.520386 | 2.83E-09 |
| 9.05   | 9.09    | 8.88   | 8.87   | -0.01713 | 0.916858 |
| 38.81  | 39.92   | 38.54  | 43.74  | 0.28143  | 0.007671 |
| 8.01   | 13.34   | 15.98  | 16.83  | 0.51945  | 0.010349 |
| 0      | 0       | 0      | 0      | NA       | NA       |
| 6.45   | 4       | 3.96   | 3.8    | -0.81169 | 8.69E-11 |
| 0      | 0       | 0      | 0      | NA       | NA       |
| 0      | 0       | 0      | 0      | NA       | NA       |
| 45.93  | 59.34   | 56.64  | 54     | 0.650126 | 1.91E-11 |
| 0.03   | 0       | 0.02   | 0.02   | NA       | NA       |
| 0.19   | 0.54    | 0.23   | 0.28   | 0.543146 | 0.444919 |
| 80.6   | 695.73  | 486.01 | 627.18 | 2.715569 | 5.41E-33 |
| 0.07   | 1.45    | 0.34   | 0.55   | 2.570596 | 6.76E-08 |
| 0      | 0       | 0      | 0      | NA       | NA       |
| 0      | 0       | 0.02   | 0      | NA       | NA       |
| 0.7    | 0.6     | 0.69   | 0.4    | -0.12578 | 0.789916 |
| 0      | 0       | 0      | 0      | NA       | NA       |
| 0      | 0       | 0      | 0      | NA       | NA       |
| 205.51 | 83.07   | 132.01 | 110.87 | -1.018   | 4.09E-16 |
| 72.31  | 78.3    | 71.77  | 74.61  | 0.094689 | 0.440749 |
| 0      | 0       | 0      | 0.12   | NA       | NA       |
| 0      | 0       | 0      | 0      | NA       | NA       |
| 0.51   | 0.99    | 1.1    | 0.99   | 0.855336 | 0.049013 |
| 43.14  | 39.52   | 47.11  | 44.95  | -0.12968 | 0.1446   |
| 1.81   | 3.41    | 2.52   | 2.84   | 0.278541 | 0.45955  |
| 22.53  | 25.22   | 23.97  | 20.51  | -0.03984 | 0.813172 |
| 0      | 1.09    | 0.61   | 0.5    | NA       | NA       |
| 77.02  | 1057.22 | 473.71 | 773.68 | 2.785252 | 7.14E-19 |
| 7.46   | 7.63    | 7.48   | 7.79   | 0.173416 | 0.328713 |
| 17.49  | 22.14   | 19.39  | 19.96  | 0.213267 | 0.083542 |
| 26.78  | 19.59   | 26.01  | 24.35  | -0.11266 | 0.459872 |
| 0.06   | 0.01    | 0.03   | 0.06   | NA       | NA       |
| 0      | 0       | 0      | 0      | NA       | NA       |
| 2.37   | 0.08    | 0.12   | 0      | -1.62659 | 0.00556  |

|       |       |       |       |          |          |
|-------|-------|-------|-------|----------|----------|
| 13.08 | 14.15 | 15.23 | 12.63 | 0.024997 | 0.890238 |
| 5.74  | 7.88  | 7.65  | 7.65  | 0.230191 | 0.065058 |
| 0     | 0     | 0     | 0     | NA       | NA       |
| 8.43  | 13.11 | 13.72 | 12.64 | 0.670665 | 1.47E-12 |
| 0.4   | 0.27  | 0.41  | 0.25  | -0.33175 | 0.495513 |
| 0     | 0     | 0     | 0     | NA       | NA       |
| 55.37 | 81.73 | 79.23 | 80.3  | 0.509721 | 2.70E-12 |
| 0.45  | 0.81  | 0.91  | 0.58  | 0.693632 | 0.123875 |
| 0     | 0.04  | 0     | 0.04  | NA       | NA       |
| 9.94  | 35.49 | 24.25 | 33.1  | 1.573389 | 8.94E-27 |
| 5.6   | 5.3   | 4.55  | 4.77  | -0.0634  | 0.805748 |
| 6.98  | 7.65  | 7.62  | 7.76  | 0.024831 | 0.934472 |
| 18.91 | 21.36 | 19.73 | 18.73 | 0.094118 | 0.466549 |
| 0.2   | 0.02  | 0.08  | 0.08  | -0.72272 | 0.294358 |
| 63.89 | 70.28 | 77.08 | 70.59 | 0.067314 | 0.657393 |
| 0     | 0     | 0.07  | 0     | NA       | NA       |
| 3.7   | 2.25  | 2.92  | 2.44  | -0.20641 | 0.472097 |
| 1.71  | 0.28  | 0.54  | 0.48  | -2.03923 | 2.38E-08 |
| 0.46  | 7.02  | 3.5   | 5.24  | 2.58301  | 1.02E-19 |
| 0     | 0     | 0     | 0     | NA       | NA       |
| 6.91  | 7.07  | 6.84  | 7.83  | 0.028457 | 0.876132 |
| 2.3   | 1.63  | 2.28  | 1.39  | -0.19856 | 0.614268 |
| 6.31  | 18.87 | 17.71 | 17.94 | 1.332955 | 3.81E-35 |
| 0.34  | 0.06  | 0.21  | 0.11  | NA       | NA       |
| 0     | 0     | 0     | 0     | NA       | NA       |
| 0.46  | 0.77  | 0.33  | 0.77  | 0.992057 | 0.015029 |
| 2.59  | 2.31  | 1.63  | 2.66  | -0.39992 | 0.175764 |
| 25.8  | 23.4  | 24.64 | 24.48 | -0.13873 | 0.359108 |
| 12.02 | 15.17 | 15.55 | 14.52 | -0.02552 | 0.881974 |
| 4.68  | 3.78  | 4.06  | 4     | -0.41403 | 0.0357   |
| 13.01 | 12.76 | 10.93 | 12.59 | -0.16163 | 0.318669 |
| 2.96  | 2.99  | 2.14  | 1.96  | -0.43546 | 0.183826 |
| 8.58  | 10.88 | 9.01  | 8.5   | 0.223841 | 0.350469 |
| 21.27 | 20.84 | 22.95 | 28.09 | -0.00878 | 0.975224 |
| 11.72 | 23.51 | 18.94 | 22.08 | 0.619641 | 1.36E-05 |
| 0.2   | 0.23  | 0.24  | 0.27  | 0.45958  | 0.422363 |
| 4.52  | 4.04  | 4.57  | 4.73  | 0.085543 | 0.738866 |
| 5.45  | 6.29  | 6.41  | 6.42  | 0.168932 | 0.1179   |
| 3.59  | 4.35  | 4.75  | 4.31  | 0.211504 | 0.297792 |
| 0     | 0     | 0     | 0     | NA       | NA       |
| 0     | 0     | 0     | 0     | NA       | NA       |
| 41.01 | 45.69 | 45.02 | 45.94 | 0.087086 | 0.510916 |
| 51.31 | 88.25 | 78.37 | 84.64 | 0.49802  | 6.21E-09 |
| 0     | 0     | 0     | 0     | NA       | NA       |
| 0.9   | 0.48  | 0.37  | 0.45  | -1.05245 | 0.002119 |

|         |        |         |        |          |          |
|---------|--------|---------|--------|----------|----------|
| 0       | 0      | 0       | 0      | NA       | NA       |
| 64.9    | 36.92  | 42.87   | 41.33  | -0.65662 | 2.32E-12 |
| 0       | 0      | 0       | 0      | NA       | NA       |
| 0.81    | 0.51   | 0.4     | 0.88   | 0.289969 | 0.604355 |
| 0       | 0      | 0       | 0      | NA       | NA       |
| 196.64  | 135.28 | 147.75  | 135.55 | -0.49897 | 1.72E-09 |
| 52.94   | 1063.7 | 370.93  | 665.59 | 3.236647 | 1.74E-17 |
| 0.76    | 0.44   | 0.43    | 0.24   | -0.29427 | 0.667336 |
| 0       | 0.5    | 0       | 0.09   | NA       | NA       |
| 16.31   | 17.68  | 14.28   | 16.05  | -0.07911 | 0.760254 |
| 0.57    | 0.95   | 0.78    | 1.27   | 0.253125 | 0.540392 |
| 13.85   | 15.7   | 20.03   | 18.6   | 0.692426 | 4.90E-08 |
| 6.72    | 4.49   | 5.06    | 4.92   | -0.03725 | 0.877689 |
| 0       | 0      | 0       | 0      | NA       | NA       |
| 15.13   | 18.32  | 18.44   | 20.14  | 0.16096  | 0.108285 |
| 0.99    | 4.55   | 2.96    | 3.01   | 2.101476 | 2.07E-24 |
| 22.81   | 7.87   | 10.68   | 10.12  | -1.29342 | 3.85E-28 |
| 0.61    | 0.77   | 0.59    | 0.97   | 0.326156 | 0.40718  |
| 32.47   | 30.97  | 33.79   | 33.63  | 0.087228 | 0.452939 |
| 33.63   | 34.71  | 30.36   | 32.65  | 0.085805 | 0.62576  |
| 27.59   | 32.45  | 29.9    | 28.89  | 0.068956 | 0.699843 |
| 4.16    | 11.08  | 8.47    | 10.46  | 1.181209 | 1.15E-11 |
| 2.03    | 3.78   | 3.66    | 5.73   | 0.83796  | 1.93E-05 |
| 27.11   | 26.72  | 25.32   | 26.17  | 0.078076 | 0.543994 |
| 13.2    | 13.88  | 14.79   | 15.69  | 0.144797 | 0.197176 |
| 1155.58 | 962.3  | 1002.51 | 939.54 | -0.30378 | 4.74E-05 |
| 0       | 0      | 0       | 0      | NA       | NA       |
| 6.52    | 3.53   | 3.61    | 4.22   | -0.17998 | 0.504223 |
| 0       | 0.81   | 0.49    | 0.8    | 1.426855 | 0.016775 |
| 993.41  | 768.51 | 1077.77 | 972.33 | -0.17936 | 0.110254 |
| 0.15    | 0.09   | 0.07    | 0.05   | -0.68665 | 0.305915 |
| 32.72   | 31.22  | 28.89   | 29.41  | -0.11332 | 0.374571 |
| 34.11   | 41.89  | 42.75   | 45.54  | 0.328934 | 0.00089  |
| 1.11    | 1.09   | 2.39    | 1.77   | 0.090161 | 0.832051 |
| 0.16    | 1.21   | 0.62    | 0.98   | 1.148893 | 0.010136 |
| 4.46    | 6.57   | 5.16    | 5.5    | 0.396699 | 0.000696 |
| 120.32  | 125    | 116.86  | 114.26 | -0.06808 | 0.583015 |
| 13.18   | 7.1    | 8.14    | 7.4    | -0.89761 | 7.07E-09 |
| 10.44   | 22.26  | 16.43   | 16.64  | 0.606312 | 0.000145 |
| 32.71   | 30.44  | 24.66   | 23.43  | -0.34325 | 0.000359 |
| 15.11   | 19.26  | 16.7    | 17.84  | 0.173198 | 0.120602 |
| 6.49    | 11.85  | 10.06   | 13.23  | 0.915463 | 7.54E-10 |
| 1.34    | 1.64   | 1.94    | 1.56   | 0.31092  | 0.496085 |
| 16.35   | 21.36  | 16.49   | 16.22  | 0.132165 | 0.385883 |
| 0.07    | 0.02   | 0       | 0.07   | NA       | NA       |

|        |        |        |        |          |          |
|--------|--------|--------|--------|----------|----------|
| 0      | 0      | 0      | 0      | NA       | NA       |
| 0      | 0      | 0      | 0      | NA       | NA       |
| 0.03   | 0      | 0      | 0      | NA       | NA       |
| 0.28   | 0.08   | 0.13   | 0.14   | -0.4452  | 0.54299  |
| 0      | 0.01   | 0      | 0      | NA       | NA       |
| 6.09   | 4.58   | 4.34   | 4.53   | 0.361649 | 0.03786  |
| 0      | 0      | 0      | 0      | NA       | NA       |
| 3.64   | 4.14   | 4.47   | 4.67   | 0.126023 | 0.553672 |
| 0      | 0      | 0      | 0      | NA       | NA       |
| 0      | 0      | 0      | 0      | NA       | NA       |
| 26.09  | 39.15  | 39.57  | 38.28  | 0.384202 | 7.32E-05 |
| 50.12  | 39.84  | 43.72  | 43.4   | -0.17757 | 0.094878 |
| 0      | 0      | 0      | 0      | NA       | NA       |
| 26.88  | 25.39  | 25.39  | 24.86  | -0.14975 | 0.249937 |
| 0.19   | 0      | 0      | 0      | NA       | NA       |
| 44.37  | 42.34  | 43.46  | 45.75  | -0.14233 | 0.200924 |
| 55.01  | 101.26 | 87.73  | 95.18  | 0.835791 | 1.38E-32 |
| 0      | 0      | 0      | 0      | NA       | NA       |
| 3.96   | 4.4    | 4.52   | 5.12   | 0.129303 | 0.394737 |
| 54.1   | 65.86  | 60.49  | 65.19  | 0.151597 | 0.18583  |
| 31.29  | 21.28  | 24.51  | 22.58  | -0.57438 | 6.13E-08 |
| 5.75   | 7.67   | 7.23   | 6.62   | 0.111329 | 0.577378 |
| 63.47  | 82.99  | 79.68  | 81.92  | 0.278346 | 0.000336 |
| 7.1    | 64.88  | 27.16  | 43.02  | 2.31573  | 3.21E-12 |
| 6.62   | 7.31   | 6.09   | 6.56   | -0.17665 | 0.339708 |
| 0.75   | 0.26   | 0.74   | 0.25   | -0.65967 | 0.116401 |
| 0      | 0      | 0      | 0      | NA       | NA       |
| 0      | 0.02   | 0      | 0.03   | NA       | NA       |
| 0      | 0      | 0      | 0      | NA       | NA       |
| 27.84  | 28.72  | 26.56  | 25.99  | 0.329472 | 0.031136 |
| 1.27   | 1.67   | 1.64   | 1.09   | 0.069854 | 0.886918 |
| 305.79 | 210.53 | 207.22 | 184.72 | -0.57924 | 5.12E-11 |
| 0      | 0      | 0      | 0      | NA       | NA       |
| 26.29  | 28.01  | 24.03  | 23.8   | 0.07087  | 0.694087 |
| 5.03   | 5.65   | 4.97   | 4.84   | 0.067824 | 0.799684 |
| 0.24   | 0.26   | 0.39   | 0.16   | 0.407747 | 0.549007 |
| 28.31  | 28.23  | 28.64  | 28.89  | 0.011234 | 0.93853  |
| 21.46  | 19.77  | 21.23  | 17.8   | -0.03721 | 0.871253 |
| 0      | 0.09   | 0      | 0      | NA       | NA       |
| 0      | 0      | 0      | 0      | NA       | NA       |
| 1.1    | 1.13   | 0.81   | 1.15   | -0.03796 | 0.92765  |
| 0      | 0      | 0      | 0      | NA       | NA       |
| 0.08   | 0.24   | 0.64   | 0.52   | 0.531642 | 0.448968 |
| 2.29   | 2.34   | 2.07   | 2.36   | 0.364154 | 0.294522 |
| 0      | 0      | 0      | 0      | NA       | NA       |



|        |        |        |         |                    |
|--------|--------|--------|---------|--------------------|
| 0      | 0      | 0      | 0 NA    | NA                 |
| 16.93  | 16.16  | 15.76  | 16.17   | -0.04918 0.81989   |
| 0      | 0      | 0      | 0 NA    | NA                 |
| 0.04   | 0.03   | 0      | 0 NA    | NA                 |
| 16.13  | 17.3   | 16.53  | 16.02   | 0.046108 0.776881  |
| 0.92   | 0.89   | 0.9    | 0.21    | 0.466501 0.53524   |
| 44.08  | 44.72  | 43.69  | 45.49   | 0.130284 0.200274  |
| 11.46  | 5.76   | 6.39   | 5.92    | -0.9493 3.20E-19   |
| 37.34  | 37.81  | 35.04  | 35.44   | -0.06385 0.631574  |
| 3.11   | 0.48   | 0.73   | 0.38    | -2.70726 1.13E-17  |
| 4.58   | 4.12   | 3.99   | 4.56    | -0.13914 0.595673  |
| 3.43   | 0.18   | 0.53   | 0.25    | -3.18921 3.89E-26  |
| 0.37   | 0.18   | 0.13   | 0.23    | -1.11127 0.007508  |
| 13.2   | 16.17  | 13.41  | 12.47   | 0.135794 0.4635    |
| 7.92   | 112.84 | 81.22  | 91.95   | 3.422554 3.69E-133 |
| 91.99  | 60.57  | 66.66  | 62.16   | -0.54469 1.10E-10  |
| 119.4  | 135.02 | 120.7  | 130.98  | 0.03879 0.784714   |
| 0      | 0      | 0      | 0 NA    | NA                 |
| 58.41  | 48.91  | 52.71  | 51.07   | -0.20321 0.021242  |
| 186.65 | 173.91 | 188.63 | 179.45  | -0.14256 0.126661  |
| 93.51  | 89.54  | 95.88  | 81.48   | 0.00277 0.990895   |
| 0      | 0      | 0      | 0 NA    | NA                 |
| 0      | 0.01   | 0      | 0.02 NA | NA                 |
| 0      | 0.02   | 0.04   | 0.03 NA | NA                 |
| 19.61  | 19.08  | 20.09  | 18.74   | 0.176443 0.15479   |
| 2.99   | 3.97   | 3.54   | 3.58    | 0.265338 0.078454  |
| 52.11  | 41.47  | 44.22  | 43.69   | -0.16418 0.174096  |
| 0      | 0.15   | 0.09   | 0.13    | 0.966909 0.113682  |
| 18.69  | 23.31  | 21.17  | 23.53   | 0.308673 0.001712  |
| 7.49   | 1.32   | 2.49   | 1.84    | -1.9279 1.67E-33   |
| 28.37  | 37.9   | 32.59  | 33.6    | 0.228053 0.046491  |
| 28.42  | 36.5   | 32.77  | 30.54   | 0.155376 0.191296  |
| 4.91   | 4.12   | 3.92   | 4.11    | 0.211376 0.18258   |
| 79     | 58.77  | 62.31  | 58.74   | -0.53964 2.56E-09  |
| 6.77   | 9.49   | 7.47   | 8.62    | 0.642051 0.000102  |
| 6.9    | 6.27   | 6.41   | 6.31    | 0.198436 0.463611  |
| 19.08  | 15.25  | 19.69  | 16.66   | -0.32791 0.002055  |
| 72.83  | 90.35  | 85.96  | 87.05   | 0.250892 0.009662  |
| 3.42   | 1.47   | 0.84   | 0.74    | -0.85856 0.0089    |
| 5.85   | 6.11   | 7.28   | 6.38    | 0.041555 0.833873  |
| 0.57   | 0      | 0.09   | 0.34    | -1.07623 0.079841  |
| 0.49   | 0.16   | 0.29   | 0.57    | -0.94664 0.090918  |
| 23.51  | 17.99  | 25.02  | 24.08   | -0.13472 0.401907  |
| 0      | 0      | 0      | 0.03 NA | NA                 |
| 0      | 0      | 0      | 0 NA    | NA                 |

|        |        |        |        |          |          |
|--------|--------|--------|--------|----------|----------|
| 6.55   | 7.86   | 8.9    | 9.93   | 0.102605 | 0.606148 |
| 1.34   | 1.52   | 1.66   | 2.24   | 0.141626 | 0.835623 |
| 525.84 | 463.63 | 503.7  | 463.35 | -0.21341 | 0.007084 |
| 2.63   | 2.48   | 2.41   | 1.97   | -0.22877 | 0.59389  |
| 0      | 0      | 0      | 0      | NA       | NA       |
| 26.7   | 28.63  | 27.43  | 26.23  | 0.019843 | 0.907869 |
| 0      | 0      | 0      | 0.02   | NA       | NA       |
| 43.72  | 53.35  | 46.71  | 45.02  | 0.282145 | 0.004593 |
| 0      | 0      | 0      | 0      | NA       | NA       |
| 0.22   | 1.42   | 0.41   | 0.51   | 1.122535 | 0.070611 |
| 0      | 0      | 0      | 0      | NA       | NA       |
| 144.97 | 156.58 | 143.81 | 139.33 | -0.14499 | 0.222522 |
| 0      | 0      | 0      | 0      | NA       | NA       |
| 17.14  | 10.92  | 11.68  | 11.92  | -0.58051 | 6.82E-10 |
| 0      | 0.02   | 0.05   | 0.05   | NA       | NA       |
| 11.64  | 27.73  | 21.98  | 25.36  | 1.02091  | 3.48E-16 |
| 12.16  | 15.85  | 15.72  | 13.07  | 0.30848  | 0.011    |
| 282.57 | 259.53 | 272.17 | 274.03 | -0.11618 | 0.202787 |
| 8.27   | 7.32   | 7.66   | 8.75   | -0.20964 | 0.399481 |
| 27.79  | 29.49  | 33.33  | 34.65  | 0.126444 | 0.429497 |
| 62.88  | 81.11  | 83.23  | 80.56  | 0.401511 | 2.62E-06 |
| 98.46  | 79.89  | 82.7   | 83.74  | -0.34525 | 9.99E-05 |
| 0.7    | 0.28   | 0.16   | 0.8    | -0.50335 | 0.469819 |
| 15.98  | 20.85  | 18.1   | 20.49  | 0.081771 | 0.518703 |
| 6.31   | 9.41   | 8.42   | 9.14   | 0.404858 | 0.000149 |
| 1.1    | 0.87   | 0.98   | 0.99   | -0.21182 | 0.679435 |
| 0.02   | 0      | 0      | 0      | NA       | NA       |
| 21.48  | 18.88  | 20.11  | 22.32  | -0.12134 | 0.453463 |
| 40.88  | 46.52  | 42.67  | 42.75  | 0.073893 | 0.572793 |
| 0      | 0      | 0      | 0      | NA       | NA       |
| 0.7    | 55.99  | 25.57  | 32.22  | 4.60623  | 4.22E-46 |
| 0.01   | 0.07   | 0.07   | 0.14   | 0.507951 | 0.493018 |
| 8.51   | 10.51  | 9.14   | 8.38   | -0.04442 | 0.808443 |
| 4.17   | 5.11   | 5.89   | 6.75   | 0.417563 | 0.005595 |
| 37.51  | 51.81  | 47.81  | 48.38  | 0.169829 | 0.102873 |
| 0.04   | 0.04   | 0.16   | 0.06   | NA       | NA       |
| 14.17  | 12.98  | 13.36  | 12.83  | -0.13048 | 0.384585 |
| 13.4   | 8.72   | 10.3   | 10.6   | -0.54026 | 1.56E-06 |
| 15.96  | 17.97  | 16.74  | 18.33  | 0.184615 | 0.222783 |
| 47.88  | 46.63  | 49.55  | 47.19  | -0.03905 | 0.773749 |
| 6.19   | 6.12   | 5.95   | 7.05   | -0.23237 | 0.060722 |
| 419.47 | 261.81 | 307.57 | 682.34 | 0.008423 | 0.991415 |
| 0      | 0      | 0      | 0      | NA       | NA       |
| 24.07  | 30.19  | 26.53  | 29.57  | 0.175973 | 0.140622 |
| 9.08   | 9.21   | 7.63   | 9.26   | 0.247162 | 0.207335 |

|        |        |        |        |          |          |
|--------|--------|--------|--------|----------|----------|
| 0      | 0      | 0      | 0      | NA       | NA       |
| 74.69  | 96.94  | 89.58  | 93.61  | 0.33857  | 0.002059 |
| 0.03   | 0.12   | 0.25   | 0.37   | 0.327188 | 0.675367 |
| 13.63  | 23.2   | 18.29  | 21.61  | 0.59882  | 1.35E-06 |
| 15.57  | 21.58  | 17.05  | 18.58  | 0.067581 | 0.781175 |
| 16.2   | 16.88  | 14.37  | 17.2   | -0.06347 | 0.626014 |
| 6.15   | 5.3    | 5.24   | 5.57   | -0.23878 | 0.062447 |
| 64.98  | 70.3   | 74.34  | 70.68  | 0.185685 | 0.027891 |
| 2.45   | 1.32   | 1.61   | 1.72   | -0.91059 | 2.81E-05 |
| 16.72  | 12.02  | 14.74  | 16.96  | -0.40672 | 0.007046 |
| 0.06   | 0.02   | 0.01   | 0.03   | NA       | NA       |
| 31.54  | 23.56  | 27.25  | 25.39  | -0.27512 | 0.073639 |
| 0.6    | 0.22   | 0.08   | 0.05   | -1.95557 | 3.60E-06 |
| 16.22  | 22.11  | 19.97  | 21.38  | 0.517225 | 2.51E-07 |
| 5.11   | 5.05   | 2.47   | 2.82   | -0.20163 | 0.357274 |
| 4.44   | 5.85   | 4.61   | 4.57   | 0.227149 | 0.247221 |
| 5.3    | 3.37   | 3.36   | 3.12   | -1.17299 | 1.48E-13 |
| 0      | 0      | 0      | 0      | NA       | NA       |
| 0      | 0      | 0.03   | 0.04   | NA       | NA       |
| 13.56  | 13.68  | 13.84  | 13.03  | 0.188297 | 0.181298 |
| 14.16  | 4.5    | 3.14   | 3.85   | -1.95342 | 1.02E-38 |
| 4.37   | 0.41   | 0.25   | 0.02   | -3.32176 | 4.73E-15 |
| 7.49   | 8.26   | 11.52  | 8.83   | 0.279928 | 0.03529  |
| 0.17   | 0.01   | 0.04   | 0      | -0.89453 | 0.167881 |
| 0.79   | 0.54   | 0.52   | 0.18   | -0.8605  | 0.033764 |
| 8.98   | 8.87   | 9.56   | 10.63  | -0.0485  | 0.726143 |
| 0      | 0.02   | 0      | 0.03   | NA       | NA       |
| 0      | 0      | 0.03   | 0      | NA       | NA       |
| 26.22  | 27.17  | 31.47  | 32.01  | 0.068791 | 0.621469 |
| 87.21  | 81.18  | 82.27  | 81.55  | -0.13061 | 0.157661 |
| 32.22  | 38.31  | 35.8   | 35.39  | 0.197979 | 0.057898 |
| 16.21  | 12.23  | 11.94  | 11.95  | -0.50529 | 9.81E-06 |
| 3.87   | 3.73   | 4.38   | 4.49   | 0.145582 | 0.569015 |
| 0      | 0      | 0      | 0      | NA       | NA       |
| 2.18   | 3.21   | 2.79   | 2.53   | 0.184131 | 0.603309 |
| 2.45   | 0.86   | 2.64   | 3.17   | -0.43153 | 0.310228 |
| 304.71 | 483.23 | 455.02 | 476.78 | 0.617395 | 2.11E-13 |
| 30.28  | 28.66  | 26.64  | 32.07  | -0.11035 | 0.415103 |
| 0      | 0      | 0      | 0      | NA       | NA       |
| 2.37   | 4.98   | 5.17   | 4.76   | 0.541651 | 0.003193 |
| 1.45   | 1.05   | 1.24   | 0.81   | -0.36802 | 0.270119 |
| 0.03   | 0      | 0      | 0      | -1.12139 | 0.047298 |
| 0      | 0      | 0      | 0      | NA       | NA       |
| 1.69   | 1.21   | 1.66   | 1.44   | -0.29149 | 0.223656 |
| 26.08  | 22.03  | 26.26  | 23.19  | -0.03444 | 0.865047 |

|        |        |        |        |          |          |
|--------|--------|--------|--------|----------|----------|
| 0.06   | 0      | 0      | 0      | NA       | NA       |
| 0      | 0.01   | 0.01   | 0.02   | NA       | NA       |
| 235.8  | 188.2  | 220.26 | 195.89 | -0.28471 | 0.006384 |
| 5.69   | 7.65   | 6.25   | 7.76   | 0.470397 | 0.00755  |
| 11.62  | 7.74   | 9.19   | 9.03   | -0.23879 | 0.176808 |
| 17.31  | 11.65  | 18.07  | 17.37  | -0.10774 | 0.590322 |
| 0.03   | 0.02   | 0.12   | 0.02   | NA       | NA       |
| 0.13   | 0.25   | 0      | 0      | NA       | NA       |
| 0.37   | 0.37   | 0.3    | 0.32   | -0.44958 | 0.137888 |
| 101.3  | 143.35 | 129.97 | 137.89 | 0.508812 | 5.18E-09 |
| 0      | 0      | 0      | 0      | NA       | NA       |
| 90.42  | 18.97  | 30.51  | 21.53  | -1.85108 | 2.92E-40 |
| 0.06   | 0      | 0      | 0.02   | NA       | NA       |
| 3.04   | 5.14   | 4.49   | 3.53   | 0.709984 | 0.003403 |
| 4.73   | 4.54   | 8.52   | 6.73   | 0.366859 | 0.401074 |
| 16.64  | 8.85   | 9.97   | 11.28  | -0.5778  | 8.30E-07 |
| 9.58   | 6      | 6.08   | 6.24   | -0.05465 | 0.857828 |
| 0.06   | 0.09   | 0.22   | 0.05   | NA       | NA       |
| 0.63   | 0.65   | 0.58   | 0.88   | 0.183246 | 0.740036 |
| 0.24   | 0.48   | 0.33   | 0.42   | 0.652989 | 0.351406 |
| 1.37   | 0      | 0.15   | 0.09   | NA       | NA       |
| 0.81   | 0.65   | 1.44   | 0.95   | 0.816809 | 0.110165 |
| 0      | 0      | 0.02   | 0      | NA       | NA       |
| 15.07  | 13.3   | 15.27  | 15.65  | -0.23528 | 0.121552 |
| 26.39  | 53.66  | 54.96  | 57.17  | 0.941059 | 8.32E-30 |
| 11.71  | 10.13  | 8.96   | 6.05   | -0.68299 | 3.67E-05 |
| 0.22   | 0.07   | 0.13   | 0.19   | 0.014345 | 0.989121 |
| 48.08  | 45.04  | 41.02  | 41.91  | -0.10168 | 0.470944 |
| 15     | 10.74  | 10.46  | 12.33  | -0.28848 | 0.089541 |
| 33.77  | 35.64  | 43.55  | 47.65  | 0.254622 | 0.006985 |
| 4.81   | 0.27   | 1.35   | 1.11   | -1.97779 | 1.34E-08 |
| 42.52  | 49.27  | 41.88  | 48.31  | 0.11803  | 0.30614  |
| 105.36 | 98.45  | 88.82  | 90.14  | -0.05315 | 0.64053  |
| 0.05   | 0.06   | 0.07   | 0.11   | 0.708134 | 0.306849 |
| 15.64  | 14.15  | 14.7   | 14.66  | -0.10637 | 0.421388 |
| 0      | 0      | 0      | 0      | NA       | NA       |
| 13.8   | 19.66  | 21.29  | 20.23  | 0.464261 | 3.49E-07 |
| 14.33  | 10.47  | 9.4    | 10.52  | -0.52865 | 5.50E-06 |
| 8.03   | 3.93   | 5.01   | 5.81   | -0.32161 | 0.196491 |
| 0      | 0      | 0      | 0      | NA       | NA       |
| 0      | 0      | 0      | 0      | NA       | NA       |
| 0      | 0.09   | 0.02   | 0.03   | NA       | NA       |
| 90.71  | 84.64  | 78.78  | 80.07  | -0.25878 | 0.021148 |
| 12.29  | 14.99  | 19.41  | 18.14  | 0.296433 | 0.080451 |
| 0.74   | 4.35   | 2.98   | 2.76   | 1.83726  | 4.60E-09 |

|       |       |        |       |          |          |
|-------|-------|--------|-------|----------|----------|
| 0.33  | 0.12  | 0.11   | 0.11  | NA       | NA       |
| 0.13  | 0.23  | 0.07   | 0.17  | 0.909619 | 0.149688 |
| 5.06  | 4.6   | 3.74   | 4.8   | 0.009992 | 0.973212 |
| 0.07  | 0.02  | 0.06   | 0.04  | NA       | NA       |
| 1.25  | 1.83  | 2.68   | 1.46  | -0.17322 | 0.662931 |
| 0     | 0     | 0      | 0     | NA       | NA       |
| 1.29  | 0.92  | 1.12   | 1.53  | -0.20081 | 0.700488 |
| 60.3  | 91.48 | 70.16  | 87.53 | 0.749132 | 3.62E-13 |
| 22.57 | 25.93 | 25.15  | 25.27 | 0.179521 | 0.065    |
| 16.28 | 13.88 | 16.51  | 17.35 | -0.05607 | 0.696592 |
| 5.02  | 9.12  | 7.83   | 9.18  | 0.378349 | 0.033239 |
| 4.39  | 2.8   | 3.5    | 3.66  | -0.4359  | 0.055676 |
| 0     | 0     | 0      | 0     | NA       | NA       |
| 26.46 | 30.53 | 30.63  | 24.03 | 0.220623 | 0.278147 |
| 0     | 0     | 0      | 0     | NA       | NA       |
| 3.72  | 4.19  | 3.88   | 4.17  | -0.06932 | 0.704761 |
| 10.02 | 34.01 | 21.53  | 29.21 | 1.233431 | 2.61E-13 |
| 0     | 0     | 0      | 0     | NA       | NA       |
| 46.69 | 61.5  | 53.49  | 55.39 | 0.231828 | 0.01562  |
| 26.9  | 29.04 | 30.12  | 29.95 | 0.136063 | 0.386383 |
| 1.37  | 3.58  | 4.13   | 3.83  | 0.943605 | 1.80E-07 |
| 12.25 | 17.31 | 18.06  | 17.63 | 0.33782  | 0.001581 |
| 35.88 | 28.99 | 34.25  | 32.59 | -0.22323 | 0.054871 |
| 0.02  | 0.01  | 0.03   | 0.05  | NA       | NA       |
| 8.45  | 10.75 | 10.43  | 10.57 | 0.388819 | 6.48E-06 |
| 39.57 | 86.97 | 61.21  | 69.47 | 0.904411 | 1.79E-14 |
| 94.74 | 93.63 | 102.03 | 91.14 | -0.03248 | 0.855166 |
| 0.33  | 0     | 0      | 0     | NA       | NA       |
| 3.39  | 5.35  | 3.62   | 4.16  | 0.194322 | 0.228522 |
| 29.47 | 47.78 | 40.56  | 51.16 | 0.660175 | 2.71E-11 |
| 20.76 | 24.71 | 24.32  | 28.01 | 0.189635 | 0.108648 |
| 28.29 | 30.75 | 43.04  | 37.33 | 0.632371 | 6.85E-07 |
| 23.45 | 26.36 | 27.61  | 22.42 | 0.195675 | 0.260156 |
| 0.03  | 0.02  | 0.1    | 0.19  | -0.37223 | 0.631601 |
| 10.95 | 8.34  | 11.14  | 10.18 | -0.36095 | 0.017296 |
| 4.29  | 3.78  | 3.04   | 7.94  | -0.1414  | 0.711654 |
| 5.74  | 5.44  | 5.89   | 7.03  | 0.100288 | 0.583993 |
| 3.45  | 4.61  | 5.17   | 3.96  | 0.183681 | 0.515226 |
| 63.27 | 37.23 | 39.14  | 38.72 | -0.79087 | 2.61E-18 |
| 4.03  | 4.33  | 4.36   | 5.76  | 0.064488 | 0.82819  |
| 3.81  | 4.87  | 5.22   | 4.57  | 0.295239 | 0.082511 |
| 3.78  | 6.04  | 6.8    | 4.67  | 0.220944 | 0.23086  |
| 0.15  | 0.07  | 0.11   | 0.2   | 0.212328 | 0.800294 |
| 18.64 | 7.07  | 8.18   | 9.23  | -1.23993 | 1.69E-23 |
| 5.69  | 6.35  | 6.81   | 6.73  | 0.007676 | 0.979916 |

|        |        |        |        |          |          |
|--------|--------|--------|--------|----------|----------|
| 0      | 0      | 0      | 0      | NA       | NA       |
| 0      | 0.93   | 0.36   | 0.77   | 2.610261 | 1.37E-06 |
| 29.63  | 24.66  | 32.5   | 31.58  | 0.049832 | 0.766199 |
| 1.21   | 3.43   | 2.99   | 3.86   | 1.37928  | 1.97E-18 |
| 3.36   | 3.7    | 3.71   | 4.57   | 0.311631 | 0.121341 |
| 10.52  | 9.78   | 9.7    | 10.49  | -0.0371  | 0.81891  |
| 3.5    | 2.54   | 2.97   | 3.24   | -0.38672 | 0.021225 |
| 37.81  | 31     | 30.15  | 30.65  | -0.35189 | 0.001248 |
| 8.8    | 10.8   | 11.14  | 10.38  | 0.290263 | 0.009522 |
| 1.9    | 2.58   | 2.23   | 2.61   | 0.48092  | 0.029727 |
| 0      | 0      | 0      | 0      | NA       | NA       |
| 9.97   | 27.05  | 14.26  | 17.97  | 0.836256 | 0.000206 |
| 0.04   | 0      | 0      | 0      | NA       | NA       |
| 44.16  | 31.13  | 33.33  | 29.62  | -0.52114 | 2.02E-08 |
| 0      | 0      | 0      | 0      | NA       | NA       |
| 0      | 0      | 0      | 0      | NA       | NA       |
| 0      | 0.11   | 0.04   | 0.04   | NA       | NA       |
| 0.71   | 0.27   | 0.83   | 0.51   | -0.74657 | 0.029838 |
| 0.26   | 0.43   | 0.39   | 0.22   | -0.00151 | 0.998212 |
| 1.13   | 1.42   | 1.96   | 1.62   | 0.807505 | 0.000305 |
| 0.53   | 3.18   | 1.24   | 1.67   | 2.137187 | 2.83E-07 |
| 318.19 | 333.7  | 313.46 | 334.4  | -0.02324 | 0.838426 |
| 32.55  | 157.19 | 110.83 | 136.32 | 1.873953 | 3.77E-59 |
| 0      | 0      | 0      | 0      | NA       | NA       |
| 42.43  | 27.01  | 28.57  | 28.45  | -0.62774 | 6.40E-11 |
| 9.16   | 18.01  | 12.15  | 20.88  | 1.093645 | 1.73E-12 |
| 0.99   | 0.06   | 0.33   | 0.13   | -2.01204 | 4.05E-06 |
| 6.06   | 10.9   | 8.94   | 9.7    | 0.376692 | 0.013807 |
| 0.41   | 0.25   | 0.34   | 0.24   | -0.97291 | 0.055173 |
| 38.03  | 36.39  | 41.68  | 40.84  | 0.002979 | 0.988102 |
| 0      | 0      | 0      | 0      | NA       | NA       |
| 38.73  | 32.81  | 45.37  | 36.77  | -0.09553 | 0.651205 |
| 0      | 0      | 0      | 0      | NA       | NA       |
| 0      | 0      | 0      | 0.37   | NA       | NA       |
| 19.72  | 19.44  | 17.88  | 20.94  | 0.02392  | 0.90523  |
| 34.53  | 80.41  | 64.96  | 73.9   | 1.054008 | 7.36E-25 |
| 7.89   | 461.26 | 151.63 | 282.21 | 4.363706 | 1.60E-27 |
| 0.26   | 1.08   | 0.38   | 0.23   | -0.11593 | 0.891048 |
| 0.36   | 0.14   | 0.19   | 0.42   | 0.118464 | 0.895604 |
| 5.45   | 3.53   | 4.4    | 3.24   | -0.43329 | 0.147669 |
| 0.05   | 0      | 0.06   | 0      | NA       | NA       |
| 0.52   | 0.2    | 0.42   | 0.29   | -1.02933 | 0.055549 |
| 0      | 0      | 0      | 0      | NA       | NA       |
| 52.86  | 56.42  | 53.58  | 54.6   | -0.00119 | 0.995214 |
| 2.01   | 0.99   | 1.43   | 1.18   | -0.77776 | 0.001085 |

|        |        |        |        |          |          |
|--------|--------|--------|--------|----------|----------|
| 8.89   | 9.21   | 10.23  | 9.95   | 0.177396 | 0.21918  |
| 38.92  | 0.72   | 3.02   | 1.41   | -3.77627 | 6.16E-19 |
| 3.39   | 3.47   | 3.32   | 5.05   | 0.159078 | 0.456741 |
| 6.93   | 6.74   | 7      | 6.94   | -0.16421 | 0.381777 |
| 0      | 0      | 0      | 0      | NA       | NA       |
| 104.57 | 142.02 | 134.37 | 129.76 | 0.268843 | 0.011354 |
| 13.83  | 16.23  | 15.21  | 15.02  | 0.118977 | 0.493018 |
| 1.84   | 0.39   | 0.55   | 0.2    | -1.39003 | 0.004194 |
| 15.37  | 15.53  | 16.67  | 16.39  | 0.049958 | 0.787206 |
| 0.04   | 0.18   | 0      | 0.06   | NA       | NA       |
| 4.57   | 12.76  | 8.09   | 10.34  | 0.905887 | 9.00E-09 |
| 0.08   | 0      | 0.17   | 0.03   | NA       | NA       |
| 1.55   | 1.81   | 2.46   | 1.9    | 0.083616 | 0.80335  |
| 18.95  | 19.71  | 21.41  | 18.51  | -0.11306 | 0.53739  |
| 12.74  | 13.11  | 13.76  | 15.74  | 0.387433 | 7.97E-05 |
| 11.94  | 41.93  | 21     | 30.57  | 1.430096 | 6.82E-19 |
| 37.42  | 19.59  | 23.98  | 23.67  | -0.80705 | 7.25E-20 |
| 0.15   | 0.33   | 0.09   | 0.27   | 0.880329 | 0.17178  |
| 323.16 | 417.47 | 419.76 | 406.62 | 0.296777 | 5.91E-05 |
| 10.17  | 6.49   | 7.22   | 7.73   | -0.14962 | 0.554281 |
| 9.27   | 5.84   | 7.89   | 5.94   | -0.52966 | 6.71E-05 |
| 0.14   | 0.27   | 0.39   | 0.24   | 0.258201 | 0.737009 |
| 127.89 | 36.81  | 70.19  | 52.79  | -1.2371  | 3.58E-06 |
| 11.52  | 8.3    | 10.72  | 8.52   | -0.01675 | 0.919582 |
| 15.8   | 19.83  | 17.8   | 17.46  | 0.337302 | 0.019245 |
| 0      | 0      | 0      | 0      | NA       | NA       |
| 0      | 0      | 0      | 0      | NA       | NA       |
| 15     | 21.41  | 19.41  | 18.23  | 0.134468 | 0.481547 |
| 26.63  | 56.49  | 40.85  | 50.04  | 0.833952 | 1.64E-14 |
| 0      | 0      | 0      | 0      | NA       | NA       |
| 0      | 0      | 0      | 0      | NA       | NA       |
| 20.58  | 17.94  | 22.44  | 19.51  | -0.0564  | 0.769286 |
| 0.01   | 0.04   | 0.01   | 0.02   | NA       | NA       |
| 2.24   | 2.32   | 1.47   | 2.24   | -0.25081 | 0.499353 |
| 0.09   | 0.1    | 0.26   | 0.24   | NA       | NA       |
| 0      | 0      | 0      | 0      | NA       | NA       |
| 3.39   | 2.68   | 3.06   | 2.89   | -0.19779 | 0.492779 |
| 40.21  | 39.55  | 40.34  | 39.86  | 0.094977 | 0.511575 |
| 16.77  | 19.78  | 16.14  | 18.68  | 0.054207 | 0.781422 |
| 0      | 0      | 0      | 0      | NA       | NA       |
| 0      | 0      | 0      | 0      | NA       | NA       |
| 0      | 0      | 0      | 0      | NA       | NA       |
| 0      | 0      | 0      | 0      | NA       | NA       |
| 8.69   | 12.51  | 9.68   | 12.58  | 0.094132 | 0.425463 |
| 45.59  | 49.69  | 49.83  | 51.17  | -0.04658 | 0.735872 |

|        |        |        |        |          |          |
|--------|--------|--------|--------|----------|----------|
| 41.09  | 38.68  | 39.87  | 41.16  | -0.08692 | 0.557574 |
| 29.27  | 26.1   | 26.28  | 27.47  | -0.16368 | 0.122857 |
| 12.03  | 16.71  | 15.14  | 15.53  | 0.697478 | 1.31E-07 |
| 0      | 0      | 0      | 0      | NA       | NA       |
| 17.87  | 14.78  | 14.62  | 14.59  | -0.32186 | 0.00026  |
| 0.02   | 0.04   | 0.15   | 0.13   | 0.946479 | 0.145311 |
| 16.46  | 11.67  | 15.72  | 15.58  | -0.22814 | NA       |
| 3.31   | 0.96   | 1.46   | 1.15   | -1.43326 | 6.16E-19 |
| 5.72   | 4.29   | 5.88   | 4.63   | -0.28743 | 0.0176   |
| 1.67   | 0.32   | 0.28   | 0.8    | -1.33073 | 0.002849 |
| 9.51   | 9.52   | 7.11   | 10     | -0.38689 | 0.038039 |
| 8.97   | 8.23   | 7.45   | 9.94   | -0.05531 | 0.727865 |
| 15.5   | 7.96   | 9.32   | 9.63   | -0.30027 | 0.030349 |
| 0      | 0.03   | 0.01   | 0.03   | NA       | NA       |
| 0.93   | 1.08   | 1.26   | 1.68   | 1.323304 | 0.020298 |
| 4.26   | 5.09   | 6.3    | 6.83   | 0.24791  | 0.047695 |
| 16.16  | 16.59  | 15.16  | 18.1   | -0.15681 | 0.206631 |
| 3.77   | 5.6    | 5.52   | 6.06   | 0.511559 | 0.045809 |
| 43.59  | 45.37  | 50.53  | 46.38  | 0.124947 | 0.376899 |
| 11.57  | 8.6    | 9.91   | 8.73   | -0.2771  | 0.129469 |
| 11.14  | 6.35   | 7.92   | 8.07   | -0.53245 | 0.000355 |
| 24.23  | 27.69  | 22.74  | 26.34  | 0.305339 | 0.001791 |
| 12.65  | 10.16  | 10.51  | 11.44  | -0.07281 | 0.512103 |
| 1.2    | 1.16   | 2.01   | 0.72   | 0.082975 | 0.918874 |
| 217.41 | 200.54 | 220.33 | 220.57 | -0.10027 | 0.294358 |
| 0.89   | 2.19   | 1.37   | 0.86   | 0.151474 | 0.776968 |
| 106.22 | 71.39  | 82.9   | 79.56  | -0.62324 | 5.35E-09 |
| 6.14   | 2.08   | 1.85   | 1.9    | -1.57949 | 1.51E-12 |
| 36.47  | 33.05  | 32.68  | 31.98  | -0.10346 | 0.447745 |
| 13.2   | 15.97  | 18.92  | 16.94  | 0.158882 | 0.251401 |
| 49.32  | 52.47  | 52.12  | 50.28  | 0.049483 | 0.660434 |
| 41.73  | 61.3   | 51.09  | 53.07  | 0.293288 | 0.009515 |
| 140.96 | 117.25 | 126.39 | 117.68 | -0.26277 | 0.00158  |
| 26.63  | 14.95  | 16.64  | 18.41  | -0.64952 | 1.14E-12 |
| 14.54  | 30.85  | 20.08  | 23.17  | 0.684434 | 1.82E-06 |
| 0.08   | 0      | 0      | 0      | NA       | NA       |
| 0      | 0      | 0      | 0      | NA       | NA       |
| 14.61  | 12.12  | 15.4   | 10.65  | -0.31163 | 0.104915 |
| 0      | 0      | 0      | 0      | NA       | NA       |
| 0.09   | 0.02   | 0.04   | 0.12   | NA       | NA       |
| 0      | 0      | 0      | 0      | NA       | NA       |
| 0.22   | 0.1    | 0.14   | 0.05   | -0.38716 | 0.616849 |
| 46.72  | 55.09  | 49.91  | 51.58  | 0.107799 | 0.339087 |
| 0.27   | 0.39   | 0.14   | 0.47   | 0.089226 | 0.92421  |
| 0.18   | 0.03   | 0.12   | 0      | NA       | NA       |



|        |        |        |        |          |          |
|--------|--------|--------|--------|----------|----------|
| 21.86  | 31.87  | 25.49  | 26.01  | 0.220992 | 0.090382 |
| 1      | 0.63   | 1.03   | 1.01   | -0.21477 | 0.456828 |
| 0.86   | 0.91   | 0.67   | 1.15   | -0.1682  | 0.807058 |
| 16.17  | 12.21  | 12.57  | 12.08  | -0.34631 | 0.00191  |
| 0.07   | 0.03   | 0.13   | 0.02   | -0.15897 | 0.853112 |
| 69.57  | 166.63 | 166.69 | 178.33 | 1.069424 | 1.59E-33 |
| 72.35  | 80.75  | 82.91  | 80.21  | 0.180109 | 0.197405 |
| 0.08   | 0.09   | 0.1    | 0.05   | -0.17167 | 0.844865 |
| 16.21  | 30.79  | 22.75  | 27.21  | 0.728442 | 2.93E-09 |
| 67.59  | 59.27  | 59.93  | 61.19  | -0.1939  | 0.012911 |
| 33.51  | 46.22  | 45.52  | 46.7   | 0.323997 | 0.003513 |
| 17.8   | 20.06  | 18.92  | 21.62  | 0.226003 | 0.030527 |
| 1.69   | 0.63   | 0.36   | 0.54   | -0.42743 | 0.500663 |
| 5.47   | 8.03   | 6.59   | 7      | 0.393368 | 0.000719 |
| 3.79   | 1.74   | 2.12   | 2.49   | -0.11318 | 0.585114 |
| 7.33   | 10.88  | 10.07  | 8.73   | 0.15766  | 0.352007 |
| 34.68  | 41.46  | 41.85  | 41.63  | 0.149728 | 0.094395 |
| 33.13  | 25.96  | 31.54  | 30.56  | -0.30337 | 0.00083  |
| 1.03   | 0      | 0      | 0.26   | NA       | NA       |
| 4.86   | 11.27  | 9.97   | 10.67  | 0.977753 | 1.80E-07 |
| 0.97   | 0.43   | 0.86   | 0.35   | -1.16631 | 0.001767 |
| 0      | 0      | 0      | 0.05   | NA       | NA       |
| 0.25   | 0.92   | 0.62   | 0.73   | 0.777631 | 0.139539 |
| 0.29   | 0.29   | 0.06   | 0.28   | -0.0022  | 0.998123 |
| 0      | 0      | 0      | 0      | NA       | NA       |
| 14.03  | 16.99  | 16.25  | 16.42  | 0.249725 | 0.151958 |
| 0.19   | 0.38   | 0.21   | 0.31   | 0.04919  | 0.956178 |
| 2.05   | 4.15   | 2.75   | 4.85   | 1.166637 | 9.03E-08 |
| 7.25   | 9.88   | 9.66   | 12     | 0.347036 | 0.025945 |
| 19.83  | 25.5   | 23.09  | 24.56  | 0.342802 | 0.00047  |
| 16.17  | 5.14   | 7.6    | 6.8    | -1.03597 | 3.31E-14 |
| 8.58   | 6.99   | 5.71   | 7.03   | -0.18774 | 0.379982 |
| 8.1    | 7.8    | 9      | 7.74   | -0.13218 | 0.535362 |
| 16.52  | 13.22  | 12.28  | 11.5   | -0.45338 | 7.09E-07 |
| 0.11   | 0.13   | 0.06   | 0.25   | 0.459153 | 0.544229 |
| 44.13  | 39.23  | 45.73  | 42     | -0.17529 | 0.128808 |
| 26.19  | 20.91  | 22.72  | 22.18  | -0.24685 | 0.053493 |
| 0.16   | 0.57   | 0.93   | 1.37   | 0.85727  | 0.109659 |
| 3.45   | 3.89   | 3.91   | 4.92   | 0.316706 | 0.077352 |
| 0.44   | 0.71   | 0.46   | 1.01   | 0.613202 | 0.251829 |
| 1.11   | 0.09   | 0.25   | 0.66   | -1.34733 | 0.014783 |
| 133.99 | 142.33 | 152.38 | 147.01 | 0.045934 | 0.733948 |
| 130.27 | 153.47 | 137.06 | 142.21 | 0.014335 | 0.929109 |
| 6.68   | 7.05   | 5.45   | 8.06   | -0.27941 | 0.012313 |
| 0.29   | 0      | 0.03   | 0.18   | -0.64125 | 0.365402 |

|        |       |        |        |          |          |
|--------|-------|--------|--------|----------|----------|
| 0.04   | 0.18  | 0.17   | 0.12   | NA       | NA       |
| 48.51  | 68.55 | 63.69  | 71.42  | 0.664644 | 4.28E-12 |
| 39.16  | 61.13 | 57.6   | 58.56  | 0.47598  | 3.22E-08 |
| 1.12   | 1     | 1.04   | 1.06   | -0.32347 | 0.269833 |
| 0      | 0     | 0      | 0      | NA       | NA       |
| 16.99  | 16.31 | 15.58  | 17.84  | -0.02489 | 0.860846 |
| 4.76   | 9.58  | 7      | 9.48   | 0.646473 | 0.00061  |
| 0.11   | 0.43  | 0.07   | 0.26   | NA       | NA       |
| 5.73   | 3.1   | 3.84   | 3.78   | -0.6575  | 8.37E-07 |
| 5.87   | 6.26  | 5.56   | 5.34   | -0.02791 | 0.909331 |
| 0.14   | 0.19  | 0.09   | 0.26   | -0.0225  | 0.981181 |
| 13.45  | 11.48 | 11.86  | 12.31  | -0.22148 | 0.083154 |
| 3.77   | 3.64  | 3.61   | 4.17   | -0.05335 | 0.859315 |
| 0      | 0     | 0      | 0      | NA       | NA       |
| 0.21   | 0.24  | 0.19   | 0.3    | 0.099947 | 0.91001  |
| 22.16  | 5.64  | 6.72   | 4.37   | -2.25943 | 5.85E-57 |
| 0.15   | 0.1   | 0.07   | 0.08   | NA       | NA       |
| 0      | 0     | 0      | 0      | NA       | NA       |
| 270.71 | 201.9 | 239.57 | 210.52 | -0.31084 | 0.000763 |
| 0      | 0     | 0      | 0      | NA       | NA       |
| 0      | 0     | 0      | 0      | NA       | NA       |
| 0      | 0     | 0      | 0      | NA       | NA       |
| 0      | 0     | 0      | 0      | NA       | NA       |
| 0.07   | 0.13  | 0.07   | 0.07   | NA       | NA       |
| 9.36   | 12.77 | 11.13  | 11.29  | 0.313641 | 0.027566 |
| 26.28  | 31.84 | 28.32  | 33.51  | 0.306806 | 0.001677 |
| 5.06   | 7.09  | 5.81   | 5.77   | 0.164958 | 0.475614 |
| 14.2   | 18.14 | 15.26  | 20.35  | 0.037392 | 0.801901 |
| 1.14   | 0.58  | 1.32   | 1.17   | 0.023361 | 0.968592 |
| 0.39   | 0.07  | 0.09   | 0      | -0.85283 | 0.197136 |
| 0      | 0     | 0      | 0      | NA       | NA       |
| 27.6   | 26.96 | 27.15  | 27.46  | -0.1921  | 0.080471 |
| 0.1    | 0.05  | 0.09   | 0.05   | NA       | NA       |
| 0.37   | 0.48  | 0.33   | 0      | NA       | NA       |
| 0      | 0     | 0      | 0      | NA       | NA       |
| 0      | 0     | 0      | 0      | NA       | NA       |
| 25.76  | 17.41 | 18.72  | 16.15  | -0.46176 | 0.002067 |
| 3.98   | 3.1   | 3.29   | 3.06   | -0.33692 | 0.141323 |
| 9.2    | 7.66  | 10.25  | 9.54   | -0.2176  | 0.264032 |
| 15.74  | 23.81 | 22.31  | 23.2   | 0.653528 | 4.60E-11 |
| 0      | 0     | 0      | 0      | NA       | NA       |
| 0      | 0     | 0      | 0      | NA       | NA       |
| 0      | 0     | 0      | 0      | NA       | NA       |
| 3.11   | 2.76  | 2.84   | 2.82   | -0.26409 | 0.27335  |
| 0.29   | 0.1   | 0.07   | 0      | NA       | NA       |

|        |        |        |        |          |          |
|--------|--------|--------|--------|----------|----------|
| 1.74   | 3.14   | 2.7    | 2.98   | 0.789494 | 1.35E-05 |
| 0.02   | 0      | 0      | 0.01   | NA       | NA       |
| 0      | 0      | 0      | 0      | NA       | NA       |
| 252.53 | 454.41 | 350.89 | 394.71 | 0.595628 | 3.71E-09 |
| 4.35   | 4.01   | 3.91   | 3.57   | -0.11117 | 0.665076 |
| 21.01  | 17.03  | 17     | 17.61  | -0.2773  | 0.002659 |
| 8.9    | 7.26   | 7.21   | 8.52   | -0.35332 | 0.005113 |
| 6.9    | 8.55   | 8.31   | 7.62   | 0.165886 | 0.220582 |
| 11.17  | 12.57  | 10.92  | 11.48  | -0.25175 | 0.13157  |
| 66.3   | 104.3  | 97.21  | 113.76 | 0.786266 | 1.07E-20 |
| 30.81  | 42.18  | 38.52  | 40.98  | 0.246754 | 0.054997 |
| 0      | 0      | 0      | 0      | NA       | NA       |
| 0      | 0.13   | 0.15   | 0.04   | NA       | NA       |
| 197.66 | 197.78 | 211.01 | 210.76 | -0.11218 | 0.210182 |
| 7.76   | 0.7    | 1.15   | 0.51   | -3.33624 | 1.01E-36 |
| 34.77  | 29.51  | 34.62  | 30.94  | -0.13863 | 0.250235 |
| 0      | 0      | 0      | 0      | NA       | NA       |
| 3.81   | 3.39   | 4.08   | 4.09   | -0.359   | 0.096985 |
| 39.94  | 55.21  | 50.64  | 55.68  | 0.31531  | 0.000636 |
| 46.61  | 62.08  | 100.19 | 85.91  | 0.544675 | 0.05661  |
| 13.17  | 20.72  | 16.61  | 18.24  | 0.479207 | 0.000302 |
| 4.93   | 2.17   | 8.47   | 4.52   | 0.891798 | 0.065686 |
| 0.67   | 0.48   | 0.72   | 0.51   | -0.11591 | 0.883618 |
| 0.47   | 0.26   | 0.29   | 0.36   | -0.58668 | 0.133126 |
| 0.01   | 0      | 0.02   | 0      | NA       | NA       |
| 16.88  | 19.75  | 16.76  | 22.82  | 0.116784 | 0.292478 |
| 0.02   | 0.15   | 0.13   | 0.11   | 0.974453 | 0.131851 |
| 10.08  | 6.09   | 8      | 5.74   | -0.52966 | 0.009718 |
| 16.62  | 18.83  | 18.44  | 18.26  | 0.074142 | 0.604446 |
| 350.5  | 317.73 | 376.87 | 315.44 | -0.24874 | 0.013184 |
| 1.41   | 1.54   | 1.83   | 1.92   | -0.213   | 0.585659 |
| 0.38   | 0.24   | 0.48   | 0.3    | -0.13118 | 0.853122 |
| 0      | 0      | 0      | 0      | NA       | NA       |
| 0      | 0      | 0.04   | 0      | NA       | NA       |
| 5.48   | 5.4    | 5.53   | 7.06   | -0.05641 | 0.843711 |
| 0.39   | 0.09   | 0.06   | 0.37   | -0.66066 | 0.345805 |
| 11.28  | 8.57   | 8.41   | 16.34  | 0.08116  | 0.840815 |
| 18.21  | 11.49  | 11.88  | 13.48  | -0.69965 | 1.14E-12 |
| 6.44   | 9.18   | 7.84   | 7.06   | 0.099864 | 0.694326 |
| 0.02   | 0.04   | 0.06   | 0.03   | NA       | NA       |
| 27.29  | 35.59  | 33.02  | 34.61  | 0.157502 | 0.103418 |
| 20.65  | 40.91  | 28.05  | 35.43  | 0.632474 | 1.27E-05 |
| 34.53  | 35.07  | 37.4   | 32.02  | 0.100192 | 0.639146 |
| 58.83  | 56.97  | 58.47  | 58.27  | -0.01242 | 0.940418 |
| 42.12  | 41.76  | 44.36  | 37.64  | -0.07778 | 0.714536 |

|        |        |        |        |          |          |
|--------|--------|--------|--------|----------|----------|
| 8.61   | 7.53   | 8.29   | 9      | 0.162937 | 0.193042 |
| 57.76  | 74.7   | 61.83  | 65.75  | 0.180934 | 0.080941 |
| 1.86   | 1.17   | 1.27   | 1.89   | -0.27606 | 0.53628  |
| 3.86   | 3.15   | 3.13   | 4.76   | -0.14235 | 0.488324 |
| 9.13   | 8.39   | 5.88   | 8.8    | -0.06185 | 0.862624 |
| 5.16   | 7.86   | 6.63   | 7.19   | 0.454979 | 0.000576 |
| 0.06   | 0.07   | 0.1    | 0.07   | 0.259026 | 0.701731 |
| 0      | 0      | 0      | 0      | NA       | NA       |
| 21.37  | 34.25  | 28.24  | 33.52  | 0.449816 | 1.17E-05 |
| 0      | 0      | 0      | 0      | NA       | NA       |
| 0      | 0      | 0      | 0      | NA       | NA       |
| 10.8   | 22.31  | 16.99  | 21.96  | 0.914808 | 3.31E-15 |
| 221.14 | 149.25 | 171.73 | 170.47 | -0.53426 | 9.57E-14 |
| 0.43   | 0.25   | 0.26   | 0.47   | -0.26974 | 0.608807 |
| 60.17  | 44.58  | 48.31  | 45.24  | -0.2716  | 0.006624 |
| 0      | 0      | 0      | 0      | NA       | NA       |
| 140    | 235.73 | 213.31 | 226.81 | 0.508944 | 1.66E-10 |
| 0.37   | 2.33   | 1.47   | 2.77   | 1.950752 | 1.25E-07 |
| 4.34   | 5.23   | 4.51   | 5.52   | 0.225682 | 0.128454 |
| 0.32   | 0.36   | 0.61   | 0.49   | 0.435796 | 0.468863 |
| 0.25   | 1.5    | 0.65   | 1.14   | 1.738683 | 2.58E-08 |
| 10.49  | 17.46  | 13.63  | 15.93  | 0.45598  | 0.000131 |
| 0.08   | 0.28   | 0.28   | 0.23   | -0.22782 | 0.747737 |
| 12.1   | 15.01  | 15.4   | 15.44  | 0.252017 | 0.174142 |
| 161.11 | 143.04 | 144.2  | 147.07 | -0.17999 | 0.013422 |
| 45.53  | 31.04  | 33     | 32.06  | -0.61453 | 1.93E-08 |
| 90.15  | 130.62 | 105.49 | 122.17 | 0.390939 | 0.000116 |
| 16.16  | 13.16  | 14.3   | 14.37  | 0.027575 | 0.853146 |
| 1.23   | 0.97   | 1.25   | 1.2    | -0.14462 | 0.737009 |
| 36.7   | 36.21  | 36.29  | 32.83  | -0.00291 | 0.990286 |
| 44.24  | 61.45  | 57.36  | 57.54  | 0.380976 | 0.0002   |
| 0      | 0      | 0      | 0      | NA       | NA       |
| 10.78  | 11.51  | 10.55  | 10.28  | -0.37616 | 0.001901 |
| 0      | 0      | 0      | 0      | NA       | NA       |
| 0.03   | 0.04   | 0.1    | 0.09   | -0.51866 | 0.482969 |
| 1.42   | 1.8    | 1.51   | 1.85   | 0.299817 | 0.206326 |
| 0      | 0.05   | 0      | 0      | NA       | NA       |
| 3.73   | 5.54   | 4.94   | 4.85   | 0.662314 | 0.00101  |
| 7.63   | 9.42   | 7.57   | 8.83   | 0.308282 | 0.011945 |
| 12.58  | 15.38  | 15.12  | 15.1   | 0.077124 | 0.675139 |
| 0.06   | 0.2    | 0.12   | 0.14   | 0.247953 | 0.741372 |
| 1.63   | 1.44   | 1.54   | 1.52   | 0.05729  | 0.855686 |
| 8.41   | 8.85   | 7.64   | 10.42  | 0.270307 | 0.072169 |
| 1.61   | 1.56   | 1.97   | 1.12   | -0.05672 | 0.909197 |
| 4.13   | 0      | 1.15   | 2.71   | -1.27115 | 0.029263 |

|        |       |        |        |          |          |
|--------|-------|--------|--------|----------|----------|
| 0.78   | 0     | 0.08   | 0      | -2.38566 | 1.72E-05 |
| 0      | 0     | 0      | 0      | NA       | NA       |
| 22.07  | 0.27  | 1.96   | 1.24   | -2.87081 | NA       |
| 0      | 0.04  | 0      | 0.08   | NA       | NA       |
| 164.19 | 92.7  | 130.85 | 117.32 | -0.7132  | 2.01E-09 |
| 68.39  | 60.58 | 62.14  | 67.74  | -0.14033 | 0.163516 |
| 15.22  | 18.26 | 18.33  | 16.94  | 0.156429 | 0.222783 |
| 0      | 0     | 0      | 0      | NA       | NA       |
| 0.49   | 0.83  | 0.52   | 0.21   | -0.61532 | 0.289434 |
| 2.11   | 0.9   | 0.98   | 1.25   | -0.84211 | 4.45E-05 |
| 0      | 0     | 0      | 0      | NA       | NA       |
| 8.94   | 9.56  | 8.83   | 9.63   | -0.09239 | 0.583329 |
| 0      | 0     | 0      | 0      | NA       | NA       |
| 7.83   | 5.15  | 7.19   | 6.85   | -0.33058 | 0.034275 |
| 3.15   | 1.8   | 2.32   | 2.18   | -0.66626 | 0.001319 |
| 4.21   | 3.6   | 4.55   | 4.25   | 0.135447 | 0.581631 |
| 0      | 0     | 0      | 0      | NA       | NA       |
| 0      | 0     | 0      | 0      | NA       | NA       |
| 26.53  | 69.43 | 44.29  | 54.88  | 0.986763 | 3.83E-17 |
| 13.35  | 11.2  | 10.01  | 8.85   | -0.07012 | 0.643327 |
| 40.74  | 71.96 | 54.22  | 60.23  | 0.499301 | 3.48E-05 |
| 73.08  | 56.75 | 57.37  | 58.49  | -0.38407 | 3.15E-06 |
| 0      | 0     | 0.05   | 0.06   | NA       | NA       |
| 6.71   | 6.4   | 8.91   | 8.37   | -0.145   | 0.479036 |
| 14.33  | 13.47 | 10.71  | 13.1   | -0.19239 | 0.148697 |
| 15.85  | 15.48 | 14.82  | 15.72  | -0.14402 | 0.317098 |
| 0.35   | 0.75  | 0.71   | 0.93   | -0.14495 | 0.841691 |
| 49.08  | 41.11 | 33.38  | 37.68  | -0.21715 | 0.006796 |
| 74.01  | 80.78 | 85.54  | 76.11  | 0.07623  | 0.578941 |
| 29.47  | 44.22 | 40.27  | 41.47  | 0.33718  | 0.004513 |
| 78.94  | 98.75 | 96.1   | 108.46 | -0.0273  | 0.817702 |
| 64.24  | 52.43 | 67.12  | 60.06  | -0.11495 | 0.475165 |
| 23.9   | 32.2  | 25.66  | 28.36  | 0.204159 | 0.117002 |
| 9.21   | 12.55 | 9.96   | 13.13  | 0.362659 | 0.050425 |
| 48.32  | 44.26 | 51.97  | 45.16  | -0.14898 | 0.117344 |
| 10.4   | 7.13  | 8.21   | 6.88   | -0.50714 | 0.075528 |
| 6      | 6.49  | 5.92   | 7.63   | 0.021574 | 0.913537 |
| 1.03   | 0.91  | 0.51   | 0.49   | -0.57785 | 0.274883 |
| 0      | 0.53  | 0.16   | 0.14   | NA       | NA       |
| 5.02   | 7.04  | 5.8    | 7.49   | 0.506593 | 0.001166 |
| 0.03   | 0.17  | 0.1    | 0.11   | 0.823996 | 0.209246 |
| 12.1   | 14.25 | 15.04  | 14.3   | 0.084817 | 0.547698 |
| 18.25  | 15.17 | 14.63  | 14.88  | -0.31853 | 0.000925 |
| 0.08   | 0.03  | 0.05   | 0      | NA       | NA       |
| 111.42 | 95.49 | 97.38  | 90.79  | -0.19663 | 0.089571 |

|       |       |       |         |          |          |
|-------|-------|-------|---------|----------|----------|
| 6.13  | 9.31  | 7.41  | 7.55    | 0.360068 | 0.062212 |
| 2.36  | 3.81  | 2.79  | 3.77    | 0.670696 | 0.006868 |
| 33.93 | 34.97 | 32.3  | 33.9    | 0.000462 | 0.997475 |
| 0.42  | 0.11  | 0.04  | 0.06    | -0.39568 | 0.609859 |
| 8.07  | 7.32  | 8.07  | 7.28    | -0.17948 | 0.239744 |
| 7.97  | 6.8   | 6.71  | 7.05    | 0.059617 | 0.737889 |
| 14.5  | 13.77 | 16.95 | 16.86   | 0.010798 | 0.965737 |
| 82.76 | 97.41 | 88.91 | 92.71   | 0.076901 | 0.516802 |
| 0.37  | 0.06  | 0.03  | 0.12    | -1.36147 | 0.021939 |
| 16.75 | 15.78 | 17.19 | 19.11   | -0.1824  | 0.196631 |
| 8.22  | 11.48 | 8.51  | 10.19   | 0.068821 | 0.677155 |
| 5.77  | 3.54  | 4.12  | 3.64    | -0.35225 | 0.010212 |
| 43.01 | 35.92 | 50.28 | 46.32   | 0.003935 | 0.986217 |
| 0.41  | 0.43  | 0.61  | 0.98    | -0.14053 | 0.855772 |
| 10.41 | 13.47 | 14.73 | 14.58   | 0.249022 | 0.052253 |
| 29.61 | 28.03 | 41.05 | 35.98   | 0.025151 | 0.865089 |
| 0     | 0     | 0.02  | 0 NA    | NA       |          |
| 15.73 | 8.37  | 9.37  | 11.02   | -0.81756 | 1.13E-10 |
| 4.62  | 4.06  | 4.9   | 5.98    | 0.079501 | 0.734646 |
| 2.66  | 2.33  | 2.39  | 2.89    | -0.15638 | 0.417972 |
| 0.05  | 0     | 0     | 0 NA    | NA       |          |
| 14.79 | 12.69 | 12.36 | 11.84   | -0.05153 | 0.741906 |
| 6.65  | 6.27  | 7.26  | 6.02    | -0.47966 | 0.00637  |
| 8.13  | 10.15 | 11.49 | 11.69   | 0.182011 | 0.271742 |
| 21.35 | 14.95 | 17.21 | 15.62   | -0.47661 | 1.94E-08 |
| 0.12  | 0     | 0.01  | 0.04    | -1.13118 | 0.071031 |
| 0     | 0     | 0     | 0 NA    | NA       |          |
| 0     | 0     | 0     | 0.06 NA | NA       |          |
| 0     | 0     | 0     | 0 NA    | NA       |          |
| 7.74  | 5.48  | 6.52  | 5.11    | -0.50716 | 0.000708 |
| 0     | 0     | 0     | 0 NA    | NA       |          |
| 12.56 | 9.2   | 9.55  | 10.04   | -0.44128 | 0.003591 |
| 11.31 | 6.68  | 6.77  | 5.86    | -0.95046 | 8.35E-16 |
| 80.15 | 90.24 | 84.27 | 83.87   | 0.061338 | 0.551312 |
| 0     | 0.19  | 0.07  | 0.06 NA | NA       |          |
| 0.95  | 0.79  | 0.67  | 1.27    | -0.58028 | 0.164486 |
| 12.08 | 12.22 | 11.31 | 15.47   | -0.01016 | 0.962062 |
| 0     | 0     | 0     | 0 NA    | NA       |          |
| 10.59 | 11.09 | 10.94 | 10.98   | 0.006267 | 0.976529 |
| 4.16  | 9.25  | 6.1   | 6.45    | 0.782733 | 0.000737 |
| 20.4  | 11    | 12.29 | 11.2    | -0.79883 | 1.34E-20 |
| 27.82 | 18.69 | 19.79 | 20.65   | -0.67252 | 4.56E-15 |
| 0.74  | 2.1   | 0.64  | 2.07    | 0.948444 | 0.080717 |
| 4.55  | 5.56  | 5.54  | 6.82    | 0.322182 | 0.015701 |
| 1.22  | 1.92  | 2.13  | 2.15    | 0.411969 | 0.400779 |

|        |        |        |        |          |          |
|--------|--------|--------|--------|----------|----------|
| 0      | 0      | 0      | 0      | NA       | NA       |
| 13.96  | 14.48  | 13.85  | 13.88  | -0.062   | 0.693269 |
| 0.11   | 0.02   | 0.07   | 0.08   | NA       | NA       |
| 0      | 0      | 0      | 0      | NA       | NA       |
| 108.52 | 116.63 | 117.67 | 124.21 | 0.085609 | 0.36391  |
| 0      | 0      | 0      | 0      | NA       | NA       |
| 0      | 0      | 0      | 0      | NA       | NA       |
| 1.49   | 1.26   | 1.32   | 1.23   | -0.25568 | 0.375599 |
| 15.99  | 9.63   | 12.22  | 11.5   | -0.79338 | 3.24E-11 |
| 0      | 0      | 0      | 0      | NA       | NA       |
| 15.94  | 17.44  | 13.26  | 14.61  | -0.20443 | 0.105163 |
| 14.69  | 8.6    | 11.97  | 11.99  | -0.53125 | 8.85E-05 |
| 5.43   | 4.19   | 2.91   | 3.8    | -0.68742 | 3.53E-06 |
| 0.05   | 0.11   | 0      | 0.12   | NA       | NA       |
| 0.16   | 0.1    | 0.05   | 0.02   | -0.08954 | 0.92335  |
| 0      | 0      | 0      | 0      | NA       | NA       |
| 0      | 0      | 0      | 0      | NA       | NA       |
| 96.35  | 113.27 | 104.2  | 104.7  | 0.155106 | 0.100007 |
| 6.75   | 6.07   | 5.08   | 4.91   | -0.17899 | 0.345712 |
| 25.92  | 21.63  | 20.63  | 22.2   | -0.19055 | 0.169106 |
| 0      | 0      | 0      | 0      | NA       | NA       |
| 3.49   | 2.05   | 2.48   | 2.41   | -0.30439 | 0.33127  |
| 0      | 0      | 0      | 0      | NA       | NA       |
| 306.52 | 320.7  | 303.81 | 293.1  | -0.02049 | 0.871419 |
| 10.8   | 15.31  | 11.03  | 12.56  | 0.173951 | 0.378453 |
| 13.01  | 11.29  | 13.29  | 13.1   | 0.068654 | 0.605614 |
| 0      | 0.21   | 0.69   | 0.79   | 1.672095 | 0.003779 |
| 0.57   | 0.77   | 0.69   | 0.24   | -0.22756 | 0.740036 |
| 35.5   | 34.94  | 37.5   | 36.25  | -0.07661 | 0.511644 |
| 54.71  | 37.9   | 44.55  | 36.35  | -0.47372 | 1.75E-05 |
| 63.53  | 57.68  | 67.98  | 59.72  | 0.021505 | 0.899594 |
| 0      | 0      | 0      | 0      | NA       | NA       |
| 0.62   | 0.03   | 0.59   | 0.4    | -0.49599 | 0.476938 |
| 3.31   | 2.82   | 3.28   | 3.2    | -0.481   | 0.085592 |
| 6.11   | 8.28   | 8.26   | 8.28   | 0.062922 | 0.74384  |
| 0.31   | 0.24   | 0.2    | 0      | NA       | NA       |
| 0      | 0      | 0      | 0      | NA       | NA       |
| 143.98 | 142.86 | 155.59 | 142.3  | -0.07824 | 0.432174 |
| 45.2   | 25.77  | 31.89  | 29.63  | -0.76239 | 5.72E-14 |
| 0.49   | 0.2    | 0.25   | 0.27   | -0.78049 | 0.053526 |
| 6.78   | 8.37   | 8.87   | 8.71   | 0.36755  | 0.000162 |
| 0      | 0      | 0      | 0      | NA       | NA       |
| 9.11   | 5.88   | 6.84   | 5.82   | -0.49825 | 0.000741 |
| 8.84   | 16.59  | 14.13  | 15.28  | 0.627237 | 6.42E-12 |
| 1.18   | 2.29   | 1.82   | 2.29   | -0.00433 | 0.994947 |

|       |        |        |        |          |          |
|-------|--------|--------|--------|----------|----------|
| 0     | 0      | 0      | 0      | NA       | NA       |
| 13.57 | 15.97  | 17.15  | 12.88  | -0.14173 | 0.374842 |
| 48.57 | 25.53  | 32.13  | 31.48  | -0.66703 | 3.70E-11 |
| 5.16  | 5.76   | 5.62   | 6.09   | 0.049673 | 0.854111 |
| 21.91 | 14.88  | 16.02  | 14.38  | -0.3642  | 5.32E-05 |
| 9.82  | 12.63  | 10.57  | 13.4   | 0.212114 | 0.085106 |
| 31.34 | 31.36  | 32.38  | 33.04  | 0.033119 | 0.802066 |
| 0.08  | 0      | 0.04   | 0.01   | NA       | NA       |
| 6.68  | 5.42   | 6.12   | 6.28   | -0.19943 | 0.113823 |
| 2.19  | 6.72   | 3.53   | 6.56   | 1.931647 | 6.43E-23 |
| 15.92 | 23.11  | 21.73  | 22.49  | 0.522089 | 1.10E-10 |
| 0.06  | 0.49   | 0.59   | 0.58   | 1.485551 | 0.001194 |
| 0.51  | 0.42   | 0.32   | 0.42   | -0.36291 | 0.617258 |
| 0     | 0      | 0      | 0      | NA       | NA       |
| 38.86 | 50.4   | 43.12  | 45.47  | 0.211139 | 0.040028 |
| 1.05  | 1.33   | 1.25   | 1.49   | 0.311622 | 0.363059 |
| 38.44 | 135.01 | 92.44  | 116.64 | 1.315015 | 1.89E-24 |
| 4.72  | 3.61   | 3.53   | 3.51   | -0.13435 | 0.52485  |
| 66.29 | 80.48  | 76.78  | 78.08  | 0.223028 | 0.007582 |
| 50.36 | 246.41 | 184.45 | 212.26 | 1.99948  | 9.26E-83 |
| 17.19 | 28.68  | 21.6   | 26.09  | 0.614665 | 2.45E-06 |
| 39.24 | 42.29  | 42.29  | 41.5   | 0.093725 | 0.424234 |
| 864.7 | 751.53 | 804.8  | 708.78 | -0.23945 | 0.008113 |
| 1.45  | 1.28   | 1.99   | 1.55   | -0.19853 | 0.683713 |
| 1.72  | 0.27   | 0.33   | 0.31   | -2.34596 | 2.10E-18 |
| 45.38 | 82.66  | 75.91  | 82.57  | 0.793549 | 1.59E-26 |
| 36.8  | 41.45  | 41.92  | 41.02  | 0.114349 | 0.38678  |
| 5.36  | 5      | 4.72   | 5.41   | 0.124092 | 0.766388 |
| 0.15  | 0.45   | 0.24   | 0.25   | 0.610629 | 0.324139 |
| 0     | 0      | 0      | 0      | NA       | NA       |
| 0.24  | 0.28   | 1.12   | 0.12   | -0.01855 | 0.985711 |
| 35.46 | 37.56  | 33.21  | 33.02  | -0.14226 | 0.388492 |
| 18.67 | 18.98  | 20.92  | 22.16  | 0.105974 | 0.411807 |
| 10.55 | 11.67  | 12.2   | 11.43  | 0.222952 | 0.031257 |
| 27.42 | 30.46  | 29.65  | 28.07  | 0.095955 | 0.382223 |
| 52.23 | 61.25  | 54.6   | 55.91  | 0.093517 | 0.468535 |
| 0     | 0      | 0      | 0      | NA       | NA       |
| 0     | 0      | 0      | 0      | NA       | NA       |
| 25.87 | 16.86  | 18.43  | 16.66  | -0.53969 | 4.77E-09 |
| 25.88 | 18.74  | 24.34  | 24.28  | -0.30991 | 0.005189 |
| 4.56  | 5.86   | 5.14   | 4.92   | 0.319631 | 0.125706 |
| 0     | 0      | 0      | 0      | NA       | NA       |
| 26.74 | 31.9   | 29.17  | 34.18  | 0.256363 | 0.005141 |
| 6.6   | 6.03   | 6.44   | 5.63   | -0.15734 | 0.458912 |
| 0     | 0      | 0      | 0      | NA       | NA       |



|       |       |       |       |          |          |
|-------|-------|-------|-------|----------|----------|
| 13.81 | 12.91 | 13.64 | 13.39 | -0.12008 | 0.522092 |
| 41.32 | 38.47 | 34.84 | 41.37 | -0.12291 | 0.287335 |
| 0.16  | 0.04  | 0.14  | 0.04  | NA       | NA       |
| 34.73 | 74.66 | 49.42 | 64.04 | 0.806171 | 3.39E-09 |
| 0     | 0.07  | 0.05  | 0     | NA       | NA       |
| 4.37  | 3.92  | 4.23  | 4.23  | 0.092279 | 0.635168 |
| 22.77 | 41.67 | 40.11 | 41.1  | 0.794559 | 2.09E-30 |
| 0     | 0     | 0     | 0     | NA       | NA       |
| 29.04 | 34.43 | 37.52 | 34.86 | 0.246024 | 0.003416 |
| 7.76  | 8.26  | 7.77  | 7.88  | 0.371182 | 0.006427 |
| 0.23  | 1.63  | 1.81  | 0.95  | 1.623515 | 0.0008   |
| 7.56  | 8.24  | 8.92  | 6.88  | -0.01965 | 0.945923 |
| 0.08  | 0.03  | 0     | 0.09  | NA       | NA       |
| 0.04  | 0     | 0.03  | 0     | NA       | NA       |
| 0     | 0.28  | 0.06  | 0.07  | 1.486112 | 0.011991 |
| 0.65  | 0.72  | 1.05  | 0.84  | -0.04562 | 0.92335  |
| 26.42 | 27.04 | 25.92 | 25.47 | 0.101584 | 0.483782 |
| 15.05 | 13.03 | 14.24 | 11.87 | -0.32813 | 0.011204 |
| 1.05  | 0.1   | 0.19  | 0     | -3.54918 | 1.51E-14 |
| 9.53  | 6.92  | 4.83  | 8.08  | -0.85119 | 8.60E-05 |
| 12.24 | 10.98 | 9.06  | 10.24 | -0.22252 | 0.24794  |
| 13.15 | 13.08 | 14.17 | 12.13 | -0.01297 | 0.954374 |
| 0.8   | 0.51  | 0.83  | 0.8   | -0.73634 | 0.135374 |
| 19.07 | 18.13 | 17.75 | 17.44 | -0.16056 | 0.182793 |
| 10.34 | 6.62  | 7.93  | 7.59  | -0.49698 | 3.55E-05 |
| 3.38  | 3.72  | 3.42  | 4.36  | -0.02022 | 0.946492 |
| 0     | 0     | 0     | 0     | NA       | NA       |
| 51.46 | 37.54 | 38.91 | 44.02 | -0.34134 | 0.008396 |
| 0     | 0.63  | 0.12  | 0.42  | 2.142471 | 0.000148 |
| 13.06 | 10.44 | 9.83  | 11.27 | -0.15478 | 0.250727 |
| 3.08  | 4.1   | 3.43  | 3.96  | 0.122766 | 0.593653 |
| 3.33  | 4.77  | 2.1   | 3.03  | 0.419988 | 0.315677 |
| 1.92  | 1.59  | 1.8   | 2.03  | -0.04971 | 0.896404 |
| 0     | 0     | 0     | 0     | NA       | NA       |
| 39.48 | 91.84 | 69.56 | 72.49 | 0.948058 | 3.70E-16 |
| 13.09 | 25.94 | 25.42 | 27.69 | 0.889847 | 4.19E-23 |
| 14.37 | 20.15 | 18.01 | 20.89 | 0.437195 | 0.003797 |
| 0     | 0     | 0.07  | 0     | NA       | NA       |
| 17.41 | 18.51 | 19.26 | 19.82 | 0.002126 | 0.990217 |
| 0     | 0     | 0     | 0     | NA       | NA       |
| 0     | 0     | 0.01  | 0     | NA       | NA       |
| 3.13  | 5.64  | 3.58  | 2.73  | 0.092413 | 0.787231 |
| 2.55  | 3.3   | 3.59  | 3.67  | 0.090722 | 0.722532 |
| 12.52 | 13.33 | 12.45 | 12.2  | -0.03126 | 0.862624 |
| 3.12  | 0.94  | 1.37  | 1.02  | -0.61681 | 0.091974 |

|       |        |        |        |          |          |
|-------|--------|--------|--------|----------|----------|
| 0     | 0      | 0      | 0      | NA       | NA       |
| 45.32 | 33.54  | 40.73  | 37.46  | -0.23835 | 0.027098 |
| 0.27  | 0      | 0      | 0.08   | NA       | NA       |
| 1.67  | 9.45   | 4.32   | 6.31   | 1.933461 | 9.51E-17 |
| 405.5 | 239.07 | 286.16 | 258.35 | -0.63881 | 6.93E-15 |
| 0     | 0      | 0      | 0      | NA       | NA       |
| 8.88  | 2.65   | 5.88   | 3.91   | -1.3078  | 2.14E-09 |
| 43.33 | 44.7   | 45.04  | 45.15  | 0.010111 | 0.94485  |
| 4.01  | 12.06  | 8.38   | 10.49  | 1.35559  | 1.07E-20 |
| 5.71  | 4.18   | 5.19   | 4.6    | -0.15059 | 0.574924 |
| 2.94  | 4.26   | 4.14   | 4.49   | 0.377683 | 0.016797 |
| 0.24  | 1.53   | 0.64   | 0.77   | -0.13535 | 0.862949 |
| 0.78  | 0.1    | 1.91   | 0.12   | -0.80662 | 0.176669 |
| 8.73  | 7.31   | 7.55   | 10.26  | -0.16311 | 0.407699 |
| 12    | 10.13  | 10.51  | 11.21  | -0.28257 | 0.01512  |
| 0     | 0      | 0      | 0      | NA       | NA       |
| 1.16  | 0.2    | 0.45   | 0.43   | -1.26881 | 0.002276 |
| 9.05  | 9.45   | 9.05   | 10.06  | 0.115793 | 0.546854 |
| 3.93  | 2.37   | 4.08   | 3.98   | -0.15638 | 0.563208 |
| 33.01 | 33.15  | 33.36  | 32.38  | -0.10066 | 0.340917 |
| 0.55  | 1.12   | 1.25   | 0.88   | 0.168291 | 0.774194 |
| 15.89 | 21.14  | 18.49  | 20.38  | 0.334552 | 0.001    |
| 31.36 | 24.73  | 28.85  | 25.48  | -0.23665 | 0.026334 |
| 0.01  | 0.02   | 0.02   | 0.06   | NA       | NA       |
| 0.42  | 0.71   | 0.5    | 0.57   | -0.1009  | 0.885986 |
| 0.05  | 0      | 0      | 0      | NA       | NA       |
| 0.9   | 2.03   | 1.53   | 3.31   | 0.94178  | 0.003113 |
| 7.47  | 3.78   | 3.01   | 3.82   | -0.54738 | 0.027721 |
| 14.17 | 20.53  | 16.96  | 23.12  | 0.047249 | 0.799254 |
| 0     | 0.04   | 0      | 0.16   | NA       | NA       |
| 8.23  | 15.08  | 10.66  | 11.87  | 0.704585 | 3.05E-07 |
| 4.98  | 9.76   | 14.76  | 6.82   | -0.00406 | 0.996111 |
| 26.63 | 36.22  | 36.62  | 33.98  | 0.362184 | 0.000466 |
| 10.56 | 10.78  | 9.36   | 11.15  | 0.024734 | 0.898972 |
| 0.08  | 0.28   | 0.02   | 0.08   | NA       | NA       |
| 86.24 | 60.18  | 69.51  | 71.02  | -0.40908 | 5.68E-05 |
| 7.9   | 7.91   | 5.84   | 5.61   | -0.0413  | 0.868928 |
| 11.57 | 14.84  | 12.56  | 14.28  | 0.112722 | 0.485787 |
| 19.5  | 17.18  | 15.85  | 18.67  | -0.14172 | 0.280857 |
| 0.12  | 0.25   | 0.15   | 0.08   | 0.488061 | 0.513527 |
| 28.39 | 24.06  | 28.35  | 22.86  | -0.12431 | 0.369702 |
| 20.24 | 21.11  | 21.33  | 20.87  | 0.016278 | 0.918874 |
| 11.75 | 14.03  | 12.3   | 12.22  | 0.033643 | 0.884853 |
| 0.02  | 0      | 0.03   | 0      | NA       | NA       |
| 10.24 | 15.53  | 13.02  | 17.12  | 0.359004 | 0.034175 |

|        |        |        |        |          |          |
|--------|--------|--------|--------|----------|----------|
| 2.59   | 2.7    | 2.46   | 2.6    | -0.1313  | 0.528355 |
| 11.7   | 12.5   | 10.27  | 11.65  | -0.15163 | 0.524881 |
| 4.08   | 4.63   | 3.82   | 5.26   | -0.01538 | 0.964409 |
| 0.06   | 0.6    | 0.15   | 1.15   | 1.525336 | 0.001836 |
| 214.42 | 196.38 | 246.11 | 204.31 | 0.00545  | 0.975069 |
| 31.54  | 34.27  | 32.09  | 29.99  | 0.053508 | 0.732879 |
| 8.65   | 14.14  | 10.9   | 12.36  | 0.558242 | 5.46E-06 |
| 0.04   | 0.17   | 0.21   | 0.44   | 1.020965 | 0.096098 |
| 11.77  | 9.99   | 9.65   | 9.41   | -0.014   | 0.936914 |
| 12.72  | 15.86  | 12.74  | 14.39  | -0.01647 | 0.937483 |
| 10.74  | 16.13  | 14.78  | 16.1   | 0.544586 | 4.24E-07 |
| 27.86  | 20.31  | 24.14  | 21.39  | -0.39291 | 8.06E-05 |
| 309.93 | 273.5  | 286.31 | 259.77 | -0.22989 | 0.003207 |
| 22.27  | 20.98  | 20.63  | 18.02  | 0.015407 | 0.933107 |
| 5.7    | 7.08   | 6.84   | 6.92   | 0.303009 | 0.073671 |
| 13.22  | 15.79  | 14.04  | 16.42  | 0.285225 | 0.010058 |
| 10.95  | 8.85   | 7.89   | 7.44   | -0.24759 | 0.270119 |
| 1.64   | 2.16   | 1.51   | 1.1    | -0.18364 | 0.72393  |
| 44.52  | 36.48  | 40.44  | 40.55  | -0.14931 | 0.147258 |
| 10.87  | 12.72  | 12.52  | 11.01  | 0.288422 | 0.164266 |
| 124.34 | 196.71 | 188.8  | 188.24 | 0.590822 | 5.02E-08 |
| 6.61   | 6.15   | 6.85   | 6.47   | -0.24624 | 0.112008 |
| 3.96   | 3.24   | 2.57   | 3.02   | 0.092018 | 0.762312 |
| 0      | 0      | 0      | 0      | NA       | NA       |
| 0      | 0      | 0      | 0      | NA       | NA       |
| 36.36  | 33.27  | 36.87  | 39.28  | 0.126501 | 0.29684  |
| 0      | 0      | 0      | 0      | NA       | NA       |
| 2.48   | 0.03   | 0.03   | 0.04   | -3.34816 | 7.58E-12 |
| 15.97  | 17.03  | 16.93  | 17.24  | 0.097801 | 0.327004 |
| 11.98  | 16.77  | 17.04  | 15.77  | 0.356677 | 0.00332  |
| 0.62   | 0.61   | 0.8    | 0.59   | -0.85097 | 0.074133 |
| 65.06  | 94.96  | 74.96  | 86.89  | 0.386757 | 0.000108 |
| 259.7  | 384.67 | 346.38 | 346.52 | 0.504685 | 2.50E-11 |
| 9.48   | 10.83  | 9.87   | 11.26  | 0.154842 | 0.310843 |
| 9.44   | 28.15  | 22.27  | 24.16  | 1.300254 | 1.47E-28 |
| 29.48  | 26.57  | 30.75  | 26.8   | 0.00081  | 0.996497 |
| 202.73 | 207.84 | 203.63 | 202.94 | -0.03986 | 0.711312 |
| 13.13  | 13.82  | 11.15  | 14.47  | -0.17572 | 0.152534 |
| 0.14   | 0      | 0      | 0      | NA       | NA       |
| 0.09   | 0.15   | 0.1    | 0.15   | 0.446344 | 0.550944 |
| 0.16   | 0.01   | 0.11   | 0      | NA       | NA       |
| 27.01  | 31.5   | 30.12  | 31.65  | 0.046589 | 0.778434 |
| 15.22  | 12.9   | 14.75  | 20.54  | -0.08266 | 0.723794 |
| 15.4   | 17.62  | 15.27  | 19.25  | 0.144771 | 0.368657 |
| 8.77   | 5.26   | 4.98   | 4.25   | -0.59665 | 0.010618 |

|       |       |       |       |          |          |
|-------|-------|-------|-------|----------|----------|
| 7.19  | 5.92  | 6.94  | 5.97  | -0.28031 | 0.001657 |
| 0     | 0     | 0.11  | 0     | NA       | NA       |
| 25.75 | 2.34  | 4.24  | 4.07  | -2.78494 | 1.17E-63 |
| 5.08  | 3.11  | 2.62  | 2.63  | -0.75814 | 0.000297 |
| 2.33  | 2.16  | 2.41  | 1.78  | 0.093826 | 0.822406 |
| 37.2  | 43.1  | 46.03 | 46.59 | 0.296096 | 0.008998 |
| 46.16 | 36.77 | 42.08 | 38.7  | -0.3366  | 0.000246 |
| 14.17 | 16.23 | 16.15 | 16.66 | -0.00209 | 0.993116 |
| 20.37 | 15.3  | 17.38 | 15.85 | -0.28713 | 0.043059 |
| 6.63  | 8.31  | 6.51  | 6.79  | 0.100571 | 0.645015 |
| 8.21  | 11.44 | 10.35 | 12.32 | 0.163969 | 0.321306 |
| 14.4  | 12.95 | 13.18 | 14.59 | -0.02577 | 0.875852 |
| 13.86 | 11.48 | 13.29 | 11    | -0.23253 | 0.090022 |
| 0.1   | 0.11  | 0.1   | 0.1   | -0.79346 | 0.199269 |
| 0.02  | 0     | 0.02  | 0.02  | NA       | NA       |
| 0     | 0     | 0     | 0     | NA       | NA       |
| 16.52 | 15.75 | 18.7  | 16.06 | -0.01817 | 0.930417 |
| 0     | 0     | 0     | 0     | NA       | NA       |
| 5     | 5.45  | 5.69  | 4.16  | -0.03967 | 0.877298 |
| 46.96 | 27.67 | 34.1  | 31.32 | -0.5066  | 1.60E-05 |
| 5.46  | 9.81  | 7.47  | 7.83  | 0.556207 | 0.01197  |
| 4.14  | 3.89  | 4.92  | 3.47  | 0.324989 | 0.142149 |
| 7.14  | 11.07 | 8.09  | 9.9   | 0.334104 | 0.028034 |
| 29.73 | 36.29 | 35.07 | 36.43 | 0.146378 | 0.128305 |
| 0     | 0     | 0     | 0     | NA       | NA       |
| 38.91 | 41.47 | 40.48 | 42.84 | 0.058918 | 0.701448 |
| 0.08  | 0     | 0.07  | 0.05  | NA       | NA       |
| 14.43 | 17.23 | 14.41 | 15.35 | 0.192895 | 0.185179 |
| 0     | 0.01  | 0.01  | 0     | NA       | NA       |
| 5.86  | 9.23  | 9.24  | 8.91  | 0.44397  | 7.84E-05 |
| 0     | 0.1   | 0.01  | 0     | NA       | NA       |
| 0     | 0     | 0     | 0     | NA       | NA       |
| 10.46 | 12.62 | 10.84 | 11.43 | 0.097513 | 0.482319 |
| 0     | 0     | 0     | 0     | NA       | NA       |
| 0     | 0     | 0     | 0     | NA       | NA       |
| 0     | 0     | 0     | 0     | NA       | NA       |
| 0     | 0     | 0     | 0.1   | NA       | NA       |
| 64.39 | 59.13 | 65.93 | 70.16 | 0.083923 | 0.458767 |
| 9.39  | 25.8  | 17.42 | 22.1  | 1.099285 | 5.28E-18 |
| 3.79  | 4.47  | 4.03  | 5.11  | 0.285263 | 0.172931 |
| 0     | 0     | 0     | 0     | NA       | NA       |
| 0.05  | 0     | 0.04  | 0     | NA       | NA       |
| 0.13  | 0     | 0     | 0     | NA       | NA       |
| 1.65  | 1.81  | 1.52  | 1.9   | -0.13948 | 0.647746 |
| 6.98  | 9.75  | 8.7   | 7.67  | 0.316083 | 0.100755 |

|       |       |       |       |          |          |
|-------|-------|-------|-------|----------|----------|
| 3.87  | 4.28  | 3.43  | 3.95  | 0.571278 | 0.007718 |
| 30.53 | 31.35 | 27.92 | 30.64 | -0.06712 | 0.62576  |
| 5.38  | 6.1   | 5.53  | 6.2   | 0.173407 | 0.510916 |
| 14.09 | 11.61 | 11.02 | 11.37 | 0.045254 | 0.823075 |
| 10.3  | 6.07  | 8.09  | 8.39  | -0.54156 | 1.98E-05 |
| 1.86  | 1.53  | 1.59  | 1.01  | -0.56096 | 0.041417 |
| 4.09  | 3.73  | 4.01  | 4.51  | -0.15394 | 0.521446 |
| 0.43  | 0.29  | 0.59  | 0.21  | -0.20064 | 0.787143 |
| 20.52 | 22.25 | 23.98 | 22.76 | 0.125933 | 0.377348 |
| 73.95 | 89.9  | 82    | 89.17 | 0.321947 | 0.000215 |
| 1.99  | 2.15  | 2.44  | 2.34  | 0.063816 | 0.825166 |
| 0.31  | 0     | 0.14  | 0.11  | -1.24077 | 0.042498 |
| 1.02  | 0.67  | 0.47  | 1.11  | -0.47531 | 0.416162 |
| 0.31  | 0.25  | 0.43  | 0.48  | -0.03559 | 0.966586 |
| 15.47 | 17.33 | 16.74 | 15.51 | 0.029145 | 0.846993 |
| 4.75  | 1.55  | 2.87  | 2.37  | -1.12186 | 3.27E-11 |
| 2.94  | 2.67  | 2.77  | 2.55  | -0.41442 | 0.009808 |
| 0     | 0     | 0     | 0.01  | NA       | NA       |
| 0     | 0     | 0     | 0     | NA       | NA       |
| 0.16  | 0     | 0     | 0     | NA       | NA       |
| 0.08  | 0.09  | 0.07  | 0.05  | -0.56197 | 0.410023 |
| 11.88 | 4.83  | 7.21  | 6.6   | -0.83118 | 5.99E-07 |
| 4.18  | 3.08  | 2.49  | 2.56  | -0.63901 | 0.033147 |
| 4.92  | 6.31  | 5.38  | 6.21  | 0.265372 | 0.183328 |
| 0     | 0     | 0     | 0     | NA       | NA       |
| 16.96 | 22.22 | 22.74 | 22.78 | 0.262488 | 0.004501 |
| 0.58  | 0.48  | 0.66  | 0.53  | 0.001857 | 0.997047 |
| 0.01  | 0     | 0.01  | 0.03  | NA       | NA       |
| 0.19  | 0.01  | 0.14  | 0.15  | -1.79482 | 0.000413 |
| 5.07  | 5.23  | 4.5   | 4.36  | -0.0817  | 0.729595 |
| 4.75  | 5.14  | 4.1   | 4.91  | 0.132216 | 0.529303 |
| 2.97  | 2.61  | 2.62  | 3.32  | -0.03326 | 0.861604 |
| 0.06  | 0     | 0     | 0     | NA       | NA       |
| 40.93 | 52.44 | 46.68 | 42.78 | 0.251428 | 0.047104 |
| 5.23  | 5.46  | 6.38  | 6.39  | 0.213873 | 0.257584 |
| 1.55  | 0.82  | 1.7   | 0.5   | -0.44999 | 0.449245 |
| 1.59  | 0.67  | 0.74  | 2.05  | 0.222477 | 0.779498 |
| 8.16  | 8.11  | 7.97  | 7.88  | 0.178708 | 0.157913 |
| 0.72  | 0.39  | 0.47  | 0.52  | -0.6411  | 0.077738 |
| 0     | 0     | 0     | 0     | NA       | NA       |
| 0.01  | 0.01  | 0     | 0.01  | NA       | NA       |
| 0     | 0     | 0     | 0     | NA       | NA       |
| 41.74 | 11.1  | 17.7  | 14.26 | -1.60503 | 4.45E-42 |
| 12.46 | 12.83 | 13.53 | 12.93 | 0.080823 | 0.740944 |
| 9.59  | 12.75 | 8.97  | 10.72 | 0.116627 | 0.471764 |

|         |        |         |        |          |          |
|---------|--------|---------|--------|----------|----------|
| 42.59   | 48.57  | 49.77   | 45.96  | 0.140492 | 0.116002 |
| 268.77  | 101.81 | 109.84  | 110.3  | -1.3465  | 4.28E-82 |
| 0.22    | 0      | 0.03    | 0      | NA       | NA       |
| 2.2     | 1.05   | 1.84    | 1.43   | -0.795   | 9.59E-05 |
| 7.34    | 5.89   | 6.51    | 6.53   | -0.23569 | 0.025992 |
| 0.34    | 0.2    | 0.68    | 1.02   | 0.300555 | 0.702808 |
| 12.08   | 14.31  | 13.99   | 13.99  | 0.029687 | 0.83934  |
| 0.21    | 0      | 0.04    | 0.02   | NA       | NA       |
| 1.38    | 1.57   | 1.38    | 1.72   | 0.077478 | 0.840248 |
| 0.37    | 0.14   | 0.2     | 0.24   | -0.58029 | 0.286737 |
| 4.56    | 4.21   | 4.13    | 3.94   | -0.17162 | 0.503331 |
| 8.23    | 12.26  | 23.8    | 9.65   | 0.199737 | 0.131035 |
| 60.25   | 39.94  | 48.68   | 45.43  | -0.49636 | 1.95E-08 |
| 0       | 0      | 0       | 0      | NA       | NA       |
| 4.16    | 1.4    | 1.8     | 1.94   | -1.54941 | 5.36E-12 |
| 0.02    | 0      | 0.02    | 0.02   | NA       | NA       |
| 66.83   | 5.58   | 16.6    | 10.18  | -2.21846 | 1.29E-08 |
| 1.93    | 1.09   | 1.26    | 1.45   | -0.25848 | 0.509848 |
| 2659.46 | 3764.1 | 3822.18 | 3437.3 | 0.418828 | NA       |
| 8.36    | 7.02   | 7.37    | 6.67   | -0.12381 | 0.521167 |
| 0       | 0      | 0       | 0      | NA       | NA       |
| 0.06    | 0.1    | 0.16    | 0.17   | 1.115849 | 0.067405 |
| 1.78    | 1.25   | 1.48    | 1.28   | -0.12468 | 0.777137 |
| 3.4     | 4.66   | 3.3     | 4.34   | 0.38131  | 0.03398  |
| 0       | 0.01   | 0.01    | 0.06   | NA       | NA       |
| 14.54   | 14.8   | 14.81   | 16.26  | -0.01398 | 0.936613 |
| 0       | 2.05   | 0.83    | 1.79   | 1.702209 | 0.001531 |
| 0.18    | 0.72   | 0.29    | 0.58   | 1.399205 | 0.005795 |
| 0       | 0      | 0       | 0      | NA       | NA       |
| 7.98    | 7.07   | 7.76    | 7.99   | -0.05179 | 0.755184 |
| 71.56   | 48.32  | 54.96   | 47.23  | -0.48385 | 1.08E-06 |
| 2.84    | 1.18   | 0.98    | 1.77   | -0.79111 | 0.076472 |
| 13.6    | 15.68  | 12.47   | 13.41  | -0.05786 | 0.727418 |
| 9.06    | 8.21   | 7.41    | 6.11   | -0.25166 | 0.177539 |
| 3.65    | 7.67   | 6.1     | 8.41   | 0.770955 | 1.72E-07 |
| 24.67   | 23.78  | 24.51   | 23.27  | -0.03589 | 0.801929 |
| 39.44   | 32.76  | 35.09   | 34.9   | -0.3392  | 0.000195 |
| 0.02    | 0      | 0       | 0      | NA       | NA       |
| 5.18    | 5.27   | 4.53    | 5.9    | 0.100827 | 0.715097 |
| 7.17    | 10.35  | 8.49    | 9.59   | -0.03933 | 0.907131 |
| 0.66    | 0.11   | 0.19    | 0.24   | NA       | NA       |
| 14.8    | 18.22  | 17.61   | 17.62  | 0.190516 | 0.232956 |
| 30.49   | 33.56  | 27.68   | 30.92  | 0.119929 | 0.357334 |
| 0.64    | 0.47   | 0.69    | 0.89   | -0.13311 | 0.760569 |
| 25.14   | 35.62  | 33      | 36.13  | 0.381948 | 0.000334 |

|        |        |       |        |          |          |
|--------|--------|-------|--------|----------|----------|
| 6.29   | 6.41   | 5.57  | 5.71   | -0.60036 | 0.010971 |
| 14.36  | 17.84  | 19.93 | 17.82  | 0.314494 | 0.034396 |
| 0.05   | 0      | 0     | 0      | NA       | NA       |
| 95.58  | 57.14  | 66.93 | 60.67  | -0.63383 | 5.11E-14 |
| 15.05  | 4.42   | 5.03  | 6.08   | -1.44987 | 3.04E-11 |
| 0      | 0      | 0     | 0      | NA       | NA       |
| 0.03   | 0.01   | 0.02  | 0.06   | -0.43254 | 0.56904  |
| 14.38  | 15.22  | 13.09 | 14.48  | 0.282912 | 0.06755  |
| 22.29  | 22.78  | 23.61 | 21.68  | 0.031454 | 0.87997  |
| 0.24   | 0.53   | 1.06  | 0.48   | 1.912513 | 7.21E-08 |
| 10.27  | 11.48  | 11.83 | 12.74  | 0.124644 | 0.346495 |
| 4.29   | 5.54   | 4.84  | 5.56   | 0.319232 | 0.039347 |
| 3.44   | 2.32   | 2.47  | 1.57   | -0.55398 | 0.139525 |
| 0      | 0      | 0     | 0      | NA       | NA       |
| 7.52   | 4.73   | 3.53  | 3.55   | -0.73679 | 6.73E-05 |
| 18.57  | 5.51   | 9.58  | 6.76   | -1.25267 | 1.18E-17 |
| 0      | 0      | 0     | 0      | NA       | NA       |
| 0      | 0.02   | 0.01  | 0.01   | NA       | NA       |
| 0.1    | 0.09   | 0.09  | 0.08   | -0.02843 | 0.976529 |
| 0      | 0.02   | 0.16  | 0.04   | NA       | NA       |
| 0      | 0      | 0     | 0      | NA       | NA       |
| 0      | 0      | 0     | 0      | NA       | NA       |
| 5.15   | 4.4    | 4.45  | 3.78   | -0.50451 | 0.004611 |
| 41.95  | 37.6   | 48.25 | 39.47  | -0.05207 | 0.675925 |
| 26.03  | 35.52  | 32.73 | 33.19  | 0.320081 | 0.000639 |
| 4.72   | 3.84   | 5.27  | 4.05   | -0.23443 | 0.226001 |
| 6.93   | 5.08   | 6.83  | 5.28   | -0.32814 | 0.062903 |
| 4.37   | 2.11   | 2.73  | 2.91   | -0.44454 | 0.112461 |
| 0      | 0      | 0.04  | 0      | NA       | NA       |
| 24.79  | 52.43  | 37.15 | 54.36  | 0.690838 | 1.45E-10 |
| 0.31   | 0.04   | 0.14  | 0.08   | -0.40214 | 0.588601 |
| 8.41   | 11.76  | 8.03  | 8.42   | 0.122345 | 0.643899 |
| 340.71 | 479.79 | 457.6 | 485.72 | 0.57888  | 7.22E-14 |
| 0.12   | 0.04   | 0     | 0      | NA       | NA       |
| 0      | 0      | 0     | 0.03   | NA       | NA       |
| 10.45  | 8.6    | 9.4   | 8.7    | -0.32834 | 0.03976  |
| 9.52   | 18.28  | 16.72 | 18.74  | 0.933753 | 1.47E-21 |
| 2.91   | 5.14   | 3.95  | 4.59   | 0.429656 | 0.002342 |
| 12.44  | 15.09  | 15.06 | 14.57  | 0.08944  | 0.474047 |
| 35.33  | 28.85  | 32.92 | 29.95  | -0.06187 | 0.607209 |
| 0      | 0      | 0     | 0      | NA       | NA       |
| 11.45  | 11.35  | 11.31 | 12.38  | 0.297436 | 0.113727 |
| 1.16   | 0.84   | 1.06  | 1.08   | -0.19815 | 0.590209 |
| 2.15   | 1.91   | 1.78  | 1.79   | -0.30381 | 0.371809 |
| 0      | 0      | 0     | 0      | NA       | NA       |

|        |        |        |        |          |          |
|--------|--------|--------|--------|----------|----------|
| 14.18  | 20.12  | 17.07  | 13.99  | 0.265221 | 0.220331 |
| 21.42  | 20.51  | 21.21  | 20.94  | -0.09474 | 0.423425 |
| 2.16   | 4.3    | 3.06   | 4.45   | 0.205797 | 0.471654 |
| 0      | 0      | 0      | 0      | NA       | NA       |
| 3.38   | 20.36  | 10.93  | 17.14  | 2.07998  | 7.23E-32 |
| 0.17   | 0.23   | 0.63   | 0.14   | 0.688984 | 0.298406 |
| 14.74  | 14.2   | 12.17  | 16.11  | -0.34375 | 0.000149 |
| 26.3   | 18.52  | 27.67  | 23.04  | -0.17414 | 0.240462 |
| 40.31  | 20.09  | 27.27  | 22.2   | -0.83001 | 6.65E-13 |
| 71.12  | 67.89  | 51.04  | 44.88  | -0.26992 | 0.007654 |
| 16.9   | 14.28  | 16.33  | 17.13  | -0.16116 | 0.113465 |
| 0      | 0      | 0      | 0      | NA       | NA       |
| 116.78 | 195.38 | 162.96 | 165.9  | 0.536197 | 1.46E-09 |
| 6.2    | 6.13   | 7.71   | 7.6    | 0.013522 | 0.96286  |
| 0.11   | 0      | 0.03   | 0      | NA       | NA       |
| 25.92  | 26.51  | 26.79  | 30.06  | 0.03364  | 0.823562 |
| 13.49  | 15.36  | 15.29  | 14.91  | 0.024155 | 0.894704 |
| 13.9   | 5.23   | 6.37   | 5.38   | -1.21847 | 8.54E-22 |
| 0      | 0.08   | 0.07   | 0.08   | NA       | NA       |
| 23.26  | 20.24  | 23.08  | 22.33  | -0.20677 | 0.078314 |
| 0.06   | 0.05   | 0.04   | 0.03   | -0.08579 | 0.925277 |
| 40.98  | 77.67  | 55.23  | 70.53  | 0.742295 | 3.95E-12 |
| 0      | 0.04   | 0.14   | 0      | NA       | NA       |
| 0      | 0      | 0      | 0      | NA       | NA       |
| 15.62  | 18.55  | 18.12  | 15.43  | 0.076962 | 0.70138  |
| 0.07   | 0.08   | 0.07   | 0.06   | -0.01212 | 0.990357 |
| 10     | 9.05   | 10.64  | 12.24  | -0.01854 | 0.945888 |
| 34.01  | 46.52  | 36.82  | 40.25  | 0.384739 | 0.000691 |
| 0      | 0.03   | 0.02   | 0.04   | NA       | NA       |
| 253.26 | 233.18 | 279.82 | 272.17 | -0.10203 | 0.3978   |
| 11.32  | 10.13  | 11.52  | 9.54   | 0.003635 | 0.987233 |
| 0.44   | 0.29   | 0.12   | 0.34   | NA       | NA       |
| 0      | 0      | 0.02   | 0      | NA       | NA       |
| 34.99  | 13.09  | 17.61  | 15.33  | -1.2667  | 9.49E-37 |
| 0.21   | 0.25   | 0.09   | 0.13   | -1.01185 | 0.063624 |
| 58.76  | 46.08  | 63.83  | 53.32  | -0.11496 | 0.310228 |
| 7.57   | 14.74  | 12.09  | 13.89  | 0.630135 | 2.74E-06 |
| 16.25  | 23.4   | 14.84  | 18.86  | 0.166227 | 0.483822 |
| 2.93   | 2.44   | 2.35   | 4.74   | -0.1283  | 0.756358 |
| 23.26  | 21     | 21.97  | 19.84  | 0.201372 | 0.218325 |
| 0.29   | 0.47   | 0.39   | 0.46   | 0.324433 | 0.446731 |
| 2.67   | 24.83  | 12.94  | 20.11  | 2.742006 | 3.82E-22 |
| 11.83  | 8.82   | 9.31   | 8.94   | -0.41791 | 0.010771 |
| 17.52  | 23.75  | 17.05  | 20.4   | 0.135663 | 0.374469 |
| 12.6   | 15.22  | 14.63  | 16.37  | 0.259349 | 0.035833 |



|        |        |        |        |          |          |
|--------|--------|--------|--------|----------|----------|
| 28.31  | 84.29  | 74.96  | 84.2   | 1.391448 | 1.88E-58 |
| 49.57  | 54.37  | 46.63  | 47.57  | 0.214027 | 0.032753 |
| 16.88  | 32.16  | 26.82  | 28.55  | 0.705007 | 2.32E-16 |
| 0      | 0      | 0      | 0      | NA       | NA       |
| 0      | 0.02   | 0.01   | 0.12   | NA       | NA       |
| 23.62  | 24.48  | 21.57  | 24.33  | -0.0236  | 0.907131 |
| 6.92   | 5.51   | 5.85   | 7.27   | 0.032169 | 0.935474 |
| 13.23  | 9.96   | 12.52  | 12.53  | -0.23385 | 0.230142 |
| 60.8   | 84.9   | 82.33  | 84.93  | 0.51984  | 9.00E-09 |
| 0.02   | 0.01   | 0      | 0      | NA       | NA       |
| 0.19   | 0.07   | 0      | 0      | NA       | NA       |
| 33.81  | 21.07  | 23.07  | 20.64  | -0.66595 | 1.79E-08 |
| 16.92  | 17.42  | 15.88  | 16.28  | 0.07153  | 0.652617 |
| 0      | 0      | 0      | 0      | NA       | NA       |
| 0      | 0.01   | 0.16   | 0.03   | NA       | NA       |
| 0      | 0      | 0      | 0      | NA       | NA       |
| 2.28   | 0.44   | 0.74   | 0.65   | -1.14934 | 0.003767 |
| 37.86  | 25.9   | 32.52  | 26.04  | -0.36129 | 0.01284  |
| 0      | 0      | 0      | 0      | NA       | NA       |
| 0      | 0.02   | 0.04   | 0.01   | NA       | NA       |
| 0      | 0      | 0      | 0      | NA       | NA       |
| 2.18   | 1.7    | 1.63   | 2.1    | -0.1618  | 0.711605 |
| 0      | 0      | 0      | 0      | NA       | NA       |
| 1.33   | 6.4    | 2.06   | 3.84   | 1.979764 | 9.90E-10 |
| 4.43   | 2.71   | 2.87   | 2.71   | -0.3519  | 0.016    |
| 0.55   | 0.47   | 0.27   | 0.49   | -0.5426  | 0.119771 |
| 56.85  | 72.2   | 78.57  | 75.43  | 0.378973 | 3.58E-07 |
| 68.99  | 101.02 | 105.07 | 94.73  | 0.316841 | 0.012177 |
| 0      | 0      | 0      | 0      | NA       | NA       |
| 31.86  | 43.26  | 37.3   | 44.68  | 0.386203 | NA       |
| 1.77   | 0.55   | 0.75   | 0.63   | -1.36131 | 8.68E-07 |
| 14.37  | 9.71   | 12.04  | 10.48  | -0.38625 | 0.006519 |
| 0.67   | 0.88   | 2.05   | 1.42   | 0.436622 | 0.342321 |
| 0      | 0      | 0      | 0      | NA       | NA       |
| 3.48   | 1.37   | 1.79   | 2.29   | -0.78526 | 0.031182 |
| 4.68   | 7.09   | 6.28   | 7.93   | 0.56338  | 0.001047 |
| 6.29   | 7.52   | 6.84   | 6.77   | 0.302864 | 0.056076 |
| 8.43   | 10.61  | 7.9    | 8.57   | -0.00045 | 0.998212 |
| 20.42  | 19.15  | 21.02  | 21.38  | -0.04524 | 0.784567 |
| 34.18  | 66.35  | 49.04  | 61.05  | 0.821725 | 5.58E-10 |
| 54.2   | 54.5   | 61.16  | 60.73  | -0.0462  | 0.669911 |
| 24.69  | 11.04  | 14.55  | 8.81   | -1.137   | 3.12E-11 |
| 270.51 | 222.28 | 267.04 | 250.43 | -0.20811 | 0.046366 |
| 2.8    | 1.26   | 2.39   | 2.09   | 0.156754 | 0.795652 |
| 174.94 | 157.42 | 159.26 | 158.8  | -0.05711 | 0.622564 |

|         |         |         |         |          |          |
|---------|---------|---------|---------|----------|----------|
| 26.26   | 18.06   | 22.78   | 20.81   | -0.43679 | 5.02E-07 |
| 0.05    | 0.24    | 0.23    | 0.24    | 0.64745  | 0.316752 |
| 12.04   | 8.45    | 9.36    | 9.01    | -0.39966 | 1.76E-05 |
| 0.24    | 1.13    | 0.51    | 1.13    | 1.13678  | 0.01319  |
| 0       | 0       | 0       | 0       | NA       | NA       |
| 34.88   | 17.3    | 22.55   | 19.46   | -0.86705 | 1.74E-24 |
| 0.59    | 1.29    | 1.16    | 3.43    | 1.185667 | 0.001665 |
| 32.72   | 32      | 35.24   | 29.77   | -0.06723 | 0.715167 |
| 1000.09 | 1105.04 | 1420.95 | 1330.36 | 0.333741 | 0.001967 |
| 2.17    | 0.1     | 0.2     | 0.57    | -2.59163 | 1.64E-07 |
| 0.33    | 1.63    | 1.04    | 1.37    | 1.868326 | 9.75E-12 |
| 478.4   | 345.91  | 459.41  | 438.87  | -0.18098 | 0.138439 |
| 151.53  | 202.19  | 163.19  | 174.59  | 0.282231 | 0.014506 |
| 0       | 0       | 0       | 0       | NA       | NA       |
| 27.65   | 62.1    | 54.13   | 63.25   | 0.943289 | 1.36E-35 |
| 5.52    | 6.19    | 6.59    | 6.74    | 0.273989 | 0.03215  |
| 21.13   | 28.52   | 24.04   | 24.34   | 0.104745 | 0.547377 |
| 0       | 0.01    | 0       | 0       | NA       | NA       |
| 0       | 0       | 0       | 0       | NA       | NA       |
| 0.1     | 0       | 0.07    | 0.07    | NA       | NA       |
| 884.81  | 750.74  | 832.81  | 724.58  | -0.20056 | 0.035679 |
| 0       | 0       | 0       | 0       | NA       | NA       |
| 75.66   | 78.51   | 86.83   | 89.72   | 0.062432 | 0.576449 |
| 0       | 0       | 0       | 0       | NA       | NA       |
| 11.76   | 10.69   | 12.79   | 10.76   | 0.05718  | 0.708838 |
| 26.82   | 28.95   | 27.72   | 26.85   | -0.04288 | 0.745682 |
| 44.99   | 48.47   | 46.9    | 42.13   | -0.10654 | 0.435752 |
| 0       | 0       | 0       | 0.02    | NA       | NA       |
| 2.43    | 3.41    | 3.35    | 3.13    | -0.06107 | 0.857626 |
| 0.04    | 0       | 0.17    | 0.06    | NA       | NA       |
| 10.4    | 24.76   | 14.63   | 21.22   | 0.738935 | 1.25E-05 |
| 17.01   | 19.09   | 19.28   | 19.26   | 0.083322 | 0.651342 |
| 0       | 0.01    | 0.02    | 0       | NA       | NA       |
| 2.98    | 3.88    | 2.31    | 2.32    | 0.157255 | 0.623956 |
| 6.56    | 5.06    | 7.17    | 5.56    | -0.37773 | 0.060395 |
| 17.92   | 9.86    | 6.53    | 7.8     | -0.65595 | 1.62E-05 |
| 1.18    | 1.16    | 1.77    | 1.06    | -0.07128 | 0.86012  |
| 138.08  | 154.64  | 144.28  | 155.24  | 0.154086 | 0.109553 |
| 0       | 1.47    | 0.43    | 0.71    | 2.861907 | 7.58E-08 |
| 0.3     | 0.22    | 0.21    | 0.21    | NA       | NA       |
| 0       | 0       | 0       | 0       | NA       | NA       |
| 0.06    | 0.29    | 0.21    | 0.15    | 0.297147 | 0.624468 |
| 0       | 0       | 0       | 0       | NA       | NA       |
| 0       | 0.03    | 0.05    | 0.03    | NA       | NA       |
| 0       | 0       | 0       | 0.1     | NA       | NA       |

|        |        |        |        |          |          |
|--------|--------|--------|--------|----------|----------|
| 3.42   | 5.53   | 4.91   | 5.22   | 0.610813 | 5.85E-07 |
| 0      | 0      | 0      | 0      | NA       | NA       |
| 35.78  | 31.87  | 34.09  | 33.86  | -0.28695 | 0.009967 |
| 12.78  | 29.75  | 23.59  | 26.36  | 1.112571 | 1.40E-21 |
| 0      | 0      | 0      | 0      | NA       | NA       |
| 148.93 | 121    | 130.81 | 122.87 | -0.29749 | 0.000362 |
| 0.66   | 0.32   | 0.56   | 0.46   | -0.40847 | 0.533239 |
| 0      | 0      | 0      | 0      | NA       | NA       |
| 12.38  | 10.11  | 12.67  | 9.83   | -0.07005 | 0.766199 |
| 0.72   | 0.78   | 0.83   | 1.17   | 0.318557 | 0.547698 |
| 0      | 0      | 0      | 0      | NA       | NA       |
| 0.82   | 1.45   | 0.98   | 2.27   | 0.418835 | 0.210043 |
| 0      | 0      | 0      | 0      | NA       | NA       |
| 24.88  | 25.32  | 27.52  | 25.65  | 0.040262 | 0.747737 |
| 7.52   | 11.7   | 8.37   | 9.82   | 0.294432 | 0.125608 |
| 83.99  | 57.17  | 61.68  | 62.78  | -0.48811 | 8.48E-11 |
| 36.95  | 59.7   | 46.66  | 57.89  | 0.573232 | 1.79E-08 |
| 0.25   | 0.12   | 0.37   | 0.24   | 0.376035 | 0.606618 |
| 17.32  | 18.22  | 18.93  | 19.42  | 0.293345 | 0.023312 |
| 6.26   | 4.93   | 6.74   | 7.21   | -0.05612 | 0.762312 |
| 0      | 0.14   | 0      | 0.02   | NA       | NA       |
| 0.04   | 0.06   | 0.07   | 0.06   | NA       | NA       |
| 29.89  | 23.44  | 27.6   | 25.22  | -0.25337 | 0.026743 |
| 14.41  | 14.96  | 17.2   | 15.94  | 0.008822 | 0.959088 |
| 10.63  | 10.91  | 10.35  | 9.25   | 0.118538 | 0.487984 |
| 0.01   | 0      | 0.01   | 0      | NA       | NA       |
| 0.05   | 0.07   | 0.07   | 0.04   | -0.58227 | 0.394473 |
| 7.92   | 9.01   | 6.53   | 8.87   | 0.160812 | 0.55341  |
| 38.6   | 35.61  | 30.5   | 29.96  | -0.04036 | 0.767799 |
| 0      | 0.01   | 0      | 0      | NA       | NA       |
| 0.05   | 0.01   | 0.01   | 0.05   | -0.42395 | 0.580536 |
| 0      | 0      | 0      | 0      | NA       | NA       |
| 8.11   | 4.79   | 4.31   | 4.84   | -0.9486  | 6.01E-11 |
| 6.18   | 10.05  | 6.64   | 8.8    | 0.300636 | 0.087963 |
| 74.89  | 60.24  | 63.61  | 59.69  | -0.31852 | 0.000306 |
| 1.79   | 0.98   | 1.14   | 1.07   | -0.67751 | 0.000442 |
| 44.2   | 78.02  | 52.78  | 77.62  | 0.724698 | 2.56E-09 |
| 15.73  | 21.94  | 23.37  | 17.15  | 0.321729 | 0.146535 |
| 0      | 0      | 0      | 0      | NA       | NA       |
| 4.3    | 3.86   | 3.9    | 4.06   | 0.0375   | 0.87997  |
| 0      | 0.03   | 0      | 0      | NA       | NA       |
| 210.29 | 152.39 | 204.92 | 188.49 | -0.19314 | 0.101967 |
| 109.14 | 146.33 | 138.85 | 138.24 | 0.184795 | 0.135383 |
| 1.47   | 0.89   | 0.95   | 1.5    | 1.094178 | 0.016848 |
| 0.11   | 0.15   | 0.11   | 0.15   | 0.007536 | 0.992952 |

|        |        |        |        |          |          |
|--------|--------|--------|--------|----------|----------|
| 41.62  | 76.22  | 64.27  | 72.7   | 0.778011 | 1.07E-15 |
| 4.88   | 6.29   | 5.52   | 4.75   | 0.171377 | 0.292424 |
| 154.35 | 148.82 | 139.38 | 146.93 | -0.13338 | 0.169997 |
| 4.37   | 2.31   | 1.88   | 3.27   | -0.65312 | 0.015598 |
| 93.99  | 58.1   | 70.56  | 76.43  | -0.49924 | 3.53E-07 |
| 0      | 0      | 0      | 0      | NA       | NA       |
| 10.51  | 11.28  | 13.12  | 10.66  | 0.143616 | 0.2979   |
| 25.93  | 31.04  | 26.65  | 28.09  | 0.082216 | 0.602154 |
| 54.11  | 44.98  | 53.26  | 50.24  | -0.1258  | 0.255153 |
| 10.29  | 9.81   | 10.03  | 8.25   | -0.19464 | 0.240858 |
| 14.44  | 17.88  | 10.51  | 19.8   | 0.254203 | 0.351216 |
| 13     | 13.6   | 13.48  | 11.76  | -0.08537 | 0.545553 |
| 10.16  | 8.54   | 8.21   | 9.17   | -0.28152 | 0.058085 |
| 39.67  | 24.74  | 26.59  | 28.77  | -0.48125 | 3.21E-06 |
| 5.37   | 7.86   | 7.76   | 9.16   | 0.275311 | 0.016197 |
| 97.05  | 80.57  | 85.46  | 75.22  | -0.267   | 0.001025 |
| 0      | 0      | 0.04   | 0      | NA       | NA       |
| 0.14   | 0.15   | 0.05   | 0      | NA       | NA       |
| 14.89  | 17.89  | 20.23  | 20.24  | 0.271701 | 0.009815 |
| 1.17   | 3.17   | 2.77   | 3.16   | 1.42077  | 1.50E-10 |
| 0      | 0.04   | 0      | 0.03   | NA       | NA       |
| 35.3   | 52.62  | 46.27  | 51.04  | 0.766552 | 1.16E-15 |
| 6.8    | 7.52   | 5.47   | 7.36   | -0.13459 | 0.306286 |
| 44.36  | 13.46  | 33.37  | 26.12  | -0.94253 | 0.009167 |
| 7.01   | 9.95   | 9.4    | 10.34  | 0.498331 | 4.16E-06 |
| 13.01  | 10.47  | 10.74  | 9.59   | -0.46668 | 0.003139 |
| 10.97  | 12.92  | 10.62  | 10.24  | -0.23084 | 0.273865 |
| 27.81  | 42.11  | 34.31  | 37.08  | 0.408148 | 3.06E-05 |
| 6.67   | 8.5    | 7.41   | 7.8    | 0.133345 | 0.476361 |
| 1.94   | 1.54   | 1.71   | 1.71   | -0.03432 | 0.939891 |
| 434.33 | 433.97 | 390.76 | 389.39 | -0.10887 | 0.268868 |
| 225.93 | 402.49 | 311.42 | 337.2  | 0.648373 | 6.33E-11 |
| 7.95   | 7.4    | 7.81   | 7.58   | 0.032718 | 0.858119 |
| 3.49   | 3.71   | 3.23   | 3.3    | -0.08123 | 0.703755 |
| 35.98  | 35.03  | 34.7   | 34.86  | -0.02026 | 0.883316 |
| 0.21   | 0.03   | 0      | 0.03   | -0.80551 | 0.193242 |
| 42.55  | 21.68  | 25.83  | 22.62  | -0.95831 | 5.81E-25 |
| 20.69  | 27.16  | 21.93  | 23.43  | 0.118719 | 0.447775 |
| 13.9   | 9.92   | 11.52  | 11.03  | -0.48371 | 2.00E-07 |
| 0.07   | 0.02   | 0.08   | 0.1    | -0.04031 | 0.966405 |
| 0.27   | 0.42   | 0.43   | 0.66   | 0.856479 | 0.104319 |
| 11.5   | 10.83  | 9.42   | 11.18  | -0.09196 | 0.568193 |
| 7.64   | 6.1    | 4.57   | 4.05   | -0.4261  | 0.007509 |
| 0      | 0      | 0      | 0      | NA       | NA       |
| 0.04   | 0      | 0      | 0.02   | NA       | NA       |

|       |        |        |        |          |          |
|-------|--------|--------|--------|----------|----------|
| 0     | 0.07   | 0.04   | 0.02   | NA       | NA       |
| 15.69 | 18.88  | 15.39  | 19.58  | 0.143678 | 0.237425 |
| 7.83  | 30.52  | 16.15  | 21.97  | 1.662937 | 1.02E-24 |
| 0     | 0.19   | 0.01   | 0.03   | NA       | NA       |
| 0.08  | 0.07   | 0.05   | 0.07   | -0.03243 | 0.973994 |
| 0.02  | 0.13   | 0.09   | 0.08   | 0.000848 | 0.999229 |
| 4.33  | 5.76   | 4.76   | 4.92   | -0.25713 | 0.241804 |
| 0.06  | 0.79   | 0.14   | 0.24   | 1.326576 | 0.02756  |
| 0.18  | 0.18   | 0.04   | 0.46   | -0.31484 | 0.69572  |
| 19.72 | 12.14  | 12.96  | 14.11  | -0.57758 | 5.61E-08 |
| 22.68 | 28.66  | 26.61  | 31.56  | -0.01599 | 0.927319 |
| 0     | 0      | 0      | 0      | NA       | NA       |
| 12.21 | 21.45  | 15.17  | 17.07  | 0.58936  | 0.000446 |
| 1.21  | 2.63   | 1.83   | 1.34   | 0.196692 | 0.629586 |
| 16.32 | 13.28  | 15.65  | 13.19  | -0.11582 | 0.616695 |
| 1.68  | 0.23   | 0.13   | 0.13   | -2.61007 | 3.91E-08 |
| 0     | 0      | 0      | 0      | NA       | NA       |
| 0     | 0      | 0      | 0      | NA       | NA       |
| 0     | 0      | 0      | 0      | NA       | NA       |
| 14.4  | 43.28  | 27.49  | 32.37  | 1.255069 | 2.94E-25 |
| 24.7  | 12.14  | 25.6   | 22.34  | -0.33538 | 0.469819 |
| 0.09  | 0.17   | 0.23   | 0.18   | NA       | NA       |
| 5.7   | 5.22   | 5.76   | 5.99   | -0.00031 | 0.99898  |
| 23.99 | 18.37  | 19.78  | 18.78  | -0.24948 | 0.029715 |
| 0.15  | 0.31   | 0.24   | 0.33   | -0.12849 | 0.862323 |
| 15.09 | 18.07  | 18.67  | 20.81  | 0.441012 | 0.000154 |
| 46.56 | 38.05  | 47.16  | 44.81  | -0.04472 | 0.811512 |
| 6.91  | 5.72   | 7.13   | 8.58   | -0.12994 | 0.492577 |
| 0.01  | 0      | 0      | 0      | NA       | NA       |
| 2.14  | 0.7    | 0.9    | 0.64   | -1.03493 | 0.001423 |
| 0     | 0      | 0      | 0.02   | NA       | NA       |
| 2.83  | 1.2    | 1.31   | 1.39   | -0.6642  | 0.077352 |
| 4.85  | 2.54   | 3.53   | 3.31   | -0.66846 | 0.000129 |
| 32.76 | 53.24  | 53.03  | 49.63  | 0.286637 | 0.000767 |
| 29.53 | 30.36  | 26.2   | 30.73  | -0.09695 | 0.481527 |
| 52.17 | 255.79 | 172.36 | 212.27 | 1.930881 | 2.27E-19 |
| 2.6   | 2.79   | 3.4    | 2.84   | 0.290027 | 0.292468 |
| 0.01  | 0.01   | 0.02   | 0.01   | NA       | NA       |
| 18.35 | 26.62  | 25.1   | 23.45  | 0.548292 | 4.10E-05 |
| 9.13  | 8.77   | 9.09   | 9.14   | -0.13485 | 0.409322 |
| 2.93  | 2.46   | 2.17   | 2.23   | -0.39199 | 0.022637 |
| 11.16 | 11.79  | 10.94  | 11.41  | -0.00616 | 0.971274 |
| 0     | 0.15   | 0.18   | 0      | NA       | NA       |
| 0     | 0      | 0      | 0      | NA       | NA       |
| 7.83  | 20.02  | 14.54  | 17.65  | 0.883231 | 7.70E-12 |

|         |        |         |         |          |          |
|---------|--------|---------|---------|----------|----------|
| 3.88    | 14.46  | 7.28    | 8.83    | 1.453792 | 5.72E-10 |
| 24.75   | 22.22  | 21.77   | 23.06   | -0.18383 | 0.076965 |
| 9.06    | 8.38   | 9.77    | 9.88    | -0.00698 | 0.974137 |
| 0.22    | 3.54   | 1.95    | 3.87    | 4.273566 | 1.27E-29 |
| 0.03    | 0      | 0       | 0       | NA       | NA       |
| 0.04    | 0.11   | 0.05    | 0.1     | 0.698448 | 0.304001 |
| 63.43   | 60.09  | 60.25   | 58.7    | -0.09753 | 0.291113 |
| 264.5   | 250.52 | 265.16  | 240.72  | -0.19067 | 0.057787 |
| 16.39   | 20.82  | 19.42   | 20.46   | 0.203914 | 0.068673 |
| 1328.78 | 1193.6 | 1215.47 | 1169.47 | -0.25536 | 0.000441 |
| 0.43    | 0.11   | 0.38    | 0.37    | -1.37943 | 0.007039 |
| 2.59    | 1.04   | 3.76    | 1.61    | -0.33865 | 0.37299  |
| 0.71    | 0      | 0       | 0.04    | NA       | NA       |
| 0       | 0      | 0       | 0       | NA       | NA       |
| 6.43    | 8.15   | 7.06    | 7.45    | 0.384505 | 0.003477 |
| 0.4     | 0.07   | 0.36    | 0.09    | -0.47095 | 0.531499 |
| 18      | 12     | 16.91   | 16.81   | -0.55696 | 2.68E-05 |
| 0       | 0      | 0       | 0       | NA       | NA       |
| 0.03    | 0.02   | 0.07    | 0.1     | -0.23579 | 0.780521 |
| 7.39    | 4.14   | 4.41    | 4.33    | -0.87391 | 9.97E-05 |
| 0.11    | 0.14   | 0.12    | 0.1     | -0.03288 | 0.968986 |
| 55.5    | 64.79  | 58.18   | 70.26   | 0.135682 | 0.388677 |
| 0       | 0      | 0       | 0       | NA       | NA       |
| 177.26  | 132.2  | 155.55  | 145.43  | -0.30613 | 0.00075  |
| 0       | 0      | 0       | 0.03    | NA       | NA       |
| 0.15    | 0.24   | 0.13    | 0.47    | NA       | NA       |
| 16.61   | 13.92  | 12.41   | 17.01   | -0.2906  | 0.033282 |
| 1.59    | 2.11   | 1.52    | 1.52    | 0.026487 | 0.948254 |
| 10.01   | 8.22   | 9.54    | 8.81    | -0.05781 | 0.759063 |
| 6.89    | 9.46   | 8.9     | 7.51    | 0.313131 | 0.130099 |
| 4.11    | 5.77   | 5.58    | 6.68    | 0.555025 | 0.001973 |
| 10.48   | 14.11  | 11.63   | 14.29   | 0.371006 | 0.004046 |
| 0.41    | 0.99   | 0.55    | 0.77    | 0.913721 | 0.006026 |
| 0       | 0      | 0       | 0.11    | NA       | NA       |
| 30.81   | 20.16  | 24.45   | 23.94   | -0.59883 | 1.20E-06 |
| 3.93    | 2.44   | 2.33    | 1.95    | -0.07783 | 0.753437 |
| 433.31  | 382.69 | 407.57  | 372.67  | -0.13975 | 0.106385 |
| 1.61    | 0.7    | 1.16    | 0.88    | -1.01769 | 0.015484 |
| 11.81   | 12.29  | 11.84   | 12.64   | -0.04931 | 0.741438 |
| 241.65  | 265.98 | 274.62  | 280.95  | 0.06666  | 0.466328 |
| 0.07    | 0.04   | 0.03    | 0.06    | NA       | NA       |
| 0.13    | 0.13   | 0.88    | 0.27    | 0.396527 | 0.547698 |
| 8.03    | 11.43  | 10.12   | 10.66   | 0.363199 | 0.028112 |
| 0.11    | 0.28   | 0.18    | 0.47    | 0.817378 | 0.159952 |
| 118.75  | 105.95 | 126.33  | 116.9   | 0.01779  | 0.902417 |

|        |        |        |        |          |          |
|--------|--------|--------|--------|----------|----------|
| 1.88   | 1.89   | 2.27   | 1.81   | 0.039216 | 0.932664 |
| 9.11   | 4.11   | 3.95   | 4.41   | -1.14796 | 5.86E-18 |
| 5.23   | 11     | 8.91   | 9.93   | 1.090598 | 8.43E-13 |
| 3.29   | 1.3    | 1.39   | 1.27   | -1.20588 | 4.55E-08 |
| 0.66   | 0.54   | 0.91   | 0.26   | -1.46914 | 0.00615  |
| 0      | 0      | 0      | 0      | NA       | NA       |
| 0.05   | 0.04   | 0      | 0      | NA       | NA       |
| 3.41   | 7.58   | 7.16   | 6.76   | 0.63644  | 0.001595 |
| 15.68  | 16.68  | 15.94  | 17.35  | -0.15496 | 0.235211 |
| 11.48  | 9.67   | 9.2    | 8.64   | -0.10195 | 0.571644 |
| 0.68   | 0.59   | 0.49   | 0.84   | -0.24097 | 0.66672  |
| 0.03   | 0.07   | 0.11   | 0.1    | -0.67399 | 0.33288  |
| 11.23  | 7.12   | 9.23   | 7.76   | -0.57081 | 0.002735 |
| 6.85   | 3.56   | 5.77   | 4.89   | -0.6468  | 4.10E-06 |
| 70.63  | 81.76  | 74.83  | 72.06  | 0.105519 | 0.335813 |
| 0      | 0.04   | 0      | 0.02   | NA       | NA       |
| 16.9   | 19.19  | 18.84  | 18.81  | -0.04201 | 0.745238 |
| 7.32   | 9.33   | 6.63   | 9.4    | -0.10825 | 0.592028 |
| 4.35   | 1.5    | 1.72   | 1.51   | -1.22273 | 3.42E-18 |
| 5.9    | 5.38   | 4.9    | 5.02   | -0.03326 | 0.903813 |
| 0      | 0      | 0      | 0      | NA       | NA       |
| 3.83   | 2.25   | 4.86   | 2.98   | -0.24536 | 0.303262 |
| 21.85  | 19.58  | 22.13  | 22.86  | -0.37951 | 9.59E-05 |
| 143.09 | 137.11 | 146.08 | 145.96 | -0.00744 | 0.948772 |
| 0.74   | 1.71   | 0.35   | 0.87   | 0.180441 | 0.695348 |
| 55.56  | 46.84  | 50.44  | 52.66  | -0.07331 | 0.492779 |
| 17.61  | 14.67  | 17.18  | 16.32  | -0.20319 | 0.058578 |
| 0.05   | 0      | 0      | 0      | NA       | NA       |
| 6.82   | 24.27  | 15.77  | 19.47  | 1.212708 | 6.02E-11 |
| 0.17   | 0.24   | 0      | 0.06   | NA       | NA       |
| 3.53   | 2.97   | 2.23   | 2.64   | -0.5294  | 0.00023  |
| 42.07  | 52.48  | 46.97  | 47.93  | 0.291767 | 0.001007 |
| 7.92   | 8.85   | 9.06   | 8.7    | -0.08908 | 0.724496 |
| 7.88   | 7.53   | 7.15   | 7.06   | -0.1835  | 0.302614 |
| 7.56   | 8.1    | 6.05   | 7.25   | -0.29976 | 0.066663 |
| 0.83   | 0.65   | 0.39   | 0.45   | -0.48455 | 0.219931 |
| 0.08   | 0.04   | 0.04   | 0.02   | NA       | NA       |
| 0.31   | 0.09   | 0.08   | 0.17   | -0.62664 | 0.348643 |
| 14.33  | 5.86   | 11.04  | 9.44   | -0.99216 | 5.79E-13 |
| 1.89   | 8.36   | 3.88   | 5.14   | 1.248167 | 5.63E-07 |
| 1.72   | 1.9    | 2      | 2.1    | 0.279587 | 0.163553 |
| 20.73  | 26.01  | 26.75  | 32.17  | 0.403402 | 3.71E-06 |
| 0      | 0.02   | 0      | 0      | NA       | NA       |
| 5.46   | 5.16   | 5.4    | 4.66   | -0.05289 | 0.826911 |
| 2.83   | 2.66   | 3.25   | 3.03   | 0.002388 | 0.994947 |

|        |         |         |         |          |          |
|--------|---------|---------|---------|----------|----------|
| 28.29  | 17.82   | 20.7    | 18.46   | -0.61726 | 7.66E-07 |
| 4.84   | 7.06    | 5.31    | 5.51    | 0.261504 | 0.123614 |
| 65.58  | 73.11   | 63.58   | 64.69   | 0.010866 | 0.947113 |
| 7.76   | 8.76    | 7.54    | 7.41    | 0.111498 | 0.500626 |
| 0      | 0       | 0       | 0       | NA       | NA       |
| 5.47   | 3.68    | 4.32    | 4.08    | -0.35283 | 0.020085 |
| 33.89  | 37.14   | 36.11   | 36.74   | 0.177869 | 0.043403 |
| 3.6    | 2.88    | 3.84    | 4.35    | -0.56902 | 0.000348 |
| 9.35   | 9.52    | 13.52   | 9.3     | 0.186542 | 0.06259  |
| 3.25   | 2.58    | 1.05    | 1.37    | -0.39139 | 0.369468 |
| 30.81  | 11.47   | 15.35   | 12.86   | -1.35414 | 8.08E-37 |
| 9.99   | 9.67    | 11.25   | 11.24   | 0.124363 | 0.558557 |
| 428.49 | 297.47  | 361.83  | 337.87  | -0.52364 | 7.73E-12 |
| 2.84   | 2.64    | 3.01    | 2.85    | 0.099239 | 0.582246 |
| 0      | 0       | 0       | 0.02    | NA       | NA       |
| 7.41   | 4.75    | 6.61    | 5.16    | -0.57553 | 0.001705 |
| 12.09  | 12.86   | 12.66   | 12.4    | 0.037131 | 0.855166 |
| 0      | 0       | 0       | 0       | NA       | NA       |
| 0      | 0       | 0       | 0       | NA       | NA       |
| 4.61   | 5.84    | 4.92    | 4.77    | 0.152956 | 0.31359  |
| 8.47   | 10.29   | 8.61    | 10.68   | -0.07115 | 0.741819 |
| 2.03   | 2.35    | 3.22    | 3.61    | 0.336614 | 0.051196 |
| 0.29   | 0       | 0       | 0       | -2.15544 | 0.000138 |
| 99.73  | 65.32   | 77.47   | 70.26   | -0.5505  | 2.74E-10 |
| 1.38   | 1.11    | 1.29    | 1.99    | -0.3029  | 0.329256 |
| 894.76 | 1503.73 | 1463.78 | 1506.93 | 0.734464 | 5.51E-32 |
| 32.9   | 36.55   | 37.54   | 39.96   | -0.08    | 0.491189 |
| 0.03   | 0       | 0       | 0       | NA       | NA       |
| 91.57  | 98.68   | 97.65   | 96.46   | 0.060154 | 0.554943 |
| 20.35  | 8.85    | 12.09   | 10.34   | -1.07556 | 3.59E-19 |
| 36.32  | 43.5    | 50.56   | 46.85   | 0.231826 | 0.021875 |
| 9.92   | 8.54    | 6.86    | 6.97    | -0.45247 | 0.001997 |
| 21.1   | 36.96   | 33.19   | 37.43   | 0.769156 | 1.47E-17 |
| 95.63  | 100.99  | 103.16  | 99.34   | -0.00069 | 0.996711 |
| 8.64   | 9.39    | 8.61    | 8.18    | -0.11485 | 0.438229 |
| 2.88   | 1.44    | 1.51    | 1.6     | -0.53107 | 0.322341 |
| 3.04   | 4.09    | 3.8     | 3.57    | 0.069191 | 0.813172 |
| 29.65  | 34.4    | 31.33   | 33.77   | 0.094335 | 0.37886  |
| 0      | 0       | 0       | 0       | NA       | NA       |
| 7.86   | 7.77    | 7.8     | 7.81    | -0.06557 | 0.662246 |
| 10.6   | 10.46   | 11.33   | 9.4     | 0.012848 | 0.941708 |
| 10.21  | 8.56    | 8.71    | 7.53    | -0.34905 | 0.039913 |
| 0      | 0       | 0       | 0       | NA       | NA       |
| 7.03   | 7.91    | 7.42    | 7.56    | 0.001685 | 0.994977 |
| 4.43   | 4.33    | 3.37    | 5.81    | 0.015544 | 0.957399 |



|         |        |        |        |          |          |
|---------|--------|--------|--------|----------|----------|
| 5.73    | 8.07   | 7.86   | 8.04   | 0.328479 | 0.009917 |
| 0.74    | 0.71   | 1      | 0.89   | 0.696797 | 0.072584 |
| 91.33   | 88.17  | 77.3   | 78.37  | -0.18341 | 0.090037 |
| 28.24   | 12.64  | 14.56  | 14.68  | -0.89136 | 4.84E-26 |
| 0       | 0.01   | 0      | 0      | NA       | NA       |
| 0.48    | 0.21   | 0.08   | 0.31   | -0.84559 | 0.179661 |
| 12.28   | 12.07  | 13     | 12.27  | 0.062731 | 0.672689 |
| 87.75   | 203.77 | 163.03 | 179.2  | 0.967197 | 5.90E-25 |
| 0.8     | 0.33   | 0.33   | 0.47   | -1.48913 | 1.79E-05 |
| 27.55   | 21.34  | 23.1   | 19.7   | -0.28249 | 0.006682 |
| 28.25   | 24.35  | 29.42  | 24.94  | 0.003783 | 0.985711 |
| 66.35   | 88.11  | 91.06  | 106.41 | 0.387359 | 6.67E-06 |
| 22.12   | 20.29  | 17.93  | 22.94  | -0.00845 | 0.957971 |
| 15.93   | 6.53   | 8.41   | 9.68   | -0.8592  | 7.84E-12 |
| 3.28    | 2.66   | 2.27   | 2.39   | -0.32411 | 0.191199 |
| 22.12   | 35.1   | 35.29  | 38.65  | 0.665203 | 9.15E-20 |
| 3.12    | 2.18   | 1.74   | 2.19   | -0.5902  | 0.042494 |
| 0       | 0      | 0      | 0.01   | NA       | NA       |
| 8.15    | 7.64   | 7.28   | 6.67   | -0.15603 | 0.289764 |
| 17.73   | 15.66  | 14.12  | 14.7   | -0.01575 | 0.950693 |
| 4.84    | 2.29   | 3.49   | 2.47   | -0.72658 | 0.000162 |
| 0       | 0      | 0      | 0      | NA       | NA       |
| 4.53    | 5.7    | 4.09   | 4.16   | 0.239198 | 0.1454   |
| 4.79    | 1.44   | 2.12   | 1.98   | -1.40221 | 1.36E-14 |
| 1.28    | 0.89   | 0.65   | 0.96   | -0.11099 | 0.834872 |
| 3.98    | 7.54   | 5.87   | 5.97   | 0.579859 | 4.88E-05 |
| 16.98   | 15.98  | 14.94  | 18.25  | -0.05787 | 0.741819 |
| 11.29   | 7.77   | 7.48   | 8.23   | -0.25017 | 0.052072 |
| 26.63   | 28.97  | 31.4   | 24.78  | 0.078979 | 0.658067 |
| 12.8    | 16.29  | 17.83  | 17.09  | 0.377064 | 0.010703 |
| 0       | 0      | 0      | 0.99   | NA       | NA       |
| 6.71    | 11.86  | 10.32  | 11.94  | 0.4588   | 6.47E-05 |
| 31.98   | 14.46  | 18.88  | 16.91  | -0.92653 | 6.12E-20 |
| 0       | 0      | 0      | 0      | NA       | NA       |
| 1109.81 | 931.9  | 1024.5 | 964.36 | -0.17019 | 0.049922 |
| 4.89    | 29.22  | 18.44  | 23.78  | 2.089758 | 3.11E-41 |
| 5.28    | 5.15   | 5.66   | 4.97   | 0.121759 | 0.621538 |
| 0.34    | 0.46   | 0.38   | 0.58   | 0.363595 | 0.553412 |
| 3.45    | 2.63   | 3.51   | 3.39   | -0.22595 | 0.316047 |
| 0       | 0      | 0      | 0      | NA       | NA       |
| 2.88    | 2.87   | 2.34   | 2.91   | -0.24846 | 0.237679 |
| 34.06   | 18.44  | 24.9   | 22.39  | -0.65034 | 4.13E-10 |
| 0.61    | 1.82   | 2.07   | 1.67   | 0.133487 | 0.800861 |
| 47.84   | 25.96  | 39.14  | 35.06  | -0.48548 | 7.41E-05 |
| 0.15    | 0      | 0.05   | 0      | NA       | NA       |

|       |         |        |         |          |          |
|-------|---------|--------|---------|----------|----------|
| 12.36 | 17.08   | 14.82  | 16.19   | 0.284492 | 0.015203 |
| 4.64  | 8.86    | 6.04   | 7.25    | 0.287297 | 0.115487 |
| 495.3 | 397.14  | 475.66 | 434.55  | -0.18974 | 0.04079  |
| 0     | 0.01    | 0      | 0.01    | NA       | NA       |
| 114   | 135.48  | 135.44 | 132.72  | 0.150047 | 0.073735 |
| 89.7  | 106.13  | 95.06  | 101.19  | 0.243817 | 0.008592 |
| 8.03  | 7.42    | 8.27   | 13.56   | 0.120343 | 0.635578 |
| 16.09 | 2029.67 | 585.18 | 1261.29 | 5.031703 | 6.23E-34 |
| 17.3  | 24.8    | 23.99  | 25.25   | 0.145002 | 0.346691 |
| 0.13  | 0       | 0.03   | 0.09    | NA       | NA       |
| 18.69 | 12.04   | 12.91  | 10.54   | -0.60362 | 1.17E-06 |
| 0     | 0       | 0.1    | 0.03    | NA       | NA       |
| 19.21 | 18.63   | 22.43  | 20.43   | 0.206868 | 0.117409 |
| 20.64 | 24.4    | 22.57  | 21.26   | 0.070397 | 0.643468 |
| 5.33  | 8.18    | 7.78   | 8.92    | 0.007553 | 0.981219 |
| 1.48  | 0.72    | 1.22   | 1.06    | -0.68185 | 0.004668 |
| 0.35  | 0       | 0.08   | 0.09    | NA       | NA       |
| 47.68 | 39.42   | 42.65  | 40.79   | -0.24168 | 0.011692 |
| 18.98 | 24.59   | 22.5   | 22.8    | 0.032675 | 0.861365 |
| 0.02  | 0       | 0      | 0       | NA       | NA       |
| 51.31 | 81.5    | 73.31  | 77.52   | 0.534476 | 3.14E-12 |
| 0     | 0       | 0      | 0       | NA       | NA       |
| 0.92  | 2.13    | 1.78   | 1.53    | 0.509633 | 0.164791 |
| 0     | 0       | 0      | 0       | NA       | NA       |
| 4.78  | 5.86    | 5.15   | 5.62    | -0.19525 | 0.330999 |
| 0     | 0       | 0      | 0       | NA       | NA       |
| 0     | 0       | 0      | 0       | NA       | NA       |
| 0.38  | 0.22    | 0.22   | 0.37    | 0.347796 | 0.427292 |
| 10.21 | 7.59    | 9.18   | 7.24    | -0.11285 | 0.743135 |
| 22.12 | 19.73   | 19.88  | 21.87   | -0.1884  | 0.049252 |
| 21.9  | 33.99   | 20.24  | 24.57   | 0.331654 | 0.055676 |
| 11.26 | 12.12   | 10.28  | 10.3    | -0.00556 | 0.974622 |
| 1.09  | 0.1     | 0.37   | 0.18    | -1.64652 | 4.77E-09 |
| 0.43  | 0.25    | 0.61   | 0.64    | -0.03195 | 0.969488 |
| 2.69  | 1.89    | 1.28   | 1.05    | -0.90548 | 0.026565 |
| 55.8  | 45.48   | 49.34  | 45.03   | -0.20496 | 0.036961 |
| 16.21 | 13.2    | 15.24  | 14.1    | -0.03342 | 0.858181 |
| 53.08 | 37.86   | 44.85  | 40.05   | 0.145668 | 0.142212 |
| 0.16  | 0.08    | 0.09   | 0.12    | -0.61549 | 0.38663  |
| 57.32 | 57.94   | 60.78  | 58.55   | 0.108304 | 0.291113 |
| 17.61 | 25.17   | 21.3   | 24.93   | 0.416548 | 9.21E-05 |
| 0     | 0       | 0      | 0       | NA       | NA       |
| 7.33  | 8.77    | 8.89   | 9.06    | 0.120944 | 0.584321 |
| 13.14 | 9.67    | 8.7    | 9.13    | -0.58008 | 2.39E-09 |
| 20.77 | 25.67   | 26.93  | 24.12   | 0.197436 | 0.024191 |

|       |        |       |       |          |          |
|-------|--------|-------|-------|----------|----------|
| 0     | 0      | 0     | 0     | NA       | NA       |
| 0     | 0      | 0     | 0     | NA       | NA       |
| 5.39  | 8.82   | 8.13  | 11.46 | 0.683551 | 0.001032 |
| 0.21  | 0.05   | 0.13  | 0.08  | -0.78032 | 0.166897 |
| 11.1  | 12.7   | 13.25 | 14.14 | 0.165256 | 0.177594 |
| 2.46  | 0.94   | 1.32  | 1.63  | -0.90019 | 0.004477 |
| 19.53 | 17.84  | 17.69 | 20.4  | 0.115695 | 0.450951 |
| 36.15 | 32.9   | 33.16 | 31.41 | -0.16495 | 0.20537  |
| 11.39 | 15.18  | 13.3  | 16.45 | 0.109375 | 0.624592 |
| 39.53 | 46     | 37.98 | 40.47 | 0.103804 | 0.346513 |
| 0.07  | 0      | 0.02  | 0.01  | -1.81403 | 0.001711 |
| 0     | 0      | 0     | 0.01  | NA       | NA       |
| 30.13 | 37.02  | 30.45 | 36.33 | 0.240368 | 0.063839 |
| 0     | 0      | 0     | 0     | NA       | NA       |
| 16.62 | 11.37  | 14.47 | 12.18 | -0.35361 | 0.001095 |
| 1.41  | 0.1    | 0.02  | 0.07  | -4.63788 | 2.08E-32 |
| 24.13 | 33.2   | 29.93 | 28.73 | 0.262047 | 0.022121 |
| 0     | 0      | 0     | 0     | NA       | NA       |
| 27.67 | 28.53  | 32.7  | 27.93 | -0.01283 | 0.940418 |
| 7.1   | 22.9   | 19.28 | 21.51 | 1.523768 | 1.45E-33 |
| 38.08 | 30.24  | 33.4  | 33.67 | -0.07551 | 0.476343 |
| 6.53  | 5.35   | 6.3   | 5.91  | 0.076789 | 0.784751 |
| 17.53 | 9.43   | 13.71 | 14.27 | -0.23652 | 0.123615 |
| 0     | 0      | 0     | 0     | NA       | NA       |
| 17    | 9.9    | 10.79 | 13.14 | -0.3232  | 0.003015 |
| 8.73  | 9.11   | 9.56  | 8.63  | 0.100215 | 0.487049 |
| 13.89 | 15.89  | 15.06 | 16.44 | 0.199404 | 0.178484 |
| 0     | 0.63   | 0     | 0.28  | 0.639771 | 0.288404 |
| 0.28  | 149.27 | 35.49 | 77.05 | 4.613207 | 3.17E-21 |
| 0     | 0      | 0     | 0     | NA       | NA       |
| 0.3   | 9.85   | 2.79  | 5.82  | 3.575946 | 6.26E-14 |
| 0.14  | 16.26  | 8.56  | 11.41 | 4.877599 | 2.54E-39 |
| 0     | 0.06   | 0     | 0.06  | NA       | NA       |
| 0     | 0      | 0     | 0     | NA       | NA       |
| 22.49 | 21.7   | 19.74 | 23.49 | -0.01731 | 0.90979  |
| 9.45  | 10.93  | 10.02 | 12.13 | 0.033314 | 0.825615 |
| 25.37 | 19.28  | 20.83 | 20.18 | -0.37825 | 0.000962 |
| 8.85  | 9.96   | 8.56  | 9.91  | 0.054395 | 0.742075 |
| 22.68 | 32.73  | 24.38 | 27.06 | 0.279044 | 0.060223 |
| 25.64 | 25.19  | 27.59 | 24.43 | 0.07387  | 0.672202 |
| 7.94  | 7.52   | 6.08  | 6.97  | -0.25056 | 0.071497 |
| 22.92 | 27.81  | 27.66 | 27.54 | 0.386084 | 1.00E-05 |
| 28.41 | 21.41  | 20.52 | 23.57 | -0.43292 | 0.000312 |
| 15.53 | 12.62  | 11.51 | 11.76 | -0.29782 | 0.015459 |
| 0     | 0      | 0     | 0     | NA       | NA       |

|        |        |        |        |          |          |
|--------|--------|--------|--------|----------|----------|
| 23.87  | 27.31  | 26.67  | 30.02  | 0.233963 | 0.037141 |
| 44.24  | 50.54  | 48.14  | 46.24  | 0.176388 | 0.056459 |
| 19.46  | 55.67  | 38.79  | 47.22  | 1.347876 | 2.50E-27 |
| 10.33  | 7.4    | 9.42   | 7.65   | -0.1785  | 0.425463 |
| 20.39  | 43.92  | 36.79  | 39.26  | 0.889647 | 2.60E-22 |
| 24.84  | 28.17  | 28.34  | 27.93  | 0.178825 | 0.130108 |
| 107.07 | 104.2  | 117.13 | 103.79 | -0.01043 | 0.94882  |
| 9.85   | 11.49  | 13.59  | 12.56  | 0.122406 | 0.42696  |
| 21.92  | 28.91  | 24.05  | 24.64  | 0.043723 | 0.736746 |
| 10.18  | 12.91  | 10.09  | 10.66  | 0.328652 | 0.021889 |
| 24.54  | 28.61  | 26.84  | 27.85  | 0.131845 | 0.332541 |
| 4.58   | 3.87   | 4.67   | 3.97   | -0.19065 | 0.223169 |
| 24.18  | 44.16  | 42.62  | 45.5   | 0.783118 | 4.32E-20 |
| 17.09  | 26.87  | 22.12  | 24.2   | 0.413388 | 0.001098 |
| 0.92   | 0.52   | 0.32   | 0.5    | -0.15494 | 0.789916 |
| 113.55 | 186.99 | 168.22 | 184.14 | 0.605579 | 5.91E-15 |
| 0      | 0      | 0      | 0      | NA       | NA       |
| 0      | 0      | 0      | 0      | NA       | NA       |
| 13.09  | 21.19  | 14.47  | 17.24  | 0.407815 | 0.019464 |
| 0.19   | 1.12   | 0.56   | 0.91   | 2.010761 | 7.29E-07 |
| 7.25   | 6.15   | 6.37   | 6.72   | -0.28554 | 0.007437 |
| 22.55  | 22.97  | 21.95  | 24.29  | -0.00809 | 0.95613  |
| 2.13   | 3.41   | 2.32   | 2.08   | 0.369477 | 0.291606 |
| 88.43  | 99.03  | 76.58  | 89.6   | -0.03276 | 0.850065 |
| 24.88  | 31.11  | 37.14  | 32.73  | -0.01821 | 0.920433 |
| 0.73   | 1.13   | 1.02   | 1.29   | 0.288932 | 0.494462 |
| 10.47  | 7.62   | 7.98   | 7.49   | -0.53143 | 0.000215 |
| 13.86  | 15.02  | 14.44  | 15.5   | 0.067633 | 0.592028 |
| 9.12   | 19.18  | 17.32  | 19.63  | 0.862758 | 1.37E-18 |
| 5.58   | 5.29   | 5.3    | 5.32   | -0.17361 | 0.310228 |
| 0      | 0      | 0      | 0      | NA       | NA       |
| 6.78   | 4.65   | 5.11   | 6.69   | -0.2991  | 0.104775 |
| 6.57   | 7.15   | 6.82   | 7.21   | 0.097504 | 0.592553 |
| 26.89  | 32.55  | 29.73  | 31.73  | 0.16367  | 0.145193 |
| 7.65   | 8.73   | 7.21   | 7.05   | -0.08453 | 0.609356 |
| 0      | 0.02   | 0      | 0      | NA       | NA       |
| 0.03   | 0      | 0      | 0.03   | NA       | NA       |
| 59.01  | 88.61  | 73.93  | 77.76  | 0.454945 | 1.24E-05 |
| 8.85   | 7.34   | 8.06   | 7.6    | -0.25234 | 0.069213 |
| 0      | 0      | 0.06   | 0.01   | NA       | NA       |
| 2.16   | 3.87   | 3.23   | 3.55   | 0.325438 | 0.147871 |
| 9.36   | 14.26  | 12.22  | 12.78  | 0.19849  | 0.310838 |
| 0      | 0      | 0      | 0      | NA       | NA       |
| 6.32   | 8.5    | 7.84   | 7.17   | 0.115463 | 0.459233 |
| 0.27   | 1.98   | 1.15   | 1.13   | 3.851639 | 3.99E-25 |

|        |        |        |        |          |          |
|--------|--------|--------|--------|----------|----------|
| 0      | 0      | 0      | 0      | NA       | NA       |
| 88.73  | 122.17 | 99.69  | 112.37 | 0.317386 | 0.002474 |
| 0      | 0      | 0      | 0      | NA       | NA       |
| 6.58   | 9.8    | 7.29   | 8.03   | 0.281307 | 0.21896  |
| 11.01  | 10.92  | 9.8    | 8.88   | -0.1894  | 0.326281 |
| 6.7    | 8.33   | 8.91   | 8.09   | 0.215214 | 0.117726 |
| 5.28   | 3.52   | 3.5    | 4.81   | -0.50593 | 0.035003 |
| 6.14   | 6.56   | 6.82   | 5.39   | -0.16195 | 0.23469  |
| 70.64  | 68.42  | 77.4   | 68.84  | -0.00584 | 0.970719 |
| 0      | 0      | 0      | 0      | NA       | NA       |
| 7.16   | 9.08   | 9.42   | 9.19   | 0.222155 | 0.163859 |
| 573.05 | 498.26 | 475.71 | 476.28 | -0.27847 | 0.000346 |
| 0.13   | 0.06   | 0.15   | 0.03   | NA       | NA       |
| 0.01   | 0.03   | 0.01   | 0.01   | NA       | NA       |
| 13.3   | 17.52  | 18.17  | 17.11  | 0.43617  | 0.001104 |
| 0.18   | 0      | 0.04   | 0.09   | -0.87447 | 0.185685 |
| 1.66   | 0.81   | 0.97   | 0.95   | -0.89371 | 0.002696 |
| 34.03  | 33.07  | 34.24  | 40.63  | 0.255018 | 0.009102 |
| 32.09  | 19.61  | 26.37  | 22.08  | -0.59425 | 2.77E-06 |
| 1.65   | 1.49   | 2.07   | 1.93   | 0.879286 | 0.004581 |
| 86.76  | 594.82 | 296.73 | 408.68 | 2.109681 | 1.25E-12 |
| 21.82  | 20.15  | 22.53  | 24.84  | 0.094837 | 0.598096 |
| 4.2    | 5.63   | 6.18   | 5.07   | 0.397981 | 0.004516 |
| 9.83   | 6.49   | 8.24   | 7.28   | -0.45583 | 0.003779 |
| 12.14  | 14.38  | 12.65  | 12.87  | 0.148083 | 0.286204 |
| 12.88  | 4.29   | 5.1    | 3.94   | -1.4418  | 9.68E-21 |
| 8.69   | 8.53   | 8.69   | 8.31   | -0.14282 | 0.300705 |
| 14.81  | 15.35  | 19     | 17.89  | -0.02131 | 0.921844 |
| 7.57   | 5.78   | 6.62   | 7.95   | -0.14839 | 0.331994 |
| 99.05  | 81.79  | 74.1   | 82.03  | -0.40106 | 7.24E-09 |
| 0      | 0      | 0      | 0.11   | NA       | NA       |
| 0.17   | 0      | 0.08   | 0      | NA       | NA       |
| 0      | 0      | 0      | 0      | NA       | NA       |
| 0      | 0      | 0      | 0      | NA       | NA       |
| 7.63   | 9.49   | 8.67   | 9.95   | 0.180519 | 0.258601 |
| 0.93   | 0.64   | 1.02   | 0.37   | -0.47537 | 0.422622 |
| 72.14  | 52.23  | 54.5   | 53.92  | -0.43227 | 2.54E-05 |
| 1.36   | 0.97   | 1.6    | 1.24   | -0.61334 | 0.141409 |
| 10.21  | 4.47   | 7.54   | 6.22   | -0.78933 | 8.22E-07 |
| 59.13  | 45.95  | 47.99  | 43.58  | -0.31685 | 0.003369 |
| 6.17   | 2.77   | 3.01   | 3.13   | -1.16771 | 7.22E-16 |
| 16.76  | 21.45  | 17.76  | 18.5   | 0.016152 | 0.956564 |
| 0.16   | 0.04   | 0.11   | 0.24   | -0.61252 | 0.384205 |
| 0      | 0      | 0      | 0      | NA       | NA       |
| 12.58  | 10.64  | 10.21  | 9.9    | -0.17894 | 0.108465 |

|        |         |        |        |          |          |
|--------|---------|--------|--------|----------|----------|
| 926.23 | 691.54  | 815.44 | 697.5  | -0.36947 | NA       |
| 20.66  | 24.34   | 23.24  | 23.19  | 0.06993  | 0.646545 |
| 6.12   | 8.06    | 6.9    | 8.3    | 0.235828 | 0.136668 |
| 7.45   | 6.24    | 6.41   | 5.89   | -0.16936 | 0.456633 |
| 12.53  | 13.33   | 14.34  | 17.86  | 0.103529 | 0.523528 |
| 20.73  | 19.32   | 17.99  | 21.56  | -0.15711 | 0.092881 |
| 5.16   | 6.79    | 6.71   | 6.88   | 0.167255 | 0.482749 |
| 36.05  | 9.99    | 13.65  | 12.21  | -1.70433 | 4.02E-47 |
| 10.98  | 10.9    | 10.62  | 9.75   | -0.13259 | 0.497407 |
| 17.11  | 17.7    | 17.66  | 17.12  | 0.000163 | 0.999184 |
| 4.1    | 9.94    | 7.61   | 8.23   | 1.020922 | 2.19E-10 |
| 0      | 0       | 0      | 0      | NA       | NA       |
| 85.96  | 111.98  | 102.98 | 109.18 | 0.333952 | 8.15E-05 |
| 50.1   | 42.65   | 46.6   | 43.93  | -0.22036 | 0.063334 |
| 14.95  | 20.19   | 18.83  | 19.88  | 0.469044 | 7.56E-05 |
| 2.1    | 1.64    | 1.57   | 2.38   | -0.07003 | 0.869167 |
| 11.23  | 11.97   | 12.76  | 11.42  | -0.09645 | 0.540905 |
| 0      | 0.02    | 0.02   | 0      | NA       | NA       |
| 0      | 0       | 0      | 0      | NA       | NA       |
| 0      | 0       | 0      | 0      | NA       | NA       |
| 0.02   | 0.07    | 0.02   | 0.07   | 0.309545 | 0.702808 |
| 0      | 0.01    | 0      | 0.04   | NA       | NA       |
| 9.54   | 33.86   | 25.64  | 31.02  | 1.494769 | 9.03E-34 |
| 8.76   | 4.84    | 6.03   | 5.63   | -0.78426 | 3.40E-06 |
| 0.77   | 0.54    | 0.35   | 0.35   | -0.26835 | 0.62151  |
| 0      | 0       | 0      | 0      | NA       | NA       |
| 3.74   | 2.25    | 3.2    | 3.06   | -0.58282 | 0.0085   |
| 6.9    | 6.45    | 4.55   | 6.13   | -0.31852 | 0.141331 |
| 9.93   | 9.48    | 9.57   | 10.33  | -0.17211 | 0.150132 |
| 0.51   | 0.08    | 0.18   | 0.12   | -1.28782 | 0.022147 |
| 32.55  | 33.26   | 34.8   | 31.19  | 0.073612 | 0.716196 |
| 41.17  | 232.78  | 123.97 | 170.18 | 1.935012 | 3.98E-14 |
| 1.67   | 0.56    | 1.01   | 0.44   | -1.15525 | 0.000193 |
| 57.59  | 27.68   | 31.95  | 30.98  | -1.12911 | 7.22E-32 |
| 92.02  | 1181.17 | 494.09 | 768.47 | 2.782172 | 2.58E-17 |
| 8.01   | 6.48    | 9.04   | 7.83   | 0.149103 | 0.303927 |
| 2.21   | 1.86    | 1.72   | 2      | -0.13823 | 0.643182 |
| 5.62   | 7.41    | 6.34   | 6.3    | 0.194141 | 0.379416 |
| 4.41   | 4.83    | 4.65   | 4.54   | 0.17213  | 0.374469 |
| 0      | 0       | 0      | 0      | NA       | NA       |
| 0.58   | 1.22    | 0.99   | 2.09   | 0.951338 | 0.000955 |
| 7.73   | 8.65    | 7.09   | 8.17   | -0.01424 | 0.963961 |
| 102.07 | 92.4    | 90.96  | 90.38  | -0.19762 | 0.023101 |
| 7.16   | 8.05    | 5.46   | 7.97   | -0.11322 | 0.559463 |
| 5.75   | 4.69    | 4.79   | 5.19   | 0.103662 | 0.583545 |

|        |        |       |        |          |          |
|--------|--------|-------|--------|----------|----------|
| 12.78  | 12.72  | 12.66 | 11.72  | -0.00107 | 0.99562  |
| 0.23   | 0.21   | 0     | 0.4    | NA       | NA       |
| 0      | 0.04   | 0     | 0      | NA       | NA       |
| 0      | 0.3    | 0.57  | 0.32   | 1.126304 | 0.073034 |
| 4.63   | 7.59   | 7.27  | 8      | 0.629223 | 1.05E-06 |
| 0.08   | 0.08   | 0.04  | 0.07   | -0.07041 | 0.938399 |
| 0.19   | 0.78   | 0.34  | 0.39   | 1.358298 | 0.006161 |
| 12.69  | 0.53   | 1.44  | 0.9    | -3.5469  | 1.22E-51 |
| 0      | 0.27   | 0.03  | 0.09   | NA       | NA       |
| 0.07   | 0.06   | 0.06  | 0.09   | -0.2601  | 0.742545 |
| 8.69   | 8.84   | 9.62  | 8.39   | -0.2122  | 0.10619  |
| 7.24   | 5.14   | 5.59  | 5.92   | -0.23386 | 0.180916 |
| 0.08   | 0.39   | 0.21  | 0.83   | 1.335246 | 0.026555 |
| 11.32  | 11.66  | 10.73 | 11.76  | 0.039638 | 0.815873 |
| 5.99   | 9.42   | 8.05  | 9.48   | 0.389161 | 0.009842 |
| 1.64   | 1.55   | 1.79  | 2.2    | -0.02494 | 0.949887 |
| 79.2   | 83.32  | 80.32 | 89.6   | 0.021627 | 0.85721  |
| 27.34  | 26.57  | 29.54 | 29.16  | 0.012676 | 0.946972 |
| 21.91  | 8.76   | 16.27 | 15.4   | -0.74254 | 6.70E-05 |
| 22.14  | 10.65  | 14.52 | 14.18  | -0.60949 | 3.68E-05 |
| 16.02  | 17.42  | 15.95 | 16.02  | 0.036966 | 0.817999 |
| 30.52  | 10.36  | 16.48 | 11.54  | -1.43678 | 5.53E-36 |
| 79.72  | 77.87  | 90.18 | 86.78  | 0.030361 | 0.812213 |
| 4.62   | 3.91   | 3.64  | 4.43   | -0.20094 | 0.387812 |
| 20.41  | 25.55  | 23.03 | 25.49  | 0.313188 | 0.017153 |
| 18.84  | 20.15  | 19.49 | 20.3   | 0.060987 | 0.750838 |
| 0.01   | 0.05   | 0.07  | 0.18   | -0.69199 | 0.299692 |
| 0      | 0      | 0     | 0      | NA       | NA       |
| 8.75   | 12.19  | 12.65 | 13.49  | 0.465573 | 0.00409  |
| 0      | 0.11   | 0.03  | 0.03   | 1.022048 | 0.109549 |
| 138.39 | 55.34  | 77.06 | 73.57  | -0.95789 | 5.44E-24 |
| 4.47   | 3.55   | 3.44  | 3.68   | -0.03996 | 0.871975 |
| 202.89 | 175.95 | 147.1 | 168.92 | -0.19525 | 0.090288 |
| 4.78   | 4.24   | 4.46  | 4.4    | -0.15866 | 0.28991  |
| 2.67   | 3.77   | 3.35  | 5.52   | 0.162081 | 0.415764 |
| 0.04   | 0      | 0     | 0      | NA       | NA       |
| 0.47   | 0.35   | 0.55  | 0.4    | 0.14841  | 0.787412 |
| 0.05   | 0.06   | 0.08  | 0.02   | -0.14594 | 0.870444 |
| 4.96   | 5.39   | 6.46  | 5.51   | 0.183226 | 0.392201 |
| 0      | 0      | 0.02  | 0      | NA       | NA       |
| 0.13   | 0      | 0     | 0      | NA       | NA       |
| 0      | 0      | 0     | 0      | NA       | NA       |
| 0      | 0      | 0     | 0      | NA       | NA       |
| 5.29   | 4.12   | 4.2   | 3.28   | -0.27262 | 0.420229 |
| 19.12  | 17.33  | 18.43 | 15.28  | 0.112935 | 0.551896 |

|         |         |         |         |          |          |
|---------|---------|---------|---------|----------|----------|
| 79.85   | 65.82   | 70.37   | 75.59   | -0.12137 | 0.180774 |
| 0.18    | 0       | 0       | 0       | NA       | NA       |
| 8.66    | 6.88    | 9.12    | 8       | -0.09166 | 0.668204 |
| 0       | 0       | 0       | 0       | NA       | NA       |
| 0.02    | 0.05    | 0.12    | 0.14    | NA       | NA       |
| 28.47   | 26.91   | 24.03   | 25.77   | -0.0018  | 0.991973 |
| 7.99    | 11.6    | 9.18    | 10.49   | 0.383422 | 0.011349 |
| 3.12    | 4.27    | 3.85    | 3.56    | 0.278254 | 0.154773 |
| 8.64    | 9.25    | 9.9     | 5.99    | 0.25495  | 0.463611 |
| 0       | 0.16    | 0.08    | 0.16    | NA       | NA       |
| 3.96    | 0.7     | 0.99    | 0.85    | -2.1428  | 1.13E-36 |
| 0.45    | 0.44    | 0.03    | 0.29    | NA       | NA       |
| 0       | 0.1     | 0.03    | 0.09    | NA       | NA       |
| 0       | 0       | 0       | 0       | NA       | NA       |
| 11.24   | 4.51    | 6.94    | 6.47    | -1.23263 | 3.52E-09 |
| 0       | 0.09    | 0       | 0.06    | NA       | NA       |
| 2.05    | 3.5     | 3.09    | 3.35    | 0.602416 | 0.001006 |
| 14.09   | 10.23   | 9.79    | 9.59    | -0.43663 | 0.000372 |
| 0       | 0       | 0       | 0       | NA       | NA       |
| 22.92   | 36.7    | 25.88   | 33.16   | 0.457186 | 0.001293 |
| 15.28   | 7.21    | 10.5    | 9.3     | -0.23906 | 0.109376 |
| 23.67   | 33.53   | 33.84   | 37.56   | 0.483015 | 2.04E-07 |
| 305.45  | 157.02  | 339.43  | 251.84  | -0.26266 | 0.490909 |
| 4.38    | 3.73    | 3.86    | 3.49    | -0.41582 | 0.001827 |
| 1.74    | 0.93    | 0.91    | 1.23    | -0.93959 | 0.016105 |
| 12.57   | 10.89   | 9.68    | 8.79    | -0.13052 | 0.590167 |
| 1.1     | 0.49    | 0.53    | 0.48    | -0.6513  | 0.13884  |
| 0       | 0       | 0       | 0       | NA       | NA       |
| 61.24   | 28.7    | 44.81   | 41.03   | -0.76596 | 1.23E-09 |
| 0.08    | 0.21    | 0.09    | 0.1     | -0.23703 | 0.701731 |
| 6.96    | 6.89    | 5.53    | 6.15    | -0.25245 | 0.116484 |
| 15.02   | 15.34   | 15.51   | 14.35   | -0.09238 | 0.460808 |
| 22.06   | 27.41   | 22.74   | 26.5    | 0.056543 | 0.72393  |
| 1098.86 | 1038.62 | 1190.27 | 1021.64 | -0.17988 | 0.054883 |
| 0.2     | 2.41    | 0.95    | 2.23    | 2.654347 | 1.50E-13 |
| 7.68    | 6.54    | 5.96    | 7.01    | 0.024737 | 0.926267 |
| 6.05    | 3.89    | 4.31    | 3.29    | -0.44967 | 0.000913 |
| 17.04   | 16.22   | 17.08   | 16.93   | -0.09802 | 0.544541 |
| 0.26    | 0.5     | 0.42    | 0.61    | 0.805031 | 0.182068 |
| 35.29   | 14.66   | 22.08   | 18.89   | -0.83683 | 1.03E-11 |
| 5.36    | 12.54   | 7.99    | 10.79   | 1.243926 | 3.83E-17 |
| 0.04    | 0.03    | 0       | 0.06    | NA       | NA       |
| 4.36    | 4.98    | 4.15    | 3.99    | 0.058847 | 0.828363 |
| 0       | 0       | 0.11    | 0       | NA       | NA       |
| 101.36  | 128.59  | 146.55  | 146.11  | 0.512225 | 1.06E-10 |



|       |       |       |       |          |          |
|-------|-------|-------|-------|----------|----------|
| 0.55  | 1.01  | 0.63  | 0.42  | -0.29922 | 0.635703 |
| 0.06  | 0.14  | 0.03  | 0.06  | 0.076066 | 0.936914 |
| 0     | 0.77  | 0.74  | 0.9   | 2.339264 | 3.70E-06 |
| 0.63  | 1.68  | 1.88  | 3.03  | 2.651528 | 2.81E-12 |
| 10.28 | 8.09  | 9.12  | 9.06  | -0.07576 | 0.64803  |
| 4.06  | 2.18  | 3.03  | 3.14  | -0.89612 | 1.20E-08 |
| 0     | 0     | 0.04  | 0     | NA       | NA       |
| 25.58 | 28.9  | 28.61 | 28.37 | 0.163925 | 0.150557 |
| 0.06  | 0.01  | 0.02  | 0.02  | -0.81031 | 0.212379 |
| 0.16  | 0.2   | 0     | 0     | NA       | NA       |
| 10.57 | 5.77  | 5.95  | 5.29  | -0.65536 | 0.010007 |
| 12.95 | 12.72 | 12.97 | 12.84 | -0.06407 | 0.682299 |
| 6.31  | 5.08  | 5.96  | 5.61  | -0.23145 | 0.273645 |
| 5.72  | 3.37  | 4.29  | 4.42  | -0.37729 | 0.009418 |
| 12.65 | 15.12 | 13.53 | 14.61 | 0.12651  | 0.422258 |
| 13.4  | 17.27 | 17.75 | 15.62 | 0.383443 | 0.009382 |
| 0     | 0     | 0     | 0     | NA       | NA       |
| 22.19 | 39.98 | 31.52 | 37.35 | 0.42758  | 0.000188 |
| 3.38  | 8.19  | 8.39  | 15.55 | 1.150764 | 0.000656 |
| 0     | 0     | 0     | 0.01  | NA       | NA       |
| 27.23 | 20.21 | 23.35 | 24.03 | -0.22598 | 0.02417  |
| 7.17  | 8.52  | 9.66  | 12    | 0.237818 | 0.294193 |
| 0.09  | 0.34  | 0.2   | 0.25  | 0.962514 | 0.069348 |
| 0     | 0     | 0.64  | 0     | NA       | NA       |
| 17.22 | 1.38  | 3.75  | 2.46  | -2.32384 | 1.58E-10 |
| 0     | 0     | 0     | 0     | NA       | NA       |
| 3.56  | 3.54  | 3.32  | 3.68  | -0.1857  | 0.211358 |
| 13.33 | 14.21 | 14.51 | 13.16 | 0.043437 | 0.824714 |
| 9.69  | 6.22  | 7.51  | 7.08  | -0.31891 | 0.013219 |
| 1.79  | 3.73  | 2.92  | 3.76  | 0.741831 | 2.78E-06 |
| 3.59  | 1.78  | 2.34  | 3     | -0.75659 | 0.008409 |
| 64.43 | 45.06 | 46.74 | 40.67 | -0.55303 | 1.36E-10 |
| 0.62  | 1.14  | 0.8   | 0.44  | -0.0934  | 0.898146 |
| 17.54 | 14.67 | 19.5  | 16.66 | -0.58728 | 4.38E-09 |
| 12.1  | 15.81 | 12.61 | 13.95 | 0.306094 | 0.021672 |
| 7.97  | 11.44 | 8.24  | 8.28  | 0.072784 | 0.699566 |
| 7.99  | 9.6   | 10.71 | 9.51  | -0.01068 | 0.972634 |
| 0     | 0     | 0     | 0     | NA       | NA       |
| 3.28  | 2.82  | 3.62  | 2.82  | -0.22731 | 0.402014 |
| 22.95 | 28.71 | 31.53 | 26.76 | 0.475104 | 4.15E-07 |
| 0     | 0     | 0     | 0     | NA       | NA       |
| 74.82 | 90.78 | 89.9  | 82.67 | 0.163252 | 0.091974 |
| 50.94 | 52.59 | 55.66 | 49.5  | -0.02985 | 0.827737 |
| 18.67 | 23.74 | 18.22 | 20.37 | 0.098126 | 0.559898 |
| 6     | 8.27  | 6.89  | 9.07  | 0.342191 | 0.049525 |

|        |        |         |        |          |          |
|--------|--------|---------|--------|----------|----------|
| 0      | 0      | 0       | 0      | NA       | NA       |
| 19.71  | 16.4   | 16.11   | 15.06  | -0.25473 | 0.015069 |
| 0.34   | 0.35   | 0.44    | 0.18   | -0.00242 | 0.997898 |
| 99.89  | 90.89  | 92.18   | 93.01  | -0.23421 | 0.003385 |
| 17.82  | 19.28  | 17.26   | 17.49  | 0.0159   | 0.922421 |
| 0      | 0      | 0       | 0      | NA       | NA       |
| 118.05 | 116.42 | 123.17  | 123.05 | -0.05482 | 0.644595 |
| 2.66   | 4.84   | 3.85    | 3.2    | 0.307614 | 0.12042  |
| 24.1   | 19.71  | 20.71   | 19.2   | -0.10599 | 0.374503 |
| 0      | 0      | 0       | 0.03   | NA       | NA       |
| 3.69   | 2.98   | 3.57    | 2.19   | -0.19593 | 0.531228 |
| 53.77  | 57.65  | 51.54   | 54.26  | -0.04722 | 0.692476 |
| 0      | 0.03   | 0       | 0      | NA       | NA       |
| 1.04   | 1.72   | 0.94    | 0.97   | -0.77174 | 0.052592 |
| 0      | 0      | 0.11    | 0.03   | NA       | NA       |
| 103.88 | 42.01  | 53.6    | 48.45  | -1.11851 | 9.90E-33 |
| 4.62   | 0.72   | 1.3     | 0.88   | -2.24465 | 3.22E-30 |
| 8.87   | 5.72   | 7.13    | 6.66   | -0.38543 | 0.035824 |
| 0.36   | 2.51   | 0.97    | 1.76   | 2.452815 | 4.68E-08 |
| 0      | 0      | 0       | 0      | NA       | NA       |
| 14.14  | 16.56  | 16.67   | 18.63  | 0.138476 | 0.296114 |
| 0.07   | 0.3    | 0.02    | 0      | NA       | NA       |
| 0.85   | 0.68   | 0.8     | 0.81   | -0.17278 | 0.626917 |
| 0.21   | 0.17   | 0.29    | 0.29   | -0.2593  | 0.718632 |
| 9.77   | 10.06  | 6.55    | 7.8    | -0.0719  | 0.751307 |
| 1.6    | 21.82  | 11.22   | 16.21  | 2.795363 | 2.25E-43 |
| 54.38  | 39.55  | 41.34   | 39.95  | -0.4421  | 4.97E-07 |
| 6.29   | 5.87   | 5.92    | 5.17   | -0.09116 | 0.619695 |
| 0.24   | 0.07   | 0.14    | 0.09   | -0.7136  | 0.275897 |
| 0.51   | 0.36   | 0.27    | 0.26   | -0.82732 | 0.012289 |
| 0.23   | 0.15   | 0.17    | 0.14   | -0.16776 | 0.821481 |
| 5.98   | 8.2    | 5.33    | 5.79   | 0.21898  | 0.387164 |
| 0.66   | 0.08   | 0.38    | 0.17   | -1.45509 | 6.44E-05 |
| 0.37   | 0.72   | 0.68    | 0.35   | 0.539505 | 0.454592 |
| 4.39   | 3.19   | 4.25    | 4.25   | -0.30825 | 0.150179 |
| 19.81  | 16.53  | 18.04   | 18.94  | -0.10723 | 0.280354 |
| 0      | 0      | 0       | 0      | NA       | NA       |
| 62.7   | 84.02  | 73.46   | 79.53  | 0.276558 | 0.004774 |
| 12.06  | 10.62  | 11.92   | 11.48  | -0.15109 | 0.342304 |
| 13.25  | 11.1   | 11.68   | 13.18  | -0.23617 | 0.133109 |
| 0      | 0      | 0       | 0      | NA       | NA       |
| 0.51   | 0.58   | 0.52    | 0.44   | -0.17378 | 0.731322 |
| 0      | 0      | 0       | 0      | NA       | NA       |
| 3.34   | 3.7    | 2.87    | 2.93   | -0.07445 | 0.744638 |
| 1192.8 | 930.09 | 1080.33 | 897.23 | -0.3011  | 0.001853 |

|       |        |        |        |          |          |
|-------|--------|--------|--------|----------|----------|
| 0.3   | 0.16   | 0.26   | 0.24   | -0.68677 | 0.040537 |
| 1.37  | 0.28   | 0.7    | 0.47   | -0.11909 | 0.843441 |
| 0.03  | 0.08   | 0.04   | 0.08   | 0.915758 | 0.158346 |
| 9.56  | 1.3    | 3.88   | 3.24   | -1.77711 | 4.68E-07 |
| 21.5  | 21.57  | 22.23  | 21.93  | 0.050845 | 0.741817 |
| 9.52  | 8.78   | 9.79   | 10.35  | -0.21592 | 0.109351 |
| 0.76  | 0.76   | 1.1    | 0.33   | -0.53774 | 0.224796 |
| 0.55  | 0.83   | 0.59   | 0.54   | 0.804392 | 0.092812 |
| 0     | 0.05   | 0.05   | 0      | NA       | NA       |
| 5.1   | 4.72   | 4.1    | 4.67   | 0.112133 | 0.64256  |
| 19.42 | 19.57  | 20.35  | 18.87  | -0.08283 | 0.553672 |
| 21.58 | 16.48  | 20.16  | 17.77  | -0.14568 | 0.483417 |
| 37.58 | 30.17  | 35.58  | 33.08  | -0.23232 | 0.033882 |
| 10.74 | 20.48  | 15.54  | 19.5   | 0.687585 | 8.94E-09 |
| 1.25  | 0.05   | 0.03   | 0.01   | -3.3293  | 3.80E-13 |
| 23.26 | 20.81  | 20.38  | 21.29  | -0.05874 | 0.666468 |
| 3.97  | 4.48   | 7.41   | 3.73   | -0.04012 | 0.886401 |
| 0.51  | 0.14   | 0.1    | 0.12   | -1.21351 | 0.034784 |
| 10.62 | 4.1    | 4.59   | 5.74   | -0.83671 | 7.07E-13 |
| 91.89 | 60.55  | 73.98  | 66.85  | -0.48687 | 5.35E-07 |
| 39.03 | 40.49  | 35.05  | 39.05  | 0.007599 | 0.966296 |
| 18.67 | 18.06  | 17.91  | 19.22  | -0.04947 | 0.759486 |
| 35.93 | 37.08  | 40.88  | 44.12  | 0.291531 | 0.000831 |
| 0     | 0      | 0      | 0      | NA       | NA       |
| 1.8   | 1.74   | 2.03   | 2.37   | 0.123009 | 0.599132 |
| 16.93 | 17.4   | 20.41  | 18.13  | 0.123726 | 0.483549 |
| 26.52 | 22.02  | 21.28  | 22.05  | -0.12005 | 0.306678 |
| 86.11 | 146.57 | 148.04 | 146.72 | 0.740065 | 2.82E-27 |
| 14.57 | 0.66   | 1.48   | 1.02   | -3.31829 | 4.69E-23 |
| 28.92 | 36.69  | 34.89  | 35.63  | 0.3825   | 0.000375 |
| 9.16  | 7.91   | 7.88   | 7.33   | -0.40448 | 0.003008 |
| 6.12  | 4.21   | 4.67   | 5.25   | -0.32852 | 0.096962 |
| 0     | 0      | 0      | 0      | NA       | NA       |
| 0     | 0      | 0      | 0      | NA       | NA       |
| 16.26 | 28.09  | 17.06  | 20     | 0.498961 | 0.038536 |
| 8.71  | 4.59   | 6.38   | 6.96   | -0.69982 | 5.19E-06 |
| 0.77  | 0.05   | 0.11   | 0.1    | -2.07625 | 3.01E-05 |
| 19.51 | 16.11  | 17.29  | 15.11  | -0.04943 | 0.719609 |
| 15.11 | 20.2   | 20.91  | 19.85  | 0.415699 | 4.16E-07 |
| 16.65 | 15.41  | 19.28  | 19.2   | 0.102941 | 0.390719 |
| 48.59 | 56.19  | 59.02  | 59.39  | 0.329035 | 0.000259 |
| 6.11  | 10.53  | 9.26   | 9.91   | 0.753859 | 1.13E-12 |
| 2.43  | 3.04   | 2.66   | 3.3    | 0.10054  | 0.787692 |
| 7.46  | 5.43   | 8.37   | 6.84   | 0.106701 | 0.575189 |
| 13.2  | 15     | 13.45  | 12.33  | 0.087321 | 0.588601 |

|        |        |       |        |          |          |
|--------|--------|-------|--------|----------|----------|
| 0.15   | 0.01   | 0.02  | 0.05   | -1.58736 | 0.004585 |
| 5.62   | 4.08   | 4.42  | 4.21   | -0.6076  | 0.000284 |
| 8.58   | 4.83   | 4.95  | 3      | -0.53326 | 0.046082 |
| 0      | 0      | 0     | 0      | NA       | NA       |
| 2.16   | 11.65  | 6.79  | 7.2    | 1.212847 | 5.19E-10 |
| 24.07  | 25.53  | 21.41 | 24.33  | -0.22047 | 0.101604 |
| 21.63  | 16.7   | 17.56 | 17.28  | -0.42305 | 2.31E-05 |
| 6.74   | 3.38   | 5.04  | 4.33   | -0.67635 | 2.69E-06 |
| 9.26   | 5.76   | 8.02  | 5.9    | -0.66796 | 1.19E-06 |
| 1.97   | 2.39   | 2.87  | 3.85   | 0.40755  | 0.101923 |
| 0.09   | 0.13   | 0.15  | 0.21   | 0.625712 | 0.361418 |
| 3.41   | 2.12   | 2.87  | 2.12   | -0.29095 | 0.125608 |
| 0      | 0      | 0     | 0      | NA       | NA       |
| 1.75   | 0.89   | 1.03  | 1.05   | -0.68867 | 0.021571 |
| 5.5    | 8.11   | 9.12  | 8.39   | 0.605863 | 0.00029  |
| 17.19  | 15.81  | 16.02 | 14.66  | -0.04747 | 0.805202 |
| 69.02  | 70.1   | 74.44 | 72.08  | 0.023518 | 0.875534 |
| 0.29   | 0.13   | 0.08  | 0.16   | -1.50075 | 0.002694 |
| 0.29   | 0.72   | 0.48  | 0.74   | 1.205039 | 0.050732 |
| 109.99 | 96.45  | 97.68 | 99.19  | -0.32473 | 3.90E-06 |
| 1.76   | 2.35   | 1.44  | 2.42   | -0.26081 | 0.439803 |
| 2.46   | 7.05   | 5.97  | 6.07   | 1.512974 | 1.93E-17 |
| 0      | 0      | 0     | 0      | NA       | NA       |
| 25.69  | 86.74  | 55.28 | 75.29  | 1.607612 | 1.46E-31 |
| 6.46   | 5.96   | 7.81  | 6.78   | 0.151323 | 0.425463 |
| 17.98  | 14.57  | 19.12 | 18.46  | -0.31343 | 0.000984 |
| 0.07   | 0.41   | 0.61  | 0.69   | 1.697401 | 0.000299 |
| 18.37  | 11.8   | 12.72 | 12.91  | -0.57486 | 1.14E-07 |
| 3.79   | 6.83   | 5.14  | 6.75   | 0.524348 | 0.007012 |
| 0      | 0      | 0     | 0      | NA       | NA       |
| 2.67   | 1.82   | 2.05  | 1.97   | -0.80091 | 1.90E-05 |
| 2.44   | 3.17   | 2.5   | 2.51   | -0.14723 | 0.587428 |
| 0      | 0.02   | 0.02  | 0      | NA       | NA       |
| 11.42  | 11.25  | 11.19 | 11     | -0.17036 | 0.380142 |
| 15.72  | 11.76  | 13.71 | 14.77  | -0.10203 | 0.592028 |
| 0.02   | 0      | 0     | 0.02   | NA       | NA       |
| 15.27  | 8.8    | 10.4  | 11.16  | -0.6439  | 2.17E-11 |
| 39.05  | 51.13  | 47.21 | 47.3   | 0.272337 | 0.001941 |
| 49.35  | 14.54  | 21.11 | 16.84  | -1.42578 | 5.63E-43 |
| 0.49   | 0.26   | 0.08  | 0.19   | -1.8401  | 6.99E-10 |
| 143.9  | 127.03 | 131.9 | 136.22 | -0.07597 | 0.394562 |
| 41.57  | 44.03  | 50.31 | 47.94  | 0.22311  | 0.032456 |
| 7.95   | 9.19   | 7.57  | 7.61   | 0.317555 | 0.010538 |
| 25.64  | 35.13  | 28.62 | 30.83  | 0.34303  | 0.000832 |
| 0.02   | 0.05   | 0.03  | 0      | NA       | NA       |

|       |       |       |       |          |          |
|-------|-------|-------|-------|----------|----------|
| 1.57  | 0.19  | 0.23  | 0.37  | -2.50303 | 5.44E-23 |
| 32.1  | 1.61  | 5.74  | 3.36  | -2.58721 | 1.96E-10 |
| 40.02 | 31.82 | 41.58 | 38.86 | -0.13044 | 0.420995 |
| 0.25  | 0.5   | 0.38  | 0.2   | -0.51219 | 0.205905 |
| 2.32  | 2.15  | 2.49  | 2.28  | -0.05926 | 0.850235 |
| 8.64  | 8.34  | 7.3   | 7.98  | -0.11464 | 0.595663 |
| 0.25  | 0.07  | 0.83  | 0.31  | -0.53744 | 0.383902 |
| 12.9  | 6.25  | 8.58  | 8.36  | -0.63363 | 0.001401 |
| 0     | 0     | 0.04  | 0     | NA       | NA       |
| 16.86 | 5.57  | 8.47  | 7.21  | -1.41289 | 7.70E-26 |
| 0     | 0     | 0.01  | 0     | NA       | NA       |
| 29.38 | 21.47 | 24.47 | 21.63 | -0.32621 | 0.002229 |
| 12.63 | 14.58 | 14.11 | 15.34 | 0.19195  | 0.079996 |
| 0     | 0     | 0     | 0     | NA       | NA       |
| 19.53 | 24.32 | 17.53 | 27.06 | 0.338632 | 0.001653 |
| 45.61 | 33.86 | 39.09 | 34.74 | -0.3182  | 0.003921 |
| 0     | 0     | 0     | 0.47  | NA       | NA       |
| 6.33  | 4.05  | 3.61  | 3.74  | -0.87181 | 1.84E-20 |
| 26.01 | 27.68 | 23.45 | 27.02 | -0.20246 | 0.045068 |
| 12.63 | 15.08 | 12.11 | 13.91 | -0.10752 | 0.590036 |
| 30.73 | 30.38 | 32.81 | 33.68 | 0.004392 | 0.977207 |
| 0     | 0     | 0     | 0     | NA       | NA       |
| 22.62 | 21.95 | 22.86 | 20.15 | -0.26261 | 0.00899  |
| 7.68  | 17.96 | 13.89 | 16.3  | 0.979155 | 1.29E-17 |
| 0     | 0     | 0     | 0     | NA       | NA       |
| 0.75  | 0.55  | 0.66  | 0.8   | 0.114582 | 0.823663 |
| 0     | 0.15  | 0.07  | 0     | NA       | NA       |
| 0     | 0.02  | 0.05  | 0.06  | NA       | NA       |
| 3.27  | 3.29  | 3.25  | 3.29  | -0.12338 | 0.473561 |
| 66.19 | 87.05 | 71.44 | 77.12 | 0.32935  | 0.000644 |
| 2.33  | 3.71  | 4.17  | 4.19  | 0.520084 | 0.002001 |
| 4.82  | 4.39  | 5.08  | 4.38  | -0.20038 | 0.327301 |
| 6.7   | 7.94  | 8.56  | 5.84  | -0.07979 | 0.741372 |
| 1.44  | 1.36  | 0.92  | 1.42  | -0.57224 | 0.011991 |
| 1.08  | 2.06  | 1.15  | 0.95  | 0.170142 | 0.718203 |
| 0     | 0     | 0     | 0.06  | NA       | NA       |
| 5.06  | 10.73 | 10.65 | 11.29 | 0.826426 | 1.09E-09 |
| 0     | 0     | 0     | 0     | NA       | NA       |
| 10.76 | 11.24 | 10.96 | 12.04 | 0.133657 | 0.472097 |
| 0     | 0     | 0     | 0     | NA       | NA       |
| 1.65  | 1.38  | 0.84  | 0.99  | -0.37845 | 0.301209 |
| 5.59  | 9.17  | 8.72  | 9.75  | 0.163723 | 0.350329 |
| 30.52 | 24.27 | 29.58 | 26.33 | -0.18953 | 0.17312  |
| 4.67  | 2.2   | 2.74  | 3.02  | -0.92517 | 2.04E-07 |
| 2.18  | 4.2   | 2.84  | 3.22  | 0.688587 | 0.000286 |

|        |        |        |        |          |           |
|--------|--------|--------|--------|----------|-----------|
| 66.03  | 38.79  | 54.02  | 49.3   | -0.39519 | 0.000237  |
| 29.32  | 32.71  | 38.38  | 37.33  | 0.022828 | 0.9065    |
| 20.76  | 13.62  | 17.23  | 16.46  | -0.48507 | 1.15E-05  |
| 1.09   | 0.25   | 0.46   | 0.69   | 0.003509 | 0.997073  |
| 9.34   | 8.05   | 6.76   | 8.03   | -0.34878 | 0.008581  |
| 17.71  | 23.13  | 24.27  | 27.85  | 0.461681 | 0.000124  |
| 0.14   | 0      | 0      | 0.1    | NA       | NA        |
| 0      | 0      | 0.1    | 0      | NA       | NA        |
| 17.03  | 13.21  | 16.32  | 14.71  | -0.19697 | 0.145311  |
| 2.84   | 2.38   | 3.21   | 2.73   | -0.16245 | 0.579114  |
| 0.02   | 0      | 0.15   | 0.02   | -0.88175 | 0.1665    |
| 4.92   | 29.24  | 21.15  | 25.68  | 2.268684 | 3.25E-71  |
| 22.74  | 20.22  | 24.32  | 23.54  | -0.21425 | 0.033298  |
| 0      | 0.05   | 0.02   | 0.05   | NA       | NA        |
| 0      | 0      | 0      | 0      | NA       | NA        |
| 0.15   | 0      | 0      | 0      | NA       | NA        |
| 13.26  | 15.57  | 15     | 14.46  | 0.215456 | 0.137335  |
| 0.21   | 0.17   | 0.42   | 0.23   | -0.90636 | 0.167589  |
| 11.84  | 6.65   | 12.1   | 8.59   | -0.20441 | 0.330897  |
| 5.47   | 8.67   | 7.42   | 6.22   | 0.284682 | 0.159249  |
| 3.36   | 3.5    | 3.42   | 4.57   | -0.14494 | 0.579435  |
| 105.65 | 91.05  | 101.88 | 88.83  | -0.05999 | 0.610153  |
| 0      | 0.22   | 0.26   | 0.23   | NA       | NA        |
| 19.89  | 118.78 | 87.38  | 99.15  | 2.261606 | 2.11E-101 |
| 13.47  | 10.04  | 11.13  | 11.7   | -0.33217 | 0.02151   |
| 1.06   | 0.18   | 0.2    | 0.12   | -2.12882 | 4.20E-09  |
| 1.51   | 0      | 0.07   | 0.05   | -2.95722 | 8.61E-09  |
| 11.98  | 90.98  | 59.47  | 76.07  | 2.424246 | 1.49E-66  |
| 2.99   | 8.08   | 6.55   | 7.59   | 1.095224 | 9.07E-12  |
| 4.79   | 4.52   | 5.13   | 6.1    | 0.096048 | 0.556392  |
| 338.86 | 71.36  | 129.92 | 111.15 | -1.49199 | 9.48E-09  |
| 0      | 0      | 0      | 0      | NA       | NA        |
| 14.37  | 10.93  | 13.33  | 10.1   | -0.20063 | 0.313063  |
| 1.21   | 0.57   | 2.06   | 0.65   | 0.412455 | 0.549989  |
| 10.93  | 8.47   | 6.84   | 8.83   | -0.56016 | 3.54E-05  |
| 0.41   | 0.28   | 0.52   | 0.36   | -0.50882 | 0.403249  |
| 0      | 0.04   | 0.05   | 0.04   | NA       | NA        |
| 1.14   | 1.21   | 0.85   | 1.22   | 0.258357 | 0.565434  |
| 1.24   | 17.27  | 6.66   | 11.83  | 2.455637 | 1.07E-10  |
| 12.5   | 12.43  | 18.62  | 15.11  | 0.156449 | 0.311407  |
| 7.48   | 8.25   | 8.89   | 7.96   | 0.02837  | 0.898651  |
| 7.69   | 7.43   | 8.11   | 6.98   | -0.23156 | 0.195741  |
| 4.05   | 4.33   | 3.34   | 3.07   | -0.13112 | 0.717625  |
| 27.92  | 10.59  | 12.43  | 11.27  | -1.15356 | 1.14E-16  |
| 18.98  | 21.78  | 21.35  | 20.5   | 0.103646 | 0.435374  |

|        |        |        |        |          |          |
|--------|--------|--------|--------|----------|----------|
| 21.82  | 15.99  | 18.24  | 17.24  | -0.37037 | 2.43E-05 |
| 6.43   | 7.03   | 5.29   | 7.87   | 0.207649 | 0.287743 |
| 0.12   | 0.39   | 0.24   | 0.34   | 1.080005 | 0.046931 |
| 0      | 0      | 0      | 0      | NA       | NA       |
| 6.22   | 11.24  | 10.78  | 9.95   | 0.796303 | 1.25E-11 |
| 4.41   | 6.53   | 6.17   | 6.15   | 0.39111  | 0.000785 |
| 2.05   | 1.01   | 0.98   | 1.16   | -0.97991 | 3.11E-05 |
| 10.19  | 20.54  | 15.21  | 18.11  | 0.831768 | 2.41E-13 |
| 0      | 0      | 0      | 0      | NA       | NA       |
| 2.42   | 1.65   | 1.48   | 1.74   | -0.51755 | 0.006776 |
| 7.68   | 6.11   | 8.49   | 7.97   | -0.20327 | 0.269288 |
| 0.45   | 0.31   | 0.05   | 0.22   | -0.32645 | 0.684151 |
| 0.4    | 0.17   | 0.1    | 0.05   | NA       | NA       |
| 18.76  | 21.83  | 16.93  | 19.61  | 0.025839 | 0.9065   |
| 0.11   | 0.27   | 0.23   | 0.19   | 0.318406 | 0.643327 |
| 0      | 0      | 0      | 0      | NA       | NA       |
| 7.89   | 4.34   | 6.14   | 5.54   | -0.44778 | 0.00439  |
| 0.05   | 0.43   | 0.03   | 0.21   | 1.008434 | 0.106385 |
| 0      | 0      | 0      | 0      | NA       | NA       |
| 12.08  | 16.49  | 15.75  | 16.98  | 0.157571 | 0.340505 |
| 4.02   | 5.08   | 4.05   | 4.23   | 0.068119 | 0.840815 |
| 0      | 0      | 0      | 0      | NA       | NA       |
| 41.02  | 33.87  | 36.23  | 37.09  | -0.15407 | 0.114067 |
| 0.46   | 1.48   | 0.71   | 0.86   | 0.960347 | 0.000761 |
| 7.72   | 10.36  | 10.94  | 10.86  | 0.287889 | 0.061413 |
| 23.54  | 26.84  | 29.25  | 29.93  | 0.157395 | 0.199496 |
| 49.35  | 34.55  | 37.56  | 36.23  | -0.33344 | 0.000121 |
| 0.9    | 0.14   | 0.12   | 0.21   | -0.7775  | 0.230908 |
| 0.49   | 1.95   | 1.51   | 2.09   | 1.063449 | 0.000406 |
| 14.75  | 10.59  | 12.35  | 14.2   | -0.45753 | 0.004505 |
| 31.26  | 31.01  | 29.51  | 30.96  | -0.05746 | 0.696062 |
| 19.81  | 27.44  | 25.75  | 23.36  | 0.207792 | 0.169958 |
| 52.65  | 39.67  | 43.15  | 38.11  | -0.54295 | 2.07E-09 |
| 222.41 | 224.28 | 236.89 | 232.29 | 0.025416 | 0.817247 |
| 16.63  | 17.9   | 16.87  | 17.03  | 0.028854 | 0.828345 |
| 0      | 0      | 0      | 0      | NA       | NA       |
| 11.45  | 11.89  | 11.43  | 10.29  | -0.0353  | 0.824304 |
| 0      | 0      | 0      | 1.36   | NA       | NA       |
| 2.77   | 5.14   | 3.86   | 4.77   | 0.666363 | 4.77E-06 |
| 2.48   | 2.04   | 2.39   | 2.24   | -0.09723 | 0.742983 |
| 3.88   | 3.55   | 2.32   | 3.32   | 0.067167 | 0.850555 |
| 84.53  | 69.42  | 72.83  | 66.06  | -0.26062 | 0.005859 |
| 12.31  | 11.36  | 10.51  | 14.41  | 0.151861 | 0.244891 |
| 7.13   | 7.83   | 7.39   | 7.93   | 0.183004 | 0.095454 |
| 0.8    | 0.25   | 0.28   | 0.17   | -0.64055 | 0.28947  |

|       |       |       |       |          |          |
|-------|-------|-------|-------|----------|----------|
| 5.2   | 6.22  | 5.02  | 6.52  | 0.027718 | 0.88917  |
| 8.32  | 9.38  | 9.16  | 7.94  | -0.04189 | 0.817702 |
| 9.19  | 11.84 | 10.33 | 10.86 | 0.196001 | 0.151718 |
| 3.26  | 5.57  | 4.97  | 5.24  | 1.101494 | 5.00E-08 |
| 26.24 | 17.18 | 20.96 | 20.72 | -0.20106 | 0.121589 |
| 1.8   | 0.25  | 0.44  | 0.4   | -1.9832  | 1.32E-12 |
| 0     | 0.28  | 0.02  | 0.04  | NA       | NA       |
| 9.26  | 10.34 | 10.36 | 9.81  | 0.140163 | 0.3249   |
| 0     | 0.01  | 0     | 0     | NA       | NA       |
| 0.13  | 0     | 0     | 0     | NA       | NA       |
| 35.54 | 24.6  | 29.85 | 24.59 | -0.3859  | 6.85E-05 |
| 0     | 0     | 0     | 0     | NA       | NA       |
| 0     | 0     | 0     | 0     | NA       | NA       |
| 2.73  | 3.36  | 3.16  | 2.71  | 0.195782 | 0.304364 |
| 3.59  | 3.3   | 5.76  | 5.76  | 0.291673 | 0.345685 |
| 1.1   | 1.31  | 0.97  | 1.15  | -0.16259 | 0.763465 |
| 32.01 | 34.45 | 31.24 | 31.9  | 0.057302 | 0.651351 |
| 0     | 0.06  | 0.01  | 0.24  | 0.38953  | 0.605399 |
| 0.8   | 0.84  | 0.39  | 0.49  | -0.06181 | 0.916659 |
| 2.08  | 1.22  | 1.71  | 1.62  | -0.82575 | 0.000442 |
| 0.2   | 0.1   | 0.16  | 0.13  | -0.19044 | 0.824096 |
| 10.3  | 8.95  | 9.96  | 10.9  | -0.14436 | 0.45229  |
| 0     | 0     | 0     | 0.04  | NA       | NA       |
| 3.94  | 3.03  | 5.57  | 3.97  | 0.389661 | 0.072419 |
| 0     | 0.25  | 0.06  | 0.36  | 0.914743 | 0.106638 |
| 0     | 0.01  | 0     | 0     | NA       | NA       |
| 9.48  | 11.68 | 10.6  | 11.3  | 0.110362 | 0.467753 |
| 42.03 | 14.96 | 20.1  | 18.21 | -1.10305 | 1.90E-25 |
| 5.32  | 5.28  | 4.18  | 6.24  | 0.069644 | 0.734119 |
| 0     | 0.61  | 0.05  | 0.04  | NA       | NA       |
| 2.58  | 1.68  | 2.1   | 1.79  | -0.23848 | 0.358717 |
| 0     | 0     | 0     | 0     | NA       | NA       |
| 23.23 | 12.53 | 13.28 | 11.76 | -0.76659 | 3.53E-08 |
| 5.89  | 6.37  | 6.36  | 5.24  | 0.216166 | 0.13018  |
| 0.12  | 0.03  | 0.23  | 0.15  | -0.00356 | 0.997047 |
| 0     | 0.08  | 0.05  | 0.03  | NA       | NA       |
| 24.48 | 27.16 | 26.91 | 26.78 | 0.006207 | 0.966556 |
| 2.79  | 1.68  | 2.09  | 1.74  | -0.93524 | 5.55E-06 |
| 2.03  | 3.41  | 2.36  | 2.61  | 0.505824 | 0.047932 |
| 0.01  | 0.1   | 0.05  | 0.08  | NA       | NA       |
| 0.01  | 0.19  | 0.15  | 0.2   | 2.01694  | 0.00023  |
| 0.56  | 0     | 0     | 0.04  | -3.32751 | 2.88E-11 |
| 5.42  | 4.69  | 4.61  | 4.55  | 0.056847 | 0.874956 |
| 0.13  | 0.04  | 0.03  | 0.13  | -0.13008 | 0.88462  |
| 4.92  | 3.58  | 3.89  | 2.78  | 0.048211 | 0.875208 |



|        |        |        |        |          |          |
|--------|--------|--------|--------|----------|----------|
| 31.74  | 13.15  | 15.44  | 13.7   | -1.28658 | 2.79E-24 |
| 0.45   | 0.27   | 0.09   | 0.26   | -0.68936 | 0.294435 |
| 0      | 0      | 0      | 0      | NA       | NA       |
| 0.01   | 0      | 0.03   | 0.13   | 0.37509  | 0.616969 |
| 103.93 | 57.04  | 59.67  | 58.81  | -0.6722  | 1.21E-17 |
| 0      | 0.01   | 0.01   | 0.01   | NA       | NA       |
| 7.63   | 7      | 6.74   | 7.79   | 0.104028 | 0.646745 |
| 176.56 | 141.27 | 144.25 | 155.74 | -0.26026 | 0.001348 |
| 0      | 0      | 0.03   | 0      | NA       | NA       |
| 7.8    | 8.34   | 8.69   | 7.75   | 0.16269  | 0.369321 |
| 14.84  | 22.19  | 17.85  | 20.35  | 0.315619 | 0.009993 |
| 12.71  | 24.26  | 20.42  | 21.68  | 0.562602 | 1.80E-08 |
| 0.02   | 0.15   | 0.09   | 0.12   | NA       | NA       |
| 12.15  | 13.27  | 12.68  | 13.64  | 0.080017 | 0.626917 |
| 49.18  | 36.43  | 39.81  | 43.09  | -0.25962 | 0.004491 |
| 6.93   | 5.98   | 6.14   | 5.67   | -0.09822 | 0.658595 |
| 600.6  | 643.96 | 624.36 | 618.93 | -0.07687 | 0.456633 |
| 8.55   | 8.74   | 7.64   | 8.77   | 0.029055 | 0.878589 |
| 0      | 0      | 0      | 0      | NA       | NA       |
| 0.48   | 0.14   | 0.18   | 0.22   | -0.29514 | 0.595673 |
| 2.37   | 2.4    | 2.65   | 3.46   | -0.12853 | 0.781272 |
| 0.03   | 0.22   | 0.02   | 0.02   | NA       | NA       |
| 232.74 | 270.11 | 234.49 | 257.46 | 0.198483 | 0.054711 |
| 0      | 0      | 0      | 0      | NA       | NA       |
| 1.31   | 0.89   | 1.21   | 0.87   | -0.3948  | 0.333214 |
| 28.73  | 30.84  | 32.26  | 30.04  | 0.35174  | 0.000389 |
| 28.53  | 46.92  | 38.76  | 39.45  | 0.277275 | 0.061286 |
| 213.58 | 185.21 | 194.97 | 191.03 | -0.14361 | 0.122751 |
| 7.94   | 7.64   | 7.54   | 6.52   | -0.04618 | 0.791573 |
| 0.09   | 0.23   | 0.22   | 0.06   | -0.54644 | 0.293318 |
| 3.47   | 3.5    | 3.87   | 3.45   | -0.16348 | 0.373934 |
| 7.01   | 13.64  | 7.88   | 10.49  | 0.490369 | 0.002051 |
| 31.23  | 35.47  | 32.17  | 35.65  | 0.10043  | 0.466968 |
| 47.48  | 40.84  | 43.64  | 39.76  | -0.15368 | 0.254064 |
| 15.44  | 17.62  | 15.91  | 17.53  | 0.245454 | 0.035086 |
| 0.15   | 0.14   | 0      | 0.15   | NA       | NA       |
| 57.8   | 38.99  | 38.53  | 35.22  | -0.59838 | 1.36E-08 |
| 0.14   | 4.48   | 0.38   | 1.89   | 1.444379 | 0.012213 |
| 12.64  | 13.58  | 12.35  | 15.41  | -0.20671 | 0.085511 |
| 5.13   | 3.09   | 2.28   | 2.57   | -0.7174  | 6.49E-06 |
| 194.78 | 158.29 | 166.06 | 159.25 | -0.30295 | 4.46E-05 |
| 30.36  | 28.86  | 32.95  | 28.96  | -0.14604 | 0.299656 |
| 9.24   | 8.36   | 6.74   | 7.55   | -0.09969 | 0.478308 |
| 7.13   | 4.99   | 7.6    | 7.18   | -0.36973 | 0.132256 |
| 53.09  | 46.69  | 45.49  | 42.63  | -0.172   | 0.091082 |

|        |        |        |        |          |          |
|--------|--------|--------|--------|----------|----------|
| 0.49   | 1.23   | 1.18   | 1.56   | 1.240375 | 0.000105 |
| 2.64   | 6.01   | 4.7    | 5.4    | 0.905041 | 4.32E-10 |
| 306.94 | 239.01 | 324.1  | 303.5  | -0.03038 | 0.854111 |
| 6.63   | 8.38   | 9.94   | 12.2   | 0.498605 | 1.76E-08 |
| 7.83   | 5.76   | 7.19   | 6.34   | -0.27496 | 0.058993 |
| 3.81   | 2.52   | 2.61   | 2.27   | -0.34419 | 0.242246 |
| 8.65   | 12.62  | 9.74   | 13.55  | 0.341638 | 0.017914 |
| 1.37   | 0.96   | 1.18   | 0.84   | -0.6972  | 0.088281 |
| 14.27  | 9.13   | 10.95  | 10.8   | -0.45624 | 0.000519 |
| 35.81  | 22.3   | 26.45  | 26.91  | -0.57419 | 2.40E-09 |
| 0.24   | 1.22   | 0.76   | 1.09   | 1.763872 | 6.45E-05 |
| 0.1    | 0.11   | 0.16   | 0.07   | NA       | NA       |
| 5.91   | 4.76   | 3.45   | 3.25   | 0.061157 | 0.871669 |
| 9.27   | 10.94  | 10.99  | 11.64  | 0.069782 | 0.707392 |
| 0      | 0      | 0      | 0      | NA       | NA       |
| 4.15   | 0.59   | 1.2    | 1.2    | -1.69119 | 4.38E-14 |
| 0      | 0      | 0      | 0      | NA       | NA       |
| 1.97   | 1.12   | 1.66   | 1.33   | -0.21518 | 0.581211 |
| 32.16  | 38.52  | 33.22  | 34.01  | 0.088564 | 0.52485  |
| 0      | 0      | 0.05   | 0.07   | NA       | NA       |
| 0      | 0      | 0      | 0      | NA       | NA       |
| 2.51   | 3.74   | 3.67   | 4.36   | 0.587711 | 0.010923 |
| 0.07   | 0.65   | 0.14   | 0.32   | 1.619404 | 0.005803 |
| 11.9   | 15.6   | 15.23  | 15.22  | 0.091067 | 0.496155 |
| 0.14   | 0      | 0      | 0      | NA       | NA       |
| 3.55   | 2.56   | 3.21   | 2.37   | -0.2142  | 0.409054 |
| 17.46  | 68.04  | 41.94  | 55.45  | 1.56653  | 1.78E-32 |
| 0.06   | 0      | 0.1    | 0      | NA       | NA       |
| 0.25   | 0.23   | 0.55   | 0.38   | 0.41348  | 0.364236 |
| 2.64   | 2.93   | 2.92   | 1.95   | 0.146314 | 0.642035 |
| 3.27   | 3.34   | 3.28   | 3.64   | -0.07638 | 0.787231 |
| 90.13  | 77.23  | 73.01  | 77.89  | -0.31442 | 0.000198 |
| 3.85   | 5.35   | 6.16   | 5.03   | 0.141709 | 0.441316 |
| 31.69  | 30.15  | 28.5   | 29.45  | -0.08241 | 0.493413 |
| 0      | 0      | 0      | 0      | NA       | NA       |
| 0.01   | 0.42   | 0.25   | 0.07   | 0.206406 | 0.810333 |
| 33.73  | 86.36  | 74.28  | 81.17  | 1.167774 | 4.52E-42 |
| 80.77  | 81.39  | 78     | 77.76  | 0.017528 | 0.876492 |
| 13.23  | 10.22  | 10.81  | 10.26  | -0.3624  | 0.000809 |
| 7.18   | 11.01  | 8.47   | 11.89  | 0.663371 | 1.55E-05 |
| 0.04   | 0.03   | 0.03   | 0.08   | NA       | NA       |
| 107.86 | 119.77 | 124.84 | 112.39 | 0.061453 | 0.591325 |
| 0      | 0      | 0      | 0      | NA       | NA       |
| 27.25  | 26.35  | 24.68  | 25.92  | -0.12343 | 0.265038 |
| 16.87  | 17.48  | 17.03  | 15.62  | -0.08064 | 0.613921 |

|         |        |         |        |          |          |
|---------|--------|---------|--------|----------|----------|
| 0       | 0      | 0       | 0.16   | NA       | NA       |
| 0.34    | 0.92   | 0.66    | 0.68   | 1.930167 | 2.87E-06 |
| 51.8    | 30.82  | 36.4    | 33.13  | -0.71097 | 3.04E-14 |
| 24.59   | 33.9   | 28.24   | 31.69  | 0.255267 | 0.030733 |
| 4.81    | 5.17   | 6.49    | 6.36   | 0.361555 | 0.018551 |
| 12.31   | 15.83  | 12.89   | 13.21  | -0.07091 | 0.661653 |
| 36.01   | 30.84  | 31.31   | 32.8   | -0.23196 | 0.019177 |
| 60.47   | 58.1   | 51.16   | 51.44  | -0.09203 | 0.455955 |
| 9.02    | 12.26  | 12.82   | 10.11  | 0.405757 | 0.005523 |
| 0       | 0      | 0       | 0      | NA       | NA       |
| 28.27   | 22.69  | 23.46   | 22.85  | -0.26708 | 0.008966 |
| 0.5     | 0.18   | 0.09    | 0.14   | -0.44698 | 0.506437 |
| 0       | 0      | 0       | 0      | NA       | NA       |
| 0.2     | 0.01   | 0.01    | 0.02   | -0.98237 | 0.10619  |
| 14.27   | 13.74  | 15.14   | 14.83  | -0.01345 | 0.937243 |
| 5.58    | 3.66   | 4.42    | 4.24   | -0.40636 | 0.045149 |
| 0       | 0.02   | 0.01    | 0.04   | NA       | NA       |
| 0       | 0      | 0       | 0      | NA       | NA       |
| 3.3     | 3.45   | 4.11    | 3.87   | 0.119998 | 0.320877 |
| 0.12    | 0.22   | 0.73    | 0.17   | 0.028858 | 0.975638 |
| 12.87   | 14.76  | 14.11   | 12.18  | 0.086651 | 0.626917 |
| 7.63    | 11.87  | 8.69    | 9.2    | 0.160557 | 0.261921 |
| 5.34    | 10.24  | 8.72    | 10.51  | 0.573161 | 0.000389 |
| 11.11   | 24.46  | 22.54   | 23.38  | 0.962834 | 6.17E-21 |
| 0.27    | 1.06   | 0.88    | 0.57   | 1.333664 | 8.85E-05 |
| 1.11    | 0.9    | 1.29    | 0.89   | -0.42101 | 0.451928 |
| 10.21   | 9.13   | 9.75    | 7.28   | -0.38088 | 0.046311 |
| 22.98   | 23.77  | 26.62   | 26.5   | 0.171279 | 0.20522  |
| 0.21    | 0      | 0       | 0      | NA       | NA       |
| 235.06  | 170.48 | 272.81  | 222.49 | -0.01532 | 0.944131 |
| 20      | 21.2   | 22.69   | 17.76  | 0.11272  | 0.556567 |
| 71.25   | 82.37  | 78.08   | 77.59  | 0.126621 | 0.162348 |
| 47.44   | 54.37  | 53.82   | 54.99  | 0.149064 | 0.069206 |
| 58.76   | 90.02  | 79.21   | 83.8   | 0.571154 | 1.60E-12 |
| 10.97   | 10.36  | 10.05   | 10.54  | -0.22744 | 0.025362 |
| 8.06    | 9.17   | 8.21    | 10.51  | 0.068172 | 0.711017 |
| 0       | 0      | 0       | 0      | NA       | NA       |
| 3.4     | 4.65   | 4.98    | 5.49   | 0.20889  | 0.422604 |
| 0       | 0      | 0       | 0      | NA       | NA       |
| 33.02   | 33.83  | 31.83   | 31.83  | -0.07238 | 0.589609 |
| 0       | 0      | 0       | 0      | NA       | NA       |
| 4.88    | 6.62   | 6.91    | 6.85   | 0.185405 | 0.332545 |
| 1227.55 | 972.91 | 1019.56 | 986.83 | -0.4078  | 5.21E-09 |
| 77.42   | 84.93  | 81.75   | 84.43  | -0.02035 | 0.900284 |
| 15.5    | 18.42  | 15.41   | 18.78  | 0.143479 | 0.169106 |

|       |       |       |       |          |          |
|-------|-------|-------|-------|----------|----------|
| 1.76  | 2.04  | 1.83  | 2.39  | -0.16031 | 0.626917 |
| 34.89 | 34.85 | 31.74 | 35.56 | -0.13411 | 0.271266 |
| 61.7  | 69.3  | 65.97 | 68.22 | 0.037647 | 0.80335  |
| 27.34 | 31.41 | 31.91 | 32.78 | 0.185871 | 0.067648 |
| 9.36  | 5.75  | 9.04  | 6.87  | -0.17918 | 0.356967 |
| 5.88  | 5.45  | 4.62  | 5.3   | -0.25455 | 0.181298 |
| 26.29 | 30.25 | 25.15 | 30.27 | -0.00782 | 0.957971 |
| 0     | 0     | 0     | 0     | NA       | NA       |
| 24.88 | 24.03 | 23.27 | 24.91 | -0.04321 | 0.797417 |
| 4.45  | 6.83  | 5.46  | 5.8   | 0.207723 | 0.190886 |
| 3.88  | 3.06  | 5.09  | 2.75  | -0.46329 | 0.06987  |
| 0     | 0     | 0     | 0     | NA       | NA       |
| 15.06 | 61.31 | 46.03 | 58.46 | 1.734837 | 1.72E-39 |
| 15.68 | 14.88 | 15.57 | 15.79 | -0.00156 | 0.994947 |
| 6.64  | 6.3   | 6.09  | 6.74  | -0.14864 | 0.3249   |
| 0.14  | 0     | 0.21  | 0.33  | NA       | NA       |
| 0     | 0     | 0     | 0     | NA       | NA       |
| 7.48  | 6.91  | 6.65  | 6.42  | 0.033401 | 0.872579 |
| 26.25 | 25.32 | 27.26 | 27.6  | -0.08986 | 0.530145 |
| 6.68  | 9.87  | 9.29  | 11.32 | 0.376242 | 0.04403  |
| 0     | 0     | 0     | 0     | NA       | NA       |
| 5.55  | 4.86  | 5.4   | 5.05  | -0.07044 | 0.787231 |
| 0     | 0     | 0     | 0     | NA       | NA       |
| 9.07  | 4.53  | 8.06  | 5.82  | -0.4483  | 0.025316 |
| 0     | 0     | 0     | 0     | NA       | NA       |
| 6.69  | 5.69  | 5.86  | 6.17  | -0.27117 | 0.085207 |
| 17.58 | 21.84 | 18.65 | 17.29 | 0.197039 | 0.203888 |
| 11.27 | 6.45  | 8.33  | 5.84  | -0.12008 | 0.366495 |
| 0     | 0     | 0     | 0     | NA       | NA       |
| 16.55 | 16    | 15.48 | 16.02 | -0.31049 | 0.001702 |
| 75.69 | 60.38 | 63.04 | 62.4  | -0.23909 | 0.012597 |
| 0     | 0     | 0     | 0     | NA       | NA       |
| 0.31  | 0.32  | 0.47  | 0.43  | 0.409882 | 0.558353 |
| 17.93 | 14.97 | 16.8  | 16.28 | -0.18811 | 0.19949  |
| 10.86 | 10.44 | 9.44  | 10.3  | -0.13904 | 0.267268 |
| 0.07  | 0.08  | 0.04  | 0.08  | -0.10923 | 0.903611 |
| 0     | 0.14  | 0     | 0     | NA       | NA       |
| 0.55  | 0.65  | 0.72  | 0.49  | -0.08562 | 0.88983  |
| 53.18 | 51.63 | 58.63 | 62.43 | -0.00249 | 0.986402 |
| 36.6  | 62.1  | 53.49 | 57.46 | 0.447398 | 6.14E-05 |
| 90.29 | 93.01 | 87.33 | 91.35 | -0.01437 | 0.904541 |
| 0     | 0     | 0     | 0     | NA       | NA       |
| 8.98  | 7.56  | 5.98  | 7.17  | -0.07948 | 0.668133 |
| 12.79 | 19.39 | 17.43 | 18.94 | 0.429483 | 0.006269 |
| 34    | 38.11 | 37.81 | 45.66 | 0.178355 | 0.08638  |

|        |        |        |        |          |          |
|--------|--------|--------|--------|----------|----------|
| 0.68   | 0.8    | 0.82   | 1.01   | 0.461369 | 0.16179  |
| 23.55  | 22.8   | 21.45  | 18.15  | 0.041703 | 0.768326 |
| 3.82   | 1.91   | 2.78   | 2.61   | -0.88459 | 0.000828 |
| 14.68  | 11.67  | 10.24  | 12.25  | -0.46767 | 0.004279 |
| 0.68   | 0.15   | 0.23   | 0.77   | -0.11812 | 0.844022 |
| 37.46  | 50.75  | 46.36  | 48.87  | 0.296493 | 0.000404 |
| 9.1    | 15.23  | 12.51  | 15.9   | 0.838995 | 1.68E-09 |
| 12.88  | 9.24   | 12.17  | 12.48  | -0.04832 | 0.876755 |
| 27.33  | 29.87  | 29.39  | 28.03  | 0.119623 | 0.31894  |
| 0      | 0      | 0      | 0      | NA       | NA       |
| 0.04   | 0      | 0      | 0      | NA       | NA       |
| 0      | 0      | 0      | 0      | NA       | NA       |
| 0.05   | 0      | 0.04   | 0      | NA       | NA       |
| 2.2    | 2.13   | 2.07   | 2.4    | -0.17738 | 0.415861 |
| 4.36   | 7.11   | 5.57   | 6.47   | 0.426846 | 0.002336 |
| 21.95  | 12.05  | 17.1   | 15.81  | -0.70609 | 2.13E-08 |
| 27.88  | 21.55  | 28.28  | 27.71  | -0.04619 | 0.800219 |
| 0.41   | 0.3    | 0.45   | 0.39   | -0.85319 | 0.027881 |
| 10.77  | 15.42  | 13.69  | 17.08  | 0.48247  | 0.000826 |
| 10.87  | 12.07  | 9.64   | 12.42  | 0.010682 | 0.957971 |
| 27.22  | 32.95  | 36.37  | 34.04  | 0.002941 | 0.986402 |
| 113.5  | 18.04  | 54.13  | 23.52  | -1.56158 | 9.21E-05 |
| 7.59   | 4.67   | 6.45   | 5.98   | -0.60724 | 0.000917 |
| 0.03   | 0.04   | 0.04   | 0.1    | -0.4021  | 0.597269 |
| 0.37   | 0.27   | 0.4    | 0.12   | -0.72413 | 0.19126  |
| 2.42   | 3.43   | 3.2    | 3.24   | 0.10572  | 0.73659  |
| 25.25  | 16.34  | 17.4   | 17.81  | -0.47098 | 1.72E-07 |
| 66.75  | 59.25  | 66.54  | 65.57  | -0.25239 | 0.027506 |
| 0.39   | 0.67   | 0.33   | 0.67   | 0.059118 | 0.947581 |
| 0      | 0      | 0      | 0      | NA       | NA       |
| 24.35  | 13.78  | 20.69  | 17.22  | -0.61361 | 1.05E-05 |
| 1.62   | 2.01   | 2.48   | 2.18   | 0.033717 | 0.944571 |
| 119.28 | 120.58 | 124.66 | 119.6  | -0.08434 | 0.430415 |
| 0.45   | 0.17   | 0.22   | 0.19   | -1.43125 | 0.008615 |
| 124.35 | 159.03 | 176.65 | 173.83 | 0.335754 | 0.000223 |
| 0.07   | 0.06   | 0.05   | 0.06   | -0.13644 | 0.87881  |
| 3.83   | 1.92   | 1.69   | 1.78   | -0.74148 | 0.000913 |
| 6.75   | 4.84   | 6.6    | 5.37   | -0.35999 | 0.091285 |
| 24.5   | 25.63  | 28.18  | 26.24  | 0.006346 | 0.972634 |
| 59.05  | 52.44  | 49.48  | 51     | -0.09447 | 0.412954 |
| 59.73  | 61.84  | 65.45  | 57.25  | -0.05678 | 0.754076 |
| 21.49  | 18.86  | 22.65  | 19.19  | -0.09615 | 0.440549 |
| 12.5   | 12.35  | 13.65  | 12.65  | -0.03612 | 0.860153 |
| 24.55  | 39.39  | 31.31  | 38.66  | 0.534606 | 5.03E-07 |
| 4.75   | 7.37   | 5.7    | 6.78   | 0.389326 | 0.00419  |

|        |        |        |        |          |          |
|--------|--------|--------|--------|----------|----------|
| 13.48  | 12.51  | 13.92  | 14     | 0.23878  | 0.029184 |
| 8.92   | 10.83  | 10.99  | 12.14  | 0.383953 | 0.002681 |
| 2.61   | 2.6    | 2.31   | 2.62   | 0.006926 | 0.986595 |
| 25.18  | 12.51  | 12.81  | 15.35  | -1.01462 | 7.95E-19 |
| 0.15   | 0.02   | 0.04   | 0.07   | -0.08255 | 0.930993 |
| 3.19   | 2.93   | 3.25   | 3.32   | -0.0818  | 0.751428 |
| 0      | 0      | 0      | 0      | NA       | NA       |
| 34.08  | 38.3   | 41.26  | 42.14  | 0.046228 | 0.717625 |
| 7.81   | 7.54   | 8.55   | 8.08   | -0.15183 | 0.367443 |
| 0.03   | 0.02   | 0.13   | 0.11   | 0.056723 | 0.950733 |
| 31.87  | 30.6   | 30.18  | 26.83  | -0.13057 | 0.227187 |
| 0.09   | 0.06   | 0.01   | 0.09   | 0.495214 | 0.499873 |
| 4.48   | 4.61   | 5.72   | 5.27   | 0.058735 | 0.860392 |
| 28.96  | 30.67  | 31.41  | 30.05  | -0.03858 | 0.776968 |
| 31.04  | 32.44  | 33.84  | 37.06  | 0.028425 | 0.852157 |
| 1.1    | 2.32   | 3.4    | 2.89   | 1.1847   | 4.78E-10 |
| 4.33   | 6.61   | 7.06   | 7.48   | 0.48293  | 0.000322 |
| 0.13   | 0.12   | 0.45   | 0.22   | 0.347405 | 0.660689 |
| 0      | 0      | 0      | 0      | NA       | NA       |
| 2.03   | 3.46   | 2.86   | 3.28   | 0.542293 | 0.056517 |
| 15.17  | 25.35  | 23.35  | 21.77  | 0.461976 | 4.08E-05 |
| 27.54  | 21.95  | 24.41  | 22.01  | -0.32539 | 0.009158 |
| 13.6   | 13.72  | 14.86  | 14.3   | -0.03068 | 0.841078 |
| 20.37  | 13.01  | 16.92  | 17.5   | -0.65214 | 1.12E-10 |
| 0.18   | 0.19   | 0.12   | 0.11   | NA       | NA       |
| 30.14  | 43.27  | 36.36  | 34.47  | 0.267081 | 0.079393 |
| 0      | 0      | 0      | 0      | NA       | NA       |
| 0      | 0      | 0      | 0      | NA       | NA       |
| 0.09   | 0.15   | 0.2    | 0.33   | 0.934852 | 0.120512 |
| 799.05 | 929.88 | 839.66 | 861.23 | 0.062507 | 0.538851 |
| 220.17 | 284.44 | 286.19 | 287.69 | 0.245903 | 0.001654 |
| 41.64  | 48.81  | 49.03  | 49.91  | 0.280244 | 0.020821 |
| 0.92   | 1.63   | 1.1    | 2.18   | 0.610273 | 0.037967 |
| 0.83   | 0.89   | 0.92   | 1.07   | -0.03522 | 0.959017 |
| 10.14  | 16.77  | 16.25  | 17.11  | 0.482557 | 0.000241 |
| 15.67  | 16.45  | 17.36  | 17.71  | -0.14105 | 0.215995 |
| 9.26   | 14.15  | 11.53  | 13.53  | 0.173795 | 0.34086  |
| 37.79  | 38.42  | 33.44  | 39.12  | -0.00871 | 0.948824 |
| 8.99   | 9.67   | 9.65   | 9.82   | -0.03175 | 0.910474 |
| 0.01   | 0.96   | 0.35   | 0.63   | 1.529954 | 0.005721 |
| 0      | 0.04   | 0      | 0      | NA       | NA       |
| 1.51   | 2.09   | 1.86   | 2.09   | 0.301741 | 0.132392 |
| 75.97  | 75.81  | 92.16  | 84.5   | 0.009041 | 0.953655 |
| 2.2    | 2.92   | 2.52   | 2.63   | 0.236972 | 0.100261 |
| 0      | 0      | 0.06   | 0      | NA       | NA       |

|         |        |        |        |          |          |
|---------|--------|--------|--------|----------|----------|
| 26.61   | 26.88  | 30.84  | 28.98  | -0.00935 | 0.966311 |
| 0       | 0      | 0      | 0      | NA       | NA       |
| 0.05    | 0      | 0      | 0      | NA       | NA       |
| 42.19   | 38.87  | 42.3   | 41.96  | -0.10677 | 0.3076   |
| 6.8     | 6.47   | 7.66   | 8.28   | 0.168079 | 0.42978  |
| 12.12   | 18.47  | 14.36  | 17.25  | 0.351834 | 0.000971 |
| 0       | 0      | 0      | 0      | NA       | NA       |
| 9.29    | 8.37   | 7.85   | 8.52   | -0.24266 | 0.102614 |
| 8.21    | 6.29   | 8.06   | 7.37   | -0.31275 | 0.185456 |
| 0.62    | 0.78   | 1.14   | 1.38   | 0.05725  | 0.877875 |
| 12.14   | 10.55  | 12.66  | 10.08  | -0.12787 | 0.524974 |
| 931.02  | 265.99 | 480.84 | 456.46 | -1.24132 | 1.35E-06 |
| 5.76    | 3.1    | 2.83   | 4.38   | -0.97281 | 3.22E-10 |
| 0       | 0      | 0.02   | 0.01   | NA       | NA       |
| 851.23  | 410.29 | 433.77 | 435.31 | -1.03959 | 1.37E-57 |
| 0       | 0      | 0      | 0      | NA       | NA       |
| 13.39   | 25.06  | 22.73  | 27.85  | 0.856388 | 2.68E-19 |
| 113.77  | 100.45 | 114.25 | 106.97 | -0.15432 | 0.147961 |
| 1130.38 | 744.14 | 748.96 | 779.58 | -0.61195 | 5.04E-22 |
| 0       | 0      | 0      | 0.06   | NA       | NA       |
| 0       | 0      | 0      | 0      | NA       | NA       |
| 0       | 0.06   | 0.03   | 0.06   | NA       | NA       |
| 33.69   | 55.47  | 46.16  | 48.96  | 0.472376 | 5.98E-06 |
| 11.93   | 14.6   | 13.84  | 12.85  | 0.28877  | 0.04109  |
| 619.51  | 635.88 | 649.21 | 666.66 | 0.046792 | 0.605614 |
| 6.24    | 3.54   | 3.19   | 2.79   | -0.5997  | 2.31E-06 |
| 3.48    | 3.47   | 3.57   | 3.43   | -0.05383 | 0.720173 |
| 49.32   | 62.42  | 62.91  | 63.22  | 0.213073 | 0.0203   |
| 0.07    | 3.77   | 1.37   | 1.81   | 2.617405 | 2.72E-08 |
| 278.57  | 355.11 | 365.35 | 347.73 | 0.302776 | 5.72E-05 |
| 37      | 30.53  | 27.93  | 27.43  | -0.32366 | 0.001032 |
| 0.24    | 0.08   | 0.32   | 0.15   | -0.2578  | 0.748426 |
| 0.05    | 0      | 0.07   | 0.05   | 0.100362 | 0.912317 |
| 8.38    | 10.65  | 11.36  | 13.44  | 0.044787 | 0.899594 |
| 0       | 0      | 0      | 0      | NA       | NA       |
| 13.09   | 8.98   | 8.48   | 9.74   | -0.59575 | 2.37E-05 |
| 15.64   | 17.92  | 17.3   | 23.55  | 0.447519 | 0.000954 |
| 0       | 0      | 0      | 0      | NA       | NA       |
| 21.96   | 24.21  | 21.91  | 24.43  | 0.094972 | 0.483584 |
| 8.48    | 9.09   | 8.48   | 10.14  | 0.267138 | 0.101952 |
| 0.06    | 0.25   | 0.12   | 0.3    | 0.308377 | 0.675345 |
| 17.14   | 18.69  | 15.71  | 18.28  | 0.099221 | 0.576938 |
| 0.05    | 0.16   | 0.15   | 0.11   | 1.015368 | 0.110544 |
| 3.25    | 3.63   | 3.8    | 3.91   | 0.320999 | 0.013672 |
| 7.51    | 9.02   | 9.43   | 7.83   | 0.107212 | 0.605564 |

|         |         |         |         |          |          |
|---------|---------|---------|---------|----------|----------|
| 9.21    | 8.51    | 7.63    | 9.66    | 0.051901 | 0.85721  |
| 0       | 0       | 0       | 0       | NA       | NA       |
| 22.55   | 22.02   | 21.22   | 22.48   | -0.1628  | 0.13942  |
| 9.86    | 5.85    | 6.8     | 6.55    | -0.62477 | 6.48E-07 |
| 0       | 0       | 0       | 0       | NA       | NA       |
| 0.58    | 0.11    | 0.28    | 0.51    | -0.57677 | 0.408031 |
| 71.49   | 84.91   | 74.89   | 76.8    | 0.076811 | 0.578108 |
| 0       | 0       | 0       | 0       | NA       | NA       |
| 0.02    | 0.1     | 0.13    | 0.07    | 0.295445 | 0.715789 |
| 0       | 0       | 0       | 0       | NA       | NA       |
| 0       | 0       | 0       | 0       | NA       | NA       |
| 3.71    | 1.85    | 3.45    | 2.24    | 0.128093 | 0.694087 |
| 0.5     | 0.37    | 0.26    | 0.21    | -0.02706 | 0.977207 |
| 1411.32 | 1583.69 | 1433.75 | 1381.41 | 0.002402 | 0.986644 |
| 0       | 0       | 0       | 0       | NA       | NA       |
| 0       | 0       | 0       | 0       | NA       | NA       |
| 1552.76 | 1411.19 | 1564    | 1377.16 | -0.18041 | 0.023273 |
| 1.87    | 1.67    | 1.56    | 1.44    | -0.4778  | 0.159808 |
| 29.94   | 34.12   | 30.71   | 33.46   | 0.125375 | 0.400736 |
| 0.07    | 0.09    | 0.15    | 0.13    | 0.676155 | 0.334022 |
| 93.49   | 160.65  | 121.28  | 134.08  | 0.470169 | 3.58E-06 |
| 2.64    | 2.45    | 2.61    | 2.97    | -0.11234 | 0.63063  |
| 4.4     | 2.41    | 4.38    | 4.12    | -0.61289 | 0.010967 |
| 38.84   | 25.96   | 30.82   | 33.7    | -0.48574 | 2.28E-09 |
| 0       | 0       | 0.1     | 0       | NA       | NA       |
| 0.04    | 0.08    | 0.09    | 0.06    | 0.255949 | 0.75719  |
| 0.02    | 0       | 0.08    | 0.11    | NA       | NA       |
| 0       | 0.11    | 0.11    | 0.06    | NA       | NA       |
| 0       | 0       | 0       | 0       | NA       | NA       |
| 0.05    | 0.12    | 0.1     | 0.06    | NA       | NA       |
| 0.02    | 0       | 0.03    | 0       | NA       | NA       |
| 6.71    | 7.95    | 6.75    | 9.2     | 0.16366  | 0.284819 |
| 5.09    | 7.31    | 7.38    | 8.45    | 0.383328 | 0.029618 |
| 7.4     | 11.14   | 10.37   | 10.48   | 0.52851  | 0.000117 |
| 6.92    | 7.82    | 8.47    | 8.61    | 0.007364 | 0.977246 |
| 79.51   | 76.95   | 84.7    | 78.65   | -0.03575 | 0.780318 |
| 0       | 0.05    | 0.01    | 0.03    | NA       | NA       |
| 213.35  | 431.83  | 438.67  | 408.58  | 0.722132 | 1.15E-16 |
| 0.39    | 0.21    | 0.35    | 0.46    | 0.528817 | 0.456106 |
| 1168.49 | 918.37  | 1039.75 | 899.52  | -0.30208 | 0.000643 |
| 0       | 0       | 0.02    | 0.02    | NA       | NA       |
| 12.63   | 14.94   | 13.75   | 15.6    | 0.315267 | 0.182853 |
| 9.11    | 12.89   | 12.4    | 12.99   | 0.399404 | 0.000261 |
| 21.88   | 23.95   | 21.21   | 25.03   | 0.069262 | 0.557726 |
| 51.84   | 59.07   | 57.7    | 57.52   | 0.145661 | 0.259514 |



|        |        |        |        |          |          |
|--------|--------|--------|--------|----------|----------|
| 0      | 0      | 0      | 0      | NA       | NA       |
| 0      | 0      | 0      | 0      | NA       | NA       |
| 0.56   | 0.55   | 0.6    | 0.55   | -0.21653 | 0.747211 |
| 9.61   | 6      | 6.97   | 6.86   | -0.70707 | 2.28E-08 |
| 0      | 0      | 0      | 0.06   | NA       | NA       |
| 13.88  | 11.67  | 13.71  | 14.74  | -0.01    | 0.960529 |
| 0.58   | 0.52   | 0.69   | 0.54   | -0.20669 | 0.725022 |
| 20     | 19.34  | 18.07  | 18.76  | -0.13722 | 0.198148 |
| 0      | 0      | 0      | 0      | NA       | NA       |
| 8.54   | 4.16   | 4.76   | 5.64   | -0.85849 | 1.72E-10 |
| 220.15 | 145.02 | 174.64 | 183.46 | -0.44999 | 2.09E-06 |
| 9.88   | 7.43   | 7.35   | 9.21   | -0.48837 | 0.037939 |
| 75.8   | 71.55  | 75.23  | 68.45  | -0.08403 | 0.439598 |
| 6.49   | 7.66   | 6.77   | 7.79   | 0.365613 | 0.022644 |
| 168.26 | 92.17  | 170.9  | 133.16 | -0.30929 | 0.35875  |
| 11.66  | 8.47   | 8.41   | 9.69   | -0.178   | 0.163163 |
| 22.49  | 18.98  | 18.39  | 21.55  | -0.26235 | 0.019687 |
| 3.51   | 8.9    | 6.44   | 8.4    | 1.148062 | 1.06E-11 |
| 4.93   | 10.3   | 9.68   | 8.77   | 0.852962 | 6.70E-08 |
| 856.47 | 665.45 | 735.42 | 617.24 | -0.37423 | 1.84E-05 |
| 0.44   | 0.08   | 0.27   | 0.05   | -0.6688  | 0.338554 |
| 27.46  | 19.65  | 31.68  | 27.74  | -0.18981 | 0.258772 |
| 0.32   | 0.76   | 0.37   | 0.79   | 0.829219 | 0.116174 |
| 5.18   | 7.36   | 7.1    | 7.82   | 0.450987 | 0.001058 |
| 0      | 0      | 0      | 0      | NA       | NA       |
| 0      | 0      | 0      | 0      | NA       | NA       |
| 0      | 0      | 0      | 0      | NA       | NA       |
| 38.55  | 51.19  | 39.73  | 43.72  | 0.262291 | 0.056966 |
| 0.09   | 0.72   | 0.14   | 0.33   | 0.519653 | 0.395445 |
| 0      | 0      | 0      | 0      | NA       | NA       |
| 3.75   | 3.09   | 4.58   | 5.65   | 0.082674 | 0.784567 |
| 0.79   | 0.25   | 0.23   | 0.27   | -1.1625  | 0.025274 |
| 0.43   | 0.6    | 0.71   | 0.64   | 0.291562 | 0.379777 |
| 1.91   | 6.59   | 4      | 5.55   | 1.176802 | 1.11E-10 |
| 10.17  | 10.63  | 11.36  | 13.52  | 0.40357  | 3.86E-05 |
| 13.81  | 15.63  | 16.37  | 16.79  | 0.157546 | 0.180069 |
| 0      | 0      | 0      | 0      | NA       | NA       |
| 26.1   | 36.6   | 32.69  | 31.41  | 0.395749 | 0.000684 |
| 0      | 0.03   | 0.14   | 0.01   | NA       | NA       |
| 0.19   | 0.12   | 0      | 0.11   | -0.47325 | 0.521762 |
| 0      | 0      | 0      | 0      | NA       | NA       |
| 0.1    | 0      | 0      | 0      | NA       | NA       |
| 0.74   | 2.72   | 2.32   | 2.72   | 1.369802 | 3.92E-17 |
| 0.99   | 1.31   | 1.67   | 1.41   | 0.441672 | 0.060766 |
| 7.2    | 27.71  | 14.06  | 20     | 1.444603 | 1.47E-07 |

|        |        |        |        |          |          |
|--------|--------|--------|--------|----------|----------|
| 37.58  | 21.85  | 26.96  | 23.33  | -0.71639 | 2.19E-13 |
| 3.68   | 7.5    | 6.85   | 6.73   | 0.705619 | 1.85E-05 |
| 14.47  | 19.61  | 16.77  | 18.49  | 0.012444 | 0.949887 |
| 10.62  | 7.8    | 7.96   | 8.58   | -0.23268 | 0.215284 |
| 7.15   | 8.96   | 7.68   | 9.52   | 0.327161 | 0.005979 |
| 27.63  | 91.22  | 50.95  | 62.54  | 1.194912 | 6.28E-13 |
| 132.51 | 112.41 | 105.53 | 106.69 | -0.2745  | 0.000644 |
| 33.33  | 47     | 39.36  | 44.94  | 0.270307 | 0.006558 |
| 0      | 0      | 0      | 0      | NA       | NA       |
| 0      | 0      | 0      | 0      | NA       | NA       |
| 1.57   | 1.21   | 1.47   | 1.62   | -0.2476  | 0.452851 |
| 14.2   | 9.84   | 12.64  | 12.41  | -0.32586 | 0.01357  |
| 54.82  | 52.63  | 49.26  | 47.02  | -0.07874 | 0.549989 |
| 0      | 0      | 0      | 0      | NA       | NA       |
| 0      | 0      | 0      | 0      | NA       | NA       |
| 1.35   | 1.86   | 1.69   | 1.62   | 0.216705 | 0.154654 |
| 0      | 0      | 0      | 0      | NA       | NA       |
| 0      | 0      | 0      | 0      | NA       | NA       |
| 0.11   | 0.05   | 0.1    | 0.26   | -0.69887 | 0.306414 |
| 126.44 | 100.82 | 113.56 | 100.67 | -0.29916 | 0.00218  |
| 0.03   | 0.1    | 0.15   | 0.04   | NA       | NA       |
| 13.69  | 14.32  | 14.96  | 14.4   | 0.137474 | 0.346395 |
| 0.08   | 0.39   | 0.29   | 0.81   | 0.946724 | 0.097263 |
| 65.23  | 64.36  | 63.82  | 60.29  | -0.0531  | 0.70361  |
| 8.37   | 10.39  | 10.67  | 12.1   | 0.026987 | 0.922596 |
| 0.6    | 0      | 0.06   | 0      | NA       | NA       |
| 0.18   | 0.08   | 0.02   | 0.15   | NA       | NA       |
| 13.43  | 2.22   | 2.19   | 2.87   | -2.24563 | 7.14E-32 |
| 108.51 | 92.76  | 101.25 | 87.26  | -0.11585 | 0.282385 |
| 44.67  | 59.68  | 52.86  | 55.92  | 0.420125 | 0.001171 |
| 0.2    | 0.09   | 0.1    | 0.33   | -0.14648 | 0.86967  |
| 10.11  | 11.19  | 9.23   | 9.73   | 0.076863 | 0.719609 |
| 0      | 0      | 0      | 0      | NA       | NA       |
| 29.19  | 25.14  | 22.4   | 25.87  | -0.08735 | 0.549425 |
| 0.03   | 0.03   | 0      | 0      | NA       | NA       |
| 11.75  | 18.62  | 13.73  | 14.21  | 0.426603 | 0.00852  |
| 22.09  | 24.25  | 23.31  | 20.38  | -0.10195 | 0.62424  |
| 2.37   | 2.71   | 2.83   | 2.58   | 0.024439 | 0.931326 |
| 0      | 0.02   | 0      | 0      | NA       | NA       |
| 11.78  | 15.52  | 14     | 13.2   | 0.107387 | 0.483343 |
| 140.4  | 74.46  | 108.6  | 92.29  | -0.69177 | 4.04E-08 |
| 138.1  | 165.02 | 165.7  | 169.53 | 0.206618 | 0.005766 |
| 18.17  | 15.38  | 15.71  | 18.09  | 0.000756 | 0.996287 |
| 10.1   | 10.55  | 8.04   | 10.62  | -0.10333 | 0.5122   |
| 0.29   | 0.31   | 0.16   | 0.14   | -0.28897 | 0.693665 |

|        |        |        |        |          |          |
|--------|--------|--------|--------|----------|----------|
| 35.91  | 30.35  | 28.81  | 33.66  | 0.116066 | 0.294481 |
| 0.04   | 0.69   | 0.39   | 0.49   | 2.454243 | 8.02E-07 |
| 91.51  | 29.68  | 65.69  | 46.57  | -0.79884 | 0.011059 |
| 12.56  | 9.99   | 12.48  | 11.56  | -0.14937 | 0.315136 |
| 10.53  | 14.25  | 16.67  | 14.99  | 0.345219 | 0.097584 |
| 1.84   | 0.24   | 0.96   | 0.45   | -1.5631  | 3.65E-06 |
| 7.28   | 7.32   | 8.15   | 7.27   | -0.16055 | 0.370854 |
| 0      | 0.06   | 0.08   | 0      | NA       | NA       |
| 3.7    | 2.42   | 3.63   | 2.52   | -0.47957 | 0.022553 |
| 21.39  | 23.43  | 23.66  | 24.34  | 0.087416 | 0.506933 |
| 171.6  | 160.95 | 166.1  | 169.52 | -0.15508 | 0.063583 |
| 6.23   | 8.63   | 7.9    | 7.66   | 0.092132 | 0.554834 |
| 5.69   | 8.09   | 8.39   | 7.39   | -0.04084 | 0.866298 |
| 0.06   | 0.07   | 0.08   | 0.01   | -0.57401 | 0.422515 |
| 5.59   | 7.13   | 6.49   | 8.11   | 0.181463 | 0.148634 |
| 12.92  | 8.72   | 11.39  | 10.71  | -0.20488 | 0.125608 |
| 28.11  | 22.47  | 25.73  | 24.39  | -0.14083 | 0.25321  |
| 61.73  | 117.53 | 91.13  | 101.16 | 0.643731 | 1.40E-11 |
| 209.76 | 125.12 | 141.58 | 132.06 | -0.71278 | 4.18E-19 |
| 10.68  | 13.34  | 10.05  | 10.43  | -0.0474  | 0.817106 |
| 21.23  | 24.51  | 26.05  | 23.28  | 0.007023 | 0.96662  |
| 24.99  | 20.3   | 22.09  | 25.07  | -0.18559 | 0.087563 |
| 10.54  | 8.64   | 8.4    | 6.98   | -0.11584 | 0.557914 |
| 8.25   | 4.39   | 6.83   | 4.91   | -0.63308 | 0.000314 |
| 0.67   | 0.03   | 0.02   | 0      | -1.51921 | 0.010467 |
| 47.58  | 14.64  | 23.4   | 16.37  | -1.51026 | 4.53E-28 |
| 86.9   | 96.72  | 89.8   | 98.28  | 0.161978 | 0.081069 |
| 45.26  | 57.78  | 54.5   | 60.24  | 0.171006 | 0.094515 |
| 7.67   | 4.62   | 5.03   | 5.77   | -0.5951  | 0.040458 |
| 2.3    | 1.93   | 2.19   | 2.42   | -0.35915 | 0.098044 |
| 22.2   | 20.33  | 19.61  | 22.76  | 0.022808 | 0.912706 |
| 30.2   | 33.62  | 30.64  | 36.37  | -0.08181 | 0.452939 |
| 19.07  | 19.43  | 19.21  | 20.56  | -0.03548 | 0.797094 |
| 2.24   | 2.78   | 3.1    | 5.08   | 0.156049 | 0.627366 |
| 0      | 1.57   | 0.56   | 1.25   | 0.399475 | 0.590736 |
| 0      | 0.15   | 0      | 0.18   | NA       | NA       |
| 10.56  | 9.12   | 11.22  | 8.45   | -0.27808 | 0.053391 |
| 3.89   | 3.51   | 4.6    | 4.15   | 0.145266 | 0.50607  |
| 1.81   | 3.35   | 2.18   | 2.87   | 0.631903 | 0.000463 |
| 0      | 0.01   | 0.01   | 0      | NA       | NA       |
| 0.1    | 0.04   | 0.51   | 0.28   | 0.214292 | 0.795652 |
| 5.55   | 12.88  | 9.44   | 11.67  | 0.881199 | 1.00E-08 |
| 27.34  | 22.35  | 25.41  | 22.81  | -0.25219 | 0.030219 |
| 5.75   | 2.77   | 2.78   | 3.15   | -0.9297  | 1.53E-10 |
| 1.06   | 7.49   | 3.64   | 5.93   | 2.328631 | 7.71E-07 |

|        |        |        |        |          |          |
|--------|--------|--------|--------|----------|----------|
| 3      | 2.6    | 2.58   | 2.47   | 0.23033  | 0.516593 |
| 11.91  | 11.21  | 13.78  | 11.2   | -0.08595 | 0.649086 |
| 0.26   | 0.15   | 0.1    | 0.08   | -0.16266 | 0.854379 |
| 7.7    | 12.22  | 11.68  | 10.58  | 0.634933 | 6.31E-07 |
| 0.62   | 2.7    | 1.88   | 2.48   | 1.043227 | 0.00052  |
| 9.61   | 15.61  | 16.8   | 14.14  | 0.424042 | 1.71E-05 |
| 33.79  | 47.91  | 42.37  | 45.62  | 0.298843 | 0.000181 |
| 0.01   | 0      | 0      | 0      | NA       | NA       |
| 0      | 0      | 0      | 0      | NA       | NA       |
| 51.49  | 56.73  | 59.39  | 58.34  | 0.165879 | 0.055613 |
| 60.45  | 74.36  | 63.4   | 64.45  | 0.057294 | 0.694326 |
| 238.08 | 314.58 | 296.97 | 272.38 | 0.302071 | 0.0005   |
| 0      | 0      | 0      | 0      | NA       | NA       |
| 112.97 | 132.03 | 132.68 | 134.2  | 0.182248 | 0.02473  |
| 0      | 0      | 0.01   | 0      | NA       | NA       |
| 33.57  | 28.04  | 28.86  | 29.57  | -0.20334 | 0.125861 |
| 28.93  | 11.31  | 15.54  | 14.84  | -1.07105 | 3.10E-19 |
| 0      | 0      | 0      | 0.16   | NA       | NA       |
| 66.4   | 60.68  | 66.55  | 61.98  | -0.1264  | 0.159534 |
| 51.05  | 56.8   | 50.57  | 52.26  | -0.04137 | 0.750576 |
| 38.23  | 42.17  | 39.22  | 40.71  | -0.05919 | 0.701112 |
| 6.82   | 8.34   | 6.56   | 5.93   | 0.030572 | 0.924712 |
| 2.79   | 4.26   | 4.11   | 4.28   | 0.182333 | 0.560786 |
| 0.26   | 0.03   | 0.28   | 0.16   | -0.33873 | 0.669911 |
| 0.04   | 0.23   | 0.05   | 0.03   | 0.03716  | 0.967875 |
| 91.74  | 141.13 | 119.71 | 126.98 | 0.444013 | 3.79E-07 |
| 6.5    | 7.28   | 7.82   | 8.47   | 0.287787 | 0.015534 |
| 43.4   | 60.61  | 55.35  | 61.03  | 0.345163 | 0.000407 |
| 12.51  | 15.04  | 14.72  | 17.93  | 0.260813 | 0.077991 |
| 15.33  | 15.42  | 13.6   | 14.83  | -0.31509 | 0.001038 |
| 0.03   | 0      | 0      | 0.05   | NA       | NA       |
| 1.38   | 1.06   | 1.69   | 2.41   | -0.28218 | 0.350163 |
| 0      | 0.01   | 0      | 0      | NA       | NA       |
| 0      | 0.07   | 0.04   | 0      | NA       | NA       |
| 5.74   | 6      | 5.63   | 6.16   | -0.01833 | 0.958712 |
| 115.01 | 114.59 | 139.13 | 131.05 | 0.065997 | 0.610298 |
| 5.15   | 6.17   | 4.27   | 5.03   | 0.068844 | 0.80335  |
| 12.65  | 14.59  | 16.47  | 14.54  | 0.072276 | 0.67024  |
| 4.72   | 4.31   | 4.57   | 4.55   | -0.29897 | 0.003846 |
| 0.09   | 0.13   | 0.06   | 0.07   | 0.166833 | 0.845973 |
| 34.62  | 40.05  | 37.3   | 50.09  | 0.302136 | 0.00126  |
| 40.74  | 42.13  | 45.33  | 41.5   | 0.032984 | 0.845043 |
| 13.49  | 11.64  | 13.41  | 13.71  | -0.27737 | 0.059161 |
| 74.55  | 88.23  | 82.9   | 80.67  | 0.33028  | 0.001566 |
| 5.76   | 3.59   | 4.34   | 4.78   | -0.18791 | 0.385069 |

|        |        |        |        |          |          |
|--------|--------|--------|--------|----------|----------|
| 3.12   | 5.96   | 4.96   | 5.22   | 0.787811 | 1.95E-07 |
| 32.35  | 41.62  | 45.17  | 41.11  | 0.274171 | 0.00405  |
| 9.47   | 10.76  | 9.8    | 9.85   | 0.322731 | 0.008667 |
| 156.54 | 281.66 | 230.28 | 241.47 | 0.568403 | 2.69E-10 |
| 0.29   | 0      | 0.13   | 0.02   | NA       | NA       |
| 30.37  | 31.53  | 34.11  | 30.94  | 0.3202   | 0.003603 |
| 7.85   | 6.76   | 6.4    | 5.73   | -0.29461 | 0.014188 |
| 141.46 | 154.94 | 155.58 | 155.28 | -0.00727 | 0.959486 |
| 11.79  | 10.37  | 10.83  | 11.34  | -0.23679 | 0.005042 |
| 9.95   | 20.37  | 17.19  | 18.08  | 0.970833 | 1.64E-16 |
| 7.02   | 7.32   | 8.16   | 7.38   | -0.00556 | 0.986207 |
| 36.33  | 39.6   | 29.88  | 30.38  | 0.112994 | 0.417889 |
| 19.33  | 14.97  | 15.93  | 14.93  | -0.53048 | 3.63E-08 |
| 9.46   | 6.46   | 6.6    | 6.42   | -0.47522 | 0.002685 |
| 18.47  | 26.6   | 23.61  | 24.92  | 0.240683 | 0.063896 |
| 6.16   | 7.57   | 6.62   | 8.81   | 0.144975 | 0.426494 |
| 0.95   | 3.37   | 2.52   | 3.33   | 1.680524 | 2.36E-15 |
| 73.3   | 42.2   | 47.96  | 44.1   | -0.66435 | 5.92E-14 |
| 0      | 0      | 0.03   | 0      | NA       | NA       |
| 7.72   | 7.96   | 7.06   | 6.05   | -0.24219 | 0.114362 |
| 4.93   | 1.64   | 2.4    | 2.91   | -0.78138 | 0.000537 |
| 17.32  | 7.27   | 14.56  | 10.44  | -0.26652 | 0.516105 |
| 1.49   | 0.29   | 0.8    | 1.54   | -1.19919 | 1.13E-05 |
| 0.08   | 0      | 0      | 0.03   | NA       | NA       |
| 0      | 0      | 0.01   | 0      | NA       | NA       |
| 18.14  | 25.91  | 29.49  | 27.36  | 0.383701 | 0.00203  |
| 6.19   | 0.79   | 0.79   | 0.6    | -2.97165 | 2.34E-40 |
| 0.01   | 0      | 0      | 0      | NA       | NA       |
| 193.72 | 282.61 | 247.98 | 246.81 | 0.354362 | 4.90E-05 |
| 8.1    | 20.19  | 14.03  | 17.04  | 0.998755 | 1.82E-12 |
| 0.04   | 0.06   | 0.13   | 0.05   | NA       | NA       |
| 14.62  | 16.11  | 15.35  | 12.86  | 0.028561 | 0.877298 |
| 13.78  | 6.71   | 8.93   | 7.9    | -0.5087  | 0.000149 |
| 2.29   | 1.61   | 1.38   | 1.69   | -0.50016 | 0.205092 |
| 0      | 0      | 0      | 0      | NA       | NA       |
| 11.92  | 5.82   | 6.73   | 5.99   | -0.95213 | 7.98E-18 |
| 163.97 | 182.03 | 188.97 | 178.34 | 0.112438 | 0.226087 |
| 0.36   | 0.34   | 0.35   | 0.32   | -0.12383 | 0.881974 |
| 742.02 | 625.7  | 727.18 | 594.89 | -0.21714 | 0.033208 |
| 4      | 4.64   | 4.82   | 4.94   | 0.186097 | 0.383483 |
| 7.12   | 8.37   | 7.6    | 9.68   | 0.158952 | 0.321793 |
| 0      | 0      | 0      | 0      | NA       | NA       |
| 8.16   | 9.9    | 9.25   | 10.65  | 0.349046 | 0.001153 |
| 4.97   | 6.13   | 5.58   | 5.58   | 0.032087 | 0.889228 |
| 36.15  | 55.13  | 50.7   | 52.69  | 0.325618 | 0.025829 |

|       |       |        |       |          |          |
|-------|-------|--------|-------|----------|----------|
| 0     | 0     | 0.01   | 0     | NA       | NA       |
| 21.16 | 45.33 | 38.88  | 40.04 | 1.187872 | 2.29E-30 |
| 0     | 0     | 0      | 0     | NA       | NA       |
| 0     | 0     | 0      | 0     | NA       | NA       |
| 26.98 | 32.57 | 29.1   | 28.03 | 0.064408 | 0.631601 |
| 5.37  | 4.53  | 5.45   | 5.57  | -0.18678 | 0.307416 |
| 35.5  | 36.37 | 35     | 36.78 | -0.11883 | 0.20585  |
| 19.85 | 18.3  | 17.39  | 16.47 | -0.13585 | 0.354921 |
| 0.88  | 0.76  | 0.3    | 0.8   | -0.40639 | 0.49779  |
| 11.64 | 14.44 | 10.92  | 10.13 | 0.161519 | 0.617064 |
| 0     | 0     | 0      | 0     | NA       | NA       |
| 15.83 | 9.84  | 10.05  | 10.52 | -0.61688 | 1.41E-11 |
| 6.6   | 5.44  | 5.21   | 5.12  | -0.09847 | 0.623698 |
| 41.13 | 30.51 | 34.54  | 32.25 | -0.36566 | 2.73E-05 |
| 0.28  | 0     | 0      | 0     | NA       | NA       |
| 8.41  | 9.59  | 9.75   | 10.34 | 0.081816 | 0.710129 |
| 0     | 0     | 0.01   | 0     | NA       | NA       |
| 4.38  | 2.79  | 3.25   | 3.94  | -0.18345 | 0.461301 |
| 1.25  | 0.88  | 0.97   | 0.73  | -0.61558 | 0.067969 |
| 1.52  | 0.59  | 0.89   | 0.77  | -0.25564 | 0.561112 |
| 22.3  | 23.33 | 25.23  | 24.75 | 0.128109 | 0.335944 |
| 0.03  | 0.02  | 0.07   | 0.12  | NA       | NA       |
| 3.3   | 2.02  | 2.1    | 1.9   | -0.73496 | 0.011298 |
| 0     | 0     | 0      | 0     | NA       | NA       |
| 11.92 | 6.91  | 8.11   | 7.27  | -0.48515 | 0.008513 |
| 44.82 | 112.1 | 100.45 | 99.62 | 1.268437 | NA       |
| 16.95 | 5.08  | 8.35   | 5.85  | -1.38627 | 3.88E-20 |
| 0     | 0     | 0      | 0     | NA       | NA       |
| 8.44  | 3.68  | 5.98   | 3.37  | -1.02591 | 1.96E-10 |
| 5.69  | 2.98  | 2.98   | 2.99  | -0.37733 | 0.230098 |
| 0     | 0     | 0      | 0     | NA       | NA       |
| 0.05  | 0.02  | 0.11   | 0.04  | NA       | NA       |
| 3.04  | 1.06  | 1.65   | 1.23  | -1.57114 | 8.34E-07 |
| 0.29  | 1.05  | 0.72   | 1.34  | 0.788896 | 0.178726 |
| 0     | 0.01  | 0.04   | 0.03  | NA       | NA       |
| 33.61 | 38.13 | 35.9   | 36.8  | 0.12273  | 0.230142 |
| 0     | 0     | 0      | 0     | NA       | NA       |
| 8.1   | 7.64  | 6.98   | 6.04  | -0.30149 | 0.031182 |
| 0     | 0.02  | 0      | 0     | NA       | NA       |
| 0     | 0     | 0      | 0     | NA       | NA       |
| 8.02  | 8.2   | 7.81   | 9.64  | 0.231082 | 0.135219 |
| 7.94  | 8.5   | 8.46   | 8.6   | 0.213716 | 0.104775 |
| 0.34  | 0.03  | 0      | 0     | NA       | NA       |
| 9.97  | 4.72  | 4.97   | 4.81  | -0.83553 | 3.17E-12 |
| 0.07  | 0     | 0      | 0     | NA       | NA       |

|       |       |       |                |          |
|-------|-------|-------|----------------|----------|
| 0     | 0.21  | 0     | 0 NA           | NA       |
| 15.49 | 7.82  | 9.32  | 12.02 -0.49375 | 0.002735 |
| 14.77 | 11.77 | 16.52 | 11.84 -0.05013 | 0.806095 |
| 0     | 0     | 0.05  | 0 NA           | NA       |
| 0.27  | 0.05  | 0.29  | 0.15 -0.79518  | 0.181341 |
| 0.15  | 0.14  | 0.11  | 0.06 NA        | NA       |
| 1.25  | 3.34  | 1.86  | 1.82 0.931838  | 0.00703  |
| 7.83  | 7.03  | 6.71  | 6.9 -0.07059   | 0.611421 |
| 2.85  | 1.38  | 1.96  | 1.61 -0.56495  | 0.144607 |
| 9.03  | 21.01 | 14.15 | 19.16 0.762687 | 1.41E-05 |
| 3.43  | 2.78  | 3.04  | 2.62 -0.38343  | 0.013843 |
| 55.27 | 66.16 | 64.52 | 58.69 0.134501 | 0.175739 |
| 0.68  | 0.8   | 0.62  | 0.78 -0.25167  | 0.720766 |
| 5.29  | 5.93  | 5.39  | 6.38 -0.0737   | 0.72924  |
| 0.46  | 0.47  | 0.47  | 0.48 -0.05132  | 0.938824 |
| 0     | 0     | 0     | 0 NA           | NA       |
| 0.12  | 0     | 0     | 0.13 NA        | NA       |
| 3.53  | 3.6   | 3.59  | 4.42 -0.1382   | 0.358866 |
| 6     | 7.65  | 6.59  | 6.08 0.29626   | 0.095296 |
| 10.42 | 7.37  | 7.69  | 8.28 -0.73242  | 5.40E-05 |
| 0.11  | 0.03  | 0.04  | 0.03 -1.823    | 0.000203 |
| 44.88 | 36.12 | 40.89 | 34.27 -0.29948 | 0.004995 |
| 0.01  | 0     | 0.01  | 0.01 NA        | NA       |
| 7.87  | 8.82  | 7.14  | 6.9 -0.02731   | 0.896069 |
| 0.12  | 2.89  | 1.71  | 3.88 2.707173  | 5.58E-14 |
| 0     | 0     | 0.02  | 0.01 NA        | NA       |
| 0.85  | 2.7   | 1.32  | 1.27 0.592524  | 0.207215 |
| 0.28  | 0     | 0.08  | 0.17 -1.9108   | 0.000343 |
| 3.31  | 4.65  | 4.46  | 5.13 0.127709  | 0.59338  |
| 15.62 | 13.72 | 14.48 | 16.72 -0.09922 | 0.549966 |
| 6.57  | 5.95  | 5.54  | 4.98 0.154014  | 0.450242 |
| 0     | 0.1   | 0     | 0 NA           | NA       |
| 0.8   | 2.06  | 1.43  | 0.9 0.012082   | 0.981184 |
| 5.41  | 5.55  | 5.02  | 4.59 0.065698  | 0.846329 |
| 20.16 | 24.41 | 19.23 | 23.76 0.213712 | 0.068365 |
| 23.15 | 27.49 | 29.18 | 24.58 0.269946 | 0.020218 |
| 52.86 | 62.1  | 63.85 | 59.87 0.09612  | 0.332296 |
| 54.95 | 68.31 | 65.11 | 66.76 0.145003 | 0.157695 |
| 11.99 | 14.51 | 16.26 | 14.6 0.307601  | 0.012871 |
| 3.05  | 1.59  | 1.62  | 1.9 -0.75196   | 1.55E-05 |
| 6.49  | 7.29  | 7.73  | 7.02 -0.10738  | 0.570299 |
| 21.51 | 33.61 | 27.12 | 28.79 0.414611 | 0.000808 |
| 0.54  | 0.28  | 0.54  | 0.28 0.072546  | 0.921811 |
| 8.25  | 8.9   | 7.84  | 10.1 0.164651  | 0.260331 |
| 0.07  | 0.03  | 0.02  | 0.02 NA        | NA       |

|        |        |        |       |          |          |
|--------|--------|--------|-------|----------|----------|
| 14.05  | 13.49  | 12.6   | 15.11 | 0.00901  | 0.967323 |
| 10.58  | 4.16   | 8.48   | 8.05  | -0.29805 | 0.464212 |
| 0.12   | 0.06   | 0.08   | 0.09  | -0.59764 | 0.359906 |
| 6.26   | 2.38   | 6.5    | 2.73  | -0.57772 | 0.005141 |
| 2.82   | 1.64   | 1.9    | 1.61  | -0.79473 | 0.000375 |
| 0.04   | 0.02   | 0.03   | 0.02  | NA       | NA       |
| 0      | 0      | 0      | 0     | NA       | NA       |
| 1.85   | 12.19  | 7.7    | 9.61  | 2.253048 | 7.24E-37 |
| 12.04  | 15.68  | 14.95  | 14.25 | 0.191513 | 0.181375 |
| 0.26   | 0.01   | 0      | 0.1   | NA       | NA       |
| 0.04   | 0      | 0.11   | 0.23  | 0.115171 | 0.896404 |
| 16.86  | 22.97  | 19.2   | 19.52 | 0.34387  | 0.000473 |
| 12.77  | 9.36   | 11.19  | 11.77 | -0.18917 | 0.179223 |
| 6.6    | 1.81   | 2.57   | 2.22  | -1.51845 | 1.67E-16 |
| 8      | 7.17   | 7.72   | 6.91  | -0.22064 | 0.081655 |
| 0.56   | 0.18   | 0.02   | 0.08  | -1.71664 | 0.001001 |
| 852.43 | 741.67 | 780.44 | 709.5 | -0.29772 | 0.000217 |
| 8.95   | 14.16  | 12.8   | 14.41 | 0.586917 | 1.35E-09 |
| 4.43   | 1.23   | 1.55   | 1.95  | -1.41839 | 1.71E-19 |
| 8.5    | 8.36   | 8.39   | 6.1   | -0.18057 | 0.321238 |
| 7.82   | 7.73   | 8.21   | 9.09  | 0.010061 | 0.974646 |
| 24.86  | 25.1   | 32.24  | 24.31 | 0.005154 | 0.977207 |
| 71.66  | 55.06  | 55.53  | 53.41 | -0.34002 | 7.12E-05 |
| 11.14  | 17.6   | 14.91  | 16.75 | 0.438697 | 2.08E-05 |
| 6.86   | 21.56  | 17.64  | 22.82 | 1.609582 | 1.68E-39 |
| 0      | 0      | 0      | 0     | NA       | NA       |
| 7.81   | 0.47   | 4.69   | 3.9   | -0.03508 | 0.966586 |
| 6.46   | 6.39   | 6.2    | 7.04  | 0.002084 | 0.991515 |
| 0.07   | 0.19   | 0.24   | 0.44  | 0.22875  | 0.736982 |
| 49.78  | 82.99  | 77.44  | 90.38 | 0.792654 | 3.78E-20 |
| 47.01  | 34.23  | 38.63  | 41.22 | -0.35274 | 6.44E-05 |
| 9.72   | 5.1    | 4.29   | 3.8   | -0.78276 | 7.08E-11 |
| 0      | 0.1    | 0      | 0     | NA       | NA       |
| 0.53   | 0.07   | 0.19   | 0.14  | -2.012   | 2.37E-08 |
| 21.55  | 23.37  | 24.3   | 24.8  | 0.156009 | 0.176934 |
| 9.63   | 6.96   | 7.97   | 6.34  | -0.32007 | 0.05912  |
| 0.32   | 0      | 0.08   | 0     | NA       | NA       |
| 1.26   | 0.64   | 0.52   | 0.77  | -0.56324 | 0.256375 |
| 7.29   | 11.46  | 11.26  | 12.42 | 0.573508 | 1.02E-05 |
| 1.64   | 1.7    | 1.95   | 2.01  | 0.423475 | 0.120624 |
| 0      | 0      | 0.06   | 0     | NA       | NA       |
| 32.06  | 38.75  | 41.39  | 42.13 | 0.235988 | 0.027566 |
| 0      | 0      | 0      | 0     | NA       | NA       |
| 2.13   | 3.04   | 2.86   | 2.66  | 0.660689 | 0.01182  |
| 18.24  | 38.49  | 26.26  | 26.53 | 0.665805 | 1.39E-07 |



|       |        |       |                |          |
|-------|--------|-------|----------------|----------|
| 0.04  | 0      | 0     | 0 NA           | NA       |
| 0.43  | 0.73   | 0.45  | 0.73 0.674023  | 0.206742 |
| 0.02  | 0.03   | 0.03  | 0.22 -0.31066  | 0.697    |
| 35.57 | 41.31  | 39.29 | 37.57 0.156192 | 0.162132 |
| 0.01  | 0      | 0.02  | 0.01 NA        | NA       |
| 2.86  | 4.05   | 3.3   | 3.67 0.316558  | 0.070963 |
| 4.49  | 3.48   | 3.46  | 3.82 -0.49757  | 0.002794 |
| 3.85  | 8.65   | 5.57  | 6.56 1.2121    | 2.63E-13 |
| 0     | 0      | 0     | 0 NA           | NA       |
| 0.2   | 0      | 0.5   | 0.58 NA        | NA       |
| 11.91 | 8.76   | 8.4   | 10.93 -0.12039 | 0.251257 |
| 23.65 | 35.98  | 33.32 | 35.02 0.502107 | 6.39E-06 |
| 5.42  | 6.36   | 5.42  | 5.93 0.091727  | 0.596078 |
| 1.04  | 1.21   | 0.74  | 0.88 -0.63801  | 0.09643  |
| 14.18 | 15.27  | 14.39 | 14.13 -0.02626 | 0.887481 |
| 6.16  | 4.98   | 6.43  | 7.17 0.01715   | 0.953301 |
| 0.23  | 13.84  | 7.24  | 10.2 3.939481  | 1.38E-39 |
| 5.74  | 8.79   | 7.02  | 7.64 0.454016  | 0.000441 |
| 52.93 | 113.02 | 76.7  | 83.89 0.852183 | 8.72E-09 |
| 0     | 0      | 0.04  | 0 NA           | NA       |
| 0.51  | 0.03   | 0.02  | 0.08 -2.27503  | 7.11E-06 |
| 0     | 0      | 0.12  | 0.03 NA        | NA       |
| 0.36  | 0.13   | 0.38  | 0.23 -0.49855  | 0.49838  |
| 0     | 0      | 0     | 0 NA           | NA       |
| 0.04  | 0.03   | 0.09  | 0.04 NA        | NA       |
| 0     | 0      | 0     | 0 NA           | NA       |
| 26.06 | 41.27  | 38.85 | 39.69 0.568668 | 2.28E-13 |
| 11.85 | 13.1   | 14.7  | 14.01 0.350673 | 0.004062 |
| 0     | 0      | 0     | 0 NA           | NA       |
| 0.54  | 1.38   | 1.46  | 1.62 0.575331  | 0.161374 |
| 0.02  | 0.1    | 0.05  | 0 NA           | NA       |
| 5.51  | 7.74   | 6.62  | 7.3 0.291984   | 0.027958 |
| 22.66 | 21.06  | 21.77 | 22.86 -0.13154 | 0.340893 |
| 0.12  | 0.06   | 0.22  | 0.25 0.006668  | 0.995104 |
| 4.01  | 3.1    | 2.82  | 2.77 -0.07901  | 0.848795 |
| 5.27  | 4.11   | 5.01  | 4.24 -0.18857  | 0.32261  |
| 10.21 | 1.51   | 3.41  | 2.23 -1.77669  | 2.61E-06 |
| 0.04  | 0.06   | 0.02  | 0.01 NA        | NA       |
| 8.38  | 6.31   | 4.76  | 5.21 -0.9493   | 4.20E-16 |
| 11.47 | 21.18  | 19.3  | 20.89 0.884773 | 6.62E-07 |
| 0     | 0      | 0.05  | 0 NA           | NA       |
| 0     | 0      | 0     | 0 NA           | NA       |
| 17.28 | 11.03  | 12.63 | 9.94 -0.71887  | 2.56E-10 |
| 0.19  | 0.05   | 0.67  | 0.4 0.038444   | 0.968592 |
| 14.86 | 15.43  | 16.32 | 15.52 0.072819 | 0.652115 |

|         |         |         |        |          |          |
|---------|---------|---------|--------|----------|----------|
| 0       | 0       | 0       | 0      | NA       | NA       |
| 0       | 0       | 0       | 0      | NA       | NA       |
| 2.5     | 2.12    | 2.3     | 2.91   | 0.099259 | 0.821129 |
| 4       | 2.79    | 3.91    | 3.91   | -0.1937  | 0.302934 |
| 0       | 0       | 0       | 0.08   | NA       | NA       |
| 31.7    | 36.38   | 33.42   | 32.62  | 0.272096 | 0.049096 |
| 11      | 8.33    | 9.27    | 8.54   | -0.16952 | 0.229832 |
| 42.58   | 17.35   | 21.82   | 17.41  | -1.01738 | 1.06E-20 |
| 9.25    | 14.86   | 12.82   | 12.97  | 0.66784  | 7.30E-07 |
| 13.08   | 9.46    | 14.36   | 10.74  | -0.1424  | 0.51098  |
| 3.24    | 1.29    | 1.14    | 1.06   | -1.54295 | 8.70E-17 |
| 4.99    | 7.32    | 8.51    | 7.7    | 0.885725 | 7.14E-07 |
| 0.51    | 0.65    | 0.62    | 0.62   | 0.056345 | 0.891888 |
| 0       | 0       | 0       | 0      | NA       | NA       |
| 1.14    | 0.66    | 0.89    | 0.79   | -0.20065 | 0.667419 |
| 14.55   | 12.15   | 13.69   | 13.75  | -0.13316 | 0.454727 |
| 15.74   | 14.1    | 12.29   | 15.41  | -0.0618  | 0.675672 |
| 18.43   | 21.79   | 18.92   | 20.89  | 0.194643 | 0.055815 |
| 3.24    | 4.77    | 4.24    | 4.12   | 0.248552 | 0.323387 |
| 0       | 0       | 0       | 0      | NA       | NA       |
| 0       | 0.02    | 0       | 0      | NA       | NA       |
| 835.85  | 672.82  | 759.11  | 644.84 | -0.29269 | 0.001089 |
| 0       | 0       | 0       | 0      | NA       | NA       |
| 14.47   | 20.47   | 21.78   | 25.24  | 0.598423 | 7.00E-08 |
| 3.99    | 5.14    | 5.51    | 5.28   | 0.41225  | 0.021491 |
| 0       | 0       | 0       | 0      | NA       | NA       |
| 11.18   | 9.3     | 9.94    | 8.9    | -0.25027 | 0.046465 |
| 0.2     | 0.07    | 0.14    | 0.07   | NA       | NA       |
| 21.23   | 22.17   | 27.08   | 20.83  | -0.01592 | 0.945788 |
| 45.18   | 49.03   | 44.26   | 46.12  | 0.077108 | 0.469684 |
| 2.86    | 1.83    | 1.44    | 1.69   | -0.72722 | 0.017232 |
| 0.37    | 0.46    | 0.27    | 0.33   | -0.39535 | 0.593809 |
| 0.25    | 0.23    | 0.17    | 0.14   | -0.52568 | 0.311237 |
| 4.93    | 2.92    | 3.47    | 4.09   | -0.0067  | 0.979259 |
| 29.17   | 13.91   | 12.78   | 15.29  | -0.74044 | 2.13E-21 |
| 0       | 0.05    | 0.07    | 0.05   | NA       | NA       |
| 1172.86 | 1016.01 | 1105.34 | 997.57 | -0.27451 | 0.000868 |
| 6.51    | 2.92    | 2.66    | 2.31   | -1.26805 | 4.12E-14 |
| 69.95   | 89.91   | 84.13   | 88.15  | 0.328305 | 0.000108 |
| 0       | 0       | 0       | 0      | NA       | NA       |
| 246.47  | 88.71   | 145.25  | 115.39 | -1.10173 | 9.26E-18 |
| 0       | 0.12    | 0       | 0      | NA       | NA       |
| 0       | 0       | 0       | 0      | NA       | NA       |
| 12.14   | 11.46   | 11.54   | 11.81  | -0.15599 | 0.186781 |
| 0.76    | 0.1     | 0.06    | 0.23   | -0.73037 | 0.25995  |

|        |        |        |        |          |           |
|--------|--------|--------|--------|----------|-----------|
| 28.47  | 79.8   | 47.57  | 61.74  | 1.246893 | 7.44E-23  |
| 24.53  | 15.27  | 14.68  | 16     | -0.7461  | 3.24E-10  |
| 0      | 0      | 0      | 0.02   | NA       | NA        |
| 0      | 0.01   | 0.01   | 0      | NA       | NA        |
| 0.23   | 0.21   | 0.26   | 0.48   | 0.723895 | 0.292936  |
| 0.21   | 21.85  | 11.04  | 12.75  | 4.619111 | 4.59E-31  |
| 14.12  | 15.44  | 16.27  | 16.44  | 0.192416 | 0.078009  |
| 0      | 0      | 0      | 0      | NA       | NA        |
| 2.33   | 2.16   | 2.5    | 2.24   | 0.298012 | 0.3828    |
| 20.06  | 10.87  | 13.09  | 14.05  | -0.30572 | 0.005629  |
| 316.45 | 456.34 | 508    | 474.19 | 0.58423  | 1.33E-14  |
| 4.54   | 4.77   | 4.97   | 5.31   | 0.225168 | 0.059161  |
| 2.79   | 2.97   | 2.83   | 4.09   | -0.07057 | 0.832151  |
| 18.88  | 31.74  | 25.01  | 24.94  | 0.425707 | 0.000545  |
| 301.91 | 301.87 | 313.09 | 274.81 | -0.07339 | 0.513751  |
| 10.02  | 12.26  | 8.3    | 9.52   | 0.301359 | 0.026579  |
| 0.11   | 0.16   | 0.68   | 0.7    | 0.610276 | 0.389605  |
| 3.55   | 6.2    | 6.05   | 6.53   | 1.042506 | 9.02E-08  |
| 12.87  | 36.1   | 26.56  | 30.66  | 1.464239 | 5.15E-32  |
| 5.93   | 7.17   | 8.51   | 7.56   | 0.323859 | 0.006059  |
| 6.57   | 6.95   | 8.5    | 6.89   | 0.043998 | 0.88325   |
| 29.92  | 26.1   | 27.83  | 27.56  | -0.11079 | 0.405571  |
| 0      | 0      | 0.15   | 0      | NA       | NA        |
| 0.01   | 0      | 0      | 0.01   | NA       | NA        |
| 45.19  | 100    | 84     | 94     | 1.045737 | 6.04E-27  |
| 2.75   | 1.05   | 1.85   | 1.46   | -1.23315 | 3.47E-17  |
| 0      | 0.22   | 0.15   | 0.26   | 0.700976 | 0.310576  |
| 0      | 0.07   | 0.2    | 0.23   | NA       | NA        |
| 0      | 0      | 0      | 0.03   | NA       | NA        |
| 16.72  | 18.64  | 17.11  | 18.62  | 0.327136 | 0.001303  |
| 0      | 0      | 0      | 0      | NA       | NA        |
| 0      | 0      | 0      | 0      | NA       | NA        |
| 0      | 0      | 0      | 0      | NA       | NA        |
| 25.42  | 143.05 | 119.72 | 138.95 | 2.537096 | 6.90E-186 |
| 0.32   | 0.02   | 0.07   | 0.08   | -1.37875 | 0.01852   |
| 0      | 0      | 0      | 0      | NA       | NA        |
| 0      | 0      | 0.03   | 0      | NA       | NA        |
| 17.17  | 17.53  | 17.81  | 21.51  | 0.137979 | 0.277475  |
| 0      | 0      | 0      | 0      | NA       | NA        |
| 5.77   | 3.29   | 3.76   | 3.75   | -0.80503 | 2.44E-07  |
| 0      | 0      | 0      | 0.06   | NA       | NA        |
| 50.94  | 106.8  | 98.86  | 110.93 | 0.951625 | 2.55E-29  |
| 39.67  | 45.09  | 40     | 48.48  | 0.387906 | 5.26E-05  |
| 4.28   | 2.86   | 3.36   | 2.86   | -0.21102 | 0.342877  |
| 0.47   | 1.38   | 0.9    | 1.32   | 1.534223 | 1.19E-08  |

|        |        |        |        |          |          |
|--------|--------|--------|--------|----------|----------|
| 46.12  | 42.86  | 38.12  | 38.64  | -0.04071 | 0.824304 |
| 10.53  | 9.64   | 9.4    | 10.49  | -0.12689 | 0.463611 |
| 41.4   | 30.39  | 36.93  | 33.34  | -0.25876 | 0.032205 |
| 0      | 0      | 0      | 0      | NA       | NA       |
| 0.75   | 0.57   | 1.85   | 1.45   | -0.13337 | 0.715675 |
| 0.04   | 0.06   | 0.03   | 0.04   | -0.33019 | 0.678253 |
| 2.76   | 2.16   | 2.95   | 2.72   | -0.23814 | 0.459233 |
| 0.28   | 0.54   | 0.5    | 0.55   | 0.599924 | 0.079043 |
| 0      | 0      | 0      | 0      | NA       | NA       |
| 14.78  | 18.16  | 18.7   | 22.39  | 0.485289 | 0.001383 |
| 6.72   | 5.21   | 4.94   | 4.13   | -0.34219 | 0.138579 |
| 3.03   | 2.68   | 4.5    | 3.67   | 0.16369  | 0.471764 |
| 3.2    | 2.68   | 2.92   | 3.05   | -0.14429 | 0.557324 |
| 0.11   | 0.18   | 0.21   | 0.11   | -0.21884 | 0.787427 |
| 0      | 0.05   | 0.04   | 0.02   | NA       | NA       |
| 0.1    | 0.1    | 0.36   | 0.27   | 0.41243  | 0.57729  |
| 37.3   | 44.4   | 43.39  | 40     | 0.026824 | 0.870603 |
| 0.99   | 1.62   | 1.4    | 1.37   | 0.01558  | 0.976227 |
| 0.47   | 0.15   | 0.63   | 0.26   | -0.39961 | 0.423274 |
| 0      | 0      | 0.01   | 0      | NA       | NA       |
| 0      | 0      | 0      | 0      | NA       | NA       |
| 0      | 0      | 0      | 0      | NA       | NA       |
| 0      | 0      | 0      | 0      | NA       | NA       |
| 1.28   | 1.64   | 1.18   | 1.63   | 0.467088 | 0.24259  |
| 10.85  | 15.28  | 13.69  | 13.54  | 0.393024 | 0.000505 |
| 72.58  | 85.36  | 76.36  | 78.86  | 0.030183 | 0.859315 |
| 35.2   | 35.97  | 31.36  | 33.28  | -0.23693 | 0.018376 |
| 0.27   | 0.39   | 0.62   | 0.41   | 0.55727  | 0.375419 |
| 115.58 | 107.96 | 128.09 | 126.48 | 0.034045 | 0.803351 |
| 11.06  | 13.79  | 12.14  | 14.36  | 0.307952 | 0.007699 |
| 9.2    | 8.31   | 8.92   | 9.37   | -0.16578 | 0.22063  |
| 0      | 0      | 0      | 0      | NA       | NA       |
| 2.54   | 1.55   | 1.99   | 2.23   | -0.02926 | 0.950976 |
| 4.16   | 5.04   | 6.22   | 5.35   | 0.234086 | 0.210945 |
| 48.87  | 71.7   | 60.75  | 67.48  | 0.387708 | 2.29E-05 |
| 1.73   | 0.17   | 0.3    | 0.18   | -3.21703 | 7.01E-39 |
| 3.59   | 2.36   | 2.01   | 2.35   | -0.42353 | 0.101304 |
| 0      | 0      | 0      | 0      | NA       | NA       |
| 0      | 0      | 0      | 0      | NA       | NA       |
| 0      | 0      | 0      | 0.01   | NA       | NA       |
| 0.03   | 0      | 0.03   | 0.04   | NA       | NA       |
| 0.24   | 0.43   | 0.37   | 0.35   | 0.674069 | 0.068618 |
| 1.78   | 3.14   | 3.73   | 4.28   | 1.066451 | 6.04E-06 |
| 0      | 0.3    | 0.2    | 0.15   | NA       | NA       |
| 0.01   | 0      | 0      | 0      | NA       | NA       |

|       |        |        |        |          |          |
|-------|--------|--------|--------|----------|----------|
| 0.02  | 0.19   | 0.09   | 0.03   | NA       | NA       |
| 31.8  | 32.26  | 34.15  | 30.37  | 0.039659 | 0.746102 |
| 2.67  | 7.75   | 6.68   | 7.3    | 1.392552 | 3.44E-15 |
| 0     | 0      | 0.04   | 0      | NA       | NA       |
| 33.6  | 72.1   | 57.29  | 69.17  | 0.905903 | 6.89E-20 |
| 1.55  | 0.69   | 0.83   | 0.89   | -0.54227 | 0.035551 |
| 4.96  | 5.11   | 5.11   | 5.29   | 0.096605 | 0.463639 |
| 0.16  | 0.08   | 0.02   | 0      | -1.67206 | 0.003919 |
| 2.58  | 1.16   | 1.29   | 1.23   | -0.58771 | 0.006184 |
| 0.38  | 0.06   | 0.31   | 0.35   | 0.044211 | 0.952797 |
| 0     | 0      | 0      | 0      | NA       | NA       |
| 54.03 | 62.97  | 60.33  | 62.39  | 0.130118 | 0.21869  |
| 0.41  | 0.43   | 0.35   | 0.35   | -0.24379 | 0.593283 |
| 20.75 | 17.18  | 17.29  | 17.18  | -0.23079 | 0.068044 |
| 0     | 0      | 0      | 0      | NA       | NA       |
| 1.9   | 1.85   | 2.05   | 1.94   | -0.06088 | 0.876492 |
| 0     | 0      | 0      | 0      | NA       | NA       |
| 0     | 0      | 0      | 0      | NA       | NA       |
| 7.63  | 6.86   | 5.83   | 5.8    | -0.23929 | 0.147782 |
| 0.14  | 0.63   | 0.61   | 0.65   | 1.701761 | 0.000835 |
| 9.35  | 2.8    | 4.93   | 3.69   | -1.09915 | 6.11E-11 |
| 0     | 0      | 0      | 0      | NA       | NA       |
| 0     | 0      | 0      | 0      | NA       | NA       |
| 0     | 0      | 0      | 0      | NA       | NA       |
| 16.01 | 34.02  | 25.36  | 25.03  | 0.510178 | 0.004687 |
| 0     | 0      | 0      | 0      | NA       | NA       |
| 1.8   | 1.36   | 1.54   | 1.45   | -0.43673 | 0.13071  |
| 0.31  | 0.33   | 0.42   | 0.62   | 0.511944 | 0.461606 |
| 3.15  | 0.39   | 0.97   | 0.83   | -1.94197 | 5.77E-16 |
| 4.12  | 3.16   | 3.01   | 2.57   | -0.39356 | 0.003797 |
| 10.47 | 4.74   | 5.6    | 4.46   | -1.39668 | 7.86E-16 |
| 74.53 | 70.9   | 73.3   | 69.03  | -0.14963 | 0.222791 |
| 1.46  | 1.88   | 1.46   | 1.35   | -0.22363 | 0.652115 |
| 12.18 | 18.75  | 15.62  | 16.93  | 0.502289 | 8.25E-07 |
| 0.04  | 0      | 0      | 0      | NA       | NA       |
| 65.05 | 124.09 | 126.83 | 127.96 | 0.927806 | 4.45E-28 |
| 17.4  | 11.96  | 11.77  | 15.35  | -0.40527 | 4.46E-05 |
| 0.42  | 0.21   | 0.52   | 0.26   | -0.06216 | 0.944533 |
| 10.19 | 10.33  | 7.37   | 8.23   | -0.13955 | 0.414993 |
| 1.11  | 2.75   | 4.93   | 3.75   | 1.565729 | 4.85E-12 |
| 0     | 0      | 0.08   | 0      | NA       | NA       |
| 0     | 0      | 0      | 0.01   | NA       | NA       |
| 27.13 | 34.62  | 33.86  | 35.5   | 0.250334 | 0.005406 |
| 32.95 | 25.09  | 30.42  | 24.75  | -0.25066 | 0.065013 |
| 1.26  | 2.12   | 1.27   | 2.64   | 2.186254 | 1.82E-24 |

|       |        |       |       |          |          |
|-------|--------|-------|-------|----------|----------|
| 9.39  | 7.17   | 10.12 | 8.83  | -0.07631 | 0.734024 |
| 7.25  | 5.33   | 7.15  | 5.49  | 0.14414  | 0.605852 |
| 9.17  | 11.43  | 8.56  | 8.4   | 0.208145 | 0.283554 |
| 3.06  | 3.61   | 3.41  | 3.47  | 0.17792  | 0.292004 |
| 0.02  | 3.69   | 1.3   | 3.34  | 2.298751 | 1.29E-05 |
| 0     | 0      | 0     | 0     | NA       | NA       |
| 28.12 | 32.76  | 34.89 | 40.42 | 0.303712 | 0.000516 |
| 0     | 0.04   | 0     | 0.05  | NA       | NA       |
| 0.7   | 0.91   | 0.75  | 0.51  | -0.40523 | 0.393575 |
| 78.18 | 66.65  | 50.28 | 55.15 | -0.51871 | 2.31E-05 |
| 4.58  | 6.29   | 5.66  | 5.87  | 0.264228 | 0.016052 |
| 0     | 0      | 0     | 0     | NA       | NA       |
| 0.05  | 0.18   | 0.1   | 0.03  | NA       | NA       |
| 0.23  | 0.12   | 0.19  | 0.35  | -0.51812 | 0.467138 |
| 76.56 | 100.32 | 80.47 | 97.88 | 0.244717 | 0.011862 |
| 4.2   | 4.41   | 3.63  | 3.51  | -0.09947 | 0.761272 |
| 0.1   | 0      | 0     | 0     | NA       | NA       |
| 20.72 | 18.55  | 22.07 | 17.2  | -0.11585 | 0.476695 |
| 50.74 | 57.19  | 59.25 | 47.86 | 0.095812 | 0.367505 |
| 15.51 | 9.72   | 11.77 | 8.78  | -0.58186 | 0.000269 |
| 0     | 0      | 0     | 0     | NA       | NA       |
| 2.05  | 1.3    | 1.32  | 1.43  | 0.019487 | 0.962964 |
| 4.02  | 2.51   | 3.28  | 2.82  | -0.26332 | 0.261921 |
| 6.05  | 5.55   | 6.13  | 5.25  | -0.06499 | 0.779498 |
| 0     | 0      | 0     | 0     | NA       | NA       |
| 6.86  | 11.68  | 7.98  | 10.18 | 0.635873 | 0.000735 |
| 11.87 | 9.08   | 8.7   | 6.74  | -0.36799 | 0.004009 |
| 11.93 | 11.94  | 11.31 | 13.01 | -0.05346 | 0.698064 |
| 12.47 | 13.14  | 13.07 | 14.24 | 0.038995 | 0.808189 |
| 19.67 | 27.03  | 24.4  | 28.56 | 0.316463 | 0.002377 |
| 0     | 0      | 0     | 0     | NA       | NA       |
| 4.81  | 4.66   | 4.67  | 4.61  | -0.02738 | 0.917692 |
| 0.51  | 0.39   | 0.36  | 0.51  | -0.33926 | 0.622614 |
| 0     | 0      | 0     | 0     | NA       | NA       |
| 3.4   | 3.05   | 3.73  | 3.64  | 0.030573 | 0.934923 |
| 6.71  | 6.74   | 6.68  | 7.52  | 0.052419 | 0.828345 |
| 14.8  | 14.07  | 17.32 | 15.65 | 0.096931 | 0.501512 |
| 0.09  | 0      | 0     | 0     | NA       | NA       |
| 5.55  | 5.05   | 4.93  | 3.93  | 0.152749 | 0.416045 |
| 0     | 0      | 0     | 0     | NA       | NA       |
| 3.68  | 2.94   | 3.73  | 3.28  | -0.24493 | 0.21395  |
| 0     | 0      | 0     | 0     | NA       | NA       |
| 0.01  | 0.05   | 0     | 0     | NA       | NA       |
| 0.01  | 0.01   | 0.04  | 0     | NA       | NA       |
| 0     | 0      | 0     | 0     | NA       | NA       |

|        |        |        |         |          |          |
|--------|--------|--------|---------|----------|----------|
| 16.68  | 18.49  | 15.7   | 15.42   | 0.0108   | 0.956564 |
| 2.69   | 4.44   | 3.56   | 4.71    | 0.551659 | 0.001582 |
| 0.04   | 0.03   | 0.06   | 0 NA    | NA       |          |
| 18.26  | 26.11  | 22.82  | 23.79   | 0.281405 | 0.018452 |
| 23.63  | 11.73  | 12.56  | 12.11   | -0.96901 | 2.00E-30 |
| 0      | 0.06   | 0.12   | 0.03    | 0.743958 | 0.27836  |
| 0.16   | 0.03   | 0.08   | 0.04    | -0.74489 | 0.257584 |
| 9.84   | 15.04  | 13.08  | 15.78   | 0.57386  | 2.19E-07 |
| 4.65   | 5.88   | 4.79   | 5.02    | 0.160473 | 0.34808  |
| 0.32   | 0.34   | 0.26   | 0.49    | 0.221348 | 0.752803 |
| 117.05 | 198.43 | 166.53 | 181.23  | 0.565446 | 2.76E-11 |
| 0      | 0      | 0      | 0 NA    | NA       |          |
| 0.04   | 0.11   | 0.54   | 0.17    | 0.195328 | 0.813043 |
| 9.81   | 13.74  | 13.86  | 17.92   | 0.581036 | 1.27E-05 |
| 54.14  | 12.8   | 21.73  | 18.35   | -1.61046 | 9.25E-33 |
| 0.04   | 0      | 0.06   | 0.07 NA | NA       |          |
| 0.03   | 0.13   | 0      | 0.13    | 0.030325 | 0.97517  |
| 1.97   | 1.84   | 1.78   | 1.83    | -0.01607 | 0.963961 |
| 1.44   | 5.24   | 3.67   | 4.03    | 2.042654 | 1.34E-13 |
| 5.93   | 5.96   | 6.54   | 5.26    | -0.00275 | 0.994813 |
| 32.8   | 36.65  | 38.6   | 36.42   | 0.086571 | 0.559778 |
| 2.1    | 2.75   | 2.46   | 2.72    | 0.066577 | 0.79622  |
| 0      | 0      | 0      | 0 NA    | NA       |          |
| 12.68  | 8.98   | 11.19  | 9.46    | -0.5094  | 5.07E-07 |
| 7.68   | 8.97   | 9.3    | 7.63    | -0.08496 | 0.528371 |
| 0      | 0      | 0      | 0 NA    | NA       |          |
| 138.38 | 120.37 | 163.59 | 147.43  | 0.021373 | 0.862746 |
| 1.15   | 1.22   | 1.35   | 1.25    | -0.37227 | 0.219967 |
| 0.15   | 0      | 0.04   | 0.07 NA | NA       |          |
| 24.53  | 13.54  | 15.11  | 14.83   | -0.75933 | 1.69E-07 |
| 0      | 0      | 0      | 0 NA    | NA       |          |
| 92.94  | 66.5   | 69.17  | 70.9    | -0.41245 | 1.02E-08 |
| 31.03  | 28.73  | 30.71  | 30.39   | -0.15082 | 0.170614 |
| 0.05   | 0.38   | 0.12   | 0.13 NA | NA       |          |
| 0      | 0      | 0      | 0 NA    | NA       |          |
| 0.37   | 0.59   | 0.61   | 0.67    | 0.171963 | 0.771217 |
| 0      | 0      | 0.03   | 0.05 NA | NA       |          |
| 0      | 0      | 0      | 0 NA    | NA       |          |
| 5.09   | 4.44   | 5.07   | 4.84    | -0.01429 | 0.947    |
| 0.62   | 0.29   | 0.09   | 0.02 NA | NA       |          |
| 0      | 0.17   | 0.08   | 0 NA    | NA       |          |
| 11.94  | 9.44   | 8.66   | 9.96    | -0.483   | 0.002253 |
| 0.66   | 0.24   | 0.41   | 0.29    | -1.26584 | 0.000535 |
| 0.11   | 0      | 0.02   | 0.06 NA | NA       |          |
| 0      | 0      | 0      | 0 NA    | NA       |          |

|         |         |         |         |          |          |
|---------|---------|---------|---------|----------|----------|
| 22.39   | 9.3     | 9.81    | 8.6     | -1.24004 | 4.05E-40 |
| 0       | 0.01    | 0       | 0.01    | NA       | NA       |
| 0       | 0       | 0       | 0       | NA       | NA       |
| 0.49    | 0.03    | 0.18    | 0.13    | -1.78307 | 0.000576 |
| 0       | 0       | 0       | 0       | NA       | NA       |
| 71.55   | 54.6    | 62.26   | 61.3    | -0.26867 | 0.001436 |
| 6.41    | 6.31    | 6.51    | 7.06    | 0.081888 | 0.696366 |
| 4.39    | 8.03    | 8.44    | 7.7     | 0.758223 | 6.00E-09 |
| 17.97   | 13.71   | 15.85   | 13.26   | -0.14418 | 0.269833 |
| 0       | 0       | 0       | 0       | NA       | NA       |
| 0       | 0       | 0       | 0       | NA       | NA       |
| 12      | 10.08   | 10.54   | 9.46    | -0.24355 | 0.123616 |
| 2.52    | 1.4     | 1.37    | 1.62    | -0.64854 | 0.001775 |
| 21.89   | 21.5    | 19.85   | 17.38   | -0.15957 | 0.320028 |
| 2300.76 | 2087.64 | 2139.32 | 1948.04 | -0.19651 | 0.013378 |
| 2.92    | 16.38   | 8.7     | 12.59   | 1.99489  | 1.58E-24 |
| 50.6    | 55.18   | 53.45   | 55.22   | 0.106981 | 0.305087 |
| 19.45   | 19.12   | 21.01   | 20.48   | -0.00398 | 0.984202 |
| 6.96    | 7.87    | 7.47    | 9.64    | -0.07909 | 0.72393  |
| 0       | 0       | 0       | 0       | NA       | NA       |
| 0.04    | 0       | 0.02    | 0       | NA       | NA       |
| 1.02    | 1.29    | 2.42    | 1.13    | 0.078075 | 0.890814 |
| 21.01   | 21.26   | 21.05   | 20.72   | 0.070794 | 0.676527 |
| 0       | 0.07    | 0       | 0       | NA       | NA       |
| 15.44   | 15.95   | 15.44   | 18.35   | 0.030347 | 0.85347  |
| 16.78   | 22.52   | 19.92   | 20.69   | 0.49452  | 2.30E-05 |
| 7.26    | 16.83   | 12.18   | 16.26   | 1.305349 | 6.64E-22 |
| 0.25    | 0       | 0.02    | 0       | -1.74922 | 0.002572 |
| 19.39   | 15.8    | 23.94   | 17.2    | -0.15206 | 0.34681  |
| 18.42   | 20.81   | 21.12   | 21.5    | -0.12948 | 0.260035 |
| 0       | 0       | 0       | 0       | NA       | NA       |
| 0.01    | 0.08    | 0.06    | 0.01    | 0.317897 | 0.683775 |
| 0.15    | 0       | 0.2     | 0.12    | NA       | NA       |
| 2.58    | 2.23    | 3.08    | 3.45    | -0.13772 | 0.720842 |
| 17.24   | 11.67   | 11.51   | 13.23   | -0.33537 | 0.000363 |
| 39.24   | 38.22   | 36.74   | 35.2    | -0.0705  | 0.622723 |
| 11.88   | 30.88   | 24.55   | 25.52   | 1.129956 | 4.78E-17 |
| 1.03    | 1.73    | 2.11    | 0.6     | -0.3042  | 0.467753 |
| 16.93   | 18.38   | 15.08   | 18.01   | -0.11451 | 0.294358 |
| 0.44    | 0       | 0.04    | 0.15    | NA       | NA       |
| 0       | 0       | 0       | 0       | NA       | NA       |
| 0.13    | 0.02    | 0.08    | 0.06    | NA       | NA       |
| 5.24    | 1.62    | 2.19    | 2.83    | -0.69047 | 0.021587 |
| 17.83   | 30.18   | 25.58   | 22.23   | 0.445628 | 0.026647 |
| 0       | 0       | 0       | 0       | NA       | NA       |



|         |        |        |         |          |           |
|---------|--------|--------|---------|----------|-----------|
| 9.41    | 9.43   | 8.36   | 6.95    | -0.1978  | 0.427274  |
| 0       | 0      | 0      | 0 NA    | NA       |           |
| 11.88   | 12.39  | 12.55  | 12.27   | 0.048365 | 0.784269  |
| 1076.34 | 854.18 | 941.4  | 826.4   | -0.35939 | 7.94E-06  |
| 0       | 0      | 0.03   | 0.08 NA | NA       |           |
| 0       | 0      | 0      | 0 NA    | NA       |           |
| 0       | 0.42   | 0.36   | 0.26    | 2.006892 | 0.000335  |
| 0.43    | 0.05   | 0.19   | 0.15    | -1.19453 | 0.028155  |
| 0.03    | 0.02   | 0      | 0 NA    | NA       |           |
| 45.97   | 51.12  | 54.84  | 57.95   | 0.411199 | 1.19E-05  |
| 11.61   | 26.81  | 21.2   | 25.75   | 0.897074 | 2.38E-14  |
| 8.52    | 9.78   | 8.61   | 10.24   | 0.36047  | 0.080898  |
| 0       | 0.27   | 0.04   | 0 NA    | NA       |           |
| 21.46   | 25.3   | 24.7   | 25.02   | 0.189548 | 0.216305  |
| 0       | 0      | 0      | 0.03 NA | NA       |           |
| 153.94  | 143.89 | 152.15 | 144.95  | -0.11298 | 0.280245  |
| 6.86    | 5.45   | 6.99   | 5.78    | 0.111903 | 0.608074  |
| 84.35   | 79.05  | 86.71  | 77.42   | -0.04312 | 0.795493  |
| 13.94   | 14.14  | 16.18  | 13.45   | -0.03998 | 0.876705  |
| 0.13    | 0      | 0      | 0 NA    | NA       |           |
| 0.12    | 0      | 0.03   | 0.05 NA | NA       |           |
| 0       | 0      | 0      | 0 NA    | NA       |           |
| 0       | 0      | 0      | 0 NA    | NA       |           |
| 0       | 0      | 0      | 0 NA    | NA       |           |
| 11.63   | 11.77  | 10.62  | 11.91   | -0.10698 | 0.570547  |
| 1.72    | 2.47   | 1.92   | 1.79    | 0.275511 | 0.303627  |
| 7.67    | 7.38   | 8.83   | 6.15    | 0.001403 | 0.997546  |
| 21.6    | 16.51  | 18.23  | 19.06   | -0.34331 | 0.016797  |
| 46.85   | 20.31  | 25.69  | 25.52   | -0.98182 | 4.39E-20  |
| 43.14   | 25.62  | 33.63  | 29.31   | -0.61159 | 3.65E-10  |
| 24.07   | 25.89  | 24.81  | 25.9    | 0.054987 | 0.71417   |
| 25.57   | 20.8   | 23.76  | 25.54   | 0.006626 | 0.964931  |
| 0       | 0      | 0      | 0 NA    | NA       |           |
| 188.21  | 39.9   | 50.9   | 45.36   | -2.1659  | 1.39E-127 |
| 0.07    | 0      | 0      | 0 NA    | NA       |           |
| 4.1     | 4.46   | 3.4    | 3.35    | -0.22973 | 0.148353  |
| 22.2    | 14.27  | 19.71  | 18      | -0.33002 | 0.032721  |
| 0       | 0      | 0      | 0 NA    | NA       |           |
| 69.4    | 26.92  | 37.4   | 37.56   | -1.01775 | 1.08E-14  |
| 1.85    | 5.3    | 3.15   | 3.49    | 1.018867 | 1.84E-05  |
| 0       | 0      | 0      | 0 NA    | NA       |           |
| 8.64    | 10.67  | 11.32  | 11.31   | 0.286851 | 0.067453  |
| 3.84    | 2.46   | 3.02   | 2.86    | -0.46299 | 0.004548  |
| 48.01   | 34.73  | 40.63  | 35.68   | -0.38651 | 9.74E-05  |
| 12.6    | 16.24  | 18.11  | 14.82   | 0.229673 | 0.151781  |

|         |         |         |         |          |          |
|---------|---------|---------|---------|----------|----------|
| 4.47    | 2.17    | 2.02    | 2.35    | -0.62387 | 0.00022  |
| 0.02    | 0.07    | 0       | 0.03    | NA       | NA       |
| 3.17    | 1.61    | 2.14    | 1.75    | -0.73275 | 0.048397 |
| 4.64    | 3.84    | 3.72    | 3.45    | -0.41359 | 0.000276 |
| 7.12    | 7.5     | 7.11    | 9.91    | 0.139816 | 0.556799 |
| 12.46   | 19.33   | 17.6    | 16.8    | 0.362795 | 0.001055 |
| 42.84   | 31.15   | 40.01   | 34.84   | -0.1668  | 0.260156 |
| 0       | 0       | 0       | 0       | NA       | NA       |
| 0       | 0       | 0       | 0       | NA       | NA       |
| 1.69    | 3.04    | 2.24    | 2.36    | 0.306956 | 0.100975 |
| 6.03    | 5.89    | 5.75    | 4.55    | -0.15977 | 0.430554 |
| 20.31   | 29.71   | 34.79   | 32.56   | 0.677338 | 1.03E-13 |
| 0.03    | 0.08    | 0       | 0       | NA       | NA       |
| 7.49    | 6.54    | 8.77    | 6.97    | -0.09968 | 0.475626 |
| 120.66  | 57.24   | 104.25  | 77.09   | -0.6217  | 1.50E-05 |
| 234.73  | 112.74  | 174.73  | 152.01  | -0.71172 | 3.85E-08 |
| 15.78   | 16.86   | 17.36   | 16.48   | -0.00984 | 0.959828 |
| 0.22    | 0.22    | 0.14    | 0.06    | -0.61037 | 0.267855 |
| 0       | 0.01    | 0       | 0       | NA       | NA       |
| 0       | 0       | 0       | 0       | NA       | NA       |
| 56.01   | 21.79   | 30.02   | 26.74   | -1.15406 | 1.38E-24 |
| 3.01    | 2.04    | 2.3     | 2.2     | -0.53298 | 0.010417 |
| 3       | 1.58    | 1.85    | 1.95    | -0.35351 | 0.095763 |
| 13.3    | 12.17   | 12.29   | 13.2    | -0.04596 | 0.805906 |
| 87.4    | 133.9   | 109.84  | 118.98  | 0.393837 | 4.70E-05 |
| 3.24    | 1.43    | 1.87    | 1.28    | -1.20785 | 1.29E-06 |
| 27.99   | 26.01   | 26.68   | 27.26   | 0.050368 | 0.799377 |
| 9.37    | 10.51   | 11.06   | 8.44    | 0.199879 | 0.470098 |
| 5.49    | 8.62    | 8.74    | 9.37    | 0.242463 | 0.061135 |
| 11.53   | 12.11   | 11.07   | 12.31   | -0.10011 | 0.445638 |
| 12.26   | 11.71   | 12.1    | 11.37   | -0.12461 | 0.398404 |
| 1356.34 | 1089.99 | 1169.35 | 1057.63 | -0.36848 | 1.24E-06 |
| 16.33   | 18.94   | 19.42   | 18.12   | 0.068995 | 0.677816 |
| 8.03    | 12.9    | 9.85    | 11.39   | 0.459547 | 0.001143 |
| 21.21   | 22.45   | 27.36   | 27.65   | 0.031221 | 0.860977 |
| 18.66   | 22.88   | 23.59   | 24.11   | 0.235998 | 0.161876 |
| 41.45   | 37.7    | 40.2    | 38.21   | -0.16369 | 0.085852 |
| 4.02    | 4.84    | 3.66    | 3.84    | 0.095549 | 0.699582 |
| 35.33   | 37.46   | 36.9    | 42.3    | -0.00076 | 0.996497 |
| 8.21    | 10.82   | 9.93    | 9.96    | 0.194635 | 0.18109  |
| 23.6    | 217.47  | 80.57   | 145.04  | 2.231989 | 5.35E-10 |
| 0.38    | 1.87    | 1.28    | 1.61    | 1.674391 | 0.001419 |
| 5.31    | 5.13    | 4.95    | 5.23    | -0.19715 | 0.257752 |
| 0.2     | 0.1     | 0.19    | 0.31    | 0.215348 | 0.794617 |
| 18.7    | 19.88   | 19.16   | 21.61   | 0.065775 | 0.573358 |

|        |        |        |        |          |          |
|--------|--------|--------|--------|----------|----------|
| 15.43  | 12.89  | 11.46  | 11.45  | -0.33499 | 0.087247 |
| 0      | 0      | 0      | 0      | NA       | NA       |
| 6.72   | 6.6    | 6.47   | 6.88   | -0.04353 | 0.818228 |
| 0      | 0      | 0      | 0      | NA       | NA       |
| 14.71  | 20.19  | 16.44  | 18.01  | 0.257828 | 0.007279 |
| 10.32  | 14.65  | 14.04  | 13.46  | 0.140659 | 0.449477 |
| 3.22   | 1.96   | 2.52   | 2.29   | -0.42755 | 0.002656 |
| 0.01   | 0      | 0      | 0      | NA       | NA       |
| 9.95   | 8.85   | 8.18   | 8.79   | -0.26012 | 0.009698 |
| 1.22   | 1.26   | 1.44   | 1.07   | -0.33248 | 0.3759   |
| 4.41   | 6.32   | 5.23   | 6.09   | 0.228638 | 0.1605   |
| 33.8   | 47.91  | 39.32  | 43.59  | 0.479619 | 0.000418 |
| 14.54  | 11.32  | 14.18  | 14.58  | -0.15668 | 0.410509 |
| 1.11   | 0.88   | 0.87   | 0.89   | -0.50086 | 0.265261 |
| 13.78  | 15.31  | 17.85  | 16.27  | 0.24296  | 0.037421 |
| 11.49  | 14.32  | 12.71  | 12.93  | 0.050793 | 0.783713 |
| 0      | 0      | 0      | 0      | NA       | NA       |
| 0.07   | 0.07   | 0.06   | 0.04   | 0.14664  | 0.867696 |
| 49.7   | 32.39  | 36.34  | 36.48  | -0.48667 | 6.23E-08 |
| 0      | 0      | 0      | 0      | NA       | NA       |
| 23.08  | 18.06  | 19.99  | 22.34  | -0.11626 | 0.344842 |
| 0      | 0      | 0      | 0      | NA       | NA       |
| 26.72  | 14.61  | 14.57  | 17.75  | -0.74242 | 6.41E-18 |
| 3.25   | 0.38   | 1.04   | 0.78   | -1.83728 | 0.000235 |
| 22.31  | 26.97  | 25.75  | 25.95  | 0.254281 | 0.022173 |
| 0      | 0      | 0      | 0      | NA       | NA       |
| 0.02   | 0      | 0      | 0      | NA       | NA       |
| 0      | 0      | 0      | 0      | NA       | NA       |
| 0      | 0      | 0      | 0      | NA       | NA       |
| 3.89   | 5.67   | 4.59   | 5.09   | 0.270662 | 0.055089 |
| 15.8   | 19.76  | 15.68  | 17.83  | 0.18102  | 0.125168 |
| 0.98   | 3.25   | 5.5    | 4.2    | 1.306928 | 0.001111 |
| 11.83  | 11.03  | 10.79  | 11.71  | -0.03795 | 0.819101 |
| 9.02   | 6.38   | 6.27   | 6.92   | -0.35295 | 0.309911 |
| 40.36  | 44.02  | 41.47  | 41.99  | 0.040327 | 0.744304 |
| 0.1    | 0.38   | 0.34   | 0.43   | 0.822884 | 0.171343 |
| 0.92   | 6.6    | 4.17   | 5.51   | 2.372578 | 1.35E-27 |
| 18.52  | 12.67  | 15.39  | 13.08  | -0.3435  | 0.037494 |
| 3.54   | 3.71   | 5.03   | 3.55   | 0.044117 | 0.868389 |
| 143.99 | 123.44 | 129.33 | 143.02 | -0.12604 | 0.143634 |
| 0      | 0      | 0      | 0      | NA       | NA       |
| 0      | 0      | 0      | 0      | NA       | NA       |
| 14.4   | 20.2   | 16.87  | 18.4   | 0.171139 | 0.203888 |
| 21.21  | 15.16  | 16.41  | 16.01  | -0.3983  | 2.39E-06 |
| 0.02   | 0.03   | 0.01   | 0.02   | -0.31205 | 0.699552 |

|        |        |        |        |          |          |
|--------|--------|--------|--------|----------|----------|
| 0      | 0      | 0      | 0      | NA       | NA       |
| 23     | 15.23  | 15.65  | 14.27  | -0.66088 | 5.60E-11 |
| 0.18   | 0.32   | 0.04   | 0.09   | 0.373582 | 0.580964 |
| 0      | 0.04   | 0      | 0      | NA       | NA       |
| 0.04   | 0.13   | 0.13   | 0.12   | 0.583992 | 0.410545 |
| 3.44   | 4.72   | 4.44   | 3.43   | -0.43916 | 0.271133 |
| 5.4    | 5.55   | 5.84   | 5.11   | -0.26415 | 0.179344 |
| 19.07  | 23.03  | 20.78  | 19.57  | 0.161815 | 0.275888 |
| 0      | 0      | 0      | 0      | NA       | NA       |
| 3.19   | 3.15   | 2.76   | 2.72   | 0.082707 | 0.827147 |
| 77.2   | 199.74 | 151.3  | 172.02 | 1.135986 | 1.18E-26 |
| 1.53   | 1.35   | 1.32   | 1.19   | 0.01298  | 0.976474 |
| 8.3    | 9.59   | 8.65   | 9.66   | -0.04317 | 0.78893  |
| 13.47  | 92.73  | 45.48  | 70.53  | 2.200287 | 6.07E-15 |
| 3.55   | 4.39   | 4.7    | 4.75   | 0.320961 | 0.015895 |
| 6.22   | 5.73   | 11.73  | 6.52   | -0.10285 | 0.485787 |
| 47.29  | 52.58  | 50.35  | 53.64  | 0.221717 | 0.004784 |
| 28.49  | 38.17  | 27.67  | 29.43  | 0.104292 | 0.625762 |
| 13.04  | 11.83  | 13.65  | 13.59  | -0.17493 | 0.226087 |
| 49.64  | 36.73  | 41.23  | 38.07  | -0.50594 | 4.07E-08 |
| 0      | 0.04   | 0.08   | 0      | NA       | NA       |
| 0.16   | 0.34   | 0.31   | 0.21   | 0.291742 | 0.652617 |
| 2.24   | 2.96   | 2.69   | 3.08   | 0.405316 | 0.021079 |
| 0      | 0.02   | 0.06   | 0.02   | NA       | NA       |
| 8.73   | 3.74   | 6.24   | 4.88   | -0.28316 | 0.578883 |
| 0      | 0      | 0      | 0      | NA       | NA       |
| 14.26  | 8.08   | 11.23  | 11.6   | -0.51066 | 0.002083 |
| 5.12   | 5.79   | 5.43   | 5      | 0.161016 | 0.471929 |
| 0      | 0      | 0      | 0      | NA       | NA       |
| 0      | 0      | 0      | 0      | NA       | NA       |
| 2.27   | 1.21   | 1.49   | 2.25   | -0.16429 | 0.687057 |
| 0.92   | 1.06   | 1.21   | 0.85   | 0.382151 | 0.338471 |
| 21.1   | 17.42  | 14.01  | 19.97  | 0.043109 | 0.839932 |
| 6.31   | 7.04   | 6.73   | 7.5    | 0.087364 | 0.741819 |
| 147.81 | 174.69 | 216.25 | 198.45 | 0.337882 | 0.000507 |
| 13.71  | 13.42  | 14.24  | 15.09  | -0.09259 | 0.51922  |
| 119.03 | 129.7  | 129.96 | 119.54 | 0.007803 | 0.959017 |
| 84.57  | 90.27  | 91.17  | 96.54  | 0.04397  | 0.679688 |
| 0      | 0      | 0      | 0      | NA       | NA       |
| 209.26 | 113.19 | 135.5  | 133.98 | -0.81669 | NA       |
| 0      | 0      | 0      | 0      | NA       | NA       |
| 32.51  | 41.04  | 43.36  | 36.31  | 0.22378  | 0.016074 |
| 9.43   | 4.56   | 4.34   | 4.61   | -1.1284  | 4.56E-16 |
| 8.41   | 18.18  | 14.56  | 16.35  | 0.890274 | 8.52E-19 |
| 13.14  | 14.65  | 14.85  | 14.29  | -0.14958 | 0.373395 |

|        |        |        |        |          |          |
|--------|--------|--------|--------|----------|----------|
| 26.35  | 21.41  | 22.26  | 22.45  | -0.20812 | 0.051396 |
| 22.02  | 27.83  | 26.05  | 27.38  | 0.147985 | 0.131742 |
| 26.92  | 25.18  | 22.52  | 21.67  | -0.15674 | 0.33127  |
| 0.08   | 0.05   | 0.19   | 0.19   | NA       | NA       |
| 2.85   | 2.27   | 2.47   | 2.43   | -0.23306 | 0.148687 |
| 8.4    | 8.27   | 8.82   | 7.57   | -0.12423 | 0.385202 |
| 14.31  | 22.61  | 19.23  | 22.11  | 0.530633 | 0.000203 |
| 1.71   | 2.17   | 3.2    | 3.18   | 0.442892 | 0.169997 |
| 1.97   | 1.67   | 1.41   | 3.3    | -0.23673 | 0.248728 |
| 377.77 | 218.43 | 240.84 | 219.13 | -0.85223 | 3.14E-30 |
| 13.47  | 17.98  | 16.09  | 16.95  | 0.353102 | 0.001972 |
| 11.14  | 9.23   | 9.77   | 10.45  | -0.05623 | 0.779226 |
| 10.23  | 5.55   | 6.97   | 6.62   | -0.57217 | 0.000393 |
| 922.95 | 755.73 | 823.75 | 712.14 | -0.34618 | 2.58E-05 |
| 5.95   | 19.07  | 15.15  | 19.58  | 1.642653 | 3.30E-48 |
| 3.75   | 3.09   | 4.31   | 4.47   | -0.33877 | 0.21047  |
| 1.1    | 1.27   | 1.09   | 0.9    | 0.349717 | 0.2944   |
| 0.21   | 3.18   | 1.42   | 1.97   | 3.362201 | 9.70E-18 |
| 0.31   | 0.09   | 0.08   | 0.21   | NA       | NA       |
| 0.03   | 0      | 0      | 0      | NA       | NA       |
| 3.31   | 4.96   | 3.96   | 4.82   | 0.118811 | 0.490543 |
| 15.31  | 14.49  | 11.42  | 13.52  | 0.169697 | 0.1434   |
| 14.02  | 14.9   | 15.34  | 14.05  | -0.10017 | 0.510072 |
| 0.15   | 0.1    | 0.12   | 0.15   | -0.00098 | 0.999184 |
| 0.83   | 1.06   | 0.96   | 0.83   | 0.089305 | 0.79727  |
| 74.89  | 80.31  | 74     | 77.75  | -0.0076  | 0.959072 |
| 6.69   | 25.18  | 24.57  | 25.31  | 1.736222 | 2.35E-53 |
| 0.02   | 0      | 0      | 0.03   | NA       | NA       |
| 0      | 0.08   | 0      | 0.05   | NA       | NA       |
| 36.11  | 136.5  | 78.29  | 99.09  | 1.410571 | 3.17E-08 |
| 0      | 0      | 0      | 0      | NA       | NA       |
| 0      | 0      | 0      | 0      | NA       | NA       |
| 17.89  | 1.6    | 3.2    | 2.56   | -2.52739 | 1.48E-16 |
| 0      | 0      | 0      | 0      | NA       | NA       |
| 7.37   | 6.06   | 6.57   | 6.71   | -0.08686 | 0.672478 |
| 15.79  | 15.01  | 14.5   | 16.88  | -0.09712 | 0.62424  |
| 27.18  | 29.67  | 29.25  | 30.4   | 0.114452 | 0.317131 |
| 42.2   | 49     | 47.26  | 37.14  | -0.08554 | 0.586514 |
| 48.77  | 63.21  | 68.75  | 70.3   | 0.530184 | 4.93E-10 |
| 0.06   | 0.02   | 0      | 0      | NA       | NA       |
| 5.06   | 4.56   | 3.38   | 3.45   | -0.08709 | 0.832104 |
| 17.23  | 17.8   | 16.55  | 21.75  | -0.01164 | 0.948254 |
| 2.48   | 5.2    | 5.06   | 4.39   | 0.412934 | 0.035001 |
| 0.26   | 0.7    | 0.76   | 0.84   | 0.158816 | 0.827131 |
| 0      | 0      | 0      | 0      | NA       | NA       |

|         |        |        |         |                   |
|---------|--------|--------|---------|-------------------|
| 0       | 0      | 0      | 0 NA    | NA                |
| 0.08    | 0.01   | 0.02   | 0 NA    | NA                |
| 9.01    | 9.2    | 9.64   | 7.19    | -0.02746 0.944533 |
| 26.1    | 23.04  | 25.6   | 22.44   | -0.03682 0.791069 |
| 0.04    | 0      | 0.05   | 0.03 NA | NA                |
| 17.14   | 27.64  | 24.79  | 22.69   | 0.337893 0.008143 |
| 52.32   | 46.35  | 55.14  | 51.09   | -0.18656 0.080024 |
| 0.4     | 0.31   | 0.24   | 0.28    | -0.405 0.445311   |
| 8       | 5.68   | 9.11   | 8.26    | -0.18654 0.376862 |
| 53.11   | 59.39  | 56.7   | 57.97   | 0.173948 0.103853 |
| 0.03    | 0.21   | 0.07   | 0.23    | 0.42105 0.582509  |
| 1.54    | 2.56   | 2.51   | 3.12    | 0.856777 8.69E-05 |
| 0.56    | 0.14   | 0.14   | 0.13    | -0.56561 0.436048 |
| 0.02    | 0      | 0      | 0 NA    | NA                |
| 20.41   | 12.81  | 16.77  | 16.18   | -0.58836 9.06E-08 |
| 5.01    | 2.95   | 4.31   | 4.82    | -0.29955 0.277718 |
| 1125.82 | 47.05  | 125.38 | 78.98   | -3.22916 5.33E-19 |
| 0.03    | 0.03   | 0.03   | 0.05    | -0.43499 0.568717 |
| 0       | 0.07   | 0.09   | 0 NA    | NA                |
| 19.62   | 23.2   | 19.38  | 19.86   | -0.04528 0.803403 |
| 0.03    | 0.11   | 0.15   | 0 NA    | NA                |
| 4.88    | 5.49   | 5.15   | 7.41    | 0.540816 0.001453 |
| 0.71    | 2.05   | 0.88   | 1.55    | 0.176811 0.807273 |
| 0       | 0      | 0      | 0 NA    | NA                |
| 3.05    | 3.91   | 2.76   | 3.47    | -0.10998 0.734946 |
| 4.97    | 6.62   | 6.05   | 6.72    | 0.310635 0.001161 |
| 2.1     | 1.91   | 1.24   | 3.09    | 0.213607 0.743929 |
| 0       | 0      | 0      | 0 NA    | NA                |
| 0       | 0      | 0      | 0.04 NA | NA                |
| 0       | 0      | 0      | 0.25 NA | NA                |
| 21.87   | 15.93  | 18.24  | 19.66   | -0.26687 0.019173 |
| 11.59   | 13.34  | 11.24  | 12.31   | -0.01754 0.927818 |
| 2.82    | 3.49   | 3.3    | 3.04    | 0.000299 0.999184 |
| 9.61    | 10.66  | 10.88  | 13.12   | 0.357265 0.014287 |
| 0       | 0      | 0      | 0.15 NA | NA                |
| 0       | 0      | 0      | 0 NA    | NA                |
| 21.92   | 32.64  | 29.48  | 26.56   | 0.301224 0.053625 |
| 19.37   | 30.17  | 26.46  | 24.03   | 0.269588 0.082879 |
| 3.51    | 7.95   | 7.28   | 8.21    | 1.073079 1.09E-09 |
| 11.79   | 10.78  | 13.24  | 10.99   | -0.11605 0.373798 |
| 24.06   | 24.92  | 24.29  | 23.49   | -0.11742 0.342811 |
| 19.67   | 42.27  | 32.82  | 38.16   | 0.8871 4.21E-15   |
| 340.93  | 363.28 | 396.56 | 346.55  | -0.01727 0.904625 |
| 5.56    | 2.79   | 2.67   | 2.26    | -1.22694 6.66E-09 |
| 43.82   | 43.84  | 45.36  | 41.93   | 0.07012 0.583834  |

|         |         |        |         |          |          |
|---------|---------|--------|---------|----------|----------|
| 0.26    | 0.27    | 0.23   | 0.42    | 0.003429 | 0.996994 |
| 43.37   | 53.78   | 52.52  | 50.85   | 0.06551  | 0.660906 |
| 1215.96 | 1113.45 | 1177   | 1162.03 | -0.14518 | 0.101523 |
| 0.2     | 0.09    | 0.03   | 0.06    | NA       | NA       |
| 0.17    | 0.03    | 0.04   | 0.07    | NA       | NA       |
| 3.99    | 4.76    | 4.73   | 4.61    | 0.252477 | 0.233244 |
| 15.36   | 16.54   | 16.64  | 16.44   | 0.095565 | 0.408321 |
| 69.87   | 75.18   | 71.7   | 70.96   | -0.04949 | 0.731121 |
| 2.54    | 13.82   | 7.93   | 10.29   | 1.833577 | 2.15E-28 |
| 0.62    | 33.73   | 5.01   | 11.09   | 2.335524 | 3.00E-05 |
| 2.09    | 0.34    | 0.29   | 0.13    | -2.07332 | 1.59E-10 |
| 0       | 0       | 0      | 0       | NA       | NA       |
| 0       | 0       | 0      | 0       | NA       | NA       |
| 0       | 0       | 0      | 0       | NA       | NA       |
| 0       | 0.02    | 0.05   | 0.05    | NA       | NA       |
| 0.41    | 0.26    | 0.12   | 0.07    | -0.53669 | 0.444638 |
| 1240.17 | 1265.32 | 1257.7 | 1201.51 | -0.00078 | 0.995607 |
| 0       | 0       | 0      | 0       | NA       | NA       |
| 0       | 0       | 0      | 0       | NA       | NA       |
| 0       | 0       | 0      | 0       | NA       | NA       |
| 0       | 0       | 0      | 0       | NA       | NA       |
| 0       | 0       | 0      | 0       | NA       | NA       |
| 0       | 0       | 0      | 0       | NA       | NA       |
| 0       | 0       | 0      | 0       | NA       | NA       |
| 5.08    | 2.74    | 3.16   | 3.05    | -0.78312 | 0.000177 |
| 21.41   | 18.99   | 22.95  | 23.98   | -0.07325 | 0.671506 |
| 0       | 0       | 0      | 0       | NA       | NA       |
| 28.95   | 19.07   | 23.01  | 20.95   | -0.47877 | 4.03E-07 |
| 0       | 0       | 0      | 0       | NA       | NA       |
| 1.35    | 1.24    | 1.11   | 1.01    | -0.33233 | 0.638798 |
| 8.61    | 5.59    | 6.86   | 7.61    | -0.25514 | 0.120219 |
| 54.52   | 80.6    | 71.52  | 70.9    | 0.37084  | 4.17E-05 |
| 11.72   | 15.59   | 12.76  | 12.78   | -0.02796 | 0.920557 |
| 4.21    | 4.71    | 4.52   | 5.16    | 0.054571 | 0.851819 |
| 7.44    | 4.7     | 6.04   | 4.17    | -0.09569 | 0.816374 |
| 9.53    | 6.01    | 7.36   | 6.6     | -0.56565 | 1.90E-07 |
| 79.06   | 77.45   | 87.96  | 74.51   | 0.118912 | 0.311187 |
| 0       | 0       | 0      | 0       | NA       | NA       |
| 7.96    | 5.42    | 5.95   | 6.46    | -0.46413 | 0.003288 |
| 1.31    | 1.11    | 0.92   | 0.92    | -0.31378 | 0.371786 |
| 0       | 0       | 0.03   | 0       | NA       | NA       |
| 9.73    | 15.74   | 12.92  | 14.94   | 0.460416 | 0.000155 |
| 59.57   | 16.9    | 29.53  | 26.55   | -1.22734 | 2.47E-18 |
| 18.25   | 10.77   | 11.31  | 11.93   | -0.7131  | 1.03E-09 |
| 0       | 0       | 0.13   | 0       | NA       | NA       |

|        |        |        |        |          |          |
|--------|--------|--------|--------|----------|----------|
| 69.07  | 37.77  | 47.09  | 41.27  | -0.89003 | 1.71E-17 |
| 0      | 0.01   | 0      | 0      | NA       | NA       |
| 0.02   | 0      | 0      | 0      | NA       | NA       |
| 0.12   | 0.02   | 0.12   | 0      | -0.73954 | 0.266502 |
| 0.24   | 0      | 0.12   | 0.33   | -0.61856 | 0.384828 |
| 10.24  | 14.86  | 11.65  | 13.56  | 0.389007 | 0.021002 |
| 3.87   | 1.37   | 2.92   | 2.66   | -0.54912 | 0.085372 |
| 0.04   | 0.09   | 0.05   | 0.12   | -0.0046  | 0.996111 |
| 0      | 0.13   | 0.02   | 0.07   | NA       | NA       |
| 0.25   | 0.85   | 0.23   | 0.19   | 0.193928 | 0.798478 |
| 0.61   | 0.33   | 0.31   | 0.11   | -0.23884 | 0.752233 |
| 0      | 0      | 0      | 0      | NA       | NA       |
| 0      | 0      | 0      | 0      | NA       | NA       |
| 372.32 | 100.58 | 182.15 | 137.99 | -1.38746 | 3.71E-09 |
| 6.09   | 8.39   | 7.88   | 8.37   | 0.118929 | 0.419733 |
| 0.31   | 0.59   | 0.6    | 0.77   | 0.013224 | 0.989869 |
| 0      | 0      | 0      | 0      | NA       | NA       |
| 0      | 0      | 0      | 0      | NA       | NA       |
| 54.52  | 68.03  | 73.02  | 65.35  | 0.14074  | 0.181341 |
| 4.11   | 4.55   | 6.12   | 5.51   | 0.165766 | 0.559125 |
| 25.66  | 24.25  | 25.8   | 25.63  | -0.07393 | 0.472416 |
| 8.69   | 4.01   | 5.52   | 5.42   | -0.75522 | 8.34E-10 |
| 6.21   | 9.74   | 8.9    | 9.06   | 0.372421 | 0.018117 |
| 2.17   | 1.07   | 0.7    | 1.46   | -0.43384 | 0.367739 |
| 17.2   | 9.45   | 11.8   | 10.57  | -0.14804 | 0.292383 |
| 23.95  | 25.78  | 24.52  | 25.07  | -0.15015 | 0.40454  |
| 0      | 0.07   | 0      | 0.05   | NA       | NA       |
| 0      | 0.14   | 0.06   | 0      | NA       | NA       |
| 16.49  | 24.77  | 15.43  | 20.26  | 0.362736 | 0.081682 |
| 12.46  | 14.13  | 10.74  | 9.26   | 0.053701 | 0.800322 |
| 0.02   | 0      | 0.05   | 0.06   | NA       | NA       |
| 0      | 0      | 0.01   | 0      | NA       | NA       |
| 5.17   | 5.2    | 3.7    | 4.3    | -0.05791 | 0.799264 |
| 96.72  | 46.37  | 83     | 63.86  | -0.54105 | 0.039037 |
| 30.45  | 42.86  | 37.08  | 40.29  | 0.458329 | 2.43E-06 |
| 1.92   | 1.96   | 2.34   | 2.04   | -0.46652 | 0.052871 |
| 3.51   | 3.77   | 3.52   | 3.39   | 0.03267  | 0.875208 |
| 4.61   | 5.38   | 5.07   | 5.49   | 0.26823  | 0.075703 |
| 553.91 | 692.87 | 729.06 | 726.82 | 0.2914   | 1.77E-05 |
| 3.82   | 5.01   | 3.36   | 3.77   | 0.195221 | 0.254688 |
| 0      | 0      | 0      | 0      | NA       | NA       |
| 0.71   | 0.71   | 1.09   | 1.16   | -0.19903 | 0.61033  |
| 5.7    | 11.58  | 10.95  | 12.38  | 0.848666 | 1.21E-20 |
| 5.28   | 3.34   | 4.83   | 4.65   | -0.44351 | 0.074652 |
| 0.16   | 0.12   | 0.29   | 0.25   | 0.897089 | 0.167378 |



|       |        |        |        |          |          |
|-------|--------|--------|--------|----------|----------|
| 0.62  | 1.35   | 0.86   | 1.03   | 0.792531 | 0.003587 |
| 0     | 0      | 0      | 0      | NA       | NA       |
| 0.23  | 1.01   | 0.2    | 0.22   | 0.58233  | 0.3914   |
| 10.88 | 9.38   | 10.09  | 8.62   | -0.2962  | 0.046491 |
| 2.97  | 1.76   | 2.36   | 2.03   | -0.779   | 3.98E-06 |
| 0     | 0      | 0      | 0      | NA       | NA       |
| 0.08  | 0      | 0.01   | 0.01   | NA       | NA       |
| 10.78 | 9.83   | 10.43  | 10.42  | 0.118259 | 0.533673 |
| 7.16  | 5.71   | 5.95   | 5.04   | -0.02272 | 0.949004 |
| 8.53  | 6.64   | 8.4    | 6.95   | -0.03909 | 0.859711 |
| 1.98  | 3.06   | 1.94   | 2.9    | -0.0734  | 0.847181 |
| 6.48  | 4.09   | 4.88   | 7.38   | -0.18355 | 0.323387 |
| 24.49 | 30.62  | 30.87  | 30.81  | 0.246318 | 0.028291 |
| 0.53  | 3.95   | 1.7    | 2.6    | 2.39736  | 2.01E-20 |
| 14.35 | 14.44  | 12.25  | 13.96  | -0.24734 | 0.011868 |
| 10.35 | 1.79   | 5.84   | 2.73   | -1.91323 | 4.53E-25 |
| 2.09  | 1.59   | 1.94   | 1.55   | -0.26047 | 0.197985 |
| 0.15  | 0.15   | 0.2    | 0.08   | -0.22077 | 0.796742 |
| 71.54 | 62.95  | 76.34  | 73.75  | -0.11509 | 0.315523 |
| 19.37 | 17.41  | 16.5   | 20.36  | -0.16171 | 0.086711 |
| 0.05  | 0      | 0      | 0      | NA       | NA       |
| 2.52  | 7.52   | 6.05   | 6.98   | 1.340274 | 8.00E-24 |
| 2.88  | 3.67   | 4.21   | 2.99   | 0.337646 | 0.03973  |
| 44.41 | 48.68  | 53.4   | 57.2   | 0.275335 | 0.006594 |
| 6.03  | 6.33   | 7.05   | 6.33   | -0.04376 | 0.780961 |
| 24.42 | 40.87  | 31.22  | 37.39  | 0.534856 | 0.000109 |
| 6.27  | 3.4    | 3.46   | 2.98   | -0.9452  | 1.19E-14 |
| 4.12  | 7.93   | 6.04   | 6.03   | 0.515684 | 0.0339   |
| 13.66 | 16.77  | 14.66  | 13.94  | 0.07703  | 0.647437 |
| 0.15  | 0.12   | 0.15   | 0.18   | -0.21354 | 0.75675  |
| 1.72  | 3.17   | 2.5    | 2.36   | 0.335354 | 0.221566 |
| 1.7   | 2.12   | 1.61   | 1.94   | 0.725132 | 0.000191 |
| 0.26  | 0.02   | 0      | 0.02   | NA       | NA       |
| 35.03 | 52.95  | 42.88  | 47.58  | 0.551393 | 4.21E-06 |
| 10.95 | 9.24   | 8.47   | 10.63  | -0.16031 | 0.450659 |
| 2.43  | 1.39   | 1.2    | 2.2    | -0.34479 | 0.103795 |
| 90.52 | 103.48 | 111.37 | 108.93 | 0.1915   | 0.020357 |
| 14.04 | 12.15  | 13.57  | 12.47  | -0.19415 | 0.218108 |
| 0     | 0      | 0      | 0      | NA       | NA       |
| 0.51  | 0.16   | 0.29   | 0.21   | -0.9427  | 0.098765 |
| 0     | 0      | 0      | 0      | NA       | NA       |
| 90.34 | 101.74 | 91.69  | 86.07  | 0.020823 | 0.909236 |
| 8.21  | 2.85   | 5.01   | 4.1    | -1.21205 | 5.02E-10 |
| 0     | 0      | 0      | 0      | NA       | NA       |
| 20.69 | 6.58   | 8.45   | 8.2    | -1.47717 | 1.59E-48 |

|        |       |       |       |          |          |
|--------|-------|-------|-------|----------|----------|
| 5.34   | 4.17  | 4.97  | 4.04  | -0.21033 | 0.36752  |
| 50.05  | 36.23 | 45.81 | 47.03 | -0.30557 | 0.02231  |
| 0      | 0     | 0     | 0     | NA       | NA       |
| 7.04   | 4.99  | 7.56  | 6.73  | -0.24349 | 0.023228 |
| 10.69  | 8.8   | 10.24 | 9.55  | -0.3257  | 0.012183 |
| 18.96  | 8.6   | 13    | 10.33 | -0.89794 | 1.98E-13 |
| 8.36   | 7.85  | 8.39  | 7.71  | -0.06087 | 0.684379 |
| 30.06  | 32.45 | 36.42 | 29.44 | 0.014843 | 0.935649 |
| 2.07   | 1.43  | 1.28  | 1.67  | -0.4178  | 0.11246  |
| 0.06   | 0     | 0.02  | 0.03  | NA       | NA       |
| 4.77   | 1.44  | 2.83  | 1.36  | -1.21869 | 3.93E-06 |
| 23.36  | 49.31 | 54.89 | 55.37 | 1.090182 | 1.81E-34 |
| 0      | 0     | 0.05  | 0     | NA       | NA       |
| 0.2    | 0     | 0     | 0     | NA       | NA       |
| 48.5   | 27.57 | 35.8  | 32.13 | -0.65809 | 3.84E-08 |
| 9.73   | 11.64 | 13.02 | 12.98 | 0.240136 | 0.095483 |
| 26.56  | 22.8  | 23.12 | 24.33 | -0.16211 | 0.299314 |
| 21.98  | 19.72 | 19.67 | 20.17 | -0.18803 | 0.09392  |
| 3.17   | 4.81  | 4.45  | 5.17  | 0.309178 | 0.068885 |
| 7.31   | 9.39  | 8.49  | 10.48 | 0.142747 | 0.348322 |
| 13.83  | 13.14 | 12.87 | 13.03 | -0.34727 | 0.02385  |
| 12.55  | 8.89  | 11.03 | 12.01 | 0.004203 | 0.982137 |
| 0      | 0     | 0     | 0     | NA       | NA       |
| 2.08   | 1.88  | 1.72  | 1.36  | -0.11215 | 0.807366 |
| 5.26   | 7.4   | 8.5   | 8.64  | 0.901475 | 8.00E-10 |
| 0      | 0     | 0     | 0     | NA       | NA       |
| 2.67   | 2.8   | 2.25  | 3.96  | -0.02515 | 0.944642 |
| 5.28   | 11.48 | 9.09  | 8.88  | 0.637672 | 1.92E-09 |
| 0      | 0     | 0     | 0     | NA       | NA       |
| 2.5    | 11.13 | 7.6   | 8.28  | 1.419907 | 2.33E-15 |
| 0.74   | 0.38  | 0.47  | 1.07  | -0.1904  | 0.675461 |
| 0      | 0     | 0     | 0     | NA       | NA       |
| 155.59 | 46.65 | 65.87 | 60.64 | -1.36372 | 2.43E-23 |
| 1.12   | 1.33  | 2.05  | 1.63  | 0.103411 | 0.814889 |
| 0      | 0     | 0.02  | 0     | NA       | NA       |
| 0.58   | 1.52  | 0.46  | 1.03  | 0.822871 | 0.054366 |
| 0      | 0     | 0     | 0     | NA       | NA       |
| 3.38   | 4.3   | 3.51  | 3.11  | -0.07573 | 0.802461 |
| 10.32  | 10.17 | 11.12 | 9.1   | -0.1039  | 0.702158 |
| 1.01   | 1.64  | 2.26  | 1.4   | -0.53506 | 0.145517 |
| 10.2   | 13.1  | 10.79 | 14.86 | 0.279498 | 0.080381 |
| 2.86   | 3.14  | 2.43  | 2.56  | 0.679663 | 0.00049  |
| 0.77   | 1.04  | 0.69  | 1.07  | 0.126592 | 0.729065 |
| 15.79  | 18.84 | 20.23 | 20.43 | 0.440489 | 3.62E-06 |
| 14.44  | 15.94 | 16.53 | 16.15 | 0.095955 | 0.40116  |

|        |       |        |       |          |          |
|--------|-------|--------|-------|----------|----------|
| 15.93  | 20.48 | 22.79  | 25.63 | 0.762649 | 1.62E-12 |
| 0.34   | 0     | 0      | 0     | NA       | NA       |
| 0      | 0.15  | 0.06   | 0.19  | NA       | NA       |
| 15.42  | 12.57 | 12.07  | 11.7  | -0.05938 | 0.671172 |
| 1.64   | 1     | 1.08   | 0.53  | -1.05683 | 0.004713 |
| 21.34  | 19.8  | 16.33  | 19.12 | -0.33443 | 0.002043 |
| 5.41   | 4.27  | 4.79   | 3.88  | -0.53525 | 0.003521 |
| 6.69   | 6.34  | 5.95   | 7.8   | 0.181474 | 0.504749 |
| 6.13   | 9.81  | 9.47   | 9.11  | 0.62297  | 5.55E-07 |
| 12.23  | 18.25 | 17.19  | 15.88 | 0.306591 | 0.005851 |
| 3.24   | 3.78  | 4.98   | 3.09  | 0.1134   | 0.747737 |
| 1.99   | 3.62  | 4.83   | 4.79  | 0.842305 | 0.01085  |
| 11.71  | 11.5  | 11.91  | 12.24 | -0.07419 | 0.540248 |
| 0.24   | 3.37  | 1.56   | 2.82  | 2.71167  | 3.14E-15 |
| 0      | 0.09  | 0.18   | 0.03  | NA       | NA       |
| 4.27   | 4.87  | 4.82   | 4.81  | 0.105599 | 0.586167 |
| 0.17   | 0     | 0      | 0.03  | NA       | NA       |
| 0      | 0     | 0      | 0     | NA       | NA       |
| 4.06   | 6.18  | 4.69   | 5.48  | 0.51618  | 4.09E-05 |
| 0      | 0     | 0      | 0     | NA       | NA       |
| 0      | 0.01  | 0      | 0.04  | NA       | NA       |
| 1.28   | 1.62  | 1.86   | 1.43  | 0.164611 | 0.608942 |
| 6.16   | 3.87  | 4.37   | 3.95  | -0.6889  | 0.001413 |
| 8.4    | 7.31  | 9.06   | 8.17  | -0.16404 | 0.538615 |
| 1.8    | 0.47  | 1.91   | 1.06  | -0.2681  | 0.62178  |
| 5.86   | 6.65  | 7.3    | 7.24  | 0.307258 | 0.06786  |
| 0.07   | 0.01  | 0.02   | 0.01  | NA       | NA       |
| 8.27   | 10.31 | 9.85   | 9.29  | 0.290166 | 0.008337 |
| 49     | 49.69 | 51.74  | 53.17 | 0.114991 | 0.228419 |
| 4.69   | 4.91  | 4.3    | 4.27  | -0.11167 | 0.694356 |
| 29.13  | 29.01 | 29.7   | 35.13 | -0.00628 | 0.973164 |
| 22.46  | 29.07 | 26.38  | 28.1  | 0.26144  | 0.010005 |
| 0      | 0     | 0      | 0.02  | NA       | NA       |
| 0      | 0     | 0      | 0     | NA       | NA       |
| 0      | 0     | 0      | 0     | NA       | NA       |
| 0      | 0     | 0      | 0     | NA       | NA       |
| 0.24   | 1.16  | 0.23   | 0.36  | -0.11435 | 0.872941 |
| 0      | 0     | 0      | 0     | NA       | NA       |
| 1.84   | 0.88  | 1.29   | 1.25  | -0.90379 | 0.000702 |
| 0.7    | 2.16  | 1.83   | 2.03  | 1.110443 | 0.003717 |
| 6.3    | 5.18  | 4.62   | 5     | -0.44925 | 0.004435 |
| 6.98   | 6.35  | 7.97   | 7.23  | -0.2014  | 0.343257 |
| 0.02   | 0.03  | 0.06   | 0.06  | 0.367922 | 0.636697 |
| 112.01 | 83.79 | 100.25 | 93.13 | -0.36735 | 0.002605 |
| 0      | 0     | 0      | 0     | NA       | NA       |

|        |        |        |        |          |          |
|--------|--------|--------|--------|----------|----------|
| 0.04   | 0.12   | 0.09   | 0.05   | 0.54822  | 0.41012  |
| 0      | 0      | 0      | 0      | NA       | NA       |
| 43.08  | 37.04  | 40.09  | 35.89  | -0.11074 | 0.240858 |
| 14.01  | 13.26  | 14.46  | 13.97  | 0.009492 | 0.947255 |
| 5.76   | 3.56   | 4.32   | 3.96   | -0.56375 | 6.03E-05 |
| 4.6    | 7.53   | 9.2    | 8.32   | 1.203717 | 3.14E-30 |
| 0      | 0.1    | 0.05   | 0.08   | NA       | NA       |
| 2.79   | 2.46   | 2.99   | 2.31   | -0.20261 | 0.333214 |
| 16.1   | 13.73  | 10.95  | 11.84  | -0.3765  | 0.004967 |
| 5.01   | 4.94   | 5.67   | 4.59   | 0.118305 | 0.702822 |
| 1.53   | 1.48   | 1.72   | 1.4    | 0.357001 | 0.409172 |
| 0      | 0      | 0      | 0      | NA       | NA       |
| 3.67   | 3.23   | 3.96   | 3.41   | -0.06211 | 0.812564 |
| 0.01   | 0      | 0.04   | 0.04   | NA       | NA       |
| 0      | 0      | 0      | 0      | NA       | NA       |
| 0      | 0      | 0      | 0      | NA       | NA       |
| 0      | 0      | 0      | 0      | NA       | NA       |
| 0.9    | 0.2    | 0.42   | 0.38   | -1.13008 | 7.95E-06 |
| 8.61   | 6.98   | 6.41   | 7.49   | -0.28907 | 0.066781 |
| 12.12  | 6.91   | 11.45  | 9.44   | -0.44823 | 7.42E-05 |
| 3.82   | 3.6    | 4.02   | 4.45   | -0.15978 | 0.479157 |
| 131.01 | 116.85 | 125.41 | 115.42 | -0.15365 | 0.076798 |
| 13.1   | 9.06   | 11.02  | 9.76   | -0.41367 | 0.024383 |
| 4.5    | 4.35   | 6.39   | 7.17   | 0.125169 | 0.442903 |
| 0.57   | 0.91   | 0.57   | 0.34   | 0.179735 | 0.813447 |
| 0      | 0      | 0      | 0      | NA       | NA       |
| 17.59  | 11.54  | 14.51  | 13.88  | -0.32514 | 0.014907 |
| 0      | 0      | 0      | 0      | NA       | NA       |
| 0.09   | 0.19   | 0.06   | 0.13   | 0.109923 | 0.891048 |
| 9.17   | 5.75   | 6.81   | 6.69   | -0.6007  | 3.08E-05 |
| 66.41  | 82.56  | 80.56  | 85.99  | 0.273648 | 0.000146 |
| 0.15   | 0.21   | 0.15   | 0.38   | NA       | NA       |
| 0      | 0.02   | 0.02   | 0.02   | NA       | NA       |
| 9.07   | 11.32  | 11.22  | 10.93  | 0.291086 | 0.001126 |
| 4.35   | 2.61   | 3.36   | 3.97   | -0.06187 | 0.853146 |
| 2.15   | 4.59   | 3.47   | 3.87   | 0.249646 | 0.426404 |
| 238.58 | 240.3  | 297.64 | 294.36 | 0.100584 | 0.387812 |
| 1.01   | 0.88   | 0.79   | 1.37   | -0.30633 | 0.572248 |
| 2.68   | 3.01   | 3.07   | 2.09   | 0.050129 | 0.895538 |
| 0.18   | 0.2    | 0.17   | 0.29   | -0.0261  | 0.966405 |
| 3.8    | 3.11   | 3.02   | 3.57   | -0.15521 | 0.487576 |
| 4.83   | 6.08   | 5.51   | 5.48   | 0.219403 | 0.061207 |
| 1.13   | 5.03   | 3.48   | 3.57   | 1.247873 | 1.10E-09 |
| 3.49   | 3.7    | 3.94   | 3.81   | 0.336937 | 0.238166 |
| 0      | 0      | 0      | 0      | NA       | NA       |

|        |        |        |        |          |          |
|--------|--------|--------|--------|----------|----------|
| 2.71   | 1.47   | 2.27   | 2.9    | 0.109039 | 0.784872 |
| 7.55   | 4.25   | 6.19   | 7.13   | -0.33219 | 0.071255 |
| 5.13   | 3.63   | 4.65   | 4.52   | 0.00126  | 0.996111 |
| 3.18   | 1.51   | 2.15   | 1.69   | -0.63822 | 0.019216 |
| 1.01   | 3.03   | 2.04   | 2.02   | 0.504064 | 0.130461 |
| 3.74   | 3.59   | 4.07   | 3.95   | 0.16163  | 0.505505 |
| 0      | 0.03   | 0.03   | 0.12   | NA       | NA       |
| 7.06   | 11.05  | 9.68   | 10.56  | 0.445821 | 0.017602 |
| 13.42  | 8.12   | 12.28  | 9.91   | -0.43205 | 0.011802 |
| 0      | 0      | 0      | 0      | NA       | NA       |
| 1.28   | 1.12   | 1.13   | 1.1    | -0.32388 | 0.407699 |
| 7.44   | 21.44  | 13.71  | 15.78  | 1.221867 | 4.04E-16 |
| 22.63  | 16.12  | 15.14  | 15.04  | -0.29239 | 0.011059 |
| 0.24   | 0.41   | 0.49   | 0.53   | 0.70066  | 0.12714  |
| 0      | 1.29   | 1.27   | 1.67   | 2.891496 | 1.25E-10 |
| 23.94  | 14.16  | 16.39  | 13.94  | -0.71661 | 5.30E-13 |
| 6.39   | 6.56   | 6.56   | 6.81   | 0.059173 | 0.741906 |
| 0.34   | 0.34   | 0.3    | 0.36   | -0.63944 | 0.113823 |
| 36.11  | 29.55  | 28.14  | 34.06  | -0.29359 | 0.002344 |
| 106.15 | 105.4  | 117.78 | 122.5  | 0.122972 | 0.20035  |
| 0      | 0      | 0      | 0      | NA       | NA       |
| 6.54   | 0.48   | 1.47   | 0.63   | -2.92855 | 1.27E-19 |
| 1.74   | 0.8    | 1.92   | 1.89   | -0.5921  | 0.065452 |
| 0      | 0.02   | 0.25   | 0      | NA       | NA       |
| 0      | 0      | 0      | 0      | NA       | NA       |
| 0      | 0      | 0      | 0      | NA       | NA       |
| 0      | 0      | 0      | 0      | NA       | NA       |
| 51.23  | 40.13  | 42.43  | 42.22  | -0.27856 | 0.001145 |
| 0      | 0      | 0      | 0      | NA       | NA       |
| 8.92   | 7.48   | 7.28   | 7      | -0.35774 | 0.025945 |
| 1.34   | 0.7    | 0.52   | 0.58   | -0.98232 | 0.000949 |
| 402.15 | 333.76 | 265.78 | 299.28 | -0.45319 | 8.68E-07 |
| 1.03   | 1.83   | 1.53   | 1.71   | 0.466886 | 0.236259 |
| 0      | 0      | 0.03   | 0      | NA       | NA       |
| 0.03   | 0      | 0      | 0      | NA       | NA       |
| 6.12   | 8.04   | 7.67   | 7.81   | 0.34086  | 0.007596 |
| 9.53   | 11.93  | 12.74  | 15.63  | 0.538801 | 9.09E-06 |
| 1.02   | 0.63   | 0.68   | 0.74   | 0.100874 | 0.892458 |
| 17.24  | 23.93  | 24     | 21.45  | 0.519814 | 3.35E-06 |
| 0      | 0.14   | 0.1    | 0.21   | 0.1731   | 0.841869 |
| 1.25   | 1.53   | 1.19   | 1.52   | 0.134658 | 0.557201 |
| 0      | 0      | 0      | 0      | NA       | NA       |
| 1.7    | 1.49   | 1.19   | 1.82   | -0.40258 | 0.247841 |
| 0.04   | 1.03   | 1.03   | 0.94   | 2.440693 | 1.13E-06 |
| 16.15  | 10.62  | 11.56  | 13.83  | -0.26611 | 0.020952 |

|        |        |        |        |          |          |
|--------|--------|--------|--------|----------|----------|
| 4.56   | 4.21   | 4.19   | 4.51   | 0.021122 | 0.931771 |
| 0.03   | 0      | 0      | 0.02   | NA       | NA       |
| 1.53   | 1.76   | 1.55   | 1.9    | 0.032705 | 0.939281 |
| 5.43   | 5.93   | 4.88   | 6.26   | 0.229375 | 0.295058 |
| 0.01   | 0.01   | 0.05   | 0      | NA       | NA       |
| 65.17  | 83.11  | 80.65  | 80.19  | 0.387093 | 1.07E-05 |
| 1.93   | 2.5    | 1.94   | 2.25   | 0.248748 | 0.49698  |
| 28.77  | 22.89  | 29.64  | 24.65  | -0.24062 | 0.005573 |
| 0      | 0.05   | 0.07   | 0.07   | 0.584556 | 0.416685 |
| 38.81  | 41.98  | 48.89  | 46.78  | 0.256262 | 0.002241 |
| 16.95  | 17.21  | 14.1   | 16.1   | 0.137262 | 0.479822 |
| 0      | 0.04   | 0.1    | 0      | NA       | NA       |
| 11.36  | 3.38   | 5.5    | 4.27   | -1.29854 | 6.20E-17 |
| 0      | 0.02   | 0.06   | 0      | NA       | NA       |
| 0      | 0      | 0      | 0      | NA       | NA       |
| 0      | 0.04   | 0      | 0.13   | NA       | NA       |
| 0.04   | 0.04   | 0.06   | 0.07   | -0.32993 | 0.675943 |
| 9.47   | 10.53  | 8.4    | 8.4    | -0.0126  | 0.953663 |
| 14.46  | 17.04  | 18.37  | 18.09  | 0.176125 | 0.265988 |
| 134.42 | 208.31 | 263.01 | 252.42 | 0.858893 | 7.76E-17 |
| 0.93   | 1.74   | 1.99   | 1.81   | 1.32936  | 6.35E-08 |
| 0      | 0      | 0      | 0      | NA       | NA       |
| 0      | 0      | 0.02   | 0.02   | NA       | NA       |
| 0      | 0      | 0      | 0      | NA       | NA       |
| 11.15  | 23.08  | 16.35  | 18.74  | 0.840452 | 4.17E-11 |
| 0      | 0      | 0      | 0      | NA       | NA       |
| 4.91   | 3.33   | 5.19   | 5.7    | 0.111226 | 0.598721 |
| 0.01   | 0.17   | 0.2    | 0.22   | 1.144529 | 0.046311 |
| 8.92   | 7.22   | 7.1    | 7.71   | -0.08605 | 0.692251 |
| 13.74  | 6.54   | 8.64   | 8.35   | -0.89865 | 4.39E-12 |
| 25.82  | 39.63  | 36.18  | 38.93  | 0.454199 | 0.001452 |
| 1.14   | 1.49   | 1.07   | 1.13   | -0.19863 | 0.723985 |
| 8.9    | 12.06  | 13.91  | 16.12  | 0.501856 | 0.000168 |
| 112.81 | 82.81  | 92.05  | 87.27  | -0.52604 | 2.98E-09 |
| 0      | 0      | 0      | 0      | NA       | NA       |
| 0.32   | 0.15   | 0.08   | 0.02   | -0.71095 | 0.304944 |
| 12.68  | 21.41  | 19.31  | 19.29  | 0.473525 | 3.03E-05 |
| 143.14 | 42.4   | 60.47  | 51.16  | -1.42776 | 2.40E-35 |
| 0      | 0      | 0      | 0      | NA       | NA       |
| 0      | 0      | 0      | 0      | NA       | NA       |
| 2.25   | 4.34   | 3.36   | 2.59   | 0.1709   | 0.466962 |
| 11.02  | 7.94   | 8.58   | 7.93   | -0.13211 | 0.338471 |
| 104.32 | 101.26 | 94.66  | 97.18  | -0.07875 | 0.420605 |
| 18.48  | 24.92  | 24.41  | 20.85  | 0.393527 | 0.00349  |
| 1.1    | 5.51   | 4.49   | 4.9    | 2.564914 | 3.24E-33 |

|       |        |        |         |          |          |
|-------|--------|--------|---------|----------|----------|
| 10.97 | 10.55  | 10.02  | 12.13   | 0.028551 | 0.934993 |
| 10.94 | 12.66  | 12.41  | 13.03   | 0.049569 | 0.708458 |
| 0     | 0      | 0.05   | 0 NA    | NA       |          |
| 6.6   | 50.26  | 24.11  | 33.51   | 2.180519 | 1.45E-10 |
| 0.3   | 0.09   | 0.1    | 0.06    | -1.26331 | 0.007814 |
| 4     | 8.89   | 4.76   | 6.71    | 0.518042 | 0.00313  |
| 97.71 | 106.73 | 111.52 | 114.14  | 0.132289 | 0.110165 |
| 10.61 | 13.21  | 12.41  | 12.79   | 0.247523 | 0.011463 |
| 11.88 | 13.11  | 14.26  | 15.69   | 0.243175 | 0.015203 |
| 0.05  | 0.19   | 0.2    | 0.24    | 0.286635 | 0.708176 |
| 8.11  | 17.7   | 12.78  | 17.06   | 0.957469 | 4.24E-14 |
| 0     | 0.06   | 0      | 0 NA    | NA       |          |
| 0.5   | 1.05   | 0.79   | 0.8     | 1.444621 | 0.005099 |
| 0.54  | 20.62  | 4.98   | 10.57   | 3.10399  | 3.81E-11 |
| 0.21  | 0.1    | 0.26   | 0.16    | 0.190066 | 0.826744 |
| 16.59 | 14.93  | 16.7   | 15.95   | -0.14879 | 0.141118 |
| 33.82 | 35     | 37.04  | 37.59   | 0.132039 | 0.184845 |
| 0.02  | 0.01   | 0      | 0 NA    | NA       |          |
| 0     | 0      | 0      | 0 NA    | NA       |          |
| 0.13  | 0.22   | 0.15   | 0.1     | 0.32431  | 0.675367 |
| 6.59  | 1.33   | 2.44   | 2.03    | -1.3772  | 6.73E-06 |
| 0.1   | 0.05   | 0.01   | 0 NA    | NA       |          |
| 1.32  | 2.93   | 3.08   | 2.74    | 0.966014 | 2.13E-06 |
| 0     | 0      | 0      | 0 NA    | NA       |          |
| 9.49  | 8.84   | 8.35   | 6.95    | -0.07848 | 0.714743 |
| 28.41 | 18.38  | 21.56  | 22.21   | -0.41755 | 2.81E-05 |
| 9.09  | 7.68   | 7.14   | 7.98    | -0.13255 | 0.329614 |
| 0     | 0.11   | 0      | 0 NA    | NA       |          |
| 1.37  | 1.41   | 1.51   | 1.95    | -0.35713 | 0.327208 |
| 5.07  | 6.37   | 7.28   | 6.96    | 0.605144 | 0.0245   |
| 20.62 | 35.02  | 38.21  | 39.27   | 0.812165 | 5.29E-22 |
| 0     | 0      | 0      | 0.04 NA | NA       |          |
| 15.64 | 13.31  | 17.49  | 15.55   | -0.28825 | 0.101063 |
| 13.32 | 19.6   | 14.15  | 17.38   | 0.296064 | 0.090508 |
| 0.76  | 0      | 0.23   | 0.11    | -1.62677 | 0.005437 |
| 4.69  | 10.14  | 9.39   | 8.68    | 0.87172  | 5.74E-05 |
| 5.29  | 9.24   | 7.6    | 8.76    | 0.629115 | 0.00027  |
| 0.18  | 0.06   | 0.15   | 0 NA    | NA       |          |
| 0     | 0      | 0      | 0 NA    | NA       |          |
| 1.23  | 1.44   | 1.37   | 1.84    | 0.043875 | 0.933507 |
| 13.26 | 17.94  | 17.58  | 16.35   | 0.220809 | 0.179004 |
| 5.37  | 3.46   | 3.57   | 4.88    | -0.75696 | 1.35E-05 |
| 28.94 | 26.25  | 26.28  | 27.02   | -0.08248 | 0.459233 |
| 8.77  | 6.23   | 8.07   | 8.52    | -0.0151  | 0.93583  |
| 0     | 0      | 0      | 0 NA    | NA       |          |

|       |        |        |        |          |          |
|-------|--------|--------|--------|----------|----------|
| 4.42  | 4.35   | 5.03   | 4.75   | 0.037736 | 0.90014  |
| 0     | 0      | 0.04   | 0      | NA       | NA       |
| 8.48  | 10.02  | 9.22   | 12.95  | 0.387841 | 0.001977 |
| 20.02 | 18.71  | 20.82  | 19.66  | -0.1676  | 0.264668 |
| 2.08  | 1.22   | 1.92   | 1.76   | -0.344   | 0.16538  |
| 4.54  | 3.86   | 4.04   | 4.54   | 0.176302 | 0.454592 |
| 34.23 | 34.17  | 37.58  | 34.79  | -0.1109  | 0.453409 |
| 0     | 0      | 0      | 0      | NA       | NA       |
| 25.94 | 22.65  | 21.05  | 20.87  | -0.33544 | 0.000213 |
| 0     | 0      | 0      | 0      | NA       | NA       |
| 2.43  | 0.86   | 1.35   | 1.1    | -0.97192 | 0.001657 |
| 0     | 0      | 0      | 0      | NA       | NA       |
| 5.95  | 2.03   | 3.83   | 4.38   | -1.27754 | 2.98E-12 |
| 12.37 | 14.98  | 16.72  | 17.21  | 0.221169 | 0.059992 |
| 0     | 0.01   | 0      | 0.03   | NA       | NA       |
| 0     | 0      | 0      | 0      | NA       | NA       |
| 26.62 | 231.29 | 113.02 | 178.27 | 2.423305 | 1.79E-20 |
| 47.61 | 50.24  | 55.5   | 52.49  | 0.146142 | 0.076513 |
| 0.78  | 0.81   | 0.92   | 0.74   | -0.17444 | 0.700507 |
| 8.31  | 10.13  | 9.71   | 10.11  | 0.211078 | 0.075989 |
| 9.11  | 15.59  | 13.2   | 14.85  | 0.755169 | 8.31E-13 |
| 3.53  | 4.58   | 4.14   | 3.99   | 0.106402 | 0.735342 |
| 0.36  | 0.1    | 0.1    | 0.05   | -2.0638  | 0.000108 |
| 0.26  | 0.36   | 0.51   | 0.17   | -0.41439 | 0.521444 |
| 12.92 | 4.32   | 6.84   | 5.32   | -1.17134 | 8.18E-14 |
| 31.03 | 26.85  | 27.92  | 30.53  | 0.031765 | 0.82905  |
| 7.68  | 10.05  | 8.25   | 9.73   | 0.604404 | 2.77E-07 |
| 0     | 0      | 0.02   | 0      | NA       | NA       |
| 0     | 0.02   | 0      | 0      | NA       | NA       |
| 1.6   | 2.35   | 2.52   | 2.42   | 0.395031 | 0.033538 |
| 13.3  | 15.95  | 15.67  | 17.42  | -0.07919 | 0.607971 |
| 6.88  | 7.81   | 7.64   | 8.02   | 0.035045 | 0.85721  |
| 12.12 | 14.48  | 17.96  | 16.93  | 0.370566 | 0.00079  |
| 2.51  | 3.69   | 3.54   | 2.54   | 0.543042 | 0.046082 |
| 1.26  | 5.03   | 2.12   | 2.9    | 1.072943 | 5.85E-05 |
| 1.2   | 1.58   | 1.24   | 1.03   | 0.53935  | 0.245866 |
| 7.95  | 16.1   | 13.01  | 13.35  | 0.735056 | 1.73E-10 |
| 0.76  | 1.76   | 1.44   | 1.33   | 0.708476 | 0.016238 |
| 12.36 | 11.58  | 11.9   | 12.08  | 0.108425 | 0.40718  |
| 0     | 0      | 0      | 0      | NA       | NA       |
| 0     | 0.19   | 0      | 0.02   | NA       | NA       |
| 0.07  | 0      | 0.05   | 0      | NA       | NA       |
| 7.5   | 1.84   | 5.64   | 4.24   | -0.98929 | 8.51E-06 |
| 0.76  | 0.79   | 0.83   | 0.59   | -0.80803 | 0.107401 |
| 12.11 | 10.68  | 10.73  | 13.1   | 0.018473 | 0.924712 |



|        |         |        |        |          |          |
|--------|---------|--------|--------|----------|----------|
| 2.85   | 2.39    | 2.51   | 2.14   | -0.48258 | 0.06743  |
| 5.63   | 5.29    | 4.62   | 4.69   | -0.15098 | 0.63024  |
| 0      | 0       | 0      | 0      | NA       | NA       |
| 91.15  | 10.28   | 19.62  | 17.7   | -2.43119 | 9.90E-12 |
| 0.31   | 0.18    | 0.29   | 0.28   | -0.12209 | 0.88556  |
| 10.35  | 7.16    | 7.66   | 7      | -0.56569 | 0.016803 |
| 8.91   | 6.6     | 8.94   | 8.77   | -0.18261 | 0.19134  |
| 0      | 0       | 0      | 0      | NA       | NA       |
| 25.47  | 32.98   | 25.94  | 29.47  | 0.225091 | 0.143494 |
| 5.51   | 6.39    | 6.06   | 8.49   | 0.126503 | 0.464212 |
| 1.47   | 1.98    | 2.25   | 2.4    | 1.498361 | 1.21E-09 |
| 1.19   | 0.73    | 0.92   | 0.88   | -0.73379 | 0.005392 |
| 27.09  | 17.22   | 16.79  | 18.09  | -0.69894 | 2.09E-09 |
| 0      | 0       | 0      | 0      | NA       | NA       |
| 18.87  | 28.53   | 21.77  | 23.91  | 0.508541 | 2.15E-05 |
| 0.57   | 0.41    | 0.48   | 0.55   | -0.39376 | 0.548358 |
| 0.34   | 1.2     | 1.12   | 0.91   | 1.431747 | 0.000984 |
| 0.03   | 0       | 0      | 0      | NA       | NA       |
| 0      | 0       | 0      | 0      | NA       | NA       |
| 12.67  | 14.47   | 14.49  | 13.9   | 0.102707 | 0.422586 |
| 365.01 | 1018.61 | 766.64 | 955.15 | 1.361549 | 4.19E-40 |
| 10.03  | 1.5     | 2.49   | 2.13   | -2.03998 | 1.26E-31 |
| 0      | 0       | 0      | 0      | NA       | NA       |
| 4.34   | 21.97   | 11.12  | 13.02  | 1.577981 | 1.98E-06 |
| 13.34  | 16.12   | 15.65  | 15.56  | 0.167661 | 0.135848 |
| 0      | 0       | 0.05   | 0      | NA       | NA       |
| 20.96  | 21.19   | 26.96  | 23.97  | 0.133712 | 0.294276 |
| 10.3   | 7.99    | 8.23   | 8.56   | -0.36629 | 0.000243 |
| 4.46   | 3.8     | 3.6    | 4.86   | -0.74879 | 3.17E-06 |
| 0      | 0       | 0      | 0.04   | NA       | NA       |
| 82.01  | 51.74   | 62.99  | 62.45  | -0.46862 | 3.98E-07 |
| 43.8   | 25.61   | 29.89  | 28.33  | -0.46586 | 3.01E-08 |
| 1.27   | 0.97    | 0.74   | 0.53   | -0.66983 | 0.052499 |
| 4.55   | 4.64    | 4.46   | 3.88   | 0.021402 | 0.933471 |
| 0.64   | 0.04    | 0.11   | 0.22   | -0.07803 | 0.933507 |
| 0      | 0.07    | 0.08   | 0.03   | NA       | NA       |
| 78.01  | 86.13   | 83.77  | 79.95  | 0.044471 | 0.743262 |
| 38.21  | 66.33   | 56.52  | 66.51  | 0.706622 | 1.06E-11 |
| 3      | 3.34    | 2.75   | 3.16   | -0.04392 | 0.867345 |
| 12.16  | 9.95    | 14.42  | 12.65  | -0.09168 | 0.623589 |
| 0.09   | 0.06    | 0.13   | 0.08   | NA       | NA       |
| 2.08   | 3.8     | 3.18   | 3.71   | 0.723849 | 2.11E-05 |
| 5.28   | 6.22    | 5.58   | 6.09   | 0.300125 | 0.103761 |
| 0.02   | 0       | 0.01   | 0      | NA       | NA       |
| 0      | 0       | 0      | 0      | NA       | NA       |

|       |       |       |       |          |          |
|-------|-------|-------|-------|----------|----------|
| 2.16  | 2.12  | 2.36  | 2.26  | -0.15958 | 0.462969 |
| 5.13  | 6.74  | 5.35  | 7.22  | 0.438369 | 0.005976 |
| 9.73  | 10.58 | 10.19 | 10.59 | 0.117377 | 0.456828 |
| 24.69 | 72.74 | 67.51 | 66.08 | 1.459563 | 2.19E-62 |
| 0     | 0     | 0     | 0     | NA       | NA       |
| 1.19  | 1.47  | 1.5   | 1.39  | 0.237208 | 0.363104 |
| 0     | 0.02  | 0     | 0.04  | NA       | NA       |
| 8.42  | 10.32 | 10.53 | 10.62 | 0.176175 | 0.141379 |
| 0.26  | 4.66  | 2.97  | 4.61  | 3.285367 | 6.49E-29 |
| 40.44 | 51.57 | 45.38 | 49.62 | 0.267604 | 0.011761 |
| 0     | 0     | 0     | 0     | NA       | NA       |
| 1.13  | 0.04  | 0.12  | 0.11  | -3.12171 | 1.24E-12 |
| 0.03  | 0.02  | 0     | 0.03  | NA       | NA       |
| 0.17  | 0.66  | 0.2   | 0.39  | 0.648884 | 0.329614 |
| 9.38  | 4.73  | 6.58  | 5.8   | -0.60646 | 0.000208 |
| 92.72 | 84.73 | 92.92 | 86.14 | -0.09238 | 0.429497 |
| 7.3   | 7.39  | 8.25  | 10.01 | 0.240177 | 0.0911   |
| 3.23  | 2.79  | 2.92  | 2.23  | -0.15569 | 0.794192 |
| 16.07 | 11.37 | 8.78  | 17.55 | 0.12522  | 0.841691 |
| 0     | 0.01  | 0.06  | 0.04  | NA       | NA       |
| 5.74  | 2.98  | 2.57  | 2.53  | -0.98279 | 6.87E-07 |
| 4.8   | 2.89  | 2.79  | 3.16  | -1.06868 | 1.22E-06 |
| 40.35 | 47.55 | 41.27 | 42.54 | 0.100547 | 0.526707 |
| 45.03 | 42.01 | 45.85 | 38.82 | 0.015463 | 0.949216 |
| 0.23  | 0.18  | 0.28  | 0.11  | -0.21885 | 0.739854 |
| 0     | 0     | 0     | 0     | NA       | NA       |
| 0.08  | 0.09  | 0.05  | 0.21  | NA       | NA       |
| 0.09  | 0.38  | 0.3   | 0.16  | 0.645108 | 0.321588 |
| 12.31 | 30.81 | 20.05 | 28.23 | 1.082248 | 6.50E-12 |
| 4.04  | 2.9   | 4.18  | 3.77  | 0.054062 | 0.854097 |
| 0     | 0     | 0     | 0     | NA       | NA       |
| 0     | 0     | 0     | 0     | NA       | NA       |
| 3.27  | 2.88  | 3.41  | 2.07  | -1.59823 | 1.22E-14 |
| 0     | 0     | 0.01  | 0.01  | NA       | NA       |
| 0.37  | 0     | 0.02  | 0.06  | -1.61179 | 0.005099 |
| 11.99 | 15.68 | 15.91 | 15.74 | 0.525526 | 3.87E-06 |
| 13.61 | 14.39 | 11.98 | 11.3  | -0.09003 | 0.705049 |
| 1.55  | 1.3   | 1.59  | 2.45  | -0.20204 | 0.545694 |
| 72.52 | 76.51 | 69.77 | 67.37 | 0.04679  | 0.779713 |
| 6.87  | 6.98  | 6.13  | 7.16  | 0.100629 | 0.566749 |
| 59.56 | 75.39 | 43.24 | 65.93 | 0.043108 | 0.828626 |
| 6.46  | 6.76  | 3.5   | 4.82  | -0.32574 | 0.347535 |
| 5.26  | 2.83  | 3.76  | 3.42  | -0.21877 | 0.444799 |
| 2.8   | 2.74  | 2.86  | 2.69  | -0.01139 | 0.983057 |
| 0     | 0.01  | 0.01  | 0     | NA       | NA       |

|       |       |       |       |          |          |
|-------|-------|-------|-------|----------|----------|
| 29.61 | 27.13 | 26.46 | 30.57 | -0.15982 | 0.092742 |
| 11.74 | 10.23 | 10.06 | 8.88  | -0.09654 | 0.591844 |
| 0.26  | 0.48  | 0.45  | 0.51  | 0.676114 | 0.154374 |
| 45.39 | 26.55 | 29.41 | 31.96 | -0.5393  | 2.67E-10 |
| 5.18  | 8.21  | 7.7   | 6.88  | 0.597205 | 2.81E-05 |
| 2.65  | 2.88  | 2.5   | 2.73  | 0.079859 | 0.832792 |
| 2.46  | 0.88  | 1.26  | 0.99  | -0.93373 | 3.75E-05 |
| 24    | 28.3  | 24.56 | 28.7  | -0.01273 | 0.945762 |
| 4.02  | 0.94  | 1.09  | 0.57  | -1.82335 | 5.58E-14 |
| 24.25 | 24.68 | 29.08 | 23.77 | 0.072471 | 0.541272 |
| 0     | 0.04  | 0.02  | 0.03  | NA       | NA       |
| 3.56  | 1.89  | 3.21  | 2.84  | -0.04902 | 0.861316 |
| 6.03  | 3.17  | 3.51  | 3.53  | -0.34779 | 0.038766 |
| 25.53 | 14.41 | 17.19 | 14.95 | -0.45864 | 0.000424 |
| 0.03  | 0.06  | 0.07  | 0.25  | 0.527033 | 0.473718 |
| 0.11  | 0     | 0.01  | 0     | NA       | NA       |
| 0.38  | 0.06  | 0.11  | 0.22  | -1.99968 | 0.000146 |
| 0.49  | 0.27  | 0.37  | 0.38  | -0.52192 | 0.418077 |
| 0.41  | 2.02  | 1.48  | 1.94  | 3.683856 | 2.09E-31 |
| 2.69  | 0.29  | 0.19  | 0.27  | -3.09268 | 1.14E-30 |
| 11.34 | 13.15 | 10.53 | 12.68 | 0.129309 | 0.384119 |
| 2.98  | 2.71  | 2.72  | 2.48  | -0.40083 | 0.082468 |
| 0     | 0     | 0     | 0     | NA       | NA       |
| 43.82 | 32.82 | 33.5  | 33.05 | -0.35047 | 3.19E-05 |
| 0.18  | 0.12  | 0.15  | 0.08  | -0.37826 | 0.585048 |
| 4.3   | 2.18  | 3.03  | 3.62  | -0.03679 | 0.88999  |
| 0     | 0     | 0     | 0     | NA       | NA       |
| 8.18  | 3.03  | 3.89  | 2.9   | -1.20648 | 9.68E-20 |
| 0.16  | 0.34  | 0.31  | 0.48  | NA       | NA       |
| 4.01  | 4.46  | 4.11  | 4.4   | 0.006115 | 0.983252 |
| 0.31  | 0.04  | 0.02  | 0.25  | NA       | NA       |
| 0.26  | 0.09  | 0.09  | 0.24  | -0.0506  | 0.953706 |
| 0     | 0     | 0     | 0     | NA       | NA       |
| 3.44  | 4.17  | 3.39  | 3.92  | 0.381471 | 0.110986 |
| 0     | 0.21  | 0     | 0.05  | NA       | NA       |
| 8.79  | 17.34 | 15.12 | 16.44 | 0.669087 | 6.33E-07 |
| 0.68  | 1.2   | 1.23  | 1.29  | 0.521969 | 0.043471 |
| 17.91 | 25.32 | 22.48 | 25.39 | 0.287903 | 0.004909 |
| 25.84 | 23.58 | 26.59 | 27.25 | 0.035431 | 0.800959 |
| 25.21 | 26.87 | 26.77 | 30.39 | 0.15051  | 0.32922  |
| 3.27  | 5.22  | 4.82  | 3.5   | 0.19911  | 0.469819 |
| 9.79  | 10.19 | 11.67 | 9.27  | 0.059627 | 0.69051  |
| 21.2  | 21.7  | 23.32 | 23.24 | 0.052906 | 0.798939 |
| 2.47  | 2.23  | 2.04  | 2.32  | 0.077086 | 0.752803 |
| 3.71  | 6.56  | 8.18  | 7.64  | 0.46524  | 0.003937 |

|        |        |        |        |          |          |
|--------|--------|--------|--------|----------|----------|
| 20.2   | 20.15  | 19.41  | 20.36  | -0.17319 | 0.10685  |
| 0      | 0      | 0      | 0      | NA       | NA       |
| 15.2   | 23.06  | 19.91  | 20.54  | 0.422921 | 1.61E-05 |
| 37.57  | 38.73  | 37.56  | 37.8   | -0.00901 | 0.948254 |
| 11.62  | 14.85  | 13.7   | 17.05  | 0.42802  | 0.000891 |
| 0.02   | 0.01   | 0.01   | 0.01   | NA       | NA       |
| 0.11   | 0.04   | 0.04   | 0.07   | -0.49604 | 0.505474 |
| 4.57   | 2.57   | 4.17   | 3.32   | -0.28192 | 0.21117  |
| 24.21  | 25.66  | 25.87  | 27.7   | -0.03403 | 0.866298 |
| 8.86   | 30.46  | 21.39  | 26.44  | 1.419259 | 1.30E-28 |
| 0      | 0      | 0      | 0      | NA       | NA       |
| 13.34  | 7.67   | 13.68  | 9.77   | -0.4762  | 9.93E-05 |
| 12.94  | 3.99   | 4.99   | 6.84   | -1.18159 | 4.00E-13 |
| 9.25   | 7.86   | 8.79   | 8.72   | 0.157895 | 0.574099 |
| 3.07   | 3.87   | 3.17   | 3.32   | 0.144802 | 0.633306 |
| 17.11  | 16.3   | 18.56  | 21.12  | -0.15791 | 0.179477 |
| 169.28 | 178.38 | 176.76 | 169.18 | -0.03517 | 0.774847 |
| 0.14   | 0.32   | 0.39   | 0.7    | 0.263974 | 0.724081 |
| 112.84 | 133.31 | 138.93 | 127.18 | 0.209359 | 0.047509 |
| 44.84  | 30.81  | 42.06  | 42.63  | -0.1745  | 0.229832 |
| 4.05   | 3.88   | 4.38   | 4.81   | 0.132128 | 0.526686 |
| 0.25   | 0.11   | 0.13   | 0.05   | NA       | NA       |
| 24.34  | 19.67  | 23.04  | 22.89  | 0.143754 | 0.393877 |
| 73.61  | 67.87  | 66.6   | 67.39  | -0.15857 | 0.085106 |
| 6.13   | 11.07  | 8.96   | 10.41  | 0.494209 | 0.002208 |
| 0      | 0.02   | 0      | 0.02   | NA       | NA       |
| 51.05  | 47.71  | 49.23  | 50.59  | -0.10712 | 0.227765 |
| 25.91  | 26.54  | 27.45  | 28.85  | 0.375404 | 0.000233 |
| 0      | 0.04   | 0      | 0.05   | NA       | NA       |
| 0      | 0.21   | 0.1    | 0      | NA       | NA       |
| 7.6    | 6.53   | 6.74   | 5.65   | 0.096218 | 0.811617 |
| 8.98   | 9.53   | 9.99   | 8.66   | 0.104311 | 0.583993 |
| 8.04   | 7.04   | 7.24   | 7.12   | -0.18949 | 0.101637 |
| 1.37   | 1.57   | 1.55   | 1.43   | 0.084487 | 0.739478 |
| 7.37   | 5.68   | 6.56   | 5.32   | -0.31917 | 0.140977 |
| 0      | 0      | 0      | 0      | NA       | NA       |
| 0      | 0.09   | 0      | 0.05   | NA       | NA       |
| 4.57   | 4.66   | 4.12   | 4.54   | -0.06681 | 0.823653 |
| 0      | 0.09   | 0.03   | 0.12   | 0.599068 | 0.398909 |
| 0      | 0      | 0      | 0      | NA       | NA       |
| 92.45  | 170.08 | 129.83 | 142.43 | 0.600862 | 6.72E-09 |
| 3.14   | 2.31   | 3.15   | 2.18   | 0.275993 | 0.412933 |
| 0      | 0      | 0      | 0      | NA       | NA       |
| 0      | 0      | 0.03   | 0      | NA       | NA       |
| 9.24   | 9.34   | 9.42   | 9.4    | -0.09871 | 0.59338  |

|       |       |       |       |          |          |
|-------|-------|-------|-------|----------|----------|
| 3.1   | 1.82  | 3.6   | 2.61  | -0.00258 | 0.993624 |
| 1.14  | 0.47  | 0.17  | 0.16  | -0.70485 | 0.255954 |
| 0.33  | 0.09  | 0.09  | 0.12  | -1.32478 | 0.012822 |
| 25.34 | 13    | 17.22 | 18.47 | -0.26629 | 0.044288 |
| 32.17 | 56.56 | 60.42 | 62.03 | 0.736297 | 1.67E-13 |
| 0     | 0.01  | 0     | 0.01  | NA       | NA       |
| 28.13 | 3.42  | 10.69 | 7.39  | -1.88019 | 6.41E-08 |
| 0.89  | 0.7   | 0.1   | 0.22  | -0.547   | 0.299799 |
| 11.75 | 13.57 | 12.21 | 12.54 | -0.08447 | 0.562589 |
| 0     | 0     | 0     | 0     | NA       | NA       |
| 0.22  | 0.06  | 0.18  | 0.13  | -0.61661 | 0.197104 |
| 0.07  | 1.18  | 0.38  | 0.34  | 0.775626 | 0.205697 |
| 4.43  | 5.2   | 3.9   | 4.1   | 0.003864 | 0.987812 |
| 1.5   | 1.39  | 1.44  | 1.52  | 0.028414 | 0.926611 |
| 5.05  | 4.52  | 5.7   | 4.12  | 0.113279 | 0.689763 |
| 0     | 0     | 0     | 0     | NA       | NA       |
| 56.4  | 52.18 | 64    | 54.32 | -0.00067 | 0.997047 |
| 0     | 0.01  | 0     | 0.02  | NA       | NA       |
| 0     | 0     | 0     | 0     | NA       | NA       |
| 6.15  | 10.17 | 10.01 | 10.27 | 0.619332 | 2.34E-06 |
| 0     | 0.06  | 0.05  | 0     | NA       | NA       |
| 6.93  | 10.45 | 9.99  | 10.32 | 0.355811 | 0.00937  |
| 12.45 | 7.61  | 7.15  | 7.26  | -0.58275 | 6.91E-05 |
| 0     | 0     | 0     | 0     | NA       | NA       |
| 0     | 0     | 0     | 0     | NA       | NA       |
| 57.04 | 82.64 | 77.7  | 73.32 | 0.381476 | 0.000301 |
| 14.09 | 12.06 | 11.22 | 13.15 | -0.02266 | 0.925277 |
| 0.02  | 0.26  | 0.16  | 0.18  | 1.609005 | 0.004896 |
| 1.6   | 0.23  | 0.54  | 0.65  | -1.42235 | 0.000174 |
| 2.43  | 2.49  | 2.38  | 2.84  | 0.089417 | 0.662925 |
| 3.12  | 2.75  | 1.5   | 1.87  | 0.039068 | 0.933829 |
| 0.16  | 1.67  | 0.17  | 0.2   | 1.197186 | 0.02796  |
| 30.22 | 37.26 | 33.69 | 36.85 | 0.264378 | 0.019252 |
| 0.02  | 0.08  | 0.2   | 0.11  | 0.156489 | 0.854296 |
| 0     | 0     | 0     | 0.04  | NA       | NA       |
| 0     | 0     | 0     | 0     | NA       | NA       |
| 14.24 | 25.66 | 20.56 | 24.37 | 0.703197 | 1.40E-15 |
| 3.17  | 2.36  | 3.35  | 3.43  | 0.06416  | 0.827131 |
| 24.56 | 6.71  | 9.12  | 9.54  | -1.53516 | 2.55E-35 |
| 8.06  | 9.06  | 9.07  | 10.72 | 0.304866 | 0.012739 |
| 0.83  | 0.72  | 0.8   | 0.91  | -0.09074 | 0.832104 |
| 8.36  | 3.29  | 5.16  | 4.71  | -1.08135 | 1.49E-11 |
| 2.23  | 2.09  | 2.18  | 2.08  | -0.09983 | 0.703963 |
| 31.94 | 19    | 24.67 | 22.12 | -0.36101 | 0.000582 |
| 0     | 0     | 0     | 0     | NA       | NA       |

|       |       |       |         |                   |
|-------|-------|-------|---------|-------------------|
| 0     | 0     | 0.04  | 0 NA    | NA                |
| 0.05  | 0     | 0.09  | 0 NA    | NA                |
| 10.37 | 20.86 | 21.89 | 25.96   | 1.107624 9.50E-38 |
| 15.65 | 13.63 | 12    | 13.17   | -0.26074 0.095599 |
| 2.13  | 5.49  | 4.59  | 5.79    | 1.258139 2.67E-18 |
| 0     | 0     | 0     | 0 NA    | NA                |
| 3.79  | 3.88  | 3.38  | 3.6     | -0.09222 0.713417 |
| 1.85  | 1.58  | 1.26  | 1.42    | -0.43271 0.032429 |
| 0     | 0     | 0     | 0 NA    | NA                |
| 11.54 | 12.29 | 11.88 | 10.45   | -0.04381 0.814711 |
| 6.9   | 5.34  | 5.41  | 4.98    | -0.35815 0.132678 |
| 43.61 | 22.31 | 27.04 | 21.24   | -0.77717 1.73E-09 |
| 0.83  | 0.84  | 1.1   | 1.1     | -0.0731 0.868021  |
| 0     | 0.03  | 0.04  | 0.02 NA | NA                |
| 0.04  | 0.32  | 0.1   | 0.4 NA  | NA                |
| 0.89  | 0.59  | 1.14  | 1.31    | -0.34392 0.346659 |
| 0.07  | 0.36  | 0.03  | 0.12 NA | NA                |
| 0.03  | 0     | 0.06  | 0 NA    | NA                |
| 3.51  | 2.9   | 3.26  | 3.24    | -0.26928 0.106013 |
| 0     | 0     | 0     | 0 NA    | NA                |
| 4.86  | 3.11  | 3.44  | 2.65    | -0.20848 0.345314 |
| 12.43 | 11.02 | 12.26 | 10.52   | -0.20736 0.191484 |
| 12.51 | 14.15 | 14.7  | 14.58   | 0.30656 0.011489  |
| 51.01 | 59.97 | 57.87 | 55.82   | 0.175358 0.076815 |
| 4.87  | 2.51  | 3.34  | 3.28    | -0.8749 0.000493  |
| 0     | 0     | 0     | 0 NA    | NA                |
| 16.94 | 13.06 | 13.48 | 17.72   | 0.055196 0.719609 |
| 0     | 0     | 0     | 0 NA    | NA                |
| 0     | 0     | 0     | 0 NA    | NA                |
| 0.07  | 0.07  | 0.12  | 0.23 NA | NA                |
| 2.08  | 3.79  | 4.18  | 3.6     | 1.224729 2.14E-14 |
| 7.32  | 8.9   | 8.38  | 9.05    | 0.248209 0.049941 |
| 3.16  | 6.03  | 2.9   | 4.26    | 0.533933 0.011927 |
| 4.67  | 2.44  | 3.15  | 2.28    | -1.03846 4.63E-08 |
| 3.28  | 4.47  | 4.37  | 3.8     | 0.170682 0.511575 |
| 3.76  | 4.18  | 5.33  | 4.59    | 0.407305 0.011173 |
| 5.87  | 9.72  | 7.65  | 8.41    | 0.701909 0.000515 |
| 0.01  | 0.08  | 0.02  | 0.31    | 0.677901 0.329012 |
| 0.45  | 0.38  | 0.47  | 0.64    | -0.41956 0.392337 |
| 80.2  | 77.22 | 75.46 | 71.55   | -0.18503 0.145592 |
| 0     | 0     | 0.08  | 0.04 NA | NA                |
| 0.04  | 0.23  | 0.34  | 0.11    | -0.04267 0.964931 |
| 0.03  | 0.14  | 0.04  | 0.08 NA | NA                |
| 2.12  | 3.96  | 2.92  | 3.52    | 0.636456 0.001642 |
| 7.94  | 5.93  | 8.69  | 8.85    | -0.07125 0.756325 |

|         |         |         |         |          |          |
|---------|---------|---------|---------|----------|----------|
| 0.61    | 1.09    | 1.36    | 0.85    | 0.750548 | 0.023923 |
| 162.63  | 150.59  | 178.58  | 147     | 0.047536 | 0.751907 |
| 7       | 5.67    | 4.9     | 5.98    | -0.20625 | 0.427274 |
| 41.56   | 49.69   | 51.31   | 43.47   | 0.146946 | 0.193213 |
| 0.03    | 0       | 0.02    | 0 NA    | NA       |          |
| 845.39  | 704.06  | 762.92  | 689.26  | -0.23662 | 0.005392 |
| 0.31    | 0.03    | 0.07    | 0.05    | -2.23591 | 6.68E-07 |
| 1.92    | 2.39    | 1.23    | 2.26    | -0.36381 | 0.355609 |
| 9.21    | 10.41   | 11.48   | 10.11   | -0.06534 | 0.734119 |
| 7.54    | 11.63   | 8.78    | 9.38    | 0.549029 | 0.000243 |
| 6623.84 | 6447.43 | 7341.14 | 6305.26 | -0.0596  | 0.587273 |
| 0.06    | 0       | 0.03    | 0.12    | -0.59261 | 0.40706  |
| 0.19    | 0.1     | 0.26    | 0.2     | -0.44935 | 0.468782 |
| 47.12   | 61.15   | 63.62   | 64      | 0.35361  | 2.74E-05 |
| 9.87    | 4.76    | 7.47    | 5.92    | -0.77468 | 2.03E-07 |
| 4.55    | 4.87    | 5.28    | 4.68    | 0.05556  | 0.809404 |
| 13.39   | 12.7    | 14.1    | 13.69   | 0.049204 | 0.710127 |
| 0       | 0       | 0       | 0 NA    | NA       |          |
| 0       | 0       | 0       | 0 NA    | NA       |          |
| 0       | 0       | 0       | 0 NA    | NA       |          |
| 35.79   | 34.19   | 37.73   | 39.85   | -0.18499 | 0.183659 |
| 27      | 30.91   | 28.37   | 30.08   | 0.273186 | 0.002694 |
| 10.36   | 8.99    | 8.37    | 7.87    | -0.11341 | 0.662854 |
| 54.13   | 53.64   | 48.11   | 55.86   | -0.09454 | 0.412427 |
| 107.78  | 147.95  | 128.28  | 142.96  | 0.354602 | 2.84E-05 |
| 6.72    | 6.75    | 6.94    | 7.98    | 0.137742 | 0.296132 |
| 7.7     | 10.05   | 8.78    | 10.05   | 0.432768 | 0.000106 |
| 11.54   | 3.06    | 5.38    | 4.32    | -1.34975 | 7.09E-23 |
| 0.04    | 0.1     | 0.07    | 0.03    | 0.620687 | 0.379758 |
| 0.58    | 0.64    | 0.79    | 0.9     | -0.32363 | 0.606828 |
| 8.4     | 8.9     | 8.84    | 9.06    | 0.00491  | 0.983224 |
| 12.5    | 12.15   | 12      | 11.41   | -0.10195 | 0.544641 |
| 3.57    | 6.01    | 5.41    | 6.23    | 0.732913 | 8.88E-06 |
| 5.82    | 5.04    | 4.8     | 5.26    | -0.19492 | 0.294358 |
| 0       | 0       | 0       | 0 NA    | NA       |          |
| 0       | 0       | 0       | 0 NA    | NA       |          |
| 2.39    | 1.25    | 1.42    | 2.01    | -0.47458 | 0.069658 |
| 6.11    | 7.14    | 6.97    | 8.17    | -0.07989 | 0.795881 |
| 2.98    | 1.92    | 2.14    | 2.04    | -0.29667 | 0.128435 |
| 119.63  | 66.77   | 94.04   | 88.4    | -0.3596  | 0.000648 |
| 16.2    | 15.33   | 16.21   | 13.93   | -0.05599 | 0.824967 |
| 2.46    | 4.53    | 3.01    | 4.21    | 0.273892 | 0.170626 |
| 11.59   | 16.35   | 14      | 18.77   | 0.295441 | 0.042002 |
| 18.28   | 26.36   | 21.09   | 25.99   | 0.51632  | 6.22E-06 |
| 3.48    | 1.96    | 2.33    | 1.79    | -0.9948  | 5.60E-07 |

|        |        |        |        |          |          |
|--------|--------|--------|--------|----------|----------|
| 11.85  | 16.04  | 11.96  | 13.66  | 0.313208 | 0.077841 |
| 15.9   | 22.36  | 20.61  | 19.72  | 0.383201 | 0.000258 |
| 0.71   | 0.83   | 0.8    | 0.75   | 0.169133 | 0.677155 |
| 0      | 0      | 0      | 0      | NA       | NA       |
| 0      | 0      | 0      | 0      | NA       | NA       |
| 0      | 0      | 0      | 0      | NA       | NA       |
| 0      | 0      | 0      | 0      | NA       | NA       |
| 27.67  | 28.66  | 29.31  | 28.88  | 0.007333 | 0.97703  |
| 12.44  | 12.22  | 9.77   | 11.62  | -0.22825 | 0.040647 |
| 11.4   | 12.18  | 12.06  | 12.52  | 0.039545 | 0.85662  |
| 0.03   | 0      | 0      | 0      | NA       | NA       |
| 0      | 0.07   | 0.44   | 0.05   | -0.12982 | 0.885142 |
| 0.07   | 0.16   | 0.17   | 0.06   | 0.35894  | 0.601709 |
| 0.37   | 0.16   | 0.95   | 0.29   | 0.411505 | 0.536932 |
| 14.5   | 14.82  | 15.44  | 14.58  | -0.03048 | 0.894838 |
| 138.47 | 126.38 | 138.24 | 140.35 | -0.06693 | 0.525325 |
| 5.27   | 7.04   | 6.39   | 6.68   | 0.33051  | 0.019563 |
| 15.76  | 13.63  | 14.33  | 13.24  | -0.17331 | 0.329829 |
| 0      | 0      | 0      | 0      | NA       | NA       |
| 10.61  | 18.02  | 17.32  | 17.76  | 0.519068 | 9.85E-08 |
| 0.05   | 0      | 0.56   | 0      | NA       | NA       |
| 56.59  | 82.81  | 72.29  | 76.89  | 0.395337 | 2.84E-05 |
| 0      | 0      | 0      | 0      | NA       | NA       |
| 4.22   | 3.11   | 2.86   | 2.63   | -0.35503 | 0.164113 |
| 32.11  | 26.18  | 28.79  | 28.24  | -0.14343 | 0.34086  |
| 0      | 0      | 0.02   | 0.02   | NA       | NA       |
| 2.38   | 2.39   | 2.21   | 1.58   | 0.796391 | 0.00066  |
| 8.59   | 9.82   | 9.33   | 9.93   | 0.149664 | 0.21395  |
| 0      | 0      | 0      | 0.01   | NA       | NA       |
| 0      | 0      | 0      | 0      | NA       | NA       |
| 0.01   | 0.01   | 0      | 0      | NA       | NA       |
| 16.88  | 15.67  | 16.44  | 18.04  | 0.028042 | 0.819846 |
| 5.95   | 5.23   | 8.28   | 9.89   | 0.163514 | 0.358058 |
| 65.73  | 43.41  | 47.03  | 43.68  | -0.62703 | 7.47E-14 |
| 2.3    | 4.87   | 3.76   | 4.49   | 1.076098 | 8.75E-05 |
| 0      | 0      | 0      | 0      | NA       | NA       |
| 0      | 0.04   | 0.04   | 0.02   | NA       | NA       |
| 0.08   | 0.35   | 0.52   | 0.19   | 0.596209 | 0.388671 |
| 0      | 0      | 0      | 0      | NA       | NA       |
| 1.59   | 3.66   | 1.32   | 1.62   | 0.815422 | 0.013095 |
| 6.41   | 6.11   | 6.29   | 7.85   | 0.252958 | 0.153532 |
| 10.91  | 7.54   | 8.57   | 7.76   | -0.3577  | 0.009169 |
| 32.11  | 31.54  | 28.33  | 29.26  | -0.10041 | 0.44334  |
| 4.97   | 15.66  | 10.39  | 13.56  | 1.65438  | 3.44E-22 |
| 0      | 0      | 0      | 0      | NA       | NA       |



|        |        |        |        |          |          |
|--------|--------|--------|--------|----------|----------|
| 3.58   | 3.91   | 2.99   | 3.74   | 0.005874 | 0.983848 |
| 10.29  | 6.8    | 6.97   | 6.55   | -0.34906 | 0.014194 |
| 28.39  | 29.03  | 25.54  | 26.28  | 0.274006 | 0.016689 |
| 0      | 0      | 0      | 0      | NA       | NA       |
| 14.08  | 23.21  | 19.77  | 22.16  | 0.475254 | 0.000311 |
| 343.31 | 842.45 | 600.13 | 690.79 | 1.003037 | 2.73E-21 |
| 2.45   | 10.72  | 7.39   | 8.65   | 1.783875 | 6.34E-38 |
| 12.73  | 12.51  | 12.7   | 12.93  | -0.06525 | 0.658761 |
| 0.2    | 0      | 0.07   | 0.13   | NA       | NA       |
| 2.56   | 1.19   | 1.27   | 1.08   | -0.83736 | 0.002385 |
| 0.08   | 0      | 0.17   | 0.08   | NA       | NA       |
| 0.08   | 0.13   | 0.08   | 0.17   | 0.435701 | 0.561469 |
| 19.55  | 15.7   | 16.91  | 14.23  | -0.32509 | 0.037975 |
| 0.04   | 0.01   | 0      | 0.04   | NA       | NA       |
| 0.02   | 0      | 0.08   | 0.09   | -0.26424 | 0.744464 |
| 0.19   | 0.09   | 0.28   | 0.27   | -0.27951 | 0.73382  |
| 13.21  | 11.13  | 13.54  | 12.23  | -0.28432 | 0.056419 |
| 10.73  | 17.17  | 15.01  | 14.88  | 0.684401 | 7.10E-11 |
| 2.91   | 3.6    | 2.65   | 3.17   | -0.09575 | 0.719768 |
| 2.78   | 6.98   | 6.57   | 6.22   | 1.070944 | 3.15E-06 |
| 14.22  | 15.02  | 13.28  | 12.46  | -0.06051 | 0.765351 |
| 0.38   | 0.14   | 0.3    | 0.59   | -0.00774 | 0.994436 |
| 0.25   | 0.15   | 0.1    | 0.08   | -0.54491 | 0.447745 |
| 0.02   | 0.01   | 0.07   | 0.01   | NA       | NA       |
| 0.39   | 0.42   | 0.12   | 0.17   | -0.41441 | 0.576761 |
| 2.97   | 3.13   | 3.4    | 2.52   | -0.25244 | 0.237977 |
| 1.2    | 1.73   | 1.49   | 0.9    | 0.140157 | 0.767787 |
| 0.47   | 0.87   | 0.3    | 0.34   | 0.311343 | 0.638633 |
| 9.69   | 11.28  | 11.16  | 13.61  | 0.303561 | 0.015763 |
| 0.79   | 0.37   | 0.32   | 0.27   | -0.76238 | 0.168788 |
| 0.17   | 0.09   | 0.15   | 0.39   | NA       | NA       |
| 35.26  | 26.89  | 39.43  | 27.76  | -0.06499 | 0.673006 |
| 11.89  | 10.04  | 10.13  | 9.52   | -0.108   | 0.461982 |
| 0.02   | 0.02   | 0.02   | 0.01   | NA       | NA       |
| 6.27   | 3.05   | 3.99   | 3      | -0.89329 | 1.09E-10 |
| 17.29  | 9.14   | 12.34  | 12.79  | -0.67575 | 2.76E-05 |
| 24.61  | 22.72  | 23.44  | 24.58  | -0.12193 | 0.285298 |
| 18.43  | 18.53  | 17.79  | 23.45  | 0.212962 | 0.043745 |
| 0      | 0.01   | 0.01   | 0.01   | 0.135608 | 0.878607 |
| 0.24   | 1.75   | 1.03   | 1.22   | 0.626756 | 0.045082 |
| 0.17   | 0      | 0.01   | 0      | NA       | NA       |
| 10.83  | 7.16   | 5.49   | 7.57   | -0.32976 | 0.025074 |
| 0      | 0      | 0      | 0      | NA       | NA       |
| 0.5    | 0.7    | 1.14   | 0.65   | 0.459692 | 0.448993 |
| 53.9   | 61.7   | 61.75  | 59.29  | 0.131204 | 0.175193 |

|       |       |       |       |          |          |
|-------|-------|-------|-------|----------|----------|
| 7.07  | 11.41 | 12.96 | 13.38 | 0.477707 | 1.46E-06 |
| 3.76  | 5.44  | 6.32  | 9.21  | 0.185291 | 0.734742 |
| 31.69 | 12.64 | 16.65 | 14.02 | -1.26238 | 2.57E-39 |
| 5.92  | 8.26  | 6.15  | 7.86  | 0.105386 | 0.486841 |
| 11.94 | 9.79  | 10.44 | 11.57 | -0.17354 | 0.19393  |
| 49.31 | 30.31 | 29.79 | 33.56 | -0.72606 | 4.81E-22 |
| 0.1   | 0.11  | 0.53  | 0.12  | 0.287076 | 0.725022 |
| 0.57  | 4.41  | 2.74  | 3.33  | 1.132586 | 0.019451 |
| 6.88  | 5.32  | 5.25  | 4.84  | -0.41433 | 2.84E-05 |
| 1.12  | 1.19  | 0.95  | 1.27  | 0.590756 | 0.024112 |
| 5.6   | 5.94  | 4.61  | 5.56  | 0.046295 | 0.844865 |
| 0     | 0     | 0     | 0     | NA       | NA       |
| 0.28  | 0.22  | 0.26  | 0.25  | 0.045736 | 0.954743 |
| 1.94  | 2.28  | 2.44  | 3.1   | 0.220895 | 0.088702 |
| 5.88  | 6.88  | 6.15  | 7.78  | 0.309422 | 0.024423 |
| 0     | 0.02  | 0     | 0     | NA       | NA       |
| 0     | 0.01  | 0     | 0.02  | NA       | NA       |
| 12.46 | 14.33 | 14.76 | 14.42 | 0.207826 | 0.316828 |
| 0     | 0.07  | 0.03  | 0.05  | NA       | NA       |
| 27.43 | 15.87 | 24.13 | 21.78 | -0.412   | 1.56E-05 |
| 18.27 | 25.32 | 18.63 | 23.48 | 0.146883 | 0.249736 |
| 12.15 | 15.26 | 12.4  | 12.52 | -0.00717 | 0.973763 |
| 17.02 | 42.14 | 30.28 | 35.72 | 1.037944 | 1.23E-20 |
| 3.68  | 4.47  | 6.28  | 3.77  | -0.07946 | 0.714952 |
| 34.95 | 35.35 | 34.96 | 40.67 | -0.08363 | 0.514409 |
| 0.02  | 0.01  | 0.01  | 0.02  | NA       | NA       |
| 0.07  | 0.02  | 0.05  | 0     | NA       | NA       |
| 7.43  | 9.04  | 8.91  | 8.62  | 0.061253 | 0.80114  |
| 9.96  | 8.62  | 8.21  | 8.78  | -0.09408 | 0.598232 |
| 13.16 | 12.07 | 11.92 | 13.55 | -0.29141 | 0.03954  |
| 7     | 8.56  | 7.57  | 8.85  | 0.201073 | 0.278077 |
| 0     | 0     | 0     | 0     | NA       | NA       |
| 0.02  | 0.51  | 0.4   | 0.13  | 1.109916 | 0.07812  |
| 6.62  | 6.67  | 5.97  | 6.47  | -0.12523 | 0.57749  |
| 10.48 | 9.68  | 10.44 | 11.41 | -0.14375 | 0.373564 |
| 73.11 | 90.62 | 87.47 | 82.45 | 0.270452 | 0.002431 |
| 0.98  | 1.84  | 1.14  | 1.51  | 0.57915  | 0.045835 |
| 26.34 | 33.41 | 34.81 | 36    | 0.316072 | 9.17E-05 |
| 36.05 | 36.44 | 34.81 | 36.03 | 0.113449 | 0.382262 |
| 0     | 0     | 0     | 0     | NA       | NA       |
| 9.57  | 8.65  | 7.63  | 7.57  | -0.3774  | 0.002838 |
| 6.92  | 9.86  | 8.43  | 10.32 | 0.321742 | 0.00572  |
| 0.6   | 0.68  | 0.49  | 0.7   | 0.20302  | 0.804014 |
| 0.11  | 0     | 0.15  | 0.08  | NA       | NA       |
| 3.74  | 4.28  | 3.43  | 3.88  | 0.602015 | 0.000973 |

|       |       |       |       |          |          |
|-------|-------|-------|-------|----------|----------|
| 0.08  | 0.02  | 0.08  | 0.04  | NA       | NA       |
| 0.04  | 0.01  | 0.03  | 0.03  | NA       | NA       |
| 20.59 | 14.85 | 18.28 | 16.43 | -0.32924 | 0.012322 |
| 0.04  | 0.19  | 0     | 0     | NA       | NA       |
| 1.2   | 0.32  | 0.82  | 0.43  | -0.59302 | 0.178604 |
| 23.64 | 43.66 | 43.94 | 43.33 | 0.597285 | 2.30E-08 |
| 0.16  | 0.23  | 0.21  | 0.36  | 0.628569 | 0.366441 |
| 0     | 0     | 0     | 0     | NA       | NA       |
| 6.38  | 4.99  | 5.21  | 4.76  | -0.40131 | 0.027839 |
| 0     | 0     | 0.04  | 0     | NA       | NA       |
| 1.99  | 1.51  | 2.01  | 1.55  | -0.36465 | 0.109352 |
| 0.18  | 0.07  | 0.14  | 0.08  | NA       | NA       |
| 31.04 | 24.75 | 26.59 | 23.31 | -0.23629 | 0.043336 |
| 0.91  | 0.11  | 0.13  | 0.22  | -1.54063 | 0.0035   |
| 0.32  | 0.08  | 0.19  | 0.27  | -0.80662 | 0.13263  |
| 30.86 | 35.79 | 34.02 | 34.81 | 0.127755 | 0.25284  |
| 0.25  | 0.52  | 0.89  | 0.38  | -0.32153 | 0.663635 |
| 3.75  | 5.41  | 4.5   | 3.65  | -0.08504 | 0.751876 |
| 0     | 0.03  | 0.01  | 0.04  | 0.137042 | 0.86956  |
| 4.06  | 7.95  | 5.73  | 6.02  | 0.544614 | 0.001047 |
| 2.55  | 4.89  | 3.69  | 4.14  | 0.44981  | 0.00578  |
| 4.59  | 5.2   | 4.63  | 4.7   | 0.089431 | 0.615093 |
| 3.22  | 5.2   | 4.8   | 4.1   | 0.958307 | 2.80E-05 |
| 0.35  | 0.17  | 0.23  | 0.35  | NA       | NA       |
| 1.11  | 2.32  | 1.56  | 1.6   | 0.254392 | 0.319845 |
| 16.12 | 17.66 | 14.96 | 16.29 | -0.16095 | 0.185179 |
| 38.29 | 31.62 | 33.28 | 33.26 | -0.23136 | 0.002913 |
| 1.8   | 2.94  | 1.91  | 2.74  | 0.324261 | 0.325444 |
| 0.52  | 0.52  | 0.29  | 0.32  | 0.127673 | 0.842024 |
| 2.97  | 4.07  | 5.92  | 5.45  | 0.283629 | 0.384297 |
| 0.38  | 0.06  | 0     | 0.02  | -2.78244 | 5.39E-08 |
| 0.19  | 0.07  | 0.06  | 0.21  | -1.2248  | 0.000597 |
| 25.2  | 14.52 | 17.11 | 13.11 | -0.68937 | 9.64E-11 |
| 4.27  | 5.11  | 5.34  | 7.13  | 0.086543 | 0.734742 |
| 24.85 | 26.88 | 25.69 | 25.61 | 0.078623 | 0.497407 |
| 5.34  | 2.51  | 3.47  | 3.15  | -0.73781 | 8.57E-06 |
| 0.93  | 1.13  | 1.03  | 0.76  | -0.27613 | 0.529935 |
| 5.98  | 3.78  | 4.3   | 2.69  | -0.67491 | 0.000121 |
| 0     | 0.08  | 0.05  | 0.03  | NA       | NA       |
| 2.53  | 3.27  | 3.15  | 3.8   | 0.096892 | 0.710688 |
| 1.14  | 1.58  | 1.4   | 1.42  | 0.33836  | 0.06157  |
| 2.89  | 7.73  | 4.26  | 7.13  | 0.9328   | 0.003851 |
| 0.05  | 0.07  | 0.12  | 0.05  | NA       | NA       |
| 0.48  | 1.32  | 1.17  | 1.43  | 0.794979 | 0.09381  |
| 15.86 | 14.15 | 16.32 | 13.57 | -0.04596 | 0.852662 |

|        |        |        |        |          |          |
|--------|--------|--------|--------|----------|----------|
| 23.82  | 22.11  | 21.57  | 26.64  | 0.038276 | 0.768326 |
| 0.7    | 0.37   | 0.33   | 0.24   | -0.40892 | 0.557172 |
| 2.5    | 3.71   | 5.31   | 4.5    | 0.163549 | 0.67193  |
| 0.08   | 0      | 0.02   | 0.02   | NA       | NA       |
| 16.83  | 14.81  | 16.78  | 15.39  | -0.05976 | 0.717647 |
| 0.24   | 0.17   | 0.27   | 0.22   | -0.3516  | 0.479036 |
| 0.49   | 0.14   | 0.13   | 0.24   | -1.0044  | 0.090949 |
| 0.14   | 0.03   | 0.09   | 0.03   | NA       | NA       |
| 5.89   | 8.17   | 6.37   | 6.96   | 0.235326 | 0.09643  |
| 17.18  | 30.32  | 28.28  | 29.37  | 0.720619 | 3.67E-18 |
| 0.11   | 0.33   | 0.16   | 0.53   | 0.858379 | 0.162326 |
| 0      | 0      | 0      | 0      | NA       | NA       |
| 2.94   | 3.46   | 2.86   | 3.28   | 0.049189 | 0.845577 |
| 0      | 0      | 0      | 0      | NA       | NA       |
| 0.11   | 0.49   | 0      | 0.51   | 0.389034 | 0.604796 |
| 2.49   | 2.47   | 2.52   | 2.79   | -0.04885 | 0.898146 |
| 0      | 0      | 0      | 0      | NA       | NA       |
| 0      | 0      | 0      | 0.06   | NA       | NA       |
| 0      | 0      | 0      | 0      | NA       | NA       |
| 0      | 0      | 0      | 0      | NA       | NA       |
| 0.05   | 0      | 0      | 0      | NA       | NA       |
| 0      | 0      | 0.05   | 0      | NA       | NA       |
| 0      | 0      | 0      | 0      | NA       | NA       |
| 21.22  | 18.63  | 19.63  | 19.15  | -0.15481 | 0.278147 |
| 0.01   | 0      | 0.01   | 0      | NA       | NA       |
| 12.67  | 13.74  | 11.36  | 11.5   | 0.08964  | 0.608074 |
| 14.95  | 18.29  | 18.2   | 19.73  | 0.047495 | 0.829763 |
| 0      | 0      | 0      | 0      | NA       | NA       |
| 15.19  | 3.07   | 4.68   | 2.18   | -2.27161 | 1.60E-38 |
| 0.61   | 0.45   | 0.22   | 0.14   | 0.052009 | 0.955141 |
| 0.05   | 0.07   | 0.04   | 0.06   | NA       | NA       |
| 0      | 0      | 0      | 0      | NA       | NA       |
| 31.66  | 37.51  | 33.53  | 34.38  | 0.164254 | 0.150397 |
| 6.29   | 7.83   | 7.17   | 7.49   | 0.217571 | 0.087517 |
| 12.7   | 9.55   | 9.84   | 9.67   | -0.34813 | 0.004873 |
| 5.91   | 9.19   | 6.25   | 7.06   | 0.55427  | 7.94E-05 |
| 0      | 0.58   | 0.11   | 0.12   | NA       | NA       |
| 51.16  | 66.48  | 63.32  | 68.85  | 0.383039 | 1.65E-05 |
| 0.02   | 0      | 0      | 0.48   | NA       | NA       |
| 0.94   | 1.11   | 1.24   | 1.36   | 0.03825  | 0.925102 |
| 215.51 | 398.88 | 333.45 | 371.36 | 0.670014 | 2.73E-15 |
| 4.82   | 4.25   | 4.82   | 4.9    | 0.219501 | 0.062064 |
| 0      | 0.07   | 0      | 0.22   | NA       | NA       |
| 1.59   | 2.09   | 1.67   | 2.05   | 0.073009 | 0.840324 |
| 11.38  | 10.28  | 15.41  | 12.12  | 0.008789 | 0.981851 |

|       |       |        |        |          |          |
|-------|-------|--------|--------|----------|----------|
| 7.45  | 9.26  | 8.45   | 8.54   | 0.324287 | 0.066536 |
| 0     | 0     | 0      | 0      | NA       | NA       |
| 85.62 | 289   | 215.03 | 240.57 | 1.32176  | 3.06E-31 |
| 0     | 0.26  | 0      | 0.05   | NA       | NA       |
| 0.12  | 0     | 0      | 0      | NA       | NA       |
| 13.84 | 8.11  | 11.39  | 9.37   | -0.41534 | 0.000273 |
| 24.4  | 29.31 | 24.83  | 28.56  | 0.251536 | 0.056954 |
| 0     | 0     | 0      | 0      | NA       | NA       |
| 3.62  | 5.09  | 4.66   | 4.57   | 0.338266 | 0.102826 |
| 17.41 | 18.96 | 17.26  | 16.21  | -0.01737 | 0.93851  |
| 20.81 | 23.43 | 17.07  | 21.82  | -0.1468  | 0.294435 |
| 5.14  | 8.35  | 8.87   | 6.69   | 0.205802 | 0.230009 |
| 0.09  | 0.73  | 0      | 0.14   | NA       | NA       |
| 0.29  | 0.2   | 0.17   | 0.14   | -0.91288 | 0.038262 |
| 0.08  | 0     | 0      | 0      | NA       | NA       |
| 0.02  | 0.05  | 0.06   | 0.03   | NA       | NA       |
| 3     | 6.4   | 4.05   | 4.98   | 0.714989 | 0.027274 |
| 39.97 | 39.88 | 36.35  | 38.2   | -0.22242 | 0.016463 |
| 13.97 | 22.99 | 18.42  | 20.18  | 0.570713 | 2.32E-05 |
| 1.2   | 2     | 2.94   | 1.35   | -0.46673 | 0.251829 |
| 0.23  | 4.78  | 1.99   | 2.08   | 2.40202  | 7.60E-08 |
| 19.5  | 21.42 | 17.88  | 20.84  | -0.14109 | 0.297125 |
| 39.92 | 40.63 | 37.77  | 39.35  | -0.0869  | 0.489193 |
| 0     | 0     | 0      | 0.03   | NA       | NA       |
| 0.15  | 0.22  | 0.37   | 0.53   | NA       | NA       |
| 0     | 0     | 0      | 0      | NA       | NA       |
| 4.12  | 2.96  | 2.6    | 2.68   | -0.54219 | 0.004162 |
| 0.75  | 1.04  | 0.79   | 0.86   | 0.18212  | 0.772349 |
| 0.17  | 0.16  | 0.13   | 0.25   | -0.24902 | 0.766621 |
| 31.53 | 35.35 | 38.21  | 35.75  | 0.161453 | 0.126079 |
| 0.07  | 0.02  | 0.01   | 0.09   | NA       | NA       |
| 4.3   | 4.65  | 4.5    | 3.99   | 0.006877 | 0.975638 |
| 5.98  | 7.26  | 5.21   | 6.55   | 0.279085 | 0.109891 |
| 3.13  | 3.23  | 3.65   | 3.91   | 0.066842 | 0.716221 |
| 2.97  | 1.78  | 2.34   | 1.95   | -0.25471 | 0.267055 |
| 2.3   | 2     | 2.09   | 2.18   | -0.03752 | 0.942223 |
| 14.23 | 14.37 | 13.66  | 11.98  | 0.059653 | 0.784205 |
| 35.86 | 46.02 | 44.27  | 45.41  | 0.245151 | 0.007492 |
| 12.3  | 18.69 | 14.9   | 15.5   | 0.25558  | 0.130108 |
| 3.62  | 4.99  | 3.41   | 2.75   | 0.175059 | 0.356637 |
| 10.34 | 12.19 | 11.96  | 13.16  | 0.231665 | 0.079703 |
| 10.26 | 16.97 | 14.48  | 17.71  | 0.693764 | 4.85E-08 |
| 21.28 | 22.21 | 21.87  | 20.61  | 0.010184 | 0.957724 |
| 33.87 | 75.06 | 60.48  | 74.68  | 0.927646 | 6.92E-20 |
| 21.38 | 20.65 | 20.93  | 21.78  | -0.20887 | 0.066673 |

|        |        |        |        |          |          |
|--------|--------|--------|--------|----------|----------|
| 53.67  | 60.65  | 52.37  | 56.55  | 0.12082  | 0.181373 |
| 4.5    | 5.91   | 5.21   | 4.85   | 0.041734 | 0.903611 |
| 6.43   | 6.23   | 6.06   | 6.18   | -0.14227 | 0.336979 |
| 0.03   | 0      | 0      | 0      | NA       | NA       |
| 19.89  | 355.98 | 163.88 | 269.03 | 3.206726 | 1.13E-21 |
| 0      | 0.03   | 0.03   | 0      | NA       | NA       |
| 71.86  | 119.7  | 98.95  | 113.44 | 0.542573 | 3.03E-09 |
| 0      | 0      | 0      | 0      | NA       | NA       |
| 0      | 0      | 0      | 0      | NA       | NA       |
| 0      | 0      | 0      | 0      | NA       | NA       |
| 0      | 0      | 0      | 0      | NA       | NA       |
| 0      | 0      | 0      | 0      | NA       | NA       |
| 62.89  | 80.69  | 63.29  | 56.55  | 0.086568 | 0.646738 |
| 15.29  | 29.5   | 17.96  | 20.87  | 0.407899 | 0.019189 |
| 55.95  | 77.62  | 73.68  | 77.48  | 0.379752 | 7.97E-07 |
| 13.63  | 8.53   | 13.13  | 13.46  | -0.35225 | 0.095522 |
| 67.12  | 68.18  | 65.86  | 55.13  | 0.02642  | 0.886918 |
| 0      | 0.06   | 0.05   | 0.03   | NA       | NA       |
| 4.19   | 3.8    | 3.67   | 3.08   | -0.31617 | 0.255545 |
| 24.6   | 31.19  | 39.99  | 39.21  | 0.6708   | 1.15E-12 |
| 0.97   | 0.88   | 0.59   | 1.18   | -0.05049 | 0.900895 |
| 0      | 0.24   | 0.22   | 0.08   | NA       | NA       |
| 46.51  | 52.9   | 56.02  | 52.51  | 0.182453 | 0.08887  |
| 21.96  | 34.76  | 32.17  | 32.89  | 0.586661 | 5.77E-07 |
| 0.02   | 0.08   | 0.09   | 0.03   | 0.671849 | 0.329183 |
| 0      | 0      | 0      | 0      | NA       | NA       |
| 0      | 0      | 0      | 0      | NA       | NA       |
| 0      | 0      | 0      | 0      | NA       | NA       |
| 6.27   | 10.35  | 6.37   | 9.36   | 0.298583 | 0.05946  |
| 0.92   | 0.47   | 0.96   | 0.65   | -0.54807 | 0.075793 |
| 0      | 9.36   | 3.29   | 6.7    | 4.625119 | 5.93E-27 |
| 0.4    | 1.5    | 0.9    | 1.38   | 1.350038 | 9.24E-06 |
| 9.86   | 8.48   | 7.88   | 7.18   | 0.040064 | 0.821129 |
| 0      | 0      | 0.06   | 0      | NA       | NA       |
| 0.04   | 0.02   | 0.06   | 0.08   | 0.59049  | 0.395794 |
| 2.62   | 3.19   | 2.99   | 2.3    | -0.27734 | 0.212763 |
| 30.84  | 37.32  | 35.09  | 42.21  | 0.389756 | 2.97E-05 |
| 266.28 | 133.14 | 188.19 | 156.84 | -0.78597 | 1.36E-10 |
| 0      | 0.01   | 0.04   | 0      | NA       | NA       |
| 0      | 0      | 0      | 0.2    | NA       | NA       |
| 46.35  | 70.1   | 60.39  | 66.14  | 0.476078 | 2.02E-06 |
| 26.04  | 24.47  | 24.79  | 25.34  | -0.12786 | 0.330016 |
| 54.49  | 75.43  | 69.7   | 72.88  | 0.312012 | 0.001277 |
| 7.91   | 22.24  | 15.53  | 16.74  | 1.152956 | 1.77E-21 |
| 0.04   | 0.32   | 0.29   | 0.85   | 0.411639 | 0.592303 |

|         |        |         |         |          |          |
|---------|--------|---------|---------|----------|----------|
| 128.01  | 165.43 | 145.81  | 149.55  | 0.153943 | 0.148693 |
| 0       | 0      | 0       | 0       | NA       | NA       |
| 22.19   | 10.31  | 13.11   | 11.42   | -0.91898 | 1.82E-15 |
| 0       | 0      | 0       | 0       | NA       | NA       |
| 35.22   | 57.55  | 57.28   | 61.33   | 0.721425 | 9.95E-21 |
| 1429.22 | 842.61 | 1084.36 | 1095.43 | -0.52195 | NA       |
| 0       | 0      | 0       | 0       | NA       | NA       |
| 3.93    | 2.62   | 3.57    | 2.57    | -0.72455 | 1.94E-05 |
| 3.05    | 1.42   | 1.97    | 1.7     | -0.89342 | 1.22E-11 |
| 10.85   | 7.99   | 7.27    | 8.15    | -0.39159 | 0.00934  |
| 0.01    | 0.01   | 0.01    | 0.01    | NA       | NA       |
| 0       | 0      | 0       | 0       | NA       | NA       |
| 4.65    | 6.1    | 4.93    | 6.37    | 0.156858 | 0.258772 |
| 45.08   | 48.14  | 49.27   | 54.28   | 0.138676 | 0.141768 |
| 16.71   | 19.51  | 18.39   | 18.68   | 0.11987  | 0.429497 |
| 0       | 0      | 0       | 0       | NA       | NA       |
| 0       | 0      | 0.02    | 0       | NA       | NA       |
| 0       | 0      | 0       | 0       | NA       | NA       |
| 0       | 0      | 0       | 0       | NA       | NA       |
| 0       | 0      | 0       | 0.07    | NA       | NA       |
| 19.9    | 16.14  | 12.82   | 15.58   | -0.05528 | 0.734898 |
| 0.17    | 0.22   | 0.13    | 0.64    | 0.619422 | 0.366495 |
| 23.85   | 27.44  | 27.94   | 28.01   | 0.156155 | 0.143358 |
| 20.47   | 22.82  | 20.11   | 18.05   | 0.000484 | 0.998123 |
| 13.05   | 15.38  | 15.07   | 15.85   | -0.05542 | 0.795969 |
| 0       | 0      | 0.01    | 0.01    | NA       | NA       |
| 0       | 0      | 0.09    | 0       | NA       | NA       |
| 7.68    | 27.29  | 21.44   | 23.34   | 1.478412 | 1.75E-40 |
| 0       | 0      | 0       | 0.02    | NA       | NA       |
| 0       | 0      | 0       | 0       | NA       | NA       |
| 27.54   | 29.49  | 26.5    | 26.62   | 0.04406  | 0.711426 |
| 44.48   | 5.19   | 11.32   | 9.13    | -2.16491 | 3.73E-10 |
| 9.6     | 4.11   | 6.97    | 6.98    | -0.60029 | 0.019159 |
| 58.66   | 51.56  | 52.57   | 59.59   | -0.12751 | 0.225454 |
| 0       | 0      | 0       | 0       | NA       | NA       |
| 0       | 0      | 0       | 0       | NA       | NA       |
| 0.27    | 0.44   | 0.38    | 0.77    | 0.800057 | 0.21999  |
| 9.4     | 7.51   | 6.94    | 7.2     | -0.33036 | 0.069578 |
| 54.64   | 60.3   | 58.43   | 61.2    | 0.001568 | 0.992257 |
| 0       | 0      | 0       | 0       | NA       | NA       |
| 2.74    | 4.18   | 4.64    | 4.26    | 0.650782 | 0.000359 |
| 0.1     | 2.68   | 1.67    | 2.31    | 2.341307 | 1.66E-09 |
| 2.89    | 2.83   | 2.96    | 3.84    | 0.113066 | 0.78157  |
| 2.87    | 0.41   | 0.38    | 0.33    | -1.83048 | 0.000436 |
| 0.36    | 0.24   | 0.35    | 0.22    | -0.8274  | 0.067835 |

|        |       |       |       |          |           |
|--------|-------|-------|-------|----------|-----------|
| 7.67   | 8.32  | 8.6   | 10.78 | 0.156363 | 0.32261   |
| 11.55  | 13.33 | 12.49 | 13    | -0.04117 | 0.812564  |
| 135.16 | 78.79 | 78.45 | 81.81 | -0.80757 | 1.01E-28  |
| 35.91  | 29.58 | 27.87 | 30.2  | -0.35203 | 4.54E-05  |
| 0.12   | 0.05  | 0.42  | 0.55  | 0.614487 | 0.376836  |
| 0.46   | 0.11  | 0.41  | 0.24  | -0.44972 | 0.529657  |
| 5.89   | 7.57  | 6.33  | 6.24  | 0.280703 | 0.058908  |
| 2.31   | 2.66  | 3.13  | 1.84  | 0.331963 | 0.17191   |
| 10.99  | 15.73 | 15.45 | 14.35 | 0.147847 | 0.465104  |
| 2.03   | 2.56  | 2.16  | 1.72  | -0.1916  | 0.646408  |
| 17.27  | 14.99 | 15.22 | 15.02 | -0.25797 | 0.0085    |
| 0.07   | 0.05  | 0.09  | 0.05  | NA       | NA        |
| 1.71   | 1.64  | 1.47  | 1.75  | -0.12203 | 0.790174  |
| 0.35   | 0.02  | 0.03  | 0.07  | -2.10327 | 8.72E-05  |
| 1.35   | 0.94  | 0.95  | 1.24  | -0.6261  | 0.056616  |
| 7.59   | 9.78  | 8.22  | 9.48  | 0.396533 | 0.001525  |
| 0.03   | 0.07  | 0.01  | 0.05  | -0.4766  | 0.525786  |
| 0      | 0     | 0     | 0     | NA       | NA        |
| 25.32  | 22.32 | 21.68 | 23.01 | -0.13586 | 0.110708  |
| 3.33   | 4.28  | 3.53  | 4.94  | 0.043806 | 0.900886  |
| 120.19 | 73.11 | 79.68 | 81.93 | -0.66251 | 3.55E-16  |
| 11.39  | 10.2  | 10.96 | 12.66 | -0.20941 | 0.113622  |
| 5.38   | 4.74  | 5.35  | 4.64  | 0.05332  | 0.889637  |
| 1.11   | 1.01  | 0.79  | 0.95  | -0.44477 | 0.254904  |
| 14.03  | 16.56 | 13.72 | 15.17 | -0.07467 | 0.729065  |
| 47.76  | 55.42 | 47.15 | 54.78 | 0.140911 | 0.210423  |
| 1.89   | 2.9   | 2.83  | 3.17  | 0.310525 | 0.127389  |
| 6.32   | 6.38  | 4.23  | 6.45  | 0.089319 | 0.708328  |
| 47.61  | 59.75 | 56.91 | 55.1  | 0.166509 | 0.125551  |
| 20.79  | 21.68 | 21.54 | 20.93 | 0.074421 | 0.635168  |
| 12.9   | 9.65  | 8.82  | 9.85  | -0.22507 | 0.096213  |
| 6.34   | 0.42  | 1.02  | 1.97  | -3.16622 | 3.77E-32  |
| 1.72   | 2.25  | 2.54  | 2.92  | 0.274079 | 0.395925  |
| 11.76  | 11.18 | 14.01 | 11.92 | 0.046629 | 0.813598  |
| 0.25   | 0.16  | 0.17  | 0.29  | -0.22182 | 0.774761  |
| 10.42  | 10.81 | 12.38 | 14.33 | 0.272082 | 0.328099  |
| 4.33   | 5.86  | 5.29  | 5.06  | 0.180843 | 0.311659  |
| 0.51   | 0.69  | 0.86  | 0.95  | -0.14515 | 0.784567  |
| 0.18   | 0.03  | 0.05  | 0.11  | -0.67329 | 0.312043  |
| 2.39   | 1.1   | 1.28  | 1.13  | -0.41273 | 0.278432  |
| 0.68   | 46.75 | 45.98 | 46.54 | 5.750179 | 9.76E-298 |
| 0      | 0     | 0     | 0     | NA       | NA        |
| 0      | 0     | 0     | 0     | NA       | NA        |
| 0      | 0     | 0     | 0     | NA       | NA        |
| 0      | 0     | 0     | 0     | NA       | NA        |



|       |       |       |       |          |          |
|-------|-------|-------|-------|----------|----------|
| 0     | 0     | 0     | 0     | NA       | NA       |
| 0.08  | 0     | 0.03  | 0.12  | NA       | NA       |
| 1.17  | 2.7   | 1.45  | 1.64  | 0.08905  | 0.823938 |
| 0     | 0.02  | 0     | 0     | NA       | NA       |
| 2.95  | 2.69  | 3.32  | 3.94  | 0.074237 | 0.835457 |
| 8.94  | 8.47  | 8.84  | 7.93  | -0.1053  | 0.560513 |
| 5.23  | 9.2   | 5.31  | 8.06  | 0.611006 | 6.25E-05 |
| 29.83 | 9.98  | 18.59 | 15.1  | -0.94437 | 0.001718 |
| 9.4   | 17.63 | 22.65 | 14.51 | 0.446656 | 0.004182 |
| 0     | 0     | 0     | 0     | NA       | NA       |
| 0.42  | 0.17  | 0.25  | 0.28  | -0.80313 | 0.163797 |
| 5.03  | 6.02  | 5.69  | 6.22  | 0.159676 | 0.25552  |
| 46.29 | 59.84 | 57.66 | 67.35 | 0.273749 | 0.001303 |
| 87.37 | 75.09 | 82.38 | 72.74 | -0.25875 | 0.006497 |
| 55.47 | 44.78 | 54.31 | 50.2  | -0.14077 | 0.230165 |
| 7.19  | 11.04 | 8.82  | 9.46  | 0.132949 | 0.45229  |
| 17.41 | 18.78 | 16.22 | 19.22 | 0.009277 | 0.953663 |
| 9.7   | 12.15 | 11.09 | 14.54 | 0.345061 | 0.004393 |
| 0.61  | 0.45  | 0.67  | 0.56  | -0.54333 | 0.12661  |
| 16.9  | 18.89 | 18.73 | 17.34 | -0.0447  | 0.818313 |
| 0.07  | 0.61  | 0.41  | 0.61  | 2.4996   | 6.95E-12 |
| 0     | 0     | 0     | 0     | NA       | NA       |
| 6.43  | 9.07  | 7.02  | 8.48  | -0.17187 | 0.438074 |
| 0.04  | 0.23  | 0.61  | 0.15  | 0.613325 | 0.38678  |
| 0.33  | 0.17  | 0.29  | 0.24  | -0.44561 | 0.322224 |
| 0.57  | 0.55  | 0.24  | 0.14  | -1.2964  | 0.02309  |
| 9.52  | 10.94 | 9.5   | 11.98 | 0.143458 | 0.590646 |
| 17.29 | 23.39 | 27.93 | 28.82 | 0.5894   | 3.55E-11 |
| 1.08  | 0.38  | 0.16  | 0.35  | -0.38112 | 0.624592 |
| 10.96 | 10.36 | 9.68  | 9.37  | -0.21792 | 0.27089  |
| 85.69 | 61.43 | 68.89 | 69.88 | -0.3636  | 6.25E-06 |
| 5.27  | 7.6   | 6.62  | 6.55  | 0.242427 | 0.086545 |
| 23.1  | 20.7  | 22.91 | 20.94 | -0.02514 | 0.861694 |
| 1.91  | 1.06  | 1.02  | 0.9   | -0.2844  | 0.473947 |
| 7.82  | 6.18  | 7.06  | 6.6   | -0.12898 | 0.27069  |
| 9.05  | 9.45  | 9.97  | 11.3  | 0.339229 | 0.002551 |
| 0.08  | 0     | 0     | 0     | NA       | NA       |
| 59.28 | 40.57 | 54.94 | 46.6  | -0.45241 | 7.12E-05 |
| 0.87  | 0.38  | 1.84  | 0.78  | 0.434229 | 0.569445 |
| 0.5   | 0     | 0.15  | 0.28  | NA       | NA       |
| 1.97  | 1.56  | 2.33  | 1.69  | -0.47605 | 0.02146  |
| 9.3   | 6.34  | 7.52  | 7.02  | -0.61042 | 4.38E-06 |
| 4.68  | 12.64 | 9.3   | 10.53 | 1.041926 | 4.27E-12 |
| 3.81  | 3.13  | 3.82  | 3.67  | -0.25348 | 0.201762 |
| 0     | 0     | 0     | 0     | NA       | NA       |

|       |        |        |       |          |          |
|-------|--------|--------|-------|----------|----------|
| 4.23  | 3.21   | 4.7    | 3.72  | 0.062698 | 0.896404 |
| 0     | 0      | 0      | 0     | NA       | NA       |
| 1.32  | 1.12   | 1.15   | 0.93  | -0.3838  | 0.29684  |
| 11.28 | 11.5   | 13     | 13.67 | -0.04917 | 0.760637 |
| 6.22  | 5.13   | 5.07   | 5.07  | 0.139452 | 0.56762  |
| 0.18  | 0.32   | 0.13   | 0.12  | -0.12947 | 0.877298 |
| 0.09  | 0.06   | 0.04   | 0.06  | NA       | NA       |
| 3.92  | 3.98   | 4.41   | 4.57  | -0.03633 | 0.916659 |
| 39.59 | 33.64  | 35.25  | 34.63 | -0.27065 | 0.003582 |
| 20.35 | 24.36  | 21.05  | 19.85 | 0.030016 | 0.86863  |
| 4.43  | 4.26   | 3.85   | 3.13  | -0.36065 | 0.117865 |
| 18.22 | 17.58  | 17.36  | 18.75 | -0.18462 | 0.108137 |
| 19.57 | 17.54  | 17.14  | 20.43 | -0.187   | 0.273049 |
| 0.8   | 0.51   | 0.6    | 1.14  | -0.89477 | 0.007467 |
| 0.79  | 0.08   | 0.43   | 0.09  | -1.11414 | 0.016582 |
| 3.41  | 5.88   | 6.62   | 6.32  | 0.824189 | 1.08E-05 |
| 0.37  | 0.45   | 0.51   | 0.31  | -0.01188 | 0.989193 |
| 0.28  | 0.51   | 0.37   | 0.43  | NA       | NA       |
| 0     | 0      | 0      | 0     | NA       | NA       |
| 2.33  | 1.84   | 2.09   | 2.23  | -0.2868  | 0.331994 |
| 15.19 | 15.21  | 15.9   | 22.39 | 0.351239 | 2.37E-05 |
| 10.41 | 12.48  | 11.75  | 10.89 | 0.112032 | 0.586972 |
| 12.18 | 23.31  | 17.9   | 21.31 | 0.758491 | 2.64E-08 |
| 14.8  | 18.83  | 14.8   | 18.53 | 0.180362 | 0.1163   |
| 0.87  | 0.5    | 0.64   | 0.5   | -0.26085 | 0.55896  |
| 0     | 0      | 0      | 0     | NA       | NA       |
| 2.93  | 2.14   | 2.01   | 2.1   | -0.50243 | 0.026022 |
| 3.25  | 8.76   | 8.71   | 8.81  | 1.043232 | 9.94E-06 |
| 18.39 | 14.7   | 14.92  | 13.71 | -0.4741  | 1.37E-06 |
| 31.13 | 31.24  | 30.48  | 33.7  | 0.046177 | 0.735342 |
| 0.02  | 0      | 0.06   | 0.05  | NA       | NA       |
| 0     | 0.1    | 0      | 0.22  | NA       | NA       |
| 21.45 | 27.71  | 26.97  | 25.41 | 0.291    | 0.006599 |
| 0     | 0.01   | 0      | 0     | NA       | NA       |
| 11.68 | 19.17  | 13.81  | 18.12 | 0.545639 | 3.69E-05 |
| 9.33  | 13.62  | 10.14  | 14.53 | 0.313465 | 0.081421 |
| 157.5 | 124.56 | 113.82 | 112.2 | -0.44277 | 7.11E-10 |
| 15.6  | 14.21  | 14.79  | 14.88 | -0.11817 | 0.339118 |
| 8.3   | 7.44   | 7.42   | 7.78  | -0.26027 | 0.079393 |
| 44.66 | 49.16  | 46.48  | 52.51 | 0.157379 | 0.071479 |
| 2.32  | 2.43   | 2.24   | 1.56  | 0.182985 | 0.50822  |
| 47.13 | 40.94  | 50.36  | 51.98 | 0.11112  | 0.354228 |
| 0.06  | 0.08   | 0.06   | 0.06  | -0.24923 | 0.766424 |
| 13.2  | 18.04  | 16.3   | 17.35 | 0.283706 | 0.019775 |
| 25.6  | 22.52  | 21.07  | 20.77 | -0.29132 | 0.006868 |

|        |        |        |        |          |          |
|--------|--------|--------|--------|----------|----------|
| 84.33  | 57.63  | 51.82  | 52.82  | -0.73207 | 1.94E-16 |
| 12.48  | 14.92  | 12.82  | 14.98  | -0.00487 | 0.98135  |
| 4.58   | 5.07   | 3.56   | 3.43   | -0.42836 | 0.055676 |
| 18.37  | 20.08  | 17.38  | 19.89  | -0.00129 | 0.995104 |
| 1.64   | 1.71   | 1.73   | 1.87   | 0.020956 | 0.964931 |
| 20.66  | 20.12  | 18.59  | 18.73  | -0.21965 | 0.159455 |
| 9.07   | 11.1   | 9.44   | 10.01  | 0.156494 | 0.28259  |
| 239.17 | 193.71 | 203    | 188.45 | -0.37147 | 3.27E-07 |
| 0      | 0      | 0      | 0      | NA       | NA       |
| 2.62   | 1.3    | 2.13   | 1.87   | -0.52825 | 0.029597 |
| 13.66  | 20.02  | 18.29  | 16.05  | 0.232405 | 0.214309 |
| 0      | 0      | 0.02   | 0      | NA       | NA       |
| 9.68   | 15.8   | 14.06  | 16.28  | 0.514614 | 4.47E-06 |
| 0      | 0      | 0      | 0      | NA       | NA       |
| 10.88  | 12.62  | 13.97  | 12.19  | 0.259073 | 0.25414  |
| 7.41   | 7.64   | 8.14   | 6.39   | 0.012697 | 0.963692 |
| 0.19   | 0.33   | 0.12   | 0.03   | -0.26855 | 0.744351 |
| 0      | 0      | 0      | 0      | NA       | NA       |
| 0      | 0.11   | 0.11   | 0      | NA       | NA       |
| 1.89   | 0.42   | 0.5    | 0.69   | -1.4605  | 0.000319 |
| 0      | 0      | 0      | 0      | NA       | NA       |
| 0      | 0      | 0.05   | 0      | NA       | NA       |
| 16.47  | 25.77  | 23.55  | 21.69  | 0.381965 | 0.000821 |
| 0.04   | 0      | 0      | 0      | NA       | NA       |
| 0      | 0.35   | 0.16   | 0      | NA       | NA       |
| 0.2    | 0.38   | 0.25   | 0.27   | 0.50312  | 0.497407 |
| 13.78  | 29.75  | 23.6   | 26.2   | 0.752939 | 1.34E-11 |
| 6.16   | 6.24   | 6.56   | 6.95   | 0.180732 | 0.38061  |
| 21.14  | 15.32  | 16.98  | 14.72  | -0.58412 | 1.33E-05 |
| 329.77 | 222.9  | 267.92 | 317.05 | -0.44587 | 0.000361 |
| 55.79  | 61.7   | 58.26  | 56.88  | -0.07003 | 0.604355 |
| 0.99   | 1.24   | 1.01   | 1.19   | 0.211563 | 0.490351 |
| 0.33   | 0.17   | 0.29   | 0.04   | -0.61146 | 0.3828   |
| 20.45  | 16.57  | 19.22  | 18.02  | -0.1722  | 0.153894 |
| 1      | 2.43   | 1.26   | 1.75   | 0.088385 | 0.834135 |
| 8.72   | 8.87   | 7.82   | 8.23   | 0.040979 | 0.822185 |
| 5.27   | 4.2    | 4.81   | 5.27   | -0.20221 | 0.2822   |
| 0      | 0      | 0      | 0      | NA       | NA       |
| 13.46  | 17.76  | 17.62  | 19.68  | 0.417722 | 0.000293 |
| 0.41   | 0.02   | 0.28   | 0.08   | -0.17585 | 0.841829 |
| 14.48  | 20     | 15.62  | 17.51  | 0.174786 | 0.166587 |
| 4.95   | 3.88   | 6.35   | 5.32   | 0.01352  | 0.971477 |
| 0      | 0      | 0      | 0      | NA       | NA       |
| 2.26   | 1.34   | 2.68   | 1.63   | 0.598326 | 0.125119 |
| 9.44   | 5.62   | 6.67   | 7.02   | -0.21509 | 0.254802 |

|        |        |        |        |          |          |
|--------|--------|--------|--------|----------|----------|
| 843.4  | 808.4  | 851.32 | 784.26 | -0.07423 | 0.388284 |
| 183.03 | 181.72 | 198.72 | 179.14 | 0.015791 | 0.900897 |
| 800.46 | 756.34 | 769.67 | 721.12 | -0.19066 | 0.014009 |
| 11.31  | 10.47  | 9.69   | 15.77  | 0.111076 | 0.362291 |
| 0      | 0      | 0      | 0      | NA       | NA       |
| 7.18   | 13.14  | 9.22   | 7.18   | 0.177653 | 0.356587 |
| 0.91   | 0.32   | 0.44   | 0.75   | -0.27701 | 0.632605 |
| 5.3    | 3.89   | 3.49   | 4.44   | -0.40073 | 0.014092 |
| 0      | 0.24   | 0      | 0      | NA       | NA       |
| 50.01  | 62.12  | 60.39  | 59.19  | 0.139184 | 0.231191 |
| 0.04   | 0.06   | 0.08   | 0.09   | 0.337053 | 0.672478 |
| 18.24  | 32.8   | 31.05  | 38.86  | 0.967746 | 1.04E-17 |
| 0.02   | 0.02   | 0.04   | 0.03   | NA       | NA       |
| 0      | 0      | 0      | 0      | NA       | NA       |
| 1.1    | 1.81   | 0      | 2.41   | NA       | NA       |
| 1.05   | 0.64   | 1.17   | 1.09   | -0.16386 | 0.760359 |
| 9.92   | 8.51   | 9      | 9.42   | -0.11893 | 0.582085 |
| 0.03   | 0.02   | 0.05   | 0.03   | NA       | NA       |
| 33.26  | 25.26  | 27.2   | 27.08  | -0.52222 | 3.94E-10 |
| 262.41 | 219.24 | 227.95 | 235.38 | -0.27588 | 7.83E-05 |
| 18.03  | 27.88  | 24.36  | 25.22  | 0.322751 | 0.00324  |
| 20.84  | 21.36  | 21.12  | 20.63  | -0.12165 | 0.278147 |
| 2.63   | 1.98   | 1.72   | 2.08   | 0.119568 | 0.764373 |
| 108.63 | 76.28  | 66.34  | 81.15  | -0.50321 | 6.04E-08 |
| 9.57   | 8.94   | 9      | 9.03   | 0.025581 | 0.942245 |
| 2.82   | 3.83   | 3.66   | 3.52   | 0.198579 | 0.488918 |
| 0.03   | 0.01   | 0.01   | 0      | NA       | NA       |
| 9.01   | 4.81   | 6.56   | 5.77   | -0.53586 | 0.009296 |
| 11.04  | 4.79   | 7.71   | 5.62   | -0.9192  | 9.95E-05 |
| 1.36   | 0.58   | 0.88   | 0.6    | -0.81112 | 0.029732 |
| 0.45   | 0.59   | 0.6    | 0.43   | 0.315392 | 0.553412 |
| 0      | 0.32   | 0      | 0.19   | NA       | NA       |
| 6.57   | 4.75   | 5.49   | 5.56   | -0.51358 | 0.000758 |
| 0.12   | 0.14   | 0.14   | 0.14   | 0.151617 | 0.797745 |
| 0.02   | 0      | 0.01   | 0      | NA       | NA       |
| 25     | 9.32   | 13.59  | 12.12  | -1.06891 | 3.60E-13 |
| 27.68  | 27.96  | 28.12  | 33.33  | 0.101997 | 0.490169 |
| 8.92   | 12.85  | 10.2   | 11.95  | 0.250346 | 0.02254  |
| 22.75  | 22.21  | 24.77  | 21.49  | -0.11655 | 0.414167 |
| 76.14  | 134.14 | 118.18 | 117.99 | 0.667276 | NA       |
| 49.5   | 52.62  | 55.69  | 53.82  | 0.180256 | 0.072747 |
| 8.06   | 4.98   | 5.32   | 5.59   | -0.11142 | 0.619647 |
| 4.01   | 3.23   | 3.14   | 3.32   | -0.21418 | 0.467    |
| 0.14   | 0.02   | 0.11   | 0.02   | -0.45761 | 0.540471 |
| 0      | 0.05   | 0      | 0      | NA       | NA       |

|        |        |        |        |          |          |
|--------|--------|--------|--------|----------|----------|
| 0      | 0      | 0      | 0      | NA       | NA       |
| 6.48   | 10.93  | 9.57   | 11.28  | 0.673448 | 1.08E-05 |
| 0      | 0      | 0      | 0      | NA       | NA       |
| 173.51 | 243.53 | 248.18 | 255.51 | 0.431191 | 7.87E-08 |
| 0      | 0      | 0      | 0      | NA       | NA       |
| 8.18   | 14.61  | 11.57  | 13.68  | 0.546708 | 0.000304 |
| 0      | 0      | 0      | 0      | NA       | NA       |
| 2.66   | 3.87   | 3.87   | 4.38   | 0.499104 | 0.040458 |
| 0.05   | 0.02   | 0.05   | 0.05   | NA       | NA       |
| 0      | 0      | 0      | 0      | NA       | NA       |
| 0.52   | 1.67   | 1.33   | 1.55   | 0.919994 | 0.008908 |
| 18.87  | 23.22  | 20.68  | 20.25  | 0.220336 | 0.082266 |
| 0.18   | 0      | 0.03   | 0      | NA       | NA       |
| 61.88  | 92.96  | 81.37  | 86.87  | 0.428867 | 1.09E-06 |
| 27.34  | 26.81  | 30.09  | 30.34  | -0.04308 | 0.841869 |
| 0.54   | 0.97   | 0.94   | 1.29   | 0.168277 | 0.666379 |
| 4.97   | 2.4    | 3.09   | 3.18   | -0.77936 | 2.51E-05 |
| 1.26   | 1.17   | 1.38   | 1.93   | -0.32325 | 0.364405 |
| 47.35  | 25.05  | 28.25  | 26.71  | -1.05357 | 2.44E-26 |
| 7.15   | 17.04  | 14.46  | 16.17  | 1.084512 | 3.58E-25 |
| 0.33   | 0.88   | 1.11   | 0.58   | 1.024456 | 0.051241 |
| 4.32   | 3.31   | 5.38   | 4.06   | -0.17013 | 0.500606 |
| 0      | 0      | 0      | 0      | NA       | NA       |
| 12.17  | 11.78  | 12.23  | 13.35  | 0.09084  | 0.537696 |
| 13.68  | 7.25   | 9.17   | 8.03   | -0.70511 | 5.25E-06 |
| 10.9   | 14.68  | 13.45  | 13.54  | 0.398983 | 0.000247 |
| 0      | 0      | 0      | 0      | NA       | NA       |
| 0      | 0      | 0      | 0      | NA       | NA       |
| 0.38   | 0      | 0.47   | 0      | NA       | NA       |
| 0.39   | 0.2    | 0.3    | 0.35   | -0.58561 | 0.351431 |
| 0.02   | 0.02   | 0      | 0.08   | NA       | NA       |
| 24.98  | 28.81  | 26.27  | 29.14  | 0.193839 | 0.094875 |
| 0.18   | 0      | 0      | 0      | NA       | NA       |
| 0.07   | 0      | 0      | 0      | NA       | NA       |
| 0.25   | 1.02   | 0.39   | 0.81   | 0.70362  | 0.109327 |
| 1.63   | 2.92   | 2.4    | 3.51   | 0.788047 | 0.004198 |
| 13.3   | 13.67  | 12.92  | 15.45  | 0.129549 | 0.60451  |
| 16.12  | 5.58   | 7.87   | 9.23   | -0.99725 | 2.20E-11 |
| 0      | 0      | 0.04   | 0.07   | NA       | NA       |
| 2      | 3.28   | 0.47   | 2.22   | 0.350779 | 0.658057 |
| 0.02   | 0.13   | 0.13   | 0.24   | 0.91016  | 0.15789  |
| 0      | 0      | 0      | 0      | NA       | NA       |
| 6.63   | 5.64   | 5.81   | 4.98   | -0.29011 | 0.18612  |
| 17.37  | 22.94  | 24.04  | 23.87  | 0.175719 | 0.171008 |
| 6.68   | 2.71   | 5.69   | 4.06   | -0.69211 | 0.002066 |

|         |         |         |         |          |          |
|---------|---------|---------|---------|----------|----------|
| 336.96  | 364.86  | 387.75  | 369.32  | 0.149659 | 0.055876 |
| 1131.73 | 1045.23 | 1196.89 | 1017.71 | -0.09386 | 0.422944 |
| 0       | 0       | 0       | 0       | NA       | NA       |
| 3.72    | 6.95    | 5.3     | 5.43    | 0.401672 | 0.117021 |
| 16.3    | 8.62    | 11.65   | 11.22   | -0.59316 | 0.000891 |
| 0       | 0       | 0       | 0       | NA       | NA       |
| 9.38    | 9.38    | 9.11    | 11.29   | -0.02475 | 0.913388 |
| 38      | 44.73   | 40.98   | 36.71   | 0.007637 | 0.962623 |
| 0.57    | 1.26    | 1.83    | 1.19    | 0.21504  | 0.717422 |
| 0       | 0       | 0       | 0       | NA       | NA       |
| 0       | 0       | 0       | 0       | NA       | NA       |
| 18.81   | 20.72   | 19.67   | 24.84   | 0.182928 | 0.234227 |
| 0       | 0       | 0       | 0       | NA       | NA       |
| 0       | 0       | 0       | 0       | NA       | NA       |
| 1.14    | 0.8     | 0.4     | 0.81    | 0.450194 | 0.476741 |
| 0.73    | 0.79    | 0.77    | 0.83    | 0.062141 | 0.884574 |
| 3.21    | 3.9     | 4.92    | 3.36    | 0.016042 | 0.948385 |
| 44.96   | 21.44   | 30.4    | 27.15   | -0.76713 | 2.40E-10 |
| 0.1     | 0.02    | 0.09    | 0.05    | NA       | NA       |
| 0.26    | 0.5     | 0.47    | 0.53    | 0.966433 | 0.082696 |
| 0.95    | 1.43    | 1.08    | 1.55    | 0.544174 | 0.111496 |
| 21.25   | 18.83   | 20.39   | 20.91   | -0.21239 | 0.180746 |
| 0       | 0       | 0.09    | 0       | NA       | NA       |
| 11.1    | 8.18    | 8.32    | 10.28   | -0.07311 | 0.774425 |
| 8.06    | 4       | 5.48    | 4.44    | -0.98621 | 1.71E-24 |
| 0.77    | 0.39    | 0.36    | 0.38    | 0.51964  | 0.217343 |
| 2.75    | 3.88    | 2.53    | 3.49    | 0.132169 | 0.621973 |
| 2.12    | 1.48    | 1.41    | 1.26    | -0.67191 | 0.001169 |
| 291.96  | 147.18  | 167.89  | 153.93  | -0.94884 | 1.03E-28 |
| 1.39    | 1.73    | 0.8     | 1.11    | 0.022013 | 0.975797 |
| 0.07    | 0.28    | 0.27    | 0.02    | NA       | NA       |
| 0       | 0       | 0       | 0.06    | NA       | NA       |
| 68.64   | 76.39   | 80.12   | 76.1    | 0.117737 | 0.285493 |
| 3.53    | 3.24    | 2.47    | 2.72    | -0.07353 | 0.848046 |
| 19.44   | 16.99   | 14.89   | 17.93   | -0.04538 | 0.849506 |
| 9.43    | 10.35   | 9.29    | 10.07   | 0.184922 | 0.328014 |
| 24.18   | 32.45   | 28.95   | 29.64   | 0.339769 | 0.000433 |
| 22.34   | 33.06   | 28.69   | 30.69   | 0.366761 | 0.001028 |
| 2.9     | 3.76    | 3.32    | 3.68    | 0.073474 | 0.80714  |
| 606.68  | 521.75  | 564.64  | 504.81  | -0.24807 | 0.003309 |
| 0       | 0       | 0       | 0       | NA       | NA       |
| 14.1    | 34.41   | 21.37   | 28.86   | 0.802817 | 5.29E-09 |
| 21.04   | 27.49   | 26.32   | 29.26   | 0.166249 | 0.266824 |
| 16.71   | 12.88   | 16.09   | 15.49   | -0.30801 | 0.017912 |
| 3.55    | 3.27    | 2.96    | 2.86    | -0.30082 | 0.048648 |

|       |       |       |       |          |          |
|-------|-------|-------|-------|----------|----------|
| 4.27  | 6.77  | 5.64  | 5.14  | 0.143218 | 0.497884 |
| 0     | 0     | 0     | 0     | NA       | NA       |
| 0.04  | 0     | 0     | 0     | NA       | NA       |
| 3.56  | 0.59  | 1.96  | 1.65  | -0.90954 | 0.047623 |
| 0.01  | 0     | 0.01  | 0.01  | NA       | NA       |
| 33.04 | 44.45 | 40.69 | 45.52 | 0.281859 | 0.002837 |
| 0.05  | 0.24  | 0.3   | 0.33  | 0.167257 | 0.850226 |
| 0     | 0     | 0     | 0     | NA       | NA       |
| 7.26  | 7.74  | 6.66  | 6.48  | -0.22308 | 0.138255 |
| 9.97  | 6.5   | 6.8   | 7.26  | -0.44545 | 9.15E-06 |
| 0.09  | 0     | 0     | 0     | NA       | NA       |
| 35.17 | 23.09 | 24.89 | 21.52 | -0.69136 | 4.14E-09 |
| 17.08 | 16.12 | 16.83 | 14.44 | -0.03282 | 0.910213 |
| 1.62  | 2.29  | 2.25  | 2.25  | 0.286971 | 0.222089 |
| 0     | 0     | 0     | 0     | NA       | NA       |
| 2.28  | 2.46  | 2.4   | 1.89  | -0.11617 | 0.736669 |
| 0     | 0     | 0     | 0     | NA       | NA       |
| 0     | 0     | 0     | 0     | NA       | NA       |
| 8.64  | 10.18 | 8.6   | 12.77 | 0.020528 | 0.885047 |
| 42.23 | 45.53 | 34.89 | 40.88 | -0.11081 | 0.425199 |
| 2.74  | 2.86  | 2.4   | 2.73  | -0.10127 | 0.658595 |
| 0.01  | 0.01  | 0.02  | 0.01  | NA       | NA       |
| 28.65 | 43.13 | 37.8  | 39.73 | 0.35129  | 0.000356 |
| 0.88  | 3.37  | 2.49  | 2.94  | 1.614329 | 2.37E-18 |
| 2.4   | 4.46  | 3.86  | 3.94  | 0.476971 | 0.00615  |
| 1.16  | 1.12  | 1.48  | 1.99  | -0.07184 | 0.87152  |
| 59.4  | 41.33 | 49.05 | 46.31 | -0.4733  | 6.82E-09 |
| 27.71 | 22.45 | 30.05 | 27.5  | -0.04332 | 0.818129 |
| 69.25 | 74.15 | 58.6  | 63.37 | -0.0885  | 0.382033 |
| 2.04  | 1.14  | 1.67  | 1.49  | -0.4663  | 0.038602 |
| 0.14  | 0.25  | 0.27  | 0.19  | -0.15327 | 0.860896 |
| 10.76 | 8.93  | 10.91 | 10.95 | -0.03927 | 0.871365 |
| 0.38  | 0.18  | 0.31  | 0.1   | -0.83387 | 0.212849 |
| 0     | 0     | 0     | 0     | NA       | NA       |
| 37.93 | 25.8  | 24.74 | 24.11 | -0.52188 | 3.62E-09 |
| 0     | 0     | 0     | 0     | NA       | NA       |
| 0.23  | 0.24  | 0.28  | 0.39  | 0.201866 | 0.767575 |
| 0.43  | 0.22  | 0.32  | 0.45  | -0.20872 | 0.780423 |
| 0.03  | 1.4   | 0.29  | 0.92  | 2.14999  | 8.48E-05 |
| 4.46  | 10.93 | 7.11  | 7.96  | 1.06964  | 6.01E-08 |
| 0.15  | 0.68  | 0.4   | 0.34  | 1.089147 | 0.043686 |
| 92.3  | 77.21 | 76.8  | 79.13 | -0.30913 | 0.000108 |
| 0.15  | 0.01  | 0.01  | 0.01  | NA       | NA       |
| 0.03  | 0.08  | 0.22  | 0.16  | 0.801157 | 0.235035 |
| 34.63 | 19.97 | 24.82 | 21.34 | -0.6579  | 1.65E-11 |

|        |        |        |        |          |          |
|--------|--------|--------|--------|----------|----------|
| 36.01  | 44.51  | 39.35  | 39.74  | 0.13239  | 0.308023 |
| 27.91  | 26.12  | 23.33  | 23.17  | -0.26907 | 0.012415 |
| 46.16  | 48.93  | 50.23  | 46.29  | 0.16412  | 0.107029 |
| 9.36   | 9.15   | 9.97   | 9.53   | -0.01272 | 0.939145 |
| 1.19   | 0.16   | 0.29   | 0.29   | -0.89425 | 0.167137 |
| 4.64   | 4.31   | 6.17   | 5.53   | -0.2961  | 0.134847 |
| 0.01   | 0.01   | 0.02   | 0.02   | NA       | NA       |
| 8.16   | 27.62  | 16.92  | 22.21  | 1.420215 | 1.96E-19 |
| 5.42   | 0.46   | 0.63   | 0.71   | -3.27543 | 2.47E-50 |
| 0      | 0.02   | 0.03   | 0.05   | NA       | NA       |
| 0      | 0      | 0.2    | 0      | NA       | NA       |
| 3.37   | 1.74   | 1.35   | 2.12   | -0.4145  | 0.15055  |
| 335.11 | 267.79 | 274.39 | 273.84 | -0.30284 | 0.000123 |
| 34.57  | 28.53  | 27.03  | 26.93  | -0.21581 | 0.132392 |
| 66.1   | 35.89  | 50.31  | 45.38  | -0.63787 | 9.20E-08 |
| 0      | 0      | 0      | 0      | NA       | NA       |
| 0      | 0      | 0.03   | 0      | NA       | NA       |
| 3.55   | 1.87   | 2.49   | 1.53   | -0.84855 | 0.000611 |
| 0      | 0      | 0      | 0      | NA       | NA       |
| 2.99   | 1.97   | 2.51   | 2.56   | -0.32499 | 0.110986 |
| 6.68   | 4.45   | 8.29   | 5.1    | -0.59306 | 0.001445 |
| 6.56   | 7.48   | 7.19   | 7.03   | 0.216328 | 0.061362 |
| 30.14  | 34.38  | 38.58  | 34.65  | 0.116966 | 0.479777 |
| 5.02   | 6.49   | 6.44   | 6.27   | 0.262663 | 0.064149 |
| 34.15  | 28     | 32.54  | 31.05  | -0.2417  | 0.017028 |
| 35.08  | 5.5    | 8.2    | 8.35   | -1.91243 | 5.00E-49 |
| 18.83  | 12.61  | 14.84  | 17.61  | -0.23631 | 0.178018 |
| 15.64  | 76.32  | 52.11  | 65.53  | 1.954296 | 2.69E-47 |
| 0.17   | 0.16   | 0.09   | 0.11   | -0.34588 | 0.657838 |
| 0      | 0      | 0      | 0      | NA       | NA       |
| 5.41   | 7.72   | 6.77   | 7.1    | 0.401089 | 0.015262 |
| 0      | 0      | 0      | 0      | NA       | NA       |
| 17.71  | 17.32  | 17.09  | 15.49  | -0.21572 | 0.115298 |
| 0.17   | 0.01   | 0.05   | 0      | -1.83193 | 0.001243 |
| 3.41   | 2.27   | 1.57   | 2.44   | -0.65985 | 0.001712 |
| 12.36  | 11.46  | 16.03  | 14.14  | 0.190656 | 0.195631 |
| 1.54   | 0.74   | 0.59   | 0.6    | -0.37719 | 0.471929 |
| 0.14   | 0.1    | 0.06   | 0      | NA       | NA       |
| 11.1   | 14.2   | 14.3   | 11.55  | 0.270018 | 0.151951 |
| 1.31   | 0.25   | 0.28   | 0.29   | -2.60771 | 8.21E-15 |
| 27.1   | 19.21  | 24.99  | 24.06  | -0.25292 | 0.056255 |
| 1.47   | 1.24   | 2.45   | 1.87   | 0.348681 | 0.293107 |
| 2.1    | 6.62   | 5.69   | 8.8    | 1.802192 | 2.70E-38 |
| 8.57   | 12.18  | 10.86  | 10.92  | 0.494839 | 0.000115 |
| 0.08   | 0      | 0.13   | 0.03   | NA       | NA       |



|        |        |        |        |          |          |
|--------|--------|--------|--------|----------|----------|
| 0      | 0      | 0      | 0      | NA       | NA       |
| 0.18   | 0.07   | 0.06   | 0.11   | 0.12537  | 0.889599 |
| 0      | 0      | 0      | 0      | NA       | NA       |
| 0.42   | 0.11   | 0.14   | 0.3    | -1.01899 | 0.026065 |
| 4.21   | 3.41   | 3.58   | 3.38   | -0.28071 | 0.024423 |
| 6.45   | 2.24   | 3.1    | 3.41   | -1.22476 | 8.02E-13 |
| 11.31  | 14.87  | 14.2   | 13.13  | -0.05172 | 0.778245 |
| 5.1    | 7.86   | 5.94   | 8.08   | 0.604758 | 5.71E-07 |
| 0      | 0      | 0      | 0      | NA       | NA       |
| 5.4    | 11.09  | 7.86   | 9.31   | 0.73503  | 2.18E-07 |
| 106.58 | 113.19 | 110.09 | 107.9  | 0.011681 | 0.93095  |
| 0.99   | 0.04   | 0.07   | 0.17   | -1.33944 | 0.019977 |
| 0      | 0.02   | 0.02   | 0.06   | NA       | NA       |
| 11.98  | 9.02   | 9.09   | 8.47   | -0.14209 | 0.303657 |
| 2.1    | 2.22   | 2.5    | 2.41   | 0.15428  | 0.560786 |
| 0.12   | 0.08   | 0      | 0      | NA       | NA       |
| 0      | 0      | 0      | 0      | NA       | NA       |
| 0.12   | 0.01   | 0.02   | 0.03   | -1.09734 | 0.081682 |
| 13.37  | 33.01  | 23.69  | 27.32  | 0.937997 | 2.44E-12 |
| 92.26  | 95.26  | 85.28  | 90.93  | 0.006489 | 0.957724 |
| 214.86 | 144.65 | 150.48 | 164.62 | -0.60504 | 1.25E-17 |
| 20.56  | 23.52  | 20.1   | 19.91  | 0.023733 | 0.8753   |
| 113.16 | 117.47 | 124.26 | 122.77 | 0.086296 | 0.375365 |
| 4.37   | 3.14   | 3.57   | 3.86   | -0.32424 | 0.028328 |
| 0      | 0      | 0      | 0      | NA       | NA       |
| 0.8    | 0.85   | 0.36   | 0.8    | -0.46958 | 0.284627 |
| 0.56   | 0.91   | 0.67   | 0.59   | 0.258646 | 0.657413 |
| 0      | 0      | 0      | 0      | NA       | NA       |
| 0.1    | 0      | 0      | 0      | NA       | NA       |
| 1.39   | 1.14   | 1.28   | 1.03   | -0.05945 | 0.937483 |
| 0.61   | 1.01   | 0.7    | 0.85   | 0.174397 | 0.643899 |
| 0      | 0      | 0      | 0      | NA       | NA       |
| 0      | 0      | 0      | 0      | NA       | NA       |
| 1.45   | 0.97   | 1.88   | 0.98   | 0.412933 | 0.198878 |
| 0      | 0      | 0      | 0      | NA       | NA       |
| 1.5    | 6.85   | 3.89   | 4.95   | 1.468691 | 2.99E-09 |
| 2.33   | 2.37   | 2.3    | 2.52   | 0.083045 | 0.769317 |
| 3.52   | 0.63   | 1.06   | 0.94   | -1.20931 | 0.000388 |
| 0.03   | 0.1    | 0.1    | 0.05   | NA       | NA       |
| 0      | 0      | 0      | 0      | NA       | NA       |
| 5.66   | 5.88   | 6.5    | 6.19   | -0.07308 | 0.70361  |
| 19.06  | 34.95  | 37.39  | 33.83  | 0.564349 | 8.48E-11 |
| 10.86  | 6.17   | 10.21  | 7.27   | -0.24792 | 0.199149 |
| 0.93   | 0.84   | 0.63   | 0.71   | 0.160546 | 0.835457 |
| 0.3    | 0.12   | 0.13   | 0.31   | -0.29491 | 0.669911 |

|        |        |       |       |          |          |
|--------|--------|-------|-------|----------|----------|
| 11.15  | 13.59  | 11.63 | 12.09 | 0.238993 | 0.063674 |
| 2.93   | 3.58   | 4.19  | 4.29  | 0.345196 | 0.002694 |
| 4.37   | 6.12   | 5.19  | 4.64  | -0.17116 | 0.480098 |
| 0      | 0      | 0     | 0     | NA       | NA       |
| 0      | 0      | 0     | 0     | NA       | NA       |
| 13.24  | 0.12   | 0.62  | 0.36  | -3.72841 | 1.24E-14 |
| 5.1    | 6.1    | 5.81  | 5.38  | 0.169078 | 0.457182 |
| 6.23   | 5.21   | 4.92  | 3.98  | -0.60809 | 1.84E-06 |
| 6.26   | 5.14   | 3.7   | 5.55  | -0.16776 | 0.416645 |
| 0.02   | 0      | 0     | 0.03  | NA       | NA       |
| 0      | 0      | 0     | 0     | NA       | NA       |
| 56.87  | 41.94  | 44.23 | 47.15 | -0.56916 | 5.04E-07 |
| 0      | 0      | 0.05  | 0.03  | NA       | NA       |
| 0.27   | 0      | 0.15  | 0.14  | NA       | NA       |
| 7.59   | 5.24   | 5.88  | 5.65  | -0.30845 | 0.091653 |
| 0      | 0      | 0     | 0     | NA       | NA       |
| 31.83  | 51.26  | 46.74 | 48.13 | 0.559826 | 1.94E-11 |
| 0      | 0.22   | 0.05  | 0     | NA       | NA       |
| 0.91   | 177.91 | 33.34 | 85.41 | 4.349797 | 3.59E-19 |
| 0.49   | 3.56   | 2.89  | 4.09  | 1.883793 | 4.95E-07 |
| 0      | 0.11   | 0.08  | 0.15  | 1.00386  | 0.117487 |
| 0      | 0      | 0     | 0.02  | NA       | NA       |
| 115.79 | 98.45  | 92.42 | 91.03 | -0.33284 | 2.24E-05 |
| 24.85  | 29.14  | 29.82 | 27.84 | 0.042232 | 0.84658  |
| 0.22   | 0.28   | 0.22  | 0.23  | -0.51288 | 0.466718 |
| 34.88  | 34.84  | 33.32 | 36.08 | -0.06726 | 0.566749 |
| 1.94   | 2.95   | 2.19  | 2.94  | 0.75484  | 5.73E-06 |
| 3.54   | 2.71   | 3.55  | 3.35  | -0.1521  | 0.611599 |
| 4.76   | 5.3    | 5.18  | 5.48  | 0.166452 | 0.340203 |
| 3.31   | 3.83   | 3.1   | 3.42  | 0.143804 | 0.576583 |
| 0.04   | 0      | 0     | 0     | NA       | NA       |
| 3.08   | 1.45   | 0.96  | 1.21  | -0.85074 | 0.003165 |
| 3.36   | 0.97   | 2.11  | 1.4   | -1.2932  | 4.78E-13 |
| 0      | 0      | 0     | 0     | NA       | NA       |
| 0      | 0      | 0     | 0     | NA       | NA       |
| 0      | 0      | 0     | 0.02  | NA       | NA       |
| 25.18  | 20.93  | 20.59 | 22.88 | -0.17836 | 0.276473 |
| 26.33  | 23.95  | 25.88 | 22.86 | 0.042567 | 0.867232 |
| 2.72   | 3.41   | 3     | 2.4   | 0.356865 | 0.132181 |
| 8.06   | 8.27   | 6.8   | 7.7   | -0.12252 | 0.653715 |
| 0      | 0.04   | 0     | 0     | NA       | NA       |
| 16.98  | 10.45  | 11.58 | 11.68 | -0.69737 | 6.78E-08 |
| 12.13  | 15.69  | 10.94 | 11.96 | 0.523824 | 0.001001 |
| 0.03   | 0.08   | 0.02  | 0.06  | NA       | NA       |
| 0      | 0.01   | 0     | 0.03  | NA       | NA       |

|        |        |        |        |          |          |
|--------|--------|--------|--------|----------|----------|
| 0      | 0      | 0      | 0      | NA       | NA       |
| 4.27   | 6.75   | 2.41   | 3.67   | -0.34911 | 0.344608 |
| 0.3    | 0.41   | 0.29   | 0.37   | -0.13636 | 0.850555 |
| 0      | 0.1    | 0.03   | 0.06   | NA       | NA       |
| 1.38   | 0.28   | 0.46   | 0.28   | -0.48788 | 0.274281 |
| 30.48  | 39.93  | 36.85  | 36.43  | 0.313536 | 0.006534 |
| 3.64   | 3.32   | 4.02   | 4.16   | 0.129305 | 0.715065 |
| 0.56   | 0.7    | 0.94   | 0.63   | -0.28176 | 0.569451 |
| 0      | 0      | 0      | 0      | NA       | NA       |
| 0.17   | 0      | 0      | 0      | NA       | NA       |
| 2.53   | 1.39   | 1.57   | 1.62   | -0.53435 | 0.003531 |
| 0.08   | 0.09   | 0.05   | 0.06   | NA       | NA       |
| 0.94   | 0      | 0      | 0      | -3.14256 | 3.31E-09 |
| 2.44   | 2.19   | 1.81   | 2.12   | -0.55322 | 0.006534 |
| 8.28   | 6.01   | 6.35   | 6.71   | -0.32387 | 0.010081 |
| 0      | 0      | 0.16   | 0.06   | NA       | NA       |
| 9.68   | 9.28   | 8.21   | 10.84  | -0.16763 | 0.470902 |
| 152.58 | 177.46 | 172.84 | 159.87 | 0.105974 | 0.310036 |
| 0      | 0      | 0      | 0      | NA       | NA       |
| 11.92  | 4.78   | 5.54   | 4.59   | -1.11408 | 2.70E-16 |
| 0.39   | 0.11   | 0.06   | 0.11   | -0.86607 | 0.155016 |
| 0.15   | 0.34   | 0.21   | 0.2    | -0.10041 | 0.905775 |
| 2.83   | 1.57   | 1.54   | 1.61   | -0.61358 | 0.014842 |
| 20.77  | 26.22  | 25.59  | 24.32  | 0.3395   | 0.002891 |
| 6      | 3.44   | 6.39   | 4.5    | -0.46109 | 0.018629 |
| 0      | 0      | 0      | 0      | NA       | NA       |
| 0      | 0.1    | 0      | 0.06   | NA       | NA       |
| 0      | 0      | 0      | 0      | NA       | NA       |
| 0      | 0.22   | 0.13   | 0.12   | 1.92166  | 0.000797 |
| 0.22   | 0.3    | 0.41   | 0.34   | 0.949392 | 0.071613 |
| 0      | 0      | 0      | 0      | NA       | NA       |
| 6.16   | 4.5    | 4.17   | 3.61   | -0.47464 | 0.003291 |
| 0      | 0      | 0      | 0      | NA       | NA       |
| 7.5    | 9.8    | 8.81   | 9.48   | 0.27266  | 0.036708 |
| 0      | 0      | 0      | 0      | NA       | NA       |
| 43.31  | 37.84  | 46.97  | 41.17  | 0.006959 | 0.962964 |
| 0      | 0      | 0      | 0      | NA       | NA       |
| 0      | 0      | 0      | 0      | NA       | NA       |
| 0      | 0.08   | 0.15   | 0.25   | 0.956985 | 0.116976 |
| 9.97   | 10.45  | 10.19  | 10.68  | -0.01252 | 0.938852 |
| 1.66   | 1.07   | 0.91   | 1.15   | -0.21783 | 0.687905 |
| 5.47   | 45.21  | 27.21  | 42.36  | 2.139892 | 1.14E-12 |
| 6.12   | 15.79  | 15.46  | 16.46  | 1.160928 | 1.32E-17 |
| 12.84  | 9.03   | 10.59  | 8.25   | -0.20212 | 0.314778 |
| 0.06   | 0.13   | 0.2    | 0.26   | -0.00716 | 0.99506  |

|        |        |        |        |          |          |
|--------|--------|--------|--------|----------|----------|
| 0.04   | 0.11   | 0.11   | 0.07   | NA       | NA       |
| 0      | 0      | 0      | 0      | NA       | NA       |
| 3.65   | 3.84   | 3.2    | 2.92   | -0.19022 | 0.461183 |
| 16.74  | 17.87  | 16.47  | 17.6   | 0.042592 | 0.858435 |
| 0.16   | 0.22   | 0.14   | 0.4    | NA       | NA       |
| 19.93  | 23.34  | 17.57  | 22.02  | 0.028097 | 0.888287 |
| 20.64  | 21.23  | 19.18  | 21.26  | 0.135612 | 0.305234 |
| 12.77  | 23.31  | 18.74  | 20.26  | 0.682591 | 1.54E-08 |
| 13.56  | 16.1   | 15.06  | 14.61  | 0.112692 | 0.414743 |
| 17.71  | 15.72  | 14.27  | 15.71  | 0.076854 | 0.818129 |
| 17.63  | 10.97  | 9.7    | 10.33  | -0.46199 | 9.53E-05 |
| 620.65 | 675.73 | 641.23 | 646.83 | 0.028418 | 0.800434 |
| 0      | 0      | 0      | 0      | NA       | NA       |
| 0      | 0      | 0      | 0.08   | NA       | NA       |
| 0      | 0      | 0      | 0      | NA       | NA       |
| 0      | 0      | 0      | 0      | NA       | NA       |
| 5.31   | 5.39   | 5.14   | 4.19   | -0.10182 | 0.57022  |
| 0      | 0.08   | 0      | 0      | NA       | NA       |
| 0      | 0      | 0      | 0      | NA       | NA       |
| 0      | 0      | 0      | 0      | NA       | NA       |
| 0.28   | 0.22   | 0.43   | 0.4    | -0.46571 | 0.419838 |
| 0.15   | 0      | 0      | 0      | NA       | NA       |
| 0      | 0      | 0      | 0      | NA       | NA       |
| 0.11   | 0.04   | 0.01   | 0.06   | NA       | NA       |
| 0      | 0      | 0.03   | 0      | NA       | NA       |
| 9.54   | 6.63   | 4.81   | 6.06   | -0.89995 | 6.51E-11 |
| 0.7    | 0.79   | 0.62   | 0.63   | 0.0015   | 0.997073 |
| 0      | 0      | 0      | 0      | NA       | NA       |
| 8.95   | 7.61   | 7.41   | 8.77   | -0.10659 | 0.524881 |
| 0      | 0      | 0      | 0      | NA       | NA       |
| 0      | 0.1    | 0      | 0      | NA       | NA       |
| 9.04   | 9.89   | 8.65   | 8.75   | 0.128271 | 0.503256 |
| 0      | 0      | 0      | 0      | NA       | NA       |
| 0      | 0      | 0      | 0      | NA       | NA       |
| 0      | 0      | 0      | 0      | NA       | NA       |
| 0      | 0.1    | 0      | 0      | NA       | NA       |
| 3.87   | 4.39   | 4.07   | 3.22   | 0.137254 | 0.575291 |
| 0.83   | 0.47   | 0.71   | 0.62   | -0.1743  | 0.69546  |
| 0      | 0      | 0      | 0      | NA       | NA       |
| 96.62  | 173.97 | 117.25 | 147.71 | 0.600903 | 1.54E-06 |
| 5.45   | 5      | 4.2    | 5.23   | 0.027997 | 0.926237 |
| 16.97  | 20.29  | 25.86  | 23.14  | 0.138456 | 0.541089 |
| 29.44  | 34.23  | 31.18  | 31.73  | 0.221781 | 0.030715 |
| 10.66  | 8.36   | 10.4   | 8.24   | -0.23855 | 0.158567 |
| 2.57   | 2.22   | 5.1    | 2.64   | 0.061981 | 0.821262 |

|        |        |         |         |          |          |
|--------|--------|---------|---------|----------|----------|
| 0      | 0      | 0       | 0       | NA       | NA       |
| 15.78  | 9.2    | 9.28    | 9.84    | -0.71797 | 8.42E-07 |
| 86.06  | 65.59  | 77.47   | 75.31   | -0.34883 | 0.000131 |
| 5.24   | 3.84   | 7.72    | 6.14    | 0.217139 | 0.414993 |
| 10.52  | 11.73  | 11.46   | 11.75   | 0.080337 | 0.614538 |
| 10.69  | 15.93  | 14.41   | 16.39   | 0.560217 | 2.54E-10 |
| 0      | 0      | 0       | 0       | NA       | NA       |
| 0.12   | 0      | 0.07    | 0.22    | NA       | NA       |
| 0      | 0      | 0       | 0       | NA       | NA       |
| 924.6  | 272.26 | 550.51  | 415.48  | -1.09723 | 0.000117 |
| 0.63   | 0.58   | 1.21    | 2.41    | -0.06063 | 0.946459 |
| 0.19   | 0.35   | 0.38    | 0.52    | 0.230348 | 0.776743 |
| 19.34  | 21.13  | 22.73   | 21.87   | 0.014038 | 0.936155 |
| 0.86   | 1.13   | 1.15    | 1.16    | 0.331064 | 0.407118 |
| 0      | 0      | 0       | 0       | NA       | NA       |
| 13.76  | 14.02  | 12.96   | 13.97   | -0.04174 | 0.819846 |
| 0.02   | 0.03   | 0.06    | 0       | NA       | NA       |
| 31.86  | 28.92  | 28.91   | 27.11   | -0.21832 | 0.092222 |
| 7.65   | 16.07  | 15.15   | 15.12   | 0.820532 | 7.20E-09 |
| 3.91   | 2.46   | 2.63    | 3.14    | -0.46107 | 0.007765 |
| 0      | 0      | 0       | 0       | NA       | NA       |
| 0      | 0.01   | 0.01    | 0.01    | NA       | NA       |
| 139.26 | 160.45 | 145.74  | 150.43  | 0.113239 | 0.224551 |
| 0.98   | 0.1    | 0.3     | 0.32    | 0.345959 | 0.662948 |
| 2.69   | 1.66   | 2.21    | 1.65    | -0.32828 | 0.186781 |
| 0      | 0      | 0       | 0       | NA       | NA       |
| 0      | 0      | 0       | 0       | NA       | NA       |
| 5.13   | 5.57   | 5.77    | 5.17    | 0.071371 | 0.62424  |
| 851.07 | 513.15 | 641.35  | 628.27  | -0.6018  | 6.80E-12 |
| 7.12   | 0.14   | 0.14    | 0.09    | -5.38322 | 1.92E-95 |
| 0.74   | 4      | 4.84    | 4.86    | 2.654482 | 2.98E-17 |
| 0      | 0      | 0       | 0       | NA       | NA       |
| 30.42  | 27.7   | 29.21   | 29.18   | -0.09872 | 0.454285 |
| 0.57   | 0.68   | 0.39    | 0.65    | -0.53507 | 0.325515 |
| 772.98 | 1307.9 | 1209.72 | 1239.98 | 0.667945 | 1.40E-21 |
| 3.04   | 2.53   | 3.01    | 2.58    | -0.52614 | 0.009933 |
| 102.83 | 131.78 | 120.94  | 127.63  | 0.104517 | 0.457081 |
| 0      | 0      | 0       | 0       | NA       | NA       |
| 204.65 | 186.64 | 193.05  | 180.39  | -0.18064 | 0.024754 |
| 0.22   | 0.32   | 0.11    | 0.15    | NA       | NA       |
| 55.11  | 59.28  | 61.75   | 58.38   | 0.01485  | 0.912803 |
| 1.95   | 2.35   | 1.59    | 1.77    | 0.045555 | 0.919582 |
| 166.55 | 222.2  | 193.48  | 194.22  | 0.250249 | 0.006191 |
| 15.01  | 20.85  | 18.95   | 19.79   | 0.245434 | 0.124551 |
| 15.89  | 16.62  | 13.37   | 15.61   | -0.25734 | 0.043368 |

|        |        |        |        |          |          |
|--------|--------|--------|--------|----------|----------|
| 3.69   | 2.64   | 3.07   | 2.5    | -1.04701 | 2.52E-07 |
| 2      | 1.05   | 0.9    | 0.87   | -1.08537 | 2.62E-05 |
| 0.03   | 0      | 0      | 0      | NA       | NA       |
| 0.16   | 0      | 0      | 0      | NA       | NA       |
| 0      | 0      | 0      | 0      | NA       | NA       |
| 0.03   | 0.07   | 0.18   | 0.05   | NA       | NA       |
| 1.75   | 1.06   | 1.16   | 0.91   | -0.51774 | 0.101181 |
| 0.04   | 0      | 0.01   | 0      | NA       | NA       |
| 7.47   | 7.62   | 8.46   | 7.74   | 0.034167 | 0.869561 |
| 57     | 58.49  | 65.11  | 63.66  | 0.147463 | 0.200269 |
| 56.74  | 79.55  | 74.71  | 79.65  | 0.40049  | 2.05E-07 |
| 0      | 0      | 0      | 0      | NA       | NA       |
| 20.21  | 21.62  | 26.79  | 27.95  | 0.434806 | 0.000175 |
| 7.84   | 5.1    | 5.3    | 5.43   | -0.72266 | 6.22E-06 |
| 0      | 0      | 0      | 0      | NA       | NA       |
| 0      | 0      | 0      | 0      | NA       | NA       |
| 339.88 | 332.42 | 359.35 | 367.64 | -0.05232 | 0.61387  |
| 6.93   | 5.9    | 5.22   | 4.65   | 0.161485 | 0.487323 |
| 39.78  | 49.91  | 39.22  | 38.82  | 0.164147 | 0.131901 |
| 5.41   | 7.57   | 7.36   | 7.47   | 0.652841 | 0.001255 |
| 0      | 0      | 0      | 0      | NA       | NA       |
| 4.04   | 1.38   | 1.49   | 1.42   | -1.46266 | 3.54E-18 |
| 0      | 0      | 0      | 0      | NA       | NA       |
| 0.9    | 0.98   | 1.13   | 1.04   | -0.17411 | 0.666468 |
| 1.62   | 1.05   | 1.24   | 1.62   | 0.199995 | 0.679367 |
| 9.8    | 8.81   | 10.29  | 11     | -0.16702 | 0.245818 |
| 36.21  | 19.67  | 25.48  | 23.75  | -0.68675 | 2.21E-08 |
| 0.99   | 1.48   | 1.49   | 1.45   | 0.51113  | 0.064618 |
| 0.01   | 0      | 0      | 0      | NA       | NA       |
| 41.54  | 15     | 19.37  | 19.45  | -0.66073 | 1.77E-11 |
| 0      | 0      | 0      | 0      | NA       | NA       |
| 0.08   | 0.03   | 0.03   | 0      | -1.11134 | 0.069776 |
| 141.56 | 67.94  | 92.16  | 79.96  | -0.84086 | 6.50E-15 |
| 0      | 0.25   | 0      | 0      | NA       | NA       |
| 0      | 0.1    | 0.13   | 0.06   | NA       | NA       |
| 11.98  | 10.14  | 15.91  | 12.79  | 0.408559 | 0.005829 |
| 0      | 0      | 0      | 0      | NA       | NA       |
| 25.09  | 12.41  | 18.8   | 14.48  | -0.79253 | 4.40E-05 |
| 0      | 0      | 0      | 0      | NA       | NA       |
| 0.28   | 0.94   | 0.78   | 0.68   | 1.750778 | 9.71E-09 |
| 2.42   | 1.24   | 1.05   | 0.98   | -0.55933 | 0.055689 |
| 48.36  | 35.79  | 40.79  | 38.15  | -0.28504 | 0.005971 |
| 0      | 0      | 0      | 0      | NA       | NA       |
| 0      | 0      | 0      | 0      | NA       | NA       |
| 2.3    | 4.62   | 4.03   | 4.29   | 0.679603 | 1.51E-07 |

|        |       |        |        |          |          |
|--------|-------|--------|--------|----------|----------|
| 27.74  | 30.28 | 29.63  | 29.83  | 0.249105 | 0.01088  |
| 0      | 0.03  | 0.02   | 0      | NA       | NA       |
| 6.23   | 5.7   | 4.45   | 5.66   | -0.57837 | 0.00663  |
| 18.85  | 18.84 | 22.33  | 17.36  | 0.204498 | 0.113795 |
| 6.37   | 5.31  | 4.45   | 7.42   | -0.05603 | 0.836041 |
| 0      | 0     | 0      | 0      | NA       | NA       |
| 2.86   | 2.82  | 2.15   | 2.2    | -0.16226 | 0.525293 |
| 0.04   | 0     | 0.17   | 0      | NA       | NA       |
| 0      | 0     | 0      | 0      | NA       | NA       |
| 0.07   | 0.03  | 0.21   | 0.11   | -0.0544  | 0.951848 |
| 14.05  | 15.7  | 15.62  | 15.25  | -0.05647 | 0.686302 |
| 5.04   | 5.3   | 5.23   | 6.89   | 0.29046  | 0.142979 |
| 5.53   | 2.84  | 4.26   | 3.26   | -0.99324 | 6.59E-21 |
| 0      | 0     | 0      | 0      | NA       | NA       |
| 0.1    | 0.25  | 0.03   | 0.11   | NA       | NA       |
| 0      | 0     | 0      | 0      | NA       | NA       |
| 3.68   | 1.29  | 2.07   | 1.71   | -0.77622 | 0.00733  |
| 31.18  | 24.46 | 30.09  | 26.19  | -0.19848 | 0.206679 |
| 5.78   | 8.12  | 7.98   | 9.12   | 0.26115  | 0.056646 |
| 31.87  | 35.31 | 31.25  | 31.6   | 0.144586 | 0.27578  |
| 6.43   | 11.07 | 10.68  | 11.31  | 0.77377  | 4.29E-16 |
| 0.54   | 4.61  | 2.63   | 3.67   | 2.74687  | 2.21E-29 |
| 3.49   | 1.45  | 1.63   | 2.4    | -0.89366 | 8.31E-06 |
| 0.11   | 0     | 0      | 0      | NA       | NA       |
| 0      | 0     | 0      | 0      | NA       | NA       |
| 16.85  | 20.72 | 18.79  | 18.75  | 0.172597 | 0.171434 |
| 12.05  | 20.56 | 14.02  | 16.75  | 0.573224 | 3.76E-05 |
| 53.05  | 45.27 | 50.34  | 51.04  | -0.12627 | 0.280762 |
| 327.45 | 95.28 | 201.88 | 143.85 | -1.07332 | 0.000934 |
| 0.15   | 0.09  | 0.16   | 0.39   | -0.54597 | 0.456496 |
| 0.14   | 0.44  | 0.25   | 1.01   | 1.606237 | 0.000348 |
| 20.57  | 19.59 | 19.17  | 19.94  | 0.154999 | 0.241295 |
| 234.64 | 197.6 | 185.62 | 155.05 | -0.29912 | 0.015386 |
| 22.75  | 34.64 | 27.17  | 29.35  | 0.367385 | 0.000611 |
| 6.14   | 3.82  | 5.49   | 3.57   | -0.02497 | 0.914411 |
| 2.63   | 6.12  | 4.77   | 5.31   | 0.717215 | 0.000264 |
| 0      | 0.04  | 0      | 0      | NA       | NA       |
| 2.07   | 1.87  | 2.3    | 1.96   | 0.485129 | 0.131494 |
| 1.72   | 1.21  | 1.03   | 1.21   | -0.21739 | 0.474427 |
| 14.99  | 12.83 | 14.45  | 13.43  | -0.20334 | 0.055398 |
| 0.38   | 0.29  | 0.24   | 0.51   | -0.66377 | 0.236544 |
| 17.68  | 17.04 | 15.75  | 16.44  | -0.33201 | 0.014888 |
| 20.23  | 36.75 | 26.33  | 29.56  | 0.54441  | 2.96E-05 |
| 2.01   | 1.71  | 1.97   | 2.08   | -0.02875 | 0.933471 |
| 0      | 0     | 0      | 0      | NA       | NA       |

|       |         |        |         |          |          |
|-------|---------|--------|---------|----------|----------|
| 18.45 | 19.83   | 13.08  | 20.11   | -0.07187 | 0.720376 |
| 22.23 | 19.38   | 18.4   | 18.47   | -0.07807 | 0.563416 |
| 14.89 | 13.74   | 14.19  | 13.79   | -0.03468 | 0.846993 |
| 18.87 | 19.63   | 14.84  | 16.17   | -0.14247 | 0.2492   |
| 3.49  | 252.46  | 54.85  | 136.46  | 3.714871 | 3.06E-15 |
| 1.42  | 21.22   | 5.25   | 10.72   | 2.462205 | 2.00E-07 |
| 0     | 0       | 0      | 0       | NA       | NA       |
| 0.27  | 0.2     | 0.19   | 0.31    | NA       | NA       |
| 1.76  | 12.2    | 4.17   | 6.06    | 1.690455 | 1.78E-08 |
| 96.97 | 3596.95 | 1529.5 | 2444.28 | 4.199388 | 2.75E-36 |
| 11.32 | 8.2     | 9.82   | 7.47    | -0.26336 | 0.195894 |
| 0     | 0       | 0.1    | 0.11    | NA       | NA       |
| 0.06  | 0.06    | 0.1    | 0.19    | 0.631947 | 0.371329 |
| 0.04  | 0       | 0      | 0       | NA       | NA       |
| 31.6  | 20.04   | 20.93  | 19.88   | -0.63626 | 4.75E-10 |
| 11.57 | 20.92   | 18.12  | 19.88   | 0.634107 | 2.25E-10 |
| 0     | 0       | 0      | 0       | NA       | NA       |
| 10.12 | 10.79   | 10.73  | 9.11    | -0.06076 | 0.717106 |
| 27.12 | 27.88   | 29.58  | 27.44   | -0.16856 | 0.135377 |
| 5.42  | 5.94    | 4.57   | 5.41    | 0.173551 | 0.335602 |
| 0.04  | 0.05    | 0.08   | 0.12    | -0.01753 | 0.986207 |
| 0     | 0       | 0.19   | 0       | NA       | NA       |
| 0.86  | 0.96    | 0.58   | 0.22    | -0.24845 | 0.752132 |
| 6.03  | 9.57    | 7.85   | 8.43    | 0.236918 | 0.178734 |
| 8.97  | 10.53   | 11.29  | 10.27   | 0.178498 | 0.219534 |
| 0.64  | 0.18    | 0.27   | 0.32    | -0.82519 | 0.133109 |
| 0.05  | 0.07    | 0.17   | 0.08    | 0.220591 | 0.792492 |
| 15.06 | 10.94   | 13.64  | 12.22   | -0.0534  | 0.744187 |
| 0.22  | 0.08    | 0.09   | 0.52    | -1.02799 | 0.074886 |
| 0.02  | 0       | 0      | 0       | NA       | NA       |
| 15.23 | 12      | 19.19  | 18.44   | -0.01834 | 0.921117 |
| 25.9  | 23.53   | 28.19  | 24.63   | 0.031254 | 0.836225 |
| 4.45  | 38.79   | 16.55  | 28.75   | 2.209614 | 1.12E-11 |
| 2.48  | 0.39    | 1.05   | 0.51    | -1.42744 | 0.001759 |
| 0.05  | 0       | 0.04   | 0.07    | NA       | NA       |
| 13.99 | 11.74   | 13     | 13.39   | 0.095666 | 0.611377 |
| 15.18 | 9.57    | 9.06   | 8.81    | -0.67092 | 2.24E-15 |
| 0     | 0       | 0      | 0       | NA       | NA       |
| 0     | 0       | 0      | 0       | NA       | NA       |
| 2.38  | 0.95    | 1.45   | 1.15    | -0.96748 | 3.00E-07 |
| 16.14 | 13.03   | 17.24  | 17.49   | -0.11958 | 0.549293 |
| 0     | 0       | 0      | 0       | NA       | NA       |
| 7.59  | 5.23    | 5.98   | 6.4     | -0.49676 | 1.98E-05 |
| 11.18 | 9.46    | 10.77  | 11.24   | -0.00281 | 0.987986 |
| 0.53  | 0.08    | 0.44   | 0.14    | -0.45101 | 0.553029 |



|        |        |        |        |          |          |
|--------|--------|--------|--------|----------|----------|
| 19.3   | 23.37  | 23.66  | 22.81  | 0.220556 | 0.111054 |
| 3.58   | 3.93   | 4.63   | 4.43   | 0.153818 | 0.423274 |
| 22.14  | 27.73  | 26.04  | 25.6   | 0.19289  | 0.103406 |
| 12.94  | 11.31  | 13.04  | 12.66  | -0.04148 | 0.811235 |
| 0      | 0      | 0      | 0      | NA       | NA       |
| 10.59  | 52.44  | 38.97  | 52.29  | 2.158112 | 6.58E-76 |
| 33.16  | 28.47  | 30.48  | 26.8   | -0.09613 | 0.507777 |
| 6.15   | 6.29   | 7.98   | 6.67   | 0.379042 | 0.011616 |
| 6.87   | 4.18   | 6.44   | 4.61   | -0.3372  | 0.147092 |
| 25.07  | 23.4   | 35.54  | 28.51  | 0.0915   | 0.667482 |
| 0.95   | 0.72   | 0.43   | 0.57   | -0.81857 | 0.038741 |
| 0      | 0      | 0      | 0      | NA       | NA       |
| 0.5    | 1.92   | 1.16   | 1.16   | 1.047127 | 0.018404 |
| 0.06   | 0.06   | 0.15   | 0.14   | -0.20358 | 0.802296 |
| 5.57   | 6.05   | 6.14   | 5.46   | 0.078573 | 0.719516 |
| 95.35  | 168.2  | 138.98 | 151.33 | 0.608743 | 4.92E-12 |
| 12.87  | 14.71  | 14.13  | 14.04  | 0.026383 | 0.882704 |
| 0      | 0      | 0      | 0      | NA       | NA       |
| 5.47   | 5.01   | 4.46   | 4.27   | -0.5498  | 0.000232 |
| 0      | 0      | 0      | 0      | NA       | NA       |
| 0      | 0      | 0      | 0      | NA       | NA       |
| 6.44   | 5.09   | 5.55   | 4.24   | -0.20278 | 0.506865 |
| 6.88   | 4.31   | 5.2    | 4.65   | -0.25709 | 0.493482 |
| 18.4   | 19.99  | 18.32  | 20.58  | 0.058695 | 0.683537 |
| 263.17 | 170.25 | 217.15 | 194.63 | -0.48062 | 4.22E-07 |
| 6.6    | 9.16   | 8.86   | 10.19  | 0.43395  | 0.003587 |
| 9.15   | 9      | 8.55   | 9.43   | 0.061778 | 0.771217 |
| 0.42   | 1.04   | 0.57   | 0.62   | 0.43964  | 0.25804  |
| 23.05  | 35.29  | 31.08  | 31.6   | 0.438821 | 2.44E-05 |
| 16.26  | 17.04  | 15.03  | 16.4   | 0.107886 | 0.370112 |
| 3.21   | 4.58   | 3.64   | 4.4    | 0.482345 | 0.008078 |
| 13.88  | 15     | 13.57  | 13.93  | 0.076284 | 0.554419 |
| 27.57  | 17.12  | 21.04  | 19.57  | -0.51716 | 1.67E-06 |
| 24.07  | 25.54  | 25.44  | 20.57  | 0.048049 | 0.801074 |
| 141.67 | 172.11 | 178.25 | 177.59 | 0.17503  | 0.030987 |
| 0      | 0      | 0      | 0      | NA       | NA       |
| 0      | 0.08   | 0.07   | 0      | NA       | NA       |
| 11.65  | 8.89   | 9.26   | 11.32  | -0.02743 | 0.855312 |
| 3.64   | 5.11   | 5.27   | 5.85   | 0.622762 | 4.35E-06 |
| 10.83  | 10.69  | 9.27   | 9.53   | 0.279381 | 0.171822 |
| 49.68  | 12.59  | 19.18  | 16.71  | -1.5421  | 6.22E-29 |
| 0      | 0      | 0      | 0      | NA       | NA       |
| 0      | 0      | 0      | 0.04   | NA       | NA       |
| 0      | 0      | 0.02   | 0      | NA       | NA       |
| 3.88   | 2.96   | 5.65   | 2.56   | -0.22844 | 0.440051 |

|       |        |        |                 |          |
|-------|--------|--------|-----------------|----------|
| 0     | 0      | 0.01   | 0 NA            | NA       |
| 6.69  | 5.75   | 5.57   | 6.03 -0.30068   | 0.250797 |
| 6.9   | 6.24   | 7.87   | 6.92 -0.00143   | 0.995607 |
| 4.89  | 4.42   | 4.57   | 5.11 -0.09799   | 0.743623 |
| 17.57 | 15.51  | 15.3   | 16.72 -0.00737  | 0.973504 |
| 28.15 | 12.33  | 17.64  | 16.51 -0.88951  | 2.24E-14 |
| 16.8  | 13.45  | 14.24  | 16.77 -0.24957  | 0.040111 |
| 10.53 | 16.62  | 15.92  | 13.56 0.326109  | 0.041174 |
| 51.9  | 66.61  | 66.98  | 64.22 0.383198  | 0.000227 |
| 0.02  | 0.11   | 0.07   | 0 NA            | NA       |
| 0.24  | 0.39   | 0.19   | 0.1 NA          | NA       |
| 7.35  | 10.39  | 8.57   | 7.88 0.097895   | 0.658595 |
| 46.84 | 39.51  | 42.24  | 39.52 -0.33155  | 0.000802 |
| 72.94 | 45.31  | 57.04  | 51.56 -0.48452  | 5.10E-07 |
| 0.55  | 0.48   | 0.32   | 0.59 0.235123   | 0.663635 |
| 0     | 0      | 0      | 0 NA            | NA       |
| 4.18  | 3.2    | 3.9    | 3.7 -0.30526    | 0.092786 |
| 0     | 0      | 0      | 0.02 NA         | NA       |
| 28.76 | 17.91  | 22     | 20.73 -0.46559  | 1.53E-06 |
| 17.18 | 8.39   | 10.26  | 7.77 -0.99993   | 1.12E-11 |
| 2.61  | 1.44   | 1.53   | 1.82 -0.19684   | 0.594083 |
| 71.42 | 84.24  | 79.72  | 90.3 0.087473   | 0.452464 |
| 13.22 | 6.98   | 15.24  | 9.57 -0.31533   | 0.197668 |
| 0.1   | 0.04   | 0.06   | 0.06 -0.22245   | 0.728039 |
| 38.38 | 42.98  | 44.61  | 44.79 0.118004  | 0.294481 |
| 1.26  | 0.36   | 0.79   | 0.59 -1.10393   | 2.81E-07 |
| 9.92  | 14.02  | 11.55  | 13.9 0.027011   | 0.874689 |
| 4.46  | 2.31   | 3.09   | 3.97 -0.42314   | 0.008703 |
| 4.47  | 4.84   | 5.54   | 7.42 0.165044   | 0.474374 |
| 3.59  | 2.48   | 2.87   | 2.36 -0.28175   | 0.246496 |
| 0     | 0      | 0      | 0 NA            | NA       |
| 8.54  | 5.82   | 4.74   | 5.02 -0.10938   | 0.675953 |
| 0.36  | 0.03   | 0.03   | 0.1 -1.07663    | 0.089571 |
| 2.66  | 3.62   | 3.15   | 3.59 0.185181   | 0.211129 |
| 37.6  | 44.74  | 44.83  | 46.11 0.079717  | 0.56012  |
| 0     | 0      | 0      | 0 NA            | NA       |
| 4.15  | 5.98   | 5.46   | 5.79 0.36514    | 0.015935 |
| 1.03  | 1.24   | 1.29   | 1.88 0.420299   | 0.28836  |
| 15.49 | 8.76   | 11.57  | 11.07 -0.55508  | 3.42E-05 |
| 0.32  | 0.24   | 0.11   | 0.2 0.844935    | 0.199199 |
| 28.2  | 31.07  | 32.85  | 31.75 0.063415  | 0.563374 |
| 2.1   | 0.63   | 1      | 0.72 -1.30837   | 5.49E-05 |
| 90.07 | 101.71 | 125.24 | 117.65 0.499539 | 2.36E-07 |
| 3.35  | 1.54   | 2.61   | 1.77 -1.0582    | 2.54E-10 |
| 0     | 0.02   | 0      | 0 NA            | NA       |

|        |        |        |        |          |          |
|--------|--------|--------|--------|----------|----------|
| 17.63  | 11.47  | 12.99  | 13.09  | -0.40534 | 0.011357 |
| 8.92   | 15.88  | 15.9   | 18.5   | 0.63726  | 0.000121 |
| 0.21   | 0.04   | 0.14   | 0.08   | -0.99753 | 0.078808 |
| 11.01  | 23.74  | 23.84  | 22     | 0.841743 | 1.15E-13 |
| 1.17   | 1.81   | 1.26   | 0.73   | 0.4036   | 0.366672 |
| 786.69 | 487.54 | 543.93 | 494.54 | -0.65506 | 2.61E-19 |
| 1.19   | 0.25   | 1.04   | 0.65   | -1.28806 | 0.003933 |
| 0      | 0      | 0      | 0      | NA       | NA       |
| 3.31   | 4.33   | 4.62   | 4.61   | 0.267036 | 0.116978 |
| 0      | 0      | 0      | 0      | NA       | NA       |
| 11.74  | 10.22  | 10.21  | 10.96  | -0.14654 | 0.434826 |
| 5.54   | 3.57   | 3.54   | 3.36   | -0.21226 | 0.289764 |
| 0.14   | 0      | 0.16   | 0      | NA       | NA       |
| 0.16   | 0      | 0      | 0.05   | NA       | NA       |
| 0      | 0      | 0      | 0      | NA       | NA       |
| 7.38   | 1.54   | 4.23   | 3.25   | -1.05954 | 7.47E-05 |
| 62.13  | 20.11  | 40.68  | 30.38  | -0.91074 | 0.000654 |
| 0.02   | 0.11   | 0.04   | 0.05   | NA       | NA       |
| 0      | 0      | 0      | 0      | NA       | NA       |
| 4.9    | 5.83   | 5.8    | 4.59   | 0.005058 | 0.981096 |
| 0.78   | 1.26   | 1.65   | 1.69   | 1.054705 | 0.005834 |
| 0.32   | 0.27   | 0.14   | 0.51   | 0.855396 | 0.129344 |
| 9.85   | 11.28  | 11.12  | 9.79   | 0.161435 | 0.348322 |
| 7.43   | 8.1    | 8.25   | 8.2    | 0.062279 | 0.624592 |
| 15.45  | 8.61   | 11.9   | 6.86   | -0.36163 | 0.022311 |
| 6.16   | 6.93   | 7.37   | 8.26   | 0.227727 | 0.436092 |
| 18.04  | 23.39  | 23.82  | 19.72  | 0.160193 | 0.214394 |
| 10.18  | 14.34  | 10.71  | 12.84  | 0.309629 | 0.010225 |
| 7.98   | 12.8   | 12.14  | 9.66   | 0.38643  | 0.154152 |
| 19.65  | 17.19  | 16.79  | 18.74  | 0.067198 | 0.635726 |
| 4.11   | 2.86   | 3.3    | 2.67   | -0.25669 | 0.231584 |
| 7.42   | 98.31  | 46.58  | 67.51  | 3.024438 | 1.90E-23 |
| 26.58  | 13.89  | 20.6   | 18.6   | -0.63952 | 1.21E-05 |
| 0      | 0.05   | 0.26   | 0.03   | NA       | NA       |
| 62.92  | 159.18 | 154.93 | 143.41 | 1.244396 | 7.32E-52 |
| 4.73   | 3.85   | 5.03   | 4.09   | -0.01654 | 0.949707 |
| 0.08   | 0.51   | 0.2    | 0.21   | 1.655339 | 0.002464 |
| 18.89  | 15.44  | 15.78  | 15.79  | -0.14823 | 0.537416 |
| 0.17   | 0.1    | 0.02   | 0.05   | NA       | NA       |
| 6.51   | 2.33   | 3.13   | 3.23   | -0.14929 | 0.376047 |
| 0      | 0      | 0      | 0      | NA       | NA       |
| 10.65  | 9.3    | 9.42   | 10.03  | -0.02398 | 0.86041  |
| 0.04   | 0.17   | 0.1    | 0.02   | NA       | NA       |
| 0.65   | 0.44   | 0.53   | 0.7    | -0.03976 | 0.958712 |
| 17.05  | 16.35  | 18.3   | 18.07  | 0.096377 | 0.462977 |

|       |       |       |       |          |          |
|-------|-------|-------|-------|----------|----------|
| 17.09 | 13.05 | 15.91 | 16.48 | 0.011399 | 0.958807 |
| 6.65  | 6.04  | 7.07  | 7.6   | 0.220263 | 0.210008 |
| 0.61  | 0.48  | 0.73  | 0.79  | -0.14656 | 0.775441 |
| 3.24  | 3.34  | 2.88  | 2.54  | -0.03114 | 0.933507 |
| 1.85  | 0.24  | 0.27  | 0.27  | -2.90795 | 4.16E-59 |
| 19.36 | 6.49  | 11.91 | 7.75  | -1.12835 | 1.07E-10 |
| 2.47  | 1.06  | 2.26  | 1.8   | -0.34783 | 0.30891  |
| 24.03 | 35.49 | 31.01 | 31.84 | 0.447116 | 6.41E-06 |
| 1     | 9.14  | 5.66  | 7.78  | 2.494915 | 3.11E-36 |
| 7.73  | 8.56  | 7.56  | 7.21  | 0.033721 | 0.855686 |
| 19.92 | 15.98 | 16.99 | 14.81 | -0.35411 | 0.005708 |
| 0     | 0     | 0     | 0     | NA       | NA       |
| 55.15 | 44.22 | 47.6  | 45.52 | -0.28254 | 0.034644 |
| 1.04  | 0.2   | 0.29  | 0.8   | -0.13484 | 0.87997  |
| 0.71  | 0.23  | 0.53  | 0.12  | NA       | NA       |
| 0     | 0     | 0     | 0.12  | NA       | NA       |
| 6.1   | 80.38 | 42.69 | 62.64 | 3.106056 | 4.19E-29 |
| 5.74  | 4.01  | 3.3   | 3.79  | -0.3557  | 0.025686 |
| 0.04  | 0.02  | 0.02  | 0     | NA       | NA       |
| 6.83  | 7.31  | 7.65  | 8.51  | 0.35393  | 0.012444 |
| 47.7  | 27.75 | 32.66 | 34.96 | -0.38369 | 3.42E-05 |
| 70    | 59.68 | 59.64 | 58.13 | -0.26038 | 0.002631 |
| 4.62  | 3.13  | 3.61  | 3.19  | -0.24434 | 0.292698 |
| 0     | 0     | 0     | 0     | NA       | NA       |
| 5.62  | 8.43  | 7.87  | 8.92  | 0.387744 | 0.000357 |
| 0.02  | 0     | 0     | 0     | NA       | NA       |
| 0     | 0     | 0     | 0.09  | NA       | NA       |
| 18.66 | 15.05 | 14.07 | 13.86 | -0.41676 | 8.75E-05 |
| 4.91  | 2.53  | 3.96  | 3.23  | -0.40717 | 0.07812  |
| 23.39 | 36.67 | 30.42 | 30.14 | 0.572413 | 3.04E-06 |
| 18.86 | 18.34 | 18.38 | 18.93 | 0.008595 | 0.958809 |
| 0.4   | 0.73  | 0.89  | 0.64  | 0.689928 | 0.003243 |
| 0.06  | 0.23  | 0.08  | 0.34  | 0.06174  | 0.948247 |
| 11.56 | 12.27 | 13.02 | 12.73 | 0.172963 | 0.161269 |
| 0     | 0     | 0     | 0     | NA       | NA       |
| 0     | 0     | 0     | 0     | NA       | NA       |
| 4.71  | 6.46  | 6.28  | 7.13  | 0.50217  | 4.02E-05 |
| 12.97 | 11.4  | 14.18 | 13.7  | 0.039134 | 0.819101 |
| 3.87  | 2.28  | 2.24  | 2.77  | -0.35916 | 0.1127   |
| 17.92 | 15.33 | 17.29 | 18.14 | -0.09266 | 0.614758 |
| 8.44  | 11.86 | 10.7  | 11.49 | 0.472731 | 0.000416 |
| 0     | 0     | 0     | 0     | NA       | NA       |
| 4.06  | 3.81  | 3.87  | 3.93  | 0.202487 | 0.396434 |
| 1.46  | 0.38  | 0.36  | 0.45  | -0.84407 | 0.021203 |
| 0.33  | 0.05  | 0.24  | 0.27  | -0.33934 | 0.658595 |

|        |        |        |        |          |          |
|--------|--------|--------|--------|----------|----------|
| 47.44  | 57.09  | 63.41  | 56.13  | 0.100993 | 0.406551 |
| 9.23   | 9.74   | 8.3    | 9.43   | 0.164528 | 0.314075 |
| 0      | 0      | 0      | 0      | NA       | NA       |
| 0      | 0      | 0      | 0      | NA       | NA       |
| 3.5    | 3.95   | 3.99   | 4.26   | 0.125139 | 0.419658 |
| 0      | 0      | 0      | 0      | NA       | NA       |
| 0      | 0.04   | 0      | 0      | NA       | NA       |
| 0      | 0.04   | 0.01   | 0.04   | NA       | NA       |
| 0.34   | 0.19   | 0.45   | 0.27   | -0.179   | 0.768241 |
| 0      | 0      | 0      | 0      | NA       | NA       |
| 0.29   | 7.24   | 2.07   | 4.57   | 3.042122 | 4.88E-11 |
| 16.03  | 12.23  | 13.88  | 12.59  | -0.48451 | 3.24E-06 |
| 5.94   | 4.96   | 4.81   | 6.35   | 0.457047 | 0.021812 |
| 0.18   | 0.13   | 0.17   | 0.15   | 0.06493  | 0.945762 |
| 129.69 | 146.16 | 144.43 | 128.02 | -0.07445 | 0.594876 |
| 0.16   | 0.17   | 0.28   | 0.41   | 0.747212 | 0.275994 |
| 0      | 0      | 0      | 0      | NA       | NA       |
| 12.77  | 8.89   | 8.85   | 7.51   | -0.54868 | 0.000113 |
| 0.14   | 0.18   | 0.18   | 0.32   | -0.71238 | 0.209841 |
| 1.06   | 1.16   | 0.95   | 1.19   | 0.370948 | 0.324139 |
| 0      | 0      | 0      | 0      | NA       | NA       |
| 0      | 0      | 0      | 0      | NA       | NA       |
| 0.21   | 0.07   | 0.03   | 0.08   | -1.94198 | 6.42E-05 |
| 75.41  | 32.64  | 38.81  | 35.96  | -1.11166 | 2.06E-29 |
| 0      | 0      | 0      | 0      | NA       | NA       |
| 0      | 0      | 0      | 0      | NA       | NA       |
| 9.57   | 9.43   | 9.88   | 9.2    | -0.05147 | 0.741849 |
| 7.12   | 6.64   | 7.81   | 9.56   | 0.224597 | 0.144251 |
| 17.4   | 19.82  | 22.66  | 22.68  | 0.354275 | 0.001027 |
| 0.36   | 0.63   | 0.41   | 0.32   | -0.96822 | 0.091989 |
| 15.21  | 13.89  | 16.37  | 13.13  | -0.07494 | 0.666171 |
| 0      | 0      | 0.03   | 0      | NA       | NA       |
| 0.25   | 0.72   | 0.75   | 0.6    | 0.752819 | 0.099388 |
| 6      | 5.17   | 4.03   | 4.69   | 0.00336  | 0.991973 |
| 0      | 0      | 0      | 0      | NA       | NA       |
| 28.8   | 10.46  | 16.89  | 16.07  | -0.89542 | 6.61E-14 |
| 0      | 0      | 0      | 0      | NA       | NA       |
| 0.02   | 0.04   | 0.03   | 0.02   | NA       | NA       |
| 0.4    | 0.07   | 0.24   | 0.64   | -0.26807 | 0.729629 |
| 0.32   | 0.09   | 0      | 0.33   | -0.64334 | 0.363624 |
| 17.12  | 14.42  | 17.87  | 19.69  | -0.1468  | 0.358439 |
| 2.46   | 2.59   | 2.58   | 2.39   | -0.243   | 0.416708 |
| 9.67   | 9.12   | 9.89   | 10.75  | -0.01992 | 0.921166 |
| 1.58   | 0.3    | 0.48   | 0.35   | -0.46507 | 0.366496 |
| 13.91  | 10.62  | 9.82   | 11.38  | -0.26407 | 0.052877 |

|         |         |         |        |          |          |
|---------|---------|---------|--------|----------|----------|
| 25.45   | 25.43   | 28.98   | 28.78  | 0.114402 | 0.408819 |
| 0       | 0       | 0       | 0      | NA       | NA       |
| 31.69   | 26.13   | 32.35   | 31.71  | -0.16544 | 0.12231  |
| 14.86   | 20.26   | 18.08   | 17.26  | 0.231951 | 0.061285 |
| 899.86  | 850.42  | 949.53  | 851.75 | -0.09277 | 0.389627 |
| 0       | 0       | 0       | 0      | NA       | NA       |
| 0.62    | 0.43    | 0.93    | 0.34   | -0.23827 | 0.696373 |
| 12.33   | 12.54   | 8.7     | 9.93   | -0.10556 | 0.527325 |
| 0       | 0       | 0       | 0      | NA       | NA       |
| 6.06    | 6.19    | 5.24    | 6.41   | 0.2414   | 0.194121 |
| 0.08    | 0       | 0       | 0.08   | NA       | NA       |
| 39.88   | 41.31   | 36.78   | 33.16  | 0.33234  | 0.003135 |
| 10.93   | 10.8    | 11.55   | 9.67   | -0.04116 | 0.87935  |
| 5.44    | 13.55   | 12.87   | 11.89  | 1.307915 | 8.26E-09 |
| 30.86   | 28.71   | 29.65   | 26.06  | -0.09093 | 0.523528 |
| 10      | 9.42    | 9.75    | 8.19   | -0.0516  | 0.855166 |
| 30.56   | 33.46   | 39.53   | 41.07  | 0.449379 | 3.77E-06 |
| 2.4     | 4.39    | 4.59    | 4.41   | 0.693485 | 0.001059 |
| 0.15    | 0.13    | 0.17    | 0.22   | -0.50472 | 0.471929 |
| 0       | 0       | 0.01    | 0      | NA       | NA       |
| 0.04    | 0.02    | 0.03    | 0.01   | NA       | NA       |
| 6.46    | 7.49    | 7.93    | 8.38   | 0.012642 | 0.948175 |
| 1.5     | 1.1     | 1.18    | 0.87   | -0.63791 | 0.021019 |
| 0       | 0       | 0       | 0      | NA       | NA       |
| 33.98   | 31.88   | 26.37   | 31.32  | -0.2106  | 0.147997 |
| 3.84    | 2.08    | 4.15    | 4      | -0.36734 | 0.190246 |
| 0       | 0       | 0       | 0      | NA       | NA       |
| 4.08    | 6.34    | 4.96    | 6.12   | 0.184845 | 0.331994 |
| 10.33   | 1.27    | 2.55    | 1.69   | -2.03323 | 2.24E-22 |
| 2.23    | 1.77    | 2.05    | 1.63   | -0.20246 | 0.294299 |
| 0.74    | 0.6     | 0.66    | 0.48   | -0.27734 | 0.667336 |
| 1.18    | 1.96    | 1.02    | 1.33   | 0.092373 | 0.841253 |
| 0.39    | 0.24    | 0.24    | 0.17   | -0.1952  | 0.784567 |
| 1.58    | 9.61    | 4.93    | 6.81   | 1.965565 | 1.61E-18 |
| 0.14    | 0.05    | 0.34    | 0.48   | 0.101522 | 0.895604 |
| 1.2     | 2.91    | 2.97    | 1.98   | 0.394765 | 0.435374 |
| 0       | 0.13    | 0.05    | 0.11   | 1.05332  | 0.097547 |
| 0       | 0       | 0       | 0      | NA       | NA       |
| 5582.83 | 2671.64 | 3387.19 | 3174.7 | -0.98    | 1.04E-28 |
| 3.51    | 2.21    | 2.34    | 2.58   | -0.73818 | 5.79E-08 |
| 0.04    | 0.03    | 0.02    | 0      | NA       | NA       |
| 0.37    | 0.54    | 0.48    | 0.5    | 0.036477 | 0.966851 |
| 0       | 0       | 0       | 0      | NA       | NA       |
| 160.84  | 189.49  | 182.29  | 178.99 | 0.197418 | 0.03364  |
| 3.21    | 5.08    | 3.81    | 4.71   | 0.481343 | 0.000348 |

|        |        |        |       |          |          |
|--------|--------|--------|-------|----------|----------|
| 0      | 0      | 0      | 0     | NA       | NA       |
| 563.75 | 607.51 | 650.44 | 633.5 | 0.067589 | 0.466794 |
| 5.37   | 10.96  | 6.97   | 9.18  | 0.643622 | 0.000375 |
| 0      | 0      | 0      | 0     | NA       | NA       |
| 13.51  | 7.68   | 9.08   | 9.15  | -0.49065 | 0.000132 |
| 0      | 0.01   | 0.02   | 0.03  | 0.727732 | 0.286215 |
| 1.27   | 2.81   | 1.24   | 1.87  | 0.442524 | 0.309911 |
| 0      | 0      | 0.03   | 0.1   | NA       | NA       |
| 0.03   | 0.14   | 0.07   | 0.13  | NA       | NA       |
| 0      | 0      | 0      | 0     | NA       | NA       |
| 44.36  | 29.61  | 31.93  | 33.3  | -0.43956 | 0.000236 |
| 28.6   | 33.27  | 30.55  | 34.15 | 0.186611 | 0.050896 |
| 0      | 0.11   | 0      | 0     | NA       | NA       |
| 6.1    | 6.13   | 6.05   | 6.11  | -0.17473 | 0.558319 |
| 19.59  | 6.49   | 8.12   | 6.24  | -1.50185 | 4.10E-22 |
| 0      | 0      | 0      | 0.03  | NA       | NA       |
| 0.5    | 0.25   | 0.1    | 0.14  | -1.3399  | 0.015255 |
| 0      | 0.01   | 0.03   | 0.01  | NA       | NA       |
| 0.02   | 0.02   | 0.01   | 0     | NA       | NA       |
| 0      | 0.01   | 0.01   | 0     | NA       | NA       |
| 23.15  | 14.23  | 15.74  | 18.23 | -0.28755 | 0.016655 |
| 6.17   | 6.87   | 6.47   | 5.13  | -0.07461 | 0.780318 |
| 0      | 0      | 0      | 0     | NA       | NA       |
| 7.54   | 7.21   | 6.98   | 6.97  | -0.24246 | 0.09784  |
| 0      | 0      | 0      | 0     | NA       | NA       |
| 0      | 0      | 0      | 0     | NA       | NA       |
| 10.02  | 18.35  | 14.24  | 16.3  | 0.732156 | 2.90E-08 |
| 0.19   | 0      | 0      | 0     | NA       | NA       |
| 52.44  | 42.86  | 45.87  | 48.85 | -0.19178 | 0.028655 |
| 13.66  | 8.81   | 11.12  | 8.86  | -0.23237 | 0.072776 |
| 0      | 0      | 0      | 0.03  | NA       | NA       |
| 0.15   | 0.38   | 0.82   | 0.28  | 0.244041 | 0.767787 |
| 9      | 5.57   | 9.55   | 7.64  | 0.049508 | 0.882704 |
| 4.88   | 5.5    | 7.15   | 6.23  | 0.181338 | 0.371475 |
| 0      | 0      | 0      | 0     | NA       | NA       |
| 0      | 0.03   | 0.01   | 0.04  | NA       | NA       |
| 1.38   | 0.91   | 0.46   | 0.24  | -0.09078 | 0.907876 |
| 0      | 0      | 0      | 0     | NA       | NA       |
| 14.84  | 12.8   | 12.27  | 13.38 | 0.074802 | 0.647986 |
| 0.14   | 0      | 0      | 0.1   | NA       | NA       |
| 17.02  | 17.22  | 15.97  | 17.96 | -0.00466 | 0.975797 |
| 7.55   | 15.07  | 12.78  | 12.81 | 0.662396 | 3.29E-05 |
| 49.45  | 63.39  | 65.57  | 63.38 | 0.279936 | 0.002693 |
| 0      | 0      | 0      | 0     | NA       | NA       |
| 33.52  | 32.43  | 31.26  | 33.21 | -0.02813 | 0.861604 |

|        |        |        |        |           |          |
|--------|--------|--------|--------|-----------|----------|
| 19.67  | 21.31  | 19.13  | 19.74  | -0.15021  | 0.324942 |
| 6.88   | 9.97   | 6.77   | 10.69  | 0.424558  | 0.147601 |
| 0      | 0      | 0      | 0      | NA        | NA       |
| 20.71  | 22.29  | 19.94  | 19.99  | 0.121241  | 0.384305 |
| 31.12  | 15.91  | 18.85  | 19     | -0.6612   | 1.45E-10 |
| 4.58   | 7.1    | 5.26   | 5.94   | 0.292719  | 0.022554 |
| 116.5  | 97.47  | 96.79  | 83.56  | -0.29077  | 0.025292 |
| 9.04   | 0.67   | 1.05   | 0.76   | -3.44645  | 5.00E-40 |
| 215.91 | 210.69 | 208.48 | 211.73 | 0.080383  | 0.381795 |
| 0.27   | 1.26   | 0.66   | 0.47   | -0.76864  | 0.153864 |
| 21.46  | 15.87  | 16.57  | 16.05  | -0.48834  | 9.88E-07 |
| 39.54  | 37.96  | 34.49  | 39.2   | -0.02265  | 0.908984 |
| 7.82   | 8.85   | 8.26   | 9.41   | 0.233256  | 0.145586 |
| 15.5   | 15.89  | 17.27  | 16.68  | 0.005039  | 0.980748 |
| 0      | 0      | 0      | 0      | NA        | NA       |
| 13.3   | 9.51   | 11.3   | 11.07  | -0.33226  | 0.002237 |
| 21.02  | 16.81  | 15.26  | 16.58  | -0.07199  | 0.693665 |
| 14.04  | 11.58  | 10.6   | 13.07  | -0.11808  | 0.324139 |
| 0      | 0      | 0      | 0      | NA        | NA       |
| 10.51  | 20.62  | 12.97  | 15.04  | 0.648252  | 0.000124 |
| 39.62  | 15.71  | 25.97  | 30.74  | -0.72365  | 1.06E-08 |
| 5.56   | 4.51   | 4.63   | 5.72   | -0.54195  | 0.003154 |
| 25.63  | 26.12  | 27.08  | 34.24  | -0.11727  | 0.303192 |
| 11.66  | 12.17  | 12.96  | 13.45  | -4.02E-05 | 0.999852 |
| 8.82   | 14.39  | 12.63  | 15.47  | 0.61354   | 3.56E-08 |
| 0.31   | 0.33   | 0.27   | 1.2    | NA        | NA       |
| 12.95  | 10.39  | 13.56  | 11.05  | -0.05585  | 0.753754 |
| 1.29   | 0.45   | 1.04   | 0.86   | -0.93427  | 0.000454 |
| 22.91  | 23.36  | 25.94  | 27.58  | 0.034465  | 0.873469 |
| 3.12   | 3.03   | 3.17   | 2.82   | -0.07569  | 0.657486 |
| 22.99  | 20.01  | 17.81  | 17.41  | -0.31847  | 0.002399 |
| 0.61   | 0.67   | 0.5    | 0.43   | -0.86801  | 0.002859 |
| 26.64  | 29.89  | 28.83  | 28.8   | 0.087855  | 0.457023 |
| 0.3    | 0.61   | 0.65   | 0.38   | -0.74732  | 0.256811 |
| 0.01   | 0.01   | 0      | 0.01   | NA        | NA       |
| 0.76   | 0      | 0.37   | 0.16   | -1.81149  | 0.001002 |
| 10.06  | 137.22 | 137.16 | 145.97 | 3.740228  | 0        |
| 12.53  | 10.8   | 11.35  | 11.17  | -0.20071  | 0.187127 |
| 1.96   | 2.83   | 2.59   | 3.08   | 0.021481  | 0.965877 |
| 5.89   | 6.48   | 6.2    | 7.1    | 0.017181  | 0.942726 |
| 0      | 0      | 0      | 0      | NA        | NA       |
| 4.99   | 6.48   | 4.87   | 4.26   | 0.150317  | 0.655612 |
| 2.67   | 3.58   | 6.2    | 6.16   | 0.986215  | 6.30E-06 |
| 0      | 0      | 0      | 0      | NA        | NA       |
| 0      | 0.59   | 0.38   | 0.14   | 1.020107  | 0.111296 |



|        |       |        |        |          |          |
|--------|-------|--------|--------|----------|----------|
| 0.59   | 2.08  | 1.35   | 1.77   | 1.229727 | 4.29E-06 |
| 0      | 0     | 0      | 0      | NA       | NA       |
| 0.49   | 0.1   | 0.19   | 0.21   | -1.3104  | 0.020298 |
| 0.12   | 0.09  | 0.19   | 0.12   | 0.214168 | 0.803033 |
| 0.31   | 0.4   | 0.06   | 0.07   | NA       | NA       |
| 0.09   | 0.04  | 0      | 0.05   | NA       | NA       |
| 3.67   | 5.1   | 3.73   | 4.66   | 0.221479 | 0.294661 |
| 25.28  | 30.05 | 28.59  | 31.15  | 0.227015 | 0.010541 |
| 2.27   | 2.41  | 2.2    | 2.23   | 0.500499 | 0.04724  |
| 0.67   | 1.19  | 1.03   | 1.06   | -0.05713 | 0.929109 |
| 1.63   | 1.92  | 1.88   | 1.67   | 0.227272 | 0.482338 |
| 5.16   | 6.18  | 5.92   | 6.6    | 0.220636 | 0.224625 |
| 205.41 | 210.9 | 216.09 | 220.62 | 0.017249 | 0.877298 |
| 0      | 0.09  | 0      | 0      | NA       | NA       |
| 0.99   | 1.31  | 1.4    | 1.82   | 0.380937 | 0.358067 |
| 49.4   | 4.19  | 12.14  | 8.76   | -2.25438 | 6.09E-10 |
| 0      | 0     | 0      | 0      | NA       | NA       |
| 0      | 0     | 0      | 0      | NA       | NA       |
| 8.04   | 8.39  | 9.43   | 8.85   | 0.322098 | 0.002911 |
| 0      | 0.23  | 0.25   | 0.11   | 0.536665 | 0.453463 |
| 1.15   | 1.31  | 1.22   | 0.9    | -0.03544 | 0.931016 |
| 12.35  | 8.17  | 8.91   | 8.07   | -0.56337 | 3.59E-07 |
| 0      | 0     | 0      | 0      | NA       | NA       |
| 0.03   | 0     | 0.11   | 0      | NA       | NA       |
| 13.96  | 20.86 | 18.32  | 16.46  | 0.450023 | 0.000467 |
| 5.82   | 7.83  | 6      | 6.74   | 0.278313 | 0.357417 |
| 19.97  | 30.87 | 35.5   | 34.78  | 0.532166 | 5.60E-08 |
| 0      | 0     | 0      | 0      | NA       | NA       |
| 0.03   | 0     | 0      | 0      | NA       | NA       |
| 0      | 0     | 0      | 0      | NA       | NA       |
| 0.06   | 0.14  | 0.17   | 0.2    | 0.950076 | 0.066199 |
| 0      | 0.01  | 0      | 0.02   | NA       | NA       |
| 0      | 0.14  | 0.06   | 0.04   | NA       | NA       |
| 0      | 0     | 0      | 0      | NA       | NA       |
| 0.01   | 0.01  | 0.01   | 0.03   | NA       | NA       |
| 3.47   | 4.74  | 3.88   | 4.51   | 0.649399 | 0.001567 |
| 1.17   | 0.12  | 0.64   | 0.2    | -1.93715 | 1.12E-05 |
| 2.62   | 3.39  | 4.15   | 4.89   | 0.38599  | 0.290983 |
| 0      | 0     | 0      | 0      | NA       | NA       |
| 1.22   | 0.67  | 0.55   | 0.51   | -1.03363 | 0.003804 |
| 0      | 0     | 0.04   | 0.08   | NA       | NA       |
| 10.55  | 11.91 | 12.45  | 14.01  | 0.361327 | 0.000743 |
| 30.69  | 42.12 | 35.04  | 35.63  | 0.354232 | 0.007437 |
| 0      | 0     | 0      | 0      | NA       | NA       |
| 3.15   | 3.6   | 3.71   | 3.56   | 0.181211 | 0.199024 |

|       |       |       |       |          |          |
|-------|-------|-------|-------|----------|----------|
| 0.07  | 0.04  | 0.07  | 0.03  | -0.62172 | 0.379477 |
| 6.69  | 12.46 | 8.82  | 8.63  | 0.253748 | 0.072419 |
| 1.09  | 1.09  | 1.18  | 0.82  | 0.450259 | 0.199181 |
| 19.81 | 25.88 | 26.19 | 23.38 | 0.115045 | 0.571464 |
| 0.02  | 0.03  | 0.24  | 0     | NA       | NA       |
| 7.13  | 9.14  | 8.23  | 8.85  | 0.153588 | 0.256799 |
| 4.74  | 0.23  | 0.83  | 0.49  | -3.07419 | 2.53E-28 |
| 3.74  | 2.96  | 2.67  | 2.36  | -0.62324 | 0.007398 |
| 71.08 | 111.6 | 87.65 | 87.3  | 0.388112 | 0.000188 |
| 6.64  | 10.2  | 9.59  | 10.14 | 0.271295 | 0.073411 |
| 46.63 | 42.57 | 42.86 | 44.33 | -0.15461 | 0.16735  |
| 3.21  | 3.14  | 2.97  | 4.15  | 0.07417  | 0.669911 |
| 0.01  | 0.02  | 0.02  | 0.02  | -0.04441 | 0.961386 |
| 0.97  | 0.78  | 0.76  | 0.55  | -0.63983 | 0.121475 |
| 0     | 0     | 0     | 0     | NA       | NA       |
| 2.95  | 3.25  | 3.06  | 3.08  | 0.113236 | 0.655028 |
| 14.58 | 15.9  | 17.17 | 16.08 | 0.234488 | 0.056971 |
| 0.15  | 1.78  | 0.53  | 1.93  | 2.68628  | 2.46E-21 |
| 0     | 0     | 0     | 0     | NA       | NA       |
| 4.84  | 3.65  | 4.07  | 3.97  | -0.08293 | 0.669022 |
| 0     | 0     | 0     | 0     | NA       | NA       |
| 3.98  | 6.13  | 4.88  | 5.68  | 0.764919 | 4.32E-06 |
| 2.3   | 1.96  | 1.49  | 1.86  | -0.45544 | 0.016067 |
| 0     | 0     | 0     | 0     | NA       | NA       |
| 0.06  | 0.03  | 0     | 0     | NA       | NA       |
| 0.22  | 0.68  | 0.55  | 0.46  | 1.215171 | 0.019135 |
| 0     | 0     | 0     | 0     | NA       | NA       |
| 8.74  | 16.18 | 14.6  | 13.98 | 0.665175 | 1.62E-08 |
| 3.92  | 3.69  | 3.14  | 3.89  | -0.0779  | 0.708562 |
| 16.03 | 11.65 | 12.85 | 13.45 | -0.46572 | 2.97E-06 |
| 0     | 0     | 0     | 0     | NA       | NA       |
| 59.87 | 50.53 | 46.34 | 43.63 | -0.37644 | 7.25E-05 |
| 26.72 | 25.56 | 25.09 | 23.73 | 0.098075 | 0.535635 |
| 8.54  | 13.45 | 14.63 | 14.73 | 0.402402 | 0.000777 |
| 43.38 | 30.45 | 34.76 | 30.83 | -0.47129 | 5.54E-08 |
| 1.05  | 5.51  | 2.67  | 4.26  | 1.89374  | 3.47E-21 |
| 0.07  | 0     | 0     | 0     | NA       | NA       |
| 1.67  | 0.29  | 0.54  | 0.31  | -1.82615 | 2.63E-10 |
| 0     | 0     | 0     | 0     | NA       | NA       |
| 44.65 | 45.44 | 38.98 | 45.11 | 0.003754 | 0.980147 |
| 0     | 0     | 0     | 0     | NA       | NA       |
| 0     | 0     | 0     | 0     | NA       | NA       |
| 0.03  | 0.24  | 0.12  | 0.31  | 1.536595 | 0.00963  |
| 13.96 | 12.93 | 11.03 | 11.14 | -0.20322 | 0.242524 |
| 15.97 | 12.83 | 15.09 | 17.66 | 0.174141 | 0.211869 |

|        |        |       |        |          |          |
|--------|--------|-------|--------|----------|----------|
| 0.03   | 0.01   | 0.04  | 0.03   | NA       | NA       |
| 0.07   | 0.03   | 0.13  | 0.06   | NA       | NA       |
| 13.74  | 16.18  | 16.59 | 17.25  | 0.263759 | 0.055969 |
| 0.39   | 0.34   | 0.36  | 0.15   | -0.39124 | 0.597269 |
| 17.05  | 16.76  | 17.62 | 18.59  | 0.111207 | 0.351985 |
| 4.55   | 3.68   | 4.76  | 3.53   | -0.44636 | 0.005084 |
| 0      | 0      | 0     | 0      | NA       | NA       |
| 3.65   | 2.73   | 2.7   | 2.16   | 0.128232 | 0.752876 |
| 123.09 | 188.64 | 172.7 | 166.39 | 0.531411 | 3.11E-09 |
| 2.63   | 4.55   | 4.11  | 4.12   | 0.599981 | 0.001858 |
| 178.18 | 3.19   | 22.89 | 9.34   | -2.61158 | NA       |
| 0      | 0      | 0     | 0.05   | NA       | NA       |
| 0.41   | 0.22   | 0.32  | 0.3    | -0.65959 | 0.166929 |
| 10.51  | 5.52   | 5.85  | 5.31   | -0.7824  | 1.83E-08 |
| 35.71  | 34.4   | 36.63 | 31.44  | -0.1194  | 0.346395 |
| 0      | 0      | 0.04  | 0.03   | NA       | NA       |
| 17.46  | 24.39  | 21.03 | 20.88  | 0.237663 | 0.038418 |
| 16.2   | 13.24  | 13.73 | 14.95  | -0.12931 | 0.417929 |
| 13.82  | 19.85  | 17.61 | 18.94  | 0.432837 | 8.63E-06 |
| 16.98  | 17.08  | 18.93 | 16.67  | -0.06247 | 0.737534 |
| 0      | 0      | 0     | 0      | NA       | NA       |
| 0      | 0      | 0     | 0      | NA       | NA       |
| 0.21   | 0.08   | 0.14  | 0.1    | -0.15673 | 0.859801 |
| 0      | 0      | 0     | 0      | NA       | NA       |
| 0      | 0      | 0     | 0      | NA       | NA       |
| 0.04   | 0.19   | 0.23  | 0.56   | 0.040207 | 0.966851 |
| 1.83   | 2.21   | 1.89  | 2.1    | 0.138099 | 0.56012  |
| 0      | 0      | 0     | 0      | NA       | NA       |
| 0      | 0      | 0     | 0      | NA       | NA       |
| 0      | 0      | 0     | 0      | NA       | NA       |
| 0.07   | 0      | 0     | 0      | NA       | NA       |
| 0      | 0      | 0     | 0      | NA       | NA       |
| 39.2   | 36.96  | 36.46 | 34.64  | -0.10968 | 0.394391 |
| 31.73  | 19.17  | 33.54 | 25.25  | -0.30445 | 0.067677 |
| 0.08   | 0.14   | 0.12  | 0.19   | NA       | NA       |
| 0      | 0      | 0     | 0      | NA       | NA       |
| 2.24   | 3.52   | 3.22  | 3.37   | 0.609767 | 0.00876  |
| 102.99 | 88.39  | 90.57 | 88.13  | -0.18086 | 0.063334 |
| 7.77   | 8.8    | 9.82  | 9.34   | 0.173956 | 0.362291 |
| 2.16   | 3.44   | 2.59  | 2.71   | 0.224021 | 0.305915 |
| 1.8    | 3.39   | 1.95  | 2.62   | 0.288731 | 0.228759 |
| 79.4   | 85.69  | 91.95 | 82.62  | 0.083842 | 0.493413 |
| 0      | 0      | 0     | 0      | NA       | NA       |
| 7.08   | 4.59   | 7.14  | 5.57   | -0.53539 | 0.052988 |
| 0      | 0.01   | 0.01  | 0      | NA       | NA       |

|       |       |       |       |          |          |
|-------|-------|-------|-------|----------|----------|
| 8.49  | 11.82 | 10.69 | 10.37 | 0.328736 | 0.005044 |
| 15    | 18.67 | 20.37 | 19.48 | 0.401617 | 0.000131 |
| 4.62  | 5.45  | 5.29  | 5.78  | 0.268593 | 0.116319 |
| 4.46  | 10.94 | 8.37  | 10.1  | 0.817446 | 4.29E-11 |
| 24.52 | 22.2  | 21.67 | 19.5  | -0.09923 | 0.619454 |
| 11.32 | 11.05 | 10.59 | 10.83 | -0.08244 | 0.456741 |
| 50.63 | 49.65 | 46.91 | 44.46 | -0.12362 | 0.281433 |
| 5.98  | 8.08  | 6.42  | 5.88  | 0.154973 | 0.506437 |
| 57.36 | 70.42 | 62.84 | 65.06 | 0.183431 | 0.055916 |
| 0     | 0     | 0     | 0     | NA       | NA       |
| 5.93  | 7.7   | 6.55  | 7.12  | 0.217937 | 0.0943   |
| 0     | 0.25  | 0.38  | 0.08  | NA       | NA       |
| 20.52 | 19.75 | 21.7  | 21.56 | 0.085698 | 0.561171 |
| 18.04 | 22.07 | 20.74 | 25.98 | 0.277214 | 0.039338 |
| 0     | 0     | 0.02  | 0     | NA       | NA       |
| 0.75  | 0.39  | 0.34  | 0.48  | -0.47448 | 0.381327 |
| 5.56  | 3.11  | 3.15  | 2.73  | -0.79266 | 8.82E-05 |
| 9.46  | 8.01  | 8.27  | 9.54  | -0.12172 | 0.299656 |
| 0     | 0.15  | 0.09  | 0.04  | 0.669814 | 0.303627 |
| 14.68 | 17.83 | 17.18 | 16.51 | 0.217941 | 0.256458 |
| 4.29  | 7.33  | 5.64  | 6.23  | 0.160266 | 0.518394 |
| 5.32  | 2.3   | 3.93  | 3.4   | -0.70398 | 0.003563 |
| 8.71  | 13.56 | 12.44 | 11.44 | 0.510137 | 0.001722 |
| 0     | 0.01  | 0.01  | 0.01  | NA       | NA       |
| 0     | 0.01  | 0     | 0.01  | NA       | NA       |
| 12.74 | 19.61 | 17.94 | 18.44 | 0.507051 | 2.26E-08 |
| 4.34  | 6.67  | 5.43  | 5.61  | 0.41415  | 0.001392 |
| 6.55  | 4.5   | 5.72  | 5.8   | -0.27556 | 0.27124  |
| 0.4   | 0.15  | 0.23  | 0.2   | -1.50586 | 3.47E-07 |
| 0     | 0     | 0     | 0     | NA       | NA       |
| 57.13 | 46.85 | 52.44 | 48.96 | -0.31131 | 0.004134 |
| 22.18 | 27.64 | 23.55 | 23.74 | 0.110156 | 0.44868  |
| 26.51 | 23.54 | 24.07 | 22.31 | -0.12696 | 0.382958 |
| 0.86  | 0.04  | 0.04  | 0     | -2.35387 | 1.93E-05 |
| 4.04  | 2.28  | 2.95  | 2.08  | -1.15879 | 2.15E-05 |
| 0     | 0     | 0     | 0     | NA       | NA       |
| 15.36 | 29.63 | 27.44 | 27.97 | 0.745713 | 1.37E-17 |
| 14.49 | 17.03 | 13.74 | 14.52 | 0.12506  | 0.393337 |
| 23.09 | 10.38 | 13.49 | 10.65 | -1.02009 | 2.85E-15 |
| 2.54  | 1.58  | 2.08  | 2.43  | -0.30877 | 0.202242 |
| 9.24  | 13.55 | 9.55  | 10.67 | 0.258457 | 0.131414 |
| 0.37  | 0.16  | 0.17  | 0.74  | 0.251377 | 0.763701 |
| 0     | 0     | 0.01  | 0     | NA       | NA       |
| 3.35  | 4.53  | 5.76  | 4.6   | 0.221185 | 0.135219 |
| 0.02  | 0.09  | 0.06  | 0.02  | NA       | NA       |

|        |       |       |        |          |          |
|--------|-------|-------|--------|----------|----------|
| 15.41  | 17.42 | 17.05 | 17.09  | 0.099867 | 0.500626 |
| 6.63   | 6.61  | 5.54  | 6.34   | -0.24048 | 0.117412 |
| 0      | 0     | 0     | 0      | NA       | NA       |
| 5.51   | 5.91  | 5.9   | 5.02   | -0.08043 | 0.725232 |
| 0      | 0     | 0     | 0      | NA       | NA       |
| 0      | 0     | 0     | 0      | NA       | NA       |
| 13.81  | 13.52 | 14.45 | 12.96  | -0.24913 | 0.014753 |
| 0.05   | 0.03  | 0.16  | 0.23   | 0.233653 | 0.778434 |
| 3.04   | 3.34  | 2.85  | 3.3    | 0.255619 | 0.20305  |
| 0.15   | 0.23  | 0.04  | 0.23   | -0.74753 | 0.21321  |
| 1.76   | 2.44  | 2.98  | 2.03   | 0.582533 | 0.045631 |
| 25.78  | 24.81 | 24.14 | 22.14  | -0.12288 | 0.36769  |
| 0      | 0     | 0     | 0      | NA       | NA       |
| 2.95   | 2.97  | 2.71  | 2.58   | 0.277135 | 0.145193 |
| 2.83   | 5.4   | 3.75  | 4.08   | 0.404678 | 0.014121 |
| 10.36  | 9.54  | 12.17 | 10.09  | -0.09675 | 0.694326 |
| 0.02   | 0.01  | 0.01  | 0      | NA       | NA       |
| 0      | 0     | 0.03  | 0      | NA       | NA       |
| 11.79  | 15.01 | 13.73 | 15.21  | 0.349407 | 0.010536 |
| 17.8   | 17.38 | 12.82 | 22.15  | 0.159307 | 0.412029 |
| 49.58  | 64.99 | 49.22 | 58.55  | 0.181847 | 0.133446 |
| 47.39  | 59.65 | 55.77 | 50.97  | 0.164563 | 0.170159 |
| 0.09   | 0.16  | 0.1   | 0.37   | NA       | NA       |
| 1.4    | 0.74  | 0.45  | 0.54   | -0.8956  | 0.036875 |
| 0.12   | 0.22  | 0.06  | 0.12   | NA       | NA       |
| 14.06  | 21.17 | 17.23 | 19.7   | 0.413536 | 0.000437 |
| 0      | 0.1   | 0.09  | 0      | NA       | NA       |
| 8.06   | 10.7  | 11.18 | 10.72  | 0.363558 | 0.006486 |
| 15.9   | 12.53 | 15.05 | 12.02  | -0.33959 | 0.128454 |
| 111.14 | 58.09 | 79.74 | 125.71 | -0.40215 | 0.339632 |
| 0      | 0     | 0     | 0      | NA       | NA       |
| 0.81   | 0.71  | 0.66  | 0.84   | -0.33954 | 0.421641 |
| 0      | 0     | 0     | 0      | NA       | NA       |
| 0.01   | 0     | 0.01  | 0.01   | NA       | NA       |
| 0.06   | 0     | 0     | 0      | NA       | NA       |
| 0      | 0     | 0     | 0      | NA       | NA       |
| 3.92   | 3.58  | 3.98  | 4.22   | 0.006509 | 0.983683 |
| 0      | 0.02  | 0.02  | 0.15   | NA       | NA       |
| 0.02   | 0.01  | 0.03  | 0.02   | NA       | NA       |
| 12.15  | 4.78  | 6.12  | 3.6    | -1.24618 | 1.57E-07 |
| 3.02   | 3.86  | 3.86  | 3.75   | 0.40927  | 0.001791 |
| 3.6    | 4.94  | 3.07  | 4.19   | 0.406851 | 0.3249   |
| 3.81   | 3.43  | 3.09  | 3.59   | -0.3276  | 0.024889 |
| 0      | 0.24  | 0     | 0      | NA       | NA       |
| 0      | 0     | 0     | 0      | NA       | NA       |

|        |        |        |        |          |          |
|--------|--------|--------|--------|----------|----------|
| 41.47  | 35.93  | 42.45  | 36.14  | -0.07353 | 0.598662 |
| 0      | 0      | 0      | 0      | NA       | NA       |
| 1.39   | 8.43   | 4.96   | 7.13   | 2.174533 | 3.95E-33 |
| 6.39   | 6.05   | 6.56   | 7.9    | -0.00814 | 0.974041 |
| 10.4   | 14.58  | 12.71  | 13.07  | 0.359397 | 0.000437 |
| 264.94 | 366.3  | 349.68 | 342.33 | 0.327296 | 7.69E-06 |
| 1.87   | 0.28   | 1      | 0.86   | -0.39057 | 0.425328 |
| 17.63  | 16.71  | 15.75  | 18.69  | -0.17756 | 0.163716 |
| 10.46  | 12.38  | 15.44  | 12.14  | 0.086732 | 0.64418  |
| 0      | 0      | 0      | 0      | NA       | NA       |
| 6.04   | 12.6   | 11.27  | 14.15  | 0.773599 | 1.72E-13 |
| 0      | 0      | 0      | 0      | NA       | NA       |
| 95.53  | 54.1   | 72.62  | 59.97  | -0.67379 | 5.38E-11 |
| 38.08  | 50.23  | 49.73  | 54.29  | 0.202314 | 0.01695  |
| 0      | 0      | 0      | 0      | NA       | NA       |
| 0      | 0      | 0      | 0      | NA       | NA       |
| 0      | 0      | 0      | 0      | NA       | NA       |
| 0.03   | 0.02   | 0      | 0      | NA       | NA       |
| 3.05   | 0.26   | 0.56   | 0.21   | -2.99557 | 7.99E-37 |
| 0.05   | 0.05   | 0.01   | 0.03   | -0.44109 | 0.559778 |
| 0      | 0      | 0      | 0      | NA       | NA       |
| 4.77   | 6.91   | 5.71   | 7.44   | 0.257393 | 0.09643  |
| 0.02   | 0.14   | 0.06   | 0.22   | 1.057324 | 0.082591 |
| 18.5   | 23.57  | 27.65  | 26.57  | 0.204265 | 0.101695 |
| 26.48  | 31.23  | 32.27  | 29.04  | 0.171054 | 0.134933 |
| 3.2    | 4.29   | 4.54   | 4.16   | 0.187195 | 0.474084 |
| 13.38  | 12.84  | 11.58  | 12.23  | -0.08295 | 0.524019 |
| 93.06  | 83.77  | 78.12  | 87.77  | -0.13739 | 0.292774 |
| 10.53  | 9.62   | 9.72   | 9.77   | -0.08483 | 0.666291 |
| 0      | 0      | 0      | 0      | NA       | NA       |
| 0.48   | 6.22   | 3.33   | 4.67   | 4.123781 | 2.51E-33 |
| 565.41 | 382.36 | 587.42 | 521.87 | -0.24521 | 0.079919 |
| 0.01   | 0      | 0      | 0      | NA       | NA       |
| 0      | 0      | 0      | 0      | NA       | NA       |
| 0.32   | 0.28   | 0.4    | 0.25   | -0.48804 | 0.485171 |
| 0      | 0      | 0      | 0      | NA       | NA       |
| 0      | 0.04   | 0      | 0      | NA       | NA       |
| 21.64  | 24.88  | 26.37  | 27.14  | 0.252381 | 0.014884 |
| 8.01   | 3.79   | 4.49   | 4.62   | -0.43701 | 0.123745 |
| 4.79   | 5.69   | 5.11   | 5.45   | -0.03595 | 0.876132 |
| 5.33   | 6.33   | 6.17   | 7.73   | 0.043322 | 0.80335  |
| 10.98  | 8.97   | 11.98  | 10.49  | -0.36657 | 0.01164  |
| 8.98   | 10.53  | 8.72   | 8.56   | 0.256567 | 0.037365 |
| 20.29  | 22.9   | 24.4   | 24.22  | -0.14851 | 0.475711 |
| 79.35  | 89.43  | 88.13  | 84.66  | 0.119124 | 0.250108 |

|        |        |        |        |          |          |
|--------|--------|--------|--------|----------|----------|
| 25.16  | 25.43  | 27.64  | 24.51  | 0.011105 | 0.947179 |
| 0      | 0      | 0      | 0      | NA       | NA       |
| 4.41   | 5.15   | 3.76   | 5.89   | 0.183792 | 0.316076 |
| 8.91   | 8.84   | 9.05   | 9.16   | -0.00407 | 0.985711 |
| 1.43   | 1.03   | 1.16   | 1.13   | -0.18658 | 0.657838 |
| 18.26  | 18.09  | 18.76  | 17.87  | -0.08803 | 0.483343 |
| 13     | 12.72  | 12.62  | 14.03  | -0.11742 | 0.60183  |
| 42.22  | 53.35  | 51.66  | 51.37  | 0.203904 | 0.027671 |
| 0.16   | 0.17   | 0.09   | 0.1    | 0.143438 | 0.870621 |
| 0      | 0      | 0      | 0      | NA       | NA       |
| 0      | 0      | 0      | 0      | NA       | NA       |
| 10.78  | 9.49   | 10.01  | 9.5    | -0.15774 | 0.226464 |
| 14.91  | 16.04  | 14.46  | 16.38  | 0.186008 | 0.136644 |
| 41.66  | 59.27  | 55.36  | 56.41  | 0.394333 | 3.72E-06 |
| 23.08  | 12.88  | 12.9   | 15.32  | -0.73255 | 8.35E-07 |
| 33.58  | 47.64  | 45.75  | 48.58  | 0.24636  | 0.013678 |
| 0.55   | 0.77   | 0.64   | 0.85   | 0.16711  | 0.807079 |
| 68.01  | 155.61 | 118.81 | 130.27 | 0.902152 | 1.85E-17 |
| 0.07   | 0.17   | 0.25   | 0.35   | 0.18582  | 0.816257 |
| 14.67  | 12.07  | 14.21  | 12.66  | -0.00118 | 0.996111 |
| 4.11   | 4.11   | 3.88   | 4.15   | -0.10845 | 0.633905 |
| 1.5    | 1.82   | 1.41   | 2.07   | -0.01072 | 0.988237 |
| 3.21   | 2.39   | 1.77   | 1.36   | -0.25207 | 0.24384  |
| 0      | 0      | 0      | 0      | NA       | NA       |
| 11.96  | 8.44   | 8.55   | 7.43   | 0.021999 | 0.914375 |
| 0.02   | 0      | 0.07   | 0.08   | NA       | NA       |
| 32.66  | 42.63  | 35.49  | 39.28  | 0.212177 | 0.044208 |
| 7.24   | 10.89  | 9.25   | 10.03  | 0.333049 | 0.062997 |
| 6.59   | 1.18   | 2.75   | 1.9    | -1.46939 | 1.16E-10 |
| 15.51  | 8.82   | 9.33   | 8.21   | -0.95973 | 3.75E-15 |
| 0.22   | 1.09   | 0.45   | 0.58   | 0.845796 | 0.146614 |
| 36.92  | 35.26  | 35.67  | 36.93  | -0.01907 | 0.908336 |
| 118.94 | 115.81 | 115.47 | 113.03 | -0.06643 | 0.489193 |
| 26.14  | 24.12  | 22.92  | 22.18  | -0.23392 | 0.021989 |
| 0.2    | 0.05   | 0.07   | 0.1    | -1.02444 | 0.069969 |
| 1.08   | 1.14   | 0.97   | 0.73   | -0.26096 | 0.567978 |
| 0.15   | 0.44   | 0.19   | 0.26   | NA       | NA       |
| 23.01  | 26.51  | 24.59  | 26.44  | 0.170152 | 0.057588 |
| 0      | 0      | 0      | 0      | NA       | NA       |
| 71.13  | 82.41  | 75.87  | 79.1   | 0.071232 | 0.547427 |
| 89.56  | 96.13  | 95.41  | 88.78  | 0.042269 | 0.791619 |
| 146.7  | 110.88 | 130.04 | 124.68 | -0.30952 | 5.14E-05 |
| 0.7    | 1.7    | 1.27   | 1.61   | 1.034036 | 1.28E-09 |
| 0.04   | 0.32   | 0      | 0      | NA       | NA       |
| 1.07   | 0.57   | 0.51   | 0.57   | -0.42678 | 0.356587 |

|         |        |         |        |          |          |
|---------|--------|---------|--------|----------|----------|
| 161.03  | 33.28  | 59.2    | 46     | -1.78634 | 1.28E-33 |
| 6.5     | 11.29  | 8.96    | 11.85  | 0.71574  | 1.36E-07 |
| 0.16    | 0.11   | 0.12    | 0.55   | -0.65258 | 0.201238 |
| 0       | 0      | 0       | 0      | NA       | NA       |
| 17.52   | 9.62   | 13.14   | 12.28  | -0.49886 | 0.016515 |
| 0       | 0      | 0       | 0      | NA       | NA       |
| 0       | 0      | 0       | 0      | NA       | NA       |
| 0       | 0      | 0       | 0      | NA       | NA       |
| 11.1    | 11.53  | 11.64   | 12.58  | -0.05305 | 0.756358 |
| 10.11   | 8.71   | 10.51   | 10.18  | -0.28538 | 0.075097 |
| 0       | 0      | 0       | 0      | NA       | NA       |
| 6.9     | 8.23   | 6.37    | 6.04   | 0.110048 | 0.706221 |
| 0       | 0.22   | 0       | 0.12   | NA       | NA       |
| 6.76    | 7.06   | 7.34    | 7.88   | 0.047214 | 0.748269 |
| 18.38   | 34.3   | 24.31   | 28.92  | 0.932607 | 5.94E-15 |
| 1.22    | 1.29   | 0.9     | 1.04   | -0.55912 | 0.008334 |
| 0.93    | 0      | 0.21    | 0.92   | 0.001738 | 0.998212 |
| 0       | 0.07   | 0       | 0      | NA       | NA       |
| 0       | 0      | 0       | 0      | NA       | NA       |
| 17.49   | 22.99  | 18.22   | 19.27  | 0.594609 | 7.98E-05 |
| 0       | 0.01   | 0.2     | 0.23   | NA       | NA       |
| 0       | 0      | 0       | 0      | NA       | NA       |
| 0.03    | 0.01   | 0.02    | 0.01   | NA       | NA       |
| 0.36    | 0.42   | 0.56    | 0.68   | 0.165617 | 0.738898 |
| 12.54   | 12.48  | 10      | 11.76  | -0.106   | 0.479822 |
| 2.38    | 2.24   | 2.68    | 2.07   | -0.08156 | 0.670138 |
| 3.8     | 3.69   | 3.64    | 3.77   | -0.04945 | 0.778405 |
| 1086.63 | 896.21 | 1068.87 | 902.35 | -0.28493 | 0.000747 |
| 29.36   | 22.12  | 20.11   | 20.08  | -0.61034 | 4.17E-09 |
| 1.51    | 3.82   | 3.81    | 3.34   | 1.104207 | 2.85E-12 |
| 0.92    | 0.08   | 0.21    | 0.25   | -2.17372 | 2.01E-07 |
| 0.88    | 1.15   | 1.19    | 1.14   | -0.10443 | 0.716327 |
| 2.72    | 2.92   | 3.09    | 2.5    | 0.142341 | 0.681006 |
| 19.2    | 14.13  | 15.7    | 12.96  | -0.35297 | 0.027721 |
| 18.44   | 23.37  | 20.08   | 22.33  | 0.195134 | 0.050913 |
| 0.69    | 0.19   | 0.12    | 0.78   | 0.365841 | 0.634704 |
| 8.31    | 15.74  | 12.64   | 13.09  | 0.445581 | 0.003445 |
| 2.4     | 0.04   | 0.23    | 0.13   | -3.44222 | 6.38E-25 |
| 7.69    | 11.81  | 10.89   | 11.42  | 0.581055 | 2.19E-05 |
| 7.27    | 9.63   | 11.69   | 8.39   | 0.078579 | 0.737889 |
| 20.2    | 30.06  | 27.4    | 25.82  | 0.559548 | 7.42E-08 |
| 196.77  | 21     | 34.3    | 31.22  | -2.77079 | 1.18E-28 |
| 13.57   | 10.51  | 10.42   | 11.47  | -0.32966 | 0.010308 |
| 15.39   | 14.15  | 19.1    | 16.99  | 0.001024 | 0.996186 |
| 0       | 0.05   | 0       | 0      | NA       | NA       |



|        |         |         |         |          |          |
|--------|---------|---------|---------|----------|----------|
| 0      | 0       | 0       | 0       | NA       | NA       |
| 21.35  | 29.23   | 30.72   | 28.17   | 0.562788 | 2.36E-07 |
| 9.17   | 13.87   | 12.96   | 12.22   | 0.422776 | 0.000523 |
| 23.51  | 29.05   | 29.31   | 27.94   | 0.384086 | 0.000173 |
| 0      | 0       | 0       | 0       | NA       | NA       |
| 2.54   | 9.49    | 6.87    | 8.08    | 1.48565  | 5.23E-15 |
| 0.06   | 0       | 0.04    | 0       | NA       | NA       |
| 11.99  | 10.96   | 11.62   | 10.81   | -0.14171 | 0.368577 |
| 0      | 0       | 0       | 0       | NA       | NA       |
| 4.29   | 4.32    | 3.75    | 3.81    | -0.16335 | 0.539415 |
| 0      | 0       | 0       | 0       | NA       | NA       |
| 18.59  | 12.72   | 13.13   | 14.55   | -0.32723 | 0.004853 |
| 0.02   | 0       | 0       | 0       | NA       | NA       |
| 0.72   | 0.75    | 0.98    | 1.17    | -0.14257 | 0.794367 |
| 20.32  | 23.06   | 25.54   | 26.6    | 0.264727 | 0.011898 |
| 75.97  | 70.61   | 68.94   | 68      | -0.05628 | 0.633909 |
| 0      | 0       | 0       | 0       | NA       | NA       |
| 10.33  | 25.74   | 13.19   | 15.65   | 0.825371 | 0.001328 |
| 0      | 0       | 0       | 0       | NA       | NA       |
| 0      | 0.01    | 0.01    | 0       | NA       | NA       |
| 9.92   | 13.28   | 17.48   | 12.79   | 0.199587 | 0.210938 |
| 0.78   | 0.62    | 1.31    | 0.59    | 0.028605 | 0.968815 |
| 18.97  | 33.75   | 26.7    | 32.05   | 0.487476 | 5.06E-05 |
| 1.44   | 1.27    | 2.57    | 2.45    | 0.21604  | 0.667482 |
| 0      | 0.01    | 0       | 0       | NA       | NA       |
| 3.3    | 4.85    | 3.23    | 4.47    | 0.463662 | 0.09643  |
| 50.73  | 75.68   | 64.11   | 64.99   | 0.281402 | 0.033907 |
| 0.51   | 0.21    | 0.17    | 0.32    | NA       | NA       |
| 511.18 | 988.33  | 746.83  | 834     | 0.677419 | 1.32E-11 |
| 0      | 0       | 0       | 0       | NA       | NA       |
| 23.35  | 16.58   | 19.02   | 19      | -0.42328 | 6.21E-05 |
| 0      | 0       | 0       | 0       | NA       | NA       |
| 0      | 0       | 0       | 0       | NA       | NA       |
| 0.52   | 0.32    | 0.45    | 0.13    | -0.89322 | 0.132042 |
| 0.19   | 13.32   | 3.23    | 5.62    | 3.297611 | 8.76E-11 |
| 0      | 0.02    | 0.04    | 0.02    | NA       | NA       |
| 91.27  | 122     | 107.05  | 109.12  | 0.226893 | 0.034369 |
| 0.07   | 0.05    | 0.14    | 0.11    | NA       | NA       |
| 10.15  | 13.8    | 13.74   | 13.3    | 0.180257 | 0.190354 |
| 1.2    | 1.69    | 2.49    | 2.59    | 1.002134 | 5.86E-05 |
| 0      | 0       | 0       | 0       | NA       | NA       |
| 5.11   | 2.27    | 4.2     | 3.95    | -0.07296 | 0.821404 |
| 2.22   | 1.46    | 1.18    | 1.29    | -0.41861 | 0.350175 |
| 4626.5 | 5405.19 | 5155.58 | 5789.39 | 0.271327 | 0.000659 |
| 8.34   | 10.21   | 9.33    | 11.19   | 0.296541 | 0.005704 |

|        |        |        |        |          |          |
|--------|--------|--------|--------|----------|----------|
| 24.81  | 39.66  | 35.18  | 36.51  | 0.490688 | 2.11E-06 |
| 0      | 0      | 0      | 0      | NA       | NA       |
| 708.27 | 233.35 | 415    | 324.32 | -1.0949  | 1.35E-06 |
| 0.21   | 0      | 0.06   | 0.07   | NA       | NA       |
| 24.52  | 21.97  | 22.1   | 24.41  | 0.058586 | 0.623489 |
| 35.39  | 44.67  | 40.02  | 46.02  | 0.287131 | 0.001199 |
| 0.28   | 1.86   | 0.71   | 0.29   | -0.44994 | 0.44626  |
| 0      | 0.01   | 0      | 0.01   | NA       | NA       |
| 3.21   | 2.98   | 3.6    | 3.51   | 0.016317 | 0.973425 |
| 24.62  | 59.02  | 30.33  | 42.84  | 0.642653 | 5.40E-05 |
| 18.71  | 16.12  | 16.48  | 20.17  | -0.01382 | 0.919582 |
| 0      | 0      | 0      | 0      | NA       | NA       |
| 4.55   | 4.68   | 4.64   | 3.91   | 0.213156 | 0.481901 |
| 5.81   | 9.55   | 8.54   | 8.23   | 0.583494 | 0.000636 |
| 596.14 | 569.47 | 562.76 | 535.19 | -0.19993 | 0.013661 |
| 0      | 0      | 0.07   | 0.08   | NA       | NA       |
| 21.35  | 25.79  | 25.55  | 20.56  | -0.14452 | 0.454965 |
| 0      | 0      | 0      | 0      | NA       | NA       |
| 10.36  | 11.44  | 9.34   | 10.16  | 0.064954 | 0.701731 |
| 0.4    | 0.13   | 0.52   | 0.26   | 0.140723 | 0.874104 |
| 4.95   | 4.95   | 3.87   | 4.28   | -0.08333 | 0.725232 |
| 0.56   | 0      | 0.18   | 0.18   | -1.4579  | 0.009299 |
| 0.11   | 0.06   | 0.02   | 0.08   | -0.96154 | 0.132392 |
| 5.19   | 3.03   | 3.31   | 4.13   | -0.63141 | 0.001327 |
| 3.84   | 3.95   | 3.39   | 4.13   | 0.425326 | 0.034735 |
| 0.42   | 0.43   | 0.28   | 0.3    | -0.01337 | 0.988787 |
| 78.25  | 316.99 | 190.2  | 248.71 | 1.520778 | 9.37E-12 |
| 0      | 0      | 0      | 0      | NA       | NA       |
| 0.15   | 0.27   | 0.18   | 0.38   | 0.976753 | 0.12196  |
| 7.06   | 9.28   | 7.17   | 9.2    | 0.149082 | 0.304266 |
| 3.13   | 1.86   | 2.79   | 2.6    | -0.20663 | 0.537183 |
| 0.18   | 0.08   | 10.16  | 0.28   | 0.814877 | 0.216528 |
| 1.15   | 0.35   | 0.98   | 0.43   | -0.69144 | 0.056847 |
| 23.32  | 21.01  | 24.89  | 24.35  | 0.04883  | 0.69359  |
| 21     | 28.63  | 24.77  | 26.75  | 0.353694 | 0.001258 |
| 0.63   | 0.49   | 0.77   | 0.85   | 0.071434 | 0.91788  |
| 18.22  | 15.61  | 17.64  | 18.18  | 0.032172 | 0.850433 |
| 0      | 0      | 0      | 0      | NA       | NA       |
| 1.47   | 1.95   | 1.82   | 1.89   | 0.252154 | 0.202787 |
| 0      | 0      | 0      | 0      | NA       | NA       |
| 2.03   | 0.31   | 0.43   | 0.35   | -2.09495 | 7.24E-06 |
| 0.02   | 0      | 0      | 0      | NA       | NA       |
| 0.08   | 0      | 0.09   | 0.02   | -0.57469 | 0.417743 |
| 3.74   | 3.94   | 3.46   | 4.16   | -0.07413 | 0.702869 |
| 0      | 0      | 0      | 0      | NA       | NA       |

|        |        |        |        |          |          |
|--------|--------|--------|--------|----------|----------|
| 21.72  | 27.89  | 25.65  | 26.49  | 0.100398 | 0.468812 |
| 26.67  | 26.67  | 25.1   | 28.5   | -0.09226 | 0.427292 |
| 96.9   | 98.82  | 96.83  | 97.67  | -0.04453 | 0.669911 |
| 22.64  | 18.39  | 19.86  | 19.79  | -0.18784 | 0.062587 |
| 3.11   | 1.72   | 4.6    | 2.63   | -0.62443 | 0.10044  |
| 0.08   | 0.12   | 0.36   | 0.16   | 0.62882  | 0.252962 |
| 14.83  | 21.45  | 20.73  | 19.82  | 0.48637  | 9.62E-07 |
| 17.24  | 12.17  | 15.02  | 14.27  | -0.30894 | 0.06755  |
| 14     | 12.86  | 15.45  | 15.25  | -0.03785 | 0.821129 |
| 10.16  | 8.77   | 8.23   | 10.54  | 0.086964 | 0.579413 |
| 74.56  | 72.97  | 75.23  | 70.91  | -0.10913 | 0.223169 |
| 0      | 0      | 0      | 0      | NA       | NA       |
| 0.53   | 10.6   | 2.66   | 6.73   | 2.92054  | 9.77E-12 |
| 13.84  | 7.96   | 6.82   | 6.86   | -0.89936 | 2.40E-07 |
| 357.87 | 124.54 | 119.13 | 112.65 | -1.58359 | 6.56E-85 |
| 0.53   | 0.75   | 0.81   | 0.45   | 0.114285 | 0.8296   |
| 26.72  | 26.18  | 24.88  | 24.39  | -0.15561 | 0.183442 |
| 0      | 0      | 0      | 0      | NA       | NA       |
| 0      | 0.03   | 0      | 0      | NA       | NA       |
| 0      | 0      | 0      | 0      | NA       | NA       |
| 0      | 0      | 0      | 0      | NA       | NA       |
| 13.32  | 11.01  | 10.67  | 12.31  | -0.28825 | 0.014763 |
| 34.22  | 40.41  | 37.92  | 37.45  | 0.21594  | 0.062925 |
| 0.01   | 0.01   | 0.03   | 0.01   | NA       | NA       |
| 0      | 0      | 0      | 0      | NA       | NA       |
| 35.73  | 30.75  | 29.79  | 33.97  | -0.13723 | 0.124627 |
| 0      | 0      | 0      | 0      | NA       | NA       |
| 0      | 0      | 0      | 0.02   | NA       | NA       |
| 0      | 0      | 0      | 0      | NA       | NA       |
| 31.84  | 20.73  | 21.59  | 21.08  | -0.6717  | 1.12E-19 |
| 4.89   | 5.57   | 7.04   | 5.92   | -0.0804  | 0.744722 |
| 16.6   | 17.51  | 13.33  | 12.91  | -0.01359 | 0.953105 |
| 12.78  | 6.78   | 7.16   | 5.46   | -1.06257 | 4.76E-23 |
| 6.26   | 7.44   | 6.9    | 6.17   | -0.02008 | 0.947205 |
| 0      | 0      | 0      | 0      | NA       | NA       |
| 58.1   | 70.44  | 68.07  | 65.17  | 0.022908 | 0.86479  |
| 13.05  | 17.35  | 12.92  | 14.51  | 0.117451 | 0.380327 |
| 20.45  | 18.44  | 22.14  | 19.83  | -0.09441 | 0.599111 |
| 588.59 | 897.71 | 792    | 836.53 | 0.5069   | 1.36E-09 |
| 35.04  | 29.52  | 31.91  | 35.13  | 0.050136 | 0.72702  |
| 0      | 0.02   | 0      | 0.03   | NA       | NA       |
| 0      | 0      | 0.07   | 0.08   | NA       | NA       |
| 1.39   | 4.65   | 3.42   | 3.16   | 1.304986 | 1.75E-09 |
| 0.13   | 0.11   | 0.08   | 0.14   | 0.146402 | 0.854636 |
| 0      | 0.05   | 0      | 0      | NA       | NA       |

|        |        |        |        |          |          |
|--------|--------|--------|--------|----------|----------|
| 3.89   | 4.58   | 3.35   | 4      | 0.057949 | 0.848046 |
| 14.12  | 8.69   | 11.36  | 9.57   | -0.39824 | 0.001661 |
| 3.72   | 6.6    | 5.68   | 5.96   | 1.400081 | 6.61E-06 |
| 0.06   | 0.04   | 0.1    | 0.05   | -0.13027 | 0.875852 |
| 33.62  | 15.19  | 21.37  | 17.48  | -0.63931 | 4.69E-05 |
| 0      | 0.13   | 0.12   | 0      | NA       | NA       |
| 50.94  | 47.64  | 40.06  | 43.95  | -0.08477 | 0.512275 |
| 20.85  | 24.55  | 27.39  | 25.95  | 0.344611 | 0.026471 |
| 0.1    | 0.03   | 0      | 0      | -0.94994 | 0.132586 |
| 0      | 0      | 0      | 0      | NA       | NA       |
| 1.74   | 2.37   | 2.64   | 2.71   | 0.111903 | 0.755288 |
| 0.34   | 0.63   | 0.37   | 0.17   | -0.59314 | 0.350175 |
| 0      | 0      | 0      | 0      | NA       | NA       |
| 0      | 0.21   | 0.19   | 0.1    | 0.531455 | 0.457266 |
| 13.48  | 27.69  | 25.08  | 28.54  | 0.917364 | 5.04E-20 |
| 13.73  | 6.87   | 8.4    | 6.97   | -0.99627 | 1.46E-11 |
| 59.37  | 86.08  | 89.06  | 86.26  | 0.613777 | 1.04E-14 |
| 11.95  | 12.33  | 10.63  | 10.76  | 0.060608 | 0.738604 |
| 16.12  | 24     | 19.15  | 21.09  | 0.236173 | 0.094197 |
| 7.11   | 10.09  | 8.9    | 8.62   | 0.317587 | 0.029691 |
| 0      | 0      | 0.05   | 0.25   | NA       | NA       |
| 26.01  | 23.1   | 23.76  | 22.04  | -0.08085 | 0.602876 |
| 124.31 | 132.12 | 136.95 | 143.74 | 0.077223 | 0.408819 |
| 4.31   | 4.25   | 3.71   | 4.25   | -0.28519 | 0.183512 |
| 0.89   | 1.18   | 0.93   | 1.38   | 0.784983 | 0.092611 |
| 4.06   | 5.59   | 5.9    | 6.04   | 0.453312 | 0.065615 |
| 0      | 0      | 0      | 0      | NA       | NA       |
| 8.07   | 32.95  | 19.34  | 25.78  | 1.549542 | 1.16E-18 |
| 0.37   | 0.29   | 0.21   | 0.19   | NA       | NA       |
| 6.75   | 14.18  | 11.44  | 14.04  | 0.833299 | 2.73E-12 |
| 0.07   | 0.99   | 0.82   | 0.52   | 1.746442 | 7.99E-05 |
| 6.7    | 9.03   | 6.79   | 8.02   | 0.087563 | 0.672313 |
| 0      | 0      | 0      | 0      | NA       | NA       |
| 11.6   | 8.3    | 9.52   | 7.84   | 0.091134 | 0.691377 |
| 64.55  | 45.04  | 79.61  | 70.17  | -0.06407 | 0.87733  |
| 23.27  | 25.12  | 25.72  | 26.01  | 0.117981 | 0.242865 |
| 0      | 0      | 0      | 0      | NA       | NA       |
| 0      | 0.07   | 0      | 0      | NA       | NA       |
| 22.36  | 16.49  | 21.05  | 21.85  | -0.11559 | 0.455575 |
| 32.86  | 11.58  | 15.71  | 13.48  | -1.39948 | 3.05E-38 |
| 0.21   | 0.44   | 0.18   | 0.16   | 0.364272 | 0.629959 |
| 0      | 0      | 0      | 0      | NA       | NA       |
| 0      | 0      | 0      | 0      | NA       | NA       |
| 1.46   | 0.41   | 1.19   | 0.42   | -1.13354 | 0.006372 |
| 10.78  | 15.26  | 11.1   | 10.04  | 0.196992 | 0.34544  |

|        |        |        |        |          |          |
|--------|--------|--------|--------|----------|----------|
| 5.16   | 4.53   | 4.93   | 4.82   | -0.22539 | 0.267708 |
| 60.02  | 40.91  | 42.49  | 45.67  | -0.5487  | 5.17E-12 |
| 6.89   | 7.09   | 10.37  | 8.23   | 0.372596 | 0.016309 |
| 14.4   | 14.94  | 14.67  | 17.39  | 0.034391 | 0.814366 |
| 0      | 0      | 0      | 0      | NA       | NA       |
| 3.05   | 2.75   | 4.04   | 3.98   | 0.037086 | 0.921158 |
| 10.94  | 12.37  | 12.9   | 13.85  | 0.011262 | 0.974041 |
| 8.26   | 8.14   | 9.59   | 8.98   | 0.211953 | 0.145311 |
| 0      | 0.02   | 0.03   | 0.01   | NA       | NA       |
| 91.23  | 94.92  | 116.2  | 92.19  | -0.17922 | 0.108465 |
| 0      | 0      | 0      | 0      | NA       | NA       |
| 15     | 13.7   | 15.23  | 14.98  | 0.024966 | 0.849938 |
| 14.22  | 10.87  | 10.78  | 13.97  | 0.049925 | 0.815954 |
| 0.13   | 0.03   | 0.01   | 0.03   | NA       | NA       |
| 0.26   | 0.19   | 0.06   | 0      | NA       | NA       |
| 31.65  | 17.57  | 19.11  | 17.8   | -0.85889 | 9.62E-18 |
| 31.64  | 22.48  | 26.42  | 23.31  | -0.38881 | 6.54E-06 |
| 17.01  | 10.03  | 10.46  | 11.22  | -0.36016 | 0.002628 |
| 0.05   | 0.02   | 0      | 0.02   | NA       | NA       |
| 6.25   | 3.73   | 4.92   | 4.31   | -0.41165 | 0.023917 |
| 0      | 0      | 0      | 0      | NA       | NA       |
| 0      | 0      | 0      | 0      | NA       | NA       |
| 0      | 0      | 0      | 0      | NA       | NA       |
| 0      | 0      | 0      | 0      | NA       | NA       |
| 5.63   | 3.96   | 5.8    | 4.91   | -0.64202 | 0.002801 |
| 2.85   | 2.96   | 3.25   | 3.84   | -0.02879 | 0.93853  |
| 3.95   | 3.64   | 4.25   | 3.76   | -0.02003 | 0.946972 |
| 2.98   | 5.03   | 4.37   | 4.29   | 0.279523 | 0.043482 |
| 13.3   | 12.07  | 13.81  | 12.97  | -0.09958 | 0.599877 |
| 2.25   | 2.75   | 1.88   | 2.36   | -0.07995 | 0.816257 |
| 0      | 0      | 0      | 0      | NA       | NA       |
| 3.63   | 3.05   | 3.24   | 3.43   | -0.12584 | 0.700714 |
| 3.63   | 3.05   | 3.24   | 3.43   | -0.12584 | 0.700714 |
| 7.24   | 5.84   | 5.69   | 5.68   | -0.31747 | 0.039055 |
| 5.02   | 7.68   | 6.48   | 9.41   | 0.399699 | 0.002111 |
| 176.47 | 158.05 | 188.92 | 175.02 | -0.08262 | 0.518248 |
| 0      | 0      | 0.57   | 0      | NA       | NA       |
| 0.31   | 0.15   | 0.54   | 0.22   | 0.220162 | 0.790475 |
| 0      | 0      | 0      | 0      | NA       | NA       |
| 5.85   | 7.67   | 7.42   | 8.97   | 0.299615 | 0.031956 |
| 0      | 0      | 0      | 0      | NA       | NA       |
| 636.07 | 440.19 | 467.75 | 440.79 | -0.4932  | 1.48E-13 |
| 22.64  | 19.86  | 20.04  | 23.85  | -0.11515 | 0.402412 |
| 474.3  | 437.5  | 425.53 | 429.91 | -0.19845 | 0.012191 |
| 19.17  | 27.92  | 23.91  | 29.85  | 0.400266 | 6.78E-05 |

|         |         |         |         |          |          |
|---------|---------|---------|---------|----------|----------|
| 0.12    | 0.64    | 0.24    | 0.34    | 0.509696 | 0.491615 |
| 0.35    | 0.24    | 0.38    | 0.6     | 0.063299 | 0.919195 |
| 1.3     | 2.74    | 1.78    | 2.71    | 0.690014 | 0.001248 |
| 21.81   | 25.59   | 23.53   | 25.71   | 0.168073 | 0.14125  |
| 0       | 0       | 0       | 0       | NA       | NA       |
| 21.95   | 12.69   | 18.26   | 14.45   | -0.63126 | 7.80E-08 |
| 0.22    | 0.24    | 0.89    | 0.31    | 0.17217  | 0.808211 |
| 65.4    | 56.38   | 73.28   | 54.19   | -0.41553 | 0.001453 |
| 44.85   | 38.27   | 41.12   | 42.58   | -0.2042  | 0.014723 |
| 2.2     | 2.7     | 2.9     | 2.66    | 0.10245  | 0.780318 |
| 1.46    | 0.88    | 1.01    | 2.43    | -0.00541 | 0.994351 |
| 0.59    | 1.45    | 1       | 0.96    | 0.441217 | 0.365415 |
| 1517.48 | 1250.73 | 1351.98 | 1195.11 | -0.27058 | 0.000752 |
| 4.27    | 4.14    | 4.93    | 5.87    | -0.08994 | 0.666949 |
| 0       | 0       | 0       | 0       | NA       | NA       |
| 17.83   | 15.5    | 17.12   | 14.36   | -0.24814 | 0.032806 |
| 6.21    | 5.97    | 7.9     | 7.64    | 0.255956 | 0.241392 |
| 19      | 22.87   | 23.12   | 24.75   | 0.254953 | 0.045043 |
| 11.63   | 15.9    | 12.4    | 15.22   | 0.267771 | 0.008677 |
| 7.72    | 3.38    | 5.35    | 4.23    | -0.77264 | 9.45E-05 |
| 0.44    | 1.4     | 0.74    | 0.5     | 0.607658 | 0.308239 |
| 219.98  | 124.85  | 145.64  | 129.69  | -0.74286 | 2.66E-19 |
| 135.34  | 168.61  | 159.11  | 163.9   | 0.118581 | 0.228442 |
| 1.75    | 1.69    | 1.58    | 1.05    | -0.46791 | 0.201459 |
| 12.44   | 10.81   | 13.44   | 11.17   | -0.53294 | 3.52E-05 |
| 3.59    | 1.61    | 2.14    | 2.59    | -0.39112 | 0.077143 |
| 9.85    | 13.32   | 12.31   | 11.31   | 0.410796 | 0.005558 |
| 14.51   | 11.05   | 10.77   | 11.72   | -0.40733 | 2.74E-05 |
| 14.68   | 26.3    | 17.93   | 22.79   | 0.461435 | 0.004233 |
| 0       | 0.02    | 0       | 0       | NA       | NA       |
| 0       | 0.14    | 0       | 0.08    | NA       | NA       |
| 5.91    | 5.27    | 6.22    | 5.66    | -0.10417 | 0.682513 |
| 6.15    | 13.45   | 9.61    | 13.34   | 1.545558 | 3.15E-23 |
| 36.02   | 62.29   | 51.07   | 58.29   | 0.522181 | 4.14E-08 |
| 2.76    | 3.44    | 3.72    | 4.06    | 0.529717 | 0.094316 |
| 0.66    | 0       | 0.41    | 0.03    | -1.86668 | 0.000949 |
| 0       | 0       | 0       | 0       | NA       | NA       |
| 0.1     | 0.28    | 0.15    | 0.23    | -0.29282 | 0.652527 |
| 0       | 0       | 0       | 0.01    | NA       | NA       |
| 46.4    | 39.65   | 36.82   | 44.16   | -0.16111 | 0.08638  |
| 24.01   | 13.68   | 19.24   | 16.93   | -0.85888 | 1.80E-05 |
| 0       | 0       | 0       | 0       | NA       | NA       |
| 0.04    | 0.05    | 0.12    | 0.11    | NA       | NA       |
| 3.19    | 3.71    | 3.71    | 3.59    | 0.288105 | 0.112768 |
| 4.99    | 3.36    | 3.52    | 3.95    | -0.12906 | 0.503256 |

|        |        |        |        |          |          |
|--------|--------|--------|--------|----------|----------|
| 0      | 0      | 0      | 0      | NA       | NA       |
| 0      | 0      | 0      | 0      | NA       | NA       |
| 21.02  | 21.62  | 20.4   | 21.91  | 0.042027 | 0.776387 |
| 2.37   | 2.06   | 2.83   | 3.24   | 0.159476 | 0.586167 |
| 10.73  | 2.83   | 4.31   | 3.28   | -1.13485 | 5.14E-05 |
| 5.69   | 4.75   | 5.22   | 3.61   | -0.37807 | 0.166539 |
| 0      | 0.29   | 0.39   | 0      | NA       | NA       |
| 42.47  | 40.31  | 39.52  | 37.49  | -0.28136 | 0.015136 |
| 0.38   | 0.66   | 0.68   | 0.17   | -0.11784 | 0.891001 |
| 0.07   | 0      | 0      | 0.05   | NA       | NA       |
| 0.1    | 0.05   | 0.07   | 0.06   | -0.55148 | 0.442903 |
| 0.09   | 0      | 0      | 0      | NA       | NA       |
| 44.06  | 43.28  | 42.56  | 44.08  | -0.01047 | 0.947884 |
| 832.58 | 796.67 | 819.72 | 758.36 | -0.15053 | 0.057745 |
| 0      | 0      | 0.08   | 0      | NA       | NA       |
| 3.33   | 3.88   | 2.61   | 3.35   | -0.12571 | 0.620167 |
| 88.54  | 90.57  | 90.2   | 85.32  | -0.00239 | 0.986548 |
| 27.22  | 27.12  | 26.5   | 25.33  | -0.15158 | 0.170863 |
| 0.08   | 0.01   | 0.03   | 0.01   | -1.45193 | 0.013633 |
| 2.02   | 1.39   | 2.45   | 2.84   | -0.97057 | 0.021812 |
| 14.35  | 10.9   | 12.22  | 11.86  | -0.10858 | 0.513598 |
| 0.89   | 0.72   | 0.84   | 1.16   | -0.21924 | 0.613414 |
| 11.46  | 15     | 18.07  | 16.21  | 0.350556 | 0.013785 |
| 19.78  | 20.19  | 27.89  | 23.43  | -0.04276 | 0.819846 |
| 5.84   | 10.36  | 10.7   | 9.24   | 0.615397 | 0.000259 |
| 0      | 0.05   | 0.09   | 0      | NA       | NA       |
| 11.41  | 10.81  | 11.51  | 10.15  | -0.16603 | 0.237304 |
| 5.25   | 9.38   | 6.47   | 7.23   | 0.581372 | 0.000681 |
| 5.65   | 10.17  | 9.24   | 9.15   | 0.629364 | 0.000434 |
| 0.09   | 0.25   | 0.02   | 0.07   | -0.41997 | 0.577378 |
| 12.15  | 15.53  | 12.19  | 12.28  | 0.043758 | 0.768326 |
| 16.54  | 9.24   | 9.95   | 9.21   | -0.413   | 0.011878 |
| 11.61  | 13.5   | 13.57  | 13.67  | 0.220611 | 0.039889 |
| 0.57   | 0.54   | 0.4    | 0.37   | -0.76754 | 0.037805 |
| 10.97  | 7.62   | 9.82   | 7.87   | -0.19463 | 0.38697  |
| 17.71  | 24.19  | 20.71  | 21.91  | 0.17938  | 0.225579 |
| 0      | 0.02   | 0.1    | 0.03   | NA       | NA       |
| 12.56  | 11.24  | 11.41  | 12.56  | -0.03849 | 0.861556 |
| 0.32   | 0.19   | 0.27   | 0.12   | -0.19047 | 0.825575 |
| 0      | 0.04   | 0      | 0      | NA       | NA       |
| 0      | 0      | 0      | 0      | NA       | NA       |
| 0      | 0      | 0      | 0      | NA       | NA       |
| 0      | 0      | 0      | 0      | NA       | NA       |
| 0      | 0      | 0      | 0      | NA       | NA       |
| 0      | 0      | 0.09   | 0      | NA       | NA       |

|        |        |        |        |          |          |
|--------|--------|--------|--------|----------|----------|
| 15.44  | 13.81  | 13.31  | 14.6   | -0.1722  | 0.179344 |
| 0.34   | 0.19   | 0.33   | 0.35   | -0.18528 | 0.776832 |
| 0      | 0      | 0      | 0      | NA       | NA       |
| 0.05   | 0.19   | 0.1    | 0.12   | NA       | NA       |
| 33.09  | 40.23  | 38.24  | 35.66  | 0.078333 | 0.548836 |
| 0.81   | 0.93   | 0.78   | 1.49   | -0.36178 | 0.411248 |
| 10.28  | 10.26  | 11.14  | 13.26  | -0.22809 | 0.327006 |
| 0      | 0      | 0      | 0      | NA       | NA       |
| 41.65  | 40.72  | 39.22  | 40.57  | -0.17871 | 0.121271 |
| 14.35  | 22.83  | 19.13  | 20.15  | 0.436157 | 9.91E-05 |
| 566.37 | 602.72 | 615.19 | 621.82 | 0.001284 | 0.992801 |
| 0.04   | 0      | 0.05   | 0.08   | NA       | NA       |
| 10.36  | 9.83   | 10.54  | 9.55   | 0.118905 | 0.525892 |
| 0      | 0      | 0      | 0      | NA       | NA       |
| 58.61  | 46.38  | 47.86  | 45.19  | -0.45265 | 2.81E-06 |
| 14.81  | 50.52  | 29.87  | 35.3   | 1.306158 | 5.94E-15 |
| 0      | 0      | 0      | 0      | NA       | NA       |
| 3.1    | 1.01   | 2.88   | 1.84   | -0.5268  | 0.251251 |
| 0      | 0      | 0      | 0      | NA       | NA       |
| 0.11   | 0.34   | 0.23   | 0.31   | -0.11161 | 0.89635  |
| 103    | 131.45 | 131.32 | 122.06 | 0.261951 | 0.004048 |
| 0      | 0      | 0      | 0      | NA       | NA       |
| 0      | 0      | 0      | 0      | NA       | NA       |
| 6.05   | 6.18   | 6.25   | 5.44   | 0.041873 | 0.875852 |
| 3.5    | 11.38  | 6.97   | 7.1    | 0.686546 | 0.000107 |
| 0      | 0      | 0      | 0.07   | NA       | NA       |
| 0      | 0      | 0      | 0      | NA       | NA       |
| 0      | 0      | 0      | 0      | NA       | NA       |
| 0.86   | 0.99   | 0.62   | 0.89   | 1.190402 | 0.00636  |
| 15.09  | 13.72  | 14.45  | 14.33  | -0.12719 | 0.564287 |
| 153.55 | 177.94 | 168.41 | 165    | 0.141895 | 0.185076 |
| 1.38   | 1.02   | 0.4    | 0.45   | -0.44158 | 0.519305 |
| 0      | 0      | 0      | 0      | NA       | NA       |
| 24.11  | 32.02  | 27.56  | 27.51  | 0.207671 | 0.06188  |
| 0.09   | 0.11   | 0.14   | 0.33   | 0.238027 | 0.775441 |
| 0      | 0      | 0.22   | 0.01   | NA       | NA       |
| 0.25   | 0.21   | 0.36   | 0.22   | -0.07909 | 0.930091 |
| 7.26   | 8.15   | 9.83   | 8.12   | 0.195606 | 0.34291  |
| 0.11   | 0.03   | 0.04   | 0.02   | NA       | NA       |
| 0      | 0      | 0      | 0.05   | NA       | NA       |
| 0.07   | 0      | 0.1    | 0.04   | NA       | NA       |
| 0      | 0      | 0      | 0      | NA       | NA       |
| 8.91   | 5.48   | 8.63   | 6.92   | -0.09708 | 0.785801 |
| 5.98   | 8.39   | 7.71   | 8.06   | 0.467199 | 0.003411 |
| 55.82  | 55.42  | 52.2   | 63.34  | -0.11787 | 0.240255 |



|          |         |          |          |          |          |
|----------|---------|----------|----------|----------|----------|
| 0.53     | 1.95    | 1.54     | 1.91     | 1.659211 | 1.57E-07 |
| 0        | 0       | 0        | 0        | NA       | NA       |
| 12.5     | 17.36   | 12.35    | 13.06    | 0.218819 | 0.093669 |
| 0.28     | 0.79    | 0.58     | 0.63     | 0.155658 | 0.839294 |
| 22.97    | 22.73   | 27.18    | 23.87    | -0.06632 | 0.684883 |
| 7.85     | 8.53    | 8.21     | 8.14     | -0.10411 | 0.55991  |
| 0.11     | 0.16    | 0.21     | 0.13     | 0.168367 | 0.849079 |
| 32.31    | 20.44   | 22.67    | 22.83    | -0.54248 | 9.29E-06 |
| 0.2      | 0.19    | 0.39     | 0.35     | 0.00224  | 0.997475 |
| 0.46     | 0.9     | 0.47     | 0.53     | -0.22389 | 0.618661 |
| 8.85     | 11.95   | 11.35    | 11.94    | 0.30256  | 0.019577 |
| 120.58   | 138.54  | 121.38   | 138.7    | 0.02851  | 0.804435 |
| 0.75     | 0.81    | 0.92     | 1.07     | 0.344421 | 0.23502  |
| 0.14     | 0       | 0.03     | 0.02     | NA       | NA       |
| 17.93    | 18.2    | 17.35    | 18.89    | 0.210605 | 0.268625 |
| 367.25   | 133.01  | 180.95   | 147.13   | -1.19108 | 1.78E-33 |
| 10.03    | 12.28   | 10.61    | 12.46    | 0.386735 | 0.006452 |
| 38.23    | 24.62   | 29.28    | 26.73    | -0.32313 | 0.001875 |
| 24.57    | 10.72   | 14.82    | 12.88    | -0.99981 | 4.43E-17 |
| 1.26     | 3.43    | 4.31     | 3.41     | 1.341073 | 2.42E-11 |
| 16063.93 | 16776.3 | 18709.66 | 18079.57 | 0.198078 | 0.010587 |
| 15.01    | 18.47   | 19.97    | 19.19    | 0.226308 | 0.152468 |
| 41.65    | 49.8    | 51.58    | 48.58    | 0.109583 | 0.475711 |
| 108.98   | 172.13  | 138.36   | 157.19   | 0.492338 | 3.04E-06 |
| 0.42     | 0       | 0.1      | 0.12     | -0.98937 | 0.123509 |
| 8.83     | 10.92   | 11.28    | 10.8     | 0.29307  | 0.048788 |
| 6.73     | 10.15   | 8.06     | 8.67     | 0.412432 | 0.013298 |
| 5.26     | 7.38    | 4.43     | 6.24     | -0.00148 | 0.995428 |
| 27.04    | 26.68   | 32.61    | 33.19    | 0.172923 | 0.125608 |
| 2.13     | 1.28    | 1.95     | 3.67     | -0.55938 | 0.031257 |
| 634.68   | 455.26  | 504.53   | 446.54   | -0.48491 | 2.08E-10 |
| 0.02     | 0       | 0        | 0.03     | NA       | NA       |
| 59.57    | 104.23  | 88.22    | 94.58    | 0.515396 | 1.89E-08 |
| 4.89     | 1.99    | 1.27     | 1.96     | -0.28028 | 0.425367 |
| 20.69    | 23.84   | 22.12    | 21.47    | 0.157264 | 0.242315 |
| 97.52    | 111.17  | 116.89   | 118.13   | 0.132218 | 0.105453 |
| 12.05    | 8.2     | 9.35     | 11.58    | -0.40313 | 0.053709 |
| 5.12     | 6.45    | 4.99     | 5.18     | -0.00614 | 0.986413 |
| 0.23     | 0.12    | 0.2      | 0.23     | -0.44593 | 0.53646  |
| 0        | 0.03    | 0.02     | 0        | NA       | NA       |
| 72.08    | 71.01   | 67.78    | 76.92    | -0.06963 | 0.518703 |
| 3.66     | 5.06    | 4.52     | 4.47     | 0.286889 | 0.124627 |
| 0        | 0       | 0        | 0        | NA       | NA       |
| 1.11     | 1.45    | 0.95     | 1.22     | -0.55718 | 0.188241 |
| 44.54    | 21.43   | 32.52    | 26.44    | -0.72881 | 3.01E-09 |

|        |        |        |                 |          |
|--------|--------|--------|-----------------|----------|
| 0.1    | 0.25   | 0.07   | 0 NA            | NA       |
| 1.54   | 22.77  | 11.79  | 17.75 3.313677  | 4.83E-30 |
| 0      | 0      | 0      | 0.05 NA         | NA       |
| 54.3   | 42.65  | 44.46  | 39.86 -0.46743  | 1.65E-06 |
| 20.59  | 23.92  | 24.1   | 25.56 0.313904  | 0.004617 |
| 8.57   | 7.73   | 7.79   | 11.25 0.085114  | 0.683775 |
| 9.21   | 10.98  | 10.71  | 9.35 -0.02339   | 0.932297 |
| 3.21   | 2.78   | 2.83   | 2.32 -0.20185   | 0.483341 |
| 18.02  | 14.04  | 20.54  | 12.66 -0.18021  | 0.279012 |
| 0.06   | 0      | 0      | 0 NA            | NA       |
| 0.08   | 0      | 0      | 0 NA            | NA       |
| 0      | 0      | 0      | 0.06 NA         | NA       |
| 0      | 0      | 0      | 0 NA            | NA       |
| 0      | 0      | 0      | 0 NA            | NA       |
| 0      | 0.07   | 0      | 0 NA            | NA       |
| 30.66  | 33.89  | 34.16  | 34.52 0.01595   | 0.906096 |
| 104.36 | 187.76 | 152.18 | 169.41 0.653627 | 1.90E-13 |
| 0      | 0      | 0      | 0 NA            | NA       |
| 0      | 0      | 0      | 0 NA            | NA       |
| 1.3    | 0.97   | 1.55   | 1.38 -0.17567   | 0.623593 |
| 0.05   | 0      | 0.03   | 0 NA            | NA       |
| 55.62  | 46.35  | 51.42  | 53.08 -0.10299  | 0.381735 |
| 5.02   | 7.1    | 8.18   | 7.83 0.415349   | 9.06E-05 |
| 23.4   | 27.58  | 27.53  | 36.55 0.297095  | 0.004592 |
| 126.84 | 279.34 | 255.14 | 293.84 0.973943 | 3.50E-33 |
| 16.61  | 27.31  | 28.43  | 27.49 0.620599  | 3.05E-13 |
| 23.26  | 22.73  | 21.02  | 21.43 -0.10049  | 0.44144  |
| 3.07   | 3.72   | 3.61   | 3.4 0.05292     | 0.856146 |
| 0.02   | 0.33   | 0.2    | 0.18 0.938836   | 0.136942 |
| 10.06  | 11.57  | 15.34  | 14.55 0.316275  | 0.016431 |
| 1.59   | 4.79   | 3.41   | 4.1 0.830627    | 0.001851 |
| 0.04   | 0.09   | 0.08   | 0.08 NA         | NA       |
| 9.22   | 10.22  | 9.43   | 10.22 0.074291  | 0.652617 |
| 61.63  | 59.58  | 64.56  | 72.72 -0.0238   | 0.895538 |
| 23.11  | 26.31  | 23.7   | 23.96 -0.00107  | 0.995607 |
| 43.98  | 43.98  | 45.39  | 44.97 0.078055  | 0.518248 |
| 0      | 0      | 0      | 0 NA            | NA       |
| 61.42  | 79.71  | 73.45  | 84.29 0.229325  | 0.012195 |
| 0      | 0      | 0      | 0 NA            | NA       |
| 29.72  | 39.74  | 37.14  | 38.21 0.320835  | 0.002336 |
| 0.03   | 0      | 0      | 0 NA            | NA       |
| 14.32  | 15.31  | 16.31  | 10 0.061886     | 0.866083 |
| 13.87  | 12.12  | 14.05  | 10.84 -0.1064   | 0.715194 |
| 0.04   | 0.06   | 0.03   | 0.07 0.060175   | 0.949004 |
| 15.79  | 34.5   | 26.23  | 27.57 0.801254  | 9.65E-12 |

|        |        |        |        |          |          |
|--------|--------|--------|--------|----------|----------|
| 17.26  | 25.55  | 24.97  | 20.75  | 0.502385 | 1.26E-06 |
| 8.53   | 9.57   | 9.82   | 10.15  | -0.0081  | 0.973283 |
| 45.09  | 56.54  | 56.05  | 56.18  | 0.189002 | 0.066059 |
| 50.04  | 39.73  | 43.83  | 39.79  | -0.30216 | 0.003443 |
| 28.84  | 23.05  | 24.74  | 27.19  | -0.3046  | 0.004184 |
| 0      | 0      | 0      | 0      | NA       | NA       |
| 35.23  | 32.17  | 29.77  | 28.43  | -0.02129 | 0.901333 |
| 5.6    | 4.63   | 4.92   | 4.28   | -0.15752 | 0.566462 |
| 1.68   | 1.64   | 1.48   | 1.66   | -0.09259 | 0.677015 |
| 20.61  | 12.03  | 13.02  | 11.96  | -0.68504 | 4.20E-07 |
| 0.58   | 0.79   | 0.24   | 0.3    | -0.71619 | 0.111556 |
| 14.3   | 10.7   | 12.84  | 10.77  | -0.3434  | 0.014622 |
| 0      | 0.02   | 0.02   | 0.03   | NA       | NA       |
| 0.02   | 0      | 0      | 0.02   | NA       | NA       |
| 0      | 0      | 0      | 0      | NA       | NA       |
| 0      | 0      | 0      | 0      | NA       | NA       |
| 0      | 0      | 0      | 0      | NA       | NA       |
| 0.27   | 0.51   | 0      | 0.07   | NA       | NA       |
| 0.08   | 0.06   | 0.07   | 0.03   | -0.2856  | 0.712991 |
| 0      | 0      | 0      | 0      | NA       | NA       |
| 142.75 | 203.95 | 180.28 | 187.5  | 0.388374 | 5.55E-06 |
| 192.33 | 144.54 | 157.57 | 150.43 | -0.27845 | 0.000104 |
| 25.01  | 10.06  | 15.08  | 13.39  | -0.9306  | 2.60E-10 |
| 0.94   | 11.95  | 7.07   | 10.76  | 3.196393 | 1.29E-40 |
| 9.28   | 8.72   | 8.95   | 9.17   | -0.0126  | 0.96662  |
| 16.24  | 28.8   | 22.54  | 26.35  | 0.641883 | 1.76E-08 |
| 6.91   | 10.12  | 9.64   | 9.91   | 0.176245 | 0.252547 |
| 23.71  | 29.1   | 24.28  | 25.24  | 0.166013 | 0.240231 |
| 18.33  | 57.32  | 33.88  | 43.84  | 1.226063 | 1.02E-17 |
| 3.97   | 9.51   | 5.66   | 8.48   | 0.812616 | 6.33E-05 |
| 4.35   | 1.8    | 2.35   | 1.99   | -1.21553 | 4.21E-07 |
| 5.25   | 4.88   | 5.27   | 5.02   | 0.096253 | 0.608942 |
| 0      | 0      | 0      | 0      | NA       | NA       |
| 0.02   | 0.03   | 0      | 0.02   | NA       | NA       |
| 0      | 0      | 0.01   | 0      | NA       | NA       |
| 0.03   | 0.01   | 0.01   | 0      | NA       | NA       |
| 7.66   | 6.98   | 7.11   | 7.51   | -0.08262 | 0.681835 |
| 7.32   | 8.23   | 8.04   | 7.88   | 0.054806 | 0.759063 |
| 31.65  | 46.39  | 41.25  | 43.35  | 0.391304 | 3.04E-05 |
| 0      | 0      | 0      | 0      | NA       | NA       |
| 2.16   | 1.12   | 1.48   | 0.78   | -1.32985 | 3.01E-08 |
| 0.15   | 0.18   | 0.29   | 0.21   | 0.901174 | 0.169106 |
| 33.2   | 53.04  | 46.6   | 53.3   | 0.613478 | 1.10E-12 |
| 7.3    | 9.18   | 8.48   | 9.46   | 0.347716 | 0.049963 |
| 28.15  | 10.89  | 12.95  | 11.35  | -1.25971 | 1.46E-47 |

|         |         |         |         |          |          |
|---------|---------|---------|---------|----------|----------|
| 0.02    | 0       | 0.01    | 0.02    | NA       | NA       |
| 0       | 0       | 0       | 0       | NA       | NA       |
| 61.7    | 90.55   | 88.36   | 94.89   | 0.484242 | 2.64E-11 |
| 39.75   | 43.8    | 44.79   | 45.83   | 0.087659 | 0.452265 |
| 0.53    | 1.33    | 1.41    | 1.79    | 0.939326 | 0.001111 |
| 0.54    | 0.12    | 0.21    | 0.29    | -0.4125  | 0.585688 |
| 11.27   | 19.97   | 16.55   | 16.97   | 0.530453 | 4.90E-06 |
| 3.24    | 5.18    | 4.56    | 3.43    | 0.196897 | 0.454007 |
| 17.18   | 1.81    | 3.26    | 2.45    | -2.7677  | 1.53E-74 |
| 38.38   | 9.55    | 11.91   | 11.13   | -1.55702 | 5.10E-52 |
| 0       | 0       | 0       | 0       | NA       | NA       |
| 0       | 0       | 0       | 0       | NA       | NA       |
| 0       | 0       | 0       | 0       | NA       | NA       |
| 3.15    | 5.56    | 3.71    | 3.74    | 0.404251 | 0.224066 |
| 29.51   | 26.4    | 29.28   | 27.97   | -0.16494 | 0.141343 |
| 11.12   | 19.92   | 17.49   | 20.68   | 0.799741 | 2.26E-11 |
| 0       | 0       | 0       | 0       | NA       | NA       |
| 10.05   | 10.38   | 12.5    | 10.13   | 0.024123 | 0.895033 |
| 0       | 0       | 0       | 0       | NA       | NA       |
| 4364.88 | 1182.61 | 1902.94 | 1671.17 | -1.54918 | 5.54E-36 |
| 0.06    | 0.13    | 0.03    | 0.09    | NA       | NA       |
| 7.18    | 7.49    | 8.69    | 10.21   | 0.393851 | 0.106776 |
| 4.6     | 6.02    | 5.03    | 5.21    | 0.111507 | 0.603757 |
| 4.97    | 4.95    | 5.62    | 5.69    | 0.335073 | 0.042356 |
| 6.93    | 10.17   | 9.65    | 8.95    | 0.367979 | 0.062045 |
| 10.15   | 14.27   | 13.68   | 11.55   | 0.171295 | 0.249578 |
| 0       | 0       | 0       | 0       | NA       | NA       |
| 1.63    | 0.87    | 1.14    | 1.54    | 0.278386 | 0.731121 |
| 21.7    | 22.35   | 21.44   | 23.07   | -0.0501  | 0.741906 |
| 0       | 0       | 0       | 0       | NA       | NA       |
| 79.28   | 53.09   | 66.45   | 59.8    | -0.44898 | 3.51E-07 |
| 4.37    | 3.98    | 3.6     | 4.18    | -0.20427 | 0.366495 |
| 170.41  | 134.01  | 154.28  | 141.17  | -0.2656  | 0.001875 |
| 0       | 0       | 0       | 0       | NA       | NA       |
| 1.21    | 1.79    | 1.97    | 2.01    | 0.662526 | 0.004572 |
| 0       | 0       | 0       | 0       | NA       | NA       |
| 0       | 0       | 0       | 0       | NA       | NA       |
| 0       | 0       | 0       | 0       | NA       | NA       |
| 5.01    | 1.87    | 1.74    | 1.52    | -1.39938 | 7.36E-15 |
| 151.57  | 208.84  | 194.27  | 178.68  | 0.28996  | 0.005099 |
| 0       | 0       | 0       | 0       | NA       | NA       |
| 1.19    | 0.5     | 0.74    | 0.66    | -0.77784 | 0.037058 |
| 0       | 0       | 0       | 0       | NA       | NA       |
| 0.05    | 0.06    | 0.03    | 0.08    | -0.46011 | 0.524162 |
| 0       | 0.01    | 0.12    | 0.01    | NA       | NA       |

|       |       |       |       |          |          |
|-------|-------|-------|-------|----------|----------|
| 0     | 0.18  | 0.15  | 0.17  | NA       | NA       |
| 18.1  | 17.98 | 16.91 | 16.79 | -0.07001 | 0.665046 |
| 0     | 4.01  | 1.47  | 2.76  | 1.6959   | 0.003438 |
| 23.83 | 48.57 | 36.87 | 36.86 | 0.576644 | 0.000181 |
| 0     | 0.09  | 0.02  | 0.04  | 1.689079 | 0.003818 |
| 0     | 0     | 0     | 0     | NA       | NA       |
| 42.27 | 46.54 | 45.38 | 43.96 | 0.087535 | 0.410345 |
| 13.98 | 16.06 | 12.51 | 15.93 | 0.064963 | 0.714536 |
| 51.35 | 39.28 | 38.67 | 39.11 | -0.41259 | 1.79E-05 |
| 0     | 0     | 0.07  | 0     | NA       | NA       |
| 0     | 0     | 0     | 0     | NA       | NA       |
| 0     | 0     | 0.03  | 0     | NA       | NA       |
| 0     | 0     | 0     | 0.11  | NA       | NA       |
| 0     | 0     | 0     | 0     | NA       | NA       |
| 11.81 | 20.4  | 15.96 | 17.33 | 0.561658 | 7.55E-06 |
| 5.54  | 7.06  | 6.33  | 6.44  | 0.247632 | 0.120591 |
| 18.22 | 9.36  | 10.92 | 10.69 | -0.8433  | 1.58E-09 |
| 5.24  | 3.29  | 4.91  | 4.57  | -0.329   | 0.027418 |
| 0     | 0     | 0     | 0     | NA       | NA       |
| 5.47  | 5.51  | 5.52  | 4.54  | -0.1591  | 0.41714  |
| 5.69  | 8.31  | 6.51  | 6.51  | 0.263626 | 0.111213 |
| 7.39  | 4.78  | 6.56  | 5.86  | -0.46781 | 0.00202  |
| 23.11 | 13.21 | 15.53 | 13.63 | -0.72952 | 2.49E-10 |
| 4.34  | 5.67  | 4.76  | 5.05  | 0.161034 | 0.37404  |
| 3.4   | 4.08  | 4.44  | 4.22  | 0.239593 | 0.124365 |
| 41.67 | 48.29 | 48.91 | 44.93 | 0.1192   | 0.252547 |
| 3.87  | 3.69  | 3.79  | 3.96  | -0.2587  | 0.267454 |
| 2.48  | 4.74  | 4.62  | 3.88  | 0.571127 | 0.00517  |
| 8.39  | 7.64  | 7.87  | 8.61  | -0.08666 | 0.491041 |
| 0.17  | 0.55  | 0.25  | 0.68  | -0.01562 | 0.986773 |
| 3.58  | 4.23  | 3.69  | 4.15  | 0.013852 | 0.952639 |
| 20.5  | 11.09 | 13.54 | 13.54 | -0.14076 | 0.372632 |
| 1.53  | 0.82  | 1.34  | 1.33  | -0.77676 | 0.04056  |
| 1.44  | 1.59  | 2.22  | 2.56  | 0.025307 | 0.951569 |
| 9.03  | 10.6  | 11.48 | 9.78  | 0.081276 | 0.611945 |
| 0     | 0     | 0     | 0     | NA       | NA       |
| 0     | 0     | 0     | 0     | NA       | NA       |
| 0     | 0     | 0     | 0     | NA       | NA       |
| 0.7   | 0     | 0.13  | 0.07  | NA       | NA       |
| 17.03 | 14.09 | 14.05 | 14.31 | -0.01806 | 0.921986 |
| 20.3  | 67.14 | 50.67 | 56.57 | 1.56092  | 1.46E-44 |
| 0     | 0     | 0     | 0     | NA       | NA       |
| 4.67  | 4.35  | 5.28  | 4.34  | 0.101219 | 0.720827 |
| 0.05  | 0.27  | 0.1   | 0.3   | 0.748126 | 0.2566   |
| 18.12 | 21.63 | 18.27 | 18.04 | 0.035411 | 0.842874 |

|        |        |        |        |          |          |
|--------|--------|--------|--------|----------|----------|
| 20.49  | 19.8   | 17.82  | 19.75  | -0.13688 | 0.314688 |
| 9.51   | 7.83   | 10.87  | 9.39   | -0.28746 | 0.120976 |
| 11.06  | 12.92  | 14.06  | 14.79  | 0.037991 | 0.872808 |
| 90.9   | 121.28 | 118.26 | 128.06 | 0.277932 | 0.014047 |
| 58.04  | 54.76  | 55.62  | 53.29  | -0.25148 | 0.064372 |
| 0      | 0      | 0.02   | 0      | NA       | NA       |
| 7.58   | 5.79   | 5.69   | 6.29   | -0.56741 | 0.001964 |
| 81.39  | 75.07  | 85.2   | 81.92  | -0.07019 | 0.510621 |
| 0      | 0      | 0      | 0      | NA       | NA       |
| 0.07   | 0.05   | 0.09   | 0.05   | NA       | NA       |
| 2.79   | 0.49   | 1.89   | 0.79   | -1.5095  | 4.41E-08 |
| 4.46   | 16.14  | 10.26  | 13.96  | 1.570227 | 5.29E-17 |
| 3.78   | 0.86   | 2.56   | 1.39   | -1.18078 | 3.22E-07 |
| 7.44   | 8.49   | 7.57   | 8.45   | 0.042685 | 0.807079 |
| 0      | 0      | 0.19   | 0      | NA       | NA       |
| 0      | 0      | 0      | 0      | NA       | NA       |
| 0      | 0      | 0      | 0      | NA       | NA       |
| 21.96  | 27.48  | 25.79  | 27.64  | 0.056972 | 0.723    |
| 45.58  | 22.39  | 33.31  | 25.83  | -0.85796 | 3.96E-10 |
| 0.14   | 0.17   | 0.15   | 0.15   | 0.342179 | 0.515404 |
| 0.14   | 0.17   | 0.15   | 0.15   | 0.342179 | 0.515404 |
| 4.85   | 7.54   | 6.01   | 6.65   | 0.124079 | 0.487271 |
| 5.01   | 0.83   | 2.13   | 1.22   | -1.64192 | 8.78E-12 |
| 0.08   | 0.02   | 0.1    | 0.07   | NA       | NA       |
| 68.29  | 89.66  | 74.17  | 74.81  | 0.248724 | 0.019086 |
| 0      | 0.01   | 0.01   | 0.01   | NA       | NA       |
| 1.44   | 3.74   | 2.92   | 4.02   | 1.144459 | 0.000113 |
| 0      | 0      | 0      | 0      | NA       | NA       |
| 1.06   | 1.14   | 1.3    | 0.72   | -0.61707 | 0.011578 |
| 0.14   | 0.15   | 0.05   | 0.05   | NA       | NA       |
| 0.03   | 0      | 0.04   | 0      | NA       | NA       |
| 25.5   | 25.36  | 24.52  | 24.73  | -0.03095 | 0.848795 |
| 0      | 0      | 0.11   | 0      | NA       | NA       |
| 0      | 0      | 0      | 0      | NA       | NA       |
| 5.69   | 7.16   | 5.33   | 6.92   | 0.07368  | 0.746274 |
| 11.58  | 15.11  | 12.33  | 11.64  | 0.081196 | 0.549425 |
| 6.4    | 4.51   | 4.91   | 4.73   | -0.4516  | 0.033994 |
| 177.54 | 147    | 154.49 | 162.14 | -0.12182 | 0.41746  |
| 14.37  | 13.37  | 14.68  | 14.21  | -0.05633 | 0.694656 |
| 3.01   | 6.07   | 5.87   | 6.97   | 0.996453 | 4.07E-07 |
| 6.82   | 2.92   | 3.79   | 3.91   | -0.76174 | 1.91E-08 |
| 29.99  | 66.02  | 63.58  | 68.44  | 1.092182 | 3.90E-32 |
| 0.04   | 0.09   | 0.09   | 0.1    | NA       | NA       |
| 0      | 0      | 0.02   | 0      | NA       | NA       |
| 166.29 | 172.02 | 192.55 | 201.99 | 0.131598 | 0.134867 |

|        |        |        |        |          |          |
|--------|--------|--------|--------|----------|----------|
| 3.93   | 7.43   | 6.24   | 6.91   | 0.731025 | 3.99E-13 |
| 13.08  | 12.59  | 11.54  | 13.56  | 0.079883 | 0.526979 |
| 0      | 0      | 0      | 0      | NA       | NA       |
| 20.78  | 23.68  | 26.61  | 24.23  | 0.059617 | 0.691476 |
| 0      | 0      | 0      | 0      | NA       | NA       |
| 0.25   | 0.4    | 0.37   | 0.33   | 0.098364 | 0.890238 |
| 0.2    | 0.12   | 0      | 0      | -2.46688 | 4.40E-06 |
| 0      | 0      | 0      | 0      | NA       | NA       |
| 0.42   | 0.19   | 0.25   | 0.38   | -0.94641 | 0.000726 |
| 11.01  | 13.56  | 12.01  | 13.69  | 0.206746 | 0.226464 |
| 11.01  | 13.56  | 12.01  | 13.69  | 0.206746 | 0.226464 |
| 0.5    | 0.32   | 0.32   | 0.48   | -0.23938 | 0.740584 |
| 4.69   | 4.92   | 5.03   | 4.65   | 0.067121 | 0.80934  |
| 7.5    | 6.46   | 6.39   | 5.47   | -0.33819 | 0.053842 |
| 7.5    | 6.46   | 6.39   | 5.47   | -0.33819 | 0.053842 |
| 104.76 | 106.53 | 101.92 | 103.47 | -0.08279 | 0.39031  |
| 104.76 | 106.53 | 101.92 | 103.47 | -0.08279 | 0.39031  |
| 12.69  | 16.67  | 15.33  | 15.75  | 0.180059 | 0.187987 |
| 0.14   | 2.54   | 0.86   | 1.02   | 1.896832 | 0.00026  |
| 5.21   | 5.8    | 5.8    | 5.77   | 0.054419 | 0.718976 |
| 6.02   | 18.07  | 11.33  | 14     | 1.207229 | 1.34E-13 |
| 0      | 0      | 0.13   | 0      | NA       | NA       |
| 0.02   | 0      | 0      | 0      | NA       | NA       |
| 3.68   | 4.16   | 4.63   | 4.78   | 0.135379 | 0.591581 |
| 100.41 | 43.06  | 49.02  | 57.97  | -0.99044 | 1.31E-22 |
| 30.68  | 31.23  | 30.98  | 30.3   | 0.236329 | 0.093224 |
| 0      | 0      | 0      | 0      | NA       | NA       |
| 5.64   | 4.6    | 4.55   | 9.25   | 0.31097  | 0.029691 |
| 0      | 0      | 0      | 0      | NA       | NA       |
| 22.42  | 20.31  | 18.62  | 20.75  | -0.03429 | 0.832661 |
| 0.57   | 2.52   | 1.47   | 2.17   | 1.684457 | 3.20E-09 |
| 39.53  | 37.96  | 40.07  | 39.08  | 0.009715 | 0.945692 |
| 0      | 0      | 0.01   | 0      | NA       | NA       |
| 24.64  | 30.63  | 34.75  | 28.93  | 0.120632 | 0.269833 |
| 3.8    | 5.73   | 4.65   | 4.58   | 0.294532 | 0.133414 |
| 25.28  | 35.47  | 33.27  | 34.26  | 0.345426 | 0.005815 |
| 3.33   | 5.46   | 4.67   | 4.83   | 0.305621 | 0.294834 |
| 0      | 0      | 0      | 0      | NA       | NA       |
| 4.75   | 8.02   | 9.51   | 7.16   | 0.658286 | 0.007765 |
| 0      | 0      | 0      | 0      | NA       | NA       |
| 4.54   | 5.03   | 4.32   | 4.56   | 0.017315 | 0.923021 |
| 0      | 0      | 0      | 0      | NA       | NA       |
| 21.21  | 25.63  | 25.7   | 27.39  | 0.225107 | 0.034456 |
| 0.07   | 0.16   | 0.1    | 0.17   | -0.33208 | 0.662948 |
| 5.88   | 3.28   | 3.63   | 5.17   | -0.41266 | 0.167881 |

|        |        |        |         |          |          |
|--------|--------|--------|---------|----------|----------|
| 15.76  | 19.21  | 19.04  | 19.09   | 0.177309 | 0.109549 |
| 120.29 | 143.91 | 126.31 | 134.24  | 0.085785 | 0.467135 |
| 0      | 0.02   | 0      | 0 NA    | NA       |          |
| 24.85  | 28.46  | 29.96  | 29.27   | 0.126434 | 0.359795 |
| 53.31  | 60.26  | 59.63  | 55.84   | 0.153777 | 0.185005 |
| 40.88  | 12.01  | 16.14  | 14.71   | -1.48935 | 7.82E-39 |
| 3.87   | 5.3    | 4.63   | 5.42    | 0.280591 | 0.145516 |
| 19.98  | 33.95  | 28.51  | 30.03   | 0.411783 | 0.001182 |
| 2.54   | 1.78   | 2.81   | 1.59    | -0.24283 | 0.587293 |
| 0      | 0.09   | 0.16   | 0.14 NA | NA       |          |
| 12.78  | 11.31  | 13.34  | 12.94   | 0.114899 | 0.622344 |
| 1.28   | 0.96   | 0.48   | 1.02    | -0.5904  | 0.0745   |
| 0      | 0.14   | 0      | 0.1 NA  | NA       |          |
| 5.56   | 5.62   | 4.48   | 4.96    | 0.091947 | 0.784872 |
| 16.27  | 14.33  | 17.41  | 16.3    | 0.0147   | 0.937483 |
| 0.09   | 0.08   | 0.05   | 0.06    | -0.17066 | 0.846993 |
| 0      | 0      | 0      | 0 NA    | NA       |          |
| 5.95   | 4.26   | 4.23   | 5.18    | -0.64628 | 0.000149 |
| 0.77   | 1.56   | 1.11   | 1.28    | 0.433659 | 0.145193 |
| 0      | 0      | 0      | 0 NA    | NA       |          |
| 0.31   | 9.01   | 5.2    | 5.43    | 3.620071 | 1.52E-17 |
| 7.48   | 5.16   | 5.46   | 6.54    | -0.36124 | 0.07838  |
| 0.01   | 0.01   | 0.01   | 0.01 NA | NA       |          |
| 0.1    | 0      | 0      | 0.02 NA | NA       |          |
| 11.55  | 10.41  | 10.35  | 9.43    | -0.23273 | 0.141124 |
| 0.47   | 0.05   | 0.05   | 0.02    | -0.51038 | 0.485103 |
| 0      | 0.01   | 0.04   | 0 NA    | NA       |          |
| 0      | 0      | 0      | 0 NA    | NA       |          |
| 0.19   | 0      | 0      | 0.09 NA | NA       |          |
| 0      | 0      | 0      | 0 NA    | NA       |          |
| 0      | 0      | 0.04   | 0 NA    | NA       |          |
| 0.21   | 0.68   | 0.46   | 0.64    | 1.044794 | 0.001163 |
| 0      | 0      | 0      | 0 NA    | NA       |          |
| 0      | 0      | 0      | 0 NA    | NA       |          |
| 0      | 0      | 0      | 0 NA    | NA       |          |
| 12.41  | 25.86  | 17.44  | 18.32   | 0.676704 | 2.49E-06 |
| 21.42  | 29.38  | 25.74  | 26.12   | 0.264717 | 0.058085 |
| 9.87   | 7.99   | 7.52   | 7.06    | -0.14723 | 0.561445 |
| 14.64  | 15.28  | 15.08  | 17.49   | 0.185473 | 0.084531 |
| 3.38   | 2.5    | 3.03   | 2.74    | -0.11933 | 0.650585 |
| 0      | 0      | 0      | 0 NA    | NA       |          |
| 0      | 0      | 0      | 0 NA    | NA       |          |
| 0      | 0      | 0      | 0 NA    | NA       |          |
| 26.71  | 48.25  | 43.37  | 44.32   | 0.583768 | 1.12E-11 |
| 0.16   | 0.38   | 0.4    | 0.41 NA | NA       |          |



|        |         |        |         |          |          |
|--------|---------|--------|---------|----------|----------|
| 0.05   | 0.03    | 0.06   | 0.1     | 0.400183 | 0.603823 |
| 12.06  | 17.26   | 15.92  | 16.08   | 0.439052 | 6.99E-06 |
| 0      | 0       | 0      | 0       | NA       | NA       |
| 3.48   | 2.07    | 2.53   | 2.51    | -0.69468 | 1.67E-05 |
| 0      | 0       | 0.06   | 0       | NA       | NA       |
| 17.17  | 3879.74 | 914.88 | 2168.01 | 5.302223 | 2.13E-33 |
| 3.56   | 0.3     | 0.91   | 0.58    | -2.52941 | 2.11E-12 |
| 0      | 0       | 0.01   | 0.04    | NA       | NA       |
| 3.37   | 18.83   | 8.23   | 13.84   | 1.811012 | 5.30E-08 |
| 17.61  | 24.57   | 31.31  | 32.54   | 0.842074 | 5.86E-12 |
| 0      | 0.14    | 0      | 0       | NA       | NA       |
| 7.05   | 10.36   | 8.39   | 8.97    | 0.408618 | 0.002622 |
| 0      | 0       | 0      | 0       | NA       | NA       |
| 0      | 0       | 0      | 0       | NA       | NA       |
| 0      | 0       | 0      | 0       | NA       | NA       |
| 0      | 0       | 0      | 0       | NA       | NA       |
| 23.46  | 23.9    | 27.96  | 21.39   | 0.146534 | 0.32397  |
| 0.16   | 0.03    | 0.08   | 0.05    | -0.62347 | 0.376661 |
| 15.59  | 7.85    | 8.86   | 12.15   | -0.45836 | 7.02E-06 |
| 146.81 | 151.65  | 144.92 | 146.51  | 0.052423 | 0.606835 |
| 0      | 0       | 0      | 0       | NA       | NA       |
| 0      | 0       | 0      | 0       | NA       | NA       |
| 0      | 0       | 0      | 0       | NA       | NA       |
| 5.94   | 3.82    | 4.61   | 4.09    | -0.59593 | 7.51E-05 |
| 2.59   | 2.56    | 2.25   | 2.66    | -0.16631 | 0.45643  |
| 0.03   | 0.07    | 0      | 0.05    | NA       | NA       |
| 0      | 0       | 0      | 0       | NA       | NA       |
| 0      | 0       | 0      | 0       | NA       | NA       |
| 20.25  | 36.73   | 29.06  | 33.66   | 0.651401 | 1.12E-09 |
| 0      | 0       | 0      | 0       | NA       | NA       |
| 82.77  | 101.56  | 104.26 | 104.43  | 0.285316 | 0.000232 |
| 90.71  | 78.64   | 99.29  | 75.94   | -0.22701 | 0.062061 |
| 1.25   | 1.5     | 1.24   | 1.36    | 0.098212 | 0.821404 |
| 0      | 0       | 0      | 0       | NA       | NA       |
| 7.78   | 1.63    | 4.17   | 2.54    | -1.21498 | 4.16E-05 |
| 21.23  | 23.32   | 21.38  | 23.37   | -0.14361 | 0.33825  |
| 5.21   | 5.85    | 7.47   | 7.61    | 0.472964 | 0.001571 |
| 2.68   | 3.4     | 2.42   | 2.65    | 0.184047 | 0.49698  |
| 20.24  | 15.88   | 15.84  | 17.64   | -0.27955 | 0.109529 |
| 46.09  | 111.81  | 82.25  | 95.23   | 1.113487 | 5.65E-27 |
| 0      | 0       | 0      | 0.07    | NA       | NA       |
| 0.08   | 0.24    | 0.18   | 0.37    | 0.39514  | 0.550111 |
| 11.06  | 14.12   | 15.67  | 14.02   | -0.17401 | 0.303684 |
| 4.95   | 7.29    | 7.87   | 7.26    | 0.401825 | 0.037445 |
| 0      | 0       | 0      | 0       | NA       | NA       |

|       |       |       |       |          |          |
|-------|-------|-------|-------|----------|----------|
| 1.33  | 1.18  | 1.5   | 1.21  | 0.005723 | 0.989838 |
| 19.85 | 36.6  | 32.64 | 28.37 | 0.491355 | 0.027902 |
| 7.34  | 2.65  | 3.43  | 3.71  | -1.21744 | 1.32E-18 |
| 0.97  | 1.08  | 1.09  | 1.16  | 0.081384 | 0.789073 |
| 12.02 | 11.03 | 11.83 | 11.86 | -0.0183  | 0.894838 |
| 7.16  | 5.34  | 6.52  | 7.19  | -0.22564 | 0.326837 |
| 0     | 0     | 0     | 0     | NA       | NA       |
| 1.7   | 1.77  | 1.59  | 1.72  | 0.087376 | 0.844731 |
| 0     | 0     | 0     | 0     | NA       | NA       |
| 0.15  | 0.11  | 0.22  | 0.36  | 0.04067  | 0.962062 |
| 41.8  | 37.81 | 37.74 | 39.34 | -0.20416 | 0.028947 |
| 4.92  | 4.73  | 4.84  | 5.96  | -0.05681 | 0.845295 |
| 0.07  | 0.24  | 0.15  | 0.65  | 1.044112 | 0.10171  |
| 0     | 0     | 0     | 0     | NA       | NA       |
| 19.63 | 25.67 | 22.08 | 24.01 | 0.255902 | 0.154152 |
| 26.92 | 25.97 | 27.3  | 27.2  | -0.06697 | 0.680958 |
| 9.22  | 13.4  | 10.93 | 11.69 | 0.197105 | 0.289947 |
| 0     | 0     | 0     | 0     | NA       | NA       |
| 24.71 | 49.82 | 59.13 | 58.81 | 1.178286 | 3.42E-46 |
| 95.62 | 92.91 | 95.63 | 91.93 | -0.03842 | 0.747061 |
| 24.65 | 29.83 | 20.61 | 23.54 | -0.12059 | 0.626917 |
| 0     | 0     | 0     | 0     | NA       | NA       |
| 20.98 | 18.18 | 22.13 | 17.35 | 0.013396 | 0.948772 |
| 36.71 | 37.69 | 34.91 | 36.33 | 0.049767 | 0.721724 |
| 21.66 | 20.83 | 21.2  | 19.25 | -0.11893 | 0.405126 |
| 27.62 | 16.26 | 17.86 | 18.17 | -0.66255 | 1.08E-05 |
| 24.34 | 20.36 | 19.47 | 21.56 | -0.22405 | 0.133472 |
| 4.7   | 1.1   | 1.36  | 0.78  | -1.72017 | 1.77E-08 |
| 2.52  | 1.81  | 2.44  | 1.06  | -0.54254 | 0.211247 |
| 0     | 0     | 0     | 0     | NA       | NA       |
| 38.19 | 47.64 | 44.13 | 49.22 | 0.330524 | 0.000121 |
| 0     | 0.05  | 0.03  | 0     | NA       | NA       |
| 0.29  | 0.04  | 0.16  | 0.19  | -1.27982 | 0.014814 |
| 8.46  | 11.03 | 8.74  | 11.53 | 0.173133 | 0.38982  |
| 0     | 0     | 0     | 0     | NA       | NA       |
| 61.59 | 79.85 | 74.69 | 78.67 | 0.234179 | 0.011176 |
| 0     | 0     | 0     | 0     | NA       | NA       |
| 0     | 0.15  | 0.07  | 0.02  | NA       | NA       |
| 0     | 0     | 0     | 0     | NA       | NA       |
| 0     | 0     | 0     | 0     | NA       | NA       |
| 0     | 0     | 0     | 0     | NA       | NA       |
| 0     | 0     | 0     | 0     | NA       | NA       |
| 88.06 | 70.15 | 81.73 | 75.53 | -0.28496 | 0.002465 |
| 11.27 | 12.88 | 13.33 | 13.9  | 0.113435 | 0.511956 |
| 13.18 | 26.68 | 18.17 | 21.95 | 0.705219 | 6.66E-08 |

|       |       |        |                 |          |
|-------|-------|--------|-----------------|----------|
| 0     | 0     | 0      | 0 NA            | NA       |
| 0     | 0     | 0      | 0 NA            | NA       |
| 0     | 0     | 0      | 0 NA            | NA       |
| 1.01  | 2.2   | 2.28   | 2.71 1.788601   | 5.58E-19 |
| 20.14 | 33.71 | 46.63  | 40.54 0.811281  | 6.80E-22 |
| 0     | 0     | 0      | 0 NA            | NA       |
| 19.76 | 14.88 | 15.84  | 14.39 -0.4105   | 0.000708 |
| 0.02  | 0.09  | 0.05   | 0.11 1.183845   | 0.051975 |
| 0     | 0     | 0      | 0 NA            | NA       |
| 10.43 | 12.52 | 12.14  | 15.31 0.211491  | 0.033436 |
| 0     | 0     | 0      | 0 NA            | NA       |
| 0     | 0     | 0      | 0 NA            | NA       |
| 0.33  | 0.19  | 0.2    | 0.11 -0.32986   | 0.657704 |
| 0.99  | 0.42  | 0.46   | 0.52 0.336454   | 0.64611  |
| 0.6   | 0.22  | 0.14   | 0.19 -0.12051   | 0.871001 |
| 0.03  | 0     | 0      | 0 NA            | NA       |
| 9.42  | 8.14  | 8.9    | 8.42 0.158598   | 0.265507 |
| 0     | 0     | 0.54   | 0.23 NA         | NA       |
| 0     | 0     | 0      | 0 NA            | NA       |
| 80.48 | 40.25 | 46.87  | 44.24 -0.92117  | 3.44E-22 |
| 0     | 0.02  | 0      | 0 NA            | NA       |
| 11.54 | 12.66 | 10.34  | 12.63 0.055812  | 0.702492 |
| 0     | 0     | 0      | 0 NA            | NA       |
| 83.13 | 301.3 | 229.78 | 265.85 1.631823 | 1.37E-49 |
| 1.74  | 1.3   | 1.27   | 1.73 -0.00979   | 0.975618 |
| 0.2   | 0.06  | 0.18   | 0.35 0.2772     | 0.702822 |
| 27.57 | 31.8  | 29.58  | 28.44 0.164176  | 0.155466 |
| 8.1   | 10    | 7.63   | 9.3 0.05675     | 0.720745 |
| 13.51 | 29.75 | 23.37  | 27.92 0.902347  | 8.83E-19 |
| 3.53  | 0.31  | 0.64   | 0.67 -2.54949   | 2.55E-11 |
| 13.01 | 5.61  | 5.87   | 5.62 -1.08101   | 7.95E-18 |
| 3.05  | 4.38  | 4.22   | 3.24 0.133364   | 0.597269 |
| 0.02  | 0.15  | 0.03   | 0.04 NA         | NA       |
| 4.6   | 4.48  | 3.14   | 4.78 0.233953   | 0.308239 |
| 13.61 | 13.76 | 13.32  | 14.52 0.005582  | 0.978047 |
| 0.02  | 0     | 0.04   | 0.04 NA         | NA       |
| 16.26 | 12.61 | 12.54  | 14.3 -0.36304   | 0.016861 |
| 9.23  | 15.73 | 13.29  | 16.17 0.613832  | 1.05E-09 |
| 13.58 | 12.71 | 11.45  | 10.85 -0.13899  | 0.515531 |
| 75.28 | 93.05 | 82.88  | 86.18 0.154279  | 0.210945 |
| 1.85  | 3.16  | 2.21   | 2.64 0.291403   | 0.301606 |
| 0.03  | 0.04  | 0.04   | 0.04 NA         | NA       |
| 2.09  | 5.94  | 4.57   | 5.64 0.967841   | 8.74E-14 |
| 24.02 | 17.44 | 18.74  | 19.94 -0.16314  | 0.100171 |
| 0.18  | 0.03  | 0.05   | 0 NA            | NA       |

|       |       |       |       |          |          |
|-------|-------|-------|-------|----------|----------|
| 58.83 | 31.28 | 38.99 | 40.28 | -0.65693 | 2.77E-15 |
| 1.92  | 5.62  | 2.02  | 4.46  | 0.95471  | 2.44E-07 |
| 0.21  | 0.96  | 0.45  | 0.76  | 1.934427 | 2.68E-07 |
| 56.8  | 33.45 | 42.91 | 41.13 | -0.47991 | 4.87E-06 |
| 54.05 | 63.65 | 65.87 | 61.94 | 0.158138 | 0.062685 |
| 72.59 | 66.53 | 72.09 | 64.73 | -0.17928 | 0.126355 |
| 13.79 | 12.13 | 12.61 | 12.72 | -0.11725 | 0.495779 |
| 85.53 | 69.76 | 71.36 | 70.05 | -0.44491 | 7.35E-06 |
| 0.03  | 0     | 0     | 0.03  | NA       | NA       |
| 0.29  | 0.25  | 0.19  | 0.26  | -0.06789 | 0.941708 |
| 0     | 0.63  | 0.13  | 0.2   | 1.78347  | 0.001928 |
| 0.01  | 0     | 0     | 0     | NA       | NA       |
| 0.02  | 0.34  | 0.22  | 0.34  | 2.846896 | 1.82E-09 |
| 4.44  | 5.39  | 4.8   | 4.64  | -0.06786 | 0.783544 |
| 11.9  | 9.31  | 9.7   | 8.59  | -0.38711 | 0.001379 |
| 4.83  | 9.94  | 8.99  | 7.29  | 0.307657 | 0.197407 |
| 0     | 0     | 0     | 0     | NA       | NA       |
| 0.04  | 0     | 0     | 0     | NA       | NA       |
| 0     | 0     | 0     | 0     | NA       | NA       |
| 2.11  | 1.93  | 1.7   | 2.39  | -0.09157 | 0.719768 |
| 4.31  | 5.67  | 5.21  | 5.81  | 0.422354 | 0.003472 |
| 0     | 0.19  | 0.41  | 0.15  | 1.030454 | 0.106295 |
| 0     | 0     | 0     | 0     | NA       | NA       |
| 54.82 | 52.14 | 50.3  | 47.15 | -0.12896 | 0.273982 |
| 56.51 | 71.2  | 70.1  | 66.9  | 0.192753 | 0.036144 |
| 7.42  | 9.68  | 9.07  | 9.71  | 0.202293 | 0.069231 |
| 0     | 0     | 0     | 0     | NA       | NA       |
| 0.14  | 0.09  | 0.19  | 0.22  | -0.03149 | 0.968828 |
| 3.34  | 2.41  | 2.76  | 3     | -0.14078 | 0.430239 |
| 0.96  | 1.2   | 0.73  | 0.81  | -0.03767 | 0.949004 |
| 0     | 0     | 0     | 0     | NA       | NA       |
| 0.04  | 0     | 0     | 0     | NA       | NA       |
| 0     | 0     | 0.03  | 0     | NA       | NA       |
| 5.8   | 3.87  | 4.76  | 3.68  | -0.44548 | 0.070643 |
| 0     | 0     | 0     | 0     | NA       | NA       |
| 0     | 0     | 0     | 0.04  | NA       | NA       |
| 5.12  | 5.43  | 5.13  | 5.27  | 0.149197 | 0.360406 |
| 3.54  | 3     | 3.69  | 3.65  | -0.42454 | 0.08638  |
| 2.54  | 2.15  | 2.55  | 2.31  | -0.07225 | 0.788023 |
| 0     | 0.22  | 0.12  | 0.25  | 1.553714 | 0.008727 |
| 0.34  | 0.22  | 0.05  | 0.09  | -0.26344 | 0.750639 |
| 5.9   | 4.11  | 4.57  | 5.21  | -0.14512 | 0.675953 |
| 0     | 0.16  | 0.14  | 0     | NA       | NA       |
| 6.11  | 6.46  | 6.32  | 7.26  | 0.185669 | 0.280328 |
| 0.15  | 0.21  | 0     | 0.09  | NA       | NA       |

|        |        |        |        |          |          |
|--------|--------|--------|--------|----------|----------|
| 20.31  | 18.76  | 20.29  | 19.17  | -0.09345 | 0.418077 |
| 120.34 | 103.27 | 113.57 | 107.5  | -0.08883 | 0.432449 |
| 0      | 0      | 0      | 0      | NA       | NA       |
| 3.45   | 4.08   | 4.74   | 4.32   | 0.191062 | 0.358058 |
| 0.17   | 0      | 0.14   | 0      | NA       | NA       |
| 2.5    | 1.69   | 1.98   | 1.54   | -0.43203 | 0.08555  |
| 10.58  | 8.85   | 8.43   | 8.12   | -0.20388 | 0.115611 |
| 65.25  | 57.74  | 66.86  | 64.41  | -0.14272 | 0.165297 |
| 3.95   | 4.12   | 3.41   | 4.1    | 0.314298 | 0.372075 |
| 34.01  | 25.89  | 30.91  | 26.55  | -0.52837 | 6.41E-08 |
| 259.68 | 196.03 | 219.83 | 193.27 | -0.12278 | 0.178587 |
| 3.78   | 1.37   | 1.95   | 0.73   | -1.044   | 0.004335 |
| 0      | 0      | 0      | 0      | NA       | NA       |
| 0      | 0      | 0      | 0      | NA       | NA       |
| 0      | 0      | 0.14   | 0      | NA       | NA       |
| 15.05  | 16.09  | 17.61  | 16.87  | -0.04454 | 0.821682 |
| 0.83   | 0.39   | 0.44   | 0.32   | -0.64703 | 0.28806  |
| 599.85 | 494.93 | 518.65 | 496.35 | -0.32202 | 1.64E-05 |
| 0      | 0      | 0      | 0      | NA       | NA       |
| 36.07  | 21.83  | 27.1   | 20.86  | -0.75794 | 1.18E-07 |
| 0.44   | 0.15   | 0.24   | 0.26   | -0.54358 | 0.405702 |
| 474.9  | 844    | 730.89 | 779.4  | 0.580547 | 1.76E-11 |
| 7.35   | 6.71   | 6.28   | 7.35   | -0.13154 | 0.380017 |
| 0      | 0      | 0      | 0      | NA       | NA       |
| 0.15   | 0      | 0      | 0      | NA       | NA       |
| 2.66   | 2.71   | 2.38   | 3.81   | -0.0085  | 0.976227 |
| 4.62   | 10.39  | 6.59   | 7.05   | 0.88663  | 8.62E-06 |
| 2.81   | 4.29   | 3.65   | 4.53   | 0.690286 | 0.004103 |
| 242.7  | 298.98 | 256.53 | 283.46 | 0.24323  | 0.004859 |
| 0.54   | 0.18   | 0.23   | 0.31   | -1.5047  | 0.005708 |
| 6.66   | 2.55   | 3.47   | 2.53   | -0.88672 | 3.15E-05 |
| 16.91  | 12.02  | 12.63  | 11.24  | -0.52871 | 7.26E-06 |
| 0      | 0      | 0      | 0      | NA       | NA       |
| 0.87   | 4.41   | 2.03   | 2.91   | 1.861359 | 4.70E-05 |
| 0      | 0      | 0      | 0.04   | NA       | NA       |
| 23.23  | 27.11  | 21.09  | 22.1   | -0.15045 | 0.484857 |
| 0      | 0      | 0      | 0      | NA       | NA       |
| 1.86   | 1.46   | 2.24   | 2.01   | 0.202027 | 0.483782 |
| 0.08   | 0.02   | 0.05   | 0.02   | -0.05747 | 0.950664 |
| 0      | 0      | 0      | 0      | NA       | NA       |
| 8.69   | 7.14   | 7.78   | 7.55   | 0.000496 | 0.998167 |
| 1.36   | 0.79   | 1.12   | 0.96   | -0.60851 | 0.023533 |
| 0.38   | 0.56   | 0.58   | 0.42   | 0.538854 | 0.207215 |
| 0      | 0      | 0      | 0      | NA       | NA       |
| 9.02   | 13.93  | 11.55  | 12.56  | 0.703419 | 9.27E-05 |

|       |        |        |        |          |          |
|-------|--------|--------|--------|----------|----------|
| 4.63  | 5.82   | 4.97   | 5.46   | -0.25087 | 0.451091 |
| 0     | 0      | 0      | 0      | NA       | NA       |
| 26.13 | 16.56  | 17.46  | 15.43  | -0.88249 | 1.07E-13 |
| 0     | 0      | 0.13   | 0      | NA       | NA       |
| 29.51 | 30.13  | 33.25  | 30.78  | 0.101708 | 0.4566   |
| 0.04  | 0      | 0      | 0      | NA       | NA       |
| 12.45 | 6.22   | 8.13   | 6.58   | -0.83257 | 4.58E-08 |
| 0.36  | 0.39   | 0.82   | 0.65   | -0.70801 | 0.188414 |
| 0.06  | 0.29   | 0.21   | 0.24   | 0.98895  | 0.118674 |
| 22.35 | 28.5   | 26.06  | 28.83  | 0.17662  | 0.163895 |
| 2.54  | 3.52   | 3.57   | 3.68   | 0.632841 | 0.000728 |
| 0     | 0      | 0      | 0      | NA       | NA       |
| 4.66  | 4.33   | 4.19   | 4.5    | -0.11294 | 0.486604 |
| 3.2   | 2.89   | 6.25   | 7.68   | 0.521126 | 0.077355 |
| 7.73  | 9.36   | 8.17   | 5.18   | -0.13999 | 0.460647 |
| 0     | 0      | 0      | 0      | NA       | NA       |
| 4.58  | 5.47   | 5.04   | 5.31   | 0.055092 | 0.823938 |
| 2.07  | 1.77   | 1.49   | 1.28   | -0.33371 | 0.576805 |
| 14.2  | 14.39  | 14.57  | 14.32  | 0.030389 | 0.81911  |
| 13.92 | 15.55  | 17.11  | 13.41  | 0.082296 | 0.720842 |
| 0     | 0      | 0      | 0      | NA       | NA       |
| 0     | 0      | 0      | 0      | NA       | NA       |
| 0     | 0      | 0      | 0.02   | NA       | NA       |
| 0     | 0      | 0      | 0      | NA       | NA       |
| 10.81 | 26.87  | 21.19  | 24.91  | 1.203428 | 2.42E-22 |
| 0     | 0      | 0      | 0      | NA       | NA       |
| 0     | 0      | 0      | 0      | NA       | NA       |
| 0.19  | 1.16   | 0.67   | 0.65   | 1.340721 | 2.40E-07 |
| 17.73 | 19.57  | 17.75  | 18.18  | -0.00653 | 0.975981 |
| 0.21  | 0.03   | 0.12   | 0.09   | -0.66492 | 0.340683 |
| 39.19 | 40.66  | 45.33  | 40.1   | 0.150388 | 0.192886 |
| 0     | 0      | 0.11   | 0      | NA       | NA       |
| 1.78  | 4.36   | 2.17   | 2.24   | 0.350957 | 0.143111 |
| 0     | 0      | 0      | 0      | NA       | NA       |
| 16.8  | 26.32  | 34.1   | 34.95  | 0.80461  | 7.30E-20 |
| 0.47  | 0.7    | 0.45   | 0.31   | 0.857222 | 0.076839 |
| 24.06 | 33.49  | 33.04  | 33.08  | 0.357531 | 0.000344 |
| 2.57  | 0.59   | 1.17   | 0.84   | -1.41525 | 2.50E-09 |
| 5.16  | 4.97   | 3.97   | 4.02   | -0.19618 | 0.51958  |
| 0     | 0      | 0      | 0      | NA       | NA       |
| 58.66 | 203.85 | 173.12 | 193.41 | 1.616485 | 7.19E-68 |
| 0     | 0.06   | 0.04   | 0      | NA       | NA       |
| 5.75  | 3.69   | 4.81   | 4.42   | -0.36302 | 0.036277 |
| 3.65  | 1.19   | 1.65   | 1.63   | -1.30573 | 3.40E-09 |
| 0.06  | 0.72   | 0.72   | 0.78   | 2.355143 | 5.59E-08 |

|        |       |       |       |          |          |
|--------|-------|-------|-------|----------|----------|
| 129.27 | 74.8  | 83.24 | 86.34 | -0.74601 | 5.81E-21 |
| 9.05   | 9.88  | 9.5   | 11.27 | 0.108027 | 0.65345  |
| 0      | 0     | 0     | 0     | NA       | NA       |
| 9.68   | 11.71 | 12    | 11.42 | 0.274607 | 0.073863 |
| 0      | 0     | 0     | 0     | NA       | NA       |
| 39.6   | 49.64 | 49.31 | 48.81 | 0.229975 | 0.00858  |
| 0      | 0     | 0     | 0.08  | NA       | NA       |
| 0      | 0     | 0     | 0     | NA       | NA       |
| 0.05   | 0     | 0     | 0     | NA       | NA       |
| 13.17  | 17.44 | 15.5  | 16.15 | 0.189454 | 0.246854 |
| 2.83   | 1.05  | 1.83  | 1.27  | -0.84715 | 7.94E-05 |
| 0      | 0     | 0     | 0     | NA       | NA       |
| 2.61   | 1.32  | 2.7   | 1.52  | -0.45193 | 0.128454 |
| 3.63   | 2.89  | 3.36  | 3.23  | -0.21787 | 0.370764 |
| 19.73  | 19.23 | 18.12 | 17.56 | -0.13217 | 0.315263 |
| 10.52  | 10.39 | 12.63 | 12.5  | 0.088931 | 0.629904 |
| 7.17   | 7.92  | 8.57  | 7.94  | 0.313884 | 0.254297 |
| 9.03   | 11.98 | 10.47 | 10.39 | 0.009168 | 0.969266 |
| 1.44   | 3.08  | 2.72  | 2.74  | 0.860392 | 0.000856 |
| 11.57  | 11.34 | 11.91 | 11.3  | -0.29671 | 0.00472  |
| 8.59   | 14.68 | 8.53  | 12.1  | 0.475184 | 0.014809 |
| 5.19   | 10.17 | 8.92  | 9.62  | 0.801106 | 3.03E-09 |
| 0.54   | 0.57  | 0.45  | 0.55  | -0.25168 | 0.624592 |
| 0      | 0     | 0     | 0     | NA       | NA       |
| 0      | 0.25  | 0.57  | 0.41  | 0.277528 | 0.726115 |
| 0      | 0     | 0     | 0     | NA       | NA       |
| 0      | 0     | 0     | 0     | NA       | NA       |
| 0      | 0     | 0     | 0     | NA       | NA       |
| 10.97  | 6.32  | 9.4   | 9.23  | -0.57288 | 0.000334 |
| 0      | 0.02  | 0     | 0     | NA       | NA       |
| 0      | 0.14  | 0.04  | 0.02  | NA       | NA       |
| 0      | 0     | 0     | 0     | NA       | NA       |
| 20.86  | 39.72 | 31.78 | 31.89 | 0.571742 | 1.70E-07 |
| 0.08   | 0.05  | 0.09  | 0.11  | 0.066594 | 0.944939 |
| 16.45  | 20.07 | 17.14 | 18.69 | 0.431519 | 5.26E-07 |
| 0      | 0     | 0     | 0     | NA       | NA       |
| 3.6    | 4     | 3.84  | 3.34  | -0.1844  | 0.446884 |
| 0      | 0     | 0     | 0     | NA       | NA       |
| 0      | 0     | 0     | 0     | NA       | NA       |
| 0.1    | 0     | 0     | 0     | NA       | NA       |
| 0      | 0     | 0     | 0     | NA       | NA       |
| 12.44  | 12.81 | 11.13 | 9.81  | -0.19246 | 0.365605 |
| 5.11   | 9.97  | 10.2  | 11.16 | 0.659453 | 1.31E-05 |
| 3.69   | 5.68  | 5.42  | 4.92  | 0.559091 | 0.001254 |
| 0      | 0.02  | 0     | 0.02  | NA       | NA       |

|        |        |        |        |          |          |
|--------|--------|--------|--------|----------|----------|
| 0      | 0      | 0      | 0      | NA       | NA       |
| 0      | 0      | 0      | 0      | NA       | NA       |
| 0.06   | 0.04   | 0      | 0      | NA       | NA       |
| 19.92  | 14.63  | 17.57  | 15.73  | -0.30529 | 0.001402 |
| 0.16   | 0.37   | 0.46   | 0.17   | -0.00341 | 0.996867 |
| 10.24  | 4.94   | 7.69   | 6.93   | -0.63931 | 3.82E-06 |
| 0      | 0      | 0      | 0      | NA       | NA       |
| 4.94   | 5.17   | 4.95   | 4.6    | -0.07931 | 0.767408 |
| 0      | 0      | 0      | 0      | NA       | NA       |
| 10.12  | 14.04  | 12.4   | 13.73  | 0.344169 | 0.001945 |
| 5.87   | 6.64   | 6.74   | 6      | -0.02388 | 0.924606 |
| 27.48  | 23.26  | 29.59  | 27.09  | -0.01576 | 0.944533 |
| 0      | 0      | 0      | 0      | NA       | NA       |
| 4.01   | 4.04   | 3.91   | 3.87   | -0.20645 | 0.23488  |
| 8.34   | 8.19   | 9.14   | 8.85   | 0.066521 | 0.652171 |
| 31.62  | 48.32  | 49.91  | 55.16  | 0.685782 | 2.44E-13 |
| 38.15  | 35.03  | 35.17  | 37.67  | -0.15304 | 0.099347 |
| 14.17  | 15.15  | 16.24  | 14.11  | 0.129195 | 0.349311 |
| 902.47 | 774.31 | 743.39 | 676.36 | -0.2979  | 0.000171 |
| 0      | 0      | 0      | 0      | NA       | NA       |
| 0      | 0.11   | 0.31   | 0.05   | NA       | NA       |
| 39.05  | 36.57  | 39.8   | 36.25  | -0.19494 | 0.096902 |
| 0      | 0      | 0      | 0      | NA       | NA       |
| 11.69  | 9.66   | 9.68   | 10.77  | -0.34537 | 0.037453 |
| 5.93   | 8.93   | 7.44   | 6.84   | 0.154281 | 0.3759   |
| 64.38  | 65.63  | 58.2   | 59.45  | -0.1662  | 0.371025 |
| 1.08   | 2.16   | 2.07   | 2.21   | 0.688309 | 0.063334 |
| 2.26   | 1.89   | 2      | 2.66   | -0.05894 | 0.833498 |
| 1.29   | 2.1    | 3.27   | 1.69   | 0.309471 | 0.40711  |
| 21.28  | 15.87  | 19.94  | 20.1   | -0.10922 | 0.516817 |
| 0      | 0      | 0      | 0      | NA       | NA       |
| 5.69   | 2.95   | 4.99   | 4.69   | -0.22922 | 0.082863 |
| 0      | 0      | 0      | 0      | NA       | NA       |
| 0      | 0      | 0      | 0      | NA       | NA       |
| 0      | 0      | 0      | 0      | NA       | NA       |
| 0      | 0      | 0      | 0      | NA       | NA       |
| 0      | 0      | 0      | 0      | NA       | NA       |
| 5.6    | 6.85   | 5.57   | 6.84   | 0.219471 | 0.31881  |
| 0      | 0      | 0      | 0      | NA       | NA       |
| 11.65  | 8.62   | 10.57  | 11.96  | -0.05849 | 0.735077 |
| 0      | 0      | 0      | 0      | NA       | NA       |
| 0      | 0      | 0      | 0      | NA       | NA       |
| 0.87   | 0.75   | 1.18   | 0.46   | -0.18862 | 0.741372 |
| 163.11 | 210.83 | 170.93 | 170.29 | 0.135203 | NA       |
| 0      | 0      | 0      | 0      | NA       | NA       |



|       |       |       |       |          |          |
|-------|-------|-------|-------|----------|----------|
| 0.02  | 0.1   | 0.05  | 0.08  | NA       | NA       |
| 0.51  | 5.83  | 7.14  | 6.71  | 2.786166 | 3.25E-41 |
| 7.47  | 1.53  | 3.8   | 2.05  | -1.70724 | 9.70E-18 |
| 0.12  | 0     | 0.17  | 0     | NA       | NA       |
| 0.02  | 0     | 0     | 0     | NA       | NA       |
| 0     | 0     | 0     | 0     | NA       | NA       |
| 11.93 | 14.68 | 13.98 | 15.07 | 0.189834 | 0.13537  |
| 0     | 0.08  | 0.1   | 0.08  | 1.119729 | 0.052606 |
| 0     | 0     | 0     | 0     | NA       | NA       |
| 2.36  | 2.65  | 2.89  | 3.53  | 0.078419 | 0.741923 |
| 3.73  | 2.96  | 3.1   | 3.68  | 0.080291 | 0.752257 |
| 16.36 | 12.49 | 16.7  | 14.44 | -0.23051 | 0.065565 |
| 0.79  | 1.03  | 0.85  | 1.07  | 0.2577   | 0.666949 |
| 5.81  | 5.56  | 5.09  | 6.12  | -0.38303 | 0.069706 |
| 0     | 0.03  | 0     | 0     | NA       | NA       |
| 0.32  | 0.08  | 0.07  | 0.16  | NA       | NA       |
| 0     | 0     | 0     | 0     | NA       | NA       |
| 0     | 0     | 0     | 0     | NA       | NA       |
| 29.68 | 21.33 | 21.19 | 22.77 | -0.23935 | 0.060021 |
| 0.03  | 0     | 0.03  | 0.02  | NA       | NA       |
| 0     | 0     | 0     | 0     | NA       | NA       |
| 23.74 | 31.92 | 28.84 | 32.9  | 0.374795 | 0.00035  |
| 1.5   | 1.16  | 1.47  | 1.35  | -0.22605 | 0.594664 |
| 0     | 0.02  | 0     | 0     | NA       | NA       |
| 2.56  | 3.08  | 3.43  | 2.8   | 0.175528 | 0.606159 |
| 3.32  | 4.35  | 4.36  | 4.75  | 0.442365 | 0.016848 |
| 0.39  | 0.04  | 0     | 0     | NA       | NA       |
| 0     | 0     | 0     | 0     | NA       | NA       |
| 3.72  | 3.65  | 4.91  | 3.57  | 0.011955 | 0.973543 |
| 4.46  | 4.99  | 4.88  | 5.98  | 0.217844 | 0.082203 |
| 15.33 | 13.31 | 14.26 | 11.23 | -0.02042 | 0.895604 |
| 0     | 0.04  | 0.02  | 0.02  | NA       | NA       |
| 0.63  | 0.66  | 0.36  | 0.38  | -0.15603 | 0.821283 |
| 0     | 0     | 0     | 0.1   | NA       | NA       |
| 0.45  | 0.26  | 0.55  | 0.51  | -0.3887  | 0.439869 |
| 0     | 0     | 0     | 0     | NA       | NA       |
| 0     | 0.01  | 0     | 0     | NA       | NA       |
| 11.04 | 8.44  | 7.33  | 6.41  | -0.70617 | 3.07E-06 |
| 3.53  | 3.13  | 2.67  | 3.09  | -0.27486 | 0.109277 |
| 0     | 0     | 0.05  | 0     | NA       | NA       |
| 13.98 | 18.76 | 16.91 | 19.28 | 0.241232 | 0.084188 |
| 0     | 0     | 0     | 0     | NA       | NA       |
| 36.34 | 39.89 | 43.16 | 38.8  | 0.073992 | 0.528371 |
| 25.39 | 12.25 | 14.34 | 12.31 | -0.98372 | 1.77E-24 |
| 13.89 | 25.58 | 25.31 | 22.7  | 0.699554 | 2.91E-08 |

|        |        |        |        |          |          |
|--------|--------|--------|--------|----------|----------|
| 54.53  | 70.17  | 63.65  | 66.48  | 0.167422 | 0.217165 |
| 7.01   | 8.21   | 6.33   | 5.67   | -0.26331 | 0.151521 |
| 6.26   | 11.13  | 9.7    | 11.48  | 0.598596 | 1.29E-06 |
| 12.34  | 11.26  | 11.34  | 11.46  | -0.2563  | 0.154853 |
| 4.8    | 5.56   | 3.97   | 4.63   | -0.12971 | 0.589862 |
| 0.62   | 0.62   | 0.63   | 0.93   | -0.09301 | 0.878994 |
| 0      | 0      | 0      | 0      | NA       | NA       |
| 0      | 0.03   | 0      | 0      | NA       | NA       |
| 0      | 0      | 0      | 0      | NA       | NA       |
| 0      | 0      | 0      | 0      | NA       | NA       |
| 0      | 0      | 0      | 0      | NA       | NA       |
| 12.94  | 12.64  | 13.41  | 14.66  | 0.074735 | 0.79555  |
| 30.57  | 21.08  | 24.1   | 20.26  | -0.31653 | 0.046088 |
| 54.54  | 83.03  | 75.77  | 81.02  | 0.454874 | 1.63E-08 |
| 0.73   | 3.88   | 3.47   | 2.75   | 1.108284 | 5.03E-07 |
| 0      | 0      | 0      | 0      | NA       | NA       |
| 0      | 0      | 0      | 0      | NA       | NA       |
| 0.69   | 0.07   | 0.08   | 0.05   | 0.539532 | 0.456847 |
| 31.65  | 40.76  | 33.32  | 32.77  | 0.182617 | 0.233531 |
| 37.93  | 78.9   | 64.07  | 76.56  | 0.829351 | 1.99E-16 |
| 0.47   | 0.28   | 0.14   | 0.26   | -0.75832 | 0.255372 |
| 0.19   | 0      | 0.03   | 0.03   | NA       | NA       |
| 0      | 0      | 0      | 0      | NA       | NA       |
| 0.15   | 0.02   | 0.01   | 0.03   | NA       | NA       |
| 1.82   | 0.67   | 0.14   | 0.21   | -0.88259 | 0.101523 |
| 0      | 0      | 0      | 0      | NA       | NA       |
| 0.61   | 3.13   | 1.95   | 1.49   | 2.743726 | 8.00E-21 |
| 4.77   | 6.22   | 7.07   | 7.84   | 0.143758 | 0.365559 |
| 1.31   | 0.62   | 0.98   | 0.81   | -0.29738 | 0.515404 |
| 2.17   | 2.43   | 1.46   | 1.85   | -0.01194 | 0.975638 |
| 65.87  | 57.06  | 56.86  | 58.6   | -0.21409 | 0.008364 |
| 26.66  | 34.88  | 32.22  | 34.61  | 0.379219 | 1.08E-05 |
| 0.02   | 0.15   | 0.02   | 0.05   | 0.138221 | 0.877295 |
| 22.73  | 28.78  | 26.41  | 28.02  | 0.12428  | 0.341614 |
| 11.09  | 16.09  | 13.94  | 14.85  | 0.292126 | 0.002067 |
| 16.99  | 19.71  | 16.69  | 14.63  | -0.17302 | 0.416799 |
| 281.25 | 299.94 | 335.74 | 329.28 | 0.080967 | 0.458912 |
| 0.83   | 0.55   | 0.96   | 1.58   | 0.989867 | 7.16E-05 |
| 0.02   | 0.02   | 0.16   | 0.12   | 0.739583 | 0.280974 |
| 2.94   | 0.99   | 0.8    | 1.22   | -1.57266 | 4.25E-07 |
| 0.23   | 0.6    | 0.73   | 0.46   | 0.897558 | 0.118772 |
| 1.85   | 2.05   | 1.57   | 0.96   | -0.17914 | 0.695627 |
| 0.08   | 0      | 0      | 0      | NA       | NA       |
| 2.94   | 5.68   | 4.02   | 4.13   | 0.525698 | 9.19E-05 |
| 0.1    | 0.07   | 0.02   | 0.07   | -0.21212 | 0.800219 |

|       |       |       |       |           |          |
|-------|-------|-------|-------|-----------|----------|
| 0.88  | 0.13  | 0.24  | 0.22  | -1.99199  | 6.20E-13 |
| 6.13  | 3.82  | 7.2   | 5.51  | -0.333333 | 0.145034 |
| 0     | 0     | 0     | 0     | NA        | NA       |
| 0     | 0     | 0     | 0     | NA        | NA       |
| 0     | 0     | 0     | 0     | NA        | NA       |
| 0     | 0     | 0     | 0     | NA        | NA       |
| 0     | 0     | 0     | 0     | NA        | NA       |
| 7.18  | 11.57 | 9.19  | 10.14 | 0.383519  | 0.001336 |
| 24.29 | 39.64 | 37.11 | 36.74 | 0.489281  | 0.001177 |
| 20.11 | 21.18 | 18.84 | 22.72 | -0.03781  | 0.846993 |
| 2.15  | 2.63  | 2.65  | 2.7   | -0.27527  | 0.421641 |
| 0     | 0     | 0     | 0     | NA        | NA       |
| 0     | 0     | 0     | 0     | NA        | NA       |
| 0     | 0     | 0     | 0     | NA        | NA       |
| 11.47 | 15.35 | 13.27 | 14.42 | 0.345162  | 0.062348 |
| 30.92 | 18.13 | 23.21 | 21.62 | -0.51987  | 1.35E-08 |
| 0     | 0     | 0     | 0     | NA        | NA       |
| 2.84  | 2.4   | 2.36  | 2.7   | -0.0012   | 0.997047 |
| 0     | 0.02  | 0.02  | 0.02  | NA        | NA       |
| 7.47  | 16.01 | 10.46 | 13.27 | 0.869976  | 7.83E-11 |
| 14.44 | 11.47 | 12.66 | 10.01 | 0.028661  | 0.924604 |
| 23.33 | 22.92 | 20.69 | 20.58 | -0.2652   | 0.004491 |
| 0     | 0     | 0     | 0     | NA        | NA       |
| 0.25  | 0.09  | 0.09  | 0.1   | -0.71632  | 0.298406 |
| 2.8   | 3.88  | 5.4   | 4.42  | 0.299858  | 0.054217 |
| 6.43  | 9.26  | 8.16  | 9.04  | 0.272098  | 0.012041 |
| 15.37 | 10.85 | 11.37 | 13.82 | -0.03222  | 0.865089 |
| 10.94 | 10.99 | 11.5  | 10.7  | 0.01972   | 0.903805 |
| 0     | 0.04  | 0     | 0.04  | NA        | NA       |
| 0     | 0     | 0     | 0     | NA        | NA       |
| 0     | 0     | 0     | 0     | NA        | NA       |
| 0     | 0     | 0     | 0     | NA        | NA       |
| 0     | 0     | 0     | 0     | NA        | NA       |
| 2.8   | 5.74  | 4.29  | 4.67  | 0.735205  | 5.87E-07 |
| 0     | 0     | 0     | 0     | NA        | NA       |
| 46.47 | 45.59 | 47.83 | 46.79 | 0.044768  | 0.734893 |
| 13.84 | 11.99 | 12.73 | 12.58 | -0.3164   | 0.008228 |
| 0     | 0     | 0     | 0     | NA        | NA       |
| 0     | 0.06  | 0.05  | 0     | NA        | NA       |
| 14.6  | 14.46 | 11.78 | 11.35 | -0.01524  | 0.948824 |
| 0     | 0     | 0     | 0     | NA        | NA       |
| 0.4   | 0.84  | 0.41  | 0.71  | 0.20599   | 0.599992 |
| 15.28 | 5.93  | 6.43  | 6.64  | -1.1089   | 7.62E-18 |
| 0     | 0     | 0     | 0     | NA        | NA       |
| 0.09  | 0     | 0.03  | 0     | -1.45271  | 0.014723 |

|        |       |        |        |          |          |
|--------|-------|--------|--------|----------|----------|
| 0.19   | 0.25  | 0.39   | 0.39   | -0.68631 | 0.202477 |
| 1.05   | 1.19  | 1.05   | 1.66   | -0.03107 | 0.954093 |
| 84.68  | 95.36 | 89.15  | 77.84  | 0.117391 | 0.368657 |
| 0      | 0     | 0      | 0      | NA       | NA       |
| 2.66   | 2.74  | 2.88   | 2.7    | 0.076512 | 0.811816 |
| 0      | 0     | 0      | 0      | NA       | NA       |
| 0      | 0.04  | 0.06   | 0.04   | NA       | NA       |
| 25.65  | 35.93 | 35.91  | 34.87  | 0.402986 | 1.37E-05 |
| 0      | 0     | 0      | 0      | NA       | NA       |
| 0      | 0     | 0      | 0      | NA       | NA       |
| 0      | 0     | 0      | 0      | NA       | NA       |
| 0      | 0     | 0      | 0      | NA       | NA       |
| 40.24  | 32.81 | 34.26  | 39.94  | -0.06048 | 0.697    |
| 0.79   | 1.07  | 0.5    | 1.74   | -0.27095 | 0.623698 |
| 7.8    | 6.77  | 6.78   | 6.25   | -0.21815 | 0.264226 |
| 0      | 0     | 0      | 0      | NA       | NA       |
| 0      | 0     | 0      | 0      | NA       | NA       |
| 0      | 0     | 0      | 0      | NA       | NA       |
| 127.44 | 123.1 | 144.39 | 139.51 | 0.036328 | 0.773744 |
| 16.65  | 24.8  | 18.6   | 21.92  | 0.506284 | 4.63E-05 |
| 8.62   | 7     | 6.24   | 9.01   | -0.36931 | 0.014129 |
| 5.2    | 9.11  | 9.03   | 9.34   | 0.57318  | 6.12E-07 |
| 0      | 0.07  | 0.07   | 0      | NA       | NA       |
| 1.57   | 1.65  | 1.78   | 1.78   | 0.271422 | 0.300549 |
| 3.29   | 13.06 | 11.65  | 13.08  | 1.677731 | 4.19E-50 |
| 28.98  | 36.49 | 33.54  | 34.27  | 0.134404 | 0.239093 |
| 0.11   | 0.24  | 0.48   | 0.47   | -0.0287  | 0.975717 |
| 17.38  | 17.86 | 16.58  | 17.16  | -0.04976 | 0.671172 |
| 0      | 0     | 0      | 0      | NA       | NA       |
| 2.2    | 3.11  | 2.13   | 1.6    | -0.49709 | 0.028355 |
| 0.06   | 0.03  | 0.06   | 0.16   | 0.546942 | 0.449265 |
| 5.91   | 3.97  | 5.22   | 4.71   | -0.0649  | 0.871476 |
| 0      | 0     | 0      | 0      | NA       | NA       |
| 0      | 0.06  | 0.11   | 0.12   | NA       | NA       |
| 8.75   | 12.34 | 10.47  | 12.72  | 0.433191 | 0.000251 |
| 11.84  | 10.69 | 10.21  | 11.32  | -0.21278 | 0.024568 |
| 0.1    | 0     | 0.07   | 0      | NA       | NA       |
| 5.79   | 4.54  | 5.02   | 4.31   | -0.33722 | 0.139012 |
| 31.62  | 31.26 | 33.94  | 27.26  | -0.19744 | 0.199194 |
| 0      | 0     | 0      | 0      | NA       | NA       |
| 0.01   | 0.03  | 0.01   | 0.01   | NA       | NA       |
| 30.25  | 24.96 | 28.68  | 26.61  | -0.23225 | 0.035794 |
| 0      | 0     | 0      | 0      | NA       | NA       |
| 7.3    | 3.74  | 4.9    | 3.92   | -0.91482 | 1.14E-08 |
| 0.38   | 2.35  | 1.01   | 1.2    | 1.684119 | 1.47E-07 |

|        |        |        |        |          |          |
|--------|--------|--------|--------|----------|----------|
| 1.88   | 7.05   | 3.97   | 5.67   | 1.694705 | 8.91E-12 |
| 31.08  | 38.7   | 35.55  | 37.23  | 0.228861 | 0.183415 |
| 1.62   | 0.34   | 0.71   | 0.33   | -1.32288 | 0.007216 |
| 2.06   | 1.22   | 1.28   | 0.98   | -0.15459 | 0.786871 |
| 0      | 0      | 0      | 0      | NA       | NA       |
| 4.01   | 4.51   | 4.01   | 3.84   | 0.117978 | 0.684112 |
| 0.08   | 0.36   | 0.22   | 0.17   | 0.894872 | 0.161374 |
| 8.69   | 5.17   | 5.94   | 5.93   | -0.49189 | 0.0103   |
| 0      | 0      | 0      | 0      | NA       | NA       |
| 0.2    | 0.12   | 0.02   | 0.06   | -0.17708 | 0.836225 |
| 0.05   | 0.22   | 0.14   | 0.12   | 0.636539 | 0.363591 |
| 0.01   | 0.05   | 0.07   | 0.09   | 0.177343 | 0.840665 |
| 0.34   | 0.4    | 0.19   | 0.34   | 0.621253 | 0.185179 |
| 11.72  | 10.35  | 12.2   | 10.03  | 0.124714 | 0.505474 |
| 7.86   | 10.04  | 7.3    | 8.03   | 0.037655 | 0.889637 |
| 0      | 0      | 0      | 0      | NA       | NA       |
| 0.92   | 0.96   | 1.2    | 1.6    | -0.52746 | 0.081571 |
| 0      | 0      | 0      | 0      | NA       | NA       |
| 2.96   | 3.99   | 3.58   | 3.85   | 0.267546 | 0.389411 |
| 0.22   | 0.44   | 0.47   | 0.17   | -0.20004 | 0.805718 |
| 4.66   | 2.51   | 3.31   | 2.6    | -0.78503 | 1.55E-07 |
| 2.46   | 2.61   | 2.41   | 2.84   | 0.209175 | 0.440475 |
| 0.02   | 0.03   | 0.04   | 0.02   | -0.15963 | 0.85662  |
| 1.15   | 0.62   | 0.56   | 0.49   | -0.52711 | 0.337108 |
| 0.46   | 0      | 0      | 0      | -3.18394 | 1.82E-09 |
| 4.78   | 5.3    | 3.98   | 4.89   | -0.00234 | 0.995073 |
| 22.68  | 16.11  | 19.61  | 20.04  | -0.27262 | 0.015511 |
| 2.44   | 1.88   | 2.13   | 1.54   | -0.14031 | 0.602656 |
| 1.94   | 3.22   | 3.95   | 3.11   | 0.542682 | 0.163906 |
| 8.1    | 8.31   | 7.53   | 9.11   | 0.141265 | 0.513317 |
| 0      | 0      | 0      | 0      | NA       | NA       |
| 0.02   | 0.25   | 0.45   | 0.19   | 0.59487  | 0.399965 |
| 18.67  | 21.27  | 22.76  | 20.95  | 0.177443 | 0.171407 |
| 0      | 0      | 0      | 0      | NA       | NA       |
| 686.07 | 681.82 | 764.58 | 664.16 | 0.005823 | 0.973504 |
| 0.25   | 0.88   | 1.08   | 0.56   | 0.49855  | 0.360225 |
| 6.46   | 7.4    | 6.25   | 4.94   | 0.092381 | 0.735131 |
| 48.99  | 31.69  | 42.17  | 37.79  | -0.35077 | 0.000518 |
| 560.94 | 455.83 | 469.11 | 431.92 | -0.35559 | 3.19E-06 |
| 0.03   | 0.02   | 0      | 0      | NA       | NA       |
| 10.41  | 16.67  | 11.72  | 14.43  | 0.378974 | 0.01938  |
| 162.71 | 180.23 | 168.08 | 172.45 | 0.05752  | 0.591581 |
| 0.02   | 0.16   | 0.1    | 0.05   | 0.550122 | 0.449245 |
| 0      | 0.02   | 0      | 0.02   | NA       | NA       |
| 7.49   | 6      | 7.63   | 6.62   | -0.16861 | 0.269011 |

|        |        |        |        |          |          |
|--------|--------|--------|--------|----------|----------|
| 0      | 0      | 0      | 0      | NA       | NA       |
| 6.54   | 12.7   | 8.74   | 10.74  | 0.609453 | 0.02034  |
| 0      | 0      | 0.02   | 0      | NA       | NA       |
| 4.96   | 5.33   | 6.63   | 6.16   | -0.14977 | 0.286067 |
| 0      | 0      | 0      | 0      | NA       | NA       |
| 23.28  | 45.51  | 37.97  | 38.78  | 0.770942 | 4.23E-12 |
| 0      | 0.02   | 0.02   | 0.15   | NA       | NA       |
| 0      | 0      | 0      | 0      | NA       | NA       |
| 7.41   | 26.24  | 18.46  | 22.81  | 1.428925 | 7.99E-36 |
| 0      | 0      | 0      | 0      | NA       | NA       |
| 11.52  | 6.84   | 11.77  | 7.66   | -0.14443 | 0.418667 |
| 0      | 0      | 0      | 0      | NA       | NA       |
| 4.43   | 0.97   | 1.46   | 1.8    | -1.5818  | 2.28E-13 |
| 8.5    | 10.75  | 6.73   | 10.56  | -0.16449 | 0.505148 |
| 0      | 0      | 0      | 0      | NA       | NA       |
| 0      | 0      | 0      | 0      | NA       | NA       |
| 12.55  | 11.43  | 15.22  | 11.63  | -0.25229 | 0.305915 |
| 1.52   | 0.87   | 0.87   | 0.25   | -0.50045 | 0.260327 |
| 1.49   | 1.53   | 1.58   | 1      | 0.045132 | 0.93333  |
| 2.41   | 2.88   | 2.06   | 3.54   | 0.35404  | 0.390715 |
| 0      | 0      | 0      | 0      | NA       | NA       |
| 17.14  | 15.42  | 18.27  | 16.34  | -0.04454 | 0.716327 |
| 0      | 0      | 0      | 0      | NA       | NA       |
| 33.78  | 34.47  | 39.38  | 40.51  | 0.028649 | 0.842133 |
| 0      | 0      | 0      | 0      | NA       | NA       |
| 0.15   | 0.06   | 0.13   | 0.09   | -0.24117 | 0.734012 |
| 0      | 0      | 0      | 0      | NA       | NA       |
| 1.54   | 1.15   | 1.29   | 1.35   | -0.23686 | 0.479777 |
| 2.85   | 2.35   | 2.49   | 2.65   | -0.30541 | 0.081187 |
| 15.96  | 18.45  | 17.47  | 17.15  | 0.172812 | 0.290108 |
| 0.34   | 0.06   | 0      | 0      | NA       | NA       |
| 0      | 0      | 0      | 0      | NA       | NA       |
| 2.01   | 3.52   | 5.6    | 4.33   | 0.696606 | 0.01357  |
| 0      | 0      | 0      | 0      | NA       | NA       |
| 0.09   | 0.03   | 0      | 0.04   | NA       | NA       |
| 269.62 | 182.01 | 199.57 | 219.81 | -0.55215 | 1.53E-12 |
| 15.1   | 23.58  | 17.76  | 21.43  | 0.306654 | 0.002402 |
| 131.31 | 111.46 | 108.77 | 112.04 | -0.22358 | 0.009256 |
| 31.81  | 37.45  | 30.45  | 33.15  | 0.028159 | 0.871975 |
| 0      | 0      | 0      | 0.07   | NA       | NA       |
| 8.02   | 6.76   | 6.38   | 6.79   | -0.10642 | 0.538851 |
| 0.94   | 5.37   | 3.15   | 4.59   | 2.273266 | 5.01E-30 |
| 10.59  | 14.51  | 14.73  | 14.76  | 0.465079 | 0.003215 |
| 9.15   | 18.74  | 15.56  | 19.97  | 0.942266 | 1.50E-14 |
| 0      | 0      | 0      | 0      | NA       | NA       |

|        |        |        |       |          |          |
|--------|--------|--------|-------|----------|----------|
| 12.65  | 13.33  | 11.89  | 13.09 | -0.04586 | 0.776308 |
| 15.65  | 17.01  | 15.89  | 14.66 | 0.039249 | 0.84141  |
| 12.28  | 13.63  | 10.98  | 12.21 | -0.11715 | 0.590425 |
| 16.09  | 32.24  | 25.94  | 26.09 | 0.731808 | 1.78E-07 |
| 0      | 0      | 0      | 0     | NA       | NA       |
| 6.99   | 4.65   | 4.68   | 5.75  | -0.48453 | 0.007493 |
| 9.13   | 16.71  | 16.67  | 17.26 | 0.893147 | 4.14E-10 |
| 0.05   | 0.11   | 0.11   | 0.08  | 0.319118 | 0.69257  |
| 0      | 0      | 0      | 0     | NA       | NA       |
| 0      | 0      | 0      | 0     | NA       | NA       |
| 0      | 0      | 0      | 0     | NA       | NA       |
| 0      | 0      | 0      | 0     | NA       | NA       |
| 0      | 0      | 0      | 0     | NA       | NA       |
| 36.29  | 3.93   | 15.78  | 11.53 | -1.47302 | 0.00234  |
| 2.66   | 5.5    | 4.69   | 4.31  | 0.298212 | 0.126024 |
| 4.19   | 5.14   | 4.23   | 5.38  | 0.343333 | 0.049321 |
| 0.6    | 0.54   | 0.98   | 0.97  | -0.55413 | 0.186897 |
| 5.28   | 5.27   | 3.64   | 3.6   | 0.015401 | 0.971274 |
| 21.07  | 16.4   | 16.76  | 12.77 | -0.4206  | 0.006769 |
| 5.51   | 4.85   | 4.92   | 4.52  | -0.13176 | 0.433366 |
| 0      | 0.04   | 0      | 0     | NA       | NA       |
| 2.7    | 13.71  | 7.68   | 10.63 | 1.679115 | 2.34E-11 |
| 0.14   | 0.1    | 0.05   | 0     | NA       | NA       |
| 0      | 0      | 0      | 0     | NA       | NA       |
| 0.63   | 0.5    | 0.53   | 0.62  | -0.08671 | 0.900044 |
| 0      | 0      | 0      | 0     | NA       | NA       |
| 1.87   | 6      | 3.42   | 4.24  | 1.383001 | 2.08E-08 |
| 0      | 0      | 0      | 0     | NA       | NA       |
| 0      | 0      | 0      | 0     | NA       | NA       |
| 0      | 0      | 0      | 0     | NA       | NA       |
| 33.51  | 50.67  | 47.7   | 48.68 | 0.537245 | 4.49E-10 |
| 0.05   | 0.02   | 0.08   | 0.13  | NA       | NA       |
| 0      | 0      | 0      | 0     | NA       | NA       |
| 0      | 0      | 0      | 0     | NA       | NA       |
| 52.74  | 60.59  | 58.79  | 54.99 | 0.042507 | 0.742414 |
| 0.02   | 0      | 0.02   | 0.06  | NA       | NA       |
| 1.11   | 0.62   | 0.91   | 1.04  | 0.175801 | 0.763311 |
| 0.04   | 0      | 0.11   | 0.03  | NA       | NA       |
| 0      | 0      | 0      | 0     | NA       | NA       |
| 3.9    | 18.53  | 18.06  | 18.92 | 2.152547 | 1.99E-64 |
| 14.96  | 11.95  | 12.26  | 13.01 | 0.052475 | 0.80114  |
| 0      | 0      | 0.14   | 0.12  | NA       | NA       |
| 14.61  | 22.58  | 16.84  | 20.01 | 0.224052 | 0.151576 |
| 362.11 | 406.47 | 389.92 | 397.8 | 0.041925 | 0.683403 |
| 9.83   | 10.27  | 11.4   | 10.42 | 0.190983 | 0.293358 |

|        |        |       |        |          |          |
|--------|--------|-------|--------|----------|----------|
| 0      | 0      | 0     | 0      | NA       | NA       |
| 0      | 0      | 0     | 0      | NA       | NA       |
| 0      | 0      | 0     | 0      | NA       | NA       |
| 1.92   | 0.63   | 0.99  | 0.78   | -1.44044 | 1.80E-14 |
| 0      | 0.01   | 0     | 0      | NA       | NA       |
| 4.56   | 1.95   | 1.85  | 2.34   | -1.08451 | 1.96E-09 |
| 0      | 0      | 0     | 0      | NA       | NA       |
| 57.74  | 46.12  | 49.61 | 47.85  | -0.32666 | 0.001851 |
| 6.81   | 8.62   | 6.54  | 6.98   | 0.169221 | 0.360192 |
| 0.34   | 0.19   | 0.16  | 0.14   | -0.70814 | 0.140908 |
| 0      | 0      | 0     | 0      | NA       | NA       |
| 0      | 0      | 0.24  | 0.11   | -0.37017 | 0.625111 |
| 0      | 0      | 0     | 0      | NA       | NA       |
| 11.43  | 13.51  | 11.66 | 12.57  | -0.00847 | 0.974137 |
| 9.31   | 15.35  | 13.23 | 13.38  | 0.286463 | 0.185685 |
| 4.48   | 2.48   | 3.47  | 3.99   | 0.118972 | 0.708805 |
| 17     | 12.77  | 14.31 | 12.08  | -0.16476 | 0.29192  |
| 0      | 0.01   | 0     | 0      | NA       | NA       |
| 26.5   | 2.2    | 4.63  | 2.4    | -2.82649 | 2.99E-16 |
| 7.21   | 4.77   | 5.54  | 5.63   | -0.43664 | 0.005829 |
| 0.19   | 0.06   | 0     | 0.04   | -0.88337 | 0.180112 |
| 1.7    | 0.49   | 0.54  | 0.42   | -1.52479 | 9.35E-09 |
| 0.28   | 0.12   | 0.26  | 0.26   | -0.77333 | 0.135826 |
| 0      | 0      | 0     | 0      | NA       | NA       |
| 106.64 | 117.62 | 121.5 | 122.01 | -0.09189 | 0.351588 |
| 0.39   | 0.13   | 0.51  | 0.58   | 0.059536 | 0.945923 |
| 0      | 0      | 0     | 0      | NA       | NA       |
| 0      | 0      | 0.05  | 0      | NA       | NA       |
| 11.22  | 10.15  | 11.57 | 11.87  | 0.182428 | 0.398582 |
| 0      | 0      | 0     | 0      | NA       | NA       |
| 4.27   | 9.44   | 6.83  | 6.94   | 0.951901 | 6.18E-07 |
| 0      | 0      | 0     | 0      | NA       | NA       |
| 8.12   | 2.07   | 2.79  | 2.29   | -1.69252 | 2.31E-49 |
| 48.9   | 46.15  | 42.73 | 40.72  | -0.11338 | 0.329012 |
| 1.27   | 1.25   | 1.27  | 0.91   | 0.070307 | 0.90895  |
| 0.37   | 0.18   | 0.25  | 0.21   | -0.65511 | 0.251136 |
| 3.18   | 0.39   | 0.7   | 0.87   | -1.98783 | 5.37E-25 |
| 0      | 0      | 0     | 0      | NA       | NA       |
| 6.55   | 7.52   | 7.33  | 7.36   | 0.167452 | 0.436737 |
| 0      | 0      | 0     | 0      | NA       | NA       |
| 0.68   | 0.38   | 0.65  | 0.65   | -0.27831 | 0.688868 |
| 0      | 0      | 0.23  | 0.06   | NA       | NA       |
| 0.08   | 0.05   | 0.03  | 0.16   | NA       | NA       |
| 65.97  | 53.35  | 61.62 | 56.63  | -0.07978 | 0.716109 |
| 25.98  | 44.1   | 37.28 | 42.57  | 0.481788 | 3.32E-07 |



|        |        |        |       |          |          |
|--------|--------|--------|-------|----------|----------|
| 8.12   | 4.73   | 6.3    | 7.95  | -0.32757 | 0.186522 |
| 0      | 0      | 0      | 0     | NA       | NA       |
| 1.49   | 2.46   | 1.51   | 1.93  | 0.367904 | 0.328248 |
| 0      | 0      | 0      | 0     | NA       | NA       |
| 0.57   | 0.53   | 0.46   | 0.96  | 0.053823 | 0.933507 |
| 0      | 0      | 0.01   | 0     | NA       | NA       |
| 0      | 0      | 0      | 0     | NA       | NA       |
| 11.82  | 10.74  | 8.78   | 9.42  | -0.21586 | 0.333953 |
| 7.49   | 10.49  | 9.84   | 8.92  | 0.370209 | 0.000832 |
| 0      | 0.02   | 0      | 0.02  | NA       | NA       |
| 3.92   | 6.82   | 5.29   | 5.38  | 0.159068 | 0.415266 |
| 0.3    | 0.1    | 0.07   | 0.14  | -0.8933  | 0.142469 |
| 0      | 0      | 0      | 0     | NA       | NA       |
| 0.1    | 0.04   | 0.05   | 0.06  | NA       | NA       |
| 0      | 0      | 0      | 0     | NA       | NA       |
| 0      | 0      | 0      | 0     | NA       | NA       |
| 10.74  | 8.04   | 9.03   | 9.52  | -0.52868 | 1.58E-09 |
| 0      | 0.19   | 0      | 0     | NA       | NA       |
| 38.54  | 53.94  | 42.01  | 45.07 | 0.217774 | 0.10348  |
| 0.02   | 0.08   | 0.08   | 0.06  | 0.630327 | 0.37404  |
| 0      | 0      | 0      | 0     | NA       | NA       |
| 5.84   | 8.55   | 9.54   | 10.99 | 0.431985 | 0.014341 |
| 55.51  | 68.86  | 63.23  | 63.72 | 0.157929 | 0.122857 |
| 7.91   | 10.68  | 9.61   | 11.1  | 0.404744 | 4.33E-05 |
| 0      | 0      | 0      | 0     | NA       | NA       |
| 0      | 0      | 0.04   | 0.04  | NA       | NA       |
| 0.19   | 0      | 0.06   | 0.06  | NA       | NA       |
| 0      | 0.16   | 0.65   | 0.28  | NA       | NA       |
| 0      | 0      | 0      | 0     | NA       | NA       |
| 0      | 0      | 0.06   | 0.02  | NA       | NA       |
| 1.65   | 3.19   | 2.21   | 2.54  | 0.9226   | 1.60E-07 |
| 0      | 0      | 0.02   | 0.14  | NA       | NA       |
| 0.14   | 0.04   | 0.09   | 0.25  | -0.14703 | 0.866354 |
| 13.48  | 16.35  | 16.2   | 15.93 | 0.10451  | 0.657486 |
| 51.9   | 62.23  | 53.22  | 55.74 | 0.269491 | 0.064666 |
| 23.29  | 10.81  | 12.7   | 12.75 | -0.92316 | 9.82E-16 |
| 0.32   | 0.68   | 0.37   | 0.46  | 0.194883 | 0.787231 |
| 8.26   | 5.95   | 8.14   | 7.85  | -0.26329 | 0.212767 |
| 224.52 | 149.76 | 185.36 | 182.4 | -0.49387 | 1.42E-08 |
| 0      | 0      | 0      | 0     | NA       | NA       |
| 2.52   | 2.65   | 2.7    | 2.85  | 0.155436 | 0.608016 |
| 26.44  | 20.43  | 21.3   | 19.79 | -0.34795 | 0.000105 |
| 35.03  | 36.59  | 35.41  | 32.76 | 0.057725 | 0.786725 |
| 22.12  | 12.43  | 18.14  | 16.93 | -0.59729 | 5.21E-07 |
| 1.81   | 2.29   | 2.5    | 1.86  | 0.080643 | 0.859382 |

|        |        |        |        |          |          |
|--------|--------|--------|--------|----------|----------|
| 0      | 0      | 0      | 0      | NA       | NA       |
| 0      | 0      | 0      | 0      | NA       | NA       |
| 2.14   | 2.03   | 2.16   | 2.21   | -0.35185 | 0.351352 |
| 0.06   | 0.13   | 0.12   | 0.23   | 0.632204 | 0.372555 |
| 17.25  | 18.05  | 13.89  | 14.39  | 0.063003 | 0.717422 |
| 0.08   | 0.04   | 0.03   | 0.1    | NA       | NA       |
| 0      | 0.08   | 0      | 0      | NA       | NA       |
| 53.51  | 45.99  | 49.92  | 47.97  | -0.16438 | 0.094427 |
| 5.23   | 5.14   | 3.53   | 3.88   | -0.46273 | 0.014316 |
| 8.08   | 2.54   | 4.78   | 3.53   | -1.09552 | 2.33E-09 |
| 13.02  | 17.04  | 15.76  | 16.26  | 0.075535 | 0.657413 |
| 0.05   | 0.14   | 0.08   | 0.12   | NA       | NA       |
| 4.62   | 7.95   | 6.97   | 6.8    | 0.266732 | 0.310262 |
| 0      | 0      | 0      | 0      | NA       | NA       |
| 0      | 0      | 0      | 0      | NA       | NA       |
| 4.94   | 3.87   | 4.23   | 3.83   | -0.26753 | 0.323195 |
| 0      | 0      | 0      | 0      | NA       | NA       |
| 542.89 | 453.61 | 462.09 | 434.25 | -0.35267 | 1.11E-06 |
| 9.46   | 6.24   | 6.27   | 7.57   | -0.22446 | 0.11259  |
| 4.26   | 5.43   | 3.48   | 4.73   | 0.466611 | 0.013056 |
| 0      | 0      | 0      | 0      | NA       | NA       |
| 0.19   | 0.36   | 0.42   | 0.32   | 0.517812 | 0.352469 |
| 0      | 0      | 0      | 0      | NA       | NA       |
| 28.67  | 34.37  | 34.8   | 38.81  | 0.098759 | 0.456828 |
| 5.41   | 11.17  | 6.06   | 10.56  | 0.623787 | 0.257584 |
| 0      | 0      | 0      | 0      | NA       | NA       |
| 17.58  | 24.35  | 23.6   | 22.52  | 0.217723 | 0.115328 |
| 0      | 0      | 0      | 0      | NA       | NA       |
| 0.12   | 0.2    | 0.33   | 0.15   | 0.628252 | 0.375473 |
| 3.73   | 5.58   | 6.03   | 6.35   | 0.19809  | 0.189754 |
| 0      | 0      | 0      | 0      | NA       | NA       |
| 1.84   | 0.71   | 1.25   | 0.96   | -1.14298 | 0.000635 |
| 626.52 | 637.89 | 653.22 | 631.99 | -0.06921 | 0.521531 |
| 0      | 0.1    | 0      | 0      | NA       | NA       |
| 0      | 0      | 0.03   | 0      | NA       | NA       |
| 24.24  | 25.5   | 21.96  | 22.93  | -0.16816 | 0.157196 |
| 3.65   | 2.6    | 2.21   | 1.97   | -0.44491 | 0.097617 |
| 0.51   | 0.24   | 0.31   | 0.2    | -0.33456 | 0.627366 |
| 13.41  | 10.17  | 9.61   | 10.35  | -0.68023 | 5.18E-09 |
| 17.31  | 19.83  | 19.23  | 19.2   | -0.0153  | 0.927525 |
| 3.9    | 4.16   | 4.11   | 5.38   | 0.317558 | 0.031227 |
| 29.71  | 37.78  | 36.58  | 35.17  | 0.266461 | 0.005474 |
| 0      | 0      | 0      | 0      | NA       | NA       |
| 11.53  | 6.68   | 6.16   | 8.98   | -0.18936 | 0.089803 |
| 4.01   | 1.56   | 1.58   | 2.51   | -0.83802 | 6.08E-05 |

|       |       |       |       |          |          |
|-------|-------|-------|-------|----------|----------|
| 8.58  | 9.22  | 8.57  | 9.21  | -0.07451 | 0.616695 |
| 36.01 | 32.64 | 36.36 | 34.37 | -0.17344 | 0.199223 |
| 46.07 | 35.39 | 38.73 | 36.22 | -0.21455 | 0.033751 |
| 33.87 | 19.16 | 24.22 | 20.13 | -0.7809  | 2.70E-15 |
| 0.28  | 0.6   | 0.44  | 0.45  | 0.248441 | 0.696341 |
| 0.13  | 0.04  | 0.11  | 0.04  | NA       | NA       |
| 0     | 0     | 0     | 0     | NA       | NA       |
| 0.47  | 0.56  | 0.48  | 0.6   | -0.07173 | 0.848046 |
| 21.43 | 21.19 | 25.58 | 21.64 | 0.101451 | 0.510958 |
| 0     | 3.35  | 2.08  | 1.97  | 2.521039 | 1.73E-06 |
| 16.27 | 20.98 | 19.29 | 21.72 | 0.464054 | 0.000132 |
| 21.75 | 13.29 | 12.75 | 13.39 | -0.76371 | 1.22E-14 |
| 15.37 | 20.44 | 19.2  | 20.2  | 0.378712 | 0.000181 |
| 0     | 0     | 0     | 0     | NA       | NA       |
| 10.38 | 16.87 | 12.38 | 15.98 | 0.491088 | 5.71E-05 |
| 0     | 0.09  | 0.02  | 0     | NA       | NA       |
| 4.97  | 4.32  | 4.54  | 4.97  | 0.098565 | 0.552768 |
| 2.97  | 1.85  | 2.56  | 2.28  | -0.45188 | 0.017215 |
| 0.24  | 0     | 0     | 0     | NA       | NA       |
| 44.89 | 14.13 | 31.35 | 22.92 | -0.9358  | 0.013298 |
| 0     | 0     | 0     | 0     | NA       | NA       |
| 0     | 0     | 0.02  | 0     | NA       | NA       |
| 0     | 0     | 0     | 0     | NA       | NA       |
| 0     | 0     | 0     | 0     | NA       | NA       |
| 20.79 | 27.42 | 23.72 | 23.63 | 0.218314 | 0.088834 |
| 0.81  | 0.55  | 0.53  | 0.32  | -0.92297 | 0.001577 |
| 26.65 | 11.23 | 23.11 | 17.46 | -0.8003  | 2.47E-08 |
| 0     | 0     | 0     | 0     | NA       | NA       |
| 10    | 8.45  | 9.48  | 8.55  | -0.29441 | 0.090468 |
| 0.02  | 0.17  | 0.31  | 0.3   | 0.609186 | 0.387812 |
| 5.38  | 7.21  | 6.33  | 6.71  | 0.198784 | 0.196201 |
| 1.21  | 1.15  | 0.85  | 1.39  | 0.064191 | 0.905457 |
| 12.72 | 17.86 | 17.22 | 17.56 | 0.440257 | 9.37E-06 |
| 33.15 | 48.03 | 42.4  | 50.14 | 0.574017 | 7.09E-09 |
| 5.56  | 5.53  | 5.2   | 5.75  | 0.005679 | 0.981096 |
| 1.98  | 1.45  | 1.92  | 0.91  | -0.08477 | 0.846993 |
| 6.82  | 6.2   | 6.44  | 7.32  | -0.00504 | 0.97502  |
| 6.97  | 7.13  | 6.84  | 6.24  | -0.04699 | 0.811992 |
| 23.88 | 11.97 | 14.78 | 14.13 | -0.89082 | 1.50E-19 |
| 0.17  | 0.08  | 0.15  | 0.33  | 0.527508 | 0.468745 |
| 0     | 0     | 0     | 0     | NA       | NA       |
| 4.88  | 2.93  | 3.83  | 2.64  | -0.89254 | 1.15E-07 |
| 6.08  | 6.54  | 5.92  | 6.36  | 0.090442 | 0.733543 |
| 0     | 0     | 0     | 0     | NA       | NA       |
| 0     | 0.27  | 0.52  | 0.42  | 2.610194 | 1.99E-06 |

|       |       |       |       |          |          |
|-------|-------|-------|-------|----------|----------|
| 62.85 | 83.61 | 89.33 | 87.48 | 0.467017 | 2.62E-06 |
| 1.72  | 4.29  | 3.32  | 3.92  | 1.2244   | 1.09E-10 |
| 23.84 | 28.95 | 29.2  | 29.97 | 0.284172 | 0.0009   |
| 0     | 0     | 0     | 0     | NA       | NA       |
| 4.27  | 4.98  | 4.29  | 4.6   | 0.030533 | 0.931016 |
| 7.59  | 8.73  | 7.42  | 7.39  | -0.05691 | 0.809536 |
| 3.85  | 4.26  | 4.38  | 4.68  | 0.211249 | 0.2964   |
| 15.43 | 20.55 | 18.05 | 21.41 | 0.414179 | 0.000602 |
| 8.54  | 2.7   | 6.2   | 4.2   | -0.99889 | 0.000157 |
| 0     | 0     | 0     | 0     | NA       | NA       |
| 28.8  | 18.9  | 22.19 | 15.57 | -0.36667 | 0.041647 |
| 13.71 | 6.89  | 7.32  | 6.67  | -0.74967 | 8.79E-16 |
| 16.83 | 18.29 | 17.51 | 17.87 | -0.07547 | 0.699537 |
| 0.16  | 0.03  | 0.12  | 0.02  | -1.35092 | 0.01568  |
| 8.12  | 8.32  | 8.71  | 10.11 | -0.07404 | 0.657486 |
| 1.39  | 1.51  | 1.51  | 1.59  | 0.134806 | 0.698064 |
| 1.17  | 1.38  | 1.29  | 1.13  | 0.011363 | 0.976514 |
| 14.27 | 14.64 | 14.99 | 12.81 | -0.1261  | 0.605101 |
| 0.01  | 0     | 0     | 0     | NA       | NA       |
| 34.52 | 24.81 | 30.09 | 27.61 | -0.36786 | 0.000523 |
| 22.23 | 17.23 | 18.84 | 17.72 | -0.40783 | 2.38E-05 |
| 0.24  | 0.37  | 0.38  | 0.39  | 0.023199 | 0.974622 |
| 0     | 0     | 0     | 0     | NA       | NA       |
| 1.27  | 0.94  | 1.11  | 0.94  | -0.08644 | 0.803033 |
| 5.35  | 5.1   | 5.49  | 5.3   | 0.02413  | 0.896466 |
| 43.13 | 101.6 | 80.97 | 91.45 | 0.966135 | 1.25E-16 |
| 3.42  | 5.26  | 5.23  | 5.1   | 0.127629 | 0.6284   |
| 0.5   | 2.3   | 2.66  | 2.32  | 1.830353 | 1.02E-15 |
| 20.2  | 23.29 | 20.48 | 21.96 | 0.030904 | 0.826846 |
| 0     | 0     | 0     | 0     | NA       | NA       |
| 0     | 0.21  | 0.12  | 0.23  | 0.861954 | 0.158567 |
| 4.12  | 1.47  | 2.42  | 2.02  | -1.06209 | 0.0001   |
| 0     | 0     | 0     | 0     | NA       | NA       |
| 0     | 0     | 0     | 0     | NA       | NA       |
| 0.2   | 0.05  | 0.16  | 0.37  | -0.32898 | 0.677932 |
| 0     | 0     | 0.26  | 0.1   | NA       | NA       |
| 0.48  | 0.55  | 0.95  | 0.66  | 0.246997 | 0.606618 |
| 28.57 | 36.43 | 30.71 | 32.64 | 0.229717 | 0.105508 |
| 1.57  | 0.57  | 1.31  | 0.69  | -0.31726 | 0.654968 |
| 1.99  | 0.71  | 1.57  | 1.15  | -0.59386 | 0.225688 |
| 54.32 | 31.15 | 39.01 | 40.46 | -0.49427 | 0.000394 |
| 8.76  | 9.42  | 9.84  | 9.62  | 0.068301 | 0.573806 |
| 3.58  | 2.81  | 2.73  | 3.43  | -0.38053 | 0.04284  |
| 1.06  | 4.93  | 2.62  | 4.59  | 1.594725 | 1.21E-14 |
| 8.12  | 4.83  | 7.44  | 7.07  | -0.31383 | 0.035551 |

|       |        |        |        |          |          |
|-------|--------|--------|--------|----------|----------|
| 0     | 0      | 0      | 0      | NA       | NA       |
| 5.21  | 3.38   | 3.3    | 3.5    | 0.165047 | 0.646408 |
| 0     | 0      | 0      | 0      | NA       | NA       |
| 0.14  | 0.1    | 0.14   | 0.05   | -0.7181  | 0.255372 |
| 13.8  | 16.01  | 17.76  | 17.52  | 0.132065 | 0.264329 |
| 2.45  | 9.74   | 6.01   | 5.94   | 1.259528 | 3.70E-14 |
| 0     | 0      | 0      | 0      | NA       | NA       |
| 0     | 0      | 0      | 0      | NA       | NA       |
| 3.24  | 2.36   | 2.52   | 2.11   | -0.29583 | 0.183659 |
| 0     | 0      | 0      | 0      | NA       | NA       |
| 0.08  | 0.13   | 0.03   | 0      | NA       | NA       |
| 0     | 0      | 0      | 0      | NA       | NA       |
| 0     | 0      | 0      | 0      | NA       | NA       |
| 0.31  | 0.13   | 0.11   | 0.1    | 0.583312 | 0.414522 |
| 0     | 0      | 0      | 0      | NA       | NA       |
| 0     | 0.43   | 0.13   | 0.36   | 1.123569 | 0.0518   |
| 0     | 0      | 0      | 0      | NA       | NA       |
| 55.17 | 92.32  | 104.19 | 93.91  | 0.820972 | 2.06E-29 |
| 0     | 0      | 0      | 0      | NA       | NA       |
| 0.28  | 0.03   | 0.02   | 0      | -1.49514 | 0.012123 |
| 8.09  | 9.49   | 8.62   | 9.21   | -0.11039 | 0.662598 |
| 23.92 | 25.63  | 25.23  | 25.01  | 0.102759 | 0.518733 |
| 0.25  | 0.22   | 0.09   | 0.36   | -0.24029 | 0.768341 |
| 0     | 0      | 0      | 0      | NA       | NA       |
| 5.18  | 0.77   | 0.57   | 0.5    | -2.47879 | 6.16E-09 |
| 55.61 | 63.66  | 58.52  | 54.62  | 0.178618 | 0.212835 |
| 21.01 | 24.66  | 25.36  | 28.42  | 0.277318 | 0.002017 |
| 1.77  | 4.88   | 2.98   | 2.53   | 1.076942 | 1.32E-06 |
| 0     | 0      | 0      | 0      | NA       | NA       |
| 13.43 | 14.83  | 14.67  | 14.51  | 0.004053 | 0.983057 |
| 92.09 | 131.43 | 136.21 | 126.89 | 0.463198 | 4.68E-08 |
| 0     | 0      | 0      | 0      | NA       | NA       |
| 27.22 | 31.09  | 26.99  | 33.26  | 0.290755 | 0.097314 |
| 0     | 0      | 0      | 0      | NA       | NA       |
| 15.01 | 14.93  | 16.93  | 15.04  | -0.00483 | 0.975381 |
| 4.3   | 3.63   | 3.77   | 4      | 0.104945 | 0.689697 |
| 17.25 | 24.65  | 19.62  | 27.5   | 0.49728  | 3.97E-08 |
| 58.45 | 126.51 | 104.23 | 105.78 | 0.828802 | 8.35E-15 |
| 93.86 | 110.91 | 105.58 | 101.36 | 0.050355 | 0.669911 |
| 27.68 | 23.37  | 24.03  | 26.32  | -0.06926 | 0.502882 |
| 22.13 | 33.43  | 30.85  | 28.54  | 0.46588  | 1.16E-06 |
| 8.58  | 10.87  | 7.97   | 9.89   | 0.066509 | 0.778327 |
| 7.35  | 3.34   | 6.35   | 4.39   | -0.29734 | 0.337024 |
| 8.85  | 19.16  | 13.48  | 16.14  | 0.750322 | 2.58E-07 |
| 5.83  | 6.59   | 6.44   | 7.04   | 0.501048 | 0.000333 |

|        |        |        |        |          |          |
|--------|--------|--------|--------|----------|----------|
| 17.14  | 19.31  | 19.11  | 18.87  | 0.021401 | 0.912249 |
| 1.71   | 0.8    | 0.76   | 0.66   | -1.21824 | 1.14E-12 |
| 25.51  | 28.31  | 27.2   | 29.46  | 0.058597 | 0.596441 |
| 0      | 0      | 0      | 0      | NA       | NA       |
| 44.75  | 17.2   | 25.66  | 20.87  | -0.88814 | 2.88E-09 |
| 0.02   | 0.04   | 0      | 0.05   | NA       | NA       |
| 0      | 0      | 0      | 0      | NA       | NA       |
| 29.8   | 21.92  | 24.32  | 26.49  | -0.02804 | 0.812855 |
| 0      | 0      | 0      | 0      | NA       | NA       |
| 11.45  | 12.59  | 11.74  | 11.36  | 0.187423 | 0.318243 |
| 0      | 0      | 0      | 0      | NA       | NA       |
| 3.5    | 1.5    | 1.6    | 2.34   | -0.6845  | 0.009346 |
| 3.13   | 2.11   | 2.28   | 2.22   | -0.44739 | 0.002157 |
| 46.86  | 23     | 26.48  | 23.44  | -0.9959  | 4.52E-32 |
| 13.32  | 15.87  | 18.75  | 18.52  | 0.347819 | 0.000549 |
| 0      | 0      | 0      | 0      | NA       | NA       |
| 2.41   | 1.56   | 1.37   | 1.22   | -0.11797 | 0.657067 |
| 0      | 0      | 0      | 0      | NA       | NA       |
| 5.35   | 4.16   | 4.54   | 4.06   | -0.17901 | 0.367443 |
| 17.15  | 19.26  | 23.38  | 23.89  | 0.532502 | 2.55E-06 |
| 0      | 0.26   | 0.13   | 0.12   | 0.387368 | 0.617944 |
| 0      | 0      | 0      | 0      | NA       | NA       |
| 2.9    | 2.26   | 2.9    | 2.12   | -0.17835 | 0.580397 |
| 10.31  | 3.24   | 3.52   | 2.48   | -1.61142 | 2.03E-19 |
| 7.14   | 9.55   | 9.63   | 10.34  | 0.312898 | 0.107244 |
| 146.15 | 147.18 | 158.96 | 132.48 | -0.02345 | 0.887702 |
| 0.04   | 0      | 0      | 0      | NA       | NA       |
| 0      | 0      | 0      | 0      | NA       | NA       |
| 14.99  | 15.85  | 14.51  | 14.71  | 0.335543 | 0.004742 |
| 0.06   | 0      | 0.05   | 0      | NA       | NA       |
| 0      | 0      | 0      | 0      | NA       | NA       |
| 2.76   | 2.31   | 2.78   | 1.89   | -0.25036 | 0.247703 |
| 28.21  | 36.52  | 30.58  | 31.11  | 0.243695 | 0.01681  |
| 0.02   | 0.17   | 0.08   | 0.07   | 0.795757 | 0.222187 |
| 0      | 0      | 0      | 0      | NA       | NA       |
| 0.02   | 0.33   | 0.14   | 1.05   | 2.042685 | 0.000247 |
| 2.15   | 2.05   | 2.16   | 2.28   | 0.006016 | 0.984202 |
| 262.24 | 130.03 | 184.99 | 163.69 | -0.70719 | 1.99E-10 |
| 0.03   | 0      | 0.02   | 0      | NA       | NA       |
| 3.08   | 3.19   | 3.66   | 2.86   | -0.29202 | 0.320862 |
| 44.52  | 64.21  | 67.11  | 62.49  | 0.219318 | 0.009045 |
| 14.82  | 24.88  | 25.89  | 22.41  | 0.628793 | 0.003133 |
| 0      | 0      | 0      | 0      | NA       | NA       |
| 60.92  | 68.25  | 66.01  | 64.22  | 0.146654 | 0.201675 |
| 16.47  | 11.66  | 11.84  | 14.43  | -0.28875 | 0.003519 |

|        |        |        |        |          |          |
|--------|--------|--------|--------|----------|----------|
| 2.85   | 2.51   | 2.1    | 1.87   | -0.57021 | 0.098591 |
| 0      | 0      | 0      | 0      | NA       | NA       |
| 36.29  | 32.86  | 35.02  | 35.68  | -0.20776 | 0.038587 |
| 18.65  | 36.58  | 31.75  | 37.39  | 0.710154 | 4.58E-12 |
| 0.11   | 0.11   | 0.13   | 0.25   | 0.42159  | 0.50214  |
| 0.17   | 0.22   | 0.19   | 0.18   | 0.168614 | 0.847283 |
| 0      | 0      | 0      | 0      | NA       | NA       |
| 0      | 0      | 0      | 0      | NA       | NA       |
| 634.09 | 638.34 | 645.15 | 659.65 | 0.020988 | 0.844671 |
| 15.39  | 12.49  | 12.94  | 13.28  | -0.42825 | 0.004673 |
| 24.74  | 21.85  | 23.88  | 26.16  | -0.02484 | 0.847229 |
| 0.1    | 0.59   | 0.22   | 0.38   | 0.972051 | 0.102873 |
| 0      | 0      | 0      | 0      | NA       | NA       |
| 0.02   | 0.08   | 0      | 0.08   | NA       | NA       |
| 11.5   | 28.63  | 23.43  | 25.67  | 1.091519 | 5.82E-17 |
| 5.49   | 25.11  | 15.98  | 20.87  | 1.438856 | 2.36E-23 |
| 11.93  | 19.22  | 20.41  | 18.1   | 0.539323 | 9.91E-08 |
| 0.13   | 0      | 0      | 0.1    | NA       | NA       |
| 0      | 0      | 0      | 0      | NA       | NA       |
| 0.11   | 0.03   | 0.17   | 0.11   | NA       | NA       |
| 4.1    | 6.58   | 6.31   | 5.43   | 0.188131 | 0.216483 |
| 9.46   | 8.98   | 9.68   | 12.74  | 0.035925 | 0.826577 |
| 0.13   | 0.09   | 0.28   | 0.1    | NA       | NA       |
| 0.65   | 0.19   | 0.43   | 0.36   | -1.09712 | 0.003209 |
| 0.94   | 0.33   | 0.46   | 1.22   | -0.58248 | 0.08817  |
| 20.11  | 40.37  | 32.2   | 36.74  | 0.77412  | 1.02E-14 |
| 0      | 0      | 0      | 0      | NA       | NA       |
| 12.1   | 14.58  | 12.62  | 12.92  | 0.120392 | 0.504574 |
| 112    | 118.63 | 107.69 | 95.86  | 0.068612 | 0.717625 |
| 4.64   | 8.65   | 6.45   | 7.58   | 0.629517 | 0.012218 |
| 116.08 | 200.99 | 186.47 | 196.74 | 0.70062  | 4.73E-17 |
| 48.9   | 48.49  | 60.51  | 60.94  | 0.405767 | 0.000212 |
| 0.83   | 0.98   | 1.15   | 0.73   | 0.151586 | 0.794367 |
| 0      | 0      | 0      | 0      | NA       | NA       |
| 51.22  | 46.4   | 50.41  | 46.6   | -0.02097 | 0.890238 |
| 1.13   | 0.07   | 0.88   | 0.27   | -1.77122 | 0.000104 |
| 11.4   | 11.48  | 12.44  | 13.17  | 0.072772 | 0.657413 |
| 0      | 0      | 0      | 0      | NA       | NA       |
| 6.44   | 6.21   | 5.84   | 5.46   | -0.08919 | 0.626917 |
| 0      | 0      | 0      | 0      | NA       | NA       |
| 0      | 0      | 0      | 0      | NA       | NA       |
| 0      | 0      | 0      | 0      | NA       | NA       |
| 0.45   | 0.22   | 0.04   | 0.23   | 0.213616 | 0.80335  |
| 29.02  | 22.33  | 21.85  | 25.53  | -0.36884 | 0.003139 |
| 0.87   | 4.24   | 2.33   | 2.85   | 1.894735 | 8.52E-12 |

|        |        |        |        |          |          |
|--------|--------|--------|--------|----------|----------|
| 1.84   | 1.79   | 2.75   | 1.88   | 0.032215 | 0.94312  |
| 1.08   | 2.28   | 1.69   | 1.96   | 0.702748 | 0.000222 |
| 2.38   | 2.46   | 2.43   | 2.71   | 0.049741 | 0.848411 |
| 0      | 0      | 0      | 0      | NA       | NA       |
| 0      | 0      | 0      | 0      | NA       | NA       |
| 80.64  | 88.31  | 82.14  | 81.4   | -0.00679 | 0.968491 |
| 44.43  | 47.01  | 39.92  | 46.82  | -0.15538 | 0.356692 |
| 6.31   | 5.42   | 6.42   | 6.39   | -0.06958 | 0.737986 |
| 0.79   | 0      | 0      | 0      | NA       | NA       |
| 2.03   | 1.75   | 1.81   | 2.04   | 0.038071 | 0.922411 |
| 108.63 | 121.98 | 129.3  | 128.63 | 0.159783 | 0.074264 |
| 14.36  | 7.6    | 7.89   | 8.27   | -0.7998  | 3.50E-14 |
| 6.44   | 9.84   | 7.2    | 8.24   | 0.549972 | 5.92E-06 |
| 4.72   | 6.41   | 6.03   | 5.51   | 0.432735 | 0.119923 |
| 0.09   | 0.01   | 0.09   | 0.08   | -0.10089 | 0.913537 |
| 1.91   | 0.36   | 0.81   | 0.46   | -1.61551 | 2.65E-05 |
| 1.74   | 1.96   | 1.4    | 1.16   | 0.004612 | 0.990895 |
| 11.84  | 21.34  | 14.33  | 15.56  | 0.797929 | 4.90E-06 |
| 14.1   | 13.64  | 10.57  | 13.28  | -0.19656 | 0.232398 |
| 0.74   | 1.17   | 0.9    | 1.4    | -0.32392 | 0.474635 |
| 0      | 0      | 0      | 0      | NA       | NA       |
| 6.26   | 5.68   | 5.82   | 5.82   | -0.04037 | 0.824188 |
| 0      | 0      | 0      | 0      | NA       | NA       |
| 10     | 9.37   | 9.54   | 9.62   | -0.05333 | 0.741849 |
| 0      | 0      | 0      | 0      | NA       | NA       |
| 6.29   | 7.5    | 7.06   | 5.6    | 0.093873 | 0.714005 |
| 0.06   | 0.28   | 0.39   | 0.25   | 1.070865 | 0.075627 |
| 5.34   | 7.33   | 6.26   | 6.15   | 0.002293 | 0.995073 |
| 4.32   | 5.01   | 4.96   | 4.18   | -0.02506 | 0.875348 |
| 1.1    | 2.15   | 2      | 2.71   | 0.789598 | 0.001618 |
| 0      | 0.08   | 0.09   | 0      | NA       | NA       |
| 0      | 0      | 0      | 0      | NA       | NA       |
| 26.21  | 24.39  | 25.36  | 27     | 0.203421 | 0.050425 |
| 38.24  | 44.25  | 41.46  | 46.55  | 0.173894 | 0.042476 |
| 16.81  | 16.46  | 16.96  | 18.02  | -0.13762 | 0.210875 |
| 0.59   | 1.19   | 0.89   | 1.51   | 0.564722 | 0.319006 |
| 32.05  | 48.02  | 46.54  | 49.1   | 0.60855  | 1.71E-11 |
| 25.67  | 23.73  | 24.14  | 24.87  | 0.038106 | 0.776743 |
| 0      | 0.04   | 0      | 0      | NA       | NA       |
| 4.53   | 6.15   | 5.07   | 6.18   | 0.24118  | 0.411156 |
| 0      | 0      | 0      | 0      | NA       | NA       |
| 28.1   | 28.53  | 30.23  | 30.88  | 0.007992 | 0.952797 |
| 1.13   | 0.83   | 0.39   | 0.41   | -1.46933 | 2.54E-05 |
| 13.39  | 10.48  | 7.79   | 10.22  | -0.52417 | 6.29E-09 |
| 115.39 | 77.99  | 110.73 | 97.61  | -0.26427 | 0.00774  |



|         |         |         |         |          |          |
|---------|---------|---------|---------|----------|----------|
| 1.45    | 0.35    | 0.37    | 0.42    | -1.45656 | 0.002325 |
| 1.4     | 0.16    | 1.44    | 1.24    | -0.72596 | 0.16179  |
| 1.96    | 1.4     | 1.63    | 1.92    | -0.20147 | 0.627366 |
| 0.02    | 0.08    | 0.05    | 0.05    | -0.12309 | 0.891001 |
| 0       | 0       | 0       | 0       | NA       | NA       |
| 0       | 0.31    | 0.04    | 0.11    | 0.818926 | 0.199228 |
| 114.44  | 8.51    | 16.17   | 12.61   | -3.02622 | 2.53E-34 |
| 9.29    | 6.73    | 8.16    | 7.63    | -0.25574 | 0.172395 |
| 0       | 0       | 0       | 0       | NA       | NA       |
| 10.09   | 8.94    | 8.31    | 8.19    | 0.129532 | 0.602449 |
| 1.75    | 0.11    | 0.81    | 0.76    | -1.48856 | 8.51E-05 |
| 0.09    | 0.29    | 0.06    | 0.03    | -0.40206 | 0.603418 |
| 5.55    | 8.79    | 6.19    | 7.88    | 0.153334 | 0.251288 |
| 4.14    | 2.14    | 3.98    | 4.67    | 0.013917 | 0.98325  |
| 0       | 0       | 0       | 0       | NA       | NA       |
| 3.45    | 4.21    | 4.29    | 4.23    | 0.293076 | 0.065997 |
| 0       | 0       | 0       | 0       | NA       | NA       |
| 0       | 0       | 0       | 0       | NA       | NA       |
| 0       | 0       | 0       | 0       | NA       | NA       |
| 0       | 0       | 0       | 0       | NA       | NA       |
| 10.31   | 12.12   | 12.08   | 11.45   | 0.004222 | 0.984596 |
| 0       | 0       | 0       | 0       | NA       | NA       |
| 45.01   | 73.74   | 54.34   | 61.31   | 0.437931 | 8.82E-05 |
| 4.34    | 6.89    | 3.51    | 3.27    | 0.285483 | 0.183826 |
| 1516.35 | 1445.55 | 1387.22 | 1277.28 | -0.19165 | 0.01993  |
| 14.21   | 12.37   | 11.5    | 10.65   | -0.24626 | 0.247948 |
| 0       | 0       | 0       | 0       | NA       | NA       |
| 0       | 0       | 0       | 0       | NA       | NA       |
| 0       | 0       | 0       | 0       | NA       | NA       |
| 8.55    | 8.41    | 8       | 7.41    | -0.16214 | 0.48467  |
| 0       | 0       | 0       | 0       | NA       | NA       |
| 0.01    | 0       | 0.02    | 0.02    | NA       | NA       |
| 0       | 0       | 0.02    | 0       | NA       | NA       |
| 0       | 0       | 0       | 0       | NA       | NA       |
| 15.13   | 10.4    | 13.39   | 12.77   | -0.38169 | 0.00397  |
| 6.72    | 4.06    | 4.88    | 4.64    | -0.43896 | 0.000115 |
| 0       | 0       | 0.24    | 0.14    | NA       | NA       |
| 0       | 0       | 0       | 0       | NA       | NA       |
| 0       | 0       | 0       | 0       | NA       | NA       |
| 6.97    | 4.78    | 4.55    | 6.83    | -0.37694 | 0.04384  |
| 0       | 0       | 0.02    | 0.01    | NA       | NA       |
| 0.66    | 0.04    | 0.35    | 0.53    | -0.28516 | 0.710759 |
| 6.45    | 7.87    | 7.11    | 7.74    | 0.147427 | 0.388802 |
| 0       | 0       | 0       | 0       | NA       | NA       |
| 0       | 0       | 0       | 0       | NA       | NA       |

|         |        |        |        |          |          |
|---------|--------|--------|--------|----------|----------|
| 0.51    | 1.04   | 1.15   | 1.07   | 0.665861 | 0.177766 |
| 21.89   | 16.07  | 16.81  | 17.01  | -0.31018 | 0.045043 |
| 0       | 0      | 0      | 0      | NA       | NA       |
| 5.17    | 0.99   | 1.94   | 1.78   | -1.74697 | 6.99E-15 |
| 0       | 0      | 0      | 0      | NA       | NA       |
| 0       | 0      | 0.08   | 0      | NA       | NA       |
| 12.92   | 20.15  | 22.12  | 19.34  | 0.467478 | 0.000118 |
| 0       | 0.01   | 0      | 0      | NA       | NA       |
| 4.49    | 5.75   | 4.19   | 5.42   | -0.00646 | 0.979263 |
| 0.09    | 0.3    | 0.2    | 0.25   | 0.660072 | 0.314039 |
| 0.29    | 0.07   | 0.2    | 0.05   | -1.19492 | 0.039954 |
| 0       | 0      | 0      | 0      | NA       | NA       |
| 11.66   | 12.91  | 9.16   | 10.63  | 0.041657 | 0.851819 |
| 0.38    | 0.33   | 0.16   | 0.31   | 0.05699  | 0.945788 |
| 0.24    | 1.18   | 0.73   | 0.78   | 1.402495 | 0.000405 |
| 13.62   | 8.88   | 12.09  | 11.66  | -0.04395 | 0.871033 |
| 0.01    | 0.03   | 0      | 0      | NA       | NA       |
| 6.68    | 6.09   | 5.78   | 5.97   | -0.1686  | 0.383157 |
| 0       | 0      | 0      | 0      | NA       | NA       |
| 0.03    | 0.02   | 0.02   | 0      | NA       | NA       |
| 0       | 0.17   | 0.45   | 0.1    | 0.739705 | 0.282385 |
| 0       | 0      | 0      | 0      | NA       | NA       |
| 0       | 0      | 0      | 0      | NA       | NA       |
| 0       | 0.21   | 0.24   | 0.08   | NA       | NA       |
| 18.5    | 23.77  | 24.61  | 23.66  | 0.198286 | 0.106062 |
| 21.14   | 36.96  | 31.45  | 27.46  | 0.870309 | 1.09E-15 |
| 0       | 0      | 0      | 0      | NA       | NA       |
| 24.55   | 56.1   | 43.12  | 50.95  | 0.944719 | 4.33E-22 |
| 0       | 0.26   | 0      | 0      | NA       | NA       |
| 18.6    | 13.51  | 14.94  | 16.66  | -0.38913 | 1.62E-05 |
| 21.46   | 17.55  | 23.75  | 21.85  | -0.07432 | 0.640034 |
| 0.15    | 0.44   | 0.22   | 0.51   | 0.929586 | 0.094381 |
| 20.59   | 32.11  | 28.2   | 30.15  | 0.579027 | 2.66E-09 |
| 1.54    | 0.44   | 0.5    | 0.79   | -0.67917 | 0.072859 |
| 19.18   | 26.93  | 22.53  | 24.08  | 0.300884 | 0.02256  |
| 1014.45 | 882.54 | 887.16 | 833.08 | -0.21595 | 0.004136 |
| 2.51    | 2.52   | 2.57   | 2.6    | 0.030292 | 0.87997  |
| 26.26   | 28.9   | 34.6   | 34.47  | 0.176014 | 0.25759  |
| 0       | 0      | 0.1    | 0      | NA       | NA       |
| 38.44   | 46.14  | 40.99  | 39.38  | 0.139222 | 0.212704 |
| 0       | 0      | 0.07   | 0      | NA       | NA       |
| 9.43    | 16.48  | 13.89  | 14.32  | 0.720335 | 3.27E-09 |
| 0.13    | 0.22   | 0.09   | 0.2    | NA       | NA       |
| 5.39    | 4.84   | 4.98   | 4.95   | -0.12988 | 0.598721 |
| 1.65    | 2.03   | 1.52   | 1.83   | 0.092173 | 0.757974 |

|        |        |        |        |          |          |
|--------|--------|--------|--------|----------|----------|
| 10.44  | 7.77   | 7.86   | 8.18   | -0.45095 | 0.000162 |
| 192.23 | 51.18  | 92.16  | 67.99  | -1.4698  | 4.87E-09 |
| 0      | 0.09   | 0      | 0.09   | NA       | NA       |
| 0.1    | 0.16   | 0.19   | 0.1    | NA       | NA       |
| 0.02   | 0.04   | 0.07   | 0      | NA       | NA       |
| 3.56   | 3.53   | 4.08   | 4.82   | 0.218681 | 0.207379 |
| 4.64   | 6.26   | 6.19   | 5.83   | 0.42043  | 0.001684 |
| 2.6    | 2.71   | 2.3    | 2.21   | -0.18232 | 0.573033 |
| 0.03   | 0.04   | 0.04   | 0.02   | -0.39047 | 0.608796 |
| 40.68  | 64.28  | 53.45  | 55.35  | 0.339967 | 0.004911 |
| 0.34   | 0.47   | 0.25   | 0.39   | 0.017452 | 0.986207 |
| 0      | 0      | 0.02   | 0      | NA       | NA       |
| 0      | 0      | 0      | 0      | NA       | NA       |
| 135.7  | 123.29 | 128.31 | 116.19 | -0.1973  | 0.071024 |
| 11.96  | 12.96  | 13.29  | 12.23  | 0.04023  | 0.861405 |
| 0      | 0      | 0      | 0      | NA       | NA       |
| 6.22   | 2.4    | 3.47   | 2.56   | -1.10465 | 4.51E-05 |
| 75.37  | 102.74 | 95.56  | 100.5  | 0.32202  | 0.000126 |
| 0.52   | 0.38   | 0.2    | 0.23   | -0.50171 | 0.487872 |
| 0      | 0      | 0      | 0      | NA       | NA       |
| 21.14  | 21.69  | 20.27  | 22.83  | 0.028947 | 0.862624 |
| 26.16  | 31.65  | 30.41  | 27.87  | 0.004326 | 0.986207 |
| 1.06   | 1.98   | 1.11   | 1.04   | 0.361305 | 0.434826 |
| 0      | 0      | 0      | 0      | NA       | NA       |
| 0      | 0      | 0      | 0      | NA       | NA       |
| 27.46  | 46.6   | 37.56  | 42.81  | 0.486777 | 2.02E-06 |
| 5.97   | 15.69  | 11.34  | 11.85  | 1.015497 | 1.07E-08 |
| 5.65   | 8.92   | 6.3    | 10.35  | 0.436401 | 0.033239 |
| 0      | 0      | 0      | 0      | NA       | NA       |
| 0.08   | 0.37   | 0.22   | 0.16   | 1.76375  | 0.001892 |
| 0      | 0      | 0      | 0      | NA       | NA       |
| 0      | 0      | 0      | 0      | NA       | NA       |
| 0      | 0      | 0      | 0      | NA       | NA       |
| 0.13   | 0.13   | 0.1    | 0.15   | -0.00275 | 0.997502 |
| 20.04  | 18.67  | 19.01  | 19.32  | 0.221243 | 0.051634 |
| 0      | 0      | 0      | 0      | NA       | NA       |
| 0      | 0.08   | 0      | 0.03   | NA       | NA       |
| 0      | 0      | 0      | 0      | NA       | NA       |
| 0      | 0      | 0      | 0.11   | NA       | NA       |
| 0      | 0      | 0      | 0      | NA       | NA       |
| 6.99   | 6.57   | 6.76   | 6.58   | -0.13168 | 0.368727 |
| 0.17   | 0.01   | 0.22   | 0.08   | -0.06194 | 0.947943 |
| 0      | 0.01   | 0      | 0      | NA       | NA       |
| 10.4   | 19.1   | 11.94  | 14.7   | 0.61205  | 3.56E-05 |
| 0.99   | 0.29   | 0.16   | 0.1    | -0.21858 | 0.799264 |

|        |        |        |        |          |          |
|--------|--------|--------|--------|----------|----------|
| 0      | 0      | 0      | 0      | NA       | NA       |
| 20.66  | 22.25  | 20.25  | 20.13  | 0.096978 | 0.46861  |
| 2.09   | 8.82   | 4.81   | 7.24   | 1.510416 | 1.63E-14 |
| 2.35   | 3      | 2.16   | 2.57   | -0.06683 | 0.856269 |
| 3.5    | 3.68   | 3.1    | 3.22   | 0.221702 | 0.141323 |
| 483.53 | 315.48 | 339.79 | 303.63 | -0.6212  | 5.23E-15 |
| 0.51   | 0.25   | 0.71   | 0.33   | -0.17126 | 0.841691 |
| 0      | 0      | 0      | 0      | NA       | NA       |
| 6.84   | 8.49   | 6.4    | 6.54   | 0.48561  | 0.000794 |
| 2.41   | 2.74   | 2.49   | 2.71   | 0.096045 | 0.555761 |
| 0      | 0      | 0      | 0      | NA       | NA       |
| 0.48   | 0      | 0.04   | 0.08   | NA       | NA       |
| 0.91   | 1.57   | 1.16   | 1.23   | 0.525316 | 0.061148 |
| 0      | 0      | 0      | 0      | NA       | NA       |
| 0      | 0      | 0      | 0      | NA       | NA       |
| 5.12   | 3.69   | 4.07   | 4.34   | 0.177887 | 0.362279 |
| 3.45   | 4.53   | 4.21   | 3.83   | 0.274342 | 0.052069 |
| 4.53   | 6.16   | 5.31   | 6.31   | -0.07831 | 0.841253 |
| 15.63  | 16.4   | 16.86  | 18.63  | 0.165864 | 0.3759   |
| 28.84  | 23.12  | 26.05  | 25.36  | -0.30768 | 0.000403 |
| 0      | 0      | 0      | 0      | NA       | NA       |
| 55.52  | 73.13  | 67.82  | 67.94  | 0.317397 | 0.000323 |
| 12.26  | 18.22  | 18.15  | 20.62  | 0.567467 | 3.68E-09 |
| 0      | 0      | 0      | 0      | NA       | NA       |
| 0.03   | 0.1    | 0.09   | 0.07   | 0.772647 | 0.230129 |
| 6.7    | 9.31   | 8.23   | 9.48   | 0.357142 | 0.006632 |
| 0      | 0      | 0      | 0      | NA       | NA       |
| 0.01   | 0.02   | 0      | 0      | NA       | NA       |
| 98.51  | 146.99 | 130.8  | 132.78 | 0.405427 | 7.51E-06 |
| 0.83   | 0.03   | 0.13   | 0.07   | -1.55634 | 0.00858  |
| 0.06   | 0.07   | 0.09   | 0.04   | -0.0577  | 0.948254 |
| 6.66   | 8      | 6.51   | 7.28   | 0.207212 | 0.319961 |
| 30.67  | 13.13  | 22.1   | 18.57  | -0.89153 | 7.84E-07 |
| 0.03   | 0.07   | 0.04   | 0      | NA       | NA       |
| 16.8   | 18.08  | 18.72  | 18.12  | -0.06152 | 0.740757 |
| 116.5  | 71     | 82.37  | 93.41  | -0.56062 | 3.67E-07 |
| 8.72   | 6.61   | 6.55   | 8.42   | -0.31862 | 0.060009 |
| 0      | 0      | 0      | 0.05   | NA       | NA       |
| 96.46  | 84.97  | 88.74  | 92.6   | -0.19413 | 0.028377 |
| 0      | 0      | 0      | 0      | NA       | NA       |
| 4.82   | 5.66   | 5.06   | 5.8    | 0.048021 | 0.852277 |
| 116.24 | 82.06  | 91.6   | 92.03  | -0.43833 | 8.45E-10 |
| 30.33  | 25.26  | 31.49  | 25.83  | -0.10664 | 0.345805 |
| 44.62  | 34.73  | 35.99  | 34.94  | -0.30161 | 0.000199 |
| 15.11  | 14.97  | 12.94  | 13.4   | -0.26082 | 0.036886 |

|        |        |        |        |          |          |
|--------|--------|--------|--------|----------|----------|
| 38.07  | 54.62  | 39.84  | 52.97  | 0.134735 | 0.221422 |
| 0      | 0.06   | 0      | 0.03   | NA       | NA       |
| 0      | 0      | 0      | 0      | NA       | NA       |
| 0.14   | 1.32   | 0.67   | 1.01   | 1.713315 | 4.60E-05 |
| 36.52  | 36.38  | 40.47  | 42.53  | -0.00726 | 0.964931 |
| 0      | 0      | 0      | 0      | NA       | NA       |
| 43.34  | 17.84  | 20.22  | 20.6   | -1.20177 | 1.42E-37 |
| 8.11   | 8.95   | 8.4    | 8.32   | 0.153098 | 0.610533 |
| 10.44  | 13.76  | 11.75  | 12.85  | 0.147555 | 0.365866 |
| 9.77   | 1.83   | 3.39   | 2.77   | -1.83533 | 3.61E-14 |
| 0      | 0.39   | 0.07   | 0.2    | NA       | NA       |
| 0      | 0      | 0      | 0      | NA       | NA       |
| 0.14   | 0.29   | 0.26   | 0.12   | 0.079933 | 0.93279  |
| 22.91  | 13.01  | 13.58  | 14.83  | -0.56684 | 2.69E-05 |
| 0      | 0.07   | 0.04   | 0.06   | -0.09061 | 0.923907 |
| 0      | 0      | 0      | 0      | NA       | NA       |
| 0.18   | 0      | 0      | 0      | NA       | NA       |
| 0      | 0      | 0      | 0      | NA       | NA       |
| 1.44   | 0.38   | 1.25   | 1.02   | -0.82204 | 0.024618 |
| 20.92  | 22.56  | 20.57  | 19.84  | 0.092883 | 0.618289 |
| 0      | 0      | 0      | 0      | NA       | NA       |
| 0      | 0      | 0      | 0      | NA       | NA       |
| 54.74  | 64.63  | 65.44  | 62.02  | 0.120141 | 0.36358  |
| 0      | 0      | 0      | 0      | NA       | NA       |
| 0.19   | 0.08   | 0.03   | 0.21   | -0.96761 | 0.134867 |
| 21.05  | 20.57  | 20.49  | 18.79  | -0.10527 | 0.488143 |
| 2.88   | 3      | 2.61   | 2.62   | -0.0537  | 0.850226 |
| 14.22  | 13.83  | 17.6   | 13.4   | 0.152858 | 0.406611 |
| 1.81   | 1.59   | 1.42   | 1.66   | -0.26902 | 0.42351  |
| 8.93   | 11.76  | 10.37  | 12.35  | 0.136751 | 0.470351 |
| 43.9   | 44.09  | 45.26  | 46.32  | 0.080665 | 0.486604 |
| 192.72 | 132.95 | 141.09 | 123.62 | -0.43102 | 2.71E-07 |
| 4.34   | 5.08   | 5.22   | 4.7    | 0.182618 | 0.289495 |
| 0      | 0      | 0      | 0      | NA       | NA       |
| 5.78   | 7.7    | 8.87   | 8.91   | 0.529302 | 1.52E-06 |
| 49.35  | 36.68  | 36.61  | 37.27  | -0.39229 | 0.000188 |
| 0.42   | 3.93   | 2.02   | 2.84   | 1.681418 | 0.000246 |
| 0      | 0.11   | 0.13   | 0.1    | NA       | NA       |
| 2.51   | 1.65   | 1.38   | 1.17   | -0.27176 | 0.658595 |
| 15.7   | 11.13  | 10.63  | 10.06  | -0.79343 | 8.05E-12 |
| 0      | 0      | 0      | 0.04   | NA       | NA       |
| 20.46  | 18.61  | 16.25  | 18.85  | 0.130877 | 0.319315 |
| 10.84  | 11.92  | 11.7   | 11.08  | 0.147308 | 0.382448 |
| 0.72   | 0.84   | 0.67   | 0.78   | 0.056799 | 0.931439 |
| 73.39  | 110.78 | 95.55  | 96.1   | 0.498672 | 1.20E-06 |

|       |        |        |                 |          |
|-------|--------|--------|-----------------|----------|
| 0     | 0      | 0      | 0 NA            | NA       |
| 0     | 0      | 0.02   | 0.02 NA         | NA       |
| 0     | 0      | 0      | 0.02 NA         | NA       |
| 7.65  | 33.67  | 18.23  | 24.29 1.550288  | 5.94E-19 |
| 0     | 0      | 0      | 0 NA            | NA       |
| 0     | 0      | 0      | 0 NA            | NA       |
| 0     | 0      | 0      | 0 NA            | NA       |
| 0.08  | 0.1    | 0.19   | 0.15 -0.58512   | 0.386244 |
| 0     | 0      | 0      | 0 NA            | NA       |
| 0.5   | 0.68   | 0.46   | 0.95 0.419127   | 0.50547  |
| 1.15  | 2.43   | 1.92   | 2.39 0.569667   | 0.2488   |
| 7.73  | 0.64   | 2.2    | 1.08 -2.53112   | 8.12E-28 |
| 0     | 0      | 0      | 0.02 NA         | NA       |
| 3.32  | 1.42   | 1.92   | 1.77 -0.02738   | 0.938996 |
| 89.71 | 128.74 | 111.05 | 128.31 0.448722 | 6.79E-06 |
| 0.22  | 0.33   | 0.12   | 0.16 0.510567   | 0.472312 |
| 0.61  | 0.34   | 0.28   | 0.14 -0.02659   | 0.975981 |
| 0.3   | 0.43   | 0.21   | 0.05 -0.36852   | 0.638027 |
| 28.29 | 38.23  | 30.29  | 33.82 0.130488  | 0.381081 |
| 12.83 | 11.3   | 10.32  | 10.56 -0.11794  | 0.539651 |
| 14.39 | 13.59  | 11.59  | 12.49 -0.11775  | 0.633008 |
| 50.23 | 67.05  | 70.7   | 70.28 0.442284  | 1.21E-07 |
| 0.03  | 0.29   | 0.15   | 0.11 0.976334   | 0.13073  |
| 6.21  | 40.22  | 26.59  | 36.28 2.186962  | 9.30E-42 |
| 2.98  | 3.2    | 5.07   | 4.36 0.261569   | 0.115445 |
| 10.88 | 1.85   | 4.24   | 2.65 -1.33893   | 8.98E-08 |
| 37.86 | 39.13  | 45.31  | 44.07 0.17778   | 0.132667 |
| 0     | 0      | 0      | 0 NA            | NA       |
| 13.11 | 15.04  | 12.64  | 10.33 -0.07808  | 0.747622 |
| 3.58  | 3.29   | 3.89   | 3.35 -0.14544   | 0.698875 |
| 0     | 0      | 0      | 0 NA            | NA       |
| 17.7  | 14.23  | 14.56  | 16.85 -0.1019   | 0.546747 |
| 1.19  | 0.5    | 0.63   | 0.54 -0.67929   | 0.165128 |
| 0     | 0      | 0      | 0 NA            | NA       |
| 0     | 0      | 0      | 0 NA            | NA       |
| 15.3  | 15.04  | 13.08  | 15.74 -0.28604  | 0.010785 |
| 0     | 0      | 0      | 0 NA            | NA       |
| 0     | 0      | 0      | 0 NA            | NA       |
| 1.39  | 0.9    | 0.89   | 1.13 -0.07853   | 0.88556  |
| 0.25  | 0.04   | 0.05   | 0.04 -0.91501   | 0.148389 |
| 0     | 0      | 0      | 0 NA            | NA       |
| 22.13 | 19.31  | 19.43  | 18.14 -0.11675  | 0.705156 |
| 0     | 0      | 0      | 0 NA            | NA       |
| 1.08  | 0.98   | 1.72   | 2.16 -0.35708   | 0.386815 |
| 0     | 0      | 0      | 0 NA            | NA       |

|       |       |       |       |          |          |
|-------|-------|-------|-------|----------|----------|
| 21.14 | 14.75 | 16.6  | 17.77 | -0.43285 | 2.81E-07 |
| 0     | 0     | 0     | 0     | NA       | NA       |
| 0     | 0     | 0     | 0     | NA       | NA       |
| 0     | 0     | 0     | 0     | NA       | NA       |
| 11.49 | 3.6   | 4.47  | 3.14  | -1.66648 | 2.76E-25 |
| 0     | 0     | 0.05  | 0.06  | NA       | NA       |
| 0     | 0     | 0     | 0.19  | NA       | NA       |
| 46.37 | 55.62 | 50.71 | 51.03 | 0.200989 | 0.098916 |
| 2.15  | 2.2   | 2.3   | 2.1   | -0.15176 | 0.667678 |
| 0     | 0     | 0     | 0     | NA       | NA       |
| 35.73 | 42.04 | 43.94 | 43.85 | 0.273385 | 0.038274 |
| 1.36  | 1.22  | 1.96  | 1.9   | 0.106368 | 0.798939 |
| 0.23  | 0     | 0     | 0.03  | NA       | NA       |
| 0     | 0     | 0     | 0     | NA       | NA       |
| 5.82  | 9.85  | 11.21 | 11.12 | 0.420744 | 0.0009   |
| 0     | 0     | 0     | 0     | NA       | NA       |
| 1.77  | 1.62  | 1.39  | 1.09  | -0.30055 | 0.468238 |
| 12.8  | 12.68 | 13.69 | 13.1  | 0.041201 | 0.843467 |
| 0     | 0.04  | 0     | 0     | NA       | NA       |
| 0     | 0     | 0     | 0     | NA       | NA       |
| 5.57  | 7.11  | 6.68  | 7.36  | 0.228737 | 0.310838 |
| 0     | 0     | 0     | 0     | NA       | NA       |
| 0.01  | 0.03  | 0.02  | 0.02  | 0.589924 | 0.389529 |
| 60.46 | 80.37 | 74.66 | 76.78 | 0.195997 | 0.044524 |
| 0.96  | 24.85 | 9.32  | 19.16 | 3.069563 | 5.41E-12 |
| 0     | 0     | 0     | 0     | NA       | NA       |
| 23.5  | 32.24 | 32.04 | 28.19 | 0.30481  | 0.057465 |
| 0     | 0     | 0     | 0     | NA       | NA       |
| 15    | 13.42 | 12.62 | 11.77 | 0.062054 | 0.763862 |
| 0     | 0     | 0     | 0     | NA       | NA       |
| 0.49  | 1.87  | 1.94  | 1.46  | 1.532311 | 5.74E-06 |
| 0     | 0     | 0     | 0.06  | NA       | NA       |
| 0.07  | 0.24  | 0.11  | 0.13  | NA       | NA       |
| 0.2   | 0     | 0.07  | 0.23  | NA       | NA       |
| 1.4   | 1.79  | 2.09  | 2.62  | 0.505466 | 0.001661 |
| 0     | 0     | 0     | 0     | NA       | NA       |
| 2.38  | 2.82  | 2.15  | 2.25  | -0.03318 | 0.933073 |
| 6.96  | 0.68  | 1.06  | 1.07  | -3.14147 | 4.06E-80 |
| 23.06 | 5.75  | 8.47  | 6.64  | -1.80329 | 2.52E-33 |
| 0     | 0     | 0     | 0     | NA       | NA       |
| 0     | 0     | 0     | 0     | NA       | NA       |
| 5.66  | 9.95  | 8.74  | 10.38 | 0.552259 | 9.96E-07 |
| 30.35 | 36.22 | 37.31 | 39.83 | 0.282205 | 0.00407  |
| 0.07  | 0.05  | 0.07  | 0.08  | NA       | NA       |
| 0     | 0.06  | 0     | 0.04  | NA       | NA       |

|        |        |        |        |          |          |
|--------|--------|--------|--------|----------|----------|
| 15.39  | 14.26  | 14.31  | 13.67  | -0.17465 | 0.103489 |
| 0.89   | 0.75   | 0.54   | 0.67   | -0.38578 | 0.194214 |
| 0.11   | 0.19   | 0.1    | 0.19   | -0.02409 | 0.976803 |
| 0      | 0      | 0      | 0      | NA       | NA       |
| 0      | 0      | 0      | 0      | NA       | NA       |
| 129.46 | 106.55 | 107.91 | 109.89 | -0.32463 | 1.91E-05 |
| 5.8    | 8.66   | 7.39   | 7.11   | 0.46655  | 0.001753 |
| 0      | 0      | 0      | 0      | NA       | NA       |
| 7.6    | 10.21  | 9.91   | 9.41   | 0.250313 | 0.069327 |
| 1.49   | 2      | 3.94   | 2.1    | 0.021325 | 0.960112 |
| 0      | 0      | 0      | 0      | NA       | NA       |
| 0.06   | 0      | 0.02   | 0      | NA       | NA       |
| 0      | 0      | 0      | 0      | NA       | NA       |
| 291.2  | 119.47 | 169.54 | 146.11 | -1.04586 | 7.02E-27 |
| 0      | 0      | 0.01   | 0      | NA       | NA       |
| 1.89   | 0.68   | 0.15   | 1.23   | -0.3133  | 0.699246 |
| 1.47   | 1.94   | 1.95   | 1.99   | 0.090427 | 0.760637 |
| 3.73   | 4.1    | 4.07   | 4.15   | 0.133153 | 0.555333 |
| 0      | 0      | 0      | 0      | NA       | NA       |
| 0      | 0.63   | 0.44   | 0.56   | 1.278985 | 0.028637 |
| 0      | 0      | 0      | 0      | NA       | NA       |
| 22.13  | 26.89  | 25.94  | 26.89  | 0.141463 | 0.209819 |
| 0      | 0      | 0      | 0.02   | NA       | NA       |
| 17.16  | 18.85  | 17.89  | 17.41  | 0.019041 | 0.901741 |
| 29.48  | 36.1   | 30.22  | 30.2   | 0.057886 | 0.771771 |
| 6.4    | 9.12   | 7.98   | 7.01   | 0.256731 | 0.147997 |
| 24.58  | 31.17  | 24.83  | 25.9   | 0.244812 | 0.060975 |
| 14.35  | 12.35  | 14     | 13.43  | -0.1715  | 0.296596 |
| 0      | 0      | 0      | 0      | NA       | NA       |
| 4.24   | 2.26   | 4.25   | 2.49   | -0.50499 | 0.134438 |
| 0.87   | 1.88   | 1.81   | 1.94   | 0.535827 | 0.25497  |
| 0      | 0      | 0      | 0      | NA       | NA       |
| 0      | 0      | 0      | 0      | NA       | NA       |
| 16.91  | 27.18  | 22.25  | 23.6   | 0.442231 | 0.001095 |
| 8.83   | 6.99   | 7.38   | 7.43   | -0.29049 | 0.042767 |
| 0      | 0      | 0      | 0      | NA       | NA       |
| 18.16  | 24.74  | 21.88  | 29.1   | 0.375394 | 0.000842 |
| 0      | 0      | 0.01   | 0      | NA       | NA       |
| 0.01   | 0.02   | 0.06   | 0.04   | 0.061344 | 0.948254 |
| 17.53  | 69.33  | 47.49  | 56.06  | 1.566851 | 1.85E-32 |
| 82.25  | 89.28  | 111.94 | 108.87 | 0.277669 | 0.032456 |
| 0      | 0      | 0.02   | 0      | NA       | NA       |
| 3.72   | 7.71   | 6.03   | 6.4    | 0.579674 | 0.002745 |
| 0      | 0      | 0      | 0      | NA       | NA       |
| 0      | 0      | 0      | 0      | NA       | NA       |



|       |       |        |                 |          |
|-------|-------|--------|-----------------|----------|
| 0     | 0     | 0      | 0 NA            | NA       |
| 0     | 0     | 0      | 0 NA            | NA       |
| 0.26  | 0     | 0.37   | 0.42 NA         | NA       |
| 0.21  | 0.05  | 0.2    | 0.17 -0.18969   | 0.788202 |
| 13.98 | 15.42 | 17.59  | 14.91 0.06343   | 0.794617 |
| 0     | 0     | 0      | 0 NA            | NA       |
| 2.38  | 2.63  | 2.56   | 1.53 -0.22141   | 0.564237 |
| 1.83  | 2.35  | 2.15   | 2.47 0.364251   | 0.054139 |
| 0     | 0     | 0      | 0 NA            | NA       |
| 0     | 0     | 0      | 0 NA            | NA       |
| 0     | 0     | 0      | 0 NA            | NA       |
| 0.23  | 0.11  | 0.16   | 0.14 -0.10904   | 0.905189 |
| 0     | 0     | 0      | 0 NA            | NA       |
| 0     | 0     | 0      | 0 NA            | NA       |
| 0.37  | 0.16  | 0.07   | 0.34 -0.21515   | 0.801901 |
| 0     | 0     | 0      | 0 NA            | NA       |
| 17.25 | 17.4  | 19.37  | 16.29 0.014634  | 0.940418 |
| 0     | 0     | 0      | 0 NA            | NA       |
| 0     | 0     | 0      | 0 NA            | NA       |
| 17.52 | 20.65 | 20.43  | 21.92 0.147325  | 0.491481 |
| 0     | 0     | 0      | 0.31 NA         | NA       |
| 0     | 0     | 0      | 0 NA            | NA       |
| 1.26  | 1.22  | 0.91   | 1.07 -0.38802   | 0.239085 |
| 0     | 0     | 0      | 0 NA            | NA       |
| 0     | 0     | 0      | 0 NA            | NA       |
| 0     | 0     | 0      | 0 NA            | NA       |
| 0.43  | 0.12  | 0.27   | 0.24 -0.19012   | 0.796717 |
| 0     | 0     | 0      | 0 NA            | NA       |
| 0     | 0     | 0      | 0 NA            | NA       |
| 0     | 0     | 0      | 0 NA            | NA       |
| 0     | 0     | 0      | 0 NA            | NA       |
| 0     | 0     | 0      | 0 NA            | NA       |
| 0.03  | 0.09  | 0.07   | 0.1 NA          | NA       |
| 178.7 | 190.7 | 186.33 | 184.66 -0.03359 | 0.815873 |
| 0     | 0     | 0      | 0 NA            | NA       |
| 0     | 0     | 0      | 0 NA            | NA       |
| 0     | 0     | 0      | 0 NA            | NA       |
| 4.82  | 4.91  | 5.21   | 6.64 0.211475   | 0.339271 |
| 0     | 0     | 0      | 0 NA            | NA       |
| 0     | 0     | 0.01   | 0 NA            | NA       |
| 0.65  | 0.03  | 0.22   | 0.09 -0.95586   | 0.120961 |
| 17.94 | 21    | 18.66  | 18.21 0.020807  | 0.935958 |
| 0.19  | 0.05  | 0.02   | 0.03 NA         | NA       |
| 3.42  | 2.66  | 2.63   | 2.64 -0.25821   | 0.317109 |
| 41.14 | 34.76 | 37.39  | 34.95 -0.18084  | 0.062063 |

|       |       |       |       |          |          |
|-------|-------|-------|-------|----------|----------|
| 6.76  | 7.57  | 7.9   | 7.95  | 0.248943 | 0.206326 |
| 0.04  | 0.02  | 0     | 0.03  | NA       | NA       |
| 2.5   | 1.25  | 1.16  | 0.84  | -0.54419 | 0.136583 |
| 0     | 0     | 0     | 0     | NA       | NA       |
| 1.17  | 0.26  | 0.4   | 0.03  | -0.70931 | 0.303848 |
| 27.68 | 42.84 | 31.31 | 37.64 | 0.488079 | 1.22E-05 |
| 6.09  | 6.21  | 6.91  | 6.73  | 0.009484 | 0.969488 |
| 0.84  | 0.84  | 0.89  | 1.08  | 0.082427 | 0.756231 |
| 2.72  | 2.88  | 3.05  | 2.63  | -0.28197 | 0.351115 |
| 0.51  | 2.45  | 1.48  | 1.28  | 1.54322  | 1.02E-05 |
| 1.33  | 2.11  | 1.5   | 1.79  | 0.115226 | 0.556593 |
| 14.23 | 16.85 | 17.77 | 17.61 | -0.00729 | 0.972611 |
| 20.97 | 17.66 | 18.54 | 19.21 | -0.17876 | 0.192705 |
| 13.93 | 15.41 | 12.4  | 14.91 | 0.192113 | 0.141625 |
| 1.35  | 1.04  | 1.43  | 1.2   | -0.37846 | 0.378021 |
| 4.72  | 7.17  | 5.47  | 6.61  | 0.105601 | 0.713701 |
| 7.73  | 8.34  | 8.98  | 9     | 0.146443 | 0.576547 |
| 25.76 | 5.52  | 6.14  | 5.79  | -2.11859 | 2.06E-45 |
| 0.35  | 0.21  | 0.21  | 0.24  | -0.94768 | 0.072419 |
| 0     | 0     | 0     | 0     | NA       | NA       |
| 0     | 0     | 0     | 0.11  | NA       | NA       |
| 0     | 0     | 0     | 0     | NA       | NA       |
| 10.04 | 6.71  | 8.46  | 6.99  | -0.28324 | 0.162608 |
| 3.43  | 0.63  | 1.97  | 1.26  | -1.38247 | 1.66E-05 |
| 0.12  | 0.01  | 0.01  | 0.06  | -1.21599 | 0.048562 |
| 0     | 0     | 0     | 0     | NA       | NA       |
| 1.47  | 1.68  | 1.86  | 2.01  | 0.256943 | 0.079259 |
| 0     | 0     | 0     | 0     | NA       | NA       |
| 0     | 0     | 0     | 0     | NA       | NA       |
| 0     | 0.02  | 0.02  | 0     | NA       | NA       |
| 0     | 0     | 0.01  | 0     | NA       | NA       |
| 0     | 0     | 0     | 0     | NA       | NA       |
| 0     | 0     | 0     | 0     | NA       | NA       |
| 0.02  | 0.01  | 0.01  | 0.01  | NA       | NA       |
| 2.17  | 1.47  | 1.19  | 1.21  | -0.79891 | 0.001629 |
| 0.08  | 0.04  | 0.06  | 0.04  | -0.48848 | 0.480886 |
| 3.35  | 11.02 | 7.27  | 9.46  | 1.645701 | 4.18E-27 |
| 0     | 0     | 0     | 0     | NA       | NA       |
| 0     | 0     | 0     | 0     | NA       | NA       |
| 7.76  | 6.72  | 7.09  | 7.93  | 0.060839 | 0.724081 |
| 30.92 | 18.89 | 21.42 | 20.82 | -0.27186 | 0.020582 |
| 13.28 | 22.36 | 19    | 22.55 | 0.478807 | 6.17E-05 |
| 0     | 0     | 0     | 0.09  | NA       | NA       |
| 1.19  | 0.56  | 0.29  | 0.53  | -1.05617 | 2.65E-05 |
| 0     | 0     | 0     | 0     | NA       | NA       |

|       |        |        |        |          |          |
|-------|--------|--------|--------|----------|----------|
| 2.63  | 4.31   | 3.78   | 3.24   | 0.26098  | 0.156826 |
| 0     | 0      | 0      | 0      | NA       | NA       |
| 0.34  | 0.47   | 0.49   | 0.53   | -0.10941 | 0.85721  |
| 0     | 0      | 0      | 0      | NA       | NA       |
| 0.36  | 0.17   | 0.21   | 0.25   | -1.24033 | 0.001561 |
| 1.89  | 9.96   | 7.18   | 8.16   | 1.989974 | 1.47E-28 |
| 0     | 0      | 0      | 0      | NA       | NA       |
| 3.06  | 8      | 8.17   | 7.37   | 1.217119 | 5.60E-21 |
| 3.31  | 2.3    | 4.39   | 2.68   | -0.01649 | 0.957354 |
| 1.88  | 0.63   | 0.47   | 0.91   | -0.5038  | 0.269703 |
| 6.79  | 6.56   | 6.58   | 6.99   | -0.13331 | 0.463668 |
| 0.08  | 0      | 0      | 0      | NA       | NA       |
| 25.2  | 17.91  | 25.39  | 22.39  | -0.24884 | 0.079439 |
| 0.59  | 0.38   | 0.38   | 0.4    | -0.27862 | 0.617258 |
| 2.36  | 4.23   | 4.04   | 4.87   | 0.042387 | 0.946869 |
| 36.98 | 36.94  | 35.09  | 34.74  | -0.0666  | 0.734646 |
| 0.22  | 0.26   | 0.31   | 0.09   | -0.69443 | 0.319006 |
| 0     | 0      | 0      | 0      | NA       | NA       |
| 0     | 0      | 0      | 0      | NA       | NA       |
| 0     | 0      | 0      | 0      | NA       | NA       |
| 0.27  | 0.51   | 0.57   | 0.51   | 0.312157 | 0.537416 |
| 0     | 0      | 0      | 0      | NA       | NA       |
| 0     | 0      | 0      | 0      | NA       | NA       |
| 0     | 0      | 0      | 0      | NA       | NA       |
| 0     | 0      | 0      | 0      | NA       | NA       |
| 0     | 0      | 0.01   | 0      | NA       | NA       |
| 0.61  | 0.72   | 0.39   | 1.09   | -0.33867 | 0.321091 |
| 0     | 0      | 0      | 0      | NA       | NA       |
| 0     | 0      | 0      | 0      | NA       | NA       |
| 22.33 | 20.1   | 23.84  | 20.61  | -0.18301 | 0.109509 |
| 0     | 0      | 0      | 0      | NA       | NA       |
| 85.3  | 113.53 | 109.29 | 112.36 | 0.362331 | 6.58E-06 |
| 0     | 0      | 0      | 0      | NA       | NA       |
| 0     | 0      | 0      | 0      | NA       | NA       |
| 2.75  | 1.53   | 2.68   | 1.47   | -0.30827 | 0.242865 |
| 0     | 0      | 0      | 0      | NA       | NA       |
| 4.75  | 4.43   | 3.81   | 4.19   | -0.32885 | 0.097523 |
| 5.11  | 5.67   | 7.63   | 6.67   | 0.271286 | 0.081394 |
| 0     | 0      | 0      | 0      | NA       | NA       |
| 0.5   | 0.3    | 0.25   | 0.21   | 0.205337 | 0.800884 |
| 96.08 | 125.41 | 133.2  | 136.15 | 0.39343  | 3.74E-06 |
| 21.08 | 26.84  | 19.86  | 24.78  | 0.363013 | 0.001769 |
| 0     | 0      | 0      | 0      | NA       | NA       |
| 0     | 0.04   | 0      | 0      | NA       | NA       |
| 0.05  | 0      | 0.07   | 0.04   | NA       | NA       |

|        |        |       |        |          |          |
|--------|--------|-------|--------|----------|----------|
| 38.1   | 49.71  | 47.56 | 51     | 0.35114  | 3.09E-05 |
| 0      | 0      | 0     | 0      | NA       | NA       |
| 0      | 0      | 0.05  | 0.01   | NA       | NA       |
| 0.01   | 0      | 0     | 0.01   | NA       | NA       |
| 10.74  | 4.14   | 9.35  | 7.46   | -0.70753 | 0.001747 |
| 0      | 0      | 0     | 0      | NA       | NA       |
| 8.04   | 6.4    | 6.03  | 5.62   | -0.28574 | 0.322715 |
| 0      | 0      | 0     | 0      | NA       | NA       |
| 0.94   | 0.86   | 0.87  | 1.05   | 0.282602 | 0.55316  |
| 0      | 0      | 0     | 0      | NA       | NA       |
| 19.86  | 28.97  | 27.88 | 26.9   | 0.444385 | 2.64E-06 |
| 0      | 0      | 0     | 0      | NA       | NA       |
| 9.77   | 75.03  | 50.27 | 63.24  | 2.244946 | 6.55E-52 |
| 4.69   | 1.39   | 1.52  | 1.31   | -1.50942 | 5.96E-11 |
| 1.51   | 0.7    | 1.49  | 0.68   | -1.0641  | 0.022897 |
| 31.82  | 33.8   | 38.78 | 39.87  | 0.315292 | 0.00077  |
| 0.15   | 1.03   | 0.12  | 0.44   | NA       | NA       |
| 0      | 0.05   | 0.15  | 0.02   | NA       | NA       |
| 0      | 0      | 0     | 0      | NA       | NA       |
| 0      | 0      | 0     | 0      | NA       | NA       |
| 0      | 0      | 0     | 0      | NA       | NA       |
| 0.11   | 0.43   | 0.38  | 0.59   | 0.043575 | 0.96253  |
| 0.12   | 0.28   | 0.22  | 0.21   | 0.692936 | 0.161397 |
| 0.65   | 0.94   | 0.69  | 1.17   | 0.247308 | 0.719609 |
| 0.83   | 0.44   | 0.49  | 0.68   | -0.54893 | 0.301734 |
| 16.72  | 20.84  | 19.6  | 17.72  | 0.006715 | 0.972939 |
| 0      | 0      | 0     | 0      | NA       | NA       |
| 14.6   | 17.79  | 16.51 | 18.82  | 0.308458 | 0.010647 |
| 0      | 0      | 0     | 0      | NA       | NA       |
| 0      | 0      | 0     | 0      | NA       | NA       |
| 14.01  | 10.18  | 12.21 | 13.45  | -0.27558 | 0.071289 |
| 24.82  | 41.06  | 37.66 | 32.45  | 0.495665 | 0.000102 |
| 6.26   | 2.06   | 2.76  | 2.74   | -1.22352 | 6.10E-09 |
| 133.96 | 140.03 | 138.9 | 148.56 | -0.01398 | 0.912249 |
| 0      | 0      | 0     | 0      | NA       | NA       |
| 0      | 0      | 0     | 0      | NA       | NA       |
| 23.57  | 32.16  | 26.44 | 28.81  | 0.217206 | 0.027927 |
| 0      | 0      | 0     | 0      | NA       | NA       |
| 8.71   | 8.41   | 7.8   | 8.43   | -0.08656 | 0.476585 |
| 0.36   | 0.36   | 0.58  | 0.66   | 0.201199 | 0.802725 |
| 12.58  | 9.5    | 10.41 | 10.3   | -0.44646 | 8.21E-06 |
| 0      | 0      | 0     | 0      | NA       | NA       |
| 0      | 0.06   | 0.22  | 0.06   | NA       | NA       |
| 20.81  | 16.43  | 18.85 | 17.51  | -0.10265 | 0.501026 |
| 4.83   | 5.15   | 5.12  | 5.84   | 0.151036 | 0.341727 |

|       |       |       |       |          |          |
|-------|-------|-------|-------|----------|----------|
| 8.85  | 10.26 | 9.57  | 8.85  | 0.100017 | 0.681472 |
| 12.46 | 14.1  | 15.01 | 14.81 | 0.101485 | 0.475711 |
| 0     | 0     | 0     | 0     | NA       | NA       |
| 7.01  | 5.33  | 4.64  | 5.65  | -0.16174 | 0.435791 |
| 8.64  | 8.75  | 9.74  | 12.04 | -0.08799 | 0.658623 |
| 13.2  | 9.04  | 10.47 | 11.46 | -0.48187 | 0.000725 |
| 1.77  | 1.29  | 2.23  | 2.14  | -0.03139 | 0.94667  |
| 11.45 | 10.59 | 10.87 | 9.33  | -0.01772 | 0.937483 |
| 2.79  | 2     | 2.26  | 2.07  | -0.32272 | 0.052219 |
| 10.03 | 9.88  | 8.71  | 10.06 | -0.04856 | 0.816626 |
| 0.17  | 0     | 0.02  | 0.04  | -1.74039 | 0.002369 |
| 0     | 0     | 0.02  | 0     | NA       | NA       |
| 31.84 | 40.68 | 37    | 41.7  | 0.334006 | 0.003123 |
| 27.61 | 22.59 | 26.34 | 24.33 | -0.28093 | 0.031396 |
| 0     | 0     | 0     | 0     | NA       | NA       |
| 0.58  | 0     | 0.07  | 0     | NA       | NA       |
| 20.95 | 20.95 | 23.95 | 22.7  | 0.036717 | 0.784567 |
| 1.94  | 2.07  | 1.81  | 1.92  | -0.10062 | 0.642532 |
| 0     | 0     | 0     | 0     | NA       | NA       |
| 0     | 0.02  | 0.04  | 0     | NA       | NA       |
| 0     | 0     | 0     | 0     | NA       | NA       |
| 1.78  | 1.86  | 1.74  | 0.6   | 0.408842 | 0.511724 |
| 7.56  | 6.95  | 9.16  | 8.5   | 0.308405 | 0.110254 |
| 0     | 0     | 0     | 0     | NA       | NA       |
| 49.38 | 50.3  | 47.67 | 47.64 | -0.16423 | 0.132862 |
| 16.2  | 23.33 | 20.21 | 25.16 | 0.410593 | 4.95E-05 |
| 0.12  | 0.26  | 0.08  | 0.09  | -0.1045  | 0.90897  |
| 0     | 0     | 0     | 0     | NA       | NA       |
| 0     | 0     | 0     | 0.03  | NA       | NA       |
| 0     | 0.03  | 0     | 0.08  | NA       | NA       |
| 0     | 0     | 0     | 0     | NA       | NA       |
| 23.82 | 20.48 | 22.14 | 15.8  | -0.32502 | 0.000875 |
| 2.19  | 0.73  | 1.69  | 0.78  | -0.95694 | 0.004416 |
| 5.77  | 5.55  | 5.43  | 6.68  | 0.101057 | 0.707245 |
| 0     | 0     | 0     | 0     | NA       | NA       |
| 8.03  | 11.71 | 11.9  | 12.89 | 0.302777 | 0.000636 |
| 0     | 0     | 0     | 0     | NA       | NA       |
| 0     | 0     | 0     | 0     | NA       | NA       |
| 0     | 0     | 0     | 0     | NA       | NA       |
| 29.66 | 18.79 | 26.39 | 22.1  | -0.4333  | 3.76E-05 |
| 0     | 0     | 0     | 0     | NA       | NA       |
| 0     | 0.07  | 0.02  | 0     | NA       | NA       |
| 0.04  | 0.03  | 0.03  | 0.03  | 0.207787 | 0.808931 |
| 49.44 | 41.77 | 47.52 | 43.8  | -0.23286 | 0.013607 |
| 0     | 0     | 0     | 0     | NA       | NA       |

|        |        |        |        |          |          |
|--------|--------|--------|--------|----------|----------|
| 0      | 0      | 0      | 0.26   | NA       | NA       |
| 0      | 0      | 0      | 0      | NA       | NA       |
| 0      | 0      | 0      | 0      | NA       | NA       |
| 0      | 0      | 0      | 0      | NA       | NA       |
| 10.13  | 28.96  | 18.39  | 23.89  | 1.114767 | 2.62E-15 |
| 0      | 0      | 0      | 0      | NA       | NA       |
| 0.44   | 0.28   | 0.24   | 0.18   | -0.17152 | 0.840472 |
| 0      | 0      | 0      | 0      | NA       | NA       |
| 0      | 0      | 0      | 0      | NA       | NA       |
| 7.7    | 7.33   | 9.01   | 7.03   | -0.06086 | 0.769067 |
| 5.32   | 3.2    | 3.29   | 4.24   | -0.34298 | 0.03132  |
| 0      | 0      | 0.12   | 0      | -0.69039 | 0.26179  |
| 36.13  | 105.95 | 76.65  | 95.02  | 1.302185 | 8.40E-30 |
| 0      | 0.01   | 0      | 0      | NA       | NA       |
| 1.34   | 1.28   | 1.83   | 1.69   | 0.417396 | 0.402014 |
| 6.14   | 14.56  | 18.84  | 13.96  | 1.135568 | 8.45E-11 |
| 0      | 0      | 0      | 0      | NA       | NA       |
| 0      | 0      | 0.03   | 0      | NA       | NA       |
| 0.09   | 0.1    | 0      | 0.09   | NA       | NA       |
| 12.18  | 11.65  | 11.79  | 11.83  | -0.12879 | 0.437644 |
| 0      | 0      | 0      | 0      | NA       | NA       |
| 0      | 0.05   | 0.01   | 0      | NA       | NA       |
| 18.71  | 2.31   | 3.64   | 2.83   | -2.65232 | 5.07E-78 |
| 0      | 0      | 0.02   | 0.14   | NA       | NA       |
| 5.05   | 5.23   | 4.37   | 4.23   | -0.12184 | 0.561641 |
| 18.03  | 4.98   | 7.89   | 6.35   | -1.23946 | 9.11E-13 |
| 1.8    | 1.39   | 2.11   | 2.47   | 0.161509 | 0.722365 |
| 13.63  | 19.57  | 18.47  | 16.85  | 0.475824 | 0.000497 |
| 0      | 0.02   | 0      | 0      | NA       | NA       |
| 0      | 0      | 0      | 0      | NA       | NA       |
| 2.98   | 2.77   | 4.3    | 3.32   | 0.232321 | 0.419838 |
| 5.08   | 3.54   | 4.25   | 4.34   | -0.60551 | 4.88E-06 |
| 215.82 | 201.32 | 221.67 | 204.83 | -0.07739 | 0.511909 |
| 0      | 0      | 0      | 0      | NA       | NA       |
| 0      | 0      | 0      | 0      | NA       | NA       |
| 14.73  | 7.42   | 6.91   | 7.51   | -0.56329 | 0.000109 |
| 34.95  | 133.7  | 92.92  | 117.44 | 1.417637 | 6.38E-32 |
| 6.99   | 6.36   | 5.19   | 5.93   | -0.23434 | 0.223121 |
| 1.67   | 1.04   | 1.12   | 1.05   | -0.37336 | 0.301759 |
| 0      | 0      | 0.1    | 0      | NA       | NA       |
| 0      | 0      | 0      | 0      | NA       | NA       |
| 1.13   | 1.27   | 1.73   | 1.35   | 0.324704 | 0.483341 |
| 0      | 0      | 0      | 0      | NA       | NA       |
| 0.08   | 0      | 0.05   | 0      | NA       | NA       |
| 0      | 0.06   | 0.05   | 0.12   | NA       | NA       |

|        |        |        |        |          |          |
|--------|--------|--------|--------|----------|----------|
| 14.38  | 15.87  | 14.2   | 16.98  | 0.219829 | 0.029784 |
| 5.03   | 7.61   | 7.13   | 10.61  | 0.830646 | 1.46E-06 |
| 0.19   | 0.04   | 0.28   | 0.17   | -0.02052 | 0.983468 |
| 0      | 0      | 0      | 0      | NA       | NA       |
| 236.3  | 133.53 | 171.79 | 157.5  | -0.66758 | 5.74E-13 |
| 0      | 0      | 0      | 0      | NA       | NA       |
| 26.39  | 28.81  | 47.59  | 31.02  | 0.134884 | 0.232634 |
| 0.13   | 0.14   | 0.14   | 0.15   | 0.645006 | 0.324226 |
| 2.97   | 3.98   | 3.78   | 3.84   | 0.174564 | 0.296522 |
| 0      | 0      | 0      | 0      | NA       | NA       |
| 0      | 0.04   | 0.02   | 0.02   | NA       | NA       |
| 0      | 0      | 0      | 0      | NA       | NA       |
| 1.62   | 1.3    | 0.95   | 1.22   | -0.17827 | 0.671258 |
| 0      | 0      | 0      | 0      | NA       | NA       |
| 0      | 0      | 0      | 0      | NA       | NA       |
| 0      | 0      | 0      | 0      | NA       | NA       |
| 6.14   | 6.29   | 5.88   | 5.84   | 0.166596 | 0.388424 |
| 12.02  | 16.45  | 12.27  | 13.87  | 0.339595 | 0.011724 |
| 0      | 0      | 0      | 0      | NA       | NA       |
| 0      | 0      | 0      | 0.08   | NA       | NA       |
| 91.19  | 109.37 | 85.03  | 88.44  | -0.08604 | 0.629081 |
| 0      | 0      | 0      | 0      | NA       | NA       |
| 26.5   | 31.13  | 29.39  | 30.12  | 0.242053 | 0.012819 |
| 0.1    | 0      | 0.12   | 0.1    | -0.87455 | 0.186354 |
| 0      | 0      | 0      | 0      | NA       | NA       |
| 18.56  | 30.63  | 20.87  | 22.71  | 0.46897  | 0.001683 |
| 0      | 0      | 0      | 0      | NA       | NA       |
| 0      | 0      | 0      | 0      | NA       | NA       |
| 7.44   | 5.13   | 6.1    | 6      | -0.71621 | 2.29E-07 |
| 0      | 0      | 0      | 0      | NA       | NA       |
| 0.39   | 0.19   | 0.77   | 0.49   | -0.87716 | 0.095475 |
| 559.19 | 566.96 | 593.82 | 539.66 | -0.0025  | 0.986207 |
| 0.05   | 0.12   | 0.31   | 0.11   | 0.437635 | 0.553779 |
| 31.21  | 80.27  | 59.88  | 73.73  | 1.138277 | 1.20E-25 |
| 9.11   | 7.3    | 7.97   | 7.77   | -0.34588 | 0.002118 |
| 0.04   | 0.65   | 0.15   | 0.36   | 1.407413 | 0.002889 |
| 0.69   | 1.28   | 0.65   | 0.52   | -0.52919 | 0.419567 |
| 125.2  | 124.84 | 135.32 | 127.91 | 0.001047 | 0.994947 |
| 0.75   | 0.63   | 0.61   | 0.56   | -0.25878 | 0.659525 |
| 15.66  | 13.98  | 13.2   | 13.19  | -0.16765 | 0.209819 |
| 10.6   | 12.91  | 16.57  | 12.99  | 0.214248 | 0.031569 |
| 40.2   | 54.32  | 54.04  | 53.54  | 0.213754 | 0.030773 |
| 0.09   | 0.1    | 0      | 0.03   | NA       | NA       |
| 0      | 0      | 0      | 0      | NA       | NA       |
| 56.45  | 81.19  | 76.65  | 82.04  | 0.424264 | 8.56E-06 |

|        |        |        |        |          |          |
|--------|--------|--------|--------|----------|----------|
| 0.5    | 0.3    | 0.02   | 0.03   | -1.41985 | 0.013338 |
| 0.66   | 0.39   | 0.62   | 0.47   | -0.60183 | 0.191484 |
| 7.6    | 8.59   | 6.11   | 6.05   | 0.097333 | 0.714263 |
| 0      | 0      | 0      | 0      | NA       | NA       |
| 0.86   | 1.5    | 1.28   | 1.7    | 1.169814 | 0.011049 |
| 0      | 0      | 0.05   | 0      | NA       | NA       |
| 0      | 0      | 0      | 0      | NA       | NA       |
| 0.96   | 1.08   | 1.1    | 0.62   | -0.14469 | 0.811429 |
| 0      | 0      | 0      | 0      | NA       | NA       |
| 4.51   | 2.37   | 4.66   | 4.25   | -0.29289 | 0.238057 |
| 229.36 | 217.93 | 225.7  | 221.1  | -0.17974 | 0.031676 |
| 0      | 0      | 0.02   | 0      | NA       | NA       |
| 215.79 | 139.16 | 165.17 | 137.09 | -0.51766 | 1.18E-07 |
| 34.87  | 49.68  | 47.75  | 45.37  | 0.422641 | 3.20E-05 |
| 19.12  | 15.19  | 14.62  | 19.14  | -0.07609 | 0.613954 |
| 0.05   | 0.04   | 0.04   | 0      | NA       | NA       |
| 1.42   | 0.39   | 0.48   | 0.38   | -1.11141 | 0.009423 |
| 0      | 0      | 0.04   | 0      | NA       | NA       |
| 17.08  | 16.73  | 18.99  | 21.25  | 0.078585 | 0.543689 |
| 44.17  | 57.19  | 53.42  | 57.32  | 0.273907 | 0.002257 |
| 9.57   | 6.71   | 7.79   | 7.12   | -0.55067 | 6.24E-07 |
| 14.59  | 12.92  | 13.61  | 13.39  | -0.15652 | 0.090779 |
| 0      | 0      | 0.11   | 0      | NA       | NA       |
| 1.69   | 1.86   | 1.5    | 1.83   | 0.33598  | 0.518703 |
| 0      | 0.07   | 0.05   | 0      | NA       | NA       |
| 0.13   | 3.5    | 2.1    | 2.67   | 3.528721 | 4.93E-20 |
| 0      | 0      | 0      | 0      | NA       | NA       |
| 0      | 0      | 0      | 0      | NA       | NA       |
| 1.77   | 0.57   | 0.55   | 0.29   | NA       | NA       |
| 0.09   | 0      | 0      | 0      | NA       | NA       |
| 0      | 0      | 0      | 0      | NA       | NA       |
| 0      | 0      | 0      | 0      | NA       | NA       |
| 0      | 0      | 0      | 0      | NA       | NA       |
| 0      | 0.11   | 0.12   | 0      | NA       | NA       |
| 73.31  | 66.77  | 72.23  | 75.3   | -0.12226 | 0.256269 |
| 1.15   | 0.35   | 0.84   | 0.65   | -0.30192 | 0.50527  |
| 0.27   | 0.49   | 0.25   | 0.2    | 0.263555 | 0.723985 |
| 2.49   | 2.31   | 2.64   | 1.87   | -0.03993 | 0.870057 |
| 3.8    | 4.79   | 4.02   | 4.86   | -0.25344 | 0.367377 |
| 0      | 0      | 0      | 0      | NA       | NA       |
| 14.19  | 10.98  | 14.33  | 10.29  | -0.36734 | 0.130673 |
| 1.78   | 1.46   | 1.45   | 1.78   | 0.092951 | 0.790865 |
| 0.36   | 0.91   | 0.58   | 0.91   | 1.083573 | 0.012476 |
| 76.87  | 66.66  | 69.87  | 68.67  | -0.24928 | 0.023554 |
| 33.28  | 35.15  | 31.8   | 38.78  | 0.031328 | 0.813172 |



|         |         |         |         |          |          |
|---------|---------|---------|---------|----------|----------|
| 2.43    | 2.18    | 2.49    | 2.6     | 0.195388 | 0.298406 |
| 23.97   | 30.11   | 29.59   | 28.46   | 0.201766 | 0.112771 |
| 0       | 0       | 0       | 0       | NA       | NA       |
| 9.25    | 7.27    | 9.08    | 7.67    | 0.055344 | 0.828363 |
| 1.83    | 1.58    | 2.03    | 1.86    | -0.08    | 0.76465  |
| 0       | 0       | 0       | 0       | NA       | NA       |
| 0.75    | 1.37    | 1.06    | 1.41    | 0.080458 | 0.859434 |
| 4.68    | 4.03    | 4.21    | 4.49    | -0.21239 | 0.263928 |
| 0       | 0       | 0       | 0       | NA       | NA       |
| 24.82   | 32.23   | 29.12   | 31.62   | 0.226713 | 0.022397 |
| 2419.79 | 2501.98 | 2416.07 | 2242.71 | 0.014658 | 0.90752  |
| 37.38   | 38.99   | 44.72   | 44.18   | -0.00321 | 0.984238 |
| 28.97   | 36.23   | 39.25   | 37.38   | 0.250821 | 0.033876 |
| 11.5    | 11.26   | 13.07   | 11.39   | -0.31287 | 0.018186 |
| 0       | 0       | 0.01    | 0       | NA       | NA       |
| 5.65    | 5.32    | 5.57    | 6.17    | 0.444728 | 0.117752 |
| 2.39    | 1.26    | 2.38    | 2.24    | -0.77932 | 0.007561 |
| 0.03    | 0       | 0       | 0       | NA       | NA       |
| 0.37    | 0.51    | 0.45    | 0.87    | 0.461139 | 0.405702 |
| 0       | 0       | 0.1     | 0       | NA       | NA       |
| 0.51    | 1.32    | 1.31    | 1.58    | 0.910907 | 0.010909 |
| 0       | 0       | 0       | 0       | NA       | NA       |
| 9.01    | 7.59    | 8.57    | 9.07    | -0.11892 | 0.580806 |
| 13.81   | 15.46   | 14.15   | 14.96   | 0.072696 | 0.65682  |
| 7.9     | 4.14    | 5.66    | 4.9     | -0.92677 | 4.36E-16 |
| 5.25    | 4.29    | 5.88    | 5.54    | -0.05421 | 0.774194 |
| 98.08   | 57.24   | 76.37   | 65.19   | -0.63441 | 2.30E-09 |
| 0.48    | 0.28    | 0.24    | 0.38    | -0.12774 | 0.83188  |
| 6.72    | 2.97    | 3.77    | 3.32    | -0.9422  | 5.59E-05 |
| 0       | 0       | 0       | 0       | NA       | NA       |
| 51.65   | 57.33   | 51.71   | 57.12   | -0.08649 | 0.527967 |
| 2.87    | 3.34    | 3.23    | 3.57    | 0.310534 | 0.099366 |
| 1.97    | 2.01    | 2.11    | 2.84    | 0.831803 | 0.001593 |
| 3.95    | 2.54    | 3.64    | 3.95    | -0.48029 | 0.110135 |
| 0       | 0       | 0.63    | 0       | NA       | NA       |
| 0       | 0       | 0       | 0       | NA       | NA       |
| 0       | 0       | 0       | 0       | NA       | NA       |
| 1.45    | 1.02    | 1.16    | 1.36    | -0.50411 | 0.234251 |
| 8.57    | 9.67    | 8.01    | 8.49    | 0.064202 | 0.85075  |
| 124.89  | 98.45   | 93.77   | 94.24   | -0.14217 | 0.11713  |
| 5.78    | 15.42   | 10.13   | 12.2    | 0.458014 | 0.005239 |
| 0       | 0       | 0       | 0       | NA       | NA       |
| 0.5     | 0       | 0.71    | 1.55    | -0.39413 | 0.602333 |
| 0       | 0       | 0       | 0       | NA       | NA       |
| 65.74   | 81.44   | 68.41   | 67.17   | 0.105238 | 0.460445 |

|       |       |       |                |          |
|-------|-------|-------|----------------|----------|
| 0     | 0     | 0     | 0 NA           | NA       |
| 0     | 0     | 0     | 0 NA           | NA       |
| 14.45 | 17.03 | 15.59 | 16.15 0.088404 | 0.608942 |
| 0.08  | 0.15  | 0.14  | 0.34 0.201062  | 0.809911 |
| 0.25  | 0.08  | 0.02  | 0.04 NA        | NA       |
| 5.59  | 4.71  | 4.71  | 5.64 -0.01708  | 0.933444 |
| 0.01  | 0.01  | 0     | 0 NA           | NA       |
| 0     | 0     | 0     | 0 NA           | NA       |
| 0.02  | 0.02  | 0.01  | 0 NA           | NA       |
| 2.57  | 3.11  | 3.88  | 2.62 0.089474  | 0.752233 |
| 0.61  | 0.4   | 0.46  | 0.48 -0.56094  | 0.201587 |
| 0     | 0.1   | 0.12  | 0.09 0.312109  | 0.698714 |
| 17.23 | 18.92 | 17.46 | 19.63 -0.08109 | 0.580221 |
| 0.09  | 0     | 0     | 0 NA           | NA       |
| 0.05  | 0.16  | 0.07  | 0.09 0.625919  | 0.365337 |
| 0.25  | 0.16  | 0.19  | 0.14 -0.11617  | 0.895033 |
| 13.43 | 17.39 | 17.95 | 18.54 0.27377  | 0.007641 |
| 37.07 | 73.94 | 63.54 | 73.82 0.950086 | 4.63E-30 |
| 0     | 0     | 0     | 0 NA           | NA       |
| 2.01  | 0.77  | 0.82  | 0.98 -0.55906  | 0.345217 |
| 0.46  | 1.53  | 1.27  | 0.98 0.448902  | 0.44868  |
| 1.06  | 1.1   | 1.12  | 1.35 0.053561  | 0.892477 |
| 0     | 0     | 0     | 0.01 NA        | NA       |
| 17.82 | 17.67 | 16.8  | 15.5 -0.08071  | 0.586781 |
| 0     | 0     | 0     | 0 NA           | NA       |
| 0     | 0     | 0     | 0 NA           | NA       |
| 0     | 0     | 0     | 0 NA           | NA       |
| 57.88 | 52.87 | 52.99 | 52.17 -0.07378 | 0.455955 |
| 0     | 0     | 0     | 0 NA           | NA       |
| 0     | 0     | 0     | 0 NA           | NA       |
| 0     | 0     | 0     | 0 NA           | NA       |
| 3.25  | 1.33  | 2.3   | 2.73 0.044773  | 0.883431 |
| 0.05  | 0     | 0     | 0 NA           | NA       |
| 1.9   | 0.63  | 1.38  | 0.95 -0.85763  | 0.011247 |
| 12.08 | 13.92 | 12.01 | 12.68 0.101347 | 0.627779 |
| 5.37  | 3.73  | 5.67  | 3.84 -0.27647  | 0.226843 |
| 0.05  | 0     | 0     | 0.04 NA        | NA       |
| 0.3   | 0.17  | 0.23  | 0.2 -0.47956   | 0.479412 |
| 0     | 0     | 0     | 0 NA           | NA       |
| 0     | 0     | 0     | 0 NA           | NA       |
| 0     | 0     | 0     | 0 NA           | NA       |
| 11.37 | 19.96 | 19.95 | 18 0.476184    | 0.010248 |
| 2.52  | 2.65  | 2.35  | 2.55 0.084129  | 0.647297 |
| 1.16  | 2.75  | 1.96  | 2.33 0.222954  | 0.546314 |
| 0     | 0     | 0     | 0 NA           | NA       |

|       |       |       |                |          |
|-------|-------|-------|----------------|----------|
| 0     | 0     | 0     | 0 NA           | NA       |
| 8.41  | 7.74  | 8.22  | 7.5 -0.11242   | 0.570142 |
| 0.81  | 0.43  | 0.6   | 0.25 -0.57935  | 0.182198 |
| 0     | 0     | 0     | 0 NA           | NA       |
| 0.27  | 0.25  | 0.28  | 0.14 0.202878  | 0.813172 |
| 0.27  | 0.42  | 0.5   | 0.52 0.601491  | 0.082538 |
| 0     | 0     | 0.04  | 0 NA           | NA       |
| 38.43 | 14.01 | 26.13 | 24.99 -0.60747 | 8.82E-06 |
| 0     | 0     | 0     | 0 NA           | NA       |
| 0.39  | 0.56  | 1.19  | 0.23 0.437623  | 0.565783 |
| 1.11  | 3.3   | 1.31  | 2.76 0.856092  | 0.053637 |
| 29.39 | 27.8  | 29.04 | 21.81 -0.11296 | 0.616181 |
| 0.27  | 0     | 0     | 0 NA           | NA       |
| 0.34  | 0     | 0     | 0 NA           | NA       |
| 0.03  | 0.02  | 0.02  | 0 NA           | NA       |
| 0.04  | 0.03  | 0.03  | 0 -1.06582     | 0.082152 |
| 0.43  | 0     | 0.19  | 0.11 NA        | NA       |
| 15.74 | 19.73 | 20.08 | 20.05 0.194006 | 0.1005   |
| 0     | 0     | 0     | 0 NA           | NA       |
| 8.72  | 12.15 | 10.36 | 12.42 0.181621 | 0.30891  |
| 1.7   | 2.26  | 2.14  | 2.71 0.48549   | 0.073227 |
| 0     | 0     | 0     | 0 NA           | NA       |
| 0     | 0     | 0     | 0 NA           | NA       |
| 9.15  | 11.25 | 12.23 | 10.64 0.151434 | 0.524576 |
| 10.91 | 5.13  | 4.83  | 4.39 -0.93954  | 1.93E-09 |
| 0     | 0     | 0     | 0 NA           | NA       |
| 0     | 0     | 0     | 0 NA           | NA       |
| 0.11  | 0.02  | 0     | 0 NA           | NA       |
| 5.77  | 5.35  | 6.01  | 5.29 0.108346  | 0.439695 |
| 0     | 0     | 0     | 0 NA           | NA       |
| 0.01  | 0     | 0.01  | 0 NA           | NA       |
| 10.39 | 6.15  | 9.65  | 9.56 -0.41325  | 0.004756 |
| 0     | 0     | 0     | 0 NA           | NA       |
| 0     | 0     | 0     | 0 NA           | NA       |
| 0     | 0     | 0     | 0 NA           | NA       |
| 0     | 0     | 0     | 0 NA           | NA       |
| 0     | 0     | 0     | 0.11 NA        | NA       |
| 6.69  | 8.34  | 8.07  | 8.23 0.178907  | 0.33195  |
| 6.69  | 8.34  | 8.07  | 8.23 0.178907  | 0.33195  |
| 6.21  | 12.09 | 10.63 | 13.04 0.643854 | 9.27E-11 |
| 0.29  | 0.07  | 0.22  | 0.22 -0.28016  | 0.718422 |
| 0     | 0.09  | 0     | 0.1 NA         | NA       |
| 0.22  | 0.1   | 0.04  | 0.13 NA        | NA       |
| 0.03  | 0     | 0     | 0 NA           | NA       |
| 0.46  | 0.11  | 0.1   | 0.23 NA        | NA       |

|        |        |        |        |          |          |
|--------|--------|--------|--------|----------|----------|
| 0      | 0      | 0      | 0      | NA       | NA       |
| 0.19   | 0.02   | 0.02   | 0      | NA       | NA       |
| 0.81   | 0.37   | 0.48   | 0.77   | -0.38546 | 0.456572 |
| 9.76   | 8.93   | 10.05  | 10.1   | -0.04222 | 0.81145  |
| 0      | 0.05   | 0.02   | 0.07   | NA       | NA       |
| 5.41   | 7.99   | 7.13   | 7.91   | 0.388505 | 0.003007 |
| 3.36   | 3.92   | 4.07   | 3.58   | 0.335486 | 0.130658 |
| 14.51  | 25.29  | 20.33  | 22.42  | 0.666255 | 3.63E-11 |
| 3.95   | 4.03   | 3.47   | 3.26   | -0.24099 | 0.2309   |
| 0      | 0      | 0      | 0      | NA       | NA       |
| 11.27  | 7.49   | 7.77   | 7.75   | -0.52144 | 1.58E-05 |
| 101.36 | 128.34 | 140.47 | 135.24 | 0.166201 | 0.083788 |
| 0      | 0      | 0      | 0      | NA       | NA       |
| 0      | 0      | 0      | 0      | NA       | NA       |
| 1.31   | 10.25  | 7.16   | 8.35   | 2.576535 | 8.92E-54 |
| 0.09   | 0.22   | 0.18   | 0.25   | 0.924006 | 0.118481 |
| 0      | 0      | 0      | 0      | NA       | NA       |
| 61.95  | 79.51  | 74.75  | 72.22  | 0.12164  | 0.380085 |
| 0      | 0      | 0      | 0      | NA       | NA       |
| 0.93   | 1.6    | 0.69   | 0.94   | -0.04232 | 0.948254 |
| 22.63  | 20.13  | 21.28  | 21.81  | -0.1542  | 0.203888 |
| 0      | 0      | 0      | 0      | NA       | NA       |
| 20.88  | 9.18   | 12.68  | 10.9   | -0.94262 | 8.27E-17 |
| 0      | 0      | 0.04   | 0.05   | NA       | NA       |
| 4.13   | 2.14   | 1.88   | 1.62   | -1.46266 | 3.54E-09 |
| 2.45   | 1.06   | 1.76   | 2.07   | -0.57871 | 0.285428 |
| 0      | 0      | 0      | 0      | NA       | NA       |
| 0      | 0      | 0      | 0      | NA       | NA       |
| 0      | 0      | 0      | 0      | NA       | NA       |
| 20.18  | 22.99  | 25.94  | 26.19  | 0.096349 | 0.589335 |
| 0      | 0.02   | 0      | 0      | NA       | NA       |
| 0      | 0      | 0      | 0      | NA       | NA       |
| 1.19   | 2.05   | 1.89   | 1.24   | 0.560759 | 0.172889 |
| 1.94   | 1.71   | 1.44   | 1.5    | -0.10769 | 0.721791 |
| 0.95   | 0.06   | 0.27   | 0      | -0.86205 | 0.190557 |
| 0      | 0.04   | 0.1    | 0.04   | NA       | NA       |
| 0      | 0      | 0      | 0      | NA       | NA       |
| 0      | 0      | 0      | 0      | NA       | NA       |
| 0.43   | 1.03   | 1.02   | 0.72   | 0.452182 | 0.432414 |
| 29.85  | 81.24  | 74.49  | 71.28  | 1.225802 | 2.98E-43 |
| 1.35   | 2.16   | 1.4    | 1.97   | 0.179691 | 0.556239 |
| 0.06   | 0      | 0.06   | 0.13   | NA       | NA       |
| 10.28  | 16.53  | 13.31  | 14.86  | 0.567866 | 0.002481 |
| 13.28  | 18.99  | 13.4   | 12.31  | 0.527848 | 9.33E-06 |
| 27.35  | 32.24  | 33.21  | 32.96  | 0.123724 | 0.27964  |

|        |        |        |        |          |          |
|--------|--------|--------|--------|----------|----------|
| 1.59   | 1.28   | 0.86   | 2.02   | -0.20809 | 0.640049 |
| 0      | 0      | 0      | 0      | NA       | NA       |
| 6.55   | 5.36   | 5.2    | 5.88   | -0.17704 | 0.334176 |
| 17.69  | 9.84   | 16.76  | 14.76  | -0.18307 | 0.482129 |
| 33.02  | 32.21  | 32.04  | 31.96  | -0.12557 | 0.256486 |
| 0      | 0      | 0      | 0      | NA       | NA       |
| 0      | 0.14   | 0      | 0      | NA       | NA       |
| 1.6    | 1.49   | 1.43   | 1.33   | 0.093321 | 0.825728 |
| 0.21   | 0.05   | 0.15   | 0.11   | -0.8799  | 0.091706 |
| 22.61  | 23.78  | 21.55  | 24.92  | 0.141407 | 0.207006 |
| 13.47  | 16.78  | 16.48  | 15.63  | 0.437087 | 2.44E-05 |
| 53.04  | 62.43  | 58.81  | 55.75  | 0.113334 | 0.276917 |
| 0      | 0      | 0      | 0      | NA       | NA       |
| 2.71   | 1.73   | 2.43   | 2.38   | -0.30907 | 0.258009 |
| 6.89   | 6.49   | 4.52   | 5      | 0.071033 | 0.753677 |
| 5.08   | 7.23   | 5.93   | 6.4    | 0.339682 | 0.029732 |
| 0.38   | 0.14   | 0.51   | 0.48   | 0.297043 | 0.680994 |
| 61.68  | 54.94  | 53.69  | 54.02  | -0.37153 | 0.000602 |
| 104.13 | 102.97 | 100.08 | 92.89  | -0.16357 | 0.115665 |
| 26.39  | 28.24  | 29.3   | 29.79  | 0.066551 | 0.646089 |
| 19.21  | 7.62   | 9.97   | 7.28   | -1.17627 | 3.19E-22 |
| 0.51   | 0.39   | 0.55   | 0.32   | -0.23253 | 0.717625 |
| 0.43   | 0.22   | 0.21   | 0.47   | -0.48168 | 0.50607  |
| 0      | 0      | 0      | 0      | NA       | NA       |
| 0      | 0      | 0      | 0      | NA       | NA       |
| 149.56 | 164.08 | 161.18 | 155.95 | 0.067589 | 0.50119  |
| 6.03   | 8.08   | 7.11   | 7.46   | 0.211542 | 0.283524 |
| 0      | 0      | 0      | 0      | NA       | NA       |
| 0      | 0      | 0      | 0      | NA       | NA       |
| 9.44   | 8.95   | 10.01  | 8.46   | -0.10664 | 0.702311 |
| 0      | 0      | 0      | 0      | NA       | NA       |
| 0      | 0      | 0      | 0      | NA       | NA       |
| 6.31   | 9.78   | 8.78   | 8.57   | 0.507973 | 0.005428 |
| 0.28   | 0.05   | 0.13   | 0.04   | NA       | NA       |
| 0      | 0      | 0      | 0      | NA       | NA       |
| 19.26  | 23.54  | 24.02  | 25.24  | 0.184528 | 0.074795 |
| 0      | 0      | 0      | 0      | NA       | NA       |
| 0      | 0      | 0.02   | 0.26   | NA       | NA       |
| 0.1    | 0.09   | 0.13   | 0.36   | -0.05213 | 0.95613  |
| 0.08   | 0      | 0.08   | 0.08   | NA       | NA       |
| 0      | 0      | 0      | 0      | NA       | NA       |
| 1.64   | 0.87   | 1.31   | 0.81   | -0.8241  | 0.030792 |
| 0      | 0      | 0      | 0      | NA       | NA       |
| 0.31   | 0.04   | 0      | 0.02   | -2.00448 | 0.000333 |
| 0.02   | 0.03   | 0      | 0      | NA       | NA       |

|        |        |        |        |          |          |
|--------|--------|--------|--------|----------|----------|
| 25.51  | 33.77  | 28.69  | 28.61  | 0.37775  | 0.089571 |
| 0      | 0      | 0      | 0      | NA       | NA       |
| 31.24  | 34.77  | 36.11  | 34.2   | 0.142034 | 0.268684 |
| 8.72   | 11.25  | 12.62  | 14.5   | 0.485816 | 7.12E-05 |
| 0      | 0.03   | 0.03   | 0      | NA       | NA       |
| 0      | 0      | 0      | 0      | NA       | NA       |
| 8.9    | 7.14   | 6.81   | 6.89   | -0.30474 | 0.011724 |
| 0.12   | 0.17   | 0.31   | 0.09   | 0.501498 | 0.492947 |
| 18.96  | 31.55  | 26.47  | 29.48  | 0.448611 | 0.000244 |
| 4.87   | 9.5    | 6.68   | 9.43   | 0.392723 | 0.012338 |
| 0      | 0      | 0      | 0      | NA       | NA       |
| 0      | 0      | 0      | 0      | NA       | NA       |
| 61.58  | 62.46  | 61.94  | 65.49  | -0.04998 | 0.68232  |
| 0      | 0      | 0.03   | 0.07   | NA       | NA       |
| 0      | 0      | 0      | 0      | NA       | NA       |
| 0      | 0      | 0      | 0      | NA       | NA       |
| 0      | 0      | 0      | 0      | NA       | NA       |
| 0.04   | 0.11   | 0.05   | 0.11   | 0.770987 | 0.254652 |
| 10.09  | 12.87  | 10.25  | 12.41  | 0.172175 | 0.21612  |
| 8.51   | 8.14   | 9.5    | 8.54   | 0.010095 | 0.964486 |
| 0      | 0      | 0      | 0      | NA       | NA       |
| 14.73  | 10.44  | 12.6   | 11.62  | -0.28926 | 0.050413 |
| 0      | 0      | 0.02   | 0.02   | NA       | NA       |
| 0.89   | 2.87   | 1.38   | 1.45   | 0.533765 | 0.19336  |
| 0      | 0      | 0      | 0      | NA       | NA       |
| 0      | 0      | 0      | 0      | NA       | NA       |
| 0      | 0      | 0      | 0      | NA       | NA       |
| 34.76  | 33.77  | 32.36  | 32.33  | 0.000325 | 0.998123 |
| 0      | 0      | 0      | 0      | NA       | NA       |
| 535.01 | 689.26 | 567.34 | 559.88 | 0.110586 | NA       |
| 0      | 0      | 0.06   | 0.13   | NA       | NA       |
| 159.94 | 131.54 | 135.64 | 138.33 | -0.32938 | 4.94E-06 |
| 1.32   | 0.72   | 0.79   | 0.54   | -0.74199 | 0.026285 |
| 4.76   | 8.26   | 6.7    | 7.7    | 0.80554  | 1.42E-07 |
| 0.16   | 0.76   | 0.35   | 0.44   | 1.514127 | 7.32E-05 |
| 0      | 0      | 0      | 0      | NA       | NA       |
| 0.03   | 0      | 0.13   | 0.05   | -0.28965 | 0.716154 |
| 32.05  | 46.84  | 37.11  | 39.46  | 0.296151 | 0.019488 |
| 0      | 0      | 0      | 0      | NA       | NA       |
| 20.04  | 19.63  | 21.2   | 18.59  | 0.081179 | 0.650179 |
| 6.59   | 8.28   | 7.37   | 8.09   | 0.413494 | 0.101594 |
| 0      | 0.03   | 0      | 0.03   | NA       | NA       |
| 0      | 0.49   | 0.26   | 0.31   | 1.549516 | 0.005737 |
| 36.06  | 46.21  | 36.58  | 45.88  | 0.311535 | 0.000307 |
| 0      | 0      | 0      | 0      | NA       | NA       |

|       |       |       |       |          |          |
|-------|-------|-------|-------|----------|----------|
| 0.17  | 0.21  | 0.38  | 0.34  | 0.217633 | 0.769428 |
| 4.02  | 2.63  | 3.77  | 1.09  | -0.34741 | 0.643165 |
| 0.12  | 0.9   | 0.42  | 0.21  | 0.885979 | 0.079549 |
| 0     | 0     | 0     | 0     | NA       | NA       |
| 23.93 | 32.26 | 29.98 | 32.58 | 0.252053 | 0.035795 |
| 0     | 0     | 0     | 0     | NA       | NA       |
| 0     | 0     | 0     | 0     | NA       | NA       |
| 3.44  | 5.83  | 4.08  | 5.25  | 0.39828  | 0.108499 |
| 0.77  | 1.8   | 1.22  | 1.3   | 0.941442 | 0.001657 |
| 0.1   | 0.36  | 0.23  | 0.11  | NA       | NA       |
| 0.11  | 0     | 0     | 0.08  | NA       | NA       |
| 23.25 | 18.08 | 18.68 | 19.24 | -0.35564 | 0.000114 |
| 0     | 0     | 0     | 0     | NA       | NA       |
| 8.96  | 7.93  | 9.23  | 9.88  | 0.05568  | 0.785112 |
| 3.28  | 5.21  | 5.86  | 5.86  | 0.902035 | 8.95E-06 |
| 1.09  | 0.71  | 0.51  | 0.85  | -0.51087 | 0.176246 |
| 0.27  | 0     | 0.09  | 0.12  | NA       | NA       |
| 9.31  | 8.53  | 11.33 | 9.96  | 0.059469 | 0.791757 |
| 4.66  | 5.12  | 5.13  | 6.04  | -0.0443  | 0.896301 |
| 0     | 0     | 0     | 0     | NA       | NA       |
| 7.66  | 5.95  | 5.75  | 6.92  | -0.22008 | 0.120386 |
| 0     | 0     | 0     | 0     | NA       | NA       |
| 0     | 0     | 0     | 0     | NA       | NA       |
| 0.05  | 0.22  | 0.14  | 0.27  | 0.522357 | 0.47883  |
| 6.54  | 9.83  | 9.17  | 10.14 | 0.579236 | 8.95E-05 |
| 0     | 0     | 0     | 0     | NA       | NA       |
| 0     | 0     | 0     | 0     | NA       | NA       |
| 0     | 0     | 0     | 0     | NA       | NA       |
| 4.26  | 3.43  | 3.95  | 4.41  | 0.174077 | 0.402412 |
| 0.06  | 0.02  | 0.06  | 0     | NA       | NA       |
| 2.23  | 1.8   | 1.56  | 1.75  | -0.30467 | 0.194721 |
| 0     | 0     | 0     | 0     | NA       | NA       |
| 0     | 0     | 0     | 0     | NA       | NA       |
| 4.48  | 3.44  | 4.11  | 2.75  | -0.09162 | 0.791573 |
| 0.03  | 0.09  | 0.02  | 0.18  | NA       | NA       |
| 0     | 0     | 0     | 0     | NA       | NA       |
| 3.6   | 3.23  | 2.96  | 4.46  | -0.16789 | 0.55735  |
| 23.82 | 27.84 | 24.75 | 23.53 | -0.15987 | 0.223312 |
| 3.36  | 2.34  | 2.37  | 2.73  | -0.21995 | 0.56012  |
| 3.63  | 2.21  | 3.33  | 2.88  | -0.20708 | 0.2822   |
| 3.97  | 12.4  | 6.71  | 10.06 | 1.408253 | 1.72E-15 |
| 0.04  | 0     | 0.02  | 0.03  | NA       | NA       |
| 8.59  | 9.75  | 9.04  | 8.85  | 0.031768 | 0.855551 |
| 0     | 0     | 0.03  | 0.03  | NA       | NA       |
| 0     | 0     | 0     | 0     | NA       | NA       |

|       |       |       |       |          |          |
|-------|-------|-------|-------|----------|----------|
| 0     | 0     | 0     | 0     | NA       | NA       |
| 0     | 0     | 0.06  | 0     | NA       | NA       |
| 0.01  | 0.01  | 0.03  | 0.04  | -0.10227 | 0.912249 |
| 3.12  | 5.51  | 4.82  | 6.36  | 0.841392 | 1.85E-09 |
| 0.67  | 0.16  | 0.25  | 0.42  | -1.26703 | 0.002792 |
| 1.14  | 1.2   | 1.07  | 1.4   | 0.289186 | 0.459233 |
| 0     | 0     | 0     | 0     | NA       | NA       |
| 0     | 0.08  | 0.04  | 0.07  | NA       | NA       |
| 20.89 | 28.73 | 27.41 | 27.58 | 0.299303 | 0.001715 |
| 0     | 0     | 0     | 0     | NA       | NA       |
| 0     | 0     | 0     | 0     | NA       | NA       |
| 0     | 0     | 0     | 0     | NA       | NA       |
| 1.56  | 2.11  | 1.72  | 2.28  | 0.379398 | 0.12405  |
| 18.66 | 10.75 | 14.65 | 9.49  | -0.59863 | 7.33E-07 |
| 55.46 | 54.65 | 54.8  | 55.57 | -0.0668  | 0.567002 |
| 0     | 0     | 0     | 0     | NA       | NA       |
| 0     | 0     | 0     | 0     | NA       | NA       |
| 0     | 0.05  | 0.04  | 0     | NA       | NA       |
| 0     | 0     | 0.04  | 0.08  | NA       | NA       |
| 0     | 0     | 0     | 0     | NA       | NA       |
| 0     | 0     | 0     | 0     | NA       | NA       |
| 0.13  | 0.07  | 0.13  | 0.11  | -0.00696 | 0.994925 |
| 0     | 0     | 0     | 0     | NA       | NA       |
| 2.02  | 3.82  | 2.51  | 3.08  | 0.806303 | 0.002464 |
| 0.81  | 1.59  | 1.37  | 1.44  | 0.551751 | 0.090382 |
| 0.64  | 0.17  | 0.28  | 0.08  | -0.81745 | 0.213836 |
| 0     | 0     | 0     | 0     | NA       | NA       |
| 0     | 0     | 0     | 0     | NA       | NA       |
| 0.7   | 0.18  | 0.5   | 0.26  | -0.38979 | 0.591287 |
| 0.03  | 0     | 0     | 0     | NA       | NA       |
| 0.1   | 0.04  | 0.21  | 0.12  | NA       | NA       |
| 0.05  | 0.03  | 0     | 0     | NA       | NA       |
| 7.67  | 2.88  | 5.21  | 3.56  | -0.96223 | 1.15E-07 |
| 0     | 0     | 0     | 0     | NA       | NA       |
| 0.07  | 0     | 0     | 0     | NA       | NA       |
| 0     | 0     | 0.01  | 0.02  | NA       | NA       |
| 0     | 0     | 0     | 0     | NA       | NA       |
| 11.84 | 11.68 | 9.85  | 11.43 | 0.098845 | 0.696062 |
| 74.11 | 67.13 | 61.57 | 63.8  | -0.30235 | 0.000311 |
| 0.14  | 0.25  | 0.09  | 0.1   | NA       | NA       |
| 8.41  | 10.93 | 9.57  | 10.07 | 0.271812 | 0.015634 |
| 11.75 | 13.59 | 15.2  | 14.05 | 0.10941  | 0.365344 |
| 0     | 0     | 0     | 0     | NA       | NA       |
| 0.12  | 0.05  | 0.08  | 0.07  | -1.17949 | 0.019472 |
| 0.13  | 0.1   | 0.03  | 0.03  | NA       | NA       |



|       |       |       |       |          |          |
|-------|-------|-------|-------|----------|----------|
| 0.03  | 0.1   | 0.05  | 0.11  | 0.438914 | 0.560513 |
| 2.41  | 1.65  | 2.36  | 1.36  | -0.23054 | 0.493948 |
| 1.2   | 2.45  | 1.27  | 1.68  | 0.578117 | 0.183659 |
| 0.2   | 0.1   | 0.28  | 0.09  | 1.607448 | 0.002426 |
| 0.02  | 0     | 0     | 0     | NA       | NA       |
| 1.93  | 1.87  | 2.24  | 2.23  | 0.006336 | 0.983353 |
| 23.82 | 39.78 | 33.09 | 35.74 | 0.439528 | 0.000114 |
| 0     | 0     | 0     | 0     | NA       | NA       |
| 0     | 0     | 0     | 0.18  | NA       | NA       |
| 1.3   | 1.12  | 0.85  | 1.12  | -0.19659 | 0.548249 |
| 23.42 | 20.61 | 17.05 | 21.32 | 0.059735 | 0.646545 |
| 0     | 0     | 0     | 0     | NA       | NA       |
| 0.4   | 0     | 0     | 0.05  | -1.51414 | 0.00978  |
| 0     | 0.09  | 0     | 0     | NA       | NA       |
| 22.82 | 20.72 | 19.44 | 20.53 | -0.17429 | 0.115842 |
| 0     | 0     | 0     | 0     | NA       | NA       |
| 0     | 0.32  | 0.07  | 0.19  | 0.545046 | 0.453854 |
| 2.91  | 2.87  | 2.76  | 2.54  | -0.1641  | 0.57714  |
| 0     | 0     | 0     | 0     | NA       | NA       |
| 46.67 | 55.25 | 55.47 | 48.19 | 0.063327 | 0.645276 |
| 0     | 0     | 0     | 0     | NA       | NA       |
| 0.11  | 0.12  | 0.13  | 0.2   | 0.442999 | 0.543453 |
| 0.05  | 0.14  | 0.26  | 0.04  | NA       | NA       |
| 5.75  | 4.61  | 5.67  | 5.36  | -0.08052 | 0.700488 |
| 3.54  | 5.78  | 5.09  | 5.71  | 0.177428 | 0.4272   |
| 37.58 | 46.17 | 45.51 | 46.31 | 0.199269 | 0.046498 |
| 47.37 | 99.64 | 73.45 | 84.75 | 0.592446 | 1.21E-07 |
| 8.73  | 10.49 | 10.59 | 9.46  | -0.08337 | 0.741849 |
| 4.63  | 5.05  | 4.99  | 4.95  | 0.172386 | 0.483696 |
| 1.38  | 0.25  | 0.51  | 0     | NA       | NA       |
| 0.23  | 0.45  | 0.37  | 0.65  | 0.285574 | 0.599474 |
| 1.6   | 3.09  | 1.98  | 2.49  | 0.542087 | 0.012026 |
| 4.95  | 4.93  | 4.71  | 5.22  | -0.105   | 0.547427 |
| 1.66  | 2.1   | 1.88  | 1.67  | 0.303512 | 0.465626 |
| 0     | 0     | 0.06  | 0.08  | NA       | NA       |
| 0     | 0     | 0     | 0     | NA       | NA       |
| 3.41  | 4.97  | 4.04  | 4.89  | 0.516631 | 0.000637 |
| 14.5  | 9.59  | 10.12 | 10.83 | -0.04879 | 0.780107 |
| 1.14  | 0.86  | 1.53  | 1.69  | 0.274324 | 0.629959 |
| 0     | 0     | 0     | 0     | NA       | NA       |
| 0     | 0     | 0     | 0     | NA       | NA       |
| 2.86  | 4.16  | 4.1   | 2.91  | 0.408919 | 0.06093  |
| 0     | 0     | 0     | 0     | NA       | NA       |
| 0     | 0.03  | 0     | 0     | NA       | NA       |
| 0.05  | 2     | 1.04  | 0.92  | 1.316987 | 0.027898 |

|       |       |       |                |          |
|-------|-------|-------|----------------|----------|
| 0     | 0     | 0     | 0 NA           | NA       |
| 0     | 0     | 0.04  | 0 NA           | NA       |
| 0     | 0     | 0     | 0 NA           | NA       |
| 0     | 0     | 0     | 0 NA           | NA       |
| 0.07  | 0.12  | 1.02  | 0.86 0.734489  | 0.267173 |
| 0     | 0     | 0.1   | 0 NA           | NA       |
| 0.83  | 0.74  | 0.8   | 0.72 -0.14991  | 0.819101 |
| 0     | 0     | 0     | 0 NA           | NA       |
| 0.81  | 1.05  | 1.21  | 1.16 0.317597  | 0.549989 |
| 15.22 | 11.17 | 14.44 | 11.73 -0.21223 | 0.308265 |
| 17.57 | 18.74 | 19.11 | 18.94 0.073692 | 0.576878 |
| 0     | 0     | 0     | 0 NA           | NA       |
| 0     | 0.1   | 0.04  | 0.02 NA        | NA       |
| 0     | 0     | 0     | 0 NA           | NA       |
| 0     | 0     | 0     | 0 NA           | NA       |
| 0.29  | 0.02  | 0.05  | 0.18 -0.36751  | 0.639143 |
| 0     | 0     | 0     | 0 NA           | NA       |
| 0     | 0     | 0     | 0 NA           | NA       |
| 20.13 | 9.02  | 10.44 | 11.76 -0.92639 | 2.79E-18 |
| 0     | 0     | 0     | 0 NA           | NA       |
| 0     | 0.05  | 0     | 0 NA           | NA       |
| 0.02  | 0     | 0.02  | 0.03 NA        | NA       |
| 11.64 | 10.47 | 10.04 | 7.9 0.032247   | 0.84981  |
| 20.4  | 18.53 | 19.49 | 21.32 0.165137 | 0.259006 |
| 0     | 0     | 0     | 0 NA           | NA       |
| 0.06  | 0.17  | 0.21  | 0.23 0.265442  | 0.717625 |
| 16.01 | 17.15 | 17.22 | 16.21 -0.09929 | 0.547859 |
| 0     | 0     | 0     | 0 NA           | NA       |
| 0.35  | 0.5   | 0.22  | 0.52 NA        | NA       |
| 0     | 0     | 0     | 0 NA           | NA       |
| 0     | 0     | 0     | 0 NA           | NA       |
| 0     | 0     | 0     | 0 NA           | NA       |
| 0.18  | 0     | 0.12  | 0 NA           | NA       |
| 17.41 | 26.88 | 21.97 | 22.71 0.281013 | 0.045065 |
| 11.14 | 16.83 | 13.71 | 13.13 0.375235 | 0.015262 |
| 0     | 0     | 0     | 0 NA           | NA       |
| 1.47  | 1.77  | 1.88  | 1.69 0.054222  | 0.875852 |
| 0     | 0     | 0.06  | 0 NA           | NA       |
| 0.46  | 0.47  | 0.55  | 0.38 -0.08393  | 0.87997  |
| 2.03  | 2.08  | 1.58  | 1.66 -0.0338   | 0.942235 |
| 0     | 0     | 0     | 0 NA           | NA       |
| 4.41  | 1.49  | 2.03  | 1.39 -1.10673  | 4.59E-13 |
| 0     | 0.09  | 0.02  | 0.07 NA        | NA       |
| 0     | 0     | 0     | 0 NA           | NA       |
| 0.17  | 0     | 0.2   | 0.12 NA        | NA       |

|       |       |       |       |          |          |
|-------|-------|-------|-------|----------|----------|
| 0     | 0     | 0     | 0     | NA       | NA       |
| 0     | 0     | 0     | 0     | NA       | NA       |
| 67.41 | 66.88 | 76.15 | 70.11 | -0.09246 | 0.417064 |
| 0     | 0     | 0     | 0.08  | NA       | NA       |
| 0.18  | 0.04  | 0.05  | 0.1   | NA       | NA       |
| 0.05  | 0     | 0.03  | 0     | NA       | NA       |
| 9.47  | 7.99  | 8     | 8.18  | -0.14463 | 0.457496 |
| 0.11  | 0     | 0.05  | 0.03  | NA       | NA       |
| 0.02  | 0.01  | 0.02  | 0     | NA       | NA       |
| 18.67 | 10.03 | 10.67 | 9.14  | -0.98578 | 1.89E-16 |
| 2.26  | 1.17  | 1.32  | 1.17  | -0.82043 | 0.000366 |
| 0     | 0     | 0     | 0     | NA       | NA       |
| 0.39  | 0.49  | 0.59  | 0.57  | 0.348074 | 0.580221 |
| 17.68 | 10.1  | 12.77 | 9.64  | -0.5843  | 2.42E-09 |
| 14.21 | 13.11 | 13.77 | 14.21 | -0.12054 | 0.220331 |
| 16.75 | 19.2  | 19.63 | 20.11 | 0.091002 | 0.453334 |
| 4.97  | 6.54  | 5.57  | 4.18  | -0.02672 | 0.933507 |
| 0     | 0     | 0     | 0     | NA       | NA       |
| 0.32  | 0.38  | 0.92  | 1.11  | 0.69941  | 0.210008 |
| 0     | 0     | 0     | 0     | NA       | NA       |
| 0     | 0     | 0     | 0     | NA       | NA       |
| 48.41 | 84.05 | 71.7  | 79.89 | 0.622001 | 6.97E-11 |
| 0     | 0     | 0     | 0     | NA       | NA       |
| 0.42  | 0.62  | 0.65  | 0.71  | 0.394655 | 0.50611  |
| 2.31  | 2.39  | 2.41  | 2     | 0.029569 | 0.944939 |
| 0     | 0     | 0     | 0     | NA       | NA       |
| 1.82  | 2.32  | 1.21  | 2.06  | -0.17157 | 0.675925 |
| 0.02  | 0     | 0     | 0     | NA       | NA       |
| 0     | 0     | 0     | 0     | NA       | NA       |
| 0     | 0     | 0     | 0     | NA       | NA       |
| 0.12  | 0.16  | 0     | 0.02  | NA       | NA       |
| 0     | 0.01  | 0.01  | 0.05  | NA       | NA       |
| 34.63 | 35.03 | 60.94 | 50.79 | 0.52389  | 0.000991 |
| 1.51  | 0.43  | 0.85  | 1.3   | -0.60431 | 0.084998 |
| 0.04  | 0.01  | 0.04  | 0     | NA       | NA       |
| 0     | 0     | 0     | 0.05  | NA       | NA       |
| 0.79  | 0.72  | 0.95  | 0.74  | -0.248   | 0.617378 |
| 0.71  | 0.78  | 0.51  | 0.54  | -0.24992 | 0.668204 |
| 0     | 0     | 0     | 0     | NA       | NA       |
| 3.88  | 4.32  | 4.03  | 4.71  | 0.225809 | 0.14481  |
| 0.02  | 0.02  | 0.07  | 0.06  | NA       | NA       |
| 0.12  | 0.04  | 0.04  | 0.12  | -0.64666 | 0.301137 |
| 6.88  | 11.9  | 12.52 | 13.48 | 0.807874 | 6.70E-20 |
| 0.36  | 0.02  | 0.05  | 0.03  | -1.15674 | 0.063143 |
| 0     | 0.27  | 0.67  | 0.22  | NA       | NA       |

|       |       |       |       |          |          |
|-------|-------|-------|-------|----------|----------|
| 0.65  | 0.46  | 0.66  | 0.34  | 0.33446  | 0.58704  |
| 0.05  | 0     | 0.03  | 0     | NA       | NA       |
| 2.26  | 3.03  | 2.61  | 2.41  | -0.06081 | 0.825412 |
| 0     | 0     | 0     | 0     | NA       | NA       |
| 9.88  | 13.02 | 10.75 | 10.38 | 0.234067 | 0.214455 |
| 0.03  | 0.02  | 0     | 0     | NA       | NA       |
| 27.8  | 34.85 | 38.93 | 33.31 | 0.178897 | 0.633306 |
| 0.29  | 0.32  | 0.27  | 0.2   | -0.38178 | 0.538851 |
| 1.46  | 3.32  | 2.25  | 2.4   | 0.768045 | 0.119914 |
| 0     | 0     | 0     | 0     | NA       | NA       |
| 2.49  | 8.26  | 6.23  | 6.97  | 1.613908 | 3.07E-23 |
| 0.2   | 0     | 0.12  | 0     | NA       | NA       |
| 0.04  | 0.08  | 0.07  | 0.1   | -0.15187 | 0.848795 |
| 3.06  | 2.55  | 1.88  | 1.93  | -0.31733 | 0.144042 |
| 10.89 | 10.05 | 8.21  | 9.4   | 0.040824 | 0.824304 |
| 0     | 0     | 0     | 0     | NA       | NA       |
| 0     | 0     | 0     | 0     | NA       | NA       |
| 0     | 0     | 0     | 0.24  | NA       | NA       |
| 0     | 0     | 0     | 0.03  | NA       | NA       |
| 0     | 0     | 0     | 0     | NA       | NA       |
| 0     | 0     | 0     | 0     | NA       | NA       |
| 0.98  | 1.3   | 1.09  | 1.06  | 0.12306  | 0.667482 |
| 0     | 0     | 0     | 0     | NA       | NA       |
| 7.33  | 5.44  | 5     | 5.32  | -0.80217 | 3.52E-09 |
| 0     | 0     | 0     | 0     | NA       | NA       |
| 0     | 0     | 0     | 0     | NA       | NA       |
| 0.09  | 0.11  | 0.2   | 0.02  | -0.25617 | 0.753628 |
| 0     | 0     | 0     | 0     | NA       | NA       |
| 0.13  | 0.16  | 0.15  | 0.21  | 0.446021 | 0.555161 |
| 0     | 0     | 0     | 0     | NA       | NA       |
| 0     | 0.06  | 0.05  | 0.02  | NA       | NA       |
| 0.03  | 0     | 0.05  | 0     | NA       | NA       |
| 0     | 0     | 0     | 0     | NA       | NA       |
| 6.06  | 6.62  | 6     | 7.58  | -0.15312 | 0.456268 |
| 0.7   | 1.3   | 1.39  | 1.57  | 0.953017 | 3.05E-05 |
| 0.04  | 0.05  | 0.13  | 0.04  | NA       | NA       |
| 0     | 0     | 0     | 0     | NA       | NA       |
| 1.68  | 0.82  | 1.49  | 0.84  | -0.15693 | 0.747737 |
| 0     | 0     | 0     | 0     | NA       | NA       |
| 0     | 0     | 0     | 0     | NA       | NA       |
| 5.32  | 12.02 | 8.84  | 9.84  | 0.57505  | 0.000318 |
| 20.84 | 23.12 | 19.96 | 21.44 | 0.208845 | 0.079426 |
| 0     | 0.02  | 0.02  | 0.04  | NA       | NA       |
| 0     | 0     | 0     | 0     | NA       | NA       |
| 0.5   | 0.53  | 0.44  | 0.46  | -0.10291 | 0.822562 |

|        |       |        |        |          |          |
|--------|-------|--------|--------|----------|----------|
| 3.19   | 11.86 | 7.9    | 10.51  | 1.399925 | 1.08E-18 |
| 0      | 0     | 0      | 0      | NA       | NA       |
| 0.55   | 0.31  | 0.24   | 0.88   | -0.45048 | 0.506243 |
| 0.03   | 0.02  | 0.02   | 0      | NA       | NA       |
| 38.29  | 27.11 | 36.83  | 28.89  | -0.31044 | 0.030847 |
| 0.03   | 0     | 0.06   | 0      | NA       | NA       |
| 7.41   | 7.1   | 8.02   | 8.79   | -0.08695 | 0.75     |
| 0      | 0     | 0      | 0      | NA       | NA       |
| 0.94   | 1.56  | 2.03   | 1.2    | 0.290359 | 0.513751 |
| 0      | 0     | 0      | 0      | NA       | NA       |
| 0.58   | 0.7   | 0.68   | 0.67   | -0.13702 | 0.792121 |
| 0      | 0     | 0      | 0      | NA       | NA       |
| 1.38   | 1.5   | 1.03   | 1.49   | 0.095151 | 0.863276 |
| 0      | 0     | 0.03   | 0      | NA       | NA       |
| 0      | 0     | 0      | 0      | NA       | NA       |
| 0      | 0     | 0      | 0      | NA       | NA       |
| 1.84   | 2.02  | 1.27   | 1.28   | -0.17124 | 0.592542 |
| 0      | 0     | 0      | 0      | NA       | NA       |
| 254.26 | 345.3 | 302.74 | 320.71 | 0.265062 | 0.003537 |
| 1.76   | 1.75  | 2.08   | 2.04   | -0.69571 | 0.045734 |
| 1.42   | 1.61  | 1.4    | 2.02   | 0.46316  | 0.072883 |
| 21.08  | 19.32 | 16.72  | 16.93  | -0.33191 | 0.002336 |
| 14.07  | 14.13 | 12.88  | 11.35  | -0.21032 | 0.066555 |
| 10.16  | 11.74 | 12.64  | 12.33  | 0.100215 | 0.485103 |
| 10.65  | 11.47 | 10.19  | 10.78  | -0.1528  | 0.328087 |
| 0      | 0     | 0      | 0      | NA       | NA       |
| 0      | 0     | 0      | 0      | NA       | NA       |
| 0      | 0     | 0      | 0      | NA       | NA       |
| 1.49   | 0.1   | 0.41   | 0.26   | -2.60703 | 2.24E-15 |
| 8.14   | 8.04  | 8.45   | 8.9    | -0.07151 | 0.685709 |
| 0      | 0     | 0      | 0      | NA       | NA       |
| 2.64   | 2.59  | 2.62   | 2.41   | -0.04213 | 0.855772 |
| 0      | 0     | 0      | 0      | NA       | NA       |
| 0.03   | 0.02  | 0.02   | 0.02   | NA       | NA       |
| 0      | 0     | 0      | 0      | NA       | NA       |
| 0.21   | 0.24  | 0.13   | 0.22   | -0.06741 | 0.935474 |
| 2.08   | 3.52  | 4.63   | 4.94   | 0.56387  | 0.159743 |
| 18.03  | 23.56 | 24.02  | 23.68  | 0.31462  | 0.001504 |
| 33.61  | 30.28 | 32.46  | 31.42  | -0.11408 | 0.410345 |
| 0      | 0     | 0      | 0      | NA       | NA       |
| 5.34   | 5.06  | 4.8    | 6.11   | 0.049083 | 0.837435 |
| 0      | 0     | 0      | 0      | NA       | NA       |
| 14.99  | 23.67 | 23.83  | 23.79  | 0.403394 | 0.009063 |
| 0.54   | 1.37  | 0.51   | 0.89   | 1.104343 | 0.006794 |
| 0      | 0     | 0      | 0      | NA       | NA       |

|        |        |        |        |          |          |
|--------|--------|--------|--------|----------|----------|
| 0      | 0      | 0      | 0      | NA       | NA       |
| 1.87   | 2.4    | 2.17   | 1.94   | 0.235695 | 0.371809 |
| 1.97   | 1.75   | 1.86   | 1.75   | -0.03223 | 0.935474 |
| 0      | 0      | 0      | 0      | NA       | NA       |
| 0      | 0      | 0      | 0      | NA       | NA       |
| 0.37   | 0.55   | 1.08   | 0.76   | 1.131534 | 0.042498 |
| 0      | 0      | 0      | 0      | NA       | NA       |
| 93.13  | 61.97  | 82.76  | 67.58  | -0.35354 | 0.007579 |
| 0      | 0      | 0.1    | 0      | NA       | NA       |
| 13.93  | 18.87  | 15.28  | 17.43  | 0.316039 | 0.008409 |
| 8.68   | 13.82  | 11.38  | 10.86  | 0.483307 | 0.00035  |
| 41.92  | 39.05  | 47.84  | 44.16  | -0.23706 | 0.093558 |
| 0.79   | 1.01   | 0.36   | 0.58   | 0.017741 | 0.984963 |
| 5.52   | 3.57   | 4.43   | 3.56   | -0.33826 | 0.08654  |
| 0      | 0      | 0.03   | 0      | NA       | NA       |
| 16.51  | 21.74  | 21.11  | 20.37  | 0.232792 | 0.172325 |
| 11.36  | 11.35  | 11.45  | 9.23   | 0.066317 | 0.722383 |
| 30.76  | 37.62  | 32.88  | 30.18  | 0.186258 | 0.214802 |
| 0      | 0      | 0.02   | 0      | NA       | NA       |
| 0.07   | 0      | 0      | 0      | NA       | NA       |
| 0      | 0      | 0.07   | 0      | NA       | NA       |
| 14.19  | 15.47  | 15.21  | 15.02  | -0.11507 | 0.401174 |
| 0      | 0      | 0      | 0      | NA       | NA       |
| 0.31   | 0.43   | 0.18   | 0.28   | 0.042625 | 0.961386 |
| 0      | 0      | 0      | 0      | NA       | NA       |
| 30.08  | 46.3   | 44.19  | 44.91  | 0.518394 | 1.77E-11 |
| 0      | 0      | 0.05   | 0      | NA       | NA       |
| 0      | 0      | 0      | 0      | NA       | NA       |
| 0.39   | 0.22   | 0.17   | 0.45   | 0.282323 | 0.71014  |
| 5.19   | 5.71   | 5.05   | 6.86   | -0.02886 | 0.924916 |
| 0      | 0      | 0      | 0      | NA       | NA       |
| 671.16 | 553.87 | 675.09 | 547.84 | -0.22289 | 0.022889 |
| 0      | 0      | 0      | 0      | NA       | NA       |
| 8.45   | 8.79   | 8.24   | 10.77  | -0.13342 | 0.441818 |
| 3.91   | 2.65   | 3.2    | 3.85   | -0.04082 | 0.874602 |
| 0.34   | 0.73   | 0.85   | 0.41   | 0.858672 | 0.179344 |
| 0      | 0      | 0      | 0      | NA       | NA       |
| 0      | 0      | 0      | 0      | NA       | NA       |
| 0      | 0      | 0      | 0      | NA       | NA       |
| 0      | 0      | 0      | 0      | NA       | NA       |
| 4.2    | 8.01   | 7.59   | 8.49   | 0.778082 | 0.001247 |
| 4.66   | 6.63   | 5.62   | 7.11   | 0.225554 | 0.139012 |
| 44.85  | 42.92  | 42.98  | 45.37  | -0.1163  | 0.164449 |
| 0      | 0      | 0      | 0      | NA       | NA       |
| 0      | 0      | 0      | 0      | NA       | NA       |

|       |       |       |       |          |          |
|-------|-------|-------|-------|----------|----------|
| 0.1   | 0     | 0.07  | 0.04  | NA       | NA       |
| 0     | 0     | 0     | 0     | NA       | NA       |
| 3.48  | 3.48  | 2.45  | 2.73  | -0.42571 | 0.031302 |
| 0     | 0     | 0     | 0     | NA       | NA       |
| 2.87  | 4.71  | 3.9   | 3.75  | 0.502513 | 0.019908 |
| 0     | 0     | 0     | 0     | NA       | NA       |
| 1.84  | 2.77  | 3.09  | 3.03  | 0.384342 | 0.162074 |
| 0.01  | 0.07  | 0     | 0.02  | NA       | NA       |
| 0     | 0     | 0     | 0     | NA       | NA       |
| 9.29  | 7.95  | 7.26  | 7.75  | -0.03467 | 0.845538 |
| 0.71  | 0.04  | 0.16  | 0.07  | NA       | NA       |
| 0     | 0     | 0     | 0     | NA       | NA       |
| 0     | 0     | 0     | 0     | NA       | NA       |
| 0     | 0     | 0     | 0.02  | NA       | NA       |
| 0.25  | 0.19  | 0.29  | 0.35  | -0.21147 | 0.767799 |
| 0.2   | 0.39  | 0.12  | 0.05  | NA       | NA       |
| 0     | 0     | 0     | 0     | NA       | NA       |
| 0     | 0.08  | 0     | 0.08  | NA       | NA       |
| 0     | 0     | 0     | 0     | NA       | NA       |
| 4.65  | 3.54  | 5.83  | 3.95  | -0.13378 | 0.754017 |
| 0     | 0     | 0     | 0.04  | NA       | NA       |
| 6.6   | 7.44  | 6.41  | 9.82  | 0.352269 | 0.002241 |
| 0     | 0     | 0.08  | 0.02  | NA       | NA       |
| 17.17 | 19.62 | 18.61 | 20.85 | 0.094856 | 0.481238 |
| 5.83  | 6.87  | 5.43  | 6.12  | 0.020315 | 0.946156 |
| 0     | 0     | 0     | 0     | NA       | NA       |
| 0.22  | 0.11  | 0.32  | 0.21  | 0.046433 | 0.958712 |
| 0.13  | 0.02  | 0.07  | 0.01  | -0.45572 | 0.546626 |
| 0     | 0     | 0     | 0     | NA       | NA       |
| 8.23  | 3.06  | 3.77  | 3.17  | -1.18435 | 1.51E-11 |
| 0.03  | 0     | 0.02  | 0     | NA       | NA       |
| 0.5   | 0.8   | 1.19  | 1.22  | 0.093292 | 0.828141 |
| 85.12 | 65    | 83.34 | 75.65 | -0.11211 | 0.42163  |
| 4.19  | 3.78  | 3.88  | 4.02  | -0.11869 | 0.392388 |
| 4.72  | 6.01  | 5.62  | 5.84  | 0.292886 | 0.084482 |
| 10.9  | 8.84  | 8.96  | 9.96  | -0.05776 | 0.784567 |
| 0     | 0     | 0     | 0     | NA       | NA       |
| 0     | 0     | 0     | 0     | NA       | NA       |
| 7.15  | 3.97  | 6.05  | 5.15  | -0.40438 | 0.055186 |
| 0     | 0     | 0     | 0     | NA       | NA       |
| 0     | 0     | 0     | 0     | NA       | NA       |
| 23.73 | 22.11 | 26.16 | 26.38 | -0.07314 | 0.563675 |
| 0     | 0     | 0     | 0     | NA       | NA       |
| 0.12  | 0.05  | 0.09  | 0.02  | 0.083254 | 0.926936 |
| 0.13  | 0.05  | 0.02  | 0.34  | -1.05898 | 0.094624 |

|       |        |       |       |          |          |
|-------|--------|-------|-------|----------|----------|
| 0     | 0      | 0     | 0     | NA       | NA       |
| 11.63 | 10.74  | 10.55 | 11.19 | -0.00663 | 0.965199 |
| 0     | 0      | 0     | 0     | NA       | NA       |
| 0     | 0.03   | 0.02  | 0     | NA       | NA       |
| 0.04  | 0      | 0     | 0     | NA       | NA       |
| 8.71  | 10.11  | 10.71 | 12    | 0.317089 | 0.018756 |
| 0     | 0      | 0     | 0     | NA       | NA       |
| 18.07 | 14.25  | 18.23 | 17.14 | 0.193309 | 0.291336 |
| 0.15  | 0      | 0.05  | 0.06  | NA       | NA       |
| 0.45  | 1.62   | 2.68  | 2.27  | 1.111039 | 0.043072 |
| 1.51  | 0.81   | 1.03  | 1.05  | -0.78547 | 0.001401 |
| 10.82 | 19.7   | 11.88 | 19.36 | 1.102057 | 0.026303 |
| 0     | 0.01   | 0.03  | 0.01  | NA       | NA       |
| 0     | 0      | 0     | 0     | NA       | NA       |
| 0     | 0.03   | 0.01  | 0.04  | 0.861883 | 0.125724 |
| 5.61  | 5.43   | 5.49  | 6.97  | -0.10519 | 0.593124 |
| 6.85  | 29.6   | 15.23 | 23.97 | 1.778281 | 4.82E-16 |
| 0.56  | 1.24   | 1.69  | 1.91  | 0.899725 | 0.015484 |
| 0.09  | 0      | 0.04  | 0     | -1.20683 | 0.049135 |
| 15.29 | 12.12  | 10.4  | 13.07 | -0.23415 | 0.167881 |
| 1.9   | 0.86   | 1.1   | 1.43  | -0.27085 | 0.287151 |
| 0     | 0      | 0     | 0     | NA       | NA       |
| 0     | 0      | 0     | 0     | NA       | NA       |
| 13.28 | 17.17  | 13.11 | 14.76 | 0.368263 | 0.001736 |
| 0     | 0      | 0     | 0     | NA       | NA       |
| 0     | 0      | 0     | 0     | NA       | NA       |
| 2.67  | 2.3    | 1.97  | 2.03  | 0.178996 | 0.197985 |
| 0     | 0      | 0     | 0     | NA       | NA       |
| 0     | 0      | 0     | 0     | NA       | NA       |
| 4.99  | 9.28   | 8.06  | 10.41 | 0.444855 | 0.001307 |
| 9.56  | 5.9    | 8.15  | 6.07  | -0.39206 | 0.037593 |
| 0     | 0      | 0     | 0     | NA       | NA       |
| 0.69  | 0.86   | 0.8   | 0.87  | 0.048264 | 0.912249 |
| 0     | 0      | 0     | 0     | NA       | NA       |
| 0     | 0      | 0     | 0     | NA       | NA       |
| 0.06  | 0.73   | 0.29  | 0.66  | 2.16627  | 4.46E-05 |
| 0     | 0      | 0     | 0     | NA       | NA       |
| 0     | 0      | 0     | 0     | NA       | NA       |
| 0     | 0      | 0     | 0     | NA       | NA       |
| 0     | 0      | 0     | 0     | NA       | NA       |
| 0     | 0      | 0     | 0     | NA       | NA       |
| 11.72 | 14.21  | 12.1  | 14.33 | 0.006058 | 0.976268 |
| 62.84 | 107.59 | 88.48 | 92.93 | 0.472488 | 1.92E-06 |
| 0.02  | 0      | 0.1   | 0     | NA       | NA       |
| 0.05  | 0.12   | 0.18  | 0.04  | -0.53814 | 0.461301 |



|       |       |       |       |          |          |
|-------|-------|-------|-------|----------|----------|
| 0     | 0     | 0     | 0     | NA       | NA       |
| 0     | 0     | 0     | 0     | NA       | NA       |
| 1.89  | 0.86  | 0.87  | 0.58  | -1.17365 | 6.73E-05 |
| 21.63 | 29.72 | 28.82 | 30    | 0.183082 | 0.356587 |
| 0     | 0     | 0     | 0     | NA       | NA       |
| 6.5   | 5.41  | 5.37  | 6.39  | -0.15667 | 0.550129 |
| 6.23  | 4.56  | 6.34  | 5.98  | -0.18891 | 0.153146 |
| 9.74  | 16.58 | 14.26 | 14.78 | 0.498483 | 1.22E-05 |
| 0     | 0     | 0     | 0     | NA       | NA       |
| 0.02  | 0.3   | 0.18  | 0.16  | 1.388536 | 0.020038 |
| 43.85 | 29.69 | 32.34 | 33.44 | -0.57106 | 2.68E-10 |
| 0.18  | 0.08  | 0.06  | 0.18  | 0.009572 | 0.99294  |
| 0     | 0     | 0     | 0     | NA       | NA       |
| 1.62  | 1.6   | 2.41  | 2.18  | 0.069934 | 0.786133 |
| 0.41  | 0.15  | 0.64  | 0.45  | -0.62154 | 0.375599 |
| 3.19  | 3.25  | 4.6   | 4.58  | -0.10634 | 0.64214  |
| 1.44  | 2.11  | 1.98  | 2.26  | 0.314346 | 0.251517 |
| 0     | 0     | 0     | 0     | NA       | NA       |
| 17.56 | 23.05 | 24.77 | 22.92 | 0.501297 | 1.17E-06 |
| 0     | 0     | 0     | 0     | NA       | NA       |
| 6.74  | 9.79  | 9.18  | 9.88  | 0.457717 | 9.89E-05 |
| 26.16 | 36.58 | 34.74 | 37.27 | 0.422182 | 0.000661 |
| 0     | 0     | 0     | 0     | NA       | NA       |
| 44.42 | 48.55 | 45.54 | 49    | 0.039969 | 0.775187 |
| 1.53  | 3.1   | 2.39  | 2.5   | 0.459045 | 0.120976 |
| 0     | 0     | 0     | 0     | NA       | NA       |
| 0     | 0     | 0     | 0     | NA       | NA       |
| 0     | 0     | 0     | 0     | NA       | NA       |
| 0     | 0     | 0     | 0     | NA       | NA       |
| 0     | 0     | 0     | 0     | NA       | NA       |
| 0     | 0     | 0     | 0     | NA       | NA       |
| 0     | 0     | 0     | 0     | NA       | NA       |
| 0     | 0     | 0     | 0     | NA       | NA       |
| 5.86  | 7.26  | 5.24  | 5.33  | 0.081571 | 0.693377 |
| 0     | 0     | 0.01  | 0.01  | NA       | NA       |
| 23.49 | 20.87 | 24.91 | 22.46 | 0.051922 | 0.813598 |
| 0     | 0     | 0     | 0     | NA       | NA       |
| 0     | 0     | 0     | 0     | NA       | NA       |
| 0     | 0     | 0     | 0     | NA       | NA       |
| 41.7  | 51.46 | 59.5  | 44.56 | 4.59E-05 | 0.999852 |
| 0.24  | 0.02  | 0.06  | 0.06  | -1.41349 | 0.009385 |
| 6.18  | 7.58  | 6.97  | 7.63  | 0.199028 | 0.17178  |
| 0     | 0     | 0.06  | 0.01  | NA       | NA       |
| 0.28  | 0.1   | 0.12  | 0.14  | 0.122479 | 0.88961  |
| 0     | 0     | 0     | 0     | NA       | NA       |

|        |        |        |        |          |          |
|--------|--------|--------|--------|----------|----------|
| 0      | 0      | 0      | 0      | NA       | NA       |
| 0      | 0      | 0      | 0      | NA       | NA       |
| 0.02   | 0.03   | 0.02   | 0.02   | 0.476462 | 0.515531 |
| 0      | 0      | 0      | 0      | NA       | NA       |
| 17.99  | 13.76  | 13.42  | 11.14  | -0.57886 | 2.31E-06 |
| 0.17   | 0.3    | 0.95   | 0.17   | 0.309767 | 0.701731 |
| 0      | 0      | 0      | 0      | NA       | NA       |
| 0      | 0      | 0      | 0      | NA       | NA       |
| 0      | 0      | 0      | 0      | NA       | NA       |
| 53.57  | 81.36  | 68.83  | 76.83  | 0.338848 | 0.000257 |
| 19.59  | 19.55  | 19.48  | 19.94  | -0.0246  | 0.91273  |
| 23.25  | 22.12  | 23.7   | 19.68  | -0.29851 | 0.000209 |
| 0      | 0      | 0      | 0      | NA       | NA       |
| 0.22   | 0.16   | 0.12   | 0.17   | -0.97573 | 0.071879 |
| 20.66  | 20.57  | 19.42  | 26.32  | 0.084647 | 0.610062 |
| 3.79   | 2.28   | 2.31   | 2.5    | -0.09787 | 0.867552 |
| 0.02   | 0      | 0.01   | 0.02   | NA       | NA       |
| 110.89 | 126.54 | 123.87 | 110.76 | -0.01754 | 0.92504  |
| 1.85   | 1.78   | 1.1    | 1.14   | -0.37439 | 0.370893 |
| 0      | 0      | 0      | 0      | NA       | NA       |
| 0.91   | 1.17   | 0.68   | 0.69   | -0.07002 | 0.902417 |
| 1.18   | 2.38   | 1.9    | 2.58   | 0.508676 | 0.042303 |
| 90.84  | 87.24  | 83.66  | 90.2   | -0.07153 | 0.50611  |
| 8.34   | 10.27  | 8      | 8.74   | -0.009   | 0.973152 |
| 19.76  | 22.42  | 21.98  | 20.33  | 0.183817 | 0.241885 |
| 0      | 0      | 0      | 0      | NA       | NA       |
| 10.7   | 37.34  | 24.85  | 31.16  | 1.547815 | 4.07E-39 |
| 0      | 0      | 0      | 0      | NA       | NA       |
| 0      | 0      | 0      | 0      | NA       | NA       |
| 21.64  | 7.83   | 11.16  | 8.21   | -1.21638 | 8.71E-11 |
| 0.01   | 0      | 0      | 0.01   | NA       | NA       |
| 0      | 0      | 0      | 0      | NA       | NA       |
| 5.15   | 6.44   | 5.1    | 6.1    | -0.05135 | 0.867339 |
| 3.42   | 0.71   | 1.54   | 1.05   | -1.58046 | 2.72E-13 |
| 0.02   | 0      | 0.03   | 0      | NA       | NA       |
| 21.88  | 16.97  | 18.38  | 21.59  | -0.20498 | 0.096066 |
| 32.37  | 33.57  | 41.24  | 32.84  | 0.011981 | 0.948247 |
| 0      | 0.07   | 0.14   | 0.03   | NA       | NA       |
| 7.27   | 1.6    | 2.28   | 2.15   | -0.60472 | 0.060819 |
| 0      | 0      | 0      | 0      | NA       | NA       |
| 29.74  | 21.8   | 26.12  | 22.99  | -0.32107 | 0.013512 |
| 72.74  | 81.06  | 81.75  | 82     | -0.00291 | 0.986207 |
| 70.79  | 117.56 | 123.34 | 120.47 | 0.615726 | 1.45E-13 |
| 107.19 | 106.44 | 114.9  | 112.49 | -0.05475 | 0.627366 |
| 17.32  | 18.66  | 18.54  | 19.97  | 0.021531 | 0.93072  |

|         |        |        |        |          |          |
|---------|--------|--------|--------|----------|----------|
| 2.79    | 2.07   | 2.73   | 2.08   | -0.55342 | 0.000366 |
| 220.21  | 208.27 | 216.63 | 222.39 | -0.00583 | 0.963961 |
| 0       | 0      | 0      | 0      | NA       | NA       |
| 7.95    | 5.36   | 6.1    | 6.76   | -0.28257 | 0.071573 |
| 0       | 0.06   | 0      | 0.04   | NA       | NA       |
| 50.04   | 58.02  | 56.28  | 57.53  | 0.370347 | 1.19E-05 |
| 27.25   | 13.93  | 22.28  | 14.96  | -0.83969 | 8.39E-12 |
| 0.73    | 0.94   | 0.97   | 0.76   | 0.395538 | 0.121489 |
| 0.01    | 0      | 0      | 0      | NA       | NA       |
| 0.01    | 0      | 0.02   | 0      | NA       | NA       |
| 0.38    | 0.16   | 0.18   | 0.13   | -0.86606 | 0.120301 |
| 0.08    | 0.04   | 0.53   | 0.02   | NA       | NA       |
| 1.42    | 0.24   | 0.84   | 0.55   | -0.81823 | 0.002258 |
| 0       | 0.06   | 0      | 0      | NA       | NA       |
| 0       | 0      | 0      | 0      | NA       | NA       |
| 6.82    | 2.33   | 4.49   | 2.02   | -0.89548 | 1.15E-05 |
| 8.29    | 27.59  | 17.45  | 22.41  | 1.551111 | 3.21E-22 |
| 15.76   | 17.78  | 16.37  | 15.05  | -0.00802 | 0.966851 |
| 0.01    | 0.03   | 0.02   | 0.05   | NA       | NA       |
| 7.73    | 4.95   | 4.22   | 4.41   | 0.121546 | 0.744236 |
| 0       | 0      | 0      | 0      | NA       | NA       |
| 1.08    | 1.53   | 1.27   | 1.81   | 0.206708 | 0.490169 |
| 0.26    | 0.28   | 0.2    | 0.24   | 0.10196  | 0.883618 |
| 5.94    | 9.89   | 8.24   | 10.31  | 0.429773 | 0.013898 |
| 1021.37 | 709.54 | 892.63 | 910.45 | -0.27318 | 0.006679 |
| 0       | 0      | 0      | 0      | NA       | NA       |
| 0.71    | 0.54   | 0.51   | 0.64   | -0.26912 | 0.484632 |
| 0       | 0      | 0      | 0      | NA       | NA       |
| 0       | 0      | 0      | 0      | NA       | NA       |
| 0       | 0      | 0      | 0      | NA       | NA       |
| 0       | 0      | 0      | 0      | NA       | NA       |
| 0       | 0      | 0      | 0      | NA       | NA       |
| 0       | 0      | 0      | 0      | NA       | NA       |
| 0       | 0      | 0      | 0      | NA       | NA       |
| 0       | 0      | 0.04   | 0      | NA       | NA       |
| 2.38    | 1.96   | 3.25   | 2.58   | -0.3922  | 0.336178 |
| 10.69   | 8.76   | 9.5    | 9.81   | -0.02337 | 0.947179 |
| 0       | 0      | 0      | 0      | NA       | NA       |
| 0       | 0.16   | 0.09   | 0.09   | 1.060615 | 0.065322 |
| 6.7     | 7.94   | 6.54   | 6.72   | 0.364516 | 0.002663 |
| 0       | 0      | 0.02   | 0      | NA       | NA       |
| 1.22    | 1.3    | 1.51   | 1.16   | -0.31233 | 0.276247 |
| 1.22    | 1.3    | 1.51   | 1.16   | -0.21325 | 0.50294  |
| 9.01    | 6.55   | 9.81   | 8.71   | -0.25396 | 0.215146 |
| 0       | 0      | 0      | 0      | NA       | NA       |

|        |        |        |        |          |          |
|--------|--------|--------|--------|----------|----------|
| 0.53   | 0.26   | 0.19   | 0.24   | -1.03693 | 0.042303 |
| 0      | 0      | 0      | 0      | NA       | NA       |
| 0.76   | 0.48   | 0.53   | 0.15   | -0.97343 | 0.070209 |
| 9.3    | 9.13   | 8.48   | 9.13   | 0.175241 | 0.268868 |
| 0.79   | 0.87   | 0.88   | 0.89   | 0.259314 | 0.382353 |
| 0      | 0      | 0      | 0      | NA       | NA       |
| 25.39  | 31.19  | 27     | 28.49  | 0.131079 | 0.268575 |
| 0      | 0      | 0      | 0      | NA       | NA       |
| 0.06   | 0.16   | 0.17   | 0.08   | NA       | NA       |
| 0      | 0      | 0      | 0.03   | NA       | NA       |
| 1.66   | 5.32   | 4.08   | 5.66   | 1.967979 | 2.63E-20 |
| 0.07   | 0.1    | 0.36   | 0.13   | -0.37103 | 0.634737 |
| 36.02  | 30.28  | 31.34  | 31.78  | -0.21707 | 0.010425 |
| 0      | 0      | 0      | 0      | NA       | NA       |
| 35.05  | 24.94  | 20.67  | 20.77  | -0.6906  | 1.16E-10 |
| 8.59   | 10.49  | 9.23   | 10.25  | -0.07886 | 0.712368 |
| 8.59   | 10.49  | 9.23   | 10.25  | -0.07886 | 0.712368 |
| 0      | 0      | 0      | 0      | NA       | NA       |
| 0.02   | 0.32   | 0.18   | 0.21   | 1.63105  | 0.004895 |
| 217.07 | 169.34 | 199.36 | 193.04 | -0.36291 | 0.000202 |
| 1.79   | 3.24   | 2.7    | 3.33   | 0.761653 | 3.44E-05 |
| 0.04   | 0      | 0.03   | 0      | NA       | NA       |
| 6.55   | 6.1    | 6.53   | 7.95   | -0.36374 | 0.08077  |
| 13.27  | 15.7   | 13.51  | 14.71  | 0.19256  | 0.282282 |
| 5.37   | 7.88   | 8.42   | 6.54   | 0.455256 | 0.073626 |
| 0      | 0.11   | 0.2    | 0.12   | NA       | NA       |
| 0      | 0      | 0      | 0      | NA       | NA       |
| 0      | 0      | 0      | 0      | NA       | NA       |
| 231.06 | 305.66 | 255.16 | 279.22 | 0.344694 | 1.10E-05 |
| 17.21  | 13.82  | 18.24  | 18.09  | 0.149436 | 0.317778 |
| 26.88  | 22.48  | 21.93  | 23.77  | -0.10794 | 0.453409 |
| 2.74   | 1.54   | 1.87   | 1.07   | -0.68442 | 0.070787 |
| 26.81  | 29.27  | 28.89  | 28.34  | 0.225636 | 0.048547 |
| 8.59   | 11.53  | 12.14  | 11.01  | 0.351146 | 0.047072 |
| 0      | 0      | 0      | 0      | NA       | NA       |
| 0      | 0      | 0      | 0      | NA       | NA       |
| 0      | 0      | 0      | 0      | NA       | NA       |
| 9.58   | 8.6    | 10.15  | 7.74   | 0.043919 | 0.806634 |
| 0      | 0      | 0      | 0      | NA       | NA       |
| 1.21   | 0.17   | 0.51   | 0.1    | -1.91799 | 1.95E-07 |
| 0.02   | 0.28   | 0.05   | 0.31   | 1.317966 | 0.027839 |
| 1.28   | 0.48   | 0.83   | 0.82   | -0.96363 | 0.000756 |
| 0      | 0      | 0      | 0      | NA       | NA       |
| 0.32   | 0.51   | 0.46   | 0.47   | 0.598196 | 0.301932 |
| 0      | 0.15   | 0.65   | 0.04   | NA       | NA       |

|        |        |        |        |          |           |
|--------|--------|--------|--------|----------|-----------|
| 0      | 0      | 0      | 0      | NA       | NA        |
| 0      | 0      | 0      | 0      | NA       | NA        |
| 0.34   | 0.87   | 0.5    | 0.99   | -0.2417  | 0.717625  |
| 0      | 0      | 0      | 0      | NA       | NA        |
| 18.61  | 9.89   | 10.78  | 10.31  | -0.78841 | 4.25E-16  |
| 1.67   | 1.41   | 1.52   | 1.21   | -0.38128 | 0.301084  |
| 0      | 0      | 0      | 0      | NA       | NA        |
| 9.64   | 35.03  | 20.96  | 26.18  | 1.382073 | 5.44E-40  |
| 0      | 0      | 0      | 0      | NA       | NA        |
| 14.99  | 8.97   | 14.85  | 11.98  | -0.30344 | 0.114633  |
| 0.04   | 0.08   | 0.02   | 0.14   | NA       | NA        |
| 0      | 0.01   | 0.01   | 0      | NA       | NA        |
| 0      | 0      | 0      | 0      | NA       | NA        |
| 11.21  | 6.86   | 9.87   | 8.01   | -0.49743 | 0.002592  |
| 0      | 0      | 0      | 0      | NA       | NA        |
| 4.84   | 3.11   | 4.32   | 4.66   | 0.054443 | 0.889637  |
| 0      | 0      | 0      | 0      | NA       | NA        |
| 7.6    | 17.15  | 12.5   | 14.55  | 1.324927 | 1.78E-15  |
| 53.37  | 49.32  | 54.31  | 53.47  | -0.032   | 0.784834  |
| 0      | 0      | 0      | 0      | NA       | NA        |
| 0      | 0.07   | 0      | 0      | NA       | NA        |
| 0.72   | 1.12   | 0.87   | 1.05   | 0.354933 | 0.493018  |
| 0.05   | 0      | 0.03   | 0.04   | NA       | NA        |
| 0      | 0      | 0      | 0      | NA       | NA        |
| 2.88   | 4.1    | 3.97   | 4.05   | 0.258624 | 0.164113  |
| 10.74  | 41.88  | 30.32  | 37.06  | 1.617831 | 7.00E-41  |
| 0      | 0      | 0      | 0      | NA       | NA        |
| 10     | 6.62   | 6.93   | 7.56   | -0.45849 | 0.037001  |
| 811.05 | 789.98 | 882.25 | 797.94 | -0.05098 | 0.635584  |
| 0      | 0      | 0      | 0      | NA       | NA        |
| 0      | 0      | 0      | 0      | NA       | NA        |
| 0.2    | 0.18   | 0.17   | 0.15   | -0.05242 | 0.948254  |
| 0      | 0      | 0      | 0      | NA       | NA        |
| 3.96   | 4.55   | 5.73   | 4.84   | 0.241626 | 0.190908  |
| 39.44  | 386.78 | 330.5  | 378.33 | 3.114319 | 2.99E-236 |
| 0.03   | 0      | 0.04   | 0      | NA       | NA        |
| 24.31  | 28.17  | 25.37  | 24.51  | 0.06234  | 0.621592  |
| 0.04   | 0      | 0.04   | 0      | NA       | NA        |
| 783.51 | 648.53 | 736.69 | 601.67 | -0.23917 | 0.019173  |
| 0      | 0      | 0      | 0      | NA       | NA        |
| 0      | 0      | 0      | 0      | NA       | NA        |
| 0      | 0      | 0      | 0      | NA       | NA        |
| 0.39   | 0.32   | 0.28   | 0.12   | -0.32609 | 0.621689  |
| 0      | 0      | 0      | 0      | NA       | NA        |
| 0      | 0      | 0.01   | 0      | NA       | NA        |

|        |        |        |         |          |          |
|--------|--------|--------|---------|----------|----------|
| 15.94  | 18.13  | 15.46  | 18.99   | -0.11732 | 0.467467 |
| 0      | 0.1    | 0.03   | 0 NA    | NA       |          |
| 81.43  | 79.64  | 77.68  | 77.24   | -0.17852 | 0.070749 |
| 2.57   | 3.78   | 4.01   | 3.14    | 0.257692 | 0.319984 |
| 0.11   | 0      | 0.08   | 0.17 NA | NA       |          |
| 0      | 0      | 0      | 0 NA    | NA       |          |
| 0      | 0      | 0      | 0 NA    | NA       |          |
| 14.77  | 17.42  | 17.21  | 19.77   | 0.240846 | 0.023711 |
| 8.84   | 11.06  | 11.35  | 10.36   | 0.285244 | 0.002487 |
| 0.12   | 0.01   | 0.03   | 0.02    | -1.99899 | 0.000123 |
| 3.42   | 1.82   | 2.86   | 2.87    | -0.45929 | 0.062147 |
| 0.12   | 0.24   | 0.91   | 0.56    | 0.52398  | 0.477667 |
| 0      | 0      | 0      | 0 NA    | NA       |          |
| 12.54  | 11.49  | 9.81   | 11.8    | -0.12088 | 0.436366 |
| 0      | 0.06   | 0      | 0 NA    | NA       |          |
| 0.14   | 0.36   | 0.19   | 0.42    | 1.170655 | 0.051923 |
| 63.22  | 77.14  | 69.39  | 71.69   | 0.093681 | 0.334532 |
| 11.95  | 12.4   | 12.13  | 12.79   | -0.03004 | 0.856146 |
| 0.22   | 0.59   | 0.42   | 0.21    | 0.059408 | 0.94822  |
| 0      | 0      | 0      | 0 NA    | NA       |          |
| 0      | 0      | 0      | 0 NA    | NA       |          |
| 0.06   | 0.14   | 0.14   | 0       | 0.216561 | 0.79675  |
| 0      | 0      | 0      | 0 NA    | NA       |          |
| 0      | 0      | 0      | 0 NA    | NA       |          |
| 620.93 | 475.82 | 553.01 | 480.53  | -0.34145 | 0.000133 |
| 0      | 0.06   | 0.11   | 0 NA    | NA       |          |
| 0      | 0      | 0      | 0 NA    | NA       |          |
| 10.72  | 8.16   | 8.01   | 7.08    | -0.16174 | 0.396541 |
| 0.13   | 0.23   | 0.18   | 0.33    | 0.490509 | 0.476938 |
| 4.45   | 5.86   | 6.19   | 5.64    | 0.165821 | 0.570335 |
| 13.54  | 12.53  | 8.04   | 9.28    | -0.04821 | 0.843689 |
| 0      | 0      | 0      | 0 NA    | NA       |          |
| 15.24  | 11.53  | 13.17  | 11.92   | -0.17838 | 0.30991  |
| 1.04   | 1.55   | 1.2    | 1.37    | 0.27697  | 0.696373 |
| 38.01  | 70.99  | 52.79  | 61.36   | 0.581656 | 8.41E-08 |
| 0      | 0      | 0      | 0 NA    | NA       |          |
| 68.03  | 80.22  | 72.28  | 74.35   | 0.067874 | 0.544995 |
| 0.12   | 0.04   | 0.08   | 0.04 NA | NA       |          |
| 28.9   | 27.94  | 30.61  | 30.29   | 0.017619 | 0.925618 |
| 14.4   | 4.48   | 7.27   | 6.06    | -1.32667 | 1.69E-30 |
| 3.4    | 4.56   | 4.28   | 3.78    | 0.19019  | 0.278147 |
| 0      | 0      | 0      | 0 NA    | NA       |          |
| 0      | 0      | 0      | 0 NA    | NA       |          |
| 8.59   | 6.66   | 7.53   | 7.26    | 0.037404 | 0.872041 |
| 0      | 0      | 0      | 0 NA    | NA       |          |

|        |       |       |       |          |          |
|--------|-------|-------|-------|----------|----------|
| 31.38  | 28.37 | 35.46 | 31.26 | -0.17939 | 0.125304 |
| 0.12   | 0.08  | 0.14  | 0.1   | -0.06964 | 0.94163  |
| 0.88   | 1.42  | 1.71  | 1.61  | 0.995199 | 0.004416 |
| 7.59   | 6.02  | 6.01  | 6.56  | -0.17552 | 0.369468 |
| 0.54   | 0.59  | 0.86  | 0.57  | 0.379521 | 0.52483  |
| 30.52  | 20.21 | 21.04 | 20.64 | -0.56994 | 1.17E-07 |
| 42.64  | 40.95 | 48.47 | 37.44 | -0.27354 | 0.102388 |
| 0.41   | 0.14  | 0.3   | 0.17  | -1.0367  | 0.063254 |
| 0      | 0     | 0     | 0     | NA       | NA       |
| 26.48  | 20.98 | 22.2  | 21.98 | -0.18214 | 0.062506 |
| 0      | 0     | 0     | 0     | NA       | NA       |
| 0.74   | 0.22  | 0.09  | 0.1   | -2.72128 | 8.04E-14 |
| 0      | 0     | 0     | 0     | NA       | NA       |
| 0.49   | 0.22  | 0     | 0.43  | -0.53702 | 0.46358  |
| 0      | 0     | 0     | 0     | NA       | NA       |
| 0      | 0     | 0     | 0     | NA       | NA       |
| 0      | 0     | 0     | 0     | NA       | NA       |
| 1.83   | 0.8   | 0.76  | 0.89  | -1.18729 | 1.41E-08 |
| 3.27   | 5.32  | 5.09  | 3.58  | 0.338869 | 0.166385 |
| 0.47   | 1.35  | 1.05  | 0.99  | 0.826665 | 0.000909 |
| 9.01   | 6.81  | 8.26  | 4.25  | -0.39629 | 0.044387 |
| 0      | 0.09  | 0.17  | 0     | NA       | NA       |
| 3.73   | 1.92  | 2.92  | 2.74  | -0.36933 | 0.158071 |
| 0.05   | 0     | 0.07  | 0.08  | NA       | NA       |
| 0      | 0     | 0     | 0     | NA       | NA       |
| 0      | 0     | 0     | 0     | NA       | NA       |
| 7.82   | 5.67  | 8.41  | 8.19  | -0.5271  | 0.01821  |
| 116.25 | 28.72 | 43.31 | 36.82 | -1.68782 | 5.10E-47 |
| 0      | 0     | 0     | 0     | NA       | NA       |
| 0      | 0     | 0.02  | 0.06  | 0.080552 | 0.932664 |
| 0.02   | 0     | 0.06  | 0.04  | NA       | NA       |
| 46.08  | 75    | 77.41 | 80.37 | 0.69726  | 2.28E-19 |
| 4.65   | 2.32  | 3.97  | 3.25  | -0.70913 | 1.92E-05 |
| 0.05   | 0.36  | 0.19  | 0.17  | 1.416803 | 0.016597 |
| 0      | 0     | 0     | 0     | NA       | NA       |
| 0      | 0     | 0     | 0     | NA       | NA       |
| 0      | 0     | 0.05  | 0     | NA       | NA       |
| 0.02   | 0.03  | 0     | 0     | NA       | NA       |
| 7.38   | 4.29  | 7.03  | 7.61  | -0.27917 | 0.2822   |
| 0      | 0.03  | 0.06  | 0.08  | NA       | NA       |
| 0      | 0     | 0     | 0     | NA       | NA       |
| 0      | 0.06  | 0     | 0     | NA       | NA       |
| 0.31   | 0     | 0.08  | 0.03  | NA       | NA       |
| 0.33   | 0.96  | 0.79  | 0.57  | 0.812207 | 0.206775 |
| 0.16   | 0.18  | 0.15  | 0.26  | 0.422538 | 0.571879 |

|        |        |        |        |          |          |
|--------|--------|--------|--------|----------|----------|
| 4.21   | 5.26   | 4.67   | 5.53   | 0.45949  | 0.017009 |
| 21.64  | 5.22   | 5.41   | 4.71   | -1.87895 | 6.77E-45 |
| 2      | 1.63   | 1.64   | 1.5    | -0.16649 | 0.554968 |
| 0      | 0.01   | 0      | 0      | NA       | NA       |
| 0      | 0      | 0.06   | 0.09   | NA       | NA       |
| 0.03   | 0.37   | 0.17   | 0.07   | 0.586977 | 0.412954 |
| 27.48  | 21.99  | 25.16  | 21.79  | -0.27423 | 0.119336 |
| 0      | 0      | 0      | 0      | NA       | NA       |
| 0.02   | 0.03   | 0      | 0.02   | NA       | NA       |
| 0.28   | 1.84   | 0.99   | 1.62   | 1.865101 | 4.10E-11 |
| 0.09   | 0      | 0.02   | 0      | NA       | NA       |
| 0      | 0.01   | 0.02   | 0      | NA       | NA       |
| 23.59  | 27.31  | 29.58  | 23.94  | 0.185925 | 0.186876 |
| 1.16   | 1.42   | 1.71   | 1.63   | 0.146917 | 0.772909 |
| 0      | 0      | 0      | 0      | NA       | NA       |
| 0.21   | 0.3    | 0      | 0      | NA       | NA       |
| 2.25   | 2.22   | 3.14   | 2.68   | 0.164922 | 0.640682 |
| 0.24   | 0      | 0.1    | 0.27   | 0.048111 | 0.926237 |
| 0.27   | 0.03   | 0.12   | 0.25   | -0.26763 | 0.729409 |
| 0      | 0      | 0      | 0      | NA       | NA       |
| 0.95   | 1.25   | 1.32   | 1.74   | -0.00319 | 0.996111 |
| 0      | 0      | 0      | 0      | NA       | NA       |
| 156.97 | 136.98 | 161.08 | 143.9  | -0.12019 | 0.250715 |
| 39.18  | 41.49  | 58.79  | 60.9   | 0.005215 | 0.98325  |
| 0.05   | 0      | 0      | 0      | NA       | NA       |
| 0      | 0      | 0      | 0      | NA       | NA       |
| 0      | 0      | 0      | 0      | NA       | NA       |
| 1.16   | 0.79   | 0.87   | 0.94   | -0.08285 | 0.91451  |
| 148.92 | 148.35 | 149.2  | 149.15 | -0.07771 | 0.485787 |
| 38.43  | 16.32  | 25.5   | 22.55  | -0.62153 | 8.13E-07 |
| 112.69 | 161.29 | 136.81 | 128.25 | 0.27248  | 0.017285 |
| 0.08   | 0.37   | 0.4    | 0.4    | 0.486067 | 0.513736 |
| 0      | 0      | 0      | 0      | NA       | NA       |
| 0.07   | 0      | 0      | 0      | NA       | NA       |
| 0      | 0      | 0      | 0      | NA       | NA       |
| 0      | 0      | 0      | 0      | NA       | NA       |
| 0.09   | 0.24   | 0.14   | 0.12   | 1.181116 | 0.046878 |
| 1.4    | 1.4    | 1.18   | 1.85   | 0.052933 | 0.943276 |
| 6.64   | 6.88   | 7      | 7.58   | 0.097774 | 0.538056 |
| 0      | 0      | 0      | 0      | NA       | NA       |
| 0      | 0      | 0      | 0      | NA       | NA       |
| 0.36   | 0.37   | 0.37   | 0.49   | -0.28912 | 0.6465   |
| 0      | 0      | 0      | 0      | NA       | NA       |
| 2.11   | 1.23   | 1.26   | 1.59   | -0.48085 | 0.057898 |
| 0      | 0      | 0      | 0      | NA       | NA       |



|       |       |       |       |          |          |
|-------|-------|-------|-------|----------|----------|
| 2.99  | 5.79  | 3.75  | 4.12  | 0.519383 | 0.130349 |
| 4.27  | 8.39  | 7.73  | 8.36  | 0.677375 | 2.39E-09 |
| 4.99  | 4.91  | 5.8   | 5.45  | 0.068129 | 0.768324 |
| 0.2   | 0     | 0.05  | 0.03  | NA       | NA       |
| 0     | 0     | 0.06  | 0.03  | NA       | NA       |
| 7.19  | 9.69  | 9.42  | 10.5  | 0.317422 | 0.003484 |
| 0     | 0     | 0     | 0     | NA       | NA       |
| 0     | 0     | 0     | 0.02  | NA       | NA       |
| 0     | 0     | 0     | 0     | NA       | NA       |
| 27.03 | 21.05 | 21.45 | 21.72 | -0.38923 | 0.000609 |
| 0     | 0     | 0     | 0     | NA       | NA       |
| 0.2   | 1.3   | 0.54  | 0.91  | 1.567596 | 0.007817 |
| 0.12  | 0.26  | 0.08  | 0.18  | NA       | NA       |
| 0     | 0     | 0.08  | 0     | NA       | NA       |
| 9.86  | 6.18  | 8.03  | 9.98  | -0.35737 | 0.166341 |
| 0.13  | 0.37  | 0.13  | 0.2   | 0.843117 | 0.147345 |
| 0.02  | 0.03  | 0.04  | 0.01  | NA       | NA       |
| 48.06 | 36.13 | 33.79 | 34.75 | -0.32614 | 0.000488 |
| 24.32 | 25.71 | 30.71 | 29.43 | 0.173418 | 0.135391 |
| 0     | 0     | 0     | 0     | NA       | NA       |
| 0     | 0     | 0     | 0     | NA       | NA       |
| 0.56  | 0.52  | 1.07  | 0.62  | 0.089426 | 0.899594 |
| 5.5   | 4.86  | 5.49  | 4.04  | -0.39807 | 0.173212 |
| 0     | 0.45  | 0.05  | 0.17  | 2.972517 | 1.61E-08 |
| 17.95 | 8.43  | 9.99  | 14.78 | -0.61768 | 5.78E-08 |
| 0     | 0     | 0     | 0     | NA       | NA       |
| 0     | 0     | 0     | 0     | NA       | NA       |
| 9.91  | 8.71  | 11.36 | 8.58  | -0.08677 | 0.70095  |
| 4.18  | 4.67  | 4.82  | 4.43  | 0.152553 | 0.369708 |
| 0     | 0     | 0     | 0     | NA       | NA       |
| 0.35  | 0.44  | 0.29  | 0.14  | -0.33604 | 0.661423 |
| 0.02  | 0     | 0     | 0.24  | NA       | NA       |
| 1.74  | 1.4   | 1.44  | 3.04  | -0.02467 | 0.959338 |
| 8.94  | 8.23  | 8.91  | 8.95  | 0.015694 | 0.91832  |
| 5.65  | 4.96  | 6.65  | 5.7   | -0.02914 | 0.901909 |
| 9.12  | 8.51  | 11.23 | 9.22  | -0.20929 | 0.159534 |
| 0.45  | 0.09  | 0.1   | 0.12  | -1.79103 | 3.26E-06 |
| 16.54 | 15.6  | 18.77 | 15.92 | 0.057016 | 0.794052 |
| 0     | 0     | 0     | 0     | NA       | NA       |
| 17.86 | 23.94 | 22.12 | 19.31 | 0.350966 | 0.009495 |
| 23.37 | 16.81 | 20.04 | 17.16 | -0.25715 | 0.135517 |
| 4.32  | 5.29  | 4.96  | 5.46  | -0.0219  | 0.895538 |
| 0     | 0     | 0     | 0     | NA       | NA       |
| 0     | 0     | 0     | 0     | NA       | NA       |
| 0     | 0     | 0.06  | 0     | NA       | NA       |

|        |        |        |       |          |          |
|--------|--------|--------|-------|----------|----------|
| 0      | 0      | 0      | 0     | NA       | NA       |
| 0      | 0.07   | 0      | 0     | NA       | NA       |
| 0      | 0      | 0.03   | 0     | NA       | NA       |
| 0      | 0      | 0      | 0     | NA       | NA       |
| 2.1    | 1.07   | 1.4    | 1.71  | -0.65984 | 0.072419 |
| 0.48   | 0.48   | 0.35   | 0.51  | -0.29896 | 0.672426 |
| 0      | 0      | 0      | 0     | NA       | NA       |
| 15.56  | 21.61  | 17.94  | 20.46 | 0.251799 | 0.026568 |
| 12.02  | 16.43  | 13.69  | 15.17 | 0.210074 | 0.156506 |
| 1.79   | 2.41   | 1.99   | 2.29  | 0.426593 | 0.014967 |
| 8.66   | 7.4    | 7.05   | 6.87  | -0.41565 | 0.000188 |
| 0      | 0      | 0      | 0     | NA       | NA       |
| 12.07  | 13.82  | 11.83  | 12.57 | -0.02169 | 0.925337 |
| 0      | 0.17   | 0      | 0.19  | NA       | NA       |
| 3.56   | 4.63   | 3.61   | 4.09  | 0.449223 | 0.062432 |
| 7.65   | 5.79   | 5.31   | 5.72  | -0.26654 | 0.294713 |
| 0      | 0.07   | 0      | 0.07  | NA       | NA       |
| 5.22   | 3.26   | 2.78   | 2.09  | -0.96407 | 0.00075  |
| 24.71  | 36.84  | 29.32  | 35.38 | 0.417785 | 0.011825 |
| 2.06   | 1.94   | 1.86   | 1.54  | -0.19168 | 0.511517 |
| 19.3   | 16     | 16.48  | 14.95 | -0.01553 | 0.940418 |
| 0      | 0      | 0      | 0     | NA       | NA       |
| 0.22   | 0.16   | 0.32   | 0.39  | -0.00426 | 0.996262 |
| 0.04   | 0.43   | 0.05   | 0.01  | NA       | NA       |
| 0      | 0      | 0      | 0     | NA       | NA       |
| 0      | 0      | 0.04   | 0     | NA       | NA       |
| 0      | 0      | 0.01   | 0.03  | NA       | NA       |
| 0      | 0      | 0      | 0     | NA       | NA       |
| 0      | 0      | 0      | 0     | NA       | NA       |
| 0.02   | 0      | 0.03   | 0.03  | NA       | NA       |
| 1.04   | 1.84   | 0.96   | 1.39  | 0.025154 | 0.96236  |
| 112.35 | 103.58 | 103.04 | 91.31 | -0.08878 | 0.646089 |
| 0      | 0      | 0      | 0     | NA       | NA       |
| 1.13   | 1.07   | 1.07   | 0.86  | -0.16094 | 0.681801 |
| 0      | 0.02   | 0      | 0     | NA       | NA       |
| 0      | 0      | 0      | 0     | NA       | NA       |
| 4.02   | 4.52   | 4.15   | 4.08  | 0.052894 | 0.852616 |
| 3.45   | 4.47   | 4.92   | 5     | 0.139073 | 0.699403 |
| 0.16   | 0.05   | 0.09   | 0.05  | NA       | NA       |
| 43.13  | 7.78   | 15.22  | 16.44 | -1.54695 | 2.11E-07 |
| 0      | 0      | 0      | 0     | NA       | NA       |
| 0.04   | 0      | 0.05   | 0     | NA       | NA       |
| 14.77  | 22.31  | 19.88  | 17.16 | 0.196362 | 0.268058 |
| 1.9    | 2.19   | 2.35   | 1.74  | -0.04712 | 0.885955 |
| 0.05   | 0.02   | 0      | 0.07  | NA       | NA       |

|       |        |       |        |          |          |
|-------|--------|-------|--------|----------|----------|
| 0     | 0      | 0     | 0      | NA       | NA       |
| 0     | 0      | 0     | 0      | NA       | NA       |
| 7.35  | 16.9   | 14.52 | 16.96  | 1.173409 | 2.80E-10 |
| 0     | 0      | 0     | 0      | NA       | NA       |
| 0     | 0      | 0     | 0      | NA       | NA       |
| 0     | 0      | 0     | 0      | NA       | NA       |
| 0     | 0.01   | 0.04  | 0      | NA       | NA       |
| 4.13  | 5.24   | 4.85  | 3.99   | 0.199826 | 0.341788 |
| 59.9  | 26.24  | 35.15 | 29.8   | -0.93149 | 1.71E-17 |
| 8.36  | 8.37   | 7.08  | 6.97   | -0.12181 | 0.438399 |
| 97.71 | 120.21 | 101   | 107.66 | 0.313854 | 0.002471 |
| 0     | 0      | 0     | 0      | NA       | NA       |
| 0     | 0      | 0     | 0      | NA       | NA       |
| 0     | 0.23   | 0.36  | 0.19   | 1.112374 | 0.077067 |
| 8.2   | 11.77  | 10.98 | 11.77  | 0.398311 | 0.000419 |
| 15.49 | 12.04  | 11.87 | 13.04  | -0.39606 | 3.10E-06 |
| 0.06  | 0.04   | 0.07  | 0.03   | -0.55434 | 0.393005 |
| 0     | 0      | 0     | 0      | NA       | NA       |
| 11.26 | 10.21  | 12.84 | 10.57  | 0.153045 | 0.290116 |
| 0     | 0      | 0     | 0      | NA       | NA       |
| 0.06  | 0.68   | 0.35  | 0.33   | 1.920592 | 0.000437 |
| 3.76  | 9.11   | 5.15  | 7.44   | 0.915797 | 2.80E-08 |
| 0.54  | 0.87   | 0.66  | 1.04   | -0.05829 | 0.933085 |
| 9.85  | 8.1    | 8.89  | 10.79  | -0.17134 | 0.423276 |
| 0.13  | 0.03   | 0.12  | 0.18   | -0.24797 | 0.760501 |
| 0.15  | 0.22   | 0.03  | 0.09   | -0.63209 | 0.36846  |
| 0.81  | 1.98   | 2.37  | 2.77   | 1.177348 | 1.27E-15 |
| 0     | 0      | 0.01  | 0      | NA       | NA       |
| 10.28 | 6.51   | 6.55  | 6.79   | -0.70718 | 3.24E-10 |
| 0     | 0      | 0     | 0      | NA       | NA       |
| 3.26  | 1.53   | 2.11  | 0.87   | -0.60838 | 0.078121 |
| 0.04  | 0.03   | 0.09  | 0      | -0.2137  | 0.791573 |
| 0.35  | 0.58   | 0.6   | 0.48   | 0.216519 | 0.758108 |
| 0     | 0      | 0     | 0      | NA       | NA       |
| 3.06  | 1.89   | 2.17  | 1.25   | -0.40692 | 0.400736 |
| 0     | 0      | 0     | 0      | NA       | NA       |
| 0     | 0      | 0     | 0.01   | NA       | NA       |
| 3.67  | 0.36   | 0.85  | 0.68   | -2.75129 | 4.29E-27 |
| 0     | 0      | 0     | 0      | NA       | NA       |
| 5.29  | 6.08   | 4.8   | 5.45   | -0.00768 | 0.974973 |
| 0.1   | 0      | 0.01  | 0.02   | NA       | NA       |
| 0.52  | 0.6    | 0.91  | 0.97   | 0.016259 | 0.977246 |
| 0     | 0      | 0     | 0      | NA       | NA       |
| 3.14  | 3.36   | 3.5   | 3.91   | 0.276666 | 0.067246 |
| 18.55 | 10.84  | 14.88 | 11.63  | -0.43575 | 0.030619 |

|         |        |         |                  |          |
|---------|--------|---------|------------------|----------|
| 0.14    | 0      | 0       | 0 NA             | NA       |
| 0.17    | 0.34   | 0.12    | 0.72 0.700817    | 0.280278 |
| 0       | 0      | 0.03    | 0.01 NA          | NA       |
| 0.4     | 2.44   | 1.38    | 1.91 1.916591    | 2.19E-09 |
| 0       | 0      | 0.02    | 0 NA             | NA       |
| 0       | 0      | 0       | 0 NA             | NA       |
| 59.32   | 47.19  | 53.85   | 51.86 -0.29475   | 0.000401 |
| 0.01    | 0.01   | 0.03    | 0.03 NA          | NA       |
| 0       | 0      | 0       | 0 NA             | NA       |
| 14.74   | 9.96   | 11.78   | 11.97 -0.40607   | 9.99E-05 |
| 0.21    | 0.07   | 0.03    | 0.16 1.010481    | 0.109937 |
| 2.42    | 0.68   | 1.45    | 1.13 -1.64066    | 3.68E-12 |
| 3.33    | 3.16   | 3.08    | 3.4 -0.00025     | 0.999184 |
| 0       | 0.03   | 0       | 0.06 NA          | NA       |
| 52.23   | 54.46  | 67.44   | 58.23 -0.35313   | 0.021981 |
| 2.86    | 4.62   | 2.55    | 4.11 0.06942     | 0.898268 |
| 0       | 0.02   | 0       | 0.05 NA          | NA       |
| 0       | 0      | 0       | 0 NA             | NA       |
| 0       | 0      | 0       | 0 NA             | NA       |
| 1.35    | 0.03   | 0.3     | 0.14 -2.2203     | 1.33E-05 |
| 0       | 0      | 0       | 0 NA             | NA       |
| 0       | 0      | 0       | 0 NA             | NA       |
| 0.31    | 0.04   | 0.04    | 0.05 NA          | NA       |
| 3.29    | 1.88   | 2.28    | 1.85 -0.65363    | 0.000226 |
| 0       | 0      | 0       | 0 NA             | NA       |
| 5.78    | 6.93   | 7.95    | 8.14 0.279684    | 0.076339 |
| 17.17   | 17.54  | 16.41   | 18.85 0.016581   | 0.929724 |
| 0       | 0.01   | 0.03    | 0.01 NA          | NA       |
| 6.3     | 24.53  | 11.94   | 19.7 1.380332    | 2.23E-05 |
| 0.36    | 0.26   | 0.43    | 0.17 -0.40674    | 0.598232 |
| 0       | 0      | 0       | 0 NA             | NA       |
| 26.26   | 28.63  | 34.6    | 29.97 0.186034   | 0.294358 |
| 1.24    | 0.96   | 0.07    | 0.74 0.079704    | 0.930993 |
| 0       | 0      | 0       | 0 NA             | NA       |
| 0.13    | 0.29   | 0.09    | 0.1 0.71137      | 0.290758 |
| 150.1   | 232.59 | 231.7   | 234.78 0.551718  | 1.96E-12 |
| 2446.16 | 974.59 | 1428.66 | 1214.14 -1.03445 | 7.05E-20 |
| 0       | 0      | 0       | 0 NA             | NA       |
| 50.14   | 81.35  | 60.82   | 64.31 0.456375   | 6.56E-07 |
| 0       | 0      | 0       | 0 NA             | NA       |
| 0       | 0      | 0       | 0 NA             | NA       |
| 0       | 0      | 0       | 0 NA             | NA       |
| 0       | 0.02   | 0       | 0 NA             | NA       |
| 33.04   | 33.99  | 40.71   | 33.8 0.078058    | 0.628598 |
| 0       | 0      | 0       | 0 NA             | NA       |

|        |        |        |       |          |          |
|--------|--------|--------|-------|----------|----------|
| 6.41   | 8.03   | 6.77   | 8.47  | -0.1026  | 0.646408 |
| 0      | 0      | 0.04   | 0 NA  | NA       |          |
| 0.31   | 0.06   | 0.65   | 0.3   | -1.49017 | 0.006063 |
| 0.13   | 0.09   | 0.2    | 0.15  | -0.09549 | 0.913145 |
| 42.02  | 40.85  | 37.62  | 38.22 | -0.20511 | 0.134356 |
| 2.23   | 3.52   | 2.8    | 3.43  | 0.600323 | 0.0001   |
| 0      | 0      | 0      | 0 NA  | NA       |          |
| 0      | 0      | 0      | 0 NA  | NA       |          |
| 0.18   | 0.69   | 0.23   | 0.57  | 1.339204 | 0.027106 |
| 0      | 0      | 0      | 0 NA  | NA       |          |
| 147.35 | 128.46 | 145.01 | 150.5 | -0.31093 | 0.000117 |
| 0      | 0.32   | 0      | 0 NA  | NA       |          |
| 0      | 0.04   | 0      | 0 NA  | NA       |          |
| 0.82   | 0.25   | 0.22   | 0.54  | -1.20805 | 0.041775 |
| 19.37  | 14.84  | 16.92  | 16.56 | -0.38746 | 0.000438 |
| 0.3    | 0.11   | 0      | 0.11  | NA       | NA       |
| 0      | 0      | 0      | 0 NA  | NA       |          |
| 0.16   | 0.21   | 0.14   | 0.38  | 0.701809 | 0.309839 |
| 0      | 0      | 0      | 0 NA  | NA       |          |
| 7.05   | 4.91   | 4.16   | 4.82  | -0.40927 | 0.063773 |
| 0      | 0      | 0      | 0 NA  | NA       |          |
| 0.01   | 0      | 0      | 0.02  | NA       | NA       |
| 0      | 0      | 0      | 0 NA  | NA       |          |
| 6.36   | 5.16   | 5.29   | 6.5   | 0.157398 | 0.594876 |
| 0.9    | 0.29   | 0.41   | 0.42  | -0.51744 | 0.480098 |
| 25.53  | 51.1   | 33.8   | 36.73 | 0.605243 | 2.76E-05 |
| 0      | 0      | 0      | 0 NA  | NA       |          |
| 4.49   | 3.08   | 3.89   | 2.79  | -0.64768 | 0.000318 |
| 32.83  | 50.42  | 38.46  | 42.71 | 0.240076 | 0.125124 |
| 0.17   | 0.11   | 0.06   | 0.05  | -1.39533 | 0.005464 |
| 0      | 0      | 0      | 0 NA  | NA       |          |
| 3.46   | 2.84   | 2.94   | 3.58  | -0.08895 | 0.708805 |
| 14.48  | 16.46  | 14.33  | 12.71 | 0.118756 | 0.494819 |
| 8.54   | 25.91  | 17.79  | 22.26 | 1.304193 | 3.66E-17 |
| 2.29   | 1.07   | 1.19   | 1.52  | -0.41309 | 0.107171 |
| 3.28   | 4.33   | 4.23   | 4.35  | 0.404267 | 0.031878 |
| 7.25   | 7.03   | 7.37   | 8.09  | -0.04389 | 0.815643 |
| 7.69   | 10.43  | 8.45   | 9.34  | 0.580445 | 0.014947 |
| 0      | 0      | 0      | 0 NA  | NA       |          |
| 54.95  | 58.03  | 54.38  | 59.01 | 7.79E-05 | 0.999538 |
| 6.19   | 6.63   | 6.26   | 6.67  | 0.084514 | 0.79793  |
| 0      | 0      | 0      | 0 NA  | NA       |          |
| 1.18   | 0.85   | 1.24   | 1.5   | -0.0917  | 0.850579 |
| 0.87   | 0.63   | 0.61   | 0.7   | -0.14963 | 0.611421 |
| 6.34   | 4.47   | 4.63   | 4.84  | -0.24016 | 0.333976 |

|        |       |        |       |          |          |
|--------|-------|--------|-------|----------|----------|
| 22.41  | 60.69 | 43.78  | 49.25 | 0.816025 | 4.12E-12 |
| 59.78  | 29.93 | 36.25  | 32.09 | -0.79159 | 1.37E-24 |
| 0      | 0     | 0      | 0     | NA       | NA       |
| 0      | 1     | 0.36   | 0.21  | NA       | NA       |
| 0.01   | 0.01  | 0.01   | 0.01  | NA       | NA       |
| 0      | 0     | 0      | 0     | NA       | NA       |
| 3.54   | 2.93  | 4.15   | 4.47  | -0.37054 | 0.083436 |
| 0      | 0     | 0      | 0     | NA       | NA       |
| 0      | 0     | 0      | 0     | NA       | NA       |
| 24.46  | 18.2  | 20.97  | 18.28 | -0.20381 | 0.199779 |
| 14.01  | 20.6  | 16.84  | 19.1  | 0.233791 | 0.133659 |
| 0      | 0.36  | 0.28   | 0.38  | 1.821146 | 0.001228 |
| 0      | 0     | 0      | 0     | NA       | NA       |
| 0      | 0     | 0      | 0     | NA       | NA       |
| 0      | 0     | 0      | 0     | NA       | NA       |
| 4.81   | 1.82  | 2.54   | 3.07  | -1.07012 | 9.06E-11 |
| 0      | 0     | 0.02   | 0.08  | NA       | NA       |
| 1.78   | 6.46  | 3.27   | 4.92  | 1.504272 | 1.62E-12 |
| 0.54   | 0.63  | 0.35   | 0.39  | -0.10136 | 0.862538 |
| 26.11  | 20.99 | 22.96  | 16.39 | -0.57257 | 7.98E-06 |
| 0      | 0     | 0      | 0     | NA       | NA       |
| 0      | 0     | 0      | 0     | NA       | NA       |
| 0.04   | 0     | 0      | 0.04  | NA       | NA       |
| 0      | 0     | 0      | 0     | NA       | NA       |
| 0      | 0     | 0      | 0     | NA       | NA       |
| 118.13 | 75.87 | 117.81 | 104.5 | -0.32052 | 0.020019 |
| 0.71   | 0.65  | 0.56   | 0.85  | 0.095656 | 0.870838 |
| 0.05   | 0     | 0      | 0     | NA       | NA       |
| 0      | 0     | 0      | 0     | NA       | NA       |
| 0      | 0     | 0      | 0     | NA       | NA       |
| 0      | 0     | 0      | 0     | NA       | NA       |
| 0.43   | 0.53  | 0.41   | 0.23  | -0.33111 | 0.629953 |
| 0.12   | 0     | 0.04   | 0.04  | NA       | NA       |
| 40.71  | 44.83 | 39.87  | 44.3  | 0.016018 | 0.9065   |
| 0.11   | 0     | 0.04   | 0.17  | NA       | NA       |
| 1.08   | 1.13  | 1.05   | 1.36  | -0.06045 | 0.9065   |
| 11.21  | 10    | 10.08  | 10.51 | -0.27559 | 0.100388 |
| 9.16   | 13.07 | 13.23  | 15.39 | 0.464253 | 1.41E-06 |
| 0      | 0     | 0      | 0     | NA       | NA       |
| 0      | 0     | 0      | 0     | NA       | NA       |
| 0      | 0.1   | 0      | 0.05  | NA       | NA       |
| 0      | 0     | 0      | 0     | NA       | NA       |
| 3.57   | 6.37  | 4.77   | 7.23  | 0.528157 | 0.002003 |
| 2.61   | 0.22  | 0.5    | 0.26  | -3.10062 | 2.56E-30 |
| 1.17   | 0.9   | 1      | 1     | -0.39097 | 0.492561 |

|       |       |       |       |          |          |
|-------|-------|-------|-------|----------|----------|
| 0     | 0     | 0     | 0     | NA       | NA       |
| 7.56  | 5.81  | 6.1   | 5.07  | -0.25559 | 0.210138 |
| 72.8  | 75.56 | 75.19 | 77.35 | 0.088482 | 0.382844 |
| 0     | 0     | 0     | 0     | NA       | NA       |
| 10.79 | 12.35 | 10.97 | 12.93 | 0.023939 | 0.923141 |
| 1.57  | 1.4   | 1.81  | 1.7   | -0.05036 | 0.876454 |
| 1.64  | 4.13  | 3.09  | 1.63  | 0.112339 | 0.699372 |
| 2.34  | 1.65  | 1.53  | 0.85  | -0.59465 | 0.080024 |
| 0     | 0.01  | 0.01  | 0.02  | NA       | NA       |
| 0     | 0     | 0.02  | 0     | NA       | NA       |
| 12.6  | 9.84  | 10.55 | 9.78  | -0.37272 | 0.027671 |
| 10.92 | 7.41  | 8.51  | 7.37  | -0.34529 | 0.027607 |
| 0     | 0     | 0     | 0     | NA       | NA       |
| 0     | 0     | 0     | 0     | NA       | NA       |
| 10.77 | 8.41  | 8.38  | 9.55  | -0.11036 | 0.493654 |
| 0     | 0     | 0.02  | 0     | NA       | NA       |
| 0.58  | 0.18  | 0.9   | 0.36  | -0.42775 | 0.482527 |
| 0.05  | 0.32  | 0.22  | 0.2   | 1.34202  | 0.025352 |
| 0.7   | 0.58  | 0.71  | 1.66  | -0.25778 | 0.696062 |
| 44.71 | 20.43 | 27.97 | 22.21 | -0.81269 | 1.38E-12 |
| 0     | 0     | 0     | 0     | NA       | NA       |
| 0     | 0     | 0     | 0     | NA       | NA       |
| 6.54  | 6.22  | 6.69  | 6.3   | -0.15333 | 0.588768 |
| 0.26  | 0.13  | 0     | 0.2   | NA       | NA       |
| 3.45  | 4.52  | 2.57  | 2.42  | -0.17786 | 0.509256 |
| 0     | 0     | 0     | 0     | NA       | NA       |
| 0.16  | 0.56  | 0.44  | 0.78  | 0.176108 | 0.819736 |
| 0.38  | 0.13  | 0.12  | 0.31  | NA       | NA       |
| 0     | 0     | 0     | 0     | NA       | NA       |
| 0.66  | 2.11  | 1.03  | 1.62  | 1.654889 | 6.18E-07 |
| 14.15 | 4.25  | 8     | 5.28  | -1.35375 | 1.62E-14 |
| 0     | 0     | 0     | 0     | NA       | NA       |
| 0     | 0.02  | 0     | 0     | NA       | NA       |
| 0     | 0     | 0     | 0     | NA       | NA       |
| 0.02  | 0.01  | 0.01  | 0     | NA       | NA       |
| 0     | 0     | 0     | 0.02  | NA       | NA       |
| 64.26 | 65.63 | 57.16 | 62.74 | -0.11942 | 0.186117 |
| 36.44 | 23.19 | 26.61 | 24.66 | -0.62952 | 8.28E-11 |
| 3.07  | 20.97 | 14.16 | 18.06 | 2.358132 | 6.81E-65 |
| 0.11  | 0.42  | 0.41  | 0.12  | 0.037588 | 0.968828 |
| 0     | 0     | 0     | 0     | NA       | NA       |
| 9.45  | 12.82 | 14.26 | 13.75 | 0.460073 | 1.75E-05 |
| 0     | 0     | 0     | 0     | NA       | NA       |
| 0     | 0     | 0     | 0     | NA       | NA       |
| 0.1   | 0     | 0     | 0     | NA       | NA       |

|       |        |       |       |           |          |
|-------|--------|-------|-------|-----------|----------|
| 0     | 0.33   | 0     | 0.23  | NA        | NA       |
| 0     | 0      | 0     | 0     | NA        | NA       |
| 0     | 0      | 0     | 0     | NA        | NA       |
| 1.33  | 1.2    | 1.25  | 0.95  | -0.4114   | 0.210138 |
| 0     | 0      | 0     | 0     | NA        | NA       |
| 11.67 | 10.29  | 9.82  | 11.25 | -8.95E-05 | 0.999538 |
| 1.05  | 0.8    | 1.27  | 1.34  | -0.24216  | 0.614563 |
| 93.3  | 108.35 | 90.88 | 105   | 0.204822  | 0.011451 |
| 0     | 0      | 0     | 0     | NA        | NA       |
| 0     | 0      | 0     | 0     | NA        | NA       |
| 0     | 0      | 0.07  | 0     | NA        | NA       |
| 0.21  | 0.39   | 0.24  | 0.37  | 0.723918  | 0.199324 |
| 0.14  | 0      | 0     | 0     | NA        | NA       |
| 0     | 0      | 0     | 0     | NA        | NA       |
| 1.15  | 1.08   | 1.07  | 1.18  | -0.15592  | 0.489855 |
| 6.12  | 6.98   | 6.43  | 6.96  | 0.100049  | 0.428777 |
| 1.81  | 9.31   | 5.67  | 7.64  | 1.79845   | 3.98E-18 |
| 0.05  | 0      | 0.39  | 0     | NA        | NA       |
| 0     | 0      | 0     | 0     | NA        | NA       |
| 5.04  | 2.74   | 3.95  | 2.81  | -0.90864  | 1.67E-06 |
| 7.46  | 7.81   | 8.37  | 7.44  | 0.09215   | 0.581631 |
| 0     | 0      | 0     | 0     | NA        | NA       |
| 0.03  | 0.03   | 0     | 0.02  | NA        | NA       |
| 7.16  | 3.42   | 5.42  | 4.57  | -0.70347  | 0.00244  |
| 0     | 0      | 0     | 0     | NA        | NA       |
| 0.08  | 0.02   | 0.03  | 0.03  | -0.92577  | 0.156506 |
| 0.08  | 0      | 0.02  | 0.03  | NA        | NA       |
| 0     | 0      | 0     | 0     | NA        | NA       |
| 0     | 0      | 0     | 0     | NA        | NA       |
| 19.27 | 17.05  | 15.38 | 16.15 | -0.2201   | 0.025973 |
| 41.78 | 29.93  | 36.14 | 31.05 | -0.30868  | 0.064708 |
| 0     | 0      | 0     | 0     | NA        | NA       |
| 0     | 0      | 0     | 0.02  | NA        | NA       |
| 5.43  | 2.94   | 3.45  | 2.05  | -0.89516  | 0.000158 |
| 1     | 1.06   | 0.98  | 0.8   | 0.068229  | 0.904425 |
| 26.69 | 31.05  | 32.09 | 31.03 | 0.059432  | 0.634977 |
| 0     | 0      | 0     | 0     | NA        | NA       |
| 0     | 0      | 0     | 0     | NA        | NA       |
| 0.69  | 1.01   | 0.9   | 1.59  | 0.400028  | 0.275857 |
| 0     | 0      | 0     | 0     | NA        | NA       |
| 0     | 0      | 0     | 0     | NA        | NA       |
| 0     | 0      | 0.02  | 0     | NA        | NA       |
| 0     | 0      | 0     | 0     | NA        | NA       |
| 0.68  | 0.26   | 0.11  | 0.35  | 1.212089  | 0.035449 |
| 7.35  | 6.25   | 6.98  | 5.96  | -0.13854  | 0.67569  |



|        |        |        |       |          |          |
|--------|--------|--------|-------|----------|----------|
| 13.41  | 6.11   | 7.2    | 7.98  | -0.60264 | 0.00077  |
| 207.55 | 215.57 | 210.18 | 208.7 | -0.02168 | 0.858181 |
| 0      | 0      | 0      | 0     | NA       | NA       |
| 0      | 0      | 0      | 0     | NA       | NA       |
| 0      | 0      | 0      | 0     | NA       | NA       |
| 4.35   | 5.47   | 5.92   | 4.85  | 0.275967 | 0.272316 |
| 0.18   | 0.06   | 0.02   | 0.2   | -0.59795 | 0.369321 |
| 8.27   | 8.62   | 9.06   | 10.7  | 0.059498 | 0.683775 |
| 33.3   | 36.58  | 30.8   | 32.78 | 0.075615 | 0.683228 |
| 17.97  | 22.5   | 22.22  | 21.58 | 0.26685  | 0.018357 |
| 0      | 0      | 0      | 0     | NA       | NA       |
| 33.15  | 37.1   | 39.64  | 41.46 | 0.181948 | 0.109937 |
| 7.29   | 4.84   | 5.55   | 5.18  | -0.52656 | 1.35E-05 |
| 36.88  | 41.11  | 43.1   | 39.54 | 0.06644  | 0.610442 |
| 5.68   | 7.86   | 6.7    | 4.64  | -0.70363 | 0.00507  |
| 0.13   | 0      | 0      | 0.37  | NA       | NA       |
| 0      | 0.13   | 0      | 0.01  | NA       | NA       |
| 0      | 0      | 0      | 0     | NA       | NA       |
| 0      | 0      | 0      | 0     | NA       | NA       |
| 1.12   | 0.38   | 0.81   | 0.66  | -1.26301 | 1.54E-05 |
| 16     | 19.02  | 18.96  | 21.36 | 0.343195 | 0.002005 |
| 1.24   | 1.15   | 1.4    | 1.17  | -0.19568 | 0.574924 |
| 5.43   | 10.4   | 10.26  | 11.53 | 0.100988 | 0.738093 |
| 0      | 0      | 0      | 0.03  | NA       | NA       |
| 0      | 0      | 0      | 0     | NA       | NA       |
| 3.64   | 4.6    | 4.6    | 5.37  | 0.187748 | 0.355581 |
| 11.26  | 4.38   | 7.98   | 7.93  | -0.47547 | 0.003599 |
| 0      | 0      | 0      | 0     | NA       | NA       |
| 0.9    | 0.57   | 1.04   | 1.01  | 0.348019 | 0.251165 |
| 0      | 0      | 0      | 0     | NA       | NA       |
| 0      | 0      | 0      | 0     | NA       | NA       |
| 0      | 0      | 0      | 0     | NA       | NA       |
| 5.98   | 6.4    | 6.21   | 7.4   | 0.053312 | 0.850579 |
| 0.56   | 0.3    | 0.79   | 0.85  | -0.83099 | 0.074652 |
| 30.59  | 31.54  | 30.24  | 32.73 | -0.00913 | 0.963466 |
| 0.12   | 0.02   | 0.16   | 0.09  | -0.49977 | 0.487872 |
| 2      | 1.21   | 2.55   | 4.12  | 0.401708 | 0.125655 |
| 3.76   | 2.65   | 3.23   | 3.03  | -0.24393 | 0.481064 |
| 1.06   | 1.58   | 1.2    | 1.41  | 0.174309 | 0.679028 |
| 37.24  | 37.58  | 37.52  | 35.29 | -0.05363 | 0.748114 |
| 0      | 0      | 0      | 0     | NA       | NA       |
| 0.8    | 0.84   | 1.1    | 0.77  | 0.086064 | 0.803033 |
| 1.7    | 2.08   | 1.81   | 2.57  | 0.377815 | 0.319154 |
| 0      | 0      | 0      | 0     | NA       | NA       |
| 12.06  | 16.43  | 14.35  | 14.73 | 0.203431 | 0.204266 |

|        |        |        |        |          |          |
|--------|--------|--------|--------|----------|----------|
| 0      | 0      | 0      | 0      | NA       | NA       |
| 0      | 0      | 0      | 0      | NA       | NA       |
| 13.12  | 14.2   | 13.47  | 14.34  | 0.069875 | 0.629904 |
| 4.46   | 3.4    | 4.22   | 3.93   | -0.27975 | 0.187472 |
| 0      | 0      | 0      | 0      | NA       | NA       |
| 0.57   | 0.57   | 0.45   | 0.43   | -0.18241 | 0.709378 |
| 2.1    | 1.88   | 1.87   | 2.29   | -0.08531 | 0.746274 |
| 7.44   | 42.81  | 29.42  | 38.41  | 2.245285 | 2.05E-59 |
| 9.49   | 7.53   | 9.15   | 8.49   | -0.34365 | 0.006322 |
| 0      | 0      | 0      | 0      | NA       | NA       |
| 0      | 0.1    | 0.03   | 0.21   | NA       | NA       |
| 12.69  | 13.95  | 16.22  | 16.97  | 0.257935 | 0.032618 |
| 0      | 0      | 0      | 0      | NA       | NA       |
| 0.06   | 0.04   | 0.04   | 0.01   | NA       | NA       |
| 0      | 0.04   | 0.04   | 0.08   | NA       | NA       |
| 39.5   | 58.19  | 50.18  | 55.51  | 0.357878 | 0.000771 |
| 0.04   | 0.12   | 0.4    | 0.98   | 0.999527 | 0.117996 |
| 9.65   | 8.01   | 9.1    | 9.81   | -0.03043 | 0.895678 |
| 0.03   | 0.22   | 0.23   | 0.31   | 1.336449 | 0.01389  |
| 0      | 0      | 0      | 0.02   | NA       | NA       |
| 0.1    | 0      | 0.03   | 0      | NA       | NA       |
| 0      | 0.04   | 0      | 0      | NA       | NA       |
| 0.16   | 0.07   | 0.13   | 0.14   | -0.17042 | 0.846415 |
| 0      | 0      | 0      | 0      | NA       | NA       |
| 15.66  | 17     | 20.25  | 18.73  | 0.459488 | 9.18E-07 |
| 0.08   | 0      | 0      | 0      | NA       | NA       |
| 0      | 0      | 0      | 0      | NA       | NA       |
| 6.55   | 8.85   | 7.35   | 7.86   | 0.150031 | 0.384205 |
| 227.31 | 170.42 | 223.97 | 195.85 | -0.2176  | 0.060494 |
| 0.5    | 0.76   | 0.17   | 0.53   | 0.406018 | 0.545792 |
| 1.45   | 1.19   | 1.26   | 1.13   | -0.53551 | 0.166291 |
| 0      | 0      | 0      | 0      | NA       | NA       |
| 17.49  | 13.29  | 12.41  | 14.48  | -0.51581 | 3.11E-05 |
| 0      | 0      | 0      | 0      | NA       | NA       |
| 6.05   | 8.61   | 7.24   | 7.33   | 0.268907 | 0.111448 |
| 3.55   | 4.59   | 4.06   | 4.22   | 0.204144 | 0.20575  |
| 19.78  | 23.53  | 22.79  | 21.48  | 0.011955 | 0.945692 |
| 13.54  | 13.17  | 13.84  | 12.5   | -0.03794 | 0.827131 |
| 7.18   | 6.02   | 5.94   | 5.52   | 0.140177 | 0.2567   |
| 0      | 0      | 0.12   | 0      | NA       | NA       |
| 0.13   | 0.15   | 0.12   | 0.15   | -0.01608 | 0.986644 |
| 0      | 0      | 0      | 0      | NA       | NA       |
| 0      | 0      | 0      | 0.07   | NA       | NA       |
| 0      | 0      | 0      | 0      | NA       | NA       |
| 5.75   | 5.44   | 4.58   | 5.03   | -0.55227 | 0.006973 |

|        |        |        |        |          |          |
|--------|--------|--------|--------|----------|----------|
| 4.77   | 4.83   | 4.08   | 4.75   | 0.03441  | 0.883671 |
| 51.93  | 89.84  | 66.9   | 84.27  | 0.687529 | 1.39E-09 |
| 0      | 0.02   | 0.02   | 0.07   | NA       | NA       |
| 0      | 0      | 0      | 0      | NA       | NA       |
| 0      | 0      | 0      | 0      | NA       | NA       |
| 0      | 0      | 0      | 0      | NA       | NA       |
| 0      | 0.1    | 0      | 0      | NA       | NA       |
| 19.09  | 21.22  | 26.93  | 20.65  | 0.085282 | 0.696368 |
| 16.89  | 12.41  | 13.15  | 12.84  | -0.43505 | 2.14E-05 |
| 0      | 0      | 0      | 0      | NA       | NA       |
| 473.78 | 134.61 | 240.58 | 183.92 | -1.34032 | 4.71E-08 |
| 0      | 0      | 0.02   | 0      | NA       | NA       |
| 0      | 0      | 0.02   | 0      | NA       | NA       |
| 29.82  | 59.27  | 54.85  | 58.79  | 0.656341 | 1.26E-15 |
| 3.06   | 3      | 3.28   | 3.51   | -0.04029 | 0.83596  |
| 1.4    | 2.33   | 1.73   | 2.44   | 0.493298 | 0.096251 |
| 0      | 0      | 0      | 0      | NA       | NA       |
| 88.05  | 134.35 | 111.56 | 112.22 | 0.441166 | 1.23E-05 |
| 0      | 0      | 0      | 0      | NA       | NA       |
| 41.54  | 52.19  | 45.64  | 44.58  | 0.254992 | 0.010766 |
| 5.8    | 5.09   | 5.7    | 5.11   | -0.23135 | 0.239433 |
| 0      | 0.04   | 0.02   | 0.02   | NA       | NA       |
| 11.83  | 12.11  | 13.36  | 12.36  | 0.093886 | 0.582234 |
| 0      | 0      | 0.02   | 0      | NA       | NA       |
| 1.94   | 1.32   | 2.07   | 1.8    | 0.286619 | 0.4894   |
| 3      | 3      | 2.72   | 3.29   | -0.21573 | 0.311225 |
| 0.46   | 0.14   | 0.22   | 0.3    | -0.80243 | 0.069351 |
| 9.52   | 34.61  | 16.18  | 30.06  | 1.058977 | 1.34E-08 |
| 0      | 0      | 0      | 0      | NA       | NA       |
| 1.68   | 1.27   | 0.91   | 1.12   | -0.62346 | 0.248876 |
| 0      | 2.54   | 0.83   | 1.55   | 3.975438 | 2.99E-16 |
| 0.2    | 0.07   | 0.08   | 0.14   | -1.16321 | 0.016536 |
| 0      | 0.17   | 0      | 0      | NA       | NA       |
| 0      | 0      | 0      | 0      | NA       | NA       |
| 0      | 0      | 0      | 0      | NA       | NA       |
| 1.32   | 1.27   | 1.06   | 1.14   | 0.003306 | 0.99012  |
| 0      | 0      | 0      | 0      | NA       | NA       |
| 0      | 0      | 0      | 0      | NA       | NA       |
| 0      | 0      | 0      | 0      | NA       | NA       |
| 0      | 0      | 0      | 0      | NA       | NA       |
| 0      | 0      | 0.1    | 0      | NA       | NA       |
| 5.68   | 7.8    | 6.96   | 6.91   | 0.055064 | 0.823653 |
| 0      | 0      | 0      | 0      | NA       | NA       |
| 1.37   | 0.45   | 1.43   | 0.79   | 0.21885  | 0.709206 |
| 6.86   | 4.63   | 2.8    | 4.11   | -0.59488 | 0.011968 |

|       |       |       |       |          |          |
|-------|-------|-------|-------|----------|----------|
| 0     | 0.08  | 0.09  | 0.14  | NA       | NA       |
| 0     | 0     | 0     | 0     | NA       | NA       |
| 0     | 0     | 0     | 0     | NA       | NA       |
| 29.62 | 26.57 | 24.85 | 28.48 | 0.000508 | 0.997898 |
| 0     | 0     | 0.03  | 0.11  | NA       | NA       |
| 1.98  | 0.49  | 1.96  | 0.91  | -0.91096 | 0.038526 |
| 11.57 | 11.97 | 13.26 | 11.93 | 0.067583 | 0.729758 |
| 9.92  | 11.85 | 12.18 | 11.97 | 0.353562 | 0.005035 |
| 7.94  | 9.71  | 7.88  | 8.15  | 0.603763 | 9.91E-06 |
| 0.19  | 0.06  | 0.16  | 0.17  | -0.42705 | 0.540523 |
| 1.4   | 2.84  | 2.72  | 1.61  | 0.445592 | 0.191667 |
| 0.47  | 1.41  | 0.79  | 0.92  | 1.228451 | 3.22E-06 |
| 35.58 | 60.02 | 57.53 | 57.57 | 0.548926 | 7.22E-10 |
| 2.4   | 1.95  | 2.33  | 2.11  | -0.06657 | 0.826324 |
| 0     | 0     | 0     | 0     | NA       | NA       |
| 8.65  | 3.56  | 4.52  | 5.9   | -0.80619 | 2.84E-08 |
| 0     | 0     | 0     | 0     | NA       | NA       |
| 6.3   | 3.74  | 4.05  | 3.79  | -0.94573 | 2.41E-09 |
| 0.46  | 0     | 0     | 0     | NA       | NA       |
| 6.47  | 6.99  | 5.92  | 5.75  | -0.24691 | 0.212094 |
| 11.41 | 10.1  | 9.45  | 8.9   | -0.05772 | 0.7737   |
| 2.43  | 4.54  | 3.79  | 5.14  | 0.387964 | 0.102125 |
| 12.25 | 6.51  | 8.68  | 7.67  | -0.74444 | 3.16E-05 |
| 13.09 | 1.73  | 3.21  | 2.75  | -2.14299 | 6.60E-32 |
| 0     | 0     | 0     | 0     | NA       | NA       |
| 0.54  | 0.6   | 0.54  | 0.46  | -0.21437 | 0.606801 |
| 3.74  | 2.66  | 3.66  | 2.57  | -0.00719 | 0.991239 |
| 1.9   | 0.58  | 0.58  | 1.35  | 0.228892 | 0.716967 |
| 0     | 0     | 0     | 0     | NA       | NA       |
| 3.92  | 3.49  | 4.51  | 3.75  | 0.00123  | 0.996533 |
| 0     | 0.03  | 0     | 0     | NA       | NA       |
| 51.23 | 60.91 | 58.16 | 57.45 | 0.194432 | 0.084844 |
| 0.02  | 0.02  | 0.02  | 0.02  | -0.13455 | 0.878464 |
| 0     | 0     | 0     | 0     | NA       | NA       |
| 0.9   | 1.39  | 1.15  | 1.15  | 0.111754 | 0.808259 |
| 0     | 0.37  | 0.16  | 0.42  | 0.647021 | 0.360176 |
| 2.93  | 0.72  | 0.87  | 0.65  | -2.16347 | 2.58E-18 |
| 9.57  | 12.78 | 12.35 | 13.92 | 0.184389 | 0.408245 |
| 1.16  | 1.03  | 1.4   | 2.04  | 0.412398 | 0.388167 |
| 20.15 | 6.63  | 13.08 | 10.51 | -0.85629 | 0.020298 |
| 12.55 | 10.52 | 10.75 | 11.3  | -0.23793 | 0.039228 |
| 8.19  | 10.36 | 10.1  | 13.06 | 0.321592 | 0.09643  |
| 2.65  | 1.21  | 2.11  | 1.46  | -0.81177 | 0.003056 |
| 7.88  | 7.11  | 7.32  | 8.83  | -0.07185 | 0.71938  |
| 0.01  | 0.05  | 0.06  | 0.05  | 0.523741 | 0.469767 |

|        |         |         |         |          |          |
|--------|---------|---------|---------|----------|----------|
| 0.12   | 0.08    | 0.11    | 0       | NA       | NA       |
| 1.51   | 0.92    | 1.03    | 1.02    | 0.147949 | 0.800294 |
| 0      | 0       | 0       | 0       | NA       | NA       |
| 0      | 0.13    | 0       | 0       | NA       | NA       |
| 11.2   | 3.74    | 3.59    | 4.41    | -1.03372 | 1.35E-22 |
| 23.4   | 12.59   | 13.27   | 12.01   | -0.74912 | 1.50E-12 |
| 0      | 0       | 0       | 0       | NA       | NA       |
| 2.43   | 1.01    | 1.48    | 1.11    | -1.00791 | 3.07E-08 |
| 0.57   | 0.23    | 0.04    | 0.11    | -1.63441 | 0.000857 |
| 76.44  | 25.33   | 43.78   | 35.26   | -1.26389 | 3.57E-24 |
| 1.46   | 2.08    | 2.5     | 2.19    | 0.614198 | 0.000848 |
| 24.73  | 24.82   | 26.13   | 26.22   | 0.062507 | 0.558743 |
| 0      | 0       | 0       | 0       | NA       | NA       |
| 16.99  | 19.23   | 19.33   | 19.9    | -0.00925 | 0.969266 |
| 0.06   | 0.14    | 0       | 0       | NA       | NA       |
| 19.45  | 19.53   | 21.22   | 18.11   | 0.021205 | 0.93072  |
| 0      | 0.02    | 0       | 0       | NA       | NA       |
| 2.68   | 1.29    | 1.11    | 0.89    | -1.20444 | 0.001127 |
| 0.31   | 0       | 0       | 0       | NA       | NA       |
| 18.96  | 21.29   | 24.34   | 24.94   | 0.185137 | 0.103821 |
| 4.36   | 5.02    | 5.49    | 5.84    | 0.428981 | 0.000823 |
| 986.33 | 1290.58 | 1346.91 | 1323.01 | 0.311199 | 1.51E-05 |
| 46.42  | 58.38   | 49.56   | 49.46   | 0.18879  | 0.097708 |
| 42.8   | 53.76   | 46.18   | 52.12   | 0.180173 | 0.093028 |
| 0      | 0       | 0       | 0       | NA       | NA       |
| 32.27  | 15.51   | 34.04   | 26.58   | -0.45111 | 0.279617 |
| 2.05   | 1.43    | 1.94    | 2.18    | 0.407964 | 0.133281 |
| 0      | 0       | 0       | 0       | NA       | NA       |
| 0      | 0.99    | 0.39    | 0.34    | 2.463232 | 7.26E-06 |
| 0      | 0.34    | 0.53    | 0       | NA       | NA       |
| 114.18 | 78.25   | 85.74   | 87.24   | -0.36741 | 8.58E-06 |
| 20.62  | 26.53   | 22.87   | 22.73   | 0.159615 | 0.190246 |
| 0.34   | 0       | 0       | 0       | NA       | NA       |
| 8.77   | 6.66    | 6.49    | 6.23    | 0.216157 | 0.044273 |
| 0      | 0       | 0       | 0       | NA       | NA       |
| 1.43   | 0.95    | 1.63    | 1.47    | 0.095885 | 0.863595 |
| 0      | 0.15    | 0       | 0.02    | NA       | NA       |
| 0.03   | 0.06    | 0       | 0.02    | NA       | NA       |
| 0.04   | 0       | 0.05    | 0.09    | NA       | NA       |
| 1.86   | 2.4     | 1.8     | 2.16    | 0.061006 | 0.888518 |
| 0      | 0       | 0       | 0       | NA       | NA       |
| 0      | 0       | 0       | 0       | NA       | NA       |
| 3.65   | 3.78    | 3.27    | 4.13    | -0.03211 | 0.909331 |
| 0      | 0       | 0       | 0       | NA       | NA       |
| 0      | 0       | 0       | 0       | NA       | NA       |

|        |        |        |         |          |          |
|--------|--------|--------|---------|----------|----------|
| 0.18   | 0.45   | 0.5    | 0.67    | 0.996058 | 0.036707 |
| 0      | 0      | 0      | 0 NA    | NA       |          |
| 0      | 0      | 0      | 0 NA    | NA       |          |
| 5.12   | 3.66   | 5.43   | 5.62    | 0.086097 | 0.828382 |
| 5.97   | 6.59   | 6.62   | 5.62    | 0.303969 | 0.064589 |
| 22.84  | 27.11  | 25.5   | 22.38   | 0.018309 | 0.922145 |
| 16.86  | 15.65  | 15.34  | 14.81   | -0.24222 | 0.010468 |
| 28.11  | 24.77  | 26.73  | 26.38   | -0.12144 | 0.257881 |
| 2.73   | 2.28   | 2.64   | 2.07    | -0.10244 | 0.776484 |
| 0      | 0      | 0      | 0 NA    | NA       |          |
| 0      | 0      | 0      | 0 NA    | NA       |          |
| 0      | 0      | 0.03   | 0 NA    | NA       |          |
| 0.15   | 0.25   | 0.24   | 0.1     | 0.096233 | 0.893692 |
| 16.93  | 3.41   | 6.61   | 10.73   | -1.22457 | 0.005054 |
| 2.96   | 2.61   | 2.86   | 2.61    | -0.10474 | 0.695686 |
| 0      | 0      | 0      | 0 NA    | NA       |          |
| 0.11   | 0.05   | 0.19   | 0.06    | -0.63845 | 0.308741 |
| 4.73   | 4.75   | 3.75   | 3.01    | -0.54033 | 0.008615 |
| 0      | 0      | 0      | 0.03 NA | NA       |          |
| 0      | 0.01   | 0      | 0 NA    | NA       |          |
| 237.95 | 256.67 | 249.64 | 249.07  | 0.088033 | 0.358439 |
| 0      | 0      | 0      | 0 NA    | NA       |          |
| 2.49   | 4.99   | 4.79   | 5.82    | 0.434845 | 0.132392 |
| 16.72  | 15.05  | 14.1   | 15.3    | -0.16146 | 0.188257 |
| 17.45  | 35.78  | 27.73  | 32.93   | 0.739429 | 1.44E-09 |
| 13.46  | 20.98  | 19.62  | 17.42   | 0.528908 | 0.001291 |
| 0      | 0      | 0.01   | 0 NA    | NA       |          |
| 17.35  | 12.58  | 11.61  | 14.25   | -0.33384 | 0.004567 |
| 0.04   | 0.06   | 0.08   | 0.05    | 0.479655 | 0.515925 |
| 0      | 0      | 0      | 0 NA    | NA       |          |
| 0.03   | 0.02   | 0.02   | 0.02 NA | NA       |          |
| 74.6   | 98.32  | 106.48 | 98.76   | 0.332934 | 2.68E-05 |
| 8.25   | 3.94   | 6.65   | 5.77    | -0.51674 | 0.00071  |
| 0      | 0.15   | 0      | 0.32 NA | NA       |          |
| 0.83   | 0.1    | 0.31   | 0.51 NA | NA       |          |
| 1.58   | 3.33   | 2.98   | 3.37    | 1.071966 | 9.82E-05 |
| 0      | 0      | 0      | 0 NA    | NA       |          |
| 2.97   | 2.52   | 1.61   | 2.96    | -0.44604 | 0.229517 |
| 0      | 0      | 0      | 0 NA    | NA       |          |
| 0.05   | 0      | 0      | 0.02 NA | NA       |          |
| 17.6   | 2.03   | 3.26   | 3.18    | -2.64313 | 7.48E-62 |
| 0      | 0      | 0      | 0 NA    | NA       |          |
| 16.19  | 12.77  | 15.97  | 17.5    | -0.15075 | 0.440312 |
| 1.17   | 1.35   | 1.24   | 1.41    | -0.0562  | 0.877665 |
| 0      | 0      | 0.02   | 0 NA    | NA       |          |

|        |        |        |        |          |          |
|--------|--------|--------|--------|----------|----------|
| 1.39   | 1.53   | 1.81   | 1.65   | 0.149852 | 0.639509 |
| 10.45  | 10.3   | 11.4   | 9.19   | 0.032452 | 0.872237 |
| 98.62  | 124.75 | 111.23 | 113.49 | 0.181054 | 0.061276 |
| 95.95  | 75.1   | 114.05 | 142.8  | -0.14046 | 0.773434 |
| 0      | 0      | 0      | 0      | NA       | NA       |
| 0      | 0      | 0      | 0      | NA       | NA       |
| 330.05 | 264.79 | 314.12 | 287.72 | -0.23106 | 0.008908 |
| 0      | 0      | 0      | 0      | NA       | NA       |
| 0      | 0      | 0      | 0      | NA       | NA       |
| 2.34   | 2.13   | 2.02   | 2.72   | 0.034433 | 0.937483 |
| 0      | 0      | 0      | 0      | NA       | NA       |
| 0.86   | 0.62   | 1.06   | 1.13   | -0.24729 | 0.604302 |
| 0      | 0      | 0      | 0      | NA       | NA       |
| 70.32  | 12.58  | 21.89  | 16.41  | -1.92507 | 1.09E-43 |
| 0      | 0      | 0      | 0      | NA       | NA       |
| 9.95   | 9.67   | 8.63   | 9.1    | -0.07009 | 0.755219 |
| 2.26   | 3.87   | 3.2    | 4.84   | 0.748436 | 1.52E-06 |
| 0      | 0.06   | 0.04   | 0.03   | NA       | NA       |
| 0      | 0      | 0      | 0      | NA       | NA       |
| 0      | 0      | 0.01   | 0      | NA       | NA       |
| 0      | 0      | 0      | 0      | NA       | NA       |
| 0      | 0.05   | 0      | 0      | NA       | NA       |
| 9.14   | 8.16   | 7.64   | 7.66   | -0.10461 | 0.581917 |
| 1.81   | 6.49   | 4.54   | 5.98   | 1.42832  | 1.17E-12 |
| 3.96   | 6.03   | 6.38   | 6.65   | 0.586083 | 6.80E-09 |
| 0.43   | 0      | 0.05   | 0.11   | -1.19117 | 0.054134 |
| 0      | 0      | 0      | 0      | NA       | NA       |
| 0      | 0      | 0.02   | 0.06   | NA       | NA       |
| 0      | 0      | 0.02   | 0.06   | NA       | NA       |
| 0      | 0      | 0      | 0      | NA       | NA       |
| 8.99   | 9.97   | 10.84  | 10.44  | 0.155486 | 0.181298 |
| 0      | 0      | 0      | 0      | NA       | NA       |
| 0.41   | 0.41   | 0.55   | 0.36   | 0.199404 | 0.779498 |
| 5.65   | 4.55   | 4.17   | 2.87   | -0.63224 | 0.000961 |
| 0      | 0      | 0      | 0      | NA       | NA       |
| 0      | 0      | 0      | 0      | NA       | NA       |
| 0      | 0      | 0      | 0      | NA       | NA       |
| 1.62   | 2.38   | 2.98   | 1.67   | 0.058612 | 0.931326 |
| 1.17   | 0.26   | 0.12   | 0      | -1.38769 | 0.015104 |
| 12.05  | 20.04  | 15.89  | 18.03  | 0.599585 | 7.28E-08 |
| 13.04  | 19.72  | 14.34  | 17.32  | 0.164323 | 0.142132 |
| 0      | 0      | 0.22   | 0      | NA       | NA       |
| 0      | 0      | 0      | 0      | NA       | NA       |
| 0      | 0      | 0      | 0      | NA       | NA       |
| 106.41 | 99.58  | 109.16 | 106.13 | -0.05678 | 0.657413 |

|       |       |       |       |          |          |
|-------|-------|-------|-------|----------|----------|
| 2.88  | 1.96  | 1.74  | 2.28  | -0.23046 | 0.436737 |
| 1.01  | 1.63  | 1.54  | 1.21  | 0.48416  | 0.100371 |
| 2.32  | 1.56  | 2.25  | 2.04  | -0.37864 | 0.078808 |
| 0.54  | 0.42  | 0.72  | 0.74  | -0.26536 | 0.541089 |
| 0     | 0     | 0     | 0     | NA       | NA       |
| 0     | 0     | 0     | 0     | NA       | NA       |
| 0     | 0     | 0     | 0     | NA       | NA       |
| 0     | 0     | 0     | 0.09  | NA       | NA       |
| 2.11  | 1.22  | 1.34  | 1.27  | 0.219246 | 0.625204 |
| 37.03 | 38.02 | 36.54 | 35.61 | 0.021212 | 0.886858 |
| 4.43  | 2.27  | 2.53  | 1.71  | -0.84566 | 0.000249 |
| 0     | 0     | 0     | 0     | NA       | NA       |
| 0     | 0     | 0     | 0     | NA       | NA       |
| 0     | 0     | 0     | 0     | NA       | NA       |
| 0     | 0     | 0     | 0     | NA       | NA       |
| 0     | 0     | 0     | 0     | NA       | NA       |
| 0     | 0     | 0     | 0     | NA       | NA       |
| 3.19  | 4.95  | 4.35  | 4.36  | 0.517707 | 0.008965 |
| 0     | 0     | 0     | 0     | NA       | NA       |
| 0     | 0     | 0     | 0     | NA       | NA       |
| 0     | 0     | 0     | 0     | NA       | NA       |
| 0     | 0     | 0     | 0     | NA       | NA       |
| 3.59  | 3.67  | 3.34  | 2.89  | -0.05193 | 0.884574 |
| 0     | 0     | 0.08  | 0     | NA       | NA       |
| 3.25  | 2.85  | 3.43  | 4.68  | 0.388787 | 0.167141 |
| 17.16 | 21.62 | 19.41 | 20.72 | 0.244735 | 0.007986 |
| 0     | 0     | 0     | 0     | NA       | NA       |
| 0     | 0     | 0     | 0     | NA       | NA       |
| 0     | 0.11  | 0     | 0     | NA       | NA       |
| 0     | 0     | 0     | 0     | NA       | NA       |
| 0     | 0     | 0     | 0     | NA       | NA       |
| 1.92  | 3.06  | 2.38  | 2.83  | 0.351331 | 0.090103 |
| 8.13  | 5.79  | 6.33  | 6.8   | -0.16818 | 0.643182 |
| 0     | 0     | 0     | 0     | NA       | NA       |
| 12.32 | 11.55 | 11.51 | 10.63 | -0.22946 | 0.128606 |
| 0     | 0     | 0     | 0     | NA       | NA       |
| 0     | 0     | 0     | 0     | NA       | NA       |
| 0.93  | 1.1   | 1.16  | 0.77  | 0.178609 | 0.809808 |
| 0     | 0     | 0     | 0     | NA       | NA       |
| 0     | 0     | 0     | 0     | NA       | NA       |
| 3.72  | 2.47  | 2.27  | 4.05  | -0.57865 | 0.067777 |
| 0     | 0     | 0     | 0     | NA       | NA       |
| 7.84  | 10.94 | 10.84 | 13.44 | 0.307939 | 0.143634 |
| 0     | 0     | 0     | 0     | NA       | NA       |
| 7.16  | 6.5   | 6.54  | 7.47  | 0.032377 | 0.919443 |



|        |        |        |        |          |          |
|--------|--------|--------|--------|----------|----------|
| 45.07  | 48.14  | 56.4   | 57.06  | 0.024544 | 0.853534 |
| 43.81  | 35.3   | 39.88  | 36.36  | -0.15164 | 0.260044 |
| 0.1    | 0.1    | 0.01   | 0.05   | -0.46975 | 0.529724 |
| 10.46  | 17.05  | 14.46  | 14.55  | 0.520584 | 9.18E-05 |
| 0      | 0      | 0      | 0      | NA       | NA       |
| 0      | 0      | 0      | 0      | NA       | NA       |
| 0.03   | 0.1    | 0      | 0      | NA       | NA       |
| 0      | 0.02   | 0.08   | 0.04   | NA       | NA       |
| 0      | 0.02   | 0.07   | 0.13   | -0.05204 | 0.955966 |
| 0      | 0.06   | 0.05   | 0.06   | NA       | NA       |
| 0      | 0      | 0      | 0      | NA       | NA       |
| 0.49   | 0.14   | 0.71   | 0.74   | -0.72654 | 0.197739 |
| 0      | 0      | 0      | 0      | NA       | NA       |
| 0      | 0      | 0      | 0      | NA       | NA       |
| 7.77   | 7.19   | 8.16   | 6.79   | 0.060249 | 0.830021 |
| 0      | 0      | 0      | 0      | NA       | NA       |
| 3.75   | 5.27   | 4.05   | 3.91   | 0.296796 | 0.394266 |
| 0      | 0.01   | 0      | 0.02   | NA       | NA       |
| 0      | 0      | 0      | 0      | NA       | NA       |
| 0.23   | 0.08   | 0.02   | 0.17   | NA       | NA       |
| 0      | 0      | 0      | 0      | NA       | NA       |
| 4.92   | 4.84   | 5.67   | 4.68   | -0.1261  | 0.416211 |
| 0      | 0.08   | 0.01   | 0      | NA       | NA       |
| 0      | 0      | 0      | 0      | NA       | NA       |
| 2.09   | 1.71   | 3.04   | 1.5    | -0.20277 | 0.55336  |
| 0.12   | 0.45   | 0.46   | 0.3    | 0.274584 | 0.677015 |
| 0.03   | 0.06   | 0.05   | 0.02   | NA       | NA       |
| 11.37  | 12.41  | 10.63  | 8.66   | -0.23326 | 0.108967 |
| 0      | 0      | 0      | 0      | NA       | NA       |
| 0.16   | 0      | 0      | 0      | NA       | NA       |
| 37.3   | 34.1   | 36.28  | 31.07  | -0.1169  | 0.324607 |
| 2.38   | 1.77   | 1.76   | 1.38   | -0.23733 | 0.3792   |
| 0.5    | 0.39   | 0.44   | 0.35   | -0.25683 | 0.673686 |
| 0      | 0      | 0      | 0      | NA       | NA       |
| 1.65   | 0.87   | 0.65   | 0.6    | -1.24324 | 1.20E-05 |
| 7.09   | 8.1    | 7.32   | 9.34   | 0.038127 | 0.909236 |
| 5.28   | 5.18   | 7.2    | 7.35   | -0.00493 | 0.99138  |
| 43.83  | 42.31  | 44.68  | 42.12  | -0.05921 | 0.583545 |
| 0.02   | 0.06   | 0.06   | 0.02   | NA       | NA       |
| 0      | 0      | 0      | 0      | NA       | NA       |
| 1.95   | 1.52   | 2      | 2.22   | -0.06609 | 0.888431 |
| 0.06   | 0.06   | 0.08   | 0.06   | -0.1096  | 0.904425 |
| 0      | 0.01   | 0.03   | 0.04   | NA       | NA       |
| 348.24 | 929.59 | 595.21 | 772.56 | 1.072861 | 1.34E-17 |
| 15.96  | 11.3   | 10.86  | 10.05  | -0.53814 | 2.28E-08 |

|         |        |        |        |          |          |
|---------|--------|--------|--------|----------|----------|
| 5.42    | 11.37  | 11.73  | 13.15  | 0.897925 | 7.95E-06 |
| 0.2     | 0.27   | 0.29   | 0.4    | 0.753253 | 0.175728 |
| 1.19    | 0.66   | 0.66   | 1.02   | -0.70759 | 0.130577 |
| 0       | 0.06   | 0.02   | 0.02   | NA       | NA       |
| 0.04    | 0      | 0      | 0.02   | NA       | NA       |
| 3.62    | 3.24   | 2.96   | 2.93   | -0.12863 | 0.496155 |
| 0.11    | 0.02   | 0.02   | 0      | -1.38844 | 0.020582 |
| 0       | 0      | 0      | 0      | NA       | NA       |
| 13.45   | 16.01  | 18.56  | 16.21  | -0.03613 | 0.894704 |
| 2.38    | 1.21   | 1.88   | 1.35   | -0.50829 | 0.100619 |
| 0       | 0      | 0      | 0      | NA       | NA       |
| 2.71    | 1.56   | 1.57   | 1.57   | -0.41719 | 0.197985 |
| 2.36    | 2.72   | 2.75   | 2.65   | 0.290846 | 0.201875 |
| 0       | 0.05   | 0.11   | 0.14   | NA       | NA       |
| 0.27    | 0.23   | 0.27   | 0.16   | 0.278174 | 0.735797 |
| 9.2     | 12.84  | 15.35  | 14.85  | 0.271727 | 0.008704 |
| 0       | 0      | 0      | 0.01   | NA       | NA       |
| 0       | 0      | 0      | 0      | NA       | NA       |
| 0       | 0      | 0      | 0      | NA       | NA       |
| 1.48    | 0.91   | 0.87   | 1.62   | -0.51144 | 0.109659 |
| 6.44    | 5.71   | 5.75   | 4.86   | -0.28698 | 0.061663 |
| 0.03    | 0.23   | 0.13   | 0.23   | 0.563714 | 0.426633 |
| 0       | 0      | 0.03   | 0.01   | NA       | NA       |
| 0.04    | 0.28   | 0.11   | 0.21   | -0.01105 | 0.991973 |
| 0       | 0      | 0      | 0      | NA       | NA       |
| 0.05    | 0      | 0.02   | 0.04   | NA       | NA       |
| 0       | 0      | 0      | 0      | NA       | NA       |
| 1056.98 | 851.93 | 958.71 | 821.75 | -0.27218 | 0.002902 |
| 3.59    | 2.75   | 2.25   | 2.83   | -0.61744 | 0.001721 |
| 13.45   | 20.49  | 15.63  | 17.8   | 0.405761 | 0.001758 |
| 0       | 0      | 0      | 0      | NA       | NA       |
| 0       | 0.01   | 0.03   | 0.08   | NA       | NA       |
| 0       | 0      | 0      | 0      | NA       | NA       |
| 0       | 0      | 0      | 0      | NA       | NA       |
| 38.78   | 64.33  | 51.39  | 65.31  | 0.730147 | 6.91E-14 |
| 0.02    | 0      | 0.02   | 0      | NA       | NA       |
| 0.06    | 0.04   | 0.05   | 0.13   | -0.46345 | 0.537833 |
| 0       | 0      | 0      | 0      | NA       | NA       |
| 1.3     | 1.72   | 1.73   | 1.78   | 0.153481 | 0.720014 |
| 24.45   | 24.44  | 24.04  | 25.09  | -0.06295 | 0.687066 |
| 0       | 0      | 0      | 0      | NA       | NA       |
| 0       | 0      | 0      | 0      | NA       | NA       |
| 0       | 0      | 0      | 0.07   | NA       | NA       |
| 0       | 0      | 0      | 0      | NA       | NA       |
| 0       | 0.02   | 0      | 0      | NA       | NA       |

|       |       |       |       |          |          |
|-------|-------|-------|-------|----------|----------|
| 41.06 | 49.71 | 49.88 | 46.86 | 0.26865  | 0.003319 |
| 2.87  | 1.22  | 1.56  | 1.34  | -0.84195 | 0.005911 |
| 0.13  | 0.11  | 0.04  | 0.17  | 0.243556 | 0.772349 |
| 0     | 0     | 0     | 0.01  | NA       | NA       |
| 3.76  | 3.39  | 3.83  | 3.5   | -0.02967 | 0.912329 |
| 0     | 0     | 0     | 0     | NA       | NA       |
| 0     | 0     | 0     | 0     | NA       | NA       |
| 0.04  | 0.03  | 0.08  | 0.04  | -0.17431 | 0.842381 |
| 12.42 | 14.49 | 11.65 | 13.85 | 0.18854  | 0.093545 |
| 5.43  | 3.91  | 3.24  | 3.73  | -0.66081 | 0.000861 |
| 0     | 0     | 0     | 0     | NA       | NA       |
| 7.83  | 7.3   | 7.58  | 8.11  | -0.08731 | 0.543203 |
| 16.07 | 61.76 | 40.44 | 46.8  | 1.464208 | 3.62E-21 |
| 0     | 0     | 0     | 0     | NA       | NA       |
| 0     | 0     | 0     | 0     | NA       | NA       |
| 42.72 | 51.58 | 57.93 | 53.16 | 0.318203 | 9.91E-05 |
| 29.62 | 38.82 | 40.92 | 38.31 | 0.235374 | 0.017534 |
| 0     | 0     | 0     | 0     | NA       | NA       |
| 0     | 0.21  | 0.14  | 0.16  | 0.111014 | 0.903611 |
| 2.33  | 0.93  | 1.39  | 1.43  | -0.68451 | 0.035721 |
| 11.75 | 8.82  | 8.06  | 6.96  | -0.5067  | 0.001107 |
| 0.02  | 0.02  | 0.01  | 0.02  | -0.86941 | 0.189213 |
| 40.49 | 35.84 | 33.46 | 30.39 | -0.33263 | 7.75E-05 |
| 0.29  | 0.32  | 0.46  | 0.39  | -0.10201 | 0.837232 |
| 0.2   | 0.64  | 0.8   | 0.99  | 1.588116 | 0.00121  |
| 0     | 0     | 0     | 0     | NA       | NA       |
| 0.05  | 0.03  | 0.05  | 0.06  | 0.10994  | 0.904541 |
| 0.19  | 0.22  | 0.1   | 0.29  | NA       | NA       |
| 1.27  | 0.34  | 0.6   | 0.84  | -0.93419 | 0.021552 |
| 21.19 | 34.21 | 27.05 | 30.86 | 0.522274 | 2.89E-07 |
| 7.9   | 9.05  | 7.19  | 7.3   | -0.13269 | 0.596633 |
| 2.4   | 3.21  | 2.33  | 3.06  | 0.355366 | 0.116174 |
| 0     | 0     | 0     | 0     | NA       | NA       |
| 0     | 0     | 0     | 0     | NA       | NA       |
| 0     | 0     | 0     | 0     | NA       | NA       |
| 0.13  | 0.29  | 0.47  | 0.13  | 0.652609 | 0.273879 |
| 1.79  | 1.51  | 1.62  | 1.51  | -0.42314 | 0.016482 |
| 0.66  | 0.4   | 0.28  | 0.24  | -0.2484  | 0.761728 |
| 0     | 0     | 0.04  | 0.03  | NA       | NA       |
| 0     | 0.02  | 0.01  | 0     | NA       | NA       |
| 0.44  | 0.17  | 0.14  | 0.26  | -0.55243 | 0.442884 |
| 12.97 | 20.02 | 17.9  | 22.38 | 0.491508 | 5.98E-07 |
| 0     | 0     | 0     | 0     | NA       | NA       |
| 0     | 0     | 0     | 0     | NA       | NA       |
| 0.1   | 0.08  | 0     | 0     | NA       | NA       |

|       |       |       |       |          |          |
|-------|-------|-------|-------|----------|----------|
| 0.32  | 0.06  | 0.27  | 0.03  | -1.2031  | 0.047491 |
| 0     | 0     | 0     | 0     | NA       | NA       |
| 0.82  | 0.54  | 0.59  | 0.54  | -0.20218 | 0.645505 |
| 0     | 0     | 0     | 0.02  | NA       | NA       |
| 5.56  | 4.81  | 5.4   | 5.82  | 0.050257 | 0.902067 |
| 0     | 0     | 0     | 0     | NA       | NA       |
| 0     | 0     | 0     | 0     | NA       | NA       |
| 2.42  | 2.56  | 4.1   | 2.8   | 0.111564 | 0.766172 |
| 0     | 0     | 0     | 0     | NA       | NA       |
| 0     | 0     | 0     | 0     | NA       | NA       |
| 0.85  | 1.36  | 1.12  | 1.52  | 0.381378 | 0.30594  |
| 0     | 0     | 0     | 0     | NA       | NA       |
| 9.64  | 11.54 | 10.22 | 10.04 | 0.02209  | 0.90702  |
| 14.54 | 11.18 | 11.49 | 12.08 | -0.39313 | 0.000453 |
| 18.59 | 19.26 | 18.85 | 19.7  | -0.02105 | 0.88186  |
| 0     | 0     | 0     | 0     | NA       | NA       |
| 0     | 0     | 0     | 0     | NA       | NA       |
| 0     | 0.03  | 0     | 0     | NA       | NA       |
| 0     | 0     | 0     | 0     | NA       | NA       |
| 0.08  | 0.17  | 0.06  | 0.18  | NA       | NA       |
| 12.27 | 17.04 | 13.88 | 14.07 | 0.243153 | 0.059274 |
| 0     | 0     | 0.08  | 0     | NA       | NA       |
| 0     | 0.11  | 0     | 0.03  | NA       | NA       |
| 0     | 0     | 0     | 0     | NA       | NA       |
| 0     | 0     | 0     | 0.08  | NA       | NA       |
| 3.84  | 7.8   | 4.45  | 7.31  | 0.610153 | 0.00868  |
| 0     | 0     | 0     | 0     | NA       | NA       |
| 0.44  | 0.28  | 0.67  | 0.35  | -0.28164 | 0.654615 |
| 27.03 | 26.42 | 23.03 | 25.67 | -0.24666 | 0.011448 |
| 0     | 0     | 0     | 0     | NA       | NA       |
| 0.67  | 0.19  | 0.2   | 0.22  | -1.23256 | 0.004522 |
| 0     | 0.02  | 0.02  | 0     | NA       | NA       |
| 0     | 0     | 0     | 0     | NA       | NA       |
| 0     | 0     | 0     | 0     | NA       | NA       |
| 2.27  | 2.38  | 2.28  | 1.36  | -0.0382  | 0.939731 |
| 0.12  | 0.63  | 0.94  | 1.08  | 0.716246 | 0.266502 |
| 0     | 0     | 0     | 0     | NA       | NA       |
| 0     | 0     | 0.02  | 0.05  | NA       | NA       |
| 3.25  | 0.7   | 1.17  | 1.33  | -1.43865 | 5.77E-08 |
| 20.5  | 12.29 | 12.35 | 14.22 | -0.37258 | 0.000849 |
| 0     | 0     | 0     | 0     | NA       | NA       |
| 0.04  | 0.03  | 0.03  | 0.19  | NA       | NA       |
| 29.88 | 24.32 | 31.24 | 29.71 | -0.13784 | 0.413097 |
| 0     | 0.03  | 0.2   | 0     | NA       | NA       |
| 0     | 0     | 0     | 0     | NA       | NA       |

|       |        |       |        |          |          |
|-------|--------|-------|--------|----------|----------|
| 0     | 0      | 0     | 0      | NA       | NA       |
| 0     | 0      | 0     | 0      | NA       | NA       |
| 0     | 0      | 0     | 0      | NA       | NA       |
| 0     | 0      | 0     | 0      | NA       | NA       |
| 5.03  | 8.01   | 5.72  | 6.23   | 0.063777 | 0.689697 |
| 0.3   | 0.51   | 0.44  | 0.56   | -0.3063  | 0.690428 |
| 0     | 0.2    | 0.04  | 0.49   | -0.01329 | 0.989999 |
| 0     | 0      | 0     | 0      | NA       | NA       |
| 0     | 0      | 0     | 0      | NA       | NA       |
| 0     | 0      | 0     | 0      | NA       | NA       |
| 0     | 0      | 0     | 0      | NA       | NA       |
| 0.21  | 0      | 0     | 0.15   | NA       | NA       |
| 0.69  | 0.45   | 0.86  | 0.46   | -0.12366 | 0.821129 |
| 0     | 0      | 0     | 0      | NA       | NA       |
| 0     | 0      | 0     | 0      | NA       | NA       |
| 0.2   | 0.23   | 0.34  | 0.13   | 0.195012 | 0.821682 |
| 0.48  | 0.18   | 0.39  | 0.32   | -0.31184 | 0.651547 |
| 0     | 0      | 0     | 0      | NA       | NA       |
| 0     | 0      | 0     | 0      | NA       | NA       |
| 0.08  | 0      | 0     | 0      | NA       | NA       |
| 0     | 0      | 0     | 0      | NA       | NA       |
| 0.18  | 0.32   | 0.15  | 0.03   | -0.27365 | 0.739084 |
| 0.13  | 0.01   | 0.08  | 0      | NA       | NA       |
| 0     | 0      | 0     | 0      | NA       | NA       |
| 10.68 | 10.44  | 9.83  | 10.53  | 0.142067 | 0.634977 |
| 0     | 0      | 0     | 0      | NA       | NA       |
| 0     | 0      | 0     | 0      | NA       | NA       |
| 0     | 0      | 0     | 0      | NA       | NA       |
| 0     | 0      | 0     | 0      | NA       | NA       |
| 0.03  | 0      | 0     | 0.03   | NA       | NA       |
| 5.98  | 6.23   | 6.57  | 6.34   | -0.03609 | 0.911864 |
| 38    | 49.64  | 46.9  | 46.27  | 0.238844 | 0.048138 |
| 0     | 0      | 0     | 0      | NA       | NA       |
| 0.02  | 0.02   | 0.02  | 0      | NA       | NA       |
| 0.01  | 0.02   | 0.06  | 0.03   | NA       | NA       |
| 30.7  | 25.92  | 27.61 | 29.27  | -0.1916  | 0.023988 |
| 0     | 0      | 0.04  | 0      | NA       | NA       |
| 0     | 0      | 0     | 0      | NA       | NA       |
| 13.27 | 9.05   | 11.39 | 8.59   | -0.56    | 9.96E-06 |
| 0.45  | 1.5    | 0.69  | 0.76   | 1.133905 | 0.061057 |
| 2.84  | 4.19   | 4.39  | 3.95   | 0.412457 | 0.008101 |
| 2.87  | 1.73   | 1.84  | 0.86   | -0.66844 | 0.00507  |
| 0     | 0      | 0     | 0      | NA       | NA       |
| 0.19  | 0      | 0.53  | 0.03   | NA       | NA       |
| 248.9 | 238.05 | 259.1 | 234.39 | -0.03474 | 0.780521 |

|        |       |        |       |          |          |
|--------|-------|--------|-------|----------|----------|
| 0      | 0     | 0      | 0     | NA       | NA       |
| 12.59  | 15.89 | 17.2   | 14.2  | 0.358343 | 0.125013 |
| 0      | 0     | 0.02   | 0.01  | NA       | NA       |
| 0      | 0     | 0.01   | 0     | NA       | NA       |
| 314.18 | 246.2 | 275.99 | 267.7 | -0.21205 | 0.019123 |
| 0      | 0.07  | 0.03   | 0     | NA       | NA       |
| 0      | 0.02  | 0      | 0     | NA       | NA       |
| 0      | 0     | 0.02   | 0     | NA       | NA       |
| 28.06  | 40.3  | 36.17  | 40.78 | 0.304573 | 0.004195 |
| 0.05   | 0.21  | 0.02   | 0.27  | 0.342364 | 0.658918 |
| 4.42   | 4.35  | 4.21   | 4.34  | 0.104041 | 0.619536 |
| 0      | 0     | 0      | 0     | NA       | NA       |
| 0      | 0     | 0      | 0     | NA       | NA       |
| 0      | 0     | 0      | 0     | NA       | NA       |
| 0      | 0     | 0      | 0     | NA       | NA       |
| 0      | 0     | 0      | 0     | NA       | NA       |
| 0      | 0     | 0      | 0     | NA       | NA       |
| 0      | 0     | 0      | 0     | NA       | NA       |
| 5.78   | 9.73  | 8.76   | 11.37 | 0.721073 | 0.038495 |
| 1.83   | 0.63  | 1.6    | 2.04  | -0.12881 | 0.750753 |
| 10.6   | 10.7  | 10.49  | 10.16 | 0.057714 | 0.715194 |
| 0      | 0     | 0      | 0     | NA       | NA       |
| 5.88   | 31.13 | 18.26  | 23.47 | 1.309136 | 1.87E-06 |
| 40.53  | 5.62  | 9.2    | 8.79  | -2.11993 | 4.87E-10 |
| 0      | 0     | 0      | 0     | NA       | NA       |
| 0.03   | 0     | 0      | 0.05  | NA       | NA       |
| 60.97  | 65.7  | 61.47  | 61.76 | 0.236089 | 0.012213 |
| 0      | 0     | 0      | 0     | NA       | NA       |
| 17.63  | 8.35  | 9.1    | 10.27 | -0.99663 | 1.29E-23 |
| 7.85   | 4.82  | 5.4    | 4.3   | -0.84996 | 6.56E-20 |
| 0      | 0     | 0      | 0     | NA       | NA       |
| 9.04   | 19.1  | 19.58  | 10.99 | 0.116163 | 0.839676 |
| 16.93  | 3.79  | 4.93   | 4.1   | -2.00758 | 1.53E-59 |
| 4.1    | 5.26  | 4.82   | 3.33  | -0.13629 | 0.486797 |
| 0      | 0     | 0      | 0     | NA       | NA       |
| 0.26   | 0.35  | 0.3    | 0.32  | -0.19412 | 0.811617 |
| 8.65   | 7.78  | 7.94   | 8.8   | -0.14117 | 0.434042 |
| 0.06   | 0.28  | 0      | 0.02  | NA       | NA       |
| 0      | 0     | 0      | 0     | NA       | NA       |
| 0      | 0.06  | 0      | 0     | NA       | NA       |
| 0      | 0     | 0.1    | 0     | NA       | NA       |
| 2.81   | 2.31  | 1.56   | 2.22  | -0.49879 | 0.048536 |
| 0.76   | 1.03  | 1.25   | 0.75  | 0.210808 | 0.554834 |
| 1.42   | 1.68  | 1.52   | 1.49  | 0.024983 | 0.936914 |
| 0.04   | 1.21  | 0.89   | 1.84  | 3.004837 | 6.75E-16 |

|        |        |        |       |          |          |
|--------|--------|--------|-------|----------|----------|
| 0      | 0      | 0      | 0     | NA       | NA       |
| 33.84  | 38.38  | 33.25  | 33.98 | -0.00844 | 0.957955 |
| 0      | 0      | 0      | 0     | NA       | NA       |
| 0      | 0      | 0.04   | 0.02  | NA       | NA       |
| 0      | 0      | 0      | 0     | NA       | NA       |
| 3.99   | 68.47  | 43.24  | 59.6  | 3.460533 | 1.48E-97 |
| 0      | 0      | 0      | 0     | NA       | NA       |
| 0      | 0      | 0      | 0     | NA       | NA       |
| 0.09   | 0      | 0.1    | 0.05  | NA       | NA       |
| 0.35   | 1.06   | 1.05   | 0.92  | 0.573183 | 0.303435 |
| 49.21  | 20.35  | 27.53  | 27.23 | -0.97385 | NA       |
| 0      | 0      | 0      | 0     | NA       | NA       |
| 0      | 0      | 0      | 0     | NA       | NA       |
| 0      | 0      | 0      | 0     | NA       | NA       |
| 362.49 | 570.72 | 582.79 | 562.3 | 0.642546 | 2.63E-19 |
| 0      | 0      | 0      | 0     | NA       | NA       |
| 5.25   | 5.92   | 6.95   | 5.34  | 0.360704 | 0.08913  |
| 0      | 0      | 0      | 0     | NA       | NA       |
| 9.43   | 8.58   | 9.59   | 8.22  | -0.17375 | 0.320291 |
| 0      | 0      | 0      | 0     | NA       | NA       |
| 0      | 0      | 0      | 0     | NA       | NA       |
| 7.9    | 7.02   | 7.91   | 7.84  | -0.28987 | 0.016109 |
| 0      | 0.08   | 0      | 0     | NA       | NA       |
| 0      | 0      | 0      | 0     | NA       | NA       |
| 0      | 0      | 0      | 0     | NA       | NA       |
| 0.05   | 0      | 0      | 0     | NA       | NA       |
| 0      | 0.05   | 0      | 0     | NA       | NA       |
| 0.24   | 0.04   | 0.18   | 0.07  | -0.59385 | 0.368664 |
| 0.37   | 0.01   | 0.18   | 0.16  | -1.76328 | 0.001408 |
| 23.11  | 27.95  | 24.17  | 28.4  | 0.208275 | 0.052219 |
| 1.94   | 2.88   | 2.68   | 1.23  | 0.459589 | 0.506442 |
| 0      | 0      | 0      | 0     | NA       | NA       |
| 1.58   | 1.31   | 1.24   | 1.18  | -0.23219 | 0.553338 |
| 0      | 0      | 0      | 0     | NA       | NA       |
| 0      | 0      | 0      | 0     | NA       | NA       |
| 0.16   | 2.33   | 1.79   | 2.21  | 1.903883 | 8.42E-08 |
| 0      | 0      | 0      | 0     | NA       | NA       |
| 0      | 0.02   | 0.04   | 0.06  | NA       | NA       |
| 0      | 0      | 0      | 0     | NA       | NA       |
| 11.99  | 21.7   | 16.64  | 16.93 | 0.549713 | 0.000301 |
| 3.12   | 2.32   | 2.73   | 2.92  | -0.25215 | 0.075163 |
| 5.72   | 5.35   | 7.27   | 6.84  | 0.190953 | 0.284819 |
| 13.34  | 26.1   | 28.11  | 41.09 | 0.936699 | 3.34E-06 |
| 5.18   | 4.8    | 5.81   | 4.17  | -0.34502 | 0.131408 |
| 0      | 0      | 0      | 0     | NA       | NA       |

|       |       |       |                |          |
|-------|-------|-------|----------------|----------|
| 0     | 0     | 0     | 0 NA           | NA       |
| 0.16  | 0.56  | 0.33  | 0.55 0.575021  | 0.426694 |
| 3     | 3.2   | 2.58  | 3.05 -0.00754  | 0.986402 |
| 2.95  | 2.35  | 2.39  | 2.44 -0.18909  | 0.515685 |
| 0.34  | 0.13  | 0.19  | 0.2 -1.24435   | 0.007518 |
| 13.83 | 14.72 | 15.31 | 13.15 -0.15334 | 0.461833 |
| 0.72  | 11.11 | 5.18  | 7.71 2.201029  | 1.04E-06 |
| 0.06  | 0     | 0.08  | 0.09 NA        | NA       |
| 3.35  | 3.01  | 2.84  | 2.59 -0.19236  | 0.511575 |
| 0     | 0     | 0     | 4.16 NA        | NA       |
| 0     | 0     | 0     | 0 NA           | NA       |
| 0     | 0     | 0     | 0 NA           | NA       |
| 0     | 0     | 0     | 0 NA           | NA       |
| 0     | 0.01  | 0.09  | 0.02 NA        | NA       |
| 2.02  | 5.18  | 3.5   | 3.92 0.882183  | 1.11E-06 |
| 2.42  | 14.88 | 8.47  | 12.65 2.36716  | 5.53E-38 |
| 0     | 0     | 0.04  | 0 NA           | NA       |
| 0.06  | 0.12  | 0.03  | 0.09 NA        | NA       |
| 10.71 | 9.67  | 9.64  | 9.27 -0.18956  | 0.191489 |
| 0.07  | 0.78  | 0.67  | 0.69 1.727479  | 0.00296  |
| 0     | 0     | 0     | 0 NA           | NA       |
| 0     | 0     | 0     | 0 NA           | NA       |
| 0.73  | 0.26  | 0.9   | 0.2 0.041833   | 0.954093 |
| 0     | 0     | 0     | 0 NA           | NA       |
| 18.11 | 19.32 | 21.83 | 19.76 0.084919 | 0.610533 |
| 0     | 0     | 0     | 0 NA           | NA       |
| 0.36  | 0.28  | 0.4   | 0.52 0.225424  | 0.682774 |
| 9.73  | 7.84  | 6.25  | 6.03 -0.61018  | 1.61E-08 |
| 0     | 0     | 0     | 0 NA           | NA       |
| 0     | 0     | 0.07  | 0 NA           | NA       |
| 0.09  | 0.08  | 0.06  | 0.03 NA        | NA       |
| 0     | 0     | 0     | 0 NA           | NA       |
| 64.72 | 50.65 | 65.72 | 53.07 -0.35819 | 2.70E-05 |
| 6.65  | 6.42  | 6.42  | 8.29 -0.06414  | 0.793806 |
| 1.09  | 1.6   | 0.81  | 2.01 0.24313   | 0.615024 |
| 12.58 | 15.72 | 12.18 | 14.6 0.310944  | 0.029948 |
| 0     | 0     | 0     | 0 NA           | NA       |
| 0.3   | 0.03  | 0.22  | 0 NA           | NA       |
| 0     | 0     | 0     | 0 NA           | NA       |
| 0     | 0     | 0     | 0 NA           | NA       |
| 0     | 0     | 0     | 0 NA           | NA       |
| 0     | 0     | 0     | 0 NA           | NA       |
| 0.19  | 0.38  | 0.12  | 0.33 0.797929  | 0.237129 |
| 0     | 0     | 0     | 0 NA           | NA       |
| 0     | 0     | 0     | 0 NA           | NA       |



|       |       |       |       |          |          |
|-------|-------|-------|-------|----------|----------|
| 0     | 0     | 0     | 0.04  | NA       | NA       |
| 0.08  | 0     | 0     | 0     | NA       | NA       |
| 22    | 24.22 | 22.29 | 24.63 | 0.067937 | 0.660533 |
| 0     | 0     | 0     | 0     | NA       | NA       |
| 1.56  | 1.23  | 0.77  | 0.57  | -0.35591 | 0.316076 |
| 0     | 0     | 0     | 0     | NA       | NA       |
| 1.37  | 1.45  | 1.09  | 1.38  | -0.0714  | 0.814711 |
| 0.27  | 0.28  | 0.37  | 0.22  | -0.66196 | 0.178479 |
| 20.13 | 6.19  | 10    | 8.51  | -1.34539 | 5.77E-19 |
| 0.96  | 2.11  | 2.34  | 2.41  | 0.764578 | 0.007154 |
| 0     | 0     | 0     | 0     | NA       | NA       |
| 0.3   | 0.03  | 0.24  | 0.03  | -1.02404 | 0.106817 |
| 0     | 0     | 0     | 0     | NA       | NA       |
| 1.05  | 1.15  | 0.83  | 0.86  | 0.040855 | 0.938515 |
| 0     | 0     | 0     | 0     | NA       | NA       |
| 0     | 0     | 0     | 0     | NA       | NA       |
| 2.43  | 2.66  | 1.49  | 1.56  | -0.21754 | 0.636702 |
| 0     | 0     | 0     | 0     | NA       | NA       |
| 7.83  | 10.99 | 7.55  | 10.05 | 0.349858 | 0.257974 |
| 47.26 | 39.61 | 46.41 | 42.72 | -0.24068 | 0.037635 |
| 52.9  | 48.12 | 46.68 | 45.47 | -0.34598 | 0.00205  |
| 0     | 0     | 0     | 0     | NA       | NA       |
| 0     | 0     | 0     | 0     | NA       | NA       |
| 0     | 0     | 0     | 0     | NA       | NA       |
| 0     | 0     | 0     | 0     | NA       | NA       |
| 1.77  | 1.9   | 1.76  | 2.07  | 0.154683 | 0.656671 |
| 0     | 0     | 0     | 0     | NA       | NA       |
| 3.38  | 4.02  | 4.25  | 3.66  | 0.102525 | 0.601205 |
| 0.03  | 0     | 0.04  | 0     | -1.07934 | 0.076512 |
| 0     | 0     | 0     | 0     | NA       | NA       |
| 0     | 0     | 0     | 0     | NA       | NA       |
| 0     | 0     | 0.07  | 0     | NA       | NA       |
| 0     | 0.02  | 0     | 0     | NA       | NA       |
| 0     | 0     | 0     | 0     | NA       | NA       |
| 0     | 0     | 0     | 0     | NA       | NA       |
| 0     | 0     | 0.16  | 0     | NA       | NA       |
| 0.04  | 0.04  | 0.05  | 0.05  | NA       | NA       |
| 0     | 0.01  | 0.01  | 0.02  | NA       | NA       |
| 0.03  | 0.04  | 0     | 0     | NA       | NA       |
| 0     | 0     | 0     | 0     | NA       | NA       |
| 0     | 0     | 0     | 0     | NA       | NA       |
| 0.46  | 0.07  | 0.25  | 0.17  | 0.082214 | 0.92437  |
| 0.04  | 0.14  | 0.11  | 0.18  | -0.52919 | 0.467533 |
| 0.06  | 0.07  | 0     | 0.03  | NA       | NA       |
| 3.7   | 1.94  | 2.88  | 1.99  | -0.47836 | 0.081061 |

|       |       |       |       |          |          |
|-------|-------|-------|-------|----------|----------|
| 0     | 0     | 0     | 0     | NA       | NA       |
| 4.33  | 4.9   | 5.72  | 4.88  | -0.02988 | 0.923907 |
| 32.72 | 29.98 | 32.94 | 30.5  | -0.2029  | 0.040732 |
| 10.44 | 1.04  | 2.28  | 1.67  | -2.49742 | 4.49E-11 |
| 0.64  | 17.83 | 7.03  | 13.86 | 3.51842  | 1.49E-19 |
| 0     | 0     | 0     | 0.19  | NA       | NA       |
| 4.7   | 8.23  | 10.8  | 7.93  | 0.552377 | 0.00223  |
| 0     | 0     | 0     | 0     | NA       | NA       |
| 0     | 0     | 0     | 0     | NA       | NA       |
| 0     | 0.01  | 0.01  | 0.02  | NA       | NA       |
| 0.21  | 0.17  | 0.31  | 0.44  | 0.307325 | 0.680219 |
| 0.26  | 0.44  | 0.28  | 0.52  | -0.479   | 0.421345 |
| 0     | 0     | 0     | 0     | NA       | NA       |
| 1.38  | 1.05  | 1.01  | 0.73  | -0.65401 | 0.099138 |
| 0.03  | 0.07  | 0.06  | 0.04  | NA       | NA       |
| 0     | 0     | 0     | 0.06  | NA       | NA       |
| 0.06  | 0.03  | 0.1   | 0.05  | NA       | NA       |
| 0.57  | 0.28  | 0.14  | 0.04  | -0.0052  | 0.996111 |
| 6.18  | 9.13  | 8.35  | 9.45  | 0.131759 | 0.586452 |
| 0.69  | 1.4   | 1.46  | 1.31  | 0.482227 | 0.203642 |
| 16.3  | 15.8  | 14.13 | 11.55 | -0.36946 | 0.075696 |
| 0     | 0     | 0     | 0     | NA       | NA       |
| 2.71  | 3     | 3.07  | 3.15  | 0.319619 | 0.405324 |
| 5.63  | 6.6   | 6.88  | 7.05  | 0.303803 | 0.363059 |
| 11.33 | 13.47 | 11.95 | 12.29 | 0.072231 | 0.608824 |
| 7.52  | 9     | 10.39 | 8.91  | 0.098799 | 0.621973 |
| 0     | 0     | 0     | 0     | NA       | NA       |
| 0     | 0     | 0.03  | 0     | NA       | NA       |
| 1.1   | 0.84  | 1.28  | 0.73  | 0.034574 | 0.947698 |
| 0     | 0     | 0     | 0     | NA       | NA       |
| 0     | 0.11  | 0     | 0     | NA       | NA       |
| 0     | 0     | 0     | 0.01  | NA       | NA       |
| 16.88 | 16.09 | 13.68 | 13.41 | -0.28704 | 0.016661 |
| 0     | 0     | 0.03  | 0     | NA       | NA       |
| 0.07  | 0     | 0.19  | 0.1   | -0.12334 | 0.890238 |
| 0     | 0.05  | 0.02  | 0     | NA       | NA       |
| 1.57  | 2.42  | 2.87  | 2.41  | 0.863912 | 0.00593  |
| 0.05  | 0.2   | 0.16  | 0.29  | 0.998462 | 0.083097 |
| 7.6   | 10.27 | 10.26 | 9.86  | 0.183205 | 0.114365 |
| 0     | 0     | 0     | 0     | NA       | NA       |
| 0     | 0     | 0     | 0     | NA       | NA       |
| 0     | 0     | 0     | 0     | NA       | NA       |
| 0     | 0     | 0.03  | 0     | NA       | NA       |
| 6.65  | 5.6   | 4.62  | 4.76  | -0.26524 | 0.224012 |
| 0.43  | 0.28  | 0.49  | 0.27  | -0.73069 | 0.231843 |

|       |       |       |       |          |          |
|-------|-------|-------|-------|----------|----------|
| 0     | 0     | 0     | 0     | NA       | NA       |
| 0     | 0     | 0     | 0     | NA       | NA       |
| 0.16  | 0.13  | 0.16  | 0.18  | -0.41964 | 0.539415 |
| 5.32  | 4.15  | 4.36  | 4.72  | -0.32099 | 0.051241 |
| 0     | 0     | 0     | 0     | NA       | NA       |
| 0.07  | 0.05  | 0.13  | 0.1   | NA       | NA       |
| 14.83 | 12.45 | 11.97 | 11.08 | -0.36661 | 0.003288 |
| 0     | 0     | 0     | 0     | NA       | NA       |
| 0     | 0     | 0     | 0     | NA       | NA       |
| 1.99  | 1.91  | 2.86  | 2.19  | -0.23813 | 0.211277 |
| 0     | 0     | 0     | 0     | NA       | NA       |
| 63.88 | 74.73 | 65.87 | 82.75 | 0.124302 | 0.294781 |
| 3.46  | 3.68  | 4.12  | 3.62  | 0.605057 | 4.41E-06 |
| 0     | 0     | 0     | 0     | NA       | NA       |
| 0.08  | 0.03  | 0.15  | 0     | NA       | NA       |
| 0.55  | 0.67  | 0.88  | 0.68  | 0.107678 | 0.81989  |
| 1.98  | 1.41  | 1.72  | 1.92  | -0.29025 | 0.347577 |
| 0     | 0     | 0     | 0.03  | NA       | NA       |
| 0     | 0     | 0     | 0     | NA       | NA       |
| 1.05  | 2.39  | 2.75  | 2.38  | 0.421289 | 0.011277 |
| 2.42  | 3.52  | 3.54  | 3.11  | 0.049577 | 0.89894  |
| 84.43 | 67.85 | 82.57 | 68.47 | -0.32806 | 0.015249 |
| 5.34  | 2.03  | 3.32  | 2.36  | -0.6464  | 0.006546 |
| 0.51  | 0.49  | 0.61  | 0.69  | -0.43048 | 0.356772 |
| 2.47  | 3.79  | 2.81  | 3.94  | 0.468647 | 0.005219 |
| 5.3   | 5.32  | 4.23  | 4.84  | -0.19591 | 0.213654 |
| 0     | 0     | 0     | 0     | NA       | NA       |
| 4.47  | 5.53  | 5.07  | 2.42  | -0.19445 | 0.690219 |
| 0.34  | 0.28  | 0.43  | 0.45  | -0.29252 | 0.50294  |
| 65.37 | 94.37 | 87.74 | 89.69 | 0.386943 | 4.43E-06 |
| 4.47  | 7.1   | 7.07  | 5.79  | 0.091717 | 0.760967 |
| 9.74  | 16.45 | 12.22 | 15.1  | 0.356668 | 0.034715 |
| 81.39 | 76.03 | 81.58 | 68.53 | -0.20009 | 0.167331 |
| 18.76 | 0.37  | 3.45  | 1.55  | -1.99044 | 0.00031  |
| 0     | 0     | 0     | 0     | NA       | NA       |
| 2.7   | 0.39  | 0.97  | 1.37  | -1.22985 | 0.001375 |
| 0     | 0     | 0     | 0     | NA       | NA       |
| 0.08  | 0.08  | 0.13  | 0.21  | -0.13951 | 0.873469 |
| 0     | 0     | 0     | 0     | NA       | NA       |
| 0     | 0     | 0     | 0     | NA       | NA       |
| 2.61  | 1.77  | 2.5   | 2.94  | -0.18435 | 0.500625 |
| 2.05  | 2.64  | 1.86  | 2.06  | 0.051652 | 0.93072  |
| 0     | 0     | 0     | 0     | NA       | NA       |
| 2.83  | 3.56  | 2.77  | 2.51  | -0.07756 | 0.842277 |
| 0     | 0.03  | 0.06  | 0.02  | NA       | NA       |

|       |       |       |       |          |          |
|-------|-------|-------|-------|----------|----------|
| 0     | 0     | 0     | 0.03  | NA       | NA       |
| 1.81  | 0.73  | 1.25  | 0.76  | -1.42395 | 4.53E-09 |
| 50.49 | 38.19 | 38.96 | 49.52 | -0.4084  | 0.001134 |
| 0     | 0     | 0     | 0     | NA       | NA       |
| 3.63  | 3.13  | 3.24  | 2.32  | -0.22576 | 0.324139 |
| 0.72  | 0     | 0.14  | 0.03  | -0.83489 | 0.212102 |
| 7.44  | 6.91  | 6.68  | 6.18  | -0.19189 | 0.367443 |
| 0     | 0.02  | 0.02  | 0.02  | NA       | NA       |
| 0     | 0     | 0     | 0     | NA       | NA       |
| 0     | 0     | 0     | 0     | NA       | NA       |
| 0.34  | 0     | 0.21  | 0.18  | -0.10867 | 0.90498  |
| 0     | 0     | 0     | 0     | NA       | NA       |
| 7.29  | 8.96  | 8.86  | 8.09  | 0.359822 | 0.025847 |
| 26.89 | 23.59 | 23.72 | 21.13 | -0.11452 | 0.53524  |
| 6.14  | 9.25  | 7.53  | 7.88  | 0.278167 | 0.04862  |
| 0     | 0.07  | 0     | 0     | NA       | NA       |
| 1.03  | 0.68  | 0.67  | 0.52  | -0.35037 | 0.524726 |
| 1.38  | 1.49  | 1.55  | 0.3   | -0.52909 | 0.341485 |
| 0     | 0     | 0     | 0     | NA       | NA       |
| 0.14  | 0.34  | 0.28  | 0.16  | 0.630601 | 0.366842 |
| 0     | 0     | 0     | 0     | NA       | NA       |
| 0     | 0     | 0     | 0     | NA       | NA       |
| 0.12  | 0.05  | 0.04  | 0.04  | -0.61955 | 0.352446 |
| 0     | 0     | 0     | 0     | NA       | NA       |
| 0.4   | 0.16  | 0.38  | 0.51  | -0.10177 | 0.902699 |
| 0     | 0     | 0     | 0     | NA       | NA       |
| 0     | 0     | 0     | 0     | NA       | NA       |
| 0     | 0     | 0     | 0     | NA       | NA       |
| 0.2   | 0.29  | 0.2   | 0.31  | NA       | NA       |
| 0     | 0     | 0     | 0     | NA       | NA       |
| 0     | 0     | 0     | 0     | NA       | NA       |
| 0.47  | 0.47  | 0.86  | 0.26  | -0.0271  | 0.975638 |
| 0     | 0     | 0     | 0     | NA       | NA       |
| 5.38  | 6.12  | 5.55  | 5.9   | 0.141312 | 0.346916 |
| 0     | 0     | 0.03  | 0.03  | NA       | NA       |
| 5.5   | 5.61  | 5.75  | 5.1   | 0.131172 | 0.574473 |
| 0     | 0     | 0     | 0     | NA       | NA       |
| 0     | 0     | 0     | 0     | NA       | NA       |
| 0     | 0     | 0     | 0     | NA       | NA       |
| 0     | 0     | 0.03  | 0     | NA       | NA       |
| 0.05  | 0     | 0     | 0     | NA       | NA       |
| 0.19  | 0     | 0     | 0     | NA       | NA       |
| 0     | 0     | 0     | 0     | NA       | NA       |
| 25.42 | 14.47 | 16.84 | 16.17 | -0.71392 | 4.12E-12 |
| 8.88  | 11.01 | 10.14 | 9.43  | 0.177371 | 0.376472 |

|        |        |        |        |          |          |
|--------|--------|--------|--------|----------|----------|
| 0      | 0.11   | 0.09   | 0.03   | NA       | NA       |
| 0      | 0.02   | 0      | 0      | NA       | NA       |
| 6.21   | 5.09   | 4.88   | 4.98   | -0.22014 | 0.244854 |
| 0.23   | 0.25   | 0.1    | 0.08   | 0.098636 | 0.916338 |
| 0      | 0.41   | 0.1    | 0.16   | 1.595143 | 0.005807 |
| 0      | 0.45   | 0.25   | 0      | NA       | NA       |
| 0      | 0      | 0      | 0      | NA       | NA       |
| 0      | 0      | 0      | 0      | NA       | NA       |
| 0.01   | 0.06   | 0.04   | 0.02   | NA       | NA       |
| 4.94   | 10.3   | 8.03   | 9.25   | 0.834103 | 2.04E-11 |
| 0      | 0      | 0      | 0      | NA       | NA       |
| 0      | 0      | 0      | 0      | NA       | NA       |
| 35.42  | 29.88  | 32.94  | 31.35  | -0.10709 | 0.363946 |
| 0      | 0      | 0      | 0      | NA       | NA       |
| 2.29   | 2.85   | 1.97   | 2.08   | 0.179594 | 0.630964 |
| 5.88   | 7.38   | 8.28   | 7.09   | 0.057643 | 0.787231 |
| 53.54  | 60.11  | 54.73  | 58.59  | 0.10095  | 0.297545 |
| 0      | 0      | 0      | 0      | NA       | NA       |
| 2.77   | 2      | 2.35   | 2.45   | -0.40673 | 0.00518  |
| 4.53   | 6.15   | 3.99   | 5.64   | 0.039156 | 0.898718 |
| 0      | 0.03   | 0.06   | 0      | NA       | NA       |
| 0      | 0      | 0      | 0      | NA       | NA       |
| 0      | 0      | 0      | 0      | NA       | NA       |
| 0      | 0.19   | 0      | 0.12   | 0.992825 | 0.080255 |
| 0      | 0      | 0      | 0.07   | NA       | NA       |
| 1.54   | 1.43   | 1.78   | 1.74   | 0.224408 | 0.491481 |
| 10.32  | 8.33   | 7.59   | 10.7   | -0.276   | 0.220582 |
| 35.54  | 21.61  | 26.65  | 24.15  | -0.56344 | 1.74E-07 |
| 2.25   | 1      | 0.73   | 0.95   | -0.46924 | 0.369688 |
| 0.29   | 0.95   | 0.69   | 1.26   | 0.860099 | 0.009167 |
| 165.98 | 153.3  | 174.71 | 164.04 | -0.02919 | 0.832062 |
| 0.45   | 1.33   | 0.77   | 1.02   | 1.301885 | 0.001851 |
| 0      | 0.04   | 0      | 0      | NA       | NA       |
| 0      | 0      | 0.24   | 0      | NA       | NA       |
| 2.96   | 0.76   | 1.41   | 1.63   | -1.00321 | 0.038766 |
| 0.44   | 0.56   | 0.06   | 0.47   | -0.89278 | 0.112888 |
| 13.56  | 22.73  | 18.99  | 23.22  | 0.575193 | 9.99E-09 |
| 22.1   | 11.57  | 13.62  | 13.34  | -0.8576  | 6.59E-20 |
| 116.26 | 181.76 | 161.78 | 162.73 | 0.3725   | 0.000103 |
| 0      | 0      | 0      | 0      | NA       | NA       |
| 8.48   | 10.84  | 9.79   | 9.88   | 0.207352 | 0.068885 |
| 0      | 0      | 0      | 0.02   | NA       | NA       |
| 0      | 0      | 0      | 0      | NA       | NA       |
| 0      | 0      | 0      | 0      | NA       | NA       |
| 1.06   | 0.27   | 0.55   | 1.25   | -0.35573 | 0.597303 |

|       |       |       |       |          |          |
|-------|-------|-------|-------|----------|----------|
| 0     | 0     | 0     | 0.02  | NA       | NA       |
| 0     | 0     | 0     | 0     | NA       | NA       |
| 0     | 0     | 0     | 0     | NA       | NA       |
| 0.34  | 0.17  | 0.19  | 0.36  | -0.8144  | 0.206679 |
| 0     | 0     | 0     | 0     | NA       | NA       |
| 0     | 0     | 0.03  | 0     | NA       | NA       |
| 20.97 | 19.52 | 21.62 | 20.87 | -0.00483 | 0.981184 |
| 3.83  | 4.53  | 2.81  | 4.69  | 0.036655 | 0.929109 |
| 0.56  | 0.84  | 0.69  | 0.49  | -1.27151 | 0.00298  |
| 35.72 | 25.01 | 28.57 | 27    | -0.33112 | 0.004359 |
| 0     | 0.06  | 0     | 0     | NA       | NA       |
| 0.02  | 0.02  | 0.1   | 0     | -0.39832 | 0.597478 |
| 0     | 0     | 0     | 0     | NA       | NA       |
| 22.55 | 22.92 | 23.24 | 24.74 | -0.02447 | 0.867696 |
| 0.35  | 0.3   | 0.46  | 0.45  | -0.10462 | 0.871984 |
| 0     | 0     | 0     | 0     | NA       | NA       |
| 0     | 0     | 0     | 0     | NA       | NA       |
| 0     | 0     | 0     | 0     | NA       | NA       |
| 27.57 | 25.94 | 23.42 | 28.86 | 0.102324 | 0.524726 |
| 0.02  | 0     | 0     | 0     | NA       | NA       |
| 0     | 0     | 0     | 0     | NA       | NA       |
| 1.12  | 2.09  | 1.24  | 0.95  | -0.23738 | 0.597269 |
| 6.37  | 5.94  | 5.07  | 5.83  | 0.314508 | 0.018689 |
| 1.35  | 1.13  | 1.3   | 1.71  | -0.28846 | 0.427292 |
| 25.73 | 23.2  | 18.72 | 20.03 | 0.23212  | 0.159635 |
| 0.52  | 0.2   | 0.49  | 0.37  | -0.7035  | 0.203888 |
| 0     | 0     | 0     | 0     | NA       | NA       |
| 3.16  | 4.85  | 3.9   | 4.57  | 0.415404 | 0.064871 |
| 0.08  | 0.6   | 0.03  | 0.05  | -0.01829 | 0.986207 |
| 0.11  | 0.5   | 0.38  | 0.38  | 1.131937 | 0.037085 |
| 0     | 0     | 0     | 0     | NA       | NA       |
| 1.85  | 5.77  | 4.28  | 4.61  | 1.482695 | 1.61E-17 |
| 0     | 0     | 0     | 0     | NA       | NA       |
| 0     | 0     | 0     | 0     | NA       | NA       |
| 0     | 0     | 0     | 0     | NA       | NA       |
| 0.03  | 0.07  | 0.05  | 0.01  | -0.54482 | 0.457266 |
| 0     | 0     | 0     | 0     | NA       | NA       |
| 2.81  | 0.06  | 0.11  | 0.08  | -4.74093 | 2.16E-73 |
| 0     | 0     | 0     | 0     | NA       | NA       |
| 5.27  | 5.45  | 4.03  | 4.06  | -0.2084  | 0.304749 |
| 3.22  | 4.73  | 4.87  | 5.89  | 0.372022 | 0.002351 |
| 0     | 0     | 0     | 0     | NA       | NA       |
| 0     | 0     | 0     | 0     | NA       | NA       |
| 0     | 0     | 0     | 0     | NA       | NA       |
| 3.03  | 2.88  | 2.93  | 2.89  | -0.12842 | 0.571464 |

|        |        |        |        |          |          |
|--------|--------|--------|--------|----------|----------|
| 10.34  | 6.71   | 7.09   | 6.56   | -0.54276 | 2.10E-05 |
| 0      | 0      | 0      | 0      | NA       | NA       |
| 0      | 0      | 0      | 0      | NA       | NA       |
| 1.19   | 0.4    | 0.56   | 0.96   | -0.92715 | 0.046876 |
| 1.28   | 0.45   | 0.95   | 0.39   | 0.236146 | 0.765104 |
| 0.13   | 0.05   | 0.07   | 0.14   | -0.28019 | 0.71577  |
| 0.94   | 1.34   | 0.89   | 0.98   | 0.095338 | 0.862841 |
| 1.28   | 0.95   | 0.89   | 1.08   | -0.31005 | 0.182838 |
| 0      | 0      | 0      | 0      | NA       | NA       |
| 0      | 0      | 0      | 0      | NA       | NA       |
| 0      | 0      | 0      | 0      | NA       | NA       |
| 551.89 | 485.34 | 545.82 | 491.52 | -0.17886 | 0.0357   |
| 0      | 0      | 0      | 0      | NA       | NA       |
| 0      | 0      | 0      | 0      | NA       | NA       |
| 0      | 0      | 0      | 0      | NA       | NA       |
| 0.41   | 0.55   | 0.58   | 0.64   | 0.457229 | 0.327886 |
| 2.32   | 0.28   | 1.04   | 0.74   | -0.95743 | 0.012444 |
| 0.03   | 0      | 0      | 0      | NA       | NA       |
| 0      | 0      | 0      | 0      | NA       | NA       |
| 0      | 0      | 0      | 0      | NA       | NA       |
| 3.1    | 2.77   | 3.27   | 2.81   | 0.022344 | 0.946459 |
| 0      | 0      | 0      | 0      | NA       | NA       |
| 0      | 0      | 0      | 0      | NA       | NA       |
| 39.66  | 36.61  | 39.01  | 40.08  | -0.06971 | 0.563182 |
| 0.06   | 0.04   | 0.11   | 0.12   | 0.249542 | 0.756208 |
| 2.7    | 2.54   | 2.32   | 2.65   | -0.14558 | 0.36572  |
| 0      | 0      | 0      | 0      | NA       | NA       |
| 0      | 0.11   | 0.18   | 0.11   | 1.175265 | 0.042303 |
| 0.06   | 0.33   | 0.41   | 0.48   | 1.71998  | 0.000315 |
| 4.19   | 5.25   | 4.07   | 4      | 0.259562 | 0.216875 |
| 1.26   | 0.41   | 0.62   | 0.47   | -1.29224 | 2.82E-10 |
| 0      | 0      | 0      | 0      | NA       | NA       |
| 25.15  | 18.72  | 21.39  | 20.12  | -0.31731 | 0.018238 |
| 0      | 0.13   | 0.12   | 0      | NA       | NA       |
| 18.84  | 20.45  | 20.04  | 20.2   | 0.021204 | 0.90752  |
| 0.53   | 0.26   | 0.29   | 0.35   | -0.73062 | 0.17392  |
| 0      | 0      | 0      | 0      | NA       | NA       |
| 20.03  | 29.12  | 24.88  | 26.84  | 0.336518 | 0.001194 |
| 0.15   | 0.12   | 0.02   | 0.08   | -0.1932  | 0.823312 |
| 0      | 0      | 0      | 0      | NA       | NA       |
| 0      | 2.82   | 0.77   | 1.06   | 1.742359 | 0.002729 |
| 22.45  | 21.87  | 21.56  | 24.56  | -0.00864 | 0.958008 |
| 0      | 0      | 0      | 0      | NA       | NA       |
| 0      | 0      | 0      | 0      | NA       | NA       |
| 0.23   | 0.31   | 0.19   | 0.15   | -0.11776 | 0.874689 |

|       |       |       |       |          |          |
|-------|-------|-------|-------|----------|----------|
| 6.3   | 6.28  | 6.49  | 7.1   | 0.055435 | 0.706426 |
| 0     | 0.05  | 0.05  | 0.05  | NA       | NA       |
| 6.37  | 8.58  | 6.86  | 8.18  | 0.246971 | 0.093502 |
| 35.97 | 49.66 | 44.37 | 46.91 | 0.344242 | 0.00097  |
| 0     | 0     | 0     | 0     | NA       | NA       |
| 1.56  | 1     | 1.44  | 1.09  | -0.78113 | 0.004879 |
| 0     | 0     | 0     | 0     | NA       | NA       |
| 0.08  | 0.14  | 0.1   | 0.09  | -0.37582 | 0.621191 |
| 0     | 0     | 0     | 0     | NA       | NA       |
| 0     | 0     | 0     | 0     | NA       | NA       |
| 0     | 0     | 0     | 0     | NA       | NA       |
| 3.15  | 2.21  | 2.58  | 2.36  | -0.38959 | 0.13018  |
| 68.92 | 62.62 | 56.63 | 54.2  | -0.48794 | 2.57E-08 |
| 0.12  | 0.18  | 0.45  | 0.18  | 0.009218 | 0.99316  |
| 6.5   | 4.44  | 6.72  | 6.17  | -0.23301 | 0.440153 |
| 6.37  | 5.84  | 5.26  | 4.13  | -0.16142 | 0.539685 |
| 0     | 0.05  | 0.03  | 0     | NA       | NA       |
| 0     | 0     | 0     | 0     | NA       | NA       |
| 0     | 0.08  | 0.22  | 0.1   | 0.71704  | 0.268074 |
| 0     | 0.11  | 0     | 0.03  | NA       | NA       |
| 1.37  | 0.29  | 1.01  | 0.7   | -1.06588 | 0.040317 |
| 39.45 | 62.92 | 55.5  | 62.41 | 0.581008 | 6.38E-11 |
| 0     | 0     | 0     | 0     | NA       | NA       |
| 41.22 | 35.95 | 40.52 | 40.35 | -0.17914 | 0.112381 |
| 0     | 0     | 0     | 0     | NA       | NA       |
| 20.29 | 27.11 | 29.91 | 27.2  | 0.180232 | 0.274629 |
| 5.05  | 7.46  | 7.79  | 8.44  | 0.555802 | 4.53E-08 |
| 0     | 0     | 0     | 0     | NA       | NA       |
| 0     | 0     | 0     | 0     | NA       | NA       |
| 60.79 | 56.8  | 58.51 | 61.37 | 0.017506 | 0.896737 |
| 0     | 0     | 0     | 0     | NA       | NA       |
| 0     | 0.03  | 0     | 0.04  | NA       | NA       |
| 5.9   | 5.57  | 6.1   | 6.79  | -0.17209 | 0.367866 |
| 0.36  | 0.51  | 0.59  | 0.7   | 0.986427 | 0.017818 |
| 0     | 0     | 0     | 0     | NA       | NA       |
| 34.02 | 19.71 | 21.96 | 17.32 | -1.01556 | 4.92E-11 |
| 0     | 0     | 0     | 0     | NA       | NA       |
| 1.59  | 2.61  | 1.83  | 2.35  | 0.430182 | 0.218124 |
| 4.06  | 2.67  | 3.39  | 3.33  | -0.71614 | 0.018879 |
| 0.02  | 0     | 0     | 0     | NA       | NA       |
| 0.14  | 0.13  | 0.11  | 0.12  | 0.316074 | 0.681006 |
| 0.97  | 0.92  | 0.94  | 0.39  | -0.28924 | 0.598635 |
| 0     | 0     | 0     | 0     | NA       | NA       |
| 0.46  | 0.26  | 0.11  | 0.11  | -0.12898 | 0.886342 |
| 0     | 0     | 0     | 0     | NA       | NA       |



|       |        |        |        |          |          |
|-------|--------|--------|--------|----------|----------|
| 0.49  | 0.2    | 0.39   | 0.27   | -0.22397 | 0.669946 |
| 26.32 | 21.56  | 25.66  | 23.97  | -0.3225  | 0.037338 |
| 2.83  | 2.27   | 1.97   | 1.17   | -0.31098 | 0.275437 |
| 0     | 0      | 0.01   | 0.02   | NA       | NA       |
| 0     | 0      | 0      | 0      | NA       | NA       |
| 0     | 0      | 0      | 0      | NA       | NA       |
| 175.3 | 216.89 | 216.91 | 204.04 | 0.323841 | 0.000214 |
| 5.65  | 6.92   | 7.87   | 8.39   | 0.14411  | 0.336699 |
| 0     | 0      | 0      | 0      | NA       | NA       |
| 0     | 0      | 0      | 0      | NA       | NA       |
| 43.66 | 7.5    | 15.98  | 12.25  | -1.79645 | 4.29E-09 |
| 0.06  | 0      | 0      | 0      | NA       | NA       |
| 2.62  | 2.63   | 2.54   | 1.87   | -0.12922 | 0.715789 |
| 0.58  | 0.24   | 0.29   | 0.21   | -0.8488  | 0.020881 |
| 0     | 0.07   | 0.06   | 0.09   | NA       | NA       |
| 0.63  | 0.41   | 0.41   | 0.38   | -0.94968 | 0.005721 |
| 0     | 0      | 0.1    | 0.01   | NA       | NA       |
| 13.37 | 21.44  | 21.27  | 22.7   | 0.500966 | 9.87E-06 |
| 2.26  | 2.77   | 2.39   | 1.97   | 0.053953 | 0.878681 |
| 0     | 0      | 0      | 0.08   | NA       | NA       |
| 0.02  | 0.02   | 0.02   | 0      | NA       | NA       |
| 0     | 0      | 0      | 0      | NA       | NA       |
| 18.59 | 17.92  | 17.93  | 18.04  | -0.11708 | 0.295974 |
| 0     | 0.1    | 0      | 0      | NA       | NA       |
| 0     | 0      | 0      | 0      | NA       | NA       |
| 30.97 | 28.83  | 25.3   | 26.76  | -0.05345 | 0.729065 |
| 0.26  | 0.25   | 0.23   | 0.18   | NA       | NA       |
| 0     | 0.03   | 0      | 0      | NA       | NA       |
| 0     | 0      | 0      | 0      | NA       | NA       |
| 0.14  | 0.14   | 0.05   | 0      | NA       | NA       |
| 0     | 0      | 0      | 0.16   | NA       | NA       |
| 0     | 0      | 0      | 0      | NA       | NA       |
| 2.21  | 1.89   | 1.88   | 1.81   | -0.28568 | 0.21869  |
| 0     | 0      | 0      | 0      | NA       | NA       |
| 7.97  | 7.29   | 7.62   | 8.46   | -0.31147 | 0.023651 |
| 4.26  | 4.71   | 4.51   | 4.36   | 0.297131 | 0.125683 |
| 0     | 0.05   | 0      | 0      | NA       | NA       |
| 4.58  | 3.87   | 3.77   | 4.17   | 0.020377 | 0.929724 |
| 23.97 | 20.25  | 21.29  | 22.01  | -0.15647 | 0.253093 |
| 0     | 0      | 0      | 0      | NA       | NA       |
| 0     | 0      | 0      | 0.17   | NA       | NA       |
| 1.02  | 0.97   | 1.25   | 1.41   | 0.161943 | 0.715789 |
| 0.23  | 0.35   | 0.24   | 0.41   | 0.26883  | 0.744608 |
| 7.9   | 17.61  | 12.98  | 14.59  | 0.999875 | 5.68E-16 |
| 27.79 | 30.67  | 28.62  | 30.44  | 0.058578 | 0.60429  |

|        |        |        |       |          |          |
|--------|--------|--------|-------|----------|----------|
| 0.27   | 0.13   | 0.25   | 0.28  | NA       | NA       |
| 0      | 0      | 0      | 0     | NA       | NA       |
| 0.31   | 0.04   | 0.06   | 0.16  | -1.07541 | 0.020952 |
| 0      | 0      | 0      | 0     | NA       | NA       |
| 2.48   | 3.15   | 1.46   | 1.67  | -0.25046 | 0.429301 |
| 0.11   | 0.16   | 0.07   | 0.09  | NA       | NA       |
| 0.57   | 0.93   | 1.16   | 1.29  | 0.356222 | 0.468465 |
| 4.57   | 4.91   | 4.69   | 5     | 0.084513 | 0.702822 |
| 0      | 0      | 0      | 0     | NA       | NA       |
| 0      | 0      | 0.13   | 0     | NA       | NA       |
| 9.4    | 13.24  | 11.78  | 11.88 | 0.16554  | 0.453196 |
| 0      | 0      | 0      | 0     | NA       | NA       |
| 0      | 0      | 0      | 0     | NA       | NA       |
| 0      | 0      | 0      | 0     | NA       | NA       |
| 0.08   | 0.06   | 0.18   | 0.18  | 0.189948 | 0.826744 |
| 110.81 | 125.44 | 125.78 | 121.7 | 0.185375 | 0.069924 |
| 9.49   | 1.01   | 2.64   | 1.83  | -1.59813 | 1.55E-06 |
| 1.76   | 0.78   | 0.91   | 1.07  | -1.16859 | 3.27E-06 |
| 0.09   | 0.08   | 0.06   | 0.08  | NA       | NA       |
| 0.01   | 0.09   | 0.04   | 0.05  | 0.05365  | 0.953698 |
| 0.21   | 0.31   | 0.71   | 1.01  | 0.727693 | 0.273707 |
| 0      | 0      | 0      | 0     | NA       | NA       |
| 0      | 0.05   | 0.17   | 0.04  | NA       | NA       |
| 0      | 0      | 0      | 0     | NA       | NA       |
| 0      | 0      | 0      | 0     | NA       | NA       |
| 0      | 0      | 0      | 0     | NA       | NA       |
| 0      | 0      | 0      | 0     | NA       | NA       |
| 0      | 0      | 0      | 0     | NA       | NA       |
| 0.31   | 0.09   | 0.4    | 0.06  | -0.60331 | 0.382223 |
| 26.03  | 31.05  | 32.67  | 32.21 | 0.347139 | 0.003165 |
| 0.37   | 0.07   | 0.05   | 0.18  | 0.422194 | 0.574843 |
| 0.51   | 0.64   | 0.4    | 1.25  | -0.14039 | 0.853656 |
| 7.48   | 6.83   | 8.98   | 9.91  | 0.365471 | 0.010007 |
| 0      | 0      | 0      | 0     | NA       | NA       |
| 0      | 0.11   | 0.01   | 0.42  | 1.949198 | 0.000638 |
| 0      | 0      | 0.02   | 0     | NA       | NA       |
| 0      | 0      | 0      | 0     | NA       | NA       |
| 0.15   | 0.16   | 0.24   | 0.33  | 0.425489 | 0.574924 |
| 0      | 0      | 0      | 0     | NA       | NA       |
| 0      | 0      | 0      | 0     | NA       | NA       |
| 1.15   | 2.24   | 2.4    | 2.65  | 0.836265 | 0.020243 |
| 0      | 0      | 0      | 0     | NA       | NA       |
| 2.38   | 1.17   | 1.18   | 1.49  | -0.01504 | 0.975069 |
| 0      | 0.18   | 0      | 0     | NA       | NA       |
| 0      | 0      | 0      | 0     | NA       | NA       |

|        |        |        |        |          |          |
|--------|--------|--------|--------|----------|----------|
| 4.27   | 3.43   | 3.23   | 4      | -0.24932 | 0.172666 |
| 4.44   | 3.66   | 4.45   | 4.43   | 0.201511 | 0.57884  |
| 0      | 0      | 0      | 0      | NA       | NA       |
| 7.55   | 9.59   | 11.17  | 10.71  | 0.241526 | 0.088238 |
| 0      | 0      | 0      | 0      | NA       | NA       |
| 0.16   | 0      | 0.04   | 0.08   | NA       | NA       |
| 0      | 0      | 0      | 0      | NA       | NA       |
| 22.34  | 6.07   | 8.05   | 7.53   | -1.8633  | 9.19E-35 |
| 171.27 | 55.66  | 82.11  | 76.85  | -1.24852 | 1.38E-24 |
| 67.99  | 36.05  | 40.81  | 43.45  | -0.85964 | 1.21E-19 |
| 0      | 0      | 0      | 0      | NA       | NA       |
| 4.17   | 3.99   | 4.61   | 4.63   | -0.1205  | 0.626891 |
| 7.46   | 7.05   | 6.2    | 6.56   | 0.115365 | 0.643327 |
| 2.84   | 2.32   | 2.42   | 2.36   | -0.35788 | 0.158567 |
| 347.62 | 288.77 | 337.6  | 298.29 | -0.18916 | 0.078205 |
| 1.61   | 2.14   | 0.82   | 1.07   | -0.54638 | 0.058108 |
| 0      | 0      | 0      | 0      | NA       | NA       |
| 3.39   | 0.69   | 1.58   | 1.1    | -1.61633 | 4.99E-07 |
| 0      | 0      | 0      | 0.06   | NA       | NA       |
| 0.07   | 0.08   | 0.13   | 0.16   | -0.13749 | 0.845257 |
| 0      | 0      | 0      | 0.04   | NA       | NA       |
| 0      | 0      | 0      | 0      | NA       | NA       |
| 0.02   | 0.05   | 0.22   | 0.09   | 0.445038 | 0.541089 |
| 6.97   | 4.43   | 3.89   | 5.15   | -0.11687 | 0.521573 |
| 9.48   | 10.91  | 10.65  | 11.31  | 0.248763 | 0.058316 |
| 0      | 0      | 0      | 0      | NA       | NA       |
| 0      | 0      | 0      | 0      | NA       | NA       |
| 9.77   | 10.28  | 10.08  | 9.36   | -0.19883 | 0.178292 |
| 0      | 0      | 0      | 0      | NA       | NA       |
| 0.25   | 0.23   | 0.1    | 0.16   | -1.00697 | 0.060572 |
| 2.45   | 1.32   | 1.14   | 1      | -1.1047  | 0.003621 |
| 20.92  | 21.8   | 20.65  | 23.97  | 0.01057  | 0.947581 |
| 9.48   | 6.88   | 8.54   | 7.95   | -0.23225 | 0.172395 |
| 6.37   | 4.28   | 4.09   | 4.34   | -0.35959 | 0.157152 |
| 0.67   | 0.59   | 0.4    | 0.57   | -0.36029 | 0.351985 |
| 0.02   | 0.16   | 0.05   | 0.06   | NA       | NA       |
| 6.74   | 4.52   | 6.16   | 4.71   | -0.09332 | 0.678117 |
| 0      | 0      | 0.01   | 0.01   | NA       | NA       |
| 0.37   | 0.95   | 0.43   | 1.18   | 0.043164 | 0.946061 |
| 0      | 0      | 0      | 0      | NA       | NA       |
| 2.34   | 2.57   | 2.59   | 2.96   | 0.141482 | 0.529852 |
| 0      | 0      | 0      | 0      | NA       | NA       |
| 343.56 | 298.54 | 307.71 | 312.07 | -0.23281 | 0.000809 |
| 2.03   | 2.43   | 2.9    | 2.95   | 0.302951 | 0.050913 |
| 36.2   | 38.66  | 39.2   | 41.93  | 0.056888 | 0.611992 |

|        |        |        |        |          |          |
|--------|--------|--------|--------|----------|----------|
| 5.29   | 3.64   | 4.4    | 4.74   | -0.11515 | 0.582085 |
| 0      | 0      | 0      | 0      | NA       | NA       |
| 0      | 0      | 0      | 0      | NA       | NA       |
| 0      | 0      | 0      | 0      | NA       | NA       |
| 1.01   | 0.87   | 0.82   | 0.63   | -0.18559 | 0.603991 |
| 0      | 0      | 0      | 0      | NA       | NA       |
| 0      | 0      | 0      | 0      | NA       | NA       |
| 1160.6 | 898.2  | 994.65 | 880.7  | -0.28085 | 0.001747 |
| 3.15   | 1.41   | 1.72   | 1.95   | -0.51288 | 0.017054 |
| 0      | 0      | 0      | 0      | NA       | NA       |
| 4.61   | 3.29   | 3.31   | 3.08   | -0.52289 | 0.044685 |
| 2.11   | 0.95   | 2.81   | 1.93   | -0.15264 | 0.692251 |
| 0      | 0      | 0      | 0      | NA       | NA       |
| 9.39   | 2.3    | 1.88   | 4.58   | -1.33065 | 0.003403 |
| 8.38   | 8.86   | 8.88   | 9.02   | 0.128438 | 0.537416 |
| 0      | 0      | 0      | 0      | NA       | NA       |
| 2.52   | 4.52   | 3.57   | 4.09   | 0.086828 | 0.810283 |
| 0      | 0      | 0      | 0      | NA       | NA       |
| 12.18  | 12.55  | 12.43  | 13.53  | 0.231141 | 0.197787 |
| 25.72  | 17.33  | 20.41  | 20.87  | -0.44465 | 0.001379 |
| 0.16   | 0.11   | 0.07   | 0.06   | 0.341572 | 0.667664 |
| 0      | 0      | 0      | 0      | NA       | NA       |
| 0      | 0      | 0      | 0      | NA       | NA       |
| 58.45  | 44.2   | 46.28  | 46.75  | -0.43727 | 3.97E-09 |
| 10.8   | 8.8    | 8.45   | 7.5    | 0.111872 | 0.740584 |
| 8.67   | 10     | 9.81   | 11.35  | 0.178923 | 0.126024 |
| 10.95  | 8.42   | 8.15   | 7.91   | -0.05327 | 0.741527 |
| 0      | 0      | 0      | 0      | NA       | NA       |
| 0.03   | 0.01   | 0.01   | 0.03   | NA       | NA       |
| 0.1    | 0.1    | 0.13   | 0.12   | -0.67494 | 0.330782 |
| 0.11   | 0.23   | 0.16   | 0.28   | -0.12525 | 0.877298 |
| 0      | 0      | 0      | 0      | NA       | NA       |
| 0      | 0      | 0      | 0      | NA       | NA       |
| 3.5    | 2.02   | 2.08   | 2.17   | 0.026192 | 0.947179 |
| 0      | 0      | 0      | 0      | NA       | NA       |
| 54.87  | 225.43 | 123.41 | 173.67 | 1.570826 | 1.93E-09 |
| 0      | 0      | 0      | 0      | NA       | NA       |
| 1.63   | 1.86   | 1.53   | 2.25   | -0.03762 | 0.941657 |
| 2.84   | 7.19   | 5.6    | 6.43   | 1.105507 | 4.65E-15 |
| 0      | 0      | 0      | 0.02   | NA       | NA       |
| 11.53  | 9.81   | 10.64  | 9.65   | -0.23597 | 0.073557 |
| 0      | 0      | 0      | 0      | NA       | NA       |
| 39.2   | 45.48  | 48.62  | 47.38  | 0.133137 | 0.201109 |
| 0.2    | 0.22   | 0.17   | 0.21   | 0.260326 | 0.73659  |
| 7.49   | 7.97   | 7.97   | 8.77   | 0.031675 | 0.821395 |

|       |       |       |       |          |          |
|-------|-------|-------|-------|----------|----------|
| 2.94  | 3.33  | 3.66  | 2.82  | -0.07208 | 0.816626 |
| 35.45 | 21.76 | 26.38 | 24    | -0.53811 | 1.41E-08 |
| 1.72  | 2.12  | 1.61  | 1.53  | 0.010075 | 0.975388 |
| 7.42  | 7.02  | 8.38  | 6.69  | 0.112485 | 0.563182 |
| 0.01  | 0.03  | 0.01  | 0.05  | NA       | NA       |
| 2.52  | 2.21  | 2.6   | 2.71  | 0.033245 | 0.936444 |
| 0.31  | 0.24  | 0.03  | 0.02  | NA       | NA       |
| 0     | 0     | 0     | 0     | NA       | NA       |
| 4.23  | 6.15  | 5.13  | 6.12  | 0.039244 | 0.889637 |
| 1     | 0.57  | 0.88  | 0.77  | -0.38604 | 0.510916 |
| 0     | 0     | 0     | 0     | NA       | NA       |
| 0.92  | 0.53  | 0.99  | 0.81  | -0.30671 | 0.419733 |
| 0     | 0     | 0     | 0     | NA       | NA       |
| 13.48 | 14.61 | 13.63 | 13.73 | -0.06574 | 0.636168 |
| 0     | 0     | 0     | 0.12  | NA       | NA       |
| 29.32 | 25.97 | 23.78 | 26.31 | -0.09438 | 0.490421 |
| 0     | 0.08  | 0     | 0     | NA       | NA       |
| 0     | 0.16  | 0.35  | 0.29  | NA       | NA       |
| 0.04  | 0.1   | 0.46  | 0.1   | NA       | NA       |
| 19.37 | 26.95 | 22.79 | 24.91 | 0.24024  | 0.01476  |
| 0.07  | 0     | 0     | 0     | NA       | NA       |
| 2.02  | 3.02  | 2.33  | 2.28  | 0.013644 | 0.964931 |
| 1.24  | 1.9   | 1.24  | 1.18  | 0.449315 | 0.320868 |
| 89.96 | 96.95 | 93.88 | 93.34 | 0.067382 | 0.524986 |
| 0     | 0.13  | 0     | 0     | NA       | NA       |
| 0.12  | 0.05  | 0.03  | 0.06  | -0.33616 | 0.673386 |
| 3.75  | 5.88  | 5.25  | 6.13  | 0.530863 | 5.75E-05 |
| 0     | 0     | 0     | 0     | NA       | NA       |
| 7.05  | 5.63  | 3.89  | 6.18  | 0.054695 | 0.802461 |
| 0     | 0     | 0     | 0     | NA       | NA       |
| 0.1   | 0.03  | 0     | 0     | NA       | NA       |
| 0.1   | 0.03  | 0     | 0     | NA       | NA       |
| 0.44  | 0.19  | 0.16  | 0     | NA       | NA       |
| 1.18  | 1.82  | 1.58  | 1.45  | -0.00078 | 0.9983   |
| 2.6   | 2.1   | 2.25  | 2.87  | -0.01845 | 0.94744  |
| 3.14  | 7.27  | 6.13  | 6.87  | 0.825087 | 3.19E-05 |
| 4.91  | 5.04  | 5.01  | 5.3   | -0.03336 | 0.880968 |
| 8.03  | 6.33  | 5.8   | 8.37  | 0.154285 | 0.296679 |
| 2.66  | 2.54  | 2.99  | 3.14  | 0.093805 | 0.769317 |
| 4.49  | 4.3   | 4.11  | 6.03  | -0.10877 | 0.536632 |
| 3.59  | 2.67  | 3.57  | 3.43  | -0.11861 | 0.662714 |
| 0.78  | 8.15  | 4.01  | 5.25  | 2.892451 | 5.99E-19 |
| 55.24 | 65.22 | 63.77 | 58.23 | -0.01585 | 0.933531 |
| 0.69  | 1.61  | 0.63  | 0.97  | 0.40006  | 0.346513 |
| 1.86  | 13.79 | 7.02  | 8.8   | 2.343233 | 2.29E-21 |

|        |        |        |        |          |          |
|--------|--------|--------|--------|----------|----------|
| 13.21  | 11.99  | 13.14  | 11.72  | -0.00773 | 0.973065 |
| 0      | 0      | 0      | 0      | NA       | NA       |
| 0      | 0      | 0      | 0      | NA       | NA       |
| 5.09   | 4.1    | 5.5    | 4.77   | -0.34727 | 0.188257 |
| 0.05   | 0.03   | 0.04   | 0      | NA       | NA       |
| 9.83   | 13.36  | 10.53  | 9.47   | 0.114053 | 0.444092 |
| 46.86  | 56.46  | 53.91  | 60.28  | 0.150765 | 0.120876 |
| 22.5   | 5.82   | 9      | 7.12   | -1.48876 | 1.20E-19 |
| 0.55   | 0.11   | 0.32   | 0.08   | -1.14629 | 0.065565 |
| 32.78  | 35.09  | 28.18  | 36.64  | 0.064358 | 0.608796 |
| 3.73   | 4.5    | 4.05   | 5.33   | 0.125805 | 0.601538 |
| 24.54  | 22.05  | 23.14  | 21.44  | -0.09415 | 0.608652 |
| 15.38  | 12.37  | 14.06  | 14.99  | 0.014051 | 0.94882  |
| 4.58   | 2.35   | 2.26   | 4.27   | -0.7321  | 0.003874 |
| 13.23  | 15.4   | 13.68  | 16.49  | 0.086616 | 0.624592 |
| 31.86  | 33.43  | 34.83  | 38.29  | 0.086878 | 0.368904 |
| 698.67 | 646.36 | 712.83 | 642.18 | -0.12814 | 0.167597 |
| 0      | 0      | 0      | 0      | NA       | NA       |
| 18     | 16.14  | 14.96  | 17.61  | -0.39494 | 7.19E-06 |
| 0      | 0      | 0      | 0      | NA       | NA       |
| 0      | 0      | 0      | 0      | NA       | NA       |
| 3.04   | 3.86   | 3.03   | 3.47   | -0.04693 | 0.886086 |
| 16.77  | 17.35  | 15.96  | 16.78  | 0.006329 | 0.970372 |
| 85.29  | 119.91 | 139.64 | 139.24 | 0.615667 | 7.37E-08 |
| 3.49   | 3.05   | 2.75   | 2.63   | -0.12015 | 0.813797 |
| 0      | 0      | 0      | 0      | NA       | NA       |
| 0.02   | 0.03   | 0      | 0.02   | NA       | NA       |
| 49.45  | 4.67   | 12.04  | 7.18   | -2.4603  | 4.13E-13 |
| 0      | 0.07   | 0.07   | 0      | NA       | NA       |
| 0.42   | 0.1    | 0.09   | 0.21   | NA       | NA       |
| 0.73   | 0.1    | 0.14   | 0.82   | -0.29476 | 0.718632 |
| 28.07  | 21.12  | 26.07  | 24.18  | -0.28349 | 0.002427 |
| 0      | 0      | 0      | 0      | NA       | NA       |
| 111.89 | 101.02 | 117.63 | 111.75 | -0.075   | 0.483811 |
| 0      | 0      | 0      | 0      | NA       | NA       |
| 0      | 0      | 0      | 0      | NA       | NA       |
| 0.5    | 0.24   | 0.13   | 0.37   | -0.96247 | 0.022437 |
| 5.43   | 5.1    | 5.39   | 5.48   | 0.066946 | 0.690438 |
| 13.43  | 11.68  | 12.97  | 13.91  | -0.32657 | 0.016361 |
| 0      | 0      | 0      | 0      | NA       | NA       |
| 42.23  | 54.25  | 47.24  | 46.65  | 0.201328 | 0.041336 |
| 0.02   | 0.02   | 0.03   | 0      | NA       | NA       |
| 2.17   | 1.41   | 1.3    | 1.49   | -0.34549 | 0.295974 |
| 0      | 0      | 0      | 0      | NA       | NA       |
| 0      | 0      | 0      | 0      | NA       | NA       |

|        |         |         |         |          |          |
|--------|---------|---------|---------|----------|----------|
| 11.23  | 8.93    | 12.94   | 8.53    | -0.24711 | 0.283732 |
| 166.93 | 3599.95 | 1103.09 | 1983.72 | 3.052707 | 2.63E-13 |
| 17.86  | 0.08    | 0.04    | 0.22    | -6.38024 | 2.18E-75 |
| 0.03   | 0       | 0       | 0       | NA       | NA       |
| 13.87  | 18.05   | 15.21   | 21.78   | 0.292033 | 0.021588 |
| 0      | 0.02    | 0.06    | 0.03    | 0.732952 | 0.280336 |
| 0.68   | 0.19    | 1.66    | 0.93    | 0.271444 | 0.742075 |
| 2.33   | 5.9     | 4.98    | 5.58    | 0.249904 | 0.476622 |
| 9.99   | 10.59   | 10.33   | 10.43   | 0.050106 | 0.757141 |
| 26.33  | 22.88   | 21.14   | 21.8    | -0.18095 | 0.099257 |
| 2.1    | 2.69    | 2.04    | 1.83    | -0.04183 | 0.904541 |
| 3      | 3.69    | 3.86    | 3.65    | 0.042059 | 0.860153 |
| 1.17   | 1.46    | 1.3     | 1.27    | -0.04264 | 0.923141 |
| 22.39  | 41.78   | 36.38   | 37.83   | 0.491215 | 0.00064  |
| 564.73 | 400.95  | 379.2   | 420.46  | -0.56233 | 1.99E-10 |
| 1.07   | 1.31    | 1.49    | 1.51    | 0.082539 | 0.812564 |
| 0      | 0       | 0       | 0.03    | NA       | NA       |
| 0      | 0       | 0       | 0       | NA       | NA       |
| 11.2   | 7.08    | 8.12    | 9.15    | -0.06351 | 0.664337 |
| 0.05   | 0.01    | 0.02    | 0.04    | NA       | NA       |
| 0      | 0.04    | 0.43    | 0.08    | -0.34837 | 0.659696 |
| 0.6    | 0       | 0       | 0       | NA       | NA       |
| 7.8    | 7.76    | 7.05    | 6.38    | -0.04305 | 0.841253 |
| 4.29   | 3.03    | 4.36    | 3.99    | -0.38178 | 0.114228 |
| 152.82 | 169.81  | 166.47  | 159.4   | 0.007597 | 0.96382  |
| 0.04   | 0.02    | 0.04    | 0.04    | NA       | NA       |
| 1.84   | 1.83    | 1.75    | 1.74    | -0.19118 | 0.441176 |
| 3.76   | 2.64    | 3.37    | 4.29    | -0.4546  | 0.00493  |
| 4.46   | 5.01    | 4.96    | 5.25    | -0.03013 | 0.903611 |
| 9.93   | 6.33    | 8.17    | 7.27    | -0.5093  | 6.76E-06 |
| 40.64  | 30.13   | 36.62   | 32.81   | -0.27633 | 0.014967 |
| 4.53   | 1.93    | 3.16    | 3.19    | -0.2789  | 0.19922  |
| 0      | 0       | 0.04    | 0.04    | NA       | NA       |
| 15.12  | 13.01   | 12.48   | 12.52   | -0.22052 | 0.017875 |
| 7.24   | 10.72   | 10.61   | 10.79   | 0.412823 | 3.97E-05 |
| 2.32   | 0.97    | 1.41    | 1.75    | -0.43219 | 0.21047  |
| 1.11   | 0.32    | 0.32    | 0.46    | -1.95454 | 1.31E-11 |
| 0      | 0       | 0       | 0       | NA       | NA       |
| 0      | 0       | 0.01    | 0       | NA       | NA       |
| 3.22   | 1.7     | 2.3     | 3.06    | -0.57072 | 0.001856 |
| 1.06   | 1.13    | 1.33    | 1.16    | -0.03823 | 0.952639 |
| 29.18  | 17.29   | 22.56   | 18.58   | -0.57144 | 6.76E-08 |
| 0      | 0       | 0.12    | 0.4     | NA       | NA       |
| 0      | 0.13    | 0       | 0       | NA       | NA       |
| 3.21   | 4.34    | 4.76    | 2.4     | 0.2009   | 0.658595 |

|       |       |       |       |          |          |
|-------|-------|-------|-------|----------|----------|
| 7.56  | 8.76  | 6.49  | 8.43  | 0.174387 | 0.570335 |
| 2.69  | 2.08  | 2.09  | 2.9   | -0.37454 | 0.110732 |
| 0     | 0     | 0     | 0     | NA       | NA       |
| 0     | 0     | 0     | 0     | NA       | NA       |
| 0     | 0     | 0     | 0     | NA       | NA       |
| 28.18 | 41.14 | 40.35 | 39.42 | 0.522583 | 3.27E-09 |
| 0     | 0     | 0     | 0     | NA       | NA       |
| 20.05 | 13.74 | 16.28 | 16.78 | -0.33028 | 0.007154 |
| 3.79  | 1.76  | 2.03  | 2.33  | -0.78021 | 1.25E-08 |
| 0.14  | 0.67  | 0.4   | 0.54  | 0.84722  | 0.110964 |
| 16.1  | 12.14 | 13.56 | 13.16 | -0.3685  | 0.000615 |
| 1.43  | 1.18  | 1.18  | 1.18  | -0.27906 | 0.474531 |
| 0     | 0     | 0     | 0     | NA       | NA       |
| 0     | 0     | 0     | 0     | NA       | NA       |
| 0     | 0     | 0     | 0     | NA       | NA       |
| 8.83  | 7.29  | 8.09  | 7.48  | -0.03286 | 0.878548 |
| 0     | 0     | 0     | 0     | NA       | NA       |
| 1.6   | 2.23  | 2     | 2.89  | 0.353718 | 0.363774 |
| 2.76  | 2     | 2.13  | 2.25  | -0.32363 | 0.07907  |
| 28.25 | 29.29 | 27.57 | 29.87 | -0.00458 | 0.975388 |
| 0     | 0.2   | 0.18  | 0     | 0.135803 | 0.789809 |
| 0     | 0     | 0     | 0     | NA       | NA       |
| 0.35  | 0.13  | 0.14  | 0.06  | -1.52741 | 8.58E-05 |
| 12.01 | 4.77  | 5.6   | 5.33  | -1.17776 | 7.73E-13 |
| 4.34  | 9.89  | 8.15  | 9.03  | 0.793475 | 1.00E-06 |
| 0.04  | 0.08  | 0     | 0     | NA       | NA       |
| 2.67  | 9.96  | 6.35  | 7.66  | 1.287213 | 4.10E-15 |
| 0     | 0     | 0     | 0     | NA       | NA       |
| 0     | 0     | 0.18  | 0     | NA       | NA       |
| 0     | 0     | 0     | 0.01  | NA       | NA       |
| 1.98  | 2.37  | 2.75  | 2.63  | 0.118627 | 0.480563 |
| 0     | 0.42  | 0.34  | 0.17  | NA       | NA       |
| 3.19  | 1.75  | 2.05  | 2.56  | -0.3575  | 0.110254 |
| 0     | 0     | 0     | 0     | NA       | NA       |
| 6.5   | 4.96  | 9.66  | 9.46  | 0.171021 | 0.611187 |
| 0.31  | 0.14  | 0.18  | 0.42  | -0.87525 | 0.021426 |
| 17.41 | 24.19 | 25.5  | 31.43 | 0.838614 | 2.22E-13 |
| 0.38  | 0.2   | 0.21  | 0.3   | -0.0677  | 0.937825 |
| 0.05  | 0     | 0     | 0     | NA       | NA       |
| 0     | 0     | 0     | 0     | NA       | NA       |
| 2.24  | 2.59  | 2.44  | 2.14  | -0.16821 | 0.289582 |
| 2.53  | 4.74  | 5.18  | 3.9   | 0.294451 | 0.129948 |
| 26.16 | 30.57 | 29.95 | 32.67 | 0.201883 | 0.013072 |
| 0.07  | 0.02  | 0.05  | 0.06  | -0.41395 | 0.590209 |
| 5.58  | 6.98  | 6.13  | 6.55  | -0.04721 | 0.823653 |



|        |        |        |       |          |          |
|--------|--------|--------|-------|----------|----------|
| 134.66 | 94.04  | 98.86  | 104.2 | -0.42339 | 3.96E-07 |
| 435.05 | 198.96 | 254.58 | 224.1 | -0.99687 | 2.02E-26 |
| 0.03   | 0.24   | 0.1    | 0.12  | 0.358901 | 0.634661 |
| 0      | 0      | 0      | 0     | NA       | NA       |
| 6.61   | 5.9    | 7.63   | 6.89  | -0.01169 | 0.948247 |
| 31.13  | 30.02  | 22.89  | 25    | -0.0743  | 0.695339 |
| 6.38   | 7.93   | 8.06   | 7.6   | 0.15671  | 0.227187 |
| 0      | 0      | 0      | 0     | NA       | NA       |
| 0      | 0.01   | 0      | 0     | NA       | NA       |
| 21.73  | 10.65  | 14.74  | 12    | -0.38128 | 0.002059 |
| 0.21   | 0.6    | 0.45   | 0.21  | -0.55563 | 0.44691  |
| 48.37  | 40.76  | 44.67  | 41.94 | -0.11487 | 0.339118 |
| 60.72  | 53.18  | 52.13  | 51.87 | -0.31322 | 4.94E-05 |
| 5.03   | 4.85   | 6.63   | 5.14  | -0.11726 | 0.617258 |
| 18.28  | 34.44  | 33.36  | 35.92 | 0.846286 | 9.85E-18 |
| 0      | 0      | 0      | 0.01  | NA       | NA       |
| 0.65   | 0.29   | 0.65   | 0.33  | -0.7629  | 0.081123 |
| 131.45 | 67.8   | 85.6   | 72.37 | -0.80728 | 3.79E-13 |
| 16.1   | 14.14  | 14.93  | 13.19 | -0.1868  | 0.346502 |
| 0      | 0.01   | 0.03   | 0.01  | NA       | NA       |
| 2.02   | 2.3    | 1.95   | 2.11  | 0.154558 | 0.565253 |
| 0      | 0.45   | 0.17   | 0.05  | NA       | NA       |
| 0.44   | 0.34   | 0.23   | 0.36  | -0.03537 | 0.969945 |
| 44.8   | 49.32  | 46.58  | 47.57 | 0.211116 | 0.053852 |
| 56.62  | 67.75  | 64.5   | 61.68 | 0.279574 | 0.007567 |
| 1.29   | 1.07   | 1.2    | 1.02  | -0.43479 | 0.266064 |
| 2.5    | 1.45   | 1.82   | 1.13  | -0.65649 | 0.065324 |
| 1.57   | 1.29   | 2.02   | 2.21  | -0.00199 | 0.995428 |
| 5.73   | 14.55  | 12.78  | 12.7  | 1.036013 | 2.54E-14 |
| 1.43   | 1.31   | 1.76   | 1.82  | 0.055873 | 0.900831 |
| 9.32   | 14.6   | 14.16  | 13.6  | 0.213986 | 0.255545 |
| 0      | 0      | 0      | 0     | NA       | NA       |
| 2.72   | 3.37   | 3.17   | 3.53  | 0.254309 | 0.151842 |
| 4.31   | 2.66   | 3.29   | 4.64  | -0.19804 | 0.312813 |
| 0      | 0      | 0      | 0     | NA       | NA       |
| 119.42 | 62.32  | 71.8   | 64.43 | -0.88097 | 7.73E-28 |
| 2.34   | 1      | 1.9    | 1.87  | -0.78607 | 0.000322 |
| 12.28  | 14.15  | 12.97  | 12.08 | 0.009292 | 0.965915 |
| 0.34   | 0.65   | 0.61   | 0.8   | 0.264441 | 0.665462 |
| 3.12   | 1.59   | 1.86   | 1.44  | -0.10598 | 0.781422 |
| 0.77   | 0.25   | 0.54   | 0.34  | -0.74326 | 0.113578 |
| 2.91   | 1.56   | 2.23   | 1.6   | -0.23429 | 0.356967 |
| 0      | 0      | 0      | 0     | NA       | NA       |
| 0      | 0.16   | 0.14   | 0     | NA       | NA       |
| 9.73   | 9.77   | 10.22  | 6.83  | -0.2359  | 0.146478 |

|        |        |        |        |          |          |
|--------|--------|--------|--------|----------|----------|
| 13.03  | 29.81  | 20.26  | 26.32  | 0.990771 | 2.44E-15 |
| 0      | 0      | 0.05   | 0 NA   | NA       |          |
| 9.48   | 15.43  | 13.45  | 14.16  | 0.354058 | 0.01866  |
| 4.3    | 5.16   | 4.77   | 5.06   | 0.380753 | 0.001029 |
| 0      | 0      | 0      | 0 NA   | NA       |          |
| 53.23  | 73.35  | 65.24  | 73.25  | 0.309078 | 7.05E-05 |
| 0.4    | 0.24   | 0.69   | 0.39   | -0.42715 | 0.439475 |
| 0      | 0      | 0      | 0 NA   | NA       |          |
| 0      | 0      | 0      | 0 NA   | NA       |          |
| 0      | 0      | 0      | 0 NA   | NA       |          |
| 10.58  | 4.12   | 7.44   | 5.98   | -1.02824 | 1.08E-09 |
| 0.27   | 0.37   | 0.53   | 1.15   | -0.15824 | 0.85721  |
| 62.59  | 65.66  | 66.98  | 69.89  | 0.100737 | 0.249249 |
| 0.01   | 0.36   | 0.52   | 0.36   | 3.122386 | 8.21E-11 |
| 0      | 0      | 0      | 0 NA   | NA       |          |
| 291.76 | 246.25 | 275.24 | 265.65 | -0.25208 | 0.002244 |
| 10.7   | 14.15  | 14.38  | 11.51  | 0.142176 | 0.401933 |
| 21.45  | 27.75  | 28.34  | 28.44  | 0.329465 | 0.000639 |
| 3.5    | 3.3    | 2.91   | 2.69   | -0.05838 | 0.76309  |
| 13.06  | 15.48  | 15.18  | 14.59  | 0.052371 | 0.722532 |
| 0      | 0      | 0      | 0 NA   | NA       |          |
| 1.12   | 1.02   | 0.97   | 0.82   | -0.47859 | 0.297636 |
| 0      | 0      | 0      | 0 NA   | NA       |          |
| 3.34   | 2.8    | 3.15   | 3.28   | -0.18218 | 0.420494 |
| 0      | 0.11   | 0.14   | 0.34   | -0.06422 | 0.94485  |
| 8.92   | 12.98  | 10.63  | 10.93  | 0.224929 | 0.046441 |
| 0.23   | 0.26   | 0.27   | 0.18   | 0.069469 | 0.925357 |
| 0.9    | 2.07   | 0.68   | 0.9    | -0.20966 | 0.608942 |
| 0.61   | 0.57   | 0.53   | 0.46   | -0.17775 | 0.717115 |
| 0      | 0      | 0      | 0 NA   | NA       |          |
| 14.59  | 16.22  | 14.35  | 14.14  | 0.161453 | 0.266072 |
| 0      | 0      | 0      | 0 NA   | NA       |          |
| 65.04  | 92.08  | 80.49  | 84.64  | 0.287065 | 0.001413 |
| 0      | 0      | 0      | 0 NA   | NA       |          |
| 3.71   | 5.43   | 5.17   | 7.62   | 0.337815 | 0.043347 |
| 0.6    | 0.59   | 0.53   | 0.39   | -0.18025 | 0.794367 |
| 0.14   | 0.04   | 0.11   | 0.11   | -0.51401 | 0.473718 |
| 15.66  | 20.79  | 17.98  | 17.34  | 0.432193 | 0.000723 |
| 0      | 0      | 0      | 0 NA   | NA       |          |
| 0      | 0      | 0      | 0 NA   | NA       |          |
| 0      | 0      | 0      | 0 NA   | NA       |          |
| 0      | 0      | 0      | 0 NA   | NA       |          |
| 3.34   | 2.3    | 3.41   | 1.9    | -0.31846 | 0.566347 |
| 0.12   | 0.2    | 0.12   | 0.12   | -0.14824 | 0.863452 |
| 2.4    | 2.58   | 3.65   | 3.17   | -0.01183 | 0.974754 |

|        |        |        |        |          |          |
|--------|--------|--------|--------|----------|----------|
| 4.73   | 4.08   | 4.9    | 3.92   | 0.051963 | 0.803033 |
| 0      | 0      | 0      | 0 NA   | NA       |          |
| 0.16   | 0.27   | 0.29   | 0.37   | -0.37273 | 0.611187 |
| 3.57   | 18.1   | 7.61   | 12.21  | 1.72017  | 2.13E-14 |
| 0.08   | 0.04   | 0.07   | 0.08   | 0.117187 | 0.896466 |
| 0      | 0      | 0      | 0 NA   | NA       |          |
| 0      | 0      | 0      | 0 NA   | NA       |          |
| 20.77  | 32.45  | 28.42  | 37.32  | 0.689822 | 4.49E-13 |
| 13.06  | 16.02  | 16.06  | 16.03  | 0.320593 | 0.143369 |
| 51.69  | 52.6   | 58.38  | 56.39  | 0.008798 | 0.949791 |
| 0.31   | 0.28   | 0.47   | 0.47   | 0.037022 | 0.968828 |
| 4.65   | 3.12   | 2.59   | 5.58   | -0.11731 | 0.871059 |
| 0      | 0      | 0      | 0 NA   | NA       |          |
| 0.61   | 0.44   | 0.51   | 0.27   | -0.4253  | 0.401284 |
| 0.14   | 0.41   | 0.34   | 0.56   | 0.451534 | 0.524726 |
| 0      | 0      | 0      | 0 NA   | NA       |          |
| 0      | 0      | 0      | 0 NA   | NA       |          |
| 0      | 0      | 0      | 0 NA   | NA       |          |
| 68.4   | 61.8   | 68.24  | 66.57  | -0.20913 | 0.008447 |
| 0.13   | 0.04   | 0.08   | 0 NA   | NA       |          |
| 1      | 3.75   | 3.42   | 4.46   | 1.45989  | 1.97E-06 |
| 13.22  | 15.65  | 15.85  | 14.29  | 0.13678  | 0.394562 |
| 0      | 0      | 0      | 0 NA   | NA       |          |
| 0      | 0      | 0      | 0 NA   | NA       |          |
| 0.75   | 0.7    | 0.33   | 0.92   | -1.10099 | 0.01915  |
| 0.56   | 0.27   | 0.49   | 0.45   | 0.024519 | 0.976098 |
| 11.54  | 11.81  | 10.02  | 15.63  | -0.17663 | 0.175193 |
| 0.91   | 1.43   | 0.98   | 1.35   | 0.262994 | 0.548854 |
| 2.15   | 2.26   | 2.32   | 1.8    | -0.08083 | 0.767346 |
| 0.16   | 0.07   | 0.13   | 0.2    | -0.12746 | 0.87542  |
| 0.37   | 0.14   | 0.43   | 0.6    | -0.82404 | 0.122452 |
| 7.02   | 11.19  | 10.85  | 12.36  | 0.365582 | 0.034047 |
| 0      | 0      | 0      | 0 NA   | NA       |          |
| 0      | 0      | 0      | 0 NA   | NA       |          |
| 5.25   | 4.91   | 4.96   | 4.93   | 0.117337 | 0.356587 |
| 0      | 0      | 0      | 0 NA   | NA       |          |
| 13.56  | 24.67  | 23.04  | 22.81  | 0.609336 | 3.33E-13 |
| 0      | 0      | 0      | 0 NA   | NA       |          |
| 10.86  | 13.75  | 14.74  | 16.16  | 0.249702 | 0.023312 |
| 160.32 | 169.22 | 164.09 | 170.32 | -0.00907 | 0.94009  |
| 3.08   | 12.97  | 11.28  | 10.58  | 1.67677  | 3.63E-30 |
| 0      | 0      | 0      | 0 NA   | NA       |          |
| 0.56   | 0      | 0.35   | 0 NA   | NA       |          |
| 21.02  | 20.1   | 20.92  | 21.43  | -0.03607 | 0.813797 |
| 27.95  | 30.76  | 30.87  | 32.08  | -0.04487 | 0.845973 |

|       |        |       |                |          |
|-------|--------|-------|----------------|----------|
| 0     | 0      | 0     | 0 NA           | NA       |
| 19.74 | 11.18  | 14.48 | 13.72 -0.65125 | 1.88E-09 |
| 0     | 0.04   | 0     | 0.23 NA        | NA       |
| 0     | 0      | 0     | 0 NA           | NA       |
| 0.67  | 0.33   | 0.33  | 0.24 -0.97292  | 0.077471 |
| 1.62  | 2.64   | 1.68  | 2.09 0.4024    | 0.151632 |
| 2.14  | 2.25   | 2.31  | 2.55 -0.00203  | 0.996111 |
| 0     | 0      | 0     | 0 NA           | NA       |
| 1.52  | 0.9    | 1.4   | 1.46 -0.31773  | 0.416612 |
| 2.9   | 2.97   | 2.86  | 3.03 -0.30892  | 0.143815 |
| 0     | 0      | 0     | 0 NA           | NA       |
| 4.86  | 3.99   | 4.24  | 3.94 -0.42817  | 0.008336 |
| 3.73  | 4.46   | 2.74  | 5.07 -0.15015  | 0.472312 |
| 0.29  | 0      | 0.04  | 0.06 -0.74511  | 0.277321 |
| 8.07  | 9.09   | 10.34 | 8.48 0.150148  | 0.135215 |
| 0     | 0      | 0     | 0 NA           | NA       |
| 0.34  | 0.34   | 0.11  | 0.42 0.018539  | 0.985711 |
| 0     | 0      | 0     | 0 NA           | NA       |
| 0     | 0      | 0     | 0.04 NA        | NA       |
| 0     | 0      | 0.16  | 0 NA           | NA       |
| 0.01  | 0      | 0.12  | 0.03 NA        | NA       |
| 17.43 | 15.74  | 9.37  | 11.87 0.015654 | 0.954887 |
| 0     | 0      | 0     | 0 NA           | NA       |
| 5.03  | 4.18   | 4.27  | 4.02 -0.27391  | 0.12255  |
| 0     | 0      | 0     | 0 NA           | NA       |
| 0     | 0      | 0     | 0 NA           | NA       |
| 5.44  | 4.27   | 3.77  | 4.44 -0.2388   | 0.246536 |
| 0     | 0      | 0     | 0 NA           | NA       |
| 0     | 0      | 0     | 0 NA           | NA       |
| 3.03  | 5.96   | 3.68  | 4.01 0.491327  | 0.003519 |
| 0.11  | 0.05   | 0     | 0.09 -0.1673   | 0.847875 |
| 0.11  | 0.08   | 0.07  | 0.04 NA        | NA       |
| 0     | 0      | 0     | 0 NA           | NA       |
| 64.82 | 40.29  | 42.72 | 45.9 -0.62722  | 5.10E-11 |
| 34.23 | 45.28  | 46.05 | 44.62 0.405432 | 1.12E-05 |
| 0     | 0.06   | 0     | 0 NA           | NA       |
| 19.99 | 15.86  | 18.79 | 17.66 -0.26689 | 0.026285 |
| 2.01  | 5.86   | 3.83  | 5.07 0.68664   | 0.00177  |
| 0     | 0      | 0     | 0 NA           | NA       |
| 0.67  | 0.77   | 0.73  | 0.99 -0.20897  | 0.708805 |
| 9.42  | 111.95 | 82.82 | 97.02 2.707877 | 1.54E-22 |
| 0     | 0      | 0     | 0 NA           | NA       |
| 0.03  | 0.07   | 0.35  | 0.32 0.57058   | 0.417919 |
| 0     | 0      | 0.01  | 0 NA           | NA       |
| 0.18  | 0      | 0     | 0.1 NA         | NA       |

|        |        |        |        |          |          |
|--------|--------|--------|--------|----------|----------|
| 0      | 0      | 0      | 0      | NA       | NA       |
| 0.27   | 0.27   | 0.25   | 0.18   | 0.43662  | 0.493018 |
| 2.99   | 3.57   | 2.64   | 3.43   | 0.192489 | 0.441176 |
| 0      | 0      | 0      | 0      | NA       | NA       |
| 14.03  | 12.18  | 11.01  | 11.47  | -0.33674 | 0.000571 |
| 1.2    | 1.24   | 1.48   | 1.96   | -0.01775 | 0.972446 |
| 10.78  | 10.08  | 10.07  | 9.45   | -0.10252 | 0.596806 |
| 0      | 0      | 0.03   | 0      | NA       | NA       |
| 0.01   | 0.02   | 0.01   | 0      | NA       | NA       |
| 0      | 0      | 0.13   | 0.12   | NA       | NA       |
| 26.04  | 27.38  | 28.26  | 28.97  | 0.136215 | 0.278077 |
| 0      | 0      | 0      | 0      | NA       | NA       |
| 11.24  | 14.58  | 12.82  | 14.05  | 0.334464 | 0.000704 |
| 3.56   | 4.77   | 3.7    | 4.86   | -0.0759  | 0.820566 |
| 0      | 0      | 0.05   | 0      | NA       | NA       |
| 19.05  | 19.78  | 20.5   | 23.85  | 0.38088  | 0.003046 |
| 0      | 0      | 0      | 0      | NA       | NA       |
| 0.06   | 0.01   | 0.05   | 0.04   | -0.63905 | 0.367221 |
| 25.05  | 59.4   | 54.07  | 60.64  | 1.167587 | 3.14E-34 |
| 1.59   | 2.11   | 2.06   | 2.62   | 0.266674 | 0.189262 |
| 1.81   | 0.44   | 0.6    | 0.21   | -1.66144 | 3.20E-14 |
| 0.56   | 0.15   | 0.09   | 0.24   | -1.69037 | 0.002098 |
| 7.69   | 10.44  | 8.85   | 9.88   | 0.331877 | 0.018396 |
| 16.87  | 12.8   | 14.61  | 13.56  | -0.31073 | 0.003182 |
| 0.19   | 0.1    | 0.13   | 0.16   | -0.04583 | 0.952987 |
| 1.41   | 1      | 1.29   | 0.83   | -0.34274 | 0.261775 |
| 8.8    | 4.28   | 5.8    | 6.14   | -0.70318 | 0.011868 |
| 0      | 0      | 0      | 0      | NA       | NA       |
| 0      | 0      | 0      | 0      | NA       | NA       |
| 6.97   | 8.45   | 8.15   | 8.49   | 0.306951 | 0.015958 |
| 1.01   | 0.61   | 0.77   | 0.36   | -0.05637 | 0.94677  |
| 7.4    | 7.77   | 7.81   | 7.67   | -0.0691  | 0.864815 |
| 0      | 0      | 0      | 0      | NA       | NA       |
| 0      | 0      | 0      | 0      | NA       | NA       |
| 15.5   | 15.24  | 12.5   | 14.68  | -0.13694 | 0.373564 |
| 0      | 0      | 0      | 0      | NA       | NA       |
| 0      | 0      | 0      | 0      | NA       | NA       |
| 0      | 0      | 0      | 0      | NA       | NA       |
| 0.92   | 0.32   | 0.43   | 0.44   | -0.68229 | 0.029872 |
| 0      | 0      | 0      | 0      | NA       | NA       |
| 0.13   | 0.09   | 0.16   | 0.02   | -0.34553 | 0.662598 |
| 14.81  | 16.4   | 16.01  | 16.46  | 0.167344 | 0.18174  |
| 4.94   | 3.59   | 4.11   | 5.68   | -0.35811 | 0.001684 |
| 3.56   | 4.38   | 6.17   | 4.46   | 0.013326 | 0.962062 |
| 584.77 | 184.77 | 240.11 | 217.76 | -1.51481 | 4.87E-39 |

|         |         |         |         |          |          |
|---------|---------|---------|---------|----------|----------|
| 0       | 0       | 0       | 0       | NA       | NA       |
| 0       | 0       | 0       | 0       | NA       | NA       |
| 3.29    | 2.6     | 2.62    | 2.87    | -0.13508 | 0.623698 |
| 9.71    | 10.01   | 11.74   | 11.84   | 0.167147 | 0.409322 |
| 29.28   | 41.03   | 38.18   | 42.08   | 0.408691 | 1.05E-05 |
| 0       | 0       | 0       | 0       | NA       | NA       |
| 0       | 0       | 0       | 0       | NA       | NA       |
| 0       | 1.88    | 0.36    | 1.16    | 3.397204 | 7.36E-11 |
| 317.18  | 176.91  | 238.5   | 208.98  | -0.6034  | 2.22E-09 |
| 0       | 0       | 0       | 0       | NA       | NA       |
| 0       | 0       | 0       | 0       | NA       | NA       |
| 3.87    | 1.3     | 1.88    | 2.21    | -1.13395 | 4.20E-07 |
| 1.35    | 1.02    | 0.52    | 1.27    | -1.10362 | 0.001507 |
| 0       | 0       | 0       | 0       | NA       | NA       |
| 0.02    | 0       | 0.02    | 0       | NA       | NA       |
| 0       | 0       | 0       | 0       | NA       | NA       |
| 0       | 0.02    | 0       | 0       | NA       | NA       |
| 0       | 0       | 0       | 0       | NA       | NA       |
| 0       | 0       | 0       | 0       | NA       | NA       |
| 0       | 0       | 0       | 0       | NA       | NA       |
| 0       | 0       | 0       | 0       | NA       | NA       |
| 101.5   | 73.88   | 81.92   | 82.95   | -0.42648 | 2.19E-10 |
| 20.28   | 43.99   | 47.97   | 52.05   | 1.149383 | 4.06E-19 |
| 41.58   | 32.82   | 34.68   | 34.55   | -0.3981  | 1.21E-07 |
| 0       | 0       | 0       | 0       | NA       | NA       |
| 0       | 0       | 0       | 0       | NA       | NA       |
| 70.86   | 94.22   | 87.12   | 86.09   | 0.255301 | 0.002704 |
| 22.43   | 16.46   | 20.71   | 21.24   | -0.11188 | 0.465848 |
| 0.54    | 0.56    | 0.71    | 1.27    | -0.00111 | 0.998368 |
| 0       | 0.17    | 0.24    | 0.23    | NA       | NA       |
| 7.55    | 9.64    | 8.76    | 9.29    | 0.260575 | 0.016949 |
| 415.5   | 328.67  | 371.28  | 320.92  | -0.19111 | 0.080549 |
| 0       | 0.46    | 0.17    | 0       | NA       | NA       |
| 0       | 0.34    | 0.92    | 0.28    | NA       | NA       |
| 0       | 0       | 0       | 0       | NA       | NA       |
| 1716.08 | 2172.88 | 2058.85 | 2136.07 | 0.347707 | 1.74E-06 |
| 528.55  | 293.2   | 376.89  | 309.61  | -0.72643 | 5.34E-14 |
| 0.29    | 0.64    | 0.31    | 0.62    | 0.417437 | 0.462317 |
| 0       | 0       | 0       | 0.05    | NA       | NA       |
| 1929.43 | 1812.83 | 1782.94 | 1673.05 | -0.21871 | 0.007206 |
| 0.08    | 0       | 0       | 0       | NA       | NA       |
| 5.62    | 4.33    | 3.57    | 4.07    | -0.54131 | 0.007134 |
| 41.93   | 6.9     | 16.17   | 11.8    | -1.6779  | 2.17E-06 |
| 0       | 0       | 0       | 0       | NA       | NA       |
| 0.83    | 0.55    | 1       | 1.07    | -0.30051 | 0.62178  |

|       |       |        |        |          |          |
|-------|-------|--------|--------|----------|----------|
| 19.22 | 21.96 | 22.2   | 22.11  | 0.195441 | 0.060282 |
| 3.45  | 2.53  | 2.19   | 2.83   | -0.05673 | 0.832384 |
| 1.62  | 1.29  | 1.16   | 1.35   | -0.11066 | 0.834197 |
| 1.51  | 2.85  | 1.5    | 2.29   | 0.102713 | 0.68041  |
| 16.7  | 34.4  | 26.23  | 22.47  | 0.732888 | 2.89E-05 |
| 8.56  | 8.74  | 5.65   | 7.93   | 0.069121 | 0.760637 |
| 8     | 12.72 | 11.71  | 11.44  | 0.539384 | 7.26E-05 |
| 0     | 0     | 0      | 0      | NA       | NA       |
| 0     | 0     | 0      | 0      | NA       | NA       |
| 0     | 0     | 0      | 0      | NA       | NA       |
| 10.05 | 13.11 | 11.7   | 11.14  | 0.340765 | 0.04284  |
| 1.9   | 2.24  | 3.49   | 1.1    | 0.195652 | 0.64404  |
| 0.98  | 0.11  | 0.46   | 0.13   | NA       | NA       |
| 0.15  | 0.17  | 0.02   | 0      | NA       | NA       |
| 0.43  | 0.18  | 0.72   | 0.34   | -0.6287  | 0.169106 |
| 3.66  | 5.68  | 4.47   | 5.86   | 0.493777 | 0.000459 |
| 0.47  | 0.46  | 0.63   | 0.87   | -0.08987 | 0.874689 |
| 0.27  | 0     | 0.07   | 0      | NA       | NA       |
| 1.93  | 1.54  | 0.91   | 2.7    | 0.447768 | 0.458059 |
| 0     | 0     | 0      | 0      | NA       | NA       |
| 8.19  | 7.22  | 6.69   | 8.4    | -0.13002 | 0.555333 |
| 0.07  | 0.1   | 0.22   | 0.35   | 0.296916 | 0.705023 |
| 0     | 0     | 0      | 0      | NA       | NA       |
| 3.48  | 2.27  | 2.46   | 2.9    | -0.5087  | 0.00083  |
| 2.22  | 2.25  | 2.49   | 2.59   | -0.18069 | 0.547377 |
| 58.22 | 47.66 | 49.66  | 48.89  | -0.39199 | 5.84E-06 |
| 1.09  | 2.53  | 2.16   | 2.55   | 1.077051 | 1.39E-07 |
| 4.2   | 5.51  | 5.28   | 5.96   | 0.352906 | 0.020068 |
| 2.95  | 3.61  | 2.76   | 1.94   | 0.154947 | 0.69546  |
| 0     | 0     | 0      | 0      | NA       | NA       |
| 0     | 0     | 0      | 0      | NA       | NA       |
| 4.17  | 0.87  | 1.38   | 1.6    | -1.47576 | 1.96E-12 |
| 57.75 | 48.85 | 50.88  | 52.01  | -0.289   | 0.000121 |
| 0     | 0     | 0      | 0      | NA       | NA       |
| 0.24  | 0     | 0      | 0.06   | NA       | NA       |
| 6.56  | 5.94  | 5.45   | 5.88   | 0.064122 | 0.814366 |
| 0     | 0     | 0      | 0      | NA       | NA       |
| 0     | 0     | 0      | 0      | NA       | NA       |
| 0.21  | 0.51  | 0.27   | 0      | NA       | NA       |
| 0     | 0     | 0      | 0      | NA       | NA       |
| 4.68  | 8.16  | 6.43   | 7.6    | 0.624656 | 3.05E-08 |
| 0     | 0.03  | 0.01   | 0      | NA       | NA       |
| 207.4 | 92.38 | 118.49 | 100.97 | -1.01064 | 2.71E-26 |
| 0     | 0     | 0      | 0      | NA       | NA       |
| 8.99  | 21.25 | 13.58  | 22     | 0.824256 | 0.006964 |

|         |         |        |        |          |          |
|---------|---------|--------|--------|----------|----------|
| 7.58    | 4.26    | 7.02   | 6.27   | -0.38179 | 0.093819 |
| 21.87   | 27.53   | 25.11  | 26.56  | 0.116992 | 0.353646 |
| 0       | 0       | 0      | 0      | NA       | NA       |
| 0       | 0       | 0      | 0      | NA       | NA       |
| 0       | 0       | 0      | 0.04   | NA       | NA       |
| 2.09    | 2.2     | 3.64   | 2.92   | 0.232275 | 0.628307 |
| 8.06    | 6.88    | 7.56   | 8.28   | -0.38418 | 0.052194 |
| 42      | 76.82   | 78.94  | 74.44  | 0.961881 | 5.12E-29 |
| 0.83    | 0.84    | 1.15   | 0.61   | -0.43165 | 0.323274 |
| 0       | 0       | 0      | 0      | NA       | NA       |
| 0.8     | 0.84    | 0.82   | 0.78   | -0.40857 | 0.286215 |
| 3.17    | 3.92    | 4.26   | 3.03   | -0.36185 | 0.060472 |
| 0       | 0       | 0      | 0      | NA       | NA       |
| 0.16    | 0.11    | 0.1    | 0.22   | NA       | NA       |
| 10.16   | 9.02    | 9.43   | 12.21  | -0.28443 | 0.048994 |
| 2.16    | 3.61    | 2.68   | 2.46   | 0.025499 | 0.934203 |
| 0.05    | 0       | 0      | 0      | NA       | NA       |
| 2169.93 | 2009.41 | 2202.3 | 1914.3 | -0.12699 | 0.193062 |
| 1091.46 | 803.76  | 944.44 | 818.44 | -0.38054 | 2.20E-05 |
| 0.09    | 0.16    | 0.23   | 0.1    | 0.149396 | 0.859398 |
| 1.23    | 1.96    | 1.59   | 1.76   | 0.607218 | 0.004835 |
| 114.59  | 321.25  | 202.58 | 270.13 | 1.160646 | 8.98E-18 |
| 11.37   | 8.3     | 8.82   | 10.02  | -0.13701 | 0.203012 |
| 15.33   | 2.5     | 3.25   | 3.45   | -2.09587 | 8.29E-47 |
| 7.41    | 9.17    | 8.03   | 8.69   | 0.221936 | 0.13018  |
| 7.41    | 9.17    | 8.03   | 8.69   | 0.221936 | 0.13018  |
| 0.16    | 0       | 0.01   | 0      | NA       | NA       |
| 0.76    | 1.35    | 0.81   | 1.09   | -0.0157  | 0.968986 |
| 0.14    | 0.09    | 0.16   | 0.56   | -0.50461 | 0.491836 |
| 42.76   | 46.07   | 39.97  | 37.24  | -0.089   | 0.56871  |
| 0       | 0       | 0      | 0      | NA       | NA       |
| 10.88   | 10.38   | 12.26  | 10.78  | -0.10467 | 0.691487 |
| 0       | 0       | 0      | 0      | NA       | NA       |
| 0       | 0       | 0      | 0      | NA       | NA       |
| 0       | 0       | 0      | 0      | NA       | NA       |
| 1.85    | 0.1     | 0.28   | 0.16   | -1.93407 | 3.28E-06 |
| 14.26   | 9.75    | 13.42  | 12.05  | -0.13516 | 0.360209 |
| 9.71    | 6.56    | 7      | 6.57   | -0.36655 | 0.010417 |
| 0.42    | 0.18    | 0.37   | 0.55   | -0.24754 | 0.747976 |
| 0       | 0       | 0      | 0      | NA       | NA       |
| 15.26   | 19.74   | 19.35  | 20     | 0.256304 | 0.110301 |
| 11.62   | 17.65   | 14.13  | 15.56  | 0.41525  | 0.000522 |
| 0       | 0       | 0      | 0      | NA       | NA       |
| 0       | 0       | 0      | 0      | NA       | NA       |
| 0       | 0       | 0      | 0      | NA       | NA       |



|        |        |        |        |          |          |
|--------|--------|--------|--------|----------|----------|
| 5.28   | 5.32   | 5.07   | 5.57   | -0.05421 | 0.767575 |
| 0      | 0.03   | 0.05   | 0.12   | NA       | NA       |
| 0      | 0      | 0      | 0      | NA       | NA       |
| 558.62 | 467.64 | 530.92 | 467.15 | -0.25599 | 0.002502 |
| 0.81   | 0.46   | 0.46   | 0.59   | -0.65227 | 0.112329 |
| 11.7   | 10.26  | 13.94  | 10.84  | 0.088221 | 0.613331 |
| 5.73   | 4.73   | 5.82   | 4.77   | 0.210515 | 0.287553 |
| 1.29   | 1.07   | 1.79   | 1.67   | 0.006626 | 0.989187 |
| 0      | 0      | 0      | 0      | NA       | NA       |
| 41.02  | 85.04  | 64.13  | 73.84  | 0.769221 | 1.48E-13 |
| 0      | 0      | 0      | 0      | NA       | NA       |
| 8.92   | 12.27  | 8.27   | 10.85  | 0.187532 | 0.296865 |
| 1.64   | 1.87   | 0.9    | 1.36   | -0.36454 | 0.455983 |
| 20.11  | 21.76  | 24.31  | 21.11  | -0.02624 | 0.882748 |
| 0      | 0      | 0      | 0      | NA       | NA       |
| 3      | 1.37   | 1.44   | 4.12   | -0.07397 | 0.898268 |
| 2.91   | 0.74   | 2.28   | 1.32   | -0.47358 | 0.298406 |
| 0      | 0      | 0.02   | 0      | NA       | NA       |
| 0      | 0      | 0      | 0      | NA       | NA       |
| 5.39   | 5.68   | 5.34   | 5.64   | 0.18559  | 0.372    |
| 0      | 0      | 0      | 0      | NA       | NA       |
| 7.05   | 5.11   | 5.49   | 5.15   | -0.11801 | 0.42331  |
| 0.04   | 0.68   | 0.15   | 0.11   | 0.873389 | 0.171754 |
| 7.83   | 8.42   | 6.89   | 8.65   | 0.156696 | 0.442538 |
| 0      | 0      | 0      | 0      | NA       | NA       |
| 0      | 0      | 0      | 0      | NA       | NA       |
| 2.02   | 2.31   | 2.91   | 2.79   | 0.10708  | 0.734129 |
| 0.22   | 0.1    | 0.22   | 0.06   | -0.66229 | 0.342329 |
| 0      | 0      | 0      | 0      | NA       | NA       |
| 4.19   | 4.49   | 5      | 5.18   | 0.283971 | 0.107181 |
| 0.32   | 0.54   | 0.4    | 0.56   | 0.763248 | 0.04968  |
| 0.96   | 0.68   | 1      | 0.84   | -0.66646 | 0.029485 |
| 10.2   | 15.48  | 12.25  | 13.43  | 0.420882 | 0.000437 |
| 72.66  | 61.34  | 70.89  | 68.97  | -0.03892 | 0.778312 |
| 0      | 0      | 0      | 0      | NA       | NA       |
| 0.08   | 0      | 0      | 0      | NA       | NA       |
| 0      | 0      | 0      | 0      | NA       | NA       |
| 8.13   | 5.52   | 5.91   | 5.03   | -0.66393 | 4.60E-05 |
| 5.75   | 8.76   | 9.42   | 9.28   | 0.2382   | 0.197136 |
| 0.86   | 0.48   | 0.67   | 0.51   | -0.94848 | 0.008997 |
| 0      | 0      | 0      | 0      | NA       | NA       |
| 2.7    | 4.9    | 4.09   | 4.29   | 0.699993 | 3.82E-06 |
| 6.12   | 7.3    | 8.78   | 8.48   | 0.284156 | 0.011733 |
| 0.04   | 0      | 0.03   | 0.03   | NA       | NA       |
| 0.07   | 0.07   | 0.1    | 0.07   | NA       | NA       |

|        |        |        |        |          |          |
|--------|--------|--------|--------|----------|----------|
| 0.07   | 0      | 0.2    | 0.08   | NA       | NA       |
| 3.65   | 1.59   | 2.02   | 1.8    | -0.7951  | 0.056684 |
| 12.27  | 10.67  | 11.56  | 10.61  | -0.09122 | 0.547437 |
| 11.84  | 13.04  | 11.09  | 13.46  | 0.251917 | 0.02585  |
| 5.31   | 11.19  | 7.49   | 8.81   | 0.819955 | 3.40E-05 |
| 6.72   | 8.27   | 9.15   | 7.95   | 0.089857 | 0.625562 |
| 29.04  | 38.44  | 35.86  | 41.62  | 0.340743 | 0.00313  |
| 0      | 0      | 0      | 0      | NA       | NA       |
| 22.71  | 30.92  | 26.68  | 28.93  | 0.218138 | 0.056129 |
| 0      | 0      | 0      | 0      | NA       | NA       |
| 1.29   | 0.75   | 1.63   | 1.44   | -0.58767 | 0.0355   |
| 0      | 0      | 0      | 0      | NA       | NA       |
| 1.65   | 0.95   | 1.23   | 0.8    | -0.30855 | 0.39046  |
| 22.32  | 17.63  | 19.3   | 16.97  | -0.08176 | 0.636669 |
| 7.06   | 10.04  | 9.08   | 9.75   | 0.102908 | 0.401933 |
| 0.02   | 0.12   | 0.14   | 0.06   | NA       | NA       |
| 0.89   | 1.06   | 1.08   | 0.76   | 0.067212 | 0.872941 |
| 0.3    | 0.44   | 0.31   | 0.4    | 0.118451 | 0.889225 |
| 0      | 0      | 0      | 0      | NA       | NA       |
| 0      | 0      | 0      | 0.03   | NA       | NA       |
| 0      | 0      | 0      | 0      | NA       | NA       |
| 22.06  | 26.5   | 25.94  | 28.37  | 0.257847 | 0.010335 |
| 0.16   | 0.19   | 0.08   | 0.09   | 0.186523 | 0.830021 |
| 0.1    | 0.02   | 0.26   | 0.05   | NA       | NA       |
| 0.1    | 0.02   | 0.26   | 0.16   | NA       | NA       |
| 0.14   | 0.3    | 0.16   | 0.21   | -0.12999 | 0.88333  |
| 50.75  | 45.5   | 49.65  | 51.81  | -0.02655 | 0.830194 |
| 2.94   | 1.97   | 1.47   | 2.03   | -0.72721 | 0.109244 |
| 560.97 | 532.44 | 543.48 | 509.2  | -0.09251 | 0.327465 |
| 2.72   | 3.85   | 3.31   | 3.12   | 0.254705 | 0.332541 |
| 0      | 0      | 0      | 0      | NA       | NA       |
| 3.59   | 4      | 4.17   | 4.19   | 0.237461 | 0.129359 |
| 177.52 | 177.28 | 165.75 | 159.68 | -0.17496 | 0.143261 |
| 0      | 0      | 0      | 0      | NA       | NA       |
| 7.82   | 5.83   | 5.82   | 6.06   | -0.28898 | 0.003912 |
| 5.6    | 4.6    | 4.71   | 3.98   | -0.22599 | 0.383764 |
| 0      | 0      | 0      | 0      | NA       | NA       |
| 12.92  | 16.34  | 15.39  | 17.73  | 0.326123 | 0.01715  |
| 0      | 0      | 0      | 0      | NA       | NA       |
| 0.08   | 0.17   | 0.11   | 0      | NA       | NA       |
| 0      | 0      | 0      | 0      | NA       | NA       |
| 2.56   | 3.65   | 3.5    | 4.03   | 0.431982 | 0.010784 |
| 1.01   | 0.5    | 0.52   | 0.47   | -0.33508 | 0.57965  |
| 0.01   | 0      | 0      | 0      | NA       | NA       |
| 11.13  | 14.18  | 11.93  | 12.38  | 0.149595 | 0.278432 |

|        |       |        |        |          |          |
|--------|-------|--------|--------|----------|----------|
| 0      | 0     | 0.15   | 0      | NA       | NA       |
| 11.62  | 10.31 | 10.66  | 11.88  | 0.035581 | 0.823811 |
| 6.77   | 6.68  | 6.52   | 5.25   | -0.07365 | 0.751186 |
| 0      | 0     | 0      | 0      | NA       | NA       |
| 2.05   | 2.17  | 1.81   | 1.86   | 0.016365 | 0.973164 |
| 0.13   | 0     | 0      | 0.08   | NA       | NA       |
| 0.43   | 0.15  | 0.23   | 0.34   | -0.18171 | 0.799746 |
| 2.27   | 1.58  | 0.87   | 0.81   | -0.07459 | 0.833498 |
| 0.48   | 0.32  | 0.25   | 0.25   | -0.77482 | 0.170173 |
| 0      | 0     | 0      | 0      | NA       | NA       |
| 14.18  | 23.2  | 17.74  | 18.85  | 0.450975 | 0.000574 |
| 45.77  | 45.59 | 42.22  | 39.47  | -0.17884 | 0.136148 |
| 0.34   | 0.36  | 0.36   | 0.24   | -0.17932 | 0.804382 |
| 140.63 | 99.94 | 118.44 | 101.95 | -0.39657 | 7.48E-05 |
| 0      | 0     | 0      | 0      | NA       | NA       |
| 10.26  | 19.56 | 15.31  | 17.71  | 0.734193 | 6.85E-11 |
| 12.52  | 11.17 | 9.2    | 12.15  | -0.31607 | 0.003767 |
| 12.07  | 24.26 | 16.72  | 18.86  | 0.656971 | 1.85E-09 |
| 8.91   | 8.25  | 7.37   | 7.65   | -0.1473  | 0.315136 |
| 0      | 0     | 0      | 0      | NA       | NA       |
| 0      | 0     | 0      | 0      | NA       | NA       |
| 2.79   | 2.83  | 3.37   | 3.01   | 0.157333 | 0.494462 |
| 0      | 0     | 0      | 0      | NA       | NA       |
| 8.65   | 12.18 | 10.13  | 9.9    | 0.147682 | 0.279398 |
| 0      | 0     | 0.17   | 0.1    | 0.523314 | 0.44144  |
| 39.62  | 40.54 | 39.41  | 50.44  | 0.283475 | 0.078314 |
| 36.64  | 30.09 | 31.41  | 31.96  | -0.18084 | 0.043699 |
| 0      | 0     | 0      | 0      | NA       | NA       |
| 0.47   | 0.45  | 0.44   | 0.65   | -0.24767 | 0.608626 |
| 0.94   | 2.33  | 0.84   | 0.61   | 1.096371 | 0.071952 |
| 23.42  | 18.31 | 20.28  | 19.78  | -0.3415  | 0.000289 |
| 0.8    | 0.91  | 0.67   | 0.43   | -0.61277 | 0.206495 |
| 368.7  | 86.01 | 147.68 | 123.4  | -1.64953 | 2.50E-13 |
| 0.04   | 0.22  | 0.15   | 0.12   | 0.107924 | 0.906499 |
| 2.33   | 1.83  | 2.19   | 2.59   | -0.2341  | 0.456741 |
| 0      | 0     | 0      | 0      | NA       | NA       |
| 0      | 0     | 0      | 0      | NA       | NA       |
| 0      | 0     | 0      | 0      | NA       | NA       |
| 4.26   | 3.3   | 3.18   | 4.3    | -0.08675 | 0.762739 |
| 0      | 0     | 0      | 0      | NA       | NA       |
| 3.47   | 2.44  | 3.15   | 3.15   | -0.05588 | 0.827483 |
| 6.76   | 4.56  | 5.07   | 6.05   | -0.07196 | 0.745071 |
| 7.25   | 7.52  | 7.61   | 9.08   | -0.03447 | 0.859697 |
| 308.88 | 70.39 | 96.93  | 83.55  | -1.86908 | 2.88E-71 |
| 1.96   | 1.19  | 0.45   | 0.72   | -0.80425 | 0.110074 |

|        |        |        |                 |          |
|--------|--------|--------|-----------------|----------|
| 0      | 0      | 0      | 0 NA            | NA       |
| 0.51   | 0.17   | 0.35   | 0.28 -0.86315   | 0.027997 |
| 1.22   | 1.31   | 1.44   | 1.65 0.266484   | 0.382718 |
| 2.6    | 1.23   | 1.6    | 1.42 -0.59302   | 0.023651 |
| 0.08   | 0.04   | 0.04   | 0 NA            | NA       |
| 0      | 0      | 0      | 0 NA            | NA       |
| 27.71  | 26.48  | 22.86  | 28.32 0.050154  | 0.71081  |
| 4.79   | 3.52   | 3.72   | 3.87 -0.36411   | 0.192499 |
| 6.04   | 7.61   | 8.04   | 7.97 0.470681   | 0.036409 |
| 0      | 0      | 0      | 0 NA            | NA       |
| 1.75   | 1.37   | 1.4    | 1.17 -0.96677   | 0.000459 |
| 0.61   | 0.05   | 0.18   | 0.06 -1.63041   | 0.001421 |
| 16.03  | 29.31  | 24.51  | 29.24 0.688925  | 5.99E-11 |
| 3.16   | 0.64   | 0.53   | 1.03 -1.19263   | 0.007901 |
| 2.75   | 2.02   | 1.8    | 2.63 -0.25476   | 0.298448 |
| 14.88  | 14.96  | 13.34  | 15.1 -0.08282   | 0.633306 |
| 0.29   | 0      | 0.09   | 0.03 -1.57942   | 0.007087 |
| 0      | 0      | 0      | 0 NA            | NA       |
| 0.22   | 1.35   | 1.23   | 1.54 2.444564   | 4.97E-14 |
| 5.34   | 4.36   | 4.3    | 3.25 -0.30164   | 0.152074 |
| 65.57  | 14.22  | 28.31  | 20.56 -1.61111  | 8.67E-09 |
| 13.65  | 22.7   | 19.26  | 20.62 0.380604  | 0.018629 |
| 0      | 0.01   | 0.02   | 0 NA            | NA       |
| 4.08   | 3.83   | 4.07   | 4.89 0.083439   | 0.735872 |
| 0.94   | 0.55   | 0.15   | 0.92 0.087356   | 0.920389 |
| 1.98   | 3.07   | 2.39   | 2.24 0.216645   | 0.333214 |
| 0.03   | 0      | 0.02   | 0.04 NA         | NA       |
| 3.91   | 1.55   | 1.07   | 1.99 -0.9783    | 0.000376 |
| 44.45  | 27.06  | 32.78  | 32.16 -0.51062  | 5.08E-10 |
| 122.37 | 108.46 | 126.35 | 110.47 -0.13417 | 0.161397 |
| 0.03   | 0      | 0      | 0 NA            | NA       |
| 0      | 0      | 0      | 0 NA            | NA       |
| 0      | 0      | 0      | 0 NA            | NA       |
| 0      | 0      | 0      | 0.11 NA         | NA       |
| 0      | 0.18   | 0.16   | 0.19 NA         | NA       |
| 0.37   | 0      | 0.41   | 0.19 NA         | NA       |
| 8.25   | 7.24   | 7.05   | 7.32 -0.18977   | 0.104409 |
| 16.6   | 16.79  | 18.21  | 16.25 0.132036  | 0.27836  |
| 7.56   | 7.26   | 6.19   | 7.08 -0.13421   | 0.280511 |
| 0.21   | 0.18   | 0.18   | 0.24 -0.19929   | 0.812564 |
| 0      | 0      | 0      | 0 NA            | NA       |
| 10.55  | 12.85  | 12.36  | 10.61 0.360633  | 0.021989 |
| 0      | 0      | 0      | 0 NA            | NA       |
| 8.13   | 11.02  | 8.45   | 9.71 0.365999   | 0.004511 |
| 0      | 0      | 0      | 0 NA            | NA       |

|         |         |         |         |          |          |
|---------|---------|---------|---------|----------|----------|
| 33.92   | 40.22   | 37.09   | 34.77   | 0.066001 | 0.653345 |
| 0       | 0       | 0.85    | 0.44    | 0.107384 | 0.895604 |
| 28.12   | 26.9    | 24.34   | 26.13   | -0.16231 | 0.09607  |
| 4.22    | 2.27    | 4.22    | 2.37    | -0.12213 | 0.499064 |
| 0       | 0       | 0       | 0       | NA       | NA       |
| 0       | 0       | 0       | 0.06    | NA       | NA       |
| 8.28    | 7.37    | 8.6     | 7.87    | -0.04059 | 0.806169 |
| 0       | 0       | 0       | 0       | NA       | NA       |
| 7.43    | 7.99    | 7.9     | 8       | 0.052301 | 0.701638 |
| 4.96    | 5.55    | 4.68    | 5.43    | 0.385838 | 0.016498 |
| 0       | 0       | 0       | 0       | NA       | NA       |
| 0       | 0       | 0       | 0       | NA       | NA       |
| 34.74   | 25.11   | 26.75   | 26.95   | -0.29487 | 0.000166 |
| 124.28  | 137.46  | 122.51  | 125.89  | 0.346835 | 0.00074  |
| 0       | 0       | 0       | 0       | NA       | NA       |
| 0       | 0       | 0       | 0       | NA       | NA       |
| 0.98    | 0.12    | 0.93    | 0.54    | -1.87525 | 2.21E-05 |
| 0       | 0       | 0       | 0       | NA       | NA       |
| 27      | 18.71   | 20.45   | 21.95   | -0.35761 | 1.67E-05 |
| 0       | 0       | 0       | 0       | NA       | NA       |
| 5.5     | 10.12   | 8.88    | 8.69    | 0.786931 | 2.61E-07 |
| 0       | 0       | 0       | 0       | NA       | NA       |
| 33.68   | 36.23   | 34.74   | 37.12   | -0.1175  | 0.25767  |
| 0       | 0       | 0       | 0       | NA       | NA       |
| 6.63    | 5.02    | 5.18    | 4.66    | -0.1745  | 0.265923 |
| 5.97    | 4.61    | 4.91    | 5.19    | -0.27415 | 0.038766 |
| 0.2     | 0.31    | 0.25    | 0.53    | -0.68773 | 0.162315 |
| 10.32   | 11.87   | 11.3    | 11.27   | 0.117815 | 0.601015 |
| 49.81   | 69.1    | 55.05   | 56.52   | 0.278103 | 0.077047 |
| 16.47   | 14.09   | 15.28   | 16.75   | -0.20992 | 0.029916 |
| 0       | 0       | 0       | 0       | NA       | NA       |
| 0       | 0       | 0       | 0       | NA       | NA       |
| 3.32    | 3.41    | 2.76    | 2.42    | -0.265   | 0.084443 |
| 0.05    | 0.05    | 0.05    | 0.06    | NA       | NA       |
| 4424.88 | 6195.94 | 5767.05 | 5537.08 | 0.336    | 5.69E-06 |
| 99.97   | 63.25   | 76.05   | 65.43   | -0.65577 | 5.44E-13 |
| 5.71    | 4.07    | 4.55    | 3.41    | -0.13428 | 0.397955 |
| 0.62    | 0.28    | 0.27    | 0.56    | 0.573575 | 0.343098 |
| 6.38    | 3.73    | 4.2     | 4.19    | -0.39503 | 0.048095 |
| 34.07   | 26.1    | 28.16   | 25.97   | -0.40777 | 9.43E-05 |
| 6.15    | 5.41    | 4.94    | 4.85    | -0.29983 | 0.023465 |
| 0       | 0       | 0       | 0       | NA       | NA       |
| 1455.89 | 1832.24 | 1709.44 | 1539.41 | 0.142705 | 0.150587 |
| 50.66   | 33.78   | 42.4    | 37.84   | -0.47215 | 9.07E-07 |
| 0.21    | 4.49    | 1.86    | 3.05    | 3.395772 | 5.17E-20 |

|         |         |         |         |          |          |
|---------|---------|---------|---------|----------|----------|
| 12.36   | 12.46   | 12.84   | 14.97   | -0.13461 | 0.33058  |
| 0.17    | 2.79    | 1.25    | 1.69    | 3.924389 | 1.89E-20 |
| 0.27    | 0.27    | 0.11    | 0.14    | 1.495989 | 0.004372 |
| 16.53   | 13.84   | 16.08   | 15.37   | 0.070992 | 0.736669 |
| 0       | 0       | 0       | 0       | NA       | NA       |
| 0       | 0       | 0       | 0       | NA       | NA       |
| 2.38    | 2.57    | 2.3     | 2.32    | 0.062227 | 0.807248 |
| 8.01    | 9.41    | 8.52    | 9.29    | 0.163818 | 0.193845 |
| 2.21    | 6.55    | 5.83    | 6.93    | 1.564741 | 1.17E-46 |
| 0       | 0.43    | 0.02    | 0.43    | NA       | NA       |
| 6.63    | 6.83    | 5.95    | 5.81    | -0.17958 | 0.374842 |
| 36.06   | 50.75   | 44.63   | 53.41   | 0.332314 | 4.84E-05 |
| 1.44    | 1.22    | 1.2     | 0.84    | -0.50723 | 0.085174 |
| 0       | 0.45    | 0.2     | 0.27    | 0.910176 | 0.1638   |
| 769.97  | 602.37  | 630.15  | 572.5   | -0.43965 | 1.30E-08 |
| 0.93    | 0.13    | 0.17    | 0.13    | -1.87597 | 7.96E-07 |
| 0       | 0       | 0       | 0       | NA       | NA       |
| 0.03    | 0       | 0       | 0.02    | NA       | NA       |
| 1210.92 | 1608.87 | 1470.6  | 1480.07 | 0.272966 | 0.000231 |
| 0       | 0       | 0       | 0.85    | NA       | NA       |
| 2.4     | 16.61   | 11.35   | 15.83   | 2.591859 | 2.45E-58 |
| 0.02    | 0.74    | 0.04    | 0.53    | 1.859013 | 0.000991 |
| 1.79    | 0.82    | 1.59    | 1.03    | -0.48333 | 0.071645 |
| 0       | 0       | 0       | 0       | NA       | NA       |
| 3.23    | 4.51    | 4.84    | 4.72    | 0.333332 | 0.109296 |
| 0       | 0       | 0       | 0       | NA       | NA       |
| 1057.05 | 1439.58 | 1353.47 | 1339.6  | 0.306823 | 0.00017  |
| 0       | 0       | 0       | 0       | NA       | NA       |
| 0       | 0       | 0       | 0       | NA       | NA       |
| 28.92   | 29.82   | 30.36   | 24.86   | 0.138264 | 0.253451 |
| 26.54   | 51.02   | 43.2    | 46.99   | 0.676653 | 1.38E-12 |
| 7.78    | 9.77    | 8.27    | 9.86    | 0.211408 | 0.094741 |
| 6.11    | 6.99    | 6.83    | 7.5     | -0.12482 | 0.496878 |
| 2.02    | 4.59    | 4.72    | 4.85    | 1.073734 | 8.47E-14 |
| 2.56    | 0.03    | 0.19    | 0.23    | -3.64672 | 2.81E-37 |
| 0       | 0.15    | 0.32    | 0.25    | 1.786648 | 0.002014 |
| 0       | 0       | 0       | 0       | NA       | NA       |
| 2.22    | 2.68    | 3.03    | 2.77    | 0.169373 | 0.261184 |
| 7293.57 | 7494.32 | 7204.23 | 6668.19 | -0.09198 | 0.32899  |
| 9.59    | 34.96   | 21.98   | 25.77   | 1.355399 | 8.40E-18 |
| 0.31    | 0.3     | 0.36    | 0.42    | -0.23913 | 0.668672 |
| 0       | 0       | 0       | 0       | NA       | NA       |
| 3.88    | 17.27   | 6.48    | 11.56   | 1.580355 | 3.53E-05 |
| 10.26   | 12.86   | 13.26   | 14.12   | 0.312993 | 0.003302 |
| 27.94   | 32.05   | 34.6    | 31.92   | 0.146885 | 0.214248 |

|         |         |         |         |          |          |
|---------|---------|---------|---------|----------|----------|
| 22.26   | 28.38   | 26.36   | 28.8    | 0.36431  | 0.006026 |
| 0       | 0       | 0       | 0       | NA       | NA       |
| 0       | 0       | 0       | 0       | NA       | NA       |
| 10.08   | 7.69    | 7.65    | 8.45    | -0.24264 | 0.092222 |
| 5.59    | 4.61    | 6.17    | 4.63    | -0.29897 | 0.065862 |
| 4.12    | 3.5     | 4.68    | 3.67    | -0.15801 | 0.515404 |
| 0.09    | 0.09    | 0.14    | 0.09    | 0.311112 | 0.684151 |
| 132.46  | 86.57   | 96.49   | 85.02   | -0.59871 | 6.93E-11 |
| 183.45  | 312.2   | 207.92  | 260.52  | 0.37971  | 0.004854 |
| 10.45   | 17.31   | 14.41   | 14.63   | 0.49852  | 7.24E-06 |
| 1.59    | 1.35    | 1.91    | 1.89    | 0.119608 | 0.769736 |
| 35.55   | 22.56   | 29.5    | 29.66   | -0.01472 | 0.929484 |
| 8.03    | 13.15   | 12.15   | 12.8    | 0.289288 | 0.011206 |
| 0       | 0.03    | 0.07    | 0.03    | NA       | NA       |
| 11.46   | 12.08   | 9.08    | 8.61    | -0.24913 | 0.132667 |
| 1482.16 | 1593.96 | 1368.21 | 1319.1  | -0.00457 | 0.97575  |
| 4.67    | 6.33    | 4.72    | 4.62    | 0.221064 | 0.402412 |
| 0       | 0       | 0       | 0       | NA       | NA       |
| 51.14   | 68.17   | 61.57   | 64.35   | 0.535342 | 4.21E-06 |
| 0       | 0       | 0       | 0       | NA       | NA       |
| 0       | 0.01    | 0       | 0       | NA       | NA       |
| 0.6     | 0       | 0.38    | 0.17    | -1.187   | 0.045647 |
| 0       | 0       | 0       | 0       | NA       | NA       |
| 19.87   | 22.03   | 20.3    | 24.19   | 0.22978  | 0.016117 |
| 0       | 0       | 0       | 0       | NA       | NA       |
| 2.26    | 9.17    | 4.66    | 6.42    | 1.304941 | 1.16E-10 |
| 76.36   | 86.77   | 73.34   | 69.05   | -0.01356 | 0.94312  |
| 0       | 0       | 0       | 0       | NA       | NA       |
| 25.65   | 22.57   | 23.47   | 23.11   | -0.03537 | 0.849079 |
| 13.78   | 10.08   | 12.87   | 11.49   | -0.26508 | 0.086588 |
| 4.73    | 6.57    | 6.33    | 6.91    | 0.421945 | 0.000117 |
| 6.05    | 7.22    | 7.23    | 8.46    | 0.230359 | 0.107884 |
| 0.62    | 1.24    | 1.29    | 0.77    | -0.03687 | 0.944474 |
| 0       | 0       | 0       | 0       | NA       | NA       |
| 0.68    | 0.77    | 1.29    | 0.96    | 0.223398 | 0.757141 |
| 16.68   | 23.71   | 19.55   | 23.26   | 0.425073 | 0.000284 |
| 4.11    | 5.75    | 6.34    | 5.52    | 0.188818 | 0.326189 |
| 14.15   | 11.19   | 12.83   | 11.46   | -0.37531 | 0.000188 |
| 0.03    | 0.03    | 0.07    | 0.07    | 0.447795 | 0.547687 |
| 0       | 0       | 0       | 0       | NA       | NA       |
| 0       | 0       | 0       | 0       | NA       | NA       |
| 0.12    | 0.02    | 0.03    | 0.15    | -0.61616 | 0.38697  |
| 2353.9  | 2957.1  | 2764.5  | 2654.46 | 0.196415 | 0.012721 |
| 6.7     | 9.88    | 11.11   | 14.26   | 0.376421 | 0.001563 |
| 1536.72 | 1451.76 | 1375.72 | 1344.51 | -0.18681 | 0.012941 |

|         |         |         |         |          |          |
|---------|---------|---------|---------|----------|----------|
| 0       | 0       | 0       | 0       | NA       | NA       |
| 6.22    | 6.48    | 5.77    | 6.27    | -0.13279 | 0.478586 |
| 28.38   | 20.16   | 24.38   | 18.55   | -0.38187 | 0.011396 |
| 4.35    | 5.28    | 4.83    | 4.74    | -0.08294 | 0.653424 |
| 67.24   | 67.52   | 67.51   | 71.47   | 0.096823 | 0.403492 |
| 3409.25 | 4167.33 | 4083.48 | 3876.76 | 0.178746 | 0.02041  |
| 13.96   | 19.92   | 18.12   | 19.65   | 0.517404 | 1.95E-07 |
| 2.27    | 3.09    | 2.95    | 2.62    | -0.13641 | 0.68041  |
| 0.76    | 1       | 0.49    | 0.37    | -0.89631 | 0.00472  |
| 13.32   | 16.26   | 13.79   | 17.19   | 0.167521 | 0.237304 |
| 0.31    | 0.84    | 0.75    | 0.61    | 2.211236 | 7.41E-08 |
| 62.85   | 46.15   | 43.81   | 47.11   | -0.42212 | 4.61E-08 |
| 8.84    | 7.46    | 8.86    | 7.36    | -0.18822 | 0.310228 |
| 0       | 0       | 0       | 0       | NA       | NA       |
| 1.32    | 0.33    | 0.29    | 0.3     | -1.66701 | 7.08E-06 |
| 10.31   | 10.83   | 12.19   | 7.53    | 0.035605 | 0.871002 |
| 1325.45 | 1177.43 | 1194.67 | 1149.47 | -0.17805 | 0.028073 |
| 2.54    | 1.32    | 2.35    | 1.89    | -0.93264 | 6.58E-07 |
| 7.86    | 8.62    | 7.55    | 8.49    | -0.04389 | 0.829763 |
| 0       | 0       | 0       | 0       | NA       | NA       |
| 2.32    | 1.03    | 1.2     | 1.33    | -0.49162 | 0.047314 |
| 42.07   | 50.85   | 45.9    | 42.3    | 0.148344 | 0.098824 |
| 0       | 0       | 0.03    | 0.01    | NA       | NA       |
| 0.13    | 0       | 0.09    | 0       | NA       | NA       |
| 85.94   | 86.09   | 85.17   | 80.2    | -0.07157 | 0.571596 |
| 0.88    | 0.44    | 0.6     | 0.71    | -0.94421 | 0.000919 |
| 5.64    | 5       | 3.95    | 4.13    | -0.42729 | 0.003672 |
| 1.94    | 1.79    | 1.9     | 2.02    | 0.163904 | 0.570142 |
| 10.22   | 9.73    | 9.51    | 11.56   | -0.1505  | 0.640628 |
| 4950.64 | 5349.01 | 4870.49 | 4532.29 | -0.06992 | 0.52693  |
| 0.33    | 0.08    | 0.2     | 0.08    | -0.92788 | 0.135854 |
| 0       | 0       | 0       | 0       | NA       | NA       |
| 6.1     | 5.79    | 5.5     | 5.26    | -0.20427 | 0.230828 |
| 0.67    | 0.51    | 0.33    | 0.18    | -1.59197 | 0.00059  |
| 0.52    | 1.1     | 0.48    | 0.8     | 0.643683 | 0.148587 |
| 15.42   | 8.67    | 10.55   | 10.61   | -0.73126 | 4.46E-10 |
| 22.32   | 21.72   | 21.16   | 22.84   | -0.21232 | 0.019966 |
| 11.05   | 14.17   | 13.49   | 12.6    | 0.144023 | 0.329256 |
| 10.71   | 26.29   | 20.96   | 23.63   | 0.855852 | 9.37E-15 |
| 35.79   | 34.29   | 29.42   | 31.89   | -0.16154 | 0.233531 |
| 25.77   | 41.45   | 38.31   | 38.29   | 0.505787 | 2.57E-08 |
| 0.04    | 0.03    | 0.01    | 0.03    | 0.420876 | 0.569444 |
| 16.28   | 22.05   | 18.43   | 22.72   | 0.556456 | 3.14E-07 |
| 0       | 0       | 0       | 0       | NA       | NA       |
| 0       | 0       | 0       | 0       | NA       | NA       |





























|      |      |       |         |    |
|------|------|-------|---------|----|
| 0    | 0    | 0     | 0 NA    | NA |
| 0    | 0    | 0     | 0 NA    | NA |
| 0    | 0    | 0     | 0 NA    | NA |
| 0    | 0    | 0     | 0 NA    | NA |
| 0    | 0    | 0     | 0 NA    | NA |
| 0    | 0    | 0     | 0 NA    | NA |
| 0    | 0    | 0     | 0 NA    | NA |
| 0    | 0    | 0     | 0 NA    | NA |
| 0    | 0    | 0     | 0 NA    | NA |
| 0    | 0    | 0     | 0 NA    | NA |
| 0    | 0    | 0     | 0 NA    | NA |
| 0    | 0    | 0     | 0 NA    | NA |
| 0    | 0    | 0     | 0 NA    | NA |
| 0    | 0    | 0     | 0 NA    | NA |
| 0    | 0    | 0     | 0 NA    | NA |
| 0    | 0    | 0     | 0 NA    | NA |
| 0    | 0    | 0     | 0 NA    | NA |
| 0    | 0    | 0     | 0 NA    | NA |
| 0    | 0    | 0     | 0 NA    | NA |
| 0    | 0    | 0     | 0 NA    | NA |
| 0    | 0    | 0     | 0 NA    | NA |
| 0    | 0    | 0     | 9.87 NA | NA |
| 0    | 0    | 0     | 0 NA    | NA |
| 0    | 0    | 0     | 0 NA    | NA |
| 0    | 0    | 0     | 0 NA    | NA |
| 0    | 0    | 0     | 0 NA    | NA |
| 0    | 0    | 0     | 0 NA    | NA |
| 0    | 0    | 0     | 0 NA    | NA |
| 0    | 0    | 0     | 0 NA    | NA |
| 0    | 0    | 0     | 0 NA    | NA |
| 0    | 0    | 0     | 0 NA    | NA |
| 0    | 0    | 0     | 0 NA    | NA |
| 0    | 0    | 0     | 0 NA    | NA |
| 0    | 0    | 0     | 0 NA    | NA |
| 2.57 | 4.46 | 12.45 | 10.9 NA | NA |
| 0    | 0    | 0     | 0 NA    | NA |
| 0    | 0    | 0     | 0 NA    | NA |
| 0    | 0    | 0     | 0 NA    | NA |
| 0    | 0    | 0     | 0 NA    | NA |
| 0    | 0    | 0     | 0 NA    | NA |
| 0    | 0    | 0     | 0 NA    | NA |
| 0    | 0    | 0     | 0 NA    | NA |
| 0    | 0    | 0     | 0 NA    | NA |
| 0    | 0    | 0     | 0 NA    | NA |
| 0    | 0    | 0     | 0 NA    | NA |
| 0    | 0    | 0     | 0 NA    | NA |
| 0    | 0    | 0     | 0 NA    | NA |
| 0    | 0    | 0     | 0 NA    | NA |
| 0    | 0    | 0     | 0 NA    | NA |
| 0    | 0    | 0     | 0 NA    | NA |
| 0    | 0    | 0     | 0 NA    | NA |
| 2.57 | 4.46 | 12.45 | 10.9 NA | NA |













|   |   |   |          |    |
|---|---|---|----------|----|
| 0 | 0 | 0 | 0 NA     | NA |
| 0 | 0 | 0 | 0 NA     | NA |
| 0 | 0 | 0 | 0 NA     | NA |
| 0 | 0 | 0 | 0 NA     | NA |
| 0 | 0 | 0 | 0 NA     | NA |
| 0 | 0 | 0 | 0 NA     | NA |
| 0 | 0 | 0 | 0 NA     | NA |
| 0 | 0 | 0 | 0 NA     | NA |
| 0 | 0 | 0 | 0 NA     | NA |
| 0 | 0 | 0 | 0 NA     | NA |
| 0 | 0 | 0 | 0 NA     | NA |
| 0 | 0 | 0 | 0 NA     | NA |
| 0 | 0 | 0 | 0 NA     | NA |
| 0 | 0 | 0 | 0 NA     | NA |
| 0 | 0 | 0 | 0 NA     | NA |
| 0 | 0 | 0 | 0 NA     | NA |
| 0 | 0 | 0 | 0 NA     | NA |
| 0 | 0 | 0 | 0 NA     | NA |
| 0 | 0 | 0 | 0 NA     | NA |
| 0 | 0 | 0 | 0 NA     | NA |
| 0 | 0 | 0 | 0 NA     | NA |
| 0 | 0 | 0 | 0 NA     | NA |
| 0 | 0 | 0 | 0 NA     | NA |
| 0 | 0 | 0 | 0 NA     | NA |
| 0 | 0 | 0 | 0 NA     | NA |
| 0 | 0 | 0 | 0 NA     | NA |
| 0 | 0 | 0 | 0 NA     | NA |
| 0 | 0 | 0 | 0 NA     | NA |
| 0 | 0 | 0 | 0 NA     | NA |
| 0 | 0 | 0 | 0 NA     | NA |
| 0 | 0 | 0 | 0 NA     | NA |
| 0 | 0 | 0 | 14.65 NA | NA |
| 0 | 0 | 0 | 0 NA     | NA |
| 0 | 0 | 0 | 0 NA     | NA |
| 0 | 0 | 0 | 0 NA     | NA |
| 0 | 0 | 0 | 0 NA     | NA |
| 0 | 0 | 0 | 0 NA     | NA |















|      |      |       |         |    |
|------|------|-------|---------|----|
| 0    | 0    | 0     | 0 NA    | NA |
| 0    | 0    | 0     | 0 NA    | NA |
| 0    | 0    | 0     | 0 NA    | NA |
| 0    | 0.28 | 0     | 0 NA    | NA |
| 0    | 0    | 0     | 0 NA    | NA |
| 0    | 0    | 0     | 0 NA    | NA |
| 0    | 0    | 0     | 0 NA    | NA |
| 2.57 | 4.46 | 12.45 | 10.9 NA | NA |
| 0    | 0    | 0     | 0 NA    | NA |
| 0    | 0    | 0     | 0 NA    | NA |
| 0    | 0    | 0     | 0 NA    | NA |
| 0    | 0    | 0     | 0 NA    | NA |
| 0    | 0    | 0     | 0 NA    | NA |
| 0    | 0    | 0     | 0 NA    | NA |
| 0    | 0    | 0     | 0 NA    | NA |
| 0    | 0    | 0     | 0 NA    | NA |
| 0    | 0    | 0     | 0 NA    | NA |
| 0    | 0    | 0     | 0 NA    | NA |
| 0    | 0    | 0     | 0 NA    | NA |
| 0    | 0    | 0     | 0 NA    | NA |
| 0    | 0    | 0     | 0 NA    | NA |
| 0    | 0    | 0     | 0 NA    | NA |
| 0    | 0    | 0     | 0 NA    | NA |
| 0    | 0    | 0     | 0 NA    | NA |
| 0    | 0    | 0     | 0 NA    | NA |
| 0    | 0    | 0     | 0 NA    | NA |
| 0    | 0    | 0     | 0 NA    | NA |
| 0    | 0    | 0     | 0 NA    | NA |
| 0    | 0    | 0     | 0 NA    | NA |
| 0    | 0    | 0     | 0 NA    | NA |
| 0    | 0    | 0     | 0 NA    | NA |
| 0    | 0    | 0     | 0 NA    | NA |
| 0    | 0    | 0     | 0 NA    | NA |
| 0    | 0    | 0     | 0 NA    | NA |
| 0    | 0    | 0     | 0 NA    | NA |
| 0    | 0    | 0     | 0 NA    | NA |
| 0    | 0    | 0     | 0 NA    | NA |
| 0    | 0    | 0     | 0 NA    | NA |
| 0    | 0    | 0     | 0 NA    | NA |
| 0    | 0    | 0     | 0 NA    | NA |
| 0    | 0    | 0     | 0 NA    | NA |
| 0    | 0    | 0     | 0 NA    | NA |
| 0    | 0    | 0     | 0 NA    | NA |
| 0    | 0    | 0     | 0 NA    | NA |
| 0    | 0    | 0     | 0 NA    | NA |
| 6.33 | 0    | 0     | 0 NA    | NA |
| 0    | 0    | 0     | 0 NA    | NA |
| 0    | 0    | 0     | 0 NA    | NA |
| 0    | 0    | 0     | 0 NA    | NA |
| 0    | 0    | 0     | 0 NA    | NA |
| 0    | 0    | 0     | 0 NA    | NA |
| 0    | 0    | 1.71  | 0 NA    | NA |
| 0    | 0    | 0     | 0 NA    | NA |





















|       |       |       |               |          |
|-------|-------|-------|---------------|----------|
| 0     | 0     | 0     | 0 NA          | NA       |
| 0     | 0.09  | 0     | 0 NA          | NA       |
| 0     | 0     | 0.08  | 0 NA          | NA       |
| 0.88  | 0.31  | 0.42  | 0.66 -0.21311 | 0.803625 |
| 0.15  | 0.05  | 0.05  | 0 NA          | NA       |
| 0     | 0.72  | 0.16  | 1.45 NA       | NA       |
| 0.73  | 0.26  | 0.93  | 0.48 -0.31754 | 0.669022 |
| 0     | 0.1   | 0     | 0.11 NA       | NA       |
| 0.11  | 0     | 0     | 0 NA          | NA       |
| 0.6   | 0.97  | 1.37  | 0.7 0.008768  | 0.99316  |
| 1.34  | 0.94  | 1.55  | 2.61 -0.25525 | 0.452561 |
| 0.16  | 0     | 0.25  | 0.23 NA       | NA       |
| 0     | 0     | 0     | 0 NA          | NA       |
| 0.1   | 0     | 0.02  | 0.1 NA        | NA       |
| 0.08  | 0     | 0.04  | 0.02 NA       | NA       |
| 0     | 0     | 0     | 0 NA          | NA       |
| 0.07  | 0.05  | 0.05  | 0.26 NA       | NA       |
| 0     | 0.75  | 0.44  | 1.19 NA       | NA       |
| 0.1   | 0.21  | 0.43  | 0.3 NA        | NA       |
| 0.2   | 0.05  | 0.11  | 0.25 NA       | NA       |
| 0.74  | 0.72  | 0.76  | 0.88 -0.09355 | 0.865089 |
| 0     | 0     | 0.03  | 0 NA          | NA       |
| 0     | 0     | 0     | 0 NA          | NA       |
| 0     | 0     | 0     | 0 NA          | NA       |
| 3.85  | 1.97  | 2.92  | 3.38 0.180172 | 0.8004   |
| 0     | 0     | 0     | 0 NA          | NA       |
| 0.45  | 0.96  | 0     | 0.35 NA       | NA       |
| 0     | 0     | 0     | 0 NA          | NA       |
| 0.05  | 0.03  | 0.11  | 0.11 NA       | NA       |
| 0     | 0     | 0     | 0 NA          | NA       |
| 0.15  | 0     | 0     | 0.11 NA       | NA       |
| 0.89  | 0.48  | 0.88  | 0.82 0.016463 | 0.984596 |
| 0.51  | 0.72  | 0     | 0 NA          | NA       |
| 0.39  | 0     | 0.07  | 0 NA          | NA       |
| 0.43  | 0.45  | 0.42  | 0.18 0.251328 | 0.763465 |
| 0.19  | 1.14  | 0.77  | 0.73 1.460186 | 0.002202 |
| 0     | 0     | 0     | 0 NA          | NA       |
| 0     | 0     | 0     | 0.45 NA       | NA       |
| 0.15  | 0.26  | 0     | 0.77 -0.19347 | 0.815512 |
| 25.11 | 26.65 | 25.83 | 26.68 0.00508 | 0.972665 |
| 0     | 0.06  | 0.06  | 0 NA          | NA       |
| 0     | 0     | 0     | 0 NA          | NA       |
| 0     | 0     | 0     | 0 NA          | NA       |
| 1.18  | 1.13  | 0.59  | 0.97 -0.52021 | 0.380666 |
| 0     | 0     | 0     | 0 NA          | NA       |

|       |       |       |       |          |          |
|-------|-------|-------|-------|----------|----------|
| 0.5   | 0.37  | 0.2   | 0.37  | -0.36237 | 0.579435 |
| 0.44  | 0.33  | 0.65  | 0.18  | NA       | NA       |
| 0     | 0     | 0     | 0     | NA       | NA       |
| 0     | 0     | 0     | 0     | NA       | NA       |
| 0     | 0.02  | 0.02  | 0     | NA       | NA       |
| 0     | 0.06  | 0     | 0     | NA       | NA       |
| 1.56  | 1.76  | 1.22  | 1.34  | 0.313392 | 0.580536 |
| 0     | 0     | 0     | 0     | NA       | NA       |
| 0     | 0     | 0     | 0     | NA       | NA       |
| 0     | 0     | 0     | 0.28  | NA       | NA       |
| 0     | 0     | 0     | 0     | NA       | NA       |
| 0.11  | 0     | 0.04  | 0.03  | NA       | NA       |
| 0     | 0.41  | 0.13  | 0     | NA       | NA       |
| 0.39  | 0.59  | 0.17  | 0.43  | NA       | NA       |
| 0     | 0.14  | 0.07  | 0.33  | 0.122911 | 0.887602 |
| 0     | 0     | 0     | 0.07  | NA       | NA       |
| 0     | 0     | 0     | 0     | NA       | NA       |
| 0.4   | 0     | 0.45  | 0     | -0.51112 | 0.489193 |
| 0.17  | 0.25  | 0.21  | 0.24  | -0.25239 | 0.733948 |
| 0.28  | 0.18  | 0.34  | 0.43  | -0.02384 | 0.978992 |
| 0     | 0     | 0     | 0     | NA       | NA       |
| 1.21  | 1.8   | 2.28  | 1.97  | 0.44489  | 0.363057 |
| 0.06  | 0.02  | 0.07  | 0.11  | NA       | NA       |
| 0     | 0     | 0     | 0     | NA       | NA       |
| 0     | 0     | 0     | 0     | NA       | NA       |
| 0.12  | 0.13  | 0.08  | 0.2   | -0.41111 | 0.578953 |
| 0     | 0     | 0     | 0     | NA       | NA       |
| 0     | 0     | 0     | 0     | NA       | NA       |
| 0     | 0     | 0     | 0     | NA       | NA       |
| 2.5   | 6.96  | 5.6   | 5.26  | 0.719235 | 0.009279 |
| 29.27 | 20.02 | 27.61 | 23.68 | -0.10541 | 0.570103 |
| 1.43  | 0.8   | 0.92  | 1.09  | -0.46003 | 0.031607 |
| 0.43  | 0.2   | 0.14  | 0     | NA       | NA       |
| 0.08  | 0.01  | 0     | 0     | -1.73868 | 0.002722 |
| 0     | 0     | 0     | 0     | NA       | NA       |
| 0     | 0     | 0.03  | 0.02  | NA       | NA       |
| 0.07  | 0     | 0     | 0     | NA       | NA       |
| 6.87  | 9.61  | 7.57  | 8.16  | 0.014687 | 0.961003 |
| 6.2   | 3.58  | 3.8   | 2.78  | -0.42819 | 0.299692 |
| 0.29  | 0.25  | 0.28  | 0.32  | -0.36566 | 0.222571 |
| 0.01  | 0     | 0     | 0     | NA       | NA       |
| 0     | 0     | 0     | 0     | NA       | NA       |
| 0     | 0.14  | 0.04  | 0     | NA       | NA       |
| 1.55  | 1.12  | 1.09  | 1.44  | -0.73688 | 0.083453 |
| 3.85  | 3.18  | 1.89  | 1.83  | -0.57054 | 0.226938 |



|        |        |        |        |          |          |
|--------|--------|--------|--------|----------|----------|
| 1.16   | 0.84   | 1.42   | 1.09   | -0.16306 | 0.817702 |
| 0.01   | 0      | 0      | 0      | NA       | NA       |
| 0      | 0      | 0      | 0      | NA       | NA       |
| 0.21   | 0.08   | 0.53   | 0.17   | -0.64284 | 0.352494 |
| 309.55 | 297.36 | 294.77 | 276.79 | -0.10386 | 0.341896 |
| 0.81   | 0.45   | 1.34   | 0.41   | -0.05521 | 0.947179 |
| 0      | 0      | 0      | 0      | NA       | NA       |
| 0.07   | 0      | 0      | 0      | NA       | NA       |
| 43.84  | 74.77  | 64.45  | 68.82  | 0.482458 | 3.23E-07 |
| 22.63  | 16.38  | 17.2   | 19.76  | -0.1359  | 0.320068 |
| 0.11   | 0.03   | 0.12   | 0.03   | -0.46581 | 0.532341 |
| 0.56   | 0.13   | 0.61   | 0.83   | 0.311573 | 0.689697 |
| 2.42   | 2.84   | 2.83   | 3.5    | 0.030767 | 0.936914 |
| 0      | 0      | 0      | 0      | NA       | NA       |
| 0      | 0      | 0      | 0      | NA       | NA       |
| 0      | 0      | 0      | 0      | NA       | NA       |
| 0      | 0      | 0      | 0      | NA       | NA       |
| 0      | 0      | 0      | 0      | NA       | NA       |
| 0      | 0      | 0      | 0      | NA       | NA       |
| 0.09   | 0      | 0.03   | 0.07   | NA       | NA       |
| 0      | 0      | 0      | 0      | NA       | NA       |
| 0      | 0      | 0      | 0      | NA       | NA       |
| 0.54   | 0.47   | 0.65   | 0.78   | 0.449029 | 0.547698 |
| 0      | 0      | 0      | 0      | NA       | NA       |
| 0      | 0      | 0      | 0      | NA       | NA       |
| 0.19   | 0.11   | 0.4    | 0.11   | NA       | NA       |
| 59.47  | 52.15  | 58.54  | 56.46  | -0.04532 | 0.783179 |
| 0      | 0      | 0      | 0      | NA       | NA       |
| 0      | 0      | 0      | 0      | NA       | NA       |
| 7.06   | 8.36   | 9.62   | 9.13   | 0.080989 | 0.707575 |
| 0      | 0      | 0      | 0      | NA       | NA       |
| 0      | 0      | 0      | 0      | NA       | NA       |
| 0      | 0      | 0      | 0      | NA       | NA       |
| 0      | 0      | 0      | 0.02   | NA       | NA       |
| 0      | 0      | 0      | 0      | NA       | NA       |
| 0      | 0      | 0      | 0      | NA       | NA       |
| 6.99   | 6.93   | 6.55   | 5.63   | -0.06166 | 0.831092 |
| 0.09   | 0.04   | 0.02   | 0.09   | -0.37525 | 0.629771 |
| 0.69   | 0.29   | 0.39   | 0.12   | -0.32293 | 0.64404  |
| 0      | 0      | 0      | 0      | NA       | NA       |
| 0      | 0      | 0      | 0      | NA       | NA       |
| 0      | 0      | 0      | 0      | NA       | NA       |
| 0      | 0      | 0      | 0      | NA       | NA       |
| 0      | 0      | 0.02   | 0.03   | NA       | NA       |
| 0      | 0      | 0      | 0      | NA       | NA       |

|       |       |       |       |          |          |
|-------|-------|-------|-------|----------|----------|
| 0     | 0     | 0     | 0     | NA       | NA       |
| 0     | 0     | 0     | 0.18  | NA       | NA       |
| 0.06  | 0.49  | 0.34  | 0.74  | 1.58641  | 0.00695  |
| 0.02  | 0     | 0.02  | 0.01  | NA       | NA       |
| 0.02  | 0     | 0     | 0     | NA       | NA       |
| 0     | 0     | 0     | 0     | NA       | NA       |
| 0     | 0     | 0     | 0     | NA       | NA       |
| 0.13  | 0     | 0     | 0     | NA       | NA       |
| 0     | 0     | 0     | 0     | NA       | NA       |
| 0.61  | 1.22  | 0.67  | 0.92  | 0.289644 | 0.561879 |
| 0     | 0     | 0     | 0     | NA       | NA       |
| 31.43 | 31.17 | 32.16 | 27.55 | -0.01221 | 0.93583  |
| 0.07  | 0.09  | 0.49  | 0.08  | 0.292181 | 0.720677 |
| 0.08  | 0.19  | 0.18  | 0.08  | -0.129   | 0.882035 |
| 0     | 0     | 0     | 0     | NA       | NA       |
| 13.88 | 14.73 | 16.31 | 16.75 | 0.085377 | 0.579259 |
| 0     | 0     | 0     | 0     | NA       | NA       |
| 0     | 0     | 0     | 0     | NA       | NA       |
| 7.7   | 7.3   | 5.73  | 6.3   | -0.2144  | 0.172931 |
| 0.04  | 0.03  | 0.09  | 0.03  | NA       | NA       |
| 0     | 0     | 0     | 0     | NA       | NA       |
| 0     | 0     | 0     | 0     | NA       | NA       |
| 0     | 0     | 0     | 0     | NA       | NA       |
| 0.87  | 0.4   | 0.53  | 0.5   | -0.61302 | 0.101637 |
| 6.83  | 8.51  | 7.61  | 9.26  | 0.197493 | 0.252336 |
| 0     | 0     | 0     | 0     | NA       | NA       |
| 0     | 0     | 0     | 0     | NA       | NA       |
| 4.09  | 5.33  | 4.44  | 3.47  | 0.043347 | 0.859382 |
| 0     | 0     | 0     | 0.01  | NA       | NA       |
| 0     | 0     | 0.15  | 0     | NA       | NA       |
| 18.06 | 18.86 | 18.65 | 17.87 | 0.133024 | 0.194662 |
| 0     | 0     | 0     | 0     | NA       | NA       |
| 0.45  | 0.16  | 0.59  | 0.56  | 0.2902   | 0.66874  |
| 5.68  | 5.83  | 5.58  | 5.53  | 0.078305 | 0.714806 |
| 0.34  | 0.33  | 0.28  | 0.25  | -0.27259 | 0.455955 |
| 0.05  | 0     | 0     | 0     | NA       | NA       |
| 8     | 8.59  | 8.37  | 8.18  | 0.143639 | 0.327465 |
| 0     | 0     | 0     | 0     | NA       | NA       |
| 1.73  | 3.7   | 3.48  | 2.26  | 0.857561 | 0.000649 |
| 0     | 0     | 0     | 0     | NA       | NA       |
| 4.42  | 5.73  | 4.33  | 4.78  | 0.153271 | 0.504223 |
| 5.94  | 6.36  | 5.47  | 5.7   | 0.178209 | 0.486638 |
| 7.64  | 9.6   | 7.64  | 9.04  | 0.021742 | 0.925277 |
| 0     | 0     | 0     | 0     | NA       | NA       |
| 0     | 0     | 0     | 0     | NA       | NA       |



|        |        |        |       |          |          |
|--------|--------|--------|-------|----------|----------|
| 2.75   | 2.62   | 2.72   | 3.69  | -0.11375 | 0.717625 |
| 0.38   | 0.09   | 0.3    | 0.04  | -0.11714 | 0.890364 |
| 0      | 0.03   | 0.43   | 0.17  | 0.477493 | 0.514255 |
| 0      | 0      | 0.05   | 0     | NA       | NA       |
| 1.12   | 1.56   | 2.13   | 2.44  | 0.210937 | 0.504854 |
| 2.82   | 2.45   | 2.37   | 2.57  | -0.20973 | 0.294358 |
| 7.49   | 8.86   | 8.26   | 8.07  | 0.117052 | 0.423669 |
| 0.03   | 0      | 0.02   | 0.03  | NA       | NA       |
| 0      | 0.03   | 0      | 0     | NA       | NA       |
| 1.72   | 2.95   | 2.14   | 2.48  | 0.553839 | 0.00045  |
| 0.06   | 0      | 0      | 0     | NA       | NA       |
| 0      | 0      | 0      | 0     | NA       | NA       |
| 0      | 0      | 0      | 0     | NA       | NA       |
| 0      | 0      | 0      | 0     | NA       | NA       |
| 0      | 0      | 0      | 0     | NA       | NA       |
| 0      | 0      | 0      | 0     | NA       | NA       |
| 31.48  | 61.25  | 54.98  | 57.68 | 0.727693 | 1.84E-16 |
| 12.6   | 15.92  | 16.5   | 19.06 | 0.483932 | 6.72E-09 |
| 5.58   | 3.56   | 4.77   | 4.09  | -0.66618 | 0.002746 |
| 22.7   | 37.19  | 31.78  | 30.87 | 0.559964 | 0.000663 |
| 23.91  | 24.2   | 24.85  | 23.41 | -0.04081 | 0.795652 |
| 1.82   | 1.78   | 1.83   | 0.89  | -0.40721 | 0.404386 |
| 22.45  | 24.9   | 22.51  | 22.21 | -0.0392  | 0.788375 |
| 14.77  | 15.66  | 14.67  | 14.63 | 0.09764  | 0.626883 |
| 0.23   | 0.4    | 0.16   | 0.25  | -0.08133 | 0.9301   |
| 0      | 0      | 0      | 0     | NA       | NA       |
| 0.15   | 0.15   | 0.3    | 0.14  | 0.072418 | 0.923857 |
| 0      | 0      | 0      | 0     | NA       | NA       |
| 0      | 0      | 0      | 0     | NA       | NA       |
| 0      | 0.06   | 0      | 0     | NA       | NA       |
| 65.67  | 82.5   | 82.32  | 83.21 | 0.192098 | 0.025835 |
| 7.02   | 5.62   | 6.76   | 6.44  | -0.28353 | 0.278342 |
| 3.81   | 5.29   | 4.26   | 5.9   | 0.673983 | 0.02269  |
| 275.62 | 159.01 | 188.75 | 196.4 | -0.69144 | NA       |
| 37.34  | 38.71  | 37.58  | 42.27 | 0.046675 | 0.76851  |
| 6.56   | 15.68  | 9.77   | 16.25 | 0.844793 | 8.79E-09 |
| 6.25   | 6.61   | 4.97   | 4.34  | -0.12712 | 0.506437 |
| 22.94  | 26.65  | 26.25  | 26.58 | 0.2397   | 0.089906 |
| 0.11   | 0.05   | 0.08   | 0.09  | 0.202198 | 0.813172 |
| 0      | 0      | 0      | 0     | NA       | NA       |
| 0      | 0      | 0      | 0     | NA       | NA       |
| 0.02   | 0      | 0      | 0     | NA       | NA       |
| 0      | 0      | 0      | 0     | NA       | NA       |
| 0      | 0      | 0      | 0     | NA       | NA       |
| 0      | 0      | 0      | 0     | NA       | NA       |

|        |        |        |       |          |          |
|--------|--------|--------|-------|----------|----------|
| 2.54   | 7.51   | 4.33   | 5.77  | 1.057845 | 3.39E-09 |
| 0      | 0      | 0      | 0     | NA       | NA       |
| 0      | 0      | 0      | 0     | NA       | NA       |
| 0      | 0      | 0      | 0     | NA       | NA       |
| 0.61   | 1.79   | 2.78   | 2.58  | 1.437089 | 1.21E-05 |
| 23.22  | 19.84  | 21.78  | 24.17 | -0.1456  | 0.216148 |
| 1.24   | 1.17   | 1.35   | 1.4   | 0.111483 | 0.858262 |
| 27.17  | 30.12  | 30.99  | 28.39 | 0.029091 | 0.875035 |
| 41.13  | 48.08  | 47.9   | 49.02 | 0.205198 | 0.021105 |
| 2.18   | 1.86   | 1.78   | 2.11  | 0.535258 | 0.158707 |
| 2.63   | 4.33   | 4.09   | 3.81  | -0.03686 | 0.932479 |
| 3.36   | 4.48   | 5.01   | 3.95  | 0.263781 | 0.366719 |
| 16.75  | 15.42  | 16.8   | 17.94 | 0.0076   | 0.975146 |
| 0.04   | 0      | 0      | 0     | NA       | NA       |
| 0      | 0.1    | 0      | 0.21  | NA       | NA       |
| 0      | 0      | 0      | 0     | NA       | NA       |
| 0.03   | 0      | 0.09   | 0.11  | NA       | NA       |
| 14.69  | 17.66  | 13.98  | 14.32 | -0.02262 | 0.927899 |
| 0      | 0      | 0      | 0     | NA       | NA       |
| 0      | 0      | 0      | 0     | NA       | NA       |
| 7.36   | 9.04   | 8.11   | 8.14  | -0.06732 | 0.789218 |
| 20.19  | 25.15  | 21.14  | 22.56 | 0.012793 | 0.939367 |
| 0      | 0      | 0      | 0     | NA       | NA       |
| 32.37  | 39.69  | 38.86  | 33.08 | -0.00222 | 0.991817 |
| 0.18   | 0.43   | 0.41   | 0.38  | 0.773408 | 0.19922  |
| 0.12   | 0.02   | 0.18   | 0.02  | -1.01125 | 0.102096 |
| 0      | 0      | 0.07   | 0     | NA       | NA       |
| 0.03   | 0.02   | 0      | 0.08  | NA       | NA       |
| 4      | 3.11   | 3.23   | 3.24  | -0.42882 | 0.055689 |
| 0      | 0      | 0      | 0     | NA       | NA       |
| 38.55  | 34.61  | 38.06  | 35.25 | -0.0508  | 0.753244 |
| 25.95  | 18.17  | 21.55  | 21.16 | -0.20373 | 0.058085 |
| 0      | 0      | 0      | 0     | NA       | NA       |
| 0      | 0      | 0      | 0     | NA       | NA       |
| 2.15   | 1.58   | 1.14   | 1.38  | -0.71824 | 0.039042 |
| 0      | 0      | 0      | 0     | NA       | NA       |
| 0      | 0.19   | 0      | 0.04  | NA       | NA       |
| 78.81  | 56.28  | 59.3   | 56.63 | -0.47371 | 8.67E-10 |
| 152.82 | 144.64 | 148.94 | 147.9 | -0.11624 | 0.246731 |
| 29.87  | 43.51  | 44.44  | 42.57 | 0.437303 | 3.90E-06 |
| 31.71  | 42.6   | 41.12  | 42.23 | 0.372527 | 1.57E-05 |
| 0.53   | 0.91   | 1.29   | 1.11  | 0.594807 | 0.12326  |
| 23.7   | 16.63  | 18.66  | 18.81 | -0.31189 | 0.079428 |
| 0      | 0      | 0      | 0     | NA       | NA       |
| 12.8   | 14.3   | 15.31  | 13.58 | 0.123875 | 0.364831 |

|       |        |        |       |          |          |
|-------|--------|--------|-------|----------|----------|
| 0.42  | 0.21   | 0.23   | 0.13  | -1.09456 | 0.029497 |
| 8.64  | 5.99   | 6.63   | 6.59  | -0.40614 | 0.219025 |
| 0     | 0      | 0      | 0     | NA       | NA       |
| 0     | 0      | 0      | 0     | NA       | NA       |
| 0     | 0      | 0      | 0     | NA       | NA       |
| 18.4  | 14.24  | 13.38  | 13.45 | -0.46077 | 0.00031  |
| 4.31  | 3.47   | 2.41   | 3.74  | -0.57762 | 0.02879  |
| 0     | 0      | 0      | 0     | NA       | NA       |
| 0.14  | 0      | 0.07   | 0.05  | NA       | NA       |
| 0     | 0      | 0      | 0.12  | NA       | NA       |
| 0     | 0      | 0      | 0     | NA       | NA       |
| 0     | 0      | 0      | 0     | NA       | NA       |
| 18.31 | 27.3   | 22.87  | 24.28 | 0.392376 | 0.00076  |
| 0.99  | 0.87   | 1.74   | 1.71  | 0.056383 | 0.94163  |
| 0     | 0      | 0      | 0     | NA       | NA       |
| 0     | 0      | 0      | 0     | NA       | NA       |
| 94.58 | 108.67 | 101.27 | 97.28 | 0.085209 | 0.488324 |
| 0     | 0      | 0      | 0     | NA       | NA       |
| 10.21 | 18.79  | 12.64  | 17.26 | 0.495011 | 0.002081 |
| 10.13 | 12.26  | 10.37  | 12.47 | 0.182274 | 0.249962 |
| 0.04  | 0.05   | 0.05   | 0.07  | 0.659676 | 0.327008 |
| 3.49  | 2.18   | 2.73   | 2.21  | -0.55672 | 0.17191  |
| 0.02  | 0      | 0.07   | 0     | NA       | NA       |
| 0     | 0      | 0      | 0     | NA       | NA       |
| 0     | 0      | 0      | 0     | NA       | NA       |
| 0     | 0      | 0      | 0     | NA       | NA       |
| 0     | 0      | 0      | 0     | NA       | NA       |
| 0     | 0      | 0      | 0     | NA       | NA       |
| 73.85 | 96.3   | 97.54  | 95.68 | 0.341415 | 3.40E-05 |
| 0     | 0      | 0      | 0     | NA       | NA       |
| 32.05 | 36.09  | 34.69  | 37.13 | 0.042743 | 0.699552 |
| 0     | 0      | 0      | 0     | NA       | NA       |
| 0     | 0      | 0      | 0     | NA       | NA       |
| 0     | 0      | 0      | 0     | NA       | NA       |
| 0     | 0      | 0      | 0     | NA       | NA       |
| 0     | 0      | 0      | 0     | NA       | NA       |
| 0     | 0      | 0      | 0     | NA       | NA       |
| 0     | 0      | 0      | 0     | NA       | NA       |
| 0.18  | 0      | 0      | 0     | NA       | NA       |
| 14.35 | 11.9   | 12.89  | 13.81 | -0.17457 | 0.298466 |
| 0     | 0      | 0      | 0     | NA       | NA       |
| 0     | 0      | 0      | 0     | NA       | NA       |
| 0     | 0      | 0      | 0     | NA       | NA       |
| 0     | 0      | 0      | 0     | NA       | NA       |
| 3.47  | 3.55   | 2.92   | 1.89  | -0.22591 | 0.485787 |

|        |         |         |         |          |          |
|--------|---------|---------|---------|----------|----------|
| 9.49   | 7.42    | 8.91    | 7.7     | -0.01255 | 0.958937 |
| 0.13   | 0       | 0.03    | 0       | NA       | NA       |
| 2.1    | 1.69    | 1.54    | 1.36    | -0.089   | 0.805024 |
| 15.72  | 23.22   | 18.46   | 21.21   | 0.307883 | 0.032346 |
| 1.65   | 2.3     | 2.03    | 1.7     | 0.166321 | 0.652115 |
| 829.36 | 1161.61 | 1097.07 | 1358.86 | 0.514641 | 2.00E-09 |
| 0      | 0.1     | 0.09    | 0.43    | NA       | NA       |
| 0      | 0       | 0       | 0       | NA       | NA       |
| 0.78   | 0.98    | 1.05    | 1.14    | 0.17815  | 0.73757  |
| 0      | 0       | 0       | 0       | NA       | NA       |
| 10.28  | 5.44    | 5.79    | 6.19    | -0.58503 | 8.54E-05 |
| 0      | 0       | 0       | 0       | NA       | NA       |
| 0      | 0       | 0       | 0.02    | NA       | NA       |
| 2.99   | 0.84    | 1.48    | 1.43    | -1.23991 | 1.33E-05 |
| 0      | 0       | 0       | 0       | NA       | NA       |
| 0      | 0       | 0.01    | 0       | NA       | NA       |
| 0      | 0       | 0       | 0       | NA       | NA       |
| 0      | 0       | 0       | 0       | NA       | NA       |
| 0      | 0       | 0       | 0       | NA       | NA       |
| 0.44   | 0.39    | 1.22    | 0       | NA       | NA       |
| 11.39  | 18.07   | 13.57   | 14.95   | 0.30884  | 0.010081 |
| 6.56   | 7.17    | 6.31    | 7.54    | 0.355304 | 0.103418 |
| 22.56  | 23.29   | 22.13   | 22.45   | -0.01756 | 0.924989 |
| 10.22  | 12.56   | 10.49   | 15.11   | 0.373668 | 0.001561 |
| 0.13   | 0       | 0.09    | 0       | NA       | NA       |
| 0      | 0       | 0       | 0       | NA       | NA       |
| 28.53  | 35.21   | 32.3    | 33.87   | 0.198811 | 0.054107 |
| 5.39   | 6.31    | 6.25    | 6.03    | 0.105446 | 0.627882 |
| 0.02   | 0.05    | 0.05    | 0.05    | NA       | NA       |
| 42.67  | 35.39   | 27.21   | 32.72   | -0.48076 | 1.21E-05 |
| 0      | 0.02    | 0.27    | 0.47    | NA       | NA       |
| 0      | 0       | 0       | 0       | NA       | NA       |
| 0      | 0.02    | 0.08    | 0.1     | NA       | NA       |
| 0.95   | 1.2     | 1.16    | 0.7     | -0.5169  | 0.1693   |
| 40.99  | 55.04   | 47.16   | 53.54   | 0.21484  | 0.034292 |
| 167.74 | 164.85  | 155.91  | 165.02  | -0.16242 | 0.042738 |
| 0      | 0       | 0       | 0       | NA       | NA       |
| 6.77   | 7.69    | 6.89    | 6.46    | -0.03638 | 0.879805 |
| 0      | 0       | 0       | 0       | NA       | NA       |
| 3.14   | 3.23    | 3.2     | 3.61    | 0.241603 | 0.301378 |
| 0      | 0       | 0       | 0       | NA       | NA       |
| 3.56   | 4.62    | 3.38    | 3.98    | 0.043269 | 0.873465 |
| 0      | 0       | 0       | 0       | NA       | NA       |
| 0      | 0       | 0       | 0       | NA       | NA       |
| 0      | 0       | 0       | 0       | NA       | NA       |



|       |       |       |                |          |
|-------|-------|-------|----------------|----------|
| 0     | 0     | 0     | 0 NA           | NA       |
| 0     | 0     | 0     | 0 NA           | NA       |
| 0     | 0     | 0     | 0 NA           | NA       |
| 0     | 0     | 0     | 0 NA           | NA       |
| 0.26  | 0.18  | 0.24  | 0.51 0.884779  | 0.163716 |
| 0     | 0     | 0     | 0 NA           | NA       |
| 0     | 0     | 0.05  | 0 NA           | NA       |
| 0     | 0     | 0     | 0.07 NA        | NA       |
| 17.48 | 24.17 | 21.58 | 22.97 0.267692 | 0.011431 |
| 0     | 0     | 0     | 0 NA           | NA       |
| 0     | 0     | 0     | 0 NA           | NA       |
| 0.3   | 0.05  | 0     | 0.03 NA        | NA       |
| 0.51  | 0.31  | 0.56  | 0.22 -0.67119  | 0.119801 |
| 0     | 0     | 0     | 0.03 NA        | NA       |
| 0.17  | 0.36  | 0.4   | 0.33 -0.11237  | 0.895538 |
| 1.99  | 1.01  | 1.23  | 1.66 -0.37837  | 0.334001 |
| 6.1   | 12.01 | 11.69 | 15.04 0.853726 | 2.65E-10 |
| 0     | 0     | 0     | 0 NA           | NA       |
| 0.49  | 1.48  | 1.75  | 0 0.51838      | 0.481067 |
| 0     | 0.03  | 0.06  | 0.13 NA        | NA       |
| 0     | 0     | 0     | 0 NA           | NA       |
| 0     | 0     | 0     | 0 NA           | NA       |
| 0.24  | 0.12  | 0.11  | 0.1 -0.58789   | 0.388677 |
| 0     | 0     | 0     | 0 NA           | NA       |
| 0     | 0.04  | 0.03  | 0 NA           | NA       |
| 0.67  | 0.33  | 0.1   | 0 NA           | NA       |
| 0     | 0     | 0     | 0 NA           | NA       |
| 0.71  | 3.97  | 2.54  | 2.02 0.811351  | 0.033686 |
| 0     | 0     | 0     | 0 NA           | NA       |
| 0     | 0     | 0     | 0 NA           | NA       |
| 0.7   | 0.29  | 0.47  | 0.33 0.072108  | 0.927017 |
| 0.06  | 0.54  | 1.23  | 0.93 NA        | NA       |
| 0     | 0     | 0     | 0 NA           | NA       |
| 22.83 | 26.3  | 31.3  | 24.59 0.260431 | 0.12231  |
| 0     | 0.11  | 0     | 0.11 NA        | NA       |
| 0.94  | 0.1   | 0.68  | 0.22 -0.38984  | 0.594701 |
| 2.91  | 1.51  | 3.04  | 1.35 -0.43429  | 0.243338 |
| 16.99 | 17.23 | 16.6  | 18.81 -0.00507 | 0.979253 |
| 74.06 | 48.08 | 49.62 | 50.02 -0.63872 | 9.50E-19 |
| 0     | 0     | 0     | 0 NA           | NA       |
| 0.16  | 0.05  | 0.09  | 0.08 -0.70722  | 0.306849 |
| 0.43  | 0.08  | 0.18  | 0.2 -0.77545   | 0.117656 |
| 32.44 | 29.18 | 32.77 | 32.79 -0.08783 | 0.510262 |
| 5.13  | 4.61  | 5.6   | 5.69 -0.07425  | 0.809911 |
| 6.52  | 6.09  | 8.17  | 7.84 -0.18342  | 0.379675 |

|      |      |      |      |          |          |
|------|------|------|------|----------|----------|
| 0.15 | 0.22 | 0.07 | 0.12 | NA       | NA       |
| 0.33 | 7.26 | 1.74 | 3.79 | 2.363974 | 6.56E-07 |
| 0.09 | 0    | 0.02 | 0.15 | NA       | NA       |
| 0    | 0    | 0    | 0    | NA       | NA       |
| 0    | 0    | 0    | 0    | NA       | NA       |
| 0    | 0.26 | 0.07 | 0.16 | 1.595243 | 0.005834 |
| 0    | 0    | 0    | 0    | NA       | NA       |
| 0    | 0    | 0    | 0    | NA       | NA       |
| 0    | 0    | 0    | 0    | NA       | NA       |
| 0    | 0    | 0    | 0    | NA       | NA       |
| 0    | 0    | 0    | 0    | NA       | NA       |
| 0    | 0    | 0    | 0    | NA       | NA       |
| 2.16 | 3.9  | 2.96 | 3.32 | 0.752518 | 0.001188 |
| 0.46 | 0    | 0    | 0.17 | NA       | NA       |
| 0.14 | 0.2  | 0    | 0    | NA       | NA       |
| 0    | 0    | 0    | 0    | NA       | NA       |
| 0    | 0    | 0    | 0    | NA       | NA       |
| 0    | 0    | 0    | 0    | NA       | NA       |
| 0    | 0    | 0    | 0    | NA       | NA       |
| 3.08 | 3.05 | 3.77 | 3.88 | 0.07079  | 0.819338 |
| 2.83 | 3.89 | 3.91 | 3.24 | -0.16076 | 0.611377 |
| 0.67 | 0.44 | 0.48 | 0.75 | -0.21933 | 0.58768  |
| 0    | 0    | 0    | 0    | NA       | NA       |
| 0.05 | 0.21 | 0.07 | 0.04 | NA       | NA       |
| 0    | 0    | 0    | 0    | NA       | NA       |
| 0    | 0    | 0    | 0    | NA       | NA       |
| 0.77 | 0.22 | 0.37 | 0.27 | -0.96832 | 0.0253   |
| 0.14 | 0.1  | 0.04 | 0.22 | -0.53002 | 0.469954 |
| 3.48 | 0.19 | 0.35 | 0.36 | -2.7883  | 1.61E-15 |
| 6.14 | 5.67 | 6.11 | 6.61 | -0.01267 | 0.95921  |
| 2.02 | 1.59 | 1.83 | 1.82 | -0.28254 | 0.278147 |
| 0    | 0    | 0    | 0    | NA       | NA       |
| 0    | 0.04 | 0.06 | 0.02 | NA       | NA       |
| 0    | 0    | 0    | 0    | NA       | NA       |
| 8.46 | 5.61 | 7.13 | 7.9  | 0.080506 | 0.836229 |
| 0.65 | 0.78 | 0.54 | 0.89 | -0.34772 | 0.344481 |
| 2.06 | 1.05 | 1.01 | 1.42 | -0.934   | 4.05E-06 |
| 0.08 | 0.09 | 0.02 | 0.02 | NA       | NA       |
| 0.06 | 0.02 | 0.05 | 0.01 | -0.28829 | 0.725232 |
| 0.04 | 0.02 | 0    | 0    | NA       | NA       |
| 0.09 | 0.05 | 0.14 | 0.03 | 0.034838 | 0.972078 |
| 0    | 0    | 0.02 | 0    | NA       | NA       |
| 0.14 | 0.17 | 0.2  | 0.15 | -0.10052 | 0.856269 |
| 0.08 | 0.02 | 0    | 0.02 | NA       | NA       |
| 0.03 | 0    | 0.02 | 0.02 | NA       | NA       |

|       |       |       |                |          |
|-------|-------|-------|----------------|----------|
| 0     | 0     | 0     | 0 NA           | NA       |
| 9.62  | 12.26 | 10.13 | 10.58 0.440775 | 0.00054  |
| 0     | 0     | 0     | 0 NA           | NA       |
| 0     | 0     | 0     | 0 NA           | NA       |
| 0     | 0     | 0     | 0 NA           | NA       |
| 0     | 0.04  | 0.19  | 0.08 NA        | NA       |
| 0     | 0     | 0     | 0 NA           | NA       |
| 0     | 0     | 0     | 0 NA           | NA       |
| 0.99  | 0.76  | 1     | 1.06 -0.0331   | 0.952639 |
| 0     | 0     | 0     | 0 NA           | NA       |
| 0.06  | 0     | 0     | 0 NA           | NA       |
| 0     | 0     | 0     | 0 NA           | NA       |
| 0     | 0     | 0     | 0 NA           | NA       |
| 0     | 0     | 0     | 0 NA           | NA       |
| 0     | 0     | 0     | 0 NA           | NA       |
| 0     | 0     | 0     | 0 NA           | NA       |
| 0     | 0     | 0     | 0 NA           | NA       |
| 0.07  | 0.08  | 0.16  | 0.31 0.724786  | 0.285616 |
| 0     | 0.01  | 0.01  | 0.02 -0.36015  | 0.646545 |
| 0.51  | 0.43  | 0.31  | 0.82 0.256828  | 0.72824  |
| 0     | 0     | 0     | 0 NA           | NA       |
| 0.02  | 0.08  | 0.08  | 0 NA           | NA       |
| 0.03  | 0.32  | 0     | 0.1 NA         | NA       |
| 0.01  | 0     | 0     | 0.01 NA        | NA       |
| 0     | 0.08  | 0     | 0 NA           | NA       |
| 5.19  | 6.14  | 4.6   | 5.32 0.229645  | 0.135302 |
| 0     | 0     | 0     | 0 NA           | NA       |
| 3.69  | 3.43  | 3.19  | 4.42 0.30017   | 0.522846 |
| 5.53  | 7.29  | 7.36  | 6.72 -0.04433  | 0.849773 |
| 0.56  | 0.2   | 0.15  | 0.48 -0.14872  | 0.864443 |
| 0.07  | 0.06  | 0.31  | 0.07 0.169036  | 0.845576 |
| 0     | 0     | 0     | 0 NA           | NA       |
| 4.73  | 3.41  | 3.5   | 2.1 -0.51883   | 0.180088 |
| 0     | 0     | 0     | 0 NA           | NA       |
| 0     | 0     | 0     | 0 NA           | NA       |
| 0     | 0     | 0     | 0 NA           | NA       |
| 0.25  | 0     | 0     | 0 NA           | NA       |
| 0     | 0     | 0     | 0 NA           | NA       |
| 0     | 0     | 0.13  | 0 NA           | NA       |
| 0     | 0     | 0     | 0 NA           | NA       |
| 0     | 0     | 0     | 0 NA           | NA       |
| 1.45  | 1.43  | 2.02  | 2.34 0.393994  | 0.455983 |
| 18.07 | 16.36 | 15.04 | 14.05 -0.18121 | 0.27087  |
| 7.38  | 9.28  | 9.65  | 9.82 0.173324  | 0.463998 |



|       |       |       |       |          |          |
|-------|-------|-------|-------|----------|----------|
| 0.1   | 0.07  | 0.13  | 0     | NA       | NA       |
| 41.81 | 49.93 | 44.49 | 47.55 | 0.089816 | 0.597345 |
| 0     | 0     | 0     | 0     | NA       | NA       |
| 0     | 0.01  | 0     | 0     | NA       | NA       |
| 0.11  | 0.09  | 0.34  | 0.26  | NA       | NA       |
| 1.96  | 1.18  | 1.16  | 1.39  | -0.65581 | 0.000197 |
| 0     | 0     | 0     | 0     | NA       | NA       |
| 0     | 0     | 0     | 0     | NA       | NA       |
| 2.84  | 3.57  | 2.78  | 3.26  | 0.373651 | 0.034371 |
| 2.76  | 1.62  | 2.37  | 1.95  | -0.79043 | 0.000155 |
| 0.13  | 0.04  | 0.31  | 0.18  | -0.61729 | 0.377071 |
| 0     | 0     | 0     | 0     | NA       | NA       |
| 36.09 | 35.51 | 54.37 | 47.43 | 0.300033 | 0.026814 |
| 0     | 0     | 0     | 0     | NA       | NA       |
| 20.78 | 25.12 | 20.07 | 26.09 | 0.410756 | 0.011176 |
| 2.87  | 0.84  | 2.07  | 1.47  | -1.08215 | 0.000259 |
| 0     | 0     | 0     | 0     | NA       | NA       |
| 1.32  | 0.15  | 0.07  | 1.5   | -0.50862 | 0.483465 |
| 0.06  | 0     | 0.05  | 0     | NA       | NA       |
| 0     | 0     | 0     | 0     | NA       | NA       |
| 17.5  | 22.21 | 22.04 | 23.82 | 0.219865 | 0.086711 |
| 0     | 0     | 0     | 0     | NA       | NA       |
| 0     | 0     | 0     | 0     | NA       | NA       |
| 11.36 | 4.03  | 5.12  | 4.59  | -1.08352 | 4.39E-14 |
| 0.15  | 0.2   | 0.17  | 0.19  | 0.433788 | 0.375128 |
| 0     | 0     | 0     | 0     | NA       | NA       |
| 0.18  | 1.76  | 0.39  | 1.18  | 1.529471 | 0.009873 |
| 0     | 0     | 0     | 0     | NA       | NA       |
| 0     | 0     | 0     | 0.05  | NA       | NA       |
| 0     | 1.08  | 0.31  | 0.79  | 1.440519 | 0.015203 |
| 0     | 0     | 0     | 0     | NA       | NA       |
| 45.25 | 28.74 | 39.29 | 32.87 | -0.45347 | 5.96E-05 |
| 0.1   | 0.42  | 0.09  | 0     | NA       | NA       |
| 0.37  | 0.55  | 1.09  | 0.37  | -0.40509 | 0.510534 |
| 0     | 0     | 0     | 0     | NA       | NA       |
| 0     | 0     | 0     | 0     | NA       | NA       |
| 43.49 | 42.2  | 36.74 | 41.87 | -0.12683 | 0.384119 |
| 0     | 0     | 0.01  | 0     | NA       | NA       |
| 0     | 0     | 0     | 0     | NA       | NA       |
| 0     | 0     | 0     | 0     | NA       | NA       |
| 0     | 0     | 0     | 0     | NA       | NA       |
| 0     | 0     | 0     | 0     | NA       | NA       |
| 0     | 0     | 0     | 0     | NA       | NA       |
| 0     | 0     | 0     | 0     | NA       | NA       |
| 0.06  | 0.02  | 0.06  | 0.06  | NA       | NA       |

|       |       |       |       |          |          |
|-------|-------|-------|-------|----------|----------|
| 2.06  | 10.6  | 4.72  | 7.74  | 2.260279 | 7.55E-23 |
| 35.61 | 33.32 | 26.04 | 31.27 | 0.268127 | 0.00449  |
| 89.51 | 86.17 | 90.67 | 78.35 | -0.19501 | 0.083453 |
| 8.81  | 9.48  | 11.33 | 11.79 | -0.2152  | 0.096129 |
| 0     | 0     | 0     | 0     | NA       | NA       |
| 0     | 0     | 0     | 0     | NA       | NA       |
| 0     | 0     | 0     | 0     | NA       | NA       |
| 0     | 0     | 0     | 0.99  | NA       | NA       |
| 1.31  | 1.87  | 1.34  | 2.33  | 0.373601 | 0.616695 |
| 2.03  | 3.15  | 3.34  | 4.27  | 0.130495 | 0.704761 |
| 0.54  | 1.24  | 0.85  | 1.11  | 0.348444 | 0.603717 |
| 0     | 0     | 0     | 0     | NA       | NA       |
| 13.55 | 2.87  | 4.27  | 2.6   | -2.0044  | 2.31E-29 |
| 0     | 0     | 0     | 0     | NA       | NA       |
| 0     | 0     | 0     | 0     | NA       | NA       |
| 5.05  | 5.85  | 5.85  | 6.09  | 0.271304 | 0.016598 |
| 0     | 0     | 0     | 0     | NA       | NA       |
| 0     | 0     | 0.04  | 0     | NA       | NA       |
| 6.42  | 9.75  | 10.38 | 8.73  | 0.442236 | 0.010028 |
| 0     | 0     | 0     | 0     | NA       | NA       |
| 0.04  | 0.17  | 0.1   | 0.16  | 0.942296 | 0.13748  |
| 0     | 0     | 0     | 0     | NA       | NA       |
| 0.03  | 0.13  | 0.24  | 0.3   | -0.5548  | 0.447184 |
| 0     | 0     | 0     | 0     | NA       | NA       |
| 0     | 0     | 0     | 0     | NA       | NA       |
| 0     | 0     | 0     | 0     | NA       | NA       |
| 0     | 0     | 0     | 0     | NA       | NA       |
| 0     | 0     | 0     | 0     | NA       | NA       |
| 0     | 0     | 0     | 0     | NA       | NA       |
| 2.47  | 1.13  | 1.13  | 1     | -0.07111 | 0.916338 |
| 0.1   | 0     | 0     | 0     | NA       | NA       |
| 2.33  | 1.69  | 1.94  | 2.01  | -0.17308 | 0.636881 |
| 6.23  | 4.84  | 4.64  | 4.47  | -0.6297  | 0.000146 |
| 0.41  | 0.13  | 0.38  | 0.23  | -0.039   | 0.967875 |
| 2.73  | 2.36  | 2.9   | 3.1   | 0.387247 | 0.27836  |
| 0     | 0.05  | 0.03  | 0.02  | NA       | NA       |
| 0     | 0     | 0     | 0     | NA       | NA       |
| 0     | 0     | 0     | 0     | NA       | NA       |
| 0     | 0     | 0     | 0     | NA       | NA       |
| 0     | 0     | 0     | 0     | NA       | NA       |
| 0.41  | 0.27  | 0.33  | 0.15  | -0.2728  | 0.715207 |
| 0.55  | 2.97  | 2.22  | 2.55  | 2.178225 | 3.08E-10 |
| 0.8   | 0.95  | 1.21  | 1.29  | 0.357735 | 0.491891 |
| 36.11 | 36.31 | 35.29 | 35.49 | -0.04834 | 0.714743 |
| 0.7   | 0.67  | 0.68  | 0.99  | -0.10935 | 0.800572 |

|         |         |        |         |          |          |
|---------|---------|--------|---------|----------|----------|
| 0       | 0       | 0      | 0       | NA       | NA       |
| 4634.03 | 2060.43 | 2803.4 | 2311.69 | -0.94917 | 1.19E-19 |
| 43.47   | 46.06   | 40.62  | 37.39   | -0.30717 | 0.092416 |
| 0       | 0       | 0      | 0       | NA       | NA       |
| 0.29    | 0.42    | 0.1    | 0.44    | NA       | NA       |
| 2.4     | 1.34    | 1.56   | 2.75    | -0.16477 | 0.710388 |
| 0.5     | 0.57    | 0.77   | 0.53    | 0.357445 | 0.496199 |
| 10.03   | 11.68   | 7.9    | 8.01    | -0.16786 | 0.541882 |
| 12.8    | 19.99   | 16.57  | 17.34   | 0.231688 | 0.254904 |
| 0.24    | 0.18    | 0.37   | 0.65    | 0.720391 | 0.231946 |
| 0       | 0       | 0      | 0       | NA       | NA       |
| 64.8    | 52.27   | 66.4   | 56.78   | -0.10448 | 0.410083 |
| 2.95    | 2.18    | 2.21   | 2.45    | -0.26677 | 0.558545 |
| 0.1     | 0       | 0      | 0       | NA       | NA       |
| 0.49    | 0       | 0.01   | 0.01    | -1.11854 | 0.069779 |
| 3.74    | 2.51    | 2.94   | 3.48    | -0.32151 | 0.231365 |
| 0       | 0       | 0      | 0       | NA       | NA       |
| 0.63    | 4.42    | 4.64   | 0.01    | 0.044901 | 0.95329  |
| 0       | 0       | 0.07   | 0.02    | NA       | NA       |
| 0       | 0       | 0      | 0       | NA       | NA       |
| 0       | 0.04    | 0.04   | 0       | NA       | NA       |
| 0       | 0       | 0      | 0       | NA       | NA       |
| 18.88   | 16.78   | 16.4   | 17.09   | -0.12679 | 0.465503 |
| 0       | 0       | 0      | 0       | NA       | NA       |
| 0       | 0       | 0      | 0       | NA       | NA       |
| 0       | 0       | 0      | 0       | NA       | NA       |
| 0.23    | 0.46    | 0.2    | 0.37    | 0.123465 | 0.882965 |
| 0       | 0       | 0      | 0       | NA       | NA       |
| 5.83    | 3.99    | 4.24   | 3.66    | -0.43659 | 0.085592 |
| 0       | 0       | 0      | 0       | NA       | NA       |
| 0       | 0       | 0      | 0.08    | NA       | NA       |
| 0       | 0       | 0      | 0       | NA       | NA       |
| 3.73    | 3.5     | 2.26   | 2.64    | 0.189511 | 0.511644 |
| 0       | 0       | 0      | 0       | NA       | NA       |
| 0.32    | 0.17    | 0      | 1.04    | 0.353014 | 0.648711 |
| 4.04    | 6.41    | 6.68   | 7.5     | 0.229286 | 0.566887 |
| 0       | 0       | 0      | 0       | NA       | NA       |
| 0       | 0       | 0      | 0       | NA       | NA       |
| 4.64    | 1.33    | 4.41   | 2.67    | -0.71982 | 0.091226 |
| 0       | 0       | 0      | 0       | NA       | NA       |
| 0.34    | 0.14    | 0.32   | 0.43    | -0.04073 | 0.962486 |
| 0.1     | 0.13    | 0.07   | 0.17    | -0.10259 | 0.907131 |
| 0       | 0.05    | 0      | 0       | NA       | NA       |
| 0       | 0       | 0      | 0       | NA       | NA       |
| 0       | 0       | 0      | 0       | NA       | NA       |

|       |       |       |       |          |          |
|-------|-------|-------|-------|----------|----------|
| 0.42  | 0.3   | 0.23  | 0.34  | -0.09505 | 0.91451  |
| 0     | 0     | 0     | 0     | NA       | NA       |
| 8.04  | 8.68  | 7.96  | 6.66  | -0.02163 | 0.950892 |
| 0.32  | 1.07  | 1.06  | 1.21  | 0.845046 | 0.018157 |
| 0     | 0     | 0     | 0     | NA       | NA       |
| 0     | 0     | 0     | 0     | NA       | NA       |
| 30.32 | 16.05 | 21.95 | 22.59 | -0.65241 | 5.76E-10 |
| 10.4  | 15.65 | 12.51 | 13.47 | 0.49939  | 2.10E-05 |
| 0.24  | 0.21  | 0.26  | 0.15  | -0.40777 | 0.513385 |
| 0     | 0     | 0     | 0     | NA       | NA       |
| 0     | 0     | 0     | 0     | NA       | NA       |
| 53.67 | 36.69 | 46.5  | 46.04 | -0.36413 | 0.000699 |
| 0     | 0     | 0     | 0     | NA       | NA       |
| 0     | 0.01  | 0     | 0.01  | NA       | NA       |
| 0     | 0.01  | 0     | 0.01  | NA       | NA       |
| 19.95 | 15.59 | 19.68 | 14.02 | -0.34335 | 0.02461  |
| 3.7   | 2.82  | 2.75  | 2.43  | -0.59248 | 0.02999  |
| 10.1  | 9.38  | 9.39  | 9.82  | -0.09327 | 0.464212 |
| 0     | 0     | 0     | 0     | NA       | NA       |
| 0.84  | 1.37  | 1.04  | 0.73  | -0.08407 | 0.898718 |
| 0     | 0     | 0     | 0     | NA       | NA       |
| 0     | 0     | 0     | 0     | NA       | NA       |
| 0.04  | 0.01  | 0.05  | 0     | NA       | NA       |
| 0.04  | 0     | 0     | 0     | NA       | NA       |
| 0.36  | 0.53  | 0.47  | 0.53  | -0.45344 | 0.450679 |
| 0     | 0     | 0.03  | 0     | NA       | NA       |
| 1.58  | 0.27  | 0.35  | 0.36  | -2.16485 | 2.29E-12 |
| 4.55  | 4.8   | 4.23  | 4.8   | 0.071487 | 0.760373 |
| 0     | 0     | 0     | 0     | NA       | NA       |
| 0     | 0     | 0     | 0     | NA       | NA       |
| 0.11  | 0     | 0.07  | 0.04  | NA       | NA       |
| 0     | 0     | 0     | 0     | NA       | NA       |
| 0.05  | 0     | 0.01  | 0     | NA       | NA       |
| 0     | 0     | 0     | 0     | NA       | NA       |
| 0     | 0     | 0     | 0     | NA       | NA       |
| 0.11  | 0.05  | 0     | 0.06  | NA       | NA       |
| 0     | 0     | 0     | 0     | NA       | NA       |
| 0     | 0     | 0     | 0     | NA       | NA       |
| 0.13  | 0     | 0.15  | 0.17  | NA       | NA       |
| 0     | 0     | 0     | 0     | NA       | NA       |
| 0     | 0     | 0     | 0     | NA       | NA       |
| 0     | 0     | 0     | 0     | NA       | NA       |
| 1.13  | 1.56  | 1.39  | 1.29  | -0.14925 | 0.824714 |
| 0     | 0     | 0.04  | 0     | NA       | NA       |
| 0     | 0     | 0     | 0     | NA       | NA       |

|       |       |       |       |          |          |
|-------|-------|-------|-------|----------|----------|
| 0     | 0     | 0     | 0     | NA       | NA       |
| 0     | 0     | 0     | 0     | NA       | NA       |
| 0     | 0     | 0     | 0     | NA       | NA       |
| 0     | 0     | 0     | 0     | NA       | NA       |
| 0     | 0     | 0.06  | 0     | NA       | NA       |
| 0     | 0.04  | 0     | 0     | NA       | NA       |
| 0     | 0     | 0     | 0     | NA       | NA       |
| 0     | 0     | 0     | 0     | NA       | NA       |
| 0     | 0     | 0     | 0     | NA       | NA       |
| 11.78 | 8.12  | 8.43  | 8.8   | -0.40761 | 0.012039 |
| 0     | 0     | 0     | 0     | NA       | NA       |
| 0     | 0     | 0     | 0     | NA       | NA       |
| 0     | 0     | 0     | 0     | NA       | NA       |
| 0     | 0     | 0     | 0     | NA       | NA       |
| 10.38 | 10.25 | 10.02 | 11.35 | 0.029301 | 0.861365 |
| 0.66  | 0.34  | 0.08  | 0.26  | -0.82744 | 0.199168 |
| 0     | 0     | 0     | 0     | NA       | NA       |
| 0.13  | 0.16  | 0.34  | 0.13  | 0.160697 | 0.850235 |
| 0     | 0     | 0     | 0     | NA       | NA       |
| 0     | 0     | 0     | 0     | NA       | NA       |
| 0     | 0     | 0     | 0     | NA       | NA       |
| 0     | 0     | 0     | 0     | NA       | NA       |
| 0.47  | 0.17  | 0.46  | 0.28  | -0.57564 | 0.365344 |
| 0     | 0     | 0     | 0     | NA       | NA       |
| 48.06 | 55.08 | 54.1  | 55.76 | 0.192011 | 0.053671 |
| 0     | 0     | 0     | 0     | NA       | NA       |
| 0     | 0     | 0     | 0     | NA       | NA       |
| 0     | 0     | 0     | 0     | NA       | NA       |
| 0     | 0     | 0     | 0     | NA       | NA       |
| 0.06  | 0.06  | 0.1   | 0.11  | -0.17617 | 0.840815 |
| 0     | 0     | 0     | 0     | NA       | NA       |
| 0     | 0     | 0     | 0     | NA       | NA       |
| 10.58 | 3.26  | 4.85  | 4.16  | -1.41627 | 1.42E-22 |
| 15.34 | 11.77 | 15.14 | 12.48 | -0.29366 | 0.100619 |
| 0     | 0     | 0     | 0     | NA       | NA       |
| 0     | 0     | 0     | 0     | NA       | NA       |
| 0     | 0     | 0     | 0     | NA       | NA       |
| 0     | 0     | 0     | 0     | NA       | NA       |
| 0.02  | 0     | 0.02  | 0     | NA       | NA       |
| 0     | 0     | 0     | 0     | NA       | NA       |
| 0     | 0     | 0     | 0     | NA       | NA       |
| 0     | 0     | 0     | 0     | NA       | NA       |
| 0     | 0     | 0     | 0     | NA       | NA       |
| 0.01  | 1.64  | 0.23  | 0.66  | 3.103668 | 1.22E-10 |
| 15.11 | 14.43 | 16.64 | 13.86 | -0.01074 | 0.953655 |

|       |      |      |                |          |
|-------|------|------|----------------|----------|
| 0     | 0    | 0    | 0 NA           | NA       |
| 0     | 0    | 0    | 0 NA           | NA       |
| 0     | 0    | 0    | 0 NA           | NA       |
| 0     | 0    | 0    | 0 NA           | NA       |
| 0     | 0.05 | 0    | 0 NA           | NA       |
| 0     | 0    | 0    | 0 NA           | NA       |
| 0.03  | 0.04 | 0.05 | 0.07 NA        | NA       |
| 0     | 0    | 0    | 0 NA           | NA       |
| 0     | 0    | 0    | 0 NA           | NA       |
| 0     | 0    | 0    | 0 NA           | NA       |
| 0     | 0    | 0    | 0 NA           | NA       |
| 0     | 0    | 0    | 0 NA           | NA       |
| 0     | 0    | 0    | 0 NA           | NA       |
| 0.02  | 0.19 | 0.09 | 0.04 NA        | NA       |
| 0     | 0    | 0.09 | 0.12 NA        | NA       |
| 2.31  | 0.86 | 1.17 | 1.44 -0.67763  | 0.05375  |
| 0.31  | 0    | 0    | 0 NA           | NA       |
| 1.56  | 1.78 | 1.18 | 1.19 -0.7994   | 0.02261  |
| 0.02  | 0    | 0    | 0 NA           | NA       |
| 0     | 0    | 0    | 0 NA           | NA       |
| 0.65  | 0    | 0    | 0 NA           | NA       |
| 0.79  | 0.58 | 0    | 0.19 NA        | NA       |
| 14.23 | 9.9  | 9.87 | 11.21 0.050179 | 0.801929 |
| 0.04  | 0.03 | 0.06 | 0 NA           | NA       |
| 0     | 0.25 | 0    | 0.09 NA        | NA       |
| 0     | 0    | 0    | 0 NA           | NA       |
| 0.15  | 0.32 | 0.19 | 0.22 NA        | NA       |
| 0     | 0    | 0    | 0 NA           | NA       |
| 0     | 0    | 0    | 0 NA           | NA       |
| 0     | 0    | 0    | 0 NA           | NA       |
| 0     | 0    | 0    | 0 NA           | NA       |
| 0.14  | 0.36 | 0.14 | 0.37 0.497366  | 0.327079 |
| 0     | 0    | 0    | 0 NA           | NA       |
| 0.91  | 0.5  | 0.79 | 1.19 -0.22006  | 0.700418 |
| 0.03  | 0    | 0.15 | 0.02 NA        | NA       |
| 0     | 0    | 0    | 0 NA           | NA       |
| 0     | 0    | 0    | 0 NA           | NA       |
| 0     | 0.07 | 0    | 0 NA           | NA       |
| 0     | 0    | 0    | 0 NA           | NA       |
| 0.11  | 0.03 | 0.01 | 0.17 -0.63822  | 0.366719 |
| 1.96  | 2.11 | 2.06 | 2.86 0.599201  | 0.045801 |
| 4.29  | 9.79 | 8.9  | 10.22 0.721835 | 0.000891 |
| 1.01  | 0.68 | 0.47 | 0.7 -0.19636   | 0.794236 |
| 0     | 0    | 0    | 0 NA           | NA       |
| 0.09  | 0.02 | 0.01 | 0.07 NA        | NA       |

















|   |      |      |         |    |
|---|------|------|---------|----|
| 0 | 0    | 0    | 0 NA    | NA |
| 0 | 0    | 0    | 0 NA    | NA |
| 0 | 0    | 0    | 0 NA    | NA |
| 0 | 0    | 0    | 0 NA    | NA |
| 0 | 0    | 0    | 0 NA    | NA |
| 0 | 0    | 0    | 0 NA    | NA |
| 0 | 0    | 0    | 0 NA    | NA |
| 0 | 0    | 1.71 | 0 NA    | NA |
| 0 | 0    | 0    | 0 NA    | NA |
| 0 | 0    | 0    | 0 NA    | NA |
| 0 | 0    | 0    | 0 NA    | NA |
| 0 | 0    | 0    | 0 NA    | NA |
| 0 | 0    | 0    | 0 NA    | NA |
| 0 | 0    | 0    | 0 NA    | NA |
| 0 | 0    | 0    | 0 NA    | NA |
| 0 | 0    | 0    | 0 NA    | NA |
| 0 | 0    | 0    | 0 NA    | NA |
| 0 | 0    | 0    | 0 NA    | NA |
| 0 | 0    | 0    | 0 NA    | NA |
| 0 | 0    | 0    | 0 NA    | NA |
| 0 | 0    | 0    | 0 NA    | NA |
| 0 | 0    | 0    | 0 NA    | NA |
| 0 | 0    | 0    | 0 NA    | NA |
| 0 | 0    | 0    | 0 NA    | NA |
| 0 | 0    | 0    | 0 NA    | NA |
| 0 | 0    | 0    | 0 NA    | NA |
| 0 | 0    | 0    | 0 NA    | NA |
| 0 | 0    | 0    | 0 NA    | NA |
| 0 | 0    | 0    | 0 NA    | NA |
| 0 | 0    | 0    | 0 NA    | NA |
| 0 | 0    | 0    | 0 NA    | NA |
| 0 | 0    | 0    | 0 NA    | NA |
| 0 | 0    | 0    | 0 NA    | NA |
| 0 | 0    | 0    | 0 NA    | NA |
| 0 | 0    | 0    | 0 NA    | NA |
| 0 | 1.57 | 2.8  | 3.02 NA | NA |
| 0 | 0    | 0    | 0 NA    | NA |
| 0 | 7.22 | 0    | 0 NA    | NA |
| 0 | 0    | 0    | 0 NA    | NA |
| 0 | 0    | 0    | 0 NA    | NA |
| 0 | 0    | 0    | 0 NA    | NA |



































|         |         |        |         |          |          |
|---------|---------|--------|---------|----------|----------|
| 0       | 0       | 0      | 0       | NA       | NA       |
| 0       | 0       | 0      | 0       | NA       | NA       |
| 0       | 0       | 0      | 0       | NA       | NA       |
| 0       | 0       | 0      | 0       | NA       | NA       |
| 0       | 0       | 0      | 0       | NA       | NA       |
| 0       | 0       | 0      | 0       | NA       | NA       |
| 0       | 0       | 0      | 0       | NA       | NA       |
| 0       | 0       | 0      | 0       | NA       | NA       |
| 0       | 0       | 0      | 0       | NA       | NA       |
| 2227.22 | 2283.46 | 2255.1 | 2208.06 | -0.0315  | 0.747413 |
| 0       | 0       | 0      | 0       | NA       | NA       |
| 0       | 0       | 0      | 0       | NA       | NA       |
| 0       | 0       | 0      | 0       | NA       | NA       |
| 0       | 0       | 0      | 0       | NA       | NA       |
| 0       | 0       | 0      | 0       | NA       | NA       |
| 0       | 0       | 0      | 0       | NA       | NA       |
| 0       | 0       | 0      | 0       | NA       | NA       |
| 0       | 0       | 0      | 0       | NA       | NA       |
| 0       | 0       | 0      | 0       | NA       | NA       |
| 0       | 0       | 0      | 0       | NA       | NA       |
| 0       | 0       | 0      | 0       | NA       | NA       |
| 0       | 0       | 0      | 0       | NA       | NA       |
| 0       | 0       | 0      | 0       | NA       | NA       |
| 0       | 0       | 0      | 0       | NA       | NA       |
| 0       | 0       | 0      | 0       | NA       | NA       |
| 0       | 0       | 0      | 0       | NA       | NA       |
| 0       | 0       | 0      | 0       | NA       | NA       |
| 0       | 0       | 0      | 0       | NA       | NA       |
| 0       | 0       | 0      | 0       | NA       | NA       |
| 0       | 0       | 0      | 0       | NA       | NA       |
| 0       | 0       | 0      | 0       | NA       | NA       |
| 0       | 0       | 0      | 0       | NA       | NA       |
| 0       | 0       | 0      | 0       | NA       | NA       |
| 0       | 0       | 0      | 0       | NA       | NA       |
| 0       | 0       | 0      | 0       | NA       | NA       |
| 0       | 0       | 0      | 0       | NA       | NA       |
| 0       | 0       | 0      | 0       | NA       | NA       |
| 36.44   | 42.75   | 32.49  | 36.17   | -0.04839 | 0.791619 |
| 0.04    | 3.06    | 1.2    | 2.25    | 2.867119 | 7.72E-15 |
| 43.89   | 60.12   | 53.45  | 57.76   | 0.35007  | 0.003248 |
| 1.33    | 1.63    | 1.46   | 1.18    | -0.35874 | 0.459916 |
| 0       | 0       | 0      | 0       | NA       | NA       |
| 0.07    | 0.41    | 0.19   | 0.56    | 0.886128 | 0.169106 |
| 16.74   | 22.76   | 18.05  | 20.4    | 0.470954 | 0.000126 |
| 11.8    | 17.15   | 12.68  | 16      | 0.362117 | 0.004026 |

|       |        |        |        |          |          |
|-------|--------|--------|--------|----------|----------|
| 368.5 | 427.67 | 466.92 | 445.86 | 0.239279 | 0.003248 |
| 18.37 | 22.28  | 17.73  | 14.93  | 0.095142 | 0.538388 |

|   |   |   |      |    |
|---|---|---|------|----|
| 0 | 0 | 0 | 0 NA | NA |
| 0 | 0 | 0 | 0 NA | NA |
| 0 | 0 | 0 | 0 NA | NA |
| 0 | 0 | 0 | 0 NA | NA |
| 0 | 0 | 0 | 0 NA | NA |
| 0 | 0 | 0 | 0 NA | NA |
| 0 | 0 | 0 | 0 NA | NA |
| 0 | 0 | 0 | 0 NA | NA |
| 0 | 0 | 0 | 0 NA | NA |
| 0 | 0 | 0 | 0 NA | NA |
| 0 | 0 | 0 | 0 NA | NA |
| 0 | 0 | 0 | 0 NA | NA |
| 0 | 0 | 0 | 0 NA | NA |
| 0 | 0 | 0 | 0 NA | NA |
| 0 | 0 | 0 | 0 NA | NA |
| 0 | 0 | 0 | 0 NA | NA |
| 0 | 0 | 0 | 0 NA | NA |
| 0 | 0 | 0 | 0 NA | NA |
| 0 | 0 | 0 | 0 NA | NA |

|      |      |      |      |          |          |
|------|------|------|------|----------|----------|
| 7.71 | 4.18 | 4.42 | 4.43 | -0.75234 | 1.04E-07 |
|------|------|------|------|----------|----------|

|   |   |   |      |    |
|---|---|---|------|----|
| 0 | 0 | 0 | 0 NA | NA |
| 0 | 0 | 0 | 0 NA | NA |
| 0 | 0 | 0 | 0 NA | NA |
| 0 | 0 | 0 | 0 NA | NA |
| 0 | 0 | 0 | 0 NA | NA |
| 0 | 0 | 0 | 0 NA | NA |
| 0 | 0 | 0 | 0 NA | NA |
| 0 | 0 | 0 | 0 NA | NA |
| 0 | 0 | 0 | 0 NA | NA |
| 0 | 0 | 0 | 0 NA | NA |
| 0 | 0 | 0 | 0 NA | NA |
| 0 | 0 | 0 | 0 NA | NA |
| 0 | 0 | 0 | 0 NA | NA |
| 0 | 0 | 0 | 0 NA | NA |
| 0 | 0 | 0 | 0 NA | NA |
| 0 | 0 | 0 | 0 NA | NA |
| 0 | 0 | 0 | 0 NA | NA |
| 0 | 0 | 0 | 0 NA | NA |
| 0 | 0 | 0 | 0 NA | NA |
| 0 | 0 | 0 | 0 NA | NA |
| 0 | 0 | 0 | 0 NA | NA |
| 0 | 0 | 0 | 0 NA | NA |
| 0 | 0 | 0 | 0 NA | NA |
| 0 | 0 | 0 | 0 NA | NA |
| 0 | 0 | 0 | 0 NA | NA |
| 0 | 0 | 0 | 0 NA | NA |
| 0 | 0 | 0 | 0 NA | NA |

|      |      |      |      |          |          |
|------|------|------|------|----------|----------|
| 1.98 | 2.83 | 3.24 | 1.46 | 0.119979 | 0.882669 |
|------|------|------|------|----------|----------|

|   |   |      |        |    |
|---|---|------|--------|----|
| 0 | 0 | 0.52 | 0.2 NA | NA |
| 0 | 0 | 0    | 0 NA   | NA |













|      |      |      |               |          |
|------|------|------|---------------|----------|
| 0    | 0    | 0    | 0 NA          | NA       |
| 0    | 0    | 0    | 0 NA          | NA       |
| 0    | 0    | 0    | 0 NA          | NA       |
| 0    | 0    | 0    | 0 NA          | NA       |
| 0    | 0    | 0    | 0 NA          | NA       |
| 0    | 0    | 0    | 0 NA          | NA       |
| 0    | 0    | 0    | 0 NA          | NA       |
| 0    | 0    | 0    | 0 NA          | NA       |
| 0    | 0    | 0    | 0 NA          | NA       |
| 0    | 0    | 0    | 0 NA          | NA       |
| 0    | 0    | 0    | 0 NA          | NA       |
| 0    | 0    | 0    | 0 NA          | NA       |
| 0    | 0    | 0    | 0 NA          | NA       |
| 0    | 0    | 0    | 0 NA          | NA       |
| 0    | 0    | 0    | 0 NA          | NA       |
| 0    | 0    | 0    | 0 NA          | NA       |
| 0    | 0    | 0    | 0 NA          | NA       |
| 0    | 0    | 0    | 0 NA          | NA       |
| 0    | 0    | 0    | 0 NA          | NA       |
| 0    | 0    | 0    | 0 NA          | NA       |
| 0    | 0    | 0    | 0 NA          | NA       |
| 0    | 0    | 0    | 0 NA          | NA       |
| 0    | 0    | 0    | 0 NA          | NA       |
| 0    | 0    | 0    | 0 NA          | NA       |
| 0    | 0    | 0    | 0 NA          | NA       |
| 0    | 0    | 0    | 0 NA          | NA       |
| 0    | 0    | 0    | 0 NA          | NA       |
| 0    | 0    | 0    | 0 NA          | NA       |
| 0    | 0    | 0    | 0 NA          | NA       |
| 0    | 0    | 0    | 0 NA          | NA       |
| 0    | 0    | 0    | 0 NA          | NA       |
| 0    | 0    | 0    | 0 NA          | NA       |
| 0    | 0    | 0    | 0 NA          | NA       |
| 0    | 0    | 0    | 0 NA          | NA       |
| 0    | 0    | 0    | 0 NA          | NA       |
| 0    | 0    | 0    | 0 NA          | NA       |
| 0    | 0    | 0    | 0 NA          | NA       |
| 0    | 0    | 0    | 0 NA          | NA       |
| 0    | 0    | 0    | 0 NA          | NA       |
| 0    | 0    | 0    | 0 NA          | NA       |
| 0    | 0    | 0    | 0 NA          | NA       |
| 0    | 0    | 0    | 0 NA          | NA       |
| 0    | 0    | 0    | 0 NA          | NA       |
| 0    | 0    | 0    | 0 NA          | NA       |
| 0    | 0    | 0    | 0 NA          | NA       |
| 0    | 0    | 0.02 | 0 NA          | NA       |
| 0.32 | 0.32 | 0.23 | 0.45 -0.12088 | 0.884731 |
| 0.07 | 0.05 | 0.05 | 0 NA          | NA       |
| 0.16 | 0.06 | 0.16 | 0.12 NA       | NA       |















|         |         |         |                  |          |
|---------|---------|---------|------------------|----------|
| 0       | 0       | 0       | 0 NA             | NA       |
| 0       | 0       | 0       | 0 NA             | NA       |
| 0       | 0       | 0       | 0 NA             | NA       |
| 0       | 0       | 0       | 0 NA             | NA       |
| 0       | 0       | 0       | 0 NA             | NA       |
| 0       | 0       | 0       | 0 NA             | NA       |
| 0       | 0       | 0       | 0 NA             | NA       |
| 0       | 0       | 0       | 0 NA             | NA       |
| 0       | 0       | 0       | 0 NA             | NA       |
| 0       | 0       | 0       | 0 NA             | NA       |
| 0       | 0       | 0       | 0 NA             | NA       |
| 4.57    | 2.87    | 5.56    | 4.72 0.048543    | 0.939167 |
| 0.36    | 0.13    | 0.12    | 0 NA             | NA       |
| 9.29    | 8.45    | 11.71   | 10 -0.10685      | 0.684108 |
| 0       | 0       | 0       | 0 NA             | NA       |
| 0.05    | 0       | 0       | 0 NA             | NA       |
| 0       | 0       | 0       | 0 NA             | NA       |
| 0       | 0       | 0       | 0 NA             | NA       |
| 4.5     | 4.91    | 4.16    | 5.2 0.147829     | 0.323263 |
| 0       | 0       | 0       | 0 NA             | NA       |
| 0       | 0       | 0       | 0 NA             | NA       |
| 0       | 0.18    | 0       | 0.06 NA          | NA       |
| 0.1     | 0       | 0       | 0 NA             | NA       |
| 0.16    | 0.04    | 0       | 0 NA             | NA       |
| 9.29    | 8.77    | 10.12   | 9.44 -0.12694    | 0.486424 |
| 0       | 0       | 0       | 0 NA             | NA       |
| 0       | 0       | 0       | 0 NA             | NA       |
| 0       | 0       | 0       | 0 NA             | NA       |
| 0       | 0       | 0.67    | 0.24 0.060522    | 0.945788 |
| 0       | 0       | 0       | 0 NA             | NA       |
| 0       | 0       | 0.71    | 0 NA             | NA       |
| 0       | 0       | 0       | 0 NA             | NA       |
| 0       | 0       | 0       | 0 NA             | NA       |
| 1.65    | 3.13    | 3.43    | 4.04 0.522461    | 0.136756 |
| 0       | 0       | 0       | 0 NA             | NA       |
| 0       | 0       | 0       | 0 NA             | NA       |
| 0       | 0       | 0       | 0 NA             | NA       |
| 2544.41 | 3102.89 | 2994.03 | 2866.41 0.260554 | 0.000807 |
| 0.14    | 0.21    | 0.16    | 0.15 0.136266    | 0.866298 |
| 0       | 0       | 0       | 0 NA             | NA       |
| 0       | 0       | 0       | 0 NA             | NA       |
| 0       | 0       | 0       | 0 NA             | NA       |
| 0       | 0       | 0       | 0 NA             | NA       |
| 0       | 0       | 0       | 0 NA             | NA       |

|       |       |       |       |          |          |
|-------|-------|-------|-------|----------|----------|
| 0     | 0     | 0     | 0.01  | NA       | NA       |
| 0     | 0     | 0     | 0     | NA       | NA       |
| 0     | 0     | 0.41  | 0.37  | NA       | NA       |
| 0.13  | 0.05  | 0.16  | 0.16  | NA       | NA       |
| 5.08  | 4.19  | 3.77  | 3.67  | -0.68247 | 8.39E-05 |
| 0     | 0     | 0     | 0     | NA       | NA       |
| 0.05  | 0.05  | 0.06  | 0.07  | -0.20753 | 0.80248  |
| 1.02  | 1.64  | 0.22  | 0.44  | NA       | NA       |
| 0     | 0.29  | 0     | 0     | NA       | NA       |
| 0     | 0     | 0     | 0     | NA       | NA       |
| 0     | 0     | 0.18  | 0     | NA       | NA       |
| 0     | 0     | 0     | 0     | NA       | NA       |
| 16.09 | 13.27 | 12.99 | 14.29 | -0.19725 | 0.26436  |
| 0     | 0     | 0     | 0     | NA       | NA       |
| 0     | 0     | 0     | 0     | NA       | NA       |
| 4     | 2.23  | 4.19  | 2.67  | 0.256677 | 0.352007 |
| 0     | 0     | 0     | 0     | NA       | NA       |
| 0.61  | 0.87  | 0.75  | 0.86  | 0.419967 | 0.334623 |
| 14.24 | 20.2  | 16.75 | 18.92 | 0.284531 | 0.009576 |
| 0     | 0     | 0     | 0     | NA       | NA       |
| 0     | 0     | 0     | 0     | NA       | NA       |
| 0     | 0     | 0     | 0     | NA       | NA       |
| 0     | 0     | 0     | 0     | NA       | NA       |
| 0     | 0     | 0     | 0     | NA       | NA       |
| 0     | 0     | 0     | 0     | NA       | NA       |
| 0.06  | 0.08  | 0     | 0     | NA       | NA       |
| 0     | 0     | 0     | 0     | NA       | NA       |
| 0     | 0     | 0     | 0     | NA       | NA       |
| 0     | 0     | 0     | 0     | NA       | NA       |
| 0     | 0     | 0     | 0     | NA       | NA       |
| 1.82  | 1.66  | 1.55  | 1.18  | -0.63186 | 0.00379  |
| 0     | 0     | 0     | 0     | NA       | NA       |
| 0     | 0     | 0     | 0     | NA       | NA       |
| 0     | 0     | 0     | 0     | NA       | NA       |
| 0     | 0     | 0     | 0     | NA       | NA       |
| 0     | 0     | 0     | 0     | NA       | NA       |
| 0.4   | 0.22  | 0.15  | 0.17  | -0.85915 | 0.110135 |
| 0     | 0.22  | 0     | 0     | NA       | NA       |
| 0     | 0     | 0     | 0.17  | NA       | NA       |
| 0.27  | 0     | 0     | 0     | NA       | NA       |
| 0.4   | 1.05  | 0.65  | 1.05  | 0.753063 | 0.215995 |
| 0     | 0     | 0.27  | 0     | NA       | NA       |
| 7.04  | 8.93  | 8.36  | 8.27  | -0.00139 | 0.994947 |
| 0     | 0     | 0     | 0     | NA       | NA       |

|      |      |      |      |          |          |
|------|------|------|------|----------|----------|
| 5.57 | 7.76 | 8.1  | 7.78 | 0.580432 | 6.94E-05 |
| 0    | 0    | 0    | 0    | NA       | NA       |
| 0    | 0    | 0    | 0    | NA       | NA       |
| 0    | 0    | 0    | 0    | NA       | NA       |
| 0    | 0    | 0    | 0    | NA       | NA       |
| 0.75 | 1.18 | 1.76 | 0.72 | 0.165081 | 0.809404 |
| 1.89 | 1.71 | 1.8  | 2.16 | -0.22686 | 0.401103 |
| 0.58 | 0.21 | 0.03 | 0.43 | NA       | NA       |
| 0    | 0    | 0    | 0    | NA       | NA       |
| 0.72 | 0.58 | 0.62 | 0.59 | 0.028121 | 0.967526 |
| 0    | 0    | 0.05 | 0    | NA       | NA       |
| 9.62 | 8.83 | 9.28 | 9.3  | -0.061   | 0.677137 |
| 0    | 0.1  | 0.05 | 0    | NA       | NA       |
| 0    | 0    | 0    | 0    | NA       | NA       |
| 0    | 0    | 0    | 0    | NA       | NA       |
| 0    | 0    | 0    | 0    | NA       | NA       |
| 0.57 | 0.49 | 0.34 | 0.19 | 0.51389  | 0.46341  |
| 0    | 0    | 0    | 0    | NA       | NA       |
| 0    | 0    | 0.03 | 0.06 | NA       | NA       |
| 0.11 | 0    | 0    | 0.1  | NA       | NA       |
| 0.05 | 0.03 | 0    | 0    | NA       | NA       |
| 0    | 0    | 0    | 0    | NA       | NA       |
| 2.8  | 1.97 | 2.28 | 1.71 | 0.054212 | 0.862624 |
| 0    | 0    | 0    | 0    | NA       | NA       |
| 0.43 | 0.25 | 0.35 | 0.35 | -0.35258 | 0.65463  |
| 0    | 0    | 0    | 0    | NA       | NA       |
| 0    | 0    | 0.13 | 0    | NA       | NA       |
| 0    | 0.19 | 0    | 0.2  | 0.206466 | 0.797097 |
| 0    | 0    | 0    | 0    | NA       | NA       |
| 0.31 | 0.22 | 0    | 0.02 | NA       | NA       |
| 0    | 0    | 0    | 0    | NA       | NA       |
| 0    | 0    | 0    | 0    | NA       | NA       |
| 0    | 0    | 0    | 0    | NA       | NA       |
| 0    | 0    | 0    | 0    | NA       | NA       |
| 0    | 0    | 0    | 0    | NA       | NA       |
| 5.53 | 4.99 | 4.96 | 5.57 | 0.03455  | 0.93072  |
| 0    | 0    | 0    | 0    | NA       | NA       |
| 9.51 | 7.85 | 8.15 | 7.68 | -0.29884 | 0.339607 |
| 0    | 0    | 0    | 0    | NA       | NA       |
| 0    | 0    | 0    | 0    | NA       | NA       |
| 0    | 0    | 0.07 | 0    | NA       | NA       |
| 0.11 | 0.24 | 0.07 | 0.34 | NA       | NA       |
| 0    | 0    | 0    | 0    | NA       | NA       |
| 0    | 0    | 0    | 0    | NA       | NA       |
| 0.81 | 1.29 | 0.7  | 0.47 | 0.044065 | 0.952539 |

|       |       |       |       |          |          |
|-------|-------|-------|-------|----------|----------|
| 0     | 0     | 0     | 0     | NA       | NA       |
| 0     | 0.12  | 0.61  | 0.39  | NA       | NA       |
| 86.45 | 53.86 | 54.17 | 53.41 | -0.60564 | 1.68E-06 |
| 2.48  | 0     | 1.77  | 0.97  | -0.44529 | 0.554664 |
| 0     | 0     | 0     | 0     | NA       | NA       |
| 0.73  | 0.17  | 0.33  | 0.31  | -0.22562 | 0.791573 |
| 0     | 0     | 0     | 0     | NA       | NA       |
| 0     | 0.07  | 0.06  | 0.58  | NA       | NA       |
| 0     | 0     | 0     | 0     | NA       | NA       |
| 0     | 0     | 0     | 0     | NA       | NA       |
| 0     | 0     | 0     | 0     | NA       | NA       |
| 0     | 0     | 0     | 0     | NA       | NA       |
| 0     | 0     | 0     | 0     | NA       | NA       |
| 1.75  | 0.31  | 1.25  | 0.47  | -2.02935 | 1.88E-10 |
| 0     | 0     | 0     | 0     | NA       | NA       |
| 0     | 0     | 0     | 0     | NA       | NA       |
| 0     | 0     | 0     | 0     | NA       | NA       |
| 0     | 0     | 0     | 0     | NA       | NA       |
| 0     | 0     | 0     | 0     | NA       | NA       |
| 0     | 0     | 0     | 0     | NA       | NA       |
| 0     | 0     | 0     | 0     | NA       | NA       |
| 0     | 0     | 0     | 0     | NA       | NA       |
| 52.98 | 47.84 | 57.35 | 37.95 | -0.02305 | 0.944642 |
| 0     | 0     | 0     | 0     | NA       | NA       |
| 0     | 0     | 0     | 0     | NA       | NA       |
| 0     | 0     | 0     | 0     | NA       | NA       |
| 0     | 0     | 0     | 0     | NA       | NA       |
| 0     | 0     | 0     | 0     | NA       | NA       |
| 0     | 0     | 0     | 0     | NA       | NA       |
| 1.6   | 2.35  | 2.39  | 1.4   | 0.431168 | 0.463597 |
| 3.36  | 0.91  | 1.22  | 0.97  | -0.81394 | 0.002704 |
| 0     | 0     | 0     | 0     | NA       | NA       |
| 0     | 0     | 0     | 0     | NA       | NA       |
| 25.07 | 27.64 | 39.9  | 24.15 | -0.15244 | 0.685207 |
| 3.65  | 7.3   | 4.86  | 5.29  | 0.497179 | 0.007067 |
| 0     | 0     | 0     | 0     | NA       | NA       |
| 0     | 0     | 0.08  | 0.09  | NA       | NA       |
| 1.27  | 1.37  | 1.62  | 2.08  | 0.527425 | 0.195652 |
| 0     | 0     | 0     | 0     | NA       | NA       |
| 0     | 0.05  | 0.01  | 0     | NA       | NA       |
| 0.14  | 0.16  | 0.35  | 0.41  | 0.088581 | 0.921496 |
| 0     | 0     | 0     | 0     | NA       | NA       |
| 0     | 0     | 0     | 0     | NA       | NA       |
| 0     | 0     | 0     | 0     | NA       | NA       |
| 0     | 0     | 0     | 0     | NA       | NA       |

|       |       |       |                |          |
|-------|-------|-------|----------------|----------|
| 0     | 0     | 0     | 0 NA           | NA       |
| 0.38  | 0.24  | 0.27  | 0.35 -0.9861   | 0.116527 |
| 0.3   | 0.36  | 0.25  | 0.28 -0.32183  | 0.614315 |
| 0     | 0     | 0     | 0 NA           | NA       |
| 0     | 0     | 0.18  | 0 NA           | NA       |
| 0     | 0     | 0     | 0 NA           | NA       |
| 3.81  | 10.9  | 7.23  | 8.23 0.641592  | 0.031343 |
| 0     | 0     | 0     | 0 NA           | NA       |
| 0     | 0     | 0     | 0.04 NA        | NA       |
| 0     | 0     | 0     | 0 NA           | NA       |
| 0.4   | 0.42  | 0.06  | 0.15 -0.54757  | 0.428887 |
| 0     | 0     | 0     | 0 NA           | NA       |
| 0     | 0     | 0     | 0 NA           | NA       |
| 0     | 0     | 0     | 0 NA           | NA       |
| 0     | 0.05  | 0     | 0.05 NA        | NA       |
| 0     | 0     | 0.02  | 0.11 NA        | NA       |
| 0     | 0     | 0     | 0 NA           | NA       |
| 0     | 0     | 0     | 0 NA           | NA       |
| 0     | 0     | 0     | 0 NA           | NA       |
| 0     | 0     | 0     | 0 NA           | NA       |
| 0.06  | 0.03  | 0.04  | 0.09 -0.30635  | 0.703988 |
| 1.69  | 0.86  | 0.16  | 0.76 -0.49971  | 0.501857 |
| 33.23 | 53.14 | 49.96 | 40.25 0.115858 | 0.427522 |
| 0     | 0     | 0     | 0 NA           | NA       |
| 0     | 0     | 0     | 0 NA           | NA       |
| 0     | 0     | 0     | 0 NA           | NA       |
| 0     | 0     | 0     | 0.14 NA        | NA       |
| 0.11  | 0.16  | 0     | 0 NA           | NA       |
| 0     | 0     | 0     | 0 NA           | NA       |
| 0     | 0     | 0     | 0 NA           | NA       |
| 0     | 0     | 0     | 0 NA           | NA       |
| 0.23  | 0.31  | 0.34  | 0.34 -0.27916  | 0.681006 |
| 0     | 0     | 0     | 0 NA           | NA       |
| 0     | 0.12  | 0.12  | 0 NA           | NA       |
| 0     | 0     | 0.06  | 0 NA           | NA       |
| 0     | 0     | 0     | 0 NA           | NA       |
| 0     | 0     | 0     | 0 NA           | NA       |
| 0.08  | 0.02  | 0.02  | 0 NA           | NA       |
| 0     | 0     | 0.14  | 0 NA           | NA       |
| 10.75 | 12.19 | 12.09 | 12.21 0.127376 | 0.274302 |
| 0     | 0     | 0     | 0 NA           | NA       |
| 0     | 0     | 0     | 0 NA           | NA       |
| 0.06  | 0.21  | 0.04  | 0.13 NA        | NA       |
| 0     | 0     | 0     | 0 NA           | NA       |
| 0     | 0     | 0     | 0 NA           | NA       |



|       |       |       |       |          |          |
|-------|-------|-------|-------|----------|----------|
| 0     | 0     | 0     | 0     | NA       | NA       |
| 0.17  | 0     | 0     | 0.13  | NA       | NA       |
| 1.69  | 1.26  | 1.31  | 0.86  | -0.46593 | 0.15537  |
| 0     | 0     | 0     | 0     | NA       | NA       |
| 0     | 0     | 0     | 0     | NA       | NA       |
| 0     | 0     | 0     | 0     | NA       | NA       |
| 0.26  | 0.37  | 0.5   | 0.19  | NA       | NA       |
| 0     | 0.12  | 0.11  | 0.12  | NA       | NA       |
| 0     | 0     | 0     | 0     | NA       | NA       |
| 0     | 0     | 0     | 0     | NA       | NA       |
| 0     | 0     | 0     | 0     | NA       | NA       |
| 0     | 0.28  | 0     | 0     | NA       | NA       |
| 0     | 0     | 0     | 0     | NA       | NA       |
| 0     | 0     | 0     | 0     | NA       | NA       |
| 4.19  | 1.5   | 3.64  | 2.09  | -0.75544 | 0.079037 |
| 0     | 0     | 0     | 0     | NA       | NA       |
| 0     | 0     | 0     | 0.13  | NA       | NA       |
| 0     | 0     | 0     | 0     | NA       | NA       |
| 0     | 0     | 0     | 0     | NA       | NA       |
| 0     | 0     | 0     | 0     | NA       | NA       |
| 0     | 0     | 0     | 0     | NA       | NA       |
| 0     | 0     | 0     | 0     | NA       | NA       |
| 5.46  | 7.24  | 6.26  | 6.51  | 0.140586 | 0.62424  |
| 0.03  | 0     | 0.02  | 0     | NA       | NA       |
| 18.54 | 15.04 | 15.35 | 16.77 | -0.21087 | 0.170856 |
| 6.64  | 7.77  | 7.17  | 6.78  | 0.350073 | 0.014595 |
| 0     | 0     | 0     | 0     | NA       | NA       |
| 0     | 0.28  | 0.39  | 0.44  | NA       | NA       |
| 1.47  | 1.36  | 1.25  | 1.04  | -0.06376 | 0.910474 |
| 0     | 0     | 0.05  | 0     | NA       | NA       |
| 0     | 0     | 0     | 0     | NA       | NA       |
| 0     | 0.16  | 0.06  | 0.07  | NA       | NA       |
| 0     | 0     | 0     | 0     | NA       | NA       |
| 2.66  | 1.57  | 2.16  | 0.59  | -0.09537 | 0.90979  |
| 0     | 0.1   | 0     | 0     | NA       | NA       |
| 0     | 0     | 0     | 0     | NA       | NA       |
| 38.81 | 12.51 | 17.89 | 14.29 | -1.4165  | 7.85E-25 |
| 0     | 0     | 0     | 0     | NA       | NA       |
| 0     | 0.36  | 0     | 0     | NA       | NA       |
| 0.5   | 0.36  | 0.17  | 0.39  | 0.21393  | 0.802539 |
| 0     | 0     | 0     | 0     | NA       | NA       |
| 0.14  | 0.05  | 0.1   | 0     | NA       | NA       |
| 8.58  | 9.98  | 9.59  | 9.98  | 0.212428 | 0.202153 |
| 0     | 0     | 0     | 0     | NA       | NA       |
| 0     | 0     | 0     | 0     | NA       | NA       |

|       |      |       |      |          |          |
|-------|------|-------|------|----------|----------|
| 0     | 0.21 | 0.95  | 0.29 | 0.258541 | 0.756231 |
| 0     | 0    | 0     | 0    | NA       | NA       |
| 1.02  | 0.76 | 1.28  | 0.83 | -0.20919 | 0.491527 |
| 0     | 0    | 0     | 0    | NA       | NA       |
| 0     | 0    | 0     | 0    | NA       | NA       |
| 0     | 0    | 0     | 0    | NA       | NA       |
| 12.07 | 8.02 | 11.27 | 12.2 | -0.5322  | 0.004695 |
| 5.36  | 5.38 | 4.32  | 8.86 | -0.46228 | 0.054722 |
| 0     | 0.07 | 0.13  | 0    | NA       | NA       |
| 0     | 0    | 0     | 0    | NA       | NA       |
| 0     | 0    | 0.04  | 0    | NA       | NA       |
| 0     | 0    | 0.08  | 0    | NA       | NA       |
| 0     | 0    | 0     | 0    | NA       | NA       |
| 0     | 0    | 0     | 0    | NA       | NA       |
| 0     | 0    | 0     | 0    | NA       | NA       |
| 0.66  | 0.32 | 0.31  | 0.72 | -0.47276 | 0.414206 |
| 0.92  | 0.22 | 0.71  | 0.92 | -0.81358 | 0.200269 |
| 0     | 0    | 0     | 0    | NA       | NA       |
| 0     | 0    | 0     | 0    | NA       | NA       |
| 0     | 0    | 0     | 0    | NA       | NA       |
| 0     | 0    | 0     | 0    | NA       | NA       |
| 2.12  | 1.71 | 3.13  | 2.74 | 0.534984 | 0.120665 |
| 0     | 0    | 0     | 0    | NA       | NA       |
| 0     | 0    | 0     | 0    | NA       | NA       |
| 0     | 0    | 0     | 0    | NA       | NA       |
| 0     | 0    | 0     | 0    | NA       | NA       |
| 0     | 0    | 0     | 0    | NA       | NA       |
| 0.15  | 0    | 0     | 0    | NA       | NA       |
| 0.51  | 0.98 | 1.52  | 0.64 | 0.237376 | 0.774862 |
| 0     | 0    | 0.08  | 0.09 | NA       | NA       |
| 0     | 0    | 0     | 0    | NA       | NA       |
| 0     | 0    | 0     | 0    | NA       | NA       |
| 0     | 0    | 0     | 0    | NA       | NA       |
| 0     | 0    | 0     | 0    | NA       | NA       |
| 0.75  | 0    | 0     | 0    | NA       | NA       |
| 0.09  | 0.2  | 0.19  | 0    | NA       | NA       |
| 5.57  | 7.52 | 7.61  | 8.22 | 0.302196 | 0.034735 |
| 0     | 0    | 0     | 0    | NA       | NA       |
| 0     | 0    | 0     | 0    | NA       | NA       |
| 0     | 0    | 0     | 0    | NA       | NA       |
| 0     | 0    | 0     | 0    | NA       | NA       |
| 0     | 0    | 0     | 0    | NA       | NA       |
| 0     | 0.21 | 0.19  | 0.11 | NA       | NA       |
| 0     | 0    | 0     | 0    | NA       | NA       |
| 0.51  | 1.1  | 0     | 0    | NA       | NA       |

|       |       |       |       |          |          |
|-------|-------|-------|-------|----------|----------|
| 13.88 | 5.41  | 7.09  | 7.29  | -1.09886 | 2.95E-19 |
| 7.29  | 6.69  | 8.32  | 7.23  | 0.054404 | 0.747737 |
| 61.1  | 52.9  | 50.19 | 48.56 | -0.37397 | 0.000212 |
| 1.77  | 1.37  | 1.53  | 1.23  | -0.09726 | 0.898972 |
| 0.05  | 0     | 0.07  | 0.05  | NA       | NA       |
| 0     | 0     | 0     | 0     | NA       | NA       |
| 0.02  | 0.04  | 0.08  | 0.14  | -0.24311 | 0.773158 |
| 0     | 0     | 0     | 0     | NA       | NA       |
| 0     | 0     | 0     | 0     | NA       | NA       |
| 0     | 0     | 0     | 0     | NA       | NA       |
| 0     | 0     | 0     | 0     | NA       | NA       |
| 0     | 0     | 0     | 0     | NA       | NA       |
| 0     | 0     | 0     | 0     | NA       | NA       |
| 0     | 0     | 0     | 0     | NA       | NA       |
| 0     | 0     | 0.03  | 0     | NA       | NA       |
| 0     | 0     | 0     | 0     | NA       | NA       |
| 0     | 0     | 0     | 0     | NA       | NA       |
| 0     | 0     | 0     | 0     | NA       | NA       |
| 0.05  | 0     | 0     | 0     | NA       | NA       |
| 0.19  | 0     | 0.61  | 0.28  | NA       | NA       |
| 0     | 0.04  | 0.05  | 0.02  | NA       | NA       |
| 0.04  | 0.06  | 0     | 0     | NA       | NA       |
| 0     | 0.01  | 0.01  | 0.01  | NA       | NA       |
| 3.22  | 3.12  | 2.9   | 3.02  | 0.096561 | 0.642754 |
| 0     | 0     | 0     | 0.71  | NA       | NA       |
| 0     | 0     | 0     | 0     | NA       | NA       |
| 18.29 | 32.84 | 24.44 | 28.12 | 0.723356 | 1.32E-08 |
| 0     | 0     | 0     | 0     | NA       | NA       |
| 0     | 0     | 0     | 0     | NA       | NA       |
| 0     | 0     | 0     | 0     | NA       | NA       |
| 0     | 0     | 0     | 0     | NA       | NA       |
| 0     | 0     | 0     | 0     | NA       | NA       |
| 6.98  | 8.44  | 6.97  | 10.15 | 0.092476 | 0.590945 |
| 0     | 0     | 0     | 0     | NA       | NA       |
| 0     | 0     | 0     | 0     | NA       | NA       |
| 0     | 0     | 0     | 0     | NA       | NA       |
| 0     | 0     | 0     | 0     | NA       | NA       |
| 0.57  | 0     | 0.08  | 0     | NA       | NA       |
| 0     | 0     | 0     | 0     | NA       | NA       |
| 0     | 0     | 0     | 0     | NA       | NA       |
| 0     | 0     | 0     | 0     | NA       | NA       |
| 0.29  | 0     | 0     | 0     | NA       | NA       |
| 4.79  | 6.55  | 6.42  | 6.94  | 0.250169 | 0.113404 |
| 0     | 0     | 0.09  | 0.08  | NA       | NA       |

|        |        |        |                 |          |
|--------|--------|--------|-----------------|----------|
| 0      | 0      | 0      | 0 NA            | NA       |
| 0      | 0      | 0.18   | 0 NA            | NA       |
| 0      | 0      | 0      | 0 NA            | NA       |
| 0      | 0      | 0      | 0 NA            | NA       |
| 0      | 0      | 0.1    | 0 NA            | NA       |
| 0      | 0      | 0      | 0 NA            | NA       |
| 14.06  | 11.89  | 14.48  | 14.2 0.002933   | 0.990286 |
| 0      | 0      | 0      | 0 NA            | NA       |
| 0      | 0      | 0.09   | 0 NA            | NA       |
| 0      | 0.09   | 0.17   | 0 NA            | NA       |
| 0      | 0      | 0      | 0.02 NA         | NA       |
| 0      | 0      | 0      | 0 NA            | NA       |
| 81.49  | 102.63 | 110.52 | 107.05 0.350667 | 2.32E-05 |
| 0      | 0      | 0      | 0 NA            | NA       |
| 2.68   | 3.4    | 3.47   | 3.15 0.098202   | 0.719609 |
| 0      | 0      | 0.04   | 0.04 NA         | NA       |
| 0      | 0      | 0.12   | 0 NA            | NA       |
| 26.24  | 45.38  | 36.89  | 40.41 0.608747  | 6.03E-08 |
| 0      | 0      | 0.05   | 0 NA            | NA       |
| 0.29   | 0      | 0      | 0 NA            | NA       |
| 5.08   | 4.55   | 4.08   | 2.86 0.177878   | 0.789073 |
| 0.3    | 0.21   | 0.19   | 0.44 NA         | NA       |
| 0      | 0      | 0      | 0 NA            | NA       |
| 0      | 0      | 0      | 0 NA            | NA       |
| 0      | 0      | 0      | 0.21 NA         | NA       |
| 0      | 0      | 0      | 0 NA            | NA       |
| 0      | 0      | 0      | 0 NA            | NA       |
| 0      | 0      | 0      | 0 NA            | NA       |
| 0      | 0      | 0      | 0.15 NA         | NA       |
| 0      | 0      | 0      | 0 NA            | NA       |
| 0.17   | 0.36   | 0.11   | 0 NA            | NA       |
| 283.92 | 262.71 | 281.69 | 274.98 -0.10426 | 0.243008 |
| 38.18  | 39.38  | 39.89  | 34.19 -0.03439  | 0.850231 |
| 0      | 0      | 0      | 0 NA            | NA       |
| 0      | 0      | 0.06   | 0.13 NA         | NA       |
| 56.68  | 40.6   | 53.2   | 48.72 -0.33907  | 2.62E-05 |
| 25.97  | 26.57  | 25.78  | 26.66 -0.03892  | 0.777313 |
| 0      | 0.57   | 0      | 0 NA            | NA       |
| 2.45   | 2.02   | 1.83   | 2.22 0.025733   | 0.959486 |
| 39.1   | 47.55  | 46.38  | 46.36 0.246801  | 0.009251 |
| 0.17   | 0.06   | 0      | 0 NA            | NA       |
| 0      | 0      | 0      | 0 NA            | NA       |
| 0      | 0      | 0      | 0 NA            | NA       |
| 0      | 0      | 0      | 0 NA            | NA       |
| 0      | 0      | 0      | 0 NA            | NA       |

|        |       |        |        |          |          |
|--------|-------|--------|--------|----------|----------|
| 0      | 0     | 0      | 0      | NA       | NA       |
| 5.17   | 0.83  | 7.08   | 7.67   | -0.11996 | 0.895033 |
| 0      | 0     | 0      | 0      | NA       | NA       |
| 0      | 0     | 0      | 0      | NA       | NA       |
| 0      | 0     | 0      | 0      | NA       | NA       |
| 1.07   | 1.63  | 1.45   | 1.87   | 0.009181 | 0.988237 |
| 0      | 0     | 0      | 0      | NA       | NA       |
| 0      | 0     | 0      | 0      | NA       | NA       |
| 1.52   | 2.71  | 3.37   | 3.24   | 0.365491 | 0.315688 |
| 0      | 0     | 0      | 0      | NA       | NA       |
| 0.15   | 0     | 0      | 0.11   | NA       | NA       |
| 0      | 0     | 0      | 0      | NA       | NA       |
| 0      | 0     | 0      | 0      | NA       | NA       |
| 0      | 0     | 0      | 0      | NA       | NA       |
| 0      | 0     | 0      | 0      | NA       | NA       |
| 0      | 0.13  | 0.19   | 0.12   | NA       | NA       |
| 9.77   | 12.62 | 13.45  | 15.15  | 0.289513 | 0.017063 |
| 0      | 0     | 0      | 0      | NA       | NA       |
| 44.67  | 48.36 | 44.96  | 45.41  | 0.006094 | 0.967323 |
| 0      | 0     | 0      | 0      | NA       | NA       |
| 0      | 0     | 0      | 0      | NA       | NA       |
| 13.5   | 15.74 | 13.55  | 16.43  | 0.339411 | 0.074285 |
| 0      | 0     | 0      | 0      | NA       | NA       |
| 0.36   | 0.26  | 0.26   | 0.44   | -0.02857 | 0.973164 |
| 9.35   | 22.83 | 15.75  | 20.37  | 1.032875 | 7.13E-16 |
| 0.14   | 0.1   | 0      | 0      | NA       | NA       |
| 0      | 0     | 0      | 0      | NA       | NA       |
| 0      | 0     | 0      | 0      | NA       | NA       |
| 12.74  | 11.03 | 10.14  | 9.97   | -0.31317 | 0.004482 |
| 1.59   | 2.64  | 2.31   | 2.28   | 0.463923 | 0.426494 |
| 0      | 0     | 0      | 0      | NA       | NA       |
| 0.16   | 0     | 0.1    | 0      | NA       | NA       |
| 0      | 0     | 0      | 0      | NA       | NA       |
| 0      | 0     | 0.1    | 0      | NA       | NA       |
| 0      | 0     | 0      | 0      | NA       | NA       |
| 0      | 0     | 0      | 0      | NA       | NA       |
| 0      | 0     | 0      | 0      | NA       | NA       |
| 0      | 0     | 0.06   | 0      | NA       | NA       |
| 0.23   | 0.33  | 0.08   | 0.09   | NA       | NA       |
| 0      | 0     | 0      | 0      | NA       | NA       |
| 0      | 0     | 0      | 0      | NA       | NA       |
| 165.78 | 212.3 | 189.77 | 195.02 | 0.181791 | 0.06412  |
| 0      | 0     | 0      | 0      | NA       | NA       |
| 71.08  | 53.72 | 69.93  | 63.06  | -0.24999 | 0.028736 |
| 0      | 0     | 0      | 0      | NA       | NA       |

|        |        |        |       |          |          |
|--------|--------|--------|-------|----------|----------|
| 0      | 0      | 0      | 0     | NA       | NA       |
| 0      | 0      | 0      | 0     | NA       | NA       |
| 0      | 0      | 0      | 0     | NA       | NA       |
| 0      | 0      | 0      | 0     | NA       | NA       |
| 0      | 0      | 0      | 0     | NA       | NA       |
| 0      | 0      | 0      | 0     | NA       | NA       |
| 0      | 0      | 0      | 0     | NA       | NA       |
| 0      | 0      | 0      | 0     | NA       | NA       |
| 0.12   | 0      | 0.04   | 0.09  | NA       | NA       |
| 929.27 | 814.94 | 874.12 | 762.4 | -0.22627 | 0.037253 |
| 2.78   | 1.6    | 1.67   | 2.09  | -0.93633 | 0.001661 |
| 0      | 0      | 0      | 0     | NA       | NA       |
| 0      | 0      | 0      | 0     | NA       | NA       |
| 0      | 0      | 0      | 0     | NA       | NA       |
| 0      | 0      | 0      | 0     | NA       | NA       |
| 17.93  | 22.09  | 17.82  | 20.93 | 0.252919 | 0.024334 |
| 0      | 0      | 0      | 0     | NA       | NA       |
| 0      | 0      | 0      | 0     | NA       | NA       |
| 0      | 0.07   | 0.13   | 0     | NA       | NA       |
| 0      | 0      | 0      | 0     | NA       | NA       |
| 2.55   | 1.49   | 2      | 2.37  | -0.97134 | 0.000576 |
| 0      | 0      | 0      | 0     | NA       | NA       |
| 6.64   | 4.96   | 5.52   | 6.59  | -0.09045 | 0.600485 |
| 0      | 0      | 0      | 0     | NA       | NA       |
| 0      | 0      | 0      | 0     | NA       | NA       |
| 0      | 0      | 0      | 0     | NA       | NA       |
| 0      | 0      | 0.5    | 0.26  | NA       | NA       |
| 0      | 0.29   | 0      | 0     | NA       | NA       |
| 0.3    | 0.3    | 0.13   | 0.17  | -0.37808 | 0.626953 |
| 0      | 0      | 0      | 0     | NA       | NA       |
| 0      | 0      | 0      | 0     | NA       | NA       |
| 12.31  | 10.94  | 10.91  | 8.92  | -0.15408 | 0.420173 |
| 0      | 0      | 0      | 0     | NA       | NA       |
| 25.45  | 22.68  | 24.12  | 22.81 | -0.14339 | 0.237304 |
| 0      | 0      | 0      | 0     | NA       | NA       |
| 0      | 0      | 0      | 0     | NA       | NA       |
| 0      | 0      | 0      | 0     | NA       | NA       |
| 0      | 0      | 0      | 0     | NA       | NA       |
| 0.06   | 0      | 0      | 0     | NA       | NA       |
| 0      | 0      | 0      | 0     | NA       | NA       |
| 0.74   | 1.25   | 1.2    | 1.64  | 0.3168   | 0.306481 |
| 0      | 0      | 0      | 0     | NA       | NA       |
| 2.32   | 1.64   | 1.58   | 2.46  | -0.07623 | 0.801182 |
| 1.55   | 1.04   | 1.05   | 0.32  | -0.43733 | 0.395849 |
| 0      | 0      | 0      | 0     | NA       | NA       |

|       |      |      |       |          |          |
|-------|------|------|-------|----------|----------|
| 0     | 0    | 0    | 0.06  | NA       | NA       |
| 0.12  | 0.09 | 0    | 0     | NA       | NA       |
| 0     | 0    | 0    | 0     | NA       | NA       |
| 0.36  | 0    | 0.23 | 0     | NA       | NA       |
| 0     | 0    | 0.15 | 0     | NA       | NA       |
| 0     | 0    | 0    | 0     | NA       | NA       |
| 3.4   | 2.45 | 1.8  | 2.43  | -0.27006 | 0.514255 |
| 0     | 0    | 0    | 0     | NA       | NA       |
| 0     | 0    | 0    | 0     | NA       | NA       |
| 8.05  | 5.2  | 6.96 | 6.04  | -0.27015 | 0.047695 |
| 0     | 0    | 0    | 0     | NA       | NA       |
| 0.35  | 0.32 | 0.65 | 0.8   | 0.457505 | 0.535925 |
| 0     | 0    | 0    | 0.05  | NA       | NA       |
| 16.43 | 17.3 | 20.3 | 19.89 | -0.00888 | 0.962234 |
| 0     | 0    | 0.74 | 0     | -0.06362 | 0.888287 |
| 0     | 0    | 0    | 0     | NA       | NA       |
| 0.43  | 0.3  | 0.25 | 0.53  | -0.46406 | 0.536828 |
| 0     | 0    | 0.16 | 0     | NA       | NA       |
| 2.42  | 1.28 | 1.12 | 1.93  | -0.59519 | 0.175539 |
| 0     | 0    | 0    | 0     | NA       | NA       |
| 0     | 0    | 0    | 0     | NA       | NA       |
| 0     | 0    | 0    | 0     | NA       | NA       |
| 0     | 0    | 0    | 0     | NA       | NA       |
| 0     | 0    | 0    | 0     | NA       | NA       |
| 0     | 0    | 0    | 0     | NA       | NA       |
| 0     | 0    | 0    | 0     | NA       | NA       |
| 0     | 0    | 0    | 0     | NA       | NA       |
| 0.1   | 0    | 0.13 | 0     | NA       | NA       |
| 0.09  | 0.06 | 0.17 | 0.13  | NA       | NA       |
| 0     | 0    | 0    | 0     | NA       | NA       |
| 1.09  | 0.5  | 0.73 | 0.6   | -0.73765 | 0.246804 |
| 0     | 0.05 | 0    | 0.1   | NA       | NA       |
| 1.01  | 1.27 | 1.3  | 1.11  | 0.167851 | 0.725188 |
| 0.34  | 0.45 | 0.45 | 0.84  | -0.41166 | 0.560623 |
| 0     | 0    | 0    | 0     | NA       | NA       |
| 0     | 0.03 | 0.03 | 0     | NA       | NA       |
| 0     | 0    | 0    | 0     | NA       | NA       |
| 0     | 0    | 0    | 0     | NA       | NA       |
| 0.46  | 0.49 | 0.51 | 0.26  | -0.15305 | 0.837191 |
| 1.6   | 2.04 | 2.23 | 2.72  | 0.218586 | 0.478513 |
| 3.89  | 4.55 | 2.73 | 4.12  | 0.180908 | 0.801875 |
| 1.71  | 0.98 | 1.27 | 2.03  | -0.25048 | 0.513736 |
| 0     | 0    | 0    | 0     | NA       | NA       |
| 0     | 0    | 0    | 0     | NA       | NA       |
| 0     | 0    | 0    | 0     | NA       | NA       |

|        |        |        |        |          |          |
|--------|--------|--------|--------|----------|----------|
| 0.91   | 0.7    | 1.02   | 1      | -0.0387  | 0.963466 |
| 7.88   | 5.6    | 5.78   | 5.74   | -0.56289 | 4.14E-05 |
| 9.76   | 13.96  | 10.55  | 13.02  | 0.105271 | 0.739018 |
| 0      | 0      | 0      | 0      | NA       | NA       |
| 65.03  | 102.83 | 89.26  | 107.31 | 0.562433 | 1.11E-09 |
| 0      | 0      | 0      | 0      | NA       | NA       |
| 0      | 0      | 0      | 0      | NA       | NA       |
| 0      | 0      | 0      | 0      | NA       | NA       |
| 0.05   | 0.16   | 0      | 0      | NA       | NA       |
| 33.64  | 32.92  | 33.68  | 34.23  | -0.05901 | 0.701402 |
| 17.56  | 8      | 9.73   | 10.98  | -0.76807 | 9.21E-08 |
| 0      | 0      | 0      | 0      | NA       | NA       |
| 0.37   | 0      | 0      | 0      | NA       | NA       |
| 1.16   | 0      | 0      | 0.21   | NA       | NA       |
| 0      | 0      | 0.02   | 0.1    | NA       | NA       |
| 0      | 0      | 0      | 0      | NA       | NA       |
| 0      | 0.18   | 0      | 0.38   | NA       | NA       |
| 0      | 0      | 0      | 0      | NA       | NA       |
| 0      | 0      | 0      | 0      | NA       | NA       |
| 0      | 0      | 0      | 0      | NA       | NA       |
| 0      | 0      | 0      | 0      | NA       | NA       |
| 14.47  | 25.27  | 21.41  | 22.99  | 0.776769 | 3.51E-13 |
| 0      | 0      | 0      | 0      | NA       | NA       |
| 0      | 0      | 0      | 0      | NA       | NA       |
| 0      | 0      | 0      | 0      | NA       | NA       |
| 0      | 0      | 0      | 0      | NA       | NA       |
| 0      | 0      | 0      | 0      | NA       | NA       |
| 0      | 0      | 0      | 0      | NA       | NA       |
| 1.43   | 1.38   | 0.88   | 1.6    | -0.74935 | 0.020298 |
| 0      | 0      | 0      | 0      | NA       | NA       |
| 2.85   | 3.57   | 3.13   | 3.65   | 0.149232 | 0.528582 |
| 0.32   | 0.18   | 0.29   | 0.3    | -0.57103 | 0.423274 |
| 0      | 0      | 0      | 0      | NA       | NA       |
| 0      | 0      | 0      | 0      | NA       | NA       |
| 0      | 0      | 0      | 0.01   | NA       | NA       |
| 0.15   | 0.22   | 0.26   | 0.17   | 0.165872 | 0.846993 |
| 132.47 | 141.45 | 155.42 | 155.25 | 0.10629  | 0.305173 |
| 0      | 0      | 0      | 0      | NA       | NA       |
| 0      | 0      | 0      | 0      | NA       | NA       |
| 8.94   | 6.16   | 6.39   | 6.47   | -0.3359  | 0.058578 |
| 0      | 0      | 0      | 0.05   | NA       | NA       |
| 0      | 0      | 0      | 0      | NA       | NA       |
| 2.87   | 2.17   | 3.88   | 2.12   | -0.21361 | 0.694087 |
| 0      | 0.16   | 0.43   | 0      | NA       | NA       |
| 14.09  | 13.93  | 12.68  | 13.95  | -0.09839 | 0.511909 |



|        |       |       |       |          |          |
|--------|-------|-------|-------|----------|----------|
| 0.55   | 0.45  | 0.5   | 0.44  | -0.39428 | 0.532755 |
| 0.11   | 0.15  | 0.14  | 0.4   | NA       | NA       |
| 0.08   | 0.05  | 0.29  | 0.3   | 0.702995 | 0.304281 |
| 0      | 0     | 0     | 0     | NA       | NA       |
| 0      | 0     | 0     | 0     | NA       | NA       |
| 0      | 0     | 0     | 0     | NA       | NA       |
| 10.58  | 9.43  | 8.53  | 11.83 | -0.01923 | 0.94312  |
| 0      | 0     | 0     | 0     | NA       | NA       |
| 0      | 0     | 0     | 0     | NA       | NA       |
| 0      | 0.04  | 0     | 0.05  | NA       | NA       |
| 0      | 0     | 0     | 0     | NA       | NA       |
| 0      | 0     | 0     | 0     | NA       | NA       |
| 17.81  | 12.3  | 20.14 | 17.64 | -0.52423 | 2.19E-05 |
| 33.01  | 38.89 | 36.67 | 39.2  | 0.132712 | 0.21197  |
| 0      | 0     | 0     | 0     | NA       | NA       |
| 0      | 0     | 0     | 0     | NA       | NA       |
| 24.59  | 33.5  | 33.02 | 30.81 | 0.437559 | 0.003182 |
| 0      | 0     | 0     | 0     | NA       | NA       |
| 0.42   | 0.34  | 0.45  | 0.52  | -0.06421 | 0.850224 |
| 0      | 0     | 0     | 0     | NA       | NA       |
| 0      | 0     | 0     | 0     | NA       | NA       |
| 0      | 0     | 0.01  | 0.01  | NA       | NA       |
| 0      | 0     | 0     | 0     | NA       | NA       |
| 0      | 0     | 0     | 0     | NA       | NA       |
| 0.05   | 0     | 0     | 0     | NA       | NA       |
| 0      | 0     | 0     | 0     | NA       | NA       |
| 31.17  | 40.33 | 36.9  | 37.71 | 0.130721 | 0.334056 |
| 0      | 0     | 0.13  | 0     | NA       | NA       |
| 0      | 0     | 0     | 0     | NA       | NA       |
| 0      | 0     | 0     | 0     | NA       | NA       |
| 0      | 0     | 0     | 0     | NA       | NA       |
| 0      | 0     | 0     | 0     | NA       | NA       |
| 114.31 | 93.62 | 95.92 | 96.81 | -0.33441 | 7.90E-05 |
| 0      | 0     | 0     | 0     | NA       | NA       |
| 0      | 0     | 0.13  | 0     | NA       | NA       |
| 0      | 0.05  | 0     | 0     | NA       | NA       |
| 0      | 0     | 0     | 0     | NA       | NA       |
| 0      | 0     | 0     | 0     | NA       | NA       |
| 0      | 0     | 0     | 0     | NA       | NA       |
| 0      | 0     | 0     | 0     | NA       | NA       |
| 0      | 0.05  | 0     | 0     | NA       | NA       |
| 76.38  | 60.37 | 64.37 | 64.41 | -0.32229 | 0.000281 |
| 0      | 0     | 0     | 0     | NA       | NA       |
| 21.91  | 25.97 | 25.06 | 23.79 | 0.00132  | 0.995822 |
| 0      | 0     | 0     | 0     | NA       | NA       |

|       |       |       |                |          |
|-------|-------|-------|----------------|----------|
| 0     | 0.15  | 0     | 0 NA           | NA       |
| 0     | 0     | 0     | 0 NA           | NA       |
| 2.39  | 0     | 1.04  | 0.57 NA        | NA       |
| 0     | 0     | 0     | 0 NA           | NA       |
| 3.48  | 2.6   | 3     | 2.27 -0.46471  | 0.076745 |
| 0     | 0     | 0     | 0 NA           | NA       |
| 0     | 0     | 0     | 0 NA           | NA       |
| 1.72  | 3.95  | 7.72  | 4.16 0.631273  | 0.103406 |
| 0     | 0     | 0     | 0 NA           | NA       |
| 18.89 | 19.03 | 15.32 | 17.93 0.1462   | 0.368657 |
| 1.78  | 4.59  | 4.64  | 2.6 0.779325   | 0.002122 |
| 0.14  | 0.1   | 0     | 0 NA           | NA       |
| 0     | 0     | 0     | 0 NA           | NA       |
| 0     | 0     | 0     | 0 NA           | NA       |
| 0.12  | 0.12  | 0.21  | 0.05 NA        | NA       |
| 0     | 0     | 0     | 0 NA           | NA       |
| 8.41  | 5.91  | 7.09  | 7.09 -0.18544  | 0.425817 |
| 6.69  | 12.25 | 9.4   | 10.55 0.396781 | 0.092433 |
| 0     | 0     | 0     | 0 NA           | NA       |
| 0     | 0.15  | 0.07  | 0 NA           | NA       |
| 0     | 0.02  | 0     | 0.03 NA        | NA       |
| 2.33  | 2.14  | 2.13  | 3.28 -0.01486  | 0.974782 |
| 0     | 0     | 0     | 0 NA           | NA       |
| 0     | 0     | 0     | 0 NA           | NA       |
| 23.11 | 31.08 | 24.27 | 28.05 0.233492 | 0.121217 |
| 0     | 0     | 0     | 0 NA           | NA       |
| 5.19  | 2.31  | 1.97  | 2.92 -0.94474  | 1.64E-05 |
| 7.18  | 7.58  | 6.4   | 8.36 -0.10436  | 0.53784  |
| 0     | 0     | 0     | 0 NA           | NA       |
| 0.29  | 0.9   | 0.74  | 0.65 1.164961  | 0.039133 |
| 0.3   | 0.32  | 0.5   | 0.67 -0.18796  | 0.828626 |
| 0.41  | 0.25  | 0.15  | 0.17 -0.46507  | 0.484492 |
| 1     | 0.49  | 0.1   | 0.19 -0.42498  | 0.573318 |
| 1.31  | 0.71  | 1.25  | 0.7 -0.62733   | 0.057305 |
| 0     | 0     | 0     | 0 NA           | NA       |
| 0     | 0     | 0     | 0 NA           | NA       |
| 7.12  | 5.38  | 8.77  | 6.84 -0.16971  | 0.504223 |
| 19.77 | 15.27 | 17.05 | 13.2 -0.34056  | 0.054871 |
| 0     | 0     | 0     | 0 NA           | NA       |
| 0.36  | 0.63  | 0.5   | 0.94 0.736646  | 0.238848 |
| 0.09  | 0.07  | 0.1   | 0.29 NA        | NA       |
| 0     | 0     | 0     | 0 NA           | NA       |
| 0.1   | 0     | 0.06  | 0 NA           | NA       |
| 0     | 0     | 0     | 0 NA           | NA       |
| 0     | 0     | 0     | 0 NA           | NA       |

|       |       |       |       |          |          |
|-------|-------|-------|-------|----------|----------|
| 0     | 0.4   | 0.23  | 0.44  | 1.020515 | 0.094381 |
| 0     | 0     | 0     | 0     | NA       | NA       |
| 0.12  | 0.31  | 0.18  | 0.44  | 0.257394 | 0.756567 |
| 0     | 0     | 0     | 0     | NA       | NA       |
| 0     | 0     | 0     | 0.11  | NA       | NA       |
| 0     | 0     | 0     | 0     | NA       | NA       |
| 0     | 0     | 0     | 0     | NA       | NA       |
| 1.01  | 0.84  | 1.12  | 0.68  | -0.05949 | 0.923197 |
| 0     | 0     | 0     | 0     | NA       | NA       |
| 0.2   | 0.13  | 0.37  | 0.58  | NA       | NA       |
| 0     | 0     | 0     | 0     | NA       | NA       |
| 0     | 0     | 0     | 0     | NA       | NA       |
| 0.01  | 0     | 0.02  | 0.05  | -0.33339 | 0.66672  |
| 0.14  | 0.02  | 0.06  | 0     | NA       | NA       |
| 0     | 0     | 0     | 0     | NA       | NA       |
| 104.3 | 89.62 | 95.11 | 89.79 | -0.19528 | 0.089906 |
| 0     | 0     | 0     | 0     | NA       | NA       |
| 0     | 0     | 0     | 0     | NA       | NA       |
| 0     | 0     | 0     | 0     | NA       | NA       |
| 0     | 0     | 0     | 0     | NA       | NA       |
| 0.09  | 0     | 0.06  | 0     | NA       | NA       |
| 0     | 0     | 0     | 0     | NA       | NA       |
| 0     | 0     | 0.06  | 0.14  | NA       | NA       |
| 0     | 0     | 0     | 0     | NA       | NA       |
| 0     | 0     | 0     | 0     | NA       | NA       |
| 0     | 0     | 0     | 0     | NA       | NA       |
| 0.08  | 0.1   | 0.06  | 0.12  | NA       | NA       |
| 23.93 | 10.2  | 15.61 | 11.5  | -0.90783 | 2.04E-07 |
| 0     | 0     | 0     | 0     | NA       | NA       |
| 0.39  | 0.28  | 0.29  | 0.46  | -0.22061 | 0.685188 |
| 0     | 0     | 0     | 0     | NA       | NA       |
| 0     | 0     | 0     | 0     | NA       | NA       |
| 0     | 0     | 0     | 0     | NA       | NA       |
| 0     | 0     | 0     | 0     | NA       | NA       |
| 0     | 0     | 0     | 0     | NA       | NA       |
| 0     | 0     | 0     | 0     | NA       | NA       |
| 0     | 0     | 0     | 0     | NA       | NA       |
| 0.26  | 0     | 0.16  | 0     | NA       | NA       |
| 0     | 0     | 0     | 0     | NA       | NA       |
| 4.56  | 3.85  | 4     | 4.4   | -0.5051  | 0.175193 |
| 0     | 0     | 0     | 0     | NA       | NA       |
| 0     | 0     | 0     | 0     | NA       | NA       |
| 0     | 0     | 0     | 0     | NA       | NA       |
| 0     | 0     | 0     | 0     | NA       | NA       |
| 0     | 0     | 0     | 0     | NA       | NA       |

|       |       |       |       |          |          |
|-------|-------|-------|-------|----------|----------|
| 0.67  | 1.94  | 0.79  | 1.03  | NA       | NA       |
| 1.84  | 2.17  | 2.12  | 2.35  | 0.264463 | 0.489971 |
| 0     | 0     | 0     | 0     | NA       | NA       |
| 0     | 0     | 0     | 0     | NA       | NA       |
| 0     | 0     | 0     | 0     | NA       | NA       |
| 0     | 0     | 0     | 0     | NA       | NA       |
| 0     | 0     | 0     | 0     | NA       | NA       |
| 0     | 0     | 0     | 0     | NA       | NA       |
| 0     | 0     | 0     | 0     | NA       | NA       |
| 0     | 0     | 0     | 0     | NA       | NA       |
| 3.14  | 5.38  | 4.94  | 4.22  | 0.258983 | 0.345805 |
| 0     | 0     | 0     | 0     | NA       | NA       |
| 0     | 0     | 0.02  | 0.06  | NA       | NA       |
| 0.4   | 0.56  | 0.52  | 0.57  | 0.775492 | 0.063583 |
| 0     | 0     | 0     | 0     | NA       | NA       |
| 0     | 0     | 0     | 0     | NA       | NA       |
| 0     | 0     | 0     | 0     | NA       | NA       |
| 0     | 0     | 0     | 0     | NA       | NA       |
| 0.01  | 0     | 0     | 0     | NA       | NA       |
| 0     | 0.06  | 0     | 0     | NA       | NA       |
| 0.1   | 0.04  | 0.01  | 0.05  | -0.87731 | 0.182838 |
| 0.16  | 0     | 0     | 0     | NA       | NA       |
| 0     | 0     | 0     | 0     | NA       | NA       |
| 0     | 0     | 0     | 0     | NA       | NA       |
| 0     | 0     | 0     | 0     | NA       | NA       |
| 3.42  | 3.47  | 3.13  | 2.87  | 0.011872 | 0.968592 |
| 0.1   | 0.28  | 0.26  | 0.22  | NA       | NA       |
| 0     | 0     | 0.22  | 0     | NA       | NA       |
| 0     | 0     | 0.01  | 0.02  | NA       | NA       |
| 0     | 0     | 0     | 0     | NA       | NA       |
| 0     | 0.04  | 0     | 0     | NA       | NA       |
| 0     | 0.09  | 0     | 0     | NA       | NA       |
| 0     | 0.03  | 0     | 0     | NA       | NA       |
| 2.25  | 2.46  | 3.19  | 1.59  | 0.41258  | 0.509848 |
| 1.24  | 0.03  | 0.06  | 0.03  | -3.86288 | 1.58E-20 |
| 0     | 0     | 0     | 0     | NA       | NA       |
| 0     | 0.18  | 0     | 0.17  | 0.958579 | 0.090409 |
| 13.14 | 23.34 | 24.75 | 24.65 | 0.839969 | 4.20E-09 |
| 0     | 0     | 0     | 0     | NA       | NA       |
| 0     | 0     | 0     | 0     | NA       | NA       |
| 0     | 0     | 0     | 0     | NA       | NA       |
| 0     | 0     | 0     | 0     | NA       | NA       |
| 5.45  | 3.39  | 3.64  | 3.52  | -0.60819 | 9.83E-06 |
| 0     | 0     | 0     | 0     | NA       | NA       |

|        |        |       |        |          |          |
|--------|--------|-------|--------|----------|----------|
| 0      | 0      | 0     | 0      | NA       | NA       |
| 0.16   | 0.47   | 0.7   | 0.13   | 0.311714 | 0.699935 |
| 0      | 0      | 0     | 0      | NA       | NA       |
| 0      | 0      | 0     | 0      | NA       | NA       |
| 2.88   | 0      | 1.65  | 0.82   | -0.57458 | 0.380754 |
| 0.23   | 0      | 0.09  | 0.13   | -1.10663 | 0.071407 |
| 1.14   | 1.24   | 0.88  | 1.27   | 0.021524 | 0.968828 |
| 1.26   | 0.96   | 1.76  | 1.67   | 0.316059 | 0.612623 |
| 0      | 0      | 0.02  | 0      | NA       | NA       |
| 0      | 0      | 0     | 0      | NA       | NA       |
| 0      | 0      | 0     | 0      | NA       | NA       |
| 0.06   | 0      | 0.12  | 0      | NA       | NA       |
| 0      | 0      | 0     | 0      | NA       | NA       |
| 0      | 0.12   | 0     | 0      | NA       | NA       |
| 0      | 0      | 0     | 0      | NA       | NA       |
| 0.19   | 0.03   | 0.04  | 0      | -0.73486 | 0.27836  |
| 0      | 0      | 0     | 0      | NA       | NA       |
| 0      | 0      | 0     | 0      | NA       | NA       |
| 0      | 0      | 0     | 0      | NA       | NA       |
| 0.07   | 0.02   | 0.29  | 0      | NA       | NA       |
| 20.64  | 30.7   | 30.34 | 33.01  | 0.537174 | 9.40E-09 |
| 0      | 0      | 0     | 0      | NA       | NA       |
| 0      | 0      | 0     | 0      | NA       | NA       |
| 0      | 0      | 0     | 0      | NA       | NA       |
| 13.65  | 21.49  | 14.39 | 15.23  | 0.342841 | 0.061355 |
| 0      | 0      | 0     | 0      | NA       | NA       |
| 0      | 0.01   | 0.03  | 0      | NA       | NA       |
| 1.61   | 0      | 0.69  | 0.6    | -0.63226 | 0.369468 |
| 0      | 0      | 0     | 0      | NA       | NA       |
| 0.05   | 0.09   | 0.04  | 0.21   | 0.668084 | 0.340787 |
| 0      | 0      | 0     | 0      | NA       | NA       |
| 107.39 | 101.33 | 99.51 | 114.07 | -0.0721  | NA       |
| 0      | 0      | 0     | 0      | NA       | NA       |
| 0      | 0      | 0     | 0      | NA       | NA       |
| 0      | 0      | 0     | 0.01   | NA       | NA       |
| 0      | 0      | 0     | 0      | NA       | NA       |
| 0.15   | 1.18   | 0.34  | 0.2    | NA       | NA       |
| 0      | 0      | 0     | 0      | NA       | NA       |
| 0      | 0      | 0     | 0      | NA       | NA       |
| 2.64   | 2.61   | 2.84  | 3.18   | 0.020056 | 0.950846 |
| 0      | 0      | 0     | 0      | NA       | NA       |
| 3.3    | 7.32   | 5.25  | 4.21   | 0.351036 | 0.197985 |
| 1.71   | 0.82   | 0     | 0.82   | NA       | NA       |
| 0      | 0      | 0     | 0      | NA       | NA       |
| 0      | 0      | 0     | 0      | NA       | NA       |

|       |       |       |                |          |
|-------|-------|-------|----------------|----------|
| 0     | 0     | 0     | 0 NA           | NA       |
| 0.51  | 1.6   | 0.89  | 0.63 1.488168  | 0.000162 |
| 0     | 0     | 0     | 0 NA           | NA       |
| 0     | 0     | 0     | 0 NA           | NA       |
| 0     | 0     | 0     | 0 NA           | NA       |
| 0     | 0     | 0.15  | 0.17 NA        | NA       |
| 0     | 0     | 0     | 0 NA           | NA       |
| 0.05  | 0.12  | 0.16  | 0.19 0.21194   | 0.786029 |
| 0     | 0     | 0     | 0 NA           | NA       |
| 0     | 0     | 0     | 0 NA           | NA       |
| 0     | 0.24  | 0     | 0 NA           | NA       |
| 0     | 0     | 0     | 0 NA           | NA       |
| 0     | 0     | 0     | 0 NA           | NA       |
| 0     | 0     | 0     | 0 NA           | NA       |
| 0     | 0     | 0     | 0 NA           | NA       |
| 0     | 0     | 0     | 0 NA           | NA       |
| 0     | 0     | 0     | 0 NA           | NA       |
| 0     | 0     | 0     | 0.03 NA        | NA       |
| 0     | 0     | 0     | 0 NA           | NA       |
| 1.25  | 1.77  | 1.15  | 2.03 -0.19481  | 0.740036 |
| 30.52 | 43.51 | 40.86 | 43.4 0.14939   | 0.128727 |
| 0     | 0     | 0     | 0 NA           | NA       |
| 0     | 0     | 0     | 0 NA           | NA       |
| 0     | 0     | 0     | 0 NA           | NA       |
| 0     | 0     | 0     | 0 NA           | NA       |
| 0     | 0     | 0     | 0 NA           | NA       |
| 0     | 0     | 0     | 0 NA           | NA       |
| 0     | 0     | 0     | 0 NA           | NA       |
| 0     | 0     | 0     | 0 NA           | NA       |
| 0     | 0     | 0     | 0 NA           | NA       |
| 0     | 0     | 0     | 0 NA           | NA       |
| 0.08  | 0.02  | 0.04  | 0.02 -0.73033  | 0.289393 |
| 0     | 0     | 0     | 0 NA           | NA       |
| 0.6   | 0.18  | 0.29  | 0.2 -0.28985   | 0.683537 |
| 0     | 0     | 0     | 0 NA           | NA       |
| 0     | 0     | 0     | 0 NA           | NA       |
| 0     | 0     | 0     | 0 NA           | NA       |
| 12.44 | 21.2  | 17.12 | 20.18 0.601602 | 3.72E-06 |
| 0.21  | 0.03  | 0.09  | 0.13 -0.58978  | 0.412623 |
| 0     | 0.14  | 0.08  | 0.02 0.79284   | 0.223214 |
| 6.64  | 6.46  | 6.6   | 5.77 0.050846  | 0.781175 |
| 6.64  | 6.46  | 6.6   | 5.77 0.050846  | 0.781175 |
| 4.03  | 4.93  | 4.18  | 4.67 0.356779  | 0.189933 |
| 0     | 0     | 0     | 0 NA           | NA       |
| 0.22  | 0     | 0.21  | 0.16 NA        | NA       |

|       |       |       |                |          |
|-------|-------|-------|----------------|----------|
| 0     | 0     | 0     | 0 NA           | NA       |
| 0     | 0     | 0     | 0 NA           | NA       |
| 63.63 | 96.2  | 79.26 | 79.97 0.268902 | 0.046931 |
| 0     | 0     | 0     | 0 NA           | NA       |
| 0     | 0     | 0     | 0 NA           | NA       |
| 0     | 0     | 0     | 0 NA           | NA       |
| 18.28 | 20.65 | 18.6  | 20.03 0.192843 | 0.068236 |
| 0     | 0     | 0     | 0 NA           | NA       |
| 3.34  | 3.37  | 2.14  | 2.5 -0.37308   | 0.20595  |
| 0     | 0     | 0     | 0 NA           | NA       |
| 0     | 0     | 0     | 0 NA           | NA       |
| 0.08  | 0     | 0     | 0 NA           | NA       |
| 4.09  | 3.79  | 3.14  | 3.17 -0.17456  | 0.597333 |
| 0.2   | 0.08  | 0.3   | 0.26 -0.13149  | 0.880515 |
| 0     | 0     | 0     | 0 NA           | NA       |
| 0     | 0     | 0     | 0 NA           | NA       |
| 0.07  | 0.04  | 0.02  | 0.03 -0.09191  | 0.922915 |
| 0     | 0     | 0     | 0 NA           | NA       |
| 3.05  | 2.07  | 2.15  | 1.55 -0.32043  | 0.340693 |
| 0     | 0     | 0.06  | 0.07 NA        | NA       |
| 1.12  | 1.16  | 1.32  | 1.09 -0.14358  | 0.813172 |
| 0     | 0     | 0     | 0 NA           | NA       |
| 0     | 0     | 0     | 0 NA           | NA       |
| 0.44  | 0.09  | 0.09  | 0 NA           | NA       |
| 0     | 0     | 0     | 0 NA           | NA       |
| 0.21  | 0.17  | 0.05  | 0.27 NA        | NA       |
| 0     | 0     | 0     | 0 NA           | NA       |
| 0     | 0     | 0     | 0 NA           | NA       |
| 0     | 0     | 0     | 0 NA           | NA       |
| 0.73  | 4.24  | 1.74  | 2.63 1.651273  | 5.63E-11 |
| 0     | 0     | 0     | 0 NA           | NA       |
| 0     | 0     | 0     | 0 NA           | NA       |
| 0     | 0     | 0     | 0 NA           | NA       |
| 0     | 0     | 0     | 0 NA           | NA       |
| 0     | 0     | 0.07  | 0 NA           | NA       |
| 0     | 0     | 0     | 0 NA           | NA       |
| 0     | 0     | 0     | 0 NA           | NA       |
| 0.2   | 0.11  | 0.18  | 0.21 0.284337  | 0.716327 |
| 7.2   | 4.2   | 9.31  | 6.46 -0.29193  | 0.388677 |
| 0.07  | 0     | 0     | 0.18 NA        | NA       |
| 0     | 0     | 0     | 0 NA           | NA       |
| 0.73  | 0.57  | 0.6   | 0.72 0.050716  | 0.924606 |
| 0     | 0     | 0     | 0 NA           | NA       |
| 0     | 0     | 0     | 0 NA           | NA       |
| 0     | 0     | 0     | 0 NA           | NA       |

|      |       |       |                |          |
|------|-------|-------|----------------|----------|
| 0    | 0.04  | 0.02  | 0 NA           | NA       |
| 0.18 | 0     | 0     | 0 NA           | NA       |
| 0    | 0.33  | 0.1   | 0.1 NA         | NA       |
| 0    | 0     | 0     | 0 NA           | NA       |
| 0    | 0     | 0     | 0 NA           | NA       |
| 0    | 0     | 0     | 0 NA           | NA       |
| 0    | 0     | 0     | 0 NA           | NA       |
| 0    | 0     | 0     | 0 NA           | NA       |
| 0    | 0     | 0.1   | 0 NA           | NA       |
| 0    | 0     | 0     | 0 NA           | NA       |
| 0    | 0     | 0     | 0.22 NA        | NA       |
| 0    | 0     | 0     | 0 NA           | NA       |
| 0    | 0     | 0     | 0 NA           | NA       |
| 0    | 0     | 0     | 0 NA           | NA       |
| 0    | 0     | 0     | 0 NA           | NA       |
| 0    | 0     | 0     | 0 NA           | NA       |
| 0.03 | 0     | 0.02  | 0 NA           | NA       |
| 0    | 0     | 0     | 0 NA           | NA       |
| 0    | 0     | 0     | 0 NA           | NA       |
| 0    | 0     | 0     | 0 NA           | NA       |
| 0.02 | 0.01  | 0     | 0.02 NA        | NA       |
| 0.03 | 0.16  | 0.17  | 0 0.421093     | 0.570443 |
| 0    | 0     | 0     | 0 NA           | NA       |
| 0    | 0     | 0     | 0 NA           | NA       |
| 0.18 | 1.49  | 0.78  | 1.22 1.851163  | 2.61E-05 |
| 0    | 0     | 0     | 0 NA           | NA       |
| 0    | 0     | 0     | 0 NA           | NA       |
| 0    | 0     | 0     | 0 NA           | NA       |
| 0    | 0     | 0     | 0 NA           | NA       |
| 0    | 0     | 0     | 0 NA           | NA       |
| 0    | 0     | 0     | 0 NA           | NA       |
| 0.09 | 0.03  | 0.14  | 0.07 NA        | NA       |
| 2.72 | 1.96  | 1.75  | 3.03 -0.43125  | 0.204327 |
| 0    | 0     | 0     | 0 NA           | NA       |
| 0    | 0     | 0     | 0 NA           | NA       |
| 0    | 0     | 0     | 0 NA           | NA       |
| 0    | 0.07  | 0     | 0.13 NA        | NA       |
| 7.29 | 11.15 | 10.21 | 10.18 0.757008 | 0.000242 |
| 0    | 0     | 0     | 0 NA           | NA       |
| 0    | 0     | 0     | 0 NA           | NA       |
| 5.63 | 2.58  | 3.19  | 2.61 -1.14527  | 2.17E-17 |
| 0.13 | 0     | 0     | 0 NA           | NA       |
| 0.7  | 0.23  | 0.98  | 0.55 -0.16668  | 0.850235 |
| 0    | 0     | 0     | 0 NA           | NA       |



|       |       |       |       |          |          |
|-------|-------|-------|-------|----------|----------|
| 0.27  | 0.74  | 0.26  | 0.49  | 0.625115 | 0.214886 |
| 0     | 0     | 0     | 0     | NA       | NA       |
| 1.64  | 3.82  | 4.05  | 3.6   | -0.02252 | 0.966233 |
| 0     | 0.01  | 0     | 0.11  | NA       | NA       |
| 0     | 0     | 0     | 0     | NA       | NA       |
| 0     | 0     | 0     | 0     | NA       | NA       |
| 0     | 0     | 0     | 0     | NA       | NA       |
| 0     | 0     | 0     | 0     | NA       | NA       |
| 0     | 0     | 0     | 0     | NA       | NA       |
| 0     | 0     | 0     | 0     | NA       | NA       |
| 0     | 0     | 0     | 0     | NA       | NA       |
| 0.04  | 0.03  | 0.07  | 0.06  | NA       | NA       |
| 0     | 0     | 0     | 0     | NA       | NA       |
| 0     | 0.15  | 0     | 0     | NA       | NA       |
| 0     | 0     | 0     | 0     | NA       | NA       |
| 0     | 0     | 0     | 0     | NA       | NA       |
| 0     | 0     | 0     | 0     | NA       | NA       |
| 0     | 0     | 0     | 0     | NA       | NA       |
| 0     | 0.04  | 0     | 0     | NA       | NA       |
| 0     | 0     | 0     | 0     | NA       | NA       |
| 3.87  | 2.53  | 3.1   | 2.65  | -0.19406 | 0.263933 |
| 0.57  | 0.49  | 0.54  | 0.3   | -0.388   | 0.488888 |
| 0     | 0     | 0     | 0     | NA       | NA       |
| 0.18  | 0.18  | 0.21  | 0.21  | -0.39703 | 0.584803 |
| 75.9  | 82.78 | 80.77 | 73.88 | 0.009637 | 0.948247 |
| 0.36  | 0.48  | 0.53  | 1.01  | 0.290226 | 0.666794 |
| 0     | 0     | 0     | 0.08  | NA       | NA       |
| 0     | 0     | 0     | 0     | NA       | NA       |
| 14.87 | 15.65 | 19.82 | 16.91 | 0.113662 | 0.678667 |
| 0.32  | 0.18  | 0.11  | 0.12  | -0.20399 | 0.813172 |
| 0     | 0     | 0     | 0     | NA       | NA       |
| 0     | 0     | 0     | 0     | NA       | NA       |
| 0     | 0     | 0     | 0     | NA       | NA       |
| 25.26 | 16.83 | 21.83 | 20.67 | -0.44387 | 0.004983 |
| 8.16  | 5.86  | 9.04  | 9.45  | 0.188421 | 0.221241 |
| 0     | 0     | 0     | 0     | NA       | NA       |
| 0     | 0     | 0.01  | 0     | NA       | NA       |
| 0     | 0     | 0     | 0     | NA       | NA       |
| 0     | 0     | 0     | 0     | NA       | NA       |
| 0.04  | 0     | 0.03  | 0.06  | NA       | NA       |
| 0     | 0     | 0     | 0.14  | NA       | NA       |
| 0.08  | 0.03  | 0     | 0.03  | NA       | NA       |
| 9.21  | 6.44  | 5.09  | 3.13  | -0.80846 | 0.001357 |
| 2.65  | 1.06  | 1.57  | 0.96  | -0.98078 | 0.000758 |

|      |      |      |               |          |
|------|------|------|---------------|----------|
| 0    | 0    | 0    | 0 NA          | NA       |
| 0    | 0    | 0    | 0 NA          | NA       |
| 0    | 0    | 0    | 0.06 NA       | NA       |
| 0    | 0    | 0    | 0 NA          | NA       |
| 0.16 | 0    | 0    | 0 NA          | NA       |
| 0    | 0    | 0    | 0.05 NA       | NA       |
| 0    | 0    | 0    | 0 NA          | NA       |
| 0    | 0    | 0    | 0 NA          | NA       |
| 0.04 | 0.05 | 0.05 | 0.03 NA       | NA       |
| 0    | 0    | 0    | 0 NA          | NA       |
| 1.31 | 0.93 | 0.81 | 0.92 -0.42351 | 0.073684 |
| 0    | 0    | 0    | 0 NA          | NA       |
| 0    | 0    | 0    | 0 NA          | NA       |
| 0.25 | 0    | 0    | 0 NA          | NA       |
| 8.69 | 6.78 | 6.63 | 6.46 -0.24455 | 0.062406 |
| 0.25 | 0    | 0    | 0 NA          | NA       |
| 0    | 0    | 0    | 0 NA          | NA       |
| 0    | 0.03 | 0    | 0.07 NA       | NA       |
| 0.05 | 0.04 | 0.07 | 0.12 NA       | NA       |
| 1.84 | 2.22 | 4.11 | 4.65 0.448466 | 0.197407 |
| 0    | 0    | 0    | 0 NA          | NA       |
| 0    | 0    | 0    | 0 NA          | NA       |
| 0.02 | 0.01 | 0.16 | 0.05 NA       | NA       |
| 0    | 0    | 0    | 0 NA          | NA       |
| 0    | 0    | 0    | 0 NA          | NA       |
| 0    | 0    | 0    | 0 NA          | NA       |
| 2.09 | 2.5  | 2.43 | 2.25 0.372626 | 0.149693 |
| 0.03 | 0    | 0    | 0 NA          | NA       |
| 2.57 | 2.17 | 2.72 | 2.5 -0.27469  | 0.438458 |
| 0.14 | 0    | 0    | 0.11 NA       | NA       |
| 0    | 0    | 0    | 0 NA          | NA       |
| 0    | 0    | 0    | 0.02 NA       | NA       |
| 0    | 0    | 0    | 0 NA          | NA       |
| 0    | 0    | 0    | 0 NA          | NA       |
| 0.02 | 0    | 0    | 0 NA          | NA       |
| 0    | 0    | 0    | 0 NA          | NA       |
| 0.03 | 0.02 | 0    | 0.02 NA       | NA       |
| 0    | 0.01 | 0    | 0 NA          | NA       |
| 0    | 0    | 0.11 | 0 NA          | NA       |
| 0    | 0    | 0.32 | 0.37 NA       | NA       |
| 0    | 0    | 0.03 | 0 NA          | NA       |
| 0    | 0    | 0    | 0 NA          | NA       |
| 3.49 | 4.93 | 2.91 | 3.18 -0.12947 | 0.678186 |
| 10.4 | 9.66 | 8.76 | 9.13 -0.07908 | 0.633956 |
| 0.02 | 0.12 | 0.16 | 0.1 0.850304  | 0.200725 |

|       |       |       |                |          |
|-------|-------|-------|----------------|----------|
| 0     | 0     | 0     | 0 NA           | NA       |
| 0     | 0     | 0     | 0 NA           | NA       |
| 1.47  | 1.29  | 1.97  | 1.36 -0.19907  | 0.752803 |
| 0     | 0     | 0     | 0 NA           | NA       |
| 0     | 0     | 0     | 0 NA           | NA       |
| 0     | 0     | 0     | 0 NA           | NA       |
| 0     | 0     | 0     | 0 NA           | NA       |
| 0     | 0.08  | 0.09  | 0.05 NA        | NA       |
| 0     | 0.03  | 0.05  | 0.03 NA        | NA       |
| 0.28  | 0     | 0.18  | 0.41 NA        | NA       |
| 0.05  | 0     | 0     | 0 NA           | NA       |
| 0     | 0     | 0     | 0 NA           | NA       |
| 0     | 0     | 0     | 0 NA           | NA       |
| 0     | 0     | 0     | 0 NA           | NA       |
| 0     | 0     | 0     | 0 NA           | NA       |
| 3.33  | 2.36  | 1.82  | 0.98 -0.46474  | 0.450268 |
| 0.02  | 0.04  | 0.01  | 0.03 NA        | NA       |
| 0.04  | 0.06  | 0.1   | 0.02 -0.9232   | 0.152396 |
| 4.45  | 6.15  | 5.27  | 5.09 0.165826  | 0.405324 |
| 28.81 | 25.36 | 26.37 | 31.14 -0.2481  | 0.025911 |
| 9.4   | 7.26  | 7.73  | 7.13 -0.27182  | 0.092442 |
| 0     | 0     | 0     | 0 NA           | NA       |
| 0     | 0     | 0     | 0 NA           | NA       |
| 0     | 0     | 0     | 0 NA           | NA       |
| 0     | 0.12  | 0.09  | 0.53 NA        | NA       |
| 0     | 0     | 0     | 0 NA           | NA       |
| 0     | 0     | 0     | 0 NA           | NA       |
| 0     | 0     | 0     | 0 NA           | NA       |
| 0     | 0     | 0     | 0 NA           | NA       |
| 7.7   | 5.59  | 5.73  | 6.47 0.007862  | 0.976795 |
| 0     | 0     | 0.11  | 0 NA           | NA       |
| 0     | 0     | 0     | 0 NA           | NA       |
| 0     | 0     | 0     | 0 NA           | NA       |
| 0     | 0     | 0     | 0 NA           | NA       |
| 0     | 0     | 0     | 0 NA           | NA       |
| 0     | 0     | 0     | 0 NA           | NA       |
| 0     | 0     | 0     | 0 NA           | NA       |
| 0     | 0     | 0     | 0 NA           | NA       |
| 56.16 | 59.72 | 63.51 | 65.49 0.12839  | 0.141709 |
| 1.96  | 0.39  | 1.44  | 1.81 -0.23578  | 0.725597 |
| 0.06  | 0.05  | 0.14  | 0.09 NA        | NA       |
| 16.23 | 11.88 | 14.29 | 13.86 -0.37508 | 0.001657 |
| 0     | 0     | 0     | 0 NA           | NA       |
| 0.09  | 0     | 0     | 0.07 NA        | NA       |
| 0     | 0     | 0     | 0 NA           | NA       |

|       |       |       |       |          |          |
|-------|-------|-------|-------|----------|----------|
| 0     | 0     | 0     | 0 NA  | NA       |          |
| 0     | 0     | 0     | 0 NA  | NA       |          |
| 0     | 0     | 0     | 0 NA  | NA       |          |
| 0     | 0     | 0     | 0 NA  | NA       |          |
| 0     | 0     | 0     | 0 NA  | NA       |          |
| 0     | 0     | 0     | 0 NA  | NA       |          |
| 0     | 0     | 0     | 0 NA  | NA       |          |
| 0     | 0     | 0     | 0 NA  | NA       |          |
| 0     | 0     | 0     | 0 NA  | NA       |          |
| 0     | 0     | 0     | 0 NA  | NA       |          |
| 0     | 0     | 0     | 0 NA  | NA       |          |
| 0     | 0     | 0     | 0 NA  | NA       |          |
| 0     | 0     | 0     | 0 NA  | NA       |          |
| 0     | 0     | 0     | 0 NA  | NA       |          |
| 0     | 0     | 0     | 0 NA  | NA       |          |
| 0     | 0     | 0     | 0 NA  | NA       |          |
| 0     | 0     | 0     | 0 NA  | NA       |          |
| 0     | 0     | 0     | 0 NA  | NA       |          |
| 0     | 0     | 0     | 0 NA  | NA       |          |
| 2.8   | 1.27  | 1.22  | 0.72  | -1.20943 | 0.000137 |
| 15.26 | 11.51 | 12.4  | 13.22 | -0.24975 | 0.220278 |
| 0     | 0     | 0     | 0 NA  | NA       |          |
| 0     | 0     | 0     | 0 NA  | NA       |          |
| 0     | 0.29  | 0     | 0 NA  | NA       |          |
| 1.44  | 0.75  | 1.87  | 0.94  | -0.50506 | 0.371016 |
| 0.13  | 0.05  | 0.17  | 0.15  | NA       | NA       |
| 0     | 0     | 0     | 0 NA  | NA       |          |
| 0     | 0     | 0     | 0 NA  | NA       |          |
| 0     | 0     | 0     | 0 NA  | NA       |          |
| 0     | 0     | 0     | 0 NA  | NA       |          |
| 0     | 0     | 0     | 0 NA  | NA       |          |
| 0     | 0     | 0     | 0 NA  | NA       |          |
| 0.2   | 0.15  | 0.43  | 0.15  | 0.269229 | 0.740073 |
| 0     | 0     | 0     | 0 NA  | NA       |          |
| 2.07  | 1.74  | 1.95  | 1.55  | -0.3374  | 0.045778 |
| 1.2   | 0.47  | 1.74  | 0.31  | -0.84066 | 0.062632 |
| 22.65 | 22.64 | 25.14 | 21.6  | -0.06732 | 0.638027 |
| 0.03  | 0     | 0     | 0 NA  | NA       |          |
| 0     | 0     | 0     | 0 NA  | NA       |          |
| 7.23  | 2.84  | 3.18  | 3.73  | -0.62213 | 0.01323  |
| 0     | 0     | 0     | 0 NA  | NA       |          |
| 0     | 0     | 0     | 0 NA  | NA       |          |
| 0     | 0     | 0     | 0 NA  | NA       |          |

|      |      |       |               |          |
|------|------|-------|---------------|----------|
| 0    | 0    | 0     | 0 NA          | NA       |
| 0    | 0    | 0     | 0 NA          | NA       |
| 0    | 0    | 0     | 0 NA          | NA       |
| 0    | 0    | 0     | 0 NA          | NA       |
| 0.03 | 0    | 0     | 0.06 NA       | NA       |
| 0    | 0    | 0     | 0 NA          | NA       |
| 0    | 0    | 0     | 0 NA          | NA       |
| 7.2  | 7.82 | 17.14 | 9.02 0.701643 | 0.016803 |
| 0    | 0    | 0     | 0 NA          | NA       |
| 0    | 0    | 0     | 0 NA          | NA       |
| 0    | 0    | 0     | 0 NA          | NA       |
| 0    | 0    | 0     | 0 NA          | NA       |
| 0    | 0    | 0     | 0 NA          | NA       |
| 0.08 | 0.04 | 0.07  | 0 NA          | NA       |
| 0    | 0    | 0     | 0 NA          | NA       |
| 0.2  | 0.06 | 0.06  | 0.1 -0.65972  | 0.343974 |
| 0    | 0    | 0     | 0 NA          | NA       |
| 0    | 0    | 0     | 0 NA          | NA       |
| 0    | 0    | 0     | 0 NA          | NA       |
| 0    | 0    | 0     | 0 NA          | NA       |
| 0    | 0    | 0     | 0 NA          | NA       |
| 0    | 0    | 0     | 0 NA          | NA       |
| 0.05 | 0    | 0.02  | 0 NA          | NA       |
| 0    | 0    | 0     | 0 NA          | NA       |
| 0    | 0    | 0     | 0 NA          | NA       |
| 0    | 0.01 | 0.01  | 0 NA          | NA       |
| 0    | 0.07 | 0     | 0.3 NA        | NA       |
| 0    | 0    | 0     | 0 NA          | NA       |
| 0    | 0    | 0     | 0 NA          | NA       |
| 0    | 0    | 0     | 0 NA          | NA       |
| 0    | 0    | 0     | 0 NA          | NA       |
| 0    | 0    | 0     | 0 NA          | NA       |
| 0    | 0    | 0     | 0 NA          | NA       |
| 0.37 | 0.59 | 0.22  | 0.29 -0.53686 | 0.455468 |
| 0    | 0    | 0     | 0 NA          | NA       |
| 0    | 0    | 0     | 0 NA          | NA       |
| 0    | 0    | 0     | 0 NA          | NA       |
| 0    | 0    | 0     | 0 NA          | NA       |
| 0    | 0    | 0     | 0 NA          | NA       |
| 0    | 0    | 0     | 0 NA          | NA       |
| 0    | 0    | 0     | 0.09 NA       | NA       |
| 0    | 0    | 0     | 0 NA          | NA       |
| 0    | 0.02 | 0     | 0.02 NA       | NA       |
| 0    | 0    | 0     | 0 NA          | NA       |
| 0    | 0    | 0.11  | 0 NA          | NA       |

|       |       |       |                |          |
|-------|-------|-------|----------------|----------|
| 0     | 0     | 0     | 0 NA           | NA       |
| 0.13  | 0.15  | 0     | 0 NA           | NA       |
| 0     | 0     | 0     | 0 NA           | NA       |
| 0     | 0     | 0     | 0 NA           | NA       |
| 0     | 0     | 0     | 0 NA           | NA       |
| 0     | 0     | 0     | 0 NA           | NA       |
| 1.45  | 0.72  | 1.91  | 2.35 0.242708  | 0.742563 |
| 0     | 0     | 0     | 0 NA           | NA       |
| 0.2   | 0.99  | 0.26  | 0.15 NA        | NA       |
| 2.01  | 2.95  | 2.11  | 2.27 0.006392  | 0.989436 |
| 0     | 0.47  | 0.21  | 0.49 NA        | NA       |
| 4.63  | 4.04  | 3.73  | 4.11 -0.222    | 0.181341 |
| 26.43 | 22.95 | 21.65 | 21.87 -0.12691 | 0.311993 |
| 0     | 0     | 0     | 0 NA           | NA       |
| 0     | 0     | 0     | 0 NA           | NA       |
| 0     | 0     | 0     | 0 NA           | NA       |
| 0     | 0     | 0     | 0 NA           | NA       |
| 4.15  | 4.17  | 4.01  | 4.53 0.017495  | 0.9528   |
| 0     | 0     | 0     | 0 NA           | NA       |
| 0.83  | 0.13  | 0.28  | 0.09 -0.86213  | 0.174892 |
| 0     | 0     | 0     | 0.28 NA        | NA       |
| 3.88  | 7.57  | 8.17  | 7.8 0.439686   | 0.018879 |
| 7.89  | 9.04  | 8.09  | 8.71 -0.01792  | 0.94667  |
| 0     | 0     | 0.03  | 0 NA           | NA       |
| 0     | 0     | 0     | 0 NA           | NA       |
| 0     | 0     | 0     | 0 NA           | NA       |
| 0     | 0     | 0     | 0 NA           | NA       |
| 0     | 0     | 0     | 0 NA           | NA       |
| 0     | 0     | 0     | 0 NA           | NA       |
| 0.26  | 0.09  | 0.09  | 0.1 -1.10013   | 0.074793 |
| 0     | 0     | 0     | 0 NA           | NA       |
| 0     | 0     | 0     | 0 NA           | NA       |
| 0.09  | 0.08  | 0.05  | 0.19 0.097524  | 0.912329 |
| 0     | 0     | 0     | 0 NA           | NA       |
| 0     | 0     | 0     | 0 NA           | NA       |
| 0     | 0     | 0     | 0 NA           | NA       |
| 0     | 0     | 0     | 0 NA           | NA       |
| 0.16  | 0     | 0     | 0.36 NA        | NA       |
| 0     | 0     | 0     | 0 NA           | NA       |
| 0     | 0     | 0.06  | 0 NA           | NA       |
| 2.79  | 2.04  | 1.67  | 0 NA           | NA       |
| 9.36  | 10.24 | 9.9   | 9.61 -0.12646  | 0.712815 |
| 0     | 0     | 0     | 0 NA           | NA       |
| 0     | 0     | 0     | 0 NA           | NA       |







|      |      |      |               |          |
|------|------|------|---------------|----------|
| 0    | 0    | 0    | 0 NA          | NA       |
| 0    | 0    | 0    | 0 NA          | NA       |
| 0.07 | 0.1  | 0    | 0 NA          | NA       |
| 0    | 0    | 0    | 0 NA          | NA       |
| 0    | 0    | 0    | 0 NA          | NA       |
| 0    | 0    | 0    | 0 NA          | NA       |
| 0    | 0    | 0    | 0 NA          | NA       |
| 0    | 0    | 0    | 0 NA          | NA       |
| 0    | 0    | 0    | 0 NA          | NA       |
| 0    | 0    | 0    | 0 NA          | NA       |
| 0    | 0    | 0    | 0.63 NA       | NA       |
| 0    | 0    | 0    | 0 NA          | NA       |
| 0    | 0    | 0    | 0 NA          | NA       |
| 0    | 0    | 0    | 0 NA          | NA       |
| 0    | 0    | 0    | 0 NA          | NA       |
| 0    | 0    | 0    | 0 NA          | NA       |
| 0    | 0    | 0    | 0 NA          | NA       |
| 0    | 0    | 0    | 0 NA          | NA       |
| 0    | 0    | 0    | 0 NA          | NA       |
| 0    | 0    | 0    | 0 NA          | NA       |
| 0    | 0    | 0    | 0 NA          | NA       |
| 0    | 0    | 0    | 0 NA          | NA       |
| 6.51 | 1.78 | 4.97 | 2.9 -1.33738  | 6.19E-11 |
| 0    | 0    | 0    | 0 NA          | NA       |
| 0    | 0    | 0    | 0 NA          | NA       |
| 0    | 0    | 0    | 0 NA          | NA       |
| 0.15 | 0.11 | 0.16 | 0.22 -0.15114 | 0.855703 |
| 0    | 0    | 0    | 0 NA          | NA       |
| 0    | 0    | 0    | 0 NA          | NA       |
| 0    | 0    | 0    | 0 NA          | NA       |
| 0    | 0    | 0    | 0 NA          | NA       |
| 0    | 0    | 0    | 0 NA          | NA       |
| 0    | 0    | 0    | 0 NA          | NA       |
| 0    | 0    | 0    | 0 NA          | NA       |
| 0    | 0    | 0    | 0 NA          | NA       |
| 0    | 0    | 0    | 0 NA          | NA       |
| 0    | 0    | 0    | 0 NA          | NA       |
| 0    | 0    | 0    | 0 NA          | NA       |
| 0    | 0    | 0    | 0 NA          | NA       |
| 0    | 0    | 0    | 0 NA          | NA       |
| 0    | 0    | 0    | 0 NA          | NA       |
| 0.54 | 0.13 | 0.44 | 0.21 -0.56576 | 0.432757 |
| 0    | 0    | 0    | 0 NA          | NA       |
| 1.8  | 2.02 | 2.21 | 1.81 -0.26632 | 0.608206 |
| 0.19 | 0    | 0    | 0.14 NA       | NA       |
| 0    | 0    | 0    | 0 NA          | NA       |

|       |       |       |                |          |
|-------|-------|-------|----------------|----------|
| 0     | 0     | 0     | 0 NA           | NA       |
| 0.06  | 0.11  | 0.04  | 0.05 -0.37808  | 0.626953 |
| 0     | 0     | 0     | 0 NA           | NA       |
| 0     | 0     | 0.03  | 0 NA           | NA       |
| 0     | 0     | 0     | 0 NA           | NA       |
| 0     | 0     | 0     | 0 NA           | NA       |
| 1.2   | 0.82  | 0.48  | 1.2 -0.40173   | 0.401763 |
| 0     | 0     | 0     | 0 NA           | NA       |
| 0     | 0     | 0     | 0 NA           | NA       |
| 0     | 0     | 0     | 0 NA           | NA       |
| 0     | 0     | 0.03  | 0.03 NA        | NA       |
| 0     | 0     | 0     | 0 NA           | NA       |
| 0     | 0     | 0     | 0 NA           | NA       |
| 0     | 0.09  | 0     | 0 NA           | NA       |
| 0.68  | 0     | 0.22  | 0.26 NA        | NA       |
| 0     | 0     | 0     | 0 NA           | NA       |
| 0     | 0     | 0     | 0 NA           | NA       |
| 0     | 0     | 0     | 0 NA           | NA       |
| 0     | 0     | 0     | 0 NA           | NA       |
| 0     | 0     | 0     | 0 NA           | NA       |
| 0     | 0     | 0     | 0 NA           | NA       |
| 0     | 0.14  | 0     | 0 NA           | NA       |
| 0     | 0     | 0     | 0 NA           | NA       |
| 0     | 0     | 0     | 0 NA           | NA       |
| 0     | 0.13  | 0.15  | 0.15 NA        | NA       |
| 0.4   | 0.14  | 0.29  | 0.21 -0.08364  | 0.930194 |
| 11.57 | 11.28 | 11.53 | 12.62 0.113673 | 0.347282 |
| 0     | 0     | 0     | 0 NA           | NA       |
| 0     | 0     | 0     | 0 NA           | NA       |
| 0     | 0     | 0     | 0 NA           | NA       |
| 0     | 0     | 0     | 0 NA           | NA       |
| 0     | 0     | 0     | 0 NA           | NA       |
| 0     | 0     | 0     | 0 NA           | NA       |
| 0     | 0     | 0     | 0 NA           | NA       |
| 0     | 0     | 0     | 0 NA           | NA       |
| 0     | 0     | 0     | 0 NA           | NA       |
| 0     | 0     | 0     | 0 NA           | NA       |
| 0     | 0.04  | 0.04  | 0.04 NA        | NA       |
| 0     | 0     | 0     | 0 NA           | NA       |
| 0     | 0     | 0     | 0 NA           | NA       |
| 0     | 0     | 0     | 0 NA           | NA       |
| 0     | 0     | 0     | 0 NA           | NA       |
| 0.17  | 0.24  | 0.23  | 0 NA           | NA       |
| 0.18  | 0.4   | 0     | 0 NA           | NA       |

|       |       |       |                |          |
|-------|-------|-------|----------------|----------|
| 0     | 0     | 0     | 0 NA           | NA       |
| 0     | 0     | 0     | 0 NA           | NA       |
| 0     | 0     | 0     | 0 NA           | NA       |
| 0     | 0.26  | 0     | 0 NA           | NA       |
| 0     | 0     | 0     | 0 NA           | NA       |
| 0     | 0     | 0     | 0 NA           | NA       |
| 0     | 0     | 0     | 0 NA           | NA       |
| 0     | 0     | 0.09  | 0.1 NA         | NA       |
| 0     | 0     | 0     | 0 NA           | NA       |
| 0     | 0     | 0     | 0 NA           | NA       |
| 0     | 0     | 0     | 0 NA           | NA       |
| 0     | 0     | 0     | 0 NA           | NA       |
| 0     | 0     | 0     | 0 NA           | NA       |
| 0     | 0     | 0     | 0 NA           | NA       |
| 0     | 0     | 0     | 0 NA           | NA       |
| 0     | 0     | 0     | 0 NA           | NA       |
| 0     | 0     | 0     | 0 NA           | NA       |
| 0     | 0     | 0     | 0 NA           | NA       |
| 0     | 0     | 0     | 0 NA           | NA       |
| 0     | 0     | 0     | 0 NA           | NA       |
| 2.89  | 0     | 5.67  | 1.5 0.032868   | 0.973425 |
| 0     | 0     | 0.21  | 0 NA           | NA       |
| 0     | 0     | 0     | 0 NA           | NA       |
| 0     | 0     | 0     | 0 NA           | NA       |
| 0     | 0     | 0     | 0 NA           | NA       |
| 0     | 0.19  | 0.09  | 0.1 NA         | NA       |
| 0     | 0     | 0     | 0 NA           | NA       |
| 0     | 0     | 0     | 0 NA           | NA       |
| 0     | 0     | 0     | 0 NA           | NA       |
| 0     | 0     | 0     | 0 NA           | NA       |
| 0     | 0     | 0     | 0 NA           | NA       |
| 0     | 0     | 0     | 0 NA           | NA       |
| 0     | 0     | 0     | 0 NA           | NA       |
| 27.13 | 24.49 | 25.85 | 28.34 -0.12296 | 0.580717 |
| 0     | 0     | 0     | 0 NA           | NA       |
| 0     | 0     | 0     | 0 NA           | NA       |
| 0     | 0     | 0     | 0 NA           | NA       |
| 0     | 0     | 0     | 0 NA           | NA       |
| 0     | 0     | 0.05  | 0 NA           | NA       |
| 0     | 0     | 0     | 0 NA           | NA       |
| 0     | 0     | 0     | 0 NA           | NA       |
| 0     | 0     | 0     | 0 NA           | NA       |
| 0     | 0     | 0     | 0 NA           | NA       |
| 0     | 0     | 0     | 0 NA           | NA       |
| 0     | 0     | 0     | 0 NA           | NA       |
| 0.12  | 0.27  | 0.21  | 0.19 -0.51037  | 0.483465 |
| 0     | 0     | 0     | 0 NA           | NA       |

|      |       |       |               |          |
|------|-------|-------|---------------|----------|
| 0    | 0     | 0     | 0 NA          | NA       |
| 0    | 0     | 0     | 0 NA          | NA       |
| 0    | 0     | 0     | 0 NA          | NA       |
| 0    | 0.19  | 0     | 0 NA          | NA       |
| 0    | 0     | 0     | 0 NA          | NA       |
| 0    | 0     | 0     | 0 NA          | NA       |
| 0    | 0     | 0     | 0 NA          | NA       |
| 0    | 0.06  | 0     | 0 NA          | NA       |
| 0    | 0     | 0     | 0 NA          | NA       |
| 0    | 0     | 0.13  | 0 NA          | NA       |
| 0    | 0     | 0     | 0 NA          | NA       |
| 0    | 0     | 0     | 0 NA          | NA       |
| 0    | 0     | 0     | 0 NA          | NA       |
| 0    | 0     | 0     | 0 NA          | NA       |
| 0    | 0     | 0     | 0 NA          | NA       |
| 0.8  | 6.72  | 5.08  | 4.95 2.267628 | 6.31E-09 |
| 0    | 0     | 0     | 0 NA          | NA       |
| 0    | 0     | 0     | 0 NA          | NA       |
| 0    | 0     | 0     | 0 NA          | NA       |
| 0    | 0     | 0     | 0 NA          | NA       |
| 0.21 | 0.07  | 0     | 0.11 NA       | NA       |
| 0    | 0     | 0     | 0 NA          | NA       |
| 0    | 0     | 0     | 0 NA          | NA       |
| 0    | 0     | 0     | 0 NA          | NA       |
| 0    | 0     | 0     | 0 NA          | NA       |
| 0    | 0     | 0     | 0 NA          | NA       |
| 0    | 0     | 0     | 0 NA          | NA       |
| 0    | 0     | 0     | 0 NA          | NA       |
| 3.14 | 5.04  | 3.91  | 5.46 0.289833 | 0.189907 |
| 12.9 | 15.25 | 12.44 | 17.19 0.39775 | 0.136309 |
| 0    | 0     | 0     | 0 NA          | NA       |
| 0    | 0     | 0     | 0 NA          | NA       |
| 0    | 0     | 0     | 0 NA          | NA       |
| 0    | 0     | 0     | 0 NA          | NA       |
| 0    | 0     | 0     | 0 NA          | NA       |
| 0    | 0.03  | 0     | 0 NA          | NA       |
| 0    | 0     | 0     | 0 NA          | NA       |
| 0    | 0     | 0     | 0 NA          | NA       |
| 0    | 0     | 0     | 0 NA          | NA       |
| 0.7  | 0.66  | 1.09  | 0.53 0.176767 | 0.840815 |
| 0    | 0     | 0     | 0 NA          | NA       |
| 0    | 0.67  | 0.12  | 0.28 NA       | NA       |
| 0    | 0     | 0     | 0 NA          | NA       |
| 0    | 0     | 0     | 0 NA          | NA       |

|      |      |      |      |          |          |
|------|------|------|------|----------|----------|
| 0    | 0.07 | 0    | 0.14 | NA       | NA       |
| 0    | 0    | 0    | 0    | NA       | NA       |
| 0    | 0    | 0    | 0    | NA       | NA       |
| 0    | 0    | 0    | 0    | NA       | NA       |
| 0    | 0    | 0    | 0    | NA       | NA       |
| 0    | 0    | 0    | 0    | NA       | NA       |
| 0    | 0    | 0    | 0    | NA       | NA       |
| 0    | 0    | 0    | 0    | NA       | NA       |
| 0    | 0    | 0    | 0    | NA       | NA       |
| 0    | 0    | 0    | 0    | NA       | NA       |
| 0    | 0    | 0    | 0    | NA       | NA       |
| 0    | 0    | 0    | 0    | NA       | NA       |
| 0    | 0    | 0    | 0    | NA       | NA       |
| 0    | 0.16 | 0    | 0    | NA       | NA       |
| 0    | 0.16 | 0    | 0    | NA       | NA       |
| 0    | 0.02 | 0    | 0    | NA       | NA       |
| 0    | 0    | 0.18 | 0    | NA       | NA       |
| 0    | 0    | 0    | 0    | NA       | NA       |
| 0    | 0    | 0    | 0    | NA       | NA       |
| 0    | 0    | 0    | 0    | NA       | NA       |
| 0    | 0    | 0    | 0    | NA       | NA       |
| 0    | 0    | 0    | 0.08 | NA       | NA       |
| 0    | 0    | 0    | 0    | NA       | NA       |
| 0    | 0    | 0    | 0    | NA       | NA       |
| 0    | 0    | 0    | 0    | NA       | NA       |
| 1.03 | 0.91 | 0.74 | 0.57 | 0.868929 | 0.007173 |
| 0    | 0    | 0    | 0    | NA       | NA       |
| 0    | 0    | 0    | 0    | NA       | NA       |
| 0    | 0    | 0    | 0    | NA       | NA       |
| 0    | 0    | 0    | 0    | NA       | NA       |
| 0    | 0    | 0    | 0    | NA       | NA       |
| 0.09 | 0.03 | 0.13 | 0.05 | NA       | NA       |
| 0    | 0    | 0    | 0    | NA       | NA       |
| 0    | 0    | 0    | 0    | NA       | NA       |
| 0    | 0    | 0    | 0    | NA       | NA       |
| 0    | 0    | 0    | 0    | NA       | NA       |
| 0    | 0.01 | 0.02 | 0.01 | NA       | NA       |
| 0    | 0    | 0    | 0    | NA       | NA       |
| 0    | 0.3  | 0    | 0    | NA       | NA       |
| 0    | 0    | 0    | 0    | NA       | NA       |
| 0    | 0    | 0    | 0    | NA       | NA       |
| 0    | 0    | 0    | 0    | NA       | NA       |
| 0    | 0    | 0    | 0    | NA       | NA       |
| 0    | 0    | 0.19 | 0.43 | NA       | NA       |
| 0    | 0    | 0    | 0    | NA       | NA       |
| 0    | 0    | 0    | 0    | NA       | NA       |



|        |        |        |        |          |          |
|--------|--------|--------|--------|----------|----------|
| 0      | 0      | 0      | 0      | NA       | NA       |
| 0      | 0      | 0      | 0.22   | NA       | NA       |
| 0      | 0      | 0      | 0      | NA       | NA       |
| 0      | 0      | 0      | 0      | NA       | NA       |
| 0      | 0.02   | 0.03   | 0.02   | NA       | NA       |
| 0      | 0      | 0      | 0      | NA       | NA       |
| 0      | 0      | 0      | 0      | NA       | NA       |
| 0      | 0      | 0      | 0      | NA       | NA       |
| 0      | 0      | 0      | 0      | NA       | NA       |
| 0      | 0      | 0      | 0      | NA       | NA       |
| 0      | 0      | 0      | 0      | NA       | NA       |
| 0      | 0      | 0      | 0      | NA       | NA       |
| 5.48   | 4.78   | 5.33   | 4.99   | -0.08428 | 0.747737 |
| 0      | 0      | 0      | 0      | NA       | NA       |
| 0      | 0      | 0      | 0      | NA       | NA       |
| 0      | 0      | 0      | 0      | NA       | NA       |
| 0      | 0      | 0      | 0      | NA       | NA       |
| 0      | 0      | 0      | 0      | NA       | NA       |
| 0      | 0.37   | 0      | 0.37   | NA       | NA       |
| 0      | 0      | 0      | 0      | NA       | NA       |
| 0      | 0      | 0      | 0      | NA       | NA       |
| 0      | 0      | 0      | 0.13   | NA       | NA       |
| 0      | 0.19   | 0.17   | 0.4    | NA       | NA       |
| 0      | 0      | 0      | 0      | NA       | NA       |
| 0      | 0      | 0.13   | 0      | NA       | NA       |
| 0      | 0      | 0      | 0      | NA       | NA       |
| 0      | 0      | 0      | 0      | NA       | NA       |
| 0      | 0      | 0      | 0      | NA       | NA       |
| 0.08   | 0.12   | 0.11   | 0      | NA       | NA       |
| 0      | 0      | 0      | 0      | NA       | NA       |
| 0      | 0      | 0      | 0      | NA       | NA       |
| 0      | 0      | 0      | 0      | NA       | NA       |
| 0.13   | 0.05   | 0.05   | 0.21   | NA       | NA       |
| 0      | 0      | 0      | 0      | NA       | NA       |
| 0      | 0      | 0      | 0      | NA       | NA       |
| 0      | 0      | 0      | 0      | NA       | NA       |
| 0      | 0      | 0.07   | 0      | NA       | NA       |
| 0      | 0.13   | 0.12   | 0      | NA       | NA       |
| 0      | 0      | 0      | 0      | NA       | NA       |
| 0      | 0      | 0      | 0      | NA       | NA       |
| 0.12   | 0      | 0.16   | 0.09   | NA       | NA       |
| 0.17   | 0      | 0      | 0      | NA       | NA       |
| 0      | 0      | 0      | 0      | NA       | NA       |
| 0      | 0      | 0      | 0      | NA       | NA       |
| 190.89 | 264.51 | 217.26 | 217.91 | 0.251974 | 0.021469 |

|       |       |       |               |          |
|-------|-------|-------|---------------|----------|
| 0     | 0     | 0     | 0 NA          | NA       |
| 0     | 0     | 0     | 0 NA          | NA       |
| 0     | 0     | 0     | 0 NA          | NA       |
| 0     | 0     | 0     | 0 NA          | NA       |
| 0     | 0     | 0     | 0 NA          | NA       |
| 0     | 0     | 0     | 0 NA          | NA       |
| 0     | 0     | 0     | 0 NA          | NA       |
| 0     | 0     | 0     | 0 NA          | NA       |
| 0     | 0     | 0     | 0 NA          | NA       |
| 0     | 0     | 0     | 0 NA          | NA       |
| 0     | 0     | 0     | 0.03 NA       | NA       |
| 0     | 0     | 0     | 0 NA          | NA       |
| 0     | 0     | 0     | 0 NA          | NA       |
| 0     | 0     | 0     | 0 NA          | NA       |
| 0     | 0     | 0     | 0 NA          | NA       |
| 0     | 0     | 0     | 0 NA          | NA       |
| 0     | 0.21  | 0     | 0 NA          | NA       |
| 0     | 0     | 0     | 0 NA          | NA       |
| 0     | 0     | 0     | 0 NA          | NA       |
| 0     | 0     | 0     | 0 NA          | NA       |
| 0     | 0     | 0     | 0 NA          | NA       |
| 0     | 0     | 0     | 0 NA          | NA       |
| 0     | 0     | 0     | 0 NA          | NA       |
| 0     | 0.07  | 0.06  | 0.07 NA       | NA       |
| 0     | 0     | 0     | 0 NA          | NA       |
| 0     | 0     | 0     | 0 NA          | NA       |
| 0     | 0.03  | 0.2   | 0 NA          | NA       |
| 0     | 0     | 0     | 0 NA          | NA       |
| 0.12  | 0     | 0     | 0 NA          | NA       |
| 0     | 0.07  | 0     | 0.08 NA       | NA       |
| 0.08  | 0.25  | 0.59  | 0.14 0.947241 | 0.143494 |
| 0     | 0.02  | 0     | 0.05 NA       | NA       |
| 0     | 0     | 0     | 0 NA          | NA       |
| 0     | 0     | 0     | 0 NA          | NA       |
| 0     | 0     | 0     | 0 NA          | NA       |
| 0     | 0.12  | 0     | 0.13 NA       | NA       |
| 16.79 | 13.51 | 14.66 | 15.28 -0.1701 | 0.184609 |
| 0     | 0     | 0     | 0 NA          | NA       |
| 0     | 0     | 0.1   | 0 NA          | NA       |
| 0     | 0     | 0     | 0 NA          | NA       |
| 0     | 0     | 0     | 0 NA          | NA       |
| 0.24  | 1.14  | 1.52  | 0.66 0.408335 | 0.594287 |
| 1.57  | 1.91  | 0.84  | 0.93 -0.18584 | 0.828965 |



|      |      |      |               |          |
|------|------|------|---------------|----------|
| 0    | 0    | 0    | 0 NA          | NA       |
| 5.86 | 5.69 | 5.13 | 4.14 -0.23328 | 0.317374 |
| 0    | 0    | 0    | 0 NA          | NA       |
| 0    | 0    | 0    | 0 NA          | NA       |
| 0    | 0    | 0    | 0 NA          | NA       |
| 0    | 0    | 0    | 0 NA          | NA       |
| 0    | 0    | 0    | 0 NA          | NA       |
| 0    | 0    | 0    | 0 NA          | NA       |
| 0    | 0    | 0    | 0 NA          | NA       |
| 0    | 0    | 0    | 0 NA          | NA       |
| 0    | 0    | 0    | 3.66 NA       | NA       |
| 0.84 | 1.68 | 1.43 | 1.44 0.740327 | 0.000871 |
| 0    | 0    | 0    | 0 NA          | NA       |
| 0    | 0    | 0    | 0 NA          | NA       |
| 0    | 0    | 0    | 0 NA          | NA       |
| 7.26 | 6.19 | 8.45 | 7.29 -0.30792 | 0.148751 |
| 0    | 0    | 0    | 0 NA          | NA       |
| 0    | 0    | 0    | 0 NA          | NA       |
| 0    | 0    | 0    | 0 NA          | NA       |
| 3.96 | 7.92 | 5.92 | 5.48 0.17823  | 0.590872 |
| 0    | 0    | 0    | 0 NA          | NA       |
| 0    | 0    | 0    | 0 NA          | NA       |
| 0    | 0    | 0    | 0 NA          | NA       |
| 0    | 0    | 0    | 0.04 NA       | NA       |
| 3.33 | 5.04 | 2.75 | 1.69 -0.06133 | 0.946272 |
| 0    | 0    | 0    | 0 NA          | NA       |
| 0    | 0    | 0    | 0 NA          | NA       |
| 0    | 0    | 0    | 0 NA          | NA       |
| 0    | 0    | 0    | 0 NA          | NA       |
| 0    | 0    | 0    | 0 NA          | NA       |
| 0    | 0    | 0    | 0 NA          | NA       |
| 0    | 0    | 0    | 0 NA          | NA       |
| 0    | 0    | 0    | 0 NA          | NA       |
| 0.25 | 0.36 | 0.16 | 0.19 NA       | NA       |
| 1.35 | 2.17 | 3.4  | 2.37 0.52437  | 0.284716 |
| 0    | 0    | 0    | 0 NA          | NA       |
| 0    | 0    | 0    | 0 NA          | NA       |
| 0    | 0    | 0    | 0 NA          | NA       |
| 0    | 0    | 0    | 0 NA          | NA       |
| 0    | 0    | 0.13 | 0 NA          | NA       |
| 0    | 0    | 0    | 0 NA          | NA       |
| 0    | 0    | 0    | 0 NA          | NA       |
| 0    | 0.13 | 0.35 | 0 NA          | NA       |
| 0    | 0    | 0    | 0 NA          | NA       |
| 0    | 0    | 0    | 0 NA          | NA       |

|       |       |       |                |          |
|-------|-------|-------|----------------|----------|
| 0     | 1.99  | 0     | 0 NA           | NA       |
| 0     | 0     | 0     | 0 NA           | NA       |
| 0     | 0     | 0     | 0 NA           | NA       |
| 0     | 0     | 0     | 0 NA           | NA       |
| 0     | 0     | 0     | 0 NA           | NA       |
| 0     | 0     | 0.03  | 0.03 NA        | NA       |
| 0.29  | 0     | 0.19  | 0 NA           | NA       |
| 0.31  | 0.39  | 0.28  | 0.49 -0.54425  | 0.377971 |
| 0     | 0     | 0     | 0 NA           | NA       |
| 0     | 0     | 0     | 0 NA           | NA       |
| 0     | 0     | 0     | 0 NA           | NA       |
| 0     | 0     | 0     | 0 NA           | NA       |
| 0     | 0     | 0     | 0 NA           | NA       |
| 0     | 0     | 0     | 0.06 NA        | NA       |
| 0     | 0     | 0.24  | 0 NA           | NA       |
| 0.22  | 0.8   | 0.72  | 1 0.296494     | 0.717115 |
| 0     | 0     | 0     | 0 NA           | NA       |
| 0     | 0     | 0     | 0 NA           | NA       |
| 0     | 0     | 0     | 0 NA           | NA       |
| 0     | 0.08  | 0     | 0 NA           | NA       |
| 0     | 0     | 0     | 0 NA           | NA       |
| 0     | 0     | 0     | 0 NA           | NA       |
| 0     | 0     | 0     | 0 NA           | NA       |
| 0     | 0     | 0     | 0 NA           | NA       |
| 0     | 0     | 0     | 0 NA           | NA       |
| 0     | 0     | 0     | 0 NA           | NA       |
| 0     | 0     | 0     | 0 NA           | NA       |
| 0     | 0     | 0     | 0 NA           | NA       |
| 0     | 0     | 0     | 0 NA           | NA       |
| 0     | 0     | 0     | 0 NA           | NA       |
| 0     | 0     | 0     | 0 NA           | NA       |
| 0     | 0     | 0.05  | 0 NA           | NA       |
| 0.05  | 0     | 0.07  | 0 NA           | NA       |
| 0     | 0     | 0     | 0 NA           | NA       |
| 0     | 0     | 0     | 0 NA           | NA       |
| 0.85  | 0.99  | 0.46  | 0.87 -0.08481  | 0.914375 |
| 0     | 0     | 0     | 0 NA           | NA       |
| 22.67 | 27.41 | 23.97 | 27.36 0.197205 | 0.109509 |
| 0     | 0     | 0     | 0 NA           | NA       |
| 0     | 0     | 0     | 0 NA           | NA       |
| 0     | 0     | 0     | 0 NA           | NA       |
| 0     | 0     | 0     | 0 NA           | NA       |
| 0.08  | 0.01  | 0.01  | 0.03 NA        | NA       |
| 0     | 0     | 0     | 0 NA           | NA       |
| 0     | 0     | 0     | 0 NA           | NA       |

|      |       |       |      |          |          |
|------|-------|-------|------|----------|----------|
| 0.41 | 0.04  | 0.08  | 0.09 | -0.82735 | 0.214293 |
| 0    | 0     | 0     | 0    | NA       | NA       |
| 2.26 | 0.89  | 0.78  | 2.21 | -0.02509 | 0.979262 |
| 0    | 0     | 0     | 0    | NA       | NA       |
| 0    | 0     | 0     | 0    | NA       | NA       |
| 0    | 0     | 0     | 0    | NA       | NA       |
| 0    | 0     | 0     | 0    | NA       | NA       |
| 0    | 0     | 0     | 0    | NA       | NA       |
| 44.6 | 28.27 | 17.17 | 23.2 | -0.70144 | 0.054409 |
| 0    | 0     | 0     | 0    | NA       | NA       |
| 0    | 0.04  | 0.03  | 0    | NA       | NA       |
| 0    | 0     | 0     | 0    | NA       | NA       |
| 0    | 0     | 0     | 0    | NA       | NA       |
| 0    | 0     | 0     | 0    | NA       | NA       |
| 0    | 0     | 0     | 0    | NA       | NA       |
| 0    | 0     | 0     | 0    | NA       | NA       |
| 0.11 | 0     | 0     | 0    | NA       | NA       |
| 0    | 0     | 0     | 0    | NA       | NA       |
| 0.29 | 0.04  | 0.1   | 0.04 | -0.96917 | 0.133791 |
| 0    | 0     | 0     | 0    | NA       | NA       |
| 0    | 0     | 0     | 0    | NA       | NA       |
| 0    | 0     | 0     | 0    | NA       | NA       |
| 0    | 0     | 0     | 0    | NA       | NA       |
| 0    | 0     | 0     | 0    | NA       | NA       |
| 0    | 0     | 0     | 0    | NA       | NA       |
| 0    | 0     | 0     | 0    | NA       | NA       |
| 0    | 0     | 0     | 0    | NA       | NA       |
| 0    | 0     | 0     | 0    | NA       | NA       |
| 0    | 0     | 0     | 0    | NA       | NA       |
| 0    | 0     | 0     | 0    | NA       | NA       |
| 0    | 0     | 0     | 0    | NA       | NA       |
| 0    | 0     | 0     | 0    | NA       | NA       |
| 0.55 | 1.1   | 0.29  | 0.25 | 0.317579 | 0.694378 |
| 0    | 0     | 0     | 0    | NA       | NA       |
| 0    | 0     | 0     | 0    | NA       | NA       |
| 0    | 0     | 0     | 0    | NA       | NA       |
| 0    | 0     | 0     | 0    | NA       | NA       |
| 0    | 0     | 0     | 0    | NA       | NA       |
| 0    | 0     | 0     | 0    | NA       | NA       |
| 0    | 0     | 0     | 0    | NA       | NA       |
| 0    | 0     | 0     | 0    | NA       | NA       |
| 0    | 0     | 0     | 0    | NA       | NA       |
| 0    | 0     | 0     | 0    | NA       | NA       |
| 0.16 | 0.23  | 0     | 0    | NA       | NA       |
| 0    | 0     | 0     | 0    | NA       | NA       |









|      |       |      |          |    |
|------|-------|------|----------|----|
| 0    | 0     | 0    | 0 NA     | NA |
| 0    | 0     | 0    | 0 NA     | NA |
| 0    | 0     | 0    | 0 NA     | NA |
| 0    | 0     | 0    | 0 NA     | NA |
| 0    | 0     | 0    | 0 NA     | NA |
| 0    | 0     | 0    | 0 NA     | NA |
| 0    | 0     | 0    | 0 NA     | NA |
| 0    | 0     | 0    | 0 NA     | NA |
| 0    | 0     | 0    | 0 NA     | NA |
| 0    | 0     | 0    | 0 NA     | NA |
| 0    | 0     | 0    | 0 NA     | NA |
| 0    | 0     | 0    | 0 NA     | NA |
| 0    | 0     | 0    | 0 NA     | NA |
| 0    | 0     | 0    | 0 NA     | NA |
| 0    | 0     | 0    | 0 NA     | NA |
| 0    | 0     | 0    | 0 NA     | NA |
| 0    | 0     | 0    | 0 NA     | NA |
| 0    | 0     | 4.43 | 0 NA     | NA |
| 0    | 0     | 0    | 0 NA     | NA |
| 0    | 0     | 0    | 0 NA     | NA |
| 0    | 0     | 0    | 0 NA     | NA |
| 0    | 0     | 0    | 0 NA     | NA |
| 0    | 0     | 0    | 0 NA     | NA |
| 0    | 0     | 0    | 0 NA     | NA |
| 0    | 0     | 0    | 0 NA     | NA |
| 0    | 0     | 0    | 0 NA     | NA |
| 0    | 0     | 0    | 0 NA     | NA |
| 0    | 0     | 0    | 0 NA     | NA |
| 0    | 0     | 0    | 0 NA     | NA |
| 0    | 0     | 0    | 0 NA     | NA |
| 0    | 0     | 0    | 0 NA     | NA |
| 0    | 0     | 0    | 0 NA     | NA |
| 0    | 0     | 0    | 0 NA     | NA |
| 0    | 0     | 0    | 0 NA     | NA |
| 4.52 | 0     | 0    | 0 NA     | NA |
| 0    | 0     | 0    | 0 NA     | NA |
| 0    | 0     | 0    | 0 NA     | NA |
| 0    | 0     | 0    | 0 NA     | NA |
| 0    | 0     | 0    | 0 NA     | NA |
| 0    | 0     | 0    | 0 NA     | NA |
| 0    | 0     | 0    | 0 NA     | NA |
| 0    | 29.88 | 0    | 29.54 NA | NA |
| 0    | 0     | 0    | 0 NA     | NA |



|       |       |       |       |          |          |
|-------|-------|-------|-------|----------|----------|
| 0     | 0     | 0     | 0     | NA       | NA       |
| 0     | 0     | 0     | 0     | NA       | NA       |
| 0     | 0     | 0     | 0     | NA       | NA       |
| 0     | 0     | 0     | 0     | NA       | NA       |
| 2.78  | 1.98  | 1.93  | 3.2   | 0.071091 | 0.882175 |
| 0.48  | 0.45  | 0.48  | 0.46  | -0.0575  | 0.914337 |
| 0     | 0     | 0     | 0     | NA       | NA       |
| 6.86  | 9.29  | 9.45  | 11.4  | 0.638889 | 0.034903 |
| 24.86 | 26.36 | 25.23 | 25.42 | 0.309293 | 0.014958 |
| 0.08  | 0.19  | 0.08  | 0.07  | NA       | NA       |
| 4.47  | 3.83  | 5.52  | 4.42  | -0.13225 | 0.616695 |
| 0     | 0     | 0     | 0     | NA       | NA       |
| 0     | 0     | 0     | 0     | NA       | NA       |
| 13.19 | 11.8  | 15.13 | 11.11 | -0.1472  | 0.407299 |
| 0     | 0     | 0     | 0     | NA       | NA       |
| 0     | 0.06  | 0.02  | 0.05  | 1.638782 | 0.004559 |
| 0     | 0     | 0     | 0     | NA       | NA       |
| 0     | 0     | 0.02  | 0.07  | NA       | NA       |
| 0     | 0     | 0     | 0     | NA       | NA       |
| 0     | 0.04  | 0.08  | 0.09  | NA       | NA       |
| 0     | 0     | 0     | 0     | NA       | NA       |
| 0     | 0.19  | 0.77  | 0.36  | NA       | NA       |
| 0     | 0     | 0     | 0     | NA       | NA       |
| 0     | 0     | 0     | 0     | NA       | NA       |
| 0     | 0     | 0     | 0     | NA       | NA       |
| 3.54  | 4.48  | 6.28  | 5.49  | 0.471114 | 0.000167 |
| 0.04  | 0.06  | 0     | 0     | NA       | NA       |
| 62.48 | 37.68 | 61.63 | 47.91 | -0.33205 | 0.035335 |
| 0     | 0     | 0     | 0     | NA       | NA       |
| 0.41  | 0     | 0     | 0.37  | -0.16891 | 0.831621 |
| 0     | 0.08  | 0.12  | 0     | NA       | NA       |
| 0     | 0     | 0     | 0     | NA       | NA       |
| 0     | 0     | 0     | 0     | NA       | NA       |
| 0     | 0     | 0     | 0     | NA       | NA       |
| 1.53  | 1.32  | 1.38  | 0.78  | -0.20299 | 0.691476 |
| 1     | 1.67  | 1.13  | 1.1   | 0.033322 | 0.944939 |
| 0.22  | 1.79  | 0     | 0.07  | -0.71451 | 0.300453 |
| 0     | 0     | 0     | 0     | NA       | NA       |
| 0.54  | 2     | 1.63  | 1.74  | 1.349207 | 1.49E-10 |
| 0     | 0     | 0     | 0     | NA       | NA       |
| 0     | 0     | 0     | 0     | NA       | NA       |
| 3.44  | 3.65  | 2.81  | 3.1   | 0.053872 | 0.871984 |
| 0     | 0     | 0     | 0     | NA       | NA       |
| 20.48 | 20.68 | 21.32 | 21.35 | -0.06172 | 0.681632 |
| 0.42  | 1.05  | 0.63  | 0.79  | 0.372367 | 0.612027 |

|        |        |        |        |          |          |
|--------|--------|--------|--------|----------|----------|
| 9.84   | 7.7    | 8.62   | 8.32   | -0.25087 | 0.216165 |
| 9.92   | 12.68  | 15.48  | 15.71  | 0.692195 | 1.85E-06 |
| 0.42   | 0.18   | 0.19   | 0.27   | -0.44733 | 0.532114 |
| 0      | 0      | 0      | 0      | NA       | NA       |
| 0      | 0      | 0      | 0      | NA       | NA       |
| 0      | 0      | 0      | 0      | NA       | NA       |
| 0      | 0      | 0      | 0      | NA       | NA       |
| 0      | 0      | 0      | 0      | NA       | NA       |
| 2.41   | 1.64   | 1.93   | 1.67   | -0.37985 | 0.148751 |
| 0.06   | 0.08   | 0      | 0.05   | NA       | NA       |
| 0.2    | 0.31   | 0.29   | 0.18   | 0.042611 | 0.959922 |
| 1.95   | 1.51   | 1.33   | 1.25   | -0.2139  | 0.605831 |
| 0.32   | 0.22   | 0.25   | 0.24   | -0.34023 | 0.617258 |
| 0      | 0      | 0      | 0      | NA       | NA       |
| 10.54  | 3.78   | 9.14   | 6.48   | -0.63286 | 0.00902  |
| 0      | 0      | 0      | 0      | NA       | NA       |
| 0      | 0      | 0      | 0      | NA       | NA       |
| 0      | 0      | 0      | 0      | NA       | NA       |
| 5.88   | 3.63   | 3.42   | 4.16   | -0.62563 | 2.29E-08 |
| 35.47  | 50.99  | 50.34  | 57.84  | 0.279544 | 0.009486 |
| 0      | 0      | 0      | 0      | NA       | NA       |
| 0      | 0      | 0      | 0      | NA       | NA       |
| 0      | 0      | 0      | 0      | NA       | NA       |
| 0      | 0      | 0      | 0      | NA       | NA       |
| 97.02  | 78.21  | 83.03  | 82.66  | -0.25991 | 0.000807 |
| 586.64 | 590.35 | 633.91 | 586.12 | -0.04117 | 0.719768 |
| 0      | 0      | 0      | 0      | NA       | NA       |
| 11.37  | 12.73  | 10.08  | 9.25   | 0.116118 | 0.611421 |
| 0      | 0      | 0      | 0      | NA       | NA       |
| 2.37   | 2.72   | 2.79   | 2.84   | 0.174343 | 0.618899 |
| 0.85   | 0.67   | 0.43   | 0.67   | 0.134994 | 0.827482 |
| 0.48   | 0.42   | 0.37   | 0.25   | -0.55091 | 0.145193 |
| 0      | 0      | 0      | 0      | NA       | NA       |
| 0      | 0      | 0.1    | 0.11   | NA       | NA       |
| 0      | 0      | 0      | 0      | NA       | NA       |
| 0      | 0      | 0      | 0      | NA       | NA       |
| 0.26   | 0.03   | 0.06   | 0      | NA       | NA       |
| 0      | 0      | 0      | 0      | NA       | NA       |
| 15.65  | 13.33  | 13.09  | 16.26  | -0.14305 | 0.336979 |
| 4.01   | 2.38   | 2.49   | 2.93   | -0.38692 | 0.225984 |
| 0      | 0      | 0.02   | 0      | NA       | NA       |
| 0      | 0      | 0      | 0      | NA       | NA       |
| 0      | 0      | 0      | 0      | NA       | NA       |
| 0      | 0      | 0      | 0      | NA       | NA       |
| 0.05   | 0.14   | 0.07   | 0.07   | NA       | NA       |























|       |       |      |                |          |
|-------|-------|------|----------------|----------|
| 0     | 0     | 0    | 0 NA           | NA       |
| 0     | 0     | 0    | 0 NA           | NA       |
| 0     | 0     | 0    | 0 NA           | NA       |
| 0     | 0     | 0    | 0 NA           | NA       |
| 0     | 0     | 0    | 0 NA           | NA       |
| 0     | 0     | 0    | 0 NA           | NA       |
| 0     | 0     | 0    | 0 NA           | NA       |
| 0     | 0     | 0    | 0 NA           | NA       |
| 0     | 0     | 0    | 0 NA           | NA       |
| 0     | 0     | 0    | 0 NA           | NA       |
| 0     | 0     | 0    | 0 NA           | NA       |
| 0     | 0     | 0    | 0 NA           | NA       |
| 0     | 0     | 0    | 0 NA           | NA       |
| 0     | 0     | 0    | 0 NA           | NA       |
| 0     | 0     | 0    | 0 NA           | NA       |
| 0     | 0     | 0    | 0 NA           | NA       |
| 0     | 0     | 0    | 0 NA           | NA       |
| 0     | 0     | 0    | 0 NA           | NA       |
| 0     | 0     | 0    | 0 NA           | NA       |
| 0     | 0     | 0    | 0 NA           | NA       |
| 0     | 0     | 0    | 0 NA           | NA       |
| 0     | 0     | 0    | 0 NA           | NA       |
| 0.1   | 0.21  | 0.33 | 0.37 0.143818  | 0.872037 |
| 0     | 0     | 0    | 0 NA           | NA       |
| 1.26  | 1.13  | 2.03 | 1.68 0.661641  | 0.31894  |
| 0     | 0     | 0    | 0 NA           | NA       |
| 0     | 0     | 0    | 0 NA           | NA       |
| 0     | 0     | 0    | 0 NA           | NA       |
| 0     | 0     | 0    | 0 NA           | NA       |
| 0     | 0     | 0.44 | 0.17 NA        | NA       |
| 0     | 0     | 0    | 0 NA           | NA       |
| 0     | 0     | 0    | 0 NA           | NA       |
| 48.21 | 45.45 | 30.1 | 40.77 -0.53376 | 0.002052 |
| 0     | 0     | 0    | 0 NA           | NA       |
| 0     | 0     | 0    | 0 NA           | NA       |
| 0     | 0     | 0    | 0 NA           | NA       |
| 0     | 0     | 0    | 0 NA           | NA       |
| 0     | 0     | 0    | 0 NA           | NA       |
| 0     | 0     | 0    | 0 NA           | NA       |
| 0     | 0     | 0    | 0 NA           | NA       |
| 0     | 0     | 0    | 0 NA           | NA       |
| 0     | 0     | 0    | 0 NA           | NA       |
| 0.09  | 0     | 0.06 | 0 NA           | NA       |
| 0     | 0     | 0    | 0 NA           | NA       |





|      |      |      |               |          |
|------|------|------|---------------|----------|
| 0    | 0    | 0.02 | 0 NA          | NA       |
| 0    | 0    | 0    | 0 NA          | NA       |
| 0.77 | 1.04 | 0.86 | 1.23 0.237217 | 0.747737 |
| 0    | 0    | 0    | 0 NA          | NA       |
| 0.05 | 0.07 | 0.2  | 0.08 NA       | NA       |
| 0    | 0    | 0    | 0 NA          | NA       |
| 0    | 0    | 0    | 0 NA          | NA       |
| 0    | 0    | 0    | 0 NA          | NA       |
| 0    | 0    | 0    | 0 NA          | NA       |
| 0    | 0    | 0    | 0 NA          | NA       |
| 0    | 0    | 0    | 0 NA          | NA       |
| 0    | 0    | 0    | 0 NA          | NA       |
| 0    | 0.28 | 0    | 0.2 NA        | NA       |
| 0    | 0    | 0    | 0 NA          | NA       |
| 0    | 0    | 0    | 0 NA          | NA       |
| 2.23 | 2.13 | 3.52 | 2.57 -0.0593  | 0.90897  |
| 2.24 | 1.43 | 1.54 | 1.52 -0.69756 | 0.000231 |
| 0    | 0    | 0    | 0 NA          | NA       |
| 0    | 0    | 0    | 0 NA          | NA       |
| 0    | 0    | 0    | 0 NA          | NA       |
| 2.67 | 0.96 | 1.33 | 1.01 -0.94018 | 0.060163 |
| 0    | 0    | 0    | 0.09 NA       | NA       |
| 0    | 0    | 0    | 0 NA          | NA       |
| 0    | 0    | 0    | 0 NA          | NA       |
| 0    | 0    | 0    | 0 NA          | NA       |
| 0    | 0    | 0    | 0 NA          | NA       |
| 0    | 0.02 | 0.01 | 0 NA          | NA       |
| 0.15 | 0    | 0    | 0 NA          | NA       |
| 0    | 0    | 0    | 0 NA          | NA       |
| 0    | 0    | 0    | 0 NA          | NA       |
| 0    | 0    | 0    | 0 NA          | NA       |
| 0.02 | 0    | 0.02 | 0 NA          | NA       |
| 0    | 0    | 0    | 0 NA          | NA       |
| 0    | 0.03 | 0    | 0.03 NA       | NA       |
| 0    | 0    | 0    | 0 NA          | NA       |
| 0    | 0.04 | 0    | 0 NA          | NA       |
| 0    | 0.04 | 0    | 0 NA          | NA       |
| 0    | 0    | 0    | 0 NA          | NA       |
| 0.02 | 0.04 | 0.09 | 0.04 NA       | NA       |
| 0    | 0    | 0    | 0 NA          | NA       |
| 0    | 0    | 0    | 0 NA          | NA       |
| 0    | 0    | 0    | 0 NA          | NA       |
| 0    | 0    | 0    | 0 NA          | NA       |
| 0.16 | 0    | 0    | 0.12 NA       | NA       |





|      |       |      |               |          |
|------|-------|------|---------------|----------|
| 0    | 0.08  | 0    | 0 NA          | NA       |
| 0    | 0     | 0    | 0 NA          | NA       |
| 0    | 0     | 0    | 0 NA          | NA       |
| 0    | 0     | 0    | 0 NA          | NA       |
| 0    | 0     | 0    | 0 NA          | NA       |
| 0    | 0     | 0    | 0 NA          | NA       |
| 0    | 0     | 0    | 0 NA          | NA       |
| 0    | 0.17  | 0.39 | 0.3 NA        | NA       |
| 0    | 0     | 0    | 0 NA          | NA       |
| 0    | 0.11  | 0    | 0 NA          | NA       |
| 0    | 0     | 0    | 0 NA          | NA       |
| 0.06 | 0     | 0    | 0.14 NA       | NA       |
| 0    | 0     | 0    | 0 NA          | NA       |
| 0    | 0     | 0    | 0 NA          | NA       |
| 0    | 0     | 0    | 0 NA          | NA       |
| 0    | 0     | 0    | 0 NA          | NA       |
| 0.25 | 0.43  | 0.24 | 0.21 -0.42332 | 0.554065 |
| 0    | 0     | 0    | 0 NA          | NA       |
| 0    | 0     | 0    | 0 NA          | NA       |
| 0    | 0     | 0    | 0 NA          | NA       |
| 0    | 0.02  | 0    | 0 NA          | NA       |
| 0    | 0     | 0    | 0 NA          | NA       |
| 0    | 0     | 0    | 0 NA          | NA       |
| 0    | 0     | 0    | 0 NA          | NA       |
| 0    | 0     | 0    | 0 NA          | NA       |
| 0    | 0     | 0    | 0 NA          | NA       |
| 0    | 0     | 0    | 0 NA          | NA       |
| 0.5  | 0.85  | 0.11 | 0.39 -0.24321 | 0.772909 |
| 0    | 0     | 0    | 0 NA          | NA       |
| 0    | 0     | 0    | 0 NA          | NA       |
| 0    | 0     | 0    | 0 NA          | NA       |
| 0    | 0     | 0    | 0 NA          | NA       |
| 0.35 | 0     | 0    | 0 NA          | NA       |
| 0    | 0     | 0.06 | 0 NA          | NA       |
| 0    | 0     | 0    | 0 NA          | NA       |
| 0    | 0     | 0.03 | 0.41 NA       | NA       |
| 0    | 0     | 0    | 0 NA          | NA       |
| 0    | 0     | 0    | 0 NA          | NA       |
| 0.08 | 0.04  | 0.09 | 0.06 -0.06279 | 0.946156 |
| 8.33 | 10.27 | 7.68 | 9.49 -0.22952 | 0.094741 |
| 0    | 0     | 0    | 0 NA          | NA       |
| 0    | 0     | 0    | 0 NA          | NA       |
| 0    | 0     | 0    | 0 NA          | NA       |
| 0.2  | 0.79  | 0.14 | 0 NA          | NA       |
| 0.09 | 0     | 0    | 0 NA          | NA       |

|      |      |      |               |          |
|------|------|------|---------------|----------|
| 0    | 0    | 0    | 0 NA          | NA       |
| 0    | 0    | 0    | 0 NA          | NA       |
| 0    | 0    | 0    | 0 NA          | NA       |
| 0    | 0    | 0    | 0 NA          | NA       |
| 0    | 0    | 0    | 0 NA          | NA       |
| 0    | 0    | 0.16 | 0 NA          | NA       |
| 0    | 0    | 0    | 0 NA          | NA       |
| 0    | 0    | 0    | 0 NA          | NA       |
| 0    | 0    | 0.04 | 0 NA          | NA       |
| 0    | 0    | 0    | 0 NA          | NA       |
| 0    | 0.23 | 0.21 | 0.12 NA       | NA       |
| 0    | 0    | 0    | 0 NA          | NA       |
| 0    | 0    | 0    | 0 NA          | NA       |
| 0    | 0    | 0    | 0 NA          | NA       |
| 0    | 0    | 0.07 | 0 NA          | NA       |
| 0    | 0    | 0    | 0 NA          | NA       |
| 0    | 0.05 | 0    | 0.02 NA       | NA       |
| 0    | 0    | 0    | 0 NA          | NA       |
| 0    | 0    | 0    | 0 NA          | NA       |
| 0.15 | 0.21 | 0.2  | 0 NA          | NA       |
| 0    | 0    | 0    | 0 NA          | NA       |
| 0    | 0    | 0    | 0 NA          | NA       |
| 0    | 0    | 0    | 0 NA          | NA       |
| 0    | 0    | 0    | 0 NA          | NA       |
| 0    | 0    | 0    | 0 NA          | NA       |
| 0    | 0    | 0    | 0 NA          | NA       |
| 0    | 0    | 0    | 0 NA          | NA       |
| 10.3 | 7.1  | 8.3  | 8.16 -0.35884 | 0.054907 |
| 0    | 0    | 0    | 0 NA          | NA       |
| 2.15 | 0.42 | 1.62 | 0.44 -1.5295  | 0.002171 |
| 0    | 0    | 0    | 0 NA          | NA       |
| 0    | 0    | 0    | 0 NA          | NA       |
| 0    | 0    | 0    | 0 NA          | NA       |
| 0    | 0    | 0    | 0 NA          | NA       |
| 1.26 | 0.94 | 1.59 | 0.79 -0.23187 | 0.687627 |
| 0.04 | 0.14 | 0.02 | 0.08 NA       | NA       |
| 0    | 0    | 0    | 0 NA          | NA       |
| 0.75 | 5.34 | 3.97 | 5.08 2.139842 | 2.00E-29 |
| 0    | 0    | 0    | 0 NA          | NA       |
| 1.27 | 1.17 | 1.13 | 0.71 -0.47691 | 0.315111 |
| 0    | 0.12 | 0.08 | 0.24 1.122829 | 0.064388 |
| 0    | 0    | 0    | 0 NA          | NA       |
| 2.27 | 2.04 | 3.11 | 2.24 0.123817 | 0.79079  |
| 2.27 | 2.04 | 3.11 | 2.24 0.123817 | 0.79079  |
| 0.18 | 0    | 0    | 0 NA          | NA       |

|       |       |       |       |          |          |
|-------|-------|-------|-------|----------|----------|
| 0.19  | 0.03  | 0.13  | 0.07  | NA       | NA       |
| 0     | 0     | 0     | 0     | NA       | NA       |
| 0     | 0     | 0     | 0     | NA       | NA       |
| 0     | 0     | 0     | 0     | NA       | NA       |
| 0     | 0     | 0     | 0     | NA       | NA       |
| 0     | 0     | 0     | 0     | NA       | NA       |
| 0     | 0     | 0     | 0     | NA       | NA       |
| 0     | 0     | 0     | 0     | NA       | NA       |
| 0.1   | 0     | 0     | 0     | NA       | NA       |
| 0     | 0     | 0     | 0     | NA       | NA       |
| 0     | 0     | 0     | 0     | NA       | NA       |
| 1.68  | 2     | 1.55  | 2.31  | 0.246667 | 0.666949 |
| 0     | 0     | 0.02  | 0.09  | NA       | NA       |
| 0     | 0     | 0     | 0     | NA       | NA       |
| 3.15  | 3.08  | 3.94  | 2.65  | 0.118204 | 0.723089 |
| 0     | 0     | 0     | 0     | NA       | NA       |
| 12.42 | 21.97 | 20.81 | 25.34 | 0.869971 | 2.59E-06 |
| 0     | 0     | 0     | 0     | NA       | NA       |
| 0     | 0     | 0     | 0     | NA       | NA       |
| 0     | 0     | 0     | 0     | NA       | NA       |
| 0     | 0     | 0     | 0     | NA       | NA       |
| 0     | 0     | 0     | 0.27  | NA       | NA       |
| 0.16  | 0     | 0.11  | 0     | NA       | NA       |
| 0.8   | 0.36  | 0.45  | 0.25  | -1.25786 | 0.014282 |
| 0     | 0.18  | 0     | 0     | NA       | NA       |
| 0     | 0     | 0     | 0     | NA       | NA       |
| 0     | 0     | 0     | 0     | NA       | NA       |
| 0     | 0     | 0     | 0     | NA       | NA       |
| 0     | 0     | 0     | 0     | NA       | NA       |
| 1.37  | 0.76  | 0.86  | 0.59  | -1.08208 | 0.058293 |
| 0     | 0     | 0     | 0     | NA       | NA       |
| 0     | 0     | 0     | 0     | NA       | NA       |
| 0     | 0     | 0     | 0     | NA       | NA       |
| 0     | 0     | 0     | 0.13  | NA       | NA       |
| 0     | 0     | 0     | 0     | NA       | NA       |
| 0     | 0     | 0.17  | 0     | NA       | NA       |
| 0     | 0     | 0     | 0     | NA       | NA       |
| 0     | 0     | 0     | 0     | NA       | NA       |
| 0     | 0     | 0     | 0     | NA       | NA       |
| 0.24  | 0     | 0.15  | 0     | NA       | NA       |
| 0     | 0     | 0     | 0     | NA       | NA       |
| 0.55  | 0.25  | 0     | 0.26  | NA       | NA       |
| 0     | 0.11  | 0     | 0     | NA       | NA       |



|       |      |      |      |          |          |
|-------|------|------|------|----------|----------|
| 0     | 0    | 0.53 | 0    | NA       | NA       |
| 0     | 0    | 0    | 0    | NA       | NA       |
| 0     | 0    | 0    | 0    | NA       | NA       |
| 0     | 0    | 0    | 0    | NA       | NA       |
| 0     | 0    | 0    | 0    | NA       | NA       |
| 0     | 0    | 0    | 0    | NA       | NA       |
| 0     | 0    | 0    | 0    | NA       | NA       |
| 0     | 0    | 0    | 0    | NA       | NA       |
| 0     | 0    | 0    | 0    | NA       | NA       |
| 0     | 0    | 0    | 0    | NA       | NA       |
| 0     | 0.04 | 0.04 | 0    | NA       | NA       |
| 0.37  | 0.21 | 1    | 0.33 | -0.09646 | 0.91804  |
| 0     | 0    | 0    | 0    | NA       | NA       |
| 0     | 0    | 0    | 0    | NA       | NA       |
| 0.15  | 0    | 0.21 | 0    | NA       | NA       |
| 0     | 0    | 0    | 0    | NA       | NA       |
| 0     | 0.12 | 0.14 | 0.08 | NA       | NA       |
| 0     | 0    | 0    | 0    | NA       | NA       |
| 0     | 0    | 0    | 0    | NA       | NA       |
| 0     | 0    | 0    | 0    | NA       | NA       |
| 0     | 0    | 0    | 0    | NA       | NA       |
| 0     | 0    | 0    | 0    | NA       | NA       |
| 0     | 0    | 0    | 0    | NA       | NA       |
| 0.05  | 0.01 | 0    | 0.01 | NA       | NA       |
| 0     | 0    | 0    | 0    | NA       | NA       |
| 1.94  | 1.11 | 2.26 | 1.54 | -0.28064 | 0.463611 |
| 0     | 0    | 0    | 0    | NA       | NA       |
| 15.74 | 2.94 | 7.02 | 4.93 | -1.73379 | 2.36E-14 |
| 0     | 0    | 0    | 0    | NA       | NA       |
| 0     | 0    | 0    | 0    | NA       | NA       |
| 0     | 0    | 0    | 0    | NA       | NA       |
| 4.05  | 4.63 | 6.09 | 5.18 | -0.13211 | 0.611083 |
| 3.89  | 3.44 | 4.39 | 5.72 | 0.209733 | 0.554419 |
| 0     | 0    | 0    | 0    | NA       | NA       |
| 0     | 0    | 0.02 | 0    | NA       | NA       |
| 0     | 0    | 0    | 0    | NA       | NA       |
| 0     | 0    | 0    | 0    | NA       | NA       |
| 0     | 0    | 0    | 0    | NA       | NA       |
| 0     | 0    | 0    | 0    | NA       | NA       |
| 0.21  | 1.53 | 1.7  | 1.72 | 1.173643 | 0.059905 |
| 0     | 0    | 0    | 0    | NA       | NA       |
| 0     | 0.05 | 0    | 0    | NA       | NA       |
| 0.06  | 0.04 | 0.04 | 0    | NA       | NA       |
| 0     | 0    | 0    | 0    | NA       | NA       |

|       |       |       |                |          |
|-------|-------|-------|----------------|----------|
| 0     | 0     | 0     | 0 NA           | NA       |
| 0     | 0     | 0     | 0 NA           | NA       |
| 0     | 0     | 0     | 0 NA           | NA       |
| 0     | 0     | 0     | 0 NA           | NA       |
| 0     | 0.22  | 0     | 0 NA           | NA       |
| 0     | 0     | 0     | 0 NA           | NA       |
| 0     | 0     | 0     | 0 NA           | NA       |
| 0     | 0     | 0     | 0 NA           | NA       |
| 0     | 0     | 0     | 0 NA           | NA       |
| 0     | 0     | 0     | 0 NA           | NA       |
| 0     | 0     | 0     | 0 NA           | NA       |
| 0     | 0     | 0     | 0 NA           | NA       |
| 0     | 0     | 0     | 0 NA           | NA       |
| 0     | 0     | 0     | 0 NA           | NA       |
| 0     | 0     | 0     | 0 NA           | NA       |
| 0     | 0     | 0     | 0 NA           | NA       |
| 0     | 0     | 0     | 0 NA           | NA       |
| 0     | 0     | 0     | 0 NA           | NA       |
| 0     | 0     | 0     | 0 NA           | NA       |
| 0     | 0     | 0     | 0 NA           | NA       |
| 0     | 0     | 0     | 0 NA           | NA       |
| 0.23  | 0.18  | 0.18  | 0.3 -0.1816    | 0.82106  |
| 0     | 0.28  | 0     | 0 NA           | NA       |
| 0     | 0     | 0     | 0 NA           | NA       |
| 0.56  | 0     | 0     | 0 NA           | NA       |
| 0     | 0     | 0     | 0 NA           | NA       |
| 0     | 0     | 0     | 0 NA           | NA       |
| 0     | 0     | 0.04  | 0.04 NA        | NA       |
| 0     | 0     | 0     | 0 NA           | NA       |
| 0     | 0     | 0.13  | 0 NA           | NA       |
| 0.12  | 0.17  | 0.32  | 0 NA           | NA       |
| 0.99  | 1.73  | 1.93  | 1.63 0.18239   | 0.769067 |
| 0     | 0     | 0     | 0 NA           | NA       |
| 0     | 0     | 0     | 0 NA           | NA       |
| 0     | 0     | 0     | 0 NA           | NA       |
| 0     | 0     | 0     | 0 NA           | NA       |
| 0     | 0     | 0     | 0 NA           | NA       |
| 30.85 | 21.16 | 31.56 | 22.93 -0.12386 | 0.564856 |
| 0     | 0     | 0     | 0 NA           | NA       |
| 0.23  | 0     | 0.15  | 0.17 NA        | NA       |
| 0     | 0     | 0     | 0 NA           | NA       |
| 0     | 0     | 0     | 0 NA           | NA       |
| 0     | 0     | 0     | 0 NA           | NA       |
| 0     | 0     | 0     | 0 NA           | NA       |
| 0     | 0     | 0     | 0 NA           | NA       |





|      |      |      |      |          |          |
|------|------|------|------|----------|----------|
| 0.1  | 0    | 0    | 0.11 | NA       | NA       |
| 0.15 | 0    | 0    | 0    | NA       | NA       |
| 0    | 0    | 0    | 0    | NA       | NA       |
| 0    | 0    | 0    | 0    | NA       | NA       |
| 0    | 0    | 0    | 0    | NA       | NA       |
| 0.13 | 0    | 0    | 0    | NA       | NA       |
| 0    | 0    | 0    | 0    | NA       | NA       |
| 0    | 0    | 0    | 0    | NA       | NA       |
| 0    | 0    | 0    | 0    | NA       | NA       |
| 0    | 0    | 0    | 0.17 | NA       | NA       |
| 0.18 | 0.14 | 0.24 | 0.11 | -0.33295 | 0.667482 |
| 0    | 0    | 0    | 0    | NA       | NA       |
| 0    | 0    | 0    | 0    | NA       | NA       |
| 0    | 0    | 0    | 0    | NA       | NA       |
| 0    | 0    | 0    | 0    | NA       | NA       |
| 0    | 0    | 0    | 0    | NA       | NA       |
| 0    | 0    | 0    | 0    | NA       | NA       |
| 0    | 0    | 0    | 0    | NA       | NA       |
| 0    | 0    | 0    | 0    | NA       | NA       |
| 0.33 | 0.47 | 0.41 | 0.48 | NA       | NA       |
| 0    | 0    | 0    | 0    | NA       | NA       |
| 0    | 0    | 0    | 0    | NA       | NA       |
| 0    | 0    | 0    | 0    | NA       | NA       |
| 0    | 0    | 0    | 0    | NA       | NA       |
| 0    | 0    | 0.24 | 0.12 | NA       | NA       |
| 0    | 0    | 0    | 0    | NA       | NA       |
| 0    | 0    | 0    | 0    | NA       | NA       |
| 0    | 0    | 0    | 0    | NA       | NA       |
| 0    | 0    | 0    | 0    | NA       | NA       |
| 1.17 | 1.95 | 1.81 | 1.18 | 0.00237  | 0.996994 |
| 0    | 0    | 0    | 0    | NA       | NA       |
| 0    | 0    | 0    | 0    | NA       | NA       |
| 0.49 | 0    | 0    | 0    | NA       | NA       |
| 0    | 0    | 0    | 0.19 | NA       | NA       |
| 0    | 0    | 0    | 0    | NA       | NA       |
| 0    | 0    | 0    | 0    | NA       | NA       |
| 0    | 0    | 0    | 0    | NA       | NA       |
| 0    | 0    | 0    | 0    | NA       | NA       |
| 0    | 0    | 0    | 0    | NA       | NA       |
| 0.77 | 2.31 | 2.01 | 1.03 | -0.19599 | 0.787231 |
| 0    | 0    | 0    | 0    | NA       | NA       |
| 0.56 | 0.1  | 0.49 | 0.11 | NA       | NA       |
| 0    | 0    | 0    | 0    | NA       | NA       |
| 0    | 0    | 0    | 0    | NA       | NA       |
| 0    | 0.15 | 0.14 | 0.16 | NA       | NA       |

|      |      |      |               |          |
|------|------|------|---------------|----------|
| 0    | 0    | 0    | 0 NA          | NA       |
| 0    | 0    | 0.03 | 0 NA          | NA       |
| 3.45 | 2.77 | 2.59 | 3.27 0.145221 | 0.832838 |
| 0    | 0    | 0    | 0 NA          | NA       |
| 0    | 0    | 0.03 | 0 NA          | NA       |
| 0    | 0.02 | 0.02 | 0 NA          | NA       |
| 0    | 0    | 0    | 0 NA          | NA       |
| 0    | 0    | 0    | 0 NA          | NA       |
| 0    | 0.11 | 0.01 | 0.12 NA       | NA       |
| 0    | 0    | 0    | 0 NA          | NA       |
| 0    | 0    | 0    | 0 NA          | NA       |
| 0    | 0    | 0.4  | 0 NA          | NA       |
| 0    | 0    | 0    | 0 NA          | NA       |
| 0    | 0    | 0    | 0 NA          | NA       |
| 0    | 0    | 0    | 0 NA          | NA       |
| 0    | 0    | 0    | 0 NA          | NA       |
| 0    | 0    | 0    | 0.19 NA       | NA       |
| 0    | 0    | 0    | 0 NA          | NA       |
| 0    | 0    | 0    | 0 NA          | NA       |
| 0    | 0    | 0.22 | 0 NA          | NA       |
| 0.1  | 0.26 | 0    | 0 NA          | NA       |
| 0    | 0    | 0    | 0 NA          | NA       |
| 0    | 0    | 0    | 0 NA          | NA       |
| 0    | 0    | 0    | 0 NA          | NA       |
| 0    | 0    | 0    | 0 NA          | NA       |
| 0    | 0.08 | 0    | 0 NA          | NA       |
| 0    | 0.12 | 0    | 0 NA          | NA       |
| 0    | 0    | 0    | 0 NA          | NA       |
| 0    | 0    | 0    | 0 NA          | NA       |
| 0.47 | 0.17 | 0.16 | 0.24 NA       | NA       |
| 0    | 0    | 0    | 0 NA          | NA       |
| 0    | 0    | 0    | 0 NA          | NA       |
| 0    | 0    | 0    | 0 NA          | NA       |
| 0    | 0    | 0    | 0 NA          | NA       |
| 0    | 0    | 0    | 0 NA          | NA       |
| 0    | 0    | 0.03 | 0 NA          | NA       |
| 0    | 0    | 0    | 0 NA          | NA       |
| 0.56 | 0.46 | 0.68 | 0.86 0.122852 | 0.848037 |
| 0    | 0    | 0    | 0.14 NA       | NA       |
| 0    | 0    | 0    | 0 NA          | NA       |
| 0    | 0    | 0    | 0 NA          | NA       |
| 0    | 0    | 0    | 0 NA          | NA       |
| 0    | 0    | 0    | 0 NA          | NA       |
| 0    | 0    | 0    | 0 NA          | NA       |

|       |      |       |               |          |
|-------|------|-------|---------------|----------|
| 0     | 0    | 0     | 0 NA          | NA       |
| 1.92  | 1.5  | 1.5   | 2.08 0.409784 | 0.573897 |
| 0     | 0    | 0     | 0 NA          | NA       |
| 0     | 0    | 0     | 0 NA          | NA       |
| 0     | 0    | 0     | 0 NA          | NA       |
| 0     | 0    | 0     | 0 NA          | NA       |
| 0     | 0    | 0     | 0 NA          | NA       |
| 24.21 | 9.14 | 13.28 | 11.7 -1.02869 | 4.47E-11 |
| 0     | 0    | 0     | 0 NA          | NA       |
| 0.33  | 0.06 | 0.11  | 0.06 NA       | NA       |
| 0     | 0    | 0     | 0 NA          | NA       |
| 0     | 0    | 0     | 0 NA          | NA       |
| 0     | 0    | 0     | 0 NA          | NA       |
| 0     | 0    | 0     | 0 NA          | NA       |
| 0     | 0    | 0     | 0 NA          | NA       |
| 0     | 0    | 0     | 0 NA          | NA       |
| 0     | 0    | 0     | 0 NA          | NA       |
| 0     | 0    | 0     | 0 NA          | NA       |
| 0     | 0    | 0     | 0 NA          | NA       |
| 0     | 0    | 0     | 0 NA          | NA       |
| 0     | 0    | 0     | 0 NA          | NA       |
| 0     | 0    | 0     | 0 NA          | NA       |
| 0.23  | 0.03 | 0.31  | 0.33 0.016245 | 0.986749 |
| 0     | 0    | 0     | 0 NA          | NA       |
| 0     | 0    | 0     | 0 NA          | NA       |
| 1.08  | 1.22 | 0.99  | 1.39 0.272854 | 0.644878 |
| 0     | 0    | 0     | 0 NA          | NA       |
| 0     | 0    | 0     | 0 NA          | NA       |
| 0     | 0    | 0     | 0 NA          | NA       |
| 0     | 0    | 0     | 0 NA          | NA       |
| 0.2   | 0.04 | 0.12  | 0.02 -0.91851 | 0.158707 |
| 0.05  | 0.03 | 0.06  | 0.07 NA       | NA       |
| 0     | 0    | 0     | 0 NA          | NA       |
| 0     | 0    | 0     | 0 NA          | NA       |
| 0     | 0    | 0     | 0 NA          | NA       |
| 0     | 0    | 0     | 0 NA          | NA       |
| 0     | 0    | 0     | 0 NA          | NA       |
| 0     | 0    | 0     | 0 NA          | NA       |
| 0     | 0    | 0     | 0 NA          | NA       |
| 0     | 0.02 | 0     | 0.03 NA       | NA       |
| 0     | 0    | 0     | 0 NA          | NA       |
| 0     | 0.02 | 0.04  | 0 NA          | NA       |
| 0     | 0    | 0     | 0 NA          | NA       |
| 0     | 0    | 0     | 0 NA          | NA       |





|      |      |      |       |          |          |
|------|------|------|-------|----------|----------|
| 0    | 0    | 0    | 0     | NA       | NA       |
| 0    | 0    | 0    | 0     | NA       | NA       |
| 0    | 0    | 0    | 0     | NA       | NA       |
| 0    | 0    | 0    | 0     | NA       | NA       |
| 0    | 0    | 0    | 0.88  | NA       | NA       |
| 0    | 0    | 0    | 0     | NA       | NA       |
| 0    | 0    | 0    | 0     | NA       | NA       |
| 0    | 0    | 0    | 0     | NA       | NA       |
| 0    | 0    | 0    | 0     | NA       | NA       |
| 0    | 0    | 0    | 0     | NA       | NA       |
| 0    | 0    | 0    | 0     | NA       | NA       |
| 0    | 0.08 | 0    | 0     | NA       | NA       |
| 0    | 0    | 0    | 0     | NA       | NA       |
| 0    | 0    | 0    | 0     | NA       | NA       |
| 0    | 0    | 0    | 0     | NA       | NA       |
| 0    | 0    | 0    | 0     | NA       | NA       |
| 0    | 0    | 0    | 0     | NA       | NA       |
| 0    | 0    | 0    | 0     | NA       | NA       |
| 0    | 0    | 0    | 0     | NA       | NA       |
| 0    | 0    | 0    | 0     | NA       | NA       |
| 0    | 0    | 0    | 0     | NA       | NA       |
| 0    | 0    | 0    | 0     | NA       | NA       |
| 9.38 | 9.4  | 9.34 | 10.12 | -0.09454 | 0.455983 |
| 0    | 0    | 0    | 0     | NA       | NA       |
| 0    | 0    | 0.1  | 0     | NA       | NA       |
| 0    | 0    | 0    | 0     | NA       | NA       |
| 0    | 0    | 0    | 0     | NA       | NA       |
| 0.47 | 0    | 0    | 0.34  | NA       | NA       |
| 0    | 0    | 0    | 0     | NA       | NA       |
| 0.33 | 0    | 0.22 | 0     | NA       | NA       |
| 0    | 0    | 0    | 0     | NA       | NA       |
| 0    | 0    | 0    | 0     | NA       | NA       |
| 0    | 0    | 0    | 0     | NA       | NA       |
| 0    | 0.08 | 0    | 0     | NA       | NA       |
| 0    | 0    | 0    | 0     | NA       | NA       |
| 0    | 0    | 0    | 0     | NA       | NA       |
| 0    | 0    | 0.21 | 0.04  | NA       | NA       |
| 0    | 0    | 0    | 0     | NA       | NA       |
| 0    | 0    | 0    | 0     | NA       | NA       |
| 0    | 0    | 0    | 0     | NA       | NA       |
| 0    | 0    | 0    | 0     | NA       | NA       |
| 0    | 0    | 0    | 0     | NA       | NA       |
| 0    | 0    | 0    | 0     | NA       | NA       |
| 0.23 | 1.15 | 0    | 0     | NA       | NA       |
| 0.02 | 0.02 | 0.03 | 0.07  | NA       | NA       |



|      |       |       |                |          |
|------|-------|-------|----------------|----------|
| 0    | 0     | 0     | 0 NA           | NA       |
| 0    | 0     | 0     | 0 NA           | NA       |
| 0    | 0     | 0     | 0 NA           | NA       |
| 0    | 0     | 0     | 0 NA           | NA       |
| 0    | 0     | 0     | 0 NA           | NA       |
| 0.11 | 0     | 0     | 0 NA           | NA       |
| 2.39 | 3.14  | 3.81  | 3.24 0.499299  | 0.100599 |
| 0    | 0     | 0     | 0 NA           | NA       |
| 0    | 0     | 0     | 0 NA           | NA       |
| 0    | 0     | 0     | 0 NA           | NA       |
| 0    | 0     | 0     | 0 NA           | NA       |
| 0    | 0     | 0     | 0 NA           | NA       |
| 0    | 0     | 0     | 0 NA           | NA       |
| 0    | 0     | 0     | 0 NA           | NA       |
| 0    | 0.21  | 0.09  | 0 NA           | NA       |
| 0    | 0     | 0     | 0 NA           | NA       |
| 0.82 | 0.59  | 0     | 0.61 NA        | NA       |
| 0    | 0     | 0     | 0 NA           | NA       |
| 1    | 3.83  | 3.37  | 4.06 1.64801   | 1.59E-15 |
| 22.7 | 12.49 | 19.76 | 17.09 -0.64324 | 2.59E-06 |
| 0    | 0     | 0     | 0 NA           | NA       |
| 0.26 | 0.35  | 0     | 0.51 NA        | NA       |
| 0    | 0     | 0     | 0 NA           | NA       |
| 0    | 0     | 0     | 0 NA           | NA       |
| 0    | 0     | 0     | 0 NA           | NA       |
| 0    | 0     | 0     | 0 NA           | NA       |
| 0    | 0     | 0     | 0 NA           | NA       |
| 0    | 0     | 0     | 0 NA           | NA       |
| 0    | 0     | 0     | 0 NA           | NA       |
| 0.25 | 0     | 0     | 0 NA           | NA       |
| 0    | 0     | 0     | 0 NA           | NA       |
| 0    | 0     | 0     | 0 NA           | NA       |
| 0.5  | 0.14  | 0.26  | 0.15 NA        | NA       |
| 0    | 0     | 0.02  | 0 NA           | NA       |
| 0.94 | 0.17  | 1.21  | 1.4 0.052568   | 0.955958 |
| 0    | 0     | 0     | 0 NA           | NA       |
| 0    | 0     | 0     | 0 NA           | NA       |
| 0    | 0     | 0     | 0 NA           | NA       |
| 0    | 0     | 0.1   | 0.12 NA        | NA       |
| 0    | 0     | 0     | 0 NA           | NA       |
| 0    | 0     | 0     | 0 NA           | NA       |
| 0    | 0     | 0     | 0 NA           | NA       |
| 0    | 0     | 0     | 0 NA           | NA       |



|       |      |      |               |          |
|-------|------|------|---------------|----------|
| 0     | 0    | 0    | 0 NA          | NA       |
| 0     | 0    | 0    | 0 NA          | NA       |
| 0     | 0    | 0    | 0 NA          | NA       |
| 10.46 | 8.75 | 4.85 | 9.24 -0.73814 | 0.013427 |
| 0     | 0    | 0    | 0 NA          | NA       |
| 0     | 0    | 0    | 0 NA          | NA       |
| 0.03  | 0    | 0.02 | 0 NA          | NA       |
| 0     | 0    | 0    | 0 NA          | NA       |
| 0     | 0    | 0    | 0 NA          | NA       |
| 0     | 0    | 0    | 0 NA          | NA       |
| 0     | 0    | 0    | 0 NA          | NA       |
| 0     | 0    | 0    | 0 NA          | NA       |
| 0     | 0    | 0    | 0 NA          | NA       |
| 0     | 0    | 0    | 0 NA          | NA       |
| 0     | 0    | 0    | 0 NA          | NA       |
| 0     | 0    | 0    | 0 NA          | NA       |
| 0     | 0    | 0    | 0 NA          | NA       |
| 0     | 0    | 0    | 0 NA          | NA       |
| 0     | 0    | 0    | 0 NA          | NA       |
| 0     | 0.05 | 0    | 0 NA          | NA       |
| 0     | 0    | 0    | 0 NA          | NA       |
| 0     | 0    | 0    | 0 NA          | NA       |
| 0     | 0    | 0    | 0 NA          | NA       |
| 2.13  | 3.18 | 2.03 | 3.37 0.097565 | 0.680186 |
| 0     | 0    | 0    | 0 NA          | NA       |
| 0     | 0    | 0    | 0 NA          | NA       |
| 0     | 0    | 0.25 | 0 NA          | NA       |
| 0     | 0    | 0    | 0 NA          | NA       |
| 0     | 0    | 0    | 0 NA          | NA       |
| 0     | 0    | 0    | 0 NA          | NA       |
| 0     | 0    | 0    | 0 NA          | NA       |
| 0     | 0    | 0    | 0 NA          | NA       |
| 0     | 0    | 0    | 0 NA          | NA       |
| 0     | 0    | 0    | 0 NA          | NA       |
| 0     | 0    | 0    | 0 NA          | NA       |
| 0     | 0    | 0    | 0 NA          | NA       |
| 0     | 0    | 0    | 0 NA          | NA       |
| 0     | 0    | 0    | 0 NA          | NA       |
| 0     | 0    | 0    | 0.14 NA       | NA       |
| 0     | 0    | 0    | 0 NA          | NA       |
| 0     | 0    | 0    | 0 NA          | NA       |
| 0     | 0    | 0    | 0 NA          | NA       |

|      |      |      |               |          |
|------|------|------|---------------|----------|
| 0    | 0    | 0    | 0 NA          | NA       |
| 0    | 0    | 0    | 0 NA          | NA       |
| 1.3  | 0.1  | 0.66 | 0.34 -0.75003 | 0.185748 |
| 0    | 0    | 0    | 0 NA          | NA       |
| 0    | 0    | 0    | 0 NA          | NA       |
| 0    | 0    | 0    | 0 NA          | NA       |
| 0    | 0.23 | 0    | 0 NA          | NA       |
| 0    | 0    | 0    | 0 NA          | NA       |
| 0    | 0    | 0    | 0 NA          | NA       |
| 0    | 0    | 0    | 0 NA          | NA       |
| 0    | 0    | 0    | 0 NA          | NA       |
| 1.67 | 1.22 | 1.01 | 2.36 -0.23774 | 0.725695 |
| 0    | 0    | 0    | 0 NA          | NA       |
| 0    | 0    | 0    | 0 NA          | NA       |
| 0    | 0    | 0    | 0 NA          | NA       |
| 0    | 0    | 0    | 0 NA          | NA       |
| 0    | 0    | 0    | 0 NA          | NA       |
| 0    | 0    | 0    | 0 NA          | NA       |
| 0    | 0    | 0    | 0 NA          | NA       |
| 0    | 0    | 0    | 0 NA          | NA       |
| 3.48 | 2.73 | 1.67 | 2.61 -0.58282 | 0.081639 |
| 0    | 0    | 0    | 0 NA          | NA       |
| 0    | 0    | 0    | 0 NA          | NA       |
| 0.1  | 0.16 | 0.14 | 0.13 0.420638 | 0.533964 |
| 0    | 0    | 0    | 0.02 NA       | NA       |
| 0    | 0    | 0    | 0 NA          | NA       |
| 0    | 0    | 0    | 0 NA          | NA       |
| 0    | 0    | 0    | 0 NA          | NA       |
| 0    | 0    | 0    | 0 NA          | NA       |
| 0    | 0    | 0    | 0 NA          | NA       |
| 0    | 0    | 0    | 0 NA          | NA       |
| 0    | 0    | 0    | 0 NA          | NA       |
| 0.22 | 0.06 | 0    | 0.14 NA       | NA       |
| 0.83 | 0.17 | 0.07 | 0.52 -0.79653 | 0.228709 |
| 0    | 0    | 0    | 0 NA          | NA       |
| 0    | 0    | 0    | 0 NA          | NA       |
| 0    | 0    | 0    | 0 NA          | NA       |
| 0    | 0    | 0    | 0 NA          | NA       |
| 0    | 0    | 0    | 0 NA          | NA       |
| 0.56 | 0.44 | 0.56 | 0.47 -0.36937 | 0.560513 |
| 0    | 0    | 0    | 0 NA          | NA       |
| 0.23 | 0    | 0.37 | 0.03 NA       | NA       |
| 0    | 0    | 0    | 0 NA          | NA       |
| 0    | 0    | 0    | 0.07 NA       | NA       |
| 0    | 0    | 0    | 0 NA          | NA       |

|      |      |      |               |          |
|------|------|------|---------------|----------|
| 0    | 0    | 0    | 0 NA          | NA       |
| 0    | 0    | 0    | 0 NA          | NA       |
| 0    | 0    | 0    | 0 NA          | NA       |
| 0    | 0    | 0    | 0 NA          | NA       |
| 0    | 0    | 0    | 0 NA          | NA       |
| 0    | 0    | 0    | 0 NA          | NA       |
| 0    | 0    | 0    | 0 NA          | NA       |
| 0    | 0    | 0    | 0 NA          | NA       |
| 0    | 0    | 0    | 0 NA          | NA       |
| 0    | 0    | 0    | 0 NA          | NA       |
| 0    | 0    | 0.12 | 0 NA          | NA       |
| 0    | 0    | 0    | 0 NA          | NA       |
| 0    | 0    | 0    | 0 NA          | NA       |
| 0    | 0    | 0    | 0 NA          | NA       |
| 0    | 0    | 0    | 0 NA          | NA       |
| 0    | 0    | 0    | 0 NA          | NA       |
| 0    | 0    | 0    | 0 NA          | NA       |
| 0    | 0    | 0    | 0 NA          | NA       |
| 0    | 0    | 0    | 0 NA          | NA       |
| 0    | 0.03 | 0    | 0 NA          | NA       |
| 0    | 0    | 0    | 0 NA          | NA       |
| 0    | 0    | 0    | 0 NA          | NA       |
| 0    | 0    | 0    | 0 NA          | NA       |
| 0.08 | 0.17 | 0.32 | 0.31 -0.08647 | 0.922915 |
| 0    | 0    | 0    | 0 NA          | NA       |
| 0    | 0    | 0    | 0 NA          | NA       |
| 0    | 0.06 | 0.03 | 0.06 NA       | NA       |
| 0    | 0    | 0    | 0 NA          | NA       |
| 0    | 0    | 0    | 0 NA          | NA       |
| 0    | 0    | 0    | 0 NA          | NA       |
| 0    | 0.48 | 0.17 | 0 NA          | NA       |
| 1.28 | 0.92 | 1.39 | 0.96 -0.02916 | 0.975618 |
| 0    | 0    | 0.06 | 0 NA          | NA       |
| 0    | 0.17 | 0    | 0 NA          | NA       |
| 0    | 0    | 0    | 0 NA          | NA       |
| 0    | 0    | 0    | 0.04 NA       | NA       |
| 0    | 0    | 0    | 0 NA          | NA       |
| 0    | 0    | 0    | 0 NA          | NA       |
| 0.13 | 0.08 | 0.11 | 0.34 0.038624 | 0.967526 |
| 0.02 | 0.08 | 0.03 | 0.03 NA       | NA       |
| 0    | 0    | 0    | 1.33 NA       | NA       |
| 0    | 0    | 0    | 0 NA          | NA       |
| 0    | 0    | 0    | 0 NA          | NA       |

|       |       |       |       |          |          |
|-------|-------|-------|-------|----------|----------|
| 0     | 0     | 0     | 0     | NA       | NA       |
| 0     | 0     | 0     | 0     | NA       | NA       |
| 0     | 0     | 0     | 0     | NA       | NA       |
| 0     | 0     | 0     | 0     | NA       | NA       |
| 0     | 0     | 0     | 0     | NA       | NA       |
| 0     | 0     | 0     | 0     | NA       | NA       |
| 0     | 0.03  | 0.06  | 0.06  | NA       | NA       |
| 0     | 0     | 0     | 0     | NA       | NA       |
| 0     | 0.05  | 0.02  | 0.03  | NA       | NA       |
| 0     | 0     | 0     | 0     | NA       | NA       |
| 0     | 0     | 0     | 0     | NA       | NA       |
| 0     | 0     | 0     | 0     | NA       | NA       |
| 0     | 0     | 0     | 0.66  | NA       | NA       |
| 0     | 0     | 0     | 0     | NA       | NA       |
| 0     | 0     | 0     | 0     | NA       | NA       |
| 0     | 0     | 0     | 0     | NA       | NA       |
| 4.39  | 7.16  | 8.09  | 5.13  | 0.169161 | 0.725564 |
| 0     | 0     | 0     | 0     | NA       | NA       |
| 0     | 0     | 0     | 0     | NA       | NA       |
| 0.41  | 0.49  | 0.33  | 0.24  | 0.010696 | 0.992113 |
| 0     | 0     | 0     | 0     | NA       | NA       |
| 0.25  | 0.18  | 0     | 1.11  | NA       | NA       |
| 0     | 0     | 0     | 0     | NA       | NA       |
| 0     | 0     | 0     | 0     | NA       | NA       |
| 0     | 0     | 0     | 0     | NA       | NA       |
| 0     | 0     | 0     | 0     | NA       | NA       |
| 0     | 0     | 0     | 0     | NA       | NA       |
| 0     | 0     | 0     | 0     | NA       | NA       |
| 0     | 0     | 0     | 0     | NA       | NA       |
| 0     | 0     | 0     | 0     | NA       | NA       |
| 0     | 0.14  | 0.14  | 0     | NA       | NA       |
| 0     | 0     | 0     | 0     | NA       | NA       |
| 0     | 0.13  | 0     | 0     | NA       | NA       |
| 0     | 0     | 0     | 0     | NA       | NA       |
| 0.3   | 0     | 0.11  | 0     | NA       | NA       |
| 0.06  | 0     | 0     | 0     | NA       | NA       |
| 0     | 0     | 0     | 0     | NA       | NA       |
| 0     | 0     | 0     | 0     | NA       | NA       |
| 5.45  | 7.01  | 6.08  | 6.63  | 0.182373 | 0.402014 |
| 0     | 0     | 0     | 0     | NA       | NA       |
| 0     | 0.22  | 0     | 0     | NA       | NA       |
| 0     | 0     | 0     | 0     | NA       | NA       |
| 41.03 | 30.25 | 46.47 | 34.83 | -0.37045 | 0.033971 |
| 0     | 0     | 0     | 0     | NA       | NA       |
| 0     | 0     | 0     | 0     | NA       | NA       |

|      |      |      |      |          |          |
|------|------|------|------|----------|----------|
| 0.17 | 0.24 | 0.37 | 0.38 | 0.063968 | 0.946972 |
| 0    | 0    | 0    | 0    | NA       | NA       |
| 0    | 0    | 0    | 0    | NA       | NA       |
| 0.44 | 0    | 0    | 0.08 | NA       | NA       |
| 1.49 | 3.47 | 3.76 | 1.95 | 0.588449 | 0.338554 |
| 0    | 0    | 0    | 0    | NA       | NA       |
| 0.01 | 0.04 | 0.03 | 0    | NA       | NA       |
| 0.1  | 0    | 0    | 0    | NA       | NA       |
| 0.64 | 0.94 | 0.66 | 1.64 | -0.01167 | 0.989999 |
| 0    | 0    | 0    | 0    | NA       | NA       |
| 0    | 0    | 0    | 0    | NA       | NA       |
| 0    | 0    | 0    | 0    | NA       | NA       |
| 2.84 | 0.38 | 0.49 | 0.35 | -1.70502 | 1.24E-05 |
| 0    | 0    | 0    | 0    | NA       | NA       |
| 0    | 0    | 0    | 0    | NA       | NA       |
| 0    | 0    | 0    | 0    | NA       | NA       |
| 0    | 0    | 0    | 0    | NA       | NA       |
| 0    | 0    | 0    | 0    | NA       | NA       |
| 0.78 | 0.13 | 0.34 | 0.1  | -1.54543 | 0.005595 |
| 0    | 0    | 0.2  | 0    | NA       | NA       |
| 0    | 0    | 0    | 0    | NA       | NA       |
| 0    | 0    | 0    | 0    | NA       | NA       |
| 0    | 0    | 0    | 0    | NA       | NA       |
| 4.29 | 4.34 | 4.06 | 4.23 | -0.03548 | 0.882315 |
| 0    | 0    | 0    | 0    | NA       | NA       |
| 0    | 0    | 0    | 0    | NA       | NA       |
| 0    | 0    | 0    | 0    | NA       | NA       |
| 0    | 0    | 0    | 0    | NA       | NA       |
| 0    | 0    | 0    | 0    | NA       | NA       |
| 0    | 0    | 0    | 0    | NA       | NA       |
| 0    | 0    | 0    | 0    | NA       | NA       |
| 0    | 0    | 0    | 0    | NA       | NA       |
| 0    | 0    | 0    | 0    | NA       | NA       |
| 0    | 0    | 0    | 0    | NA       | NA       |
| 0.25 | 0.12 | 0.22 | 0.2  | -0.64705 | 0.260589 |
| 0    | 0    | 0    | 0    | NA       | NA       |
| 0    | 0    | 0    | 0    | NA       | NA       |
| 0    | 0.02 | 0.02 | 0.11 | NA       | NA       |
| 0.66 | 0.2  | 0.15 | 0.35 | -0.76251 | 0.169502 |
| 0    | 0    | 0    | 0    | NA       | NA       |
| 0    | 0    | 0    | 0    | NA       | NA       |
| 0    | 0    | 0    | 0    | NA       | NA       |
| 5.47 | 2.07 | 2.76 | 2.28 | -1.00134 | 0.008082 |

|      |      |      |               |          |
|------|------|------|---------------|----------|
| 0    | 0    | 0    | 0 NA          | NA       |
| 0    | 0    | 0    | 0 NA          | NA       |
| 0    | 0    | 0    | 0 NA          | NA       |
| 0    | 0    | 0    | 0 NA          | NA       |
| 1.68 | 1.15 | 0.9  | 1.25 -0.13902 | 0.779226 |
| 0    | 0    | 0    | 0 NA          | NA       |
| 0    | 0    | 0    | 0 NA          | NA       |
| 0    | 0    | 0    | 0 NA          | NA       |
| 0    | 0    | 0    | 0 NA          | NA       |
| 0.25 | 0    | 0.28 | 0.06 NA       | NA       |
| 0    | 0    | 0    | 0 NA          | NA       |
| 0.22 | 0    | 0    | 0.33 NA       | NA       |
| 0    | 0    | 0    | 0 NA          | NA       |
| 0.1  | 0    | 0.24 | 0.09 NA       | NA       |
| 0    | 0    | 0    | 0 NA          | NA       |
| 0.1  | 0.3  | 0.21 | 0.31 NA       | NA       |
| 0    | 0    | 0    | 0 NA          | NA       |
| 0    | 0    | 0    | 0 NA          | NA       |
| 0    | 0    | 0    | 0 NA          | NA       |
| 0    | 0    | 0    | 0 NA          | NA       |
| 0    | 0    | 0    | 0 NA          | NA       |
| 0    | 0    | 0    | 0 NA          | NA       |
| 0    | 0    | 0    | 0 NA          | NA       |
| 0.77 | 0.89 | 1.19 | 1.06 0.220728 | 0.745708 |
| 0    | 0    | 0    | 0 NA          | NA       |
| 0    | 0    | 0    | 0.26 NA       | NA       |
| 0    | 0    | 0    | 0 NA          | NA       |
| 0    | 0    | 0    | 0 NA          | NA       |
| 0    | 0    | 0    | 0 NA          | NA       |
| 0    | 2.92 | 2.76 | 2.3 4.117225  | 1.52E-28 |
| 0    | 0    | 0    | 0 NA          | NA       |
| 0    | 0.4  | 0.18 | 0.42 NA       | NA       |
| 0    | 0    | 0    | 0.05 NA       | NA       |
| 0    | 0    | 0    | 0 NA          | NA       |
| 0    | 0    | 0    | 0 NA          | NA       |
| 0    | 0    | 0    | 0 NA          | NA       |
| 0    | 0.05 | 0.1  | 0.05 NA       | NA       |
| 0    | 0    | 0    | 0 NA          | NA       |
| 0    | 0    | 0    | 0 NA          | NA       |
| 0    | 0    | 0    | 0.07 NA       | NA       |
| 0    | 0    | 0    | 0 NA          | NA       |
| 0    | 0    | 0    | 0 NA          | NA       |
| 0    | 0    | 0    | 0 NA          | NA       |
| 0    | 0    | 0    | 0 NA          | NA       |
| 0    | 0    | 0    | 0 NA          | NA       |

|      |      |      |              |          |
|------|------|------|--------------|----------|
| 0    | 0    | 0    | 0 NA         | NA       |
| 0    | 0    | 0    | 0 NA         | NA       |
| 0    | 0    | 0    | 0 NA         | NA       |
| 0    | 0    | 0    | 0 NA         | NA       |
| 0    | 0    | 0    | 0 NA         | NA       |
| 0    | 0    | 0    | 0 NA         | NA       |
| 0    | 0    | 0    | 0 NA         | NA       |
| 0    | 0    | 0    | 0 NA         | NA       |
| 0    | 0    | 0    | 0 NA         | NA       |
| 0    | 0    | 0    | 0 NA         | NA       |
| 0    | 0    | 0    | 0 NA         | NA       |
| 0    | 0    | 0.33 | 0 NA         | NA       |
| 0    | 0    | 0    | 0 NA         | NA       |
| 0    | 0    | 0    | 0 NA         | NA       |
| 0    | 0    | 0    | 0 NA         | NA       |
| 0    | 0.11 | 0.05 | 0.23 NA      | NA       |
| 0.43 | 0.46 | 0.77 | 0.4 0.057545 | 0.948247 |
| 0    | 0    | 0    | 0 NA         | NA       |
| 0    | 0    | 0    | 0 NA         | NA       |
| 0.21 | 0.31 | 0.28 | 0 NA         | NA       |
| 0    | 0    | 0    | 0 NA         | NA       |
| 0    | 0    | 0    | 0 NA         | NA       |
| 0    | 0    | 0    | 0 NA         | NA       |
| 0    | 0    | 0    | 0 NA         | NA       |
| 0    | 0    | 0    | 0 NA         | NA       |
| 0.42 | 0.11 | 0.09 | 0 NA         | NA       |
| 0    | 0    | 0    | 0 NA         | NA       |
| 0    | 0    | 0    | 0 NA         | NA       |
| 0    | 0    | 0    | 0 NA         | NA       |
| 0.03 | 0    | 0    | 0 NA         | NA       |
| 0    | 0    | 0    | 0 NA         | NA       |
| 0    | 0    | 0    | 0 NA         | NA       |
| 0    | 0    | 0    | 0 NA         | NA       |
| 0    | 0    | 0    | 0 NA         | NA       |
| 0    | 0    | 0    | 0 NA         | NA       |
| 0    | 0    | 0    | 0 NA         | NA       |
| 0    | 0    | 0.15 | 0 NA         | NA       |
| 0    | 0    | 0    | 0 NA         | NA       |
| 0    | 0    | 0    | 0 NA         | NA       |
| 0    | 0    | 0    | 0 NA         | NA       |
| 0    | 0    | 0    | 0 NA         | NA       |
| 0    | 0    | 0    | 0 NA         | NA       |
| 0    | 0    | 0    | 0 NA         | NA       |
| 0.05 | 0.04 | 0.04 | 0.09 NA      | NA       |
| 0    | 0    | 0    | 0 NA         | NA       |
| 0    | 0    | 0    | 0 NA         | NA       |

|      |       |      |                |          |
|------|-------|------|----------------|----------|
| 0    | 0     | 0    | 0 NA           | NA       |
| 0    | 0     | 0    | 0 NA           | NA       |
| 0    | 0     | 0    | 0 NA           | NA       |
| 0    | 0     | 0    | 0 NA           | NA       |
| 0    | 0     | 0    | 0 NA           | NA       |
| 0    | 0     | 0    | 0 NA           | NA       |
| 0    | 4.4   | 0    | 0 NA           | NA       |
| 0.12 | 0     | 0.11 | 0 NA           | NA       |
| 0    | 0     | 0    | 0 NA           | NA       |
| 0    | 0.13  | 0.18 | 0.33 NA        | NA       |
| 0    | 0     | 0    | 0 NA           | NA       |
| 0    | 0     | 0    | 0 NA           | NA       |
| 0    | 0     | 0    | 0 NA           | NA       |
| 0    | 0     | 0    | 0 NA           | NA       |
| 0    | 0     | 0    | 0 NA           | NA       |
| 0    | 0     | 0    | 0 NA           | NA       |
| 0    | 0     | 0    | 0 NA           | NA       |
| 0.08 | 0.22  | 0.05 | 0 NA           | NA       |
| 0    | 0     | 0    | 0 NA           | NA       |
| 0    | 0     | 0    | 0.04 NA        | NA       |
| 0    | 0     | 0    | 0 NA           | NA       |
| 0    | 0.14  | 0    | 0 NA           | NA       |
| 0    | 0     | 0.18 | 0 NA           | NA       |
| 0    | 0     | 0    | 0 NA           | NA       |
| 0    | 0     | 0    | 0 NA           | NA       |
| 0    | 0     | 0    | 0 NA           | NA       |
| 0    | 0     | 0    | 0 NA           | NA       |
| 0    | 0     | 0    | 0 NA           | NA       |
| 0    | 0     | 0    | 0 NA           | NA       |
| 0    | 0     | 0    | 0 NA           | NA       |
| 0.74 | 0.09  | 0.25 | 0.28 -0.95986  | 0.137936 |
| 0    | 0     | 0    | 0 NA           | NA       |
| 0    | 0     | 0    | 0 NA           | NA       |
| 0    | 0     | 0    | 0 NA           | NA       |
| 0    | 0.3   | 0    | 0 NA           | NA       |
| 0    | 0     | 0    | 0 NA           | NA       |
| 0    | 0     | 0    | 0 NA           | NA       |
| 0    | 0     | 0    | 0 NA           | NA       |
| 0    | 0     | 0.02 | 0 NA           | NA       |
| 3.78 | 12.57 | 9.14 | 12.24 1.132074 | 8.32E-09 |
| 0    | 0     | 0    | 0 NA           | NA       |
| 0    | 0     | 0    | 0 NA           | NA       |
| 0    | 0     | 0    | 0 NA           | NA       |
| 0    | 0     | 0    | 0 NA           | NA       |



|       |       |       |                |          |
|-------|-------|-------|----------------|----------|
| 0     | 0     | 0     | 0 NA           | NA       |
| 0     | 0     | 0     | 0 NA           | NA       |
| 20.17 | 13.93 | 21.02 | 17.62 -0.23134 | 0.045629 |
| 0     | 0     | 0     | 0 NA           | NA       |
| 0     | 0     | 0     | 0 NA           | NA       |
| 0     | 0     | 0     | 0 NA           | NA       |
| 0     | 0     | 0     | 0 NA           | NA       |
| 0     | 0     | 0     | 0 NA           | NA       |
| 0     | 0.06  | 0.06  | 0 NA           | NA       |
| 0     | 0     | 0.08  | 0.09 NA        | NA       |
| 0     | 0     | 0     | 0 NA           | NA       |
| 0     | 0     | 0.24  | 0 NA           | NA       |
| 0     | 0     | 0     | 0 NA           | NA       |
| 0     | 0     | 0     | 0 NA           | NA       |
| 0     | 0     | 0.03  | 0 NA           | NA       |
| 0     | 0.29  | 0.13  | 0 NA           | NA       |
| 0     | 0     | 0     | 0 NA           | NA       |
| 0     | 0     | 0     | 0 NA           | NA       |
| 0     | 0     | 0     | 0 NA           | NA       |
| 0     | 0     | 0     | 0 NA           | NA       |
| 1.76  | 1.51  | 2.02  | 1.97 -0.08971  | 0.890364 |
| 0.23  | 0     | 0     | 0 NA           | NA       |
| 0     | 0     | 0     | 0 NA           | NA       |
| 0     | 0     | 0     | 0 NA           | NA       |
| 0     | 0     | 0     | 0 NA           | NA       |
| 0     | 0     | 0     | 0 NA           | NA       |
| 0     | 0     | 0     | 0 NA           | NA       |
| 0     | 0     | 0.24  | 0 NA           | NA       |
| 0.26  | 0.06  | 0     | 0.07 NA        | NA       |
| 0     | 0     | 0     | 0 NA           | NA       |
| 19.8  | 15.16 | 18.02 | 19.31 -0.18913 | 0.05733  |
| 0     | 0     | 0     | 0 NA           | NA       |
| 0     | 0     | 0     | 0.03 NA        | NA       |
| 1.05  | 0.19  | 0.34  | 0 NA           | NA       |
| 0.04  | 0.03  | 0.03  | 0.08 NA        | NA       |
| 0     | 0     | 0     | 0 NA           | NA       |
| 0     | 0     | 0.25  | 0 NA           | NA       |
| 0     | 0     | 0     | 0 NA           | NA       |
| 0.13  | 0     | 0     | 0 NA           | NA       |
| 0     | 0     | 0     | 0 NA           | NA       |
| 5.46  | 4.29  | 6.87  | 6.64 0.246359  | 0.46674  |
| 0.47  | 0.43  | 0.42  | 0.49 -0.23184  | 0.690133 |
| 0     | 0     | 0     | 0 NA           | NA       |
| 0     | 0     | 0     | 0 NA           | NA       |

|      |      |      |      |          |          |
|------|------|------|------|----------|----------|
| 3.37 | 4.51 | 3.82 | 3.41 | 0.107471 | 0.807248 |
| 0    | 0    | 0    | 0    | NA       | NA       |
| 0    | 0    | 0    | 0    | NA       | NA       |
| 0    | 0    | 0    | 0    | NA       | NA       |
| 0    | 0    | 0    | 0    | NA       | NA       |
| 0    | 0.19 | 0.17 | 0    | NA       | NA       |
| 0    | 0.11 | 0    | 0    | NA       | NA       |
| 0    | 0    | 0    | 0    | NA       | NA       |
| 0    | 0    | 0    | 0    | NA       | NA       |
| 0    | 0    | 0    | 0    | NA       | NA       |
| 0    | 0    | 0    | 0    | NA       | NA       |
| 0    | 0    | 0.12 | 0.25 | NA       | NA       |
| 0    | 0    | 0    | 0    | NA       | NA       |
| 0    | 0    | 0    | 0    | NA       | NA       |
| 0    | 0    | 0    | 0    | NA       | NA       |
| 0    | 0    | 0    | 0    | NA       | NA       |
| 0.52 | 0    | 0.17 | 0.19 | NA       | NA       |
| 0    | 0    | 0    | 0    | NA       | NA       |
| 0    | 0    | 0    | 0    | NA       | NA       |
| 0    | 0    | 0    | 0    | NA       | NA       |
| 0    | 0    | 0    | 0    | NA       | NA       |
| 0    | 0    | 0    | 0    | NA       | NA       |
| 0    | 0    | 0    | 0    | NA       | NA       |
| 0    | 0    | 0    | 0.21 | NA       | NA       |
| 0    | 0    | 0    | 0    | NA       | NA       |
| 0    | 0    | 0    | 0    | NA       | NA       |
| 0    | 0    | 0    | 0    | NA       | NA       |
| 0    | 0    | 0    | 0    | NA       | NA       |
| 0    | 0    | 0    | 0    | NA       | NA       |
| 0    | 0    | 0    | 0    | NA       | NA       |
| 0    | 0    | 0    | 0    | NA       | NA       |
| 0    | 0    | 0    | 0    | NA       | NA       |
| 0    | 0    | 0    | 0    | NA       | NA       |
| 0    | 0    | 0    | 0    | NA       | NA       |
| 0    | 0    | 0    | 0    | NA       | NA       |
| 0    | 0    | 0    | 0    | NA       | NA       |
| 0    | 0    | 0    | 0    | NA       | NA       |
| 2.67 | 0.9  | 1.07 | 1.04 | -0.88041 | 0.09074  |
| 0.62 | 0.19 | 0.82 | 0.63 | -0.53288 | 0.414087 |
| 0    | 0    | 0    | 0    | NA       | NA       |
| 0    | 0    | 0    | 0    | NA       | NA       |
| 0    | 0    | 0    | 0    | NA       | NA       |
| 0    | 0    | 0    | 0    | NA       | NA       |
| 0    | 0    | 0    | 0    | NA       | NA       |
| 0    | 0    | 0    | 0    | NA       | NA       |
| 0    | 0    | 0    | 0    | NA       | NA       |
| 0    | 0    | 0    | 0    | NA       | NA       |
| 0.5  | 0.45 | 0.42 | 0.48 | -0.69314 | 0.308411 |

|      |      |      |               |          |
|------|------|------|---------------|----------|
| 0    | 0    | 0    | 0 NA          | NA       |
| 0    | 0    | 0    | 0 NA          | NA       |
| 0    | 0    | 0    | 0 NA          | NA       |
| 0.18 | 0    | 0    | 0 NA          | NA       |
| 0    | 0    | 0    | 0 NA          | NA       |
| 0    | 0    | 0    | 0 NA          | NA       |
| 0    | 0    | 0    | 0 NA          | NA       |
| 0    | 0    | 0    | 0 NA          | NA       |
| 0    | 0    | 0    | 0 NA          | NA       |
| 0    | 0    | 0    | 0 NA          | NA       |
| 0    | 0    | 0    | 0 NA          | NA       |
| 0    | 0    | 0    | 0 NA          | NA       |
| 0    | 0    | 0    | 0 NA          | NA       |
| 0.03 | 0.14 | 0.07 | 0.03 0.032607 | 0.973212 |
| 0.33 | 0.23 | 0.2  | 0.13 -1.07036 | 0.008234 |
| 0    | 0    | 0    | 0 NA          | NA       |
| 0    | 0    | 0    | 0 NA          | NA       |
| 0    | 0    | 0    | 0 NA          | NA       |
| 0    | 0    | 0    | 0 NA          | NA       |
| 0    | 0    | 0    | 0 NA          | NA       |
| 0    | 0.1  | 0.15 | 0.18 NA       | NA       |
| 0    | 0    | 0    | 0 NA          | NA       |
| 0    | 0    | 0    | 0 NA          | NA       |
| 0    | 0    | 0    | 0 NA          | NA       |
| 0.27 | 0.14 | 0.25 | 0.18 -0.06251 | 0.936444 |
| 0    | 0    | 0    | 0 NA          | NA       |
| 0    | 0    | 0    | 0 NA          | NA       |
| 0    | 0    | 0    | 0 NA          | NA       |
| 0    | 0    | 0    | 0 NA          | NA       |
| 0    | 0    | 0    | 0 NA          | NA       |
| 0    | 0.06 | 0.05 | 0.06 NA       | NA       |
| 0    | 0    | 0    | 0 NA          | NA       |
| 0    | 0    | 0    | 0 NA          | NA       |
| 0    | 0    | 0    | 0 NA          | NA       |
| 0    | 0    | 0    | 0 NA          | NA       |
| 0.43 | 0.15 | 0.37 | 0.63 0.545604 | 0.428726 |
| 0    | 0    | 0    | 0 NA          | NA       |
| 0    | 0    | 0    | 0 NA          | NA       |
| 0    | 0    | 0.13 | 0 NA          | NA       |
| 2.47 | 6.42 | 6.99 | 8.32 2.006536 | 4.55E-13 |
| 0    | 0    | 0    | 0 NA          | NA       |
| 0.25 | 0.03 | 0.12 | 0.17 -0.89912 | 0.162315 |
| 0    | 0    | 0    | 0 NA          | NA       |
| 0    | 0    | 0    | 0 NA          | NA       |

|      |      |      |      |          |          |
|------|------|------|------|----------|----------|
| 0.43 | 0.36 | 0.15 | 0.23 | -0.27861 | 0.713345 |
| 0    | 0    | 0    | 0    | NA       | NA       |
| 0    | 0    | 0    | 0.12 | NA       | NA       |
| 0    | 0    | 0    | 0    | NA       | NA       |
| 0    | 0    | 0    | 0    | NA       | NA       |
| 0    | 0    | 0    | 0    | NA       | NA       |
| 0    | 0    | 0    | 0    | NA       | NA       |
| 0    | 0    | 0    | 0    | NA       | NA       |
| 0    | 0    | 0    | 0    | NA       | NA       |
| 0    | 0    | 0    | 0    | NA       | NA       |
| 0    | 0    | 0    | 0    | NA       | NA       |
| 0.9  | 0.76 | 0.83 | 0.65 | -0.44496 | 0.35239  |
| 0    | 0    | 0    | 0    | NA       | NA       |
| 0    | 0    | 0    | 0    | NA       | NA       |
| 0    | 0    | 0    | 0    | NA       | NA       |
| 0.02 | 0.03 | 0.02 | 0    | NA       | NA       |
| 0.04 | 0    | 0    | 0    | NA       | NA       |
| 0    | 0    | 0    | 0    | NA       | NA       |
| 0    | 0    | 0    | 0    | NA       | NA       |
| 0    | 0    | 0    | 0    | NA       | NA       |
| 4.37 | 2    | 2.61 | 2.62 | -0.81745 | 0.019013 |
| 0    | 0    | 0    | 0    | NA       | NA       |
| 0    | 0    | 0    | 0    | NA       | NA       |
| 0    | 0    | 0    | 0    | NA       | NA       |
| 0.31 | 0    | 0.39 | 0.23 | NA       | NA       |
| 0    | 0    | 0    | 0    | NA       | NA       |
| 0    | 0    | 0    | 0    | NA       | NA       |
| 0    | 0    | 0    | 0    | NA       | NA       |
| 0    | 0    | 0    | 0    | NA       | NA       |
| 0    | 0    | 0    | 0    | NA       | NA       |
| 0.41 | 0    | 0    | 0    | NA       | NA       |
| 0.31 | 0    | 0    | 0.23 | NA       | NA       |
| 0    | 0    | 0    | 0    | NA       | NA       |
| 0    | 0    | 0    | 0    | NA       | NA       |
| 0    | 0    | 0    | 0    | NA       | NA       |
| 0    | 0.15 | 0    | 0    | NA       | NA       |
| 0.06 | 0    | 0.08 | 0.04 | NA       | NA       |
| 0    | 0    | 0    | 0    | NA       | NA       |
| 0    | 0.08 | 0    | 0    | NA       | NA       |
| 0    | 0    | 0    | 0    | NA       | NA       |
| 0    | 0    | 0    | 0    | NA       | NA       |
| 0    | 0    | 0    | 0    | NA       | NA       |
| 0    | 0    | 0    | 0    | NA       | NA       |
| 0    | 0    | 0    | 0    | NA       | NA       |
| 0    | 0    | 0.09 | 0    | NA       | NA       |

|      |      |      |               |          |
|------|------|------|---------------|----------|
| 0    | 0    | 0    | 0 NA          | NA       |
| 0    | 0    | 0    | 0 NA          | NA       |
| 0    | 0    | 0    | 0 NA          | NA       |
| 0    | 0    | 0    | 0 NA          | NA       |
| 0    | 0    | 0    | 0 NA          | NA       |
| 0    | 0    | 0    | 0 NA          | NA       |
| 0    | 0    | 0    | 0 NA          | NA       |
| 0    | 0.14 | 0    | 0 NA          | NA       |
| 0    | 0    | 0.03 | 0 NA          | NA       |
| 0    | 0    | 0    | 0 NA          | NA       |
| 0    | 0    | 0.05 | 0 NA          | NA       |
| 0    | 0    | 0.08 | 0.05 NA       | NA       |
| 0    | 0    | 0    | 0 NA          | NA       |
| 0    | 0    | 0    | 0 NA          | NA       |
| 0    | 0    | 0    | 0 NA          | NA       |
| 0    | 0    | 0    | 0 NA          | NA       |
| 0    | 0    | 0    | 0 NA          | NA       |
| 0    | 0    | 0    | 0 NA          | NA       |
| 0    | 0    | 0    | 0 NA          | NA       |
| 0    | 0    | 0    | 0 NA          | NA       |
| 0.7  | 0.95 | 1.22 | 1.06 -0.12956 | 0.813172 |
| 0    | 0    | 0    | 0 NA          | NA       |
| 0    | 0    | 0    | 0 NA          | NA       |
| 0    | 0    | 0    | 0 NA          | NA       |
| 0    | 0    | 0    | 0 NA          | NA       |
| 1.12 | 0    | 0    | 0 NA          | NA       |
| 0    | 0    | 0    | 0 NA          | NA       |
| 0.07 | 0.12 | 0.05 | 0.03 NA       | NA       |
| 0    | 0    | 0.12 | 0 NA          | NA       |
| 0    | 0    | 0    | 0 NA          | NA       |
| 0    | 0    | 0    | 0 NA          | NA       |
| 0    | 0    | 0    | 0 NA          | NA       |
| 0    | 0    | 0    | 0 NA          | NA       |
| 0    | 0    | 0    | 0 NA          | NA       |
| 0    | 0    | 0    | 0 NA          | NA       |
| 0    | 0    | 0    | 0 NA          | NA       |
| 0.03 | 0.01 | 0.1  | 0.04 NA       | NA       |
| 0    | 0    | 0    | 0 NA          | NA       |
| 0    | 0    | 0    | 0 NA          | NA       |
| 9.45 | 6.74 | 7.74 | 7.73 -0.04088 | 0.873758 |
| 0    | 0    | 0    | 0 NA          | NA       |
| 1.28 | 1.07 | 0.92 | 1.28 0.280093 | 0.677401 |
| 0    | 0    | 0    | 0 NA          | NA       |
| 0    | 0    | 0    | 0 NA          | NA       |
| 0    | 0    | 0    | 0 NA          | NA       |

|       |       |       |                |          |
|-------|-------|-------|----------------|----------|
| 0     | 0     | 0     | 0 NA           | NA       |
| 0     | 0     | 0     | 0 NA           | NA       |
| 0     | 0     | 0     | 0 NA           | NA       |
| 0     | 0     | 0     | 0 NA           | NA       |
| 0     | 0     | 0     | 0 NA           | NA       |
| 0     | 0     | 0     | 0 NA           | NA       |
| 10.69 | 13.52 | 12.27 | 12.41 0.164958 | 0.332376 |
| 0     | 0     | 0     | 0 NA           | NA       |
| 0     | 0     | 0     | 0 NA           | NA       |
| 0     | 0     | 0     | 0 NA           | NA       |
| 0.37  | 0.13  | 0.12  | 0.16 NA        | NA       |
| 0     | 0     | 0     | 0 NA           | NA       |
| 0.11  | 0.1   | 0.17  | 0.44 0.250836  | 0.763941 |
| 0     | 0     | 0     | 0 NA           | NA       |
| 0     | 0     | 0     | 0 NA           | NA       |
| 0     | 0     | 0     | 0 NA           | NA       |
| 0     | 0.15  | 0.14  | 0 NA           | NA       |
| 0     | 0     | 0     | 0 NA           | NA       |
| 0     | 0     | 0     | 0 NA           | NA       |
| 0     | 0     | 0     | 0 NA           | NA       |
| 0     | 0     | 0     | 0 NA           | NA       |
| 0.32  | 0.35  | 0.94  | 0.12 0.216418  | 0.799634 |
| 0     | 0     | 0     | 0 NA           | NA       |
| 0     | 0     | 0     | 0 NA           | NA       |
| 0     | 0     | 0     | 0 NA           | NA       |
| 0     | 0     | 0     | 0 NA           | NA       |
| 2.73  | 2.46  | 2.82  | 1.66 -0.07617  | 0.903718 |
| 0     | 0     | 0     | 0 NA           | NA       |
| 0     | 0     | 0     | 0 NA           | NA       |
| 0     | 0     | 0     | 0 NA           | NA       |
| 1.03  | 0.17  | 0.66  | 0.67 -1.07961  | 0.07747  |
| 0     | 0     | 0     | 0 NA           | NA       |
| 2.86  | 0     | 0.79  | 0 NA           | NA       |
| 0     | 0     | 0     | 0 NA           | NA       |
| 0     | 0     | 0     | 0 NA           | NA       |
| 0     | 0     | 0     | 0 NA           | NA       |
| 0     | 0     | 0     | 0 NA           | NA       |
| 0     | 0     | 0     | 0 NA           | NA       |
| 0     | 0.04  | 0     | 0 NA           | NA       |
| 0     | 0     | 0     | 0 NA           | NA       |
| 0     | 0     | 0     | 0 NA           | NA       |
| 0     | 0     | 0     | 0 NA           | NA       |
| 0     | 0     | 0     | 0 NA           | NA       |
| 0.1   | 0.07  | 0.08  | 0 NA           | NA       |
| 0     | 0     | 0     | 0 NA           | NA       |

|      |      |      |         |    |
|------|------|------|---------|----|
| 0    | 0    | 0    | 0 NA    | NA |
| 0    | 0    | 0    | 0 NA    | NA |
| 0    | 0    | 0.04 | 0.05 NA | NA |
| 0.05 | 0.19 | 0.11 | 0.12 NA | NA |
| 0    | 0    | 0    | 0 NA    | NA |
| 0    | 0.36 | 0    | 0 NA    | NA |
| 0    | 0    | 0    | 0 NA    | NA |
| 0    | 0    | 0    | 0 NA    | NA |
| 0    | 0    | 0.24 | 0 NA    | NA |
| 0    | 0    | 0    | 0 NA    | NA |
| 0    | 0    | 0    | 0 NA    | NA |
| 0    | 0    | 0    | 0 NA    | NA |
| 0    | 0    | 0.37 | 0.71 NA | NA |
| 0    | 0.14 | 0    | 0.15 NA | NA |
| 0    | 0    | 0    | 0.09 NA | NA |
| 0    | 0    | 0    | 0 NA    | NA |
| 0    | 0    | 0    | 0 NA    | NA |
| 0    | 0    | 0    | 0 NA    | NA |
| 0    | 0    | 0    | 0 NA    | NA |
| 0    | 0    | 0    | 0 NA    | NA |
| 0    | 0    | 0    | 0 NA    | NA |
| 0.05 | 0.04 | 0.06 | 0.04 NA | NA |
| 0    | 0    | 0    | 0 NA    | NA |
| 0    | 0    | 0    | 0 NA    | NA |
| 0    | 0    | 0    | 0 NA    | NA |
| 0    | 0    | 0    | 0 NA    | NA |
| 0    | 0    | 0    | 0 NA    | NA |
| 0    | 0    | 0    | 0 NA    | NA |
| 0    | 0    | 0.1  | 0 NA    | NA |
| 0    | 0    | 0    | 0 NA    | NA |
| 0    | 0    | 0    | 0 NA    | NA |
| 0    | 0    | 0    | 0 NA    | NA |
| 0    | 0    | 0    | 0 NA    | NA |
| 0    | 0    | 0    | 0 NA    | NA |
| 0    | 0    | 0    | 0 NA    | NA |
| 0    | 0    | 0    | 0 NA    | NA |
| 0    | 0    | 0    | 0 NA    | NA |
| 0.11 | 0.04 | 0.41 | 0.13 NA | NA |
| 0    | 0    | 0    | 0 NA    | NA |
| 0    | 0    | 0    | 0 NA    | NA |
| 0    | 0    | 0    | 0 NA    | NA |
| 0    | 0    | 0    | 0.09 NA | NA |
| 0    | 0    | 0    | 0 NA    | NA |
| 0    | 0    | 0    | 0 NA    | NA |





|       |       |       |                |          |
|-------|-------|-------|----------------|----------|
| 0     | 0     | 0     | 0 NA           | NA       |
| 0     | 0     | 0.03  | 0 NA           | NA       |
| 0     | 0.11  | 0     | 0 NA           | NA       |
| 0     | 0     | 0     | 0 NA           | NA       |
| 0     | 0     | 0     | 0 NA           | NA       |
| 0     | 0     | 0     | 0 NA           | NA       |
| 0     | 0     | 0     | 0 NA           | NA       |
| 0     | 0     | 0     | 0 NA           | NA       |
| 0.24  | 0.24  | 0.19  | 0.11 -0.06933  | 0.932586 |
| 0     | 0     | 0     | 0 NA           | NA       |
| 0     | 0     | 0     | 0 NA           | NA       |
| 0     | 0     | 0     | 0 NA           | NA       |
| 0.38  | 0.27  | 0.25  | 0 NA           | NA       |
| 0     | 0     | 0     | 0 NA           | NA       |
| 8.25  | 22.64 | 15.89 | 17.52 1.09727  | 5.58E-18 |
| 0     | 0     | 0     | 0 NA           | NA       |
| 0     | 0     | 0     | 0 NA           | NA       |
| 0     | 0     | 0     | 0 NA           | NA       |
| 0     | 0     | 0     | 0 NA           | NA       |
| 0     | 0     | 0     | 0 NA           | NA       |
| 0.64  | 0.82  | 0.98  | 0.63 0.376209  | 0.500483 |
| 0     | 0     | 0     | 0 NA           | NA       |
| 0     | 0     | 0     | 0 NA           | NA       |
| 0     | 0     | 0     | 0 NA           | NA       |
| 0     | 0     | 0     | 0 NA           | NA       |
| 0     | 0     | 0     | 0 NA           | NA       |
| 0     | 0     | 0     | 0 NA           | NA       |
| 0     | 0     | 0     | 0 NA           | NA       |
| 0     | 0     | 0     | 0 NA           | NA       |
| 0     | 0     | 0     | 0 NA           | NA       |
| 0     | 0     | 0     | 0 NA           | NA       |
| 0     | 0     | 0     | 0 NA           | NA       |
| 0.5   | 0.13  | 0.19  | 0 NA           | NA       |
| 0     | 0     | 0     | 0 NA           | NA       |
| 0     | 0     | 0     | 0 NA           | NA       |
| 0     | 0     | 0     | 0 NA           | NA       |
| 0.07  | 0     | 0.06  | 0 NA           | NA       |
| 0.38  | 0     | 0.25  | 0 NA           | NA       |
| 0     | 0     | 0     | 0 NA           | NA       |
| 0     | 0     | 0     | 0 NA           | NA       |
| 0     | 0     | 0     | 0 NA           | NA       |
| 0     | 0     | 0     | 0 NA           | NA       |
| 32.81 | 37.26 | 35.39 | 33.88 0.085819 | 0.451545 |
| 0     | 0     | 0     | 0 NA           | NA       |
| 0     | 0     | 0     | 0 NA           | NA       |
| 0     | 0     | 0     | 0 NA           | NA       |



|       |       |       |       |          |          |
|-------|-------|-------|-------|----------|----------|
| 0.38  | 0     | 0.38  | 0.88  | NA       | NA       |
| 0.15  | 0     | 0.1   | 0     | NA       | NA       |
| 0.4   | 0.57  | 0.74  | 0.29  | NA       | NA       |
| 0     | 0     | 0     | 0     | NA       | NA       |
| 0     | 0     | 0     | 0     | NA       | NA       |
| 0.11  | 0     | 0     | 0     | NA       | NA       |
| 0     | 0     | 0     | 0     | NA       | NA       |
| 0     | 0     | 0     | 0     | NA       | NA       |
| 0     | 0     | 0     | 0     | NA       | NA       |
| 0     | 0     | 0     | 0     | NA       | NA       |
| 0     | 0     | 0     | 0     | NA       | NA       |
| 0     | 0     | 0     | 0     | NA       | NA       |
| 0     | 0     | 0     | 0     | NA       | NA       |
| 0     | 0     | 0     | 0     | NA       | NA       |
| 0     | 0     | 0     | 0     | NA       | NA       |
| 0     | 0     | 0     | 0     | NA       | NA       |
| 3.45  | 5.43  | 4.23  | 4.4   | 0.34038  | 0.147092 |
| 14.16 | 29.43 | 26.74 | 29.47 | 1.028997 | 8.39E-27 |
| 0     | 0     | 0     | 0     | NA       | NA       |
| 0     | 0     | 0     | 0     | NA       | NA       |
| 0     | 0     | 0     | 0     | NA       | NA       |
| 0     | 0     | 0     | 0     | NA       | NA       |
| 0.85  | 0     | 0     | 0     | NA       | NA       |
| 0     | 0     | 0.05  | 0.03  | NA       | NA       |
| 0     | 0     | 0     | 0     | NA       | NA       |
| 0     | 0     | 0     | 0     | NA       | NA       |
| 0.05  | 0     | 0.03  | 0.11  | NA       | NA       |
| 0.09  | 0.34  | 0.06  | 0.07  | NA       | NA       |
| 0     | 0     | 0     | 0     | NA       | NA       |
| 0     | 0     | 0     | 0     | NA       | NA       |
| 0.66  | 0.31  | 0.65  | 0.49  | -0.54889 | 0.358058 |
| 0     | 0     | 0     | 0     | NA       | NA       |
| 0     | 0     | 0.14  | 0     | NA       | NA       |
| 0     | 0     | 0     | 0     | NA       | NA       |
| 0.16  | 0.04  | 0.15  | 0.13  | -0.13271 | 0.882102 |
| 0     | 0.05  | 0.1   | 0     | NA       | NA       |
| 0     | 0     | 0     | 0     | NA       | NA       |
| 0     | 0     | 0     | 0     | NA       | NA       |
| 0     | 0     | 0     | 0     | NA       | NA       |
| 0     | 0     | 0     | 0     | NA       | NA       |
| 0     | 0     | 0     | 0     | NA       | NA       |
| 0     | 0     | 0     | 0     | NA       | NA       |
| 0     | 0     | 0     | 0     | NA       | NA       |
| 0     | 0.34  | 0.06  | 0.08  | NA       | NA       |
| 0     | 0     | 0     | 0     | NA       | NA       |

|       |       |       |               |          |
|-------|-------|-------|---------------|----------|
| 0.04  | 0     | 0     | 0 NA          | NA       |
| 0     | 0     | 0     | 0 NA          | NA       |
| 0     | 0     | 0     | 0 NA          | NA       |
| 1.2   | 1.68  | 1.28  | 1.2 -0.19092  | 0.720725 |
| 0     | 0     | 0     | 0.08 NA       | NA       |
| 0     | 0     | 0     | 0 NA          | NA       |
| 0.73  | 0.32  | 0.18  | 0.24 -0.58093 | 0.420705 |
| 0     | 0     | 0     | 0 NA          | NA       |
| 0.62  | 0.76  | 0.61  | 0.5 0.240005  | 0.774862 |
| 0     | 0     | 0     | 0 NA          | NA       |
| 0.16  | 0.41  | 1.23  | 0.76 0.79528  | 0.238613 |
| 0     | 0     | 0.11  | 0 NA          | NA       |
| 0     | 0     | 0     | 0 NA          | NA       |
| 0     | 0     | 0     | 0 NA          | NA       |
| 0     | 0     | 0     | 0 NA          | NA       |
| 0     | 0     | 0     | 0 NA          | NA       |
| 0     | 0     | 0     | 0 NA          | NA       |
| 0     | 0     | 0     | 0 NA          | NA       |
| 0     | 0     | 0     | 0 NA          | NA       |
| 0     | 0     | 0     | 0 NA          | NA       |
| 0     | 0     | 0     | 0 NA          | NA       |
| 0     | 0     | 0.11  | 0 NA          | NA       |
| 0     | 0     | 0     | 0 NA          | NA       |
| 0     | 0     | 0     | 0 NA          | NA       |
| 0     | 0     | 0     | 0 NA          | NA       |
| 0     | 0     | 0     | 0 NA          | NA       |
| 0     | 0     | 0     | 0 NA          | NA       |
| 0     | 0     | 0     | 0 NA          | NA       |
| 1.99  | 1.39  | 2.17  | 2.26 -0.37587 | 0.159008 |
| 0     | 0     | 0.21  | 0 NA          | NA       |
| 0.08  | 0     | 0     | 0 NA          | NA       |
| 0     | 0     | 0     | 0 NA          | NA       |
| 0     | 0     | 0     | 0 NA          | NA       |
| 27.23 | 30.69 | 32.82 | 31 0.13881    | 0.317957 |
| 0     | 0     | 0     | 0 NA          | NA       |
| 0     | 0     | 0     | 0 NA          | NA       |
| 0     | 0     | 0     | 0 NA          | NA       |
| 0     | 0     | 0     | 0 NA          | NA       |
| 0     | 0     | 0     | 0 NA          | NA       |
| 0     | 0     | 0     | 0 NA          | NA       |
| 0     | 0     | 0.02  | 0 NA          | NA       |
| 0     | 0     | 0     | 0 NA          | NA       |
| 0.49  | 0.08  | 0.15  | 0.21 -1.36903 | 0.006301 |
| 0     | 0     | 0     | 0 NA          | NA       |
| 0     | 0     | 0.08  | 0 NA          | NA       |
| 0     | 0     | 0     | 0 NA          | NA       |

|      |       |      |               |          |
|------|-------|------|---------------|----------|
| 0    | 0     | 0    | 0 NA          | NA       |
| 0    | 0     | 0    | 0.04 NA       | NA       |
| 0.25 | 0.91  | 0.33 | 0.57 NA       | NA       |
| 0    | 0     | 0    | 0 NA          | NA       |
| 0    | 0     | 0    | 0 NA          | NA       |
| 0    | 0     | 0    | 0 NA          | NA       |
| 0    | 0     | 0    | 0 NA          | NA       |
| 0    | 0     | 0    | 0 NA          | NA       |
| 0    | 0     | 0    | 0 NA          | NA       |
| 0    | 0     | 0    | 0 NA          | NA       |
| 0.09 | 0     | 0    | 0.06 NA       | NA       |
| 0    | 0     | 0    | 0 NA          | NA       |
| 0    | 0     | 0    | 0 NA          | NA       |
| 0    | 0.11  | 0.2  | 0.12 NA       | NA       |
| 0    | 0     | 0    | 0 NA          | NA       |
| 0    | 0     | 0    | 0 NA          | NA       |
| 0    | 0     | 0    | 0 NA          | NA       |
| 0    | 0     | 0    | 0 NA          | NA       |
| 0.39 | 0.56  | 0.4  | 0.22 0.461582 | 0.527404 |
| 0    | 0.07  | 0.06 | 0.13 NA       | NA       |
| 0    | 0     | 0    | 0 NA          | NA       |
| 0.05 | 0.08  | 0.17 | 0.17 0.929163 | 0.141709 |
| 0.61 | 0.66  | 0.4  | 0 -0.63579    | 0.369652 |
| 0    | 0     | 0    | 0 NA          | NA       |
| 0.1  | 0.07  | 0    | 0 NA          | NA       |
| 1.32 | 0.23  | 0    | 0.49 NA       | NA       |
| 7.08 | 10.14 | 9.68 | 7.27 0.006281 | 0.987312 |
| 0    | 0     | 0    | 0 NA          | NA       |
| 0.92 | 0.47  | 0.43 | 0.78 -0.42905 | 0.540079 |
| 0    | 0     | 1.33 | 0 NA          | NA       |
| 0.03 | 0.3   | 0.1  | 0.13 0.337999 | 0.671258 |
| 0    | 0     | 0    | 0 NA          | NA       |
| 0    | 0     | 0    | 0 NA          | NA       |
| 0    | 0     | 0.12 | 0 NA          | NA       |
| 0    | 0     | 0    | 0 NA          | NA       |
| 0    | 0     | 0    | 0 NA          | NA       |
| 0    | 0     | 0    | 0 NA          | NA       |
| 0    | 0     | 0    | 0 NA          | NA       |
| 0    | 0     | 0    | 0 NA          | NA       |
| 0    | 0     | 0    | 0 NA          | NA       |
| 0.49 | 0.18  | 0.32 | 0.18 NA       | NA       |
| 0    | 0     | 0    | 0 NA          | NA       |
| 0    | 0     | 0    | 0 NA          | NA       |
| 0    | 0     | 0    | 0 NA          | NA       |
| 0    | 0     | 0    | 0.22 NA       | NA       |

|      |      |      |               |          |
|------|------|------|---------------|----------|
| 0    | 0    | 0    | 0 NA          | NA       |
| 0    | 0    | 0    | 0 NA          | NA       |
| 0    | 0    | 0    | 0 NA          | NA       |
| 0.05 | 0.81 | 1.82 | 0.35 0.393611 | 0.583836 |
| 0    | 0    | 0    | 1.33 NA       | NA       |
| 0.09 | 0.06 | 0.12 | 0 NA          | NA       |
| 0    | 0    | 0    | 0 NA          | NA       |
| 0    | 0    | 0    | 0 NA          | NA       |
| 0    | 0    | 0    | 0.7 NA        | NA       |
| 0    | 0    | 0    | 0 NA          | NA       |
| 0    | 0    | 0    | 0 NA          | NA       |
| 0.16 | 0.17 | 0.11 | 0.19 -0.12364 | 0.890146 |
| 0    | 0    | 0    | 0 NA          | NA       |
| 0.26 | 0.13 | 0.13 | 0.23 0.124866 | 0.887755 |
| 0    | 0    | 0    | 0 NA          | NA       |
| 0    | 0    | 0    | 0 NA          | NA       |
| 0    | 0    | 0    | 0 NA          | NA       |
| 0    | 0.93 | 0    | 0 NA          | NA       |
| 0    | 0    | 0    | 0 NA          | NA       |
| 0.51 | 0.64 | 0.43 | 0.46 0.257038 | 0.668568 |
| 0    | 0    | 0    | 0 NA          | NA       |
| 0.12 | 0.18 | 0.19 | 0.15 -0.00499 | 0.99586  |
| 0    | 0    | 0    | 0 NA          | NA       |
| 0.09 | 0    | 0    | 0 NA          | NA       |
| 0    | 0    | 0    | 0 NA          | NA       |
| 0    | 0    | 0    | 0 NA          | NA       |
| 0    | 0    | 0    | 0 NA          | NA       |
| 0    | 0    | 0    | 0 NA          | NA       |
| 0    | 0    | 0.12 | 0 NA          | NA       |
| 0    | 0    | 0    | 0 NA          | NA       |
| 0    | 0    | 0    | 0 NA          | NA       |
| 0    | 0    | 0    | 0 NA          | NA       |
| 0    | 0    | 0    | 0.22 NA       | NA       |
| 0    | 0    | 0    | 0 NA          | NA       |
| 0    | 0    | 0    | 0 NA          | NA       |
| 0    | 0    | 0    | 0.06 NA       | NA       |
| 0.02 | 0.02 | 0    | 0 NA          | NA       |
| 0    | 0    | 0    | 0 NA          | NA       |
| 0.03 | 0    | 0    | 0 NA          | NA       |
| 0    | 0    | 0    | 0 NA          | NA       |
| 0.06 | 0    | 0    | 0.04 NA       | NA       |
| 0    | 0    | 0    | 0 NA          | NA       |
| 0    | 0    | 0    | 0 NA          | NA       |
| 0    | 0    | 0    | 0 NA          | NA       |

|      |      |      |         |                   |
|------|------|------|---------|-------------------|
| 0    | 0    | 0    | 0 NA    | NA                |
| 0    | 0    | 0    | 0 NA    | NA                |
| 0    | 0    | 0    | 0 NA    | NA                |
| 0    | 0    | 0    | 0 NA    | NA                |
| 0    | 0    | 0    | 0 NA    | NA                |
| 0    | 0    | 0    | 0 NA    | NA                |
| 3.67 | 4.78 | 5.01 | 5.16    | 0.41542 0.252943  |
| 0    | 0    | 0    | 0 NA    | NA                |
| 0    | 0    | 0    | 0 NA    | NA                |
| 0    | 0    | 0    | 0 NA    | NA                |
| 0    | 0    | 0    | 0 NA    | NA                |
| 0    | 0    | 0    | 0 NA    | NA                |
| 0    | 0    | 0    | 0 NA    | NA                |
| 0    | 0    | 0    | 0 NA    | NA                |
| 0    | 0    | 0    | 0 NA    | NA                |
| 0    | 0    | 0    | 0 NA    | NA                |
| 0    | 0    | 0    | 0 NA    | NA                |
| 0    | 0    | 0    | 0 NA    | NA                |
| 0.22 | 0    | 0    | 0.17 NA | NA                |
| 4.48 | 3.54 | 5.35 | 2.6     | 0.192377 0.718249 |
| 0    | 0    | 0    | 0 NA    | NA                |
| 0    | 0    | 0    | 0 NA    | NA                |
| 0    | 0    | 0    | 0 NA    | NA                |
| 0.39 | 0    | 0    | 0 NA    | NA                |
| 0.26 | 0.52 | 0.79 | 1.29    | -0.54573 0.400722 |
| 0    | 0    | 0    | 0 NA    | NA                |
| 0    | 0    | 0    | 0 NA    | NA                |
| 0    | 0    | 0    | 0 NA    | NA                |
| 0    | 0    | 0    | 0 NA    | NA                |
| 0    | 0    | 0    | 0 NA    | NA                |
| 0    | 0    | 0    | 0 NA    | NA                |
| 0    | 0    | 0    | 0 NA    | NA                |
| 0    | 0    | 0    | 0 NA    | NA                |
| 0    | 0    | 0    | 0 NA    | NA                |
| 0    | 0    | 0    | 0 NA    | NA                |
| 0    | 0    | 0    | 0 NA    | NA                |
| 0    | 0    | 0    | 0 NA    | NA                |
| 0    | 0    | 0    | 0 NA    | NA                |
| 0    | 0    | 0    | 0 NA    | NA                |
| 0    | 0    | 0    | 0 NA    | NA                |
| 0    | 0    | 0    | 0 NA    | NA                |
| 0    | 0    | 0    | 0 NA    | NA                |
| 0    | 0    | 0    | 0 NA    | NA                |
| 0    | 0    | 0    | 0 NA    | NA                |
| 0    | 0    | 0    | 0 NA    | NA                |
| 0.03 | 0.03 | 0.05 | 0.04    | 0.790003 0.23469  |

|      |      |      |               |          |
|------|------|------|---------------|----------|
| 0    | 0    | 0    | 0 NA          | NA       |
| 0.03 | 0.02 | 0.07 | 0.11 NA       | NA       |
| 0.07 | 0.02 | 0    | 0 NA          | NA       |
| 0    | 0    | 0    | 0 NA          | NA       |
| 0    | 0    | 0    | 0 NA          | NA       |
| 0    | 0    | 0    | 0 NA          | NA       |
| 0    | 0    | 0    | 0 NA          | NA       |
| 0    | 0    | 0    | 0 NA          | NA       |
| 0    | 0    | 0    | 0 NA          | NA       |
| 0    | 0    | 0    | 0 NA          | NA       |
| 7.14 | 5.78 | 6.65 | 6.2 -0.27685  | 0.029173 |
| 0    | 0    | 0    | 0 NA          | NA       |
| 0    | 0    | 0    | 0 NA          | NA       |
| 0    | 0    | 0    | 0 NA          | NA       |
| 0    | 0    | 0    | 0 NA          | NA       |
| 0    | 0    | 0    | 0 NA          | NA       |
| 0    | 0    | 0    | 0 NA          | NA       |
| 0.11 | 0    | 0    | 0 NA          | NA       |
| 0.28 | 0.04 | 0    | 0.08 -1.05154 | 0.094316 |
| 0    | 0    | 0    | 0 NA          | NA       |
| 0.11 | 0    | 0    | 0.08 NA       | NA       |
| 0    | 0    | 0    | 0 NA          | NA       |
| 0    | 0    | 0.43 | 0.3 NA        | NA       |
| 0    | 0    | 0    | 0 NA          | NA       |
| 0    | 0    | 0    | 0 NA          | NA       |
| 0    | 0.17 | 0.3  | 0 NA          | NA       |
| 0    | 0    | 0    | 0 NA          | NA       |
| 0    | 0    | 0    | 0 NA          | NA       |
| 0    | 0    | 0    | 0 NA          | NA       |
| 0    | 0    | 0    | 0 NA          | NA       |
| 0    | 0    | 0    | 0 NA          | NA       |
| 0.12 | 0.07 | 0.08 | 0.04 NA       | NA       |
| 0    | 0    | 0    | 0 NA          | NA       |
| 0    | 0    | 0    | 0 NA          | NA       |
| 0    | 0    | 0    | 0 NA          | NA       |
| 0.48 | 0.09 | 0.15 | 0.18 -0.56247 | 0.406624 |
| 1.15 | 0.49 | 0.82 | 0.51 -0.52637 | 0.472776 |
| 1.15 | 0.49 | 0.82 | 0.51 -0.52637 | 0.472776 |
| 0.1  | 0.05 | 0.08 | 0.11 0.183442 | 0.833427 |
| 0    | 0    | 0    | 0 NA          | NA       |
| 0    | 0    | 0    | 0 NA          | NA       |
| 0    | 0    | 0    | 0 NA          | NA       |
| 0    | 0    | 0    | 0 NA          | NA       |
| 0    | 0    | 0    | 0.12 NA       | NA       |





|      |      |      |               |          |
|------|------|------|---------------|----------|
| 0    | 0    | 0    | 0 NA          | NA       |
| 0    | 0    | 0    | 0 NA          | NA       |
| 0    | 0    | 0    | 0 NA          | NA       |
| 0    | 0    | 0    | 0 NA          | NA       |
| 0    | 0    | 0    | 0 NA          | NA       |
| 4.66 | 4.91 | 5.71 | 5.44 0.239285 | 0.368664 |
| 0    | 0    | 0    | 0 NA          | NA       |
| 0    | 0    | 0    | 0 NA          | NA       |
| 0.12 | 0    | 0    | 0 NA          | NA       |
| 1.36 | 1.47 | 0.55 | 0.6 0.11647   | 0.896404 |
| 0    | 0.59 | 0.75 | 0.5 1.116161  | 0.076162 |
| 0    | 0    | 0    | 0 NA          | NA       |
| 0    | 0    | 0    | 0 NA          | NA       |
| 0    | 0    | 0    | 0 NA          | NA       |
| 0    | 0    | 0    | 0 NA          | NA       |
| 0    | 0    | 0    | 0 NA          | NA       |
| 0    | 0    | 0    | 0 NA          | NA       |
| 0    | 0    | 0    | 0 NA          | NA       |
| 0    | 0    | 0    | 0 NA          | NA       |
| 0    | 0    | 0.3  | 0 NA          | NA       |
| 0    | 0    | 0    | 0 NA          | NA       |
| 0    | 0    | 0    | 0 NA          | NA       |
| 0    | 0    | 0    | 0 NA          | NA       |
| 2.27 | 2.74 | 3.36 | 3.33 0.356686 | 0.464212 |
| 0    | 0    | 0    | 0 NA          | NA       |
| 0    | 0    | 0    | 0 NA          | NA       |
| 0    | 0    | 0    | 0 NA          | NA       |
| 0    | 0    | 0    | 0 NA          | NA       |
| 0    | 0    | 0    | 0 NA          | NA       |
| 0    | 0    | 0    | 0 NA          | NA       |
| 0    | 0    | 0    | 0 NA          | NA       |
| 0    | 0    | 0    | 0 NA          | NA       |
| 0    | 0    | 0    | 0 NA          | NA       |
| 0    | 0    | 0    | 0 NA          | NA       |
| 0    | 0    | 0    | 0 NA          | NA       |
| 0    | 0    | 0    | 0 NA          | NA       |
| 0    | 0.04 | 0    | 0 NA          | NA       |
| 0    | 0    | 0    | 0 NA          | NA       |
| 0.24 | 0    | 0.16 | 0 NA          | NA       |
| 0.37 | 0.27 | 0.24 | 0.51 -0.1996  | 0.817702 |
| 0    | 0    | 0    | 0 NA          | NA       |
| 0.4  | 0.8  | 0.86 | 0.75 -0.27934 | 0.677986 |
| 0    | 0    | 0    | 0 NA          | NA       |
| 0.3  | 0.22 | 0.67 | 0.69 0.084524 | 0.928303 |

|      |      |      |               |          |
|------|------|------|---------------|----------|
| 0    | 0    | 0    | 0 NA          | NA       |
| 0    | 0.01 | 0.02 | 0.11 NA       | NA       |
| 0    | 0    | 0    | 0 NA          | NA       |
| 0    | 0    | 0    | 0 NA          | NA       |
| 0    | 0    | 0    | 0 NA          | NA       |
| 4.02 | 5.36 | 2.64 | 3.9 0.229624  | 0.494795 |
| 0.05 | 0    | 0    | 0 NA          | NA       |
| 0    | 0    | 0    | 0 NA          | NA       |
| 0    | 0    | 0    | 0 NA          | NA       |
| 0.47 | 1.01 | 0.86 | 0.89 1.164675 | 0.06118  |
| 0.99 | 0    | 0.52 | 0.45 -0.69623 | 0.316276 |
| 0    | 0    | 0    | 0 NA          | NA       |
| 0    | 0    | 0    | 0 NA          | NA       |
| 0    | 0    | 0    | 0 NA          | NA       |
| 0    | 0    | 0    | 0 NA          | NA       |
| 0    | 0    | 0    | 0 NA          | NA       |
| 0    | 0    | 0    | 0 NA          | NA       |
| 0    | 0    | 0    | 0 NA          | NA       |
| 0    | 0    | 0    | 0 NA          | NA       |
| 0    | 0    | 0.06 | 0 NA          | NA       |
| 0    | 0    | 0    | 0 NA          | NA       |
| 0    | 0.61 | 0    | 0 NA          | NA       |
| 0    | 0    | 0    | 0 NA          | NA       |
| 0.66 | 0.2  | 0.13 | 0.14 NA       | NA       |
| 0.98 | 0.44 | 0.92 | 0.97 0.005665 | 0.995428 |
| 0    | 0    | 0    | 0 NA          | NA       |
| 0    | 0    | 0    | 0 NA          | NA       |
| 0    | 0    | 0.17 | 0.11 NA       | NA       |
| 0    | 0    | 0    | 0 NA          | NA       |
| 0    | 0    | 0    | 0 NA          | NA       |
| 0    | 0    | 0    | 0 NA          | NA       |
| 0    | 0    | 0    | 0 NA          | NA       |
| 0    | 0    | 0    | 0 NA          | NA       |
| 0    | 0    | 0    | 0 NA          | NA       |
| 0    | 0    | 0    | 0 NA          | NA       |
| 0    | 0    | 0    | 0 NA          | NA       |
| 0    | 0    | 0    | 0 NA          | NA       |
| 0    | 0    | 0    | 0 NA          | NA       |
| 0    | 0    | 0    | 0.26 NA       | NA       |
| 0    | 0    | 0    | 0 NA          | NA       |
| 0    | 0.1  | 0    | 0 NA          | NA       |
| 0.73 | 0.96 | 0.35 | 1.03 0.348904 | 0.467753 |
| 0    | 0.11 | 0.03 | 0 NA          | NA       |
| 0.44 | 0.31 | 0    | 0.95 NA       | NA       |

|      |      |      |               |          |
|------|------|------|---------------|----------|
| 0    | 0    | 0    | 0 NA          | NA       |
| 0    | 0    | 0    | 0 NA          | NA       |
| 0    | 0    | 0    | 0 NA          | NA       |
| 0    | 0    | 0    | 0 NA          | NA       |
| 0    | 0    | 0    | 0 NA          | NA       |
| 0    | 0    | 0    | 0 NA          | NA       |
| 0    | 0    | 0    | 0 NA          | NA       |
| 0    | 0    | 0    | 0 NA          | NA       |
| 0    | 0    | 0.27 | 0.31 NA       | NA       |
| 0    | 0    | 0    | 0 NA          | NA       |
| 0    | 0    | 0    | 0 NA          | NA       |
| 0    | 0    | 0    | 0 NA          | NA       |
| 0    | 0    | 0    | 0 NA          | NA       |
| 0    | 0    | 0.19 | 0.22 NA       | NA       |
| 0    | 0    | 0    | 0 NA          | NA       |
| 0    | 0    | 0.06 | 0.07 NA       | NA       |
| 0    | 0    | 0    | 0 NA          | NA       |
| 0    | 0    | 0.04 | 0 NA          | NA       |
| 0    | 0    | 0    | 0 NA          | NA       |
| 0    | 0    | 0    | 0 NA          | NA       |
| 0    | 0    | 0    | 0 NA          | NA       |
| 0    | 0    | 0    | 0 NA          | NA       |
| 0.11 | 0.31 | 0.15 | 0 NA          | NA       |
| 0    | 0    | 0    | 0 NA          | NA       |
| 1.19 | 1.19 | 1.73 | 1.31 -0.50201 | 0.068669 |
| 0    | 0    | 0    | 0 NA          | NA       |
| 0    | 0    | 0    | 0 NA          | NA       |
| 0    | 0    | 0    | 0 NA          | NA       |
| 0    | 0    | 0    | 0.16 NA       | NA       |
| 0    | 0    | 0    | 0 NA          | NA       |
| 0    | 0    | 0    | 0 NA          | NA       |
| 0    | 0    | 0    | 0 NA          | NA       |
| 0    | 0    | 0    | 0 NA          | NA       |
| 0    | 0    | 0    | 0 NA          | NA       |
| 0    | 0    | 0    | 0 NA          | NA       |
| 0    | 0.17 | 0    | 0 NA          | NA       |
| 0    | 0    | 0    | 0 NA          | NA       |
| 0.47 | 0    | 0    | 0 NA          | NA       |
| 0    | 0    | 0    | 0.03 NA       | NA       |
| 0    | 0    | 0    | 0 NA          | NA       |
| 0    | 0    | 0    | 0 NA          | NA       |
| 0    | 0    | 0    | 0 NA          | NA       |
| 0.24 | 0.04 | 0    | 0 NA          | NA       |
| 0    | 0    | 0    | 0 NA          | NA       |

|       |       |       |                |          |
|-------|-------|-------|----------------|----------|
| 0     | 0     | 0     | 0 NA           | NA       |
| 0     | 0     | 0     | 0 NA           | NA       |
| 0     | 0     | 0     | 0 NA           | NA       |
| 0.07  | 0.27  | 0.2   | 0.17 NA        | NA       |
| 0     | 0     | 0     | 0 NA           | NA       |
| 0     | 0     | 0     | 0 NA           | NA       |
| 0     | 0     | 0     | 0 NA           | NA       |
| 0     | 0     | 0     | 0 NA           | NA       |
| 0.23  | 0.1   | 0.22  | 0.07 -0.02368  | 0.980845 |
| 0.64  | 0.33  | 0.12  | 0.07 -0.64931  | 0.358058 |
| 0     | 0     | 0     | 0 NA           | NA       |
| 0     | 0     | 0     | 0 NA           | NA       |
| 0     | 0     | 0     | 0 NA           | NA       |
| 0     | 0     | 0     | 0 NA           | NA       |
| 0     | 0     | 0     | 0 NA           | NA       |
| 0     | 0     | 0     | 0 NA           | NA       |
| 0     | 0     | 0     | 0 NA           | NA       |
| 0     | 0     | 0     | 0 NA           | NA       |
| 0     | 0     | 0     | 0 NA           | NA       |
| 0     | 1.41  | 0.23  | 0.8 0.323666   | 0.685516 |
| 0.15  | 0     | 0.1   | 0 NA           | NA       |
| 0     | 0     | 0     | 0 NA           | NA       |
| 0     | 0     | 0     | 0 NA           | NA       |
| 0     | 0     | 0     | 0.03 NA        | NA       |
| 0     | 0     | 0     | 0 NA           | NA       |
| 0     | 0     | 0     | 0 NA           | NA       |
| 14.13 | 12.82 | 13.92 | 13.68 -0.11714 | 0.429634 |
| 0     | 0     | 0     | 0 NA           | NA       |
| 0     | 0     | 0     | 0 NA           | NA       |
| 0     | 0     | 0     | 0 NA           | NA       |
| 0     | 0     | 0     | 0 NA           | NA       |
| 0     | 0     | 0     | 0 NA           | NA       |
| 0     | 0     | 0     | 0 NA           | NA       |
| 0     | 0     | 0     | 0 NA           | NA       |
| 0     | 0     | 0     | 0 NA           | NA       |
| 0     | 0     | 0     | 0 NA           | NA       |
| 0     | 0.06  | 0     | 0 NA           | NA       |
| 0     | 0     | 0     | 0.17 NA        | NA       |
| 0.03  | 0     | 0.02  | 0.11 NA        | NA       |
| 0     | 0     | 0     | 0.27 NA        | NA       |
| 0     | 0     | 0     | 0 NA           | NA       |
| 0     | 0     | 0     | 0 NA           | NA       |
| 0     | 0     | 0     | 0 NA           | NA       |



|      |      |      |               |          |
|------|------|------|---------------|----------|
| 0    | 0    | 0    | 0 NA          | NA       |
| 0    | 0    | 0    | 0 NA          | NA       |
| 0    | 0    | 0    | 0 NA          | NA       |
| 0    | 0    | 0    | 0 NA          | NA       |
| 0    | 0    | 0    | 0 NA          | NA       |
| 0    | 0    | 0    | 0 NA          | NA       |
| 0    | 0    | 0    | 0 NA          | NA       |
| 0    | 0    | 0    | 0 NA          | NA       |
| 0    | 0    | 0    | 0 NA          | NA       |
| 0.38 | 0.13 | 0.42 | 0.54 0.320382 | 0.682301 |
| 0    | 0    | 0    | 0 NA          | NA       |
| 0    | 0    | 0    | 0 NA          | NA       |
| 0    | 0    | 0    | 0 NA          | NA       |
| 0    | 0    | 0    | 0 NA          | NA       |
| 0    | 0    | 0    | 0 NA          | NA       |
| 0    | 0    | 0    | 0 NA          | NA       |
| 0    | 0    | 0    | 0 NA          | NA       |
| 0    | 0    | 0    | 0 NA          | NA       |
| 0    | 0    | 0    | 0 NA          | NA       |
| 0    | 0    | 0    | 0 NA          | NA       |
| 0    | 0    | 0    | 0 NA          | NA       |
| 0    | 0    | 0    | 0 NA          | NA       |
| 0    | 0.03 | 0.02 | 0 NA          | NA       |
| 0    | 0    | 0    | 0 NA          | NA       |
| 0.5  | 0.12 | 0.1  | 0.11 NA       | NA       |
| 0.71 | 0.17 | 0.15 | 0.18 NA       | NA       |
| 0    | 0    | 0    | 0 NA          | NA       |
| 0    | 0    | 0    | 0 NA          | NA       |
| 0    | 0    | 0    | 0 NA          | NA       |
| 0    | 0    | 0    | 0 NA          | NA       |
| 0    | 0    | 0    | 0 NA          | NA       |
| 0    | 0    | 0    | 0 NA          | NA       |
| 0    | 0    | 0    | 0 NA          | NA       |
| 0    | 0    | 0    | 0 NA          | NA       |
| 0    | 0    | 0    | 0 NA          | NA       |
| 0    | 0    | 0    | 0 NA          | NA       |
| 0    | 0    | 0    | 0 NA          | NA       |
| 0.03 | 0.02 | 0.02 | 0 NA          | NA       |
| 0    | 0.07 | 0.02 | 0 NA          | NA       |
| 0.03 | 0    | 0    | 0 NA          | NA       |
| 0    | 0    | 0    | 0.48 NA       | NA       |
| 0    | 0    | 0    | 0 NA          | NA       |
| 0    | 0    | 0    | 0 NA          | NA       |
| 0    | 0    | 0    | 0 NA          | NA       |
| 0    | 0    | 0    | 0 NA          | NA       |

|      |      |      |               |          |
|------|------|------|---------------|----------|
| 0    | 0    | 0    | 0 NA          | NA       |
| 0    | 0    | 0    | 0 NA          | NA       |
| 0.16 | 0.93 | 0.32 | 0.74 0.930546 | 0.14235  |
| 0    | 0    | 0    | 0 NA          | NA       |
| 0.11 | 0.23 | 0    | 0 NA          | NA       |
| 0    | 0    | 0    | 0 NA          | NA       |
| 0.32 | 0.27 | 0.16 | 0.07 -0.35035 | 0.655012 |
| 0    | 0    | 0    | 0 NA          | NA       |
| 0.01 | 0    | 0.01 | 0 NA          | NA       |
| 0    | 0    | 0.19 | 0.05 NA       | NA       |
| 0    | 0    | 0    | 0 NA          | NA       |
| 0    | 0    | 0    | 0 NA          | NA       |
| 0    | 0    | 0    | 0 NA          | NA       |
| 0    | 0    | 0    | 0 NA          | NA       |
| 0    | 0    | 0    | 0 NA          | NA       |
| 0    | 0    | 0    | 0 NA          | NA       |
| 0    | 0    | 0    | 0 NA          | NA       |
| 0    | 0    | 0    | 0 NA          | NA       |
| 0    | 0    | 0    | 0 NA          | NA       |
| 0    | 0    | 0    | 0 NA          | NA       |
| 0    | 0    | 0    | 0 NA          | NA       |
| 0    | 0    | 0    | 0 NA          | NA       |
| 0    | 0    | 0    | 0 NA          | NA       |
| 0    | 0    | 0    | 0 NA          | NA       |
| 0    | 0    | 0    | 0 NA          | NA       |
| 0    | 0    | 0    | 0 NA          | NA       |
| 0    | 0    | 0    | 0 NA          | NA       |
| 0    | 0    | 0    | 0 NA          | NA       |
| 0.19 | 0.04 | 0.45 | 0.12 NA       | NA       |
| 0    | 0    | 0    | 0 NA          | NA       |
| 0    | 0    | 0.05 | 0 NA          | NA       |
| 0.37 | 0.35 | 0.16 | 0.19 NA       | NA       |
| 0    | 0    | 0    | 0 NA          | NA       |
| 0    | 0    | 0    | 0 NA          | NA       |
| 0    | 0    | 0    | 0 NA          | NA       |
| 0    | 0    | 0    | 0 NA          | NA       |
| 0.04 | 0    | 0.09 | 0.23 NA       | NA       |
| 1.19 | 2.42 | 3.23 | 1.71 0.252901 | 0.610501 |
| 0    | 0.08 | 0    | 0 NA          | NA       |
| 0    | 0    | 0    | 0.05 NA       | NA       |
| 0    | 0    | 0    | 0 NA          | NA       |
| 0    | 0    | 0    | 0 NA          | NA       |
| 0.79 | 1.62 | 2.12 | 1.66 0.34745  | 0.582246 |
| 0    | 0    | 0    | 0 NA          | NA       |
| 0    | 1.15 | 0    | 0 NA          | NA       |
| 0    | 0    | 0    | 0 NA          | NA       |
| 0    | 0    | 0    | 0 NA          | NA       |



|       |       |       |                |          |
|-------|-------|-------|----------------|----------|
| 0     | 0     | 0     | 0 NA           | NA       |
| 0     | 0     | 0     | 0 NA           | NA       |
| 0     | 0     | 0     | 0 NA           | NA       |
| 0     | 0     | 0     | 0 NA           | NA       |
| 0     | 0     | 0     | 0 NA           | NA       |
| 0     | 0     | 0     | 0 NA           | NA       |
| 0     | 0     | 0     | 0 NA           | NA       |
| 2.96  | 1.21  | 1.43  | 2.05 -1.11702  | 0.001655 |
| 0     | 0     | 0.09  | 0 NA           | NA       |
| 0     | 0     | 0     | 0 NA           | NA       |
| 0     | 0     | 0.02  | 0 NA           | NA       |
| 0     | 0     | 0     | 0 NA           | NA       |
| 0     | 0.26  | 0.3   | 0.14 NA        | NA       |
| 0     | 0     | 0     | 0 NA           | NA       |
| 0.08  | 0.07  | 0     | 0 NA           | NA       |
| 0     | 0     | 0     | 0 NA           | NA       |
| 0     | 0     | 0     | 0 NA           | NA       |
| 0     | 0     | 0     | 0 NA           | NA       |
| 0     | 0     | 0     | 0 NA           | NA       |
| 0     | 0     | 0     | 0 NA           | NA       |
| 0     | 0     | 0     | 0 NA           | NA       |
| 0     | 0     | 0     | 0 NA           | NA       |
| 0     | 0     | 0     | 0 NA           | NA       |
| 0.01  | 0     | 0.01  | 0.01 NA        | NA       |
| 8.36  | 1.91  | 3.7   | 3.11 -1.20444  | 5.02E-05 |
| 0     | 0     | 0     | 0 NA           | NA       |
| 0     | 0     | 0     | 0 NA           | NA       |
| 0     | 0     | 0     | 0 NA           | NA       |
| 0     | 0     | 0     | 0 NA           | NA       |
| 0     | 0     | 0     | 0 NA           | NA       |
| 0     | 0     | 0     | 0 NA           | NA       |
| 19.91 | 14.34 | 14.13 | 13.92 -0.65405 | 6.27E-08 |
| 0     | 0     | 0     | 0 NA           | NA       |
| 0.47  | 0.47  | 0.8   | 0.63 0.238638  | 0.740459 |
| 0     | 0     | 0     | 0 NA           | NA       |
| 0.26  | 0.19  | 0.09  | 0.2 NA         | NA       |
| 0.03  | 0.02  | 0.04  | 0.02 NA        | NA       |
| 0.67  | 0.15  | 0.27  | 0.38 -0.05754  | 0.950693 |
| 0     | 0     | 0     | 0 NA           | NA       |
| 0.08  | 0.06  | 0.11  | 0 NA           | NA       |
| 0     | 0     | 0     | 0 NA           | NA       |
| 0.08  | 0.02  | 0.07  | 0.06 NA        | NA       |
| 0     | 0     | 0     | 0 NA           | NA       |
| 0     | 0     | 0     | 0 NA           | NA       |
| 0     | 0     | 0     | 0 NA           | NA       |

|      |      |      |               |          |
|------|------|------|---------------|----------|
| 0    | 0    | 0    | 0 NA          | NA       |
| 0    | 0    | 0    | 0 NA          | NA       |
| 0    | 0    | 0    | 0 NA          | NA       |
| 0    | 0    | 0    | 0 NA          | NA       |
| 0    | 0    | 0    | 0 NA          | NA       |
| 0    | 0    | 0    | 0 NA          | NA       |
| 0    | 0    | 0    | 0 NA          | NA       |
| 0    | 0    | 0    | 0 NA          | NA       |
| 0    | 0    | 0    | 0 NA          | NA       |
| 0    | 0    | 0    | 0 NA          | NA       |
| 0    | 0    | 0    | 0 NA          | NA       |
| 0    | 0    | 0    | 0 NA          | NA       |
| 0    | 0    | 0    | 0 NA          | NA       |
| 0    | 0    | 0    | 0 NA          | NA       |
| 0.12 | 0.14 | 0.14 | 0.19 0.279045 | 0.722818 |
| 0.06 | 0    | 0.04 | 0.05 NA       | NA       |
| 0    | 0    | 0    | 0 NA          | NA       |
| 0.37 | 0.13 | 0.43 | 0.21 NA       | NA       |
| 0    | 0    | 0    | 0 NA          | NA       |
| 0    | 0    | 0    | 0 NA          | NA       |
| 0    | 0    | 0    | 0 NA          | NA       |
| 0.21 | 0.22 | 0.3  | 0.21 -0.22431 | 0.76992  |
| 0    | 0.15 | 0    | 0 NA          | NA       |
| 0    | 0    | 0    | 0 NA          | NA       |
| 0    | 0.24 | 0    | 0 NA          | NA       |
| 0    | 0    | 0    | 0 NA          | NA       |
| 0    | 0    | 0    | 0 NA          | NA       |
| 0    | 0    | 0    | 0 NA          | NA       |
| 0    | 0    | 0    | 0 NA          | NA       |
| 0    | 0    | 0    | 0 NA          | NA       |
| 0    | 0    | 0    | 0 NA          | NA       |
| 0    | 0    | 0    | 0 NA          | NA       |
| 0.16 | 0.23 | 0.2  | 0.35 0.592758 | 0.385589 |
| 0    | 0    | 0    | 0 NA          | NA       |
| 0.11 | 0    | 0.07 | 0.08 NA       | NA       |
| 0    | 0    | 0    | 0 NA          | NA       |
| 0    | 0    | 0    | 0 NA          | NA       |
| 0.19 | 0.28 | 0.13 | 0.29 NA       | NA       |
| 0.7  | 0.38 | 0.35 | 0.26 NA       | NA       |
| 0    | 0    | 0.16 | 0 NA          | NA       |
| 0    | 0    | 0    | 0 NA          | NA       |
| 0    | 0    | 0    | 0 NA          | NA       |



|       |       |       |                |          |
|-------|-------|-------|----------------|----------|
| 0     | 0     | 0     | 0 NA           | NA       |
| 0.15  | 0     | 0     | 0 NA           | NA       |
| 0     | 0     | 0     | 0 NA           | NA       |
| 0.11  | 0.43  | 0.31  | 0.43 0.560843  | 0.441464 |
| 0     | 0     | 0     | 0 NA           | NA       |
| 0     | 0     | 0     | 0 NA           | NA       |
| 0     | 0     | 0     | 0 NA           | NA       |
| 0     | 0     | 0     | 0 NA           | NA       |
| 0     | 0.25  | 0     | 0 NA           | NA       |
| 0     | 0     | 0     | 0 NA           | NA       |
| 0     | 0     | 0     | 0 NA           | NA       |
| 0     | 0     | 0     | 0 NA           | NA       |
| 0.21  | 0     | 0     | 0.32 NA        | NA       |
| 0.02  | 0     | 0.04  | 0 NA           | NA       |
| 0     | 0     | 0     | 0 NA           | NA       |
| 0     | 0     | 0     | 0 NA           | NA       |
| 0     | 0     | 0     | 0 NA           | NA       |
| 0     | 0     | 0     | 0 NA           | NA       |
| 0     | 0     | 0     | 0 NA           | NA       |
| 0     | 0     | 0     | 0 NA           | NA       |
| 0.75  | 0     | 0.03  | 0.16 NA        | NA       |
| 0     | 0     | 0     | 0 NA           | NA       |
| 0     | 0     | 0     | 0 NA           | NA       |
| 0     | 0     | 0     | 0 NA           | NA       |
| 0     | 0     | 0     | 0 NA           | NA       |
| 0     | 0     | 0     | 0 NA           | NA       |
| 0     | 1.2   | 0.23  | 0.59 1.745708  | 0.002441 |
| 0.28  | 0     | 0.02  | 0 NA           | NA       |
| 0     | 0     | 0     | 0 NA           | NA       |
| 0     | 0     | 0     | 0 NA           | NA       |
| 0     | 0     | 0     | 0 NA           | NA       |
| 0     | 0     | 0     | 0 NA           | NA       |
| 0     | 0     | 0     | 0 NA           | NA       |
| 0.57  | 0     | 0.54  | 0.63 NA        | NA       |
| 0     | 0     | 0     | 0 NA           | NA       |
| 0     | 0     | 0     | 0 NA           | NA       |
| 0     | 0     | 0     | 0 NA           | NA       |
| 0     | 0.07  | 0     | 0 NA           | NA       |
| 0     | 0     | 0     | 0 NA           | NA       |
| 13.56 | 17.92 | 19.88 | 19.98 0.350767 | 0.042776 |
| 0     | 0     | 0     | 0 NA           | NA       |
| 0     | 0.12  | 0     | 0 NA           | NA       |
| 0.03  | 0.05  | 0.03  | 0 NA           | NA       |
| 0     | 0     | 0     | 0 NA           | NA       |

|      |      |      |               |          |
|------|------|------|---------------|----------|
| 0    | 0    | 0    | 0 NA          | NA       |
| 0    | 0    | 0    | 0 NA          | NA       |
| 0    | 0    | 0    | 0 NA          | NA       |
| 0    | 0    | 0    | 0 NA          | NA       |
| 0    | 0    | 0    | 0 NA          | NA       |
| 0    | 0    | 0    | 0 NA          | NA       |
| 1.38 | 0.63 | 0.67 | 1.16 -0.54847 | 0.411511 |
| 0    | 0    | 0    | 0 NA          | NA       |
| 0    | 0    | 0.04 | 0 NA          | NA       |
| 0    | 0    | 0    | 0 NA          | NA       |
| 0    | 0    | 0    | 0 NA          | NA       |
| 0    | 0    | 0    | 0.51 NA       | NA       |
| 0    | 0    | 0    | 0 NA          | NA       |
| 0    | 0    | 0    | 0 NA          | NA       |
| 0    | 0    | 0    | 0 NA          | NA       |
| 0    | 0    | 0    | 0 NA          | NA       |
| 0    | 0    | 0    | 0 NA          | NA       |
| 0.45 | 0.96 | 0.28 | 0 NA          | NA       |
| 0    | 0    | 0    | 0 NA          | NA       |
| 0    | 0    | 0    | 0 NA          | NA       |
| 0    | 0    | 0    | 0 NA          | NA       |
| 0    | 0    | 0    | 0 NA          | NA       |
| 0    | 0    | 0    | 0 NA          | NA       |
| 0    | 0    | 0    | 0 NA          | NA       |
| 0    | 0    | 0    | 0 NA          | NA       |
| 0.19 | 0    | 0    | 0 NA          | NA       |
| 0    | 0    | 0    | 0 NA          | NA       |
| 0    | 0    | 0    | 0 NA          | NA       |
| 0    | 0    | 0    | 0 NA          | NA       |
| 0    | 0    | 0    | 0 NA          | NA       |
| 0    | 0    | 0    | 0 NA          | NA       |
| 0    | 0    | 0    | 0 NA          | NA       |
| 0    | 0    | 0    | 0 NA          | NA       |
| 0    | 0    | 0    | 0 NA          | NA       |
| 0    | 0    | 0    | 0 NA          | NA       |
| 0    | 0    | 0    | 0 NA          | NA       |
| 0    | 0    | 0    | 0 NA          | NA       |
| 0    | 0    | 0    | 0 NA          | NA       |
| 0    | 0    | 0    | 0 NA          | NA       |
| 0    | 0    | 0    | 0 NA          | NA       |
| 0    | 0    | 0    | 0 NA          | NA       |
| 0    | 0    | 0    | 0 NA          | NA       |
| 0    | 0    | 0    | 0 NA          | NA       |
| 0    | 0    | 0    | 0 NA          | NA       |
| 0    | 0    | 0    | 0 NA          | NA       |
| 0    | 0    | 0    | 0 NA          | NA       |
| 0    | 0    | 0    | 0 NA          | NA       |
| 1.24 | 0.28 | 1.1  | 0 -0.41507    | 0.590161 |
| 0    | 0    | 0    | 0 NA          | NA       |
| 0    | 0    | 0    | 0 NA          | NA       |
| 0    | 0    | 0    | 0 NA          | NA       |
| 0.06 | 0.05 | 0.15 | 0.15 0.614374 | 0.373202 |
| 0    | 0    | 0    | 0 NA          | NA       |
| 0    | 0.17 | 0    | 0 NA          | NA       |
| 0    | 0    | 0    | 0 NA          | NA       |

|       |       |       |       |          |          |
|-------|-------|-------|-------|----------|----------|
| 0     | 0     | 0     | 0     | NA       | NA       |
| 0     | 0     | 0     | 0     | NA       | NA       |
| 0.26  | 0.06  | 0.17  | 0.19  | NA       | NA       |
| 0     | 0     | 0     | 0     | NA       | NA       |
| 0     | 0     | 0     | 0     | NA       | NA       |
| 0     | 0     | 0     | 0     | NA       | NA       |
| 0     | 0     | 0     | 0.05  | NA       | NA       |
| 0     | 0     | 0     | 0     | NA       | NA       |
| 0     | 0     | 0     | 0     | NA       | NA       |
| 0     | 0     | 0     | 0     | NA       | NA       |
| 0.1   | 0     | 0     | 0     | NA       | NA       |
| 0     | 0     | 0     | 0     | NA       | NA       |
| 0     | 0     | 0     | 0     | NA       | NA       |
| 0     | 0     | 0     | 0     | NA       | NA       |
| 0     | 0     | 0     | 0     | NA       | NA       |
| 0.66  | 1.1   | 1.74  | 1.77  | 0.574181 | 0.207412 |
| 0.11  | 0.04  | 0.08  | 0.08  | NA       | NA       |
| 0.03  | 0.29  | 0.12  | 0.17  | 0.863093 | 0.191102 |
| 0     | 0     | 0     | 0     | NA       | NA       |
| 0     | 0     | 0     | 0.1   | NA       | NA       |
| 0     | 0     | 0     | 0     | NA       | NA       |
| 0     | 0     | 0     | 0     | NA       | NA       |
| 0     | 0     | 0     | 0     | NA       | NA       |
| 0     | 0     | 0     | 0     | NA       | NA       |
| 0     | 0     | 0     | 0     | NA       | NA       |
| 24.6  | 22.04 | 23.75 | 22.45 | -0.10857 | 0.25284  |
| 0.88  | 4.38  | 3.34  | 3.84  | 1.041572 | 0.076085 |
| 0     | 0     | 0     | 0     | NA       | NA       |
| 0     | 0     | 0     | 0     | NA       | NA       |
| 0     | 0     | 0     | 0     | NA       | NA       |
| 15.19 | 22.28 | 19.05 | 18.66 | 0.272454 | 0.027828 |
| 0     | 0     | 0     | 0     | NA       | NA       |
| 0     | 0     | 0     | 0     | NA       | NA       |
| 0     | 0     | 0     | 0.25  | NA       | NA       |
| 0     | 0     | 0     | 0     | NA       | NA       |
| 0     | 0     | 0     | 0     | NA       | NA       |
| 0     | 0     | 0     | 0     | -0.36567 | 0.639172 |
| 0     | 0     | 0     | 0     | NA       | NA       |
| 0     | 0.07  | 0.02  | 0     | NA       | NA       |
| 0     | 0     | 0     | 0     | NA       | NA       |
| 0     | 0     | 0     | 0     | NA       | NA       |
| 0     | 0     | 0     | 0     | NA       | NA       |
| 0.61  | 0     | 0.19  | 0.23  | NA       | NA       |
| 0.98  | 1.13  | 0     | 0     | NA       | NA       |



|      |      |      |               |          |
|------|------|------|---------------|----------|
| 0    | 0    | 0    | 0 NA          | NA       |
| 0    | 0    | 0    | 0 NA          | NA       |
| 0    | 0    | 0    | 0 NA          | NA       |
| 0    | 0    | 0    | 0 NA          | NA       |
| 0    | 0    | 0    | 0 NA          | NA       |
| 0    | 0    | 0    | 0 NA          | NA       |
| 0    | 0    | 0    | 0 NA          | NA       |
| 0    | 0    | 0    | 0 NA          | NA       |
| 0    | 0    | 0    | 0 NA          | NA       |
| 0.49 | 1.51 | 0.9  | 1.93 1.690707 | 0.001084 |
| 0    | 0    | 0    | 0 NA          | NA       |
| 0    | 0    | 0    | 0 NA          | NA       |
| 0    | 0    | 0.13 | 0 NA          | NA       |
| 0    | 0    | 0    | 0 NA          | NA       |
| 0    | 0    | 0    | 0 NA          | NA       |
| 0.06 | 0.06 | 0.09 | 0.18 0.215913 | 0.800322 |
| 0    | 0    | 0    | 0 NA          | NA       |
| 0    | 0    | 0    | 0 NA          | NA       |
| 0    | 0    | 0    | 0 NA          | NA       |
| 0    | 0    | 0    | 0 NA          | NA       |
| 0    | 0    | 0    | 0 NA          | NA       |
| 0    | 0    | 0.15 | 0 NA          | NA       |
| 0    | 0    | 0    | 0 NA          | NA       |
| 0    | 0    | 0    | 0 NA          | NA       |
| 0    | 0    | 0    | 0 NA          | NA       |
| 0    | 0    | 0    | 0 NA          | NA       |
| 0    | 0    | 0    | 0 NA          | NA       |
| 0    | 0    | 0    | 0 NA          | NA       |
| 0    | 0.93 | 0.39 | 0 NA          | NA       |
| 0    | 0    | 0    | 0 NA          | NA       |
| 0    | 0    | 0.31 | 0 NA          | NA       |
| 0    | 0    | 0    | 0 NA          | NA       |
| 0    | 0    | 0    | 0 NA          | NA       |
| 0    | 0    | 0    | 0 NA          | NA       |
| 0    | 0    | 0    | 0.24 NA       | NA       |
| 0    | 0    | 0    | 0 NA          | NA       |
| 0.13 | 0.29 | 0.18 | 0.2 NA        | NA       |
| 0    | 0    | 0    | 0 NA          | NA       |
| 0    | 0.07 | 0    | 0 NA          | NA       |
| 0.12 | 0.17 | 0.08 | 0 NA          | NA       |
| 0.7  | 0.78 | 0.36 | 0.51 0.190592 | 0.785863 |
| 0    | 1.04 | 0    | 0 NA          | NA       |
| 0    | 0    | 0    | 0 NA          | NA       |



|      |      |      |               |          |
|------|------|------|---------------|----------|
| 0    | 0    | 0    | 0 NA          | NA       |
| 0    | 0    | 0    | 0 NA          | NA       |
| 0    | 0.16 | 0    | 0 NA          | NA       |
| 0    | 0    | 0    | 0 NA          | NA       |
| 0    | 0    | 0    | 0 NA          | NA       |
| 0    | 0    | 0    | 0 NA          | NA       |
| 0    | 0.12 | 0.11 | 0 NA          | NA       |
| 0    | 0    | 0    | 0 NA          | NA       |
| 0    | 0    | 0    | 0 NA          | NA       |
| 0    | 0    | 0    | 0 NA          | NA       |
| 0.29 | 0.31 | 0.65 | 0.89 0.148367 | 0.857432 |
| 0    | 0    | 0    | 0 NA          | NA       |
| 0    | 0    | 0    | 0 NA          | NA       |
| 0.1  | 0    | 0.36 | 0.17 NA       | NA       |
| 0.55 | 0    | 0    | 0.14 NA       | NA       |
| 0    | 0    | 0    | 0 NA          | NA       |
| 0    | 0    | 0    | 0 NA          | NA       |
| 0    | 0    | 0    | 0 NA          | NA       |
| 0    | 0    | 0.08 | 0 NA          | NA       |
| 4.92 | 5.68 | 4.86 | 5.49 0.010248 | 0.979404 |
| 0    | 0    | 0    | 0 NA          | NA       |
| 0.2  | 0    | 0    | 0 NA          | NA       |
| 0    | 0    | 0    | 0 NA          | NA       |
| 0    | 0    | 0    | 0 NA          | NA       |
| 0.08 | 0    | 0    | 0 NA          | NA       |
| 0    | 0    | 0    | 0 NA          | NA       |
| 0    | 0    | 0    | 0 NA          | NA       |
| 0    | 0    | 0    | 0.03 NA       | NA       |
| 0    | 0    | 0    | 0 NA          | NA       |
| 0    | 0    | 0    | 0 NA          | NA       |
| 0    | 0    | 0    | 0 NA          | NA       |
| 0    | 0    | 0    | 0 NA          | NA       |
| 0    | 0    | 0    | 0 NA          | NA       |
| 0    | 0    | 0    | 0 NA          | NA       |
| 0    | 0    | 0    | 0 NA          | NA       |
| 0.32 | 0.43 | 0.26 | 0.6 -0.05011  | 0.948015 |
| 0    | 0    | 0    | 0 NA          | NA       |
| 0    | 0    | 0    | 0 NA          | NA       |
| 0    | 0    | 0    | 0 NA          | NA       |
| 0    | 0.07 | 0    | 0 NA          | NA       |
| 0    | 0    | 0    | 0 NA          | NA       |
| 0.04 | 0.77 | 0.38 | 0.59 1.162232 | 0.061355 |
| 0    | 0    | 0    | 0 NA          | NA       |
| 0.67 | 0    | 0    | 0 NA          | NA       |
| 0    | 0    | 0    | 0 NA          | NA       |



|      |      |      |               |          |
|------|------|------|---------------|----------|
| 0    | 0    | 0    | 0 NA          | NA       |
| 0    | 0    | 0.02 | 0 NA          | NA       |
| 0    | 0    | 0    | 0 NA          | NA       |
| 0    | 0    | 0    | 0 NA          | NA       |
| 0    | 0    | 0.03 | 0.04 NA       | NA       |
| 6.1  | 8.69 | 7.35 | 7.48 0.227488 | 0.121061 |
| 0    | 0    | 0    | 0 NA          | NA       |
| 0    | 0    | 0    | 0 NA          | NA       |
| 0    | 0    | 0    | 0 NA          | NA       |
| 0    | 0    | 0    | 0 NA          | NA       |
| 0    | 0    | 0    | 0 NA          | NA       |
| 0    | 0    | 0    | 0 NA          | NA       |
| 0    | 0    | 0    | 0 NA          | NA       |
| 1.34 | 1.12 | 0.82 | 1.24 -0.00952 | 0.989187 |
| 0    | 0    | 0    | 0 NA          | NA       |
| 0    | 0    | 0    | 0 NA          | NA       |
| 0    | 0    | 0    | 0 NA          | NA       |
| 0.76 | 0.44 | 1    | 0.11 -0.17171 | 0.846189 |
| 0    | 0    | 0    | 0 NA          | NA       |
| 0    | 0    | 0    | 0 NA          | NA       |
| 0    | 0    | 0    | 0 NA          | NA       |
| 0    | 0    | 0    | 0 NA          | NA       |
| 0    | 0    | 0    | 0 NA          | NA       |
| 0    | 0.15 | 0.13 | 0 NA          | NA       |
| 0    | 0    | 0    | 0 NA          | NA       |
| 9.69 | 7.89 | 8.15 | 8.14 -0.19424 | 0.129712 |
| 0    | 0    | 0.14 | 0 NA          | NA       |
| 0    | 0    | 0    | 0.14 NA       | NA       |
| 0    | 0    | 0    | 0 NA          | NA       |
| 0    | 0.11 | 0.1  | 0.35 NA       | NA       |
| 0    | 0    | 0    | 0 NA          | NA       |
| 0.07 | 0.1  | 0    | 0.05 NA       | NA       |
| 0    | 0    | 0    | 0 NA          | NA       |
| 0    | 0    | 0    | 0 NA          | NA       |
| 0    | 0    | 0    | 0 NA          | NA       |
| 0    | 0    | 0    | 0 NA          | NA       |
| 0    | 0    | 0    | 0 NA          | NA       |
| 0    | 0    | 0    | 0 NA          | NA       |
| 0    | 0    | 0    | 0 NA          | NA       |
| 0    | 0    | 0    | 0 NA          | NA       |
| 0    | 0    | 0    | 0 NA          | NA       |
| 0    | 0    | 0    | 0 NA          | NA       |
| 0.94 | 0.8  | 0.76 | 0.77 0.019125 | 0.967103 |
| 0    | 0    | 0    | 0 NA          | NA       |
| 0    | 0    | 0    | 0 NA          | NA       |

|      |      |      |               |          |
|------|------|------|---------------|----------|
| 0    | 0    | 0    | 0 NA          | NA       |
| 0    | 0    | 0    | 0 NA          | NA       |
| 0    | 0    | 0    | 0 NA          | NA       |
| 0    | 0    | 0    | 0 NA          | NA       |
| 0.17 | 0.12 | 0.11 | 0 NA          | NA       |
| 0    | 0    | 0    | 0 NA          | NA       |
| 0    | 0    | 0.13 | 0 NA          | NA       |
| 0    | 0    | 0    | 0 NA          | NA       |
| 0    | 0    | 0    | 0 NA          | NA       |
| 0    | 0    | 0    | 0 NA          | NA       |
| 0    | 0    | 0    | 0 NA          | NA       |
| 0    | 0    | 0    | 0 NA          | NA       |
| 0    | 0    | 0    | 0 NA          | NA       |
| 0    | 0    | 0    | 0 NA          | NA       |
| 0    | 0    | 0    | 0 NA          | NA       |
| 0    | 0    | 0    | 0 NA          | NA       |
| 0    | 0    | 0    | 0 NA          | NA       |
| 0    | 0    | 0    | 0 NA          | NA       |
| 0    | 0    | 0    | 0 NA          | NA       |
| 0    | 0    | 0    | 0 NA          | NA       |
| 0.15 | 0    | 0    | 0 NA          | NA       |
| 0    | 0    | 0    | 0 NA          | NA       |
| 0    | 0    | 0    | 0 NA          | NA       |
| 0    | 0    | 0    | 0 NA          | NA       |
| 0    | 0    | 0    | 0 NA          | NA       |
| 0    | 0    | 0    | 0 NA          | NA       |
| 0.59 | 0.68 | 0.32 | 0.09 -0.32283 | 0.688382 |
| 0    | 0    | 0    | 0 NA          | NA       |
| 0    | 0    | 0    | 0 NA          | NA       |
| 0    | 0    | 0    | 0 NA          | NA       |
| 0    | 0    | 0    | 0 NA          | NA       |
| 0    | 0    | 0    | 0 NA          | NA       |
| 0    | 0    | 0    | 0 NA          | NA       |
| 0.45 | 1.1  | 1.34 | 0.56 1.122658 | 0.014809 |
| 0    | 0    | 0    | 0 NA          | NA       |
| 0    | 0    | 0    | 0 NA          | NA       |
| 0.02 | 0    | 0.02 | 0.01 NA       | NA       |
| 0.03 | 0.09 | 0.02 | 0.02 NA       | NA       |
| 0    | 0    | 0    | 0 NA          | NA       |
| 0    | 0    | 0    | 0 NA          | NA       |
| 0    | 0.02 | 0.04 | 0.03 NA       | NA       |
| 0    | 0    | 0    | 0 NA          | NA       |
| 0    | 0    | 0    | 0 NA          | NA       |
| 0.12 | 0.64 | 0.34 | 0.69 1.986207 | 8.84E-05 |
| 0    | 0    | 0    | 0 NA          | NA       |
| 0.17 | 0.12 | 0.33 | 0.13 -0.03763 | 0.968592 |

|       |       |       |                |          |
|-------|-------|-------|----------------|----------|
| 0     | 0     | 0     | 0 NA           | NA       |
| 0     | 0     | 0     | 0 NA           | NA       |
| 0     | 0     | 0     | 0 NA           | NA       |
| 0.13  | 0.11  | 0.22  | 0.07 -0.23886  | 0.776206 |
| 0     | 0     | 0     | 0 NA           | NA       |
| 0     | 0     | 0     | 0 NA           | NA       |
| 0     | 0     | 0     | 0 NA           | NA       |
| 0     | 0.12  | 0.04  | 0 NA           | NA       |
| 0     | 0     | 0     | 0.12 NA        | NA       |
| 0     | 0     | 0     | 0 NA           | NA       |
| 0.21  | 0.05  | 0.1   | 0.11 NA        | NA       |
| 0     | 0     | 0     | 0 NA           | NA       |
| 0     | 0     | 0     | 0 NA           | NA       |
| 0     | 0     | 0     | 0 NA           | NA       |
| 0     | 0     | 0     | 0 NA           | NA       |
| 0     | 0     | 0     | 0 NA           | NA       |
| 0     | 0     | 0     | 0 NA           | NA       |
| 0     | 0     | 0.19  | 0 NA           | NA       |
| 0.09  | 0.86  | 0.39  | 0.51 1.899685  | 0.000656 |
| 0     | 0     | 0     | 0 NA           | NA       |
| 0     | 0     | 0     | 0 NA           | NA       |
| 0     | 0     | 0     | 0 NA           | NA       |
| 32.66 | 30.78 | 29.91 | 34.19 -0.30431 | 0.001056 |
| 0     | 0     | 0     | 0 NA           | NA       |
| 0     | 0     | 0     | 0 NA           | NA       |
| 0     | 0     | 0.14  | 0 NA           | NA       |
| 0     | 0     | 0     | 0 NA           | NA       |
| 0     | 0     | 0     | 0 NA           | NA       |
| 0     | 0     | 0     | 0 NA           | NA       |
| 0     | 0     | 0     | 0 NA           | NA       |
| 0     | 0     | 0     | 0 NA           | NA       |
| 0     | 0     | 0     | 0 NA           | NA       |
| 0     | 0     | 0     | 0 NA           | NA       |
| 0     | 0     | 0     | 0 NA           | NA       |
| 0     | 2.98  | 1.03  | 1.65 2.372952  | 1.76E-05 |
| 0.22  | 0.02  | 0.09  | 0.05 -0.29544  | 0.708963 |
| 0     | 0     | 0     | 0 NA           | NA       |
| 0     | 0     | 0     | 0 NA           | NA       |
| 0     | 0     | 0     | 0 NA           | NA       |
| 0     | 0     | 0     | 0 NA           | NA       |
| 0     | 0     | 0.08  | 0 NA           | NA       |
| 0     | 0     | 0     | 0 NA           | NA       |
| 0     | 0     | 0     | 0 NA           | NA       |

|      |      |      |      |          |          |
|------|------|------|------|----------|----------|
| 0    | 0    | 0    | 0    | NA       | NA       |
| 0.6  | 0.45 | 0.47 | 0.44 | -0.64446 | 0.230142 |
| 0    | 0    | 0    | 0    | NA       | NA       |
| 0    | 0    | 0    | 0    | NA       | NA       |
| 0.09 | 0.06 | 0    | 0.07 | NA       | NA       |
| 0    | 0    | 0    | 0    | NA       | NA       |
| 0    | 0    | 0    | 0    | NA       | NA       |
| 1.83 | 2.1  | 1.69 | 0.92 | -0.04733 | 0.94882  |
| 0    | 0    | 0.08 | 0.17 | NA       | NA       |
| 0.48 | 0.64 | 0.71 | 1.05 | 0.186606 | 0.807332 |
| 0.43 | 0.14 | 0.06 | 0.1  | -0.28398 | 0.729146 |
| 0.27 | 0    | 0    | 0    | NA       | NA       |
| 0    | 0    | 0    | 0    | NA       | NA       |
| 0    | 0    | 0    | 0    | NA       | NA       |
| 0    | 0    | 0    | 0    | NA       | NA       |
| 0    | 0    | 0    | 0    | NA       | NA       |
| 0    | 0    | 0    | 0    | NA       | NA       |
| 0    | 0    | 0    | 0    | NA       | NA       |
| 0    | 0    | 0    | 0    | NA       | NA       |
| 0    | 0    | 0    | 0    | NA       | NA       |
| 0    | 0    | 0    | 0    | NA       | NA       |
| 0    | 0    | 0    | 0    | NA       | NA       |
| 0    | 0    | 0    | 0    | NA       | NA       |
| 0    | 0    | 0    | 0    | NA       | NA       |
| 0    | 0    | 0    | 0    | NA       | NA       |
| 0    | 0    | 0    | 0    | NA       | NA       |
| 0    | 0    | 0    | 0    | NA       | NA       |
| 0    | 0    | 0    | 0    | NA       | NA       |
| 0    | 0    | 0    | 0    | NA       | NA       |
| 0    | 0    | 0    | 0    | NA       | NA       |
| 0    | 0    | 0    | 0    | NA       | NA       |
| 0    | 0    | 0    | 0    | NA       | NA       |
| 0    | 0    | 0    | 0    | NA       | NA       |
| 0    | 0    | 0    | 0    | NA       | NA       |
| 1    | 1    | 1.05 | 1.03 | -0.24543 | 0.763558 |
| 0    | 0    | 0    | 0    | NA       | NA       |
| 0    | 0    | 0    | 0    | NA       | NA       |
| 0    | 0    | 0    | 0    | NA       | NA       |
| 0    | 0    | 0    | 0    | NA       | NA       |
| 0    | 0    | 0    | 0    | NA       | NA       |

|       |       |       |       |          |          |
|-------|-------|-------|-------|----------|----------|
| 0     | 0     | 0     | 0     | NA       | NA       |
| 0.11  | 0.33  | 0.46  | 0.43  | 0.328107 | 0.681936 |
| 0     | 0     | 0     | 0     | NA       | NA       |
| 0     | 0     | 0     | 0     | NA       | NA       |
| 0     | 0     | 0     | 0     | NA       | NA       |
| 0     | 0     | 0     | 0     | NA       | NA       |
| 0     | 0     | 0     | 0     | NA       | NA       |
| 0     | 0     | 0     | 0     | NA       | NA       |
| 0     | 0     | 0     | 0     | NA       | NA       |
| 0     | 0     | 0     | 0     | NA       | NA       |
| 0     | 0     | 0     | 0     | NA       | NA       |
| 0     | 0.04  | 0     | 0.02  | NA       | NA       |
| 0     | 0     | 0     | 0     | NA       | NA       |
| 0     | 0     | 0     | 0     | NA       | NA       |
| 0     | 0     | 0     | 0     | NA       | NA       |
| 0     | 0     | 0     | 0     | NA       | NA       |
| 0     | 0     | 0     | 0     | NA       | NA       |
| 0.43  | 0.35  | 0.99  | 0.81  | 0.158702 | 0.837191 |
| 0     | 0     | 0     | 0     | NA       | NA       |
| 0.02  | 0.04  | 0.03  | 0     | NA       | NA       |
| 0.22  | 0.83  | 0.57  | 0.52  | 0.925711 | 0.153697 |
| 0     | 0     | 0     | 0     | NA       | NA       |
| 0     | 0     | 0     | 0     | NA       | NA       |
| 0     | 0     | 0     | 0     | NA       | NA       |
| 0     | 0     | 0.04  | 0     | NA       | NA       |
| 0     | 0.01  | 0     | 0     | NA       | NA       |
| 0     | 0     | 0     | 0     | NA       | NA       |
| 0     | 0     | 0     | 0     | NA       | NA       |
| 0     | 0     | 0     | 0     | NA       | NA       |
| 0     | 0     | 0     | 0     | NA       | NA       |
| 0     | 0     | 0     | 0     | NA       | NA       |
| 0     | 0     | 0     | 0     | NA       | NA       |
| 0     | 0     | 0     | 0     | NA       | NA       |
| 0     | 0     | 0     | 0     | NA       | NA       |
| 0     | 0     | 0     | 0     | NA       | NA       |
| 0     | 0     | 0     | 0     | NA       | NA       |
| 0     | 0     | 0     | 0     | NA       | NA       |
| 0     | 0     | 0     | 0     | NA       | NA       |
| 0.8   | 0     | 0     | 0     | NA       | NA       |
| 0     | 0     | 0     | 0     | NA       | NA       |
| 18.46 | 16.05 | 15.56 | 17.91 | -0.18878 | 0.322362 |
| 0     | 0     | 0     | 0     | NA       | NA       |
| 0     | 0     | 0.05  | 0     | NA       | NA       |
| 0     | 0     | 0     | 0     | NA       | NA       |
| 0.23  | 0     | 0.13  | 0.25  | NA       | NA       |

|      |      |      |              |          |
|------|------|------|--------------|----------|
| 0    | 0    | 0    | 0 NA         | NA       |
| 0    | 0    | 0    | 0 NA         | NA       |
| 0    | 0    | 0    | 0 NA         | NA       |
| 0.22 | 1.39 | 0.15 | 0 NA         | NA       |
| 0    | 0    | 0.11 | 0 NA         | NA       |
| 0    | 0    | 0    | 0 NA         | NA       |
| 0    | 0    | 0.26 | 0 NA         | NA       |
| 0    | 0    | 0    | 0 NA         | NA       |
| 0    | 0    | 0    | 0 NA         | NA       |
| 0    | 0    | 0    | 0 NA         | NA       |
| 0    | 0    | 0    | 0 NA         | NA       |
| 0    | 0    | 0    | 0 NA         | NA       |
| 0    | 0    | 0.13 | 0 NA         | NA       |
| 0.03 | 0.02 | 0    | 0.02 NA      | NA       |
| 0    | 0    | 0.14 | 0 NA         | NA       |
| 0    | 0    | 0    | 0 NA         | NA       |
| 0    | 0    | 0    | 0 NA         | NA       |
| 0    | 0    | 0    | 0 NA         | NA       |
| 0    | 0    | 0    | 0 NA         | NA       |
| 0    | 0    | 0    | 0 NA         | NA       |
| 0    | 0    | 0    | 0 NA         | NA       |
| 0    | 0    | 0    | 0 NA         | NA       |
| 0    | 0    | 0    | 0 NA         | NA       |
| 0    | 0    | 0    | 0 NA         | NA       |
| 0    | 0    | 0    | 0 NA         | NA       |
| 0    | 0    | 0    | 0 NA         | NA       |
| 0    | 0    | 0    | 0 NA         | NA       |
| 0    | 0    | 0    | 0 NA         | NA       |
| 0    | 0    | 0    | 0 NA         | NA       |
| 0    | 0    | 0    | 0 NA         | NA       |
| 0    | 0    | 0    | 0 NA         | NA       |
| 0    | 0    | 0    | 0 NA         | NA       |
| 0    | 0    | 0    | 0 NA         | NA       |
| 0    | 0    | 0    | 0 NA         | NA       |
| 0    | 0    | 0    | 0 NA         | NA       |
| 0    | 0    | 0    | 0 NA         | NA       |
| 0    | 0    | 0    | 0 NA         | NA       |
| 0    | 0    | 0    | 0 NA         | NA       |
| 0    | 0    | 0    | 0 NA         | NA       |
| 0    | 0    | 0    | 0 NA         | NA       |
| 0    | 0    | 0    | 0 NA         | NA       |
| 0    | 0    | 0    | 0 NA         | NA       |
| 0    | 0    | 0    | 0 NA         | NA       |
| 0    | 0    | 0    | 0 NA         | NA       |
| 0    | 0    | 0    | 0 NA         | NA       |
| 0    | 0    | 0    | 0 NA         | NA       |
| 0.18 | 0.34 | 1.04 | 0.3 -0.30945 | 0.658595 |
| 0    | 0    | 0    | 0 NA         | NA       |
| 0    | 0    | 0    | 0 NA         | NA       |
| 0    | 0    | 0    | 0 NA         | NA       |
| 0    | 0    | 0    | 0 NA         | NA       |



|      |      |      |               |          |
|------|------|------|---------------|----------|
| 0    | 0    | 0    | 0 NA          | NA       |
| 0.12 | 0.18 | 0.08 | 0.19 NA       | NA       |
| 0    | 0.03 | 0.17 | 0.16 0.76026  | 0.212198 |
| 0.23 | 0    | 0.16 | 0.06 NA       | NA       |
| 0    | 0    | 0    | 0 NA          | NA       |
| 0.11 | 1.46 | 1    | 1.41 2.968821 | 3.46E-16 |
| 0    | 0    | 0    | 0 NA          | NA       |
| 0    | 0    | 0    | 0 NA          | NA       |
| 0    | 0    | 0.14 | 0 NA          | NA       |
| 0    | 0    | 0    | 0 NA          | NA       |
| 0    | 0    | 0    | 0 NA          | NA       |
| 0.14 | 0    | 0.09 | 0 NA          | NA       |
| 0    | 0    | 0    | 0 NA          | NA       |
| 0    | 0    | 0    | 0 NA          | NA       |
| 0    | 0    | 0    | 0 NA          | NA       |
| 0    | 0    | 0    | 0 NA          | NA       |
| 0    | 0    | 0    | 0 NA          | NA       |
| 0    | 0    | 0    | 0 NA          | NA       |
| 0.76 | 1.15 | 1.44 | 1.54 0.813282 | 0.110873 |
| 0    | 0    | 0    | 0 NA          | NA       |
| 0    | 0.07 | 0.14 | 0 NA          | NA       |
| 0    | 0    | 0    | 0 NA          | NA       |
| 0.25 | 0    | 0    | 0.03 NA       | NA       |
| 0    | 0    | 0    | 0 NA          | NA       |
| 0    | 0    | 0    | 0 NA          | NA       |
| 0    | 0    | 0    | 0 NA          | NA       |
| 0    | 0.14 | 0.13 | 0.14 NA       | NA       |
| 0    | 0    | 0    | 0 NA          | NA       |
| 0    | 0    | 0    | 0 NA          | NA       |
| 0    | 0    | 0    | 0 NA          | NA       |
| 0    | 0    | 0    | 0 NA          | NA       |
| 0    | 0    | 0    | 0 NA          | NA       |
| 0    | 0    | 0    | 0 NA          | NA       |
| 0.28 | 0.31 | 0.16 | 0.22 0.431066 | 0.573033 |
| 0    | 0    | 0    | 0 NA          | NA       |
| 0    | 0    | 0    | 0 NA          | NA       |
| 0    | 0    | 0    | 0 NA          | NA       |
| 0    | 0    | 0    | 0 NA          | NA       |
| 0    | 0    | 0    | 0 NA          | NA       |
| 0    | 0    | 0    | 0 NA          | NA       |
| 0.39 | 0.13 | 0.13 | 0.3 -0.54531  | 0.422604 |
| 0    | 0    | 0    | 0 NA          | NA       |
| 0    | 0    | 0    | 0 NA          | NA       |

|      |      |      |               |          |
|------|------|------|---------------|----------|
| 0    | 0    | 0    | 0 NA          | NA       |
| 0    | 0    | 0    | 0 NA          | NA       |
| 0    | 0    | 0    | 0 NA          | NA       |
| 0    | 0    | 0    | 0 NA          | NA       |
| 0    | 0.07 | 0.06 | 0.07 NA       | NA       |
| 0.15 | 0.12 | 0.18 | 0.16 -0.01249 | 0.987118 |
| 0    | 0    | 0    | 0 NA          | NA       |
| 0    | 0    | 0    | 0 NA          | NA       |
| 0    | 0    | 0    | 0 NA          | NA       |
| 0    | 0.13 | 0    | 0 NA          | NA       |
| 0    | 0    | 0    | 0 NA          | NA       |
| 0    | 0    | 0    | 0 NA          | NA       |
| 0    | 0    | 0.06 | 0 NA          | NA       |
| 0    | 0    | 0    | 0 NA          | NA       |
| 0    | 0    | 0    | 0 NA          | NA       |
| 0    | 0    | 0    | 0 NA          | NA       |
| 0    | 0    | 0    | 0 NA          | NA       |
| 0    | 0    | 0    | 0 NA          | NA       |
| 0    | 0    | 0    | 0 NA          | NA       |
| 0    | 0.22 | 0    | 0.12 NA       | NA       |
| 0    | 0    | 0    | 0 NA          | NA       |
| 0    | 0    | 0    | 0 NA          | NA       |
| 0    | 0    | 0    | 0 NA          | NA       |
| 0    | 0    | 0    | 0 NA          | NA       |
| 0.08 | 0.1  | 0.03 | 0.2 NA        | NA       |
| 0    | 0    | 0.22 | 0 NA          | NA       |
| 0    | 0    | 0    | 0 NA          | NA       |
| 0    | 0    | 0    | 0 NA          | NA       |
| 0    | 0    | 0    | 0 NA          | NA       |
| 0    | 0    | 0    | 0 NA          | NA       |
| 0    | 0    | 0    | 0 NA          | NA       |
| 0    | 0    | 0    | 0 NA          | NA       |
| 0    | 0    | 0    | 0 NA          | NA       |
| 0    | 0    | 0    | 0 NA          | NA       |
| 0    | 0    | 0    | 0 NA          | NA       |
| 0    | 0    | 0    | 0 NA          | NA       |
| 0    | 0    | 0    | 0 NA          | NA       |
| 0    | 0    | 0    | 0 NA          | NA       |
| 0    | 0    | 0    | 0 NA          | NA       |
| 0    | 0    | 0    | 0 NA          | NA       |
| 0    | 0    | 0    | 0 NA          | NA       |
| 0    | 0    | 0    | 0 NA          | NA       |
| 0    | 0    | 0    | 0 NA          | NA       |
| 0    | 0    | 0    | 0 NA          | NA       |
| 0    | 0    | 0    | 0 NA          | NA       |
| 0.1  | 0    | 0    | 0 NA          | NA       |
| 0    | 0    | 0    | 0 NA          | NA       |
| 0    | 0    | 0    | 0 NA          | NA       |
| 0    | 0    | 0    | 0 NA          | NA       |
| 0    | 0    | 0    | 0 NA          | NA       |



|      |      |      |      |          |          |
|------|------|------|------|----------|----------|
| 0.84 | 0.63 | 0.45 | 0.64 | -0.43459 | 0.446465 |
| 1.07 | 0.98 | 0.67 | 1.32 | 0.206268 | 0.744819 |
| 0    | 0    | 0    | 0    | NA       | NA       |
| 0.57 | 0.12 | 0.11 | 0.19 | -0.91448 | 0.162141 |
| 0    | 0    | 0    | 0    | NA       | NA       |
| 0    | 0    | 0    | 0    | NA       | NA       |
| 0    | 0    | 0    | 0.02 | NA       | NA       |
| 0    | 0    | 0.02 | 0    | NA       | NA       |
| 0    | 0    | 0    | 0    | NA       | NA       |
| 0    | 0    | 0    | 0    | NA       | NA       |
| 0    | 0    | 0    | 0    | NA       | NA       |
| 0.08 | 0    | 0    | 0.06 | NA       | NA       |
| 0    | 0    | 0    | 0    | NA       | NA       |
| 0    | 0    | 0    | 0    | NA       | NA       |
| 0.23 | 0.02 | 0    | 0    | NA       | NA       |
| 0    | 0    | 0    | 0    | NA       | NA       |
| 0    | 0    | 0    | 0    | NA       | NA       |
| 0    | 0    | 0    | 0    | NA       | NA       |
| 0    | 0    | 0    | 0    | NA       | NA       |
| 0    | 0    | 0    | 0    | NA       | NA       |
| 0.18 | 0.26 | 0.55 | 0.55 | 0.781872 | 0.249736 |
| 0    | 0    | 0    | 0    | NA       | NA       |
| 0    | 0    | 0    | 0    | NA       | NA       |
| 0    | 0    | 0    | 0    | NA       | NA       |
| 0    | 0.47 | 0.63 | 0    | NA       | NA       |
| 0    | 0    | 0    | 0    | NA       | NA       |
| 0    | 0    | 0    | 0    | NA       | NA       |
| 0    | 0    | 0    | 0    | NA       | NA       |
| 0    | 0    | 0    | 0    | NA       | NA       |
| 0    | 0    | 0    | 0    | NA       | NA       |
| 0    | 0    | 0    | 0    | NA       | NA       |
| 0    | 0    | 0    | 0    | NA       | NA       |
| 0.1  | 0.07 | 0.07 | 0    | NA       | NA       |
| 0    | 0    | 0    | 0    | NA       | NA       |
| 0    | 0    | 0.09 | 0    | NA       | NA       |
| 0.16 | 0.47 | 0.52 | 0.61 | -0.23578 | 0.781175 |
| 0.15 | 0    | 0.08 | 0    | NA       | NA       |
| 0    | 0    | 0    | 0    | NA       | NA       |
| 0    | 0    | 0    | 0    | NA       | NA       |
| 0    | 0    | 0    | 0    | NA       | NA       |
| 0    | 0.2  | 0    | 0.21 | NA       | NA       |
| 0    | 0    | 0    | 0    | NA       | NA       |
| 0    | 0    | 0    | 0    | NA       | NA       |
| 0.53 | 0.93 | 0.64 | 0.63 | 0.825682 | 0.167841 |
| 0    | 0    | 0    | 0    | NA       | NA       |
| 0    | 0    | 0    | 0    | NA       | NA       |
| 0    | 0    | 0    | 0    | NA       | NA       |

|       |       |       |               |          |
|-------|-------|-------|---------------|----------|
| 0     | 0     | 0     | 0 NA          | NA       |
| 0     | 0.11  | 0     | 0 NA          | NA       |
| 0     | 0     | 0.41  | 0 NA          | NA       |
| 0     | 0     | 0     | 0 NA          | NA       |
| 0.05  | 0.14  | 0.17  | 0.04 -0.20309 | 0.812564 |
| 0     | 0     | 0     | 0 NA          | NA       |
| 0     | 0     | 0.09  | 0 NA          | NA       |
| 0     | 0.06  | 0     | 0 NA          | NA       |
| 0     | 0     | 0     | 0 NA          | NA       |
| 0     | 0     | 0     | 0 NA          | NA       |
| 0     | 0     | 0     | 0 NA          | NA       |
| 0     | 0     | 0     | 0 NA          | NA       |
| 0.17  | 0.12  | 0.06  | 0.13 -0.75109 | 0.268868 |
| 0     | 0     | 0     | 0 NA          | NA       |
| 0     | 0     | 0     | 0 NA          | NA       |
| 0     | 0     | 0     | 0 NA          | NA       |
| 0     | 0     | 0     | 0 NA          | NA       |
| 0.56  | 0.56  | 1.06  | 0.98 -0.28862 | 0.592681 |
| 0.19  | 0     | 0.09  | 0.2 NA        | NA       |
| 0     | 0     | 0     | 0 NA          | NA       |
| 0     | 0     | 0     | 0 NA          | NA       |
| 0     | 0     | 0     | 0 NA          | NA       |
| 0     | 0     | 0     | 0 NA          | NA       |
| 0     | 0     | 0     | 0 NA          | NA       |
| 0.57  | 0.71  | 0.63  | 0.36 -0.05923 | 0.944131 |
| 0     | 0     | 0     | 0 NA          | NA       |
| 0     | 0     | 0     | 0 NA          | NA       |
| 0     | 0     | 0     | 0 NA          | NA       |
| 0.32  | 0.08  | 0.36  | 0 -0.35841    | 0.63024  |
| 0     | 0     | 0     | 0 NA          | NA       |
| 0.3   | 0     | 0.1   | 0.23 NA       | NA       |
| 0     | 0     | 0     | 0 NA          | NA       |
| 0     | 0     | 0     | 0 NA          | NA       |
| 0     | 0     | 0     | 0 NA          | NA       |
| 0     | 0     | 0     | 0 NA          | NA       |
| 0     | 0     | 0     | 0 NA          | NA       |
| 0     | 0     | 0     | 0 NA          | NA       |
| 0     | 0     | 0     | 0 NA          | NA       |
| 0     | 0     | 0     | 0 NA          | NA       |
| 18.22 | 24.16 | 25.49 | 22.4 0.29145  | 0.628101 |
| 0     | 0.33  | 0     | 0 NA          | NA       |
| 0     | 0     | 0     | 0 NA          | NA       |
| 0     | 0     | 0     | 0 NA          | NA       |
| 0     | 0     | 0     | 0 NA          | NA       |
| 0.49  | 0.71  | 0.41  | 0.56 -0.29521 | 0.708536 |

|      |      |      |               |          |
|------|------|------|---------------|----------|
| 0    | 0    | 0    | 0 NA          | NA       |
| 0    | 0    | 0    | 0 NA          | NA       |
| 0    | 0    | 0    | 0 NA          | NA       |
| 0    | 0    | 0    | 0 NA          | NA       |
| 0    | 0    | 0    | 0 NA          | NA       |
| 0    | 0    | 0    | 0 NA          | NA       |
| 0    | 0    | 0    | 0 NA          | NA       |
| 0    | 0    | 0    | 0 NA          | NA       |
| 0    | 0    | 0    | 0 NA          | NA       |
| 4.53 | 3.07 | 2.96 | 3.01 -0.51415 | 0.246372 |
| 0.99 | 1.06 | 0.84 | 0.37 0.178267 | 0.837757 |
| 0    | 0    | 0    | 0 NA          | NA       |
| 2.79 | 2.47 | 1.73 | 1.1 -0.29558  | 0.652241 |
| 0    | 0.05 | 0    | 0 NA          | NA       |
| 0    | 0    | 0    | 0 NA          | NA       |
| 0    | 0    | 0    | 0 NA          | NA       |
| 0.15 | 0.28 | 0.4  | 0.49 0.069429 | 0.94312  |
| 0    | 0    | 0    | 0 NA          | NA       |
| 0    | 0    | 0    | 0 NA          | NA       |
| 0    | 0    | 0    | 0 NA          | NA       |
| 0    | 0    | 0    | 0 NA          | NA       |
| 0    | 0    | 0    | 0 NA          | NA       |
| 0    | 0    | 0    | 0.29 NA       | NA       |
| 0    | 0    | 0    | 0 NA          | NA       |
| 0.6  | 0.22 | 0    | 0 NA          | NA       |
| 0    | 0    | 0    | 0 NA          | NA       |
| 0    | 0    | 0    | 0 NA          | NA       |
| 0    | 0    | 0    | 0.26 NA       | NA       |
| 0    | 0    | 0    | 0 NA          | NA       |
| 0    | 0    | 0    | 0 NA          | NA       |
| 0    | 0    | 0    | 0 NA          | NA       |
| 0    | 0    | 0    | 0 NA          | NA       |
| 0.27 | 0.38 | 0.17 | 0.6 NA        | NA       |
| 0    | 0    | 0    | 0 NA          | NA       |
| 0.02 | 0.09 | 0.04 | 0.12 0.304318 | 0.704229 |
| 0    | 0.02 | 0.09 | 0 NA          | NA       |
| 0    | 0    | 0    | 0 NA          | NA       |
| 0    | 0    | 0    | 0 NA          | NA       |
| 1.15 | 0.74 | 0.44 | 0 -0.20109    | 0.762607 |
| 0    | 0    | 0    | 0 NA          | NA       |
| 0    | 0    | 0.04 | 0 NA          | NA       |
| 0    | 0    | 0    | 0 NA          | NA       |
| 0    | 0    | 0    | 0 NA          | NA       |
| 0    | 0    | 0    | 0 NA          | NA       |



|         |         |         |                  |          |
|---------|---------|---------|------------------|----------|
| 0       | 0       | 0       | 0 NA             | NA       |
| 0       | 0       | 0       | 0 NA             | NA       |
| 0       | 0       | 0       | 0 NA             | NA       |
| 0       | 0       | 0       | 0 NA             | NA       |
| 0       | 0       | 0       | 0.14 NA          | NA       |
| 0       | 0       | 0.21    | 0 NA             | NA       |
| 0       | 0       | 0       | 0 NA             | NA       |
| 2.54    | 2.87    | 3.15    | 2.53 0.367437    | 0.115445 |
| 0.13    | 0.16    | 0.18    | 0.03 0.149734    | 0.865089 |
| 0       | 0       | 0       | 0 NA             | NA       |
| 0       | 0       | 0       | 0 NA             | NA       |
| 0       | 0       | 0       | 0 NA             | NA       |
| 0       | 0       | 0       | 0 NA             | NA       |
| 0       | 0       | 0.05    | 0 NA             | NA       |
| 0       | 0       | 0       | 0 NA             | NA       |
| 0       | 0       | 0       | 0 NA             | NA       |
| 0       | 0       | 0       | 0 NA             | NA       |
| 0       | 0       | 0       | 0 NA             | NA       |
| 0.21    | 0.1     | 0.28    | 0.11 -0.1264     | 0.886485 |
| 0       | 0       | 0       | 0 NA             | NA       |
| 0       | 0       | 0       | 0 NA             | NA       |
| 0       | 0       | 0       | 0 NA             | NA       |
| 0.88    | 0.52    | 0.86    | 0.7 -0.32661     | 0.65463  |
| 0       | 0       | 0       | 0 NA             | NA       |
| 0       | 0       | 0       | 0 NA             | NA       |
| 0       | 0.48    | 0.11    | 0 NA             | NA       |
| 0       | 0       | 0       | 0 NA             | NA       |
| 4992.56 | 6013.22 | 5314.12 | 4965.04 0.232003 | 0.010966 |
| 0       | 0       | 0       | 0 NA             | NA       |
| 0       | 0       | 0       | 0 NA             | NA       |
| 0       | 0       | 0       | 0 NA             | NA       |
| 0       | 0       | 0       | 0 NA             | NA       |
| 0       | 0.12    | 0       | 0 NA             | NA       |
| 0       | 0       | 0       | 0 NA             | NA       |
| 0.9     | 0.79    | 0.78    | 1.02 -0.51656    | 0.420121 |
| 0       | 0       | 0       | 0 NA             | NA       |
| 0       | 0       | 0       | 0 NA             | NA       |
| 1.2     | 0.55    | 1.15    | 1.02 -0.35788    | 0.56211  |
| 0       | 0       | 0       | 0.14 NA          | NA       |
| 0       | 0       | 0       | 0.11 NA          | NA       |
| 0       | 0.07    | 0       | 0 NA             | NA       |
| 0       | 0       | 0       | 0.17 NA          | NA       |
| 0       | 0.06    | 0       | 0 NA             | NA       |
| 0       | 0       | 0       | 0 NA             | NA       |
| 0       | 0       | 0       | 0 NA             | NA       |



|       |       |       |       |          |          |
|-------|-------|-------|-------|----------|----------|
| 6.2   | 7.67  | 8.59  | 8.37  | 0.096161 | 0.790687 |
| 0     | 0     | 0     | 0     | NA       | NA       |
| 0     | 0     | 0     | 0     | NA       | NA       |
| 0     | 0     | 0     | 0     | NA       | NA       |
| 0     | 0     | 0     | 0     | NA       | NA       |
| 0     | 0     | 0     | 0     | NA       | NA       |
| 0     | 0     | 0     | 0     | NA       | NA       |
| 0     | 0     | 0     | 0     | NA       | NA       |
| 0     | 0     | 0     | 0     | NA       | NA       |
| 30.03 | 33.57 | 35.56 | 33.46 | 0.270077 | 0.054634 |
| 0     | 0     | 0     | 0     | NA       | NA       |
| 0.03  | 0     | 0.02  | 0     | NA       | NA       |
| 0     | 0     | 0     | 0     | NA       | NA       |
| 0     | 0     | 0     | 0     | NA       | NA       |
| 0     | 0.07  | 0.1   | 0     | NA       | NA       |
| 0     | 0     | 0     | 0     | NA       | NA       |
| 0.05  | 0.15  | 0.26  | 0.26  | 0.721001 | 0.280278 |
| 0     | 0     | 0     | 0     | NA       | NA       |
| 0     | 0.47  | 0     | 0     | NA       | NA       |
| 0     | 0     | 0     | 0     | NA       | NA       |
| 6.97  | 5.44  | 5.61  | 6.07  | -0.56377 | 2.11E-05 |
| 0     | 0     | 0     | 0     | NA       | NA       |
| 0     | 0     | 0     | 0     | NA       | NA       |
| 0     | 0     | 0     | 0     | NA       | NA       |
| 0     | 0     | 0     | 0     | NA       | NA       |
| 0     | 0.06  | 0     | 0     | NA       | NA       |
| 0.22  | 0     | 0     | 0     | NA       | NA       |
| 0     | 0     | 0     | 0     | NA       | NA       |
| 2.76  | 3.56  | 2.74  | 3.77  | 0.234896 | 0.20354  |
| 0     | 0     | 0     | 0     | NA       | NA       |
| 0     | 0     | 0     | 0     | NA       | NA       |
| 0     | 0.08  | 0.07  | 0     | NA       | NA       |
| 0     | 0     | 0     | 0     | NA       | NA       |
| 0     | 0     | 0     | 0     | NA       | NA       |
| 0.56  | 0.2   | 0.09  | 0.1   | NA       | NA       |
| 0     | 0     | 0     | 0     | NA       | NA       |
| 0     | 0     | 0     | 0     | NA       | NA       |
| 0     | 0     | 0     | 0     | NA       | NA       |
| 0     | 0     | 0     | 0     | NA       | NA       |
| 0.44  | 0.45  | 0.55  | 1.09  | -0.18711 | 0.788447 |
| 0     | 0     | 0     | 0     | NA       | NA       |
| 0     | 0     | 0     | 0     | NA       | NA       |
| 0     | 0     | 0     | 0     | NA       | NA       |
| 0     | 0     | 0     | 0     | NA       | NA       |
| 0.42  | 0     | 0     | 0     | NA       | NA       |

|      |      |      |               |          |
|------|------|------|---------------|----------|
| 0    | 0    | 0    | 0 NA          | NA       |
| 0    | 0    | 0    | 0 NA          | NA       |
| 0    | 0    | 0    | 0 NA          | NA       |
| 0    | 0    | 0    | 0 NA          | NA       |
| 0    | 0    | 0    | 0 NA          | NA       |
| 0    | 0    | 0    | 0 NA          | NA       |
| 0    | 0    | 0    | 0 NA          | NA       |
| 0.54 | 0    | 0    | 0 NA          | NA       |
| 0    | 0    | 0    | 0 NA          | NA       |
| 0    | 0    | 0.07 | 0.1 NA        | NA       |
| 0    | 0    | 0    | 0 NA          | NA       |
| 0    | 0    | 0    | 0 NA          | NA       |
| 0    | 0    | 0    | 0 NA          | NA       |
| 0    | 0    | 0    | 0 NA          | NA       |
| 0    | 0    | 0    | 0 NA          | NA       |
| 0    | 0.05 | 0    | 0 NA          | NA       |
| 0    | 0    | 0    | 0 NA          | NA       |
| 0    | 0    | 0    | 0 NA          | NA       |
| 0    | 0    | 0    | 0 NA          | NA       |
| 0    | 0    | 0    | 0 NA          | NA       |
| 0    | 0    | 0    | 0 NA          | NA       |
| 0    | 0    | 0    | 0 NA          | NA       |
| 0    | 0.01 | 0    | 0 NA          | NA       |
| 0    | 0    | 0    | 0 NA          | NA       |
| 0    | 0    | 0    | 0 NA          | NA       |
| 0    | 0    | 0    | 0 NA          | NA       |
| 0.81 | 1.33 | 0.91 | 1.67 0.434741 | 0.517301 |
| 0    | 0.57 | 0.55 | 0.17 0.099732 | 0.914722 |
| 0.21 | 0    | 0.22 | 0.26 NA       | NA       |
| 0    | 0    | 0    | 0 NA          | NA       |
| 0    | 0    | 0    | 0 NA          | NA       |
| 0    | 0    | 0    | 0 NA          | NA       |
| 0    | 0    | 0    | 0 NA          | NA       |
| 0    | 0    | 0    | 0 NA          | NA       |
| 0.15 | 0    | 0.1  | 0.23 NA       | NA       |
| 0    | 0    | 0    | 0 NA          | NA       |
| 0    | 0    | 0    | 0 NA          | NA       |
| 1.91 | 1.91 | 1.46 | 1.44 0.182634 | 0.744989 |
| 0    | 0    | 0    | 0 NA          | NA       |
| 0    | 0    | 0    | 0 NA          | NA       |
| 0    | 0    | 0    | 0 NA          | NA       |

|       |        |        |        |          |          |
|-------|--------|--------|--------|----------|----------|
| 0.29  | 0.72   | 0.79   | 0.44   | 0.776105 | 0.245818 |
| 0     | 0      | 0      | 0      | NA       | NA       |
| 0     | 0      | 0      | 0      | NA       | NA       |
| 0.38  | 0      | 0.23   | 0      | NA       | NA       |
| 0     | 0      | 0      | 0      | NA       | NA       |
| 0     | 0      | 0      | 0      | NA       | NA       |
| 0     | 0      | 0      | 0      | NA       | NA       |
| 0     | 0      | 0      | 0      | NA       | NA       |
| 0     | 0      | 0      | 0      | NA       | NA       |
| 0     | 0      | 0      | 0      | NA       | NA       |
| 0     | 0      | 0      | 0      | NA       | NA       |
| 0     | 0      | 143.96 | 0      | NA       | NA       |
| 0     | 0      | 0      | 0      | NA       | NA       |
| 0     | 0      | 0      | 0      | NA       | NA       |
| 0     | 0      | 0      | 0      | NA       | NA       |
| 1.9   | 2.32   | 2.2    | 1.42   | 0.270537 | 0.492411 |
| 3.93  | 1.52   | 2.94   | 3.43   | -0.74814 | 0.090949 |
| 0     | 0      | 0      | 0      | NA       | NA       |
| 0     | 0      | 0      | 0      | NA       | NA       |
| 1.73  | 2.88   | 3.97   | 2.59   | 0.430225 | 0.294429 |
| 0     | 0      | 0      | 0      | NA       | NA       |
| 0.17  | 0      | 0.06   | 0.26   | NA       | NA       |
| 0.09  | 0      | 0      | 0      | NA       | NA       |
| 0     | 0.08   | 0.37   | 0.08   | NA       | NA       |
| 0     | 0      | 0      | 0      | NA       | NA       |
| 1.49  | 0.94   | 1.3    | 1.15   | -0.72812 | 0.006703 |
| 0     | 0      | 0      | 0      | NA       | NA       |
| 0     | 0      | 0      | 0      | NA       | NA       |
| 0     | 0      | 0      | 0      | NA       | NA       |
| 0     | 0      | 0      | 0      | NA       | NA       |
| 0     | 0      | 0      | 0      | NA       | NA       |
| 1.89  | 2.28   | 2.12   | 2.32   | 0.225947 | 0.50607  |
| 0     | 0      | 0      | 0      | NA       | NA       |
| 0     | 0      | 0      | 0      | NA       | NA       |
| 0     | 0      | 0      | 0      | NA       | NA       |
| 0     | 0      | 0      | 0      | NA       | NA       |
| 0     | 0      | 0      | 0      | NA       | NA       |
| 0     | 0      | 0      | 0      | NA       | NA       |
| 0     | 0      | 0      | 0      | NA       | NA       |
| 296.7 | 280.77 | 280.87 | 258.43 | -0.17121 | 0.078245 |
| 0     | 0      | 0      | 0      | NA       | NA       |
| 0     | 0.08   | 0.43   | 1.15   | 1.14182  | 0.057282 |
| 0     | 0      | 0      | 0      | NA       | NA       |
| 0     | 0      | 0      | 0      | NA       | NA       |

|      |      |      |               |          |
|------|------|------|---------------|----------|
| 0    | 0    | 0    | 0 NA          | NA       |
| 0    | 0    | 0    | 0 NA          | NA       |
| 0    | 0.02 | 0    | 0 NA          | NA       |
| 0    | 0    | 0    | 0 NA          | NA       |
| 1.28 | 3.78 | 1.96 | 4.46 0.5644   | 0.21214  |
| 0    | 0    | 0    | 0 NA          | NA       |
| 0    | 0    | 0    | 0 NA          | NA       |
| 0    | 0    | 0    | 0 NA          | NA       |
| 0    | 0    | 0    | 0 NA          | NA       |
| 0.14 | 0.12 | 0.38 | 0.06 NA       | NA       |
| 0    | 0    | 0    | 0 NA          | NA       |
| 0    | 0    | 0    | 0 NA          | NA       |
| 0    | 0    | 0    | 0.2 NA        | NA       |
| 0.14 | 0.03 | 0.09 | 0.06 NA       | NA       |
| 0    | 0    | 0    | 0 NA          | NA       |
| 0    | 0    | 0    | 0 NA          | NA       |
| 0    | 0    | 0    | 0 NA          | NA       |
| 1.14 | 1.03 | 1.44 | 1.6 0.176093  | 0.733242 |
| 0    | 0    | 0    | 0.13 NA       | NA       |
| 0.21 | 0    | 0    | 0.07 NA       | NA       |
| 0.11 | 0.03 | 0.34 | 0 NA          | NA       |
| 0    | 0    | 0    | 0.13 NA       | NA       |
| 0    | 0    | 0    | 0 NA          | NA       |
| 0    | 0    | 0    | 0 NA          | NA       |
| 0    | 0    | 0    | 0 NA          | NA       |
| 0    | 0    | 0    | 0 NA          | NA       |
| 0    | 0    | 0    | 0 NA          | NA       |
| 0    | 0    | 0    | 0 NA          | NA       |
| 0    | 0    | 0    | 0 NA          | NA       |
| 0    | 0    | 0    | 0 NA          | NA       |
| 7.94 | 6.17 | 7.41 | 7.09 -0.2723  | 0.035605 |
| 0    | 0    | 0    | 0 NA          | NA       |
| 0.11 | 0    | 0    | 0 NA          | NA       |
| 0    | 0    | 0    | 0 NA          | NA       |
| 0    | 0    | 0    | 0 NA          | NA       |
| 0.81 | 2.54 | 1.52 | 1.27 0.939512 | 0.085511 |
| 0    | 0    | 0    | 0 NA          | NA       |
| 0    | 0    | 0    | 0 NA          | NA       |
| 0.31 | 0.11 | 0    | 0.23 NA       | NA       |
| 0    | 0    | 0    | 0 NA          | NA       |
| 0    | 0    | 0    | 0 NA          | NA       |
| 1.19 | 1.09 | 0.78 | 1.21 -0.34542 | 0.364486 |
| 0    | 0    | 0    | 0 NA          | NA       |
| 0    | 0    | 0    | 0 NA          | NA       |
| 0    | 0    | 0    | 0 NA          | NA       |

|       |       |       |       |          |          |
|-------|-------|-------|-------|----------|----------|
| 0     | 0     | 0     | 0     | NA       | NA       |
| 0     | 0     | 0     | 0     | NA       | NA       |
| 0     | 0     | 0     | 0     | NA       | NA       |
| 0     | 0     | 0     | 0     | NA       | NA       |
| 0     | 0     | 0     | 0     | NA       | NA       |
| 0     | 0     | 0     | 0     | NA       | NA       |
| 0     | 0     | 0     | 0     | NA       | NA       |
| 0     | 0     | 0.05  | 0     | NA       | NA       |
| 0     | 0     | 0     | 0     | NA       | NA       |
| 0     | 0     | 0     | 0     | NA       | NA       |
| 0     | 0     | 0     | 0     | NA       | NA       |
| 0     | 0     | 0     | 0     | NA       | NA       |
| 0     | 0     | 0     | 0     | NA       | NA       |
| 0     | 0     | 0     | 0     | NA       | NA       |
| 0.09  | 0.05  | 0.08  | 0.07  | -0.66675 | 0.334666 |
| 0     | 0     | 0     | 0     | NA       | NA       |
| 0     | 0     | 0     | 0     | NA       | NA       |
| 0     | 0     | 0     | 0     | NA       | NA       |
| 0     | 0     | 0     | 0     | NA       | NA       |
| 0     | 0     | 0     | 0     | NA       | NA       |
| 0     | 0     | 0     | 0     | NA       | NA       |
| 0     | 0     | 0     | 0     | NA       | NA       |
| 0     | 0     | 0     | 0     | NA       | NA       |
| 0     | 0     | 0     | 0     | NA       | NA       |
| 0     | 0     | 0     | 0     | NA       | NA       |
| 3.85  | 3.23  | 3.22  | 5.05  | -0.10978 | 0.832051 |
| 0     | 0     | 0     | 0     | NA       | NA       |
| 0     | 0     | 0     | 0     | NA       | NA       |
| 0     | 0     | 0     | 0     | NA       | NA       |
| 15.65 | 18.29 | 20.54 | 20.94 | 0.304861 | 0.010014 |
| 0     | 0     | 0     | 0     | NA       | NA       |
| 0     | 0     | 0     | 0     | NA       | NA       |
| 0     | 0     | 0     | 0     | NA       | NA       |
| 0.52  | 0     | 0.14  | 0     | -0.76144 | 0.214042 |
| 0     | 0     | 0     | 0     | NA       | NA       |
| 0     | 0     | 0     | 0     | NA       | NA       |
| 0     | 0     | 0     | 0     | NA       | NA       |
| 0.15  | 0.66  | 0.51  | 0.23  | 0.58633  | 0.393575 |
| 0     | 0     | 0     | 0     | NA       | NA       |
| 0     | 0     | 0     | 0     | NA       | NA       |
| 0     | 0     | 0     | 0     | NA       | NA       |
| 0     | 0     | 0     | 0     | NA       | NA       |
| 0     | 0     | 0     | 0.07  | NA       | NA       |
| 0     | 0     | 0     | 0     | NA       | NA       |

|      |      |      |               |          |
|------|------|------|---------------|----------|
| 0    | 0    | 0    | 0 NA          | NA       |
| 0    | 0    | 0    | 0 NA          | NA       |
| 0    | 0    | 0    | 0 NA          | NA       |
| 0    | 0    | 0    | 0 NA          | NA       |
| 0    | 0    | 0    | 0 NA          | NA       |
| 0.81 | 0.17 | 0.27 | 0.2 -1.22924  | 0.008424 |
| 0.84 | 0.93 | 0.68 | 1.13 0.114602 | 0.893692 |
| 0    | 0    | 0    | 0 NA          | NA       |
| 0    | 0    | 0    | 0 NA          | NA       |
| 0    | 0    | 0    | 0 NA          | NA       |
| 0    | 0    | 0    | 0 NA          | NA       |
| 0    | 0    | 0    | 0 NA          | NA       |
| 0    | 0    | 0    | 0 NA          | NA       |
| 0    | 0    | 0    | 0 NA          | NA       |
| 3.17 | 2.28 | 4.77 | 4.03 0.120345 | 0.842073 |
| 0    | 0    | 0    | 0 NA          | NA       |
| 0    | 0    | 0    | 0 NA          | NA       |
| 0    | 0    | 0    | 0 NA          | NA       |
| 0    | 0    | 0    | 0 NA          | NA       |
| 0    | 0    | 0    | 0 NA          | NA       |
| 1.02 | 2.61 | 1.75 | 1.97 0.770444 | 0.076126 |
| 0    | 0    | 0    | 0 NA          | NA       |
| 0    | 0    | 0    | 0 NA          | NA       |
| 0    | 0    | 0    | 0 NA          | NA       |
| 0    | 0    | 0    | 0 NA          | NA       |
| 0    | 0    | 0    | 0 NA          | NA       |
| 0    | 0    | 0    | 0 NA          | NA       |
| 0    | 0    | 0    | 0 NA          | NA       |
| 0    | 0    | 0    | 0 NA          | NA       |
| 0    | 0    | 0    | 0 NA          | NA       |
| 0.18 | 0.26 | 0.24 | 0.14 NA       | NA       |
| 0    | 0    | 0.08 | 0 NA          | NA       |
| 0    | 0    | 0    | 0 NA          | NA       |
| 1.31 | 0.46 | 1.17 | 0 NA          | NA       |
| 0    | 0    | 0    | 0 NA          | NA       |
| 0    | 0    | 0    | 0 NA          | NA       |
| 0    | 0    | 0    | 0 NA          | NA       |
| 0    | 0    | 0    | 0 NA          | NA       |
| 0    | 0    | 0    | 0 NA          | NA       |
| 0.25 | 0.27 | 0.37 | 0.47 0.488142 | 0.308741 |
| 0    | 0    | 0    | 0 NA          | NA       |
| 0    | 0    | 0    | 0 NA          | NA       |
| 0    | 0    | 0    | 0.05 NA       | NA       |
| 0    | 0    | 0    | 0 NA          | NA       |
| 0    | 0    | 0    | 0 NA          | NA       |

|      |      |      |      |          |          |
|------|------|------|------|----------|----------|
| 0    | 0    | 0.18 | 0.21 | NA       | NA       |
| 0    | 0    | 0    | 0    | NA       | NA       |
| 0    | 0    | 0    | 0    | NA       | NA       |
| 0    | 0    | 0    | 0    | NA       | NA       |
| 0    | 0    | 0    | 0    | NA       | NA       |
| 0    | 0    | 0    | 0    | NA       | NA       |
| 0    | 0    | 0    | 0    | NA       | NA       |
| 0    | 0    | 0    | 0    | NA       | NA       |
| 0    | 0    | 0    | 0    | NA       | NA       |
| 0    | 0    | 0    | 0    | NA       | NA       |
| 5.26 | 4.01 | 4.4  | 2.88 | -0.30853 | 0.317109 |
| 0    | 0    | 0    | 0.13 | NA       | NA       |
| 0    | 0    | 0    | 0    | NA       | NA       |
| 0.14 | 0.1  | 0    | 0.42 | NA       | NA       |
| 0    | 0    | 0    | 0.25 | NA       | NA       |
| 0    | 0    | 0    | 0    | NA       | NA       |
| 0    | 0    | 0    | 0    | NA       | NA       |
| 0    | 0.88 | 0.92 | 1.45 | 1.16224  | 0.062063 |
| 0    | 0    | 0    | 0    | NA       | NA       |
| 0    | 0    | 0    | 0    | NA       | NA       |
| 0    | 0    | 0    | 0    | NA       | NA       |
| 0    | 0    | 0    | 0    | NA       | NA       |
| 4.2  | 3.68 | 4.16 | 4.26 | 0.431955 | 0.014728 |
| 0    | 0    | 0    | 0    | NA       | NA       |
| 0    | 0    | 0    | 0    | NA       | NA       |
| 0    | 0    | 0    | 0    | NA       | NA       |
| 0    | 0    | 0    | 0    | NA       | NA       |
| 0    | 0    | 0    | 0    | NA       | NA       |
| 0.04 | 0.08 | 0.09 | 0    | NA       | NA       |
| 1.49 | 0.73 | 0.4  | 0.21 | -0.07934 | 0.933656 |
| 0    | 0    | 0    | 0    | NA       | NA       |
| 0    | 0    | 0    | 0    | NA       | NA       |
| 0    | 0    | 0    | 0    | NA       | NA       |
| 0    | 0    | 0    | 0    | NA       | NA       |
| 0    | 0    | 0    | 0    | NA       | NA       |
| 0    | 0    | 0    | 0    | NA       | NA       |
| 0    | 0    | 0    | 0    | NA       | NA       |
| 0    | 0    | 0    | 0    | NA       | NA       |
| 0.76 | 0.36 | 0.47 | 0.2  | -1.0285  | 0.037252 |
| 0    | 0    | 0    | 0    | NA       | NA       |
| 0.09 | 0    | 0    | 0    | NA       | NA       |
| 0    | 0    | 0.02 | 0    | NA       | NA       |
| 0    | 0    | 0.03 | 0    | NA       | NA       |
| 0    | 0    | 0    | 0    | NA       | NA       |
| 0    | 0    | 0    | 0    | NA       | NA       |

|      |       |       |                |          |
|------|-------|-------|----------------|----------|
| 0    | 0     | 0     | 0 NA           | NA       |
| 0    | 0     | 0     | 0 NA           | NA       |
| 0    | 0     | 0     | 0 NA           | NA       |
| 0    | 0     | 0     | 0 NA           | NA       |
| 0    | 0     | 0     | 0 NA           | NA       |
| 0    | 0     | 0     | 0 NA           | NA       |
| 0    | 0     | 0     | 0.08 NA        | NA       |
| 0    | 0     | 0     | 0 NA           | NA       |
| 0    | 0     | 0.13  | 0.15 NA        | NA       |
| 0    | 0     | 0     | 0 NA           | NA       |
| 0    | 0     | 0     | 0 NA           | NA       |
| 0    | 0     | 0     | 0 NA           | NA       |
| 0    | 0     | 0     | 0 NA           | NA       |
| 1.04 | 0.29  | 0.35  | 0.07 -0.9684   | 0.111556 |
| 0    | 0     | 0     | 0 NA           | NA       |
| 0    | 0     | 0     | 0 NA           | NA       |
| 0    | 0     | 0     | 0 NA           | NA       |
| 0    | 0     | 0     | 0 NA           | NA       |
| 0    | 0     | 0     | 0 NA           | NA       |
| 0    | 0.14  | 0     | 0 NA           | NA       |
| 2.18 | 2.67  | 1.51  | 2.62 -0.12096  | 0.856269 |
| 0    | 0     | 0     | 0 NA           | NA       |
| 0.21 | 0.04  | 0.12  | 0.08 -0.76537  | 0.245828 |
| 0    | 0.07  | 0     | 0 NA           | NA       |
| 0    | 0.12  | 0     | 0 NA           | NA       |
| 0.32 | 0.03  | 0.33  | 0 NA           | NA       |
| 0    | 0     | 0     | 0 NA           | NA       |
| 0    | 0     | 0     | 0 NA           | NA       |
| 0    | 0     | 0     | 0 NA           | NA       |
| 0    | 0     | 0     | 0 NA           | NA       |
| 7.23 | 16.42 | 13.32 | 14.87 1.198425 | 2.52E-19 |
| 0    | 0     | 0     | 0 NA           | NA       |
| 0    | 0.13  | 0     | 0 NA           | NA       |
| 0    | 0     | 0     | 0 NA           | NA       |
| 0    | 0     | 0     | 0 NA           | NA       |
| 2.54 | 1.66  | 1.05  | 1.32 -0.96845  | 0.033317 |
| 0    | 0     | 0     | 0 NA           | NA       |
| 0    | 0     | 0     | 0 NA           | NA       |
| 0    | 0     | 0     | 0 NA           | NA       |
| 0    | 0     | 0     | 0 NA           | NA       |
| 0    | 0     | 0     | 0 NA           | NA       |
| 0.52 | 0.12  | 0     | 0.39 NA        | NA       |
| 0    | 0     | 0     | 0 NA           | NA       |
| 0    | 0     | 0     | 0 NA           | NA       |
| 0    | 0     | 0     | 0 NA           | NA       |







|      |      |      |               |          |
|------|------|------|---------------|----------|
| 0    | 0    | 0    | 0 NA          | NA       |
| 0    | 0    | 0    | 0 NA          | NA       |
| 0    | 0    | 0    | 0 NA          | NA       |
| 0    | 0    | 0    | 0 NA          | NA       |
| 0.32 | 0.38 | 0.55 | 0.49 0.035322 | 0.966656 |
| 0    | 0    | 0    | 0 NA          | NA       |
| 0    | 0    | 0    | 0 NA          | NA       |
| 0    | 0    | 0    | 0 NA          | NA       |
| 0    | 0    | 0    | 0 NA          | NA       |
| 0    | 0    | 0    | 0 NA          | NA       |
| 0    | 0    | 0    | 0 NA          | NA       |
| 0    | 0    | 0    | 0 NA          | NA       |
| 0    | 0    | 0    | 0 NA          | NA       |
| 0    | 0    | 0    | 0 NA          | NA       |
| 0    | 0    | 0    | 0 NA          | NA       |
| 0    | 0    | 0    | 0 NA          | NA       |
| 0    | 0    | 0    | 0 NA          | NA       |
| 0.05 | 0.04 | 0.11 | 0.08 NA       | NA       |
| 0    | 0.06 | 0    | 0 NA          | NA       |
| 0    | 0    | 0    | 0 NA          | NA       |
| 0    | 0    | 0    | 0 NA          | NA       |
| 0    | 0    | 0    | 0 NA          | NA       |
| 0    | 0    | 0    | 0 NA          | NA       |
| 0    | 0    | 0    | 0 NA          | NA       |
| 0    | 0    | 0    | 0 NA          | NA       |
| 0    | 0    | 0    | 0 NA          | NA       |
| 0    | 0    | 0    | 0 NA          | NA       |
| 0    | 0    | 0    | 0 NA          | NA       |
| 0.17 | 1.21 | 1.08 | 1.31 1.632778 | 0.005432 |
| 0    | 0    | 0    | 0 NA          | NA       |
| 0    | 0    | 0    | 0 NA          | NA       |
| 0    | 0    | 0    | 0 NA          | NA       |
| 0    | 0    | 0    | 0 NA          | NA       |
| 0    | 0    | 0    | 0 NA          | NA       |
| 0    | 0.27 | 0.12 | 0.14 NA       | NA       |
| 0    | 0    | 0    | 0 NA          | NA       |
| 0    | 0    | 0    | 0 NA          | NA       |
| 0    | 0    | 0    | 0 NA          | NA       |
| 0    | 0    | 0    | 0 NA          | NA       |
| 0    | 0    | 0    | 0 NA          | NA       |
| 0    | 0    | 0    | 0 NA          | NA       |
| 0    | 0    | 0    | 0 NA          | NA       |
| 0    | 0    | 0    | 0 NA          | NA       |
| 0.11 | 0    | 0    | 0.06 NA       | NA       |
| 0.7  | 0.96 | 0.76 | 0.44 -0.16391 | 0.810572 |



|        |         |         |         |                   |
|--------|---------|---------|---------|-------------------|
| 0      | 0       | 0       | 0 NA    | NA                |
| 0      | 0       | 0       | 0 NA    | NA                |
| 0      | 0.34    | 0.16    | 0 NA    | NA                |
| 0      | 0       | 0       | 0 NA    | NA                |
| 0      | 0       | 0       | 0 NA    | NA                |
| 0      | 0       | 0       | 0 NA    | NA                |
| 0      | 0       | 0       | 0 NA    | NA                |
| 0      | 0       | 0       | 0 NA    | NA                |
| 0      | 0       | 0       | 0 NA    | NA                |
| 0      | 0       | 0       | 0 NA    | NA                |
| 0      | 0.16    | 0.28    | 0 NA    | NA                |
| 0      | 0       | 0       | 0 NA    | NA                |
| 0      | 0       | 0       | 0 NA    | NA                |
| 0      | 0       | 0       | 0 NA    | NA                |
| 0      | 0       | 0       | 0 NA    | NA                |
| 0.07   | 0.05    | 0.13    | 0 NA    | NA                |
| 3017.3 | 2739.09 | 2929.97 | 2700.15 | -0.18874 NA       |
| 0      | 0       | 0       | 0 NA    | NA                |
| 0      | 0       | 0       | 0.46 NA | NA                |
| 0      | 0       | 0       | 0 NA    | NA                |
| 0      | 0       | 0       | 0.25 NA | NA                |
| 3.16   | 3.31    | 8.93    | 4.75    | 0.219498 0.611377 |
| 0.06   | 0.09    | 0.04    | 0.18    | 0.060524 0.94882  |
| 0      | 0       | 0       | 0 NA    | NA                |
| 0      | 0       | 0       | 0 NA    | NA                |
| 0      | 0       | 0       | 0 NA    | NA                |
| 0      | 0       | 0       | 0 NA    | NA                |
| 0      | 0       | 0       | 0 NA    | NA                |
| 0      | 0       | 0       | 0 NA    | NA                |
| 0      | 0       | 0       | 0.11 NA | NA                |
| 0      | 0       | 0       | 0 NA    | NA                |
| 0      | 0       | 0       | 0 NA    | NA                |
| 0      | 0       | 0       | 0 NA    | NA                |
| 0      | 0       | 0       | 0 NA    | NA                |
| 0      | 0       | 0       | 0 NA    | NA                |
| 1.14   | 2.25    | 1.97    | 2.45    | 0.213366 0.722373 |
| 0.07   | 0.03    | 0.06    | 0.09    | -0.19259 0.820566 |
| 0      | 0       | 0       | 0 NA    | NA                |
| 0      | 0       | 0       | 0 NA    | NA                |
| 0      | 0       | 0.18    | 0 NA    | NA                |
| 0      | 0       | 0       | 0 NA    | NA                |
| 0      | 0       | 0       | 0 NA    | NA                |
| 0      | 0       | 0       | 0 NA    | NA                |
| 0      | 0       | 0       | 0 NA    | NA                |

|      |      |      |               |          |
|------|------|------|---------------|----------|
| 0.13 | 0    | 0    | 0 NA          | NA       |
| 0    | 0    | 0    | 0 NA          | NA       |
| 0    | 0    | 0    | 0 NA          | NA       |
| 0    | 0    | 0    | 0 NA          | NA       |
| 0    | 0    | 0    | 0 NA          | NA       |
| 0.05 | 0.02 | 0    | 0.04 NA       | NA       |
| 0    | 0    | 0    | 0 NA          | NA       |
| 0    | 0    | 0    | 0 NA          | NA       |
| 0    | 0    | 0    | 0 NA          | NA       |
| 0.32 | 0.11 | 0.13 | 0.33 -0.1505  | 0.862624 |
| 7.37 | 9.08 | 7.97 | 8.86 -0.0069  | 0.979889 |
| 0    | 0    | 0    | 0 NA          | NA       |
| 0.34 | 0    | 0    | 0.05 NA       | NA       |
| 0    | 0    | 0    | 0 NA          | NA       |
| 0    | 0    | 0    | 0 NA          | NA       |
| 0    | 0    | 0    | 0 NA          | NA       |
| 0    | 0    | 0    | 0 NA          | NA       |
| 0    | 0    | 0    | 0 NA          | NA       |
| 0    | 0    | 0    | 0 NA          | NA       |
| 0    | 0    | 0    | 0 NA          | NA       |
| 0    | 0    | 0    | 0 NA          | NA       |
| 0    | 0    | 0    | 0 NA          | NA       |
| 0    | 0    | 0    | 0 NA          | NA       |
| 0.3  | 0.11 | 0    | 0.11 NA       | NA       |
| 0    | 0    | 0    | 0 NA          | NA       |
| 0    | 0    | 0    | 0 NA          | NA       |
| 0    | 0    | 0    | 0 NA          | NA       |
| 0    | 0    | 0    | 0 NA          | NA       |
| 0    | 0    | 0    | 0 NA          | NA       |
| 0    | 0    | 0    | 0 NA          | NA       |
| 0    | 0    | 0    | 0 NA          | NA       |
| 2.61 | 2.51 | 1.63 | 4.07 -0.18904 | 0.730825 |
| 0    | 0    | 0    | 0 NA          | NA       |
| 0.11 | 0.46 | 0.31 | 0.35 0.933097 | 0.097399 |
| 0    | 0    | 0    | 0 NA          | NA       |
| 0    | 0    | 0    | 0 NA          | NA       |
| 0    | 0    | 0    | 0 NA          | NA       |
| 0    | 0.15 | 0.07 | 0.08 NA       | NA       |
| 0    | 0    | 0    | 0 NA          | NA       |
| 0    | 0    | 0    | 0 NA          | NA       |
| 0    | 0    | 0    | 0 NA          | NA       |
| 0.3  | 0.36 | 0.17 | 0.26 -0.43788 | 0.565434 |
| 0    | 0    | 0    | 0 NA          | NA       |
| 0    | 0    | 0    | 0 NA          | NA       |
| 0    | 0    | 0    | 0 NA          | NA       |

|      |      |      |               |          |
|------|------|------|---------------|----------|
| 0    | 0    | 0    | 0 NA          | NA       |
| 0    | 0    | 0    | 0 NA          | NA       |
| 0    | 0    | 0    | 0 NA          | NA       |
| 0    | 0    | 0    | 0 NA          | NA       |
| 0    | 0    | 0    | 0 NA          | NA       |
| 0    | 0    | 0    | 0 NA          | NA       |
| 0.12 | 0.25 | 0.03 | 0 NA          | NA       |
| 0    | 0    | 0    | 0 NA          | NA       |
| 0    | 0    | 0    | 0 NA          | NA       |
| 0    | 0    | 0    | 0 NA          | NA       |
| 0    | 0    | 0    | 0 NA          | NA       |
| 0    | 0    | 0    | 0 NA          | NA       |
| 0    | 0    | 0    | 0 NA          | NA       |
| 0    | 0    | 0    | 0 NA          | NA       |
| 0    | 0    | 0    | 0 NA          | NA       |
| 2.2  | 1.58 | 2.66 | 1.27 0.21439  | 0.776743 |
| 0    | 0    | 0    | 0 NA          | NA       |
| 0    | 0    | 0    | 0 NA          | NA       |
| 0    | 0    | 0    | 0 NA          | NA       |
| 0    | 0    | 0    | 0 NA          | NA       |
| 0    | 0    | 0    | 0 NA          | NA       |
| 0    | 0    | 0    | 0 NA          | NA       |
| 0    | 0    | 0    | 0 NA          | NA       |
| 0    | 0    | 0    | 0 NA          | NA       |
| 0    | 0    | 0    | 0.05 NA       | NA       |
| 0    | 0    | 0    | 0 NA          | NA       |
| 0    | 0    | 0    | 0 NA          | NA       |
| 0    | 0    | 0    | 0 NA          | NA       |
| 0    | 0.02 | 0    | 0 NA          | NA       |
| 0    | 0    | 0    | 0 NA          | NA       |
| 0    | 0    | 0    | 0 NA          | NA       |
| 0    | 0    | 0    | 0 NA          | NA       |
| 0.19 | 0.15 | 0.14 | 0.16 -0.62585 | 0.378395 |
| 0    | 0    | 0    | 0 NA          | NA       |
| 0    | 0    | 0    | 0 NA          | NA       |
| 0    | 0    | 0    | 0 NA          | NA       |
| 0    | 0    | 0    | 0 NA          | NA       |
| 0.27 | 0.17 | 0.18 | 0 NA          | NA       |
| 0    | 0    | 0    | 0 NA          | NA       |
| 0    | 0    | 0    | 0 NA          | NA       |
| 0    | 0    | 0    | 0 NA          | NA       |
| 0    | 0.31 | 0.27 | 0.63 NA       | NA       |
| 0    | 0    | 0    | 0 NA          | NA       |
| 0    | 0    | 0    | 0 NA          | NA       |
| 0    | 0    | 0    | 0 NA          | NA       |
| 0    | 0    | 0    | 0 NA          | NA       |
| 0    | 0    | 0    | 0 NA          | NA       |

|      |      |      |               |          |
|------|------|------|---------------|----------|
| 0    | 0    | 0    | 0 NA          | NA       |
| 0    | 0    | 0    | 0 NA          | NA       |
| 0    | 0    | 0    | 0 NA          | NA       |
| 0    | 0    | 0    | 0 NA          | NA       |
| 0    | 0    | 1.63 | 0 NA          | NA       |
| 0    | 0    | 0    | 0 NA          | NA       |
| 0    | 0    | 0    | 0 NA          | NA       |
| 0    | 0    | 0    | 0 NA          | NA       |
| 0    | 0    | 0    | 0 NA          | NA       |
| 0    | 0.14 | 0.13 | 0 NA          | NA       |
| 0    | 0    | 0    | 0 NA          | NA       |
| 0    | 0    | 0    | 0 NA          | NA       |
| 0    | 0    | 0    | 0 NA          | NA       |
| 0    | 0    | 0    | 0 NA          | NA       |
| 0    | 0    | 0    | 0 NA          | NA       |
| 0    | 0    | 0    | 0 NA          | NA       |
| 1.07 | 0.99 | 0.1  | 0.81 -0.2259  | 0.790022 |
| 0    | 0    | 0    | 0 NA          | NA       |
| 0    | 0    | 0    | 0 NA          | NA       |
| 0    | 0    | 0    | 0 NA          | NA       |
| 0    | 0    | 0    | 0 NA          | NA       |
| 0    | 0    | 0    | 0 NA          | NA       |
| 0    | 0    | 0    | 0 NA          | NA       |
| 0    | 0    | 0    | 0 NA          | NA       |
| 0    | 0    | 0    | 0 NA          | NA       |
| 1.99 | 3.53 | 3.14 | 2.59 0.293643 | 0.416383 |
| 0    | 0    | 0    | 0 NA          | NA       |
| 0    | 0    | 0    | 0 NA          | NA       |
| 0    | 0    | 0    | 0 NA          | NA       |
| 0    | 0    | 0    | 0 NA          | NA       |
| 0    | 0.17 | 0.08 | 0 NA          | NA       |
| 0    | 0    | 0    | 0 NA          | NA       |
| 0    | 0    | 0    | 0 NA          | NA       |
| 0    | 0    | 0    | 0 NA          | NA       |
| 0    | 0    | 0    | 0 NA          | NA       |
| 2.01 | 5.1  | 4.97 | 4.9 1.027568  | 0.000366 |
| 0    | 0    | 0    | 0 NA          | NA       |
| 0    | 0    | 0    | 0 NA          | NA       |
| 0.97 | 0    | 0    | 0.67 NA       | NA       |
| 0    | 0    | 0    | 0 NA          | NA       |
| 0    | 0    | 0    | 0 NA          | NA       |
| 0    | 0    | 0    | 0 NA          | NA       |
| 0.11 | 0.2  | 0.26 | 0.16 NA       | NA       |
| 0    | 0    | 0    | 0 NA          | NA       |









|      |      |      |      |          |          |
|------|------|------|------|----------|----------|
| 0    | 0.03 | 0.04 | 0.08 | NA       | NA       |
| 0    | 0    | 0    | 0    | NA       | NA       |
| 0    | 0    | 0    | 0    | NA       | NA       |
| 0    | 0    | 0    | 0    | NA       | NA       |
| 0.03 | 0    | 0.02 | 0    | NA       | NA       |
| 0    | 0    | 0    | 0    | NA       | NA       |
| 0    | 0    | 0    | 0    | NA       | NA       |
| 0    | 0    | 0    | 0    | NA       | NA       |
| 0    | 0    | 0    | 0    | NA       | NA       |
| 0.06 | 0.02 | 0.04 | 0.02 | NA       | NA       |
| 0    | 0.14 | 0    | 0    | NA       | NA       |
| 0    | 0    | 0    | 0    | NA       | NA       |
| 0    | 0    | 0.16 | 0    | NA       | NA       |
| 0    | 0    | 0    | 0    | NA       | NA       |
| 0.36 | 0.4  | 0.37 | 0.55 | 0.490199 | 0.38697  |
| 0    | 0    | 0    | 0    | NA       | NA       |
| 0.24 | 0.09 | 0.08 | 0.18 | NA       | NA       |
| 0    | 0    | 0    | 0    | NA       | NA       |
| 0    | 0    | 0    | 0    | NA       | NA       |
| 0    | 0    | 0    | 0    | NA       | NA       |
| 0    | 0    | 0    | 0    | NA       | NA       |
| 0    | 0    | 0    | 0    | NA       | NA       |
| 0    | 0    | 0    | 0    | NA       | NA       |
| 0    | 0    | 0    | 0    | NA       | NA       |
| 0    | 0    | 0    | 0    | NA       | NA       |
| 0    | 0    | 0    | 0    | NA       | NA       |
| 0    | 0    | 0    | 0    | NA       | NA       |
| 0    | 0    | 0    | 0    | NA       | NA       |
| 0    | 0    | 0    | 0    | NA       | NA       |
| 0    | 0    | 0    | 0    | NA       | NA       |
| 0    | 0    | 0    | 0    | NA       | NA       |
| 0    | 0    | 0    | 0    | NA       | NA       |
| 0    | 0    | 0    | 0    | NA       | NA       |
| 0    | 0.17 | 0    | 0    | NA       | NA       |
| 0    | 0    | 0    | 0    | NA       | NA       |
| 0    | 0    | 0    | 0    | NA       | NA       |
| 0    | 0    | 0    | 0    | NA       | NA       |
| 0.17 | 0.45 | 0.07 | 0.01 | NA       | NA       |
| 4.47 | 2.5  | 1.39 | 1.93 | -0.96783 | 3.31E-08 |
| 0    | 0    | 0    | 0    | NA       | NA       |
| 0    | 0    | 0    | 0    | NA       | NA       |
| 0    | 0    | 0    | 0    | NA       | NA       |
| 0.72 | 1.67 | 3.84 | 2.78 | 0.048911 | 0.953105 |
| 0    | 0    | 0    | 0    | NA       | NA       |
| 0    | 0    | 0    | 0    | NA       | NA       |

|      |       |       |                |          |
|------|-------|-------|----------------|----------|
| 0    | 0     | 0     | 0 NA           | NA       |
| 0    | 0     | 0     | 0 NA           | NA       |
| 0    | 0     | 0     | 0 NA           | NA       |
| 0    | 0     | 0     | 0 NA           | NA       |
| 0    | 0     | 0     | 0 NA           | NA       |
| 0    | 0     | 0     | 0 NA           | NA       |
| 0.13 | 0.07  | 0     | 0.09 NA        | NA       |
| 0    | 0     | 0     | 0 NA           | NA       |
| 0    | 0     | 0     | 0 NA           | NA       |
| 0    | 0     | 0     | 0 NA           | NA       |
| 0    | 0     | 0     | 0 NA           | NA       |
| 4.02 | 18.05 | 14.56 | 16.76 1.928227 | 1.61E-36 |
| 0    | 0     | 0     | 0 NA           | NA       |
| 1.2  | 1.17  | 1.93  | 1.74 -0.08386  | 0.89896  |
| 0    | 0     | 0     | 0 NA           | NA       |
| 0    | 0.04  | 0     | 0 NA           | NA       |
| 0    | 0     | 0     | 0 NA           | NA       |
| 0    | 0     | 0     | 0 NA           | NA       |
| 1.44 | 4.05  | 2.36  | 2.63 0.738067  | 0.052345 |
| 0.15 | 0     | 0     | 0 NA           | NA       |
| 0    | 0     | 0     | 0 NA           | NA       |
| 0.22 | 0     | 0.86  | 0.33 NA        | NA       |
| 0    | 0     | 0     | 0 NA           | NA       |
| 0    | 0     | 0     | 0 NA           | NA       |
| 0    | 0     | 0     | 0 NA           | NA       |
| 0    | 0     | 0     | 0 NA           | NA       |
| 0    | 0     | 0.25  | 0 NA           | NA       |
| 0    | 0     | 0     | 0 NA           | NA       |
| 0.2  | 0.42  | 0.13  | 0 NA           | NA       |
| 0    | 0     | 0     | 0 NA           | NA       |
| 0    | 0     | 0     | 0 NA           | NA       |
| 0    | 0     | 0     | 0 NA           | NA       |
| 0    | 0     | 0     | 0 NA           | NA       |
| 0    | 0     | 0     | 0 NA           | NA       |
| 0    | 0     | 0     | 0 NA           | NA       |
| 0.07 | 0.06  | 0.04  | 0.05 -0.39715  | 0.606618 |
| 0    | 0.11  | 0.21  | 0.12 NA        | NA       |
| 0    | 0     | 0     | 0 NA           | NA       |
| 0    | 0     | 0     | 0 NA           | NA       |
| 0    | 0     | 0     | 0 NA           | NA       |
| 0    | 0     | 0     | 0 NA           | NA       |
| 0    | 0     | 0     | 0 NA           | NA       |
| 0    | 0     | 0     | 0 NA           | NA       |
| 0.82 | 0.55  | 0.45  | 0.47 -0.60182  | 0.113352 |
| 0    | 0     | 0     | 0 NA           | NA       |





|       |       |       |                |          |
|-------|-------|-------|----------------|----------|
| 0     | 0     | 0     | 0 NA           | NA       |
| 0     | 0     | 0     | 0 NA           | NA       |
| 0     | 0     | 0     | 0 NA           | NA       |
| 0     | 0     | 0     | 0 NA           | NA       |
| 0     | 0     | 0     | 0 NA           | NA       |
| 0     | 0     | 0     | 0 NA           | NA       |
| 0     | 0     | 0     | 0 NA           | NA       |
| 35.15 | 42.73 | 39.22 | 36.22 0.041527 | 0.856269 |
| 0     | 0     | 0     | 0 NA           | NA       |
| 0     | 0     | 0     | 0 NA           | NA       |
| 0     | 0     | 0     | 0 NA           | NA       |
| 0     | 0     | 0.55  | 0 NA           | NA       |
| 0     | 0     | 0     | 0 NA           | NA       |
| 0     | 0     | 0     | 0 NA           | NA       |
| 0     | 0     | 0     | 0 NA           | NA       |
| 0.04  | 0.02  | 0.04  | 0.02 -0.20867  | 0.80882  |
| 0.68  | 0     | 0.07  | 0.15 -1.00109  | 0.111325 |
| 0     | 0     | 0     | 0 NA           | NA       |
| 0     | 0     | 0     | 0 NA           | NA       |
| 2.81  | 2.13  | 2.2   | 2.24 -0.53326  | 0.028355 |
| 0     | 0     | 0     | 0 NA           | NA       |
| 0     | 0     | 0     | 0 NA           | NA       |
| 0.47  | 0     | 0.06  | 0 NA           | NA       |
| 0     | 0     | 0     | 0 NA           | NA       |
| 0     | 0     | 0     | 0 NA           | NA       |
| 0.08  | 0.04  | 0.05  | 0.12 NA        | NA       |
| 0     | 0.11  | 0.1   | 0 NA           | NA       |
| 0     | 0     | 0     | 0 NA           | NA       |
| 0     | 0     | 0     | 0 NA           | NA       |
| 0.02  | 0.03  | 0.07  | 0.08 0.346872  | 0.656224 |
| 0     | 0     | 0     | 0 NA           | NA       |
| 0     | 0     | 0     | 0 NA           | NA       |
| 0     | 0     | 0     | 0 NA           | NA       |
| 0.12  | 0     | 0     | 0 NA           | NA       |
| 0     | 0     | 0     | 0 NA           | NA       |
| 0     | 0     | 0.03  | 0.03 NA        | NA       |
| 0     | 0     | 0     | 0 NA           | NA       |
| 0     | 0     | 0     | 0 NA           | NA       |
| 0     | 0     | 0     | 0 NA           | NA       |
| 0     | 0     | 0     | 0 NA           | NA       |
| 0     | 0     | 0     | 0 NA           | NA       |
| 0     | 0     | 0     | 0 NA           | NA       |
| 0     | 0     | 0     | 0 NA           | NA       |
| 0     | 0     | 0     | 0 NA           | NA       |
| 0     | 0     | 0     | 0 NA           | NA       |
| 0     | 0.09  | 0.17  | 0 NA           | NA       |
| 0     | 0     | 0     | 0 NA           | NA       |



|      |      |      |      |          |          |
|------|------|------|------|----------|----------|
| 0.2  | 0    | 0.07 | 0.05 | NA       | NA       |
| 0    | 0    | 0    | 0    | NA       | NA       |
| 0    | 0    | 0    | 0    | NA       | NA       |
| 0    | 0    | 0    | 0    | NA       | NA       |
| 0    | 0    | 0    | 0    | NA       | NA       |
| 0    | 0    | 0    | 0    | NA       | NA       |
| 0    | 0    | 0    | 0    | NA       | NA       |
| 0    | 1    | 0.42 | 0.5  | NA       | NA       |
| 0.26 | 0    | 0.17 | 0.2  | NA       | NA       |
| 0    | 0    | 0    | 0    | NA       | NA       |
| 0    | 0    | 0    | 0    | NA       | NA       |
| 0    | 0    | 0    | 0    | NA       | NA       |
| 0    | 0    | 0    | 0    | NA       | NA       |
| 0    | 0    | 0    | 0    | NA       | NA       |
| 0    | 0    | 0    | 0    | NA       | NA       |
| 0    | 0.1  | 0    | 0    | NA       | NA       |
| 0    | 0    | 0    | 0    | NA       | NA       |
| 0    | 0    | 0    | 0    | NA       | NA       |
| 0.42 | 0.3  | 0.68 | 0.79 | 0.077382 | 0.935474 |
| 0    | 0    | 0.07 | 0.24 | NA       | NA       |
| 0    | 0    | 0    | 0    | NA       | NA       |
| 0    | 0    | 0    | 0    | NA       | NA       |
| 0    | 0    | 0.13 | 0    | NA       | NA       |
| 0    | 0    | 0    | 0    | NA       | NA       |
| 0    | 0    | 0    | 0    | NA       | NA       |
| 0    | 0    | 0    | 0    | NA       | NA       |
| 0    | 0    | 0    | 0    | NA       | NA       |
| 0    | 0    | 0    | 0    | NA       | NA       |
| 0    | 0    | 0    | 0    | NA       | NA       |
| 0.11 | 0    | 0.5  | 0    | NA       | NA       |
| 0    | 0    | 0    | 0    | NA       | NA       |
| 0    | 0    | 0    | 0    | NA       | NA       |
| 1.41 | 3.32 | 2.77 | 4.11 | 0.706855 | 0.1262   |
| 0    | 0    | 0    | 0    | NA       | NA       |
| 0    | 0    | 0    | 0    | NA       | NA       |
| 0    | 0    | 0    | 0    | NA       | NA       |
| 0    | 0    | 0    | 0    | NA       | NA       |
| 0    | 0    | 1.78 | 0.7  | NA       | NA       |
| 0    | 0    | 0    | 0    | NA       | NA       |
| 0    | 0    | 0    | 0    | NA       | NA       |
| 0    | 0    | 0    | 0    | NA       | NA       |
| 0    | 0    | 3.15 | 0    | 0.015351 | NA       |
| 0    | 0    | 0    | 0    | NA       | NA       |
| 0    | 0    | 0    | 0    | NA       | NA       |
| 0    | 0    | 0    | 0    | NA       | NA       |

|      |      |      |               |          |
|------|------|------|---------------|----------|
| 0    | 0    | 0    | 0 NA          | NA       |
| 0.36 | 0.45 | 0.34 | 0.4 -0.45153  | 0.510916 |
| 0.25 | 0.35 | 0.25 | 0.2 -0.38566  | 0.527967 |
| 1.12 | 1.02 | 0.68 | 1.39 0.204056 | 0.78773  |
| 0    | 0    | 0    | 0 NA          | NA       |
| 0.16 | 0.12 | 0    | 0.24 NA       | NA       |
| 0    | 0.6  | 1.34 | 0.46 0.275215 | 0.738866 |
| 0    | 0    | 0    | 0 NA          | NA       |
| 0    | 0    | 0    | 0 NA          | NA       |
| 0    | 0    | 0    | 0 NA          | NA       |
| 0    | 0    | 0    | 0 NA          | NA       |
| 0    | 0    | 0    | 0 NA          | NA       |
| 0.1  | 0    | 0    | 0 NA          | NA       |
| 0    | 0    | 0    | 0 NA          | NA       |
| 0    | 0    | 0    | 0 NA          | NA       |
| 0    | 0    | 0    | 0 NA          | NA       |
| 0    | 0    | 0    | 0 NA          | NA       |
| 0    | 0    | 0    | 0 NA          | NA       |
| 0    | 0    | 0    | 0 NA          | NA       |
| 0    | 0    | 0    | 0 NA          | NA       |
| 0    | 0    | 0    | 0 NA          | NA       |
| 0    | 0    | 0    | 0 NA          | NA       |
| 0    | 0    | 0    | 0 NA          | NA       |
| 0.2  | 0.15 | 0.63 | 0.22 -0.08647 | 0.926858 |
| 0.21 | 0    | 0.18 | 0.09 NA       | NA       |
| 0    | 0    | 0    | 0 NA          | NA       |
| 0.28 | 0    | 0    | 0 NA          | NA       |
| 0    | 0    | 0    | 0 NA          | NA       |
| 0    | 0    | 0    | 0 NA          | NA       |
| 0    | 0    | 0    | 0 NA          | NA       |
| 0.11 | 0.11 | 0.1  | 0.24 NA       | NA       |
| 0    | 0    | 0    | 0 NA          | NA       |
| 0    | 0    | 0    | 0.06 NA       | NA       |
| 0.14 | 0.1  | 0    | 0 NA          | NA       |
| 0    | 0    | 0    | 0 NA          | NA       |
| 0    | 0    | 0    | 0 NA          | NA       |
| 0    | 0    | 0    | 0 NA          | NA       |
| 0    | 0    | 0    | 0 NA          | NA       |
| 0    | 0    | 0    | 0.1 NA        | NA       |
| 0    | 0.04 | 0    | 0 NA          | NA       |
| 0    | 0    | 0    | 0 NA          | NA       |
| 0    | 0    | 0    | 0 NA          | NA       |
| 0.06 | 0.06 | 0.13 | 0.31 0.365817 | 0.629904 |
| 0    | 0    | 0    | 0 NA          | NA       |

|      |      |      |      |          |          |
|------|------|------|------|----------|----------|
| 0.03 | 0.04 | 0.02 | 0.04 | NA       | NA       |
| 0    | 0    | 0    | 0    | NA       | NA       |
| 0    | 0    | 0    | 0    | NA       | NA       |
| 0    | 0    | 0    | 0    | NA       | NA       |
| 0    | 0    | 0    | 0    | NA       | NA       |
| 0    | 0    | 0    | 0    | NA       | NA       |
| 0    | 0    | 0    | 0    | NA       | NA       |
| 0    | 0    | 0    | 0    | NA       | NA       |
| 0.84 | 0.77 | 0.52 | 1.16 | 0.196194 | 0.808612 |
| 0    | 0    | 0    | 0    | NA       | NA       |
| 0    | 0    | 0    | 0    | NA       | NA       |
| 0    | 0    | 0    | 0    | NA       | NA       |
| 0    | 0    | 0.03 | 0    | NA       | NA       |
| 0    | 0    | 0    | 0    | NA       | NA       |
| 0    | 0    | 0    | 0    | NA       | NA       |
| 0    | 0    | 0    | 0    | NA       | NA       |
| 0    | 0    | 0    | 0    | NA       | NA       |
| 0    | 0    | 0    | 0    | NA       | NA       |
| 0    | 0    | 0    | 0    | NA       | NA       |
| 0    | 0    | 0    | 0    | NA       | NA       |
| 0    | 0    | 0    | 0    | NA       | NA       |
| 0.36 | 0.09 | 0.24 | 0.46 | NA       | NA       |
| 0    | 0    | 0    | 0    | NA       | NA       |
| 0    | 0    | 0    | 0    | NA       | NA       |
| 0    | 0    | 0    | 0    | NA       | NA       |
| 0    | 0    | 0    | 0    | NA       | NA       |
| 0    | 0    | 0    | 0    | NA       | NA       |
| 0    | 0    | 0    | 0    | NA       | NA       |
| 0    | 0    | 0    | 0    | NA       | NA       |
| 0    | 0    | 0    | 0    | NA       | NA       |
| 0    | 0    | 0    | 0    | NA       | NA       |
| 0    | 0    | 0    | 0    | NA       | NA       |
| 0    | 0    | 0    | 0    | NA       | NA       |
| 0    | 0    | 0    | 0    | NA       | NA       |
| 0    | 0    | 0    | 0    | NA       | NA       |
| 0    | 0.01 | 0    | 0    | NA       | NA       |
| 0    | 0.6  | 0.07 | 0.03 | NA       | NA       |
| 0    | 0.16 | 0.08 | 0    | NA       | NA       |
| 0.45 | 0.4  | 0.31 | 0.15 | -0.6245  | 0.335208 |
| 0.16 | 0.04 | 0.04 | 0.12 | NA       | NA       |
| 0    | 0    | 0    | 0    | NA       | NA       |
| 2.05 | 1.91 | 1.76 | 2.47 | -0.29885 | 0.590144 |







|      |      |      |               |          |
|------|------|------|---------------|----------|
| 0    | 0    | 0    | 0 NA          | NA       |
| 0    | 0    | 0    | 0 NA          | NA       |
| 0    | 0    | 0    | 0 NA          | NA       |
| 0    | 0    | 0    | 0 NA          | NA       |
| 0    | 0    | 0.15 | 0 NA          | NA       |
| 3    | 1.88 | 2.27 | 1.34 -0.34153 | 0.411647 |
| 0    | 0    | 0    | 0 NA          | NA       |
| 0    | 0    | 0    | 0 NA          | NA       |
| 0    | 0    | 0    | 0 NA          | NA       |
| 0    | 0    | 0    | 0 NA          | NA       |
| 0    | 0    | 0    | 0 NA          | NA       |
| 0    | 0    | 0    | 0 NA          | NA       |
| 0    | 0    | 0    | 0.06 NA       | NA       |
| 0    | 0    | 0    | 0 NA          | NA       |
| 0    | 0    | 0    | 0 NA          | NA       |
| 0    | 0    | 0    | 0 NA          | NA       |
| 0.64 | 0    | 0    | 0 NA          | NA       |
| 0    | 0    | 0    | 0 NA          | NA       |
| 0    | 0    | 0    | 0 NA          | NA       |
| 0    | 0    | 0    | 0 NA          | NA       |
| 0    | 0    | 0    | 0 NA          | NA       |
| 0    | 0    | 0    | 0 NA          | NA       |
| 0    | 0    | 0    | 0 NA          | NA       |
| 0    | 0    | 0    | 0 NA          | NA       |
| 0    | 0    | 0    | 0 NA          | NA       |
| 0.32 | 0    | 0.2  | 0 NA          | NA       |
| 0    | 0    | 0    | 0 NA          | NA       |
| 0    | 0    | 0    | 0 NA          | NA       |
| 0    | 0    | 0    | 0 NA          | NA       |
| 0    | 0    | 0    | 0 NA          | NA       |
| 0    | 0    | 0    | 0 NA          | NA       |
| 0    | 0    | 0    | 0 NA          | NA       |
| 0    | 0    | 0    | 0 NA          | NA       |
| 0.38 | 0.29 | 0.69 | 0 NA          | NA       |
| 0    | 0    | 0.71 | 0 NA          | NA       |
| 0    | 0    | 0    | 0 NA          | NA       |
| 0.82 | 0    | 0    | 0 NA          | NA       |
| 0    | 0    | 0    | 0 NA          | NA       |
| 0    | 0    | 0    | 0 NA          | NA       |
| 0.16 | 0.29 | 0.32 | 0.12 0.389077 | 0.611072 |
| 0    | 0    | 0    | 0 NA          | NA       |
| 0.11 | 0    | 0    | 0 NA          | NA       |
| 0    | 0    | 0    | 0 NA          | NA       |
| 0    | 0    | 0    | 0 NA          | NA       |
| 0    | 0    | 0    | 0 NA          | NA       |

|      |      |      |      |          |          |
|------|------|------|------|----------|----------|
| 0    | 0    | 0.02 | 0.02 | NA       | NA       |
| 0    | 0    | 0.13 | 0    | NA       | NA       |
| 0    | 0    | 0    | 0    | NA       | NA       |
| 0    | 0    | 0    | 0    | NA       | NA       |
| 0    | 0    | 0    | 0    | NA       | NA       |
| 0    | 0    | 0    | 0    | NA       | NA       |
| 0.18 | 0    | 0.24 | 0.14 | NA       | NA       |
| 0    | 0    | 0    | 0    | NA       | NA       |
| 0    | 0    | 0    | 0    | NA       | NA       |
| 0    | 0    | 0    | 0    | NA       | NA       |
| 0    | 0    | 0.37 | 0    | NA       | NA       |
| 0    | 0    | 0    | 0    | NA       | NA       |
| 3.85 | 4.23 | 3.57 | 3.61 | -0.00011 | 0.999852 |
| 0    | 0    | 0    | 0    | NA       | NA       |
| 0.56 | 0.32 | 1.15 | 0.82 | 0.351698 | 0.656333 |
| 0    | 0    | 0    | 0    | NA       | NA       |
| 0    | 0    | 0    | 0    | NA       | NA       |
| 0    | 0.04 | 0    | 0    | NA       | NA       |
| 0    | 0    | 0    | 0    | NA       | NA       |
| 0    | 0    | 0    | 0    | NA       | NA       |
| 0    | 0    | 0    | 0    | NA       | NA       |
| 0    | 0    | 0    | 0    | NA       | NA       |
| 0    | 0    | 0    | 0    | NA       | NA       |
| 0    | 0    | 0    | 0    | NA       | NA       |
| 0    | 0    | 0    | 0    | NA       | NA       |
| 0    | 0    | 0    | 0    | NA       | NA       |
| 0.4  | 0.35 | 0.83 | 0.53 | 0.544776 | 0.367739 |
| 0    | 0    | 0    | 0    | NA       | NA       |
| 0    | 0    | 0    | 0    | NA       | NA       |
| 0    | 0    | 0    | 0    | NA       | NA       |
| 0    | 0    | 0.03 | 0    | NA       | NA       |
| 0    | 0    | 0    | 0    | NA       | NA       |
| 0    | 0.08 | 0.03 | 0    | NA       | NA       |
| 0.92 | 1.38 | 0.28 | 0.06 | -0.04252 | 0.964931 |
| 0    | 0    | 0    | 0    | NA       | NA       |
| 0    | 0    | 0    | 0    | NA       | NA       |
| 0    | 0    | 0    | 0    | NA       | NA       |
| 7.56 | 4.79 | 4.66 | 5.37 | -0.50484 | 0.003851 |
| 0    | 0    | 0    | 0    | NA       | NA       |
| 0    | 0    | 0    | 0    | NA       | NA       |
| 0    | 0    | 0    | 0    | NA       | NA       |
| 0    | 0    | 0    | 0    | NA       | NA       |
| 0.17 | 0    | 0    | 0    | NA       | NA       |
| 0    | 0    | 0.25 | 0    | NA       | NA       |



|      |      |      |               |          |
|------|------|------|---------------|----------|
| 0    | 0    | 0    | 0 NA          | NA       |
| 0    | 0.1  | 0    | 0 NA          | NA       |
| 0    | 0    | 0    | 0 NA          | NA       |
| 0    | 0.08 | 0    | 0 NA          | NA       |
| 0    | 0    | 0    | 0 NA          | NA       |
| 0    | 0    | 0    | 0 NA          | NA       |
| 0.05 | 0.02 | 0.02 | 0.02 NA       | NA       |
| 0    | 0    | 0    | 0 NA          | NA       |
| 0    | 0    | 0    | 0 NA          | NA       |
| 0    | 0    | 0    | 0 NA          | NA       |
| 0    | 0    | 0    | 0 NA          | NA       |
| 0    | 0    | 0    | 0 NA          | NA       |
| 0    | 0    | 0    | 0 NA          | NA       |
| 0.03 | 0    | 0.04 | 0.02 NA       | NA       |
| 0    | 0    | 0    | 0 NA          | NA       |
| 0    | 0    | 0    | 0 NA          | NA       |
| 0    | 0    | 0    | 0 NA          | NA       |
| 0    | 0    | 0    | 0 NA          | NA       |
| 0    | 0    | 0    | 0 NA          | NA       |
| 0    | 0    | 0    | 0 NA          | NA       |
| 0.08 | 0    | 0    | 0.06 NA       | NA       |
| 0.41 | 0    | 0    | 0.15 NA       | NA       |
| 0    | 0    | 0    | 0 NA          | NA       |
| 0    | 0    | 0    | 0 NA          | NA       |
| 1.65 | 1.54 | 0.52 | 1.8 -0.09229  | 0.920758 |
| 0    | 0    | 0    | 0 NA          | NA       |
| 0.22 | 0.03 | 0.49 | 0.33 -0.13066 | 0.884574 |
| 0    | 0    | 0    | 0 NA          | NA       |
| 0    | 0.39 | 0.31 | 0 NA          | NA       |
| 0.53 | 0.25 | 0.69 | 0.8 -0.6526   | 0.345488 |
| 0    | 0    | 0    | 0 NA          | NA       |
| 0    | 0    | 0.02 | 0 NA          | NA       |
| 0    | 0    | 0    | 0 NA          | NA       |
| 0    | 0    | 0    | 0 NA          | NA       |
| 0    | 0    | 0    | 0 NA          | NA       |
| 1.23 | 0.29 | 2.03 | 2.09 -0.16987 | 0.847304 |
| 0    | 0    | 0    | 0 NA          | NA       |
| 0    | 0    | 0    | 0 NA          | NA       |
| 0    | 0.65 | 0.4  | 0.23 NA       | NA       |
| 0    | 0    | 0    | 0 NA          | NA       |
| 0.44 | 0.05 | 0.3  | 0.38 -0.43584 | 0.55861  |
| 0.28 | 0.26 | 0    | 0.15 -0.09005 | 0.924089 |
| 0    | 0    | 0    | 0 NA          | NA       |
| 0    | 0    | 0    | 0 NA          | NA       |



|      |      |      |               |          |
|------|------|------|---------------|----------|
| 0    | 0    | 0    | 0 NA          | NA       |
| 0    | 0    | 0    | 0 NA          | NA       |
| 0.43 | 0.16 | 0.32 | 0.2 -0.24544  | 0.768241 |
| 3.08 | 3.18 | 2.08 | 3.09 -0.20204 | 0.59267  |
| 0    | 0    | 0    | 0 NA          | NA       |
| 0    | 0    | 0    | 0 NA          | NA       |
| 0.15 | 0.11 | 0    | 0.23 NA       | NA       |
| 0    | 0    | 0    | 0 NA          | NA       |
| 0.48 | 0.21 | 0.8  | 0.11 0.124949 | 0.889637 |
| 0    | 0    | 0    | 0 NA          | NA       |
| 0    | 0    | 0    | 0 NA          | NA       |
| 0    | 0    | 0    | 0 NA          | NA       |
| 0    | 0    | 0    | 0 NA          | NA       |
| 0    | 0.12 | 0    | 0 NA          | NA       |
| 0.02 | 0    | 0    | 0 NA          | NA       |
| 0    | 0    | 0    | 0.13 NA       | NA       |
| 0.08 | 0.03 | 0.03 | 0 NA          | NA       |
| 0    | 0    | 0    | 0 NA          | NA       |
| 0.19 | 0    | 0.25 | 0 NA          | NA       |
| 0    | 0    | 0    | 0 NA          | NA       |
| 0    | 0    | 0.08 | 0 NA          | NA       |
| 0    | 0    | 0    | 0 NA          | NA       |
| 0    | 0    | 0    | 0 NA          | NA       |
| 0    | 0    | 0.06 | 0 NA          | NA       |
| 0    | 0    | 0    | 0 NA          | NA       |
| 0    | 0    | 0    | 0 NA          | NA       |
| 0    | 0    | 0    | 0 NA          | NA       |
| 0    | 0    | 0    | 0 NA          | NA       |
| 0    | 0    | 0    | 0 NA          | NA       |
| 0    | 0    | 0    | 0 NA          | NA       |
| 0    | 0    | 0    | 0 NA          | NA       |
| 0    | 0    | 0    | 0 NA          | NA       |
| 0    | 0    | 0    | 0 NA          | NA       |
| 0    | 0    | 0    | 0 NA          | NA       |
| 0    | 0    | 0    | 0 NA          | NA       |
| 0    | 0    | 0    | 0 NA          | NA       |
| 0    | 0    | 0    | 0 NA          | NA       |
| 0    | 0    | 0    | 0 NA          | NA       |
| 0    | 0    | 0    | 0 NA          | NA       |
| 3.66 | 2.4  | 2.32 | 2.43 -0.46669 | 0.000646 |
| 0    | 0    | 0    | 0 NA          | NA       |
| 2.23 | 1.53 | 1.56 | 2.08 -0.43445 | 0.376421 |
| 0    | 0    | 0    | 0 NA          | NA       |
| 0    | 0    | 0    | 0 NA          | NA       |
| 0    | 0    | 0    | 0 NA          | NA       |
| 0    | 0    | 0    | 0 NA          | NA       |
| 0    | 0    | 0    | 0 NA          | NA       |
| 0    | 0    | 0    | 0 NA          | NA       |
| 1.87 | 0.57 | 0.51 | 0.95 -0.55719 | 0.418678 |
| 0    | 0    | 0    | 0 NA          | NA       |
| 0    | 0.06 | 0    | 0 NA          | NA       |

|       |       |      |                |          |
|-------|-------|------|----------------|----------|
| 0     | 0     | 0    | 0 NA           | NA       |
| 0     | 0     | 0    | 0 NA           | NA       |
| 0     | 0     | 0    | 0 NA           | NA       |
| 0     | 0     | 0    | 0 NA           | NA       |
| 0     | 0     | 0    | 0 NA           | NA       |
| 0     | 0     | 0    | 0 NA           | NA       |
| 0     | 0     | 0    | 0 NA           | NA       |
| 0     | 0     | 0    | 0 NA           | NA       |
| 0.32  | 0     | 0.09 | 0.11 NA        | NA       |
| 0     | 0     | 0    | 0 NA           | NA       |
| 0     | 0     | 0.04 | 0.05 NA        | NA       |
| 0.13  | 0     | 0.15 | 0.02 -0.14207  | 0.857756 |
| 0.08  | 0     | 0    | 0 NA           | NA       |
| 0     | 0     | 0    | 0 NA           | NA       |
| 0     | 0     | 0    | 0.06 NA        | NA       |
| 0     | 0     | 0    | 0 NA           | NA       |
| 5.6   | 6.06  | 5.5  | 5.2 0.063668   | 0.722818 |
| 0     | 0     | 0    | 0 NA           | NA       |
| 0     | 0     | 0    | 0 NA           | NA       |
| 0     | 0     | 0    | 0 NA           | NA       |
| 0     | 0     | 0    | 0 NA           | NA       |
| 2.15  | 0.97  | 0.83 | 0.79 -0.61037  | 0.175033 |
| 0     | 0     | 0    | 0 NA           | NA       |
| 0     | 0     | 0    | 0 NA           | NA       |
| 0     | 0     | 0    | 0 NA           | NA       |
| 0     | 0     | 0    | 0 NA           | NA       |
| 0     | 0     | 0.08 | 0 NA           | NA       |
| 0     | 0     | 0    | 0 NA           | NA       |
| 0     | 0     | 0    | 0 NA           | NA       |
| 0     | 0     | 0    | 0 NA           | NA       |
| 29.12 | 33.09 | 30.9 | 35.31 0.341318 | 0.082454 |
| 0     | 0     | 0    | 0 NA           | NA       |
| 0     | 0     | 0    | 0 NA           | NA       |
| 0     | 0     | 0    | 0 NA           | NA       |
| 0.58  | 0.8   | 0.68 | 1.41 0.004492  | 0.996111 |
| 0     | 0     | 0    | 0 NA           | NA       |
| 0     | 0     | 0    | 0 NA           | NA       |
| 0.63  | 4.73  | 4.05 | 2.73 0.841193  | 0.106466 |
| 0     | 0     | 0    | 0 NA           | NA       |
| 0     | 0     | 0    | 0 NA           | NA       |
| 0     | 0     | 0    | 0 NA           | NA       |
| 0     | 0     | 0    | 0 NA           | NA       |
| 0.04  | 0.03  | 0    | 0 NA           | NA       |
| 0     | 0     | 0    | 0 NA           | NA       |
| 0     | 0     | 0    | 0 NA           | NA       |



|      |      |      |               |          |
|------|------|------|---------------|----------|
| 0    | 0    | 0    | 0 NA          | NA       |
| 0    | 0.1  | 0    | 0 NA          | NA       |
| 0    | 0    | 0    | 0 NA          | NA       |
| 0    | 0    | 0    | 0 NA          | NA       |
| 0.08 | 0.36 | 0.21 | 0.27 1.22561  | 0.029355 |
| 0.09 | 0.1  | 0.1  | 0.18 0.389971 | 0.615839 |
| 0.31 | 0.22 | 0    | 0 NA          | NA       |
| 0    | 0.15 | 0    | 0 NA          | NA       |
| 0    | 0    | 0    | 0 NA          | NA       |
| 0    | 0    | 0    | 0 NA          | NA       |
| 0    | 0    | 0    | 0 NA          | NA       |
| 0    | 0    | 0    | 0 NA          | NA       |
| 0    | 0    | 0    | 0.14 NA       | NA       |
| 0    | 0    | 0    | 0 NA          | NA       |
| 0    | 0    | 0    | 0 NA          | NA       |
| 0    | 0    | 0    | 0 NA          | NA       |
| 6.41 | 7.63 | 8.72 | 6.86 0.333888 | 0.469557 |
| 0    | 0    | 0    | 0 NA          | NA       |
| 0    | 0    | 0    | 0 NA          | NA       |
| 0    | 0    | 0    | 0 NA          | NA       |
| 0    | 0    | 0    | 0 NA          | NA       |
| 3.23 | 6.04 | 4.6  | 5.25 0.505224 | 0.032449 |
| 0    | 0    | 0.04 | 0 NA          | NA       |
| 0    | 0    | 0    | 0 NA          | NA       |
| 0    | 0    | 0    | 0 NA          | NA       |
| 0    | 0    | 0    | 0 NA          | NA       |
| 0    | 0    | 0    | 0 NA          | NA       |
| 0    | 0    | 0    | 0 NA          | NA       |
| 0.21 | 0.07 | 0.16 | 0.22 -0.15462 | 0.861807 |
| 0    | 0    | 0.05 | 0.02 NA       | NA       |
| 0    | 0.14 | 0.27 | 0 NA          | NA       |
| 0    | 0    | 0    | 0 NA          | NA       |
| 0    | 0    | 0    | 0 NA          | NA       |
| 0    | 0    | 0    | 0 NA          | NA       |
| 0    | 0    | 0    | 0 NA          | NA       |
| 0    | 0    | 0    | 0 NA          | NA       |
| 0    | 0    | 0    | 0 NA          | NA       |
| 0    | 0    | 0    | 0 NA          | NA       |
| 0    | 0    | 0.07 | 0.16 NA       | NA       |
| 0    | 0    | 0    | 0 NA          | NA       |
| 0    | 0    | 0    | 0 NA          | NA       |
| 0    | 0    | 0    | 0 NA          | NA       |
| 0    | 0    | 0    | 0 NA          | NA       |
| 0.25 | 1.25 | 0.42 | 1.05 1.134107 | 0.070764 |
| 0    | 0    | 0    | 0 NA          | NA       |
| 0    | 0.78 | 0.31 | 0.37 0.403745 | 0.584472 |

|      |      |      |               |          |
|------|------|------|---------------|----------|
| 0    | 0    | 0    | 0 NA          | NA       |
| 0.7  | 0    | 0    | 0 NA          | NA       |
| 0    | 0    | 0    | 0 NA          | NA       |
| 0    | 0    | 0    | 0 NA          | NA       |
| 0    | 0    | 0    | 0 NA          | NA       |
| 0    | 0.13 | 0.12 | 0 NA          | NA       |
| 0.27 | 0    | 0.12 | 0.14 NA       | NA       |
| 0    | 0    | 0    | 0.12 NA       | NA       |
| 0    | 0    | 0    | 0 NA          | NA       |
| 0    | 0    | 0    | 0 NA          | NA       |
| 0    | 0    | 0    | 0 NA          | NA       |
| 0    | 0    | 0    | 0 NA          | NA       |
| 0    | 0    | 0    | 0 NA          | NA       |
| 0    | 0    | 0    | 0 NA          | NA       |
| 0    | 0    | 0    | 0 NA          | NA       |
| 0    | 0    | 0    | 0.05 NA       | NA       |
| 0    | 0    | 0    | 0 NA          | NA       |
| 0    | 0    | 0    | 0 NA          | NA       |
| 0    | 0    | 0    | 0 NA          | NA       |
| 0    | 0    | 0.04 | 0 NA          | NA       |
| 0    | 0    | 0    | 0 NA          | NA       |
| 0.14 | 0.15 | 0    | 0.42 0.03036  | 0.97502  |
| 0    | 0    | 0    | 0 NA          | NA       |
| 0.45 | 0.8  | 0.56 | 0.65 0.505865 | 0.277569 |
| 0    | 0    | 0    | 0.15 NA       | NA       |
| 0    | 0    | 0    | 0 NA          | NA       |
| 0    | 0    | 0    | 0 NA          | NA       |
| 0    | 0    | 0    | 0 NA          | NA       |
| 0    | 0.21 | 0.19 | 0 NA          | NA       |
| 0    | 0    | 0    | 0 NA          | NA       |
| 0    | 0    | 0.31 | 0 NA          | NA       |
| 0.29 | 0    | 0.19 | 0 NA          | NA       |
| 0    | 0    | 0    | 0 NA          | NA       |
| 0    | 0    | 0    | 0 NA          | NA       |
| 0    | 0    | 0    | 0 NA          | NA       |
| 0    | 0    | 0    | 0 NA          | NA       |
| 0    | 0    | 0    | 0 NA          | NA       |
| 0    | 0    | 0    | 0 NA          | NA       |
| 0    | 0    | 0    | 0 NA          | NA       |
| 0    | 0    | 0    | 0 NA          | NA       |
| 0    | 0    | 0    | 0 NA          | NA       |
| 0    | 0    | 0    | 0 NA          | NA       |
| 0.2  | 0.28 | 0.26 | 1.11 NA       | NA       |
| 0    | 0    | 0    | 0 NA          | NA       |
| 0    | 0    | 0    | 0 NA          | NA       |

|      |      |      |               |          |
|------|------|------|---------------|----------|
| 0    | 0    | 0    | 0 NA          | NA       |
| 0    | 0    | 0    | 0 NA          | NA       |
| 0    | 0    | 0    | 0 NA          | NA       |
| 0.06 | 0.12 | 0    | 0 NA          | NA       |
| 0    | 0.08 | 0    | 0 NA          | NA       |
| 0    | 0    | 0    | 0 NA          | NA       |
| 0    | 0    | 0    | 0 NA          | NA       |
| 0.11 | 0    | 0    | 0.04 NA       | NA       |
| 0    | 0    | 0    | 0 NA          | NA       |
| 0.25 | 0    | 0    | 0 NA          | NA       |
| 0    | 0    | 0    | 0 NA          | NA       |
| 0    | 0    | 0    | 0 NA          | NA       |
| 0.41 | 0.15 | 0.13 | 0.15 NA       | NA       |
| 0    | 0    | 0    | 0 NA          | NA       |
| 1.63 | 1.95 | 1.35 | 1.04 -0.07677 | 0.875208 |
| 0    | 0    | 0    | 0 NA          | NA       |
| 0    | 0    | 0    | 0 NA          | NA       |
| 0.65 | 0.57 | 0    | 0.45 -0.5499  | 0.452939 |
| 0    | 0    | 0    | 0 NA          | NA       |
| 0    | 0    | 0    | 0 NA          | NA       |
| 0    | 0    | 0    | 0 NA          | NA       |
| 0    | 0    | 0    | 0 NA          | NA       |
| 0    | 0    | 0    | 0 NA          | NA       |
| 0    | 0    | 0    | 0 NA          | NA       |
| 0    | 0    | 0    | 0 NA          | NA       |
| 0    | 0    | 0.06 | 0 NA          | NA       |
| 0    | 0    | 0    | 0 NA          | NA       |
| 0    | 0    | 0    | 0 NA          | NA       |
| 0    | 0    | 0    | 0 NA          | NA       |
| 0    | 0    | 0    | 0 NA          | NA       |
| 0.41 | 0    | 0.1  | 0.17 -0.57846 | 0.421641 |
| 0    | 0    | 0.09 | 0 NA          | NA       |
| 0    | 0    | 0    | 0 NA          | NA       |
| 0    | 0    | 0.04 | 0 NA          | NA       |
| 0.16 | 0    | 0    | 0 NA          | NA       |
| 0    | 0    | 0    | 0 NA          | NA       |
| 0    | 0    | 0    | 0 NA          | NA       |
| 0    | 0    | 0    | 0 NA          | NA       |
| 0.14 | 0.22 | 0.27 | 0.21 0.651339 | 0.27362  |
| 0    | 0    | 0    | 0 NA          | NA       |
| 0    | 0    | 0    | 0 NA          | NA       |
| 0    | 0    | 0    | 0 NA          | NA       |
| 0    | 0    | 0    | 0 NA          | NA       |
| 0.84 | 1.2  | 1.94 | 1.16 -0.0122  | 0.989838 |





|       |       |       |               |          |
|-------|-------|-------|---------------|----------|
| 0     | 0     | 0     | 0 NA          | NA       |
| 0     | 0     | 0     | 0 NA          | NA       |
| 0     | 0     | 0     | 0 NA          | NA       |
| 0     | 0     | 0     | 0 NA          | NA       |
| 0     | 0     | 0     | 0 NA          | NA       |
| 0     | 0     | 0     | 0 NA          | NA       |
| 0     | 0     | 0     | 0 NA          | NA       |
| 0     | 0     | 0     | 0 NA          | NA       |
| 0     | 0     | 0     | 0 NA          | NA       |
| 0     | 0     | 0     | 0 NA          | NA       |
| 0     | 0     | 0     | 0 NA          | NA       |
| 0     | 0     | 0.24  | 0 NA          | NA       |
| 0     | 0     | 0     | 0 NA          | NA       |
| 0     | 0     | 0     | 0 NA          | NA       |
| 0     | 0     | 0     | 0 NA          | NA       |
| 0     | 0     | 0     | 0 NA          | NA       |
| 0     | 0     | 0     | 0 NA          | NA       |
| 0     | 0     | 0     | 0 NA          | NA       |
| 53.58 | 51.53 | 49.27 | 41.9 -0.01283 | 0.937114 |
| 0     | 0     | 0     | 0 NA          | NA       |
| 0     | 0     | 0     | 0 NA          | NA       |
| 0     | 0     | 0.09  | 0 NA          | NA       |
| 0     | 0     | 0     | 0 NA          | NA       |
| 0     | 0     | 0     | 0 NA          | NA       |
| 0     | 0     | 0     | 0 NA          | NA       |
| 0     | 0     | 0     | 0 NA          | NA       |
| 0     | 0     | 0     | 0 NA          | NA       |
| 0     | 0     | 0     | 0 NA          | NA       |
| 0     | 0     | 0     | 0 NA          | NA       |
| 0.54  | 0.39  | 0.92  | 0.59 0.382157 | 0.557914 |
| 0     | 0     | 0     | 0 NA          | NA       |
| 0     | 0     | 0.08  | 0 NA          | NA       |
| 0     | 0     | 0     | 0 NA          | NA       |
| 0     | 0     | 0     | 0 NA          | NA       |
| 0     | 0     | 0     | 0 NA          | NA       |
| 0     | 0     | 0     | 0 NA          | NA       |
| 0     | 0     | 0     | 0 NA          | NA       |
| 0     | 0     | 0     | 0 NA          | NA       |
| 0     | 0     | 0     | 0 NA          | NA       |
| 0     | 0     | 0     | 0 NA          | NA       |
| 0     | 0     | 0     | 0 NA          | NA       |
| 0     | 0     | 0     | 0 NA          | NA       |
| 0     | 0     | 0     | 0 NA          | NA       |
| 0     | 0     | 0     | 0 NA          | NA       |
| 0.25  | 0.23  | 0.14  | 0.33 0.192728 | 0.823986 |



|      |      |      |               |          |
|------|------|------|---------------|----------|
| 0    | 0    | 0    | 0 NA          | NA       |
| 0    | 0    | 0    | 0 NA          | NA       |
| 0    | 0    | 0    | 0 NA          | NA       |
| 0    | 0    | 0    | 0 NA          | NA       |
| 0    | 0    | 0    | 0 NA          | NA       |
| 0    | 0    | 0    | 0 NA          | NA       |
| 0    | 0    | 0    | 0 NA          | NA       |
| 0    | 0.13 | 0.02 | 0 NA          | NA       |
| 0    | 0    | 0    | 0 NA          | NA       |
| 0    | 0    | 0    | 0 NA          | NA       |
| 0    | 0    | 0    | 0 NA          | NA       |
| 0    | 0    | 0    | 0 NA          | NA       |
| 0    | 0    | 0    | 0 NA          | NA       |
| 0.69 | 0.82 | 0.53 | 0.5 0.259595  | 0.744989 |
| 0    | 0    | 0    | 0 NA          | NA       |
| 0    | 0.05 | 0.07 | 0.03 NA       | NA       |
| 0    | 0    | 0    | 0 NA          | NA       |
| 0    | 0    | 0    | 0 NA          | NA       |
| 0    | 0.16 | 0    | 0 NA          | NA       |
| 0    | 0    | 0    | 0 NA          | NA       |
| 0    | 0    | 0.06 | 0.22 NA       | NA       |
| 0    | 0    | 0    | 0 NA          | NA       |
| 0    | 0    | 0    | 0 NA          | NA       |
| 0    | 0    | 0.15 | 0 NA          | NA       |
| 0    | 0    | 0    | 0 NA          | NA       |
| 0.16 | 0.3  | 0.44 | 0.19 -0.05726 | 0.951399 |
| 0    | 0    | 0    | 0 NA          | NA       |
| 0    | 0    | 0    | 0 NA          | NA       |
| 0    | 0    | 0    | 0 NA          | NA       |
| 0    | 0    | 0    | 0 NA          | NA       |
| 0    | 0    | 0    | 0 NA          | NA       |
| 0    | 0    | 0    | 0 NA          | NA       |
| 0    | 0    | 0    | 0 NA          | NA       |
| 0    | 0    | 0    | 0 NA          | NA       |
| 0    | 0    | 0    | 0 NA          | NA       |
| 0    | 0    | 0    | 0 NA          | NA       |
| 0    | 0    | 0    | 0 NA          | NA       |
| 0    | 0    | 0    | 0 NA          | NA       |
| 0    | 0    | 0    | 0 NA          | NA       |
| 0    | 0    | 0    | 0 NA          | NA       |
| 0    | 0    | 0    | 0 NA          | NA       |
| 0    | 0    | 0    | 0 NA          | NA       |
| 0    | 0    | 0    | 0 NA          | NA       |
| 0.16 | 0.07 | 0.15 | 0.17 -0.29546 | 0.712235 |
| 0    | 0.21 | 0    | 0 NA          | NA       |
| 0    | 0    | 0    | 0 NA          | NA       |
| 0    | 0    | 0    | 0 NA          | NA       |

|      |      |      |      |          |          |
|------|------|------|------|----------|----------|
| 2.73 | 2.2  | 2.01 | 2.38 | -0.42484 | 0.161397 |
| 0    | 0    | 0    | 0    | NA       | NA       |
| 0    | 0    | 0    | 0    | NA       | NA       |
| 0    | 0    | 0    | 0    | NA       | NA       |
| 0    | 0    | 0    | 0    | NA       | NA       |
| 0    | 0    | 0    | 0    | NA       | NA       |
| 0    | 0    | 0    | 0    | NA       | NA       |
| 0    | 0    | 0    | 0    | NA       | NA       |
| 0    | 0    | 0    | 0    | NA       | NA       |
| 0.12 | 0.13 | 0.24 | 0.09 | NA       | NA       |
| 0    | 0    | 0    | 0    | NA       | NA       |
| 0    | 0    | 0    | 0    | NA       | NA       |
| 0.05 | 0.56 | 0.35 | 0.4  | 0.709783 | 0.290722 |
| 0    | 0    | 0    | 0    | NA       | NA       |
| 0    | 0.44 | 0    | 0.12 | NA       | NA       |
| 0    | 0    | 0    | 0    | NA       | NA       |
| 0    | 0    | 0    | 0    | NA       | NA       |
| 0.16 | 0.57 | 0.11 | 0.73 | NA       | NA       |
| 3.71 | 0.5  | 1.39 | 2.06 | -1.40967 | 0.001414 |
| 0    | 0    | 0    | 0    | NA       | NA       |
| 0.28 | 0.31 | 0.13 | 0.41 | NA       | NA       |
| 0    | 0    | 0    | 0    | NA       | NA       |
| 0    | 0    | 0    | 0    | NA       | NA       |
| 0    | 0    | 0    | 0    | NA       | NA       |
| 0    | 0    | 0    | 0    | NA       | NA       |
| 0    | 0    | 0    | 0    | NA       | NA       |
| 0.18 | 0    | 0    | 0.13 | NA       | NA       |
| 0    | 0    | 0    | 0    | NA       | NA       |
| 0    | 0    | 0    | 0    | NA       | NA       |
| 0    | 0    | 0    | 0    | NA       | NA       |
| 0    | 0    | 0    | 0    | NA       | NA       |
| 0    | 0    | 0    | 0    | NA       | NA       |
| 0    | 0    | 0    | 0    | NA       | NA       |
| 1.29 | 0.38 | 0.47 | 0.52 | -0.39456 | 0.498449 |
| 0    | 0    | 0    | 0    | NA       | NA       |
| 0    | 0    | 0    | 0    | NA       | NA       |
| 0    | 0    | 0    | 0    | NA       | NA       |
| 0    | 0.14 | 0    | 0    | NA       | NA       |
| 0    | 0    | 0    | 0    | NA       | NA       |
| 0.18 | 0.13 | 0.21 | 0.4  | NA       | NA       |
| 0    | 0    | 0    | 0    | NA       | NA       |
| 0    | 0    | 0    | 0    | NA       | NA       |
| 0    | 0    | 0    | 0.52 | NA       | NA       |
| 0    | 0    | 0    | 0    | NA       | NA       |
| 0    | 0    | 0    | 0    | NA       | NA       |

|      |      |      |               |          |
|------|------|------|---------------|----------|
| 0    | 0    | 0    | 0 NA          | NA       |
| 0    | 0    | 0    | 0 NA          | NA       |
| 0    | 0    | 0    | 0 NA          | NA       |
| 0    | 0    | 0    | 0 NA          | NA       |
| 0    | 0    | 0    | 0.21 NA       | NA       |
| 0    | 0    | 0    | 0 NA          | NA       |
| 0.19 | 1.31 | 0.58 | 1.02 0.909705 | 0.143293 |
| 0.37 | 0.09 | 0    | 0 NA          | NA       |
| 0    | 0    | 0    | 0 NA          | NA       |
| 0    | 0    | 0    | 0 NA          | NA       |
| 0    | 0    | 0    | 0 NA          | NA       |
| 0    | 0    | 0    | 0 NA          | NA       |
| 0    | 0    | 0    | 0 NA          | NA       |
| 0    | 0    | 0    | 0 NA          | NA       |
| 0    | 0    | 0    | 0 NA          | NA       |
| 0    | 0    | 0    | 0 NA          | NA       |
| 0    | 0    | 1.4  | 0 NA          | NA       |
| 0    | 0    | 0    | 0 NA          | NA       |
| 0    | 0    | 0    | 0 NA          | NA       |
| 0.09 | 0.25 | 0.47 | 0.13 0.026537 | 0.978168 |
| 0    | 0    | 0    | 0 NA          | NA       |
| 0    | 0.06 | 0    | 0.08 NA       | NA       |
| 0    | 0    | 0    | 0 NA          | NA       |
| 0    | 0    | 0    | 0 NA          | NA       |
| 0    | 0    | 0    | 0 NA          | NA       |
| 0.08 | 0.07 | 0.08 | 0.08 0.140235 | 0.874689 |
| 0    | 0    | 0    | 0 NA          | NA       |
| 6.46 | 5.94 | 6.22 | 5.14 0.047753 | 0.88556  |
| 0    | 0    | 0    | 0 NA          | NA       |
| 0    | 0    | 0    | 0 NA          | NA       |
| 0    | 0    | 0    | 0 NA          | NA       |
| 0    | 0    | 0    | 0 NA          | NA       |
| 0    | 0    | 0    | 0 NA          | NA       |
| 0    | 0    | 0    | 0 NA          | NA       |
| 0    | 0    | 0    | 0 NA          | NA       |
| 0    | 0.04 | 0.12 | 0.13 NA       | NA       |
| 0    | 0    | 0    | 0 NA          | NA       |
| 0    | 0    | 0    | 0 NA          | NA       |
| 0    | 0    | 0    | 0 NA          | NA       |
| 0.1  | 1.01 | 1.33 | 1.13 1.395016 | 0.006303 |
| 0    | 0    | 0    | 0 NA          | NA       |
| 0    | 0    | 0    | 0.24 NA       | NA       |
| 0    | 0    | 0    | 0 NA          | NA       |
| 0    | 0    | 0    | 0 NA          | NA       |
| 0    | 0    | 0    | 0 NA          | NA       |

|      |      |       |               |          |
|------|------|-------|---------------|----------|
| 0    | 0    | 0     | 0 NA          | NA       |
| 0.56 | 0.63 | 0.77  | 0.39 0.218903 | 0.759019 |
| 0    | 0    | 0     | 0 NA          | NA       |
| 0    | 0    | 0     | 0 NA          | NA       |
| 0    | 0    | 0     | 0 NA          | NA       |
| 0    | 0    | 0     | 0 NA          | NA       |
| 0.13 | 0.02 | 0.09  | 0.04 NA       | NA       |
| 0.16 | 0.23 | 0.37  | 0.49 0.432646 | 0.561815 |
| 0    | 0    | 0.07  | 0 NA          | NA       |
| 0    | 0    | 0     | 0.07 NA       | NA       |
| 0    | 0    | 0     | 0 NA          | NA       |
| 7.9  | 10.4 | 10.75 | 11.14 0.53637 | 0.02086  |
| 0    | 0    | 0     | 0 NA          | NA       |
| 0    | 0    | 0     | 0 NA          | NA       |
| 0    | 0    | 0     | 0 NA          | NA       |
| 0    | 0    | 0     | 0 NA          | NA       |
| 0    | 0.13 | 0     | 0.14 NA       | NA       |
| 0    | 0    | 0     | 0 NA          | NA       |
| 0    | 0.09 | 0.4   | 0.09 NA       | NA       |
| 0    | 0    | 0     | 0 NA          | NA       |
| 0    | 0    | 0     | 0 NA          | NA       |
| 0    | 0    | 0     | 0 NA          | NA       |
| 0    | 0    | 0     | 0 NA          | NA       |
| 0    | 0    | 0     | 0 NA          | NA       |
| 0    | 0    | 0     | 0 NA          | NA       |
| 0    | 0    | 0     | 0 NA          | NA       |
| 0    | 0    | 0     | 0 NA          | NA       |
| 0    | 0    | 0     | 0 NA          | NA       |
| 0    | 0    | 0     | 0 NA          | NA       |
| 0    | 0    | 0     | 0 NA          | NA       |
| 0.07 | 0    | 0.04  | 0 NA          | NA       |
| 0    | 0    | 0     | 0 NA          | NA       |
| 0    | 0    | 0     | 0 NA          | NA       |
| 0    | 0    | 0     | 0.03 NA       | NA       |
| 0.78 | 0.69 | 0.98  | 1.58 0.123745 | 0.874956 |
| 0    | 0    | 0     | 0 NA          | NA       |
| 0    | 0    | 0     | 0 NA          | NA       |
| 0    | 0    | 0     | 0 NA          | NA       |
| 0    | 0    | 0.08  | 0.09 NA       | NA       |
| 0    | 0    | 0     | 0 NA          | NA       |
| 0    | 0    | 0     | 0 NA          | NA       |
| 0    | 0    | 0     | 0 NA          | NA       |
| 0    | 0    | 0     | 0 NA          | NA       |
| 0    | 0    | 0     | 0 NA          | NA       |
| 0    | 0    | 0     | 0 NA          | NA       |
| 0    | 0    | 0     | 0 NA          | NA       |
| 0    | 0    | 0     | 0 NA          | NA       |
| 4.31 | 2.37 | 2.39  | 3.75 -0.39547 | 0.296758 |
| 0    | 0    | 0     | 0 NA          | NA       |

|      |      |      |              |          |
|------|------|------|--------------|----------|
| 0.21 | 0    | 0.15 | 0 NA         | NA       |
| 0    | 0    | 0    | 0 NA         | NA       |
| 0    | 0    | 0    | 0 NA         | NA       |
| 0    | 0    | 0    | 0 NA         | NA       |
| 0    | 0    | 0    | 0 NA         | NA       |
| 0    | 0    | 0    | 0 NA         | NA       |
| 0    | 0    | 0    | 0 NA         | NA       |
| 0    | 0    | 0    | 0 NA         | NA       |
| 0.07 | 0.1  | 0.05 | 0.11 NA      | NA       |
| 0    | 0    | 0    | 0 NA         | NA       |
| 0    | 0    | 0    | 0 NA         | NA       |
| 0    | 0    | 0    | 0 NA         | NA       |
| 0    | 0    | 0    | 0 NA         | NA       |
| 0    | 0    | 0    | 0 NA         | NA       |
| 4.09 | 5.73 | 6.9  | 7.2 0.227661 | 0.420229 |
| 0    | 0    | 0.07 | 0 NA         | NA       |
| 0    | 0    | 0    | 0 NA         | NA       |
| 0    | 0    | 0    | 0 NA         | NA       |
| 0    | 0    | 0    | 0.12 NA      | NA       |
| 0    | 0    | 0    | 0 NA         | NA       |
| 0    | 0    | 0    | 0 NA         | NA       |
| 0    | 0    | 0    | 0 NA         | NA       |
| 0    | 0    | 0    | 0 NA         | NA       |
| 0    | 0    | 0    | 0 NA         | NA       |
| 0    | 0    | 0    | 0 NA         | NA       |
| 0    | 0    | 0    | 0 NA         | NA       |
| 0    | 0    | 0    | 0 NA         | NA       |
| 0    | 0    | 0    | 0 NA         | NA       |
| 0    | 0    | 0.1  | 0 NA         | NA       |
| 0    | 0.14 | 0    | 0 NA         | NA       |
| 0.33 | 0.05 | 0.07 | 0.12 -0.3587 | 0.639996 |
| 0    | 0    | 0.25 | 0 NA         | NA       |
| 0    | 0    | 0    | 0 NA         | NA       |
| 0    | 0    | 0    | 0 NA         | NA       |
| 0    | 0    | 0    | 0 NA         | NA       |
| 0    | 0    | 0    | 0 NA         | NA       |
| 0    | 0    | 0    | 0 NA         | NA       |
| 0    | 0    | 0    | 0 NA         | NA       |
| 0    | 0    | 0    | 0 NA         | NA       |
| 0    | 0.01 | 0    | 0.01 NA      | NA       |
| 0    | 0    | 0    | 0 NA         | NA       |
| 0    | 0.11 | 0    | 0 NA         | NA       |
| 0.02 | 0    | 0    | 0 NA         | NA       |
| 0    | 0    | 0    | 0 NA         | NA       |
| 0    | 0    | 0    | 0 NA         | NA       |
| 0    | 0    | 0    | 0 NA         | NA       |



|      |      |      |               |          |
|------|------|------|---------------|----------|
| 0    | 0    | 0    | 0 NA          | NA       |
| 0    | 0    | 0    | 0 NA          | NA       |
| 0.5  | 0.12 | 0.33 | 0.62 -0.09912 | 0.912329 |
| 0    | 0    | 0    | 0 NA          | NA       |
| 0    | 0    | 0.02 | 0 NA          | NA       |
| 0    | 0    | 0    | 0 NA          | NA       |
| 0    | 0    | 0    | 0 NA          | NA       |
| 0.11 | 0.08 | 0.15 | 0.07 -0.19517 | 0.821404 |
| 0.14 | 0.15 | 0.02 | 0.1 NA        | NA       |
| 0    | 0    | 0    | 0 NA          | NA       |
| 0    | 0    | 0.21 | 0 NA          | NA       |
| 0    | 0    | 0    | 0 NA          | NA       |
| 0    | 0    | 0    | 0 NA          | NA       |
| 1.06 | 0    | 0    | 0 NA          | NA       |
| 0    | 0    | 0    | 0 NA          | NA       |
| 0    | 0.15 | 0    | 0 NA          | NA       |
| 0    | 0    | 0    | 0 NA          | NA       |
| 0    | 0    | 0    | 0 NA          | NA       |
| 0    | 0    | 0    | 0 NA          | NA       |
| 0    | 0    | 0    | 0 NA          | NA       |
| 0    | 0    | 0    | 0 NA          | NA       |
| 0    | 0    | 0    | 0 NA          | NA       |
| 1.23 | 0    | 0.74 | 0 NA          | NA       |
| 0.2  | 0.14 | 0.13 | 0.3 NA        | NA       |
| 0    | 0    | 0    | 0 NA          | NA       |
| 0    | 0    | 0    | 0 NA          | NA       |
| 0    | 0    | 0    | 0 NA          | NA       |
| 0    | 0    | 0    | 0 NA          | NA       |
| 0    | 0    | 0    | 0 NA          | NA       |
| 0    | 0    | 0    | 0 NA          | NA       |
| 0    | 0    | 0    | 0 NA          | NA       |
| 0    | 0    | 0    | 0 NA          | NA       |
| 0    | 0    | 0    | 0 NA          | NA       |
| 0    | 0    | 0    | 0 NA          | NA       |
| 0    | 0    | 0    | 0 NA          | NA       |
| 0    | 0    | 0    | 0 NA          | NA       |
| 0    | 0    | 0    | 0 NA          | NA       |
| 0    | 0    | 0    | 0 NA          | NA       |
| 0    | 0    | 0    | 0 NA          | NA       |
| 0    | 0    | 0    | 0 NA          | NA       |
| 0    | 0    | 0    | 0 NA          | NA       |
| 0    | 0    | 0    | 0 NA          | NA       |
| 0    | 0    | 0    | 0 NA          | NA       |
| 0    | 0    | 0    | 0 NA          | NA       |
| 0    | 0    | 0    | 0 NA          | NA       |
| 0    | 0    | 0    | 0 NA          | NA       |
| 0    | 0    | 0    | 0 NA          | NA       |
| 0    | 0    | 0    | 0 NA          | NA       |
| 0    | 0    | 0    | 0 NA          | NA       |
| 0    | 0    | 0    | 0 NA          | NA       |
| 0    | 0    | 0    | 0 NA          | NA       |
| 0    | 0    | 0    | 0 NA          | NA       |
| 0    | 0    | 0    | 0 NA          | NA       |
| 0    | 0    | 0    | 0 NA          | NA       |
| 0    | 0    | 0    | 0 NA          | NA       |
| 0    | 0    | 0    | 0 NA          | NA       |
| 0    | 0    | 0    | 0 NA          | NA       |
| 0    | 0    | 0.13 | 0 NA          | NA       |
| 0    | 0    | 0    | 0 NA          | NA       |

|         |         |         |         |          |          |
|---------|---------|---------|---------|----------|----------|
| 0.16    | 0       | 0       | 0       | NA       | NA       |
| 1762.66 | 1413.92 | 1655.47 | 1421.51 | -0.25635 | NA       |
| 0       | 0       | 0       | 0       | NA       | NA       |
| 0       | 0       | 0       | 0       | NA       | NA       |
| 0       | 0       | 0       | 0       | NA       | NA       |
| 0       | 0       | 0       | 0       | NA       | NA       |
| 0       | 0       | 0       | 0       | NA       | NA       |
| 0       | 0       | 0       | 0       | NA       | NA       |
| 0       | 0       | 0       | 0       | NA       | NA       |
| 0       | 0       | 0       | 0.32    | NA       | NA       |
| 0       | 0       | 0       | 0       | NA       | NA       |
| 0       | 0       | 0       | 0       | NA       | NA       |
| 0       | 0       | 0       | 0       | NA       | NA       |
| 0       | 0       | 0       | 0       | NA       | NA       |
| 0       | 0       | 0       | 0       | NA       | NA       |
| 0       | 0.35    | 0       | 0       | NA       | NA       |
| 0       | 0       | 0       | 0       | NA       | NA       |
| 0       | 0       | 0       | 0       | NA       | NA       |
| 0.73    | 0.39    | 0.2     | 0.47    | -0.71171 | 0.235917 |
| 0.13    | 0.24    | 0.23    | 0.4     | 0.075324 | 0.912803 |
| 0       | 0       | 0       | 0       | NA       | NA       |
| 0       | 0.44    | 0       | 0.22    | NA       | NA       |
| 0       | 0       | 0       | 0       | NA       | NA       |
| 0.34    | 0       | 0       | 0       | NA       | NA       |
| 0       | 0       | 0       | 0       | NA       | NA       |
| 0       | 0       | 0       | 0       | NA       | NA       |
| 1       | 0       | 0.38    | 0       | -1.02743 | 0.104442 |
| 0       | 0       | 0       | 0       | NA       | NA       |
| 0       | 0       | 0       | 0       | NA       | NA       |
| 0       | 0       | 0       | 0       | NA       | NA       |
| 0       | 0       | 0       | 0       | NA       | NA       |
| 0       | 0       | 0       | 0       | NA       | NA       |
| 0       | 0       | 0       | 0       | NA       | NA       |
| 0       | 0       | 0       | 0       | NA       | NA       |
| 0       | 0       | 0       | 0       | NA       | NA       |
| 0       | 0       | 0       | 0       | NA       | NA       |
| 0       | 0       | 0       | 0       | NA       | NA       |
| 0       | 0       | 0       | 0       | NA       | NA       |
| 0       | 0       | 0       | 0       | NA       | NA       |
| 0.41    | 0.25    | 0.14    | 0.39    | -0.23958 | 0.771217 |
| 0       | 0       | 0       | 0       | NA       | NA       |
| 0       | 0       | 0       | 0       | NA       | NA       |
| 0       | 0       | 0       | 0       | NA       | NA       |

|      |      |      |               |          |
|------|------|------|---------------|----------|
| 0    | 0    | 0    | 0 NA          | NA       |
| 0    | 0    | 0    | 0 NA          | NA       |
| 1.04 | 0.78 | 0.75 | 1.16 0.003868 | 0.994947 |
| 0    | 0    | 0    | 0 NA          | NA       |
| 0    | 0    | 0    | 0 NA          | NA       |
| 0    | 0    | 0    | 0 NA          | NA       |
| 0    | 0    | 0    | 0 NA          | NA       |
| 0    | 0    | 0    | 0 NA          | NA       |
| 0    | 0    | 0    | 0 NA          | NA       |
| 0    | 0    | 0    | 0 NA          | NA       |
| 0    | 0    | 0    | 0 NA          | NA       |
| 0    | 0    | 0    | 0 NA          | NA       |
| 0.15 | 0.78 | 0.8  | 1.05 0.587969 | 0.341652 |
| 0    | 0    | 0    | 0 NA          | NA       |
| 0    | 0    | 0    | 0 NA          | NA       |
| 0    | 0    | 0    | 0 NA          | NA       |
| 0    | 0    | 0    | 0 NA          | NA       |
| 0    | 0    | 0    | 0 NA          | NA       |
| 2.6  | 0.83 | 0.67 | 0.73 -1.5756  | 6.42E-05 |
| 0    | 0    | 0    | 0 NA          | NA       |
| 0    | 0    | 0    | 0 NA          | NA       |
| 0    | 0    | 0    | 0 NA          | NA       |
| 0    | 0    | 0    | 0 NA          | NA       |
| 0    | 0    | 0    | 0 NA          | NA       |
| 0    | 0    | 0    | 0 NA          | NA       |
| 0    | 0    | 0    | 0 NA          | NA       |
| 0.22 | 0.25 | 0.15 | 0.17 -0.07693 | 0.935474 |
| 0    | 0    | 0    | 0 NA          | NA       |
| 0    | 0    | 0    | 0 NA          | NA       |
| 0    | 0    | 0    | 0 NA          | NA       |
| 0    | 0    | 0    | 0 NA          | NA       |
| 0    | 0    | 0    | 0 NA          | NA       |
| 0    | 0    | 0    | 0 NA          | NA       |
| 0    | 0    | 0    | 0 NA          | NA       |
| 0.78 | 0.61 | 0.67 | 0.61 0.018398 | 0.980927 |
| 0    | 0    | 0    | 0 NA          | NA       |
| 0    | 0    | 0    | 0 NA          | NA       |
| 0.21 | 0    | 0    | 0 NA          | NA       |
| 0    | 0    | 0.12 | 0 NA          | NA       |
| 0    | 0    | 0    | 0 NA          | NA       |
| 0    | 0.17 | 0.08 | 0.19 NA       | NA       |
| 0    | 0    | 0    | 0 NA          | NA       |
| 0    | 0    | 0    | 0 NA          | NA       |

|      |      |      |               |          |
|------|------|------|---------------|----------|
| 0    | 0    | 0    | 0 NA          | NA       |
| 0    | 0    | 0    | 0 NA          | NA       |
| 0    | 0    | 0    | 0 NA          | NA       |
| 0    | 0    | 0    | 0 NA          | NA       |
| 0    | 0    | 0    | 0 NA          | NA       |
| 0    | 0    | 0    | 0 NA          | NA       |
| 0    | 0    | 0    | 0 NA          | NA       |
| 0    | 0    | 0    | 0 NA          | NA       |
| 0    | 0    | 0    | 0 NA          | NA       |
| 0    | 0    | 0    | 0 NA          | NA       |
| 0    | 0    | 0    | 0 NA          | NA       |
| 0    | 0    | 0    | 0 NA          | NA       |
| 0.22 | 0    | 0.08 | 0 NA          | NA       |
| 0    | 0    | 0    | 0 NA          | NA       |
| 0    | 0    | 0    | 0 NA          | NA       |
| 0    | 0    | 0    | 0 NA          | NA       |
| 0    | 0    | 0    | 0 NA          | NA       |
| 0.27 | 0.43 | 0.43 | 0.33 0.242346 | 0.728848 |
| 0    | 0    | 0    | 0 NA          | NA       |
| 0    | 0    | 0    | 0 NA          | NA       |
| 0    | 0    | 0    | 0 NA          | NA       |
| 0    | 0    | 0    | 0 NA          | NA       |
| 0    | 0    | 0    | 0 NA          | NA       |
| 0    | 0.53 | 0.39 | 0.89 0.266078 | 0.74746  |
| 0.08 | 0    | 0    | 0 NA          | NA       |
| 0    | 0    | 0    | 0 NA          | NA       |
| 0    | 0    | 0    | 0 NA          | NA       |
| 0    | 0    | 0    | 0 NA          | NA       |
| 0    | 0.14 | 0    | 0.08 NA       | NA       |
| 0.14 | 0.04 | 0.04 | 0.06 NA       | NA       |
| 0    | 0    | 0    | 0 NA          | NA       |
| 0    | 0    | 0    | 0 NA          | NA       |
| 0    | 0    | 0    | 0 NA          | NA       |
| 0    | 0    | 0    | 0 NA          | NA       |
| 0    | 0    | 0    | 0 NA          | NA       |
| 0.13 | 0    | 0.08 | 0.09 -0.05129 | 0.954743 |
| 0.72 | 0    | 0.48 | 0.27 NA       | NA       |
| 0    | 0    | 0    | 0 NA          | NA       |
| 0    | 0    | 0.13 | 0 NA          | NA       |
| 0    | 0    | 0    | 0 NA          | NA       |
| 0.08 | 0.08 | 0    | 0.06 NA       | NA       |
| 0    | 0    | 0    | 0 NA          | NA       |

|      |      |      |               |          |
|------|------|------|---------------|----------|
| 0    | 0    | 0    | 0 NA          | NA       |
| 0    | 0    | 0    | 0 NA          | NA       |
| 0    | 0    | 0    | 0.11 NA       | NA       |
| 0    | 0    | 0    | 0 NA          | NA       |
| 0    | 0    | 0    | 0 NA          | NA       |
| 0    | 0    | 0    | 0 NA          | NA       |
| 0    | 0    | 0    | 0 NA          | NA       |
| 0.14 | 0.07 | 0.05 | 0.05 -0.39913 | 0.606148 |
| 0    | 0.12 | 0    | 0 NA          | NA       |
| 0    | 0    | 0    | 0 NA          | NA       |
| 0    | 0    | 0    | 0 NA          | NA       |
| 0    | 0    | 0    | 0 NA          | NA       |
| 2.15 | 1.54 | 1.73 | 2.1 -0.27621  | 0.340537 |
| 0    | 0    | 0    | 0 NA          | NA       |
| 0    | 0    | 0    | 0 NA          | NA       |
| 0    | 0    | 0    | 0 NA          | NA       |
| 0    | 0    | 0    | 0 NA          | NA       |
| 0    | 0    | 0    | 0 NA          | NA       |
| 0    | 0    | 0    | 0 NA          | NA       |
| 0    | 0    | 0    | 0 NA          | NA       |
| 4.59 | 6.85 | 4.12 | 5.89 0.652186 | 0.005098 |
| 0    | 0    | 0    | 0 NA          | NA       |
| 0    | 0    | 0    | 0 NA          | NA       |
| 0    | 0    | 0    | 0 NA          | NA       |
| 0    | 0    | 0    | 0 NA          | NA       |
| 0    | 0    | 0    | 0 NA          | NA       |
| 0.34 | 0.12 | 0.23 | 0.13 -0.67155 | 0.329632 |
| 0    | 0    | 0    | 0 NA          | NA       |
| 0    | 0    | 0    | 0 NA          | NA       |
| 0.08 | 0    | 0    | 0 NA          | NA       |
| 0    | 0    | 0.01 | 0.09 NA       | NA       |
| 0    | 0    | 0    | 0 NA          | NA       |
| 0    | 0    | 0    | 0 NA          | NA       |
| 0    | 0    | 0    | 0 NA          | NA       |
| 0.89 | 0.26 | 0.23 | 0.27 -0.51333 | 0.476585 |
| 0    | 0    | 0    | 0 NA          | NA       |
| 0    | 0    | 0    | 0 NA          | NA       |
| 0    | 0.68 | 0    | 0 NA          | NA       |
| 0    | 0    | 0    | 0 NA          | NA       |
| 0    | 0    | 0.35 | 0 NA          | NA       |
| 0    | 0    | 0    | 0 NA          | NA       |
| 0.22 | 0.63 | 0.52 | 0.51 0.035518 | 0.965066 |
| 0    | 0    | 0    | 0 NA          | NA       |
| 0    | 0    | 0    | 0 NA          | NA       |
| 0    | 0    | 0    | 0 NA          | NA       |

|      |      |      |               |          |
|------|------|------|---------------|----------|
| 0    | 0    | 0    | 0 NA          | NA       |
| 0.29 | 0.66 | 1.07 | 0.96 0.467571 | 0.447184 |
| 0.03 | 0.04 | 0.04 | 0.07 NA       | NA       |
| 0    | 0    | 0    | 0 NA          | NA       |
| 0    | 0.01 | 0    | 0 NA          | NA       |
| 0    | 0    | 0    | 0 NA          | NA       |
| 0    | 0    | 0    | 0 NA          | NA       |
| 0    | 0    | 0    | 0 NA          | NA       |
| 0.78 | 0.13 | 0.17 | 0.24 -2.03126 | 1.32E-07 |
| 0    | 0    | 0    | 0.22 NA       | NA       |
| 0.31 | 0.23 | 0.13 | 0.12 -0.12735 | 0.886085 |
| 0    | 0    | 0    | 0 NA          | NA       |
| 0    | 0.18 | 0    | 0 NA          | NA       |
| 0    | 0    | 0    | 0 NA          | NA       |
| 0    | 0    | 0    | 0 NA          | NA       |
| 0    | 0    | 0    | 0 NA          | NA       |
| 0    | 0    | 0    | 0 NA          | NA       |
| 0.07 | 2.06 | 0.24 | 0.68 0.650683 | 0.337264 |
| 0    | 0    | 0    | 0.17 NA       | NA       |
| 0    | 0    | 0    | 0 NA          | NA       |
| 0.93 | 0.45 | 0.42 | 0.12 -1.25822 | 0.021127 |
| 0    | 0    | 0    | 0 NA          | NA       |
| 0.1  | 0.13 | 0    | 0.23 NA       | NA       |
| 0    | 0    | 0    | 0 NA          | NA       |
| 0    | 0    | 0    | 0 NA          | NA       |
| 0    | 0    | 0    | 0 NA          | NA       |
| 0    | 0    | 0    | 0 NA          | NA       |
| 0    | 0    | 0    | 0 NA          | NA       |
| 0    | 0    | 0    | 0 NA          | NA       |
| 0    | 0    | 0    | 0 NA          | NA       |
| 0    | 0.07 | 0    | 0 NA          | NA       |
| 0    | 0    | 0    | 0 NA          | NA       |
| 0    | 0    | 0    | 0 NA          | NA       |
| 0    | 0    | 0    | 0 NA          | NA       |
| 0    | 0    | 0    | 0 NA          | NA       |
| 0    | 0    | 0    | 0 NA          | NA       |
| 0    | 0    | 0    | 0 NA          | NA       |
| 0    | 0    | 0    | 0 NA          | NA       |
| 0    | 0    | 0    | 0 NA          | NA       |
| 0    | 0    | 0    | 0 NA          | NA       |
| 0    | 0    | 0    | 0 NA          | NA       |
| 0    | 0    | 0    | 0 NA          | NA       |
| 0    | 0    | 0    | 0 NA          | NA       |
| 0.18 | 0    | 0.34 | 0.54 NA       | NA       |
| 0.09 | 0    | 0.18 | 0 NA          | NA       |
| 0    | 0    | 0    | 0 NA          | NA       |
| 0    | 0    | 0    | 0 NA          | NA       |
| 0    | 0    | 0.02 | 0.04 NA       | NA       |
| 0.03 | 0.02 | 0    | 0 NA          | NA       |
| 0    | 0    | 0    | 0 NA          | NA       |
| 0    | 0    | 0    | 0.25 NA       | NA       |

|      |      |      |               |          |
|------|------|------|---------------|----------|
| 0    | 0    | 0    | 0 NA          | NA       |
| 0    | 0    | 0    | 0 NA          | NA       |
| 0    | 0    | 0    | 0 NA          | NA       |
| 0    | 0    | 0    | 0 NA          | NA       |
| 0    | 0.15 | 0    | 0 NA          | NA       |
| 0    | 0.07 | 0    | 0.08 NA       | NA       |
| 0    | 0    | 0.1  | 0 NA          | NA       |
| 0    | 0    | 0    | 0 NA          | NA       |
| 0    | 0    | 0    | 0 NA          | NA       |
| 0    | 0    | 0    | 0 NA          | NA       |
| 0    | 0    | 0    | 0 NA          | NA       |
| 0    | 0    | 0    | 0.16 NA       | NA       |
| 0.27 | 0.25 | 0.08 | 0.21 -0.83951 | 0.16485  |
| 0    | 0    | 0    | 0 NA          | NA       |
| 0.41 | 0.63 | 0.82 | 0.6 0.220477  | 0.723985 |
| 0    | 0    | 0    | 0 NA          | NA       |
| 0    | 0    | 0    | 0 NA          | NA       |
| 0    | 0.19 | 0    | 0 NA          | NA       |
| 0    | 0    | 0    | 0 NA          | NA       |
| 0    | 0    | 0.1  | 0 NA          | NA       |
| 0    | 0    | 0    | 0 NA          | NA       |
| 0    | 0    | 0    | 0 NA          | NA       |
| 0    | 0    | 0    | 0 NA          | NA       |
| 0    | 0    | 0    | 0 NA          | NA       |
| 0.62 | 0.26 | 0.27 | 0.29 NA       | NA       |
| 0    | 0    | 0    | 0 NA          | NA       |
| 0    | 0    | 0    | 0 NA          | NA       |
| 0.16 | 0    | 0.16 | 0 NA          | NA       |
| 0    | 0    | 0    | 0 NA          | NA       |
| 0.09 | 0.13 | 0.16 | 0.08 0.397859 | 0.604701 |
| 0    | 0    | 0    | 0 NA          | NA       |
| 0    | 0    | 0    | 0 NA          | NA       |
| 0.31 | 0.22 | 0.41 | 0.47 NA       | NA       |
| 0    | 0    | 0    | 0 NA          | NA       |
| 0    | 0    | 0    | 0 NA          | NA       |
| 0    | 0    | 0    | 0 NA          | NA       |
| 0    | 0    | 0    | 0 NA          | NA       |
| 1.04 | 0    | 0.36 | 0.17 -1.27907 | 0.036892 |
| 0    | 0    | 0    | 0 NA          | NA       |
| 2.94 | 2.74 | 2.71 | 3.44 -0.08351 | 0.884574 |
| 5.21 | 6.25 | 5.75 | 8.17 0.360801 | 0.286204 |
| 0    | 0.17 | 0    | 0 NA          | NA       |
| 0    | 0    | 0    | 0 NA          | NA       |
| 0    | 0    | 0    | 0 NA          | NA       |

|       |       |       |                |          |
|-------|-------|-------|----------------|----------|
| 0     | 0     | 0     | 0 NA           | NA       |
| 0     | 0.19  | 0.09  | 0 NA           | NA       |
| 0     | 0     | 0     | 0 NA           | NA       |
| 0     | 0     | 0     | 0 NA           | NA       |
| 0     | 0     | 0     | 0 NA           | NA       |
| 0     | 0     | 0.25  | 0.3 NA         | NA       |
| 0     | 0     | 0     | 0 NA           | NA       |
| 0     | 0     | 1.29  | 0 NA           | NA       |
| 0.3   | 0     | 0     | 0 NA           | NA       |
| 1.42  | 0.14  | 0.79  | 0.45 -0.51237  | 0.489075 |
| 0     | 0     | 0     | 0 NA           | NA       |
| 0     | 0     | 0     | 0 NA           | NA       |
| 0     | 0     | 0     | 0 NA           | NA       |
| 0     | 0     | 0     | 0 NA           | NA       |
| 0     | 0     | 0     | 0 NA           | NA       |
| 0     | 0     | 0     | 0 NA           | NA       |
| 0     | 0     | 0     | 0 NA           | NA       |
| 0     | 0     | 0     | 0 NA           | NA       |
| 0     | 0     | 0.01  | 0 NA           | NA       |
| 0     | 0     | 0     | 0 NA           | NA       |
| 0     | 0     | 0     | 0 NA           | NA       |
| 0     | 0     | 0     | 0 NA           | NA       |
| 0.49  | 0     | 0.36  | 0 -1.21878     | 0.048838 |
| 48.12 | 97.21 | 65.67 | 92.46 0.832216 | 3.59E-13 |
| 0     | 0     | 0     | 0 NA           | NA       |
| 0     | 0     | 0     | 0 NA           | NA       |
| 0     | 0     | 0     | 0 NA           | NA       |
| 0     | 0     | 0     | 0 NA           | NA       |
| 1.52  | 0     | 0.89  | 0 NA           | NA       |
| 0     | 0     | 0     | 0 NA           | NA       |
| 0     | 0     | 0     | 0 NA           | NA       |
| 0     | 0     | 0     | 0 NA           | NA       |
| 0     | 0     | 0     | 0 NA           | NA       |
| 0.08  | 0     | 0.05  | 0.07 NA        | NA       |
| 0     | 0     | 0     | 0 NA           | NA       |
| 0     | 0     | 0     | 0 NA           | NA       |
| 0     | 0     | 0     | 0 NA           | NA       |
| 0     | 0     | 0     | 0 NA           | NA       |
| 0     | 0     | 0.64  | 0.42 NA        | NA       |
| 0     | 0     | 0     | 0 NA           | NA       |
| 0     | 0     | 0     | 0 NA           | NA       |
| 0     | 0     | 0     | 0 NA           | NA       |
| 0.08  | 0     | 0     | 0.15 NA        | NA       |
| 0     | 0     | 0     | 0 NA           | NA       |
| 0     | 0     | 0     | 0 NA           | NA       |
| 0     | 0     | 0     | 0 NA           | NA       |



|       |      |      |                |          |
|-------|------|------|----------------|----------|
| 0     | 0    | 0    | 0 NA           | NA       |
| 0     | 0    | 0    | 0 NA           | NA       |
| 0     | 0    | 0    | 0 NA           | NA       |
| 0     | 0    | 0    | 0 NA           | NA       |
| 0     | 0    | 0    | 0 NA           | NA       |
| 0     | 0    | 0    | 0 NA           | NA       |
| 0     | 0    | 0    | 0 NA           | NA       |
| 0.14  | 0.61 | 0.38 | 0.64 0.635085  | 0.354183 |
| 0     | 0    | 0    | 0 NA           | NA       |
| 0.05  | 0.11 | 0.24 | 0.08 NA        | NA       |
| 0     | 0    | 0    | 0 NA           | NA       |
| 0     | 0    | 0    | 0 NA           | NA       |
| 0     | 0    | 0    | 0 NA           | NA       |
| 0     | 0    | 0    | 0 NA           | NA       |
| 0     | 0    | 0    | 0 NA           | NA       |
| 0     | 0    | 0    | 0 NA           | NA       |
| 0     | 0    | 0    | 0 NA           | NA       |
| 0     | 0    | 0    | 0 NA           | NA       |
| 0     | 0    | 0    | 0 NA           | NA       |
| 0     | 0    | 0    | 0 NA           | NA       |
| 0     | 0    | 0.02 | 0.05 NA        | NA       |
| 0     | 0    | 0    | 0 NA           | NA       |
| 0     | 0    | 0    | 0 NA           | NA       |
| 0     | 0    | 0    | 0 NA           | NA       |
| 0     | 0.05 | 0.22 | 0 NA           | NA       |
| 0     | 0    | 0    | 0 NA           | NA       |
| 0     | 0    | 0    | 0 NA           | NA       |
| 0     | 0.59 | 1.17 | 0.28 0.301142  | 0.709727 |
| 0     | 0    | 0    | 0 NA           | NA       |
| 0.2   | 1.06 | 1.24 | 0.76 0.192799  | 0.813043 |
| 0     | 0    | 0    | 0 NA           | NA       |
| 0     | 0    | 0    | 0 NA           | NA       |
| 0     | 0    | 0    | 0 NA           | NA       |
| 0     | 0    | 0    | 0 NA           | NA       |
| 0     | 0    | 0    | 0 NA           | NA       |
| 0     | 0    | 0    | 0.18 NA        | NA       |
| 0     | 0    | 0    | 0 NA           | NA       |
| 0     | 0    | 0    | 0 NA           | NA       |
| 0     | 0    | 0    | 0 NA           | NA       |
| 0     | 0.07 | 0    | 0 NA           | NA       |
| 0     | 0    | 0    | 0 NA           | NA       |
| 0.64  | 0.21 | 0    | 0 NA           | NA       |
| 0     | 0.59 | 0.31 | 0.54 1.07626   | 0.076418 |
| 11.95 | 3.57 | 8.77 | 10.45 -0.36157 | 0.389113 |





|      |      |      |               |          |
|------|------|------|---------------|----------|
| 0    | 0    | 0    | 0 NA          | NA       |
| 0    | 0    | 0    | 0 NA          | NA       |
| 0    | 0    | 0    | 0 NA          | NA       |
| 1.64 | 0.64 | 0.6  | 0.77 0.091679 | 0.867696 |
| 0    | 0    | 0    | 0 NA          | NA       |
| 0    | 0    | 0    | 0 NA          | NA       |
| 0    | 0    | 0    | 0 NA          | NA       |
| 4.34 | 3.13 | 3.14 | 4.42 -0.34644 | 0.18933  |
| 0    | 0    | 0    | 0 NA          | NA       |
| 0    | 0    | 0    | 0 NA          | NA       |
| 0    | 0    | 0    | 0 NA          | NA       |
| 0    | 0    | 0    | 0 NA          | NA       |
| 0    | 0    | 0    | 0 NA          | NA       |
| 0    | 0    | 0    | 0 NA          | NA       |
| 0    | 0    | 0    | 0 NA          | NA       |
| 0    | 0    | 0    | 0 NA          | NA       |
| 0    | 0    | 0    | 0 NA          | NA       |
| 0    | 0    | 0    | 0 NA          | NA       |
| 0    | 0    | 0    | 0 NA          | NA       |
| 0    | 0    | 0    | 0 NA          | NA       |
| 0    | 0    | 0    | 0 NA          | NA       |
| 0    | 0    | 0    | 0 NA          | NA       |
| 0    | 0    | 0    | 0 NA          | NA       |
| 0.16 | 0.25 | 0.31 | 0.35 NA       | NA       |
| 0    | 0    | 0    | 0 NA          | NA       |
| 0.02 | 0    | 0    | 0 NA          | NA       |
| 0    | 0    | 0    | 0 NA          | NA       |
| 0    | 0    | 0    | 0 NA          | NA       |
| 0    | 0.55 | 0.44 | 0.17 0.782583 | 0.221058 |
| 0    | 0    | 0    | 0 NA          | NA       |
| 0.04 | 0    | 0    | 0 NA          | NA       |
| 0    | 0    | 0    | 0 NA          | NA       |
| 0    | 0    | 0    | 0 NA          | NA       |
| 0    | 0    | 0    | 0 NA          | NA       |
| 0    | 0    | 0    | 0 NA          | NA       |
| 0.15 | 0    | 0.15 | 0 NA          | NA       |
| 0    | 0    | 0    | 0 NA          | NA       |
| 0    | 0    | 0    | 0 NA          | NA       |
| 0    | 0    | 0    | 0 NA          | NA       |
| 0    | 0    | 0    | 0 NA          | NA       |
| 0    | 0    | 0    | 0 NA          | NA       |
| 0    | 0    | 0    | 0 NA          | NA       |
| 0    | 0.11 | 0    | 0 NA          | NA       |
| 0    | 0    | 0    | 0 NA          | NA       |

|      |      |      |               |          |
|------|------|------|---------------|----------|
| 0    | 0    | 0    | 0 NA          | NA       |
| 0    | 0    | 0    | 0 NA          | NA       |
| 0    | 0    | 0    | 0 NA          | NA       |
| 0    | 0    | 0    | 0 NA          | NA       |
| 0    | 0    | 0    | 0 NA          | NA       |
| 0    | 0    | 0    | 0 NA          | NA       |
| 0    | 0    | 0    | 0 NA          | NA       |
| 0    | 0    | 0    | 0 NA          | NA       |
| 0.03 | 0.02 | 0.09 | 0.04 NA       | NA       |
| 0    | 0.07 | 0    | 0 NA          | NA       |
| 1    | 0.76 | 0.93 | 1.27 -0.47823 | 0.27836  |
| 0    | 0    | 0    | 0 NA          | NA       |
| 0    | 0    | 0    | 0 NA          | NA       |
| 0    | 0.03 | 0    | 0 NA          | NA       |
| 0    | 0    | 0    | 0 NA          | NA       |
| 0    | 0    | 0    | 0 NA          | NA       |
| 0    | 0    | 0    | 0 NA          | NA       |
| 0    | 0    | 0    | 0 NA          | NA       |
| 0    | 0    | 0    | 0 NA          | NA       |
| 0    | 0    | 0    | 0 NA          | NA       |
| 0    | 0    | 0    | 0 NA          | NA       |
| 0    | 0    | 0    | 0 NA          | NA       |
| 0    | 0    | 0    | 0 NA          | NA       |
| 0    | 0    | 0    | 0 NA          | NA       |
| 0    | 0    | 0.11 | 0 NA          | NA       |
| 0    | 0    | 0    | 0 NA          | NA       |
| 0    | 0    | 0    | 0 NA          | NA       |
| 0    | 0    | 0    | 0 NA          | NA       |
| 0    | 0    | 0    | 0 NA          | NA       |
| 0    | 0    | 0    | 0 NA          | NA       |
| 0    | 0    | 0    | 0 NA          | NA       |
| 0.11 | 0.04 | 0.11 | 0.04 NA       | NA       |
| 0    | 0    | 0    | 0 NA          | NA       |
| 0    | 0    | 0    | 0 NA          | NA       |
| 0.66 | 0.35 | 1.19 | 0.76 -0.05805 | 0.949887 |
| 0    | 0    | 0    | 0 NA          | NA       |
| 0    | 0    | 0    | 0 NA          | NA       |
| 0    | 0    | 0    | 0 NA          | NA       |
| 0    | 0    | 0    | 0 NA          | NA       |
| 0.06 | 1.21 | 0.48 | 0.49 0.898967 | 0.170251 |
| 0    | 0    | 0    | 0 NA          | NA       |
| 0    | 0    | 0    | 0 NA          | NA       |
| 0    | 0    | 0    | 0 NA          | NA       |
| 0    | 0    | 0    | 0 NA          | NA       |
| 0    | 0    | 0    | 0 NA          | NA       |

|      |      |      |               |          |
|------|------|------|---------------|----------|
| 0    | 0    | 0    | 0 NA          | NA       |
| 0    | 1.1  | 0.57 | 0 NA          | NA       |
| 0    | 0    | 0    | 0.12 NA       | NA       |
| 0    | 0    | 0    | 0 NA          | NA       |
| 0    | 0    | 0    | 0 NA          | NA       |
| 0    | 0    | 0    | 0 NA          | NA       |
| 0.28 | 0.07 | 0.17 | 0.23 -0.12409 | 0.889637 |
| 0    | 0    | 0    | 0.16 NA       | NA       |
| 0.59 | 0.43 | 0.1  | 0.06 -0.59491 | 0.407239 |
| 0    | 0    | 0    | 0 NA          | NA       |
| 0    | 0    | 0    | 0 NA          | NA       |
| 0.05 | 0    | 0    | 0.02 NA       | NA       |
| 0    | 0    | 0    | 0 NA          | NA       |
| 0.25 | 0.06 | 0.35 | 0.2 -0.93392  | 0.148787 |
| 0    | 0    | 0    | 0 NA          | NA       |
| 0    | 0    | 0    | 0 NA          | NA       |
| 0.17 | 0    | 0.11 | 0.13 NA       | NA       |
| 0    | 0    | 0    | 0 NA          | NA       |
| 0    | 0    | 0    | 0 NA          | NA       |
| 0    | 0    | 0    | 0 NA          | NA       |
| 0    | 0    | 0    | 0 NA          | NA       |
| 0    | 0    | 0    | 0 NA          | NA       |
| 0    | 0    | 0    | 0 NA          | NA       |
| 0    | 0    | 0    | 0 NA          | NA       |
| 0    | 0.12 | 0    | 0 NA          | NA       |
| 0    | 0    | 0    | 0 NA          | NA       |
| 0    | 0    | 0    | 0 NA          | NA       |
| 0.81 | 0.78 | 0.84 | 0.83 0.057003 | 0.938678 |
| 0    | 0    | 0    | 0 NA          | NA       |
| 0    | 0    | 0    | 0.13 NA       | NA       |
| 0    | 0    | 0    | 0 NA          | NA       |
| 0    | 0    | 0    | 0 NA          | NA       |
| 0    | 0    | 0    | 0 NA          | NA       |
| 0    | 0    | 0    | 0 NA          | NA       |
| 0    | 0    | 0    | 0 NA          | NA       |
| 0.35 | 0    | 0    | 0.26 NA       | NA       |
| 0    | 0    | 0    | 0 NA          | NA       |
| 0    | 0    | 0.1  | 0.09 NA       | NA       |
| 0    | 0    | 0    | 0 NA          | NA       |
| 0    | 0    | 0    | 0.14 NA       | NA       |
| 0    | 0    | 0    | 0 NA          | NA       |
| 0    | 0    | 0    | 0 NA          | NA       |
| 0    | 0    | 0    | 0 NA          | NA       |
| 0.41 | 0    | 0    | 0 NA          | NA       |
| 0    | 0    | 0    | 0 NA          | NA       |



|      |      |      |               |          |
|------|------|------|---------------|----------|
| 0    | 0    | 0    | 0 NA          | NA       |
| 0    | 0    | 0    | 0 NA          | NA       |
| 0    | 0    | 0    | 0 NA          | NA       |
| 0    | 0    | 0    | 0 NA          | NA       |
| 0    | 0    | 0    | 0 NA          | NA       |
| 1.68 | 1.41 | 1.83 | 1.74 -0.08661 | 0.771242 |
| 0    | 0    | 0    | 0 NA          | NA       |
| 0    | 0    | 0    | 0 NA          | NA       |
| 0    | 0    | 0.11 | 0 NA          | NA       |
| 2.13 | 3.64 | 2.68 | 3.11 0.384768 | 0.40476  |
| 0    | 0    | 0    | 0 NA          | NA       |
| 0    | 0.08 | 0    | 0 NA          | NA       |
| 0    | 0    | 0    | 0 NA          | NA       |
| 0    | 0    | 0    | 0 NA          | NA       |
| 0    | 0    | 0    | 0 NA          | NA       |
| 0.41 | 1.11 | 1.24 | 1.41 0.681268 | 0.263401 |
| 0    | 0    | 0    | 0 NA          | NA       |
| 0.17 | 0.51 | 0.48 | 0.21 0.12728  | 0.88333  |
| 0    | 0    | 0    | 0 NA          | NA       |
| 0    | 0    | 0    | 0 NA          | NA       |
| 0    | 0    | 0    | 0 NA          | NA       |
| 0.12 | 0    | 0.01 | 0 NA          | NA       |
| 0    | 0    | 0    | 0 NA          | NA       |
| 0    | 0    | 0    | 0 NA          | NA       |
| 0    | 0    | 0    | 0 NA          | NA       |
| 0    | 0    | 0    | 0 NA          | NA       |
| 0    | 0    | 0    | 0 NA          | NA       |
| 0    | 0    | 0    | 0 NA          | NA       |
| 0    | 0    | 0    | 0 NA          | NA       |
| 0    | 0    | 0    | 0 NA          | NA       |
| 0    | 0    | 0    | 0 NA          | NA       |
| 0.14 | 0    | 0    | 0 NA          | NA       |
| 0    | 0    | 0    | 0 NA          | NA       |
| 0    | 0    | 0    | 0 NA          | NA       |
| 0    | 0.11 | 0.1  | 0 NA          | NA       |
| 0    | 0    | 0    | 0 NA          | NA       |
| 0    | 0    | 0    | 0 NA          | NA       |
| 0    | 0    | 0    | 0.12 NA       | NA       |
| 0.31 | 0    | 0.1  | 0.12 NA       | NA       |
| 0    | 0    | 0    | 0 NA          | NA       |
| 0    | 0.2  | 0    | 0.42 NA       | NA       |
| 0    | 0    | 0    | 0 NA          | NA       |
| 0    | 0    | 0    | 0 NA          | NA       |
| 0    | 0    | 0    | 0 NA          | NA       |
| 0    | 0    | 0.07 | 0.04 NA       | NA       |
| 0    | 0    | 0    | 0.52 NA       | NA       |
| 0    | 0    | 0    | 0 NA          | NA       |



|       |       |       |       |          |          |
|-------|-------|-------|-------|----------|----------|
| 0.26  | 0     | 0.17  | 0.07  | NA       | NA       |
| 0     | 0     | 0     | 0     | NA       | NA       |
| 0     | 0     | 0     | 0     | NA       | NA       |
| 0     | 0     | 0     | 0     | NA       | NA       |
| 0     | 0     | 0     | 0     | NA       | NA       |
| 0     | 0     | 0     | 0     | NA       | NA       |
| 0     | 0     | 0     | 0     | NA       | NA       |
| 0     | 0     | 0     | 0     | NA       | NA       |
| 0     | 0     | 0     | 0     | NA       | NA       |
| 0.19  | 0.14  | 0.65  | 0.07  | -0.08631 | 0.927525 |
| 0     | 0     | 0     | 0     | NA       | NA       |
| 0     | 0     | 0     | 0     | NA       | NA       |
| 0     | 0     | 0     | 0     | NA       | NA       |
| 0     | 0     | 0     | 0     | NA       | NA       |
| 0     | 0     | 0     | 0     | NA       | NA       |
| 0     | 0     | 0     | 0     | NA       | NA       |
| 0.75  | 1.57  | 2.13  | 2.23  | 1.375932 | 2.97E-12 |
| 0     | 0.11  | 0     | 0.12  | NA       | NA       |
| 0     | 0.66  | 0     | 0     | NA       | NA       |
| 0     | 0     | 0     | 0     | NA       | NA       |
| 0     | 0     | 0     | 0     | NA       | NA       |
| 0     | 0     | 0     | 0     | NA       | NA       |
| 0     | 0     | 0     | 0     | NA       | NA       |
| 29.15 | 33.36 | 41.43 | 42.15 | -0.50317 | 0.047756 |
| 0.15  | 0.07  | 0.14  | 0.08  | NA       | NA       |
| 0     | 0     | 0     | 0     | NA       | NA       |
| 0     | 0.27  | 0.13  | 0     | NA       | NA       |
| 0     | 0     | 0     | 0     | NA       | NA       |
| 7.61  | 7.98  | 6.63  | 10.59 | -0.07384 | 0.85662  |
| 0     | 0     | 0     | 0     | NA       | NA       |
| 0     | 0     | 0.22  | 0.13  | NA       | NA       |
| 0     | 0     | 0     | 0     | NA       | NA       |
| 0     | 0     | 0     | 0     | NA       | NA       |
| 0     | 0     | 0     | 0     | NA       | NA       |
| 0.06  | 0     | 0     | 0.2   | NA       | NA       |
| 0     | 0     | 0     | 0     | NA       | NA       |
| 0     | 0.22  | 0.3   | 0.23  | NA       | NA       |
| 0     | 0     | 0     | 0     | NA       | NA       |
| 0     | 0     | 0     | 0     | NA       | NA       |
| 0     | 0     | 0     | 0     | NA       | NA       |
| 0     | 0     | 0     | 0     | NA       | NA       |
| 0     | 0     | 0     | 0     | NA       | NA       |
| 0     | 0     | 0.03  | 0     | NA       | NA       |

|      |      |      |      |          |          |
|------|------|------|------|----------|----------|
| 0.53 | 0    | 0    | 0.38 | NA       | NA       |
| 0    | 0    | 0.04 | 0    | NA       | NA       |
| 0    | 0    | 0    | 0    | NA       | NA       |
| 0    | 0    | 0    | 0    | NA       | NA       |
| 0.11 | 0    | 0    | 0    | NA       | NA       |
| 0    | 0    | 0    | 0    | NA       | NA       |
| 0    | 0    | 0    | 0    | NA       | NA       |
| 0.1  | 0.05 | 0.1  | 0.08 | NA       | NA       |
| 0    | 0    | 0    | 0    | NA       | NA       |
| 0    | 0    | 0    | 0    | NA       | NA       |
| 0    | 0    | 0    | 0    | NA       | NA       |
| 0    | 0.02 | 0    | 0    | NA       | NA       |
| 0    | 0    | 0    | 0    | NA       | NA       |
| 0    | 0    | 0    | 0    | NA       | NA       |
| 0    | 0    | 0    | 0    | NA       | NA       |
| 0    | 0    | 0    | 0    | NA       | NA       |
| 0    | 0    | 0    | 0    | NA       | NA       |
| 0.14 | 0.17 | 0.06 | 0.4  | -0.16526 | 0.850555 |
| 0    | 0    | 0    | 0.08 | NA       | NA       |
| 0    | 0    | 0    | 0    | NA       | NA       |
| 0    | 0    | 0    | 0    | NA       | NA       |
| 2.56 | 1.91 | 2.26 | 2.35 | -0.28864 | 0.245851 |
| 0    | 0    | 0    | 0    | NA       | NA       |
| 0    | 0    | 0    | 0    | NA       | NA       |
| 0    | 0    | 0    | 0    | NA       | NA       |
| 0    | 0    | 0    | 0    | NA       | NA       |
| 0    | 0    | 0    | 0    | NA       | NA       |
| 0    | 0    | 0    | 0    | NA       | NA       |
| 2.3  | 0.49 | 1.34 | 1.71 | -0.3945  | 0.591558 |
| 0    | 0    | 0    | 0    | NA       | NA       |
| 0    | 0    | 0    | 0    | NA       | NA       |
| 0    | 0    | 0    | 0    | NA       | NA       |
| 0    | 0    | 0    | 0    | NA       | NA       |
| 0    | 0    | 0    | 0    | NA       | NA       |
| 0    | 0    | 0    | 0    | NA       | NA       |
| 0.32 | 0.35 | 0.26 | 0.4  | -0.11331 | 0.865087 |
| 0    | 0    | 0    | 0    | NA       | NA       |
| 0    | 0    | 0    | 0    | NA       | NA       |
| 0    | 0    | 0    | 0    | NA       | NA       |
| 0.07 | 0    | 0    | 0    | NA       | NA       |
| 0    | 0    | 0    | 0    | NA       | NA       |
| 0    | 0.22 | 0    | 0.35 | NA       | NA       |
| 0    | 0    | 0    | 0    | NA       | NA       |
| 0    | 0    | 0    | 0    | NA       | NA       |

|       |       |        |                |          |
|-------|-------|--------|----------------|----------|
| 0     | 0     | 0      | 0 NA           | NA       |
| 0     | 0     | 0.48   | 0 NA           | NA       |
| 0     | 0     | 0      | 0 NA           | NA       |
| 0     | 0     | 0      | 0 NA           | NA       |
| 0     | 0     | 0.04   | 0 NA           | NA       |
| 0     | 0     | 0      | 0 NA           | NA       |
| 0     | 0     | 0      | 0 NA           | NA       |
| 0     | 0     | 0      | 0 NA           | NA       |
| 0     | 0     | 0      | 0 NA           | NA       |
| 0.04  | 0.13  | 0.05   | 0 NA           | NA       |
| 0     | 0     | 0      | 0 NA           | NA       |
| 0     | 0     | 0      | 0 NA           | NA       |
| 0     | 0     | 0      | 0 NA           | NA       |
| 0     | 0     | 0      | 0.19 NA        | NA       |
| 0     | 0     | 0      | 0 NA           | NA       |
| 0     | 0     | 0      | 0 NA           | NA       |
| 0     | 0     | 0      | 0 NA           | NA       |
| 0.18  | 0     | 0.61   | 0.13 NA        | NA       |
| 0     | 0     | 0      | 0 NA           | NA       |
| 0     | 0     | 0      | 0 NA           | NA       |
| 0     | 0.11  | 0      | 0 NA           | NA       |
| 0     | 0     | 0      | 0 NA           | NA       |
| 6.35  | 4.16  | 3.09   | 3.75 -0.76155  | 4.19E-08 |
| 0     | 0     | 0      | 0 NA           | NA       |
| 0     | 0     | 0      | 0 NA           | NA       |
| 0     | 0     | 0      | 0.09 NA        | NA       |
| 0     | 0     | 0      | 0 NA           | NA       |
| 0     | 0     | 0      | 0 NA           | NA       |
| 0.31  | 0.05  | 0.17   | 0.36 NA        | NA       |
| 0     | 0     | 0      | 0 NA           | NA       |
| 0     | 0     | 0      | 0 NA           | NA       |
| 0     | 0     | 0      | 0 NA           | NA       |
| 0     | 0     | 0      | 0 NA           | NA       |
| 0.53  | 0.57  | 0.35   | 1 -0.13608     | 0.876492 |
| 0     | 0     | 0      | 0 NA           | NA       |
| 0     | 0     | 0      | 0 NA           | NA       |
| 0     | 0     | 0.04   | 0 NA           | NA       |
| 1.81  | 1.01  | 1.2    | 0.7 -0.35267   | 0.444919 |
| 0     | 0     | 0      | 0 NA           | NA       |
| 53.64 | 91.69 | 105.63 | 95.15 0.625977 | 2.44E-06 |
| 0     | 0     | 0      | 0 NA           | NA       |
| 0     | 0     | 0      | 0 NA           | NA       |
| 0     | 0     | 0      | 0 NA           | NA       |



|      |       |      |       |          |          |
|------|-------|------|-------|----------|----------|
| 0    | 0.05  | 0.05 | 0.01  | NA       | NA       |
| 0    | 0     | 0    | 0     | NA       | NA       |
| 0    | 0     | 0    | 0     | NA       | NA       |
| 0    | 0     | 0    | 0     | NA       | NA       |
| 0    | 0     | 0    | 0     | NA       | NA       |
| 0    | 0     | 0    | 0     | NA       | NA       |
| 0    | 0     | 0    | 0     | NA       | NA       |
| 0    | 0     | 0    | 0     | NA       | NA       |
| 0    | 0.02  | 0.02 | 0.12  | NA       | NA       |
| 0    | 0     | 0    | 0     | NA       | NA       |
| 0    | 0     | 0    | 0     | NA       | NA       |
| 0    | 0     | 0    | 0     | NA       | NA       |
| 0    | 0     | 0    | 0     | NA       | NA       |
| 0    | 0     | 0    | 0     | NA       | NA       |
| 0    | 0     | 0    | 0     | NA       | NA       |
| 0    | 0     | 0    | 0     | NA       | NA       |
| 0    | 0     | 0    | 0     | NA       | NA       |
| 0    | 0     | 0    | 0     | NA       | NA       |
| 0    | 0     | 0    | 0     | NA       | NA       |
| 6.42 | 10.35 | 11.2 | 11.71 | 0.520983 | 0.001671 |
| 0    | 0     | 0    | 0     | NA       | NA       |
| 0    | 0     | 0    | 0     | NA       | NA       |
| 0    | 0     | 0    | 0     | NA       | NA       |
| 0    | 0     | 0    | 0     | NA       | NA       |
| 0    | 0     | 0    | 0     | NA       | NA       |
| 0    | 0     | 0    | 0     | NA       | NA       |
| 0    | 0     | 0    | 0     | NA       | NA       |
| 3.77 | 5.75  | 7.16 | 9.48  | 0.71221  | 0.054902 |
| 0    | 0     | 0    | 0     | NA       | NA       |
| 0    | 0     | 0    | 0     | NA       | NA       |
| 0    | 0     | 0    | 0     | NA       | NA       |
| 0    | 0     | 0    | 0     | NA       | NA       |
| 0    | 0     | 0    | 0     | NA       | NA       |
| 0    | 0     | 0    | 0     | NA       | NA       |
| 0    | 0     | 0    | 0     | NA       | NA       |
| 0    | 0     | 0    | 0     | NA       | NA       |
| 0    | 0     | 0    | 0     | NA       | NA       |
| 0    | 0     | 0    | 0     | NA       | NA       |
| 0    | 0     | 0    | 0     | NA       | NA       |
| 0    | 0     | 0    | 0     | NA       | NA       |
| 0    | 0     | 0    | 0     | NA       | NA       |
| 0    | 0     | 0    | 0     | NA       | NA       |
| 0    | 0     | 0    | 0     | NA       | NA       |
| 0    | 0     | 0    | 0     | NA       | NA       |
| 5.04 | 2.29  | 3.1  | 2.08  | -0.87345 | 0.020218 |
| 0    | 0     | 0    | 0     | NA       | NA       |

|      |      |      |               |          |
|------|------|------|---------------|----------|
| 0    | 0    | 0    | 0 NA          | NA       |
| 0    | 0.03 | 0    | 0.03 NA       | NA       |
| 0    | 0    | 0    | 0 NA          | NA       |
| 0    | 0    | 0    | 0 NA          | NA       |
| 0    | 0    | 0    | 0 NA          | NA       |
| 0    | 0    | 0    | 0 NA          | NA       |
| 0.44 | 0    | 0.22 | 0 NA          | NA       |
| 0    | 0    | 0    | 0 NA          | NA       |
| 0.08 | 0.06 | 0.06 | 0.19 NA       | NA       |
| 0.04 | 0    | 0    | 0 NA          | NA       |
| 0    | 0    | 0    | 0 NA          | NA       |
| 0    | 0    | 0    | 0 NA          | NA       |
| 0    | 0    | 0    | 0 NA          | NA       |
| 0    | 0    | 0.01 | 0 NA          | NA       |
| 0    | 0    | 0.05 | 0.12 NA       | NA       |
| 0    | 0    | 0    | 0 NA          | NA       |
| 0    | 0    | 0    | 0 NA          | NA       |
| 0    | 0    | 0    | 0 NA          | NA       |
| 0    | 0    | 0    | 0 NA          | NA       |
| 0    | 0    | 0    | 0 NA          | NA       |
| 0    | 0    | 0    | 0 NA          | NA       |
| 4.52 | 6.14 | 5.73 | 5.1 0.380785  | 0.159249 |
| 0    | 0    | 0    | 0 NA          | NA       |
| 0    | 0    | 0    | 0.06 NA       | NA       |
| 0    | 0    | 0    | 0 NA          | NA       |
| 0    | 0    | 0    | 0 NA          | NA       |
| 0    | 0    | 0    | 0 NA          | NA       |
| 0    | 0    | 0    | 0 NA          | NA       |
| 0    | 0    | 0    | 0 NA          | NA       |
| 0.76 | 0.68 | 1.04 | 0.85 0.123748 | 0.826991 |
| 0    | 0    | 0    | 0 NA          | NA       |
| 0    | 0    | 0    | 0 NA          | NA       |
| 0    | 0    | 0    | 0 NA          | NA       |
| 0.23 | 0.18 | 0.16 | 0.12 0.123849 | 0.867552 |
| 0    | 0    | 0    | 0 NA          | NA       |
| 0    | 0    | 0    | 0 NA          | NA       |
| 4.1  | 2.61 | 3.77 | 1.97 -0.9176  | 0.000338 |
| 0    | 0    | 0.02 | 0.04 NA       | NA       |
| 0.04 | 0    | 0    | 0 NA          | NA       |
| 0.45 | 0.08 | 0.07 | 0.51 -0.6598  | 0.348322 |
| 0    | 0    | 0    | 0 NA          | NA       |
| 0    | 0    | 0    | 0 NA          | NA       |
| 0.31 | 0.11 | 0.52 | 0.23 -0.42378 | 0.537183 |
| 0    | 0    | 0    | 0 NA          | NA       |
| 0    | 0    | 0.12 | 0 NA          | NA       |



|      |      |      |               |          |
|------|------|------|---------------|----------|
| 0    | 0    | 0    | 0 NA          | NA       |
| 0    | 0    | 0    | 0 NA          | NA       |
| 7.08 | 4.61 | 5.36 | 6.27 -0.24487 | 0.255315 |
| 0.45 | 0    | 0.15 | 0.09 NA       | NA       |
| 0    | 0    | 0    | 0 NA          | NA       |
| 0    | 0    | 0    | 0 NA          | NA       |
| 0    | 0    | 0    | 0 NA          | NA       |
| 0    | 0.11 | 0.14 | 0.03 0.276229 | 0.730825 |
| 0    | 0    | 0    | 0 NA          | NA       |
| 0.77 | 1.04 | 0.62 | 0.59 -0.11879 | 0.890318 |
| 0    | 0    | 0    | 0 NA          | NA       |
| 0    | 0    | 0    | 0 NA          | NA       |
| 0    | 0    | 0    | 0 NA          | NA       |
| 0    | 0    | 0    | 0 NA          | NA       |
| 0    | 0    | 0    | 0 NA          | NA       |
| 0.15 | 0.66 | 0.3  | 0.46 NA       | NA       |
| 0    | 0    | 0    | 0 NA          | NA       |
| 0    | 0    | 0    | 0 NA          | NA       |
| 0.04 | 0    | 0    | 0.06 NA       | NA       |
| 0    | 0    | 0    | 0.03 NA       | NA       |
| 0    | 0    | 0    | 0 NA          | NA       |
| 4.58 | 4.05 | 4.94 | 4.98 -0.18367 | 0.56904  |
| 0    | 0    | 0    | 0 NA          | NA       |
| 0    | 0    | 0    | 0 NA          | NA       |
| 0    | 0    | 0    | 0 NA          | NA       |
| 0    | 0    | 0    | 0 NA          | NA       |
| 0    | 0    | 0    | 0 NA          | NA       |
| 0    | 0    | 0    | 0 NA          | NA       |
| 0    | 0    | 0    | 0 NA          | NA       |
| 0    | 0    | 0    | 0 NA          | NA       |
| 0    | 0    | 0    | 0 NA          | NA       |
| 3.51 | 2.74 | 3.77 | 2.89 -0.35215 | 0.350063 |
| 0    | 0    | 0    | 0 NA          | NA       |
| 0    | 0    | 0    | 0 NA          | NA       |
| 0.31 | 0.38 | 0.96 | 0.5 0.708504  | 0.21766  |
| 0    | 0    | 0    | 0 NA          | NA       |
| 0    | 0    | 0    | 0 NA          | NA       |
| 0    | 0    | 0    | 0 NA          | NA       |
| 0    | 0    | 0    | 0 NA          | NA       |
| 0    | 0    | 0    | 0 NA          | NA       |
| 0    | 0    | 0    | 0.43 NA       | NA       |
| 0    | 0    | 0    | 0 NA          | NA       |
| 0    | 0    | 0    | 0 NA          | NA       |
| 0    | 0    | 0    | 0 NA          | NA       |
| 0    | 0    | 0    | 0 NA          | NA       |





|      |      |      |               |          |
|------|------|------|---------------|----------|
| 0    | 0    | 0    | 0 NA          | NA       |
| 0    | 0    | 0    | 0 NA          | NA       |
| 0    | 0    | 0.03 | 0.08 NA       | NA       |
| 2.63 | 3.44 | 3.72 | 4.21 0.541847 | 0.018452 |
| 0    | 0    | 0    | 0 NA          | NA       |
| 0    | 0    | 0    | 0 NA          | NA       |
| 0    | 0    | 0    | 0 NA          | NA       |
| 0    | 0    | 0    | 0 NA          | NA       |
| 0    | 0    | 0    | 0 NA          | NA       |
| 0    | 0    | 0    | 0 NA          | NA       |
| 0    | 0.32 | 0    | 0 NA          | NA       |
| 0.54 | 0    | 0.35 | 0 NA          | NA       |
| 0    | 0    | 0    | 0 NA          | NA       |
| 0    | 0    | 0    | 0 NA          | NA       |
| 0.12 | 0    | 0    | 0 NA          | NA       |
| 0.06 | 0    | 0    | 0 NA          | NA       |
| 0    | 0    | 0    | 0 NA          | NA       |
| 0    | 0    | 0    | 0 NA          | NA       |
| 0.12 | 0    | 0    | 0 NA          | NA       |
| 0    | 0.14 | 0.51 | 0 NA          | NA       |
| 0    | 0    | 0    | 0 NA          | NA       |
| 0    | 0    | 0    | 0 NA          | NA       |
| 0    | 0    | 0.61 | 0.7 NA        | NA       |
| 0    | 0.09 | 0    | 0.09 NA       | NA       |
| 0.02 | 0    | 0.07 | 0 NA          | NA       |
| 0.02 | 0.05 | 0.02 | 0.03 NA       | NA       |
| 0    | 0    | 0    | 0 NA          | NA       |
| 0    | 0    | 0    | 0 NA          | NA       |
| 0    | 0    | 0    | 0 NA          | NA       |
| 1.35 | 0.04 | 0.36 | 0 -2.02652    | 0.000185 |
| 0    | 0    | 0    | 0 NA          | NA       |
| 0    | 0    | 0    | 0 NA          | NA       |
| 0    | 0    | 0    | 0 NA          | NA       |
| 0    | 0    | 0    | 0 NA          | NA       |
| 0    | 0    | 0    | 0 NA          | NA       |
| 0    | 0    | 0    | 0 NA          | NA       |
| 0    | 0    | 0    | 0 NA          | NA       |
| 0    | 0    | 0    | 0 NA          | NA       |
| 0    | 0    | 0    | 0 NA          | NA       |
| 0    | 0    | 0    | 0 NA          | NA       |
| 0    | 0    | 0    | 0 NA          | NA       |
| 0    | 0    | 0    | 0 NA          | NA       |
| 0    | 0    | 0    | 0 NA          | NA       |
| 0    | 0    | 0    | 0 NA          | NA       |
| 0    | 0    | 0.28 | 0.02 NA       | NA       |
| 0    | 0    | 0    | 0 NA          | NA       |
| 0    | 0    | 0    | 0 NA          | NA       |

|      |      |      |               |          |
|------|------|------|---------------|----------|
| 0.3  | 0.05 | 0.1  | 0 NA          | NA       |
| 0    | 0    | 0    | 0 NA          | NA       |
| 0    | 0    | 0.02 | 0 NA          | NA       |
| 0    | 0    | 0    | 0 NA          | NA       |
| 0    | 0    | 0    | 0 NA          | NA       |
| 0    | 0    | 0    | 0 NA          | NA       |
| 0    | 0    | 0    | 0 NA          | NA       |
| 0    | 0    | 0    | 0 NA          | NA       |
| 0    | 0    | 0    | 0 NA          | NA       |
| 0    | 2.06 | 0    | 3.31 NA       | NA       |
| 0    | 0    | 0    | 0 NA          | NA       |
| 0    | 0    | 0    | 0 NA          | NA       |
| 0    | 0    | 0    | 0 NA          | NA       |
| 0    | 0    | 0    | 0 NA          | NA       |
| 0    | 0    | 0    | 0 NA          | NA       |
| 0    | 0    | 0    | 0 NA          | NA       |
| 0    | 0    | 0    | 0 NA          | NA       |
| 0    | 0    | 0    | 0 NA          | NA       |
| 0    | 0    | 0    | 0 NA          | NA       |
| 0    | 0    | 0    | 0 NA          | NA       |
| 0    | 0    | 0    | 0 NA          | NA       |
| 0    | 0.16 | 0.14 | 0 NA          | NA       |
| 0.77 | 0.55 | 0.24 | 0.84 NA       | NA       |
| 0    | 0    | 0    | 0 NA          | NA       |
| 0    | 0    | 0    | 0 NA          | NA       |
| 0    | 0    | 0    | 0 NA          | NA       |
| 0    | 0    | 0    | 0 NA          | NA       |
| 0    | 0    | 0    | 0 NA          | NA       |
| 0    | 0    | 0    | 0 NA          | NA       |
| 0    | 0    | 0    | 0 NA          | NA       |
| 0.84 | 1.48 | 0.57 | 0.46 0.361887 | 0.637812 |
| 0    | 0    | 0    | 0 NA          | NA       |
| 0.67 | 0    | 0.04 | 0.03 NA       | NA       |
| 0    | 0    | 0    | 0 NA          | NA       |
| 3.81 | 4.45 | 4.07 | 4.21 0.163312 | 0.57456  |
| 0    | 0    | 0    | 0 NA          | NA       |
| 0.1  | 0.06 | 0.17 | 0.08 -0.02955 | 0.97289  |
| 3.68 | 3.25 | 3.26 | 2.58 -0.39042 | 0.226464 |
| 0    | 0    | 0    | 0 NA          | NA       |
| 0    | 0    | 0    | 0 NA          | NA       |
| 1.3  | 0.37 | 0.33 | 0.58 NA       | NA       |
| 0    | 0    | 0    | 0 NA          | NA       |
| 0    | 0    | 0    | 0 NA          | NA       |
| 0    | 0    | 0    | 0 NA          | NA       |



|        |        |        |        |          |          |
|--------|--------|--------|--------|----------|----------|
| 0      | 0      | 0      | 0      | NA       | NA       |
| 0      | 0      | 0      | 0.04   | NA       | NA       |
| 0      | 0      | 0      | 0      | NA       | NA       |
| 0.23   | 0.33   | 0.74   | 0.17   | NA       | NA       |
| 0      | 0      | 0      | 0      | NA       | NA       |
| 0      | 0      | 0.68   | 0      | NA       | NA       |
| 0      | 0      | 0      | 0      | NA       | NA       |
| 0      | 0      | 0      | 0      | NA       | NA       |
| 0      | 0      | 0      | 0      | NA       | NA       |
| 0      | 0      | 0      | 0      | NA       | NA       |
| 244.27 | 249.11 | 235.45 | 236.62 | -0.09696 | 0.283812 |
| 0      | 0      | 0      | 0      | NA       | NA       |
| 0      | 0      | 0      | 0      | NA       | NA       |
| 0      | 0      | 0      | 0      | NA       | NA       |
| 0      | 0      | 0      | 0      | NA       | NA       |
| 0      | 0      | 0      | 0      | NA       | NA       |
| 0      | 0.02   | 0.11   | 0.12   | 0.615263 | 0.36572  |
| 0      | 0      | 0      | 0      | NA       | NA       |
| 0      | 0      | 0      | 0      | NA       | NA       |
| 0      | 0      | 0.16   | 0      | NA       | NA       |
| 0      | 0      | 0      | 0      | NA       | NA       |
| 0      | 0      | 0      | 0      | NA       | NA       |
| 0.03   | 0      | 0      | 0      | NA       | NA       |
| 0.11   | 0.37   | 0.24   | 0.19   | 0.278062 | 0.735872 |
| 0      | 0      | 0      | 0      | NA       | NA       |
| 0.08   | 0      | 0      | 0      | NA       | NA       |
| 0      | 0      | 0      | 0      | NA       | NA       |
| 0      | 0      | 0      | 0      | NA       | NA       |
| 0      | 0      | 0      | 0      | NA       | NA       |
| 0      | 0      | 0      | 0      | NA       | NA       |
| 0      | 0      | 0      | 0.26   | NA       | NA       |
| 0      | 0      | 0      | 0      | NA       | NA       |
| 0      | 0      | 0      | 0      | NA       | NA       |
| 0      | 0      | 0      | 0      | NA       | NA       |
| 0      | 0      | 0      | 0      | NA       | NA       |
| 0      | 0      | 0      | 0      | NA       | NA       |
| 0      | 0.14   | 0.13   | 0      | NA       | NA       |
| 0      | 0      | 0      | 0      | NA       | NA       |
| 0      | 0      | 0      | 0      | NA       | NA       |
| 1.99   | 0.71   | 1.25   | 0.73   | -0.46655 | 0.533964 |
| 0.51   | 0.85   | 1.2    | 1.21   | 0.171053 | 0.726975 |
| 0      | 0      | 0      | 0      | NA       | NA       |
| 0      | 0      | 0      | 0      | NA       | NA       |
| 0      | 0      | 0      | 0      | NA       | NA       |

|       |       |       |                |          |
|-------|-------|-------|----------------|----------|
| 0     | 0     | 0     | 0 NA           | NA       |
| 0     | 0     | 0     | 0 NA           | NA       |
| 0     | 0     | 0     | 0 NA           | NA       |
| 0     | 0     | 0     | 0 NA           | NA       |
| 0     | 0     | 0     | 0 NA           | NA       |
| 0     | 0     | 0     | 0 NA           | NA       |
| 0     | 0     | 0.03  | 0 NA           | NA       |
| 0     | 0     | 0     | 0 NA           | NA       |
| 0     | 0     | 0     | 0 NA           | NA       |
| 0     | 0     | 0     | 0 NA           | NA       |
| 0     | 0     | 0     | 0 NA           | NA       |
| 0     | 0     | 0.08  | 0 NA           | NA       |
| 0     | 0     | 0     | 0 NA           | NA       |
| 0     | 0     | 0     | 0 NA           | NA       |
| 0     | 0     | 0     | 0 NA           | NA       |
| 0     | 0     | 0     | 0 NA           | NA       |
| 0.14  | 0.21  | 0     | 0.11 NA        | NA       |
| 0     | 0     | 0     | 0 NA           | NA       |
| 0     | 0     | 0     | 0 NA           | NA       |
| 0     | 0     | 0     | 0 NA           | NA       |
| 0     | 0     | 0     | 0 NA           | NA       |
| 0     | 0     | 0.02  | 0.05 NA        | NA       |
| 0     | 0     | 0     | 0 NA           | NA       |
| 0     | 0     | 0     | 0 NA           | NA       |
| 0     | 0     | 0     | 0 NA           | NA       |
| 0     | 0     | 0     | 0 NA           | NA       |
| 35.15 | 37.99 | 30.82 | 33.57 -0.14858 | 0.216769 |
| 0     | 0     | 0     | 0 NA           | NA       |
| 0     | 0     | 0     | 0 NA           | NA       |
| 0     | 0     | 0     | 0 NA           | NA       |
| 0     | 0     | 0     | 0 NA           | NA       |
| 0     | 0     | 0     | 0 NA           | NA       |
| 0     | 0     | 0     | 0 NA           | NA       |
| 0     | 0     | 0     | 0 NA           | NA       |
| 0     | 0     | 0     | 0 NA           | NA       |
| 0.11  | 0.86  | 0.71  | 0.69 0.177265  | 0.818738 |
| 0     | 0     | 0     | 0 NA           | NA       |
| 0.12  | 1.5   | 1.47  | 1.06 1.457494  | 0.011305 |
| 0     | 0     | 0     | 0 NA           | NA       |
| 0     | 0     | 0     | 0 NA           | NA       |
| 0.08  | 0.03  | 0.03  | 0.03 NA        | NA       |
| 0     | 0     | 0     | 0 NA           | NA       |
| 0     | 0     | 0     | 0.02 NA        | NA       |
| 0     | 0     | 0     | 0 NA           | NA       |
| 1.01  | 2.34  | 1.26  | 1.62 0.264681  | 0.552333 |

|      |       |      |      |          |          |
|------|-------|------|------|----------|----------|
| 0.66 | 0.67  | 0.79 | 0.3  | 0.011344 | 0.991716 |
| 0    | 0     | 0    | 0    | NA       | NA       |
| 0    | 0     | 0    | 0    | NA       | NA       |
| 0    | 0     | 0    | 0    | NA       | NA       |
| 0    | 0     | 0    | 0    | NA       | NA       |
| 0    | 0     | 0    | 0    | NA       | NA       |
| 0    | 0     | 0    | 0    | NA       | NA       |
| 0    | 0     | 0    | 0    | NA       | NA       |
| 0    | 0     | 0    | 0    | NA       | NA       |
| 0    | 0     | 0    | 0    | NA       | NA       |
| 0    | 0     | 0    | 0    | NA       | NA       |
| 0    | 0     | 0    | 0    | NA       | NA       |
| 0.58 | 0.62  | 0.37 | 0.43 | NA       | NA       |
| 0    | 0     | 0    | 0    | NA       | NA       |
| 0    | 0     | 0    | 0    | NA       | NA       |
| 0    | 0     | 0    | 0    | NA       | NA       |
| 0    | 0     | 0.06 | 0    | NA       | NA       |
| 0    | 0     | 0    | 0    | NA       | NA       |
| 0    | 0     | 0    | 0    | NA       | NA       |
| 0    | 0     | 0    | 0    | NA       | NA       |
| 0.55 | 0.69  | 1.76 | 0.7  | 0.016174 | 0.985216 |
| 0    | 0     | 0    | 0    | NA       | NA       |
| 0    | 0     | 0    | 0    | NA       | NA       |
| 0.13 | 0.09  | 0    | 0    | NA       | NA       |
| 0    | 0     | 0    | 0    | NA       | NA       |
| 0    | 0     | 0.06 | 0    | NA       | NA       |
| 0    | 0     | 0.06 | 0    | NA       | NA       |
| 0    | 0     | 0.03 | 0    | NA       | NA       |
| 0.23 | 0.1   | 0.17 | 0    | -0.80702 | 0.226314 |
| 0    | 0     | 0    | 0    | NA       | NA       |
| 0    | 0     | 0    | 0    | NA       | NA       |
| 0    | 0     | 0    | 0    | NA       | NA       |
| 0    | 0     | 0    | 0    | NA       | NA       |
| 0    | 0     | 0    | 0    | NA       | NA       |
| 0    | 0     | 0    | 0    | NA       | NA       |
| 0    | 0     | 0    | 0    | NA       | NA       |
| 0    | 0     | 0    | 0    | NA       | NA       |
| 0    | 0.13  | 0    | 0    | NA       | NA       |
| 0    | 0     | 0    | 0    | NA       | NA       |
| 0    | 0     | 0    | 0    | NA       | NA       |
| 3.32 | 10.47 | 8.77 | 9.51 | 1.654749 | 1.28E-20 |
| 0    | 0     | 0    | 0    | NA       | NA       |

|      |      |      |               |          |
|------|------|------|---------------|----------|
| 0    | 0    | 0    | 0 NA          | NA       |
| 0    | 0    | 0    | 0 NA          | NA       |
| 0    | 0    | 0    | 0 NA          | NA       |
| 0    | 0    | 0    | 0 NA          | NA       |
| 0    | 0    | 0    | 0 NA          | NA       |
| 3.44 | 7.18 | 6.34 | 6.3 0.853369  | 0.034891 |
| 0    | 0    | 0    | 0 NA          | NA       |
| 0    | 0    | 0    | 0 NA          | NA       |
| 0    | 0    | 0    | 0 NA          | NA       |
| 0    | 0    | 0    | 0 NA          | NA       |
| 0    | 0    | 0    | 0 NA          | NA       |
| 0    | 0    | 0    | 0 NA          | NA       |
| 0    | 0    | 0    | 0 NA          | NA       |
| 1.86 | 1.28 | 1.58 | 2.07 0.189115 | 0.717625 |
| 0    | 0    | 0    | 0 NA          | NA       |
| 0    | 0    | 0    | 0 NA          | NA       |
| 0    | 0    | 0    | 0 NA          | NA       |
| 0    | 0    | 0    | 0 NA          | NA       |
| 0    | 0    | 0    | 0 NA          | NA       |
| 0.41 | 0    | 0    | 0 NA          | NA       |
| 0    | 0    | 0    | 0 NA          | NA       |
| 0    | 0.01 | 0    | 0 NA          | NA       |
| 0    | 0    | 0    | 0 NA          | NA       |
| 0    | 0    | 0    | 0 NA          | NA       |
| 0.01 | 0.79 | 0.51 | 0.67 2.417635 | 3.91E-08 |
| 0    | 0    | 0    | 0 NA          | NA       |
| 0.14 | 0.41 | 0.24 | 0.11 -0.16828 | 0.84898  |
| 0    | 7.53 | 2.75 | 0 NA          | NA       |
| 0    | 0    | 0    | 0.11 NA       | NA       |
| 0    | 0    | 0    | 0 NA          | NA       |
| 0    | 0    | 0    | 0 NA          | NA       |
| 0    | 0    | 0    | 0 NA          | NA       |
| 0    | 0.1  | 0    | 0 NA          | NA       |
| 0    | 0    | 0    | 0 NA          | NA       |
| 0    | 0    | 0    | 0.1 NA        | NA       |
| 0    | 0    | 0    | 0 NA          | NA       |
| 0    | 0    | 0    | 0 NA          | NA       |
| 0    | 0    | 0    | 0 NA          | NA       |
| 0    | 0    | 0    | 0 NA          | NA       |
| 0    | 0    | 0    | 0 NA          | NA       |
| 0    | 0    | 0    | 0 NA          | NA       |
| 0    | 0    | 0    | 0 NA          | NA       |
| 0    | 0    | 0    | 0 NA          | NA       |
| 6.78 | 3.14 | 7.12 | 5.16 -0.28627 | 0.529429 |
| 0    | 0    | 0    | 0 NA          | NA       |
| 0    | 0    | 0    | 0 NA          | NA       |







|      |      |      |               |          |
|------|------|------|---------------|----------|
| 0    | 0    | 0.13 | 0 NA          | NA       |
| 0    | 0    | 0    | 0 NA          | NA       |
| 0    | 0    | 0    | 0 NA          | NA       |
| 0    | 0    | 0    | 0 NA          | NA       |
| 0    | 0    | 0    | 0 NA          | NA       |
| 0    | 0    | 0.65 | 0.19 NA       | NA       |
| 0    | 0    | 0    | 0 NA          | NA       |
| 0    | 0    | 0    | 0 NA          | NA       |
| 0    | 0    | 0    | 0 NA          | NA       |
| 0    | 0    | 0    | 0 NA          | NA       |
| 0    | 0    | 0    | 0 NA          | NA       |
| 0    | 0    | 0    | 0 NA          | NA       |
| 0.29 | 0.2  | 0.11 | 0.1 -0.61186  | 0.3828   |
| 0    | 0    | 0    | 0 NA          | NA       |
| 0    | 0    | 0    | 0 NA          | NA       |
| 0    | 0    | 0    | 0 NA          | NA       |
| 0.12 | 0.21 | 0.41 | 0.17 NA       | NA       |
| 0    | 0    | 0    | 0.06 NA       | NA       |
| 0    | 0    | 0    | 0 NA          | NA       |
| 0    | 0    | 0    | 0 NA          | NA       |
| 0    | 0    | 0    | 0 NA          | NA       |
| 0    | 0.11 | 0.15 | 0 NA          | NA       |
| 0    | 0    | 0    | 0 NA          | NA       |
| 0    | 0.31 | 0    | 0.71 NA       | NA       |
| 0    | 0    | 0    | 0 NA          | NA       |
| 0    | 0    | 0    | 0 NA          | NA       |
| 0    | 0    | 0    | 0 NA          | NA       |
| 0    | 0    | 0    | 0 NA          | NA       |
| 0    | 0    | 0    | 0 NA          | NA       |
| 0    | 0    | 0    | 0 NA          | NA       |
| 0    | 0    | 0    | 0 NA          | NA       |
| 0.16 | 0    | 0.21 | 0 NA          | NA       |
| 0    | 0    | 0    | 0 NA          | NA       |
| 0    | 0    | 0    | 0 NA          | NA       |
| 0    | 0    | 0    | 0 NA          | NA       |
| 2.08 | 0.24 | 0.57 | 0.42 -1.92053 | 4.27E-16 |
| 0    | 0    | 0    | 0 NA          | NA       |
| 0.03 | 0    | 0    | 0.07 NA       | NA       |
| 0    | 0    | 0    | 0 NA          | NA       |
| 0    | 0    | 0    | 0 NA          | NA       |
| 0    | 0    | 0.07 | 0 NA          | NA       |
| 0    | 0    | 0    | 0 NA          | NA       |
| 0    | 0    | 0.01 | 0.2 NA        | NA       |
| 0    | 0    | 0    | 0 NA          | NA       |
| 0    | 0    | 0    | 0 NA          | NA       |

|      |      |      |               |          |
|------|------|------|---------------|----------|
| 0    | 0    | 0    | 0 NA          | NA       |
| 0    | 0    | 0    | 0 NA          | NA       |
| 0    | 0    | 0    | 0 NA          | NA       |
| 0    | 0    | 0    | 0 NA          | NA       |
| 0    | 0    | 0    | 0 NA          | NA       |
| 0    | 0    | 0    | 0 NA          | NA       |
| 0    | 0    | 0    | 0 NA          | NA       |
| 0    | 0    | 0    | 0 NA          | NA       |
| 0    | 0    | 0    | 0 NA          | NA       |
| 0    | 0    | 0    | 0 NA          | NA       |
| 0    | 0    | 0.02 | 0 NA          | NA       |
| 0    | 0    | 0    | 0 NA          | NA       |
| 0    | 0.15 | 0    | 0.02 NA       | NA       |
| 0    | 0    | 0    | 0 NA          | NA       |
| 0    | 0    | 0    | 0 NA          | NA       |
| 0    | 0    | 0    | 0 NA          | NA       |
| 0    | 0    | 0    | 0 NA          | NA       |
| 0    | 0    | 0    | 0 NA          | NA       |
| 0    | 0    | 0    | 0 NA          | NA       |
| 0    | 0    | 0    | 0 NA          | NA       |
| 0    | 0    | 0    | 0 NA          | NA       |
| 0    | 0    | 0    | 0 NA          | NA       |
| 0    | 0    | 0    | 0 NA          | NA       |
| 0    | 0    | 0    | 0 NA          | NA       |
| 0    | 0    | 0    | 0 NA          | NA       |
| 0    | 0    | 0    | 0 NA          | NA       |
| 0    | 0    | 0    | 0 NA          | NA       |
| 0    | 0    | 0    | 0 NA          | NA       |
| 0    | 0    | 0.24 | 0 NA          | NA       |
| 0.02 | 0    | 0    | 0.02 NA       | NA       |
| 0    | 0    | 0    | 0 NA          | NA       |
| 0    | 0    | 0    | 0 NA          | NA       |
| 0    | 0    | 0    | 0 NA          | NA       |
| 0    | 0    | 0    | 0 NA          | NA       |
| 0    | 0    | 0    | 0 NA          | NA       |
| 0.39 | 1.06 | 0.66 | 1.01 0.681184 | 0.161377 |
| 0    | 0    | 0    | 0 NA          | NA       |
| 0    | 0.17 | 0.31 | 0.53 NA       | NA       |
| 0    | 0    | 0    | 0 NA          | NA       |
| 0    | 0.18 | 0    | 0 NA          | NA       |
| 0.06 | 0    | 0.04 | 0 NA          | NA       |
| 0    | 0    | 0    | 0 NA          | NA       |
| 0    | 0    | 0    | 0 NA          | NA       |
| 0    | 0    | 0    | 0 NA          | NA       |
| 0    | 0.08 | 0.08 | 0.09 NA       | NA       |
| 0.19 | 0.27 | 0    | 0 NA          | NA       |
| 0    | 0    | 0    | 0 NA          | NA       |

|      |      |      |      |          |          |
|------|------|------|------|----------|----------|
| 0    | 0    | 0    | 0.05 | NA       | NA       |
| 0    | 0    | 0    | 0    | NA       | NA       |
| 0    | 0.06 | 0.28 | 0.11 | NA       | NA       |
| 0.14 | 0.86 | 0.08 | 0.09 | NA       | NA       |
| 0    | 0    | 0    | 0.09 | NA       | NA       |
| 0    | 0    | 0    | 0    | NA       | NA       |
| 0    | 0    | 0    | 0    | NA       | NA       |
| 0    | 0    | 0    | 0    | NA       | NA       |
| 0    | 0    | 0.3  | 0    | NA       | NA       |
| 0    | 0    | 0    | 0    | NA       | NA       |
| 0    | 0    | 0    | 0    | NA       | NA       |
| 0    | 0    | 0    | 0    | NA       | NA       |
| 0.27 | 0    | 0    | 0.44 | NA       | NA       |
| 0    | 0    | 0    | 0    | NA       | NA       |
| 0    | 0    | 0    | 0    | NA       | NA       |
| 0    | 0    | 0    | 0    | NA       | NA       |
| 0    | 0    | 0    | 0    | NA       | NA       |
| 0    | 0    | 0    | 0.03 | NA       | NA       |
| 1.29 | 2.27 | 3.92 | 2.37 | 1.011423 | 0.035335 |
| 0    | 0    | 0    | 0    | NA       | NA       |
| 0    | 0    | 0    | 0    | NA       | NA       |
| 0    | 0    | 0    | 0    | NA       | NA       |
| 0.11 | 0.24 | 0.16 | 0.58 | 0.482462 | 0.500103 |
| 0    | 0    | 0    | 0    | NA       | NA       |
| 0    | 0    | 0    | 0    | NA       | NA       |
| 0    | 0    | 0    | 0    | NA       | NA       |
| 0    | 0    | 0    | 0    | NA       | NA       |
| 0.33 | 0.17 | 0.15 | 0.22 | -0.33683 | 0.627779 |
| 0    | 0    | 0    | 0    | NA       | NA       |
| 0    | 0    | 0    | 0    | NA       | NA       |
| 0    | 0    | 0    | 0    | NA       | NA       |
| 0    | 0    | 0    | 0    | NA       | NA       |
| 0    | 0    | 0    | 0    | NA       | NA       |
| 0    | 0    | 0    | 0    | NA       | NA       |
| 0    | 0    | 0    | 0    | NA       | NA       |
| 0    | 0    | 0    | 0    | NA       | NA       |
| 0    | 0    | 0    | 0    | NA       | NA       |
| 0    | 0    | 0    | 0    | NA       | NA       |
| 0    | 0    | 0    | 0    | NA       | NA       |
| 0    | 0    | 0    | 0    | NA       | NA       |
| 0    | 0    | 0    | 0    | NA       | NA       |
| 0    | 0    | 0    | 0    | NA       | NA       |
| 0    | 0    | 0    | 0    | NA       | NA       |
| 0    | 0    | 0    | 0    | NA       | NA       |
| 0    | 0    | 0    | 0    | NA       | NA       |
| 0.19 | 0    | 0    | 0    | NA       | NA       |

|      |      |      |               |          |
|------|------|------|---------------|----------|
| 0    | 0    | 0    | 0 NA          | NA       |
| 0    | 0    | 0    | 0 NA          | NA       |
| 0.49 | 0    | 0    | 0 NA          | NA       |
| 0    | 0    | 0    | 0 NA          | NA       |
| 0    | 0    | 0    | 0 NA          | NA       |
| 0    | 0    | 0    | 0.19 NA       | NA       |
| 0    | 0    | 0    | 0 NA          | NA       |
| 0.02 | 0    | 0    | 0 NA          | NA       |
| 0.06 | 0    | 0    | 0 NA          | NA       |
| 0    | 0    | 0    | 0.12 NA       | NA       |
| 0    | 0    | 0    | 0 NA          | NA       |
| 0.17 | 0.23 | 0.16 | 0.21 0.058358 | 0.943448 |
| 4.15 | 2.65 | 4.08 | 2.52 -0.33025 | 0.31492  |
| 0    | 0    | 0    | 0 NA          | NA       |
| 0    | 0    | 0    | 0 NA          | NA       |
| 0    | 0    | 0    | 0 NA          | NA       |
| 0    | 0    | 0    | 0 NA          | NA       |
| 0    | 0    | 1.2  | 0 NA          | NA       |
| 0.55 | 0.49 | 1.43 | 0.23 0.162861 | 0.836965 |
| 0    | 0    | 0    | 0 NA          | NA       |
| 0.21 | 0.07 | 0.07 | 0 NA          | NA       |
| 0    | 0    | 0    | 0 NA          | NA       |
| 0    | 0    | 0    | 0 NA          | NA       |
| 0    | 0    | 0    | 0 NA          | NA       |
| 0    | 0    | 0    | 0 NA          | NA       |
| 0    | 0    | 0    | 0 NA          | NA       |
| 0    | 0    | 0    | 0 NA          | NA       |
| 0    | 0    | 0    | 0 NA          | NA       |
| 0    | 0    | 0    | 0 NA          | NA       |
| 0.05 | 0.1  | 0.02 | 0.07 NA       | NA       |
| 0    | 0    | 0    | 0 NA          | NA       |
| 0    | 0    | 0    | 0 NA          | NA       |
| 0    | 0    | 0    | 0 NA          | NA       |
| 0    | 0.29 | 0    | 0.09 NA       | NA       |
| 0    | 0    | 0    | 0 NA          | NA       |
| 0    | 0    | 0    | 0 NA          | NA       |
| 5.81 | 1.46 | 2.02 | 4.07 -0.86766 | 0.081564 |
| 0    | 0    | 0    | 0 NA          | NA       |
| 0    | 0    | 0    | 0 NA          | NA       |
| 10   | 1.51 | 3.67 | 2.67 -1.73636 | 6.93E-10 |
| 0.27 | 0.2  | 0.18 | 0 NA          | NA       |
| 0.16 | 0.34 | 0.1  | 0.24 NA       | NA       |
| 0    | 0    | 0    | 0 NA          | NA       |
| 0    | 0    | 0    | 0 NA          | NA       |
| 0.21 | 0.24 | 0.11 | 0.51 0.625832 | 0.344375 |

|       |        |       |                |          |
|-------|--------|-------|----------------|----------|
| 0     | 0      | 0     | 0 NA           | NA       |
| 0     | 0      | 0     | 0 NA           | NA       |
| 0     | 0      | 0     | 0 NA           | NA       |
| 0     | 0.34   | 0.08  | 0.18 NA        | NA       |
| 0.26  | 0.19   | 0     | 0 NA           | NA       |
| 0     | 0      | 0     | 0 NA           | NA       |
| 0.23  | 0.34   | 0     | 0 NA           | NA       |
| 0     | 0      | 0     | 0 NA           | NA       |
| 0     | 0      | 0     | 0 NA           | NA       |
| 0     | 0      | 0     | 0 NA           | NA       |
| 0     | 0.15   | 0     | 0 NA           | NA       |
| 0.04  | 0.04   | 0.04  | 0.09 0.142972  | 0.870838 |
| 0     | 0      | 0     | 0 NA           | NA       |
| 0     | 0.07   | 0.06  | 0.04 NA        | NA       |
| 722.5 | 540.74 | 610.9 | 547.94 -0.3646 | 0.000183 |
| 0     | 0      | 0     | 0 NA           | NA       |
| 0     | 0      | 0     | 0 NA           | NA       |
| 0     | 0.06   | 0     | 0.04 NA        | NA       |
| 0     | 0      | 0     | 0 NA           | NA       |
| 0     | 0      | 0     | 0 NA           | NA       |
| 0     | 0      | 0     | 0 NA           | NA       |
| 0     | 0      | 0     | 0 NA           | NA       |
| 6.2   | 6.91   | 5.48  | 4.46 -0.03582  | 0.932838 |
| 0     | 0      | 0     | 0 NA           | NA       |
| 0     | 0      | 0     | 0 NA           | NA       |
| 0     | 0      | 0     | 0 NA           | NA       |
| 0     | 0      | 0     | 0 NA           | NA       |
| 0     | 0      | 0     | 0 NA           | NA       |
| 0     | 0      | 0     | 0 NA           | NA       |
| 0     | 0      | 0     | 0 NA           | NA       |
| 0     | 0      | 0     | 0 NA           | NA       |
| 0     | 0      | 0     | 0 NA           | NA       |
| 0     | 0      | 0     | 0 NA           | NA       |
| 0     | 0      | 0     | 0 NA           | NA       |
| 0.06  | 0.07   | 0.13  | 0.12 -0.21654  | 0.800959 |
| 0     | 0      | 0     | 0 NA           | NA       |
| 0     | 0      | 0     | 0.14 NA        | NA       |
| 0     | 0      | 0     | 0 NA           | NA       |
| 0     | 0      | 0     | 0 NA           | NA       |
| 0     | 0      | 0     | 0 NA           | NA       |
| 0     | 0.06   | 0.1   | 0 NA           | NA       |
| 1.7   | 0.08   | 0.72  | 0.27 -1.20616  | 0.044004 |
| 0     | 0.08   | 0     | 0 NA           | NA       |

|      |      |      |              |          |
|------|------|------|--------------|----------|
| 0    | 0    | 0    | 0 NA         | NA       |
| 0    | 0    | 0    | 0 NA         | NA       |
| 0    | 0    | 0    | 0 NA         | NA       |
| 0    | 0    | 0    | 0 NA         | NA       |
| 0    | 0    | 0    | 0 NA         | NA       |
| 0.22 | 0    | 0.14 | 0.16 NA      | NA       |
| 0.08 | 0    | 0    | 0 NA         | NA       |
| 0    | 0    | 0    | 0 NA         | NA       |
| 0    | 0    | 0    | 0 NA         | NA       |
| 0    | 0    | 0    | 0 NA         | NA       |
| 0    | 0    | 0    | 0 NA         | NA       |
| 0    | 0    | 0    | 0 NA         | NA       |
| 0    | 0.07 | 1.79 | 0.45 NA      | NA       |
| 0    | 0    | 0    | 0 NA         | NA       |
| 0    | 0    | 0    | 0 NA         | NA       |
| 0    | 0    | 0    | 0 NA         | NA       |
| 0    | 0    | 0    | 0 NA         | NA       |
| 0    | 0    | 0    | 0 NA         | NA       |
| 0    | 0    | 0    | 0 NA         | NA       |
| 0    | 0    | 0    | 0 NA         | NA       |
| 0    | 0    | 0    | 0 NA         | NA       |
| 0.19 | 0    | 0    | 0 NA         | NA       |
| 0    | 0    | 0    | 0 NA         | NA       |
| 0.33 | 0    | 0    | 0 NA         | NA       |
| 0    | 0    | 0    | 0 NA         | NA       |
| 0    | 0    | 0    | 0 NA         | NA       |
| 0    | 0    | 0    | 0 NA         | NA       |
| 0    | 0    | 0    | 0 NA         | NA       |
| 0    | 0    | 0.41 | 0 NA         | NA       |
| 0    | 0    | 0    | 0 NA         | NA       |
| 0    | 0    | 0.11 | 0 NA         | NA       |
| 0    | 0    | 0    | 0 NA         | NA       |
| 0    | 0    | 0    | 0 NA         | NA       |
| 0    | 0    | 0    | 0 NA         | NA       |
| 0    | 0    | 0    | 0 NA         | NA       |
| 0    | 0    | 0    | 0 NA         | NA       |
| 0    | 0    | 0    | 0 NA         | NA       |
| 0    | 0    | 0    | 0 NA         | NA       |
| 0    | 0    | 0    | 0 NA         | NA       |
| 0    | 0    | 0    | 0 NA         | NA       |
| 0.67 | 0.59 | 0.52 | 0.6 0.051826 | 0.940418 |
| 0    | 0    | 0    | 0 NA         | NA       |
| 0    | 0    | 0    | 0 NA         | NA       |
| 0    | 0    | 0    | 0 NA         | NA       |
| 0    | 0    | 0    | 0 NA         | NA       |
| 0    | 0    | 0    | 0 NA         | NA       |









|      |      |      |               |          |
|------|------|------|---------------|----------|
| 0    | 0    | 0    | 0 NA          | NA       |
| 0    | 0    | 0    | 0 NA          | NA       |
| 0    | 0    | 0    | 0 NA          | NA       |
| 1.46 | 0.46 | 0.97 | 0.84 -1.1734  | 0.000551 |
| 0    | 0    | 0    | 0 NA          | NA       |
| 0    | 0    | 0    | 0 NA          | NA       |
| 0    | 0    | 0    | 0 NA          | NA       |
| 0    | 0.09 | 0    | 0 NA          | NA       |
| 0    | 0    | 0    | 0 NA          | NA       |
| 0    | 0    | 0    | 0 NA          | NA       |
| 0    | 0.03 | 0    | 0 NA          | NA       |
| 0    | 0    | 0    | 0 NA          | NA       |
| 0.11 | 0.08 | 0    | 0 NA          | NA       |
| 0    | 0    | 0    | 0 NA          | NA       |
| 0    | 0    | 0    | 0 NA          | NA       |
| 0    | 0    | 0    | 0 NA          | NA       |
| 0    | 0.05 | 0    | 0.1 NA        | NA       |
| 0    | 0    | 0    | 0 NA          | NA       |
| 0    | 0    | 0    | 0 NA          | NA       |
| 0    | 0    | 0    | 0 NA          | NA       |
| 0    | 0    | 0    | 0 NA          | NA       |
| 0    | 0    | 0    | 0 NA          | NA       |
| 0    | 0    | 0    | 0 NA          | NA       |
| 0    | 0    | 0    | 0 NA          | NA       |
| 0    | 0    | 0    | 0.47 NA       | NA       |
| 0    | 0    | 0    | 0 NA          | NA       |
| 0    | 0    | 0    | 0 NA          | NA       |
| 0    | 0    | 0    | 0 NA          | NA       |
| 0    | 0    | 0    | 0 NA          | NA       |
| 0    | 0    | 0    | 0 NA          | NA       |
| 0    | 0    | 0    | 0 NA          | NA       |
| 0    | 0    | 0    | 0 NA          | NA       |
| 0    | 0    | 0    | 0 NA          | NA       |
| 0.47 | 0.17 | 0.08 | 0.26 -0.98461 | 0.095737 |
| 0    | 0    | 0    | 0 NA          | NA       |
| 0    | 0    | 0.1  | 0 NA          | NA       |
| 0    | 0    | 0    | 0 NA          | NA       |
| 0    | 0    | 0    | 0 NA          | NA       |
| 0    | 0    | 0    | 0 NA          | NA       |
| 1.46 | 1.41 | 0.78 | 1.35 -0.1941  | 0.645015 |
| 0    | 0    | 0    | 0 NA          | NA       |
| 0    | 0    | 0    | 0 NA          | NA       |
| 0    | 0.66 | 0    | 0 NA          | NA       |
| 0    | 0    | 0    | 0 NA          | NA       |

|      |      |      |      |          |          |
|------|------|------|------|----------|----------|
| 1.83 | 5.49 | 6.39 | 5.26 | 1.26585  | 0.003411 |
| 0.02 | 0.01 | 0.01 | 0.06 | NA       | NA       |
| 0    | 0    | 0.14 | 0.05 | NA       | NA       |
| 0    | 0    | 0    | 0    | NA       | NA       |
| 0    | 0    | 0    | 0    | NA       | NA       |
| 0    | 0    | 0    | 0    | NA       | NA       |
| 0    | 0    | 0    | 0    | NA       | NA       |
| 0    | 0    | 0    | 0    | NA       | NA       |
| 0    | 0    | 0    | 0    | NA       | NA       |
| 0    | 0    | 0    | 0    | NA       | NA       |
| 0    | 0    | 0    | 0    | NA       | NA       |
| 0    | 0    | 0    | 0    | NA       | NA       |
| 0    | 0    | 0    | 0    | NA       | NA       |
| 0    | 0    | 0    | 0    | NA       | NA       |
| 0    | 0    | 0    | 0    | NA       | NA       |
| 0    | 0    | 0    | 0    | NA       | NA       |
| 0    | 0    | 0    | 0    | NA       | NA       |
| 0    | 0    | 0    | 0    | NA       | NA       |
| 0    | 0    | 0    | 0    | NA       | NA       |
| 0    | 0    | 0    | 0    | NA       | NA       |
| 0    | 0    | 0    | 0    | NA       | NA       |
| 4    | 7.68 | 3.81 | 5.77 | 0.216693 | 0.675538 |
| 0.39 | 0.07 | 0.32 | 0.52 | -0.31984 | 0.69204  |
| 0    | 0    | 0    | 0    | NA       | NA       |
| 0    | 0    | 0    | 0    | NA       | NA       |
| 0    | 0    | 0    | 0    | NA       | NA       |
| 0.19 | 0.11 | 0.09 | 0.01 | NA       | NA       |
| 0    | 0    | 0    | 0    | NA       | NA       |
| 0    | 0    | 0    | 0    | NA       | NA       |
| 0    | 0    | 0    | 0    | NA       | NA       |
| 0.14 | 0.2  | 0.18 | 0.26 | NA       | NA       |
| 0    | 0    | 0    | 0    | NA       | NA       |
| 0    | 0.02 | 0    | 0.05 | NA       | NA       |
| 0.16 | 0.14 | 0.25 | 0    | NA       | NA       |
| 0.59 | 0.34 | 0.57 | 0.29 | -0.30061 | 0.709114 |
| 0    | 0    | 0    | 0    | NA       | NA       |
| 0    | 0    | 0    | 0    | NA       | NA       |
| 0    | 0    | 0    | 0    | NA       | NA       |
| 0    | 0    | 0    | 0    | NA       | NA       |
| 0    | 0    | 0    | 0    | NA       | NA       |
| 0    | 0    | 0    | 0    | NA       | NA       |
| 0    | 0    | 0    | 0    | NA       | NA       |
| 0    | 0    | 0    | 0    | NA       | NA       |
| 2.19 | 2.65 | 2.07 | 2.2  | -0.27756 | 0.572396 |
| 0    | 0    | 0    | 0    | NA       | NA       |
| 0    | 0    | 0    | 0    | NA       | NA       |

|      |      |      |               |          |
|------|------|------|---------------|----------|
| 0    | 0    | 0    | 0 NA          | NA       |
| 0.33 | 0.06 | 0    | 0.06 NA       | NA       |
| 0.13 | 0.28 | 0    | 0.39 NA       | NA       |
| 0    | 0    | 0    | 0 NA          | NA       |
| 0    | 0    | 0    | 0 NA          | NA       |
| 0    | 0    | 0    | 0 NA          | NA       |
| 0    | 0    | 0    | 0 NA          | NA       |
| 1.47 | 1.5  | 1.27 | 2.05 0.01426  | 0.976446 |
| 0    | 0    | 0    | 0 NA          | NA       |
| 0    | 0    | 0    | 0 NA          | NA       |
| 0.31 | 0.04 | 0.07 | 0.12 -1.04204 | 0.102138 |
| 0    | 0    | 0    | 0 NA          | NA       |
| 0    | 0    | 0    | 0 NA          | NA       |
| 0    | 0    | 0    | 0 NA          | NA       |
| 0    | 0    | 0    | 0 NA          | NA       |
| 0    | 0    | 0    | 0 NA          | NA       |
| 0    | 0    | 0    | 0.04 NA       | NA       |
| 0.66 | 0.62 | 0.55 | 0.53 -0.35943 | 0.469767 |
| 0    | 0    | 0    | 0 NA          | NA       |
| 0    | 0    | 0    | 0 NA          | NA       |
| 0    | 0.08 | 0.04 | 0.02 NA       | NA       |
| 0    | 0    | 0.47 | 0 NA          | NA       |
| 0    | 0    | 0    | 0 NA          | NA       |
| 0    | 0    | 0    | 0 NA          | NA       |
| 0    | 0    | 0    | 0 NA          | NA       |
| 0    | 0    | 0    | 0 NA          | NA       |
| 0    | 0    | 0    | 0 NA          | NA       |
| 0    | 0    | 0    | 0 NA          | NA       |
| 0.77 | 1.11 | 0.51 | 0.98 0.263474 | 0.747737 |
| 0    | 0    | 0    | 0 NA          | NA       |
| 0    | 0    | 0    | 0 NA          | NA       |
| 0    | 0    | 0    | 0 NA          | NA       |
| 0    | 0    | 0    | 0 NA          | NA       |
| 0    | 0    | 0    | 0 NA          | NA       |
| 0    | 0    | 0    | 0 NA          | NA       |
| 0    | 0    | 0.02 | 0 NA          | NA       |
| 3.9  | 2.78 | 3.71 | 3.48 -0.4289  | 0.00151  |
| 0    | 0    | 0    | 0 NA          | NA       |
| 0    | 0    | 0    | 0 NA          | NA       |
| 0    | 0    | 0    | 0 NA          | NA       |
| 0    | 0    | 0    | 0 NA          | NA       |
| 0    | 0    | 0    | 0 NA          | NA       |
| 0    | 0    | 0    | 0 NA          | NA       |
| 0    | 0    | 0    | 0 NA          | NA       |
| 0.31 | 0.11 | 0.2  | 0.12 NA       | NA       |
| 0    | 0    | 0    | 0 NA          | NA       |
| 0    | 0.01 | 0    | 0 NA          | NA       |

|      |       |       |                |          |
|------|-------|-------|----------------|----------|
| 0    | 0     | 0     | 0 NA           | NA       |
| 0.34 | 0.12  | 0.18  | 0.13 -0.89424  | 0.10834  |
| 0    | 0     | 0     | 0 NA           | NA       |
| 0    | 0     | 0     | 0 NA           | NA       |
| 0    | 0     | 0     | 0 NA           | NA       |
| 0    | 0     | 0     | 0 NA           | NA       |
| 0    | 0     | 0     | 0 NA           | NA       |
| 0    | 0     | 0     | 0 NA           | NA       |
| 2.1  | 1.83  | 1.89  | 1.7 -0.27875   | 0.217909 |
| 0    | 0     | 0     | 0 NA           | NA       |
| 0    | 0     | 0     | 0 NA           | NA       |
| 0    | 0     | 0     | 0 NA           | NA       |
| 0.4  | 1.25  | 0.45  | 0.17 0.222367  | 0.760114 |
| 0    | 0     | 0     | 0 NA           | NA       |
| 0    | 0     | 0     | 0 NA           | NA       |
| 0    | 0     | 0     | 0 NA           | NA       |
| 0    | 0     | 0     | 0 NA           | NA       |
| 31.1 | 26.64 | 20.77 | 25.15 -0.32038 | 0.003455 |
| 0    | 0     | 0     | 0 NA           | NA       |
| 0    | 0     | 0     | 0 NA           | NA       |
| 0    | 0     | 0     | 0 NA           | NA       |
| 0    | 0.15  | 0     | 0 NA           | NA       |
| 0    | 0     | 0     | 0 NA           | NA       |
| 0    | 0     | 0     | 0 NA           | NA       |
| 0.79 | 0.22  | 1.33  | 0.25 -0.18203  | 0.83188  |
| 0    | 0     | 0     | 0 NA           | NA       |
| 0    | 0     | 0     | 0 NA           | NA       |
| 0    | 0     | 0     | 0 NA           | NA       |
| 0    | 0     | 0     | 0 NA           | NA       |
| 0    | 0     | 0     | 0.04 NA        | NA       |
| 0    | 0     | 0     | 0 NA           | NA       |
| 0    | 0     | 0     | 0 NA           | NA       |
| 0    | 0     | 0     | 0 NA           | NA       |
| 0    | 0     | 0     | 0 NA           | NA       |
| 0    | 0     | 0     | 0 NA           | NA       |
| 0    | 0     | 0     | 0 NA           | NA       |
| 0    | 0     | 0     | 0 NA           | NA       |
| 0    | 0     | 0     | 0 NA           | NA       |
| 0    | 0     | 0     | 0 NA           | NA       |
| 0    | 0     | 0     | 0 NA           | NA       |
| 0    | 0     | 0     | 0 NA           | NA       |
| 0    | 0     | 0     | 0 NA           | NA       |
| 0    | 0     | 0     | 0 NA           | NA       |
| 0.06 | 0.12  | 0     | 0.05 NA        | NA       |
| 0    | 0     | 0     | 0 NA           | NA       |
| 1.4  | 0.12  | 0.45  | 0.09 -1.38898  | 0.010954 |

|      |      |      |               |          |
|------|------|------|---------------|----------|
| 0    | 0    | 0    | 0 NA          | NA       |
| 0    | 0    | 0    | 0 NA          | NA       |
| 0    | 0.1  | 0.09 | 0.11 NA       | NA       |
| 0    | 0    | 0    | 0 NA          | NA       |
| 0    | 0    | 0    | 0 NA          | NA       |
| 0    | 0    | 0    | 0 NA          | NA       |
| 0    | 0    | 0    | 0 NA          | NA       |
| 0    | 0    | 0    | 0 NA          | NA       |
| 0.4  | 0.61 | 0.54 | 0.44 0.136253 | 0.837571 |
| 0    | 0    | 0    | 0 NA          | NA       |
| 0    | 0    | 0    | 0 NA          | NA       |
| 0    | 0    | 0    | 0 NA          | NA       |
| 0    | 0    | 0    | 0 NA          | NA       |
| 0.19 | 0.96 | 0.88 | 1.29 0.449758 | 0.550869 |
| 0    | 0    | 0    | 0 NA          | NA       |
| 0.37 | 0.23 | 0.53 | 0.36 NA       | NA       |
| 0    | 0    | 0    | 0 NA          | NA       |
| 0    | 0    | 0    | 0 NA          | NA       |
| 0    | 0    | 0    | 0 NA          | NA       |
| 0    | 0    | 0    | 0 NA          | NA       |
| 0    | 0    | 0    | 0 NA          | NA       |
| 0    | 0    | 0    | 0 NA          | NA       |
| 0    | 0    | 0    | 0 NA          | NA       |
| 0    | 0.2  | 0    | 0 NA          | NA       |
| 0.21 | 0.03 | 0.07 | 0.14 -0.73642 | 0.28409  |
| 0    | 0    | 0    | 0 NA          | NA       |
| 0    | 0    | 0    | 0 NA          | NA       |
| 0    | 0    | 0    | 0 NA          | NA       |
| 0    | 0    | 0    | 0 NA          | NA       |
| 0    | 0    | 0    | 0 NA          | NA       |
| 9.64 | 7.07 | 8.57 | 8.28 -0.04906 | 0.84658  |
| 4.3  | 2.35 | 3.45 | 3.12 -0.62449 | 0.054086 |
| 0    | 0    | 0    | 0 NA          | NA       |
| 0    | 0    | 0    | 0 NA          | NA       |
| 0    | 0    | 0    | 0.12 NA       | NA       |
| 0    | 0    | 0    | 0 NA          | NA       |
| 0    | 0    | 0    | 0 NA          | NA       |
| 0    | 0    | 0    | 0 NA          | NA       |
| 0    | 0    | 0.36 | 0 NA          | NA       |
| 0    | 0    | 0    | 0 NA          | NA       |
| 0    | 0    | 0    | 0 NA          | NA       |
| 0    | 0    | 0    | 0 NA          | NA       |
| 0    | 0    | 0    | 0 NA          | NA       |
| 0    | 0    | 0    | 0 NA          | NA       |
| 0    | 0.28 | 0    | 0 NA          | NA       |





|      |       |       |                |          |
|------|-------|-------|----------------|----------|
| 0    | 0     | 0     | 0 NA           | NA       |
| 0    | 0     | 0     | 0 NA           | NA       |
| 0    | 0     | 0     | 0 NA           | NA       |
| 0    | 0     | 0     | 0 NA           | NA       |
| 0.16 | 0.35  | 0.11  | 0.12 0.050899  | 0.955966 |
| 0    | 0     | 0     | 0 NA           | NA       |
| 0    | 0     | 0     | 0 NA           | NA       |
| 0    | 0     | 0     | 0 NA           | NA       |
| 0    | 0     | 0     | 0 NA           | NA       |
| 0    | 0     | 0     | 0 NA           | NA       |
| 0    | 0     | 0     | 0 NA           | NA       |
| 0    | 0     | 0     | 0 NA           | NA       |
| 0    | 0     | 0     | 0 NA           | NA       |
| 0    | 85.79 | 94.09 | 95.47 0.528918 | 0.461413 |
| 0    | 0     | 0     | 0 NA           | NA       |
| 0    | 0     | 0     | 0 NA           | NA       |
| 0    | 0     | 0     | 0 NA           | NA       |
| 0    | 0     | 0     | 0 NA           | NA       |
| 0    | 0     | 0     | 0 NA           | NA       |
| 0    | 0     | 0     | 0 NA           | NA       |
| 0    | 0     | 0     | 0 NA           | NA       |
| 0    | 0     | 0     | 0 NA           | NA       |
| 0    | 0     | 0     | 0 NA           | NA       |
| 0.04 | 0.04  | 0.06  | 0.1 NA         | NA       |
| 0.09 | 0.08  | 0.1   | 0.1 0.330022   | 0.669626 |
| 0    | 0     | 0     | 0 NA           | NA       |
| 0    | 0     | 0     | 0 NA           | NA       |
| 0    | 0     | 0     | 0 NA           | NA       |
| 0    | 0     | 0     | 0 NA           | NA       |
| 0    | 0     | 0     | 0 NA           | NA       |
| 0.1  | 0.63  | 0.52  | 0.37 1.291736  | 0.031609 |
| 0    | 0     | 0     | 0 NA           | NA       |
| 0    | 0     | 0     | 0 NA           | NA       |
| 0    | 0     | 0     | 0 NA           | NA       |
| 0.97 | 1.13  | 1.53  | 1.09 0.088016  | 0.875852 |
| 0    | 0     | 0     | 0.06 NA        | NA       |
| 0    | 0     | 0     | 0 NA           | NA       |
| 0    | 0     | 0     | 0 NA           | NA       |
| 0    | 0     | 0     | 0 NA           | NA       |
| 0    | 0     | 0     | 0 NA           | NA       |
| 0    | 0     | 0     | 0 NA           | NA       |
| 0    | 0     | 0     | 0 NA           | NA       |
| 0    | 0     | 0     | 0 NA           | NA       |
| 0.12 | 0.09  | 0     | 0.37 NA        | NA       |
| 0.17 | 0.48  | 0.33  | 0.25 NA        | NA       |
| 0    | 0     | 0     | 0 NA           | NA       |

|         |         |         |                 |          |
|---------|---------|---------|-----------------|----------|
| 0       | 0.58    | 0.6     | 0 NA            | NA       |
| 0.61    | 0.62    | 0.16    | 0.28 -0.13241   | 0.882748 |
| 0       | 0       | 0       | 0 NA            | NA       |
| 0       | 0       | 0       | 0 NA            | NA       |
| 0       | 0       | 0       | 0.07 NA         | NA       |
| 0       | 0       | 0       | 0 NA            | NA       |
| 0       | 0       | 0.45    | 0 NA            | NA       |
| 0       | 0       | 0       | 0 NA            | NA       |
| 0       | 0       | 0       | 0 NA            | NA       |
| 0.7     | 0       | 0.13    | 0.38 -0.32021   | 0.673856 |
| 0       | 0       | 0       | 0 NA            | NA       |
| 0       | 0       | 0       | 0 NA            | NA       |
| 0       | 0       | 0       | 0 NA            | NA       |
| 0       | 0       | 0       | 0 NA            | NA       |
| 0       | 0       | 0       | 0 NA            | NA       |
| 0       | 0       | 0       | 0 NA            | NA       |
| 0       | 0       | 0       | 0 NA            | NA       |
| 0       | 0       | 0       | 0 NA            | NA       |
| 0       | 0       | 0       | 0 NA            | NA       |
| 0       | 0       | 0       | 0 NA            | NA       |
| 7.33    | 4.66    | 3.85    | 5.77 -0.37659   | 0.223054 |
| 0       | 0       | 0       | 0.15 NA         | NA       |
| 0       | 0       | 0       | 0 NA            | NA       |
| 0       | 0       | 0       | 0 NA            | NA       |
| 0       | 0       | 0       | 0 NA            | NA       |
| 0       | 0       | 0.03    | 0 NA            | NA       |
| 0       | 0       | 0       | 0 NA            | NA       |
| 0       | 0       | 0       | 0 NA            | NA       |
| 0       | 0       | 0       | 0 NA            | NA       |
| 0       | 0       | 0       | 0 NA            | NA       |
| 0       | 0       | 0       | 0 NA            | NA       |
| 0       | 0       | 0       | 0 NA            | NA       |
| 0.21    | 0.15    | 0.27    | 0 NA            | NA       |
| 261.18  | 206.21  | 230.91  | 203.33 -0.31254 | 0.001058 |
| 0       | 0       | 0       | 0 NA            | NA       |
| 0       | 0       | 0       | 0 NA            | NA       |
| 0       | 0       | 0       | 0 NA            | NA       |
| 1076.86 | 1679.92 | 1768.22 | 2001.06 0.66997 | 5.94E-15 |
| 0       | 0       | 0       | 0 NA            | NA       |
| 0       | 0       | 0       | 0 NA            | NA       |
| 0       | 0       | 0.06    | 0 NA            | NA       |
| 0       | 0       | 0       | 0 NA            | NA       |
| 0       | 0       | 0       | 0 NA            | NA       |
| 0       | 0.18    | 0       | 0.38 NA         | NA       |
| 0.14    | 0       | 0       | 0 NA            | NA       |

|      |      |      |      |          |          |
|------|------|------|------|----------|----------|
| 0    | 0    | 0    | 0.08 | NA       | NA       |
| 0    | 0    | 0    | 0    | NA       | NA       |
| 0    | 0    | 0    | 0    | NA       | NA       |
| 0    | 0    | 0    | 0    | NA       | NA       |
| 0    | 0    | 0    | 0    | NA       | NA       |
| 0    | 0    | 0    | 0    | NA       | NA       |
| 0    | 0    | 0    | 0    | NA       | NA       |
| 0    | 0    | 0    | 0    | NA       | NA       |
| 0.2  | 0.25 | 0.33 | 0.36 | -0.76507 | 0.225454 |
| 0    | 0    | 0    | 0    | NA       | NA       |
| 0.96 | 0.88 | 1.06 | 1.2  | 0.283103 | 0.32816  |
| 0    | 0    | 0    | 0    | NA       | NA       |
| 0.16 | 0.18 | 0.09 | 0.02 | NA       | NA       |
| 0.28 | 0    | 0    | 0    | NA       | NA       |
| 0.3  | 0.22 | 0.14 | 0.23 | NA       | NA       |
| 0    | 0    | 0    | 0    | NA       | NA       |
| 2.07 | 2.63 | 1.93 | 1.54 | 0.131679 | 0.869167 |
| 0    | 0    | 0    | 0    | NA       | NA       |
| 0    | 0    | 0    | 0    | NA       | NA       |
| 0    | 0    | 0    | 0    | NA       | NA       |
| 0    | 0    | 0    | 0    | NA       | NA       |
| 0    | 0    | 0.12 | 0    | NA       | NA       |
| 0    | 0    | 0    | 0    | NA       | NA       |
| 0    | 0.14 | 0    | 0    | NA       | NA       |
| 0    | 0    | 0    | 0    | NA       | NA       |
| 0    | 0    | 0    | 0    | NA       | NA       |
| 0    | 0    | 0    | 0    | NA       | NA       |
| 0.9  | 0.05 | 0    | 0.05 | -2.2169  | 6.90E-05 |
| 0    | 0    | 0    | 0    | NA       | NA       |
| 0    | 0    | 0    | 0    | NA       | NA       |
| 0    | 0    | 0    | 0    | NA       | NA       |
| 0    | 0    | 0    | 0    | NA       | NA       |
| 0    | 0    | 0    | 0    | NA       | NA       |
| 0    | 0.05 | 0    | 0    | NA       | NA       |
| 0    | 0    | 0    | 0    | NA       | NA       |
| 0    | 0.26 | 0.29 | 0.22 | 0.655656 | 0.33195  |
| 0.1  | 0.05 | 0.26 | 0.06 | -0.54682 | 0.421056 |
| 0    | 0    | 0    | 0    | NA       | NA       |
| 0    | 0    | 0    | 0    | NA       | NA       |
| 0    | 0    | 0    | 0    | NA       | NA       |
| 0.26 | 0.72 | 0.77 | 0.62 | 0.739329 | 0.096682 |
| 0    | 0    | 0    | 0    | NA       | NA       |

|       |        |        |        |          |          |
|-------|--------|--------|--------|----------|----------|
| 0.06  | 0.02   | 0.19   | 0.11   | 0.247782 | 0.766619 |
| 0     | 0      | 0      | 0      | NA       | NA       |
| 0     | 0      | 0      | 0      | NA       | NA       |
| 0     | 0      | 0      | 0      | NA       | NA       |
| 0.04  | 0.03   | 0      | 0.03   | NA       | NA       |
| 0     | 0      | 0      | 0      | NA       | NA       |
| 0     | 0.07   | 0.07   | 0      | NA       | NA       |
| 0     | 0      | 0      | 0      | NA       | NA       |
| 0     | 0      | 0      | 0      | NA       | NA       |
| 0     | 0      | 0      | 0      | NA       | NA       |
| 0     | 0      | 0      | 0      | NA       | NA       |
| 0     | 0      | 0      | 0      | NA       | NA       |
| 0     | 0      | 0      | 0      | NA       | NA       |
| 0.03  | 0.02   | 0.11   | 0.19   | -0.03085 | 0.97517  |
| 0     | 0      | 0      | 0      | NA       | NA       |
| 0     | 0      | 0      | 0      | NA       | NA       |
| 0     | 0      | 0      | 0      | NA       | NA       |
| 0     | 0      | 0      | 0      | NA       | NA       |
| 0     | 0      | 0      | 0      | NA       | NA       |
| 595.4 | 615.11 | 604.96 | 577.65 | -0.05283 | 0.645015 |
| 0     | 0      | 0      | 0      | NA       | NA       |
| 0     | 0      | 0      | 0      | NA       | NA       |
| 0     | 0      | 0      | 0      | NA       | NA       |
| 19.9  | 25.17  | 24.33  | 24.65  | 0.181146 | 0.083788 |
| 0     | 0      | 0      | 0      | NA       | NA       |
| 0     | 0      | 0      | 0      | NA       | NA       |
| 0     | 0.08   | 0      | 0.01   | NA       | NA       |
| 0     | 0      | 0      | 0      | NA       | NA       |
| 0     | 0      | 0      | 0      | NA       | NA       |
| 0     | 0      | 0      | 0      | NA       | NA       |
| 0     | 0      | 0      | 0      | NA       | NA       |
| 1.1   | 0      | 0      | 0      | NA       | NA       |
| 0     | 0.12   | 0.04   | 0.03   | NA       | NA       |
| 0     | 0      | 0      | 0      | NA       | NA       |
| 0     | 0      | 0      | 0      | NA       | NA       |
| 0     | 0      | 0      | 0      | NA       | NA       |
| 0     | 0      | 0      | 0      | NA       | NA       |
| 0     | 0      | 0      | 0      | NA       | NA       |
| 0.99  | 0.68   | 0.6    | 0.44   | -0.61624 | 0.245457 |
| 0.04  | 0.33   | 0.31   | 0.19   | 1.166022 | 0.061583 |
| 0     | 0      | 0      | 0      | NA       | NA       |
| 0     | 0      | 0      | 0      | NA       | NA       |
| 0     | 0      | 0      | 0      | NA       | NA       |
| 0     | 0      | 0      | 0      | NA       | NA       |

|      |      |      |               |          |
|------|------|------|---------------|----------|
| 0    | 0    | 0    | 0 NA          | NA       |
| 0    | 0    | 0    | 0 NA          | NA       |
| 0    | 0    | 0    | 0 NA          | NA       |
| 0    | 0    | 0    | 0 NA          | NA       |
| 0    | 0    | 0    | 0 NA          | NA       |
| 0    | 0    | 0    | 0 NA          | NA       |
| 0    | 0    | 0    | 0 NA          | NA       |
| 0.4  | 0.29 | 0.11 | 0.28 -0.16112 | 0.851872 |
| 0    | 0    | 0    | 0 NA          | NA       |
| 0    | 0    | 0    | 0 NA          | NA       |
| 0.31 | 0.11 | 0    | 0.23 NA       | NA       |
| 0    | 0    | 0    | 0 NA          | NA       |
| 0.17 | 0    | 0.2  | 0.06 NA       | NA       |
| 0    | 2.08 | 0    | 0 NA          | NA       |
| 0    | 0    | 0    | 0 NA          | NA       |
| 0.05 | 0.03 | 0.19 | 0.04 NA       | NA       |
| 3.18 | 1.95 | 2.87 | 2.03 -0.09041 | 0.820566 |
| 0.21 | 0    | 0    | 0.03 NA       | NA       |
| 0    | 0    | 0    | 0 NA          | NA       |
| 0.41 | 0    | 0.09 | 0.31 NA       | NA       |
| 0    | 0    | 0    | 0 NA          | NA       |
| 0    | 0    | 0    | 0 NA          | NA       |
| 0    | 0    | 0    | 0 NA          | NA       |
| 0    | 0    | 0    | 0 NA          | NA       |
| 0    | 0    | 0    | 0 NA          | NA       |
| 0.97 | 3.15 | 0    | 0.03 NA       | NA       |
| 0    | 0    | 0    | 0 NA          | NA       |
| 0    | 0    | 0    | 0 NA          | NA       |
| 0    | 0    | 0    | 0 NA          | NA       |
| 0    | 0    | 0    | 0 NA          | NA       |
| 0    | 0    | 0    | 0 NA          | NA       |
| 0    | 0    | 0    | 0 NA          | NA       |
| 0.52 | 0.93 | 0.67 | 0.19 NA       | NA       |
| 0    | 0    | 0    | 0 NA          | NA       |
| 0    | 0    | 0    | 0 NA          | NA       |
| 0    | 0    | 0    | 0 NA          | NA       |
| 0    | 0    | 0    | 0 NA          | NA       |
| 0    | 0    | 0    | 0 NA          | NA       |
| 0    | 0    | 0    | 0 NA          | NA       |
| 0    | 0    | 0    | 0 NA          | NA       |
| 0    | 0    | 0.05 | 0.03 NA       | NA       |
| 0    | 0.23 | 0    | 0.41 NA       | NA       |
| 0    | 0    | 0    | 0 NA          | NA       |
| 0.03 | 0.25 | 0.06 | 0.19 1.641766 | 0.004722 |
| 0    | 0    | 0    | 0 NA          | NA       |









|       |        |        |       |          |          |
|-------|--------|--------|-------|----------|----------|
| 0     | 0      | 0      | 0     | NA       | NA       |
| 0     | 0      | 0      | 0     | NA       | NA       |
| 0     | 0      | 0      | 0.15  | NA       | NA       |
| 0     | 0      | 0      | 0     | NA       | NA       |
| 0     | 0      | 0      | 0.07  | NA       | NA       |
| 0     | 0      | 0      | 0     | NA       | NA       |
| 0     | 0      | 0      | 0     | NA       | NA       |
| 0     | 0      | 0      | 0     | NA       | NA       |
| 0     | 0      | 0      | 0     | NA       | NA       |
| 0     | 0      | 0      | 0     | NA       | NA       |
| 0     | 0      | 0      | 0     | NA       | NA       |
| 0     | 0      | 0      | 0     | NA       | NA       |
| 0     | 0      | 0      | 0     | NA       | NA       |
| 0     | 0      | 0      | 0     | NA       | NA       |
| 0.26  | 0      | 0      | 0     | NA       | NA       |
| 0     | 0      | 0      | 0     | NA       | NA       |
| 50.51 | 33.03  | 39.09  | 33.48 | -0.43077 | 0.000751 |
| 0     | 0      | 0      | 0     | NA       | NA       |
| 0     | 0      | 0      | 0     | NA       | NA       |
| 0     | 0      | 0      | 0     | NA       | NA       |
| 0     | 0      | 0      | 0     | NA       | NA       |
| 1.58  | 0.8    | 0.73   | 1.07  | -0.39144 | 0.587397 |
| 0     | 0      | 0      | 0     | NA       | NA       |
| 0     | 0      | 0      | 0     | NA       | NA       |
| 7.78  | 9.69   | 7.71   | 8.08  | -0.09694 | 0.645863 |
| 96.61 | 142.79 | 217.64 | 98.21 | 0.615701 | 0.32444  |
| 0     | 0      | 0      | 0     | NA       | NA       |
| 0.42  | 0.26   | 0.24   | 0.23  | -0.02682 | 0.977843 |
| 0     | 0      | 0      | 0     | NA       | NA       |
| 0     | 0      | 0      | 0     | NA       | NA       |
| 0     | 0.26   | 0      | 0     | NA       | NA       |
| 0     | 0      | 0      | 0     | NA       | NA       |
| 0     | 0      | 0      | 0     | NA       | NA       |
| 0     | 0      | 0      | 0     | NA       | NA       |
| 0     | 0      | 0      | 0     | NA       | NA       |
| 0     | 0      | 0      | 0     | NA       | NA       |
| 0     | 0      | 0      | 0     | NA       | NA       |
| 0     | 0.12   | 0      | 0     | NA       | NA       |
| 4.44  | 6.75   | 6.41   | 5.97  | 0.536679 | 0.001213 |
| 0     | 0      | 0      | 0     | NA       | NA       |
| 0     | 0      | 0      | 0     | NA       | NA       |
| 0     | 0      | 0      | 0     | NA       | NA       |
| 0     | 0      | 0      | 0     | NA       | NA       |
| 0     | 0      | 0.07   | 0     | NA       | NA       |

|      |      |      |               |          |
|------|------|------|---------------|----------|
| 0    | 0    | 0    | 0 NA          | NA       |
| 0    | 0    | 0    | 0 NA          | NA       |
| 0    | 0    | 0    | 0 NA          | NA       |
| 0    | 0    | 0    | 0 NA          | NA       |
| 0    | 0    | 0    | 0 NA          | NA       |
| 0    | 0.07 | 0    | 0 NA          | NA       |
| 0    | 0    | 0    | 0 NA          | NA       |
| 0    | 0    | 0.08 | 0 NA          | NA       |
| 0    | 0    | 0    | 0 NA          | NA       |
| 0    | 0    | 0    | 0 NA          | NA       |
| 0    | 0    | 0    | 0 NA          | NA       |
| 0    | 0    | 0    | 0 NA          | NA       |
| 0.82 | 1.31 | 0.97 | 0.91 0.193641 | 0.589374 |
| 0    | 0    | 0    | 0 NA          | NA       |
| 0    | 0    | 0    | 0 NA          | NA       |
| 0    | 0    | 0    | 0 NA          | NA       |
| 0    | 0    | 0    | 0 NA          | NA       |
| 0    | 0    | 0    | 0 NA          | NA       |
| 0    | 0    | 0    | 0 NA          | NA       |
| 0    | 0    | 0    | 0 NA          | NA       |
| 0    | 0    | 0    | 0 NA          | NA       |
| 0    | 0    | 0    | 0 NA          | NA       |
| 0    | 0    | 0    | 0 NA          | NA       |
| 0    | 0    | 0.09 | 0 NA          | NA       |
| 0    | 0    | 0    | 0 NA          | NA       |
| 0    | 0    | 0    | 0 NA          | NA       |
| 0    | 0    | 0    | 0 NA          | NA       |
| 0    | 0    | 0    | 0 NA          | NA       |
| 0    | 0    | 0    | 0 NA          | NA       |
| 0    | 0.07 | 0.04 | 0.07 NA       | NA       |
| 0.65 | 1.5  | 0.52 | 0.99 0.185446 | 0.820283 |
| 0    | 0    | 0    | 0 NA          | NA       |
| 0    | 0    | 0    | 0 NA          | NA       |
| 0    | 0    | 0    | 0 NA          | NA       |
| 0    | 0.04 | 0    | 0 NA          | NA       |
| 0    | 0    | 0    | 0 NA          | NA       |
| 0    | 0    | 0    | 0 NA          | NA       |
| 2.81 | 2.44 | 2.2  | 2.18 -0.68898 | 0.068951 |
| 0    | 0    | 0    | 0 NA          | NA       |
| 0.08 | 0.22 | 0.32 | 0.15 NA       | NA       |
| 0    | 0    | 0    | 0 NA          | NA       |
| 0    | 0    | 0    | 0 NA          | NA       |
| 0    | 0    | 0    | 0 NA          | NA       |
| 0    | 0    | 0    | 0 NA          | NA       |



|      |      |      |      |          |          |
|------|------|------|------|----------|----------|
| 0    | 0    | 0    | 0.14 | NA       | NA       |
| 0    | 0    | 0    | 0    | NA       | NA       |
| 0    | 0    | 0.54 | 0    | -0.03422 | 0.944501 |
| 0    | 0    | 0    | 0    | NA       | NA       |
| 0    | 0    | 0    | 0    | NA       | NA       |
| 0    | 0    | 0    | 0    | NA       | NA       |
| 0    | 0    | 0    | 0    | NA       | NA       |
| 0    | 0    | 0    | 0    | NA       | NA       |
| 0    | 0    | 0    | 0    | NA       | NA       |
| 0    | 0    | 0    | 0    | NA       | NA       |
| 0    | 0    | 0    | 0    | NA       | NA       |
| 0    | 0    | 0    | 0    | NA       | NA       |
| 0    | 0    | 0    | 0    | NA       | NA       |
| 0    | 0    | 0    | 0    | NA       | NA       |
| 0    | 0    | 0    | 0    | NA       | NA       |
| 0    | 0    | 0    | 0    | NA       | NA       |
| 0    | 0    | 0    | 0    | NA       | NA       |
| 0    | 0    | 0.07 | 0    | NA       | NA       |
| 0    | 0    | 0    | 0    | NA       | NA       |
| 0    | 0    | 0    | 0    | NA       | NA       |
| 0    | 0    | 0    | 0    | NA       | NA       |
| 0.58 | 0    | 0.35 | 0    | NA       | NA       |
| 0.35 | 0.06 | 0.14 | 0.06 | -1.93627 | 2.28E-07 |
| 0    | 0    | 0    | 0    | NA       | NA       |
| 0.92 | 0.78 | 0.81 | 0.7  | -0.69703 | 0.11836  |
| 0    | 0    | 0    | 0    | NA       | NA       |
| 0    | 0    | 0    | 0    | NA       | NA       |
| 0    | 0    | 0    | 0    | NA       | NA       |
| 0    | 0    | 0    | 0    | NA       | NA       |
| 0.23 | 0.28 | 0.42 | 0.25 | 0.750814 | 0.186392 |
| 0    | 0    | 0    | 0    | NA       | NA       |
| 2.25 | 1.4  | 1.72 | 1.39 | -0.30346 | 0.525605 |
| 0    | 0    | 5.09 | 0    | NA       | NA       |
| 0.13 | 0.09 | 0.08 | 0.13 | NA       | NA       |
| 0    | 0    | 0    | 0    | NA       | NA       |
| 0    | 0    | 0    | 0    | NA       | NA       |
| 0    | 0    | 0    | 0    | NA       | NA       |
| 0    | 0    | 0    | 0    | NA       | NA       |
| 0    | 0    | 0    | 0    | NA       | NA       |
| 0    | 0    | 0    | 0    | NA       | NA       |
| 0    | 0    | 0    | 0    | NA       | NA       |
| 0    | 0    | 0    | 0    | NA       | NA       |
| 0    | 0    | 0    | 0    | NA       | NA       |
| 0    | 0.39 | 0    | 0    | NA       | NA       |
| 0    | 0    | 0.06 | 0    | NA       | NA       |
| 0    | 0    | 0    | 0    | NA       | NA       |



|       |       |       |       |          |          |
|-------|-------|-------|-------|----------|----------|
| 0.37  | 0.8   | 0.37  | 0.7   | 0.046458 | 0.961386 |
| 0     | 0     | 0     | 0     | NA       | NA       |
| 0     | 0     | 0     | 0     | NA       | NA       |
| 0     | 0.16  | 0     | 0.16  | NA       | NA       |
| 0.13  | 0     | 0.25  | 0.19  | NA       | NA       |
| 0     | 0     | 0.13  | 0     | NA       | NA       |
| 0     | 0     | 0     | 0     | NA       | NA       |
| 0     | 0     | 0     | 0     | NA       | NA       |
| 0     | 0     | 0     | 0     | NA       | NA       |
| 0     | 0.15  | 0     | 0.16  | NA       | NA       |
| 0     | 0.03  | 0     | 0.03  | NA       | NA       |
| 0     | 0     | 0     | 0     | NA       | NA       |
| 0     | 0     | 0     | 0     | NA       | NA       |
| 1.04  | 0.5   | 0.42  | 1.47  | -0.2196  | 0.783783 |
| 0     | 0     | 0     | 0     | NA       | NA       |
| 0     | 1.63  | 0     | 0     | NA       | NA       |
| 0     | 0     | 0     | 0     | NA       | NA       |
| 2.15  | 0.58  | 1.2   | 0.6   | -0.34983 | 0.658172 |
| 0     | 0     | 0     | 0     | NA       | NA       |
| 1.74  | 1.81  | 3.14  | 2.74  | 0.00457  | 0.995073 |
| 0     | 0     | 0     | 0     | NA       | NA       |
| 0.23  | 0.16  | 0.16  | 0.03  | NA       | NA       |
| 0     | 0     | 0.06  | 0     | NA       | NA       |
| 0     | 0     | 0     | 0     | NA       | NA       |
| 0     | 0     | 0     | 0     | NA       | NA       |
| 0     | 0     | 0     | 0     | NA       | NA       |
| 2.65  | 0.48  | 1.73  | 1.92  | -1.39631 | 1.21E-05 |
| 0     | 0     | 0     | 0     | NA       | NA       |
| 0     | 0     | 0     | 0     | NA       | NA       |
| 0     | 0     | 0     | 0     | NA       | NA       |
| 0     | 0     | 0     | 0     | NA       | NA       |
| 0     | 0     | 0     | 0     | NA       | NA       |
| 0     | 0     | 0     | 0     | NA       | NA       |
| 0     | 0     | 0     | 0     | NA       | NA       |
| 0     | 0     | 0     | 0     | NA       | NA       |
| 0     | 0     | 0     | 0     | NA       | NA       |
| 0.34  | 0.04  | 0.09  | 0.38  | NA       | NA       |
| 0     | 0.17  | 0.08  | 0     | NA       | NA       |
| 0.24  | 0.13  | 0.16  | 0.42  | NA       | NA       |
| 22.52 | 35.76 | 45.84 | 40.11 | 0.717031 | 3.12E-14 |
| 0     | 0.01  | 0     | 0     | NA       | NA       |
| 0     | 0     | 0     | 0     | NA       | NA       |
| 0     | 0     | 0     | 0     | NA       | NA       |
| 3.9   | 1.35  | 1.25  | 2.31  | -0.1972  | 0.819038 |
| 0     | 0     | 0     | 0     | NA       | NA       |





|        |        |        |        |          |          |
|--------|--------|--------|--------|----------|----------|
| 0.39   | 0.51   | 0.5    | 0.53   | 0.306174 | 0.407357 |
| 0      | 0      | 0      | 0      | NA       | NA       |
| 0      | 0      | 0      | 0      | NA       | NA       |
| 0      | 0      | 0      | 0      | NA       | NA       |
| 0      | 0      | 0      | 0      | NA       | NA       |
| 0      | 0      | 0      | 0      | NA       | NA       |
| 0      | 0      | 0      | 0      | NA       | NA       |
| 0.57   | 0.45   | 0.22   | 0.42   | -0.30092 | 0.660487 |
| 0      | 0      | 0.26   | 0      | NA       | NA       |
| 0      | 0      | 0      | 0      | NA       | NA       |
| 0      | 0      | 0      | 0      | NA       | NA       |
| 0      | 0      | 0      | 0      | NA       | NA       |
| 0      | 0      | 0      | 0      | NA       | NA       |
| 0      | 0      | 0      | 0      | NA       | NA       |
| 0      | 0      | 0      | 0      | NA       | NA       |
| 0      | 0      | 0      | 0      | NA       | NA       |
| 0      | 0      | 0      | 0      | NA       | NA       |
| 0.09   | 0      | 0.06   | 0      | NA       | NA       |
| 0      | 0      | 0      | 0      | NA       | NA       |
| 0      | 0      | 0.22   | 0.43   | NA       | NA       |
| 0      | 0      | 0      | 0      | NA       | NA       |
| 0      | 0      | 0      | 0      | NA       | NA       |
| 0      | 0      | 0      | 0      | NA       | NA       |
| 0      | 0      | 0      | 0      | NA       | NA       |
| 0      | 0      | 0      | 0      | NA       | NA       |
| 0      | 0      | 0      | 0      | NA       | NA       |
| 0      | 0      | 0      | 0      | NA       | NA       |
| 0      | 0      | 0      | 0      | NA       | NA       |
| 0      | 0      | 0      | 0      | NA       | NA       |
| 0      | 0      | 0      | 0      | NA       | NA       |
| 0      | 0      | 0      | 0      | NA       | NA       |
| 0      | 0      | 0      | 0      | NA       | NA       |
| 0.05   | 0      | 0      | 0.04   | NA       | NA       |
| 8.54   | 4.64   | 5.77   | 6.9    | -0.52585 | 0.052635 |
| 0      | 0      | 0      | 0      | NA       | NA       |
| 115.84 | 161.23 | 141.28 | 135.54 | 0.181593 | 0.225902 |
| 0      | 0      | 0      | 0      | NA       | NA       |
| 0      | 0      | 0      | 0      | NA       | NA       |
| 0      | 0      | 0      | 0      | NA       | NA       |
| 0      | 0      | 0      | 0      | NA       | NA       |
| 0.41   | 0.15   | 0.66   | 0      | NA       | NA       |
| 0      | 0.08   | 0.14   | 0.13   | 0.94244  | 0.137213 |
| 0      | 0      | 0      | 0      | NA       | NA       |
| 0      | 0      | 0      | 0      | NA       | NA       |
| 0      | 0.1    | 0      | 0.22   | NA       | NA       |

|      |      |      |      |          |          |
|------|------|------|------|----------|----------|
| 0    | 0    | 0    | 0    | NA       | NA       |
| 0    | 0    | 0    | 0    | NA       | NA       |
| 0    | 0    | 0    | 0.06 | NA       | NA       |
| 0    | 0    | 0    | 0    | NA       | NA       |
| 0    | 0    | 0    | 0    | NA       | NA       |
| 0    | 0    | 0    | 0    | NA       | NA       |
| 0    | 0    | 0    | 0    | NA       | NA       |
| 0    | 0    | 0    | 0    | NA       | NA       |
| 0    | 0    | 0    | 0    | NA       | NA       |
| 0    | 0    | 0    | 0    | NA       | NA       |
| 0    | 0    | 0    | 0    | NA       | NA       |
| 0    | 0    | 0    | 0    | NA       | NA       |
| 0    | 0    | 0    | 0    | NA       | NA       |
| 0    | 0    | 0    | 0    | NA       | NA       |
| 0    | 0    | 0    | 0    | NA       | NA       |
| 0    | 0    | 0    | 0    | NA       | NA       |
| 0    | 0    | 0    | 0    | NA       | NA       |
| 0    | 0.27 | 0.05 | 0.06 | NA       | NA       |
| 1.38 | 1.78 | 2.27 | 1.53 | 0.132501 | 0.801074 |
| 0    | 0    | 0    | 0    | NA       | NA       |
| 2.01 | 2.29 | 2.45 | 1.59 | -0.02739 | 0.95471  |
| 0    | 0    | 0    | 0    | NA       | NA       |
| 0    | 0    | 0    | 0    | NA       | NA       |
| 0    | 0    | 0    | 0    | NA       | NA       |
| 0    | 0    | 0    | 0    | NA       | NA       |
| 0    | 0    | 0    | 0    | NA       | NA       |
| 0    | 0    | 0    | 0    | NA       | NA       |
| 0    | 0    | 0.02 | 0    | NA       | NA       |
| 0    | 0    | 0    | 0    | NA       | NA       |
| 0    | 0    | 0    | 0    | NA       | NA       |
| 0    | 0    | 0    | 0.05 | NA       | NA       |
| 0    | 0    | 0    | 0    | NA       | NA       |
| 0.5  | 0.36 | 0.61 | 1.05 | -0.01501 | 0.986207 |
| 0    | 0    | 0    | 0    | NA       | NA       |
| 0    | 0    | 0    | 0    | NA       | NA       |
| 0    | 0    | 0    | 0    | NA       | NA       |
| 0    | 0    | 0    | 0    | NA       | NA       |
| 0    | 0    | 0    | 0    | NA       | NA       |
| 0    | 0    | 0    | 0    | NA       | NA       |
| 0    | 0    | 0    | 0    | NA       | NA       |
| 0    | 0    | 0    | 0    | NA       | NA       |
| 0    | 0    | 0    | 0    | NA       | NA       |
| 0    | 0    | 0    | 0    | NA       | NA       |
| 0    | 0    | 0    | 0    | NA       | NA       |
| 0    | 0    | 0    | 0.14 | NA       | NA       |

|      |      |      |               |          |
|------|------|------|---------------|----------|
| 0    | 0    | 0    | 0 NA          | NA       |
| 0    | 0    | 0    | 0 NA          | NA       |
| 0    | 0    | 0    | 0 NA          | NA       |
| 0    | 0    | 0    | 0 NA          | NA       |
| 0    | 0    | 0    | 0 NA          | NA       |
| 0    | 0    | 0    | 0 NA          | NA       |
| 0.22 | 0.13 | 0.07 | 0.12 NA       | NA       |
| 0.18 | 0.09 | 0.05 | 0.03 -0.3044  | 0.703816 |
| 0    | 0    | 0    | 0 NA          | NA       |
| 0    | 0    | 0    | 0 NA          | NA       |
| 0    | 0    | 0    | 0 NA          | NA       |
| 0    | 0    | 0    | 0 NA          | NA       |
| 0    | 0    | 0    | 0 NA          | NA       |
| 0.04 | 0    | 0.02 | 0 NA          | NA       |
| 1.76 | 0.85 | 0.92 | 0.94 -0.70887 | 0.024259 |
| 0    | 0    | 0    | 0 NA          | NA       |
| 0    | 0    | 0    | 0 NA          | NA       |
| 0    | 0    | 0    | 0 NA          | NA       |
| 0    | 0.14 | 0    | 0.07 NA       | NA       |
| 0    | 0    | 0    | 0 NA          | NA       |
| 0    | 0    | 0    | 0 NA          | NA       |
| 0    | 0    | 0    | 0 NA          | NA       |
| 0    | 0    | 0    | 0 NA          | NA       |
| 0.26 | 0.44 | 0.41 | 0.54 0.488695 | 0.509466 |
| 0    | 0.45 | 0.07 | 0 NA          | NA       |
| 0    | 0    | 0    | 0 NA          | NA       |
| 0    | 0    | 0    | 0 NA          | NA       |
| 0    | 0    | 0.08 | 0 NA          | NA       |
| 0    | 0    | 0    | 0 NA          | NA       |
| 0    | 0    | 0    | 0 NA          | NA       |
| 0    | 0    | 0    | 0 NA          | NA       |
| 0.12 | 0    | 0    | 0.09 NA       | NA       |
| 0    | 0    | 0    | 0 NA          | NA       |
| 0    | 0    | 0    | 0 NA          | NA       |
| 0    | 0    | 0    | 0 NA          | NA       |
| 0    | 0    | 0    | 0 NA          | NA       |
| 0    | 0.09 | 0    | 0 NA          | NA       |
| 0    | 0    | 0    | 0 NA          | NA       |
| 0    | 0    | 0.15 | 0 NA          | NA       |
| 0    | 0    | 0    | 0 NA          | NA       |
| 0    | 0    | 0    | 0 NA          | NA       |
| 0    | 0.02 | 0    | 0 NA          | NA       |
| 0.16 | 0.06 | 0.16 | 0.06 NA       | NA       |
| 0    | 0    | 0    | 0 NA          | NA       |
| 0    | 0    | 0    | 0 NA          | NA       |



|      |       |       |       |          |          |
|------|-------|-------|-------|----------|----------|
| 8.07 | 20.22 | 18.04 | 21.33 | 0.958261 | 6.87E-11 |
| 0.21 | 0.53  | 0.26  | 0.75  | 1.627496 | 0.002136 |
| 0    | 0     | 0     | 0     | NA       | NA       |
| 0.25 | 0     | 0.33  | 0     | NA       | NA       |
| 0.05 | 0     | 0     | 0     | NA       | NA       |
| 0.03 | 0     | 0     | 0.02  | NA       | NA       |
| 0    | 0     | 0     | 0     | NA       | NA       |
| 0.96 | 0.23  | 1.06  | 0.93  | -0.55068 | 0.429497 |
| 0    | 0     | 0     | 0     | NA       | NA       |
| 0.17 | 0.41  | 0.02  | 0.03  | NA       | NA       |
| 0    | 0     | 0     | 0     | NA       | NA       |
| 0    | 0     | 0     | 0     | NA       | NA       |
| 0    | 0     | 0     | 0     | NA       | NA       |
| 0.1  | 0.06  | 0.02  | 0.09  | NA       | NA       |
| 0.13 | 0.23  | 0.09  | 0.1   | NA       | NA       |
| 0    | 0     | 0     | 0     | NA       | NA       |
| 0    | 0.12  | 0.23  | 0.52  | NA       | NA       |
| 0    | 0     | 0.7   | 0     | NA       | NA       |
| 0    | 0     | 0     | 0     | NA       | NA       |
| 0    | 0     | 0     | 0     | NA       | NA       |
| 0    | 0     | 0     | 0     | NA       | NA       |
| 0    | 0     | 0     | 0     | NA       | NA       |
| 0.12 | 0     | 0     | 0     | NA       | NA       |
| 0.4  | 1.35  | 0.97  | 1.11  | 0.652667 | 0.267548 |
| 0.07 | 0     | 0     | 0     | NA       | NA       |
| 0    | 0     | 0     | 0     | NA       | NA       |
| 0    | 0     | 0     | 0     | NA       | NA       |
| 0    | 0     | 0     | 0     | NA       | NA       |
| 0.52 | 0.22  | 0.41  | 0.19  | -0.63695 | 0.257584 |
| 0    | 0     | 0     | 0     | NA       | NA       |
| 0    | 0     | 0     | 0     | NA       | NA       |
| 0.04 | 0     | 0.01  | 0     | NA       | NA       |
| 0    | 0     | 0     | 0     | NA       | NA       |
| 0    | 0     | 0     | 0     | NA       | NA       |
| 0    | 0     | 0     | 0     | NA       | NA       |
| 0    | 0     | 0     | 0     | NA       | NA       |
| 0    | 0     | 0     | 0     | NA       | NA       |
| 0    | 0     | 0     | 0     | NA       | NA       |
| 0    | 0     | 0     | 0     | NA       | NA       |
| 0    | 0     | 0     | 0     | NA       | NA       |
| 2.07 | 2.04  | 1.71  | 2.04  | -0.28499 | 0.521333 |
| 0    | 0     | 0     | 0     | NA       | NA       |
| 0.91 | 1.31  | 0.6   | 2.33  | -0.05719 | 0.948772 |
| 0    | 0     | 0.03  | 0.04  | NA       | NA       |
| 0    | 0     | 0     | 0     | NA       | NA       |

|      |      |      |               |          |
|------|------|------|---------------|----------|
| 0    | 0    | 0    | 0 NA          | NA       |
| 2.77 | 1.5  | 1.7  | 2.33 -0.55224 | 0.183808 |
| 0    | 0.02 | 0    | 0 NA          | NA       |
| 0    | 0    | 0    | 0 NA          | NA       |
| 0    | 0    | 0    | 0 NA          | NA       |
| 0.12 | 0    | 0.08 | 0 NA          | NA       |
| 1.58 | 0.85 | 1.44 | 0.9 -0.78634  | 0.01389  |
| 0.18 | 0    | 0    | 0 NA          | NA       |
| 0    | 0    | 0    | 0 NA          | NA       |
| 0    | 0    | 0    | 0 NA          | NA       |
| 0    | 0    | 0    | 0 NA          | NA       |
| 0    | 0    | 0    | 0 NA          | NA       |
| 0    | 0    | 0    | 0 NA          | NA       |
| 0    | 0    | 0    | 0 NA          | NA       |
| 0    | 0    | 0    | 0 NA          | NA       |
| 0    | 0    | 0    | 0 NA          | NA       |
| 0    | 0    | 0    | 0 NA          | NA       |
| 0.22 | 1.76 | 0.72 | 1.35 1.092413 | 0.08336  |
| 0    | 0.15 | 0.06 | 0.15 NA       | NA       |
| 0    | 0    | 0    | 0 NA          | NA       |
| 0.28 | 0.6  | 0.36 | 0 NA          | NA       |
| 0    | 0    | 0.23 | 0 NA          | NA       |
| 0    | 0    | 0    | 0 NA          | NA       |
| 0    | 0    | 0    | 0 NA          | NA       |
| 0    | 0    | 0    | 0 NA          | NA       |
| 0    | 0    | 0    | 0 NA          | NA       |
| 0    | 0    | 0    | 0 NA          | NA       |
| 0    | 0    | 0    | 0 NA          | NA       |
| 0    | 0    | 0    | 0 NA          | NA       |
| 0.11 | 0    | 0.06 | 0.02 NA       | NA       |
| 0    | 0    | 0    | 0 NA          | NA       |
| 0    | 0    | 0    | 0 NA          | NA       |
| 0    | 0    | 0    | 0 NA          | NA       |
| 0    | 0    | 0    | 0 NA          | NA       |
| 0    | 0    | 0    | 0 NA          | NA       |
| 0.43 | 0.26 | 0.35 | 0.35 -0.38647 | 0.239509 |
| 0    | 0    | 0    | 0 NA          | NA       |
| 0    | 0    | 0    | 0 NA          | NA       |
| 0    | 0    | 0    | 0 NA          | NA       |
| 0    | 0    | 0    | 0 NA          | NA       |
| 2.06 | 1.14 | 2.14 | 1.43 -0.36779 | 0.533329 |
| 2.06 | 1.14 | 2.14 | 1.43 -0.36779 | 0.533329 |
| 0    | 0    | 0    | 0 NA          | NA       |

|      |      |      |      |          |          |
|------|------|------|------|----------|----------|
| 0    | 0    | 0.1  | 0.11 | NA       | NA       |
| 0.27 | 0.1  | 0.05 | 0.06 | NA       | NA       |
| 0    | 0    | 0    | 0    | NA       | NA       |
| 0    | 0    | 0    | 0    | NA       | NA       |
| 0    | 0    | 0    | 0    | NA       | NA       |
| 0    | 0    | 0    | 0    | NA       | NA       |
| 0    | 0    | 0    | 0    | NA       | NA       |
| 0    | 0    | 0    | 0    | NA       | NA       |
| 0    | 0    | 0    | 0    | NA       | NA       |
| 0    | 0    | 0    | 0    | NA       | NA       |
| 0    | 0    | 0    | 0    | NA       | NA       |
| 0.41 | 0.95 | 0.66 | 2.36 | 0.591216 | 0.387358 |
| 0    | 0    | 0    | 0    | NA       | NA       |
| 0    | 0    | 0    | 0    | NA       | NA       |
| 0    | 0    | 0    | 0    | NA       | NA       |
| 0    | 0    | 0    | 0    | NA       | NA       |
| 0    | 0    | 0    | 0    | NA       | NA       |
| 0    | 0    | 0    | 0    | NA       | NA       |
| 0    | 0.1  | 0.09 | 0.21 | NA       | NA       |
| 0    | 0    | 0    | 0    | NA       | NA       |
| 0    | 0    | 0    | 0.02 | NA       | NA       |
| 0.27 | 0.14 | 0    | 0.05 | NA       | NA       |
| 0    | 0    | 0    | 0    | NA       | NA       |
| 0.36 | 1.45 | 0.63 | 1.08 | 0.348291 | 0.639028 |
| 0    | 0    | 0    | 0    | NA       | NA       |
| 0    | 0    | 0    | 0    | NA       | NA       |
| 0    | 0    | 0    | 0    | NA       | NA       |
| 1.37 | 0    | 0.84 | 0    | NA       | NA       |
| 0    | 0    | 0    | 0    | NA       | NA       |
| 0.03 | 0    | 0.04 | 0.02 | NA       | NA       |
| 0    | 0    | 0    | 0    | NA       | NA       |
| 0    | 0    | 0    | 0    | NA       | NA       |
| 0    | 0    | 0    | 0.18 | NA       | NA       |
| 0    | 0    | 0    | 0    | NA       | NA       |
| 0    | 0    | 0    | 0    | NA       | NA       |
| 0    | 0    | 0    | 0    | NA       | NA       |
| 0    | 0    | 0    | 0    | NA       | NA       |
| 0    | 0    | 0    | 0    | NA       | NA       |
| 0    | 0    | 0    | 0    | NA       | NA       |
| 0    | 0    | 0    | 0    | NA       | NA       |
| 0.16 | 0.24 | 0.09 | 0.2  | 0.288633 | 0.718661 |
| 0    | 0    | 0    | 0    | NA       | NA       |
| 0    | 0    | 0    | 0    | NA       | NA       |
| 0    | 0    | 0    | 0    | NA       | NA       |
| 0    | 0    | 0    | 0    | NA       | NA       |
| 0    | 0    | 0    | 0    | NA       | NA       |

|      |       |       |      |          |          |
|------|-------|-------|------|----------|----------|
| 0    | 0     | 0     | 0    | NA       | NA       |
| 0    | 0.42  | 0     | 0    | NA       | NA       |
| 3.2  | 2.74  | 2.49  | 3.43 | -0.43238 | 0.176246 |
| 0.14 | 0.15  | 0.1   | 0.05 | NA       | NA       |
| 0    | 0     | 0     | 0    | NA       | NA       |
| 0.25 | 1.06  | 0.63  | 0.55 | NA       | NA       |
| 0    | 0.07  | 0     | 0.07 | NA       | NA       |
| 0    | 0     | 0     | 0    | NA       | NA       |
| 0.14 | 0.1   | 0     | 0.11 | NA       | NA       |
| 0    | 0     | 0     | 0    | NA       | NA       |
| 0    | 0     | 0     | 0    | NA       | NA       |
| 0    | 0     | 0     | 0    | NA       | NA       |
| 11.1 | 12.35 | 13.66 | 12.8 | 0.138661 | 0.332638 |
| 0    | 0     | 0     | 0    | NA       | NA       |
| 0    | 0     | 0     | 0    | NA       | NA       |
| 0.12 | 0     | 0.15  | 0.09 | NA       | NA       |
| 0    | 0     | 0     | 0    | NA       | NA       |
| 0    | 0     | 0     | 0    | NA       | NA       |
| 0    | 0     | 0     | 0    | NA       | NA       |
| 0    | 0     | 0     | 0    | NA       | NA       |
| 0.1  | 0.02  | 0.02  | 0    | NA       | NA       |
| 0    | 0     | 0     | 0    | NA       | NA       |
| 0    | 0.12  | 0.21  | 0.12 | NA       | NA       |
| 0    | 0     | 0     | 0    | NA       | NA       |
| 0    | 0     | 0     | 0    | NA       | NA       |
| 0    | 0     | 0     | 0    | NA       | NA       |
| 0    | 0     | 0     | 0    | NA       | NA       |
| 0    | 0     | 0     | 0    | NA       | NA       |
| 0    | 0     | 0     | 0    | NA       | NA       |
| 0    | 0     | 0     | 0    | NA       | NA       |
| 0    | 0     | 0     | 0    | NA       | NA       |
| 0    | 0     | 0     | 0    | NA       | NA       |
| 0    | 0     | 0     | 0    | NA       | NA       |
| 0    | 0     | 0     | 0    | NA       | NA       |
| 0    | 0     | 0     | 0    | NA       | NA       |
| 0    | 0     | 0     | 0    | NA       | NA       |
| 0.36 | 3.71  | 2.68  | 2.03 | 2.446823 | 1.46E-07 |
| 0.04 | 0.05  | 0.05  | 0.2  | NA       | NA       |
| 0    | 0     | 0.04  | 0.04 | NA       | NA       |
| 0    | 0     | 0     | 0    | NA       | NA       |
| 0    | 0     | 0     | 0    | NA       | NA       |
| 4.35 | 3.15  | 3.35  | 4.16 | 0.017517 | 0.952639 |
| 0    | 0     | 0     | 0    | NA       | NA       |
| 0    | 0     | 0     | 0    | NA       | NA       |



|      |      |      |               |          |
|------|------|------|---------------|----------|
| 0    | 0    | 0    | 0 NA          | NA       |
| 0    | 0    | 0    | 0 NA          | NA       |
| 0    | 0    | 0    | 0 NA          | NA       |
| 0    | 0    | 0    | 0 NA          | NA       |
| 0    | 0    | 0    | 0 NA          | NA       |
| 0    | 0    | 0.05 | 0.05 NA       | NA       |
| 0    | 0.27 | 0    | 0.77 NA       | NA       |
| 0    | 0    | 0    | 0 NA          | NA       |
| 0    | 0    | 0    | 0 NA          | NA       |
| 0    | 0    | 0    | 0 NA          | NA       |
| 0    | 0    | 0    | 0 NA          | NA       |
| 0    | 0    | 0    | 0 NA          | NA       |
| 0    | 0    | 0    | 0 NA          | NA       |
| 0    | 0.27 | 0.21 | 0 NA          | NA       |
| 0    | 0    | 0    | 0 NA          | NA       |
| 0    | 0    | 0    | 0 NA          | NA       |
| 0    | 0    | 0    | 0 NA          | NA       |
| 0    | 0    | 0    | 0 NA          | NA       |
| 0    | 0    | 0    | 0 NA          | NA       |
| 0    | 0    | 0    | 0 NA          | NA       |
| 0    | 0    | 0    | 0 NA          | NA       |
| 0    | 0    | 0    | 0 NA          | NA       |
| 0    | 0    | 0    | 0 NA          | NA       |
| 0    | 0    | 0    | 0 NA          | NA       |
| 0    | 0    | 0    | 0 NA          | NA       |
| 0    | 0    | 0    | 0 NA          | NA       |
| 0.09 | 0.13 | 0.18 | 0.34 NA       | NA       |
| 0    | 0    | 0    | 0 NA          | NA       |
| 0    | 0    | 0    | 0 NA          | NA       |
| 0    | 0    | 0    | 0 NA          | NA       |
| 0    | 0    | 0    | 0 NA          | NA       |
| 0    | 0    | 0    | 0 NA          | NA       |
| 0    | 0    | 0    | 0 NA          | NA       |
| 0    | 0    | 0    | 0 NA          | NA       |
| 0    | 0    | 0    | 0 NA          | NA       |
| 0.14 | 0    | 0    | 0 NA          | NA       |
| 0    | 0    | 0    | 0 NA          | NA       |
| 0    | 0    | 0    | 0 NA          | NA       |
| 0    | 0    | 0    | 0 NA          | NA       |
| 0.68 | 0.79 | 0.65 | 0.98 0.746822 | 0.276843 |
| 0    | 0    | 0    | 0 NA          | NA       |
| 0.53 | 0.18 | 0.36 | 0.03 -0.82168 | 0.214248 |
| 0    | 0    | 0    | 0 NA          | NA       |
| 0    | 0    | 0    | 0 NA          | NA       |
| 0    | 0    | 0    | 0 NA          | NA       |
| 0    | 0.07 | 0    | 0.23 NA       | NA       |
| 0    | 0    | 0    | 0 NA          | NA       |

|      |      |      |               |          |
|------|------|------|---------------|----------|
| 0    | 0    | 0    | 0 NA          | NA       |
| 0.32 | 0    | 0    | 0 NA          | NA       |
| 0    | 0    | 0    | 0 NA          | NA       |
| 0    | 0    | 0    | 0 NA          | NA       |
| 0    | 0    | 0    | 0 NA          | NA       |
| 0    | 0    | 0    | 0 NA          | NA       |
| 0.12 | 0    | 0.39 | 0 NA          | NA       |
| 0    | 0    | 0    | 0 NA          | NA       |
| 0    | 0    | 0    | 0 NA          | NA       |
| 0    | 0    | 0    | 0 NA          | NA       |
| 0    | 0    | 0    | 0 NA          | NA       |
| 0    | 0    | 0    | 0 NA          | NA       |
| 0    | 0    | 0    | 0 NA          | NA       |
| 0    | 0    | 0    | 0 NA          | NA       |
| 0    | 0    | 0    | 0 NA          | NA       |
| 0.09 | 0    | 0.06 | 0 NA          | NA       |
| 0    | 0    | 0    | 0 NA          | NA       |
| 0    | 0    | 0    | 0 NA          | NA       |
| 0    | 0    | 0    | 0 NA          | NA       |
| 0    | 0    | 0    | 0 NA          | NA       |
| 0    | 0    | 0    | 0 NA          | NA       |
| 0    | 0    | 0    | 0 NA          | NA       |
| 1.68 | 2.64 | 3.71 | 3.69 1.137563 | 6.83E-05 |
| 0    | 0    | 0    | 0.11 NA       | NA       |
| 0    | 0    | 0    | 0 NA          | NA       |
| 0    | 0    | 0    | 0 NA          | NA       |
| 0    | 0    | 0    | 0 NA          | NA       |
| 0    | 0    | 0    | 0 NA          | NA       |
| 0    | 0    | 0    | 0 NA          | NA       |
| 6.74 | 5.27 | 5.53 | 5.76 -0.25566 | 0.514255 |
| 0    | 0    | 0.28 | 0.11 NA       | NA       |
| 0    | 0    | 0    | 0 NA          | NA       |
| 0    | 0    | 0    | 0 NA          | NA       |
| 0    | 0    | 0    | 0 NA          | NA       |
| 0.1  | 0.09 | 0.28 | 0.08 NA       | NA       |
| 0    | 0    | 0    | 0 NA          | NA       |
| 0    | 0    | 0    | 0 NA          | NA       |
| 0    | 0    | 0    | 0 NA          | NA       |
| 0    | 0    | 0    | 0 NA          | NA       |
| 0    | 0    | 0    | 0 NA          | NA       |
| 0    | 0    | 0    | 0 NA          | NA       |
| 0    | 0    | 0    | 0 NA          | NA       |
| 0    | 0    | 0    | 0 NA          | NA       |
| 0    | 0    | 0    | 0 NA          | NA       |
| 0.02 | 0    | 0    | 0 NA          | NA       |
| 0    | 0    | 0    | 0 NA          | NA       |

|       |       |       |                |          |
|-------|-------|-------|----------------|----------|
| 0     | 0     | 0     | 0 NA           | NA       |
| 14.44 | 17.33 | 17.46 | 13.02 0.117042 | 0.479777 |
| 0     | 0     | 0     | 0 NA           | NA       |
| 0     | 0     | 0     | 0 NA           | NA       |
| 0     | 0     | 0     | 0 NA           | NA       |
| 0     | 0     | 0     | 0 NA           | NA       |
| 0.5   | 0.71  | 0.2   | 0.22 -0.62766  | 0.367099 |
| 0     | 0.23  | 0.24  | 0 NA           | NA       |
| 0     | 0.07  | 0     | 0.12 NA        | NA       |
| 0     | 0     | 0     | 0 NA           | NA       |
| 0     | 0     | 0     | 0 NA           | NA       |
| 0     | 0     | 0     | 0 NA           | NA       |
| 0     | 0     | 0     | 0 NA           | NA       |
| 0     | 0     | 0     | 0 NA           | NA       |
| 0.23  | 0     | 0     | 0 NA           | NA       |
| 0     | 0     | 0     | 0 NA           | NA       |
| 0     | 0     | 0     | 0 NA           | NA       |
| 0     | 0     | 0     | 0 NA           | NA       |
| 0     | 0     | 0     | 0 NA           | NA       |
| 0     | 0     | 0     | 0 NA           | NA       |
| 0     | 0     | 0     | 0.2 NA         | NA       |
| 0     | 0     | 0     | 0 NA           | NA       |
| 0     | 0     | 0     | 0.02 NA        | NA       |
| 0     | 0     | 0     | 0 NA           | NA       |
| 0     | 0     | 0     | 0 NA           | NA       |
| 0     | 0     | 0     | 0 NA           | NA       |
| 0     | 0     | 0     | 0 NA           | NA       |
| 0     | 0     | 0     | 0 NA           | NA       |
| 0     | 0     | 0     | 0 NA           | NA       |
| 0.45  | 0.06  | 0.23  | 0.12 -1.68976  | 0.000253 |
| 0.19  | 0.15  | 0.12  | 0.23 -0.25136  | 0.713701 |
| 0     | 0     | 0     | 0 NA           | NA       |
| 0     | 0     | 0     | 0 NA           | NA       |
| 0     | 0     | 0.44  | 0 NA           | NA       |
| 0     | 0     | 0     | 0 NA           | NA       |
| 0     | 0     | 0.02  | 0 NA           | NA       |
| 0     | 0     | 0     | 0 NA           | NA       |
| 0     | 0     | 0     | 0 NA           | NA       |
| 0.14  | 0.47  | 0.22  | 0.14 0.963255  | 0.136357 |
| 0     | 0     | 0     | 0 NA           | NA       |
| 0     | 0     | 0     | 0 NA           | NA       |
| 0     | 0     | 0     | 0 NA           | NA       |

|      |      |      |      |          |          |
|------|------|------|------|----------|----------|
| 0    | 0.96 | 0.34 | 0.06 | 1.333857 | 0.020861 |
| 0    | 0    | 0    | 0    | NA       | NA       |
| 0    | 0    | 0    | 0    | NA       | NA       |
| 0    | 0    | 0    | 0    | NA       | NA       |
| 0    | 0    | 0    | 0.07 | NA       | NA       |
| 0    | 0    | 0.16 | 0    | NA       | NA       |
| 0    | 0    | 0    | 0    | NA       | NA       |
| 0    | 0    | 0    | 0    | NA       | NA       |
| 0    | 0    | 0    | 0.11 | NA       | NA       |
| 0    | 0    | 0    | 0    | NA       | NA       |
| 0    | 0    | 0    | 0    | NA       | NA       |
| 0    | 0    | 0    | 0    | NA       | NA       |
| 0    | 0    | 0    | 0    | NA       | NA       |
| 0    | 0    | 0    | 0    | NA       | NA       |
| 0    | 0    | 0    | 0    | NA       | NA       |
| 0    | 0    | 0    | 0    | NA       | NA       |
| 0    | 0    | 0    | 0    | NA       | NA       |
| 0    | 0    | 0    | 0    | NA       | NA       |
| 0    | 0    | 0    | 0    | NA       | NA       |
| 0    | 0    | 0    | 0    | NA       | NA       |
| 0    | 0    | 0    | 0    | NA       | NA       |
| 0    | 0    | 0    | 0    | NA       | NA       |
| 0    | 0    | 0    | 0    | NA       | NA       |
| 0    | 0.14 | 0.02 | 0    | NA       | NA       |
| 0    | 0    | 0    | 0    | NA       | NA       |
| 0    | 0    | 0    | 0    | NA       | NA       |
| 0    | 0    | 0    | 0    | NA       | NA       |
| 0    | 0    | 0    | 0    | NA       | NA       |
| 0    | 0    | 0    | 0    | NA       | NA       |
| 0    | 0    | 0    | 0    | NA       | NA       |
| 0    | 0    | 0    | 0    | NA       | NA       |
| 0    | 0    | 0    | 0    | NA       | NA       |
| 0    | 0    | 0    | 0    | NA       | NA       |
| 0    | 0    | 0    | 0    | NA       | NA       |
| 0.24 | 0.38 | 0.48 | 0.42 | 0.690734 | 0.214455 |
| 0    | 0    | 0    | 0    | NA       | NA       |
| 0    | 0    | 0    | 0    | NA       | NA       |
| 0    | 0    | 0    | 0    | NA       | NA       |
| 0.47 | 0.49 | 0.44 | 0.41 | -0.2898  | 0.6806   |
| 0    | 0    | 0    | 0    | NA       | NA       |
| 0    | 0    | 0    | 0    | NA       | NA       |
| 0    | 0    | 0    | 0    | NA       | NA       |
| 0    | 0    | 0    | 0    | NA       | NA       |
| 3.27 | 1    | 1.85 | 0.76 | -1.4969  | 1.02E-05 |
| 0    | 0    | 0    | 0    | NA       | NA       |
| 0    | 0    | 0    | 0    | NA       | NA       |
| 0    | 0    | 0    | 0    | NA       | NA       |

|      |      |      |      |          |          |
|------|------|------|------|----------|----------|
| 0    | 0    | 0    | 0    | NA       | NA       |
| 0    | 0    | 0.11 | 0.13 | NA       | NA       |
| 0    | 0    | 0    | 0    | NA       | NA       |
| 0    | 0    | 0    | 0    | NA       | NA       |
| 0    | 0    | 0    | 0    | NA       | NA       |
| 0    | 0    | 0    | 0    | NA       | NA       |
| 0    | 0    | 0    | 0    | NA       | NA       |
| 0.26 | 0.5  | 0.46 | 0.42 | 0.73594  | 0.189934 |
| 0    | 0    | 0    | 0    | NA       | NA       |
| 0    | 0    | 0    | 0    | NA       | NA       |
| 0    | 0    | 0    | 0    | NA       | NA       |
| 0    | 0    | 0    | 0    | NA       | NA       |
| 0    | 0    | 0    | 0    | NA       | NA       |
| 0    | 0    | 0    | 0    | NA       | NA       |
| 0    | 0    | 0    | 0    | NA       | NA       |
| 1.67 | 1.45 | 1.46 | 1.07 | -0.44997 | 0.401587 |
| 0    | 0    | 0    | 0    | NA       | NA       |
| 0    | 0    | 0    | 0    | NA       | NA       |
| 0    | 0    | 0    | 0    | NA       | NA       |
| 0    | 0    | 0    | 0    | NA       | NA       |
| 0    | 0    | 0    | 0    | NA       | NA       |
| 0.18 | 0.48 | 0.45 | 0.51 | 0.409687 | 0.321876 |
| 0    | 0    | 0.52 | 0    | NA       | NA       |
| 0    | 0    | 0    | 0    | NA       | NA       |
| 0    | 0    | 0    | 0    | NA       | NA       |
| 0.09 | 0.06 | 0    | 0    | NA       | NA       |
| 0.33 | 0.03 | 0.4  | 0.03 | 0.028568 | 0.975981 |
| 0    | 0    | 0    | 0    | NA       | NA       |
| 0    | 0.24 | 0    | 0    | NA       | NA       |
| 0    | 0    | 0    | 0    | NA       | NA       |
| 0    | 0    | 0    | 0    | NA       | NA       |
| 0    | 0    | 0    | 0    | NA       | NA       |
| 0    | 0    | 0    | 0    | NA       | NA       |
| 0    | 5.03 | 1.93 | 2.72 | 3.113225 | 8.73E-10 |
| 0    | 0    | 0.1  | 0.11 | NA       | NA       |
| 0    | 0    | 0    | 0    | NA       | NA       |
| 0    | 0    | 0    | 0    | NA       | NA       |
| 0    | 0    | 0    | 0    | NA       | NA       |
| 0    | 0    | 0    | 0    | NA       | NA       |
| 0    | 0    | 0    | 0    | NA       | NA       |
| 0    | 0    | 0    | 0    | NA       | NA       |
| 0    | 0    | 0    | 0    | NA       | NA       |
| 0    | 0    | 0    | 0    | NA       | NA       |
| 0    | 0    | 0    | 0.04 | NA       | NA       |
| 0    | 0    | 0    | 0    | NA       | NA       |

|      |      |      |         |    |
|------|------|------|---------|----|
| 0    | 0    | 0    | 0 NA    | NA |
| 0    | 0    | 0    | 0 NA    | NA |
| 0    | 0    | 0    | 0 NA    | NA |
| 0    | 0.08 | 0    | 0.04 NA | NA |
| 0    | 0    | 0    | 0 NA    | NA |
| 0    | 0    | 0    | 0 NA    | NA |
| 0    | 0    | 0    | 0 NA    | NA |
| 0    | 0    | 0.04 | 0 NA    | NA |
| 0    | 0.03 | 0    | 0 NA    | NA |
| 0    | 0    | 0    | 0 NA    | NA |
| 0    | 0    | 0    | 0 NA    | NA |
| 0    | 0    | 0    | 0 NA    | NA |
| 0    | 0    | 0    | 0 NA    | NA |
| 0    | 0.63 | 0.55 | 0 NA    | NA |
| 0    | 0    | 0    | 0 NA    | NA |
| 0    | 0    | 0    | 0 NA    | NA |
| 0    | 0.03 | 0    | 0 NA    | NA |
| 0    | 0    | 0    | 0 NA    | NA |
| 0    | 0    | 0    | 0 NA    | NA |
| 0    | 0    | 0    | 0 NA    | NA |
| 0.09 | 0.04 | 0.06 | 0.07 NA | NA |
| 0    | 0    | 0    | 0 NA    | NA |
| 0    | 0    | 0    | 0 NA    | NA |
| 0    | 0    | 0    | 0 NA    | NA |
| 0    | 0    | 0    | 0 NA    | NA |
| 0    | 0    | 0    | 0 NA    | NA |
| 0    | 0    | 0    | 0 NA    | NA |
| 0    | 0    | 0    | 0 NA    | NA |
| 0    | 0    | 0    | 0 NA    | NA |
| 0    | 0    | 0    | 0 NA    | NA |
| 0    | 0    | 0.13 | 0 NA    | NA |
| 0    | 0    | 0    | 0 NA    | NA |
| 0.27 | 0.33 | 0.12 | 0.28 NA | NA |
| 0    | 0    | 0    | 0 NA    | NA |
| 0.07 | 0.05 | 0.14 | 0 NA    | NA |
| 0    | 0    | 0    | 0 NA    | NA |
| 0    | 0    | 0    | 0 NA    | NA |
| 0    | 0    | 0    | 0 NA    | NA |
| 0    | 0    | 0    | 0 NA    | NA |
| 0    | 0    | 0    | 0 NA    | NA |
| 0    | 0.12 | 0    | 0 NA    | NA |







|      |      |      |      |          |          |
|------|------|------|------|----------|----------|
| 0    | 0    | 0    | 0    | NA       | NA       |
| 0.59 | 0.35 | 0.14 | 0.14 | -0.71173 | 0.288653 |
| 0.08 | 0    | 0.15 | 0.42 | -0.34994 | 0.656837 |
| 0.03 | 0.2  | 0    | 0.02 | NA       | NA       |
| 0    | 0    | 0    | 0    | NA       | NA       |
| 0    | 0    | 0    | 0    | NA       | NA       |
| 0    | 0    | 0    | 0    | NA       | NA       |
| 0    | 0    | 0    | 0    | NA       | NA       |
| 0    | 0    | 0    | 0    | NA       | NA       |
| 0    | 0    | 0    | 0    | NA       | NA       |
| 0    | 0    | 0    | 0    | NA       | NA       |
| 0    | 0    | 0    | 0    | NA       | NA       |
| 1.22 | 1.06 | 1.19 | 1.38 | -0.30838 | 0.368824 |
| 0    | 0    | 0    | 0    | NA       | NA       |
| 0    | 0    | 0    | 0.04 | NA       | NA       |
| 0    | 0    | 0    | 0    | NA       | NA       |
| 0    | 0    | 0    | 0    | NA       | NA       |
| 0    | 0    | 0    | 0    | NA       | NA       |
| 0    | 0    | 0    | 0    | NA       | NA       |
| 0    | 0    | 0    | 0    | NA       | NA       |
| 0    | 0    | 0    | 0    | NA       | NA       |
| 5.14 | 2.64 | 8.33 | 4.35 | 0.517233 | 0.416045 |
| 0    | 0    | 0    | 0    | NA       | NA       |
| 0    | 0.14 | 0.06 | 0.12 | 0.861954 | 0.158567 |
| 0    | 0    | 0    | 0    | NA       | NA       |
| 0    | 0    | 0    | 0    | NA       | NA       |
| 0    | 0    | 0    | 0    | NA       | NA       |
| 0    | 0    | 0    | 0    | NA       | NA       |
| 0    | 0    | 0    | 0    | NA       | NA       |
| 0    | 0.38 | 0.14 | 0.49 | 0.493599 | 0.493482 |
| 0    | 0    | 0    | 0    | NA       | NA       |
| 0    | 0    | 0    | 0    | NA       | NA       |
| 0    | 0    | 0.18 | 0.21 | NA       | NA       |
| 0    | 0.04 | 0    | 0.04 | NA       | NA       |
| 0    | 0    | 0    | 0    | NA       | NA       |
| 0    | 0    | 0    | 0    | NA       | NA       |
| 0    | 0    | 0    | 0    | NA       | NA       |
| 0    | 0    | 0    | 0    | NA       | NA       |
| 0    | 0    | 0    | 0    | NA       | NA       |
| 0    | 0    | 0    | 0    | NA       | NA       |
| 0    | 0    | 0    | 0    | NA       | NA       |
| 0.26 | 0.43 | 0.35 | 0.19 | -0.12849 | 0.886675 |
| 0    | 0    | 0    | 0    | NA       | NA       |
| 0    | 0    | 0    | 0    | NA       | NA       |
| 0    | 0    | 0    | 0    | NA       | NA       |
| 0    | 0    | 0    | 0    | NA       | NA       |

|      |      |      |               |          |
|------|------|------|---------------|----------|
| 0    | 0    | 0    | 0 NA          | NA       |
| 0.1  | 0    | 0    | 0 NA          | NA       |
| 0    | 0    | 0    | 0 NA          | NA       |
| 0.19 | 0.14 | 0.25 | 0 NA          | NA       |
| 0    | 0    | 0    | 0.21 NA       | NA       |
| 0    | 0    | 0    | 0 NA          | NA       |
| 0    | 0    | 0    | 0 NA          | NA       |
| 0    | 0    | 0    | 0 NA          | NA       |
| 0    | 0    | 0    | 0 NA          | NA       |
| 0    | 0    | 0    | 0 NA          | NA       |
| 0    | 0    | 0    | 0 NA          | NA       |
| 0    | 0    | 0    | 0 NA          | NA       |
| 1.45 | 3.2  | 3.76 | 2.25 0.351004 | 0.406835 |
| 0    | 0    | 0    | 0 NA          | NA       |
| 0    | 0.07 | 0.05 | 0.22 NA       | NA       |
| 0    | 0    | 0    | 0 NA          | NA       |
| 0    | 0    | 0    | 0 NA          | NA       |
| 0    | 0    | 0    | 0 NA          | NA       |
| 0    | 0    | 0    | 0 NA          | NA       |
| 0    | 0    | 0    | 0 NA          | NA       |
| 0    | 0    | 0    | 0 NA          | NA       |
| 0    | 0    | 0    | 0 NA          | NA       |
| 0    | 0    | 0    | 0 NA          | NA       |
| 0    | 0    | 0    | 0 NA          | NA       |
| 0    | 0    | 0    | 0 NA          | NA       |
| 0    | 0    | 0    | 0 NA          | NA       |
| 0    | 0    | 0    | 0 NA          | NA       |
| 0    | 0    | 0    | 0 NA          | NA       |
| 0    | 0    | 0    | 0 NA          | NA       |
| 1.04 | 1.91 | 1.79 | 1.78 -0.16949 | 0.741372 |
| 0    | 0    | 0    | 0 NA          | NA       |
| 0.3  | 1.03 | 0.92 | 0.3 0.578374  | 0.422302 |
| 0    | 0    | 0    | 0 NA          | NA       |
| 0    | 0    | 0    | 0 NA          | NA       |
| 0    | 0.06 | 0    | 0 NA          | NA       |
| 0    | 0    | 0    | 0 NA          | NA       |
| 0    | 0.14 | 0.28 | 0.55 1.01585  | 0.10536  |
| 0    | 0    | 0    | 0 NA          | NA       |
| 0    | 0    | 0    | 0 NA          | NA       |
| 0    | 0.9  | 0    | 0.45 NA       | NA       |
| 0    | 0    | 0    | 0 NA          | NA       |
| 0    | 0    | 0    | 0 NA          | NA       |
| 0.42 | 0    | 0.41 | 0 NA          | NA       |
| 0    | 0    | 0.21 | 0 NA          | NA       |

|        |       |       |       |          |          |
|--------|-------|-------|-------|----------|----------|
| 0      | 0     | 0     | 0     | NA       | NA       |
| 0      | 0     | 0     | 0     | NA       | NA       |
| 0      | 0     | 0     | 0     | NA       | NA       |
| 0      | 0     | 0     | 0     | NA       | NA       |
| 0.1    | 0     | 0     | 0     | NA       | NA       |
| 0      | 0     | 0     | 0     | NA       | NA       |
| 0.37   | 0.07  | 0.06  | 0.14  | NA       | NA       |
| 2.45   | 1.33  | 2.23  | 1.69  | 0.093417 | 0.876943 |
| 0      | 0     | 0     | 0     | NA       | NA       |
| 0      | 0     | 0     | 0     | NA       | NA       |
| 0      | 0     | 0     | 0     | NA       | NA       |
| 0      | 0     | 0     | 0     | NA       | NA       |
| 0      | 0     | 0     | 0     | NA       | NA       |
| 0      | 0     | 0     | 0     | NA       | NA       |
| 0      | 0     | 0     | 0     | NA       | NA       |
| 0      | 0     | 0     | 0     | NA       | NA       |
| 0      | 0     | 0     | 0     | NA       | NA       |
| 179.21 | 72.59 | 61.57 | 65.37 | -1.37915 | 2.29E-12 |
| 0      | 0     | 0     | 0     | NA       | NA       |
| 0      | 0     | 0     | 0     | NA       | NA       |
| 0      | 0     | 0     | 0     | NA       | NA       |
| 0.9    | 0.58  | 0.73  | 0.52  | -0.30168 | 0.636697 |
| 3      | 1.65  | 2.37  | 2.08  | 0.004224 | 0.995073 |
| 0      | 0     | 0     | 0     | NA       | NA       |
| 0      | 0     | 0     | 0     | NA       | NA       |
| 0      | 0     | 0     | 0     | NA       | NA       |
| 0      | 0     | 0     | 0     | NA       | NA       |
| 0      | 0     | 0     | 0     | NA       | NA       |
| 0      | 0     | 0     | 0     | NA       | NA       |
| 0      | 0     | 0     | 0     | NA       | NA       |
| 0      | 0     | 0     | 0     | NA       | NA       |
| 0      | 0     | 0     | 0     | NA       | NA       |
| 0      | 0     | 0     | 0     | NA       | NA       |
| 0      | 0     | 0     | 0     | NA       | NA       |
| 0.5    | 1.06  | 0.78  | 0.67  | -0.67059 | 0.106385 |
| 0      | 0     | 0     | 0     | NA       | NA       |
| 0      | 0     | 0     | 0     | NA       | NA       |
| 0      | 0     | 0     | 0     | NA       | NA       |
| 0      | 0     | 0     | 0     | NA       | NA       |
| 0      | 0     | 0     | 0     | NA       | NA       |
| 0      | 0     | 0     | 0     | NA       | NA       |
| 0      | 0     | 0     | 0     | NA       | NA       |
| 0      | 0     | 0     | 0     | NA       | NA       |
| 0      | 0     | 0     | 0     | NA       | NA       |
| 0      | 0     | 0     | 0     | NA       | NA       |
| 0      | 0     | 0     | 0     | NA       | NA       |
| 0      | 0     | 0     | 0     | NA       | NA       |
| 0      | 0     | 0     | 0     | NA       | NA       |
| 0      | 0     | 0     | 0     | NA       | NA       |
| 2.71   | 2.08  | 2.19  | 2.47  | -0.25028 | 0.501478 |

|      |      |      |               |          |
|------|------|------|---------------|----------|
| 0    | 0    | 0    | 0 NA          | NA       |
| 0    | 0    | 0    | 0 NA          | NA       |
| 0    | 0.22 | 0.39 | 0 NA          | NA       |
| 0    | 0    | 0    | 0 NA          | NA       |
| 0    | 0    | 0    | 0 NA          | NA       |
| 0    | 0    | 0    | 0 NA          | NA       |
| 0    | 0    | 0    | 0 NA          | NA       |
| 0.42 | 0    | 0    | 0 NA          | NA       |
| 0    | 0    | 0    | 0 NA          | NA       |
| 0.61 | 0.34 | 0.49 | 0.44 -0.91707 | 0.160156 |
| 0.61 | 0.34 | 0.49 | 0.44 -0.91707 | 0.160156 |
| 0    | 0.27 | 0.23 | 0 NA          | NA       |
| 0    | 0    | 0    | 0 NA          | NA       |
| 0    | 0    | 0.08 | 0 NA          | NA       |
| 0    | 0    | 0    | 0 NA          | NA       |
| 0    | 0    | 0    | 0 NA          | NA       |
| 0    | 0    | 0    | 0 NA          | NA       |
| 0    | 0    | 0    | 0 NA          | NA       |
| 0.57 | 0.3  | 0.26 | 0.14 -0.51275 | 0.482272 |
| 0    | 0    | 0    | 0 NA          | NA       |
| 0    | 0    | 0    | 0 NA          | NA       |
| 0    | 0    | 0    | 0 NA          | NA       |
| 0    | 0    | 0    | 0 NA          | NA       |
| 0    | 0    | 0    | 0 NA          | NA       |
| 0    | 0    | 0.33 | 0 NA          | NA       |
| 0    | 0    | 0    | 0 NA          | NA       |
| 0    | 0    | 0    | 0 NA          | NA       |
| 0    | 0    | 0    | 0 NA          | NA       |
| 0    | 0    | 0    | 0 NA          | NA       |
| 0    | 0    | 0    | 0 NA          | NA       |
| 0    | 0    | 0    | 0 NA          | NA       |
| 0    | 0    | 0    | 0 NA          | NA       |
| 0.04 | 0.02 | 0.03 | 0.02 NA       | NA       |
| 0    | 0    | 0    | 0 NA          | NA       |
| 0    | 0    | 0    | 0 NA          | NA       |
| 0    | 0    | 0    | 0.03 NA       | NA       |
| 0    | 0    | 0    | 0 NA          | NA       |
| 0    | 0    | 0    | 0 NA          | NA       |
| 0    | 0    | 0    | 0 NA          | NA       |
| 0.36 | 1.23 | 1.18 | 0.69 0.381264 | 0.595663 |
| 0    | 0    | 0    | 0 NA          | NA       |
| 0    | 0    | 0    | 0 NA          | NA       |
| 0    | 0    | 0    | 0 NA          | NA       |
| 0    | 0    | 0    | 0 NA          | NA       |
| 0    | 0    | 0    | 0 NA          | NA       |

|   |      |      |         |    |
|---|------|------|---------|----|
| 0 | 0    | 0    | 0 NA    | NA |
| 0 | 0    | 0    | 0 NA    | NA |
| 0 | 0    | 0.11 | 0 NA    | NA |
| 0 | 0    | 0    | 0 NA    | NA |
| 0 | 0    | 0    | 0 NA    | NA |
| 0 | 0    | 0    | 0 NA    | NA |
| 0 | 0    | 0.24 | 0 NA    | NA |
| 0 | 0    | 0.07 | 0 NA    | NA |
| 0 | 0    | 0    | 0 NA    | NA |
| 0 | 0    | 0    | 0 NA    | NA |
| 0 | 0    | 0    | 0 NA    | NA |
| 0 | 0    | 0    | 0 NA    | NA |
| 0 | 0    | 0    | 0 NA    | NA |
| 0 | 0    | 0    | 0 NA    | NA |
| 0 | 0    | 0    | 0 NA    | NA |
| 0 | 0    | 0.16 | 0 NA    | NA |
| 0 | 0    | 0    | 0 NA    | NA |
| 0 | 0    | 0    | 0 NA    | NA |
| 0 | 0    | 0    | 0 NA    | NA |
| 0 | 0.16 | 0    | 0 NA    | NA |
| 0 | 0    | 0    | 0 NA    | NA |
| 0 | 0    | 0    | 0 NA    | NA |
| 0 | 0    | 0    | 0 NA    | NA |
| 0 | 0    | 0    | 0 NA    | NA |
| 0 | 0    | 0    | 0 NA    | NA |
| 0 | 0    | 0    | 0 NA    | NA |
| 0 | 0    | 0    | 0 NA    | NA |
| 0 | 0    | 0    | 0 NA    | NA |
| 0 | 0    | 0    | 0 NA    | NA |
| 0 | 0    | 0    | 0 NA    | NA |
| 0 | 0    | 0    | 0 NA    | NA |
| 0 | 0    | 0    | 0 NA    | NA |
| 0 | 0    | 0    | 0 NA    | NA |
| 0 | 0    | 0    | 0 NA    | NA |
| 0 | 0    | 0    | 0 NA    | NA |
| 0 | 0    | 0    | 0 NA    | NA |
| 0 | 0    | 0    | 0 NA    | NA |
| 0 | 0    | 0    | 0 NA    | NA |
| 0 | 0    | 0    | 0 NA    | NA |
| 0 | 0    | 0    | 0 NA    | NA |
| 0 | 0    | 0    | 0 NA    | NA |
| 0 | 0    | 0    | 0 NA    | NA |
| 0 | 0    | 0.09 | 0.03 NA | NA |



|       |       |       |                |          |
|-------|-------|-------|----------------|----------|
| 0     | 0     | 0     | 0 NA           | NA       |
| 0     | 0     | 0     | 0 NA           | NA       |
| 0     | 0     | 0     | 0.1 NA         | NA       |
| 0     | 0     | 0     | 0 NA           | NA       |
| 0     | 0.14  | 0     | 0 NA           | NA       |
| 0     | 0     | 0     | 0 NA           | NA       |
| 0     | 0     | 0     | 0 NA           | NA       |
| 0     | 0     | 0     | 0 NA           | NA       |
| 0     | 0     | 0     | 0 NA           | NA       |
| 0     | 0     | 0     | 0 NA           | NA       |
| 0     | 0     | 0     | 0 NA           | NA       |
| 0     | 0     | 0     | 0 NA           | NA       |
| 0     | 0     | 0     | 0 NA           | NA       |
| 0     | 0     | 0     | 0 NA           | NA       |
| 0     | 0     | 0     | 0 NA           | NA       |
| 0     | 0     | 0     | 0 NA           | NA       |
| 0     | 0     | 0     | 0 NA           | NA       |
| 0     | 0     | 0     | 0 NA           | NA       |
| 0     | 0     | 0     | 0 NA           | NA       |
| 0     | 0     | 0     | 0 NA           | NA       |
| 0     | 0     | 0     | 0 NA           | NA       |
| 0     | 0     | 0     | 0 NA           | NA       |
| 0     | 0.75  | 0.6   | 0 NA           | NA       |
| 0     | 0     | 0     | 0 NA           | NA       |
| 0     | 0     | 0     | 0 NA           | NA       |
| 0     | 0     | 0     | 0 NA           | NA       |
| 0     | 0     | 0     | 0 NA           | NA       |
| 0     | 0     | 0     | 0 NA           | NA       |
| 0     | 0     | 0     | 0 NA           | NA       |
| 0     | 0     | 0     | 0 NA           | NA       |
| 6.42  | 13.11 | 8.14  | 13.83 0.636477 | 0.052055 |
| 0     | 0     | 0     | 0 NA           | NA       |
| 0     | 0     | 0     | 0 NA           | NA       |
| 0     | 0     | 0     | 0 NA           | NA       |
| 0     | 0     | 0     | 0 NA           | NA       |
| 0     | 0     | 0     | 0 NA           | NA       |
| 0     | 0     | 0     | 0 NA           | NA       |
| 0     | 0     | 0     | 0 NA           | NA       |
| 0     | 0     | 0     | 0 NA           | NA       |
| 0     | 0     | 0     | 0 NA           | NA       |
| 0     | 0     | 0     | 0 NA           | NA       |
| 0     | 0     | 0     | 0 NA           | NA       |
| 0     | 0     | 0     | 0 NA           | NA       |
| 0     | 0     | 0     | 0 NA           | NA       |
| 0     | 0     | 0     | 0 NA           | NA       |
| 0     | 0     | 0     | 0 NA           | NA       |
| 0     | 0     | 0     | 0 NA           | NA       |
| 15.05 | 12.33 | 14.22 | 12.05 -0.33852 | 0.010725 |
| 0.51  | 0     | 0.09  | 0 NA           | NA       |
| 0     | 0     | 0     | 0 NA           | NA       |

|       |      |      |                |          |
|-------|------|------|----------------|----------|
| 0     | 0    | 0    | 0 NA           | NA       |
| 0     | 0    | 0    | 0 NA           | NA       |
| 0     | 0    | 0    | 0 NA           | NA       |
| 0     | 0    | 0    | 0 NA           | NA       |
| 0.35  | 0.5  | 0    | 0 NA           | NA       |
| 0.17  | 0    | 0.02 | 0 NA           | NA       |
| 0     | 0    | 0    | 0 NA           | NA       |
| 0     | 0    | 0    | 0 NA           | NA       |
| 0     | 0    | 0    | 0 NA           | NA       |
| 0     | 0    | 0    | 0 NA           | NA       |
| 0     | 0    | 0    | 0 NA           | NA       |
| 0     | 0    | 0    | 0 NA           | NA       |
| 4.32  | 5.9  | 4.17 | 4.17 0.301696  | 0.316615 |
| 0.04  | 0    | 0.02 | 0 NA           | NA       |
| 0     | 0    | 0    | 0 NA           | NA       |
| 0     | 0    | 0    | 0 NA           | NA       |
| 0     | 0    | 0    | 0 NA           | NA       |
| 0     | 0    | 0    | 0 NA           | NA       |
| 0     | 0    | 0    | 0 NA           | NA       |
| 0.07  | 0.06 | 0.06 | 0 NA           | NA       |
| 0     | 0    | 0    | 0 NA           | NA       |
| 0     | 0    | 0    | 0 NA           | NA       |
| 0     | 0    | 0    | 0 NA           | NA       |
| 0     | 0    | 0    | 0 NA           | NA       |
| 0     | 0    | 0    | 0.14 NA        | NA       |
| 0     | 0    | 0    | 0 NA           | NA       |
| 0     | 0    | 0    | 0 NA           | NA       |
| 20.81 | 23.9 | 23   | 23.05 0.133367 | 0.223169 |
| 0     | 0    | 0    | 0 NA           | NA       |
| 0     | 0    | 0    | 0 NA           | NA       |
| 0     | 0    | 0    | 0 NA           | NA       |
| 0     | 0    | 0    | 0 NA           | NA       |
| 0     | 0    | 0    | 0 NA           | NA       |
| 0     | 0    | 0    | 0 NA           | NA       |
| 0     | 0    | 0    | 0 NA           | NA       |
| 0     | 0    | 0    | 0 NA           | NA       |
| 0     | 0    | 0    | 0 NA           | NA       |
| 0     | 0    | 0    | 0 NA           | NA       |
| 0     | 0    | 0    | 0 NA           | NA       |
| 8.62  | 7.69 | 5.7  | 5.08 -0.67467  | 0.002001 |
| 1.45  | 1.61 | 1.23 | 1.24 -0.03154  | 0.955141 |
| 0     | 0    | 0    | 0 NA           | NA       |





|      |      |      |               |          |
|------|------|------|---------------|----------|
| 0    | 0    | 0    | 0 NA          | NA       |
| 0    | 0    | 0.31 | 0 NA          | NA       |
| 0    | 0    | 0    | 0 NA          | NA       |
| 0    | 0    | 0    | 0 NA          | NA       |
| 1.47 | 2.28 | 1.68 | 2.56 0.099841 | 0.895424 |
| 0    | 0    | 0.09 | 0 NA          | NA       |
| 0    | 0    | 0    | 0 NA          | NA       |
| 0    | 0    | 0    | 0 NA          | NA       |
| 0    | 0    | 0    | 0 NA          | NA       |
| 0    | 0    | 0    | 0 NA          | NA       |
| 0    | 0    | 0    | 0 NA          | NA       |
| 0    | 0    | 0    | 0 NA          | NA       |
| 0    | 0    | 0    | 0 NA          | NA       |
| 0    | 0    | 0    | 0 NA          | NA       |
| 0.95 | 0    | 2.21 | 1.47 0.10046  | 0.913642 |
| 0    | 0    | 0    | 0 NA          | NA       |
| 0    | 0    | 0    | 0 NA          | NA       |
| 0.12 | 0    | 0    | 0 NA          | NA       |
| 0    | 0    | 0    | 0 NA          | NA       |
| 0    | 0    | 0    | 0 NA          | NA       |
| 0    | 0    | 0    | 0 NA          | NA       |
| 0    | 0.05 | 0.05 | 0 NA          | NA       |
| 0    | 0    | 0    | 0 NA          | NA       |
| 0    | 0    | 0    | 0 NA          | NA       |
| 0    | 0    | 0    | 0 NA          | NA       |
| 0    | 0    | 0    | 0 NA          | NA       |
| 0    | 0    | 0    | 0 NA          | NA       |
| 0    | 0    | 0    | 0 NA          | NA       |
| 9.99 | 5.46 | 5.71 | 9.41 -0.25275 | 0.296596 |
| 0    | 0    | 0    | 0 NA          | NA       |
| 6.37 | 4.39 | 5.47 | 6.16 -0.10211 | 0.730117 |
| 0    | 0    | 0    | 0 NA          | NA       |
| 0    | 0    | 0    | 0 NA          | NA       |
| 0    | 0.08 | 0.05 | 0.05 0.265362 | 0.73382  |
| 0    | 0    | 0    | 0 NA          | NA       |
| 0    | 0    | 0    | 0 NA          | NA       |
| 0    | 0    | 0    | 0 NA          | NA       |
| 0    | 0    | 0    | 0 NA          | NA       |
| 0    | 0    | 0    | 0 NA          | NA       |
| 0    | 0    | 0    | 0 NA          | NA       |
| 0    | 0    | 0    | 0 NA          | NA       |
| 1.77 | 1.78 | 2.99 | 2.07 -0.03853 | 0.960935 |
| 0    | 0    | 0    | 0 NA          | NA       |
| 0    | 0    | 0    | 0 NA          | NA       |
| 0    | 0    | 0    | 0 NA          | NA       |



|      |      |      |      |          |          |
|------|------|------|------|----------|----------|
| 0    | 0    | 0    | 0    | NA       | NA       |
| 0    | 0    | 0    | 0.18 | NA       | NA       |
| 0    | 0    | 0    | 0    | NA       | NA       |
| 0    | 0    | 0    | 0    | NA       | NA       |
| 0    | 0    | 0    | 0    | NA       | NA       |
| 0    | 0    | 0    | 0    | NA       | NA       |
| 0    | 0    | 0    | 0    | NA       | NA       |
| 0    | 0    | 0    | 0    | NA       | NA       |
| 0    | 0.02 | 0    | 0    | NA       | NA       |
| 0    | 0    | 0    | 0    | NA       | NA       |
| 0    | 0    | 0    | 0    | NA       | NA       |
| 0.2  | 0.18 | 0.3  | 0.43 | 0.657297 | 0.251517 |
| 0    | 0    | 0    | 0    | NA       | NA       |
| 0    | 0    | 0    | 0    | NA       | NA       |
| 0    | 0    | 0    | 0    | NA       | NA       |
| 0    | 0    | 0    | 0    | NA       | NA       |
| 0    | 0    | 0    | 0    | NA       | NA       |
| 0    | 0    | 0    | 0    | NA       | NA       |
| 0    | 0    | 0    | 0    | NA       | NA       |
| 0    | 0    | 0    | 0    | NA       | NA       |
| 0.07 | 0.12 | 0.12 | 0.03 | 0.095763 | 0.918088 |
| 0.13 | 0.22 | 0.84 | 0    | NA       | NA       |
| 0    | 0    | 0    | 0    | NA       | NA       |
| 0    | 0    | 0    | 0    | NA       | NA       |
| 0    | 0    | 1.65 | 0    | NA       | NA       |
| 0    | 0    | 0    | 0.24 | NA       | NA       |
| 0    | 0    | 0    | 0    | NA       | NA       |
| 0    | 0    | 0    | 0    | NA       | NA       |
| 0.95 | 0.48 | 0.52 | 0.69 | -0.77809 | 0.036988 |
| 0    | 0    | 0    | 0    | NA       | NA       |
| 0    | 0.1  | 0.03 | 0.07 | NA       | NA       |
| 0    | 0    | 0    | 0    | NA       | NA       |
| 0    | 0    | 0    | 0    | NA       | NA       |
| 0    | 0    | 0    | 0    | NA       | NA       |
| 0    | 0    | 0    | 0    | NA       | NA       |
| 0.08 | 0.06 | 0    | 0    | NA       | NA       |
| 0    | 0    | 0    | 0    | NA       | NA       |
| 0    | 0    | 0    | 0    | NA       | NA       |
| 0.97 | 0.35 | 0    | 0    | NA       | NA       |
| 0    | 0    | 0    | 0    | NA       | NA       |
| 1.03 | 0.45 | 0.49 | 0.57 | -0.76815 | 0.060773 |
| 0    | 0    | 0    | 0    | NA       | NA       |
| 3.02 | 1.77 | 1.74 | 1.82 | -0.19157 | 0.611872 |

|       |       |       |       |          |          |
|-------|-------|-------|-------|----------|----------|
| 20.36 | 25.87 | 26.85 | 29.09 | 0.280274 | 0.008201 |
| 0     | 0     | 0     | 0     | NA       | NA       |
| 0     | 0     | 0     | 0     | NA       | NA       |
| 0     | 0     | 0     | 0     | NA       | NA       |
| 0     | 0     | 0     | 0     | NA       | NA       |
| 0     | 0     | 0     | 0     | NA       | NA       |
| 0     | 0     | 0     | 0     | NA       | NA       |
| 0     | 0     | 0     | 0     | NA       | NA       |
| 0     | 0     | 0     | 0     | NA       | NA       |
| 0     | 0     | 0     | 0     | NA       | NA       |
| 0     | 0     | 0     | 0     | NA       | NA       |
| 0     | 0     | 0     | 0     | NA       | NA       |
| 0     | 0     | 0     | 0     | NA       | NA       |
| 0     | 0     | 0     | 0     | NA       | NA       |
| 0     | 0     | 0     | 0     | NA       | NA       |
| 0     | 0     | 0     | 0     | NA       | NA       |
| 0.04  | 0     | 0.08  | 0.03  | NA       | NA       |
| 0     | 0     | 0     | 0     | NA       | NA       |
| 0     | 0     | 0     | 0     | NA       | NA       |
| 0     | 0     | 0     | 0     | NA       | NA       |
| 0     | 0     | 0     | 0     | NA       | NA       |
| 0     | 0     | 0     | 0     | NA       | NA       |
| 0     | 0     | 0     | 0     | NA       | NA       |
| 0     | 0     | 0     | 0.12  | NA       | NA       |
| 0     | 0     | 0     | 0     | NA       | NA       |
| 0     | 0     | 0     | 0     | NA       | NA       |
| 0.35  | 0.08  | 0.31  | 0     | NA       | NA       |
| 0     | 0     | 0     | 0     | NA       | NA       |
| 0     | 0     | 0     | 0     | NA       | NA       |
| 0     | 0     | 0     | 0     | NA       | NA       |
| 0.03  | 0     | 0     | 0.02  | NA       | NA       |
| 0     | 0     | 0     | 0     | NA       | NA       |
| 0     | 0     | 0     | 0     | NA       | NA       |
| 0.24  | 0.18  | 0.18  | 0.32  | 0.072541 | 0.931636 |
| 0     | 0     | 0     | 0     | NA       | NA       |
| 1     | 1.89  | 1.52  | 1.63  | 0.453176 | 0.355581 |
| 0     | 0     | 0     | 0     | NA       | NA       |
| 3.48  | 3.87  | 2.77  | 3.73  | 0.347431 | 0.489515 |
| 0     | 0     | 0     | 0     | NA       | NA       |
| 0.17  | 0     | 0     | 0     | NA       | NA       |
| 0     | 0     | 0     | 0     | NA       | NA       |
| 0     | 0     | 0     | 0     | NA       | NA       |
| 1.46  | 1.17  | 1.02  | 0.94  | 0.179818 | 0.783287 |



|      |      |      |               |          |
|------|------|------|---------------|----------|
| 0    | 0    | 0    | 0 NA          | NA       |
| 0    | 0    | 0    | 0 NA          | NA       |
| 0    | 0    | 0    | 0 NA          | NA       |
| 0    | 0    | 0    | 0 NA          | NA       |
| 0.05 | 0.02 | 0.06 | 0.02 NA       | NA       |
| 0.2  | 0.24 | 0.31 | 0.76 0.238718 | 0.777317 |
| 0    | 0    | 0    | 0 NA          | NA       |
| 0    | 0    | 0    | 0 NA          | NA       |
| 0.95 | 0.07 | 0.02 | 1 NA          | NA       |
| 0    | 0    | 0    | 0 NA          | NA       |
| 0    | 0    | 0    | 0 NA          | NA       |
| 0    | 0    | 0    | 0 NA          | NA       |
| 0    | 0    | 0    | 0 NA          | NA       |
| 0    | 0    | 0    | 0 NA          | NA       |
| 0.21 | 0.2  | 0.26 | 0.2 0.007329  | 0.99316  |
| 0    | 0    | 0    | 0 NA          | NA       |
| 0    | 0    | 0    | 0 NA          | NA       |
| 0    | 0    | 0    | 0 NA          | NA       |
| 0    | 0    | 0    | 0 NA          | NA       |
| 0    | 0    | 0    | 0 NA          | NA       |
| 0.11 | 0.15 | 0.14 | 0.16 -0.81802 | 0.22193  |
| 0.12 | 1.81 | 1.12 | 2.22 1.872338 | 0.000348 |
| 0    | 0    | 0    | 0 NA          | NA       |
| 0    | 0    | 0    | 0 NA          | NA       |
| 0    | 0    | 0    | 0 NA          | NA       |
| 0    | 0.45 | 0.2  | 0 NA          | NA       |
| 0    | 0    | 0    | 0 NA          | NA       |
| 0    | 0    | 0    | 0 NA          | NA       |
| 0    | 0    | 0    | 0 NA          | NA       |
| 1.93 | 1.4  | 5.19 | 2.31 NA       | NA       |
| 0    | 0    | 0    | 0 NA          | NA       |
| 0    | 0    | 0.05 | 0 NA          | NA       |
| 0    | 0    | 0    | 0 NA          | NA       |
| 0    | 0.08 | 0    | 0 NA          | NA       |
| 0    | 0    | 0    | 0 NA          | NA       |
| 0    | 0    | 0    | 0 NA          | NA       |
| 0    | 0    | 0    | 0 NA          | NA       |
| 0    | 0    | 0    | 0 NA          | NA       |
| 0    | 0    | 0    | 0 NA          | NA       |
| 0    | 0    | 0    | 0 NA          | NA       |
| 0    | 0    | 0    | 0 NA          | NA       |
| 0.39 | 0.3  | 0.8  | 0.92 0.179094 | 0.80335  |
| 0    | 0    | 0    | 0 NA          | NA       |
| 0    | 0    | 0    | 0 NA          | NA       |
| 0    | 0    | 0    | 0 NA          | NA       |

|      |       |       |      |          |          |
|------|-------|-------|------|----------|----------|
| 0    | 0     | 0     | 0    | NA       | NA       |
| 0    | 0     | 0     | 0    | NA       | NA       |
| 0    | 0     | 0     | 0    | NA       | NA       |
| 0    | 0     | 0     | 0    | NA       | NA       |
| 0    | 0     | 0     | 0    | NA       | NA       |
| 0    | 0     | 0     | 0    | NA       | NA       |
| 0    | 0     | 0.04  | 0    | NA       | NA       |
| 0    | 0     | 0.03  | 0.06 | NA       | NA       |
| 0    | 0     | 0     | 0    | NA       | NA       |
| 0    | 0     | 0     | 0    | NA       | NA       |
| 0    | 0     | 0     | 0    | NA       | NA       |
| 0    | 0     | 0     | 0    | NA       | NA       |
| 0    | 0     | 0     | 0    | NA       | NA       |
| 0    | 0     | 0     | 0    | NA       | NA       |
| 0.16 | 0     | 0     | 0    | NA       | NA       |
| 0.82 | 0.95  | 2.71  | 1.74 | 0.67576  | 0.170273 |
| 0    | 0     | 0     | 0    | NA       | NA       |
| 9.3  | 11.22 | 10.74 | 8.34 | -0.06492 | 0.848795 |
| 0    | 0     | 0     | 0    | NA       | NA       |
| 0    | 0     | 0     | 0    | NA       | NA       |
| 0    | 0     | 0     | 0.11 | NA       | NA       |
| 0    | 0     | 0     | 0    | NA       | NA       |
| 0    | 0     | 0     | 0    | NA       | NA       |
| 0    | 0     | 0     | 0    | NA       | NA       |
| 0    | 0     | 0     | 0    | NA       | NA       |
| 0    | 0     | 0     | 0    | NA       | NA       |
| 0    | 0     | 0     | 0    | NA       | NA       |
| 0    | 0     | 0     | 0    | NA       | NA       |
| 0    | 0     | 0     | 0    | NA       | NA       |
| 0.29 | 0.42  | 0.54  | 0.5  | 0.207643 | 0.800622 |
| 0    | 0     | 0     | 0    | NA       | NA       |
| 0    | 0     | 0     | 0    | NA       | NA       |
| 0    | 0     | 0     | 0.22 | NA       | NA       |
| 0    | 0     | 0     | 0    | NA       | NA       |
| 0    | 0     | 0     | 0    | NA       | NA       |
| 0    | 0     | 0     | 0    | NA       | NA       |
| 0.18 | 0     | 0     | 0.21 | NA       | NA       |
| 0    | 0     | 0     | 0.03 | NA       | NA       |
| 0    | 0     | 0     | 0    | NA       | NA       |
| 0    | 0     | 0.03  | 0    | NA       | NA       |
| 0.26 | 0.47  | 0.48  | 0.72 | 1.136493 | 0.031721 |
| 0    | 0     | 0     | 0    | NA       | NA       |
| 0    | 0     | 0     | 0    | NA       | NA       |
| 0    | 0     | 0     | 0    | NA       | NA       |



|      |      |      |               |          |
|------|------|------|---------------|----------|
| 0    | 0.03 | 0.03 | 0 NA          | NA       |
| 0    | 0    | 0    | 0 NA          | NA       |
| 0    | 0    | 0    | 0 NA          | NA       |
| 0    | 0    | 0    | 0 NA          | NA       |
| 0    | 0    | 0    | 0 NA          | NA       |
| 0    | 0    | 0    | 0 NA          | NA       |
| 0    | 0    | 0    | 0 NA          | NA       |
| 0    | 0    | 0    | 0 NA          | NA       |
| 0    | 0    | 0    | 0 NA          | NA       |
| 0.1  | 0    | 0    | 0 NA          | NA       |
| 0.05 | 0    | 0.03 | 0 NA          | NA       |
| 0    | 0    | 0    | 0 NA          | NA       |
| 0    | 0    | 0    | 0 NA          | NA       |
| 0    | 0.06 | 0    | 0 NA          | NA       |
| 0    | 0    | 0    | 0 NA          | NA       |
| 0    | 0    | 0    | 0 NA          | NA       |
| 0    | 0    | 0    | 0 NA          | NA       |
| 0    | 0    | 0    | 0 NA          | NA       |
| 0    | 0    | 0    | 0 NA          | NA       |
| 0    | 0    | 0    | 0 NA          | NA       |
| 0    | 0    | 0    | 0 NA          | NA       |
| 0    | 0    | 0    | 0 NA          | NA       |
| 0    | 0    | 0    | 0 NA          | NA       |
| 0    | 0    | 0    | 0 NA          | NA       |
| 0    | 0    | 0    | 0 NA          | NA       |
| 0.41 | 0.04 | 0.08 | 0.4 NA        | NA       |
| 0    | 0    | 0    | 0 NA          | NA       |
| 0    | 0    | 0    | 0 NA          | NA       |
| 0    | 0    | 0    | 0 NA          | NA       |
| 0    | 0    | 0    | 0 NA          | NA       |
| 0    | 0    | 0    | 0 NA          | NA       |
| 0    | 0    | 0    | 0 NA          | NA       |
| 0.02 | 0.12 | 0.05 | 0 NA          | NA       |
| 0    | 0    | 0    | 0 NA          | NA       |
| 0    | 0    | 0    | 0 NA          | NA       |
| 0    | 0    | 0    | 0 NA          | NA       |
| 0    | 0    | 0    | 0 NA          | NA       |
| 0    | 0    | 0    | 0 NA          | NA       |
| 0    | 0    | 0    | 0 NA          | NA       |
| 0    | 0    | 0    | 0 NA          | NA       |
| 0    | 0    | 0    | 0 NA          | NA       |
| 0    | 0    | 0    | 0 NA          | NA       |
| 0.74 | 1.24 | 1.28 | 1.47 0.055653 | 0.919583 |
| 0    | 0    | 0.34 | 0.1 NA        | NA       |
| 0    | 0    | 0    | 0 NA          | NA       |

|       |       |       |       |          |          |
|-------|-------|-------|-------|----------|----------|
| 0.1   | 0     | 0     | 0.08  | NA       | NA       |
| 0     | 0     | 0     | 0     | NA       | NA       |
| 0     | 0     | 0     | 0     | NA       | NA       |
| 0     | 0     | 0     | 0     | NA       | NA       |
| 0     | 0     | 0     | 0     | NA       | NA       |
| 0     | 0     | 0.02  | 0     | NA       | NA       |
| 0     | 0     | 0     | 0     | NA       | NA       |
| 21.83 | 24.53 | 23.89 | 26.86 | 0.170347 | 0.322715 |
| 0.06  | 0.18  | 0     | 0.1   | NA       | NA       |
| 0     | 0     | 0     | 0     | NA       | NA       |
| 0     | 0     | 0     | 0     | NA       | NA       |
| 0     | 0     | 0     | 0     | NA       | NA       |
| 0     | 0     | 0.08  | 0     | NA       | NA       |
| 0.64  | 1.26  | 1.69  | 2.53  | 1.134715 | 0.051655 |
| 0     | 0     | 0     | 0     | NA       | NA       |
| 0.05  | 0.07  | 0.05  | 0.06  | 0.145733 | 0.870559 |
| 0.12  | 0.09  | 0     | 0     | NA       | NA       |
| 0     | 0     | 0     | 0     | NA       | NA       |
| 0     | 0     | 0     | 0     | NA       | NA       |
| 0     | 0     | 0     | 0     | NA       | NA       |
| 0     | 0     | 0     | 0     | NA       | NA       |
| 0     | 0     | 0     | 0     | NA       | NA       |
| 0     | 0.06  | 0.03  | 0.06  | NA       | NA       |
| 0     | 0     | 0     | 0     | NA       | NA       |
| 0     | 0     | 0     | 0     | NA       | NA       |
| 0     | 0     | 0     | 0     | NA       | NA       |
| 0     | 0     | 0     | 0     | NA       | NA       |
| 0     | 0     | 0     | 0     | NA       | NA       |
| 0     | 0     | 0     | 0     | NA       | NA       |
| 0     | 0     | 0     | 0     | NA       | NA       |
| 0     | 0     | 0     | 0     | NA       | NA       |
| 0     | 0     | 0     | 0     | NA       | NA       |
| 0.03  | 0     | 0     | 0.03  | NA       | NA       |
| 0     | 0     | 0     | 0     | NA       | NA       |
| 0     | 0     | 0     | 0     | NA       | NA       |
| 0.4   | 0     | 0.06  | 0.08  | -2.30724 | 7.96E-06 |
| 0     | 0     | 0     | 0     | NA       | NA       |
| 0.23  | 0.12  | 0.26  | 0.17  | NA       | NA       |
| 0     | 0     | 0     | 0     | NA       | NA       |
| 0.1   | 0     | 0     | 0     | NA       | NA       |
| 0.75  | 0.36  | 0.16  | 0     | NA       | NA       |
| 0.13  | 0     | 0     | 0     | NA       | NA       |
| 0     | 0     | 0     | 0     | NA       | NA       |
| 0     | 0     | 0     | 0     | NA       | NA       |
| 0     | 0     | 0     | 0     | NA       | NA       |
| 0     | 0     | 0     | 0     | NA       | NA       |

|      |      |      |               |          |
|------|------|------|---------------|----------|
| 0    | 0    | 0    | 0 NA          | NA       |
| 0    | 0    | 0    | 0 NA          | NA       |
| 0    | 0    | 0    | 0 NA          | NA       |
| 0    | 0    | 0    | 0 NA          | NA       |
| 0    | 0    | 0    | 0 NA          | NA       |
| 0    | 0    | 0    | 0 NA          | NA       |
| 1.54 | 1.44 | 1.22 | 1.59 0.148197 | 0.823653 |
| 0    | 0    | 0    | 0 NA          | NA       |
| 0    | 0    | 0    | 0 NA          | NA       |
| 0    | 0    | 0    | 0 NA          | NA       |
| 0    | 0    | 0    | 0 NA          | NA       |
| 0    | 0    | 0    | 0 NA          | NA       |
| 0    | 0.24 | 0.08 | 0.08 NA       | NA       |
| 0    | 0    | 0    | 0 NA          | NA       |
| 0    | 0    | 0    | 0 NA          | NA       |
| 0    | 0    | 0    | 0 NA          | NA       |
| 0    | 0    | 0    | 0 NA          | NA       |
| 0    | 0    | 0    | 0.32 NA       | NA       |
| 0    | 0    | 0.3  | 0 NA          | NA       |
| 0    | 0    | 0    | 0 NA          | NA       |
| 2.35 | 0.93 | 2.03 | 1.6 -0.82759  | 0.074568 |
| 0    | 0    | 0    | 0 NA          | NA       |
| 0    | 0    | 0    | 0 NA          | NA       |
| 0    | 0    | 0    | 0 NA          | NA       |
| 0    | 0    | 0    | 0 NA          | NA       |
| 0    | 0    | 0    | 0 NA          | NA       |
| 0    | 0.58 | 0.04 | 0.09 NA       | NA       |
| 0    | 0    | 0    | 0 NA          | NA       |
| 0    | 0    | 0    | 0 NA          | NA       |
| 0    | 0    | 0    | 0.18 NA       | NA       |
| 0    | 0    | 0    | 0 NA          | NA       |
| 0    | 0    | 0    | 0 NA          | NA       |
| 0    | 0    | 0    | 0 NA          | NA       |
| 0    | 0    | 0    | 0 NA          | NA       |
| 0.07 | 0.18 | 0.22 | 0.22 NA       | NA       |
| 0.08 | 0.41 | 0.33 | 0.06 0.176988 | 0.84023  |
| 0    | 0    | 0    | 0 NA          | NA       |
| 0    | 0    | 0    | 0 NA          | NA       |
| 0.3  | 0.62 | 0.2  | 1.14 0.020976 | 0.983469 |
| 0    | 0    | 0    | 0 NA          | NA       |
| 2.19 | 0.93 | 0.49 | 0.74 -1.04024 | 0.05654  |
| 0    | 0    | 0    | 0 NA          | NA       |
| 0    | 0    | 0    | 0 NA          | NA       |
| 0    | 0    | 0    | 0 NA          | NA       |

|      |      |      |      |          |          |
|------|------|------|------|----------|----------|
| 0.49 | 0.35 | 0.49 | 0.56 | -0.00244 | 0.997928 |
| 0    | 0    | 0    | 0    | NA       | NA       |
| 0    | 0    | 0    | 0    | NA       | NA       |
| 0    | 0    | 0    | 0    | NA       | NA       |
| 0    | 0    | 0    | 0    | NA       | NA       |
| 0    | 0    | 0    | 0    | NA       | NA       |
| 0    | 0.16 | 0    | 0    | NA       | NA       |
| 0    | 0    | 0    | 0    | NA       | NA       |
| 0    | 0    | 0    | 0    | NA       | NA       |
| 0    | 0    | 0    | 0    | NA       | NA       |
| 0    | 0.24 | 0    | 0    | NA       | NA       |
| 0    | 0    | 0    | 0    | NA       | NA       |
| 0.07 | 0    | 0.11 | 0.07 | NA       | NA       |
| 0    | 0    | 0    | 0    | NA       | NA       |
| 0    | 0    | 0.02 | 0.02 | NA       | NA       |
| 0    | 0    | 0    | 0    | NA       | NA       |
| 0    | 0    | 0    | 0    | NA       | NA       |
| 0    | 0    | 0    | 0    | NA       | NA       |
| 0    | 0    | 0    | 0    | NA       | NA       |
| 0    | 0    | 0    | 0    | NA       | NA       |
| 0    | 0    | 0    | 0    | NA       | NA       |
| 0.26 | 0.61 | 0.31 | 0.6  | 0.728581 | 0.199892 |
| 0    | 0.25 | 0    | 0.49 | NA       | NA       |
| 0    | 0    | 0    | 0    | NA       | NA       |
| 0    | 0    | 0    | 0    | NA       | NA       |
| 0    | 0    | 0    | 0    | NA       | NA       |
| 0    | 0    | 0    | 0    | NA       | NA       |
| 0    | 0    | 0    | 0    | NA       | NA       |
| 0    | 0    | 0    | 0    | NA       | NA       |
| 0    | 0    | 0    | 0    | NA       | NA       |
| 0    | 0    | 0    | 0    | NA       | NA       |
| 0.28 | 0.23 | 0.09 | 0.05 | NA       | NA       |
| 0    | 0    | 0    | 0    | NA       | NA       |
| 0    | 0    | 0    | 0    | NA       | NA       |
| 0.42 | 1.66 | 0.77 | 1.23 | 0.540697 | 0.323973 |
| 0    | 0    | 0    | 0    | NA       | NA       |
| 0    | 0    | 0    | 0    | NA       | NA       |
| 0    | 0    | 0    | 0    | NA       | NA       |
| 0.19 | 0    | 0.37 | 0.28 | NA       | NA       |
| 0    | 0    | 0    | 0    | NA       | NA       |
| 0    | 0    | 0    | 0    | NA       | NA       |
| 0.57 | 0    | 0    | 0    | NA       | NA       |
| 0    | 0    | 0    | 0    | NA       | NA       |
| 0    | 0    | 0    | 0    | NA       | NA       |

|       |       |       |                |          |
|-------|-------|-------|----------------|----------|
| 0     | 0     | 0     | 0 NA           | NA       |
| 0     | 0     | 0     | 0 NA           | NA       |
| 0     | 0     | 0     | 0 NA           | NA       |
| 0     | 0     | 0     | 0 NA           | NA       |
| 0     | 0     | 0     | 0 NA           | NA       |
| 0     | 0     | 0     | 0 NA           | NA       |
| 0     | 0     | 0     | 0 NA           | NA       |
| 0     | 0     | 0     | 0 NA           | NA       |
| 0     | 0     | 0     | 0 NA           | NA       |
| 0.05  | 0     | 0.03  | 0 NA           | NA       |
| 10.97 | 12.76 | 12.21 | 10.17 -0.03386 | 0.888597 |
| 0     | 0     | 0     | 0 NA           | NA       |
| 0.3   | 0.11  | 0.29  | 0.11 -0.33933  | 0.646089 |
| 0.27  | 0.67  | 0.62  | 0.4 0.833338   | 0.206326 |
| 0.45  | 0     | 0.1   | 0.23 NA        | NA       |
| 0.09  | 0     | 0.06  | 0.07 NA        | NA       |
| 0     | 0     | 0     | 0 NA           | NA       |
| 0     | 0     | 0     | 0 NA           | NA       |
| 0     | 0     | 0     | 0 NA           | NA       |
| 0.14  | 0.14  | 0.08  | 0.25 0.027476  | 0.975388 |
| 0     | 0     | 0     | 0 NA           | NA       |
| 0     | 0     | 0     | 0 NA           | NA       |
| 0     | 0     | 0     | 0 NA           | NA       |
| 0.02  | 0.07  | 0.09  | 0.12 0.810398  | 0.21994  |
| 0     | 0     | 0     | 0 NA           | NA       |
| 0     | 0     | 0     | 0 NA           | NA       |
| 0     | 0     | 0     | 0 NA           | NA       |
| 0     | 0     | 0     | 0 NA           | NA       |
| 0     | 0     | 0     | 0 NA           | NA       |
| 0     | 0     | 0     | 0 NA           | NA       |
| 0     | 0     | 0     | 0 NA           | NA       |
| 0     | 0     | 0     | 0 NA           | NA       |
| 0     | 0     | 0     | 0 NA           | NA       |
| 0     | 0     | 0     | 0 NA           | NA       |
| 0     | 0     | 0     | 0 NA           | NA       |
| 0     | 0     | 0     | 0 NA           | NA       |
| 0.23  | 1.58  | 1.94  | 1.57 1.447469  | 0.014685 |
| 0     | 0     | 0     | 0 NA           | NA       |
| 0     | 0     | 0     | 0 NA           | NA       |
| 1.17  | 1.37  | 1.04  | 0.96 -0.0891   | 0.843986 |
| 0     | 0     | 0     | 0 NA           | NA       |
| 0     | 0     | 0     | 0 NA           | NA       |
| 0     | 0     | 0     | 0 NA           | NA       |
| 0     | 0     | 0     | 0 NA           | NA       |
| 0     | 0     | 0     | 0 NA           | NA       |



|       |      |      |               |          |
|-------|------|------|---------------|----------|
| 0     | 0    | 0    | 0 NA          | NA       |
| 0     | 0    | 0    | 0 NA          | NA       |
| 0.22  | 0.16 | 0.59 | 0.33 NA       | NA       |
| 1.93  | 1.61 | 1.4  | 1.96 -0.2066  | 0.454408 |
| 0     | 0    | 0    | 0 NA          | NA       |
| 0     | 0    | 0    | 0.5 NA        | NA       |
| 0     | 0    | 0    | 0.01 NA       | NA       |
| 0     | 0    | 0    | 0 NA          | NA       |
| 0     | 0    | 0    | 0 NA          | NA       |
| 0     | 0    | 0    | 0 NA          | NA       |
| 0     | 0    | 0    | 0 NA          | NA       |
| 0     | 0    | 0    | 0 NA          | NA       |
| 0     | 0.06 | 0    | 0.15 NA       | NA       |
| 0.2   | 0    | 0.03 | 0.03 -1.20811 | 0.047577 |
| 0     | 0    | 0    | 0 NA          | NA       |
| 0     | 0    | 0    | 0 NA          | NA       |
| 0.26  | 0.58 | 0.73 | 0.52 0.672059 | 0.127567 |
| 0     | 0.05 | 0    | 0 NA          | NA       |
| 0     | 0    | 0    | 0 NA          | NA       |
| 0     | 0    | 0    | 0 NA          | NA       |
| 0     | 0    | 0    | 0 NA          | NA       |
| 0     | 0    | 0    | 0 NA          | NA       |
| 1.01  | 0.46 | 0.33 | 0.37 -0.60341 | 0.282975 |
| 0     | 0    | 0    | 0 NA          | NA       |
| 0     | 0    | 0    | 0 NA          | NA       |
| 0     | 0    | 0    | 0 NA          | NA       |
| 0     | 0    | 0    | 0 NA          | NA       |
| 0     | 0.2  | 0.22 | 0.43 NA       | NA       |
| 0     | 0    | 0    | 0 NA          | NA       |
| 0     | 0.41 | 0.18 | 0.42 NA       | NA       |
| 0     | 0    | 0    | 0 NA          | NA       |
| 0     | 0    | 0    | 0 NA          | NA       |
| 0     | 0    | 0    | 0 NA          | NA       |
| 0     | 0    | 0    | 0 NA          | NA       |
| 0     | 0    | 0    | 0 NA          | NA       |
| 0     | 0    | 0    | 0 NA          | NA       |
| 0     | 0    | 0    | 0 NA          | NA       |
| 0     | 0    | 0    | 0 NA          | NA       |
| 0     | 0    | 0    | 0 NA          | NA       |
| 0     | 0    | 0    | 0 NA          | NA       |
| 0     | 0    | 0    | 0 NA          | NA       |
| 0     | 0    | 0    | 0 NA          | NA       |
| 0     | 0    | 0    | 0 NA          | NA       |
| 0     | 0    | 0.08 | 0 NA          | NA       |
| 11.59 | 7.19 | 7.01 | 3.8 -0.36365  | 0.488694 |
| 0     | 0    | 0    | 0 NA          | NA       |

|      |      |      |               |          |
|------|------|------|---------------|----------|
| 0    | 0    | 0    | 0 NA          | NA       |
| 0    | 0    | 0    | 0 NA          | NA       |
| 0    | 0    | 0    | 0.36 NA       | NA       |
| 0    | 0    | 0.72 | 0 NA          | NA       |
| 0    | 0    | 0    | 0 NA          | NA       |
| 0    | 0    | 0    | 0 NA          | NA       |
| 0    | 0    | 0    | 0 NA          | NA       |
| 0    | 0    | 0    | 0 NA          | NA       |
| 0    | 0.14 | 0    | 0.26 NA       | NA       |
| 0.13 | 0.05 | 0.04 | 0 NA          | NA       |
| 0    | 0    | 0    | 0 NA          | NA       |
| 0.3  | 0.26 | 0.23 | 0.32 -0.60313 | 0.368177 |
| 0    | 0    | 0    | 0 NA          | NA       |
| 0    | 0    | 0    | 0 NA          | NA       |
| 0    | 0    | 0    | 0 NA          | NA       |
| 0    | 0    | 0    | 0 NA          | NA       |
| 0    | 0    | 0    | 0 NA          | NA       |
| 0    | 0    | 0.11 | 0 NA          | NA       |
| 0    | 0    | 0    | 0 NA          | NA       |
| 0    | 0    | 0    | 0 NA          | NA       |
| 0    | 0    | 0    | 0 NA          | NA       |
| 0    | 0    | 0    | 0.14 NA       | NA       |
| 0    | 0.04 | 0    | 0 NA          | NA       |
| 0    | 0    | 0    | 0 NA          | NA       |
| 0.32 | 0.13 | 0.16 | 0.18 -0.30354 | 0.709563 |
| 0    | 0    | 0    | 0 NA          | NA       |
| 0    | 0    | 0    | 0 NA          | NA       |
| 0    | 0    | 0    | 0 NA          | NA       |
| 0    | 0    | 0    | 0 NA          | NA       |
| 0    | 0    | 0    | 0 NA          | NA       |
| 0    | 0    | 0    | 0 NA          | NA       |
| 0    | 0    | 0    | 0 NA          | NA       |
| 0    | 0    | 0    | 0 NA          | NA       |
| 0    | 0    | 0    | 0 NA          | NA       |
| 0    | 0    | 0    | 0 NA          | NA       |
| 0.58 | 0.44 | 0.62 | 0.35 -0.15378 | 0.792792 |
| 0.41 | 0.2  | 0.27 | 0.16 -0.47787 | 0.459233 |
| 0    | 0    | 0    | 0 NA          | NA       |
| 0    | 0    | 0    | 0 NA          | NA       |
| 0    | 0    | 0    | 0 NA          | NA       |
| 0    | 0    | 0    | 0 NA          | NA       |
| 0    | 0    | 0    | 0 NA          | NA       |
| 0    | 0    | 0.09 | 0 NA          | NA       |
| 0    | 0    | 0    | 0 NA          | NA       |



|       |       |       |       |          |          |
|-------|-------|-------|-------|----------|----------|
| 0     | 0     | 0     | 0     | NA       | NA       |
| 0     | 0     | 0     | 0     | NA       | NA       |
| 0     | 0     | 0     | 0     | NA       | NA       |
| 0     | 0     | 0     | 0     | NA       | NA       |
| 0     | 0     | 0     | 0     | NA       | NA       |
| 0     | 0     | 0     | 0     | NA       | NA       |
| 0     | 0     | 0     | 0     | NA       | NA       |
| 0     | 0     | 0     | 0     | NA       | NA       |
| 0     | 0     | 0     | 0     | NA       | NA       |
| 0     | 0     | 0     | 0     | NA       | NA       |
| 0     | 0     | 0     | 0     | NA       | NA       |
| 17.17 | 15.98 | 17.62 | 17.67 | -0.11978 | 0.349758 |
| 1.28  | 0.72  | 0.86  | 1.44  | -0.13416 | 0.847304 |
| 0     | 0     | 0     | 0     | NA       | NA       |
| 0     | 0     | 0     | 0     | NA       | NA       |
| 0     | 0     | 0     | 0     | NA       | NA       |
| 0     | 0     | 0     | 0     | NA       | NA       |
| 0     | 0     | 0     | 0     | NA       | NA       |
| 0     | 0     | 0     | 0     | NA       | NA       |
| 0     | 0     | 0     | 0     | NA       | NA       |
| 0.92  | 1.28  | 1.66  | 1.06  | 0.64189  | 0.238613 |
| 0     | 0     | 0     | 0     | NA       | NA       |
| 0     | 0     | 0     | 0     | NA       | NA       |
| 0     | 0     | 0     | 0     | NA       | NA       |
| 0     | 0     | 0     | 0     | NA       | NA       |
| 0     | 0     | 0.07  | 0     | NA       | NA       |
| 0     | 0     | 0     | 0     | NA       | NA       |
| 0     | 0     | 0     | 0.13  | NA       | NA       |
| 0     | 0     | 0     | 0     | NA       | NA       |
| 0     | 0     | 0     | 0     | NA       | NA       |
| 0     | 0     | 0     | 0     | NA       | NA       |
| 0.2   | 0.7   | 0.92  | 1.19  | 0.679241 | 0.29684  |
| 0     | 0     | 0     | 0     | NA       | NA       |
| 0.92  | 0.47  | 0.09  | 0.2   | -0.44558 | 0.554701 |
| 0     | 0     | 0     | 0     | NA       | NA       |
| 0     | 0     | 0     | 0     | NA       | NA       |
| 0     | 0     | 0     | 0     | NA       | NA       |
| 0.02  | 0.18  | 0.25  | 0.14  | 1.635795 | 0.005034 |
| 0     | 0     | 0     | 0     | NA       | NA       |
| 0     | 0     | 0     | 0.47  | NA       | NA       |
| 0     | 0     | 0     | 0     | NA       | NA       |
| 0     | 0     | 0     | 0     | NA       | NA       |
| 0     | 0     | 0     | 0     | NA       | NA       |
| 0     | 0     | 0     | 0     | NA       | NA       |
| 0     | 0     | 0     | 0.02  | NA       | NA       |
| 0     | 0     | 0     | 0     | NA       | NA       |





|   |      |   |         |    |
|---|------|---|---------|----|
| 0 | 0    | 0 | 0 NA    | NA |
| 0 | 0    | 0 | 0 NA    | NA |
| 0 | 0    | 0 | 0 NA    | NA |
| 0 | 0    | 0 | 0 NA    | NA |
| 0 | 0    | 0 | 0 NA    | NA |
| 0 | 0    | 0 | 0 NA    | NA |
| 0 | 0    | 0 | 0 NA    | NA |
| 0 | 0    | 0 | 0 NA    | NA |
| 0 | 0    | 0 | 0 NA    | NA |
| 0 | 0    | 0 | 0 NA    | NA |
| 0 | 1.77 | 0 | 6.18 NA | NA |
| 0 | 0    | 0 | 0 NA    | NA |
| 0 | 0    | 0 | 0 NA    | NA |
| 0 | 0    | 0 | 0 NA    | NA |
| 0 | 0    | 0 | 0 NA    | NA |
| 0 | 0    | 0 | 0 NA    | NA |
| 0 | 0    | 0 | 0 NA    | NA |
| 0 | 0    | 0 | 0 NA    | NA |
| 0 | 0    | 0 | 0 NA    | NA |
| 0 | 0    | 0 | 0 NA    | NA |
| 0 | 0    | 0 | 0 NA    | NA |
| 0 | 0    | 0 | 0 NA    | NA |
| 0 | 0    | 0 | 0 NA    | NA |
| 0 | 0    | 0 | 0 NA    | NA |
| 0 | 0    | 0 | 0 NA    | NA |
| 0 | 0    | 0 | 0 NA    | NA |
| 0 | 0    | 0 | 0 NA    | NA |
| 0 | 0    | 0 | 0 NA    | NA |
| 0 | 0    | 0 | 0 NA    | NA |
| 0 | 0    | 0 | 0 NA    | NA |
| 0 | 0    | 0 | 0 NA    | NA |
| 0 | 0    | 0 | 0 NA    | NA |
| 0 | 0    | 0 | 0 NA    | NA |
| 0 | 0    | 0 | 0 NA    | NA |
| 0 | 0.52 | 0 | 0 NA    | NA |
| 0 | 0    | 0 | 0 NA    | NA |
| 0 | 0    | 0 | 0 NA    | NA |
| 0 | 0    | 0 | 0 NA    | NA |
| 0 | 0    | 0 | 0 NA    | NA |







|       |        |        |                 |          |
|-------|--------|--------|-----------------|----------|
| 0     | 0      | 0      | 0 NA            | NA       |
| 0     | 0      | 0      | 0 NA            | NA       |
| 0     | 0      | 0      | 0 NA            | NA       |
| 0.89  | 0.88   | 0.32   | 0.63 0.032207   | 0.972136 |
| 0     | 0      | 0      | 0 NA            | NA       |
| 0     | 0      | 0      | 0 NA            | NA       |
| 0.1   | 0.08   | 0.4    | 0.7 -0.39487    | 0.60946  |
| 0.01  | 0.12   | 0.01   | 0 NA            | NA       |
| 0     | 0      | 0      | 0 NA            | NA       |
| 0     | 0      | 0      | 0 NA            | NA       |
| 0     | 0      | 0      | 0 NA            | NA       |
| 0     | 0      | 0      | 0 NA            | NA       |
| 0     | 0      | 0      | 0 NA            | NA       |
| 0     | 0      | 0      | 0 NA            | NA       |
| 0     | 0      | 0      | 0 NA            | NA       |
| 0     | 0      | 0      | 0 NA            | NA       |
| 0     | 0      | 0      | 0 NA            | NA       |
| 0     | 0      | 0      | 0 NA            | NA       |
| 0     | 0      | 0      | 0 NA            | NA       |
| 0     | 0      | 0      | 0 NA            | NA       |
| 0     | 0      | 0.03   | 0 NA            | NA       |
| 0     | 0      | 0      | 0 NA            | NA       |
| 0     | 0      | 0      | 0 NA            | NA       |
| 1.33  | 1.55   | 2.3    | 1.64 0.094693   | 0.908712 |
| 0     | 0      | 0      | 0 NA            | NA       |
| 0     | 0      | 0      | 0 NA            | NA       |
| 239.3 | 384.32 | 387.78 | 386.77 0.637452 | 4.79E-22 |
| 0.03  | 0      | 0.02   | 0.02 NA         | NA       |
| 0.16  | 0      | 0      | 0 NA            | NA       |
| 0     | 0      | 0      | 0 NA            | NA       |
| 0.19  | 0.27   | 0.12   | 0 NA            | NA       |
| 0     | 0      | 0      | 0 NA            | NA       |
| 0     | 0      | 0      | 0 NA            | NA       |
| 0     | 0      | 0      | 0 NA            | NA       |
| 3.09  | 3.98   | 5.68   | 6.1 0.87757     | 0.000456 |
| 0     | 0      | 0      | 0 NA            | NA       |
| 0.09  | 0.07   | 0      | 0.07 NA         | NA       |
| 0     | 0      | 0      | 0 NA            | NA       |
| 0.6   | 0.13   | 0.24   | 0 NA            | NA       |
| 0     | 0      | 0      | 0 NA            | NA       |
| 14.25 | 18.98  | 15.71  | 16.59 0.144296  | 0.296522 |
| 12.14 | 10.68  | 9.08   | 11.01 -0.1253   | 0.457266 |
| 0     | 0      | 0      | 0 NA            | NA       |
| 0     | 0      | 0      | 0 NA            | NA       |



|       |      |      |                |          |
|-------|------|------|----------------|----------|
| 0     | 0    | 0    | 0 NA           | NA       |
| 0     | 0    | 0    | 0 NA           | NA       |
| 0     | 0    | 0    | 0 NA           | NA       |
| 0     | 0    | 0    | 0 NA           | NA       |
| 0     | 0    | 0    | 0 NA           | NA       |
| 0     | 0    | 0    | 0 NA           | NA       |
| 0     | 0    | 0    | 0 NA           | NA       |
| 0     | 0    | 0    | 0 NA           | NA       |
| 2.64  | 2.27 | 2.86 | 3.05 -0.31254  | 0.424758 |
| 0     | 0    | 0    | 0 NA           | NA       |
| 0     | 0.3  | 0.09 | 0 NA           | NA       |
| 0     | 0    | 0    | 0 NA           | NA       |
| 0     | 0    | 0    | 0 NA           | NA       |
| 0     | 0    | 0    | 0 NA           | NA       |
| 0     | 0.14 | 0    | 0 NA           | NA       |
| 0     | 0    | 0    | 0 NA           | NA       |
| 0     | 0    | 0    | 0 NA           | NA       |
| 0     | 0    | 0    | 0 NA           | NA       |
| 0     | 0    | 0    | 0 NA           | NA       |
| 0     | 0    | 0    | 0 NA           | NA       |
| 0     | 0    | 0    | 0 NA           | NA       |
| 0     | 0    | 0    | 0 NA           | NA       |
| 10.73 | 8.57 | 8.23 | 10.65 -0.24229 | 0.274842 |
| 0     | 0    | 0    | 0 NA           | NA       |
| 0     | 0    | 0.01 | 0 NA           | NA       |
| 0.03  | 0.04 | 0    | 0 NA           | NA       |
| 0     | 0    | 0    | 0 NA           | NA       |
| 0.04  | 0.06 | 0    | 0 NA           | NA       |
| 0     | 0    | 0    | 0 NA           | NA       |
| 0     | 0    | 0    | 0 NA           | NA       |
| 0     | 0    | 0    | 0 NA           | NA       |
| 0     | 0    | 0    | 0 NA           | NA       |
| 0     | 0    | 0    | 0 NA           | NA       |
| 0.54  | 0.48 | 0.45 | 0.1 -0.1415    | 0.87436  |
| 1.18  | 0.58 | 1.01 | 1.54 -0.13644  | 0.844837 |
| 0     | 0    | 0    | 0 NA           | NA       |
| 0     | 0    | 0    | 0 NA           | NA       |
| 0     | 0.94 | 0    | 0 NA           | NA       |
| 0     | 0    | 0.04 | 0 NA           | NA       |
| 0.46  | 0    | 0.56 | 0.33 NA        | NA       |
| 0     | 0    | 0    | 0 NA           | NA       |
| 0     | 0    | 0    | 0 NA           | NA       |
| 0     | 0    | 0    | 0 NA           | NA       |
| 0     | 0    | 0    | 0 NA           | NA       |

|      |      |      |      |          |          |
|------|------|------|------|----------|----------|
| 0    | 0    | 0    | 0.18 | NA       | NA       |
| 0    | 0    | 0    | 0    | NA       | NA       |
| 0    | 0    | 0    | 0    | NA       | NA       |
| 0    | 0    | 0    | 0    | NA       | NA       |
| 0    | 0.02 | 0    | 0    | NA       | NA       |
| 0    | 0    | 0    | 0    | NA       | NA       |
| 2.3  | 2.09 | 1.14 | 1.4  | -0.10405 | 0.886485 |
| 0    | 0    | 0    | 0    | NA       | NA       |
| 0    | 0    | 0    | 0    | NA       | NA       |
| 0    | 0    | 0    | 0    | NA       | NA       |
| 0    | 0    | 0    | 0    | NA       | NA       |
| 0    | 0.38 | 0.17 | 0    | NA       | NA       |
| 0    | 0    | 0    | 0    | NA       | NA       |
| 0    | 0    | 0    | 0    | NA       | NA       |
| 0    | 0    | 0    | 0    | NA       | NA       |
| 0.12 | 0.11 | 0    | 0.21 | NA       | NA       |
| 0    | 0    | 0    | 0    | NA       | NA       |
| 0    | 0    | 0    | 0    | NA       | NA       |
| 0    | 0    | 0    | 0    | NA       | NA       |
| 0    | 0    | 0    | 0    | NA       | NA       |
| 0.1  | 0    | 0    | 0    | NA       | NA       |
| 0.26 | 0.19 | 0.14 | 0.16 | -0.555   | 0.403495 |
| 0    | 0    | 0    | 0    | NA       | NA       |
| 0    | 0    | 0    | 0    | NA       | NA       |
| 0.13 | 0    | 0.07 | 0    | NA       | NA       |
| 0    | 0    | 0    | 0    | NA       | NA       |
| 0    | 0    | 0    | 0    | NA       | NA       |
| 0    | 0    | 0    | 0    | NA       | NA       |
| 0    | 0.32 | 0    | 0    | NA       | NA       |
| 0    | 0    | 0    | 0    | NA       | NA       |
| 0    | 0    | 0    | 0    | NA       | NA       |
| 0    | 0    | 0    | 0    | NA       | NA       |
| 0    | 0    | 0    | 0    | NA       | NA       |
| 0    | 0    | 0    | 0    | NA       | NA       |
| 0    | 0    | 0.12 | 0.06 | -0.26194 | 0.7405   |
| 0    | 0    | 0    | 0    | NA       | NA       |
| 0    | 0    | 0    | 0    | NA       | NA       |
| 0    | 0    | 0    | 0    | NA       | NA       |
| 0    | 0    | 0    | 0    | NA       | NA       |
| 8.68 | 9.08 | 7.07 | 8.7  | -0.34607 | 0.038629 |
| 0.48 | 0.47 | 0.86 | 0.32 | -0.39133 | 0.604446 |
| 0    | 0    | 0.17 | 0    | NA       | NA       |
| 0    | 0    | 0    | 0    | NA       | NA       |
| 0    | 0    | 0    | 0    | NA       | NA       |
| 0    | 0    | 0.19 | 0    | NA       | NA       |

|      |      |      |               |          |
|------|------|------|---------------|----------|
| 0    | 0    | 0    | 0 NA          | NA       |
| 0    | 0    | 0    | 0 NA          | NA       |
| 0    | 0    | 0    | 0 NA          | NA       |
| 0    | 0    | 0    | 0 NA          | NA       |
| 0    | 0    | 0    | 0 NA          | NA       |
| 0    | 0    | 0    | 0 NA          | NA       |
| 0    | 0    | 0    | 0 NA          | NA       |
| 0    | 0    | 0    | 0 NA          | NA       |
| 0    | 0    | 0    | 0 NA          | NA       |
| 0    | 0    | 0.13 | 0.15 NA       | NA       |
| 0.12 | 0.49 | 0.16 | 0.04 NA       | NA       |
| 0    | 0    | 0    | 0 NA          | NA       |
| 0    | 0    | 0    | 0 NA          | NA       |
| 0    | 0    | 0    | 0 NA          | NA       |
| 1.16 | 1.97 | 1.41 | 2.16 0.440375 | 0.435791 |
| 0    | 0    | 0    | 0 NA          | NA       |
| 0    | 0    | 0    | 0 NA          | NA       |
| 0    | 0    | 0    | 0 NA          | NA       |
| 0    | 0    | 0    | 0 NA          | NA       |
| 0    | 0    | 0    | 0 NA          | NA       |
| 0    | 0    | 0    | 0 NA          | NA       |
| 0    | 0    | 0    | 0 NA          | NA       |
| 0    | 0    | 0    | 0 NA          | NA       |
| 0    | 0    | 0    | 0 NA          | NA       |
| 0.08 | 0.39 | 0.31 | 0.47 0.372252 | 0.633008 |
| 0    | 0.06 | 0.12 | 0 NA          | NA       |
| 0    | 0    | 0    | 0 NA          | NA       |
| 0    | 0    | 0    | 0 NA          | NA       |
| 0    | 0    | 0    | 0 NA          | NA       |
| 0.08 | 0    | 0    | 0 NA          | NA       |
| 0    | 0    | 0    | 0 NA          | NA       |
| 0.29 | 0    | 0    | 0 NA          | NA       |
| 0    | 0    | 0    | 0 NA          | NA       |
| 0    | 0    | 0    | 0 NA          | NA       |
| 1.44 | 0.82 | 1.26 | 0.77 0.075664 | 0.936984 |
| 0    | 0    | 0    | 0 NA          | NA       |
| 0    | 0    | 0    | 0 NA          | NA       |
| 0    | 0    | 0    | 0 NA          | NA       |
| 0.56 | 0    | 0.43 | 0.45 -0.98062 | 0.120193 |
| 0    | 0    | 0    | 0 NA          | NA       |
| 0    | 0    | 0    | 0 NA          | NA       |
| 0    | 0    | 0    | 0 NA          | NA       |
| 0    | 0.55 | 0.18 | 0.27 NA       | NA       |

|       |       |       |                |          |
|-------|-------|-------|----------------|----------|
| 0     | 0     | 0     | 0 NA           | NA       |
| 0     | 0     | 0     | 0 NA           | NA       |
| 0     | 0     | 0     | 0 NA           | NA       |
| 0     | 0     | 0     | 0 NA           | NA       |
| 0     | 0     | 0     | 0 NA           | NA       |
| 0.85  | 0.28  | 0.17  | 0.23 NA        | NA       |
| 0.68  | 0.53  | 0.39  | 0.75 -0.21259  | 0.701638 |
| 0     | 0     | 0     | 0 NA           | NA       |
| 0     | 0     | 0     | 0 NA           | NA       |
| 7.07  | 5.35  | 5.22  | 8.2 -0.10998   | 0.717075 |
| 0     | 0     | 0     | 0 NA           | NA       |
| 0     | 0     | 0     | 0 NA           | NA       |
| 36.45 | 33.6  | 39.27 | 36.52 0.041002 | 0.827131 |
| 0     | 0     | 0     | 0 NA           | NA       |
| 0.32  | 0     | 0.21  | 0 NA           | NA       |
| 0     | 0     | 0     | 0 NA           | NA       |
| 0     | 0     | 0     | 0 NA           | NA       |
| 0     | 0     | 0     | 0 NA           | NA       |
| 0     | 0     | 0     | 0 NA           | NA       |
| 0     | 0     | 0     | 0 NA           | NA       |
| 0     | 0     | 0     | 0 NA           | NA       |
| 0     | 0     | 0.06  | 0 NA           | NA       |
| 20.23 | 14.54 | 14.05 | 15.16 -0.53922 | 4.72E-05 |
| 0     | 0     | 0     | 0 NA           | NA       |
| 0     | 0     | 0     | 0.34 NA        | NA       |
| 0     | 0     | 0     | 0 NA           | NA       |
| 0     | 0     | 0     | 0 NA           | NA       |
| 0.77  | 2.47  | 1.29  | 1.48 0.284918  | 0.676579 |
| 0     | 0     | 0     | 0 NA           | NA       |
| 0     | 0     | 0     | 0 NA           | NA       |
| 0     | 0     | 0     | 0 NA           | NA       |
| 0     | 0     | 0     | 0 NA           | NA       |
| 4.61  | 3.47  | 2.96  | 3.75 -0.46695  | 0.052339 |
| 0     | 0     | 0     | 0 NA           | NA       |
| 0     | 0     | 0     | 0 NA           | NA       |
| 0     | 0     | 0     | 0 NA           | NA       |
| 0     | 0     | 0     | 0 NA           | NA       |
| 0     | 0.28  | 0     | 0.29 NA        | NA       |
| 0     | 0     | 0     | 0 NA           | NA       |
| 0     | 0     | 0     | 0 NA           | NA       |
| 0     | 0     | 0     | 0.09 -0.19901  | 0.799708 |
| 0     | 0     | 0     | 0 NA           | NA       |
| 0     | 0     | 0     | 0 NA           | NA       |
| 0     | 0     | 0     | 0 NA           | NA       |

|       |       |       |                |          |
|-------|-------|-------|----------------|----------|
| 0     | 0     | 0     | 0 NA           | NA       |
| 0     | 0     | 0     | 0 NA           | NA       |
| 0     | 0     | 0     | 0 NA           | NA       |
| 0.59  | 1.27  | 1.53  | 1.18 0.185406  | 0.821682 |
| 0     | 0     | 0     | 0 NA           | NA       |
| 0.15  | 0.11  | 0.1   | 0.11 NA        | NA       |
| 1.43  | 0.48  | 0.31  | 0 -0.58253     | 0.412337 |
| 38.97 | 34.62 | 35.25 | 34.61 -0.10997 | 0.431444 |
| 0     | 0     | 0     | 0 NA           | NA       |
| 0     | 0     | 0     | 0 NA           | NA       |
| 5.17  | 5.66  | 4.97  | 6.54 -0.13448  | 0.605669 |
| 0.05  | 0     | 0     | 0 NA           | NA       |
| 0     | 0     | 0     | 0 NA           | NA       |
| 0     | 0     | 0     | 0 NA           | NA       |
| 0     | 0     | 0     | 0 NA           | NA       |
| 0     | 0     | 0     | 0 NA           | NA       |
| 0     | 0     | 0     | 0 NA           | NA       |
| 0     | 0     | 0.19  | 0.22 NA        | NA       |
| 0     | 0     | 0     | 0 NA           | NA       |
| 0     | 0     | 0     | 0 NA           | NA       |
| 0     | 0     | 0     | 0 NA           | NA       |
| 0     | 0     | 0     | 0 NA           | NA       |
| 0     | 0     | 0     | 0 NA           | NA       |
| 0     | 0     | 0     | 0 NA           | NA       |
| 0     | 0     | 0     | 0 NA           | NA       |
| 0     | 0     | 0     | 0 NA           | NA       |
| 0     | 0     | 0     | 0 NA           | NA       |
| 0     | 0     | 0     | 0 NA           | NA       |
| 0     | 0     | 0     | 0 NA           | NA       |
| 0     | 0     | 0     | 0 NA           | NA       |
| 0     | 0     | 0     | 0 NA           | NA       |
| 0.14  | 0.44  | 0.14  | 0.59 -0.52628  | 0.466847 |
| 0     | 0.1   | 0     | 0 NA           | NA       |
| 0     | 0     | 0     | 0 NA           | NA       |
| 0     | 0.07  | 0     | 0 NA           | NA       |
| 0     | 0     | 0     | 0 NA           | NA       |
| 0     | 0     | 0     | 0 NA           | NA       |
| 0     | 0     | 0     | 0 NA           | NA       |
| 0     | 0     | 0     | 0 NA           | NA       |
| 0     | 0     | 0     | 0 NA           | NA       |
| 0     | 0     | 0     | 0 NA           | NA       |
| 0     | 0     | 0     | 0 NA           | NA       |
| 17.53 | 11.68 | 12.62 | 11.06 -0.42676 | 0.000361 |
| 0     | 0     | 0     | 0 NA           | NA       |
| 0     | 0     | 0     | 0 NA           | NA       |
| 0     | 0     | 0     | 0 NA           | NA       |
| 0     | 0     | 0     | 0 NA           | NA       |
| 0     | 0     | 0     | 0 NA           | NA       |

|       |       |       |                |          |
|-------|-------|-------|----------------|----------|
| 0     | 0     | 0     | 0 NA           | NA       |
| 0     | 0     | 0     | 0 NA           | NA       |
| 0     | 0     | 0.02  | 0 NA           | NA       |
| 0.19  | 0.48  | 0.42  | 0.28 NA        | NA       |
| 3.6   | 3.5   | 2.66  | 2.42 -0.19401  | 0.627366 |
| 0.52  | 1.47  | 0.31  | 0.99 NA        | NA       |
| 0     | 0     | 0     | 0 NA           | NA       |
| 0     | 0.01  | 0.07  | 0.01 NA        | NA       |
| 0     | 0     | 0     | 0 NA           | NA       |
| 0.2   | 0.37  | 0.17  | 0.27 0.08973   | 0.922927 |
| 0     | 0     | 0     | 0 NA           | NA       |
| 33.52 | 26.27 | 28.33 | 25.01 -0.35728 | 0.001899 |
| 0     | 0     | 0     | 0 NA           | NA       |
| 0.51  | 0     | 0     | 0 NA           | NA       |
| 0     | 0     | 0     | 0 NA           | NA       |
| 0     | 0     | 0     | 0 NA           | NA       |
| 0     | 4.28  | 0     | 0 NA           | NA       |
| 0     | 0     | 0     | 0 NA           | NA       |
| 0     | 0     | 0     | 0 NA           | NA       |
| 0.18  | 0.29  | 0.22  | 0 NA           | NA       |
| 0     | 0     | 0     | 0 NA           | NA       |
| 0     | 0     | 0     | 0 NA           | NA       |
| 0     | 0     | 0     | 0 NA           | NA       |
| 0     | 0     | 0     | 0 NA           | NA       |
| 0     | 0     | 0     | 0 NA           | NA       |
| 0     | 0     | 0     | 0 NA           | NA       |
| 0     | 0     | 0     | 0 NA           | NA       |
| 0     | 0     | 0     | 0 NA           | NA       |
| 0     | 0     | 0     | 0 NA           | NA       |
| 0     | 0     | 0     | 0 NA           | NA       |
| 0     | 0     | 0     | 0 NA           | NA       |
| 0     | 0     | 0     | 0 NA           | NA       |
| 0.93  | 0     | 0.22  | 0.94 -0.22297  | 0.793531 |
| 0     | 0     | 0     | 0 NA           | NA       |
| 0.53  | 0.37  | 0     | 0 NA           | NA       |
| 0     | 0     | 0     | 0 NA           | NA       |
| 0     | 0     | 0     | 0.32 NA        | NA       |
| 0     | 0     | 0     | 0 NA           | NA       |
| 0     | 0     | 0     | 0 NA           | NA       |
| 0     | 0     | 0     | 0 NA           | NA       |
| 0     | 0     | 0     | 0 NA           | NA       |
| 0     | 0     | 0     | 0 NA           | NA       |
| 0     | 0     | 0     | 0 NA           | NA       |
| 1.93  | 4.41  | 3.91  | 2.48 0.166445  | 0.784205 |
| 0     | 0     | 0     | 0 NA           | NA       |
| 0     | 0     | 0     | 0 NA           | NA       |
| 0     | 0     | 0     | 0 NA           | NA       |

|      |       |       |       |          |          |
|------|-------|-------|-------|----------|----------|
| 0.32 | 0     | 0     | 0     | NA       | NA       |
| 0    | 0     | 0     | 0     | NA       | NA       |
| 0.16 | 0     | 0     | 1.74  | NA       | NA       |
| 0    | 0     | 0     | 0     | NA       | NA       |
| 0    | 0     | 0     | 0     | NA       | NA       |
| 0    | 0     | 0     | 0     | NA       | NA       |
| 0    | 0     | 0     | 0     | NA       | NA       |
| 0    | 0     | 0     | 0     | NA       | NA       |
| 0    | 0     | 0     | 0     | NA       | NA       |
| 0    | 0     | 0.12  | 0     | NA       | NA       |
| 0    | 0     | 0     | 0     | NA       | NA       |
| 0    | 0     | 0.01  | 0     | NA       | NA       |
| 0    | 0     | 0     | 0     | NA       | NA       |
| 0.62 | 0     | 0.07  | 0     | NA       | NA       |
| 0.19 | 0.14  | 0.84  | 0     | NA       | NA       |
| 0    | 0     | 0     | 0     | NA       | NA       |
| 0    | 0     | 0     | 0     | NA       | NA       |
| 0    | 0     | 0     | 0     | NA       | NA       |
| 0    | 0     | 0     | 0     | NA       | NA       |
| 0.1  | 0     | 0     | 0     | NA       | NA       |
| 0    | 0     | 0     | 0     | NA       | NA       |
| 1.78 | 2.22  | 1.81  | 2.18  | 0.333675 | 0.421318 |
| 0    | 0     | 0     | 0     | NA       | NA       |
| 0    | 0     | 0     | 0     | NA       | NA       |
| 0.55 | 0.4   | 1.03  | 0.76  | 0.537841 | 0.455306 |
| 0    | 0     | 0     | 0     | NA       | NA       |
| 0    | 0     | 0     | 0     | NA       | NA       |
| 0    | 0     | 0     | 0     | NA       | NA       |
| 3.31 | 3.66  | 3.54  | 4.05  | -0.19975 | 0.402014 |
| 0    | 0     | 0     | 0     | NA       | NA       |
| 0    | 0     | 0     | 0     | NA       | NA       |
| 0    | 0     | 0     | 0     | NA       | NA       |
| 0    | 0     | 0     | 0     | NA       | NA       |
| 0    | 0     | 0.02  | 0.02  | NA       | NA       |
| 0    | 0     | 0.23  | 0     | NA       | NA       |
| 0    | 0     | 0     | 0     | NA       | NA       |
| 0.22 | 0     | 0     | 0     | NA       | NA       |
| 3.13 | 3.14  | 3.51  | 2.72  | -0.11152 | 0.734646 |
| 0    | 0     | 0     | 0     | NA       | NA       |
| 0.33 | 1.26  | 1.07  | 0.54  | 0.395869 | 0.596167 |
| 0    | 0     | 0     | 0     | NA       | NA       |
| 0    | 0     | 0     | 0     | NA       | NA       |
| 15.7 | 16.95 | 15.04 | 15.47 | -0.03718 | 0.891001 |
| 0    | 0     | 0     | 0     | NA       | NA       |

|       |       |       |       |          |          |
|-------|-------|-------|-------|----------|----------|
| 0.5   | 0.73  | 0.79  | 0.54  | -0.24001 | 0.743262 |
| 0     | 0     | 0     | 0     | NA       | NA       |
| 0     | 0     | 0     | 0     | NA       | NA       |
| 0     | 0     | 0     | 0     | NA       | NA       |
| 0     | 0     | 0     | 0     | NA       | NA       |
| 0     | 0     | 0     | 0     | NA       | NA       |
| 0.22  | 0.13  | 0     | 0.04  | NA       | NA       |
| 0     | 0     | 0     | 0     | NA       | NA       |
| 0     | 0     | 0     | 0     | NA       | NA       |
| 0     | 0     | 0     | 0     | NA       | NA       |
| 0     | 0     | 0     | 0     | NA       | NA       |
| 0     | 0     | 0     | 0     | NA       | NA       |
| 0     | 0     | 0     | 0     | NA       | NA       |
| 0     | 0.64  | 0     | 0     | NA       | NA       |
| 0     | 0     | 0     | 0     | NA       | NA       |
| 0     | 0     | 0     | 0     | NA       | NA       |
| 0     | 0     | 0     | 0     | NA       | NA       |
| 0     | 0     | 0     | 0     | NA       | NA       |
| 0     | 0     | 0     | 0     | NA       | NA       |
| 0.21  | 0     | 0     | 0     | NA       | NA       |
| 0     | 0     | 0     | 0     | NA       | NA       |
| 0     | 0     | 0     | 0     | NA       | NA       |
| 0.04  | 0     | 0.03  | 0.16  | NA       | NA       |
| 0     | 0     | 0     | 0     | NA       | NA       |
| 1.65  | 0.57  | 1.14  | 1.12  | 0.018837 | 0.984238 |
| 0     | 0     | 0     | 0     | NA       | NA       |
| 0     | 0     | 0     | 0     | NA       | NA       |
| 0     | 0     | 0     | 0     | NA       | NA       |
| 0.62  | 0.32  | 0.85  | 0.12  | NA       | NA       |
| 0     | 0     | 0     | 0     | NA       | NA       |
| 0     | 0     | 0     | 0     | NA       | NA       |
| 0     | 0     | 0     | 0     | NA       | NA       |
| 0     | 0     | 0     | 0     | NA       | NA       |
| 0     | 0     | 0     | 0     | NA       | NA       |
| 0     | 0     | 0     | 0     | NA       | NA       |
| 0     | 0     | 0     | 0     | NA       | NA       |
| 0     | 0     | 0     | 0     | NA       | NA       |
| 0     | 0     | 0     | 0     | NA       | NA       |
| 0.59  | 0     | 0     | 0     | NA       | NA       |
| 0     | 0     | 0     | 0     | NA       | NA       |
| 44.42 | 53.48 | 45.49 | 51.14 | 0.07336  | 0.536828 |
| 0     | 0     | 0     | 0     | NA       | NA       |
| 0     | 0     | 0     | 0     | NA       | NA       |
| 0     | 0     | 0.14  | 0.81  | NA       | NA       |



|      |      |      |               |          |
|------|------|------|---------------|----------|
| 0    | 0    | 0    | 0 NA          | NA       |
| 0    | 0    | 0    | 0 NA          | NA       |
| 0    | 0    | 0    | 0 NA          | NA       |
| 0    | 0    | 0    | 0 NA          | NA       |
| 0    | 0    | 0    | 0 NA          | NA       |
| 0    | 0    | 0    | 0 NA          | NA       |
| 0    | 0.33 | 0.15 | 0.17 -0.7285  | 0.279617 |
| 0    | 0    | 0    | 0 NA          | NA       |
| 2.32 | 0.56 | 1.48 | 0.7 -1.10655  | 0.010002 |
| 0    | 0    | 0    | 0 NA          | NA       |
| 0    | 0    | 0    | 0.94 NA       | NA       |
| 0    | 0    | 0    | 0 NA          | NA       |
| 0    | 0.01 | 0.01 | 0.01 NA       | NA       |
| 0.06 | 0.17 | 0.08 | 0.25 0.52825  | 0.470902 |
| 0    | 0.05 | 0.05 | 0 NA          | NA       |
| 8.62 | 6.2  | 7.3  | 7.55 -0.32205 | 0.092138 |
| 4.52 | 3.68 | 3.18 | 3.4 -0.17169  | 0.414778 |
| 0    | 0    | 0    | 0 NA          | NA       |
| 0    | 0    | 0    | 0 NA          | NA       |
| 0    | 0    | 0    | 0 NA          | NA       |
| 0    | 0    | 0    | 0 NA          | NA       |
| 0    | 0    | 0    | 0 NA          | NA       |
| 0    | 0    | 0    | 0 NA          | NA       |
| 0.04 | 0    | 0.28 | 0.13 NA       | NA       |
| 0    | 0    | 0    | 0 NA          | NA       |
| 0.14 | 0.1  | 0.05 | 0.11 NA       | NA       |
| 0    | 0    | 0    | 0 NA          | NA       |
| 0    | 0    | 0    | 0 NA          | NA       |
| 0    | 0    | 0    | 0 NA          | NA       |
| 0    | 0    | 0    | 0 NA          | NA       |
| 0    | 0    | 0    | 0 NA          | NA       |
| 0    | 0    | 0    | 0 NA          | NA       |
| 0    | 0    | 0    | 0 NA          | NA       |
| 0    | 0    | 0    | 0.27 NA       | NA       |
| 0    | 0    | 0    | 0 NA          | NA       |
| 0.02 | 0    | 0.07 | 0 NA          | NA       |
| 0    | 0    | 0    | 0 NA          | NA       |
| 0    | 0    | 0    | 0 NA          | NA       |
| 0.08 | 0.28 | 0.24 | 0.54 1.152255 | 0.060547 |
| 1.25 | 0.9  | 0.82 | 0.32 -0.48792 | 0.425899 |
| 0    | 0    | 0    | 0 NA          | NA       |
| 0    | 0    | 0    | 0 NA          | NA       |
| 0.77 | 0.27 | 0.24 | 1.12 NA       | NA       |
| 0    | 0    | 0    | 0 NA          | NA       |

|        |       |        |        |          |          |
|--------|-------|--------|--------|----------|----------|
| 0      | 0     | 0      | 0      | NA       | NA       |
| 15.41  | 15.1  | 12.5   | 11.51  | -0.05103 | 0.752397 |
| 0      | 0     | 0      | 0      | NA       | NA       |
| 0      | 0     | 0      | 0      | NA       | NA       |
| 0      | 0     | 0      | 0      | NA       | NA       |
| 0      | 0     | 0      | 0      | NA       | NA       |
| 0      | 0     | 0      | 0      | NA       | NA       |
| 0      | 0     | 0      | 0      | NA       | NA       |
| 0      | 0     | 0      | 0      | NA       | NA       |
| 0      | 0     | 0.21   | 0      | NA       | NA       |
| 0      | 0     | 0      | 0      | NA       | NA       |
| 168.48 | 125.3 | 138.22 | 125.35 | -0.44376 | 3.89E-07 |
| 30.43  | 23.33 | 28.92  | 27.15  | 0.102253 | 0.614698 |
| 0      | 0     | 0      | 0      | NA       | NA       |
| 2.48   | 0.84  | 2.36   | 2.19   | -0.3564  | 0.52954  |
| 0      | 0     | 0      | 0      | NA       | NA       |
| 0      | 0     | 0      | 0      | NA       | NA       |
| 8.96   | 4.44  | 6.92   | 5.09   | -0.65914 | 0.001345 |
| 0      | 0     | 0      | 0      | NA       | NA       |
| 0      | 0     | 0      | 0      | NA       | NA       |
| 0      | 0     | 0      | 0      | NA       | NA       |
| 0      | 0     | 0      | 0      | NA       | NA       |
| 4.7    | 6.77  | 3.32   | 4.31   | 0.095868 | 0.820566 |
| 0      | 0     | 0      | 0      | NA       | NA       |
| 0.35   | 0     | 0      | 0      | NA       | NA       |
| 0      | 0     | 0      | 0      | NA       | NA       |
| 0      | 0     | 0      | 0      | NA       | NA       |
| 0      | 0     | 0.09   | 0      | NA       | NA       |
| 0      | 0     | 0      | 0      | NA       | NA       |
| 0      | 0     | 0      | 0      | NA       | NA       |
| 0      | 0     | 0      | 0      | NA       | NA       |
| 0      | 0     | 0      | 0      | NA       | NA       |
| 0      | 0     | 0      | 0      | NA       | NA       |
| 0.1    | 0.66  | 0.31   | 0.36   | NA       | NA       |
| 0.62   | 0.31  | 0.31   | 0.26   | -0.45641 | 0.546434 |
| 0      | 0     | 0      | 0      | NA       | NA       |
| 0      | 0     | 0      | 0      | NA       | NA       |
| 0.13   | 0.02  | 0.11   | 0.1    | NA       | NA       |
| 0      | 0     | 0      | 0      | NA       | NA       |
| 0      | 0     | 0      | 0      | NA       | NA       |
| 0      | 0     | 0      | 0      | NA       | NA       |
| 0      | 0     | 0      | 0      | NA       | NA       |

|      |      |      |               |          |
|------|------|------|---------------|----------|
| 0    | 0    | 0.06 | 0 NA          | NA       |
| 0    | 0    | 0    | 0 NA          | NA       |
| 0    | 0    | 0    | 0 NA          | NA       |
| 0    | 0    | 0    | 0 NA          | NA       |
| 0    | 0    | 0    | 0 NA          | NA       |
| 0    | 0    | 0    | 0 NA          | NA       |
| 0.83 | 0.39 | 0.6  | 0.63 -0.42478 | 0.39037  |
| 0    | 0    | 0    | 0 NA          | NA       |
| 0    | 0    | 0    | 0 NA          | NA       |
| 0    | 0    | 0    | 0 NA          | NA       |
| 0    | 0    | 0    | 0 NA          | NA       |
| 0    | 0    | 0    | 0 NA          | NA       |
| 0    | 0    | 0    | 0 NA          | NA       |
| 0    | 0    | 0    | 0 NA          | NA       |
| 0    | 0    | 0    | 0 NA          | NA       |
| 2.15 | 2.5  | 2.32 | 2.62 -0.01661 | 0.967791 |
| 0.29 | 0    | 0.19 | 0.44 NA       | NA       |
| 0    | 0    | 0    | 0 NA          | NA       |
| 0    | 0    | 0    | 0 NA          | NA       |
| 0    | 0    | 0    | 0 NA          | NA       |
| 0    | 0    | 0    | 0 NA          | NA       |
| 0    | 0    | 0    | 0 NA          | NA       |
| 0    | 0    | 0    | 0 NA          | NA       |
| 0    | 0    | 0.28 | 0.49 NA       | NA       |
| 0    | 0    | 0    | 0 NA          | NA       |
| 0    | 0    | 0    | 0 NA          | NA       |
| 0    | 0    | 0    | 0 NA          | NA       |
| 0.15 | 1.52 | 1.12 | 1.04 1.554757 | 0.003177 |
| 0    | 0    | 0    | 0 NA          | NA       |
| 0    | 0    | 0    | 0 NA          | NA       |
| 0.2  | 0.25 | 0.27 | 0.31 NA       | NA       |
| 0    | 0    | 0    | 0 NA          | NA       |
| 0    | 0    | 0    | 0 NA          | NA       |
| 0    | 0    | 0    | 0 NA          | NA       |
| 0    | 0    | 0    | 0 NA          | NA       |
| 0    | 0    | 0.06 | 0 NA          | NA       |
| 0    | 0    | 0    | 0 NA          | NA       |
| 0    | 0    | 0    | 0 NA          | NA       |
| 0    | 0    | 0    | 0 NA          | NA       |
| 1.25 | 0.35 | 0.8  | 0.86 -0.71576 | 0.124472 |
| 0    | 0    | 0    | 0 NA          | NA       |
| 0    | 0    | 0    | 0 NA          | NA       |
| 0    | 0    | 0    | 0 NA          | NA       |
| 0    | 0    | 0    | 0 NA          | NA       |
| 0    | 0    | 0    | 0 NA          | NA       |

|       |      |      |               |          |
|-------|------|------|---------------|----------|
| 0     | 0    | 0    | 0 NA          | NA       |
| 0     | 0    | 0    | 0 NA          | NA       |
| 0     | 0    | 0    | 0 NA          | NA       |
| 0     | 0.08 | 0.08 | 0.09 NA       | NA       |
| 0.02  | 0.08 | 0.28 | 0.07 NA       | NA       |
| 0     | 0    | 0    | 0 NA          | NA       |
| 0.12  | 0.09 | 0.08 | 0 NA          | NA       |
| 0     | 0    | 0    | 0 NA          | NA       |
| 0     | 0    | 0    | 0 NA          | NA       |
| 0     | 0    | 0    | 0 NA          | NA       |
| 0     | 0    | 0    | 0 NA          | NA       |
| 0.09  | 0.48 | 0.79 | 0.56 0.014295 | 0.98869  |
| 0     | 0    | 0    | 0 NA          | NA       |
| 0     | 0.07 | 0.46 | 0.23 NA       | NA       |
| 0     | 0    | 0    | 0 NA          | NA       |
| 0     | 0    | 0    | 0 NA          | NA       |
| 0     | 0    | 0    | 0 NA          | NA       |
| 0     | 0    | 0    | 0 NA          | NA       |
| 0     | 0    | 0    | 0 NA          | NA       |
| 0     | 0    | 0    | 0 NA          | NA       |
| 0     | 0    | 0    | 0 NA          | NA       |
| 0.16  | 0.08 | 0.14 | 0.11 -0.47612 | 0.472312 |
| 0     | 0    | 0    | 0 NA          | NA       |
| 0     | 0.02 | 0    | 0 NA          | NA       |
| 0     | 0    | 0    | 0 NA          | NA       |
| 0     | 0    | 0    | 0 NA          | NA       |
| 0     | 0    | 0    | 0 NA          | NA       |
| 0     | 0    | 0    | 0 NA          | NA       |
| 0     | 0    | 0    | 0 NA          | NA       |
| 0     | 0    | 0    | 0 NA          | NA       |
| 0     | 0    | 0    | 0 NA          | NA       |
| 0     | 0    | 0    | 0 NA          | NA       |
| 0.57  | 0.75 | 0.42 | 0.61 -0.59222 | 0.20705  |
| 0     | 0    | 0    | 0 NA          | NA       |
| 0     | 0    | 0    | 0 NA          | NA       |
| 0     | 0    | 0    | 0 NA          | NA       |
| 0.13  | 0    | 0    | 0 NA          | NA       |
| 0     | 0    | 0    | 0 NA          | NA       |
| 0     | 0    | 0    | 0 NA          | NA       |
| 10.01 | 2.96 | 4.52 | 4.5 -0.41185  | 0.21413  |
| 0     | 0    | 0    | 0 NA          | NA       |
| 0     | 0    | 0    | 0 NA          | NA       |
| 0     | 0    | 0    | 0 NA          | NA       |
| 0.31  | 0.22 | 0.28 | 0.16 NA       | NA       |
| 0     | 0    | 0    | 0 NA          | NA       |
| 0     | 0.08 | 0.07 | 0 NA          | NA       |
| 0     | 0    | 0    | 0 NA          | NA       |

|       |       |       |               |          |
|-------|-------|-------|---------------|----------|
| 0     | 0.3   | 0     | 0 NA          | NA       |
| 0     | 0     | 0     | 0 NA          | NA       |
| 0     | 0.55  | 0     | 0 NA          | NA       |
| 0     | 0     | 0     | 0 NA          | NA       |
| 0     | 0     | 0     | 0 NA          | NA       |
| 0     | 0     | 0     | 0.09 NA       | NA       |
| 0     | 0     | 0     | 0 NA          | NA       |
| 0     | 0     | 0     | 0 NA          | NA       |
| 0     | 0     | 0     | 0 NA          | NA       |
| 0     | 0     | 0     | 0 NA          | NA       |
| 0     | 0     | 0     | 0 NA          | NA       |
| 0     | 0.24  | 0     | 0 NA          | NA       |
| 0     | 0.03  | 0     | 0 NA          | NA       |
| 0     | 0     | 0     | 0 NA          | NA       |
| 0     | 0     | 0     | 0 NA          | NA       |
| 0     | 0     | 0     | 0 NA          | NA       |
| 0     | 0.07  | 0.06  | 0 NA          | NA       |
| 0     | 0     | 0     | 0 NA          | NA       |
| 0.09  | 0     | 0     | 0 NA          | NA       |
| 0     | 0     | 0     | 0 NA          | NA       |
| 0     | 0     | 0     | 0 NA          | NA       |
| 0.36  | 0     | 0     | 0 NA          | NA       |
| 0.39  | 0.28  | 0.51  | 0.44 NA       | NA       |
| 0     | 0     | 0     | 0 NA          | NA       |
| 0     | 0     | 0     | 0 NA          | NA       |
| 9.63  | 10.55 | 11.44 | 10.9 -0.0165  | 0.944638 |
| 0.36  | 0.26  | 0     | 0.07 NA       | NA       |
| 0     | 0     | 0     | 0 NA          | NA       |
| 10.78 | 1.86  | 3.92  | 3.22 -1.69903 | 1.07E-07 |
| 0     | 0     | 0     | 0 NA          | NA       |
| 0     | 0     | 0     | 0 NA          | NA       |
| 0     | 0     | 0     | 0 NA          | NA       |
| 0     | 0     | 0     | 0 NA          | NA       |
| 0     | 0     | 0     | 0 NA          | NA       |
| 0     | 0     | 0     | 0 NA          | NA       |
| 0     | 0     | 0     | 0 NA          | NA       |
| 0     | 0     | 0     | 0 NA          | NA       |
| 0     | 0     | 0     | 0 NA          | NA       |
| 0.04  | 0.02  | 0.07  | 0.04 NA       | NA       |
| 0     | 0     | 0     | 0 NA          | NA       |
| 0     | 0     | 0     | 0 NA          | NA       |
| 0     | 0     | 0     | 0 NA          | NA       |
| 0     | 0     | 0     | 0 NA          | NA       |
| 0     | 0     | 0     | 0 NA          | NA       |
| 1.09  | 0.59  | 0.7   | 2.43 0.214495 | 0.802461 |
| 0     | 0     | 0     | 0 NA          | NA       |
| 0     | 0     | 0     | 0 NA          | NA       |

|       |       |      |                |          |
|-------|-------|------|----------------|----------|
| 0     | 0     | 0    | 0 NA           | NA       |
| 0     | 0     | 0.11 | 0 NA           | NA       |
| 0.45  | 0     | 0    | 0 NA           | NA       |
| 0     | 0     | 0    | 0 NA           | NA       |
| 0     | 0     | 0    | 0 NA           | NA       |
| 0.46  | 0.24  | 0.02 | 0.01 NA        | NA       |
| 0.92  | 0.45  | 1.59 | 0 -0.07422     | 0.938678 |
| 0     | 0     | 0    | 0 NA           | NA       |
| 0     | 0     | 0    | 0 NA           | NA       |
| 0     | 0     | 0    | 0 NA           | NA       |
| 0.39  | 0.23  | 0.57 | 0.47 -0.15717  | 0.780961 |
| 0     | 0     | 0    | 0 NA           | NA       |
| 0     | 0     | 0    | 0 NA           | NA       |
| 0     | 0     | 0    | 0 NA           | NA       |
| 14.05 | 7.13  | 8.75 | 9.8 -0.66742   | 2.77E-07 |
| 0     | 0     | 0    | 0 NA           | NA       |
| 0     | 0     | 0    | 0 NA           | NA       |
| 0     | 0     | 0    | 0 NA           | NA       |
| 0     | 0     | 0.11 | 0 NA           | NA       |
| 0     | 0     | 0    | 0 NA           | NA       |
| 0     | 0     | 0    | 0 NA           | NA       |
| 0     | 0     | 0    | 0 NA           | NA       |
| 0     | 0     | 0    | 0 NA           | NA       |
| 0     | 0     | 0    | 0 NA           | NA       |
| 0     | 0     | 0    | 0 NA           | NA       |
| 0     | 0     | 0    | 0 NA           | NA       |
| 0     | 0     | 0    | 0 NA           | NA       |
| 0     | 0     | 0    | 0 NA           | NA       |
| 0     | 0     | 0    | 0 NA           | NA       |
| 0     | 4.16  | 2.72 | 0 0.052855     | 0.94485  |
| 0     | 0     | 0    | 0 NA           | NA       |
| 0     | 0     | 0    | 0 NA           | NA       |
| 0.95  | 0     | 0    | 0 NA           | NA       |
| 0.05  | 0.07  | 0.07 | 0.04 NA        | NA       |
| 0     | 0     | 0    | 0 NA           | NA       |
| 0.58  | 0     | 0.1  | 0 NA           | NA       |
| 0     | 0.76  | 0.32 | 0.38 NA        | NA       |
| 0     | 0     | 0    | 0 NA           | NA       |
| 0     | 0     | 0    | 0 NA           | NA       |
| 0     | 0     | 0    | 0 NA           | NA       |
| 0     | 0     | 0    | 0 NA           | NA       |
| 0     | 0     | 0    | 0 NA           | NA       |
| 0     | 0     | 0    | 0 NA           | NA       |
| 0     | 0     | 0    | 0 NA           | NA       |
| 0     | 0     | 0    | 0 NA           | NA       |
| 0     | 0     | 0    | 0 NA           | NA       |
| 0     | 0     | 0    | 0 NA           | NA       |
| 0     | 0     | 0    | 0 NA           | NA       |
| 0     | 0     | 0    | 0 NA           | NA       |
| 15.34 | 25.55 | 25.6 | 27.35 0.646604 | 6.19E-12 |
| 0     | 0.31  | 0    | 0 NA           | NA       |

|       |       |       |         |                   |
|-------|-------|-------|---------|-------------------|
| 0     | 0.01  | 0     | 0 NA    | NA                |
| 19.37 | 18.11 | 17.06 | 17.73   | -0.054 0.81312    |
| 0.73  | 1.32  | 0.83  | 1.54    | 0.483848 0.233743 |
| 0     | 0     | 0     | 0 NA    | NA                |
| 0     | 0     | 0     | 0 NA    | NA                |
| 0     | 0     | 0     | 0 NA    | NA                |
| 0     | 0     | 0     | 0 NA    | NA                |
| 0     | 0     | 0     | 0 NA    | NA                |
| 0     | 0     | 0     | 0 NA    | NA                |
| 0     | 0     | 0     | 0 NA    | NA                |
| 0     | 0     | 0     | 0 NA    | NA                |
| 1.88  | 1.16  | 1     | 0.97    | -0.26313 0.49188  |
| 0     | 0     | 0     | 0 NA    | NA                |
| 0     | 0     | 0     | 0 NA    | NA                |
| 0     | 0     | 0     | 0 NA    | NA                |
| 0     | 0     | 0     | 0 NA    | NA                |
| 0.24  | 0.55  | 0.17  | 0.19    | -0.10086 0.90702  |
| 0     | 0     | 0     | 0 NA    | NA                |
| 0.11  | 0.22  | 0.15  | 0.13    | -0.1748 0.795969  |
| 0     | 0.05  | 0     | 0.05 NA | NA                |
| 0     | 0     | 0     | 0 NA    | NA                |
| 0     | 0.14  | 0.25  | 0 NA    | NA                |
| 0     | 0     | 0     | 0 NA    | NA                |
| 0     | 0     | 0     | 0 NA    | NA                |
| 0     | 0     | 0     | 0 NA    | NA                |
| 0     | 0     | 0     | 0 NA    | NA                |
| 0.34  | 0.07  | 0.15  | 0.16 NA | NA                |
| 0.19  | 0     | 0     | 0 NA    | NA                |
| 0     | 0.11  | 0.1   | 0.59 NA | NA                |
| 0     | 0     | 0     | 0 NA    | NA                |
| 0     | 0     | 0     | 0 NA    | NA                |
| 1.92  | 0.86  | 0.44  | 1.06    | -1.08786 0.067405 |
| 0     | 0     | 0     | 0 NA    | NA                |
| 0.58  | 0     | 0     | 0.15 NA | NA                |
| 0     | 0     | 0     | 0 NA    | NA                |
| 0     | 0     | 0     | 0 NA    | NA                |
| 0     | 0     | 0     | 0 NA    | NA                |
| 0     | 0     | 0     | 0 NA    | NA                |
| 0     | 0     | 0     | 0 NA    | NA                |
| 0     | 0     | 0     | 0 NA    | NA                |
| 0     | 0     | 0     | 0 NA    | NA                |
| 0     | 0     | 0     | 0 NA    | NA                |
| 0     | 0     | 0     | 0 NA    | NA                |
| 0     | 0     | 0     | 0 NA    | NA                |
| 0     | 0.35  | 0     | 0 NA    | NA                |

|        |        |        |        |          |          |
|--------|--------|--------|--------|----------|----------|
| 0      | 0      | 0      | 0      | NA       | NA       |
| 0      | 0      | 0      | 0      | NA       | NA       |
| 379.82 | 372.19 | 416.11 | 392.68 | -0.06175 | 0.631187 |
| 0      | 0      | 0      | 0      | NA       | NA       |
| 0      | 0      | 0      | 0      | NA       | NA       |
| 0      | 0      | 0      | 0      | NA       | NA       |
| 0      | 0      | 0      | 0      | NA       | NA       |
| 2.38   | 11.39  | 7.02   | 6.93   | 0.367198 | 0.587275 |
| 0      | 0      | 0      | 0      | NA       | NA       |
| 0      | 0      | 0      | 0      | NA       | NA       |
| 0.06   | 0      | 0.06   | 0.07   | NA       | NA       |
| 0      | 0      | 0      | 0      | NA       | NA       |
| 0      | 0      | 0      | 0      | NA       | NA       |
| 0      | 0      | 0      | 0      | NA       | NA       |
| 0      | 0      | 0      | 0      | NA       | NA       |
| 0.12   | 0      | 0      | 0.09   | NA       | NA       |
| 0      | 0      | 0      | 0      | NA       | NA       |
| 0      | 0      | 0      | 0      | NA       | NA       |
| 0      | 0      | 0      | 0      | NA       | NA       |
| 0      | 0      | 0      | 0      | NA       | NA       |
| 0.11   | 0      | 0      | 0      | NA       | NA       |
| 0      | 0      | 0      | 0      | NA       | NA       |
| 1.41   | 1.73   | 1.47   | 2.62   | -0.05486 | 0.89766  |
| 1.15   | 2.51   | 2.17   | 2.59   | 0.440946 | 0.135861 |
| 0      | 0      | 0      | 0      | NA       | NA       |
| 0.68   | 2.18   | 1.48   | 2.76   | 0.143013 | 0.865592 |
| 0      | 0      | 0      | 0      | NA       | NA       |
| 0      | 0      | 0      | 0      | NA       | NA       |
| 0      | 0.3    | 0      | 0      | NA       | NA       |
| 0      | 0      | 0      | 0      | NA       | NA       |
| 0      | 0      | 0      | 0      | NA       | NA       |
| 0      | 0      | 0      | 0      | NA       | NA       |
| 0      | 0      | 0      | 0      | NA       | NA       |
| 0      | 0      | 0      | 0      | NA       | NA       |
| 0.58   | 0.62   | 0.34   | 0.46   | -0.04911 | 0.949887 |
| 0      | 0      | 0      | 0      | NA       | NA       |
| 0      | 0      | 0      | 0      | NA       | NA       |
| 0      | 0      | 0      | 0      | NA       | NA       |
| 0      | 0      | 0      | 0      | NA       | NA       |
| 0      | 0.06   | 0.04   | 0.2    | NA       | NA       |
| 4.2    | 2.83   | 2.96   | 4.41   | -0.37724 | 0.179186 |
| 0      | 0      | 0      | 0      | NA       | NA       |
| 0      | 0      | 0      | 0      | NA       | NA       |
| 0      | 0      | 0      | 0      | NA       | NA       |
| 0      | 0      | 0      | 0      | NA       | NA       |
| 0      | 0      | 0      | 0      | NA       | NA       |



|      |       |       |                |          |
|------|-------|-------|----------------|----------|
| 0    | 0     | 0     | 0 NA           | NA       |
| 0    | 0     | 0     | 0 NA           | NA       |
| 0.88 | 0.42  | 0     | 0 NA           | NA       |
| 0    | 0     | 0     | 0 NA           | NA       |
| 0    | 0     | 0     | 0 NA           | NA       |
| 0    | 0     | 0     | 0 NA           | NA       |
| 0    | 0     | 0     | 0 NA           | NA       |
| 0    | 0     | 0     | 0 NA           | NA       |
| 0    | 0     | 0     | 0 NA           | NA       |
| 0    | 0     | 0     | 0 NA           | NA       |
| 0    | 0     | 0     | 0 NA           | NA       |
| 0.26 | 0     | 0     | 0 -1.41244     | 0.013657 |
| 0    | 0     | 0     | 0 NA           | NA       |
| 0.06 | 0     | 0.1   | 0.12 NA        | NA       |
| 0    | 0.01  | 0.01  | 0 NA           | NA       |
| 0.23 | 0     | 0.15  | 0 NA           | NA       |
| 0    | 0     | 0     | 0 NA           | NA       |
| 0    | 0     | 0     | 0 NA           | NA       |
| 0    | 0     | 0     | 0.7 NA         | NA       |
| 0    | 0     | 0     | 0 NA           | NA       |
| 9.53 | 13.07 | 11.12 | 12.41 0.318672 | 0.148305 |
| 0    | 0     | 0     | 0 NA           | NA       |
| 0.66 | 1.57  | 0.71  | 0.98 0.235566  | 0.778962 |
| 0    | 0     | 0     | 0 NA           | NA       |
| 0    | 0     | 0     | 0 NA           | NA       |
| 0    | 0     | 0     | 0 NA           | NA       |
| 0.15 | 0.14  | 0.19  | 0.37 NA        | NA       |
| 0    | 0     | 0     | 0 NA           | NA       |
| 0    | 0     | 0     | 0 NA           | NA       |
| 0    | 0     | 0     | 0 NA           | NA       |
| 0    | 0     | 0     | 0 NA           | NA       |
| 0    | 0     | 0     | 0 NA           | NA       |
| 0    | 0     | 0     | 0 NA           | NA       |
| 0    | 0     | 0.09  | 0.1 NA         | NA       |
| 0    | 0     | 0     | 0 NA           | NA       |
| 0    | 0.22  | 0     | 0.23 NA        | NA       |
| 0    | 0     | 0     | 0 NA           | NA       |
| 0    | 0     | 0     | 0 NA           | NA       |
| 0    | 0     | 0     | 0 NA           | NA       |
| 0    | 0     | 0     | 0 NA           | NA       |
| 0.04 | 0     | 0     | 0.07 NA        | NA       |
| 0.6  | 0.73  | 0.8   | 0.73 0.12838   | 0.836872 |
| 0    | 0     | 0     | 0 NA           | NA       |
| 0    | 0     | 0     | 0 NA           | NA       |

|       |       |       |      |          |          |
|-------|-------|-------|------|----------|----------|
| 0     | 0     | 0     | 0    | NA       | NA       |
| 0     | 0     | 0     | 0    | NA       | NA       |
| 0     | 0     | 0     | 0    | NA       | NA       |
| 0     | 0     | 0     | 0    | NA       | NA       |
| 0     | 0     | 0     | 0    | NA       | NA       |
| 0     | 0     | 0     | 0    | NA       | NA       |
| 0     | 0.15  | 0     | 0    | NA       | NA       |
| 0     | 0     | 0     | 0    | NA       | NA       |
| 0     | 0     | 0     | 0    | NA       | NA       |
| 0     | 0     | 0     | 0    | NA       | NA       |
| 0     | 0     | 0     | 0    | NA       | NA       |
| 0     | 0     | 0     | 0    | NA       | NA       |
| 0     | 0     | 0     | 0    | NA       | NA       |
| 0     | 0     | 0     | 0    | NA       | NA       |
| 0     | 0     | 0     | 0    | NA       | NA       |
| 0     | 0     | 0     | 0    | NA       | NA       |
| 0     | 0     | 0     | 0    | NA       | NA       |
| 0     | 0     | 0     | 0    | NA       | NA       |
| 0     | 0     | 0     | 0    | NA       | NA       |
| 0     | 0     | 0     | 0    | NA       | NA       |
| 0     | 0.32  | 0.28  | 0.65 | NA       | NA       |
| 0     | 0     | 0     | 0    | NA       | NA       |
| 0     | 0     | 0     | 0    | NA       | NA       |
| 0     | 0     | 0     | 0    | NA       | NA       |
| 0     | 0     | 0     | 0    | NA       | NA       |
| 0     | 0     | 0     | 0    | NA       | NA       |
| 0     | 0     | 0     | 0    | NA       | NA       |
| 0     | 0     | 0     | 0    | NA       | NA       |
| 0     | 0     | 0     | 0    | NA       | NA       |
| 0     | 0     | 0     | 0    | NA       | NA       |
| 0     | 0     | 0     | 0    | NA       | NA       |
| 0     | 0     | 0     | 0    | NA       | NA       |
| 0     | 0     | 0     | 0    | NA       | NA       |
| 0     | 0     | 0     | 0    | NA       | NA       |
| 0     | 0     | 0     | 0    | NA       | NA       |
| 0     | 0     | 0.16  | 0    | NA       | NA       |
| 0     | 0     | 0     | 0    | NA       | NA       |
| 0     | 0     | 0     | 0    | NA       | NA       |
| 0     | 0     | 0     | 0    | NA       | NA       |
| 0     | 0     | 0     | 0    | NA       | NA       |
| 0     | 0     | 0     | 0    | NA       | NA       |
| 0     | 0     | 0     | 0    | NA       | NA       |
| 0     | 0     | 0     | 0    | NA       | NA       |
| 0     | 0     | 0     | 0    | NA       | NA       |
| 0     | 0     | 0     | 0    | NA       | NA       |
| 0     | 0     | 0     | 0    | NA       | NA       |
| 0     | 0     | 0     | 0    | NA       | NA       |
| 0     | 0     | 0     | 0    | NA       | NA       |
| 12.86 | 11.29 | 10.19 | 9.86 | -0.32177 | 0.013163 |
| 0     | 0     | 0     | 0    | NA       | NA       |

|        |        |        |        |          |          |
|--------|--------|--------|--------|----------|----------|
| 0.29   | 0.1    | 0.19   | 0.11   | NA       | NA       |
| 0      | 0      | 0      | 0      | NA       | NA       |
| 0.03   | 0      | 0.79   | 0      | -0.08462 | 0.926441 |
| 0      | 0      | 0      | 0      | NA       | NA       |
| 0      | 0      | 0      | 0      | NA       | NA       |
| 0      | 0      | 0      | 0.07   | NA       | NA       |
| 2.75   | 1.87   | 1.99   | 1.77   | -1.2457  | 0.000519 |
| 0      | 0      | 0      | 0      | NA       | NA       |
| 0      | 0      | 0      | 0      | NA       | NA       |
| 0      | 0      | 0      | 0      | NA       | NA       |
| 0      | 0      | 0      | 0      | NA       | NA       |
| 0      | 0      | 0      | 0      | NA       | NA       |
| 0      | 0      | 0      | 0      | NA       | NA       |
| 0.38   | 0.58   | 0.36   | 0.67   | 0.035128 | 0.967483 |
| 1.02   | 0.99   | 1.62   | 1.13   | 0.361551 | 0.550981 |
| 0      | 0      | 0      | 0      | NA       | NA       |
| 0      | 0      | 0      | 0.06   | NA       | NA       |
| 0      | 0      | 0      | 0      | NA       | NA       |
| 0.16   | 0.21   | 0.4    | 0.44   | -0.17026 | 0.843928 |
| 0      | 0      | 0      | 0      | NA       | NA       |
| 0      | 0      | 0      | 0      | NA       | NA       |
| 0      | 0      | 0      | 0      | NA       | NA       |
| 0      | 0      | 0      | 0      | NA       | NA       |
| 0      | 0      | 0      | 0      | NA       | NA       |
| 0      | 0      | 0      | 0      | NA       | NA       |
| 611.29 | 465.46 | 575.54 | 460.43 | -0.35323 | 0.00207  |
| 0      | 0      | 0      | 0      | NA       | NA       |
| 0      | 0      | 0      | 0      | NA       | NA       |
| 0      | 0      | 0      | 0      | NA       | NA       |
| 0      | 0      | 0      | 0      | NA       | NA       |
| 0      | 0      | 0      | 0      | NA       | NA       |
| 0      | 0      | 0      | 0      | NA       | NA       |
| 0      | 0      | 0      | 0      | NA       | NA       |
| 0      | 0      | 0      | 0      | NA       | NA       |
| 0      | 0      | 0      | 0      | NA       | NA       |
| 0      | 0      | 0      | 0      | NA       | NA       |
| 0      | 0      | 0.22   | 0      | NA       | NA       |
| 0      | 0      | 0      | 0      | NA       | NA       |
| 0      | 0      | 0      | 0      | NA       | NA       |
| 4.04   | 8.15   | 4.69   | 6.7    | 0.962744 | 1.79E-05 |
| 0      | 0      | 0      | 0      | NA       | NA       |
| 0.42   | 0.3    | 0.52   | 0.31   | NA       | NA       |
| 0      | 0      | 0      | 0      | NA       | NA       |
| 0      | 0      | 0.03   | 0      | NA       | NA       |
| 22.03  | 22.64  | 23.9   | 24.86  | -0.07036 | 0.786725 |

|        |        |        |                 |          |
|--------|--------|--------|-----------------|----------|
| 0      | 0      | 0      | 0 NA            | NA       |
| 0      | 0      | 0      | 0 NA            | NA       |
| 0.23   | 0.18   | 0.51   | 0.19 -0.15515   | 0.854832 |
| 0      | 0      | 0      | 0 NA            | NA       |
| 0      | 0      | 0      | 0 NA            | NA       |
| 0      | 0      | 0      | 0 NA            | NA       |
| 0      | 0      | 0      | 0 NA            | NA       |
| 8.57   | 2.48   | 3.7    | 3.1 -1.32243    | 1.57E-17 |
| 0      | 0      | 0      | 0 NA            | NA       |
| 3.8    | 4.3    | 2.48   | 4.2 -0.2438     | 0.447464 |
| 0      | 0      | 0      | 0 NA            | NA       |
| 0      | 0.06   | 0      | 0 NA            | NA       |
| 0.13   | 0      | 0      | 0.1 NA          | NA       |
| 0      | 0      | 0      | 0 NA            | NA       |
| 0      | 0      | 0      | 0 NA            | NA       |
| 0.12   | 0      | 0      | 0 NA            | NA       |
| 0      | 0      | 0      | 0 NA            | NA       |
| 0      | 0      | 0      | 0 NA            | NA       |
| 0.33   | 0.43   | 0.07   | 0.21 -0.18466   | 0.829887 |
| 0      | 0      | 0      | 0 NA            | NA       |
| 3.25   | 0      | 0      | 1.53 NA         | NA       |
| 0      | 0      | 0      | 0 NA            | NA       |
| 0      | 0      | 0      | 0 NA            | NA       |
| 0      | 0      | 0      | 0 NA            | NA       |
| 0      | 0      | 0      | 0 NA            | NA       |
| 0      | 0      | 0      | 0 NA            | NA       |
| 0      | 0      | 0      | 0 NA            | NA       |
| 0      | 0      | 0      | 0 NA            | NA       |
| 0      | 0      | 0      | 0 NA            | NA       |
| 0      | 0      | 0      | 0 NA            | NA       |
| 0      | 0      | 0      | 2.26 NA         | NA       |
| 257.89 | 242.49 | 212.06 | 217.02 -0.18501 | 0.090409 |
| 0      | 0      | 0      | 0 NA            | NA       |
| 0.51   | 0.62   | 0.68   | 0.69 -0.269     | 0.712235 |
| 0      | 0      | 0      | 0 NA            | NA       |
| 0      | 0      | 0      | 0 NA            | NA       |
| 0      | 0      | 0      | 0 NA            | NA       |
| 0      | 0      | 0.05   | 0 NA            | NA       |
| 0      | 0      | 0      | 0 NA            | NA       |
| 0.15   | 0      | 0.11   | 0 NA            | NA       |
| 0      | 0      | 0      | 0 NA            | NA       |
| 10.42  | 7.58   | 12.9   | 8.15 -0.17078   | 0.324106 |
| 0.02   | 0.09   | 0.13   | 0.04 0.394548   | 0.605559 |
| 0      | 0      | 0      | 0 NA            | NA       |
| 0      | 0.16   | 0      | 0 NA            | NA       |







|       |       |       |         |          |          |
|-------|-------|-------|---------|----------|----------|
| 97.68 | 84.35 | 90.31 | 84.32   | -0.2121  | 0.029485 |
| 0     | 0     | 0     | 0 NA    | NA       |          |
| 21.16 | 17.34 | 18.46 | 18.51   | -0.26549 | 0.004164 |
| 0     | 0     | 0     | 0 NA    | NA       |          |
| 9.12  | 6.57  | 9.08  | 8.74    | -0.45144 | 0.012907 |
| 0     | 0     | 0     | 0 NA    | NA       |          |
| 0     | 0     | 0.08  | 0.12 NA | NA       |          |
| 0.94  | 1.26  | 1.05  | 1.45    | 0.00614  | 0.990286 |
| 0     | 0     | 0     | 0 NA    | NA       |          |
| 0     | 0     | 0     | 0 NA    | NA       |          |
| 0     | 0     | 0     | 1.19 NA | NA       |          |
| 0     | 0     | 0     | 0 NA    | NA       |          |
| 0     | 0     | 0     | 0 NA    | NA       |          |
| 0     | 0     | 0     | 0 NA    | NA       |          |
| 0     | 0.2   | 0     | 0 NA    | NA       |          |
| 18.33 | 16.63 | 17.94 | 21.95   | -0.05345 | 0.752189 |
| 0     | 0     | 0     | 0 NA    | NA       |          |
| 0     | 0     | 0     | 0 NA    | NA       |          |
| 0     | 0     | 0.21  | 0 NA    | NA       |          |
| 0     | 0     | 0     | 0 NA    | NA       |          |
| 0     | 0.55  | 0     | 0.46 NA | NA       |          |
| 0     | 0     | 0     | 0 NA    | NA       |          |
| 0.32  | 0.31  | 0.22  | 0.49 NA | NA       |          |
| 0     | 0     | 0     | 0 NA    | NA       |          |
| 0     | 0     | 0     | 0 NA    | NA       |          |
| 0     | 0     | 0     | 0 NA    | NA       |          |
| 0     | 0     | 0     | 0 NA    | NA       |          |
| 0     | 0     | 0     | 0 NA    | NA       |          |
| 0     | 0     | 0     | 0 NA    | NA       |          |
| 0     | 0     | 0     | 0 NA    | NA       |          |
| 0     | 0     | 0     | 0 NA    | NA       |          |
| 0     | 0     | 0     | 0 NA    | NA       |          |
| 0.21  | 0     | 0     | 0 NA    | NA       |          |
| 0     | 0     | 0     | 0 NA    | NA       |          |
| 0     | 0     | 0     | 0 NA    | NA       |          |
| 0     | 0     | 0     | 0 NA    | NA       |          |
| 0     | 0     | 0     | 0 NA    | NA       |          |
| 0.02  | 0     | 0.01  | 0 NA    | NA       |          |
| 0.26  | 0.13  | 0.11  | 0.17    | -0.64082 | 0.345805 |
| 0     | 0     | 0     | 0 NA    | NA       |          |
| 0     | 0.55  | 0.33  | 0 NA    | NA       |          |
| 0     | 0     | 0     | 0 NA    | NA       |          |
| 0     | 0     | 0     | 0 NA    | NA       |          |
| 4.11  | 6.47  | 5.67  | 4       | 0.405771 | 0.020293 |
| 0     | 0     | 0     | 0 NA    | NA       |          |





|       |       |       |                |          |
|-------|-------|-------|----------------|----------|
| 0     | 0     | 0     | 0 NA           | NA       |
| 0.06  | 0     | 0.12  | 0.18 NA        | NA       |
| 0     | 0     | 0     | 0 NA           | NA       |
| 0     | 0.09  | 0.08  | 0 NA           | NA       |
| 0     | 0     | 0     | 0 NA           | NA       |
| 0.91  | 0.68  | 0     | 0.42 -0.56667  | 0.42505  |
| 0     | 0     | 0     | 0 NA           | NA       |
| 0     | 0     | 0     | 0 NA           | NA       |
| 0     | 0     | 0     | 0 NA           | NA       |
| 0     | 0     | 0     | 0 NA           | NA       |
| 0     | 0     | 0     | 0 NA           | NA       |
| 0     | 0     | 0     | 0 NA           | NA       |
| 1.28  | 0     | 0.61  | 1.17 NA        | NA       |
| 16.28 | 22.14 | 18.59 | 21.35 0.224391 | 0.151723 |
| 0     | 0     | 0     | 0 NA           | NA       |
| 0     | 0     | 0     | 0 NA           | NA       |
| 0     | 0     | 0.01  | 0 NA           | NA       |
| 0     | 0     | 0     | 0 NA           | NA       |
| 0     | 0     | 0     | 0 NA           | NA       |
| 0     | 0     | 0     | 0 NA           | NA       |
| 0     | 0     | 0     | 0 NA           | NA       |
| 0     | 0     | 0     | 0 NA           | NA       |
| 0     | 0     | 0     | 0.04 NA        | NA       |
| 0     | 0     | 0     | 0 NA           | NA       |
| 0     | 0     | 0     | 0 NA           | NA       |
| 6.31  | 4.65  | 7.02  | 5.7 -0.30656   | 0.13847  |
| 0     | 0     | 0.02  | 0 NA           | NA       |
| 0     | 2.11  | 0.6   | 2.13 0.894441  | 0.142914 |
| 3.19  | 6.4   | 4.58  | 8.07 0.517763  | 0.071085 |
| 0     | 0     | 0     | 0 NA           | NA       |
| 0     | 0     | 0     | 0 NA           | NA       |
| 0     | 0     | 0     | 0 NA           | NA       |
| 0     | 0     | 0     | 0 NA           | NA       |
| 0     | 0     | 0     | 0 NA           | NA       |
| 11.37 | 7.95  | 9.52  | 7.95 -0.40211  | 0.004866 |
| 0     | 0     | 0     | 0 NA           | NA       |
| 0     | 0     | 0     | 0 NA           | NA       |
| 0     | 0     | 0     | 0 NA           | NA       |
| 0     | 0     | 0     | 0 NA           | NA       |
| 0     | 0     | 0     | 0 NA           | NA       |
| 0     | 0     | 0     | 0 NA           | NA       |
| 0     | 0     | 0     | 0 NA           | NA       |
| 0     | 0.33  | 0.15  | 0.43 NA        | NA       |
| 0.01  | 0.16  | 0.66  | 0.44 NA        | NA       |
| 0     | 0     | 0     | 0 NA           | NA       |

|       |       |      |                |          |
|-------|-------|------|----------------|----------|
| 0     | 0     | 0    | 0 NA           | NA       |
| 0     | 0     | 0    | 0 NA           | NA       |
| 0     | 0     | 0    | 0 NA           | NA       |
| 8.73  | 0     | 0    | 0 -1.60157     | 0.005246 |
| 0     | 0     | 0    | 0 NA           | NA       |
| 0     | 0     | 0    | 0 NA           | NA       |
| 0     | 0     | 0    | 0 NA           | NA       |
| 0     | 0     | 0    | 0 NA           | NA       |
| 0     | 0     | 0    | 0 NA           | NA       |
| 0     | 0     | 0    | 0 NA           | NA       |
| 0     | 0     | 0    | 0 NA           | NA       |
| 0.61  | 0     | 0.27 | 0.06 -1.69192  | 0.003797 |
| 0     | 0     | 0    | 0 NA           | NA       |
| 0     | 0     | 0    | 0 NA           | NA       |
| 0     | 0     | 0    | 0 NA           | NA       |
| 0     | 0     | 0    | 0 NA           | NA       |
| 0     | 0     | 0    | 0 NA           | NA       |
| 0     | 0     | 0    | 0 NA           | NA       |
| 0     | 0     | 0    | 0 NA           | NA       |
| 3.94  | 1.37  | 3.4  | 2.26 -0.85514  | 0.000418 |
| 0     | 0     | 0    | 0 NA           | NA       |
| 0     | 0     | 0    | 0 NA           | NA       |
| 0     | 0     | 0    | 0 NA           | NA       |
| 0     | 0     | 0    | 0 NA           | NA       |
| 0     | 0     | 0    | 0 NA           | NA       |
| 0     | 0     | 0    | 0 NA           | NA       |
| 0     | 0     | 0    | 0 NA           | NA       |
| 0     | 0     | 0    | 0 NA           | NA       |
| 0     | 0     | 0    | 0 NA           | NA       |
| 0.25  | 0.46  | 0    | 0.4 -0.17051   | 0.844865 |
| 0     | 0     | 0    | 0.03 NA        | NA       |
| 0     | 0     | 0    | 0 NA           | NA       |
| 0     | 0     | 0    | 0 NA           | NA       |
| 0     | 0     | 0    | 0 NA           | NA       |
| 0     | 0     | 0    | 0 NA           | NA       |
| 0     | 0.07  | 0.13 | 0.22 NA        | NA       |
| 0     | 0     | 0    | 0 NA           | NA       |
| 0     | 0     | 0    | 0 NA           | NA       |
| 16.51 | 36.84 | 25.6 | 33.72 0.798567 | 1.14E-10 |
| 0     | 0     | 0    | 0 NA           | NA       |
| 0     | 0     | 0    | 0 NA           | NA       |
| 0.29  | 0.13  | 0    | 0 NA           | NA       |
| 0     | 0     | 2.51 | 0 NA           | NA       |

|       |       |       |                |           |
|-------|-------|-------|----------------|-----------|
| 0     | 0     | 0     | 0 NA           | NA        |
| 0.06  | 0.04  | 0.2   | 0.12 0.766486  | 0.234158  |
| 13.44 | 10.45 | 12.69 | 10.29 -0.30664 | 0.081756  |
| 0     | 0     | 0     | 0 NA           | NA        |
| 0.13  | 0     | 0     | 0 NA           | NA        |
| 20.28 | 3.68  | 4.2   | 3.76 -2.29664  | 3.84E-102 |
| 0     | 0     | 0     | 0 NA           | NA        |
| 0.17  | 0.13  | 0.23  | 0.87 NA        | NA        |
| 0     | 0     | 0     | 0 NA           | NA        |
| 0     | 0     | 0     | 0.19 NA        | NA        |
| 0     | 0     | 0     | 0.13 NA        | NA        |
| 0     | 0     | 0     | 0 NA           | NA        |
| 0     | 0     | 0     | 0 NA           | NA        |
| 0     | 0     | 0     | 0 NA           | NA        |
| 0     | 0     | 0     | 0 NA           | NA        |
| 6.56  | 4     | 3.21  | 4.91 -0.50036  | 0.163829  |
| 0     | 0     | 0     | 0 NA           | NA        |
| 0     | 0.25  | 0     | 0 -0.05852     | NA        |
| 0     | 0     | 0     | 0 NA           | NA        |
| 0     | 0     | 0     | 0 NA           | NA        |
| 0     | 0     | 0     | 0 NA           | NA        |
| 0     | 0     | 0     | 0 NA           | NA        |
| 5.16  | 5.82  | 5.3   | 6.63 0.222949  | 0.488355  |
| 0     | 0     | 0     | 0 NA           | NA        |
| 0     | 0     | 0     | 0 NA           | NA        |
| 0     | 0     | 0     | 0 NA           | NA        |
| 0     | 0     | 0     | 0 NA           | NA        |
| 0     | 0     | 0     | 0 NA           | NA        |
| 0     | 0     | 0     | 0 NA           | NA        |
| 0     | 0     | 0     | 0 NA           | NA        |
| 0     | 0     | 0     | 0 NA           | NA        |
| 0     | 0     | 0     | 0 NA           | NA        |
| 0     | 0     | 0     | 0 NA           | NA        |
| 0     | 0     | 0     | 0 NA           | NA        |
| 0     | 0     | 0     | 0 NA           | NA        |
| 0     | 0     | 0     | 0 NA           | NA        |
| 0     | 0     | 0     | 0 NA           | NA        |
| 0     | 0     | 0     | 0 NA           | NA        |
| 0     | 0     | 0     | 0 NA           | NA        |
| 0     | 0     | 0     | 0 NA           | NA        |
| 0     | 0     | 0     | 0 NA           | NA        |
| 0     | 0     | 0     | 0 NA           | NA        |
| 0     | 0     | 0     | 0 NA           | NA        |
| 0.51  | 0     | 0.4   | 0.12 NA        | NA        |
| 0.16  | 0.31  | 0.39  | 0.35 0.561336  | 0.414087  |
| 0     | 0     | 0     | 0.46 NA        | NA        |
| 0     | 0     | 0     | 0 NA           | NA        |
| 0     | 0     | 0     | 0 NA           | NA        |



|       |       |       |       |          |          |
|-------|-------|-------|-------|----------|----------|
| 0.68  | 0.52  | 1.04  | 0.32  | -0.05772 | 0.949887 |
| 0     | 0     | 0     | 0     | NA       | NA       |
| 0     | 0     | 0.02  | 0     | NA       | NA       |
| 0     | 0     | 0     | 0     | NA       | NA       |
| 0     | 0     | 0     | 0     | NA       | NA       |
| 46.61 | 48.65 | 47.06 | 44.91 | 0.002862 | 0.989728 |
| 0     | 0.05  | 0.1   | 0.19  | NA       | NA       |
| 0     | 0     | 0     | 0     | NA       | NA       |
| 6.81  | 4.55  | 5.3   | 4.71  | -0.53724 | 7.26E-06 |
| 0     | 0     | 0     | 0     | NA       | NA       |
| 0     | 0     | 0     | 0     | NA       | NA       |
| 0     | 0     | 0     | 0     | NA       | NA       |
| 0     | 0     | 0     | 0.08  | NA       | NA       |
| 0.4   | 0     | 0.05  | 0.05  | NA       | NA       |
| 0.21  | 0     | 0.06  | 0.04  | NA       | NA       |
| 0     | 0     | 0     | 0     | NA       | NA       |
| 0.55  | 0.84  | 0.82  | 0.54  | -0.00499 | 0.996111 |
| 0     | 0     | 0     | 0     | NA       | NA       |
| 0     | 0.05  | 0     | 0     | NA       | NA       |
| 0     | 0     | 0     | 0     | NA       | NA       |
| 0     | 0     | 0.57  | 0     | NA       | NA       |
| 0     | 0     | 0     | 0     | NA       | NA       |
| 0     | 0     | 0     | 0     | NA       | NA       |
| 0     | 0     | 0     | 0     | NA       | NA       |
| 0     | 0     | 0     | 0     | NA       | NA       |
| 0.11  | 0.48  | 0.4   | 0.46  | 0.223152 | 0.79412  |
| 0     | 0     | 0     | 0     | NA       | NA       |
| 0     | 0     | 0     | 0     | NA       | NA       |
| 0     | 0     | 0     | 0     | NA       | NA       |
| 0     | 0     | 0.19  | 0.02  | NA       | NA       |
| 0     | 0     | 0.05  | 0     | NA       | NA       |
| 0     | 0     | 0     | 0     | NA       | NA       |
| 0.17  | 0.24  | 0.11  | 0     | NA       | NA       |
| 0     | 0     | 0     | 0     | NA       | NA       |
| 0     | 0     | 0     | 0     | NA       | NA       |
| 0     | 0     | 0     | 0     | NA       | NA       |
| 0     | 0     | 0     | 0     | NA       | NA       |
| 0     | 0     | 0     | 0     | NA       | NA       |
| 0     | 0     | 0     | 0     | NA       | NA       |
| 0     | 0     | 0     | 0     | NA       | NA       |
| 0.84  | 1.27  | 1.14  | 1.22  | 0.41755  | 0.379477 |
| 0     | 0     | 0     | 0     | NA       | NA       |
| 0.12  | 0.35  | 0.24  | 0     | NA       | NA       |
| 0     | 0     | 0     | 0     | NA       | NA       |

|       |       |       |       |          |          |
|-------|-------|-------|-------|----------|----------|
| 0     | 0     | 0     | 0     | NA       | NA       |
| 0     | 0     | 0     | 1.12  | NA       | NA       |
| 4.29  | 4.95  | 2.6   | 3.82  | -0.25221 | 0.487022 |
| 0     | 0     | 0     | 0     | NA       | NA       |
| 0     | 0     | 0     | 0     | NA       | NA       |
| 0     | 0     | 0     | 0     | NA       | NA       |
| 0     | 0     | 0     | 0     | NA       | NA       |
| 0     | 0     | 0     | 0     | NA       | NA       |
| 0.19  | 0.03  | 0.32  | 0.31  | 0.254154 | 0.760359 |
| 0     | 0     | 0     | 0     | NA       | NA       |
| 0     | 0     | 0     | 0     | NA       | NA       |
| 0     | 0     | 0     | 0     | NA       | NA       |
| 0     | 0     | 0     | 0     | NA       | NA       |
| 0     | 0     | 0     | 0     | NA       | NA       |
| 0.05  | 0.18  | 0.17  | 0.38  | 0.47755  | 0.524726 |
| 7.37  | 6.44  | 6.81  | 7.01  | -0.3574  | 0.072747 |
| 0     | 0     | 0     | 0     | NA       | NA       |
| 0     | 0     | 0     | 0     | NA       | NA       |
| 2.35  | 0.59  | 1.33  | 1     | -0.17171 | 0.822562 |
| 18.37 | 22.33 | 22.07 | 20.96 | 0.306217 | 0.021114 |
| 0     | 0     | 0     | 0     | NA       | NA       |
| 0.98  | 1.09  | 0.45  | 0.75  | -0.52592 | 0.387812 |
| 0     | 0.53  | 0     | 0     | NA       | NA       |
| 0     | 0     | 0     | 0     | NA       | NA       |
| 0     | 0     | 0     | 0     | NA       | NA       |
| 0     | 0     | 0     | 0     | NA       | NA       |
| 0     | 0     | 0     | 0     | NA       | NA       |
| 0     | 0     | 0     | 0     | NA       | NA       |
| 0     | 0     | 0     | 0     | NA       | NA       |
| 0     | 0     | 0     | 0     | NA       | NA       |
| 0.03  | 0.01  | 0.02  | 0.01  | NA       | NA       |
| 0     | 0     | 0     | 0     | NA       | NA       |
| 0     | 0     | 0     | 0     | NA       | NA       |
| 0     | 0     | 0     | 0     | NA       | NA       |
| 0     | 0     | 0     | 0     | NA       | NA       |
| 0     | 0     | 0     | 0     | NA       | NA       |
| 0     | 0     | 0     | 0     | NA       | NA       |
| 0     | 0     | 0     | 0     | NA       | NA       |
| 0     | 0     | 0     | 0     | NA       | NA       |
| 0     | 0     | 0.08  | 0     | NA       | NA       |
| 0     | 0     | 0     | 0     | NA       | NA       |
| 0     | 0     | 0     | 0     | NA       | NA       |
| 0     | 0     | 0     | 0     | NA       | NA       |
| 0     | 0     | 0     | 0     | NA       | NA       |
| 0     | 0     | 0.15  | 0     | NA       | NA       |
| 0     | 0     | 0     | 0     | NA       | NA       |
| 0     | 0     | 0     | 0.02  | NA       | NA       |





|       |      |       |       |          |          |
|-------|------|-------|-------|----------|----------|
| 0     | 0    | 0     | 0.1   | NA       | NA       |
| 0.74  | 0.43 | 0.11  | 0.13  | NA       | NA       |
| 19.56 | 16.7 | 15.45 | 15.98 | -0.28585 | 0.008028 |
| 0     | 0    | 0     | 0     | NA       | NA       |
| 0.16  | 0.05 | 0.47  | 0     | NA       | NA       |
| 0     | 0    | 0     | 0     | NA       | NA       |
| 0     | 0    | 0     | 0     | NA       | NA       |
| 0     | 0.18 | 0     | 0     | NA       | NA       |
| 0     | 0    | 0     | 0     | NA       | NA       |
| 0     | 0    | 0     | 0     | NA       | NA       |
| 0     | 0    | 0     | 0     | NA       | NA       |
| 0     | 0    | 0     | 0     | NA       | NA       |
| 0     | 0    | 0     | 0     | NA       | NA       |
| 0     | 0    | 0     | 0     | NA       | NA       |
| 0     | 0.27 | 0.12  | 0     | NA       | NA       |
| 0     | 0    | 0     | 0     | NA       | NA       |
| 0     | 0    | 0     | 0     | NA       | NA       |
| 0     | 0    | 0     | 0     | NA       | NA       |
| 0.63  | 0.39 | 0.26  | 0.55  | -0.75851 | 0.117212 |
| 0     | 0    | 0.29  | 0     | NA       | NA       |
| 0     | 0    | 0     | 0     | NA       | NA       |
| 0     | 0    | 0     | 0     | NA       | NA       |
| 0     | 0    | 0     | 0     | NA       | NA       |
| 0     | 0    | 0     | 0     | NA       | NA       |
| 0     | 0    | 0     | 0     | NA       | NA       |
| 1.32  | 0.71 | 1.25  | 0.73  | -0.40112 | 0.602861 |
| 0     | 0    | 0     | 0     | NA       | NA       |
| 0.76  | 0    | 0     | 0     | NA       | NA       |
| 0.03  | 0.28 | 0.04  | 0     | NA       | NA       |
| 0     | 0    | 0     | 0     | NA       | NA       |
| 0.52  | 0    | 0.31  | 0     | NA       | NA       |
| 0     | 0    | 0     | 0     | NA       | NA       |
| 0     | 0    | 0.11  | 0.12  | NA       | NA       |
| 0     | 0    | 0     | 0     | NA       | NA       |
| 0     | 0    | 0     | 0     | NA       | NA       |
| 0     | 0    | 0     | 0     | NA       | NA       |
| 0     | 0    | 0     | 0     | NA       | NA       |
| 0     | 0    | 0     | 0     | NA       | NA       |
| 0     | 0    | 0     | 0     | NA       | NA       |
| 0     | 0    | 0     | 0     | NA       | NA       |
| 0.11  | 0.08 | 0     | 0     | NA       | NA       |
| 0     | 0    | 0     | 0     | NA       | NA       |
| 0     | 0.27 | 0.17  | 0     | NA       | NA       |
| 0     | 0    | 0     | 0     | NA       | NA       |
| 0     | 0    | 0     | 0     | NA       | NA       |
| 0     | 0    | 0     | 0     | NA       | NA       |

|      |      |      |               |          |
|------|------|------|---------------|----------|
| 0    | 0    | 0    | 0 NA          | NA       |
| 0    | 0    | 0    | 0 NA          | NA       |
| 0    | 0    | 0    | 0 NA          | NA       |
| 0    | 0    | 0    | 0 NA          | NA       |
| 0    | 0    | 0    | 0 NA          | NA       |
| 0    | 0    | 0    | 0 NA          | NA       |
| 0    | 0    | 0    | 0 NA          | NA       |
| 0    | 0    | 0    | 0 NA          | NA       |
| 0    | 0    | 0    | 0.02 NA       | NA       |
| 0.5  | 0.59 | 0.37 | 0.72 0.312617 | 0.582605 |
| 0    | 0    | 0    | 0 NA          | NA       |
| 0    | 0    | 0    | 0 NA          | NA       |
| 0    | 0    | 0    | 0 NA          | NA       |
| 0    | 0    | 0    | 0 NA          | NA       |
| 3.62 | 2.88 | 4.75 | 3.4 0.057995  | 0.929724 |
| 0    | 0    | 0    | 0 NA          | NA       |
| 0    | 0    | 0    | 0 NA          | NA       |
| 0    | 0.24 | 0    | 0 NA          | NA       |
| 0    | 0    | 0    | 0 NA          | NA       |
| 0    | 0    | 0    | 0 NA          | NA       |
| 0    | 0    | 0    | 0 NA          | NA       |
| 0    | 0    | 0    | 0 NA          | NA       |
| 0    | 0    | 0    | 0 NA          | NA       |
| 0    | 0    | 0    | 0 NA          | NA       |
| 0    | 0    | 0    | 0 NA          | NA       |
| 0    | 0    | 0    | 0 NA          | NA       |
| 0    | 0    | 0    | 0 NA          | NA       |
| 0    | 0    | 0    | 0 NA          | NA       |
| 0    | 0    | 0    | 0 NA          | NA       |
| 0    | 0    | 0    | 0 NA          | NA       |
| 0    | 0    | 0    | 0 NA          | NA       |
| 0    | 0    | 0    | 0 NA          | NA       |
| 0    | 0    | 0    | 0 NA          | NA       |
| 0    | 0    | 0    | 0 NA          | NA       |
| 0    | 0    | 0    | 0 NA          | NA       |
| 0    | 0    | 0.25 | 0.28 NA       | NA       |
| 0    | 0    | 0    | 0 NA          | NA       |
| 0    | 0.26 | 0    | 0.14 NA       | NA       |
| 0    | 0    | 0.03 | 0 NA          | NA       |
| 0    | 0    | 0    | 0 NA          | NA       |
| 0    | 0    | 0    | 0 NA          | NA       |
| 0    | 0    | 0    | 0.25 NA       | NA       |
| 1.6  | 0.04 | 0.41 | 1.44 NA       | NA       |
| 0    | 0    | 0    | 0 NA          | NA       |
| 0    | 0    | 0    | 0 NA          | NA       |
| 0    | 0    | 0    | 0 NA          | NA       |

|       |       |       |      |          |          |
|-------|-------|-------|------|----------|----------|
| 0     | 0     | 0     | 0    | NA       | NA       |
| 0     | 0     | 0     | 0    | NA       | NA       |
| 0.05  | 0.07  | 0.08  | 0.04 | NA       | NA       |
| 0     | 0     | 0     | 0    | NA       | NA       |
| 0     | 0     | 0     | 0    | NA       | NA       |
| 0     | 0     | 0     | 0    | NA       | NA       |
| 0     | 0     | 0     | 0    | NA       | NA       |
| 0     | 0     | 0     | 0    | NA       | NA       |
| 0     | 0.32  | 0.15  | 0.09 | NA       | NA       |
| 0     | 0     | 0     | 0    | NA       | NA       |
| 0     | 0     | 0     | 0    | NA       | NA       |
| 0     | 0     | 0     | 0    | NA       | NA       |
| 0     | 0     | 0     | 0    | NA       | NA       |
| 0     | 0     | 0     | 0    | NA       | NA       |
| 0     | 0     | 0     | 0    | NA       | NA       |
| 0     | 0     | 0     | 0    | NA       | NA       |
| 0     | 0     | 0     | 0    | NA       | NA       |
| 16.46 | 14.11 | 16.74 | 14   | -0.17712 | 0.463028 |
| 0     | 0     | 0     | 0    | NA       | NA       |
| 0     | 0     | 0     | 0    | NA       | NA       |
| 0     | 0     | 0     | 0    | NA       | NA       |
| 0     | 0     | 0     | 0    | NA       | NA       |
| 0     | 0     | 0     | 0    | NA       | NA       |
| 0     | 0     | 0     | 0    | NA       | NA       |
| 0.63  | 0.5   | 0.75  | 0.65 | -0.10827 | 0.861142 |
| 0.2   | 0.43  | 0.13  | 0.3  | NA       | NA       |
| 0     | 0     | 0     | 0    | NA       | NA       |
| 0     | 0     | 0     | 0    | NA       | NA       |
| 0     | 0     | 0     | 0    | NA       | NA       |
| 0.1   | 0.18  | 0.04  | 0.06 | NA       | NA       |
| 0     | 0     | 0.02  | 0.04 | NA       | NA       |
| 0     | 0     | 0     | 0    | NA       | NA       |
| 0     | 0     | 0     | 0    | NA       | NA       |
| 0.51  | 0     | 0.16  | 0.19 | NA       | NA       |
| 0     | 0     | 0     | 0    | NA       | NA       |
| 0     | 0     | 0     | 0    | NA       | NA       |
| 0     | 0     | 0     | 0    | NA       | NA       |
| 0     | 0     | 0.29  | 0.34 | NA       | NA       |
| 0     | 0     | 0     | 0    | NA       | NA       |
| 0.2   | 0.03  | 0.13  | 0.1  | NA       | NA       |
| 0     | 0     | 0     | 0    | NA       | NA       |
| 0     | 0     | 0.06  | 0    | NA       | NA       |
| 0     | 0     | 0     | 0    | NA       | NA       |
| 0     | 0     | 0     | 0    | NA       | NA       |
| 0     | 0     | 0     | 0    | NA       | NA       |

|       |       |       |                |          |
|-------|-------|-------|----------------|----------|
| 0     | 0     | 0     | 0 NA           | NA       |
| 0     | 0.05  | 0     | 0 NA           | NA       |
| 0     | 0     | 0.1   | 0 NA           | NA       |
| 0     | 0     | 0     | 0 NA           | NA       |
| 0.38  | 0.03  | 0     | 0 NA           | NA       |
| 0     | 0     | 0     | 0 NA           | NA       |
| 0     | 0     | 0     | 0 NA           | NA       |
| 54.96 | 70.37 | 65.3  | 67.49 0.312245 | 0.030372 |
| 0     | 0     | 0     | 0 NA           | NA       |
| 0     | 0     | 0     | 0 NA           | NA       |
| 0     | 0     | 0     | 0 NA           | NA       |
| 0.43  | 0.54  | 0.43  | 0.4 0.288967   | 0.640948 |
| 14.22 | 10.96 | 10.03 | 11.3 -0.44026  | 1.52E-05 |
| 0     | 0     | 0     | 0 NA           | NA       |
| 0     | 0     | 0     | 0 NA           | NA       |
| 0     | 0     | 0     | 0 NA           | NA       |
| 0     | 0     | 0.12  | 0 NA           | NA       |
| 0     | 0     | 0     | 0 NA           | NA       |
| 0     | 0.35  | 0     | 0.36 NA        | NA       |
| 0     | 0.2   | 0.05  | 0 NA           | NA       |
| 0.62  | 0.41  | 0.21  | 0 NA           | NA       |
| 0     | 0     | 0     | 0 NA           | NA       |
| 0     | 0     | 0.13  | 0 NA           | NA       |
| 0     | 0     | 0     | 0 NA           | NA       |
| 0     | 0     | 0     | 0 NA           | NA       |
| 0     | 0     | 0     | 0 NA           | NA       |
| 0     | 0     | 0     | 0 NA           | NA       |
| 0.27  | 0.26  | 0.32  | 0.36 -0.31561  | 0.695016 |
| 0.18  | 0.86  | 0.47  | 0.38 1.192751  | 0.032912 |
| 0     | 0     | 0     | 0 NA           | NA       |
| 0     | 0.19  | 0.27  | 0.05 NA        | NA       |
| 0     | 0     | 0.13  | 0 NA           | NA       |
| 0     | 0     | 0     | 0 NA           | NA       |
| 0     | 0     | 0     | 0 NA           | NA       |
| 0.04  | 0.02  | 0.05  | 0.02 NA        | NA       |
| 0     | 0     | 0     | 0 NA           | NA       |
| 0     | 0     | 0     | 0 NA           | NA       |
| 0     | 0     | 0     | 0 NA           | NA       |
| 0.18  | 0     | 0     | 0 NA           | NA       |
| 5.8   | 7.44  | 4.52  | 5.29 -0.13426  | 0.457266 |
| 0     | 0     | 0     | 0 NA           | NA       |
| 0     | 0     | 0     | 0 NA           | NA       |
| 0     | 0     | 0     | 0 NA           | NA       |
| 0     | 0     | 0     | 0 NA           | NA       |

|       |       |       |                |          |
|-------|-------|-------|----------------|----------|
| 0.45  | 0     | 0     | 0 NA           | NA       |
| 0     | 0     | 0     | 0 NA           | NA       |
| 0     | 0     | 0     | 0 NA           | NA       |
| 0     | 0     | 0     | 0 NA           | NA       |
| 0     | 0     | 0     | 0 NA           | NA       |
| 0     | 0     | 0     | 0 NA           | NA       |
| 0     | 0     | 0     | 0 NA           | NA       |
| 26.84 | 52.81 | 49.43 | 50.03 0.457825 | 8.75E-05 |
| 0     | 0.29  | 0.25  | 0 NA           | NA       |
| 0.04  | 0     | 0.05  | 0.03 NA        | NA       |
| 0     | 0     | 0     | 0 NA           | NA       |
| 0     | 0.27  | 1.18  | 0 NA           | NA       |
| 0     | 0     | 0     | 0 NA           | NA       |
| 0     | 0     | 0     | 0 NA           | NA       |
| 0     | 0     | 0     | 0 NA           | NA       |
| 0.29  | 0     | 0     | 0 NA           | NA       |
| 0     | 0     | 0     | 0 NA           | NA       |
| 6.95  | 6.05  | 6.51  | 6.81 0.05256   | 0.87436  |
| 0     | 0     | 0     | 0 NA           | NA       |
| 0     | 0     | 0     | 0 NA           | NA       |
| 0     | 0     | 0     | 0 NA           | NA       |
| 0     | 0     | 0     | 0 NA           | NA       |
| 5.7   | 6.29  | 5.75  | 5.67 -0.17194  | 0.59823  |
| 0     | 0     | 0     | 0 NA           | NA       |
| 0     | 0.21  | 0.18  | 0 NA           | NA       |
| 0     | 0     | 0     | 0 NA           | NA       |
| 18.49 | 22.45 | 22.01 | 20.36 0.240699 | 0.043428 |
| 0     | 0     | 0     | 0 NA           | NA       |
| 0     | 0     | 0     | 0 NA           | NA       |
| 0.02  | 0     | 0     | 0 NA           | NA       |
| 0     | 0     | 0     | 0 NA           | NA       |
| 0     | 0     | 0     | 0 NA           | NA       |
| 11.54 | 8.41  | 8.7   | 8.73 -0.43773  | 5.37E-05 |
| 0     | 0     | 0     | 0 NA           | NA       |
| 0     | 0     | 0     | 0 NA           | NA       |
| 0.1   | 0.07  | 0.07  | 0 NA           | NA       |
| 0     | 0     | 0     | 0 NA           | NA       |
| 0     | 0     | 0     | 0 NA           | NA       |
| 0     | 0.02  | 0     | 0 NA           | NA       |
| 0     | 0     | 0     | 0 NA           | NA       |
| 0     | 0     | 0     | 0 NA           | NA       |
| 0     | 0     | 0     | 0 NA           | NA       |
| 0     | 0     | 0     | 0 NA           | NA       |
| 6.65  | 7.3   | 8.25  | 8.05 0.138223  | 0.612737 |
| 0     | 0     | 0     | 0 NA           | NA       |

|       |       |       |                |          |
|-------|-------|-------|----------------|----------|
| 0     | 0     | 0     | 0 NA           | NA       |
| 0     | 0     | 0     | 0 NA           | NA       |
| 0     | 0     | 0     | 0 NA           | NA       |
| 0     | 0     | 0     | 0 NA           | NA       |
| 0     | 0     | 0     | 0 NA           | NA       |
| 0     | 0     | 0     | 0 NA           | NA       |
| 0     | 0     | 0     | 0 NA           | NA       |
| 0     | 0     | 0     | 0 NA           | NA       |
| 0     | 0     | 0     | 0 NA           | NA       |
| 0.06  | 0     | 0     | 0 NA           | NA       |
| 0     | 0.53  | 0.15  | 0.69 NA        | NA       |
| 0     | 0     | 0     | 0 NA           | NA       |
| 0     | 0.41  | 0     | 0 NA           | NA       |
| 0     | 0     | 0     | 0 NA           | NA       |
| 0     | 0     | 0.23  | 0 NA           | NA       |
| 0     | 0     | 0     | 0 NA           | NA       |
| 2.76  | 1.97  | 2.06  | 1.52 -0.12385  | 0.751907 |
| 0.22  | 0     | 0.14  | 0.16 NA        | NA       |
| 1.42  | 2.62  | 1.75  | 2.53 0.46188   | 0.076464 |
| 0     | 0     | 0     | 0 NA           | NA       |
| 0     | 0     | 0.13  | 0 NA           | NA       |
| 0     | 0     | 0     | 0 NA           | NA       |
| 0.43  | 0.09  | 0.21  | 0.28 -0.65392  | 0.350255 |
| 0     | 0     | 0     | 0 NA           | NA       |
| 0     | 0     | 0     | 0 NA           | NA       |
| 0     | 0     | 0     | 0 NA           | NA       |
| 0     | 0     | 0     | 0 NA           | NA       |
| 0     | 0     | 0     | 0 NA           | NA       |
| 0     | 0     | 0     | 0 NA           | NA       |
| 0     | 0     | 0     | 0 NA           | NA       |
| 0     | 0     | 0     | 0 NA           | NA       |
| 0     | 0     | 0     | 0 NA           | NA       |
| 0     | 0     | 0     | 0 NA           | NA       |
| 0     | 0     | 0     | 0 NA           | NA       |
| 0     | 0     | 0     | 0 NA           | NA       |
| 0     | 0     | 0     | 0 NA           | NA       |
| 0     | 0     | 0     | 0 NA           | NA       |
| 0.44  | 0.54  | 0.16  | 0.47 1.691371  | 0.002718 |
| 0     | 0     | 0     | 0 NA           | NA       |
| 0     | 0     | 0     | 0 NA           | NA       |
| 38.86 | 34.88 | 43.27 | 34.92 -0.01629 | 0.95613  |
| 0     | 0     | 0     | 0 NA           | NA       |
| 0     | 0     | 0.27  | 0 NA           | NA       |
| 0     | 0     | 0     | 0 NA           | NA       |
| 0.11  | 0.15  | 0.26  | 0.77 0.110455  | 0.903906 |
| 0     | 0     | 0     | 0 NA           | NA       |
| 6.52  | 10.36 | 7.25  | 9.1 0.172438   | 0.535222 |
| 0     | 0     | 0     | 0 NA           | NA       |
| 0     | 0     | 0     | 0 NA           | NA       |

|      |      |      |               |          |
|------|------|------|---------------|----------|
| 0    | 0    | 0    | 0 NA          | NA       |
| 0    | 0    | 0    | 0 NA          | NA       |
| 0.05 | 0.28 | 0.12 | 0.25 NA       | NA       |
| 0    | 0    | 0    | 0 NA          | NA       |
| 0    | 0    | 0    | 0 NA          | NA       |
| 0    | 0    | 0    | 0 NA          | NA       |
| 0    | 0    | 0    | 0 NA          | NA       |
| 0    | 0    | 0    | 0 NA          | NA       |
| 0    | 0    | 0    | 0 NA          | NA       |
| 0    | 0    | 0    | 0 NA          | NA       |
| 0    | 0    | 0    | 0 NA          | NA       |
| 0    | 0    | 0    | 0 NA          | NA       |
| 0    | 0    | 0    | 0 NA          | NA       |
| 0    | 0    | 0    | 0 NA          | NA       |
| 0    | 0    | 0.07 | 0 NA          | NA       |
| 0    | 1.03 | 0.91 | 2.24 3.049408 | 9.90E-09 |
| 0    | 0    | 0    | 0 NA          | NA       |
| 0    | 0.19 | 0    | 0 NA          | NA       |
| 0    | 0    | 0    | 0 NA          | NA       |
| 0    | 0    | 0.09 | 0 NA          | NA       |
| 0    | 0    | 0    | 0 NA          | NA       |
| 0    | 0    | 0    | 0 NA          | NA       |
| 0    | 0    | 0    | 0 NA          | NA       |
| 0    | 0    | 0    | 0 NA          | NA       |
| 0    | 0    | 0    | 0 NA          | NA       |
| 0    | 0    | 0    | 0 NA          | NA       |
| 0    | 0    | 0    | 0 NA          | NA       |
| 0    | 0    | 0    | 0 NA          | NA       |
| 0    | 0    | 0    | 0 NA          | NA       |
| 0    | 0    | 0.26 | 0.1 NA        | NA       |
| 0    | 0    | 0    | 0 NA          | NA       |
| 0    | 0    | 0    | 0 NA          | NA       |
| 0    | 0    | 0    | 0 NA          | NA       |
| 0    | 0    | 0    | 0 NA          | NA       |
| 0    | 0    | 0    | 0 NA          | NA       |
| 0    | 0    | 0    | 0 NA          | NA       |
| 0.64 | 0    | 0.28 | 0.16 NA       | NA       |
| 0    | 0    | 0    | 0 NA          | NA       |
| 0    | 0    | 0    | 0 NA          | NA       |
| 0.11 | 0.07 | 0.04 | 0.18 NA       | NA       |
| 0.1  | 0.43 | 0.2  | 0.75 0.889459 | 0.170879 |
| 0    | 0    | 0    | 0 NA          | NA       |
| 0    | 0    | 0    | 0 NA          | NA       |

|        |        |        |                 |          |
|--------|--------|--------|-----------------|----------|
| 0      | 0      | 0      | 0 NA            | NA       |
| 0      | 0      | 0.16   | 0 NA            | NA       |
| 0      | 0      | 0      | 0 NA            | NA       |
| 0      | 0      | 0      | 0 NA            | NA       |
| 0.16   | 0      | 0.2    | 0.12 NA         | NA       |
| 0      | 0      | 0      | 0 NA            | NA       |
| 0      | 0      | 0      | 0 NA            | NA       |
| 0      | 0      | 0      | 0 NA            | NA       |
| 0      | 0      | 0      | 0 NA            | NA       |
| 0      | 0      | 0      | 0 NA            | NA       |
| 0      | 0      | 0      | 0 NA            | NA       |
| 0      | 0      | 0      | 0 NA            | NA       |
| 0.07   | 0.02   | 0.09   | 0.05 NA         | NA       |
| 0.26   | 0.02   | 0.02   | 0.1 -0.89638    | 0.172931 |
| 0      | 0      | 0      | 0 NA            | NA       |
| 0      | 0      | 0      | 0.11 NA         | NA       |
| 0      | 0      | 0      | 0.06 NA         | NA       |
| 0      | 0      | 0      | 0 NA            | NA       |
| 0      | 0      | 0      | 0 NA            | NA       |
| 0      | 0      | 0      | 0 NA            | NA       |
| 23.33  | 18.59  | 22.71  | 23.59 -0.08922  | 0.609388 |
| 0      | 0.13   | 0      | 0.14 NA         | NA       |
| 510.11 | 426.43 | 487.32 | 518.66 -0.04717 | 0.739854 |
| 2.45   | 1.05   | 1.79   | 2.82 0.378941   | 0.625297 |
| 0      | 0      | 0      | 0 NA            | NA       |
| 0      | 0      | 0      | 0 NA            | NA       |
| 0      | 0      | 0      | 0 NA            | NA       |
| 4.78   | 2.07   | 2.61   | 3.1 -0.56505    | 0.038832 |
| 0      | 0      | 0      | 0 NA            | NA       |
| 0      | 0.07   | 0      | 0 NA            | NA       |
| 0      | 0      | 0      | 0 NA            | NA       |
| 3.25   | 3.13   | 3.78   | 3.25 0.073616   | 0.815904 |
| 0      | 0      | 0      | 0 NA            | NA       |
| 0      | 0      | 0      | 0 NA            | NA       |
| 0      | 0      | 0      | 0 NA            | NA       |
| 0      | 0      | 0      | 0 NA            | NA       |
| 0.38   | 0.27   | 0      | 0 NA            | NA       |
| 332.56 | 332.91 | 327.84 | 303.51 -0.15013 | 0.100452 |
| 5.12   | 6.34   | 5.47   | 7.99 0.228127   | 0.52337  |
| 0      | 0      | 0      | 0 NA            | NA       |
| 0.12   | 0.5    | 0      | 0 NA            | NA       |
| 0      | 0      | 0      | 0 NA            | NA       |
| 0.28   | 0.3    | 0.19   | 0 NA            | NA       |
| 0      | 0      | 0.16   | 0.13 NA         | NA       |



|       |       |       |       |          |          |
|-------|-------|-------|-------|----------|----------|
| 0.14  | 0.17  | 0.11  | 0.21  | 0.004165 | 0.996111 |
| 0     | 0     | 0     | 0     | NA       | NA       |
| 0     | 0     | 0     | 0     | NA       | NA       |
| 2.8   | 1.06  | 1.45  | 1.48  | -1.15903 | 2.64E-06 |
| 0     | 0     | 0     | 0     | NA       | NA       |
| 0     | 0     | 0     | 0     | NA       | NA       |
| 0     | 0     | 0     | 0     | NA       | NA       |
| 1.12  | 0.49  | 0.47  | 1.03  | -0.45416 | 0.35871  |
| 0     | 0.09  | 0     | 0     | NA       | NA       |
| 0.49  | 0.14  | 0.38  | 0.34  | -2.02282 | 1.32E-06 |
| 0     | 0     | 0     | 0     | NA       | NA       |
| 0     | 0     | 0     | 0     | NA       | NA       |
| 26.26 | 22.33 | 24.85 | 24.59 | 0.00128  | 0.995196 |
| 0     | 0     | 0.38  | 0     | NA       | NA       |
| 0     | 0     | 0     | 0     | NA       | NA       |
| 0     | 0     | 0     | 0     | NA       | NA       |
| 6.29  | 8.84  | 8.69  | 9.15  | 0.360474 | 0.014152 |
| 0     | 0     | 0     | 0     | NA       | NA       |
| 0     | 0     | 0     | 0     | NA       | NA       |
| 0     | 0     | 0     | 0     | NA       | NA       |
| 1.05  | 0     | 0     | 0.76  | NA       | NA       |
| 1.82  | 2.92  | 3.26  | 3.01  | 0.184153 | 0.554091 |
| 0     | 0     | 0     | 0     | NA       | NA       |
| 0.05  | 0.07  | 0.1   | 0     | NA       | NA       |
| 19.86 | 24.29 | 21.68 | 21.24 | 0.030377 | 0.895057 |
| 5.2   | 8.71  | 9.09  | 9.18  | 0.609344 | 0.002356 |
| 0     | 0     | 0     | 0     | NA       | NA       |
| 0     | 0     | 0.05  | 0     | NA       | NA       |
| 0     | 0     | 0     | 0     | NA       | NA       |
| 0     | 0     | 0     | 0     | NA       | NA       |
| 0     | 0     | 0     | 0     | NA       | NA       |
| 0     | 0     | 0     | 0     | NA       | NA       |
| 0     | 0     | 0.13  | 0     | NA       | NA       |
| 0     | 0     | 0     | 0     | NA       | NA       |
| 0.23  | 0.21  | 0     | 0.09  | NA       | NA       |
| 0     | 0     | 0     | 0     | NA       | NA       |
| 0     | 0     | 0     | 0     | NA       | NA       |
| 0     | 0     | 0     | 0     | NA       | NA       |
| 0     | 0     | 0     | 0     | NA       | NA       |
| 0     | 0     | 0     | 0     | NA       | NA       |
| 3.46  | 2.75  | 1.92  | 2.44  | -0.21791 | 0.572543 |
| 0     | 0     | 0     | 0     | NA       | NA       |
| 0     | 0     | 0     | 0     | NA       | NA       |
| 0     | 0     | 0     | 0     | NA       | NA       |
| 0     | 0.15  | 0.2   | 0.66  | NA       | NA       |

|      |      |      |               |          |
|------|------|------|---------------|----------|
| 0    | 0    | 0    | 0 NA          | NA       |
| 0    | 0    | 0    | 0 NA          | NA       |
| 0    | 0    | 0    | 0 NA          | NA       |
| 0.21 | 0.08 | 0.07 | 0.24 NA       | NA       |
| 0    | 0    | 0    | 0 NA          | NA       |
| 0.55 | 0.61 | 0.88 | 1.08 -0.16257 | 0.771116 |
| 0    | 0    | 0    | 0 NA          | NA       |
| 0    | 0    | 0    | 0 NA          | NA       |
| 0    | 0    | 0    | 0 NA          | NA       |
| 0.09 | 0.12 | 0.17 | 0.26 0.595408 | 0.407228 |
| 0    | 0    | 0    | 0 NA          | NA       |
| 0    | 0    | 0    | 0 NA          | NA       |
| 0    | 0    | 0    | 0 NA          | NA       |
| 0.14 | 0    | 0    | 0 NA          | NA       |
| 0    | 0    | 0    | 0 NA          | NA       |
| 0    | 0    | 0    | 0 NA          | NA       |
| 0    | 0    | 0    | 0 NA          | NA       |
| 0    | 0    | 0    | 0 NA          | NA       |
| 0    | 0    | 0    | 0 NA          | NA       |
| 0.47 | 0.22 | 0    | 0 NA          | NA       |
| 0    | 0    | 0    | 0 NA          | NA       |
| 0    | 0    | 0    | 0 NA          | NA       |
| 0    | 0    | 0    | 0 NA          | NA       |
| 0    | 0    | 0    | 0 NA          | NA       |
| 0.46 | 0.32 | 0    | 0 NA          | NA       |
| 0    | 0    | 0    | 0 NA          | NA       |
| 0    | 0    | 0    | 0 NA          | NA       |
| 0    | 0    | 0    | 0 NA          | NA       |
| 0    | 0    | 0    | 0 NA          | NA       |
| 0    | 0    | 0    | 0 NA          | NA       |
| 0    | 0    | 0    | 0 NA          | NA       |
| 0    | 0    | 0    | 0 NA          | NA       |
| 0    | 0    | 0    | 0 NA          | NA       |
| 0    | 0    | 0    | 0 NA          | NA       |
| 0    | 0    | 0    | 0 NA          | NA       |
| 0    | 0    | 0    | 0 NA          | NA       |
| 0    | 0    | 0    | 0 NA          | NA       |
| 0.58 | 0    | 0    | 0.12 NA       | NA       |
| 0    | 0    | 0    | 0 NA          | NA       |
| 0    | 0    | 0    | 0 NA          | NA       |
| 0.44 | 0.18 | 0.26 | 0 -0.75363    | 0.270663 |
| 0    | 0    | 0    | 0.33 NA       | NA       |
| 0    | 0    | 0    | 0 NA          | NA       |
| 0    | 0    | 0    | 0 NA          | NA       |

|       |       |       |                |          |
|-------|-------|-------|----------------|----------|
| 0     | 0     | 0.03  | 0 NA           | NA       |
| 0     | 0     | 0     | 0 NA           | NA       |
| 0     | 0     | 0     | 0 NA           | NA       |
| 0     | 0     | 0.43  | 0 NA           | NA       |
| 0     | 0.18  | 0     | 0.06 NA        | NA       |
| 0     | 0     | 0     | 0 NA           | NA       |
| 0     | 0     | 0     | 0 NA           | NA       |
| 0     | 0     | 0     | 0.03 NA        | NA       |
| 0     | 0     | 0     | 0 NA           | NA       |
| 0     | 0     | 0.17  | 0 NA           | NA       |
| 0.98  | 0.55  | 1.56  | 0.82 0.053884  | 0.954085 |
| 21.7  | 37.37 | 37.88 | 37.14 0.646687 | 7.48E-08 |
| 0     | 0     | 0     | 0 NA           | NA       |
| 0     | 0     | 0.17  | 0.19 NA        | NA       |
| 0     | 0     | 0     | 0 NA           | NA       |
| 7.66  | 8.21  | 7.9   | 5.4 -0.35357   | 0.013244 |
| 0     | 0     | 0     | 0 NA           | NA       |
| 0     | 0     | 0     | 0 NA           | NA       |
| 0     | 0     | 0     | 0 NA           | NA       |
| 0     | 0     | 0.11  | 0 NA           | NA       |
| 0     | 0     | 0     | 0 NA           | NA       |
| 0     | 0     | 0     | 0 NA           | NA       |
| 0     | 0     | 0     | 0 NA           | NA       |
| 0     | 0     | 0     | 0 NA           | NA       |
| 1.57  | 2.51  | 1.79  | 2.41 1.002002  | 0.049282 |
| 0     | 0     | 0     | 0 NA           | NA       |
| 0     | 0     | 0     | 0 NA           | NA       |
| 0     | 0     | 0     | 0 NA           | NA       |
| 0     | 0     | 0     | 0 NA           | NA       |
| 0     | 0     | 0     | 0 NA           | NA       |
| 0.28  | 0     | 0.09  | 0.21 NA        | NA       |
| 0     | 0     | 0     | 0 NA           | NA       |
| 0     | 0     | 0     | 0 NA           | NA       |
| 0     | 0     | 0     | 0 NA           | NA       |
| 0.2   | 0.13  | 0.11  | 0.24 0.102404  | 0.896466 |
| 0     | 0.11  | 0     | 0 NA           | NA       |
| 0     | 0     | 0     | 0 NA           | NA       |
| 0     | 0     | 0     | 0 NA           | NA       |
| 0.06  | 0     | 0     | 0 NA           | NA       |
| 0.23  | 0.17  | 0     | 0 NA           | NA       |
| 11.34 | 20.64 | 13.65 | 19.52 0.148578 | 0.478049 |
| 0     | 0     | 0     | 0 NA           | NA       |
| 0     | 0     | 0     | 0 NA           | NA       |
| 0     | 0     | 0     | 0 NA           | NA       |
| 0     | 0.06  | 0     | 0 NA           | NA       |

|        |        |       |        |          |          |
|--------|--------|-------|--------|----------|----------|
| 0      | 0      | 0     | 0      | NA       | NA       |
| 0      | 0      | 0     | 0      | NA       | NA       |
| 13.26  | 11.64  | 13.41 | 11.22  | -0.1483  | 0.409574 |
| 0      | 0      | 0     | 0      | NA       | NA       |
| 0.09   | 0      | 0     | 0      | NA       | NA       |
| 0.29   | 0      | 0     | 0      | NA       | NA       |
| 0      | 0      | 0     | 0      | NA       | NA       |
| 0      | 0      | 0     | 0      | NA       | NA       |
| 0      | 0      | 0     | 0      | NA       | NA       |
| 0      | 0      | 0     | 0      | NA       | NA       |
| 5.76   | 11.14  | 7.77  | 9.49   | 0.891437 | 3.77E-06 |
| 0      | 0      | 0     | 0      | NA       | NA       |
| 0      | 0      | 0     | 0      | NA       | NA       |
| 0      | 0      | 0     | 0      | NA       | NA       |
| 0.18   | 0.18   | 0.2   | 0.22   | 0.339248 | 0.669982 |
| 230.62 | 243.98 | 234.2 | 234.92 | -0.0369  | 0.723201 |
| 0      | 0      | 0     | 0      | NA       | NA       |
| 0      | 0      | 0.05  | 0      | NA       | NA       |
| 0.89   | 0.81   | 0.41  | 0.92   | -0.37123 | 0.467573 |
| 0      | 0      | 0     | 0      | NA       | NA       |
| 0      | 0      | 0     | 0      | NA       | NA       |
| 12.36  | 17     | 13.32 | 11.65  | 0.275442 | 0.075215 |
| 0      | 0      | 0     | 0      | NA       | NA       |
| 0      | 0      | 0     | 0      | NA       | NA       |
| 0      | 0      | 0     | 0      | NA       | NA       |
| 0      | 0      | 0     | 0      | NA       | NA       |
| 0.86   | 2.45   | 2.01  | 2.89   | 0.569075 | 0.360206 |
| 0      | 0      | 0     | 0      | NA       | NA       |
| 0      | 0      | 0     | 0      | NA       | NA       |
| 0      | 0      | 0     | 0      | NA       | NA       |
| 0      | 0      | 0     | 0      | NA       | NA       |
| 0      | 0      | 0     | 0      | NA       | NA       |
| 0.24   | 0      | 0.16  | 0      | NA       | NA       |
| 0      | 0      | 0     | 0      | NA       | NA       |
| 0      | 0      | 0     | 0      | NA       | NA       |
| 0      | 0      | 0     | 0      | NA       | NA       |
| 0      | 0      | 0     | 0      | NA       | NA       |
| 0      | 0.07   | 0     | 0      | NA       | NA       |
| 0      | 0      | 0     | 0      | NA       | NA       |
| 0      | 0      | 0     | 0      | NA       | NA       |
| 0      | 0      | 0     | 0      | NA       | NA       |
| 0      | 0      | 0     | 0      | NA       | NA       |
| 0      | 0      | 0     | 0      | NA       | NA       |
| 0      | 0      | 0.2   | 0      | NA       | NA       |
| 0      | 0      | 0     | 0      | NA       | NA       |

|      |       |      |                |          |
|------|-------|------|----------------|----------|
| 0    | 0     | 0    | 0 NA           | NA       |
| 0    | 0     | 0    | 0 NA           | NA       |
| 0    | 0     | 0    | 0 NA           | NA       |
| 0    | 0     | 0.07 | 0 NA           | NA       |
| 0    | 0     | 0    | 0.17 NA        | NA       |
| 0    | 0     | 0    | 0 NA           | NA       |
| 0    | 0     | 0    | 0 NA           | NA       |
| 0    | 0     | 0    | 0 NA           | NA       |
| 0    | 0     | 0    | 0 NA           | NA       |
| 0    | 0     | 0    | 0 NA           | NA       |
| 3.99 | 4.89  | 5.99 | 5.76 0.237156  | 0.366719 |
| 0    | 0     | 0    | 0 NA           | NA       |
| 0    | 0.17  | 0.08 | 0.17 NA        | NA       |
| 0.23 | 1.92  | 1.37 | 1.53 2.584144  | 3.60E-12 |
| 0    | 0     | 0    | 0 NA           | NA       |
| 0    | 0     | 0    | 0 NA           | NA       |
| 0    | 0     | 0    | 0 NA           | NA       |
| 0    | 0     | 0    | 0 NA           | NA       |
| 0    | 0     | 0    | 0 NA           | NA       |
| 0    | 0     | 0    | 0 NA           | NA       |
| 0    | 0     | 0    | 0 NA           | NA       |
| 0    | 0     | 0    | 0 NA           | NA       |
| 0    | 0     | 0    | 0 NA           | NA       |
| 0    | 0     | 0    | 0 NA           | NA       |
| 0    | 0.04  | 0.11 | 0.22 NA        | NA       |
| 0    | 0     | 0    | 0 NA           | NA       |
| 0    | 0     | 0    | 0 NA           | NA       |
| 0    | 0.08  | 0    | 0 NA           | NA       |
| 0.66 | 0     | 0    | 0 NA           | NA       |
| 0    | 0     | 0    | 0 NA           | NA       |
| 0    | 0.01  | 0    | 0 NA           | NA       |
| 2.88 | 3.18  | 4.05 | 3.76 0.026622  | 0.94882  |
| 0    | 0     | 0    | 0 NA           | NA       |
| 0    | 0     | 0    | 0 NA           | NA       |
| 0    | 0     | 0    | 0 NA           | NA       |
| 0    | 0     | 0    | 0 NA           | NA       |
| 0    | 0     | 0    | 0 NA           | NA       |
| 0.2  | 0     | 0    | 0 NA           | NA       |
| 42.3 | 26.88 | 30.9 | 25.92 -0.58919 | 9.69E-06 |
| 0    | 0     | 0    | 0 NA           | NA       |
| 0    | 0     | 0    | 0 NA           | NA       |
| 0    | 0     | 0    | 0 NA           | NA       |
| 0    | 0     | 0    | 0 NA           | NA       |
| 0    | 0     | 0    | 0 NA           | NA       |

|       |       |       |       |          |          |
|-------|-------|-------|-------|----------|----------|
| 2.45  | 2.68  | 1.93  | 2.78  | -0.55662 | 0.221058 |
| 0     | 0     | 0     | 0     | NA       | NA       |
| 0     | 0     | 0     | 0     | NA       | NA       |
| 0     | 0     | 0     | 0     | NA       | NA       |
| 0     | 0     | 0     | 0     | NA       | NA       |
| 0     | 0     | 0     | 0     | NA       | NA       |
| 0     | 0     | 0     | 0     | NA       | NA       |
| 0.61  | 2.57  | 1.45  | 1.29  | 0.222475 | 0.792792 |
| 0.52  | 1.16  | 0.79  | 0.89  | 0.1547   | 0.821682 |
| 0     | 0     | 0     | 0     | NA       | NA       |
| 0     | 0     | 0     | 0     | NA       | NA       |
| 0     | 0     | 0     | 0     | NA       | NA       |
| 0.2   | 0     | 0     | 0     | NA       | NA       |
| 0     | 0.36  | 0     | 0     | NA       | NA       |
| 0     | 0     | 0     | 0     | NA       | NA       |
| 0     | 0     | 0     | 0     | NA       | NA       |
| 0     | 0     | 0     | 0     | NA       | NA       |
| 0     | 0     | 0     | 0     | NA       | NA       |
| 0     | 0     | 0     | 0     | NA       | NA       |
| 0     | 0     | 0     | 0     | NA       | NA       |
| 0.25  | 2.22  | 1.01  | 1.66  | 1.49916  | 4.41E-05 |
| 0     | 0     | 0     | 0     | NA       | NA       |
| 0     | 0     | 0     | 0     | NA       | NA       |
| 0     | 0     | 0     | 0     | NA       | NA       |
| 0     | 0     | 0     | 0     | NA       | NA       |
| 0     | 0     | 0     | 0     | NA       | NA       |
| 0.3   | 0     | 0     | 0     | NA       | NA       |
| 0     | 0     | 0     | 0     | NA       | NA       |
| 1.22  | 0.41  | 0.37  | 0.41  | -1.44154 | 9.29E-06 |
| 0.43  | 0.91  | 0.79  | 0     | NA       | NA       |
| 11.4  | 7.35  | 9.4   | 8.12  | -0.64303 | 1.04E-08 |
| 0     | 0     | 0     | 0     | NA       | NA       |
| 0     | 0     | 0     | 0     | NA       | NA       |
| 0     | 0     | 0     | 0     | NA       | NA       |
| 0     | 0     | 0.14  | 0.33  | NA       | NA       |
| 0     | 0     | 0     | 0     | NA       | NA       |
| 0     | 0     | 0     | 0.29  | NA       | NA       |
| 0     | 0.27  | 0     | 0     | NA       | NA       |
| 19.6  | 17.48 | 18.68 | 15.41 | -0.02906 | 0.944817 |
| 0     | 0     | 0     | 0     | NA       | NA       |
| 20.94 | 30.39 | 23.24 | 28.9  | 0.247304 | 0.157661 |
| 0     | 0     | 0     | 0     | NA       | NA       |
| 0     | 0     | 0     | 0     | NA       | NA       |
| 0     | 0     | 0     | 0     | NA       | NA       |

|      |      |      |               |          |
|------|------|------|---------------|----------|
| 0    | 0    | 0    | 0 NA          | NA       |
| 0    | 0    | 0    | 0 NA          | NA       |
| 0    | 0    | 0    | 0 NA          | NA       |
| 0    | 0    | 0    | 0 NA          | NA       |
| 0    | 0    | 0.22 | 0.25 NA       | NA       |
| 0    | 0    | 0    | 0 NA          | NA       |
| 0    | 0    | 0    | 0 NA          | NA       |
| 0    | 0    | 0    | 0 NA          | NA       |
| 3.33 | 5.15 | 3.61 | 4.61 0.498281 | 0.098687 |
| 0    | 0    | 0    | 0 NA          | NA       |
| 0    | 0    | 0    | 0 NA          | NA       |
| 1.33 | 2.47 | 1.31 | 1.09 0.098024 | 0.808234 |
| 0    | 0    | 0    | 0 NA          | NA       |
| 0    | 0    | 0    | 0 NA          | NA       |
| 0    | 0    | 0    | 0 NA          | NA       |
| 0    | 0    | 0    | 0 NA          | NA       |
| 0    | 0    | 0    | 0 NA          | NA       |
| 0    | 0    | 0    | 0 NA          | NA       |
| 0    | 0    | 0    | 0 NA          | NA       |
| 0.1  | 0    | 0.07 | 0 NA          | NA       |
| 0    | 0    | 0    | 0 NA          | NA       |
| 0    | 0    | 0    | 0 NA          | NA       |
| 0    | 0    | 0    | 0 NA          | NA       |
| 0    | 0    | 0    | 0 NA          | NA       |
| 0    | 0    | 0    | 0 NA          | NA       |
| 0    | 0    | 0    | 0 NA          | NA       |
| 0    | 0    | 0    | 0 NA          | NA       |
| 0    | 0    | 0    | 0 NA          | NA       |
| 0    | 0    | 0    | 0 NA          | NA       |
| 0    | 0.28 | 0    | 0.29 NA       | NA       |
| 0    | 0    | 0    | 0 NA          | NA       |
| 0    | 0    | 0    | 0 NA          | NA       |
| 0    | 0    | 0.28 | 0 NA          | NA       |
| 0    | 0    | 0    | 0 NA          | NA       |
| 0    | 0    | 0    | 0 NA          | NA       |
| 0    | 0    | 0    | 0 NA          | NA       |
| 0    | 0.23 | 0.07 | 0 NA          | NA       |
| 0    | 0    | 0.11 | 0 NA          | NA       |
| 0    | 0    | 0    | 0 NA          | NA       |
| 0    | 0    | 0    | 0 NA          | NA       |
| 0    | 0    | 0    | 0 NA          | NA       |
| 0    | 0.18 | 0.06 | 0.49 NA       | NA       |
| 0    | 0    | 0    | 0 NA          | NA       |
| 0.09 | 0    | 0.06 | 0 NA          | NA       |

|       |       |       |                |          |
|-------|-------|-------|----------------|----------|
| 0     | 0     | 0     | 0 NA           | NA       |
| 0     | 0     | 0     | 0 NA           | NA       |
| 0.11  | 0     | 0.07  | 0 NA           | NA       |
| 0     | 0     | 0     | 0 NA           | NA       |
| 0     | 0     | 0     | 0 NA           | NA       |
| 0     | 0     | 0     | 0 NA           | NA       |
| 79.68 | 36.61 | 41.43 | 86.55 -0.44029 | 0.143203 |
| 0     | 0     | 0     | 0 NA           | NA       |
| 0     | 0     | 0     | 0 NA           | NA       |
| 0     | 0     | 0     | 0 NA           | NA       |
| 0     | 0     | 0     | 0 NA           | NA       |
| 3.42  | 14.98 | 9.82  | 14.95 1.919145 | 9.56E-36 |
| 0.05  | 0     | 0     | 0 NA           | NA       |
| 0     | 0     | 0     | 0 NA           | NA       |
| 0.31  | 1.57  | 0.82  | 0.19 -0.33643  | 0.671258 |
| 0     | 0     | 0     | 0 NA           | NA       |
| 0     | 0     | 0     | 0 NA           | NA       |
| 0     | 0     | 0     | 0 NA           | NA       |
| 0     | 0     | 0     | 0 NA           | NA       |
| 0     | 0     | 0     | 0 NA           | NA       |
| 0     | 0     | 0     | 0 NA           | NA       |
| 0     | 0     | 0     | 0 NA           | NA       |
| 0     | 0     | 0     | 0 NA           | NA       |
| 0     | 0     | 0     | 0 NA           | NA       |
| 0     | 0.01  | 0     | 0 NA           | NA       |
| 2.77  | 1.57  | 2.31  | 2.42 -0.21989  | 0.722198 |
| 0     | 0     | 0     | 0 NA           | NA       |
| 17.28 | 18.04 | 20.74 | 22.24 0.190147 | 0.081682 |
| 0     | 0     | 0     | 0 NA           | NA       |
| 0     | 0.11  | 0     | 0 NA           | NA       |
| 0     | 0     | 0     | 0 NA           | NA       |
| 0     | 0     | 0     | 0 NA           | NA       |
| 0     | 0     | 0     | 0 NA           | NA       |
| 0     | 0     | 0     | 0 NA           | NA       |
| 3.09  | 2.81  | 3.19  | 3.11 -0.41306  | 0.372075 |
| 1.24  | 0.78  | 1.05  | 0.64 -0.71847  | 0.133281 |
| 0     | 0     | 0     | 0 NA           | NA       |
| 0     | 0     | 0     | 0 NA           | NA       |
| 14.97 | 10.47 | 12.33 | 10.91 -0.34061 | 0.016162 |
| 0     | 0     | 0.11  | 0 NA           | NA       |
| 0.2   | 0.15  | 0     | 0.15 NA        | NA       |
| 0     | 0     | 0     | 0 NA           | NA       |
| 0     | 0     | 0     | 0 NA           | NA       |
| 0     | 0.25  | 0     | 0.39 NA        | NA       |



|       |       |       |                |          |
|-------|-------|-------|----------------|----------|
| 0     | 0     | 0     | 0 NA           | NA       |
| 38.31 | 24.84 | 34.06 | 29.82 -0.49961 | 2.08E-06 |
| 0     | 0     | 0     | 0 NA           | NA       |
| 0     | 0     | 0     | 0 NA           | NA       |
| 0.08  | 0.46  | 0.21  | 0.4 0.324451   | 0.685979 |
| 0     | 0     | 0     | 0 NA           | NA       |
| 0     | 0     | 0     | 0 NA           | NA       |
| 0     | 0     | 0     | 0 NA           | NA       |
| 0     | 0     | 0     | 0 NA           | NA       |
| 0     | 0     | 0.5   | 0 NA           | NA       |
| 0     | 0     | 0     | 0 NA           | NA       |
| 0     | 0     | 0     | 0 NA           | NA       |
| 0     | 0     | 0     | 0 NA           | NA       |
| 0     | 0     | 0     | 0 NA           | NA       |
| 0     | 0     | 0     | 0 NA           | NA       |
| 0     | 0     | 0     | 0 NA           | NA       |
| 0     | 0     | 0     | 0 NA           | NA       |
| 0     | 0     | 0     | 0 NA           | NA       |
| 0     | 0     | 0     | 0 NA           | NA       |
| 0.04  | 0.03  | 0.06  | 0.22 NA        | NA       |
| 1.73  | 0.06  | 0.76  | 0.16 -1.51374  | 0.008854 |
| 0     | 0     | 0     | 0 NA           | NA       |
| 5.55  | 4.66  | 7.03  | 6.14 -0.26164  | 0.293358 |
| 0     | 0     | 0     | 0 NA           | NA       |
| 2.06  | 3.05  | 4.14  | 5.48 0.476008  | 0.452851 |
| 0     | 0     | 0     | 0 NA           | NA       |
| 0     | 0     | 0     | 0 NA           | NA       |
| 0     | 0     | 0     | 0 NA           | NA       |
| 0     | 0     | 0     | 0 NA           | NA       |
| 0     | 0     | 0     | 0 NA           | NA       |
| 0     | 0     | 0     | 0 NA           | NA       |
| 0     | 0     | 0     | 0 NA           | NA       |
| 0.04  | 0     | 0     | 0 NA           | NA       |
| 0     | 0     | 0     | 0.13 NA        | NA       |
| 0     | 0     | 0     | 0 NA           | NA       |
| 0     | 0     | 0     | 0 NA           | NA       |
| 0     | 0     | 0     | 0 NA           | NA       |
| 0     | 0     | 0     | 0 NA           | NA       |
| 0.67  | 0.48  | 0     | 0 NA           | NA       |
| 0.37  | 0.9   | 0.55  | 0.1 0.369381   | 0.628307 |
| 0     | 0     | 0     | 0 NA           | NA       |
| 0     | 0     | 0     | 0 NA           | NA       |
| 0.33  | 0.43  | 0.33  | 0.39 -0.16421  | 0.812564 |
| 0     | 0     | 0     | 0 NA           | NA       |

|       |      |       |                |          |
|-------|------|-------|----------------|----------|
| 0     | 0    | 0     | 0 NA           | NA       |
| 0     | 0    | 0     | 0 NA           | NA       |
| 0     | 0    | 0     | 0 NA           | NA       |
| 0.13  | 0.38 | 0.04  | 0.1 NA         | NA       |
| 0     | 0    | 0     | 0 NA           | NA       |
| 6.61  | 3.87 | 6.42  | 5.75 -0.11686  | 0.786725 |
| 6.25  | 4.38 | 4.54  | 5.33 -0.15202  | 0.729357 |
| 0     | 0    | 0     | 0 NA           | NA       |
| 0     | 0    | 0     | 0 NA           | NA       |
| 0     | 0    | 0     | 0 NA           | NA       |
| 0     | 0    | 0     | 0 NA           | NA       |
| 0     | 0    | 0     | 0 NA           | NA       |
| 0     | 0    | 0     | 0 NA           | NA       |
| 0     | 0    | 0     | 0 NA           | NA       |
| 0     | 0    | 0     | 0 NA           | NA       |
| 0     | 0    | 0     | 0 NA           | NA       |
| 0     | 0    | 0     | 0 NA           | NA       |
| 0     | 0    | 0     | 0 NA           | NA       |
| 0     | 0    | 0     | 0 NA           | NA       |
| 0     | 0    | 0     | 0 NA           | NA       |
| 0     | 0.34 | 0.29  | 0 NA           | NA       |
| 0     | 0    | 0     | 0 NA           | NA       |
| 0.65  | 0.29 | 0.21  | 0.15 -1.18271  | 0.007103 |
| 0     | 0    | 0     | 0 NA           | NA       |
| 0     | 0    | 0     | 0 NA           | NA       |
| 0     | 0.02 | 0.02  | 0 NA           | NA       |
| 0     | 0    | 0     | 0 NA           | NA       |
| 48.18 | 47.7 | 53.65 | 47.78 -0.04491 | 0.734551 |
| 0     | 0    | 0     | 0 NA           | NA       |
| 0     | 0    | 0     | 0 NA           | NA       |
| 0     | 0.16 | 0.38  | 0.07 1.080947  | 0.087963 |
| 3.66  | 1.5  | 3.58  | 2.17 -0.53546  | 0.057341 |
| 0     | 0    | 0     | 0 NA           | NA       |
| 0.6   | 1.43 | 1.2   | 1.74 0.706395  | 0.219628 |
| 0     | 0    | 0     | 0 NA           | NA       |
| 0     | 0.11 | 0     | 0.06 NA        | NA       |
| 0     | 0    | 0     | 0 NA           | NA       |
| 0     | 0    | 0     | 0 NA           | NA       |
| 0     | 0    | 0     | 0 NA           | NA       |
| 0     | 0    | 0     | 0 NA           | NA       |
| 0     | 0    | 0     | 0 NA           | NA       |
| 0     | 0    | 0     | 0 NA           | NA       |
| 1.29  | 0    | 0     | 0 NA           | NA       |
| 0.15  | 0    | 0     | 0 NA           | NA       |

|       |       |       |               |          |
|-------|-------|-------|---------------|----------|
| 0     | 0     | 0     | 0 NA          | NA       |
| 0     | 0     | 0.25  | 0 NA          | NA       |
| 0     | 0     | 0     | 0 NA          | NA       |
| 2.02  | 1     | 0.7   | 1.32 -2.36245 | 4.79E-17 |
| 0     | 0     | 0     | 0 NA          | NA       |
| 0.58  | 1.22  | 0.99  | 0.6 0.701805  | 0.153326 |
| 0     | 0     | 0     | 0 NA          | NA       |
| 0     | 0     | 0     | 0 NA          | NA       |
| 0     | 0     | 0     | 0 NA          | NA       |
| 0     | 0     | 0     | 0 NA          | NA       |
| 0     | 0     | 0     | 0 NA          | NA       |
| 0     | 0     | 0.06  | 0 NA          | NA       |
| 0     | 0     | 0     | 0 NA          | NA       |
| 33.28 | 27.64 | 30.07 | 32.9 -0.14893 | 0.202242 |
| 0     | 0     | 0     | 0 NA          | NA       |
| 0     | 0     | 0     | 0 NA          | NA       |
| 0     | 0     | 0     | 0 NA          | NA       |
| 8.61  | 8.21  | 6.9   | 7.43 -0.17426 | 0.214394 |
| 0     | 0     | 0     | 0 NA          | NA       |
| 0     | 0     | 0.1   | 0.12 NA       | NA       |
| 0     | 0     | 0     | 0 NA          | NA       |
| 0.07  | 0.05  | 0.07  | 0.03 NA       | NA       |
| 1.08  | 1.39  | 1.29  | 1.16 0.354094 | 0.590945 |
| 0     | 0     | 0     | 0.02 NA       | NA       |
| 0.2   | 0.12  | 0.29  | 0.17 -0.37841 | 0.546747 |
| 0     | 0     | 0     | 0 NA          | NA       |
| 0     | 0     | 0     | 0 NA          | NA       |
| 0.08  | 0.03  | 0.03  | 0.05 NA       | NA       |
| 0.47  | 1.2   | 1.08  | 1.55 0.561769 | 0.241885 |
| 0.13  | 0     | 0     | 0 NA          | NA       |
| 6.52  | 7.16  | 5.99  | 6.31 0.010566 | 0.972634 |
| 1.1   | 1.99  | 1.87  | 1.7 0.544478  | 0.287997 |
| 0     | 0     | 0     | 0 NA          | NA       |
| 0.06  | 0.04  | 0.14  | 0.07 -0.14578 | 0.869956 |
| 0.23  | 0.22  | 0.42  | 0.24 -0.18681 | 0.828841 |
| 0.46  | 0.52  | 0.43  | 1.09 0.085773 | 0.912249 |
| 0     | 0     | 0     | 0.03 NA       | NA       |
| 1.11  | 0.91  | 1.03  | 0.92 -0.17102 | 0.725232 |
| 0.16  | 0.19  | 0.24  | 0.26 0.119166 | 0.87997  |
| 0     | 0     | 0     | 0.01 NA       | NA       |
| 0.18  | 0.12  | 0.31  | 0.02 NA       | NA       |
| 0.5   | 1.36  | 0.42  | 0.65 -0.1958  | 0.785803 |
| 0.16  | 0     | 0.02  | 0.06 NA       | NA       |
| 0     | 0     | 0.05  | 0 NA          | NA       |
| 0.96  | 0.68  | 0.86  | 0.99 -0.17871 | 0.828138 |

|        |        |        |        |          |          |
|--------|--------|--------|--------|----------|----------|
| 0.6    | 0.25   | 0.46   | 0.53   | -0.1471  | 0.868473 |
| 0      | 0      | 0      | 0      | NA       | NA       |
| 0      | 0      | 0      | 0      | NA       | NA       |
| 0.75   | 0.94   | 0.54   | 0.29   | -0.04937 | 0.950846 |
| 0.2    | 0      | 0      | 0      | NA       | NA       |
| 0.14   | 0.02   | 0.05   | 0.13   | -0.56837 | 0.433242 |
| 0      | 0      | 0      | 0      | NA       | NA       |
| 0      | 0      | 0      | 0      | NA       | NA       |
| 0      | 0      | 0      | 0      | NA       | NA       |
| 0.04   | 0      | 0.13   | 0.03   | NA       | NA       |
| 0      | 0      | 0.31   | 0.12   | NA       | NA       |
| 0      | 0      | 0      | 0      | NA       | NA       |
| 0.48   | 0.26   | 0.29   | 0.26   | -0.5024  | 0.352227 |
| 0.64   | 0.18   | 0.25   | 0.34   | -1.34662 | 0.001877 |
| 0      | 0      | 0      | 0      | NA       | NA       |
| 472.33 | 272.18 | 370.67 | 327.28 | -0.61824 | 2.83E-11 |
| 0.09   | 0      | 0.11   | 0.19   | NA       | NA       |
| 0.58   | 0.61   | 0.67   | 0.25   | -0.23878 | 0.744187 |
| 2.81   | 3.15   | 2.58   | 2.33   | 0.043369 | 0.925102 |
| 2.38   | 1.83   | 2.73   | 2.18   | -0.63078 | 0.058757 |
| 2.11   | 1.48   | 1.76   | 1.73   | -0.31897 | 0.372883 |
| 0.05   | 0.13   | 0.43   | 0      | NA       | NA       |
| 0      | 0.05   | 0.02   | 0.14   | NA       | NA       |
| 0.11   | 0.04   | 0      | 0      | NA       | NA       |
| 0.02   | 0      | 0.1    | 0      | NA       | NA       |
| 0      | 0      | 0      | 0.06   | NA       | NA       |
| 0      | 0.33   | 0      | 0      | NA       | NA       |
| 3.62   | 2.94   | 4.12   | 3.2    | -0.36466 | 0.050896 |
| 0.16   | 0.16   | 0.21   | 0.11   | NA       | NA       |
| 0      | 0      | 0      | 0      | NA       | NA       |
| 7.75   | 8.73   | 7.21   | 6.83   | -0.16335 | 0.651547 |
| 0      | 0.08   | 0      | 0      | NA       | NA       |
| 0      | 0      | 0      | 0      | NA       | NA       |
| 0      | 0      | 0      | 0      | NA       | NA       |
| 0.01   | 0      | 0.01   | 0      | NA       | NA       |
| 0      | 0.13   | 0.26   | 0      | NA       | NA       |
| 0.15   | 0      | 0      | 0      | NA       | NA       |
| 0.94   | 0.52   | 0.72   | 1.18   | -0.03875 | 0.956002 |
| 0      | 0.11   | 0      | 0      | NA       | NA       |
| 0.07   | 0.14   | 0.07   | 0.09   | 0.590307 | 0.410083 |
| 6.29   | 3.49   | 4.47   | 4.46   | -0.27729 | 0.456908 |
| 0      | 0      | 0      | 0      | NA       | NA       |
| 0      | 0      | 0      | 0      | NA       | NA       |
| 0      | 0      | 0      | 0      | NA       | NA       |
| 0      | 0      | 0      | 0      | NA       | NA       |

|       |       |       |       |          |          |
|-------|-------|-------|-------|----------|----------|
| 0     | 0     | 0.73  | 0.74  | 0.635348 | 0.289764 |
| 0.05  | 0.16  | 0.13  | 0.15  | 0.170727 | 0.843862 |
| 45.71 | 44.23 | 49.69 | 41.85 | 0.060413 | 0.771982 |
| 0     | 0.05  | 0.08  | 0.03  | NA       | NA       |
| 7.78  | 7.88  | 11.25 | 6.77  | -0.11202 | 0.662854 |
| 0     | 0     | 0     | 0     | NA       | NA       |
| 7.18  | 9.15  | 9.33  | 10.04 | 0.262536 | 0.297367 |
| 0     | 0.02  | 0.04  | 0.03  | NA       | NA       |
| 0.5   | 0.54  | 0.65  | 0.71  | 0.456299 | 0.47057  |
| 0.06  | 0     | 0     | 0.39  | NA       | NA       |
| 0     | 0     | 0     | 0     | NA       | NA       |
| 3.77  | 3.35  | 6.48  | 3.36  | 0.004078 | 0.995428 |
| 0.08  | 0.13  | 0.08  | 0.1   | NA       | NA       |
| 0     | 0     | 0     | 0     | NA       | NA       |
| 3.02  | 3.53  | 3.44  | 2.18  | 0.140746 | 0.747622 |
| 1.43  | 1.15  | 1.09  | 0.88  | -1.44438 | 1.47E-07 |
| 0     | 0     | 0     | 0     | NA       | NA       |
| 0.15  | 0.03  | 0     | 0.1   | NA       | NA       |
| 0     | 0     | 0     | 0     | NA       | NA       |
| 0.02  | 0.05  | 0.02  | 0.04  | NA       | NA       |
| 0.01  | 0     | 0.02  | 0     | NA       | NA       |
| 1.38  | 0.83  | 1.07  | 1.44  | -0.55426 | 0.229339 |
| 1.09  | 0.3   | 0.5   | 0.59  | -0.84837 | 0.042052 |
| 0.03  | 0.04  | 0     | 0.05  | NA       | NA       |
| 0     | 0     | 0     | 0     | NA       | NA       |
| 0.18  | 0.22  | 0.11  | 0.15  | 0.069866 | 0.942726 |
| 0     | 0.02  | 0.17  | 0.1   | NA       | NA       |
| 0.16  | 0     | 0.06  | 0.07  | NA       | NA       |
| 0     | 0     | 0     | 0     | NA       | NA       |
| 0.6   | 0.42  | 0.23  | 0.32  | -0.91055 | 0.113766 |
| 2.33  | 1.8   | 1.95  | 2.05  | 0.382478 | 0.270119 |
| 0.23  | 0.02  | 0.3   | 0.02  | NA       | NA       |
| 0.04  | 0.12  | 0.08  | 0.09  | -0.03486 | 0.971856 |
| 0     | 0     | 0     | 0     | NA       | NA       |
| 0.06  | 0     | 0.07  | 0.13  | NA       | NA       |
| 0.04  | 0.03  | 0.03  | 0.03  | NA       | NA       |
| 0.24  | 0     | 0.15  | 0.29  | NA       | NA       |
| 0.22  | 0.27  | 0.6   | 0.45  | -0.33532 | 0.637843 |
| 0     | 0     | 0     | 0     | NA       | NA       |
| 0.02  | 0.25  | 0.13  | 0.13  | 1.1547   | 0.06412  |
| 0.72  | 0.52  | 0.6   | 0.4   | 0.09017  | 0.923514 |
| 0.04  | 0     | 0     | 0     | NA       | NA       |
| 0     | 0.05  | 0.23  | 0     | NA       | NA       |
| 0.06  | 0     | 0.04  | 0.05  | NA       | NA       |
| 0     | 0.02  | 0     | 0     | NA       | NA       |

|       |       |       |       |          |          |
|-------|-------|-------|-------|----------|----------|
| 1.05  | 0.44  | 0.64  | 0.95  | -1.09408 | 0.010195 |
| 0     | 0     | 0.1   | 0     | NA       | NA       |
| 0     | 0     | 0     | 0     | NA       | NA       |
| 0.05  | 0.06  | 0.11  | 0.08  | NA       | NA       |
| 0     | 0     | 0.01  | 0     | NA       | NA       |
| 0.85  | 0.55  | 0.45  | 0.65  | -0.14013 | 0.863981 |
| 0     | 0.03  | 0.02  | 0.03  | NA       | NA       |
| 0     | 0.04  | 0     | 0     | NA       | NA       |
| 0     | 0     | 0     | 0     | NA       | NA       |
| 0     | 0.03  | 0.01  | 0.03  | NA       | NA       |
| 1.26  | 1.93  | 1.24  | 1.41  | 0.280259 | 0.636853 |
| 0     | 0     | 0     | 0.25  | NA       | NA       |
| 1.82  | 1.7   | 1.05  | 0.95  | -0.55623 | 0.223567 |
| 3.14  | 1.75  | 1.56  | 1.64  | -0.47319 | 0.318669 |
| 0     | 0.04  | 0     | 0.33  | NA       | NA       |
| 0.03  | 0.02  | 0.02  | 0.02  | NA       | NA       |
| 0.17  | 0.02  | 0.12  | 0.05  | -0.81937 | 0.221688 |
| 14.34 | 21.81 | 19.53 | 21.02 | 0.845269 | 3.56E-09 |
| 50.97 | 90.04 | 84.7  | 86.25 | 0.632066 | 1.63E-08 |
| 0.36  | 0.24  | 0.18  | 0.57  | -0.26288 | 0.725564 |
| 0     | 0     | 0     | 0     | NA       | NA       |
| 0.26  | 0.3   | 0.68  | 0.05  | -0.21791 | 0.799773 |
| 0     | 0     | 0     | 0     | NA       | NA       |
| 0.13  | 0.17  | 0.12  | 0.27  | 0.361315 | 0.624468 |
| 0     | 0     | 0     | 0     | NA       | NA       |
| 0.13  | 0.1   | 0.01  | 0.07  | -0.95487 | 0.139164 |
| 0     | 0     | 0     | 0     | NA       | NA       |
| 0     | 0     | 0     | 0.01  | NA       | NA       |
| 0.11  | 0.07  | 0.13  | 0.12  | 0.093456 | 0.910474 |
| 0.02  | 0.04  | 0.03  | 0.04  | NA       | NA       |
| 0     | 0     | 0     | 0     | NA       | NA       |
| 0.08  | 0.03  | 0.03  | 0     | NA       | NA       |
| 0.2   | 0.55  | 0.2   | 0.48  | -0.23585 | 0.779226 |
| 0.36  | 1.14  | 1.26  | 1.07  | 0.925473 | 0.017232 |
| 0.71  | 0.75  | 0.69  | 0.81  | 0.206599 | 0.56871  |
| 0.29  | 0.2   | 0.19  | 0.04  | -0.45088 | 0.553122 |
| 0.33  | 0.45  | 0.17  | 0.16  | -0.79881 | 0.187125 |
| 0     | 0.02  | 0     | 0     | NA       | NA       |
| 0     | 0     | 0     | 0     | NA       | NA       |
| 0     | 0     | 0     | 0     | NA       | NA       |
| 4.45  | 6.73  | 6.26  | 6.21  | 0.47634  | 0.002823 |
| 2.61  | 1.02  | 2.25  | 2.11  | -0.87362 | 0.030526 |
| 3.06  | 5.85  | 1.4   | 1.33  | 0.040338 | 0.949968 |
| 30.61 | 41.92 | 48.74 | 44.84 | 0.358723 | 0.009417 |
| 0.75  | 0.48  | 0.24  | 0.38  | -0.6932  | 0.160886 |

|       |       |       |       |          |          |
|-------|-------|-------|-------|----------|----------|
| 0     | 0     | 0.15  | 0.13  | NA       | NA       |
| 0     | 0     | 0     | 0     | NA       | NA       |
| 0.66  | 0     | 0     | 0.17  | -1.01016 | 0.100118 |
| 1.92  | 0.87  | 0.73  | 0.86  | -0.82215 | 0.116002 |
| 0.29  | 0.05  | 0.33  | 0.27  | 0.212909 | 0.801523 |
| 0.22  | 0.07  | 0.15  | 0.16  | -0.70233 | 0.232532 |
| 0     | 0.1   | 0     | 0     | NA       | NA       |
| 0.06  | 0.07  | 0.07  | 0.05  | NA       | NA       |
| 0     | 0     | 0     | 0     | NA       | NA       |
| 0     | 0     | 0     | 0     | NA       | NA       |
| 0.92  | 0.95  | 1.21  | 0.85  | -0.28142 | 0.590161 |
| 3.55  | 4.87  | 4.5   | 4.64  | 0.154307 | 0.670485 |
| 0     | 0     | 0     | 0     | NA       | NA       |
| 0.11  | 0.15  | 0.43  | 0.73  | 0.805348 | 0.223228 |
| 4.53  | 5.42  | 5.02  | 4.99  | 0.031803 | 0.891545 |
| 1.07  | 0.68  | 0.45  | 0.73  | -0.5606  | 0.36358  |
| 1.62  | 0.03  | 0.02  | 0.02  | NA       | NA       |
| 0     | 0     | 0     | 0     | NA       | NA       |
| 0     | 0.03  | 0     | 0.03  | NA       | NA       |
| 0     | 0     | 0     | 0     | NA       | NA       |
| 0.25  | 0.11  | 0.13  | 0.2   | -0.91614 | 0.019898 |
| 0     | 0     | 0     | 0     | NA       | NA       |
| 0.35  | 0.51  | 0.8   | 0.55  | -0.47761 | 0.327481 |
| 0     | 0     | 0     | 0     | NA       | NA       |
| 0.16  | 0.04  | 0.1   | 0.06  | NA       | NA       |
| 0     | 0     | 0     | 0     | NA       | NA       |
| 0.11  | 0.37  | 0.44  | 0.08  | NA       | NA       |
| 0.36  | 1.03  | 1.15  | 1.32  | 0.236729 | 0.696843 |
| 15.87 | 18.83 | 14.25 | 18.88 | 0.369484 | 0.000385 |
| 0     | 0     | 0     | 0     | NA       | NA       |
| 2.97  | 1.94  | 2.57  | 2.36  | -0.38867 | 0.256749 |
| 0.92  | 1.35  | 0.66  | 0.77  | 0.396035 | 0.609463 |
| 33.84 | 40.9  | 37.33 | 37.14 | 0.088847 | 0.477667 |
| 0     | 0.03  | 0.05  | 0.03  | NA       | NA       |
| 0.55  | 1.18  | 1.04  | 0.84  | 0.490818 | 0.185456 |
| 0     | 0.04  | 0.1   | 0.08  | NA       | NA       |
| 0     | 0.08  | 0.14  | 0.24  | NA       | NA       |
| 1.1   | 1.09  | 1.19  | 1.25  | 0.323776 | 0.486054 |
| 0     | 0     | 0     | 0     | NA       | NA       |
| 3.13  | 1.13  | 0.58  | 0.51  | -0.78119 | 0.077103 |
| 0.68  | 0.32  | 0.64  | 0.98  | -0.12781 | 0.874169 |
| 0     | 0     | 0     | 0     | NA       | NA       |
| 0.41  | 0.81  | 0.44  | 0.58  | 0.501937 | 0.39037  |
| 0.42  | 0.7   | 0.43  | 0.53  | -0.01655 | 0.978117 |
| 0     | 0     | 0     | 0     | NA       | NA       |

|       |       |       |       |          |          |
|-------|-------|-------|-------|----------|----------|
| 0.03  | 0.04  | 0     | 0.08  | NA       | NA       |
| 0     | 0.02  | 0     | 0.39  | NA       | NA       |
| 0     | 0     | 0     | 0     | NA       | NA       |
| 1.8   | 0.84  | 0.83  | 1     | -0.86091 | 0.003056 |
| 2.09  | 0.99  | 1.39  | 1.48  | -0.6383  | 0.201459 |
| 0     | 0     | 0     | 0     | NA       | NA       |
| 5.1   | 3.55  | 4.74  | 6.31  | -0.05904 | 0.906152 |
| 0     | 0     | 0     | 0     | NA       | NA       |
| 0.38  | 0.09  | 0.18  | 0.14  | -0.65528 | 0.322341 |
| 0     | 0     | 0     | 0     | NA       | NA       |
| 0     | 0     | 0     | 0     | NA       | NA       |
| 0     | 0     | 0.12  | 0     | NA       | NA       |
| 0.05  | 0.04  | 0.02  | 0.02  | NA       | NA       |
| 0     | 0     | 0     | 0     | NA       | NA       |
| 0     | 0     | 0     | 0     | NA       | NA       |
| 1.03  | 1.68  | 1.53  | 0.91  | 0.334122 | 0.42962  |
| 0.43  | 0.58  | 0.94  | 0.55  | -0.09514 | 0.909236 |
| 0.07  | 0     | 0.28  | 0     | NA       | NA       |
| 1.65  | 1.05  | 1.47  | 1.25  | -0.01586 | 0.976803 |
| 0     | 0     | 0     | 0     | NA       | NA       |
| 3.87  | 3.62  | 3.75  | 3.41  | -0.03537 | 0.916875 |
| 0.16  | 0.32  | 0.13  | 0.15  | -0.16363 | 0.836746 |
| 0.39  | 0.14  | 0.16  | 0.09  | -1.20853 | 0.018115 |
| 0.07  | 0.05  | 0.07  | 0     | NA       | NA       |
| 0     | 0     | 0.1   | 0     | NA       | NA       |
| 4.29  | 3.85  | 4.38  | 3.84  | -0.15213 | 0.544565 |
| 0     | 0     | 0     | 0     | NA       | NA       |
| 0.05  | 0.03  | 0.06  | 0.14  | NA       | NA       |
| 7.82  | 9.82  | 7.99  | 8.86  | 0.035593 | 0.872037 |
| 10.97 | 13.21 | 17.59 | 12.77 | 0.512792 | 0.000258 |
| 0     | 0     | 0     | 0.16  | NA       | NA       |
| 0     | 0     | 0     | 0     | NA       | NA       |
| 0.73  | 0.96  | 0.48  | 0     | -0.71973 | 0.265284 |
| 0     | 0.11  | 0.31  | 0.24  | NA       | NA       |
| 0     | 0     | 0     | 0     | NA       | NA       |
| 0     | 0     | 0     | 0     | NA       | NA       |
| 0     | 0     | 0     | 0     | NA       | NA       |
| 0     | 0     | 0     | 0     | NA       | NA       |
| 0     | 0     | 0     | 0     | NA       | NA       |
| 0     | 0     | 0     | 0.08  | NA       | NA       |
| 0.06  | 0     | 0     | 0     | NA       | NA       |
| 0     | 0     | 0     | 0     | NA       | NA       |
| 0     | 0     | 0     | 0     | NA       | NA       |
| 0     | 0     | 0     | 0     | NA       | NA       |
| 0     | 0     | 0     | 0     | NA       | NA       |





|      |      |       |               |          |
|------|------|-------|---------------|----------|
| 0    | 0    | 0     | 0 NA          | NA       |
| 0    | 0    | 0     | 0 NA          | NA       |
| 0    | 0.83 | 0     | 0.08 NA       | NA       |
| 0    | 0    | 0     | 0 NA          | NA       |
| 0    | 0    | 0     | 0 NA          | NA       |
| 0.26 | 0.38 | 0.09  | 0.1 NA        | NA       |
| 0    | 0    | 0     | 0 NA          | NA       |
| 0    | 0    | 0     | 0 NA          | NA       |
| 0    | 0    | 0     | 0 NA          | NA       |
| 0    | 0    | 0     | 0 NA          | NA       |
| 0    | 0    | 0     | 0 NA          | NA       |
| 0    | 0    | 0     | 0 NA          | NA       |
| 0    | 0    | 0     | 0 NA          | NA       |
| 0    | 0    | 0     | 0 NA          | NA       |
| 1.37 | 3.49 | 13.58 | 5.62 1.691668 | 1.42E-05 |
| 0    | 0    | 0     | 0 NA          | NA       |
| 0    | 0.1  | 0.18  | 0.31 NA       | NA       |
| 0    | 0.12 | 0     | 0 NA          | NA       |
| 0    | 0    | 0     | 0 NA          | NA       |
| 0    | 0    | 0     | 0 NA          | NA       |
| 0    | 0.25 | 0.47  | 0.49 -0.32361 | 0.687627 |
| 0    | 0    | 0     | 0 NA          | NA       |
| 0    | 0    | 0     | 0 NA          | NA       |
| 0    | 0    | 0     | 0 NA          | NA       |
| 0    | 0    | 0     | 0 NA          | NA       |
| 0    | 0    | 0     | 0 NA          | NA       |
| 0    | 0.32 | 0.15  | 0.17 NA       | NA       |
| 0    | 0    | 0     | 0 NA          | NA       |
| 0    | 0    | 0     | 0 NA          | NA       |
| 0    | 0    | 0     | 0 NA          | NA       |
| 0    | 0    | 0     | 0 NA          | NA       |
| 0    | 0    | 0     | 0 NA          | NA       |
| 0    | 0    | 0     | 0 NA          | NA       |
| 0    | 0    | 0     | 0 NA          | NA       |
| 0.08 | 0    | 0.01  | 0.02 -1.07759 | 0.085419 |
| 0    | 0    | 0     | 0 NA          | NA       |
| 0    | 0    | 0     | 0 NA          | NA       |
| 0    | 0    | 0     | 0 NA          | NA       |
| 8.95 | 8.96 | 10.42 | 8.17 0.052919 | 0.88917  |
| 0.23 | 0.08 | 0.09  | 0.27 NA       | NA       |
| 0    | 0    | 0     | 0 NA          | NA       |
| 0    | 0    | 0     | 0 NA          | NA       |
| 0    | 0    | 0     | 0 NA          | NA       |





|       |      |      |               |          |
|-------|------|------|---------------|----------|
| 0     | 0    | 0    | 0 NA          | NA       |
| 0     | 0    | 0    | 0 NA          | NA       |
| 0     | 0    | 0    | 0.09 NA       | NA       |
| 11.07 | 4.2  | 6.64 | 6.11 -1.06405 | 5.52E-10 |
| 0     | 0    | 0    | 0 NA          | NA       |
| 0.13  | 0    | 0    | 0 NA          | NA       |
| 0     | 0    | 0    | 0 NA          | NA       |
| 0     | 0    | 0    | 0.09 NA       | NA       |
| 0     | 0    | 0    | 0 NA          | NA       |
| 0     | 0    | 0    | 0 NA          | NA       |
| 0.36  | 0    | 0    | 0 -1.73553    | 0.002461 |
| 0     | 0    | 0    | 0 NA          | NA       |
| 0     | 0    | 0    | 0.07 NA       | NA       |
| 0     | 0    | 0    | 0 NA          | NA       |
| 1.16  | 0.12 | 0.39 | 0.72 -0.14501 | 0.871002 |
| 0     | 0    | 0    | 0 NA          | NA       |
| 0     | 0    | 0    | 0 NA          | NA       |
| 0.03  | 0.05 | 0.03 | 0.03 NA       | NA       |
| 0     | 0    | 0    | 0 NA          | NA       |
| 0     | 0    | 0    | 0 NA          | NA       |
| 0     | 0    | 0    | 0 NA          | NA       |
| 0     | 0    | 0    | 0 NA          | NA       |
| 1.52  | 0.75 | 1.16 | 1.13 -0.31516 | 0.569537 |
| 0     | 0    | 0    | 0 NA          | NA       |
| 0     | 0    | 0    | 0 NA          | NA       |
| 0     | 0    | 0    | 0 NA          | NA       |
| 0     | 0    | 0    | 0.03 NA       | NA       |
| 0     | 0    | 0    | 0 NA          | NA       |
| 0     | 0    | 0    | 0 NA          | NA       |
| 0.29  | 0    | 0    | 0 NA          | NA       |
| 0     | 0    | 0    | 0 NA          | NA       |
| 0     | 0    | 0    | 0 NA          | NA       |
| 0.06  | 0    | 0.16 | 0 NA          | NA       |
| 0     | 0    | 0    | 0 NA          | NA       |
| 0     | 0    | 0    | 0 NA          | NA       |
| 0     | 0    | 0.13 | 0 NA          | NA       |
| 0.18  | 0.13 | 0.25 | 0 NA          | NA       |
| 0.1   | 0.04 | 0.28 | 0.03 NA       | NA       |
| 0     | 0    | 0    | 0 NA          | NA       |
| 3.02  | 0.98 | 1.58 | 0.81 -0.92283 | 0.121903 |
| 0     | 0    | 0    | 0 NA          | NA       |
| 0     | 0    | 0    | 0 NA          | NA       |
| 0.03  | 0.01 | 0.02 | 0.03 NA       | NA       |
| 0     | 0    | 0    | 0 NA          | NA       |
| 0     | 0    | 0    | 0 NA          | NA       |



|      |      |      |               |          |
|------|------|------|---------------|----------|
| 0    | 0    | 0    | 0 NA          | NA       |
| 0    | 0    | 0    | 0 NA          | NA       |
| 0.3  | 0.47 | 1.18 | 1.32 1.099466 | 0.081594 |
| 0    | 0    | 0    | 0 NA          | NA       |
| 0    | 0    | 0    | 0 NA          | NA       |
| 0    | 0    | 0    | 0 NA          | NA       |
| 0    | 0    | 0    | 0 NA          | NA       |
| 0    | 0.13 | 0    | 0 NA          | NA       |
| 0    | 0    | 0    | 0 NA          | NA       |
| 0    | 0    | 0    | 0 NA          | NA       |
| 0    | 0    | 0    | 0 NA          | NA       |
| 0    | 0    | 0    | 0.07 NA       | NA       |
| 0    | 0    | 0    | 0 NA          | NA       |
| 0    | 0    | 0    | 0 NA          | NA       |
| 0    | 0    | 0    | 0 NA          | NA       |
| 0    | 0    | 0    | 0 NA          | NA       |
| 0    | 0    | 0    | 0 NA          | NA       |
| 0    | 0    | 0    | 0 NA          | NA       |
| 0    | 0.09 | 0    | 0.09 NA       | NA       |
| 0    | 0    | 0    | 0 NA          | NA       |
| 0    | 0    | 0    | 0 NA          | NA       |
| 2    | 0.59 | 1.54 | 1.43 -0.70998 | 0.043403 |
| 0    | 0.21 | 0    | 0 NA          | NA       |
| 0    | 0    | 0    | 0 NA          | NA       |
| 0    | 0    | 0    | 0 NA          | NA       |
| 0.33 | 0.15 | 0.3  | 0.56 0.063667 | 0.928303 |
| 2.52 | 2.56 | 3.62 | 3.53 -0.03287 | 0.950703 |
| 0    | 0    | 0    | 0 NA          | NA       |
| 0    | 0    | 0    | 0 NA          | NA       |
| 0    | 0    | 0    | 0 NA          | NA       |
| 0    | 0    | 0    | 0 NA          | NA       |
| 0    | 0    | 0    | 0 NA          | NA       |
| 0    | 0    | 0.07 | 0.26 NA       | NA       |
| 0    | 0    | 0    | 0 NA          | NA       |
| 0    | 0    | 0    | 0 NA          | NA       |
| 0    | 0    | 0    | 0.03 NA       | NA       |
| 0    | 0    | 0    | 0 NA          | NA       |
| 0    | 0    | 0    | 0 NA          | NA       |
| 0    | 0    | 0    | 0 NA          | NA       |
| 0    | 0    | 0    | 0 NA          | NA       |
| 0    | 0    | 0    | 0 NA          | NA       |
| 0    | 0    | 0    | 0 NA          | NA       |
| 0    | 0    | 0    | 0 NA          | NA       |
| 0    | 0.05 | 0    | 0.11 NA       | NA       |

|      |      |      |      |          |          |
|------|------|------|------|----------|----------|
| 0    | 0    | 0    | 0    | NA       | NA       |
| 0    | 0    | 0    | 0    | NA       | NA       |
| 0.8  | 0.49 | 0.85 | 0.8  | 0.260995 | 0.694378 |
| 0    | 0    | 0    | 0    | NA       | NA       |
| 0    | 0.29 | 0.66 | 0.15 | NA       | NA       |
| 0    | 0    | 0    | 0    | NA       | NA       |
| 0    | 0    | 0.12 | 0.41 | NA       | NA       |
| 0    | 0    | 0    | 0    | NA       | NA       |
| 0    | 0    | 0    | 0    | NA       | NA       |
| 0    | 0    | 0    | 0    | NA       | NA       |
| 0    | 0    | 0    | 0    | NA       | NA       |
| 0    | 0    | 0    | 0    | NA       | NA       |
| 0.66 | 3.17 | 1.78 | 1.01 | 0.530772 | 0.287325 |
| 0    | 0    | 0    | 0    | NA       | NA       |
| 0    | 0    | 0    | 0    | NA       | NA       |
| 0    | 0    | 0    | 0    | NA       | NA       |
| 0    | 0    | 0    | 0    | NA       | NA       |
| 0    | 0    | 0    | 0    | NA       | NA       |
| 0    | 0    | 0    | 0    | NA       | NA       |
| 0    | 0    | 0    | 0    | NA       | NA       |
| 0    | 0    | 0    | 0    | NA       | NA       |
| 0    | 0    | 0    | 0    | NA       | NA       |
| 0.76 | 0.42 | 0.64 | 0.23 | -0.60033 | 0.397367 |
| 0    | 0    | 0.05 | 0.06 | NA       | NA       |
| 0    | 0    | 0    | 0    | NA       | NA       |
| 0.6  | 0.19 | 0.51 | 0.51 | -0.56494 | 0.378421 |
| 0    | 0    | 0    | 0    | NA       | NA       |
| 0.61 | 0.06 | 0.3  | 0.17 | -0.42512 | 0.574892 |
| 0.39 | 0.25 | 0.22 | 0.42 | -0.01972 | 0.983274 |
| 0    | 0    | 0    | 0    | NA       | NA       |
| 0    | 0    | 0    | 0    | NA       | NA       |
| 0    | 0    | 0    | 0    | NA       | NA       |
| 0.04 | 0.03 | 0.1  | 0.07 | -0.25772 | 0.756358 |
| 0    | 0    | 0    | 0    | NA       | NA       |
| 0    | 0    | 0    | 0    | NA       | NA       |
| 0    | 0    | 0    | 0    | NA       | NA       |
| 0    | 0    | 0    | 0    | NA       | NA       |
| 0    | 0    | 0    | 0    | NA       | NA       |
| 0.29 | 1.32 | 1.34 | 1.91 | 0.593914 | 0.355081 |
| 0    | 0    | 0    | 0    | NA       | NA       |
| 0    | 0    | 0    | 0    | NA       | NA       |
| 0    | 0    | 0    | 0    | NA       | NA       |
| 0    | 0    | 0    | 0    | NA       | NA       |
| 0.04 | 0    | 0    | 0    | NA       | NA       |



|      |      |      |      |          |          |
|------|------|------|------|----------|----------|
| 0.03 | 0.13 | 0.07 | 0.03 | NA       | NA       |
| 0    | 0    | 0    | 0    | NA       | NA       |
| 0    | 0    | 0    | 0    | NA       | NA       |
| 0    | 0    | 0    | 0    | NA       | NA       |
| 0    | 0    | 0    | 0    | NA       | NA       |
| 0    | 0    | 0    | 0    | NA       | NA       |
| 0    | 0    | 0    | 0    | NA       | NA       |
| 0    | 0    | 0    | 0    | NA       | NA       |
| 1.22 | 0.42 | 0    | 0.28 | -0.18429 | 0.755068 |
| 0    | 0    | 0    | 0    | NA       | NA       |
| 0.54 | 0.17 | 0.08 | 0.06 | -1.04726 | 0.09381  |
| 0    | 0    | 0    | 0    | NA       | NA       |
| 0.14 | 0    | 0    | 0.21 | NA       | NA       |
| 0    | 0    | 0    | 0    | NA       | NA       |
| 0    | 0    | 0    | 0    | NA       | NA       |
| 0    | 0    | 0    | 0    | NA       | NA       |
| 0    | 0.32 | 0    | 0    | NA       | NA       |
| 0    | 0    | 0    | 0    | NA       | NA       |
| 0    | 0    | 0    | 0    | NA       | NA       |
| 0    | 0.02 | 0.03 | 0.02 | NA       | NA       |
| 0    | 0    | 0    | 0    | NA       | NA       |
| 0    | 0    | 0    | 0    | NA       | NA       |
| 0    | 0.1  | 0.1  | 0    | NA       | NA       |
| 0    | 0.03 | 0.03 | 0    | NA       | NA       |
| 0    | 0    | 0    | 0    | NA       | NA       |
| 0    | 0    | 0.24 | 0.17 | -0.37219 | 0.623301 |
| 0    | 0    | 0    | 0    | NA       | NA       |
| 0    | 0    | 0    | 0    | NA       | NA       |
| 0    | 0    | 0    | 0    | NA       | NA       |
| 0    | 0    | 0    | 0    | NA       | NA       |
| 0    | 0    | 0    | 0    | NA       | NA       |
| 0    | 0    | 0    | 0    | NA       | NA       |
| 0    | 0.03 | 0.01 | 0.02 | NA       | NA       |
| 0    | 0    | 0    | 0    | NA       | NA       |
| 0    | 0    | 0    | 0    | NA       | NA       |
| 0    | 0    | 0    | 0    | NA       | NA       |
| 0    | 0    | 0    | 0    | NA       | NA       |
| 1.08 | 1.4  | 0.32 | 0.19 | 0.123218 | 0.876132 |
| 0    | 0    | 0    | 0    | NA       | NA       |
| 0    | 0    | 0    | 0    | NA       | NA       |
| 0    | 0    | 0    | 0    | NA       | NA       |
| 0    | 0    | 0    | 0    | NA       | NA       |
| 0    | 0    | 0    | 0    | NA       | NA       |

|      |      |      |         |    |
|------|------|------|---------|----|
| 0    | 0    | 0    | 0 NA    | NA |
| 0    | 0    | 0    | 0 NA    | NA |
| 0    | 0    | 0    | 0 NA    | NA |
| 0    | 0    | 0    | 0 NA    | NA |
| 0    | 0    | 0    | 0 NA    | NA |
| 0    | 0    | 0    | 0 NA    | NA |
| 0    | 0    | 0    | 0 NA    | NA |
| 0    | 0.19 | 0    | 0 NA    | NA |
| 0    | 0    | 0    | 0 NA    | NA |
| 0    | 0    | 0    | 0 NA    | NA |
| 0    | 0    | 0    | 0 NA    | NA |
| 0.27 | 0    | 0    | 0 NA    | NA |
| 0    | 0    | 0    | 0 NA    | NA |
| 0    | 0    | 0    | 0 NA    | NA |
| 0    | 0    | 0    | 0 NA    | NA |
| 0    | 0    | 0    | 0 NA    | NA |
| 0    | 0    | 0.09 | 0 NA    | NA |
| 0    | 0    | 0    | 0 NA    | NA |
| 0    | 0    | 0    | 0 NA    | NA |
| 0    | 0    | 0    | 0 NA    | NA |
| 0    | 0    | 0    | 0 NA    | NA |
| 0    | 0    | 0    | 0 NA    | NA |
| 0    | 0.17 | 0.3  | 0 NA    | NA |
| 0    | 0    | 0    | 0 NA    | NA |
| 0    | 0    | 0    | 0 NA    | NA |
| 0    | 0    | 0    | 0 NA    | NA |
| 0    | 0    | 0    | 0 NA    | NA |
| 0    | 0    | 0    | 0 NA    | NA |
| 0.56 | 0    | 0.34 | 0 NA    | NA |
| 0    | 0    | 0    | 0 NA    | NA |
| 0    | 0    | 0    | 0 NA    | NA |
| 0    | 0    | 0    | 0 NA    | NA |
| 0    | 0    | 0    | 0 NA    | NA |
| 0    | 0    | 0    | 0 NA    | NA |
| 0    | 0    | 0    | 0 NA    | NA |
| 0    | 0    | 0    | 0 NA    | NA |
| 0    | 0    | 0    | 0 NA    | NA |
| 0.22 | 0.16 | 0    | 0.27 NA | NA |
| 0    | 0    | 0    | 0 NA    | NA |
| 0    | 0    | 0    | 0 NA    | NA |
| 0    | 0    | 0    | 0 NA    | NA |
| 0    | 0    | 0    | 0 NA    | NA |
| 0    | 0    | 0    | 0 NA    | NA |
| 0    | 0    | 0    | 0 NA    | NA |
| 0    | 0    | 0    | 0 NA    | NA |
| 0    | 0    | 0    | 0 NA    | NA |
| 0    | 0    | 0    | 0.07 NA | NA |
| 0    | 0.04 | 0.04 | 0.02 NA | NA |

|      |      |       |               |          |
|------|------|-------|---------------|----------|
| 0    | 0    | 0     | 0 NA          | NA       |
| 0    | 0    | 0.03  | 0 NA          | NA       |
| 0    | 0    | 0     | 0 NA          | NA       |
| 0    | 0    | 0     | 0 NA          | NA       |
| 0    | 0    | 0     | 0 NA          | NA       |
| 0    | 0    | 0     | 0 NA          | NA       |
| 0    | 0    | 0     | 0 NA          | NA       |
| 0.73 | 3.38 | 0     | 1.03 NA       | NA       |
| 0    | 0    | 0     | 0 NA          | NA       |
| 0    | 0    | 0     | 0 NA          | NA       |
| 0    | 0    | 0     | 0 NA          | NA       |
| 0    | 0    | 0     | 0 NA          | NA       |
| 0    | 0    | 0     | 0 NA          | NA       |
| 0    | 0    | 0     | 0 NA          | NA       |
| 0    | 0    | 0     | 0 NA          | NA       |
| 0    | 0    | 0     | 0 NA          | NA       |
| 0    | 0    | 0     | 0 NA          | NA       |
| 0    | 0    | 0.04  | 0 NA          | NA       |
| 0.01 | 0.09 | 0.13  | 0.02 0.3776   | 0.627373 |
| 0    | 0    | 0     | 0 NA          | NA       |
| 0    | 0    | 0.08  | 0.09 NA       | NA       |
| 0    | 0    | 0     | 0 NA          | NA       |
| 1.91 | 1.03 | 1.93  | 1.72 0.07644  | 0.90702  |
| 0    | 0    | 0     | 0 NA          | NA       |
| 1.74 | 0.03 | 1.01  | 0.15 -0.6865  | 0.320211 |
| 0    | 0    | 0     | 0 NA          | NA       |
| 0.44 | 0    | 0.17  | 0 -0.09965    | 0.819101 |
| 0    | 0    | 0     | 0 NA          | NA       |
| 0    | 0    | 0     | 0 NA          | NA       |
| 0.94 | 0.68 | 0.59  | 0.69 -0.08402 | 0.905189 |
| 0    | 0    | 0     | 0 NA          | NA       |
| 0    | 0    | 0     | 0 NA          | NA       |
| 0    | 0    | 0     | 0 NA          | NA       |
| 0    | 0    | 0     | 0 NA          | NA       |
| 0    | 0    | 0     | 0 NA          | NA       |
| 0    | 0    | 0     | 0 NA          | NA       |
| 0    | 0    | 0     | 0 NA          | NA       |
| 0    | 0    | 0     | 0 NA          | NA       |
| 0    | 0    | 0     | 0 NA          | NA       |
| 0.11 | 0    | 0     | 0 NA          | NA       |
| 9.9  | 8.39 | 10.58 | 9.16 0.06463  | 0.825925 |
| 0    | 0    | 0     | 0 NA          | NA       |
| 0    | 0    | 0.05  | 0 NA          | NA       |
| 0    | 0    | 0     | 0 NA          | NA       |
| 0    | 0    | 0     | 0 NA          | NA       |
| 0    | 0    | 0     | 0 NA          | NA       |

|      |      |      |               |          |
|------|------|------|---------------|----------|
| 0    | 0    | 0    | 0 NA          | NA       |
| 0    | 0    | 0    | 0 NA          | NA       |
| 0.45 | 0.08 | 0.06 | 0.11 -0.93755 | 0.0254   |
| 0    | 0    | 0    | 0 NA          | NA       |
| 0    | 0    | 0    | 0 NA          | NA       |
| 0.58 | 0    | 0    | 0 NA          | NA       |
| 0    | 0    | 0    | 0 NA          | NA       |
| 0    | 0    | 0    | 0 NA          | NA       |
| 0    | 0    | 0    | 0 NA          | NA       |
| 0    | 0    | 0    | 0 NA          | NA       |
| 0    | 0    | 0    | 0 NA          | NA       |
| 3.18 | 3.35 | 2.76 | 3.19 -0.12648 | 0.651342 |
| 0    | 0    | 0    | 0 NA          | NA       |
| 0    | 0    | 0    | 0 NA          | NA       |
| 0    | 0    | 0    | 0 NA          | NA       |
| 0    | 0.15 | 0    | 0 NA          | NA       |
| 0.17 | 0    | 0.22 | 0.38 NA       | NA       |
| 0    | 0    | 0    | 0 NA          | NA       |
| 0.19 | 0.32 | 0.09 | 0.29 -0.15473 | 0.861316 |
| 0    | 0    | 0    | 0 NA          | NA       |
| 0    | 0    | 0    | 0 NA          | NA       |
| 0    | 0    | 0    | 0 NA          | NA       |
| 0    | 0    | 0    | 0 NA          | NA       |
| 1.15 | 1.88 | 0.1  | 1.41 -0.12003 | 0.890146 |
| 0    | 0    | 0    | 0 NA          | NA       |
| 0    | 0    | 0    | 0 NA          | NA       |
| 0.16 | 0.12 | 0    | 0.62 NA       | NA       |
| 0    | 0    | 0    | 0 NA          | NA       |
| 0    | 0    | 0    | 0 NA          | NA       |
| 0    | 0    | 0    | 0 NA          | NA       |
| 0    | 0    | 0    | 0 NA          | NA       |
| 0    | 0    | 0    | 0 NA          | NA       |
| 0    | 0    | 0    | 0 NA          | NA       |
| 0    | 0    | 0    | 0 NA          | NA       |
| 0    | 0    | 0    | 0 NA          | NA       |
| 0    | 0    | 0    | 0 NA          | NA       |
| 0    | 0    | 0    | 0 NA          | NA       |
| 0    | 0    | 0    | 0 NA          | NA       |
| 0    | 0    | 0    | 0 NA          | NA       |
| 0    | 0    | 0    | 0 NA          | NA       |
| 0    | 0    | 0    | 0 NA          | NA       |
| 0    | 0    | 0    | 0 NA          | NA       |
| 0    | 0    | 0    | 0 NA          | NA       |
| 0    | 0    | 0    | 0 NA          | NA       |
| 0    | 0    | 0    | 0 NA          | NA       |
| 0    | 0    | 0    | 0 NA          | NA       |
| 0.05 | 0.23 | 0.19 | 0.14 0.458297 | 0.544467 |
| 0    | 0    | 0    | 0 NA          | NA       |
| 0    | 0    | 0.02 | 0 NA          | NA       |
| 0    | 0    | 0    | 0 NA          | NA       |

|      |      |      |               |          |
|------|------|------|---------------|----------|
| 0    | 0.08 | 0    | 0 NA          | NA       |
| 0    | 0    | 0    | 0 NA          | NA       |
| 0.67 | 0.31 | 0.23 | 0.66 -0.40709 | 0.542757 |
| 0    | 0    | 0    | 0 NA          | NA       |
| 0    | 0    | 0    | 0 NA          | NA       |
| 0    | 0    | 0    | 0 NA          | NA       |
| 0    | 0    | 0    | 0 NA          | NA       |
| 0    | 0    | 0    | 0 NA          | NA       |
| 0.14 | 0.29 | 0.27 | 0 NA          | NA       |
| 0    | 0    | 0    | 0 NA          | NA       |
| 0.17 | 0.38 | 0.32 | 0.1 NA        | NA       |
| 0    | 0    | 0    | 0 NA          | NA       |
| 0    | 0    | 0    | 0 NA          | NA       |
| 0    | 0    | 0    | 0 NA          | NA       |
| 0    | 0    | 0    | 0 NA          | NA       |
| 0.18 | 0    | 0    | 0 NA          | NA       |
| 0    | 0    | 0    | 0 NA          | NA       |
| 0    | 0    | 0    | 0 NA          | NA       |
| 0    | 0    | 0    | 0 NA          | NA       |
| 0    | 0    | 0    | 0 NA          | NA       |
| 0    | 0    | 0    | 0 NA          | NA       |
| 0    | 0    | 0    | 0 NA          | NA       |
| 0    | 0    | 0    | 0 NA          | NA       |
| 0    | 0    | 0    | 0 NA          | NA       |
| 0    | 0    | 0    | 0 NA          | NA       |
| 0    | 0    | 0    | 0 NA          | NA       |
| 0    | 0    | 0    | 0.03 NA       | NA       |
| 0    | 0    | 0    | 0.11 NA       | NA       |
| 0    | 0    | 0    | 0 NA          | NA       |
| 0    | 0    | 0    | 0 NA          | NA       |
| 0    | 0.25 | 0.11 | 0.13 NA       | NA       |
| 1.4  | 0.6  | 1.6  | 2.28 -0.23181 | 0.778767 |
| 0    | 0    | 0    | 0 NA          | NA       |
| 0    | 0    | 0    | 0 NA          | NA       |
| 0    | 0    | 0    | 0 NA          | NA       |
| 0    | 0    | 0    | 0 NA          | NA       |
| 0    | 0    | 0    | 0 NA          | NA       |
| 0    | 0    | 0    | 0 NA          | NA       |
| 0    | 0    | 0    | 0 NA          | NA       |
| 0    | 0    | 0    | 0 NA          | NA       |
| 0    | 0    | 0    | 0 NA          | NA       |
| 0    | 0    | 0    | 0 NA          | NA       |
| 0.05 | 0.02 | 0    | 0.02 NA       | NA       |
| 0    | 0    | 0    | 0 NA          | NA       |
| 0    | 0    | 0    | 0 NA          | NA       |
| 0    | 0    | 0    | 0 NA          | NA       |





|      |      |      |               |          |
|------|------|------|---------------|----------|
| 0    | 0    | 0    | 0 NA          | NA       |
| 0    | 0    | 0    | 0 NA          | NA       |
| 0    | 0    | 0    | 0 NA          | NA       |
| 0    | 0    | 0    | 0 NA          | NA       |
| 0    | 0    | 0    | 0 NA          | NA       |
| 0    | 0    | 0    | 0 NA          | NA       |
| 0    | 0    | 0    | 0 NA          | NA       |
| 0    | 0    | 0.03 | 0 NA          | NA       |
| 0    | 0    | 0    | 0 NA          | NA       |
| 0    | 0    | 0    | 0 NA          | NA       |
| 0    | 0    | 0    | 0 NA          | NA       |
| 0    | 0    | 0.3  | 0 NA          | NA       |
| 0    | 0    | 0    | 0 NA          | NA       |
| 0    | 0    | 0    | 0 NA          | NA       |
| 0    | 0    | 0    | 0 NA          | NA       |
| 0    | 0    | 0    | 0 NA          | NA       |
| 0    | 0    | 0.31 | 0.06 NA       | NA       |
| 0    | 0    | 0    | 0.24 NA       | NA       |
| 0    | 0    | 0.15 | 0 NA          | NA       |
| 0    | 0    | 0    | 0 NA          | NA       |
| 0    | 0    | 0    | 0 NA          | NA       |
| 0    | 0.03 | 0    | 0 NA          | NA       |
| 0    | 0    | 0    | 0 NA          | NA       |
| 0    | 0    | 0    | 0 NA          | NA       |
| 0.28 | 0    | 0.13 | 0 NA          | NA       |
| 0    | 0    | 0    | 0 NA          | NA       |
| 0    | 0    | 0    | 0 NA          | NA       |
| 0.17 | 0.09 | 0.17 | 0.19 0.081148 | 0.932479 |
| 0    | 0    | 0    | 0 NA          | NA       |
| 0    | 0    | 0    | 0 NA          | NA       |
| 0    | 0.29 | 0    | 0 NA          | NA       |
| 0    | 0    | 0    | 0 NA          | NA       |
| 0    | 0    | 0    | 0 NA          | NA       |
| 0    | 0    | 0    | 0 NA          | NA       |
| 0    | 0    | 0    | 0 NA          | NA       |
| 0    | 0    | 0    | 0 NA          | NA       |
| 0    | 0    | 0    | 0 NA          | NA       |
| 0.74 | 0.23 | 1.25 | 0.95 -0.23857 | 0.761259 |
| 0    | 0    | 0.05 | 0 NA          | NA       |
| 1.87 | 0.62 | 0.63 | 0.57 -1.31084 | 2.37E-06 |
| 0    | 0    | 0    | 0 NA          | NA       |
| 0    | 0    | 0    | 0 NA          | NA       |
| 0    | 0    | 0    | 0 NA          | NA       |
| 1.71 | 0.58 | 0.41 | 0.12 -0.70854 | 0.304499 |
| 0    | 0    | 0    | 0 NA          | NA       |



|      |      |      |      |          |          |
|------|------|------|------|----------|----------|
| 0    | 0    | 0    | 0    | NA       | NA       |
| 0    | 0    | 0    | 0    | NA       | NA       |
| 0    | 0    | 0    | 0    | NA       | NA       |
| 0    | 0    | 0    | 0    | NA       | NA       |
| 0    | 0.04 | 0.06 | 0.02 | NA       | NA       |
| 0    | 0    | 0    | 0    | NA       | NA       |
| 0    | 0    | 0    | 0    | NA       | NA       |
| 0    | 0    | 0    | 0    | NA       | NA       |
| 0    | 0    | 0    | 0    | NA       | NA       |
| 0.1  | 0    | 0.05 | 0.08 | NA       | NA       |
| 0    | 0    | 0    | 0    | NA       | NA       |
| 0    | 0    | 0    | 0    | NA       | NA       |
| 0.07 | 0.06 | 0.1  | 0.07 | -0.11238 | 0.896414 |
| 0    | 0    | 0    | 0    | NA       | NA       |
| 0    | 0    | 0    | 0    | NA       | NA       |
| 0    | 0    | 0    | 0    | NA       | NA       |
| 0    | 0    | 0    | 0    | NA       | NA       |
| 0.14 | 0.47 | 0.25 | 0.33 | 0.404407 | 0.599474 |
| 0.46 | 0.13 | 0.19 | 0.14 | NA       | NA       |
| 0    | 0    | 0    | 0    | NA       | NA       |
| 0    | 0    | 0    | 0    | NA       | NA       |
| 0    | 0    | 0    | 0    | NA       | NA       |
| 1.14 | 0.18 | 0.51 | 0.36 | -0.91479 | 0.154131 |
| 0    | 0    | 0    | 0    | NA       | NA       |
| 0    | 0    | 0    | 0    | NA       | NA       |
| 0    | 0    | 0    | 0    | NA       | NA       |
| 0    | 0    | 0    | 0    | NA       | NA       |
| 0    | 0.15 | 0.21 | 0.1  | NA       | NA       |
| 0    | 0    | 0    | 0    | NA       | NA       |
| 0    | 0    | 0    | 0    | NA       | NA       |
| 0    | 0    | 0    | 0    | NA       | NA       |
| 0    | 0    | 0    | 0    | NA       | NA       |
| 0    | 0    | 0    | 0    | NA       | NA       |
| 0    | 0    | 0    | 0    | NA       | NA       |
| 0    | 0    | 0    | 0    | NA       | NA       |
| 0    | 0    | 0    | 0    | NA       | NA       |
| 0    | 0    | 0    | 0    | NA       | NA       |
| 0    | 0    | 0    | 0    | NA       | NA       |
| 0    | 0    | 0    | 0    | NA       | NA       |
| 0    | 0    | 0    | 0    | NA       | NA       |
| 0.03 | 0.07 | 0.06 | 0.15 | NA       | NA       |
| 0.51 | 0.11 | 0.1  | 0.11 | -0.97779 | 0.130108 |
| 0    | 0    | 0    | 0    | NA       | NA       |
| 0    | 0    | 0    | 0    | NA       | NA       |
| 0    | 0    | 0    | 0    | NA       | NA       |
| 0    | 0    | 0    | 0    | NA       | NA       |

|      |      |      |               |          |
|------|------|------|---------------|----------|
| 0    | 0    | 0    | 0 NA          | NA       |
| 0    | 0    | 0    | 0 NA          | NA       |
| 0    | 0    | 0    | 0 NA          | NA       |
| 2.23 | 1.08 | 0.47 | 1.51 -0.75586 | 0.171502 |
| 0    | 0    | 0    | 0 NA          | NA       |
| 0    | 0    | 0    | 0 NA          | NA       |
| 0    | 0.03 | 0    | 0 NA          | NA       |
| 0.15 | 0.42 | 0.42 | 0.33 0.684088 | 0.250727 |
| 0    | 0    | 0    | 0 NA          | NA       |
| 0    | 0    | 0    | 0 NA          | NA       |
| 0    | 0    | 0    | 0 NA          | NA       |
| 0    | 0    | 0    | 0 NA          | NA       |
| 0    | 0    | 0    | 0 NA          | NA       |
| 0    | 0    | 0    | 0 NA          | NA       |
| 0    | 0    | 0    | 0 NA          | NA       |
| 0    | 0    | 0    | 0 NA          | NA       |
| 0    | 0.08 | 0.15 | 0.12 NA       | NA       |
| 0.04 | 0    | 0    | 0 NA          | NA       |
| 0    | 0    | 0    | 0 NA          | NA       |
| 7.92 | 7.05 | 6.77 | 7.57 -0.18675 | 0.235157 |
| 0    | 0    | 0.23 | 0.18 NA       | NA       |
| 0    | 0    | 0    | 0 NA          | NA       |
| 0    | 0    | 0    | 0 NA          | NA       |
| 0    | 0.33 | 0.12 | 0 NA          | NA       |
| 0    | 0.01 | 0    | 0 NA          | NA       |
| 0    | 0    | 0    | 0 NA          | NA       |
| 0    | 0    | 0    | 0 NA          | NA       |
| 0.17 | 0    | 0.11 | 0.13 NA       | NA       |
| 0.12 | 0.16 | 0.11 | 0.07 NA       | NA       |
| 0    | 0    | 0    | 0 NA          | NA       |
| 0    | 0    | 0    | 0 NA          | NA       |
| 0    | 0    | 0    | 0 NA          | NA       |
| 0    | 0    | 0    | 0 NA          | NA       |
| 0.09 | 0.06 | 0.06 | 0 NA          | NA       |
| 0    | 0.8  | 0.13 | 0.02 NA       | NA       |
| 0    | 0.11 | 0.31 | 0.36 NA       | NA       |
| 0    | 0    | 0    | 0 NA          | NA       |
| 0    | 0    | 0    | 0 NA          | NA       |
| 0    | 0    | 0    | 0 NA          | NA       |
| 0    | 0.03 | 0.06 | 0.03 NA       | NA       |
| 0    | 0    | 0    | 0 NA          | NA       |
| 0    | 0    | 0    | 0 NA          | NA       |
| 0    | 0    | 0    | 0 NA          | NA       |

|      |      |      |               |          |
|------|------|------|---------------|----------|
| 0    | 0.34 | 0    | 0 NA          | NA       |
| 0    | 0.06 | 0    | 0.07 NA       | NA       |
| 0    | 0    | 0    | 0 NA          | NA       |
| 0    | 0    | 0    | 0 NA          | NA       |
| 0    | 0    | 0    | 0 NA          | NA       |
| 0    | 0    | 0    | 0 NA          | NA       |
| 0.09 | 0.13 | 0.06 | 0.41 NA       | NA       |
| 0    | 0    | 0    | 0 NA          | NA       |
| 0    | 0.38 | 0.42 | 0.9 NA        | NA       |
| 0    | 0    | 0    | 0 NA          | NA       |
| 0    | 0    | 0    | 0 NA          | NA       |
| 0    | 0    | 0    | 0 NA          | NA       |
| 0    | 0    | 0    | 0 NA          | NA       |
| 0    | 0    | 0    | 0 NA          | NA       |
| 0    | 0    | 0    | 0 NA          | NA       |
| 0    | 0    | 0    | 0 NA          | NA       |
| 0    | 0    | 0.19 | 0 NA          | NA       |
| 0    | 0    | 0    | 0 NA          | NA       |
| 0    | 0    | 0    | 0 NA          | NA       |
| 0    | 0    | 0    | 0 NA          | NA       |
| 0    | 0.33 | 0    | 0 NA          | NA       |
| 0    | 0    | 0    | 0 NA          | NA       |
| 0    | 0    | 0    | 0 NA          | NA       |
| 0    | 0.13 | 0    | 0 NA          | NA       |
| 1.08 | 0.81 | 0.66 | 0.92 -0.27652 | 0.446465 |
| 0    | 0    | 0    | 0 NA          | NA       |
| 0    | 0    | 0    | 0 NA          | NA       |
| 0    | 0    | 0    | 0 NA          | NA       |
| 0    | 0    | 0    | 0 NA          | NA       |
| 0    | 0    | 0    | 0 NA          | NA       |
| 0    | 0    | 0    | 0 NA          | NA       |
| 0    | 0    | 0    | 0 NA          | NA       |
| 0    | 0    | 0    | 0 NA          | NA       |
| 0    | 0    | 0    | 0 NA          | NA       |
| 0    | 0    | 0    | 0 NA          | NA       |
| 0    | 0    | 0    | 0 NA          | NA       |
| 0    | 0    | 0    | 0 NA          | NA       |
| 0    | 0    | 0    | 0 NA          | NA       |
| 9.88 | 8.52 | 9.82 | 9.17 -0.21262 | 0.527312 |
| 0    | 0    | 0    | 0 NA          | NA       |
| 2.88 | 2.69 | 2.72 | 2.37 0.36621  | 0.322341 |
| 0    | 0    | 0    | 0 NA          | NA       |
| 0    | 0    | 0    | 0 NA          | NA       |
| 0    | 0    | 0    | 0 NA          | NA       |



|      |      |      |      |          |          |
|------|------|------|------|----------|----------|
| 0    | 0    | 0    | 0    | NA       | NA       |
| 0    | 0    | 0    | 0.1  | NA       | NA       |
| 0    | 0    | 0    | 0    | NA       | NA       |
| 0    | 0    | 0    | 0    | NA       | NA       |
| 0    | 0    | 0    | 0    | NA       | NA       |
| 0    | 0    | 0    | 0    | NA       | NA       |
| 0    | 0    | 0    | 0    | NA       | NA       |
| 0    | 0    | 0    | 0    | NA       | NA       |
| 0    | 0    | 0    | 0    | NA       | NA       |
| 0    | 0    | 0.03 | 0.14 | NA       | NA       |
| 0    | 0    | 0    | 0    | NA       | NA       |
| 0    | 0    | 0    | 0    | NA       | NA       |
| 0    | 0    | 0    | 0    | NA       | NA       |
| 0    | 0    | 0    | 0    | NA       | NA       |
| 0    | 0    | 0    | 0    | NA       | NA       |
| 0    | 0    | 0    | 0    | NA       | NA       |
| 0    | 0    | 0    | 0    | NA       | NA       |
| 0    | 0    | 0    | 0    | NA       | NA       |
| 0    | 0    | 0    | 0    | NA       | NA       |
| 0.49 | 1.28 | 1.17 | 2.44 | 0.892745 | 0.157519 |
| 0    | 0    | 0    | 0    | NA       | NA       |
| 0    | 0    | 0    | 0    | NA       | NA       |
| 0    | 0    | 0    | 0    | NA       | NA       |
| 0    | 0    | 0    | 0    | NA       | NA       |
| 0    | 0    | 0    | 0    | NA       | NA       |
| 0    | 0    | 0    | 0    | NA       | NA       |
| 0    | 0    | 0    | 0    | NA       | NA       |
| 0    | 0    | 0    | 0    | NA       | NA       |
| 1.76 | 1.63 | 2.6  | 0.57 | 0.237792 | 0.748862 |
| 4.33 | 3.77 | 2.71 | 2.93 | -0.22301 | 0.678826 |
| 0    | 0    | 0    | 0    | NA       | NA       |
| 0    | 0    | 0    | 0    | NA       | NA       |
| 0    | 0    | 0    | 0    | NA       | NA       |
| 0    | 0    | 0    | 0    | NA       | NA       |
| 0    | 0    | 0    | 0    | NA       | NA       |
| 0    | 0.01 | 0.03 | 0.05 | NA       | NA       |
| 0    | 0    | 0    | 0    | NA       | NA       |
| 0    | 0    | 0    | 0    | NA       | NA       |
| 0    | 0    | 0    | 0    | NA       | NA       |
| 0    | 0    | 0    | 0    | NA       | NA       |
| 0    | 0    | 0    | 0    | NA       | NA       |
| 0    | 0    | 0    | 0    | NA       | NA       |
| 7.79 | 6.93 | 7.73 | 8.93 | -0.01294 | 0.974295 |
| 0    | 0    | 0    | 0    | NA       | NA       |

|      |      |      |               |          |
|------|------|------|---------------|----------|
| 0    | 0    | 0    | 0 NA          | NA       |
| 0    | 0    | 0    | 0 NA          | NA       |
| 0    | 0    | 0    | 0 NA          | NA       |
| 0    | 0    | 0    | 0 NA          | NA       |
| 0    | 0    | 0    | 0 NA          | NA       |
| 0    | 0    | 0    | 0 NA          | NA       |
| 1.51 | 1.46 | 1.77 | 0.92 0.329541 | 0.616273 |
| 0.05 | 0.33 | 0.15 | 0.24 -0.00828 | 0.994144 |
| 0    | 0    | 0    | 0 NA          | NA       |
| 0    | 0    | 0    | 0 NA          | NA       |
| 0    | 0    | 0    | 0.17 NA       | NA       |
| 0    | 0    | 0.11 | 0 NA          | NA       |
| 0    | 0    | 0    | 0 NA          | NA       |
| 0.04 | 0.03 | 0    | 0.01 NA       | NA       |
| 0.16 | 0.23 | 0.1  | 0.36 NA       | NA       |
| 0    | 0    | 0    | 0 NA          | NA       |
| 0    | 0    | 0    | 0 NA          | NA       |
| 0    | 0    | 0    | 0 NA          | NA       |
| 0    | 0    | 0    | 0 NA          | NA       |
| 0    | 0    | 0    | 0 NA          | NA       |
| 0.66 | 0.63 | 0.27 | 0.7 -0.41773  | 0.561089 |
| 0    | 0    | 0    | 0 NA          | NA       |
| 0    | 0    | 0    | 0 NA          | NA       |
| 0    | 0    | 0    | 0 NA          | NA       |
| 0    | 0    | 0    | 0 NA          | NA       |
| 0.31 | 0    | 0    | 0.24 NA       | NA       |
| 0    | 0    | 0    | 0 NA          | NA       |
| 0.02 | 0.02 | 0.02 | 0.08 NA       | NA       |
| 0    | 0    | 0    | 0 NA          | NA       |
| 0    | 0    | 0    | 0.07 NA       | NA       |
| 0    | 0    | 0    | 0 NA          | NA       |
| 0    | 0    | 0    | 0 NA          | NA       |
| 2.14 | 0.24 | 0.37 | 0.27 -2.55629 | 1.30E-16 |
| 6.73 | 5.74 | 6.33 | 6.94 -0.02011 | 0.939281 |
| 0    | 0    | 0    | 0 NA          | NA       |
| 0    | 0    | 0    | 0 NA          | NA       |
| 0.53 | 1.13 | 0    | 0.78 NA       | NA       |
| 0    | 0    | 0    | 0 NA          | NA       |
| 0    | 0    | 0    | 0 NA          | NA       |
| 0.71 | 0.48 | 0.1  | 1.72 0.117251 | 0.896909 |
| 2.08 | 1.2  | 0.81 | 0.62 -0.45461 | 0.532747 |
| 0    | 0    | 0    | 0 NA          | NA       |
| 0    | 0    | 0    | 0 NA          | NA       |
| 0    | 0    | 0    | 0 NA          | NA       |
| 0    | 0    | 0    | 0 NA          | NA       |

|      |      |      |               |          |
|------|------|------|---------------|----------|
| 0    | 0    | 0    | 0 NA          | NA       |
| 0    | 0    | 0    | 0 NA          | NA       |
| 0    | 0    | 0.1  | 0 NA          | NA       |
| 0    | 0    | 0    | 0 NA          | NA       |
| 0    | 0    | 0    | 0 NA          | NA       |
| 0    | 0    | 0    | 0 NA          | NA       |
| 0.05 | 0.02 | 0.03 | 0.02 NA       | NA       |
| 0.8  | 0.19 | 0.45 | 0.3 -0.69116  | 0.301606 |
| 0.09 | 0    | 0.06 | 0 NA          | NA       |
| 0    | 0    | 0    | 0 NA          | NA       |
| 1.73 | 1.87 | 1.64 | 1.5 -0.30292  | 0.303045 |
| 0    | 0    | 0    | 0 NA          | NA       |
| 0    | 0    | 0    | 0 NA          | NA       |
| 0.02 | 0.03 | 0.13 | 0.03 -0.03473 | 0.972152 |
| 0    | 0    | 0    | 0 NA          | NA       |
| 0    | 0    | 0    | 0 NA          | NA       |
| 0    | 0    | 0    | 0 NA          | NA       |
| 0    | 0    | 0    | 0 NA          | NA       |
| 0    | 0    | 0    | 0 NA          | NA       |
| 0    | 0    | 0    | 0 NA          | NA       |
| 0    | 0    | 0    | 0 NA          | NA       |
| 0    | 0    | 0    | 0 NA          | NA       |
| 0    | 0    | 0    | 0 NA          | NA       |
| 4.1  | 4.5  | 5.33 | 5.46 -0.03598 | 0.948772 |
| 0    | 0    | 0    | 0 NA          | NA       |
| 0    | 0    | 0    | 0 NA          | NA       |
| 0    | 0.22 | 0.1  | 0 NA          | NA       |
| 0    | 0    | 0    | 0 NA          | NA       |
| 0    | 0.07 | 0.02 | 0 NA          | NA       |
| 0.41 | 1.39 | 1.83 | 2.07 1.359908 | 0.009334 |
| 2.51 | 1.03 | 1.4  | 2.37 -0.49061 | 0.414764 |
| 0    | 0    | 0    | 0 NA          | NA       |
| 0    | 0    | 0.12 | 0 NA          | NA       |
| 0    | 0    | 0    | 0 NA          | NA       |
| 0    | 0    | 0    | 0 NA          | NA       |
| 0    | 0    | 0    | 0 NA          | NA       |
| 0    | 0    | 0    | 0 NA          | NA       |
| 0    | 0    | 0    | 0 NA          | NA       |
| 0    | 0    | 0.09 | 0.21 NA       | NA       |
| 0    | 0    | 0    | 0 NA          | NA       |
| 0    | 0    | 0    | 0 NA          | NA       |
| 0    | 0    | 0    | 0 NA          | NA       |
| 0    | 0    | 0.08 | 0.09 NA       | NA       |
| 0    | 0    | 0    | 0 NA          | NA       |
| 0    | 0    | 0    | 0 NA          | NA       |
| 0    | 0    | 0    | 0 NA          | NA       |







|       |       |       |      |          |          |
|-------|-------|-------|------|----------|----------|
| 0     | 0     | 0     | 0    | NA       | NA       |
| 0     | 0     | 0     | 0    | NA       | NA       |
| 0.01  | 0.01  | 0.03  | 0.02 | NA       | NA       |
| 0.4   | 0.74  | 0.69  | 0.35 | -0.077   | 0.929109 |
| 0     | 0.11  | 0.09  | 0    | NA       | NA       |
| 0     | 0     | 0     | 0    | NA       | NA       |
| 0     | 0     | 0     | 0    | NA       | NA       |
| 0     | 0     | 0     | 0    | NA       | NA       |
| 0     | 0     | 0     | 0    | NA       | NA       |
| 0     | 0     | 0     | 0    | NA       | NA       |
| 0     | 0     | 0     | 0    | NA       | NA       |
| 0     | 0     | 0     | 0    | NA       | NA       |
| 52.57 | 65.22 | 65.35 | 64.4 | 0.228988 | 0.019987 |
| 0     | 0     | 0     | 0    | NA       | NA       |
| 0.05  | 0.17  | 0.13  | 0.2  | 1.408775 | 0.019189 |
| 0     | 0     | 0     | 0    | NA       | NA       |
| 0     | 0     | 0     | 0    | NA       | NA       |
| 0     | 0     | 0     | 0    | NA       | NA       |
| 0.06  | 0.1   | 0.06  | 0.01 | NA       | NA       |
| 0     | 0     | 0     | 0    | NA       | NA       |
| 0     | 0     | 0     | 0    | NA       | NA       |
| 0     | 0     | 0     | 0    | NA       | NA       |
| 0     | 0     | 0     | 0    | NA       | NA       |
| 0     | 0     | 0     | 0    | NA       | NA       |
| 0.36  | 0.06  | 0.07  | 0.04 | -1.27197 | 0.038116 |
| 0     | 0     | 0     | 0    | NA       | NA       |
| 0     | 0     | 0     | 0    | NA       | NA       |
| 0     | 0     | 0     | 0.38 | NA       | NA       |
| 0     | 0     | 0     | 0    | NA       | NA       |
| 0     | 0     | 0     | 0    | NA       | NA       |
| 0     | 0     | 0     | 0    | NA       | NA       |
| 0     | 0     | 0     | 0    | NA       | NA       |
| 0     | 0     | 0     | 0    | NA       | NA       |
| 0     | 0     | 0     | 0    | NA       | NA       |
| 0     | 0     | 0     | 0    | NA       | NA       |
| 0     | 0     | 0     | 0    | NA       | NA       |
| 0.12  | 0     | 0.16  | 0.19 | NA       | NA       |
| 0     | 0     | 0     | 0    | NA       | NA       |
| 0     | 0     | 0     | 0    | NA       | NA       |
| 0     | 0     | 0     | 0    | NA       | NA       |
| 0     | 0     | 0     | 0    | NA       | NA       |
| 0     | 0     | 0     | 0    | NA       | NA       |
| 0     | 0     | 0     | 0    | NA       | NA       |
| 0     | 0     | 0     | 0    | NA       | NA       |
| 0     | 0     | 0     | 0    | NA       | NA       |
| 0     | 0     | 0     | 0    | NA       | NA       |
| 0     | 0     | 0     | 0    | NA       | NA       |
| 0     | 0     | 0     | 0    | NA       | NA       |
| 0     | 0     | 0     | 0    | NA       | NA       |
| 1.03  | 0.2   | 0.31  | 0    | NA       | NA       |
| 0.6   | 0.99  | 0.82  | 1.79 | 0.517987 | 0.455612 |
| 0     | 0     | 0     | 0    | NA       | NA       |

|      |       |       |                |          |
|------|-------|-------|----------------|----------|
| 0    | 0     | 0     | 0 NA           | NA       |
| 0    | 0     | 0     | 0 NA           | NA       |
| 0    | 0     | 0     | 0 NA           | NA       |
| 0    | 0     | 0     | 0 NA           | NA       |
| 0    | 0     | 0     | 0 NA           | NA       |
| 0    | 0     | 0     | 0 NA           | NA       |
| 0    | 0     | 0     | 0 NA           | NA       |
| 0    | 0     | 0     | 0 NA           | NA       |
| 0    | 0     | 0     | 0 NA           | NA       |
| 0.32 | 0     | 0.41  | 0 NA           | NA       |
| 0    | 0     | 0     | 0 NA           | NA       |
| 0    | 0     | 0     | 0 NA           | NA       |
| 0    | 0     | 0     | 0 NA           | NA       |
| 0    | 0     | 0     | 0 NA           | NA       |
| 0    | 0     | 0     | 0 NA           | NA       |
| 0    | 0     | 0     | 0 NA           | NA       |
| 0    | 0     | 0     | 0 NA           | NA       |
| 0    | 0     | 0     | 0 NA           | NA       |
| 6.63 | 54.73 | 20.88 | 34.59 1.894024 | 4.46E-07 |
| 0    | 0     | 0     | 0 NA           | NA       |
| 0    | 0     | 0     | 0 NA           | NA       |
| 0    | 0     | 0     | 0 NA           | NA       |
| 0.76 | 0.22  | 0.3   | 0.57 -0.04917  | 0.957971 |
| 0    | 0     | 0     | 0 NA           | NA       |
| 0    | 0     | 0     | 0 NA           | NA       |
| 0    | 0     | 0     | 0 NA           | NA       |
| 0    | 0     | 0     | 0 NA           | NA       |
| 0    | 0.02  | 0     | 0.03 NA        | NA       |
| 0.38 | 0     | 0     | 0 NA           | NA       |
| 0    | 0     | 0     | 0 NA           | NA       |
| 0    | 0     | 0     | 0 NA           | NA       |
| 0    | 0     | 0     | 0 NA           | NA       |
| 0.35 | 0     | 0     | 0 NA           | NA       |
| 0    | 0     | 0     | 0.02 NA        | NA       |
| 0    | 0     | 0     | 0 NA           | NA       |
| 8.09 | 6.13  | 6.87  | 5.53 -0.33892  | 0.036474 |
| 0    | 0     | 0     | 0 NA           | NA       |
| 0    | 0     | 0     | 0 NA           | NA       |
| 0    | 0     | 0     | 0 NA           | NA       |
| 0    | 0     | 0     | 0 NA           | NA       |
| 0    | 0     | 0     | 0 NA           | NA       |
| 0    | 0     | 0     | 0 NA           | NA       |
| 0    | 0     | 0     | 0 NA           | NA       |
| 0.04 | 0.01  | 0     | 0 NA           | NA       |

|      |      |      |               |          |
|------|------|------|---------------|----------|
| 0    | 0    | 0    | 0 NA          | NA       |
| 0    | 0    | 0    | 0 NA          | NA       |
| 0    | 0    | 0    | 0 NA          | NA       |
| 0    | 0.08 | 0.07 | 0.41 NA       | NA       |
| 0    | 0    | 0    | 0 NA          | NA       |
| 0    | 0    | 0    | 0 NA          | NA       |
| 0.68 | 0.33 | 0.44 | 0.17 NA       | NA       |
| 0    | 0    | 0    | 0 NA          | NA       |
| 0    | 0    | 0    | 0 NA          | NA       |
| 0    | 0    | 0    | 0 NA          | NA       |
| 0    | 0    | 0    | 0 NA          | NA       |
| 0    | 0    | 0    | 0 NA          | NA       |
| 0.25 | 0.15 | 0.41 | 0.27 0.718207 | 0.294435 |
| 0    | 0    | 0.12 | 0 NA          | NA       |
| 0.63 | 0    | 0.03 | 0 -3.2626     | 9.82E-11 |
| 0    | 0    | 0    | 0 NA          | NA       |
| 0    | 0    | 0    | 0 NA          | NA       |
| 0    | 0    | 0    | 0.26 NA       | NA       |
| 0.41 | 0    | 0.07 | 0.15 NA       | NA       |
| 0.11 | 0.16 | 0    | 0 NA          | NA       |
| 0    | 0    | 0    | 0 NA          | NA       |
| 0.86 | 0.64 | 0.89 | 0.8 -0.27238  | 0.520552 |
| 0    | 0    | 0    | 0 NA          | NA       |
| 0.21 | 0.17 | 0.12 | 0.18 -0.14228 | 0.860153 |
| 0    | 0    | 0    | 0 NA          | NA       |
| 0.04 | 0.03 | 0    | 0 NA          | NA       |
| 0    | 0.03 | 0    | 0 NA          | NA       |
| 0    | 0    | 0    | 0 NA          | NA       |
| 0    | 0    | 0    | 0 NA          | NA       |
| 0    | 0    | 0    | 0 NA          | NA       |
| 0    | 0    | 0    | 0 NA          | NA       |
| 0    | 0    | 0    | 0 NA          | NA       |
| 0    | 0    | 0    | 0 NA          | NA       |
| 0    | 0    | 0    | 0 NA          | NA       |
| 0    | 0    | 0    | 0 NA          | NA       |
| 0    | 0    | 0    | 0 NA          | NA       |
| 0    | 0    | 0    | 0 NA          | NA       |
| 0    | 0    | 0    | 0 NA          | NA       |
| 0.59 | 0.18 | 0    | 3.2 NA        | NA       |
| 0.85 | 1    | 1.04 | 0.9 0.154574  | 0.632339 |
| 0    | 0    | 0    | 0 NA          | NA       |
| 0    | 0    | 0    | 0 NA          | NA       |
| 0    | 0    | 0    | 0 NA          | NA       |
| 0    | 0    | 0    | 0 NA          | NA       |
| 0    | 0    | 0    | 0 NA          | NA       |

|       |      |      |               |          |
|-------|------|------|---------------|----------|
| 0     | 0    | 0    | 0 NA          | NA       |
| 0     | 0    | 0    | 0 NA          | NA       |
| 0     | 0    | 0    | 0 NA          | NA       |
| 0     | 0    | 0    | 0 NA          | NA       |
| 0     | 0    | 0    | 0 NA          | NA       |
| 0     | 0    | 0    | 0 NA          | NA       |
| 0     | 0.47 | 0    | 0 NA          | NA       |
| 0     | 0    | 0    | 0 NA          | NA       |
| 0     | 0.16 | 0    | 0 NA          | NA       |
| 0     | 0    | 0    | 0 NA          | NA       |
| 0     | 0    | 0    | 0 NA          | NA       |
| 0.09  | 0.04 | 0.13 | 0.19 0.03909  | 0.963692 |
| 0.01  | 0.11 | 0    | 0 NA          | NA       |
| 0     | 0    | 0    | 0 NA          | NA       |
| 0     | 0    | 0    | 0 NA          | NA       |
| 0     | 0    | 0    | 0 NA          | NA       |
| 0.86  | 0.48 | 0.34 | 0.57 -0.33588 | 0.63017  |
| 0     | 0    | 0    | 0 NA          | NA       |
| 0     | 0.16 | 0    | 0.05 NA       | NA       |
| 0.03  | 0.07 | 0    | 0 NA          | NA       |
| 1.79  | 1.56 | 1.56 | 2.63 -0.46863 | 0.179688 |
| 0     | 0    | 0.12 | 0 NA          | NA       |
| 0     | 0    | 0    | 0 NA          | NA       |
| 0     | 0    | 0    | 0 NA          | NA       |
| 0.31  | 0.23 | 0.31 | 0.35 0.065225 | 0.922927 |
| 0     | 0    | 0    | 0 NA          | NA       |
| 0     | 0    | 0    | 0 NA          | NA       |
| 0.15  | 0.07 | 0.27 | 0.04 NA       | NA       |
| 0     | 0    | 0    | 0 NA          | NA       |
| 0     | 0    | 0    | 0 NA          | NA       |
| 0     | 0    | 0    | 0 NA          | NA       |
| 0     | 0    | 0    | 0 NA          | NA       |
| 0     | 0    | 0    | 0 NA          | NA       |
| 13.39 | 8.05 | 7.97 | 7.78 -0.73869 | 0.000227 |
| 0     | 0.08 | 0    | 0 NA          | NA       |
| 0     | 0    | 0    | 0 NA          | NA       |
| 0     | 0    | 0    | 0 NA          | NA       |
| 0.36  | 0.09 | 0.04 | 0.07 NA       | NA       |
| 0     | 0    | 0    | 0 NA          | NA       |
| 0     | 0    | 0    | 0 NA          | NA       |
| 0     | 0    | 0    | 0 NA          | NA       |
| 0     | 0    | 0    | 0.11 NA       | NA       |
| 0     | 0    | 0    | 0 NA          | NA       |
| 0     | 0    | 0    | 0 NA          | NA       |
| 0     | 0    | 0    | 0 NA          | NA       |

|      |      |      |               |          |
|------|------|------|---------------|----------|
| 0    | 0    | 0    | 0 NA          | NA       |
| 0.18 | 0    | 0    | 0.14 NA       | NA       |
| 0    | 0    | 0    | 0 NA          | NA       |
| 0.3  | 0.36 | 0.38 | 0.55 0.143066 | 0.859422 |
| 0    | 0    | 0    | 0 NA          | NA       |
| 0    | 0    | 0    | 0 NA          | NA       |
| 0.08 | 0    | 0.1  | 0 NA          | NA       |
| 0    | 0    | 0    | 0 NA          | NA       |
| 0    | 0    | 0    | 0 NA          | NA       |
| 0    | 0    | 0    | 0 NA          | NA       |
| 0    | 0    | 0    | 0 NA          | NA       |
| 0    | 0    | 0    | 0 NA          | NA       |
| 0    | 0    | 0    | 0 NA          | NA       |
| 0    | 0    | 0    | 0 NA          | NA       |
| 0    | 0    | 0    | 0.33 NA       | NA       |
| 0    | 0    | 0.06 | 0 NA          | NA       |
| 0    | 0    | 0    | 0 NA          | NA       |
| 0    | 0    | 0    | 0 NA          | NA       |
| 0    | 0    | 0    | 0 NA          | NA       |
| 0    | 0    | 0    | 0 NA          | NA       |
| 0    | 0    | 0    | 0 NA          | NA       |
| 0    | 0.02 | 0.01 | 0 NA          | NA       |
| 0    | 0    | 0    | 1.33 NA       | NA       |
| 0    | 0    | 0    | 0 NA          | NA       |
| 0    | 0    | 0    | 0 NA          | NA       |
| 0    | 0    | 0    | 0 NA          | NA       |
| 0    | 0    | 0    | 0 NA          | NA       |
| 0    | 0    | 0    | 0 NA          | NA       |
| 0    | 0.17 | 0.15 | 0.09 NA       | NA       |
| 0    | 0    | 0    | 0 NA          | NA       |
| 0.27 | 1.59 | 1.96 | 0.2 0.191585  | 0.823938 |
| 0    | 0    | 0    | 0 NA          | NA       |
| 0.15 | 0.1  | 0.06 | 0.05 NA       | NA       |
| 0    | 0    | 0    | 0 NA          | NA       |
| 0    | 0    | 0    | 0 NA          | NA       |
| 0    | 0    | 0    | 0 NA          | NA       |
| 0    | 0.18 | 0.32 | 0 NA          | NA       |
| 0    | 0    | 0    | 0 NA          | NA       |
| 0    | 0    | 0    | 0 NA          | NA       |
| 0.47 | 0.4  | 0.1  | 0.63 0.028614 | 0.976446 |
| 0.05 | 0.03 | 0.15 | 0.13 -0.49278 | 0.50896  |
| 0    | 0    | 0    | 0 NA          | NA       |
| 0    | 0    | 0    | 0 NA          | NA       |
| 0    | 0    | 0    | 0 NA          | NA       |
| 0    | 0    | 0    | 0 NA          | NA       |

|       |       |       |       |          |          |
|-------|-------|-------|-------|----------|----------|
| 0     | 0     | 0     | 0     | NA       | NA       |
| 0     | 0     | 0     | 0     | NA       | NA       |
| 14.31 | 13.83 | 14.66 | 14.49 | -0.50241 | 9.86E-05 |
| 0     | 0     | 0     | 0     | NA       | NA       |
| 0     | 0     | 0     | 0     | NA       | NA       |
| 0     | 0     | 0     | 0     | NA       | NA       |
| 0     | 0     | 0     | 0     | NA       | NA       |
| 0     | 0     | 0     | 0     | NA       | NA       |
| 0     | 0     | 0     | 0     | NA       | NA       |
| 0     | 0     | 0     | 0     | NA       | NA       |
| 0     | 0     | 0     | 0     | NA       | NA       |
| 0     | 0     | 0     | 0     | NA       | NA       |
| 0.68  | 0.27  | 0     | 0     | -0.08593 | NA       |
| 0     | 0     | 0     | 0     | NA       | NA       |
| 0     | 0     | 0     | 0     | NA       | NA       |
| 0     | 0     | 0     | 0     | NA       | NA       |
| 1.61  | 1.01  | 2.99  | 3.24  | -0.06039 | 0.945788 |
| 0     | 0     | 0     | 0     | NA       | NA       |
| 8.94  | 0     | 18.64 | 0.58  | -0.04746 | 0.931245 |
| 0     | 0.02  | 0     | 0     | NA       | NA       |
| 0     | 0     | 0     | 0     | NA       | NA       |
| 0     | 0     | 0     | 0.01  | NA       | NA       |
| 0     | 0     | 0     | 0     | NA       | NA       |
| 0     | 0.1   | 0     | 0     | NA       | NA       |
| 0.11  | 0.08  | 0.18  | 0     | NA       | NA       |
| 0     | 0     | 0     | 0     | NA       | NA       |
| 0.04  | 0     | 0     | 0     | NA       | NA       |
| 0     | 0     | 0     | 0     | NA       | NA       |
| 0     | 0     | 0     | 0     | NA       | NA       |
| 0     | 0     | 0     | 0     | NA       | NA       |
| 0     | 0     | 0     | 0     | NA       | NA       |
| 3.59  | 1.52  | 1.86  | 1.85  | -0.59696 | 0.196205 |
| 0     | 0     | 0     | 0     | NA       | NA       |
| 0     | 0     | 0     | 0     | NA       | NA       |
| 4.9   | 4.77  | 4.65  | 4.19  | -0.60341 | 0.00723  |
| 0     | 0     | 0     | 0     | NA       | NA       |
| 0.01  | 0.02  | 0     | 0.07  | -0.37571 | 0.628307 |
| 0     | 0     | 0     | 0     | NA       | NA       |
| 0     | 0     | 0     | 0     | NA       | NA       |
| 0     | 0     | 0     | 0     | NA       | NA       |
| 0     | 0     | 0     | 0     | NA       | NA       |
| 0     | 0     | 0     | 0     | NA       | NA       |
| 1.73  | 1.39  | 1.11  | 1.21  | -0.21464 | 0.546118 |
| 0     | 0     | 0     | 0     | NA       | NA       |

|       |       |       |               |          |
|-------|-------|-------|---------------|----------|
| 0     | 0     | 0     | 0 NA          | NA       |
| 0     | 0     | 0     | 0 NA          | NA       |
| 19.66 | 21.23 | 21.22 | 18.6 -0.02688 | 0.908519 |
| 1.48  | 0.67  | 1.23  | 2.82 -0.13507 | 0.862825 |
| 0     | 0     | 0     | 0 NA          | NA       |
| 2.07  | 5.07  | 3.7   | 4.12 0.595331 | 0.226314 |
| 0     | 0     | 0     | 0 NA          | NA       |
| 0     | 0     | 0     | 0 NA          | NA       |
| 0     | 0     | 0     | 0 NA          | NA       |
| 0     | 0     | 0     | 0 NA          | NA       |
| 0     | 0.43  | 0.14  | 0.15 -0.07185 | 0.938972 |
| 0.66  | 0.42  | 0.42  | 0.33 -0.76972 | 0.220278 |
| 0.15  | 0.09  | 0     | 0 NA          | NA       |
| 0.04  | 0     | 0.06  | 0 NA          | NA       |
| 0     | 0     | 0     | 0 NA          | NA       |
| 0     | 0     | 0     | 0 NA          | NA       |
| 0     | 0.03  | 0     | 0 NA          | NA       |
| 0     | 0     | 0     | 0 NA          | NA       |
| 0     | 0     | 0     | 0 NA          | NA       |
| 11.1  | 4.04  | 7.1   | 5.07 -1.07776 | 1.57E-05 |
| 0     | 0     | 0     | 0 NA          | NA       |
| 0     | 0     | 0     | 0 NA          | NA       |
| 0     | 0     | 0     | 0 NA          | NA       |
| 0     | 0     | 0     | 0 NA          | NA       |
| 0     | 0     | 0     | 0 NA          | NA       |
| 0     | 0     | 0     | 0 NA          | NA       |
| 0     | 0     | 0     | 0 NA          | NA       |
| 0     | 0     | 0     | 0 NA          | NA       |
| 0     | 0     | 0     | 0 NA          | NA       |
| 0     | 0     | 0     | 0 NA          | NA       |
| 0     | 0     | 0     | 0 NA          | NA       |
| 0.14  | 0     | 0     | 0 NA          | NA       |
| 0     | 0     | 0     | 0 NA          | NA       |
| 0     | 0     | 0     | 0 NA          | NA       |
| 0     | 0     | 0     | 0 NA          | NA       |
| 0     | 0     | 0     | 0 NA          | NA       |
| 0     | 0     | 0     | 0 NA          | NA       |
| 0     | 0     | 0     | 0 NA          | NA       |
| 0     | 0     | 0     | 0 NA          | NA       |
| 0     | 0     | 0     | 0 NA          | NA       |
| 0     | 0     | 0     | 0.14 NA       | NA       |
| 0     | 0     | 0.08  | 0.09 NA       | NA       |
| 0     | 0     | 0     | 0 NA          | NA       |
| 0     | 0.08  | 0.15  | 0.13 NA       | NA       |
| 0     | 0     | 0     | 0 NA          | NA       |



|      |      |      |               |          |
|------|------|------|---------------|----------|
| 0.05 | 0    | 0    | 0 NA          | NA       |
| 0    | 0    | 0    | 0 NA          | NA       |
| 0    | 0    | 0    | 0 NA          | NA       |
| 0    | 0    | 0    | 0 NA          | NA       |
| 0    | 0    | 0    | 0 NA          | NA       |
| 0    | 0    | 0    | 0 NA          | NA       |
| 0    | 0    | 0    | 0 NA          | NA       |
| 0    | 0    | 0    | 0 NA          | NA       |
| 0    | 0    | 0    | 0 NA          | NA       |
| 0    | 0    | 0    | 0 NA          | NA       |
| 0    | 0    | 0    | 0 NA          | NA       |
| 0    | 0    | 0    | 0 NA          | NA       |
| 0    | 0.05 | 0    | 0 NA          | NA       |
| 0    | 0    | 0    | 0 NA          | NA       |
| 0.46 | 0.43 | 0.61 | 0.52 -0.22917 | 0.787143 |
| 0    | 0    | 0    | 0 NA          | NA       |
| 0    | 0    | 0    | 0 NA          | NA       |
| 0    | 0    | 0    | 0 NA          | NA       |
| 0.28 | 0.18 | 0.19 | 0.24 -0.15465 | 0.852157 |
| 0    | 0    | 0    | 0 NA          | NA       |
| 0    | 0    | 0    | 0 NA          | NA       |
| 0    | 0    | 0    | 0 NA          | NA       |
| 0    | 0    | 0    | 0 NA          | NA       |
| 0    | 0    | 0    | 0 NA          | NA       |
| 0    | 0    | 0    | 0 NA          | NA       |
| 0    | 0    | 0    | 0 NA          | NA       |
| 0    | 0.21 | 0    | 0.11 NA       | NA       |
| 0    | 0    | 0    | 0 NA          | NA       |
| 0.37 | 0    | 0.14 | 0.16 NA       | NA       |
| 0    | 0    | 0    | 0 NA          | NA       |
| 0    | 0    | 0    | 0 NA          | NA       |
| 0    | 0    | 0    | 0 NA          | NA       |
| 0    | 0    | 0    | 0 NA          | NA       |
| 0    | 0    | 0    | 0 NA          | NA       |
| 0    | 0    | 0    | 0 NA          | NA       |
| 0    | 0    | 0    | 0 NA          | NA       |
| 0    | 0    | 0    | 0 NA          | NA       |
| 0    | 0    | 0    | 0 NA          | NA       |
| 0.04 | 0    | 0.01 | 0 NA          | NA       |
| 0    | 0    | 0    | 0 NA          | NA       |
| 0    | 0    | 0    | 0 NA          | NA       |
| 0    | 0    | 0    | 0 NA          | NA       |
| 0.06 | 0    | 0.04 | 0 NA          | NA       |
| 0    | 0    | 0    | 0 NA          | NA       |

|      |      |      |      |          |          |
|------|------|------|------|----------|----------|
| 0    | 0    | 0    | 0    | NA       | NA       |
| 0    | 0    | 0    | 0    | NA       | NA       |
| 0    | 0    | 0    | 0.31 | NA       | NA       |
| 0    | 0    | 0    | 0    | NA       | NA       |
| 0    | 0    | 0    | 0    | NA       | NA       |
| 0    | 0    | 0    | 0    | NA       | NA       |
| 0    | 0    | 0    | 0    | NA       | NA       |
| 0    | 0    | 0    | 0    | NA       | NA       |
| 0    | 0    | 0    | 0    | NA       | NA       |
| 0    | 0    | 0    | 0    | NA       | NA       |
| 0    | 0    | 0    | 0    | NA       | NA       |
| 0    | 0    | 0.28 | 0.12 | NA       | NA       |
| 0    | 0    | 0    | 0    | NA       | NA       |
| 0    | 0    | 0    | 0    | NA       | NA       |
| 0    | 0    | 0    | 0    | NA       | NA       |
| 0    | 0    | 0    | 0    | NA       | NA       |
| 0.14 | 0    | 0    | 0    | NA       | NA       |
| 5.41 | 4.81 | 5.19 | 5.36 | 0.05394  | 0.804596 |
| 0    | 0    | 0    | 0    | NA       | NA       |
| 0    | 0    | 0    | 0    | NA       | NA       |
| 0    | 0    | 0    | 0    | NA       | NA       |
| 0    | 0    | 0    | 0    | NA       | NA       |
| 0    | 0    | 0    | 0    | NA       | NA       |
| 0    | 0    | 0    | 0    | NA       | NA       |
| 1.01 | 0.38 | 0.7  | 0.61 | -0.0099  | 0.992442 |
| 0    | 0    | 0    | 0    | NA       | NA       |
| 0    | 0    | 0    | 0    | NA       | NA       |
| 7.41 | 6.18 | 5.27 | 4.22 | 0.048196 | 0.944533 |
| 0    | 0    | 0    | 0    | NA       | NA       |
| 0    | 0    | 0    | 0    | NA       | NA       |
| 0.47 | 0    | 0    | 0.02 | NA       | NA       |
| 0    | 0    | 0    | 0    | NA       | NA       |
| 0    | 0    | 0    | 0    | NA       | NA       |
| 0    | 0    | 0    | 0    | NA       | NA       |
| 0.09 | 0.09 | 0.14 | 0.16 | -0.42327 | 0.56871  |
| 0    | 0    | 0    | 0    | NA       | NA       |
| 0    | 0    | 0    | 0    | NA       | NA       |
| 0    | 0    | 0    | 0    | NA       | NA       |
| 0.01 | 0    | 0.02 | 0.02 | NA       | NA       |
| 0    | 0    | 0    | 0    | NA       | NA       |
| 0    | 0    | 0    | 0    | NA       | NA       |
| 0.46 | 0.31 | 0.43 | 0.38 | -0.24136 | 0.60914  |
| 0    | 0    | 0    | 0    | NA       | NA       |

|      |      |      |               |          |
|------|------|------|---------------|----------|
| 0    | 0.19 | 0.06 | 0 NA          | NA       |
| 0    | 0    | 0    | 0 NA          | NA       |
| 0    | 0    | 0    | 0 NA          | NA       |
| 0    | 0    | 0    | 0 NA          | NA       |
| 2.92 | 2.13 | 2.56 | 3.14 -0.41852 | 0.192886 |
| 0    | 0    | 0    | 0 NA          | NA       |
| 0.16 | 0.06 | 0.07 | 0.03 -1.05278 | 0.086818 |
| 0    | 0    | 0.13 | 0.07 NA       | NA       |
| 1.93 | 2.26 | 1.69 | 2.53 -0.35363 | 0.258601 |
| 0    | 0    | 0    | 0 NA          | NA       |
| 0    | 0    | 0    | 0 NA          | NA       |
| 0    | 0    | 0    | 0 NA          | NA       |
| 0    | 0    | 0    | 0 NA          | NA       |
| 0.02 | 0.01 | 0.03 | 0.04 NA       | NA       |
| 0    | 0    | 0    | 0 NA          | NA       |
| 0    | 0    | 0    | 0 NA          | NA       |
| 0    | 0    | 0    | 0 NA          | NA       |
| 0    | 0    | 0    | 0 NA          | NA       |
| 0    | 0    | 0    | 0 NA          | NA       |
| 0    | 0    | 0    | 0 NA          | NA       |
| 0    | 0    | 0    | 0 NA          | NA       |
| 0    | 0.04 | 0    | 0 NA          | NA       |
| 0    | 0    | 0    | 0 NA          | NA       |
| 0.57 | 0.41 | 0.45 | 0.4 0.213729  | 0.785803 |
| 0    | 0    | 0    | 0 NA          | NA       |
| 0    | 0    | 0    | 0 NA          | NA       |
| 0    | 0    | 0    | 0 NA          | NA       |
| 0    | 0    | 0    | 0 NA          | NA       |
| 0    | 0    | 0    | 0 NA          | NA       |
| 0    | 0    | 0    | 0 NA          | NA       |
| 1.19 | 1.68 | 1.23 | 0.88 0.812505 | 0.097384 |
| 0    | 0    | 0    | 0 NA          | NA       |
| 0    | 0.08 | 0    | 0 NA          | NA       |
| 0    | 0    | 0    | 0 NA          | NA       |
| 0    | 0    | 0    | 0 NA          | NA       |
| 0    | 0    | 0    | 0 NA          | NA       |
| 0    | 0    | 0    | 0 NA          | NA       |
| 0    | 0    | 0    | 0 NA          | NA       |
| 0    | 0    | 0    | 0 NA          | NA       |
| 0    | 0    | 0    | 0 NA          | NA       |
| 2.87 | 3.84 | 3.39 | 3.25 0.123672 | 0.746806 |
| 0    | 0    | 0    | 0 NA          | NA       |
| 0    | 0    | 0    | 0 NA          | NA       |
| 0    | 0    | 0    | 0 NA          | NA       |

|      |      |      |      |          |          |
|------|------|------|------|----------|----------|
| 0.16 | 0.39 | 0.05 | 0.42 | -0.14313 | 0.872941 |
| 9.98 | 6.89 | 7.49 | 7.99 | -0.48782 | 0.006372 |
| 0    | 0    | 0    | 0    | NA       | NA       |
| 0    | 0    | 0    | 0    | NA       | NA       |
| 0    | 0    | 0    | 0    | NA       | NA       |
| 1.16 | 3.17 | 0.99 | 2.48 | 0.906167 | 0.04037  |
| 0    | 0    | 0    | 0    | NA       | NA       |
| 0    | 0    | 0    | 0    | NA       | NA       |
| 0    | 0    | 0    | 0    | NA       | NA       |
| 0    | 0    | 0    | 0    | NA       | NA       |
| 0    | 0    | 0    | 0    | NA       | NA       |
| 0    | 0    | 0    | 0    | NA       | NA       |
| 0    | 0    | 0    | 0    | NA       | NA       |
| 0    | 0    | 0    | 0    | NA       | NA       |
| 0    | 0    | 0    | 0    | NA       | NA       |
| 0    | 0    | 0    | 0    | NA       | NA       |
| 0    | 0    | 0    | 0    | NA       | NA       |
| 0    | 0    | 0    | 0    | NA       | NA       |
| 0    | 0    | 0    | 0    | NA       | NA       |
| 0    | 0    | 0    | 0    | NA       | NA       |
| 0    | 0    | 0    | 0.08 | NA       | NA       |
| 0    | 0    | 0    | 0    | NA       | NA       |
| 0    | 0    | 0.19 | 0    | NA       | NA       |
| 0.03 | 0    | 0.02 | 0    | NA       | NA       |
| 0    | 0    | 0    | 0    | NA       | NA       |
| 0    | 0    | 0    | 0    | NA       | NA       |
| 0    | 0    | 0    | 0    | NA       | NA       |
| 0    | 1.05 | 0    | 0.27 | NA       | NA       |
| 0    | 0    | 0    | 0    | NA       | NA       |
| 0    | 0    | 0    | 0    | NA       | NA       |
| 0.44 | 0.67 | 0.3  | 0.78 | 0.163438 | 0.819846 |
| 0    | 0    | 0    | 0    | NA       | NA       |
| 0    | 0    | 0    | 0    | NA       | NA       |
| 0    | 0    | 0    | 0    | NA       | NA       |
| 0    | 0    | 0    | 0    | NA       | NA       |
| 0    | 0    | 0    | 0    | NA       | NA       |
| 0    | 0    | 0    | 0    | NA       | NA       |
| 0    | 0    | 0    | 0    | NA       | NA       |
| 0    | 0    | 0    | 0    | NA       | NA       |
| 0    | 0    | 0.02 | 0    | NA       | NA       |
| 0    | 0    | 0    | 0    | NA       | NA       |
| 0    | 0    | 0    | 0    | NA       | NA       |
| 0    | 0    | 0    | 0    | NA       | NA       |
| 0    | 0    | 0    | 0    | NA       | NA       |

|      |      |       |               |          |
|------|------|-------|---------------|----------|
| 0    | 0    | 0     | 0 NA          | NA       |
| 0    | 0    | 0     | 0 NA          | NA       |
| 0    | 0    | 0     | 0 NA          | NA       |
| 0    | 0    | 0     | 0 NA          | NA       |
| 0    | 0    | 0     | 0 NA          | NA       |
| 0    | 0    | 0     | 0 NA          | NA       |
| 0    | 0    | 0     | 0 NA          | NA       |
| 0    | 0    | 0     | 0 NA          | NA       |
| 0    | 0    | 0     | 0.15 NA       | NA       |
| 10.7 | 14.9 | 13.05 | 13.1 0.378873 | 0.005649 |
| 0.5  | 0.72 | 0.16  | 0.19 NA       | NA       |
| 0    | 0    | 0     | 0 NA          | NA       |
| 0    | 0    | 0     | 0 NA          | NA       |
| 0    | 0    | 0     | 0 NA          | NA       |
| 0    | 0    | 0     | 0 NA          | NA       |
| 0    | 0    | 0     | 0 NA          | NA       |
| 0    | 0    | 0     | 0 NA          | NA       |
| 0.12 | 0.36 | 0.55  | 0.32 NA       | NA       |
| 0    | 0    | 0     | 0 NA          | NA       |
| 0    | 0    | 0     | 0 NA          | NA       |
| 0    | 0    | 0     | 0 NA          | NA       |
| 0    | 0    | 0     | 0 NA          | NA       |
| 0    | 0    | 0     | 0 NA          | NA       |
| 0    | 0    | 0     | 0 NA          | NA       |
| 0    | 0    | 0     | 0 NA          | NA       |
| 0    | 0    | 0     | 0 NA          | NA       |
| 0    | 0    | 0     | 0 NA          | NA       |
| 0    | 0    | 0     | 0 NA          | NA       |
| 0    | 0    | 0     | 0 NA          | NA       |
| 0    | 0.18 | 0.18  | 0.05 NA       | NA       |
| 0    | 0    | 0     | 0 NA          | NA       |
| 0    | 0    | 0     | 0 NA          | NA       |
| 0    | 0    | 0     | 0 NA          | NA       |
| 0    | 0    | 0     | 0 NA          | NA       |
| 0    | 0    | 0     | 0 NA          | NA       |
| 0.17 | 0    | 0.09  | 0.06 NA       | NA       |
| 0    | 0    | 0     | 0 NA          | NA       |
| 0.03 | 0.02 | 0     | 0 NA          | NA       |
| 0    | 0    | 0     | 0 NA          | NA       |
| 0.11 | 0.19 | 0.28  | 0.31 NA       | NA       |
| 0    | 0    | 0     | 0 NA          | NA       |
| 0    | 0    | 0     | 0 NA          | NA       |
| 0    | 0    | 0     | 0 NA          | NA       |
| 0    | 0    | 0     | 0 NA          | NA       |
| 0    | 0    | 0     | 0 NA          | NA       |
| 0    | 0.19 | 0.43  | 0.2 NA        | NA       |
| 0    | 0    | 0     | 0 NA          | NA       |





|      |      |      |               |          |
|------|------|------|---------------|----------|
| 0    | 0    | 0    | 0 NA          | NA       |
| 0    | 0    | 0    | 0 NA          | NA       |
| 0    | 0    | 0    | 0 NA          | NA       |
| 0    | 0    | 0    | 0 NA          | NA       |
| 0    | 0    | 0    | 0 NA          | NA       |
| 1.92 | 0.75 | 0.16 | 0.71 -1.76882 | 0.000293 |
| 0    | 0    | 0    | 0 NA          | NA       |
| 0    | 0.04 | 0    | 0 NA          | NA       |
| 0    | 0.08 | 0    | 0 NA          | NA       |
| 0    | 0    | 0.21 | 0 NA          | NA       |
| 0    | 0    | 0    | 0 NA          | NA       |
| 0    | 0    | 0    | 0 NA          | NA       |
| 0    | 0    | 0    | 0 NA          | NA       |
| 0    | 0    | 0.03 | 0.04 NA       | NA       |
| 0    | 0    | 0    | 0 NA          | NA       |
| 0    | 0    | 0    | 0 NA          | NA       |
| 0    | 0    | 0    | 0 NA          | NA       |
| 0    | 0    | 0    | 0 NA          | NA       |
| 0    | 0    | 0    | 0 NA          | NA       |
| 0    | 0    | 0    | 0 NA          | NA       |
| 0    | 0    | 0    | 0 NA          | NA       |
| 0    | 0    | 0    | 0 NA          | NA       |
| 0    | 0    | 0    | 0 NA          | NA       |
| 0.11 | 0.24 | 0.14 | 0 NA          | NA       |
| 0    | 0    | 0    | 0 NA          | NA       |
| 0    | 0    | 0    | 0 NA          | NA       |
| 0    | 0    | 0    | 0 NA          | NA       |
| 0    | 0    | 0    | 0 NA          | NA       |
| 0    | 0    | 0    | 0 NA          | NA       |
| 0    | 0    | 0    | 0 NA          | NA       |
| 0    | 0    | 0    | 0 NA          | NA       |
| 0    | 0    | 0    | 0 NA          | NA       |
| 0    | 0    | 0    | 0 NA          | NA       |
| 0.19 | 0.23 | 0.23 | 0.12 NA       | NA       |
| 0    | 0    | 0    | 0 NA          | NA       |
| 0    | 0    | 0    | 0 NA          | NA       |
| 0    | 0    | 0    | 0 NA          | NA       |
| 0    | 0    | 0    | 0 NA          | NA       |
| 0    | 0    | 0    | 0 NA          | NA       |
| 0    | 0    | 0    | 0 NA          | NA       |
| 0    | 0    | 0    | 0 NA          | NA       |
| 0    | 0    | 0    | 0 NA          | NA       |
| 0.93 | 0.7  | 1.35 | 0.98 -0.16343 | 0.700418 |
| 0.55 | 0.07 | 0.11 | 1.15 NA       | NA       |
| 0    | 0    | 0.12 | 0 NA          | NA       |
| 2.8  | 3.7  | 2.66 | 3.15 -0.37366 | 0.340017 |
| 0    | 0    | 0    | 0 NA          | NA       |
| 0    | 0    | 0    | 0 NA          | NA       |





|       |       |       |                |          |
|-------|-------|-------|----------------|----------|
| 0     | 0     | 0     | 0 NA           | NA       |
| 0     | 0     | 0     | 0 NA           | NA       |
| 0     | 0     | 0     | 0 NA           | NA       |
| 0     | 0     | 0.07  | 0 NA           | NA       |
| 0     | 0     | 0     | 0 NA           | NA       |
| 0.15  | 0.05  | 0.2   | 0 NA           | NA       |
| 0     | 0     | 0     | 0 NA           | NA       |
| 0     | 0     | 0     | 0 NA           | NA       |
| 0     | 0     | 0     | 0 NA           | NA       |
| 1.4   | 1.97  | 2.12  | 1.89 0.215814  | 0.734024 |
| 0.18  | 0     | 0     | 0.25 NA        | NA       |
| 0     | 0     | 0     | 0 NA           | NA       |
| 0     | 0     | 0     | 0 NA           | NA       |
| 0     | 0     | 0     | 0 NA           | NA       |
| 0     | 0.08  | 0     | 0 NA           | NA       |
| 0.2   | 0.19  | 0.23  | 0.15 -0.39672  | 0.607465 |
| 0     | 0     | 0     | 0 NA           | NA       |
| 0.38  | 0.81  | 1.06  | 0.63 0.648225  | 0.358058 |
| 0.24  | 0.17  | 0     | 0 NA           | NA       |
| 0     | 0     | 0     | 0 NA           | NA       |
| 0     | 0     | 0     | 0 NA           | NA       |
| 0     | 0.84  | 0.46  | 0.35 NA        | NA       |
| 0     | 0     | 0     | 0 NA           | NA       |
| 0     | 0     | 0     | 0 NA           | NA       |
| 0     | 0     | 0     | 0 NA           | NA       |
| 0     | 0.31  | 0.14  | 0.08 NA        | NA       |
| 0.03  | 0     | 0     | 0 NA           | NA       |
| 0     | 0     | 0     | 0 NA           | NA       |
| 0.15  | 0     | 0.39  | 0.08 NA        | NA       |
| 0     | 0     | 0     | 0 NA           | NA       |
| 0.11  | 0     | 0.22  | 0 NA           | NA       |
| 0     | 0     | 0     | 0 NA           | NA       |
| 0     | 0     | 0     | 0 NA           | NA       |
| 0     | 0     | 0     | 0 NA           | NA       |
| 15.01 | 10.51 | 11.19 | 12.01 -0.45639 | 0.001549 |
| 0.08  | 0.03  | 0.07  | 0.08 0.134032  | 0.879126 |
| 0     | 0     | 0     | 0 NA           | NA       |
| 0     | 0     | 0     | 0 NA           | NA       |
| 0     | 0.11  | 0     | 0 NA           | NA       |
| 0     | 0     | 0     | 0 NA           | NA       |
| 0.18  | 0     | 0.12  | 0 NA           | NA       |
| 0     | 0     | 0     | 0 NA           | NA       |
| 0     | 0     | 0     | 0 NA           | NA       |
| 0.02  | 0.02  | 0.05  | 0 -0.76948     | 0.254601 |
| 0     | 0     | 0     | 0 NA           | NA       |



|      |      |      |               |          |
|------|------|------|---------------|----------|
| 0    | 0    | 0    | 0 NA          | NA       |
| 0    | 0    | 0    | 0 NA          | NA       |
| 0    | 0    | 0    | 0 NA          | NA       |
| 0    | 0    | 0    | 0 NA          | NA       |
| 0    | 0    | 0    | 0 NA          | NA       |
| 0    | 0    | 0    | 0 NA          | NA       |
| 0    | 0    | 0    | 0 NA          | NA       |
| 0    | 0.14 | 0.43 | 0.29 NA       | NA       |
| 0    | 0    | 0    | 0 NA          | NA       |
| 0    | 0    | 0    | 0 NA          | NA       |
| 3.12 | 6.36 | 4.83 | 3.62 0.576588 | 0.063691 |
| 0    | 0    | 0    | 0 NA          | NA       |
| 0    | 0.06 | 0.27 | 0.02 NA       | NA       |
| 0    | 0    | 0    | 0 NA          | NA       |
| 2.26 | 1.5  | 0.77 | 1.53 -0.73619 | 0.214293 |
| 0    | 0    | 0    | 0 NA          | NA       |
| 0.21 | 0.06 | 0.21 | 0.15 -0.05073 | 0.952639 |
| 0    | 0    | 0    | 0 NA          | NA       |
| 0    | 0    | 0    | 0 NA          | NA       |
| 0    | 0    | 0    | 0 NA          | NA       |
| 0    | 0    | 0    | 0 NA          | NA       |
| 0    | 0    | 0    | 0 NA          | NA       |
| 0.03 | 0    | 0.01 | 0 NA          | NA       |
| 0    | 0    | 0    | 0 NA          | NA       |
| 0    | 0    | 0    | 0 NA          | NA       |
| 0    | 0    | 0    | 0 NA          | NA       |
| 0    | 0    | 0    | 0 NA          | NA       |
| 0.17 | 0.12 | 0.12 | 0.07 NA       | NA       |
| 0    | 0    | 0    | 0 NA          | NA       |
| 0    | 0    | 0    | 0 NA          | NA       |
| 0    | 0    | 0    | 0 NA          | NA       |
| 0    | 0    | 0    | 0 NA          | NA       |
| 0    | 0    | 0    | 0 NA          | NA       |
| 0    | 0    | 0    | 0.66 NA       | NA       |
| 0.13 | 0.14 | 0    | 0 NA          | NA       |
| 0    | 0    | 0    | 0 NA          | NA       |
| 0    | 0    | 0    | 0 NA          | NA       |
| 0    | 0    | 0    | 0 NA          | NA       |
| 0    | 0.15 | 0    | 0 NA          | NA       |
| 0    | 0    | 0    | 0 NA          | NA       |
| 0    | 0    | 0    | 0 NA          | NA       |
| 0    | 0    | 0    | 0 NA          | NA       |
| 0    | 0    | 0    | 0 NA          | NA       |
| 0    | 0    | 0    | 0 NA          | NA       |
| 0.51 | 0.67 | 0.21 | 0.39 -0.0673  | 0.944533 |



|      |      |      |      |          |          |
|------|------|------|------|----------|----------|
| 0    | 0    | 0    | 0    | NA       | NA       |
| 0    | 0    | 0    | 0.69 | 0.074407 | 0.868021 |
| 2.18 | 1.28 | 1.8  | 3    | -0.31889 | 0.338471 |
| 0    | 0    | 0    | 0    | NA       | NA       |
| 0.07 | 0.09 | 0.02 | 0.13 | NA       | NA       |
| 0    | 0    | 0    | 0    | NA       | NA       |
| 0    | 0.1  | 0    | 0    | NA       | NA       |
| 0    | 0    | 0    | 0    | NA       | NA       |
| 0    | 0.34 | 0    | 0    | NA       | NA       |
| 0    | 0    | 0    | 0    | NA       | NA       |
| 0    | 0.5  | 0    | 0    | NA       | NA       |
| 0    | 0    | 0.05 | 0    | NA       | NA       |
| 0.35 | 0.62 | 0.59 | 0.13 | 0.021821 | 0.982392 |
| 0    | 0    | 0    | 0    | NA       | NA       |
| 0    | 0    | 0    | 0    | NA       | NA       |
| 0    | 0    | 0    | 0    | NA       | NA       |
| 0    | 0    | 0    | 0    | NA       | NA       |
| 0    | 0    | 0    | 0    | NA       | NA       |
| 0    | 0    | 0    | 0    | NA       | NA       |
| 0    | 0    | 0    | 0    | NA       | NA       |
| 0    | 0    | 0    | 0    | NA       | NA       |
| 0    | 0    | 0.13 | 0.15 | NA       | NA       |
| 0    | 0.17 | 0    | 0    | NA       | NA       |
| 0    | 0    | 0    | 0    | NA       | NA       |
| 0    | 0    | 0    | 0    | NA       | NA       |
| 0    | 0    | 0    | 0    | NA       | NA       |
| 0    | 0    | 0    | 0    | NA       | NA       |
| 0    | 0    | 0    | 0    | NA       | NA       |
| 0.3  | 0.11 | 0    | 0.66 | NA       | NA       |
| 0    | 0    | 0    | 0    | NA       | NA       |
| 0    | 0    | 0    | 0    | NA       | NA       |
| 0    | 0    | 0.14 | 0    | NA       | NA       |
| 0    | 0    | 0    | 0    | NA       | NA       |
| 0    | 0    | 0    | 0    | NA       | NA       |
| 0    | 0    | 0    | 0    | NA       | NA       |
| 0    | 0    | 0    | 0    | NA       | NA       |
| 0    | 0.11 | 0    | 0    | NA       | NA       |
| 0    | 0    | 0    | 0    | NA       | NA       |
| 0    | 0    | 0    | 0    | NA       | NA       |
| 0    | 0    | 0.15 | 0.23 | NA       | NA       |
| 0    | 0    | 0    | 0    | NA       | NA       |
| 0    | 0    | 0    | 0    | NA       | NA       |
| 0.1  | 0.14 | 0.07 | 0    | NA       | NA       |
| 0    | 0    | 0    | 0    | NA       | NA       |

|      |      |      |               |          |
|------|------|------|---------------|----------|
| 0    | 0    | 0    | 0 NA          | NA       |
| 0    | 0    | 0    | 0 NA          | NA       |
| 0    | 0    | 0    | 0.08 NA       | NA       |
| 0    | 0    | 0    | 0 NA          | NA       |
| 0    | 0    | 0.07 | 0 NA          | NA       |
| 0.2  | 0.1  | 0.32 | 0.15 NA       | NA       |
| 0    | 0    | 0    | 0 NA          | NA       |
| 0    | 0    | 0    | 0 NA          | NA       |
| 0    | 0    | 0    | 0 NA          | NA       |
| 0.68 | 0.61 | 0.63 | 0.68 -0.1962  | 0.560623 |
| 0.04 | 0.03 | 0.03 | 0.06 NA       | NA       |
| 0    | 0    | 0    | 0 NA          | NA       |
| 0    | 0    | 0    | 0 NA          | NA       |
| 0    | 0    | 0    | 0 NA          | NA       |
| 0    | 0    | 0    | 0 NA          | NA       |
| 0    | 0.12 | 0    | 0 NA          | NA       |
| 0    | 0    | 0    | 0 NA          | NA       |
| 0    | 0    | 0    | 0 NA          | NA       |
| 0    | 0    | 0    | 0 NA          | NA       |
| 0    | 0    | 0    | 0 NA          | NA       |
| 0    | 0    | 0    | 0 NA          | NA       |
| 0.5  | 0.64 | 0.53 | 0.68 NA       | NA       |
| 0    | 0    | 0    | 0 NA          | NA       |
| 0    | 0    | 0    | 0 NA          | NA       |
| 0    | 0    | 0    | 0 NA          | NA       |
| 0    | 0    | 0    | 0 NA          | NA       |
| 0.43 | 0.34 | 0.27 | 0.48 -0.56789 | 0.327108 |
| 1.88 | 3.29 | 3.41 | 2.53 0.804468 | 0.004668 |
| 0    | 0    | 0    | 0 NA          | NA       |
| 0    | 0    | 0    | 0 NA          | NA       |
| 0    | 0    | 0    | 0 NA          | NA       |
| 0    | 0    | 0    | 0 NA          | NA       |
| 0    | 0    | 0    | 0 NA          | NA       |
| 0    | 0    | 0.63 | 0 NA          | NA       |
| 0.21 | 0.39 | 0.24 | 0.48 0.115308 | 0.879103 |
| 0    | 0    | 0    | 0 NA          | NA       |
| 0    | 0    | 0    | 0 NA          | NA       |
| 0    | 0    | 0    | 0 NA          | NA       |
| 3.44 | 0.54 | 1.05 | 1.81 -1.4749  | 1.32E-05 |
| 0    | 0    | 0    | 0 NA          | NA       |
| 0    | 0    | 0    | 0 NA          | NA       |
| 0    | 0    | 0    | 0 NA          | NA       |
| 0    | 0    | 0    | 0 NA          | NA       |
| 3.55 | 3.23 | 4.19 | 2.99 0.042443 | 0.89455  |
| 0    | 0    | 0    | 0 NA          | NA       |

|      |      |      |      |          |          |
|------|------|------|------|----------|----------|
| 0    | 0    | 0    | 0 NA | NA       |          |
| 0    | 0    | 0    | 0 NA | NA       |          |
| 0    | 0    | 0    | 0 NA | NA       |          |
| 0    | 0    | 0    | 0 NA | NA       |          |
| 0    | 0    | 0    | 0 NA | NA       |          |
| 0    | 0    | 0    | 0 NA | NA       |          |
| 1.55 | 1.51 | 1.03 | 1.43 | 0.07896  | 0.929197 |
| 2.62 | 2.28 | 3.29 | 1.83 | -0.26024 | 0.58687  |
| 0    | 0    | 0    | 0 NA | NA       |          |
| 0.17 | 0.13 | 0.18 | 0.43 | 0.3363   | 0.672472 |
| 0    | 0    | 0    | 0 NA | NA       |          |
| 0    | 0    | 0    | 0 NA | NA       |          |
| 0    | 0    | 0    | 0 NA | NA       |          |
| 0    | 0    | 0    | 0 NA | NA       |          |
| 0    | 0    | 0    | 0 NA | NA       |          |
| 0    | 0    | 0    | 0 NA | NA       |          |
| 0.16 | 2.72 | 1.55 | 2.01 | 1.739218 | 0.001651 |
| 0    | 0    | 0    | 0 NA | NA       |          |
| 0.08 | 0.16 | 0.35 | 0    | -0.41083 | 0.587288 |
| 0    | 0    | 0    | 0 NA | NA       |          |
| 0    | 0    | 0    | 0 NA | NA       |          |
| 0    | 0    | 0    | 0 NA | NA       |          |
| 0    | 0    | 0    | 0 NA | NA       |          |
| 0    | 0    | 0    | 0 NA | NA       |          |
| 0.1  | 0.25 | 0.09 | 0 NA | NA       |          |
| 0    | 0    | 0    | 0 NA | NA       |          |
| 0    | 0.01 | 0.01 | 0 NA | NA       |          |
| 0    | 0    | 0    | 0 NA | NA       |          |
| 0    | 0    | 0    | 0 NA | NA       |          |
| 0.13 | 0.23 | 0.09 | 0.19 | NA       | NA       |
| 0    | 0    | 0    | 0 NA | NA       |          |
| 0    | 0    | 0    | 0 NA | NA       |          |
| 0    | 0    | 0    | 0 NA | NA       |          |
| 0    | 0    | 0    | 0 NA | NA       |          |
| 0.48 | 0.54 | 0.54 | 0.57 | 0.21453  | 0.734645 |
| 0    | 0    | 0    | 0 NA | NA       |          |
| 0    | 0    | 0    | 0 NA | NA       |          |
| 0    | 0    | 0    | 0 NA | NA       |          |
| 0    | 0    | 0    | 0 NA | NA       |          |
| 0    | 0    | 0    | 0 NA | NA       |          |
| 0    | 0    | 0    | 0 NA | NA       |          |
| 0    | 0    | 0    | 0 NA | NA       |          |
| 0    | 0    | 0    | 0 NA | NA       |          |
| 1.06 | 0.3  | 0.24 | 0.63 | -0.97725 | 0.040441 |
| 0    | 0    | 0    | 0 NA | NA       |          |
| 0    | 0    | 0    | 0 NA | NA       |          |



|      |      |      |      |          |          |
|------|------|------|------|----------|----------|
| 1.16 | 0.77 | 0.89 | 0.76 | -1.04899 | 0.008057 |
| 0    | 0    | 0    | 0    | NA       | NA       |
| 0    | 0.1  | 0.18 | 0    | NA       | NA       |
| 0    | 0.28 | 0.52 | 0.15 | 0.53282  | 0.468064 |
| 0    | 0    | 0    | 0    | NA       | NA       |
| 0    | 0    | 0    | 0    | NA       | NA       |
| 0    | 0    | 0    | 0    | NA       | NA       |
| 0    | 0    | 0    | 0    | NA       | NA       |
| 0    | 0    | 0    | 0    | NA       | NA       |
| 0.03 | 0    | 0    | 0    | NA       | NA       |
| 1.35 | 0.41 | 0.26 | 0.85 | -1.49084 | 0.000302 |
| 0    | 0    | 0    | 0    | NA       | NA       |
| 0    | 0    | 0    | 0    | NA       | NA       |
| 0    | 0    | 0    | 0    | NA       | NA       |
| 0    | 0    | 0    | 0    | NA       | NA       |
| 0    | 0    | 0    | 0    | NA       | NA       |
| 0    | 0    | 0    | 0    | NA       | NA       |
| 0.16 | 0.2  | 0.11 | 0    | NA       | NA       |
| 0    | 0.22 | 0    | 0    | NA       | NA       |
| 0    | 0    | 0    | 0    | NA       | NA       |
| 0    | 0    | 0    | 0    | NA       | NA       |
| 0    | 0    | 0    | 0    | NA       | NA       |
| 0    | 0    | 0    | 0    | NA       | NA       |
| 0    | 0    | 0    | 0    | NA       | NA       |
| 0    | 0    | 0    | 0    | NA       | NA       |
| 0    | 0    | 0    | 0    | NA       | NA       |
| 0    | 0    | 0    | 0    | NA       | NA       |
| 0    | 0    | 0    | 0    | NA       | NA       |
| 0    | 0    | 0    | 0    | NA       | NA       |
| 0    | 0    | 0    | 0    | NA       | NA       |
| 0    | 0    | 0    | 0    | NA       | NA       |
| 0    | 0    | 0.07 | 0    | NA       | NA       |
| 0    | 0    | 0    | 0    | NA       | NA       |
| 0    | 0    | 0    | 0    | NA       | NA       |
| 0    | 0    | 0    | 0    | NA       | NA       |
| 0    | 0    | 0    | 0    | NA       | NA       |
| 0    | 0    | 0    | 0    | NA       | NA       |
| 4.65 | 5.08 | 5.94 | 5.73 | -0.01517 | 0.956971 |
| 0    | 0.27 | 0.12 | 0.14 | NA       | NA       |
| 0    | 0    | 0    | 0    | NA       | NA       |
| 0    | 0    | 0    | 0    | NA       | NA       |
| 0    | 0    | 0    | 0    | NA       | NA       |
| 0    | 0    | 0    | 0    | NA       | NA       |
| 0    | 0    | 0    | 0    | NA       | NA       |
| 0.3  | 0.48 | 0.48 | 0.7  | -0.20761 | 0.801875 |
| 0    | 0    | 0    | 0    | NA       | NA       |
| 0    | 0    | 0    | 0    | NA       | NA       |

|      |      |      |      |          |          |
|------|------|------|------|----------|----------|
| 0    | 0    | 0    | 0    | NA       | NA       |
| 0    | 0    | 0    | 0    | NA       | NA       |
| 0    | 0    | 0    | 0    | NA       | NA       |
| 0    | 0    | 0    | 0    | NA       | NA       |
| 5.8  | 4.76 | 5.66 | 5.79 | -0.2038  | 0.352007 |
| 0.37 | 0.4  | 0.24 | 0.28 | NA       | NA       |
| 0    | 0    | 0    | 0    | NA       | NA       |
| 0    | 0    | 0    | 0    | NA       | NA       |
| 0    | 0    | 0    | 0    | NA       | NA       |
| 0.27 | 2.53 | 1.07 | 1.49 | 0.963314 | 0.107572 |
| 0.42 | 0.07 | 0.04 | 0    | NA       | NA       |
| 0    | 0    | 0    | 0    | NA       | NA       |
| 0    | 0    | 0.53 | 0    | NA       | NA       |
| 0.02 | 0    | 0.03 | 0.02 | NA       | NA       |
| 0    | 0    | 0    | 0    | NA       | NA       |
| 0    | 0    | 0.03 | 0    | NA       | NA       |
| 0    | 0    | 0    | 0    | NA       | NA       |
| 0    | 0    | 0    | 0    | NA       | NA       |
| 0    | 0    | 0    | 0    | NA       | NA       |
| 0    | 0    | 0.1  | 0    | NA       | NA       |
| 0    | 0    | 0    | 0    | NA       | NA       |
| 0    | 0    | 0    | 0    | NA       | NA       |
| 0    | 0    | 0    | 0    | NA       | NA       |
| 0    | 0    | 0    | 0    | NA       | NA       |
| 0    | 0    | 0    | 0    | NA       | NA       |
| 0    | 0    | 0    | 0    | NA       | NA       |
| 0    | 0    | 0    | 0    | NA       | NA       |
| 0    | 0    | 0    | 0    | NA       | NA       |
| 0    | 0    | 0    | 0    | NA       | NA       |
| 0    | 0    | 0    | 0    | NA       | NA       |
| 0    | 0    | 0    | 0    | NA       | NA       |
| 0    | 0    | 0    | 0    | NA       | NA       |
| 0    | 0    | 0    | 0    | NA       | NA       |
| 0    | 0    | 0    | 0    | NA       | NA       |
| 0    | 0    | 0    | 0    | NA       | NA       |
| 0    | 0    | 0    | 0    | NA       | NA       |
| 0    | 0    | 0    | 0    | NA       | NA       |
| 0    | 0    | 0    | 0    | NA       | NA       |
| 0    | 0    | 0    | 0    | NA       | NA       |
| 0    | 0    | 0    | 0    | NA       | NA       |
| 0    | 0    | 0    | 0    | NA       | NA       |
| 0    | 0    | 0    | 0    | NA       | NA       |
| 0    | 0    | 0    | 0    | NA       | NA       |
| 0    | 0    | 0    | 0    | NA       | NA       |
| 0    | 0    | 0    | 0    | NA       | NA       |
| 0    | 0    | 0    | 0    | NA       | NA       |
| 0    | 0    | 0    | 0    | NA       | NA       |
| 0.42 | 1.35 | 0.95 | 1.09 | 0.255656 | 0.754608 |

|       |       |       |       |          |          |
|-------|-------|-------|-------|----------|----------|
| 0     | 0     | 0     | 0     | NA       | NA       |
| 0     | 0     | 0     | 0     | NA       | NA       |
| 75.33 | 59.56 | 64.88 | 53.83 | -0.47162 | 6.44E-10 |
| 0     | 0     | 0     | 0     | NA       | NA       |
| 0.14  | 0     | 0     | 0     | NA       | NA       |
| 0     | 0     | 0     | 0     | NA       | NA       |
| 0     | 0     | 0     | 0.05  | NA       | NA       |
| 0     | 0.06  | 0     | 0     | NA       | NA       |
| 0     | 0     | 0     | 0     | NA       | NA       |
| 0     | 0     | 0     | 0     | NA       | NA       |
| 0     | 0     | 0     | 0     | NA       | NA       |
| 0     | 0     | 0     | 0     | NA       | NA       |
| 0     | 0     | 0     | 0     | NA       | NA       |
| 0     | 0     | 0     | 0     | NA       | NA       |
| 0     | 0     | 0     | 0     | NA       | NA       |
| 0     | 0     | 0     | 0     | NA       | NA       |
| 0     | 0     | 0     | 0     | NA       | NA       |
| 0     | 0     | 0     | 0     | NA       | NA       |
| 0     | 0     | 0     | 0     | NA       | NA       |
| 0     | 0     | 0     | 0     | NA       | NA       |
| 0     | 0     | 0     | 0     | NA       | NA       |
| 0     | 0     | 0     | 0     | NA       | NA       |
| 0     | 0     | 0     | 0     | NA       | NA       |
| 0     | 0     | 0     | 0     | NA       | NA       |
| 0     | 0     | 0     | 0     | NA       | NA       |
| 0     | 0     | 0     | 0     | NA       | NA       |
| 1     | 0.35  | 0.61  | 0.53  | NA       | NA       |
| 0     | 0     | 0     | 0     | NA       | NA       |
| 0     | 0     | 0     | 0     | NA       | NA       |
| 0     | 0     | 0     | 0     | NA       | NA       |
| 0     | 0     | 0     | 0     | NA       | NA       |
| 0     | 0     | 0     | 0     | NA       | NA       |
| 0     | 0     | 0     | 0     | NA       | NA       |
| 0     | 0     | 0     | 0     | NA       | NA       |
| 0     | 0     | 0     | 0     | NA       | NA       |
| 0     | 0     | 0     | 0     | NA       | NA       |
| 0     | 0     | 0     | 0     | NA       | NA       |
| 0     | 0     | 0     | 0     | NA       | NA       |
| 0     | 0     | 0     | 0     | NA       | NA       |
| 0     | 0     | 0     | 0     | NA       | NA       |
| 0     | 0     | 0     | 0     | NA       | NA       |
| 0     | 0     | 0     | 0     | NA       | NA       |
| 0     | 0     | 0     | 0     | NA       | NA       |
| 0     | 0     | 0     | 0     | NA       | NA       |
| 1.99  | 0.61  | 0.86  | 0.86  | -1.01353 | 0.005529 |
| 0     | 0     | 0     | 0     | NA       | NA       |
| 0     | 0     | 0     | 0     | NA       | NA       |
| 0     | 0     | 0     | 0     | NA       | NA       |
| 0     | 0     | 0     | 0     | NA       | NA       |
| 0     | 0.08  | 0     | 0.04  | NA       | NA       |
| 0     | 0     | 0     | 0     | NA       | NA       |
| 1.16  | 1.08  | 1.47  | 0.82  | -0.32702 | 0.449002 |
| 0     | 0     | 0     | 0     | NA       | NA       |
| 0     | 0     | 0     | 0     | NA       | NA       |
| 0     | 0     | 0     | 0     | NA       | NA       |
| 0     | 0     | 0     | 0     | NA       | NA       |
| 0     | 0.07  | 0     | 0     | NA       | NA       |
| 0     | 0     | 0     | 0     | NA       | NA       |
| 0     | 0     | 0     | 0     | NA       | NA       |
| 0     | 0     | 0     | 0     | NA       | NA       |
| 0     | 0     | 0     | 0     | NA       | NA       |
| 0     | 0.03  | 0     | 0     | NA       | NA       |
| 1.38  | 0.91  | 0.81  | 1.1   | -0.439   | 0.155768 |

|      |      |      |               |          |
|------|------|------|---------------|----------|
| 0    | 0    | 0    | 0 NA          | NA       |
| 0    | 0    | 0    | 0 NA          | NA       |
| 0    | 0    | 0    | 0 NA          | NA       |
| 0    | 0    | 0    | 0 NA          | NA       |
| 0    | 0    | 0    | 0 NA          | NA       |
| 0    | 0    | 0    | 0 NA          | NA       |
| 0    | 0    | 0    | 0 NA          | NA       |
| 0    | 0    | 0    | 0 NA          | NA       |
| 0    | 0    | 0    | 0 NA          | NA       |
| 0    | 0    | 0    | 0 NA          | NA       |
| 0    | 0.02 | 0.01 | 0.02 NA       | NA       |
| 0    | 0    | 0    | 0 NA          | NA       |
| 0    | 0.13 | 0.21 | 0.18 -0.56146 | 0.419903 |
| 0    | 0    | 0    | 0 NA          | NA       |
| 0    | 0    | 0    | 0 NA          | NA       |
| 0.07 | 0.05 | 0    | 0.17 NA       | NA       |
| 0    | 0    | 0    | 0 NA          | NA       |
| 0    | 0.08 | 0    | 0 NA          | NA       |
| 0    | 0    | 0    | 0 NA          | NA       |
| 0    | 0    | 0    | 0 NA          | NA       |
| 0    | 0    | 0    | 0 NA          | NA       |
| 0    | 0    | 0    | 0 NA          | NA       |
| 0    | 0    | 0    | 0 NA          | NA       |
| 0    | 0    | 0    | 0 NA          | NA       |
| 0    | 0    | 0    | 0 NA          | NA       |
| 0    | 0    | 0    | 0 NA          | NA       |
| 0    | 0    | 0    | 0 NA          | NA       |
| 0    | 0    | 0    | 0 NA          | NA       |
| 0    | 0    | 0    | 0 NA          | NA       |
| 4.82 | 1.63 | 1.89 | 0.23 -1.0775  | 0.047206 |
| 1.42 | 1.67 | 1.32 | 1.13 0.058464 | 0.928909 |
| 0    | 0    | 0    | 0 NA          | NA       |
| 0.03 | 0    | 0    | 0 NA          | NA       |
| 0    | 0    | 0    | 0 NA          | NA       |
| 0    | 0    | 0    | 0.08 NA       | NA       |
| 0.08 | 0    | 0.05 | 0.24 NA       | NA       |
| 0    | 0    | 0    | 0 NA          | NA       |
| 2    | 1.6  | 1.05 | 2.1 -0.19803  | 0.622432 |
| 0    | 0    | 0    | 0 NA          | NA       |
| 0    | 0    | 0    | 0 NA          | NA       |
| 0    | 0    | 0    | 0 NA          | NA       |
| 0    | 0    | 0    | 0 NA          | NA       |
| 0    | 0    | 0    | 0 NA          | NA       |
| 0    | 0    | 0    | 0 NA          | NA       |
| 0    | 0    | 0    | 0 NA          | NA       |
| 0    | 0    | 0.09 | 0 NA          | NA       |











|   |   |      |          |    |
|---|---|------|----------|----|
| 0 | 0 | 0    | 0 NA     | NA |
| 0 | 0 | 0    | 0 NA     | NA |
| 0 | 0 | 0    | 0 NA     | NA |
| 0 | 0 | 0    | 0 NA     | NA |
| 0 | 0 | 0    | 0 NA     | NA |
| 0 | 0 | 0    | 0 NA     | NA |
| 0 | 0 | 0    | 0 NA     | NA |
| 0 | 0 | 0    | 0 NA     | NA |
| 0 | 0 | 0    | 0 NA     | NA |
| 0 | 0 | 0    | 0 NA     | NA |
| 0 | 0 | 0    | 0 NA     | NA |
| 0 | 0 | 0    | 0 NA     | NA |
| 0 | 0 | 0    | 0 NA     | NA |
| 0 | 0 | 0    | 0 NA     | NA |
| 0 | 0 | 0    | 0 NA     | NA |
| 0 | 0 | 0    | 0 NA     | NA |
| 0 | 0 | 0    | 0 NA     | NA |
| 0 | 0 | 0    | 0 NA     | NA |
| 0 | 0 | 0    | 0 NA     | NA |
| 0 | 0 | 0    | 12.16 NA | NA |
| 0 | 0 | 0    | 0 NA     | NA |
| 0 | 0 | 0    | 0 NA     | NA |
| 4 | 0 | 0    | 0 NA     | NA |
| 0 | 0 | 0    | 0 NA     | NA |
| 0 | 0 | 0    | 0 NA     | NA |
| 0 | 0 | 0    | 0 NA     | NA |
| 0 | 0 | 0    | 0 NA     | NA |
| 0 | 0 | 0    | 0 NA     | NA |
| 0 | 0 | 0    | 0 NA     | NA |
| 0 | 0 | 0    | 0 NA     | NA |
| 0 | 0 | 0    | 0 NA     | NA |
| 0 | 0 | 0    | 0 NA     | NA |
| 0 | 0 | 0.32 | 0 NA     | NA |
| 0 | 0 | 0    | 0 NA     | NA |
| 0 | 0 | 0    | 0 NA     | NA |
| 0 | 0 | 0    | 0 NA     | NA |
| 0 | 0 | 0    | 0 NA     | NA |





































|      |      |      |               |          |
|------|------|------|---------------|----------|
| 0    | 0    | 0    | 0 NA          | NA       |
| 0    | 0    | 0    | 0 NA          | NA       |
| 0    | 0    | 0    | 0 NA          | NA       |
| 0    | 0    | 0    | 0 NA          | NA       |
| 0    | 0    | 0    | 0 NA          | NA       |
| 0    | 0    | 0    | 0 NA          | NA       |
| 0    | 0    | 0    | 0 NA          | NA       |
| 0    | 0    | 0    | 0 NA          | NA       |
| 0    | 0    | 0    | 0 NA          | NA       |
| 0    | 0    | 0    | 0 NA          | NA       |
| 0    | 0    | 0    | 0 NA          | NA       |
| 0    | 0    | 0    | 0 NA          | NA       |
| 0    | 0    | 0    | 0 NA          | NA       |
| 0    | 0    | 0    | 0 NA          | NA       |
| 0    | 0    | 0    | 0 NA          | NA       |
| 0    | 0    | 0    | 0 NA          | NA       |
| 0    | 0    | 0    | 0 NA          | NA       |
| 0    | 0    | 0    | 0 NA          | NA       |
| 0.22 | 0.32 | 0.29 | 0.25 NA       | NA       |
| 0.34 | 0.35 | 0.23 | 0.96 0.014135 | 0.989187 |
| 0    | 0    | 0    | 0 NA          | NA       |
| 0.11 | 0    | 0    | 0 NA          | NA       |
| 0.45 | 0.85 | 0.32 | 0.67 0.343293 | 0.554892 |
| 0    | 0    | 0    | 0 NA          | NA       |
| 0    | 0    | 0    | 0 NA          | NA       |
| 0    | 0    | 0    | 0 NA          | NA       |
| 0    | 0    | 0    | 0 NA          | NA       |
| 0    | 0    | 0    | 0 NA          | NA       |
| 0    | 0    | 0    | 0 NA          | NA       |
| 0    | 0    | 0    | 0 NA          | NA       |
| 0    | 0    | 0    | 0 NA          | NA       |
| 0    | 0    | 0    | 0 NA          | NA       |
| 0    | 0    | 0    | 0 NA          | NA       |
| 0.07 | 0    | 0    | 0 NA          | NA       |
| 0    | 0    | 0    | 0 NA          | NA       |
| 0    | 0    | 0    | 0 NA          | NA       |
| 0    | 0    | 0    | 0 NA          | NA       |
| 0    | 0    | 0    | 0 NA          | NA       |
| 0    | 0    | 0    | 0 NA          | NA       |
| 0    | 0    | 0.03 | 0.03 NA       | NA       |
| 0    | 0    | 0    | 0 NA          | NA       |
| 0    | 0    | 0    | 0 NA          | NA       |
| 0    | 0    | 0    | 0 NA          | NA       |

|       |       |      |                |          |
|-------|-------|------|----------------|----------|
| 0     | 0     | 0    | 0 NA           | NA       |
| 0     | 0     | 0    | 0 NA           | NA       |
| 0     | 0     | 0.1  | 0 NA           | NA       |
| 0     | 0     | 0    | 0 NA           | NA       |
| 0     | 0     | 0    | 0 NA           | NA       |
| 0     | 0     | 0    | 0 NA           | NA       |
| 0     | 0     | 0.06 | 0.07 NA        | NA       |
| 0     | 0     | 0    | 0 NA           | NA       |
| 0     | 0     | 0    | 0 NA           | NA       |
| 0     | 0     | 0.21 | 0.08 NA        | NA       |
| 0     | 0     | 0    | 0 NA           | NA       |
| 0     | 0     | 0    | 0 NA           | NA       |
| 0.17  | 0     | 0    | 0 NA           | NA       |
| 0     | 0     | 0    | 0 NA           | NA       |
| 0     | 0     | 0    | 0 NA           | NA       |
| 0     | 0     | 0    | 0 NA           | NA       |
| 0     | 0     | 0    | 0 NA           | NA       |
| 0     | 0     | 0    | 0 NA           | NA       |
| 0     | 0     | 0    | 0 NA           | NA       |
| 0     | 0     | 0    | 0 NA           | NA       |
| 0     | 0     | 0    | 0 NA           | NA       |
| 0     | 0     | 0    | 0 NA           | NA       |
| 0     | 0     | 0    | 0 NA           | NA       |
| 19.41 | 22.67 | 22.8 | 23.95 0.245044 | 0.008143 |
| 0     | 0     | 0    | 0 NA           | NA       |
| 0.78  | 1.25  | 0.95 | 1.11 0.073993  | 0.92335  |
| 0     | 0     | 0    | 0 NA           | NA       |
| 0     | 0     | 0    | 0 NA           | NA       |
| 0     | 0     | 0    | 0 NA           | NA       |
| 0     | 0     | 0    | 0 NA           | NA       |
| 0     | 0     | 0    | 0 NA           | NA       |
| 0     | 0     | 0    | 0 NA           | NA       |
| 0     | 0     | 0    | 0 NA           | NA       |
| 0     | 0     | 0    | 0 NA           | NA       |
| 0     | 0     | 0    | 0 NA           | NA       |
| 0     | 0     | 0    | 0 NA           | NA       |
| 0     | 0     | 0    | 0 NA           | NA       |
| 0     | 0     | 0    | 0 NA           | NA       |
| 0     | 0     | 0.2  | 0 NA           | NA       |
| 0     | 0     | 0    | 0 NA           | NA       |
| 0     | 0     | 0    | 0 NA           | NA       |
| 0     | 0     | 0    | 0 NA           | NA       |
| 0     | 0     | 0    | 0 NA           | NA       |
| 0     | 0     | 0    | 0 NA           | NA       |
| 0     | 0     | 0    | 0 NA           | NA       |
| 0.45  | 0     | 0.72 | 0 NA           | NA       |



|       |       |       |                |          |
|-------|-------|-------|----------------|----------|
| 0     | 0     | 0     | 0 NA           | NA       |
| 0     | 0     | 0     | 0 NA           | NA       |
| 0     | 0     | 0.11  | 0 NA           | NA       |
| 0     | 0     | 0     | 0 NA           | NA       |
| 0     | 0     | 0     | 0 NA           | NA       |
| 0     | 0     | 0     | 0 NA           | NA       |
| 0     | 0     | 0     | 0 NA           | NA       |
| 0     | 0     | 0     | 0 NA           | NA       |
| 0     | 0     | 0     | 0 NA           | NA       |
| 0     | 0.06  | 0.05  | 0.12 NA        | NA       |
| 0     | 0     | 0     | 0 NA           | NA       |
| 0     | 0     | 0     | 0 NA           | NA       |
| 4.04  | 3.27  | 4.38  | 4.16 -0.05337  | 0.908112 |
| 0.76  | 0.7   | 0.91  | 0.69 0.06446   | 0.92437  |
| 0     | 0     | 0     | 0 NA           | NA       |
| 0     | 0     | 0     | 0 NA           | NA       |
| 0     | 0     | 0     | 0 NA           | NA       |
| 0     | 0     | 0     | 0 NA           | NA       |
| 0     | 0     | 0     | 0 NA           | NA       |
| 0     | 0     | 0     | 0 NA           | NA       |
| 0     | 0     | 0     | 0 NA           | NA       |
| 0     | 0     | 0     | 0 NA           | NA       |
| 0     | 0.12  | 0.11  | 0 NA           | NA       |
| 0     | 0     | 0     | 0 NA           | NA       |
| 0     | 0     | 0     | 0 NA           | NA       |
| 0     | 0     | 0     | 0 NA           | NA       |
| 0     | 0     | 0     | 0 NA           | NA       |
| 0     | 0     | 0     | 0 NA           | NA       |
| 0     | 0     | 0     | 0 NA           | NA       |
| 0     | 0     | 0     | 0 NA           | NA       |
| 0     | 0     | 0     | 0 NA           | NA       |
| 0     | 0     | 0     | 0 NA           | NA       |
| 0     | 0     | 0     | 0 NA           | NA       |
| 0     | 0     | 0     | 0 NA           | NA       |
| 29.91 | 41.69 | 44.68 | 45.78 0.668544 | 2.69E-14 |
| 0     | 0     | 0     | 0 NA           | NA       |
| 0     | 0     | 0     | 0 NA           | NA       |
| 0     | 0     | 0     | 0 NA           | NA       |
| 0     | 0     | 0     | 0 NA           | NA       |
| 0.32  | 0     | 0     | 0 NA           | NA       |
| 0     | 0     | 0     | 0 NA           | NA       |
| 0     | 0.01  | 0.05  | 0 NA           | NA       |
| 0     | 0     | 0     | 0 NA           | NA       |
| 0     | 0     | 0     | 0 NA           | NA       |
| 0     | 0     | 0     | 0.01 NA        | NA       |

|      |      |      |               |          |
|------|------|------|---------------|----------|
| 0    | 0    | 0    | 0 NA          | NA       |
| 0    | 0    | 0    | 0 NA          | NA       |
| 0    | 0    | 0    | 0 NA          | NA       |
| 0.11 | 0.09 | 0    | 0 NA          | NA       |
| 0    | 0    | 0    | 0 NA          | NA       |
| 0    | 0    | 0.64 | 0 NA          | NA       |
| 0    | 0    | 0    | 0 NA          | NA       |
| 0    | 0    | 0    | 0 NA          | NA       |
| 0    | 0    | 0    | 0 NA          | NA       |
| 0    | 0    | 0    | 0 NA          | NA       |
| 0.1  | 0    | 0.04 | 0.12 NA       | NA       |
| 0    | 0    | 0    | 0 NA          | NA       |
| 8.01 | 6.24 | 8.05 | 7.76 -0.20979 | 0.228664 |
| 0.34 | 0.61 | 0.61 | 0.99 0.668028 | 0.061331 |
| 0.52 | 0    | 0    | 0 NA          | NA       |
| 0    | 0    | 0    | 0 NA          | NA       |
| 0    | 0    | 0    | 0 NA          | NA       |
| 0    | 0    | 0    | 0 NA          | NA       |
| 0    | 0    | 0    | 0 NA          | NA       |
| 0    | 0    | 0    | 0 NA          | NA       |
| 0.05 | 0.07 | 0.03 | 0 NA          | NA       |
| 0    | 0    | 0    | 0 NA          | NA       |
| 0    | 0    | 0    | 0 NA          | NA       |
| 0    | 0.14 | 0.19 | 0.14 NA       | NA       |
| 0    | 0    | 0    | 0 NA          | NA       |
| 0    | 0    | 0    | 0 NA          | NA       |
| 2.04 | 1.57 | 3.48 | 2.22 -0.13135 | 0.852034 |
| 0    | 0    | 0    | 0 NA          | NA       |
| 0    | 0    | 0    | 0 NA          | NA       |
| 0    | 0    | 0    | 0 NA          | NA       |
| 1.6  | 1.61 | 1.13 | 1.36 -0.11674 | 0.837257 |
| 0.13 | 0.09 | 0    | 0.03 NA       | NA       |
| 0    | 0    | 0    | 0 NA          | NA       |
| 0    | 0    | 0    | 0 NA          | NA       |
| 0.45 | 0.37 | 0.52 | 0.68 -0.03858 | 0.965501 |
| 0    | 0    | 0    | 0 NA          | NA       |
| 0    | 0    | 0    | 0 NA          | NA       |
| 0    | 0    | 0    | 0 NA          | NA       |
| 0.19 | 0    | 0    | 0 NA          | NA       |
| 0    | 0    | 0    | 0 NA          | NA       |
| 0.03 | 0    | 0    | 0 NA          | NA       |
| 0    | 0    | 0    | 0 NA          | NA       |
| 0    | 0    | 0    | 0 NA          | NA       |
| 0    | 0    | 0    | 0 NA          | NA       |

|       |       |      |                |          |
|-------|-------|------|----------------|----------|
| 0     | 0     | 0    | 0 NA           | NA       |
| 0     | 0     | 0    | 0 NA           | NA       |
| 0     | 0     | 0    | 0 NA           | NA       |
| 0     | 0     | 0    | 0 NA           | NA       |
| 0     | 0     | 0    | 0 NA           | NA       |
| 0     | 0     | 0    | 0 NA           | NA       |
| 0     | 0.12  | 0    | 0.13 NA        | NA       |
| 0     | 0.21  | 0.1  | 0.33 NA        | NA       |
| 0     | 0     | 0    | 0 NA           | NA       |
| 0     | 0     | 0    | 0 NA           | NA       |
| 53.99 | 46.76 | 47.3 | 52.38 -0.10107 | 0.266669 |
| 0     | 0     | 0    | 0 NA           | NA       |
| 0     | 0     | 0    | 0 NA           | NA       |
| 0     | 0     | 0    | 0.11 NA        | NA       |
| 0     | 0     | 0.13 | 0 NA           | NA       |
| 0     | 0     | 0    | 0 NA           | NA       |
| 0     | 0     | 0    | 0 NA           | NA       |
| 0     | 0     | 0    | 0 NA           | NA       |
| 0     | 0     | 0    | 0 NA           | NA       |
| 0     | 0     | 0    | 0 NA           | NA       |
| 0     | 0     | 0    | 0 NA           | NA       |
| 0     | 0     | 0    | 0 NA           | NA       |
| 0     | 0     | 0    | 0 NA           | NA       |
| 0     | 0     | 0    | 0 NA           | NA       |
| 0     | 0     | 0    | 0 NA           | NA       |
| 11.78 | 3.86  | 4.85 | 5.6 -1.24625   | 2.02E-15 |
| 0     | 0     | 0    | 0 NA           | NA       |
| 0     | 0     | 0    | 0 NA           | NA       |
| 0     | 0     | 0    | 0 NA           | NA       |
| 0     | 0.15  | 0    | 0 NA           | NA       |
| 0     | 0     | 0    | 0.16 NA        | NA       |
| 0     | 0     | 0    | 0 NA           | NA       |
| 0     | 0     | 0    | 0 NA           | NA       |
| 0     | 0     | 0    | 0 NA           | NA       |
| 0     | 0     | 0    | 0 NA           | NA       |
| 0     | 0     | 0    | 0 NA           | NA       |
| 0     | 0     | 0    | 0 NA           | NA       |
| 0     | 0     | 0    | 0 NA           | NA       |
| 0     | 0     | 0    | 0 NA           | NA       |
| 0     | 0     | 0    | 0 NA           | NA       |
| 0     | 0     | 0    | 0 NA           | NA       |
| 0     | 0     | 0    | 0 NA           | NA       |
| 0     | 0     | 0    | 0 NA           | NA       |
| 0     | 0     | 0    | 0 NA           | NA       |
| 0     | 0     | 0    | 0 NA           | NA       |
| 0     | 0.28  | 0.09 | 0 NA           | NA       |

|      |      |      |      |          |          |
|------|------|------|------|----------|----------|
| 0    | 0    | 0    | 0    | NA       | NA       |
| 0    | 0.21 | 0.07 | 0.15 | NA       | NA       |
| 0    | 0    | 0    | 0    | NA       | NA       |
| 0    | 0    | 0    | 0    | NA       | NA       |
| 0    | 0    | 0    | 0    | NA       | NA       |
| 0    | 0    | 0    | 0    | NA       | NA       |
| 0    | 0    | 0    | 0    | NA       | NA       |
| 0    | 0    | 0.43 | 0    | NA       | NA       |
| 0    | 0    | 0    | 0    | NA       | NA       |
| 0    | 0    | 0    | 0    | NA       | NA       |
| 0    | 0    | 0    | 0    | NA       | NA       |
| 0    | 0    | 0    | 0    | NA       | NA       |
| 0    | 0    | 0    | 0    | NA       | NA       |
| 0    | 0    | 0    | 0    | NA       | NA       |
| 0    | 0.21 | 0.19 | 0.18 | NA       | NA       |
| 0    | 0    | 0    | 0    | NA       | NA       |
| 0    | 0    | 0    | 0    | NA       | NA       |
| 0    | 0    | 0    | 0    | NA       | NA       |
| 0    | 0    | 0    | 0    | NA       | NA       |
| 1.05 | 0.13 | 0.34 | 0.53 | -0.65018 | 0.356637 |
| 0    | 0    | 0    | 0    | NA       | NA       |
| 0    | 0    | 0    | 0    | NA       | NA       |
| 0.21 | 0.09 | 0.17 | 0.12 | -0.74653 | 0.245457 |
| 0    | 0    | 0    | 0    | NA       | NA       |
| 0    | 0    | 0    | 0    | NA       | NA       |
| 0    | 0    | 0    | 0    | NA       | NA       |
| 0    | 0    | 0    | 0    | NA       | NA       |
| 0    | 0    | 0    | 0    | NA       | NA       |
| 1.03 | 0.58 | 1.79 | 1.4  | 0.201094 | 0.803403 |
| 0    | 0    | 0    | 0    | NA       | NA       |
| 0.13 | 0    | 0.08 | 0    | NA       | NA       |
| 0    | 0    | 0    | 0    | NA       | NA       |
| 0    | 0    | 0    | 0    | NA       | NA       |
| 0    | 0    | 0    | 0    | NA       | NA       |
| 0.18 | 0    | 0    | 0    | NA       | NA       |
| 0    | 0    | 0    | 0    | NA       | NA       |
| 0    | 0    | 0    | 0    | NA       | NA       |
| 0    | 0    | 0    | 0    | NA       | NA       |
| 0    | 0    | 0    | 0    | NA       | NA       |
| 0    | 0    | 0    | 0    | NA       | NA       |
| 0    | 0    | 0    | 0.07 | NA       | NA       |
| 0    | 0    | 0    | 0    | NA       | NA       |



|      |      |      |               |          |
|------|------|------|---------------|----------|
| 0    | 0    | 0    | 0 NA          | NA       |
| 0    | 0    | 0    | 0 NA          | NA       |
| 0    | 0    | 0    | 0 NA          | NA       |
| 0    | 0    | 0    | 0 NA          | NA       |
| 0    | 0    | 0    | 0 NA          | NA       |
| 0    | 0    | 0    | 0 NA          | NA       |
| 0    | 0    | 0    | 0 NA          | NA       |
| 0    | 0    | 0    | 0 NA          | NA       |
| 0    | 0    | 0    | 0 NA          | NA       |
| 0    | 0    | 0    | 0 NA          | NA       |
| 0    | 0    | 0.88 | 0.35 NA       | NA       |
| 0    | 0    | 0    | 0 NA          | NA       |
| 0    | 0    | 0    | 0 NA          | NA       |
| 0    | 0    | 0    | 0 NA          | NA       |
| 0    | 0    | 0    | 0 NA          | NA       |
| 0    | 0    | 0    | 0 NA          | NA       |
| 0    | 0    | 0    | 0 NA          | NA       |
| 0    | 0    | 0    | 0.11 NA       | NA       |
| 0    | 0    | 0    | 0 NA          | NA       |
| 0    | 0    | 0    | 0 NA          | NA       |
| 0    | 0    | 0    | 0 NA          | NA       |
| 0    | 0    | 0    | 0 NA          | NA       |
| 0    | 0    | 0    | 0 NA          | NA       |
| 0    | 0    | 0    | 0 NA          | NA       |
| 0    | 0    | 0    | 0 NA          | NA       |
| 1    | 0.48 | 1.09 | 0.25 -0.07182 | 0.941231 |
| 0    | 0.08 | 0    | 0.08 NA       | NA       |
| 0    | 0    | 0    | 0 NA          | NA       |
| 0    | 0    | 0    | 0 NA          | NA       |
| 0    | 0    | 0    | 0 NA          | NA       |
| 0    | 0    | 0    | 0 NA          | NA       |
| 0    | 0    | 0    | 0 NA          | NA       |
| 0    | 0    | 0    | 0 NA          | NA       |
| 0.91 | 1    | 0.83 | 1.19 0.11391  | 0.762429 |
| 0    | 0    | 0    | 0 NA          | NA       |
| 0    | 0    | 0    | 0 NA          | NA       |
| 0    | 0    | 0    | 0 NA          | NA       |
| 0.02 | 0    | 0.04 | 0.04 NA       | NA       |
| 0    | 0    | 0    | 0 NA          | NA       |
| 0    | 0    | 0    | 0 NA          | NA       |
| 0    | 0    | 0    | 0 NA          | NA       |
| 0    | 0    | 0    | 0 NA          | NA       |
| 0.16 | 0.11 | 0.21 | 0 NA          | NA       |



|      |      |      |               |          |
|------|------|------|---------------|----------|
| 0    | 0    | 0    | 0 NA          | NA       |
| 0    | 0    | 0    | 0 NA          | NA       |
| 0    | 0    | 0    | 0 NA          | NA       |
| 0    | 0    | 0    | 0 NA          | NA       |
| 0.76 | 0.24 | 1.3  | 0.74 0.19443  | 0.817247 |
| 0    | 0    | 0.1  | 0 NA          | NA       |
| 0    | 0    | 0    | 0 NA          | NA       |
| 0    | 0    | 0    | 0 NA          | NA       |
| 0    | 0    | 0    | 0 NA          | NA       |
| 0    | 0    | 0.02 | 0.02 NA       | NA       |
| 0.5  | 0.23 | 0    | 0.12 NA       | NA       |
| 0    | 0    | 0    | 0 NA          | NA       |
| 0    | 0    | 0    | 0 NA          | NA       |
| 0    | 0    | 0    | 0 NA          | NA       |
| 0    | 0    | 0    | 0 NA          | NA       |
| 0    | 0    | 0    | 0 NA          | NA       |
| 0    | 0    | 0    | 0 NA          | NA       |
| 0    | 0    | 0    | 0 NA          | NA       |
| 0    | 0    | 0    | 0 NA          | NA       |
| 0    | 0    | 0    | 0 NA          | NA       |
| 0.21 | 0.27 | 0.5  | 0.32 NA       | NA       |
| 0    | 0    | 0    | 0 NA          | NA       |
| 0    | 0    | 0    | 0 NA          | NA       |
| 0    | 0    | 0    | 0 NA          | NA       |
| 0    | 0    | 0    | 0 NA          | NA       |
| 0    | 0    | 0    | 0 NA          | NA       |
| 0    | 0    | 0    | 0 NA          | NA       |
| 0    | 0    | 0    | 0 NA          | NA       |
| 0    | 0    | 0    | 0 NA          | NA       |
| 0    | 0    | 0    | 0 NA          | NA       |
| 0    | 0    | 0    | 0 NA          | NA       |
| 0    | 0    | 0    | 0 NA          | NA       |
| 0    | 0    | 0    | 0 NA          | NA       |
| 0    | 0    | 0    | 0 NA          | NA       |
| 0    | 0    | 0    | 0 NA          | NA       |
| 0    | 0    | 0    | 0 NA          | NA       |
| 0    | 0    | 0    | 0 NA          | NA       |
| 0    | 0    | 0    | 0 NA          | NA       |
| 0    | 0    | 0    | 0 NA          | NA       |
| 0    | 0    | 0    | 0 NA          | NA       |
| 0    | 0    | 0    | 0 NA          | NA       |
| 0    | 0    | 0    | 0 NA          | NA       |
| 0.87 | 6.44 | 3.35 | 4.15 1.882731 | 1.86E-05 |
| 0    | 0    | 0    | 0 NA          | NA       |
| 0    | 0    | 0    | 0 NA          | NA       |
| 0.17 | 0.13 | 0.07 | 0.08 -0.39671 | 0.602449 |
| 0    | 0    | 0    | 0 NA          | NA       |
| 0    | 0    | 0    | 0 NA          | NA       |



|      |      |      |      |          |          |
|------|------|------|------|----------|----------|
| 0    | 0    | 0    | 0    | NA       | NA       |
| 0    | 0    | 0    | 0    | NA       | NA       |
| 0    | 0    | 0    | 0    | NA       | NA       |
| 0    | 0    | 0    | 0    | NA       | NA       |
| 0    | 0    | 0    | 0    | NA       | NA       |
| 0    | 0    | 0    | 0    | NA       | NA       |
| 0    | 0    | 0    | 0    | NA       | NA       |
| 0    | 0.04 | 0.02 | 0.02 | NA       | NA       |
| 0    | 0    | 0    | 0    | NA       | NA       |
| 0    | 0    | 0    | 0    | NA       | NA       |
| 0.89 | 0.26 | 1.2  | 1.05 | -0.64306 | 0.232565 |
| 0    | 0    | 0    | 0    | NA       | NA       |
| 0    | 0    | 0    | 0    | NA       | NA       |
| 0    | 0.08 | 0    | 0    | NA       | NA       |
| 0    | 0    | 0    | 0    | NA       | NA       |
| 0    | 0    | 0    | 0    | NA       | NA       |
| 0    | 0    | 0    | 0    | NA       | NA       |
| 0.45 | 1.23 | 0.9  | 0.77 | 0.990699 | 0.051241 |
| 0    | 0    | 0    | 0    | NA       | NA       |
| 0    | 0    | 0    | 0    | NA       | NA       |
| 0    | 0    | 0    | 0    | NA       | NA       |
| 0    | 0    | 0    | 0    | NA       | NA       |
| 0    | 0    | 0    | 0    | NA       | NA       |
| 0    | 0.21 | 0    | 0    | NA       | NA       |
| 0    | 0    | 0    | 0    | NA       | NA       |
| 0    | 0    | 0    | 0    | NA       | NA       |
| 0    | 0    | 0    | 0    | NA       | NA       |
| 0    | 0    | 0    | 0    | NA       | NA       |
| 0    | 0    | 0    | 0    | NA       | NA       |
| 0    | 0    | 0    | 0    | NA       | NA       |
| 0    | 0    | 0    | 0    | NA       | NA       |
| 0    | 0    | 0    | 0    | NA       | NA       |
| 0    | 0    | 0    | 0    | NA       | NA       |
| 0    | 0    | 0    | 0    | NA       | NA       |
| 0    | 0    | 0    | 0    | NA       | NA       |
| 0    | 0    | 0    | 0    | NA       | NA       |
| 0    | 0    | 0    | 0    | NA       | NA       |
| 0    | 0    | 0    | 0    | NA       | NA       |
| 0    | 0    | 0    | 0    | NA       | NA       |
| 0.13 | 0.1  | 0.09 | 0.07 | NA       | NA       |
| 0    | 0    | 0    | 0    | NA       | NA       |
| 0    | 0    | 0    | 0    | NA       | NA       |
| 0    | 0    | 0    | 0    | NA       | NA       |
| 0    | 0    | 0    | 0.16 | NA       | NA       |
| 0    | 0    | 0.14 | 0    | NA       | NA       |
| 0    | 0    | 0    | 0    | NA       | NA       |
| 0    | 0    | 0    | 0    | NA       | NA       |
| 0    | 0    | 0    | 0    | NA       | NA       |

|       |       |       |                |          |
|-------|-------|-------|----------------|----------|
| 0     | 0     | 0     | 0 NA           | NA       |
| 0     | 0     | 0     | 0 NA           | NA       |
| 0     | 0.22  | 0     | 0.12 NA        | NA       |
| 0     | 0     | 0     | 0 NA           | NA       |
| 0.26  | 0.08  | 0.05  | 0.09 -0.6452   | 0.361968 |
| 0.1   | 0     | 0     | 0 NA           | NA       |
| 0     | 0     | 0     | 0 NA           | NA       |
| 0     | 0     | 0     | 0 NA           | NA       |
| 0     | 0     | 0     | 0 NA           | NA       |
| 5.19  | 6.26  | 5.92  | 6.73 0.293338  | 0.087428 |
| 0     | 0     | 0     | 0 NA           | NA       |
| 1.17  | 1.69  | 1.2   | 0.93 0.104713  | 0.904541 |
| 0     | 0     | 0     | 0 NA           | NA       |
| 0     | 0     | 0     | 0 NA           | NA       |
| 0     | 0.26  | 2.11  | 0.38 0.550618  | 0.451066 |
| 2.35  | 3.87  | 4.79  | 4.87 0.503075  | 0.308411 |
| 0     | 0     | 0     | 0 NA           | NA       |
| 9.94  | 8.19  | 9.08  | 8.56 -0.22538  | 0.024047 |
| 0     | 0     | 0     | 0.12 NA        | NA       |
| 0     | 0     | 0     | 0 NA           | NA       |
| 0     | 0     | 0     | 0 NA           | NA       |
| 0     | 0     | 0     | 0 NA           | NA       |
| 0     | 0     | 0     | 0 NA           | NA       |
| 0     | 0     | 0     | 0 NA           | NA       |
| 0     | 0     | 0     | 0 NA           | NA       |
| 16.13 | 14.51 | 16.25 | 16.84 -0.03075 | 0.790875 |
| 0     | 0     | 0.1   | 0 NA           | NA       |
| 1.6   | 1.78  | 1.62  | 1.49 0.035289  | 0.909236 |
| 0     | 0     | 0     | 0 NA           | NA       |
| 0     | 0     | 0     | 0 NA           | NA       |
| 0     | 0     | 0     | 0 NA           | NA       |
| 0     | 0     | 0     | 0 NA           | NA       |
| 0     | 0     | 0     | 0 NA           | NA       |
| 0     | 0     | 0     | 0 NA           | NA       |
| 7.6   | 8.5   | 7.21  | 6.86 0.115268  | 0.610062 |
| 0     | 0     | 12.79 | 0 NA           | NA       |
| 0     | 0     | 0     | 0 NA           | NA       |
| 0.07  | 0.02  | 0.04  | 0.03 -0.27811  | 0.735872 |
| 0     | 0     | 0     | 0 NA           | NA       |
| 0     | 0     | 0     | 0 NA           | NA       |
| 0     | 0     | 0     | 0 NA           | NA       |
| 0     | 0     | 0     | 0 NA           | NA       |
| 0.29  | 0.42  | 0.1   | 0 NA           | NA       |
| 0     | 0     | 0     | 0 NA           | NA       |
| 0     | 0     | 0     | 0 NA           | NA       |

|      |      |      |         |          |          |
|------|------|------|---------|----------|----------|
| 0    | 0    | 0    | 0 NA    | NA       |          |
| 0    | 0    | 0    | 0 NA    | NA       |          |
| 0    | 0    | 0    | 0 NA    | NA       |          |
| 0    | 0    | 0    | 0 NA    | NA       |          |
| 0    | 0    | 0    | 0 NA    | NA       |          |
| 0    | 0    | 0    | 0 NA    | NA       |          |
| 0    | 0    | 0    | 0 NA    | NA       |          |
| 0    | 0    | 0    | 0 NA    | NA       |          |
| 0    | 0    | 0    | 0 NA    | NA       |          |
| 0    | 0    | 0    | 0 NA    | NA       |          |
| 0    | 0    | 0    | 0.13 NA | NA       |          |
| 0.28 | 0.29 | 0.43 | 0.43    | 0.544522 | 0.238958 |
| 0    | 0    | 0    | 0 NA    | NA       |          |
| 0    | 0    | 0    | 0 NA    | NA       |          |
| 0.2  | 0.15 | 0    | 0.15 NA | NA       |          |
| 0    | 0    | 0    | 0 NA    | NA       |          |
| 0    | 0    | 0    | 0 NA    | NA       |          |
| 0    | 0    | 0    | 0 NA    | NA       |          |
| 0    | 0    | 0    | 0 NA    | NA       |          |
| 0    | 0    | 0    | 0 NA    | NA       |          |
| 0    | 0    | 0    | 0 NA    | NA       |          |
| 0    | 0    | 0    | 0 NA    | NA       |          |
| 0    | 0    | 0    | 0 NA    | NA       |          |
| 0    | 0    | 0    | 0 NA    | NA       |          |
| 0    | 0    | 0    | 0 NA    | NA       |          |
| 0    | 0    | 0    | 0 NA    | NA       |          |
| 0    | 0    | 0    | 0 NA    | NA       |          |
| 0    | 0    | 0    | 0 NA    | NA       |          |
| 0    | 0    | 0    | 0 NA    | NA       |          |
| 0    | 0    | 0    | 0 NA    | NA       |          |
| 0    | 0    | 0    | 0 NA    | NA       |          |
| 0    | 0    | 0    | 0 NA    | NA       |          |
| 0    | 0    | 0    | 0 NA    | NA       |          |
| 0    | 0    | 0    | 0 NA    | NA       |          |
| 0    | 0    | 0    | 0 NA    | NA       |          |
| 0    | 0    | 0    | 0 NA    | NA       |          |
| 4.75 | 7.99 | 6.2  | 7.3     | 0.446931 | 0.000726 |
| 0    | 0    | 0    | 0 NA    | NA       |          |
| 0    | 0    | 0    | 0 NA    | NA       |          |
| 0    | 0    | 0    | 0 NA    | NA       |          |
| 0    | 0    | 0    | 0 NA    | NA       |          |

|       |       |       |         |          |          |
|-------|-------|-------|---------|----------|----------|
| 1.31  | 10.05 | 12.82 | 11.1    | 2.468    | 8.72E-16 |
| 0     | 0     | 0     | 0 NA    | NA       |          |
| 0     | 0     | 0     | 0 NA    | NA       |          |
| 0     | 0     | 0     | 0 NA    | NA       |          |
| 0     | 0     | 0     | 0 NA    | NA       |          |
| 0     | 0     | 0     | 0 NA    | NA       |          |
| 0     | 0     | 0     | 0 NA    | NA       |          |
| 0     | 0     | 0     | 0 NA    | NA       |          |
| 0     | 0     | 0     | 0 NA    | NA       |          |
| 0     | 0     | 0     | 0 NA    | NA       |          |
| 11.03 | 9.03  | 9.63  | 11.19   | 0.186109 | 0.689248 |
| 0     | 0     | 0     | 0 NA    | NA       |          |
| 0     | 0     | 0     | 0 NA    | NA       |          |
| 1.93  | 0     | 0.59  | 0.45    | -1.4459  | 0.01186  |
| 0     | 0     | 0     | 0 NA    | NA       |          |
| 0     | 0     | 0     | 0 NA    | NA       |          |
| 0     | 0     | 0     | 0 NA    | NA       |          |
| 0     | 0     | 0     | 0 NA    | NA       |          |
| 0     | 0     | 0     | 0 NA    | NA       |          |
| 0     | 0     | 0     | 0 NA    | NA       |          |
| 0     | 0     | 0     | 0 NA    | NA       |          |
| 0     | 0     | 0     | 0 NA    | NA       |          |
| 0.4   | 0.47  | 0     | 0 NA    | NA       |          |
| 0     | 0     | 0     | 0 NA    | NA       |          |
| 0     | 0     | 0     | 0 NA    | NA       |          |
| 0.27  | 0     | 0     | 0.41 NA | NA       |          |
| 0     | 0     | 0     | 0 NA    | NA       |          |
| 0     | 0     | 0     | 0 NA    | NA       |          |
| 0.07  | 0.83  | 0.38  | 0.63    | 1.362551 | 0.011513 |
| 0     | 0     | 0     | 0 NA    | NA       |          |
| 0     | 0     | 0     | 0 NA    | NA       |          |
| 0     | 0     | 0     | 0 NA    | NA       |          |
| 0     | 0     | 0     | 0 NA    | NA       |          |
| 0     | 0     | 0     | 0 NA    | NA       |          |
| 0     | 0     | 0     | 0 NA    | NA       |          |
| 0     | 0     | 0     | 0 NA    | NA       |          |
| 0     | 0     | 0     | 0 NA    | NA       |          |
| 6.92  | 6.32  | 7.02  | 6.25    | -0.074   | 0.671429 |
| 0     | 0     | 0     | 0 NA    | NA       |          |
| 0     | 0     | 0     | 0.17 NA | NA       |          |
| 0     | 0     | 0     | 0 NA    | NA       |          |
| 0     | 0     | 0     | 0 NA    | NA       |          |
| 0     | 0     | 0     | 0 NA    | NA       |          |
| 0     | 0.06  | 0.07  | 0.07 NA | NA       |          |





|      |       |       |      |          |          |
|------|-------|-------|------|----------|----------|
| 2.1  | 1.81  | 1.97  | 2.3  | -0.10133 | 0.785803 |
| 0    | 0     | 0     | 0    | NA       | NA       |
| 0    | 0     | 0     | 0    | NA       | NA       |
| 0    | 0     | 0     | 0    | NA       | NA       |
| 0    | 0     | 0     | 0    | NA       | NA       |
| 0    | 0.08  | 0     | 0    | NA       | NA       |
| 0    | 0     | 0.09  | 0    | NA       | NA       |
| 0    | 0     | 0     | 0    | NA       | NA       |
| 0    | 0     | 0     | 0    | NA       | NA       |
| 0.59 | 0     | 0.21  | 0.06 | NA       | NA       |
| 0    | 0     | 0     | 0    | NA       | NA       |
| 0    | 0     | 0     | 0    | NA       | NA       |
| 0    | 0     | 0     | 0    | NA       | NA       |
| 0    | 0     | 0     | 0    | NA       | NA       |
| 0    | 0     | 0     | 0    | NA       | NA       |
| 0    | 0     | 0     | 0    | NA       | NA       |
| 0    | 0     | 0     | 0    | NA       | NA       |
| 0.02 | 0.04  | 0.01  | 0.08 | NA       | NA       |
| 0    | 0     | 0     | 0    | NA       | NA       |
| 0    | 0     | 0     | 0    | NA       | NA       |
| 0    | 0     | 0     | 0    | NA       | NA       |
| 0    | 0     | 0     | 0    | NA       | NA       |
| 0    | 0.13  | 0     | 0    | NA       | NA       |
| 0    | 0     | 0     | 0    | NA       | NA       |
| 0    | 0     | 0     | 0    | NA       | NA       |
| 0    | 0     | 0     | 0    | NA       | NA       |
| 0    | 0     | 0     | 0    | NA       | NA       |
| 0    | 0     | 0     | 0    | NA       | NA       |
| 0    | 0     | 0     | 0    | NA       | NA       |
| 0    | 0     | 0     | 0    | NA       | NA       |
| 0    | 0     | 0     | 0    | NA       | NA       |
| 2.53 | 4.22  | 4.48  | 4.57 | 0.572868 | 0.303085 |
| 0    | 0     | 0     | 0    | NA       | NA       |
| 0    | 0     | 0     | 0    | NA       | NA       |
| 0    | 0     | 0     | 0    | NA       | NA       |
| 7.98 | 11.25 | 11.21 | 11.4 | 0.39153  | 0.000105 |
| 0    | 0     | 0     | 0    | NA       | NA       |
| 0    | 0     | 0     | 0    | NA       | NA       |
| 0    | 0     | 0     | 0    | NA       | NA       |
| 0    | 0     | 0     | 0    | NA       | NA       |
| 1.32 | 1.21  | 1.19  | 1.11 | -0.24977 | 0.524162 |
| 0    | 0     | 0     | 0    | NA       | NA       |
| 0    | 0     | 0     | 0    | NA       | NA       |
| 0    | 0     | 0     | 0    | NA       | NA       |

|       |       |       |               |          |
|-------|-------|-------|---------------|----------|
| 0     | 0     | 0     | 0 NA          | NA       |
| 0     | 0     | 0     | 0 NA          | NA       |
| 0     | 0     | 0     | 0 NA          | NA       |
| 0.05  | 0.04  | 0.03  | 0.08 NA       | NA       |
| 0.03  | 0.02  | 0.06  | 0 NA          | NA       |
| 0     | 0     | 0     | 0 NA          | NA       |
| 0     | 0     | 0     | 0 NA          | NA       |
| 0     | 0     | 0     | 0 NA          | NA       |
| 0     | 0     | 0     | 0 NA          | NA       |
| 0     | 0     | 0     | 0 NA          | NA       |
| 0     | 0     | 0     | 0 NA          | NA       |
| 0     | 0     | 0     | 0 NA          | NA       |
| 0     | 0     | 0     | 0 NA          | NA       |
| 0     | 0.13  | 0     | 0 NA          | NA       |
| 0     | 0     | 0     | 0 NA          | NA       |
| 0     | 0     | 0     | 0 NA          | NA       |
| 0     | 0.12  | 0.33  | 0.26 NA       | NA       |
| 20.01 | 23.75 | 18.57 | 15.6 0.149823 | 0.600061 |
| 0     | 0.05  | 0.2   | 0 NA          | NA       |
| 0     | 0     | 0     | 0 NA          | NA       |
| 0     | 0     | 0     | 0 NA          | NA       |
| 0     | 0     | 0     | 0 NA          | NA       |
| 0     | 0     | 0     | 0 NA          | NA       |
| 0     | 0     | 0     | 0 NA          | NA       |
| 0     | 0     | 0     | 0 NA          | NA       |
| 0     | 0     | 0     | 0 NA          | NA       |
| 0     | 0     | 0     | 0 NA          | NA       |
| 0     | 0     | 0     | 0 NA          | NA       |
| 0     | 0     | 0     | 0 NA          | NA       |
| 0     | 0     | 0     | 0 NA          | NA       |
| 0     | 0     | 0     | 0 NA          | NA       |
| 0     | 0     | 0     | 0 NA          | NA       |
| 0     | 0     | 0     | 0.11 NA       | NA       |
| 5.82  | 4.74  | 5.83  | 3.82 0.07305  | 0.710129 |
| 0     | 0     | 0     | 0 NA          | NA       |
| 0     | 0     | 0     | 0 NA          | NA       |
| 0     | 0     | 0     | 0 NA          | NA       |
| 0     | 0     | 0     | 0 NA          | NA       |
| 0     | 0     | 0     | 0 NA          | NA       |
| 0     | 0     | 0     | 0 NA          | NA       |
| 0     | 0     | 0     | 0 NA          | NA       |
| 0     | 0     | 0     | 0.05 NA       | NA       |

|      |      |      |               |          |
|------|------|------|---------------|----------|
| 0    | 0    | 0    | 0 NA          | NA       |
| 0    | 0    | 0    | 0 NA          | NA       |
| 0    | 0    | 0    | 0 NA          | NA       |
| 0    | 0    | 0.07 | 0 NA          | NA       |
| 0.14 | 0    | 0    | 0 NA          | NA       |
| 0    | 0    | 0    | 0 NA          | NA       |
| 0    | 0    | 0    | 0 NA          | NA       |
| 0    | 0    | 0    | 0 NA          | NA       |
| 0    | 0    | 0    | 0 NA          | NA       |
| 0    | 0    | 0    | 0 NA          | NA       |
| 0    | 0    | 0.05 | 0 NA          | NA       |
| 0    | 0    | 0    | 0 NA          | NA       |
| 0    | 0    | 0.1  | 0 NA          | NA       |
| 0    | 0    | 0    | 0 NA          | NA       |
| 0    | 0    | 0    | 0 NA          | NA       |
| 0    | 0    | 0    | 0 NA          | NA       |
| 0    | 0    | 0    | 0 NA          | NA       |
| 0    | 0    | 0    | 0 NA          | NA       |
| 0    | 0    | 0    | 0.12 NA       | NA       |
| 0    | 0    | 0    | 0 NA          | NA       |
| 0    | 0    | 0    | 0 NA          | NA       |
| 0    | 0    | 0    | 0 NA          | NA       |
| 0    | 0    | 0    | 0.1 NA        | NA       |
| 0    | 0    | 0    | 0 NA          | NA       |
| 0    | 0    | 0    | 0 NA          | NA       |
| 0    | 0    | 0.05 | 0 NA          | NA       |
| 0.05 | 0.09 | 0.1  | 0.11 0.214633 | 0.800959 |
| 0    | 0    | 0    | 0 NA          | NA       |
| 0    | 0.35 | 0    | 0.57 NA       | NA       |
| 0    | 0    | 0    | 0 NA          | NA       |
| 0    | 0    | 0    | 0 NA          | NA       |
| 0    | 0    | 0    | 0 NA          | NA       |
| 0    | 0    | 0    | 0 NA          | NA       |
| 0    | 0    | 0    | 0 NA          | NA       |
| 0    | 0    | 0    | 0 NA          | NA       |
| 0    | 0    | 0    | 0 NA          | NA       |
| 0    | 0    | 0    | 0 NA          | NA       |
| 0    | 0    | 0    | 0 NA          | NA       |
| 0    | 0    | 0    | 0 NA          | NA       |
| 0    | 0    | 0    | 0 NA          | NA       |
| 0    | 0    | 0    | 0 NA          | NA       |
| 0    | 0    | 0    | 0.13 NA       | NA       |
| 0    | 0    | 0    | 0 NA          | NA       |
| 0    | 0    | 0    | 0.17 NA       | NA       |
| 0    | 0    | 0    | 0 NA          | NA       |

|       |       |       |               |          |
|-------|-------|-------|---------------|----------|
| 0     | 0     | 0.11  | 0 NA          | NA       |
| 0     | 0     | 0     | 0 NA          | NA       |
| 0     | 0     | 0     | 0 NA          | NA       |
| 0     | 0     | 0     | 0 NA          | NA       |
| 0     | 0     | 0     | 0 NA          | NA       |
| 0     | 0     | 0     | 0 NA          | NA       |
| 0     | 0     | 0     | 0 NA          | NA       |
| 0     | 0     | 0     | 0 NA          | NA       |
| 0     | 0     | 0     | 0 NA          | NA       |
| 0     | 0     | 0     | 0 NA          | NA       |
| 0     | 0     | 0     | 0 NA          | NA       |
| 0     | 0     | 0     | 0 NA          | NA       |
| 0     | 0     | 0     | 0 NA          | NA       |
| 0     | 0     | 0     | 0 NA          | NA       |
| 0     | 0     | 0     | 0 NA          | NA       |
| 0     | 0.05  | 0.02  | 0.04 NA       | NA       |
| 0     | 0     | 0     | 0 NA          | NA       |
| 0     | 0     | 0     | 0 NA          | NA       |
| 0     | 0     | 0     | 0 NA          | NA       |
| 0     | 0     | 0     | 0 NA          | NA       |
| 4.31  | 5.91  | 3.77  | 4.65 0.15902  | 0.530244 |
| 0     | 0     | 0     | 0 NA          | NA       |
| 0     | 0     | 0     | 0 NA          | NA       |
| 0     | 0     | 0     | 0 NA          | NA       |
| 0     | 0     | 0     | 0 NA          | NA       |
| 0     | 0     | 0     | 0 NA          | NA       |
| 2.96  | 4.1   | 4.91  | 2.93 -0.00846 | 0.986207 |
| 0     | 0.12  | 0     | 0 NA          | NA       |
| 0     | 0     | 0     | 0 NA          | NA       |
| 0     | 0     | 0     | 0 NA          | NA       |
| 0     | 0     | 0     | 0 NA          | NA       |
| 0     | 0     | 0     | 0 NA          | NA       |
| 0     | 0     | 0     | 0 NA          | NA       |
| 0     | 0     | 0     | 0 NA          | NA       |
| 0     | 0     | 0     | 0 NA          | NA       |
| 0     | 0     | 0     | 0 NA          | NA       |
| 0     | 0     | 0     | 0 NA          | NA       |
| 0     | 0     | 0     | 0 NA          | NA       |
| 0     | 0     | 0     | 0 NA          | NA       |
| 0     | 0     | 0     | 0 NA          | NA       |
| 1.57  | 1.55  | 2.47  | 2.1 0.042756  | 0.94882  |
| 0     | 0     | 0     | 0 NA          | NA       |
| 0     | 0     | 0     | 0 NA          | NA       |
| 0     | 0     | 0     | 0 NA          | NA       |
| 0     | 0     | 0     | 0 NA          | NA       |
| 0.09  | 0     | 0     | 0 NA          | NA       |
| 0     | 0     | 0     | 0 NA          | NA       |
| 0     | 0     | 0     | 0 NA          | NA       |
| 0     | 0     | 0     | 0 NA          | NA       |
| 12.79 | 17.12 | 17.03 | 17.8 0.305011 | 0.003844 |



|      |      |      |               |          |
|------|------|------|---------------|----------|
| 0    | 0    | 0    | 0 NA          | NA       |
| 0    | 0    | 0.41 | 0 NA          | NA       |
| 0    | 0    | 0    | 0 NA          | NA       |
| 0    | 0    | 0    | 0 NA          | NA       |
| 0.63 | 0.5  | 0.32 | 0.63 0.014469 | 0.987886 |
| 0    | 0    | 0    | 0 NA          | NA       |
| 0    | 0    | 0    | 0 NA          | NA       |
| 0    | 0    | 0.25 | 0.07 NA       | NA       |
| 0    | 0    | 0    | 0 NA          | NA       |
| 0    | 0    | 0    | 0 NA          | NA       |
| 0    | 0    | 0    | 0 NA          | NA       |
| 0    | 0    | 0    | 0 NA          | NA       |
| 0    | 0    | 0    | 0 NA          | NA       |
| 0    | 0    | 0    | 0 NA          | NA       |
| 0    | 0    | 0    | 0 NA          | NA       |
| 0    | 0    | 0    | 0 NA          | NA       |
| 0    | 0    | 0    | 0 NA          | NA       |
| 0    | 0    | 0    | 0 NA          | NA       |
| 0    | 0    | 0    | 0 NA          | NA       |
| 0    | 0    | 0    | 0 NA          | NA       |
| 0.4  | 0.38 | 0.55 | 0.46 0.440485 | 0.372883 |
| 0    | 0    | 0    | 0 NA          | NA       |
| 0    | 0    | 0    | 0 NA          | NA       |
| 0    | 0    | 0    | 0 NA          | NA       |
| 0    | 0    | 0    | 0 NA          | NA       |
| 0    | 0    | 0    | 0 NA          | NA       |
| 0    | 0    | 0    | 0 NA          | NA       |
| 0    | 0    | 0    | 0 NA          | NA       |
| 0    | 0    | 0    | 0 NA          | NA       |
| 0    | 0    | 0    | 0 NA          | NA       |
| 0    | 0    | 0    | 0 NA          | NA       |
| 2.64 | 1.9  | 2.89 | 2.66 -0.1389  | 0.636669 |
| 0    | 0    | 0    | 0 NA          | NA       |
| 0    | 0    | 0    | 0 NA          | NA       |
| 0    | 0    | 0.18 | 0 NA          | NA       |
| 0    | 0.13 | 0    | 0 NA          | NA       |
| 0.02 | 0    | 0.06 | 0.04 NA       | NA       |
| 0    | 0    | 0    | 0 NA          | NA       |
| 0    | 0    | 0    | 0 NA          | NA       |
| 0    | 0    | 0    | 0 NA          | NA       |
| 0    | 0    | 0    | 0 NA          | NA       |
| 0    | 0.11 | 0.09 | 0.03 NA       | NA       |
| 0    | 0    | 0    | 0 NA          | NA       |
| 0    | 0.01 | 0    | 0 NA          | NA       |
| 0    | 0    | 0    | 0 NA          | NA       |

|      |      |      |               |          |
|------|------|------|---------------|----------|
| 0    | 0    | 0    | 0 NA          | NA       |
| 0    | 0    | 0    | 0 NA          | NA       |
| 0    | 0    | 0    | 0 NA          | NA       |
| 0    | 0    | 0    | 0 NA          | NA       |
| 0    | 0    | 0    | 0 NA          | NA       |
| 0    | 0    | 0    | 0 NA          | NA       |
| 0    | 0    | 0    | 0 NA          | NA       |
| 1.08 | 0.76 | 1.2  | 1.02 -0.13054 | 0.742475 |
| 0    | 0    | 0    | 0 NA          | NA       |
| 0    | 0    | 0    | 0 NA          | NA       |
| 0    | 0    | 0    | 0 NA          | NA       |
| 0    | 0    | 0    | 0 NA          | NA       |
| 0    | 0.06 | 0.04 | 0.07 NA       | NA       |
| 0    | 0    | 0    | 0 NA          | NA       |
| 0    | 0    | 0    | 0 NA          | NA       |
| 0.1  | 0.02 | 0.16 | 0.12 -0.07065 | 0.942206 |
| 0    | 0    | 0    | 0 NA          | NA       |
| 0    | 0    | 0    | 0 NA          | NA       |
| 0.17 | 0.66 | 0.43 | 0.41 0.346204 | 0.650233 |
| 0    | 0    | 0    | 0 NA          | NA       |
| 0    | 0    | 0    | 0 NA          | NA       |
| 0    | 0    | 0    | 0 NA          | NA       |
| 0    | 0    | 0    | 0 NA          | NA       |
| 0    | 0    | 0    | 0 NA          | NA       |
| 0    | 0    | 0    | 0 NA          | NA       |
| 0    | 0    | 0    | 0.5 NA        | NA       |
| 0    | 0    | 0    | 0 NA          | NA       |
| 0    | 0    | 0    | 0 NA          | NA       |
| 0    | 0    | 0    | 0 NA          | NA       |
| 0    | 0    | 0.31 | 0 NA          | NA       |
| 0    | 0    | 0    | 0 NA          | NA       |
| 0    | 0    | 0    | 0 NA          | NA       |
| 0.26 | 0.13 | 0.02 | 0.13 NA       | NA       |
| 0    | 0    | 0    | 0 NA          | NA       |
| 0    | 0    | 0    | 0 NA          | NA       |
| 0    | 0    | 0    | 0 NA          | NA       |
| 0    | 0    | 0    | 0 NA          | NA       |
| 0    | 0    | 0    | 0 NA          | NA       |
| 0    | 0    | 0    | 0 NA          | NA       |
| 0    | 0    | 0    | 0 NA          | NA       |
| 0    | 0    | 0.09 | 0 NA          | NA       |
| 2    | 1.44 | 0.84 | 0.88 -0.21479 | 0.767346 |
| 0    | 0    | 0    | 0 NA          | NA       |
| 0    | 0    | 0    | 0 NA          | NA       |



|      |      |      |               |          |
|------|------|------|---------------|----------|
| 0    | 0    | 0    | 0 NA          | NA       |
| 0    | 0    | 0    | 0 NA          | NA       |
| 0    | 0    | 0    | 0 NA          | NA       |
| 0.13 | 0.06 | 0    | 0.07 NA       | NA       |
| 0    | 0    | 0    | 0.42 NA       | NA       |
| 0    | 0    | 0    | 0 NA          | NA       |
| 0    | 0    | 0    | 0 NA          | NA       |
| 0    | 0    | 0    | 0 NA          | NA       |
| 0.4  | 0    | 0.03 | 0.06 -1.67146 | 0.004247 |
| 0    | 0    | 0    | 0 NA          | NA       |
| 0    | 0.28 | 0.19 | 0.07 NA       | NA       |
| 0.27 | 0    | 0    | 0 NA          | NA       |
| 0    | 0    | 0    | 0 NA          | NA       |
| 0    | 0.51 | 0    | 0 NA          | NA       |
| 0    | 0    | 0    | 0 NA          | NA       |
| 0    | 0    | 0    | 0 NA          | NA       |
| 0    | 0    | 0    | 0 NA          | NA       |
| 0    | 0    | 0    | 0 NA          | NA       |
| 0    | 0    | 0    | 0 NA          | NA       |
| 0    | 0    | 0    | 0 NA          | NA       |
| 0    | 0    | 0    | 0 NA          | NA       |
| 0    | 0    | 0    | 0 NA          | NA       |
| 0    | 0    | 0    | 0 NA          | NA       |
| 0    | 0    | 0    | 0 NA          | NA       |
| 0    | 0    | 0    | 0 NA          | NA       |
| 0    | 0    | 0    | 0 NA          | NA       |
| 0    | 0    | 0    | 0 NA          | NA       |
| 0    | 0    | 0    | 0 NA          | NA       |
| 0    | 0    | 0    | 0 NA          | NA       |
| 0    | 0    | 0    | 0 NA          | NA       |
| 0    | 0    | 0    | 0 NA          | NA       |
| 0    | 0    | 0    | 0 NA          | NA       |
| 0    | 0    | 0    | 0 NA          | NA       |
| 0    | 0    | 0    | 0 NA          | NA       |
| 0    | 0    | 0    | 0 NA          | NA       |
| 0    | 0    | 0    | 0 NA          | NA       |
| 0    | 0    | 0    | 0 NA          | NA       |
| 0    | 0    | 0    | 0 NA          | NA       |
| 0    | 0    | 0    | 0 NA          | NA       |
| 0    | 0    | 0    | 0 NA          | NA       |
| 0    | 0    | 0    | 0 NA          | NA       |
| 0    | 0    | 0    | 0 NA          | NA       |
| 1.09 | 0    | 0.58 | 1.52 -0.24923 | 0.766424 |
| 0    | 0    | 0    | 0 NA          | NA       |
| 0.11 | 0.16 | 0.07 | 0 NA          | NA       |
| 0    | 0    | 0    | 0 NA          | NA       |
| 0    | 0    | 0    | 0 NA          | NA       |
| 0    | 0    | 0    | 0 NA          | NA       |

|      |      |      |      |          |          |
|------|------|------|------|----------|----------|
| 4.71 | 1.02 | 2.03 | 1.04 | -1.54259 | 0.000869 |
| 0    | 0    | 0    | 0    | NA       | NA       |
| 0    | 0    | 0    | 0    | NA       | NA       |
| 0    | 0    | 0    | 0    | NA       | NA       |
| 0    | 0    | 0    | 0    | NA       | NA       |
| 0    | 0    | 0    | 0    | NA       | NA       |
| 0    | 0    | 0    | 0    | NA       | NA       |
| 0    | 0    | 0    | 0    | NA       | NA       |
| 0.34 | 0    | 0.22 | 0    | NA       | NA       |
| 0    | 0    | 0    | 0    | NA       | NA       |
| 0    | 0    | 0    | 0    | NA       | NA       |
| 0    | 0    | 0    | 0    | NA       | NA       |
| 0    | 0    | 0    | 0.34 | NA       | NA       |
| 0.03 | 0.03 | 0.04 | 0.02 | -0.44896 | 0.551917 |
| 0    | 0    | 0    | 0    | NA       | NA       |
| 0    | 0    | 0    | 0    | NA       | NA       |
| 0    | 0    | 0    | 0    | NA       | NA       |
| 0    | 0    | 0    | 0.09 | NA       | NA       |
| 0    | 0    | 0    | 0    | NA       | NA       |
| 0    | 0    | 0    | 0    | NA       | NA       |
| 0    | 0    | 0    | 0    | NA       | NA       |
| 0    | 0    | 0    | 0    | NA       | NA       |
| 0    | 0    | 0    | 0    | NA       | NA       |
| 0    | 0    | 0    | 0    | NA       | NA       |
| 0    | 0    | 0    | 0    | NA       | NA       |
| 0    | 0    | 0    | 0    | NA       | NA       |
| 0    | 0    | 0    | 0    | NA       | NA       |
| 0    | 0    | 0    | 0    | NA       | NA       |
| 0    | 0    | 0    | 0    | NA       | NA       |
| 0.17 | 0.12 | 0.12 | 0.03 | -0.46626 | 0.537335 |
| 0    | 0    | 0    | 0    | NA       | NA       |
| 0    | 0    | 0    | 0    | NA       | NA       |
| 0    | 0    | 0    | 0    | NA       | NA       |
| 0    | 0    | 0    | 0    | NA       | NA       |
| 0    | 0    | 0.1  | 0    | NA       | NA       |
| 0    | 0    | 0    | 0    | NA       | NA       |
| 0    | 0    | 0    | 0    | NA       | NA       |
| 0    | 0    | 0    | 0    | NA       | NA       |
| 0.26 | 0.18 | 0.5  | 0.38 | NA       | NA       |
| 0    | 0.13 | 0.05 | 0.06 | NA       | NA       |
| 1.24 | 0.82 | 0.96 | 0.9  | -0.30654 | 0.515531 |
| 0    | 0    | 0    | 0    | NA       | NA       |



|       |      |       |                |          |
|-------|------|-------|----------------|----------|
| 0     | 0    | 0.1   | 0 NA           | NA       |
| 0     | 0    | 0     | 0.11 NA        | NA       |
| 0     | 0    | 0     | 0 NA           | NA       |
| 0.16  | 0    | 0     | 0 NA           | NA       |
| 0     | 0    | 0     | 0.16 NA        | NA       |
| 0     | 0    | 0.13  | 0 NA           | NA       |
| 0     | 0    | 0     | 0 NA           | NA       |
| 0     | 0    | 0     | 0 NA           | NA       |
| 0     | 0    | 0     | 0 NA           | NA       |
| 0     | 0    | 0     | 0 NA           | NA       |
| 0.04  | 0    | 0.03  | 0.05 NA        | NA       |
| 1.44  | 0.9  | 1.22  | 1.34 -0.108    | 0.877792 |
| 5.13  | 7.42 | 6.92  | 6.88 0.346054  | 0.004373 |
| 0     | 0    | 0     | 0 NA           | NA       |
| 0     | 0    | 0     | 0 NA           | NA       |
| 2.22  | 1.89 | 2.31  | 2.32 -0.31431  | 0.515531 |
| 0     | 0    | 0     | 0 NA           | NA       |
| 0.51  | 0.06 | 0.11  | 0.19 -0.7544   | 0.268058 |
| 0     | 0    | 0     | 0 NA           | NA       |
| 0     | 0    | 0     | 0 NA           | NA       |
| 0.2   | 0    | 0.13  | 0 NA           | NA       |
| 0     | 0    | 0.12  | 0.27 NA        | NA       |
| 0     | 0    | 0     | 0 NA           | NA       |
| 0     | 0    | 0     | 0 NA           | NA       |
| 0     | 0    | 0     | 0 NA           | NA       |
| 0.45  | 0.1  | 0.56  | 0 NA           | NA       |
| 0.08  | 0.19 | 0.03  | 0.03 -0.01022  | 0.992479 |
| 0     | 0    | 0     | 0 NA           | NA       |
| 0     | 0    | 0     | 0 NA           | NA       |
| 0     | 0    | 0     | 0 NA           | NA       |
| 0     | 0    | 0     | 0 NA           | NA       |
| 0     | 0    | 0     | 0 NA           | NA       |
| 0     | 0    | 0     | 0 NA           | NA       |
| 0     | 0    | 0     | 0 NA           | NA       |
| 0     | 0    | 0     | 0 NA           | NA       |
| 0     | 0    | 0     | 0 NA           | NA       |
| 0     | 0    | 0     | 0 NA           | NA       |
| 0     | 0    | 0     | 0 NA           | NA       |
| 0     | 0    | 0     | 0 NA           | NA       |
| 0     | 0    | 0     | 0 NA           | NA       |
| 0     | 0    | 0     | 0 NA           | NA       |
| 0     | 0    | 0     | 0 NA           | NA       |
| 0     | 0.08 | 0.12  | 0.04 NA        | NA       |
| 31.48 | 25   | 28.64 | 26.36 -0.18926 | 0.278471 |
| 0     | 0    | 0     | 0 NA           | NA       |
| 0     | 0    | 0     | 0 NA           | NA       |

|      |      |      |      |          |          |
|------|------|------|------|----------|----------|
| 0    | 0    | 0    | 0    | NA       | NA       |
| 0    | 0    | 0    | 0    | NA       | NA       |
| 0    | 0    | 0    | 0    | NA       | NA       |
| 0    | 0    | 0    | 0    | NA       | NA       |
| 0    | 0    | 0    | 0    | NA       | NA       |
| 0    | 0    | 0    | 0    | NA       | NA       |
| 0    | 0    | 0    | 0    | NA       | NA       |
| 0    | 0    | 0    | 0    | NA       | NA       |
| 0    | 0    | 0    | 0    | NA       | NA       |
| 0    | 0    | 0    | 0    | NA       | NA       |
| 0    | 0    | 0    | 0    | NA       | NA       |
| 0    | 0    | 0    | 0    | NA       | NA       |
| 0    | 0    | 0    | 0    | NA       | NA       |
| 0    | 0    | 0    | 0    | NA       | NA       |
| 0    | 0    | 0.07 | 0    | NA       | NA       |
| 0    | 0    | 0    | 0    | NA       | NA       |
| 0    | 0    | 0    | 0    | NA       | NA       |
| 8.88 | 6.4  | 8.73 | 6.89 | -0.43806 | 0.114373 |
| 0    | 0    | 0    | 0    | NA       | NA       |
| 0    | 0    | 0    | 0    | NA       | NA       |
| 0    | 0    | 0    | 0    | NA       | NA       |
| 0.09 | 0.14 | 0.19 | 0.16 | 0.203885 | 0.771116 |
| 0    | 0.4  | 0    | 0    | NA       | NA       |
| 0    | 0    | 0    | 0    | NA       | NA       |
| 0    | 0    | 0    | 0    | NA       | NA       |
| 2.21 | 2.65 | 2.86 | 2.52 | 0.456613 | 0.298406 |
| 0    | 0    | 0    | 0    | NA       | NA       |
| 0    | 0    | 0    | 0    | NA       | NA       |
| 0    | 0    | 0    | 0    | NA       | NA       |
| 0    | 0.03 | 0    | 0    | NA       | NA       |
| 0    | 0    | 0    | 0    | NA       | NA       |
| 0    | 0    | 0    | 0    | NA       | NA       |
| 0    | 0    | 0    | 0    | NA       | NA       |
| 0    | 0    | 0    | 0    | NA       | NA       |
| 0    | 0    | 0    | 0    | NA       | NA       |
| 0.18 | 0.13 | 0.24 | 0    | NA       | NA       |
| 0    | 0    | 0.07 | 0.08 | NA       | NA       |
| 0    | 0    | 0    | 0    | NA       | NA       |
| 0    | 0    | 0    | 0    | NA       | NA       |
| 0    | 0.14 | 0.06 | 0.07 | NA       | NA       |
| 0    | 0    | 0    | 0    | NA       | NA       |
| 0.12 | 0    | 0    | 0    | NA       | NA       |
| 0    | 0    | 0    | 0    | NA       | NA       |

|      |      |      |               |          |
|------|------|------|---------------|----------|
| 0    | 0    | 0    | 0 NA          | NA       |
| 0    | 0    | 0    | 0 NA          | NA       |
| 0.43 | 2.76 | 2.48 | 1.47 0.847121 | 0.142155 |
| 0.04 | 0.01 | 0.05 | 0.01 -0.45914 | 0.539415 |
| 0    | 0    | 0    | 0 NA          | NA       |
| 0    | 0    | 0    | 0 NA          | NA       |
| 0    | 0    | 0    | 0 NA          | NA       |
| 0    | 0.25 | 0    | 0.05 NA       | NA       |
| 0    | 0    | 0    | 0 NA          | NA       |
| 0    | 0    | 0    | 0 NA          | NA       |
| 0    | 0    | 0.07 | 0 NA          | NA       |
| 0    | 0    | 0    | 0 NA          | NA       |
| 0    | 0.5  | 0    | 0 NA          | NA       |
| 0    | 0    | 0    | 0 NA          | NA       |
| 0    | 0    | 0    | 0 NA          | NA       |
| 0    | 0    | 0    | 0 NA          | NA       |
| 0    | 0    | 0    | 0 NA          | NA       |
| 0    | 0    | 0    | 0 NA          | NA       |
| 0    | 0    | 0    | 0 NA          | NA       |
| 0    | 0    | 0    | 0 NA          | NA       |
| 0    | 0    | 0    | 0 NA          | NA       |
| 0    | 0    | 0    | 0 NA          | NA       |
| 0    | 0    | 0    | 0 NA          | NA       |
| 0    | 0    | 0    | 0 NA          | NA       |
| 0    | 0    | 0    | 0 NA          | NA       |
| 0    | 0    | 0    | 0 NA          | NA       |
| 0.09 | 0    | 0.01 | 0 -1.19764    | 0.042937 |
| 0    | 0    | 0    | 0 NA          | NA       |
| 0    | 0.04 | 0    | 0 NA          | NA       |
| 0    | 0    | 0    | 0 NA          | NA       |
| 0.07 | 0.1  | 0.09 | 0.26 NA       | NA       |
| 0    | 0    | 0    | 0 NA          | NA       |
| 0    | 0    | 0    | 0 NA          | NA       |
| 0    | 0    | 0    | 0 NA          | NA       |
| 0    | 0    | 0    | 0 NA          | NA       |
| 0    | 0    | 0    | 0 NA          | NA       |
| 0.12 | 0.08 | 0.15 | 0.09 NA       | NA       |
| 0    | 0    | 0    | 0 NA          | NA       |
| 0    | 0    | 0    | 0 NA          | NA       |
| 0    | 0    | 0.08 | 0 NA          | NA       |
| 0    | 0    | 0    | 0 NA          | NA       |
| 0    | 0    | 0    | 0 NA          | NA       |
| 0    | 0    | 0    | 0 NA          | NA       |
| 1.07 | 0.1  | 0.35 | 0.12 -1.30615 | 0.01218  |
| 0    | 0    | 0    | 0 NA          | NA       |
| 0    | 0    | 0    | 0 NA          | NA       |

|      |      |      |               |          |
|------|------|------|---------------|----------|
| 0    | 0    | 0    | 0 NA          | NA       |
| 0    | 0    | 0    | 0 NA          | NA       |
| 0.26 | 0.37 | 1.16 | 0.96 0.309423 | 0.696368 |
| 0    | 0    | 0    | 0 NA          | NA       |
| 0    | 0    | 0.07 | 0 NA          | NA       |
| 0    | 0    | 0.1  | 0.19 NA       | NA       |
| 0    | 0    | 0    | 0 NA          | NA       |
| 0.96 | 4.01 | 2.75 | 3.08 0.889966 | 0.008538 |
| 0.74 | 2.44 | 1.66 | 1.24 0.57003  | 0.215995 |
| 0    | 0    | 0    | 0 NA          | NA       |
| 0    | 0    | 0    | 0 NA          | NA       |
| 0    | 0    | 0    | 0 NA          | NA       |
| 0    | 0    | 0    | 0 NA          | NA       |
| 0    | 0    | 0    | 0 NA          | NA       |
| 0    | 0    | 0    | 0 NA          | NA       |
| 0    | 0    | 0    | 0 NA          | NA       |
| 0    | 0    | 0    | 0 NA          | NA       |
| 0    | 0    | 0    | 0 NA          | NA       |
| 0    | 0    | 0    | 0 NA          | NA       |
| 0    | 0    | 0    | 0 NA          | NA       |
| 0    | 0    | 0    | 0 NA          | NA       |
| 0    | 0    | 0    | 0 NA          | NA       |
| 0    | 0    | 0    | 0 NA          | NA       |
| 0    | 0    | 0    | 0 NA          | NA       |
| 0.53 | 0.26 | 0.29 | 0.49 0.140458 | 0.850501 |
| 8.11 | 7.2  | 7.7  | 7.1 -0.12197  | 0.523528 |
| 0    | 0    | 0    | 0 NA          | NA       |
| 0    | 0    | 0    | 0 NA          | NA       |
| 0    | 0    | 0    | 0 NA          | NA       |
| 0    | 0.09 | 0.25 | 0.19 NA       | NA       |
| 0    | 0    | 0.91 | 0 NA          | NA       |
| 0    | 0    | 0    | 0 NA          | NA       |
| 0    | 0    | 0    | 0 NA          | NA       |
| 0    | 0    | 0    | 0 NA          | NA       |
| 0    | 0    | 0    | 0 NA          | NA       |
| 0    | 0    | 0    | 0 NA          | NA       |
| 0    | 0    | 0.15 | 0 NA          | NA       |
| 0    | 0    | 0    | 0 NA          | NA       |
| 0    | 0    | 0    | 0 NA          | NA       |
| 0    | 0    | 0    | 0 NA          | NA       |
| 0    | 0    | 0    | 0.1 NA        | NA       |
| 0    | 0    | 0    | 0 NA          | NA       |
| 0    | 0    | 0    | 0 NA          | NA       |

|      |      |      |               |          |
|------|------|------|---------------|----------|
| 0    | 0    | 0    | 0 NA          | NA       |
| 0    | 0    | 0    | 0 NA          | NA       |
| 0    | 0    | 0    | 0 NA          | NA       |
| 0    | 0    | 0    | 0 NA          | NA       |
| 0    | 0    | 0    | 0 NA          | NA       |
| 0    | 0.29 | 0.25 | 0 NA          | NA       |
| 0    | 0    | 0    | 0 NA          | NA       |
| 0    | 0    | 0    | 0 NA          | NA       |
| 0    | 0    | 0    | 0 NA          | NA       |
| 0    | 0    | 0    | 0 NA          | NA       |
| 0    | 0    | 0    | 0 NA          | NA       |
| 0    | 0    | 0.08 | 0 NA          | NA       |
| 0    | 0    | 0    | 0 NA          | NA       |
| 0    | 0    | 0    | 0 NA          | NA       |
| 0    | 0    | 0    | 0 NA          | NA       |
| 0    | 0    | 0    | 0 NA          | NA       |
| 0    | 0    | 0    | 0 NA          | NA       |
| 0.24 | 0.06 | 0.41 | 0.25 NA       | NA       |
| 0    | 0    | 0    | 0 NA          | NA       |
| 0    | 0    | 0    | 0 NA          | NA       |
| 0    | 0    | 0.12 | 0 NA          | NA       |
| 2.67 | 1.68 | 1.63 | 1.9 -0.77896  | 3.79E-05 |
| 0.58 | 0.42 | 1.01 | 1.15 0.30006  | 0.698958 |
| 0    | 0    | 0    | 0 NA          | NA       |
| 0    | 0    | 0    | 0 NA          | NA       |
| 9.14 | 3.7  | 4.2  | 3.31 -0.71807 | 0.003632 |
| 0    | 0    | 0    | 0 NA          | NA       |
| 0    | 0.1  | 0.12 | 0.11 NA       | NA       |
| 0    | 0    | 0    | 0 NA          | NA       |
| 0    | 0    | 0    | 0 NA          | NA       |
| 0    | 0.01 | 0    | 0.09 NA       | NA       |
| 0    | 0    | 0    | 0 NA          | NA       |
| 0    | 1.27 | 2.67 | 1.49 -0.05207 | NA       |
| 0    | 0    | 0    | 0 NA          | NA       |
| 0    | 0    | 0.39 | 0 NA          | NA       |
| 0    | 0    | 0    | 0 NA          | NA       |
| 0    | 0    | 0    | 0 NA          | NA       |
| 0    | 0    | 0    | 0 NA          | NA       |
| 0    | 0    | 0    | 0 NA          | NA       |
| 0    | 0    | 0    | 0 NA          | NA       |
| 0    | 0    | 0    | 0 NA          | NA       |
| 0    | 0    | 0    | 0 NA          | NA       |
| 3.9  | 1.99 | 3.14 | 2.04 -0.3688  | 0.505474 |
| 0    | 0    | 0    | 0 NA          | NA       |
| 2.65 | 4.62 | 5.5  | 6.39 0.85855  | 0.000472 |
| 0    | 0    | 0    | 0 NA          | NA       |





|        |       |        |       |          |          |
|--------|-------|--------|-------|----------|----------|
| 0      | 0     | 0      | 0     | NA       | NA       |
| 0      | 0     | 0.11   | 0.13  | NA       | NA       |
| 0      | 0     | 0      | 0     | NA       | NA       |
| 0      | 0     | 0      | 0     | NA       | NA       |
| 0      | 0     | 0      | 0     | NA       | NA       |
| 0      | 0     | 0      | 0     | NA       | NA       |
| 0      | 0     | 0      | 0     | NA       | NA       |
| 0      | 0     | 0      | 0     | NA       | NA       |
| 0      | 0     | 0      | 0     | NA       | NA       |
| 0      | 0     | 0      | 0     | NA       | NA       |
| 0      | 0     | 0      | 0     | NA       | NA       |
| 0      | 0     | 0      | 0     | NA       | NA       |
| 0      | 0     | 0      | 0     | NA       | NA       |
| 803.18 | 740.2 | 755.04 | 692.4 | -0.1831  | 0.020586 |
| 0      | 0     | 0      | 0     | NA       | NA       |
| 0      | 0     | 0      | 0     | NA       | NA       |
| 0      | 0     | 0      | 0     | NA       | NA       |
| 0.15   | 0.11  | 0      | 0.06  | NA       | NA       |
| 0      | 0.05  | 0.47   | 1.31  | 0.255215 | 0.75745  |
| 0      | 0     | 0      | 0     | NA       | NA       |
| 0      | 0.02  | 0      | 0     | NA       | NA       |
| 1.04   | 0.75  | 0.21   | 0.95  | -0.51145 | 0.451225 |
| 0      | 0     | 0      | 0     | NA       | NA       |
| 0      | 0     | 0      | 0     | NA       | NA       |
| 0      | 0     | 0      | 0     | NA       | NA       |
| 0      | 0     | 0      | 0     | NA       | NA       |
| 0.72   | 0.71  | 1.33   | 1.71  | -0.08591 | 0.921213 |
| 0      | 0     | 0      | 0     | NA       | NA       |
| 0      | 0     | 0      | 0     | NA       | NA       |
| 0      | 0     | 0      | 0     | NA       | NA       |
| 0      | 0     | 0      | 0     | NA       | NA       |
| 0      | 0     | 0      | 0     | NA       | NA       |
| 0      | 0     | 0      | 0     | NA       | NA       |
| 0      | 0     | 0      | 0     | NA       | NA       |
| 0      | 0     | 0      | 0     | NA       | NA       |
| 0      | 0     | 0      | 0     | NA       | NA       |
| 0      | 0     | 0      | 0     | NA       | NA       |
| 0      | 0     | 0      | 0     | NA       | NA       |
| 0      | 0     | 0      | 0     | NA       | NA       |
| 0      | 0     | 0      | 0     | NA       | NA       |
| 0.39   | 0.09  | 0.18   | 0.25  | NA       | NA       |
| 0      | 0     | 0      | 0     | NA       | NA       |
| 0.67   | 0.24  | 0      | 0.74  | NA       | NA       |
| 0      | 0     | 0      | 0     | NA       | NA       |
| 1.24   | 0.77  | 0.33   | 1.81  | 0.394293 | 0.573033 |

|      |      |      |               |          |
|------|------|------|---------------|----------|
| 0    | 0    | 0    | 0 NA          | NA       |
| 0.37 | 0.09 | 0.25 | 0.09 NA       | NA       |
| 0    | 0.03 | 0    | 0 NA          | NA       |
| 0.22 | 0.24 | 0    | 0 NA          | NA       |
| 0    | 0    | 0    | 0 NA          | NA       |
| 0    | 0    | 0    | 0 NA          | NA       |
| 0.16 | 0    | 0.11 | 0.5 NA        | NA       |
| 0    | 0    | 0    | 0 NA          | NA       |
| 0    | 0    | 0    | 0 NA          | NA       |
| 0    | 0    | 0.01 | 0.01 NA       | NA       |
| 0    | 0    | 0    | 0 NA          | NA       |
| 0    | 0    | 0    | 0 NA          | NA       |
| 0    | 0.09 | 0.08 | 0 NA          | NA       |
| 0    | 0    | 0    | 0 NA          | NA       |
| 0    | 0    | 0    | 0 NA          | NA       |
| 0    | 0    | 0    | 0 NA          | NA       |
| 0    | 0    | 0    | 0 NA          | NA       |
| 0    | 0    | 0    | 0 NA          | NA       |
| 0    | 0    | 0    | 0 NA          | NA       |
| 0    | 0    | 0    | 0 NA          | NA       |
| 0    | 0    | 0    | 0 NA          | NA       |
| 0    | 0    | 0    | 0 NA          | NA       |
| 0    | 0    | 0    | 0 NA          | NA       |
| 0    | 0    | 0    | 0 NA          | NA       |
| 0.23 | 0    | 0.16 | 0 NA          | NA       |
| 0    | 0    | 0    | 0 NA          | NA       |
| 0    | 0    | 0    | 0 NA          | NA       |
| 0    | 0    | 0    | 0 NA          | NA       |
| 0    | 0    | 0    | 0 NA          | NA       |
| 0    | 0    | 0    | 0 NA          | NA       |
| 0    | 0    | 0    | 0 NA          | NA       |
| 0    | 0    | 0    | 0 NA          | NA       |
| 0    | 0    | 0    | 0 NA          | NA       |
| 0    | 0    | 0    | 0 NA          | NA       |
| 2.78 | 3.22 | 2.06 | 2.43 0.130871 | 0.72224  |
| 0.06 | 0.15 | 0.08 | 0.1 0.199746  | 0.776743 |
| 0    | 0    | 0    | 0 NA          | NA       |
| 0    | 0    | 0    | 0 NA          | NA       |
| 0    | 0    | 0    | 0 NA          | NA       |
| 0.03 | 0.02 | 0.02 | 0.09 NA       | NA       |
| 0    | 0    | 0    | 0 NA          | NA       |
| 0    | 0    | 0    | 0 NA          | NA       |
| 0    | 0    | 0    | 0 NA          | NA       |
| 0    | 0    | 0    | 0.13 NA       | NA       |
| 0    | 0    | 0    | 0 NA          | NA       |
| 0    | 0    | 0    | 0 NA          | NA       |
| 0    | 0    | 0    | 0 NA          | NA       |
| 0    | 0    | 1.64 | 0.62 0.099135 | 0.842277 |
| 0    | 0    | 0    | 0 NA          | NA       |
| 0    | 0    | 0    | 0 NA          | NA       |
| 0.19 | 0.14 | 0    | 0 NA          | NA       |

|      |       |      |      |          |          |
|------|-------|------|------|----------|----------|
| 0    | 0     | 0    | 0    | NA       | NA       |
| 0    | 0     | 0    | 0    | NA       | NA       |
| 5.11 | 8.93  | 5.63 | 7.31 | 0.34679  | 0.173353 |
| 1.63 | 0.52  | 1.19 | 0.27 | -0.67045 | 0.323617 |
| 2.29 | 0.83  | 2.33 | 1.69 | -0.25467 | 0.65647  |
| 0    | 0     | 0    | 0    | NA       | NA       |
| 0.1  | 0     | 0.03 | 0.04 | NA       | NA       |
| 0    | 0     | 0    | 0    | NA       | NA       |
| 0    | 0     | 0    | 0    | NA       | NA       |
| 0    | 0     | 0    | 0    | NA       | NA       |
| 0    | 0     | 0    | 0    | NA       | NA       |
| 0    | 0     | 0    | 0    | NA       | NA       |
| 0    | 0     | 0    | 0    | NA       | NA       |
| 2.17 | 2.65  | 0    | 1.6  | -0.00541 | 0.995428 |
| 0.08 | 0     | 0    | 0    | NA       | NA       |
| 0    | 0     | 0    | 0    | NA       | NA       |
| 0    | 0     | 0.02 | 0    | NA       | NA       |
| 0    | 0     | 0    | 0    | NA       | NA       |
| 0.7  | 0.22  | 0.3  | 0.34 | -0.80135 | 0.113436 |
| 0    | 0     | 0    | 0    | NA       | NA       |
| 0    | 0     | 0    | 0    | NA       | NA       |
| 0    | 0     | 0    | 0    | NA       | NA       |
| 0    | 0     | 0.09 | 0.22 | NA       | NA       |
| 0    | 0     | 0    | 0    | NA       | NA       |
| 0    | 0     | 0    | 0    | NA       | NA       |
| 0    | 0.22  | 0    | 0.22 | NA       | NA       |
| 0    | 0     | 0    | 0    | NA       | NA       |
| 0.41 | 2.19  | 1.42 | 2.37 | 1.499328 | 0.002743 |
| 0    | 0     | 0    | 0    | NA       | NA       |
| 0    | 0     | 0    | 0    | NA       | NA       |
| 0    | 0     | 0    | 0    | NA       | NA       |
| 0    | 0     | 0    | 0    | NA       | NA       |
| 0    | 0     | 0    | 0    | NA       | NA       |
| 0    | 0.08  | 0.08 | 0    | NA       | NA       |
| 0    | 0     | 0    | 0    | NA       | NA       |
| 0.15 | 0.11  | 0.19 | 0.56 | NA       | NA       |
| 0    | 0     | 0    | 0    | NA       | NA       |
| 0    | 0     | 0    | 0    | NA       | NA       |
| 0    | 0     | 0    | 0    | NA       | NA       |
| 0    | 0     | 0    | 0    | NA       | NA       |
| 9.29 | 12.99 | 10   | 10.1 | 0.157394 | 0.526847 |
| 0    | 0     | 0    | 0    | NA       | NA       |
| 0    | 0     | 0    | 0    | NA       | NA       |
| 0    | 0.13  | 0    | 0    | NA       | NA       |
| 0    | 0     | 0    | 0    | NA       | NA       |

|      |      |      |               |          |
|------|------|------|---------------|----------|
| 0    | 0    | 0    | 0 NA          | NA       |
| 0    | 0    | 0    | 0 NA          | NA       |
| 3.46 | 1.14 | 2.05 | 3.16 -0.05396 | 0.950843 |
| 0.32 | 0.23 | 0.2  | 0 NA          | NA       |
| 0    | 0.19 | 0    | 0 NA          | NA       |
| 0    | 0    | 0    | 0 NA          | NA       |
| 0    | 0    | 0    | 0 NA          | NA       |
| 0    | 0    | 0    | 0 NA          | NA       |
| 0    | 0    | 0    | 0 NA          | NA       |
| 0    | 0    | 0    | 0 NA          | NA       |
| 0    | 0    | 0    | 0 NA          | NA       |
| 0    | 0    | 0    | 0 NA          | NA       |
| 0    | 0    | 0    | 0 NA          | NA       |
| 0    | 0    | 0    | 0 NA          | NA       |
| 0    | 0    | 0    | 0 NA          | NA       |
| 0    | 0    | 0    | 0 NA          | NA       |
| 0    | 0    | 0    | 0 NA          | NA       |
| 0    | 0    | 0    | 0 NA          | NA       |
| 0    | 0    | 0    | 0 NA          | NA       |
| 0    | 0    | 0    | 0 NA          | NA       |
| 0    | 0    | 0    | 0 NA          | NA       |
| 0    | 0    | 0    | 0 NA          | NA       |
| 1.15 | 0.38 | 1.98 | 2.09 -0.00705 | 0.993344 |
| 0    | 0    | 0    | 0 NA          | NA       |
| 0.09 | 0.13 | 0.18 | 0.07 NA       | NA       |
| 0    | 0    | 0    | 0 NA          | NA       |
| 0    | 0    | 0    | 0 NA          | NA       |
| 0    | 0    | 0    | 0 NA          | NA       |
| 0    | 0    | 0    | 0 NA          | NA       |
| 0.04 | 0.03 | 0.03 | 0.06 NA       | NA       |
| 0    | 0    | 0    | 0 NA          | NA       |
| 0    | 0    | 0    | 0 NA          | NA       |
| 0    | 0    | 0    | 0 NA          | NA       |
| 0    | 0    | 0    | 0 NA          | NA       |
| 0    | 0    | 0    | 0 NA          | NA       |
| 0    | 0    | 0    | 0 NA          | NA       |
| 0    | 0    | 0    | 0 NA          | NA       |
| 0.2  | 0    | 0    | 0 NA          | NA       |
| 0    | 0    | 0    | 0 NA          | NA       |
| 0    | 0    | 0    | 0 NA          | NA       |
| 0    | 0    | 0    | 0 NA          | NA       |
| 0    | 0    | 0    | 0 NA          | NA       |
| 0.13 | 0.02 | 0    | 0.09 NA       | NA       |
| 0    | 0    | 0    | 0 NA          | NA       |
| 0    | 0    | 0    | 0 NA          | NA       |
| 0    | 0    | 0    | 0 NA          | NA       |
| 0    | 0    | 0    | 0 NA          | NA       |
| 0    | 0    | 0    | 0 NA          | NA       |

|        |        |       |                 |          |
|--------|--------|-------|-----------------|----------|
| 0      | 0      | 0     | 0 NA            | NA       |
| 0      | 0      | 0     | 0 NA            | NA       |
| 0.46   | 0.41   | 0.18  | 0.41 -0.27829   | 0.734587 |
| 0      | 0      | 0     | 0 NA            | NA       |
| 0      | 0      | 0     | 0 NA            | NA       |
| 0      | 0      | 0     | 0 NA            | NA       |
| 0      | 0.37   | 0.34  | 0.13 0.397456   | 0.591581 |
| 0      | 0      | 0     | 0 NA            | NA       |
| 0.19   | 0      | 0     | 0 NA            | NA       |
| 0      | 0      | 0     | 0 NA            | NA       |
| 0      | 0      | 0.01  | 0 NA            | NA       |
| 0      | 0      | 0     | 0 NA            | NA       |
| 0      | 0      | 0     | 0 NA            | NA       |
| 0      | 0      | 0     | 0 NA            | NA       |
| 0      | 0.11   | 0     | 0.24 NA         | NA       |
| 0.26   | 2.99   | 1.56  | 0.32 0.39214    | 0.574697 |
| 0      | 0      | 0     | 0 NA            | NA       |
| 0      | 0      | 0     | 0.21 NA         | NA       |
| 0      | 0      | 0     | 0 NA            | NA       |
| 0      | 0      | 0     | 0 NA            | NA       |
| 0      | 0      | 0.1   | 0 NA            | NA       |
| 13.08  | 20.83  | 16.91 | 16.13 0.212072  | 0.095864 |
| 0.15   | 0.33   | 0.4   | 0 NA            | NA       |
| 0      | 0      | 0     | 0 NA            | NA       |
| 0      | 0      | 0     | 0 NA            | NA       |
| 0      | 0      | 0.07  | 0 NA            | NA       |
| 0      | 0.23   | 0     | 0 NA            | NA       |
| 0      | 0      | 0     | 0 NA            | NA       |
| 0      | 0      | 0     | 0 NA            | NA       |
| 1.54   | 0.79   | 0.66  | 0.7 -0.48763    | 0.435353 |
| 8.84   | 9.77   | 8.57  | 8.52 -0.00792   | 0.967024 |
| 0      | 0      | 0     | 0 NA            | NA       |
| 0      | 0      | 0     | 0 NA            | NA       |
| 105.56 | 144.14 | 136.5 | 138.26 0.321553 | 0.000138 |
| 0.07   | 0      | 0     | 0 NA            | NA       |
| 0      | 0      | 0     | 0 NA            | NA       |
| 0.24   | 0.17   | 0.14  | 0.13 NA         | NA       |
| 0      | 0      | 0     | 0 NA            | NA       |
| 0      | 0      | 0     | 0.07 NA         | NA       |
| 0      | 0      | 0     | 0 NA            | NA       |
| 0      | 0      | 0     | 0 NA            | NA       |
| 0      | 0.68   | 0.4   | 0.23 NA         | NA       |
| 0.2    | 0      | 0.13  | 0 NA            | NA       |
| 0      | 0      | 0     | 0 NA            | NA       |
| 0      | 0      | 0     | 0 NA            | NA       |

|      |      |      |               |          |
|------|------|------|---------------|----------|
| 0    | 0    | 0    | 0 NA          | NA       |
| 0    | 0    | 0    | 0 NA          | NA       |
| 0    | 0    | 0    | 0 NA          | NA       |
| 0    | 0    | 0    | 0 NA          | NA       |
| 0    | 0    | 0    | 0 NA          | NA       |
| 0    | 0    | 0    | 0 NA          | NA       |
| 0    | 0    | 0    | 0 NA          | NA       |
| 0    | 0    | 0    | 0.1 NA        | NA       |
| 0    | 0    | 0.09 | 0 NA          | NA       |
| 0    | 0    | 0    | 0 NA          | NA       |
| 0    | 0    | 0    | 0 NA          | NA       |
| 0    | 0    | 0    | 0.07 NA       | NA       |
| 0    | 0    | 0    | 0 NA          | NA       |
| 0    | 0    | 0    | 0 NA          | NA       |
| 0    | 0    | 0.3  | 0.11 NA       | NA       |
| 0    | 0    | 0    | 0 NA          | NA       |
| 1.37 | 2.1  | 1.58 | 1.5 -0.20432  | 0.760373 |
| 0    | 0    | 0    | 0 NA          | NA       |
| 0    | 0    | 0    | 0 NA          | NA       |
| 0    | 0    | 0    | 0 NA          | NA       |
| 0.49 | 0    | 0.17 | 0.04 -0.27933 | 0.624592 |
| 0    | 0    | 0    | 0 NA          | NA       |
| 0    | 0.51 | 0.35 | 0.27 NA       | NA       |
| 0    | 0    | 0    | 0 NA          | NA       |
| 0    | 0    | 0    | 0 NA          | NA       |
| 0    | 0    | 0    | 0 NA          | NA       |
| 0    | 0    | 0    | 0 NA          | NA       |
| 0    | 0    | 0    | 0 NA          | NA       |
| 0    | 0    | 0    | 0 NA          | NA       |
| 0.56 | 0.57 | 0.63 | 0.73 -0.1041  | 0.908519 |
| 0    | 0    | 0    | 0 NA          | NA       |
| 0    | 0    | 0    | 0 NA          | NA       |
| 0    | 0    | 0    | 0 NA          | NA       |
| 0    | 0    | 0    | 0 NA          | NA       |
| 0.16 | 0.23 | 0.05 | 0 NA          | NA       |
| 0    | 0    | 0    | 0 NA          | NA       |
| 0    | 0    | 0.23 | 0 NA          | NA       |
| 0    | 0    | 0    | 0 NA          | NA       |
| 0    | 0    | 0    | 0 NA          | NA       |
| 0    | 1.05 | 0    | 0 NA          | NA       |
| 0.36 | 0    | 0.45 | 0.13 NA       | NA       |
| 0    | 0    | 0    | 0 NA          | NA       |
| 0.24 | 0.86 | 0.27 | 0.18 NA       | NA       |
| 0    | 0    | 0    | 0 NA          | NA       |
| 0    | 0    | 0.03 | 0 NA          | NA       |

|      |       |       |       |          |          |
|------|-------|-------|-------|----------|----------|
| 0    | 0     | 0.15  | 0.18  | NA       | NA       |
| 0    | 0     | 0     | 0     | NA       | NA       |
| 0    | 0     | 0     | 0     | NA       | NA       |
| 9.41 | 22.91 | 18.28 | 27.74 | 0.997385 | 0.032464 |
| 0    | 0.01  | 0.06  | 0.49  | -0.06005 | 0.933652 |
| 0    | 0     | 0     | 0     | NA       | NA       |
| 0    | 0     | 0     | 0     | NA       | NA       |
| 0    | 0     | 0     | 0     | NA       | NA       |
| 0    | 0     | 0     | 0     | NA       | NA       |
| 0    | 0     | 0     | 0     | NA       | NA       |
| 0    | 0     | 0     | 0     | NA       | NA       |
| 0    | 0     | 0     | 0     | NA       | NA       |
| 0    | 0     | 0     | 0     | NA       | NA       |
| 0    | 0     | 0     | 0     | NA       | NA       |
| 0    | 0     | 0     | 0     | NA       | NA       |
| 0    | 0     | 0     | 0     | NA       | NA       |
| 0    | 0     | 0     | 0     | NA       | NA       |
| 0    | 0     | 0     | 0     | NA       | NA       |
| 0    | 0     | 0     | 0     | NA       | NA       |
| 0    | 0     | 0     | 0     | NA       | NA       |
| 0    | 0     | 0     | 0     | NA       | NA       |
| 4.63 | 3.28  | 1.87  | 1.11  | -0.40471 | 0.590167 |
| 0    | 0     | 0     | 0     | NA       | NA       |
| 0    | 0     | 0     | 0     | NA       | NA       |
| 0    | 0     | 0     | 0     | NA       | NA       |
| 0    | 0     | 0     | 0     | NA       | NA       |
| 0    | 0     | 0     | 0     | NA       | NA       |
| 0    | 0     | 0     | 0     | NA       | NA       |
| 0.3  | 0     | 0     | 0     | NA       | NA       |
| 0    | 0     | 0     | 0     | NA       | NA       |
| 0    | 2.31  | 0.28  | 1.03  | NA       | NA       |
| 0    | 0     | 0     | 0     | NA       | NA       |
| 0    | 0     | 0     | 0     | NA       | NA       |
| 0.21 | 0     | 0     | 0.02  | NA       | NA       |
| 0    | 0     | 0     | 0     | NA       | NA       |
| 0.1  | 0     | 0     | 0     | NA       | NA       |
| 0    | 0     | 0     | 0     | NA       | NA       |
| 0.4  | 0.38  | 0     | 0     | NA       | NA       |
| 0    | 0     | 0     | 0     | NA       | NA       |
| 0    | 0     | 0     | 0     | NA       | NA       |
| 0    | 0     | 0     | 0     | NA       | NA       |
| 13   | 36.74 | 24.5  | 29.82 | 1.144052 | 3.21E-18 |
| 0    | 0     | 0     | 0     | NA       | NA       |
| 0    | 0     | 0.08  | 0     | NA       | NA       |
| 0    | 0     | 0     | 0     | NA       | NA       |
| 0    | 0     | 0     | 0     | NA       | NA       |
| 0    | 0     | 0     | 0     | NA       | NA       |





|      |       |       |       |          |          |
|------|-------|-------|-------|----------|----------|
| 0.41 | 0.31  | 0.3   | 0.21  | NA       | NA       |
| 0    | 0     | 0     | 0     | NA       | NA       |
| 0    | 0     | 0     | 0     | NA       | NA       |
| 0    | 0     | 0     | 0     | NA       | NA       |
| 0    | 0     | 0     | 0     | NA       | NA       |
| 0    | 0     | 0     | 0     | NA       | NA       |
| 0    | 0     | 0     | 0     | NA       | NA       |
| 0    | 0     | 0     | 0     | NA       | NA       |
| 0    | 0     | 0     | 0     | NA       | NA       |
| 0.39 | 0.42  | 0.7   | 0.45  | 0.194442 | 0.794074 |
| 0    | 0     | 0     | 0     | NA       | NA       |
| 0    | 0     | 0     | 0     | NA       | NA       |
| 0    | 0     | 0     | 0     | NA       | NA       |
| 0    | 0     | 0     | 0     | NA       | NA       |
| 0.77 | 0.82  | 1.36  | 1.33  | -0.6547  | 0.104488 |
| 0    | 0     | 0     | 0     | NA       | NA       |
| 0    | 0     | 0     | 0     | NA       | NA       |
| 1.05 | 0.99  | 0.85  | 1.34  | -0.12264 | 0.876132 |
| 0    | 0     | 0     | 0     | NA       | NA       |
| 0    | 0     | 0     | 0     | NA       | NA       |
| 0    | 0     | 0     | 0     | NA       | NA       |
| 0    | 0     | 0     | 0     | NA       | NA       |
| 0    | 0     | 0     | 0     | NA       | NA       |
| 0    | 0     | 0     | 0     | NA       | NA       |
| 0    | 0     | 0     | 0     | NA       | NA       |
| 0    | 0     | 0     | 0     | NA       | NA       |
| 0.36 | 0.83  | 0.9   | 0.39  | 0.028599 | 0.9757   |
| 15.4 | 24.76 | 16.64 | 17.32 | 0.153489 | 0.744989 |
| 0    | 0     | 0     | 0     | NA       | NA       |
| 0.41 | 0.88  | 0.79  | 0.62  | 0.52765  | 0.283156 |
| 0    | 0     | 0     | 0     | NA       | NA       |
| 0    | 0     | 0     | 0.09  | NA       | NA       |
| 0    | 0     | 0.06  | 0     | NA       | NA       |
| 0    | 0     | 0     | 0     | NA       | NA       |
| 0    | 0     | 0     | 0     | NA       | NA       |
| 0    | 0     | 0     | 0     | NA       | NA       |
| 0    | 0     | 0     | 0     | NA       | NA       |
| 0    | 0     | 0     | 0     | NA       | NA       |
| 0    | 0     | 0     | 0     | NA       | NA       |
| 0    | 0     | 0     | 0     | NA       | NA       |
| 0    | 0.06  | 0     | 0     | NA       | NA       |
| 0    | 0     | 0     | 0     | NA       | NA       |
| 0    | 0     | 0     | 0     | NA       | NA       |



|        |        |        |                 |          |
|--------|--------|--------|-----------------|----------|
| 0      | 0      | 0      | 0 NA            | NA       |
| 0      | 0      | 0      | 0 NA            | NA       |
| 0      | 0      | 0      | 0 NA            | NA       |
| 0      | 0      | 0      | 0.07 NA         | NA       |
| 0      | 0      | 0      | 0 NA            | NA       |
| 0      | 0      | 0      | 0 NA            | NA       |
| 0      | 0      | 0      | 0 NA            | NA       |
| 0      | 0      | 0      | 0 NA            | NA       |
| 0      | 0      | 0      | 0 NA            | NA       |
| 0      | 0      | 0      | 0 NA            | NA       |
| 0.34   | 0      | 0      | 0 NA            | NA       |
| 0.22   | 0      | 0      | 0.08 NA         | NA       |
| 0      | 0      | 0      | 0 NA            | NA       |
| 0      | 0      | 0      | 0 NA            | NA       |
| 0      | 0      | 0      | 0 NA            | NA       |
| 0      | 0      | 0      | 0 NA            | NA       |
| 0      | 0      | 0      | 0 NA            | NA       |
| 5.68   | 2.87   | 5.71   | 4.6 -0.44557    | 0.215995 |
| 0      | 0      | 0      | 0 NA            | NA       |
| 0      | 0      | 0      | 0 NA            | NA       |
| 0      | 0      | 0      | 0 NA            | NA       |
| 0      | 0      | 0      | 0 NA            | NA       |
| 0      | 0      | 0      | 0 NA            | NA       |
| 0      | 0      | 0      | 0 NA            | NA       |
| 7.33   | 0      | 0      | 5.51 -0.20244   | 0.696368 |
| 0      | 0      | 0.02   | 0 NA            | NA       |
| 0      | 0      | 0      | 0 NA            | NA       |
| 0      | 0      | 0      | 0 NA            | NA       |
| 0      | 0      | 0      | 0 NA            | NA       |
| 0      | 0      | 0      | 0 NA            | NA       |
| 0      | 0      | 0      | 0 NA            | NA       |
| 0.17   | 0.46   | 0.11   | 0.92 NA         | NA       |
| 0      | 0      | 0      | 0 NA            | NA       |
| 0      | 0      | 0      | 0 NA            | NA       |
| 116.98 | 132.98 | 136.72 | 135.06 0.237156 | 0.009065 |
| 0      | 0      | 0      | 0 NA            | NA       |
| 0      | 0      | 0      | 0 NA            | NA       |
| 0      | 0      | 0      | 0 NA            | NA       |
| 0      | 0      | 0.07   | 0 NA            | NA       |
| 0      | 0      | 0      | 0 NA            | NA       |
| 0      | 0      | 0      | 0 NA            | NA       |
| 0      | 0      | 0      | 0 NA            | NA       |
| 0.51   | 0.83   | 1.02   | 0.96 0.330428   | 0.513143 |
| 0      | 0      | 0      | 0 NA            | NA       |
| 0      | 0      | 0      | 0 NA            | NA       |



|      |      |      |               |          |
|------|------|------|---------------|----------|
| 0    | 0    | 0    | 0 NA          | NA       |
| 0    | 0    | 0    | 0 NA          | NA       |
| 0.1  | 0    | 0.3  | 0.04 NA       | NA       |
| 1.09 | 1.68 | 2.97 | 2.34 0.803751 | 0.147871 |
| 0    | 0    | 0    | 0 NA          | NA       |
| 0    | 0.04 | 0.02 | 0.02 NA       | NA       |
| 0    | 0    | 0    | 0 NA          | NA       |
| 0    | 0    | 0    | 0 NA          | NA       |
| 0    | 0    | 0    | 0 NA          | NA       |
| 0    | 0    | 0    | 0 NA          | NA       |
| 0    | 0    | 0    | 0 NA          | NA       |
| 0.08 | 0    | 0.11 | 0 NA          | NA       |
| 0    | 0.05 | 0.09 | 0 NA          | NA       |
| 0    | 0.27 | 0    | 0 NA          | NA       |
| 0    | 0    | 0    | 0 NA          | NA       |
| 0    | 0    | 0    | 0 NA          | NA       |
| 0    | 0    | 0    | 0 NA          | NA       |
| 0    | 0    | 0    | 0 NA          | NA       |
| 0    | 0    | 0    | 0 NA          | NA       |
| 0    | 0    | 0.12 | 0 NA          | NA       |
| 0    | 0    | 0    | 0 NA          | NA       |
| 0.06 | 0.03 | 0.05 | 0.07 NA       | NA       |
| 0    | 0    | 0    | 0 NA          | NA       |
| 0    | 0    | 0    | 0 NA          | NA       |
| 0    | 0    | 0    | 0 NA          | NA       |
| 0    | 0    | 0    | 0 NA          | NA       |
| 0.21 | 0.12 | 0.51 | 0.18 -0.09636 | 0.907869 |
| 0.09 | 0    | 0    | 0.14 NA       | NA       |
| 0    | 0    | 0    | 0 NA          | NA       |
| 0    | 0    | 0    | 0 NA          | NA       |
| 1.2  | 1.8  | 1.89 | 1.66 0.517768 | 0.135861 |
| 0    | 0    | 0    | 0.13 NA       | NA       |
| 0    | 0    | 0    | 0 NA          | NA       |
| 0    | 0    | 0    | 0 NA          | NA       |
| 0    | 0    | 0    | 0 NA          | NA       |
| 0.67 | 0.14 | 0.37 | 0.33 -1.09327 | 0.01081  |
| 0    | 0    | 0    | 0 NA          | NA       |
| 0    | 0    | 0    | 0 NA          | NA       |
| 0    | 0    | 0    | 0 NA          | NA       |
| 0    | 0    | 0    | 0 NA          | NA       |
| 0    | 0    | 0    | 0 NA          | NA       |
| 0    | 0    | 0    | 0 NA          | NA       |
| 0.17 | 0.12 | 0.12 | 0.1 -0.44078  | 0.476585 |
| 0    | 0    | 0    | 0 NA          | NA       |
| 0    | 0    | 0    | 0 NA          | NA       |

|      |      |      |               |          |
|------|------|------|---------------|----------|
| 0    | 0    | 0    | 0 NA          | NA       |
| 0    | 0    | 0    | 0 NA          | NA       |
| 0    | 0    | 0    | 0 NA          | NA       |
| 0    | 0    | 0    | 0 NA          | NA       |
| 0.12 | 0    | 0    | 0 NA          | NA       |
| 0    | 0.33 | 0    | 0.09 NA       | NA       |
| 0    | 0    | 0    | 0 NA          | NA       |
| 0    | 0    | 0    | 0 NA          | NA       |
| 0    | 0    | 0    | 0 NA          | NA       |
| 0.59 | 0.6  | 0.67 | 0.91 -0.23083 | 0.692109 |
| 0    | 0    | 0    | 0 NA          | NA       |
| 0    | 0    | 0    | 0 NA          | NA       |
| 0    | 0    | 0    | 0 NA          | NA       |
| 0    | 0    | 0    | 0 NA          | NA       |
| 0    | 0    | 0    | 0 NA          | NA       |
| 0    | 0    | 0    | 0 NA          | NA       |
| 0    | 0    | 0    | 0 NA          | NA       |
| 0    | 0    | 0    | 0 NA          | NA       |
| 0    | 0    | 0    | 0 NA          | NA       |
| 0    | 0    | 0    | 0 NA          | NA       |
| 0    | 0    | 0    | 0 NA          | NA       |
| 0.85 | 0.36 | 0.19 | 0 NA          | NA       |
| 0    | 0    | 0    | 0 NA          | NA       |
| 0.03 | 0.06 | 0    | 0.14 NA       | NA       |
| 1.99 | 2.11 | 2.87 | 2.2 0.135182  | 0.741276 |
| 0    | 0    | 0    | 0 NA          | NA       |
| 0    | 0    | 0    | 0 NA          | NA       |
| 0    | 0    | 0    | 0 NA          | NA       |
| 0    | 0.21 | 0.09 | 0 NA          | NA       |
| 0    | 0    | 0    | 0 NA          | NA       |
| 0    | 0    | 0    | 0 NA          | NA       |
| 0    | 0    | 0    | 0.13 NA       | NA       |
| 0    | 0    | 0    | 0 NA          | NA       |
| 0    | 0    | 0    | 0 NA          | NA       |
| 0    | 0    | 0    | 0.08 NA       | NA       |
| 0    | 0    | 0    | 0 NA          | NA       |
| 0    | 0    | 0    | 0 NA          | NA       |
| 0    | 0    | 0    | 0 NA          | NA       |
| 0    | 0    | 0    | 0 NA          | NA       |
| 2.02 | 3.02 | 2.61 | 2.44 0.416861 | 0.03647  |
| 0    | 0    | 0    | 0 NA          | NA       |
| 0    | 0    | 0    | 0 NA          | NA       |
| 0    | 0.68 | 0.25 | 0.11 0.023914 | 0.980147 |
| 0    | 0    | 0.35 | 0.08 NA       | NA       |
| 0    | 0    | 0    | 0 NA          | NA       |

|      |      |      |               |          |
|------|------|------|---------------|----------|
| 0    | 0    | 0    | 0 NA          | NA       |
| 0    | 0    | 0    | 0 NA          | NA       |
| 0    | 0    | 0    | 0 NA          | NA       |
| 0    | 0    | 1.94 | 0 NA          | NA       |
| 0    | 0    | 0    | 0 NA          | NA       |
| 0    | 0    | 0    | 0 NA          | NA       |
| 0    | 0    | 0    | 0 NA          | NA       |
| 0.57 | 0.53 | 1.32 | 1.31 0.077995 | 0.931947 |
| 0    | 0    | 0    | 0 NA          | NA       |
| 0    | 0    | 0.05 | 0 NA          | NA       |
| 2.49 | 1.57 | 1.6  | 2.72 -0.6711  | 0.051746 |
| 0    | 0    | 0    | 0 NA          | NA       |
| 0    | 0    | 0    | 0 NA          | NA       |
| 0    | 0    | 0    | 0 NA          | NA       |
| 0    | 0    | 0    | 0.11 NA       | NA       |
| 0    | 0    | 0    | 0 NA          | NA       |
| 0    | 0    | 0    | 0.23 NA       | NA       |
| 0    | 0    | 0    | 0 NA          | NA       |
| 0    | 0    | 0    | 0 NA          | NA       |
| 0    | 0    | 0    | 0 NA          | NA       |
| 0    | 0    | 0    | 0 NA          | NA       |
| 0    | 0    | 0    | 0 NA          | NA       |
| 0    | 0    | 0    | 0 NA          | NA       |
| 0    | 0    | 0    | 0 NA          | NA       |
| 0    | 0    | 0.75 | 0.45 NA       | NA       |
| 0    | 0    | 0    | 0 NA          | NA       |
| 0    | 0    | 0    | 0 NA          | NA       |
| 0    | 0    | 0.31 | 0.15 NA       | NA       |
| 0    | 0    | 0    | 0 NA          | NA       |
| 0    | 0    | 0    | 0 NA          | NA       |
| 0    | 0    | 0    | 0 NA          | NA       |
| 2.01 | 1.41 | 1.94 | 1.35 -0.66049 | 0.057527 |
| 0    | 0    | 0    | 0 NA          | NA       |
| 0    | 0    | 0    | 0 NA          | NA       |
| 0    | 0    | 0    | 0 NA          | NA       |
| 0    | 0    | 0    | 0 NA          | NA       |
| 0    | 0    | 0    | 0 NA          | NA       |
| 0    | 0    | 0    | 0 NA          | NA       |
| 0    | 0    | 0    | 0 NA          | NA       |
| 0    | 0    | 0    | 0 NA          | NA       |
| 0    | 0    | 0    | 0 NA          | NA       |
| 0    | 0    | 0    | 0 NA          | NA       |
| 0    | 0    | 0    | 0 NA          | NA       |
| 0    | 0    | 0    | 0.16 NA       | NA       |



|       |       |       |        |          |          |
|-------|-------|-------|--------|----------|----------|
| 0.86  | 1.4   | 2.55  | 2.19   | 0.9886   | 0.003872 |
| 0     | 0     | 0     | 0 NA   | NA       |          |
| 0     | 0     | 0     | 0 NA   | NA       |          |
| 0     | 0     | 0     | 0 NA   | NA       |          |
| 1.4   | 0.24  | 0     | 0.1 NA | NA       |          |
| 0     | 0     | 0     | 0 NA   | NA       |          |
| 0     | 0     | 0     | 0 NA   | NA       |          |
| 0     | 0     | 0     | 0 NA   | NA       |          |
| 3.21  | 3.25  | 4.02  | 1.27   | -0.03633 | 0.95555  |
| 0     | 0     | 0     | 0 NA   | NA       |          |
| 0     | 0     | 0     | 0 NA   | NA       |          |
| 0     | 0     | 0     | 0 NA   | NA       |          |
| 0.26  | 0.34  | 0.81  | 0.7    | 0.421679 | 0.568414 |
| 0     | 0     | 0     | 0 NA   | NA       |          |
| 0     | 0     | 0     | 0 NA   | NA       |          |
| 0.2   | 1.07  | 0.92  | 1.26   | 0.529609 | 0.467533 |
| 0     | 0     | 0     | 0 NA   | NA       |          |
| 0     | 0.73  | 0     | 0.65   | 0.823554 | 0.170953 |
| 0     | 0     | 0     | 0 NA   | NA       |          |
| 0     | 0     | 0     | 0 NA   | NA       |          |
| 13.74 | 14.15 | 17.05 | 17.09  | 0.088508 | 0.544229 |
| 0     | 0     | 0     | 0 NA   | NA       |          |
| 0     | 0     | 0     | 0 NA   | NA       |          |
| 0     | 0     | 0     | 0 NA   | NA       |          |
| 0     | 0     | 0     | 0 NA   | NA       |          |
| 0     | 0     | 0     | 0 NA   | NA       |          |
| 0     | 0     | 0     | 0 NA   | NA       |          |
| 0     | 0     | 0     | 0 NA   | NA       |          |
| 0.02  | 0.07  | 0.11  | 0.04   | 0.987273 | 0.10619  |
| 0     | 0     | 0     | 0 NA   | NA       |          |
| 0     | 0     | 0     | 0 NA   | NA       |          |
| 0     | 0     | 0     | 0 NA   | NA       |          |
| 0     | 0     | 0     | 0 NA   | NA       |          |
| 0     | 0     | 0     | 0 NA   | NA       |          |
| 0     | 0     | 0     | 0 NA   | NA       |          |
| 0     | 0     | 0     | 0 NA   | NA       |          |
| 0     | 0     | 0     | 0 NA   | NA       |          |
| 0     | 0     | 0     | 0 NA   | NA       |          |
| 0     | 0     | 0     | 0 NA   | NA       |          |
| 0     | 0     | 0     | 0 NA   | NA       |          |
| 0     | 0     | 0     | 0 NA   | NA       |          |
| 0     | 0     | 0     | 0 NA   | NA       |          |
| 0     | 0     | 0     | 0 NA   | NA       |          |
| 0     | 0.14  | 0.13  | 0 NA   | NA       |          |

|      |      |      |               |          |
|------|------|------|---------------|----------|
| 0    | 0    | 0    | 0 NA          | NA       |
| 0    | 0    | 0    | 0 NA          | NA       |
| 0    | 0    | 0    | 0 NA          | NA       |
| 0    | 0    | 0    | 0 NA          | NA       |
| 0    | 0    | 0    | 0 NA          | NA       |
| 0.1  | 0.2  | 0.13 | 0.12 0.684834 | 0.310228 |
| 0    | 0    | 0    | 0 NA          | NA       |
| 0.22 | 1.06 | 0.88 | 0.65 0.708784 | 0.137684 |
| 0    | 0    | 0    | 0 NA          | NA       |
| 0    | 0    | 0    | 0 NA          | NA       |
| 0    | 0    | 0    | 0 NA          | NA       |
| 0    | 0    | 0    | 0 NA          | NA       |
| 0.35 | 0.15 | 0.09 | 0.11 -0.45755 | 0.542026 |
| 0    | 0    | 0    | 0 NA          | NA       |
| 0    | 0.02 | 0    | 0 NA          | NA       |
| 0    | 0    | 0    | 0 NA          | NA       |
| 0    | 0    | 0    | 0 NA          | NA       |
| 0    | 0    | 0    | 0 NA          | NA       |
| 0    | 0    | 0    | 0 NA          | NA       |
| 0    | 0    | 0    | 0 NA          | NA       |
| 2.43 | 2.01 | 2.06 | 1.6 -0.19703  | 0.517818 |
| 0.03 | 0    | 0    | 0 NA          | NA       |
| 0.05 | 0.02 | 0.07 | 0 -0.36358    | 0.636669 |
| 0.1  | 0.09 | 0.2  | 0.37 NA       | NA       |
| 0.19 | 0    | 0    | 0 NA          | NA       |
| 0    | 0    | 0    | 0 NA          | NA       |
| 0    | 0    | 0    | 0 NA          | NA       |
| 0    | 0    | 0    | 0 NA          | NA       |
| 0    | 0    | 0    | 0 NA          | NA       |
| 0.05 | 0    | 0    | 0.02 NA       | NA       |
| 0.03 | 0.07 | 0.02 | 0.02 NA       | NA       |
| 0    | 0    | 0    | 0 NA          | NA       |
| 0    | 0    | 0    | 0 NA          | NA       |
| 0    | 0    | 0    | 0 NA          | NA       |
| 0    | 0    | 0.13 | 0 NA          | NA       |
| 0    | 0    | 0    | 0 NA          | NA       |
| 1.85 | 0.97 | 3.22 | 2.1 -0.09837  | 0.888431 |
| 0    | 0    | 0    | 0 NA          | NA       |
| 0.32 | 0.41 | 0.55 | 0.54 0.298302 | 0.643492 |
| 0    | 0    | 0    | 0 NA          | NA       |
| 0.44 | 0    | 0    | 0 NA          | NA       |
| 0    | 0    | 0    | 0 NA          | NA       |
| 0    | 0    | 0    | 0 NA          | NA       |
| 0    | 0    | 0    | 0 NA          | NA       |
| 0    | 0    | 0    | 0 NA          | NA       |

|       |      |       |                |          |
|-------|------|-------|----------------|----------|
| 0     | 0    | 0     | 0 NA           | NA       |
| 0     | 0.1  | 0     | 0 NA           | NA       |
| 0     | 0    | 0     | 0 NA           | NA       |
| 2.56  | 0    | 0     | 2.55 -0.27992  | 0.634393 |
| 0     | 0    | 0     | 0 NA           | NA       |
| 0     | 0.27 | 0     | 0 NA           | NA       |
| 0.15  | 0    | 0     | 0.11 NA        | NA       |
| 0     | 0    | 0.31  | 0.18 NA        | NA       |
| 0     | 0    | 0     | 0 NA           | NA       |
| 0     | 0    | 0     | 0 NA           | NA       |
| 0     | 0    | 0     | 0 NA           | NA       |
| 0.2   | 0.14 | 0     | 0.15 NA        | NA       |
| 0     | 0    | 0     | 0 NA           | NA       |
| 0     | 0    | 0     | 0 NA           | NA       |
| 0.05  | 0.04 | 0.06  | 0.03 -0.45257  | 0.546314 |
| 0     | 0    | 0     | 0 NA           | NA       |
| 0     | 0    | 0     | 0 NA           | NA       |
| 0     | 0    | 0     | 0 NA           | NA       |
| 0     | 0    | 0     | 0 NA           | NA       |
| 0     | 0    | 0     | 0 NA           | NA       |
| 0.14  | 0.4  | 0.38  | 0.11 0.618181  | 0.382844 |
| 0     | 0    | 0     | 0 NA           | NA       |
| 0     | 0    | 0     | 0 NA           | NA       |
| 27.4  | 25.3 | 29.06 | 26.21 -0.20193 | 0.176246 |
| 0     | 0    | 0     | 0 NA           | NA       |
| 0     | 0    | 0     | 0 NA           | NA       |
| 0     | 0    | 0     | 0 NA           | NA       |
| 0     | 0    | 0     | 0 NA           | NA       |
| 7.3   | 6.01 | 7.07  | 8.08 0.209424  | 0.530724 |
| 0     | 0.03 | 0     | 0 NA           | NA       |
| 0     | 0    | 0     | 0 NA           | NA       |
| 14.21 | 14.3 | 16.11 | 15.69 -0.01354 | 0.950846 |
| 0     | 0    | 0     | 0 NA           | NA       |
| 0     | 0    | 0     | 0 NA           | NA       |
| 0     | 0    | 0     | 0 NA           | NA       |
| 0     | 0    | 0     | 0 NA           | NA       |
| 0.18  | 0.48 | 0.24  | 0.14 NA        | NA       |
| 0     | 0    | 0     | 0 NA           | NA       |
| 0     | 0    | 0     | 0 NA           | NA       |
| 0     | 0    | 0     | 0 NA           | NA       |
| 0     | 0    | 0     | 0 NA           | NA       |
| 0     | 0    | 0     | 0 NA           | NA       |
| 2.84  | 2.84 | 3.75  | 3.47 -0.05404  | 0.908763 |
| 0     | 0    | 0     | 0 NA           | NA       |
| 0     | 0    | 0.07  | 0 NA           | NA       |

|      |      |      |               |          |
|------|------|------|---------------|----------|
| 0.12 | 0    | 0    | 0 NA          | NA       |
| 0    | 0    | 0    | 0 NA          | NA       |
| 0    | 0    | 0    | 0 NA          | NA       |
| 0    | 0    | 0    | 0 NA          | NA       |
| 0    | 0    | 0    | 0 NA          | NA       |
| 0    | 0    | 0    | 0 NA          | NA       |
| 0    | 0    | 0    | 0 NA          | NA       |
| 0    | 0    | 0    | 0 NA          | NA       |
| 0    | 0    | 0    | 0 NA          | NA       |
| 0.15 | 0    | 0    | 0 NA          | NA       |
| 0    | 0    | 0    | 0 NA          | NA       |
| 0    | 0    | 0    | 0 NA          | NA       |
| 0    | 0    | 0    | 0 NA          | NA       |
| 0    | 0    | 0    | 0 NA          | NA       |
| 0    | 0    | 0    | 0.04 NA       | NA       |
| 0    | 0    | 0    | 0 NA          | NA       |
| 0    | 0    | 0    | 0 NA          | NA       |
| 0    | 0    | 0    | 0 NA          | NA       |
| 0.17 | 0    | 0.08 | 0 NA          | NA       |
| 0    | 0.04 | 0.12 | 0.04 NA       | NA       |
| 0.3  | 0.18 | 0.54 | 0.08 0.044012 | 0.963303 |
| 0    | 0    | 0    | 0 NA          | NA       |
| 0    | 0    | 0    | 0 NA          | NA       |
| 0    | 0    | 0    | 0 NA          | NA       |
| 0    | 0    | 0    | 0 NA          | NA       |
| 0    | 0    | 0    | 0 NA          | NA       |
| 0    | 0    | 0.1  | 0 NA          | NA       |
| 1.52 | 1.18 | 0.38 | 0.42 NA       | NA       |
| 0    | 0    | 0    | 0 NA          | NA       |
| 0    | 0    | 0    | 0 NA          | NA       |
| 0.13 | 0.36 | 0.08 | 0 NA          | NA       |
| 1.9  | 3.49 | 3.39 | 2.21 0.183204 | 0.721197 |
| 0    | 0    | 0    | 0 NA          | NA       |
| 0    | 0    | 0    | 0 NA          | NA       |
| 0    | 0    | 0    | 0.3 NA        | NA       |
| 0    | 0.92 | 0.08 | 0 NA          | NA       |
| 0    | 0    | 0    | 0 NA          | NA       |
| 0.15 | 0    | 0    | 0.23 NA       | NA       |
| 0    | 0    | 0    | 0 NA          | NA       |
| 0    | 0    | 0    | 0 NA          | NA       |
| 0    | 0    | 0    | 0 NA          | NA       |
| 0.45 | 0.51 | 0.41 | 0.4 -0.41392  | 0.21952  |
| 0    | 0    | 0    | 0 NA          | NA       |

|      |      |      |               |          |
|------|------|------|---------------|----------|
| 0    | 0    | 0    | 0 NA          | NA       |
| 0    | 0.12 | 0    | 0 NA          | NA       |
| 0    | 0    | 0    | 0 NA          | NA       |
| 0    | 0    | 0.08 | 0 NA          | NA       |
| 0    | 0    | 0    | 0 NA          | NA       |
| 1.59 | 0.83 | 0.48 | 0.33 -1.09362 | 0.059883 |
| 0    | 0    | 0    | 0 NA          | NA       |
| 0    | 0    | 0    | 0 NA          | NA       |
| 0    | 0    | 0    | 0 NA          | NA       |
| 0    | 0    | 0    | 0 NA          | NA       |
| 0    | 0.01 | 0    | 0.17 NA       | NA       |
| 0    | 0    | 0    | 0 NA          | NA       |
| 0    | 0    | 0    | 0 NA          | NA       |
| 0    | 0    | 0    | 0 NA          | NA       |
| 0    | 0.23 | 0.14 | 0.16 NA       | NA       |
| 0    | 0    | 0    | 0 NA          | NA       |
| 0    | 0    | 0    | 0 NA          | NA       |
| 0.08 | 0    | 0    | 0 NA          | NA       |
| 0    | 0    | 0    | 0 NA          | NA       |
| 0    | 0    | 0    | 0 NA          | NA       |
| 0    | 0    | 0    | 0 NA          | NA       |
| 0    | 0    | 0    | 0 NA          | NA       |
| 0    | 0    | 0    | 0 NA          | NA       |
| 0    | 0    | 0    | 0 NA          | NA       |
| 0    | 0    | 0    | 0 NA          | NA       |
| 0    | 0    | 0    | 0 NA          | NA       |
| 0    | 0    | 0    | 0 NA          | NA       |
| 0    | 0    | 0    | 0 NA          | NA       |
| 0    | 0    | 0    | 0 NA          | NA       |
| 0.36 | 0    | 0    | 0.13 NA       | NA       |
| 0    | 0    | 0    | 0 NA          | NA       |
| 0    | 0    | 0    | 0 NA          | NA       |
| 0    | 0    | 0    | 0 NA          | NA       |
| 0.97 | 0.28 | 0.63 | 0.29 -0.03567 | 0.969893 |
| 0    | 0    | 0    | 0 NA          | NA       |
| 0    | 0    | 0    | 0 NA          | NA       |
| 0.02 | 0.03 | 0    | 0 NA          | NA       |
| 0    | 0    | 0    | 0 NA          | NA       |
| 0    | 0    | 0    | 0 NA          | NA       |
| 0    | 0    | 0    | 0 NA          | NA       |
| 0    | 0    | 0    | 0 NA          | NA       |
| 0    | 0    | 0    | 0 NA          | NA       |
| 0    | 0    | 0    | 0 NA          | NA       |
| 0    | 0    | 0    | 0 NA          | NA       |
| 0    | 0    | 0    | 0 NA          | NA       |
| 0    | 0    | 0    | 0 NA          | NA       |
| 0    | 0    | 0    | 0 NA          | NA       |
| 0    | 0.3  | 0    | 0.06 NA       | NA       |
| 0    | 0    | 0    | 0 NA          | NA       |

|       |       |       |                |          |
|-------|-------|-------|----------------|----------|
| 0     | 0     | 0     | 0 NA           | NA       |
| 0     | 0     | 0     | 0 NA           | NA       |
| 0.23  | 0.33  | 0     | 0 NA           | NA       |
| 0     | 0     | 0     | 0 NA           | NA       |
| 0     | 0     | 0     | 0 NA           | NA       |
| 0     | 0.11  | 0.11  | 0 NA           | NA       |
| 0     | 0     | 0     | 0 NA           | NA       |
| 0     | 0     | 0.43  | 0 NA           | NA       |
| 0     | 0     | 0     | 0 NA           | NA       |
| 1.12  | 0.4   | 0.34  | 0.4 NA         | NA       |
| 0     | 0     | 0.17  | 0 NA           | NA       |
| 0     | 0     | 0     | 0 NA           | NA       |
| 0     | 0     | 0     | 0 NA           | NA       |
| 0     | 0     | 0     | 0 NA           | NA       |
| 0     | 0     | 0.05  | 0 NA           | NA       |
| 0     | 0     | 0     | 0 NA           | NA       |
| 0     | 0     | 0     | 0 NA           | NA       |
| 0     | 0     | 0     | 0 NA           | NA       |
| 0.87  | 0.69  | 0.9   | 0.74 0.214981  | 0.568438 |
| 0     | 0.18  | 0     | 0 NA           | NA       |
| 0.32  | 0     | 0     | 0 NA           | NA       |
| 0     | 0     | 0     | 0 NA           | NA       |
| 0.92  | 1.65  | 0.59  | 1.37 0.335096  | 0.671172 |
| 0     | 0     | 0     | 0 NA           | NA       |
| 0     | 0     | 0     | 0 NA           | NA       |
| 0     | 0     | 0     | 0 NA           | NA       |
| 0.03  | 0.34  | 0.88  | 0.59 2.139659  | 2.75E-05 |
| 0     | 0     | 0     | 0 NA           | NA       |
| 14.81 | 18.56 | 18.55 | 18.24 0.366054 | 0.000434 |
| 0     | 0     | 0     | 0 NA           | NA       |
| 0.09  | 0     | 0.08  | 0 NA           | NA       |
| 0.42  | 0.68  | 0.43  | 0.77 0.273395  | 0.70575  |
| 24    | 14.19 | 13.2  | 16.86 -0.34512 | 0.059496 |
| 0     | 0     | 0     | 0 NA           | NA       |
| 6.54  | 6.17  | 8.14  | 7.65 0.217816  | 0.520384 |
| 1.1   | 0.59  | 0.54  | 1.17 -0.56953  | 0.246536 |
| 0     | 0     | 0     | 0 NA           | NA       |
| 0     | 0     | 0.01  | 0 NA           | NA       |
| 0     | 0     | 0     | 0 NA           | NA       |
| 0     | 0     | 0     | 0 NA           | NA       |
| 0     | 0     | 0.11  | 0 NA           | NA       |
| 1.99  | 3.25  | 2.97  | 2.62 0.328746  | 0.468266 |
| 0     | 0     | 0     | 0 NA           | NA       |
| 0     | 0     | 0     | 0 NA           | NA       |

|      |      |      |               |          |
|------|------|------|---------------|----------|
| 0    | 0    | 0    | 0 NA          | NA       |
| 0    | 0    | 0    | 0 NA          | NA       |
| 0    | 0    | 0    | 0.16 NA       | NA       |
| 0.13 | 0.09 | 0.08 | 0 NA          | NA       |
| 0    | 0    | 0    | 0 NA          | NA       |
| 4.71 | 3.74 | 3.69 | 3.91 0.148054 | 0.512275 |
| 0    | 0    | 0    | 0 NA          | NA       |
| 0.5  | 0.77 | 0.73 | 0.77 -0.20525 | 0.759031 |
| 0    | 0    | 0    | 0 NA          | NA       |
| 0    | 0    | 0    | 0 NA          | NA       |
| 0    | 0    | 0    | 0 NA          | NA       |
| 0    | 0    | 0    | 0 NA          | NA       |
| 0    | 0    | 0    | 0 NA          | NA       |
| 0    | 0    | 0    | 0 NA          | NA       |
| 0    | 0    | 0    | 0 NA          | NA       |
| 2.05 | 0.57 | 1.39 | 1.51 -0.66716 | 0.250727 |
| 0    | 0    | 0    | 0 NA          | NA       |
| 0.04 | 0.15 | 0.1  | 0.38 0.242195 | 0.76732  |
| 0    | 0.26 | 0    | 0 NA          | NA       |
| 0    | 0.36 | 0    | 0 NA          | NA       |
| 0    | 0    | 0    | 0 NA          | NA       |
| 0    | 0    | 0    | 0 NA          | NA       |
| 0    | 0    | 0    | 0 NA          | NA       |
| 0    | 0    | 0    | 0 NA          | NA       |
| 0.08 | 0    | 0.38 | 0.18 NA       | NA       |
| 0    | 0    | 0    | 0 NA          | NA       |
| 0    | 1.79 | 0    | 0 NA          | NA       |
| 0    | 0    | 0    | 0 NA          | NA       |
| 0    | 0    | 0.1  | 0 NA          | NA       |
| 0    | 0    | 0    | 0 NA          | NA       |
| 0.38 | 0.14 | 0    | 0 NA          | NA       |
| 0    | 0    | 0    | 0 NA          | NA       |
| 0    | 0    | 0    | 0 NA          | NA       |
| 0    | 0    | 0    | 0 NA          | NA       |
| 0    | 0.22 | 0    | 0.12 NA       | NA       |
| 0    | 0    | 0    | 0 NA          | NA       |
| 0    | 0    | 0.05 | 0 NA          | NA       |
| 0    | 0    | 0    | 0 NA          | NA       |
| 0    | 0    | 0    | 0 NA          | NA       |
| 0    | 0    | 0    | 0 NA          | NA       |
| 0    | 0    | 0    | 0 NA          | NA       |
| 0    | 0    | 0    | 0 NA          | NA       |
| 0    | 0    | 0    | 0 NA          | NA       |
| 0.04 | 0.03 | 0    | 0.03 NA       | NA       |
| 0    | 0    | 0    | 0 NA          | NA       |

|       |       |       |               |          |
|-------|-------|-------|---------------|----------|
| 0     | 0     | 0.4   | 0 NA          | NA       |
| 0.24  | 0.13  | 0.12  | 0.47 -0.25387 | 0.74724  |
| 0     | 0     | 0     | 0 NA          | NA       |
| 0     | 0.25  | 0.06  | 0.26 NA       | NA       |
| 0     | 0     | 0.1   | 0 NA          | NA       |
| 0     | 0     | 0     | 0 NA          | NA       |
| 0.25  | 0     | 0     | 0 NA          | NA       |
| 0.57  | 0.53  | 0.98  | 0.17 0.320694 | 0.612158 |
| 0     | 0     | 0     | 0 NA          | NA       |
| 0     | 0     | 0     | 0 NA          | NA       |
| 0     | 0     | 0     | 0 NA          | NA       |
| 0.34  | 0.13  | 0.37  | 0.26 0.063023 | 0.946459 |
| 0     | 0     | 0.51  | 0 NA          | NA       |
| 0     | 0     | 0     | 0 NA          | NA       |
| 0.05  | 0.22  | 0.16  | 0.3 0.580133  | 0.42196  |
| 3.27  | 2.69  | 2.54  | 2.77 -0.44559 | 0.028074 |
| 0     | 0     | 0     | 0 NA          | NA       |
| 1.78  | 0.9   | 0.89  | 0.88 -0.38738 | 0.284762 |
| 0     | 0     | 0     | 0 NA          | NA       |
| 0     | 0.24  | 0.3   | 0.94 NA       | NA       |
| 10.46 | 45.51 | 32.35 | 40.4 1.703441 | 4.40E-40 |
| 0     | 0     | 0     | 0 NA          | NA       |
| 0     | 0     | 0     | 0 NA          | NA       |
| 0     | 0     | 0     | 0 NA          | NA       |
| 0     | 1     | 0     | 0 NA          | NA       |
| 0     | 0     | 0     | 0 NA          | NA       |
| 0     | 0     | 0     | 0 NA          | NA       |
| 0     | 0     | 0     | 0 NA          | NA       |
| 0     | 0     | 0     | 0 NA          | NA       |
| 0     | 0     | 0     | 0 NA          | NA       |
| 0     | 0     | 0     | 0 NA          | NA       |
| 0     | 0     | 0     | 0 NA          | NA       |
| 0     | 0     | 0.33  | 0.56 NA       | NA       |
| 0     | 0     | 0     | 0 NA          | NA       |
| 0.42  | 4.17  | 2.36  | 2.91 2.223936 | 6.70E-06 |
| 8.7   | 12.22 | 8.31  | 9.33 0.348725 | 0.093781 |
| 0     | 0.29  | 0.09  | 0.21 NA       | NA       |
| 0     | 0     | 0     | 0 NA          | NA       |
| 0.03  | 0.02  | 0.05  | 0.06 NA       | NA       |
| 0     | 0     | 0     | 0 NA          | NA       |
| 0.07  | 0     | 0     | 0 NA          | NA       |
| 0     | 0     | 0     | 0 NA          | NA       |
| 0     | 0     | 0     | 0 NA          | NA       |
| 0     | 0     | 0     | 0 NA          | NA       |
| 0     | 0     | 0     | 0 NA          | NA       |





|       |       |       |                |          |
|-------|-------|-------|----------------|----------|
| 0     | 0     | 0     | 0 NA           | NA       |
| 0     | 0     | 0     | 0 NA           | NA       |
| 0     | 0     | 0     | 0 NA           | NA       |
| 0     | 0     | 0     | 0 NA           | NA       |
| 0     | 0     | 0     | 0 NA           | NA       |
| 0     | 0     | 0     | 0 NA           | NA       |
| 0     | 0     | 0     | 0 NA           | NA       |
| 0     | 0     | 0     | 0 NA           | NA       |
| 0     | 0     | 0     | 0 NA           | NA       |
| 0     | 0     | 0     | 0 NA           | NA       |
| 0     | 0     | 0     | 0 NA           | NA       |
| 0     | 0     | 0     | 0 NA           | NA       |
| 0.44  | 0     | 0.3   | 0.25 -0.3992   | 0.601709 |
| 0.14  | 0.05  | 0.14  | 0.21 NA        | NA       |
| 0     | 0     | 0     | 0 NA           | NA       |
| 0     | 0     | 0     | 0 NA           | NA       |
| 0     | 0     | 0     | 0 NA           | NA       |
| 0.04  | 0.08  | 0.07  | 0.06 NA        | NA       |
| 0     | 0.25  | 0.3   | 0.36 NA        | NA       |
| 0     | 0     | 0     | 0 NA           | NA       |
| 0     | 0     | 0     | 0 NA           | NA       |
| 0.33  | 0.21  | 0.28  | 0.22 -0.00447  | 0.996287 |
| 0     | 0     | 0.3   | 0 NA           | NA       |
| 0     | 0     | 0     | 0 NA           | NA       |
| 0     | 0     | 0     | 0 NA           | NA       |
| 0.22  | 0.24  | 0     | 0.08 NA        | NA       |
| 0     | 0     | 0     | 0 NA           | NA       |
| 0     | 0     | 0     | 0 NA           | NA       |
| 0     | 0     | 0     | 0 NA           | NA       |
| 0     | 0     | 0     | 0 NA           | NA       |
| 0     | 0     | 0     | 0 NA           | NA       |
| 0     | 0     | 0     | 0 NA           | NA       |
| 0     | 0     | 0     | 0 NA           | NA       |
| 0     | 0     | 0     | 0 NA           | NA       |
| 0     | 0     | 0     | 0 NA           | NA       |
| 0     | 0     | 0     | 0 NA           | NA       |
| 0     | 0     | 0     | 0 NA           | NA       |
| 0     | 0     | 0     | 0 NA           | NA       |
| 2.55  | 4.07  | 6.25  | 5.35 0.138699  | 0.700418 |
| 0     | 0     | 0     | 0 NA           | NA       |
| 0     | 0     | 0     | 0 NA           | NA       |
| 0.44  | 0.41  | 0.23  | 0.26 -0.71773  | 0.278147 |
| 0     | 0     | 0     | 0 NA           | NA       |
| 0     | 0     | 0     | 0 NA           | NA       |
| 22.19 | 31.14 | 38.58 | 31.54 0.307351 | 0.138212 |

|       |       |       |                |          |
|-------|-------|-------|----------------|----------|
| 0     | 0     | 0     | 0 NA           | NA       |
| 5.37  | 4.09  | 5.24  | 4.82 -0.16903  | 0.601564 |
| 0     | 0.05  | 0.09  | 0.05 NA        | NA       |
| 4.82  | 6.19  | 5.48  | 5.6 0.228222   | 0.106397 |
| 0     | 0.07  | 0.19  | 0.07 NA        | NA       |
| 0     | 0     | 0     | 0 NA           | NA       |
| 0     | 0     | 0     | 0 NA           | NA       |
| 0.67  | 0.72  | 0.83  | 0.54 -0.05791  | 0.948772 |
| 0     | 0     | 0     | 0 NA           | NA       |
| 0     | 0     | 0     | 0 NA           | NA       |
| 0     | 0     | 0     | 0 NA           | NA       |
| 0     | 0.29  | 0     | 0 NA           | NA       |
| 0     | 0     | 0     | 0 NA           | NA       |
| 0     | 0     | 0     | 0 NA           | NA       |
| 0.28  | 0.1   | 0.09  | 0.1 NA         | NA       |
| 0     | 0.31  | 0     | 0.69 -0.16386  | 0.850235 |
| 0     | 0     | 0     | 0 NA           | NA       |
| 0     | 0     | 0     | 0 NA           | NA       |
| 0     | 0     | 0     | 0 NA           | NA       |
| 0     | 0     | 0.04  | 0 NA           | NA       |
| 0.32  | 0.39  | 0.4   | 0.49 0.130031  | 0.869186 |
| 0     | 0     | 0.07  | 0 NA           | NA       |
| 0     | 0     | 0     | 0 NA           | NA       |
| 0     | 0     | 0     | 0 NA           | NA       |
| 0     | 0     | 0.09  | 0 NA           | NA       |
| 0     | 0     | 0     | 0 NA           | NA       |
| 0     | 0     | 0     | 0 NA           | NA       |
| 19.5  | 16.62 | 13.7  | 18.36 -0.48858 | 0.02231  |
| 1.83  | 2.41  | 2.15  | 1.43 -0.35416  | 0.364255 |
| 0.03  | 0     | 0     | 0.02 NA        | NA       |
| 0     | 0.31  | 0.09  | 0.1 NA         | NA       |
| 0     | 0     | 0     | 0 NA           | NA       |
| 0     | 0     | 0     | 0 NA           | NA       |
| 0.22  | 0.1   | 0.22  | 0.21 0.094731  | 0.916858 |
| 0     | 0     | 0     | 0 NA           | NA       |
| 0     | 0     | 0     | 0.11 NA        | NA       |
| 0.18  | 0.01  | 0.04  | 0.03 -1.2405   | 0.043126 |
| 30.61 | 33.25 | 29.77 | 26.99 -0.04141 | 0.816626 |
| 0.15  | 0     | 0.15  | 0.06 NA        | NA       |
| 0     | 0     | 0     | 0 NA           | NA       |
| 0     | 0     | 0     | 0 NA           | NA       |
| 0.98  | 1.7   | 1.59  | 1.47 0.460055  | 0.139768 |
| 0     | 0     | 0     | 0 NA           | NA       |
| 0.42  | 0     | 0.19  | 0.22 NA        | NA       |
| 0.12  | 0.35  | 1.12  | 0.55 1.091776  | 0.083315 |

|       |       |       |       |          |          |
|-------|-------|-------|-------|----------|----------|
| 0.11  | 0     | 0     | 0.04  | NA       | NA       |
| 0     | 0     | 0     | 0     | NA       | NA       |
| 0     | 0     | 0     | 0     | NA       | NA       |
| 0     | 0     | 0     | 0     | NA       | NA       |
| 13.09 | 10.26 | 11.96 | 14.7  | 0.019313 | 0.945788 |
| 0     | 0     | 0     | 0     | NA       | NA       |
| 0.08  | 0     | 0     | 0.12  | NA       | NA       |
| 0     | 0     | 0.05  | 0.16  | NA       | NA       |
| 0     | 0     | 0     | 0     | NA       | NA       |
| 0     | 0     | 0     | 0     | NA       | NA       |
| 0     | 0     | 0     | 0     | NA       | NA       |
| 0     | 0     | 0     | 0     | NA       | NA       |
| 0     | 0     | 0     | 0     | NA       | NA       |
| 0     | 0     | 0     | 0     | NA       | NA       |
| 25.7  | 24.81 | 22.74 | 25.55 | 0.054842 | 0.865554 |
| 1.14  | 0.84  | 0.88  | 0.84  | -0.62265 | 0.155245 |
| 0     | 0     | 0     | 0     | NA       | NA       |
| 3.07  | 2.07  | 4.15  | 2.61  | 0.035221 | 0.94882  |
| 0     | 0     | 0     | 0     | NA       | NA       |
| 0     | 0     | 0     | 0     | NA       | NA       |
| 0     | 0     | 0     | 0     | NA       | NA       |
| 0     | 0     | 0     | 0     | NA       | NA       |
| 0     | 0     | 0     | 0     | NA       | NA       |
| 0     | 0     | 0     | 0     | NA       | NA       |
| 3.8   | 4.3   | 4.12  | 4.64  | -0.20589 | 0.394391 |
| 0     | 0     | 0     | 0     | NA       | NA       |
| 0     | 0     | 0     | 0     | NA       | NA       |
| 0     | 0     | 0     | 0.23  | NA       | NA       |
| 0     | 0     | 0     | 0     | NA       | NA       |
| 0     | 0     | 0     | 0     | NA       | NA       |
| 0     | 0     | 0     | 0     | NA       | NA       |
| 0     | 0     | 0     | 0     | NA       | NA       |
| 0     | 0     | 0     | 0     | NA       | NA       |
| 0     | 0     | 0     | 0     | NA       | NA       |
| 0     | 0     | 0.09  | 0     | NA       | NA       |
| 0     | 0     | 0     | 0     | NA       | NA       |
| 0     | 0     | 0     | 0     | NA       | NA       |
| 0     | 0     | 0     | 0     | NA       | NA       |
| 0     | 0     | 0     | 0.2   | NA       | NA       |
| 0.18  | 0.41  | 0.33  | 0.12  | 0.254037 | 0.761272 |
| 0     | 0     | 0     | 0     | NA       | NA       |
| 0     | 0     | 0     | 0     | NA       | NA       |
| 0.18  | 0     | 0     | 0     | NA       | NA       |
| 0     | 0     | 0     | 0     | NA       | NA       |
| 0     | 0     | 0.04  | 0     | NA       | NA       |
| 0     | 0     | 0     | 0     | NA       | NA       |

|      |      |      |               |          |
|------|------|------|---------------|----------|
| 0    | 0    | 0    | 0 NA          | NA       |
| 0    | 0    | 0    | 0 NA          | NA       |
| 0    | 0    | 0    | 0 NA          | NA       |
| 0    | 0    | 0    | 0 NA          | NA       |
| 0    | 0    | 0    | 0 NA          | NA       |
| 0.32 | 0.34 | 0    | 0.12 NA       | NA       |
| 0    | 0    | 0.24 | 0 NA          | NA       |
| 0    | 0    | 0    | 0 NA          | NA       |
| 0    | 0    | 0    | 0 NA          | NA       |
| 0    | 0    | 0    | 0 NA          | NA       |
| 0    | 0    | 0    | 0 NA          | NA       |
| 0    | 0    | 0    | 0 NA          | NA       |
| 0    | 0    | 0    | 0 NA          | NA       |
| 0    | 0    | 0    | 0 NA          | NA       |
| 0    | 0    | 0    | 0 NA          | NA       |
| 0    | 0    | 0    | 0 NA          | NA       |
| 0    | 0    | 0    | 0 NA          | NA       |
| 0    | 0    | 0    | 0 NA          | NA       |
| 1.07 | 1.43 | 0.84 | 0.97 -0.35067 | 0.408819 |
| 0    | 0    | 0    | 0 NA          | NA       |
| 0    | 0    | 0    | 0 NA          | NA       |
| 0.15 | 0.22 | 0.41 | 0.34 0.169384 | 0.847782 |
| 0    | 0    | 0    | 0 NA          | NA       |
| 0    | 0    | 0    | 0 NA          | NA       |
| 0    | 0    | 0    | 0 NA          | NA       |
| 0    | 0    | 0    | 0 NA          | NA       |
| 0.53 | 0.57 | 0.75 | 0.47 -0.34433 | 0.483115 |
| 0    | 0    | 0    | 0 NA          | NA       |
| 0    | 0    | 0    | 0 NA          | NA       |
| 2.43 | 1.58 | 0.85 | 1.63 -0.27775 | 0.541018 |
| 0    | 0    | 0    | 0 NA          | NA       |
| 0    | 0    | 0    | 0 NA          | NA       |
| 0.07 | 0.1  | 0.05 | 0.05 NA       | NA       |
| 0    | 0    | 0    | 0 NA          | NA       |
| 0    | 0    | 0    | 0 NA          | NA       |
| 0    | 0    | 0    | 0 NA          | NA       |
| 0    | 0    | 0    | 0 NA          | NA       |
| 0    | 0    | 0    | 0 NA          | NA       |
| 0    | 0.41 | 0    | 0 NA          | NA       |
| 0    | 0    | 0    | 0 NA          | NA       |
| 0    | 0    | 0    | 0 NA          | NA       |
| 0    | 0    | 0.08 | 0 NA          | NA       |
| 0    | 0    | 0    | 1.52 NA       | NA       |
| 0    | 0    | 0    | 0 NA          | NA       |
| 0    | 0    | 0    | 0 NA          | NA       |

|       |       |       |                |          |
|-------|-------|-------|----------------|----------|
| 0     | 0     | 0     | 0 NA           | NA       |
| 0     | 0     | 0     | 0 NA           | NA       |
| 0     | 0     | 0     | 0 NA           | NA       |
| 0     | 0     | 0     | 1.19 0.145674  | NA       |
| 0     | 0     | 0     | 0 NA           | NA       |
| 0     | 0     | 0     | 0 NA           | NA       |
| 0     | 0     | 0     | 0 NA           | NA       |
| 0     | 0     | 0     | 0 NA           | NA       |
| 0     | 0.12  | 0     | 0 NA           | NA       |
| 0     | 0     | 0     | 0.22 NA        | NA       |
| 0     | 0     | 0     | 0 NA           | NA       |
| 0     | 0     | 0     | 0 NA           | NA       |
| 0.52  | 2.55  | 3.7   | 3.7 1.326975   | 0.009288 |
| 0     | 0     | 0     | 0 NA           | NA       |
| 0     | 0     | 0     | 0 NA           | NA       |
| 0     | 0     | 0     | 0 NA           | NA       |
| 0     | 0     | 0     | 0 NA           | NA       |
| 0     | 0     | 0     | 0 NA           | NA       |
| 0     | 0     | 0     | 0 NA           | NA       |
| 0     | 0     | 0     | 0 NA           | NA       |
| 0.03  | 0     | 0.05  | 0 NA           | NA       |
| 0     | 0.11  | 0     | 0.12 NA        | NA       |
| 0     | 0     | 0     | 0 NA           | NA       |
| 0     | 0     | 0     | 0 NA           | NA       |
| 0     | 0     | 0     | 0 NA           | NA       |
| 0     | 0     | 0     | 0 NA           | NA       |
| 0     | 0     | 0     | 0 NA           | NA       |
| 0     | 0     | 0     | 0.43 NA        | NA       |
| 0.1   | 0     | 0     | 0 NA           | NA       |
| 0     | 0     | 0     | 0 NA           | NA       |
| 22.52 | 65.32 | 48.86 | 51.38 1.343927 | 3.83E-13 |
| 0     | 0     | 0     | 0 NA           | NA       |
| 0     | 0     | 0     | 0 NA           | NA       |
| 0     | 0     | 0     | 0 NA           | NA       |
| 0     | 0     | 0     | 0 NA           | NA       |
| 0     | 0.13  | 0.04  | 0.09 NA        | NA       |
| 0     | 0     | 0     | 0 NA           | NA       |
| 0     | 0     | 0     | 0 NA           | NA       |
| 0     | 0     | 0.07  | 0.15 NA        | NA       |
| 0     | 0     | 0     | 0 NA           | NA       |
| 0     | 0.75  | 0     | 0.12 NA        | NA       |
| 0     | 0     | 0.07  | 0 NA           | NA       |
| 0     | 0     | 0     | 0 NA           | NA       |
| 0     | 0     | 0     | 0 NA           | NA       |
| 0     | 0     | 0     | 0 NA           | NA       |

|      |      |      |               |          |
|------|------|------|---------------|----------|
| 0    | 0    | 0    | 0 NA          | NA       |
| 0.95 | 0.3  | 0.42 | 0.88 -0.42757 | 0.55685  |
| 0    | 0.02 | 0    | 0 NA          | NA       |
| 0.88 | 0.93 | 0.76 | 0.65 -0.13048 | 0.846238 |
| 0.15 | 0    | 0    | 0 NA          | NA       |
| 0    | 0    | 0    | 0 NA          | NA       |
| 0    | 0    | 0    | 0 NA          | NA       |
| 0    | 0    | 0    | 0 NA          | NA       |
| 0    | 0    | 0    | 0 NA          | NA       |
| 0.05 | 0.04 | 0.03 | 0 NA          | NA       |
| 0    | 0    | 0    | 0 NA          | NA       |
| 0    | 0    | 0    | 0 NA          | NA       |
| 0.08 | 0    | 0    | 0 NA          | NA       |
| 0    | 0    | 0    | 0 NA          | NA       |
| 0    | 0    | 0    | 0 NA          | NA       |
| 0    | 0    | 0    | 0 NA          | NA       |
| 0    | 0    | 0    | 0 NA          | NA       |
| 0    | 0    | 0    | 0 NA          | NA       |
| 0    | 0    | 0    | 0 NA          | NA       |
| 0    | 0    | 0    | 0 NA          | NA       |
| 0.15 | 0    | 0.21 | 0.02 -0.4624  | 0.533692 |
| 0    | 0    | 0    | 0 NA          | NA       |
| 0    | 0    | 0    | 0 NA          | NA       |
| 0    | 0    | 0.06 | 0.13 NA       | NA       |
| 0    | 0    | 0    | 0 NA          | NA       |
| 0.38 | 0.28 | 0.35 | 0.36 -0.50257 | 0.343974 |
| 0    | 0    | 0    | 0 NA          | NA       |
| 0    | 0    | 0    | 0 NA          | NA       |
| 0.94 | 0.59 | 0.94 | 0.45 -0.43    | 0.423732 |
| 0    | 0.97 | 0.19 | 0.07 NA       | NA       |
| 0    | 0    | 0    | 0 NA          | NA       |
| 0    | 0    | 0    | 0 NA          | NA       |
| 0    | 0    | 0    | 0 NA          | NA       |
| 0    | 0    | 0    | 0 NA          | NA       |
| 0.19 | 0.13 | 0.06 | 0.43 NA       | NA       |
| 0    | 0    | 0    | 0 NA          | NA       |
| 0    | 0    | 0    | 0 NA          | NA       |
| 0    | 0    | 0    | 0 NA          | NA       |
| 0    | 0    | 0    | 0 NA          | NA       |
| 0    | 0.02 | 0    | 0 NA          | NA       |
| 0    | 0    | 0    | 0 NA          | NA       |
| 0    | 0    | 0    | 0 NA          | NA       |
| 0    | 0    | 0    | 0 NA          | NA       |
| 0.09 | 0    | 0    | 0 NA          | NA       |

|       |       |       |       |          |          |
|-------|-------|-------|-------|----------|----------|
| 0     | 0     | 0     | 0     | NA       | NA       |
| 0     | 0     | 0     | 0.29  | NA       | NA       |
| 0     | 0     | 0     | 0     | NA       | NA       |
| 0     | 0     | 0     | 0     | NA       | NA       |
| 0     | 0     | 0     | 0     | NA       | NA       |
| 0     | 0     | 0     | 0     | NA       | NA       |
| 1.57  | 1.76  | 2.88  | 3.27  | 0.189461 | 0.727418 |
| 0     | 0     | 0     | 0     | NA       | NA       |
| 4.29  | 4.46  | 4.19  | 4.39  | 0.097846 | 0.549896 |
| 0     | 0.59  | 0     | 0     | NA       | NA       |
| 0     | 0     | 0     | 0     | NA       | NA       |
| 0     | 0     | 0     | 0     | NA       | NA       |
| 0     | 0     | 0     | 0     | NA       | NA       |
| 0     | 0     | 0     | 0     | NA       | NA       |
| 52.41 | 43.78 | 52.05 | 49.12 | 0.043102 | 0.759226 |
| 0     | 0     | 0     | 0     | NA       | NA       |
| 1.53  | 1.24  | 1.82  | 1.4   | -0.32178 | 0.36391  |
| 0     | 0.06  | 0     | 0     | NA       | NA       |
| 0     | 0.36  | 0     | 1.48  | NA       | NA       |
| 0.07  | 0     | 0     | 0     | NA       | NA       |
| 0     | 0     | 0     | 0     | NA       | NA       |
| 0     | 0     | 0     | 0     | NA       | NA       |
| 0     | 0     | 0     | 0.12  | NA       | NA       |
| 0     | 0     | 0     | 0     | NA       | NA       |
| 1.81  | 2.52  | 1.58  | 1.37  | -0.22825 | 0.539651 |
| 0     | 0     | 0     | 0     | NA       | NA       |
| 0     | 0     | 0     | 0     | NA       | NA       |
| 0     | 0     | 0     | 0     | NA       | NA       |
| 0     | 0.02  | 0     | 0     | NA       | NA       |
| 0     | 0     | 0     | 0     | NA       | NA       |
| 0     | 0     | 0     | 0     | NA       | NA       |
| 0.11  | 0.91  | 0.42  | 0.8   | 0.814801 | 0.194399 |
| 0     | 0     | 0.04  | 0.11  | NA       | NA       |
| 0     | 0     | 0     | 0     | NA       | NA       |
| 6.13  | 3.85  | 5.75  | 2.56  | -0.43708 | 0.316511 |
| 0     | 0     | 0     | 0     | NA       | NA       |
| 0     | 0     | 0     | 0     | NA       | NA       |
| 0     | 0     | 0     | 0     | NA       | NA       |
| 0     | 0     | 0.07  | 0     | NA       | NA       |
| 0.44  | 0.62  | 0.51  | 0.5   | 0.122711 | 0.800247 |
| 0     | 0     | 0     | 0     | NA       | NA       |
| 0     | 0     | 0.09  | 0.21  | NA       | NA       |
| 0     | 0     | 0     | 0     | NA       | NA       |
| 0     | 0     | 0     | 0     | NA       | NA       |
| 0     | 0     | 0     | 0     | NA       | NA       |



|       |       |       |                |          |
|-------|-------|-------|----------------|----------|
| 0     | 0     | 0     | 0 NA           | NA       |
| 0     | 0     | 0     | 0 NA           | NA       |
| 0.31  | 0.21  | 0.36  | 0.35 0.414122  | 0.518424 |
| 0     | 0     | 0     | 0 NA           | NA       |
| 0     | 0     | 0     | 0 NA           | NA       |
| 0     | 0     | 0     | 0 NA           | NA       |
| 0     | 0     | 0     | 0 NA           | NA       |
| 0.35  | 0.16  | 0.19  | 0.27 -0.40186  | 0.548809 |
| 0     | 0.02  | 0     | 0 NA           | NA       |
| 0     | 0     | 0     | 0 NA           | NA       |
| 0     | 0     | 0     | 0 NA           | NA       |
| 0     | 0.14  | 0.07  | 0.15 NA        | NA       |
| 0     | 0     | 0     | 0 NA           | NA       |
| 0     | 0     | 0     | 0 NA           | NA       |
| 0     | 0.11  | 0     | 0 NA           | NA       |
| 0     | 0     | 0     | 0 NA           | NA       |
| 0     | 0     | 0     | 0 NA           | NA       |
| 0     | 0.06  | 0     | 0 NA           | NA       |
| 0     | 0     | 0.06  | 0 NA           | NA       |
| 0     | 0     | 0     | 0 NA           | NA       |
| 0     | 0     | 0     | 0 NA           | NA       |
| 0.34  | 0.26  | 0.32  | 0.61 0.099564  | 0.88333  |
| 0     | 0     | 0     | 0 NA           | NA       |
| 10.55 | 11.67 | 11.36 | 11.54 0.155242 | 0.267769 |
| 1.17  | 1.85  | 0.42  | 1.43 0.160587  | 0.844576 |
| 0     | 0     | 0     | 0 NA           | NA       |
| 0     | 0     | 0     | 0 NA           | NA       |
| 0     | 0     | 0     | 0 NA           | NA       |
| 0     | 0     | 0     | 0 NA           | NA       |
| 0     | 0.07  | 0.09  | 0.06 NA        | NA       |
| 0     | 0     | 0     | 0 NA           | NA       |
| 0     | 0     | 0     | 0 NA           | NA       |
| 0     | 0     | 0     | 0 NA           | NA       |
| 0     | 0     | 0     | 0 NA           | NA       |
| 0     | 0     | 0     | 0 NA           | NA       |
| 0     | 0     | 0     | 0 NA           | NA       |
| 0     | 0     | 0     | 0 NA           | NA       |
| 0     | 0     | 0     | 0 NA           | NA       |
| 0     | 0     | 0     | 0 NA           | NA       |
| 0     | 0     | 0.13  | 0 NA           | NA       |
| 0     | 0.12  | 0.21  | 0.36 NA        | NA       |
| 0     | 0     | 0     | 0 NA           | NA       |
| 0.37  | 0.81  | 1.61  | 0.27 -0.57823  | 0.421641 |
| 0     | 0     | 0     | 0 NA           | NA       |
| 0     | 0     | 0     | 0 NA           | NA       |

|      |       |       |       |          |          |
|------|-------|-------|-------|----------|----------|
| 0    | 0     | 0     | 0     | NA       | NA       |
| 0    | 0     | 0     | 0     | NA       | NA       |
| 0    | 0     | 0     | 0     | NA       | NA       |
| 0.96 | 1.53  | 1.23  | 2.93  | -0.52244 | 0.436467 |
| 0    | 0     | 0     | 0     | NA       | NA       |
| 0.4  | 0.67  | 0.1   | 0     | -0.2068  | 0.802066 |
| 0    | 0     | 0     | 0     | NA       | NA       |
| 12.2 | 12.58 | 12.93 | 12.85 | 0.062221 | 0.695914 |
| 0    | 0     | 0     | 0     | NA       | NA       |
| 0    | 0     | 0     | 0     | NA       | NA       |
| 0    | 0     | 0     | 0     | NA       | NA       |
| 0.14 | 0     | 0     | 0     | NA       | NA       |
| 0    | 0.02  | 0     | 0.09  | NA       | NA       |
| 0    | 0     | 0     | 0     | NA       | NA       |
| 0.11 | 0.08  | 0.05  | 0.01  | -0.42942 | 0.574794 |
| 0    | 0     | 0     | 0     | NA       | NA       |
| 0    | 0.23  | 0     | 0     | NA       | NA       |
| 0    | 0     | 0     | 0     | NA       | NA       |
| 0    | 0     | 0     | 0     | NA       | NA       |
| 0    | 0     | 0     | 0     | NA       | NA       |
| 0    | 0     | 0     | 0     | NA       | NA       |
| 0    | 0     | 0     | 0     | NA       | NA       |
| 0    | 0     | 0     | 0     | NA       | NA       |
| 0    | 0     | 0     | 0     | NA       | NA       |
| 0.13 | 0.63  | 0.3   | 0.24  | 0.460466 | 0.542468 |
| 0    | 0     | 0     | 0     | NA       | NA       |
| 0.21 | 0.09  | 0.14  | 0.17  | -0.42634 | 0.489325 |
| 0    | 0     | 0     | 0     | NA       | NA       |
| 0    | 0     | 0     | 0     | NA       | NA       |
| 0.72 | 0.74  | 1.33  | 1.31  | 0.072629 | 0.939809 |
| 0    | 0     | 0     | 0     | NA       | NA       |
| 0    | 0     | 0     | 0     | NA       | NA       |
| 0    | 0     | 0     | 0     | NA       | NA       |
| 5.41 | 7.3   | 5.95  | 7.71  | 0.266881 | 0.039044 |
| 0    | 0     | 0     | 0     | NA       | NA       |
| 0    | 0     | 0     | 0     | NA       | NA       |
| 0    | 0.1   | 0     | 0     | NA       | NA       |
| 0    | 0     | 0     | 0     | NA       | NA       |
| 0    | 0     | 0     | 0     | NA       | NA       |
| 0    | 0     | 0     | 0     | NA       | NA       |
| 0    | 0.22  | 0     | 0     | NA       | NA       |
| 0    | 0     | 0     | 0     | NA       | NA       |
| 0    | 0     | 0     | 0     | NA       | NA       |
| 0    | 0.03  | 0.02  | 0     | NA       | NA       |
| 0    | 0     | 0     | 0     | NA       | NA       |

|      |      |       |      |          |          |
|------|------|-------|------|----------|----------|
| 2.24 | 1.13 | 1.17  | 1.24 | -0.7829  | 0.011187 |
| 0.18 | 0.46 | 0.19  | 0    | NA       | NA       |
| 0    | 0    | 0.38  | 0.51 | 0.639485 | 0.286745 |
| 0    | 0    | 0     | 0    | NA       | NA       |
| 0.16 | 0    | 0     | 0    | NA       | NA       |
| 0    | 0    | 0     | 0    | NA       | NA       |
| 0    | 0    | 0     | 0    | NA       | NA       |
| 2.99 | 3.01 | 3.03  | 3.41 | -0.02975 | 0.876943 |
| 0    | 0    | 0     | 0    | NA       | NA       |
| 0    | 0    | 0     | 0    | NA       | NA       |
| 0    | 0    | 0     | 0.11 | NA       | NA       |
| 0    | 0    | 0     | 0    | NA       | NA       |
| 0    | 0    | 0     | 0    | NA       | NA       |
| 8.14 | 10.9 | 11.05 | 8.55 | 0.007955 | 0.975146 |
| 0.04 | 0    | 0.08  | 0    | NA       | NA       |
| 0    | 0    | 0     | 0    | NA       | NA       |
| 0    | 0    | 0     | 0.47 | NA       | NA       |
| 0    | 0    | 0     | 0    | NA       | NA       |
| 0    | 0    | 0     | 0    | NA       | NA       |
| 4.85 | 2.18 | 2.64  | 5.13 | -0.39134 | 0.528582 |
| 0    | 0    | 0     | 0    | NA       | NA       |
| 0    | 0    | 0     | 0    | NA       | NA       |
| 0    | 0    | 0     | 0    | NA       | NA       |
| 0    | 0    | 0     | 0    | NA       | NA       |
| 0.16 | 1.33 | 1.62  | 0    | 0.521687 | 0.342304 |
| 0    | 0.19 | 0.22  | 0.14 | 0.897796 | 0.1693   |
| 0    | 0    | 0     | 0    | NA       | NA       |
| 0.05 | 0    | 0     | 0    | NA       | NA       |
| 0    | 0.15 | 0.07  | 0    | NA       | NA       |
| 0    | 0    | 0     | 0    | NA       | NA       |
| 0    | 0    | 0     | 0    | NA       | NA       |
| 3.03 | 0.9  | 0     | 0    | NA       | NA       |
| 0    | 0    | 0     | 0    | NA       | NA       |
| 0    | 0    | 0     | 0    | NA       | NA       |
| 0    | 0    | 0     | 0    | NA       | NA       |
| 0    | 0    | 0     | 0    | NA       | NA       |
| 0    | 0    | 0     | 0    | NA       | NA       |
| 0    | 0    | 0     | 1.67 | -0.17298 | 0.71014  |
| 0    | 0    | 0     | 0    | NA       | NA       |
| 0    | 0    | 0     | 0    | NA       | NA       |
| 0    | 0    | 0     | 0    | NA       | NA       |
| 0    | 0    | 0     | 0    | NA       | NA       |
| 0    | 0    | 0     | 0    | NA       | NA       |
| 0    | 0    | 0     | 0.02 | NA       | NA       |
| 0    | 0    | 0     | 0    | NA       | NA       |
| 1.34 | 1.25 | 0.89  | 1.34 | -0.39882 | 0.524186 |



|      |      |      |      |          |          |
|------|------|------|------|----------|----------|
| 0    | 0.05 | 0.05 | 0.11 | NA       | NA       |
| 0    | 0    | 0    | 0    | NA       | NA       |
| 8.91 | 6.97 | 6.96 | 8.02 | -0.03265 | 0.972027 |
| 0    | 0    | 0    | 0    | NA       | NA       |
| 1.38 | 1.96 | 1.24 | 0.96 | -0.10687 | 0.894838 |
| 0    | 0    | 0    | 0    | NA       | NA       |
| 7.03 | 2.24 | 3.98 | 4.3  | -0.02561 | 0.974622 |
| 0    | 0    | 0    | 0    | NA       | NA       |
| 0    | 0    | 0    | 0    | NA       | NA       |
| 0    | 0    | 0.14 | 0    | NA       | NA       |
| 0    | 0    | 0    | 0    | NA       | NA       |
| 0    | 0    | 0    | 0    | NA       | NA       |
| 0    | 0.06 | 0    | 0    | NA       | NA       |
| 0    | 0    | 0    | 0    | NA       | NA       |
| 0    | 0    | 0    | 0    | NA       | NA       |
| 0    | 0    | 0    | 0    | NA       | NA       |
| 0    | 0    | 0    | 0.02 | NA       | NA       |
| 0.61 | 0.22 | 0.4  | 0.57 | -0.20467 | 0.812855 |
| 0    | 0    | 0    | 0    | NA       | NA       |
| 0.23 | 0.05 | 0.63 | 0.49 | -0.78696 | 0.243995 |
| 0.12 | 0.14 | 0.05 | 0.06 | -0.33115 | 0.671172 |
| 0    | 0    | 0    | 0    | NA       | NA       |
| 0.04 | 0    | 0.08 | 0    | NA       | NA       |
| 0    | 0    | 0    | 0    | NA       | NA       |
| 0    | 0    | 0    | 0    | NA       | NA       |
| 0    | 0    | 0    | 0    | NA       | NA       |
| 0    | 0    | 0    | 0    | NA       | NA       |
| 0    | 0    | 0    | 0    | NA       | NA       |
| 0.08 | 0    | 0    | 0    | NA       | NA       |
| 0    | 0    | 0    | 0    | NA       | NA       |
| 0    | 0    | 0    | 0    | NA       | NA       |
| 0    | 0    | 0    | 0    | NA       | NA       |
| 0    | 0    | 0    | 0    | NA       | NA       |
| 0    | 0    | 0    | 0    | NA       | NA       |
| 0    | 0    | 0    | 0    | NA       | NA       |
| 1.23 | 0.44 | 0.94 | 0.56 | 0.016652 | 0.984835 |
| 1.34 | 3.94 | 3.78 | 3.77 | 1.110418 | 2.06E-12 |
| 0.4  | 0    | 0    | 0    | NA       | NA       |
| 0    | 0    | 0    | 0    | NA       | NA       |
| 0.12 | 0.14 | 0.15 | 0.13 | NA       | NA       |
| 0    | 0    | 0    | 0    | NA       | NA       |
| 0    | 0    | 0    | 0    | NA       | NA       |
| 2.25 | 10.8 | 5.07 | 7.2  | 1.419347 | 5.46E-05 |
| 0.04 | 0    | 0.09 | 0.07 | NA       | NA       |

|       |       |      |                |          |
|-------|-------|------|----------------|----------|
| 0     | 0     | 0    | 0 NA           | NA       |
| 0     | 0     | 0    | 0 NA           | NA       |
| 0     | 0     | 0    | 0 NA           | NA       |
| 0.13  | 0.09  | 0.09 | 0 NA           | NA       |
| 0     | 0     | 0    | 0 NA           | NA       |
| 0     | 0     | 0    | 0 NA           | NA       |
| 11.62 | 11.23 | 11.9 | 11.25 -0.05925 | 0.76237  |
| 0     | 0     | 0    | 0 NA           | NA       |
| 0     | 0     | 0    | 0 NA           | NA       |
| 0     | 0     | 0    | 0 NA           | NA       |
| 0     | 0     | 0    | 0 NA           | NA       |
| 0     | 0     | 0    | 0 NA           | NA       |
| 0     | 0     | 0    | 0 NA           | NA       |
| 0     | 0     | 0    | 0 NA           | NA       |
| 0     | 0     | 0    | 0 NA           | NA       |
| 0.31  | 0.79  | 0    | 0.24 -0.27209  | 0.73757  |
| 0     | 0     | 0    | 0 NA           | NA       |
| 0     | 0     | 0    | 0 NA           | NA       |
| 0     | 0     | 1.61 | 0 NA           | NA       |
| 0     | 0     | 0    | 0 NA           | NA       |
| 0     | 0     | 0    | 0 NA           | NA       |
| 0     | 0     | 0    | 0 NA           | NA       |
| 0     | 0     | 0    | 0 NA           | NA       |
| 0     | 0     | 0    | 0 NA           | NA       |
| 0     | 0     | 0    | 0 NA           | NA       |
| 0     | 0     | 0    | 0 NA           | NA       |
| 0     | 0.16  | 0    | 0 NA           | NA       |
| 0     | 0     | 0    | 0 NA           | NA       |
| 0     | 0     | 0.17 | 0 NA           | NA       |
| 0     | 0     | 0    | 0 NA           | NA       |
| 0     | 0     | 0    | 0 NA           | NA       |
| 0     | 0     | 0    | 0 NA           | NA       |
| 0     | 0     | 0    | 0 NA           | NA       |
| 0     | 0     | 0    | 0 NA           | NA       |
| 0     | 0     | 0    | 0 NA           | NA       |
| 0     | 0     | 0    | 0 NA           | NA       |
| 0     | 0     | 0    | 0 NA           | NA       |
| 0     | 0     | 0    | 0 NA           | NA       |
| 0     | 0     | 0    | 0 NA           | NA       |
| 0     | 0     | 0    | 0 NA           | NA       |
| 0     | 0     | 0    | 0 NA           | NA       |
| 0     | 0     | 0    | 0 NA           | NA       |
| 0     | 0     | 0    | 0 NA           | NA       |
| 0     | 0     | 0    | 0 NA           | NA       |
| 0.11  | 0     | 0.12 | 0.16 NA        | NA       |
| 0     | 0     | 0    | 0 NA           | NA       |
| 0     | 0     | 0    | 0 NA           | NA       |
| 0     | 0     | 0    | 0 NA           | NA       |
| 0     | 0     | 0    | 0 NA           | NA       |
| 0     | 0     | 0    | 0 NA           | NA       |
| 0.48  | 0     | 0.46 | 0.36 NA        | NA       |
| 8.34  | 10.61 | 8.68 | 6.92 -0.02028  | 0.965837 |

|       |        |       |       |          |          |
|-------|--------|-------|-------|----------|----------|
| 0     | 0      | 0     | 0     | NA       | NA       |
| 5.38  | 5.46   | 5.3   | 5.93  | -0.18518 | 0.377866 |
| 0     | 0      | 0     | 0     | NA       | NA       |
| 7.55  | 9.18   | 12.07 | 10.91 | 0.231637 | 0.311316 |
| 0     | 0.12   | 0     | 0.13  | NA       | NA       |
| 0     | 0      | 0     | 0     | NA       | NA       |
| 0.17  | 0.24   | 0.66  | 0.13  | NA       | NA       |
| 0     | 0      | 0     | 0     | NA       | NA       |
| 0     | 0      | 0     | 0     | NA       | NA       |
| 0     | 0      | 0     | 0     | NA       | NA       |
| 0     | 0      | 0     | 0     | NA       | NA       |
| 0     | 0      | 0     | 0     | NA       | NA       |
| 69.96 | 110.39 | 98.24 | 103   | 0.382665 | 0.000171 |
| 0     | 0      | 0     | 0     | NA       | NA       |
| 0     | 0      | 0     | 0     | NA       | NA       |
| 0     | 0      | 0     | 0     | NA       | NA       |
| 1.8   | 0.08   | 0.97  | 0.34  | -1.54661 | 0.003535 |
| 0     | 0      | 0     | 0     | NA       | NA       |
| 0     | 0      | 0     | 0     | NA       | NA       |
| 0     | 0      | 0     | 0     | NA       | NA       |
| 0.61  | 0.69   | 0     | 0     | NA       | NA       |
| 0     | 0      | 0     | 0     | NA       | NA       |
| 0     | 0      | 0     | 0     | NA       | NA       |
| 0     | 0      | 0     | 0     | NA       | NA       |
| 0     | 0      | 0     | 0     | NA       | NA       |
| 0     | 0      | 0     | 0     | NA       | NA       |
| 0     | 0      | 0     | 0     | NA       | NA       |
| 0     | 0      | 0     | 0     | NA       | NA       |
| 0     | 0      | 0     | 0     | NA       | NA       |
| 0.22  | 0.24   | 0.15  | 0.09  | NA       | NA       |
| 0     | 0      | 0     | 0     | NA       | NA       |
| 0     | 0      | 0     | 0     | NA       | NA       |
| 0     | 0      | 0     | 0     | NA       | NA       |
| 0     | 0      | 0     | 0     | NA       | NA       |
| 0     | 0      | 0     | 0     | NA       | NA       |
| 0     | 0      | 0.11  | 0.13  | NA       | NA       |
| 0     | 0      | 0     | 0     | NA       | NA       |
| 0     | 0      | 0     | 0     | NA       | NA       |
| 0     | 0      | 0.09  | 0.08  | NA       | NA       |
| 0     | 0      | 0     | 0     | NA       | NA       |
| 14.57 | 14.6   | 27.03 | 28.04 | 0.438565 | 0.121341 |
| 0     | 0      | 0     | 0     | NA       | NA       |
| 0.83  | 0.73   | 0.52  | 0.21  | -0.40303 | 0.598721 |
| 0     | 0      | 0     | 0     | NA       | NA       |
| 0     | 0      | 0     | 0     | NA       | NA       |
| 0     | 0      | 0     | 0     | NA       | NA       |





|       |       |       |                |          |
|-------|-------|-------|----------------|----------|
| 0     | 0     | 0     | 0 NA           | NA       |
| 0     | 0     | 0     | 0 NA           | NA       |
| 0     | 0     | 0     | 0 NA           | NA       |
| 0     | 0     | 0     | 0 NA           | NA       |
| 0     | 0     | 0     | 0 NA           | NA       |
| 0.37  | 0.26  | 0.12  | 0.14 NA        | NA       |
| 0.17  | 0     | 0     | 0 NA           | NA       |
| 0     | 0     | 0     | 0 NA           | NA       |
| 0     | 0     | 0     | 0.15 NA        | NA       |
| 0     | 0     | 0     | 0 NA           | NA       |
| 0.03  | 0     | 0     | 0 NA           | NA       |
| 0     | 0     | 0     | 0 NA           | NA       |
| 0     | 0     | 0     | 0.2 NA         | NA       |
| 0     | 0     | 0     | 0 NA           | NA       |
| 0     | 0     | 0     | 0 NA           | NA       |
| 1.87  | 1.06  | 1.02  | 1.07 -0.69142  | 0.039167 |
| 0     | 0     | 0     | 0 NA           | NA       |
| 0     | 0     | 0     | 0 NA           | NA       |
| 2.83  | 2.07  | 2.89  | 1.73 -0.3677   | 0.513527 |
| 0     | 0     | 0     | 0 NA           | NA       |
| 0     | 0     | 0     | 0 NA           | NA       |
| 0     | 0     | 0     | 0 NA           | NA       |
| 0.05  | 0.12  | 0.07  | 0.04 NA        | NA       |
| 0     | 0     | 0     | 0 NA           | NA       |
| 0     | 0     | 0     | 0 NA           | NA       |
| 0.42  | 0.41  | 1.01  | 1.03 0.229653  | 0.739451 |
| 0     | 0     | 0     | 0 NA           | NA       |
| 0     | 0.2   | 0.13  | 0.07 NA        | NA       |
| 0     | 0     | 0     | 0 NA           | NA       |
| 0     | 0.64  | 0.88  | 1.34 0.844917  | 0.166296 |
| 47.27 | 33.04 | 36.34 | 36.68 -0.3564  | 3.61E-06 |
| 0     | 0     | 0     | 0 NA           | NA       |
| 0     | 0.09  | 0     | 0.09 NA        | NA       |
| 0     | 0     | 0     | 0 NA           | NA       |
| 0     | 0     | 0     | 0 NA           | NA       |
| 0     | 0     | 0     | 0 NA           | NA       |
| 0     | 0     | 0.22  | 0 NA           | NA       |
| 0     | 0     | 0     | 0 NA           | NA       |
| 0     | 0     | 0     | 0 NA           | NA       |
| 0     | 0.41  | 0     | 0 NA           | NA       |
| 0     | 0     | 0     | 0 NA           | NA       |
| 11.36 | 14.08 | 13    | 11.31 -0.00616 | 0.984238 |
| 0.21  | 0.18  | 0.17  | 0.17 -0.41517  | 0.417064 |
| 0     | 0     | 0     | 0 NA           | NA       |
| 0     | 0     | 0     | 0 NA           | NA       |

|      |      |      |               |          |
|------|------|------|---------------|----------|
| 0    | 0.09 | 0.17 | 0 NA          | NA       |
| 0    | 0    | 0    | 0 NA          | NA       |
| 0    | 0    | 0    | 0 NA          | NA       |
| 0    | 0    | 0    | 0 NA          | NA       |
| 0    | 0    | 0    | 0 NA          | NA       |
| 0    | 0    | 0    | 0 NA          | NA       |
| 0    | 0    | 0    | 0 NA          | NA       |
| 0    | 0    | 0.1  | 0 NA          | NA       |
| 0.2  | 0.04 | 0.19 | 0.17 -0.12882 | 0.884574 |
| 0    | 0    | 0    | 0 NA          | NA       |
| 0    | 0    | 0    | 0 NA          | NA       |
| 0    | 0    | 0    | 0 NA          | NA       |
| 0    | 0    | 0    | 0 NA          | NA       |
| 0    | 0    | 0    | 0 NA          | NA       |
| 0    | 0    | 0    | 0 NA          | NA       |
| 0    | 0    | 0    | 0 NA          | NA       |
| 0    | 0    | 0    | 0 NA          | NA       |
| 0    | 0    | 0    | 0 NA          | NA       |
| 0    | 0    | 0    | 0 NA          | NA       |
| 0    | 0.27 | 0.17 | 0.1 NA        | NA       |
| 0    | 0    | 0    | 0 NA          | NA       |
| 0    | 0    | 0    | 0 NA          | NA       |
| 0    | 0    | 0    | 0 NA          | NA       |
| 0    | 0    | 0    | 0 NA          | NA       |
| 0    | 0    | 0    | 0 NA          | NA       |
| 0    | 0    | 0    | 0 NA          | NA       |
| 0    | 0    | 0    | 0 NA          | NA       |
| 0.79 | 0.18 | 1.19 | 0.54 0.126787 | 0.888457 |
| 0    | 0    | 0    | 0 NA          | NA       |
| 0    | 0    | 0    | 0 NA          | NA       |
| 0    | 0    | 0    | 0 NA          | NA       |
| 0    | 0    | 0    | 0 NA          | NA       |
| 0    | 0    | 0    | 0 NA          | NA       |
| 0    | 0    | 0    | 0 NA          | NA       |
| 0    | 0    | 0    | 0.13 NA       | NA       |
| 0    | 0    | 0    | 0 NA          | NA       |
| 0    | 0    | 0    | 0 NA          | NA       |
| 0    | 0    | 0    | 0.15 NA       | NA       |
| 0    | 0    | 0    | 0 NA          | NA       |
| 0    | 0    | 0    | 0 NA          | NA       |
| 0    | 0    | 0.34 | 0 NA          | NA       |
| 0.32 | 0    | 0    | 0 NA          | NA       |
| 0.92 | 0    | 0.35 | 0 NA          | NA       |

|      |      |      |      |          |          |
|------|------|------|------|----------|----------|
| 0    | 0    | 0    | 0    | NA       | NA       |
| 0    | 0    | 0    | 0    | NA       | NA       |
| 0    | 0.03 | 0    | 0    | NA       | NA       |
| 3.15 | 2.95 | 3.29 | 3.28 | -0.01409 | 0.973889 |
| 0.39 | 0.09 | 0.03 | 0.3  | -1.01282 | 0.087169 |
| 0    | 0    | 0.6  | 1.4  | 0.328175 | 0.528371 |
| 0    | 0    | 0    | 0    | NA       | NA       |
| 0    | 0    | 0    | 0    | NA       | NA       |
| 0    | 0    | 0    | 0    | NA       | NA       |
| 0    | 0    | 0    | 0    | NA       | NA       |
| 0    | 0    | 0    | 0    | NA       | NA       |
| 0    | 0    | 0    | 0    | NA       | NA       |
| 0    | 0    | 0    | 0    | NA       | NA       |
| 0    | 0    | 0    | 0    | NA       | NA       |
| 0.32 | 0.39 | 0.51 | 1    | 0.79605  | 0.238781 |
| 0.02 | 0.02 | 0    | 0    | NA       | NA       |
| 0    | 0.16 | 0.11 | 0    | NA       | NA       |
| 0    | 0.13 | 0.24 | 0.27 | NA       | NA       |
| 0    | 0    | 0    | 0    | NA       | NA       |
| 0    | 0    | 0    | 0    | NA       | NA       |
| 0    | 0    | 0    | 0    | NA       | NA       |
| 0.1  | 0.15 | 0.49 | 0.48 | 0.929748 | 0.128134 |
| 0    | 0    | 0    | 0    | NA       | NA       |
| 0    | 0    | 0    | 0    | NA       | NA       |
| 0    | 0    | 0    | 0    | NA       | NA       |
| 0    | 0.09 | 0    | 0    | NA       | NA       |
| 0    | 0    | 0    | 0    | NA       | NA       |
| 0    | 0    | 0.25 | 0.14 | NA       | NA       |
| 0    | 0    | 0    | 0    | NA       | NA       |
| 0.19 | 0.17 | 0.06 | 0.29 | -0.08619 | 0.927899 |
| 0.76 | 0.5  | 0.6  | 0.89 | -0.34483 | 0.645015 |
| 0    | 0    | 0    | 0    | NA       | NA       |
| 0    | 0    | 0    | 0    | NA       | NA       |
| 0    | 0    | 0    | 0    | NA       | NA       |
| 0    | 0    | 0    | 0    | NA       | NA       |
| 0    | 0    | 0    | 0    | NA       | NA       |
| 0    | 0    | 0    | 0    | NA       | NA       |
| 0    | 0    | 0    | 0    | NA       | NA       |
| 0    | 0    | 0    | 0    | NA       | NA       |
| 0    | 0    | 0    | 0    | NA       | NA       |
| 0    | 0    | 0    | 0    | NA       | NA       |
| 0    | 0    | 0    | 0    | NA       | NA       |
| 0    | 0    | 0    | 0    | NA       | NA       |
| 0    | 0    | 0    | 0    | NA       | NA       |
| 0    | 0    | 0    | 0.17 | NA       | NA       |

|      |      |      |      |          |          |
|------|------|------|------|----------|----------|
| 0.35 | 0.48 | 0.45 | 0.59 | 0.153419 | 0.848795 |
| 0    | 0    | 0    | 0    | NA       | NA       |
| 0.06 | 0    | 0.03 | 0    | NA       | NA       |
| 0.42 | 3    | 3.79 | 3.55 | 0.707747 | 0.169119 |
| 0    | 0    | 0    | 0    | NA       | NA       |
| 0    | 0    | 0    | 0    | NA       | NA       |
| 0    | 0    | 0    | 0    | NA       | NA       |
| 0    | 0    | 0    | 0    | NA       | NA       |
| 0.04 | 0    | 0    | 0    | NA       | NA       |
| 0    | 0    | 0.23 | 0    | NA       | NA       |
| 0    | 0    | 0    | 0    | NA       | NA       |
| 0    | 0    | 0    | 0    | NA       | NA       |
| 0    | 0    | 0    | 0    | NA       | NA       |
| 3.75 | 3.52 | 1.7  | 4.41 | 0.439698 | 0.355468 |
| 0    | 0    | 0    | 0.32 | NA       | NA       |
| 0    | 0    | 0    | 0    | NA       | NA       |
| 0    | 0    | 0    | 0    | NA       | NA       |
| 0    | 0    | 0    | 0    | NA       | NA       |
| 0    | 0    | 0    | 0    | NA       | NA       |
| 0.02 | 0    | 0.02 | 0.12 | NA       | NA       |
| 0.04 | 0.05 | 0.05 | 0    | NA       | NA       |
| 0    | 0    | 0    | 0    | NA       | NA       |
| 0.22 | 0    | 0.07 | 0.13 | NA       | NA       |
| 0    | 0    | 0    | 0    | NA       | NA       |
| 0    | 0    | 0    | 0    | NA       | NA       |
| 0    | 0    | 0    | 0    | NA       | NA       |
| 0    | 0    | 0    | 0    | NA       | NA       |
| 0    | 0    | 0    | 0    | NA       | NA       |
| 0    | 0    | 0    | 0    | NA       | NA       |
| 0    | 0    | 0.32 | 0    | NA       | NA       |
| 0    | 0    | 0.1  | 0    | NA       | NA       |
| 0    | 0    | 0    | 0    | NA       | NA       |
| 0    | 0    | 0    | 0    | NA       | NA       |
| 0.95 | 0    | 0.15 | 1.38 | 0.004667 | 0.996111 |
| 0    | 0    | 0    | 0    | NA       | NA       |
| 0    | 0    | 0    | 0    | NA       | NA       |
| 0    | 0    | 0    | 0    | NA       | NA       |
| 3.81 | 3.82 | 4.24 | 4.71 | 0.143335 | 0.824304 |
| 0    | 0    | 0    | 0    | NA       | NA       |
| 0    | 0    | 0    | 0    | NA       | NA       |
| 0    | 0    | 0    | 0    | NA       | NA       |
| 0    | 0    | 0    | 0    | NA       | NA       |
| 0    | 0    | 0    | 0    | NA       | NA       |
| 0.31 | 0.86 | 0.76 | 0.51 | 0.590592 | 0.378376 |

|       |       |       |                |          |
|-------|-------|-------|----------------|----------|
| 0     | 0     | 0     | 0 NA           | NA       |
| 0     | 0     | 0     | 0 NA           | NA       |
| 0     | 0     | 0     | 0 NA           | NA       |
| 0     | 0     | 0     | 0 NA           | NA       |
| 0     | 0     | 0     | 0 NA           | NA       |
| 0     | 0     | 0     | 0 NA           | NA       |
| 0     | 0     | 0     | 0 NA           | NA       |
| 0.8   | 0.91  | 0.18  | 0 NA           | NA       |
| 0     | 0     | 0     | 0 NA           | NA       |
| 0.15  | 0.32  | 0.52  | 0.3 NA         | NA       |
| 0     | 0     | 0     | 0 NA           | NA       |
| 0.23  | 0.22  | 0.55  | 0.09 NA        | NA       |
| 0     | 0     | 0     | 0 NA           | NA       |
| 0     | 0     | 0     | 0 NA           | NA       |
| 0     | 0     | 0     | 0 NA           | NA       |
| 0     | 0     | 0     | 0 NA           | NA       |
| 0     | 0     | 0     | 0 NA           | NA       |
| 0     | 0     | 0     | 0 NA           | NA       |
| 0     | 0     | 0     | 0.31 NA        | NA       |
| 0     | 0     | 0     | 0 NA           | NA       |
| 0     | 0     | 0     | 0 NA           | NA       |
| 0     | 0     | 0     | 0 NA           | NA       |
| 0     | 0.07  | 0.3   | 0.07 NA        | NA       |
| 0     | 0     | 0     | 0 NA           | NA       |
| 0     | 0     | 0     | 0 NA           | NA       |
| 0     | 0     | 0     | 0 NA           | NA       |
| 0     | 0     | 0     | 0 NA           | NA       |
| 0     | 0     | 0     | 0 NA           | NA       |
| 0     | 0     | 0     | 0 NA           | NA       |
| 0     | 0     | 0     | 0 NA           | NA       |
| 0     | 0     | 0     | 0 NA           | NA       |
| 0     | 0     | 0     | 0 NA           | NA       |
| 0     | 0     | 0     | 0 NA           | NA       |
| 0     | 0     | 0     | 0 NA           | NA       |
| 0     | 0     | 0     | 0 NA           | NA       |
| 0     | 0     | 0     | 0 NA           | NA       |
| 0     | 0     | 0     | 0 NA           | NA       |
| 0     | 0     | 0     | 1.55 NA        | NA       |
| 0     | 0     | 0     | 0 NA           | NA       |
| 0     | 0     | 0     | 0.33 NA        | NA       |
| 31.95 | 27.84 | 30.68 | 24.41 -0.05141 | 0.735762 |
| 0     | 0     | 0     | 0 NA           | NA       |
| 0     | 0     | 0     | 0 NA           | NA       |
| 0     | 0     | 0     | 0 NA           | NA       |

|       |      |      |       |          |          |
|-------|------|------|-------|----------|----------|
| 2.53  | 1.76 | 1.89 | 1.84  | -0.34545 | 0.233097 |
| 0     | 0    | 0    | 0     | NA       | NA       |
| 1.68  | 2.01 | 1.4  | 1.47  | 0.115833 | 0.813797 |
| 0     | 0.08 | 0.03 | 0.03  | NA       | NA       |
| 0     | 0    | 0    | 0     | NA       | NA       |
| 0     | 0    | 0    | 0     | NA       | NA       |
| 0.07  | 0    | 0    | 0     | NA       | NA       |
| 2.45  | 1.52 | 0.6  | 0.83  | -0.97105 | 0.00041  |
| 0     | 0    | 0    | 0     | NA       | NA       |
| 0     | 0    | 0    | 0     | NA       | NA       |
| 0     | 0    | 0    | 0     | NA       | NA       |
| 43.66 | 60.2 | 58.4 | 54.89 | 0.22383  | 0.064842 |
| 0     | 0    | 0    | 0     | NA       | NA       |
| 0.08  | 0.06 | 0.06 | 0.12  | NA       | NA       |
| 0     | 0    | 0    | 0     | NA       | NA       |
| 0     | 0    | 0    | 0     | NA       | NA       |
| 0     | 0    | 0    | 0     | NA       | NA       |
| 0.25  | 0.18 | 0.46 | 0.73  | NA       | NA       |
| 0     | 0    | 0    | 0     | NA       | NA       |
| 0     | 0    | 0.03 | 0     | NA       | NA       |
| 0     | 0    | 0    | 0     | NA       | NA       |
| 0     | 0    | 0    | 0     | NA       | NA       |
| 0     | 0    | 0    | 0     | NA       | NA       |
| 0     | 0    | 0    | 0     | NA       | NA       |
| 0     | 0.72 | 0.65 | 0.15  | 0.844343 | 0.132673 |
| 0     | 0    | 0    | 0     | NA       | NA       |
| 0     | 0    | 0    | 0     | NA       | NA       |
| 0     | 0    | 0    | 0     | NA       | NA       |
| 0     | 0    | 0    | 0     | NA       | NA       |
| 0     | 0    | 0    | 0     | NA       | NA       |
| 0.04  | 0.18 | 0.08 | 0.29  | 0.781178 | 0.222794 |
| 0     | 0    | 0.25 | 0     | NA       | NA       |
| 0     | 0    | 0    | 0     | NA       | NA       |
| 0     | 0    | 0    | 0     | NA       | NA       |
| 0.52  | 0.13 | 0.11 | 0.26  | NA       | NA       |
| 0     | 0    | 0    | 0     | NA       | NA       |
| 0     | 0    | 0    | 0     | NA       | NA       |
| 0     | 0    | 0.71 | 0.15  | NA       | NA       |
| 2.78  | 5.32 | 5.25 | 5.59  | 0.50702  | 0.00173  |
| 0     | 0    | 0    | 0     | NA       | NA       |
| 0     | 0    | 0    | 0     | NA       | NA       |
| 0     | 0    | 0    | 0     | NA       | NA       |
| 0     | 0    | 0    | 0     | NA       | NA       |
| 0     | 0    | 0    | 0.05  | NA       | NA       |

|      |      |      |      |          |          |
|------|------|------|------|----------|----------|
| 0    | 0.08 | 0.12 | 0.08 | 0.164805 | 0.852277 |
| 0    | 0.02 | 0.11 | 0.12 | 0.666544 | 0.301064 |
| 0    | 0    | 0    | 0    | NA       | NA       |
| 0    | 0    | 0    | 0    | NA       | NA       |
| 0    | 0    | 0    | 0    | NA       | NA       |
| 0    | 0    | 0    | 0    | NA       | NA       |
| 0    | 0    | 0    | 0    | NA       | NA       |
| 0    | 0    | 0.07 | 0.03 | NA       | NA       |
| 0    | 0    | 0    | 0    | NA       | NA       |
| 0    | 0    | 0    | 0    | NA       | NA       |
| 0    | 0    | 0    | 0    | NA       | NA       |
| 0.56 | 2.01 | 1.57 | 1.29 | 0.224229 | 0.733747 |
| 0    | 0    | 0    | 0    | NA       | NA       |
| 0    | 0    | 0    | 0    | NA       | NA       |
| 0    | 0    | 0    | 0.07 | NA       | NA       |
| 0    | 0    | 0    | 0    | NA       | NA       |
| 0    | 0    | 0    | 0    | NA       | NA       |
| 0.16 | 0    | 0.07 | 0.07 | NA       | NA       |
| 0    | 0    | 0    | 0    | NA       | NA       |
| 0    | 0    | 0    | 0    | NA       | NA       |
| 0.17 | 0    | 0    | 0    | NA       | NA       |
| 0    | 0    | 0    | 0    | NA       | NA       |
| 0.68 | 0.49 | 0.8  | 0.85 | 0.230922 | 0.717933 |
| 0    | 0    | 0    | 0    | NA       | NA       |
| 0    | 0    | 0    | 0    | NA       | NA       |
| 0    | 0    | 0    | 0    | NA       | NA       |
| 0.89 | 0.96 | 0.39 | 0.45 | -0.24743 | 0.764762 |
| 0    | 0    | 0    | 0    | NA       | NA       |
| 0    | 0.44 | 0.67 | 0.15 | NA       | NA       |
| 0    | 0    | 0    | 0    | NA       | NA       |
| 0    | 0    | 0    | 0    | NA       | NA       |
| 0    | 0    | 0    | 0    | NA       | NA       |
| 0    | 0    | 0    | 0    | NA       | NA       |
| 0    | 0    | 0    | 0.02 | NA       | NA       |
| 0    | 0    | 0    | 0    | NA       | NA       |
| 0    | 0    | 0    | 0    | NA       | NA       |
| 0    | 0    | 0    | 0    | NA       | NA       |
| 0    | 0    | 0    | 0    | NA       | NA       |
| 0.29 | 0.21 | 0.37 | 0.55 | -0.25249 | 0.762392 |
| 0    | 0    | 0    | 0    | NA       | NA       |
| 0    | 0    | 0    | 0    | NA       | NA       |
| 0    | 0.12 | 0    | 0    | NA       | NA       |
| 0    | 0    | 0    | 0    | NA       | NA       |
| 0    | 0    | 0    | 0    | NA       | NA       |
| 0    | 0    | 0    | 0    | NA       | NA       |

|      |      |      |      |          |          |
|------|------|------|------|----------|----------|
| 5.23 | 3.6  | 5.84 | 3.81 | 0.126274 | 0.765554 |
| 0    | 0    | 0.16 | 0.37 | NA       | NA       |
| 0    | 0    | 0    | 0    | NA       | NA       |
| 0    | 0    | 0    | 0    | NA       | NA       |
| 0    | 0    | 0    | 0    | NA       | NA       |
| 0    | 0    | 0    | 0    | NA       | NA       |
| 0    | 0    | 0    | 0    | NA       | NA       |
| 0    | 0    | 0    | 0    | NA       | NA       |
| 0    | 0    | 0    | 0    | NA       | NA       |
| 1.73 | 1.77 | 1.78 | 1.78 | 0.332273 | 0.125615 |
| 0    | 0    | 0    | 0    | NA       | NA       |
| 0    | 0    | 0    | 0    | NA       | NA       |
| 0    | 0    | 0    | 0    | NA       | NA       |
| 0    | 0    | 0    | 0    | NA       | NA       |
| 0    | 0    | 0    | 0    | NA       | NA       |
| 0    | 0    | 0    | 0    | NA       | NA       |
| 0.26 | 0.55 | 0    | 0    | NA       | NA       |
| 0.08 | 0    | 0.05 | 0    | NA       | NA       |
| 0    | 0    | 0    | 0    | NA       | NA       |
| 0    | 0    | 0    | 0    | NA       | NA       |
| 0    | 0.12 | 0    | 0    | NA       | NA       |
| 0    | 0    | 0    | 0    | NA       | NA       |
| 0    | 0    | 0    | 0    | NA       | NA       |
| 0.84 | 0.33 | 0.73 | 0.16 | -0.70622 | 0.290983 |
| 0.56 | 0.71 | 0.58 | 0.3  | NA       | NA       |
| 0    | 0    | 0    | 0    | NA       | NA       |
| 0    | 0    | 0    | 0    | NA       | NA       |
| 1.35 | 1.49 | 1.41 | 1.3  | -0.2039  | 0.516105 |
| 0    | 0    | 0    | 0    | NA       | NA       |
| 0    | 0    | 0    | 0    | NA       | NA       |
| 0    | 0    | 0    | 0    | NA       | NA       |
| 2.25 | 3.58 | 0.53 | 1.43 | 0.052426 | 0.948772 |
| 0.59 | 0.15 | 0    | 0    | NA       | NA       |
| 0    | 0    | 0    | 0    | NA       | NA       |
| 0    | 0    | 0    | 0    | NA       | NA       |
| 0    | 0    | 0    | 0    | NA       | NA       |
| 0    | 0    | 0    | 0    | NA       | NA       |
| 2.11 | 1.58 | 1.14 | 1.62 | -0.26487 | 0.511718 |
| 0    | 0    | 0    | 0    | NA       | NA       |
| 0    | 0    | 0    | 0    | NA       | NA       |
| 0    | 0    | 0    | 0    | NA       | NA       |
| 0    | 0    | 0    | 0.14 | NA       | NA       |
| 0    | 0    | 0    | 0    | NA       | NA       |
| 0.18 | 0.16 | 0.17 | 0.2  | NA       | NA       |



|      |      |      |               |          |
|------|------|------|---------------|----------|
| 0    | 0    | 0    | 0 NA          | NA       |
| 0    | 0    | 0    | 0 NA          | NA       |
| 0    | 0    | 0    | 0 NA          | NA       |
| 0    | 0    | 0    | 0 NA          | NA       |
| 0    | 0    | 0.09 | 0 NA          | NA       |
| 0    | 0    | 0    | 0 NA          | NA       |
| 0    | 0    | 0    | 0 NA          | NA       |
| 0    | 0    | 0    | 0 NA          | NA       |
| 0    | 0    | 0    | 0 NA          | NA       |
| 0    | 0    | 0    | 0 NA          | NA       |
| 0    | 0    | 0    | 0 NA          | NA       |
| 0    | 0    | 0    | 0 NA          | NA       |
| 0    | 0    | 0    | 0 NA          | NA       |
| 0    | 0    | 0    | 0 NA          | NA       |
| 0    | 0    | 0    | 0 NA          | NA       |
| 0    | 0    | 0    | 0 NA          | NA       |
| 0    | 0    | 0    | 0 NA          | NA       |
| 0    | 0    | 0    | 0 NA          | NA       |
| 0    | 0    | 0    | 0 NA          | NA       |
| 0    | 0    | 0    | 0 NA          | NA       |
| 0    | 0.03 | 0    | 0 NA          | NA       |
| 0    | 0.36 | 0.11 | 0 NA          | NA       |
| 0    | 0    | 0    | 0 NA          | NA       |
| 0    | 0.33 | 0.15 | 0.17 NA       | NA       |
| 0    | 0    | 0    | 0 NA          | NA       |
| 0    | 0    | 0    | 0 NA          | NA       |
| 0    | 0    | 0    | 0 NA          | NA       |
| 0    | 0    | 0    | 0 NA          | NA       |
| 0    | 0    | 0    | 0 NA          | NA       |
| 0    | 0    | 0    | 0 NA          | NA       |
| 0    | 0    | 0    | 0 NA          | NA       |
| 0    | 0    | 0.08 | 0.1 NA        | NA       |
| 0    | 0    | 0    | 0 NA          | NA       |
| 0    | 0    | 0    | 0 NA          | NA       |
| 0    | 0    | 0    | 0 NA          | NA       |
| 0    | 0    | 0    | 0 NA          | NA       |
| 0    | 0    | 0    | 0 NA          | NA       |
| 0    | 0    | 0    | 0 NA          | NA       |
| 0    | 0    | 0    | 0 NA          | NA       |
| 0    | 0    | 0    | 0 NA          | NA       |
| 0    | 0    | 0    | 0 NA          | NA       |
| 0    | 0    | 0    | 0 NA          | NA       |
| 0    | 0    | 0    | 0 NA          | NA       |
| 0    | 0    | 0    | 0 NA          | NA       |
| 0    | 0    | 0    | 0 NA          | NA       |
| 0    | 0    | 0    | 0 NA          | NA       |
| 0    | 0    | 0    | 0 NA          | NA       |
| 0    | 0    | 0    | 0 NA          | NA       |
| 0    | 0    | 0    | 0 NA          | NA       |
| 0.11 | 0    | 0    | 0 NA          | NA       |
| 0    | 0    | 0    | 0 NA          | NA       |
| 0    | 0    | 0    | 0 NA          | NA       |
| 0    | 0    | 0    | 0 NA          | NA       |
| 0    | 0    | 0    | 0 NA          | NA       |
| 0    | 0    | 0    | 0 NA          | NA       |
| 0    | 0    | 0    | 0 NA          | NA       |
| 0    | 0    | 0    | 0 NA          | NA       |
| 0    | 0    | 0    | 0 NA          | NA       |
| 0    | 0.06 | 0.06 | 0 NA          | NA       |
| 0    | 0    | 0    | 0 NA          | NA       |
| 0.28 | 0.24 | 0.86 | 0.22 0.261553 | 0.751876 |
| 0    | 0    | 0    | 0 NA          | NA       |
| 0    | 0    | 0    | 0 NA          | NA       |
| 0    | 0    | 0    | 0 NA          | NA       |
| 0.01 | 0.02 | 0.04 | 0 -0.72822    | 0.286173 |

|      |      |      |               |          |
|------|------|------|---------------|----------|
| 0    | 0    | 0    | 0 NA          | NA       |
| 0    | 0    | 0.1  | 0 NA          | NA       |
| 0    | 0    | 0    | 0 NA          | NA       |
| 0.11 | 0.05 | 0.06 | 0.09 -0.28153 | 0.731584 |
| 0    | 0    | 0    | 0 NA          | NA       |
| 0    | 0    | 0    | 0 NA          | NA       |
| 0    | 0    | 0    | 0 NA          | NA       |
| 0    | 0    | 0    | 0 NA          | NA       |
| 0.16 | 0.16 | 0.15 | 0.11 -0.52418 | 0.472817 |
| 0    | 0    | 0    | 0 NA          | NA       |
| 0    | 0    | 0.02 | 0 NA          | NA       |
| 0    | 0    | 0    | 0 NA          | NA       |
| 0    | 0    | 0    | 0 NA          | NA       |
| 0.03 | 0.1  | 0.05 | 0.07 NA       | NA       |
| 0    | 0    | 0    | 0 NA          | NA       |
| 0    | 0    | 0    | 0 NA          | NA       |
| 0    | 0    | 0    | 0 NA          | NA       |
| 0    | 0    | 0    | 0 NA          | NA       |
| 0    | 0    | 0    | 0 NA          | NA       |
| 0    | 0    | 0    | 0 NA          | NA       |
| 0    | 0    | 0    | 0 NA          | NA       |
| 1.27 | 0.5  | 0.81 | 1.01 -0.86024 | 0.075737 |
| 0    | 0    | 0    | 0 NA          | NA       |
| 0.49 | 0.04 | 0.3  | 0.35 NA       | NA       |
| 0    | 0    | 0    | 0 NA          | NA       |
| 0    | 0    | 0    | 0 NA          | NA       |
| 0    | 0    | 0    | 0 NA          | NA       |
| 0    | 0    | 0    | 0 NA          | NA       |
| 0    | 0    | 0    | 0 NA          | NA       |
| 0    | 0    | 0    | 0 NA          | NA       |
| 0.29 | 0.72 | 0.83 | 2.35 0.464628 | 0.52693  |
| 0    | 0    | 0    | 0 NA          | NA       |
| 0    | 0    | 0    | 0 NA          | NA       |
| 0    | 0    | 0    | 0 NA          | NA       |
| 0    | 0    | 0.05 | 0 NA          | NA       |
| 0    | 0.03 | 0    | 0 NA          | NA       |
| 0    | 0    | 0    | 0 NA          | NA       |
| 0    | 0    | 0    | 0 NA          | NA       |
| 0    | 0    | 0    | 0 NA          | NA       |
| 0    | 0.89 | 0.83 | 0.61 0.824103 | 0.214043 |
| 0    | 0    | 0    | 0 NA          | NA       |
| 0    | 0    | 0    | 0 NA          | NA       |
| 0.1  | 0    | 0    | 0 NA          | NA       |
| 0    | 0    | 0    | 0 NA          | NA       |
| 0    | 0    | 0    | 0 NA          | NA       |

|      |      |      |               |          |
|------|------|------|---------------|----------|
| 0    | 0    | 0    | 0 NA          | NA       |
| 0    | 0    | 0    | 0 NA          | NA       |
| 0    | 0    | 0.06 | 0.13 -0.42556 | 0.453409 |
| 0.04 | 0.05 | 0.01 | 0.03 NA       | NA       |
| 0.3  | 0    | 0    | 0.22 NA       | NA       |
| 0.66 | 0.24 | 0.19 | 0.5 -0.45162  | 0.551917 |
| 0    | 0    | 0    | 0 NA          | NA       |
| 0    | 0    | 0    | 0 NA          | NA       |
| 0    | 0    | 0    | 0 NA          | NA       |
| 0    | 0    | 0    | 0 NA          | NA       |
| 0    | 0    | 0    | 0 NA          | NA       |
| 0.29 | 0    | 0    | 0.11 NA       | NA       |
| 0    | 0    | 0    | 0 NA          | NA       |
| 0    | 0    | 0    | 0 NA          | NA       |
| 0    | 0    | 0.1  | 0 NA          | NA       |
| 0.13 | 0    | 0    | 0 NA          | NA       |
| 0    | 0    | 0    | 0.15 NA       | NA       |
| 0    | 0    | 0    | 0 NA          | NA       |
| 0    | 0    | 0    | 0 NA          | NA       |
| 0.02 | 0    | 0.14 | 0.06 NA       | NA       |
| 0    | 0.42 | 0    | 0 NA          | NA       |
| 0    | 0    | 0    | 0 NA          | NA       |
| 0    | 0    | 0.12 | 0 NA          | NA       |
| 0    | 0    | 0    | 0 NA          | NA       |
| 0.08 | 0    | 0    | 0 NA          | NA       |
| 0    | 0    | 0    | 0 NA          | NA       |
| 0    | 0    | 0    | 0 NA          | NA       |
| 0    | 0    | 0    | 0 NA          | NA       |
| 0    | 0    | 0    | 0 NA          | NA       |
| 0    | 0    | 0    | 0 NA          | NA       |
| 0    | 0    | 0    | 0 NA          | NA       |
| 0    | 0    | 0    | 0 NA          | NA       |
| 0    | 0    | 0    | 0 NA          | NA       |
| 0    | 0    | 0    | 0 NA          | NA       |
| 0    | 0    | 0    | 0 NA          | NA       |
| 0    | 0    | 0    | 0 NA          | NA       |
| 0    | 0    | 0    | 0 NA          | NA       |
| 0    | 0    | 0    | 0 NA          | NA       |
| 0    | 0    | 0    | 0 NA          | NA       |
| 0    | 0    | 0    | 0 NA          | NA       |
| 2.31 | 3.42 | 2.71 | 3.29 0.444295 | 0.016598 |
| 0    | 0.12 | 0    | 0.25 NA       | NA       |
| 0    | 0    | 0    | 0 NA          | NA       |
| 0    | 0    | 0    | 0 NA          | NA       |
| 0    | 0    | 0    | 0 NA          | NA       |

|      |      |      |               |          |
|------|------|------|---------------|----------|
| 0    | 0    | 0    | 0 NA          | NA       |
| 0    | 0    | 0    | 0 NA          | NA       |
| 0.1  | 0    | 0    | 0 NA          | NA       |
| 7.34 | 8.82 | 8.12 | 11.2 0.498838 | 0.09333  |
| 3.57 | 9.83 | 3.61 | 4.4 0.444115  | 0.202072 |
| 0    | 0    | 0    | 0 NA          | NA       |
| 0    | 0    | 0    | 0 NA          | NA       |
| 0    | 0    | 0    | 0 NA          | NA       |
| 0    | 0    | 0    | 0 NA          | NA       |
| 0.16 | 0    | 0    | 0 NA          | NA       |
| 0    | 0    | 0    | 0 NA          | NA       |
| 0    | 0    | 0    | 0.14 NA       | NA       |
| 0    | 0    | 0    | 0 NA          | NA       |
| 0.14 | 0.22 | 0.31 | 0.25 0.565855 | 0.38554  |
| 0    | 0    | 0    | 0 NA          | NA       |
| 1.03 | 1.21 | 1.34 | 1.18 0.067077 | 0.900928 |
| 1.99 | 0    | 0    | 0.06 NA       | NA       |
| 0    | 0    | 0    | 0 NA          | NA       |
| 0    | 0    | 0    | 0 NA          | NA       |
| 4.56 | 3.46 | 3.63 | 3.96 -0.32832 | 0.14749  |
| 0    | 0    | 0    | 0 NA          | NA       |
| 0    | 0    | 0    | 0 NA          | NA       |
| 0    | 0    | 0    | 0 NA          | NA       |
| 0    | 0    | 0    | 0 NA          | NA       |
| 0    | 0    | 0    | 0 NA          | NA       |
| 0    | 0    | 0.18 | 0 NA          | NA       |
| 0.82 | 0.12 | 0.43 | 0.99 0.122415 | 0.891001 |
| 0    | 0    | 0    | 0 NA          | NA       |
| 0    | 0    | 0.06 | 0.2 NA        | NA       |
| 0    | 0    | 0    | 0 NA          | NA       |
| 0    | 0    | 0    | 0 NA          | NA       |
| 0    | 0    | 0    | 0 NA          | NA       |
| 1.06 | 0.71 | 0.91 | 0.22 -0.14718 | 0.866083 |
| 0.51 | 0    | 0    | 0.1 NA        | NA       |
| 0    | 0    | 0    | 0 NA          | NA       |
| 2.92 | 4.3  | 5.37 | 6.25 0.670201 | 0.060735 |
| 0    | 0    | 0    | 0 NA          | NA       |
| 0.14 | 0.04 | 0.1  | 0.06 -0.09548 | 0.919239 |
| 0    | 0    | 0    | 0 NA          | NA       |
| 0    | 0    | 0    | 0 NA          | NA       |
| 0    | 0.11 | 0    | 0 NA          | NA       |
| 0    | 0    | 0    | 0 NA          | NA       |
| 0.2  | 0    | 0.36 | 0 NA          | NA       |
| 0    | 0    | 0    | 0 NA          | NA       |
| 0    | 0    | 0    | 0 NA          | NA       |

|      |       |       |                |          |
|------|-------|-------|----------------|----------|
| 0    | 0     | 0     | 0 NA           | NA       |
| 0    | 0     | 0     | 0 NA           | NA       |
| 2.18 | 15.41 | 15.09 | 23.11 1.626158 | 7.48E-08 |
| 0    | 0     | 0     | 0 NA           | NA       |
| 0    | 0     | 0     | 0 NA           | NA       |
| 0    | 0     | 0     | 0 NA           | NA       |
| 0    | 0     | 0.11  | 0.13 NA        | NA       |
| 0    | 0     | 0     | 0 NA           | NA       |
| 0    | 0     | 0     | 0 NA           | NA       |
| 0    | 0     | 0     | 0 NA           | NA       |
| 0    | 0     | 0     | 0 NA           | NA       |
| 0.43 | 0.46  | 0.37  | 0.4 -0.41888   | 0.42351  |
| 0.02 | 0     | 0.13  | 0 NA           | NA       |
| 0    | 0     | 0     | 0 NA           | NA       |
| 0.91 | 1.28  | 1.15  | 0.68 0.016597  | 0.986207 |
| 0    | 0     | 0     | 0 NA           | NA       |
| 0    | 0     | 0     | 0 NA           | NA       |
| 0    | 0.23  | 0     | 0.12 NA        | NA       |
| 0.61 | 0.12  | 0.23  | 0.08 -1.27117  | 0.020525 |
| 0    | 0     | 0     | 0 NA           | NA       |
| 0.52 | 0.66  | 0.54  | 0.6 0.09764    | 0.835457 |
| 0    | 0     | 0.04  | 0 NA           | NA       |
| 0    | 0     | 0     | 0 NA           | NA       |
| 0    | 0     | 0     | 0 NA           | NA       |
| 0    | 0     | 0     | 0 NA           | NA       |
| 0    | 0     | 0     | 0 NA           | NA       |
| 0    | 0     | 0     | 0 NA           | NA       |
| 0    | 0     | 0     | 0 NA           | NA       |
| 0    | 0     | 0     | 0 NA           | NA       |
| 0    | 0     | 0     | 0 NA           | NA       |
| 0.15 | 0     | 0.08  | 0.14 NA        | NA       |
| 0.18 | 0.03  | 0.09  | 0.32 NA        | NA       |
| 0    | 0     | 0     | 0 NA           | NA       |
| 3.68 | 2.05  | 2.79  | 2.2 -0.62224   | 0.001675 |
| 0    | 0     | 0     | 0 NA           | NA       |
| 0    | 0.03  | 0     | 0 NA           | NA       |
| 0    | 0     | 0     | 0 NA           | NA       |
| 0.07 | 0     | 0.04  | 0.05 NA        | NA       |
| 0    | 0     | 0     | 0 NA           | NA       |
| 0    | 0.08  | 0     | 0 NA           | NA       |
| 0    | 0     | 0     | 0 NA           | NA       |
| 0.06 | 0     | 0.02  | 0 NA           | NA       |
| 0    | 0     | 0     | 0 NA           | NA       |
| 0    | 0     | 0     | 0 NA           | NA       |
| 0.46 | 1.62  | 1.13  | 1.44 0.846817  | 0.022012 |



|       |       |       |      |          |          |
|-------|-------|-------|------|----------|----------|
| 0     | 0     | 0     | 0    | NA       | NA       |
| 0     | 0     | 0.87  | 1.05 | NA       | NA       |
| 0.54  | 0.24  | 0.29  | 0.5  | -0.50202 | 0.493482 |
| 0.69  | 0.42  | 0.42  | 0.43 | -0.46048 | 0.308239 |
| 2.63  | 6.42  | 11.24 | 9.55 | 2.334769 | 2.24E-10 |
| 0     | 0     | 0     | 0    | NA       | NA       |
| 0     | 0     | 0     | 0    | NA       | NA       |
| 0     | 0     | 0.15  | 0    | NA       | NA       |
| 0     | 0     | 0     | 0    | NA       | NA       |
| 0     | 0     | 0     | 0    | NA       | NA       |
| 0     | 0     | 0     | 0    | NA       | NA       |
| 0     | 0     | 0     | 0    | NA       | NA       |
| 0     | 0     | 0     | 0    | NA       | NA       |
| 0     | 0     | 0     | 0    | NA       | NA       |
| 0     | 0     | 0     | 0    | NA       | NA       |
| 0     | 0.03  | 0     | 0    | NA       | NA       |
| 0     | 0     | 0     | 0    | NA       | NA       |
| 0     | 0     | 0     | 0    | NA       | NA       |
| 0.19  | 0.27  | 0.35  | 0.5  | 0.280844 | 0.733468 |
| 0     | 0.11  | 0     | 0    | NA       | NA       |
| 0     | 0     | 0     | 0    | NA       | NA       |
| 0     | 0     | 0     | 0    | NA       | NA       |
| 0     | 0.06  | 0     | 0.03 | NA       | NA       |
| 0     | 0     | 0     | 0    | NA       | NA       |
| 0.14  | 0.36  | 0.19  | 0.33 | -0.11634 | 0.896865 |
| 0     | 0     | 0     | 0    | NA       | NA       |
| 0     | 0     | 0     | 0    | NA       | NA       |
| 0     | 0     | 0     | 0    | NA       | NA       |
| 0     | 0     | 0     | 0    | NA       | NA       |
| 54.56 | 28.89 | 37.88 | 37.2 | -0.53719 | 4.72E-07 |
| 0     | 0     | 0     | 0    | NA       | NA       |
| 0     | 0     | 0     | 0    | NA       | NA       |
| 0     | 0     | 0     | 0    | NA       | NA       |
| 0     | 0     | 0     | 0    | NA       | NA       |
| 1.57  | 2.25  | 0.93  | 2.13 | 0.183793 | 0.805735 |
| 0     | 0     | 0     | 0    | NA       | NA       |
| 0     | 0     | 0.06  | 0    | NA       | NA       |
| 0     | 0     | 0     | 0    | NA       | NA       |
| 0     | 0     | 0     | 0    | NA       | NA       |
| 0.07  | 1.35  | 0.26  | 0.75 | 0.919465 | 0.109529 |
| 0     | 0     | 0     | 0    | NA       | NA       |
| 0     | 0     | 0     | 0    | NA       | NA       |
| 0     | 0     | 0     | 0    | NA       | NA       |
| 0     | 0     | 0     | 0    | NA       | NA       |

|       |       |       |                |          |
|-------|-------|-------|----------------|----------|
| 0     | 0     | 0     | 0 NA           | NA       |
| 3.04  | 3.1   | 3.33  | 3.54 -0.01173  | 0.969266 |
| 0     | 0     | 0     | 0 NA           | NA       |
| 0     | 0     | 0     | 0 NA           | NA       |
| 0     | 0     | 0     | 0 NA           | NA       |
| 0     | 0     | 0     | 0 NA           | NA       |
| 0     | 0     | 0     | 0 NA           | NA       |
| 0     | 0     | 0.03  | 0 NA           | NA       |
| 0     | 0     | 0     | 0 NA           | NA       |
| 0     | 0     | 0     | 0 NA           | NA       |
| 0     | 0     | 0     | 0 NA           | NA       |
| 0     | 0     | 0     | 0 NA           | NA       |
| 0.16  | 0     | 0     | 0 NA           | NA       |
| 0     | 0     | 0     | 0 NA           | NA       |
| 0     | 0     | 0     | 0 NA           | NA       |
| 0     | 0     | 0     | 0 NA           | NA       |
| 0.05  | 0     | 0.04  | 0.04 NA        | NA       |
| 0     | 0     | 0     | 0 NA           | NA       |
| 0     | 0     | 0     | 0 NA           | NA       |
| 0     | 0     | 0     | 0 NA           | NA       |
| 0     | 0     | 0     | 0 NA           | NA       |
| 0     | 0     | 0     | 0 NA           | NA       |
| 0     | 0     | 0     | 0 NA           | NA       |
| 0     | 0     | 0     | 0 NA           | NA       |
| 0     | 0     | 0     | 0 NA           | NA       |
| 0     | 0     | 0     | 0 NA           | NA       |
| 0     | 0     | 0     | 0 NA           | NA       |
| 0     | 0     | 0     | 0 NA           | NA       |
| 0     | 0     | 0     | 0 NA           | NA       |
| 0     | 0     | 0     | 0.05 NA        | NA       |
| 0     | 0     | 0     | 0 NA           | NA       |
| 0.18  | 0.58  | 0.69  | 0.77 1.31098   | 0.012779 |
| 0     | 0     | 0     | 0 NA           | NA       |
| 0     | 0     | 0     | 0 NA           | NA       |
| 0     | 0     | 0     | 0 NA           | NA       |
| 0     | 0     | 0     | 0 NA           | NA       |
| 0     | 0     | 0     | 0 NA           | NA       |
| 0     | 0     | 0     | 0 NA           | NA       |
| 0     | 0     | 0     | 0 NA           | NA       |
| 0     | 0     | 0     | 0 NA           | NA       |
| 0     | 0     | 0     | 0 NA           | NA       |
| 0     | 0     | 0     | 0 NA           | NA       |
| 0     | 0     | 0     | 0 NA           | NA       |
| 12.33 | 12.49 | 14.41 | 14.28 0.105069 | 0.55896  |



|      |      |      |               |          |
|------|------|------|---------------|----------|
| 0.07 | 0.05 | 0.19 | 0.04 NA       | NA       |
| 1.35 | 0    | 0    | 0 NA          | NA       |
| 0    | 0.06 | 0.11 | 0.06 NA       | NA       |
| 0    | 0    | 0    | 0 NA          | NA       |
| 0    | 0    | 0.11 | 0.26 NA       | NA       |
| 0    | 0    | 0    | 0 NA          | NA       |
| 0    | 0    | 0    | 0 NA          | NA       |
| 0    | 0    | 0    | 0 NA          | NA       |
| 1.7  | 0.94 | 1.07 | 0.69 -0.33054 | 0.624468 |
| 0    | 0    | 0    | 0 NA          | NA       |
| 0    | 0    | 0    | 0 NA          | NA       |
| 0    | 0    | 0    | 0 NA          | NA       |
| 0.16 | 0    | 0.11 | 0.25 NA       | NA       |
| 0    | 0    | 0    | 0 NA          | NA       |
| 0    | 0    | 0    | 0 NA          | NA       |
| 0    | 0    | 0    | 0 NA          | NA       |
| 0    | 0    | 0    | 0 NA          | NA       |
| 0    | 0    | 0    | 0 NA          | NA       |
| 0.27 | 0.1  | 0.54 | 0.2 NA        | NA       |
| 0    | 0    | 0    | 0 NA          | NA       |
| 0    | 0    | 0    | 0 NA          | NA       |
| 0    | 0    | 0    | 0 NA          | NA       |
| 0    | 0    | 0    | 0 NA          | NA       |
| 0    | 0    | 0    | 0 NA          | NA       |
| 0    | 0    | 0    | 0 NA          | NA       |
| 0    | 0.23 | 0    | 0 NA          | NA       |
| 0    | 0.12 | 0    | 0 NA          | NA       |
| 1.12 | 0.38 | 0.36 | 0.5 -0.81267  | 0.157005 |
| 0    | 0    | 0    | 0 NA          | NA       |
| 0.2  | 0    | 0    | 0 NA          | NA       |
| 0    | 0    | 0    | 0 NA          | NA       |
| 1.36 | 1.54 | 1.7  | 1.74 0.153195 | 0.795969 |
| 0    | 0    | 0    | 0 NA          | NA       |
| 0    | 0    | 0    | 0.11 NA       | NA       |
| 0    | 0    | 0    | 0 NA          | NA       |
| 0    | 0    | 0    | 0 NA          | NA       |
| 0    | 0    | 0    | 0 NA          | NA       |
| 0    | 0    | 0    | 0 NA          | NA       |
| 0    | 0.11 | 0    | 0 NA          | NA       |
| 0.11 | 0    | 0    | 0 NA          | NA       |
| 0    | 0    | 0    | 0 NA          | NA       |
| 0    | 0    | 0    | 0 NA          | NA       |
| 1.93 | 1.27 | 1.22 | 1.58 -0.56331 | 0.027438 |
| 0.25 | 0.58 | 0.17 | 0.3 0.224884  | 0.787231 |
| 0.04 | 0    | 0    | 0 NA          | NA       |

|       |       |      |                |          |
|-------|-------|------|----------------|----------|
| 0     | 0     | 0    | 0 NA           | NA       |
| 0     | 0     | 0    | 0 NA           | NA       |
| 0.1   | 0.92  | 0.4  | 0.45 1.013444  | 0.113823 |
| 0.13  | 0.09  | 0    | 0.19 NA        | NA       |
| 33.33 | 38.12 | 40   | 35.63 0.201643 | 0.072776 |
| 0     | 0     | 0    | 0 NA           | NA       |
| 0     | 0     | 0    | 0 NA           | NA       |
| 0     | 0     | 0    | 0 NA           | NA       |
| 0     | 0     | 0    | 0 NA           | NA       |
| 0     | 0     | 0    | 0 NA           | NA       |
| 0.47  | 0     | 0.16 | 0 NA           | NA       |
| 0     | 0     | 0    | 0 NA           | NA       |
| 0.04  | 0.03  | 0    | 0.03 NA        | NA       |
| 0     | 0     | 0    | 0 NA           | NA       |
| 0     | 0     | 0    | 0 NA           | NA       |
| 0     | 0     | 0    | 0 NA           | NA       |
| 0     | 0     | 0    | 0 NA           | NA       |
| 0     | 0     | 0    | 0 NA           | NA       |
| 0.56  | 1.42  | 0    | 2.01 0.031444  | 0.96513  |
| 0     | 0     | 0    | 0 NA           | NA       |
| 0     | 0     | 0    | 0 NA           | NA       |
| 0     | 0     | 0.53 | 0 NA           | NA       |
| 0     | 0     | 0    | 0 NA           | NA       |
| 0     | 0     | 0    | 0 NA           | NA       |
| 0     | 0     | 0    | 0 NA           | NA       |
| 0     | 0     | 0    | 0 NA           | NA       |
| 0     | 0     | 0    | 0 NA           | NA       |
| 0.38  | 0     | 0    | 0.1 NA         | NA       |
| 0     | 0     | 0    | 0 NA           | NA       |
| 0.24  | 0.37  | 0.56 | 0.42 NA        | NA       |
| 0     | 0     | 0    | 0 NA           | NA       |
| 0     | 0     | 0    | 0 NA           | NA       |
| 0     | 0     | 0    | 0 NA           | NA       |
| 0     | 0     | 0    | 0 NA           | NA       |
| 0     | 0     | 0    | 0 NA           | NA       |
| 0     | 0     | 0    | 0 NA           | NA       |
| 0     | 0     | 0    | 0 NA           | NA       |
| 0.13  | 0.32  | 0.36 | 0.1 0.111523   | 0.90198  |
| 0     | 0     | 0    | 0 NA           | NA       |
| 0     | 0     | 0.06 | 0.03 NA        | NA       |
| 0     | 0     | 0    | 0 NA           | NA       |
| 0     | 0.18  | 0    | 0.04 NA        | NA       |
| 0     | 0     | 0.69 | 0 NA           | NA       |
| 0     | 0     | 0    | 0 NA           | NA       |
| 0     | 0     | 0    | 0 NA           | NA       |

|      |      |      |               |          |
|------|------|------|---------------|----------|
| 0    | 0    | 0    | 0 NA          | NA       |
| 0    | 0    | 0    | 0 NA          | NA       |
| 0    | 0    | 0    | 0 NA          | NA       |
| 0    | 0    | 0    | 0 NA          | NA       |
| 0    | 0    | 0    | 0 NA          | NA       |
| 0    | 0    | 0    | 0 NA          | NA       |
| 1.31 | 0.02 | 0.39 | 0.24 -1.22824 | 0.046382 |
| 0    | 0    | 0.46 | 0.21 NA       | NA       |
| 0    | 0    | 0    | 0.01 NA       | NA       |
| 0    | 0    | 0    | 0 NA          | NA       |
| 0    | 0    | 0.15 | 0 NA          | NA       |
| 0    | 0    | 0    | 0 NA          | NA       |
| 0    | 0    | 0    | 0 NA          | NA       |
| 0.28 | 0.72 | 0.38 | 0.86 -0.08054 | 0.932032 |
| 0.37 | 0    | 0.1  | 0.11 -0.82126 | 0.212198 |
| 0    | 0    | 0    | 0 NA          | NA       |
| 0    | 0    | 0    | 0 NA          | NA       |
| 0    | 0    | 0    | 0 NA          | NA       |
| 0    | 0    | 0    | 0 NA          | NA       |
| 0    | 0    | 0    | 0 NA          | NA       |
| 0    | 0    | 0    | 0 NA          | NA       |
| 0    | 0    | 0    | 0 NA          | NA       |
| 0    | 0    | 0.29 | 0 NA          | NA       |
| 0    | 0    | 0    | 0 NA          | NA       |
| 0    | 0.26 | 0.12 | 0 NA          | NA       |
| 0    | 0    | 0    | 0 NA          | NA       |
| 0    | 0    | 0.41 | 0 NA          | NA       |
| 0    | 0    | 0    | 0 NA          | NA       |
| 0    | 0    | 0    | 0 NA          | NA       |
| 0    | 0    | 0    | 0 NA          | NA       |
| 0    | 0    | 0    | 0 NA          | NA       |
| 4.06 | 7.12 | 7.22 | 7.75 0.794297 | 3.08E-06 |
| 0    | 0    | 0    | 0 NA          | NA       |
| 0    | 0    | 0    | 0 NA          | NA       |
| 0    | 0    | 0    | 0 NA          | NA       |
| 0    | 0    | 0    | 0 NA          | NA       |
| 0.74 | 0.09 | 0.41 | 0.13 -1.49087 | 0.000418 |
| 0    | 0    | 0    | 0 NA          | NA       |
| 0    | 0    | 0    | 0 NA          | NA       |
| 0    | 0    | 0    | 0 NA          | NA       |
| 0    | 0    | 0    | 0 NA          | NA       |
| 0    | 0    | 0    | 0 NA          | NA       |
| 0    | 0    | 0    | 0 NA          | NA       |
| 0    | 0    | 0    | 0 NA          | NA       |
| 0    | 0    | 0    | 0.08 NA       | NA       |

|      |      |      |      |          |          |
|------|------|------|------|----------|----------|
| 0    | 1.99 | 1.4  | 0.86 | 0.414532 | 0.457756 |
| 0    | 0    | 0    | 0    | NA       | NA       |
| 0    | 0    | 0    | 0    | NA       | NA       |
| 0    | 0    | 0    | 0    | NA       | NA       |
| 0    | 0    | 0    | 0    | NA       | NA       |
| 0    | 0    | 0    | 0    | NA       | NA       |
| 0    | 0    | 0    | 0    | NA       | NA       |
| 0    | 0    | 0    | 0    | NA       | NA       |
| 0    | 0    | 0.07 | 0.07 | NA       | NA       |
| 0.33 | 0.3  | 0.11 | 0.19 | NA       | NA       |
| 0    | 0    | 0    | 0    | NA       | NA       |
| 0    | 0    | 0    | 0    | NA       | NA       |
| 0    | 1.64 | 0    | 0    | NA       | NA       |
| 0    | 0    | 0    | 0    | NA       | NA       |
| 0    | 0    | 0    | 0    | NA       | NA       |
| 0    | 0    | 0    | 0    | NA       | NA       |
| 0    | 0    | 0    | 0    | NA       | NA       |
| 0    | 0    | 0    | 0    | NA       | NA       |
| 0    | 0    | 0    | 0    | NA       | NA       |
| 0    | 0    | 0    | 0    | NA       | NA       |
| 0    | 0    | 0    | 0    | NA       | NA       |
| 0    | 0    | 0    | 0    | NA       | NA       |
| 0    | 0    | 0    | 0    | NA       | NA       |
| 1.09 | 0    | 0    | 0.43 | NA       | NA       |
| 0    | 0    | 0    | 0    | NA       | NA       |
| 1.09 | 0.46 | 1.76 | 0.73 | -0.48888 | 0.476741 |
| 0    | 0.47 | 0.9  | 0    | NA       | NA       |
| 0    | 0    | 0    | 0    | NA       | NA       |
| 0    | 0    | 0    | 0    | NA       | NA       |
| 0    | 0    | 0    | 0    | NA       | NA       |
| 0.16 | 0    | 0.04 | 0.01 | NA       | NA       |
| 0    | 0    | 0    | 0    | NA       | NA       |
| 0    | 0    | 0    | 0    | NA       | NA       |
| 0    | 0    | 0    | 0    | NA       | NA       |
| 0.53 | 0.51 | 0.17 | 0.4  | -0.02106 | 0.981184 |
| 0    | 0    | 0    | 0    | NA       | NA       |
| 0    | 0    | 0    | 0    | NA       | NA       |
| 0.21 | 0.03 | 0.06 | 0.13 | -0.94126 | 0.147756 |
| 0    | 0    | 0    | 0    | NA       | NA       |
| 0.24 | 0.39 | 0.48 | 0.38 | 0.051583 | 0.952639 |
| 0    | 0.15 | 0.07 | 0.85 | NA       | NA       |
| 0    | 0    | 0    | 0    | NA       | NA       |
| 0    | 0    | 0    | 0    | NA       | NA       |
| 0.03 | 0    | 0.03 | 0.08 | NA       | NA       |
| 0    | 0    | 0    | 0.36 | NA       | NA       |

|      |      |      |      |          |          |
|------|------|------|------|----------|----------|
| 0.31 | 0    | 0    | 0    | NA       | NA       |
| 0.85 | 0    | 0.55 | 0.64 | NA       | NA       |
| 0    | 0    | 0    | 0    | NA       | NA       |
| 0    | 0    | 0    | 0    | NA       | NA       |
| 0    | 0    | 0    | 0    | NA       | NA       |
| 0    | 0    | 0    | 0    | NA       | NA       |
| 0    | 0.07 | 0    | 0    | NA       | NA       |
| 0    | 0    | 0    | 0    | NA       | NA       |
| 0    | 0    | 0    | 0    | NA       | NA       |
| 0    | 0    | 0    | 0    | NA       | NA       |
| 0    | 0    | 0    | 0    | NA       | NA       |
| 2.32 | 2.46 | 1.62 | 3.44 | -0.2738  | 0.610342 |
| 0    | 0    | 0    | 0    | NA       | NA       |
| 0    | 0    | 0.03 | 0    | NA       | NA       |
| 0    | 0    | 0    | 0    | NA       | NA       |
| 0    | 0    | 0    | 0    | NA       | NA       |
| 0    | 0.23 | 0.39 | 0.22 | NA       | NA       |
| 0    | 0    | 0    | 0    | NA       | NA       |
| 0    | 0.11 | 0.17 | 0    | NA       | NA       |
| 0    | 0    | 0    | 0    | NA       | NA       |
| 0    | 0    | 0    | 0    | NA       | NA       |
| 0    | 0    | 0    | 0    | NA       | NA       |
| 0    | 0.15 | 0    | 0    | NA       | NA       |
| 0    | 0.4  | 1.13 | 0    | 0.134824 | 0.877879 |
| 0    | 0    | 0    | 0    | NA       | NA       |
| 0    | 0    | 0    | 0    | NA       | NA       |
| 0    | 0    | 0    | 0    | NA       | NA       |
| 0    | 0    | 0    | 0    | NA       | NA       |
| 0    | 0    | 0    | 0    | NA       | NA       |
| 0    | 0    | 0    | 0    | NA       | NA       |
| 0    | 0    | 0    | 0    | NA       | NA       |
| 0    | 0    | 0    | 0    | NA       | NA       |
| 0    | 0    | 0    | 0    | NA       | NA       |
| 0    | 0    | 0    | 0    | NA       | NA       |
| 0    | 0.18 | 0    | 0    | NA       | NA       |
| 1.19 | 0    | 0.36 | 0    | NA       | NA       |
| 0    | 0    | 0    | 0.02 | NA       | NA       |
| 0    | 0    | 0    | 0    | NA       | NA       |
| 0    | 0.73 | 0    | 0.48 | -0.09793 | 0.841078 |
| 0    | 0    | 0    | 0    | NA       | NA       |
| 0.07 | 0.03 | 0.03 | 0.04 | -0.90045 | 0.170894 |
| 0    | 0    | 0    | 0    | NA       | NA       |
| 0    | 0    | 0    | 0    | NA       | NA       |

|       |       |       |               |          |
|-------|-------|-------|---------------|----------|
| 0     | 0     | 0     | 0 NA          | NA       |
| 0     | 0     | 0.19  | 0 NA          | NA       |
| 0     | 0     | 0     | 0 NA          | NA       |
| 0     | 0     | 0     | 0 NA          | NA       |
| 0     | 0.2   | 0.03  | 0.12 NA       | NA       |
| 0     | 0     | 0     | 0 NA          | NA       |
| 1.26  | 1.78  | 2.61  | 3.64 0.881082 | 0.112705 |
| 0.11  | 0     | 0     | 0 NA          | NA       |
| 0     | 0     | 0     | 0 NA          | NA       |
| 0     | 0     | 0     | 0 NA          | NA       |
| 0     | 0     | 0     | 0 NA          | NA       |
| 0     | 0     | 0     | 0 NA          | NA       |
| 0     | 0.19  | 0     | 0 NA          | NA       |
| 0     | 0     | 0     | 0 NA          | NA       |
| 0     | 0     | 0     | 0 NA          | NA       |
| 0     | 0     | 0     | 0 NA          | NA       |
| 0     | 0     | 0     | 0 NA          | NA       |
| 0.08  | 0.16  | 0.06  | 0 NA          | NA       |
| 0     | 0     | 0     | 0 NA          | NA       |
| 0     | 0     | 0     | 0 NA          | NA       |
| 0     | 0     | 0     | 0 NA          | NA       |
| 0     | 0     | 0     | 0 NA          | NA       |
| 0     | 0     | 0     | 0 NA          | NA       |
| 0     | 0     | 0     | 0 NA          | NA       |
| 0     | 0     | 0     | 0 NA          | NA       |
| 0     | 0     | 0     | 0 NA          | NA       |
| 0     | 0     | 0     | 0 NA          | NA       |
| 0     | 0     | 0.09  | 0 NA          | NA       |
| 0     | 0     | 0     | 0 NA          | NA       |
| 25.77 | 11.49 | 19.02 | 8.28 -0.8814  | 0.018382 |
| 0.05  | 0.07  | 0.1   | 0.06 NA       | NA       |
| 0     | 0     | 0     | 0 NA          | NA       |
| 0     | 0.07  | 0.07  | 0.1 NA        | NA       |
| 0     | 0     | 0     | 0 NA          | NA       |
| 0     | 0     | 0     | 0 NA          | NA       |
| 0     | 0     | 0     | 0 NA          | NA       |
| 0     | 0     | 0     | 0 NA          | NA       |
| 0     | 0     | 0     | 0 NA          | NA       |
| 0     | 0     | 0     | 0 NA          | NA       |
| 0     | 0.58  | 0     | 0 NA          | NA       |
| 0     | 0     | 0     | 0 NA          | NA       |
| 0     | 0     | 0     | 0 NA          | NA       |
| 0     | 0     | 0     | 0 NA          | NA       |
| 0     | 0     | 0     | 0 NA          | NA       |
| 0     | 0.12  | 0     | 0 NA          | NA       |
| 0     | 0     | 0     | 0 NA          | NA       |

|      |       |      |         |          |          |
|------|-------|------|---------|----------|----------|
| 0    | 0     | 0    | 0 NA    | NA       |          |
| 0    | 0     | 0    | 0 NA    | NA       |          |
| 0    | 0     | 0    | 0 NA    | NA       |          |
| 0    | 0     | 0    | 0 NA    | NA       |          |
| 0.05 | 0.03  | 0.23 | 0.12    | 0.3656   | 0.631963 |
| 0    | 0     | 0    | 0 NA    | NA       |          |
| 0    | 0     | 0    | 0 NA    | NA       |          |
| 0    | 0     | 0    | 0 NA    | NA       |          |
| 0    | 0     | 0    | 0 NA    | NA       |          |
| 0    | 0     | 0    | 0 NA    | NA       |          |
| 0    | 0     | 0    | 0 NA    | NA       |          |
| 0.06 | 0.27  | 0.34 | 0.1     | 0.265346 | 0.747737 |
| 2.44 | 10.98 | 9.04 | 10.26   | 1.905995 | 1.03E-39 |
| 0    | 0     | 0    | 0 NA    | NA       |          |
| 0.26 | 0.24  | 0    | 0.05 NA | NA       |          |
| 0    | 0     | 0    | 0 NA    | NA       |          |
| 0    | 0     | 0    | 0 NA    | NA       |          |
| 0    | 0     | 0    | 0 NA    | NA       |          |
| 0    | 0     | 0    | 0 NA    | NA       |          |
| 0    | 0     | 0    | 0 NA    | NA       |          |
| 0    | 0     | 0    | 0 NA    | NA       |          |
| 0    | 0     | 0    | 0 NA    | NA       |          |
| 0.02 | 0.05  | 0.02 | 0 NA    | NA       |          |
| 0.06 | 0.1   | 0.17 | 0 NA    | NA       |          |
| 0    | 0     | 0    | 0 NA    | NA       |          |
| 0    | 0     | 0    | 0 NA    | NA       |          |
| 0    | 0.03  | 0.03 | 0 NA    | NA       |          |
| 0    | 0     | 0.08 | 0 NA    | NA       |          |
| 0    | 0     | 0    | 0 NA    | NA       |          |
| 0    | 0     | 0    | 0 NA    | NA       |          |
| 0    | 0     | 0    | 0 NA    | NA       |          |
| 0.04 | 0.09  | 0.03 | 0.13 NA | NA       |          |
| 0    | 0     | 0    | 0 NA    | NA       |          |
| 0    | 0     | 0.28 | 0.33 NA | NA       |          |
| 0    | 0     | 0.21 | 0 NA    | NA       |          |
| 0    | 0.12  | 0.2  | 0.11 NA | NA       |          |
| 0    | 0     | 0    | 0 NA    | NA       |          |
| 0    | 0     | 0    | 0 NA    | NA       |          |
| 0.51 | 0.91  | 1.64 | 0.38    | 0.229133 | 0.786747 |
| 0    | 0     | 0    | 0 NA    | NA       |          |
| 0    | 0     | 0    | 0.12 NA | NA       |          |
| 0    | 0     | 0    | 0 NA    | NA       |          |
| 0    | 0     | 0    | 0 NA    | NA       |          |
| 8.84 | 5.48  | 3.75 | 3.95    | -0.54591 | 0.196126 |

|      |      |      |      |          |          |
|------|------|------|------|----------|----------|
| 0    | 0    | 0    | 0.1  | NA       | NA       |
| 0    | 0    | 0    | 0    | NA       | NA       |
| 0    | 0    | 0    | 0    | NA       | NA       |
| 0.05 | 0.11 | 0.12 | 0.36 | NA       | NA       |
| 0    | 0    | 0    | 0    | NA       | NA       |
| 0.37 | 0.18 | 0.08 | 0.12 | NA       | NA       |
| 0    | 0    | 0    | 0    | NA       | NA       |
| 0    | 0    | 0    | 0    | NA       | NA       |
| 0    | 0    | 0    | 0    | NA       | NA       |
| 0    | 0    | 0    | 0    | NA       | NA       |
| 0    | 0    | 0    | 0    | NA       | NA       |
| 0    | 0    | 0    | 0    | NA       | NA       |
| 0    | 0    | 0    | 0    | NA       | NA       |
| 0    | 0    | 0    | 0    | NA       | NA       |
| 0    | 0    | 0    | 0    | NA       | NA       |
| 0    | 0    | 0    | 0    | NA       | NA       |
| 0    | 0    | 0    | 0    | NA       | NA       |
| 0    | 0    | 0    | 0    | NA       | NA       |
| 0    | 0    | 0    | 0    | NA       | NA       |
| 0    | 0    | 0    | 0    | NA       | NA       |
| 0    | 0    | 0    | 0    | NA       | NA       |
| 0    | 0    | 0    | 0    | NA       | NA       |
| 0    | 0    | 0    | 0    | NA       | NA       |
| 1.35 | 0.13 | 0.47 | 0.29 | -0.79292 | 0.101724 |
| 0    | 0    | 0    | 0    | NA       | NA       |
| 0    | 0    | 0    | 0    | NA       | NA       |
| 0    | 0    | 0    | 0    | NA       | NA       |
| 0.51 | 0    | 0.31 | 0    | NA       | NA       |
| 0    | 0    | 0    | 0    | NA       | NA       |
| 0    | 0    | 0    | 0    | NA       | NA       |
| 0    | 0    | 0    | 0    | NA       | NA       |
| 0    | 0    | 0    | 0    | NA       | NA       |
| 0    | 0    | 0    | 0    | NA       | NA       |
| 0    | 0    | 0    | 0    | NA       | NA       |
| 0.3  | 0.44 | 1.1  | 0.69 | 0.217282 | 0.798939 |
| 0    | 0    | 0.06 | 0    | NA       | NA       |
| 0    | 0    | 0    | 0    | NA       | NA       |
| 0    | 0    | 0    | 0    | NA       | NA       |
| 1.17 | 0.8  | 0.55 | 1.09 | -0.49274 | 0.289276 |
| 0    | 0    | 0    | 0.02 | NA       | NA       |
| 0    | 0    | 0    | 0    | NA       | NA       |
| 2.04 | 0.51 | 0.65 | 0.62 | -1.69896 | 5.89E-23 |
| 0    | 0    | 0    | 0    | NA       | NA       |



|      |      |      |      |          |          |
|------|------|------|------|----------|----------|
| 0    | 0    | 0.08 | 0.09 | NA       | NA       |
| 0    | 0    | 0    | 0    | NA       | NA       |
| 0    | 0    | 0    | 0    | NA       | NA       |
| 0    | 0    | 0    | 0    | NA       | NA       |
| 0    | 0    | 0    | 0    | NA       | NA       |
| 0    | 0    | 0    | 0    | NA       | NA       |
| 0    | 0    | 0    | 0    | NA       | NA       |
| 0.6  | 0.61 | 0.52 | 0.6  | 0.411225 | 0.549293 |
| 0    | 0    | 0    | 0    | NA       | NA       |
| 0    | 0    | 0    | 0    | NA       | NA       |
| 0    | 0    | 0    | 0    | NA       | NA       |
| 0    | 0    | 0    | 0    | NA       | NA       |
| 0    | 0    | 0    | 0    | NA       | NA       |
| 0    | 0    | 0    | 0    | NA       | NA       |
| 0.17 | 0.14 | 0.07 | 0.17 | NA       | NA       |
| 0.47 | 0    | 0    | 0.56 | NA       | NA       |
| 0    | 0    | 0    | 0    | NA       | NA       |
| 1.39 | 0.33 | 0    | 1.67 | -0.47636 | 0.51289  |
| 0.23 | 0.09 | 0.08 | 0.11 | -1.14108 | 0.031177 |
| 0    | 0    | 0    | 0    | NA       | NA       |
| 0.1  | 0.22 | 0.07 | 0    | NA       | NA       |
| 0    | 0    | 0    | 0    | NA       | NA       |
| 0    | 0    | 0    | 0    | NA       | NA       |
| 0.03 | 0.13 | 0.06 | 0.02 | NA       | NA       |
| 0    | 0.12 | 0.24 | 0.32 | NA       | NA       |
| 3.69 | 5.73 | 4.3  | 5.36 | 0.266059 | 0.164449 |
| 0    | 0    | 0    | 0    | NA       | NA       |
| 2.37 | 2.29 | 1.36 | 3.25 | 0.133334 | 0.838834 |
| 0    | 0    | 0    | 0    | NA       | NA       |
| 0    | 0    | 0    | 0.06 | NA       | NA       |
| 0    | 0    | 0    | 0    | NA       | NA       |
| 0    | 0    | 0    | 0    | NA       | NA       |
| 0    | 0    | 0    | 0    | NA       | NA       |
| 0    | 0    | 0    | 0    | NA       | NA       |
| 0    | 0    | 0    | 0    | NA       | NA       |
| 0    | 0    | 0    | 0    | NA       | NA       |
| 0    | 0    | 0    | 0    | NA       | NA       |
| 1.36 | 0.78 | 1.17 | 1.08 | -0.40175 | 0.538388 |
| 3.47 | 0    | 1.05 | 0.95 | -2.18157 | 1.49E-06 |
| 0.39 | 0.04 | 0.3  | 0.34 | -1.04032 | 0.097727 |
| 0    | 0    | 0    | 0    | NA       | NA       |
| 0.08 | 0    | 0    | 0.06 | NA       | NA       |
| 0    | 0    | 0    | 0    | NA       | NA       |
| 0.31 | 0.22 | 0.41 | 0.35 | NA       | NA       |
| 0    | 0    | 0    | 0    | NA       | NA       |



|      |      |      |               |          |
|------|------|------|---------------|----------|
| 0    | 0    | 0    | 0 NA          | NA       |
| 0    | 0    | 0    | 0 NA          | NA       |
| 0    | 0    | 0    | 0 NA          | NA       |
| 0.53 | 0.16 | 0.1  | 0.35 -0.75807 | 0.260605 |
| 0    | 0    | 0    | 0 NA          | NA       |
| 0    | 0    | 0    | 0 NA          | NA       |
| 0    | 0    | 0    | 0 NA          | NA       |
| 0    | 0    | 0    | 0 NA          | NA       |
| 0    | 0    | 0    | 0.22 NA       | NA       |
| 0    | 0    | 0    | 0 NA          | NA       |
| 0    | 0    | 0    | 0 NA          | NA       |
| 0    | 0    | 0    | 0 NA          | NA       |
| 0    | 0    | 0    | 0 NA          | NA       |
| 0.17 | 0.06 | 0.17 | 0.06 NA       | NA       |
| 0    | 0    | 0    | 0 NA          | NA       |
| 0    | 0.08 | 0    | 0.02 NA       | NA       |
| 0    | 0    | 0    | 0 NA          | NA       |
| 0    | 0    | 0.22 | 0.26 NA       | NA       |
| 0    | 0    | 0    | 0 NA          | NA       |
| 1.36 | 0.19 | 0.1  | 0.31 -1.77876 | 0.000247 |
| 0    | 0    | 0    | 0 NA          | NA       |
| 0    | 0    | 0    | 0 NA          | NA       |
| 0.89 | 1.42 | 1.27 | 3.77 0.331098 | 0.624468 |
| 0    | 0    | 0    | 0 NA          | NA       |
| 9.7  | 8.77 | 7.9  | 9.24 -0.32061 | 0.069491 |
| 0    | 0    | 0    | 0 NA          | NA       |
| 0    | 0    | 0    | 0 NA          | NA       |
| 0    | 0    | 0    | 0 NA          | NA       |
| 0.27 | 0.85 | 0.82 | 0.9 1.170052  | 0.009051 |
| 0    | 0    | 0    | 0 NA          | NA       |
| 0    | 0.06 | 0    | 0.13 NA       | NA       |
| 0    | 0    | 0    | 0 NA          | NA       |
| 0    | 0    | 0    | 0 NA          | NA       |
| 0    | 0    | 0    | 0 NA          | NA       |
| 0    | 0    | 0    | 0 NA          | NA       |
| 0    | 0    | 0    | 0 NA          | NA       |
| 0    | 0    | 0    | 0 NA          | NA       |
| 0    | 0.43 | 0.57 | 0.14 NA       | NA       |
| 0    | 0    | 0    | 0 NA          | NA       |
| 0    | 0    | 0    | 0 NA          | NA       |
| 0.14 | 0.03 | 0.52 | 0.07 NA       | NA       |
| 0    | 0    | 0    | 0.06 NA       | NA       |
| 0.03 | 0.02 | 0.05 | 0 NA          | NA       |

|      |      |      |               |          |
|------|------|------|---------------|----------|
| 0    | 0    | 0    | 0 NA          | NA       |
| 0    | 0    | 0    | 0.08 NA       | NA       |
| 0    | 0    | 0    | 0 NA          | NA       |
| 0.61 | 1.29 | 0.91 | 1.08 0.560657 | 0.414764 |
| 0    | 0    | 0    | 0 NA          | NA       |
| 0    | 0    | 0    | 0 NA          | NA       |
| 0.13 | 0.31 | 0.44 | 0.67 0.918393 | 0.116043 |
| 0.61 | 0    | 0.13 | 0.45 NA       | NA       |
| 0    | 0    | 0    | 0 NA          | NA       |
| 0.37 | 0.26 | 0.27 | 0.13 -0.59082 | 0.303435 |
| 0    | 0    | 0    | 0 NA          | NA       |
| 0    | 0    | 0    | 0 NA          | NA       |
| 0    | 0    | 0    | 0 NA          | NA       |
| 0    | 0    | 0    | 0 NA          | NA       |
| 0    | 0    | 0    | 0 NA          | NA       |
| 0    | 0    | 0    | 0 NA          | NA       |
| 0    | 0    | 0    | 0 NA          | NA       |
| 0.05 | 0.03 | 0.06 | 0.04 NA       | NA       |
| 0.36 | 0.65 | 0.54 | 1.17 0.225765 | 0.772444 |
| 0    | 0    | 0    | 0 NA          | NA       |
| 0    | 0    | 0    | 0 NA          | NA       |
| 0    | 0    | 0    | 0 NA          | NA       |
| 0    | 0    | 0    | 0 NA          | NA       |
| 0    | 0    | 0    | 0 NA          | NA       |
| 0    | 0    | 0    | 0 NA          | NA       |
| 1.74 | 1.76 | 1.97 | 1.3 -0.21855  | 0.642856 |
| 0    | 0    | 0    | 0 NA          | NA       |
| 0    | 0    | 0    | 0 NA          | NA       |
| 0    | 0    | 0    | 0 NA          | NA       |
| 0.39 | 0.22 | 0.31 | 0.4 NA        | NA       |
| 0.35 | 0.24 | 0.26 | 0.38 -0.34719 | 0.50193  |
| 0    | 0    | 0    | 0 NA          | NA       |
| 0    | 0    | 0    | 0 NA          | NA       |
| 0    | 0    | 0    | 0 NA          | NA       |
| 9.55 | 8.65 | 9.56 | 9.72 0.06405  | 0.823663 |
| 0.02 | 0.04 | 0.02 | 0 NA          | NA       |
| 0    | 0    | 0    | 0 NA          | NA       |
| 0.1  | 0    | 0.03 | 0.04 NA       | NA       |
| 0    | 0    | 0    | 0 NA          | NA       |
| 0    | 0    | 0    | 0 NA          | NA       |
| 0    | 0    | 0    | 0 NA          | NA       |
| 0    | 0    | 0    | 0 NA          | NA       |
| 0    | 0    | 0    | 0.11 NA       | NA       |
| 0    | 0    | 0    | 0 NA          | NA       |
| 0    | 0    | 0    | 0 NA          | NA       |

|      |      |      |               |          |
|------|------|------|---------------|----------|
| 0    | 0    | 0    | 0 NA          | NA       |
| 0    | 0    | 0    | 0 NA          | NA       |
| 0.96 | 0.56 | 1.03 | 1.41 -0.2947  | 0.689103 |
| 0    | 0.05 | 0.05 | 0 NA          | NA       |
| 0    | 0    | 0    | 0 NA          | NA       |
| 0    | 0    | 0    | 0 NA          | NA       |
| 0    | 0    | 0.3  | 0 NA          | NA       |
| 0    | 0    | 0    | 0 NA          | NA       |
| 0    | 0    | 0    | 0 NA          | NA       |
| 0.31 | 0.23 | 0.41 | 0.12 0.497512 | 0.488156 |
| 0    | 0    | 0    | 0 NA          | NA       |
| 0.42 | 0.23 | 0.46 | 0.12 NA       | NA       |
| 0    | 0    | 0    | 0 NA          | NA       |
| 0.3  | 0.23 | 0.12 | 0.25 -0.59917 | 0.267832 |
| 0.33 | 0.41 | 0.29 | 0.33 -0.25338 | 0.733217 |
| 0    | 0    | 0    | 0 NA          | NA       |
| 0    | 0    | 0    | 0 NA          | NA       |
| 0    | 0    | 0    | 0 NA          | NA       |
| 0.09 | 0.25 | 0.27 | 0.53 -0.16625 | 0.813797 |
| 0    | 0    | 0    | 0 NA          | NA       |
| 0    | 0    | 0.06 | 0 NA          | NA       |
| 0    | 0    | 0    | 0 NA          | NA       |
| 0    | 0    | 0    | 0 NA          | NA       |
| 0    | 0    | 0    | 0 NA          | NA       |
| 0    | 0    | 0.11 | 0 NA          | NA       |
| 0    | 0    | 0    | 0 NA          | NA       |
| 0    | 0    | 0    | 0 NA          | NA       |
| 1.2  | 0.85 | 1.94 | 1.81 -0.12066 | 0.875248 |
| 0    | 0    | 0    | 0 NA          | NA       |
| 0    | 0    | 0    | 0 NA          | NA       |
| 0    | 0    | 0    | 0 NA          | NA       |
| 0    | 0    | 0    | 0 NA          | NA       |
| 0    | 0    | 0.1  | 0 NA          | NA       |
| 0    | 0    | 0    | 0 NA          | NA       |
| 0    | 0.08 | 0    | 0 NA          | NA       |
| 0    | 0    | 0    | 0 NA          | NA       |
| 0    | 0    | 0    | 0 NA          | NA       |
| 0    | 0    | 0    | 0 NA          | NA       |
| 0.24 | 0.17 | 0    | 0.12 NA       | NA       |
| 0.27 | 0.07 | 0.12 | 0.06 NA       | NA       |
| 0    | 0    | 0    | 0 NA          | NA       |
| 0    | 0.05 | 0    | 0 NA          | NA       |
| 0    | 0    | 0.05 | 0 NA          | NA       |
| 0    | 0    | 0    | 0 NA          | NA       |
| 0    | 0    | 0    | 0 NA          | NA       |

|      |      |      |               |          |
|------|------|------|---------------|----------|
| 0    | 0    | 0    | 0 NA          | NA       |
| 0    | 0    | 0    | 0 NA          | NA       |
| 0.23 | 0.65 | 0.61 | 0.78 -0.17093 | 0.839473 |
| 0    | 0.13 | 0.12 | 0 NA          | NA       |
| 0    | 0    | 0    | 0 NA          | NA       |
| 0    | 0    | 0    | 0 NA          | NA       |
| 0    | 0    | 0.32 | 0 NA          | NA       |
| 0.27 | 0    | 0    | 0 NA          | NA       |
| 0.09 | 0.06 | 0.06 | 0.33 NA       | NA       |
| 0    | 0    | 0    | 0 NA          | NA       |
| 0    | 0    | 0    | 0 NA          | NA       |
| 0    | 0    | 0    | 0 NA          | NA       |
| 0.32 | 0.36 | 0.4  | 0.87 0.183326 | 0.818186 |
| 0    | 0.27 | 0    | 0 NA          | NA       |
| 0    | 0    | 0    | 0.1 NA        | NA       |
| 0.07 | 0    | 0    | 0 NA          | NA       |
| 0    | 0    | 0    | 0 NA          | NA       |
| 2.03 | 1.01 | 1.18 | 1.21 -0.78641 | 0.001211 |
| 0    | 0    | 0    | 0 NA          | NA       |
| 0    | 0    | 0    | 0 NA          | NA       |
| 0    | 0    | 0    | 0 NA          | NA       |
| 0    | 0    | 0    | 0 NA          | NA       |
| 0    | 0    | 0    | 0 NA          | NA       |
| 0    | 0    | 0    | 0 NA          | NA       |
| 0    | 0    | 0    | 0 NA          | NA       |
| 0    | 0    | 0    | 0 NA          | NA       |
| 0    | 0    | 0.23 | 0 NA          | NA       |
| 0    | 0    | 0    | 0 NA          | NA       |
| 0    | 0    | 0    | 0 NA          | NA       |
| 0    | 0    | 0    | 0 NA          | NA       |
| 0    | 0    | 0    | 0 NA          | NA       |
| 0    | 0    | 0.2  | 0 NA          | NA       |
| 0    | 0    | 0    | 0 NA          | NA       |
| 0    | 0    | 0    | 0 NA          | NA       |
| 0    | 0    | 0    | 0 NA          | NA       |
| 0    | 0    | 0    | 0 NA          | NA       |
| 0    | 0    | 0    | 0 NA          | NA       |
| 1.91 | 2.9  | 3.22 | 2.87 0.302926 | 0.370277 |
| 0    | 0    | 0    | 0 NA          | NA       |
| 0    | 0    | 0    | 0 NA          | NA       |
| 0    | 0    | 0    | 0 NA          | NA       |
| 0    | 0    | 0    | 0 NA          | NA       |
| 0    | 0    | 0    | 0 NA          | NA       |
| 1.24 | 1.78 | 1.75 | 1.63 0.002622 | 0.996445 |
| 0    | 0    | 0    | 0 NA          | NA       |
| 0    | 0    | 0    | 0 NA          | NA       |







|      |      |      |      |          |          |
|------|------|------|------|----------|----------|
| 1.65 | 0.91 | 0.37 | 0.97 | -1.12186 | 0.013477 |
| 0    | 0    | 0    | 0    | NA       | NA       |
| 0    | 0.44 | 0    | 0    | NA       | NA       |
| 0    | 0    | 0    | 0    | NA       | NA       |
| 0    | 0    | 0    | 0    | NA       | NA       |
| 1.31 | 0.23 | 0.6  | 0.37 | -1.69248 | 4.04E-09 |
| 0.11 | 0.04 | 0    | 0.04 | NA       | NA       |
| 1.45 | 0.63 | 0.53 | 0.44 | -0.8586  | 0.067964 |
| 0    | 0    | 0    | 0    | NA       | NA       |
| 0    | 0    | 0    | 0    | NA       | NA       |
| 0    | 0    | 0    | 0    | NA       | NA       |
| 0    | 0    | 0    | 0    | NA       | NA       |
| 0    | 0.13 | 0    | 0    | NA       | NA       |
| 0    | 0    | 0.12 | 0.36 | NA       | NA       |
| 0    | 0    | 0    | 0    | NA       | NA       |
| 0    | 0.51 | 0    | 0    | NA       | NA       |
| 0    | 0    | 0    | 0    | NA       | NA       |
| 0    | 0    | 0    | 0    | NA       | NA       |
| 0    | 0    | 0    | 0    | NA       | NA       |
| 0.1  | 0.29 | 0.07 | 0.23 | NA       | NA       |
| 0    | 0    | 0.33 | 0    | NA       | NA       |
| 0    | 0    | 0    | 0    | NA       | NA       |
| 0    | 0    | 0    | 0    | NA       | NA       |
| 0    | 0    | 0    | 0    | NA       | NA       |
| 0    | 0    | 0    | 0    | NA       | NA       |
| 0.57 | 1.2  | 0    | 0    | -0.02781 | 0.967323 |
| 0    | 0    | 0    | 0    | NA       | NA       |
| 0    | 0    | 0    | 0    | NA       | NA       |
| 0.29 | 0.11 | 0.1  | 0    | NA       | NA       |
| 0    | 0    | 0    | 0    | NA       | NA       |
| 0    | 0    | 0    | 0    | NA       | NA       |
| 0    | 0    | 0    | 0    | NA       | NA       |
| 0    | 0    | 0    | 0    | NA       | NA       |
| 0    | 0    | 0    | 0    | NA       | NA       |
| 0    | 0    | 0    | 0    | NA       | NA       |
| 0.4  | 0.44 | 0.24 | 0.38 | NA       | NA       |
| 0    | 0    | 0    | 0    | NA       | NA       |
| 0.74 | 0.31 | 0.49 | 0.35 | -0.90417 | 0.004175 |
| 0    | 0    | 0    | 0    | NA       | NA       |
| 0    | 0    | 0    | 0    | NA       | NA       |
| 0    | 0    | 0.14 | 0.16 | NA       | NA       |
| 0    | 0    | 0    | 0    | NA       | NA       |
| 0.48 | 1.02 | 1.24 | 0.04 | NA       | NA       |
| 2.07 | 0.33 | 0.58 | 0.44 | -1.55656 | 0.000301 |
| 0.46 | 0.49 | 0.15 | 0.26 | -0.26754 | 0.746207 |



|      |      |      |      |          |          |
|------|------|------|------|----------|----------|
| 0    | 0    | 0    | 0    | NA       | NA       |
| 0    | 0    | 0    | 0    | NA       | NA       |
| 0    | 0    | 0.12 | 0.27 | NA       | NA       |
| 0    | 0    | 0    | 0    | NA       | NA       |
| 0    | 0    | 0    | 0    | NA       | NA       |
| 0    | 0    | 0    | 0    | NA       | NA       |
| 0    | 0    | 0    | 0    | NA       | NA       |
| 0    | 0.01 | 0    | 0    | NA       | NA       |
| 0    | 0    | 0    | 0    | NA       | NA       |
| 0    | 0    | 0    | 0    | NA       | NA       |
| 0    | 0    | 0    | 0    | NA       | NA       |
| 0    | 0    | 0    | 0    | NA       | NA       |
| 4.15 | 3.17 | 2    | 2.21 | -0.09719 | 0.890238 |
| 0    | 0    | 0    | 0    | NA       | NA       |
| 0    | 0    | 0    | 0    | NA       | NA       |
| 0    | 0    | 0    | 0    | NA       | NA       |
| 0    | 0    | 0.14 | 0    | NA       | NA       |
| 0    | 0    | 0    | 0    | NA       | NA       |
| 0.39 | 0.4  | 0.19 | 0.55 | 0.147229 | 0.862746 |
| 0    | 0    | 0    | 0    | NA       | NA       |
| 0    | 0.03 | 0.16 | 0.18 | 0.853485 | 0.129185 |
| 0    | 0    | 0    | 0    | NA       | NA       |
| 0    | 0    | 0    | 0    | NA       | NA       |
| 0    | 0    | 0    | 0    | NA       | NA       |
| 0    | 0    | 0    | 0    | NA       | NA       |
| 0.16 | 0    | 0    | 0.12 | NA       | NA       |
| 0    | 0    | 0    | 0    | NA       | NA       |
| 0    | 0    | 0    | 0    | NA       | NA       |
| 0.92 | 1.46 | 1.12 | 1.34 | 0.192696 | 0.652879 |
| 0    | 0    | 0    | 0    | NA       | NA       |
| 0    | 0    | 0    | 0    | NA       | NA       |
| 0    | 0    | 0    | 0    | NA       | NA       |
| 0    | 0    | 0    | 0    | NA       | NA       |
| 0    | 0    | 0.11 | 0    | NA       | NA       |
| 0    | 0    | 0    | 0    | NA       | NA       |
| 0    | 0    | 0    | 0    | NA       | NA       |
| 0    | 0    | 0    | 0    | NA       | NA       |
| 0.7  | 0.84 | 0.95 | 1.1  | 0.412553 | 0.356694 |
| 0    | 0    | 0    | 0    | NA       | NA       |
| 0.1  | 0.12 | 0.05 | 0.14 | -0.13158 | 0.881548 |
| 0    | 0    | 0    | 0    | NA       | NA       |
| 0    | 0.09 | 0    | 0    | NA       | NA       |
| 0    | 0    | 0    | 0    | NA       | NA       |
| 0    | 0    | 0    | 0.1  | NA       | NA       |
| 0    | 0    | 0    | 0    | NA       | NA       |

|       |       |       |       |          |          |
|-------|-------|-------|-------|----------|----------|
| 0     | 0     | 0     | 0     | NA       | NA       |
| 0     | 0     | 0     | 0     | NA       | NA       |
| 0     | 0     | 0     | 0     | NA       | NA       |
| 0     | 0     | 0     | 0     | NA       | NA       |
| 0     | 0     | 0     | 0     | NA       | NA       |
| 0     | 0     | 0     | 0     | NA       | NA       |
| 0     | 0     | 0     | 0     | NA       | NA       |
| 0.03  | 0.04  | 0     | 0     | NA       | NA       |
| 0     | 0     | 0     | 0     | NA       | NA       |
| 0.09  | 0     | 0     | 0     | NA       | NA       |
| 0     | 0     | 0     | 0     | NA       | NA       |
| 0     | 0     | 0     | 0     | NA       | NA       |
| 0.13  | 0.05  | 0.08  | 0.03  | -0.40892 | 0.594876 |
| 0     | 0     | 0     | 0     | NA       | NA       |
| 0     | 0     | 0     | 0     | NA       | NA       |
| 0     | 0     | 0     | 0     | NA       | NA       |
| 0     | 0     | 0     | 0.03  | NA       | NA       |
| 0     | 0     | 0     | 0     | NA       | NA       |
| 0     | 0.03  | 0     | 0     | NA       | NA       |
| 0     | 0     | 0     | 0     | NA       | NA       |
| 0     | 0     | 0     | 0     | NA       | NA       |
| 0     | 0.16  | 0.13  | 0.29  | NA       | NA       |
| 0     | 0     | 0     | 0     | NA       | NA       |
| 0     | 0     | 0     | 0     | NA       | NA       |
| 0     | 0     | 0     | 0     | NA       | NA       |
| 0     | 0     | 0     | 0     | NA       | NA       |
| 0.25  | 0     | 0     | 0     | NA       | NA       |
| 0.28  | 0.71  | 0.67  | 0.49  | 0.935731 | 0.081829 |
| 0     | 0     | 0     | 0     | NA       | NA       |
| 1.7   | 1.38  | 2.05  | 1.58  | -0.21836 | 0.610296 |
| 0     | 0     | 0     | 0     | NA       | NA       |
| 0     | 0     | 0.22  | 0     | NA       | NA       |
| 0.11  | 0.05  | 0.02  | 0     | NA       | NA       |
| 0     | 0     | 0     | 0     | NA       | NA       |
| 0     | 0     | 0.16  | 0     | NA       | NA       |
| 0     | 0     | 0     | 0     | NA       | NA       |
| 0.32  | 0.11  | 0.52  | 0     | NA       | NA       |
| 0.44  | 0.36  | 0.46  | 0.32  | 0.355565 | 0.520857 |
| 0.02  | 0.04  | 0.13  | 0.04  | NA       | NA       |
| 0     | 0     | 0     | 0     | NA       | NA       |
| 15.55 | 16.27 | 16.81 | 16.56 | 0.041442 | 0.725368 |
| 0     | 0     | 0     | 0     | NA       | NA       |
| 0.35  | 0.52  | 0.62  | 0.51  | 0.704846 | 0.068332 |
| 0     | 0     | 0     | 0     | NA       | NA       |
| 0     | 0     | 0     | 0     | NA       | NA       |

|      |      |      |      |          |          |
|------|------|------|------|----------|----------|
| 0    | 0    | 0    | 0    | NA       | NA       |
| 0    | 0    | 0    | 0    | NA       | NA       |
| 0    | 0    | 0    | 0    | NA       | NA       |
| 0    | 0    | 0    | 0    | NA       | NA       |
| 0    | 0    | 0    | 0    | NA       | NA       |
| 0.44 | 0.16 | 0.35 | 0.17 | -0.40389 | 0.598815 |
| 0    | 0    | 0    | 0    | NA       | NA       |
| 0    | 0    | 0    | 0    | NA       | NA       |
| 3.18 | 3.79 | 3.52 | 3.73 | 0.004265 | 0.992113 |
| 0    | 0.04 | 0    | 0    | NA       | NA       |
| 1.11 | 1.59 | 1.39 | 1.48 | 0.36917  | 0.010964 |
| 0    | 0    | 0    | 0    | NA       | NA       |
| 0    | 0    | 0    | 0    | NA       | NA       |
| 0    | 0    | 0    | 0    | NA       | NA       |
| 0    | 0    | 0    | 0    | NA       | NA       |
| 0    | 0    | 0    | 0    | NA       | NA       |
| 0    | 0    | 0    | 0    | NA       | NA       |
| 0    | 0.67 | 0    | 0    | NA       | NA       |
| 0.54 | 0.73 | 1.22 | 0.78 | 0.634713 | 0.26777  |
| 0    | 0    | 0    | 0.16 | NA       | NA       |
| 0    | 0    | 0    | 0    | NA       | NA       |
| 0    | 0    | 0    | 0    | NA       | NA       |
| 0    | 0    | 0    | 0    | NA       | NA       |
| 0    | 0    | 0    | 0    | NA       | NA       |
| 0    | 0    | 0    | 0    | NA       | NA       |
| 0.18 | 0.29 | 0.24 | 0.19 | 0.01394  | 0.986671 |
| 0    | 0    | 0    | 0    | NA       | NA       |
| 0    | 0    | 0    | 0    | NA       | NA       |
| 0    | 0    | 0    | 0    | NA       | NA       |
| 0    | 0    | 0    | 0    | NA       | NA       |
| 0    | 0    | 0    | 0    | NA       | NA       |
| 0.62 | 0.61 | 0.36 | 0.82 | -0.23976 | 0.716999 |
| 2.24 | 3.68 | 2.96 | 5.2  | 0.569125 | 0.166259 |
| 0    | 0    | 0    | 0    | NA       | NA       |
| 0    | 0    | 0    | 0    | NA       | NA       |
| 0.01 | 0    | 0.02 | 0.07 | NA       | NA       |
| 0.73 | 0.83 | 0.86 | 1.16 | 0.415133 | 0.297125 |
| 0.03 | 0    | 0.02 | 0    | NA       | NA       |
| 0    | 0    | 0    | 0    | NA       | NA       |
| 0    | 0    | 0    | 0    | NA       | NA       |
| 0    | 0    | 0    | 0    | NA       | NA       |
| 0    | 0    | 0    | 0    | NA       | NA       |
| 0    | 0    | 0    | 0    | NA       | NA       |
| 0    | 0    | 0    | 0    | NA       | NA       |
| 0    | 0    | 0    | 0    | NA       | NA       |
| 0    | 0    | 0.2  | 0    | NA       | NA       |

|       |       |       |       |          |          |
|-------|-------|-------|-------|----------|----------|
| 0.68  | 0.85  | 1     | 1.15  | 0.153665 | 0.85721  |
| 0     | 0     | 0     | 0     | NA       | NA       |
| 0     | 0     | 0     | 0     | NA       | NA       |
| 0     | 0     | 0     | 0     | NA       | NA       |
| 0     | 0     | 0     | 0     | NA       | NA       |
| 5.42  | 0.64  | 3.24  | 2.22  | -1.17375 | 0.021681 |
| 0     | 0     | 0     | 0     | NA       | NA       |
| 0.7   | 0.93  | 0.64  | 1.35  | -0.5614  | 0.286248 |
| 0     | 0     | 0     | 0     | NA       | NA       |
| 0     | 0     | 0     | 0     | NA       | NA       |
| 0     | 0     | 0     | 0     | NA       | NA       |
| 55.42 | 83.27 | 72.69 | 76.03 | 0.452389 | 3.07E-08 |
| 0     | 0     | 0.13  | 0     | NA       | NA       |
| 0     | 0     | 0     | 0     | NA       | NA       |
| 0     | 0     | 0     | 0     | NA       | NA       |
| 0     | 0     | 0     | 0     | NA       | NA       |
| 0     | 0     | 0     | 0     | NA       | NA       |
| 0.63  | 0     | 0     | 0     | NA       | NA       |
| 0     | 0     | 0     | 0     | NA       | NA       |
| 0     | 0     | 0     | 0     | NA       | NA       |
| 0     | 0     | 0     | 0.03  | NA       | NA       |
| 0     | 0     | 0     | 0     | NA       | NA       |
| 0     | 0     | 0     | 0     | NA       | NA       |
| 0     | 0     | 0     | 0     | NA       | NA       |
| 0     | 0.12  | 0.11  | 0.12  | NA       | NA       |
| 0     | 0     | 0     | 0     | NA       | NA       |
| 0     | 0     | 0     | 0     | NA       | NA       |
| 0     | 0     | 0     | 0     | NA       | NA       |
| 0     | 0     | 0     | 0     | NA       | NA       |
| 0     | 0     | 0.12  | 0     | NA       | NA       |
| 0     | 0.04  | 0.09  | 0.01  | NA       | NA       |
| 0.26  | 0.14  | 0.13  | 0.13  | -0.67228 | 0.306849 |
| 0     | 0     | 0     | 0     | NA       | NA       |
| 0     | 0     | 0     | 0     | NA       | NA       |
| 0     | 0     | 0     | 0     | NA       | NA       |
| 0     | 0     | 0     | 0     | NA       | NA       |
| 0     | 0.16  | 0.07  | 0.08  | NA       | NA       |
| 0     | 0     | 0     | 0     | NA       | NA       |
| 0.04  | 0.04  | 0.07  | 0.06  | -0.14079 | 0.868021 |
| 0     | 0     | 0     | 0     | NA       | NA       |
| 4.38  | 1.69  | 1.85  | 2.62  | -0.93713 | 0.000734 |
| 5.2   | 3.05  | 2.96  | 3.35  | -0.75246 | 0.000372 |
| 0.02  | 0.01  | 0.01  | 0     | NA       | NA       |
| 0.47  | 0.78  | 1.02  | 0.58  | -0.20159 | 0.809928 |
| 0     | 0     | 0     | 0     | NA       | NA       |

|      |      |      |      |          |          |
|------|------|------|------|----------|----------|
| 1.91 | 2.84 | 1.96 | 1.61 | 0.540048 | 0.239665 |
| 0    | 0    | 0    | 0    | NA       | NA       |
| 0.82 | 0.61 | 0.9  | 0.62 | 0.007142 | 0.994915 |
| 0    | 0    | 0    | 0    | NA       | NA       |
| 0.32 | 0.39 | 0.57 | 0.58 | -0.04746 | 0.95921  |
| 0    | 0    | 0    | 0    | NA       | NA       |
| 0    | 0    | 0    | 0    | NA       | NA       |
| 0    | 0.06 | 0.05 | 0.06 | NA       | NA       |
| 0.06 | 0    | 0.15 | 0    | NA       | NA       |
| 0.08 | 0    | 0.01 | 0    | NA       | NA       |
| 0    | 0    | 0    | 0    | NA       | NA       |
| 0.26 | 0    | 0    | 0.19 | NA       | NA       |
| 0    | 0    | 0    | 0    | NA       | NA       |
| 0.08 | 0.08 | 0    | 0.09 | NA       | NA       |
| 0.08 | 0    | 0    | 0    | NA       | NA       |
| 0.28 | 1.07 | 0.42 | 0.58 | 1.14238  | 0.027438 |
| 0    | 0    | 0    | 0    | NA       | NA       |
| 0.23 | 0.18 | 0.31 | 0.19 | 0.046873 | 0.953655 |
| 0    | 0    | 0    | 0    | NA       | NA       |
| 0.03 | 0    | 0    | 0    | NA       | NA       |
| 0    | 0    | 0    | 0    | NA       | NA       |
| 0    | 0    | 0    | 0    | NA       | NA       |
| 0    | 0    | 0    | 0    | NA       | NA       |
| 0    | 0    | 0.09 | 0.11 | NA       | NA       |
| 0    | 0    | 0    | 0    | NA       | NA       |
| 0    | 0    | 0    | 0    | NA       | NA       |
| 0.8  | 1.19 | 0.82 | 1.12 | 0.233284 | 0.625762 |
| 0    | 0.22 | 0    | 0    | NA       | NA       |
| 0.05 | 0.03 | 0.1  | 0    | NA       | NA       |
| 0    | 0    | 0    | 0    | NA       | NA       |
| 0.11 | 0    | 0.02 | 0    | NA       | NA       |
| 0    | 0.06 | 0    | 0    | NA       | NA       |
| 0    | 0    | 0    | 0    | NA       | NA       |
| 0    | 0    | 0    | 0    | NA       | NA       |
| 0.12 | 0    | 0.08 | 0.18 | NA       | NA       |
| 0.38 | 0.21 | 0.02 | 0    | NA       | NA       |
| 0    | 0    | 0    | 0    | NA       | NA       |
| 0    | 0    | 0    | 0    | NA       | NA       |
| 0    | 0    | 0    | 0    | NA       | NA       |
| 0    | 0    | 0    | 0    | NA       | NA       |
| 0    | 0    | 0    | 0    | NA       | NA       |
| 0    | 0    | 0    | 0    | NA       | NA       |
| 1.78 | 5.78 | 3.6  | 3.14 | 0.590503 | 0.185456 |
| 0    | 0    | 0    | 0    | NA       | NA       |
| 0    | 0    | 0    | 0    | NA       | NA       |
| 0.37 | 0.46 | 0.43 | 0.28 | -0.02216 | 0.982137 |

|      |      |      |               |          |
|------|------|------|---------------|----------|
| 0    | 0    | 0    | 0 NA          | NA       |
| 0    | 0    | 0    | 0 NA          | NA       |
| 0    | 0    | 0    | 0 NA          | NA       |
| 0    | 0    | 0    | 0 NA          | NA       |
| 0    | 0    | 0    | 0 NA          | NA       |
| 0    | 0    | 0    | 0 NA          | NA       |
| 0    | 0    | 0    | 0 NA          | NA       |
| 0    | 0    | 0    | 0 NA          | NA       |
| 0    | 0    | 0    | 0 NA          | NA       |
| 0    | 0    | 0    | 0 NA          | NA       |
| 0    | 0    | 0    | 0 NA          | NA       |
| 0    | 0    | 0    | 0 NA          | NA       |
| 0.12 | 0.17 | 0.08 | 0.18 NA       | NA       |
| 0    | 0    | 0    | 0 NA          | NA       |
| 0    | 0.29 | 0    | 0 NA          | NA       |
| 0.06 | 0    | 0.01 | 0.01 NA       | NA       |
| 0    | 0    | 0    | 0 NA          | NA       |
| 2.07 | 2.17 | 1.18 | 1.43 NA       | NA       |
| 0    | 0    | 0.12 | 0.14 NA       | NA       |
| 0.55 | 0    | 1.97 | 0 0.096136    | 0.843856 |
| 0    | 0    | 0    | 0 NA          | NA       |
| 0    | 0    | 0    | 0 NA          | NA       |
| 0    | 0    | 0    | 0 NA          | NA       |
| 0    | 0    | 0    | 0 NA          | NA       |
| 0    | 0    | 0    | 0 NA          | NA       |
| 0    | 0    | 0    | 0 NA          | NA       |
| 0.22 | 0.03 | 0.15 | 0.1 -0.69221  | 0.320148 |
| 0    | 0    | 0    | 0 NA          | NA       |
| 0    | 0    | 0    | 0 NA          | NA       |
| 0    | 0    | 0    | 0 NA          | NA       |
| 0    | 0    | 0    | 0 NA          | NA       |
| 0    | 0.18 | 0.08 | 0.25 NA       | NA       |
| 0.18 | 0    | 0    | 0 NA          | NA       |
| 0    | 0    | 0    | 0 NA          | NA       |
| 0.18 | 0.13 | 0.06 | 0.21 NA       | NA       |
| 0    | 0    | 0    | 0 NA          | NA       |
| 0.11 | 0.21 | 0.07 | 0.04 NA       | NA       |
| 0    | 0    | 0    | 0 NA          | NA       |
| 0.97 | 1.56 | 1.24 | 1.46 0.431337 | 0.172889 |
| 0.17 | 0.03 | 0.08 | 0.04 -0.65246 | 0.355081 |
| 0    | 0    | 0    | 0 NA          | NA       |
| 0    | 0    | 0    | 0 NA          | NA       |
| 0    | 0    | 0    | 0 NA          | NA       |
| 0    | 0    | 0    | 0 NA          | NA       |



|       |      |       |                |          |
|-------|------|-------|----------------|----------|
| 0     | 0    | 0.1   | 0 NA           | NA       |
| 0     | 0    | 0     | 0 NA           | NA       |
| 0.37  | 0    | 0     | 0 NA           | NA       |
| 0     | 0    | 0     | 0 NA           | NA       |
| 0     | 0    | 0     | 0 NA           | NA       |
| 0     | 0.07 | 0.1   | 0 NA           | NA       |
| 0     | 0    | 0     | 0 NA           | NA       |
| 0     | 0    | 0     | 0 NA           | NA       |
| 0.44  | 0.16 | 0.59  | 0.33 -0.31163  | 0.688868 |
| 0.02  | 0.01 | 0.03  | 0.03 -0.23693  | 0.776832 |
| 0     | 0    | 0     | 0 NA           | NA       |
| 0     | 0    | 0     | 0 NA           | NA       |
| 0     | 0    | 0     | 0.22 NA        | NA       |
| 0     | 0    | 0     | 0 NA           | NA       |
| 0.01  | 0.02 | 0.02  | 0.02 NA        | NA       |
| 1.44  | 3.6  | 2.35  | 3.47 0.779353  | 0.002244 |
| 0     | 0    | 0     | 0 NA           | NA       |
| 1.05  | 0.7  | 0.73  | 1.02 -0.26182  | 0.601015 |
| 0     | 0    | 0     | 0 NA           | NA       |
| 0.47  | 1.11 | 1.22  | 0.74 0.338433  | 0.663517 |
| 1     | 0.69 | 0.49  | 0.56 -0.54952  | 0.240819 |
| 0     | 0    | 0     | 0 NA           | NA       |
| 4.3   | 3.5  | 3.58  | 4.47 -0.07162  | 0.867634 |
| 0     | 0    | 0     | 0 NA           | NA       |
| 0     | 0    | 0     | 0 NA           | NA       |
| 0     | 0    | 0     | 0 NA           | NA       |
| 0     | 0    | 0     | 0 NA           | NA       |
| 0     | 0    | 0     | 0 NA           | NA       |
| 0     | 0    | 0     | 0 NA           | NA       |
| 0     | 0    | 0     | 0 NA           | NA       |
| 0     | 0.21 | 0     | 0 NA           | NA       |
| 0     | 0.15 | 0.07  | 0 NA           | NA       |
| 0     | 0    | 0     | 0 NA           | NA       |
| 0     | 0    | 0     | 0 NA           | NA       |
| 0     | 0    | 0     | 0.12 NA        | NA       |
| 0.18  | 0.26 | 0.25  | 0.28 0.741647  | 0.254603 |
| 0     | 0    | 0     | 0 NA           | NA       |
| 0.22  | 0.47 | 0.14  | 0 NA           | NA       |
| 21.15 | 25.3 | 23.78 | 19.23 -0.16861 | 0.625329 |
| 1.02  | 0.64 | 0.79  | 0.81 -0.51514  | 0.10526  |
| 0     | 0    | 0     | 0 NA           | NA       |
| 0     | 0    | 0     | 0 NA           | NA       |
| 0     | 0    | 0     | 0 NA           | NA       |
| 0.11  | 0.11 | 0.6   | 0.12 -0.26787  | 0.731121 |

|      |      |      |      |          |          |
|------|------|------|------|----------|----------|
| 1.19 | 1.51 | 1.51 | 1.42 | 0.072499 | 0.854111 |
| 0    | 0    | 0    | 0    | NA       | NA       |
| 2.14 | 0.27 | 0.68 | 0    | -1.09711 | 0.074995 |
| 0    | 0    | 0.01 | 0.04 | NA       | NA       |
| 0.25 | 0    | 0    | 0.31 | 0.015463 | 0.975224 |
| 0.26 | 0.55 | 0.4  | 0.45 | -0.13106 | 0.880476 |
| 0.33 | 0.92 | 1.06 | 0.88 | 0.635595 | 0.226046 |
| 0    | 0    | 0    | 0    | NA       | NA       |
| 0.58 | 0.5  | 0.17 | 0.68 | 0.016871 | 0.984827 |
| 0    | 0    | 0    | 0    | NA       | NA       |
| 0    | 0.02 | 0.02 | 0.09 | NA       | NA       |
| 0    | 0    | 0    | 0.18 | NA       | NA       |
| 0.75 | 3.6  | 2.17 | 3.03 | 0.665158 | 0.260888 |
| 0    | 0.15 | 0    | 0    | NA       | NA       |
| 0    | 0    | 0    | 0    | NA       | NA       |
| 0    | 0    | 0    | 0    | NA       | NA       |
| 0.84 | 0.46 | 0.46 | 0.66 | -0.58073 | 0.090508 |
| 0    | 0    | 0    | 0    | NA       | NA       |
| 0    | 0    | 0    | 0    | NA       | NA       |
| 0    | 0.06 | 0.06 | 0.2  | NA       | NA       |
| 0    | 0    | 0    | 0    | NA       | NA       |
| 0    | 0    | 0    | 0.04 | NA       | NA       |
| 0    | 0    | 0    | 0    | NA       | NA       |
| 0.18 | 0.05 | 0.06 | 0.08 | -1.31214 | 0.008469 |
| 0.3  | 0.09 | 0.25 | 0.05 | -0.26849 | 0.742964 |
| 0.13 | 0    | 0    | 0    | NA       | NA       |
| 1.95 | 1.56 | 1.08 | 0.94 | -0.21522 | 0.742414 |
| 0    | 0    | 0    | 0    | NA       | NA       |
| 0    | 0    | 0    | 0    | NA       | NA       |
| 0    | 0    | 0    | 0    | NA       | NA       |
| 0    | 0    | 0    | 0    | NA       | NA       |
| 0.14 | 0.2  | 0.16 | 0.22 | -0.43461 | 0.554518 |
| 0    | 0    | 0    | 0    | NA       | NA       |
| 1.02 | 0    | 0.58 | 0    | NA       | NA       |
| 0    | 0    | 0    | 0    | NA       | NA       |
| 0    | 0    | 0    | 0    | NA       | NA       |
| 0    | 0    | 0    | 0    | NA       | NA       |
| 0    | 0    | 0    | 0    | NA       | NA       |
| 0.04 | 0.03 | 0.03 | 0.03 | NA       | NA       |
| 0    | 0.08 | 0.1  | 0.08 | NA       | NA       |
| 0    | 0    | 0    | 0    | NA       | NA       |
| 0    | 0    | 0    | 0    | NA       | NA       |
| 0.03 | 0    | 0    | 0    | NA       | NA       |
| 0    | 0    | 0    | 0    | NA       | NA       |
| 0    | 0    | 0    | 0    | NA       | NA       |

|      |      |      |               |          |
|------|------|------|---------------|----------|
| 0    | 0    | 0    | 0 NA          | NA       |
| 1.1  | 0.53 | 0.66 | 0.6 -0.56266  | 0.279162 |
| 0.09 | 0    | 0.06 | 0 NA          | NA       |
| 0    | 0    | 0    | 0 NA          | NA       |
| 0    | 0    | 0    | 0 NA          | NA       |
| 0    | 0    | 0    | 0 NA          | NA       |
| 0    | 0    | 0    | 0 NA          | NA       |
| 0.02 | 0.1  | 0.02 | 0.06 NA       | NA       |
| 0.42 | 0    | 0.09 | 0 NA          | NA       |
| 0    | 0    | 0    | 0 NA          | NA       |
| 4.68 | 2.86 | 1.36 | 1.68 0.044924 | NA       |
| 0    | 0    | 0    | 0 NA          | NA       |
| 0    | 0    | 0    | 0 NA          | NA       |
| 0    | 0    | 0    | 0 NA          | NA       |
| 0    | 0    | 0    | 0 NA          | NA       |
| 0    | 0    | 0    | 0 NA          | NA       |
| 0    | 0    | 0    | 0 NA          | NA       |
| 0    | 0    | 0.15 | 0.17 NA       | NA       |
| 0    | 0    | 0    | 0 NA          | NA       |
| 0    | 0    | 0.13 | 0.3 NA        | NA       |
| 0.06 | 0    | 0.02 | 0.02 NA       | NA       |
| 0.1  | 0.32 | 0.32 | 0.35 0.23267  | 0.780521 |
| 0.19 | 0.03 | 0.08 | 0.09 -0.54042 | 0.459233 |
| 0    | 0    | 0    | 0 NA          | NA       |
| 0.1  | 0.07 | 0.07 | 0 NA          | NA       |
| 0    | 0    | 0.33 | 0 NA          | NA       |
| 0.14 | 0.1  | 0.09 | 0.07 NA       | NA       |
| 0    | 0.09 | 0.08 | 0.05 NA       | NA       |
| 0    | 0    | 0.05 | 0.06 NA       | NA       |
| 0    | 0    | 0    | 0 NA          | NA       |
| 0    | 0    | 0.35 | 0.36 -0.78785 | 0.236924 |
| 0.04 | 0.07 | 0.01 | 0.02 NA       | NA       |
| 0    | 0    | 0    | 0 NA          | NA       |
| 0    | 0    | 0    | 0 NA          | NA       |
| 0    | 0    | 0    | 0 NA          | NA       |
| 0    | 0    | 0    | 0 NA          | NA       |
| 0    | 0    | 0    | 0 NA          | NA       |
| 0    | 0.05 | 0    | 0 NA          | NA       |
| 0    | 0    | 0    | 0 NA          | NA       |
| 0    | 0    | 0    | 0 NA          | NA       |
| 0    | 0    | 0    | 0 NA          | NA       |
| 0.05 | 0.13 | 0    | 0.04 -0.5943  | 0.40718  |
| 0    | 0    | 0    | 0 NA          | NA       |
| 0    | 0    | 0    | 0 NA          | NA       |
| 0    | 0    | 0    | 0 NA          | NA       |

|      |      |      |               |          |
|------|------|------|---------------|----------|
| 0    | 0    | 0    | 0 NA          | NA       |
| 0    | 0    | 0    | 0 NA          | NA       |
| 0.06 | 0    | 0    | 0.04 NA       | NA       |
| 0    | 0    | 0    | 0 NA          | NA       |
| 0.25 | 0.31 | 0.26 | 0.36 0.327491 | 0.568717 |
| 0    | 0    | 0    | 0 NA          | NA       |
| 0.03 | 0.22 | 0.15 | 0.13 -0.08511 | 0.926611 |
| 0    | 0.08 | 0.05 | 0.1 1.237417  | 0.032725 |
| 0    | 0    | 0    | 0 NA          | NA       |
| 0    | 0    | 0    | 0 NA          | NA       |
| 1.53 | 1.84 | 1.84 | 2.4 0.157465  | 0.558649 |
| 0    | 0    | 0    | 0 NA          | NA       |
| 0    | 0    | 0    | 0 NA          | NA       |
| 0    | 0    | 0.03 | 0.01 NA       | NA       |
| 0    | 0    | 0    | 0 NA          | NA       |
| 0    | 0    | 0    | 0.03 NA       | NA       |
| 0    | 0    | 0.02 | 0 NA          | NA       |
| 0.18 | 0.15 | 0.17 | 0 NA          | NA       |
| 0    | 0    | 0    | 0 NA          | NA       |
| 0    | 0    | 0    | 0 NA          | NA       |
| 0.02 | 0.01 | 0.06 | 0 NA          | NA       |
| 0    | 0    | 0    | 0 NA          | NA       |
| 0    | 0    | 0    | 0 NA          | NA       |
| 0    | 0    | 0    | 0 NA          | NA       |
| 0    | 0    | 0    | 0 NA          | NA       |
| 0.04 | 0    | 0.01 | 0 NA          | NA       |
| 0    | 0    | 0.29 | 0 NA          | NA       |
| 0    | 0    | 0    | 0 NA          | NA       |
| 0    | 0    | 0    | 0 NA          | NA       |
| 0.5  | 0.73 | 0.78 | 0.77 0.884874 | 0.147258 |
| 0.18 | 0.06 | 0    | 0.07 NA       | NA       |
| 0    | 0    | 0    | 0 NA          | NA       |
| 0    | 0    | 0    | 0 NA          | NA       |
| 0    | 0    | 0    | 0 NA          | NA       |
| 0    | 0    | 0    | 0 NA          | NA       |
| 0    | 0.14 | 0.05 | 0 NA          | NA       |
| 0    | 0    | 0    | 0 NA          | NA       |
| 0    | 0    | 0    | 0 NA          | NA       |
| 0.66 | 0.83 | 0.98 | 0.75 0.334404 | 0.671364 |
| 0    | 0    | 0    | 0 NA          | NA       |
| 0    | 0    | 0    | 0 NA          | NA       |
| 0    | 0    | 0    | 0 NA          | NA       |
| 0    | 0    | 0    | 0 NA          | NA       |
| 0.66 | 0    | 0.15 | 0.2 NA        | NA       |
| 0    | 0    | 0    | 0 NA          | NA       |

|      |      |      |               |          |
|------|------|------|---------------|----------|
| 0    | 0    | 0    | 0 NA          | NA       |
| 0    | 0    | 0    | 0 NA          | NA       |
| 0.1  | 0.25 | 0.4  | 0.3 0.658437  | 0.345488 |
| 0    | 0    | 0    | 0 NA          | NA       |
| 1.42 | 2.14 | 2.38 | 1.15 -0.05308 | 0.935474 |
| 0    | 0    | 0    | 0 NA          | NA       |
| 0    | 0    | 0    | 0 NA          | NA       |
| 0    | 0    | 0    | 0 NA          | NA       |
| 0.01 | 0.05 | 0.16 | 0.14 NA       | NA       |
| 0.54 | 1.05 | 0.48 | 0.98 0.191039 | 0.729357 |
| 0.15 | 0.32 | 0.15 | 0.29 0.375148 | 0.617615 |
| 0    | 0    | 0.1  | 0.09 NA       | NA       |
| 0    | 0    | 0    | 0 NA          | NA       |
| 0    | 0    | 0    | 0 NA          | NA       |
| 0    | 0    | 0    | 0 NA          | NA       |
| 0    | 0    | 0    | 0.04 NA       | NA       |
| 0.09 | 0    | 0.08 | 0.02 NA       | NA       |
| 0    | 0    | 0    | 0 NA          | NA       |
| 0    | 0    | 0    | 0 NA          | NA       |
| 0.1  | 0.14 | 0.06 | 0.08 NA       | NA       |
| 0    | 0.12 | 0.17 | 0.33 NA       | NA       |
| 0    | 0    | 0    | 0 NA          | NA       |
| 0    | 0    | 0    | 0 NA          | NA       |
| 0    | 0    | 0    | 0 NA          | NA       |
| 0    | 0    | 0    | 0 NA          | NA       |
| 0    | 0    | 0    | 0 NA          | NA       |
| 0    | 0    | 0    | 0 NA          | NA       |
| 0    | 0    | 0    | 0 NA          | NA       |
| 0    | 0    | 0    | 0 NA          | NA       |
| 0    | 0    | 0    | 0 NA          | NA       |
| 0    | 0.1  | 0.18 | 0.1 NA        | NA       |
| 0    | 0    | 0.23 | 0.27 NA       | NA       |
| 0    | 0    | 0    | 0 NA          | NA       |
| 0    | 0.08 | 0.04 | 0 NA          | NA       |
| 0    | 0.08 | 0.43 | 0.08 NA       | NA       |
| 0.19 | 0.11 | 0.1  | 0.05 -0.48612 | 0.507452 |
| 0    | 0    | 0    | 0 NA          | NA       |
| 0    | 0    | 0    | 0 NA          | NA       |
| 0.3  | 0.22 | 0    | 0 NA          | NA       |
| 0    | 0    | 0    | 0 NA          | NA       |
| 0    | 0    | 0    | 0 NA          | NA       |
| 0    | 0    | 0    | 0 NA          | NA       |
| 0    | 0    | 0    | 0 NA          | NA       |
| 0.99 | 0.35 | 0    | 0.39 NA       | NA       |
| 0    | 0.04 | 0.04 | 0.04 NA       | NA       |
| 0    | 0    | 0    | 0 NA          | NA       |

|      |       |      |       |          |          |
|------|-------|------|-------|----------|----------|
| 0    | 0     | 0    | 0     | NA       | NA       |
| 0    | 0     | 0    | 0     | NA       | NA       |
| 0    | 0     | 0    | 0     | NA       | NA       |
| 0    | 0     | 0    | 0     | NA       | NA       |
| 0.28 | 1.37  | 1.48 | 2.8   | 0.956806 | 0.076596 |
| 0.83 | 1.03  | 0.42 | 0.14  | 0.047041 | 0.959979 |
| 0    | 0.16  | 0    | 0     | NA       | NA       |
| 0    | 0     | 0    | 0     | NA       | NA       |
| 0    | 0     | 0    | 0     | NA       | NA       |
| 0    | 0     | 0    | 0     | NA       | NA       |
| 0    | 0     | 0    | 0     | NA       | NA       |
| 0    | 0     | 0    | 0     | NA       | NA       |
| 0.77 | 0.72  | 0.42 | 0.37  | -0.23259 | 0.708838 |
| 0.46 | 0.9   | 0.31 | 1.81  | -0.09168 | 0.90704  |
| 0    | 0     | 0    | 0     | NA       | NA       |
| 0    | 0     | 0    | 0     | NA       | NA       |
| 0    | 0     | 0    | 0     | NA       | NA       |
| 0    | 0     | 0    | 0     | NA       | NA       |
| 2.36 | 0.54  | 0.59 | 1.7   | -0.50324 | 0.340683 |
| 0    | 0     | 0    | 0     | NA       | NA       |
| 0    | 0     | 0    | 0     | NA       | NA       |
| 0    | 0     | 0    | 0     | NA       | NA       |
| 0    | 0     | 0    | 0     | NA       | NA       |
| 0    | 0     | 0.28 | 0     | NA       | NA       |
| 9.1  | 31.68 | 19.6 | 25.21 | 1.231637 | 3.33E-06 |
| 0    | 0     | 0    | 0     | NA       | NA       |
| 0    | 0     | 0    | 0     | NA       | NA       |
| 2.17 | 2.44  | 1.35 | 1.03  | -0.62007 | 0.241885 |
| 0    | 0     | 0    | 0     | NA       | NA       |
| 0    | 0     | 0    | 0     | NA       | NA       |
| 2.39 | 1.68  | 1.98 | 2.33  | -0.09023 | 0.859671 |
| 0    | 0     | 0    | 0     | NA       | NA       |
| 4.41 | 3.24  | 3.12 | 3.22  | -0.47049 | 0.000748 |
| 0    | 0     | 0    | 0     | NA       | NA       |
| 0    | 0     | 0    | 0     | NA       | NA       |
| 0    | 0     | 0    | 0.05  | NA       | NA       |
| 0    | 0     | 0    | 0     | NA       | NA       |
| 0    | 0     | 0.25 | 0     | NA       | NA       |
| 0    | 0.11  | 0.11 | 0.06  | NA       | NA       |
| 0    | 0     | 0    | 0     | NA       | NA       |
| 0    | 0     | 0    | 0     | NA       | NA       |
| 0    | 0     | 0    | 0     | NA       | NA       |
| 0    | 0     | 0    | 0     | NA       | NA       |
| 0    | 0     | 0    | 0     | NA       | NA       |
| 0.6  | 1.44  | 0.89 | 0.83  | 1.013137 | 0.005769 |

|      |      |      |               |          |
|------|------|------|---------------|----------|
| 0    | 0    | 0    | 0 NA          | NA       |
| 0    | 0    | 0    | 0 NA          | NA       |
| 0    | 0    | 0    | 0 NA          | NA       |
| 0    | 0    | 0    | 0 NA          | NA       |
| 0.15 | 0.11 | 0.2  | 0 NA          | NA       |
| 0    | 0.47 | 0    | 0.65 NA       | NA       |
| 0    | 0    | 0    | 0 NA          | NA       |
| 0    | 0    | 0    | 0 NA          | NA       |
| 0.05 | 0.12 | 0.13 | 0.38 0.005158 | 0.996111 |
| 0.27 | 0.25 | 0.12 | 0.1 -0.72102  | 0.233601 |
| 0    | 0    | 0    | 0 NA          | NA       |
| 0    | 0.09 | 0    | 0.18 NA       | NA       |
| 0    | 0    | 0    | 0 NA          | NA       |
| 0    | 0    | 0    | 0 NA          | NA       |
| 0    | 0    | 0    | 0 NA          | NA       |
| 0    | 0    | 0    | 0 NA          | NA       |
| 0    | 0    | 0    | 0 NA          | NA       |
| 0    | 0    | 0    | 0 NA          | NA       |
| 0    | 0    | 0    | 0 NA          | NA       |
| 0    | 0    | 0.11 | 0 NA          | NA       |
| 0    | 0.19 | 0    | 0 NA          | NA       |
| 0.71 | 0.34 | 0.76 | 0.53 NA       | NA       |
| 0.11 | 0.03 | 0.1  | 0.14 -0.42733 | 0.502794 |
| 0    | 0    | 0    | 0 NA          | NA       |
| 0    | 0    | 0    | 0 NA          | NA       |
| 0    | 0    | 0    | 0 NA          | NA       |
| 0    | 0    | 0    | 0 NA          | NA       |
| 0    | 0    | 0    | 0 NA          | NA       |
| 0    | 0    | 0.03 | 0.03 NA       | NA       |
| 0    | 0    | 0    | 0 NA          | NA       |
| 0.6  | 0    | 0.27 | 0 NA          | NA       |
| 0    | 0    | 0    | 0 NA          | NA       |
| 0    | 0    | 0    | 0 NA          | NA       |
| 0    | 0    | 0    | 0 NA          | NA       |
| 0.03 | 0.04 | 0.05 | 0.02 NA       | NA       |
| 0    | 0    | 0    | 0.13 NA       | NA       |
| 0    | 0    | 0    | 0 NA          | NA       |
| 0    | 0    | 0    | 0 NA          | NA       |
| 0    | 0    | 0    | 0 NA          | NA       |
| 0    | 0.35 | 0.16 | 0.09 NA       | NA       |
| 0.31 | 0.11 | 0.4  | 0 NA          | NA       |
| 2.54 | 0.7  | 0.1  | 1.56 -0.49055 | 0.49821  |
| 0    | 0    | 0    | 0 NA          | NA       |
| 3.68 | 2    | 1.77 | 1.26 -0.41905 | 0.29266  |

|      |      |      |               |          |
|------|------|------|---------------|----------|
| 0    | 0    | 0    | 0 NA          | NA       |
| 0.2  | 0.07 | 0.05 | 0.13 -0.45651 | 0.547362 |
| 0    | 0.03 | 0.16 | 0.07 NA       | NA       |
| 0    | 0    | 0    | 0 NA          | NA       |
| 0    | 0    | 0    | 0 NA          | NA       |
| 0.2  | 0    | 0    | 0 NA          | NA       |
| 0.33 | 0.17 | 0.13 | 0.21 -0.94209 | 0.019815 |
| 0    | 0    | 0    | 0 NA          | NA       |
| 1.43 | 1.98 | 1.87 | 0.94 -0.0884  | 0.871253 |
| 1.43 | 0.8  | 1.71 | 1.24 0.11598  | 0.857432 |
| 0.25 | 0.2  | 0.13 | 0.24 -0.18848 | 0.816626 |
| 0    | 0    | 0.08 | 0 NA          | NA       |
| 0    | 0.07 | 0    | 0 NA          | NA       |
| 0    | 0    | 0    | 0 NA          | NA       |
| 0    | 0    | 0    | 0 NA          | NA       |
| 0    | 0.11 | 0    | 0 NA          | NA       |
| 0    | 0    | 0    | 0.29 NA       | NA       |
| 0    | 0    | 0    | 0 NA          | NA       |
| 0    | 0    | 0    | 0 NA          | NA       |
| 0    | 0    | 0    | 0 NA          | NA       |
| 0    | 0    | 0    | 0 NA          | NA       |
| 0    | 0    | 0    | 0 NA          | NA       |
| 0    | 0    | 0    | 0 NA          | NA       |
| 0    | 0    | 0    | 0 NA          | NA       |
| 0    | 0    | 0    | 0 NA          | NA       |
| 0    | 0    | 0    | 0 NA          | NA       |
| 0.49 | 0.82 | 1.07 | 0.94 0.937055 | 0.026814 |
| 0    | 0    | 0    | 0 NA          | NA       |
| 0    | 0    | 0    | 0 NA          | NA       |
| 0    | 0    | 0    | 0.02 NA       | NA       |
| 0    | 0    | 0    | 0 NA          | NA       |
| 0    | 0    | 0    | 0 NA          | NA       |
| 0    | 0    | 0    | 0 NA          | NA       |
| 0    | 0    | 0.07 | 0 NA          | NA       |
| 0    | 0    | 0    | 0 NA          | NA       |
| 0    | 0    | 0    | 0 NA          | NA       |
| 0    | 0    | 0    | 0 NA          | NA       |
| 0    | 0    | 0    | 0 NA          | NA       |
| 0    | 0    | 0    | 0 NA          | NA       |
| 0    | 0    | 0    | 0 NA          | NA       |
| 0    | 0    | 0    | 0 NA          | NA       |
| 0    | 0    | 0    | 0 NA          | NA       |
| 0    | 0    | 0    | 0 NA          | NA       |
| 0.18 | 0.15 | 0.12 | 0.18 0.158628 | 0.855946 |
| 0    | 0    | 0    | 0 NA          | NA       |
| 0    | 0    | 0    | 0 NA          | NA       |



|      |      |      |               |          |
|------|------|------|---------------|----------|
| 0    | 0    | 0    | 0 NA          | NA       |
| 0    | 0    | 0    | 0 NA          | NA       |
| 0.45 | 0    | 0.06 | 0.02 NA       | NA       |
| 3.6  | 1.52 | 1.48 | 3.33 -0.81206 | 0.058249 |
| 0    | 0    | 0    | 0 NA          | NA       |
| 0    | 0    | 0    | 0 NA          | NA       |
| 0.06 | 0.02 | 0.04 | 0.13 NA       | NA       |
| 0    | 0.1  | 0    | 0 NA          | NA       |
| 0    | 0    | 0    | 0 NA          | NA       |
| 0    | 0    | 0    | 0 NA          | NA       |
| 0    | 0    | 0    | 0 NA          | NA       |
| 2.98 | 4.12 | 4.84 | 5.07 0.773594 | 0.041251 |
| 0    | 0    | 0    | 0 NA          | NA       |
| 0.01 | 0    | 0    | 0 NA          | NA       |
| 0.02 | 0    | 0.01 | 0.03 NA       | NA       |
| 0    | 0    | 0    | 0 NA          | NA       |
| 0.05 | 0.06 | 0    | 0.06 NA       | NA       |
| 0    | 0    | 0    | 0 NA          | NA       |
| 0    | 0    | 0    | 0 NA          | NA       |
| 0    | 0    | 0    | 0 NA          | NA       |
| 0    | 0    | 0    | 0 NA          | NA       |
| 0    | 0    | 0    | 0 NA          | NA       |
| 0    | 0    | 0    | 0 NA          | NA       |
| 0.32 | 0.37 | 0.77 | 0.61 0.242598 | 0.773749 |
| 0.45 | 0.58 | 0.54 | 0.62 -0.1224  | 0.814819 |
| 0    | 0    | 0    | 0 NA          | NA       |
| 0    | 0    | 0    | 0 NA          | NA       |
| 0    | 0    | 0    | 0 NA          | NA       |
| 0.42 | 0.43 | 0.3  | 0.61 0.179436 | 0.782895 |
| 0    | 0    | 0    | 0 NA          | NA       |
| 0    | 0    | 0    | 0 NA          | NA       |
| 0    | 0    | 0    | 0 NA          | NA       |
| 0    | 0    | 0    | 0 NA          | NA       |
| 0.05 | 0.17 | 0.11 | 0.09 0.898509 | 0.169997 |
| 0.09 | 0.19 | 0.12 | 0.13 NA       | NA       |
| 0    | 0    | 0    | 0 NA          | NA       |
| 0    | 0    | 0    | 0 NA          | NA       |
| 0    | 0    | 0    | 0 NA          | NA       |
| 0    | 0.31 | 0.14 | 0.16 NA       | NA       |
| 0.56 | 0.76 | 0.85 | 1.39 -0.13588 | 0.84981  |
| 1.05 | 0    | 0    | 0 NA          | NA       |
| 0    | 0    | 0    | 0 NA          | NA       |
| 0    | 0    | 0    | 0 NA          | NA       |

|      |      |      |               |          |
|------|------|------|---------------|----------|
| 0    | 0    | 0    | 0 NA          | NA       |
| 0    | 0    | 0    | 0 NA          | NA       |
| 0    | 0    | 0    | 0 NA          | NA       |
| 0    | 0    | 0    | 0 NA          | NA       |
| 0    | 0    | 0    | 0 NA          | NA       |
| 0    | 0    | 0    | 0 NA          | NA       |
| 0    | 0    | 0    | 0 NA          | NA       |
| 1.79 | 1.73 | 1.51 | 1.21 0.06458  | 0.903519 |
| 0    | 0    | 0    | 0 NA          | NA       |
| 0    | 0    | 0    | 0 NA          | NA       |
| 0.29 | 1.69 | 1.23 | 1.57 0.478108 | 0.398778 |
| 0    | 0    | 0    | 0 NA          | NA       |
| 0.13 | 0.08 | 0.09 | 0.09 -0.29935 | 0.710991 |
| 0.14 | 0.09 | 0.09 | 0.21 NA       | NA       |
| 0    | 0.03 | 0.05 | 0.02 NA       | NA       |
| 1.45 | 0.8  | 1.69 | 1.66 0.036945 | 0.966405 |
| 0    | 0    | 0    | 0 NA          | NA       |
| 0    | 0    | 0    | 0 NA          | NA       |
| 0    | 0    | 0    | 0 NA          | NA       |
| 0    | 0    | 0.05 | 0 NA          | NA       |
| 0.06 | 0.22 | 0.21 | 0 -0.21591    | 0.797745 |
| 0    | 0    | 0    | 0 NA          | NA       |
| 0    | 0    | 0    | 0 NA          | NA       |
| 0    | 0    | 0    | 0 NA          | NA       |
| 0    | 0    | 0.17 | 0 NA          | NA       |
| 0.02 | 0.1  | 0    | 0.04 NA       | NA       |
| 0.63 | 1.4  | 0.73 | 1.11 0.130931 | 0.83046  |
| 0    | 0    | 0    | 0 NA          | NA       |
| 0    | 0    | 0.32 | 0.24 NA       | NA       |
| 0    | 0    | 0    | 0 NA          | NA       |
| 0    | 0    | 0    | 0 NA          | NA       |
| 0    | 0.1  | 0    | 0 NA          | NA       |
| 0.03 | 0.03 | 0.01 | 0.07 NA       | NA       |
| 0    | 0    | 0    | 0 NA          | NA       |
| 1.73 | 2.5  | 2.49 | 2.87 0.546458 | 0.01182  |
| 0.14 | 0.15 | 0.02 | 0.08 -0.55322 | 0.449351 |
| 0    | 0.39 | 0.36 | 0.17 0.697481 | 0.31359  |
| 0.27 | 0.58 | 0.45 | 0.47 0.894514 | 0.107008 |
| 0    | 0    | 0    | 0 NA          | NA       |
| 0    | 0    | 0    | 0 NA          | NA       |
| 0.22 | 0.24 | 0.07 | 0.42 NA       | NA       |
| 0    | 0    | 0    | 0 NA          | NA       |
| 0    | 0    | 0    | 0 NA          | NA       |
| 0    | 0    | 0    | 0 NA          | NA       |
| 0.18 | 0    | 0    | 0.14 NA       | NA       |

|      |      |      |               |          |
|------|------|------|---------------|----------|
| 0    | 0.01 | 0    | 0 NA          | NA       |
| 0    | 0    | 0    | 0 NA          | NA       |
| 0    | 0    | 0.04 | 0.04 NA       | NA       |
| 1.99 | 2.07 | 2.05 | 2.22 0.112087 | 0.636727 |
| 0    | 0    | 0    | 0 NA          | NA       |
| 0    | 0    | 0    | 0 NA          | NA       |
| 0    | 0    | 0    | 0 NA          | NA       |
| 0    | 0.47 | 0.09 | 0.3 NA        | NA       |
| 0    | 0    | 0    | 0 NA          | NA       |
| 0    | 0.26 | 0.21 | 0.08 0.782583 | 0.221058 |
| 0    | 0    | 0    | 0 NA          | NA       |
| 0    | 0    | 0    | 0 NA          | NA       |
| 0    | 0    | 0.01 | 0 NA          | NA       |
| 0    | 0    | 0    | 0 NA          | NA       |
| 0    | 0    | 0    | 0 NA          | NA       |
| 0    | 0    | 0    | 0 NA          | NA       |
| 0    | 0    | 0    | 0 NA          | NA       |
| 0    | 0    | 0    | 0 NA          | NA       |
| 0    | 0    | 0    | 0 NA          | NA       |
| 0    | 0    | 0    | 0 NA          | NA       |
| 0    | 0    | 0    | 0 NA          | NA       |
| 0    | 0    | 0    | 0 NA          | NA       |
| 1.77 | 2.44 | 2.19 | 2.3 0.446782  | 0.031302 |
| 0    | 0.12 | 0.07 | 0 NA          | NA       |
| 0    | 0    | 0    | 0 NA          | NA       |
| 0.18 | 0.18 | 0.26 | 0.42 0.359721 | 0.564287 |
| 0    | 0    | 0    | 0 NA          | NA       |
| 0    | 0    | 0    | 0 NA          | NA       |
| 0    | 0    | 0    | 0 NA          | NA       |
| 0    | 0    | 0    | 0 NA          | NA       |
| 0.06 | 0.12 | 0    | 0.26 NA       | NA       |
| 0    | 0    | 0    | 0 NA          | NA       |
| 0    | 0    | 0    | 0 NA          | NA       |
| 0    | 0    | 0    | 0 NA          | NA       |
| 0.31 | 0    | 0.2  | 0 NA          | NA       |
| 0    | 0    | 0    | 0 NA          | NA       |
| 0    | 0    | 0    | 0 NA          | NA       |
| 0.31 | 0.73 | 0.26 | 0.32 0.322778 | 0.639952 |
| 0.79 | 1.55 | 0    | 0 NA          | NA       |
| 0    | 0    | 0    | 0 NA          | NA       |
| 0    | 0.06 | 0.06 | 0.06 NA       | NA       |
| 0.39 | 0.07 | 0.2  | 0.07 NA       | NA       |
| 0    | 0    | 0    | 0 NA          | NA       |
| 0    | 0    | 0.19 | 0.22 NA       | NA       |
| 0    | 0    | 0    | 0 NA          | NA       |
| 0.05 | 0.13 | 0.17 | 0.26 0.0256   | 0.97908  |



|      |      |      |               |          |
|------|------|------|---------------|----------|
| 0    | 0    | 0.09 | 0 NA          | NA       |
| 0.17 | 1.14 | 0.87 | 0.99 1.578247 | 0.000829 |
| 1.25 | 0.9  | 1.01 | 0.86 -0.37058 | 0.20305  |
| 0    | 0    | 0    | 0 NA          | NA       |
| 0.78 | 4.73 | 4.61 | 2.56 1.032481 | 0.086813 |
| 0    | 0    | 0    | 0 NA          | NA       |
| 0    | 0    | 0    | 0 NA          | NA       |
| 0.26 | 0.54 | 0.35 | 0.72 0.59002  | 0.318281 |
| 0.64 | 0.32 | 0.27 | 0.4 -0.40306  | 0.59462  |
| 0    | 0    | 0    | 0 NA          | NA       |
| 0.15 | 0    | 0.1  | 0.23 NA       | NA       |
| 0.25 | 0.18 | 0.16 | 0.38 NA       | NA       |
| 0.22 | 0    | 0    | 0 NA          | NA       |
| 0    | 0    | 0    | 0 NA          | NA       |
| 0    | 0    | 0    | 0 NA          | NA       |
| 0    | 0    | 0    | 0 NA          | NA       |
| 0    | 0    | 0    | 0 NA          | NA       |
| 0    | 0    | 0    | 0 NA          | NA       |
| 0    | 0    | 0    | 0 NA          | NA       |
| 0.19 | 0.51 | 0.37 | 0.48 1.232568 | 0.001639 |
| 0    | 0    | 0    | 0 NA          | NA       |
| 0    | 0    | 0    | 0 NA          | NA       |
| 0    | 0    | 0    | 0 NA          | NA       |
| 0    | 0.22 | 0    | 0.12 NA       | NA       |
| 0    | 0    | 0    | 0 NA          | NA       |
| 0.14 | 0    | 0    | 0 NA          | NA       |
| 0    | 0    | 0    | 0 NA          | NA       |
| 0    | 0    | 0    | 0.39 NA       | NA       |
| 0    | 0    | 0    | 0 NA          | NA       |
| 1.38 | 0.09 | 0.43 | 0.25 -2.01237 | 2.07E-07 |
| 0    | 0    | 0    | 0 NA          | NA       |
| 0    | 0    | 0    | 0 NA          | NA       |
| 0    | 0    | 0    | 0 NA          | NA       |
| 0    | 0    | 0    | 0 NA          | NA       |
| 0    | 0    | 0    | 0 NA          | NA       |
| 0    | 0    | 0    | 0.13 NA       | NA       |
| 0    | 0    | 0    | 0.03 NA       | NA       |
| 0    | 0    | 0    | 0 NA          | NA       |
| 0    | 0    | 0    | 0 NA          | NA       |
| 0    | 0    | 0    | 0 NA          | NA       |
| 0.47 | 0.54 | 0.44 | 0.36 -0.11441 | 0.896708 |
| 0    | 0    | 0    | 0 NA          | NA       |
| 0    | 0    | 0    | 0 NA          | NA       |
| 0    | 0    | 0    | 0 NA          | NA       |
| 0    | 0    | 0    | 0 NA          | NA       |

|      |      |      |               |          |
|------|------|------|---------------|----------|
| 0    | 0    | 0    | 0 NA          | NA       |
| 0    | 0.25 | 0    | 0.26 NA       | NA       |
| 0    | 0    | 0    | 0 NA          | NA       |
| 0    | 0.03 | 0.01 | 0.03 NA       | NA       |
| 0    | 0    | 0    | 0 NA          | NA       |
| 0.4  | 0.15 | 0.03 | 0.02 -1.1604  | 0.063235 |
| 0    | 0    | 0    | 0 NA          | NA       |
| 0    | 0    | 0    | 0 NA          | NA       |
| 0.37 | 0    | 0.31 | 0.05 -0.39416 | 0.608716 |
| 0    | 0    | 0    | 0 NA          | NA       |
| 0    | 0    | 0    | 0 NA          | NA       |
| 0    | 0    | 0    | 0 NA          | NA       |
| 0    | 0    | 0    | 0 NA          | NA       |
| 0    | 0    | 0    | 0 NA          | NA       |
| 0.2  | 0.25 | 0.54 | 0.08 0.667252 | 0.341896 |
| 0    | 0    | 0    | 0 NA          | NA       |
| 0    | 0.17 | 0.17 | 0.19 NA       | NA       |
| 0    | 0    | 0    | 0 NA          | NA       |
| 0    | 0.13 | 0.08 | 0.04 0.966213 | 0.135756 |
| 0.35 | 0.06 | 0.46 | 0 NA          | NA       |
| 0    | 0    | 0    | 0 NA          | NA       |
| 0    | 0    | 0    | 0 NA          | NA       |
| 0.24 | 0    | 0.12 | 0 NA          | NA       |
| 0    | 0    | 0    | 0 NA          | NA       |
| 0    | 0    | 0    | 0 NA          | NA       |
| 0    | 0    | 0    | 0 NA          | NA       |
| 0    | 0    | 0    | 0 NA          | NA       |
| 0.8  | 0.11 | 0    | 0.12 NA       | NA       |
| 2.65 | 3.83 | 3.81 | 3.53 0.366158 | 0.463294 |
| 0    | 0    | 0    | 0 NA          | NA       |
| 0    | 0    | 0    | 0 NA          | NA       |
| 0    | 0    | 0    | 0 NA          | NA       |
| 0    | 0.33 | 0    | 0.09 NA       | NA       |
| 0    | 0    | 0    | 0 NA          | NA       |
| 0    | 0    | 0    | 0 NA          | NA       |
| 0    | 0    | 0    | 0 NA          | NA       |
| 0    | 0    | 0    | 0 NA          | NA       |
| 0.22 | 0.7  | 1.04 | 0.81 1.211763 | 0.006236 |
| 5.16 | 7.48 | 3.92 | 1.84 -0.02449 | 0.978663 |
| 0    | 0.63 | 1.03 | 0 NA          | NA       |
| 0.03 | 0.04 | 0.05 | 0.15 NA       | NA       |
| 0    | 0.08 | 0.02 | 0 NA          | NA       |
| 0.26 | 0.12 | 0.17 | 0.13 -0.51686 | 0.479822 |
| 0    | 0    | 0    | 0 NA          | NA       |
| 0    | 0    | 0    | 0 NA          | NA       |

|      |      |      |      |          |          |
|------|------|------|------|----------|----------|
| 0.08 | 0.06 | 0.22 | 0.19 | NA       | NA       |
| 0.44 | 2.28 | 1.56 | 1    | 0.942393 | 0.095263 |
| 0    | 0    | 0    | 0    | NA       | NA       |
| 6.85 | 4.44 | 2.86 | 4.61 | -0.66563 | 0.145647 |
| 0    | 0    | 0    | 0    | NA       | NA       |
| 0    | 0    | 0    | 0    | NA       | NA       |
| 0.81 | 0.49 | 0.44 | 0.47 | -0.52217 | 0.13944  |
| 0.35 | 0.14 | 0.18 | 0.35 | -0.15861 | 0.849094 |
| 0.05 | 1.1  | 0.74 | 0.72 | 1.167757 | 0.0518   |
| 0    | 0    | 0    | 0    | NA       | NA       |
| 0.27 | 0.39 | 0.42 | 0.26 | -0.11561 | 0.895604 |
| 0.08 | 0    | 0    | 0.06 | NA       | NA       |
| 0    | 0    | 0    | 0    | NA       | NA       |
| 0.19 | 0.1  | 0    | 0.11 | NA       | NA       |
| 0    | 0    | 0    | 0    | NA       | NA       |
| 0    | 0    | 0    | 0    | NA       | NA       |
| 0.38 | 0.12 | 0.3  | 0.32 | 0.086612 | 0.921986 |
| 0    | 0.1  | 0.03 | 0    | NA       | NA       |
| 0    | 0    | 0    | 0    | NA       | NA       |
| 0    | 0    | 0    | 0    | NA       | NA       |
| 0.19 | 0.03 | 0.03 | 0.06 | NA       | NA       |
| 0    | 0    | 0    | 0    | NA       | NA       |
| 0.34 | 0.54 | 0.68 | 0.56 | 0.446821 | 0.356772 |
| 0    | 0    | 0    | 0    | NA       | NA       |
| 0    | 0    | 0    | 0    | NA       | NA       |
| 0    | 0    | 0    | 0    | NA       | NA       |
| 0.04 | 0.03 | 0.1  | 0.08 | NA       | NA       |
| 0.76 | 0.83 | 0.64 | 1.28 | 0.210206 | 0.734657 |
| 0    | 0    | 0    | 0    | NA       | NA       |
| 0.08 | 0.09 | 0.02 | 0.04 | NA       | NA       |
| 0    | 0.04 | 0    | 0.04 | NA       | NA       |
| 0.33 | 0.11 | 0.18 | 0.15 | -0.30059 | 0.667482 |
| 0.61 | 1.32 | 1.14 | 1.58 | 0.242874 | 0.73659  |
| 0    | 0    | 0    | 0    | NA       | NA       |
| 0    | 0    | 0    | 0    | NA       | NA       |
| 0    | 0    | 0.01 | 0    | NA       | NA       |
| 0.2  | 0.14 | 0.13 | 0    | NA       | NA       |
| 0    | 0    | 0    | 0    | NA       | NA       |
| 0    | 0    | 0    | 0    | NA       | NA       |
| 0    | 0    | 0    | 0    | NA       | NA       |
| 0.84 | 2.16 | 1.56 | 2    | 0.404143 | 0.512203 |
| 0.29 | 0.29 | 0.27 | 0.13 | -1.1696  | 0.003582 |
| 0    | 0    | 0    | 0    | NA       | NA       |
| 0    | 0.07 | 0    | 0    | NA       | NA       |
| 0.09 | 0.31 | 0.17 | 0.2  | NA       | NA       |

|      |      |      |               |          |
|------|------|------|---------------|----------|
| 0    | 0    | 0    | 0 NA          | NA       |
| 0.09 | 0    | 0    | 0.05 NA       | NA       |
| 0    | 0    | 0    | 0 NA          | NA       |
| 0.42 | 0.3  | 0.37 | 0.53 -0.33322 | 0.675953 |
| 0    | 0    | 0    | 0 NA          | NA       |
| 0.66 | 0.31 | 0.39 | 0.76 -0.0771  | 0.888946 |
| 0    | 0    | 0    | 0 NA          | NA       |
| 0    | 0    | 0    | 0 NA          | NA       |
| 0    | 0    | 0    | 0 NA          | NA       |
| 0    | 0    | 0.24 | 0 NA          | NA       |
| 0.19 | 0.37 | 0.26 | 0.48 -0.02952 | 0.975388 |
| 0.23 | 0.29 | 0.31 | 0.22 -0.07351 | 0.922287 |
| 1.64 | 0.44 | 1.87 | 2.74 0.505518 | 0.48614  |
| 0    | 0    | 0    | 0 NA          | NA       |
| 0    | 0    | 0.01 | 0 NA          | NA       |
| 0    | 0    | 0    | 0 NA          | NA       |
| 0    | 0    | 0    | 0 NA          | NA       |
| 0    | 0    | 0    | 0 NA          | NA       |
| 0.06 | 0.03 | 0.04 | 0.17 -0.47649 | 0.521964 |
| 0.05 | 0.01 | 0.02 | 0.02 -0.78956 | 0.218325 |
| 0    | 0    | 0    | 0 NA          | NA       |
| 0    | 0    | 0    | 0 NA          | NA       |
| 0    | 0    | 0    | 0 NA          | NA       |
| 0    | 0.91 | 0.33 | 0.78 NA       | NA       |
| 0    | 0    | 0    | 0 NA          | NA       |
| 0.47 | 0.34 | 0.44 | 0.28 -0.0004  | 0.999657 |
| 0    | 0.13 | 0    | 0.26 NA       | NA       |
| 0    | 0    | 0    | 0 NA          | NA       |
| 0.22 | 0.34 | 0.37 | 0.35 0.619559 | 0.227028 |
| 0.18 | 0.22 | 0.09 | 0.07 NA       | NA       |
| 0    | 0    | 0    | 0 NA          | NA       |
| 0    | 0    | 0    | 0 NA          | NA       |
| 0    | 0.12 | 0.11 | 0.26 NA       | NA       |
| 0    | 0    | 0    | 0 NA          | NA       |
| 0    | 0    | 0    | 0.03 NA       | NA       |
| 0    | 0    | 0    | 0 NA          | NA       |
| 0.01 | 0.02 | 0.03 | 0.04 -0.06065 | 0.948772 |
| 0    | 0    | 0    | 0 NA          | NA       |
| 0    | 0    | 0    | 0 NA          | NA       |
| 0    | 0    | 0    | 0 NA          | NA       |
| 0    | 0    | 0    | 0 NA          | NA       |
| 0    | 0    | 0    | 0 NA          | NA       |
| 0.13 | 0.18 | 0.17 | 0.15 NA       | NA       |
| 0.5  | 0.22 | 0.08 | 0.09 -0.9089  | 0.161938 |
| 0.98 | 0.9  | 1.03 | 1.31 0.318597 | 0.50527  |



|      |      |      |      |          |          |
|------|------|------|------|----------|----------|
| 0.75 | 1.32 | 0.9  | 1.08 | 0.308344 | 0.646972 |
| 0    | 0    | 0    | 0    | NA       | NA       |
| 0    | 0    | 0    | 0    | NA       | NA       |
| 0    | 0    | 0    | 0    | NA       | NA       |
| 0.15 | 0    | 0    | 0    | NA       | NA       |
| 0    | 0    | 0    | 0    | NA       | NA       |
| 0    | 0    | 0    | 0    | NA       | NA       |
| 0    | 0    | 0    | 0    | NA       | NA       |
| 0    | 0    | 0    | 0    | NA       | NA       |
| 0    | 0    | 0    | 0    | NA       | NA       |
| 0.49 | 0.36 | 0.71 | 0.82 | -0.00711 | 0.991594 |
| 0    | 0    | 0.03 | 0    | NA       | NA       |
| 0    | 0    | 0    | 0    | NA       | NA       |
| 0    | 0    | 0    | 0    | NA       | NA       |
| 0    | 0.04 | 0    | 0    | NA       | NA       |
| 0    | 0    | 0    | 0    | NA       | NA       |
| 0    | 0    | 0    | 0    | NA       | NA       |
| 0    | 0    | 0.02 | 0    | NA       | NA       |
| 0    | 0    | 0    | 0    | NA       | NA       |
| 0    | 0    | 0    | 0    | NA       | NA       |
| 0.23 | 0.06 | 0.19 | 0.04 | -0.55353 | 0.430936 |
| 0    | 0    | 0.2  | 0.23 | NA       | NA       |
| 0    | 0    | 0    | 0    | NA       | NA       |
| 0.2  | 0.12 | 0.14 | 0.21 | -0.06359 | 0.944005 |
| 0    | 0.18 | 0    | 0.61 | NA       | NA       |
| 0    | 0    | 0    | 0    | NA       | NA       |
| 0    | 0    | 0    | 0    | NA       | NA       |
| 0    | 0    | 0    | 0    | NA       | NA       |
| 4.69 | 4.21 | 3.43 | 3.56 | -0.08958 | 0.867232 |
| 5.18 | 4.79 | 4.93 | 4.92 | -0.00758 | 0.974767 |
| 0    | 0    | 0    | 0    | NA       | NA       |
| 0    | 0    | 0    | 0    | NA       | NA       |
| 0    | 0    | 0    | 0.94 | NA       | NA       |
| 0.1  | 0.37 | 0.07 | 0.08 | NA       | NA       |
| 0    | 0    | 0    | 0    | NA       | NA       |
| 0    | 0    | 0    | 0    | NA       | NA       |
| 0    | 0    | 0    | 0    | NA       | NA       |
| 0    | 0    | 0    | 0    | NA       | NA       |
| 0    | 0    | 0    | 0    | NA       | NA       |
| 7.19 | 6.52 | 8.04 | 6.62 | -0.13821 | 0.528705 |
| 0    | 0    | 0    | 0    | NA       | NA       |
| 0    | 0.11 | 0.09 | 0.01 | NA       | NA       |
| 0    | 0    | 0    | 0    | NA       | NA       |
| 0    | 0    | 0    | 0    | NA       | NA       |

|      |      |      |      |          |          |
|------|------|------|------|----------|----------|
| 0    | 0.09 | 0    | 0.1  | NA       | NA       |
| 0    | 0    | 0.09 | 0    | NA       | NA       |
| 0.32 | 0    | 0    | 0.47 | NA       | NA       |
| 0    | 0    | 0    | 0    | NA       | NA       |
| 0.38 | 0.52 | 0.43 | 0.38 | -0.1277  | 0.862624 |
| 0    | 0    | 0.13 | 0    | NA       | NA       |
| 0    | 0    | 0    | 0    | NA       | NA       |
| 0    | 0    | 0    | 0    | NA       | NA       |
| 0.19 | 0.17 | 0.13 | 0.19 | -0.22444 | 0.792039 |
| 0    | 0.11 | 0    | 0.09 | NA       | NA       |
| 0    | 0    | 0    | 0    | NA       | NA       |
| 0    | 0    | 0    | 0    | NA       | NA       |
| 0    | 0    | 0    | 0    | NA       | NA       |
| 0    | 0    | 0    | 0    | NA       | NA       |
| 0    | 0    | 0    | 0    | NA       | NA       |
| 0    | 0    | 0    | 0    | NA       | NA       |
| 0    | 0    | 0    | 0    | NA       | NA       |
| 0    | 0    | 0    | 0    | NA       | NA       |
| 0    | 0    | 0    | 0    | NA       | NA       |
| 0    | 0    | 0    | 0    | NA       | NA       |
| 0.9  | 2.52 | 1.24 | 1.01 | 0.340887 | 0.633306 |
| 0    | 0    | 0.01 | 0.01 | NA       | NA       |
| 0    | 0.48 | 0    | 0.17 | NA       | NA       |
| 0    | 0    | 0    | 0    | NA       | NA       |
| 0    | 0    | 0    | 0    | NA       | NA       |
| 0    | 0    | 0.19 | 0    | NA       | NA       |
| 0    | 0    | 0    | 0    | NA       | NA       |
| 0    | 0    | 0    | 0    | NA       | NA       |
| 0    | 0.23 | 0.33 | 0.33 | 0.782409 | 0.202148 |
| 0    | 0    | 0    | 0    | NA       | NA       |
| 0    | 0    | 0    | 0    | NA       | NA       |
| 0    | 0    | 0    | 0    | NA       | NA       |
| 0    | 0    | 0    | 0    | NA       | NA       |
| 0    | 0.17 | 0.23 | 0.08 | 0.697136 | 0.312337 |
| 0    | 0    | 0    | 0    | NA       | NA       |
| 0    | 0    | 0    | 0    | NA       | NA       |
| 0    | 0    | 0    | 0    | NA       | NA       |
| 0    | 0    | 0    | 0    | NA       | NA       |
| 0    | 0    | 0    | 0    | NA       | NA       |
| 0    | 0    | 0    | 0    | NA       | NA       |
| 0    | 0    | 0.02 | 0    | NA       | NA       |
| 0    | 0.05 | 0    | 0    | NA       | NA       |
| 0    | 0    | 0    | 0    | NA       | NA       |
| 0    | 0.07 | 0    | 0    | NA       | NA       |

|      |      |      |               |          |
|------|------|------|---------------|----------|
| 0    | 0    | 0    | 0 NA          | NA       |
| 0    | 0    | 0    | 0 NA          | NA       |
| 0    | 0    | 0    | 0.07 NA       | NA       |
| 0    | 0    | 0    | 0 NA          | NA       |
| 0.05 | 0.12 | 0.14 | 0.08 0.557611 | 0.411555 |
| 0    | 0    | 0    | 0 NA          | NA       |
| 0    | 0    | 0    | 0 NA          | NA       |
| 0    | 0    | 0    | 0 NA          | NA       |
| 0    | 0    | 0    | 0 NA          | NA       |
| 0    | 0    | 0    | 0 NA          | NA       |
| 0    | 0    | 0    | 0 NA          | NA       |
| 0.09 | 0.08 | 0.07 | 0.03 NA       | NA       |
| 0    | 0    | 0    | 0 NA          | NA       |
| 0    | 0    | 0    | 0 NA          | NA       |
| 0    | 0    | 0    | 0 NA          | NA       |
| 0.27 | 0.39 | 0.61 | 0.46 0.7024   | 0.077096 |
| 0    | 0.07 | 0    | 0 NA          | NA       |
| 0.57 | 0.26 | 0.58 | 0.36 -0.55902 | 0.132005 |
| 1.3  | 6.63 | 4.56 | 5.84 1.234666 | 4.01E-05 |
| 0    | 0    | 0    | 0 NA          | NA       |
| 0    | 0    | 0    | 0 NA          | NA       |
| 0    | 0    | 0    | 0 NA          | NA       |
| 0    | 0    | 0    | 0 NA          | NA       |
| 0    | 0    | 0    | 0 NA          | NA       |
| 0.12 | 0    | 0    | 0.12 NA       | NA       |
| 0    | 0    | 0    | 0 NA          | NA       |
| 0.6  | 1.18 | 0.89 | 1.24 0.668826 | 0.101952 |
| 0    | 0    | 0    | 0 NA          | NA       |
| 0    | 0    | 0.18 | 0 NA          | NA       |
| 0.25 | 0.12 | 0.26 | 0.1 -0.39802  | 0.60221  |
| 0    | 0    | 0    | 0 NA          | NA       |
| 0    | 0    | 0    | 0 NA          | NA       |
| 0    | 0    | 0    | 0 NA          | NA       |
| 2.05 | 1.31 | 0.96 | 0.86 0.134641 | 0.880515 |
| 0    | 0    | 0    | 0 NA          | NA       |
| 0.24 | 0.1  | 0.18 | 0.14 0.011247 | 0.991817 |
| 1.71 | 4.86 | 1.71 | 2.75 0.475783 | 0.492779 |
| 0    | 0    | 0    | 0 NA          | NA       |
| 0    | 0.4  | 0    | 0 NA          | NA       |
| 0.06 | 0.05 | 0.09 | 0.1 NA        | NA       |
| 0.37 | 0.27 | 0.1  | 0.09 -0.78695 | 0.214248 |
| 0    | 0    | 0    | 0 NA          | NA       |
| 0    | 0    | 0    | 0 NA          | NA       |
| 0    | 0.06 | 0    | 0 NA          | NA       |
| 0    | 0    | 0    | 0 NA          | NA       |

|      |      |      |      |          |          |
|------|------|------|------|----------|----------|
| 0.37 | 0.21 | 0.1  | 0.26 | -0.16198 | 0.847088 |
| 0.12 | 0.24 | 0.41 | 0.25 | NA       | NA       |
| 0    | 0    | 0.05 | 0    | NA       | NA       |
| 0    | 0    | 0    | 0    | NA       | NA       |
| 0.31 | 3.33 | 2.56 | 3.42 | 2.952027 | 8.16E-51 |
| 1.49 | 0.57 | 0.49 | 0.7  | -0.43578 | 0.4566   |
| 0    | 0    | 0    | 0    | NA       | NA       |
| 0    | 0    | 0    | 0    | NA       | NA       |
| 0.38 | 0.48 | 0.59 | 0.18 | -0.4456  | 0.541089 |
| 0    | 0.25 | 0    | 0.05 | NA       | NA       |
| 0    | 0    | 0    | 0    | NA       | NA       |
| 0    | 0    | 0    | 0    | NA       | NA       |
| 0    | 0    | 0    | 0    | NA       | NA       |
| 0    | 0    | 0    | 0.13 | NA       | NA       |
| 0    | 0    | 0    | 0    | NA       | NA       |
| 0    | 0    | 0    | 0    | NA       | NA       |
| 0    | 0    | 0.07 | 0    | NA       | NA       |
| 0    | 0    | 0    | 0.29 | NA       | NA       |
| 0    | 0    | 0    | 0    | NA       | NA       |
| 0    | 0    | 0    | 0    | NA       | NA       |
| 0    | 0    | 0    | 0    | NA       | NA       |
| 0    | 0    | 0    | 0    | NA       | NA       |
| 0    | 0    | 0    | 0    | NA       | NA       |
| 0    | 0    | 0    | 0    | NA       | NA       |
| 0    | 0.47 | 0    | 0    | NA       | NA       |
| 0    | 0    | 0    | 0    | NA       | NA       |
| 0    | 0    | 0    | 0    | NA       | NA       |
| 0    | 0.17 | 0.15 | 0.18 | NA       | NA       |
| 0    | 0.11 | 0    | 0    | NA       | NA       |
| 0    | 0    | 0.14 | 0    | NA       | NA       |
| 0.8  | 1.15 | 0.79 | 1.13 | 0.803405 | 0.023292 |
| 0    | 0.04 | 0.02 | 0.01 | NA       | NA       |
| 0    | 0    | 0    | 0    | NA       | NA       |
| 0    | 0    | 0    | 0    | NA       | NA       |
| 0    | 0    | 0    | 0    | NA       | NA       |
| 0    | 0    | 0    | 0    | NA       | NA       |
| 0    | 0    | 0    | 0    | NA       | NA       |
| 0.08 | 0.03 | 0    | 0    | NA       | NA       |
| 0    | 0    | 0    | 0    | NA       | NA       |
| 0.47 | 0.52 | 0.42 | 0.6  | 0.050668 | 0.942726 |
| 0    | 0    | 0    | 0    | NA       | NA       |
| 0    | 0    | 0    | 0    | NA       | NA       |
| 0    | 0    | 0    | 0    | NA       | NA       |
| 0.19 | 0.26 | 0.24 | 0.34 | 0.550816 | 0.377866 |

|      |      |      |               |          |
|------|------|------|---------------|----------|
| 0    | 0    | 0    | 0 NA          | NA       |
| 0.42 | 0    | 0    | 0 NA          | NA       |
| 0    | 0    | 0    | 0 NA          | NA       |
| 0    | 0    | 0    | 0 NA          | NA       |
| 0    | 0    | 0    | 0 NA          | NA       |
| 0    | 0    | 0    | 0 NA          | NA       |
| 0    | 0    | 0    | 0 NA          | NA       |
| 0    | 0.02 | 0.02 | 0 NA          | NA       |
| 1.47 | 1.55 | 1.15 | 1.35 0.123517 | 0.836225 |
| 0    | 0    | 0    | 0 NA          | NA       |
| 0    | 0    | 0    | 0 NA          | NA       |
| 0    | 0.1  | 0.04 | 0.2 NA        | NA       |
| 0    | 0    | 0    | 0 NA          | NA       |
| 0    | 0    | 0    | 0 NA          | NA       |
| 0    | 0    | 0    | 0 NA          | NA       |
| 0    | 0    | 0    | 0 NA          | NA       |
| 0    | 0    | 0    | 0 NA          | NA       |
| 0    | 0    | 0    | 0 NA          | NA       |
| 0.01 | 0.01 | 0    | 0.04 NA       | NA       |
| 0    | 0    | 0    | 0 NA          | NA       |
| 3.34 | 2.41 | 2.43 | 2.43 -0.35116 | 0.208413 |
| 0    | 0    | 0    | 0 NA          | NA       |
| 0    | 0.12 | 0    | 0 NA          | NA       |
| 0    | 0    | 0    | 0 NA          | NA       |
| 0    | 0.96 | 0.94 | 0 0.426647    | 0.370467 |
| 0    | 0.04 | 0.01 | 0.02 NA       | NA       |
| 0    | 0    | 0    | 0 NA          | NA       |
| 0    | 0    | 0    | 0 NA          | NA       |
| 0.31 | 0    | 0    | 0 NA          | NA       |
| 0.12 | 0    | 0.16 | 0.37 -0.64698 | 0.352227 |
| 0.14 | 0.05 | 0.05 | 0.05 NA       | NA       |
| 0.58 | 1.41 | 0.56 | 0.61 0.465861 | 0.38859  |
| 0    | 0    | 0    | 0 NA          | NA       |
| 0    | 0    | 0    | 0 NA          | NA       |
| 0    | 0    | 0    | 0 NA          | NA       |
| 0    | 0    | 0    | 0 NA          | NA       |
| 1.28 | 0.61 | 0.55 | 1.11 -0.2337  | 0.781422 |
| 0    | 0    | 0    | 0 NA          | NA       |
| 0.18 | 0    | 0.12 | 0.07 NA       | NA       |
| 0    | 0    | 0    | 0 NA          | NA       |
| 0.41 | 0.11 | 0.12 | 0.35 NA       | NA       |
| 0    | 0    | 0.12 | 0.14 NA       | NA       |
| 0    | 0    | 0    | 0 NA          | NA       |



|      |      |      |      |          |          |
|------|------|------|------|----------|----------|
| 0    | 0    | 0    | 0    | NA       | NA       |
| 0.75 | 0.3  | 0.07 | 0.16 | -0.68426 | 0.278763 |
| 0    | 0    | 0    | 0    | NA       | NA       |
| 0    | 0    | 0    | 0    | NA       | NA       |
| 5.02 | 3.19 | 2.51 | 3.92 | -0.86307 | 0.000106 |
| 0.05 | 0.04 | 0.1  | 0.04 | NA       | NA       |
| 0    | 0    | 0    | 0    | NA       | NA       |
| 0    | 0    | 0    | 0    | NA       | NA       |
| 0.28 | 0.33 | 0.18 | 0.17 | 0.214417 | 0.800959 |
| 0    | 0    | 0    | 0    | NA       | NA       |
| 0    | 0    | 0    | 0    | NA       | NA       |
| 0    | 0    | 0    | 0    | NA       | NA       |
| 0    | 0.24 | 0.17 | 0.06 | 0.147299 | 0.867696 |
| 0    | 0    | 0    | 0    | NA       | NA       |
| 0    | 0    | 0    | 0    | NA       | NA       |
| 0    | 0    | 0.05 | 0    | NA       | NA       |
| 0    | 0    | 0    | 0    | NA       | NA       |
| 0    | 0    | 0    | 0    | NA       | NA       |
| 0    | 0.27 | 0    | 0    | NA       | NA       |
| 0.07 | 1.21 | 0.52 | 0.91 | 2.413961 | 1.06E-09 |
| 0    | 0    | 0    | 0    | NA       | NA       |
| 0    | 0    | 0.08 | 0    | NA       | NA       |
| 0.27 | 0    | 0    | 0    | NA       | NA       |
| 0    | 0    | 0    | 0    | NA       | NA       |
| 0.37 | 0.36 | 0.28 | 0.41 | 0.114961 | 0.886918 |
| 0    | 0    | 0    | 0.05 | NA       | NA       |
| 0    | 0.06 | 0    | 0.09 | NA       | NA       |
| 0.62 | 3.49 | 4.78 | 1.31 | 0.600805 | 0.401913 |
| 0    | 0    | 0    | 0    | NA       | NA       |
| 0.17 | 0.12 | 0    | 0    | NA       | NA       |
| 0    | 0    | 0    | 0    | NA       | NA       |
| 0.07 | 0.26 | 0.33 | 0.32 | 1.540673 | 0.005182 |
| 0    | 0    | 0    | 0.02 | NA       | NA       |
| 0.09 | 0    | 0.12 | 0.07 | NA       | NA       |
| 0    | 0    | 0    | 0    | NA       | NA       |
| 1.36 | 0.95 | 1.63 | 1.42 | 0.151191 | 0.787143 |
| 0    | 0.36 | 0    | 0    | NA       | NA       |
| 0.44 | 0    | 0    | 0    | NA       | NA       |
| 0    | 0    | 0    | 0    | NA       | NA       |
| 0    | 0    | 0    | 0    | NA       | NA       |
| 0    | 0    | 0    | 0    | NA       | NA       |
| 0    | 0    | 0    | 0    | NA       | NA       |
| 0    | 0    | 0    | 0    | NA       | NA       |
| 0.67 | 0.53 | 0.49 | 0.5  | -0.36881 | 0.062134 |
| 0    | 0    | 0    | 0    | NA       | NA       |

|      |      |      |      |          |          |
|------|------|------|------|----------|----------|
| 0.34 | 0.35 | 0.12 | 0.39 | -0.12735 | 0.856269 |
| 0    | 0    | 0    | 0    | NA       | NA       |
| 2.58 | 3.21 | 3.14 | 3.22 | 0.14953  | 0.611772 |
| 0    | 0    | 0    | 0    | NA       | NA       |
| 0    | 0.08 | 0    | 0.06 | NA       | NA       |
| 0    | 0.02 | 0    | 0    | NA       | NA       |
| 0.01 | 0.01 | 0    | 0    | NA       | NA       |
| 0.19 | 0.14 | 0.16 | 0.33 | 0.274706 | 0.712726 |
| 0    | 0    | 0    | 0    | NA       | NA       |
| 0    | 0    | 0    | 0    | NA       | NA       |
| 0    | 0    | 0    | 0    | NA       | NA       |
| 0    | 0    | 0    | 0    | NA       | NA       |
| 0    | 0    | 0    | 0    | NA       | NA       |
| 1.99 | 1.28 | 1.57 | 1.57 | -0.28334 | 0.533329 |
| 0    | 0    | 0    | 0    | NA       | NA       |
| 0    | 0    | 0    | 0    | NA       | NA       |
| 0    | 0    | 0    | 0    | NA       | NA       |
| 0    | 0    | 0    | 0.12 | NA       | NA       |
| 0    | 0    | 0    | 0    | NA       | NA       |
| 0    | 0    | 0    | 0    | NA       | NA       |
| 0    | 0    | 0    | 0    | NA       | NA       |
| 0.11 | 0    | 0    | 0    | NA       | NA       |
| 0    | 0    | 0    | 0    | NA       | NA       |
| 0    | 0    | 0    | 0    | NA       | NA       |
| 0    | 0    | 0    | 0    | NA       | NA       |
| 0    | 0    | 0.04 | 0    | NA       | NA       |
| 0    | 0.01 | 0.01 | 0    | NA       | NA       |
| 1.47 | 0.87 | 0.64 | 0.4  | -0.20562 | 0.798921 |
| 0.12 | 0.98 | 0.47 | 0.6  | 1.288465 | 0.021491 |
| 0    | 0    | 0    | 0    | NA       | NA       |
| 0    | 0    | 0    | 0    | NA       | NA       |
| 0    | 0    | 0    | 0    | NA       | NA       |
| 0    | 0    | 0    | 0    | NA       | NA       |
| 0    | 0    | 0    | 0    | NA       | NA       |
| 0    | 0    | 0    | 0    | NA       | NA       |
| 1.49 | 3.32 | 2.71 | 2.84 | 0.299118 | 0.569536 |
| 0.25 | 0.23 | 0.33 | 0.17 | 0.009049 | 0.993398 |
| 0.02 | 0.07 | 0.09 | 0.02 | 0.372351 | 0.632792 |
| 0    | 0.05 | 0    | 0    | NA       | NA       |
| 0.19 | 0.14 | 0    | 0    | NA       | NA       |
| 0.5  | 0.55 | 0.5  | 1.08 | -0.10911 | 0.834513 |
| 0.3  | 1.16 | 0.85 | 1.04 | 0.670876 | 0.200826 |
| 0.19 | 0    | 0    | 0.07 | NA       | NA       |
| 0    | 0    | 0    | 0    | NA       | NA       |





|       |       |       |                |          |
|-------|-------|-------|----------------|----------|
| 0     | 0     | 0     | 0 NA           | NA       |
| 0     | 0     | 0     | 0 NA           | NA       |
| 0.11  | 0.23  | 0     | 0.12 NA        | NA       |
| 0     | 0     | 0     | 0 NA           | NA       |
| 0.25  | 0.35  | 0.38  | 0.28 0.257561  | 0.605472 |
| 0     | 0     | 0     | 0 NA           | NA       |
| 0     | 0     | 0     | 0 NA           | NA       |
| 1.36  | 1.31  | 1.02  | 0.98 -0.44365  | 0.397627 |
| 0     | 0     | 0     | 0 NA           | NA       |
| 0.14  | 0.05  | 0.14  | 0.16 -0.39153  | 0.566853 |
| 10.41 | 20.61 | 16.85 | 20.08 0.753745 | 8.36E-07 |
| 0     | 0     | 0     | 0.07 NA        | NA       |
| 0.08  | 0.07  | 0.28  | 0.26 0.494847  | 0.506442 |
| 0     | 0     | 0     | 0 NA           | NA       |
| 0     | 0     | 0     | 0 NA           | NA       |
| 0     | 0     | 0     | 0 NA           | NA       |
| 0     | 0     | 0     | 0 NA           | NA       |
| 0     | 0     | 0     | 0 NA           | NA       |
| 0     | 0     | 0     | 0 NA           | NA       |
| 0     | 0     | 0     | 0.03 NA        | NA       |
| 0     | 0     | 0     | 0 NA           | NA       |
| 0     | 0     | 0     | 0 NA           | NA       |
| 0.02  | 0     | 0.01  | 0 NA           | NA       |
| 0     | 0     | 0     | 0 NA           | NA       |
| 0.37  | 0.48  | 0.61  | 0.23 NA        | NA       |
| 0     | 0     | 0     | 0 NA           | NA       |
| 0.03  | 0     | 0     | 0 NA           | NA       |
| 0     | 0     | 0     | 0 NA           | NA       |
| 0     | 0     | 0     | 0 NA           | NA       |
| 0.27  | 0     | 0     | 0 NA           | NA       |
| 0.16  | 0     | 0.21  | 0 NA           | NA       |
| 0.21  | 0.11  | 0.11  | 0.05 -0.54174  | 0.429359 |
| 0     | 0.49  | 0.31  | 0 0.085419     | 0.857277 |
| 0.19  | 0     | 0     | 0 NA           | NA       |
| 0     | 0     | 0     | 0 NA           | NA       |
| 0     | 0     | 0     | 0 NA           | NA       |
| 0     | 0     | 0     | 0 NA           | NA       |
| 0.22  | 0.07  | 0.44  | 0.55 0.282594  | 0.731363 |
| 0     | 0     | 0     | 0 NA           | NA       |
| 0     | 0     | 0     | 0 NA           | NA       |
| 0.35  | 0.14  | 0.12  | 0.13 NA        | NA       |
| 0     | 0     | 0     | 0 NA           | NA       |
| 0     | 0     | 0     | 0 NA           | NA       |
| 0.87  | 0.21  | 1.29  | 0.21 -0.54385  | 0.457266 |

|       |      |      |      |          |          |
|-------|------|------|------|----------|----------|
| 0.02  | 0.03 | 0.01 | 0.04 | NA       | NA       |
| 0     | 0    | 0    | 0.08 | NA       | NA       |
| 0     | 0    | 0.03 | 0.04 | NA       | NA       |
| 0     | 0    | 0    | 0    | NA       | NA       |
| 0     | 0    | 0    | 0    | NA       | NA       |
| 0     | 0    | 0    | 0    | NA       | NA       |
| 0.26  | 0.1  | 0.26 | 0.19 | 0.038488 | 0.968374 |
| 0     | 0    | 0    | 0    | NA       | NA       |
| 10.28 | 6.75 | 8.69 | 6.38 | -0.22012 | 0.314014 |
| 0     | 0    | 0    | 0    | NA       | NA       |
| 0     | 0    | 0    | 0    | NA       | NA       |
| 1.96  | 1.99 | 2.23 | 2.19 | 0.24695  | 0.355366 |
| 0     | 0    | 0    | 0    | NA       | NA       |
| 5.63  | 6.97 | 7.69 | 8.26 | 0.109286 | 0.700707 |
| 0     | 0    | 0    | 0    | NA       | NA       |
| 0     | 0    | 0    | 0    | NA       | NA       |
| 0.43  | 1.08 | 0.28 | 0.68 | 0.328354 | 0.679381 |
| 0     | 0    | 0    | 0    | NA       | NA       |
| 0     | 0    | 0    | 0    | NA       | NA       |
| 0     | 0    | 0    | 0    | NA       | NA       |
| 0     | 0    | 0    | 0    | NA       | NA       |
| 0     | 0    | 0    | 0    | NA       | NA       |
| 0     | 0    | 0    | 0    | NA       | NA       |
| 0     | 0    | 0    | 0    | NA       | NA       |
| 0     | 0    | 0    | 0    | NA       | NA       |
| 0     | 0    | 0    | 0    | NA       | NA       |
| 0     | 0    | 0    | 0    | NA       | NA       |
| 0.15  | 0.08 | 0    | 0.15 | -0.59514 | 0.406926 |
| 0     | 0    | 0    | 0    | NA       | NA       |
| 0.06  | 0.05 | 0.06 | 0.09 | -0.53791 | 0.434826 |
| 0     | 0    | 0.18 | 0    | NA       | NA       |
| 0     | 0    | 0    | 0    | NA       | NA       |
| 7.28  | 6.22 | 6.54 | 5.94 | -0.25803 | 0.273748 |
| 0     | 0    | 0.06 | 0.05 | NA       | NA       |
| 0     | 0    | 0.09 | 0.32 | NA       | NA       |
| 0     | 0    | 0    | 0    | NA       | NA       |
| 0.07  | 0.47 | 0.18 | 0.18 | -0.79926 | 0.194144 |
| 0     | 0    | 0    | 0    | NA       | NA       |
| 0     | 0    | 0    | 0    | NA       | NA       |
| 0     | 0    | 0    | 0    | NA       | NA       |
| 0     | 0    | 0    | 0    | NA       | NA       |
| 0     | 0    | 0.36 | 0.18 | NA       | NA       |
| 0.07  | 0    | 0.08 | 0    | -0.46061 | 0.510842 |
| 0.74  | 0.75 | 0.37 | 0.91 | 0.147055 | 0.862949 |
| 0     | 0    | 0    | 0    | NA       | NA       |

|       |      |       |       |          |          |
|-------|------|-------|-------|----------|----------|
| 0     | 0    | 0     | 0.04  | NA       | NA       |
| 0     | 0    | 0     | 0     | NA       | NA       |
| 0     | 0    | 0     | 0     | NA       | NA       |
| 0.13  | 0    | 0     | 0     | NA       | NA       |
| 0     | 0    | 0     | 0     | NA       | NA       |
| 0     | 0    | 0.22  | 0     | NA       | NA       |
| 0     | 0    | 0     | 0     | NA       | NA       |
| 0.05  | 0    | 0     | 0     | NA       | NA       |
| 0     | 0    | 0     | 0     | NA       | NA       |
| 0     | 0    | 0.02  | 0     | NA       | NA       |
| 1.11  | 0.75 | 0.49  | 0.71  | -0.02949 | 0.969973 |
| 0     | 0    | 0     | 0     | NA       | NA       |
| 0.37  | 0.3  | 0.61  | 0.75  | -0.12406 | 0.821581 |
| 0.26  | 0.38 | 0     | 0.19  | NA       | NA       |
| 10.33 | 8.34 | 11.37 | 10.14 | -0.10662 | 0.572793 |
| 0     | 0.44 | 0.21  | 0.16  | -0.22743 | 0.787231 |
| 0     | 0    | 0     | 0     | NA       | NA       |
| 0     | 0    | 0     | 0     | NA       | NA       |
| 0     | 0    | 0     | 0     | NA       | NA       |
| 0     | 0    | 0     | 0     | NA       | NA       |
| 0.17  | 0.5  | 0.11  | 0.13  | NA       | NA       |
| 0     | 0    | 0     | 0     | NA       | NA       |
| 1.03  | 0.68 | 0.79  | 0.86  | -0.38564 | 0.405998 |
| 0     | 0    | 0     | 0     | NA       | NA       |
| 0     | 0    | 0     | 0     | NA       | NA       |
| 0     | 0    | 0     | 0     | NA       | NA       |
| 0     | 0    | 0     | 0     | NA       | NA       |
| 0     | 0    | 0     | 0     | NA       | NA       |
| 0     | 0    | 0     | 0     | NA       | NA       |
| 0     | 0.21 | 0     | 0     | NA       | NA       |
| 3.79  | 3.05 | 3.65  | 3.71  | -0.51352 | 0.066789 |
| 0     | 0    | 0     | 0     | NA       | NA       |
| 0     | 0    | 0     | 0     | NA       | NA       |
| 0     | 0    | 0     | 0     | NA       | NA       |
| 0     | 0    | 0     | 0     | NA       | NA       |
| 0.05  | 0.09 | 0.11  | 0.14  | 0.535109 | 0.451091 |
| 0     | 0    | 0     | 0     | NA       | NA       |
| 2.98  | 8.6  | 6.75  | 8.22  | 1.535195 | 4.15E-15 |
| 0     | 0    | 0     | 0     | NA       | NA       |
| 0     | 0    | 0     | 0     | NA       | NA       |
| 0     | 0    | 0     | 0     | NA       | NA       |
| 0     | 0    | 0     | 0     | NA       | NA       |
| 0     | 0    | 0     | 0     | NA       | NA       |
| 0     | 0    | 0     | 0     | NA       | NA       |
| 0     | 0    | 0.24  | 0     | NA       | NA       |

|      |      |      |               |          |
|------|------|------|---------------|----------|
| 0.28 | 0    | 0    | 0 NA          | NA       |
| 0    | 0    | 0    | 0 NA          | NA       |
| 1.23 | 1.39 | 1.45 | 1.22 -0.1349  | 0.764545 |
| 1.52 | 0.31 | 0.14 | 0.32 NA       | NA       |
| 0    | 0    | 0    | 0 NA          | NA       |
| 0    | 0    | 0    | 0 NA          | NA       |
| 0    | 0    | 0    | 0 NA          | NA       |
| 0    | 0    | 0    | 0 NA          | NA       |
| 0.06 | 0.02 | 0.03 | 0.02 -0.54203 | 0.458091 |
| 0.11 | 0    | 0    | 0 NA          | NA       |
| 0    | 0    | 0    | 0 NA          | NA       |
| 0    | 0    | 0    | 0 NA          | NA       |
| 3.73 | 1.69 | 1.49 | 0.99 -0.81458 | 0.187456 |
| 0    | 0    | 0    | 0 NA          | NA       |
| 0    | 0    | 0    | 0 NA          | NA       |
| 0    | 0    | 0    | 0 NA          | NA       |
| 0.03 | 0.08 | 0.04 | 0.03 NA       | NA       |
| 0    | 0    | 0    | 0 NA          | NA       |
| 0    | 0    | 0    | 0 NA          | NA       |
| 0    | 0    | 0    | 0 NA          | NA       |
| 0    | 0    | 0    | 0 NA          | NA       |
| 0    | 0    | 0    | 0 NA          | NA       |
| 0    | 0    | 0    | 0 NA          | NA       |
| 0    | 0    | 0    | 0 NA          | NA       |
| 0    | 0    | 0    | 0 NA          | NA       |
| 0    | 0    | 0    | 0 NA          | NA       |
| 0    | 0    | 0    | 0 NA          | NA       |
| 0    | 0    | 0    | 0 NA          | NA       |
| 0    | 0.05 | 0    | 0 NA          | NA       |
| 0    | 0    | 0    | 0 NA          | NA       |
| 0    | 0    | 0    | 0 NA          | NA       |
| 0    | 0    | 0    | 0 NA          | NA       |
| 0.28 | 0.2  | 0.65 | 0 NA          | NA       |
| 0    | 0    | 0.11 | 0.13 NA       | NA       |
| 0    | 0    | 0    | 0 NA          | NA       |
| 0    | 0    | 0    | 0 NA          | NA       |
| 0    | 0    | 0    | 0 NA          | NA       |
| 0    | 0.01 | 0    | 0.03 NA       | NA       |
| 0    | 0    | 0    | 0 NA          | NA       |
| 0.35 | 0.35 | 0.53 | 0.54 -0.02218 | 0.977207 |
| 0.1  | 0    | 0    | 0 NA          | NA       |
| 0    | 0    | 0    | 0 NA          | NA       |
| 0    | 0    | 0.35 | 1.01 -0.0954  | 0.91001  |
| 0    | 0    | 0    | 0 NA          | NA       |
| 0    | 0    | 0    | 0 NA          | NA       |
| 0    | 0    | 0    | 0.09 NA       | NA       |

|      |      |      |      |          |          |
|------|------|------|------|----------|----------|
| 0    | 0.06 | 0.11 | 0.32 | NA       | NA       |
| 0    | 0    | 0    | 0    | NA       | NA       |
| 1.04 | 0.38 | 0.8  | 0.85 | -0.83103 | 0.073626 |
| 0    | 0    | 0    | 0    | NA       | NA       |
| 0.22 | 0    | 0.14 | 0.21 | -0.36435 | 0.641926 |
| 0    | 0    | 0    | 0    | NA       | NA       |
| 0    | 0    | 0    | 0    | NA       | NA       |
| 2.04 | 1.86 | 1.98 | 2.7  | 0.163411 | 0.59742  |
| 0    | 0    | 0.7  | 0.44 | 0.611692 | 0.35328  |
| 0    | 0    | 0    | 0    | NA       | NA       |
| 0    | 0.04 | 0.08 | 0    | NA       | NA       |
| 0    | 0.19 | 0.09 | 0.11 | NA       | NA       |
| 0.94 | 0.56 | 1.34 | 1.65 | 0.052347 | 0.952639 |
| 0.05 | 0.1  | 0.21 | 0.41 | 0.653173 | 0.354183 |
| 0    | 0    | 0    | 0    | NA       | NA       |
| 0    | 0    | 0    | 0    | NA       | NA       |
| 9.1  | 6.83 | 7.4  | 8.22 | -0.08565 | 0.731121 |
| 0    | 0    | 0    | 0.25 | NA       | NA       |
| 0.51 | 0.37 | 0.69 | 0.19 | 0.077225 | 0.933708 |
| 0    | 0    | 0    | 0    | NA       | NA       |
| 0    | 0    | 0    | 0    | NA       | NA       |
| 0    | 0    | 0    | 0    | NA       | NA       |
| 0    | 0    | 0    | 0    | NA       | NA       |
| 0    | 0    | 0    | 0    | NA       | NA       |
| 0    | 0    | 0    | 0.03 | NA       | NA       |
| 0    | 0    | 0    | 0    | NA       | NA       |
| 0    | 0    | 0    | 0    | NA       | NA       |
| 0    | 0.23 | 0.12 | 0    | NA       | NA       |
| 0    | 0    | 0    | 0    | NA       | NA       |
| 0    | 0.15 | 0    | 0.36 | 0.036334 | 0.944533 |
| 0.06 | 0.03 | 0.05 | 0.14 | NA       | NA       |
| 0    | 0    | 0.12 | 0    | NA       | NA       |
| 0    | 0    | 0    | 0    | NA       | NA       |
| 0    | 0.02 | 0.05 | 0    | NA       | NA       |
| 0    | 0    | 0    | 0    | NA       | NA       |
| 0    | 0    | 0    | 0    | NA       | NA       |
| 0.55 | 0.72 | 0.46 | 0.72 | 0.329874 | 0.658595 |
| 0    | 0    | 0    | 0    | NA       | NA       |
| 0    | 0    | 0    | 0    | NA       | NA       |
| 0    | 0    | 0.11 | 0    | NA       | NA       |
| 0    | 0    | 0    | 0    | NA       | NA       |
| 0    | 0    | 0    | 0    | NA       | NA       |
| 0    | 0    | 0    | 0    | NA       | NA       |
| 0    | 0    | 0    | 0    | NA       | NA       |
| 0.15 | 0.21 | 0.21 | 0.11 | NA       | NA       |
| 0    | 0    | 0    | 0    | NA       | NA       |

|      |      |      |               |          |
|------|------|------|---------------|----------|
| 0    | 0    | 0    | 0 NA          | NA       |
| 0    | 0    | 0    | 0 NA          | NA       |
| 0    | 0    | 0    | 0 NA          | NA       |
| 0    | 0    | 0    | 0 NA          | NA       |
| 0.39 | 0    | 0    | 0 NA          | NA       |
| 0.04 | 0.08 | 0    | 0.03 NA       | NA       |
| 0    | 0    | 0    | 0 NA          | NA       |
| 0.53 | 1.04 | 1.26 | 0.71 -0.4083  | 0.555333 |
| 0.14 | 0    | 0.15 | 0.05 NA       | NA       |
| 0    | 0.66 | 0.5  | 0 0.151865    | 0.848801 |
| 0.02 | 0.04 | 0.05 | 0.11 NA       | NA       |
| 0.39 | 0    | 0    | 0 NA          | NA       |
| 0    | 0    | 0    | 0 NA          | NA       |
| 0.09 | 0.06 | 0    | 0 NA          | NA       |
| 2.21 | 0.6  | 2.07 | 0.32 -0.65549 | 0.292687 |
| 0    | 0.05 | 0.14 | 0 NA          | NA       |
| 0    | 0.01 | 0.01 | 0 NA          | NA       |
| 0.71 | 0.61 | 0.17 | 0.47 -0.83369 | 0.126024 |
| 0    | 0    | 0    | 0 NA          | NA       |
| 0    | 0    | 0    | 0 NA          | NA       |
| 0.37 | 0.31 | 1.23 | 1.06 0.357352 | 0.623534 |
| 0    | 0    | 0    | 0 NA          | NA       |
| 1.06 | 0.34 | 1.62 | 1.01 0.492627 | 0.497681 |
| 0    | 0    | 0    | 0 NA          | NA       |
| 0.6  | 0    | 0    | 0.05 NA       | NA       |
| 0    | 0    | 0    | 0 NA          | NA       |
| 0    | 0    | 0    | 0 NA          | NA       |
| 0    | 0    | 0    | 0 NA          | NA       |
| 0    | 0    | 0    | 0 NA          | NA       |
| 0    | 0    | 0    | 0 NA          | NA       |
| 0    | 0    | 0    | 0 NA          | NA       |
| 0    | 0    | 0    | 0 NA          | NA       |
| 0    | 0    | 0    | 0 NA          | NA       |
| 0    | 0    | 0    | 0 NA          | NA       |
| 0    | 0    | 0    | 0 NA          | NA       |
| 2.85 | 0    | 2.07 | 0 -0.14622    | 0.735182 |
| 0.05 | 0    | 0.07 | 0.04 NA       | NA       |
| 0    | 0    | 0    | 0 NA          | NA       |
| 0    | 0    | 0.15 | 0.18 NA       | NA       |
| 0    | 0    | 0    | 0 NA          | NA       |
| 0    | 0    | 0    | 0 NA          | NA       |
| 0    | 0    | 2.22 | 0 NA          | NA       |
| 0    | 0    | 0    | 0 NA          | NA       |
| 0    | 0    | 0.23 | 0 NA          | NA       |

|       |       |       |       |          |          |
|-------|-------|-------|-------|----------|----------|
| 0     | 0     | 0     | 0     | NA       | NA       |
| 0     | 0     | 0     | 0     | NA       | NA       |
| 13.69 | 14.37 | 14.98 | 14.19 | 0.09511  | 0.422634 |
| 1.17  | 1.31  | 2.35  | 2.34  | 0.315043 | 0.405702 |
| 0.34  | 0.43  | 0.57  | 0     | NA       | NA       |
| 0.02  | 0     | 0     | 0.02  | NA       | NA       |
| 0.69  | 0.2   | 0.75  | 0.85  | 0.114731 | 0.891335 |
| 0     | 0     | 0     | 0     | NA       | NA       |
| 0     | 0     | 0     | 0     | NA       | NA       |
| 0.68  | 0.43  | 0.58  | 0.33  | 0.038573 | 0.964005 |
| 0     | 0     | 0     | 0     | NA       | NA       |
| 0     | 0     | 0     | 0     | NA       | NA       |
| 0     | 0     | 0     | 0     | NA       | NA       |
| 2.16  | 1.02  | 1.19  | 1.93  | -0.92418 | 0.010703 |
| 0     | 0     | 0     | 0     | NA       | NA       |
| 0     | 0     | 0     | 0     | NA       | NA       |
| 0     | 0     | 0     | 0     | NA       | NA       |
| 0.14  | 0.2   | 0     | 0     | NA       | NA       |
| 0.15  | 0.16  | 0.33  | 0.12  | -0.06947 | 0.928303 |
| 0.1   | 0     | 0     | 0     | NA       | NA       |
| 0     | 0     | 0     | 0     | NA       | NA       |
| 1.43  | 0.51  | 0     | 0.8   | -0.16292 | 0.850065 |
| 10.58 | 17.28 | 13.76 | 14.42 | 0.465985 | 0.006656 |
| 0     | 0     | 0     | 0     | NA       | NA       |
| 0     | 0     | 0     | 0     | NA       | NA       |
| 0     | 0     | 0.11  | 0.12  | NA       | NA       |
| 0     | 0     | 0     | 0     | NA       | NA       |
| 0     | 0.49  | 0.22  | 0     | NA       | NA       |
| 0.07  | 0.05  | 0.12  | 0.08  | NA       | NA       |
| 0     | 0     | 0     | 0     | NA       | NA       |
| 0     | 0     | 0     | 0     | NA       | NA       |
| 0     | 0     | 0     | 0     | NA       | NA       |
| 0     | 0     | 0     | 0     | NA       | NA       |
| 0.24  | 0.1   | 0.28  | 0.18  | -0.31439 | 0.67902  |
| 0     | 0     | 0     | 0     | NA       | NA       |
| 0     | 0     | 0     | 0     | NA       | NA       |
| 1.08  | 0     | 0.18  | 0.33  | -0.73889 | 0.279591 |
| 0     | 0.21  | 0     | 0     | NA       | NA       |
| 0.05  | 0.11  | 0.13  | 0.18  | 0.089256 | 0.920382 |
| 0     | 0     | 0     | 0     | NA       | NA       |
| 0.16  | 1.03  | 0.74  | 0.48  | 0.299054 | 0.714496 |
| 0     | 0     | 0     | 0     | NA       | NA       |
| 0     | 0     | 0     | 0     | NA       | NA       |
| 0     | 0     | 0     | 0     | NA       | NA       |



|       |       |       |       |          |          |
|-------|-------|-------|-------|----------|----------|
| 0     | 0     | 0     | 0 NA  | NA       |          |
| 0     | 0     | 0     | 0 NA  | NA       |          |
| 0     | 0     | 0     | 0 NA  | NA       |          |
| 0     | 0     | 0     | 0 NA  | NA       |          |
| 0     | 0     | 0     | 0 NA  | NA       |          |
| 0     | 0     | 0     | 0 NA  | NA       |          |
| 25.97 | 26.05 | 23.23 | 27.39 | 0.099886 | 0.599539 |
| 0.17  | 0.07  | 0     | 0 NA  | NA       |          |
| 0     | 0     | 0     | 0 NA  | NA       |          |
| 0.11  | 0.18  | 0.37  | 0.27  | NA       | NA       |
| 0.5   | 0.24  | 0.54  | 0.62  | -0.14498 | 0.871315 |
| 0     | 0     | 0     | 0.03  | NA       | NA       |
| 0     | 0     | 0     | 0 NA  | NA       |          |
| 0     | 0     | 0     | 0 NA  | NA       |          |
| 0     | 0     | 0     | 0 NA  | NA       |          |
| 0     | 0     | 0.1   | 0 NA  | NA       |          |
| 0     | 0     | 0     | 0 NA  | NA       |          |
| 0     | 0.06  | 0     | 0 NA  | NA       |          |
| 0     | 0     | 0     | 0 NA  | NA       |          |
| 0.63  | 0.65  | 0.53  | 0.67  | -0.05861 | 0.940228 |
| 9.98  | 6.24  | 8.05  | 7     | -0.56038 | 0.042305 |
| 0.21  | 0.44  | 0.41  | 0.35  | 0.076334 | 0.928809 |
| 0     | 0     | 0     | 0 NA  | NA       |          |
| 0     | 0     | 0     | 0 NA  | NA       |          |
| 0     | 0     | 0     | 0 NA  | NA       |          |
| 0.89  | 0.43  | 0.26  | 0.15  | -0.4473  | 0.555523 |
| 0     | 0     | 0     | 0 NA  | NA       |          |
| 0     | 0     | 0     | 0.1   | NA       | NA       |
| 0     | 0     | 0     | 0 NA  | NA       |          |
| 0     | 0     | 0.09  | 0 NA  | NA       |          |
| 1.27  | 0.98  | 1.14  | 1.42  | -0.11605 | 0.874956 |
| 0.12  | 0.04  | 0     | 0 NA  | NA       |          |
| 0     | 0     | 0     | 0 NA  | NA       |          |
| 8     | 12.43 | 11.67 | 11.08 | 0.296965 | 0.13822  |
| 0     | 0     | 0     | 0 NA  | NA       |          |
| 0     | 0     | 0     | 0 NA  | NA       |          |
| 0     | 0.03  | 0     | 0.03  | NA       | NA       |
| 0     | 0     | 0     | 0 NA  | NA       |          |
| 0     | 0.14  | 0.13  | 0 NA  | NA       |          |
| 0     | 0     | 0     | 0 NA  | NA       |          |
| 0     | 0.12  | 0.32  | 0 NA  | NA       |          |
| 0     | 0     | 0     | 0 NA  | NA       |          |
| 0     | 0     | 0     | 0 NA  | NA       |          |
| 0     | 0     | 0     | 0 NA  | NA       |          |
| 0     | 0     | 0     | 0 NA  | NA       |          |

|       |       |       |                |          |
|-------|-------|-------|----------------|----------|
| 0     | 0     | 0     | 0 NA           | NA       |
| 0     | 0     | 0     | 0 NA           | NA       |
| 0     | 0     | 0     | 0 NA           | NA       |
| 0     | 0     | 0     | 0 NA           | NA       |
| 0     | 0     | 0     | 0 NA           | NA       |
| 0     | 0     | 0     | 0 NA           | NA       |
| 0     | 0.03  | 0.02  | 0 NA           | NA       |
| 48.38 | 42.17 | 52.72 | 48.32 -0.07534 | 0.467753 |
| 3.51  | 3.85  | 4.23  | 4.13 -0.07961  | 0.748426 |
| 1.72  | 0.32  | 0.37  | 0.17 -1.12752  | 0.062632 |
| 0     | 0     | 0     | 0 NA           | NA       |
| 0     | 0     | 0.54  | 0 NA           | NA       |
| 0.48  | 0.83  | 0.29  | 0.97 0.494302  | 0.461413 |
| 0     | 0.13  | 0     | 0 NA           | NA       |
| 0     | 0     | 0     | 0 NA           | NA       |
| 0.76  | 1.06  | 1.56  | 1.35 -0.07334  | 0.892342 |
| 0     | 0     | 0     | 0 NA           | NA       |
| 0.07  | 0     | 0     | 0 NA           | NA       |
| 0     | 0     | 0     | 0 NA           | NA       |
| 0     | 0     | 0     | 0 NA           | NA       |
| 0     | 0     | 0     | 0 NA           | NA       |
| 0     | 0     | 0     | 0 NA           | NA       |
| 0.16  | 0     | 0.06  | 0.19 NA        | NA       |
| 0     | 0     | 0.1   | 0.12 NA        | NA       |
| 0.32  | 0.34  | 0.63  | 0.23 0.123203  | 0.881283 |
| 0     | 0     | 0     | 0 NA           | NA       |
| 2.95  | 6.34  | 3.79  | 4.07 0.22683   | 0.533964 |
| 0     | 0     | 0     | 0 NA           | NA       |
| 0     | 0     | 0     | 0 NA           | NA       |
| 0     | 0     | 0     | 0 NA           | NA       |
| 0     | 0     | 0     | 0 NA           | NA       |
| 0.14  | 0     | 0     | 0.03 NA        | NA       |
| 0     | 0     | 0     | 0 NA           | NA       |
| 0.39  | 0.56  | 0.24  | 2 NA           | NA       |
| 0     | 0     | 0     | 0 NA           | NA       |
| 0     | 0     | 0     | 0 NA           | NA       |
| 0.2   | 0.06  | 0.1   | 0.11 -0.77301  | 0.250235 |
| 0     | 0     | 0     | 0 NA           | NA       |
| 0.15  | 0.27  | 0.16  | 0.12 0.161918  | 0.832062 |
| 0.43  | 0.17  | 0.33  | 0.67 -0.18431  | 0.783287 |
| 0     | 0     | 0     | 0 NA           | NA       |
| 0     | 0     | 0     | 0 NA           | NA       |
| 0     | 0     | 0     | 0.11 NA        | NA       |
| 0     | 0     | 0     | 0 NA           | NA       |
| 0     | 0     | 0     | 0 NA           | NA       |

|      |      |      |      |          |          |
|------|------|------|------|----------|----------|
| 0    | 0    | 0    | 0.26 | NA       | NA       |
| 0    | 0    | 0    | 0    | NA       | NA       |
| 0    | 0    | 0.15 | 0    | NA       | NA       |
| 0    | 0    | 0    | 0    | NA       | NA       |
| 0    | 0    | 0    | 0    | NA       | NA       |
| 0    | 0    | 0    | 0    | NA       | NA       |
| 0    | 0    | 0    | 0    | NA       | NA       |
| 0    | 0    | 0    | 0    | NA       | NA       |
| 0    | 0    | 0    | 0    | NA       | NA       |
| 0    | 0    | 0    | 0    | NA       | NA       |
| 0    | 0    | 0    | 0    | NA       | NA       |
| 0    | 0    | 0    | 0    | NA       | NA       |
| 0    | 0    | 0    | 0    | NA       | NA       |
| 0    | 0    | 0    | 0    | NA       | NA       |
| 0    | 0    | 0    | 0    | NA       | NA       |
| 0    | 0    | 0    | 0    | NA       | NA       |
| 0.41 | 0.16 | 0.64 | 0    | -0.22935 | 0.774862 |
| 0    | 0.05 | 0.04 | 0    | NA       | NA       |
| 0    | 0    | 0    | 0    | NA       | NA       |
| 0    | 0    | 0    | 0    | NA       | NA       |
| 0    | 0    | 0    | 0    | NA       | NA       |
| 0    | 0    | 0    | 0    | NA       | NA       |
| 0    | 0    | 0    | 0    | NA       | NA       |
| 0    | 0    | 0    | 0    | NA       | NA       |
| 0.09 | 0    | 0    | 0    | NA       | NA       |
| 0    | 0    | 0.32 | 0    | NA       | NA       |
| 0    | 0    | 0    | 0    | NA       | NA       |
| 0.07 | 0.07 | 0.09 | 0.03 | NA       | NA       |
| 0.19 | 0.13 | 0.16 | 0.23 | -0.09822 | 0.908984 |
| 0    | 0    | 0    | 0    | NA       | NA       |
| 0    | 0    | 0    | 0    | NA       | NA       |
| 0    | 0    | 0.16 | 0.09 | NA       | NA       |
| 0    | 0    | 0    | 0    | NA       | NA       |
| 0    | 0    | 0    | 0.14 | NA       | NA       |
| 0    | 0    | 0    | 0.27 | NA       | NA       |
| 0    | 0    | 0    | 0    | NA       | NA       |
| 0.15 | 0    | 0.1  | 0    | NA       | NA       |
| 0    | 0    | 0    | 0    | NA       | NA       |
| 0    | 0    | 0    | 0    | NA       | NA       |
| 0    | 0    | 0    | 0    | NA       | NA       |
| 0    | 0    | 0    | 0    | NA       | NA       |
| 0    | 0    | 0    | 0    | NA       | NA       |
| 0    | 0    | 0    | 0    | NA       | NA       |
| 0    | 0    | 0.08 | 0    | NA       | NA       |

|      |      |      |      |          |          |
|------|------|------|------|----------|----------|
| 0.51 | 0.41 | 0.76 | 0.64 | -0.02037 | 0.976795 |
| 0    | 0    | 0    | 0    | NA       | NA       |
| 1.79 | 1.48 | 1.87 | 1.44 | -0.37198 | 0.462433 |
| 0    | 0    | 0    | 0    | NA       | NA       |
| 0    | 0    | 0    | 0    | NA       | NA       |
| 0    | 0    | 0    | 0    | NA       | NA       |
| 1.56 | 1.41 | 4.09 | 2.59 | -0.43639 | 0.489147 |
| 0    | 0    | 0    | 0    | NA       | NA       |
| 0    | 0    | 0    | 0    | NA       | NA       |
| 0    | 0    | 0    | 0    | NA       | NA       |
| 0    | 0    | 0.53 | 0    | NA       | NA       |
| 0    | 0    | 0    | 0    | NA       | NA       |
| 0    | 0    | 0    | 0    | NA       | NA       |
| 0    | 0    | 0    | 0    | NA       | NA       |
| 0    | 0    | 0    | 0    | NA       | NA       |
| 0    | 0    | 0    | 0    | NA       | NA       |
| 0    | 0.4  | 0    | 0    | NA       | NA       |
| 0    | 0    | 0    | 0    | NA       | NA       |
| 0    | 0    | 0    | 0    | NA       | NA       |
| 0    | 0    | 0    | 0    | NA       | NA       |
| 0    | 0    | 0    | 0    | NA       | NA       |
| 0    | 0    | 0    | 0    | NA       | NA       |
| 0    | 0    | 0    | 0    | NA       | NA       |
| 0    | 0    | 0    | 0.12 | NA       | NA       |
| 0    | 0    | 0    | 0    | NA       | NA       |
| 0    | 0    | 0    | 0    | NA       | NA       |
| 0    | 0    | 0    | 0    | NA       | NA       |
| 1.11 | 0.63 | 0.11 | 0.36 | -1.10058 | 0.061666 |
| 0    | 0    | 0    | 0    | NA       | NA       |
| 0    | 0    | 0    | 0    | NA       | NA       |
| 0    | 0    | 0    | 0    | NA       | NA       |
| 0    | 0    | 0    | 0    | NA       | NA       |
| 0    | 0    | 0    | 0    | NA       | NA       |
| 0.42 | 0.68 | 0.54 | 0.85 | -0.21801 | 0.720827 |
| 0    | 0    | 0    | 0    | NA       | NA       |
| 0    | 0    | 0    | 0    | NA       | NA       |
| 0    | 0    | 0    | 0    | NA       | NA       |
| 0.02 | 0    | 0.01 | 0.03 | NA       | NA       |
| 0    | 0    | 0    | 0    | NA       | NA       |
| 0    | 0    | 0    | 0    | NA       | NA       |
| 0    | 0    | 0    | 0    | NA       | NA       |
| 0    | 0    | 0    | 0    | NA       | NA       |
| 0.91 | 1.29 | 1.11 | 0.33 | NA       | NA       |
| 0    | 0    | 0    | 0    | NA       | NA       |
| 0    | 0    | 0    | 0    | NA       | NA       |

|      |       |       |                |          |
|------|-------|-------|----------------|----------|
| 0    | 0     | 0     | 0 NA           | NA       |
| 0    | 0     | 0     | 0 NA           | NA       |
| 0    | 0     | 0     | 0 NA           | NA       |
| 1.44 | 0     | 0.12  | 0.27 -1.7352   | 0.002799 |
| 0    | 0     | 0     | 0 NA           | NA       |
| 0    | 0     | 0     | 0 NA           | NA       |
| 0    | 0     | 0     | 0 NA           | NA       |
| 0    | 0     | 0     | 0 NA           | NA       |
| 0    | 0     | 0     | 0 NA           | NA       |
| 0    | 0     | 0     | 0 NA           | NA       |
| 0    | 0     | 0     | 0 NA           | NA       |
| 10.2 | 13.44 | 10.71 | 11.53 0.172778 | 0.284762 |
| 0    | 0     | 0     | 0 NA           | NA       |
| 0    | 0     | 0     | 0 NA           | NA       |
| 0    | 0     | 0     | 0 NA           | NA       |
| 0.08 | 0     | 0     | 0 NA           | NA       |
| 0    | 0     | 0     | 0 NA           | NA       |
| 0    | 0     | 0     | 0 NA           | NA       |
| 0    | 0     | 0     | 0 NA           | NA       |
| 0    | 0     | 0     | 0 NA           | NA       |
| 0    | 0     | 0     | 0 NA           | NA       |
| 0    | 0.84  | 0     | 0 NA           | NA       |
| 0    | 0.95  | 0     | 0 NA           | NA       |
| 0    | 0     | 0     | 0 NA           | NA       |
| 0    | 0     | 0     | 0 NA           | NA       |
| 0    | 0     | 0     | 0 NA           | NA       |
| 0    | 0     | 0     | 0 NA           | NA       |
| 0    | 0     | 0     | 0 NA           | NA       |
| 0    | 0     | 0     | 0 NA           | NA       |
| 0    | 0     | 0     | 0 NA           | NA       |
| 0.27 | 0.46  | 0.4   | 0.73 -0.12975  | 0.850433 |
| 0    | 0     | 0     | 0 NA           | NA       |
| 0    | 0     | 0     | 0 NA           | NA       |
| 0    | 0     | 0     | 0 NA           | NA       |
| 0    | 0     | 0     | 0 NA           | NA       |
| 0    | 0     | 0     | 0 NA           | NA       |
| 8.51 | 10.62 | 11.43 | 12.06 0.341946 | 0.006352 |
| 0    | 0     | 0     | 0 NA           | NA       |
| 0.2  | 0.44  | 0.44  | 0.21 0.135607  | 0.879652 |
| 0    | 0     | 0     | 0 NA           | NA       |
| 5.85 | 4.5   | 7.34  | 7.39 0.027107  | 0.957348 |
| 0    | 0     | 0     | 0 NA           | NA       |
| 0    | 0     | 0     | 0 NA           | NA       |
| 0    | 0     | 0     | 0 NA           | NA       |

|      |      |      |      |          |          |
|------|------|------|------|----------|----------|
| 1.01 | 0    | 0.52 | 0.56 | -0.41386 | 0.590855 |
| 0    | 0    | 0    | 0    | NA       | NA       |
| 0    | 0    | 0    | 0    | NA       | NA       |
| 0    | 0    | 0    | 0    | NA       | NA       |
| 0    | 0    | 0    | 0    | NA       | NA       |
| 0.7  | 1.16 | 0.87 | 0.66 | 0.272366 | 0.694214 |
| 0    | 0    | 0    | 0    | NA       | NA       |
| 0    | 0    | 0    | 0    | NA       | NA       |
| 0    | 0    | 0    | 0    | NA       | NA       |
| 0    | 0    | 0    | 0    | NA       | NA       |
| 0    | 0    | 0    | 0    | NA       | NA       |
| 0    | 0    | 0    | 0    | NA       | NA       |
| 0    | 0    | 0    | 0    | NA       | NA       |
| 0    | 0    | 0    | 0    | NA       | NA       |
| 0    | 0    | 0    | 0    | NA       | NA       |
| 0    | 0    | 0    | 0    | NA       | NA       |
| 0.21 | 0    | 0.14 | 0    | NA       | NA       |
| 0    | 0    | 0    | 0    | NA       | NA       |
| 0    | 0    | 0    | 0    | NA       | NA       |
| 0    | 0    | 0    | 0    | NA       | NA       |
| 0    | 0    | 0    | 0    | NA       | NA       |
| 0    | 0    | 0    | 0    | NA       | NA       |
| 0    | 0    | 0    | 0    | NA       | NA       |
| 0    | 0    | 0    | 0    | NA       | NA       |
| 0.19 | 0    | 0    | 0    | NA       | NA       |
| 0    | 0    | 0    | 0    | NA       | NA       |
| 0    | 0    | 0    | 0    | NA       | NA       |
| 0    | 0    | 0.39 | 0.47 | NA       | NA       |
| 0    | 0    | 0    | 0    | NA       | NA       |
| 0    | 0    | 0    | 0    | NA       | NA       |
| 0    | 0    | 0    | 0    | NA       | NA       |
| 0    | 0    | 0    | 0    | NA       | NA       |
| 0    | 0    | 0    | 0    | NA       | NA       |
| 0    | 0    | 0    | 0    | NA       | NA       |
| 0    | 0    | 0    | 0    | NA       | NA       |
| 2.63 | 5.7  | 0    | 3.9  | 0.051468 | 0.942726 |
| 0    | 0    | 0    | 0    | NA       | NA       |
| 0    | 0    | 0    | 0    | NA       | NA       |
| 0.57 | 0.2  | 0.54 | 0.21 | NA       | NA       |
| 0    | 0    | 0    | 0    | NA       | NA       |
| 0    | 0    | 0    | 0    | NA       | NA       |
| 0    | 0    | 0    | 0    | NA       | NA       |
| 0    | 0    | 0    | 0    | NA       | NA       |
| 0    | 0.14 | 0    | 0    | NA       | NA       |



|       |       |       |               |          |
|-------|-------|-------|---------------|----------|
| 0     | 0     | 1.03  | 0 NA          | NA       |
| 0     | 2.36  | 0     | 0 NA          | NA       |
| 0     | 0     | 0     | 0 NA          | NA       |
| 0.1   | 0.1   | 0.13  | 0.15 0.266769 | 0.742665 |
| 0     | 0     | 0     | 0 NA          | NA       |
| 0     | 0     | 0     | 0 NA          | NA       |
| 0     | 0     | 0     | 0 NA          | NA       |
| 0     | 0     | 0     | 0 NA          | NA       |
| 0     | 0     | 0     | 0 NA          | NA       |
| 0     | 0     | 0     | 0 NA          | NA       |
| 0.1   | 0.36  | 0.42  | 0.42 0.474425 | 0.527037 |
| 0     | 0     | 0     | 0 NA          | NA       |
| 0     | 0     | 0     | 0 NA          | NA       |
| 0     | 0     | 0     | 0 NA          | NA       |
| 0     | 0     | 0     | 0 NA          | NA       |
| 0     | 0     | 0     | 0 NA          | NA       |
| 15.24 | 17.36 | 14.59 | 16.54 0.08759 | 0.601015 |
| 0     | 0     | 0     | 0 NA          | NA       |
| 0     | 0.21  | 0.19  | 0 NA          | NA       |
| 0     | 0     | 0     | 0 NA          | NA       |
| 0     | 0     | 0     | 0 NA          | NA       |
| 0     | 0     | 0     | 0 NA          | NA       |
| 0     | 0     | 0     | 0 NA          | NA       |
| 0     | 0     | 0     | 0 NA          | NA       |
| 0.11  | 0.16  | 0.14  | 0.24 NA       | NA       |
| 0     | 0     | 0     | 0 NA          | NA       |
| 0     | 0     | 0     | 0 NA          | NA       |
| 0     | 0     | 0     | 0.29 NA       | NA       |
| 0     | 0     | 0     | 0 NA          | NA       |
| 0     | 0     | 0     | 0 NA          | NA       |
| 0     | 0     | 0.07  | 0.08 NA       | NA       |
| 0     | 0.08  | 0     | 0 NA          | NA       |
| 0     | 0     | 0     | 0 NA          | NA       |
| 0     | 0     | 0     | 0 NA          | NA       |
| 0     | 0     | 0     | 0 NA          | NA       |
| 0     | 0     | 0     | 0 NA          | NA       |
| 0     | 0     | 0     | 0 NA          | NA       |
| 0     | 0     | 0     | 0 NA          | NA       |
| 0     | 0     | 0     | 0 NA          | NA       |
| 0     | 0     | 0     | 0 NA          | NA       |
| 0     | 0.04  | 0.18  | 0 0.136839    | 0.873479 |
| 0     | 0     | 0     | 0 NA          | NA       |
| 0.41  | 0.73  | 0.97  | 0.97 -0.11946 | 0.888827 |
| 0     | 0     | 0     | 0 NA          | NA       |



|      |      |      |               |          |
|------|------|------|---------------|----------|
| 0    | 0    | 0    | 0 NA          | NA       |
| 0    | 0    | 0    | 0 NA          | NA       |
| 0    | 0    | 0    | 0 NA          | NA       |
| 0    | 0    | 0    | 0 NA          | NA       |
| 1.36 | 1.1  | 1.41 | 1.17 0.049356 | 0.933637 |
| 0    | 0.1  | 0.04 | 0.04 -0.28092 | 0.729146 |
| 0    | 0    | 0    | 0 NA          | NA       |
| 0    | 0.09 | 0    | 0 NA          | NA       |
| 0    | 0    | 0    | 0 NA          | NA       |
| 0    | 0    | 0    | 0 NA          | NA       |
| 0    | 0    | 0    | 0 NA          | NA       |
| 0    | 0    | 0    | 0 NA          | NA       |
| 0.45 | 0.62 | 0.42 | 0.68 0.552183 | 0.292698 |
| 0    | 0    | 0    | 0 NA          | NA       |
| 0    | 0.11 | 0.11 | 0 NA          | NA       |
| 0    | 0    | 0    | 0 NA          | NA       |
| 0    | 0    | 0    | 0 NA          | NA       |
| 0    | 0    | 0    | 0 NA          | NA       |
| 0    | 0    | 0    | 0 NA          | NA       |
| 0    | 0    | 0    | 0 NA          | NA       |
| 0    | 0    | 0    | 0 NA          | NA       |
| 0    | 0    | 0    | 0 NA          | NA       |
| 0    | 0    | 0    | 0 NA          | NA       |
| 0    | 0    | 0    | 0 NA          | NA       |
| 0.13 | 0    | 0.09 | 0 NA          | NA       |
| 0.43 | 0.38 | 0.27 | 0.42 -0.0192  | 0.9775   |
| 0    | 0    | 0    | 0 NA          | NA       |
| 0    | 0    | 0    | 0 NA          | NA       |
| 0.43 | 0    | 0    | 0 NA          | NA       |
| 0    | 0    | 0    | 0.13 NA       | NA       |
| 0.27 | 0.07 | 0.06 | 0 NA          | NA       |
| 0    | 0    | 0    | 0 NA          | NA       |
| 0    | 0    | 0    | 0 NA          | NA       |
| 0    | 0    | 0    | 0 NA          | NA       |
| 0    | 0    | 0    | 0 NA          | NA       |
| 0    | 0    | 0    | 0 NA          | NA       |
| 0    | 0    | 0    | 0 NA          | NA       |
| 0    | 0    | 0    | 0 NA          | NA       |
| 0    | 0    | 0    | 0 NA          | NA       |
| 0.2  | 0    | 0.13 | 0 NA          | NA       |
| 0    | 0    | 0    | 0 NA          | NA       |
| 0    | 0    | 0    | 0 NA          | NA       |
| 0    | 0    | 0    | 0 NA          | NA       |
| 0    | 0    | 0    | 0 NA          | NA       |

|      |      |       |       |          |          |
|------|------|-------|-------|----------|----------|
| 0    | 0.14 | 0     | 0.14  | NA       | NA       |
| 0.05 | 0.04 | 0     | 0     | NA       | NA       |
| 0    | 0    | 0     | 0     | NA       | NA       |
| 0    | 0    | 0     | 0     | NA       | NA       |
| 0    | 0    | 0     | 0     | NA       | NA       |
| 0    | 0    | 0     | 0     | NA       | NA       |
| 0    | 0    | 0     | 0     | NA       | NA       |
| 5.86 | 3.44 | 10.05 | 12.94 | 0.058669 | 0.94667  |
| 0    | 0    | 0     | 0     | NA       | NA       |
| 0    | 0    | 0     | 0     | NA       | NA       |
| 0    | 0.77 | 0     | 0.48  | NA       | NA       |
| 0    | 0    | 0.31  | 1.16  | NA       | NA       |
| 0    | 0    | 0     | 0     | NA       | NA       |
| 0    | 0    | 0     | 0     | NA       | NA       |
| 0    | 0    | 0     | 0     | NA       | NA       |
| 0    | 0    | 0     | 0     | NA       | NA       |
| 0    | 0    | 0     | 0     | NA       | NA       |
| 5.6  | 4.99 | 5.21  | 5.45  | -0.19439 | 0.148305 |
| 0    | 0    | 0     | 0     | NA       | NA       |
| 0.13 | 0.05 | 0.45  | 0.05  | NA       | NA       |
| 0    | 0    | 0     | 0     | NA       | NA       |
| 0    | 0    | 0     | 0     | NA       | NA       |
| 0    | 0    | 0     | 0     | NA       | NA       |
| 0    | 0    | 0.28  | 0.32  | NA       | NA       |
| 0    | 0    | 0     | 0     | NA       | NA       |
| 0    | 0    | 0     | 0     | NA       | NA       |
| 0    | 0    | 0     | 0     | NA       | NA       |
| 0    | 0    | 0     | 0     | NA       | NA       |
| 0.88 | 1.8  | 1.56  | 2.6   | -0.49567 | 0.502977 |
| 0    | 0    | 0     | 0     | NA       | NA       |
| 0    | 0    | 0     | 0     | NA       | NA       |
| 0    | 0    | 0     | 0     | NA       | NA       |
| 0    | 0    | 0     | 0     | NA       | NA       |
| 0    | 0    | 0     | 0     | NA       | NA       |
| 0    | 0    | 0     | 0     | NA       | NA       |
| 0    | 0    | 0     | 0     | NA       | NA       |
| 0    | 0    | 0     | 0     | NA       | NA       |
| 0    | 0    | 0     | 0     | NA       | NA       |
| 0    | 0    | 0     | 0     | NA       | NA       |
| 0    | 0    | 0     | 0     | NA       | NA       |
| 0    | 0    | 0     | 0.16  | NA       | NA       |
| 0    | 0    | 0     | 0     | NA       | NA       |
| 0    | 0    | 0     | 0     | NA       | NA       |
| 0    | 0    | 0     | 0     | NA       | NA       |

|      |      |      |               |          |
|------|------|------|---------------|----------|
| 0    | 0    | 0    | 0 NA          | NA       |
| 0    | 0.18 | 0.08 | 0 NA          | NA       |
| 0    | 0    | 0    | 0 NA          | NA       |
| 0    | 0    | 0    | 0 NA          | NA       |
| 0    | 0    | 0    | 0 NA          | NA       |
| 0    | 0    | 0    | 0 NA          | NA       |
| 0    | 0.51 | 0.1  | 0 NA          | NA       |
| 0    | 0    | 0    | 0 NA          | NA       |
| 0    | 0    | 0    | 0 NA          | NA       |
| 0.2  | 0.35 | 0    | 0 NA          | NA       |
| 0    | 0    | 0    | 0 NA          | NA       |
| 0    | 0    | 0    | 0 NA          | NA       |
| 0    | 0    | 0    | 0 NA          | NA       |
| 0    | 0    | 0.35 | 0 NA          | NA       |
| 0    | 0    | 0    | 0 NA          | NA       |
| 0.59 | 0    | 0    | 0 NA          | NA       |
| 0    | 0    | 0    | 0 NA          | NA       |
| 0    | 0    | 0    | 0 NA          | NA       |
| 0    | 0    | 0    | 0 NA          | NA       |
| 0    | 0    | 0    | 0 NA          | NA       |
| 6.29 | 2.4  | 1.91 | 1.77 -0.61105 | 0.368781 |
| 0    | 0    | 0    | 0 NA          | NA       |
| 1.02 | 3.11 | 2.25 | 0.8 0.156323  | 0.860153 |
| 0    | 0    | 0    | 0 NA          | NA       |
| 0    | 0    | 0    | 0 NA          | NA       |
| 0    | 0    | 0    | 0 NA          | NA       |
| 0    | 0    | 0    | 0 NA          | NA       |
| 2.51 | 1.64 | 2.09 | 0.92 -0.16601 | 0.843986 |
| 0    | 0.03 | 0    | 0.07 NA       | NA       |
| 0    | 0    | 0    | 0 NA          | NA       |
| 0    | 0.34 | 0    | 0.35 NA       | NA       |
| 0    | 0    | 0    | 0 NA          | NA       |
| 0    | 0    | 0    | 0 NA          | NA       |
| 1.27 | 1.09 | 0.59 | 0.48 -0.20084 | 0.807537 |
| 0    | 0    | 0    | 0 NA          | NA       |
| 0.34 | 0.19 | 0.55 | 0.31 -0.17758 | 0.833037 |
| 0    | 0    | 2.58 | 1.31 NA       | NA       |
| 0    | 0    | 0    | 0 NA          | NA       |
| 0    | 0    | 0    | 0 NA          | NA       |
| 0    | 0    | 0    | 0 NA          | NA       |
| 0    | 0    | 0    | 0 NA          | NA       |
| 0    | 0    | 0    | 0 NA          | NA       |
| 0.67 | 0.28 | 0.57 | 0.31 -0.16819 | 0.846189 |
| 0    | 0    | 0    | 0 NA          | NA       |

|      |      |      |               |         |
|------|------|------|---------------|---------|
| 0    | 0    | 0    | 0 NA          | NA      |
| 0    | 0    | 0    | 0 NA          | NA      |
| 0    | 0    | 0    | 0.32 NA       | NA      |
| 0    | 0    | 0    | 0 NA          | NA      |
| 0    | 0    | 0    | 0 NA          | NA      |
| 0    | 0    | 0    | 0 NA          | NA      |
| 0    | 0    | 0    | 0 NA          | NA      |
| 0    | 0    | 0    | 0 NA          | NA      |
| 0    | 0    | 0    | 0 NA          | NA      |
| 1.11 | 0.53 | 0.24 | 0.14 NA       | NA      |
| 0    | 0    | 0    | 0 NA          | NA      |
| 0    | 0    | 0    | 0 NA          | NA      |
| 2    | 1.64 | 1.66 | 2.22 -0.02345 | 0.94726 |
| 0.69 | 0    | 0.26 | 0.68 NA       | NA      |
| 0    | 0    | 0    | 0 NA          | NA      |
| 0    | 0    | 0    | 0 NA          | NA      |
| 0    | 0    | 0    | 0 NA          | NA      |
| 0    | 0    | 0.15 | 0 NA          | NA      |
| 0    | 0    | 0    | 0 NA          | NA      |
| 0    | 0    | 0    | 0 NA          | NA      |
| 0    | 0    | 0    | 0 NA          | NA      |
| 0    | 0    | 0    | 0 NA          | NA      |
| 0    | 0    | 0    | 0 NA          | NA      |
| 0    | 0    | 0    | 0 NA          | NA      |
| 0    | 0    | 0    | 0 NA          | NA      |
| 2.43 | 0    | 0    | 0 NA          | NA      |
| 0    | 0    | 0    | 0 NA          | NA      |
| 0    | 0    | 0    | 0 NA          | NA      |
| 0    | 0    | 0    | 0.07 NA       | NA      |
| 0    | 0    | 0    | 0 NA          | NA      |
| 0    | 0    | 0    | 0 NA          | NA      |
| 0    | 0    | 0    | 0 NA          | NA      |
| 0    | 0    | 0    | 0 NA          | NA      |
| 0    | 0    | 0    | 0 NA          | NA      |
| 0    | 0    | 0    | 0 NA          | NA      |
| 0    | 0    | 0    | 0 NA          | NA      |
| 0    | 0    | 0    | 0 NA          | NA      |
| 0    | 0    | 0    | 0 NA          | NA      |
| 0    | 0    | 0    | 0 NA          | NA      |
| 0    | 0    | 0    | 0 NA          | NA      |
| 0    | 0    | 0    | 0 NA          | NA      |
| 0    | 0    | 0.14 | 0.17 NA       | NA      |
| 0    | 0    | 0    | 0 NA          | NA      |
| 0    | 0    | 0    | 0 NA          | NA      |



|       |       |       |                |          |
|-------|-------|-------|----------------|----------|
| 0     | 0     | 0     | 0 NA           | NA       |
| 0     | 0     | 0     | 0 NA           | NA       |
| 0     | 0     | 0     | 0 NA           | NA       |
| 0.16  | 0.31  | 0.36  | 0.16 -0.21625  | 0.793531 |
| 0     | 0     | 0     | 0 NA           | NA       |
| 0     | 0     | 0     | 0 NA           | NA       |
| 0     | 0     | 0     | 0 NA           | NA       |
| 0.2   | 0     | 0.52  | 0.15 NA        | NA       |
| 0     | 0     | 0     | 0 NA           | NA       |
| 1.77  | 0.68  | 0     | 0.41 NA        | NA       |
| 0     | 0     | 0     | 0 NA           | NA       |
| 0     | 0     | 0     | 0 NA           | NA       |
| 0     | 0     | 0     | 0 NA           | NA       |
| 0     | 0     | 0     | 0 NA           | NA       |
| 0     | 0.07  | 0     | 0.08 NA        | NA       |
| 0     | 0     | 0     | 0 NA           | NA       |
| 0     | 0     | 0     | 0 NA           | NA       |
| 0     | 0     | 0     | 0 NA           | NA       |
| 0.78  | 0.37  | 0.39  | 0.44 NA        | NA       |
| 0     | 0     | 0     | 0 NA           | NA       |
| 0     | 0     | 0     | 0 NA           | NA       |
| 0     | 0     | 0     | 0 NA           | NA       |
| 0     | 0     | 0     | 0 NA           | NA       |
| 0     | 0     | 0     | 0 NA           | NA       |
| 0     | 0     | 0     | 0 NA           | NA       |
| 0     | 0.03  | 0.04  | 0 NA           | NA       |
| 0     | 0     | 0     | 0 NA           | NA       |
| 0     | 0     | 0     | 0 NA           | NA       |
| 0     | 0     | 0     | 0 NA           | NA       |
| 0     | 0     | 0     | 0 NA           | NA       |
| 0     | 0     | 0     | 0 NA           | NA       |
| 0     | 0     | 0     | 0 NA           | NA       |
| 12.45 | 15.06 | 12.15 | 14.78 0.177285 | 0.28409  |
| 0     | 0     | 0     | 0 NA           | NA       |
| 8.7   | 4.7   | 3.06  | 0 NA           | NA       |
| 0     | 0     | 0     | 0 NA           | NA       |
| 0     | 0     | 0     | 0 NA           | NA       |
| 0     | 0.39  | 1.36  | 1.92 0.085405  | 0.927257 |
| 0     | 0     | 0     | 0 NA           | NA       |
| 0     | 0     | 0     | 0 NA           | NA       |
| 0     | 0     | 0     | 0 NA           | NA       |
| 0     | 0     | 0     | 0 NA           | NA       |
| 11.04 | 12.2  | 11.69 | 11.02 0.010802 | 0.945888 |
| 0     | 0     | 0     | 0 NA           | NA       |

|      |      |      |               |          |
|------|------|------|---------------|----------|
| 0    | 0    | 0    | 0 NA          | NA       |
| 0    | 0    | 0    | 0 NA          | NA       |
| 0    | 0    | 0    | 0 NA          | NA       |
| 0    | 0    | 0    | 0 NA          | NA       |
| 0    | 0    | 0    | 0 NA          | NA       |
| 0.43 | 0    | 0.26 | 0 NA          | NA       |
| 0    | 0    | 0    | 0 NA          | NA       |
| 0    | 0    | 0    | 0 NA          | NA       |
| 0    | 0    | 0    | 0 NA          | NA       |
| 0    | 0    | 0    | 0 NA          | NA       |
| 0    | 0    | 0    | 0 NA          | NA       |
| 0    | 0    | 0    | 0 NA          | NA       |
| 0    | 0    | 0    | 0 NA          | NA       |
| 0    | 0    | 0    | 0 NA          | NA       |
| 0    | 0    | 0    | 0 NA          | NA       |
| 0    | 0    | 0    | 0 NA          | NA       |
| 0    | 0    | 0    | 0 NA          | NA       |
| 0    | 0    | 0    | 0 NA          | NA       |
| 0    | 0    | 0    | 0 NA          | NA       |
| 0    | 0    | 0    | 0 NA          | NA       |
| 0    | 0    | 0    | 0 NA          | NA       |
| 0    | 0    | 0    | 0 NA          | NA       |
| 0    | 0    | 0    | 0 NA          | NA       |
| 0.48 | 0.38 | 0    | 0 NA          | NA       |
| 0    | 0    | 0    | 0 NA          | NA       |
| 0    | 0    | 0    | 0 NA          | NA       |
| 0    | 0    | 0    | 0 NA          | NA       |
| 0    | 0    | 0    | 0 NA          | NA       |
| 0    | 0    | 0    | 0 NA          | NA       |
| 0    | 0    | 0    | 0 NA          | NA       |
| 0    | 0    | 0    | 0 NA          | NA       |
| 0    | 0    | 0    | 0 NA          | NA       |
| 0.5  | 0    | 0.35 | 0.42 NA       | NA       |
| 0    | 0    | 0    | 0 NA          | NA       |
| 0    | 0    | 0    | 0 NA          | NA       |
| 0.08 | 0    | 0.1  | 0.35 NA       | NA       |
| 0    | 0    | 0    | 0 NA          | NA       |
| 0    | 0    | 0    | 0 NA          | NA       |
| 0    | 0    | 0    | 0 NA          | NA       |
| 0.25 | 0.26 | 0.15 | 0.31 0.218982 | 0.793361 |
| 0    | 0    | 0    | 0 NA          | NA       |
| 0    | 0    | 0    | 0 NA          | NA       |
| 0.03 | 0    | 0.02 | 0.07 NA       | NA       |
| 0    | 0    | 0    | 0 NA          | NA       |
| 0    | 0    | 0    | 0 NA          | NA       |
| 0    | 0    | 0    | 0 NA          | NA       |





|      |      |      |      |          |          |
|------|------|------|------|----------|----------|
| 0    | 0.08 | 0.07 | 0.08 | NA       | NA       |
| 0    | 0    | 0    | 0    | NA       | NA       |
| 0    | 0    | 0    | 0    | NA       | NA       |
| 0    | 0    | 0    | 0    | NA       | NA       |
| 0    | 0    | 0    | 0    | NA       | NA       |
| 0    | 0    | 0    | 0    | NA       | NA       |
| 0.95 | 0.78 | 0.67 | 0.51 | -0.34268 | 0.50611  |
| 0.16 | 0.24 | 0.06 | 0.13 | NA       | NA       |
| 0    | 0    | 0    | 0.08 | NA       | NA       |
| 0    | 0    | 0    | 0    | NA       | NA       |
| 0    | 0    | 0    | 0    | NA       | NA       |
| 0    | 0    | 0    | 0    | NA       | NA       |
| 0    | 0    | 0    | 0    | NA       | NA       |
| 0    | 0.22 | 0    | 0    | NA       | NA       |
| 0.02 | 0.08 | 0.01 | 0.01 | NA       | NA       |
| 0    | 0    | 0    | 0    | NA       | NA       |
| 0    | 0    | 0    | 0    | NA       | NA       |
| 0    | 0    | 0    | 0    | NA       | NA       |
| 0    | 0    | 0    | 0    | NA       | NA       |
| 0    | 0    | 0    | 0    | NA       | NA       |
| 0    | 0    | 0.4  | 0.15 | NA       | NA       |
| 0    | 0    | 0    | 0    | NA       | NA       |
| 0    | 0    | 0    | 0    | NA       | NA       |
| 0    | 0    | 0    | 0    | NA       | NA       |
| 0    | 0    | 0    | 0    | NA       | NA       |
| 0    | 0    | 0    | 0    | NA       | NA       |
| 0    | 0    | 0    | 0    | NA       | NA       |
| 0    | 0    | 0    | 0    | NA       | NA       |
| 0    | 0    | 0    | 0    | NA       | NA       |
| 0    | 0    | 0    | 0    | NA       | NA       |
| 0    | 0    | 0    | 0    | NA       | NA       |
| 0    | 0    | 0    | 0    | NA       | NA       |
| 0    | 0    | 0    | 0    | NA       | NA       |
| 0    | 0    | 0    | 0    | NA       | NA       |
| 0    | 0    | 0    | 0    | NA       | NA       |
| 0    | 0    | 0    | 0    | NA       | NA       |
| 0    | 0    | 0    | 0    | NA       | NA       |
| 0    | 0    | 0    | 0    | NA       | NA       |
| 0    | 0    | 0    | 0    | NA       | NA       |
| 0    | 0    | 0    | 0    | NA       | NA       |
| 0    | 0    | 0    | 0    | NA       | NA       |
| 0    | 0    | 0    | 0    | NA       | NA       |
| 0    | 0    | 0    | 0    | NA       | NA       |
| 0    | 0    | 0    | 0    | NA       | NA       |
| 0.38 | 0.39 | 0.26 | 0.29 | -0.1051  | 0.899681 |
| 0    | 0    | 0    | 0    | NA       | NA       |
| 0    | 0    | 0    | 0    | NA       | NA       |
| 0    | 0    | 0    | 0    | NA       | NA       |
| 0    | 0    | 0    | 0    | NA       | NA       |
| 0    | 0    | 0    | 0    | NA       | NA       |
| 0    | 0.4  | 0.25 | 0.42 | NA       | NA       |
| 0    | 0    | 0    | 0    | NA       | NA       |
| 0    | 0    | 0    | 0    | NA       | NA       |
| 0    | 0    | 0    | 0    | NA       | NA       |
| 0    | 0    | 0    | 0    | NA       | NA       |

|      |      |      |               |          |
|------|------|------|---------------|----------|
| 0    | 0    | 0    | 0 NA          | NA       |
| 0    | 0    | 0    | 0 NA          | NA       |
| 0    | 0    | 0.72 | 0.42 NA       | NA       |
| 0    | 0    | 0    | 0 NA          | NA       |
| 0    | 0.33 | 0.6  | 0 NA          | NA       |
| 0.35 | 0.47 | 0.16 | 0.57 0.005796 | 0.99522  |
| 0.07 | 0    | 0.34 | 0.41 -0.11826 | 0.895538 |
| 0    | 0    | 0    | 0 NA          | NA       |
| 0    | 0    | 0    | 0 NA          | NA       |
| 0    | 0    | 0    | 0 NA          | NA       |
| 0    | 0    | 0    | 0 NA          | NA       |
| 0    | 0    | 0    | 0 NA          | NA       |
| 0    | 0    | 0    | 0 NA          | NA       |
| 0    | 0    | 0    | 0 NA          | NA       |
| 0    | 0    | 0    | 0 NA          | NA       |
| 0    | 0    | 0    | 0 NA          | NA       |
| 0    | 0    | 0    | 0 NA          | NA       |
| 0    | 0    | 0    | 0 NA          | NA       |
| 0    | 0    | 0    | 0 NA          | NA       |
| 0    | 0    | 0    | 0 NA          | NA       |
| 0    | 0    | 0    | 0 NA          | NA       |
| 0    | 0    | 0    | 0 NA          | NA       |
| 0    | 0    | 0    | 0 NA          | NA       |
| 0    | 0    | 0.02 | 0 NA          | NA       |
| 0    | 0    | 0    | 0 NA          | NA       |
| 0    | 0.02 | 0    | 0 NA          | NA       |
| 0.66 | 0.03 | 0.06 | 0 -2.49998    | 2.88E-06 |
| 0    | 0    | 0    | 0 NA          | NA       |
| 0    | 0    | 0    | 0 NA          | NA       |
| 0    | 0    | 0    | 0 NA          | NA       |
| 0    | 0.02 | 0.03 | 0.04 NA       | NA       |
| 0    | 0    | 0    | 0 NA          | NA       |
| 0    | 0    | 0    | 0 NA          | NA       |
| 0    | 0    | 0    | 0 NA          | NA       |
| 0    | 0    | 0    | 0 NA          | NA       |
| 0    | 0    | 0    | 0 NA          | NA       |
| 0    | 0    | 0    | 0 NA          | NA       |
| 0    | 0    | 0    | 0.02 NA       | NA       |
| 0    | 0    | 0    | 0 NA          | NA       |
| 0    | 0.11 | 0.1  | 0 NA          | NA       |
| 0    | 0    | 0    | 0 NA          | NA       |
| 0.09 | 0.13 | 0    | 0.07 NA       | NA       |
| 0    | 0    | 0    | 0 NA          | NA       |
| 0    | 0    | 0    | 0 NA          | NA       |

|      |      |      |               |          |
|------|------|------|---------------|----------|
| 0    | 0    | 0    | 0 NA          | NA       |
| 0    | 0    | 0    | 0 NA          | NA       |
| 0    | 0    | 0    | 0 NA          | NA       |
| 0    | 0    | 0    | 0 NA          | NA       |
| 0    | 0    | 0    | 0 NA          | NA       |
| 0    | 0    | 0    | 0 NA          | NA       |
| 0    | 0    | 0    | 0 NA          | NA       |
| 0    | 0.35 | 0    | 0 NA          | NA       |
| 0    | 0    | 0    | 0.11 NA       | NA       |
| 1.08 | 1.27 | 1.45 | 1.09 0.065343 | 0.857271 |
| 0    | 0    | 0    | 0 NA          | NA       |
| 0    | 0    | 0    | 0 NA          | NA       |
| 0    | 0    | 0    | 0 NA          | NA       |
| 0    | 0    | 0    | 0 NA          | NA       |
| 0    | 0    | 0    | 0 NA          | NA       |
| 0    | 0    | 0    | 0 NA          | NA       |
| 0    | 0    | 0    | 0 NA          | NA       |
| 0    | 0    | 0    | 0 NA          | NA       |
| 0    | 0    | 0    | 0 NA          | NA       |
| 0    | 0    | 0    | 0 NA          | NA       |
| 0    | 0    | 0    | 0 NA          | NA       |
| 0.05 | 0    | 0.08 | 0.03 NA       | NA       |
| 0    | 0    | 0    | 0 NA          | NA       |
| 0    | 0    | 0    | 0 NA          | NA       |
| 0    | 0    | 0.13 | 0.08 NA       | NA       |
| 0    | 0    | 0    | 0 NA          | NA       |
| 0    | 0    | 0    | 0 NA          | NA       |
| 0    | 0    | 0    | 0 NA          | NA       |
| 0.08 | 0.13 | 0.71 | 0.42 NA       | NA       |
| 0    | 0.01 | 0    | 0 NA          | NA       |
| 0    | 0    | 0    | 0 NA          | NA       |
| 0    | 0    | 0    | 0 NA          | NA       |
| 0    | 0    | 0    | 0 NA          | NA       |
| 0    | 0    | 0    | 0 NA          | NA       |
| 0    | 0    | 0    | 0 NA          | NA       |
| 0    | 0    | 0    | 0 NA          | NA       |
| 0    | 0    | 0    | 0 NA          | NA       |
| 0    | 0    | 0    | 0 NA          | NA       |
| 0    | 0    | 0    | 0 NA          | NA       |
| 0    | 0    | 0    | 0 NA          | NA       |
| 0    | 0    | 0    | 0 NA          | NA       |
| 0    | 0    | 0    | 0 NA          | NA       |
| 0    | 0    | 0    | 0.05 NA       | NA       |
| 0    | 0    | 0    | 0 NA          | NA       |
| 0    | 0    | 0    | 0 NA          | NA       |

|      |      |      |               |          |
|------|------|------|---------------|----------|
| 0    | 0    | 0.24 | 0 NA          | NA       |
| 0    | 0    | 0    | 0 NA          | NA       |
| 0    | 0    | 0    | 0 NA          | NA       |
| 0    | 0    | 0    | 0 NA          | NA       |
| 0    | 0    | 0    | 0 NA          | NA       |
| 0    | 0    | 0    | 0 NA          | NA       |
| 0    | 0    | 0    | 0 NA          | NA       |
| 0    | 0    | 0    | 0 NA          | NA       |
| 0    | 0    | 0    | 0 NA          | NA       |
| 1.22 | 1.33 | 1.62 | 1.98 0.567067 | 0.13861  |
| 0    | 0    | 0    | 0 NA          | NA       |
| 0.03 | 0.02 | 0.02 | 0 NA          | NA       |
| 0    | 0    | 0    | 0 NA          | NA       |
| 0    | 0    | 0    | 0 NA          | NA       |
| 0    | 0    | 0    | 0 NA          | NA       |
| 0    | 0    | 0    | 0 NA          | NA       |
| 0    | 0.23 | 0    | 0 NA          | NA       |
| 0    | 1.22 | 0.71 | 0.83 NA       | NA       |
| 0    | 0    | 0    | 0 NA          | NA       |
| 0    | 0    | 0    | 0 NA          | NA       |
| 0.43 | 0.31 | 0    | 0 NA          | NA       |
| 4.89 | 3.49 | 5.9  | 5.65 -0.16969 | 0.729595 |
| 0    | 0    | 0    | 0 NA          | NA       |
| 0    | 0    | 0    | 0 NA          | NA       |
| 0    | 0    | 0    | 0 NA          | NA       |
| 0    | 0    | 0    | 0 NA          | NA       |
| 0    | 0    | 0    | 0 NA          | NA       |
| 0    | 0    | 0    | 0 NA          | NA       |
| 0    | 0    | 0    | 0 NA          | NA       |
| 0    | 0    | 0    | 0 NA          | NA       |
| 0    | 0    | 0.1  | 0 NA          | NA       |
| 0    | 0    | 0    | 0 NA          | NA       |
| 0.13 | 0    | 0.1  | 0.2 NA        | NA       |
| 0    | 0    | 0    | 0 NA          | NA       |
| 0.16 | 0.11 | 0.06 | 0.04 NA       | NA       |
| 0    | 0    | 0    | 0 NA          | NA       |
| 0    | 0    | 0    | 0 NA          | NA       |
| 0    | 0    | 0    | 0 NA          | NA       |
| 0    | 0.25 | 0    | 0.14 NA       | NA       |
| 1    | 0.72 | 1.44 | 1.35 -0.27503 | 0.721197 |
| 0    | 0    | 0    | 0 NA          | NA       |
| 0    | 0    | 0.26 | 0 NA          | NA       |
| 0    | 0    | 0    | 0 NA          | NA       |
| 0    | 0    | 0    | 0 NA          | NA       |



|      |      |      |               |          |
|------|------|------|---------------|----------|
| 0    | 0    | 0    | 0 NA          | NA       |
| 0    | 0.32 | 0    | 0 NA          | NA       |
| 0    | 0    | 0    | 0 NA          | NA       |
| 0    | 0.19 | 0.17 | 0.22 NA       | NA       |
| 0    | 0    | 0    | 0 NA          | NA       |
| 0    | 0    | 0    | 0 NA          | NA       |
| 0    | 0    | 0    | 0 NA          | NA       |
| 0.08 | 0.04 | 0.13 | 0.08 NA       | NA       |
| 0    | 0    | 0    | 0 NA          | NA       |
| 0    | 0    | 0    | 0 NA          | NA       |
| 0.08 | 0.26 | 0.23 | 0.28 1.24909  | 0.026998 |
| 0    | 0    | 0    | 0 NA          | NA       |
| 0    | 0    | 0    | 0 NA          | NA       |
| 0    | 0    | 0    | 0 NA          | NA       |
| 0    | 0    | 0    | 0 NA          | NA       |
| 0    | 0    | 0    | 0 NA          | NA       |
| 3.27 | 0.63 | 0.85 | 0.1 -2.1053   | 7.03E-07 |
| 0    | 0    | 0    | 0 NA          | NA       |
| 0    | 0    | 0    | 0 NA          | NA       |
| 0    | 0    | 0    | 0 NA          | NA       |
| 0    | 0    | 0    | 0 NA          | NA       |
| 0    | 0    | 0    | 0 NA          | NA       |
| 0    | 0    | 0    | 0 NA          | NA       |
| 0    | 0    | 0    | 0 NA          | NA       |
| 0    | 0    | 0    | 0 NA          | NA       |
| 0    | 0    | 0    | 0 NA          | NA       |
| 0    | 0    | 0    | 0 NA          | NA       |
| 0    | 0    | 0    | 0 NA          | NA       |
| 0    | 0    | 0    | 0 NA          | NA       |
| 0    | 0    | 0    | 0 NA          | NA       |
| 0    | 0    | 0    | 0 NA          | NA       |
| 0    | 0    | 0    | 0 NA          | NA       |
| 0    | 0    | 0    | 0 NA          | NA       |
| 0    | 0    | 0    | 0 NA          | NA       |
| 0    | 0    | 0    | 0 NA          | NA       |
| 0    | 0    | 0    | 0 NA          | NA       |
| 0    | 0    | 0    | 0 NA          | NA       |
| 0    | 0    | 0    | 0 NA          | NA       |
| 0    | 0    | 0    | 0 NA          | NA       |
| 0    | 0    | 0    | 0 NA          | NA       |
| 0    | 0    | 0    | 0 NA          | NA       |
| 0.45 | 0.03 | 0    | 0.27 -0.61327 | 0.389411 |
| 0    | 0    | 0    | 0 NA          | NA       |
| 0    | 0    | 0.05 | 0.04 NA       | NA       |
| 0    | 0    | 0    | 0 NA          | NA       |
| 0    | 0    | 0    | 0 NA          | NA       |
| 0    | 0    | 0    | 0 NA          | NA       |
| 0    | 0    | 0    | 0 NA          | NA       |
| 0    | 0    | 0    | 0 NA          | NA       |
| 0    | 0    | 0    | 0 NA          | NA       |
| 0    | 0    | 0    | 0 NA          | NA       |
| 0.45 | 0    | 0    | 0 NA          | NA       |
| 0    | 0    | 0    | 0 NA          | NA       |
| 0    | 0    | 0    | 0 NA          | NA       |
| 0    | 0    | 0    | 0 NA          | NA       |
| 0    | 0    | 0    | 0 NA          | NA       |

|       |       |       |                |          |
|-------|-------|-------|----------------|----------|
| 0     | 0     | 0     | 0 NA           | NA       |
| 0     | 0     | 0     | 0 NA           | NA       |
| 0     | 0     | 0     | 0 NA           | NA       |
| 0     | 0     | 0     | 0 NA           | NA       |
| 0     | 0     | 0     | 0 NA           | NA       |
| 0     | 0     | 0     | 0 NA           | NA       |
| 1.26  | 0.4   | 0.5   | 0.54 -1.1071   | 0.010007 |
| 0     | 0     | 0     | 0 NA           | NA       |
| 0     | 0     | 0     | 0.02 NA        | NA       |
| 0     | 0     | 0     | 0 NA           | NA       |
| 0     | 0     | 0     | 0 NA           | NA       |
| 0     | 0     | 0     | 0 NA           | NA       |
| 0     | 0     | 0     | 0 NA           | NA       |
| 0     | 0     | 0     | 0 NA           | NA       |
| 0     | 0     | 0     | 0 NA           | NA       |
| 0     | 0     | 0     | 0 NA           | NA       |
| 0     | 0     | 0     | 0 NA           | NA       |
| 0     | 0     | 0     | 0 NA           | NA       |
| 0     | 0     | 0     | 0 NA           | NA       |
| 0     | 0     | 0.11  | 0 NA           | NA       |
| 0.37  | 0.37  | 0.16  | 0.47 NA        | NA       |
| 0     | 0     | 0     | 0 NA           | NA       |
| 0     | 0     | 0     | 0 NA           | NA       |
| 0     | 0     | 0     | 0 NA           | NA       |
| 0     | 0     | 0     | 0 NA           | NA       |
| 0     | 0     | 0     | 0 NA           | NA       |
| 0     | 0     | 0     | 0 NA           | NA       |
| 0     | 0     | 0     | 0 NA           | NA       |
| 46.23 | 61.46 | 58.66 | 59.29 0.588713 | 8.76E-11 |
| 0     | 0     | 0     | 0 NA           | NA       |
| 0     | 0     | 0     | 0 NA           | NA       |
| 0     | 0     | 0     | 0 NA           | NA       |
| 0     | 0     | 0     | 0 NA           | NA       |
| 0     | 0     | 0     | 0 NA           | NA       |
| 0     | 0     | 0     | 0 NA           | NA       |
| 0.55  | 0     | 0.12  | 0 NA           | NA       |
| 0     | 0     | 0     | 0 NA           | NA       |
| 0     | 0     | 0     | 0 NA           | NA       |
| 0     | 0     | 0     | 0 NA           | NA       |
| 0     | 0     | 0     | 0 NA           | NA       |
| 0     | 0     | 0     | 0 NA           | NA       |
| 0.6   | 0.58  | 0.9   | 0.74 0.29801   | 0.617081 |
| 0     | 0     | 0     | 0 NA           | NA       |
| 0.52  | 0     | 0     | 0 NA           | NA       |
| 0     | 0     | 0.03  | 0 NA           | NA       |





|      |      |      |               |          |
|------|------|------|---------------|----------|
| 0    | 0    | 0    | 0 NA          | NA       |
| 0    | 0    | 0    | 0 NA          | NA       |
| 0    | 0    | 0    | 0 NA          | NA       |
| 0.91 | 0    | 0.28 | 0 NA          | NA       |
| 1.51 | 2.04 | 1.11 | 0.67 NA       | NA       |
| 0    | 0    | 0    | 0 NA          | NA       |
| 0    | 0    | 0    | 0 NA          | NA       |
| 0.35 | 0.25 | 0.44 | 0 NA          | NA       |
| 0    | 0    | 0    | 0 NA          | NA       |
| 0    | 0    | 0    | 0 NA          | NA       |
| 0    | 0    | 0    | 0 NA          | NA       |
| 0.04 | 0    | 0    | 0 NA          | NA       |
| 0    | 0    | 0    | 0 NA          | NA       |
| 0.82 | 1.46 | 6.5  | 4.28 1.543839 | 0.003543 |
| 0    | 0    | 0    | 0 NA          | NA       |
| 0    | 0    | 0    | 0 NA          | NA       |
| 0    | 0    | 0    | 0 NA          | NA       |
| 0    | 0    | 0    | 0 NA          | NA       |
| 0    | 0.04 | 0.08 | 0.04 NA       | NA       |
| 0    | 0    | 0    | 0 NA          | NA       |
| 0    | 0    | 0    | 0 NA          | NA       |
| 0    | 0    | 0    | 0 NA          | NA       |
| 0    | 0    | 0    | 0 NA          | NA       |
| 0    | 0    | 0    | 0 NA          | NA       |
| 0    | 0    | 0    | 0 NA          | NA       |
| 0    | 0    | 0    | 0 NA          | NA       |
| 0    | 0    | 0    | 0 NA          | NA       |
| 0    | 0    | 0    | 0 NA          | NA       |
| 0    | 0    | 0    | 0 NA          | NA       |
| 0    | 0    | 0    | 0 NA          | NA       |
| 0    | 0    | 0    | 0 NA          | NA       |
| 0    | 0    | 0    | 0 NA          | NA       |
| 0    | 0    | 0    | 0 NA          | NA       |
| 0    | 0    | 0    | 0 NA          | NA       |
| 0    | 0    | 0    | 0 NA          | NA       |
| 0    | 0    | 0    | 0 NA          | NA       |
| 0    | 0    | 0    | 0 NA          | NA       |
| 0    | 0    | 0    | 0 NA          | NA       |
| 2.43 | 1.23 | 3.27 | 3.22 0.063401 | 0.946459 |
| 0    | 0    | 0    | 0 NA          | NA       |
| 0    | 0    | 0    | 0 NA          | NA       |
| 0    | 0    | 0    | 0 NA          | NA       |
| 0    | 0    | 0.18 | 0 NA          | NA       |
| 0    | 0    | 0    | 0 NA          | NA       |
| 0.12 | 0.17 | 0.08 | 0 NA          | NA       |
| 0    | 0    | 0    | 0 NA          | NA       |
| 0    | 0    | 0    | 0 NA          | NA       |
| 0    | 0    | 0    | 0 NA          | NA       |
| 0    | 0.67 | 0    | 0.93 NA       | NA       |
| 0    | 0    | 0    | 0 NA          | NA       |

|      |      |      |               |          |
|------|------|------|---------------|----------|
| 0    | 0    | 0    | 0 NA          | NA       |
| 0    | 0    | 0    | 0 NA          | NA       |
| 0    | 0    | 0    | 0 NA          | NA       |
| 0    | 0    | 0    | 0 NA          | NA       |
| 0    | 0    | 0    | 0 NA          | NA       |
| 0    | 0    | 0    | 0 NA          | NA       |
| 0    | 0    | 0    | 0 NA          | NA       |
| 0.81 | 0.16 | 0.59 | 0.45 -0.58092 | 0.380327 |
| 4.13 | 4.32 | 4.3  | 4.02 0.063805 | 0.759067 |
| 0    | 0    | 0    | 0 NA          | NA       |
| 0    | 0    | 0    | 0 NA          | NA       |
| 0    | 0    | 0    | 0 NA          | NA       |
| 0.03 | 0.48 | 0.46 | 0.42 1.099729 | 0.077486 |
| 0    | 0    | 0    | 0 NA          | NA       |
| 0    | 0    | 0    | 0 NA          | NA       |
| 0    | 0.02 | 0.02 | 0.01 NA       | NA       |
| 0    | 0    | 0    | 0 NA          | NA       |
| 5.52 | 3.99 | 3.92 | 4.47 -0.25591 | 0.05102  |
| 0.33 | 0.31 | 0.32 | 0.21 -0.14616 | 0.851786 |
| 0    | 0    | 0    | 0 NA          | NA       |
| 0    | 0    | 0    | 0 NA          | NA       |
| 0    | 0    | 0    | 0 NA          | NA       |
| 0    | 0    | 0    | 0 NA          | NA       |
| 0    | 0    | 0    | 0 NA          | NA       |
| 0    | 0    | 0    | 0 NA          | NA       |
| 0    | 0    | 0    | 0 NA          | NA       |
| 0    | 0    | 0    | 0 NA          | NA       |
| 0    | 0    | 0    | 0 NA          | NA       |
| 0    | 0    | 0    | 0 NA          | NA       |
| 0    | 0    | 0    | 0 NA          | NA       |
| 0    | 0    | 0    | 0 NA          | NA       |
| 0.06 | 0    | 0    | 0 NA          | NA       |
| 0    | 0.18 | 0.06 | 0.13 1.056936 | 0.09392  |
| 0    | 0    | 0    | 0 NA          | NA       |
| 0    | 0    | 0    | 0 NA          | NA       |
| 0    | 0    | 0    | 0 NA          | NA       |
| 0    | 0    | 0    | 0 NA          | NA       |
| 0    | 0    | 0    | 0 NA          | NA       |
| 0.2  | 0.14 | 0    | 0 NA          | NA       |
| 0    | 0    | 0    | 0 NA          | NA       |
| 0    | 0    | 0    | 0 NA          | NA       |
| 0    | 0    | 0    | 0 NA          | NA       |
| 0    | 0    | 0    | 0 NA          | NA       |
| 0    | 0    | 0    | 0 NA          | NA       |
| 0.03 | 0    | 0    | 0 NA          | NA       |



|         |        |        |         |                   |
|---------|--------|--------|---------|-------------------|
| 0       | 0      | 0      | 0 NA    | NA                |
| 0       | 0      | 0      | 0 NA    | NA                |
| 0       | 0      | 0      | 0 NA    | NA                |
| 0       | 0      | 0      | 0 NA    | NA                |
| 1011.73 | 773.13 | 918.21 | 779.36  | -0.33596 0.000369 |
| 0       | 0      | 0      | 0 NA    | NA                |
| 0.11    | 0.08   | 0.07   | 0.08 NA | NA                |
| 0       | 0      | 0      | 0.32 NA | NA                |
| 1.32    | 1.68   | 1.28   | 1.28    | 0.190057 0.675925 |
| 0       | 0      | 0      | 0 NA    | NA                |
| 1.76    | 0.7    | 1.9    | 1.04    | -0.29202 0.574266 |
| 0       | 0      | 0      | 0 NA    | NA                |
| 0.25    | 0.08   | 0.11   | 0.12    | -0.52587 0.473386 |
| 0       | 0      | 0      | 0 NA    | NA                |
| 0       | 0      | 0      | 0 NA    | NA                |
| 0       | 0      | 0      | 0 NA    | NA                |
| 0       | 0      | 0      | 0 NA    | NA                |
| 0       | 0      | 0      | 0 NA    | NA                |
| 0       | 0      | 0      | 0.11 NA | NA                |
| 0       | 0      | 0      | 0 NA    | NA                |
| 0       | 0      | 0      | 0 NA    | NA                |
| 0.08    | 0      | 0      | 0.06 NA | NA                |
| 0       | 0      | 0      | 0 NA    | NA                |
| 0       | 0      | 0      | 0 NA    | NA                |
| 0       | 0      | 0      | 0 NA    | NA                |
| 0       | 0      | 0      | 0 NA    | NA                |
| 0       | 0      | 0      | 0 NA    | NA                |
| 0       | 0      | 0      | 0 NA    | NA                |
| 0       | 0      | 0.12   | 0 NA    | NA                |
| 0       | 0      | 0      | 0 NA    | NA                |
| 0       | 0      | 0      | 0 NA    | NA                |
| 0       | 0      | 0      | 0 NA    | NA                |
| 0       | 0      | 0      | 0 NA    | NA                |
| 0       | 0      | 0      | 0.11 NA | NA                |
| 0       | 0      | 0      | 0 NA    | NA                |
| 0       | 0.32   | 0.43   | 0 NA    | NA                |
| 0       | 0      | 0      | 0 NA    | NA                |
| 0       | 0      | 0      | 0 NA    | NA                |
| 0       | 0      | 0      | 0 NA    | NA                |
| 0       | 0      | 0.04   | 0.04 NA | NA                |
| 0       | 0      | 0      | 0 NA    | NA                |
| 0.11    | 0.08   | 0.31   | 0.09 NA | NA                |
| 0       | 0      | 0      | 0 NA    | NA                |
| 0       | 0      | 0      | 0.26 NA | NA                |
| 0       | 0      | 0      | 0 NA    | NA                |
| 0       | 0      | 0      | 0 NA    | NA                |
| 0.15    | 0.12   | 0.12   | 0.03    | -0.55984 0.415237 |



|      |      |      |               |          |
|------|------|------|---------------|----------|
| 0    | 0    | 0    | 0 NA          | NA       |
| 0    | 0    | 0    | 0 NA          | NA       |
| 0    | 0    | 0    | 0 NA          | NA       |
| 0    | 0    | 0    | 0 NA          | NA       |
| 0    | 0    | 0    | 0.04 NA       | NA       |
| 0    | 0    | 0    | 0 NA          | NA       |
| 0    | 0    | 0    | 0 NA          | NA       |
| 0    | 0    | 0    | 0 NA          | NA       |
| 0    | 0    | 0    | 0 NA          | NA       |
| 0    | 0    | 0    | 0 NA          | NA       |
| 0    | 0    | 0    | 0 NA          | NA       |
| 0.66 | 1.92 | 2.34 | 1.94 NA       | NA       |
| 0    | 0    | 0    | 0 NA          | NA       |
| 0    | 0    | 0    | 0 NA          | NA       |
| 0    | 0    | 0    | 0 NA          | NA       |
| 0    | 0    | 0    | 0 NA          | NA       |
| 0    | 0    | 0    | 0 NA          | NA       |
| 0    | 0    | 0    | 0 NA          | NA       |
| 0    | 1.26 | 0    | 0.63 NA       | NA       |
| 0    | 0    | 0    | 0 NA          | NA       |
| 1.25 | 0.63 | 0.63 | 0.63 NA       | NA       |
| 0    | 0    | 0    | 0 NA          | NA       |
| 0    | 0    | 0    | 0 NA          | NA       |
| 0.03 | 0.02 | 0.02 | 0 NA          | NA       |
| 0.08 | 0    | 0.02 | 0 NA          | NA       |
| 0    | 0    | 0    | 0 NA          | NA       |
| 0    | 0    | 0    | 0 NA          | NA       |
| 0    | 0    | 0    | 0 NA          | NA       |
| 0    | 0    | 0    | 0 NA          | NA       |
| 0    | 0    | 0    | 0 NA          | NA       |
| 0    | 0    | 0    | 0 NA          | NA       |
| 0    | 0    | 0    | 0 NA          | NA       |
| 0    | 0    | 0    | 0 NA          | NA       |
| 0    | 0    | 0    | 0 NA          | NA       |
| 0    | 0    | 0    | 0 NA          | NA       |
| 0    | 0    | 0    | 0 NA          | NA       |
| 0    | 0    | 0    | 0 NA          | NA       |
| 0.7  | 0.38 | 0.8  | 0.26 NA       | NA       |
| 0    | 0    | 0    | 0 NA          | NA       |
| 0.15 | 0.86 | 0.69 | 0.56 0.970111 | 0.131995 |
| 0    | 0    | 0    | 0 NA          | NA       |
| 0    | 0    | 0    | 0 NA          | NA       |
| 0    | 0.88 | 0    | 0 NA          | NA       |
| 0    | 0    | 0    | 0 NA          | NA       |







|       |       |       |               |          |
|-------|-------|-------|---------------|----------|
| 0     | 0     | 0     | 0 NA          | NA       |
| 0     | 0     | 0     | 0 NA          | NA       |
| 0     | 0     | 0     | 0 NA          | NA       |
| 0     | 0     | 0     | 0 NA          | NA       |
| 0     | 0     | 0     | 0 NA          | NA       |
| 0     | 0     | 0     | 0 NA          | NA       |
| 0     | 0     | 0     | 0 NA          | NA       |
| 0     | 0     | 0     | 0 NA          | NA       |
| 0     | 0     | 0     | 0 NA          | NA       |
| 0     | 0     | 0     | 0 NA          | NA       |
| 16.45 | 11.34 | 11.73 | 12.7 -0.40288 | 0.002628 |
| 0     | 0     | 0     | 0 NA          | NA       |
| 0     | 0     | 0     | 0 NA          | NA       |
| 0     | 0     | 0     | 0 NA          | NA       |
| 0     | 0     | 0     | 0 NA          | NA       |
| 0     | 0     | 0     | 0 NA          | NA       |
| 0     | 0     | 0     | 0 NA          | NA       |
| 0     | 0     | 0     | 0 NA          | NA       |
| 0     | 0     | 0     | 0 NA          | NA       |
| 0     | 0     | 0     | 0 NA          | NA       |
| 0     | 0     | 0     | 0 NA          | NA       |
| 0     | 0     | 0     | 0 NA          | NA       |
| 0     | 0     | 0     | 0 NA          | NA       |
| 0     | 0     | 0     | 0 NA          | NA       |
| 0     | 0     | 0     | 0 NA          | NA       |
| 0     | 0     | 0     | 0 NA          | NA       |
| 0     | 0     | 0     | 0 NA          | NA       |
| 0     | 0     | 0     | 0 NA          | NA       |
| 0     | 0     | 0     | 0 NA          | NA       |
| 0     | 0     | 0     | 0 NA          | NA       |
| 0     | 0     | 0     | 0 NA          | NA       |
| 0     | 0     | 0     | 0 NA          | NA       |
| 3.92  | 7.92  | 6.5   | 6.81 0.764825 | 1.11E-05 |
| 0.01  | 0     | 0.34  | 0.46 NA       | NA       |
| 0     | 0     | 0     | 0 NA          | NA       |
| 0     | 0     | 0     | 0 NA          | NA       |
| 0     | 0     | 0     | 0 NA          | NA       |
| 0     | 0     | 0     | 0 NA          | NA       |
| 0     | 0     | 0     | 0 NA          | NA       |
| 0     | 0     | 0     | 0 NA          | NA       |
| 0     | 0     | 0     | 0 NA          | NA       |
| 0     | 0     | 0     | 0 NA          | NA       |
| 0     | 0     | 0     | 0 NA          | NA       |
| 0     | 0     | 0     | 0 NA          | NA       |
| 0     | 0     | 0     | 0 NA          | NA       |
| 0     | 0     | 0     | 0 NA          | NA       |
| 0     | 0     | 0     | 0 NA          | NA       |
| 0.1   | 0.14  | 0.2   | 0.08 NA       | NA       |
| 0     | 0     | 0     | 0 NA          | NA       |



|       |       |       |                |          |
|-------|-------|-------|----------------|----------|
| 0     | 0     | 0     | 0 NA           | NA       |
| 0     | 0     | 0     | 0 NA           | NA       |
| 0     | 0     | 0     | 0 NA           | NA       |
| 0     | 0     | 0     | 0 NA           | NA       |
| 25.94 | 22.29 | 22.92 | 21.6 -0.04612  | 0.743277 |
| 14.01 | 11.86 | 10.22 | 11.64 -0.36179 | 0.115665 |
| 0     | 0     | 0     | 0 NA           | NA       |
| 0     | 0     | 0     | 0 NA           | NA       |
| 0     | 0     | 0     | 0 NA           | NA       |
| 0     | 0     | 0     | 0 NA           | NA       |
| 0     | 0     | 0     | 0 NA           | NA       |
| 0     | 0     | 0     | 0 NA           | NA       |
| 0.2   | 0.3   | 0     | 0 NA           | NA       |
| 0     | 0     | 0     | 0 NA           | NA       |
| 0     | 0     | 0     | 0 NA           | NA       |
| 0.02  | 0.02  | 0     | 0 NA           | NA       |
| 0     | 0     | 0     | 0 NA           | NA       |
| 0     | 0     | 0     | 0 NA           | NA       |
| 0     | 0     | 0     | 0 NA           | NA       |
| 0     | 0     | 0     | 0 NA           | NA       |
| 0.16  | 0     | 0     | 0 NA           | NA       |
| 0     | 0     | 0     | 0 NA           | NA       |
| 0     | 0     | 0     | 0 NA           | NA       |
| 0     | 0     | 0     | 0 NA           | NA       |
| 0     | 0.03  | 0     | 0 NA           | NA       |
| 3.66  | 64.73 | 15.92 | 19.39 -0.32381 | 0.657704 |
| 1.43  | 0.41  | 0.55  | 0.61 -0.52647  | 0.419916 |
| 0     | 0     | 0     | 0 NA           | NA       |
| 0     | 0     | 0     | 0 NA           | NA       |
| 70.19 | 75.91 | 75.55 | 75.46 0.032306 | 0.767346 |
| 0     | 0     | 0     | 0 NA           | NA       |
| 0     | 0     | 0     | 0 NA           | NA       |
| 0     | 0     | 0     | 0 NA           | NA       |
| 0     | 0     | 0     | 0.63 NA        | NA       |
| 0     | 0     | 0     | 0 NA           | NA       |
| 0     | 0     | 0     | 0 NA           | NA       |
| 0     | 0     | 0     | 0 NA           | NA       |
| 0     | 0     | 0     | 0 NA           | NA       |
| 0.12  | 0.09  | 0.1   | 0.15 0.142747  | 0.872063 |
| 0     | 0     | 0     | 0 NA           | NA       |
| 0     | 0     | 0     | 0 NA           | NA       |
| 0     | 0     | 0     | 0 NA           | NA       |
| 0     | 0.27  | 0     | 0 NA           | NA       |
| 0.09  | 0     | 0     | 0 NA           | NA       |

|       |       |       |                |          |
|-------|-------|-------|----------------|----------|
| 0.22  | 0     | 0.14  | 0 NA           | NA       |
| 0     | 0     | 0     | 0 NA           | NA       |
| 0     | 0     | 0     | 0 NA           | NA       |
| 0     | 0     | 0     | 0 NA           | NA       |
| 0     | 0     | 0     | 0 NA           | NA       |
| 0     | 0     | 0     | 0.02 NA        | NA       |
| 0     | 0     | 0     | 0 NA           | NA       |
| 0     | 0     | 0     | 0 NA           | NA       |
| 0     | 0     | 0     | 0 NA           | NA       |
| 0     | 0     | 0     | 0 NA           | NA       |
| 0     | 0     | 0     | 0 NA           | NA       |
| 1.64  | 1.68  | 1.63  | 1.19 0.152611  | 0.821404 |
| 0     | 0     | 0     | 0 NA           | NA       |
| 28.74 | 29.39 | 30.39 | 29.47 0.025269 | 0.884853 |
| 0.69  | 0.08  | 0.23  | 0.09 NA        | NA       |
| 0     | 0     | 0     | 0 NA           | NA       |
| 0     | 0     | 0     | 0 NA           | NA       |
| 0     | 0     | 0     | 0 NA           | NA       |
| 1.33  | 0.29  | 0     | 0.68 -0.26185  | 0.73659  |
| 0     | 0     | 0     | 0 NA           | NA       |
| 2.24  | 1.02  | 0.4   | 0.3 -0.43882   | 0.564913 |
| 0     | 0     | 0     | 0 NA           | NA       |
| 0.27  | 0     | 0.17  | 0 NA           | NA       |
| 0     | 0     | 0     | 0 NA           | NA       |
| 0.12  | 0     | 0.15  | 0 NA           | NA       |
| 0     | 0     | 0     | 0 NA           | NA       |
| 0     | 0     | 0     | 0 NA           | NA       |
| 0     | 0     | 0     | 0 NA           | NA       |
| 0     | 0     | 0     | 0 NA           | NA       |
| 0     | 0     | 0     | 0 NA           | NA       |
| 0     | 0     | 0     | 0 NA           | NA       |
| 0     | 0     | 0     | 0 NA           | NA       |
| 0     | 0     | 0     | 0 NA           | NA       |
| 0     | 0     | 0     | 0 NA           | NA       |
| 0     | 0     | 0     | 0 NA           | NA       |
| 0     | 0     | 0     | 0 NA           | NA       |
| 0     | 0     | 0     | 0 NA           | NA       |
| 0     | 0     | 0     | 0 NA           | NA       |
| 0     | 0     | 0     | 0 NA           | NA       |
| 0     | 0     | 0     | 0 NA           | NA       |
| 0     | 0     | 0     | 0 NA           | NA       |
| 0     | 0     | 0     | 0 NA           | NA       |
| 0     | 0     | 0     | 0 NA           | NA       |
| 0     | 0     | 0     | 0 NA           | NA       |
| 0     | 0     | 0     | 0 NA           | NA       |
| 0.18  | 0.08  | 0.07  | 0.06 -0.78169  | 0.242382 |
| 0     | 0     | 0     | 0 NA           | NA       |
| 0     | 0     | 0     | 0 NA           | NA       |



|      |      |      |               |          |
|------|------|------|---------------|----------|
| 0    | 0    | 0    | 0 NA          | NA       |
| 0.78 | 0.7  | 0.94 | 0.64 NA       | NA       |
| 0    | 0    | 0    | 0 NA          | NA       |
| 0    | 0    | 0    | 0 NA          | NA       |
| 0    | 0    | 0    | 0 NA          | NA       |
| 0    | 0    | 0    | 0 NA          | NA       |
| 0    | 0    | 0    | 0.17 NA       | NA       |
| 0    | 0    | 0    | 0 NA          | NA       |
| 0    | 0    | 0    | 0 NA          | NA       |
| 0.84 | 0.33 | 0.37 | 0.57 -0.26126 | 0.746102 |
| 0    | 0    | 0    | 0 NA          | NA       |
| 0    | 0.31 | 0    | 0 NA          | NA       |
| 0    | 0    | 0    | 0 NA          | NA       |
| 0    | 0    | 0    | 0 NA          | NA       |
| 0    | 0    | 0    | 0 NA          | NA       |
| 0    | 0    | 0    | 0 NA          | NA       |
| 0    | 0    | 0    | 0 NA          | NA       |
| 0    | 0    | 0    | 0 NA          | NA       |
| 0    | 0    | 0.11 | 0 NA          | NA       |
| 0    | 0    | 0    | 0 NA          | NA       |
| 0    | 0    | 0    | 0 NA          | NA       |
| 0    | 0    | 0    | 0 NA          | NA       |
| 0.43 | 0.48 | 0.89 | 0.25 0.106085 | 0.886858 |
| 3.3  | 1.71 | 1.81 | 1.19 -0.78159 | 0.015789 |
| 0    | 0    | 0    | 0 NA          | NA       |
| 0    | 0    | 0    | 0 NA          | NA       |
| 0    | 0    | 0    | 0 NA          | NA       |
| 0    | 0    | 0    | 0 NA          | NA       |
| 0    | 0    | 0    | 0 NA          | NA       |
| 0    | 0    | 0    | 0 NA          | NA       |
| 0    | 0    | 0    | 0 NA          | NA       |
| 0    | 0    | 0    | 0 NA          | NA       |
| 0    | 0    | 0    | 0 NA          | NA       |
| 0    | 0    | 0    | 0 NA          | NA       |
| 0.12 | 0.15 | 0.08 | 0.16 0.545249 | 0.429497 |
| 0    | 0    | 0    | 0 NA          | NA       |
| 0    | 0    | 0    | 0 NA          | NA       |
| 0    | 0    | 0    | 0 NA          | NA       |
| 0.97 | 1.14 | 1    | 0.87 0.062436 | 0.925827 |
| 0    | 0    | 0    | 0 NA          | NA       |
| 0    | 0    | 0    | 0 NA          | NA       |
| 0    | 0    | 0    | 0 NA          | NA       |
| 0    | 0    | 0    | 0 NA          | NA       |
| 0    | 0    | 0    | 0 NA          | NA       |

|      |      |      |      |          |          |
|------|------|------|------|----------|----------|
| 0    | 0    | 0    | 0.35 | NA       | NA       |
| 0    | 0    | 0    | 0    | NA       | NA       |
| 0.04 | 0.18 | 0.15 | 0.26 | 0.43243  | 0.553779 |
| 0    | 0    | 0    | 0    | NA       | NA       |
| 0    | 0    | 0    | 0    | NA       | NA       |
| 0    | 0    | 0    | 0    | NA       | NA       |
| 0    | 0    | 0    | 0    | NA       | NA       |
| 0    | 0    | 0    | 0    | NA       | NA       |
| 0    | 0    | 0    | 0    | NA       | NA       |
| 0    | 0    | 0    | 0    | NA       | NA       |
| 0    | 0    | 0    | 0    | NA       | NA       |
| 0    | 1.03 | 0    | 0.34 | NA       | NA       |
| 0    | 0    | 0    | 0    | NA       | NA       |
| 0    | 0    | 0    | 0    | NA       | NA       |
| 0    | 0    | 0    | 0    | NA       | NA       |
| 0    | 0    | 0    | 0    | NA       | NA       |
| 0    | 0    | 0    | 0    | NA       | NA       |
| 0    | 0    | 0    | 0    | NA       | NA       |
| 0    | 0    | 0    | 0    | NA       | NA       |
| 0    | 0    | 0    | 0    | NA       | NA       |
| 1.87 | 0    | 0.74 | 0    | NA       | NA       |
| 0    | 0    | 0    | 0    | NA       | NA       |
| 0    | 0    | 0    | 0    | NA       | NA       |
| 0    | 0    | 0    | 0    | NA       | NA       |
| 0    | 0    | 0    | 0    | NA       | NA       |
| 0.93 | 1.53 | 0.71 | 0.72 | 0.034706 | 0.960875 |
| 0    | 0    | 0    | 0    | NA       | NA       |
| 0    | 0    | 0    | 0    | NA       | NA       |
| 0    | 0.06 | 0.09 | 0.05 | NA       | NA       |
| 0    | 0    | 0    | 0    | NA       | NA       |
| 0    | 0    | 0    | 0.65 | NA       | NA       |
| 0    | 0    | 0    | 0    | NA       | NA       |
| 0    | 0    | 0    | 0    | NA       | NA       |
| 0    | 0    | 0    | 0    | NA       | NA       |
| 0.04 | 0    | 0.01 | 0.01 | NA       | NA       |
| 0    | 0    | 0    | 0    | NA       | NA       |
| 0    | 0    | 0    | 0    | NA       | NA       |
| 0    | 0    | 0    | 0    | NA       | NA       |
| 0    | 0    | 0    | 0    | NA       | NA       |
| 0    | 0    | 0    | 0    | NA       | NA       |
| 3.81 | 3.05 | 2.56 | 5.45 | 0.171863 | 0.733637 |
| 0.02 | 0.05 | 0.03 | 0.02 | NA       | NA       |
| 0    | 0.14 | 0    | 0.15 | NA       | NA       |
| 0    | 0    | 0    | 0    | NA       | NA       |
| 0    | 0    | 0    | 0    | NA       | NA       |
| 0    | 0    | 0    | 0    | NA       | NA       |

|      |      |      |      |          |          |
|------|------|------|------|----------|----------|
| 0    | 0    | 0    | 0    | NA       | NA       |
| 4.67 | 0.56 | 2.64 | 1.38 | -0.82371 | 0.141671 |
| 0    | 0    | 0    | 0    | NA       | NA       |
| 0    | 0    | 0    | 0    | NA       | NA       |
| 0    | 0.11 | 0    | 0.23 | NA       | NA       |
| 0    | 0    | 0    | 0    | NA       | NA       |
| 0.56 | 0.4  | 0    | 0    | NA       | NA       |
| 0    | 0    | 0    | 0    | NA       | NA       |
| 0    | 0    | 0    | 0    | NA       | NA       |
| 0    | 0    | 0    | 0    | NA       | NA       |
| 0    | 0    | 0    | 0    | NA       | NA       |
| 0    | 0    | 0.15 | 0    | NA       | NA       |
| 3.63 | 0.99 | 1.25 | 0.9  | -1.43142 | 0.002173 |
| 0    | 0    | 0    | 0    | NA       | NA       |
| 0    | 0    | 0    | 0    | NA       | NA       |
| 0    | 0    | 0    | 0    | NA       | NA       |
| 0    | 0.05 | 0    | 0.06 | NA       | NA       |
| 0.45 | 0.11 | 0.1  | 0    | NA       | NA       |
| 0    | 0    | 0    | 0    | NA       | NA       |
| 0    | 0    | 0    | 0    | NA       | NA       |
| 0    | 0    | 0    | 0    | NA       | NA       |
| 0    | 0    | 0    | 0    | NA       | NA       |
| 0.21 | 0.32 | 0.49 | 0.18 | -0.1113  | 0.895641 |
| 0.54 | 0    | 0    | 0    | NA       | NA       |
| 0    | 0.06 | 0.05 | 0.06 | NA       | NA       |
| 0    | 0    | 0    | 0    | NA       | NA       |
| 0    | 0    | 0    | 0    | NA       | NA       |
| 0.18 | 0.41 | 0.74 | 0.22 | NA       | NA       |
| 3.94 | 1.28 | 0.94 | 0.94 | -0.72354 | 0.136605 |
| 0    | 0    | 0    | 0    | NA       | NA       |
| 0    | 0    | 0    | 0    | NA       | NA       |
| 0    | 0.04 | 0    | 0    | NA       | NA       |
| 0    | 0    | 0    | 0    | NA       | NA       |
| 0    | 0    | 0.1  | 0    | NA       | NA       |
| 0.11 | 0.3  | 0.14 | 0    | NA       | NA       |
| 0    | 0    | 0    | 0.11 | NA       | NA       |
| 0    | 0    | 0    | 0    | NA       | NA       |
| 0.31 | 0.31 | 0.33 | 0    | NA       | NA       |
| 0.6  | 0.37 | 0.41 | 0.37 | -0.53196 | 0.310012 |
| 0    | 0    | 0    | 0    | NA       | NA       |
| 0    | 0    | 0    | 0    | NA       | NA       |
| 0.28 | 0.25 | 0.41 | 0.21 | 0.092905 | 0.907131 |
| 0    | 0    | 0    | 0    | NA       | NA       |
| 0    | 0    | 0    | 0    | NA       | NA       |



|       |       |       |                |          |
|-------|-------|-------|----------------|----------|
| 0     | 0     | 0     | 0 NA           | NA       |
| 0     | 0     | 0     | 0 NA           | NA       |
| 0     | 0     | 0     | 0 NA           | NA       |
| 0     | 0.16  | 0.52  | 0.5 NA         | NA       |
| 0     | 0     | 0     | 0 NA           | NA       |
| 0     | 0     | 0     | 0 NA           | NA       |
| 0.54  | 0.41  | 0.83  | 0.37 -0.11183  | 0.897468 |
| 0.11  | 0.32  | 0.38  | 0 -0.15619     | 0.856286 |
| 0     | 0     | 0     | 0 NA           | NA       |
| 0     | 0     | 0     | 0 NA           | NA       |
| 0     | 0     | 0     | 0 NA           | NA       |
| 0     | 0     | 0     | 0 NA           | NA       |
| 0     | 0     | 0     | 0 NA           | NA       |
| 0     | 0     | 0     | 0 NA           | NA       |
| 0.19  | 0.31  | 0.36  | 0.33 0.100818  | 0.88999  |
| 0     | 0     | 0     | 0 NA           | NA       |
| 0     | 0     | 0     | 0 NA           | NA       |
| 0     | 0     | 0     | 0 NA           | NA       |
| 0.5   | 0.77  | 0.01  | 0 -0.112       | 0.890816 |
| 0     | 0     | 0     | 0 NA           | NA       |
| 0     | 0     | 0     | 0 NA           | NA       |
| 0     | 0     | 0     | 0 NA           | NA       |
| 0     | 0.35  | 0.21  | 0 NA           | NA       |
| 0     | 0     | 0     | 0 NA           | NA       |
| 0     | 0     | 0     | 0 NA           | NA       |
| 0     | 0     | 0     | 0 NA           | NA       |
| 7.62  | 8.02  | 7.69  | 8.18 0.040009  | 0.854636 |
| 0     | 0     | 0     | 0 NA           | NA       |
| 4.84  | 0.41  | 1.23  | 0.76 -2.14044  | 1.32E-06 |
| 0     | 0     | 0     | 0 NA           | NA       |
| 13.86 | 12.82 | 11.31 | 11.36 -0.29698 | 0.116483 |
| 0     | 0     | 0.05  | 0.03 NA        | NA       |
| 0     | 0     | 0     | 0 NA           | NA       |
| 0.28  | 0.13  | 0.07  | 0 NA           | NA       |
| 0     | 0     | 0     | 0 NA           | NA       |
| 0     | 0     | 0     | 0 NA           | NA       |
| 0     | 0     | 0     | 0 NA           | NA       |
| 0.03  | 0.04  | 0.05  | 0.02 -0.26918  | 0.744464 |
| 0     | 0     | 0     | 0 NA           | NA       |
| 0     | 0     | 0     | 0 NA           | NA       |
| 0     | 0     | 0     | 0 NA           | NA       |
| 0     | 0     | 0     | 0 NA           | NA       |
| 0     | 0     | 0     | 0 NA           | NA       |
| 0     | 0     | 0.17  | 0.19 NA        | NA       |
| 0     | 0     | 0     | 0 NA           | NA       |

|      |      |      |               |          |
|------|------|------|---------------|----------|
| 0    | 0    | 0    | 0 NA          | NA       |
| 0    | 0    | 0    | 0 NA          | NA       |
| 0    | 0    | 0    | 0 NA          | NA       |
| 0    | 0    | 0    | 0 NA          | NA       |
| 0    | 0.64 | 0.51 | 0.63 0.346065 | 0.662925 |
| 0.99 | 0.65 | 0.74 | 0.53 -0.44594 | 0.44706  |
| 0.27 | 1.38 | 0.26 | 0.4 0.475134  | 0.521446 |
| 0    | 0    | 0    | 0.23 NA       | NA       |
| 1.25 | 0    | 1.4  | 0 NA          | NA       |
| 0.19 | 0    | 0    | 0 NA          | NA       |
| 0.02 | 0.01 | 0.03 | 0.03 NA       | NA       |
| 0    | 0    | 0    | 0 NA          | NA       |
| 0    | 0    | 0    | 0 NA          | NA       |
| 3.84 | 3.08 | 3.22 | 2.97 -0.5023  | 0.002801 |
| 0    | 0    | 0    | 0 NA          | NA       |
| 0    | 0    | 0    | 0 NA          | NA       |
| 0    | 0    | 0    | 0 NA          | NA       |
| 0    | 0    | 0    | 0 NA          | NA       |
| 0.31 | 0.28 | 0.15 | 0.02 NA       | NA       |
| 0.44 | 0    | 0    | 0.5 NA        | NA       |
| 0    | 0    | 0    | 0 NA          | NA       |
| 0    | 0.11 | 0.18 | 0.24 NA       | NA       |
| 0    | 0    | 0    | 0 NA          | NA       |
| 0    | 0    | 0    | 0 NA          | NA       |
| 0    | 0    | 0    | 0 NA          | NA       |
| 0    | 0    | 0    | 0 NA          | NA       |
| 0.93 | 0.63 | 1.12 | 0.72 0.193677 | 0.687066 |
| 0.02 | 0.01 | 0.01 | 0.01 NA       | NA       |
| 0    | 0    | 0    | 0 NA          | NA       |
| 0    | 0    | 0    | 0.07 NA       | NA       |
| 0    | 0    | 0    | 0 NA          | NA       |
| 0    | 0    | 0    | 0 NA          | NA       |
| 0.32 | 0    | 0.11 | 0 NA          | NA       |
| 0    | 0    | 0    | 0 NA          | NA       |
| 0    | 0    | 0    | 0 NA          | NA       |
| 0.05 | 0.28 | 0.23 | 0.37 1.303019 | 0.032397 |
| 0    | 0    | 0    | 0 NA          | NA       |
| 0    | 0    | 0    | 0 NA          | NA       |
| 0    | 0    | 0    | 0 NA          | NA       |
| 0    | 0    | 0    | 0 NA          | NA       |
| 0.54 | 0.29 | 0.76 | 0.61 -0.36986 | 0.542471 |
| 0.23 | 0.25 | 0.65 | 0.27 -0.15229 | 0.755216 |
| 0    | 0    | 0    | 0 NA          | NA       |
| 0    | 0    | 0    | 0 NA          | NA       |
| 0    | 0    | 0    | 0 NA          | NA       |

|      |       |       |       |          |          |
|------|-------|-------|-------|----------|----------|
| 0.18 | 0.02  | 0.35  | 0     | NA       | NA       |
| 0.7  | 0     | 0.25  | 0.65  | NA       | NA       |
| 0    | 0     | 0     | 0     | NA       | NA       |
| 0    | 0     | 0     | 0     | NA       | NA       |
| 0    | 0     | 0.31  | 0     | NA       | NA       |
| 0    | 0     | 0     | 0     | NA       | NA       |
| 0    | 0     | 0     | 0     | NA       | NA       |
| 0    | 0     | 0     | 0     | NA       | NA       |
| 0    | 0     | 0     | 0     | NA       | NA       |
| 2.61 | 2.62  | 2.74  | 3.24  | 0.031659 | 0.949216 |
| 10.9 | 11.94 | 10.02 | 17.49 | 0.065775 | 0.843862 |
| 0.43 | 0.28  | 0.2   | 0.21  | -0.00689 | 0.995073 |
| 0    | 0     | 0     | 0     | NA       | NA       |
| 0    | 0     | 0     | 0.33  | NA       | NA       |
| 0    | 0     | 0     | 0     | NA       | NA       |
| 0.3  | 0.26  | 0.43  | 0.8   | -0.07368 | 0.93853  |
| 0.12 | 0.06  | 0.17  | 0.08  | 0.2265   | 0.789916 |
| 0    | 0     | 0     | 0     | NA       | NA       |
| 0.21 | 0.08  | 0.07  | 0     | NA       | NA       |
| 0    | 0     | 0     | 0     | NA       | NA       |
| 0.03 | 0     | 0.14  | 0     | NA       | NA       |
| 1.05 | 0     | 0.33  | 0     | NA       | NA       |
| 0    | 0     | 0     | 0     | NA       | NA       |
| 0    | 0     | 0     | 0     | NA       | NA       |
| 0    | 0     | 0     | 0     | NA       | NA       |
| 0    | 0     | 0     | 0     | NA       | NA       |
| 0    | 0     | 0     | 0     | NA       | NA       |
| 0    | 0     | 0     | 0     | NA       | NA       |
| 4.46 | 4.62  | 5.51  | 5.19  | -0.18334 | 0.476585 |
| 0    | 0     | 0     | 0     | NA       | NA       |
| 0.45 | 0     | 0.3   | 0     | NA       | NA       |
| 0    | 0.04  | 0     | 0     | NA       | NA       |
| 0    | 0     | 0     | 0     | NA       | NA       |
| 0    | 0     | 0     | 0     | NA       | NA       |
| 0    | 0.47  | 0     | 0     | NA       | NA       |
| 0    | 0     | 0     | 0     | NA       | NA       |
| 0    | 0     | 0     | 0     | NA       | NA       |
| 0    | 0     | 0     | 0.09  | NA       | NA       |
| 0.21 | 0.3   | 0     | 0     | NA       | NA       |
| 0    | 0     | 0     | 0     | NA       | NA       |
| 0.28 | 0.07  | 0.38  | 0     | NA       | NA       |
| 0    | 0     | 0     | 0     | NA       | NA       |
| 0    | 0     | 0     | 0     | NA       | NA       |
| 0    | 0     | 0     | 0     | NA       | NA       |

|      |      |      |      |          |          |
|------|------|------|------|----------|----------|
| 3.17 | 6.13 | 4.68 | 5.21 | 0.604775 | 0.003093 |
| 0    | 0    | 0    | 0    | NA       | NA       |
| 6.6  | 2.63 | 3.29 | 2.96 | -0.43047 | 0.387554 |
| 0    | 0    | 0.09 | 0    | NA       | NA       |
| 0    | 0    | 0    | 0    | NA       | NA       |
| 7.8  | 4.18 | 6.41 | 6.1  | -0.31654 | 0.301759 |
| 0.2  | 0.04 | 0.09 | 0.08 | NA       | NA       |
| 0    | 0    | 0    | 0    | NA       | NA       |
| 0    | 0    | 0    | 0    | NA       | NA       |
| 0    | 0    | 0    | 0    | NA       | NA       |
| 0    | 0    | 0    | 0    | NA       | NA       |
| 0    | 0    | 0    | 0    | NA       | NA       |
| 0    | 0    | 0    | 0    | NA       | NA       |
| 0    | 0    | 0    | 0    | NA       | NA       |
| 0    | 0    | 0    | 0    | NA       | NA       |
| 0    | 0    | 0.25 | 0    | NA       | NA       |
| 0.73 | 0.39 | 0.21 | 0    | -0.56311 | 0.434346 |
| 3.38 | 8.22 | 6.84 | 6.66 | 0.525625 | 0.01293  |
| 0    | 0    | 0    | 0    | NA       | NA       |
| 0    | 0    | 0    | 0    | NA       | NA       |
| 0    | 0    | 0    | 0    | NA       | NA       |
| 0    | 0.13 | 0    | 0    | NA       | NA       |
| 0.58 | 0.25 | 0.04 | 0    | NA       | NA       |
| 0    | 0    | 0    | 0    | NA       | NA       |
| 0    | 0    | 0    | 0    | NA       | NA       |
| 0    | 0    | 0    | 0    | NA       | NA       |
| 0    | 0    | 0    | 0.15 | NA       | NA       |
| 0    | 0    | 0    | 0    | NA       | NA       |
| 0    | 0    | 0    | 0    | NA       | NA       |
| 0    | 0    | 0    | 0    | NA       | NA       |
| 2.92 | 4.83 | 4.46 | 2.28 | 0.327125 | 0.660852 |
| 0    | 0    | 0    | 0    | NA       | NA       |
| 0    | 0    | 0    | 0    | NA       | NA       |
| 0    | 0    | 0    | 0.32 | NA       | NA       |
| 0    | 0    | 0    | 0    | NA       | NA       |
| 0    | 0    | 0    | 0    | NA       | NA       |
| 0    | 0    | 0    | 0    | NA       | NA       |
| 0    | 0    | 0    | 0    | NA       | NA       |
| 0.13 | 0    | 0.29 | 0.68 | NA       | NA       |
| 0    | 0    | 0    | 0    | NA       | NA       |
| 0    | 0    | 0    | 0    | NA       | NA       |
| 0    | 0    | 0    | 0    | NA       | NA       |
| 0.1  | 0    | 0    | 0    | NA       | NA       |
| 0    | 0    | 0    | 0    | NA       | NA       |

|      |      |      |               |          |
|------|------|------|---------------|----------|
| 0.1  | 0    | 0    | 0 NA          | NA       |
| 0    | 0    | 0    | 0 NA          | NA       |
| 0.12 | 0    | 0    | 0 NA          | NA       |
| 0.05 | 0    | 0.07 | 0.19 -0.18518 | 0.817504 |
| 0    | 0    | 0    | 0 NA          | NA       |
| 0    | 0    | 0    | 0 NA          | NA       |
| 0    | 0    | 0    | 0 NA          | NA       |
| 0    | 0.11 | 0    | 0 NA          | NA       |
| 0    | 0    | 0    | 0 NA          | NA       |
| 0    | 0.18 | 0.03 | 0.02 NA       | NA       |
| 0    | 0    | 0    | 0 NA          | NA       |
| 0    | 0.11 | 0.1  | 0.23 NA       | NA       |
| 0    | 0    | 0    | 0 NA          | NA       |
| 0    | 0    | 0    | 0 NA          | NA       |
| 1.57 | 1.87 | 1.4  | 1.43 -0.27188 | 0.48033  |
| 0    | 0    | 0    | 0 NA          | NA       |
| 0    | 0    | 0    | 0 NA          | NA       |
| 0    | 0    | 0    | 0 NA          | NA       |
| 0    | 0    | 0    | 0 NA          | NA       |
| 0    | 0    | 0    | 0.24 NA       | NA       |
| 0    | 0    | 0    | 0 NA          | NA       |
| 0    | 0    | 0    | 0 NA          | NA       |
| 0.16 | 0.01 | 0    | 0.44 NA       | NA       |
| 0    | 0    | 0    | 0 NA          | NA       |
| 0    | 0    | 0    | 0 NA          | NA       |
| 0    | 0    | 0    | 0 NA          | NA       |
| 0.19 | 0.14 | 0.38 | 0.44 NA       | NA       |
| 0    | 0    | 0    | 0 NA          | NA       |
| 0    | 0    | 0    | 0 NA          | NA       |
| 0    | 0    | 0    | 0 NA          | NA       |
| 0    | 0    | 0    | 0 NA          | NA       |
| 0    | 0    | 0    | 0 NA          | NA       |
| 0    | 0    | 0    | 0 NA          | NA       |
| 0.15 | 0    | 0.07 | 0.02 -1.03639 | 0.104286 |
| 0    | 0    | 0    | 0 NA          | NA       |
| 0    | 0    | 0    | 0 NA          | NA       |
| 1.26 | 0.9  | 0.2  | 0.23 NA       | NA       |
| 1.16 | 0.72 | 0.76 | 1.25 0.160474 | 0.854124 |
| 0.63 | 0.17 | 0.57 | 0.61 -0.7352  | 0.106029 |
| 0    | 0    | 0    | 0 NA          | NA       |
| 0    | 0    | 0.37 | 0.65 NA       | NA       |
| 0    | 0    | 0    | 0 NA          | NA       |
| 0    | 0    | 0    | 0 NA          | NA       |
| 0    | 0    | 0    | 0 NA          | NA       |

|       |       |       |         |          |          |
|-------|-------|-------|---------|----------|----------|
| 0.18  | 0.58  | 0.3   | 0.43    | -0.1093  | 0.904253 |
| 0     | 0     | 0     | 0 NA    | NA       |          |
| 0     | 0     | 0     | 0 NA    | NA       |          |
| 0     | 0     | 0     | 0 NA    | NA       |          |
| 0     | 0     | 0     | 0 NA    | NA       |          |
| 0     | 0     | 0     | 0.2 NA  | NA       |          |
| 0.15  | 0.16  | 0.1   | 0.11 NA | NA       |          |
| 0     | 0     | 0     | 0 NA    | NA       |          |
| 0     | 0     | 0     | 0 NA    | NA       |          |
| 0.29  | 0.56  | 0.43  | 0.19    | 0.496013 | 0.361519 |
| 0     | 0     | 0     | 0 NA    | NA       |          |
| 0.86  | 0     | 0.19  | 0.33 NA | NA       |          |
| 0     | 0     | 0     | 0 NA    | NA       |          |
| 0.4   | 0.45  | 0.5   | 0.6     | 0.053301 | 0.928706 |
| 0     | 0     | 0     | 0 NA    | NA       |          |
| 0     | 0     | 0     | 0 NA    | NA       |          |
| 0     | 0.14  | 0     | 0 NA    | NA       |          |
| 0     | 0     | 0     | 0 NA    | NA       |          |
| 0     | 0.12  | 0.04  | 0.09 NA | NA       |          |
| 0     | 0     | 0     | 0 NA    | NA       |          |
| 16.15 | 17.25 | 16.28 | 17.16   | -0.12422 | 0.627779 |
| 0     | 0     | 0     | 0 NA    | NA       |          |
| 0     | 0     | 0     | 0 NA    | NA       |          |
| 0     | 0     | 0     | 0 NA    | NA       |          |
| 0     | 0     | 0     | 0.14 NA | NA       |          |
| 0     | 0     | 0     | 0 NA    | NA       |          |
| 0     | 0     | 0     | 0 NA    | NA       |          |
| 0     | 0     | 0     | 0 NA    | NA       |          |
| 0     | 0     | 0     | 0 NA    | NA       |          |
| 0     | 0     | 0     | 0 NA    | NA       |          |
| 0     | 0     | 0     | 0 NA    | NA       |          |
| 0     | 0     | 0     | 0 NA    | NA       |          |
| 0     | 0     | 0     | 0 NA    | NA       |          |
| 0     | 0     | 0     | 0 NA    | NA       |          |
| 0.29  | 0     | 0     | 0 NA    | NA       |          |
| 0     | 0.14  | 0     | 0 NA    | NA       |          |
| 0.96  | 0.92  | 0.93  | 1.48    | 0.286989 | 0.659679 |
| 0.76  | 0.47  | 0.07  | 0.49    | -0.08403 | 0.930024 |
| 0     | 0     | 0.22  | 0 NA    | NA       |          |
| 0     | 0     | 0     | 0 NA    | NA       |          |
| 0     | 0     | 0     | 0 NA    | NA       |          |
| 0.03  | 0.09  | 0.02  | 0.06 NA | NA       |          |
| 1.92  | 0.89  | 1.41  | 0.86    | -0.4403  | 0.477206 |
| 0     | 0     | 0     | 0 NA    | NA       |          |
| 0     | 0     | 0.02  | 0 NA    | NA       |          |
| 0     | 0     | 0     | 0 NA    | NA       |          |

|      |      |      |      |          |          |
|------|------|------|------|----------|----------|
| 0    | 0.03 | 0.08 | 0.05 | NA       | NA       |
| 0.07 | 0.03 | 0.02 | 0.03 | NA       | NA       |
| 0    | 0    | 0.78 | 0.4  | 0.335385 | 0.643667 |
| 0    | 0    | 0    | 0    | NA       | NA       |
| 0.6  | 0.07 | 0    | 0.3  | -0.62184 | 0.367443 |
| 0    | 0.12 | 0.11 | 0.63 | NA       | NA       |
| 0    | 0    | 0    | 0    | NA       | NA       |
| 0    | 0    | 0.07 | 0    | NA       | NA       |
| 0    | 0    | 0    | 0    | NA       | NA       |
| 3.46 | 1.22 | 1.68 | 0.89 | -0.7213  | 0.121475 |
| 0    | 0    | 0    | 0    | NA       | NA       |
| 0.86 | 0.95 | 1.49 | 1.53 | -0.116   | 0.840033 |
| 0    | 0    | 0    | 0    | NA       | NA       |
| 0    | 0    | 0    | 0.15 | NA       | NA       |
| 0    | 0    | 0    | 0    | NA       | NA       |
| 0.7  | 0.59 | 0.47 | 0.18 | 0.051436 | 0.956564 |
| 0.24 | 0.84 | 0.7  | 0.55 | 0.42013  | 0.574403 |
| 0.37 | 1.07 | 1.07 | 1.59 | 0.576267 | 0.379666 |
| 0.73 | 1.2  | 1.18 | 0.99 | -0.13867 | 0.859801 |
| 4.77 | 1.22 | 1.9  | 1.19 | -0.99051 | 0.012705 |
| 0    | 0.17 | 0.15 | 0    | NA       | NA       |
| 0    | 0.66 | 0.79 | 0.54 | 0.666753 | 0.339097 |
| 0.79 | 0.66 | 1.04 | 0.99 | -0.12735 | 0.882748 |
| 0    | 0    | 0    | 0    | NA       | NA       |
| 0    | 0    | 0    | 0    | NA       | NA       |
| 0    | 0.01 | 0    | 0.01 | NA       | NA       |
| 0.32 | 0.07 | 0.17 | 0.02 | -0.96334 | 0.127349 |
| 0    | 0    | 0    | 0    | NA       | NA       |
| 0    | 0    | 0    | 0    | NA       | NA       |
| 0    | 0    | 0    | 0    | NA       | NA       |
| 0    | 0    | 0    | 0.03 | NA       | NA       |
| 0    | 0    | 0    | 0    | NA       | NA       |
| 0    | 0.13 | 0.06 | 0.09 | NA       | NA       |
| 0    | 0.11 | 0    | 0    | NA       | NA       |
| 0    | 0    | 0    | 0    | NA       | NA       |
| 0.2  | 0    | 0    | 0    | NA       | NA       |
| 0    | 0    | 0    | 0    | NA       | NA       |
| 0    | 0    | 0    | 0.65 | NA       | NA       |
| 0    | 0    | 0    | 0    | NA       | NA       |
| 0    | 0    | 0    | 0    | NA       | NA       |
| 0    | 0    | 0    | 0    | NA       | NA       |
| 0.92 | 0.95 | 0.79 | 0.75 | -0.22086 | 0.704152 |
| 0    | 0    | 0    | 0    | NA       | NA       |
| 0.06 | 0.42 | 0.09 | 0.25 | 0.975447 | 0.109529 |
| 0    | 0    | 0    | 0    | NA       | NA       |

|       |       |       |               |          |
|-------|-------|-------|---------------|----------|
| 0     | 0     | 0     | 0 NA          | NA       |
| 0.91  | 0     | 0.47  | 0 NA          | NA       |
| 0     | 0     | 0     | 0 NA          | NA       |
| 0     | 0     | 0     | 0 NA          | NA       |
| 6.05  | 5.69  | 5.32  | 5.36 -0.45493 | 0.081856 |
| 0     | 0     | 0.13  | 0.16 NA       | NA       |
| 0     | 0     | 0.3   | 0 NA          | NA       |
| 0     | 0     | 0     | 0 NA          | NA       |
| 1.25  | 2.33  | 2.06  | 2.62 0.393871 | 0.319165 |
| 0.86  | 1.1   | 0.31  | 1.41 -0.1918  | 0.821151 |
| 0     | 0     | 0     | 0 NA          | NA       |
| 0     | 0     | 0     | 0 NA          | NA       |
| 0.02  | 0.01  | 0     | 0 NA          | NA       |
| 0     | 0     | 0     | 0 NA          | NA       |
| 0     | 0.09  | 0     | 0 NA          | NA       |
| 0     | 0     | 0     | 0 NA          | NA       |
| 0     | 0     | 0     | 0 NA          | NA       |
| 0     | 0     | 0     | 0 NA          | NA       |
| 0     | 0.15  | 0     | 0 NA          | NA       |
| 0     | 0     | 0     | 0 NA          | NA       |
| 0     | 0     | 0     | 0 NA          | NA       |
| 0     | 0     | 0.21  | 0.24 NA       | NA       |
| 0.12  | 0     | 0     | 0 NA          | NA       |
| 1.29  | 0     | 0     | 0.89 NA       | NA       |
| 0     | 0     | 0     | 0 NA          | NA       |
| 0     | 0.17  | 0.07  | 0.07 NA       | NA       |
| 0.17  | 0     | 0     | 0 NA          | NA       |
| 0     | 0     | 0     | 0 NA          | NA       |
| 0     | 0     | 0     | 0 NA          | NA       |
| 0.34  | 0.53  | 0.76  | 0.2 0.395647  | 0.608115 |
| 0     | 0     | 0     | 0 NA          | NA       |
| 0.08  | 0.06  | 0.05  | 0 NA          | NA       |
| 0     | 0.02  | 0.04  | 0 NA          | NA       |
| 0     | 0     | 0     | 0 NA          | NA       |
| 0     | 0     | 0.19  | 0.11 NA       | NA       |
| 0     | 0     | 0     | 0 NA          | NA       |
| 0     | 0     | 0     | 0 NA          | NA       |
| 0.59  | 0     | 0.64  | 0.58 0.023197 | 0.980472 |
| 0.8   | 0.17  | 0.31  | 0.66 -0.96879 | 0.083088 |
| 0     | 0     | 0     | 0 NA          | NA       |
| 0     | 0.12  | 0     | 0.12 NA       | NA       |
| 0     | 0.08  | 0.11  | 0.24 1.444477 | 0.012723 |
| 0     | 0     | 0     | 0 NA          | NA       |
| 10.05 | 13.04 | 11.66 | 14.1 0.144613 | 0.480941 |



|      |      |      |               |          |
|------|------|------|---------------|----------|
| 0    | 0    | 0    | 0 NA          | NA       |
| 0.44 | 1.5  | 1.1  | 0.59 0.253923 | 0.736669 |
| 0    | 0    | 0    | 0 NA          | NA       |
| 0    | 0.04 | 0    | 0 NA          | NA       |
| 0    | 0    | 0    | 0 NA          | NA       |
| 0    | 0    | 0    | 0 NA          | NA       |
| 0    | 0    | 0    | 0 NA          | NA       |
| 0    | 0    | 0    | 0 NA          | NA       |
| 0    | 0    | 0    | 0 NA          | NA       |
| 0    | 0    | 0    | 0 NA          | NA       |
| 0.76 | 1.48 | 1.03 | 2.32 0.334148 | 0.592856 |
| 0    | 0    | 0    | 0 NA          | NA       |
| 0.04 | 0    | 0    | 0.07 NA       | NA       |
| 0    | 0    | 0    | 0 NA          | NA       |
| 0    | 0    | 0.09 | 0 NA          | NA       |
| 0    | 0    | 0    | 0 NA          | NA       |
| 1.94 | 1.19 | 1.95 | 2.51 -0.14485 | 0.815412 |
| 0    | 0    | 0    | 0 NA          | NA       |
| 0    | 0    | 0    | 0 NA          | NA       |
| 0    | 0    | 0    | 0 NA          | NA       |
| 0    | 0    | 0    | 0 NA          | NA       |
| 0.43 | 1.53 | 0.71 | 1.13 0.205603 | 0.793902 |
| 0    | 0    | 0    | 0 NA          | NA       |
| 0.04 | 0.15 | 0    | 0.06 NA       | NA       |
| 0    | 0    | 0    | 0 NA          | NA       |
| 0    | 0    | 0    | 0 NA          | NA       |
| 0    | 0    | 0    | 0 NA          | NA       |
| 0    | 0    | 0    | 0 NA          | NA       |
| 0    | 0    | 0    | 0.05 NA       | NA       |
| 0    | 0.1  | 0    | 0.11 NA       | NA       |
| 0    | 0    | 0    | 0 NA          | NA       |
| 0    | 0    | 0    | 0 NA          | NA       |
| 0    | 0    | 0    | 0 NA          | NA       |
| 0    | 0    | 0.19 | 0 NA          | NA       |
| 0    | 0.06 | 0.03 | 0.03 NA       | NA       |
| 0.07 | 0    | 0    | 0.1 NA        | NA       |
| 0.32 | 0.02 | 0.02 | 0.07 -1.04375 | 0.101637 |
| 0    | 0    | 0    | 0 NA          | NA       |
| 0.11 | 0.41 | 0.53 | 0.51 0.761093 | 0.263401 |
| 0    | 0    | 0    | 0 NA          | NA       |
| 0    | 0    | 0    | 0 NA          | NA       |
| 1.04 | 0.52 | 1.33 | 0.15 -0.31446 | 0.687717 |
| 0    | 0    | 0    | 0 NA          | NA       |

|      |      |      |               |          |
|------|------|------|---------------|----------|
| 0.82 | 0.7  | 0    | 0 NA          | NA       |
| 0    | 0.15 | 0.28 | 0.32 NA       | NA       |
| 0.54 | 0.28 | 0.25 | 0.27 NA       | NA       |
| 0.1  | 0    | 0    | 0 NA          | NA       |
| 0    | 0    | 0    | 0 NA          | NA       |
| 0    | 0.27 | 0    | 0 0.001393    | 0.99768  |
| 0    | 0    | 0    | 0 NA          | NA       |
| 0    | 0    | 0.09 | 0.1 NA        | NA       |
| 0    | 0    | 0.04 | 0 NA          | NA       |
| 0.03 | 0    | 0.01 | 0.05 -0.39381 | 0.597269 |
| 0    | 0    | 0    | 0 NA          | NA       |
| 0    | 0    | 0    | 0 NA          | NA       |
| 0    | 0    | 0    | 0 NA          | NA       |
| 0    | 0    | 0    | 0 NA          | NA       |
| 0    | 0.11 | 0    | 0 NA          | NA       |
| 0    | 0    | 0    | 0 NA          | NA       |
| 0    | 0    | 0    | 0 NA          | NA       |
| 0    | 0    | 0    | 0 NA          | NA       |
| 0    | 0    | 0    | 0 NA          | NA       |
| 0    | 0    | 0    | 0 NA          | NA       |
| 0    | 0    | 0    | 0 NA          | NA       |
| 0    | 0    | 0    | 0 NA          | NA       |
| 0    | 0    | 0.03 | 0 NA          | NA       |
| 0    | 0    | 0    | 0 NA          | NA       |
| 1.67 | 1.39 | 1.21 | 1.14 0.298681 | 0.608288 |
| 0    | 0    | 0    | 0 NA          | NA       |
| 0    | 0    | 0    | 0 NA          | NA       |
| 0    | 0    | 0    | 0 NA          | NA       |
| 0    | 0.79 | 0    | 0 NA          | NA       |
| 0    | 0.15 | 0.16 | 0.28 NA       | NA       |
| 0    | 0    | 0    | 0 NA          | NA       |
| 0    | 0.02 | 0.05 | 0.03 NA       | NA       |
| 0    | 0    | 0    | 0 NA          | NA       |
| 0    | 0    | 0    | 0 NA          | NA       |
| 0    | 0    | 0    | 0 NA          | NA       |
| 0    | 0    | 0    | 0 NA          | NA       |
| 0.15 | 0    | 0.5  | 0.11 NA       | NA       |
| 0.08 | 0.19 | 0.07 | 0.44 NA       | NA       |
| 0    | 0    | 0    | 0 NA          | NA       |
| 0    | 0    | 0    | 0 NA          | NA       |
| 0    | 0.06 | 0.39 | 0.13 NA       | NA       |
| 0.9  | 0.75 | 1.09 | 0.79 -0.47029 | 0.48977  |
| 0    | 0    | 0    | 0 NA          | NA       |
| 0    | 0    | 0    | 0 NA          | NA       |
| 0    | 0    | 0    | 0 NA          | NA       |

|      |       |       |       |          |          |
|------|-------|-------|-------|----------|----------|
| 0    | 0     | 0     | 0     | NA       | NA       |
| 0.56 | 0.29  | 0.32  | 0.3   | -0.0712  | 0.941447 |
| 0    | 0     | 0     | 0     | NA       | NA       |
| 0    | 0.13  | 0.34  | 0     | NA       | NA       |
| 0    | 0     | 0     | 0     | NA       | NA       |
| 0    | 0     | 0     | 0     | NA       | NA       |
| 0    | 0     | 0     | 0     | NA       | NA       |
| 0    | 0     | 0     | 0     | NA       | NA       |
| 0    | 0     | 0     | 0     | NA       | NA       |
| 0.65 | 0.73  | 0.49  | 0.94  | 0.074888 | 0.928658 |
| 0    | 0.21  | 0.2   | 0.62  | NA       | NA       |
| 0    | 0     | 0     | 0     | NA       | NA       |
| 0.22 | 0     | 0     | 0.08  | NA       | NA       |
| 0.05 | 0     | 0.07  | 0.04  | NA       | NA       |
| 0    | 0     | 0     | 0     | NA       | NA       |
| 0    | 0     | 0     | 0     | NA       | NA       |
| 0    | 0     | 0     | 0.1   | NA       | NA       |
| 0    | 0     | 0     | 0     | NA       | NA       |
| 0    | 0     | 0     | 0     | NA       | NA       |
| 0    | 0     | 0     | 0     | NA       | NA       |
| 2.01 | 0.98  | 1.49  | 1.87  | -0.71578 | 0.007485 |
| 0    | 0     | 0     | 0     | NA       | NA       |
| 0    | 0     | 0     | 0     | NA       | NA       |
| 0    | 0     | 0     | 0     | NA       | NA       |
| 0    | 0     | 0     | 0     | NA       | NA       |
| 0    | 0     | 0     | 0     | NA       | NA       |
| 0    | 0     | 0.09  | 0.11  | NA       | NA       |
| 0    | 0     | 0     | 0     | NA       | NA       |
| 0    | 0     | 0     | 0     | NA       | NA       |
| 6.52 | 13.59 | 10.89 | 11.83 | 0.797699 | 7.53E-07 |
| 2.33 | 2.04  | 2.61  | 2.77  | -0.05944 | 0.815873 |
| 0    | 0     | 0     | 0     | NA       | NA       |
| 0    | 0     | 0     | 0     | NA       | NA       |
| 0    | 0     | 0     | 0     | NA       | NA       |
| 0    | 0     | 0     | 0     | NA       | NA       |
| 0    | 0     | 0     | 0     | NA       | NA       |
| 0    | 0     | 0     | 0     | NA       | NA       |
| 0    | 0     | 0     | 0     | NA       | NA       |
| 0.53 | 0.33  | 0.07  | 0.08  | -0.58141 | 0.417629 |
| 0    | 0.49  | 0.14  | 0.32  | 0.315128 | 0.694326 |
| 0    | 0     | 0     | 0     | NA       | NA       |
| 4.37 | 7.8   | 5.31  | 6.76  | 0.343578 | 0.062886 |
| 0    | 0     | 0     | 0     | NA       | NA       |
| 0    | 0     | 0     | 0     | NA       | NA       |

|      |      |      |               |          |
|------|------|------|---------------|----------|
| 0    | 0    | 0    | 0 NA          | NA       |
| 0.45 | 1.52 | 1.56 | 1.51 0.711183 | 0.268617 |
| 0.55 | 0.19 | 0.53 | 0.6 NA        | NA       |
| 0.16 | 0    | 0    | 0 NA          | NA       |
| 0.9  | 0    | 0.29 | 0 NA          | NA       |
| 1.78 | 0.23 | 1.17 | 0.73 -0.52263 | 0.461833 |
| 0    | 0    | 0.11 | 0 NA          | NA       |
| 0    | 0    | 0    | 0 NA          | NA       |
| 0.03 | 0.08 | 0.1  | 0.09 NA       | NA       |
| 0    | 0    | 0    | 0 NA          | NA       |
| 0    | 0    | 0    | 0 NA          | NA       |
| 0    | 0    | 0    | 0 NA          | NA       |
| 0    | 0    | 0    | 0 NA          | NA       |
| 0    | 0    | 0    | 0 NA          | NA       |
| 0    | 0    | 0    | 0 NA          | NA       |
| 0    | 0    | 0    | 0 NA          | NA       |
| 0.46 | 0.32 | 0.5  | 0.62 -0.27092 | 0.67791  |
| 0    | 0    | 0    | 0 NA          | NA       |
| 0    | 0    | 0    | 0 NA          | NA       |
| 0.25 | 0    | 0.16 | 0 NA          | NA       |
| 0    | 0    | 0    | 0 NA          | NA       |
| 0    | 0    | 0    | 0 NA          | NA       |
| 0    | 0.06 | 0    | 0 NA          | NA       |
| 0.09 | 0    | 0    | 0.32 NA       | NA       |
| 0    | 0    | 0    | 0 NA          | NA       |
| 0    | 0    | 0    | 0 NA          | NA       |
| 4.88 | 7.52 | 4.97 | 8 0.628882    | 0.024663 |
| 0    | 0    | 0    | 0 NA          | NA       |
| 0.04 | 0.23 | 0.22 | 0.44 0.62837  | 0.367858 |
| 0    | 0    | 0    | 0 NA          | NA       |
| 0    | 0    | 0    | 0 NA          | NA       |
| 0    | 0    | 0.39 | 0.24 NA       | NA       |
| 0    | 0    | 0.39 | 0 NA          | NA       |
| 0    | 0.22 | 0.38 | 0.09 NA       | NA       |
| 0    | 0    | 0    | 0 NA          | NA       |
| 0.11 | 0.07 | 0.07 | 0.04 NA       | NA       |
| 0    | 0    | 0    | 0 NA          | NA       |
| 0    | 0    | 0    | 0 NA          | NA       |
| 0    | 0    | 0    | 0 NA          | NA       |
| 0    | 0    | 0    | 0 NA          | NA       |
| 0    | 0    | 0    | 0 NA          | NA       |
| 0    | 0    | 0    | 0 NA          | NA       |
| 0    | 0    | 0    | 0 NA          | NA       |
| 0    | 0    | 0    | 0 NA          | NA       |
| 0    | 0    | 0    | 0 NA          | NA       |
| 0    | 0    | 0    | 0.08 NA       | NA       |

|       |       |       |       |          |          |
|-------|-------|-------|-------|----------|----------|
| 0     | 0.14  | 0     | 0.15  | NA       | NA       |
| 0     | 0     | 0     | 0     | NA       | NA       |
| 0     | 0.21  | 1.33  | 0.22  | 0.043316 | 0.961482 |
| 0     | 0     | 0     | 0     | NA       | NA       |
| 0     | 0     | 0     | 0     | NA       | NA       |
| 0     | 0.13  | 0     | 0     | NA       | NA       |
| 0     | 0     | 0.08  | 0     | NA       | NA       |
| 0     | 0.01  | 0.01  | 0     | NA       | NA       |
| 0     | 0     | 0     | 0     | NA       | NA       |
| 0     | 0     | 0     | 0     | NA       | NA       |
| 0     | 0     | 0     | 0     | NA       | NA       |
| 0     | 0     | 0     | 0.1   | NA       | NA       |
| 0     | 0     | 0     | 0     | NA       | NA       |
| 0     | 0     | 0     | 0     | NA       | NA       |
| 0     | 0     | 0     | 0     | NA       | NA       |
| 0.56  | 0     | 0     | 0     | NA       | NA       |
| 0     | 0     | 0     | 0     | NA       | NA       |
| 0     | 0     | 0     | 0     | NA       | NA       |
| 0     | 0     | 0     | 0     | NA       | NA       |
| 1.62  | 0     | 0     | 0     | NA       | NA       |
| 0     | 0     | 0     | 0     | NA       | NA       |
| 0     | 0     | 0.14  | 0     | NA       | NA       |
| 0     | 0     | 0     | 0     | NA       | NA       |
| 0.58  | 0.4   | 0.32  | 0.41  | -0.42593 | 0.261775 |
| 0     | 0     | 0     | 0     | NA       | NA       |
| 0     | 0     | 0.17  | 0     | NA       | NA       |
| 0.34  | 0.41  | 0.45  | 0.59  | 0.232769 | 0.735887 |
| 0     | 0     | 0     | 0     | NA       | NA       |
| 0     | 0     | 0     | 0     | NA       | NA       |
| 0.22  | 0.15  | 0     | 0.48  | NA       | NA       |
| 0     | 0     | 0     | 0     | NA       | NA       |
| 0     | 0     | 0     | 0     | NA       | NA       |
| 0.31  | 0.05  | 0.02  | 0.02  | -0.21301 | 0.803964 |
| 0     | 0     | 0     | 0     | NA       | NA       |
| 0     | 0     | 0     | 0     | NA       | NA       |
| 0     | 0     | 0     | 0     | NA       | NA       |
| 0     | 0     | 0     | 0     | NA       | NA       |
| 22.31 | 17.85 | 16.87 | 14.09 | -0.44902 | 0.0008   |
| 0     | 0     | 0     | 0     | NA       | NA       |
| 0     | 0     | 0     | 0     | NA       | NA       |
| 0.3   | 0.51  | 0.46  | 0.84  | -0.15276 | 0.855582 |
| 0     | 0     | 0     | 0     | NA       | NA       |
| 0     | 0     | 0     | 0     | NA       | NA       |
| 0     | 0     | 0     | 0     | NA       | NA       |
| 0     | 0     | 0     | 0     | NA       | NA       |

|       |       |       |                |          |
|-------|-------|-------|----------------|----------|
| 0     | 0     | 0     | 0 NA           | NA       |
| 0     | 0     | 0     | 0 NA           | NA       |
| 0.22  | 0.39  | 0.66  | 0.25 0.410468  | 0.594664 |
| 0     | 0     | 0     | 0 NA           | NA       |
| 0     | 0     | 0.15  | 0 NA           | NA       |
| 0.05  | 0.01  | 0     | 0.04 NA        | NA       |
| 0     | 0     | 0     | 0 NA           | NA       |
| 0     | 0     | 0.4   | 0.35 NA        | NA       |
| 0     | 0     | 0     | 0 NA           | NA       |
| 0     | 0     | 0     | 0 NA           | NA       |
| 0     | 0     | 0     | 0.14 NA        | NA       |
| 0.23  | 0.12  | 0.12  | 0.06 -0.19507  | 0.818186 |
| 0     | 0     | 0     | 0 NA           | NA       |
| 0.23  | 0     | 0.11  | 0.06 NA        | NA       |
| 0     | 0     | 0     | 0 NA           | NA       |
| 0.06  | 0     | 0.04  | 0 NA           | NA       |
| 17.17 | 15.19 | 19.18 | 15.13 0.080761 | 0.762552 |
| 0     | 0     | 0     | 0 NA           | NA       |
| 0     | 0     | 0     | 0 NA           | NA       |
| 0.06  | 0     | 0     | 0 NA           | NA       |
| 0     | 0     | 0     | 0 NA           | NA       |
| 0     | 0     | 0     | 0 NA           | NA       |
| 0.14  | 0     | 0.09  | 0.1 NA         | NA       |
| 11.16 | 10.55 | 9.74  | 11.95 -0.01124 | 0.956533 |
| 0.89  | 3.19  | 2.18  | 0.96 0.096311  | 0.917848 |
| 0.29  | 0     | 0.37  | 0.21 NA        | NA       |
| 0     | 0     | 0     | 0 NA           | NA       |
| 0     | 0     | 0     | 0 NA           | NA       |
| 0     | 0     | 0     | 0 NA           | NA       |
| 0     | 0     | 0     | 0 NA           | NA       |
| 0.39  | 0     | 0.13  | 0 NA           | NA       |
| 0     | 0     | 0     | 0 NA           | NA       |
| 0     | 0     | 0     | 0 NA           | NA       |
| 0     | 0     | 0.05  | 0 NA           | NA       |
| 0     | 0     | 0     | 0 NA           | NA       |
| 0     | 0     | 0     | 0 NA           | NA       |
| 0     | 0     | 0     | 0 NA           | NA       |
| 0     | 0     | 0     | 0 NA           | NA       |
| 0.32  | 0     | 0.66  | 0.75 NA        | NA       |
| 34.82 | 39.12 | 27.72 | 20.82 0.230543 | 0.71647  |
| 0     | 0     | 0     | 0 NA           | NA       |
| 0.16  | 0.56  | 0.29  | 0.6 1.202715   | 0.051642 |
| 0     | 0.05  | 0.05  | 0.01 NA        | NA       |
| 0     | 0     | 0.17  | 0 NA           | NA       |
| 0     | 0     | 0     | 0 NA           | NA       |

|      |      |      |               |          |
|------|------|------|---------------|----------|
| 0    | 0    | 0    | 0 NA          | NA       |
| 0    | 0    | 0.01 | 0 NA          | NA       |
| 0.11 | 0.08 | 0    | 0 NA          | NA       |
| 0.15 | 0    | 0    | 0 NA          | NA       |
| 0    | 0.21 | 0    | 0.09 NA       | NA       |
| 0    | 0    | 0    | 0 NA          | NA       |
| 0.26 | 0    | 0.17 | 0 NA          | NA       |
| 0    | 0    | 0    | 0 NA          | NA       |
| 0    | 0    | 0    | 0 NA          | NA       |
| 0    | 0    | 0    | 0 NA          | NA       |
| 0    | 0    | 0    | 0 NA          | NA       |
| 0    | 0.04 | 0.11 | 0.05 NA       | NA       |
| 0    | 0    | 0    | 0 NA          | NA       |
| 0    | 0.09 | 0    | 0 NA          | NA       |
| 0    | 0    | 0    | 0.05 NA       | NA       |
| 0    | 0    | 0    | 0 NA          | NA       |
| 0    | 0    | 0    | 0 NA          | NA       |
| 0.19 | 0    | 0.62 | 0.14 NA       | NA       |
| 0    | 0    | 0    | 0 NA          | NA       |
| 0.02 | 0.03 | 0.04 | 0.05 NA       | NA       |
| 0    | 0    | 0    | 0 NA          | NA       |
| 0    | 0    | 0    | 0 NA          | NA       |
| 0    | 0    | 0    | 0 NA          | NA       |
| 0    | 0    | 0.4  | 0 NA          | NA       |
| 0    | 0    | 0    | 0.39 NA       | NA       |
| 0.25 | 0    | 0.31 | 0.19 NA       | NA       |
| 1.08 | 2.46 | 0.82 | 1.37 -0.33888 | 0.670138 |
| 0    | 0    | 0    | 0 NA          | NA       |
| 0    | 0    | 0    | 0.41 NA       | NA       |
| 0    | 0    | 0    | 0 NA          | NA       |
| 0    | 0    | 0    | 0 NA          | NA       |
| 2.4  | 0.9  | 1.13 | 1.41 -0.6578  | 0.123816 |
| 0    | 0    | 0    | 0 NA          | NA       |
| 0    | 0.22 | 0    | 0 NA          | NA       |
| 0    | 0    | 0    | 0.28 NA       | NA       |
| 0    | 0    | 0    | 0 NA          | NA       |
| 0.37 | 0.28 | 0.36 | 0.46 -0.43635 | 0.302923 |
| 1.48 | 0.14 | 0.22 | 0.45 -0.97674 | 0.130733 |
| 0    | 0    | 0    | 0 NA          | NA       |
| 0    | 0    | 0    | 0 NA          | NA       |
| 0    | 0    | 0    | 0 NA          | NA       |
| 2.65 | 7.65 | 6.28 | 7.23 1.191643 | 2.22E-05 |
| 0    | 0    | 0    | 0 NA          | NA       |
| 0    | 0    | 0    | 0 NA          | NA       |

|      |      |      |               |          |
|------|------|------|---------------|----------|
| 0    | 0    | 0    | 0 NA          | NA       |
| 0    | 0    | 0    | 0 NA          | NA       |
| 0    | 0    | 0    | 0 NA          | NA       |
| 0    | 0    | 0    | 0.08 NA       | NA       |
| 0    | 0    | 0    | 0 NA          | NA       |
| 0.03 | 0    | 0    | 0 NA          | NA       |
| 0    | 0    | 0    | 0 NA          | NA       |
| 0    | 0    | 0.34 | 0 NA          | NA       |
| 0    | 0    | 0    | 0 NA          | NA       |
| 0    | 0    | 0    | 0 NA          | NA       |
| 0    | 0    | 0    | 0 NA          | NA       |
| 0    | 0    | 0    | 0 NA          | NA       |
| 0.46 | 0.33 | 0.44 | 0.35 -0.58245 | 0.367921 |
| 0    | 0    | 0    | 0 NA          | NA       |
| 0.14 | 0.21 | 0.35 | 0.15 NA       | NA       |
| 0    | 0    | 0    | 0 NA          | NA       |
| 0    | 0.19 | 0    | 0 NA          | NA       |
| 0    | 0    | 0    | 0 NA          | NA       |
| 0    | 0    | 0    | 0 NA          | NA       |
| 0    | 0    | 0    | 0 NA          | NA       |
| 0    | 0    | 0    | 0 NA          | NA       |
| 0    | 0    | 0    | 0 NA          | NA       |
| 0    | 0    | 0    | 0 NA          | NA       |
| 0    | 0    | 0    | 0 NA          | NA       |
| 0.24 | 0.79 | 0.64 | 0.19 0.646491 | 0.309615 |
| 0    | 0    | 0    | 0 NA          | NA       |
| 0    | 0    | 0    | 0 NA          | NA       |
| 0    | 0    | 0    | 0 NA          | NA       |
| 0    | 0    | 0    | 0 NA          | NA       |
| 0    | 0    | 0    | 0 NA          | NA       |
| 0.6  | 0.43 | 0.39 | 0.34 NA       | NA       |
| 0    | 0    | 0    | 0 NA          | NA       |
| 0    | 0    | 0    | 0 NA          | NA       |
| 5.19 | 6.39 | 5.94 | 7.85 0.231847 | 0.40454  |
| 0    | 0    | 0    | 0 NA          | NA       |
| 0    | 0    | 0    | 0 NA          | NA       |
| 0    | 0    | 0    | 0 NA          | NA       |
| 0    | 0.14 | 0.05 | 0 NA          | NA       |
| 0    | 0    | 0.08 | 0 NA          | NA       |
| 1.44 | 2.23 | 1.28 | 1.64 -0.02708 | 0.968828 |
| 0.75 | 0.27 | 0.61 | 0.56 -0.20968 | 0.807537 |
| 0    | 0    | 0    | 0 NA          | NA       |
| 0.87 | 0    | 0.89 | 1.73 0.407163 | 0.597893 |
| 0    | 0    | 0    | 0 NA          | NA       |
| 4.62 | 6.01 | 3.92 | 6.93 0.00151  | 0.997928 |



|       |       |       |       |          |          |
|-------|-------|-------|-------|----------|----------|
| 0.08  | 0.24  | 0.34  | 0.13  | -0.26115 | 0.752803 |
| 0.92  | 0     | 0.19  | 0     | NA       | NA       |
| 33.58 | 38.86 | 35.63 | 33.86 | 0.002334 | 0.993768 |
| 0     | 0     | 0     | 0     | NA       | NA       |
| 2.22  | 1.62  | 1.31  | 0.98  | -0.44528 | 0.289096 |
| 0     | 0     | 0     | 0     | NA       | NA       |
| 0.35  | 0.24  | 0.57  | 0.39  | NA       | NA       |
| 0     | 0.06  | 0     | 0     | NA       | NA       |
| 0     | 0     | 0     | 0     | NA       | NA       |
| 0     | 0     | 0     | 0     | NA       | NA       |
| 0.03  | 0.04  | 0.02  | 0     | NA       | NA       |
| 0     | 0     | 0.1   | 0     | NA       | NA       |
| 0     | 0.12  | 0     | 0     | NA       | NA       |
| 0.04  | 0.03  | 0.1   | 0.21  | NA       | NA       |
| 0     | 0     | 0     | 0     | NA       | NA       |
| 0     | 0.13  | 0     | 0.08  | NA       | NA       |
| 0.95  | 1.82  | 1.25  | 0.95  | 0.212292 | 0.788447 |
| 0     | 0     | 0     | 0.17  | NA       | NA       |
| 0     | 0     | 0     | 0     | NA       | NA       |
| 0.03  | 0.46  | 0.33  | 0.57  | 2.754434 | 8.35E-09 |
| 0     | 0.11  | 0.11  | 0     | NA       | NA       |
| 0     | 0     | 0     | 0     | NA       | NA       |
| 0     | 0.51  | 0     | 0.26  | NA       | NA       |
| 0     | 0     | 0     | 0     | NA       | NA       |
| 0     | 0.1   | 0.19  | 0     | NA       | NA       |
| 0     | 0     | 0     | 0     | NA       | NA       |
| 0     | 0     | 0     | 0     | NA       | NA       |
| 3.64  | 2.85  | 2.6   | 3.33  | -0.2891  | 0.644595 |
| 0.25  | 0.51  | 0.51  | 0.43  | 0.678628 | 0.289448 |
| 0     | 0     | 0     | 0     | NA       | NA       |
| 0     | 0.26  | 0     | 0     | NA       | NA       |
| 0     | 0     | 0     | 0     | NA       | NA       |
| 0     | 0     | 0     | 0     | NA       | NA       |
| 0     | 0     | 0     | 0     | NA       | NA       |
| 0.16  | 0     | 0     | 0     | NA       | NA       |
| 0.52  | 0.37  | 0.14  | 0.16  | -0.18919 | 0.825615 |
| 0     | 0     | 0     | 0     | NA       | NA       |
| 0     | 0     | 0     | 0     | NA       | NA       |
| 0     | 0     | 0.15  | 0     | NA       | NA       |
| 0     | 0     | 0     | 0     | NA       | NA       |
| 0.2   | 1.1   | 0.73  | 0.95  | 1.338759 | 0.002984 |
| 0.3   | 0.47  | 0.28  | 0.37  | -0.13927 | 0.827737 |
| 0     | 0     | 0     | 0     | NA       | NA       |
| 0     | 0.11  | 0     | 0     | NA       | NA       |
| 0     | 0     | 0     | 0     | NA       | NA       |

|      |      |      |               |          |
|------|------|------|---------------|----------|
| 0    | 0    | 0    | 0 NA          | NA       |
| 0.04 | 0    | 0.02 | 0.07 NA       | NA       |
| 0    | 0    | 0    | 0 NA          | NA       |
| 0    | 2.55 | 0    | 0 NA          | NA       |
| 0    | 0    | 0    | 0 NA          | NA       |
| 0.03 | 0    | 0.02 | 0 NA          | NA       |
| 5.34 | 5.08 | 5.29 | 5.07 -0.24499 | 0.041715 |
| 0    | 0    | 0    | 0 NA          | NA       |
| 0.61 | 0.66 | 1.48 | 0.84 0.136018 | 0.847627 |
| 0    | 0.08 | 0    | 0.09 NA       | NA       |
| 0.67 | 0.36 | 0.49 | 0.61 -0.39789 | 0.60461  |
| 0    | 0    | 0    | 0 NA          | NA       |
| 0    | 0    | 0.1  | 0 NA          | NA       |
| 0    | 0    | 0    | 0 NA          | NA       |
| 0    | 0    | 0    | 0 NA          | NA       |
| 0.3  | 0.59 | 0.39 | 0.38 0.020304 | 0.981851 |
| 0    | 0    | 0    | 0 NA          | NA       |
| 0    | 0.03 | 0.04 | 0.06 NA       | NA       |
| 0    | 0    | 0    | 0 NA          | NA       |
| 0.13 | 0.05 | 0    | 0 NA          | NA       |
| 0    | 0    | 0    | 0 NA          | NA       |
| 0    | 0    | 0    | 0 NA          | NA       |
| 0    | 0    | 0    | 0 NA          | NA       |
| 0    | 0    | 0    | 0 NA          | NA       |
| 0    | 0    | 0    | 0 NA          | NA       |
| 0    | 0    | 0    | 0 NA          | NA       |
| 0    | 0    | 0    | 0 NA          | NA       |
| 0    | 0    | 0    | 0 NA          | NA       |
| 0    | 0    | 0    | 0 NA          | NA       |
| 0    | 0    | 0    | 0 NA          | NA       |
| 0    | 0    | 0.01 | 0 NA          | NA       |
| 0    | 0.07 | 0.07 | 0.14 NA       | NA       |
| 0    | 0    | 0    | 0 NA          | NA       |
| 0    | 0    | 0    | 0 NA          | NA       |
| 0    | 0    | 0    | 0 NA          | NA       |
| 0    | 0.01 | 0.02 | 0.02 NA       | NA       |
| 1.66 | 1.52 | 1.17 | 1.37 -0.01635 | 0.983057 |
| 0.51 | 0    | 0.26 | 0 NA          | NA       |
| 0    | 0    | 0.11 | 0 NA          | NA       |
| 0    | 0    | 0    | 0 NA          | NA       |
| 0    | 0    | 0    | 0 NA          | NA       |
| 0    | 0    | 0    | 0 NA          | NA       |
| 0    | 0    | 0.01 | 0.14 NA       | NA       |
| 0    | 0    | 0    | 0 NA          | NA       |
| 0.91 | 1.42 | 0.6  | 0.69 0.361823 | 0.64007  |
| 0    | 0.65 | 0    | 0.42 NA       | NA       |

|      |      |      |               |          |
|------|------|------|---------------|----------|
| 0    | 0    | 0    | 0 NA          | NA       |
| 0    | 0    | 0    | 0 NA          | NA       |
| 0    | 0    | 0    | 0 NA          | NA       |
| 0    | 0    | 0.29 | 0 NA          | NA       |
| 0.04 | 0    | 0.07 | 0.03 NA       | NA       |
| 0    | 0    | 0    | 0 NA          | NA       |
| 0    | 0    | 0    | 0 NA          | NA       |
| 0.38 | 0.38 | 0.36 | 0.6 NA        | NA       |
| 0    | 0.03 | 0    | 0 NA          | NA       |
| 0    | 0    | 0    | 0 NA          | NA       |
| 0    | 0    | 0    | 0 NA          | NA       |
| 0    | 0    | 0    | 0 NA          | NA       |
| 0.15 | 0.05 | 0    | 0.05 NA       | NA       |
| 0    | 0.22 | 0    | 0 NA          | NA       |
| 0    | 0    | 0.14 | 0 NA          | NA       |
| 0.04 | 0.05 | 0.08 | 0.03 NA       | NA       |
| 0    | 0    | 0    | 0 NA          | NA       |
| 0    | 0.14 | 0    | 0 NA          | NA       |
| 0    | 0    | 0    | 0 NA          | NA       |
| 0.31 | 0.34 | 0.1  | 0.12 NA       | NA       |
| 0    | 0    | 0    | 0 NA          | NA       |
| 0    | 0.13 | 0    | 0.14 NA       | NA       |
| 0.7  | 0.97 | 1.31 | 1.05 0.605565 | 0.032856 |
| 0    | 0    | 0    | 0 NA          | NA       |
| 0.02 | 0.04 | 0.01 | 0.04 NA       | NA       |
| 0    | 0    | 0.03 | 0 NA          | NA       |
| 0    | 0    | 0    | 0 NA          | NA       |
| 0    | 0    | 0.03 | 0 NA          | NA       |
| 0    | 0    | 0    | 0.07 NA       | NA       |
| 0.3  | 0.52 | 0.37 | 0.27 0.387553 | 0.608869 |
| 0    | 0.01 | 0    | 0.02 NA       | NA       |
| 0    | 0    | 0    | 0.07 NA       | NA       |
| 0    | 0    | 0    | 0 NA          | NA       |
| 0    | 0    | 0    | 0 NA          | NA       |
| 0    | 0    | 0    | 0 NA          | NA       |
| 0    | 0.03 | 0.02 | 0.04 NA       | NA       |
| 0    | 0    | 0    | 0 NA          | NA       |
| 0    | 0    | 0    | 0 NA          | NA       |
| 0    | 0.18 | 0.18 | 0.06 NA       | NA       |
| 0    | 0    | 0    | 0 NA          | NA       |
| 0    | 0    | 0    | 0 NA          | NA       |
| 0    | 0    | 0    | 0 NA          | NA       |
| 0    | 0    | 0    | 0 NA          | NA       |
| 0    | 0.18 | 0    | 0 NA          | NA       |
| 0    | 0    | 0    | 0 NA          | NA       |

|       |       |       |       |          |          |
|-------|-------|-------|-------|----------|----------|
| 0.42  | 0     | 0     | 0.21  | NA       | NA       |
| 0     | 0     | 0     | 0     | NA       | NA       |
| 0     | 0     | 0     | 0     | NA       | NA       |
| 0     | 0     | 0.1   | 0     | NA       | NA       |
| 0     | 0     | 0     | 0     | NA       | NA       |
| 0     | 0     | 0     | 0     | NA       | NA       |
| 0     | 0     | 0     | 0     | NA       | NA       |
| 0     | 0     | 0     | 0     | NA       | NA       |
| 0     | 0     | 0     | 0     | NA       | NA       |
| 0     | 0.16  | 0     | 0     | NA       | NA       |
| 0     | 0     | 0     | 0     | NA       | NA       |
| 0     | 0     | 0     | 0     | NA       | NA       |
| 0     | 0     | 0     | 0     | NA       | NA       |
| 0     | 0     | 0     | 0     | NA       | NA       |
| 0     | 0     | 0     | 0     | NA       | NA       |
| 0     | 0     | 0     | 0.05  | NA       | NA       |
| 0     | 0     | 0     | 0     | NA       | NA       |
| 0     | 0     | 0     | 0     | NA       | NA       |
| 12.03 | 13.49 | 11.87 | 13.75 | 0.224977 | 0.137344 |
| 0     | 0     | 0     | 0     | NA       | NA       |
| 0     | 0     | 0.19  | 0     | NA       | NA       |
| 1.46  | 0.42  | 0.37  | 0     | NA       | NA       |
| 0     | 0     | 0     | 0     | NA       | NA       |
| 0.55  | 0.38  | 0.86  | 0.59  | -0.29259 | 0.617029 |
| 0.33  | 0.1   | 0.2   | 0.36  | -0.25917 | 0.741215 |
| 0     | 0.11  | 0     | 0     | NA       | NA       |
| 0     | 0     | 0     | 0     | NA       | NA       |
| 0     | 0     | 0     | 0     | NA       | NA       |
| 0.09  | 0.81  | 0.14  | 0.51  | 1.011759 | 0.081571 |
| 0     | 0     | 0     | 0     | NA       | NA       |
| 0     | 0.06  | 0     | 0     | NA       | NA       |
| 0.2   | 0.58  | 0     | 0     | NA       | NA       |
| 0     | 0     | 0     | 0     | NA       | NA       |
| 0     | 0     | 0     | 0     | NA       | NA       |
| 1.22  | 1.85  | 0.99  | 0.94  | -0.24121 | 0.667336 |
| 0     | 0     | 0     | 0     | NA       | NA       |
| 0     | 0     | 0     | 0     | NA       | NA       |
| 0.1   | 0.06  | 0.08  | 0.12  | 0.226523 | 0.767431 |
| 0     | 0     | 0     | 0.14  | NA       | NA       |
| 0     | 0     | 0     | 0     | NA       | NA       |
| 0     | 0     | 0     | 0.32  | NA       | NA       |
| 0     | 0     | 0     | 0     | NA       | NA       |
| 5.34  | 6.28  | 7.01  | 6.75  | -0.00409 | 0.992113 |
| 0     | 0     | 0     | 0     | NA       | NA       |

|      |      |      |               |          |
|------|------|------|---------------|----------|
| 0    | 0    | 0    | 0 NA          | NA       |
| 0    | 0    | 0    | 0 NA          | NA       |
| 0    | 0    | 0    | 0 NA          | NA       |
| 0.02 | 0.23 | 0.09 | 0.27 1.10472  | 0.075675 |
| 0    | 0    | 0    | 0 NA          | NA       |
| 0    | 0    | 0    | 0 NA          | NA       |
| 0    | 0    | 0    | 0 NA          | NA       |
| 1.1  | 0.72 | 0.78 | 0.51 -0.52329 | 0.177988 |
| 0    | 0    | 0    | 0 NA          | NA       |
| 0    | 0    | 0    | 0 NA          | NA       |
| 0    | 0    | 0    | 0 NA          | NA       |
| 0    | 0    | 0    | 0 NA          | NA       |
| 0    | 0    | 0    | 0 NA          | NA       |
| 0    | 0    | 0.01 | 0 NA          | NA       |
| 0    | 0    | 0    | 0 NA          | NA       |
| 0    | 0    | 0    | 0.17 NA       | NA       |
| 0    | 0    | 0    | 0 NA          | NA       |
| 0    | 0    | 0    | 0 NA          | NA       |
| 0    | 0.05 | 0.04 | 0.1 NA        | NA       |
| 0    | 0    | 0    | 0 NA          | NA       |
| 1.75 | 0.87 | 1.16 | 1 -0.632      | 0.033317 |
| 0    | 0    | 0    | 0.1 NA        | NA       |
| 0.59 | 0.14 | 0.51 | 0.44 NA       | NA       |
| 1.73 | 0.77 | 1.4  | 1.13 -0.10854 | 0.905111 |
| 0    | 0    | 0    | 0 NA          | NA       |
| 0    | 0    | 0.05 | 0.27 NA       | NA       |
| 0    | 0    | 0    | 0 NA          | NA       |
| 0    | 0    | 0    | 0 NA          | NA       |
| 0    | 0    | 0    | 0 NA          | NA       |
| 0    | 0    | 0    | 0 NA          | NA       |
| 0    | 0    | 0.92 | 0 NA          | NA       |
| 0    | 0    | 0    | 0 NA          | NA       |
| 0.55 | 0    | 0.72 | 0.27 NA       | NA       |
| 0    | 0    | 0    | 0 NA          | NA       |
| 0    | 0    | 0    | 0 NA          | NA       |
| 0    | 0    | 0    | 0 NA          | NA       |
| 0    | 0    | 0    | 0 NA          | NA       |
| 0    | 0    | 0    | 0 NA          | NA       |
| 0    | 0    | 0    | 0 NA          | NA       |
| 0    | 0    | 0    | 0.04 NA       | NA       |
| 0.41 | 0.37 | 0.5  | 0.46 0.222601 | 0.651342 |
| 1.29 | 1.15 | 1.12 | 1.24 -0.06346 | 0.848037 |
| 0    | 0    | 0    | 0 NA          | NA       |
| 0.24 | 0    | 0.27 | 0 NA          | NA       |
| 0    | 0    | 0    | 0 NA          | NA       |

|      |      |      |               |          |
|------|------|------|---------------|----------|
| 0.3  | 0.43 | 0.3  | 0 NA          | NA       |
| 0.76 | 0.14 | 0.13 | 0.07 NA       | NA       |
| 0    | 0    | 0    | 0 NA          | NA       |
| 0.29 | 0.25 | 0.38 | 0.24 -0.17081 | 0.842381 |
| 0    | 0    | 0    | 0 NA          | NA       |
| 0    | 0    | 0    | 0 NA          | NA       |
| 0    | 0    | 0    | 0 NA          | NA       |
| 0    | 0    | 0    | 0 NA          | NA       |
| 0    | 0.11 | 0    | 0 NA          | NA       |
| 0.13 | 0.55 | 0.17 | 0.78 0.217332 | 0.800294 |
| 0    | 0    | 0    | 0 NA          | NA       |
| 0    | 0    | 0    | 0 NA          | NA       |
| 0    | 0    | 0.28 | 0 NA          | NA       |
| 0    | 0    | 0    | 0 NA          | NA       |
| 0    | 0    | 0    | 0 NA          | NA       |
| 0    | 0    | 0    | 0 NA          | NA       |
| 0.07 | 0.25 | 0    | 0.16 NA       | NA       |
| 0    | 0    | 0    | 0 NA          | NA       |
| 0.08 | 0.06 | 0.11 | 0.12 NA       | NA       |
| 0    | 0    | 0    | 0 NA          | NA       |
| 0.02 | 0    | 0    | 0.07 NA       | NA       |
| 0    | 0    | 0    | 0 NA          | NA       |
| 0.43 | 0    | 0    | 0 NA          | NA       |
| 0.84 | 0.4  | 0    | 0 NA          | NA       |
| 0.57 | 0.68 | 0.69 | 0.53 0.682931 | 0.32599  |
| 0    | 0.02 | 0    | 0.03 NA       | NA       |
| 0    | 0    | 0    | 0 NA          | NA       |
| 0    | 0    | 0    | 0 NA          | NA       |
| 0    | 0.03 | 0    | 0.14 NA       | NA       |
| 0    | 0.04 | 0.03 | 0.03 NA       | NA       |
| 0    | 0    | 0    | 0.1 NA        | NA       |
| 0    | 0    | 0    | 0 NA          | NA       |
| 0    | 0    | 0    | 0 NA          | NA       |
| 0    | 0    | 0    | 0 NA          | NA       |
| 0.23 | 0.67 | 1.39 | 1.32 0.688642 | 0.291618 |
| 0    | 0.11 | 0    | 0 NA          | NA       |
| 0    | 0    | 0    | 0 NA          | NA       |
| 0    | 0    | 0    | 0 NA          | NA       |
| 0    | 0.1  | 0    | 0.05 NA       | NA       |
| 0    | 0    | 0    | 0 NA          | NA       |
| 0    | 0    | 0    | 0 NA          | NA       |
| 0    | 0    | 0    | 0 NA          | NA       |
| 0.04 | 0.04 | 0.03 | 0.08 NA       | NA       |
| 0    | 0    | 0    | 0 NA          | NA       |
| 0    | 0    | 0    | 0 NA          | NA       |

|      |      |      |               |          |
|------|------|------|---------------|----------|
| 0    | 0    | 0    | 0 NA          | NA       |
| 0    | 0    | 0    | 0 NA          | NA       |
| 0.39 | 0.92 | 0.77 | 0.76 0.667265 | 0.221794 |
| 0    | 0    | 0.15 | 0.03 NA       | NA       |
| 0    | 0    | 0    | 0 NA          | NA       |
| 0    | 0    | 0    | 0 NA          | NA       |
| 0    | 0    | 0    | 0 NA          | NA       |
| 0    | 0    | 0    | 0 NA          | NA       |
| 0    | 0.06 | 0    | 0 NA          | NA       |
| 0.86 | 0.34 | 0.39 | 0.36 -0.34158 | 0.658595 |
| 0    | 0    | 0    | 0 NA          | NA       |
| 0    | 0    | 0    | 0 NA          | NA       |
| 0    | 0    | 0    | 0 NA          | NA       |
| 0.1  | 0.13 | 0.18 | 0.19 0.390567 | 0.603778 |
| 0    | 0    | 0    | 0 NA          | NA       |
| 0    | 0    | 0    | 0 NA          | NA       |
| 0.41 | 0    | 0    | 0 NA          | NA       |
| 0.26 | 2.51 | 2.73 | 2.62 0.750221 | 0.189542 |
| 0.51 | 1.06 | 0.18 | 0.1 NA        | NA       |
| 0    | 0    | 0    | 0 NA          | NA       |
| 0.15 | 0    | 0    | 0 NA          | NA       |
| 0    | 0.03 | 0.03 | 0 NA          | NA       |
| 0    | 0    | 0    | 0 NA          | NA       |
| 0    | 0    | 0    | 0 NA          | NA       |
| 0    | 0    | 0    | 0 NA          | NA       |
| 0    | 0    | 0    | 0 NA          | NA       |
| 0    | 0    | 0    | 0 NA          | NA       |
| 4.7  | 0    | 0    | 0.89 -0.43548 | 0.469004 |
| 0    | 0    | 0    | 0 NA          | NA       |
| 0    | 0    | 0    | 0 NA          | NA       |
| 0.26 | 0.32 | 0.13 | 0.15 -0.09186 | 0.922585 |
| 0    | 0    | 0    | 0 NA          | NA       |
| 0    | 0    | 0    | 0 NA          | NA       |
| 0    | 0    | 0    | 0 NA          | NA       |
| 0    | 0.15 | 0    | 0 NA          | NA       |
| 0    | 2.07 | 1.73 | 1.75 2.412788 | 3.58E-06 |
| 0    | 0    | 0    | 0.13 NA       | NA       |
| 0    | 0    | 0    | 0 NA          | NA       |
| 0    | 0    | 0    | 0 NA          | NA       |
| 0    | 0    | 0    | 0 NA          | NA       |
| 0    | 0    | 0    | 0 NA          | NA       |
| 0.32 | 0.79 | 0.62 | 0.6 0.652731  | 0.354231 |
| 0    | 0    | 0    | 0 NA          | NA       |
| 0    | 0    | 0    | 0 NA          | NA       |

|      |      |      |               |          |
|------|------|------|---------------|----------|
| 0    | 0    | 0    | 0 NA          | NA       |
| 0    | 0    | 0    | 0 NA          | NA       |
| 0    | 0    | 0    | 0 NA          | NA       |
| 0    | 0    | 0    | 0 NA          | NA       |
| 2.82 | 3.01 | 2.98 | 3.95 0.10145  | 0.719768 |
| 0.18 | 0    | 0    | 0 NA          | NA       |
| 0    | 0.08 | 0.12 | 0 NA          | NA       |
| 0    | 0    | 0    | 0 NA          | NA       |
| 0    | 0    | 0    | 0.11 NA       | NA       |
| 0    | 0    | 0.38 | 0.37 NA       | NA       |
| 0    | 0    | 0    | 0 NA          | NA       |
| 0    | 0    | 0    | 0 NA          | NA       |
| 0    | 0.08 | 0    | 0 NA          | NA       |
| 0    | 0    | 0    | 0 NA          | NA       |
| 0    | 0    | 0    | 0 NA          | NA       |
| 0    | 0.11 | 0.1  | 0 NA          | NA       |
| 0    | 0    | 0    | 0 NA          | NA       |
| 0.05 | 0    | 0    | 0 NA          | NA       |
| 4.68 | 5.01 | 5.29 | 5.89 0.165064 | 0.524726 |
| 0    | 0.61 | 0.14 | 0 NA          | NA       |
| 0    | 0    | 0    | 0 NA          | NA       |
| 0    | 0    | 0    | 0 NA          | NA       |
| 0    | 0    | 0    | 0 NA          | NA       |
| 0    | 0    | 0    | 0 NA          | NA       |
| 0.46 | 0.61 | 0.52 | 0.59 -0.07688 | 0.899652 |
| 0    | 0    | 0    | 0 NA          | NA       |
| 0    | 0    | 0    | 0 NA          | NA       |
| 0    | 0    | 0    | 0 NA          | NA       |
| 0.53 | 0    | 0.12 | 0.13 NA       | NA       |
| 0    | 0    | 0    | 0 NA          | NA       |
| 0    | 0    | 0    | 0 NA          | NA       |
| 0    | 0    | 0    | 0.06 NA       | NA       |
| 0    | 0    | 0    | 0 NA          | NA       |
| 0    | 0    | 0    | 0 NA          | NA       |
| 0    | 0    | 0    | 0 NA          | NA       |
| 0.06 | 0.06 | 0.09 | 0.03 NA       | NA       |
| 0    | 0    | 0    | 0.22 NA       | NA       |
| 0    | 0    | 0    | 0 NA          | NA       |
| 0    | 0    | 0    | 0 NA          | NA       |
| 0    | 0    | 0    | 0 NA          | NA       |
| 0    | 0    | 0    | 0 NA          | NA       |
| 0    | 0    | 0    | 0 NA          | NA       |
| 0    | 0.09 | 0    | 0 NA          | NA       |
| 0    | 0    | 0    | 0 NA          | NA       |
| 0    | 0    | 0    | 0 NA          | NA       |
| 0    | 0    | 0    | 0 NA          | NA       |



|      |      |      |               |          |
|------|------|------|---------------|----------|
| 0    | 0    | 0    | 0 NA          | NA       |
| 0    | 0    | 0    | 0 NA          | NA       |
| 0    | 0    | 0    | 0 NA          | NA       |
| 0    | 0    | 0    | 0 NA          | NA       |
| 0    | 0    | 0    | 0 NA          | NA       |
| 0    | 0    | 0    | 0 NA          | NA       |
| 0    | 0    | 0    | 0 NA          | NA       |
| 0.43 | 0    | 0.38 | 0.19 NA       | NA       |
| 0.81 | 2.13 | 1.27 | 1.34 0.735615 | 0.057427 |
| 0    | 0    | 0    | 0 NA          | NA       |
| 2.19 | 2.15 | 2.29 | 1.63 -0.40818 | 0.17118  |
| 0    | 0    | 0    | 0 NA          | NA       |
| 0    | 0    | 0    | 0 NA          | NA       |
| 0    | 0    | 0    | 0 NA          | NA       |
| 0.3  | 0.93 | 0.56 | 0.64 0.492196 | 0.46975  |
| 0    | 0    | 0    | 0 NA          | NA       |
| 0    | 0    | 0    | 0 NA          | NA       |
| 0    | 0    | 1.69 | 2.06 0.147986 | 0.832216 |
| 0.07 | 0    | 0    | 0.26 NA       | NA       |
| 3.66 | 1.53 | 0.56 | 4.35 NA       | NA       |
| 0    | 0    | 0    | 0 NA          | NA       |
| 0    | 0    | 0    | 0 NA          | NA       |
| 0    | 0    | 0.27 | 0.16 NA       | NA       |
| 0    | 0    | 0    | 0 NA          | NA       |
| 0    | 0    | 0    | 0 NA          | NA       |
| 2.34 | 2.25 | 2.5  | 2.54 -0.05555 | 0.898733 |
| 0    | 0    | 0    | 0 NA          | NA       |
| 0    | 0    | 0    | 0 NA          | NA       |
| 0.1  | 0    | 0.13 | 0.22 NA       | NA       |
| 0    | 0    | 0.1  | 0 NA          | NA       |
| 0    | 0    | 0.14 | 0 NA          | NA       |
| 0    | 0    | 0    | 0 NA          | NA       |
| 0    | 0    | 0    | 0 NA          | NA       |
| 0    | 0.46 | 0.21 | 0.12 NA       | NA       |
| 0.86 | 0.69 | 0.68 | 0.67 -0.15343 | 0.796113 |
| 0    | 0    | 0    | 0 NA          | NA       |
| 0    | 0    | 0    | 0 NA          | NA       |
| 0    | 0    | 0    | 0 NA          | NA       |
| 0.01 | 0.11 | 0.08 | 0.04 0.022134 | 0.982382 |
| 0    | 0.11 | 0.1  | 0.11 NA       | NA       |
| 0    | 0    | 0    | 0 NA          | NA       |
| 0    | 0    | 0    | 0 NA          | NA       |
| 0.1  | 0.07 | 0    | 0 NA          | NA       |
| 0    | 0    | 0    | 0 NA          | NA       |
| 0    | 0    | 0    | 0 NA          | NA       |

|       |      |       |                |          |
|-------|------|-------|----------------|----------|
| 0     | 0    | 0.9   | 0 NA           | NA       |
| 0.25  | 0.18 | 0     | 0.37 NA        | NA       |
| 0     | 0    | 0.16  | 0.76 NA        | NA       |
| 1.48  | 0.48 | 1.85  | 0.27 -0.14777  | 0.868389 |
| 0.26  | 0.38 | 0.05  | 0.49 1.127507  | 0.054404 |
| 0     | 0    | 0     | 0 NA           | NA       |
| 0.08  | 0.06 | 0     | 0 NA           | NA       |
| 0     | 0    | 0     | 0 NA           | NA       |
| 0     | 0    | 0     | 0 NA           | NA       |
| 0     | 0    | 0     | 0 NA           | NA       |
| 0     | 0    | 0     | 0 NA           | NA       |
| 0     | 0    | 0     | 0 NA           | NA       |
| 0     | 0    | 0.09  | 0 NA           | NA       |
| 0     | 0    | 0     | 0 NA           | NA       |
| 0     | 0    | 0.07  | 0 NA           | NA       |
| 0     | 0    | 0     | 0 NA           | NA       |
| 0     | 0    | 0     | 0 NA           | NA       |
| 0     | 0    | 0     | 0 NA           | NA       |
| 0     | 0    | 0     | 0 NA           | NA       |
| 0     | 0    | 0     | 0 NA           | NA       |
| 0     | 0    | 0     | 0 NA           | NA       |
| 2.01  | 1.81 | 1.82  | 1.3 0.032803   | 0.964365 |
| 0     | 0    | 0     | 0 NA           | NA       |
| 0     | 0    | 0     | 0 NA           | NA       |
| 0     | 0    | 0     | 0 NA           | NA       |
| 0     | 0    | 0     | 0 NA           | NA       |
| 0     | 0    | 0     | 0 NA           | NA       |
| 0     | 0    | 0     | 0 NA           | NA       |
| 14.37 | 9.97 | 10.93 | 11.19 -0.56567 | 1.66E-05 |
| 0     | 0    | 0     | 0 NA           | NA       |
| 1.53  | 0.49 | 0.78  | 0.64 -0.19627  | 0.820323 |
| 0     | 0    | 0     | 0 NA           | NA       |
| 0.61  | 0.97 | 0.55  | 0.57 0.349906  | 0.615925 |
| 0     | 0    | 0     | 0 NA           | NA       |
| 1.97  | 2.08 | 2.02  | 2.5 0.015449   | 0.974831 |
| 0     | 0    | 0     | 0 NA           | NA       |
| 0     | 0    | 0     | 0.11 NA        | NA       |
| 0     | 0    | 0     | 0 NA           | NA       |
| 0     | 0    | 0     | 0 NA           | NA       |
| 2.44  | 1.28 | 0.39  | 1.38 -0.78682  | 0.14275  |
| 0.07  | 0    | 0.14  | 0 NA           | NA       |
| 0     | 0    | 0     | 0 NA           | NA       |
| 0     | 0    | 0     | 1.39 NA        | NA       |
| 0     | 0    | 0     | 0 NA           | NA       |
| 0     | 0    | 0     | 0 NA           | NA       |

|        |       |       |                 |          |
|--------|-------|-------|-----------------|----------|
| 0      | 0     | 0     | 0 NA            | NA       |
| 0      | 0     | 0     | 0 NA            | NA       |
| 0      | 0     | 0     | 0 NA            | NA       |
| 0      | 0     | 0.1   | 0 NA            | NA       |
| 0      | 0     | 0     | 0 NA            | NA       |
| 0      | 0     | 0     | 0 NA            | NA       |
| 0      | 0     | 0     | 0 NA            | NA       |
| 0      | 0     | 0     | 0.33 NA         | NA       |
| 1.89   | 1.94  | 2.77  | 2.26 0.093489   | 0.828444 |
| 0.1    | 0.26  | 0.38  | 0.27 1.072011   | 0.045149 |
| 0      | 0     | 0     | 0 NA            | NA       |
| 0      | 0     | 0     | 0 NA            | NA       |
| 0      | 0     | 0     | 0 NA            | NA       |
| 0      | 0     | 0     | 0.1 NA          | NA       |
| 0.68   | 0.73  | 0.69  | 0.67 0.446601   | 0.464212 |
| 0      | 0     | 0     | 0 NA            | NA       |
| 0.04   | 0.05  | 0.1   | 0.03 NA         | NA       |
| 0      | 0     | 0     | 0 NA            | NA       |
| 0      | 0     | 0     | 0 NA            | NA       |
| 0      | 0     | 0     | 0 NA            | NA       |
| 12.38  | 13.28 | 14.31 | 12.97 0.138941  | 0.377348 |
| 2.43   | 2.73  | 2.93  | 2.82 0.243233   | 0.3249   |
| 0      | 0     | 0     | 0 NA            | NA       |
| 0      | 0     | 0.06  | 0 NA            | NA       |
| 0      | 0     | 0     | 0 NA            | NA       |
| 2.35   | 2.5   | 1.9   | 3.59 0.357372   | 0.528705 |
| 0      | 0     | 0     | 0 NA            | NA       |
| 0      | 0     | 0     | 0 NA            | NA       |
| 0      | 0     | 0     | 0 NA            | NA       |
| 0      | 0     | 0     | 0 NA            | NA       |
| 0      | 0     | 0     | 0 NA            | NA       |
| 0.47   | 0     | 0     | 0 NA            | NA       |
| 0      | 0     | 0     | 0 NA            | NA       |
| 2.6    | 2.06  | 1.34  | 2.31 -0.39706   | 0.468812 |
| 0      | 0     | 0     | 0 NA            | NA       |
| 100.56 | 58.3  | 91.21 | 104.76 -0.36827 | 0.053852 |
| 0      | 0     | 0     | 0 NA            | NA       |
| 0      | 0     | 0     | 0 NA            | NA       |
| 5.94   | 3.34  | 5.14  | 3.63 -0.2999    | 0.377975 |
| 0      | 0     | 0     | 0 NA            | NA       |
| 0.72   | 0.87  | 1.12  | 0.73 -0.12558   | 0.878434 |
| 0      | 0     | 0     | 0 NA            | NA       |
| 0      | 0     | 0     | 0.31 NA         | NA       |
| 0      | 0     | 0     | 0 NA            | NA       |
| 0.49   | 0.45  | 0.29  | 0.25 -0.6981    | 0.185471 |

|      |      |      |               |          |
|------|------|------|---------------|----------|
| 0    | 0    | 0    | 0 NA          | NA       |
| 0.24 | 1.38 | 0.52 | 2.06 0.630377 | 0.373934 |
| 0.02 | 0.07 | 0.05 | 0.05 NA       | NA       |
| 0    | 0    | 0    | 0 NA          | NA       |
| 0    | 0    | 0.02 | 0.05 NA       | NA       |
| 0    | 0    | 0    | 0 NA          | NA       |
| 0    | 0    | 0    | 0 NA          | NA       |
| 0    | 0    | 0    | 0 NA          | NA       |
| 0    | 0.37 | 0    | 0 NA          | NA       |
| 0    | 0    | 0    | 0 NA          | NA       |
| 0    | 0    | 0    | 0 NA          | NA       |
| 0    | 0    | 0    | 0 NA          | NA       |
| 0    | 0    | 0    | 0 NA          | NA       |
| 2.11 | 3.34 | 4.68 | 3.2 0.5703    | 0.205749 |
| 0    | 0    | 0    | 0.32 NA       | NA       |
| 0    | 0    | 0    | 0 NA          | NA       |
| 0    | 0    | 0    | 0 NA          | NA       |
| 0    | 0    | 0    | 0 NA          | NA       |
| 0    | 0    | 0    | 0 NA          | NA       |
| 0    | 0    | 0.18 | 0.21 NA       | NA       |
| 0    | 0    | 0    | 0 NA          | NA       |
| 0    | 0    | 0    | 0 NA          | NA       |
| 0    | 0    | 0    | 0 NA          | NA       |
| 0.17 | 0.18 | 0.14 | 0.15 -0.02848 | 0.970719 |
| 0    | 0    | 0    | 0 NA          | NA       |
| 0    | 0    | 0.32 | 0 NA          | NA       |
| 0.7  | 1.17 | 0.53 | 1.09 0.241248 | 0.762312 |
| 0    | 0    | 0    | 0 NA          | NA       |
| 0.68 | 0.58 | 0.4  | 0.46 NA       | NA       |
| 0    | 0    | 0    | 0 NA          | NA       |
| 0.68 | 0.76 | 0.62 | 0.59 -0.0829  | 0.872217 |
| 0    | 0    | 0    | 0 NA          | NA       |
| 0    | 0.11 | 0    | 0 NA          | NA       |
| 0    | 0    | 0    | 0 NA          | NA       |
| 0    | 0    | 0    | 0 NA          | NA       |
| 0    | 0    | 0    | 0 NA          | NA       |
| 0    | 0    | 0    | 0 NA          | NA       |
| 0    | 0    | 0    | 0 NA          | NA       |
| 0    | 0    | 0    | 0 NA          | NA       |
| 0    | 0    | 0    | 0 NA          | NA       |
| 0.02 | 0.01 | 0.02 | 0.05 NA       | NA       |
| 0    | 0    | 0    | 0 NA          | NA       |
| 0    | 0    | 0    | 0 NA          | NA       |
| 0    | 0    | 0    | 0 NA          | NA       |
| 0    | 0    | 0.02 | 0 NA          | NA       |
| 0.49 | 0    | 0    | 0.32 NA       | NA       |

|       |       |      |               |          |
|-------|-------|------|---------------|----------|
| 0     | 0     | 0    | 0 NA          | NA       |
| 0.07  | 0.02  | 0.05 | 0.05 NA       | NA       |
| 0     | 0     | 0    | 0 NA          | NA       |
| 0     | 0     | 0    | 0 NA          | NA       |
| 0     | 0     | 0    | 0 NA          | NA       |
| 0     | 0     | 0    | 0 NA          | NA       |
| 0     | 0     | 0    | 0 NA          | NA       |
| 0     | 0     | 0    | 0 NA          | NA       |
| 12.84 | 12.53 | 12   | 12.3 -0.19419 | 0.169807 |
| 0.04  | 0.13  | 0.1  | 0.05 NA       | NA       |
| 0.02  | 0     | 0    | 0.12 NA       | NA       |
| 0     | 0     | 0    | 0 NA          | NA       |
| 0     | 0     | 0    | 0 NA          | NA       |
| 0.09  | 0.06  | 0.33 | 0.31 0.758671 | 0.265261 |
| 0     | 0     | 0    | 0 NA          | NA       |
| 0     | 0     | 0    | 0 NA          | NA       |
| 0     | 0     | 0.04 | 0 NA          | NA       |
| 0     | 0     | 0    | 0 NA          | NA       |
| 0.16  | 0     | 0    | 0 NA          | NA       |
| 0     | 0.11  | 0    | 0 NA          | NA       |
| 0     | 0     | 0    | 0 NA          | NA       |
| 0     | 0     | 0    | 0 NA          | NA       |
| 0     | 0     | 0    | 0 NA          | NA       |
| 0     | 0     | 0    | 0 NA          | NA       |
| 0     | 0     | 0.33 | 0 NA          | NA       |
| 0     | 0     | 0.01 | 0 NA          | NA       |
| 1.68  | 0.75  | 1.37 | 0.63 -0.15864 | 0.856269 |
| 2.9   | 2.78  | 3.68 | 2.53 -0.15482 | 0.630015 |
| 0     | 0     | 0    | 0 NA          | NA       |
| 0     | 0     | 0    | 0 NA          | NA       |
| 0     | 0     | 0    | 0 NA          | NA       |
| 0     | 0     | 0    | 0 NA          | NA       |
| 0     | 0     | 0    | 0 NA          | NA       |
| 0.19  | 0     | 0.25 | 0 NA          | NA       |
| 0     | 0     | 0    | 0 NA          | NA       |
| 0     | 0     | 0    | 0 NA          | NA       |
| 0.03  | 0     | 0    | 0.03 NA       | NA       |
| 0     | 0     | 0    | 0 NA          | NA       |
| 0     | 0     | 0    | 0 NA          | NA       |
| 0     | 0     | 0    | 0 NA          | NA       |
| 0     | 0     | 0    | 0 NA          | NA       |
| 0     | 0     | 0    | 0 NA          | NA       |
| 0     | 0     | 0    | 0 NA          | NA       |
| 0     | 0     | 0    | 0 NA          | NA       |
| 0     | 0.16  | 0    | 0.41 NA       | NA       |
| 0     | 0     | 0    | 0 NA          | NA       |

|       |       |       |       |          |          |
|-------|-------|-------|-------|----------|----------|
| 0.33  | 0.83  | 0.89  | 0.71  | 0.478126 | 0.157695 |
| 0     | 0     | 0     | 0     | NA       | NA       |
| 0.32  | 0.12  | 0.26  | 0.15  | -0.42625 | 0.554834 |
| 0     | 0     | 0     | 0     | NA       | NA       |
| 0     | 0     | 0     | 0     | NA       | NA       |
| 0     | 0     | 0     | 0     | NA       | NA       |
| 0     | 0     | 0     | 0     | NA       | NA       |
| 12.47 | 13.92 | 12.23 | 13.96 | 0.090445 | 0.489363 |
| 0     | 0     | 0     | 0     | NA       | NA       |
| 0.22  | 0     | 0     | 0     | NA       | NA       |
| 0     | 0     | 0     | 0     | NA       | NA       |
| 0     | 0     | 0     | 0     | NA       | NA       |
| 0.1   | 0     | 0     | 0     | NA       | NA       |
| 0     | 0     | 0.03  | 0     | NA       | NA       |
| 0     | 0     | 0     | 0     | NA       | NA       |
| 0     | 0     | 0     | 0     | NA       | NA       |
| 3.81  | 2.85  | 3.83  | 5.12  | -0.09846 | 0.828141 |
| 0     | 0     | 0     | 0     | NA       | NA       |
| 0     | 0     | 0     | 0     | NA       | NA       |
| 0     | 0.51  | 0.09  | 0.18  | NA       | NA       |
| 0.42  | 0     | 0.08  | 0.08  | NA       | NA       |
| 0.26  | 1.03  | 0.47  | 0.33  | 0.05263  | 0.955009 |
| 0     | 0     | 0     | 0     | NA       | NA       |
| 0     | 0     | 0     | 0     | NA       | NA       |
| 0     | 0     | 0     | 0     | NA       | NA       |
| 0     | 0     | 0     | 0     | NA       | NA       |
| 0.02  | 0.08  | 0.03  | 0     | NA       | NA       |
| 0     | 0     | 0     | 0     | NA       | NA       |
| 0     | 0     | 0     | 0     | NA       | NA       |
| 0     | 0     | 0     | 0     | NA       | NA       |
| 0     | 0     | 0     | 0     | NA       | NA       |
| 0     | 0     | 0.03  | 0     | NA       | NA       |
| 0     | 0     | 0     | 0     | NA       | NA       |
| 0     | 0     | 0     | 0     | NA       | NA       |
| 0     | 0     | 0     | 0     | NA       | NA       |
| 0     | 0.06  | 0     | 0     | NA       | NA       |
| 0     | 0     | 0     | 0     | NA       | NA       |
| 0     | 0     | 0     | 0     | NA       | NA       |
| 0.31  | 0     | 0     | 0     | NA       | NA       |
| 0     | 0     | 0     | 0     | NA       | NA       |
| 0     | 0     | 0     | 0     | NA       | NA       |
| 0     | 0.15  | 0     | 0     | NA       | NA       |
| 0.18  | 0     | 0.24  | 0     | NA       | NA       |
| 0.41  | 0.34  | 0.33  | 0.39  | -0.22407 | 0.077785 |

|       |       |       |       |          |          |
|-------|-------|-------|-------|----------|----------|
| 0.83  | 0.58  | 0.57  | 0.79  | -0.31353 | 0.469684 |
| 0     | 0.12  | 0.11  | 0.06  | NA       | NA       |
| 0     | 0     | 0     | 0     | NA       | NA       |
| 2.16  | 2.03  | 2.37  | 2.33  | -0.24105 | 0.472775 |
| 0     | 0     | 0     | 0     | NA       | NA       |
| 0.62  | 1.36  | 1.48  | 0.56  | -0.3952  | 0.363899 |
| 0     | 0     | 0     | 0     | NA       | NA       |
| 0.06  | 0.15  | 0.21  | 0.21  | 0.185686 | 0.825444 |
| 0     | 0     | 0     | 0     | NA       | NA       |
| 0     | 0     | 0     | 0     | NA       | NA       |
| 0     | 0     | 0     | 0     | NA       | NA       |
| 0     | 0     | 0     | 0     | NA       | NA       |
| 0     | 0     | 0     | 0     | NA       | NA       |
| 39.84 | 38.98 | 43.11 | 40.91 | -0.13368 | 0.232727 |
| 0     | 0     | 0     | 0     | NA       | NA       |
| 0     | 0     | 0.16  | 0     | NA       | NA       |
| 0     | 0.03  | 0     | 0     | NA       | NA       |
| 0     | 0     | 0     | 0     | NA       | NA       |
| 0.57  | 0.13  | 0.22  | 0.2   | -0.4653  | 0.511967 |
| 0     | 0     | 0     | 0     | NA       | NA       |
| 0     | 0     | 0     | 0     | NA       | NA       |
| 0     | 0     | 0.66  | 0     | NA       | NA       |
| 0.11  | 0.16  | 0.15  | 0.25  | NA       | NA       |
| 0.69  | 1.45  | 10.13 | 4.36  | 1.036312 | 0.103418 |
| 0.18  | 0.19  | 0.12  | 0     | NA       | NA       |
| 0.68  | 0.98  | 1.05  | 1.27  | 0.492551 | 0.134884 |
| 0.09  | 0     | 0     | 0.02  | NA       | NA       |
| 0     | 0.62  | 0.57  | 0.56  | 0.240556 | 0.776183 |
| 58.12 | 41.02 | 48.5  | 44.28 | -0.62103 | 2.06E-05 |
| 0.47  | 0.45  | 0     | 0.7   | NA       | NA       |
| 0     | 0     | 0.12  | 0.13  | NA       | NA       |
| 0.43  | 0.33  | 0.37  | 1.22  | -0.38986 | 0.47363  |
| 25.38 | 38.4  | 36.59 | 32.83 | 0.39593  | 0.003557 |
| 0     | 0     | 0     | 0     | NA       | NA       |
| 1.52  | 0     | 0     | 0.54  | NA       | NA       |
| 0     | 0     | 0     | 0     | NA       | NA       |
| 0     | 0     | 0     | 0     | NA       | NA       |
| 0     | 0     | 0.11  | 0     | NA       | NA       |
| 0     | 0     | 0.15  | 0.17  | NA       | NA       |
| 0.13  | 0     | 0.12  | 0     | NA       | NA       |
| 0.96  | 1.03  | 1.28  | 1.27  | 0.405149 | 0.556832 |
| 0     | 0     | 0     | 0     | NA       | NA       |
| 0     | 0     | 0     | 0     | NA       | NA       |
| 0     | 0     | 0     | 0     | NA       | NA       |
| 0     | 0     | 0     | 0     | NA       | NA       |

|       |       |       |                |          |
|-------|-------|-------|----------------|----------|
| 0     | 0     | 0     | 0 NA           | NA       |
| 0.38  | 0.55  | 0.5   | 0.37 0.040865  | 0.957348 |
| 0     | 0.15  | 0     | 0 NA           | NA       |
| 0     | 0.24  | 0.22  | 0.25 NA        | NA       |
| 0     | 0     | 0     | 0.08 NA        | NA       |
| 0.8   | 0.76  | 1.02  | 2.36 0.631769  | 0.373137 |
| 0.18  | 0.13  | 1.13  | 0.27 NA        | NA       |
| 0.03  | 3.88  | 2.02  | 2.63 4.14243   | 4.57E-24 |
| 1.37  | 1.43  | 1.32  | 1.45 0.214092  | 0.666949 |
| 1.39  | 0.81  | 0.54  | 0.68 -0.72252  | 0.214293 |
| 0     | 0     | 0     | 0 NA           | NA       |
| 0     | 0     | 0     | 0 NA           | NA       |
| 1     | 1.77  | 1.05  | 1.3 0.134239   | 0.807405 |
| 0     | 0     | 0     | 0 NA           | NA       |
| 1.75  | 2.48  | 2.22  | 2.7 0.286735   | 0.211303 |
| 1.23  | 0.55  | 0.2   | 0.12 -0.37851  | 0.622432 |
| 0.22  | 0     | 0.15  | 0.1 -1.34904   | 0.023923 |
| 6.22  | 10.88 | 9.14  | 10.33 0.500042 | 0.085922 |
| 0     | 0     | 0     | 0 NA           | NA       |
| 0.19  | 0.19  | 0.18  | 0.17 -0.32067  | 0.636669 |
| 0     | 0     | 0.92  | 0 NA           | NA       |
| 0.47  | 0.26  | 0.08  | 0.18 NA        | NA       |
| 0.64  | 0     | 0.14  | 0.16 NA        | NA       |
| 0     | 0     | 0     | 0 NA           | NA       |
| 0.12  | 0.09  | 0.4   | 0.54 -0.34667  | 0.662598 |
| 0     | 0.25  | 0.22  | 0.52 NA        | NA       |
| 0     | 0     | 0     | 0 NA           | NA       |
| 14.45 | 15.94 | 18.81 | 14.69 0.24583  | 0.127253 |
| 0     | 0     | 0     | 0 NA           | NA       |
| 0     | 0     | 0     | 0 NA           | NA       |
| 5.77  | 7.91  | 8.06  | 7.74 0.516127  | 0.0507   |
| 0.13  | 0.1   | 0.08  | 0.07 -0.4423   | 0.535362 |
| 0     | 0.89  | 0.35  | 0.4 0.203481   | 0.811275 |
| 0     | 0     | 0     | 0 NA           | NA       |
| 0     | 0.11  | 0     | 0 NA           | NA       |
| 0     | 0     | 0.1   | 0 NA           | NA       |
| 5.88  | 10.28 | 21.7  | 13.66 0.703753 | 0.057256 |
| 0.93  | 6.53  | 6.95  | 9.72 1.104238  | 0.070946 |
| 0     | 0     | 0     | 0 NA           | NA       |
| 0     | 0     | 0     | 0 NA           | NA       |
| 0.68  | 0.77  | 0.64  | 1.01 0.094233  | 0.85075  |
| 0     | 0.31  | 0.14  | 0.08 NA        | NA       |
| 0.44  | 0     | 0.14  | 0.33 NA        | NA       |
| 0     | 0     | 0     | 0 NA           | NA       |
| 0     | 0     | 0     | 0 NA           | NA       |



|      |      |      |               |          |
|------|------|------|---------------|----------|
| 0.69 | 0    | 0    | 0 NA          | NA       |
| 0.18 | 0.21 | 0.17 | 0.17 -0.24317 | 0.718648 |
| 2.72 | 2.71 | 3.4  | 1.78 0.412257 | 0.449822 |
| 0.04 | 0.04 | 0.06 | 0.03 NA       | NA       |
| 0    | 0    | 0    | 0 NA          | NA       |
| 0    | 0    | 0    | 0 NA          | NA       |
| 0    | 0    | 0    | 0 NA          | NA       |
| 0    | 0    | 0    | 0 NA          | NA       |
| 0    | 0    | 0    | 0 NA          | NA       |
| 0.08 | 0    | 0    | 0.03 NA       | NA       |
| 0.47 | 0.11 | 0.61 | 1.41 0.205527 | 0.812051 |
| 0.26 | 0.12 | 0.23 | 0.33 -0.17671 | 0.840815 |
| 0.23 | 0.16 | 0.44 | 0 NA          | NA       |
| 0.74 | 1.46 | 0.73 | 0.56 0.284117 | 0.729065 |
| 0    | 0    | 0    | 0 NA          | NA       |
| 0.77 | 0.18 | 0    | 0 NA          | NA       |
| 0    | 0    | 0.48 | 0.07 NA       | NA       |
| 1.13 | 0.42 | 0.47 | 0.54 0.155534 | 0.86089  |
| 0.63 | 0.61 | 0.66 | 0.53 0.100843 | 0.862442 |
| 3.02 | 2.28 | 2.37 | 2.43 -0.25305 | 0.41055  |
| 0.36 | 0.26 | 0.12 | 0.54 NA       | NA       |
| 0    | 0.28 | 0.51 | 0.15 NA       | NA       |
| 0.09 | 0.09 | 0.06 | 0.07 NA       | NA       |
| 0.02 | 0.04 | 0.02 | 0.01 NA       | NA       |
| 0.65 | 0.54 | 0.49 | 0.47 0.145942 | 0.834197 |
| 0    | 0    | 0.16 | 0.09 NA       | NA       |
| 0.46 | 0.32 | 0.47 | 0.17 -0.49172 | 0.510191 |
| 0    | 0.22 | 0    | 0 NA          | NA       |
| 0.92 | 1.51 | 2.01 | 1.49 0.294339 | 0.659884 |
| 0.14 | 0    | 0.19 | 0 NA          | NA       |
| 0    | 0.22 | 0.2  | 0.46 NA       | NA       |
| 0    | 0    | 0    | 0 NA          | NA       |
| 0    | 0    | 0    | 0 NA          | NA       |
| 0    | 0    | 0    | 0 NA          | NA       |
| 0    | 0    | 0.07 | 0.08 NA       | NA       |
| 0.88 | 0.31 | 0.39 | 0.33 -0.57873 | 0.422003 |
| 0    | 0    | 0    | 0 NA          | NA       |
| 2.38 | 0.84 | 0.71 | 0.42 NA       | NA       |
| 1    | 0.92 | 0.35 | 0.32 -0.43666 | 0.524726 |
| 0    | 0    | 0    | 0 NA          | NA       |
| 0    | 0    | 0    | 0 NA          | NA       |
| 6.99 | 6.18 | 6.47 | 7.02 -0.02915 | 0.90414  |
| 0    | 0    | 0    | 0 NA          | NA       |
| 0    | 0.15 | 0.14 | 0 NA          | NA       |
| 0.47 | 0.21 | 0.82 | 0.22 -0.37815 | 0.627366 |

|      |      |      |      |          |          |
|------|------|------|------|----------|----------|
| 0.95 | 0    | 0.4  | 1.4  | NA       | NA       |
| 0.18 | 0.39 | 1.19 | 1.1  | 0.767176 | 0.26013  |
| 0    | 0    | 0    | 0    | NA       | NA       |
| 0.24 | 0.69 | 0.56 | 0.73 | 0.692427 | 0.318776 |
| 0    | 0    | 0    | 0    | NA       | NA       |
| 1.82 | 2.12 | 3.12 | 3.22 | 0.561206 | 0.098821 |
| 0    | 0    | 0    | 0    | NA       | NA       |
| 0.34 | 1.02 | 0    | 0.33 | NA       | NA       |
| 0    | 0    | 0    | 0    | NA       | NA       |
| 1.37 | 0.51 | 0.85 | 1.1  | -0.98341 | 0.013146 |
| 0    | 0    | 0.42 | 0    | NA       | NA       |
| 0.11 | 0    | 0    | 0.08 | NA       | NA       |
| 0    | 0    | 0    | 0    | NA       | NA       |
| 0    | 0    | 0    | 0    | NA       | NA       |
| 0    | 0.18 | 0.33 | 0.57 | NA       | NA       |
| 0.11 | 0.82 | 0.53 | 0.43 | 0.935364 | 0.1512   |
| 0    | 0    | 0    | 0    | NA       | NA       |
| 0    | 0    | 0    | 0    | NA       | NA       |
| 0.35 | 1.34 | 0.99 | 1.15 | 0.671118 | 0.302498 |
| 0    | 0.03 | 0.06 | 0.03 | NA       | NA       |
| 0    | 0    | 0    | 0    | NA       | NA       |
| 0.62 | 0    | 0    | 0.44 | NA       | NA       |
| 0.06 | 0.12 | 0    | 0.25 | NA       | NA       |
| 0    | 0    | 0    | 0    | NA       | NA       |
| 0    | 0    | 0    | 0    | NA       | NA       |
| 0    | 0    | 0    | 0.18 | NA       | NA       |
| 0    | 0    | 0    | 4.85 | NA       | NA       |
| 0.15 | 0    | 0    | 0    | NA       | NA       |
| 0.27 | 0    | 0    | 0    | NA       | NA       |
| 0    | 0    | 0    | 0.04 | -0.79065 | 0.198577 |
| 0.78 | 1.01 | 1.34 | 0.71 | -0.20774 | 0.793593 |
| 0    | 0    | 0    | 0    | NA       | NA       |
| 0    | 0    | 0    | 0    | NA       | NA       |
| 0    | 0    | 0    | 0    | NA       | NA       |
| 0    | 0    | 0    | 0    | NA       | NA       |
| 0    | 0.43 | 0    | 0.3  | NA       | NA       |
| 0    | 0    | 0.11 | 0.12 | -0.91074 | 0.137936 |
| 0    | 0    | 0    | 0    | NA       | NA       |
| 0    | 0    | 0    | 0    | NA       | NA       |
| 0    | 0    | 0    | 0    | NA       | NA       |
| 0    | 0    | 0    | 0    | NA       | NA       |
| 0    | 0.1  | 0.09 | 0    | NA       | NA       |
| 0.13 | 0.29 | 0.22 | 0.3  | 0.150397 | 0.847875 |
| 0.83 | 0    | 0.44 | 0.63 | -0.67238 | 0.337423 |
| 0    | 0    | 0    | 0    | NA       | NA       |

|       |      |       |       |          |          |
|-------|------|-------|-------|----------|----------|
| 0     | 0    | 0.02  | 0.07  | NA       | NA       |
| 0     | 0    | 0     | 0     | NA       | NA       |
| 0.2   | 0.42 | 0     | 0.15  | NA       | NA       |
| 0     | 0    | 0.38  | 2.14  | 0.326895 | 0.462391 |
| 0     | 0.08 | 0     | 0     | NA       | NA       |
| 0     | 0    | 0     | 0     | NA       | NA       |
| 0     | 0    | 0     | 0     | NA       | NA       |
| 0.16  | 0    | 0     | 0     | NA       | NA       |
| 0     | 0.11 | 0.2   | 0     | NA       | NA       |
| 2.51  | 2.27 | 1.66  | 2.76  | -0.22732 | 0.487046 |
| 0.36  | 0    | 0.16  | 0.09  | NA       | NA       |
| 1.03  | 1.37 | 2.5   | 2.12  | 0.373085 | 0.476585 |
| 0     | 0    | 0     | 0     | NA       | NA       |
| 0     | 0    | 0     | 0     | NA       | NA       |
| 0.12  | 0.16 | 0     | 0.09  | NA       | NA       |
| 0.15  | 0.11 | 0     | 0.11  | NA       | NA       |
| 0     | 0    | 0     | 0     | NA       | NA       |
| 0     | 0    | 0     | 0     | NA       | NA       |
| 14.45 | 17.2 | 15.27 | 13.97 | 0.134081 | 0.555149 |
| 0     | 0    | 0     | 0     | NA       | NA       |
| 0     | 0    | 0     | 0     | NA       | NA       |
| 1.09  | 1.42 | 1.19  | 1.5   | 0.490061 | 0.416147 |
| 0.1   | 0.21 | 0.29  | 0.18  | 0.104883 | 0.90895  |
| 0     | 0    | 0.8   | 0     | NA       | NA       |
| 0.51  | 0.73 | 0.51  | 0.58  | -0.20958 | 0.802296 |
| 14.83 | 12.7 | 13.37 | 11.38 | -0.26153 | 0.016197 |
| 0     | 0    | 0     | 0     | NA       | NA       |
| 0     | 0    | 0     | 0     | NA       | NA       |
| 0     | 0    | 0     | 0     | NA       | NA       |
| 0     | 0    | 0     | 0     | NA       | NA       |
| 0     | 0    | 0.03  | 0     | NA       | NA       |
| 0     | 0    | 0     | 0     | NA       | NA       |
| 0     | 0    | 0     | 0     | NA       | NA       |
| 0     | 0    | 0     | 0     | NA       | NA       |
| 0     | 0    | 0     | 0     | NA       | NA       |
| 2.16  | 1.44 | 1.71  | 1.5   | -0.37899 | 0.193042 |
| 0.57  | 1.02 | 0.95  | 0.94  | -0.08269 | 0.919195 |
| 0     | 0    | 0     | 0     | NA       | NA       |
| 0     | 0    | 0     | 0     | NA       | NA       |
| 0     | 0    | 0     | 0     | NA       | NA       |
| 0     | 0    | 0     | 0     | NA       | NA       |
| 0     | 0    | 0     | 0     | NA       | NA       |
| 0     | 0    | 0     | 0     | NA       | NA       |
| 0.2   | 0.14 | 0.53  | 0.3   | NA       | NA       |
| 0     | 0    | 0     | 0     | NA       | NA       |

|       |      |      |      |          |          |
|-------|------|------|------|----------|----------|
| 0     | 0    | 0    | 0    | NA       | NA       |
| 0     | 0    | 0    | 0    | NA       | NA       |
| 0     | 0    | 0    | 0    | NA       | NA       |
| 0     | 0    | 0    | 0    | NA       | NA       |
| 0     | 0    | 0.02 | 0    | NA       | NA       |
| 0     | 0    | 0    | 0    | NA       | NA       |
| 10.33 | 9.83 | 9.68 | 9.97 | -0.02858 | 0.862624 |
| 0     | 0    | 0    | 0    | NA       | NA       |
| 0     | 0    | 0    | 0    | NA       | NA       |
| 0     | 0    | 0    | 0    | NA       | NA       |
| 0     | 0.32 | 0    | 0.18 | NA       | NA       |
| 0     | 0    | 0    | 0    | NA       | NA       |
| 0     | 0    | 0    | 0    | NA       | NA       |
| 0     | 0    | 0    | 0    | NA       | NA       |
| 0     | 0    | 0    | 0    | NA       | NA       |
| 0.25  | 0.71 | 0    | 0.18 | NA       | NA       |
| 0     | 0.27 | 0.6  | 0.63 | 0.558236 | 0.444404 |
| 0     | 0    | 0    | 0    | NA       | NA       |
| 0     | 0    | 0    | 0    | NA       | NA       |
| 0     | 0    | 0    | 0    | NA       | NA       |
| 0     | 0    | 0    | 0    | NA       | NA       |
| 0     | 0    | 0    | 0    | NA       | NA       |
| 0     | 0    | 0    | 0    | NA       | NA       |
| 0     | 0    | 0    | 0    | NA       | NA       |
| 0.16  | 0    | 0    | 0    | NA       | NA       |
| 0     | 0    | 0    | 0    | NA       | NA       |
| 0     | 0    | 0    | 0    | NA       | NA       |
| 0     | 0    | 0    | 0    | NA       | NA       |
| 0     | 0    | 0    | 0    | NA       | NA       |
| 0     | 0    | 0    | 0    | NA       | NA       |
| 3.34  | 2.51 | 1.07 | 1.09 | -0.82911 | 0.063132 |
| 0.18  | 0.24 | 0.1  | 0.31 | 0.288469 | 0.720745 |
| 0     | 0    | 0    | 0    | NA       | NA       |
| 0     | 0    | 0    | 0    | NA       | NA       |
| 0     | 0    | 0    | 0    | NA       | NA       |
| 0     | 0    | 0    | 0    | NA       | NA       |
| 0     | 0    | 0    | 0    | NA       | NA       |
| 0     | 0    | 0    | 0    | NA       | NA       |
| 0     | 0    | 0    | 0    | NA       | NA       |
| 0     | 0    | 0    | 0    | NA       | NA       |
| 0     | 0    | 0    | 0    | NA       | NA       |
| 0     | 0    | 0    | 0    | NA       | NA       |
| 0     | 0    | 0    | 0    | NA       | NA       |
| 0     | 0    | 0    | 0    | NA       | NA       |
| 0     | 0    | 0    | 0    | NA       | NA       |
| 0     | 0    | 0    | 0    | NA       | NA       |
| 0.1   | 0.03 | 0    | 0    | NA       | NA       |



|      |      |      |               |          |
|------|------|------|---------------|----------|
| 0    | 0    | 0    | 0 NA          | NA       |
| 0    | 0    | 0    | 0 NA          | NA       |
| 0    | 0    | 0    | 0 NA          | NA       |
| 0    | 0    | 0    | 0 NA          | NA       |
| 0    | 0    | 0    | 0 NA          | NA       |
| 0.27 | 0.05 | 0.49 | 0.57 -0.33278 | 0.675163 |
| 0    | 0    | 0    | 0.19 NA       | NA       |
| 0    | 0    | 0    | 0 NA          | NA       |
| 0    | 0    | 0    | 0 NA          | NA       |
| 0    | 0    | 0    | 0 NA          | NA       |
| 0    | 0    | 0    | 0 NA          | NA       |
| 0    | 0    | 0    | 0 NA          | NA       |
| 0    | 0    | 0    | 0 NA          | NA       |
| 0    | 0    | 0    | 0 NA          | NA       |
| 0    | 0    | 0    | 0 NA          | NA       |
| 0    | 0    | 0.09 | 0 NA          | NA       |
| 0    | 0    | 0    | 0 NA          | NA       |
| 0    | 0    | 0    | 0 NA          | NA       |
| 0    | 0    | 0    | 0 NA          | NA       |
| 0    | 0    | 0    | 0 NA          | NA       |
| 0    | 0    | 0    | 0 NA          | NA       |
| 0.66 | 0.36 | 0.83 | 0.82 0.016389 | 0.986207 |
| 0    | 0    | 0    | 0 NA          | NA       |
| 0    | 0    | 0    | 0 NA          | NA       |
| 0    | 0    | 0    | 0 NA          | NA       |
| 0    | 0    | 0    | 0 NA          | NA       |
| 0    | 0    | 0    | 0 NA          | NA       |
| 0.46 | 0.42 | 0    | 0.44 -0.01995 | 0.983692 |
| 0    | 0    | 0    | 0.07 NA       | NA       |
| 0    | 0    | 0    | 0 NA          | NA       |
| 0    | 0    | 0    | 0 NA          | NA       |
| 0    | 0    | 0    | 0 NA          | NA       |
| 0    | 0    | 0    | 0 NA          | NA       |
| 0.24 | 0.14 | 0.04 | 0.06 -0.51934 | 0.481337 |
| 0    | 0    | 0    | 0 NA          | NA       |
| 0    | 0.07 | 0    | 0 NA          | NA       |
| 0    | 0    | 0    | 0 NA          | NA       |
| 0    | 0    | 0    | 0 NA          | NA       |
| 0    | 0    | 0.15 | 0.06 NA       | NA       |
| 0    | 0    | 0    | 0 NA          | NA       |
| 0    | 0    | 0    | 0 NA          | NA       |
| 0    | 0    | 0    | 0 NA          | NA       |
| 0    | 0    | 0    | 0 NA          | NA       |
| 0    | 0    | 0.22 | 0 NA          | NA       |
| 0    | 0    | 0    | 0 NA          | NA       |
| 0    | 0    | 0    | 0 NA          | NA       |



|      |      |       |       |          |          |
|------|------|-------|-------|----------|----------|
| 0    | 0    | 0.36  | 0.43  | NA       | NA       |
| 0    | 0    | 0     | 0     | NA       | NA       |
| 0    | 0    | 0     | 0     | NA       | NA       |
| 0    | 0    | 0     | 0     | NA       | NA       |
| 0    | 0    | 0     | 0     | NA       | NA       |
| 0    | 0    | 0     | 0     | NA       | NA       |
| 0    | 0    | 0     | 0     | NA       | NA       |
| 0.27 | 0.26 | 0.19  | 0.31  | -0.0348  | 0.971704 |
| 0    | 0    | 0     | 0     | NA       | NA       |
| 0    | 0    | 0     | 0     | NA       | NA       |
| 0    | 0    | 0     | 0     | NA       | NA       |
| 0    | 0    | 0     | 0     | NA       | NA       |
| 0    | 0    | 0     | 0     | NA       | NA       |
| 0    | 0    | 0     | 0     | NA       | NA       |
| 0.2  | 0.3  | 0.22  | 0.21  | 0.434024 | 0.561641 |
| 0    | 0    | 0     | 0     | NA       | NA       |
| 0    | 0    | 0     | 0     | NA       | NA       |
| 0    | 0    | 0     | 0     | NA       | NA       |
| 0    | 0    | 0     | 0     | NA       | NA       |
| 0    | 0    | 0     | 0     | NA       | NA       |
| 0    | 0.12 | 0     | 0.13  | NA       | NA       |
| 0.17 | 0.12 | 0.87  | 0.75  | 0.453433 | 0.537744 |
| 0    | 0    | 0     | 0     | NA       | NA       |
| 0.05 | 0    | 0.11  | 0.12  | -0.13674 | 0.875348 |
| 0    | 0    | 0     | 0     | NA       | NA       |
| 0    | 0    | 0     | 0     | NA       | NA       |
| 0    | 0    | 0     | 0     | NA       | NA       |
| 0.18 | 0.58 | 0.25  | 0.76  | 0.50921  | 0.412741 |
| 0    | 0    | 0     | 0     | NA       | NA       |
| 0    | 0    | 0     | 0     | NA       | NA       |
| 0    | 0    | 0     | 0     | NA       | NA       |
| 0    | 0    | 0.1   | 0     | NA       | NA       |
| 7.94 | 7.38 | 10.65 | 10.56 | -0.23567 | 0.249578 |
| 0    | 0    | 0     | 0     | NA       | NA       |
| 0    | 0    | 0     | 0     | NA       | NA       |
| 0    | 0    | 0     | 0     | NA       | NA       |
| 0    | 0    | 0     | 0     | NA       | NA       |
| 0    | 0    | 0     | 0     | NA       | NA       |
| 0.08 | 0    | 0.11  | 0.09  | NA       | NA       |
| 0    | 0    | 0     | 0     | NA       | NA       |
| 0    | 0    | 0     | 0     | NA       | NA       |
| 0    | 0    | 0     | 0     | NA       | NA       |
| 0    | 0    | 0     | 0     | NA       | NA       |
| 0.63 | 0.15 | 0.61  | 0     | NA       | NA       |



|       |       |       |       |          |          |
|-------|-------|-------|-------|----------|----------|
| 0.45  | 0.12  | 0.18  | 0.1   | -0.72705 | 0.274874 |
| 0     | 0     | 0     | 0     | NA       | NA       |
| 0.99  | 2.59  | 1.67  | 2.94  | 0.835578 | 0.013521 |
| 0     | 0     | 0     | 0     | NA       | NA       |
| 0     | 0     | 0     | 0     | NA       | NA       |
| 0     | 0     | 0     | 0     | NA       | NA       |
| 0     | 0     | 0     | 0     | NA       | NA       |
| 0     | 0     | 0     | 0     | NA       | NA       |
| 1.73  | 0.24  | 0     | 0     | NA       | NA       |
| 0     | 0     | 0     | 0     | NA       | NA       |
| 0     | 0     | 0     | 0     | NA       | NA       |
| 0     | 0     | 0     | 0     | NA       | NA       |
| 0     | 0     | 0     | 0     | NA       | NA       |
| 0     | 0     | 0     | 0     | NA       | NA       |
| 0     | 0     | 0     | 0     | NA       | NA       |
| 0     | 0     | 0     | 0     | NA       | NA       |
| 23.18 | 30.15 | 24.81 | 27.48 | 0.221196 | 0.035572 |
| 0     | 0     | 0     | 0     | NA       | NA       |
| 0     | 0     | 0     | 0     | NA       | NA       |
| 0     | 0     | 0     | 0     | NA       | NA       |
| 0.16  | 0.06  | 0     | 0.06  | NA       | NA       |
| 0     | 0     | 0     | 0     | NA       | NA       |
| 0     | 0     | 0     | 0     | NA       | NA       |
| 0.07  | 0.05  | 0.07  | 0.09  | -0.09414 | 0.848046 |
| 0     | 0     | 0     | 0     | NA       | NA       |
| 54.23 | 55.64 | 63.14 | 60.68 | 0.106538 | 0.332975 |
| 0     | 0     | 0     | 0     | NA       | NA       |
| 0     | 0     | 0     | 0     | NA       | NA       |
| 0     | 0     | 0     | 0     | NA       | NA       |
| 0     | 0     | 0     | 0     | NA       | NA       |
| 0     | 0     | 0     | 0.09  | NA       | NA       |
| 0     | 0     | 0     | 0     | NA       | NA       |
| 0     | 0     | 0     | 0     | NA       | NA       |
| 0     | 0     | 0     | 0     | NA       | NA       |
| 0     | 0     | 0     | 0     | NA       | NA       |
| 0.04  | 0     | 0     | 0     | NA       | NA       |
| 0.14  | 0     | 0     | 0.04  | NA       | NA       |
| 0.76  | 0.16  | 0.65  | 0.41  | -0.39954 | 0.600319 |
| 0     | 0     | 0     | 0     | NA       | NA       |
| 0     | 0     | 0     | 0     | NA       | NA       |
| 0     | 0     | 0     | 0     | NA       | NA       |
| 0     | 0     | 0     | 0     | NA       | NA       |
| 0.13  | 0.27  | 0.13  | 0.29  | 0.581498 | 0.411555 |
| 0     | 0     | 0     | 0     | NA       | NA       |



|       |       |      |                |          |
|-------|-------|------|----------------|----------|
| 0     | 0     | 0    | 0 NA           | NA       |
| 0.18  | 0     | 0.35 | 0 NA           | NA       |
| 0     | 0     | 0.19 | 0.22 NA        | NA       |
| 0     | 0     | 0    | 0 NA           | NA       |
| 0     | 0     | 0    | 0 NA           | NA       |
| 0.59  | 0     | 0    | 0 NA           | NA       |
| 10.14 | 12.77 | 9.75 | 11.41 -0.03036 | 0.930091 |
| 0     | 0     | 0    | 0 NA           | NA       |
| 0     | 0     | 0    | 0 NA           | NA       |
| 0     | 0     | 0.46 | 0.27 NA        | NA       |
| 0     | 0     | 0    | 0 NA           | NA       |
| 0     | 0     | 0    | 0 NA           | NA       |
| 0     | 0     | 0    | 0 NA           | NA       |
| 0.14  | 0.02  | 0.15 | 0.11 -0.94628  | 0.126806 |
| 0     | 0     | 0    | 0 NA           | NA       |
| 0     | 0     | 0    | 0 NA           | NA       |
| 0     | 0     | 0    | 0 NA           | NA       |
| 0     | 0     | 0    | 0 NA           | NA       |
| 0     | 0     | 0    | 0 NA           | NA       |
| 0     | 0.14  | 0    | 0 NA           | NA       |
| 0     | 0     | 0    | 0 NA           | NA       |
| 0     | 0     | 0    | 0 NA           | NA       |
| 0     | 0     | 0    | 0 NA           | NA       |
| 0     | 0     | 0    | 0 NA           | NA       |
| 0     | 0     | 0    | 0 NA           | NA       |
| 0     | 0.31  | 0    | 0 NA           | NA       |
| 0     | 0     | 0    | 0 NA           | NA       |
| 0     | 0     | 0    | 0 NA           | NA       |
| 0     | 0.23  | 1.78 | 4.67 NA        | NA       |
| 0     | 0     | 0    | 0 NA           | NA       |
| 0     | 0     | 0    | 0 NA           | NA       |
| 0     | 0     | 0    | 0 NA           | NA       |
| 0     | 0     | 0    | 0 NA           | NA       |
| 0     | 0     | 0    | 0 NA           | NA       |
| 0     | 0     | 0    | 0 NA           | NA       |
| 0     | 0     | 0    | 0 NA           | NA       |
| 0     | 0     | 0    | 0 NA           | NA       |
| 0     | 0     | 0    | 0 NA           | NA       |
| 0     | 0     | 0    | 0 NA           | NA       |
| 0     | 0     | 0    | 0 NA           | NA       |
| 0     | 0     | 0    | 0 NA           | NA       |
| 3.47  | 2.32  | 3.57 | 5.9 0.028391   | 0.948362 |
| 0     | 0.34  | 0.29 | 0 NA           | NA       |
| 3.38  | 2.77  | 2.91 | 4.45 0.067765  | 0.899652 |
| 0     | 0     | 0    | 0 NA           | NA       |
| 0     | 0     | 0    | 0 NA           | NA       |
| 0     | 0     | 0    | 0 NA           | NA       |
| 0     | 0     | 0    | 0 NA           | NA       |
| 0     | 0     | 0    | 0 NA           | NA       |

|      |      |      |               |          |
|------|------|------|---------------|----------|
| 0    | 0    | 0    | 0 NA          | NA       |
| 0    | 0    | 0.2  | 0 NA          | NA       |
| 0    | 0    | 0    | 0 NA          | NA       |
| 0    | 0    | 0    | 0 NA          | NA       |
| 0    | 0.03 | 0    | 0 NA          | NA       |
| 0    | 0    | 0    | 0 NA          | NA       |
| 2.51 | 2.8  | 1.82 | 2.42 -0.17599 | 0.789809 |
| 0    | 0    | 0    | 0 NA          | NA       |
| 0    | 0.05 | 0.07 | 0 NA          | NA       |
| 0    | 0    | 0    | 0 NA          | NA       |
| 0    | 0    | 0    | 0 NA          | NA       |
| 0    | 0    | 0    | 0 NA          | NA       |
| 0    | 0    | 0    | 0 NA          | NA       |
| 0    | 0    | 0    | 0 NA          | NA       |
| 0    | 0    | 0    | 0 NA          | NA       |
| 0    | 0    | 0    | 0 NA          | NA       |
| 0    | 0    | 0    | 0 NA          | NA       |
| 0    | 0    | 0    | 0 NA          | NA       |
| 0    | 0    | 0    | 0 NA          | NA       |
| 0    | 0    | 0    | 0 NA          | NA       |
| 0    | 0    | 0    | 0 NA          | NA       |
| 0    | 0    | 0    | 0 NA          | NA       |
| 0    | 0    | 0    | 0 NA          | NA       |
| 0    | 0    | 0    | 0 NA          | NA       |
| 0    | 0    | 0    | 0 NA          | NA       |
| 0    | 0    | 0    | 0 NA          | NA       |
| 0    | 0    | 0    | 0 NA          | NA       |
| 0    | 0    | 0    | 0 NA          | NA       |
| 0    | 0    | 0    | 0 NA          | NA       |
| 0    | 0.16 | 0    | 0 NA          | NA       |
| 0    | 0    | 0    | 0 NA          | NA       |
| 0    | 0    | 0    | 0 NA          | NA       |
| 0    | 0    | 0    | 0 NA          | NA       |
| 0    | 0    | 0    | 0.07 NA       | NA       |
| 0    | 0    | 0    | 0 NA          | NA       |
| 0    | 0    | 0    | 0 NA          | NA       |
| 0    | 0    | 0    | 0 NA          | NA       |
| 0    | 0    | 0    | 0 NA          | NA       |
| 0    | 0    | 0    | 0 NA          | NA       |
| 0    | 0.03 | 0    | 0 NA          | NA       |
| 9.87 | 4.48 | 9.02 | 8.62 -0.6014  | 0.021517 |
| 0    | 0    | 0    | 0 NA          | NA       |
| 0    | 0    | 0.09 | 0 NA          | NA       |
| 0    | 0    | 0.04 | 0.04 NA       | NA       |
| 0    | 0    | 0    | 0 NA          | NA       |
| 4.29 | 6.67 | 8.75 | 7.75 0.539125 | 0.053852 |
| 0    | 0.15 | 0    | 0 NA          | NA       |

|      |      |      |      |          |          |
|------|------|------|------|----------|----------|
| 2.61 | 1.51 | 1.54 | 2.66 | -1.06514 | 0.002255 |
| 0    | 0    | 0    | 0    | NA       | NA       |
| 0    | 0    | 0    | 0    | NA       | NA       |
| 0    | 0    | 0    | 0    | NA       | NA       |
| 0    | 0    | 0    | 0    | NA       | NA       |
| 0    | 0    | 0    | 0    | NA       | NA       |
| 0    | 0    | 0    | 0    | NA       | NA       |
| 0    | 0    | 0    | 0    | NA       | NA       |
| 0    | 0    | 0    | 0    | NA       | NA       |
| 0    | 0    | 0    | 0    | NA       | NA       |
| 0    | 0    | 0    | 0    | NA       | NA       |
| 0    | 0    | 0    | 0    | NA       | NA       |
| 0    | 0    | 0.03 | 0    | NA       | NA       |
| 0    | 0    | 0    | 0    | NA       | NA       |
| 0    | 0    | 0    | 0    | NA       | NA       |
| 0    | 0    | 0    | 0    | NA       | NA       |
| 0    | 0    | 0    | 0    | NA       | NA       |
| 0    | 0    | 0    | 0    | NA       | NA       |
| 0    | 0    | 0.93 | 0    | NA       | NA       |
| 0    | 0.23 | 0    | 0.12 | NA       | NA       |
| 0    | 0    | 0    | 0    | NA       | NA       |
| 0    | 0    | 0    | 0    | NA       | NA       |
| 0    | 0.2  | 0.06 | 0.28 | NA       | NA       |
| 0    | 0    | 0    | 0    | NA       | NA       |
| 0    | 0    | 0    | 0    | NA       | NA       |
| 0    | 0    | 0    | 0    | NA       | NA       |
| 0    | 0    | 0    | 0    | NA       | NA       |
| 0    | 0    | 0    | 0    | NA       | NA       |
| 0.31 | 0    | 0.07 | 0.31 | NA       | NA       |
| 0    | 0    | 0    | 0    | NA       | NA       |
| 0    | 0    | 0    | 0    | NA       | NA       |
| 0    | 0    | 0    | 0    | NA       | NA       |
| 0    | 0    | 0    | 0    | NA       | NA       |
| 0.39 | 0.14 | 0.63 | 0.87 | 0.320383 | 0.679028 |
| 0    | 0    | 0    | 0    | NA       | NA       |
| 0    | 0    | 0    | 0    | NA       | NA       |
| 0    | 0    | 0    | 0    | NA       | NA       |
| 0    | 0    | 0    | 0    | NA       | NA       |
| 0.29 | 0    | 0    | 0    | NA       | NA       |
| 0    | 0    | 0.17 | 0    | NA       | NA       |
| 0.26 | 0    | 0    | 0    | NA       | NA       |
| 0    | 0    | 0    | 0    | NA       | NA       |

|      |      |      |               |          |
|------|------|------|---------------|----------|
| 0    | 0    | 0    | 0 NA          | NA       |
| 1.77 | 0.25 | 0.47 | 1.08 -0.44787 | 0.542471 |
| 0    | 0    | 0    | 0 NA          | NA       |
| 1.34 | 1.24 | 1.1  | 1.45 -0.03323 | 0.94241  |
| 0    | 0    | 0    | 0 NA          | NA       |
| 0    | 0    | 0    | 0 NA          | NA       |
| 0    | 0    | 0    | 0.73 NA       | NA       |
| 0.49 | 0.28 | 0.45 | 0.2 -0.27321  | 0.713423 |
| 0    | 0    | 0    | 0 NA          | NA       |
| 0    | 0    | 0    | 0 NA          | NA       |
| 0    | 0    | 0    | 0 NA          | NA       |
| 0    | 0    | 0    | 0 NA          | NA       |
| 0    | 0    | 0    | 0 NA          | NA       |
| 0    | 0    | 0    | 0 NA          | NA       |
| 0    | 0    | 0    | 0 NA          | NA       |
| 0    | 0    | 0    | 0 NA          | NA       |
| 0    | 0    | 0.18 | 0 NA          | NA       |
| 0.06 | 0    | 0    | 0.05 NA       | NA       |
| 0    | 0    | 0    | 0 NA          | NA       |
| 0    | 0    | 0    | 0.19 NA       | NA       |
| 0    | 0    | 0    | 0 NA          | NA       |
| 0    | 0    | 0    | 0 NA          | NA       |
| 0    | 0    | 0    | 0 NA          | NA       |
| 0.11 | 0    | 0    | 0 NA          | NA       |
| 0    | 0    | 0    | 0 NA          | NA       |
| 0    | 0    | 0    | 0 NA          | NA       |
| 0    | 0    | 0    | 0 NA          | NA       |
| 0    | 0    | 0    | 0 NA          | NA       |
| 0    | 0    | 0    | 0 NA          | NA       |
| 0    | 0    | 0    | 0 NA          | NA       |
| 0    | 0    | 0    | 0 NA          | NA       |
| 0    | 0    | 0    | 0 NA          | NA       |
| 0    | 0    | 0.11 | 0.06 NA       | NA       |
| 0    | 0    | 0    | 0 NA          | NA       |
| 0    | 0    | 0    | 0 NA          | NA       |
| 0    | 0    | 0    | 0 NA          | NA       |
| 0    | 0    | 0    | 0 NA          | NA       |
| 0    | 0    | 0    | 0 NA          | NA       |
| 0.11 | 0.21 | 0.17 | 0.2 0.401737  | 0.600175 |
| 0.16 | 0.11 | 0.15 | 0.12 NA       | NA       |
| 0.17 | 0.73 | 0.56 | 0.38 0.559426 | 0.434244 |
| 0.01 | 0.01 | 0    | 0 NA          | NA       |
| 0    | 0    | 0    | 0 NA          | NA       |
| 0    | 0    | 0    | 0 NA          | NA       |
| 0    | 0    | 0    | 0 NA          | NA       |
| 1.64 | 2    | 1.19 | 1.73 0.093742 | 0.9065   |

|      |      |      |               |          |
|------|------|------|---------------|----------|
| 0    | 0.15 | 0.53 | 0 NA          | NA       |
| 0    | 0    | 0    | 0 NA          | NA       |
| 0    | 0    | 0    | 0 NA          | NA       |
| 0    | 0    | 0    | 0 NA          | NA       |
| 0    | 0    | 0    | 0 NA          | NA       |
| 0    | 0    | 0    | 0 NA          | NA       |
| 0    | 0    | 0    | 0 NA          | NA       |
| 0    | 0    | 0    | 0 NA          | NA       |
| 0    | 0    | 0    | 0 NA          | NA       |
| 0    | 0    | 0.03 | 0 NA          | NA       |
| 0    | 0    | 0    | 0 NA          | NA       |
| 0    | 0    | 0    | 0 NA          | NA       |
| 0    | 0    | 0.11 | 0.26 NA       | NA       |
| 0    | 0    | 0    | 0 NA          | NA       |
| 0    | 0    | 0    | 0 NA          | NA       |
| 0    | 0    | 0    | 0 NA          | NA       |
| 0    | 0    | 0    | 0 NA          | NA       |
| 0    | 0    | 0    | 0 NA          | NA       |
| 0    | 0.06 | 0.1  | 0.3 NA        | NA       |
| 0    | 0    | 0    | 0 NA          | NA       |
| 0    | 0    | 0    | 0 NA          | NA       |
| 0    | 0    | 0    | 0 NA          | NA       |
| 0    | 0    | 0    | 0 NA          | NA       |
| 0    | 0    | 0    | 0 NA          | NA       |
| 0    | 0    | 0    | 0 NA          | NA       |
| 0    | 0    | 0    | 0 NA          | NA       |
| 0    | 0    | 0    | 0 NA          | NA       |
| 0    | 0    | 0    | 0 NA          | NA       |
| 0    | 0    | 0    | 0 NA          | NA       |
| 0    | 0    | 0    | 0 NA          | NA       |
| 0    | 0    | 0    | 0 NA          | NA       |
| 0    | 0    | 0    | 0 NA          | NA       |
| 0    | 0    | 0    | 0 NA          | NA       |
| 0.09 | 0    | 0    | 0 NA          | NA       |
| 0    | 0    | 0.2  | 0 NA          | NA       |
| 0    | 0    | 0    | 0 NA          | NA       |
| 0    | 0    | 0    | 0 NA          | NA       |
| 0.28 | 0.05 | 0    | 0.14 -0.42263 | 0.573641 |
| 0    | 0    | 0    | 0 NA          | NA       |
| 0    | 0    | 0    | 0 NA          | NA       |
| 0    | 0    | 0    | 0 NA          | NA       |
| 0.7  | 0.42 | 0.19 | 0.63 -0.39107 | 0.564856 |
| 0    | 0    | 0    | 0 NA          | NA       |
| 0    | 0    | 0    | 0 NA          | NA       |
| 0    | 0    | 0    | 0 NA          | NA       |
| 0    | 0    | 0    | 0 NA          | NA       |

|       |       |       |                |          |
|-------|-------|-------|----------------|----------|
| 0     | 0     | 0     | 0 NA           | NA       |
| 0     | 0     | 0     | 0 NA           | NA       |
| 0     | 0     | 0.05  | 0 NA           | NA       |
| 0     | 0     | 0     | 0 NA           | NA       |
| 0     | 0     | 0     | 0 NA           | NA       |
| 0.32  | 0.35  | 0.74  | 0.36 NA        | NA       |
| 0     | 0     | 0     | 0 NA           | NA       |
| 0     | 0     | 0.1   | 0 NA           | NA       |
| 0     | 0     | 0     | 0 NA           | NA       |
| 0     | 0     | 0     | 0 NA           | NA       |
| 0     | 0     | 0     | 0 NA           | NA       |
| 0     | 0     | 0     | 0 NA           | NA       |
| 0     | 0     | 0     | 0 NA           | NA       |
| 0     | 0     | 0     | 0 NA           | NA       |
| 0     | 0     | 0.05  | 0 NA           | NA       |
| 47.73 | 21.45 | 22.92 | 26.91 -0.97876 | 6.75E-11 |
| 3.54  | 3.85  | 3.64  | 3.47 0.111083  | 0.591923 |
| 0     | 0     | 0     | 0 NA           | NA       |
| 0     | 0     | 0     | 0 NA           | NA       |
| 0     | 0     | 0     | 0 NA           | NA       |
| 0     | 0     | 0     | 0 NA           | NA       |
| 0     | 0     | 0     | 0 NA           | NA       |
| 0     | 0     | 0.37  | 0.14 NA        | NA       |
| 0.84  | 0.52  | 1.18  | 0.87 0.337404  | 0.65647  |
| 0     | 0     | 0     | 0 NA           | NA       |
| 0     | 0     | 0     | 0 NA           | NA       |
| 0     | 0     | 0     | 0 NA           | NA       |
| 0     | 0     | 0     | 0 NA           | NA       |
| 0     | 0     | 0     | 0 NA           | NA       |
| 0.32  | 0.92  | 0.32  | 0.48 NA        | NA       |
| 0     | 0     | 0.16  | 0 NA           | NA       |
| 0     | 0     | 0     | 0 NA           | NA       |
| 0     | 0     | 0     | 0 NA           | NA       |
| 5.28  | 3.22  | 2.79  | 2.7 -0.46704   | 0.149296 |
| 0     | 0     | 0     | 0 NA           | NA       |
| 0     | 0     | 0     | 0 NA           | NA       |
| 0     | 0.78  | 0     | 0 NA           | NA       |
| 0.14  | 0.14  | 0.18  | 0.2 NA         | NA       |
| 0     | 0     | 0     | 0.97 -0.45704  | 0.51513  |
| 0     | 0     | 0     | 0 NA           | NA       |
| 0.68  | 0.32  | 0.46  | 0.3 -0.44508   | 0.496085 |
| 0     | 0.31  | 0.28  | 0.11 NA        | NA       |
| 0     | 0     | 0     | 0 NA           | NA       |
| 0     | 0     | 0     | 0 NA           | NA       |
| 0     | 0     | 0     | 0 NA           | NA       |







|       |       |       |                |          |
|-------|-------|-------|----------------|----------|
| 0     | 0     | 0     | 0 NA           | NA       |
| 24.55 | 37.29 | 35.25 | 37.33 0.519098 | 1.15E-09 |
| 0     | 0.11  | 0     | 0 NA           | NA       |
| 0     | 0     | 0     | 0 NA           | NA       |
| 0     | 0     | 0     | 0 NA           | NA       |
| 0     | 0     | 0     | 0 NA           | NA       |
| 0     | 0     | 0     | 0 NA           | NA       |
| 0     | 0     | 0     | 0 NA           | NA       |
| 0     | 0     | 0     | 0 NA           | NA       |
| 0     | 0     | 0.1   | 0 NA           | NA       |
| 0     | 0.18  | 0     | 0 NA           | NA       |
| 0     | 0     | 0     | 0.06 NA        | NA       |
| 0     | 0     | 0     | 0 NA           | NA       |
| 0     | 0.39  | 0.94  | 0.4 NA         | NA       |
| 0.59  | 0.13  | 0.31  | 0.28 -0.70161  | 0.264149 |
| 0     | 0     | 0     | 0 NA           | NA       |
| 0     | 0     | 0     | 0 NA           | NA       |
| 0     | 0     | 0     | 0 NA           | NA       |
| 0     | 0     | 0     | 0 NA           | NA       |
| 0     | 0     | 0     | 0 NA           | NA       |
| 0.28  | 0     | 0.21  | 0.35 NA        | NA       |
| 0.89  | 1.25  | 0.89  | 0.69 -0.30522  | 0.616434 |
| 0     | 0     | 0     | 0 NA           | NA       |
| 0     | 0     | 0     | 0 NA           | NA       |
| 0     | 0     | 0     | 0 NA           | NA       |
| 0     | 0     | 0     | 0 NA           | NA       |
| 0     | 0     | 0     | 0 NA           | NA       |
| 0.22  | 0.2   | 0.15  | 0.42 0.353702  | 0.654603 |
| 0     | 0     | 0     | 0 NA           | NA       |
| 0.57  | 0     | 0     | 0 NA           | NA       |
| 0     | 0     | 0     | 0 NA           | NA       |
| 0     | 0     | 0     | 0 NA           | NA       |
| 0     | 0     | 0     | 0 NA           | NA       |
| 0     | 0     | 0     | 0 NA           | NA       |
| 0     | 0     | 0     | 0 NA           | NA       |
| 0     | 0     | 0     | 0 NA           | NA       |
| 0     | 0     | 0     | 0 NA           | NA       |
| 0     | 0     | 0     | 0 NA           | NA       |
| 0     | 0     | 0     | 0 NA           | NA       |
| 2.85  | 3.25  | 3.78  | 4.7 0.707486   | 0.102826 |
| 0     | 0     | 0     | 0 NA           | NA       |
| 0     | 0     | 0     | 0 NA           | NA       |
| 0     | 0     | 0     | 0 NA           | NA       |



|      |       |      |       |          |          |
|------|-------|------|-------|----------|----------|
| 0    | 0     | 0    | 0     | NA       | NA       |
| 0    | 0     | 0.39 | 0.11  | NA       | NA       |
| 0    | 0     | 0    | 0     | NA       | NA       |
| 0    | 0     | 0    | 0     | NA       | NA       |
| 0    | 0     | 0    | 0     | NA       | NA       |
| 0    | 0     | 0    | 0     | NA       | NA       |
| 0    | 0     | 0    | 0     | NA       | NA       |
| 0    | 0     | 0    | 0     | NA       | NA       |
| 0    | 0     | 0    | 0     | NA       | NA       |
| 0    | 0     | 0    | 0     | NA       | NA       |
| 0.72 | 0.16  | 0.15 | 0.21  | -1.08532 | 0.080293 |
| 0    | 0     | 0    | 0     | NA       | NA       |
| 0.6  | 0.72  | 0.39 | 0.6   | -0.26668 | 0.747043 |
| 0    | 0     | 0    | 0     | NA       | NA       |
| 0    | 0     | 0    | 0     | NA       | NA       |
| 0    | 0     | 0    | 0     | NA       | NA       |
| 0    | 0     | 0    | 0     | NA       | NA       |
| 0    | 0     | 0    | 0     | NA       | NA       |
| 0    | 0     | 0    | 0     | NA       | NA       |
| 0    | 0     | 0    | 0     | NA       | NA       |
| 0    | 0     | 0    | 0     | NA       | NA       |
| 0    | 0     | 0    | 0     | NA       | NA       |
| 0    | 0     | 0    | 0     | NA       | NA       |
| 0    | 0     | 0    | 0.01  | NA       | NA       |
| 0    | 0     | 0    | 0     | NA       | NA       |
| 0    | 0     | 0    | 0     | NA       | NA       |
| 0    | 0     | 0    | 0     | NA       | NA       |
| 0    | 0     | 0    | 0     | NA       | NA       |
| 0    | 0     | 0    | 0     | NA       | NA       |
| 0    | 0     | 0    | 0     | NA       | NA       |
| 0    | 0     | 0    | 0     | NA       | NA       |
| 0    | 0     | 0    | 0     | NA       | NA       |
| 0    | 0     | 0    | 0     | NA       | NA       |
| 0    | 0     | 0    | 0     | NA       | NA       |
| 0    | 0     | 0    | 0     | NA       | NA       |
| 0    | 0     | 0    | 0     | NA       | NA       |
| 0    | 0     | 0    | 0     | NA       | NA       |
| 0    | 0     | 0    | 0     | NA       | NA       |
| 0    | 0     | 0    | 0     | NA       | NA       |
| 0    | 0     | 0    | 0     | NA       | NA       |
| 0    | 0     | 0    | 0     | NA       | NA       |
| 2.84 | 17.77 | 8.96 | 14.74 | 2.061082 | 1.06E-17 |

|      |      |      |               |          |
|------|------|------|---------------|----------|
| 0    | 0    | 0    | 0 NA          | NA       |
| 0    | 0    | 0    | 0 NA          | NA       |
| 0    | 0    | 0    | 0 NA          | NA       |
| 0    | 0    | 0    | 0 NA          | NA       |
| 0.36 | 0.33 | 0.39 | 0.29 -0.07775 | 0.891888 |
| 0    | 0.13 | 0.09 | 0.03 NA       | NA       |
| 0    | 0    | 0    | 0 NA          | NA       |
| 0    | 0    | 0    | 0 NA          | NA       |
| 0    | 0    | 0    | 0 NA          | NA       |
| 0    | 0    | 0    | 0 NA          | NA       |
| 0    | 0    | 0    | 0 NA          | NA       |
| 0    | 0    | 0    | 0 NA          | NA       |
| 0    | 0    | 0    | 0 NA          | NA       |
| 1.14 | 0.93 | 0.88 | 1.2 -0.0236   | 0.958712 |
| 0    | 0    | 0    | 0 NA          | NA       |
| 0    | 0    | 0    | 0 NA          | NA       |
| 0    | 0    | 0    | 0 NA          | NA       |
| 0    | 0    | 0    | 0 NA          | NA       |
| 0    | 0    | 0    | 0 NA          | NA       |
| 0    | 0    | 0    | 0.12 NA       | NA       |
| 0.17 | 0    | 0    | 0 NA          | NA       |
| 0    | 0    | 0    | 0 NA          | NA       |
| 0.11 | 0.32 | 0.3  | 0.68 0.505853 | 0.478944 |
| 0.19 | 0.18 | 0.09 | 0.1 NA        | NA       |
| 0    | 0    | 0    | 0 NA          | NA       |
| 0    | 0    | 0    | 0 NA          | NA       |
| 0    | 0    | 0    | 0 NA          | NA       |
| 0    | 0    | 0    | 0 NA          | NA       |
| 0    | 0    | 0    | 0 NA          | NA       |
| 0    | 0    | 0    | 0 NA          | NA       |
| 0    | 0    | 0    | 0 NA          | NA       |
| 0    | 0    | 0    | 0 NA          | NA       |
| 0.09 | 0.19 | 0.12 | 0.07 NA       | NA       |
| 0    | 0    | 0    | 0 NA          | NA       |
| 0    | 0    | 0    | 0 NA          | NA       |
| 0    | 0    | 0    | 0 NA          | NA       |
| 0    | 0    | 0    | 0 NA          | NA       |
| 0    | 0    | 0    | 0 NA          | NA       |
| 0.71 | 1.03 | 0.91 | 0.39 0.045207 | 0.949887 |
| 0    | 0    | 0    | 0 NA          | NA       |
| 0.31 | 1.27 | 0.64 | 0.67 1.488274 | 0.008906 |
| 0    | 0    | 0    | 0 NA          | NA       |
| 0.87 | 0.84 | 1.75 | 2.24 0.9104   | 0.083681 |
| 0    | 0    | 0    | 0 NA          | NA       |
| 0    | 0    | 0    | 0 NA          | NA       |
| 2.11 | 1.14 | 0.46 | 0.66 -0.48244 | 0.506814 |

|       |       |       |                |          |
|-------|-------|-------|----------------|----------|
| 0     | 0     | 0     | 0 NA           | NA       |
| 0     | 0     | 0     | 0 NA           | NA       |
| 0     | 0     | 0     | 0 NA           | NA       |
| 0     | 0     | 0     | 0 NA           | NA       |
| 0     | 0     | 0     | 0 NA           | NA       |
| 0.36  | 0     | 0.15  | 0.14 -1.27869  | 0.032828 |
| 0     | 0     | 0     | 0 NA           | NA       |
| 0     | 0     | 0     | 0 NA           | NA       |
| 0     | 0     | 0     | 0 NA           | NA       |
| 0     | 0     | 0     | 0 NA           | NA       |
| 0     | 0     | 0     | 0 NA           | NA       |
| 11.01 | 12.69 | 12.74 | 12.41 0.048604 | 0.748153 |
| 0     | 0     | 0     | 0 NA           | NA       |
| 8.32  | 17.42 | 13.73 | 17 1.10349     | 1.42E-10 |
| 0     | 0     | 0     | 0 NA           | NA       |
| 0     | 0     | 0     | 0 NA           | NA       |
| 0     | 0     | 0     | 0 NA           | NA       |
| 0     | 0     | 0     | 0 NA           | NA       |
| 0     | 0     | 0     | 0 NA           | NA       |
| 0     | 0     | 0     | 0 NA           | NA       |
| 0.31  | 1.09  | 0.73  | 0.89 0.967913  | 0.005464 |
| 0     | 0     | 0     | 0 NA           | NA       |
| 0     | 0     | 0     | 0 NA           | NA       |
| 0     | 0     | 0     | 0 NA           | NA       |
| 0     | 0     | 0     | 0 NA           | NA       |
| 0     | 0     | 0     | 0 NA           | NA       |
| 0     | 0     | 0     | 0 NA           | NA       |
| 0     | 0     | 0     | 0 NA           | NA       |
| 0     | 0     | 0     | 0 NA           | NA       |
| 0     | 0     | 0     | 0 NA           | NA       |
| 0     | 0     | 0     | 0 NA           | NA       |
| 0     | 0     | 0     | 0 NA           | NA       |
| 0.27  | 0     | 0.18  | 0 NA           | NA       |
| 0     | 0     | 0     | 0 NA           | NA       |
| 0     | 0     | 0     | 0 NA           | NA       |
| 0     | 0     | 0     | 0 NA           | NA       |
| 0     | 0     | 0     | 0 NA           | NA       |
| 0     | 0     | 0     | 0 NA           | NA       |
| 1.09  | 1.85  | 2.15  | 1.72 0.346632  | 0.431901 |
| 9.71  | 9.77  | 0     | 12.83 NA       | NA       |
| 0.51  | 0.53  | 0.63  | 0.34 -0.40541  | 0.418229 |
| 0     | 0     | 0     | 0 NA           | NA       |
| 0     | 0     | 0     | 0 NA           | NA       |
| 0     | 0     | 0     | 0 NA           | NA       |
| 0     | 0     | 0     | 0 NA           | NA       |





|      |      |      |               |          |
|------|------|------|---------------|----------|
| 0    | 0    | 0    | 0 NA          | NA       |
| 0    | 0.09 | 0    | 0 NA          | NA       |
| 0    | 0    | 0    | 0 NA          | NA       |
| 0.2  | 0.14 | 0.39 | 0.44 NA       | NA       |
| 0    | 0    | 0    | 0 NA          | NA       |
| 0.72 | 1.04 | 1.09 | 0.9 0.164088  | 0.852058 |
| 0    | 0    | 0    | 0 NA          | NA       |
| 3.34 | 2.24 | 2.24 | 2.54 -0.43775 | 0.029948 |
| 0    | 0    | 0    | 0 NA          | NA       |
| 0.21 | 0.12 | 0.14 | 0.06 -0.46324 | 0.539218 |
| 0    | 0.19 | 0.06 | 0.14 NA       | NA       |
| 0    | 0    | 0    | 0.57 NA       | NA       |
| 0    | 0    | 0    | 0.54 NA       | NA       |
| 0.25 | 0.18 | 0.32 | 0.18 NA       | NA       |
| 0    | 0.68 | 0.21 | 0.48 NA       | NA       |
| 0.06 | 0.12 | 0.16 | 0.14 0.158328 | 0.856286 |
| 0    | 0    | 0    | 0 NA          | NA       |
| 0    | 0    | 0    | 0 NA          | NA       |
| 0    | 0    | 0    | 0 NA          | NA       |
| 0.63 | 1.33 | 0.9  | 1.26 0.818338 | 0.215872 |
| 0    | 0    | 0    | 0 NA          | NA       |
| 0    | 0    | 0    | 0 NA          | NA       |
| 0    | 0    | 0    | 0 NA          | NA       |
| 0    | 0.09 | 0    | 0.12 NA       | NA       |
| 0    | 0    | 0    | 0 NA          | NA       |
| 0    | 0    | 0    | 0 NA          | NA       |
| 0.29 | 0.1  | 0.1  | 0.11 NA       | NA       |
| 0    | 0    | 0    | 0 NA          | NA       |
| 1.91 | 2.27 | 2.8  | 2.11 -0.02168 | 0.968828 |
| 0    | 0    | 0    | 0.07 NA       | NA       |
| 0.52 | 0.46 | 0.43 | 0.29 -0.03174 | 0.974646 |
| 0    | 0    | 0    | 0 NA          | NA       |
| 0.37 | 0.13 | 0.31 | 0.28 NA       | NA       |
| 0.05 | 0.04 | 0.1  | 0.04 NA       | NA       |
| 0    | 0    | 0    | 0 NA          | NA       |
| 3.65 | 1.61 | 1.71 | 2.73 -0.12265 | 0.852311 |
| 0.1  | 0.08 | 0.09 | 0.01 -0.39277 | 0.611421 |
| 0.46 | 0.56 | 0.21 | 0.41 -0.01008 | 0.992442 |
| 0    | 0    | 0    | 0 NA          | NA       |
| 0    | 0    | 0    | 0 NA          | NA       |
| 0.03 | 0.01 | 0.04 | 0.01 NA       | NA       |
| 0.17 | 0.33 | 0.12 | 0 NA          | NA       |
| 0.16 | 0.14 | 0.09 | 0.17 -0.07781 | 0.934923 |
| 0    | 0    | 0    | 0 NA          | NA       |
| 0    | 0    | 0.25 | 0 NA          | NA       |

|      |      |      |      |          |          |
|------|------|------|------|----------|----------|
| 2.09 | 1.94 | 1.91 | 2.52 | 0.029216 | 0.94813  |
| 0    | 0    | 0    | 0    | NA       | NA       |
| 0    | 0    | 0    | 0    | NA       | NA       |
| 0    | 0    | 0    | 0    | NA       | NA       |
| 0    | 0    | 0    | 0    | NA       | NA       |
| 0    | 0    | 0    | 0    | NA       | NA       |
| 0    | 0.03 | 0.03 | 0    | NA       | NA       |
| 0    | 0    | 0    | 0    | NA       | NA       |
| 0.19 | 0.15 | 0.05 | 0.06 | -0.76344 | 0.263126 |
| 0.08 | 0.03 | 0.19 | 0    | NA       | NA       |
| 0    | 0    | 0    | 0    | NA       | NA       |
| 0    | 0    | 0    | 0    | NA       | NA       |
| 0    | 0.15 | 0    | 0.24 | NA       | NA       |
| 0    | 0    | 0    | 0    | NA       | NA       |
| 0.14 | 0.1  | 0    | 0    | NA       | NA       |
| 0    | 0    | 0    | 0    | NA       | NA       |
| 0    | 0.12 | 0.11 | 0.38 | NA       | NA       |
| 0    | 0    | 0    | 0    | NA       | NA       |
| 0.19 | 0.33 | 0.15 | 0.3  | 0.345596 | 0.629586 |
| 0    | 0    | 0    | 0    | NA       | NA       |
| 4.11 | 2.32 | 3.21 | 3.36 | -0.45219 | 0.331994 |
| 0.68 | 0.3  | 0.68 | 0.13 | -0.06993 | 0.94241  |
| 0    | 0    | 0    | 0    | NA       | NA       |
| 1.03 | 0.51 | 0.37 | 0.42 | -0.79563 | 0.176246 |
| 0.16 | 0.13 | 0.48 | 0.84 | 0.140262 | 0.875035 |
| 0.03 | 0    | 0.02 | 0    | NA       | NA       |
| 0.25 | 0.49 | 0.4  | 0.55 | 0.646652 | 0.295208 |
| 0    | 0    | 0.13 | 0.15 | NA       | NA       |
| 1.02 | 0.91 | 0.49 | 0.57 | -0.3952  | 0.609788 |
| 1.1  | 0.79 | 2.04 | 1.93 | 0.100109 | 0.906178 |
| 0.15 | 0.27 | 0.15 | 0.12 | NA       | NA       |
| 0.45 | 0.97 | 0    | 0    | NA       | NA       |
| 0.11 | 0.12 | 0.15 | 0.27 | -0.04467 | 0.958937 |
| 1.97 | 1.58 | 1.9  | 1.46 | -0.02443 | 0.978777 |
| 0    | 0    | 0    | 0    | NA       | NA       |
| 0.07 | 0.09 | 0.27 | 0.4  | 0.288953 | 0.723388 |
| 0    | 0    | 0    | 0    | NA       | NA       |
| 0    | 0    | 0    | 0    | NA       | NA       |
| 0    | 0    | 0    | 0    | NA       | NA       |
| 0    | 0    | 0    | 0    | NA       | NA       |
| 0    | 0.06 | 0.03 | 0    | NA       | NA       |
| 3.55 | 2.31 | 1.44 | 3.92 | -0.42745 | 0.359108 |
| 0    | 0    | 0    | 0    | NA       | NA       |
| 0    | 0    | 0    | 0    | NA       | NA       |
| 0    | 0    | 0    | 0    | NA       | NA       |

|      |      |      |               |          |
|------|------|------|---------------|----------|
| 0    | 0    | 0    | 0 NA          | NA       |
| 0    | 0    | 0    | 0 NA          | NA       |
| 0    | 0    | 0    | 0 NA          | NA       |
| 0    | 0    | 0    | 0 NA          | NA       |
| 0.03 | 0    | 0    | 0 NA          | NA       |
| 0.29 | 0    | 0.13 | 0.17 -0.86895 | 0.187557 |
| 0    | 0    | 0.17 | 0 NA          | NA       |
| 0    | 0    | 0    | 0 NA          | NA       |
| 0    | 0.03 | 0    | 0.03 NA       | NA       |
| 0.96 | 0.87 | 1.02 | 1.05 0.214611 | 0.720745 |
| 0.15 | 0    | 0    | 0 NA          | NA       |
| 0    | 0    | 0    | 0 NA          | NA       |
| 0    | 0    | 0    | 0 NA          | NA       |
| 0    | 0    | 0    | 0 NA          | NA       |
| 0    | 0.27 | 0.08 | 0.1 NA        | NA       |
| 0    | 0    | 0    | 0.13 NA       | NA       |
| 0    | 0    | 0    | 0 NA          | NA       |
| 0    | 0    | 0    | 0 NA          | NA       |
| 0    | 0    | 0    | 0 NA          | NA       |
| 0    | 0    | 0    | 0 NA          | NA       |
| 0.19 | 0.51 | 0.13 | 0.54 0.4533   | 0.546314 |
| 0    | 0.1  | 0.18 | 0.31 NA       | NA       |
| 0    | 0    | 0    | 0 NA          | NA       |
| 0.87 | 0.23 | 0.36 | 0.16 -0.4024  | 0.602861 |
| 0    | 0.44 | 0.4  | 0.15 NA       | NA       |
| 0    | 0    | 0    | 0 NA          | NA       |
| 0    | 0    | 0    | 0 NA          | NA       |
| 0    | 0    | 0.24 | 0.67 NA       | NA       |
| 0    | 0    | 0    | 0 NA          | NA       |
| 0    | 0    | 0    | 0 NA          | NA       |
| 0    | 0    | 0    | 0 NA          | NA       |
| 0    | 0    | 0    | 0 NA          | NA       |
| 0    | 0    | 0    | 0 NA          | NA       |
| 0.16 | 0    | 0    | 0 NA          | NA       |
| 0.32 | 0.23 | 0.26 | 0.34 -0.14652 | 0.867232 |
| 0.16 | 0.23 | 0    | 0 NA          | NA       |
| 0    | 0    | 0    | 0 NA          | NA       |
| 0    | 0    | 0    | 0 NA          | NA       |
| 0    | 0    | 0.21 | 0 NA          | NA       |
| 0.63 | 0.76 | 0.49 | 0.56 -0.31398 | 0.673432 |
| 0    | 0    | 0    | 0 NA          | NA       |
| 0    | 0    | 0    | 0 NA          | NA       |
| 1.46 | 1.59 | 1    | 1.07 0.085576 | 0.862849 |
| 0    | 0    | 0.11 | 0 NA          | NA       |
| 0.1  | 0.11 | 0.13 | 0.06 0.314394 | 0.696126 |

|      |      |      |      |          |          |
|------|------|------|------|----------|----------|
| 0    | 0    | 0.02 | 0.02 | NA       | NA       |
| 0    | 0    | 0    | 0    | NA       | NA       |
| 0    | 0    | 0    | 0    | NA       | NA       |
| 0.92 | 0.93 | 0.12 | 0.42 | 0.017283 | 0.986288 |
| 0.3  | 0.43 | 0.2  | 0.34 | NA       | NA       |
| 0    | 0    | 0    | 0    | NA       | NA       |
| 0    | 0    | 0    | 0    | NA       | NA       |
| 0    | 0.07 | 0    | 0    | NA       | NA       |
| 0    | 0    | 0    | 0    | NA       | NA       |
| 0    | 0.15 | 0.14 | 0.15 | NA       | NA       |
| 0.13 | 0.09 | 0.26 | 0.2  | NA       | NA       |
| 0    | 0    | 0    | 0    | NA       | NA       |
| 0    | 0    | 0    | 0    | NA       | NA       |
| 0.26 | 0    | 0    | 0    | NA       | NA       |
| 0    | 0    | 0.17 | 0.19 | NA       | NA       |
| 0    | 0    | 0    | 0    | NA       | NA       |
| 0.05 | 0.03 | 0.03 | 0.02 | NA       | NA       |
| 0.58 | 0.25 | 0.31 | 0.18 | -0.65862 | 0.34862  |
| 0    | 0    | 0.17 | 0.1  | NA       | NA       |
| 0    | 0    | 0    | 0    | NA       | NA       |
| 0.22 | 0.26 | 0.44 | 0.22 | 0.444425 | 0.55896  |
| 0    | 0    | 0    | 0    | NA       | NA       |
| 0    | 0    | 0    | 0    | NA       | NA       |
| 0    | 0.19 | 0    | 0    | NA       | NA       |
| 0    | 0    | 0    | 0    | NA       | NA       |
| 0    | 0    | 0    | 0    | NA       | NA       |
| 0    | 0    | 0    | 0    | NA       | NA       |
| 0    | 0    | 0    | 0    | NA       | NA       |
| 2.71 | 1.21 | 1.5  | 1.87 | -0.17734 | 0.794993 |
| 0.42 | 0.45 | 0.58 | 0.38 | 0.031532 | 0.959017 |
| 0    | 0    | 0    | 0.03 | NA       | NA       |
| 0    | 0    | 0    | 0    | NA       | NA       |
| 0    | 0    | 0    | 0    | NA       | NA       |
| 0    | 0    | 0    | 0.04 | NA       | NA       |
| 0.42 | 0.22 | 0.12 | 0.14 | -0.63171 | 0.368781 |
| 0    | 0    | 0    | 0    | NA       | NA       |
| 0    | 0    | 0    | 0    | NA       | NA       |
| 4.25 | 1.64 | 2.28 | 2.23 | -0.95502 | 7.13E-11 |
| 0.14 | 0    | 0    | 0.22 | NA       | NA       |
| 0    | 0    | 0    | 0    | NA       | NA       |
| 0    | 0    | 0    | 0    | NA       | NA       |
| 0    | 0    | 0    | 0    | NA       | NA       |
| 0.28 | 0.19 | 0.1  | 0.19 | -0.36305 | 0.577152 |
| 0    | 0    | 1.71 | 0    | NA       | NA       |
| 0.24 | 0.18 | 0.41 | 0.09 | NA       | NA       |

|      |       |       |               |          |
|------|-------|-------|---------------|----------|
| 0    | 0     | 0     | 0 NA          | NA       |
| 0.02 | 0.08  | 0.05  | 0.09 0.15413  | 0.862538 |
| 0.48 | 0.68  | 0.52  | 0.82 -0.25796 | 0.62293  |
| 0    | 0     | 0     | 0 NA          | NA       |
| 0    | 0.08  | 0     | 0 NA          | NA       |
| 0    | 0     | 0     | 0 NA          | NA       |
| 0    | 0.21  | 0.2   | 0.22 NA       | NA       |
| 0.44 | 0.58  | 0.39  | 0.49 0.518202 | 0.399892 |
| 0    | 0     | 0     | 0 NA          | NA       |
| 0    | 0     | 0     | 0.04 NA       | NA       |
| 0    | 0     | 0     | 0 NA          | NA       |
| 0    | 0.26  | 0.12  | 0 NA          | NA       |
| 0.08 | 0.29  | 0.27  | 0.3 0.416319  | 0.504765 |
| 0    | 0     | 0     | 0 NA          | NA       |
| 2.17 | 2.79  | 2.41  | 2.02 0.101819 | 0.859827 |
| 0.12 | 0.18  | 0     | 0 NA          | NA       |
| 0    | 0     | 0     | 0 NA          | NA       |
| 0.58 | 0.46  | 0.61  | 0.39 -0.01011 | 0.991973 |
| 0.08 | 0     | 0.34  | 0.13 -0.14616 | 0.863932 |
| 0    | 0     | 0     | 0 NA          | NA       |
| 0.06 | 0.05  | 0.21  | 0 NA          | NA       |
| 0    | 0.38  | 0     | 0 NA          | NA       |
| 0    | 0     | 0.11  | 0.24 NA       | NA       |
| 0    | 0     | 0     | 0 NA          | NA       |
| 0.82 | 0     | 0     | 0 NA          | NA       |
| 3.52 | 5.69  | 5.36  | 5.65 0.534852 | 0.005972 |
| 0.09 | 0.07  | 0     | 0.02 NA       | NA       |
| 0    | 0     | 0     | 0 NA          | NA       |
| 0    | 0.24  | 0.55  | 0.13 NA       | NA       |
| 0    | 0     | 0     | 0 NA          | NA       |
| 1.53 | 20.26 | 11.77 | 18.8 1.636249 | 0.00355  |
| 0    | 0     | 0.49  | 0 NA          | NA       |
| 0    | 0     | 0     | 0 NA          | NA       |
| 0    | 0.15  | 0     | 0 NA          | NA       |
| 0.2  | 0     | 0.13  | 0 NA          | NA       |
| 0.09 | 0.03  | 0.16  | 0.07 -0.38892 | 0.614091 |
| 0    | 0     | 0     | 0 NA          | NA       |
| 0    | 0     | 0     | 0 NA          | NA       |
| 0    | 0     | 0     | 0 NA          | NA       |
| 0.2  | 0     | 0.13  | 0.15 NA       | NA       |
| 0.38 | 1     | 0.44  | 0.6 0.804033  | 0.231619 |
| 0    | 0     | 0     | 0 NA          | NA       |
| 1.3  | 1.88  | 1.13  | 1.71 -0.10309 | 0.872808 |
| 0    | 0     | 0     | 0 NA          | NA       |
| 1.86 | 0.86  | 1.51  | 1.15 -0.36901 | 0.514164 |

|       |       |       |      |          |          |
|-------|-------|-------|------|----------|----------|
| 0.59  | 0.52  | 0.71  | 0.51 | 0.227237 | 0.773507 |
| 0.2   | 0.05  | 0.14  | 0.1  | NA       | NA       |
| 0.75  | 0.77  | 0.99  | 0.79 | -0.08979 | 0.884597 |
| 0.44  | 0.48  | 0.84  | 0    | NA       | NA       |
| 0     | 0.83  | 0.88  | 0.14 | 0.733492 | 0.256757 |
| 0     | 0     | 0     | 0    | NA       | NA       |
| 0.98  | 1.22  | 1.1   | 0.86 | 0.213723 | 0.554834 |
| 0     | 0.12  | 0     | 0.12 | NA       | NA       |
| 0     | 0     | 0     | 0    | NA       | NA       |
| 0     | 0     | 0.14  | 0    | NA       | NA       |
| 0.21  | 0.15  | 0.21  | 0    | NA       | NA       |
| 0     | 0     | 0     | 0    | NA       | NA       |
| 0     | 0     | 0.28  | 0.16 | NA       | NA       |
| 0.11  | 0.33  | 0.68  | 0.95 | 0.715222 | 0.300938 |
| 0     | 0     | 0     | 0    | NA       | NA       |
| 0     | 0     | 0     | 0.14 | NA       | NA       |
| 0     | 0     | 0     | 0.03 | NA       | NA       |
| 0     | 0.02  | 0     | 0    | NA       | NA       |
| 0     | 0     | 0     | 0    | NA       | NA       |
| 0     | 0     | 0     | 0    | NA       | NA       |
| 0     | 0     | 0     | 0    | NA       | NA       |
| 2.69  | 5.87  | 5.6   | 6.97 | 1.385795 | 1.15E-15 |
| 0.25  | 0.35  | 0.32  | 0.55 | NA       | NA       |
| 1.82  | 1.27  | 0     | 0.63 | NA       | NA       |
| 0.64  | 1.49  | 1.18  | 1.38 | 0.98722  | 0.040458 |
| 0.51  | 0     | 0     | 0    | NA       | NA       |
| 0     | 0     | 0     | 0.04 | NA       | NA       |
| 0.24  | 0     | 0     | 0    | NA       | NA       |
| 1.07  | 0.66  | 1     | 1.61 | 0.147968 | 0.862746 |
| 0     | 0     | 0.25  | 0    | NA       | NA       |
| 0.38  | 0     | 0.47  | 0    | NA       | NA       |
| 0     | 0     | 0     | 0    | NA       | NA       |
| 0.15  | 0.1   | 0     | 0    | NA       | NA       |
| 0.19  | 0.08  | 0.21  | 0.26 | 0.122535 | 0.891001 |
| 19.81 | 59.31 | 31.56 | 44.6 | 1.174875 | 0.040378 |
| 0     | 0     | 0     | 0    | NA       | NA       |
| 0.12  | 0     | 0.08  | 0    | NA       | NA       |
| 0     | 0.07  | 0     | 0    | NA       | NA       |
| 0     | 0.08  | 0     | 0.09 | NA       | NA       |
| 0.06  | 0     | 0.04  | 0    | NA       | NA       |
| 0.03  | 0     | 0.02  | 0.02 | NA       | NA       |
| 0     | 0     | 0     | 0    | NA       | NA       |
| 0.42  | 0.3   | 0.46  | 0.53 | -0.08193 | 0.931764 |
| 0     | 0     | 0     | 0    | NA       | NA       |
| 0     | 0     | 0.05  | 0.03 | NA       | NA       |

|      |      |      |      |          |          |
|------|------|------|------|----------|----------|
| 0    | 0    | 0    | 6.6  | NA       | NA       |
| 1.1  | 0.66 | 1.41 | 0.93 | -0.43416 | 0.400736 |
| 0.18 | 0.13 | 0.12 | 0.26 | NA       | NA       |
| 0    | 0    | 0    | 0    | NA       | NA       |
| 0    | 0    | 0    | 0    | NA       | NA       |
| 0    | 0    | 0    | 0    | NA       | NA       |
| 0    | 0    | 0.18 | 0.31 | NA       | NA       |
| 0.02 | 0    | 0    | 0.01 | NA       | NA       |
| 0    | 0    | 0    | 0    | NA       | NA       |
| 0    | 0    | 0    | 0    | NA       | NA       |
| 0    | 0    | 0    | 0    | NA       | NA       |
| 0.96 | 1.22 | 0.84 | 2.06 | 0.373945 | 0.607409 |
| 0    | 0    | 0    | 0.22 | NA       | NA       |
| 0    | 0.25 | 0    | 0.09 | NA       | NA       |
| 0    | 0    | 0    | 0    | NA       | NA       |
| 0    | 0    | 0    | 0    | NA       | NA       |
| 0.69 | 0    | 0.68 | 0.75 | -0.12548 | 0.888663 |
| 0    | 0    | 0    | 0    | NA       | NA       |
| 0    | 0    | 0    | 0    | NA       | NA       |
| 0.16 | 0    | 0    | 0    | NA       | NA       |
| 0.22 | 0    | 0.22 | 0.08 | NA       | NA       |
| 0    | 0    | 0    | 0    | NA       | NA       |
| 0    | 0    | 0    | 0    | NA       | NA       |
| 0    | 0    | 0    | 0    | NA       | NA       |
| 0    | 0    | 0    | 0    | NA       | NA       |
| 0    | 0.15 | 0.13 | 0.15 | NA       | NA       |
| 0.05 | 0.14 | 0.37 | 0.27 | 0.619675 | 0.383865 |
| 1.69 | 1.78 | 1.45 | 1.25 | 0.116051 | 0.850235 |
| 1.5  | 0.48 | 0.33 | 0.5  | NA       | NA       |
| 0    | 0    | 0    | 0    | NA       | NA       |
| 0.27 | 2.09 | 1.02 | 1.18 | 0.748664 | 0.275443 |
| 0.88 | 1.52 | 2.06 | 0.47 | 0.545137 | 0.383112 |
| 0.32 | 0    | 0.21 | 0    | NA       | NA       |
| 0.1  | 0    | 0.03 | 0.01 | NA       | NA       |
| 0.65 | 0.09 | 0.17 | 0.25 | -1.30669 | 0.023171 |
| 5.04 | 6.98 | 3.25 | 4.06 | 0.037121 | 0.955141 |
| 0    | 0    | 0    | 0    | NA       | NA       |
| 0    | 0    | 0    | 0    | NA       | NA       |
| 0    | 0    | 0    | 0    | NA       | NA       |
| 0    | 0    | 0    | 0    | NA       | NA       |
| 0    | 0    | 0    | 0    | NA       | NA       |
| 0.19 | 0.55 | 0.37 | 0.14 | NA       | NA       |
| 0    | 0    | 0    | 0    | NA       | NA       |
| 0.09 | 0    | 0    | 0    | NA       | NA       |
| 0.58 | 0    | 0    | 0    | NA       | NA       |

|      |      |      |               |          |
|------|------|------|---------------|----------|
| 0    | 0    | 0    | 0 NA          | NA       |
| 0    | 0    | 0    | 0 NA          | NA       |
| 1.45 | 0.89 | 0.99 | 0.94 -0.30462 | 0.289764 |
| 0    | 0    | 0    | 0 NA          | NA       |
| 0    | 0    | 0    | 0.03 NA       | NA       |
| 0.24 | 0.02 | 0    | 0.02 -1.41667 | 0.017797 |
| 0.56 | 0.25 | 0.15 | 0.23 -0.88879 | 0.130108 |
| 0.57 | 0    | 0.43 | 0.21 NA       | NA       |
| 5.44 | 5.99 | 5.87 | 5.83 0.056073 | 0.674092 |
| 0    | 0.23 | 0    | 0.12 NA       | NA       |
| 0    | 0    | 0    | 0 NA          | NA       |
| 0    | 0    | 0    | 0 NA          | NA       |
| 5.36 | 6.36 | 7.87 | 7.48 0.224817 | 0.082448 |
| 0    | 0.11 | 0    | 0 NA          | NA       |
| 0.94 | 1.42 | 1.34 | 1.27 0.281067 | 0.443481 |
| 0    | 0    | 0    | 0 NA          | NA       |
| 0.29 | 0.63 | 0.58 | 0.55 0.194901 | 0.821481 |
| 0.73 | 2.52 | 1.8  | 2.12 1.186809 | 2.43E-05 |
| 0    | 0    | 0    | 0 NA          | NA       |
| 0.19 | 0.13 | 0.49 | 0.42 NA       | NA       |
| 0    | 0    | 0    | 0 NA          | NA       |
| 0.08 | 0.6  | 0.67 | 0.32 0.102607 | 0.909236 |
| 0    | 0    | 0    | 0 NA          | NA       |
| 0.04 | 0.03 | 0    | 0 NA          | NA       |
| 0    | 0    | 0    | 0 NA          | NA       |
| 0    | 0    | 0    | 0 NA          | NA       |
| 0.09 | 0.07 | 0.11 | 0.08 -0.2832  | 0.709367 |
| 0    | 0    | 0    | 0 NA          | NA       |
| 0    | 0.15 | 0    | 0 NA          | NA       |
| 0.28 | 0.4  | 0.09 | 0.11 NA       | NA       |
| 0    | 0    | 0.11 | 0 NA          | NA       |
| 0.75 | 0    | 0    | 0 NA          | NA       |
| 0.47 | 0.34 | 0.21 | 0.18 -0.09137 | 0.923329 |
| 0.31 | 0.33 | 0.79 | 0.65 0.510628 | 0.49072  |
| 0.64 | 0.31 | 0.55 | 0 NA          | NA       |
| 0    | 0    | 0.34 | 0.26 NA       | NA       |
| 0    | 0    | 0    | 0 NA          | NA       |
| 0    | 0    | 0.08 | 0 NA          | NA       |
| 0.45 | 0.25 | 0.43 | 0.33 -0.27713 | 0.599298 |
| 0.13 | 0.09 | 0.33 | 0.29 NA       | NA       |
| 0.78 | 0.42 | 1.15 | 0.59 NA       | NA       |
| 0    | 0    | 0    | 0 NA          | NA       |
| 0.18 | 0.02 | 0.04 | 0.16 -0.242   | 0.772425 |
| 0.08 | 0.23 | 0    | 0 NA          | NA       |
| 0    | 0    | 0    | 0 NA          | NA       |



|       |       |       |       |          |          |
|-------|-------|-------|-------|----------|----------|
| 2.25  | 0.62  | 0.7   | 0.4   | -1.97019 | 1.94E-06 |
| 0.52  | 0.37  | 0.5   | 0.96  | NA       | NA       |
| 0     | 0     | 0     | 0     | NA       | NA       |
| 0     | 0.23  | 0.21  | 0.72  | NA       | NA       |
| 13.52 | 18.97 | 16.55 | 16.39 | 0.156589 | 0.214858 |
| 0     | 0     | 0     | 0     | NA       | NA       |
| 0     | 0     | 0     | 0     | NA       | NA       |
| 0     | 0     | 0     | 0     | NA       | NA       |
| 0     | 0     | 0     | 0     | NA       | NA       |
| 17.6  | 52.24 | 42.11 | 46.87 | 1.445941 | 1.30E-29 |
| 0     | 0     | 0     | 0     | NA       | NA       |
| 0     | 0     | 0.32  | 0.19  | NA       | NA       |
| 0.57  | 0.88  | 0.55  | 0.76  | 0.152869 | 0.754507 |
| 0     | 0     | 0     | 0     | NA       | NA       |
| 0     | 0     | 0     | 0     | NA       | NA       |
| 2.08  | 3.62  | 1.96  | 4.06  | 0.637827 | 0.029942 |
| 0     | 0     | 0     | 0     | NA       | NA       |
| 0     | 0     | 0     | 0     | NA       | NA       |
| 2.28  | 1.57  | 1.88  | 2.71  | -0.44979 | 0.19126  |
| 0.1   | 0.29  | 0.07  | 0     | NA       | NA       |
| 0     | 0     | 0     | 0     | NA       | NA       |
| 0     | 0     | 0     | 0     | NA       | NA       |
| 5.73  | 6.9   | 7.21  | 7.66  | -0.10337 | 0.668672 |
| 0     | 0.11  | 0.1   | 0     | NA       | NA       |
| 0     | 0     | 0     | 0     | NA       | NA       |
| 0     | 0     | 0     | 0.17  | NA       | NA       |
| 0     | 0     | 0     | 0     | NA       | NA       |
| 0     | 0.22  | 0.21  | 0.24  | NA       | NA       |
| 0     | 0     | 0     | 0     | NA       | NA       |
| 0     | 0.27  | 0.37  | 0.85  | NA       | NA       |
| 0.27  | 0.96  | 0.17  | 0     | -0.3452  | 0.644878 |
| 0     | 0     | 0     | 0     | NA       | NA       |
| 0     | 0     | 0     | 0     | NA       | NA       |
| 0.65  | 0     | 0.2   | 0.48  | NA       | NA       |
| 0     | 0     | 0     | 0     | NA       | NA       |
| 0     | 0     | 0     | 0     | NA       | NA       |
| 0     | 0.01  | 0     | 0     | NA       | NA       |
| 0     | 0     | 0     | 0     | NA       | NA       |
| 1.5   | 0.54  | 0.58  | 0.38  | -0.35765 | 0.645015 |
| 0     | 0     | 0     | 0     | NA       | NA       |
| 0     | 0.04  | 0.07  | 0.06  | NA       | NA       |
| 3.24  | 3.15  | 3.62  | 3.75  | -0.07033 | 0.84099  |
| 0     | 0.16  | 0.24  | 0.22  | NA       | NA       |
| 2.91  | 2.4   | 3.12  | 2.61  | -0.19331 | 0.575962 |
| 0     | 0     | 0     | 0     | NA       | NA       |

|      |      |      |               |          |
|------|------|------|---------------|----------|
| 0    | 0    | 0    | 0 NA          | NA       |
| 0    | 0    | 0    | 0 NA          | NA       |
| 3.21 | 0.92 | 1.27 | 1.93 -0.82332 | 0.125124 |
| 0    | 0    | 0    | 0 NA          | NA       |
| 0.49 | 0    | 0.08 | 0 NA          | NA       |
| 1.86 | 1.28 | 1.43 | 1.29 -0.31589 | 0.226464 |
| 0.05 | 0.03 | 0.06 | 0.07 NA       | NA       |
| 0    | 0    | 0.15 | 0.09 NA       | NA       |
| 0.45 | 0.22 | 0.4  | 0.68 NA       | NA       |
| 0    | 0    | 0    | 0 NA          | NA       |
| 0    | 0    | 0    | 0 NA          | NA       |
| 0.35 | 0.25 | 0.17 | 0.07 NA       | NA       |
| 0    | 0    | 0    | 0 NA          | NA       |
| 0.45 | 1.28 | 0.86 | 0.81 0.538886 | 0.196201 |
| 0    | 0    | 0    | 0 NA          | NA       |
| 0    | 0    | 0    | 0 NA          | NA       |
| 0.14 | 0.2  | 0.28 | 0.21 NA       | NA       |
| 0    | 0    | 0    | 0 NA          | NA       |
| 6.04 | 3.59 | 5.06 | 7.62 -0.05256 | 0.944005 |
| 0    | 0    | 0    | 0 NA          | NA       |
| 0    | 0    | 0    | 0 NA          | NA       |
| 0    | 0.15 | 0    | 0.11 NA       | NA       |
| 0.46 | 0.67 | 0.74 | 0.77 -0.10489 | 0.876951 |
| 0.2  | 0.23 | 0.11 | 0.31 0.040414 | 0.966075 |
| 0    | 0    | 0    | 0 NA          | NA       |
| 0.3  | 0.11 | 0.1  | 0.11 NA       | NA       |
| 1.54 | 1.28 | 1.58 | 1.96 -0.00474 | 0.992257 |
| 0    | 0.22 | 0.08 | 0.05 NA       | NA       |
| 0.07 | 0.05 | 0.18 | 0.07 0.130946 | 0.884263 |
| 0    | 0    | 0    | 0 NA          | NA       |
| 0    | 0    | 0    | 0 NA          | NA       |
| 0.06 | 0.12 | 0.13 | 0.12 NA       | NA       |
| 0.2  | 0.29 | 0.13 | 0 NA          | NA       |
| 0    | 0    | 0    | 0 NA          | NA       |
| 0    | 0.11 | 0    | 0.05 NA       | NA       |
| 0.09 | 0.05 | 0    | 0.1 -0.45782  | 0.538388 |
| 0    | 0    | 0    | 0 NA          | NA       |
| 0    | 0    | 0    | 0 NA          | NA       |
| 0.32 | 0.63 | 0.54 | 0.43 0.155462 | 0.85662  |
| 0    | 0    | 0    | 0 NA          | NA       |
| 0.22 | 0.64 | 0.29 | 0.5 NA        | NA       |
| 0    | 0    | 0    | 0 NA          | NA       |
| 0.31 | 0.67 | 0.28 | 0.4 0.162231  | 0.854296 |
| 0.16 | 0    | 0    | 0.12 NA       | NA       |
| 0    | 0    | 0    | 0 NA          | NA       |

|      |      |      |               |          |
|------|------|------|---------------|----------|
| 0    | 0    | 0    | 0 NA          | NA       |
| 0    | 0    | 0.81 | 0 NA          | NA       |
| 0.1  | 0.28 | 0.46 | 0.23 NA       | NA       |
| 0.04 | 0    | 0.13 | 0 NA          | NA       |
| 0.07 | 0.05 | 0.05 | 0 NA          | NA       |
| 0    | 0    | 0    | 0 NA          | NA       |
| 0    | 0    | 0    | 0 NA          | NA       |
| 0    | 0    | 0    | 0 NA          | NA       |
| 0    | 0    | 0    | 0 NA          | NA       |
| 0    | 0    | 0    | 0 NA          | NA       |
| 0    | 0    | 0    | 0 NA          | NA       |
| 0.56 | 0.49 | 0.52 | 0.65 -0.27795 | 0.301969 |
| 0    | 0.23 | 0    | 0 NA          | NA       |
| 0    | 0    | 0    | 0 NA          | NA       |
| 0.19 | 0    | 0.24 | 0 NA          | NA       |
| 0    | 0.12 | 0.1  | 0.09 0.645788 | 0.361215 |
| 0    | 0    | 0    | 0.32 NA       | NA       |
| 0    | 0    | 0    | 0 NA          | NA       |
| 0    | 0    | 0    | 0 NA          | NA       |
| 0    | 0    | 0    | 0.01 NA       | NA       |
| 0    | 0    | 0    | 0 NA          | NA       |
| 0.37 | 0.32 | 0.17 | 0.03 -0.29719 | 0.713701 |
| 0.09 | 0.65 | 0    | 0 NA          | NA       |
| 0    | 0.76 | 0.23 | 0.93 0.666089 | 0.319165 |
| 0    | 0    | 0    | 0 NA          | NA       |
| 0    | 0    | 0.18 | 0.1 NA        | NA       |
| 1.96 | 1.24 | 1.32 | 1.6 -0.26929  | 0.462623 |
| 0.23 | 0.16 | 0.23 | 0 NA          | NA       |
| 0.37 | 0.31 | 0.07 | 0.24 NA       | NA       |
| 0.2  | 0    | 0.13 | 0.15 NA       | NA       |
| 0    | 0.08 | 0.15 | 0.41 NA       | NA       |
| 0.26 | 0.02 | 0.04 | 0 NA          | NA       |
| 0    | 0    | 0    | 0 NA          | NA       |
| 0    | 0    | 0    | 0 NA          | NA       |
| 0    | 0    | 0    | 0 NA          | NA       |
| 0    | 0    | 0    | 0 NA          | NA       |
| 0.77 | 0.54 | 0.55 | 0.59 0.518927 | 0.482117 |
| 0    | 0    | 0.55 | 0 NA          | NA       |
| 2.26 | 0.3  | 1.71 | 2.22 -0.65403 | 0.317534 |
| 2.04 | 1.55 | 1.61 | 1.68 -0.34934 | 0.264032 |
| 0.35 | 0.38 | 0.22 | 0.36 0.211156 | 0.767649 |
| 3.02 | 1.59 | 1.57 | 1.36 0.047554 | 0.958855 |
| 0    | 0    | 0    | 0 NA          | NA       |
| 0    | 0.02 | 0.03 | 0 NA          | NA       |

|      |      |      |      |          |          |
|------|------|------|------|----------|----------|
| 6.61 | 9.9  | 8.02 | 8.97 | 0.285409 | 0.072192 |
| 0    | 0    | 0    | 0    | NA       | NA       |
| 0    | 0.01 | 0.01 | 0.02 | NA       | NA       |
| 0.43 | 0.31 | 0.48 | 0.11 | NA       | NA       |
| 0    | 0.08 | 0    | 0.08 | NA       | NA       |
| 0    | 0    | 0    | 0    | NA       | NA       |
| 0    | 0    | 0    | 0    | NA       | NA       |
| 0.17 | 0.25 | 0.18 | 0.11 | -0.31225 | 0.662367 |
| 0.54 | 0.43 | 0.44 | 0.52 | -0.14692 | 0.723461 |
| 0    | 0    | 0    | 0    | NA       | NA       |
| 0    | 0    | 0    | 0    | NA       | NA       |
| 0    | 0    | 0    | 0    | NA       | NA       |
| 0    | 0    | 0    | 0    | NA       | NA       |
| 0    | 0.15 | 0.07 | 0.16 | NA       | NA       |
| 0    | 0.08 | 0    | 0    | NA       | NA       |
| 0    | 0    | 0    | 0    | NA       | NA       |
| 0    | 1.04 | 1.08 | 0.78 | 0.536301 | 0.465679 |
| 2.6  | 3.34 | 3.98 | 4.14 | 0.232895 | 0.344028 |
| 0    | 0    | 0    | 0    | NA       | NA       |
| 0    | 0.34 | 0.46 | 0    | 0.525644 | 0.413305 |
| 0.45 | 0    | 0    | 0.97 | NA       | NA       |
| 0.24 | 0.21 | 0.2  | 0.04 | -0.22822 | 0.78879  |
| 4.12 | 5.53 | 5.85 | 3.23 | 0.406592 | 0.249285 |
| 0    | 0    | 0.21 | 0.24 | NA       | NA       |
| 0    | 0    | 0    | 0    | NA       | NA       |
| 0    | 0    | 0    | 0    | NA       | NA       |
| 1.03 | 2.75 | 1.66 | 2    | 0.579272 | 0.352632 |
| 0.18 | 0.13 | 0.12 | 0    | NA       | NA       |
| 0.15 | 0.11 | 0    | 0.23 | NA       | NA       |
| 0    | 0    | 0    | 0    | NA       | NA       |
| 0.14 | 0.1  | 0    | 0    | NA       | NA       |
| 3.1  | 2.65 | 3.5  | 2.54 | -0.36709 | 0.446052 |
| 0.85 | 1.15 | 1.28 | 1.53 | -0.01375 | 0.986671 |
| 0.37 | 1.2  | 1.57 | 1.39 | 0.699878 | 0.29626  |
| 0    | 0    | 0    | 0    | NA       | NA       |
| 0.91 | 1.49 | 1.52 | 1.99 | 0.339328 | 0.265727 |
| 0    | 0    | 0    | 0    | NA       | NA       |
| 1.21 | 1.07 | 1.34 | 0.51 | -0.16738 | 0.836509 |
| 0    | 0    | 0    | 0    | NA       | NA       |
| 0    | 0    | 0    | 0    | NA       | NA       |
| 0.11 | 0.12 | 0.11 | 0.17 | NA       | NA       |
| 0    | 0    | 0    | 0    | NA       | NA       |
| 0    | 0    | 0    | 0    | NA       | NA       |
| 0.99 | 1.54 | 1.46 | 1.15 | 0.220412 | 0.602449 |
| 1.97 | 2.33 | 2.16 | 2.28 | -0.13516 | 0.820881 |

|      |      |      |               |          |
|------|------|------|---------------|----------|
| 0    | 0    | 0.23 | 0 NA          | NA       |
| 0.83 | 0.41 | 0.26 | 0.28 -0.34805 | 0.659572 |
| 0    | 0    | 0    | 0 NA          | NA       |
| 0.07 | 0.2  | 0.28 | 0.11 -0.00399 | 0.996711 |
| 0.1  | 0.1  | 0.09 | 0.03 NA       | NA       |
| 0    | 0    | 0    | 0 NA          | NA       |
| 1.61 | 0.36 | 0.82 | 0.51 -1.23267 | 0.001331 |
| 0.44 | 0.32 | 0.1  | 0.22 NA       | NA       |
| 0    | 0    | 0.12 | 0 NA          | NA       |
| 0    | 0    | 0.01 | 0 NA          | NA       |
| 2.45 | 1.4  | 0.83 | 1.47 -0.57189 | 0.323961 |
| 0    | 0.37 | 0    | 0.19 NA       | NA       |
| 0    | 0    | 1.46 | 0 NA          | NA       |
| 0    | 0    | 0    | 0 NA          | NA       |
| 1.13 | 1.11 | 1.22 | 1.42 -0.03939 | 0.951569 |
| 0    | 0    | 0    | 0 NA          | NA       |
| 0    | 0    | 0.18 | 0.21 NA       | NA       |
| 0.45 | 0.32 | 0.69 | 0.42 0.088637 | 0.925002 |
| 0.27 | 0.06 | 0.12 | 0.2 NA        | NA       |
| 0    | 0.12 | 0    | 0 NA          | NA       |
| 0.67 | 0.97 | 0.96 | 0.73 0.034408 | 0.962938 |
| 0    | 0    | 0    | 0.25 NA       | NA       |
| 0    | 0    | 0    | 0 NA          | NA       |
| 0    | 0    | 0    | 0 NA          | NA       |
| 0    | 0    | 0    | 0 NA          | NA       |
| 0    | 0    | 0    | 0.03 NA       | NA       |
| 0    | 0    | 0    | 0.1 NA        | NA       |
| 7.91 | 4.78 | 5.49 | 4.92 -0.47927 | 0.000951 |
| 0    | 0.2  | 0.09 | 0 NA          | NA       |
| 0    | 0    | 0.19 | 0 NA          | NA       |
| 0    | 0.21 | 0    | 0 NA          | NA       |
| 0    | 0    | 0    | 0 NA          | NA       |
| 0    | 0.46 | 0.17 | 0.19 NA       | NA       |
| 0    | 0    | 0    | 0 NA          | NA       |
| 0    | 0    | 0    | 0 NA          | NA       |
| 0    | 0    | 0    | 0 NA          | NA       |
| 0.29 | 0.35 | 0.17 | 0.24 0.614319 | 0.368824 |
| 3.29 | 3.99 | 3.81 | 3.69 0.501895 | 0.037652 |
| 0.05 | 0.11 | 0.1  | 0.04 NA       | NA       |
| 0.6  | 0.54 | 0.8  | 1.82 0.151159 | 0.860153 |
| 2.54 | 2.43 | 2.83 | 2.34 -0.14164 | 0.814797 |
| 0.98 | 0.87 | 1.32 | 0.58 0.332943 | 0.626225 |
| 0    | 0    | 0    | 0 NA          | NA       |
| 0    | 0    | 0    | 0 NA          | NA       |
| 0.53 | 0    | 0.32 | 0.38 NA       | NA       |

|      |      |      |      |          |          |
|------|------|------|------|----------|----------|
| 0.31 | 0.67 | 0.63 | 0.51 | 0.461632 | 0.471929 |
| 0.47 | 1.22 | 1.44 | 1.34 | 0.153365 | 0.800223 |
| 0    | 0.14 | 0.05 | 0    | NA       | NA       |
| 0    | 0    | 0    | 0    | NA       | NA       |
| 0    | 0    | 0    | 0.35 | NA       | NA       |
| 0    | 0    | 0    | 0    | NA       | NA       |
| 0.26 | 0.31 | 0.23 | 0.07 | NA       | NA       |
| 8.95 | 7.29 | 8.72 | 8.71 | 0.044525 | 0.887755 |
| 1.36 | 1.61 | 1.58 | 1.66 | -0.15876 | 0.65103  |
| 0    | 0    | 0    | 0    | NA       | NA       |
| 0    | 0.09 | 0.17 | 0.1  | NA       | NA       |
| 0    | 0.43 | 0    | 0.09 | NA       | NA       |
| 0.25 | 0    | 0    | 0    | NA       | NA       |
| 0    | 0    | 0    | 0.07 | NA       | NA       |
| 0.55 | 0.06 | 0.42 | 0.3  | -0.17295 | 0.844865 |
| 0.61 | 0    | 0    | 0    | NA       | NA       |
| 0    | 0    | 0    | 0    | NA       | NA       |
| 0    | 0    | 0    | 0    | NA       | NA       |
| 0.98 | 0.23 | 0.75 | 0.12 | -0.06606 | 0.944533 |
| 0.07 | 0    | 0.04 | 0.4  | NA       | NA       |
| 0    | 0    | 0    | 0    | NA       | NA       |
| 0    | 0    | 0    | 0    | NA       | NA       |
| 0.52 | 0.6  | 0.49 | 0.4  | 0.162166 | 0.854111 |
| 0.12 | 0.12 | 0.1  | 0.21 | 0.078235 | 0.924089 |
| 0    | 0    | 0.23 | 0.13 | NA       | NA       |
| 1.03 | 0.64 | 0.88 | 1    | -0.34613 | 0.636669 |
| 0    | 0    | 0    | 0.39 | NA       | NA       |
| 0    | 0    | 0    | 0    | NA       | NA       |
| 0    | 0    | 0    | 0    | NA       | NA       |
| 0.96 | 1.13 | 1.05 | 1.2  | 0.048462 | 0.948824 |
| 0.28 | 1.77 | 1.15 | 0.76 | -0.04579 | 0.955966 |
| 0.65 | 0.58 | 0.21 | 0.25 | NA       | NA       |
| 0.22 | 0.16 | 0.42 | 0.49 | NA       | NA       |
| 0    | 0.18 | 0.16 | 0.19 | NA       | NA       |
| 0    | 0    | 0    | 0    | NA       | NA       |
| 0    | 0.75 | 0.17 | 0    | NA       | NA       |
| 4    | 2.98 | 4.36 | 3.02 | -0.27308 | 0.583792 |
| 0    | 0    | 0    | 0    | NA       | NA       |
| 0    | 0    | 0    | 0    | NA       | NA       |
| 0    | 0.69 | 0    | 0    | NA       | NA       |
| 0    | 0    | 0    | 0    | NA       | NA       |
| 0    | 0    | 0    | 0    | NA       | NA       |
| 0    | 0    | 0    | 0    | NA       | NA       |
| 1.03 | 1.86 | 2.03 | 2.06 | 0.519741 | 0.116032 |
| 0    | 0    | 0    | 0    | NA       | NA       |

|       |       |       |       |          |          |
|-------|-------|-------|-------|----------|----------|
| 0     | 0.64  | 0.15  | 0     | NA       | NA       |
| 0.44  | 0     | 0     | 0.17  | NA       | NA       |
| 0     | 0.36  | 0.25  | 0.28  | NA       | NA       |
| 0     | 0     | 0     | 0     | NA       | NA       |
| 0     | 0     | 0     | 0.23  | NA       | NA       |
| 0.65  | 0.31  | 0.49  | 0.99  | -0.27513 | 0.708257 |
| 0     | 0     | 0.47  | 0.13  | NA       | NA       |
| 0     | 0     | 0     | 0     | NA       | NA       |
| 0     | 0     | 0     | 0     | NA       | NA       |
| 0     | 0.22  | 0     | 0.08  | NA       | NA       |
| 0     | 0.19  | 0.51  | 0.2   | NA       | NA       |
| 0.18  | 0     | 0.12  | 0     | NA       | NA       |
| 0     | 0.22  | 0.1   | 0.34  | NA       | NA       |
| 0     | 0     | 0     | 0     | NA       | NA       |
| 0     | 0     | 0     | 0     | NA       | NA       |
| 0.78  | 3.53  | 1.53  | 1.53  | 0.412183 | 0.387722 |
| 9.02  | 9.46  | 13.07 | 13.68 | 0.607053 | 0.027002 |
| 0.33  | 0.35  | 0.26  | 0.17  | 0.111655 | 0.901699 |
| 0     | 0.16  | 0.76  | 0.17  | 0.223752 | 0.788559 |
| 0     | 0     | 0     | 0     | NA       | NA       |
| 0     | 0     | 0     | 0     | NA       | NA       |
| 0     | 0     | 0     | 0     | NA       | NA       |
| 0.05  | 0     | 0.08  | 0     | -0.60447 | 0.393877 |
| 0     | 0.17  | 0     | 0     | NA       | NA       |
| 7.23  | 7.46  | 6.87  | 6.87  | 0.277995 | 0.037805 |
| 0.6   | 0.05  | 0.24  | 0.23  | -1.19065 | 0.013555 |
| 48.52 | 43.09 | 44.2  | 43.71 | -0.12362 | 0.361207 |
| 0.06  | 0     | 0.08  | 0.12  | NA       | NA       |
| 0.38  | 0.34  | 0.55  | 0.26  | -0.30808 | 0.681472 |
| 0     | 0     | 0     | 0     | NA       | NA       |
| 0.7   | 0.2   | 0.78  | 0.44  | -0.08916 | 0.924712 |
| 0     | 0     | 0     | 0     | NA       | NA       |
| 0.19  | 0.41  | 0.25  | 0.24  | 0.462166 | 0.408819 |
| 0     | 0     | 0     | 0     | NA       | NA       |
| 0.21  | 0.15  | 0.34  | 0.18  | -0.48346 | 0.454965 |
| 0     | 0.09  | 0.17  | 0     | NA       | NA       |
| 0     | 0     | 0.16  | 0.09  | NA       | NA       |
| 0.29  | 0.32  | 0.49  | 1     | 0.188871 | 0.819846 |
| 0.13  | 0.05  | 0     | 0.08  | NA       | NA       |
| 0.85  | 1.23  | 1.3   | 1.42  | 0.320694 | 0.453409 |
| 0     | 0     | 0.12  | 0     | NA       | NA       |
| 0     | 0.31  | 0     | 0     | NA       | NA       |
| 0     | 0.07  | 0     | 0     | NA       | NA       |
| 3.02  | 3.85  | 2.94  | 3.23  | 0.032013 | 0.936357 |
| 0.13  | 0.06  | 0     | 0.03  | NA       | NA       |

|      |      |      |               |          |
|------|------|------|---------------|----------|
| 0    | 0    | 0    | 0 NA          | NA       |
| 0.11 | 0.34 | 0.22 | 0.49 0.505358 | 0.396889 |
| 0    | 0    | 0    | 0.29 NA       | NA       |
| 0    | 0.07 | 0.17 | 0.06 -0.07025 | 0.94241  |
| 0    | 0    | 0    | 0 NA          | NA       |
| 0.25 | 2.83 | 3.63 | 0 0.078102    | 0.898186 |
| 0    | 0    | 0    | 0 NA          | NA       |
| 0    | 0    | 0.15 | 0 NA          | NA       |
| 0    | 0    | 0    | 0 NA          | NA       |
| 0.11 | 0.41 | 0.08 | 0.17 NA       | NA       |
| 0.15 | 0.33 | 0.14 | 0.27 0.555325 | 0.447403 |
| 0    | 0    | 0.05 | 0 NA          | NA       |
| 0    | 0.22 | 0.4  | 0.11 NA       | NA       |
| 0    | 0    | 0    | 0 NA          | NA       |
| 0    | 0    | 0    | 0.16 NA       | NA       |
| 0.8  | 0.88 | 0.95 | 1.46 0.474468 | 0.401568 |
| 0    | 0    | 0.14 | 0 NA          | NA       |
| 0.24 | 0.39 | 0.28 | 0.36 0.507895 | 0.446731 |
| 0    | 0    | 0.09 | 0.11 NA       | NA       |
| 0.22 | 0.16 | 0.29 | 0.17 NA       | NA       |
| 0    | 1.99 | 1.26 | 1.45 0.285743 | 0.604518 |
| 0.29 | 0.42 | 0.39 | 0.55 NA       | NA       |
| 0.65 | 0.28 | 0.43 | 0.49 -0.53563 | 0.463611 |
| 0    | 0.16 | 0    | 0 NA          | NA       |
| 0    | 0    | 0    | 0 NA          | NA       |
| 0    | 0    | 0    | 0 NA          | NA       |
| 0    | 0.15 | 0    | 0 NA          | NA       |
| 0    | 0    | 0    | 0 NA          | NA       |
| 0    | 0.23 | 0    | 0 NA          | NA       |
| 0    | 0    | 0    | 0 NA          | NA       |
| 0.45 | 0.32 | 0.15 | 0.26 NA       | NA       |
| 0    | 0    | 0    | 0 NA          | NA       |
| 0.13 | 0.29 | 0.54 | 0.41 NA       | NA       |
| 0    | 0.1  | 0.02 | 0 NA          | NA       |
| 0.38 | 0.33 | 0.37 | 0.57 0.461504 | 0.375128 |
| 0.23 | 0    | 0.29 | 0.17 NA       | NA       |
| 0.11 | 0.08 | 0.1  | 0.06 -0.13783 | 0.868809 |
| 0    | 0    | 0    | 0 NA          | NA       |
| 0    | 0    | 0    | 0 NA          | NA       |
| 0.14 | 0.1  | 0.12 | 0.15 -0.43892 | 0.422205 |
| 0    | 0    | 0    | 0 NA          | NA       |
| 0.21 | 0.15 | 0.42 | 0.16 NA       | NA       |
| 0    | 0    | 0    | 0 NA          | NA       |
| 0    | 0    | 0    | 0 NA          | NA       |
| 0    | 0.1  | 0.08 | 0.14 NA       | NA       |



|       |       |       |      |          |          |
|-------|-------|-------|------|----------|----------|
| 0     | 1.52  | 0.81  | 0.79 | 0.924329 | 0.157599 |
| 0.23  | 0.16  | 0     | 0    | NA       | NA       |
| 1.43  | 2.91  | 1.98  | 1.17 | 0.214375 | 0.743623 |
| 0.29  | 0.58  | 0.39  | 0.38 | 0.071347 | 0.910192 |
| 0     | 0     | 0     | 0    | NA       | NA       |
| 1.4   | 0.88  | 1.22  | 0.61 | -0.05414 | 0.954093 |
| 0.29  | 0.84  | 0.39  | 0.33 | -0.10503 | 0.90897  |
| 0.3   | 0.24  | 0.21  | 0.26 | 0.126963 | 0.878681 |
| 0.27  | 0     | 0     | 0    | NA       | NA       |
| 0.41  | 0.37  | 0.41  | 0.08 | -0.1793  | 0.836807 |
| 0     | 0     | 0.31  | 0    | NA       | NA       |
| 0.04  | 0     | 0.05  | 0.03 | NA       | NA       |
| 0.49  | 0.35  | 0.45  | 0.38 | -0.11747 | 0.881539 |
| 0     | 0.1   | 0     | 0    | NA       | NA       |
| 0.05  | 0.07  | 0.14  | 0.43 | NA       | NA       |
| 0     | 0     | 0     | 0.09 | NA       | NA       |
| 0     | 0.94  | 0.39  | 0    | NA       | NA       |
| 0     | 0     | 0     | 0    | NA       | NA       |
| 0     | 0.56  | 0.26  | 0.74 | NA       | NA       |
| 0.86  | 1.22  | 1.48  | 1.31 | 0.601354 | 0.000877 |
| 0     | 0.15  | 0.14  | 0    | NA       | NA       |
| 10.66 | 8.26  | 8.88  | 9.15 | -0.21256 | 0.348322 |
| 0     | 0     | 0     | 0    | NA       | NA       |
| 0.61  | 0     | 0     | 0    | NA       | NA       |
| 0     | 1.39  | 0.93  | 0.54 | 0.120025 | 0.895033 |
| 1.43  | 0.44  | 0.67  | 0.31 | -0.46961 | 0.533521 |
| 0.37  | 0     | 0     | 0    | NA       | NA       |
| 0     | 0     | 0     | 0    | NA       | NA       |
| 2.96  | 2.03  | 2.3   | 2.1  | -0.46424 | 0.003297 |
| 0     | 0     | 0.13  | 0    | NA       | NA       |
| 0.16  | 0.18  | 0.41  | 0.67 | -0.0974  | 0.90014  |
| 6.63  | 10.57 | 10.22 | 9.21 | 0.594408 | 4.34E-05 |
| 0.03  | 0     | 0.02  | 0    | NA       | NA       |
| 0     | 0     | 0     | 0    | NA       | NA       |
| 0.29  | 0     | 0.05  | 0.25 | -0.32662 | 0.678112 |
| 0.05  | 0     | 0     | 0    | NA       | NA       |
| 0.2   | 0     | 1.52  | 0    | -0.07765 | 0.862624 |
| 0     | 0     | 0.07  | 0    | NA       | NA       |
| 0     | 0     | 0     | 0    | NA       | NA       |
| 0     | 0.09  | 0.53  | 0    | NA       | NA       |
| 0     | 0.1   | 0.19  | 0    | NA       | NA       |
| 0.16  | 0.8   | 0.53  | 0.48 | -0.14428 | 0.871922 |
| 0     | 0.33  | 0.15  | 0    | NA       | NA       |
| 2.36  | 2.65  | 2.04  | 1.26 | 0.442039 | 0.561271 |
| 0.4   | 0.14  | 0.11  | 0.1  | -1.40612 | 0.008911 |

|       |       |       |                |          |
|-------|-------|-------|----------------|----------|
| 0     | 0     | 0     | 0 NA           | NA       |
| 0.07  | 0.05  | 0.3   | 0.17 -0.1137   | 0.899474 |
| 0.13  | 0.09  | 0.38  | 0.27 -0.26613  | 0.703505 |
| 0     | 0     | 0     | 0 NA           | NA       |
| 0.27  | 0     | 0     | 0 NA           | NA       |
| 0.38  | 0.27  | 0.89  | 0.5 -0.65784   | 0.342762 |
| 0.29  | 0.42  | 0.38  | 0.11 NA        | NA       |
| 0     | 0     | 0.16  | 0 NA           | NA       |
| 0.43  | 0.62  | 0.8   | 0 NA           | NA       |
| 0     | 0     | 0     | 0 NA           | NA       |
| 1.02  | 1.18  | 1.46  | 1.38 0.197262  | 0.8101   |
| 0     | 0.48  | 0.21  | 0 NA           | NA       |
| 1.39  | 1.45  | 1.36  | 1.06 -0.2393   | 0.676615 |
| 0     | 0     | 0     | 0 NA           | NA       |
| 0     | 0.22  | 0     | 0 NA           | NA       |
| 0     | 0     | 0     | 0 NA           | NA       |
| 0.12  | 0     | 0.16  | 0.18 NA        | NA       |
| 0     | 0     | 0     | 0 NA           | NA       |
| 0     | 0     | 0     | 0 NA           | NA       |
| 0     | 0     | 0     | 0 NA           | NA       |
| 0     | 0     | 0     | 0 NA           | NA       |
| 0     | 0.61  | 0.75  | 0.64 1.214984  | 0.044273 |
| 0     | 0     | 0     | 0 NA           | NA       |
| 0     | 0     | 0     | 0.13 NA        | NA       |
| 0     | 0     | 0.66  | 0.39 NA        | NA       |
| 0     | 0     | 0     | 0 NA           | NA       |
| 0     | 0.08  | 0     | 0 NA           | NA       |
| 0     | 0     | 0     | 0 NA           | NA       |
| 0     | 0     | 0     | 0 NA           | NA       |
| 0.38  | 0.2   | 0.25  | 0.43 NA        | NA       |
| 0     | 0     | 0     | 0 NA           | NA       |
| 2.14  | 3.47  | 2.52  | 3.51 0.725275  | 0.014959 |
| 0     | 0     | 0     | 0 NA           | NA       |
| 0     | 0     | 0     | 0 NA           | NA       |
| 0     | 0     | 0.1   | 0 NA           | NA       |
| 0     | 0     | 0     | 0 NA           | NA       |
| 0     | 0.07  | 0     | 0 NA           | NA       |
| 0.91  | 2.63  | 1.65  | 1.67 0.988087  | 0.047132 |
| 0     | 0.58  | 0.51  | 0.3 NA         | NA       |
| 0     | 0     | 0     | 0.12 NA        | NA       |
| 13.81 | 13.43 | 12.79 | 13.71 -0.25692 | 0.030806 |
| 0.25  | 0.36  | 0.51  | 0 NA           | NA       |
| 0     | 0     | 0     | 0 NA           | NA       |
| 0.4   | 0.14  | 0.13  | 0.3 NA         | NA       |
| 0     | 0.12  | 0.11  | 0.26 NA        | NA       |

|       |       |       |       |          |          |
|-------|-------|-------|-------|----------|----------|
| 1.43  | 1.94  | 1.67  | 2.01  | 0.406188 | 0.107181 |
| 0     | 1.17  | 1.24  | 0.28  | NA       | NA       |
| 0.81  | 0.66  | 0.99  | 0.8   | -0.02017 | 0.978992 |
| 1     | 0.66  | 0.92  | 0.77  | -0.33632 | 0.549416 |
| 9.98  | 13.83 | 16.4  | 14    | 0.430369 | 0.112381 |
| 0.04  | 0.02  | 0.02  | 0.01  | NA       | NA       |
| 0     | 0     | 0.4   | 0.95  | NA       | NA       |
| 1.83  | 2.09  | 1.49  | 2.97  | 0.399699 | 0.301209 |
| 0     | 0.54  | 0.46  | 1.13  | 0.789171 | 0.240188 |
| 0     | 0     | 0     | 0     | NA       | NA       |
| 0     | 0     | 0     | 0     | NA       | NA       |
| 0.07  | 0.59  | 0.25  | 0.74  | 0.889393 | 0.174767 |
| 0     | 0     | 0     | 0     | NA       | NA       |
| 0     | 0     | 0     | 0.16  | NA       | NA       |
| 0.16  | 0.21  | 0.17  | 0.09  | -0.53952 | 0.412337 |
| 0     | 0     | 0     | 0     | NA       | NA       |
| 0     | 0     | 0     | 0     | NA       | NA       |
| 12.72 | 9.12  | 10.42 | 10.59 | 0.488388 | 0.234603 |
| 0.15  | 0.33  | 0.4   | 0.68  | -0.00767 | 0.994915 |
| 1.31  | 0     | 0.21  | 0.74  | -0.46866 | 0.528371 |
| 0.27  | 0     | 0     | 0     | NA       | NA       |
| 0     | 0     | 0     | 0     | NA       | NA       |
| 0     | 0     | 0.17  | 0     | NA       | NA       |
| 0.16  | 0     | 0     | 0.12  | NA       | NA       |
| 0     | 0     | 0     | 0     | NA       | NA       |
| 0.23  | 0.08  | 0.39  | 0     | -0.43574 | 0.553808 |
| 2.44  | 2.7   | 1.87  | 1.51  | -0.09597 | 0.886055 |
| 3.72  | 5.5   | 7.01  | 5.71  | 0.2166   | 0.718036 |
| 0.23  | 0     | 0.23  | 0     | NA       | NA       |
| 0     | 0.11  | 0     | 0     | NA       | NA       |
| 0.05  | 0.14  | 0.19  | 0.17  | 0.68436  | 0.322614 |
| 0     | 0     | 0     | 0     | NA       | NA       |
| 0     | 0     | 0.11  | 0     | NA       | NA       |
| 0.51  | 0.49  | 0.57  | 0.45  | 0.144088 | 0.867339 |
| 0     | 0     | 0.02  | 0.05  | NA       | NA       |
| 0.23  | 0.98  | 0.89  | 0     | 0.288177 | 0.713454 |
| 0.4   | 0.29  | 0.67  | 0.23  | -0.08824 | 0.925277 |
| 0.21  | 0.45  | 0.67  | 0     | NA       | NA       |
| 0     | 0.55  | 0.25  | 0.29  | NA       | NA       |
| 0     | 0.29  | 0     | 0     | NA       | NA       |
| 2.5   | 1.67  | 1.09  | 1.85  | -0.54825 | 0.292384 |
| 0     | 0     | 0     | 0     | NA       | NA       |
| 0     | 0.14  | 0     | 0     | NA       | NA       |
| 0     | 0.08  | 0     | 0     | NA       | NA       |
| 0     | 0     | 0     | 0     | NA       | NA       |

|      |      |      |      |          |          |
|------|------|------|------|----------|----------|
| 0.43 | 1.22 | 0    | 0.93 | NA       | NA       |
| 0    | 0    | 0.25 | 0.09 | NA       | NA       |
| 0.57 | 0    | 0    | 0    | NA       | NA       |
| 0.16 | 1.14 | 0.83 | 0.6  | 0.346393 | 0.661482 |
| 0    | 0    | 0    | 0    | NA       | NA       |
| 1.42 | 1.12 | 1.45 | 1.54 | 0.148387 | 0.715097 |
| 0    | 0    | 0.11 | 0    | NA       | NA       |
| 0.23 | 0.17 | 0    | 0    | NA       | NA       |
| 0    | 0    | 0    | 0    | NA       | NA       |
| 0    | 0.1  | 0.03 | 0.07 | NA       | NA       |
| 0    | 0    | 0    | 0    | NA       | NA       |
| 0    | 0    | 0    | 0    | NA       | NA       |
| 0.39 | 0    | 0.13 | 0    | NA       | NA       |
| 0    | 0    | 0    | 0    | NA       | NA       |
| 0    | 0    | 0    | 0    | NA       | NA       |
| 1.12 | 0.49 | 0.75 | 0.66 | -0.27002 | 0.569512 |
| 0    | 0.46 | 1.01 | 0.47 | NA       | NA       |
| 0    | 0    | 0.09 | 0    | NA       | NA       |
| 0    | 0    | 0    | 0    | NA       | NA       |
| 1.65 | 0.88 | 0.68 | 0.55 | -0.78649 | 0.120648 |
| 0    | 0    | 0    | 0    | NA       | NA       |
| 0    | 0    | 0    | 0    | NA       | NA       |
| 0    | 0.27 | 0    | 0.28 | NA       | NA       |
| 0    | 0    | 0    | 0    | NA       | NA       |
| 0.12 | 0.03 | 0.03 | 0    | -2.01026 | 0.000416 |
| 0    | 0    | 0    | 0    | NA       | NA       |
| 0    | 0    | 0    | 0    | NA       | NA       |
| 0.6  | 0    | 0.38 | 0    | NA       | NA       |
| 1.21 | 0.17 | 0.16 | 0.54 | NA       | NA       |
| 0    | 0    | 0    | 0    | NA       | NA       |
| 0    | 0.06 | 0.11 | 0    | NA       | NA       |
| 2.25 | 1.8  | 1.94 | 1.67 | -0.26171 | 0.136969 |
| 0    | 1.71 | 0.33 | 0.51 | NA       | NA       |
| 0    | 0    | 0    | 0    | NA       | NA       |
| 0.09 | 0.08 | 0.07 | 0.1  | -0.14471 | 0.81989  |
| 0    | 0.24 | 0.38 | 0.43 | 0.600734 | 0.382033 |
| 0.79 | 0.36 | 0.68 | 0.33 | -0.13215 | 0.876951 |
| 0    | 0    | 0    | 0    | NA       | NA       |
| 0.2  | 0.43 | 0    | 0    | NA       | NA       |
| 0    | 0    | 0    | 0    | NA       | NA       |
| 0    | 0    | 0    | 0    | NA       | NA       |
| 0.01 | 0.26 | 0.09 | 0    | 1.296786 | 0.023993 |
| 0.34 | 0.27 | 0.34 | 0.39 | -0.03893 | 0.946597 |
| 2.93 | 0.99 | 2.01 | 1.04 | -1.08901 | 0.012568 |
| 0    | 0    | 0    | 0    | NA       | NA       |

|      |      |      |               |          |
|------|------|------|---------------|----------|
| 0    | 0    | 0    | 0 NA          | NA       |
| 0    | 0    | 0    | 0 NA          | NA       |
| 0.19 | 0    | 0.06 | 0 NA          | NA       |
| 0.36 | 0.9  | 0.35 | 0.27 -0.00288 | 0.997599 |
| 0.39 | 0.28 | 0.52 | 0.2 -0.21136  | 0.805735 |
| 0    | 1.87 | 0.41 | 0 NA          | NA       |
| 0.79 | 1.52 | 1.5  | 1.35 0.343013 | 0.379343 |
| 0.11 | 0.4  | 0.2  | 0.36 0.294795 | 0.694326 |
| 0    | 0    | 0.57 | 0 NA          | NA       |
| 1.21 | 1.19 | 1.15 | 1.11 0.131177 | 0.786009 |
| 0    | 0    | 0    | 0 NA          | NA       |
| 0.53 | 1.08 | 0.83 | 0.67 0.911146 | 0.145311 |
| 0.46 | 0.33 | 0    | 0.11 NA       | NA       |
| 0    | 0    | 0    | 0 NA          | NA       |
| 0    | 0    | 0    | 0 NA          | NA       |
| 0    | 0    | 0.04 | 0.01 NA       | NA       |
| 0.37 | 0.26 | 0.24 | 0.31 -0.58584 | 0.095658 |
| 0    | 0    | 0    | 0 NA          | NA       |
| 0    | 0    | 0    | 0 NA          | NA       |
| 0    | 0    | 0    | 0 NA          | NA       |
| 0.86 | 0.31 | 0.19 | 0 NA          | NA       |
| 0    | 0    | 0    | 0 NA          | NA       |
| 0    | 0    | 0    | 0.76 NA       | NA       |
| 0.25 | 0.4  | 0.66 | 0.12 -0.23187 | 0.776308 |
| 0    | 0    | 0    | 0 NA          | NA       |
| 0    | 0    | 0    | 0 NA          | NA       |
| 0.78 | 0.65 | 0.52 | 0.2 -0.24303  | 0.772425 |
| 1.85 | 1.76 | 1.51 | 2.14 0.107427 | 0.794039 |
| 0.43 | 0.28 | 0.15 | 0.14 -0.28228 | 0.730562 |
| 0    | 0.18 | 0    | 0.56 NA       | NA       |
| 0.26 | 1.1  | 0.99 | 0.95 0.94406  | 0.13697  |
| 0    | 0    | 0    | 0 NA          | NA       |
| 0.57 | 0.55 | 0.37 | 0.28 NA       | NA       |
| 1.35 | 0.63 | 1.42 | 1.05 -0.22128 | 0.708566 |
| 0    | 0    | 0    | 0 NA          | NA       |
| 0.58 | 1.25 | 1.14 | 1.6 0.957301  | 0.138575 |
| 0.24 | 0.26 | 0    | 0.18 NA       | NA       |
| 0.48 | 0.11 | 0.74 | 0.12 -0.3852  | 0.618289 |
| 0    | 0    | 0    | 0.08 NA       | NA       |
| 0.12 | 0    | 0.41 | 0.18 NA       | NA       |
| 0    | 0    | 0    | 0 NA          | NA       |
| 0    | 0    | 0    | 0 NA          | NA       |
| 0    | 0    | 0.14 | 0 NA          | NA       |
| 0    | 0    | 0    | 0 NA          | NA       |
| 0.07 | 0.05 | 0.1  | 0.11 0.005913 | 0.995428 |

|      |      |      |      |          |          |
|------|------|------|------|----------|----------|
| 0.47 | 0.29 | 0.41 | 0.34 | -0.35565 | 0.510958 |
| 0.04 | 0.04 | 0.02 | 0    | NA       | NA       |
| 0    | 0    | 0.08 | 0    | NA       | NA       |
| 0    | 0    | 0    | 0    | NA       | NA       |
| 0.06 | 0.09 | 0.08 | 0.13 | 0.370705 | 0.625633 |
| 0.68 | 0.53 | 0.58 | 0.48 | -0.21929 | 0.663037 |
| 0    | 0.42 | 0.39 | 0    | NA       | NA       |
| 0.29 | 0.1  | 0.23 | 0.11 | 0.100219 | 0.912803 |
| 1.69 | 0.85 | 1.11 | 1.27 | -0.0741  | 0.935649 |
| 0    | 0    | 0.28 | 0.16 | NA       | NA       |
| 0.49 | 0.23 | 0.11 | 0.12 | NA       | NA       |
| 0    | 0    | 0    | 0    | NA       | NA       |
| 0    | 0    | 0    | 0    | NA       | NA       |
| 0    | 0.11 | 0    | 0.17 | -0.11874 | 0.811556 |
| 0    | 0    | 0.1  | 0.11 | NA       | NA       |
| 0    | 0    | 0    | 0.2  | NA       | NA       |
| 0.17 | 0    | 0    | 0    | NA       | NA       |
| 0.19 | 0.14 | 0    | 0    | NA       | NA       |
| 0    | 0    | 0    | 0    | NA       | NA       |
| 0    | 0    | 0    | 0    | NA       | NA       |
| 0    | 0    | 0    | 0    | NA       | NA       |
| 0.08 | 0.39 | 0.57 | 0.41 | 1.140596 | 0.068513 |
| 0.23 | 0.98 | 0    | 1.02 | 0.473917 | 0.491004 |
| 0.03 | 0.03 | 0.04 | 0.02 | NA       | NA       |
| 8.54 | 4.17 | 9.29 | 6.96 | -0.00316 | 0.996111 |
| 0    | 0    | 0    | 0    | NA       | NA       |
| 0.22 | 0    | 0.14 | 0.16 | NA       | NA       |
| 0    | 0    | 0    | 0    | NA       | NA       |
| 0.57 | 0.11 | 0.8  | 0.32 | -0.30972 | 0.65944  |
| 0    | 0    | 0    | 0    | NA       | NA       |
| 0    | 0    | 0    | 0    | NA       | NA       |
| 0.35 | 0    | 0.22 | 1.04 | NA       | NA       |
| 0    | 0    | 0    | 0    | NA       | NA       |
| 0.09 | 0.26 | 0.12 | 0.28 | NA       | NA       |
| 2.37 | 0    | 0    | 1.58 | NA       | NA       |
| 0    | 0    | 0    | 0    | NA       | NA       |
| 0.45 | 0.32 | 0.53 | 0    | NA       | NA       |
| 0.77 | 0.75 | 0.88 | 1.37 | -0.30331 | 0.585659 |
| 0.39 | 0.11 | 0.27 | 0.24 | -0.34136 | 0.667682 |
| 0    | 0    | 0    | 0    | NA       | NA       |
| 0.14 | 0    | 0.29 | 0.16 | NA       | NA       |
| 1.4  | 0    | 0.1  | 0    | NA       | NA       |
| 0    | 0    | 0    | 0    | NA       | NA       |
| 0.71 | 1.45 | 0.63 | 0.54 | 0.339622 | 0.658595 |



|       |       |      |                |          |
|-------|-------|------|----------------|----------|
| 0     | 0     | 0    | 0 NA           | NA       |
| 0     | 0     | 0    | 0 NA           | NA       |
| 0     | 0     | 0    | 0 NA           | NA       |
| 0.35  | 0     | 0    | 0.26 NA        | NA       |
| 0     | 0     | 0    | 0 NA           | NA       |
| 7.63  | 10    | 8.57 | 8.13 0.132712  | 0.487067 |
| 0.19  | 0.13  | 0    | 0.14 NA        | NA       |
| 0     | 0     | 0    | 0 NA           | NA       |
| 0     | 0     | 0    | 0 NA           | NA       |
| 0.97  | 0.69  | 0.89 | 0.35 NA        | NA       |
| 0     | 0     | 0    | 0 NA           | NA       |
| 0     | 0     | 0    | 0 NA           | NA       |
| 0.82  | 0     | 0    | 0 NA           | NA       |
| 0     | 0     | 0    | 0 NA           | NA       |
| 3.01  | 3.52  | 2.92 | 3.43 -0.06206  | 0.915276 |
| 0     | 0     | 0    | 0.09 NA        | NA       |
| 0     | 0     | 0    | 0 NA           | NA       |
| 0     | 0     | 0.21 | 0.12 NA        | NA       |
| 0     | 0     | 0    | 0 NA           | NA       |
| 0     | 0     | 0    | 0 NA           | NA       |
| 0     | 0     | 0    | 0 NA           | NA       |
| 0     | 0     | 0    | 0 NA           | NA       |
| 0     | 0     | 0    | 0 NA           | NA       |
| 10.81 | 9.22  | 8.12 | 6.24 -0.21273  | 0.496155 |
| 0     | 0     | 0    | 0.12 NA        | NA       |
| 0     | 0     | 0    | 0 NA           | NA       |
| 0     | 0     | 0    | 0 NA           | NA       |
| 0     | 0     | 0    | 0.66 NA        | NA       |
| 0     | 0     | 0    | 0 NA           | NA       |
| 0     | 0.43  | 0    | 0.48 NA        | NA       |
| 0.02  | 0.02  | 0.02 | 0.03 -0.45887  | 0.543914 |
| 0     | 0     | 0    | 0 NA           | NA       |
| 1.25  | 2     | 2.17 | 1.88 0.800202  | 0.000357 |
| 0     | 0     | 0    | 0 NA           | NA       |
| 20.46 | 0     | 0    | 0 NA           | NA       |
| 0     | 0     | 0    | 0 NA           | NA       |
| 21.79 | 22.96 | 25.1 | 28.25 0.173449 | 0.313974 |
| 0     | 0     | 0    | 0 NA           | NA       |
| 0     | 0     | 0    | 0 NA           | NA       |
| 0     | 0     | 0    | 0 NA           | NA       |
| 0     | 0.06  | 0.02 | 0 NA           | NA       |
| 1.92  | 1.55  | 0.88 | 0.73 -0.33311  | 0.629439 |
| 0     | 0     | 0    | 0 NA           | NA       |
| 0     | 0     | 0    | 0 NA           | NA       |
| 0     | 0     | 0    | 0 NA           | NA       |



|      |      |      |               |          |
|------|------|------|---------------|----------|
| 0    | 0    | 0    | 0 NA          | NA       |
| 0    | 0    | 0    | 0 NA          | NA       |
| 0    | 0    | 0    | 0 NA          | NA       |
| 0    | 0    | 0    | 0 NA          | NA       |
| 0    | 0    | 0    | 0 NA          | NA       |
| 0    | 0    | 0    | 0 NA          | NA       |
| 0    | 0    | 0    | 0 NA          | NA       |
| 0    | 0    | 0    | 0 NA          | NA       |
| 0    | 0    | 0    | 0 NA          | NA       |
| 0    | 0.15 | 0    | 0.08 NA       | NA       |
| 0    | 0    | 0    | 0 NA          | NA       |
| 0    | 0    | 0    | 0 NA          | NA       |
| 0    | 0.56 | 0.54 | 0.83 0.660722 | 0.327465 |
| 0.23 | 0    | 0.15 | 0 NA          | NA       |
| 0    | 0    | 0    | 0 NA          | NA       |
| 0.24 | 0.09 | 0    | 0.09 NA       | NA       |
| 0.08 | 0.06 | 0.14 | 0.09 -0.10883 | 0.905536 |
| 0    | 0    | 0    | 0 NA          | NA       |
| 0    | 0    | 0    | 0 NA          | NA       |
| 0    | 0    | 2.85 | 0 NA          | NA       |
| 0    | 0    | 0    | 0 NA          | NA       |
| 1.49 | 0.8  | 0.66 | 1.32 -0.1507  | 0.852311 |
| 0    | 0    | 0    | 5.29 NA       | NA       |
| 0    | 0.26 | 0    | 0 NA          | NA       |
| 0    | 0    | 0    | 0 NA          | NA       |
| 0    | 0    | 0    | 0 NA          | NA       |
| 0    | 0    | 0    | 0 NA          | NA       |
| 0    | 0    | 0    | 0 NA          | NA       |
| 0    | 0    | 0    | 0 NA          | NA       |
| 0    | 0    | 0    | 0 NA          | NA       |
| 0    | 0    | 0    | 0 NA          | NA       |
| 0.3  | 0.96 | 0.69 | 0.46 0.374597 | 0.583836 |
| 0    | 0    | 0    | 0 NA          | NA       |
| 0    | 0    | 0    | 0 NA          | NA       |
| 0.07 | 0.08 | 0.05 | 0 NA          | NA       |
| 0    | 0.12 | 0.53 | 0.54 NA       | NA       |
| 0    | 0    | 0    | 0 NA          | NA       |
| 0    | 0    | 1.33 | 0 NA          | NA       |
| 1.11 | 0    | 0    | 0 NA          | NA       |
| 0    | 0    | 0    | 0 NA          | NA       |
| 0    | 0    | 0    | 0 NA          | NA       |
| 0    | 0    | 0    | 0 NA          | NA       |
| 0    | 0    | 0    | 0 NA          | NA       |

|       |       |       |                |          |
|-------|-------|-------|----------------|----------|
| 0     | 0     | 0     | 0 NA           | NA       |
| 1.19  | 1.02  | 0.95  | 0.68 0.068733  | 0.933507 |
| 0     | 0     | 0     | 0.26 NA        | NA       |
| 0     | 0     | 0     | 0 NA           | NA       |
| 0     | 0     | 0     | 0 NA           | NA       |
| 0.38  | 0.34  | 0.37  | 0.33 -0.18733  | 0.741819 |
| 14.09 | 18.31 | 49.64 | 71.4 0.812667  | 0.181298 |
| 0     | 0     | 0     | 0 NA           | NA       |
| 0     | 0     | 0     | 0 NA           | NA       |
| 0     | 0.13  | 0.52  | 0.42 NA        | NA       |
| 0     | 0     | 0     | 0 NA           | NA       |
| 0     | 0     | 0     | 0 NA           | NA       |
| 0     | 0     | 0     | 0 NA           | NA       |
| 0     | 0     | 0     | 0 NA           | NA       |
| 0     | 0     | 0     | 0 NA           | NA       |
| 0     | 0     | 0     | 0 NA           | NA       |
| 0     | 0     | 0.08  | 0 NA           | NA       |
| 12.59 | 10.22 | 11.45 | 13.67 0.078841 | 0.873778 |
| 32.18 | 28.35 | 31.2  | 28.54 -0.02462 | 0.85662  |
| 0     | 0     | 0     | 0 NA           | NA       |
| 0     | 0     | 0     | 0 NA           | NA       |
| 0     | 0     | 0     | 0 NA           | NA       |
| 1.29  | 0.42  | 0.39  | 0.71 -0.47947  | 0.505554 |
| 1.64  | 0.2   | 0.92  | 0.35 -0.96785  | 0.096599 |
| 0     | 0     | 0     | 0 NA           | NA       |
| 0     | 0     | 0.42  | 0 NA           | NA       |
| 0     | 0     | 0.13  | 0 NA           | NA       |
| 0     | 0     | 0     | 0 NA           | NA       |
| 0     | 1.57  | 2.8   | 3.02 NA        | NA       |
| 0     | 0.04  | 0     | 0 NA           | NA       |
| 0.02  | 0     | 0.02  | 0 NA           | NA       |
| 0     | 0     | 0     | 0 NA           | NA       |
| 0     | 0     | 0     | 0 NA           | NA       |
| 0     | 0     | 0     | 0 NA           | NA       |
| 0     | 0     | 0     | 0 NA           | NA       |
| 0.19  | 0.36  | 0.17  | 0.29 0.548104  | 0.454251 |
| 2.5   | 2.39  | 3.27  | 3.12 -0.37325  | 0.40718  |
| 0     | 0     | 0     | 0 NA           | NA       |
| 0     | 0     | 0     | 0 NA           | NA       |
| 0     | 0     | 0     | 0 NA           | NA       |
| 0     | 0     | 0.04  | 0 NA           | NA       |
| 0.61  | 1.64  | 1.11  | 0.92 -0.05639  | 0.948772 |
| 0     | 0     | 0     | 0.13 NA        | NA       |

|       |       |       |                |          |
|-------|-------|-------|----------------|----------|
| 0     | 0     | 0     | 0 NA           | NA       |
| 0.04  | 0.54  | 0.3   | 0.27 1.089646  | 0.079393 |
| 0     | 0     | 0     | 0 NA           | NA       |
| 0.68  | 0.08  | 0.25  | 0.2 -0.97323   | 0.11359  |
| 0     | 0     | 0     | 0 NA           | NA       |
| 0     | 0.19  | 0     | 0.1 NA         | NA       |
| 0     | 0     | 0     | 0 NA           | NA       |
| 0     | 0     | 0.47  | 0 NA           | NA       |
| 0.26  | 0     | 0     | 0 NA           | NA       |
| 0     | 0     | 0     | 0 NA           | NA       |
| 1.81  | 2.33  | 2.22  | 2.53 0.357708  | 0.167215 |
| 0.2   | 0.15  | 0.53  | 0 NA           | NA       |
| 0.05  | 0.02  | 0.03  | 0 NA           | NA       |
| 0     | 0     | 0     | 0 NA           | NA       |
| 0     | 0     | 0.09  | 0.21 NA        | NA       |
| 0     | 0     | 0     | 0 NA           | NA       |
| 0     | 0     | 0     | 0 NA           | NA       |
| 0     | 0     | 0     | 0 NA           | NA       |
| 0     | 0     | 0     | 0 NA           | NA       |
| 0     | 0     | 0     | 0 NA           | NA       |
| 0     | 0     | 0     | 0 NA           | NA       |
| 0     | 0     | 0     | 0 NA           | NA       |
| 30.81 | 26.22 | 25.29 | 27.84 -0.17377 | 0.190058 |
| 0     | 0     | 0     | 0 NA           | NA       |
| 0     | 0     | 0     | 0 NA           | NA       |
| 0     | 0     | 0     | 0 NA           | NA       |
| 0     | 0     | 0     | 0 NA           | NA       |
| 0     | 0     | 0     | 0 NA           | NA       |
| 0     | 0     | 0     | 0 NA           | NA       |
| 0     | 0     | 0     | 0 NA           | NA       |
| 0     | 0     | 0     | 0 NA           | NA       |
| 0     | 0     | 0     | 0 NA           | NA       |
| 0     | 0     | 0     | 0 NA           | NA       |
| 0     | 0     | 0     | 0 NA           | NA       |
| 0     | 1.49  | 0.77  | 0 NA           | NA       |
| 0     | 0     | 0     | 0 NA           | NA       |
| 0     | 0     | 0     | 0 NA           | NA       |
| 0     | 0     | 0     | 0 NA           | NA       |
| 0     | 0     | 0     | 0 NA           | NA       |
| 0     | 0     | 0     | 0 NA           | NA       |
| 0     | 0     | 0     | 0 NA           | NA       |
| 0     | 0     | 0     | 0 NA           | NA       |
| 0     | 0     | 0     | 0 NA           | NA       |
| 0     | 0     | 0     | 0 NA           | NA       |
| 1.05  | 0.19  | 0.45  | 0.19 -1.64228  | 8.67E-05 |
| 0     | 0     | 0     | 0 NA           | NA       |
| 0.03  | 0.07  | 0     | 0 NA           | NA       |

|      |      |      |      |          |          |
|------|------|------|------|----------|----------|
| 0.68 | 1.7  | 1.43 | 1.11 | 0.958159 | 0.101801 |
| 0    | 0    | 0    | 0    | NA       | NA       |
| 0    | 0    | 0    | 0    | NA       | NA       |
| 0    | 0    | 0    | 0    | NA       | NA       |
| 8.41 | 8.36 | 8.96 | 8.84 | 0.020474 | 0.944721 |
| 0    | 0    | 0    | 0    | NA       | NA       |
| 0    | 0.09 | 0.43 | 0.49 | 0.367464 | 0.621469 |
| 0    | 0    | 0    | 0    | NA       | NA       |
| 0    | 0    | 0    | 0    | NA       | NA       |
| 0    | 0    | 0    | 0    | NA       | NA       |
| 0    | 0.7  | 0    | 1.79 | NA       | NA       |
| 0    | 0    | 0    | 0    | NA       | NA       |
| 0    | 0.42 | 0.68 | 0.65 | NA       | NA       |
| 0    | 0    | 0    | 0    | NA       | NA       |
| 0    | 0    | 0.21 | 0    | NA       | NA       |
| 0    | 0    | 0    | 0    | NA       | NA       |
| 0    | 0    | 0.22 | 0    | NA       | NA       |
| 0    | 0    | 0    | 0    | NA       | NA       |
| 0    | 0    | 0    | 0    | NA       | NA       |
| 0    | 0    | 0    | 0    | NA       | NA       |
| 0    | 0    | 0    | 0.18 | NA       | NA       |
| 0    | 0    | 0    | 0    | NA       | NA       |
| 0    | 0    | 0    | 0    | NA       | NA       |
| 0    | 0    | 0    | 0    | NA       | NA       |
| 0    | 0    | 0    | 0    | NA       | NA       |
| 0    | 0    | 0    | 0    | NA       | NA       |
| 0    | 0    | 0    | 0    | NA       | NA       |
| 0    | 0    | 0    | 0    | NA       | NA       |
| 0    | 0    | 0    | 0    | NA       | NA       |
| 0    | 0    | 0    | 0    | NA       | NA       |
| 0    | 0    | 0    | 0    | NA       | NA       |
| 0    | 0.18 | 0.33 | 0.09 | NA       | NA       |
| 0    | 0    | 0    | 0    | NA       | NA       |
| 0    | 0    | 0    | 0    | NA       | NA       |
| 0    | 0    | 0.44 | 0    | NA       | NA       |
| 0    | 0    | 0    | 0    | NA       | NA       |
| 0    | 0    | 0    | 0    | NA       | NA       |
| 0    | 0    | 0    | 0    | NA       | NA       |
| 0    | 0    | 0    | 0    | NA       | NA       |
| 0.47 | 0    | 0    | 0    | NA       | NA       |
| 0    | 0    | 0    | 0    | NA       | NA       |
| 0    | 0.24 | 0    | 0    | NA       | NA       |
| 0.16 | 0.11 | 0.1  | 0.12 | NA       | NA       |
| 0    | 0.22 | 0    | 0.46 | NA       | NA       |
| 0    | 0    | 0    | 0    | NA       | NA       |
| 0    | 0    | 0    | 0    | NA       | NA       |
| 0    | 0.09 | 0.05 | 0.04 | NA       | NA       |
| 0    | 0    | 0    | 0    | NA       | NA       |
| 0    | 0    | 0    | 0    | NA       | NA       |





|       |      |      |               |          |
|-------|------|------|---------------|----------|
| 0     | 0    | 0    | 0 NA          | NA       |
| 0     | 0    | 0    | 0 NA          | NA       |
| 0     | 0    | 0    | 0 NA          | NA       |
| 0     | 0    | 0    | 0 NA          | NA       |
| 0     | 0    | 0    | 0 NA          | NA       |
| 0     | 0.05 | 0    | 0 NA          | NA       |
| 0     | 0    | 0    | 0 NA          | NA       |
| 0     | 0    | 0    | 0 NA          | NA       |
| 12.83 | 7.67 | 9.62 | 9.23 -0.63684 | 4.65E-09 |
| 0     | 0    | 0    | 0 NA          | NA       |
| 0     | 0.1  | 0    | 0 NA          | NA       |
| 0.13  | 0.05 | 0.02 | 0.12 NA       | NA       |
| 0     | 0    | 0    | 0 NA          | NA       |
| 0     | 0    | 0.1  | 0 NA          | NA       |
| 0     | 0    | 0    | 0 NA          | NA       |
| 0     | 0    | 0    | 0 NA          | NA       |
| 0     | 0    | 0    | 0 NA          | NA       |
| 0     | 0    | 0    | 0 NA          | NA       |
| 0     | 0    | 0    | 0 NA          | NA       |
| 0     | 0    | 0    | 0 NA          | NA       |
| 0.53  | 0    | 0.39 | 0.73 NA       | NA       |
| 0     | 0    | 0    | 0 NA          | NA       |
| 0     | 0    | 0    | 0 NA          | NA       |
| 5.15  | 6.19 | 4.43 | 6.57 0.024962 | 0.902417 |
| 0     | 0    | 0    | 0 NA          | NA       |
| 2.64  | 5.42 | 1.45 | 2.42 0.042037 | 0.961386 |
| 0     | 0    | 0    | 0 NA          | NA       |
| 0     | 0    | 0    | 0 NA          | NA       |
| 0     | 0    | 0    | 0 NA          | NA       |
| 0     | 0    | 0    | 0 NA          | NA       |
| 0.27  | 0.29 | 0.27 | 0.47 -0.10886 | 0.87997  |
| 0.13  | 0.36 | 0    | 0.1 NA        | NA       |
| 0     | 0    | 0    | 0 NA          | NA       |
| 0.13  | 0    | 0.35 | 0 NA          | NA       |
| 0     | 0    | 0    | 0 NA          | NA       |
| 0     | 0    | 0    | 0 NA          | NA       |
| 0     | 0    | 0    | 0 NA          | NA       |
| 0     | 0    | 0    | 0 NA          | NA       |
| 0     | 0    | 0    | 0 NA          | NA       |
| 0     | 0    | 0    | 0 NA          | NA       |
| 0     | 0    | 0    | 0 NA          | NA       |
| 0     | 0    | 0    | 0 NA          | NA       |
| 0     | 0    | 0    | 0 NA          | NA       |
| 0.2   | 0.87 | 0.39 | 0.45 NA       | NA       |
| 0     | 0    | 0    | 0.25 NA       | NA       |

|       |      |      |                |          |
|-------|------|------|----------------|----------|
| 0.07  | 0    | 0    | 0 NA           | NA       |
| 0.23  | 0    | 0    | 0 NA           | NA       |
| 0     | 0    | 0    | 0 NA           | NA       |
| 0     | 0    | 0    | 0 NA           | NA       |
| 0.24  | 0.34 | 0.3  | 0 NA           | NA       |
| 0     | 0    | 0    | 0 NA           | NA       |
| 0     | 0    | 0    | 0 NA           | NA       |
| 3.28  | 9.43 | 7.65 | 9.19 1.213146  | 4.96E-06 |
| 0     | 0.47 | 0    | 2.53 NA        | NA       |
| 0     | 0    | 0    | 0 NA           | NA       |
| 0     | 0    | 0    | 0 NA           | NA       |
| 0.17  | 0.26 | 0.13 | 0.22 0.324601  | 0.659977 |
| 0.48  | 0.47 | 0.43 | 0.5 -0.38156   | 0.33195  |
| 0     | 0    | 0    | 0 NA           | NA       |
| 0     | 0    | 0    | 0 NA           | NA       |
| 19.84 | 9.54 | 9.73 | 11.87 -0.97418 | 9.33E-18 |
| 0     | 0    | 0    | 0 NA           | NA       |
| 0     | 0    | 0    | 0 NA           | NA       |
| 2.04  | 1.85 | 2.49 | 2.59 -0.03686  | 0.931254 |
| 0     | 0    | 0    | 0 NA           | NA       |
| 0     | 0    | 0    | 0 NA           | NA       |
| 0     | 0    | 0    | 0 NA           | NA       |
| 0.1   | 0.11 | 0.22 | 0.21 0.4918    | 0.496155 |
| 0.05  | 0.07 | 0.05 | 0.08 NA        | NA       |
| 0     | 0    | 0    | 0 NA           | NA       |
| 0     | 0    | 0    | 0 NA           | NA       |
| 0     | 0    | 0    | 0 NA           | NA       |
| 0     | 0    | 0.19 | 0 NA           | NA       |
| 0     | 0    | 0    | 0 NA           | NA       |
| 0     | 0    | 0    | 0 NA           | NA       |
| 0     | 0    | 0    | 0 NA           | NA       |
| 0     | 0    | 0    | 0 NA           | NA       |
| 0.08  | 0.06 | 0    | 0.06 NA        | NA       |
| 0     | 0    | 0    | 0 NA           | NA       |
| 0     | 0    | 0    | 0 NA           | NA       |
| 0     | 0.19 | 0.09 | 0.4 NA         | NA       |
| 0     | 0    | 0    | 0 NA           | NA       |
| 0     | 0    | 0    | 0 NA           | NA       |
| 0.36  | 0.64 | 0.23 | 0.13 NA        | NA       |
| 0     | 0    | 0    | 0 NA           | NA       |
| 0     | 0    | 0    | 0 NA           | NA       |
| 0     | 0    | 0    | 0 NA           | NA       |
| 0     | 0    | 0    | 0 NA           | NA       |
| 0.25  | 0.24 | 0.04 | 0.06 NA        | NA       |
| 0     | 0    | 0    | 0 NA           | NA       |



|       |       |       |               |          |
|-------|-------|-------|---------------|----------|
| 0     | 0     | 0     | 0 NA          | NA       |
| 0     | 0     | 0     | 0.11 NA       | NA       |
| 0     | 0     | 0     | 0 NA          | NA       |
| 11.46 | 9.79  | 7.7   | 8.67 0.386325 | 0.031562 |
| 0.04  | 0.03  | 0.12  | 0.07 NA       | NA       |
| 1.36  | 0.32  | 0     | 0 NA          | NA       |
| 0     | 0     | 0     | 0 NA          | NA       |
| 0     | 0     | 0     | 0 NA          | NA       |
| 0     | 0     | 0     | 0 NA          | NA       |
| 0     | 0.11  | 0     | 0.12 NA       | NA       |
| 0     | 0     | 0     | 0 NA          | NA       |
| 1.46  | 1.68  | 1.23  | 1.19 -0.61778 | 0.00859  |
| 0     | 0     | 0     | 0 NA          | NA       |
| 0     | 0     | 0     | 0 NA          | NA       |
| 0     | 0     | 0     | 0 NA          | NA       |
| 0     | 0     | 0     | 0 NA          | NA       |
| 0     | 0     | 0     | 0 NA          | NA       |
| 0     | 0     | 0     | 0 NA          | NA       |
| 0     | 0     | 0     | 0 NA          | NA       |
| 0.1   | 0     | 0.21  | 0 NA          | NA       |
| 0     | 0     | 0     | 0.45 NA       | NA       |
| 0     | 0     | 0     | 0 NA          | NA       |
| 0     | 0     | 0     | 0 NA          | NA       |
| 0     | 0     | 0     | 0 NA          | NA       |
| 12.17 | 10.69 | 11.11 | 9 -0.23909    | 0.405702 |
| 0     | 0     | 0.14  | 0.49 NA       | NA       |
| 0     | 0     | 0     | 0 NA          | NA       |
| 0     | 0     | 0     | 0 NA          | NA       |
| 0     | 0     | 0.01  | 0.04 NA       | NA       |
| 0     | 0.17  | 0     | 0 NA          | NA       |
| 0     | 0     | 0     | 0 NA          | NA       |
| 0     | 0     | 0     | 0 NA          | NA       |
| 0     | 0     | 0     | 0 NA          | NA       |
| 4.08  | 2.2   | 1.79  | 4.09 -0.55442 | 0.264852 |
| 0     | 0     | 0     | 0 NA          | NA       |
| 0.1   | 0.1   | 0.07  | 0.09 -0.29183 | 0.713701 |
| 0     | 0     | 0     | 0 NA          | NA       |
| 0     | 0     | 0     | 0 NA          | NA       |
| 0     | 0     | 0.07  | 0 NA          | NA       |
| 0     | 0     | 0     | 0 NA          | NA       |
| 0     | 0     | 0     | 0 NA          | NA       |
| 0     | 0     | 0     | 0 NA          | NA       |
| 0     | 0     | 0     | 0 NA          | NA       |
| 0     | 0.14  | 0     | 0 NA          | NA       |
| 0     | 0.09  | 0     | 0 NA          | NA       |

|       |      |       |       |          |          |
|-------|------|-------|-------|----------|----------|
| 0     | 0    | 0     | 0     | NA       | NA       |
| 0     | 0    | 0     | 0     | NA       | NA       |
| 0.33  | 0.14 | 0.21  | 0.28  | -0.39999 | 0.557456 |
| 0     | 0    | 0     | 0     | NA       | NA       |
| 0     | 0    | 0     | 0     | NA       | NA       |
| 1.8   | 0.89 | 2.07  | 2.04  | 0.038954 | 0.944533 |
| 0     | 0    | 0     | 0     | NA       | NA       |
| 0     | 0    | 0     | 0     | NA       | NA       |
| 0.36  | 0.19 | 0.25  | 0.18  | -0.26169 | 0.698705 |
| 0     | 0.87 | 0.21  | 0     | NA       | NA       |
| 0     | 0.22 | 0     | 0     | NA       | NA       |
| 0.54  | 1.32 | 1.32  | 1.29  | 1.030568 | 0.001625 |
| 0.75  | 0    | 0     | 0     | NA       | NA       |
| 0     | 0    | 0     | 0     | NA       | NA       |
| 36.88 | 1.64 | 7.76  | 17.96 | NA       | NA       |
| 0     | 0.12 | 0.53  | 0.54  | NA       | NA       |
| 0     | 0    | 0     | 0     | NA       | NA       |
| 0     | 0    | 0.12  | 0     | NA       | NA       |
| 0     | 0.37 | 0.33  | 0     | NA       | NA       |
| 0     | 0    | 0     | 0     | NA       | NA       |
| 0     | 0    | 0     | 0     | NA       | NA       |
| 0.21  | 0    | 0     | 0     | NA       | NA       |
| 0     | 0    | 0     | 0     | NA       | NA       |
| 0     | 0    | 0     | 0     | NA       | NA       |
| 0     | 0.12 | 0.53  | 0     | NA       | NA       |
| 0     | 0    | 0     | 0     | NA       | NA       |
| 0     | 0    | 0     | 0     | NA       | NA       |
| 0     | 0    | 0     | 0     | NA       | NA       |
| 0     | 0    | 0     | 0     | NA       | NA       |
| 0.95  | 0.49 | 0.69  | 0.97  | -0.16406 | 0.801901 |
| 0     | 0.14 | 0.07  | 0.07  | NA       | NA       |
| 0     | 0    | 0     | 0     | NA       | NA       |
| 0     | 0    | 0     | 0     | NA       | NA       |
| 0     | 0    | 0     | 0     | NA       | NA       |
| 0     | 0    | 0     | 0     | NA       | NA       |
| 0.34  | 0.78 | 0.95  | 0.67  | -0.34745 | 0.612623 |
| 0     | 0    | 0     | 0     | NA       | NA       |
| 0     | 0    | 0.27  | 0     | NA       | NA       |
| 0     | 0    | 0     | 0     | NA       | NA       |
| 0     | 0    | 0     | 0     | NA       | NA       |
| 0     | 0    | 0     | 0     | NA       | NA       |
| 0     | 0    | 0     | 0     | NA       | NA       |
| 8.34  | 6.75 | 10.11 | 9.53  | 0.160028 | 0.523123 |
| 0     | 0    | 0     | 0     | NA       | NA       |
| 0     | 0    | 0     | 0     | NA       | NA       |

|       |       |       |       |          |          |
|-------|-------|-------|-------|----------|----------|
| 0.13  | 0.04  | 0.1   | 0.02  | -0.53254 | 0.467987 |
| 0     | 0     | 0     | 0     | NA       | NA       |
| 0     | 0     | 0     | 0     | NA       | NA       |
| 0     | 0     | 0.03  | 0     | NA       | NA       |
| 0     | 0     | 0     | 0     | NA       | NA       |
| 0     | 0     | 0.26  | 0     | NA       | NA       |
| 0     | 0     | 0     | 0     | NA       | NA       |
| 0     | 0     | 0     | 0     | NA       | NA       |
| 0     | 0     | 0.31  | 0.36  | NA       | NA       |
| 0     | 0     | 0     | 0     | NA       | NA       |
| 0     | 0     | 0     | 0     | NA       | NA       |
| 0     | 0     | 0.31  | 0     | NA       | NA       |
| 11.86 | 9.15  | 12.14 | 11.82 | -0.16055 | 0.37382  |
| 0     | 0     | 0.18  | 0.38  | NA       | NA       |
| 0     | 0     | 0.15  | 0.35  | NA       | NA       |
| 0.04  | 0.08  | 0.12  | 0.03  | NA       | NA       |
| 0     | 0     | 0     | 0     | NA       | NA       |
| 16.75 | 14.76 | 14.95 | 15.45 | -0.14193 | 0.298406 |
| 0     | 0     | 0     | 0     | NA       | NA       |
| 0.34  | 0.51  | 0.29  | 0.2   | -0.11466 | 0.899594 |
| 0     | 0     | 0     | 0     | NA       | NA       |
| 0     | 0     | 0     | 0     | NA       | NA       |
| 0     | 0     | 0     | 0     | NA       | NA       |
| 0     | 0     | 0     | 0     | NA       | NA       |
| 0     | 0     | 0     | 0     | NA       | NA       |
| 0     | 0     | 0     | 0     | NA       | NA       |
| 0     | 0     | 0     | 0     | NA       | NA       |
| 0     | 0     | 0     | 0     | NA       | NA       |
| 0     | 0     | 0     | 0     | NA       | NA       |
| 0     | 0     | 0     | 0     | NA       | NA       |
| 0     | 0     | 0     | 0     | NA       | NA       |
| 0     | 0     | 0     | 0     | NA       | NA       |
| 0     | 0     | 0     | 0     | NA       | NA       |
| 0     | 0     | 0     | 0     | NA       | NA       |
| 1.83  | 5.49  | 6.39  | 5.26  | 1.26585  | 0.003411 |
| 0     | 0     | 0     | 0     | NA       | NA       |
| 0.22  | 1.7   | 2.09  | 0.96  | -0.10018 | 0.909331 |
| 0     | 0     | 0     | 0     | NA       | NA       |
| 3.52  | 5.6   | 4.65  | 5.21  | 0.33063  | 0.249781 |
| 0     | 0     | 0     | 0     | NA       | NA       |
| 0     | 0     | 0     | 0     | NA       | NA       |
| 0     | 0     | 0     | 0     | NA       | NA       |
| 0     | 0     | 0     | 0     | NA       | NA       |
| 0     | 0     | 0     | 0     | NA       | NA       |
| 0     | 0.57  | 0.39  | 0.3   | NA       | NA       |
| 0     | 0     | 0     | 0     | NA       | NA       |
| 0     | 0     | 0     | 0     | NA       | NA       |

|       |       |      |               |          |
|-------|-------|------|---------------|----------|
| 0     | 0     | 0    | 0 NA          | NA       |
| 0     | 0     | 0    | 0 NA          | NA       |
| 0     | 0.12  | 0.53 | 0.54 NA       | NA       |
| 0     | 0     | 0    | 0 NA          | NA       |
| 0     | 0     | 0    | 0 NA          | NA       |
| 0     | 0.12  | 0    | 0 NA          | NA       |
| 0     | 0     | 0    | 0 NA          | NA       |
| 0     | 0     | 0    | 0 NA          | NA       |
| 0     | 0     | 0    | 0 NA          | NA       |
| 0.05  | 0.42  | 0.32 | 0.16 0.969326 | 0.048748 |
| 0     | 0     | 0    | 0 NA          | NA       |
| 11.81 | 11.33 | 8.85 | 11.3 -0.27629 | 0.078783 |
| 0     | 0     | 0    | 0 NA          | NA       |
| 3.3   | 1.39  | 2.06 | 1.23 -0.82051 | 0.035551 |
| 0     | 0     | 0    | 0 NA          | NA       |
| 0     | 0     | 0    | 0 NA          | NA       |
| 0     | 0     | 0    | 0 NA          | NA       |
| 0     | 0     | 0    | 0 NA          | NA       |
| 0     | 0     | 0    | 0 NA          | NA       |
| 0     | 0     | 0    | 0 NA          | NA       |
| 0     | 0     | 0    | 0 NA          | NA       |
| 0     | 0     | 0.25 | 0 NA          | NA       |
| 0     | 0     | 0    | 0 NA          | NA       |
| 0     | 0     | 0    | 0 NA          | NA       |
| 0     | 0     | 0    | 0 NA          | NA       |
| 0     | 0     | 0    | 0 NA          | NA       |
| 0.99  | 0.79  | 0.85 | 0.88 -0.14575 | 0.657873 |
| 0     | 0.01  | 0.04 | 0.21 NA       | NA       |
| 0     | 0     | 0    | 0.08 NA       | NA       |
| 0     | 0     | 0    | 0 NA          | NA       |
| 0     | 0     | 0    | 0 NA          | NA       |
| 0.26  | 0     | 0    | 0 NA          | NA       |
| 0     | 0     | 0    | 0.25 NA       | NA       |
| 0     | 0     | 0    | 0 NA          | NA       |
| 0     | 0.2   | 0    | 0.21 NA       | NA       |
| 0.22  | 0.55  | 0.24 | 0.35 0.3444   | 0.664963 |
| 0     | 0     | 0    | 0 NA          | NA       |
| 0     | 0     | 0    | 0 NA          | NA       |
| 0     | 0     | 0    | 0 NA          | NA       |
| 0.35  | 0.25  | 0.11 | 0.13 NA       | NA       |
| 1.65  | 0.45  | 1.52 | 1.25 0.049111 | 0.954245 |
| 0     | 0     | 0    | 0 NA          | NA       |
| 0     | 0     | 0    | 0 NA          | NA       |
| 0     | 0     | 0    | 0 NA          | NA       |
| 0     | 0     | 0    | 0 NA          | NA       |

|      |      |      |               |          |
|------|------|------|---------------|----------|
| 0    | 0    | 0    | 0 NA          | NA       |
| 0    | 0    | 0    | 0 NA          | NA       |
| 0    | 0    | 0    | 0 NA          | NA       |
| 0    | 0    | 0    | 0 NA          | NA       |
| 0    | 0    | 0    | 0 NA          | NA       |
| 0    | 0    | 0.16 | 0 NA          | NA       |
| 0    | 0    | 0    | 0 NA          | NA       |
| 0.27 | 0.19 | 0.18 | 0 NA          | NA       |
| 0.32 | 0.11 | 0    | 0.12 NA       | NA       |
| 0    | 0    | 0    | 0 NA          | NA       |
| 0    | 0    | 0    | 0 NA          | NA       |
| 0    | 0    | 0    | 0 NA          | NA       |
| 0    | 0    | 0    | 0 NA          | NA       |
| 0    | 0    | 0    | 0 NA          | NA       |
| 0    | 0    | 0    | 0 NA          | NA       |
| 0    | 0    | 0    | 0 NA          | NA       |
| 0.1  | 0.07 | 0    | 0 NA          | NA       |
| 0    | 0    | 0    | 0 NA          | NA       |
| 0    | 0.02 | 0.02 | 0.1 NA        | NA       |
| 0    | 0    | 0    | 0 NA          | NA       |
| 0    | 0    | 0    | 0 NA          | NA       |
| 0.42 | 0.28 | 0    | 0 NA          | NA       |
| 0    | 0    | 0    | 0 NA          | NA       |
| 0    | 0    | 0    | 0 NA          | NA       |
| 0    | 0    | 0    | 0 NA          | NA       |
| 2.22 | 1.18 | 1.02 | 1.21 -0.46616 | 0.238892 |
| 0    | 0    | 0    | 0 NA          | NA       |
| 0    | 0    | 0    | 0 NA          | NA       |
| 0.17 | 0    | 0.03 | 0 NA          | NA       |
| 0    | 0    | 0    | 0 NA          | NA       |
| 0    | 0    | 0.15 | 0 NA          | NA       |
| 0    | 0    | 0    | 0 NA          | NA       |
| 0    | 0    | 0    | 0 NA          | NA       |
| 0    | 0.22 | 0    | 0 NA          | NA       |
| 0    | 0    | 0    | 0 NA          | NA       |
| 0    | 0    | 0    | 0 NA          | NA       |
| 0    | 0    | 0    | 0 NA          | NA       |
| 0    | 0    | 0    | 0 NA          | NA       |
| 0    | 0    | 0    | 0 NA          | NA       |
| 0.17 | 0.25 | 0    | 0.39 NA       | NA       |
| 0    | 0    | 0    | 0 NA          | NA       |
| 0    | 0    | 0    | 0.36 NA       | NA       |
| 0    | 0    | 0    | 0 NA          | NA       |
| 0    | 0    | 0    | 0 NA          | NA       |
| 0    | 0    | 0    | 0 NA          | NA       |
| 0    | 0    | 0    | 0 NA          | NA       |
| 0    | 0    | 0    | 0 NA          | NA       |
| 0.77 | 1.47 | 0.62 | 1 0.318516    | 0.479793 |

|      |      |      |      |          |          |
|------|------|------|------|----------|----------|
| 0.1  | 0.13 | 0.07 | 0.04 | -0.52792 | 0.453585 |
| 0    | 0    | 0    | 0    | NA       | NA       |
| 0    | 0    | 0    | 0    | NA       | NA       |
| 0    | 0    | 0    | 0    | NA       | NA       |
| 0    | 0    | 0    | 0    | NA       | NA       |
| 0    | 0    | 0    | 0    | NA       | NA       |
| 0    | 0    | 0    | 0    | NA       | NA       |
| 0    | 0    | 0    | 0    | NA       | NA       |
| 0    | 0.16 | 0    | 0.33 | NA       | NA       |
| 0    | 0    | 0    | 0    | NA       | NA       |
| 1.2  | 1.3  | 0.69 | 0.78 | 0.082093 | 0.92421  |
| 0    | 0.12 | 0    | 0    | NA       | NA       |
| 0    | 0    | 0    | 0    | NA       | NA       |
| 0    | 0.96 | 0.28 | 0.48 | NA       | NA       |
| 0    | 0    | 0    | 0    | NA       | NA       |
| 0.02 | 0.02 | 0.03 | 0.05 | NA       | NA       |
| 0    | 0    | 0    | 0    | NA       | NA       |
| 0    | 0    | 0    | 0    | NA       | NA       |
| 0    | 0    | 0    | 0    | NA       | NA       |
| 0    | 0    | 0    | 0    | NA       | NA       |
| 0    | 0.16 | 0.15 | 0.17 | NA       | NA       |
| 0    | 0    | 0    | 0    | NA       | NA       |
| 0    | 0    | 0    | 0    | NA       | NA       |
| 0    | 0    | 0    | 0    | NA       | NA       |
| 0    | 0    | 0    | 0    | NA       | NA       |
| 5.91 | 3.98 | 7.96 | 6.12 | 0.041841 | 0.941387 |
| 0    | 0    | 0    | 0    | NA       | NA       |
| 2.05 | 1.02 | 1.65 | 1.97 | -0.35028 | 0.657838 |
| 0    | 0    | 0    | 0    | NA       | NA       |
| 0    | 0    | 0    | 0    | NA       | NA       |
| 0    | 0    | 0    | 0    | NA       | NA       |
| 0    | 0    | 0    | 0    | NA       | NA       |
| 3.13 | 1.34 | 3.25 | 2.34 | -0.22256 | 0.750013 |
| 0    | 0    | 0    | 0    | NA       | NA       |
| 0    | 0    | 0    | 0    | NA       | NA       |
| 0    | 0    | 0    | 0    | NA       | NA       |
| 0    | 0    | 0    | 0    | NA       | NA       |
| 0.25 | 0.42 | 0.23 | 0.29 | NA       | NA       |
| 0    | 0    | 0    | 0    | NA       | NA       |
| 2.36 | 2.09 | 2.38 | 2.59 | 0.189252 | 0.578667 |
| 0    | 0    | 0    | 0    | NA       | NA       |
| 0    | 0    | 0    | 0    | NA       | NA       |
| 0    | 0    | 0    | 0    | NA       | NA       |

|       |       |       |               |          |
|-------|-------|-------|---------------|----------|
| 0     | 0     | 0     | 0 NA          | NA       |
| 0     | 0     | 0     | 0 NA          | NA       |
| 0     | 0     | 0     | 0 NA          | NA       |
| 0     | 0     | 0     | 0 NA          | NA       |
| 0     | 0     | 0     | 0 NA          | NA       |
| 0     | 0     | 0     | 0 NA          | NA       |
| 0     | 0     | 0     | 0 NA          | NA       |
| 7.21  | 2.86  | 0     | 0 NA          | NA       |
| 2.53  | 2.7   | 3.11  | 3.04 -0.03874 | 0.924712 |
| 0     | 0     | 0     | 0 NA          | NA       |
| 0.85  | 0.76  | 0.28  | 0.48 -0.4567  | 0.546988 |
| 0     | 0     | 0     | 0 NA          | NA       |
| 0     | 0     | 0     | 0 NA          | NA       |
| 0     | 0.26  | 0.23  | 0 NA          | NA       |
| 1.03  | 3.05  | 2.95  | 2.33 0.525793 | 0.471929 |
| 0     | 0.12  | 0.53  | 0.54 NA       | NA       |
| 0     | 0     | 0     | 0 NA          | NA       |
| 0     | 0     | 0     | 0 NA          | NA       |
| 0     | 0     | 0     | 0 NA          | NA       |
| 0     | 0     | 0     | 0 NA          | NA       |
| 0     | 0     | 0     | 0 NA          | NA       |
| 0.19  | 0.03  | 0.13  | 0 NA          | NA       |
| 0     | 0     | 0     | 0 NA          | NA       |
| 0     | 1.26  | 0     | 0 NA          | NA       |
| 0     | 0     | 0     | 0.75 NA       | NA       |
| 0     | 0     | 0     | 0 NA          | NA       |
| 0     | 0     | 0     | 0 NA          | NA       |
| 0     | 0     | 0     | 0 NA          | NA       |
| 0     | 0     | 0     | 0 NA          | NA       |
| 0     | 0     | 0     | 0.02 NA       | NA       |
| 0     | 0     | 0     | 0 NA          | NA       |
| 0.59  | 0.29  | 0.43  | 0.61 -0.17958 | 0.804429 |
| 0     | 0.12  | 0.11  | 0.49 NA       | NA       |
| 0     | 0     | 0     | 0 NA          | NA       |
| 0     | 0     | 0     | 0 NA          | NA       |
| 0.22  | 0.47  | 0.28  | 0.32 NA       | NA       |
| 0     | 0     | 0     | 0 NA          | NA       |
| 0.34  | 0     | 0.11  | 0 NA          | NA       |
| 1.11  | 1.95  | 1.72  | 2.05 0.59711  | 0.292047 |
| 0     | 0     | 0     | 0 NA          | NA       |
| 0     | 0     | 0     | 0 NA          | NA       |
| 14.09 | 18.31 | 49.64 | 71.4 0.812667 | 0.181298 |
| 0.84  | 0.15  | 0.68  | 0 NA          | NA       |
| 0     | 0     | 0     | 0 NA          | NA       |
| 0.21  | 0.08  | 0.11  | 0.22 -0.80124 | 0.168047 |

|      |      |      |               |          |
|------|------|------|---------------|----------|
| 0    | 0    | 0    | 0 NA          | NA       |
| 0.47 | 0.76 | 0.56 | 0.58 -0.0319  | 0.95613  |
| 0    | 0    | 0    | 0 NA          | NA       |
| 0    | 0    | 0    | 0 NA          | NA       |
| 0    | 0.31 | 0.19 | 0.65 NA       | NA       |
| 0    | 0    | 0    | 0 NA          | NA       |
| 0    | 0    | 0    | 0 NA          | NA       |
| 0    | 0    | 0.28 | 0.12 0.376103 | 0.601538 |
| 0    | 0    | 0    | 0 NA          | NA       |
| 0    | 0    | 0    | 0 NA          | NA       |
| 0    | 0    | 0    | 0 NA          | NA       |
| 0    | 0.32 | 0.14 | 0 NA          | NA       |
| 0.12 | 0.41 | 0    | 0.38 NA       | NA       |
| 0    | 0.24 | 0    | 0.34 NA       | NA       |
| 0    | 0    | 0    | 0 NA          | NA       |
| 0.16 | 0.05 | 0.03 | 0.01 -0.81384 | 0.22556  |
| 0    | 0    | 0    | 0 NA          | NA       |
| 0    | 0    | 0    | 0 NA          | NA       |
| 0    | 0.63 | 0    | 0 NA          | NA       |
| 0.81 | 0.65 | 0.82 | 0.73 0.150312 | 0.827131 |
| 0    | 0    | 0.13 | 0 NA          | NA       |
| 0    | 0    | 0    | 0 NA          | NA       |
| 0    | 0    | 0    | 0 NA          | NA       |
| 0    | 0    | 0    | 0 NA          | NA       |
| 0    | 0    | 0    | 0 NA          | NA       |
| 0    | 0    | 0    | 0 NA          | NA       |
| 0.23 | 0    | 0    | 0 NA          | NA       |
| 0    | 0    | 0    | 0 NA          | NA       |
| 0    | 0    | 0    | 0 NA          | NA       |
| 0.01 | 0.03 | 0.02 | 0.04 NA       | NA       |
| 0    | 0    | 0    | 0 NA          | NA       |
| 0    | 0    | 0    | 0 NA          | NA       |
| 0    | 0    | 0    | 0 NA          | NA       |
| 0.14 | 0.31 | 0.19 | 0.22 NA       | NA       |
| 0    | 0    | 0    | 0 NA          | NA       |
| 0    | 0    | 0.02 | 0 NA          | NA       |
| 0    | 0    | 0    | 0 NA          | NA       |
| 0    | 0    | 0.07 | 0.08 NA       | NA       |
| 0    | 0    | 0    | 0 NA          | NA       |
| 0    | 0    | 0    | 0 NA          | NA       |
| 0    | 0    | 0    | 0 NA          | NA       |
| 0    | 0    | 0    | 0 NA          | NA       |
| 0    | 0    | 0    | 0 NA          | NA       |
| 0    | 0    | 0    | 0 NA          | NA       |
| 0.41 | 0.14 | 0.19 | 0.23 -1.08924 | 0.00674  |



|       |       |       |       |          |          |
|-------|-------|-------|-------|----------|----------|
| 0     | 0     | 0     | 0 NA  | NA       |          |
| 0     | 0     | 0     | 0 NA  | NA       |          |
| 0     | 0     | 0     | 0 NA  | NA       |          |
| 0     | 0     | 0     | 0 NA  | NA       |          |
| 0     | 0     | 0     | 0 NA  | NA       |          |
| 0     | 0     | 0     | 0 NA  | NA       |          |
| 0     | 0     | 0     | 0 NA  | NA       |          |
| 0     | 0     | 0     | 0 NA  | NA       |          |
| 0     | 0     | 0     | 0 NA  | NA       |          |
| 20.08 | 18.76 | 18.37 | 18.74 | -0.0921  | 0.37676  |
| 0     | 0     | 0     | 0 NA  | NA       |          |
| 0     | 0     | 0     | 0 NA  | NA       |          |
| 0     | 0     | 0     | 0 NA  | NA       |          |
| 0.12  | 0     | 0     | 0 NA  | NA       |          |
| 0     | 0     | 0     | 0 NA  | NA       |          |
| 0     | 0     | 0     | 0 NA  | NA       |          |
| 0     | 0     | 0     | 0 NA  | NA       |          |
| 0     | 0     | 0     | 0 NA  | NA       |          |
| 0     | 0     | 0     | 0 NA  | NA       |          |
| 0     | 0     | 0     | 0 NA  | NA       |          |
| 0     | 0     | 0     | 0 NA  | NA       |          |
| 0     | 0     | 0     | 0 NA  | NA       |          |
| 0     | 0     | 0     | 0 NA  | NA       |          |
| 0     | 0     | 0     | 0 NA  | NA       |          |
| 15.22 | 15.26 | 13.75 | 15.24 | -0.09118 | 0.451091 |
| 0     | 0     | 0     | 0 NA  | NA       |          |
| 0.72  | 1.19  | 0.62  | 0.86  | 0.663499 | 0.321344 |
| 0     | 0     | 0     | 0 NA  | NA       |          |
| 0     | 0     | 0     | 0 NA  | NA       |          |
| 0     | 0     | 0     | 0 NA  | NA       |          |
| 0     | 0     | 0     | 0 NA  | NA       |          |
| 0     | 0     | 0     | 0 NA  | NA       |          |
| 11.79 | 9.86  | 10.27 | 10.97 | -0.11854 | 0.38188  |
| 0     | 0     | 0     | 0 NA  | NA       |          |
| 0     | 0     | 0     | 0 NA  | NA       |          |
| 0     | 0     | 0     | 0 NA  | NA       |          |
| 1.4   | 0     | 0.57  | 0.34  | NA       | NA       |
| 0     | 0     | 0     | 0 NA  | NA       |          |
| 0     | 0     | 0     | 0 NA  | NA       |          |
| 8.79  | 8.8   | 9.14  | 10.76 | 0.041114 | 0.868389 |
| 0     | 0     | 0     | 0 NA  | NA       |          |
| 0     | 0     | 0     | 0 NA  | NA       |          |
| 0     | 0     | 0     | 0 NA  | NA       |          |
| 0     | 0     | 0.04  | 0.01  | NA       | NA       |
| 0     | 0     | 0     | 0 NA  | NA       |          |





|      |      |      |      |          |          |
|------|------|------|------|----------|----------|
| 0.74 | 0.53 | 0.46 | 0.81 | NA       | NA       |
| 0    | 0    | 0.14 | 0    | NA       | NA       |
| 0    | 0    | 0    | 0    | NA       | NA       |
| 0    | 0    | 0    | 0    | NA       | NA       |
| 0    | 0    | 0    | 0    | NA       | NA       |
| 0    | 0    | 0    | 0    | NA       | NA       |
| 0    | 0    | 0    | 0    | NA       | NA       |
| 0    | 0    | 0    | 0    | NA       | NA       |
| 0.24 | 0    | 0.26 | 0    | NA       | NA       |
| 0.24 | 0    | 0.26 | 0    | NA       | NA       |
| 0    | 0    | 0    | 0    | NA       | NA       |
| 0    | 0    | 0    | 0    | NA       | NA       |
| 0    | 0.09 | 0.1  | 0.2  | NA       | NA       |
| 0    | 0    | 0    | 0    | NA       | NA       |
| 0    | 0    | 0    | 0    | NA       | NA       |
| 0    | 0.12 | 0    | 0.07 | NA       | NA       |
| 0    | 0    | 0    | 0    | NA       | NA       |
| 0    | 0    | 0    | 0    | NA       | NA       |
| 0    | 0    | 0    | 0    | NA       | NA       |
| 0    | 0    | 0    | 0    | NA       | NA       |
| 0    | 0    | 0    | 0    | NA       | NA       |
| 0.21 | 0.61 | 0.28 | 0.4  | 0.502903 | 0.497731 |
| 0    | 0    | 0    | 0    | NA       | NA       |
| 0    | 0    | 0    | 0    | NA       | NA       |
| 0.56 | 0.31 | 0.08 | 0.29 | -0.16906 | 0.848408 |
| 0    | 0    | 0    | 0    | NA       | NA       |
| 0    | 0    | 0    | 0    | NA       | NA       |
| 0    | 0    | 0    | 0    | NA       | NA       |
| 0    | 0.05 | 0.02 | 0.03 | NA       | NA       |
| 0    | 0    | 0.15 | 0.34 | NA       | NA       |
| 0    | 0    | 0    | 0    | NA       | NA       |
| 0    | 0    | 0    | 0    | NA       | NA       |
| 0    | 0    | 0    | 0    | NA       | NA       |
| 0    | 0    | 0    | 0    | NA       | NA       |
| 0    | 0    | 0.06 | 0    | NA       | NA       |
| 7.02 | 2.28 | 4.95 | 3.55 | -1.00322 | 2.77E-07 |
| 0    | 0.54 | 0    | 0    | NA       | NA       |
| 0    | 0    | 0    | 0    | NA       | NA       |
| 0    | 0.17 | 0    | 0    | NA       | NA       |
| 0    | 0    | 0    | 0    | NA       | NA       |
| 0    | 0    | 0    | 0    | NA       | NA       |
| 0    | 0    | 0    | 0    | NA       | NA       |

|      |      |      |      |          |          |
|------|------|------|------|----------|----------|
| 0    | 0.63 | 0.35 | 1.66 | NA       | NA       |
| 0    | 0    | 0    | 0    | NA       | NA       |
| 0    | 0    | 0    | 0    | NA       | NA       |
| 0    | 0    | 0    | 0    | NA       | NA       |
| 0    | 0    | 0    | 0    | NA       | NA       |
| 0    | 0    | 0    | 0    | NA       | NA       |
| 0    | 0    | 0    | 0    | NA       | NA       |
| 0    | 0    | 0.07 | 0    | NA       | NA       |
| 2.27 | 0.79 | 1.23 | 1.14 | -1.27265 | 1.52E-08 |
| 0.07 | 0.05 | 0.39 | 0.05 | -0.50523 | 0.494244 |
| 0    | 0    | 0    | 0    | NA       | NA       |
| 0    | 0    | 0    | 0    | NA       | NA       |
| 0    | 0    | 0    | 0    | NA       | NA       |
| 0    | 0    | 0    | 0    | NA       | NA       |
| 0    | 0    | 0    | 0    | NA       | NA       |
| 0    | 0    | 0    | 0    | NA       | NA       |
| 0.07 | 0.12 | 0.19 | 0.08 | -0.10614 | 0.904253 |
| 0    | 0    | 0    | 0    | NA       | NA       |
| 0    | 0    | 0    | 0    | NA       | NA       |
| 0    | 0    | 0    | 0    | NA       | NA       |
| 0.07 | 0.13 | 0.05 | 0.03 | -0.53286 | 0.466968 |
| 0    | 0    | 0    | 0    | NA       | NA       |
| 0    | 0    | 0    | 0    | NA       | NA       |
| 0    | 0    | 0    | 0    | NA       | NA       |
| 0.16 | 0.23 | 0.22 | 0.37 | NA       | NA       |
| 0.02 | 0.02 | 0.01 | 0.07 | -0.42734 | 0.566853 |
| 1.37 | 2.61 | 0    | 2.37 | -0.4526  | 0.54119  |
| 0.11 | 0.08 | 0    | 0    | NA       | NA       |
| 0    | 1.57 | 2.8  | 3.02 | NA       | NA       |
| 0    | 0    | 0    | 0    | NA       | NA       |
| 0    | 0.11 | 0    | 0    | NA       | NA       |
| 0    | 0    | 0    | 0    | NA       | NA       |
| 0    | 0    | 0    | 0    | NA       | NA       |
| 0    | 0    | 0    | 0    | NA       | NA       |
| 0.36 | 0    | 0.68 | 0    | NA       | NA       |
| 0    | 0    | 0    | 0    | NA       | NA       |
| 0    | 0    | 0    | 0    | NA       | NA       |
| 0    | 0    | 0    | 0    | NA       | NA       |
| 0    | 0    | 0    | 0    | NA       | NA       |
| 0    | 0    | 0    | 0    | NA       | NA       |
| 0    | 0    | 0    | 0    | NA       | NA       |
| 0    | 0    | 0    | 0    | NA       | NA       |
| 0    | 0    | 0    | 0    | NA       | NA       |
| 0    | 0    | 0    | 0    | NA       | NA       |
| 0.04 | 0    | 0.01 | 0    | NA       | NA       |
| 0    | 0    | 0    | 0    | NA       | NA       |
| 0.24 | 0.17 | 0.07 | 0.13 | -0.39251 | 0.56904  |

|      |      |      |      |          |          |
|------|------|------|------|----------|----------|
| 0.16 | 0.12 | 0    | 0.12 | NA       | NA       |
| 0    | 0    | 0.15 | 0.34 | NA       | NA       |
| 0    | 0    | 0    | 0    | NA       | NA       |
| 0.29 | 0.1  | 0.1  | 0.11 | NA       | NA       |
| 0    | 0    | 0    | 0    | NA       | NA       |
| 0    | 0    | 0    | 0    | NA       | NA       |
| 0.02 | 0.07 | 0.04 | 0.03 | -0.42917 | 0.571644 |
| 0    | 0    | 0    | 0    | NA       | NA       |
| 0    | 0    | 0    | 0    | NA       | NA       |
| 0.17 | 0.29 | 0.15 | 0.26 | 0.11368  | 0.90035  |
| 0    | 0    | 0    | 0    | NA       | NA       |
| 2.15 | 2.68 | 2.46 | 2.56 | 0.183445 | 0.696126 |
| 0    | 0    | 0    | 0    | NA       | NA       |
| 0    | 0    | 0    | 0    | NA       | NA       |
| 0    | 0    | 0    | 0    | NA       | NA       |
| 3.36 | 3.34 | 3.01 | 4.02 | 0.090635 | 0.737009 |
| 0    | 0    | 0    | 0    | NA       | NA       |
| 0    | 0    | 0    | 0    | NA       | NA       |
| 0.08 | 0.06 | 0    | 0.06 | NA       | NA       |
| 0    | 0    | 0    | 0    | NA       | NA       |
| 0    | 0    | 0    | 0    | NA       | NA       |
| 0    | 0.13 | 0    | 0.14 | NA       | NA       |
| 0    | 0    | 1.12 | 1.42 | NA       | NA       |
| 0    | 0    | 0    | 0    | NA       | NA       |
| 0.12 | 0.07 | 0.04 | 0.01 | -0.69828 | 0.31492  |
| 0.86 | 0.25 | 0    | 0.13 | NA       | NA       |
| 0    | 0.39 | 0.12 | 0    | NA       | NA       |
| 0    | 0    | 0    | 0    | NA       | NA       |
| 0    | 0    | 0    | 0    | NA       | NA       |
| 0    | 0    | 0    | 0    | NA       | NA       |
| 0.09 | 0.13 | 0.06 | 0.23 | NA       | NA       |
| 0    | 0    | 0    | 0    | NA       | NA       |
| 1.64 | 1.64 | 2.47 | 1.23 | 0.364738 | 0.605502 |
| 1.99 | 5.28 | 3.7  | 4.96 | 1.130081 | 0.005595 |
| 0    | 0    | 0    | 0    | NA       | NA       |
| 0    | 0    | 0    | 0    | NA       | NA       |
| 0    | 0    | 0    | 0    | NA       | NA       |
| 0    | 0    | 0    | 0    | NA       | NA       |
| 0    | 0    | 0    | 0    | NA       | NA       |
| 0    | 0    | 0    | 0    | NA       | NA       |
| 2.41 | 3.93 | 3.36 | 3.96 | 0.256033 | 0.294734 |
| 0    | 0    | 0    | 0    | NA       | NA       |
| 0    | 0    | 0    | 0    | NA       | NA       |
| 0    | 0    | 0    | 0    | NA       | NA       |
| 0    | 0    | 0    | 0    | NA       | NA       |

|      |      |      |               |          |
|------|------|------|---------------|----------|
| 0    | 0    | 0    | 0 NA          | NA       |
| 0    | 0    | 0    | 0 NA          | NA       |
| 0    | 0    | 0    | 0 NA          | NA       |
| 0.38 | 0.41 | 0.38 | 0 NA          | NA       |
| 0    | 0    | 0    | 0 NA          | NA       |
| 0    | 0.27 | 0.12 | 0.99 NA       | NA       |
| 0    | 0    | 0    | 0 NA          | NA       |
| 0    | 0    | 0    | 0 NA          | NA       |
| 0.18 | 0.13 | 0.81 | 0.26 NA       | NA       |
| 0    | 0    | 0    | 0 NA          | NA       |
| 0.2  | 0.11 | 0.21 | 0.21 -0.51836 | 0.459051 |
| 0    | 0    | 0    | 0 NA          | NA       |
| 0    | 0    | 0.03 | 0.02 NA       | NA       |
| 0    | 0    | 0    | 0 NA          | NA       |
| 0    | 0    | 0    | 0 NA          | NA       |
| 0    | 0    | 0    | 0 NA          | NA       |
| 0    | 0    | 0    | 0 NA          | NA       |
| 0.79 | 1.58 | 0.93 | 1.07 0.001116 | 0.99898  |
| 0    | 0    | 0    | 0 NA          | NA       |
| 0    | 0    | 0    | 0 NA          | NA       |
| 0    | 0    | 0    | 0 NA          | NA       |
| 0    | 0    | 0    | 0.12 NA       | NA       |
| 0    | 0    | 0    | 0 NA          | NA       |
| 0    | 0    | 0    | 0 NA          | NA       |
| 0    | 0    | 0    | 0 NA          | NA       |
| 0.13 | 0    | 0.66 | 0.19 NA       | NA       |
| 0    | 0    | 0    | 0 NA          | NA       |
| 0    | 0    | 0    | 0 NA          | NA       |
| 0    | 2.05 | 1.36 | 0.36 NA       | NA       |
| 0    | 0    | 0    | 0 NA          | NA       |
| 0    | 0    | 0    | 0 NA          | NA       |
| 0    | 0    | 0    | 0 NA          | NA       |
| 0    | 0    | 0    | 0 NA          | NA       |
| 0    | 0    | 0    | 0 NA          | NA       |
| 0    | 0    | 0    | 0 NA          | NA       |
| 0    | 0    | 0    | 0 NA          | NA       |
| 1.28 | 0.65 | 0.68 | 0.39 -0.45047 | 0.538693 |
| 0    | 0    | 0    | 0 NA          | NA       |
| 0    | 0    | 0    | 0 NA          | NA       |
| 0    | 0    | 0    | 0 NA          | NA       |
| 0    | 0    | 0    | 0 NA          | NA       |
| 0    | 0    | 0    | 0 NA          | NA       |
| 0    | 0    | 0    | 0 NA          | NA       |
| 0    | 0    | 0    | 0 NA          | NA       |
| 0    | 0.12 | 0.53 | 0.54 NA       | NA       |
| 0    | 0.02 | 0.03 | 0 NA          | NA       |

|      |      |      |      |          |          |
|------|------|------|------|----------|----------|
| 0    | 0    | 0    | 0    | NA       | NA       |
| 0.03 | 0    | 0    | 0    | NA       | NA       |
| 0    | 0    | 0    | 0.36 | NA       | NA       |
| 0    | 0    | 0    | 0    | NA       | NA       |
| 0    | 0    | 0.11 | 0.51 | NA       | NA       |
| 0    | 0    | 0    | 0    | NA       | NA       |
| 0    | 0    | 0    | 0    | NA       | NA       |
| 0    | 0    | 0    | 0    | NA       | NA       |
| 0    | 0    | 0.26 | 0    | NA       | NA       |
| 0    | 0    | 0    | 0    | NA       | NA       |
| 0    | 0    | 0    | 0    | NA       | NA       |
| 0    | 0    | 0    | 0    | NA       | NA       |
| 0    | 0.17 | 0.46 | 0.71 | NA       | NA       |
| 0    | 0    | 0    | 0    | NA       | NA       |
| 0    | 0    | 0    | 0    | NA       | NA       |
| 0    | 0    | 0    | 0    | NA       | NA       |
| 0    | 0    | 0    | 0    | NA       | NA       |
| 0    | 0    | 0    | 0    | NA       | NA       |
| 0    | 0    | 0    | 0    | NA       | NA       |
| 0    | 0    | 0    | 0    | NA       | NA       |
| 0    | 0    | 0    | 0    | NA       | NA       |
| 0    | 0    | 0    | 0    | NA       | NA       |
| 0    | 0    | 0    | 0    | NA       | NA       |
| 0    | 0    | 0    | 0    | NA       | NA       |
| 0    | 0    | 0    | 0    | NA       | NA       |
| 0    | 0    | 0    | 0    | NA       | NA       |
| 0    | 0    | 0    | 0    | NA       | NA       |
| 0    | 0    | 0    | 0    | NA       | NA       |
| 0    | 0    | 0    | 0    | NA       | NA       |
| 0    | 0    | 0    | 0    | NA       | NA       |
| 0    | 0    | 0    | 0    | NA       | NA       |
| 0    | 0    | 0    | 0    | NA       | NA       |
| 0.82 | 0.73 | 1.03 | 0.89 | 0.200008 | 0.745483 |
| 0.52 | 0.09 | 0.17 | 0.49 | -0.29449 | 0.715207 |
| 0    | 0    | 0.22 | 0.13 | NA       | NA       |
| 0    | 0    | 0    | 0.49 | NA       | NA       |
| 0    | 0    | 0    | 0    | NA       | NA       |
| 0    | 0.03 | 0.07 | 0.06 | NA       | NA       |
| 0    | 0    | 0    | 0    | NA       | NA       |
| 0    | 0    | 0    | 0    | NA       | NA       |
| 0    | 0    | 0    | 0    | NA       | NA       |
| 0    | 0    | 0    | 0    | NA       | NA       |
| 0    | 0    | 0    | 0    | NA       | NA       |
| 0    | 0    | 0    | 0    | NA       | NA       |
| 0    | 0    | 0    | 0    | NA       | NA       |
| 0    | 0    | 0    | 0    | NA       | NA       |
| 0.22 | 0    | 0.14 | 0.53 | NA       | NA       |
| 0.53 | 0    | 0    | 0    | NA       | NA       |



|       |       |       |       |          |          |
|-------|-------|-------|-------|----------|----------|
| 16.78 | 17.36 | 17.98 | 18.95 | 0.108208 | 0.492261 |
| 0     | 0.29  | 0.13  | 0.31  | NA       | NA       |
| 0     | 0     | 0     | 0     | NA       | NA       |
| 0.16  | 0     | 0     | 0     | NA       | NA       |
| 0     | 0     | 0     | 0     | NA       | NA       |
| 0     | 0     | 0     | 0     | NA       | NA       |
| 0     | 0.05  | 0.09  | 0.02  | NA       | NA       |
| 0     | 0     | 0     | 0.18  | NA       | NA       |
| 0     | 0     | 0     | 0     | NA       | NA       |
| 0     | 0     | 0     | 0     | NA       | NA       |
| 1.3   | 0.9   | 0.65  | 0.74  | -0.71731 | 0.120936 |
| 0     | 0     | 0.09  | 0.2   | NA       | NA       |
| 0     | 0     | 0     | 0     | NA       | NA       |
| 0     | 0     | 0     | 0     | NA       | NA       |
| 0     | 0     | 0     | 0     | NA       | NA       |
| 0     | 0     | 0     | 0     | NA       | NA       |
| 0     | 0     | 0     | 0     | NA       | NA       |
| 0     | 0     | 0.24  | 0     | NA       | NA       |
| 2.53  | 2.75  | 2.92  | 2.38  | 0.388995 | 0.116976 |
| 0     | 0.12  | 0     | 0     | NA       | NA       |
| 0     | 0     | 0     | 0     | NA       | NA       |
| 0     | 0     | 0     | 0     | NA       | NA       |
| 0     | 0     | 0     | 0     | NA       | NA       |
| 0     | 0     | 0     | 0     | NA       | NA       |
| 14.09 | 18.31 | 49.64 | 71.4  | 0.812667 | 0.181298 |
| 0.14  | 0.2   | 0     | 0.43  | NA       | NA       |
| 0.13  | 0.23  | 0.21  | 0.15  | 0.622671 | 0.374842 |
| 2.06  | 1.73  | 2.27  | 2.66  | 0.157984 | 0.690133 |
| 2.9   | 1.39  | 1.51  | 1.39  | -0.41428 | 0.462712 |
| 0     | 0     | 0     | 0     | NA       | NA       |
| 0     | 0     | 0     | 0     | NA       | NA       |
| 0     | 0.34  | 0     | 0     | NA       | NA       |
| 0     | 0     | 0     | 0     | NA       | NA       |
| 0     | 0     | 0     | 0     | NA       | NA       |
| 0     | 0     | 0     | 0     | NA       | NA       |
| 0     | 0     | 0     | 0     | NA       | NA       |
| 0     | 0     | 0     | 0     | NA       | NA       |
| 0     | 0     | 0     | 0     | NA       | NA       |
| 0     | 0.94  | 0.47  | 0.02  | 0.23731  | 0.71471  |
| 0.29  | 0.1   | 0     | 0     | NA       | NA       |
| 0     | 0     | 0     | 0     | NA       | NA       |
| 0     | 0     | 0     | 0     | NA       | NA       |
| 0.68  | 0     | 0     | 0     | NA       | NA       |
| 0     | 0     | 0     | 0     | NA       | NA       |
| 0     | 0     | 0     | 0     | NA       | NA       |



|       |       |       |       |          |          |
|-------|-------|-------|-------|----------|----------|
| 0.23  | 0.68  | 0.9   | 0.77  | 0.932258 | 0.015895 |
| 0     | 0     | 0     | 0.77  | NA       | NA       |
| 1.02  | 2.75  | 0     | 0     | -0.0445  | 0.926611 |
| 0     | 0.09  | 0.34  | 0     | NA       | NA       |
| 0.33  | 0.24  | 0.07  | 0.08  | NA       | NA       |
| 32.36 | 23.86 | 21.44 | 27.45 | -0.33343 | 0.028245 |
| 0     | 0.06  | 0     | 0     | NA       | NA       |
| 0.02  | 0.05  | 0     | 0.06  | NA       | NA       |
| 0     | 0     | 0.02  | 0     | NA       | NA       |
| 0     | 0     | 0     | 0     | NA       | NA       |
| 0     | 0.46  | 0     | 0     | NA       | NA       |
| 0.46  | 0.41  | 0.15  | 0.35  | -0.44791 | 0.554834 |
| 0     | 0     | 0     | 0     | NA       | NA       |
| 0     | 0     | 0     | 0     | NA       | NA       |
| 0     | 0     | 0     | 0     | NA       | NA       |
| 0     | 0     | 0     | 0     | NA       | NA       |
| 0     | 0     | 0     | 0.36  | NA       | NA       |
| 0.15  | 0.22  | 0.7   | 0.23  | 0.009851 | 0.992762 |
| 0     | 0     | 0     | 0     | NA       | NA       |
| 0     | 0     | 0     | 0     | NA       | NA       |
| 0     | 0     | 0     | 0     | NA       | NA       |
| 0     | 0     | 0     | 0     | NA       | NA       |
| 0     | 0     | 0     | 0     | NA       | NA       |
| 0     | 0     | 0     | 0     | NA       | NA       |
| 0     | 0     | 0     | 0     | NA       | NA       |
| 0     | 0     | 0     | 0     | NA       | NA       |
| 0     | 0     | 0     | 0.12  | NA       | NA       |
| 0     | 0     | 0     | 0     | NA       | NA       |
| 0     | 0     | 0     | 0     | NA       | NA       |
| 0     | 0     | 0     | 0     | NA       | NA       |
| 0     | 0     | 0     | 0     | NA       | NA       |
| 0     | 0     | 0     | 0     | NA       | NA       |
| 0     | 0     | 0     | 0     | NA       | NA       |
| 0     | 0     | 0     | 0     | NA       | NA       |
| 0     | 0     | 0     | 0     | NA       | NA       |
| 0     | 0     | 0     | 0     | NA       | NA       |
| 0     | 0     | 0     | 0     | NA       | NA       |
| 0     | 0     | 0     | 0     | NA       | NA       |
| 0     | 0     | 0     | 0     | NA       | NA       |
| 0     | 0     | 0     | 0     | NA       | NA       |
| 0     | 0     | 0     | 0     | NA       | NA       |
| 0     | 0     | 0     | 0     | NA       | NA       |
| 0     | 0     | 0     | 0     | NA       | NA       |
| 0     | 0     | 0     | 0     | NA       | NA       |
| 0.1   | 0.14  | 0.33  | 0.3   | NA       | NA       |
| 2.75  | 2.53  | 2.7   | 2.47  | 0.045196 | 0.928809 |
| 0     | 0     | 0     | 0     | NA       | NA       |
| 1.3   | 0.27  | 0.48  | 0.97  | -0.49128 | 0.506994 |

|       |       |       |                |          |
|-------|-------|-------|----------------|----------|
| 0     | 0     | 0     | 0 NA           | NA       |
| 0     | 0     | 0     | 0 NA           | NA       |
| 0     | 0     | 0     | 0 NA           | NA       |
| 0     | 0     | 0     | 0 NA           | NA       |
| 0     | 0     | 0     | 0 NA           | NA       |
| 0     | 0.01  | 0.01  | 0 NA           | NA       |
| 0     | 0.85  | 0.52  | 0.17 NA        | NA       |
| 0     | 0     | 0     | 0 NA           | NA       |
| 0     | 0     | 0     | 0 NA           | NA       |
| 0     | 0     | 0     | 0 NA           | NA       |
| 0     | 0     | 0     | 0 NA           | NA       |
| 0     | 0     | 0     | 0 NA           | NA       |
| 0     | 0     | 0     | 0 NA           | NA       |
| 2.51  | 3.21  | 1.96  | 3.1 0.191362   | 0.476104 |
| 0     | 0     | 0     | 0 NA           | NA       |
| 0.16  | 0     | 0.1   | 0 NA           | NA       |
| 0     | 0     | 0     | 0 NA           | NA       |
| 0     | 0     | 0     | 0 NA           | NA       |
| 0     | 0.05  | 0     | 0.74 NA        | NA       |
| 0     | 0     | 0     | 0 NA           | NA       |
| 0     | 0     | 0     | 0 NA           | NA       |
| 0     | 0.14  | 0.13  | 0.2 NA         | NA       |
| 0.69  | 0     | 0.15  | 0 NA           | NA       |
| 0     | 0     | 0     | 0 NA           | NA       |
| 0     | 0     | 0     | 0 NA           | NA       |
| 0.06  | 0.05  | 0.05  | 0.06 NA        | NA       |
| 0     | 0     | 0     | 0 NA           | NA       |
| 16.06 | 11.36 | 12.23 | 10.66 -0.59549 | 2.02E-05 |
| 0     | 0     | 0     | 0 NA           | NA       |
| 0     | 0     | 0     | 0 NA           | NA       |
| 0     | 0     | 0     | 0 NA           | NA       |
| 0     | 0     | 0     | 0 NA           | NA       |
| 0     | 0     | 0     | 0 NA           | NA       |
| 0     | 0.42  | 0     | 0.22 NA        | NA       |
| 0     | 0     | 0     | 0 NA           | NA       |
| 0     | 0     | 0     | 0 NA           | NA       |
| 0     | 0     | 0     | 0 NA           | NA       |
| 0.61  | 0.43  | 0.45  | 0.55 -0.50957  | 0.230308 |
| 5.34  | 8.33  | 6.34  | 7.03 0.505883  | 0.00463  |
| 0     | 0     | 0     | 0 NA           | NA       |
| 0     | 0     | 0     | 0 NA           | NA       |
| 0     | 0     | 0     | 0 NA           | NA       |
| 0     | 0     | 0     | 0 NA           | NA       |
| 0     | 0.26  | 0.33  | 0.6 NA         | NA       |
| 0     | 0     | 0     | 0 NA           | NA       |

|       |      |      |      |          |          |
|-------|------|------|------|----------|----------|
| 0     | 0    | 0    | 0    | NA       | NA       |
| 0     | 0    | 0    | 0.33 | NA       | NA       |
| 0     | 0    | 0    | 0    | NA       | NA       |
| 0     | 0    | 0    | 0    | NA       | NA       |
| 0     | 0.18 | 0.39 | 0    | NA       | NA       |
| 0.32  | 0.35 | 0    | 0    | NA       | NA       |
| 0.16  | 0.08 | 0.21 | 0.04 | NA       | NA       |
| 0.3   | 0.13 | 0.06 | 0.13 | -0.63576 | 0.327465 |
| 0     | 0    | 0    | 0    | NA       | NA       |
| 1.15  | 0.99 | 1.12 | 1.16 | -0.49188 | 0.409477 |
| 0     | 0    | 0    | 0    | NA       | NA       |
| 1.87  | 1.64 | 3.93 | 6.19 | 0.515565 | 0.20776  |
| 0     | 0    | 0    | 0    | NA       | NA       |
| 0     | 0    | 0    | 0    | NA       | NA       |
| 0     | 0.71 | 0.46 | 0.71 | 1.381851 | 0.020601 |
| 0     | 0    | 0.07 | 0.1  | NA       | NA       |
| 0     | 0    | 0    | 0    | NA       | NA       |
| 0.62  | 0.48 | 0    | 4.19 | NA       | NA       |
| 0     | 0    | 0    | 0    | NA       | NA       |
| 0.17  | 0    | 0    | 0    | NA       | NA       |
| 0     | 0    | 0    | 0    | NA       | NA       |
| 0     | 0    | 0    | 0    | NA       | NA       |
| 0     | 0    | 0    | 0    | NA       | NA       |
| 0     | 0    | 0    | 0    | NA       | NA       |
| 0     | 0    | 0    | 0    | NA       | NA       |
| 0.95  | 0.88 | 0.54 | 0.82 | 0.01026  | 0.992146 |
| 0     | 0    | 0    | 0    | NA       | NA       |
| 0     | 0    | 0    | 0    | NA       | NA       |
| 0     | 0    | 0    | 0    | NA       | NA       |
| 5.09  | 0.84 | 3.19 | 2.82 | -1.13378 | 0.004285 |
| 0     | 0    | 0    | 0    | NA       | NA       |
| 0.1   | 0.08 | 0    | 0    | NA       | NA       |
| 0.18  | 0.21 | 0.05 | 0.11 | -0.27799 | 0.734939 |
| 25.63 | 4.79 | 7.41 | 7.11 | -1.76085 | 1.05E-25 |
| 0     | 0    | 0    | 0    | NA       | NA       |
| 0     | 0    | 0    | 0    | NA       | NA       |
| 0     | 0    | 0    | 0    | NA       | NA       |
| 0     | 0    | 0    | 0    | NA       | NA       |
| 0     | 0    | 0    | 0    | NA       | NA       |
| 0     | 0    | 0    | 0    | NA       | NA       |
| 0     | 0    | 0    | 0    | NA       | NA       |
| 0     | 0    | 0    | 0    | NA       | NA       |
| 0     | 0    | 0    | 0    | NA       | NA       |
| 0.37  | 0.35 | 0    | 0.75 | NA       | NA       |
| 0     | 0    | 0    | 0    | NA       | NA       |

|        |       |        |        |          |          |
|--------|-------|--------|--------|----------|----------|
| 0.79   | 0.31  | 0.59   | 0.47   | -0.2746  | 0.731121 |
| 0      | 0     | 0      | 0      | NA       | NA       |
| 0      | 0     | 0      | 0      | NA       | NA       |
| 0      | 0     | 0      | 0      | NA       | NA       |
| 4.01   | 1.96  | 3.19   | 3.32   | -0.43334 | 0.060282 |
| 0      | 0     | 0      | 0      | NA       | NA       |
| 0      | 0     | 0      | 0      | NA       | NA       |
| 0.49   | 1.05  | 0.94   | 0      | -0.01756 | 0.986207 |
| 0      | 0     | 0      | 0      | NA       | NA       |
| 0      | 0     | 0      | 4.34   | NA       | NA       |
| 0      | 0     | 0      | 0      | NA       | NA       |
| 0      | 0     | 0      | 0      | NA       | NA       |
| 0      | 0     | 0      | 0      | NA       | NA       |
| 0      | 0     | 2.48   | 0      | NA       | NA       |
| 0      | 0     | 0      | 0      | NA       | NA       |
| 0      | 0     | 0      | 0      | NA       | NA       |
| 0      | 0     | 0      | 0.18   | NA       | NA       |
| 104.17 | 94.49 | 112.64 | 122.06 | 0.454039 | 0.035335 |
| 0      | 0     | 0      | 0      | NA       | NA       |
| 0.95   | 0     | 0.39   | 0.44   | -0.9176  | 0.160635 |
| 0      | 0     | 0      | 0      | NA       | NA       |
| 0      | 0     | 0      | 0.82   | NA       | NA       |
| 0      | 0     | 0      | 0      | NA       | NA       |
| 0      | 0     | 0      | 0      | NA       | NA       |
| 0      | 0     | 0      | 0      | NA       | NA       |
| 0.05   | 0     | 0.04   | 0.04   | NA       | NA       |
| 0      | 0     | 0      | 0      | NA       | NA       |
| 0.21   | 1.06  | 0.35   | 0.48   | 0.376285 | 0.625329 |
| 0      | 0     | 0      | 0      | NA       | NA       |
| 1.72   | 0     | 0      | 0      | NA       | NA       |
| 0.24   | 0     | 0.63   | 0      | NA       | NA       |
| 0      | 0     | 0      | 0      | NA       | NA       |
| 0      | 1.01  | 0      | 0      | NA       | NA       |
| 0      | 0     | 0      | 0      | NA       | NA       |
| 0      | 0     | 0      | 0      | NA       | NA       |
| 0      | 0     | 0      | 0      | NA       | NA       |
| 0      | 0     | 0.04   | 0.08   | NA       | NA       |
| 0      | 0     | 0      | 0      | NA       | NA       |
| 0      | 0     | 0      | 0      | NA       | NA       |
| 0      | 0     | 0      | 0      | NA       | NA       |
| 0      | 0     | 0      | 0      | NA       | NA       |
| 0      | 0     | 0      | 0      | NA       | NA       |
| 0      | 0     | 0      | 0      | NA       | NA       |
| 0      | 0     | 0      | 0      | NA       | NA       |
| 0      | 0     | 0      | 0.24   | NA       | NA       |

|       |       |       |       |          |          |
|-------|-------|-------|-------|----------|----------|
| 0     | 0     | 0     | 0     | NA       | NA       |
| 0.92  | 0.22  | 0.4   | 0.35  | -0.99715 | 0.115981 |
| 0     | 0     | 0     | 0     | NA       | NA       |
| 0     | 0     | 0     | 0     | NA       | NA       |
| 0     | 0     | 0     | 0     | NA       | NA       |
| 0     | 0     | 0     | 0     | NA       | NA       |
| 0     | 0     | 0     | 0     | NA       | NA       |
| 4.16  | 4.15  | 3.74  | 4.03  | 0.07288  | 0.791573 |
| 0     | 0     | 0     | 0     | NA       | NA       |
| 0     | 0     | 0     | 0     | NA       | NA       |
| 0.76  | 0.86  | 0.82  | 0.83  | 0.12471  | 0.777473 |
| 0     | 0.33  | 0     | 0     | NA       | NA       |
| 0     | 0.07  | 0     | 0     | NA       | NA       |
| 0.07  | 0.02  | 0.08  | 0.02  | NA       | NA       |
| 0.71  | 0.76  | 0.5   | 0.93  | 0.304672 | 0.580536 |
| 0     | 0     | 0     | 0     | NA       | NA       |
| 0.34  | 0.41  | 0.75  | 1.1   | 0.454609 | 0.522846 |
| 0.35  | 0.76  | 1.5   | 0.92  | 0.625447 | 0.374298 |
| 0     | 0     | 0     | 0     | NA       | NA       |
| 0     | 0     | 0     | 0     | NA       | NA       |
| 0     | 0     | 0     | 0     | NA       | NA       |
| 0     | 0     | 0     | 0.04  | NA       | NA       |
| 0     | 0     | 0     | 0     | NA       | NA       |
| 0.68  | 0.58  | 0.78  | 0.61  | -0.09925 | 0.895678 |
| 0     | 0     | 0     | 0     | NA       | NA       |
| 0     | 0     | 0.08  | 0     | NA       | NA       |
| 0     | 0     | 0.03  | 0     | NA       | NA       |
| 0     | 0     | 0     | 0     | NA       | NA       |
| 24.88 | 24.65 | 22.82 | 24.07 | -0.02242 | 0.925102 |
| 0     | 0     | 0     | 0     | NA       | NA       |
| 20.67 | 18.36 | 17.81 | 20.37 | -0.09031 | 0.408127 |
| 0     | 0     | 0     | 0     | NA       | NA       |
| 0     | 0     | 0     | 0     | NA       | NA       |
| 0     | 0.22  | 0     | 0.26  | NA       | NA       |
| 0     | 0     | 0     | 0     | NA       | NA       |
| 0.29  | 0.3   | 0.22  | 0.39  | -0.06462 | 0.942206 |
| 0     | 0     | 0     | 0     | NA       | NA       |
| 0     | 0     | 0     | 0     | NA       | NA       |
| 0     | 0     | 0     | 0     | NA       | NA       |
| 0     | 0     | 0     | 0     | NA       | NA       |
| 0     | 0     | 0     | 0     | NA       | NA       |
| 0.13  | 0     | 0     | 0.2   | NA       | NA       |
| 0     | 0     | 0     | 0     | NA       | NA       |
| 0     | 0     | 0     | 0     | NA       | NA       |
| 0     | 0     | 0     | 0     | NA       | NA       |

|      |      |      |      |          |          |
|------|------|------|------|----------|----------|
| 0    | 0    | 0    | 0    | NA       | NA       |
| 0.21 | 0.24 | 0.31 | 0.32 | -0.13315 | 0.871984 |
| 0    | 0    | 0    | 0.03 | NA       | NA       |
| 0    | 0    | 0    | 0    | NA       | NA       |
| 0    | 0    | 0    | 0    | NA       | NA       |
| 0    | 0    | 0    | 0    | NA       | NA       |
| 0    | 0    | 0    | 0    | NA       | NA       |
| 0    | 0    | 0    | 0    | NA       | NA       |
| 0    | 0    | 0    | 0    | NA       | NA       |
| 0    | 0    | 0    | 0    | NA       | NA       |
| 0    | 0    | 0    | 0    | NA       | NA       |
| 0    | 0    | 0    | 0    | NA       | NA       |
| 0.08 | 0.07 | 0.07 | 0.05 | NA       | NA       |
| 0    | 0    | 0    | 0    | NA       | NA       |
| 0    | 0    | 0    | 0    | NA       | NA       |
| 0.7  | 0.33 | 0    | 0.69 | NA       | NA       |
| 0    | 0    | 0    | 0    | NA       | NA       |
| 0.85 | 0.55 | 0.67 | 0.72 | -0.36916 | 0.308927 |
| 0    | 0    | 0    | 0    | NA       | NA       |
| 0    | 0.37 | 0    | 0    | NA       | NA       |
| 0    | 0    | 0    | 0    | NA       | NA       |
| 0    | 0    | 0    | 0    | NA       | NA       |
| 0    | 0    | 0    | 0    | NA       | NA       |
| 0    | 0    | 0    | 0    | NA       | NA       |
| 0    | 0    | 0.02 | 0.03 | NA       | NA       |
| 0    | 0    | 0    | 0    | NA       | NA       |
| 0    | 0    | 0    | 0    | NA       | NA       |
| 0    | 0    | 0    | 0    | NA       | NA       |
| 0    | 0    | 0    | 0    | NA       | NA       |
| 0    | 0.17 | 0.08 | 0.27 | NA       | NA       |
| 0    | 0    | 0    | 0    | NA       | NA       |
| 0    | 0    | 0    | 0    | NA       | NA       |
| 0    | 0    | 0    | 0.11 | NA       | NA       |
| 0    | 0    | 0    | 0    | NA       | NA       |
| 0    | 0    | 0    | 0    | NA       | NA       |
| 0.24 | 0    | 0.13 | 0.11 | NA       | NA       |
| 0    | 0.05 | 0    | 0.06 | NA       | NA       |
| 0    | 0    | 0    | 0    | NA       | NA       |
| 0    | 0    | 0    | 0    | NA       | NA       |
| 0    | 0    | 0    | 0    | NA       | NA       |



|      |      |      |               |          |
|------|------|------|---------------|----------|
| 0    | 0    | 0    | 0 NA          | NA       |
| 0    | 0    | 0    | 0 NA          | NA       |
| 0    | 0    | 0    | 0 NA          | NA       |
| 0    | 0    | 0.12 | 0 NA          | NA       |
| 0    | 0    | 0.15 | 0 NA          | NA       |
| 0    | 0    | 0    | 0 NA          | NA       |
| 4.03 | 0.67 | 0    | 1.85 NA       | NA       |
| 0    | 0.21 | 0.1  | 0.11 NA       | NA       |
| 0    | 0.03 | 0.09 | 0.01 NA       | NA       |
| 0    | 0    | 0    | 0 NA          | NA       |
| 0    | 0    | 0    | 0 NA          | NA       |
| 0    | 0    | 0    | 0 NA          | NA       |
| 0    | 0    | 0.23 | 0 NA          | NA       |
| 0    | 0    | 0    | 0 NA          | NA       |
| 2.07 | 0    | 0    | 0.92 NA       | NA       |
| 0    | 0    | 0    | 0 NA          | NA       |
| 0    | 0    | 0    | 0 NA          | NA       |
| 0    | 0    | 0    | 0 NA          | NA       |
| 0    | 0    | 0    | 0 NA          | NA       |
| 0    | 0    | 0    | 0 NA          | NA       |
| 0    | 0    | 0    | 0 NA          | NA       |
| 0    | 0    | 0    | 0 NA          | NA       |
| 0    | 0    | 0    | 0 NA          | NA       |
| 0    | 0    | 0    | 0 NA          | NA       |
| 0    | 0    | 0    | 0 NA          | NA       |
| 0    | 0    | 0    | 0 NA          | NA       |
| 0    | 0    | 0    | 0 NA          | NA       |
| 0    | 0    | 0    | 0 NA          | NA       |
| 0    | 0    | 0    | 0 NA          | NA       |
| 0    | 0    | 0    | 0 NA          | NA       |
| 0    | 0    | 0    | 0 NA          | NA       |
| 0    | 0    | 0    | 0 NA          | NA       |
| 0.47 | 0    | 0    | 0 NA          | NA       |
| 0    | 0    | 0    | 0 NA          | NA       |
| 0    | 0    | 0    | 0 NA          | NA       |
| 0    | 0    | 0    | 0 NA          | NA       |
| 0    | 0    | 0    | 0 NA          | NA       |
| 2.65 | 0.54 | 0.47 | 0.55 NA       | NA       |
| 0    | 0    | 0    | 0 NA          | NA       |
| 0    | 0    | 0    | 0 NA          | NA       |
| 0.26 | 0.24 | 0.27 | 0.03 0.040281 | 0.96662  |
| 0    | 0    | 0    | 0 NA          | NA       |
| 0.1  | 0.07 | 0.18 | 0.2 0.049228  | 0.956864 |
| 0    | 0    | 0    | 0 NA          | NA       |
| 0    | 0    | 0    | 0 NA          | NA       |
| 0    | 0    | 0    | 0 NA          | NA       |
| 0    | 0    | 0    | 0 NA          | NA       |
| 0    | 0    | 0    | 0 NA          | NA       |
| 0.28 | 0    | 0.09 | 0 NA          | NA       |

|      |       |       |       |          |          |
|------|-------|-------|-------|----------|----------|
| 0    | 0     | 0     | 0     | NA       | NA       |
| 0    | 0     | 0.16  | 0     | NA       | NA       |
| 0    | 0     | 0     | 0     | NA       | NA       |
| 0.87 | 2.96  | 1.55  | 0.81  | 0.809897 | 0.217474 |
| 0    | 0     | 0     | 0     | NA       | NA       |
| 0    | 0     | 0     | 0     | NA       | NA       |
| 0    | 0     | 0     | 0     | NA       | NA       |
| 0    | 0     | 0     | 0.41  | NA       | NA       |
| 0    | 0     | 0     | 0     | NA       | NA       |
| 0    | 0     | 0     | 0     | NA       | NA       |
| 0    | 0     | 0     | 0     | NA       | NA       |
| 0    | 0     | 0     | 0     | NA       | NA       |
| 0.08 | 0.08  | 0.04  | 0.04  | -0.99339 | 0.120936 |
| 0    | 0     | 0     | 0     | NA       | NA       |
| 4.64 | 5.49  | 5.05  | 5.49  | 0.350972 | 0.032444 |
| 0    | 0     | 0     | 0     | NA       | NA       |
| 9.7  | 12.64 | 11.51 | 12.22 | 0.342922 | 0.001836 |
| 0    | 0     | 0     | 0     | NA       | NA       |
| 0    | 0     | 0     | 0     | NA       | NA       |
| 0    | 0     | 0     | 0.18  | NA       | NA       |
| 0    | 0     | 0     | 0     | NA       | NA       |
| 0.03 | 0     | 0.07  | 0.04  | NA       | NA       |
| 0    | 0     | 0     | 0     | NA       | NA       |
| 0    | 0.35  | 0     | 0     | NA       | NA       |
| 0    | 0     | 0     | 0.03  | NA       | NA       |
| 0.51 | 0.54  | 0.56  | 0.45  | -0.04391 | 0.944474 |
| 0    | 0     | 0.68  | 0     | NA       | NA       |
| 0    | 0     | 0     | 0     | NA       | NA       |
| 0    | 0     | 0     | 0     | NA       | NA       |
| 0    | 0     | 0     | 0     | NA       | NA       |
| 0    | 0     | 0     | 0     | NA       | NA       |
| 0    | 0     | 0     | 0     | NA       | NA       |
| 0    | 0     | 0     | 0     | NA       | NA       |
| 0    | 0     | 0     | 0     | NA       | NA       |
| 0    | 0     | 0     | 0     | NA       | NA       |
| 0    | 0     | 0     | 0     | NA       | NA       |
| 0    | 0     | 0     | 0     | NA       | NA       |
| 0    | 0     | 0     | 0     | NA       | NA       |
| 0    | 0     | 0     | 0     | NA       | NA       |
| 0    | 0     | 0     | 0     | NA       | NA       |
| 0    | 0     | 0     | 0     | NA       | NA       |
| 0    | 0.12  | 0.53  | 0.54  | NA       | NA       |
| 0    | 0     | 0     | 0     | NA       | NA       |
| 0    | 0     | 0     | 0     | NA       | NA       |
| 0    | 0     | 0     | 0     | NA       | NA       |





|      |      |      |               |          |
|------|------|------|---------------|----------|
| 0    | 0    | 0    | 0 NA          | NA       |
| 0    | 0    | 0    | 0 NA          | NA       |
| 0    | 0    | 0    | 0 NA          | NA       |
| 0    | 0    | 0    | 0 NA          | NA       |
| 0    | 0    | 0    | 0 NA          | NA       |
| 0    | 0    | 0    | 0 NA          | NA       |
| 0    | 0    | 0    | 0 NA          | NA       |
| 0.23 | 0.03 | 0.08 | 0.03 -0.80687 | 0.225539 |
| 0    | 0    | 0    | 0 NA          | NA       |
| 0    | 0    | 0    | 0 NA          | NA       |
| 0    | 0    | 0    | 0 NA          | NA       |
| 0    | 0    | 0    | 0 NA          | NA       |
| 0    | 0    | 0    | 0.06 NA       | NA       |
| 0    | 0    | 0    | 0 NA          | NA       |
| 0    | 0    | 0    | 0 NA          | NA       |
| 0.17 | 0.12 | 0    | 0.13 NA       | NA       |
| 0.39 | 0.29 | 0.35 | 0.36 0.243255 | 0.70062  |
| 0    | 0    | 0.16 | 0 NA          | NA       |
| 0    | 0    | 0    | 0 NA          | NA       |
| 0.67 | 0.51 | 0.61 | 0.73 -0.46889 | 0.081061 |
| 0    | 0    | 0    | 0 NA          | NA       |
| 0    | 0    | 0.05 | 0.05 NA       | NA       |
| 0    | 0    | 0    | 0 NA          | NA       |
| 0.3  | 0.21 | 0.35 | 0.23 NA       | NA       |
| 0    | 0    | 0    | 0 NA          | NA       |
| 0    | 0    | 0    | 0 NA          | NA       |
| 0.38 | 0    | 0    | 0.27 NA       | NA       |
| 0    | 0    | 0    | 0 NA          | NA       |
| 0    | 0    | 0    | 0 NA          | NA       |
| 0    | 0    | 0    | 0 NA          | NA       |
| 0    | 0    | 0    | 0 NA          | NA       |
| 0    | 0    | 0    | 0 NA          | NA       |
| 0    | 0    | 0.19 | 0.11 NA       | NA       |
| 0    | 0    | 0    | 0 NA          | NA       |
| 0.8  | 1.1  | 0.65 | 0.8 NA        | NA       |
| 1.03 | 0.94 | 0.48 | 1.06 -0.13448 | 0.874689 |
| 0    | 0    | 0    | 0 NA          | NA       |
| 0    | 0    | 0    | 0 NA          | NA       |
| 0    | 0    | 0    | 0 NA          | NA       |
| 0    | 0    | 0    | 0 NA          | NA       |
| 0.41 | 0.29 | 0.21 | 0.23 NA       | NA       |
| 4.92 | 0.67 | 1.31 | 0.05 -1.32792 | 0.013166 |
| 0    | 0    | 0    | 0.11 NA       | NA       |
| 0    | 0.09 | 0    | 0.09 NA       | NA       |
| 0    | 0    | 0    | 0 NA          | NA       |

|      |      |      |      |          |          |
|------|------|------|------|----------|----------|
| 2.65 | 4.66 | 5.56 | 4.91 | 0.609715 | 0.092442 |
| 0    | 0    | 0    | 0    | NA       | NA       |
| 0    | 0    | 0    | 0    | NA       | NA       |
| 0    | 0    | 0    | 0    | NA       | NA       |
| 0    | 0    | 0    | 0.13 | NA       | NA       |
| 0    | 0    | 0    | 0    | NA       | NA       |
| 0    | 0    | 0    | 0    | NA       | NA       |
| 0    | 0    | 0    | 0    | NA       | NA       |
| 0    | 0    | 0    | 0    | NA       | NA       |
| 0    | 0    | 0    | 0    | NA       | NA       |
| 0    | 0    | 0    | 0    | NA       | NA       |
| 0    | 0    | 0    | 0    | NA       | NA       |
| 0    | 0    | 0    | 0    | NA       | NA       |
| 0    | 0    | 0    | 0    | NA       | NA       |
| 0    | 0    | 0    | 0    | NA       | NA       |
| 0    | 0    | 0    | 0    | NA       | NA       |
| 0    | 0    | 0    | 0    | NA       | NA       |
| 0    | 0    | 0    | 0    | NA       | NA       |
| 0    | 0    | 0    | 0    | NA       | NA       |
| 0    | 0    | 0    | 0    | NA       | NA       |
| 0.52 | 0.54 | 0.54 | 0.53 | 0.175145 | 0.783713 |
| 0    | 0    | 0    | 0    | NA       | NA       |
| 0    | 0    | 0    | 0    | NA       | NA       |
| 0    | 0    | 0    | 0    | NA       | NA       |
| 0    | 0    | 0    | 0    | NA       | NA       |
| 0    | 0    | 0    | 0    | NA       | NA       |
| 0    | 0    | 0    | 0    | NA       | NA       |
| 0.24 | 0.17 | 0.15 | 0.53 | NA       | NA       |
| 0    | 0    | 0    | 0    | NA       | NA       |
| 0    | 0.96 | 0    | 0    | NA       | NA       |
| 0    | 0    | 0.83 | 0    | NA       | NA       |
| 0    | 0    | 0    | 0    | NA       | NA       |
| 0    | 0    | 0    | 0    | NA       | NA       |
| 0    | 0    | 0    | 0    | NA       | NA       |
| 0    | 0    | 0    | 0    | NA       | NA       |
| 0    | 0    | 0    | 0    | NA       | NA       |
| 0.25 | 0.55 | 0.34 | 0.39 | NA       | NA       |
| 0    | 0    | 0    | 0    | NA       | NA       |
| 0    | 0    | 0.12 | 0    | NA       | NA       |
| 0    | 0    | 0    | 0    | NA       | NA       |
| 0    | 0    | 0    | 0    | NA       | NA       |
| 0.33 | 0.12 | 0.11 | 0.37 | NA       | NA       |
| 0    | 0    | 0    | 0    | NA       | NA       |

|      |       |      |               |          |
|------|-------|------|---------------|----------|
| 0    | 0     | 0    | 0 NA          | NA       |
| 0    | 0     | 0    | 0 NA          | NA       |
| 0.12 | 0     | 0.08 | 0 NA          | NA       |
| 0.25 | 0     | 0.16 | 0 NA          | NA       |
| 0    | 0     | 0    | 0 NA          | NA       |
| 0    | 0     | 0    | 0 NA          | NA       |
| 0.16 | 0.12  | 0.32 | 0.12 NA       | NA       |
| 0    | 0     | 0    | 0 NA          | NA       |
| 0    | 0     | 0    | 0 NA          | NA       |
| 0    | 0     | 0    | 0 NA          | NA       |
| 0    | 0     | 0    | 0 NA          | NA       |
| 0    | 0     | 0    | 0 NA          | NA       |
| 0    | 0     | 3.37 | 0 NA          | NA       |
| 0.05 | 0.07  | 0.06 | 0.03 NA       | NA       |
| 0.22 | 0.16  | 0.15 | 0 NA          | NA       |
| 0    | 0.34  | 0    | 0.18 NA       | NA       |
| 0.03 | 0.04  | 0.03 | 0.04 -0.43761 | 0.498577 |
| 0.55 | 0.47  | 0.58 | 0.62 -0.07744 | 0.921574 |
| 0    | 0     | 0.27 | 0 NA          | NA       |
| 0.23 | 0     | 0    | 0 NA          | NA       |
| 0.46 | 0     | 0.46 | 0.51 NA       | NA       |
| 0    | 0     | 0    | 0 NA          | NA       |
| 0    | 0     | 0    | 0 NA          | NA       |
| 5.37 | 3.69  | 5.43 | 3.03 -0.03909 | 0.95613  |
| 0    | 0     | 0    | 0 NA          | NA       |
| 0    | 0     | 0    | 0 NA          | NA       |
| 0    | 0     | 0    | 0 NA          | NA       |
| 0    | 0     | 0    | 0 NA          | NA       |
| 0    | 0     | 0    | 0 NA          | NA       |
| 0.07 | 0.25  | 0.29 | 0.12 0.728282 | 0.273773 |
| 0    | 0     | 0    | 0 NA          | NA       |
| 0    | 0     | 0    | 0 NA          | NA       |
| 0    | 0     | 0    | 0 NA          | NA       |
| 0    | 0     | 0    | 0 NA          | NA       |
| 0.03 | 0     | 0.02 | 0 NA          | NA       |
| 0    | 0     | 0    | 0 NA          | NA       |
| 0    | 0     | 0    | 0 NA          | NA       |
| 0.15 | 0.25  | 0.11 | 0.11 NA       | NA       |
| 0    | 0     | 0.03 | 0.03 NA       | NA       |
| 0    | 0     | 0    | 0 NA          | NA       |
| 1.77 | 1.25  | 9.18 | 7.55 0.911924 | 0.153319 |
| 0    | 0     | 0    | 0 NA          | NA       |
| 0    | 0     | 0    | 0 NA          | NA       |
| 0    | 0     | 0    | 0 NA          | NA       |
| 0    | 10.76 | 0    | 0 NA          | NA       |

|       |       |       |                |          |
|-------|-------|-------|----------------|----------|
| 0     | 0     | 0     | 0 NA           | NA       |
| 0     | 0     | 0.25  | 0 NA           | NA       |
| 0     | 0     | 0     | 0 NA           | NA       |
| 0     | 0     | 0     | 0 NA           | NA       |
| 0     | 0     | 0     | 0 NA           | NA       |
| 0     | 0     | 0     | 0 NA           | NA       |
| 0     | 9.42  | 0     | 0 NA           | NA       |
| 0     | 0.2   | 0     | 0.42 NA        | NA       |
| 0     | 0     | 0     | 0 NA           | NA       |
| 0     | 0     | 0     | 0 NA           | NA       |
| 31.98 | 23.07 | 20.06 | 24.84 -0.22824 | 0.06191  |
| 0     | 0     | 0     | 0 NA           | NA       |
| 0     | 0     | 0     | 0 NA           | NA       |
| 0     | 0     | 0     | 0 NA           | NA       |
| 0     | 0     | 0     | 0 NA           | NA       |
| 0     | 0     | 0     | 0 NA           | NA       |
| 0     | 0     | 0     | 0 NA           | NA       |
| 0.49  | 1.86  | 0.44  | 0.41 0.164717  | 0.844837 |
| 5.18  | 4.68  | 4.2   | 4.46 -0.14515  | 0.572217 |
| 0     | 0     | 0     | 0 NA           | NA       |
| 0.18  | 0.88  | 0.69  | 0.53 0.827458  | 0.211251 |
| 2.72  | 0     | 0     | 0 NA           | NA       |
| 0     | 0     | 0     | 0 NA           | NA       |
| 0     | 0     | 0     | 0 NA           | NA       |
| 0     | 0     | 0     | 0 NA           | NA       |
| 0     | 0     | 0     | 0 NA           | NA       |
| 0     | 0     | 0     | 0 NA           | NA       |
| 0     | 0     | 0     | 0 NA           | NA       |
| 0     | 0     | 0     | 0 NA           | NA       |
| 0     | 0     | 0     | 0 NA           | NA       |
| 0.09  | 0.14  | 0.08  | 0 NA           | NA       |
| 0     | 0     | 0     | 0 NA           | NA       |
| 0     | 0     | 0     | 0 NA           | NA       |
| 0     | 0     | 0     | 0 NA           | NA       |
| 0.06  | 0.63  | 0.07  | 0.41 1.555455  | 0.007134 |
| 0     | 0     | 0     | 0 NA           | NA       |
| 0     | 0     | 0     | 0 NA           | NA       |
| 0     | 0     | 0     | 0 NA           | NA       |
| 0     | 0     | 0     | 0 NA           | NA       |
| 0     | 0     | 0     | 0 NA           | NA       |
| 0.86  | 1.37  | 0.64  | 0.3 -0.67345   | 0.289347 |
| 0     | 0     | 0.21  | 0 NA           | NA       |
| 0     | 0     | 0     | 0 NA           | NA       |
| 0     | 0     | 0     | 0 NA           | NA       |
| 0     | 0     | 0     | 0 NA           | NA       |



|       |       |       |                |          |
|-------|-------|-------|----------------|----------|
| 0     | 0     | 0     | 0 NA           | NA       |
| 0     | 0     | 0.1   | 0.11 NA        | NA       |
| 0     | 0     | 0     | 0 NA           | NA       |
| 0     | 0     | 0     | 0 NA           | NA       |
| 0     | 0     | 0.56  | 0 NA           | NA       |
| 0.32  | 0.58  | 0.43  | 0.44 0.11633   | 0.863135 |
| 0     | 0     | 0     | 0 NA           | NA       |
| 0.16  | 0     | 0     | 0 NA           | NA       |
| 0     | 0     | 0     | 0 NA           | NA       |
| 2.78  | 4.51  | 4.03  | 3.85 0.53684   | 0.077352 |
| 0.29  | 0.2   | 0.21  | 0.2 -0.10118   | 0.898268 |
| 0     | 0     | 0     | 0 NA           | NA       |
| 0.02  | 0.01  | 0.02  | 0.04 NA        | NA       |
| 0.05  | 0.02  | 0.03  | 0.04 -0.61334  | 0.382561 |
| 0     | 0     | 0     | 0 NA           | NA       |
| 0     | 0     | 0     | 0 NA           | NA       |
| 0.38  | 0.25  | 0.15  | 0.23 -0.49301  | 0.376582 |
| 3.34  | 5.81  | 4.43  | 5.13 0.517395  | 0.009279 |
| 0     | 0     | 0     | 0 NA           | NA       |
| 0     | 0.39  | 0     | 0 NA           | NA       |
| 0     | 0.14  | 0.38  | 0.14 NA        | NA       |
| 0     | 0     | 0     | 0 NA           | NA       |
| 0     | 0     | 0     | 0 NA           | NA       |
| 0.06  | 0     | 0.09  | 0.05 NA        | NA       |
| 0     | 0     | 0     | 0 NA           | NA       |
| 0.47  | 0.31  | 0.21  | 0.22 -0.91952  | 0.07962  |
| 0     | 0     | 0     | 0 NA           | NA       |
| 0     | 0     | 0     | 0 NA           | NA       |
| 0     | 0     | 0     | 0 NA           | NA       |
| 0     | 0     | 0     | 0 NA           | NA       |
| 12.66 | 6.16  | 0     | 10.09 NA       | NA       |
| 0     | 0     | 0     | 0 NA           | NA       |
| 0     | 0     | 0     | 0 NA           | NA       |
| 0     | 0.12  | 0     | 0.12 NA        | NA       |
| 0.16  | 0.16  | 0.23  | 0.24 -0.07673  | 0.924604 |
| 0     | 0     | 0     | 0 NA           | NA       |
| 16.09 | 15.64 | 17.27 | 15.51 0.032376 | 0.868389 |
| 0     | 0     | 0     | 0 NA           | NA       |
| 0     | 0     | 0     | 0 NA           | NA       |
| 1.44  | 2.3   | 6.51  | 5.51 1.253943  | 0.027451 |
| 0     | 0     | 0     | 0 NA           | NA       |
| 0     | 0     | 0     | 0 NA           | NA       |
| 0     | 0     | 0     | 0 NA           | NA       |
| 0     | 0     | 0     | 0 NA           | NA       |
| 0.04  | 0     | 0     | 0 NA           | NA       |

|       |       |       |       |          |          |
|-------|-------|-------|-------|----------|----------|
| 0     | 0     | 0     | 0     | NA       | NA       |
| 0.23  | 0.16  | 0     | 0.34  | NA       | NA       |
| 0     | 0     | 0     | 0     | NA       | NA       |
| 0     | 0.08  | 0     | 0     | NA       | NA       |
| 0     | 0     | 0     | 0     | NA       | NA       |
| 0     | 0     | 0     | 0     | NA       | NA       |
| 0     | 0.18  | 0     | 0     | NA       | NA       |
| 0.31  | 0.38  | 0.24  | 0.1   | 0.006837 | 0.995073 |
| 0     | 0     | 0     | 0     | NA       | NA       |
| 0     | 0     | 0     | 0     | NA       | NA       |
| 0     | 0     | 0     | 0     | NA       | NA       |
| 0     | 0     | 0     | 0     | NA       | NA       |
| 0     | 0     | 0     | 0     | NA       | NA       |
| 0.15  | 0.31  | 0.1   | 0     | NA       | NA       |
| 0     | 0     | 0.16  | 0     | NA       | NA       |
| 0     | 0     | 0.13  | 0     | NA       | NA       |
| 0     | 0     | 0     | 0     | NA       | NA       |
| 0     | 0     | 0     | 0     | NA       | NA       |
| 0     | 0     | 0.4   | 0.51  | NA       | NA       |
| 0     | 0     | 0     | 0     | NA       | NA       |
| 0     | 0     | 0     | 0     | NA       | NA       |
| 0     | 0     | 0     | 0     | NA       | NA       |
| 23.77 | 26.82 | 26.98 | 29.88 | 0.260394 | 0.015425 |
| 0     | 0     | 0     | 0     | NA       | NA       |
| 0     | 0     | 0     | 0     | NA       | NA       |
| 0     | 0     | 0     | 0     | NA       | NA       |
| 0     | 0     | 0     | 0.07  | NA       | NA       |
| 0     | 0     | 0     | 0     | NA       | NA       |
| 0.29  | 0.1   | 0     | 0     | NA       | NA       |
| 0     | 0     | 0     | 0     | NA       | NA       |
| 0     | 0     | 0     | 0     | NA       | NA       |
| 0     | 0     | 0     | 0     | NA       | NA       |
| 0.96  | 1.26  | 1.1   | 1.2   | 0.043262 | 0.935649 |
| 0.23  | 0.13  | 0.34  | 0.3   | -0.00781 | 0.992113 |
| 0     | 0     | 0     | 0     | NA       | NA       |
| 0     | 0     | 0     | 0     | NA       | NA       |
| 0     | 0     | 0     | 0     | NA       | NA       |
| 0     | 0     | 0     | 0     | NA       | NA       |
| 0     | 0.06  | 0.07  | 0.1   | NA       | NA       |
| 0.13  | 0     | 0     | 0.29  | NA       | NA       |
| 0     | 0.03  | 0     | 0.04  | NA       | NA       |
| 0.72  | 0.31  | 0.41  | 0.5   | -0.92383 | 0.047797 |
| 0     | 0     | 0     | 0     | NA       | NA       |
| 0     | 0     | 0     | 0     | NA       | NA       |
| 0     | 0     | 0.3   | 0.17  | NA       | NA       |

|      |      |      |               |          |
|------|------|------|---------------|----------|
| 0    | 0    | 0    | 0 NA          | NA       |
| 0    | 0    | 0    | 0.12 NA       | NA       |
| 0    | 0    | 0    | 0 NA          | NA       |
| 0    | 0    | 0    | 0 NA          | NA       |
| 0    | 0    | 0    | 0 NA          | NA       |
| 0.02 | 0    | 0    | 0 NA          | NA       |
| 0.16 | 0.09 | 0.13 | 0 -0.45269    | 0.547588 |
| 0    | 0    | 0    | 0 NA          | NA       |
| 0    | 0    | 0    | 0 NA          | NA       |
| 0    | 0    | 0    | 0 NA          | NA       |
| 0    | 0    | 0    | 0 NA          | NA       |
| 0    | 0.12 | 0.22 | 0.13 NA       | NA       |
| 0    | 0    | 0    | 0 NA          | NA       |
| 0    | 0    | 0    | 0 NA          | NA       |
| 0    | 0    | 0    | 0 NA          | NA       |
| 0    | 0    | 0    | 0 NA          | NA       |
| 0    | 0    | 0    | 0 NA          | NA       |
| 0    | 0    | 0    | 0 NA          | NA       |
| 0    | 0    | 0    | 0 NA          | NA       |
| 0.03 | 0    | 0.16 | 0.04 NA       | NA       |
| 0    | 0    | 0    | 0 NA          | NA       |
| 0    | 0    | 0.39 | 0.3 NA        | NA       |
| 0.47 | 0.34 | 0.19 | 0.36 -0.07938 | 0.933708 |
| 0    | 0    | 0    | 0 NA          | NA       |
| 0    | 0    | 0    | 0.36 NA       | NA       |
| 0.32 | 0    | 0    | 0 NA          | NA       |
| 0    | 0    | 0    | 0 NA          | NA       |
| 0    | 0    | 0    | 0 NA          | NA       |
| 0.49 | 0.35 | 0.6  | 1.06 NA       | NA       |
| 0.43 | 0.62 | 0.48 | 0.11 -0.48214 | 0.519862 |
| 0.6  | 0    | 0.36 | 0 NA          | NA       |
| 0.18 | 0    | 0.24 | 0 NA          | NA       |
| 0    | 0    | 0    | 0 NA          | NA       |
| 0    | 0    | 0    | 0 NA          | NA       |
| 0    | 0    | 0    | 0 NA          | NA       |
| 0    | 0.48 | 1.13 | 0.4 NA        | NA       |
| 0    | 0    | 0    | 0 NA          | NA       |
| 0    | 0.01 | 0    | 0.01 NA       | NA       |
| 4.37 | 4.21 | 4.12 | 4.52 -0.02276 | 0.940484 |
| 0    | 0    | 0    | 0 NA          | NA       |
| 0.24 | 0.17 | 0    | 0 NA          | NA       |
| 0    | 0    | 0    | 0 NA          | NA       |
| 0    | 0    | 0    | 0 NA          | NA       |
| 0    | 0    | 0    | 0 NA          | NA       |
| 0.03 | 0    | 0    | 0 NA          | NA       |



|      |      |      |               |          |
|------|------|------|---------------|----------|
| 0    | 0    | 0    | 0 NA          | NA       |
| 0    | 0    | 0    | 0 NA          | NA       |
| 0    | 0    | 0    | 0 NA          | NA       |
| 0    | 0    | 0    | 0 NA          | NA       |
| 0    | 0    | 0    | 0 NA          | NA       |
| 0    | 0    | 0    | 0 NA          | NA       |
| 0.51 | 0.16 | 0.05 | 0.14 -1.22839 | 0.033854 |
| 0    | 0    | 0    | 0 NA          | NA       |
| 0    | 0    | 0    | 0 NA          | NA       |
| 0    | 0    | 0    | 0 NA          | NA       |
| 0    | 0.09 | 0    | 0 NA          | NA       |
| 0    | 2.07 | 0    | 5.8 NA        | NA       |
| 0    | 0.12 | 0    | 0 NA          | NA       |
| 0    | 0    | 0    | 0 NA          | NA       |
| 0    | 0    | 0    | 0 NA          | NA       |
| 0    | 0    | 0    | 0 NA          | NA       |
| 0    | 0    | 0    | 0 NA          | NA       |
| 0    | 0.48 | 0    | 0.91 NA       | NA       |
| 0.35 | 0.19 | 0.7  | 0.33 -0.06103 | 0.948247 |
| 0    | 0    | 0    | 0 NA          | NA       |
| 0    | 0    | 0    | 0 NA          | NA       |
| 0    | 0    | 0    | 0 NA          | NA       |
| 0    | 0    | 0    | 0 NA          | NA       |
| 0    | 0    | 0    | 0 NA          | NA       |
| 0    | 0    | 0    | 0 NA          | NA       |
| 0    | 0    | 0    | 0 NA          | NA       |
| 0    | 0    | 0.03 | 0 NA          | NA       |
| 0    | 0    | 0    | 0 NA          | NA       |
| 0    | 0    | 0    | 0 NA          | NA       |
| 0.06 | 0.06 | 0.09 | 0.06 0.706719 | 0.303045 |
| 0    | 0    | 0    | 0 NA          | NA       |
| 0    | 0    | 0    | 0 NA          | NA       |
| 0.07 | 0.33 | 0.2  | 0.26 0.715684 | 0.246167 |
| 0    | 0    | 0    | 0 NA          | NA       |
| 0    | 0    | 0    | 0 NA          | NA       |
| 0    | 0    | 0    | 0.19 NA       | NA       |
| 0    | 0    | 0    | 0 NA          | NA       |
| 0    | 0    | 0    | 0 NA          | NA       |
| 0    | 0    | 0    | 0 NA          | NA       |
| 0.14 | 0    | 0    | 0 NA          | NA       |
| 0.25 | 0.18 | 0.16 | 0.75 NA       | NA       |
| 0    | 0    | 0    | 0 NA          | NA       |
| 0.13 | 0    | 0.07 | 0.02 NA       | NA       |
| 0    | 0    | 0    | 0 NA          | NA       |

|      |      |      |               |          |
|------|------|------|---------------|----------|
| 0    | 0    | 0    | 0 NA          | NA       |
| 0    | 0    | 0.29 | 0 NA          | NA       |
| 0.23 | 0.2  | 0.22 | 0.04 -0.22617 | 0.79079  |
| 0.27 | 0.09 | 0.21 | 0.08 -0.93604 | 0.124742 |
| 0    | 0    | 0    | 0 NA          | NA       |
| 0    | 0    | 0    | 0 NA          | NA       |
| 0    | 0    | 0    | 0 NA          | NA       |
| 0    | 0    | 0.1  | 0 NA          | NA       |
| 0    | 0    | 0    | 0 NA          | NA       |
| 0    | 0    | 0    | 0 NA          | NA       |
| 0    | 0    | 0    | 0 NA          | NA       |
| 0    | 0    | 0    | 0 NA          | NA       |
| 0    | 0    | 0    | 0 NA          | NA       |
| 0    | 0.99 | 1.02 | 2.51 NA       | NA       |
| 0    | 0    | 0    | 0 NA          | NA       |
| 0    | 0    | 0    | 0 NA          | NA       |
| 0    | 0    | 0    | 0 NA          | NA       |
| 0    | 0    | 0    | 0 NA          | NA       |
| 0    | 0.05 | 0    | 0.03 NA       | NA       |
| 0    | 0    | 0    | 0 NA          | NA       |
| 0    | 0    | 0    | 0 NA          | NA       |
| 0    | 0.08 | 0    | 0 NA          | NA       |
| 0    | 0    | 0    | 0 NA          | NA       |
| 0    | 0    | 0    | 0 NA          | NA       |
| 0    | 0    | 0    | 0.38 NA       | NA       |
| 0.46 | 0    | 0    | 0.46 NA       | NA       |
| 0.46 | 1    | 0.15 | 0 -0.34517    | 0.652879 |
| 0    | 0    | 0    | 0 NA          | NA       |
| 0    | 0    | 0    | 0 NA          | NA       |
| 0    | 0    | 0    | 0.51 NA       | NA       |
| 0    | 0    | 0    | 0 NA          | NA       |
| 0    | 0.27 | 0.23 | 0.55 NA       | NA       |
| 0    | 0    | 0    | 0 NA          | NA       |
| 0    | 0    | 0    | 0 NA          | NA       |
| 0    | 0    | 0    | 0 NA          | NA       |
| 0    | 0    | 0    | 0 NA          | NA       |
| 0    | 0    | 0    | 0 NA          | NA       |
| 0    | 0    | 0    | 0 NA          | NA       |
| 0    | 0    | 0    | 0 NA          | NA       |
| 0    | 0    | 0    | 0 NA          | NA       |
| 0    | 0    | 0    | 0 NA          | NA       |
| 0    | 0    | 0.71 | 0.87 NA       | NA       |
| 0    | 0    | 0    | 0 NA          | NA       |
| 0    | 0    | 0    | 0 NA          | NA       |
| 0.15 | 0.21 | 0.2  | 0.3 NA        | NA       |



|       |       |       |      |          |          |
|-------|-------|-------|------|----------|----------|
| 0.52  | 0.65  | 0.57  | 0.5  | 0.169176 | 0.79079  |
| 0     | 0     | 0     | 0    | NA       | NA       |
| 0     | 0     | 0     | 0    | NA       | NA       |
| 0     | 0     | 0     | 0    | NA       | NA       |
| 0     | 0     | 0.53  | 0    | NA       | NA       |
| 0     | 0     | 0     | 0    | NA       | NA       |
| 0.18  | 0     | 0.28  | 0.21 | NA       | NA       |
| 0.4   | 0.14  | 0.26  | 0.6  | NA       | NA       |
| 0     | 0     | 0     | 0    | NA       | NA       |
| 0.37  | 0     | 0     | 0.06 | NA       | NA       |
| 0     | 0     | 0     | 0    | NA       | NA       |
| 0     | 0     | 0     | 0    | NA       | NA       |
| 14.09 | 18.31 | 49.64 | 71.4 | 0.812667 | 0.181298 |
| 0     | 0     | 0     | 0    | NA       | NA       |
| 0     | 0.06  | 0.28  | 0.1  | NA       | NA       |
| 0     | 0     | 0     | 0    | NA       | NA       |
| 0.43  | 1.37  | 0.69  | 0    | -0.38944 | 0.616434 |
| 0     | 0     | 0.09  | 0    | NA       | NA       |
| 0     | 0     | 0     | 0    | NA       | NA       |
| 0     | 0     | 0     | 0    | NA       | NA       |
| 0     | 0     | 0     | 0    | NA       | NA       |
| 0     | 0     | 0     | 0    | NA       | NA       |
| 0     | 0.7   | 0     | 0    | NA       | NA       |
| 0     | 0     | 0     | 0    | NA       | NA       |
| 0     | 0     | 0     | 0    | NA       | NA       |
| 0.91  | 0.82  | 1.18  | 0.84 | -0.26309 | 0.491401 |
| 0     | 0     | 0     | 0    | NA       | NA       |
| 0     | 0     | 0     | 0    | NA       | NA       |
| 0     | 0     | 0     | 0    | NA       | NA       |
| 0.59  | 0.68  | 1.02  | 0.54 | 0.639253 | 0.361693 |
| 0     | 0     | 0     | 0    | NA       | NA       |
| 0     | 0     | 0     | 0    | NA       | NA       |
| 0.22  | 0.21  | 0.17  | 0.15 | -0.20688 | 0.80335  |
| 0     | 0     | 0     | 0    | NA       | NA       |
| 0     | 0     | 0     | 0    | NA       | NA       |
| 0     | 0     | 0     | 0    | NA       | NA       |
| 0     | 0     | 0     | 0    | NA       | NA       |
| 0     | 0     | 0     | 0    | NA       | NA       |
| 0     | 0     | 0     | 0    | NA       | NA       |
| 0.28  | 0.1   | 0.11  | 0.05 | -1.2172  | 0.045109 |
| 4.05  | 5.21  | 7.76  | 6.79 | 0.878677 | 0.062632 |
| 0     | 0     | 0     | 0    | NA       | NA       |
| 0     | 0     | 0     | 0    | NA       | NA       |
| 0     | 0     | 0     | 0    | NA       | NA       |





|      |      |      |               |          |
|------|------|------|---------------|----------|
| 0    | 0    | 0    | 0 NA          | NA       |
| 0    | 0    | 0    | 0 NA          | NA       |
| 0    | 0    | 0    | 0 NA          | NA       |
| 0    | 0    | 0    | 0 NA          | NA       |
| 0    | 0    | 0    | 0 NA          | NA       |
| 0    | 0    | 0.01 | 0 NA          | NA       |
| 0.26 | 0.45 | 0.04 | 0.44 0.668713 | 0.336283 |
| 0    | 0    | 0    | 0 NA          | NA       |
| 0.92 | 0    | 0.88 | 0 NA          | NA       |
| 0    | 0    | 0    | 0 NA          | NA       |
| 0    | 0.12 | 0.53 | 0.54 NA       | NA       |
| 0    | 0    | 0    | 0 NA          | NA       |
| 0    | 0    | 0    | 0 NA          | NA       |
| 0    | 0    | 0    | 0 NA          | NA       |
| 0    | 0    | 0    | 0 NA          | NA       |
| 0    | 0    | 0    | 0 NA          | NA       |
| 1.5  | 0    | 0    | 0 NA          | NA       |
| 0    | 0    | 0    | 0 NA          | NA       |
| 0    | 0    | 0    | 0 NA          | NA       |
| 0    | 0    | 0    | 0 NA          | NA       |
| 0    | 0    | 0    | 0 NA          | NA       |
| 0    | 0    | 0    | 0 NA          | NA       |
| 0    | 0    | 0    | 0.17 NA       | NA       |
| 0    | 0    | 0    | 0 NA          | NA       |
| 0    | 0    | 0    | 0 NA          | NA       |
| 0    | 0    | 0    | 0 NA          | NA       |
| 0.09 | 0.18 | 0.19 | 0.27 0.039718 | 0.963961 |
| 0    | 0    | 0.54 | 1.68 NA       | NA       |
| 0    | 0    | 0    | 0 NA          | NA       |
| 0    | 0    | 0    | 0 NA          | NA       |
| 0    | 0    | 0    | 0 NA          | NA       |
| 0    | 0    | 0    | 0 NA          | NA       |
| 0    | 0    | 2.56 | 1.06 NA       | NA       |
| 0.67 | 0    | 0    | 0.34 NA       | NA       |
| 0    | 0    | 0    | 0 NA          | NA       |
| 0    | 0    | 0    | 0 NA          | NA       |
| 0    | 0    | 0    | 0 NA          | NA       |
| 0    | 0    | 0.31 | 0.37 NA       | NA       |
| 0    | 0.51 | 0.45 | 1.32 NA       | NA       |
| 1.51 | 0.4  | 0.92 | 0.74 NA       | NA       |
| 0    | 0    | 0    | 0 NA          | NA       |
| 0    | 0    | 0    | 0 NA          | NA       |
| 0    | 0    | 0    | 0 NA          | NA       |
| 0.48 | 0.87 | 1    | 0.82 0.149983 | 0.782812 |

|       |      |       |                |          |
|-------|------|-------|----------------|----------|
| 0     | 0    | 0     | 0 NA           | NA       |
| 9.87  | 13.6 | 11.53 | 11.59 0.097845 | 0.673103 |
| 0     | 0    | 0     | 0 NA           | NA       |
| 0     | 0    | 0     | 0 NA           | NA       |
| 0     | 0    | 0     | 0 NA           | NA       |
| 0     | 0    | 0.18  | 0 NA           | NA       |
| 0     | 0    | 0     | 0 NA           | NA       |
| 0     | 0    | 0     | 0 NA           | NA       |
| 0     | 0    | 0     | 0 NA           | NA       |
| 10.69 | 0    | 0     | 0 NA           | NA       |
| 0     | 1.53 | 0     | 0 NA           | NA       |
| 0     | 0    | 0     | 0 NA           | NA       |
| 0     | 0    | 0     | 0 NA           | NA       |
| 0.03  | 0.09 | 0.09  | 0.43 3.81E-05  | 0.999931 |
| 0     | 0    | 0     | 0 NA           | NA       |
| 0     | 0    | 0     | 0 NA           | NA       |
| 0     | 0    | 0     | 0 NA           | NA       |
| 0.62  | 0.22 | 0.41  | 0.7 -0.20812   | 0.809404 |
| 0.36  | 0.09 | 0.32  | 0.46 NA        | NA       |
| 0     | 0    | 0     | 0 NA           | NA       |
| 0.11  | 0.08 | 0.04  | 0 NA           | NA       |
| 0     | 0    | 0     | 0 NA           | NA       |
| 0     | 0    | 0     | 0 NA           | NA       |
| 0     | 0    | 0     | 0 NA           | NA       |
| 0     | 0    | 0     | 0 NA           | NA       |
| 0     | 0    | 0     | 0 NA           | NA       |
| 0     | 0    | 0     | 0 NA           | NA       |
| 0     | 0    | 0     | 0 NA           | NA       |
| 0     | 0    | 0     | 0 NA           | NA       |
| 0     | 0    | 0     | 0 NA           | NA       |
| 0     | 0    | 0     | 0 NA           | NA       |
| 0     | 0    | 0     | 0 NA           | NA       |
| 0     | 0    | 0     | 0.15 NA        | NA       |
| 0     | 0    | 0     | 0 NA           | NA       |
| 0     | 0    | 0     | 0 NA           | NA       |
| 1.83  | 0.38 | 0     | 0.1 -1.55685   | 0.008182 |
| 0     | 0    | 0     | 0 NA           | NA       |
| 0     | 0    | 0     | 0 NA           | NA       |
| 0     | 0.46 | 0.56  | 0.64 NA        | NA       |
| 0     | 0    | 0     | 0 NA           | NA       |
| 0     | 0    | 0     | 0 NA           | NA       |
| 0     | 0    | 0     | 0 NA           | NA       |
| 0     | 0    | 0     | 0 NA           | NA       |
| 0.02  | 0.01 | 0.01  | 0.01 NA        | NA       |
| 0     | 0    | 0     | 0 NA           | NA       |
| 0.8   | 0.56 | 0     | 0 NA           | NA       |

|      |       |       |               |          |
|------|-------|-------|---------------|----------|
| 0    | 0.12  | 0.53  | 0.54 NA       | NA       |
| 2.84 | 81.63 | 73.05 | 95.02 NA      | NA       |
| 0    | 0     | 0     | 0 NA          | NA       |
| 6.87 | 7.52  | 7.22  | 7.54 0.156884 | 0.298406 |
| 0    | 0     | 0     | 0 NA          | NA       |
| 0    | 0     | 0     | 0 NA          | NA       |
| 0    | 0     | 0     | 0 NA          | NA       |
| 0    | 0     | 0     | 0 NA          | NA       |
| 0    | 0.14  | 0     | 0 NA          | NA       |
| 0    | 0     | 0     | 0 NA          | NA       |
| 0    | 0     | 0     | 0 NA          | NA       |
| 0    | 0     | 0     | 0 NA          | NA       |
| 0.49 | 0.55  | 1.06  | 0.45 -0.34301 | 0.637843 |
| 0    | 0     | 0     | 0 NA          | NA       |
| 0    | 0     | 0     | 0 NA          | NA       |
| 0.66 | 0.23  | 0.21  | 0.96 NA       | NA       |
| 0    | 0     | 0.6   | 0 NA          | NA       |
| 0    | 0     | 0     | 0 NA          | NA       |
| 0    | 0     | 0     | 0 NA          | NA       |
| 0    | 0     | 0     | 0 NA          | NA       |
| 0    | 0     | 0     | 0 NA          | NA       |
| 0    | 0     | 0     | 0 NA          | NA       |
| 0    | 0     | 0     | 0 NA          | NA       |
| 0    | 0     | 0     | 0 NA          | NA       |
| 0    | 0     | 0.1   | 0.11 NA       | NA       |
| 0    | 0.47  | 0     | 0 NA          | NA       |
| 0    | 0     | 0     | 0 NA          | NA       |
| 0    | 0     | 0     | 0 NA          | NA       |
| 0    | 0     | 0     | 0 NA          | NA       |
| 0    | 0     | 0     | 0 NA          | NA       |
| 0    | 0     | 0     | 0 NA          | NA       |
| 0    | 0     | 0     | 0 NA          | NA       |
| 0    | 0     | 0     | 0 NA          | NA       |
| 0.14 | 0.51  | 0.19  | 0.76 0.561105 | 0.430561 |
| 0    | 0     | 0     | 0 NA          | NA       |
| 0    | 0     | 0     | 0 NA          | NA       |
| 0    | 0     | 0     | 0 NA          | NA       |
| 0.2  | 0.43  | 0.26  | 0 NA          | NA       |
| 0    | 0     | 0     | 0 NA          | NA       |
| 0    | 0     | 0     | 0 NA          | NA       |
| 0    | 0     | 0     | 0 NA          | NA       |
| 0    | 0     | 0     | 0 NA          | NA       |
| 0.98 | 0.77  | 0.72  | 0.56 0.115639 | 0.88961  |
| 0    | 0     | 0     | 0 NA          | NA       |
| 0.95 | 0.94  | 0.94  | 0.94 -0.06432 | 0.818228 |



|       |       |       |       |          |          |
|-------|-------|-------|-------|----------|----------|
| 0     | 0     | 0     | 0     | NA       | NA       |
| 0     | 0     | 0     | 0     | NA       | NA       |
| 1.36  | 0.16  | 0.35  | 0.39  | -1.66286 | 0.001933 |
| 0     | 0     | 0     | 0     | NA       | NA       |
| 0     | 0     | 0.19  | 0     | NA       | NA       |
| 14.09 | 18.31 | 49.64 | 71.4  | 0.812667 | 0.181298 |
| 0     | 0     | 0     | 0     | NA       | NA       |
| 0     | 0     | 0     | 0     | NA       | NA       |
| 0     | 0     | 0     | 0     | NA       | NA       |
| 0.31  | 0     | 0.2   | 0     | NA       | NA       |
| 0.06  | 0     | 0.04  | 0.16  | NA       | NA       |
| 0     | 0     | 0     | 0     | NA       | NA       |
| 0     | 0     | 0.76  | 0     | NA       | NA       |
| 0     | 0     | 0     | 0.25  | NA       | NA       |
| 0     | 0     | 0     | 0     | NA       | NA       |
| 0     | 0     | 0     | 0     | NA       | NA       |
| 0     | 0     | 0     | 0     | NA       | NA       |
| 9.73  | 10.89 | 13.48 | 13.63 | 0.223882 | 0.106774 |
| 0     | 0     | 0     | 0     | NA       | NA       |
| 0     | 0     | 0     | 0     | NA       | NA       |
| 0     | 0     | 0     | 0     | NA       | NA       |
| 0     | 0     | 0     | 0     | NA       | NA       |
| 0.09  | 2.11  | 0.88  | 1.25  | 2.366314 | 2.06E-09 |
| 0     | 0     | 0     | 0     | NA       | NA       |
| 0     | 0     | 0     | 0     | NA       | NA       |
| 0     | 0     | 0     | 0     | NA       | NA       |
| 0     | 7.48  | 0     | 0     | NA       | NA       |
| 0     | 0     | 0     | 0     | NA       | NA       |
| 0     | 0     | 0     | 0     | NA       | NA       |
| 0     | 0     | 0     | 0     | NA       | NA       |
| 0     | 0     | 0     | 0     | NA       | NA       |
| 0     | 0     | 0     | 0     | NA       | NA       |
| 0     | 0     | 0     | 0     | NA       | NA       |
| 0     | 0     | 0     | 0     | NA       | NA       |
| 0.61  | 1.54  | 0.77  | 1.1   | 0.822739 | 0.008302 |
| 0     | 0     | 0     | 0     | NA       | NA       |
| 0     | 0     | 0     | 0     | NA       | NA       |
| 0     | 0     | 0     | 0     | NA       | NA       |
| 0.21  | 0.27  | 0.17  | 0.04  | 0.177414 | 0.840447 |
| 0     | 0     | 0     | 0     | NA       | NA       |
| 36.1  | 35.91 | 31.3  | 32.03 | -0.0101  | 0.948824 |
| 0     | 0     | 0     | 0     | NA       | NA       |
| 0     | 0     | 0     | 0     | NA       | NA       |
| 3.78  | 2.85  | 3.01  | 2.96  | -0.15785 | 0.452969 |
| 0     | 0     | 0     | 0     | NA       | NA       |



|      |      |      |      |          |          |
|------|------|------|------|----------|----------|
| 0.22 | 0    | 0.35 | 0    | NA       | NA       |
| 0    | 0    | 0    | 0    | NA       | NA       |
| 0.04 | 0.47 | 0.13 | 0.65 | NA       | NA       |
| 0    | 0    | 0    | 0    | NA       | NA       |
| 0    | 0    | 0    | 0    | NA       | NA       |
| 0    | 0    | 0    | 0    | NA       | NA       |
| 0    | 0    | 0    | 0    | NA       | NA       |
| 0.8  | 0    | 0    | 0    | NA       | NA       |
| 0    | 0    | 0    | 0    | NA       | NA       |
| 0.09 | 0.07 | 0.03 | 0.04 | NA       | NA       |
| 0    | 0    | 0    | 0    | NA       | NA       |
| 0    | 0    | 0    | 0    | NA       | NA       |
| 0    | 0    | 0    | 0    | NA       | NA       |
| 0    | 0    | 0    | 0    | NA       | NA       |
| 0    | 0    | 0    | 0    | NA       | NA       |
| 0    | 0    | 0    | 0    | NA       | NA       |
| 0    | 0    | 7.75 | 0    | NA       | NA       |
| 0    | 0    | 0    | 0    | NA       | NA       |
| 0    | 0    | 0    | 0    | NA       | NA       |
| 0    | 0.18 | 0.26 | 0.1  | NA       | NA       |
| 0    | 0    | 0    | 0    | NA       | NA       |
| 0    | 0    | 0    | 0    | NA       | NA       |
| 0    | 0    | 0    | 0    | NA       | NA       |
| 0    | 0    | 0    | 0    | NA       | NA       |
| 0    | 0    | 0    | 0    | NA       | NA       |
| 0.78 | 0.92 | 0.98 | 0.22 | -0.35058 | 0.649103 |
| 0    | 0    | 0    | 0    | NA       | NA       |
| 0.21 | 0    | 0.13 | 0.46 | NA       | NA       |
| 0    | 0    | 0    | 0    | NA       | NA       |
| 0    | 0    | 0    | 0    | NA       | NA       |
| 0    | 0    | 0    | 0    | NA       | NA       |
| 0    | 0    | 0    | 0    | NA       | NA       |
| 0    | 0    | 0    | 0    | NA       | NA       |
| 0    | 0    | 0    | 0    | NA       | NA       |
| 0    | 0    | 0    | 0    | NA       | NA       |
| 0    | 0    | 0    | 0    | NA       | NA       |
| 0    | 0    | 0    | 0    | NA       | NA       |
| 0    | 0    | 0    | 0    | NA       | NA       |
| 0    | 0.34 | 0    | 0    | NA       | NA       |
| 0    | 0    | 0    | 0.13 | NA       | NA       |
| 0    | 0    | 0    | 0    | NA       | NA       |
| 0    | 0    | 0    | 0    | NA       | NA       |



|       |       |       |               |          |
|-------|-------|-------|---------------|----------|
| 0     | 0     | 0     | 0 NA          | NA       |
| 0     | 0     | 0     | 0 NA          | NA       |
| 0     | 0     | 0     | 0 NA          | NA       |
| 0     | 0     | 0     | 0 NA          | NA       |
| 0     | 0     | 0     | 0 NA          | NA       |
| 0     | 0     | 0     | 0 NA          | NA       |
| 0     | 0     | 0     | 0 NA          | NA       |
| 0     | 0.16  | 0.29  | 0 NA          | NA       |
| 0     | 0     | 0     | 0 NA          | NA       |
| 0.06  | 0.12  | 0.04  | 0.04 NA       | NA       |
| 0     | 0     | 0     | 0 NA          | NA       |
| 0     | 0     | 0     | 0 NA          | NA       |
| 0     | 0     | 0     | 0 NA          | NA       |
| 0     | 0     | 0     | 0 NA          | NA       |
| 0     | 0     | 0     | 0 NA          | NA       |
| 0     | 0     | 0     | 0 NA          | NA       |
| 0     | 0     | 2.83  | 0 NA          | NA       |
| 0     | 0     | 0     | 0 NA          | NA       |
| 0     | 0     | 0     | 0 NA          | NA       |
| 0.34  | 0.45  | 0.33  | 0.34 0.414874 | 0.316076 |
| 0     | 0     | 0     | 0 NA          | NA       |
| 0     | 0     | 0     | 0 NA          | NA       |
| 0.98  | 1.66  | 0.74  | 1.23 -0.06175 | 0.918874 |
| 0     | 0     | 0     | 0 NA          | NA       |
| 14.78 | 16.97 | 18.69 | 17.5 0.24041  | 0.023075 |
| 0     | 0     | 0     | 0 NA          | NA       |
| 0     | 0     | 0     | 0 NA          | NA       |
| 0.44  | 0.31  | 0     | 0.16 NA       | NA       |
| 0     | 0     | 0     | 0 NA          | NA       |
| 0     | 0     | 0     | 0 NA          | NA       |
| 0     | 0     | 0     | 0 NA          | NA       |
| 0     | 0     | 0     | 0 NA          | NA       |
| 3.16  | 1.9   | 2.16  | 2.09 -0.70691 | 0.063706 |
| 0     | 0     | 0     | 0 NA          | NA       |
| 0     | 0     | 0     | 0 NA          | NA       |
| 0     | 0.37  | 0     | 0 NA          | NA       |
| 0     | 0.02  | 0.17  | 0.03 NA       | NA       |
| 0     | 0     | 0     | 0 NA          | NA       |
| 0     | 0     | 0     | 0.06 NA       | NA       |
| 0     | 0     | 0     | 0 NA          | NA       |
| 0.08  | 0     | 0.08  | 0.05 NA       | NA       |
| 0     | 0     | 0     | 0 NA          | NA       |
| 0     | 0     | 0     | 0 NA          | NA       |
| 0     | 0     | 0     | 0 NA          | NA       |
| 0     | 0     | 0     | 0 NA          | NA       |



|       |       |       |       |          |          |
|-------|-------|-------|-------|----------|----------|
| 0.17  | 0.12  | 0     | 0.38  | NA       | NA       |
| 0     | 0     | 0     | 0     | NA       | NA       |
| 0     | 0     | 0     | 0     | NA       | NA       |
| 0     | 0     | 0     | 0     | NA       | NA       |
| 0     | 0     | 0     | 0     | NA       | NA       |
| 1.71  | 1.23  | 0.96  | 1.51  | -0.23131 | 0.58687  |
| 0     | 0     | 0     | 0     | NA       | NA       |
| 0     | 0     | 0     | 0     | NA       | NA       |
| 0     | 0     | 0     | 0     | NA       | NA       |
| 0     | 0.53  | 0.41  | 0.11  | NA       | NA       |
| 0     | 0     | 0     | 0     | NA       | NA       |
| 0.13  | 0.03  | 0     | 0.03  | NA       | NA       |
| 0     | 0     | 0     | 0     | NA       | NA       |
| 0.27  | 0     | 0.17  | 0.2   | NA       | NA       |
| 0     | 0     | 0     | 0     | NA       | NA       |
| 0     | 0     | 0     | 0     | NA       | NA       |
| 0     | 0     | 0     | 0     | NA       | NA       |
| 0     | 0     | 0     | 0     | NA       | NA       |
| 0     | 0     | 0     | 0     | NA       | NA       |
| 0     | 0     | 0     | 0     | NA       | NA       |
| 0     | 0     | 0     | 0     | NA       | NA       |
| 0     | 0     | 0     | 0     | NA       | NA       |
| 0     | 0     | 0     | 0.32  | NA       | NA       |
| 0     | 0     | 0     | 0     | NA       | NA       |
| 0     | 0     | 0     | 0     | NA       | NA       |
| 0.38  | 0     | 0.25  | 0.14  | NA       | NA       |
| 0.17  | 0.21  | 0.12  | 0.25  | 0.275293 | 0.729021 |
| 0     | 0     | 0.14  | 0     | NA       | NA       |
| 0     | 0     | 0     | 0     | NA       | NA       |
| 0.94  | 0.43  | 0.61  | 0.49  | -0.4866  | 0.28384  |
| 0.12  | 0.26  | 0.24  | 0.28  | NA       | NA       |
| 0     | 0     | 0     | 0     | NA       | NA       |
| 0     | 0     | 0     | 0     | NA       | NA       |
| 0     | 0     | 0     | 0     | NA       | NA       |
| 0     | 0     | 0     | 0     | NA       | NA       |
| 0     | 0     | 0     | 0     | NA       | NA       |
| 0     | 0     | 0.31  | 0     | NA       | NA       |
| 0     | 0     | 0     | 0     | NA       | NA       |
| 0.49  | 0.9   | 0.65  | 0.97  | 0.936319 | 0.010081 |
| 19.54 | 11.04 | 12.89 | 11.92 | -0.66879 | 3.88E-10 |
| 0     | 0     | 0     | 0     | NA       | NA       |
| 0.15  | 0.22  | 0.2   | 0     | NA       | NA       |
| 0     | 0     | 0     | 0     | NA       | NA       |



|       |       |       |                |          |
|-------|-------|-------|----------------|----------|
| 0     | 0     | 0     | 0 NA           | NA       |
| 0     | 0     | 10.23 | 0 NA           | NA       |
| 0     | 0     | 0     | 0 NA           | NA       |
| 0     | 0     | 0     | 0 NA           | NA       |
| 0.17  | 0.12  | 0.08  | 0.13 NA        | NA       |
| 0.09  | 0     | 0     | 0 NA           | NA       |
| 0     | 0     | 0     | 0 NA           | NA       |
| 0     | 0     | 0.07  | 0 NA           | NA       |
| 2.24  | 2.35  | 2.82  | 2.35 0.047684  | 0.917087 |
| 0     | 0     | 0     | 0 NA           | NA       |
| 0     | 0     | 0     | 0 NA           | NA       |
| 0     | 0     | 0     | 0 NA           | NA       |
| 0     | 0     | 0     | 0 NA           | NA       |
| 16.08 | 16.05 | 16.59 | 14.65 -0.16798 | 0.265705 |
| 0     | 0     | 0.38  | 0 NA           | NA       |
| 0     | 0.05  | 0.04  | 0 NA           | NA       |
| 0     | 0     | 0     | 0 NA           | NA       |
| 0     | 0     | 0     | 0 NA           | NA       |
| 0     | 0     | 1.29  | 0 NA           | NA       |
| 0     | 0     | 0     | 0 NA           | NA       |
| 0     | 0     | 0     | 0 NA           | NA       |
| 0     | 0     | 0     | 0 NA           | NA       |
| 0     | 0     | 0     | 0 NA           | NA       |
| 0.14  | 0.4   | 0.46  | 0 NA           | NA       |
| 0.02  | 0.04  | 0.02  | 0.01 NA        | NA       |
| 0     | 0     | 0     | 0 NA           | NA       |
| 0.87  | 1.72  | 1.72  | 2.18 0.981851  | 0.00348  |
| 0     | 0     | 0     | 0 NA           | NA       |
| 0     | 0     | 0     | 0 NA           | NA       |
| 0.15  | 0.09  | 0.14  | 0.19 -0.43707  | 0.562733 |
| 0     | 0.12  | 0     | 0.13 NA        | NA       |
| 0     | 0     | 0     | 0 NA           | NA       |
| 0     | 0.03  | 0.06  | 0.09 NA        | NA       |
| 0.06  | 0.02  | 0.02  | 0 NA           | NA       |
| 0     | 0     | 0     | 0 NA           | NA       |
| 0.88  | 0.58  | 0.47  | 0.71 -0.44926  | 0.375192 |
| 0.38  | 1.88  | 1.64  | 0.55 -0.05615  | 0.952639 |
| 0     | 0     | 0     | 0 NA           | NA       |
| 0.4   | 0.74  | 0.52  | 0.97 0.369499  | 0.626917 |
| 0.07  | 0.22  | 0.16  | 0.05 0.295337  | 0.718036 |
| 0     | 0     | 0     | 0 NA           | NA       |
| 0     | 0     | 0     | 0 NA           | NA       |
| 0.28  | 0     | 0.19  | 1.28 NA        | NA       |
| 0     | 0     | 0     | 0 NA           | NA       |
| 0     | 0     | 0.1   | 0 NA           | NA       |

|      |      |      |      |          |          |
|------|------|------|------|----------|----------|
| 0.6  | 1.28 | 0.85 | 0.98 | 0.412036 | 0.593004 |
| 0    | 0    | 0    | 0    | NA       | NA       |
| 0    | 0    | 0.01 | 0    | NA       | NA       |
| 0.02 | 0    | 0.02 | 0.04 | NA       | NA       |
| 0    | 0    | 0    | 0    | NA       | NA       |
| 0.33 | 0.12 | 0.18 | 0.21 | -0.02538 | 0.978992 |
| 0    | 0    | 0    | 0    | NA       | NA       |
| 0.46 | 0.46 | 0.64 | 0.94 | 0.335455 | 0.569445 |
| 0    | 0    | 0    | 0    | NA       | NA       |
| 0.17 | 0.1  | 0.18 | 0.07 | -0.29295 | 0.716647 |
| 0    | 0    | 0    | 0    | NA       | NA       |
| 0.11 | 0.04 | 0.18 | 0.17 | NA       | NA       |
| 0    | 0    | 0    | 0    | NA       | NA       |
| 0    | 0    | 0    | 0    | NA       | NA       |
| 0    | 0    | 0    | 0    | NA       | NA       |
| 0.22 | 0.66 | 1.73 | 1.72 | 0.396712 | 0.585659 |
| 0    | 0    | 0    | 0    | NA       | NA       |
| 0    | 0    | 0    | 0    | NA       | NA       |
| 0    | 0    | 0    | 0    | NA       | NA       |
| 0    | 0    | 0    | 0    | NA       | NA       |
| 0    | 0    | 0    | 0    | NA       | NA       |
| 0    | 0.02 | 0    | 0    | NA       | NA       |
| 0    | 0    | 0    | 0    | NA       | NA       |
| 0    | 0    | 0    | 0    | NA       | NA       |
| 0    | 0    | 0    | 0    | NA       | NA       |
| 0    | 0    | 0    | 0.11 | NA       | NA       |
| 0.05 | 0    | 0.05 | 0.1  | NA       | NA       |
| 0.25 | 0.1  | 0.11 | 0.15 | -0.403   | 0.551069 |
| 0    | 0    | 0    | 0    | NA       | NA       |
| 0.02 | 0.02 | 0.05 | 0.04 | 0.50985  | 0.442695 |
| 0    | 0    | 0    | 0    | NA       | NA       |
| 0.05 | 0.04 | 0.1  | 0.15 | NA       | NA       |
| 0    | 0    | 0    | 0    | NA       | NA       |
| 0    | 0    | 0    | 0    | NA       | NA       |
| 0    | 0    | 0    | 0    | NA       | NA       |
| 0    | 0.03 | 0.15 | 0    | NA       | NA       |
| 0    | 0    | 0    | 0    | NA       | NA       |
| 0    | 0    | 0    | 0    | NA       | NA       |
| 0    | 0    | 0    | 0    | NA       | NA       |
| 0.08 | 0    | 0    | 0    | NA       | NA       |
| 1.96 | 2.16 | 1.81 | 2.27 | 0.423626 | 0.552951 |
| 0.36 | 0    | 0    | 0    | NA       | NA       |
| 1.15 | 0.64 | 0.49 | 0.58 | -0.66686 | 0.059985 |
| 0    | 0    | 0    | 0    | NA       | NA       |
| 0    | 0    | 0    | 0    | NA       | NA       |

|      |       |       |                |          |
|------|-------|-------|----------------|----------|
| 0    | 0     | 0     | 0 NA           | NA       |
| 0    | 0     | 0     | 0.21 NA        | NA       |
| 0    | 0     | 0     | 0 NA           | NA       |
| 0    | 0     | 0     | 0.05 NA        | NA       |
| 0    | 0     | 0     | 0 NA           | NA       |
| 0    | 0     | 0     | 0 NA           | NA       |
| 0    | 0     | 0     | 0 NA           | NA       |
| 5.87 | 8.14  | 8.39  | 8.08 0.332099  | 0.066892 |
| 0.28 | 0.33  | 0.34  | 0.29 0.22853   | 0.752448 |
| 0.32 | 0.14  | 0.25  | 0.24 0.041017  | 0.96382  |
| 0.09 | 0     | 0     | 0.22 NA        | NA       |
| 0    | 0     | 0     | 0.14 NA        | NA       |
| 0    | 0     | 0     | 0.02 NA        | NA       |
| 0    | 0     | 0     | 0 NA           | NA       |
| 0    | 0     | 0     | 0 NA           | NA       |
| 0    | 0     | 0     | 0 NA           | NA       |
| 0.05 | 0.09  | 0.04  | 0.24 0.222607  | 0.794617 |
| 0    | 0     | 0     | 0 NA           | NA       |
| 0.07 | 0.02  | 0.09  | 0.05 NA        | NA       |
| 3.16 | 0.99  | 1.54  | 1.34 -1.11133  | 9.81E-06 |
| 0    | 0.02  | 0.04  | 0.02 NA        | NA       |
| 0    | 0     | 0     | 0 NA           | NA       |
| 0.04 | 0.08  | 0.06  | 0.04 NA        | NA       |
| 0.36 | 0.4   | 0.21  | 0.58 -0.11443  | 0.898878 |
| 0    | 0     | 0     | 0 NA           | NA       |
| 0    | 0     | 0     | 0 NA           | NA       |
| 13.4 | 10.57 | 11.19 | 10.59 -0.42325 | 0.002379 |
| 0    | 0     | 0     | 0 NA           | NA       |
| 0    | 0.04  | 0     | 0.04 NA        | NA       |
| 0    | 0     | 0.07  | 0 NA           | NA       |
| 0.23 | 0.43  | 0.31  | 0.69 0.158434  | 0.857277 |
| 0    | 0     | 0     | 0 NA           | NA       |
| 0    | 0     | 0     | 0 NA           | NA       |
| 0    | 0.31  | 0.07  | 0.33 NA        | NA       |
| 0    | 0     | 0     | 0 NA           | NA       |
| 0    | 0     | 0     | 0 NA           | NA       |
| 0    | 0     | 0     | 0 NA           | NA       |
| 0    | 0     | 0     | 0 NA           | NA       |
| 0.04 | 0.01  | 0     | 0.03 NA        | NA       |
| 0.07 | 0.13  | 0.17  | 0.1 NA         | NA       |
| 0.13 | 0.26  | 0.18  | 0.44 0.44616   | 0.543006 |
| 0.09 | 0.15  | 0.18  | 0.02 0.093371  | 0.921574 |
| 0    | 0     | 0     | 0 NA           | NA       |
| 0.57 | 0.16  | 0.24  | 0.21 -0.93146  | 0.073956 |
| 0    | 0     | 0     | 0 NA           | NA       |

|      |      |      |      |          |          |
|------|------|------|------|----------|----------|
| 0.53 | 0.19 | 0.45 | 0.41 | -0.15752 | 0.846993 |
| 0    | 0    | 0    | 0    | NA       | NA       |
| 0.04 | 0.13 | 0.27 | 0.11 | 0.30992  | 0.702467 |
| 0    | 0    | 0    | 0    | NA       | NA       |
| 0    | 0.37 | 0.31 | 0    | NA       | NA       |
| 0.72 | 0.38 | 0.57 | 0.34 | -0.60453 | 0.191667 |
| 0.05 | 0.22 | 0.27 | 0.31 | 0.301203 | 0.712235 |
| 0    | 0    | 0    | 0.06 | NA       | NA       |
| 0.57 | 0.63 | 0.47 | 0.73 | 0.059431 | 0.930417 |
| 0    | 0    | 0    | 0    | NA       | NA       |
| 0    | 0    | 0    | 0    | NA       | NA       |
| 0    | 0    | 0    | 0    | NA       | NA       |
| 0    | 0    | 0    | 0    | NA       | NA       |
| 0    | 0    | 0    | 0    | NA       | NA       |
| 0    | 0    | 0    | 0    | NA       | NA       |
| 0    | 0    | 0    | 0    | NA       | NA       |
| 0.09 | 0.1  | 0.11 | 0.11 | 0.098314 | 0.757038 |
| 0    | 0    | 0    | 0    | NA       | NA       |
| 0    | 0    | 0    | 0    | NA       | NA       |
| 0    | 0    | 0    | 0    | NA       | NA       |
| 0    | 0    | 0    | 0    | NA       | NA       |
| 0    | 0    | 0    | 0    | NA       | NA       |
| 0    | 0.05 | 0    | 0.02 | NA       | NA       |
| 0    | 0    | 0    | 0.01 | NA       | NA       |
| 0    | 0.02 | 0    | 0.02 | NA       | NA       |
| 0    | 0    | 0    | 0    | NA       | NA       |
| 0.65 | 0.16 | 0.7  | 0.49 | NA       | NA       |
| 0    | 0    | 0    | 0    | NA       | NA       |
| 0    | 0.07 | 0    | 0.06 | NA       | NA       |
| 0    | 0    | 0    | 0    | NA       | NA       |
| 0.44 | 0.48 | 0.64 | 0.65 | 0.653406 | 0.203686 |
| 0    | 0    | 0    | 0    | NA       | NA       |
| 0    | 0    | 0    | 0    | NA       | NA       |
| 0.09 | 0.71 | 0.61 | 0.69 | 1.643128 | 0.000809 |
| 0    | 0    | 0.44 | 0    | NA       | NA       |
| 0    | 0    | 0    | 0    | NA       | NA       |
| 0    | 0    | 0    | 0    | NA       | NA       |
| 0    | 0    | 0    | 0    | NA       | NA       |
| 0.03 | 0.02 | 0.08 | 0    | NA       | NA       |
| 0    | 0    | 0    | 0    | NA       | NA       |
| 0    | 0    | 0    | 0    | NA       | NA       |
| 0    | 0    | 0    | 0    | NA       | NA       |
| 2.91 | 1.21 | 1.59 | 1.8  | -0.95511 | 0.001429 |
| 0    | 0    | 0.03 | 0    | NA       | NA       |



|      |      |      |      |          |          |
|------|------|------|------|----------|----------|
| 0    | 0    | 0    | 0.07 | NA       | NA       |
| 0.83 | 0    | 0.18 | 0    | NA       | NA       |
| 0    | 0    | 0    | 0    | NA       | NA       |
| 0    | 0    | 0    | 0    | NA       | NA       |
| 0    | 0    | 0    | 0    | NA       | NA       |
| 0.43 | 0.31 | 0.33 | 0.21 | -0.35749 | 0.566853 |
| 1.28 | 0    | 0    | 0.28 | NA       | NA       |
| 0    | 0.02 | 0    | 0    | NA       | NA       |
| 0    | 0    | 0    | 0    | NA       | NA       |
| 0    | 0    | 0    | 0    | NA       | NA       |
| 0.1  | 0.18 | 0    | 0    | NA       | NA       |
| 0    | 0    | 0    | 0    | NA       | NA       |
| 0.84 | 1.12 | 1.09 | 1.48 | 0.044718 | 0.941019 |
| 0    | 0.25 | 0.21 | 0    | NA       | NA       |
| 0    | 0    | 0    | 0    | NA       | NA       |
| 0    | 0    | 0    | 0    | NA       | NA       |
| 0.41 | 0.59 | 1.48 | 0.15 | 0.117489 | 0.896708 |
| 0    | 0    | 0    | 0    | NA       | NA       |
| 0.06 | 0.15 | 0.15 | 0.04 | 0.079233 | 0.933107 |
| 0    | 0    | 0    | 0    | NA       | NA       |
| 0.22 | 0.28 | 0.32 | 0.18 | NA       | NA       |
| 0.76 | 0.42 | 0.54 | 0.58 | -0.49835 | 0.367443 |
| 0    | 0    | 0    | 0    | NA       | NA       |
| 0    | 0    | 0    | 0    | NA       | NA       |
| 0.01 | 0.01 | 0.01 | 0.02 | -0.22976 | 0.783598 |
| 0    | 0    | 0    | 0    | NA       | NA       |
| 0.77 | 0    | 0    | 0    | NA       | NA       |
| 0    | 0    | 0    | 0.5  | NA       | NA       |
| 0    | 0    | 0    | 0    | NA       | NA       |
| 0    | 0.11 | 0.04 | 0.02 | NA       | NA       |
| 0    | 0.02 | 0    | 0.02 | NA       | NA       |
| 0.16 | 0.1  | 0.11 | 0.18 | -0.1825  | 0.674449 |
| 0    | 0    | 0    | 0    | NA       | NA       |
| 0    | 0    | 0    | 0    | NA       | NA       |
| 0    | 0    | 0    | 0    | NA       | NA       |
| 0    | 0.06 | 0.02 | 0.04 | NA       | NA       |
| 0.28 | 1.04 | 0.83 | 0.81 | 1.436682 | 0.000627 |
| 0    | 0    | 0    | 0    | NA       | NA       |
| 5.83 | 6.83 | 6.65 | 6.84 | 0.043807 | 0.886918 |
| 0.12 | 0.24 | 0.26 | 0.38 | 0.878047 | 0.120386 |
| 0    | 0    | 0    | 0    | NA       | NA       |
| 0.03 | 0.06 | 0.06 | 0.07 | 0.213513 | 0.791573 |
| 0.11 | 0.08 | 0.03 | 0.08 | -0.23843 | 0.772334 |
| 0    | 0    | 0    | 0    | NA       | NA       |
| 0.4  | 0.53 | 0.67 | 0.95 | 0.365739 | 0.630291 |

|      |      |      |      |          |          |
|------|------|------|------|----------|----------|
| 3.48 | 2.95 | 2.22 | 3.45 | -0.32586 | 0.222112 |
| 0    | 0.02 | 0    | 0    | NA       | NA       |
| 0    | 0    | 0    | 0    | NA       | NA       |
| 0    | 0    | 0    | 0    | NA       | NA       |
| 0    | 0    | 0    | 0    | NA       | NA       |
| 0    | 0    | 0    | 0    | NA       | NA       |
| 0.11 | 0.06 | 0.14 | 0.05 | NA       | NA       |
| 0    | 0    | 0    | 0    | NA       | NA       |
| 0.06 | 0.29 | 0.04 | 0.22 | 0.564662 | 0.411807 |
| 0.12 | 0    | 0.08 | 0    | NA       | NA       |
| 0.87 | 0.61 | 0.62 | 0.35 | -0.27695 | 0.644832 |
| 0    | 0.01 | 0.01 | 0.01 | NA       | NA       |
| 0    | 0    | 0    | 0    | NA       | NA       |
| 0    | 0    | 0    | 0    | NA       | NA       |
| 0.04 | 0.07 | 0.02 | 0.02 | 0.027094 | 0.977746 |
| 0    | 0    | 0    | 0    | NA       | NA       |
| 0    | 0    | 0    | 0    | NA       | NA       |
| 3.23 | 2.85 | 2.75 | 3.04 | -0.25438 | 0.330691 |
| 1.14 | 0.27 | 0.31 | 0.41 | -1.59508 | 1.58E-05 |
| 0    | 0.21 | 0    | 0    | NA       | NA       |
| 0    | 0    | 0    | 0    | NA       | NA       |
| 0    | 0    | 0    | 0    | NA       | NA       |
| 0.06 | 0    | 0    | 0    | NA       | NA       |
| 0    | 0    | 0    | 0    | NA       | NA       |
| 0    | 0    | 0    | 0    | NA       | NA       |
| 0    | 0    | 0    | 0    | NA       | NA       |
| 0.02 | 0.13 | 0.04 | 0.08 | NA       | NA       |
| 0    | 0    | 0    | 0    | NA       | NA       |
| 0.03 | 0.02 | 0.02 | 0.02 | NA       | NA       |
| 0.2  | 0    | 0    | 0    | NA       | NA       |
| 0    | 0    | 0    | 0    | NA       | NA       |
| 0.03 | 0.01 | 0.01 | 0.07 | NA       | NA       |
| 0    | 0    | 0    | 0    | NA       | NA       |
| 0    | 0    | 0    | 0.03 | NA       | NA       |
| 0    | 0    | 0    | 0    | NA       | NA       |
| 0    | 0    | 0    | 0    | NA       | NA       |
| 0.12 | 0.08 | 0.1  | 0.09 | -0.15589 | 0.86041  |
| 0    | 0    | 0    | 0    | NA       | NA       |
| 1.71 | 0.3  | 0.53 | 0.31 | NA       | NA       |
| 0    | 0    | 0    | 0    | NA       | NA       |
| 0    | 0    | 0.02 | 0    | NA       | NA       |
| 0    | 0    | 0    | 0    | NA       | NA       |
| 0    | 0.14 | 0.13 | 0    | NA       | NA       |
| 0.02 | 0.05 | 0.05 | 0.08 | 0.568252 | 0.428362 |
| 0    | 0    | 0    | 0    | NA       | NA       |

|      |      |      |      |          |          |
|------|------|------|------|----------|----------|
| 0    | 0.1  | 0.1  | 0.09 | NA       | NA       |
| 0.53 | 1.61 | 1.34 | 1.1  | 1.086018 | 0.015621 |
| 0.03 | 0    | 0.02 | 0    | NA       | NA       |
| 0    | 0    | 0    | 0    | NA       | NA       |
| 0.1  | 0.22 | 0.27 | 0    | NA       | NA       |
| 0    | 0    | 0    | 0    | NA       | NA       |
| 0.08 | 0    | 0    | 0.13 | NA       | NA       |
| 0    | 0    | 0    | 0    | NA       | NA       |
| 0    | 0    | 0    | 0    | NA       | NA       |
| 0    | 0    | 0    | 0    | NA       | NA       |
| 0.01 | 0.02 | 0.02 | 0.02 | 0.495596 | 0.407801 |
| 0    | 0    | 0    | 0    | NA       | NA       |
| 0.14 | 0.22 | 0.13 | 0.17 | 0.187326 | 0.821682 |
| 0.13 | 0    | 0.11 | 0.07 | NA       | NA       |
| 0    | 0    | 0    | 0    | NA       | NA       |
| 0    | 0    | 0.02 | 0    | NA       | NA       |
| 0.07 | 0.07 | 0.02 | 0.05 | NA       | NA       |
| 0    | 0    | 0.02 | 0.04 | NA       | NA       |
| 0    | 0    | 0    | 0    | NA       | NA       |
| 0.22 | 0.42 | 0.5  | 1.02 | 1.219484 | 0.044901 |
| 0    | 0    | 0    | 0    | NA       | NA       |
| 0.23 | 0.22 | 0.25 | 0.33 | -0.02473 | 0.976795 |
| 0    | 0    | 0    | 0    | NA       | NA       |
| 0    | 0    | 0    | 0    | NA       | NA       |
| 0    | 0    | 0    | 0    | NA       | NA       |
| 0.02 | 0    | 0    | 0    | NA       | NA       |
| 0.08 | 0.06 | 0.1  | 0.08 | -0.00817 | 0.992113 |
| 0    | 0.04 | 0    | 0.08 | NA       | NA       |
| 0.35 | 0.66 | 0.96 | 0.84 | 0.812998 | 0.153532 |
| 0.04 | 0.1  | 0.15 | 0.12 | 0.709658 | 0.301209 |
| 0.15 | 0    | 0    | 0.16 | NA       | NA       |
| 0    | 0    | 0    | 0    | NA       | NA       |
| 0    | 0    | 0    | 0    | NA       | NA       |
| 0.22 | 0.17 | 0.18 | 0.24 | -0.03833 | 0.904541 |
| 0.05 | 0.08 | 0.07 | 0.09 | NA       | NA       |
| 0.03 | 0.02 | 0    | 0.02 | NA       | NA       |
| 0    | 0    | 0.01 | 0    | NA       | NA       |
| 0    | 0.01 | 0    | 0    | NA       | NA       |
| 0.13 | 0.08 | 0.1  | 0.17 | -0.36576 | 0.616695 |
| 0.28 | 0.37 | 0.56 | 0.72 | 0.428526 | 0.390522 |
| 0    | 0    | 0    | 0    | NA       | NA       |
| 0.1  | 0.14 | 0.07 | 0.07 | 0.377803 | 0.626917 |
| 0    | 0    | 0    | 0    | NA       | NA       |
| 0.47 | 0.44 | 0.66 | 0.62 | 0.095725 | 0.866298 |
| 0.15 | 0.02 | 0.1  | 0.14 | -0.32491 | 0.68611  |

|      |      |      |      |          |          |
|------|------|------|------|----------|----------|
| 0.16 | 0.11 | 0.35 | 0.12 | NA       | NA       |
| 0    | 0    | 0    | 0    | NA       | NA       |
| 0.06 | 0.16 | 0.13 | 0.2  | 0.312799 | 0.698623 |
| 0.13 | 0.28 | 0    | 0.29 | NA       | NA       |
| 0.24 | 0.18 | 0.02 | 0.14 | -0.60261 | 0.38906  |
| 0    | 0    | 0    | 0.03 | NA       | NA       |
| 0    | 0    | 0    | 0    | NA       | NA       |
| 0.58 | 0.93 | 1.02 | 1.26 | 0.530392 | 0.041779 |
| 0.1  | 0.07 | 0    | 0.08 | NA       | NA       |
| 0.04 | 0    | 0    | 0    | NA       | NA       |
| 0    | 0    | 0    | 0    | NA       | NA       |
| 0    | 0    | 0    | 0    | NA       | NA       |
| 0    | 0    | 0    | 0    | NA       | NA       |
| 0.08 | 0    | 0.05 | 0    | NA       | NA       |
| 0.05 | 0.05 | 0.07 | 0.06 | -0.07819 | 0.916858 |
| 0    | 0    | 0    | 0    | NA       | NA       |
| 0.1  | 0.07 | 0.03 | 0.04 | -0.28231 | 0.731424 |
| 0    | 0    | 0.03 | 0.02 | NA       | NA       |
| 0    | 0    | 0    | 0    | NA       | NA       |
| 0    | 0    | 0    | 0    | NA       | NA       |
| 0    | 0    | 0    | 0    | NA       | NA       |
| 0    | 0    | 0    | 0    | NA       | NA       |
| 0.9  | 1.39 | 1.28 | 1.38 | 0.694321 | 0.101594 |
| 0.6  | 1.28 | 0.85 | 0.98 | 0.412036 | 0.593004 |
| 0    | 0    | 0    | 0    | NA       | NA       |
| 0.02 | 0.02 | 0.03 | 0.02 | NA       | NA       |
| 0.31 | 0.3  | 0.39 | 0.32 | 0.057771 | 0.933444 |
| 0    | 0    | 0    | 0    | NA       | NA       |
| 0.26 | 0.15 | 0.04 | 0.08 | NA       | NA       |
| 0    | 0    | 0    | 0    | NA       | NA       |
| 0    | 0    | 0    | 0    | NA       | NA       |
| 0    | 0    | 0    | 0    | NA       | NA       |
| 0    | 0    | 0    | 0    | NA       | NA       |
| 0.11 | 0.12 | 0.11 | 0.17 | NA       | NA       |
| 0.12 | 0.07 | 0.05 | 0.04 | NA       | NA       |
| 0    | 0    | 0    | 0    | NA       | NA       |
| 0    | 0    | 0    | 0    | NA       | NA       |
| 0.13 | 0.09 | 0.69 | 0.2  | 0.023114 | 0.980927 |
| 0    | 0    | 0    | 0    | NA       | NA       |
| 1.78 | 1.87 | 1.44 | 1.44 | -0.2922  | 0.486991 |
| 0.62 | 0.12 | 0.23 | 0.45 | -0.64102 | 0.291237 |
| 0.91 | 0.31 | 0.55 | 0.37 | -0.82008 | 0.115611 |
| 0    | 0    | 0    | 0    | NA       | NA       |
| 0.2  | 0.29 | 0.17 | 0.43 | -0.03346 | 0.972152 |
| 0    | 0    | 0    | 0    | NA       | NA       |

|      |      |      |               |          |
|------|------|------|---------------|----------|
| 0    | 0    | 0    | 0 NA          | NA       |
| 0    | 0    | 0    | 0 NA          | NA       |
| 0    | 0    | 0    | 0 NA          | NA       |
| 0.82 | 0.88 | 1.86 | 2.14 0.390785 | 0.59264  |
| 0.07 | 0.06 | 0.07 | 0.05 0.010978 | 0.991998 |
| 2.81 | 1.96 | 2.65 | 2.38 -0.18552 | 0.587397 |
| 0    | 0    | 0    | 0 NA          | NA       |
| 0    | 0    | 0    | 0 NA          | NA       |
| 0    | 0    | 0    | 0 NA          | NA       |
| 0    | 0    | 0    | 0 NA          | NA       |
| 0    | 0    | 0    | 0 NA          | NA       |
| 0    | 0    | 0    | 0 NA          | NA       |
| 0    | 0    | 0    | 0 NA          | NA       |
| 0.12 | 0.08 | 0    | 0 NA          | NA       |
| 0.18 | 0.14 | 0.24 | 0.11 0.067075 | 0.922339 |
| 0    | 0    | 0.04 | 0.02 NA       | NA       |
| 0.15 | 0.25 | 0.23 | 0.23 -0.41107 | 0.559662 |
| 0    | 0    | 0    | 0 NA          | NA       |
| 0    | 0    | 0    | 0 NA          | NA       |
| 0.02 | 0    | 0.02 | 0 NA          | NA       |
| 0    | 0    | 0    | 0 NA          | NA       |
| 0.16 | 0.03 | 0.05 | 0.02 -1.33358 | 0.021604 |
| 0    | 0    | 0    | 0 NA          | NA       |
| 0    | 0    | 0    | 0 NA          | NA       |
| 0    | 0    | 0.07 | 0.04 NA       | NA       |
| 0    | 0    | 0    | 0 NA          | NA       |
| 0    | 0    | 0.04 | 0.05 NA       | NA       |
| 0    | 0    | 0    | 0 NA          | NA       |
| 0    | 0    | 0    | 0 NA          | NA       |
| 0    | 0    | 0    | 0 NA          | NA       |
| 0.17 | 0.14 | 0.08 | 0.08 -0.34605 | 0.65463  |
| 0.05 | 0.08 | 0.07 | 0.09 NA       | NA       |
| 0    | 0    | 0    | 0 NA          | NA       |
| 0    | 0    | 0    | 0 NA          | NA       |
| 0.31 | 0    | 0    | 0 NA          | NA       |
| 0    | 0    | 0    | 0 NA          | NA       |
| 0    | 0    | 0    | 0 NA          | NA       |
| 0.44 | 0.12 | 0.17 | 0.03 -1.12591 | 0.06099  |
| 0.64 | 0.35 | 0.37 | 0.21 -0.38935 | 0.556729 |
| 0    | 0.21 | 0    | 0.15 NA       | NA       |
| 0    | 0    | 0    | 0 NA          | NA       |
| 0    | 0    | 0    | 0 NA          | NA       |
| 0    | 0    | 0    | 0 NA          | NA       |
| 0    | 0    | 0    | 0 NA          | NA       |

|       |       |      |                |          |
|-------|-------|------|----------------|----------|
| 0.1   | 0.07  | 0.07 | 0 NA           | NA       |
| 0     | 0     | 0    | 0 NA           | NA       |
| 0     | 0     | 0    | 0 NA           | NA       |
| 0     | 0     | 0.05 | 0.03 NA        | NA       |
| 0     | 0     | 0    | 0 NA           | NA       |
| 0     | 0     | 0    | 0 NA           | NA       |
| 0     | 0     | 0.15 | 0 NA           | NA       |
| 0.78  | 1.17  | 1.11 | 1.55 0.423032  | 0.323959 |
| 0.15  | 0.06  | 0.1  | 0.07 -0.28296  | 0.731121 |
| 0     | 0.09  | 0    | 0 NA           | NA       |
| 0     | 0     | 0    | 0 NA           | NA       |
| 0.07  | 0.01  | 0    | 0 NA           | NA       |
| 0     | 0     | 0    | 0 NA           | NA       |
| 0     | 0     | 0    | 0 NA           | NA       |
| 16.89 | 15.61 | 8.12 | 10.43 -0.10357 | 0.895057 |
| 0     | 0.03  | 0    | 0 NA           | NA       |
| 0     | 0     | 0    | 0 NA           | NA       |
| 0     | 0     | 0    | 0 NA           | NA       |
| 0.3   | 0.16  | 0.2  | 0.11 -0.37805  | 0.564856 |
| 0     | 0     | 0    | 0 NA           | NA       |
| 0     | 0     | 0.02 | 0 NA           | NA       |
| 0     | 0.08  | 0    | 0 NA           | NA       |
| 0.08  | 0     | 0.03 | 0.09 NA        | NA       |
| 1.23  | 1.91  | 1.64 | 1.59 0.46083   | 0.16434  |
| 0     | 0.04  | 0.02 | 0.02 NA        | NA       |
| 11.03 | 9.69  | 5.86 | 9.92 -0.28506  | 0.392428 |
| 0.05  | 0.03  | 0.03 | 0 NA           | NA       |
| 0     | 0     | 0    | 0 NA           | NA       |
| 0.56  | 0.28  | 0.36 | 0.46 -0.31483  | 0.62834  |
| 0.03  | 0.09  | 0.1  | 0.09 NA        | NA       |
| 0     | 0     | 0.11 | 0 NA           | NA       |
| 0     | 0     | 0    | 0 NA           | NA       |
| 0     | 0     | 0    | 0 NA           | NA       |
| 0     | 0     | 0    | 0 NA           | NA       |
| 0     | 0     | 0    | 0 NA           | NA       |
| 0     | 0     | 0    | 0 NA           | NA       |
| 0.1   | 0.55  | 0.62 | 0.45 1.298922  | 0.014565 |
| 0     | 0     | 0    | 0 NA           | NA       |
| 0     | 0     | 0    | 0 NA           | NA       |
| 0     | 0     | 0    | 0 NA           | NA       |
| 0.61  | 1.33  | 1.26 | 1.11 0.883152  | 0.029607 |
| 0.49  | 0     | 0    | 0 NA           | NA       |
| 0.26  | 0     | 0    | 0 NA           | NA       |
| 0     | 0.04  | 0    | 0 NA           | NA       |
| 0     | 0     | 0    | 0 NA           | NA       |

|      |       |      |       |          |          |
|------|-------|------|-------|----------|----------|
| 0    | 0     | 0    | 0     | NA       | NA       |
| 0.02 | 0     | 0    | 0.02  | NA       | NA       |
| 0    | 0     | 0    | 0     | NA       | NA       |
| 0    | 0     | 0    | 0     | NA       | NA       |
| 0    | 0     | 0    | 0     | NA       | NA       |
| 0    | 0     | 0.07 | 0     | NA       | NA       |
| 0    | 0     | 0.07 | 0     | NA       | NA       |
| 0    | 0     | 0    | 0     | NA       | NA       |
| 0    | 0     | 0    | 0     | NA       | NA       |
| 0    | 0     | 0    | 0     | NA       | NA       |
| 0.03 | 0     | 0    | 0     | NA       | NA       |
| 0    | 0     | 0    | 0     | NA       | NA       |
| 0    | 0     | 0    | 0     | NA       | NA       |
| 0    | 0.15  | 0    | 0     | NA       | NA       |
| 0.14 | 0.19  | 0.11 | 0.29  | 0.179214 | 0.830802 |
| 0    | 0     | 0    | 0     | NA       | NA       |
| 0    | 0     | 0    | 0.1   | NA       | NA       |
| 0    | 0     | 0    | 0     | NA       | NA       |
| 0    | 0     | 0    | 0     | NA       | NA       |
| 0    | 0     | 0    | 0     | NA       | NA       |
| 0    | 0.06  | 0.02 | 0     | NA       | NA       |
| 0    | 0     | 0    | 0     | NA       | NA       |
| 0    | 0     | 0    | 0     | NA       | NA       |
| 0.1  | 0.03  | 0.06 | 0.03  | NA       | NA       |
| 0    | 0     | 0    | 0     | NA       | NA       |
| 0.09 | 0.13  | 0.12 | 0.22  | 0.164631 | 0.850433 |
| 0.88 | 0.28  | 0.55 | 0.46  | -0.69871 | 0.095483 |
| 0    | 0     | 0    | 0     | NA       | NA       |
| 0.15 | 0     | 0.05 | 0     | NA       | NA       |
| 0    | 0     | 0    | 0     | NA       | NA       |
| 0    | 0     | 0    | 0     | NA       | NA       |
| 0    | 0     | 0    | 0     | NA       | NA       |
| 0    | 0     | 0    | 0     | NA       | NA       |
| 0.18 | 0     | 0    | 0     | NA       | NA       |
| 0.15 | 1.01  | 0.4  | 0.57  | 0.837276 | 0.192354 |
| 0    | 0     | 0    | 0     | NA       | NA       |
| 2.7  | 2.17  | 2.46 | 2.72  | -0.20558 | 0.345805 |
| 0    | 0     | 0    | 0     | NA       | NA       |
| 0    | 0     | 0    | 0     | NA       | NA       |
| 0    | 0     | 0    | 0     | NA       | NA       |
| 0    | 0     | 0    | 0     | NA       | NA       |
| 0    | 0     | 0    | 0.58  | NA       | NA       |
| 8.05 | 12.97 | 6.31 | 12.39 | -0.03854 | 0.935474 |
| 0.36 | 0.11  | 0.14 | 0.14  | -0.40363 | 0.590993 |
| 0    | 0     | 0    | 0     | NA       | NA       |

|      |      |      |               |          |
|------|------|------|---------------|----------|
| 0    | 0    | 0    | 0 NA          | NA       |
| 0    | 0    | 0    | 0 NA          | NA       |
| 0    | 0    | 0    | 0 NA          | NA       |
| 0    | 0.15 | 0    | 0 NA          | NA       |
| 0    | 0    | 0    | 0 NA          | NA       |
| 0.13 | 0.03 | 0.09 | 0.12 -0.53337 | 0.457266 |
| 0.06 | 0    | 0.04 | 0 NA          | NA       |
| 0.19 | 0.18 | 0.42 | 0.39 0.736683 | 0.252508 |
| 0    | 0    | 0    | 0 NA          | NA       |
| 0    | 0    | 0    | 0 NA          | NA       |
| 0    | 0    | 0    | 0 NA          | NA       |
| 0    | 0    | 0    | 0 NA          | NA       |
| 0    | 0    | 0    | 0 NA          | NA       |
| 0.25 | 0.25 | 0.2  | 0.28 -0.43638 | 0.32261  |
| 0.13 | 0.2  | 0.32 | 0.14 0.334281 | 0.662931 |
| 0    | 0    | 0    | 0 NA          | NA       |
| 0    | 0    | 0    | 0 NA          | NA       |
| 0    | 0    | 0    | 0 NA          | NA       |
| 0    | 0    | 0    | 0 NA          | NA       |
| 0    | 0    | 0    | 0 NA          | NA       |
| 0.04 | 0    | 0    | 0 NA          | NA       |
| 1.03 | 1.07 | 1.32 | 1.12 0.418286 | 0.308411 |
| 0    | 0    | 0    | 0 NA          | NA       |
| 0    | 0    | 0    | 0 NA          | NA       |
| 0.37 | 0.59 | 0.53 | 1.07 0.306038 | 0.623589 |
| 3.88 | 3.67 | 5.31 | 4.56 -0.19192 | 0.548249 |
| 0    | 0    | 0    | 0 NA          | NA       |
| 0    | 0    | 0    | 0 NA          | NA       |
| 0    | 0    | 0    | 0 NA          | NA       |
| 0    | 0    | 0    | 0 NA          | NA       |
| 0    | 0    | 0    | 0.07 NA       | NA       |
| 0    | 0    | 0    | 0 NA          | NA       |
| 0.11 | 0.17 | 0.11 | 0.24 0.206365 | 0.804624 |
| 0    | 0    | 0    | 0 NA          | NA       |
| 0    | 0    | 0    | 0 NA          | NA       |
| 0    | 0.01 | 0.08 | 0.03 0.127218 | 0.887755 |
| 0    | 0    | 0    | 0 NA          | NA       |
| 0    | 0    | 0    | 0 NA          | NA       |
| 0    | 0    | 0    | 0 NA          | NA       |
| 0    | 0    | 0    | 0 NA          | NA       |
| 0    | 0    | 0    | 0 NA          | NA       |
| 0    | 0    | 0    | 0 NA          | NA       |
| 0    | 0    | 0.02 | 0.07 NA       | NA       |
| 0    | 0    | 0    | 0 NA          | NA       |
| 0    | 0    | 0    | 0 NA          | NA       |
| 0    | 0    | 0    | 0 NA          | NA       |



|      |      |      |               |          |
|------|------|------|---------------|----------|
| 0.09 | 0.06 | 0    | 0 NA          | NA       |
| 0.08 | 0.4  | 0.19 | 0.16 0.744807 | 0.24954  |
| 0    | 0    | 0    | 0 NA          | NA       |
| 0    | 0    | 0    | 0 NA          | NA       |
| 0.22 | 0.46 | 0.34 | 0.47 0.782048 | 0.117992 |
| 0    | 0    | 0    | 0 NA          | NA       |
| 0    | 0    | 0    | 0 NA          | NA       |
| 0    | 0.02 | 0.02 | 0.04 NA       | NA       |
| 0.11 | 0.03 | 0.03 | 0.03 NA       | NA       |
| 0    | 0    | 0    | 0 NA          | NA       |
| 0    | 0    | 0.19 | 0.09 NA       | NA       |
| 0    | 0    | 0    | 0 NA          | NA       |
| 0.04 | 0.12 | 0.05 | 0 NA          | NA       |
| 0.67 | 0.19 | 0.36 | 0.58 -0.42695 | 0.459233 |
| 0    | 0    | 0    | 0 NA          | NA       |
| 0    | 0    | 0    | 0 NA          | NA       |
| 0    | 0    | 0    | 0 NA          | NA       |
| 0.73 | 0.62 | 0.88 | 1.12 0.124856 | 0.846415 |
| 0    | 0    | 0    | 0 NA          | NA       |
| 0    | 0    | 0    | 0 NA          | NA       |
| 0    | 0    | 0    | 0 NA          | NA       |
| 0.68 | 0.49 | 0.59 | 0.31 -0.00873 | 0.993624 |
| 0    | 0    | 0    | 0 NA          | NA       |
| 0    | 0    | 0    | 0 NA          | NA       |
| 0    | 0    | 0    | 0 NA          | NA       |
| 0    | 0    | 0    | 0 NA          | NA       |
| 0    | 0    | 0    | 0 NA          | NA       |
| 0.09 | 0.23 | 0.27 | 0.19 0.392891 | 0.612027 |
| 0    | 0    | 0    | 0 NA          | NA       |
| 0    | 0    | 0    | 0 NA          | NA       |
| 0    | 0    | 0    | 0 NA          | NA       |
| 0.18 | 0.26 | 0.14 | 0.16 0.347122 | 0.652879 |
| 0.73 | 1.13 | 1.2  | 0.91 0.371116 | 0.340204 |
| 1.02 | 0.7  | 0.55 | 0.86 -0.18493 | 0.780423 |
| 0    | 0    | 0    | 0 NA          | NA       |
| 0.13 | 0.33 | 0.11 | 0.32 0.456327 | 0.541089 |
| 0    | 0    | 0    | 0 NA          | NA       |
| 0    | 0.08 | 0    | 0.12 NA       | NA       |
| 0.05 | 0    | 0.06 | 0 NA          | NA       |
| 0    | 0    | 0    | 0 NA          | NA       |
| 8.38 | 4    | 3.15 | 3.12 -0.79931 | 0.067698 |
| 0.42 | 0.41 | 0.48 | 0.51 -0.03968 | 0.952539 |
| 0    | 0    | 0    | 0.02 NA       | NA       |
| 0    | 0    | 0    | 0 NA          | NA       |
| 0.33 | 0    | 0.17 | 0.1 NA        | NA       |

|      |      |      |               |          |
|------|------|------|---------------|----------|
| 0    | 0    | 0    | 0 NA          | NA       |
| 0    | 0    | 0    | 0.39 NA       | NA       |
| 0    | 0    | 0    | 0 NA          | NA       |
| 0    | 0    | 0    | 0 NA          | NA       |
| 0.09 | 0.06 | 0.12 | 0.16 0.287821 | 0.725731 |
| 0    | 0    | 0.03 | 0 NA          | NA       |
| 0    | 0    | 0    | 0 NA          | NA       |
| 0    | 0    | 0    | 0 NA          | NA       |
| 0.04 | 0.01 | 0.01 | 0 NA          | NA       |
| 0    | 0.07 | 0.04 | 0 NA          | NA       |
| 0.16 | 0.09 | 0.15 | 0.06 0.057552 | 0.950846 |
| 0    | 0    | 0    | 0 NA          | NA       |
| 0    | 0    | 0    | 0 NA          | NA       |
| 0    | 0    | 0    | 0 NA          | NA       |
| 0    | 0    | 0.04 | 0 NA          | NA       |
| 0.06 | 0.09 | 0.11 | 0.37 NA       | NA       |
| 0    | 0    | 0    | 0 NA          | NA       |
| 0    | 0    | 0    | 0 NA          | NA       |
| 0.11 | 0.06 | 0.06 | 0.14 0.291964 | 0.719609 |
| 0    | 0    | 0    | 0 NA          | NA       |
| 0    | 0    | 0    | 0 NA          | NA       |
| 0    | 0.22 | 0    | 0 NA          | NA       |
| 0.23 | 0.05 | 0.05 | 0.15 -0.5016  | 0.499964 |
| 0.09 | 0.12 | 0.2  | 0.1 0.215855  | 0.786725 |
| 0    | 0    | 0.07 | 0 NA          | NA       |
| 0.42 | 0.37 | 0.35 | 0.16 -0.07891 | 0.934202 |
| 0    | 0    | 0    | 0 NA          | NA       |
| 2.92 | 4.21 | 3.41 | 4.16 0.446255 | 0.05946  |
| 0    | 0    | 0    | 0 NA          | NA       |
| 0    | 0    | 0    | 0 NA          | NA       |
| 0.44 | 0.45 | 0.13 | 0.13 -0.50336 | 0.496996 |
| 0    | 0    | 0    | 0 NA          | NA       |
| 0.07 | 0.21 | 0    | 0.11 NA       | NA       |
| 0    | 0.12 | 0    | 0 NA          | NA       |
| 0    | 0    | 0    | 0 NA          | NA       |
| 0    | 0    | 0    | 0 NA          | NA       |
| 0    | 0    | 0    | 0 NA          | NA       |
| 0.02 | 0.11 | 0.11 | 0.01 0.739042 | 0.276843 |
| 0    | 0.08 | 0.04 | 0 NA          | NA       |
| 0    | 0    | 0    | 0 NA          | NA       |
| 0    | 0    | 0    | 0 NA          | NA       |
| 0    | 0    | 0    | 0.11 NA       | NA       |
| 0.05 | 0.05 | 0.11 | 0 NA          | NA       |
| 0.04 | 0.06 | 0    | 0.03 NA       | NA       |
| 0    | 0    | 0    | 0 NA          | NA       |

|      |      |      |               |          |
|------|------|------|---------------|----------|
| 0    | 0    | 0    | 0 NA          | NA       |
| 0.04 | 0.01 | 0.05 | 0.03 NA       | NA       |
| 0    | 1.55 | 0    | 0 NA          | NA       |
| 0    | 0    | 0    | 0 NA          | NA       |
| 0    | 0    | 0    | 0 NA          | NA       |
| 0.1  | 0.07 | 0.07 | 0.04 NA       | NA       |
| 0    | 0    | 0    | 0 NA          | NA       |
| 0    | 0    | 0    | 0 NA          | NA       |
| 0.04 | 0.06 | 0.13 | 0.11 0.866968 | 0.178685 |
| 0.03 | 0.02 | 0    | 0.02 NA       | NA       |
| 0    | 0    | 0    | 0 NA          | NA       |
| 0.03 | 0.05 | 0.02 | 0.03 -0.09062 | 0.923907 |
| 0    | 0    | 0    | 0.06 NA       | NA       |
| 0    | 0    | 0    | 0 NA          | NA       |
| 0.71 | 0.91 | 0.48 | 0.36 -0.26518 | 0.723985 |
| 0.07 | 0    | 0.02 | 0 NA          | NA       |
| 0    | 0    | 0    | 0 NA          | NA       |
| 0    | 0    | 0.03 | 0.03 NA       | NA       |
| 0    | 0    | 0    | 0 NA          | NA       |
| 0.14 | 0.05 | 0.07 | 0.16 -0.32591 | 0.684807 |
| 0    | 0    | 0.03 | 0 NA          | NA       |
| 0    | 0    | 0    | 0 NA          | NA       |
| 0    | 0    | 0    | 0 NA          | NA       |
| 0    | 0    | 0    | 0 NA          | NA       |
| 0    | 0    | 0    | 0 NA          | NA       |
| 0    | 0    | 0    | 0 NA          | NA       |
| 0    | 0    | 0    | 0 NA          | NA       |
| 0    | 0    | 0    | 0 NA          | NA       |
| 0.51 | 0.96 | 0.91 | 0.77 0.534167 | 0.196631 |
| 0.37 | 0.35 | 0.48 | 0.21 0.347508 | 0.660906 |
| 0    | 0.07 | 0.05 | 0 NA          | NA       |
| 0    | 0    | 0    | 0 NA          | NA       |
| 0    | 0    | 0    | 0 NA          | NA       |
| 0    | 0    | 0    | 0.03 NA       | NA       |
| 0    | 0    | 0    | 0 NA          | NA       |
| 0    | 0    | 0    | 0 NA          | NA       |
| 0    | 0    | 0    | 0 NA          | NA       |
| 0.25 | 0    | 0.14 | 0.1 -0.49393  | 0.504223 |
| 0    | 0    | 0    | 0.2 NA        | NA       |
| 0.03 | 0.01 | 0.02 | 0 NA          | NA       |
| 0    | 0    | 0    | 0 NA          | NA       |
| 0.03 | 0.07 | 0.07 | 0.05 -0.38046 | 0.623698 |
| 0.12 | 0.17 | 0.1  | 0.11 0.204902 | 0.809116 |
| 0    | 0    | 0    | 0 NA          | NA       |

|      |      |      |               |          |
|------|------|------|---------------|----------|
| 0.02 | 0    | 0    | 0 NA          | NA       |
| 0.35 | 0.1  | 0.1  | 0.12 NA       | NA       |
| 0    | 0    | 0    | 0 NA          | NA       |
| 0.25 | 0.58 | 0.17 | 0.33 0.747074 | 0.276638 |
| 0    | 0    | 0    | 0 NA          | NA       |
| 0    | 0    | 0    | 0 NA          | NA       |
| 0.2  | 0.12 | 0.11 | 0.09 -0.62669 | 0.373137 |
| 0.05 | 0.04 | 0.04 | 0.08 NA       | NA       |
| 0.23 | 0.15 | 0.25 | 0.23 -0.32228 | 0.572396 |
| 0.02 | 0    | 0    | 0 NA          | NA       |
| 0.15 | 0    | 0    | 0 NA          | NA       |
| 0    | 0    | 0    | 0 NA          | NA       |
| 0    | 0    | 0.19 | 0.11 NA       | NA       |
| 0    | 1.53 | 1.47 | 1.2 2.40335   | 1.67E-06 |
| 0    | 0    | 0    | 0 NA          | NA       |
| 0.08 | 0.06 | 0.08 | 0.06 NA       | NA       |
| 0    | 0    | 0    | 0 NA          | NA       |
| 2.04 | 0.49 | 0.96 | 1.84 -0.87771 | 0.047831 |
| 0.53 | 0.2  | 0.39 | 0.62 -0.32558 | 0.626626 |
| 0    | 0.02 | 0.01 | 0 NA          | NA       |
| 0    | 0    | 0    | 0 NA          | NA       |
| 0    | 0    | 0    | 0 NA          | NA       |
| 0    | 0    | 0    | 0 NA          | NA       |
| 0    | 0    | 0    | 0 NA          | NA       |
| 0    | 0    | 0    | 0 NA          | NA       |
| 0    | 0    | 0    | 0 NA          | NA       |
| 0    | 0    | 0    | 0 NA          | NA       |
| 0    | 0    | 0    | 0 NA          | NA       |
| 0.06 | 0    | 0.02 | 0.04 NA       | NA       |
| 0    | 0    | 0    | 0 NA          | NA       |
| 0.22 | 0.1  | 0    | 0 NA          | NA       |
| 0    | 0    | 0    | 0 NA          | NA       |
| 0    | 0    | 0    | 0 NA          | NA       |
| 0.38 | 0.61 | 0.79 | 1.05 1.010354 | 0.006794 |
| 0    | 0    | 0    | 0 NA          | NA       |
| 0    | 0    | 0    | 0 NA          | NA       |
| 0.57 | 0.19 | 0.48 | 0.47 0.127646 | 0.881283 |
| 0    | 0.07 | 0    | 0.02 NA       | NA       |
| 0    | 0    | 0    | 0 NA          | NA       |
| 0    | 0    | 0    | 0 NA          | NA       |
| 0.16 | 0.35 | 0.34 | 0.23 0.123768 | 0.863484 |
| 0    | 0    | 0    | 0 NA          | NA       |
| 0    | 0    | 0    | 0 NA          | NA       |
| 0.19 | 0.11 | 0.13 | 0.21 0.049276 | 0.958771 |
| 0.1  | 0.36 | 0.21 | 0.62 0.392791 | 0.59844  |

|      |      |      |               |          |
|------|------|------|---------------|----------|
| 0    | 0    | 0    | 0 NA          | NA       |
| 0    | 0    | 0    | 0 NA          | NA       |
| 0    | 0    | 0    | 0 NA          | NA       |
| 0    | 0    | 0    | 0 NA          | NA       |
| 0    | 0    | 0    | 0 NA          | NA       |
| 0    | 0    | 0    | 0 NA          | NA       |
| 0    | 0    | 0    | 0 NA          | NA       |
| 0    | 0    | 0    | 0 NA          | NA       |
| 0    | 0    | 0    | 0 NA          | NA       |
| 0    | 0    | 0    | 0 NA          | NA       |
| 0.06 | 0    | 0.04 | 0.02 -1.41732 | 0.011201 |
| 0    | 0.02 | 0.05 | 0.05 NA       | NA       |
| 0.04 | 0.08 | 0.1  | 0.12 0.13618  | 0.878681 |
| 0    | 0    | 0    | 0.02 NA       | NA       |
| 0    | 0    | 0    | 0.06 NA       | NA       |
| 0    | 0    | 0    | 0 NA          | NA       |
| 0.1  | 0.07 | 0.41 | 0.15 -0.62086 | 0.3823   |
| 0    | 0    | 0    | 0 NA          | NA       |
| 0    | 0.13 | 0    | 0.27 NA       | NA       |
| 0.06 | 0.06 | 0.1  | 0.13 NA       | NA       |
| 0.11 | 0.04 | 0.08 | 0.19 -0.26224 | 0.750321 |
| 0    | 0    | 0    | 0 NA          | NA       |
| 0    | 0    | 0    | 0 NA          | NA       |
| 0.17 | 0    | 0    | 0 NA          | NA       |
| 0.18 | 0.69 | 0.56 | 0.37 0.671912 | 0.334808 |
| 0    | 0    | 0    | 0 NA          | NA       |
| 0    | 0    | 0    | 0 NA          | NA       |
| 0    | 0    | 0    | 0 NA          | NA       |
| 0    | 0    | 0    | 0 NA          | NA       |
| 0    | 0    | 0    | 0 NA          | NA       |
| 0    | 0    | 0    | 0.65 NA       | NA       |
| 0    | 0    | 0    | 0 NA          | NA       |
| 0    | 0    | 0    | 0 NA          | NA       |
| 0.13 | 0.15 | 0.13 | 0.17 0.073723 | 0.873361 |
| 0.13 | 0.06 | 0    | 0 NA          | NA       |
| 0    | 0    | 0    | 0 NA          | NA       |
| 0.77 | 0.47 | 0.45 | 0.73 0.107061 | 0.875208 |
| 0    | 0    | 0    | 0 NA          | NA       |
| 0.32 | 0.32 | 0.41 | 0.5 -0.31801  | 0.633928 |
| 0    | 0    | 0    | 0 NA          | NA       |
| 0    | 0    | 0    | 0 NA          | NA       |
| 0.05 | 0.02 | 0.04 | 0.12 -0.67508 | 0.334924 |
| 0    | 0    | 0    | 0 NA          | NA       |
| 0    | 0    | 0    | 0 NA          | NA       |
| 0    | 0    | 0    | 0 NA          | NA       |

|      |      |      |      |          |          |
|------|------|------|------|----------|----------|
| 0    | 0    | 0    | 0.11 | NA       | NA       |
| 0    | 0    | 0.82 | 0    | NA       | NA       |
| 0    | 0    | 0    | 0    | NA       | NA       |
| 0    | 0    | 0    | 0    | NA       | NA       |
| 0    | 0    | 0    | 0    | NA       | NA       |
| 0    | 0    | 0.04 | 0.15 | NA       | NA       |
| 0    | 0    | 0    | 0    | NA       | NA       |
| 1.35 | 1.2  | 1.53 | 1.58 | 0.009038 | 0.980125 |
| 0    | 0    | 0    | 0    | NA       | NA       |
| 0.02 | 0.04 | 0    | 0.02 | NA       | NA       |
| 0    | 0    | 0    | 0    | NA       | NA       |
| 0.27 | 1.3  | 0.18 | 0.5  | -0.18144 | 0.797808 |
| 0.12 | 0    | 0.16 | 0    | NA       | NA       |
| 0    | 0    | 0.04 | 0    | NA       | NA       |
| 0    | 0    | 0    | 0    | NA       | NA       |
| 0    | 0    | 0    | 0    | NA       | NA       |
| 0    | 0    | 0    | 0    | NA       | NA       |
| 0    | 0    | 0    | 0    | NA       | NA       |
| 0    | 0    | 0    | 0    | NA       | NA       |
| 0    | 0    | 0    | 0    | NA       | NA       |
| 0    | 0    | 0    | 0    | NA       | NA       |
| 0.08 | 0.01 | 0.06 | 0.05 | -0.70967 | 0.30594  |
| 0    | 0    | 0    | 0    | NA       | NA       |
| 0.15 | 0    | 0.1  | 0.11 | NA       | NA       |
| 0    | 0    | 0    | 0    | NA       | NA       |
| 0    | 0    | 0    | 0    | NA       | NA       |
| 0    | 0    | 0    | 0    | NA       | NA       |
| 0    | 0    | 0    | 0    | NA       | NA       |
| 0    | 0    | 0    | 0    | NA       | NA       |
| 0    | 0    | 0    | 0    | NA       | NA       |
| 0    | 0    | 0    | 0    | NA       | NA       |
| 0.83 | 0.81 | 1    | 1.2  | 0.128387 | 0.801901 |
| 0.08 | 0.03 | 0.19 | 0.18 | 0.04811  | 0.959338 |
| 0.03 | 0.04 | 0.05 | 0.02 | NA       | NA       |
| 0.03 | 0.02 | 0.04 | 0.11 | NA       | NA       |
| 0    | 0    | 0    | 0    | NA       | NA       |
| 0.24 | 0.6  | 0.32 | 0.81 | 0.012638 | 0.990357 |
| 0.51 | 0.16 | 0.35 | 0.39 | 0.273975 | 0.737972 |
| 0    | 0    | 0    | 0    | NA       | NA       |
| 0    | 0    | 0    | 0    | NA       | NA       |
| 0    | 0    | 0    | 0    | NA       | NA       |
| 0.21 | 0.74 | 0.67 | 0.62 | 0.462119 | 0.537744 |
| 0    | 0    | 0    | 0    | NA       | NA       |
| 0.29 | 0.14 | 0.22 | 0.15 | -0.516   | 0.434711 |
| 0.28 | 0.29 | 0.33 | 0.21 | 0.317785 | 0.662598 |

|      |      |      |               |          |
|------|------|------|---------------|----------|
| 0    | 0    | 0    | 0 NA          | NA       |
| 0.24 | 0.57 | 0.47 | 0.29 0.964142 | 0.101374 |
| 0    | 0.03 | 0    | 0 NA          | NA       |
| 0    | 0    | 0.23 | 0.3 NA        | NA       |
| 0.82 | 0    | 0.68 | 0.05 -0.42796 | 0.503848 |
| 0    | 0    | 0    | 0 NA          | NA       |
| 0.02 | 0    | 0    | 0.01 NA       | NA       |
| 0    | 6.78 | 0    | 0 NA          | NA       |
| 0    | 0    | 0    | 0 NA          | NA       |
| 0    | 0    | 0    | 0 NA          | NA       |
| 0    | 0    | 0    | 0 NA          | NA       |
| 0    | 0.09 | 0    | 0 NA          | NA       |
| 0.02 | 0    | 0    | 0 NA          | NA       |
| 0    | 0    | 0    | 0 NA          | NA       |
| 0.49 | 0.76 | 0.56 | 0.67 0.14272  | 0.787143 |
| 0.07 | 0.17 | 0.34 | 0.33 0.92676  | 0.145017 |
| 0.05 | 0.02 | 0    | 0 NA          | NA       |
| 0.21 | 0.35 | 0.14 | 0.27 0.243843 | 0.772334 |
| 0    | 0    | 0    | 0 NA          | NA       |
| 0.08 | 0    | 0    | 0.04 NA       | NA       |
| 0    | 0    | 0    | 0 NA          | NA       |
| 0    | 0    | 0    | 0 NA          | NA       |
| 0    | 0    | 0    | 0 NA          | NA       |
| 0.6  | 0.57 | 0.07 | 0.23 -0.26278 | 0.75134  |
| 0    | 0.14 | 0.02 | 0.08 NA       | NA       |
| 0    | 0.03 | 0    | 0 NA          | NA       |
| 0    | 0    | 0.01 | 0 NA          | NA       |
| 0    | 0.03 | 0    | 0.03 NA       | NA       |
| 0    | 0    | 0    | 0 NA          | NA       |
| 0    | 0    | 0    | 0 NA          | NA       |
| 0    | 0    | 0.26 | 0 NA          | NA       |
| 0    | 0    | 0    | 0 NA          | NA       |
| 0    | 0    | 0    | 0 NA          | NA       |
| 0    | 0    | 0    | 0 NA          | NA       |
| 0.3  | 0.12 | 0.18 | 0.16 -0.06415 | 0.946597 |
| 0    | 0    | 0    | 0 NA          | NA       |
| 0    | 0    | 0    | 0 NA          | NA       |
| 0.21 | 0    | 0.4  | 0 NA          | NA       |
| 0    | 0    | 0    | 0 NA          | NA       |
| 0    | 0    | 0    | 0 NA          | NA       |
| 0    | 0    | 0    | 0.18 NA       | NA       |
| 0    | 0.02 | 0    | 0 NA          | NA       |
| 1.55 | 1.31 | 0.65 | 1.25 -0.05513 | 0.931635 |
| 0    | 0    | 0    | 0 NA          | NA       |
| 0    | 0    | 0    | 0 NA          | NA       |

|       |       |       |                |          |
|-------|-------|-------|----------------|----------|
| 0     | 0     | 0     | 0 NA           | NA       |
| 0.04  | 0.1   | 0.03  | 0.14 NA        | NA       |
| 0     | 0     | 0     | 0 NA           | NA       |
| 2.77  | 5.73  | 3.95  | 12.14 0.922936 | 0.147258 |
| 0.36  | 0.41  | 0.19  | 0.44 0.015272  | 0.986671 |
| 0     | 0     | 0     | 0 NA           | NA       |
| 0     | 0     | 0     | 0 NA           | NA       |
| 0     | 0     | 0     | 0 NA           | NA       |
| 0     | 0.07  | 0.06  | 0 NA           | NA       |
| 0.16  | 0.24  | 0     | 0.06 NA        | NA       |
| 0.04  | 0     | 0.05  | 0.06 NA        | NA       |
| 0.03  | 0     | 0.02  | 0.12 NA        | NA       |
| 0.13  | 0.25  | 0.23  | 0.22 -0.32066  | 0.628307 |
| 20.46 | 10.96 | 10.87 | 9.53 -0.57362  | 0.084844 |
| 0     | 0     | 0     | 0 NA           | NA       |
| 0     | 0     | 0.05  | 0 NA           | NA       |
| 0     | 0.01  | 0     | 0 NA           | NA       |
| 0     | 0     | 0     | 0 NA           | NA       |
| 0     | 0     | 0.03  | 0 NA           | NA       |
| 0     | 0.13  | 0     | 0 NA           | NA       |
| 0     | 0.1   | 0.02  | 0.02 NA        | NA       |
| 0.06  | 0     | 0.02  | 0.02 NA        | NA       |
| 0     | 0     | 0     | 0 NA           | NA       |
| 0     | 0     | 0     | 0 NA           | NA       |
| 0.21  | 0.3   | 0.27  | 0.32 NA        | NA       |
| 0.08  | 0.03  | 0     | 0.06 NA        | NA       |
| 0     | 0.41  | 0     | 0.11 NA        | NA       |
| 0     | 0     | 0     | 0 NA           | NA       |
| 0.02  | 0.03  | 0.01  | 0.02 NA        | NA       |
| 0     | 0     | 0     | 0 NA           | NA       |
| 0.02  | 0.03  | 0     | 0.02 NA        | NA       |
| 0     | 0     | 0     | 0 NA           | NA       |
| 3.96  | 2.85  | 2.93  | 3.88 -0.20728  | 0.333995 |
| 0     | 0     | 0     | 0 NA           | NA       |
| 0.21  | 0.08  | 0.09  | 0.04 NA        | NA       |
| 0.05  | 0.02  | 0.14  | 0.13 0.567519  | 0.422944 |
| 0     | 0     | 0     | 0 NA           | NA       |
| 0     | 0     | 0     | 0 NA           | NA       |
| 0     | 0     | 0     | 0 NA           | NA       |
| 0.26  | 0.19  | 0.25  | 0.16 0.061796  | 0.948247 |
| 0     | 0     | 0     | 0 NA           | NA       |
| 0     | 0     | 0     | 0 NA           | NA       |
| 0     | 0     | 0     | 0 NA           | NA       |
| 0.04  | 0     | 0.01  | 0 NA           | NA       |
| 0     | 0     | 0     | 0 NA           | NA       |



|      |      |      |               |          |
|------|------|------|---------------|----------|
| 0    | 0.02 | 0    | 0 NA          | NA       |
| 0    | 0    | 0    | 0 NA          | NA       |
| 0    | 0    | 0    | 0 NA          | NA       |
| 0    | 0    | 0    | 0 NA          | NA       |
| 0    | 0.01 | 0    | 0.01 NA       | NA       |
| 0    | 0    | 0    | 0 NA          | NA       |
| 0    | 0    | 0    | 0 NA          | NA       |
| 0    | 0    | 0    | 0 NA          | NA       |
| 0    | 0    | 0    | 0 NA          | NA       |
| 0    | 0    | 0    | 0 NA          | NA       |
| 0.05 | 0.06 | 0.02 | 0.04 NA       | NA       |
| 0    | 0    | 0    | 0 NA          | NA       |
| 0    | 0    | 0.01 | 0 NA          | NA       |
| 0.22 | 0.02 | 0.07 | 0.11 -0.54376 | 0.457712 |
| 0    | 0    | 0    | 0 NA          | NA       |
| 0    | 0    | 0.09 | 0.07 NA       | NA       |
| 0    | 0    | 0    | 0 NA          | NA       |
| 0    | 0.14 | 0.13 | 0 NA          | NA       |
| 0    | 0    | 0    | 0.01 NA       | NA       |
| 0    | 0    | 0    | 0 NA          | NA       |
| 0.03 | 0.02 | 0.04 | 0.05 NA       | NA       |
| 0    | 0    | 0    | 0 NA          | NA       |
| 0    | 0    | 0    | 0 NA          | NA       |
| 0    | 0    | 0    | 0 NA          | NA       |
| 0.29 | 0.09 | 0.06 | 0.06 NA       | NA       |
| 0    | 0    | 0    | 0 NA          | NA       |
| 0    | 0    | 1.36 | 0 NA          | NA       |
| 0    | 0    | 0    | 0.03 NA       | NA       |
| 0    | 0    | 0    | 0 NA          | NA       |
| 0    | 0.48 | 0.15 | 0.9 NA        | NA       |
| 0.05 | 0.08 | 0.07 | 0.09 NA       | NA       |
| 0.39 | 0.29 | 0.07 | 0.09 -0.42263 | 0.576805 |
| 0.2  | 0.03 | 0.03 | 0 -1.45254    | 0.014888 |
| 0    | 0    | 0    | 0 NA          | NA       |
| 0    | 0    | 0    | 0 NA          | NA       |
| 0    | 0    | 0    | 0 NA          | NA       |
| 0    | 0    | 0    | 0 NA          | NA       |
| 0.04 | 0    | 0.07 | 0 NA          | NA       |
| 0    | 0    | 0    | 0 NA          | NA       |
| 0.04 | 0.05 | 0.17 | 0.05 NA       | NA       |
| 0.08 | 0    | 0.06 | 0.04 NA       | NA       |
| 0.02 | 0.01 | 0.03 | 0.03 NA       | NA       |
| 0    | 0.09 | 0.08 | 0.21 NA       | NA       |
| 0    | 0    | 0    | 0 NA          | NA       |
| 0    | 0    | 0    | 0 NA          | NA       |

|      |      |      |               |          |
|------|------|------|---------------|----------|
| 0    | 0    | 0    | 0 NA          | NA       |
| 0    | 0    | 0    | 0 NA          | NA       |
| 0    | 0    | 0    | 0 NA          | NA       |
| 0    | 0    | 0.02 | 0 NA          | NA       |
| 0    | 0    | 0    | 0 NA          | NA       |
| 0    | 0    | 0    | 0 NA          | NA       |
| 0    | 0    | 0.05 | 0 NA          | NA       |
| 0    | 0    | 0.16 | 0 NA          | NA       |
| 0    | 0    | 0    | 0 NA          | NA       |
| 0    | 0    | 0    | 0 NA          | NA       |
| 0.04 | 0    | 0    | 0 NA          | NA       |
| 0    | 0    | 0    | 0 NA          | NA       |
| 0    | 0    | 0.02 | 0 NA          | NA       |
| 0    | 0.67 | 1.09 | 1.33 NA       | NA       |
| 0    | 0    | 0    | 0 NA          | NA       |
| 0.11 | 0.09 | 0.09 | 0.09 -0.19416 | 0.676615 |
| 0    | 0    | 0    | 0 NA          | NA       |
| 0.06 | 0.61 | 0.66 | 0.5 1.284642  | 0.031887 |
| 0.01 | 0    | 0.01 | 0 NA          | NA       |
| 0    | 0    | 0    | 0.11 NA       | NA       |
| 0    | 0    | 0.34 | 0.34 NA       | NA       |
| 0    | 0    | 0    | 0 NA          | NA       |
| 0    | 0    | 0    | 0 NA          | NA       |
| 0    | 0    | 0    | 0 NA          | NA       |
| 0    | 0    | 0    | 0 NA          | NA       |
| 1.93 | 1.14 | 1.24 | 2.02 0.288809 | 0.681584 |
| 0    | 0    | 0    | 0 NA          | NA       |
| 0.35 | 0.13 | 0.12 | 0.19 NA       | NA       |
| 0    | 0    | 0    | 0 NA          | NA       |
| 0.41 | 0.3  | 0.21 | 0.39 -0.44972 | 0.551292 |
| 0.09 | 0    | 0.06 | 0.07 NA       | NA       |
| 0    | 0    | 0    | 0 NA          | NA       |
| 0    | 0.02 | 0.01 | 0.01 NA       | NA       |
| 0    | 0    | 0    | 0 NA          | NA       |
| 0    | 0    | 0    | 0 NA          | NA       |
| 0    | 0    | 0    | 0 NA          | NA       |
| 0    | 0    | 0.2  | 0 NA          | NA       |
| 0    | 0    | 0    | 0 NA          | NA       |
| 0    | 0.05 | 0.09 | 0.05 NA       | NA       |
| 0    | 0    | 0.03 | 0 NA          | NA       |
| 0    | 0    | 0    | 0 NA          | NA       |
| 0.17 | 0.12 | 0    | 0.35 NA       | NA       |
| 0.6  | 0.18 | 0.22 | 0.25 -1.38781 | 0.000374 |
| 0.01 | 0.02 | 0    | 0 NA          | NA       |
| 0.12 | 0.09 | 0    | 0.09 NA       | NA       |

|       |       |       |       |          |          |
|-------|-------|-------|-------|----------|----------|
| 0     | 0.02  | 0.02  | 0.08  | NA       | NA       |
| 0.31  | 0.06  | 0.08  | 0.03  | NA       | NA       |
| 0     | 0     | 0     | 0     | NA       | NA       |
| 0.37  | 0.23  | 0.31  | 0.22  | -0.29895 | 0.523528 |
| 0.83  | 0.41  | 0.72  | 0.8   | 0.006766 | 0.992801 |
| 0     | 0     | 0     | 0     | NA       | NA       |
| 0     | 0     | 0     | 0     | NA       | NA       |
| 0     | 0     | 0     | 0     | NA       | NA       |
| 0     | 0     | 0.01  | 0     | NA       | NA       |
| 0     | 0.02  | 0     | 0     | NA       | NA       |
| 0     | 0     | 0     | 0     | NA       | NA       |
| 0     | 0     | 0     | 0     | NA       | NA       |
| 0.04  | 0     | 0     | 0.03  | NA       | NA       |
| 0     | 0     | 0     | 0     | NA       | NA       |
| 0     | 0     | 0     | 0     | NA       | NA       |
| 0     | 0     | 0     | 0     | NA       | NA       |
| 0     | 0.01  | 0     | 0     | NA       | NA       |
| 0     | 0     | 0     | 0     | NA       | NA       |
| 0.54  | 0.86  | 0.53  | 0.67  | 0.195403 | 0.747737 |
| 0     | 0.02  | 0.02  | 0     | NA       | NA       |
| 0.03  | 0.07  | 0.02  | 0.11  | NA       | NA       |
| 0     | 0.13  | 0     | 0     | NA       | NA       |
| 0.06  | 0.14  | 0.13  | 0.17  | 0.08194  | 0.931113 |
| 0     | 0     | 0     | 0     | NA       | NA       |
| 14.76 | 11.21 | 16.51 | 14.36 | -0.23507 | 0.215606 |
| 0.03  | 0     | 0     | 0     | NA       | NA       |
| 0     | 0     | 0     | 0     | NA       | NA       |
| 0     | 0     | 0.02  | 0     | NA       | NA       |
| 1.35  | 1.44  | 1.32  | 1.22  | 0.009728 | 0.986207 |
| 0     | 0.01  | 0.03  | 0.06  | NA       | NA       |
| 0     | 0     | 0     | 0     | NA       | NA       |
| 0     | 0.15  | 0.04  | 0     | NA       | NA       |
| 0.05  | 0     | 0     | 0     | NA       | NA       |
| 0     | 0     | 0     | 0     | NA       | NA       |
| 0     | 0.1   | 0.02  | 0     | NA       | NA       |
| 0     | 0     | 0     | 0     | NA       | NA       |
| 0     | 0     | 0     | 0     | NA       | NA       |
| 0.03  | 0.02  | 0.1   | 0.06  | 0.598496 | 0.404623 |
| 1.93  | 3.27  | 2.74  | 3.91  | 0.765826 | 0.00462  |
| 0     | 0     | 0     | 0     | NA       | NA       |
| 0     | 0     | 0     | 0     | NA       | NA       |
| 0     | 0     | 0     | 0     | NA       | NA       |
| 0     | 0     | 0.21  | 0     | NA       | NA       |
| 0     | 0     | 0     | 0     | NA       | NA       |
| 0     | 0     | 0     | 0     | NA       | NA       |

|      |      |      |      |          |           |
|------|------|------|------|----------|-----------|
| 0    | 0.14 | 0    | 0.29 | NA       | NA        |
| 2.77 | 0    | 3.96 | 0.01 | -0.2759  | 0.721754  |
| 0    | 0    | 0    | 0    | NA       | NA        |
| 0    | 0    | 0    | 0    | NA       | NA        |
| 0    | 0.03 | 0    | 0    | NA       | NA        |
| 0    | 0    | 0    | 0    | NA       | NA        |
| 0    | 0    | 0    | 0    | NA       | NA        |
| 0    | 0    | 0    | 0    | NA       | NA        |
| 0.09 | 0.17 | 0.08 | 0.05 | NA       | NA        |
| 0.2  | 0.11 | 0.16 | 0.09 | -0.45148 | 0.548249  |
| 0    | 0    | 0    | 0    | NA       | NA        |
| 0    | 0.01 | 0    | 0.01 | NA       | NA        |
| 0    | 0    | 0    | 0    | NA       | NA        |
| 0    | 0.01 | 0.02 | 0    | NA       | NA        |
| 0    | 0    | 0.07 | 0.04 | NA       | NA        |
| 0    | 0    | 0    | 0    | NA       | NA        |
| 0    | 0    | 0    | 0    | NA       | NA        |
| 0    | 0.05 | 0.03 | 0.06 | 0.209298 | 0.800959  |
| 0.02 | 0.02 | 0.09 | 0    | NA       | NA        |
| 0.01 | 0    | 0    | 0    | NA       | NA        |
| 1.24 | 1.61 | 0.76 | 0.55 | 0.036961 | 0.965199  |
| 0    | 0    | 0    | 0    | NA       | NA        |
| 0    | 0    | 0    | 0.03 | NA       | NA        |
| 0.36 | 0.15 | 0.29 | 0.18 | -0.65981 | 0.269237  |
| 0    | 0    | 0    | 0    | NA       | NA        |
| 0    | 0    | 0    | 0    | NA       | NA        |
| 0    | 0    | 0    | 0    | NA       | NA        |
| 1.57 | 2.27 | 1.96 | 2.75 | 0.560136 | 0.011999  |
| 0    | 0    | 0.08 | 0.03 | NA       | NA        |
| 0    | 0    | 0    | 0    | NA       | NA        |
| 0.57 | 0.62 | 0.54 | 0.5  | 0.158305 | 0.813172  |
| 0    | 0    | 0    | 0    | NA       | NA        |
| 0    | 0    | 0    | 0    | NA       | NA        |
| 0.32 | 0    | 0.13 | 0    | NA       | NA        |
| 0    | 0    | 0    | 0    | NA       | NA        |
| 0.24 | 0.21 | 0.25 | 0.27 | -0.14383 | 0.666949  |
| 0    | 0    | 0    | 0    | NA       | NA        |
| 0.15 | 0    | 0    | 0.22 | NA       | NA        |
| 0    | 0    | 0    | 0    | NA       | NA        |
| 8.33 | 0.29 | 0.68 | 0.42 | -4.09162 | 1.96E-114 |
| 0    | 0    | 0    | 0    | NA       | NA        |
| 5.1  | 5.3  | 3.95 | 5.23 | 0.519172 | 0.069681  |
| 0    | 0    | 0    | 0    | NA       | NA        |
| 0    | 0    | 0    | 0    | NA       | NA        |
| 1.39 | 0.7  | 0.83 | 0.63 | -0.14572 | 0.866123  |

|      |      |      |               |          |
|------|------|------|---------------|----------|
| 0    | 0    | 0    | 0 NA          | NA       |
| 0.2  | 0.36 | 0.42 | 0.25 0.157451 | 0.801652 |
| 0    | 0    | 0    | 0 NA          | NA       |
| 0    | 0    | 0    | 0 NA          | NA       |
| 0    | 0    | 0    | 0 NA          | NA       |
| 0.23 | 0.21 | 0.23 | 0.25 -0.15998 | 0.342304 |
| 0.09 | 0.06 | 0.08 | 0.11 -0.38904 | 0.615182 |
| 0.08 | 0    | 0    | 0.02 NA       | NA       |
| 0.03 | 0.02 | 0.04 | 0.1 NA        | NA       |
| 0.37 | 1.06 | 0.74 | 1.23 0.730242 | 0.209246 |
| 0    | 0.02 | 0    | 0.01 NA       | NA       |
| 0.1  | 0.23 | 0.03 | 0.2 0.019894  | 0.98448  |
| 0.52 | 0.27 | 0.15 | 0.16 -0.84464 | 0.197633 |
| 0.01 | 0    | 0    | 0 NA          | NA       |
| 0    | 0    | 0    | 0 NA          | NA       |
| 0    | 0    | 0.4  | 0 NA          | NA       |
| 0    | 0    | 0    | 0 NA          | NA       |
| 0.03 | 0.02 | 0    | 0 NA          | NA       |
| 0    | 0    | 0    | 0 NA          | NA       |
| 0    | 0    | 0    | 0 NA          | NA       |
| 0.55 | 0.66 | 0.61 | 0.78 0.105589 | 0.862624 |
| 0    | 0    | 0.57 | 0 NA          | NA       |
| 0.02 | 0    | 0    | 0 NA          | NA       |
| 0    | 0    | 0    | 0 NA          | NA       |
| 0.21 | 0.2  | 0.21 | 0.15 -0.35683 | 0.50119  |
| 0    | 0    | 0.1  | 0 NA          | NA       |
| 0.17 | 0.16 | 0.05 | 0.14 -0.10986 | 0.904541 |
| 0    | 0    | 0    | 0 NA          | NA       |
| 0.76 | 0.62 | 0.36 | 0.53 -0.21854 | 0.718422 |
| 0    | 0    | 0    | 0 NA          | NA       |
| 0.08 | 0.12 | 0.08 | 0.07 NA       | NA       |
| 0.89 | 0.65 | 0.69 | 0.54 -0.41104 | 0.290936 |
| 0.04 | 0.03 | 0.03 | 0.08 NA       | NA       |
| 0    | 0    | 0    | 0 NA          | NA       |
| 0    | 0    | 0    | 0.4 NA        | NA       |
| 0    | 0    | 0.02 | 0 NA          | NA       |
| 0    | 0    | 0.04 | 0 NA          | NA       |
| 0.78 | 0.52 | 0.32 | 0.54 -0.50345 | 0.339493 |
| 0    | 0    | 0    | 0 NA          | NA       |
| 0    | 0    | 0    | 0 NA          | NA       |
| 0.23 | 0.49 | 0.53 | 0.09 0.514088 | 0.475626 |
| 0    | 0    | 0    | 0 NA          | NA       |
| 0    | 0    | 0.02 | 0 NA          | NA       |
| 0    | 0    | 0    | 0 NA          | NA       |
| 1.06 | 0.92 | 0.92 | 0.52 -0.38953 | 0.436212 |

|      |      |      |               |          |
|------|------|------|---------------|----------|
| 0    | 0    | 0    | 0 NA          | NA       |
| 0    | 0.06 | 0.01 | 0 NA          | NA       |
| 1.26 | 1.45 | 1.07 | 1.02 -0.04812 | 0.948254 |
| 0    | 0    | 0    | 0 NA          | NA       |
| 0    | 0    | 0    | 0 NA          | NA       |
| 0.05 | 0    | 0.07 | 0 NA          | NA       |
| 0    | 0    | 0    | 0 NA          | NA       |
| 0.11 | 0.16 | 0.14 | 0.19 0.380575 | 0.592028 |
| 0.16 | 0.2  | 0.28 | 0.3 0.205456  | 0.795969 |
| 0    | 0    | 0    | 0 NA          | NA       |
| 1    | 0    | 0.32 | 0.56 NA       | NA       |
| 0    | 0    | 0    | 0.03 NA       | NA       |
| 0.1  | 0.23 | 0.23 | 0.18 1.183293 | 0.006769 |
| 0    | 0    | 0    | 0 NA          | NA       |
| 0    | 0    | 0    | 0 NA          | NA       |
| 0    | 0    | 0    | 0 NA          | NA       |
| 0    | 0    | 0    | 0 NA          | NA       |
| 0    | 0    | 0    | 0 NA          | NA       |
| 0    | 0    | 0    | 0 NA          | NA       |
| 0    | 0    | 0    | 0 NA          | NA       |
| 0.19 | 0.42 | 0.13 | 0.87 NA       | NA       |
| 0    | 0    | 0.09 | 0.2 NA        | NA       |
| 0    | 0    | 0    | 0 NA          | NA       |
| 1.27 | 0.68 | 0.73 | 1.11 -0.14947 | 0.817219 |
| 0    | 0    | 0    | 0 NA          | NA       |
| 0.72 | 1.84 | 1.72 | 1.8 1.314731  | 1.56E-10 |
| 0.62 | 0    | 0.38 | 0.45 NA       | NA       |
| 0.36 | 0.07 | 0.1  | 0.14 -0.85732 | 0.184269 |
| 0    | 0    | 0    | 0.35 NA       | NA       |
| 0    | 0    | 0.06 | 0 NA          | NA       |
| 0    | 0    | 0    | 0 NA          | NA       |
| 0    | 0.44 | 1.06 | 0.56 NA       | NA       |
| 0    | 0    | 0.04 | 0 NA          | NA       |
| 0    | 0.05 | 0    | 0 NA          | NA       |
| 0.37 | 0.18 | 0.11 | 0.3 -0.73703  | 0.219708 |
| 2.68 | 0    | 0    | 0.09 NA       | NA       |
| 0    | 0.2  | 0    | 0 NA          | NA       |
| 0    | 0    | 0    | 0 NA          | NA       |
| 0    | 0    | 0.06 | 0 NA          | NA       |
| 0    | 0    | 0    | 0 NA          | NA       |
| 0    | 0    | 0    | 0 NA          | NA       |
| 0.36 | 0.39 | 0.45 | 0.58 0.346264 | 0.578548 |
| 0    | 0    | 0    | 0 NA          | NA       |
| 0    | 0    | 0    | 0 NA          | NA       |

|      |      |      |               |          |
|------|------|------|---------------|----------|
| 0    | 0    | 0    | 0 NA          | NA       |
| 0    | 0    | 0    | 0 NA          | NA       |
| 0    | 0    | 0    | 0 NA          | NA       |
| 0    | 0    | 0    | 0 NA          | NA       |
| 0    | 0    | 0    | 0 NA          | NA       |
| 0    | 0    | 0.06 | 0 NA          | NA       |
| 0    | 0    | 0.03 | 0 NA          | NA       |
| 0    | 0    | 0    | 0 NA          | NA       |
| 0.13 | 0.12 | 0.12 | 0.26 0.014481 | 0.988942 |
| 0    | 0    | 0    | 0 NA          | NA       |
| 0    | 0    | 0    | 0 NA          | NA       |
| 0.07 | 0.02 | 0.05 | 0.03 NA       | NA       |
| 0    | 0.05 | 0    | 0 NA          | NA       |
| 0    | 0.07 | 0    | 0 NA          | NA       |
| 0.24 | 0.94 | 0.58 | 0.6 0.684852  | 0.185076 |
| 0    | 0    | 0    | 0 NA          | NA       |
| 0    | 0    | 0    | 0 NA          | NA       |
| 0    | 0    | 0    | 0 NA          | NA       |
| 0.1  | 0    | 0    | 0 NA          | NA       |
| 0    | 0    | 0    | 0 NA          | NA       |
| 0    | 0.03 | 0.01 | 0 NA          | NA       |
| 0    | 0    | 0    | 0 NA          | NA       |
| 0.37 | 0.42 | 0.25 | 0.46 -0.1801  | 0.741461 |
| 0    | 0    | 0    | 0 NA          | NA       |
| 0    | 0    | 0.01 | 0 NA          | NA       |
| 0    | 0.03 | 0.01 | 0.01 NA       | NA       |
| 0    | 0    | 0    | 0 NA          | NA       |
| 0.08 | 0    | 0.01 | 0 NA          | NA       |
| 0    | 0    | 0    | 0 NA          | NA       |
| 0    | 0    | 0    | 0 NA          | NA       |
| 0.1  | 0.01 | 0.05 | 0.1 -0.13634  | 0.87881  |
| 0.23 | 0.24 | 0.16 | 0.4 -0.14401  | 0.857688 |
| 0.02 | 0    | 0    | 0 NA          | NA       |
| 0    | 0    | 0    | 0 NA          | NA       |
| 0    | 0    | 0    | 0 NA          | NA       |
| 0    | 0    | 0    | 0 NA          | NA       |
| 0    | 0    | 0    | 0 NA          | NA       |
| 0.27 | 0.05 | 0.09 | 0.16 NA       | NA       |
| 0    | 0    | 0    | 0 NA          | NA       |
| 0    | 0    | 0    | 0 NA          | NA       |
| 0    | 0    | 0    | 0 NA          | NA       |
| 0    | 0    | 0    | 0 NA          | NA       |
| 0    | 0    | 0    | 0 NA          | NA       |
| 0    | 0    | 0.11 | 0 NA          | NA       |
| 0    | 0    | 0    | 0 NA          | NA       |

|       |       |       |                |          |
|-------|-------|-------|----------------|----------|
| 0     | 0     | 0.03  | 0 NA           | NA       |
| 0     | 0     | 0     | 0 NA           | NA       |
| 0     | 0     | 0     | 0 NA           | NA       |
| 16.47 | 15.02 | 15.87 | 15.46 -0.25098 | 0.163178 |
| 0     | 0     | 0.03  | 0.08 NA        | NA       |
| 0.32  | 0.18  | 0.22  | 0.22 -0.39951  | 0.581813 |
| 0.35  | 0.66  | 0.96  | 0.84 0.812998  | 0.153532 |
| 0     | 0     | 0     | 1.28 NA        | NA       |
| 0.57  | 0.59  | 0.39  | 0.69 -0.18639  | 0.761728 |
| 0     | 0     | 0     | 0 NA           | NA       |
| 0.02  | 0.08  | 0.01  | 0.04 NA        | NA       |
| 0     | 0     | 0     | 0 NA           | NA       |
| 0     | 0     | 0     | 0 NA           | NA       |
| 0     | 0     | 0     | 0 NA           | NA       |
| 0     | 0     | 0     | 0 NA           | NA       |
| 1.03  | 0.42  | 0.68  | 0.68 -0.38911  | 0.366441 |
| 0     | 0     | 0     | 0 NA           | NA       |
| 0.21  | 0.33  | 0.31  | 0.27 0.527281  | 0.236538 |
| 0.02  | 0.03  | 0.02  | 0.02 NA        | NA       |
| 0.37  | 0.23  | 0.75  | 0.59 0.081719  | 0.931771 |
| 0     | 0     | 0     | 0 NA           | NA       |
| 0.69  | 0.94  | 0.72  | 1.18 0.383319  | 0.228299 |
| 0     | 0     | 0     | 0 NA           | NA       |
| 0     | 0     | 0     | 0 NA           | NA       |
| 0     | 0     | 0     | 0 NA           | NA       |
| 0.37  | 0.42  | 0.33  | 0.62 0.28086   | 0.685479 |
| 0     | 0     | 0     | 0 NA           | NA       |
| 0     | 0     | 0.03  | 0.03 NA        | NA       |
| 0     | 0     | 0     | 0 NA           | NA       |
| 1.56  | 1.84  | 1.74  | 2.15 0.549728  | 0.106776 |
| 0     | 0     | 0     | 0 NA           | NA       |
| 0     | 0     | 0     | 0 NA           | NA       |
| 0     | 0     | 0     | 0 NA           | NA       |
| 0     | 0     | 0     | 0 NA           | NA       |
| 0     | 0     | 0     | 0 NA           | NA       |
| 0     | 0     | 0     | 0 NA           | NA       |
| 0     | 0     | 0     | 0 NA           | NA       |
| 0     | 0     | 0     | 0 NA           | NA       |
| 0.07  | 0.08  | 0.13  | 0.04 0.314859  | 0.697198 |
| 0     | 0     | 0     | 0 NA           | NA       |
| 0     | 0     | 0     | 0 NA           | NA       |
| 0     | 0     | 0     | 0 NA           | NA       |
| 0     | 0.03  | 0.06  | 0.03 NA        | NA       |
| 0     | 0     | 0     | 0 NA           | NA       |
| 0.81  | 0.59  | 0.2   | 0.39 -0.62506  | 0.360002 |



|      |      |      |               |          |
|------|------|------|---------------|----------|
| 0    | 0    | 0    | 0 NA          | NA       |
| 0    | 0    | 0    | 0 NA          | NA       |
| 0.14 | 0    | 0.12 | 0.35 NA       | NA       |
| 0.15 | 0.33 | 0.08 | 0.19 0.162432 | 0.853146 |
| 0    | 0    | 0    | 0 NA          | NA       |
| 0    | 0    | 0    | 0 NA          | NA       |
| 0    | 0.02 | 0.05 | 0 NA          | NA       |
| 0    | 0    | 0    | 0 NA          | NA       |
| 0.02 | 0.03 | 0.04 | 0.05 0.143245 | 0.844671 |
| 0    | 0.03 | 0.04 | 0 NA          | NA       |
| 0    | 0    | 0    | 0 NA          | NA       |
| 0.11 | 0.04 | 0.04 | 0 NA          | NA       |
| 0.23 | 0.19 | 0.09 | 0.08 -0.23903 | 0.776308 |
| 0    | 0    | 0.08 | 0 NA          | NA       |
| 0    | 0    | 0    | 0 NA          | NA       |
| 0    | 0    | 0.03 | 0 NA          | NA       |
| 0    | 0    | 0    | 0 NA          | NA       |
| 0    | 0    | 0    | 0 NA          | NA       |
| 0    | 0.03 | 0.04 | 0.02 NA       | NA       |
| 0    | 0    | 0    | 0 NA          | NA       |
| 0.03 | 0.02 | 0.01 | 0 NA          | NA       |
| 0    | 0    | 0    | 0 NA          | NA       |
| 0.08 | 0.17 | 0.06 | 0.08 -0.17246 | 0.839676 |
| 0    | 0    | 0    | 0 NA          | NA       |
| 0.12 | 0.06 | 0.05 | 0.09 NA       | NA       |
| 0.45 | 0.19 | 0.47 | 0.49 -0.40884 | 0.532571 |
| 0    | 0    | 0    | 0 NA          | NA       |
| 0    | 0    | 0    | 0 NA          | NA       |
| 0    | 0    | 0    | 0 NA          | NA       |
| 0.46 | 0.07 | 0.24 | 0.16 -1.0323  | 0.053493 |
| 0    | 0    | 0    | 0 NA          | NA       |
| 0    | 0    | 0    | 0 NA          | NA       |
| 0    | 0    | 0    | 0 NA          | NA       |
| 0    | 0    | 0    | 0 NA          | NA       |
| 0    | 0    | 0    | 0 NA          | NA       |
| 0    | 0    | 0    | 0 NA          | NA       |
| 0    | 0    | 0    | 0 NA          | NA       |
| 0.03 | 0.05 | 0    | 0.03 NA       | NA       |
| 0    | 0    | 0    | 0 NA          | NA       |
| 0    | 0    | 0    | 0 NA          | NA       |
| 0    | 0    | 0    | 0 NA          | NA       |
| 0.13 | 0.04 | 0.11 | 0 NA          | NA       |
| 0    | 0    | 0    | 0 NA          | NA       |
| 0.12 | 0.18 | 0.04 | 0.09 0.244962 | 0.767408 |
| 0    | 0    | 0    | 0 NA          | NA       |

|      |      |      |      |          |          |
|------|------|------|------|----------|----------|
| 0    | 0    | 0.05 | 0.03 | NA       | NA       |
| 0    | 0    | 0    | 0    | NA       | NA       |
| 0    | 0    | 0    | 0    | NA       | NA       |
| 0    | 0    | 0    | 0.08 | NA       | NA       |
| 0.06 | 0    | 0    | 0    | NA       | NA       |
| 1.05 | 1.24 | 1.75 | 1.42 | 0.274693 | 0.374491 |
| 0.12 | 0.12 | 0.13 | 0.12 | -0.15593 | 0.757266 |
| 0    | 0    | 0    | 0    | NA       | NA       |
| 0    | 0    | 0    | 0    | NA       | NA       |
| 0    | 0    | 0    | 0    | NA       | NA       |
| 0    | 0    | 0    | 0    | NA       | NA       |
| 0    | 0    | 0    | 0    | NA       | NA       |
| 0.72 | 0.38 | 0.57 | 0.34 | -0.60453 | 0.191667 |
| 0    | 0    | 0    | 0    | NA       | NA       |
| 0    | 0    | 0    | 0    | NA       | NA       |
| 0    | 0.15 | 0    | 0    | NA       | NA       |
| 0    | 0    | 0    | 0    | NA       | NA       |
| 0    | 0    | 0    | 0    | NA       | NA       |
| 0    | 0    | 0    | 0    | NA       | NA       |
| 0    | 0    | 0    | 0    | NA       | NA       |
| 0.24 | 0    | 0    | 0    | NA       | NA       |
| 0    | 0    | 0    | 0    | NA       | NA       |
| 0    | 0    | 0    | 0    | NA       | NA       |
| 0    | 0    | 0    | 0    | NA       | NA       |
| 0    | 0    | 0    | 0    | NA       | NA       |
| 1.67 | 0.92 | 0.79 | 2.11 | -0.314   | 0.669626 |
| 0    | 0    | 0    | 0    | NA       | NA       |
| 0.05 | 0    | 0    | 0    | NA       | NA       |
| 0    | 0    | 0    | 0    | NA       | NA       |
| 0    | 0    | 0    | 0    | NA       | NA       |
| 0    | 0    | 0    | 0    | NA       | NA       |
| 0    | 0    | 0    | 0    | NA       | NA       |
| 0.13 | 0.19 | 0    | 0.2  | NA       | NA       |
| 0    | 0    | 0    | 0    | NA       | NA       |
| 0.19 | 0.14 | 0.13 | 0.18 | -0.52893 | 0.359511 |
| 0.03 | 0.03 | 0.02 | 0.05 | NA       | NA       |
| 0.03 | 0    | 0.05 | 0.03 | NA       | NA       |
| 0    | 0    | 0    | 0    | NA       | NA       |
| 0    | 0    | 0    | 0    | NA       | NA       |
| 0    | 0    | 0    | 0    | NA       | NA       |
| 0    | 0    | 0    | 0.66 | -0.07175 | 0.873287 |
| 0    | 0    | 0    | 0    | NA       | NA       |
| 0    | 0.08 | 0.04 | 0.1  | 0.89168  | 0.16179  |
| 0.3  | 0.56 | 0.09 | 0.36 | 0.634705 | 0.34291  |
| 0.01 | 0    | 0    | 0.04 | NA       | NA       |

|       |       |       |       |          |          |
|-------|-------|-------|-------|----------|----------|
| 0     | 0     | 0     | 0     | NA       | NA       |
| 0     | 0.06  | 0.34  | 0.17  | NA       | NA       |
| 0     | 0     | 0     | 0     | NA       | NA       |
| 0.91  | 0.3   | 0.55  | 0.5   | -0.65708 | 0.092065 |
| 0     | 0.05  | 0.02  | 0.15  | NA       | NA       |
| 0     | 0     | 0     | 0     | NA       | NA       |
| 0     | 0.01  | 0.03  | 0.02  | NA       | NA       |
| 0     | 0     | 0     | 0     | NA       | NA       |
| 1.98  | 4     | 3.62  | 3.45  | 0.75352  | 0.020243 |
| 0     | 0     | 0     | 0     | NA       | NA       |
| 0     | 0     | 0     | 0     | NA       | NA       |
| 0.01  | 0     | 0     | 0     | NA       | NA       |
| 6.12  | 5.34  | 2.65  | 5.2   | -0.13052 | 0.878681 |
| 1.54  | 2.21  | 1.65  | 2.19  | -0.02075 | 0.968986 |
| 0     | 0     | 0     | 0     | NA       | NA       |
| 0     | 0     | 0     | 0     | NA       | NA       |
| 0     | 0     | 0     | 0     | NA       | NA       |
| 0     | 0     | 0     | 0     | NA       | NA       |
| 0     | 0     | 0.1   | 0     | NA       | NA       |
| 0     | 0     | 0     | 0     | NA       | NA       |
| 0.3   | 0.55  | 0.3   | 0.57  | 0.402249 | 0.598495 |
| 0.04  | 0.03  | 0.1   | 0.04  | NA       | NA       |
| 0     | 0.04  | 0.02  | 0.12  | NA       | NA       |
| 12.81 | 6.1   | 9.33  | 8.05  | -0.73666 | 0.006116 |
| 0     | 0     | 0     | 0     | NA       | NA       |
| 0     | 0     | 0     | 0     | NA       | NA       |
| 1.03  | 1.17  | 1.31  | 1.54  | -0.02781 | 0.951737 |
| 0.64  | 1.09  | 1.5   | 0.41  | 0.300396 | 0.603309 |
| 0     | 0     | 0.23  | 0     | NA       | NA       |
| 0     | 0     | 0     | 0     | NA       | NA       |
| 0     | 0     | 0     | 0     | NA       | NA       |
| 0     | 0     | 0.29  | 0.11  | NA       | NA       |
| 0     | 0     | 0     | 0     | NA       | NA       |
| 0     | 0     | 0     | 0     | NA       | NA       |
| 0     | 0     | 0     | 0     | NA       | NA       |
| 0     | 0     | 0     | 0     | NA       | NA       |
| 0     | 0     | 0     | 0     | NA       | NA       |
| 0.27  | 0.08  | 0     | 0     | NA       | NA       |
| 10.4  | 14.25 | 12.83 | 13.79 | 0.524573 | 0.000656 |
| 3.54  | 4.5   | 4.11  | 4.44  | 0.038371 | 0.878681 |
| 0     | 0     | 0     | 0     | NA       | NA       |
| 0     | 0.06  | 0.34  | 0.17  | NA       | NA       |
| 0     | 0     | 0     | 0     | NA       | NA       |
| 2.25  | 0.33  | 1.36  | 1.88  | -0.35779 | 0.583792 |
| 3.08  | 2.6   | 2.73  | 3.08  | 0.009097 | 0.983825 |

|      |      |      |               |          |
|------|------|------|---------------|----------|
| 0    | 0    | 0    | 0 NA          | NA       |
| 0    | 0    | 0    | 0 NA          | NA       |
| 0    | 0    | 0    | 0 NA          | NA       |
| 0.09 | 1.58 | 1.8  | 1.07 1.528783 | 0.009746 |
| 0    | 0    | 0    | 0 NA          | NA       |
| 0    | 0    | 0    | 0 NA          | NA       |
| 0    | 0    | 0    | 0 NA          | NA       |
| 0    | 0    | 0.01 | 0 NA          | NA       |
| 0    | 0    | 0    | 0 NA          | NA       |
| 0    | 0    | 0    | 0 NA          | NA       |
| 0    | 0    | 0    | 0 NA          | NA       |
| 0    | 0.14 | 0    | 0 NA          | NA       |
| 0    | 0    | 0    | 0.26 NA       | NA       |
| 0.06 | 0    | 0    | 0 NA          | NA       |
| 0    | 0    | 0    | 0 NA          | NA       |
| 0.19 | 0.02 | 0.01 | 0.03 NA       | NA       |
| 0    | 0    | 0    | 0 NA          | NA       |
| 0    | 0    | 0    | 0 NA          | NA       |
| 0    | 0    | 0    | 0 NA          | NA       |
| 0    | 0    | 0    | 0 NA          | NA       |
| 0    | 0    | 0    | 0 NA          | NA       |
| 0    | 0    | 0    | 0 NA          | NA       |
| 5.95 | 3.62 | 4.41 | 5.95 -0.59622 | 0.008664 |
| 0    | 0    | 0    | 0 NA          | NA       |
| 0    | 0    | 0    | 0 NA          | NA       |
| 0.04 | 0    | 0    | 0 NA          | NA       |
| 0    | 0    | 0    | 0 NA          | NA       |
| 0.7  | 0.21 | 0.48 | 0.54 -0.87823 | 0.043702 |
| 0    | 0    | 0    | 0 NA          | NA       |
| 0    | 0    | 0    | 0 NA          | NA       |
| 0    | 0    | 0    | 0 NA          | NA       |
| 0    | 0    | 0.14 | 0 NA          | NA       |
| 0.28 | 0.16 | 0.17 | 0.21 -0.28189 | 0.643033 |
| 1.53 | 2.93 | 2.07 | 3.56 -0.01455 | 0.979168 |
| 0.87 | 0    | 0.5  | 0.28 -1.13571 | 0.067214 |
| 0    | 0    | 0    | 0 NA          | NA       |
| 0    | 0    | 0    | 0 NA          | NA       |
| 0    | 0    | 0    | 0 NA          | NA       |
| 1.23 | 2.04 | 1.17 | 0.91 0.380035 | 0.617064 |
| 0    | 0    | 0    | 0 NA          | NA       |
| 0.07 | 0.92 | 0.58 | 0.8 1.170649  | 0.019025 |
| 0.02 | 0.01 | 0.13 | 0.1 NA        | NA       |
| 0    | 0    | 0    | 0 NA          | NA       |
| 0    | 0    | 0    | 0 NA          | NA       |
| 0    | 0    | 0    | 0 NA          | NA       |

|      |      |      |      |          |          |
|------|------|------|------|----------|----------|
| 0    | 0    | 0    | 0    | NA       | NA       |
| 0    | 0    | 0    | 0    | NA       | NA       |
| 0.07 | 0.04 | 0.13 | 0.14 | NA       | NA       |
| 0    | 0    | 0    | 0    | NA       | NA       |
| 0    | 0    | 0    | 0    | NA       | NA       |
| 0    | 0    | 0    | 0    | NA       | NA       |
| 0    | 0    | 0    | 0    | NA       | NA       |
| 0.05 | 0.01 | 0.05 | 0.01 | NA       | NA       |
| 0    | 0    | 0    | 0    | NA       | NA       |
| 0    | 0    | 0    | 0    | NA       | NA       |
| 0    | 0.06 | 0.34 | 0.17 | NA       | NA       |
| 1.42 | 1.35 | 1.26 | 1.4  | 0.02984  | 0.94992  |
| 0    | 0    | 0    | 0    | NA       | NA       |
| 0.69 | 0.27 | 0.54 | 0.56 | -0.38433 | 0.513736 |
| 0.46 | 0.66 | 0.28 | 0.57 | 0.508273 | 0.438274 |
| 0    | 0    | 0.02 | 0    | NA       | NA       |
| 0    | 0    | 0    | 0    | NA       | NA       |
| 0.36 | 0.12 | 0.24 | 0.21 | -0.75754 | 0.06368  |
| 0.21 | 0.07 | 0.1  | 0.05 | -0.40384 | 0.582246 |
| 0    | 0    | 0    | 0    | NA       | NA       |
| 1.9  | 0    | 0    | 0    | NA       | NA       |
| 0    | 0    | 0    | 0    | NA       | NA       |
| 0    | 0    | 0    | 0    | NA       | NA       |
| 0    | 0    | 0    | 0    | NA       | NA       |
| 0    | 0    | 0    | 0    | NA       | NA       |
| 0    | 0    | 0    | 0    | NA       | NA       |
| 0.7  | 1.13 | 1.11 | 1.12 | 0.349315 | 0.361197 |
| 0.18 | 0.13 | 0.24 | 0    | NA       | NA       |
| 0.3  | 0.26 | 0.28 | 0.3  | -0.00531 | 0.978563 |
| 0    | 0    | 0.02 | 0    | NA       | NA       |
| 0.91 | 3.44 | 0.41 | 1.09 | 0.188557 | 0.821129 |
| 0.18 | 0.22 | 0.28 | 0.12 | -0.68457 | 0.291113 |
| 0.19 | 0.42 | 0.39 | 0.29 | 0.838299 | 0.191296 |
| 0    | 0    | 0    | 0    | NA       | NA       |
| 0    | 0    | 0    | 0    | NA       | NA       |
| 0    | 0.05 | 0.07 | 0.08 | NA       | NA       |
| 0.03 | 0.05 | 0.02 | 0.05 | NA       | NA       |
| 0    | 0.05 | 2.25 | 0.27 | NA       | NA       |
| 0    | 0    | 0    | 0.17 | NA       | NA       |
| 0    | 0    | 0    | 0    | NA       | NA       |
| 3.25 | 2.66 | 2.9  | 3.15 | -0.10463 | 0.629904 |
| 0    | 0    | 0    | 0    | NA       | NA       |
| 3.56 | 4.34 | 3.45 | 1.8  | -0.21589 | 0.674513 |
| 0.55 | 0.08 | 0.36 | 0.42 | -0.39081 | 0.614758 |

|       |      |       |                |          |
|-------|------|-------|----------------|----------|
| 0.02  | 0    | 0     | 0 NA           | NA       |
| 0     | 0    | 0     | 0 NA           | NA       |
| 0     | 0    | 0     | 0 NA           | NA       |
| 0.18  | 0    | 0.03  | 0.1 NA         | NA       |
| 0     | 0    | 0     | 0 NA           | NA       |
| 0     | 0    | 0     | 0 NA           | NA       |
| 0     | 0.55 | 1.28  | 0.49 0.526092  | 0.475626 |
| 0     | 0    | 0     | 0.13 NA        | NA       |
| 0     | 0    | 0     | 0 NA           | NA       |
| 0     | 0    | 0     | 0 NA           | NA       |
| 0     | 0.03 | 0     | 0 NA           | NA       |
| 0.21  | 0    | 0     | 0 NA           | NA       |
| 1.28  | 0.65 | 1.08  | 0.5 -0.2626    | 0.59446  |
| 0.82  | 0.75 | 0.49  | 1.01 0.304938  | 0.630964 |
| 0     | 0    | 0     | 0 NA           | NA       |
| 0.09  | 0.2  | 0.06  | 0.22 NA        | NA       |
| 0.52  | 0.09 | 0.09  | 0.69 -0.63147  | 0.373564 |
| 0.04  | 0.18 | 0.12  | 0.1 0.16284    | 0.850555 |
| 0     | 0    | 0     | 0 NA           | NA       |
| 0.22  | 0.05 | 0.09  | 0.15 -0.70686  | 0.284762 |
| 0     | 0    | 0     | 0 NA           | NA       |
| 3.15  | 6.46 | 4.71  | 6.89 0.690506  | 0.0109   |
| 0     | 0    | 0     | 0 NA           | NA       |
| 2.07  | 0.69 | 1.76  | 0.98 0.137485  | 0.876132 |
| 0     | 0    | 0     | 0 NA           | NA       |
| 0     | 0    | 0     | 0 NA           | NA       |
| 0     | 0    | 0     | 0 NA           | NA       |
| 0     | 0    | 0     | 0 NA           | NA       |
| 17.78 | 22.5 | 23.15 | 22.78 0.312042 | 0.005035 |
| 0     | 0    | 0     | 0 NA           | NA       |
| 0     | 0    | 0     | 0 NA           | NA       |
| 4.47  | 3.65 | 2.55  | 3.59 -0.2249   | 0.610599 |
| 0     | 0    | 0     | 0 NA           | NA       |
| 0     | 0.07 | 0     | 0 NA           | NA       |
| 0     | 0    | 0     | 0 NA           | NA       |
| 0     | 0    | 0     | 0 NA           | NA       |
| 0     | 0    | 0.03  | 0.02 NA        | NA       |
| 0     | 0    | 0     | 0 NA           | NA       |
| 0     | 0    | 0     | 0 NA           | NA       |
| 0     | 0    | 0     | 0 NA           | NA       |
| 0     | 0    | 0     | 0 NA           | NA       |
| 0     | 0    | 0     | 0 NA           | NA       |
| 0     | 0    | 0     | 0.03 NA        | NA       |
| 0     | 0    | 0     | 0 NA           | NA       |
| 0     | 0    | 0.3   | 0 NA           | NA       |
| 0     | 0.07 | 0     | 0.08 NA        | NA       |

|      |      |      |               |          |
|------|------|------|---------------|----------|
| 0    | 0    | 0    | 0 NA          | NA       |
| 0    | 0    | 0    | 0 NA          | NA       |
| 0    | 0    | 0    | 0 NA          | NA       |
| 0    | 0    | 0    | 0 NA          | NA       |
| 4.56 | 0    | 0    | 0 NA          | NA       |
| 0    | 0    | 0.16 | 0.18 NA       | NA       |
| 0    | 0    | 0    | 0 NA          | NA       |
| 0    | 0    | 0    | 0 NA          | NA       |
| 0    | 0.05 | 0.04 | 0.05 NA       | NA       |
| 0    | 0    | 0    | 0 NA          | NA       |
| 0    | 0    | 0    | 0.14 NA       | NA       |
| 0    | 0    | 0    | 0.14 NA       | NA       |
| 0    | 0.02 | 0.16 | 0.07 0.243229 | 0.770492 |
| 0    | 0.02 | 0    | 0.12 NA       | NA       |
| 0    | 0    | 0    | 0 NA          | NA       |
| 0    | 0    | 0    | 0 NA          | NA       |
| 0    | 0    | 0.01 | 0 NA          | NA       |
| 0.11 | 1.13 | 0.52 | 1.45 1.568568 | 0.007804 |
| 0.6  | 0.04 | 0.37 | 0.29 -0.46602 | 0.527293 |
| 0    | 0    | 0    | 0 NA          | NA       |
| 0    | 0    | 0    | 0 NA          | NA       |
| 0    | 0    | 0    | 0 NA          | NA       |
| 0.46 | 0.56 | 0.68 | 0.74 -0.0897  | 0.921012 |
| 0.13 | 0.07 | 0.18 | 0.05 NA       | NA       |
| 0.1  | 0    | 0    | 0.14 NA       | NA       |
| 0    | 0    | 0    | 0 NA          | NA       |
| 0.19 | 0.34 | 0.13 | 0.12 -0.16807 | 0.846126 |
| 0    | 0.07 | 0.28 | 0.08 NA       | NA       |
| 0    | 0    | 0.03 | 0 NA          | NA       |
| 0    | 0    | 0    | 0 NA          | NA       |
| 0    | 0    | 0    | 0 NA          | NA       |
| 0    | 0    | 0    | 0 NA          | NA       |
| 0    | 0    | 0    | 0 NA          | NA       |
| 0    | 0    | 0    | 0 NA          | NA       |
| 0    | 0.01 | 0    | 0 NA          | NA       |
| 0    | 0    | 0.04 | 0 NA          | NA       |
| 0    | 0    | 0    | 0 NA          | NA       |
| 1.23 | 1.17 | 1.51 | 0.49 0.059675 | 0.94822  |
| 0    | 0    | 0    | 0 NA          | NA       |
| 0.06 | 0.1  | 0    | 0.16 0.238525 | 0.771242 |
| 0.21 | 0    | 0    | 0 NA          | NA       |
| 0.17 | 0.35 | 0.17 | 0.44 0.882591 | 0.165365 |
| 0    | 0.2  | 0    | 0 NA          | NA       |
| 1.4  | 2.61 | 2.16 | 3.49 0.607952 | 0.002396 |
| 0.36 | 0.28 | 0.13 | 0 NA          | NA       |

|      |      |      |               |          |
|------|------|------|---------------|----------|
| 0    | 0    | 0.02 | 0 NA          | NA       |
| 0    | 0    | 0    | 0 NA          | NA       |
| 1.97 | 0.54 | 0.88 | 0.47 -0.92909 | 0.017602 |
| 0    | 0    | 0.02 | 0 NA          | NA       |
| 0    | 0    | 0    | 0 NA          | NA       |
| 0    | 0    | 0    | 0 NA          | NA       |
| 0    | 0    | 0    | 0 NA          | NA       |
| 0.04 | 0    | 0    | 0 NA          | NA       |
| 0    | 0    | 0    | 0 NA          | NA       |
| 0    | 0    | 0    | 0 NA          | NA       |
| 0    | 0    | 0    | 0 NA          | NA       |
| 0    | 0    | 0    | 0 NA          | NA       |
| 0    | 0    | 0    | 0 NA          | NA       |
| 0.09 | 0.13 | 0.06 | 0.08 NA       | NA       |
| 0    | 0    | 0    | 0 NA          | NA       |
| 0.23 | 0.09 | 0.1  | 0.13 -0.62587 | 0.249736 |
| 0    | 0    | 0    | 0 NA          | NA       |
| 0    | 0    | 0    | 0 NA          | NA       |
| 0    | 0    | 0    | 0 NA          | NA       |
| 0    | 0    | 0    | 0 NA          | NA       |
| 0    | 0    | 0    | 0 NA          | NA       |
| 0    | 0.36 | 0.39 | 0 NA          | NA       |
| 0    | 0    | 0    | 0 NA          | NA       |
| 0    | 0    | 0    | 0 NA          | NA       |
| 0    | 0    | 0    | 0 NA          | NA       |
| 6.76 | 4.5  | 5.46 | 8.27 -0.46495 | 0.04037  |
| 0    | 0    | 0    | 0 NA          | NA       |
| 0    | 0    | 0    | 0 NA          | NA       |
| 0.21 | 0.03 | 0    | 0.06 -0.74205 | 0.2488   |
| 0.01 | 0.37 | 0.4  | 0 NA          | NA       |
| 0    | 0    | 0    | 0 NA          | NA       |
| 0    | 0    | 0    | 0 NA          | NA       |
| 0    | 0    | 0    | 0.11 NA       | NA       |
| 0    | 0    | 0    | 0 NA          | NA       |
| 0    | 0    | 0    | 0 NA          | NA       |
| 0    | 0    | 0    | 0 NA          | NA       |
| 1.19 | 1.68 | 1.47 | 2.16 -0.0769  | 0.918712 |
| 0    | 0    | 0    | 0 NA          | NA       |
| 0    | 0    | 0    | 0 NA          | NA       |
| 0    | 0    | 0    | 0 NA          | NA       |
| 0.66 | 0.24 | 0.15 | 0.34 -0.70501 | 0.308338 |
| 0    | 0    | 0    | 0 NA          | NA       |
| 4.06 | 3.6  | 3.35 | 3.39 -0.40149 | 0.02036  |



|       |       |       |               |          |
|-------|-------|-------|---------------|----------|
| 0     | 0     | 0     | 0 NA          | NA       |
| 1.91  | 1.95  | 2.27  | 1.15 NA       | NA       |
| 0     | 0     | 0     | 0 NA          | NA       |
| 0.23  | 0     | 0     | 0.09 NA       | NA       |
| 0     | 0     | 0     | 0 NA          | NA       |
| 0     | 0     | 0     | 0 NA          | NA       |
| 0     | 0     | 0     | 0 NA          | NA       |
| 0     | 0     | 0     | 0 NA          | NA       |
| 0     | 0     | 0     | 0 NA          | NA       |
| 27.08 | 23.63 | 25.27 | 27.17 -0.0844 | 0.53739  |
| 0     | 0     | 0     | 0 NA          | NA       |
| 0     | 0     | 0     | 0 NA          | NA       |
| 0     | 0     | 0     | 0 NA          | NA       |
| 0     | 0     | 0     | 0 NA          | NA       |
| 13.86 | 11.03 | 11.26 | 18.43 -0.0281 | 0.941403 |
| 0     | 0     | 0     | 0 NA          | NA       |
| 0     | 0     | 0     | 0 NA          | NA       |
| 0     | 0     | 0     | 0 NA          | NA       |
| 0     | 0     | 0     | 0 NA          | NA       |
| 0.1   | 0.07  | 0.13  | 0 NA          | NA       |
| 0.56  | 0     | 0     | 0 NA          | NA       |
| 0     | 0     | 0     | 0 NA          | NA       |
| 0     | 0.14  | 0.04  | 0 NA          | NA       |
| 0     | 0     | 0     | 0 NA          | NA       |
| 0     | 0     | 0     | 0 NA          | NA       |
| 0     | 0     | 0     | 0 NA          | NA       |
| 0     | 0     | 0     | 0 NA          | NA       |
| 0     | 0.03  | 0.07  | 0.11 NA       | NA       |
| 0     | 0     | 0     | 0 NA          | NA       |
| 0     | 0     | 0     | 0 NA          | NA       |
| 0     | 0     | 0     | 0 NA          | NA       |
| 0     | 0     | 0     | 0 NA          | NA       |
| 0     | 0     | 0     | 0 NA          | NA       |
| 0     | 0     | 0     | 0 NA          | NA       |
| 0     | 0     | 0     | 0 NA          | NA       |
| 0     | 0     | 0     | 0 NA          | NA       |
| 0     | 0     | 0     | 0 NA          | NA       |
| 0     | 0     | 0.1   | 0 NA          | NA       |
| 0     | 0     | 0     | 0 NA          | NA       |
| 0     | 0     | 0     | 0 NA          | NA       |
| 0     | 0     | 0     | 0 NA          | NA       |
| 0.42  | 0.25  | 0.45  | 0.41 0.148383 | 0.867536 |
| 0     | 0     | 0     | 0 NA          | NA       |
| 0     | 0     | 0     | 0 NA          | NA       |
| 0.44  | 0.21  | 0.2   | 0 NA          | NA       |
| 0     | 0     | 0     | 0 NA          | NA       |



|      |      |      |       |          |          |
|------|------|------|-------|----------|----------|
| 0.1  | 0    | 0.13 | 0     | NA       | NA       |
| 0    | 0    | 0    | 0     | NA       | NA       |
| 0    | 0    | 0    | 0     | NA       | NA       |
| 0    | 0    | 0    | 0     | NA       | NA       |
| 0    | 0    | 0    | 0     | NA       | NA       |
| 0    | 0    | 0    | 0     | NA       | NA       |
| 0    | 0    | 0    | 0     | NA       | NA       |
| 0    | 0    | 0    | 0     | NA       | NA       |
| 0    | 0    | 0    | 0     | NA       | NA       |
| 0    | 0    | 0.02 | 0     | NA       | NA       |
| 0    | 0    | 0    | 0     | NA       | NA       |
| 0.84 | 0.62 | 0.74 | 0.59  | -0.28863 | 0.464526 |
| 0    | 0    | 0    | 0     | NA       | NA       |
| 0    | 0    | 0    | 0     | NA       | NA       |
| 0    | 0    | 0    | 0     | NA       | NA       |
| 0.04 | 0    | 0    | 0.03  | NA       | NA       |
| 0    | 0    | 0    | 0     | NA       | NA       |
| 0    | 0    | 0    | 0     | NA       | NA       |
| 0    | 0    | 0    | 0     | NA       | NA       |
| 0    | 0    | 0    | 0     | NA       | NA       |
| 0.04 | 0.02 | 0.04 | 0.03  | 0.296901 | 0.710803 |
| 0    | 0    | 0    | 0     | NA       | NA       |
| 0    | 0    | 0    | 0     | NA       | NA       |
| 0    | 0    | 0    | 0     | NA       | NA       |
| 0    | 0    | 0    | 0     | NA       | NA       |
| 0    | 0    | 0.09 | 0.43  | NA       | NA       |
| 0    | 0    | 0    | 0     | NA       | NA       |
| 1.09 | 0.13 | 0.36 | 0.27  | -0.82097 | 0.220817 |
| 0    | 0    | 0    | 0     | NA       | NA       |
| 0.12 | 0.16 | 0    | 0.22  | -0.43398 | 0.567268 |
| 0    | 0    | 0    | 0     | NA       | NA       |
| 2.77 | 5.72 | 3.95 | 12.14 | 0.922936 | 0.147258 |
| 0    | 0    | 0.22 | 0.13  | NA       | NA       |
| 0.99 | 0.94 | 0.65 | 0.42  | -0.05128 | 0.95471  |
| 0    | 0    | 0    | 0     | NA       | NA       |
| 0.03 | 0.03 | 0.04 | 0.03  | NA       | NA       |
| 0    | 0.07 | 0    | 0.04  | NA       | NA       |
| 0    | 0    | 0.35 | 0     | NA       | NA       |
| 0.04 | 0.09 | 0.06 | 0.13  | NA       | NA       |
| 0    | 0    | 0    | 0     | NA       | NA       |
| 0    | 0    | 0    | 0     | NA       | NA       |
| 0    | 0    | 0    | 0     | NA       | NA       |

|      |      |      |               |          |
|------|------|------|---------------|----------|
| 0    | 0    | 0.16 | 0 NA          | NA       |
| 0    | 0.15 | 0.07 | 0 NA          | NA       |
| 0    | 0.45 | 0.77 | 0.18 0.627982 | 0.370135 |
| 0.02 | 0    | 0    | 0 NA          | NA       |
| 0    | 0    | 0    | 0 NA          | NA       |
| 0    | 0    | 0    | 0 NA          | NA       |
| 0    | 0    | 0    | 0 NA          | NA       |
| 0    | 0    | 0    | 0 NA          | NA       |
| 0    | 0    | 0    | 0 NA          | NA       |
| 0    | 0.25 | 0.23 | 0.21 -0.00664 | 0.995254 |
| 0    | 0    | 0    | 0 NA          | NA       |
| 0    | 0    | 0    | 0 NA          | NA       |
| 0    | 0.09 | 0    | 0 NA          | NA       |
| 0.76 | 0.18 | 0.31 | 0.18 NA       | NA       |
| 0.75 | 0.83 | 1.09 | 1.06 0.250824 | 0.528371 |
| 0    | 0    | 0    | 0 NA          | NA       |
| 0    | 0.26 | 0.19 | 0.2 1.187756  | 0.040233 |
| 0    | 0    | 0    | 0 NA          | NA       |
| 0    | 0    | 0    | 0.57 NA       | NA       |
| 0    | 0    | 0    | 0 NA          | NA       |
| 0    | 0    | 0    | 0 NA          | NA       |
| 0    | 0    | 0    | 0 NA          | NA       |
| 0.25 | 0.08 | 0.12 | 0.16 -0.27299 | 0.741215 |
| 0    | 0    | 0    | 0 NA          | NA       |
| 0    | 0    | 0    | 0 NA          | NA       |
| 0    | 0    | 0    | 0 NA          | NA       |
| 0    | 0    | 0    | 0 NA          | NA       |
| 0    | 0    | 0    | 0 NA          | NA       |
| 0    | 0    | 0    | 0 NA          | NA       |
| 0.25 | 0.18 | 0.23 | 0.1 -0.19442  | 0.820426 |
| 0    | 0    | 0    | 0 NA          | NA       |
| 0    | 0    | 0    | 0 NA          | NA       |
| 1.38 | 0.91 | 1.09 | 1.04 -0.19153 | 0.70432  |
| 0    | 0    | 0.03 | 0 NA          | NA       |
| 0    | 0    | 0    | 0 NA          | NA       |
| 0    | 0    | 0    | 0 NA          | NA       |
| 0    | 0    | 0    | 0 NA          | NA       |
| 0    | 0    | 0    | 0 NA          | NA       |
| 0    | 0.18 | 1.06 | 0 NA          | NA       |
| 1.44 | 1.89 | 1.87 | 2.09 0.23776  | 0.458059 |
| 0.29 | 0.42 | 0.28 | 0.22 NA       | NA       |
| 0    | 0    | 0    | 0 NA          | NA       |
| 0.06 | 0.04 | 0.19 | 0.11 0.913298 | 0.161767 |

|       |       |      |       |          |          |
|-------|-------|------|-------|----------|----------|
| 0     | 0     | 0    | 0     | NA       | NA       |
| 0.02  | 0.03  | 0.04 | 0.03  | NA       | NA       |
| 0     | 0     | 0    | 0     | NA       | NA       |
| 0     | 0     | 0    | 0     | NA       | NA       |
| 0     | 0     | 0    | 0     | NA       | NA       |
| 0     | 0.07  | 0.02 | 0.02  | NA       | NA       |
| 0     | 0     | 0    | 0     | NA       | NA       |
| 0     | 0     | 0    | 0     | NA       | NA       |
| 0     | 0     | 0    | 0     | NA       | NA       |
| 0     | 0     | 0    | 0     | NA       | NA       |
| 0     | 0     | 0    | 0     | NA       | NA       |
| 0     | 0.11  | 0.58 | 0.97  | NA       | NA       |
| 0     | 0     | 0    | 0.05  | NA       | NA       |
| 0     | 0     | 0    | 0     | NA       | NA       |
| 0     | 0     | 0    | 0     | NA       | NA       |
| 0     | 0     | 0    | 0     | NA       | NA       |
| 0     | 0     | 0    | 0     | NA       | NA       |
| 7.31  | 11.12 | 7.07 | 4.05  | 0.37434  | 0.605502 |
| 0     | 0     | 0    | 0     | NA       | NA       |
| 2.16  | 7.16  | 4.63 | 4.51  | 0.497939 | 0.084206 |
| 0     | 0     | 0    | 0     | NA       | NA       |
| 0.21  | 0     | 0.05 | 0.32  | 0.016242 | 0.987051 |
| 0     | 0     | 0    | 0     | NA       | NA       |
| 0     | 0     | 0    | 0     | NA       | NA       |
| 0     | 0     | 0    | 0     | NA       | NA       |
| 0     | 0     | 0    | 0     | NA       | NA       |
| 0     | 0     | 0    | 0     | NA       | NA       |
| 0     | 0     | 0    | 0     | NA       | NA       |
| 0     | 0     | 0    | 0     | NA       | NA       |
| 0     | 0     | 0    | 0     | NA       | NA       |
| 0     | 0     | 0    | 0     | NA       | NA       |
| 0     | 0     | 0    | 0     | NA       | NA       |
| 0     | 0     | 0    | 0     | NA       | NA       |
| 0     | 0     | 0    | 0     | NA       | NA       |
| 0     | 0     | 0    | 0     | NA       | NA       |
| 0     | 0     | 0    | 0     | NA       | NA       |
| 0     | 0     | 0    | 0     | NA       | NA       |
| 0     | 0     | 0    | 0     | NA       | NA       |
| 0     | 0     | 0    | 0     | NA       | NA       |
| 0     | 0     | 0    | 0     | NA       | NA       |
| 0     | 0     | 0    | 0     | NA       | NA       |
| 0     | 0     | 0    | 0     | NA       | NA       |
| 0     | 0     | 0    | 0     | NA       | NA       |
| 0.77  | 0.54  | 1.03 | 0.56  | -0.39475 | 0.449862 |
| 0     | 0     | 0    | 0     | NA       | NA       |
| 0     | 0     | 0.03 | 0     | NA       | NA       |
| 0     | 0     | 0    | 0     | NA       | NA       |
| 0     | 0     | 0    | 0     | NA       | NA       |
| 0     | 0     | 0    | 0     | NA       | NA       |
| 0     | 0     | 0    | 0     | NA       | NA       |
| 1.62  | 0.68  | 1.04 | 1.03  | -0.65197 | 0.014341 |
| 0     | 0     | 0    | 0     | NA       | NA       |
| 0     | 0     | 0    | 0     | NA       | NA       |
| 53.13 | 36.16 | 41.4 | 37.83 | -0.53926 | 1.02E-06 |
| 0     | 0     | 0    | 0     | NA       | NA       |

|      |      |      |               |          |
|------|------|------|---------------|----------|
| 0    | 0    | 0    | 0 NA          | NA       |
| 0.38 | 0.37 | 0.52 | 0.75 0.364374 | 0.543636 |
| 0    | 0    | 0    | 0 NA          | NA       |
| 0    | 0    | 0.13 | 0 NA          | NA       |
| 0    | 0    | 0    | 0 NA          | NA       |
| 0    | 0    | 0    | 0 NA          | NA       |
| 0    | 0    | 0    | 0 NA          | NA       |
| 0    | 0    | 0    | 0 NA          | NA       |
| 0    | 0    | 0    | 0 NA          | NA       |
| 0    | 0.08 | 0.06 | 0.34 NA       | NA       |
| 0    | 0    | 0    | 0 NA          | NA       |
| 0    | 0    | 0    | 0 NA          | NA       |
| 0    | 0    | 0    | 0 NA          | NA       |
| 0    | 0    | 0    | 0 NA          | NA       |
| 0    | 0.04 | 0    | 0 NA          | NA       |
| 0    | 0    | 0    | 0 NA          | NA       |
| 0    | 0    | 0    | 0 NA          | NA       |
| 0    | 0    | 0    | 0 NA          | NA       |
| 0    | 0    | 0    | 0 NA          | NA       |
| 0    | 0    | 0    | 0 NA          | NA       |
| 0    | 0    | 0    | 0 NA          | NA       |
| 0    | 0    | 0    | 0 NA          | NA       |
| 0    | 0    | 0    | 0 NA          | NA       |
| 0    | 0    | 0    | 0 NA          | NA       |
| 0.14 | 0.02 | 0.45 | 0.53 -0.67282 | 0.321394 |
| 0    | 0    | 0    | 0 NA          | NA       |
| 0    | 0    | 0    | 0 NA          | NA       |
| 0    | 0    | 0    | 0 NA          | NA       |
| 0    | 0    | 0    | 0 NA          | NA       |
| 0.11 | 0.12 | 0.19 | 0.18 -0.35253 | 0.617648 |
| 0    | 0    | 0    | 0 NA          | NA       |
| 0    | 0    | 0    | 0 NA          | NA       |
| 0.2  | 0.07 | 0.02 | 1.11 0.27824  | NA       |
| 0.06 | 0.23 | 0.17 | 0.2 NA        | NA       |
| 0    | 0    | 0    | 0 NA          | NA       |
| 0    | 0    | 0    | 0 NA          | NA       |
| 0    | 0.01 | 0    | 0 NA          | NA       |
| 0    | 0    | 0    | 0 NA          | NA       |
| 0.24 | 0.27 | 0.14 | 0.18 NA       | NA       |
| 0    | 0    | 0    | 0 NA          | NA       |
| 0    | 0    | 0    | 0 NA          | NA       |
| 0    | 0    | 0    | 0 NA          | NA       |
| 0    | 0    | 0    | 0 NA          | NA       |
| 0    | 0    | 0    | 0 NA          | NA       |







|      |      |      |               |          |
|------|------|------|---------------|----------|
| 0    | 0    | 0    | 0 NA          | NA       |
| 0    | 0    | 0.53 | 0.06 NA       | NA       |
| 0    | 0    | 0    | 0 NA          | NA       |
| 0    | 0    | 0    | 0 NA          | NA       |
| 0    | 0    | 0    | 0 NA          | NA       |
| 0    | 0    | 0    | 0 NA          | NA       |
| 0    | 0    | 0    | 0 NA          | NA       |
| 0    | 0    | 0    | 0 NA          | NA       |
| 0    | 0    | 0    | 0 NA          | NA       |
| 0    | 0.11 | 0    | 0.07 NA       | NA       |
| 0    | 0    | 0    | 0 NA          | NA       |
| 0    | 0    | 0    | 0 NA          | NA       |
| 0    | 0    | 0    | 0 NA          | NA       |
| 0    | 0    | 0    | 0 NA          | NA       |
| 0.04 | 0.02 | 0.05 | 0.06 0.046991 | 0.960529 |
| 0    | 0    | 0    | 0 NA          | NA       |
| 0    | 0.04 | 0    | 0 NA          | NA       |
| 0    | 0    | 0    | 0 NA          | NA       |
| 0    | 0    | 0    | 0 NA          | NA       |
| 0    | 0    | 0    | 0 NA          | NA       |
| 0    | 0    | 0    | 0 NA          | NA       |
| 0.04 | 0.04 | 0.07 | 0.05 NA       | NA       |
| 0    | 0    | 0    | 0 NA          | NA       |
| 0    | 0    | 0    | 0 NA          | NA       |
| 0    | 0    | 0    | 0 NA          | NA       |
| 0    | 0    | 0    | 0 NA          | NA       |
| 0    | 0    | 0    | 0 NA          | NA       |
| 0    | 0    | 0    | 0 NA          | NA       |
| 0    | 0    | 0    | 0 NA          | NA       |
| 0    | 0    | 0    | 0 NA          | NA       |
| 0    | 0    | 0    | 0 NA          | NA       |
| 0    | 0    | 0    | 0 NA          | NA       |
| 0    | 0    | 0    | 0 NA          | NA       |
| 0    | 0    | 0    | 0 NA          | NA       |
| 0    | 0.05 | 0.01 | 0 NA          | NA       |
| 0    | 0    | 0    | 0 NA          | NA       |
| 0    | 0    | 0    | 0 NA          | NA       |
| 0    | 0    | 0    | 0 NA          | NA       |
| 0    | 0    | 0    | 0 NA          | NA       |
| 0.62 | 0.46 | 0.74 | 0.57 0.189302 | 0.739854 |
| 0    | 0    | 0    | 0 NA          | NA       |
| 0    | 0    | 0    | 0 NA          | NA       |
| 0    | 0    | 0    | 0 NA          | NA       |

|      |      |      |         |    |
|------|------|------|---------|----|
| 0    | 0    | 0    | 0 NA    | NA |
| 0    | 0    | 0    | 0 NA    | NA |
| 0    | 0    | 0    | 0 NA    | NA |
| 0    | 0    | 0    | 0 NA    | NA |
| 0    | 0    | 0    | 0 NA    | NA |
| 0    | 0    | 0    | 0 NA    | NA |
| 0    | 0    | 0    | 0 NA    | NA |
| 0    | 0    | 0    | 0 NA    | NA |
| 0    | 0.01 | 0    | 0.01 NA | NA |
| 0    | 0    | 0    | 0 NA    | NA |
| 0    | 0    | 0    | 0 NA    | NA |
| 0    | 0    | 0    | 0 NA    | NA |
| 0    | 0    | 0    | 0 NA    | NA |
| 0    | 0    | 0    | 0 NA    | NA |
| 0    | 0    | 0    | 0 NA    | NA |
| 0    | 0    | 0    | 0 NA    | NA |
| 0    | 0    | 0    | 0 NA    | NA |
| 0    | 0    | 0    | 0 NA    | NA |
| 0    | 0    | 0    | 0 NA    | NA |
| 0    | 0    | 0    | 0 NA    | NA |
| 0    | 0    | 0    | 0.06 NA | NA |
| 0    | 0    | 0    | 0 NA    | NA |
| 0    | 0    | 0    | 0.07 NA | NA |
| 0    | 0    | 0    | 0 NA    | NA |
| 0.12 | 0.11 | 0.06 | 0.05 NA | NA |
| 0    | 0    | 0    | 0 NA    | NA |
| 0    | 0    | 0    | 0 NA    | NA |
| 0    | 0    | 0    | 0 NA    | NA |
| 0    | 0    | 0    | 0.1 NA  | NA |
| 0    | 0    | 0    | 0 NA    | NA |
| 0    | 0    | 0    | 0 NA    | NA |
| 0    | 0    | 0    | 0 NA    | NA |
| 0    | 0    | 0    | 0 NA    | NA |
| 0    | 0    | 0    | 0 NA    | NA |
| 0    | 0    | 0    | 0 NA    | NA |
| 0    | 0.01 | 0.01 | 0 NA    | NA |
| 0    | 0    | 0    | 0 NA    | NA |
| 0    | 0    | 0    | 0 NA    | NA |
| 0    | 0    | 0    | 0 NA    | NA |
| 0    | 0    | 0    | 0 NA    | NA |
| 0    | 0    | 0    | 0 NA    | NA |
| 0    | 0.18 | 0.22 | 0.05 NA | NA |
| 0    | 0    | 0    | 0 NA    | NA |
| 0    | 0    | 0    | 0 NA    | NA |





|      |      |      |               |          |
|------|------|------|---------------|----------|
| 0    | 0    | 0.04 | 0 NA          | NA       |
| 0    | 0    | 0    | 0 NA          | NA       |
| 0    | 0    | 0    | 0 NA          | NA       |
| 0    | 0    | 0    | 0 NA          | NA       |
| 0    | 0    | 0    | 0 NA          | NA       |
| 0    | 0    | 0    | 0 NA          | NA       |
| 0    | 0    | 0    | 0 NA          | NA       |
| 0    | 0    | 0.01 | 0 NA          | NA       |
| 0    | 0    | 0    | 0 NA          | NA       |
| 0    | 0    | 0    | 0 NA          | NA       |
| 0    | 0    | 0    | 0 NA          | NA       |
| 0.02 | 0.07 | 0    | 0.02 NA       | NA       |
| 0    | 0    | 0    | 0 NA          | NA       |
| 0    | 0    | 0    | 0 NA          | NA       |
| 0    | 0    | 0    | 0 NA          | NA       |
| 0.45 | 0.2  | 0.53 | 0.46 -0.28474 | 0.633536 |
| 0    | 0    | 0    | 0 NA          | NA       |
| 0    | 0    | 0    | 0 NA          | NA       |
| 0    | 0    | 0    | 0 NA          | NA       |
| 0    | 0    | 0    | 0 NA          | NA       |
| 0.04 | 0.06 | 0.03 | 0.1 NA        | NA       |
| 0    | 0    | 0    | 0 NA          | NA       |
| 0    | 0    | 0    | 0 NA          | NA       |
| 0    | 0    | 0    | 0 NA          | NA       |
| 0.2  | 0.21 | 0.07 | 0.14 -0.64619 | 0.318334 |
| 0    | 0    | 0    | 0 NA          | NA       |
| 0    | 0    | 0    | 0 NA          | NA       |
| 0    | 0    | 0    | 0 NA          | NA       |
| 0    | 0    | 0    | 0 NA          | NA       |
| 0    | 0    | 0    | 0 NA          | NA       |
| 0    | 0    | 0    | 0 NA          | NA       |
| 0.22 | 0.29 | 0.41 | 0.1 -0.26521  | 0.72924  |
| 0.27 | 0    | 0.12 | 0.03 -0.69304 | 0.312043 |
| 0    | 0    | 0    | 0 NA          | NA       |
| 0    | 0    | 0    | 0 NA          | NA       |
| 0    | 0    | 0    | 0 NA          | NA       |
| 0.07 | 0.19 | 0.14 | 0.05 NA       | NA       |
| 0    | 0    | 0    | 0 NA          | NA       |
| 0    | 0    | 0    | 0 NA          | NA       |
| 0    | 0    | 0    | 0 NA          | NA       |
| 0    | 0    | 0    | 0 NA          | NA       |
| 0    | 0    | 0    | 0 NA          | NA       |
| 0.36 | 0.26 | 0.15 | 0.22 -0.40046 | 0.603087 |
| 0    | 0    | 0    | 0 NA          | NA       |

|      |       |      |       |          |          |
|------|-------|------|-------|----------|----------|
| 1.14 | 0     | 0    | 0     | NA       | NA       |
| 0    | 0     | 0    | 0     | NA       | NA       |
| 0    | 0     | 0    | 0     | NA       | NA       |
| 0    | 0     | 0.06 | 0     | NA       | NA       |
| 0    | 0     | 0    | 0     | NA       | NA       |
| 0    | 0     | 0    | 0     | NA       | NA       |
| 0.1  | 0     | 0    | 0     | NA       | NA       |
| 0.22 | 0.04  | 0.05 | 0.22  | -0.73938 | 0.273748 |
| 0    | 0     | 0    | 0     | NA       | NA       |
| 0    | 0     | 0    | 0     | NA       | NA       |
| 0    | 0     | 0    | 0     | NA       | NA       |
| 0    | 0     | 0    | 0     | NA       | NA       |
| 0    | 0     | 0    | 0     | NA       | NA       |
| 0    | 0     | 0    | 0     | NA       | NA       |
| 0    | 0     | 0    | 0     | NA       | NA       |
| 0    | 0     | 0    | 0     | NA       | NA       |
| 0    | 0     | 0    | 0     | NA       | NA       |
| 13.7 | 13.65 | 18.4 | 18.37 | 0.117426 | 0.719768 |
| 0    | 0     | 0    | 0     | NA       | NA       |
| 0    | 0     | 0    | 0.5   | NA       | NA       |
| 0    | 0     | 0    | 0     | NA       | NA       |
| 0    | 0     | 0    | 0     | NA       | NA       |
| 0    | 0     | 0    | 0     | NA       | NA       |
| 0    | 0     | 0    | 0     | NA       | NA       |
| 0    | 0     | 0    | 0     | NA       | NA       |
| 0    | 0     | 0    | 0     | NA       | NA       |
| 0.07 | 0     | 0    | 0     | NA       | NA       |
| 0    | 0     | 0    | 0     | NA       | NA       |
| 0    | 0     | 0    | 0     | NA       | NA       |
| 4.22 | 6.9   | 6.5  | 6.43  | 0.278293 | 0.148627 |
| 0    | 0     | 0    | 0     | NA       | NA       |
| 0    | 0     | 0    | 0     | NA       | NA       |
| 0    | 0     | 0    | 0.27  | NA       | NA       |
| 0    | 0     | 0    | 0     | NA       | NA       |
| 0    | 0     | 0    | 0     | NA       | NA       |
| 0    | 0     | 0.05 | 0.03  | NA       | NA       |
| 0    | 0     | 0    | 0     | NA       | NA       |
| 0    | 0     | 0    | 0     | NA       | NA       |
| 0    | 0     | 1.67 | 5.31  | NA       | NA       |
| 0    | 0     | 0    | 0     | NA       | NA       |
| 0    | 0     | 0    | 0     | NA       | NA       |
| 0    | 0     | 0    | 0     | NA       | NA       |
| 2.05 | 0.45  | 0.91 | 0.54  | -0.58038 | NA       |
| 0    | 0     | 0    | 0     | NA       | NA       |

|       |       |      |               |          |
|-------|-------|------|---------------|----------|
| 0     | 0     | 0    | 0 NA          | NA       |
| 0     | 0     | 0    | 0 NA          | NA       |
| 0     | 0     | 0    | 0 NA          | NA       |
| 0     | 0     | 0    | 0 NA          | NA       |
| 0     | 0     | 0    | 0 NA          | NA       |
| 0     | 0     | 0    | 0 NA          | NA       |
| 0     | 0     | 0    | 0 NA          | NA       |
| 0     | 0     | 0    | 0 NA          | NA       |
| 0     | 0     | 0    | 0 NA          | NA       |
| 0     | 0     | 0    | 0 NA          | NA       |
| 0     | 0     | 0    | 0 NA          | NA       |
| 0     | 0     | 0    | 0 NA          | NA       |
| 0     | 0     | 0    | 0 NA          | NA       |
| 0.35  | 0.08  | 0    | 0 NA          | NA       |
| 0     | 0     | 0    | 0 NA          | NA       |
| 0     | 0     | 0    | 0 NA          | NA       |
| 10.82 | 0     | 0    | 0 NA          | NA       |
| 0     | 0     | 0    | 0 NA          | NA       |
| 0     | 0     | 0    | 0 NA          | NA       |
| 0     | 0     | 0    | 0 NA          | NA       |
| 0     | 0     | 0    | 0 NA          | NA       |
| 0.14  | 0.1   | 0.18 | 0.11 -0.9733  | 0.101333 |
| 0     | 0     | 0    | 0 NA          | NA       |
| 0     | 0     | 0    | 0 NA          | NA       |
| 0.05  | 0.07  | 0.05 | 0.07 0.520547 | 0.469819 |
| 0     | 0     | 0    | 0 NA          | NA       |
| 0     | 0     | 0    | 0 NA          | NA       |
| 0     | 0     | 0    | 0 NA          | NA       |
| 0     | 0     | 0    | 0 NA          | NA       |
| 0     | 0     | 0    | 0 NA          | NA       |
| 0.04  | 0.03  | 0.12 | 0.08 NA       | NA       |
| 0     | 0     | 0    | 0 NA          | NA       |
| 0     | 0     | 0    | 0 NA          | NA       |
| 0     | 0     | 0    | 0 NA          | NA       |
| 0     | 0     | 0    | 0 NA          | NA       |
| 0     | 0     | 0    | 0 NA          | NA       |
| 0     | 0     | 0    | 0 NA          | NA       |
| 0     | 0     | 0    | 0 NA          | NA       |
| 0     | 0     | 0    | 0 NA          | NA       |
| 2.08  | 10.84 | 0    | 4.12 NA       | NA       |
| 0     | 0     | 0    | 0 NA          | NA       |
| 0     | 0     | 0    | 0 NA          | NA       |
| 0     | 0     | 0    | 0 NA          | NA       |
| 0     | 0     | 0    | 0 NA          | NA       |

|       |       |       |               |          |
|-------|-------|-------|---------------|----------|
| 0     | 0     | 0     | 0 NA          | NA       |
| 0     | 0     | 0     | 0 NA          | NA       |
| 0     | 0     | 0     | 0 NA          | NA       |
| 0     | 0     | 0     | 0 NA          | NA       |
| 0     | 0     | 0     | 0 NA          | NA       |
| 0     | 0.04  | 0.12  | 0.22 NA       | NA       |
| 0     | 0     | 0     | 0 NA          | NA       |
| 0     | 0     | 0     | 0 NA          | NA       |
| 0     | 0     | 0     | 0 NA          | NA       |
| 0.13  | 0.02  | 0.14  | 0.04 -0.23179 | 0.775122 |
| 0     | 0     | 0     | 0 NA          | NA       |
| 0.59  | 3.03  | 1.24  | 1.24 1.01529  | 0.015187 |
| 0     | 0     | 0     | 0 NA          | NA       |
| 0     | 0     | 0     | 0 NA          | NA       |
| 65    | 74.68 | 89.18 | 95.2 0.314415 | 0.037023 |
| 0.07  | 0.03  | 0.08  | 0.1 NA        | NA       |
| 0     | 0     | 0     | 0 NA          | NA       |
| 0     | 0     | 0     | 0 NA          | NA       |
| 0     | 0     | 0     | 0 NA          | NA       |
| 25.04 | 0     | 0     | 0 NA          | NA       |
| 0     | 0     | 10.42 | 0 NA          | NA       |
| 0     | 0     | 0     | 0 NA          | NA       |
| 0     | 0     | 0     | 0 NA          | NA       |
| 0     | 0     | 0     | 0 NA          | NA       |
| 0.27  | 0.24  | 0.29  | 0.35 -0.51977 | 0.284869 |
| 0     | 0     | 0     | 0 NA          | NA       |
| 0     | 0     | 0     | 0 NA          | NA       |
| 0     | 0     | 0     | 0 NA          | NA       |
| 0     | 0     | 0     | 0 NA          | NA       |
| 0     | 0     | 0     | 0 NA          | NA       |
| 0     | 0     | 0     | 0 NA          | NA       |
| 0     | 0     | 0     | 0 NA          | NA       |
| 0     | 0     | 0     | 0 NA          | NA       |
| 0     | 0     | 0     | 0 NA          | NA       |
| 0     | 0     | 0     | 0 NA          | NA       |
| 0     | 0     | 0     | 0 NA          | NA       |
| 0     | 0     | 0     | 0 NA          | NA       |
| 0     | 0     | 0     | 0 NA          | NA       |
| 0     | 0     | 0     | 0 NA          | NA       |
| 0     | 0     | 0     | 0 NA          | NA       |
| 0     | 0     | 0     | 0 NA          | NA       |
| 0     | 0     | 0     | 0 NA          | NA       |
| 0     | 0     | 0     | 0 NA          | NA       |
| 0.15  | 0.38  | 0.34  | 0.38 0.895414 | 0.129963 |
| 0     | 0     | 0     | 0 NA          | NA       |
| 0     | 0     | 0     | 0 NA          | NA       |
| 0     | 0     | 0     | 0 NA          | NA       |
| 0     | 0     | 0     | 0 NA          | NA       |













|      |      |      |               |          |
|------|------|------|---------------|----------|
| 0    | 0    | 0    | 0 NA          | NA       |
| 0    | 0    | 0    | 0 NA          | NA       |
| 2.09 | 1.26 | 1.61 | 2.05 -0.31356 | 0.570559 |
| 0.01 | 0.02 | 0.01 | 0.09 0.10217  | 0.910213 |
| 0.32 | 0.36 | 0.17 | 0.28 0.046564 | 0.959072 |
| 0    | 0    | 0    | 0 NA          | NA       |
| 0    | 0    | 0    | 0 NA          | NA       |
| 0    | 0    | 0    | 0 NA          | NA       |
| 0    | 0    | 0    | 0 NA          | NA       |
| 0    | 0    | 0    | 0 NA          | NA       |
| 0    | 0    | 0    | 0 NA          | NA       |
| 0    | 0    | 0    | 0 NA          | NA       |
| 0    | 0    | 0    | 0 NA          | NA       |
| 0    | 0    | 0    | 0 NA          | NA       |
| 0    | 0    | 0    | 0 NA          | NA       |
| 0    | 0    | 0    | 0 NA          | NA       |
| 0    | 0    | 0    | 0 NA          | NA       |
| 0    | 0    | 0    | 0 NA          | NA       |
| 0    | 0    | 0    | 0 NA          | NA       |
| 0.24 | 0.43 | 0.05 | 0.11 -0.44389 | 0.556832 |
| 0    | 0    | 0    | 0 NA          | NA       |
| 0    | 0    | 0    | 0 NA          | NA       |
| 0    | 0    | 0    | 0 NA          | NA       |
| 0    | 0    | 0    | 0 NA          | NA       |
| 0.02 | 0.04 | 0.02 | 0.02 NA       | NA       |
| 0    | 0    | 0    | 0 NA          | NA       |
| 0    | 0    | 0    | 0 NA          | NA       |
| 0    | 0    | 0    | 0 NA          | NA       |
| 0    | 0    | 0    | 0 NA          | NA       |
| 0    | 0    | 0    | 0 NA          | NA       |
| 0    | 0    | 0    | 0 NA          | NA       |
| 0    | 0    | 0    | 0 NA          | NA       |
| 0    | 0    | 0    | 0 NA          | NA       |
| 0.05 | 0.12 | 0.07 | 0 NA          | NA       |
| 0    | 0    | 0    | 0 NA          | NA       |
| 0    | 0    | 0    | 0 NA          | NA       |
| 0    | 0    | 0    | 0 NA          | NA       |
| 0    | 0    | 0    | 0 NA          | NA       |
| 0    | 0    | 0    | 0 NA          | NA       |
| 0    | 0    | 0    | 0 NA          | NA       |
| 0    | 0    | 0    | 0 NA          | NA       |
| 0    | 0    | 0    | 0 NA          | NA       |
| 0    | 0    | 0    | 0 NA          | NA       |
| 0.74 | 0.31 | 0.42 | 0.82 -0.4331  | 0.492131 |
| 0    | 0    | 0    | 0 NA          | NA       |



|   |   |   |      |    |
|---|---|---|------|----|
| 0 | 0 | 0 | 0 NA | NA |
| 0 | 0 | 0 | 0 NA | NA |
| 0 | 0 | 0 | 0 NA | NA |
| 0 | 0 | 0 | 0 NA | NA |
