# Supplementary material
Source: PubMed Central journal article supplement (PMC7610708)
Supplement: EMS119935-supplement-Supplemental_Methods.pdf [file EMS119935-supplement-Supplemental_Methods.pdf]

## 1 **Supplemental Materials**

2

### 3 **METHODS**

#### 4 **Mice**

5 All CARMN<sup>+/+</sup> and CARMN<sup>-/-</sup> animal experiments were performed in accordance with the  
6 Animals (Scientific Procedures) Act (UK) 1986 and under the auspices of UK Home Office  
7 Project and Personal Licenses (number I34D4F056) held within The University of Edinburgh  
8 facilities. CARMN NtacCARMN knock-out mice and C57BL/6Ntac littermate wild-type controls  
9 were created by TACONIC Bioscience, Inc. (NY, USA). In order to obtain constitutive knock-  
10 out for CARMN, the first exon of the CARMN transcripts and a portion of 4.8kb of the gene  
11 promoter were deleted, leaving exons 2/3 and the miRNA stem loops intact. We aimed to  
12 prevent bias by keeping environmental cues, housing conditions and handling practices  
13 comparable between groups by randomization. All mice used in in vivo experiments  
14 underwent a process of randomisation prior to be subjected to experimental procedures and  
15 processing, where each animal was randomly assigned to random numbers in an excel sheet.  
16 Moreover, cages were placed in a random order and shelf on the rack, and number of mice  
17 per cage varied depending on nest size. Meta-analysis studies registered a predominance in  
18 carotid atherosclerosis in men than women<sup>2,3</sup>. In addition, studies in animals confirmed that  
19 sex is a biological variable, and generally male animals show more inflamed plaque  
20 phenotype<sup>4</sup>. Only one gender was used to minimize variation within groups and keep  
21 standard deviation low and power high. For the purpose of this study, only male animals were  
22 included to remain comparable with a dose-response study with AAV-PCSK9, and this  
23 therefore represents a limitation to the understanding of underlying mechanisms of sex-  
24 related differences. Male, 8-week-old CARMN<sup>-/-</sup> (n=16) and CARMN<sup>+/+</sup> (n=19) animals were

1 injected intraperitoneally (IP) with  $1 \times 10^{12}$  vg/mouse of Adeno-Associated Vector serotype 8  
2 (AAV-8) expressing Protein Convertase Subtilisin/kexin type 9 (PCSK9). At 1-week post  
3 injection, all mice were fed with high cholesterol diet (DBM Food Hygiene Supply, Scotland)  
4 for 18 weeks. During the time of the study, plasma was collected from the tail for cholesterol  
5 measurements immediately previous injection and at 6-,10-weeks post-injection and at  
6 sacrifice. Twenty-four hours prior sacrifice, mice were injected IP with 200 mg/kg of sterile 5-  
7 ethynyl-2'-deoxyuridine (Invitrogen™, A10044) in sterile PBS. All mice were then sacrificed at  
8 27 weeks post injection for collection and processing of plasma and tissues. The processing  
9 of animal tissues used for downstream analysis was performed in a blinded way in which a  
10 blinded number was assigned to each sample. The key list of number and genotype was not  
11 accessible to the person acquiring raw measurements until data analysis. Non-responder  
12 mice (n=3), in which no change in plasma cholesterol and no formation of atherosclerotic  
13 plaque in their aortic valves and brachiocephalic arteries were observed, were removed from  
14 the analysis of the plaque volume, size and composition. LDLR knock-out studies were carried  
15 out in accordance with institutional guidelines and regulations of the Animal Welfare  
16 Committee of the Royal Netherlands Academy of Arts and Sciences under project license  
17 number PV2018-011. Low density lipoprotein receptor knockout (LDLR<sup>-/-</sup>) mice originated  
18 from Jaxx (B6.129S7-Ldlrtm1Her/J Stock No: 002207). Experimental mice were obtained from  
19 an in-house breeding colony in Maastricht University, which is refreshed every 10 generations  
20 from JACC source to avoid genetic drift. Male low-density lipoprotein receptor deficient mice  
21 (LDLR<sup>-/-</sup>) of 8-12 weeks old were fed chow (controls) or high-cholesterol diet (HCD, 0.25%,  
22 824171, Tecnilab-BMI) for 16 weeks. All mice were euthanized with an overdose  
23 pentobarbital (100mg/kg) injected intraperitoneally. Brachiocephalic arteries, aortic roots,  
24 spleen, lymph nodes and blood were collected for further analysis.

1

## 2 **Blood count and flow cytometry**

3 Immune cell subsets were quantified in a blinded way in blood, spleen and lymph nodes using  
4 flow cytometry (see Online Figure 5-7 for gating strategy) and absolute cell counts were  
5 obtained using TruCount (BD, Cat No 340334). Blood was subjected to erythrocyte lysis prior  
6 to antibody labeling (8.4g NH<sub>4</sub>CL + 0.84g NaHCO<sub>3</sub> in 1 litre H<sub>2</sub>O, pH 7.2-7.4). Combinations of  
7 different antibodies were used to identify leukocytes (CD45 Biolegend clone 30-F11), B-cells  
8 (B220 BD clone RA3-6B2), T-helper cells (CD3 eBioScience clone 17A2/CD4 BD clone GK1.5),  
9 cytotoxic T-cells (CD3/CD8 eBioScience clone 53-6.7), NK cells (CD8/NK1.1 BD clone PK136)  
10 NKT cells (CD3/NK1.1), monocyte subsets (Ly6C Milteni clone 1G7.G10/CD11b BD clone  
11 M1/70) and eosinophils (SiglecF BD clone E50-2440/CD11b clone M1/70). Spleens and lymph  
12 nodes were dissociated into single-cell suspensions and enzymatically digested for dendritic  
13 cell separation using liberase and DNase (both 0.2 mg/ml, Roche) for 30 min in RPMI medium.  
14 Spleen and lymph nodes were then subjected to erythrocyte lysis as stated above. Antibody  
15 staining was performed using the following antibodies to detect granulocytes (CD11b<sup>high</sup>,  
16 Ly6G<sup>high</sup> BD, Cat. 561114 and BD, Cat. 560602 respectively), T cells (CD3ε<sup>+</sup>, BD Cat. 45003180),  
17 T helper cells (CD4<sup>+</sup>; BD, Cat. 560246), cytotoxic T cells (CD8a<sup>+</sup>; BD Cat. 100711),  
18 effector/memory T cells (CD44<sup>high</sup>, CD62<sup>low</sup>; BD, eBioscience, Cat. 560181 and Cat. 110081  
19 respectively), naïve T cells (CD44<sup>low</sup>, CD62<sup>high</sup>), regulatory T cells (CD4<sup>+</sup>, CD25<sup>+</sup>, FoxP3<sup>+</sup>;  
20 eBioscience cat. 560246), B cells (B220<sup>+</sup>; BD Cat. 561227), NK cells (NK1.1<sup>+</sup>; BD, Cat. 561046)  
21 and monocytes (CD11b<sup>high</sup>, Ly6G<sup>-</sup>, Ly6C<sup>high/int/low</sup>; BD, eBioscience and Miltenyi, Cat. 561114,  
22 Cat. 560602, Cat. 130102899 respectively). The gating strategy is depicted in Online Figure 6.  
23 Tibia and fibula were flushed with PBS using a 23G needle and gently pressed through a 70  
24 μm strainer. Bone marrow cells were subjected to erythrocyte lysis as stated before. All

1 lineage negative cells (CD3<sup>-</sup>, B220<sup>-</sup>, CD11b<sup>-</sup>, Ly6G<sup>-</sup>, NK1.1<sup>-</sup> and Ter-119<sup>-</sup>) were analyzed further  
2 for bone marrow stem cells (lin/Sca-1/c-kit; eBioscience, Bd, Cat. 455981, Cat. 47117182  
3 respectively), common myeloid progenitors (CD16/32<sup>int</sup>, CD34<sup>int</sup>; eBioscience and BD Cat.  
4 14016182), granulocyte-macrophage progenitors (CD16/32<sup>high</sup>, CD34<sup>high</sup>), erythrocyte-  
5 megakaryocyte progenitors (CD16/32<sup>-</sup>, CD34<sup>-</sup>). Gating strategy for bone marrow progenitors  
6 is shown in Online Figure 7. All data was acquired and analyzed using a FACSCanto II and  
7 FACSdiva software (BD Bioscience).

8

### 9 **Processing of Aortic roots**

10 Aortic roots of LDLR<sup>-/-</sup> mice were embedded in OCT and frozen at 80°C till further use for laser  
11 capture microdissection. Aortic roots of CARMN<sup>+/+</sup> and CARMN<sup>-/-</sup> were fixed in  
12 paraformaldehyde (1%, 24h), paraffin embedding, and serially sectioned (4µm per section),  
13 and stained with haematoxylin and eosin (H&E) and imaged. Specifically, following steps of  
14 deparaffination in xylene and ethanol (100%, 96%, 70%, 50%) solutions at room temperature,  
15 slides were washed in RNase-Free water and Rnase-Free PBS. Slides were then incubated with  
16 Haematoxylin solution for 3 minutes followed by wash in RNase-Free water. Following bluing  
17 step for 3 minutes, slides were then washed in running tap water for 5 minutes and  
18 counterstained with Eosin for 3 seconds. Sections were then washed in tap water and  
19 dehydrated (95%, 100% EtOH, Xylene) and mounted with xylene-based mounting medium to  
20 be imaged. Sections were used for immunohistochemical staining within a 100 µm interval  
21 here a fully developed media within the aortic valves was present. The sum of plaque area in  
22 all three valves was analysed in a blinded way in five consecutive H&E sections at 20 µm  
23 intervals using computerized morphometry (QuPath v0.1.2, Open-source software for digital  
24 pathology image analysis) and averaged per mouse. Two sections per mouse were stained

1 with alpha-SMA, Lgals3, EdU and Sirius Red. The signal was quantified and averaged per  
2 mouse.

3

#### 4 **Laser Capture Microdissection (LCM)**

5 Plaques from frozen sections of aortic roots (9 slides, 18 sections/mouse) were captured from  
6 Low Density Lipoprotein Receptor (LDLR) knock-out mice in a random order. Blinding was not  
7 possible at this stage due to clear differences between morphology. However, for subsequent  
8 analysis of RNA and qRT-PCR analysis each sample was assigned to a random number and the  
9 group to which they belonged to was revealed only at the end of the analysis. To perform  
10 microdissection PALM Robo laser capture microdissection (LCM) machine (New York, NY),  
11 was used as previously described<sup>4</sup>. Atherosclerotic plaques were collected in Qiazol reagent  
12 (Qiagen) and RNA was extracted using miRNeasy Micro Kit (Qiagen). Samples were quantified  
13 using QuBit technology (Thermo Fisher Scientific) according to manufacturer's instructions.

14

#### 15 **Optical Projection Tomography (OPT)**

16 Formalin (Sigma)-fixed aortic arches and major branches (left carotid artery, left subclavian  
17 artery and brachiocephalic trunk) from CARMN<sup>-/-</sup> and CARMN<sup>+/+</sup> were embedded in 1.5% low  
18 melting point agarose (Invitrogen,16520-050) and dehydrated with 24 hours serial incubation  
19 washes with 100% MetOH, BABB solution made up with Benzyl alcohol (Sigma,402834) and  
20 benzyl benzoate (Sigma,B6630) and 100% MetOH. Samples were then placed in a calibrated  
21 tomography machine (Edinburgh, UK) for further processing of the vessel performed by an  
22 independent operator blinded for genotype. Tomographic reconstruction of the pictures was  
23 obtained using CTAn software<sup>2</sup>.

24

## 1 **Processing of brachiocephalic arteries**

2 Following OPT analysis, brachiocephalic arteries were serially sectioned (5µm per section).

3 The processing of the samples was performed in a blinded way. Five equally dispersed

4 sections were stained with haematoxylin and eosin (H&E) and imaged. Sections within the

5 plaque interval were used for immunohistochemical staining. Plaque areas were analysed five

6 consecutive H&E sections using ImageJ software and averaged per mouse. Two sections per

7 mouse were stained with alpha-SMA, Lgals3, EdU and Sirius Red and the signal was averaged

8 per mouse. Sirius Red staining was performed to quantify plaque collagen and detailed

9 procedure can be found in the Methods in “Collagen detection in tissue” section below. The

10 signal was quantified only in the plaque area and the medial layer was not included in the

11 quantification of the immunostainings.

12

## 13 **Immunohistochemistry (IHC)**

14 Paraformaldehyde-fixed tissues were deparaffinised in xylene and ethanol (100%, 96%, 70%,

15 50%) solutions at room temperature and washed in RNase-Free water and Rnase-Free PBS.

16 Tissues were then incubated (microwave, 90W) with antigen retrieval buffer HIER (made up

17 with 1X citrate antigen retrieval buffer, pH 6.0 diluted from 10X stock (S2031, Dako) in mQ

18 water for 10 minutes. Slides were then washed in TBS buffer slides and incubated with goat

19 serum (MP-7404, Impress kit) accordingly with manufacturer’s instructions for 30 minutes at

20 room temperature. Primary antibody anti-alpha-SMA at a concentration of 1:3000 diluted in

21 TBT (F3777, Sigma) or Lgals3 (Cedarlane, CL8942AP) in a concentration of 1:4000 diluted in

22 1% goat serum in PBS or IgG (Dako, X0910) control for 30 minutes at room temperature.

23 Tissues were then washed (3X) in TBT and incubated with secondary antibodies, poly-anty-

24 FITC<sup>HRP</sup> diluted 1:600 in TBT for alpha-SMA staining and ready to use goat anti-rat IgG

1 secondary antibody (Vector Impress kit MP-7404) for Lgals3 staining, for 30 minutes at room  
2 temperature. Following TBT washes (3X) signal was developed with DAB diluent  
3 (ImPACT™DAB) accordingly with manufacturer's instructions for 2 minutes at room  
4 temperature. Reaction was then quenched with tap water and sections were counterstained  
5 with haematoxylin. Slides were dehydrated (70%, 96%, 100% EtOH washes followed by  
6 xylene) and mounted in coverslip with xylene-based mounting medium.

7

### 8 **Plasma cholesterol measurements**

9 Detection of cholesterol was performed using Cholesterol FS\* kit (DiaSys Diagnostic System  
10 GmbH, Germany) accordingly to manufacturer's instructions. The absorbances of samples  
11 and standards were measured using plate reader at 490 nm.

12

### 13 **EdU detection in tissue**

14 Paraformaldehyde-fixed tissues were deparaffinised in xylene and ethanol (100%, 96%, 70%,  
15 50%) solutions at room temperature and washed in RNase-Free water and RNase-Free PBS.  
16 Tissues were then incubated (microwave, 90W) with antigen retrieval buffer (made up with  
17 1X citrate antigen retrieval buffer, pH 6.0 diluted from 10X stock (S2031, Dako) in mQ water  
18 for 10 minutes. After rinsing in PBS/BSA, slides were then treated with PBS-TritonX-0.5% for  
19 20 minutes. EdU cocktail was prepared accordingly with manufacturer's instructions (Click-IT  
20 EdU Proliferation kit for Imaging kit). Tissues were then incubated with the cocktail for 30 min  
21 at room temperature and protected from light. After washes with BSA/PBS and PBS/Twin-20  
22 for 3 min, slides were stained with DAPI at a dilution of 1:1000 in PBS for 3 minutes protected  
23 from light and mounted with water-based mounting medium.

24

## 1 **Collagen detection in tissue**

2 Paraformaldehyde-fixed tissues were deparaffinised in xylene and ethanol (100%, 96%, 70%,  
3 50%) solutions at room temperature and washed in RNase-Free water and RNase-Free PBS.  
4 After wash with tap water and rinsed in demineralised water, slides were incubated with 0.2%  
5 Phosphomolybdic Acid (PMA) in distilled water solution for 5 minutes and incubated with  
6 0.1% Sirius-Red solution in saturated picric acid for 90 minutes. Tissues were then washed  
7 with 0.01M HCl (made up with 1 volume of 1M HCl and 99 volumes of distilled water) for 2  
8 minutes and rinsed in water. Slides were then dehydrated with serial washes (70%, 96%, 100%  
9 EtOH and xylol and mounted in xylene-based mounting media.

10

## 11 **Human atherosclerotic samples**

12 As previously described<sup>3</sup>, patients with symptomatic carotid artery stenosis scheduled  
13 undergo carotid endarterectomy were recruited from neurovascular clinics at the Royal  
14 Infirmary of Edinburgh. At the time of surgery, plaques were collected immediately following  
15 excision and biopsy specimens for RNA analysis were immediately frozen and stored at -80°C.  
16 Carotid artery tissue collection for in situ hybridization was part of the Maastricht Pathology  
17 Tissue Collection and further storage and use of the tissue was in line with the Dutch Code for  
18 Proper Secondary use of Human Tissue and the local Medical Ethical Committee (protocol  
19 number 16-4-181). Carotid arteries were collected from patients undergoing carotid  
20 endarterectomy. Formalin-fixed, paraffin embedded 5mm-segments were used for histology.

21

## 22 **Human cell culture**

23 Human Coronary Arterial Smooth Muscle Cells (hCASMS), purchased from Lonza (Basel,  
24 Switzerland), were cultured in Smooth Muscle Cells Growth Medium 2 (PromoCell)



1 supplemented with 10% foetal bovine serum (Life Technologies, Paisley, UK), Supplement  
2 (PromoCell), 50µg/mL penicillin and 50µg/mL streptomycin (Gibco, Paisley, UK) and L-  
3 glutamin (Gibco, Paisley, UK). Cells were maintained in culture in humidified atmosphere 37°C  
4 (5% CO<sub>2</sub>) and used between passages 2-6.

5

## 6 **5' and 3' Rapid Amplification of cDNA Ends (RACE)**

7 5' and 3' RACE was performed using the SMARTer® RACE 5'/3' Kit (Takara) according to the  
8 manufacturer's instructions. Briefly, nuclear RNA was isolated from CASMCs using PARIS kit  
9 (Invitrogen) and RACE-ready cDNA was prepared separately for 5' and 3' RACE as described  
10 in kit protocol. Following cDNA synthesis, 5'- and 3'-RACE PCR products were amplified using  
11 Universal primer (supplied with kit) and gene-specific primers (see Table 2). RACE PCR  
12 products were analysed using agarose gel and further purified and cloned into the linearized  
13 pRACE vector with In-Fusion® HD Cloning supplied with RACE kit. At least two clones were  
14 sequenced using M13 forward primer for each band visualized on agarose gel. Sequencing  
15 data was analysed with BLAST and mapped on human genome assembly GRCh38.p13 using  
16 Ensemble gene browser.

## 17 **Subcellular Fractionation**

18 RNA fractionation was performed using the PARIS™ Kit (Thermo Fisher) according to the  
19 manufacturer's instructions.

20

## 21 **Long-read Nanopore sequencing**

1 Long-read sequencing was performed following enrichment of the nuclear fraction obtained  
2 through subcellular fractionation (PARIS™ Kit, Thermo Fisher) using cDNA-PCR Sequencing kit  
3 (SQK-PCS109) following manufacturer's instructions. Briefly, ribosomal RNA depletion was  
4 performed with Ribominus Eukaryote System V2 (Thermo Fisher) and 296ng of RNA was used  
5 for polyadenylation step using Lucigen Poly(A) Polymerase Tailing Kit (Lucigen). Following  
6 RNA purification with Agencourt RNA cleanup XP Kit (Beckman Coulter), 5ng of  
7 polyadenylated RNA was used for Nanopore library preparation using cDNA-PCR Sequencing  
8 kit (SQK-PCS109) and sequenced using Oxford Nanopore Technologies' (ONT) MinION  
9 sequencer using FLO-MIN106 flow cell. Sequencing was performed using MinKNOWN  
10 127.0.0.1 software. Base-calling was performed using Guppy (<https://nanoporetech.com/>).  
11 We obtained 6.8M reads for replicate 1 and 7.1M reads for replicate 2. Fastq reads were  
12 mapped to the human genome (GENCODE GRCh38 primary assembly fasta file) using  
13 minimap2 (Li Bioinformatics 2018). To focus on CARMN locus, we kept all mapped reads  
14 overlapping any CARMN exons and/or miR143/miR145 loci using Samtools  
15 (<http://www.htslib.org/>).

16

#### 17 **RNA-seq analysis of CASMC RNA-seq from ENCODE data**

18 Reads for caSMCs (n=2) were obtained from gene expression omnibus (GSE78534) and  
19 mapped to the human genome using STAR<sup>5</sup> (indexed with GENCODEv33, parameters –  
20 sjdbOverhang 100). StringTie<sup>6</sup> was then used to assemble any non-GENCODE transcripts  
21 merge these with GENCODE v33 (using -m 300). RSEM<sup>7</sup> was used to obtain transcript FPKMs  
22 against this new reference (generated using –bowtie2).

23

#### 24 **Transfection of hCASMCs with GapmeR and Mimics**

1 Antisense oligonucleotides (GapmeR) targeting CARMN transcripts (Exiqon, Denmark) were  
2 transiently transfected in hCASMCs using RNAimax Lipofectamine reagent (Invitrogen,  
3 Cat.13778-150) in Opti-MEM reduced serum medium (Gibco) for 5 hours and then added  
4 complete smooth muscle cells medium overnight. GapCARMN  
5 (A\*T\*A\*G\*G\*T\*G\*T\*C\*A\*G\*G\*T\*G\*T\*C), GapCARMN2 (T\*T\*G\*A\*G\*G\*T\*A\*G\*C\*  
6 T\*A\*A\*G\*A\*G) and GapCARMN3 (T\*C\*T\*G\*T\*G\*A\*A\*A\*G\*G\*T\*G\*A\*T\*G) target a  
7 common region to the CARMN transcripts while GapCTR  
8 (A\*A\*C\*A\*C\*G\*T\*C\*T\*A\*T\*A\*C\*G\*C) was used as standard negative control. Mimics  
9 reagents were provided by miRagen Therapeutics as double stranded oligonucleotides in  
10 their mature sequence (hsa-miR-143-3p and has-miR-145-5p). In the case of transfection,  
11 mimics were added in combination with GapmeR reagents in a concentration of 5nM.

12

### 13 **RNA sequencing (RNA-seq) analysis**

14 RNA sequencing was performed in stimulated hCASMCs (PDGF-BB treatment, scratch  
15 stimulus and cholesterol loading) or corresponding basal conditions (described 3 basal)  
16 following transfection with GapCARMN and GapCTR. Total RNA was obtained using the  
17 miRNeasy kit (Qiagen, Hilden, Germany) following the manufacturer's instruction. The quality  
18 of samples was assessed with Agilent RNA 6000 Nano kit (Agilent technology Inc., California  
19 US) accordingly with manufacturer's instructions and samples with RIN > 9.8 to 10 were used.  
20 PolyA-enriched strand-specific RNA libraries were prepared by GENEWIZ, Inc. (South  
21 Plainfield, New Jersey, USA). Libraries were sequenced with Illumina HiSeq at an average of  
22 30 million reads per samples (paired end 2 x 150bp). Gene quantification (read count and  
23 normalised expression value as FPKM) was obtained using RSEM (options: -bowtie2 -forward-  
24 prob 0 -paired-end), based on GENCODE annotation version 26 (primary assembly). The

1 differential expression was assessed using DESeq2 by comparing treated conditions with the  
2 untreated control cells. We considered a threshold of absolute Fold Change  $\geq 2$  and adjusted  
3 pvalue  $< 0.01$  to identify significant changes between two conditions. We also applied an  
4 expression value threshold of 2 FPKM (average of the three replicates) in the considered  
5 groups. Sample clustering was evaluated using the Principal component analysis (PCA) tool  
6 available in DESeq2 on the regularized log transformed data. Heatmaps were generated using  
7 the CRAN package heatmap. The gene ontology analysis was done using topGO (Alexa A and  
8 Rahnenfuhrer J (2016)) on enriched genes over a background of expressed genes (FPKM $>2$  in  
9 at least one condition). Fisher's exact test was used to calculate the p-values.

10

#### 11 **Cell proliferation assay**

12 hCASMCs were plated at a density of  $1 \times 10^5$  cells/well in 6-well plate and starved in 0.2%  
13 Foetal Bovine Serum (FBS) medium for 48 hours following transfection using RNAiMax  
14 reagent (Invitrogen, Cat.13778-150) and Opti-MEM medium (Gibco) for 5 hours and then  
15 smooth muscle complete medium (15% FBS) was added overnight. Following 48 hours of  
16 starvation with 0.2%FBS medium, cells were then treated with Platelet Derived Growth Factor  
17 (PDGF)-BB (R&D System) 20ng/mL, or untreated with 0.2% FBS fresh medium for 48 hours. In  
18 both conditions (treated and untreated), cells were simultaneously supplemented with EdU  
19 ( $10 \mu\text{M}$ ) accordingly with manufacturer's instructions. 48 hours following the stimulation, cells  
20 were harvested and fixed with 70% of ethanol. EdU incorporation was quantified using Click-  
21 it EdU Proliferation kit assay (Life Technologies) with Alexa Fluor 594 antibody according to  
22 manufacturer's protocol and analysed by Fortessa Analytic Flow Cytometry (FACS).

23 In the case of GapmeR transfection, hCASMCs were plated to a confluence of  $1 \times 10^5$  in 6-well  
24 plates. 24 hours after plating, cells were transiently transfected with GapCARMN (or

1 GapCARMN2), GapCTR and un-transfected cells (Mock) for 5 hours and then added complete  
2 smooth muscle cells medium. Cell proliferation assay was carried out 24 hours following  
3 transfection.

4

#### 5 **Cell migration assay**

6 hCASMCs were plated at a density of  $1.8 \times 10^5$  cells/well in 6-well plate and starved in 0.2%  
7 Foetal Bovine Serum (FBS) medium for 48 hours following transfection using RNAiMax  
8 reagent (Invitrogen, Cat.13778-150) and Opti-MEM medium (Gibco) for 5 hours and then  
9 smooth muscle complete medium (15% FBS) was added overnight. Following starvation with  
10 0.2%FBS, cells in monolayer were then scratched with a sterile pipet (~500 $\mu$ m-wide wounds)  
11 and replaced with fresh medium. At 10 hours following the scratch cells were harvested for  
12 quantification of the relative migration. Pictures were captured at 0- and 10-hours post-  
13 scratch and the migration distances were analysed by using ImageJ software.

14 In the case of GapmeR transfection, hCASMCs were plated to a confluence  $1.8 \times 10^5$  in 6-well  
15 plates. 24 hours after plating, cells were transiently transfected using RNAiMax with  
16 GapCARMN (or GapCARMN2 GapCTR and un-transfected cells (Mock) for 5 hours and then  
17 added complete smooth muscle cells medium.

18

#### 19 **Cholesterol loading assay**

20 hCASMCs were plated at a density of  $2 \times 10^5$  cells/well in 6-well plate and, following  
21 transfection (as above explained), cells were treated with water soluble cholesterol-methyl-  
22  $\beta$ -cyclodextrin (Sigma) loading 10 $\mu$ g/mL in 0.2% Bovine Serum Albumin (BSA) medium for 72  
23 hours or in 0.2% BSA medium for the untreated cells. Cells were then harvested for  
24 downstream RNA analysis.

1 In the case of GapmeR transfection, hCASCs were plated to a confluence  $2 \times 10^5$  in 6-well  
2 plates. 24 hours after plating, cells were transiently transfected using RNAiMax with  
3 GapCARMN (or GapCARMN2), GapCTR and un-transfected cells (Mock) for 5 hours and then  
4 added complete smooth muscle cells medium. Cholesterol loading assay was carried out 24  
5 hours following transfection.

6

### 7 **hCASCs loading with ox-LDL particles**

8 hCASCs were seeded at  $2 \times 10^5$  confluence in 6-well plate. After 24 hours from the plating,  
9 cells were treated with Ox-LDL particles (Invitrogen L34358) and harvested at 24 hours post  
10 treatment to perform RNA extraction and MTT assay. Pictures were acquired with  
11 fluorescence microscopy at 24 hours post treatment.

12

### 13 **MTT cell viability assay**

14 MTT cell viability assay was performed using MTT assay kit (Abcam, ab211091) following  
15 manufacturer's instructions.

16

### 17 **RNA-Fluorescent in-situ hybridization**

18 Custom RNA-FISH tiled probe sets were generated to all exons of CARMN as well as  
19 UBC and SNORD3 as positive controls (Thermo Fisher Scientific). RNA-FISH was  
20 performed according to manufacturer's instructions (ViewRNA™ cell FISH) with minor  
21 changes as previously published<sup>8</sup>. Briefly, CASCs were grown on 16-mm coverslips  
22 to 80% confluency, washed in PBS and fixed in 4% paraformaldehyde with 1% glacial  
23 acetic acid for 1h. Following detergent QS permeabilization and 1:4000 protease  
24 digest, coverslips were incubated with a combination of CARMN, UBC, and SNORD3

1 probe sets. Probe set buffer was used as a negative control and specificity of.  
2 Following probe hybridisation, cover slips were incubated with branched tree  
3 technology pre-amplifier for 1h and then with the amplifier for 30 min. Coverslips  
4 were then mounted onto glass slides using VECTASHIELD Antifade Mounting Medium  
5 with DAPI (Vector Laboratories) and imaged using Andor Revolution XDi spinning disk  
6 confocal microscope. To quantify the data produced by RNA-FISH, Z stack images of each  
7 condition were taken, and quantification performed using semi-automated procedure using  
8 Image J Software where an intensity threshold above which a spot is considered an RNA  
9 particle was selected under default settings. Once threshold was computationally estimated  
10 (and then manually confirmed or adjusted), the images were converted to binary and the  
11 number of particles were quantified using the “Analyse Particles” feature on ImageJ. This  
12 allowed us to count the number of nuclear transcripts per cell, in a non-biased manner. Cells  
13 were only counted if the whole of the nuclei was present in view, and not overlapping other  
14 cells.

15

#### 16 **Gene expression analysis by qRT-PCR**

17 Total RNA from hCASMCS, from plaques isolated from patients with symptomatic carotid  
18 artery stenosis and from mouse aortas, was obtained using the miRNeasy kit (Qiagen, Hilden,  
19 Germany) following the manufacturer’s instruction. In the case of tissues, frozen samples  
20 were fragmented using liquid N<sub>2</sub> and tissue homogenizer to further ensure the tissue  
21 disruption. cDNA for mRNA analysis of gene expression was synthesized from total RNA using  
22 the Multiscribe Reverse Transcriptase (Life technologies, Paisley, UK). cDNA for miRNA  
23 analysis was obtained from total RNA using specific reverse transcription primers according  
24 to the TaqMan MiRNA Assay protocol (Applied Biosystem, Foster City, CA, USA). Quantitative

1 qRT-PCR was performed using Power SYBR green (Life technologies) with custom PCR primers  
2 (Eurofins Scientific, Ebersberg, Germany). In the case of Sybr Green qRT-PCR, samples were  
3 subjected to 2 minutes at 50 °C, 10 minutes at 95°C, 40 cycles of denaturation for 15 sec at  
4 95°C, 1 min at 60°C. In the case of TaqMan reaction, qRT-PCR plate underwent to a first step  
5 of 2 min at 50°C followed by 10 min at 95°C and 40 cycles at 95°C for 15 sec to finish with 1  
6 min at 60°C. The sequences of the primers used is specified in the Online Supplement- Table  
7 I). Ubiquitin C for human and Cyclophilin and 18s for mouse, were selected as housekeeping  
8 genes because of their stability across all studied groups. In the case of microRNAs, RNU48  
9 for human and U6 for mouse samples were selected as stable endogenous controls. Fold  
10 changes were calculated by using the  $2^{-\Delta\Delta ct}$  method.

11

## 12 **In Situ Hybridization (ISH)**

13 CARMN was detected in human carotid atherosclerotic plaques fixed in formalin and  
14 embedded in paraffin. Slides were deparaffinised in xylene and ethanol (100%, 96%, 70%)  
15 solutions at room temperature and washed in RNase-Free water and Rnase-Free PBS. The  
16 tissue was then incubated with 1:1000 Proteinase K (miRCURY LNA miRNA ISH Buffer Set,  
17 Qiagen Cat.339450) diluted into RNase-Free PBS and incubated in hot humidified plate at  
18 37°C. After serial RNase-Free PBS washes the tissue was incubated with LNA double-DIG  
19 labelled probes (Exiqon) detecting CARMN (/5DigN/TCTGGTCCAGGTGTGGCTCCTT/3Dig\_N/) and  
20 control probe (/5DigN/GTGTAACACGTCTATACGCCCA /3Dig\_N/) at 100nM diluted in 1x  
21 Formamide-free miRNA ISH buffer (miRCURY LNA miRNA ISH Buffer Set, Qiagen Cat.339450)  
22 at 55°C O/N. The tissue slides were then washed (X3) in 5X SSC Buffer (prepared with RNase-  
23 free water from 20X SSC, Thermo Fisher Scientific) at 55°C followed by room temperature  
24 wash. The tissue was then blocked with 1X Roche DIG blocking buffer (made up in maleic acid



1 from 10X blocking reagent, Roche Cat. 11585762001) for 1 hour followed by the incubation  
2 with Anti-Digoxigenin-AP diluted 1:500 in 1X blocking buffer (Fab fragments, Roche  
3 Cat.11093274910) for 1 and ½ hours. The tissue was then washed 3 times with RNase-free  
4 PBST and incubated with detection solution prepared by NBT/BCIP tablet (Roche  
5 Cat.11697471001) accordingly with manufacturer's instructions. Reaction was stopped after  
6 40 minutes by washing the tissue with RNase-Free PBS. The tissue was then treated with 0.3%  
7 H<sub>2</sub>O<sub>2</sub> in MetOH to block endogenous peroxidases for 15 minutes at room temperature. After  
8 a wash in demineralised water, the tissue was washed with 0.1% BSA in TBST and incubated  
9 with 5% Goat serum diluted in TBST-T buffer for 30 minutes at room temperature. The tissue  
10 was then incubated with human alpha-SMA antibody (Dako, Cat. M0851, clone 1A4), diluted  
11 1:2500 in TBST or human CD68 antibody (Dako, Cat. M0814, clone KP1) diluted 1:250 in TBST  
12 or human CD45 (Cat. GA75161 Dako) diluted 1:400 or IgG control (abcam, Cat. 37355),  
13 (diluted to reach the same concentration of alpha-SMA, CD68 or CD45) for 30 minutes at  
14 room temperature. After washing in TBS, the tissue was incubated with ready to use  
15 Brightvision anti-mouse HRP (Immunologic, VWR Cat. VWRKDPVM55HRP) for 30 minutes at  
16 room temperature. Following 2X washes in TBS, Poly-Detector HRP Green Kit (BioSB, Cat.  
17 BSB0130) was applied in the tissue accordingly to manufacturer's instructions for 3 minutes  
18 at room temperature. The stain was stopped by washing in tap water and tissue was  
19 counterstained with Fast Red solution (Sigma, N3020) for 5 minutes at room temperature,  
20 dehydrated with serial washes (96%, 100% EtOH and xylene) and glasses were mounted in  
21 coverslip with xylene-based mounting medium.

22

## 23 **Pseudo Fluorescent Image Analysis**

1 Bright field images for MIR143HG (Purple *in situ* staining) and CD68/alpha-SMA (green  
2 immunohistochemistry staining) in human plaque were converted into pseudo fluorescent  
3 images using Image J Software. Images were opened in Image J, and the colour deconvolution  
4 tool used, selecting regions of interest for each stain (Purple *in situ* staining, green  
5 immunohistochemistry staining, and pink nuclear red counterstain), generating RGB values  
6 for each colour, and splitting the images into these components. The RGB values generated  
7 for each colour were kept consistent for further analysis across all samples. Once the images  
8 were split into the 3 colours, the nuclear stain was discounted, so that the *in situ* and  
9 immunohistochemistry staining could be seen clearly. These were then inverted, brightness  
10 adjusted consistently across all samples, and given pseudo colours of red and green  
11 respectively, and the resulting images merged to create a dual fluorescent image.

12

### 13 **Statistical analysis of experimental data**

14 Graphs are presented as bar charts of mean  $\pm$  standard error of the mean (SEM) with  
15 individual datapoints superimposed to show full data distribution. QRT-PCR data in graphs is  
16 shown as relative expression to housekeeping control as described by Livak and Schmittgen<sup>3</sup>.  
17 Statistical tests used to assess statistical significance is indicated in each figure legend with  
18 the precise p-value provided in the graphs where statistical significance was observed. For *in*  
19 *vitro* experiments, all biological replicates using primary cells correspond to independent  
20 experiments from distinct expansions and passage numbers, with technical replicates (precise  
21 replicate number indicated in the figure legends). As each experimental data set is an average  
22 of a large number of cultured cells, we assumed the data was normally distributed based on  
23 the central limit theorem. Statistical analysis of biological replicates was performed using  
24 unpaired t-test (2 groups comparison) or one-way ANOVA with Bonferroni correction for

1 multiple comparisons (>2 groups comparison). Statistical analysis was performed using  
2 GraphPad Prism 8.0.0. All the data obtained from *in vivo* experiments were tested for normal  
3 distribution using the Kolmogorov-Smirnov test. Data following a normal distribution was  
4 analysed using unpaired t-test. In the case of data not-normally distributed or n too small  
5 (n<6) to test for normality, statistical significance was analysed using Mann-Witney. Multiple  
6 testing correction was used for comparison of groups within ANOVA using the Bonferroni  
7 correction. No multiple testing correction was done beyond this and therefore, it might  
8 represent a limitation of this study.

9

10 **Online Table II. Human and mouse SYBR Green primers sequences and TaqMan probes.**

11

12

| <b>HUMAN PRIMERS</b> | <b>SEQUENCE</b>        |
|----------------------|------------------------|
| CARMN_001_Fw         | TGGGAATGGAAACCCTTGGT   |
| CARMN_001_Rev        | AAGCTGCATGTTCAAGGTCG   |
| CARMN_003_Fw         | CTGTAACAAGTGCACAGGCAA  |
| CARMN_003_Rev        | TTCTGTTGGGAGGCTTGGAGA  |
| CARMN_005_FW         | CCAGGAAAGGCAAGGGCGCTA  |
| CARMN_005_Rev        | TGGGAGCGGATGTGGGTGCCG  |
| CARMN_006_Fw         | GCTGTAACAAGTGCACAGGCA  |
| CARMN_006_Rev        | GTGGGCTCACAGTTCTGTCT   |
| CARMN_007_Fw         | GATCCAGAGTAGGAGGGAGCC  |
| CARMN_007_Rev        | GGCCCTTGAATCTGCTTGCC   |
| CARMN_008_Fw         | AGCCTGGAAGTGGCTGGATGT  |
| CARMN_008_Rev        | AAACGCATGCCTGATGGTGT   |
| CARMN_009_Fw         | GCTCCCAAAGCAGGAAGACC   |
| CARMN_009_Rev        | GCCCAACCTCACAAATCCTCT  |
| CARMN_010_Fw         | AATGCAGGAGGCATGGGCCA   |
| CARMN_010_Rev        | GCCACTTGAGTCAGTGATGGTG |
| CARMN_011_Fw         | AAAAGTCAGAGGCTGTGGGAC  |
| CARMN_011_Rew        | TTGCCACACAATGCCCTA     |
| CARMN_012_Fw         | TGCCTCTTCAGCTCATATAAG  |
| CARMN_012_Rev        | GCTAGCGCCCTTGCCTTTCCT  |
| Common primer_Fw     | CGCCATGCTGATGTCAGAGA   |

|                      |                         |
|----------------------|-------------------------|
| Common primer_Rev    | GTTCTGTCTCCGGGCTGC      |
| Ubc_Fw               | TTGCCTTGACATTCTCGATG    |
| Ubc_Rev              | ATCGCTGTGATCGTCACTTG    |
| <b>MOUSE PRIMERS</b> | <b>SEQUENCE</b>         |
| CARMN_01_Fw          | CATTTGAGGGAGCCAGGGGT    |
| CARMN_01_Rev         | GTGGGAAGGAACAGTAGGACA   |
| CARMN_02_Fw          | AGTGCCAGCCCTGAGGAAAG    |
| CARMN_02_Rev         | TCCCCAGATAACCTTTGCTTCGT |
| Common primer_Fw     | GGTCCAGTGCCAGTTGCTTA    |
| Common primer_Rev    | GTGGTTGTGGGTGTTATTGCT   |
| Ppia_Fw              | ATTTCTTTTACTTGCGGGC     |
| Ppia_Rev             | AGACTTGAAGGGGAATG       |
| 18S_Fw               | GTAACCCGTTGAACCCATT     |
| 18S_Rev              | CCATCCAATCGGTAGTAGCG    |
| <b>TAQMAN PROBES</b> | <b>ASSAY ID</b>         |
| CD68                 | Hs02836816_g1           |
| LGALS3               | Hs00173587_m1           |
| ACTA2                | Hs00426835_g1           |
| MHY11                | Hs00975796_m1           |
| CCN                  | <u>Hs00959434_m1</u>    |
| TAGLN                | Hs06633192_s1           |
| KLF4                 | <u>Hs00358836_m1</u>    |
| UBC                  | Hs01867132_s1           |

|                     |                                        |   |
|---------------------|----------------------------------------|---|
| Hsa-miR-143-3p      | 477912_mir                             | 1 |
| Hsa-miR-145-5p      | 477916_mir                             | 2 |
| RNU48               | Hs04931161_g1                          |   |
| U6-snRNA            | Mm00505971_m1                          |   |
| <b>RACE PRIMERS</b> | <b>SEQUENCE</b>                        |   |
| 5'RACE              | GATTACGCCAAGCTTCCCAGGAGGCTGCTTCTC      |   |
| 3'RACE_1            | GATTACGCCAAGCTTAGGCTGGGTCTAATTAGTTGAGA |   |
| 3'RACE_2            | GATTACGCCAAGCTTCAGCCCGGAGACAGAACT      |   |

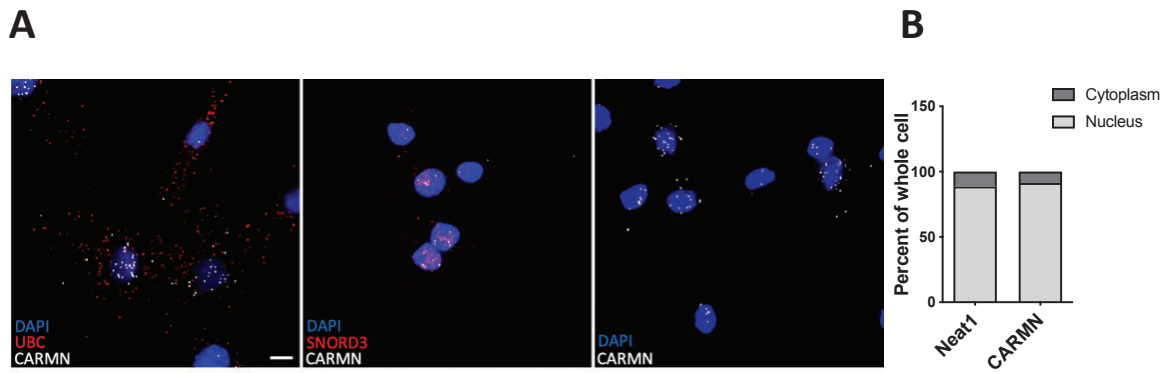

1 **Online Figure I. CARMN localises in the nucleus of hCASCs at basal conditions.**

2 A) RNA FISH analysis of CARMN, cytoplasmic UBC mRNA, and nuclear SNORD3 mRNA in  
 3 quiesced CASCs. Scale bar = 100um. B) Subcellular fractionation of hCASCs (n=1) at basal  
 4 condition. QRT-PCR results indicate CARMN mostly localizes in the nucleic compartment of  
 5 cells. Neat1 was used as nuclear control.

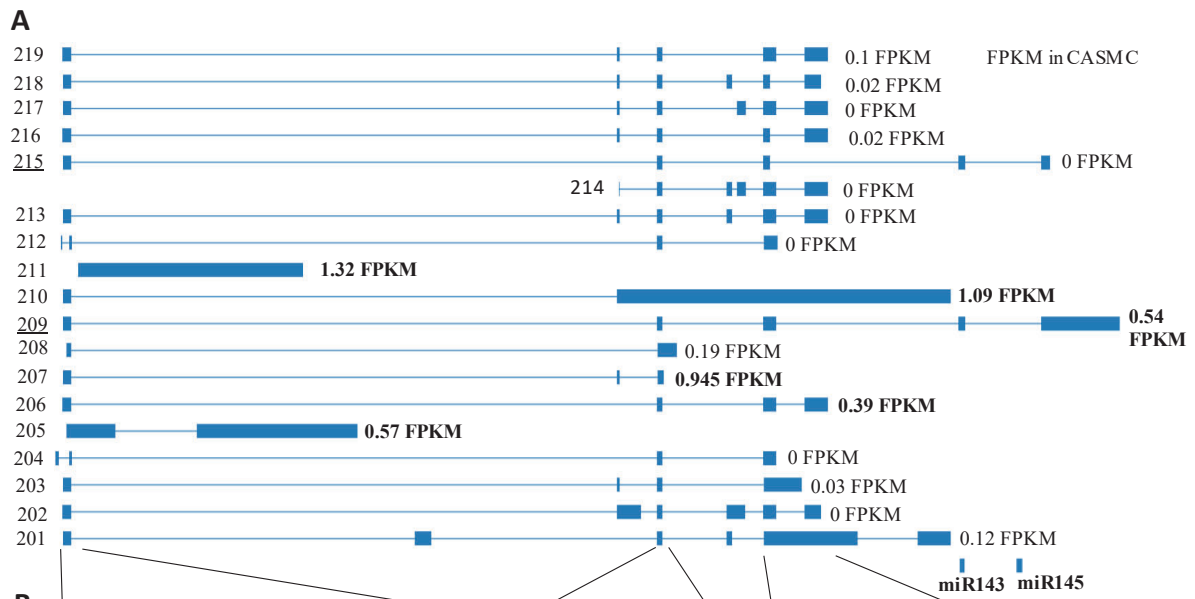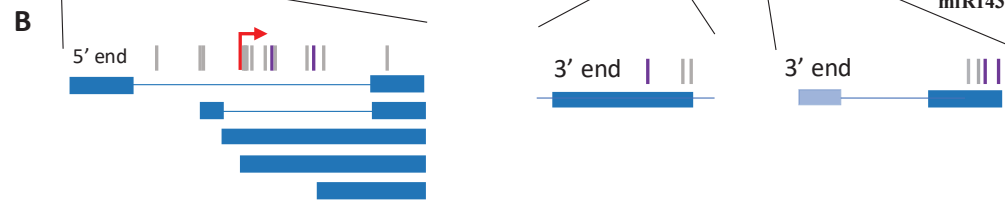

**C**

| Nanopore spliced reads not overlapping miR143/miR145 | total number of reads          | number of reads with identical exonic structure in both replicates |
|------------------------------------------------------|--------------------------------|--------------------------------------------------------------------|
| 5' end near main TSS                                 | 30 (17 in Rep1 and 13 in Rep2) | 17                                                                 |
| Other 5' end                                         | 7 (3 in Rep3 and 4 in Rep2)    | 0                                                                  |

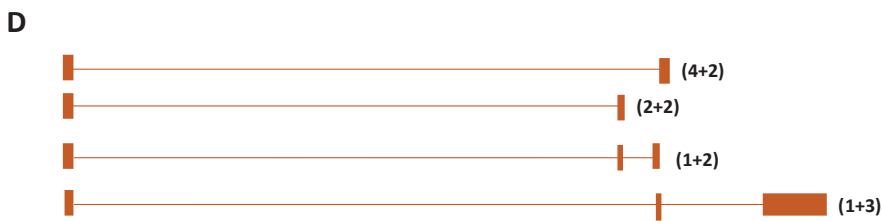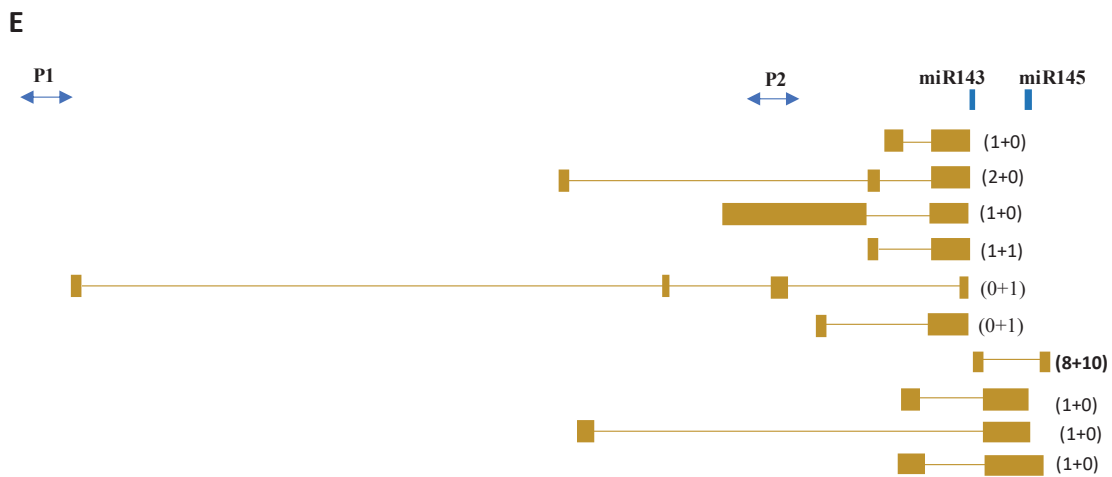



1 **Online Figure II. Characterisation of CARMN/miR-143/145 locus structure.**

2 A) Schematic of CARMN locus and isoforms based on ENSEMBL version p13/GENCODE v33.

3 Expression level of each isoform in CASMC is indicated (average FPKM based on 2 RNA-seq

4 replicates). B) Summary of 5' and 3' end. Only region with RACE products is indicated.

5 Nanopore ends are in grey while RACE ends are in purple. The main TSS identified based on

6 RACE and nanopore sequencing is indicated as a red arrow. C) Table of spliced CARMN reads

7 non-overlapping miR143/miR145 loci. D) Schematic of exonic structure detected in both

8 nanopore sequencing replicates. In bracket, number of reads in replicate 1 + number of reads

9 in replicate 2. E) Schematic of potential pri-miRNA read fragments. The two previously

10 described miRNA promoters are indicated (P1 and P2). In bracket, number of reads in

11 replicate 1 + number of reads in replicate 2.

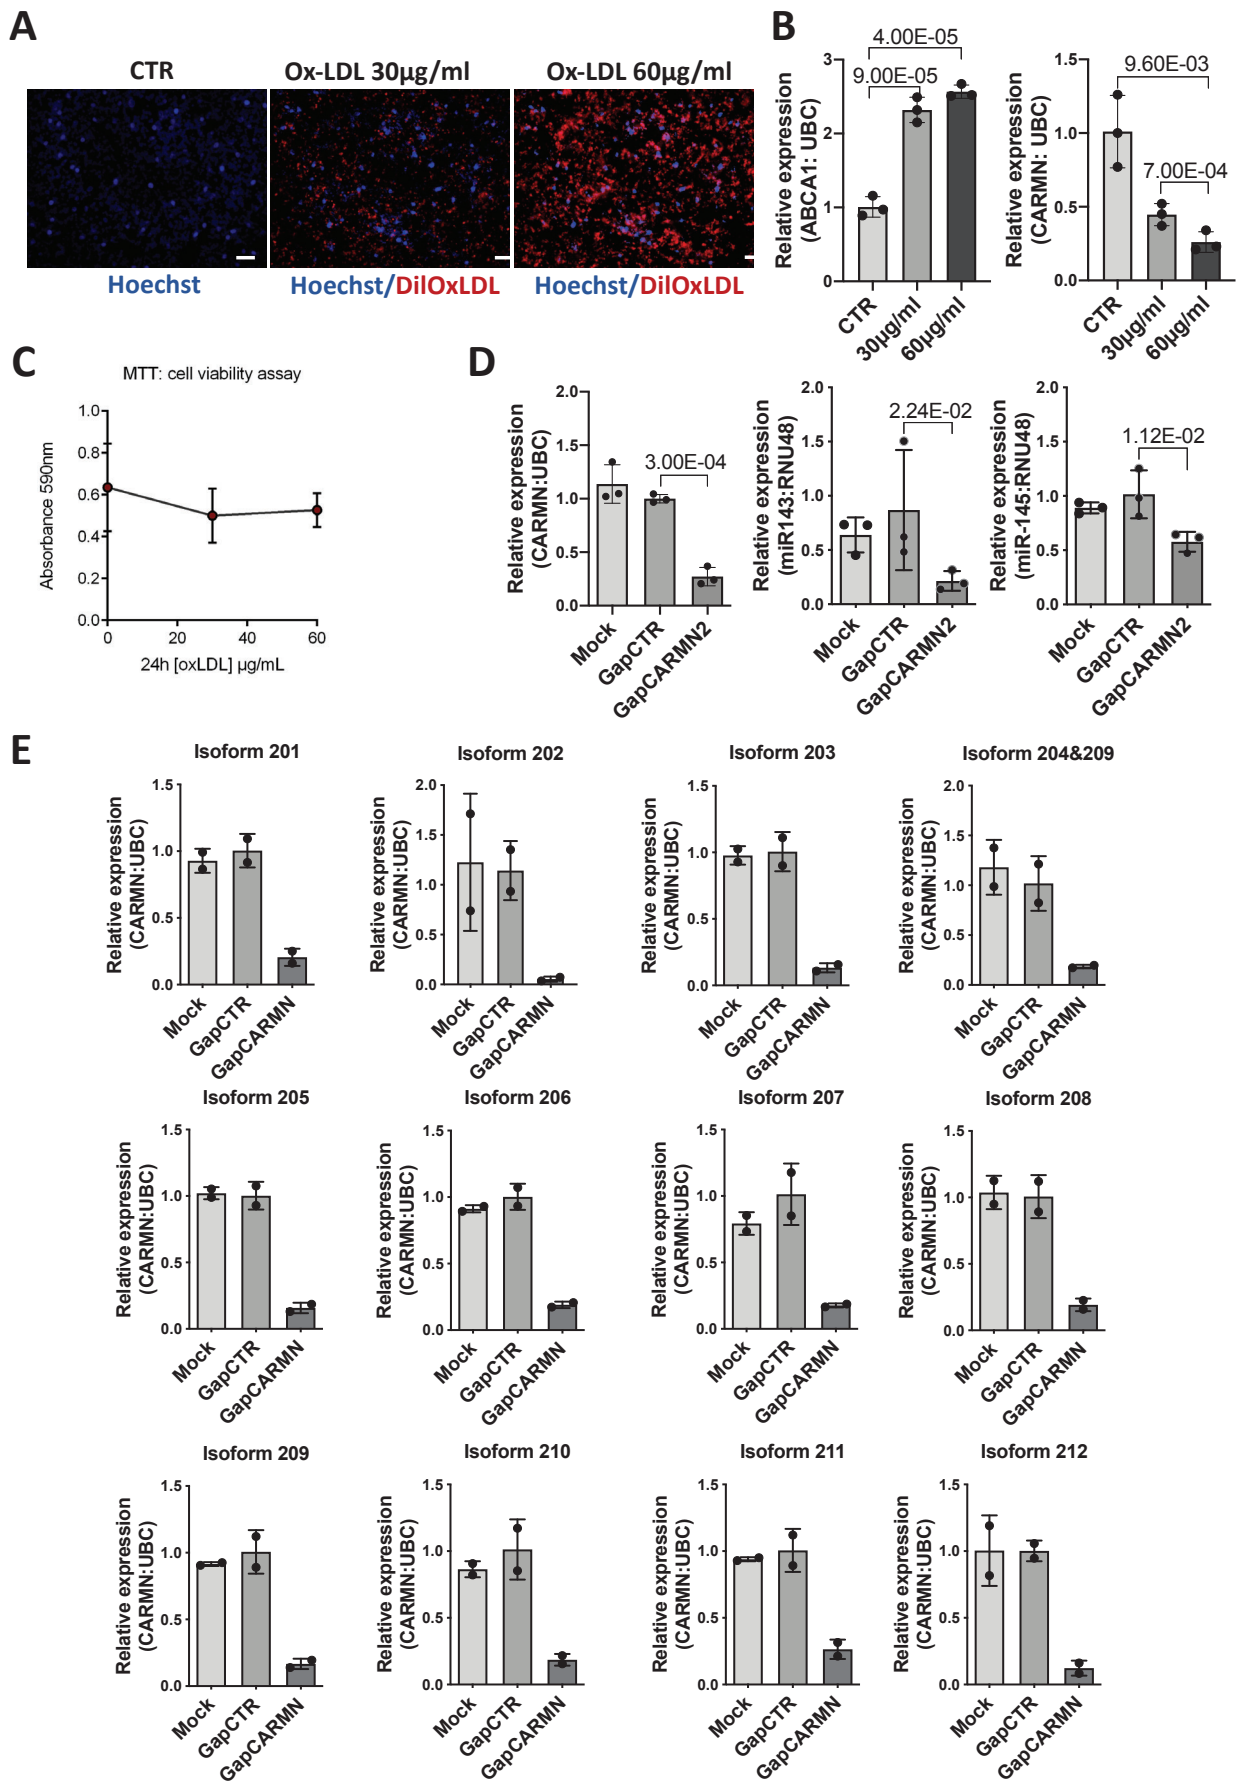

1 **Online Figure III. CARMN expression is affected by ox-LDL and GapmeR approach**  
2 **significantly decreases encoded transcripts.**

3 A) Representative images of hCASMCs treated with Dil-labelled ox-LDL for 24 at a  
4 concentration of 30 or 60ug/ml or control. Ox-LDL particles are stained in red, nuclei in blue.

5 B) qRT-PCR relative to ABCA1 and CARMN respectively in hCASMCs treated with ox-LDL  
6 particles or control. UBC was used as housekeeper gene. One-way ANOVA with Bonferroni  
7 multiple comparison test was used to assess statistical significance indicated with p values. C)

8 MTT cell availability assay performed in hCASMC treated with ox-LDL 30 or 60ug/ml or  
9 control. D) qRT-PCR data of CARMN and miR-143/145 in hCASMCs (n=3) following

10 transfection with GapCARMN2 in basal condition versus control. One-way ANOVA with  
11 Bonferroni multiple comparison test was used to assess statistical significance indicated with

12 p values. E) Expression of CARMN transcript variants in hCASMCs (n=2) following transfection

13 with GapmeR targeting CARMN (GapCARMN), GapmeR control (GapCTR) and un-transfected  
14 cells (Mock). QRT-PCR results were obtained using transcript-specific couple of primers. One-

15 way ANOVA with Bonferroni multiple comparison test was used to assess statistical  
16 significance indicated with p values.

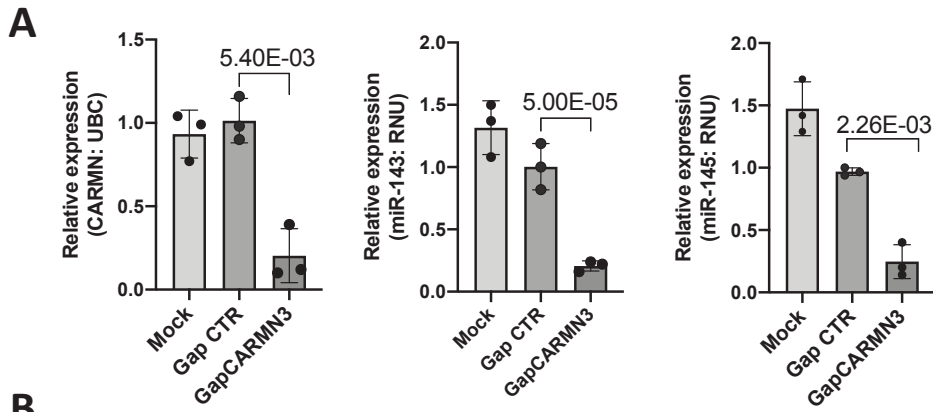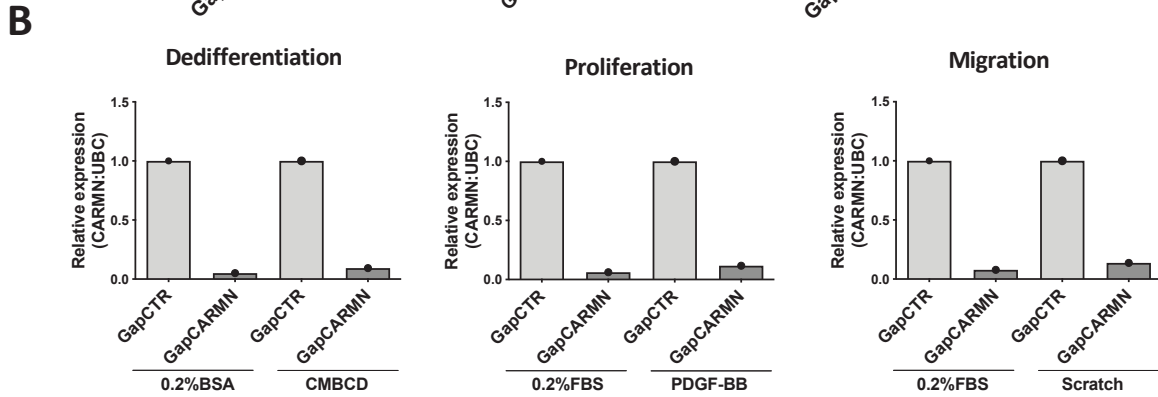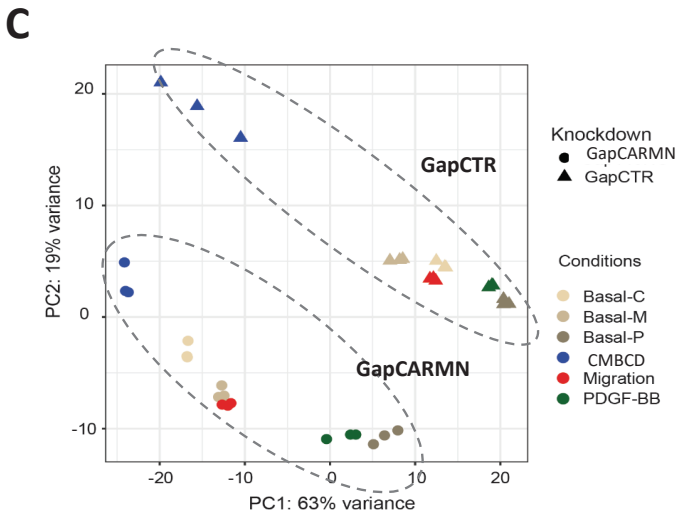

**D**

Significant changes  
GapCARMN vs GapCTR  
( $abs(\text{LogFC}) \geq 1$  &  $\text{padj} < 0.01$  &  $\text{FPKM} \geq 2$ )

|           | Total | up  | down |
|-----------|-------|-----|------|
| Basal-P   | 469   | 216 | 253  |
| PDGF-BB   | 649   | 338 | 311  |
| Basal-M   | 1103  | 480 | 623  |
| Migration | 1180  | 481 | 699  |
| Basal-C   | 1322  | 615 | 707  |
| CMBCD     | 734   | 336 | 398  |

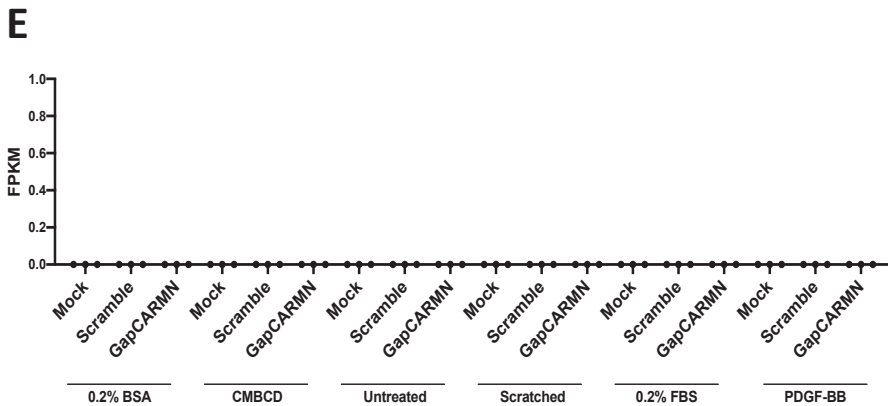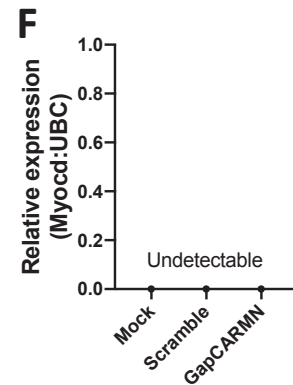

1 **Online Figure IV. Transcriptomic analysis of CARMN depleted hCASMCM in biological (basal)**  
2 **and pathological (PDGF-BB, Cholesterol-treated and migration-induced) conditions.**

3 A) QRT-PCR data relative to CARMN and miR-143/145 following 48 hours of transfection with  
4 GapmeR targeting common exon to CARMN transcripts, GapCARMN3, versus control. One-  
5 way ANOVA with Bonferroni multiple comparison test was used to assess statistical  
6 significance indicated with p values. B) QRT-PCR validation of CARMN GapmeR-mediated  
7 knock-down in samples used for RNA sequencing (RNA-Seq) experiment. GapCTR indicates  
8 the transfection of hCASMCMs with GapmeR control and Gap CARMN refers to the transfection  
9 with GapmeR targeting CARMN. C) Principal component analysis of all RNA-seq samples  
10 obtained using DESeq2. Control and CARMN knockdown samples are highlighted. D) Table  
11 showing the number of significant changes ( $\text{abs LogFC} \geq 1$  &  $\text{padj} < 0.01$  &  $\text{FPKM} \geq 2$ ) upon  
12 CARMN knockdown samples in the 6 independent conditions. E), F) Expression of Myocardin  
13 (Myocd) gene as FPKM and qRT-PCR respectively, in hCASMCMs (n=1) under basal or stimulated  
14 conditions following CARMN depletion or control. UBC and RNU were used as housekeeper  
15 control genes. One-way ANOVA with Bonferroni multiple comparison test was used to assess  
16 statistical significance indicated with p values.

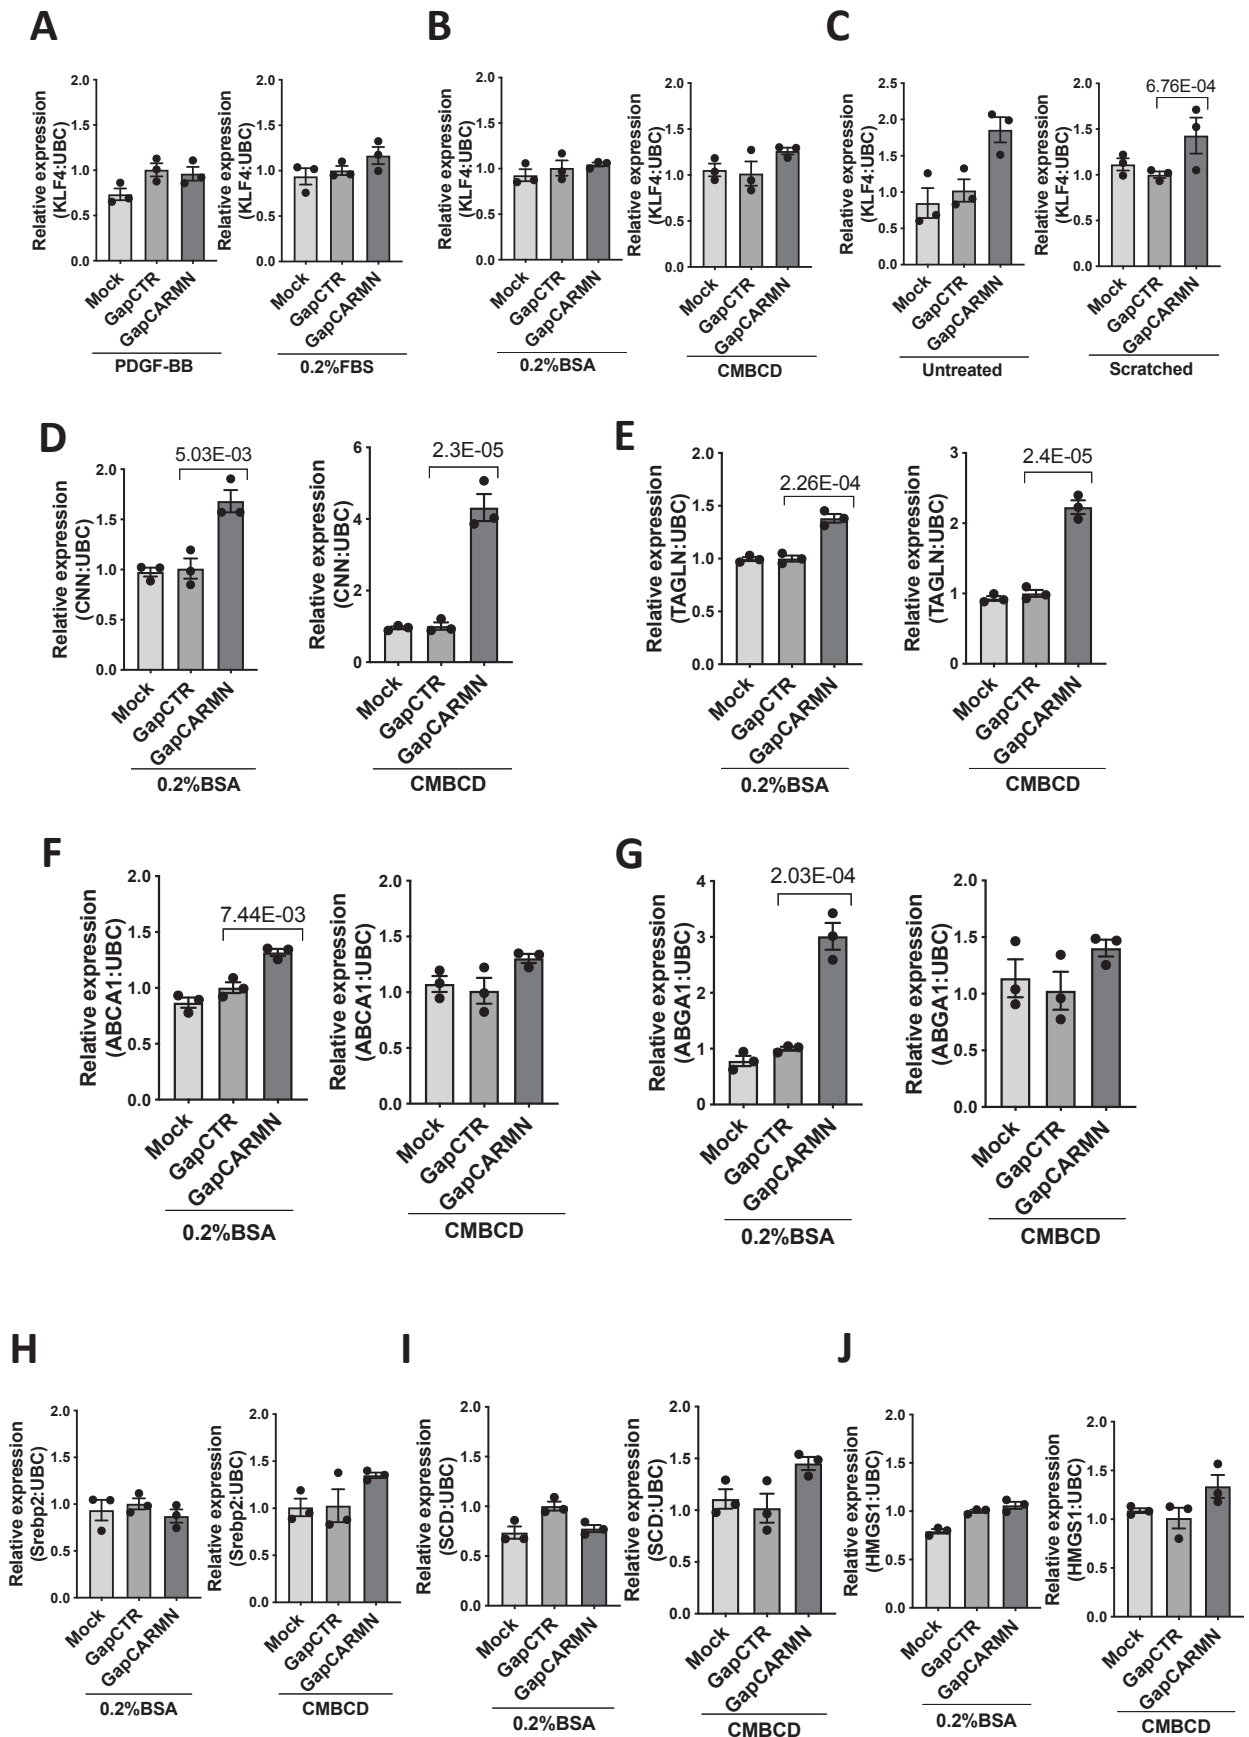

1 **Online Figure V. Expression of vSMC regulator genes, vSMC identity markers and genes**  
2 **involved in lipid homeostasis in CARMN-depleted hCASMCs.**

3 A), B), C) QRT-PCR results of KLF4 gene following transfection with GapCARMN in treated  
4 (PDGF-BB, CMBCD, scratch) and untreated hCASMCs (n=3) versus GapCTR. One-way ANOVA  
5 with Bonferroni multiple comparison test was used to assess statistical significance indicated  
6 with p values. D), E) Expression of CNN and TAGLN genes in hCASMCs (n=3) treated with  
7 CMBCD and control (0.2%BSA) following transfection with GapCARMN or GapCTR. One-way  
8 ANOVA with Bonferroni multiple comparison test was used to assess statistical significance  
9 indicated with p values. F), G), H), I), J) QRT-PCR data of ABCA1, ABGA1, Srebp2, SCD, HMGS1  
10 genes respectively in hCASMCs (n=3) following treatment with CMBCD or 0.2% BSA control in  
11 GapCARMN transfected cells or control (GapCTR). UBC was used as housekeeper control  
12 gene. One-way ANOVA with Bonferroni multiple comparison test was used to assess  
13 statistical significance indicated with p values.

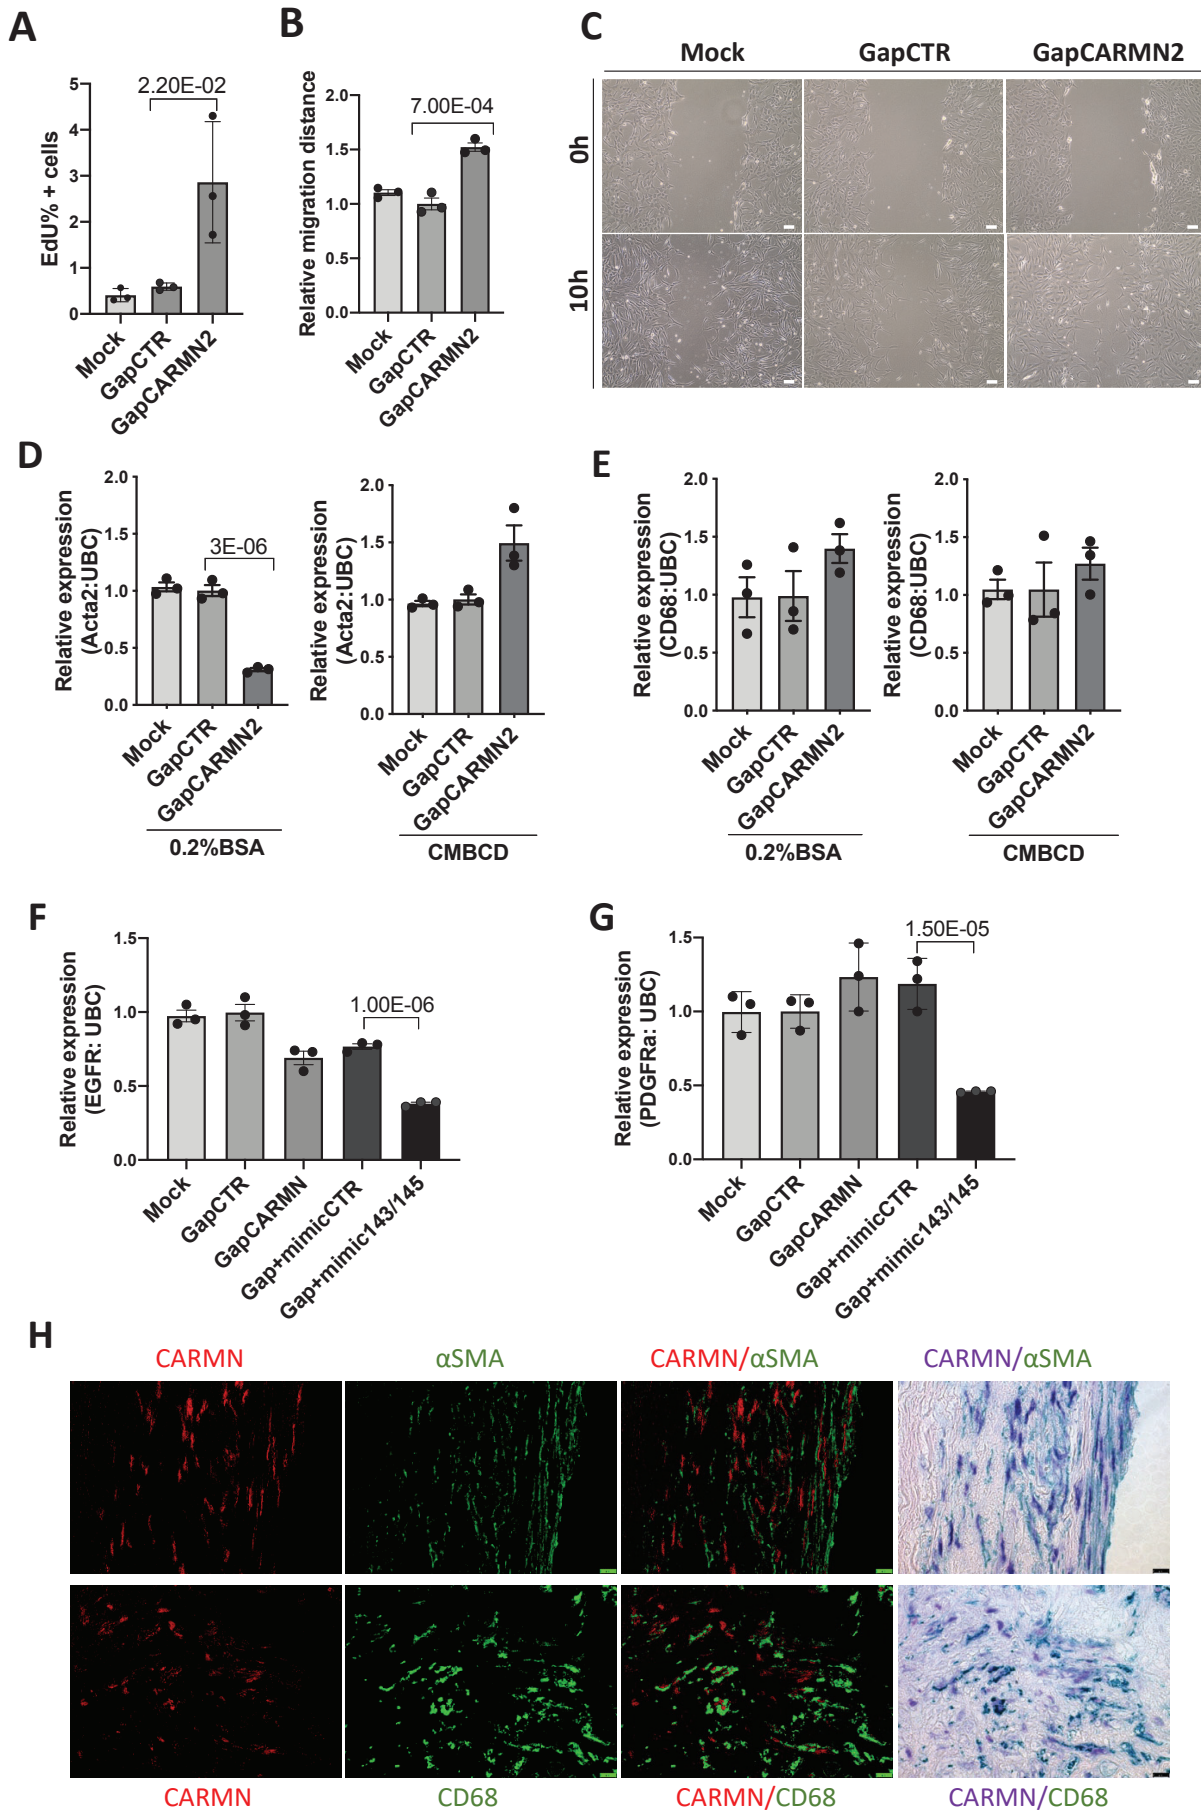



1 **Online Figure VI. Assessment of observed phenotypes GapCARMN2 and expression of**  
2 **microRNAs target genes following co-transfection of GapCARMN with mimics.**

3 A) Graph showing the percentage of EdU positive hCASMCS (n=3) obtained by FACS analysis  
4 following transfection with GapmeR targeting CARMN (GapCARMN2), Scramble GapmeR  
5 (GapCTR) and un-transfected cells (Mock) in unstimulated cells (0.2% FBS). Data were  
6 analysed with FlowJo software One-way ANOVA with Bonferroni multiple comparison test  
7 was used to assess statistical significance indicated with p values. B), C) Quantification of the  
8 relative migration distances and representative micrographs of hCASMCS (n=3) acquired at  
9 10X (scale bar 100µm) at 0 and 10 hours post scratch assay following transfection with the  
10 second GapmeR targeting CARMN transcripts (GapCARMN2), GapmeR control (GapCTR) and  
11 un-transfected cells (Mock). The relative migration distance was obtained using ImageJ tool.  
12 One-way ANOVA with Bonferroni multiple comparison test was used to assess statistical  
13 significance indicated with p values. D), E) Expression levels of dedifferentiation markers  
14 Acta2 and CD68 in hCASMCS (n=3) stimulated with CMBCD or in 0.2% BSA for 72 hours  
15 following transfection with CARMN GapmeR (GapCARMN2), GapmeR control (GapCTR) or un-  
16 transfected (Mock) cells. One-way ANOVA with Bonferroni multiple comparison test was used  
17 to assess statistical significance indicated with p values. F), G) QRT-PCR data of EGFR and  
18 PDGFRa in hCASMCS (n=3) at basal conditions following transfection with GapCARMN,  
19 GapCTR and co-transfection with a combination of GapCARMN and mimic control  
20 (GapCARMN+mimicCTR) or in combination with miR-143/145 (GapCARMN + mimic143-145).  
21 UBC was used as housekeeping gene. One-way ANOVA with Bonferroni multiple comparison  
22 test was used to assess statistical significance indicated with p values. H) Representative  
23 pseudo-fluorescent and bright field images of in-situ detection of CARMN co-localizing with

1 CD68 or  $\alpha$ -SMA signal in plaques obtained from carotid artery derived from symptomatic  
2 patients at carotid endarterectomy. Pictures were acquired at 63X magnification and were  
3 converted to pseudo-fluorescent using ImageJ software. Scale bar 10 $\mu$ m.

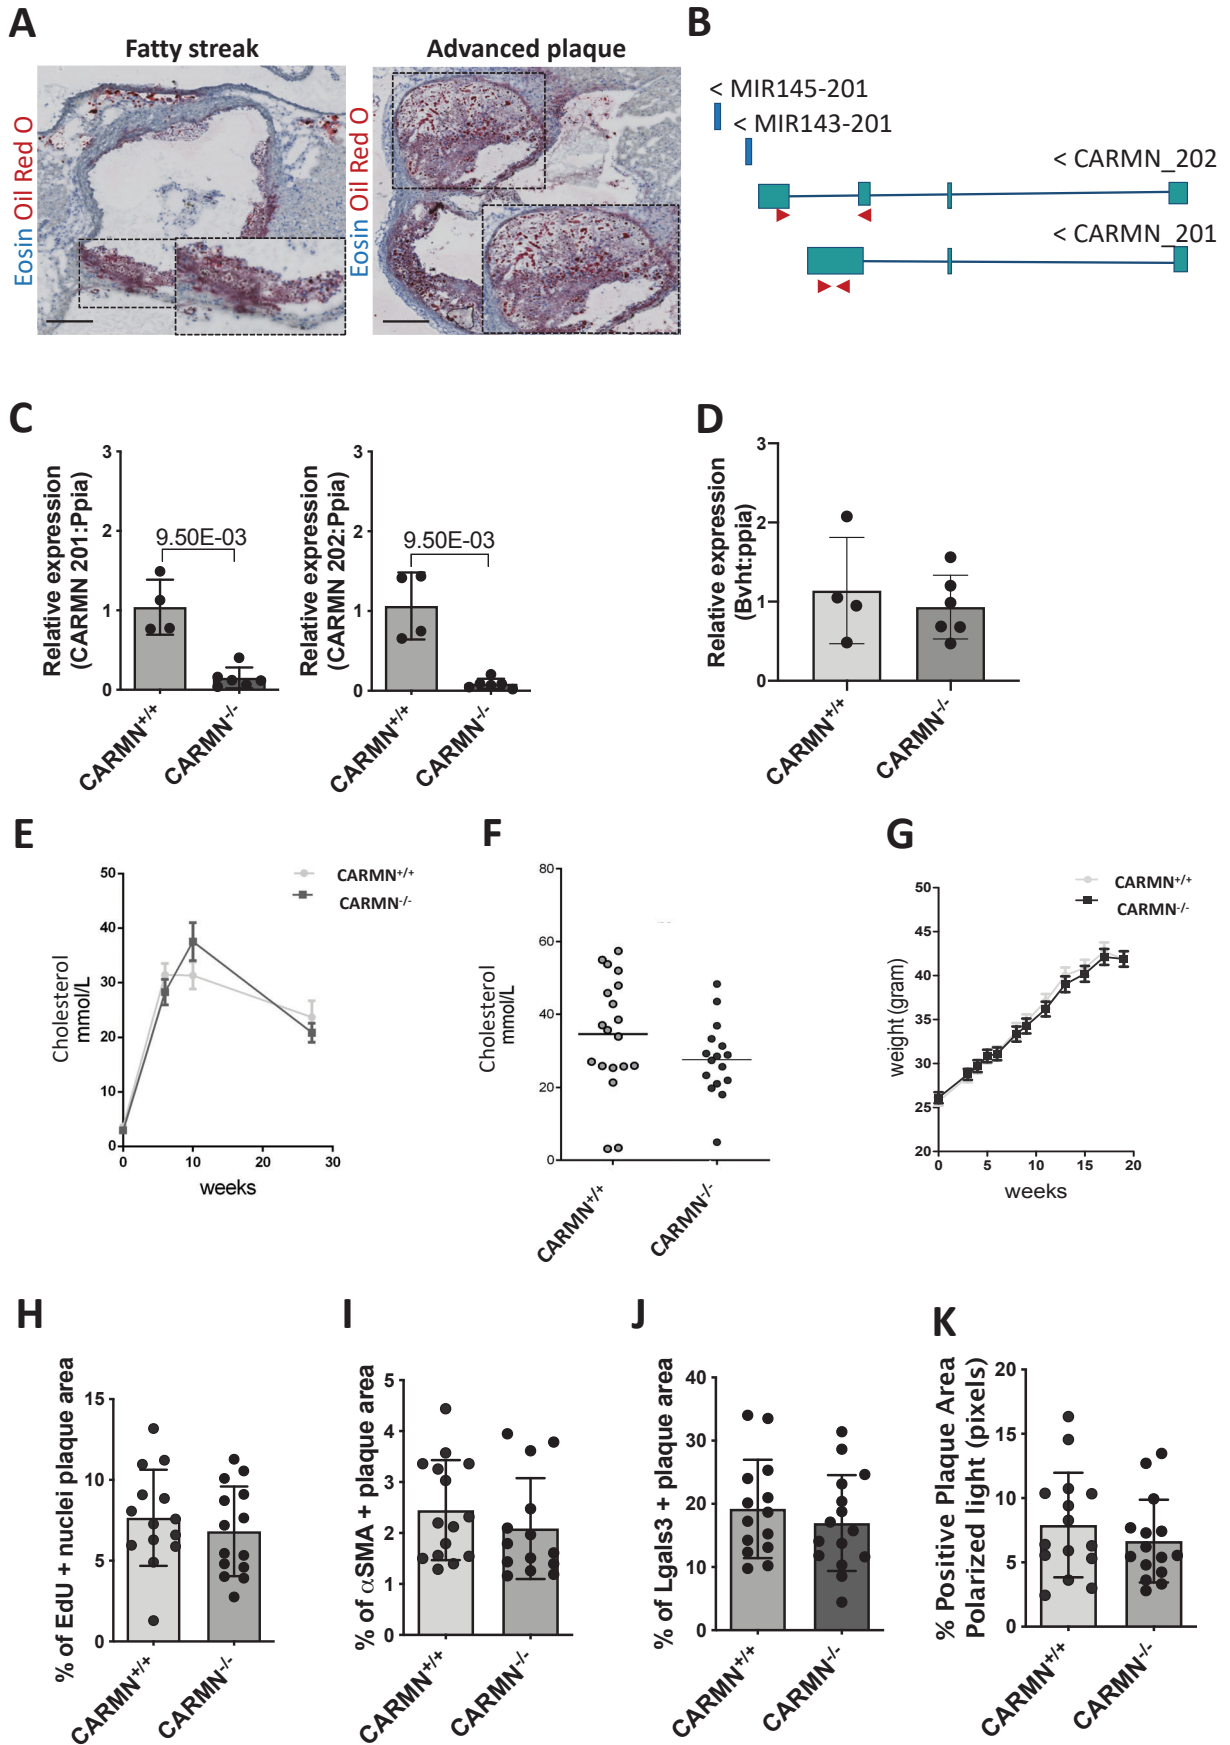

1 **Online Figure VII. The knock-down of CARMN does not affect the expression of Bvht at basal**  
2 **conditions or circulating cholesterol levels and plaque composition in the aortic root of**  
3 **atherosclerotic CARMN<sup>-/-</sup> versus CARMN<sup>+/+</sup> animals.**

4 A) Oil Red O staining in aortic roots cross-sections isolated from LDLR<sup>-/-</sup> mice developing early  
5 fatty streak and advanced plaque. Lipids are stained in red, nuclei in blue (eosin). Pictures  
6 were acquired at 4X and 10X magnification, scale bar 100µm. B) Graphic representation of  
7 mouse CARMN splice variants and pre-microRNAs miR-143 and miR-145 located in mouse  
8 chromosome 18 based on the latest release of Ensembl 98. The scheme includes the position  
9 of the primers used to specifically detect the two transcripts (red arrows). Arrows next to  
10 transcripts name indicate the sense of transcription. C) QRT-PCR showing the expression of  
11 mouse CARMN transcript variants in the aortic arches of CARMN<sup>-/-</sup> (n=6) and CARMN<sup>+/+</sup> (n=4)  
12 animals at baseline. Values are normalized with Ppia housekeeping control. Mann-Whitney  
13 was used to assess statistical significance indicated with p values. D) QRT-PCR data relative to  
14 Bvht expression in the aortic arches of CARMN<sup>-/-</sup> (n=6) and CARMN<sup>+/+</sup> (n=4) animals at  
15 baseline. Values are normalized with Ppia housekeeping control. E) Regression line showing  
16 the levels of circulating cholesterol in the plasma of CARMN<sup>+/+</sup> (n=19) and CARMN<sup>-/-</sup> (n=16)  
17 animals during the weeks of the experiment. Values are expressed as mmol/L. F) Circulating  
18 levels of cholesterol at 10-weeks post AAV-PCSK9 injection measured in CARMN<sup>+/+</sup> (n=19) and  
19 CARMN<sup>-/-</sup> (n=16) animals. Values are expressed as mmol/L. G) Regression line showing the  
20 weight of CARMN<sup>+/+</sup> (n=19) and CARMN<sup>-/-</sup> (n=16) animals during the weeks of the experiment.  
21 Weight is expressed in grams. H) Quantification of proliferating cells in the plaques developed  
22 in the aortic roots of CARMN<sup>+/+</sup> (n=14) and CARMN<sup>-/-</sup> (n=15) animals. Values are expressed as  
23 % of positive nuclei over the total cells counted in the plaque. I) and J) Quantification of the

1 content of  $\alpha$ SMA and Lgals3 staining respectively in the aortic root plaques of CARMN<sup>+/+</sup>  
2 (n=14) and CARMN<sup>-/-</sup> (n=15) animals. K) Quantification of collagen content in the aortic root  
3 plaques of CARMN<sup>+/+</sup> (n=14) and CARMN<sup>-/-</sup> (n=15) animals. Mann-Whitney was used to assess  
4 statistical significance indicated with p values.

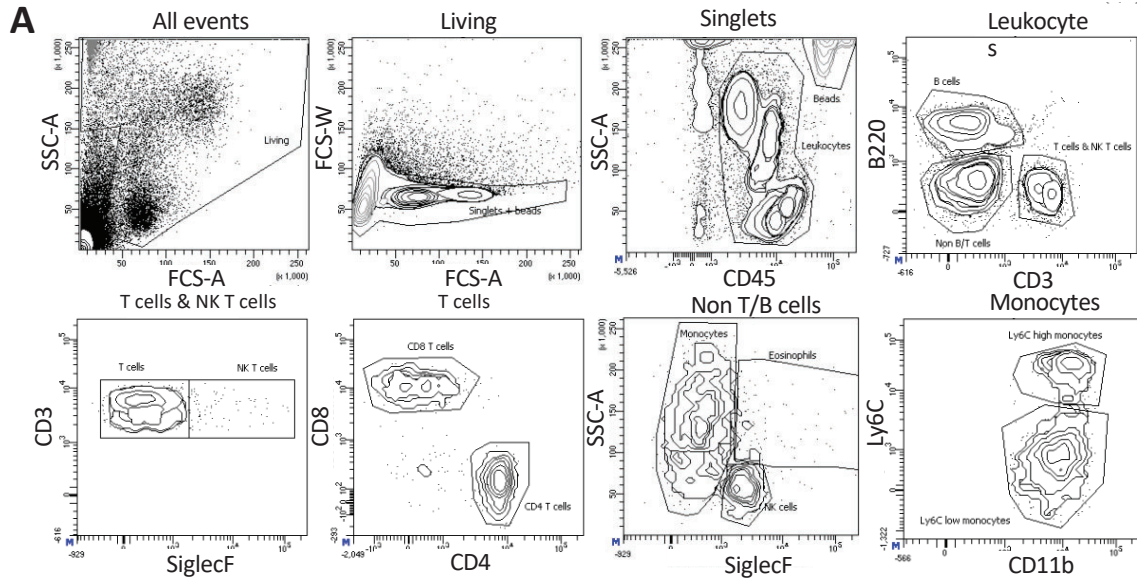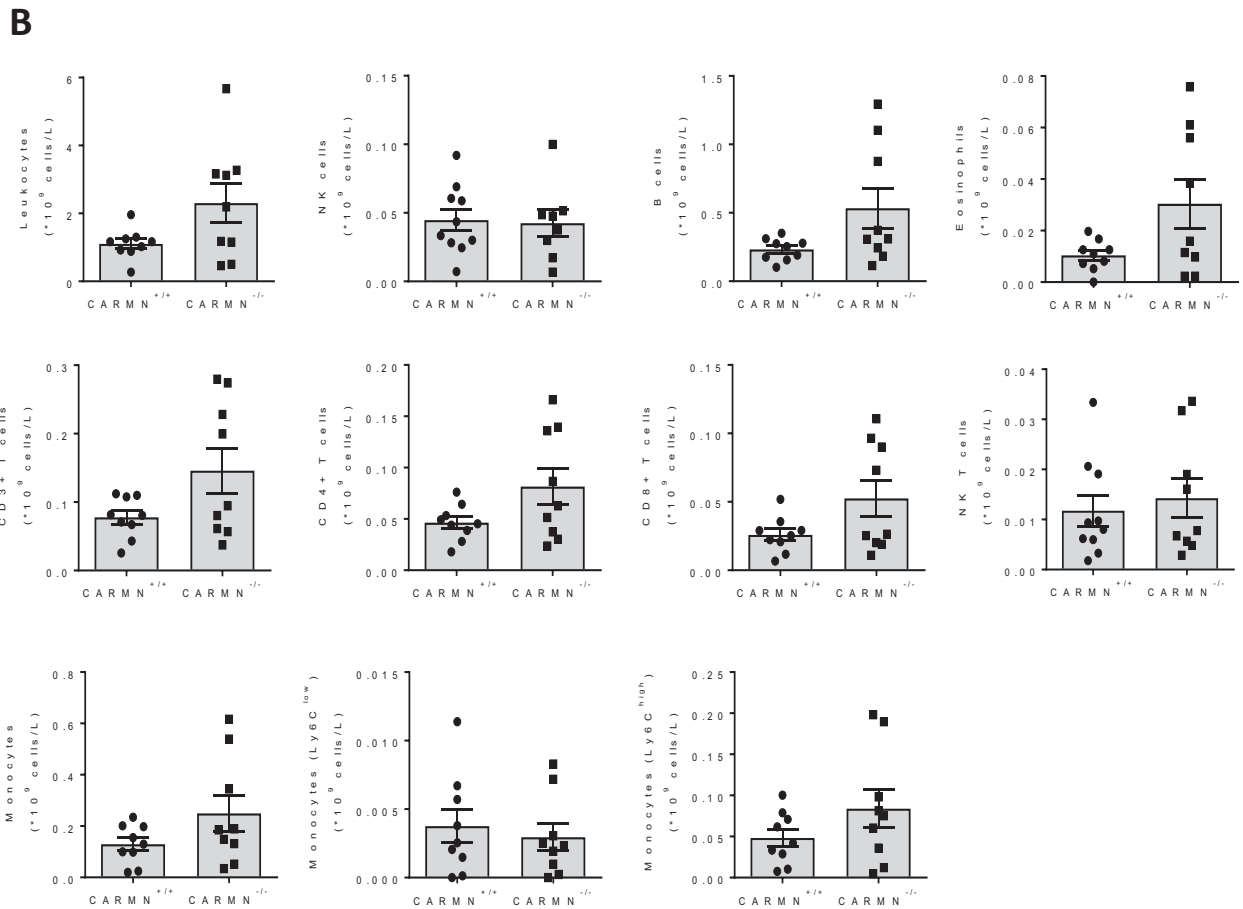

1 **Online Figure VIII. Quantification of blood lymphocytes subsets in CARMN<sup>+/+</sup> and CARMN<sup>-/-</sup>**  
2 **animals.**

3 A) Gating strategy of flow cytometry analysis for blood TruCount. B) Quantification of blood  
4 lymphocytes subsets.

5

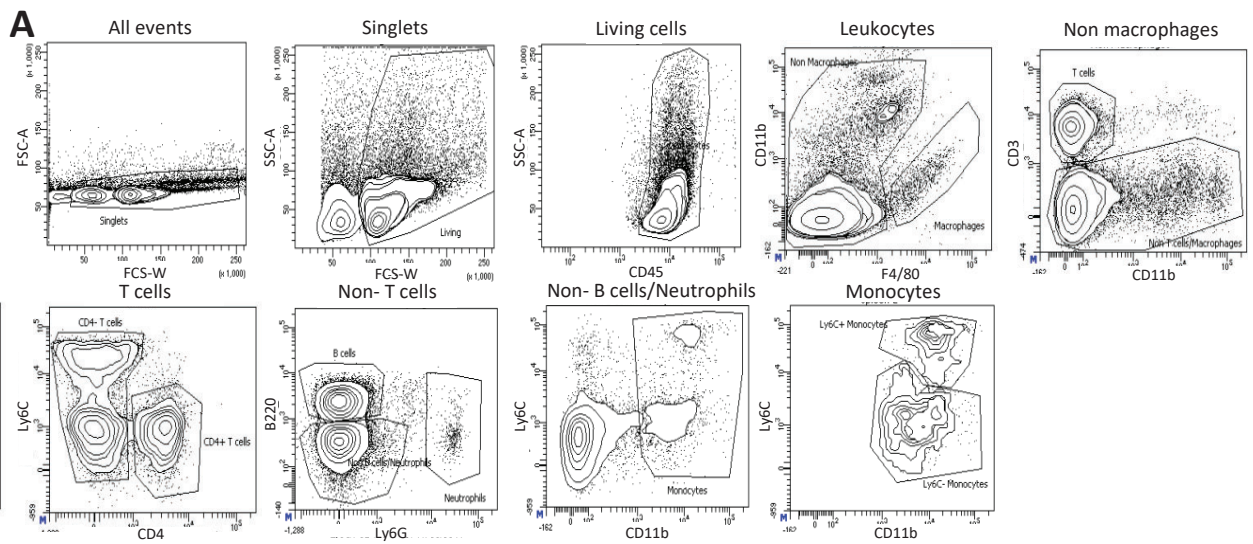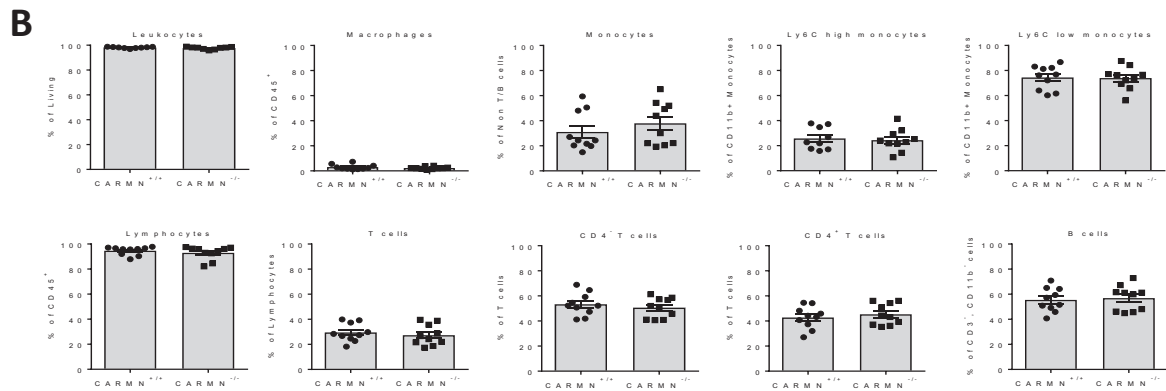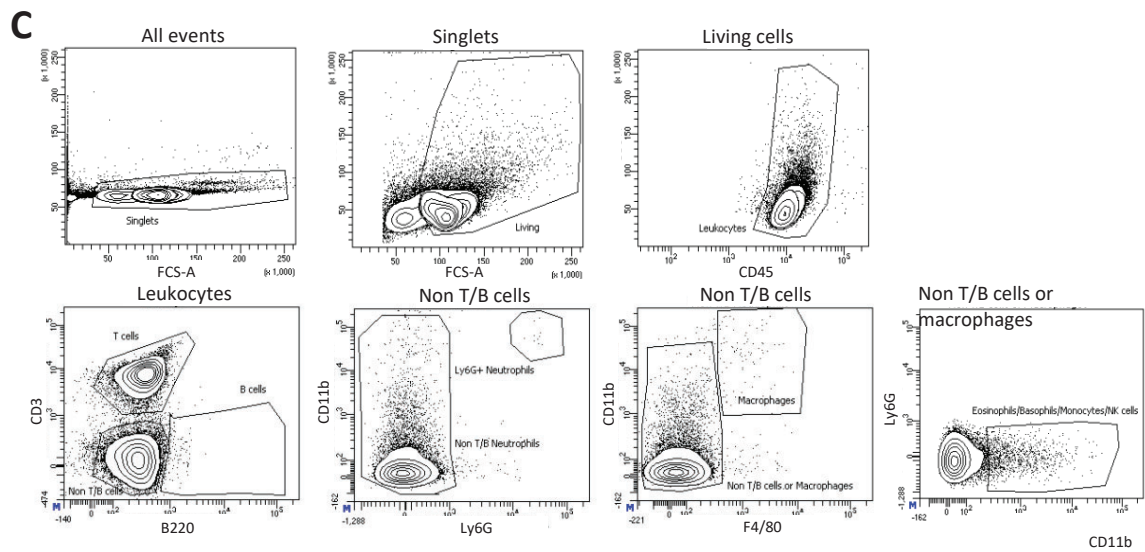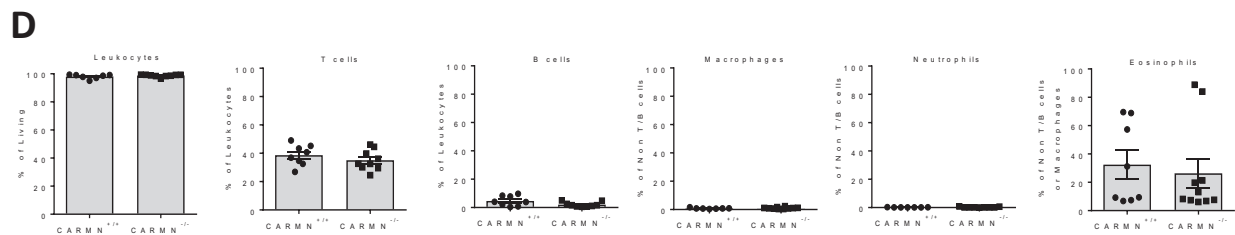



1 **Online Figure IX. Quantification of immune subsets in spleen and lymph nodes of CARMN<sup>+/+</sup>**  
2 **and CARMN<sup>-/-</sup> animals.**  
3 A) Gating strategy of flow cytometry analysis for spleen. B) Quantification of immune subsets  
4 in murine spleen. C) Gating strategy for lymph node FACS. D) Quantification of immune  
5 subsets in murine lymph nodes.

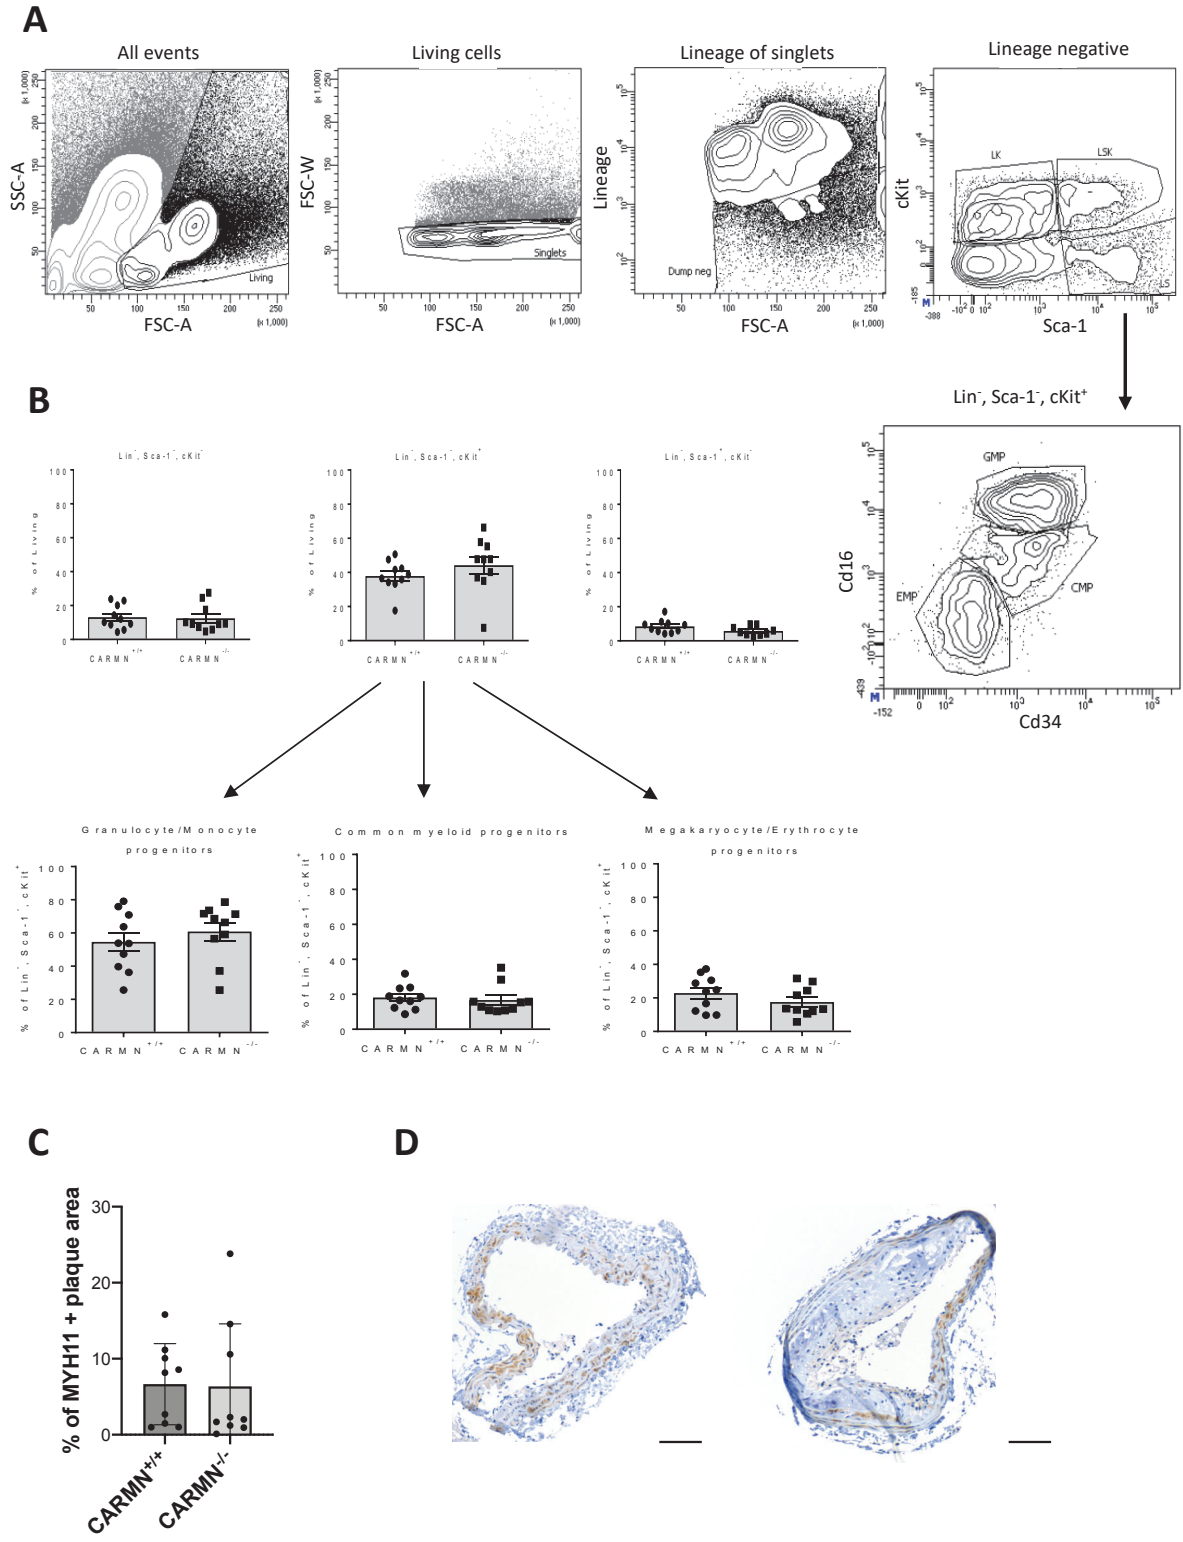

1 **Online Figure X. Quantification of lineage negative cells of bone marrow progenitors and**  
2 **Myh11 plaque content in CARMN<sup>+/+</sup> and CARMN<sup>-/-</sup> animals.**

3 A) Gating strategy of flow cytometry analysis for bone marrow progenitors. B) Quantification  
4 of lineage negative cells consisting of: Lineage<sup>-</sup>, Stem cell antigen-1 (Sca-1)<sup>-</sup>, cKit<sup>-</sup> cells (Lin<sup>-</sup>,  
5 Sca-1<sup>-</sup>, cKit<sup>-</sup>), Lineage<sup>-</sup>, Sca-1<sup>+</sup>, cKit<sup>-</sup> (Lin<sup>-</sup>, Sca-1<sup>+</sup>, cKit<sup>-</sup>) and Lineage<sup>-</sup>, Sca-1<sup>-</sup>, cKit<sup>+</sup> (Lin<sup>-</sup>, Sca-1<sup>-</sup>,  
6 cKit<sup>+</sup>). Lower panel displays the different progenitor populations originating from Lin<sup>-</sup>, Sca-1<sup>+</sup>,  
7 cKit<sup>-</sup> cells. C), D) Quantification of the positive area for Myh11 staining and representative  
8 immunostaining pictures in the plaque of CARMN<sup>-/-</sup> (n=9) and CARMN<sup>+/+</sup> (n=9) animals.  
9 Pictures were acquired at 10X magnification. Scale bar 100µm.
